# Supplementary material for: Comparing efficacy in reducing pulling and welfare impacts of four types of leash walking equipment
Source: PeerJ journal article supplement (doi:10.7717/peerj.18131), 2024-10-24
Supplement: Shelter1_Tension_files.zip [file Bubba_harness_202291395026 copy.xlsx]

## Sheet: Averaged Newtons
Date	Time	Averaged Newtons
2022-09-13	09:50:40	4.27077	4.27077	0		Impulse	1938.27
2022-09-13	09:50:41	2.03559	6.30636	0		Total steps	42
2022-09-13	09:50:42	3.47826	9.78462	0		# >5sec	2
2022-09-13	09:50:43	45.6077	55.3923	1
2022-09-13	09:50:44	28.2457	83.638	2
2022-09-13	09:50:45	3.42453	87.0625	2
2022-09-13	09:50:46	36.87	123.932	3
2022-09-13	09:50:47	46.1836	170.116	4
2022-09-13	09:50:48	39.8841	210	5
2022-09-13	09:50:49	44.8551	254.855	6
2022-09-13	09:50:50	54.9467	309.802	7
2022-09-13	09:50:51	23.5845	333.386	8
2022-09-13	09:50:52	10.918	344.304	8
2022-09-13	09:50:53	20.2019	364.506	9
2022-09-13	09:50:54	50.6433	415.15	10
2022-09-13	09:50:55	55.6893	470.839	11
2022-09-13	09:50:56	8.4501	479.289	11
2022-09-13	09:50:57	55.6962	534.985	12
2022-09-13	09:50:58	34.1766	569.162	13
2022-09-13	09:50:59	18.2049	587.367	14
2022-09-13	09:51:00	31.1389	618.506	15
2022-09-13	09:51:01	21.5877	640.093	16
2022-09-13	09:51:02	17.5741	657.667	17
2022-09-13	09:51:03	15.6394	673.307	18
2022-09-13	09:51:04	14.2403	687.547	19
2022-09-13	09:51:05	13.294	700.841	20
2022-09-13	09:51:06	13.5076	714.349	21
2022-09-13	09:51:07	13.084	727.433	22
2022-09-13	09:51:08	12.9732	740.406	22
2022-09-13	09:51:09	12.3087	752.715	22
2022-09-13	09:51:10	12.0495	764.764	22
2022-09-13	09:51:11	11.274	776.038	22
2022-09-13	09:51:12	11.1145	787.153	22
2022-09-13	09:51:13	11.5228	798.675	22
2022-09-13	09:51:14	11.7989	810.474	22
2022-09-13	09:51:15	10.9015	821.376	22
2022-09-13	09:51:16	10.7406	832.116	22
2022-09-13	09:51:17	10.12	842.236	22
2022-09-13	09:51:18	10.0346	852.271	22
2022-09-13	09:51:19	6.83217	859.103	22
2022-09-13	09:51:20	5.30676	864.41	22
2022-09-13	09:51:21	18.4283	882.838	23
2022-09-13	09:51:22	14.5249	897.363	24
2022-09-13	09:51:23	2.65143	900.015	24
2022-09-13	09:51:24	1.63706	901.652	24
2022-09-13	09:51:25	2.05928	903.711	24
2022-09-13	09:51:26	2.03548	905.746	24
2022-09-13	09:51:27	1.93553	907.682	24
2022-09-13	09:51:28	2.11997	909.802	24
2022-09-13	09:51:29	2.09586	911.898	24
2022-09-13	09:51:30	2.07785	913.976	24
2022-09-13	09:51:31	2.02693	916.003	24
2022-09-13	09:51:32	3.46937	919.472	24
2022-09-13	09:51:33	2.17566	921.648	24
2022-09-13	09:51:34	1.94904	923.597	24
2022-09-13	09:51:35	-0.104017	923.597	24
2022-09-13	09:51:36	-0.0787771	923.597	24
2022-09-13	09:51:37	0.824219	924.421	24
2022-09-13	09:51:38	3.63411	928.055	24
2022-09-13	09:51:39	6.27328	934.328	24
2022-09-13	09:51:40	9.81683	944.145	24
2022-09-13	09:51:41	2.76722	946.912	24
2022-09-13	09:51:42	2.02438	948.937	24
2022-09-13	09:51:43	1.49547	950.432	24
2022-09-13	09:51:44	-2.80429	950.432	24
2022-09-13	09:51:45	-1.85336	950.432	24
2022-09-13	09:51:46	11.1168	961.549	24
2022-09-13	09:51:47	5.38843	966.937	24
2022-09-13	09:51:48	4.05542	970.993	24
2022-09-13	09:51:49	6.13331	977.126	24
2022-09-13	09:51:50	13.785	990.911	25
2022-09-13	09:51:51	22.8419	1013.75	26
2022-09-13	09:51:52	36.1221	1049.88	27
2022-09-13	09:51:53	33.7411	1083.62	28
2022-09-13	09:51:54	18.5377	1102.15	29
2022-09-13	09:51:55	14.6092	1116.76	30
2022-09-13	09:51:56	11.2826	1128.05	30
2022-09-13	09:51:57	22.3523	1150.4	31
2022-09-13	09:51:58	13.3174	1163.72	32
2022-09-13	09:51:59	21.9027	1185.62	33
2022-09-13	09:52:00	13.3537	1198.97	34
2022-09-13	09:52:01	1.87909	1200.85	34
2022-09-13	09:52:02	7.48515	1208.34	34
2022-09-13	09:52:03	13.9543	1222.29	35
2022-09-13	09:52:04	9.91704	1232.21	35
2022-09-13	09:52:05	10.976	1243.18	35
2022-09-13	09:52:06	15.7023	1258.89	36
2022-09-13	09:52:07	6.61605	1265.5	36
2022-09-13	09:52:08	16.2791	1281.78	37
2022-09-13	09:52:09	12.473	1294.25	37
2022-09-13	09:52:10	5.23188	1299.49	37
2022-09-13	09:52:11	5.91333	1305.4	37
2022-09-13	09:52:12	7.19386	1312.59	37
2022-09-13	09:52:13	6.64157	1319.23	37
2022-09-13	09:52:14	21.2191	1340.45	38
2022-09-13	09:52:15	3.44649	1343.9	38
2022-09-13	09:52:16	2.03978	1345.94	38
2022-09-13	09:52:17	2.5503	1348.49	38
2022-09-13	09:52:18	3.28816	1351.78	38
2022-09-13	09:52:19	2.69026	1354.47	38
2022-09-13	09:52:20	1.8747	1356.34	38
2022-09-13	09:52:21	3.03406	1359.38	38
2022-09-13	09:52:22	3.2589	1362.64	38
2022-09-13	09:52:23	2.92529	1365.56	38
2022-09-13	09:52:24	4.96271	1370.52	38
2022-09-13	09:52:25	4.10717	1374.63	38
2022-09-13	09:52:26	4.16031	1378.79	38
2022-09-13	09:52:27	1.7657	1380.56	38
2022-09-13	09:52:28	12.2136	1392.77	38
2022-09-13	09:52:29	14.8489	1407.62	39
2022-09-13	09:52:30	4.64559	1412.27	39
2022-09-13	09:52:31	2.06219	1414.33	39
2022-09-13	09:52:32	2.6546	1416.98	39
2022-09-13	09:52:33	5.45735	1422.44	39
2022-09-13	09:52:34	10.7878	1433.23	39
2022-09-13	09:52:35	3.0417	1436.27	39
2022-09-13	09:52:36	1.9151	1438.18	39
2022-09-13	09:52:37	1.84536	1440.03	39
2022-09-13	09:52:38	11.0392	1451.07	39
2022-09-13	09:52:39	17.1466	1468.22	40
2022-09-13	09:52:40	10.0425	1478.26	40
2022-09-13	09:52:41	4.19494	1482.45	40
2022-09-13	09:52:42	21.122	1503.57	41
2022-09-13	09:52:43	12.3062	1515.88	41
2022-09-13	09:52:44	10.1757	1526.06	41
2022-09-13	09:52:45	2.11154	1528.17	41
2022-09-13	09:52:46	2.636	1530.8	41
2022-09-13	09:52:47	1.99094	1532.8	41
2022-09-13	09:52:48	1.32416	1534.12	41
2022-09-13	09:52:49	-0.428067	1534.12	41
2022-09-13	09:52:50	-0.65989	1534.12	41
2022-09-13	09:52:51	6.11151	1540.23	41
2022-09-13	09:52:52	2.05257	1542.28	41
2022-09-13	09:52:53	2.02212	1544.31	41
2022-09-13	09:52:54	1.92501	1546.23	41
2022-09-13	09:52:55	3.16896	1549.4	41
2022-09-13	09:52:56	2.01691	1551.42	41
2022-09-13	09:52:57	1.74606	1553.16	41
2022-09-13	09:52:58	2.14368	1555.31	41
2022-09-13	09:52:59	2.77167	1558.08	41
2022-09-13	09:53:00	2.63066	1560.71	41
2022-09-13	09:53:01	1.91137	1562.62	41
2022-09-13	09:53:02	1.94957	1564.57	41
2022-09-13	09:53:03	1.68381	1566.25	41
2022-09-13	09:53:04	2.07596	1568.33	41
2022-09-13	09:53:05	2.3842	1570.71	41
2022-09-13	09:53:06	2.27401	1572.99	41
2022-09-13	09:53:07	2.72229	1575.71	41
2022-09-13	09:53:08	2.92568	1578.64	41
2022-09-13	09:53:09	2.49303	1581.13	41
2022-09-13	09:53:10	2.49088	1583.62	41
2022-09-13	09:53:11	1.31748	1584.94	41
2022-09-13	09:53:12	-0.872378	1584.94	41
2022-09-13	09:53:13	-0.0116381	1584.94	41
2022-09-13	09:53:14	-0.472436	1584.94	41
2022-09-13	09:53:15	1.77928	1586.72	41
2022-09-13	09:53:16	0.331296	1587.05	41
2022-09-13	09:53:17	-0.931687	1587.05	41
2022-09-13	09:53:18	1.27843	1588.33	41
2022-09-13	09:53:19	1.81442	1590.14	41
2022-09-13	09:53:20	1.8571	1592	41
2022-09-13	09:53:21	1.91075	1593.91	41
2022-09-13	09:53:22	1.95432	1595.86	41
2022-09-13	09:53:23	1.95296	1597.82	41
2022-09-13	09:53:24	1.95042	1599.77	41
2022-09-13	09:53:25	1.95512	1601.72	41
2022-09-13	09:53:26	1.95244	1603.67	41
2022-09-13	09:53:27	1.93831	1605.61	41
2022-09-13	09:53:28	1.9249	1607.54	41
2022-09-13	09:53:29	2.14198	1609.68	41
2022-09-13	09:53:30	1.21831	1610.9	41
2022-09-13	09:53:31	1.07911	1611.98	41
2022-09-13	09:53:32	1.65534	1613.63	41
2022-09-13	09:53:33	2.10022	1615.73	41
2022-09-13	09:53:34	2.1284	1617.86	41
2022-09-13	09:53:35	1.46362	1619.32	41
2022-09-13	09:53:36	3.27458	1622.6	41
2022-09-13	09:53:37	3.27865	1625.88	41
2022-09-13	09:53:38	3.24028	1629.12	41
2022-09-13	09:53:39	3.16564	1632.28	41
2022-09-13	09:53:40	3.10751	1635.39	41
2022-09-13	09:53:41	2.94062	1638.33	41
2022-09-13	09:53:42	2.83417	1641.16	41
2022-09-13	09:53:43	2.7713	1643.94	41
2022-09-13	09:53:44	2.89693	1646.83	41
2022-09-13	09:53:45	1.63604	1648.47	41
2022-09-13	09:53:46	1.26736	1649.74	41
2022-09-13	09:53:47	1.55949	1651.3	41
2022-09-13	09:53:48	2.35342	1653.65	41
2022-09-13	09:53:49	6.45288	1660.1	41
2022-09-13	09:53:50	10.3322	1670.43	41
2022-09-13	09:53:51	7.89765	1678.33	41
2022-09-13	09:53:52	5.09637	1683.43	41
2022-09-13	09:53:53	1.55523	1684.98	41
2022-09-13	09:53:54	1.80265	1686.79	41
2022-09-13	09:53:55	2.09648	1688.88	41
2022-09-13	09:53:56	1.9812	1690.86	41
2022-09-13	09:53:57	2.23804	1693.1	41
2022-09-13	09:53:58	2.13016	1695.23	41
2022-09-13	09:53:59	1.87362	1697.11	41
2022-09-13	09:54:00	1.84696	1698.95	41
2022-09-13	09:54:01	1.87311	1700.83	41
2022-09-13	09:54:02	1.87011	1702.7	41
2022-09-13	09:54:03	1.85246	1704.55	41
2022-09-13	09:54:04	1.83751	1706.39	41
2022-09-13	09:54:05	1.87051	1708.26	41
2022-09-13	09:54:06	2.22008	1710.48	41
2022-09-13	09:54:07	5.1383	1715.62	41
2022-09-13	09:54:08	4.4774	1720.09	41
2022-09-13	09:54:09	1.93632	1722.03	41
2022-09-13	09:54:10	2.03276	1724.06	41
2022-09-13	09:54:11	2.04963	1726.11	41
2022-09-13	09:54:12	2.01069	1728.12	41
2022-09-13	09:54:13	2.03842	1730.16	41
2022-09-13	09:54:14	3.90915	1734.07	41
2022-09-13	09:54:15	2.19247	1736.26	41
2022-09-13	09:54:16	2.10695	1738.37	41
2022-09-13	09:54:17	2.06977	1740.44	41
2022-09-13	09:54:18	2.0503	1742.49	41
2022-09-13	09:54:19	2.13059	1744.62	41
2022-09-13	09:54:20	2.16021	1746.78	41
2022-09-13	09:54:21	2.12444	1748.9	41
2022-09-13	09:54:22	2.16966	1751.07	41
2022-09-13	09:54:23	2.06689	1753.14	41
2022-09-13	09:54:24	1.8812	1755.02	41
2022-09-13	09:54:25	1.75455	1756.78	41
2022-09-13	09:54:26	1.73021	1758.51	41
2022-09-13	09:54:27	2.02184	1760.53	41
2022-09-13	09:54:28	2.17149	1762.7	41
2022-09-13	09:54:29	4.60531	1767.31	41
2022-09-13	09:54:30	2.21889	1769.52	41
2022-09-13	09:54:31	2.35822	1771.88	41
2022-09-13	09:54:32	1.69914	1773.58	41
2022-09-13	09:54:33	1.674	1775.26	41
2022-09-13	09:54:34	1.23825	1776.49	41
2022-09-13	09:54:35	0.78053	1777.27	41
2022-09-13	09:54:36	0.833217	1778.11	41
2022-09-13	09:54:37	-0.339575	1778.11	41
2022-09-13	09:54:38	0.503563	1778.61	41
2022-09-13	09:54:39	0.630163	1779.24	41
2022-09-13	09:54:40	1.19094	1780.43	41
2022-09-13	09:54:41	1.55263	1781.98	41
2022-09-13	09:54:42	2.22763	1784.21	41
2022-09-13	09:54:43	1.76298	1785.98	41
2022-09-13	09:54:44	1.50514	1787.48	41
2022-09-13	09:54:45	1.66813	1789.15	41
2022-09-13	09:54:46	1.82257	1790.97	41
2022-09-13	09:54:47	1.66423	1792.64	41
2022-09-13	09:54:48	3.04464	1795.68	41
2022-09-13	09:54:49	4.87745	1800.56	41
2022-09-13	09:54:50	5.70315	1806.26	41
2022-09-13	09:54:51	6.4696	1812.73	41
2022-09-13	09:54:52	5.42267	1818.15	41
2022-09-13	09:54:53	5.90954	1824.06	41
2022-09-13	09:54:54	5.44198	1829.5	41
2022-09-13	09:54:55	4.86017	1834.36	41
2022-09-13	09:54:56	3.09466	1837.46	41
2022-09-13	09:54:57	2.02399	1839.48	41
2022-09-13	09:54:58	1.74436	1841.23	41
2022-09-13	09:54:59	-1.17419	1841.23	41
2022-09-13	09:55:00	-0.717842	1841.23	41
2022-09-13	09:55:01	-0.355402	1841.23	41
2022-09-13	09:55:02	-0.360891	1841.23	41
2022-09-13	09:55:03	-0.176908	1841.23	41
2022-09-13	09:55:04	0.00503788	1841.23	41
2022-09-13	09:55:05	0.381267	1841.61	41
2022-09-13	09:55:06	0.245558	1841.86	41
2022-09-13	09:55:07	0.179118	1842.04	41
2022-09-13	09:55:08	0.222694	1842.26	41
2022-09-13	09:55:09	1.04544	1843.31	41
2022-09-13	09:55:10	2.0773	1845.38	41
2022-09-13	09:55:11	0.723767	1846.11	41
2022-09-13	09:55:12	0.0277312	1846.14	41
2022-09-13	09:55:13	1.49932	1847.63	41
2022-09-13	09:55:14	2.04798	1849.68	41
2022-09-13	09:55:15	0.548161	1850.23	41
2022-09-13	09:55:16	0.217827	1850.45	41
2022-09-13	09:55:17	1.94459	1852.39	41
2022-09-13	09:55:18	2.01488	1854.41	41
2022-09-13	09:55:19	2.09829	1856.51	41
2022-09-13	09:55:20	0.138767	1856.65	41
2022-09-13	09:55:21	-0.0826251	1856.65	41
2022-09-13	09:55:22	0.690113	1857.34	41
2022-09-13	09:55:23	0.839669	1858.18	41
2022-09-13	09:55:24	0.812221	1858.99	41
2022-09-13	09:55:25	1.04567	1860.03	41
2022-09-13	09:55:26	1.25966	1861.29	41
2022-09-13	09:55:27	1.22456	1862.52	41
2022-09-13	09:55:28	1.41397	1863.93	41
2022-09-13	09:55:29	1.45681	1865.39	41
2022-09-13	09:55:30	2.29377	1867.68	41
2022-09-13	09:55:31	4.81596	1872.5	41
2022-09-13	09:55:32	5.55436	1878.05	41
2022-09-13	09:55:33	2.99637	1881.05	41
2022-09-13	09:55:34	14.6979	1895.75	42
2022-09-13	09:55:35	9.72974	1905.48	42
2022-09-13	09:55:36	8.92843	1914.4	42
2022-09-13	09:55:37	8.18876	1922.59	42
2022-09-13	09:55:38	3.86417	1926.46	42
2022-09-13	09:55:39	5.95277	1932.41	42
2022-09-13	09:55:40	5.85871	1938.27	42

## Sheet: Bubba_harness_202291395026  (3)
Date	Time	Lbs	Newtons	Averaged	Total force x time	total steps > 13.345		**GoPro Fitting: 940
2022-09-13	09:50:40	2.1396	9.51737	4.27077	9.51737	FALSE	0			Total force x time	3662.64
2022-09-13	09:50:40	1.20113	5.34287	4.27077	5.34287	FALSE	0			Total steps	139
2022-09-13	09:50:40	0.199758	0.888564	4.27077	10.4059	FALSE	0
2022-09-13	09:50:40	0.299962	1.33429	4.27077	6.67716	FALSE	0
2022-09-13	09:50:41	0.439046	1.95296	2.03559	12.3589	FALSE	0
2022-09-13	09:50:41	0.526578	2.34232	2.03559	9.01948	FALSE	0
2022-09-13	09:50:41	0.407239	1.81148	2.03559	14.1704	FALSE	0
2022-09-13	09:50:42	0.277926	1.23627	3.47826	10.2558	FALSE	0
2022-09-13	09:50:42	0.222201	0.988394	3.47826	15.1588	FALSE	0
2022-09-13	09:50:42	0.602761	2.6812	3.47826	12.937	FALSE	0
2022-09-13	09:50:42	2.0249	9.00716	3.47826	24.1659	FALSE	0
2022-09-13	09:50:43	5.54566	24.6682	45.6077	37.6052	1	1
2022-09-13	09:50:43	13.8344	61.5382	45.6077	85.7041	1	2
2022-09-13	09:50:43	11.0911	49.3354	45.6077	86.9406	1	3
2022-09-13	09:50:43	10.5411	46.8889	45.6077	132.593	1	4
2022-09-13	09:50:44	6.97609	31.031	28.2457	117.972	1	5
2022-09-13	09:50:44	5.51482	24.531	28.2457	157.124	1	6
2022-09-13	09:50:44	5.55431	24.7067	28.2457	142.678	1	7
2022-09-13	09:50:44	7.35441	32.7139	28.2457	189.838	1	8
2022-09-13	09:50:45	1.38882	6.17775	3.42453	148.856	FALSE	8
2022-09-13	09:50:45	0.283779	1.26231	3.42453	191.1	FALSE	8
2022-09-13	09:50:45	0.63701	2.83355	3.42453	151.69	FALSE	8
2022-09-13	09:50:46	1.74739	7.77274	36.87	198.873	FALSE	8
2022-09-13	09:50:46	8.36026	37.1881	36.87	188.878	1	9
2022-09-13	09:50:46	14.3694	63.918	36.87	262.791	1	10
2022-09-13	09:50:46	8.67792	38.6011	36.87	227.479	1	11
2022-09-13	09:50:47	7.9338	35.2911	46.1836	298.082	1	12
2022-09-13	09:50:47	13.6658	60.7882	46.1836	288.267	1	13
2022-09-13	09:50:47	6.57711	29.2563	46.1836	327.338	1	14
2022-09-13	09:50:47	13.3534	59.3986	46.1836	347.666	1	15
2022-09-13	09:50:48	12.9419	57.5682	39.8841	384.907	1	16
2022-09-13	09:50:48	7.79049	34.6537	39.8841	382.319	1	17
2022-09-13	09:50:48	6.16662	27.4304	39.8841	412.337	1	18
2022-09-13	09:50:49	11.8379	52.6573	44.8551	434.977	1	19
2022-09-13	09:50:49	15.2411	67.7955	44.8551	480.132	1	20
2022-09-13	09:50:49	14.0162	62.3469	44.8551	497.324	1	21
2022-09-13	09:50:49	6.29207	27.9884	44.8551	508.121	1	22
2022-09-13	09:50:49	3.03212	13.4875	44.8551	510.811	1	23
2022-09-13	09:50:50	3.07604	13.6828	54.9467	521.804	1	24
2022-09-13	09:50:50	11.4171	50.7855	54.9467	561.597	1	25
2022-09-13	09:50:50	22.5646	100.372	54.9467	622.175	1	26
2022-09-13	09:50:51	10.7785	47.9449	23.5845	609.541	1	27
2022-09-13	09:50:51	4.81574	21.4214	23.5845	643.597	1	28
2022-09-13	09:50:51	3.48851	15.5176	23.5845	625.059	1	29
2022-09-13	09:50:51	2.12541	9.45425	23.5845	653.051	FALSE	29
2022-09-13	09:50:52	2.61472	11.6308	10.918	636.69	FALSE	29
2022-09-13	09:50:52	2.14352	9.53481	10.918	662.586	FALSE	29
2022-09-13	09:50:52	2.38983	10.6304	10.918	647.32	FALSE	29
2022-09-13	09:50:52	2.66983	11.8759	10.918	674.462	FALSE	29
2022-09-13	09:50:53	2.72805	12.1349	20.2019	659.455	FALSE	29
2022-09-13	09:50:53	3.53558	15.727	20.2019	690.189	1	30
2022-09-13	09:50:53	6.445	28.6686	20.2019	688.124	1	31
2022-09-13	09:50:53	5.45772	24.277	20.2019	714.466	1	32
2022-09-13	09:50:54	8.23655	36.6378	50.6433	724.762	1	33
2022-09-13	09:50:54	10.8262	48.1571	50.6433	762.623	1	34
2022-09-13	09:50:54	15.0926	67.1349	50.6433	791.897	1	35
2022-09-13	09:50:55	14.9144	66.3422	55.6893	828.965	1	36
2022-09-13	09:50:55	9.90978	44.0807	55.6893	835.977	1	37
2022-09-13	09:50:55	9.91314	44.0956	55.6893	873.061	1	38
2022-09-13	09:50:55	15.3407	68.2385	55.6893	904.216	1	39
2022-09-13	09:50:56	4.10744	18.2707	8.4501	891.331	1	40
2022-09-13	09:50:56	0.947494	4.21464	8.4501	908.43	FALSE	40
2022-09-13	09:50:56	0.0694786	0.309055	8.4501	891.641	FALSE	40
2022-09-13	09:50:56	2.47426	11.006	8.4501	919.436	FALSE	40
2022-09-13	09:50:57	7.94815	35.355	55.6962	926.996	1	41
2022-09-13	09:50:57	15.9776	71.0716	55.6962	990.508	1	42
2022-09-13	09:50:57	12.9642	57.6674	55.6962	984.663	1	43
2022-09-13	09:50:57	13.1943	58.6909	55.6962	1049.2	1	44
2022-09-13	09:50:58	13.3726	59.484	34.1766	1044.15	1	45
2022-09-13	09:50:58	8.15685	36.2833	34.1766	1085.48	1	46
2022-09-13	09:50:58	4.6139	20.5235	34.1766	1064.67	1	47
2022-09-13	09:50:58	4.58963	20.4156	34.1766	1105.9	1	48
2022-09-13	09:50:59	4.24902	18.9005	18.2049	1083.57	1	49
2022-09-13	09:50:59	3.55966	15.8341	18.2049	1121.73	1	50
2022-09-13	09:50:59	4.46927	19.8802	18.2049	1103.45	1	51
2022-09-13	09:51:00	6.21533	27.647	31.1389	1149.38	1	52
2022-09-13	09:51:00	7.31248	32.5274	31.1389	1135.98	1	53
2022-09-13	09:51:00	7.69573	34.2321	31.1389	1183.61	1	54
2022-09-13	09:51:00	6.77782	30.1491	31.1389	1166.13	1	55
2022-09-13	09:51:01	5.6478	25.1225	21.5877	1208.73	1	56
2022-09-13	09:51:01	4.96032	22.0645	21.5877	1188.19	1	57
2022-09-13	09:51:01	4.42922	19.7021	21.5877	1228.44	1	58
2022-09-13	09:51:01	4.37523	19.4619	21.5877	1207.65	1	59
2022-09-13	09:51:02	4.15172	18.4677	17.5741	1246.9	1	60
2022-09-13	09:51:02	3.91416	17.411	17.5741	1225.06	1	61
2022-09-13	09:51:02	3.94851	17.5638	17.5741	1264.47	1	62
2022-09-13	09:51:02	3.78892	16.8539	17.5741	1241.92	1	63
2022-09-13	09:51:03	3.68744	16.4025	15.6394	1280.87	1	64
2022-09-13	09:51:03	3.39935	15.121	15.6394	1257.04	1	65
2022-09-13	09:51:03	3.46088	15.3947	15.6394	1296.26	1	66
2022-09-13	09:51:04	3.22571	14.3486	14.2403	1271.39	1	67
2022-09-13	09:51:04	3.15986	14.0557	14.2403	1310.32	1	68
2022-09-13	09:51:04	3.29523	14.6578	14.2403	1286.05	1	69
2022-09-13	09:51:04	3.12464	13.899	14.2403	1324.22	1	70
2022-09-13	09:51:05	3.03619	13.5056	13.294	1299.55	1	71
2022-09-13	09:51:05	2.97716	13.243	13.294	1337.46	FALSE	71
2022-09-13	09:51:05	3.04169	13.53	13.294	1313.08	1	72
2022-09-13	09:51:05	2.89945	12.8973	13.294	1350.36	FALSE	72
2022-09-13	09:51:06	3.02189	13.442	13.5076	1326.52	1	73
2022-09-13	09:51:06	2.9821	13.265	13.5076	1363.62	FALSE	73
2022-09-13	09:51:06	3.11635	13.8621	13.5076	1340.39	1	74
2022-09-13	09:51:06	3.02627	13.4615	13.5076	1377.09	1	75
2022-09-13	09:51:07	2.92871	13.0275	13.084	1353.41	FALSE	75
2022-09-13	09:51:07	2.99228	13.3103	13.084	1390.4	FALSE	75
2022-09-13	09:51:07	2.90556	12.9245	13.084	1366.34	FALSE	75
2022-09-13	09:51:07	2.9391	13.0737	13.084	1403.47	FALSE	75
2022-09-13	09:51:08	2.95243	13.133	12.9732	1379.47	FALSE	75
2022-09-13	09:51:08	2.93619	13.0608	12.9732	1416.53	FALSE	75
2022-09-13	09:51:08	2.86088	12.7258	12.9732	1392.2	FALSE	75
2022-09-13	09:51:09	2.92892	13.0284	12.3087	1429.56	FALSE	75
2022-09-13	09:51:09	2.80159	12.462	12.3087	1404.66	FALSE	75
2022-09-13	09:51:09	2.61202	11.6188	12.3087	1441.18	FALSE	75
2022-09-13	09:51:09	2.72597	12.1257	12.3087	1416.78	FALSE	75
2022-09-13	09:51:10	2.73431	12.1628	12.0495	1453.34	FALSE	75
2022-09-13	09:51:10	2.74978	12.2316	12.0495	1429.02	FALSE	75
2022-09-13	09:51:10	2.67131	11.8825	12.0495	1465.22	FALSE	75
2022-09-13	09:51:10	2.68001	11.9212	12.0495	1440.94	FALSE	75
2022-09-13	09:51:11	2.65161	11.7949	11.274	1477.02	FALSE	75
2022-09-13	09:51:11	2.52057	11.212	11.274	1452.15	FALSE	75
2022-09-13	09:51:11	2.55915	11.3836	11.274	1488.4	FALSE	75
2022-09-13	09:51:11	2.40673	10.7056	11.274	1462.85	FALSE	75
2022-09-13	09:51:12	2.50022	11.1215	11.1145	1499.52	FALSE	75
2022-09-13	09:51:12	2.55681	11.3732	11.1145	1474.23	FALSE	75
2022-09-13	09:51:12	2.43889	10.8487	11.1145	1510.37	FALSE	75
2022-09-13	09:51:13	2.53782	11.2887	11.5228	1485.52	FALSE	75
2022-09-13	09:51:13	2.50927	11.1617	11.5228	1521.53	FALSE	75
2022-09-13	09:51:13	2.65589	11.8139	11.5228	1497.33	FALSE	75
2022-09-13	09:51:13	2.65879	11.8268	11.5228	1533.36	FALSE	75
2022-09-13	09:51:14	2.66083	11.8359	11.7989	1509.17	FALSE	75
2022-09-13	09:51:14	2.78174	12.3737	11.7989	1545.73	FALSE	75
2022-09-13	09:51:14	2.58251	11.4875	11.7989	1520.65	FALSE	75
2022-09-13	09:51:14	2.58495	11.4984	11.7989	1557.23	FALSE	75
2022-09-13	09:51:15	2.50994	11.1647	10.9015	1531.82	FALSE	75
2022-09-13	09:51:15	2.50683	11.1509	10.9015	1568.38	FALSE	75
2022-09-13	09:51:15	2.25039	10.0102	10.9015	1541.83	FALSE	75
2022-09-13	09:51:15	2.53589	11.2801	10.9015	1579.66	FALSE	75
2022-09-13	09:51:16	2.44408	10.8718	10.7406	1552.7	FALSE	75
2022-09-13	09:51:16	2.44301	10.867	10.7406	1590.53	FALSE	75
2022-09-13	09:51:16	2.39487	10.6529	10.7406	1563.35	FALSE	75
2022-09-13	09:51:16	2.37645	10.5709	10.7406	1601.1	FALSE	75
2022-09-13	09:51:17	2.29345	10.2017	10.12	1573.56	FALSE	75
2022-09-13	09:51:17	2.25487	10.0301	10.12	1611.13	FALSE	75
2022-09-13	09:51:17	2.27691	10.1282	10.12	1583.68	FALSE	75
2022-09-13	09:51:18	2.31691	10.3061	10.0346	1621.44	FALSE	75
2022-09-13	09:51:18	2.18108	9.70188	10.0346	1593.39	FALSE	75
2022-09-13	09:51:18	2.27121	10.1028	10.0346	1631.54	FALSE	75
2022-09-13	09:51:18	2.25431	10.0276	10.0346	1603.41	FALSE	75
2022-09-13	09:51:19	1.97324	8.77737	6.83217	1640.32	FALSE	75
2022-09-13	09:51:19	1.74169	7.74739	6.83217	1611.16	FALSE	75
2022-09-13	09:51:19	1.03223	4.59157	6.83217	1644.91	FALSE	75
2022-09-13	09:51:19	1.3966	6.21236	6.83217	1617.37	FALSE	75
2022-09-13	09:51:20	1.57436	7.00307	5.30676	1651.91	FALSE	75
2022-09-13	09:51:20	0.612786	2.72579	5.30676	1620.1	FALSE	75
2022-09-13	09:51:20	1.32551	5.89613	5.30676	1657.81	FALSE	75
2022-09-13	09:51:20	1.2594	5.60206	5.30676	1625.7	FALSE	75
2022-09-13	09:51:21	1.88999	8.40705	18.4283	1666.22	FALSE	75
2022-09-13	09:51:21	3.68927	16.4106	18.4283	1642.11	1	76
2022-09-13	09:51:21	6.84937	30.4674	18.4283	1696.68	1	77
2022-09-13	09:51:22	5.42561	24.1342	14.5249	1666.25	1	78
2022-09-13	09:51:22	3.96103	17.6195	14.5249	1714.3	1	79
2022-09-13	09:51:22	2.36327	10.5123	14.5249	1676.76	FALSE	79
2022-09-13	09:51:22	1.31146	5.83364	14.5249	1720.14	FALSE	79
2022-09-13	09:51:23	0.654974	2.91346	2.65143	1679.67	FALSE	79
2022-09-13	09:51:23	0.75187	3.34447	2.65143	1723.48	FALSE	79
2022-09-13	09:51:23	0.582201	2.58975	2.65143	1682.26	FALSE	79
2022-09-13	09:51:23	0.395229	1.75806	2.65143	1725.24	FALSE	79
2022-09-13	09:51:24	0.390191	1.73565	1.63706	1684	FALSE	79
2022-09-13	09:51:24	0.305356	1.35828	1.63706	1726.6	FALSE	79
2022-09-13	09:51:24	0.385356	1.71414	1.63706	1685.71	FALSE	79
2022-09-13	09:51:24	0.391209	1.74018	1.63706	1728.34	FALSE	79
2022-09-13	09:51:25	0.355484	1.58126	2.05928	1687.29	FALSE	79
2022-09-13	09:51:25	0.408257	1.81601	2.05928	1730.15	FALSE	79
2022-09-13	09:51:25	0.625102	2.78058	2.05928	1690.07	FALSE	79
2022-09-13	09:51:26	0.579402	2.5773	2.03548	1732.73	FALSE	79
2022-09-13	09:51:26	0.496909	2.21035	2.03548	1692.28	FALSE	79
2022-09-13	09:51:26	0.374924	1.66774	2.03548	1734.4	FALSE	79
2022-09-13	09:51:26	0.379148	1.68653	2.03548	1693.97	FALSE	79
2022-09-13	09:51:27	0.436094	1.93983	1.93553	1736.34	FALSE	79
2022-09-13	09:51:27	0.535484	2.38194	1.93553	1696.35	FALSE	79
2022-09-13	09:51:27	0.44841	1.99462	1.93553	1738.33	FALSE	79
2022-09-13	09:51:27	0.320522	1.42575	1.93553	1697.78	FALSE	79
2022-09-13	09:51:28	0.500929	2.22823	2.11997	1740.56	FALSE	79
2022-09-13	09:51:28	0.465509	2.07068	2.11997	1699.85	FALSE	79
2022-09-13	09:51:28	0.484084	2.1533	2.11997	1742.71	FALSE	79
2022-09-13	09:51:28	0.45584	2.02767	2.11997	1701.88	FALSE	79
2022-09-13	09:51:29	0.43411	1.93101	2.09586	1744.64	FALSE	79
2022-09-13	09:51:29	0.450496	2.0039	2.09586	1703.88	FALSE	79
2022-09-13	09:51:29	0.488206	2.17164	2.09586	1746.82	FALSE	79
2022-09-13	09:51:29	0.51187	2.2769	2.09586	1706.16	FALSE	79
2022-09-13	09:51:30	0.597774	2.65902	2.07785	1749.48	FALSE	79
2022-09-13	09:51:30	0.413295	1.83842	2.07785	1707.99	FALSE	79
2022-09-13	09:51:30	0.390293	1.7361	2.07785	1751.21	FALSE	79
2022-09-13	09:51:31	0.315127	1.40175	2.02693	1709.4	FALSE	79
2022-09-13	09:51:31	0.491463	2.18613	2.02693	1753.4	FALSE	79
2022-09-13	09:51:31	0.437214	1.94482	2.02693	1711.34	FALSE	79
2022-09-13	09:51:31	0.578893	2.57503	2.02693	1755.97	FALSE	79
2022-09-13	09:51:32	0.483881	2.1524	3.46937	1713.49	FALSE	79
2022-09-13	09:51:32	0.782557	3.48097	3.46937	1759.45	FALSE	79
2022-09-13	09:51:32	1.26169	5.61225	3.46937	1719.11	FALSE	79
2022-09-13	09:51:32	0.591666	2.63185	3.46937	1762.09	FALSE	79
2022-09-13	09:51:33	0.45187	2.01001	2.17566	1721.12	FALSE	79
2022-09-13	09:51:33	0.436501	1.94164	2.17566	1764.03	FALSE	79
2022-09-13	09:51:33	0.812685	3.61499	2.17566	1724.73	FALSE	79
2022-09-13	09:51:33	0.255382	1.13599	2.17566	1765.16	FALSE	79
2022-09-13	09:51:34	0.750649	3.33904	1.94904	1728.07	FALSE	79
2022-09-13	09:51:34	0.280522	1.24782	1.94904	1766.41	FALSE	79
2022-09-13	09:51:34	0.283321	1.26027	1.94904	1729.33	FALSE	79
2022-09-13	09:51:35	-0.0689946	-0.306902	-0.104017	1766.41	FALSE	79
2022-09-13	09:51:35	0.165509	0.736217	-0.104017	1730.07	FALSE	79
2022-09-13	09:51:35	0.0119723	0.0532552	-0.104017	1766.46	FALSE	79
2022-09-13	09:51:35	-0.202023	-0.898639	-0.104017	1730.07	FALSE	79
2022-09-13	09:51:36	-0.248435	-1.10509	-0.0787771	1766.46	FALSE	79
2022-09-13	09:51:36	0.0676465	0.300905	-0.0787771	1730.37	FALSE	79
2022-09-13	09:51:36	0.211056	0.938819	-0.0787771	1767.4	FALSE	79
2022-09-13	09:51:36	-0.101107	-0.449744	-0.0787771	1730.37	FALSE	79
2022-09-13	09:51:37	0.212074	0.943348	0.824219	1768.35	FALSE	79
2022-09-13	09:51:37	0.1793	0.797562	0.824219	1731.16	FALSE	79
2022-09-13	09:51:37	0.109886	0.488795	0.824219	1768.84	FALSE	79
2022-09-13	09:51:37	0.239911	1.06717	0.824219	1732.23	FALSE	79
2022-09-13	09:51:38	0.327392	1.45631	3.63411	1770.29	FALSE	79
2022-09-13	09:51:38	0.922913	4.1053	3.63411	1736.34	FALSE	79
2022-09-13	09:51:38	1.33701	5.94729	3.63411	1776.24	FALSE	79
2022-09-13	09:51:38	0.680623	3.02755	3.63411	1739.36	FALSE	79
2022-09-13	09:51:39	1.44302	6.41884	6.27328	1782.66	FALSE	79
2022-09-13	09:51:39	1.95676	8.70406	6.27328	1748.07	FALSE	79
2022-09-13	09:51:39	0.831107	3.69693	6.27328	1786.35	FALSE	79
2022-09-13	09:51:40	4.45391	19.8119	9.81683	1767.88	1	80
2022-09-13	09:51:40	1.75849	7.82212	9.81683	1794.18	FALSE	80
2022-09-13	09:51:40	1.72795	7.68627	9.81683	1775.57	FALSE	80
2022-09-13	09:51:40	0.887341	3.94707	9.81683	1798.12	FALSE	80
2022-09-13	09:51:41	0.555382	2.47045	2.76722	1778.04	FALSE	80
2022-09-13	09:51:41	1.13268	5.03839	2.76722	1803.16	FALSE	80
2022-09-13	09:51:41	0.506527	2.25313	2.76722	1780.29	FALSE	80
2022-09-13	09:51:41	0.293804	1.3069	2.76722	1804.47	FALSE	80
2022-09-13	09:51:42	0.665458	2.96009	2.02438	1783.25	FALSE	80
2022-09-13	09:51:42	0.208766	0.928633	2.02438	1805.4	FALSE	80
2022-09-13	09:51:42	0.426018	1.89501	2.02438	1785.15	FALSE	80
2022-09-13	09:51:42	0.520165	2.3138	2.02438	1807.71	FALSE	80
2022-09-13	09:51:43	0.295127	1.31278	1.49547	1786.46	FALSE	80
2022-09-13	09:51:43	0.645509	2.87135	1.49547	1810.58	FALSE	80
2022-09-13	09:51:43	0.0679518	0.302263	1.49547	1786.76	FALSE	80
2022-09-13	09:51:44	0.00505114	0.0224685	-2.80429	1810.61	FALSE	80
2022-09-13	09:51:44	-0.611997	-2.72229	-2.80429	1786.76	FALSE	80
2022-09-13	09:51:44	-1.14187	-5.07927	-2.80429	1810.61	FALSE	80
2022-09-13	09:51:44	-0.772913	-3.43807	-2.80429	1786.76	FALSE	80
2022-09-13	09:51:45	-0.83902	-3.73213	-1.85336	1810.61	FALSE	80
2022-09-13	09:51:45	-0.799834	-3.55782	-1.85336	1786.76	FALSE	80
2022-09-13	09:51:45	-0.167824	-0.746515	-1.85336	1810.61	FALSE	80
2022-09-13	09:51:45	0.140064	0.623033	-1.85336	1787.38	FALSE	80
2022-09-13	09:51:46	1.70322	7.57626	11.1168	1818.18	FALSE	80
2022-09-13	09:51:46	3.53421	15.7209	11.1168	1803.1	1	81
2022-09-13	09:51:46	1.56363	6.95534	11.1168	1825.14	FALSE	81
2022-09-13	09:51:46	3.19563	14.2148	11.1168	1817.32	1	82
2022-09-13	09:51:47	1.48215	6.5929	5.38843	1831.73	FALSE	82
2022-09-13	09:51:47	2.79202	12.4195	5.38843	1829.74	FALSE	82
2022-09-13	09:51:47	0.347341	1.54504	5.38843	1833.27	FALSE	82
2022-09-13	09:51:47	0.223982	0.996317	5.38843	1830.74	FALSE	82
2022-09-13	09:51:48	0.86444	3.8452	4.05542	1837.12	FALSE	82
2022-09-13	09:51:48	0.637367	2.83514	4.05542	1833.57	FALSE	82
2022-09-13	09:51:48	1.23329	5.48592	4.05542	1842.61	FALSE	82
2022-09-13	09:51:49	3.01589	13.4153	6.13331	1846.99	1	83
2022-09-13	09:51:49	0.509936	2.2683	6.13331	1844.87	FALSE	83
2022-09-13	09:51:49	1.36826	6.08629	6.13331	1853.07	FALSE	83
2022-09-13	09:51:49	0.621234	2.76337	6.13331	1847.64	FALSE	83
2022-09-13	09:51:50	2.81986	12.5433	13.785	1865.62	FALSE	83
2022-09-13	09:51:50	0.834873	3.71368	13.785	1851.35	FALSE	83
2022-09-13	09:51:50	4.08988	18.1926	13.785	1883.81	1	84
2022-09-13	09:51:50	4.65141	20.6904	13.785	1872.04	1	85
2022-09-13	09:51:51	3.14485	13.9889	22.8419	1897.8	1	86
2022-09-13	09:51:51	7.1051	31.6049	22.8419	1903.65	1	87
2022-09-13	09:51:51	1.16307	5.17357	22.8419	1902.97	FALSE	87
2022-09-13	09:51:51	9.12729	40.6	22.8419	1944.25	1	88
2022-09-13	09:51:52	4.4534	19.8096	36.1221	1922.78	1	89
2022-09-13	09:51:52	5.87334	26.1258	36.1221	1970.37	1	90
2022-09-13	09:51:52	14.0351	62.4309	36.1221	1985.21	1	91
2022-09-13	09:51:53	5.46922	24.3282	33.7411	1994.7	1	92
2022-09-13	09:51:53	13.3996	59.6041	33.7411	2044.82	1	93
2022-09-13	09:51:53	6.84729	30.4581	33.7411	2025.16	1	94
2022-09-13	09:51:53	4.62525	20.574	33.7411	2065.39	1	95
2022-09-13	09:51:54	5.23726	23.2964	18.5377	2048.46	1	96
2022-09-13	09:51:54	1.16663	5.1894	18.5377	2070.58	FALSE	96
2022-09-13	09:51:54	8.98627	39.9727	18.5377	2088.43	1	97
2022-09-13	09:51:54	1.27966	5.69218	18.5377	2076.27	FALSE	97
2022-09-13	09:51:55	6.60184	29.3663	14.6092	2117.79	1	98
2022-09-13	09:51:55	1.73747	7.72861	14.6092	2084	FALSE	98
2022-09-13	09:51:55	3.03314	13.492	14.6092	2131.29	1	99
2022-09-13	09:51:55	1.76469	7.84969	14.6092	2091.85	FALSE	99
2022-09-13	09:51:56	1.59487	7.0943	11.2826	2138.38	FALSE	99
2022-09-13	09:51:56	1.9995	8.89418	11.2826	2100.74	FALSE	99
2022-09-13	09:51:56	1.08892	4.84373	11.2826	2143.22	FALSE	99
2022-09-13	09:51:56	5.4625	24.2983	11.2826	2125.04	1	100
2022-09-13	09:51:57	2.23319	9.93368	22.3523	2153.16	FALSE	100
2022-09-13	09:51:57	6.85609	30.4973	22.3523	2155.54	1	101
2022-09-13	09:51:57	5.98581	26.6261	22.3523	2179.78	1	102
2022-09-13	09:51:58	2.27085	10.1012	13.3174	2165.64	FALSE	102
2022-09-13	09:51:58	5.22525	23.243	13.3174	2203.03	1	103
2022-09-13	09:51:58	0.9593	4.26716	13.3174	2169.91	FALSE	103
2022-09-13	09:51:58	3.52016	15.6584	13.3174	2218.69	1	104
2022-09-13	09:51:59	1.91248	8.50709	21.9027	2178.41	FALSE	104
2022-09-13	09:51:59	6.71579	29.8732	21.9027	2248.56	1	105
2022-09-13	09:51:59	4.69156	20.869	21.9027	2199.28	1	106
2022-09-13	09:51:59	6.37594	28.3615	21.9027	2276.92	1	107
2022-09-13	09:52:00	5.67334	25.2362	13.3537	2224.52	1	108
2022-09-13	09:52:00	2.17859	9.6908	13.3537	2286.61	FALSE	108
2022-09-13	09:52:00	1.83559	8.16507	13.3537	2232.68	FALSE	108
2022-09-13	09:52:00	2.32062	10.3226	13.3537	2296.93	FALSE	108
2022-09-13	09:52:01	0.429682	1.91131	1.87909	2234.6	FALSE	108
2022-09-13	09:52:01	0.806018	3.58533	1.87909	2300.52	FALSE	108
2022-09-13	09:52:01	0.031616	0.140634	1.87909	2234.74	FALSE	108
2022-09-13	09:52:02	0.474568	2.11097	7.48515	2302.63	FALSE	108
2022-09-13	09:52:02	0.785916	3.49591	7.48515	2238.23	FALSE	108
2022-09-13	09:52:02	1.02246	4.54811	7.48515	2307.18	FALSE	108
2022-09-13	09:52:02	4.448	19.7856	7.48515	2258.02	1	109
2022-09-13	09:52:03	1.26184	5.61292	13.9543	2312.79	FALSE	109
2022-09-13	09:52:03	3.60505	16.036	13.9543	2274.05	1	110
2022-09-13	09:52:03	1.60357	7.133	13.9543	2319.92	FALSE	110
2022-09-13	09:52:03	6.07782	27.0354	13.9543	2301.09	1	111
2022-09-13	09:52:04	2.12469	9.45105	9.91704	2329.37	FALSE	111
2022-09-13	09:52:04	3.03604	13.5049	9.91704	2314.59	1	112
2022-09-13	09:52:04	1.991	8.85637	9.91704	2338.23	FALSE	112
2022-09-13	09:52:04	1.76607	7.85583	9.91704	2322.45	FALSE	112
2022-09-13	09:52:05	2.59894	11.5606	10.976	2349.79	FALSE	112
2022-09-13	09:52:05	1.52073	6.76451	10.976	2329.21	FALSE	112
2022-09-13	09:52:05	3.99955	17.7908	10.976	2367.58	1	113
2022-09-13	09:52:05	1.7508	7.78791	10.976	2337	FALSE	113
2022-09-13	09:52:06	5.04601	22.4457	15.7023	2390.03	1	114
2022-09-13	09:52:06	0.976196	4.34232	15.7023	2341.34	FALSE	114
2022-09-13	09:52:06	4.5679	20.3189	15.7023	2410.35	1	115
2022-09-13	09:52:07	0.486578	2.1644	6.61605	2343.51	FALSE	115
2022-09-13	09:52:07	2.86037	12.7235	6.61605	2423.07	FALSE	115
2022-09-13	09:52:07	1.0791	4.80005	6.61605	2348.31	FALSE	115
2022-09-13	09:52:07	1.52337	6.77625	6.61605	2429.85	FALSE	115
2022-09-13	09:52:08	2.70561	12.0351	16.2791	2360.34	FALSE	115
2022-09-13	09:52:08	2.41619	10.7477	16.2791	2440.59	FALSE	115
2022-09-13	09:52:08	5.28235	23.4969	16.2791	2383.84	1	116
2022-09-13	09:52:08	4.23467	18.8367	16.2791	2459.43	1	117
2022-09-13	09:52:09	6.5339	29.0641	12.473	2412.91	1	118
2022-09-13	09:52:09	1.58754	7.0617	12.473	2466.49	FALSE	118
2022-09-13	09:52:09	2.8053	12.4785	12.473	2425.38	FALSE	118
2022-09-13	09:52:09	0.289478	1.28766	12.473	2467.78	FALSE	118
2022-09-13	09:52:10	1.87798	8.35363	5.23188	2433.74	FALSE	118
2022-09-13	09:52:10	0.883626	3.93055	5.23188	2471.71	FALSE	118
2022-09-13	09:52:10	0.766934	3.41148	5.23188	2437.15	FALSE	118
2022-09-13	09:52:11	2.16332	9.62288	5.91333	2481.33	FALSE	118
2022-09-13	09:52:11	1.1765	5.23331	5.91333	2442.38	FALSE	118
2022-09-13	09:52:11	1.47813	6.57502	5.91333	2487.91	FALSE	118
2022-09-13	09:52:11	0.499555	2.22212	5.91333	2444.6	FALSE	118
2022-09-13	09:52:12	1.75864	7.82278	7.19386	2495.73	FALSE	118
2022-09-13	09:52:12	0.782404	3.48029	7.19386	2448.08	FALSE	118
2022-09-13	09:52:12	2.96312	13.1806	7.19386	2508.91	FALSE	118
2022-09-13	09:52:12	0.964847	4.29183	7.19386	2452.38	FALSE	118
2022-09-13	09:52:13	1.8335	8.15577	6.64157	2517.07	FALSE	118
2022-09-13	09:52:13	1.0077	4.48245	6.64157	2456.86	FALSE	118
2022-09-13	09:52:13	1.80907	8.04711	6.64157	2525.12	FALSE	118
2022-09-13	09:52:13	1.3221	5.88097	6.64157	2462.74	FALSE	118
2022-09-13	09:52:14	6.26006	27.846	21.2191	2552.96	1	119
2022-09-13	09:52:14	2.97553	13.2358	21.2191	2475.98	FALSE	119
2022-09-13	09:52:14	8.3107	36.9677	21.2191	2589.93	1	120
2022-09-13	09:52:14	1.53482	6.82719	21.2191	2482.8	FALSE	120
2022-09-13	09:52:15	1.08704	4.83537	3.44649	2594.76	FALSE	120
2022-09-13	09:52:15	0.560471	2.49309	3.44649	2485.3	FALSE	120
2022-09-13	09:52:15	0.676908	3.01102	3.44649	2597.78	FALSE	120
2022-09-13	09:52:16	0.711361	3.16428	2.03978	2488.46	FALSE	120
2022-09-13	09:52:16	0.368308	1.63831	2.03978	2599.41	FALSE	120
2022-09-13	09:52:16	0.0368577	0.16395	2.03978	2488.62	FALSE	120
2022-09-13	09:52:16	0.717723	3.19258	2.03978	2602.61	FALSE	120
2022-09-13	09:52:17	0.500318	2.22551	2.5503	2490.85	FALSE	120
2022-09-13	09:52:17	0.488054	2.17096	2.5503	2604.78	FALSE	120
2022-09-13	09:52:17	0.480623	2.13791	2.5503	2492.99	FALSE	120
2022-09-13	09:52:17	0.824338	3.66682	2.5503	2608.44	FALSE	120
2022-09-13	09:52:18	0.74444	3.31142	3.28816	2496.3	FALSE	120
2022-09-13	09:52:18	0.735433	3.27135	3.28816	2611.72	FALSE	120
2022-09-13	09:52:18	0.738384	3.28448	3.28816	2499.58	FALSE	120
2022-09-13	09:52:18	0.738588	3.28539	3.28816	2615	FALSE	120
2022-09-13	09:52:19	0.735585	3.27203	2.69026	2502.86	FALSE	120
2022-09-13	09:52:19	0.723524	3.21838	2.69026	2618.22	FALSE	120
2022-09-13	09:52:19	0.35528	1.58036	2.69026	2504.44	FALSE	120
2022-09-13	09:52:20	0.427239	1.90044	1.8747	2620.12	FALSE	120
2022-09-13	09:52:20	0.444746	1.97832	1.8747	2506.41	FALSE	120
2022-09-13	09:52:20	0.33355	1.4837	1.8747	2621.6	FALSE	120
2022-09-13	09:52:20	0.480267	2.13632	1.8747	2508.55	FALSE	120
2022-09-13	09:52:21	0.517264	2.30089	3.03406	2623.9	FALSE	120
2022-09-13	09:52:21	0.743982	3.30938	3.03406	2511.86	FALSE	120
2022-09-13	09:52:21	0.729173	3.24351	3.03406	2627.15	FALSE	120
2022-09-13	09:52:21	0.737926	3.28244	3.03406	2515.14	FALSE	120
2022-09-13	09:52:22	0.730801	3.25075	3.2589	2630.4	FALSE	120
2022-09-13	09:52:22	0.740165	3.2924	3.2589	2518.43	FALSE	120
2022-09-13	09:52:22	0.727392	3.23559	3.2589	2633.63	FALSE	120
2022-09-13	09:52:22	0.732175	3.25686	3.2589	2521.69	FALSE	120
2022-09-13	09:52:23	0.738333	3.28425	2.92529	2636.92	FALSE	120
2022-09-13	09:52:23	0.738995	3.2872	2.92529	2524.98	FALSE	120
2022-09-13	09:52:23	0.713753	3.17492	2.92529	2640.09	FALSE	120
2022-09-13	09:52:23	0.439453	1.95477	2.92529	2526.93	FALSE	120
2022-09-13	09:52:24	0.928664	4.13088	4.96271	2644.22	FALSE	120
2022-09-13	09:52:24	1.03711	4.61327	4.96271	2531.55	FALSE	120
2022-09-13	09:52:24	1.38123	6.14399	4.96271	2650.37	FALSE	120
2022-09-13	09:52:25	1.39711	6.21462	4.10717	2537.76	FALSE	120
2022-09-13	09:52:25	0.459657	2.04465	4.10717	2652.41	FALSE	120
2022-09-13	09:52:25	0.856501	3.80989	4.10717	2541.57	FALSE	120
2022-09-13	09:52:25	0.980063	4.35952	4.10717	2656.77	FALSE	120
2022-09-13	09:52:26	0.752023	3.34515	4.16031	2544.92	FALSE	120
2022-09-13	09:52:26	1.64225	7.30506	4.16031	2664.08	FALSE	120
2022-09-13	09:52:26	0.789987	3.51402	4.16031	2548.43	FALSE	120
2022-09-13	09:52:26	0.556857	2.47701	4.16031	2666.55	FALSE	120
2022-09-13	09:52:27	0.432328	1.92308	1.7657	2550.35	FALSE	120
2022-09-13	09:52:27	0.453652	2.01793	1.7657	2668.57	FALSE	120
2022-09-13	09:52:27	0.283372	1.2605	1.7657	2551.61	FALSE	120
2022-09-13	09:52:27	0.418435	1.86128	1.7657	2670.43	FALSE	120
2022-09-13	09:52:28	2.23014	9.92011	12.2136	2561.53	FALSE	120
2022-09-13	09:52:28	1.64317	7.30915	12.2136	2677.74	FALSE	120
2022-09-13	09:52:28	4.36388	19.4114	12.2136	2580.95	1	121
2022-09-13	09:52:29	2.38327	10.6013	14.8489	2688.34	FALSE	121
2022-09-13	09:52:29	5.9195	26.3311	14.8489	2607.28	1	122
2022-09-13	09:52:29	3.1735	14.1164	14.8489	2702.46	1	123
2022-09-13	09:52:29	1.87645	8.34682	14.8489	2615.62	FALSE	123
2022-09-13	09:52:30	2.51594	11.1914	4.64559	2713.65	FALSE	123
2022-09-13	09:52:30	0.396196	1.76236	4.64559	2617.39	FALSE	123
2022-09-13	09:52:30	0.748257	3.3284	4.64559	2716.98	FALSE	123
2022-09-13	09:52:30	0.517112	2.30022	4.64559	2619.69	FALSE	123
2022-09-13	09:52:31	0.59701	2.65562	2.06219	2719.64	FALSE	123
2022-09-13	09:52:31	0.422405	1.87894	2.06219	2621.57	FALSE	123
2022-09-13	09:52:31	0.438893	1.95228	2.06219	2721.59	FALSE	123
2022-09-13	09:52:31	0.396094	1.76191	2.06219	2623.33	FALSE	123
2022-09-13	09:52:32	0.562048	2.5001	2.6546	2724.09	FALSE	123
2022-09-13	09:52:32	0.52327	2.32761	2.6546	2625.65	FALSE	123
2022-09-13	09:52:32	0.541489	2.40865	2.6546	2726.5	FALSE	123
2022-09-13	09:52:32	0.760318	3.38205	2.6546	2629.04	FALSE	123
2022-09-13	09:52:33	0.550751	2.44985	5.45735	2728.95	FALSE	123
2022-09-13	09:52:33	2.82378	12.5607	5.45735	2641.6	FALSE	123
2022-09-13	09:52:33	0.306069	1.36146	5.45735	2730.31	FALSE	123
2022-09-13	09:52:34	4.36826	19.4309	10.7878	2661.03	1	124
2022-09-13	09:52:34	0.364491	1.62133	10.7878	2731.93	FALSE	124
2022-09-13	09:52:34	4.7852	21.2855	10.7878	2682.31	1	125
2022-09-13	09:52:34	0.182914	0.813638	10.7878	2732.74	FALSE	125
2022-09-13	09:52:35	0.837926	3.72726	3.0417	2686.04	FALSE	125
2022-09-13	09:52:35	0.52958	2.35568	3.0417	2735.1	FALSE	125
2022-09-13	09:52:35	0.7993	3.55545	3.0417	2689.6	FALSE	125
2022-09-13	09:52:35	0.568409	2.5284	3.0417	2737.63	FALSE	125
2022-09-13	09:52:36	0.535382	2.38149	1.9151	2691.98	FALSE	125
2022-09-13	09:52:36	0.360013	1.60141	1.9151	2739.23	FALSE	125
2022-09-13	09:52:36	0.520776	2.31652	1.9151	2694.29	FALSE	125
2022-09-13	09:52:36	0.305967	1.361	1.9151	2740.59	FALSE	125
2022-09-13	09:52:37	0.42098	1.8726	1.84536	2696.17	FALSE	125
2022-09-13	09:52:37	0.447799	1.9919	1.84536	2742.58	FALSE	125
2022-09-13	09:52:37	0.375789	1.67158	1.84536	2697.84	FALSE	125
2022-09-13	09:52:38	0.361132	1.60639	11.0392	2744.19	FALSE	125
2022-09-13	09:52:38	2.12541	9.45425	11.0392	2707.29	FALSE	125
2022-09-13	09:52:38	1.94653	8.65855	11.0392	2752.85	FALSE	125
2022-09-13	09:52:38	5.49385	24.4377	11.0392	2731.73	1	126
2022-09-13	09:52:39	2.85431	12.6965	17.1466	2765.54	FALSE	126
2022-09-13	09:52:39	4.54525	20.2182	17.1466	2751.95	1	127
2022-09-13	09:52:39	1.92566	8.56572	17.1466	2774.11	FALSE	127
2022-09-13	09:52:39	6.0937	27.106	17.1466	2779.05	1	128
2022-09-13	09:52:40	1.57757	7.01735	10.0425	2781.13	FALSE	128
2022-09-13	09:52:40	4.98759	22.1858	10.0425	2801.24	1	129
2022-09-13	09:52:40	0.447188	1.98918	10.0425	2783.11	FALSE	129
2022-09-13	09:52:40	2.01823	8.97749	10.0425	2810.22	FALSE	129
2022-09-13	09:52:41	0.109071	0.48517	4.19494	2783.6	FALSE	129
2022-09-13	09:52:41	0.821692	3.65505	4.19494	2813.87	FALSE	129
2022-09-13	09:52:41	1.89843	8.4446	4.19494	2792.04	FALSE	129
2022-09-13	09:52:42	9.03609	40.1943	21.122	2854.07	1	130
2022-09-13	09:52:42	5.78479	25.7319	21.122	2817.78	1	131
2022-09-13	09:52:42	2.15167	9.57106	21.122	2863.64	FALSE	131
2022-09-13	09:52:42	2.02118	8.99061	21.122	2826.77	FALSE	131
2022-09-13	09:52:43	4.00948	17.835	12.3062	2881.47	1	132
2022-09-13	09:52:43	1.67961	7.47124	12.3062	2834.24	FALSE	132
2022-09-13	09:52:43	2.97462	13.2317	12.3062	2894.71	FALSE	132
2022-09-13	09:52:43	2.40251	10.6868	12.3062	2844.93	FALSE	132
2022-09-13	09:52:44	2.68276	11.9335	10.1757	2906.64	FALSE	132
2022-09-13	09:52:44	5.46021	24.2881	10.1757	2869.21	1	133
2022-09-13	09:52:44	0.492125	2.18907	10.1757	2908.83	FALSE	133
2022-09-13	09:52:44	0.515331	2.2923	10.1757	2871.51	FALSE	133
2022-09-13	09:52:45	0.516247	2.29637	2.11154	2911.12	FALSE	133
2022-09-13	09:52:45	0.38327	1.70486	2.11154	2873.21	FALSE	133
2022-09-13	09:52:45	0.528919	2.35274	2.11154	2913.48	FALSE	133
2022-09-13	09:52:45	0.470344	2.09218	2.11154	2875.3	FALSE	133
2022-09-13	09:52:46	0.696654	3.09886	2.636	2916.58	FALSE	133
2022-09-13	09:52:46	0.544745	2.42313	2.636	2877.73	FALSE	133
2022-09-13	09:52:46	0.5364	2.38601	2.636	2918.96	FALSE	133
2022-09-13	09:52:47	0.464491	2.06615	1.99094	2879.79	FALSE	133
2022-09-13	09:52:47	0.504542	2.2443	1.99094	2921.21	FALSE	133
2022-09-13	09:52:47	0.515127	2.29139	1.99094	2882.08	FALSE	133
2022-09-13	09:52:47	0.30617	1.36191	1.99094	2922.57	FALSE	133
2022-09-13	09:52:48	0.233092	1.03684	1.32416	2883.12	FALSE	133
2022-09-13	09:52:48	0.275738	1.22654	1.32416	2923.79	FALSE	133
2022-09-13	09:52:48	0.340878	1.51629	1.32416	2884.64	FALSE	133
2022-09-13	09:52:48	0.341031	1.51697	1.32416	2925.31	FALSE	133
2022-09-13	09:52:49	0.208766	0.928633	-0.428067	2885.57	FALSE	133
2022-09-13	09:52:49	-0.0388674	-0.17289	-0.428067	2925.31	FALSE	133
2022-09-13	09:52:49	-0.27902	-1.24114	-0.428067	2885.57	FALSE	133
2022-09-13	09:52:49	-0.275814	-1.22688	-0.428067	2925.31	FALSE	133
2022-09-13	09:52:50	-0.313371	-1.39394	-0.65989	2885.57	FALSE	133
2022-09-13	09:52:50	-0.173066	-0.769832	-0.65989	2925.31	FALSE	133
2022-09-13	09:52:50	0.041387	0.184098	-0.65989	2885.75	FALSE	133
2022-09-13	09:52:51	0.434415	1.93236	6.11151	2927.24	FALSE	133
2022-09-13	09:52:51	4.17563	18.574	6.11151	2904.32	1	134
2022-09-13	09:52:51	0.320827	1.4271	6.11151	2928.67	FALSE	134
2022-09-13	09:52:51	0.564847	2.51255	6.11151	2906.84	FALSE	134
2022-09-13	09:52:52	0.286069	1.27249	2.05257	2929.94	FALSE	134
2022-09-13	09:52:52	0.479351	2.13225	2.05257	2908.97	FALSE	134
2022-09-13	09:52:52	0.520674	2.31606	2.05257	2932.26	FALSE	134
2022-09-13	09:52:52	0.559657	2.48947	2.05257	2911.46	FALSE	134
2022-09-13	09:52:53	0.381743	1.69807	2.02212	2933.96	FALSE	134
2022-09-13	09:52:53	0.560623	2.49376	2.02212	2913.95	FALSE	134
2022-09-13	09:52:53	0.434771	1.93395	2.02212	2935.89	FALSE	134
2022-09-13	09:52:53	0.441234	1.9627	2.02212	2915.91	FALSE	134
2022-09-13	09:52:54	0.396196	1.76236	1.92501	2937.65	FALSE	134
2022-09-13	09:52:54	0.487341	2.16779	1.92501	2918.08	FALSE	134
2022-09-13	09:52:54	0.492532	2.19088	1.92501	2939.84	FALSE	134
2022-09-13	09:52:54	0.354975	1.579	1.92501	2919.66	FALSE	134
2022-09-13	09:52:55	0.650394	2.89308	3.16896	2942.74	FALSE	134
2022-09-13	09:52:55	0.556603	2.47588	3.16896	2922.14	FALSE	134
2022-09-13	09:52:55	0.930242	4.1379	3.16896	2946.88	FALSE	134
2022-09-13	09:52:56	0.612481	2.72444	2.01691	2924.86	FALSE	134
2022-09-13	09:52:56	0.502863	2.23684	2.01691	2949.11	FALSE	134
2022-09-13	09:52:56	0.330038	1.46808	2.01691	2926.33	FALSE	134
2022-09-13	09:52:56	0.368308	1.63831	2.01691	2950.75	FALSE	134
2022-09-13	09:52:57	0.37813	1.682	1.74606	2928.01	FALSE	134
2022-09-13	09:52:57	0.45126	2.00729	1.74606	2952.76	FALSE	134
2022-09-13	09:52:57	0.302914	1.34742	1.74606	2929.36	FALSE	134
2022-09-13	09:52:57	0.437825	1.94753	1.74606	2954.71	FALSE	134
2022-09-13	09:52:58	0.522201	2.32285	2.14368	2931.68	FALSE	134
2022-09-13	09:52:58	0.464389	2.0657	2.14368	2956.77	FALSE	134
2022-09-13	09:52:58	0.480776	2.13859	2.14368	2933.82	FALSE	134
2022-09-13	09:52:58	0.460318	2.04759	2.14368	2958.82	FALSE	134
2022-09-13	09:52:59	0.519555	2.31108	2.77167	2936.13	FALSE	134
2022-09-13	09:52:59	0.833244	3.70644	2.77167	2962.53	FALSE	134
2022-09-13	09:52:59	0.516501	2.2975	2.77167	2938.43	FALSE	134
2022-09-13	09:53:00	0.69874	3.10814	2.63066	2965.63	FALSE	134
2022-09-13	09:53:00	0.627188	2.78986	2.63066	2941.22	FALSE	134
2022-09-13	09:53:00	0.513397	2.28369	2.63066	2967.92	FALSE	134
2022-09-13	09:53:00	0.526272	2.34096	2.63066	2943.56	FALSE	134
2022-09-13	09:53:01	0.416298	1.85178	1.91137	2969.77	FALSE	134
2022-09-13	09:53:01	0.4107	1.82688	1.91137	2945.39	FALSE	134
2022-09-13	09:53:01	0.473753	2.10735	1.91137	2971.88	FALSE	134
2022-09-13	09:53:01	0.418028	1.85947	1.91137	2947.25	FALSE	134
2022-09-13	09:53:02	0.431616	1.91991	1.94957	2973.8	FALSE	134
2022-09-13	09:53:02	0.444186	1.97583	1.94957	2949.22	FALSE	134
2022-09-13	09:53:02	0.441845	1.96541	1.94957	2975.76	FALSE	134
2022-09-13	09:53:02	0.435484	1.93712	1.94957	2951.16	FALSE	134
2022-09-13	09:53:03	0.364186	1.61997	1.68381	2977.38	FALSE	134
2022-09-13	09:53:03	0.358333	1.59394	1.68381	2952.75	FALSE	134
2022-09-13	09:53:03	0.372074	1.65506	1.68381	2979.04	FALSE	134
2022-09-13	09:53:03	0.419555	1.86626	1.68381	2954.62	FALSE	134
2022-09-13	09:53:04	0.425509	1.89275	2.07596	2980.93	FALSE	134
2022-09-13	09:53:04	0.492125	2.18907	2.07596	2956.81	FALSE	134
2022-09-13	09:53:04	0.482456	2.14606	2.07596	2983.08	FALSE	134
2022-09-13	09:53:05	0.48612	2.16236	2.3842	2958.97	FALSE	134
2022-09-13	09:53:05	0.521234	2.31855	2.3842	2985.39	FALSE	134
2022-09-13	09:53:05	0.548715	2.44079	2.3842	2961.41	FALSE	134
2022-09-13	09:53:05	0.587901	2.6151	2.3842	2988.01	FALSE	134
2022-09-13	09:53:06	0.525203	2.33621	2.27401	2963.75	FALSE	134
2022-09-13	09:53:06	0.517875	2.30361	2.27401	2990.31	FALSE	134
2022-09-13	09:53:06	0.498588	2.21782	2.27401	2965.97	FALSE	134
2022-09-13	09:53:06	0.503219	2.23842	2.27401	2992.55	FALSE	134
2022-09-13	09:53:07	0.588664	2.6185	2.72229	2968.58	FALSE	134
2022-09-13	09:53:07	0.631259	2.80797	2.72229	2995.36	FALSE	134
2022-09-13	09:53:07	0.616552	2.74255	2.72229	2971.33	FALSE	134
2022-09-13	09:53:07	0.611514	2.72014	2.72229	2998.08	FALSE	134
2022-09-13	09:53:08	0.67187	2.98861	2.92568	2974.31	FALSE	134
2022-09-13	09:53:08	0.660216	2.93677	2.92568	3001.02	FALSE	134
2022-09-13	09:53:08	0.641081	2.85166	2.92568	2977.17	FALSE	134
2022-09-13	09:53:09	0.545916	2.42834	2.49303	3003.44	FALSE	134
2022-09-13	09:53:09	0.569733	2.53429	2.49303	2979.7	FALSE	134
2022-09-13	09:53:09	0.54729	2.43446	2.49303	3005.88	FALSE	134
2022-09-13	09:53:09	0.578893	2.57503	2.49303	2982.28	FALSE	134
2022-09-13	09:53:10	0.596603	2.65381	2.49088	3008.53	FALSE	134
2022-09-13	09:53:10	0.642557	2.85822	2.49088	2985.13	FALSE	134
2022-09-13	09:53:10	0.562201	2.50078	2.49088	3011.03	FALSE	134
2022-09-13	09:53:10	0.438537	1.9507	2.49088	2987.08	FALSE	134
2022-09-13	09:53:11	0.595025	2.64679	1.31748	3013.68	FALSE	134
2022-09-13	09:53:11	0.677519	3.01374	1.31748	2990.1	FALSE	134
2022-09-13	09:53:11	0.0523285	0.232768	1.31748	3013.91	FALSE	134
2022-09-13	09:53:11	-0.14014	-0.623371	1.31748	2990.1	FALSE	134
2022-09-13	09:53:12	-0.219682	-0.977189	-0.872378	3013.91	FALSE	134
2022-09-13	09:53:12	-0.251539	-1.1189	-0.872378	2990.1	FALSE	134
2022-09-13	09:53:12	-0.266755	-1.18658	-0.872378	3013.91	FALSE	134
2022-09-13	09:53:12	-0.046501	-0.206846	-0.872378	2990.1	FALSE	134
2022-09-13	09:53:13	0.0346694	0.154216	-0.0116381	3014.07	FALSE	134
2022-09-13	09:53:13	-0.115305	-0.5129	-0.0116381	2990.1	FALSE	134
2022-09-13	09:53:13	0.0727865	0.323769	-0.0116381	3014.39	FALSE	134
2022-09-13	09:53:14	-0.228129	-1.01476	-0.472436	2990.1	FALSE	134
2022-09-13	09:53:14	-0.275865	-1.2271	-0.472436	3014.39	FALSE	134
2022-09-13	09:53:14	-0.0636511	-0.283133	-0.472436	2990.1	FALSE	134
2022-09-13	09:53:14	0.142812	0.635256	-0.472436	3015.03	FALSE	134
2022-09-13	09:53:15	0.244695	1.08845	1.77928	2991.19	FALSE	134
2022-09-13	09:53:15	0.161845	0.719919	1.77928	3015.75	FALSE	134
2022-09-13	09:53:15	1.07889	4.79912	1.77928	2995.99	FALSE	134
2022-09-13	09:53:15	0.114568	0.509621	1.77928	3016.26	FALSE	134
2022-09-13	09:53:16	0.0692751	0.308149	0.331296	2996.29	FALSE	134
2022-09-13	09:53:16	0.131107	0.58319	0.331296	3016.84	FALSE	134
2022-09-13	09:53:16	0.097672	0.434465	0.331296	2996.73	FALSE	134
2022-09-13	09:53:16	-0.000139698	-0.000621405	0.331296	3016.84	FALSE	134
2022-09-13	09:53:17	-0.108028	-0.48053	-0.931687	2996.73	FALSE	134
2022-09-13	09:53:17	-0.268333	-1.1936	-0.931687	3016.84	FALSE	134
2022-09-13	09:53:17	-0.251997	-1.12093	-0.931687	2996.73	FALSE	134
2022-09-13	09:53:18	0.0370104	0.16463	1.27843	3017	FALSE	134
2022-09-13	09:53:18	0.331361	1.47396	1.27843	2998.2	FALSE	134
2022-09-13	09:53:18	0.494059	2.19767	1.27843	3019.2	FALSE	134
2022-09-13	09:53:18	0.287188	1.27747	1.27843	2999.48	FALSE	134
2022-09-13	09:53:19	0.338384	1.5052	1.81442	3020.71	FALSE	134
2022-09-13	09:53:19	0.481234	2.14063	1.81442	3001.62	FALSE	134
2022-09-13	09:53:19	0.403066	1.79292	1.81442	3022.5	FALSE	134
2022-09-13	09:53:19	0.408919	1.81895	1.81442	3003.44	FALSE	134
2022-09-13	09:53:20	0.420216	1.8692	1.8571	3024.37	FALSE	134
2022-09-13	09:53:20	0.414466	1.84363	1.8571	3005.28	FALSE	134
2022-09-13	09:53:20	0.413601	1.83978	1.8571	3026.21	FALSE	134
2022-09-13	09:53:20	0.421692	1.87577	1.8571	3007.16	FALSE	134
2022-09-13	09:53:21	0.419758	1.86717	1.91075	3028.08	FALSE	134
2022-09-13	09:53:21	0.429275	1.9095	1.91075	3009.07	FALSE	134
2022-09-13	09:53:21	0.432888	1.92557	1.91075	3030	FALSE	134
2022-09-13	09:53:21	0.436298	1.94074	1.91075	3011.01	FALSE	134
2022-09-13	09:53:22	0.440471	1.9593	1.95432	3031.96	FALSE	134
2022-09-13	09:53:22	0.437875	1.94776	1.95432	3012.96	FALSE	134
2022-09-13	09:53:22	0.439708	1.95591	1.95432	3033.92	FALSE	134
2022-09-13	09:53:23	0.444695	1.97809	1.95296	3014.94	FALSE	134
2022-09-13	09:53:23	0.436756	1.94278	1.95296	3035.86	FALSE	134
2022-09-13	09:53:23	0.439453	1.95477	1.95296	3016.89	FALSE	134
2022-09-13	09:53:23	0.43528	1.93621	1.95296	3037.8	FALSE	134
2022-09-13	09:53:24	0.436552	1.94187	1.95042	3018.83	FALSE	134
2022-09-13	09:53:24	0.436145	1.94006	1.95042	3039.74	FALSE	134
2022-09-13	09:53:24	0.443015	1.97062	1.95042	3020.8	FALSE	134
2022-09-13	09:53:24	0.438181	1.94912	1.95042	3041.68	FALSE	134
2022-09-13	09:53:25	0.439911	1.95681	1.95512	3022.76	FALSE	134
2022-09-13	09:53:25	0.441641	1.96451	1.95512	3043.65	FALSE	134
2022-09-13	09:53:25	0.4364	1.94119	1.95512	3024.7	FALSE	134
2022-09-13	09:53:25	0.440166	1.95795	1.95512	3045.61	FALSE	134
2022-09-13	09:53:26	0.435992	1.93938	1.95244	3026.64	FALSE	134
2022-09-13	09:53:26	0.440929	1.96134	1.95244	3047.57	FALSE	134
2022-09-13	09:53:26	0.43986	1.95659	1.95244	3028.6	FALSE	134
2022-09-13	09:53:27	0.439708	1.95591	1.93831	3049.52	FALSE	134
2022-09-13	09:53:27	0.437417	1.94572	1.93831	3030.54	FALSE	134
2022-09-13	09:53:27	0.433092	1.92648	1.93831	3051.45	FALSE	134
2022-09-13	09:53:27	0.432786	1.92512	1.93831	3032.47	FALSE	134
2022-09-13	09:53:28	0.432227	1.92263	1.9249	3053.37	FALSE	134
2022-09-13	09:53:28	0.43355	1.92852	1.9249	3034.4	FALSE	134
2022-09-13	09:53:28	0.430649	1.91561	1.9249	3055.29	FALSE	134
2022-09-13	09:53:28	0.434517	1.93282	1.9249	3036.33	FALSE	134
2022-09-13	09:53:29	0.434618	1.93327	2.14198	3057.22	FALSE	134
2022-09-13	09:53:29	0.428206	1.90475	2.14198	3038.23	FALSE	134
2022-09-13	09:53:29	0.446069	1.9842	2.14198	3059.21	FALSE	134
2022-09-13	09:53:29	0.617265	2.74572	2.14198	3040.98	FALSE	134
2022-09-13	09:53:30	0.542812	2.41454	1.21831	3061.62	FALSE	134
2022-09-13	09:53:30	0.30327	1.34901	1.21831	3042.33	FALSE	134
2022-09-13	09:53:30	-0.0244145	-0.108601	1.21831	3061.62	FALSE	134
2022-09-13	09:53:31	0.129224	0.574814	1.07911	3042.9	FALSE	134
2022-09-13	09:53:31	0.212277	0.944251	1.07911	3062.57	FALSE	134
2022-09-13	09:53:31	0.297468	1.3232	1.07911	3044.23	FALSE	134
2022-09-13	09:53:31	0.331412	1.47419	1.07911	3064.04	FALSE	134
2022-09-13	09:53:32	0.374466	1.6657	1.65534	3045.89	FALSE	134
2022-09-13	09:53:32	0.40271	1.79133	1.65534	3065.83	FALSE	134
2022-09-13	09:53:32	0.373092	1.65959	1.65534	3047.55	FALSE	134
2022-09-13	09:53:32	0.338283	1.50475	1.65534	3067.34	FALSE	134
2022-09-13	09:53:33	0.355331	1.58058	2.10022	3049.13	FALSE	134
2022-09-13	09:53:33	0.368766	1.64034	2.10022	3068.98	FALSE	134
2022-09-13	09:53:33	0.43014	1.91335	2.10022	3051.05	FALSE	134
2022-09-13	09:53:33	0.734364	3.2666	2.10022	3072.24	FALSE	134
2022-09-13	09:53:34	0.759809	3.37978	2.1284	3054.43	FALSE	134
2022-09-13	09:53:34	0.410802	1.82733	2.1284	3074.07	FALSE	134
2022-09-13	09:53:34	0.378384	1.68313	2.1284	3056.11	FALSE	134
2022-09-13	09:53:34	0.364949	1.62337	2.1284	3075.69	FALSE	134
2022-09-13	09:53:35	0.327901	1.45857	1.46362	3057.57	FALSE	134
2022-09-13	09:53:35	0.326323	1.45155	1.46362	3077.14	FALSE	134
2022-09-13	09:53:35	0.332888	1.48075	1.46362	3059.05	FALSE	134
2022-09-13	09:53:36	0.734873	3.26886	3.27458	3080.41	FALSE	134
2022-09-13	09:53:36	0.742455	3.30259	3.27458	3062.35	FALSE	134
2022-09-13	09:53:36	0.732786	3.25958	3.27458	3083.67	FALSE	134
2022-09-13	09:53:36	0.734517	3.26728	3.27458	3065.62	FALSE	134
2022-09-13	09:53:37	0.737977	3.28267	3.27865	3086.96	FALSE	134
2022-09-13	09:53:37	0.740318	3.29308	3.27865	3068.91	FALSE	134
2022-09-13	09:53:37	0.735941	3.27361	3.27865	3090.23	FALSE	134
2022-09-13	09:53:37	0.734059	3.26524	3.27865	3072.18	FALSE	134
2022-09-13	09:53:38	0.741641	3.29897	3.24028	3093.53	FALSE	134
2022-09-13	09:53:38	0.723728	3.21929	3.24028	3075.4	FALSE	134
2022-09-13	09:53:38	0.729936	3.2469	3.24028	3096.78	FALSE	134
2022-09-13	09:53:38	0.718486	3.19597	3.24028	3078.59	FALSE	134
2022-09-13	09:53:39	0.725102	3.2254	3.16564	3100	FALSE	134
2022-09-13	09:53:39	0.702303	3.12398	3.16564	3081.72	FALSE	134
2022-09-13	09:53:39	0.707595	3.14752	3.16564	3103.15	FALSE	134
2022-09-13	09:53:40	0.663931	2.9533	3.10751	3084.67	FALSE	134
2022-09-13	09:53:40	0.67589	3.00649	3.10751	3106.15	FALSE	134
2022-09-13	09:53:40	0.75874	3.37503	3.10751	3088.04	FALSE	134
2022-09-13	09:53:40	0.69584	3.09524	3.10751	3109.25	FALSE	134
2022-09-13	09:53:41	0.734771	3.26841	2.94062	3091.31	FALSE	134
2022-09-13	09:53:41	0.726934	3.23355	2.94062	3112.48	FALSE	134
2022-09-13	09:53:41	0.728817	3.24192	2.94062	3094.55	FALSE	134
2022-09-13	09:53:41	0.453804	2.01861	2.94062	3114.5	FALSE	134
2022-09-13	09:53:42	0.727188	3.23468	2.83417	3097.79	FALSE	134
2022-09-13	09:53:42	0.445	1.97945	2.83417	3116.48	FALSE	134
2022-09-13	09:53:42	0.741081	3.29648	2.83417	3101.08	FALSE	134
2022-09-13	09:53:42	0.635331	2.82608	2.83417	3119.31	FALSE	134
2022-09-13	09:53:43	0.671819	2.98839	2.7713	3104.07	FALSE	134
2022-09-13	09:53:43	0.542303	2.41227	2.7713	3121.72	FALSE	134
2022-09-13	09:53:43	0.581896	2.58839	2.7713	3106.66	FALSE	134
2022-09-13	09:53:43	0.696043	3.09614	2.7713	3124.82	FALSE	134
2022-09-13	09:53:44	0.66729	2.96824	2.89693	3109.63	FALSE	134
2022-09-13	09:53:44	0.638435	2.83989	2.89693	3127.66	FALSE	134
2022-09-13	09:53:44	0.648053	2.88267	2.89693	3112.51	FALSE	134
2022-09-13	09:53:45	0.543321	2.4168	1.63604	3130.07	FALSE	134
2022-09-13	09:53:45	0.418995	1.86377	1.63604	3114.38	FALSE	134
2022-09-13	09:53:45	0.265458	1.18081	1.63604	3131.25	FALSE	134
2022-09-13	09:53:45	0.243422	1.08279	1.63604	3115.46	FALSE	134
2022-09-13	09:53:46	0.278181	1.2374	1.26736	3132.49	FALSE	134
2022-09-13	09:53:46	0.287799	1.28019	1.26736	3116.74	FALSE	134
2022-09-13	09:53:46	0.288766	1.28449	1.26736	3133.78	FALSE	134
2022-09-13	09:53:47	0.289835	1.28924	1.55949	3118.03	FALSE	134
2022-09-13	09:53:47	0.325102	1.44612	1.55949	3135.22	FALSE	134
2022-09-13	09:53:47	0.389479	1.73248	1.55949	3119.76	FALSE	134
2022-09-13	09:53:47	0.355738	1.58239	1.55949	3136.8	FALSE	134
2022-09-13	09:53:47	0.392786	1.74719	1.55949	3121.51	FALSE	134
2022-09-13	09:53:48	0.115942	0.515733	2.35342	3137.32	FALSE	134
2022-09-13	09:53:48	1.09503	4.87091	2.35342	3126.38	FALSE	134
2022-09-13	09:53:48	0.376247	1.67362	2.35342	3138.99	FALSE	134
2022-09-13	09:53:49	0.398944	1.77458	6.45288	3128.15	FALSE	134
2022-09-13	09:53:49	1.15207	5.12464	6.45288	3144.12	FALSE	134
2022-09-13	09:53:49	0.796349	3.54232	6.45288	3131.7	FALSE	134
2022-09-13	09:53:49	3.45533	15.37	6.45288	3159.49	1	135
2022-09-13	09:53:50	2.72342	12.1143	10.3322	3143.81	FALSE	135
2022-09-13	09:53:50	4.28378	19.0551	10.3322	3178.54	1	136
2022-09-13	09:53:50	1.24469	5.53663	10.3322	3149.35	FALSE	136
2022-09-13	09:53:50	1.0392	4.62257	10.3322	3183.17	FALSE	136
2022-09-13	09:53:51	0.880725	3.91764	7.89765	3153.26	FALSE	136
2022-09-13	09:53:51	3.28149	14.5967	7.89765	3197.76	1	137
2022-09-13	09:53:51	2.46444	10.9623	7.89765	3164.23	FALSE	137
2022-09-13	09:53:51	0.475229	2.11391	7.89765	3199.88	FALSE	137
2022-09-13	09:53:52	1.66312	7.39789	5.09637	3171.62	FALSE	137
2022-09-13	09:53:52	0.67187	2.98861	5.09637	3202.86	FALSE	137
2022-09-13	09:53:52	1.02938	4.57889	5.09637	3176.2	FALSE	137
2022-09-13	09:53:52	1.21849	5.42009	5.09637	3208.28	FALSE	137
2022-09-13	09:53:53	0.372328	1.65619	1.55523	3177.86	FALSE	137
2022-09-13	09:53:53	0.520827	2.31674	1.55523	3210.6	FALSE	137
2022-09-13	09:53:53	0.155738	0.692754	1.55523	3178.55	FALSE	137
2022-09-13	09:53:54	0.380929	1.69445	1.80265	3212.3	FALSE	137
2022-09-13	09:53:54	0.34612	1.53961	1.80265	3180.09	FALSE	137
2022-09-13	09:53:54	0.649428	2.88879	1.80265	3215.18	FALSE	137
2022-09-13	09:53:54	0.244542	1.08777	1.80265	3181.18	FALSE	137
2022-09-13	09:53:55	0.454466	2.02156	2.09648	3217.21	FALSE	137
2022-09-13	09:53:55	0.438995	1.95274	2.09648	3183.13	FALSE	137
2022-09-13	09:53:55	0.660166	2.93655	2.09648	3220.14	FALSE	137
2022-09-13	09:53:55	0.331616	1.47509	2.09648	3184.61	FALSE	137
2022-09-13	09:53:56	0.541489	2.40865	1.9812	3222.55	FALSE	137
2022-09-13	09:53:56	0.347443	1.5455	1.9812	3186.15	FALSE	137
2022-09-13	09:53:56	0.532125	2.367	1.9812	3224.92	FALSE	137
2022-09-13	09:53:56	0.360522	1.60367	1.9812	3187.76	FALSE	137
2022-09-13	09:53:57	0.52159	2.32014	2.23804	3227.24	FALSE	137
2022-09-13	09:53:57	0.489377	2.17685	2.23804	3189.93	FALSE	137
2022-09-13	09:53:57	0.498435	2.21714	2.23804	3229.46	FALSE	137
2022-09-13	09:53:58	0.447545	1.99077	2.13016	3191.92	FALSE	137
2022-09-13	09:53:58	0.624186	2.7765	2.13016	3232.23	FALSE	137
2022-09-13	09:53:58	0.426069	1.89524	2.13016	3193.82	FALSE	137
2022-09-13	09:53:58	0.417723	1.85812	2.13016	3234.09	FALSE	137
2022-09-13	09:53:59	0.420013	1.8683	1.87362	3195.69	FALSE	137
2022-09-13	09:53:59	0.432023	1.92172	1.87362	3236.01	FALSE	137
2022-09-13	09:53:59	0.411158	1.82891	1.87362	3197.52	FALSE	137
2022-09-13	09:53:59	0.421641	1.87554	1.87362	3237.89	FALSE	137
2022-09-13	09:54:00	0.414262	1.84272	1.84696	3199.36	FALSE	137
2022-09-13	09:54:00	0.41701	1.85494	1.84696	3239.74	FALSE	137
2022-09-13	09:54:00	0.416858	1.85427	1.84696	3201.21	FALSE	137
2022-09-13	09:54:00	0.412735	1.83593	1.84696	3241.58	FALSE	137
2022-09-13	09:54:01	0.421641	1.87554	1.87311	3203.09	FALSE	137
2022-09-13	09:54:01	0.419708	1.86695	1.87311	3243.45	FALSE	137
2022-09-13	09:54:01	0.421845	1.87645	1.87311	3204.97	FALSE	137
2022-09-13	09:54:01	0.421183	1.87351	1.87311	3245.32	FALSE	137
2022-09-13	09:54:02	0.422863	1.88098	1.87011	3206.85	FALSE	137
2022-09-13	09:54:02	0.4193	1.86513	1.87011	3247.18	FALSE	137
2022-09-13	09:54:02	0.419097	1.86423	1.87011	3208.71	FALSE	137
2022-09-13	09:54:03	0.419199	1.86468	1.85246	3249.05	FALSE	137
2022-09-13	09:54:03	0.417417	1.85675	1.85246	3210.57	FALSE	137
2022-09-13	09:54:03	0.415229	1.84702	1.85246	3250.9	FALSE	137
2022-09-13	09:54:03	0.413957	1.84136	1.85246	3212.41	FALSE	137
2022-09-13	09:54:04	0.412735	1.83593	1.83751	3252.73	FALSE	137
2022-09-13	09:54:04	0.410344	1.82529	1.83751	3214.23	FALSE	137
2022-09-13	09:54:04	0.411412	1.83004	1.83751	3254.56	FALSE	137
2022-09-13	09:54:04	0.417875	1.85879	1.83751	3216.09	FALSE	137
2022-09-13	09:54:05	0.42271	1.8803	1.87051	3256.44	FALSE	137
2022-09-13	09:54:05	0.420216	1.8692	1.87051	3217.96	FALSE	137
2022-09-13	09:54:05	0.417367	1.85653	1.87051	3258.3	FALSE	137
2022-09-13	09:54:05	0.421743	1.876	1.87051	3219.84	FALSE	137
2022-09-13	09:54:06	0.66612	2.96303	2.22008	3261.26	FALSE	137
2022-09-13	09:54:06	0.446578	1.98647	2.22008	3221.83	FALSE	137
2022-09-13	09:54:06	0.384593	1.71075	2.22008	3262.97	FALSE	137
2022-09-13	09:54:07	0.457977	2.03717	5.1383	3223.86	FALSE	137
2022-09-13	09:54:07	0.834974	3.71413	5.1383	3266.69	FALSE	137
2022-09-13	09:54:07	0.836501	3.72092	5.1383	3227.58	FALSE	137
2022-09-13	09:54:07	2.49111	11.081	5.1383	3277.77	FALSE	137
2022-09-13	09:54:08	1.87151	8.32485	4.4774	3235.91	FALSE	137
2022-09-13	09:54:08	0.978588	4.35296	4.4774	3282.12	FALSE	137
2022-09-13	09:54:08	0.701132	3.11878	4.4774	3239.03	FALSE	137
2022-09-13	09:54:08	0.475026	2.11301	4.4774	3284.23	FALSE	137
2022-09-13	09:54:09	0.436908	1.94345	1.93632	3240.97	FALSE	137
2022-09-13	09:54:09	0.445051	1.97968	1.93632	3286.21	FALSE	137
2022-09-13	09:54:09	0.436145	1.94006	1.93632	3242.91	FALSE	137
2022-09-13	09:54:09	0.423117	1.88211	1.93632	3288.1	FALSE	137
2022-09-13	09:54:10	0.436705	1.94255	2.03276	3244.85	FALSE	137
2022-09-13	09:54:10	0.465865	2.07226	2.03276	3290.17	FALSE	137
2022-09-13	09:54:10	0.475789	2.1164	2.03276	3246.97	FALSE	137
2022-09-13	09:54:10	0.44958	1.99982	2.03276	3292.17	FALSE	137
2022-09-13	09:54:11	0.469275	2.08743	2.04963	3249.06	FALSE	137
2022-09-13	09:54:11	0.452888	2.01454	2.04963	3294.18	FALSE	137
2022-09-13	09:54:11	0.460166	2.04691	2.04963	3251.1	FALSE	137
2022-09-13	09:54:12	0.462812	2.05868	2.01069	3296.24	FALSE	137
2022-09-13	09:54:12	0.448308	1.99416	2.01069	3253.1	FALSE	137
2022-09-13	09:54:12	0.447647	1.99122	2.01069	3298.23	FALSE	137
2022-09-13	09:54:12	0.449326	1.99869	2.01069	3255.1	FALSE	137
2022-09-13	09:54:13	0.438537	1.9507	2.03842	3300.18	FALSE	137
2022-09-13	09:54:13	0.43874	1.9516	2.03842	3257.05	FALSE	137
2022-09-13	09:54:13	0.44673	1.98714	2.03842	3302.17	FALSE	137
2022-09-13	09:54:13	0.50902	2.26422	2.03842	3259.31	FALSE	137
2022-09-13	09:54:14	0.612837	2.72602	3.90915	3304.9	FALSE	137
2022-09-13	09:54:14	1.18286	5.2616	3.90915	3264.57	FALSE	137
2022-09-13	09:54:14	1.10622	4.92069	3.90915	3309.82	FALSE	137
2022-09-13	09:54:14	0.613346	2.72829	3.90915	3267.3	FALSE	137
2022-09-13	09:54:15	0.52897	2.35296	2.19247	3312.17	FALSE	137
2022-09-13	09:54:15	0.443982	1.97492	2.19247	3269.28	FALSE	137
2022-09-13	09:54:15	0.505713	2.24951	2.19247	3314.42	FALSE	137
2022-09-13	09:54:16	0.494873	2.20129	2.10695	3271.48	FALSE	137
2022-09-13	09:54:16	0.446832	1.9876	2.10695	3316.41	FALSE	137
2022-09-13	09:54:16	0.462965	2.05936	2.10695	3273.54	FALSE	137
2022-09-13	09:54:16	0.489987	2.17956	2.10695	3318.59	FALSE	137
2022-09-13	09:54:17	0.444847	1.97877	2.06977	3275.52	FALSE	137
2022-09-13	09:54:17	0.473652	2.1069	2.06977	3320.69	FALSE	137
2022-09-13	09:54:17	0.461183	2.05143	2.06977	3277.57	FALSE	137
2022-09-13	09:54:17	0.481539	2.14198	2.06977	3322.84	FALSE	137
2022-09-13	09:54:18	0.484949	2.15715	2.0503	3279.73	FALSE	137
2022-09-13	09:54:18	0.439809	1.95636	2.0503	3324.79	FALSE	137
2022-09-13	09:54:18	0.456756	2.03174	2.0503	3281.76	FALSE	137
2022-09-13	09:54:18	0.462201	2.05596	2.0503	3326.85	FALSE	137
2022-09-13	09:54:19	0.448868	1.99665	2.13059	3283.75	FALSE	137
2022-09-13	09:54:19	0.517366	2.30135	2.13059	3329.15	FALSE	137
2022-09-13	09:54:19	0.4707	2.09377	2.13059	3285.85	FALSE	137
2022-09-13	09:54:20	0.480267	2.13632	2.16021	3331.29	FALSE	137
2022-09-13	09:54:20	0.508766	2.26309	2.16021	3288.11	FALSE	137
2022-09-13	09:54:20	0.461641	2.05347	2.16021	3333.34	FALSE	137
2022-09-13	09:54:20	0.49187	2.18794	2.16021	3290.3	FALSE	137
2022-09-13	09:54:21	0.474822	2.1121	2.12444	3335.45	FALSE	137
2022-09-13	09:54:21	0.478435	2.12817	2.12444	3292.43	FALSE	137
2022-09-13	09:54:21	0.497316	2.21216	2.12444	3337.66	FALSE	137
2022-09-13	09:54:21	0.459809	2.04532	2.12444	3294.47	FALSE	137
2022-09-13	09:54:22	0.476858	2.12116	2.16966	3339.78	FALSE	137
2022-09-13	09:54:22	0.493448	2.19496	2.16966	3296.67	FALSE	137
2022-09-13	09:54:22	0.490191	2.18047	2.16966	3341.96	FALSE	137
2022-09-13	09:54:22	0.490547	2.18205	2.16966	3298.85	FALSE	137
2022-09-13	09:54:23	0.48902	2.17526	2.06689	3344.14	FALSE	137
2022-09-13	09:54:23	0.463779	2.06298	2.06689	3300.91	FALSE	137
2022-09-13	09:54:23	0.464542	2.06638	2.06689	3346.21	FALSE	137
2022-09-13	09:54:23	0.441285	1.96292	2.06689	3302.87	FALSE	137
2022-09-13	09:54:24	0.418791	1.86287	1.8812	3348.07	FALSE	137
2022-09-13	09:54:24	0.434873	1.9344	1.8812	3304.81	FALSE	137
2022-09-13	09:54:24	0.415076	1.84634	1.8812	3349.92	FALSE	137
2022-09-13	09:54:25	0.414975	1.84589	1.75455	3306.66	FALSE	137
2022-09-13	09:54:25	0.393295	1.74945	1.75455	3351.66	FALSE	137
2022-09-13	09:54:25	0.437417	1.94572	1.75455	3308.6	FALSE	137
2022-09-13	09:54:25	0.332074	1.47713	1.75455	3353.14	FALSE	137
2022-09-13	09:54:26	0.327341	1.45608	1.73021	3310.06	FALSE	137
2022-09-13	09:54:26	0.348715	1.55115	1.73021	3354.69	FALSE	137
2022-09-13	09:54:26	0.398639	1.77323	1.73021	3311.83	FALSE	137
2022-09-13	09:54:26	0.481183	2.1404	1.73021	3356.83	FALSE	137
2022-09-13	09:54:27	0.476247	2.11844	2.02184	3313.95	FALSE	137
2022-09-13	09:54:27	0.459402	2.04351	2.02184	3358.88	FALSE	137
2022-09-13	09:54:27	0.388512	1.72818	2.02184	3315.68	FALSE	137
2022-09-13	09:54:27	0.493957	2.19722	2.02184	3361.07	FALSE	137
2022-09-13	09:54:28	0.400624	1.78206	2.17149	3317.46	FALSE	137
2022-09-13	09:54:28	0.485204	2.15828	2.17149	3363.23	FALSE	137
2022-09-13	09:54:28	0.578689	2.57412	2.17149	3320.03	FALSE	137
2022-09-13	09:54:29	0.877672	3.90406	4.60531	3367.14	FALSE	137
2022-09-13	09:54:29	1.51961	6.75953	4.60531	3326.79	FALSE	137
2022-09-13	09:54:29	1.18429	5.26796	4.60531	3372.4	FALSE	137
2022-09-13	09:54:29	0.559707	2.48969	4.60531	3329.28	FALSE	137
2022-09-13	09:54:30	0.544084	2.42019	2.21889	3374.82	FALSE	137
2022-09-13	09:54:30	0.537621	2.39145	2.21889	3331.67	FALSE	137
2022-09-13	09:54:30	0.459606	2.04442	2.21889	3376.87	FALSE	137
2022-09-13	09:54:30	0.454008	2.01952	2.21889	3333.69	FALSE	137
2022-09-13	09:54:31	0.510394	2.27033	2.35822	3379.14	FALSE	137
2022-09-13	09:54:31	0.411107	1.82869	2.35822	3335.52	FALSE	137
2022-09-13	09:54:31	0.888562	3.9525	2.35822	3383.09	FALSE	137
2022-09-13	09:54:31	0.310547	1.38138	2.35822	3336.9	FALSE	137
2022-09-13	09:54:32	0.153702	0.683697	1.69914	3383.78	FALSE	137
2022-09-13	09:54:32	0.305814	1.36032	1.69914	3338.26	FALSE	137
2022-09-13	09:54:32	0.607239	2.70112	1.69914	3386.48	FALSE	137
2022-09-13	09:54:32	0.461183	2.05143	1.69914	3340.31	FALSE	137
2022-09-13	09:54:33	0.384288	1.70939	1.674	3388.19	FALSE	137
2022-09-13	09:54:33	0.426934	1.89909	1.674	3342.21	FALSE	137
2022-09-13	09:54:33	0.317774	1.41352	1.674	3389.6	FALSE	137
2022-09-13	09:54:34	0.285713	1.27091	1.23825	3343.48	FALSE	137
2022-09-13	09:54:34	0.175331	0.779907	1.23825	3390.38	FALSE	137
2022-09-13	09:54:34	0.368359	1.63853	1.23825	3345.12	FALSE	137
2022-09-13	09:54:34	0.284084	1.26366	1.23825	3391.64	FALSE	137
2022-09-13	09:54:35	0.262099	1.16587	0.78053	3346.29	FALSE	137
2022-09-13	09:54:35	0.0713106	0.317204	0.78053	3391.96	FALSE	137
2022-09-13	09:54:35	0.223677	0.99496	0.78053	3347.28	FALSE	137
2022-09-13	09:54:35	0.144797	0.644086	0.78053	3392.6	FALSE	137
2022-09-13	09:54:36	0.252735	1.12422	0.833217	3348.41	FALSE	137
2022-09-13	09:54:36	0.105102	0.467515	0.833217	3393.07	FALSE	137
2022-09-13	09:54:36	0.19701	0.87634	0.833217	3349.28	FALSE	137
2022-09-13	09:54:36	0.194415	0.864797	0.833217	3393.94	FALSE	137
2022-09-13	09:54:37	0.0797585	0.354782	-0.339575	3349.64	FALSE	137
2022-09-13	09:54:37	-0.103091	-0.458569	-0.339575	3393.94	FALSE	137
2022-09-13	09:54:37	-0.205687	-0.914937	-0.339575	3349.64	FALSE	137
2022-09-13	09:54:38	0.042812	0.190436	0.503563	3394.13	FALSE	137
2022-09-13	09:54:38	0.0983844	0.437633	0.503563	3350.08	FALSE	137
2022-09-13	09:54:38	0.202048	0.89875	0.503563	3395.03	FALSE	137
2022-09-13	09:54:38	0.10958	0.487434	0.503563	3350.56	FALSE	137
2022-09-13	09:54:39	0.208664	0.928179	0.630163	3395.95	FALSE	137
2022-09-13	09:54:39	0.0936516	0.416581	0.630163	3350.98	FALSE	137
2022-09-13	09:54:39	0.131311	0.584098	0.630163	3396.54	FALSE	137
2022-09-13	09:54:39	0.133041	0.591793	0.630163	3351.57	FALSE	137
2022-09-13	09:54:40	0.22902	1.01873	1.19094	3397.56	FALSE	137
2022-09-13	09:54:40	0.197723	0.879511	1.19094	3352.45	FALSE	137
2022-09-13	09:54:40	0.365051	1.62382	1.19094	3399.18	FALSE	137
2022-09-13	09:54:40	0.279148	1.24171	1.19094	3353.69	FALSE	137
2022-09-13	09:54:41	0.268868	1.19598	1.55263	3400.38	FALSE	137
2022-09-13	09:54:41	0.302608	1.34606	1.55263	3355.04	FALSE	137
2022-09-13	09:54:41	0.428359	1.90543	1.55263	3402.28	FALSE	137
2022-09-13	09:54:41	0.396349	1.76304	1.55263	3356.8	FALSE	137
2022-09-13	09:54:42	0.426629	1.89773	2.22763	3404.18	FALSE	137
2022-09-13	09:54:42	0.541132	2.40706	2.22763	3359.21	FALSE	137
2022-09-13	09:54:42	0.534618	2.37809	2.22763	3406.56	FALSE	137
2022-09-13	09:54:43	0.456603	2.03106	1.76298	3361.24	FALSE	137
2022-09-13	09:54:43	0.328104	1.45947	1.76298	3408.02	FALSE	137
2022-09-13	09:54:43	0.408155	1.81556	1.76298	3363.06	FALSE	137
2022-09-13	09:54:43	0.392481	1.74583	1.76298	3409.76	FALSE	137
2022-09-13	09:54:44	0.434975	1.93486	1.50514	3364.99	FALSE	137
2022-09-13	09:54:44	0.235229	1.04635	1.50514	3410.81	FALSE	137
2022-09-13	09:54:44	0.392786	1.74719	1.50514	3366.74	FALSE	137
2022-09-13	09:54:44	0.290496	1.29218	1.50514	3412.1	FALSE	137
2022-09-13	09:54:45	0.447748	1.99167	1.66813	3368.73	FALSE	137
2022-09-13	09:54:45	0.245967	1.09411	1.66813	3413.2	FALSE	137
2022-09-13	09:54:45	0.397672	1.76892	1.66813	3370.5	FALSE	137
2022-09-13	09:54:45	0.408664	1.81782	1.66813	3415.01	FALSE	137
2022-09-13	09:54:46	0.528613	2.35138	1.82257	3372.85	FALSE	137
2022-09-13	09:54:46	0.277723	1.23537	1.82257	3416.25	FALSE	137
2022-09-13	09:54:46	0.422863	1.88098	1.82257	3374.73	FALSE	137
2022-09-13	09:54:47	0.298384	1.32727	1.66423	3417.58	FALSE	137
2022-09-13	09:54:47	0.419097	1.86423	1.66423	3376.6	FALSE	137
2022-09-13	09:54:47	0.261336	1.16247	1.66423	3418.74	FALSE	137
2022-09-13	09:54:47	0.517723	2.30294	1.66423	3378.9	FALSE	137
2022-09-13	09:54:48	0.327392	1.45631	3.04464	3420.2	FALSE	137
2022-09-13	09:54:48	0.605153	2.69184	3.04464	3381.59	FALSE	137
2022-09-13	09:54:48	0.491819	2.18771	3.04464	3422.38	FALSE	137
2022-09-13	09:54:48	1.3135	5.84271	3.04464	3387.43	FALSE	137
2022-09-13	09:54:49	0.698486	3.10701	4.87745	3425.49	FALSE	137
2022-09-13	09:54:49	1.41772	6.3063	4.87745	3393.74	FALSE	137
2022-09-13	09:54:49	1.29757	5.77185	4.87745	3431.26	FALSE	137
2022-09-13	09:54:49	0.972227	4.32466	4.87745	3398.06	FALSE	137
2022-09-13	09:54:50	1.68943	7.51492	5.70315	3438.78	FALSE	137
2022-09-13	09:54:50	0.736959	3.27814	5.70315	3401.34	FALSE	137
2022-09-13	09:54:50	1.96434	8.73778	5.70315	3447.51	FALSE	137
2022-09-13	09:54:50	0.737773	3.28176	5.70315	3404.62	FALSE	137
2022-09-13	09:54:51	1.88047	8.36471	6.4696	3455.88	FALSE	137
2022-09-13	09:54:51	0.628461	2.79552	6.4696	3407.42	FALSE	137
2022-09-13	09:54:51	1.85436	8.24856	6.4696	3464.13	FALSE	137
2022-09-13	09:54:52	1.028	4.57275	5.42267	3411.99	FALSE	137
2022-09-13	09:54:52	1.14836	5.10813	5.42267	3469.24	FALSE	137
2022-09-13	09:54:52	1.72378	7.66772	5.42267	3419.66	FALSE	137
2022-09-13	09:54:52	0.976145	4.34209	5.42267	3473.58	FALSE	137
2022-09-13	09:54:53	2.62963	11.6971	5.90954	3431.36	FALSE	137
2022-09-13	09:54:53	0.4107	1.82688	5.90954	3475.4	FALSE	137
2022-09-13	09:54:53	1.91238	8.50665	5.90954	3439.86	FALSE	137
2022-09-13	09:54:53	0.361387	1.60752	5.90954	3477.01	FALSE	137
2022-09-13	09:54:54	0.909886	4.04735	5.44198	3443.91	FALSE	137
2022-09-13	09:54:54	1.18775	5.28335	5.44198	3482.3	FALSE	137
2022-09-13	09:54:54	0.976908	4.34548	5.44198	3448.26	FALSE	137
2022-09-13	09:54:54	1.8191	8.09172	5.44198	3490.39	FALSE	137
2022-09-13	09:54:55	0.534567	2.37786	4.86017	3450.64	FALSE	137
2022-09-13	09:54:55	2.19599	9.7682	4.86017	3500.16	FALSE	137
2022-09-13	09:54:55	0.54729	2.43446	4.86017	3453.07	FALSE	137
2022-09-13	09:54:56	1.09726	4.88083	3.09466	3505.04	FALSE	137
2022-09-13	09:54:56	0.504491	2.24408	3.09466	3455.31	FALSE	137
2022-09-13	09:54:56	0.543728	2.41861	3.09466	3507.46	FALSE	137
2022-09-13	09:54:56	0.637367	2.83514	3.09466	3458.15	FALSE	137
2022-09-13	09:54:57	0.268257	1.19326	2.02399	3508.65	FALSE	137
2022-09-13	09:54:57	0.665	2.95805	2.02399	3461.11	FALSE	137
2022-09-13	09:54:57	0.404898	1.80107	2.02399	3510.45	FALSE	137
2022-09-13	09:54:57	0.481896	2.14357	2.02399	3463.25	FALSE	137
2022-09-13	09:54:58	0.438944	1.95251	1.74436	3512.4	FALSE	137
2022-09-13	09:54:58	0.445305	1.98081	1.74436	3465.23	FALSE	137
2022-09-13	09:54:58	0.490547	2.18205	1.74436	3514.58	FALSE	137
2022-09-13	09:54:58	0.193804	0.862079	1.74436	3466.09	FALSE	137
2022-09-13	09:54:59	-0.151794	-0.67521	-1.17419	3514.58	FALSE	137
2022-09-13	09:54:59	-0.305992	-1.36111	-1.17419	3466.09	FALSE	137
2022-09-13	09:54:59	-0.318969	-1.41884	-1.17419	3514.58	FALSE	137
2022-09-13	09:54:59	-0.279122	-1.24159	-1.17419	3466.09	FALSE	137
2022-09-13	09:55:00	-0.240343	-1.06909	-0.717842	3514.58	FALSE	137
2022-09-13	09:55:00	-0.142481	-0.633784	-0.717842	3466.09	FALSE	137
2022-09-13	09:55:00	-0.10131	-0.450647	-0.717842	3514.58	FALSE	137
2022-09-13	09:55:01	-0.0929132	-0.413296	-0.355402	3466.09	FALSE	137
2022-09-13	09:55:01	-0.0584603	-0.260043	-0.355402	3514.58	FALSE	137
2022-09-13	09:55:01	-0.0701651	-0.312108	-0.355402	3466.09	FALSE	137
2022-09-13	09:55:01	-0.0980532	-0.43616	-0.355402	3514.58	FALSE	137
2022-09-13	09:55:02	-0.0821244	-0.365306	-0.360891	3466.09	FALSE	137
2022-09-13	09:55:02	-0.0778496	-0.346291	-0.360891	3514.58	FALSE	137
2022-09-13	09:55:02	-0.0784094	-0.348781	-0.360891	3466.09	FALSE	137
2022-09-13	09:55:02	-0.0861447	-0.383189	-0.360891	3514.58	FALSE	137
2022-09-13	09:55:03	-0.0563738	-0.250762	-0.176908	3466.09	FALSE	137
2022-09-13	09:55:03	0.0173666	0.0772501	-0.176908	3514.66	FALSE	137
2022-09-13	09:55:03	-0.0557122	-0.247819	-0.176908	3466.09	FALSE	137
2022-09-13	09:55:03	-0.0643636	-0.286302	-0.176908	3514.66	FALSE	137
2022-09-13	09:55:04	-0.0592745	-0.263665	0.00503788	3466.09	FALSE	137
2022-09-13	09:55:04	0.0100384	0.0446528	0.00503788	3514.71	FALSE	137
2022-09-13	09:55:04	0.0526338	0.234126	0.00503788	3466.33	FALSE	137
2022-09-13	09:55:05	0.103677	0.461176	0.381267	3515.17	FALSE	137
2022-09-13	09:55:05	0.0800129	0.355913	0.381267	3466.68	FALSE	137
2022-09-13	09:55:05	0.052583	0.2339	0.381267	3515.4	FALSE	137
2022-09-13	09:55:05	0.106578	0.47408	0.381267	3467.16	FALSE	137
2022-09-13	09:55:06	0.0835753	0.37176	0.245558	3515.77	FALSE	137
2022-09-13	09:55:06	0.0300893	0.133843	0.245558	3467.29	FALSE	137
2022-09-13	09:55:06	0.0526338	0.234126	0.245558	3516.01	FALSE	137
2022-09-13	09:55:06	0.0545168	0.242502	0.245558	3467.53	FALSE	137
2022-09-13	09:55:07	0.0508527	0.226203	0.179118	3516.23	FALSE	137
2022-09-13	09:55:07	0.0425066	0.189078	0.179118	3467.72	FALSE	137
2022-09-13	09:55:07	0.027443	0.122072	0.179118	3516.36	FALSE	137
2022-09-13	09:55:08	0.0743641	0.330786	0.222694	3468.05	FALSE	137
2022-09-13	09:55:08	0.0308527	0.137239	0.222694	3516.49	FALSE	137
2022-09-13	09:55:08	0.0153819	0.0684218	0.222694	3468.12	FALSE	137
2022-09-13	09:55:08	0.0796567	0.354329	0.222694	3516.85	FALSE	137
2022-09-13	09:55:09	0.086018	0.382625	1.04544	3468.5	FALSE	137
2022-09-13	09:55:09	0.318842	1.41827	1.04544	3518.26	FALSE	137
2022-09-13	09:55:09	0.278283	1.23786	1.04544	3469.74	FALSE	137
2022-09-13	09:55:09	0.256959	1.14301	1.04544	3519.41	FALSE	137
2022-09-13	09:55:10	1.22205	5.43592	2.0773	3475.18	FALSE	137
2022-09-13	09:55:10	0.157926	0.702486	2.0773	3520.11	FALSE	137
2022-09-13	09:55:10	0.303524	1.35014	2.0773	3476.53	FALSE	137
2022-09-13	09:55:10	0.184491	0.820653	2.0773	3520.93	FALSE	137
2022-09-13	09:55:11	0.402252	1.7893	0.723767	3478.32	FALSE	137
2022-09-13	09:55:11	0.279911	1.2451	0.723767	3522.18	FALSE	137
2022-09-13	09:55:11	0.19014	0.845781	0.723767	3479.16	FALSE	137
2022-09-13	09:55:11	-0.221463	-0.985112	0.723767	3522.18	FALSE	137
2022-09-13	09:55:12	-0.229402	-1.02043	0.0277312	3479.16	FALSE	137
2022-09-13	09:55:12	-0.10986	-0.488679	0.0277312	3522.18	FALSE	137
2022-09-13	09:55:12	0.168003	0.747311	0.0277312	3479.91	FALSE	137
2022-09-13	09:55:12	0.196196	0.872719	0.0277312	3523.05	FALSE	137
2022-09-13	09:55:13	0.160624	0.714488	1.49932	3480.63	FALSE	137
2022-09-13	09:55:13	0.352888	1.56972	1.49932	3524.62	FALSE	137
2022-09-13	09:55:13	0.497672	2.21374	1.49932	3482.84	FALSE	137
2022-09-13	09:55:14	0.487036	2.16643	2.04798	3526.79	FALSE	137
2022-09-13	09:55:14	0.436094	1.93983	2.04798	3484.78	FALSE	137
2022-09-13	09:55:14	0.429784	1.91177	2.04798	3528.7	FALSE	137
2022-09-13	09:55:14	0.488715	2.1739	2.04798	3486.95	FALSE	137
2022-09-13	09:55:15	0.526629	2.34255	0.548161	3531.04	FALSE	137
2022-09-13	09:55:15	0.290853	1.29377	0.548161	3488.25	FALSE	137
2022-09-13	09:55:15	-0.129656	-0.576736	0.548161	3531.04	FALSE	137
2022-09-13	09:55:15	-0.194898	-0.866945	0.548161	3488.25	FALSE	137
2022-09-13	09:55:16	-0.265127	-1.17934	0.217827	3531.04	FALSE	137
2022-09-13	09:55:16	-0.0354069	-0.157497	0.217827	3488.25	FALSE	137
2022-09-13	09:55:16	0.169784	0.755233	0.217827	3531.79	FALSE	137
2022-09-13	09:55:16	0.326629	1.45291	0.217827	3489.7	FALSE	137
2022-09-13	09:55:17	0.411056	1.82846	1.94459	3533.62	FALSE	137
2022-09-13	09:55:17	0.435941	1.93915	1.94459	3491.64	FALSE	137
2022-09-13	09:55:17	0.464491	2.06615	1.94459	3535.69	FALSE	137
2022-09-13	09:55:18	0.436654	1.94232	2.01488	3493.58	FALSE	137
2022-09-13	09:55:18	0.430598	1.91539	2.01488	3537.6	FALSE	137
2022-09-13	09:55:18	0.564135	2.50939	2.01488	3496.09	FALSE	137
2022-09-13	09:55:18	0.380471	1.69241	2.01488	3539.3	FALSE	137
2022-09-13	09:55:19	0.362965	1.61454	2.09829	3497.7	FALSE	137
2022-09-13	09:55:19	0.499707	2.2228	2.09829	3541.52	FALSE	137
2022-09-13	09:55:19	0.431921	1.92127	2.09829	3499.63	FALSE	137
2022-09-13	09:55:19	0.592278	2.63457	2.09829	3544.15	FALSE	137
2022-09-13	09:55:20	0.424288	1.88732	0.138767	3501.51	FALSE	137
2022-09-13	09:55:20	0.177825	0.791001	0.138767	3544.95	FALSE	137
2022-09-13	09:55:20	-0.282379	-1.25608	0.138767	3501.51	FALSE	137
2022-09-13	09:55:20	-0.194949	-0.867172	0.138767	3544.95	FALSE	137
2022-09-13	09:55:21	-0.232659	-1.03491	-0.0826251	3501.51	FALSE	137
2022-09-13	09:55:21	0.0223539	0.0994346	-0.0826251	3545.04	FALSE	137
2022-09-13	09:55:21	0.00220126	0.00979164	-0.0826251	3501.52	FALSE	137
2022-09-13	09:55:21	0.133804	0.595187	-0.0826251	3545.64	FALSE	137
2022-09-13	09:55:22	0.125509	0.558289	0.690113	3502.08	FALSE	137
2022-09-13	09:55:22	0.145967	0.64929	0.690113	3546.29	FALSE	137
2022-09-13	09:55:22	0.193957	0.86276	0.690113	3502.94	FALSE	137
2022-09-13	09:55:23	0.128512	0.571647	0.839669	3546.86	FALSE	137
2022-09-13	09:55:23	0.214008	0.95195	0.839669	3503.9	FALSE	137
2022-09-13	09:55:23	0.194618	0.8657	0.839669	3547.73	FALSE	137
2022-09-13	09:55:23	0.217926	0.969378	0.839669	3504.87	FALSE	137
2022-09-13	09:55:24	0.202965	0.902829	0.812221	3548.63	FALSE	137
2022-09-13	09:55:24	0.148308	0.659704	0.812221	3505.53	FALSE	137
2022-09-13	09:55:24	0.18159	0.807749	0.812221	3549.44	FALSE	137
2022-09-13	09:55:24	0.197519	0.878604	0.812221	3506.4	FALSE	137
2022-09-13	09:55:25	0.206221	0.917312	1.04567	3550.35	FALSE	137
2022-09-13	09:55:25	0.305356	1.35828	1.04567	3507.76	FALSE	137
2022-09-13	09:55:25	0.239504	1.06536	1.04567	3551.42	FALSE	137
2022-09-13	09:55:25	0.189224	0.841706	1.04567	3508.6	FALSE	137
2022-09-13	09:55:26	0.324288	1.4425	1.25966	3552.86	FALSE	137
2022-09-13	09:55:26	0.250496	1.11426	1.25966	3509.72	FALSE	137
2022-09-13	09:55:26	0.274771	1.22224	1.25966	3554.08	FALSE	137
2022-09-13	09:55:27	0.246985	1.09864	1.22456	3510.82	FALSE	137
2022-09-13	09:55:27	0.249224	1.1086	1.22456	3555.19	FALSE	137
2022-09-13	09:55:27	0.288613	1.28381	1.22456	3512.1	FALSE	137
2022-09-13	09:55:27	0.316349	1.40718	1.22456	3556.6	FALSE	137
2022-09-13	09:55:28	0.309733	1.37775	1.41397	3513.48	FALSE	137
2022-09-13	09:55:28	0.348715	1.55115	1.41397	3558.15	FALSE	137
2022-09-13	09:55:28	0.290496	1.29218	1.41397	3514.77	FALSE	137
2022-09-13	09:55:28	0.322557	1.4348	1.41397	3559.59	FALSE	137
2022-09-13	09:55:29	0.351107	1.56179	1.45681	3516.33	FALSE	137
2022-09-13	09:55:29	0.320624	1.4262	1.45681	3561.01	FALSE	137
2022-09-13	09:55:29	0.305865	1.36055	1.45681	3517.69	FALSE	137
2022-09-13	09:55:29	0.33243	1.47872	1.45681	3562.49	FALSE	137
2022-09-13	09:55:30	0.474924	2.11256	2.29377	3519.81	FALSE	137
2022-09-13	09:55:30	0.380267	1.6915	2.29377	3564.18	FALSE	137
2022-09-13	09:55:30	0.539351	2.39914	2.29377	3522.2	FALSE	137
2022-09-13	09:55:30	0.668104	2.97186	2.29377	3567.15	FALSE	137
2022-09-13	09:55:31	0.753651	3.35239	4.81596	3525.56	FALSE	137
2022-09-13	09:55:31	0.447596	1.991	4.81596	3569.15	FALSE	137
2022-09-13	09:55:31	2.04678	9.10449	4.81596	3534.66	FALSE	137
2022-09-13	09:55:32	1.88261	8.37423	5.55436	3577.52	FALSE	137
2022-09-13	09:55:32	0.869682	3.86852	5.55436	3538.53	FALSE	137
2022-09-13	09:55:32	1.01945	4.53472	5.55436	3582.05	FALSE	137
2022-09-13	09:55:32	1.22296	5.43997	5.55436	3543.97	FALSE	137
2022-09-13	09:55:33	0.638588	2.84057	2.99637	3584.9	FALSE	137
2022-09-13	09:55:33	0.473143	2.10463	2.99637	3546.07	FALSE	137
2022-09-13	09:55:33	0.741285	3.29738	2.99637	3588.19	FALSE	137
2022-09-13	09:55:33	0.841438	3.74288	2.99637	3549.82	FALSE	137
2022-09-13	09:55:34	1.41289	6.28482	14.6979	3594.48	FALSE	137
2022-09-13	09:55:34	5.80958	25.8422	14.6979	3575.66	1	138
2022-09-13	09:55:34	3.69828	16.4507	14.6979	3610.93	1	139
2022-09-13	09:55:34	2.2962	10.214	14.6979	3585.87	FALSE	139
2022-09-13	09:55:35	2.21126	9.83613	9.72974	3620.76	FALSE	139
2022-09-13	09:55:35	2.24083	9.96766	9.72974	3595.84	FALSE	139
2022-09-13	09:55:35	2.10994	9.38544	9.72974	3630.15	FALSE	139
2022-09-13	09:55:36	2.0166	8.97024	8.92843	3604.81	FALSE	139
2022-09-13	09:55:36	1.97869	8.80161	8.92843	3638.95	FALSE	139
2022-09-13	09:55:36	2.12383	9.44722	8.92843	3614.26	FALSE	139
2022-09-13	09:55:36	1.90968	8.49464	8.92843	3647.45	FALSE	139
2022-09-13	09:55:37	2.2648	10.0743	8.18876	3624.33	FALSE	139
2022-09-13	09:55:37	1.87711	8.34976	8.18876	3655.8	FALSE	139
2022-09-13	09:55:37	1.81497	8.07335	8.18876	3632.41	FALSE	139
2022-09-13	09:55:37	1.40678	6.25764	8.18876	3662.05	FALSE	139
2022-09-13	09:55:38	0.720318	3.20412	3.86417	3635.61	FALSE	139
2022-09-13	09:55:38	0.648613	2.88516	3.86417	3664.94	FALSE	139
2022-09-13	09:55:38	0.893092	3.97265	3.86417	3639.58	FALSE	139
2022-09-13	09:55:38	1.21279	5.39473	3.86417	3670.33	FALSE	139
2022-09-13	09:55:39	1.3537	6.02153	5.95277	3645.6	FALSE	139
2022-09-13	09:55:39	1.53426	6.8247	5.95277	3677.16	FALSE	139
2022-09-13	09:55:39	1.19818	5.32974	5.95277	3650.93	FALSE	139
2022-09-13	09:55:39	1.26683	5.63511	5.95277	3682.79	FALSE	139
2022-09-13	09:55:40	1.31676	5.85721	5.85871	3656.79	FALSE	139
2022-09-13	09:55:40	1.32083	5.87532	5.85871	3688.67	FALSE	139
2022-09-13	09:55:40	1.3137	5.8436	5.85871	3662.64	FALSE	139

## Sheet: Bubba_harness_202291395026  (2)
Date	Time	Lbs	Newtons	Total force x time	total steps > 13.345		**GoPro Fitting: 940
2022-09-13	09:50:40	2.1396	9.51737	9.51737	FALSE	0			Total force x time	3662.64
2022-09-13	09:50:40	1.20113	5.34287	5.34287	FALSE	0			Total steps	139
2022-09-13	09:50:40	0.199758	0.888564	10.4059	FALSE	0
2022-09-13	09:50:40	0.299962	1.33429	6.67716	FALSE	0
2022-09-13	09:50:41	0.439046	1.95296	12.3589	FALSE	0
2022-09-13	09:50:41	0.526578	2.34232	9.01948	FALSE	0
2022-09-13	09:50:41	0.407239	1.81148	14.1704	FALSE	0
2022-09-13	09:50:42	0.277926	1.23627	10.2558	FALSE	0
2022-09-13	09:50:42	0.222201	0.988394	15.1588	FALSE	0
2022-09-13	09:50:42	0.602761	2.6812	12.937	FALSE	0
2022-09-13	09:50:42	2.0249	9.00716	24.1659	FALSE	0
2022-09-13	09:50:43	5.54566	24.6682	37.6052	1	1
2022-09-13	09:50:43	13.8344	61.5382	85.7041	1	2
2022-09-13	09:50:43	11.0911	49.3354	86.9406	1	3
2022-09-13	09:50:43	10.5411	46.8889	132.593	1	4
2022-09-13	09:50:44	6.97609	31.031	117.972	1	5
2022-09-13	09:50:44	5.51482	24.531	157.124	1	6
2022-09-13	09:50:44	5.55431	24.7067	142.678	1	7
2022-09-13	09:50:44	7.35441	32.7139	189.838	1	8
2022-09-13	09:50:45	1.38882	6.17775	148.856	FALSE	8
2022-09-13	09:50:45	0.283779	1.26231	191.1	FALSE	8
2022-09-13	09:50:45	0.63701	2.83355	151.69	FALSE	8
2022-09-13	09:50:46	1.74739	7.77274	198.873	FALSE	8
2022-09-13	09:50:46	8.36026	37.1881	188.878	1	9
2022-09-13	09:50:46	14.3694	63.918	262.791	1	10
2022-09-13	09:50:46	8.67792	38.6011	227.479	1	11
2022-09-13	09:50:47	7.9338	35.2911	298.082	1	12
2022-09-13	09:50:47	13.6658	60.7882	288.267	1	13
2022-09-13	09:50:47	6.57711	29.2563	327.338	1	14
2022-09-13	09:50:47	13.3534	59.3986	347.666	1	15
2022-09-13	09:50:48	12.9419	57.5682	384.907	1	16
2022-09-13	09:50:48	7.79049	34.6537	382.319	1	17
2022-09-13	09:50:48	6.16662	27.4304	412.337	1	18
2022-09-13	09:50:49	11.8379	52.6573	434.977	1	19
2022-09-13	09:50:49	15.2411	67.7955	480.132	1	20
2022-09-13	09:50:49	14.0162	62.3469	497.324	1	21
2022-09-13	09:50:49	6.29207	27.9884	508.121	1	22
2022-09-13	09:50:49	3.03212	13.4875	510.811	1	23
2022-09-13	09:50:50	3.07604	13.6828	521.804	1	24
2022-09-13	09:50:50	11.4171	50.7855	561.597	1	25
2022-09-13	09:50:50	22.5646	100.372	622.175	1	26
2022-09-13	09:50:51	10.7785	47.9449	609.541	1	27
2022-09-13	09:50:51	4.81574	21.4214	643.597	1	28
2022-09-13	09:50:51	3.48851	15.5176	625.059	1	29
2022-09-13	09:50:51	2.12541	9.45425	653.051	FALSE	29
2022-09-13	09:50:52	2.61472	11.6308	636.69	FALSE	29
2022-09-13	09:50:52	2.14352	9.53481	662.586	FALSE	29
2022-09-13	09:50:52	2.38983	10.6304	647.32	FALSE	29
2022-09-13	09:50:52	2.66983	11.8759	674.462	FALSE	29
2022-09-13	09:50:53	2.72805	12.1349	659.455	FALSE	29
2022-09-13	09:50:53	3.53558	15.727	690.189	1	30
2022-09-13	09:50:53	6.445	28.6686	688.124	1	31
2022-09-13	09:50:53	5.45772	24.277	714.466	1	32
2022-09-13	09:50:54	8.23655	36.6378	724.762	1	33
2022-09-13	09:50:54	10.8262	48.1571	762.623	1	34
2022-09-13	09:50:54	15.0926	67.1349	791.897	1	35
2022-09-13	09:50:55	14.9144	66.3422	828.965	1	36
2022-09-13	09:50:55	9.90978	44.0807	835.977	1	37
2022-09-13	09:50:55	9.91314	44.0956	873.061	1	38
2022-09-13	09:50:55	15.3407	68.2385	904.216	1	39
2022-09-13	09:50:56	4.10744	18.2707	891.331	1	40
2022-09-13	09:50:56	0.947494	4.21464	908.43	FALSE	40
2022-09-13	09:50:56	0.0694786	0.309055	891.641	FALSE	40
2022-09-13	09:50:56	2.47426	11.006	919.436	FALSE	40
2022-09-13	09:50:57	7.94815	35.355	926.996	1	41
2022-09-13	09:50:57	15.9776	71.0716	990.508	1	42
2022-09-13	09:50:57	12.9642	57.6674	984.663	1	43
2022-09-13	09:50:57	13.1943	58.6909	1049.2	1	44
2022-09-13	09:50:58	13.3726	59.484	1044.15	1	45
2022-09-13	09:50:58	8.15685	36.2833	1085.48	1	46
2022-09-13	09:50:58	4.6139	20.5235	1064.67	1	47
2022-09-13	09:50:58	4.58963	20.4156	1105.9	1	48
2022-09-13	09:50:59	4.24902	18.9005	1083.57	1	49
2022-09-13	09:50:59	3.55966	15.8341	1121.73	1	50
2022-09-13	09:50:59	4.46927	19.8802	1103.45	1	51
2022-09-13	09:51:00	6.21533	27.647	1149.38	1	52
2022-09-13	09:51:00	7.31248	32.5274	1135.98	1	53
2022-09-13	09:51:00	7.69573	34.2321	1183.61	1	54
2022-09-13	09:51:00	6.77782	30.1491	1166.13	1	55
2022-09-13	09:51:01	5.6478	25.1225	1208.73	1	56
2022-09-13	09:51:01	4.96032	22.0645	1188.19	1	57
2022-09-13	09:51:01	4.42922	19.7021	1228.44	1	58
2022-09-13	09:51:01	4.37523	19.4619	1207.65	1	59
2022-09-13	09:51:02	4.15172	18.4677	1246.9	1	60
2022-09-13	09:51:02	3.91416	17.411	1225.06	1	61
2022-09-13	09:51:02	3.94851	17.5638	1264.47	1	62
2022-09-13	09:51:02	3.78892	16.8539	1241.92	1	63
2022-09-13	09:51:03	3.68744	16.4025	1280.87	1	64
2022-09-13	09:51:03	3.39935	15.121	1257.04	1	65
2022-09-13	09:51:03	3.46088	15.3947	1296.26	1	66
2022-09-13	09:51:04	3.22571	14.3486	1271.39	1	67
2022-09-13	09:51:04	3.15986	14.0557	1310.32	1	68
2022-09-13	09:51:04	3.29523	14.6578	1286.05	1	69
2022-09-13	09:51:04	3.12464	13.899	1324.22	1	70
2022-09-13	09:51:05	3.03619	13.5056	1299.55	1	71
2022-09-13	09:51:05	2.97716	13.243	1337.46	FALSE	71
2022-09-13	09:51:05	3.04169	13.53	1313.08	1	72
2022-09-13	09:51:05	2.89945	12.8973	1350.36	FALSE	72
2022-09-13	09:51:06	3.02189	13.442	1326.52	1	73
2022-09-13	09:51:06	2.9821	13.265	1363.62	FALSE	73
2022-09-13	09:51:06	3.11635	13.8621	1340.39	1	74
2022-09-13	09:51:06	3.02627	13.4615	1377.09	1	75
2022-09-13	09:51:07	2.92871	13.0275	1353.41	FALSE	75
2022-09-13	09:51:07	2.99228	13.3103	1390.4	FALSE	75
2022-09-13	09:51:07	2.90556	12.9245	1366.34	FALSE	75
2022-09-13	09:51:07	2.9391	13.0737	1403.47	FALSE	75
2022-09-13	09:51:08	2.95243	13.133	1379.47	FALSE	75
2022-09-13	09:51:08	2.93619	13.0608	1416.53	FALSE	75
2022-09-13	09:51:08	2.86088	12.7258	1392.2	FALSE	75
2022-09-13	09:51:09	2.92892	13.0284	1429.56	FALSE	75
2022-09-13	09:51:09	2.80159	12.462	1404.66	FALSE	75
2022-09-13	09:51:09	2.61202	11.6188	1441.18	FALSE	75
2022-09-13	09:51:09	2.72597	12.1257	1416.78	FALSE	75
2022-09-13	09:51:10	2.73431	12.1628	1453.34	FALSE	75
2022-09-13	09:51:10	2.74978	12.2316	1429.02	FALSE	75
2022-09-13	09:51:10	2.67131	11.8825	1465.22	FALSE	75
2022-09-13	09:51:10	2.68001	11.9212	1440.94	FALSE	75
2022-09-13	09:51:11	2.65161	11.7949	1477.02	FALSE	75
2022-09-13	09:51:11	2.52057	11.212	1452.15	FALSE	75
2022-09-13	09:51:11	2.55915	11.3836	1488.4	FALSE	75
2022-09-13	09:51:11	2.40673	10.7056	1462.85	FALSE	75
2022-09-13	09:51:12	2.50022	11.1215	1499.52	FALSE	75
2022-09-13	09:51:12	2.55681	11.3732	1474.23	FALSE	75
2022-09-13	09:51:12	2.43889	10.8487	1510.37	FALSE	75
2022-09-13	09:51:13	2.53782	11.2887	1485.52	FALSE	75
2022-09-13	09:51:13	2.50927	11.1617	1521.53	FALSE	75
2022-09-13	09:51:13	2.65589	11.8139	1497.33	FALSE	75
2022-09-13	09:51:13	2.65879	11.8268	1533.36	FALSE	75
2022-09-13	09:51:14	2.66083	11.8359	1509.17	FALSE	75
2022-09-13	09:51:14	2.78174	12.3737	1545.73	FALSE	75
2022-09-13	09:51:14	2.58251	11.4875	1520.65	FALSE	75
2022-09-13	09:51:14	2.58495	11.4984	1557.23	FALSE	75
2022-09-13	09:51:15	2.50994	11.1647	1531.82	FALSE	75
2022-09-13	09:51:15	2.50683	11.1509	1568.38	FALSE	75
2022-09-13	09:51:15	2.25039	10.0102	1541.83	FALSE	75
2022-09-13	09:51:15	2.53589	11.2801	1579.66	FALSE	75
2022-09-13	09:51:16	2.44408	10.8718	1552.7	FALSE	75
2022-09-13	09:51:16	2.44301	10.867	1590.53	FALSE	75
2022-09-13	09:51:16	2.39487	10.6529	1563.35	FALSE	75
2022-09-13	09:51:16	2.37645	10.5709	1601.1	FALSE	75
2022-09-13	09:51:17	2.29345	10.2017	1573.56	FALSE	75
2022-09-13	09:51:17	2.25487	10.0301	1611.13	FALSE	75
2022-09-13	09:51:17	2.27691	10.1282	1583.68	FALSE	75
2022-09-13	09:51:18	2.31691	10.3061	1621.44	FALSE	75
2022-09-13	09:51:18	2.18108	9.70188	1593.39	FALSE	75
2022-09-13	09:51:18	2.27121	10.1028	1631.54	FALSE	75
2022-09-13	09:51:18	2.25431	10.0276	1603.41	FALSE	75
2022-09-13	09:51:19	1.97324	8.77737	1640.32	FALSE	75
2022-09-13	09:51:19	1.74169	7.74739	1611.16	FALSE	75
2022-09-13	09:51:19	1.03223	4.59157	1644.91	FALSE	75
2022-09-13	09:51:19	1.3966	6.21236	1617.37	FALSE	75
2022-09-13	09:51:20	1.57436	7.00307	1651.91	FALSE	75
2022-09-13	09:51:20	0.612786	2.72579	1620.1	FALSE	75
2022-09-13	09:51:20	1.32551	5.89613	1657.81	FALSE	75
2022-09-13	09:51:20	1.2594	5.60206	1625.7	FALSE	75
2022-09-13	09:51:21	1.88999	8.40705	1666.22	FALSE	75
2022-09-13	09:51:21	3.68927	16.4106	1642.11	1	76
2022-09-13	09:51:21	6.84937	30.4674	1696.68	1	77
2022-09-13	09:51:22	5.42561	24.1342	1666.25	1	78
2022-09-13	09:51:22	3.96103	17.6195	1714.3	1	79
2022-09-13	09:51:22	2.36327	10.5123	1676.76	FALSE	79
2022-09-13	09:51:22	1.31146	5.83364	1720.14	FALSE	79
2022-09-13	09:51:23	0.654974	2.91346	1679.67	FALSE	79
2022-09-13	09:51:23	0.75187	3.34447	1723.48	FALSE	79
2022-09-13	09:51:23	0.582201	2.58975	1682.26	FALSE	79
2022-09-13	09:51:23	0.395229	1.75806	1725.24	FALSE	79
2022-09-13	09:51:24	0.390191	1.73565	1684	FALSE	79
2022-09-13	09:51:24	0.305356	1.35828	1726.6	FALSE	79
2022-09-13	09:51:24	0.385356	1.71414	1685.71	FALSE	79
2022-09-13	09:51:24	0.391209	1.74018	1728.34	FALSE	79
2022-09-13	09:51:25	0.355484	1.58126	1687.29	FALSE	79
2022-09-13	09:51:25	0.408257	1.81601	1730.15	FALSE	79
2022-09-13	09:51:25	0.625102	2.78058	1690.07	FALSE	79
2022-09-13	09:51:26	0.579402	2.5773	1732.73	FALSE	79
2022-09-13	09:51:26	0.496909	2.21035	1692.28	FALSE	79
2022-09-13	09:51:26	0.374924	1.66774	1734.4	FALSE	79
2022-09-13	09:51:26	0.379148	1.68653	1693.97	FALSE	79
2022-09-13	09:51:27	0.436094	1.93983	1736.34	FALSE	79
2022-09-13	09:51:27	0.535484	2.38194	1696.35	FALSE	79
2022-09-13	09:51:27	0.44841	1.99462	1738.33	FALSE	79
2022-09-13	09:51:27	0.320522	1.42575	1697.78	FALSE	79
2022-09-13	09:51:28	0.500929	2.22823	1740.56	FALSE	79
2022-09-13	09:51:28	0.465509	2.07068	1699.85	FALSE	79
2022-09-13	09:51:28	0.484084	2.1533	1742.71	FALSE	79
2022-09-13	09:51:28	0.45584	2.02767	1701.88	FALSE	79
2022-09-13	09:51:29	0.43411	1.93101	1744.64	FALSE	79
2022-09-13	09:51:29	0.450496	2.0039	1703.88	FALSE	79
2022-09-13	09:51:29	0.488206	2.17164	1746.82	FALSE	79
2022-09-13	09:51:29	0.51187	2.2769	1706.16	FALSE	79
2022-09-13	09:51:30	0.597774	2.65902	1749.48	FALSE	79
2022-09-13	09:51:30	0.413295	1.83842	1707.99	FALSE	79
2022-09-13	09:51:30	0.390293	1.7361	1751.21	FALSE	79
2022-09-13	09:51:31	0.315127	1.40175	1709.4	FALSE	79
2022-09-13	09:51:31	0.491463	2.18613	1753.4	FALSE	79
2022-09-13	09:51:31	0.437214	1.94482	1711.34	FALSE	79
2022-09-13	09:51:31	0.578893	2.57503	1755.97	FALSE	79
2022-09-13	09:51:32	0.483881	2.1524	1713.49	FALSE	79
2022-09-13	09:51:32	0.782557	3.48097	1759.45	FALSE	79
2022-09-13	09:51:32	1.26169	5.61225	1719.11	FALSE	79
2022-09-13	09:51:32	0.591666	2.63185	1762.09	FALSE	79
2022-09-13	09:51:33	0.45187	2.01001	1721.12	FALSE	79
2022-09-13	09:51:33	0.436501	1.94164	1764.03	FALSE	79
2022-09-13	09:51:33	0.812685	3.61499	1724.73	FALSE	79
2022-09-13	09:51:33	0.255382	1.13599	1765.16	FALSE	79
2022-09-13	09:51:34	0.750649	3.33904	1728.07	FALSE	79
2022-09-13	09:51:34	0.280522	1.24782	1766.41	FALSE	79
2022-09-13	09:51:34	0.283321	1.26027	1729.33	FALSE	79
2022-09-13	09:51:35	-0.0689946	-0.306902	1766.41	FALSE	79
2022-09-13	09:51:35	0.165509	0.736217	1730.07	FALSE	79
2022-09-13	09:51:35	0.0119723	0.0532552	1766.46	FALSE	79
2022-09-13	09:51:35	-0.202023	-0.898639	1730.07	FALSE	79
2022-09-13	09:51:36	-0.248435	-1.10509	1766.46	FALSE	79
2022-09-13	09:51:36	0.0676465	0.300905	1730.37	FALSE	79
2022-09-13	09:51:36	0.211056	0.938819	1767.4	FALSE	79
2022-09-13	09:51:36	-0.101107	-0.449744	1730.37	FALSE	79
2022-09-13	09:51:37	0.212074	0.943348	1768.35	FALSE	79
2022-09-13	09:51:37	0.1793	0.797562	1731.16	FALSE	79
2022-09-13	09:51:37	0.109886	0.488795	1768.84	FALSE	79
2022-09-13	09:51:37	0.239911	1.06717	1732.23	FALSE	79
2022-09-13	09:51:38	0.327392	1.45631	1770.29	FALSE	79
2022-09-13	09:51:38	0.922913	4.1053	1736.34	FALSE	79
2022-09-13	09:51:38	1.33701	5.94729	1776.24	FALSE	79
2022-09-13	09:51:38	0.680623	3.02755	1739.36	FALSE	79
2022-09-13	09:51:39	1.44302	6.41884	1782.66	FALSE	79
2022-09-13	09:51:39	1.95676	8.70406	1748.07	FALSE	79
2022-09-13	09:51:39	0.831107	3.69693	1786.35	FALSE	79
2022-09-13	09:51:40	4.45391	19.8119	1767.88	1	80
2022-09-13	09:51:40	1.75849	7.82212	1794.18	FALSE	80
2022-09-13	09:51:40	1.72795	7.68627	1775.57	FALSE	80
2022-09-13	09:51:40	0.887341	3.94707	1798.12	FALSE	80
2022-09-13	09:51:41	0.555382	2.47045	1778.04	FALSE	80
2022-09-13	09:51:41	1.13268	5.03839	1803.16	FALSE	80
2022-09-13	09:51:41	0.506527	2.25313	1780.29	FALSE	80
2022-09-13	09:51:41	0.293804	1.3069	1804.47	FALSE	80
2022-09-13	09:51:42	0.665458	2.96009	1783.25	FALSE	80
2022-09-13	09:51:42	0.208766	0.928633	1805.4	FALSE	80
2022-09-13	09:51:42	0.426018	1.89501	1785.15	FALSE	80
2022-09-13	09:51:42	0.520165	2.3138	1807.71	FALSE	80
2022-09-13	09:51:43	0.295127	1.31278	1786.46	FALSE	80
2022-09-13	09:51:43	0.645509	2.87135	1810.58	FALSE	80
2022-09-13	09:51:43	0.0679518	0.302263	1786.76	FALSE	80
2022-09-13	09:51:44	0.00505114	0.0224685	1810.61	FALSE	80
2022-09-13	09:51:44	-0.611997	-2.72229	1786.76	FALSE	80
2022-09-13	09:51:44	-1.14187	-5.07927	1810.61	FALSE	80
2022-09-13	09:51:44	-0.772913	-3.43807	1786.76	FALSE	80
2022-09-13	09:51:45	-0.83902	-3.73213	1810.61	FALSE	80
2022-09-13	09:51:45	-0.799834	-3.55782	1786.76	FALSE	80
2022-09-13	09:51:45	-0.167824	-0.746515	1810.61	FALSE	80
2022-09-13	09:51:45	0.140064	0.623033	1787.38	FALSE	80
2022-09-13	09:51:46	1.70322	7.57626	1818.18	FALSE	80
2022-09-13	09:51:46	3.53421	15.7209	1803.1	1	81
2022-09-13	09:51:46	1.56363	6.95534	1825.14	FALSE	81
2022-09-13	09:51:46	3.19563	14.2148	1817.32	1	82
2022-09-13	09:51:47	1.48215	6.5929	1831.73	FALSE	82
2022-09-13	09:51:47	2.79202	12.4195	1829.74	FALSE	82
2022-09-13	09:51:47	0.347341	1.54504	1833.27	FALSE	82
2022-09-13	09:51:47	0.223982	0.996317	1830.74	FALSE	82
2022-09-13	09:51:48	0.86444	3.8452	1837.12	FALSE	82
2022-09-13	09:51:48	0.637367	2.83514	1833.57	FALSE	82
2022-09-13	09:51:48	1.23329	5.48592	1842.61	FALSE	82
2022-09-13	09:51:49	3.01589	13.4153	1846.99	1	83
2022-09-13	09:51:49	0.509936	2.2683	1844.87	FALSE	83
2022-09-13	09:51:49	1.36826	6.08629	1853.07	FALSE	83
2022-09-13	09:51:49	0.621234	2.76337	1847.64	FALSE	83
2022-09-13	09:51:50	2.81986	12.5433	1865.62	FALSE	83
2022-09-13	09:51:50	0.834873	3.71368	1851.35	FALSE	83
2022-09-13	09:51:50	4.08988	18.1926	1883.81	1	84
2022-09-13	09:51:50	4.65141	20.6904	1872.04	1	85
2022-09-13	09:51:51	3.14485	13.9889	1897.8	1	86
2022-09-13	09:51:51	7.1051	31.6049	1903.65	1	87
2022-09-13	09:51:51	1.16307	5.17357	1902.97	FALSE	87
2022-09-13	09:51:51	9.12729	40.6	1944.25	1	88
2022-09-13	09:51:52	4.4534	19.8096	1922.78	1	89
2022-09-13	09:51:52	5.87334	26.1258	1970.37	1	90
2022-09-13	09:51:52	14.0351	62.4309	1985.21	1	91
2022-09-13	09:51:53	5.46922	24.3282	1994.7	1	92
2022-09-13	09:51:53	13.3996	59.6041	2044.82	1	93
2022-09-13	09:51:53	6.84729	30.4581	2025.16	1	94
2022-09-13	09:51:53	4.62525	20.574	2065.39	1	95
2022-09-13	09:51:54	5.23726	23.2964	2048.46	1	96
2022-09-13	09:51:54	1.16663	5.1894	2070.58	FALSE	96
2022-09-13	09:51:54	8.98627	39.9727	2088.43	1	97
2022-09-13	09:51:54	1.27966	5.69218	2076.27	FALSE	97
2022-09-13	09:51:55	6.60184	29.3663	2117.79	1	98
2022-09-13	09:51:55	1.73747	7.72861	2084	FALSE	98
2022-09-13	09:51:55	3.03314	13.492	2131.29	1	99
2022-09-13	09:51:55	1.76469	7.84969	2091.85	FALSE	99
2022-09-13	09:51:56	1.59487	7.0943	2138.38	FALSE	99
2022-09-13	09:51:56	1.9995	8.89418	2100.74	FALSE	99
2022-09-13	09:51:56	1.08892	4.84373	2143.22	FALSE	99
2022-09-13	09:51:56	5.4625	24.2983	2125.04	1	100
2022-09-13	09:51:57	2.23319	9.93368	2153.16	FALSE	100
2022-09-13	09:51:57	6.85609	30.4973	2155.54	1	101
2022-09-13	09:51:57	5.98581	26.6261	2179.78	1	102
2022-09-13	09:51:58	2.27085	10.1012	2165.64	FALSE	102
2022-09-13	09:51:58	5.22525	23.243	2203.03	1	103
2022-09-13	09:51:58	0.9593	4.26716	2169.91	FALSE	103
2022-09-13	09:51:58	3.52016	15.6584	2218.69	1	104
2022-09-13	09:51:59	1.91248	8.50709	2178.41	FALSE	104
2022-09-13	09:51:59	6.71579	29.8732	2248.56	1	105
2022-09-13	09:51:59	4.69156	20.869	2199.28	1	106
2022-09-13	09:51:59	6.37594	28.3615	2276.92	1	107
2022-09-13	09:52:00	5.67334	25.2362	2224.52	1	108
2022-09-13	09:52:00	2.17859	9.6908	2286.61	FALSE	108
2022-09-13	09:52:00	1.83559	8.16507	2232.68	FALSE	108
2022-09-13	09:52:00	2.32062	10.3226	2296.93	FALSE	108
2022-09-13	09:52:01	0.429682	1.91131	2234.6	FALSE	108
2022-09-13	09:52:01	0.806018	3.58533	2300.52	FALSE	108
2022-09-13	09:52:01	0.031616	0.140634	2234.74	FALSE	108
2022-09-13	09:52:02	0.474568	2.11097	2302.63	FALSE	108
2022-09-13	09:52:02	0.785916	3.49591	2238.23	FALSE	108
2022-09-13	09:52:02	1.02246	4.54811	2307.18	FALSE	108
2022-09-13	09:52:02	4.448	19.7856	2258.02	1	109
2022-09-13	09:52:03	1.26184	5.61292	2312.79	FALSE	109
2022-09-13	09:52:03	3.60505	16.036	2274.05	1	110
2022-09-13	09:52:03	1.60357	7.133	2319.92	FALSE	110
2022-09-13	09:52:03	6.07782	27.0354	2301.09	1	111
2022-09-13	09:52:04	2.12469	9.45105	2329.37	FALSE	111
2022-09-13	09:52:04	3.03604	13.5049	2314.59	1	112
2022-09-13	09:52:04	1.991	8.85637	2338.23	FALSE	112
2022-09-13	09:52:04	1.76607	7.85583	2322.45	FALSE	112
2022-09-13	09:52:05	2.59894	11.5606	2349.79	FALSE	112
2022-09-13	09:52:05	1.52073	6.76451	2329.21	FALSE	112
2022-09-13	09:52:05	3.99955	17.7908	2367.58	1	113
2022-09-13	09:52:05	1.7508	7.78791	2337	FALSE	113
2022-09-13	09:52:06	5.04601	22.4457	2390.03	1	114
2022-09-13	09:52:06	0.976196	4.34232	2341.34	FALSE	114
2022-09-13	09:52:06	4.5679	20.3189	2410.35	1	115
2022-09-13	09:52:07	0.486578	2.1644	2343.51	FALSE	115
2022-09-13	09:52:07	2.86037	12.7235	2423.07	FALSE	115
2022-09-13	09:52:07	1.0791	4.80005	2348.31	FALSE	115
2022-09-13	09:52:07	1.52337	6.77625	2429.85	FALSE	115
2022-09-13	09:52:08	2.70561	12.0351	2360.34	FALSE	115
2022-09-13	09:52:08	2.41619	10.7477	2440.59	FALSE	115
2022-09-13	09:52:08	5.28235	23.4969	2383.84	1	116
2022-09-13	09:52:08	4.23467	18.8367	2459.43	1	117
2022-09-13	09:52:09	6.5339	29.0641	2412.91	1	118
2022-09-13	09:52:09	1.58754	7.0617	2466.49	FALSE	118
2022-09-13	09:52:09	2.8053	12.4785	2425.38	FALSE	118
2022-09-13	09:52:09	0.289478	1.28766	2467.78	FALSE	118
2022-09-13	09:52:10	1.87798	8.35363	2433.74	FALSE	118
2022-09-13	09:52:10	0.883626	3.93055	2471.71	FALSE	118
2022-09-13	09:52:10	0.766934	3.41148	2437.15	FALSE	118
2022-09-13	09:52:11	2.16332	9.62288	2481.33	FALSE	118
2022-09-13	09:52:11	1.1765	5.23331	2442.38	FALSE	118
2022-09-13	09:52:11	1.47813	6.57502	2487.91	FALSE	118
2022-09-13	09:52:11	0.499555	2.22212	2444.6	FALSE	118
2022-09-13	09:52:12	1.75864	7.82278	2495.73	FALSE	118
2022-09-13	09:52:12	0.782404	3.48029	2448.08	FALSE	118
2022-09-13	09:52:12	2.96312	13.1806	2508.91	FALSE	118
2022-09-13	09:52:12	0.964847	4.29183	2452.38	FALSE	118
2022-09-13	09:52:13	1.8335	8.15577	2517.07	FALSE	118
2022-09-13	09:52:13	1.0077	4.48245	2456.86	FALSE	118
2022-09-13	09:52:13	1.80907	8.04711	2525.12	FALSE	118
2022-09-13	09:52:13	1.3221	5.88097	2462.74	FALSE	118
2022-09-13	09:52:14	6.26006	27.846	2552.96	1	119
2022-09-13	09:52:14	2.97553	13.2358	2475.98	FALSE	119
2022-09-13	09:52:14	8.3107	36.9677	2589.93	1	120
2022-09-13	09:52:14	1.53482	6.82719	2482.8	FALSE	120
2022-09-13	09:52:15	1.08704	4.83537	2594.76	FALSE	120
2022-09-13	09:52:15	0.560471	2.49309	2485.3	FALSE	120
2022-09-13	09:52:15	0.676908	3.01102	2597.78	FALSE	120
2022-09-13	09:52:16	0.711361	3.16428	2488.46	FALSE	120
2022-09-13	09:52:16	0.368308	1.63831	2599.41	FALSE	120
2022-09-13	09:52:16	0.0368577	0.16395	2488.62	FALSE	120
2022-09-13	09:52:16	0.717723	3.19258	2602.61	FALSE	120
2022-09-13	09:52:17	0.500318	2.22551	2490.85	FALSE	120
2022-09-13	09:52:17	0.488054	2.17096	2604.78	FALSE	120
2022-09-13	09:52:17	0.480623	2.13791	2492.99	FALSE	120
2022-09-13	09:52:17	0.824338	3.66682	2608.44	FALSE	120
2022-09-13	09:52:18	0.74444	3.31142	2496.3	FALSE	120
2022-09-13	09:52:18	0.735433	3.27135	2611.72	FALSE	120
2022-09-13	09:52:18	0.738384	3.28448	2499.58	FALSE	120
2022-09-13	09:52:18	0.738588	3.28539	2615	FALSE	120
2022-09-13	09:52:19	0.735585	3.27203	2502.86	FALSE	120
2022-09-13	09:52:19	0.723524	3.21838	2618.22	FALSE	120
2022-09-13	09:52:19	0.35528	1.58036	2504.44	FALSE	120
2022-09-13	09:52:20	0.427239	1.90044	2620.12	FALSE	120
2022-09-13	09:52:20	0.444746	1.97832	2506.41	FALSE	120
2022-09-13	09:52:20	0.33355	1.4837	2621.6	FALSE	120
2022-09-13	09:52:20	0.480267	2.13632	2508.55	FALSE	120
2022-09-13	09:52:21	0.517264	2.30089	2623.9	FALSE	120
2022-09-13	09:52:21	0.743982	3.30938	2511.86	FALSE	120
2022-09-13	09:52:21	0.729173	3.24351	2627.15	FALSE	120
2022-09-13	09:52:21	0.737926	3.28244	2515.14	FALSE	120
2022-09-13	09:52:22	0.730801	3.25075	2630.4	FALSE	120
2022-09-13	09:52:22	0.740165	3.2924	2518.43	FALSE	120
2022-09-13	09:52:22	0.727392	3.23559	2633.63	FALSE	120
2022-09-13	09:52:22	0.732175	3.25686	2521.69	FALSE	120
2022-09-13	09:52:23	0.738333	3.28425	2636.92	FALSE	120
2022-09-13	09:52:23	0.738995	3.2872	2524.98	FALSE	120
2022-09-13	09:52:23	0.713753	3.17492	2640.09	FALSE	120
2022-09-13	09:52:23	0.439453	1.95477	2526.93	FALSE	120
2022-09-13	09:52:24	0.928664	4.13088	2644.22	FALSE	120
2022-09-13	09:52:24	1.03711	4.61327	2531.55	FALSE	120
2022-09-13	09:52:24	1.38123	6.14399	2650.37	FALSE	120
2022-09-13	09:52:25	1.39711	6.21462	2537.76	FALSE	120
2022-09-13	09:52:25	0.459657	2.04465	2652.41	FALSE	120
2022-09-13	09:52:25	0.856501	3.80989	2541.57	FALSE	120
2022-09-13	09:52:25	0.980063	4.35952	2656.77	FALSE	120
2022-09-13	09:52:26	0.752023	3.34515	2544.92	FALSE	120
2022-09-13	09:52:26	1.64225	7.30506	2664.08	FALSE	120
2022-09-13	09:52:26	0.789987	3.51402	2548.43	FALSE	120
2022-09-13	09:52:26	0.556857	2.47701	2666.55	FALSE	120
2022-09-13	09:52:27	0.432328	1.92308	2550.35	FALSE	120
2022-09-13	09:52:27	0.453652	2.01793	2668.57	FALSE	120
2022-09-13	09:52:27	0.283372	1.2605	2551.61	FALSE	120
2022-09-13	09:52:27	0.418435	1.86128	2670.43	FALSE	120
2022-09-13	09:52:28	2.23014	9.92011	2561.53	FALSE	120
2022-09-13	09:52:28	1.64317	7.30915	2677.74	FALSE	120
2022-09-13	09:52:28	4.36388	19.4114	2580.95	1	121
2022-09-13	09:52:29	2.38327	10.6013	2688.34	FALSE	121
2022-09-13	09:52:29	5.9195	26.3311	2607.28	1	122
2022-09-13	09:52:29	3.1735	14.1164	2702.46	1	123
2022-09-13	09:52:29	1.87645	8.34682	2615.62	FALSE	123
2022-09-13	09:52:30	2.51594	11.1914	2713.65	FALSE	123
2022-09-13	09:52:30	0.396196	1.76236	2617.39	FALSE	123
2022-09-13	09:52:30	0.748257	3.3284	2716.98	FALSE	123
2022-09-13	09:52:30	0.517112	2.30022	2619.69	FALSE	123
2022-09-13	09:52:31	0.59701	2.65562	2719.64	FALSE	123
2022-09-13	09:52:31	0.422405	1.87894	2621.57	FALSE	123
2022-09-13	09:52:31	0.438893	1.95228	2721.59	FALSE	123
2022-09-13	09:52:31	0.396094	1.76191	2623.33	FALSE	123
2022-09-13	09:52:32	0.562048	2.5001	2724.09	FALSE	123
2022-09-13	09:52:32	0.52327	2.32761	2625.65	FALSE	123
2022-09-13	09:52:32	0.541489	2.40865	2726.5	FALSE	123
2022-09-13	09:52:32	0.760318	3.38205	2629.04	FALSE	123
2022-09-13	09:52:33	0.550751	2.44985	2728.95	FALSE	123
2022-09-13	09:52:33	2.82378	12.5607	2641.6	FALSE	123
2022-09-13	09:52:33	0.306069	1.36146	2730.31	FALSE	123
2022-09-13	09:52:34	4.36826	19.4309	2661.03	1	124
2022-09-13	09:52:34	0.364491	1.62133	2731.93	FALSE	124
2022-09-13	09:52:34	4.7852	21.2855	2682.31	1	125
2022-09-13	09:52:34	0.182914	0.813638	2732.74	FALSE	125
2022-09-13	09:52:35	0.837926	3.72726	2686.04	FALSE	125
2022-09-13	09:52:35	0.52958	2.35568	2735.1	FALSE	125
2022-09-13	09:52:35	0.7993	3.55545	2689.6	FALSE	125
2022-09-13	09:52:35	0.568409	2.5284	2737.63	FALSE	125
2022-09-13	09:52:36	0.535382	2.38149	2691.98	FALSE	125
2022-09-13	09:52:36	0.360013	1.60141	2739.23	FALSE	125
2022-09-13	09:52:36	0.520776	2.31652	2694.29	FALSE	125
2022-09-13	09:52:36	0.305967	1.361	2740.59	FALSE	125
2022-09-13	09:52:37	0.42098	1.8726	2696.17	FALSE	125
2022-09-13	09:52:37	0.447799	1.9919	2742.58	FALSE	125
2022-09-13	09:52:37	0.375789	1.67158	2697.84	FALSE	125
2022-09-13	09:52:38	0.361132	1.60639	2744.19	FALSE	125
2022-09-13	09:52:38	2.12541	9.45425	2707.29	FALSE	125
2022-09-13	09:52:38	1.94653	8.65855	2752.85	FALSE	125
2022-09-13	09:52:38	5.49385	24.4377	2731.73	1	126
2022-09-13	09:52:39	2.85431	12.6965	2765.54	FALSE	126
2022-09-13	09:52:39	4.54525	20.2182	2751.95	1	127
2022-09-13	09:52:39	1.92566	8.56572	2774.11	FALSE	127
2022-09-13	09:52:39	6.0937	27.106	2779.05	1	128
2022-09-13	09:52:40	1.57757	7.01735	2781.13	FALSE	128
2022-09-13	09:52:40	4.98759	22.1858	2801.24	1	129
2022-09-13	09:52:40	0.447188	1.98918	2783.11	FALSE	129
2022-09-13	09:52:40	2.01823	8.97749	2810.22	FALSE	129
2022-09-13	09:52:41	0.109071	0.48517	2783.6	FALSE	129
2022-09-13	09:52:41	0.821692	3.65505	2813.87	FALSE	129
2022-09-13	09:52:41	1.89843	8.4446	2792.04	FALSE	129
2022-09-13	09:52:42	9.03609	40.1943	2854.07	1	130
2022-09-13	09:52:42	5.78479	25.7319	2817.78	1	131
2022-09-13	09:52:42	2.15167	9.57106	2863.64	FALSE	131
2022-09-13	09:52:42	2.02118	8.99061	2826.77	FALSE	131
2022-09-13	09:52:43	4.00948	17.835	2881.47	1	132
2022-09-13	09:52:43	1.67961	7.47124	2834.24	FALSE	132
2022-09-13	09:52:43	2.97462	13.2317	2894.71	FALSE	132
2022-09-13	09:52:43	2.40251	10.6868	2844.93	FALSE	132
2022-09-13	09:52:44	2.68276	11.9335	2906.64	FALSE	132
2022-09-13	09:52:44	5.46021	24.2881	2869.21	1	133
2022-09-13	09:52:44	0.492125	2.18907	2908.83	FALSE	133
2022-09-13	09:52:44	0.515331	2.2923	2871.51	FALSE	133
2022-09-13	09:52:45	0.516247	2.29637	2911.12	FALSE	133
2022-09-13	09:52:45	0.38327	1.70486	2873.21	FALSE	133
2022-09-13	09:52:45	0.528919	2.35274	2913.48	FALSE	133
2022-09-13	09:52:45	0.470344	2.09218	2875.3	FALSE	133
2022-09-13	09:52:46	0.696654	3.09886	2916.58	FALSE	133
2022-09-13	09:52:46	0.544745	2.42313	2877.73	FALSE	133
2022-09-13	09:52:46	0.5364	2.38601	2918.96	FALSE	133
2022-09-13	09:52:47	0.464491	2.06615	2879.79	FALSE	133
2022-09-13	09:52:47	0.504542	2.2443	2921.21	FALSE	133
2022-09-13	09:52:47	0.515127	2.29139	2882.08	FALSE	133
2022-09-13	09:52:47	0.30617	1.36191	2922.57	FALSE	133
2022-09-13	09:52:48	0.233092	1.03684	2883.12	FALSE	133
2022-09-13	09:52:48	0.275738	1.22654	2923.79	FALSE	133
2022-09-13	09:52:48	0.340878	1.51629	2884.64	FALSE	133
2022-09-13	09:52:48	0.341031	1.51697	2925.31	FALSE	133
2022-09-13	09:52:49	0.208766	0.928633	2885.57	FALSE	133
2022-09-13	09:52:49	-0.0388674	-0.17289	2925.31	FALSE	133
2022-09-13	09:52:49	-0.27902	-1.24114	2885.57	FALSE	133
2022-09-13	09:52:49	-0.275814	-1.22688	2925.31	FALSE	133
2022-09-13	09:52:50	-0.313371	-1.39394	2885.57	FALSE	133
2022-09-13	09:52:50	-0.173066	-0.769832	2925.31	FALSE	133
2022-09-13	09:52:50	0.041387	0.184098	2885.75	FALSE	133
2022-09-13	09:52:51	0.434415	1.93236	2927.24	FALSE	133
2022-09-13	09:52:51	4.17563	18.574	2904.32	1	134
2022-09-13	09:52:51	0.320827	1.4271	2928.67	FALSE	134
2022-09-13	09:52:51	0.564847	2.51255	2906.84	FALSE	134
2022-09-13	09:52:52	0.286069	1.27249	2929.94	FALSE	134
2022-09-13	09:52:52	0.479351	2.13225	2908.97	FALSE	134
2022-09-13	09:52:52	0.520674	2.31606	2932.26	FALSE	134
2022-09-13	09:52:52	0.559657	2.48947	2911.46	FALSE	134
2022-09-13	09:52:53	0.381743	1.69807	2933.96	FALSE	134
2022-09-13	09:52:53	0.560623	2.49376	2913.95	FALSE	134
2022-09-13	09:52:53	0.434771	1.93395	2935.89	FALSE	134
2022-09-13	09:52:53	0.441234	1.9627	2915.91	FALSE	134
2022-09-13	09:52:54	0.396196	1.76236	2937.65	FALSE	134
2022-09-13	09:52:54	0.487341	2.16779	2918.08	FALSE	134
2022-09-13	09:52:54	0.492532	2.19088	2939.84	FALSE	134
2022-09-13	09:52:54	0.354975	1.579	2919.66	FALSE	134
2022-09-13	09:52:55	0.650394	2.89308	2942.74	FALSE	134
2022-09-13	09:52:55	0.556603	2.47588	2922.14	FALSE	134
2022-09-13	09:52:55	0.930242	4.1379	2946.88	FALSE	134
2022-09-13	09:52:56	0.612481	2.72444	2924.86	FALSE	134
2022-09-13	09:52:56	0.502863	2.23684	2949.11	FALSE	134
2022-09-13	09:52:56	0.330038	1.46808	2926.33	FALSE	134
2022-09-13	09:52:56	0.368308	1.63831	2950.75	FALSE	134
2022-09-13	09:52:57	0.37813	1.682	2928.01	FALSE	134
2022-09-13	09:52:57	0.45126	2.00729	2952.76	FALSE	134
2022-09-13	09:52:57	0.302914	1.34742	2929.36	FALSE	134
2022-09-13	09:52:57	0.437825	1.94753	2954.71	FALSE	134
2022-09-13	09:52:58	0.522201	2.32285	2931.68	FALSE	134
2022-09-13	09:52:58	0.464389	2.0657	2956.77	FALSE	134
2022-09-13	09:52:58	0.480776	2.13859	2933.82	FALSE	134
2022-09-13	09:52:58	0.460318	2.04759	2958.82	FALSE	134
2022-09-13	09:52:59	0.519555	2.31108	2936.13	FALSE	134
2022-09-13	09:52:59	0.833244	3.70644	2962.53	FALSE	134
2022-09-13	09:52:59	0.516501	2.2975	2938.43	FALSE	134
2022-09-13	09:53:00	0.69874	3.10814	2965.63	FALSE	134
2022-09-13	09:53:00	0.627188	2.78986	2941.22	FALSE	134
2022-09-13	09:53:00	0.513397	2.28369	2967.92	FALSE	134
2022-09-13	09:53:00	0.526272	2.34096	2943.56	FALSE	134
2022-09-13	09:53:01	0.416298	1.85178	2969.77	FALSE	134
2022-09-13	09:53:01	0.4107	1.82688	2945.39	FALSE	134
2022-09-13	09:53:01	0.473753	2.10735	2971.88	FALSE	134
2022-09-13	09:53:01	0.418028	1.85947	2947.25	FALSE	134
2022-09-13	09:53:02	0.431616	1.91991	2973.8	FALSE	134
2022-09-13	09:53:02	0.444186	1.97583	2949.22	FALSE	134
2022-09-13	09:53:02	0.441845	1.96541	2975.76	FALSE	134
2022-09-13	09:53:02	0.435484	1.93712	2951.16	FALSE	134
2022-09-13	09:53:03	0.364186	1.61997	2977.38	FALSE	134
2022-09-13	09:53:03	0.358333	1.59394	2952.75	FALSE	134
2022-09-13	09:53:03	0.372074	1.65506	2979.04	FALSE	134
2022-09-13	09:53:03	0.419555	1.86626	2954.62	FALSE	134
2022-09-13	09:53:04	0.425509	1.89275	2980.93	FALSE	134
2022-09-13	09:53:04	0.492125	2.18907	2956.81	FALSE	134
2022-09-13	09:53:04	0.482456	2.14606	2983.08	FALSE	134
2022-09-13	09:53:05	0.48612	2.16236	2958.97	FALSE	134
2022-09-13	09:53:05	0.521234	2.31855	2985.39	FALSE	134
2022-09-13	09:53:05	0.548715	2.44079	2961.41	FALSE	134
2022-09-13	09:53:05	0.587901	2.6151	2988.01	FALSE	134
2022-09-13	09:53:06	0.525203	2.33621	2963.75	FALSE	134
2022-09-13	09:53:06	0.517875	2.30361	2990.31	FALSE	134
2022-09-13	09:53:06	0.498588	2.21782	2965.97	FALSE	134
2022-09-13	09:53:06	0.503219	2.23842	2992.55	FALSE	134
2022-09-13	09:53:07	0.588664	2.6185	2968.58	FALSE	134
2022-09-13	09:53:07	0.631259	2.80797	2995.36	FALSE	134
2022-09-13	09:53:07	0.616552	2.74255	2971.33	FALSE	134
2022-09-13	09:53:07	0.611514	2.72014	2998.08	FALSE	134
2022-09-13	09:53:08	0.67187	2.98861	2974.31	FALSE	134
2022-09-13	09:53:08	0.660216	2.93677	3001.02	FALSE	134
2022-09-13	09:53:08	0.641081	2.85166	2977.17	FALSE	134
2022-09-13	09:53:09	0.545916	2.42834	3003.44	FALSE	134
2022-09-13	09:53:09	0.569733	2.53429	2979.7	FALSE	134
2022-09-13	09:53:09	0.54729	2.43446	3005.88	FALSE	134
2022-09-13	09:53:09	0.578893	2.57503	2982.28	FALSE	134
2022-09-13	09:53:10	0.596603	2.65381	3008.53	FALSE	134
2022-09-13	09:53:10	0.642557	2.85822	2985.13	FALSE	134
2022-09-13	09:53:10	0.562201	2.50078	3011.03	FALSE	134
2022-09-13	09:53:10	0.438537	1.9507	2987.08	FALSE	134
2022-09-13	09:53:11	0.595025	2.64679	3013.68	FALSE	134
2022-09-13	09:53:11	0.677519	3.01374	2990.1	FALSE	134
2022-09-13	09:53:11	0.0523285	0.232768	3013.91	FALSE	134
2022-09-13	09:53:11	-0.14014	-0.623371	2990.1	FALSE	134
2022-09-13	09:53:12	-0.219682	-0.977189	3013.91	FALSE	134
2022-09-13	09:53:12	-0.251539	-1.1189	2990.1	FALSE	134
2022-09-13	09:53:12	-0.266755	-1.18658	3013.91	FALSE	134
2022-09-13	09:53:12	-0.046501	-0.206846	2990.1	FALSE	134
2022-09-13	09:53:13	0.0346694	0.154216	3014.07	FALSE	134
2022-09-13	09:53:13	-0.115305	-0.5129	2990.1	FALSE	134
2022-09-13	09:53:13	0.0727865	0.323769	3014.39	FALSE	134
2022-09-13	09:53:14	-0.228129	-1.01476	2990.1	FALSE	134
2022-09-13	09:53:14	-0.275865	-1.2271	3014.39	FALSE	134
2022-09-13	09:53:14	-0.0636511	-0.283133	2990.1	FALSE	134
2022-09-13	09:53:14	0.142812	0.635256	3015.03	FALSE	134
2022-09-13	09:53:15	0.244695	1.08845	2991.19	FALSE	134
2022-09-13	09:53:15	0.161845	0.719919	3015.75	FALSE	134
2022-09-13	09:53:15	1.07889	4.79912	2995.99	FALSE	134
2022-09-13	09:53:15	0.114568	0.509621	3016.26	FALSE	134
2022-09-13	09:53:16	0.0692751	0.308149	2996.29	FALSE	134
2022-09-13	09:53:16	0.131107	0.58319	3016.84	FALSE	134
2022-09-13	09:53:16	0.097672	0.434465	2996.73	FALSE	134
2022-09-13	09:53:16	-0.000139698	-0.000621405	3016.84	FALSE	134
2022-09-13	09:53:17	-0.108028	-0.48053	2996.73	FALSE	134
2022-09-13	09:53:17	-0.268333	-1.1936	3016.84	FALSE	134
2022-09-13	09:53:17	-0.251997	-1.12093	2996.73	FALSE	134
2022-09-13	09:53:18	0.0370104	0.16463	3017	FALSE	134
2022-09-13	09:53:18	0.331361	1.47396	2998.2	FALSE	134
2022-09-13	09:53:18	0.494059	2.19767	3019.2	FALSE	134
2022-09-13	09:53:18	0.287188	1.27747	2999.48	FALSE	134
2022-09-13	09:53:19	0.338384	1.5052	3020.71	FALSE	134
2022-09-13	09:53:19	0.481234	2.14063	3001.62	FALSE	134
2022-09-13	09:53:19	0.403066	1.79292	3022.5	FALSE	134
2022-09-13	09:53:19	0.408919	1.81895	3003.44	FALSE	134
2022-09-13	09:53:20	0.420216	1.8692	3024.37	FALSE	134
2022-09-13	09:53:20	0.414466	1.84363	3005.28	FALSE	134
2022-09-13	09:53:20	0.413601	1.83978	3026.21	FALSE	134
2022-09-13	09:53:20	0.421692	1.87577	3007.16	FALSE	134
2022-09-13	09:53:21	0.419758	1.86717	3028.08	FALSE	134
2022-09-13	09:53:21	0.429275	1.9095	3009.07	FALSE	134
2022-09-13	09:53:21	0.432888	1.92557	3030	FALSE	134
2022-09-13	09:53:21	0.436298	1.94074	3011.01	FALSE	134
2022-09-13	09:53:22	0.440471	1.9593	3031.96	FALSE	134
2022-09-13	09:53:22	0.437875	1.94776	3012.96	FALSE	134
2022-09-13	09:53:22	0.439708	1.95591	3033.92	FALSE	134
2022-09-13	09:53:23	0.444695	1.97809	3014.94	FALSE	134
2022-09-13	09:53:23	0.436756	1.94278	3035.86	FALSE	134
2022-09-13	09:53:23	0.439453	1.95477	3016.89	FALSE	134
2022-09-13	09:53:23	0.43528	1.93621	3037.8	FALSE	134
2022-09-13	09:53:24	0.436552	1.94187	3018.83	FALSE	134
2022-09-13	09:53:24	0.436145	1.94006	3039.74	FALSE	134
2022-09-13	09:53:24	0.443015	1.97062	3020.8	FALSE	134
2022-09-13	09:53:24	0.438181	1.94912	3041.68	FALSE	134
2022-09-13	09:53:25	0.439911	1.95681	3022.76	FALSE	134
2022-09-13	09:53:25	0.441641	1.96451	3043.65	FALSE	134
2022-09-13	09:53:25	0.4364	1.94119	3024.7	FALSE	134
2022-09-13	09:53:25	0.440166	1.95795	3045.61	FALSE	134
2022-09-13	09:53:26	0.435992	1.93938	3026.64	FALSE	134
2022-09-13	09:53:26	0.440929	1.96134	3047.57	FALSE	134
2022-09-13	09:53:26	0.43986	1.95659	3028.6	FALSE	134
2022-09-13	09:53:27	0.439708	1.95591	3049.52	FALSE	134
2022-09-13	09:53:27	0.437417	1.94572	3030.54	FALSE	134
2022-09-13	09:53:27	0.433092	1.92648	3051.45	FALSE	134
2022-09-13	09:53:27	0.432786	1.92512	3032.47	FALSE	134
2022-09-13	09:53:28	0.432227	1.92263	3053.37	FALSE	134
2022-09-13	09:53:28	0.43355	1.92852	3034.4	FALSE	134
2022-09-13	09:53:28	0.430649	1.91561	3055.29	FALSE	134
2022-09-13	09:53:28	0.434517	1.93282	3036.33	FALSE	134
2022-09-13	09:53:29	0.434618	1.93327	3057.22	FALSE	134
2022-09-13	09:53:29	0.428206	1.90475	3038.23	FALSE	134
2022-09-13	09:53:29	0.446069	1.9842	3059.21	FALSE	134
2022-09-13	09:53:29	0.617265	2.74572	3040.98	FALSE	134
2022-09-13	09:53:30	0.542812	2.41454	3061.62	FALSE	134
2022-09-13	09:53:30	0.30327	1.34901	3042.33	FALSE	134
2022-09-13	09:53:30	-0.0244145	-0.108601	3061.62	FALSE	134
2022-09-13	09:53:31	0.129224	0.574814	3042.9	FALSE	134
2022-09-13	09:53:31	0.212277	0.944251	3062.57	FALSE	134
2022-09-13	09:53:31	0.297468	1.3232	3044.23	FALSE	134
2022-09-13	09:53:31	0.331412	1.47419	3064.04	FALSE	134
2022-09-13	09:53:32	0.374466	1.6657	3045.89	FALSE	134
2022-09-13	09:53:32	0.40271	1.79133	3065.83	FALSE	134
2022-09-13	09:53:32	0.373092	1.65959	3047.55	FALSE	134
2022-09-13	09:53:32	0.338283	1.50475	3067.34	FALSE	134
2022-09-13	09:53:33	0.355331	1.58058	3049.13	FALSE	134
2022-09-13	09:53:33	0.368766	1.64034	3068.98	FALSE	134
2022-09-13	09:53:33	0.43014	1.91335	3051.05	FALSE	134
2022-09-13	09:53:33	0.734364	3.2666	3072.24	FALSE	134
2022-09-13	09:53:34	0.759809	3.37978	3054.43	FALSE	134
2022-09-13	09:53:34	0.410802	1.82733	3074.07	FALSE	134
2022-09-13	09:53:34	0.378384	1.68313	3056.11	FALSE	134
2022-09-13	09:53:34	0.364949	1.62337	3075.69	FALSE	134
2022-09-13	09:53:35	0.327901	1.45857	3057.57	FALSE	134
2022-09-13	09:53:35	0.326323	1.45155	3077.14	FALSE	134
2022-09-13	09:53:35	0.332888	1.48075	3059.05	FALSE	134
2022-09-13	09:53:36	0.734873	3.26886	3080.41	FALSE	134
2022-09-13	09:53:36	0.742455	3.30259	3062.35	FALSE	134
2022-09-13	09:53:36	0.732786	3.25958	3083.67	FALSE	134
2022-09-13	09:53:36	0.734517	3.26728	3065.62	FALSE	134
2022-09-13	09:53:37	0.737977	3.28267	3086.96	FALSE	134
2022-09-13	09:53:37	0.740318	3.29308	3068.91	FALSE	134
2022-09-13	09:53:37	0.735941	3.27361	3090.23	FALSE	134
2022-09-13	09:53:37	0.734059	3.26524	3072.18	FALSE	134
2022-09-13	09:53:38	0.741641	3.29897	3093.53	FALSE	134
2022-09-13	09:53:38	0.723728	3.21929	3075.4	FALSE	134
2022-09-13	09:53:38	0.729936	3.2469	3096.78	FALSE	134
2022-09-13	09:53:38	0.718486	3.19597	3078.59	FALSE	134
2022-09-13	09:53:39	0.725102	3.2254	3100	FALSE	134
2022-09-13	09:53:39	0.702303	3.12398	3081.72	FALSE	134
2022-09-13	09:53:39	0.707595	3.14752	3103.15	FALSE	134
2022-09-13	09:53:40	0.663931	2.9533	3084.67	FALSE	134
2022-09-13	09:53:40	0.67589	3.00649	3106.15	FALSE	134
2022-09-13	09:53:40	0.75874	3.37503	3088.04	FALSE	134
2022-09-13	09:53:40	0.69584	3.09524	3109.25	FALSE	134
2022-09-13	09:53:41	0.734771	3.26841	3091.31	FALSE	134
2022-09-13	09:53:41	0.726934	3.23355	3112.48	FALSE	134
2022-09-13	09:53:41	0.728817	3.24192	3094.55	FALSE	134
2022-09-13	09:53:41	0.453804	2.01861	3114.5	FALSE	134
2022-09-13	09:53:42	0.727188	3.23468	3097.79	FALSE	134
2022-09-13	09:53:42	0.445	1.97945	3116.48	FALSE	134
2022-09-13	09:53:42	0.741081	3.29648	3101.08	FALSE	134
2022-09-13	09:53:42	0.635331	2.82608	3119.31	FALSE	134
2022-09-13	09:53:43	0.671819	2.98839	3104.07	FALSE	134
2022-09-13	09:53:43	0.542303	2.41227	3121.72	FALSE	134
2022-09-13	09:53:43	0.581896	2.58839	3106.66	FALSE	134
2022-09-13	09:53:43	0.696043	3.09614	3124.82	FALSE	134
2022-09-13	09:53:44	0.66729	2.96824	3109.63	FALSE	134
2022-09-13	09:53:44	0.638435	2.83989	3127.66	FALSE	134
2022-09-13	09:53:44	0.648053	2.88267	3112.51	FALSE	134
2022-09-13	09:53:45	0.543321	2.4168	3130.07	FALSE	134
2022-09-13	09:53:45	0.418995	1.86377	3114.38	FALSE	134
2022-09-13	09:53:45	0.265458	1.18081	3131.25	FALSE	134
2022-09-13	09:53:45	0.243422	1.08279	3115.46	FALSE	134
2022-09-13	09:53:46	0.278181	1.2374	3132.49	FALSE	134
2022-09-13	09:53:46	0.287799	1.28019	3116.74	FALSE	134
2022-09-13	09:53:46	0.288766	1.28449	3133.78	FALSE	134
2022-09-13	09:53:47	0.289835	1.28924	3118.03	FALSE	134
2022-09-13	09:53:47	0.325102	1.44612	3135.22	FALSE	134
2022-09-13	09:53:47	0.389479	1.73248	3119.76	FALSE	134
2022-09-13	09:53:47	0.355738	1.58239	3136.8	FALSE	134
2022-09-13	09:53:47	0.392786	1.74719	3121.51	FALSE	134
2022-09-13	09:53:48	0.115942	0.515733	3137.32	FALSE	134
2022-09-13	09:53:48	1.09503	4.87091	3126.38	FALSE	134
2022-09-13	09:53:48	0.376247	1.67362	3138.99	FALSE	134
2022-09-13	09:53:49	0.398944	1.77458	3128.15	FALSE	134
2022-09-13	09:53:49	1.15207	5.12464	3144.12	FALSE	134
2022-09-13	09:53:49	0.796349	3.54232	3131.7	FALSE	134
2022-09-13	09:53:49	3.45533	15.37	3159.49	1	135
2022-09-13	09:53:50	2.72342	12.1143	3143.81	FALSE	135
2022-09-13	09:53:50	4.28378	19.0551	3178.54	1	136
2022-09-13	09:53:50	1.24469	5.53663	3149.35	FALSE	136
2022-09-13	09:53:50	1.0392	4.62257	3183.17	FALSE	136
2022-09-13	09:53:51	0.880725	3.91764	3153.26	FALSE	136
2022-09-13	09:53:51	3.28149	14.5967	3197.76	1	137
2022-09-13	09:53:51	2.46444	10.9623	3164.23	FALSE	137
2022-09-13	09:53:51	0.475229	2.11391	3199.88	FALSE	137
2022-09-13	09:53:52	1.66312	7.39789	3171.62	FALSE	137
2022-09-13	09:53:52	0.67187	2.98861	3202.86	FALSE	137
2022-09-13	09:53:52	1.02938	4.57889	3176.2	FALSE	137
2022-09-13	09:53:52	1.21849	5.42009	3208.28	FALSE	137
2022-09-13	09:53:53	0.372328	1.65619	3177.86	FALSE	137
2022-09-13	09:53:53	0.520827	2.31674	3210.6	FALSE	137
2022-09-13	09:53:53	0.155738	0.692754	3178.55	FALSE	137
2022-09-13	09:53:54	0.380929	1.69445	3212.3	FALSE	137
2022-09-13	09:53:54	0.34612	1.53961	3180.09	FALSE	137
2022-09-13	09:53:54	0.649428	2.88879	3215.18	FALSE	137
2022-09-13	09:53:54	0.244542	1.08777	3181.18	FALSE	137
2022-09-13	09:53:55	0.454466	2.02156	3217.21	FALSE	137
2022-09-13	09:53:55	0.438995	1.95274	3183.13	FALSE	137
2022-09-13	09:53:55	0.660166	2.93655	3220.14	FALSE	137
2022-09-13	09:53:55	0.331616	1.47509	3184.61	FALSE	137
2022-09-13	09:53:56	0.541489	2.40865	3222.55	FALSE	137
2022-09-13	09:53:56	0.347443	1.5455	3186.15	FALSE	137
2022-09-13	09:53:56	0.532125	2.367	3224.92	FALSE	137
2022-09-13	09:53:56	0.360522	1.60367	3187.76	FALSE	137
2022-09-13	09:53:57	0.52159	2.32014	3227.24	FALSE	137
2022-09-13	09:53:57	0.489377	2.17685	3189.93	FALSE	137
2022-09-13	09:53:57	0.498435	2.21714	3229.46	FALSE	137
2022-09-13	09:53:58	0.447545	1.99077	3191.92	FALSE	137
2022-09-13	09:53:58	0.624186	2.7765	3232.23	FALSE	137
2022-09-13	09:53:58	0.426069	1.89524	3193.82	FALSE	137
2022-09-13	09:53:58	0.417723	1.85812	3234.09	FALSE	137
2022-09-13	09:53:59	0.420013	1.8683	3195.69	FALSE	137
2022-09-13	09:53:59	0.432023	1.92172	3236.01	FALSE	137
2022-09-13	09:53:59	0.411158	1.82891	3197.52	FALSE	137
2022-09-13	09:53:59	0.421641	1.87554	3237.89	FALSE	137
2022-09-13	09:54:00	0.414262	1.84272	3199.36	FALSE	137
2022-09-13	09:54:00	0.41701	1.85494	3239.74	FALSE	137
2022-09-13	09:54:00	0.416858	1.85427	3201.21	FALSE	137
2022-09-13	09:54:00	0.412735	1.83593	3241.58	FALSE	137
2022-09-13	09:54:01	0.421641	1.87554	3203.09	FALSE	137
2022-09-13	09:54:01	0.419708	1.86695	3243.45	FALSE	137
2022-09-13	09:54:01	0.421845	1.87645	3204.97	FALSE	137
2022-09-13	09:54:01	0.421183	1.87351	3245.32	FALSE	137
2022-09-13	09:54:02	0.422863	1.88098	3206.85	FALSE	137
2022-09-13	09:54:02	0.4193	1.86513	3247.18	FALSE	137
2022-09-13	09:54:02	0.419097	1.86423	3208.71	FALSE	137
2022-09-13	09:54:03	0.419199	1.86468	3249.05	FALSE	137
2022-09-13	09:54:03	0.417417	1.85675	3210.57	FALSE	137
2022-09-13	09:54:03	0.415229	1.84702	3250.9	FALSE	137
2022-09-13	09:54:03	0.413957	1.84136	3212.41	FALSE	137
2022-09-13	09:54:04	0.412735	1.83593	3252.73	FALSE	137
2022-09-13	09:54:04	0.410344	1.82529	3214.23	FALSE	137
2022-09-13	09:54:04	0.411412	1.83004	3254.56	FALSE	137
2022-09-13	09:54:04	0.417875	1.85879	3216.09	FALSE	137
2022-09-13	09:54:05	0.42271	1.8803	3256.44	FALSE	137
2022-09-13	09:54:05	0.420216	1.8692	3217.96	FALSE	137
2022-09-13	09:54:05	0.417367	1.85653	3258.3	FALSE	137
2022-09-13	09:54:05	0.421743	1.876	3219.84	FALSE	137
2022-09-13	09:54:06	0.66612	2.96303	3261.26	FALSE	137
2022-09-13	09:54:06	0.446578	1.98647	3221.83	FALSE	137
2022-09-13	09:54:06	0.384593	1.71075	3262.97	FALSE	137
2022-09-13	09:54:07	0.457977	2.03717	3223.86	FALSE	137
2022-09-13	09:54:07	0.834974	3.71413	3266.69	FALSE	137
2022-09-13	09:54:07	0.836501	3.72092	3227.58	FALSE	137
2022-09-13	09:54:07	2.49111	11.081	3277.77	FALSE	137
2022-09-13	09:54:08	1.87151	8.32485	3235.91	FALSE	137
2022-09-13	09:54:08	0.978588	4.35296	3282.12	FALSE	137
2022-09-13	09:54:08	0.701132	3.11878	3239.03	FALSE	137
2022-09-13	09:54:08	0.475026	2.11301	3284.23	FALSE	137
2022-09-13	09:54:09	0.436908	1.94345	3240.97	FALSE	137
2022-09-13	09:54:09	0.445051	1.97968	3286.21	FALSE	137
2022-09-13	09:54:09	0.436145	1.94006	3242.91	FALSE	137
2022-09-13	09:54:09	0.423117	1.88211	3288.1	FALSE	137
2022-09-13	09:54:10	0.436705	1.94255	3244.85	FALSE	137
2022-09-13	09:54:10	0.465865	2.07226	3290.17	FALSE	137
2022-09-13	09:54:10	0.475789	2.1164	3246.97	FALSE	137
2022-09-13	09:54:10	0.44958	1.99982	3292.17	FALSE	137
2022-09-13	09:54:11	0.469275	2.08743	3249.06	FALSE	137
2022-09-13	09:54:11	0.452888	2.01454	3294.18	FALSE	137
2022-09-13	09:54:11	0.460166	2.04691	3251.1	FALSE	137
2022-09-13	09:54:12	0.462812	2.05868	3296.24	FALSE	137
2022-09-13	09:54:12	0.448308	1.99416	3253.1	FALSE	137
2022-09-13	09:54:12	0.447647	1.99122	3298.23	FALSE	137
2022-09-13	09:54:12	0.449326	1.99869	3255.1	FALSE	137
2022-09-13	09:54:13	0.438537	1.9507	3300.18	FALSE	137
2022-09-13	09:54:13	0.43874	1.9516	3257.05	FALSE	137
2022-09-13	09:54:13	0.44673	1.98714	3302.17	FALSE	137
2022-09-13	09:54:13	0.50902	2.26422	3259.31	FALSE	137
2022-09-13	09:54:14	0.612837	2.72602	3304.9	FALSE	137
2022-09-13	09:54:14	1.18286	5.2616	3264.57	FALSE	137
2022-09-13	09:54:14	1.10622	4.92069	3309.82	FALSE	137
2022-09-13	09:54:14	0.613346	2.72829	3267.3	FALSE	137
2022-09-13	09:54:15	0.52897	2.35296	3312.17	FALSE	137
2022-09-13	09:54:15	0.443982	1.97492	3269.28	FALSE	137
2022-09-13	09:54:15	0.505713	2.24951	3314.42	FALSE	137
2022-09-13	09:54:16	0.494873	2.20129	3271.48	FALSE	137
2022-09-13	09:54:16	0.446832	1.9876	3316.41	FALSE	137
2022-09-13	09:54:16	0.462965	2.05936	3273.54	FALSE	137
2022-09-13	09:54:16	0.489987	2.17956	3318.59	FALSE	137
2022-09-13	09:54:17	0.444847	1.97877	3275.52	FALSE	137
2022-09-13	09:54:17	0.473652	2.1069	3320.69	FALSE	137
2022-09-13	09:54:17	0.461183	2.05143	3277.57	FALSE	137
2022-09-13	09:54:17	0.481539	2.14198	3322.84	FALSE	137
2022-09-13	09:54:18	0.484949	2.15715	3279.73	FALSE	137
2022-09-13	09:54:18	0.439809	1.95636	3324.79	FALSE	137
2022-09-13	09:54:18	0.456756	2.03174	3281.76	FALSE	137
2022-09-13	09:54:18	0.462201	2.05596	3326.85	FALSE	137
2022-09-13	09:54:19	0.448868	1.99665	3283.75	FALSE	137
2022-09-13	09:54:19	0.517366	2.30135	3329.15	FALSE	137
2022-09-13	09:54:19	0.4707	2.09377	3285.85	FALSE	137
2022-09-13	09:54:20	0.480267	2.13632	3331.29	FALSE	137
2022-09-13	09:54:20	0.508766	2.26309	3288.11	FALSE	137
2022-09-13	09:54:20	0.461641	2.05347	3333.34	FALSE	137
2022-09-13	09:54:20	0.49187	2.18794	3290.3	FALSE	137
2022-09-13	09:54:21	0.474822	2.1121	3335.45	FALSE	137
2022-09-13	09:54:21	0.478435	2.12817	3292.43	FALSE	137
2022-09-13	09:54:21	0.497316	2.21216	3337.66	FALSE	137
2022-09-13	09:54:21	0.459809	2.04532	3294.47	FALSE	137
2022-09-13	09:54:22	0.476858	2.12116	3339.78	FALSE	137
2022-09-13	09:54:22	0.493448	2.19496	3296.67	FALSE	137
2022-09-13	09:54:22	0.490191	2.18047	3341.96	FALSE	137
2022-09-13	09:54:22	0.490547	2.18205	3298.85	FALSE	137
2022-09-13	09:54:23	0.48902	2.17526	3344.14	FALSE	137
2022-09-13	09:54:23	0.463779	2.06298	3300.91	FALSE	137
2022-09-13	09:54:23	0.464542	2.06638	3346.21	FALSE	137
2022-09-13	09:54:23	0.441285	1.96292	3302.87	FALSE	137
2022-09-13	09:54:24	0.418791	1.86287	3348.07	FALSE	137
2022-09-13	09:54:24	0.434873	1.9344	3304.81	FALSE	137
2022-09-13	09:54:24	0.415076	1.84634	3349.92	FALSE	137
2022-09-13	09:54:25	0.414975	1.84589	3306.66	FALSE	137
2022-09-13	09:54:25	0.393295	1.74945	3351.66	FALSE	137
2022-09-13	09:54:25	0.437417	1.94572	3308.6	FALSE	137
2022-09-13	09:54:25	0.332074	1.47713	3353.14	FALSE	137
2022-09-13	09:54:26	0.327341	1.45608	3310.06	FALSE	137
2022-09-13	09:54:26	0.348715	1.55115	3354.69	FALSE	137
2022-09-13	09:54:26	0.398639	1.77323	3311.83	FALSE	137
2022-09-13	09:54:26	0.481183	2.1404	3356.83	FALSE	137
2022-09-13	09:54:27	0.476247	2.11844	3313.95	FALSE	137
2022-09-13	09:54:27	0.459402	2.04351	3358.88	FALSE	137
2022-09-13	09:54:27	0.388512	1.72818	3315.68	FALSE	137
2022-09-13	09:54:27	0.493957	2.19722	3361.07	FALSE	137
2022-09-13	09:54:28	0.400624	1.78206	3317.46	FALSE	137
2022-09-13	09:54:28	0.485204	2.15828	3363.23	FALSE	137
2022-09-13	09:54:28	0.578689	2.57412	3320.03	FALSE	137
2022-09-13	09:54:29	0.877672	3.90406	3367.14	FALSE	137
2022-09-13	09:54:29	1.51961	6.75953	3326.79	FALSE	137
2022-09-13	09:54:29	1.18429	5.26796	3372.4	FALSE	137
2022-09-13	09:54:29	0.559707	2.48969	3329.28	FALSE	137
2022-09-13	09:54:30	0.544084	2.42019	3374.82	FALSE	137
2022-09-13	09:54:30	0.537621	2.39145	3331.67	FALSE	137
2022-09-13	09:54:30	0.459606	2.04442	3376.87	FALSE	137
2022-09-13	09:54:30	0.454008	2.01952	3333.69	FALSE	137
2022-09-13	09:54:31	0.510394	2.27033	3379.14	FALSE	137
2022-09-13	09:54:31	0.411107	1.82869	3335.52	FALSE	137
2022-09-13	09:54:31	0.888562	3.9525	3383.09	FALSE	137
2022-09-13	09:54:31	0.310547	1.38138	3336.9	FALSE	137
2022-09-13	09:54:32	0.153702	0.683697	3383.78	FALSE	137
2022-09-13	09:54:32	0.305814	1.36032	3338.26	FALSE	137
2022-09-13	09:54:32	0.607239	2.70112	3386.48	FALSE	137
2022-09-13	09:54:32	0.461183	2.05143	3340.31	FALSE	137
2022-09-13	09:54:33	0.384288	1.70939	3388.19	FALSE	137
2022-09-13	09:54:33	0.426934	1.89909	3342.21	FALSE	137
2022-09-13	09:54:33	0.317774	1.41352	3389.6	FALSE	137
2022-09-13	09:54:34	0.285713	1.27091	3343.48	FALSE	137
2022-09-13	09:54:34	0.175331	0.779907	3390.38	FALSE	137
2022-09-13	09:54:34	0.368359	1.63853	3345.12	FALSE	137
2022-09-13	09:54:34	0.284084	1.26366	3391.64	FALSE	137
2022-09-13	09:54:35	0.262099	1.16587	3346.29	FALSE	137
2022-09-13	09:54:35	0.0713106	0.317204	3391.96	FALSE	137
2022-09-13	09:54:35	0.223677	0.99496	3347.28	FALSE	137
2022-09-13	09:54:35	0.144797	0.644086	3392.6	FALSE	137
2022-09-13	09:54:36	0.252735	1.12422	3348.41	FALSE	137
2022-09-13	09:54:36	0.105102	0.467515	3393.07	FALSE	137
2022-09-13	09:54:36	0.19701	0.87634	3349.28	FALSE	137
2022-09-13	09:54:36	0.194415	0.864797	3393.94	FALSE	137
2022-09-13	09:54:37	0.0797585	0.354782	3349.64	FALSE	137
2022-09-13	09:54:37	-0.103091	-0.458569	3393.94	FALSE	137
2022-09-13	09:54:37	-0.205687	-0.914937	3349.64	FALSE	137
2022-09-13	09:54:38	0.042812	0.190436	3394.13	FALSE	137
2022-09-13	09:54:38	0.0983844	0.437633	3350.08	FALSE	137
2022-09-13	09:54:38	0.202048	0.89875	3395.03	FALSE	137
2022-09-13	09:54:38	0.10958	0.487434	3350.56	FALSE	137
2022-09-13	09:54:39	0.208664	0.928179	3395.95	FALSE	137
2022-09-13	09:54:39	0.0936516	0.416581	3350.98	FALSE	137
2022-09-13	09:54:39	0.131311	0.584098	3396.54	FALSE	137
2022-09-13	09:54:39	0.133041	0.591793	3351.57	FALSE	137
2022-09-13	09:54:40	0.22902	1.01873	3397.56	FALSE	137
2022-09-13	09:54:40	0.197723	0.879511	3352.45	FALSE	137
2022-09-13	09:54:40	0.365051	1.62382	3399.18	FALSE	137
2022-09-13	09:54:40	0.279148	1.24171	3353.69	FALSE	137
2022-09-13	09:54:41	0.268868	1.19598	3400.38	FALSE	137
2022-09-13	09:54:41	0.302608	1.34606	3355.04	FALSE	137
2022-09-13	09:54:41	0.428359	1.90543	3402.28	FALSE	137
2022-09-13	09:54:41	0.396349	1.76304	3356.8	FALSE	137
2022-09-13	09:54:42	0.426629	1.89773	3404.18	FALSE	137
2022-09-13	09:54:42	0.541132	2.40706	3359.21	FALSE	137
2022-09-13	09:54:42	0.534618	2.37809	3406.56	FALSE	137
2022-09-13	09:54:43	0.456603	2.03106	3361.24	FALSE	137
2022-09-13	09:54:43	0.328104	1.45947	3408.02	FALSE	137
2022-09-13	09:54:43	0.408155	1.81556	3363.06	FALSE	137
2022-09-13	09:54:43	0.392481	1.74583	3409.76	FALSE	137
2022-09-13	09:54:44	0.434975	1.93486	3364.99	FALSE	137
2022-09-13	09:54:44	0.235229	1.04635	3410.81	FALSE	137
2022-09-13	09:54:44	0.392786	1.74719	3366.74	FALSE	137
2022-09-13	09:54:44	0.290496	1.29218	3412.1	FALSE	137
2022-09-13	09:54:45	0.447748	1.99167	3368.73	FALSE	137
2022-09-13	09:54:45	0.245967	1.09411	3413.2	FALSE	137
2022-09-13	09:54:45	0.397672	1.76892	3370.5	FALSE	137
2022-09-13	09:54:45	0.408664	1.81782	3415.01	FALSE	137
2022-09-13	09:54:46	0.528613	2.35138	3372.85	FALSE	137
2022-09-13	09:54:46	0.277723	1.23537	3416.25	FALSE	137
2022-09-13	09:54:46	0.422863	1.88098	3374.73	FALSE	137
2022-09-13	09:54:47	0.298384	1.32727	3417.58	FALSE	137
2022-09-13	09:54:47	0.419097	1.86423	3376.6	FALSE	137
2022-09-13	09:54:47	0.261336	1.16247	3418.74	FALSE	137
2022-09-13	09:54:47	0.517723	2.30294	3378.9	FALSE	137
2022-09-13	09:54:48	0.327392	1.45631	3420.2	FALSE	137
2022-09-13	09:54:48	0.605153	2.69184	3381.59	FALSE	137
2022-09-13	09:54:48	0.491819	2.18771	3422.38	FALSE	137
2022-09-13	09:54:48	1.3135	5.84271	3387.43	FALSE	137
2022-09-13	09:54:49	0.698486	3.10701	3425.49	FALSE	137
2022-09-13	09:54:49	1.41772	6.3063	3393.74	FALSE	137
2022-09-13	09:54:49	1.29757	5.77185	3431.26	FALSE	137
2022-09-13	09:54:49	0.972227	4.32466	3398.06	FALSE	137
2022-09-13	09:54:50	1.68943	7.51492	3438.78	FALSE	137
2022-09-13	09:54:50	0.736959	3.27814	3401.34	FALSE	137
2022-09-13	09:54:50	1.96434	8.73778	3447.51	FALSE	137
2022-09-13	09:54:50	0.737773	3.28176	3404.62	FALSE	137
2022-09-13	09:54:51	1.88047	8.36471	3455.88	FALSE	137
2022-09-13	09:54:51	0.628461	2.79552	3407.42	FALSE	137
2022-09-13	09:54:51	1.85436	8.24856	3464.13	FALSE	137
2022-09-13	09:54:52	1.028	4.57275	3411.99	FALSE	137
2022-09-13	09:54:52	1.14836	5.10813	3469.24	FALSE	137
2022-09-13	09:54:52	1.72378	7.66772	3419.66	FALSE	137
2022-09-13	09:54:52	0.976145	4.34209	3473.58	FALSE	137
2022-09-13	09:54:53	2.62963	11.6971	3431.36	FALSE	137
2022-09-13	09:54:53	0.4107	1.82688	3475.4	FALSE	137
2022-09-13	09:54:53	1.91238	8.50665	3439.86	FALSE	137
2022-09-13	09:54:53	0.361387	1.60752	3477.01	FALSE	137
2022-09-13	09:54:54	0.909886	4.04735	3443.91	FALSE	137
2022-09-13	09:54:54	1.18775	5.28335	3482.3	FALSE	137
2022-09-13	09:54:54	0.976908	4.34548	3448.26	FALSE	137
2022-09-13	09:54:54	1.8191	8.09172	3490.39	FALSE	137
2022-09-13	09:54:55	0.534567	2.37786	3450.64	FALSE	137
2022-09-13	09:54:55	2.19599	9.7682	3500.16	FALSE	137
2022-09-13	09:54:55	0.54729	2.43446	3453.07	FALSE	137
2022-09-13	09:54:56	1.09726	4.88083	3505.04	FALSE	137
2022-09-13	09:54:56	0.504491	2.24408	3455.31	FALSE	137
2022-09-13	09:54:56	0.543728	2.41861	3507.46	FALSE	137
2022-09-13	09:54:56	0.637367	2.83514	3458.15	FALSE	137
2022-09-13	09:54:57	0.268257	1.19326	3508.65	FALSE	137
2022-09-13	09:54:57	0.665	2.95805	3461.11	FALSE	137
2022-09-13	09:54:57	0.404898	1.80107	3510.45	FALSE	137
2022-09-13	09:54:57	0.481896	2.14357	3463.25	FALSE	137
2022-09-13	09:54:58	0.438944	1.95251	3512.4	FALSE	137
2022-09-13	09:54:58	0.445305	1.98081	3465.23	FALSE	137
2022-09-13	09:54:58	0.490547	2.18205	3514.58	FALSE	137
2022-09-13	09:54:58	0.193804	0.862079	3466.09	FALSE	137
2022-09-13	09:54:59	-0.151794	-0.67521	3514.58	FALSE	137
2022-09-13	09:54:59	-0.305992	-1.36111	3466.09	FALSE	137
2022-09-13	09:54:59	-0.318969	-1.41884	3514.58	FALSE	137
2022-09-13	09:54:59	-0.279122	-1.24159	3466.09	FALSE	137
2022-09-13	09:55:00	-0.240343	-1.06909	3514.58	FALSE	137
2022-09-13	09:55:00	-0.142481	-0.633784	3466.09	FALSE	137
2022-09-13	09:55:00	-0.10131	-0.450647	3514.58	FALSE	137
2022-09-13	09:55:01	-0.0929132	-0.413296	3466.09	FALSE	137
2022-09-13	09:55:01	-0.0584603	-0.260043	3514.58	FALSE	137
2022-09-13	09:55:01	-0.0701651	-0.312108	3466.09	FALSE	137
2022-09-13	09:55:01	-0.0980532	-0.43616	3514.58	FALSE	137
2022-09-13	09:55:02	-0.0821244	-0.365306	3466.09	FALSE	137
2022-09-13	09:55:02	-0.0778496	-0.346291	3514.58	FALSE	137
2022-09-13	09:55:02	-0.0784094	-0.348781	3466.09	FALSE	137
2022-09-13	09:55:02	-0.0861447	-0.383189	3514.58	FALSE	137
2022-09-13	09:55:03	-0.0563738	-0.250762	3466.09	FALSE	137
2022-09-13	09:55:03	0.0173666	0.0772501	3514.66	FALSE	137
2022-09-13	09:55:03	-0.0557122	-0.247819	3466.09	FALSE	137
2022-09-13	09:55:03	-0.0643636	-0.286302	3514.66	FALSE	137
2022-09-13	09:55:04	-0.0592745	-0.263665	3466.09	FALSE	137
2022-09-13	09:55:04	0.0100384	0.0446528	3514.71	FALSE	137
2022-09-13	09:55:04	0.0526338	0.234126	3466.33	FALSE	137
2022-09-13	09:55:05	0.103677	0.461176	3515.17	FALSE	137
2022-09-13	09:55:05	0.0800129	0.355913	3466.68	FALSE	137
2022-09-13	09:55:05	0.052583	0.2339	3515.4	FALSE	137
2022-09-13	09:55:05	0.106578	0.47408	3467.16	FALSE	137
2022-09-13	09:55:06	0.0835753	0.37176	3515.77	FALSE	137
2022-09-13	09:55:06	0.0300893	0.133843	3467.29	FALSE	137
2022-09-13	09:55:06	0.0526338	0.234126	3516.01	FALSE	137
2022-09-13	09:55:06	0.0545168	0.242502	3467.53	FALSE	137
2022-09-13	09:55:07	0.0508527	0.226203	3516.23	FALSE	137
2022-09-13	09:55:07	0.0425066	0.189078	3467.72	FALSE	137
2022-09-13	09:55:07	0.027443	0.122072	3516.36	FALSE	137
2022-09-13	09:55:08	0.0743641	0.330786	3468.05	FALSE	137
2022-09-13	09:55:08	0.0308527	0.137239	3516.49	FALSE	137
2022-09-13	09:55:08	0.0153819	0.0684218	3468.12	FALSE	137
2022-09-13	09:55:08	0.0796567	0.354329	3516.85	FALSE	137
2022-09-13	09:55:09	0.086018	0.382625	3468.5	FALSE	137
2022-09-13	09:55:09	0.318842	1.41827	3518.26	FALSE	137
2022-09-13	09:55:09	0.278283	1.23786	3469.74	FALSE	137
2022-09-13	09:55:09	0.256959	1.14301	3519.41	FALSE	137
2022-09-13	09:55:10	1.22205	5.43592	3475.18	FALSE	137
2022-09-13	09:55:10	0.157926	0.702486	3520.11	FALSE	137
2022-09-13	09:55:10	0.303524	1.35014	3476.53	FALSE	137
2022-09-13	09:55:10	0.184491	0.820653	3520.93	FALSE	137
2022-09-13	09:55:11	0.402252	1.7893	3478.32	FALSE	137
2022-09-13	09:55:11	0.279911	1.2451	3522.18	FALSE	137
2022-09-13	09:55:11	0.19014	0.845781	3479.16	FALSE	137
2022-09-13	09:55:11	-0.221463	-0.985112	3522.18	FALSE	137
2022-09-13	09:55:12	-0.229402	-1.02043	3479.16	FALSE	137
2022-09-13	09:55:12	-0.10986	-0.488679	3522.18	FALSE	137
2022-09-13	09:55:12	0.168003	0.747311	3479.91	FALSE	137
2022-09-13	09:55:12	0.196196	0.872719	3523.05	FALSE	137
2022-09-13	09:55:13	0.160624	0.714488	3480.63	FALSE	137
2022-09-13	09:55:13	0.352888	1.56972	3524.62	FALSE	137
2022-09-13	09:55:13	0.497672	2.21374	3482.84	FALSE	137
2022-09-13	09:55:14	0.487036	2.16643	3526.79	FALSE	137
2022-09-13	09:55:14	0.436094	1.93983	3484.78	FALSE	137
2022-09-13	09:55:14	0.429784	1.91177	3528.7	FALSE	137
2022-09-13	09:55:14	0.488715	2.1739	3486.95	FALSE	137
2022-09-13	09:55:15	0.526629	2.34255	3531.04	FALSE	137
2022-09-13	09:55:15	0.290853	1.29377	3488.25	FALSE	137
2022-09-13	09:55:15	-0.129656	-0.576736	3531.04	FALSE	137
2022-09-13	09:55:15	-0.194898	-0.866945	3488.25	FALSE	137
2022-09-13	09:55:16	-0.265127	-1.17934	3531.04	FALSE	137
2022-09-13	09:55:16	-0.0354069	-0.157497	3488.25	FALSE	137
2022-09-13	09:55:16	0.169784	0.755233	3531.79	FALSE	137
2022-09-13	09:55:16	0.326629	1.45291	3489.7	FALSE	137
2022-09-13	09:55:17	0.411056	1.82846	3533.62	FALSE	137
2022-09-13	09:55:17	0.435941	1.93915	3491.64	FALSE	137
2022-09-13	09:55:17	0.464491	2.06615	3535.69	FALSE	137
2022-09-13	09:55:18	0.436654	1.94232	3493.58	FALSE	137
2022-09-13	09:55:18	0.430598	1.91539	3537.6	FALSE	137
2022-09-13	09:55:18	0.564135	2.50939	3496.09	FALSE	137
2022-09-13	09:55:18	0.380471	1.69241	3539.3	FALSE	137
2022-09-13	09:55:19	0.362965	1.61454	3497.7	FALSE	137
2022-09-13	09:55:19	0.499707	2.2228	3541.52	FALSE	137
2022-09-13	09:55:19	0.431921	1.92127	3499.63	FALSE	137
2022-09-13	09:55:19	0.592278	2.63457	3544.15	FALSE	137
2022-09-13	09:55:20	0.424288	1.88732	3501.51	FALSE	137
2022-09-13	09:55:20	0.177825	0.791001	3544.95	FALSE	137
2022-09-13	09:55:20	-0.282379	-1.25608	3501.51	FALSE	137
2022-09-13	09:55:20	-0.194949	-0.867172	3544.95	FALSE	137
2022-09-13	09:55:21	-0.232659	-1.03491	3501.51	FALSE	137
2022-09-13	09:55:21	0.0223539	0.0994346	3545.04	FALSE	137
2022-09-13	09:55:21	0.00220126	0.00979164	3501.52	FALSE	137
2022-09-13	09:55:21	0.133804	0.595187	3545.64	FALSE	137
2022-09-13	09:55:22	0.125509	0.558289	3502.08	FALSE	137
2022-09-13	09:55:22	0.145967	0.64929	3546.29	FALSE	137
2022-09-13	09:55:22	0.193957	0.86276	3502.94	FALSE	137
2022-09-13	09:55:23	0.128512	0.571647	3546.86	FALSE	137
2022-09-13	09:55:23	0.214008	0.95195	3503.9	FALSE	137
2022-09-13	09:55:23	0.194618	0.8657	3547.73	FALSE	137
2022-09-13	09:55:23	0.217926	0.969378	3504.87	FALSE	137
2022-09-13	09:55:24	0.202965	0.902829	3548.63	FALSE	137
2022-09-13	09:55:24	0.148308	0.659704	3505.53	FALSE	137
2022-09-13	09:55:24	0.18159	0.807749	3549.44	FALSE	137
2022-09-13	09:55:24	0.197519	0.878604	3506.4	FALSE	137
2022-09-13	09:55:25	0.206221	0.917312	3550.35	FALSE	137
2022-09-13	09:55:25	0.305356	1.35828	3507.76	FALSE	137
2022-09-13	09:55:25	0.239504	1.06536	3551.42	FALSE	137
2022-09-13	09:55:25	0.189224	0.841706	3508.6	FALSE	137
2022-09-13	09:55:26	0.324288	1.4425	3552.86	FALSE	137
2022-09-13	09:55:26	0.250496	1.11426	3509.72	FALSE	137
2022-09-13	09:55:26	0.274771	1.22224	3554.08	FALSE	137
2022-09-13	09:55:27	0.246985	1.09864	3510.82	FALSE	137
2022-09-13	09:55:27	0.249224	1.1086	3555.19	FALSE	137
2022-09-13	09:55:27	0.288613	1.28381	3512.1	FALSE	137
2022-09-13	09:55:27	0.316349	1.40718	3556.6	FALSE	137
2022-09-13	09:55:28	0.309733	1.37775	3513.48	FALSE	137
2022-09-13	09:55:28	0.348715	1.55115	3558.15	FALSE	137
2022-09-13	09:55:28	0.290496	1.29218	3514.77	FALSE	137
2022-09-13	09:55:28	0.322557	1.4348	3559.59	FALSE	137
2022-09-13	09:55:29	0.351107	1.56179	3516.33	FALSE	137
2022-09-13	09:55:29	0.320624	1.4262	3561.01	FALSE	137
2022-09-13	09:55:29	0.305865	1.36055	3517.69	FALSE	137
2022-09-13	09:55:29	0.33243	1.47872	3562.49	FALSE	137
2022-09-13	09:55:30	0.474924	2.11256	3519.81	FALSE	137
2022-09-13	09:55:30	0.380267	1.6915	3564.18	FALSE	137
2022-09-13	09:55:30	0.539351	2.39914	3522.2	FALSE	137
2022-09-13	09:55:30	0.668104	2.97186	3567.15	FALSE	137
2022-09-13	09:55:31	0.753651	3.35239	3525.56	FALSE	137
2022-09-13	09:55:31	0.447596	1.991	3569.15	FALSE	137
2022-09-13	09:55:31	2.04678	9.10449	3534.66	FALSE	137
2022-09-13	09:55:32	1.88261	8.37423	3577.52	FALSE	137
2022-09-13	09:55:32	0.869682	3.86852	3538.53	FALSE	137
2022-09-13	09:55:32	1.01945	4.53472	3582.05	FALSE	137
2022-09-13	09:55:32	1.22296	5.43997	3543.97	FALSE	137
2022-09-13	09:55:33	0.638588	2.84057	3584.9	FALSE	137
2022-09-13	09:55:33	0.473143	2.10463	3546.07	FALSE	137
2022-09-13	09:55:33	0.741285	3.29738	3588.19	FALSE	137
2022-09-13	09:55:33	0.841438	3.74288	3549.82	FALSE	137
2022-09-13	09:55:34	1.41289	6.28482	3594.48	FALSE	137
2022-09-13	09:55:34	5.80958	25.8422	3575.66	1	138
2022-09-13	09:55:34	3.69828	16.4507	3610.93	1	139
2022-09-13	09:55:34	2.2962	10.214	3585.87	FALSE	139
2022-09-13	09:55:35	2.21126	9.83613	3620.76	FALSE	139
2022-09-13	09:55:35	2.24083	9.96766	3595.84	FALSE	139
2022-09-13	09:55:35	2.10994	9.38544	3630.15	FALSE	139
2022-09-13	09:55:36	2.0166	8.97024	3604.81	FALSE	139
2022-09-13	09:55:36	1.97869	8.80161	3638.95	FALSE	139
2022-09-13	09:55:36	2.12383	9.44722	3614.26	FALSE	139
2022-09-13	09:55:36	1.90968	8.49464	3647.45	FALSE	139
2022-09-13	09:55:37	2.2648	10.0743	3624.33	FALSE	139
2022-09-13	09:55:37	1.87711	8.34976	3655.8	FALSE	139
2022-09-13	09:55:37	1.81497	8.07335	3632.41	FALSE	139
2022-09-13	09:55:37	1.40678	6.25764	3662.05	FALSE	139
2022-09-13	09:55:38	0.720318	3.20412	3635.61	FALSE	139
2022-09-13	09:55:38	0.648613	2.88516	3664.94	FALSE	139
2022-09-13	09:55:38	0.893092	3.97265	3639.58	FALSE	139
2022-09-13	09:55:38	1.21279	5.39473	3670.33	FALSE	139
2022-09-13	09:55:39	1.3537	6.02153	3645.6	FALSE	139
2022-09-13	09:55:39	1.53426	6.8247	3677.16	FALSE	139
2022-09-13	09:55:39	1.19818	5.32974	3650.93	FALSE	139
2022-09-13	09:55:39	1.26683	5.63511	3682.79	FALSE	139
2022-09-13	09:55:40	1.31676	5.85721	3656.79	FALSE	139
2022-09-13	09:55:40	1.32083	5.87532	3688.67	FALSE	139
2022-09-13	09:55:40	1.3137	5.8436	3662.64	FALSE	139

## Sheet: Bubba_harness_202291395026 (E)
Date	Time	Lbs	Total force x time			**GoPro Fitting: 940
2022-09-13	09:50:40	2.1396	2.1396	FALSE	0			Total force x time	1652.65
2022-09-13	09:50:40	1.20113	3.34073	FALSE	0			Total steps	139
2022-09-13	09:50:40	0.199758	3.54049	FALSE	0
2022-09-13	09:50:40	0.299962	3.84045	FALSE	0
2022-09-13	09:50:41	0.439046	4.2795	FALSE	0
2022-09-13	09:50:41	0.526578	4.80607	FALSE	0
2022-09-13	09:50:41	0.407239	5.21331	FALSE	0
2022-09-13	09:50:42	0.277926	5.49124	FALSE	0
2022-09-13	09:50:42	0.222201	5.71344	FALSE	0
2022-09-13	09:50:42	0.602761	6.3162	FALSE	0
2022-09-13	09:50:42	2.0249	8.3411	FALSE	0
2022-09-13	09:50:43	5.54566	13.8868	1	1
2022-09-13	09:50:43	13.8344	27.7212	1	2
2022-09-13	09:50:43	11.0911	38.8123	1	3
2022-09-13	09:50:43	10.5411	49.3534	1	4
2022-09-13	09:50:44	6.97609	56.3295	1	5
2022-09-13	09:50:44	5.51482	61.8443	1	6
2022-09-13	09:50:44	5.55431	67.3986	1	7
2022-09-13	09:50:44	7.35441	74.753	1	8
2022-09-13	09:50:45	1.38882	76.1418	FALSE	8
2022-09-13	09:50:45	0.283779	76.4256	FALSE	8
2022-09-13	09:50:45	0.63701	77.0626	FALSE	8
2022-09-13	09:50:46	1.74739	78.81	FALSE	8
2022-09-13	09:50:46	8.36026	87.1702	1	9
2022-09-13	09:50:46	14.3694	101.54	1	10
2022-09-13	09:50:46	8.67792	110.218	1	11
2022-09-13	09:50:47	7.9338	118.151	1	12
2022-09-13	09:50:47	13.6658	131.817	1	13
2022-09-13	09:50:47	6.57711	138.394	1	14
2022-09-13	09:50:47	13.3534	151.748	1	15
2022-09-13	09:50:48	12.9419	164.69	1	16
2022-09-13	09:50:48	7.79049	172.48	1	17
2022-09-13	09:50:48	6.16662	178.647	1	18
2022-09-13	09:50:49	11.8379	190.485	1	19
2022-09-13	09:50:49	15.2411	205.726	1	20
2022-09-13	09:50:49	14.0162	219.742	1	21
2022-09-13	09:50:49	6.29207	226.034	1	22
2022-09-13	09:50:49	3.03212	229.066	1	23
2022-09-13	09:50:50	3.07604	232.142	1	24
2022-09-13	09:50:50	11.4171	243.559	1	25
2022-09-13	09:50:50	22.5646	266.124	1	26
2022-09-13	09:50:51	10.7785	276.902	1	27
2022-09-13	09:50:51	4.81574	281.718	1	28
2022-09-13	09:50:51	3.48851	285.207	1	29
2022-09-13	09:50:51	2.12541	287.332	FALSE	29
2022-09-13	09:50:52	2.61472	289.947	FALSE	29
2022-09-13	09:50:52	2.14352	292.09	FALSE	29
2022-09-13	09:50:52	2.38983	294.48	FALSE	29
2022-09-13	09:50:52	2.66983	297.15	FALSE	29
2022-09-13	09:50:53	2.72805	299.878	FALSE	29
2022-09-13	09:50:53	3.53558	303.414	1	30
2022-09-13	09:50:53	6.445	309.859	1	31
2022-09-13	09:50:53	5.45772	315.316	1	32
2022-09-13	09:50:54	8.23655	323.553	1	33
2022-09-13	09:50:54	10.8262	334.379	1	34
2022-09-13	09:50:54	15.0926	349.472	1	35
2022-09-13	09:50:55	14.9144	364.386	1	36
2022-09-13	09:50:55	9.90978	374.296	1	37
2022-09-13	09:50:55	9.91314	384.209	1	38
2022-09-13	09:50:55	15.3407	399.55	1	39
2022-09-13	09:50:56	4.10744	403.657	1	40
2022-09-13	09:50:56	0.947494	404.605	FALSE	40
2022-09-13	09:50:56	0.0694786	404.674	FALSE	40
2022-09-13	09:50:56	2.47426	407.148	FALSE	40
2022-09-13	09:50:57	7.94815	415.096	1	41
2022-09-13	09:50:57	15.9776	431.074	1	42
2022-09-13	09:50:57	12.9642	444.038	1	43
2022-09-13	09:50:57	13.1943	457.233	1	44
2022-09-13	09:50:58	13.3726	470.605	1	45
2022-09-13	09:50:58	8.15685	478.762	1	46
2022-09-13	09:50:58	4.6139	483.376	1	47
2022-09-13	09:50:58	4.58963	487.966	1	48
2022-09-13	09:50:59	4.24902	492.215	1	49
2022-09-13	09:50:59	3.55966	495.774	1	50
2022-09-13	09:50:59	4.46927	500.243	1	51
2022-09-13	09:51:00	6.21533	506.459	1	52
2022-09-13	09:51:00	7.31248	513.771	1	53
2022-09-13	09:51:00	7.69573	521.467	1	54
2022-09-13	09:51:00	6.77782	528.245	1	55
2022-09-13	09:51:01	5.6478	533.893	1	56
2022-09-13	09:51:01	4.96032	538.853	1	57
2022-09-13	09:51:01	4.42922	543.282	1	58
2022-09-13	09:51:01	4.37523	547.657	1	59
2022-09-13	09:51:02	4.15172	551.809	1	60
2022-09-13	09:51:02	3.91416	555.723	1	61
2022-09-13	09:51:02	3.94851	559.672	1	62
2022-09-13	09:51:02	3.78892	563.461	1	63
2022-09-13	09:51:03	3.68744	567.148	1	64
2022-09-13	09:51:03	3.39935	570.547	1	65
2022-09-13	09:51:03	3.46088	574.008	1	66
2022-09-13	09:51:04	3.22571	577.234	1	67
2022-09-13	09:51:04	3.15986	580.394	1	68
2022-09-13	09:51:04	3.29523	583.689	1	69
2022-09-13	09:51:04	3.12464	586.814	1	70
2022-09-13	09:51:05	3.03619	589.85	1	71
2022-09-13	09:51:05	2.97716	592.827	FALSE	71
2022-09-13	09:51:05	3.04169	595.869	1	72
2022-09-13	09:51:05	2.89945	598.768	FALSE	72
2022-09-13	09:51:06	3.02189	601.79	1	73
2022-09-13	09:51:06	2.9821	604.772	FALSE	73
2022-09-13	09:51:06	3.11635	607.889	1	74
2022-09-13	09:51:06	3.02627	610.915	1	75
2022-09-13	09:51:07	2.92871	613.844	FALSE	75
2022-09-13	09:51:07	2.99228	616.836	FALSE	75
2022-09-13	09:51:07	2.90556	619.741	FALSE	75
2022-09-13	09:51:07	2.9391	622.681	FALSE	75
2022-09-13	09:51:08	2.95243	625.633	FALSE	75
2022-09-13	09:51:08	2.93619	628.569	FALSE	75
2022-09-13	09:51:08	2.86088	631.43	FALSE	75
2022-09-13	09:51:09	2.92892	634.359	FALSE	75
2022-09-13	09:51:09	2.80159	637.161	FALSE	75
2022-09-13	09:51:09	2.61202	639.773	FALSE	75
2022-09-13	09:51:09	2.72597	642.499	FALSE	75
2022-09-13	09:51:10	2.73431	645.233	FALSE	75
2022-09-13	09:51:10	2.74978	647.983	FALSE	75
2022-09-13	09:51:10	2.67131	650.654	FALSE	75
2022-09-13	09:51:10	2.68001	653.334	FALSE	75
2022-09-13	09:51:11	2.65161	655.986	FALSE	75
2022-09-13	09:51:11	2.52057	658.506	FALSE	75
2022-09-13	09:51:11	2.55915	661.065	FALSE	75
2022-09-13	09:51:11	2.40673	663.472	FALSE	75
2022-09-13	09:51:12	2.50022	665.972	FALSE	75
2022-09-13	09:51:12	2.55681	668.529	FALSE	75
2022-09-13	09:51:12	2.43889	670.968	FALSE	75
2022-09-13	09:51:13	2.53782	673.506	FALSE	75
2022-09-13	09:51:13	2.50927	676.015	FALSE	75
2022-09-13	09:51:13	2.65589	678.671	FALSE	75
2022-09-13	09:51:13	2.65879	681.33	FALSE	75
2022-09-13	09:51:14	2.66083	683.991	FALSE	75
2022-09-13	09:51:14	2.78174	686.772	FALSE	75
2022-09-13	09:51:14	2.58251	689.355	FALSE	75
2022-09-13	09:51:14	2.58495	691.94	FALSE	75
2022-09-13	09:51:15	2.50994	694.45	FALSE	75
2022-09-13	09:51:15	2.50683	696.957	FALSE	75
2022-09-13	09:51:15	2.25039	699.207	FALSE	75
2022-09-13	09:51:15	2.53589	701.743	FALSE	75
2022-09-13	09:51:16	2.44408	704.187	FALSE	75
2022-09-13	09:51:16	2.44301	706.63	FALSE	75
2022-09-13	09:51:16	2.39487	709.025	FALSE	75
2022-09-13	09:51:16	2.37645	711.401	FALSE	75
2022-09-13	09:51:17	2.29345	713.695	FALSE	75
2022-09-13	09:51:17	2.25487	715.95	FALSE	75
2022-09-13	09:51:17	2.27691	718.226	FALSE	75
2022-09-13	09:51:18	2.31691	720.543	FALSE	75
2022-09-13	09:51:18	2.18108	722.724	FALSE	75
2022-09-13	09:51:18	2.27121	724.996	FALSE	75
2022-09-13	09:51:18	2.25431	727.25	FALSE	75
2022-09-13	09:51:19	1.97324	729.223	FALSE	75
2022-09-13	09:51:19	1.74169	730.965	FALSE	75
2022-09-13	09:51:19	1.03223	731.997	FALSE	75
2022-09-13	09:51:19	1.3966	733.394	FALSE	75
2022-09-13	09:51:20	1.57436	734.968	FALSE	75
2022-09-13	09:51:20	0.612786	735.581	FALSE	75
2022-09-13	09:51:20	1.32551	736.906	FALSE	75
2022-09-13	09:51:20	1.2594	738.166	FALSE	75
2022-09-13	09:51:21	1.88999	740.056	FALSE	75
2022-09-13	09:51:21	3.68927	743.745	1	76
2022-09-13	09:51:21	6.84937	750.594	1	77
2022-09-13	09:51:22	5.42561	756.02	1	78
2022-09-13	09:51:22	3.96103	759.981	1	79
2022-09-13	09:51:22	2.36327	762.344	FALSE	79
2022-09-13	09:51:22	1.31146	763.656	FALSE	79
2022-09-13	09:51:23	0.654974	764.311	FALSE	79
2022-09-13	09:51:23	0.75187	765.063	FALSE	79
2022-09-13	09:51:23	0.582201	765.645	FALSE	79
2022-09-13	09:51:23	0.395229	766.04	FALSE	79
2022-09-13	09:51:24	0.390191	766.43	FALSE	79
2022-09-13	09:51:24	0.305356	766.736	FALSE	79
2022-09-13	09:51:24	0.385356	767.121	FALSE	79
2022-09-13	09:51:24	0.391209	767.512	FALSE	79
2022-09-13	09:51:25	0.355484	767.868	FALSE	79
2022-09-13	09:51:25	0.408257	768.276	FALSE	79
2022-09-13	09:51:25	0.625102	768.901	FALSE	79
2022-09-13	09:51:26	0.579402	769.48	FALSE	79
2022-09-13	09:51:26	0.496909	769.977	FALSE	79
2022-09-13	09:51:26	0.374924	770.352	FALSE	79
2022-09-13	09:51:26	0.379148	770.731	FALSE	79
2022-09-13	09:51:27	0.436094	771.167	FALSE	79
2022-09-13	09:51:27	0.535484	771.703	FALSE	79
2022-09-13	09:51:27	0.44841	772.151	FALSE	79
2022-09-13	09:51:27	0.320522	772.472	FALSE	79
2022-09-13	09:51:28	0.500929	772.973	FALSE	79
2022-09-13	09:51:28	0.465509	773.438	FALSE	79
2022-09-13	09:51:28	0.484084	773.922	FALSE	79
2022-09-13	09:51:28	0.45584	774.378	FALSE	79
2022-09-13	09:51:29	0.43411	774.812	FALSE	79
2022-09-13	09:51:29	0.450496	775.263	FALSE	79
2022-09-13	09:51:29	0.488206	775.751	FALSE	79
2022-09-13	09:51:29	0.51187	776.263	FALSE	79
2022-09-13	09:51:30	0.597774	776.861	FALSE	79
2022-09-13	09:51:30	0.413295	777.274	FALSE	79
2022-09-13	09:51:30	0.390293	777.664	FALSE	79
2022-09-13	09:51:31	0.315127	777.979	FALSE	79
2022-09-13	09:51:31	0.491463	778.471	FALSE	79
2022-09-13	09:51:31	0.437214	778.908	FALSE	79
2022-09-13	09:51:31	0.578893	779.487	FALSE	79
2022-09-13	09:51:32	0.483881	779.971	FALSE	79
2022-09-13	09:51:32	0.782557	780.753	FALSE	79
2022-09-13	09:51:32	1.26169	782.015	FALSE	79
2022-09-13	09:51:32	0.591666	782.607	FALSE	79
2022-09-13	09:51:33	0.45187	783.059	FALSE	79
2022-09-13	09:51:33	0.436501	783.495	FALSE	79
2022-09-13	09:51:33	0.812685	784.308	FALSE	79
2022-09-13	09:51:33	0.255382	784.563	FALSE	79
2022-09-13	09:51:34	0.750649	785.314	FALSE	79
2022-09-13	09:51:34	0.280522	785.594	FALSE	79
2022-09-13	09:51:34	0.283321	785.878	FALSE	79
2022-09-13	09:51:35	-0.0689946	785.878	FALSE	79
2022-09-13	09:51:35	0.165509	786.043	FALSE	79
2022-09-13	09:51:35	0.0119723	786.055	FALSE	79
2022-09-13	09:51:35	-0.202023	786.055	FALSE	79
2022-09-13	09:51:36	-0.248435	786.055	FALSE	79
2022-09-13	09:51:36	0.0676465	786.123	FALSE	79
2022-09-13	09:51:36	0.211056	786.334	FALSE	79
2022-09-13	09:51:36	-0.101107	786.334	FALSE	79
2022-09-13	09:51:37	0.212074	786.546	FALSE	79
2022-09-13	09:51:37	0.1793	786.725	FALSE	79
2022-09-13	09:51:37	0.109886	786.835	FALSE	79
2022-09-13	09:51:37	0.239911	787.075	FALSE	79
2022-09-13	09:51:38	0.327392	787.402	FALSE	79
2022-09-13	09:51:38	0.922913	788.325	FALSE	79
2022-09-13	09:51:38	1.33701	789.662	FALSE	79
2022-09-13	09:51:38	0.680623	790.343	FALSE	79
2022-09-13	09:51:39	1.44302	791.786	FALSE	79
2022-09-13	09:51:39	1.95676	793.743	FALSE	79
2022-09-13	09:51:39	0.831107	794.574	FALSE	79
2022-09-13	09:51:40	4.45391	799.028	1	80
2022-09-13	09:51:40	1.75849	800.786	FALSE	80
2022-09-13	09:51:40	1.72795	802.514	FALSE	80
2022-09-13	09:51:40	0.887341	803.402	FALSE	80
2022-09-13	09:51:41	0.555382	803.957	FALSE	80
2022-09-13	09:51:41	1.13268	805.09	FALSE	80
2022-09-13	09:51:41	0.506527	805.596	FALSE	80
2022-09-13	09:51:41	0.293804	805.89	FALSE	80
2022-09-13	09:51:42	0.665458	806.555	FALSE	80
2022-09-13	09:51:42	0.208766	806.764	FALSE	80
2022-09-13	09:51:42	0.426018	807.19	FALSE	80
2022-09-13	09:51:42	0.520165	807.71	FALSE	80
2022-09-13	09:51:43	0.295127	808.006	FALSE	80
2022-09-13	09:51:43	0.645509	808.651	FALSE	80
2022-09-13	09:51:43	0.0679518	808.719	FALSE	80
2022-09-13	09:51:44	0.00505114	808.724	FALSE	80
2022-09-13	09:51:44	-0.611997	808.724	FALSE	80
2022-09-13	09:51:44	-1.14187	808.724	FALSE	80
2022-09-13	09:51:44	-0.772913	808.724	FALSE	80
2022-09-13	09:51:45	-0.83902	808.724	FALSE	80
2022-09-13	09:51:45	-0.799834	808.724	FALSE	80
2022-09-13	09:51:45	-0.167824	808.724	FALSE	80
2022-09-13	09:51:45	0.140064	808.864	FALSE	80
2022-09-13	09:51:46	1.70322	810.567	FALSE	80
2022-09-13	09:51:46	3.53421	814.102	1	81
2022-09-13	09:51:46	1.56363	815.665	FALSE	81
2022-09-13	09:51:46	3.19563	818.861	1	82
2022-09-13	09:51:47	1.48215	820.343	FALSE	82
2022-09-13	09:51:47	2.79202	823.135	FALSE	82
2022-09-13	09:51:47	0.347341	823.482	FALSE	82
2022-09-13	09:51:47	0.223982	823.706	FALSE	82
2022-09-13	09:51:48	0.86444	824.571	FALSE	82
2022-09-13	09:51:48	0.637367	825.208	FALSE	82
2022-09-13	09:51:48	1.23329	826.441	FALSE	82
2022-09-13	09:51:49	3.01589	829.457	1	83
2022-09-13	09:51:49	0.509936	829.967	FALSE	83
2022-09-13	09:51:49	1.36826	831.335	FALSE	83
2022-09-13	09:51:49	0.621234	831.957	FALSE	83
2022-09-13	09:51:50	2.81986	834.777	FALSE	83
2022-09-13	09:51:50	0.834873	835.611	FALSE	83
2022-09-13	09:51:50	4.08988	839.701	1	84
2022-09-13	09:51:50	4.65141	844.353	1	85
2022-09-13	09:51:51	3.14485	847.498	1	86
2022-09-13	09:51:51	7.1051	854.603	1	87
2022-09-13	09:51:51	1.16307	855.766	FALSE	87
2022-09-13	09:51:51	9.12729	864.893	1	88
2022-09-13	09:51:52	4.4534	869.346	1	89
2022-09-13	09:51:52	5.87334	875.22	1	90
2022-09-13	09:51:52	14.0351	889.255	1	91
2022-09-13	09:51:53	5.46922	894.724	1	92
2022-09-13	09:51:53	13.3996	908.124	1	93
2022-09-13	09:51:53	6.84729	914.971	1	94
2022-09-13	09:51:53	4.62525	919.596	1	95
2022-09-13	09:51:54	5.23726	924.833	1	96
2022-09-13	09:51:54	1.16663	926	FALSE	96
2022-09-13	09:51:54	8.98627	934.986	1	97
2022-09-13	09:51:54	1.27966	936.266	FALSE	97
2022-09-13	09:51:55	6.60184	942.868	1	98
2022-09-13	09:51:55	1.73747	944.605	FALSE	98
2022-09-13	09:51:55	3.03314	947.638	1	99
2022-09-13	09:51:55	1.76469	949.403	FALSE	99
2022-09-13	09:51:56	1.59487	950.998	FALSE	99
2022-09-13	09:51:56	1.9995	952.998	FALSE	99
2022-09-13	09:51:56	1.08892	954.086	FALSE	99
2022-09-13	09:51:56	5.4625	959.549	1	100
2022-09-13	09:51:57	2.23319	961.782	FALSE	100
2022-09-13	09:51:57	6.85609	968.638	1	101
2022-09-13	09:51:57	5.98581	974.624	1	102
2022-09-13	09:51:58	2.27085	976.895	FALSE	102
2022-09-13	09:51:58	5.22525	982.12	1	103
2022-09-13	09:51:58	0.9593	983.079	FALSE	103
2022-09-13	09:51:58	3.52016	986.6	1	104
2022-09-13	09:51:59	1.91248	988.512	FALSE	104
2022-09-13	09:51:59	6.71579	995.228	1	105
2022-09-13	09:51:59	4.69156	999.919	1	106
2022-09-13	09:51:59	6.37594	1006.3	1	107
2022-09-13	09:52:00	5.67334	1011.97	1	108
2022-09-13	09:52:00	2.17859	1014.15	FALSE	108
2022-09-13	09:52:00	1.83559	1015.98	FALSE	108
2022-09-13	09:52:00	2.32062	1018.3	FALSE	108
2022-09-13	09:52:01	0.429682	1018.73	FALSE	108
2022-09-13	09:52:01	0.806018	1019.54	FALSE	108
2022-09-13	09:52:01	0.031616	1019.57	FALSE	108
2022-09-13	09:52:02	0.474568	1020.05	FALSE	108
2022-09-13	09:52:02	0.785916	1020.83	FALSE	108
2022-09-13	09:52:02	1.02246	1021.85	FALSE	108
2022-09-13	09:52:02	4.448	1026.3	1	109
2022-09-13	09:52:03	1.26184	1027.56	FALSE	109
2022-09-13	09:52:03	3.60505	1031.17	1	110
2022-09-13	09:52:03	1.60357	1032.77	FALSE	110
2022-09-13	09:52:03	6.07782	1038.85	1	111
2022-09-13	09:52:04	2.12469	1040.97	FALSE	111
2022-09-13	09:52:04	3.03604	1044.01	1	112
2022-09-13	09:52:04	1.991	1046	FALSE	112
2022-09-13	09:52:04	1.76607	1047.77	FALSE	112
2022-09-13	09:52:05	2.59894	1050.37	FALSE	112
2022-09-13	09:52:05	1.52073	1051.89	FALSE	112
2022-09-13	09:52:05	3.99955	1055.89	1	113
2022-09-13	09:52:05	1.7508	1057.64	FALSE	113
2022-09-13	09:52:06	5.04601	1062.68	1	114
2022-09-13	09:52:06	0.976196	1063.66	FALSE	114
2022-09-13	09:52:06	4.5679	1068.23	1	115
2022-09-13	09:52:07	0.486578	1068.71	FALSE	115
2022-09-13	09:52:07	2.86037	1071.57	FALSE	115
2022-09-13	09:52:07	1.0791	1072.65	FALSE	115
2022-09-13	09:52:07	1.52337	1074.18	FALSE	115
2022-09-13	09:52:08	2.70561	1076.88	FALSE	115
2022-09-13	09:52:08	2.41619	1079.3	FALSE	115
2022-09-13	09:52:08	5.28235	1084.58	1	116
2022-09-13	09:52:08	4.23467	1088.82	1	117
2022-09-13	09:52:09	6.5339	1095.35	1	118
2022-09-13	09:52:09	1.58754	1096.94	FALSE	118
2022-09-13	09:52:09	2.8053	1099.74	FALSE	118
2022-09-13	09:52:09	0.289478	1100.03	FALSE	118
2022-09-13	09:52:10	1.87798	1101.91	FALSE	118
2022-09-13	09:52:10	0.883626	1102.79	FALSE	118
2022-09-13	09:52:10	0.766934	1103.56	FALSE	118
2022-09-13	09:52:11	2.16332	1105.72	FALSE	118
2022-09-13	09:52:11	1.1765	1106.9	FALSE	118
2022-09-13	09:52:11	1.47813	1108.38	FALSE	118
2022-09-13	09:52:11	0.499555	1108.88	FALSE	118
2022-09-13	09:52:12	1.75864	1110.64	FALSE	118
2022-09-13	09:52:12	0.782404	1111.42	FALSE	118
2022-09-13	09:52:12	2.96312	1114.38	FALSE	118
2022-09-13	09:52:12	0.964847	1115.35	FALSE	118
2022-09-13	09:52:13	1.8335	1117.18	FALSE	118
2022-09-13	09:52:13	1.0077	1118.19	FALSE	118
2022-09-13	09:52:13	1.80907	1120	FALSE	118
2022-09-13	09:52:13	1.3221	1121.32	FALSE	118
2022-09-13	09:52:14	6.26006	1127.58	1	119
2022-09-13	09:52:14	2.97553	1130.56	FALSE	119
2022-09-13	09:52:14	8.3107	1138.87	1	120
2022-09-13	09:52:14	1.53482	1140.4	FALSE	120
2022-09-13	09:52:15	1.08704	1141.49	FALSE	120
2022-09-13	09:52:15	0.560471	1142.05	FALSE	120
2022-09-13	09:52:15	0.676908	1142.73	FALSE	120
2022-09-13	09:52:16	0.711361	1143.44	FALSE	120
2022-09-13	09:52:16	0.368308	1143.81	FALSE	120
2022-09-13	09:52:16	0.0368577	1143.84	FALSE	120
2022-09-13	09:52:16	0.717723	1144.56	FALSE	120
2022-09-13	09:52:17	0.500318	1145.06	FALSE	120
2022-09-13	09:52:17	0.488054	1145.55	FALSE	120
2022-09-13	09:52:17	0.480623	1146.03	FALSE	120
2022-09-13	09:52:17	0.824338	1146.85	FALSE	120
2022-09-13	09:52:18	0.74444	1147.6	FALSE	120
2022-09-13	09:52:18	0.735433	1148.33	FALSE	120
2022-09-13	09:52:18	0.738384	1149.07	FALSE	120
2022-09-13	09:52:18	0.738588	1149.81	FALSE	120
2022-09-13	09:52:19	0.735585	1150.55	FALSE	120
2022-09-13	09:52:19	0.723524	1151.27	FALSE	120
2022-09-13	09:52:19	0.35528	1151.62	FALSE	120
2022-09-13	09:52:20	0.427239	1152.05	FALSE	120
2022-09-13	09:52:20	0.444746	1152.5	FALSE	120
2022-09-13	09:52:20	0.33355	1152.83	FALSE	120
2022-09-13	09:52:20	0.480267	1153.31	FALSE	120
2022-09-13	09:52:21	0.517264	1153.83	FALSE	120
2022-09-13	09:52:21	0.743982	1154.57	FALSE	120
2022-09-13	09:52:21	0.729173	1155.3	FALSE	120
2022-09-13	09:52:21	0.737926	1156.04	FALSE	120
2022-09-13	09:52:22	0.730801	1156.77	FALSE	120
2022-09-13	09:52:22	0.740165	1157.51	FALSE	120
2022-09-13	09:52:22	0.727392	1158.24	FALSE	120
2022-09-13	09:52:22	0.732175	1158.97	FALSE	120
2022-09-13	09:52:23	0.738333	1159.71	FALSE	120
2022-09-13	09:52:23	0.738995	1160.45	FALSE	120
2022-09-13	09:52:23	0.713753	1161.16	FALSE	120
2022-09-13	09:52:23	0.439453	1161.6	FALSE	120
2022-09-13	09:52:24	0.928664	1162.53	FALSE	120
2022-09-13	09:52:24	1.03711	1163.57	FALSE	120
2022-09-13	09:52:24	1.38123	1164.95	FALSE	120
2022-09-13	09:52:25	1.39711	1166.34	FALSE	120
2022-09-13	09:52:25	0.459657	1166.8	FALSE	120
2022-09-13	09:52:25	0.856501	1167.66	FALSE	120
2022-09-13	09:52:25	0.980063	1168.64	FALSE	120
2022-09-13	09:52:26	0.752023	1169.39	FALSE	120
2022-09-13	09:52:26	1.64225	1171.03	FALSE	120
2022-09-13	09:52:26	0.789987	1171.82	FALSE	120
2022-09-13	09:52:26	0.556857	1172.38	FALSE	120
2022-09-13	09:52:27	0.432328	1172.81	FALSE	120
2022-09-13	09:52:27	0.453652	1173.27	FALSE	120
2022-09-13	09:52:27	0.283372	1173.55	FALSE	120
2022-09-13	09:52:27	0.418435	1173.97	FALSE	120
2022-09-13	09:52:28	2.23014	1176.2	FALSE	120
2022-09-13	09:52:28	1.64317	1177.84	FALSE	120
2022-09-13	09:52:28	4.36388	1182.21	1	121
2022-09-13	09:52:29	2.38327	1184.59	FALSE	121
2022-09-13	09:52:29	5.9195	1190.51	1	122
2022-09-13	09:52:29	3.1735	1193.68	1	123
2022-09-13	09:52:29	1.87645	1195.56	FALSE	123
2022-09-13	09:52:30	2.51594	1198.07	FALSE	123
2022-09-13	09:52:30	0.396196	1198.47	FALSE	123
2022-09-13	09:52:30	0.748257	1199.22	FALSE	123
2022-09-13	09:52:30	0.517112	1199.74	FALSE	123
2022-09-13	09:52:31	0.59701	1200.33	FALSE	123
2022-09-13	09:52:31	0.422405	1200.76	FALSE	123
2022-09-13	09:52:31	0.438893	1201.19	FALSE	123
2022-09-13	09:52:31	0.396094	1201.59	FALSE	123
2022-09-13	09:52:32	0.562048	1202.15	FALSE	123
2022-09-13	09:52:32	0.52327	1202.68	FALSE	123
2022-09-13	09:52:32	0.541489	1203.22	FALSE	123
2022-09-13	09:52:32	0.760318	1203.98	FALSE	123
2022-09-13	09:52:33	0.550751	1204.53	FALSE	123
2022-09-13	09:52:33	2.82378	1207.35	FALSE	123
2022-09-13	09:52:33	0.306069	1207.66	FALSE	123
2022-09-13	09:52:34	4.36826	1212.03	1	124
2022-09-13	09:52:34	0.364491	1212.39	FALSE	124
2022-09-13	09:52:34	4.7852	1217.18	1	125
2022-09-13	09:52:34	0.182914	1217.36	FALSE	125
2022-09-13	09:52:35	0.837926	1218.2	FALSE	125
2022-09-13	09:52:35	0.52958	1218.73	FALSE	125
2022-09-13	09:52:35	0.7993	1219.53	FALSE	125
2022-09-13	09:52:35	0.568409	1220.09	FALSE	125
2022-09-13	09:52:36	0.535382	1220.63	FALSE	125
2022-09-13	09:52:36	0.360013	1220.99	FALSE	125
2022-09-13	09:52:36	0.520776	1221.51	FALSE	125
2022-09-13	09:52:36	0.305967	1221.82	FALSE	125
2022-09-13	09:52:37	0.42098	1222.24	FALSE	125
2022-09-13	09:52:37	0.447799	1222.69	FALSE	125
2022-09-13	09:52:37	0.375789	1223.06	FALSE	125
2022-09-13	09:52:38	0.361132	1223.42	FALSE	125
2022-09-13	09:52:38	2.12541	1225.55	FALSE	125
2022-09-13	09:52:38	1.94653	1227.49	FALSE	125
2022-09-13	09:52:38	5.49385	1232.99	1	126
2022-09-13	09:52:39	2.85431	1235.84	FALSE	126
2022-09-13	09:52:39	4.54525	1240.39	1	127
2022-09-13	09:52:39	1.92566	1242.31	FALSE	127
2022-09-13	09:52:39	6.0937	1248.41	1	128
2022-09-13	09:52:40	1.57757	1249.98	FALSE	128
2022-09-13	09:52:40	4.98759	1254.97	1	129
2022-09-13	09:52:40	0.447188	1255.42	FALSE	129
2022-09-13	09:52:40	2.01823	1257.44	FALSE	129
2022-09-13	09:52:41	0.109071	1257.55	FALSE	129
2022-09-13	09:52:41	0.821692	1258.37	FALSE	129
2022-09-13	09:52:41	1.89843	1260.27	FALSE	129
2022-09-13	09:52:42	9.03609	1269.3	1	130
2022-09-13	09:52:42	5.78479	1275.09	1	131
2022-09-13	09:52:42	2.15167	1277.24	FALSE	131
2022-09-13	09:52:42	2.02118	1279.26	FALSE	131
2022-09-13	09:52:43	4.00948	1283.27	1	132
2022-09-13	09:52:43	1.67961	1284.95	FALSE	132
2022-09-13	09:52:43	2.97462	1287.92	FALSE	132
2022-09-13	09:52:43	2.40251	1290.33	FALSE	132
2022-09-13	09:52:44	2.68276	1293.01	FALSE	132
2022-09-13	09:52:44	5.46021	1298.47	1	133
2022-09-13	09:52:44	0.492125	1298.96	FALSE	133
2022-09-13	09:52:44	0.515331	1299.48	FALSE	133
2022-09-13	09:52:45	0.516247	1299.99	FALSE	133
2022-09-13	09:52:45	0.38327	1300.38	FALSE	133
2022-09-13	09:52:45	0.528919	1300.91	FALSE	133
2022-09-13	09:52:45	0.470344	1301.38	FALSE	133
2022-09-13	09:52:46	0.696654	1302.07	FALSE	133
2022-09-13	09:52:46	0.544745	1302.62	FALSE	133
2022-09-13	09:52:46	0.5364	1303.15	FALSE	133
2022-09-13	09:52:47	0.464491	1303.62	FALSE	133
2022-09-13	09:52:47	0.504542	1304.12	FALSE	133
2022-09-13	09:52:47	0.515127	1304.64	FALSE	133
2022-09-13	09:52:47	0.30617	1304.94	FALSE	133
2022-09-13	09:52:48	0.233092	1305.18	FALSE	133
2022-09-13	09:52:48	0.275738	1305.45	FALSE	133
2022-09-13	09:52:48	0.340878	1305.79	FALSE	133
2022-09-13	09:52:48	0.341031	1306.13	FALSE	133
2022-09-13	09:52:49	0.208766	1306.34	FALSE	133
2022-09-13	09:52:49	-0.0388674	1306.34	FALSE	133
2022-09-13	09:52:49	-0.27902	1306.34	FALSE	133
2022-09-13	09:52:49	-0.275814	1306.34	FALSE	133
2022-09-13	09:52:50	-0.313371	1306.34	FALSE	133
2022-09-13	09:52:50	-0.173066	1306.34	FALSE	133
2022-09-13	09:52:50	0.041387	1306.38	FALSE	133
2022-09-13	09:52:51	0.434415	1306.82	FALSE	133
2022-09-13	09:52:51	4.17563	1310.99	1	134
2022-09-13	09:52:51	0.320827	1311.32	FALSE	134
2022-09-13	09:52:51	0.564847	1311.88	FALSE	134
2022-09-13	09:52:52	0.286069	1312.17	FALSE	134
2022-09-13	09:52:52	0.479351	1312.65	FALSE	134
2022-09-13	09:52:52	0.520674	1313.17	FALSE	134
2022-09-13	09:52:52	0.559657	1313.73	FALSE	134
2022-09-13	09:52:53	0.381743	1314.11	FALSE	134
2022-09-13	09:52:53	0.560623	1314.67	FALSE	134
2022-09-13	09:52:53	0.434771	1315.1	FALSE	134
2022-09-13	09:52:53	0.441234	1315.54	FALSE	134
2022-09-13	09:52:54	0.396196	1315.94	FALSE	134
2022-09-13	09:52:54	0.487341	1316.43	FALSE	134
2022-09-13	09:52:54	0.492532	1316.92	FALSE	134
2022-09-13	09:52:54	0.354975	1317.28	FALSE	134
2022-09-13	09:52:55	0.650394	1317.93	FALSE	134
2022-09-13	09:52:55	0.556603	1318.48	FALSE	134
2022-09-13	09:52:55	0.930242	1319.41	FALSE	134
2022-09-13	09:52:56	0.612481	1320.03	FALSE	134
2022-09-13	09:52:56	0.502863	1320.53	FALSE	134
2022-09-13	09:52:56	0.330038	1320.86	FALSE	134
2022-09-13	09:52:56	0.368308	1321.23	FALSE	134
2022-09-13	09:52:57	0.37813	1321.6	FALSE	134
2022-09-13	09:52:57	0.45126	1322.06	FALSE	134
2022-09-13	09:52:57	0.302914	1322.36	FALSE	134
2022-09-13	09:52:57	0.437825	1322.8	FALSE	134
2022-09-13	09:52:58	0.522201	1323.32	FALSE	134
2022-09-13	09:52:58	0.464389	1323.78	FALSE	134
2022-09-13	09:52:58	0.480776	1324.26	FALSE	134
2022-09-13	09:52:58	0.460318	1324.72	FALSE	134
2022-09-13	09:52:59	0.519555	1325.24	FALSE	134
2022-09-13	09:52:59	0.833244	1326.08	FALSE	134
2022-09-13	09:52:59	0.516501	1326.59	FALSE	134
2022-09-13	09:53:00	0.69874	1327.29	FALSE	134
2022-09-13	09:53:00	0.627188	1327.92	FALSE	134
2022-09-13	09:53:00	0.513397	1328.43	FALSE	134
2022-09-13	09:53:00	0.526272	1328.96	FALSE	134
2022-09-13	09:53:01	0.416298	1329.38	FALSE	134
2022-09-13	09:53:01	0.4107	1329.79	FALSE	134
2022-09-13	09:53:01	0.473753	1330.26	FALSE	134
2022-09-13	09:53:01	0.418028	1330.68	FALSE	134
2022-09-13	09:53:02	0.431616	1331.11	FALSE	134
2022-09-13	09:53:02	0.444186	1331.55	FALSE	134
2022-09-13	09:53:02	0.441845	1332	FALSE	134
2022-09-13	09:53:02	0.435484	1332.43	FALSE	134
2022-09-13	09:53:03	0.364186	1332.8	FALSE	134
2022-09-13	09:53:03	0.358333	1333.15	FALSE	134
2022-09-13	09:53:03	0.372074	1333.53	FALSE	134
2022-09-13	09:53:03	0.419555	1333.95	FALSE	134
2022-09-13	09:53:04	0.425509	1334.37	FALSE	134
2022-09-13	09:53:04	0.492125	1334.86	FALSE	134
2022-09-13	09:53:04	0.482456	1335.35	FALSE	134
2022-09-13	09:53:05	0.48612	1335.83	FALSE	134
2022-09-13	09:53:05	0.521234	1336.35	FALSE	134
2022-09-13	09:53:05	0.548715	1336.9	FALSE	134
2022-09-13	09:53:05	0.587901	1337.49	FALSE	134
2022-09-13	09:53:06	0.525203	1338.01	FALSE	134
2022-09-13	09:53:06	0.517875	1338.53	FALSE	134
2022-09-13	09:53:06	0.498588	1339.03	FALSE	134
2022-09-13	09:53:06	0.503219	1339.53	FALSE	134
2022-09-13	09:53:07	0.588664	1340.12	FALSE	134
2022-09-13	09:53:07	0.631259	1340.75	FALSE	134
2022-09-13	09:53:07	0.616552	1341.37	FALSE	134
2022-09-13	09:53:07	0.611514	1341.98	FALSE	134
2022-09-13	09:53:08	0.67187	1342.65	FALSE	134
2022-09-13	09:53:08	0.660216	1343.31	FALSE	134
2022-09-13	09:53:08	0.641081	1343.96	FALSE	134
2022-09-13	09:53:09	0.545916	1344.5	FALSE	134
2022-09-13	09:53:09	0.569733	1345.07	FALSE	134
2022-09-13	09:53:09	0.54729	1345.62	FALSE	134
2022-09-13	09:53:09	0.578893	1346.2	FALSE	134
2022-09-13	09:53:10	0.596603	1346.79	FALSE	134
2022-09-13	09:53:10	0.642557	1347.44	FALSE	134
2022-09-13	09:53:10	0.562201	1348	FALSE	134
2022-09-13	09:53:10	0.438537	1348.44	FALSE	134
2022-09-13	09:53:11	0.595025	1349.03	FALSE	134
2022-09-13	09:53:11	0.677519	1349.71	FALSE	134
2022-09-13	09:53:11	0.0523285	1349.76	FALSE	134
2022-09-13	09:53:11	-0.14014	1349.76	FALSE	134
2022-09-13	09:53:12	-0.219682	1349.76	FALSE	134
2022-09-13	09:53:12	-0.251539	1349.76	FALSE	134
2022-09-13	09:53:12	-0.266755	1349.76	FALSE	134
2022-09-13	09:53:12	-0.046501	1349.76	FALSE	134
2022-09-13	09:53:13	0.0346694	1349.8	FALSE	134
2022-09-13	09:53:13	-0.115305	1349.8	FALSE	134
2022-09-13	09:53:13	0.0727865	1349.87	FALSE	134
2022-09-13	09:53:14	-0.228129	1349.87	FALSE	134
2022-09-13	09:53:14	-0.275865	1349.87	FALSE	134
2022-09-13	09:53:14	-0.0636511	1349.87	FALSE	134
2022-09-13	09:53:14	0.142812	1350.01	FALSE	134
2022-09-13	09:53:15	0.244695	1350.26	FALSE	134
2022-09-13	09:53:15	0.161845	1350.42	FALSE	134
2022-09-13	09:53:15	1.07889	1351.5	FALSE	134
2022-09-13	09:53:15	0.114568	1351.61	FALSE	134
2022-09-13	09:53:16	0.0692751	1351.68	FALSE	134
2022-09-13	09:53:16	0.131107	1351.81	FALSE	134
2022-09-13	09:53:16	0.097672	1351.91	FALSE	134
2022-09-13	09:53:16	-0.000139698	1351.91	FALSE	134
2022-09-13	09:53:17	-0.108028	1351.91	FALSE	134
2022-09-13	09:53:17	-0.268333	1351.91	FALSE	134
2022-09-13	09:53:17	-0.251997	1351.91	FALSE	134
2022-09-13	09:53:18	0.0370104	1351.95	FALSE	134
2022-09-13	09:53:18	0.331361	1352.28	FALSE	134
2022-09-13	09:53:18	0.494059	1352.77	FALSE	134
2022-09-13	09:53:18	0.287188	1353.06	FALSE	134
2022-09-13	09:53:19	0.338384	1353.4	FALSE	134
2022-09-13	09:53:19	0.481234	1353.88	FALSE	134
2022-09-13	09:53:19	0.403066	1354.28	FALSE	134
2022-09-13	09:53:19	0.408919	1354.69	FALSE	134
2022-09-13	09:53:20	0.420216	1355.11	FALSE	134
2022-09-13	09:53:20	0.414466	1355.53	FALSE	134
2022-09-13	09:53:20	0.413601	1355.94	FALSE	134
2022-09-13	09:53:20	0.421692	1356.36	FALSE	134
2022-09-13	09:53:21	0.419758	1356.78	FALSE	134
2022-09-13	09:53:21	0.429275	1357.21	FALSE	134
2022-09-13	09:53:21	0.432888	1357.64	FALSE	134
2022-09-13	09:53:21	0.436298	1358.08	FALSE	134
2022-09-13	09:53:22	0.440471	1358.52	FALSE	134
2022-09-13	09:53:22	0.437875	1358.96	FALSE	134
2022-09-13	09:53:22	0.439708	1359.4	FALSE	134
2022-09-13	09:53:23	0.444695	1359.84	FALSE	134
2022-09-13	09:53:23	0.436756	1360.28	FALSE	134
2022-09-13	09:53:23	0.439453	1360.72	FALSE	134
2022-09-13	09:53:23	0.43528	1361.15	FALSE	134
2022-09-13	09:53:24	0.436552	1361.59	FALSE	134
2022-09-13	09:53:24	0.436145	1362.03	FALSE	134
2022-09-13	09:53:24	0.443015	1362.47	FALSE	134
2022-09-13	09:53:24	0.438181	1362.91	FALSE	134
2022-09-13	09:53:25	0.439911	1363.35	FALSE	134
2022-09-13	09:53:25	0.441641	1363.79	FALSE	134
2022-09-13	09:53:25	0.4364	1364.23	FALSE	134
2022-09-13	09:53:25	0.440166	1364.67	FALSE	134
2022-09-13	09:53:26	0.435992	1365.1	FALSE	134
2022-09-13	09:53:26	0.440929	1365.54	FALSE	134
2022-09-13	09:53:26	0.43986	1365.98	FALSE	134
2022-09-13	09:53:27	0.439708	1366.42	FALSE	134
2022-09-13	09:53:27	0.437417	1366.86	FALSE	134
2022-09-13	09:53:27	0.433092	1367.29	FALSE	134
2022-09-13	09:53:27	0.432786	1367.73	FALSE	134
2022-09-13	09:53:28	0.432227	1368.16	FALSE	134
2022-09-13	09:53:28	0.43355	1368.59	FALSE	134
2022-09-13	09:53:28	0.430649	1369.02	FALSE	134
2022-09-13	09:53:28	0.434517	1369.46	FALSE	134
2022-09-13	09:53:29	0.434618	1369.89	FALSE	134
2022-09-13	09:53:29	0.428206	1370.32	FALSE	134
2022-09-13	09:53:29	0.446069	1370.77	FALSE	134
2022-09-13	09:53:29	0.617265	1371.38	FALSE	134
2022-09-13	09:53:30	0.542812	1371.93	FALSE	134
2022-09-13	09:53:30	0.30327	1372.23	FALSE	134
2022-09-13	09:53:30	-0.0244145	1372.23	FALSE	134
2022-09-13	09:53:31	0.129224	1372.36	FALSE	134
2022-09-13	09:53:31	0.212277	1372.57	FALSE	134
2022-09-13	09:53:31	0.297468	1372.87	FALSE	134
2022-09-13	09:53:31	0.331412	1373.2	FALSE	134
2022-09-13	09:53:32	0.374466	1373.57	FALSE	134
2022-09-13	09:53:32	0.40271	1373.98	FALSE	134
2022-09-13	09:53:32	0.373092	1374.35	FALSE	134
2022-09-13	09:53:32	0.338283	1374.69	FALSE	134
2022-09-13	09:53:33	0.355331	1375.04	FALSE	134
2022-09-13	09:53:33	0.368766	1375.41	FALSE	134
2022-09-13	09:53:33	0.43014	1375.84	FALSE	134
2022-09-13	09:53:33	0.734364	1376.58	FALSE	134
2022-09-13	09:53:34	0.759809	1377.34	FALSE	134
2022-09-13	09:53:34	0.410802	1377.75	FALSE	134
2022-09-13	09:53:34	0.378384	1378.13	FALSE	134
2022-09-13	09:53:34	0.364949	1378.49	FALSE	134
2022-09-13	09:53:35	0.327901	1378.82	FALSE	134
2022-09-13	09:53:35	0.326323	1379.14	FALSE	134
2022-09-13	09:53:35	0.332888	1379.48	FALSE	134
2022-09-13	09:53:36	0.734873	1380.21	FALSE	134
2022-09-13	09:53:36	0.742455	1380.95	FALSE	134
2022-09-13	09:53:36	0.732786	1381.69	FALSE	134
2022-09-13	09:53:36	0.734517	1382.42	FALSE	134
2022-09-13	09:53:37	0.737977	1383.16	FALSE	134
2022-09-13	09:53:37	0.740318	1383.9	FALSE	134
2022-09-13	09:53:37	0.735941	1384.64	FALSE	134
2022-09-13	09:53:37	0.734059	1385.37	FALSE	134
2022-09-13	09:53:38	0.741641	1386.11	FALSE	134
2022-09-13	09:53:38	0.723728	1386.84	FALSE	134
2022-09-13	09:53:38	0.729936	1387.57	FALSE	134
2022-09-13	09:53:38	0.718486	1388.28	FALSE	134
2022-09-13	09:53:39	0.725102	1389.01	FALSE	134
2022-09-13	09:53:39	0.702303	1389.71	FALSE	134
2022-09-13	09:53:39	0.707595	1390.42	FALSE	134
2022-09-13	09:53:40	0.663931	1391.08	FALSE	134
2022-09-13	09:53:40	0.67589	1391.76	FALSE	134
2022-09-13	09:53:40	0.75874	1392.52	FALSE	134
2022-09-13	09:53:40	0.69584	1393.21	FALSE	134
2022-09-13	09:53:41	0.734771	1393.95	FALSE	134
2022-09-13	09:53:41	0.726934	1394.68	FALSE	134
2022-09-13	09:53:41	0.728817	1395.4	FALSE	134
2022-09-13	09:53:41	0.453804	1395.86	FALSE	134
2022-09-13	09:53:42	0.727188	1396.59	FALSE	134
2022-09-13	09:53:42	0.445	1397.03	FALSE	134
2022-09-13	09:53:42	0.741081	1397.77	FALSE	134
2022-09-13	09:53:42	0.635331	1398.41	FALSE	134
2022-09-13	09:53:43	0.671819	1399.08	FALSE	134
2022-09-13	09:53:43	0.542303	1399.62	FALSE	134
2022-09-13	09:53:43	0.581896	1400.2	FALSE	134
2022-09-13	09:53:43	0.696043	1400.9	FALSE	134
2022-09-13	09:53:44	0.66729	1401.57	FALSE	134
2022-09-13	09:53:44	0.638435	1402.2	FALSE	134
2022-09-13	09:53:44	0.648053	1402.85	FALSE	134
2022-09-13	09:53:45	0.543321	1403.4	FALSE	134
2022-09-13	09:53:45	0.418995	1403.81	FALSE	134
2022-09-13	09:53:45	0.265458	1404.08	FALSE	134
2022-09-13	09:53:45	0.243422	1404.32	FALSE	134
2022-09-13	09:53:46	0.278181	1404.6	FALSE	134
2022-09-13	09:53:46	0.287799	1404.89	FALSE	134
2022-09-13	09:53:46	0.288766	1405.18	FALSE	134
2022-09-13	09:53:47	0.289835	1405.47	FALSE	134
2022-09-13	09:53:47	0.325102	1405.79	FALSE	134
2022-09-13	09:53:47	0.389479	1406.18	FALSE	134
2022-09-13	09:53:47	0.355738	1406.54	FALSE	134
2022-09-13	09:53:47	0.392786	1406.93	FALSE	134
2022-09-13	09:53:48	0.115942	1407.05	FALSE	134
2022-09-13	09:53:48	1.09503	1408.14	FALSE	134
2022-09-13	09:53:48	0.376247	1408.52	FALSE	134
2022-09-13	09:53:49	0.398944	1408.92	FALSE	134
2022-09-13	09:53:49	1.15207	1410.07	FALSE	134
2022-09-13	09:53:49	0.796349	1410.87	FALSE	134
2022-09-13	09:53:49	3.45533	1414.32	1	135
2022-09-13	09:53:50	2.72342	1417.04	FALSE	135
2022-09-13	09:53:50	4.28378	1421.33	1	136
2022-09-13	09:53:50	1.24469	1422.57	FALSE	136
2022-09-13	09:53:50	1.0392	1423.61	FALSE	136
2022-09-13	09:53:51	0.880725	1424.49	FALSE	136
2022-09-13	09:53:51	3.28149	1427.77	1	137
2022-09-13	09:53:51	2.46444	1430.24	FALSE	137
2022-09-13	09:53:51	0.475229	1430.71	FALSE	137
2022-09-13	09:53:52	1.66312	1432.38	FALSE	137
2022-09-13	09:53:52	0.67187	1433.05	FALSE	137
2022-09-13	09:53:52	1.02938	1434.08	FALSE	137
2022-09-13	09:53:52	1.21849	1435.3	FALSE	137
2022-09-13	09:53:53	0.372328	1435.67	FALSE	137
2022-09-13	09:53:53	0.520827	1436.19	FALSE	137
2022-09-13	09:53:53	0.155738	1436.35	FALSE	137
2022-09-13	09:53:54	0.380929	1436.73	FALSE	137
2022-09-13	09:53:54	0.34612	1437.07	FALSE	137
2022-09-13	09:53:54	0.649428	1437.72	FALSE	137
2022-09-13	09:53:54	0.244542	1437.97	FALSE	137
2022-09-13	09:53:55	0.454466	1438.42	FALSE	137
2022-09-13	09:53:55	0.438995	1438.86	FALSE	137
2022-09-13	09:53:55	0.660166	1439.52	FALSE	137
2022-09-13	09:53:55	0.331616	1439.85	FALSE	137
2022-09-13	09:53:56	0.541489	1440.39	FALSE	137
2022-09-13	09:53:56	0.347443	1440.74	FALSE	137
2022-09-13	09:53:56	0.532125	1441.27	FALSE	137
2022-09-13	09:53:56	0.360522	1441.63	FALSE	137
2022-09-13	09:53:57	0.52159	1442.16	FALSE	137
2022-09-13	09:53:57	0.489377	1442.64	FALSE	137
2022-09-13	09:53:57	0.498435	1443.14	FALSE	137
2022-09-13	09:53:58	0.447545	1443.59	FALSE	137
2022-09-13	09:53:58	0.624186	1444.21	FALSE	137
2022-09-13	09:53:58	0.426069	1444.64	FALSE	137
2022-09-13	09:53:58	0.417723	1445.06	FALSE	137
2022-09-13	09:53:59	0.420013	1445.48	FALSE	137
2022-09-13	09:53:59	0.432023	1445.91	FALSE	137
2022-09-13	09:53:59	0.411158	1446.32	FALSE	137
2022-09-13	09:53:59	0.421641	1446.74	FALSE	137
2022-09-13	09:54:00	0.414262	1447.16	FALSE	137
2022-09-13	09:54:00	0.41701	1447.57	FALSE	137
2022-09-13	09:54:00	0.416858	1447.99	FALSE	137
2022-09-13	09:54:00	0.412735	1448.4	FALSE	137
2022-09-13	09:54:01	0.421641	1448.83	FALSE	137
2022-09-13	09:54:01	0.419708	1449.25	FALSE	137
2022-09-13	09:54:01	0.421845	1449.67	FALSE	137
2022-09-13	09:54:01	0.421183	1450.09	FALSE	137
2022-09-13	09:54:02	0.422863	1450.51	FALSE	137
2022-09-13	09:54:02	0.4193	1450.93	FALSE	137
2022-09-13	09:54:02	0.419097	1451.35	FALSE	137
2022-09-13	09:54:03	0.419199	1451.77	FALSE	137
2022-09-13	09:54:03	0.417417	1452.19	FALSE	137
2022-09-13	09:54:03	0.415229	1452.6	FALSE	137
2022-09-13	09:54:03	0.413957	1453.02	FALSE	137
2022-09-13	09:54:04	0.412735	1453.43	FALSE	137
2022-09-13	09:54:04	0.410344	1453.84	FALSE	137
2022-09-13	09:54:04	0.411412	1454.25	FALSE	137
2022-09-13	09:54:04	0.417875	1454.67	FALSE	137
2022-09-13	09:54:05	0.42271	1455.09	FALSE	137
2022-09-13	09:54:05	0.420216	1455.51	FALSE	137
2022-09-13	09:54:05	0.417367	1455.93	FALSE	137
2022-09-13	09:54:05	0.421743	1456.35	FALSE	137
2022-09-13	09:54:06	0.66612	1457.02	FALSE	137
2022-09-13	09:54:06	0.446578	1457.46	FALSE	137
2022-09-13	09:54:06	0.384593	1457.85	FALSE	137
2022-09-13	09:54:07	0.457977	1458.31	FALSE	137
2022-09-13	09:54:07	0.834974	1459.14	FALSE	137
2022-09-13	09:54:07	0.836501	1459.98	FALSE	137
2022-09-13	09:54:07	2.49111	1462.47	FALSE	137
2022-09-13	09:54:08	1.87151	1464.34	FALSE	137
2022-09-13	09:54:08	0.978588	1465.32	FALSE	137
2022-09-13	09:54:08	0.701132	1466.02	FALSE	137
2022-09-13	09:54:08	0.475026	1466.49	FALSE	137
2022-09-13	09:54:09	0.436908	1466.93	FALSE	137
2022-09-13	09:54:09	0.445051	1467.38	FALSE	137
2022-09-13	09:54:09	0.436145	1467.81	FALSE	137
2022-09-13	09:54:09	0.423117	1468.24	FALSE	137
2022-09-13	09:54:10	0.436705	1468.67	FALSE	137
2022-09-13	09:54:10	0.465865	1469.14	FALSE	137
2022-09-13	09:54:10	0.475789	1469.61	FALSE	137
2022-09-13	09:54:10	0.44958	1470.06	FALSE	137
2022-09-13	09:54:11	0.469275	1470.53	FALSE	137
2022-09-13	09:54:11	0.452888	1470.99	FALSE	137
2022-09-13	09:54:11	0.460166	1471.45	FALSE	137
2022-09-13	09:54:12	0.462812	1471.91	FALSE	137
2022-09-13	09:54:12	0.448308	1472.36	FALSE	137
2022-09-13	09:54:12	0.447647	1472.8	FALSE	137
2022-09-13	09:54:12	0.449326	1473.25	FALSE	137
2022-09-13	09:54:13	0.438537	1473.69	FALSE	137
2022-09-13	09:54:13	0.43874	1474.13	FALSE	137
2022-09-13	09:54:13	0.44673	1474.58	FALSE	137
2022-09-13	09:54:13	0.50902	1475.09	FALSE	137
2022-09-13	09:54:14	0.612837	1475.7	FALSE	137
2022-09-13	09:54:14	1.18286	1476.88	FALSE	137
2022-09-13	09:54:14	1.10622	1477.99	FALSE	137
2022-09-13	09:54:14	0.613346	1478.6	FALSE	137
2022-09-13	09:54:15	0.52897	1479.13	FALSE	137
2022-09-13	09:54:15	0.443982	1479.58	FALSE	137
2022-09-13	09:54:15	0.505713	1480.08	FALSE	137
2022-09-13	09:54:16	0.494873	1480.58	FALSE	137
2022-09-13	09:54:16	0.446832	1481.02	FALSE	137
2022-09-13	09:54:16	0.462965	1481.49	FALSE	137
2022-09-13	09:54:16	0.489987	1481.98	FALSE	137
2022-09-13	09:54:17	0.444847	1482.42	FALSE	137
2022-09-13	09:54:17	0.473652	1482.89	FALSE	137
2022-09-13	09:54:17	0.461183	1483.36	FALSE	137
2022-09-13	09:54:17	0.481539	1483.84	FALSE	137
2022-09-13	09:54:18	0.484949	1484.32	FALSE	137
2022-09-13	09:54:18	0.439809	1484.76	FALSE	137
2022-09-13	09:54:18	0.456756	1485.22	FALSE	137
2022-09-13	09:54:18	0.462201	1485.68	FALSE	137
2022-09-13	09:54:19	0.448868	1486.13	FALSE	137
2022-09-13	09:54:19	0.517366	1486.65	FALSE	137
2022-09-13	09:54:19	0.4707	1487.12	FALSE	137
2022-09-13	09:54:20	0.480267	1487.6	FALSE	137
2022-09-13	09:54:20	0.508766	1488.11	FALSE	137
2022-09-13	09:54:20	0.461641	1488.57	FALSE	137
2022-09-13	09:54:20	0.49187	1489.06	FALSE	137
2022-09-13	09:54:21	0.474822	1489.53	FALSE	137
2022-09-13	09:54:21	0.478435	1490.01	FALSE	137
2022-09-13	09:54:21	0.497316	1490.51	FALSE	137
2022-09-13	09:54:21	0.459809	1490.97	FALSE	137
2022-09-13	09:54:22	0.476858	1491.45	FALSE	137
2022-09-13	09:54:22	0.493448	1491.94	FALSE	137
2022-09-13	09:54:22	0.490191	1492.43	FALSE	137
2022-09-13	09:54:22	0.490547	1492.92	FALSE	137
2022-09-13	09:54:23	0.48902	1493.41	FALSE	137
2022-09-13	09:54:23	0.463779	1493.87	FALSE	137
2022-09-13	09:54:23	0.464542	1494.34	FALSE	137
2022-09-13	09:54:23	0.441285	1494.78	FALSE	137
2022-09-13	09:54:24	0.418791	1495.2	FALSE	137
2022-09-13	09:54:24	0.434873	1495.63	FALSE	137
2022-09-13	09:54:24	0.415076	1496.05	FALSE	137
2022-09-13	09:54:25	0.414975	1496.46	FALSE	137
2022-09-13	09:54:25	0.393295	1496.86	FALSE	137
2022-09-13	09:54:25	0.437417	1497.29	FALSE	137
2022-09-13	09:54:25	0.332074	1497.63	FALSE	137
2022-09-13	09:54:26	0.327341	1497.95	FALSE	137
2022-09-13	09:54:26	0.348715	1498.3	FALSE	137
2022-09-13	09:54:26	0.398639	1498.7	FALSE	137
2022-09-13	09:54:26	0.481183	1499.18	FALSE	137
2022-09-13	09:54:27	0.476247	1499.66	FALSE	137
2022-09-13	09:54:27	0.459402	1500.12	FALSE	137
2022-09-13	09:54:27	0.388512	1500.51	FALSE	137
2022-09-13	09:54:27	0.493957	1501	FALSE	137
2022-09-13	09:54:28	0.400624	1501.4	FALSE	137
2022-09-13	09:54:28	0.485204	1501.89	FALSE	137
2022-09-13	09:54:28	0.578689	1502.47	FALSE	137
2022-09-13	09:54:29	0.877672	1503.34	FALSE	137
2022-09-13	09:54:29	1.51961	1504.86	FALSE	137
2022-09-13	09:54:29	1.18429	1506.05	FALSE	137
2022-09-13	09:54:29	0.559707	1506.61	FALSE	137
2022-09-13	09:54:30	0.544084	1507.15	FALSE	137
2022-09-13	09:54:30	0.537621	1507.69	FALSE	137
2022-09-13	09:54:30	0.459606	1508.15	FALSE	137
2022-09-13	09:54:30	0.454008	1508.6	FALSE	137
2022-09-13	09:54:31	0.510394	1509.11	FALSE	137
2022-09-13	09:54:31	0.411107	1509.52	FALSE	137
2022-09-13	09:54:31	0.888562	1510.41	FALSE	137
2022-09-13	09:54:31	0.310547	1510.72	FALSE	137
2022-09-13	09:54:32	0.153702	1510.88	FALSE	137
2022-09-13	09:54:32	0.305814	1511.18	FALSE	137
2022-09-13	09:54:32	0.607239	1511.79	FALSE	137
2022-09-13	09:54:32	0.461183	1512.25	FALSE	137
2022-09-13	09:54:33	0.384288	1512.63	FALSE	137
2022-09-13	09:54:33	0.426934	1513.06	FALSE	137
2022-09-13	09:54:33	0.317774	1513.38	FALSE	137
2022-09-13	09:54:34	0.285713	1513.66	FALSE	137
2022-09-13	09:54:34	0.175331	1513.84	FALSE	137
2022-09-13	09:54:34	0.368359	1514.21	FALSE	137
2022-09-13	09:54:34	0.284084	1514.49	FALSE	137
2022-09-13	09:54:35	0.262099	1514.75	FALSE	137
2022-09-13	09:54:35	0.0713106	1514.83	FALSE	137
2022-09-13	09:54:35	0.223677	1515.05	FALSE	137
2022-09-13	09:54:35	0.144797	1515.19	FALSE	137
2022-09-13	09:54:36	0.252735	1515.45	FALSE	137
2022-09-13	09:54:36	0.105102	1515.55	FALSE	137
2022-09-13	09:54:36	0.19701	1515.75	FALSE	137
2022-09-13	09:54:36	0.194415	1515.94	FALSE	137
2022-09-13	09:54:37	0.0797585	1516.02	FALSE	137
2022-09-13	09:54:37	-0.103091	1516.02	FALSE	137
2022-09-13	09:54:37	-0.205687	1516.02	FALSE	137
2022-09-13	09:54:38	0.042812	1516.07	FALSE	137
2022-09-13	09:54:38	0.0983844	1516.16	FALSE	137
2022-09-13	09:54:38	0.202048	1516.37	FALSE	137
2022-09-13	09:54:38	0.10958	1516.48	FALSE	137
2022-09-13	09:54:39	0.208664	1516.69	FALSE	137
2022-09-13	09:54:39	0.0936516	1516.78	FALSE	137
2022-09-13	09:54:39	0.131311	1516.91	FALSE	137
2022-09-13	09:54:39	0.133041	1517.04	FALSE	137
2022-09-13	09:54:40	0.22902	1517.27	FALSE	137
2022-09-13	09:54:40	0.197723	1517.47	FALSE	137
2022-09-13	09:54:40	0.365051	1517.83	FALSE	137
2022-09-13	09:54:40	0.279148	1518.11	FALSE	137
2022-09-13	09:54:41	0.268868	1518.38	FALSE	137
2022-09-13	09:54:41	0.302608	1518.69	FALSE	137
2022-09-13	09:54:41	0.428359	1519.11	FALSE	137
2022-09-13	09:54:41	0.396349	1519.51	FALSE	137
2022-09-13	09:54:42	0.426629	1519.94	FALSE	137
2022-09-13	09:54:42	0.541132	1520.48	FALSE	137
2022-09-13	09:54:42	0.534618	1521.01	FALSE	137
2022-09-13	09:54:43	0.456603	1521.47	FALSE	137
2022-09-13	09:54:43	0.328104	1521.8	FALSE	137
2022-09-13	09:54:43	0.408155	1522.21	FALSE	137
2022-09-13	09:54:43	0.392481	1522.6	FALSE	137
2022-09-13	09:54:44	0.434975	1523.03	FALSE	137
2022-09-13	09:54:44	0.235229	1523.27	FALSE	137
2022-09-13	09:54:44	0.392786	1523.66	FALSE	137
2022-09-13	09:54:44	0.290496	1523.95	FALSE	137
2022-09-13	09:54:45	0.447748	1524.4	FALSE	137
2022-09-13	09:54:45	0.245967	1524.65	FALSE	137
2022-09-13	09:54:45	0.397672	1525.04	FALSE	137
2022-09-13	09:54:45	0.408664	1525.45	FALSE	137
2022-09-13	09:54:46	0.528613	1525.98	FALSE	137
2022-09-13	09:54:46	0.277723	1526.26	FALSE	137
2022-09-13	09:54:46	0.422863	1526.68	FALSE	137
2022-09-13	09:54:47	0.298384	1526.98	FALSE	137
2022-09-13	09:54:47	0.419097	1527.4	FALSE	137
2022-09-13	09:54:47	0.261336	1527.66	FALSE	137
2022-09-13	09:54:47	0.517723	1528.18	FALSE	137
2022-09-13	09:54:48	0.327392	1528.5	FALSE	137
2022-09-13	09:54:48	0.605153	1529.11	FALSE	137
2022-09-13	09:54:48	0.491819	1529.6	FALSE	137
2022-09-13	09:54:48	1.3135	1530.92	FALSE	137
2022-09-13	09:54:49	0.698486	1531.61	FALSE	137
2022-09-13	09:54:49	1.41772	1533.03	FALSE	137
2022-09-13	09:54:49	1.29757	1534.33	FALSE	137
2022-09-13	09:54:49	0.972227	1535.3	FALSE	137
2022-09-13	09:54:50	1.68943	1536.99	FALSE	137
2022-09-13	09:54:50	0.736959	1537.73	FALSE	137
2022-09-13	09:54:50	1.96434	1539.69	FALSE	137
2022-09-13	09:54:50	0.737773	1540.43	FALSE	137
2022-09-13	09:54:51	1.88047	1542.31	FALSE	137
2022-09-13	09:54:51	0.628461	1542.94	FALSE	137
2022-09-13	09:54:51	1.85436	1544.79	FALSE	137
2022-09-13	09:54:52	1.028	1545.82	FALSE	137
2022-09-13	09:54:52	1.14836	1546.97	FALSE	137
2022-09-13	09:54:52	1.72378	1548.69	FALSE	137
2022-09-13	09:54:52	0.976145	1549.67	FALSE	137
2022-09-13	09:54:53	2.62963	1552.3	FALSE	137
2022-09-13	09:54:53	0.4107	1552.71	FALSE	137
2022-09-13	09:54:53	1.91238	1554.62	FALSE	137
2022-09-13	09:54:53	0.361387	1554.98	FALSE	137
2022-09-13	09:54:54	0.909886	1555.89	FALSE	137
2022-09-13	09:54:54	1.18775	1557.08	FALSE	137
2022-09-13	09:54:54	0.976908	1558.06	FALSE	137
2022-09-13	09:54:54	1.8191	1559.88	FALSE	137
2022-09-13	09:54:55	0.534567	1560.41	FALSE	137
2022-09-13	09:54:55	2.19599	1562.61	FALSE	137
2022-09-13	09:54:55	0.54729	1563.15	FALSE	137
2022-09-13	09:54:56	1.09726	1564.25	FALSE	137
2022-09-13	09:54:56	0.504491	1564.76	FALSE	137
2022-09-13	09:54:56	0.543728	1565.3	FALSE	137
2022-09-13	09:54:56	0.637367	1565.94	FALSE	137
2022-09-13	09:54:57	0.268257	1566.21	FALSE	137
2022-09-13	09:54:57	0.665	1566.87	FALSE	137
2022-09-13	09:54:57	0.404898	1567.28	FALSE	137
2022-09-13	09:54:57	0.481896	1567.76	FALSE	137
2022-09-13	09:54:58	0.438944	1568.2	FALSE	137
2022-09-13	09:54:58	0.445305	1568.64	FALSE	137
2022-09-13	09:54:58	0.490547	1569.13	FALSE	137
2022-09-13	09:54:58	0.193804	1569.33	FALSE	137
2022-09-13	09:54:59	-0.151794	1569.33	FALSE	137
2022-09-13	09:54:59	-0.305992	1569.33	FALSE	137
2022-09-13	09:54:59	-0.318969	1569.33	FALSE	137
2022-09-13	09:54:59	-0.279122	1569.33	FALSE	137
2022-09-13	09:55:00	-0.240343	1569.33	FALSE	137
2022-09-13	09:55:00	-0.142481	1569.33	FALSE	137
2022-09-13	09:55:00	-0.10131	1569.33	FALSE	137
2022-09-13	09:55:01	-0.0929132	1569.33	FALSE	137
2022-09-13	09:55:01	-0.0584603	1569.33	FALSE	137
2022-09-13	09:55:01	-0.0701651	1569.33	FALSE	137
2022-09-13	09:55:01	-0.0980532	1569.33	FALSE	137
2022-09-13	09:55:02	-0.0821244	1569.33	FALSE	137
2022-09-13	09:55:02	-0.0778496	1569.33	FALSE	137
2022-09-13	09:55:02	-0.0784094	1569.33	FALSE	137
2022-09-13	09:55:02	-0.0861447	1569.33	FALSE	137
2022-09-13	09:55:03	-0.0563738	1569.33	FALSE	137
2022-09-13	09:55:03	0.0173666	1569.34	FALSE	137
2022-09-13	09:55:03	-0.0557122	1569.34	FALSE	137
2022-09-13	09:55:03	-0.0643636	1569.34	FALSE	137
2022-09-13	09:55:04	-0.0592745	1569.34	FALSE	137
2022-09-13	09:55:04	0.0100384	1569.35	FALSE	137
2022-09-13	09:55:04	0.0526338	1569.41	FALSE	137
2022-09-13	09:55:05	0.103677	1569.51	FALSE	137
2022-09-13	09:55:05	0.0800129	1569.59	FALSE	137
2022-09-13	09:55:05	0.052583	1569.64	FALSE	137
2022-09-13	09:55:05	0.106578	1569.75	FALSE	137
2022-09-13	09:55:06	0.0835753	1569.83	FALSE	137
2022-09-13	09:55:06	0.0300893	1569.86	FALSE	137
2022-09-13	09:55:06	0.0526338	1569.92	FALSE	137
2022-09-13	09:55:06	0.0545168	1569.97	FALSE	137
2022-09-13	09:55:07	0.0508527	1570.02	FALSE	137
2022-09-13	09:55:07	0.0425066	1570.06	FALSE	137
2022-09-13	09:55:07	0.027443	1570.09	FALSE	137
2022-09-13	09:55:08	0.0743641	1570.17	FALSE	137
2022-09-13	09:55:08	0.0308527	1570.2	FALSE	137
2022-09-13	09:55:08	0.0153819	1570.21	FALSE	137
2022-09-13	09:55:08	0.0796567	1570.29	FALSE	137
2022-09-13	09:55:09	0.086018	1570.38	FALSE	137
2022-09-13	09:55:09	0.318842	1570.7	FALSE	137
2022-09-13	09:55:09	0.278283	1570.97	FALSE	137
2022-09-13	09:55:09	0.256959	1571.23	FALSE	137
2022-09-13	09:55:10	1.22205	1572.45	FALSE	137
2022-09-13	09:55:10	0.157926	1572.61	FALSE	137
2022-09-13	09:55:10	0.303524	1572.91	FALSE	137
2022-09-13	09:55:10	0.184491	1573.1	FALSE	137
2022-09-13	09:55:11	0.402252	1573.5	FALSE	137
2022-09-13	09:55:11	0.279911	1573.78	FALSE	137
2022-09-13	09:55:11	0.19014	1573.97	FALSE	137
2022-09-13	09:55:11	-0.221463	1573.97	FALSE	137
2022-09-13	09:55:12	-0.229402	1573.97	FALSE	137
2022-09-13	09:55:12	-0.10986	1573.97	FALSE	137
2022-09-13	09:55:12	0.168003	1574.14	FALSE	137
2022-09-13	09:55:12	0.196196	1574.34	FALSE	137
2022-09-13	09:55:13	0.160624	1574.5	FALSE	137
2022-09-13	09:55:13	0.352888	1574.85	FALSE	137
2022-09-13	09:55:13	0.497672	1575.35	FALSE	137
2022-09-13	09:55:14	0.487036	1575.83	FALSE	137
2022-09-13	09:55:14	0.436094	1576.27	FALSE	137
2022-09-13	09:55:14	0.429784	1576.7	FALSE	137
2022-09-13	09:55:14	0.488715	1577.19	FALSE	137
2022-09-13	09:55:15	0.526629	1577.72	FALSE	137
2022-09-13	09:55:15	0.290853	1578.01	FALSE	137
2022-09-13	09:55:15	-0.129656	1578.01	FALSE	137
2022-09-13	09:55:15	-0.194898	1578.01	FALSE	137
2022-09-13	09:55:16	-0.265127	1578.01	FALSE	137
2022-09-13	09:55:16	-0.0354069	1578.01	FALSE	137
2022-09-13	09:55:16	0.169784	1578.18	FALSE	137
2022-09-13	09:55:16	0.326629	1578.5	FALSE	137
2022-09-13	09:55:17	0.411056	1578.91	FALSE	137
2022-09-13	09:55:17	0.435941	1579.35	FALSE	137
2022-09-13	09:55:17	0.464491	1579.81	FALSE	137
2022-09-13	09:55:18	0.436654	1580.25	FALSE	137
2022-09-13	09:55:18	0.430598	1580.68	FALSE	137
2022-09-13	09:55:18	0.564135	1581.25	FALSE	137
2022-09-13	09:55:18	0.380471	1581.63	FALSE	137
2022-09-13	09:55:19	0.362965	1581.99	FALSE	137
2022-09-13	09:55:19	0.499707	1582.49	FALSE	137
2022-09-13	09:55:19	0.431921	1582.92	FALSE	137
2022-09-13	09:55:19	0.592278	1583.51	FALSE	137
2022-09-13	09:55:20	0.424288	1583.94	FALSE	137
2022-09-13	09:55:20	0.177825	1584.11	FALSE	137
2022-09-13	09:55:20	-0.282379	1584.11	FALSE	137
2022-09-13	09:55:20	-0.194949	1584.11	FALSE	137
2022-09-13	09:55:21	-0.232659	1584.11	FALSE	137
2022-09-13	09:55:21	0.0223539	1584.14	FALSE	137
2022-09-13	09:55:21	0.00220126	1584.14	FALSE	137
2022-09-13	09:55:21	0.133804	1584.27	FALSE	137
2022-09-13	09:55:22	0.125509	1584.4	FALSE	137
2022-09-13	09:55:22	0.145967	1584.54	FALSE	137
2022-09-13	09:55:22	0.193957	1584.74	FALSE	137
2022-09-13	09:55:23	0.128512	1584.87	FALSE	137
2022-09-13	09:55:23	0.214008	1585.08	FALSE	137
2022-09-13	09:55:23	0.194618	1585.28	FALSE	137
2022-09-13	09:55:23	0.217926	1585.49	FALSE	137
2022-09-13	09:55:24	0.202965	1585.7	FALSE	137
2022-09-13	09:55:24	0.148308	1585.84	FALSE	137
2022-09-13	09:55:24	0.18159	1586.03	FALSE	137
2022-09-13	09:55:24	0.197519	1586.22	FALSE	137
2022-09-13	09:55:25	0.206221	1586.43	FALSE	137
2022-09-13	09:55:25	0.305356	1586.74	FALSE	137
2022-09-13	09:55:25	0.239504	1586.98	FALSE	137
2022-09-13	09:55:25	0.189224	1587.16	FALSE	137
2022-09-13	09:55:26	0.324288	1587.49	FALSE	137
2022-09-13	09:55:26	0.250496	1587.74	FALSE	137
2022-09-13	09:55:26	0.274771	1588.01	FALSE	137
2022-09-13	09:55:27	0.246985	1588.26	FALSE	137
2022-09-13	09:55:27	0.249224	1588.51	FALSE	137
2022-09-13	09:55:27	0.288613	1588.8	FALSE	137
2022-09-13	09:55:27	0.316349	1589.11	FALSE	137
2022-09-13	09:55:28	0.309733	1589.42	FALSE	137
2022-09-13	09:55:28	0.348715	1589.77	FALSE	137
2022-09-13	09:55:28	0.290496	1590.06	FALSE	137
2022-09-13	09:55:28	0.322557	1590.39	FALSE	137
2022-09-13	09:55:29	0.351107	1590.74	FALSE	137
2022-09-13	09:55:29	0.320624	1591.06	FALSE	137
2022-09-13	09:55:29	0.305865	1591.36	FALSE	137
2022-09-13	09:55:29	0.33243	1591.7	FALSE	137
2022-09-13	09:55:30	0.474924	1592.17	FALSE	137
2022-09-13	09:55:30	0.380267	1592.55	FALSE	137
2022-09-13	09:55:30	0.539351	1593.09	FALSE	137
2022-09-13	09:55:30	0.668104	1593.76	FALSE	137
2022-09-13	09:55:31	0.753651	1594.51	FALSE	137
2022-09-13	09:55:31	0.447596	1594.96	FALSE	137
2022-09-13	09:55:31	2.04678	1597.01	FALSE	137
2022-09-13	09:55:32	1.88261	1598.89	FALSE	137
2022-09-13	09:55:32	0.869682	1599.76	FALSE	137
2022-09-13	09:55:32	1.01945	1600.78	FALSE	137
2022-09-13	09:55:32	1.22296	1602	FALSE	137
2022-09-13	09:55:33	0.638588	1602.64	FALSE	137
2022-09-13	09:55:33	0.473143	1603.11	FALSE	137
2022-09-13	09:55:33	0.741285	1603.85	FALSE	137
2022-09-13	09:55:33	0.841438	1604.7	FALSE	137
2022-09-13	09:55:34	1.41289	1606.11	FALSE	137
2022-09-13	09:55:34	5.80958	1611.92	1	138
2022-09-13	09:55:34	3.69828	1615.62	1	139
2022-09-13	09:55:34	2.2962	1617.91	FALSE	139
2022-09-13	09:55:35	2.21126	1620.12	FALSE	139
2022-09-13	09:55:35	2.24083	1622.37	FALSE	139
2022-09-13	09:55:35	2.10994	1624.48	FALSE	139
2022-09-13	09:55:36	2.0166	1626.49	FALSE	139
2022-09-13	09:55:36	1.97869	1628.47	FALSE	139
2022-09-13	09:55:36	2.12383	1630.59	FALSE	139
2022-09-13	09:55:36	1.90968	1632.5	FALSE	139
2022-09-13	09:55:37	2.2648	1634.77	FALSE	139
2022-09-13	09:55:37	1.87711	1636.65	FALSE	139
2022-09-13	09:55:37	1.81497	1638.46	FALSE	139
2022-09-13	09:55:37	1.40678	1639.87	FALSE	139
2022-09-13	09:55:38	0.720318	1640.59	FALSE	139
2022-09-13	09:55:38	0.648613	1641.24	FALSE	139
2022-09-13	09:55:38	0.893092	1642.13	FALSE	139
2022-09-13	09:55:38	1.21279	1643.34	FALSE	139
2022-09-13	09:55:39	1.3537	1644.7	FALSE	139
2022-09-13	09:55:39	1.53426	1646.23	FALSE	139
2022-09-13	09:55:39	1.19818	1647.43	FALSE	139
2022-09-13	09:55:39	1.26683	1648.7	FALSE	139
2022-09-13	09:55:40	1.31676	1650.01	FALSE	139
2022-09-13	09:55:40	1.32083	1651.33	FALSE	139
2022-09-13	09:55:40	1.3137	1652.65	FALSE	139

## Sheet: Bubba_harness_202291395026
						**GoPro Fitting: 940
2022-09-13	09:50:26	0.248562
2022-09-13	09:50:26	0.244898
2022-09-13	09:50:27	0.25014
2022-09-13	09:50:27	0.244746
2022-09-13	09:50:27	0.244848
2022-09-13	09:50:28	0.235382
2022-09-13	09:50:28	0.242201
2022-09-13	09:50:28	0.242405
2022-09-13	09:50:28	0.23757
2022-09-13	09:50:29	0.241234
2022-09-13	09:50:29	0.255738
2022-09-13	09:50:29	0.232176
2022-09-13	09:50:29	0.243066
2022-09-13	09:50:30	0.246883
2022-09-13	09:50:30	0.238944
2022-09-13	09:50:30	0.253092
2022-09-13	09:50:30	0.242557
2022-09-13	09:50:31	0.254364
2022-09-13	09:50:31	0.227697
2022-09-13	09:50:31	0.235382
2022-09-13	09:50:32	-0.000648613
2022-09-13	09:50:32	0.704135
2022-09-13	09:50:32	0.176756
2022-09-13	09:50:32	0.121692
2022-09-13	09:50:33	0.217825
2022-09-13	09:50:33	0.187545
2022-09-13	09:50:33	0.250191
2022-09-13	09:50:33	0.649529
2022-09-13	09:50:34	0.363575
2022-09-13	09:50:34	0.405916
2022-09-13	09:50:34	0.417417
2022-09-13	09:50:34	0.425102
2022-09-13	09:50:35	0.505
2022-09-13	09:50:35	0.35126
2022-09-13	09:50:35	0.588766
2022-09-13	09:50:35	0.399504
2022-09-13	09:50:36	0.349733
2022-09-13	09:50:36	0.240725
2022-09-13	09:50:36	0.438842
2022-09-13	09:50:37	0.235382
2022-09-13	09:50:37	0.505407
2022-09-13	09:50:37	0.559809
2022-09-13	09:50:37	0.417163
2022-09-13	09:50:38	0.308257
2022-09-13	09:50:38	0.25243
2022-09-13	09:50:38	0.603372
2022-09-13	09:50:38	0.414415
2022-09-13	09:50:39	0.44154
2022-09-13	09:50:39	1.3476
2022-09-13	09:50:39	2.5452
2022-09-13	09:50:39	3.57996
2022-09-13	09:50:40	2.1396
2022-09-13	09:50:40	1.20113
2022-09-13	09:50:40	0.199758
2022-09-13	09:50:40	0.299962
2022-09-13	09:50:41	0.439046
2022-09-13	09:50:41	0.526578
2022-09-13	09:50:41	0.407239
2022-09-13	09:50:42	0.277926
2022-09-13	09:50:42	0.222201
2022-09-13	09:50:42	0.602761
2022-09-13	09:50:42	2.0249
2022-09-13	09:50:43	5.54566
2022-09-13	09:50:43	13.8344
2022-09-13	09:50:43	11.0911
2022-09-13	09:50:43	10.5411
2022-09-13	09:50:44	6.97609
2022-09-13	09:50:44	5.51482
2022-09-13	09:50:44	5.55431
2022-09-13	09:50:44	7.35441
2022-09-13	09:50:45	1.38882
2022-09-13	09:50:45	0.283779
2022-09-13	09:50:45	0.63701
2022-09-13	09:50:46	1.74739
2022-09-13	09:50:46	8.36026
2022-09-13	09:50:46	14.3694
2022-09-13	09:50:46	8.67792
2022-09-13	09:50:47	7.9338
2022-09-13	09:50:47	13.6658
2022-09-13	09:50:47	6.57711
2022-09-13	09:50:47	13.3534
2022-09-13	09:50:48	12.9419
2022-09-13	09:50:48	7.79049
2022-09-13	09:50:48	6.16662
2022-09-13	09:50:49	11.8379
2022-09-13	09:50:49	15.2411
2022-09-13	09:50:49	14.0162
2022-09-13	09:50:49	6.29207
2022-09-13	09:50:49	3.03212
2022-09-13	09:50:50	3.07604
2022-09-13	09:50:50	11.4171
2022-09-13	09:50:50	22.5646
2022-09-13	09:50:51	10.7785
2022-09-13	09:50:51	4.81574
2022-09-13	09:50:51	3.48851
2022-09-13	09:50:51	2.12541
2022-09-13	09:50:52	2.61472
2022-09-13	09:50:52	2.14352
2022-09-13	09:50:52	2.38983
2022-09-13	09:50:52	2.66983
2022-09-13	09:50:53	2.72805
2022-09-13	09:50:53	3.53558
2022-09-13	09:50:53	6.445
2022-09-13	09:50:53	5.45772
2022-09-13	09:50:54	8.23655
2022-09-13	09:50:54	10.8262
2022-09-13	09:50:54	15.0926
2022-09-13	09:50:55	14.9144
2022-09-13	09:50:55	9.90978
2022-09-13	09:50:55	9.91314
2022-09-13	09:50:55	15.3407
2022-09-13	09:50:56	4.10744
2022-09-13	09:50:56	0.947494
2022-09-13	09:50:56	0.0694786
2022-09-13	09:50:56	2.47426
2022-09-13	09:50:57	7.94815
2022-09-13	09:50:57	15.9776
2022-09-13	09:50:57	12.9642
2022-09-13	09:50:57	13.1943
2022-09-13	09:50:58	13.3726
2022-09-13	09:50:58	8.15685
2022-09-13	09:50:58	4.6139
2022-09-13	09:50:58	4.58963
2022-09-13	09:50:59	4.24902
2022-09-13	09:50:59	3.55966
2022-09-13	09:50:59	4.46927
2022-09-13	09:51:00	6.21533
2022-09-13	09:51:00	7.31248
2022-09-13	09:51:00	7.69573
2022-09-13	09:51:00	6.77782
2022-09-13	09:51:01	5.6478
2022-09-13	09:51:01	4.96032
2022-09-13	09:51:01	4.42922
2022-09-13	09:51:01	4.37523
2022-09-13	09:51:02	4.15172
2022-09-13	09:51:02	3.91416
2022-09-13	09:51:02	3.94851
2022-09-13	09:51:02	3.78892
2022-09-13	09:51:03	3.68744
2022-09-13	09:51:03	3.39935
2022-09-13	09:51:03	3.46088
2022-09-13	09:51:04	3.22571
2022-09-13	09:51:04	3.15986
2022-09-13	09:51:04	3.29523
2022-09-13	09:51:04	3.12464
2022-09-13	09:51:05	3.03619
2022-09-13	09:51:05	2.97716
2022-09-13	09:51:05	3.04169
2022-09-13	09:51:05	2.89945
2022-09-13	09:51:06	3.02189
2022-09-13	09:51:06	2.9821
2022-09-13	09:51:06	3.11635
2022-09-13	09:51:06	3.02627
2022-09-13	09:51:07	2.92871
2022-09-13	09:51:07	2.99228
2022-09-13	09:51:07	2.90556
2022-09-13	09:51:07	2.9391
2022-09-13	09:51:08	2.95243
2022-09-13	09:51:08	2.93619
2022-09-13	09:51:08	2.86088
2022-09-13	09:51:09	2.92892
2022-09-13	09:51:09	2.80159
2022-09-13	09:51:09	2.61202
2022-09-13	09:51:09	2.72597
2022-09-13	09:51:10	2.73431
2022-09-13	09:51:10	2.74978
2022-09-13	09:51:10	2.67131
2022-09-13	09:51:10	2.68001
2022-09-13	09:51:11	2.65161
2022-09-13	09:51:11	2.52057
2022-09-13	09:51:11	2.55915
2022-09-13	09:51:11	2.40673
2022-09-13	09:51:12	2.50022
2022-09-13	09:51:12	2.55681
2022-09-13	09:51:12	2.43889
2022-09-13	09:51:13	2.53782
2022-09-13	09:51:13	2.50927
2022-09-13	09:51:13	2.65589
2022-09-13	09:51:13	2.65879
2022-09-13	09:51:14	2.66083
2022-09-13	09:51:14	2.78174
2022-09-13	09:51:14	2.58251
2022-09-13	09:51:14	2.58495
2022-09-13	09:51:15	2.50994
2022-09-13	09:51:15	2.50683
2022-09-13	09:51:15	2.25039
2022-09-13	09:51:15	2.53589
2022-09-13	09:51:16	2.44408
2022-09-13	09:51:16	2.44301
2022-09-13	09:51:16	2.39487
2022-09-13	09:51:16	2.37645
2022-09-13	09:51:17	2.29345
2022-09-13	09:51:17	2.25487
2022-09-13	09:51:17	2.27691
2022-09-13	09:51:18	2.31691
2022-09-13	09:51:18	2.18108
2022-09-13	09:51:18	2.27121
2022-09-13	09:51:18	2.25431
2022-09-13	09:51:19	1.97324
2022-09-13	09:51:19	1.74169
2022-09-13	09:51:19	1.03223
2022-09-13	09:51:19	1.3966
2022-09-13	09:51:20	1.57436
2022-09-13	09:51:20	0.612786
2022-09-13	09:51:20	1.32551
2022-09-13	09:51:20	1.2594
2022-09-13	09:51:21	1.88999
2022-09-13	09:51:21	3.68927
2022-09-13	09:51:21	6.84937
2022-09-13	09:51:22	5.42561
2022-09-13	09:51:22	3.96103
2022-09-13	09:51:22	2.36327
2022-09-13	09:51:22	1.31146
2022-09-13	09:51:23	0.654974
2022-09-13	09:51:23	0.75187
2022-09-13	09:51:23	0.582201
2022-09-13	09:51:23	0.395229
2022-09-13	09:51:24	0.390191
2022-09-13	09:51:24	0.305356
2022-09-13	09:51:24	0.385356
2022-09-13	09:51:24	0.391209
2022-09-13	09:51:25	0.355484
2022-09-13	09:51:25	0.408257
2022-09-13	09:51:25	0.625102
2022-09-13	09:51:26	0.579402
2022-09-13	09:51:26	0.496909
2022-09-13	09:51:26	0.374924
2022-09-13	09:51:26	0.379148
2022-09-13	09:51:27	0.436094
2022-09-13	09:51:27	0.535484
2022-09-13	09:51:27	0.44841
2022-09-13	09:51:27	0.320522
2022-09-13	09:51:28	0.500929
2022-09-13	09:51:28	0.465509
2022-09-13	09:51:28	0.484084
2022-09-13	09:51:28	0.45584
2022-09-13	09:51:29	0.43411
2022-09-13	09:51:29	0.450496
2022-09-13	09:51:29	0.488206
2022-09-13	09:51:29	0.51187
2022-09-13	09:51:30	0.597774
2022-09-13	09:51:30	0.413295
2022-09-13	09:51:30	0.390293
2022-09-13	09:51:31	0.315127
2022-09-13	09:51:31	0.491463
2022-09-13	09:51:31	0.437214
2022-09-13	09:51:31	0.578893
2022-09-13	09:51:32	0.483881
2022-09-13	09:51:32	0.782557
2022-09-13	09:51:32	1.26169
2022-09-13	09:51:32	0.591666
2022-09-13	09:51:33	0.45187
2022-09-13	09:51:33	0.436501
2022-09-13	09:51:33	0.812685
2022-09-13	09:51:33	0.255382
2022-09-13	09:51:34	0.750649
2022-09-13	09:51:34	0.280522
2022-09-13	09:51:34	0.283321
2022-09-13	09:51:35	-0.0689946
2022-09-13	09:51:35	0.165509
2022-09-13	09:51:35	0.0119723
2022-09-13	09:51:35	-0.202023
2022-09-13	09:51:36	-0.248435
2022-09-13	09:51:36	0.0676465
2022-09-13	09:51:36	0.211056
2022-09-13	09:51:36	-0.101107
2022-09-13	09:51:37	0.212074
2022-09-13	09:51:37	0.1793
2022-09-13	09:51:37	0.109886
2022-09-13	09:51:37	0.239911
2022-09-13	09:51:38	0.327392
2022-09-13	09:51:38	0.922913
2022-09-13	09:51:38	1.33701
2022-09-13	09:51:38	0.680623
2022-09-13	09:51:39	1.44302
2022-09-13	09:51:39	1.95676
2022-09-13	09:51:39	0.831107
2022-09-13	09:51:40	4.45391
2022-09-13	09:51:40	1.75849
2022-09-13	09:51:40	1.72795
2022-09-13	09:51:40	0.887341
2022-09-13	09:51:41	0.555382
2022-09-13	09:51:41	1.13268
2022-09-13	09:51:41	0.506527
2022-09-13	09:51:41	0.293804
2022-09-13	09:51:42	0.665458
2022-09-13	09:51:42	0.208766
2022-09-13	09:51:42	0.426018
2022-09-13	09:51:42	0.520165
2022-09-13	09:51:43	0.295127
2022-09-13	09:51:43	0.645509
2022-09-13	09:51:43	0.0679518
2022-09-13	09:51:44	0.00505114
2022-09-13	09:51:44	-0.611997
2022-09-13	09:51:44	-1.14187
2022-09-13	09:51:44	-0.772913
2022-09-13	09:51:45	-0.83902
2022-09-13	09:51:45	-0.799834
2022-09-13	09:51:45	-0.167824
2022-09-13	09:51:45	0.140064
2022-09-13	09:51:46	1.70322
2022-09-13	09:51:46	3.53421
2022-09-13	09:51:46	1.56363
2022-09-13	09:51:46	3.19563
2022-09-13	09:51:47	1.48215
2022-09-13	09:51:47	2.79202
2022-09-13	09:51:47	0.347341
2022-09-13	09:51:47	0.223982
2022-09-13	09:51:48	0.86444
2022-09-13	09:51:48	0.637367
2022-09-13	09:51:48	1.23329
2022-09-13	09:51:49	3.01589
2022-09-13	09:51:49	0.509936
2022-09-13	09:51:49	1.36826
2022-09-13	09:51:49	0.621234
2022-09-13	09:51:50	2.81986
2022-09-13	09:51:50	0.834873
2022-09-13	09:51:50	4.08988
2022-09-13	09:51:50	4.65141
2022-09-13	09:51:51	3.14485
2022-09-13	09:51:51	7.1051
2022-09-13	09:51:51	1.16307
2022-09-13	09:51:51	9.12729
2022-09-13	09:51:52	4.4534
2022-09-13	09:51:52	5.87334
2022-09-13	09:51:52	14.0351
2022-09-13	09:51:53	5.46922
2022-09-13	09:51:53	13.3996
2022-09-13	09:51:53	6.84729
2022-09-13	09:51:53	4.62525
2022-09-13	09:51:54	5.23726
2022-09-13	09:51:54	1.16663
2022-09-13	09:51:54	8.98627
2022-09-13	09:51:54	1.27966
2022-09-13	09:51:55	6.60184
2022-09-13	09:51:55	1.73747
2022-09-13	09:51:55	3.03314
2022-09-13	09:51:55	1.76469
2022-09-13	09:51:56	1.59487
2022-09-13	09:51:56	1.9995
2022-09-13	09:51:56	1.08892
2022-09-13	09:51:56	5.4625
2022-09-13	09:51:57	2.23319
2022-09-13	09:51:57	6.85609
2022-09-13	09:51:57	5.98581
2022-09-13	09:51:58	2.27085
2022-09-13	09:51:58	5.22525
2022-09-13	09:51:58	0.9593
2022-09-13	09:51:58	3.52016
2022-09-13	09:51:59	1.91248
2022-09-13	09:51:59	6.71579
2022-09-13	09:51:59	4.69156
2022-09-13	09:51:59	6.37594
2022-09-13	09:52:00	5.67334
2022-09-13	09:52:00	2.17859
2022-09-13	09:52:00	1.83559
2022-09-13	09:52:00	2.32062
2022-09-13	09:52:01	0.429682
2022-09-13	09:52:01	0.806018
2022-09-13	09:52:01	0.031616
2022-09-13	09:52:02	0.474568
2022-09-13	09:52:02	0.785916
2022-09-13	09:52:02	1.02246
2022-09-13	09:52:02	4.448
2022-09-13	09:52:03	1.26184
2022-09-13	09:52:03	3.60505
2022-09-13	09:52:03	1.60357
2022-09-13	09:52:03	6.07782
2022-09-13	09:52:04	2.12469
2022-09-13	09:52:04	3.03604
2022-09-13	09:52:04	1.991
2022-09-13	09:52:04	1.76607
2022-09-13	09:52:05	2.59894
2022-09-13	09:52:05	1.52073
2022-09-13	09:52:05	3.99955
2022-09-13	09:52:05	1.7508
2022-09-13	09:52:06	5.04601
2022-09-13	09:52:06	0.976196
2022-09-13	09:52:06	4.5679
2022-09-13	09:52:07	0.486578
2022-09-13	09:52:07	2.86037
2022-09-13	09:52:07	1.0791
2022-09-13	09:52:07	1.52337
2022-09-13	09:52:08	2.70561
2022-09-13	09:52:08	2.41619
2022-09-13	09:52:08	5.28235
2022-09-13	09:52:08	4.23467
2022-09-13	09:52:09	6.5339
2022-09-13	09:52:09	1.58754
2022-09-13	09:52:09	2.8053
2022-09-13	09:52:09	0.289478
2022-09-13	09:52:10	1.87798
2022-09-13	09:52:10	0.883626
2022-09-13	09:52:10	0.766934
2022-09-13	09:52:11	2.16332
2022-09-13	09:52:11	1.1765
2022-09-13	09:52:11	1.47813
2022-09-13	09:52:11	0.499555
2022-09-13	09:52:12	1.75864
2022-09-13	09:52:12	0.782404
2022-09-13	09:52:12	2.96312
2022-09-13	09:52:12	0.964847
2022-09-13	09:52:13	1.8335
2022-09-13	09:52:13	1.0077
2022-09-13	09:52:13	1.80907
2022-09-13	09:52:13	1.3221
2022-09-13	09:52:14	6.26006
2022-09-13	09:52:14	2.97553
2022-09-13	09:52:14	8.3107
2022-09-13	09:52:14	1.53482
2022-09-13	09:52:15	1.08704
2022-09-13	09:52:15	0.560471
2022-09-13	09:52:15	0.676908
2022-09-13	09:52:16	0.711361
2022-09-13	09:52:16	0.368308
2022-09-13	09:52:16	0.0368577
2022-09-13	09:52:16	0.717723
2022-09-13	09:52:17	0.500318
2022-09-13	09:52:17	0.488054
2022-09-13	09:52:17	0.480623
2022-09-13	09:52:17	0.824338
2022-09-13	09:52:18	0.74444
2022-09-13	09:52:18	0.735433
2022-09-13	09:52:18	0.738384
2022-09-13	09:52:18	0.738588
2022-09-13	09:52:19	0.735585
2022-09-13	09:52:19	0.723524
2022-09-13	09:52:19	0.35528
2022-09-13	09:52:20	0.427239
2022-09-13	09:52:20	0.444746
2022-09-13	09:52:20	0.33355
2022-09-13	09:52:20	0.480267
2022-09-13	09:52:21	0.517264
2022-09-13	09:52:21	0.743982
2022-09-13	09:52:21	0.729173
2022-09-13	09:52:21	0.737926
2022-09-13	09:52:22	0.730801
2022-09-13	09:52:22	0.740165
2022-09-13	09:52:22	0.727392
2022-09-13	09:52:22	0.732175
2022-09-13	09:52:23	0.738333
2022-09-13	09:52:23	0.738995
2022-09-13	09:52:23	0.713753
2022-09-13	09:52:23	0.439453
2022-09-13	09:52:24	0.928664
2022-09-13	09:52:24	1.03711
2022-09-13	09:52:24	1.38123
2022-09-13	09:52:25	1.39711
2022-09-13	09:52:25	0.459657
2022-09-13	09:52:25	0.856501
2022-09-13	09:52:25	0.980063
2022-09-13	09:52:26	0.752023
2022-09-13	09:52:26	1.64225
2022-09-13	09:52:26	0.789987
2022-09-13	09:52:26	0.556857
2022-09-13	09:52:27	0.432328
2022-09-13	09:52:27	0.453652
2022-09-13	09:52:27	0.283372
2022-09-13	09:52:27	0.418435
2022-09-13	09:52:28	2.23014
2022-09-13	09:52:28	1.64317
2022-09-13	09:52:28	4.36388
2022-09-13	09:52:29	2.38327
2022-09-13	09:52:29	5.9195
2022-09-13	09:52:29	3.1735
2022-09-13	09:52:29	1.87645
2022-09-13	09:52:30	2.51594
2022-09-13	09:52:30	0.396196
2022-09-13	09:52:30	0.748257
2022-09-13	09:52:30	0.517112
2022-09-13	09:52:31	0.59701
2022-09-13	09:52:31	0.422405
2022-09-13	09:52:31	0.438893
2022-09-13	09:52:31	0.396094
2022-09-13	09:52:32	0.562048
2022-09-13	09:52:32	0.52327
2022-09-13	09:52:32	0.541489
2022-09-13	09:52:32	0.760318
2022-09-13	09:52:33	0.550751
2022-09-13	09:52:33	2.82378
2022-09-13	09:52:33	0.306069
2022-09-13	09:52:34	4.36826
2022-09-13	09:52:34	0.364491
2022-09-13	09:52:34	4.7852
2022-09-13	09:52:34	0.182914
2022-09-13	09:52:35	0.837926
2022-09-13	09:52:35	0.52958
2022-09-13	09:52:35	0.7993
2022-09-13	09:52:35	0.568409
2022-09-13	09:52:36	0.535382
2022-09-13	09:52:36	0.360013
2022-09-13	09:52:36	0.520776
2022-09-13	09:52:36	0.305967
2022-09-13	09:52:37	0.42098
2022-09-13	09:52:37	0.447799
2022-09-13	09:52:37	0.375789
2022-09-13	09:52:38	0.361132
2022-09-13	09:52:38	2.12541
2022-09-13	09:52:38	1.94653
2022-09-13	09:52:38	5.49385
2022-09-13	09:52:39	2.85431
2022-09-13	09:52:39	4.54525
2022-09-13	09:52:39	1.92566
2022-09-13	09:52:39	6.0937
2022-09-13	09:52:40	1.57757
2022-09-13	09:52:40	4.98759
2022-09-13	09:52:40	0.447188
2022-09-13	09:52:40	2.01823
2022-09-13	09:52:41	0.109071
2022-09-13	09:52:41	0.821692
2022-09-13	09:52:41	1.89843
2022-09-13	09:52:42	9.03609
2022-09-13	09:52:42	5.78479
2022-09-13	09:52:42	2.15167
2022-09-13	09:52:42	2.02118
2022-09-13	09:52:43	4.00948
2022-09-13	09:52:43	1.67961
2022-09-13	09:52:43	2.97462
2022-09-13	09:52:43	2.40251
2022-09-13	09:52:44	2.68276
2022-09-13	09:52:44	5.46021
2022-09-13	09:52:44	0.492125
2022-09-13	09:52:44	0.515331
2022-09-13	09:52:45	0.516247
2022-09-13	09:52:45	0.38327
2022-09-13	09:52:45	0.528919
2022-09-13	09:52:45	0.470344
2022-09-13	09:52:46	0.696654
2022-09-13	09:52:46	0.544745
2022-09-13	09:52:46	0.5364
2022-09-13	09:52:47	0.464491
2022-09-13	09:52:47	0.504542
2022-09-13	09:52:47	0.515127
2022-09-13	09:52:47	0.30617
2022-09-13	09:52:48	0.233092
2022-09-13	09:52:48	0.275738
2022-09-13	09:52:48	0.340878
2022-09-13	09:52:48	0.341031
2022-09-13	09:52:49	0.208766
2022-09-13	09:52:49	-0.0388674
2022-09-13	09:52:49	-0.27902
2022-09-13	09:52:49	-0.275814
2022-09-13	09:52:50	-0.313371
2022-09-13	09:52:50	-0.173066
2022-09-13	09:52:50	0.041387
2022-09-13	09:52:51	0.434415
2022-09-13	09:52:51	4.17563
2022-09-13	09:52:51	0.320827
2022-09-13	09:52:51	0.564847
2022-09-13	09:52:52	0.286069
2022-09-13	09:52:52	0.479351
2022-09-13	09:52:52	0.520674
2022-09-13	09:52:52	0.559657
2022-09-13	09:52:53	0.381743
2022-09-13	09:52:53	0.560623
2022-09-13	09:52:53	0.434771
2022-09-13	09:52:53	0.441234
2022-09-13	09:52:54	0.396196
2022-09-13	09:52:54	0.487341
2022-09-13	09:52:54	0.492532
2022-09-13	09:52:54	0.354975
2022-09-13	09:52:55	0.650394
2022-09-13	09:52:55	0.556603
2022-09-13	09:52:55	0.930242
2022-09-13	09:52:56	0.612481
2022-09-13	09:52:56	0.502863
2022-09-13	09:52:56	0.330038
2022-09-13	09:52:56	0.368308
2022-09-13	09:52:57	0.37813
2022-09-13	09:52:57	0.45126
2022-09-13	09:52:57	0.302914
2022-09-13	09:52:57	0.437825
2022-09-13	09:52:58	0.522201
2022-09-13	09:52:58	0.464389
2022-09-13	09:52:58	0.480776
2022-09-13	09:52:58	0.460318
2022-09-13	09:52:59	0.519555
2022-09-13	09:52:59	0.833244
2022-09-13	09:52:59	0.516501
2022-09-13	09:53:00	0.69874
2022-09-13	09:53:00	0.627188
2022-09-13	09:53:00	0.513397
2022-09-13	09:53:00	0.526272
2022-09-13	09:53:01	0.416298
2022-09-13	09:53:01	0.4107
2022-09-13	09:53:01	0.473753
2022-09-13	09:53:01	0.418028
2022-09-13	09:53:02	0.431616
2022-09-13	09:53:02	0.444186
2022-09-13	09:53:02	0.441845
2022-09-13	09:53:02	0.435484
2022-09-13	09:53:03	0.364186
2022-09-13	09:53:03	0.358333
2022-09-13	09:53:03	0.372074
2022-09-13	09:53:03	0.419555
2022-09-13	09:53:04	0.425509
2022-09-13	09:53:04	0.492125
2022-09-13	09:53:04	0.482456
2022-09-13	09:53:05	0.48612
2022-09-13	09:53:05	0.521234
2022-09-13	09:53:05	0.548715
2022-09-13	09:53:05	0.587901
2022-09-13	09:53:06	0.525203
2022-09-13	09:53:06	0.517875
2022-09-13	09:53:06	0.498588
2022-09-13	09:53:06	0.503219
2022-09-13	09:53:07	0.588664
2022-09-13	09:53:07	0.631259
2022-09-13	09:53:07	0.616552
2022-09-13	09:53:07	0.611514
2022-09-13	09:53:08	0.67187
2022-09-13	09:53:08	0.660216
2022-09-13	09:53:08	0.641081
2022-09-13	09:53:09	0.545916
2022-09-13	09:53:09	0.569733
2022-09-13	09:53:09	0.54729
2022-09-13	09:53:09	0.578893
2022-09-13	09:53:10	0.596603
2022-09-13	09:53:10	0.642557
2022-09-13	09:53:10	0.562201
2022-09-13	09:53:10	0.438537
2022-09-13	09:53:11	0.595025
2022-09-13	09:53:11	0.677519
2022-09-13	09:53:11	0.0523285
2022-09-13	09:53:11	-0.14014
2022-09-13	09:53:12	-0.219682
2022-09-13	09:53:12	-0.251539
2022-09-13	09:53:12	-0.266755
2022-09-13	09:53:12	-0.046501
2022-09-13	09:53:13	0.0346694
2022-09-13	09:53:13	-0.115305
2022-09-13	09:53:13	0.0727865
2022-09-13	09:53:14	-0.228129
2022-09-13	09:53:14	-0.275865
2022-09-13	09:53:14	-0.0636511
2022-09-13	09:53:14	0.142812
2022-09-13	09:53:15	0.244695
2022-09-13	09:53:15	0.161845
2022-09-13	09:53:15	1.07889
2022-09-13	09:53:15	0.114568
2022-09-13	09:53:16	0.0692751
2022-09-13	09:53:16	0.131107
2022-09-13	09:53:16	0.097672
2022-09-13	09:53:16	-0.000139698
2022-09-13	09:53:17	-0.108028
2022-09-13	09:53:17	-0.268333
2022-09-13	09:53:17	-0.251997
2022-09-13	09:53:18	0.0370104
2022-09-13	09:53:18	0.331361
2022-09-13	09:53:18	0.494059
2022-09-13	09:53:18	0.287188
2022-09-13	09:53:19	0.338384
2022-09-13	09:53:19	0.481234
2022-09-13	09:53:19	0.403066
2022-09-13	09:53:19	0.408919
2022-09-13	09:53:20	0.420216
2022-09-13	09:53:20	0.414466
2022-09-13	09:53:20	0.413601
2022-09-13	09:53:20	0.421692
2022-09-13	09:53:21	0.419758
2022-09-13	09:53:21	0.429275
2022-09-13	09:53:21	0.432888
2022-09-13	09:53:21	0.436298
2022-09-13	09:53:22	0.440471
2022-09-13	09:53:22	0.437875
2022-09-13	09:53:22	0.439708
2022-09-13	09:53:23	0.444695
2022-09-13	09:53:23	0.436756
2022-09-13	09:53:23	0.439453
2022-09-13	09:53:23	0.43528
2022-09-13	09:53:24	0.436552
2022-09-13	09:53:24	0.436145
2022-09-13	09:53:24	0.443015
2022-09-13	09:53:24	0.438181
2022-09-13	09:53:25	0.439911
2022-09-13	09:53:25	0.441641
2022-09-13	09:53:25	0.4364
2022-09-13	09:53:25	0.440166
2022-09-13	09:53:26	0.435992
2022-09-13	09:53:26	0.440929
2022-09-13	09:53:26	0.43986
2022-09-13	09:53:27	0.439708
2022-09-13	09:53:27	0.437417
2022-09-13	09:53:27	0.433092
2022-09-13	09:53:27	0.432786
2022-09-13	09:53:28	0.432227
2022-09-13	09:53:28	0.43355
2022-09-13	09:53:28	0.430649
2022-09-13	09:53:28	0.434517
2022-09-13	09:53:29	0.434618
2022-09-13	09:53:29	0.428206
2022-09-13	09:53:29	0.446069
2022-09-13	09:53:29	0.617265
2022-09-13	09:53:30	0.542812
2022-09-13	09:53:30	0.30327
2022-09-13	09:53:30	-0.0244145
2022-09-13	09:53:31	0.129224
2022-09-13	09:53:31	0.212277
2022-09-13	09:53:31	0.297468
2022-09-13	09:53:31	0.331412
2022-09-13	09:53:32	0.374466
2022-09-13	09:53:32	0.40271
2022-09-13	09:53:32	0.373092
2022-09-13	09:53:32	0.338283
2022-09-13	09:53:33	0.355331
2022-09-13	09:53:33	0.368766
2022-09-13	09:53:33	0.43014
2022-09-13	09:53:33	0.734364
2022-09-13	09:53:34	0.759809
2022-09-13	09:53:34	0.410802
2022-09-13	09:53:34	0.378384
2022-09-13	09:53:34	0.364949
2022-09-13	09:53:35	0.327901
2022-09-13	09:53:35	0.326323
2022-09-13	09:53:35	0.332888
2022-09-13	09:53:36	0.734873
2022-09-13	09:53:36	0.742455
2022-09-13	09:53:36	0.732786
2022-09-13	09:53:36	0.734517
2022-09-13	09:53:37	0.737977
2022-09-13	09:53:37	0.740318
2022-09-13	09:53:37	0.735941
2022-09-13	09:53:37	0.734059
2022-09-13	09:53:38	0.741641
2022-09-13	09:53:38	0.723728
2022-09-13	09:53:38	0.729936
2022-09-13	09:53:38	0.718486
2022-09-13	09:53:39	0.725102
2022-09-13	09:53:39	0.702303
2022-09-13	09:53:39	0.707595
2022-09-13	09:53:40	0.663931
2022-09-13	09:53:40	0.67589
2022-09-13	09:53:40	0.75874
2022-09-13	09:53:40	0.69584
2022-09-13	09:53:41	0.734771
2022-09-13	09:53:41	0.726934
2022-09-13	09:53:41	0.728817
2022-09-13	09:53:41	0.453804
2022-09-13	09:53:42	0.727188
2022-09-13	09:53:42	0.445
2022-09-13	09:53:42	0.741081
2022-09-13	09:53:42	0.635331
2022-09-13	09:53:43	0.671819
2022-09-13	09:53:43	0.542303
2022-09-13	09:53:43	0.581896
2022-09-13	09:53:43	0.696043
2022-09-13	09:53:44	0.66729
2022-09-13	09:53:44	0.638435
2022-09-13	09:53:44	0.648053
2022-09-13	09:53:45	0.543321
2022-09-13	09:53:45	0.418995
2022-09-13	09:53:45	0.265458
2022-09-13	09:53:45	0.243422
2022-09-13	09:53:46	0.278181
2022-09-13	09:53:46	0.287799
2022-09-13	09:53:46	0.288766
2022-09-13	09:53:47	0.289835
2022-09-13	09:53:47	0.325102
2022-09-13	09:53:47	0.389479
2022-09-13	09:53:47	0.355738
2022-09-13	09:53:47	0.392786
2022-09-13	09:53:48	0.115942
2022-09-13	09:53:48	1.09503
2022-09-13	09:53:48	0.376247
2022-09-13	09:53:49	0.398944
2022-09-13	09:53:49	1.15207
2022-09-13	09:53:49	0.796349
2022-09-13	09:53:49	3.45533
2022-09-13	09:53:50	2.72342
2022-09-13	09:53:50	4.28378
2022-09-13	09:53:50	1.24469
2022-09-13	09:53:50	1.0392
2022-09-13	09:53:51	0.880725
2022-09-13	09:53:51	3.28149
2022-09-13	09:53:51	2.46444
2022-09-13	09:53:51	0.475229
2022-09-13	09:53:52	1.66312
2022-09-13	09:53:52	0.67187
2022-09-13	09:53:52	1.02938
2022-09-13	09:53:52	1.21849
2022-09-13	09:53:53	0.372328
2022-09-13	09:53:53	0.520827
2022-09-13	09:53:53	0.155738
2022-09-13	09:53:54	0.380929
2022-09-13	09:53:54	0.34612
2022-09-13	09:53:54	0.649428
2022-09-13	09:53:54	0.244542
2022-09-13	09:53:55	0.454466
2022-09-13	09:53:55	0.438995
2022-09-13	09:53:55	0.660166
2022-09-13	09:53:55	0.331616
2022-09-13	09:53:56	0.541489
2022-09-13	09:53:56	0.347443
2022-09-13	09:53:56	0.532125
2022-09-13	09:53:56	0.360522
2022-09-13	09:53:57	0.52159
2022-09-13	09:53:57	0.489377
2022-09-13	09:53:57	0.498435
2022-09-13	09:53:58	0.447545
2022-09-13	09:53:58	0.624186
2022-09-13	09:53:58	0.426069
2022-09-13	09:53:58	0.417723
2022-09-13	09:53:59	0.420013
2022-09-13	09:53:59	0.432023
2022-09-13	09:53:59	0.411158
2022-09-13	09:53:59	0.421641
2022-09-13	09:54:00	0.414262
2022-09-13	09:54:00	0.41701
2022-09-13	09:54:00	0.416858
2022-09-13	09:54:00	0.412735
2022-09-13	09:54:01	0.421641
2022-09-13	09:54:01	0.419708
2022-09-13	09:54:01	0.421845
2022-09-13	09:54:01	0.421183
2022-09-13	09:54:02	0.422863
2022-09-13	09:54:02	0.4193
2022-09-13	09:54:02	0.419097
2022-09-13	09:54:03	0.419199
2022-09-13	09:54:03	0.417417
2022-09-13	09:54:03	0.415229
2022-09-13	09:54:03	0.413957
2022-09-13	09:54:04	0.412735
2022-09-13	09:54:04	0.410344
2022-09-13	09:54:04	0.411412
2022-09-13	09:54:04	0.417875
2022-09-13	09:54:05	0.42271
2022-09-13	09:54:05	0.420216
2022-09-13	09:54:05	0.417367
2022-09-13	09:54:05	0.421743
2022-09-13	09:54:06	0.66612
2022-09-13	09:54:06	0.446578
2022-09-13	09:54:06	0.384593
2022-09-13	09:54:07	0.457977
2022-09-13	09:54:07	0.834974
2022-09-13	09:54:07	0.836501
2022-09-13	09:54:07	2.49111
2022-09-13	09:54:08	1.87151
2022-09-13	09:54:08	0.978588
2022-09-13	09:54:08	0.701132
2022-09-13	09:54:08	0.475026
2022-09-13	09:54:09	0.436908
2022-09-13	09:54:09	0.445051
2022-09-13	09:54:09	0.436145
2022-09-13	09:54:09	0.423117
2022-09-13	09:54:10	0.436705
2022-09-13	09:54:10	0.465865
2022-09-13	09:54:10	0.475789
2022-09-13	09:54:10	0.44958
2022-09-13	09:54:11	0.469275
2022-09-13	09:54:11	0.452888
2022-09-13	09:54:11	0.460166
2022-09-13	09:54:12	0.462812
2022-09-13	09:54:12	0.448308
2022-09-13	09:54:12	0.447647
2022-09-13	09:54:12	0.449326
2022-09-13	09:54:13	0.438537
2022-09-13	09:54:13	0.43874
2022-09-13	09:54:13	0.44673
2022-09-13	09:54:13	0.50902
2022-09-13	09:54:14	0.612837
2022-09-13	09:54:14	1.18286
2022-09-13	09:54:14	1.10622
2022-09-13	09:54:14	0.613346
2022-09-13	09:54:15	0.52897
2022-09-13	09:54:15	0.443982
2022-09-13	09:54:15	0.505713
2022-09-13	09:54:16	0.494873
2022-09-13	09:54:16	0.446832
2022-09-13	09:54:16	0.462965
2022-09-13	09:54:16	0.489987
2022-09-13	09:54:17	0.444847
2022-09-13	09:54:17	0.473652
2022-09-13	09:54:17	0.461183
2022-09-13	09:54:17	0.481539
2022-09-13	09:54:18	0.484949
2022-09-13	09:54:18	0.439809
2022-09-13	09:54:18	0.456756
2022-09-13	09:54:18	0.462201
2022-09-13	09:54:19	0.448868
2022-09-13	09:54:19	0.517366
2022-09-13	09:54:19	0.4707
2022-09-13	09:54:20	0.480267
2022-09-13	09:54:20	0.508766
2022-09-13	09:54:20	0.461641
2022-09-13	09:54:20	0.49187
2022-09-13	09:54:21	0.474822
2022-09-13	09:54:21	0.478435
2022-09-13	09:54:21	0.497316
2022-09-13	09:54:21	0.459809
2022-09-13	09:54:22	0.476858
2022-09-13	09:54:22	0.493448
2022-09-13	09:54:22	0.490191
2022-09-13	09:54:22	0.490547
2022-09-13	09:54:23	0.48902
2022-09-13	09:54:23	0.463779
2022-09-13	09:54:23	0.464542
2022-09-13	09:54:23	0.441285
2022-09-13	09:54:24	0.418791
2022-09-13	09:54:24	0.434873
2022-09-13	09:54:24	0.415076
2022-09-13	09:54:25	0.414975
2022-09-13	09:54:25	0.393295
2022-09-13	09:54:25	0.437417
2022-09-13	09:54:25	0.332074
2022-09-13	09:54:26	0.327341
2022-09-13	09:54:26	0.348715
2022-09-13	09:54:26	0.398639
2022-09-13	09:54:26	0.481183
2022-09-13	09:54:27	0.476247
2022-09-13	09:54:27	0.459402
2022-09-13	09:54:27	0.388512
2022-09-13	09:54:27	0.493957
2022-09-13	09:54:28	0.400624
2022-09-13	09:54:28	0.485204
2022-09-13	09:54:28	0.578689
2022-09-13	09:54:29	0.877672
2022-09-13	09:54:29	1.51961
2022-09-13	09:54:29	1.18429
2022-09-13	09:54:29	0.559707
2022-09-13	09:54:30	0.544084
2022-09-13	09:54:30	0.537621
2022-09-13	09:54:30	0.459606
2022-09-13	09:54:30	0.454008
2022-09-13	09:54:31	0.510394
2022-09-13	09:54:31	0.411107
2022-09-13	09:54:31	0.888562
2022-09-13	09:54:31	0.310547
2022-09-13	09:54:32	0.153702
2022-09-13	09:54:32	0.305814
2022-09-13	09:54:32	0.607239
2022-09-13	09:54:32	0.461183
2022-09-13	09:54:33	0.384288
2022-09-13	09:54:33	0.426934
2022-09-13	09:54:33	0.317774
2022-09-13	09:54:34	0.285713
2022-09-13	09:54:34	0.175331
2022-09-13	09:54:34	0.368359
2022-09-13	09:54:34	0.284084
2022-09-13	09:54:35	0.262099
2022-09-13	09:54:35	0.0713106
2022-09-13	09:54:35	0.223677
2022-09-13	09:54:35	0.144797
2022-09-13	09:54:36	0.252735
2022-09-13	09:54:36	0.105102
2022-09-13	09:54:36	0.19701
2022-09-13	09:54:36	0.194415
2022-09-13	09:54:37	0.0797585
2022-09-13	09:54:37	-0.103091
2022-09-13	09:54:37	-0.205687
2022-09-13	09:54:38	0.042812
2022-09-13	09:54:38	0.0983844
2022-09-13	09:54:38	0.202048
2022-09-13	09:54:38	0.10958
2022-09-13	09:54:39	0.208664
2022-09-13	09:54:39	0.0936516
2022-09-13	09:54:39	0.131311
2022-09-13	09:54:39	0.133041
2022-09-13	09:54:40	0.22902
2022-09-13	09:54:40	0.197723
2022-09-13	09:54:40	0.365051
2022-09-13	09:54:40	0.279148
2022-09-13	09:54:41	0.268868
2022-09-13	09:54:41	0.302608
2022-09-13	09:54:41	0.428359
2022-09-13	09:54:41	0.396349
2022-09-13	09:54:42	0.426629
2022-09-13	09:54:42	0.541132
2022-09-13	09:54:42	0.534618
2022-09-13	09:54:43	0.456603
2022-09-13	09:54:43	0.328104
2022-09-13	09:54:43	0.408155
2022-09-13	09:54:43	0.392481
2022-09-13	09:54:44	0.434975
2022-09-13	09:54:44	0.235229
2022-09-13	09:54:44	0.392786
2022-09-13	09:54:44	0.290496
2022-09-13	09:54:45	0.447748
2022-09-13	09:54:45	0.245967
2022-09-13	09:54:45	0.397672
2022-09-13	09:54:45	0.408664
2022-09-13	09:54:46	0.528613
2022-09-13	09:54:46	0.277723
2022-09-13	09:54:46	0.422863
2022-09-13	09:54:47	0.298384
2022-09-13	09:54:47	0.419097
2022-09-13	09:54:47	0.261336
2022-09-13	09:54:47	0.517723
2022-09-13	09:54:48	0.327392
2022-09-13	09:54:48	0.605153
2022-09-13	09:54:48	0.491819
2022-09-13	09:54:48	1.3135
2022-09-13	09:54:49	0.698486
2022-09-13	09:54:49	1.41772
2022-09-13	09:54:49	1.29757
2022-09-13	09:54:49	0.972227
2022-09-13	09:54:50	1.68943
2022-09-13	09:54:50	0.736959
2022-09-13	09:54:50	1.96434
2022-09-13	09:54:50	0.737773
2022-09-13	09:54:51	1.88047
2022-09-13	09:54:51	0.628461
2022-09-13	09:54:51	1.85436
2022-09-13	09:54:52	1.028
2022-09-13	09:54:52	1.14836
2022-09-13	09:54:52	1.72378
2022-09-13	09:54:52	0.976145
2022-09-13	09:54:53	2.62963
2022-09-13	09:54:53	0.4107
2022-09-13	09:54:53	1.91238
2022-09-13	09:54:53	0.361387
2022-09-13	09:54:54	0.909886
2022-09-13	09:54:54	1.18775
2022-09-13	09:54:54	0.976908
2022-09-13	09:54:54	1.8191
2022-09-13	09:54:55	0.534567
2022-09-13	09:54:55	2.19599
2022-09-13	09:54:55	0.54729
2022-09-13	09:54:56	1.09726
2022-09-13	09:54:56	0.504491
2022-09-13	09:54:56	0.543728
2022-09-13	09:54:56	0.637367
2022-09-13	09:54:57	0.268257
2022-09-13	09:54:57	0.665
2022-09-13	09:54:57	0.404898
2022-09-13	09:54:57	0.481896
2022-09-13	09:54:58	0.438944
2022-09-13	09:54:58	0.445305
2022-09-13	09:54:58	0.490547
2022-09-13	09:54:58	0.193804
2022-09-13	09:54:59	-0.151794
2022-09-13	09:54:59	-0.305992
2022-09-13	09:54:59	-0.318969
2022-09-13	09:54:59	-0.279122
2022-09-13	09:55:00	-0.240343
2022-09-13	09:55:00	-0.142481
2022-09-13	09:55:00	-0.10131
2022-09-13	09:55:01	-0.0929132
2022-09-13	09:55:01	-0.0584603
2022-09-13	09:55:01	-0.0701651
2022-09-13	09:55:01	-0.0980532
2022-09-13	09:55:02	-0.0821244
2022-09-13	09:55:02	-0.0778496
2022-09-13	09:55:02	-0.0784094
2022-09-13	09:55:02	-0.0861447
2022-09-13	09:55:03	-0.0563738
2022-09-13	09:55:03	0.0173666
2022-09-13	09:55:03	-0.0557122
2022-09-13	09:55:03	-0.0643636
2022-09-13	09:55:04	-0.0592745
2022-09-13	09:55:04	0.0100384
2022-09-13	09:55:04	0.0526338
2022-09-13	09:55:05	0.103677
2022-09-13	09:55:05	0.0800129
2022-09-13	09:55:05	0.052583
2022-09-13	09:55:05	0.106578
2022-09-13	09:55:06	0.0835753
2022-09-13	09:55:06	0.0300893
2022-09-13	09:55:06	0.0526338
2022-09-13	09:55:06	0.0545168
2022-09-13	09:55:07	0.0508527
2022-09-13	09:55:07	0.0425066
2022-09-13	09:55:07	0.027443
2022-09-13	09:55:08	0.0743641
2022-09-13	09:55:08	0.0308527
2022-09-13	09:55:08	0.0153819
2022-09-13	09:55:08	0.0796567
2022-09-13	09:55:09	0.086018
2022-09-13	09:55:09	0.318842
2022-09-13	09:55:09	0.278283
2022-09-13	09:55:09	0.256959
2022-09-13	09:55:10	1.22205
2022-09-13	09:55:10	0.157926
2022-09-13	09:55:10	0.303524
2022-09-13	09:55:10	0.184491
2022-09-13	09:55:11	0.402252
2022-09-13	09:55:11	0.279911
2022-09-13	09:55:11	0.19014
2022-09-13	09:55:11	-0.221463
2022-09-13	09:55:12	-0.229402
2022-09-13	09:55:12	-0.10986
2022-09-13	09:55:12	0.168003
2022-09-13	09:55:12	0.196196
2022-09-13	09:55:13	0.160624
2022-09-13	09:55:13	0.352888
2022-09-13	09:55:13	0.497672
2022-09-13	09:55:14	0.487036
2022-09-13	09:55:14	0.436094
2022-09-13	09:55:14	0.429784
2022-09-13	09:55:14	0.488715
2022-09-13	09:55:15	0.526629
2022-09-13	09:55:15	0.290853
2022-09-13	09:55:15	-0.129656
2022-09-13	09:55:15	-0.194898
2022-09-13	09:55:16	-0.265127
2022-09-13	09:55:16	-0.0354069
2022-09-13	09:55:16	0.169784
2022-09-13	09:55:16	0.326629
2022-09-13	09:55:17	0.411056
2022-09-13	09:55:17	0.435941
2022-09-13	09:55:17	0.464491
2022-09-13	09:55:18	0.436654
2022-09-13	09:55:18	0.430598
2022-09-13	09:55:18	0.564135
2022-09-13	09:55:18	0.380471
2022-09-13	09:55:19	0.362965
2022-09-13	09:55:19	0.499707
2022-09-13	09:55:19	0.431921
2022-09-13	09:55:19	0.592278
2022-09-13	09:55:20	0.424288
2022-09-13	09:55:20	0.177825
2022-09-13	09:55:20	-0.282379
2022-09-13	09:55:20	-0.194949
2022-09-13	09:55:21	-0.232659
2022-09-13	09:55:21	0.0223539
2022-09-13	09:55:21	0.00220126
2022-09-13	09:55:21	0.133804
2022-09-13	09:55:22	0.125509
2022-09-13	09:55:22	0.145967
2022-09-13	09:55:22	0.193957
2022-09-13	09:55:23	0.128512
2022-09-13	09:55:23	0.214008
2022-09-13	09:55:23	0.194618
2022-09-13	09:55:23	0.217926
2022-09-13	09:55:24	0.202965
2022-09-13	09:55:24	0.148308
2022-09-13	09:55:24	0.18159
2022-09-13	09:55:24	0.197519
2022-09-13	09:55:25	0.206221
2022-09-13	09:55:25	0.305356
2022-09-13	09:55:25	0.239504
2022-09-13	09:55:25	0.189224
2022-09-13	09:55:26	0.324288
2022-09-13	09:55:26	0.250496
2022-09-13	09:55:26	0.274771
2022-09-13	09:55:27	0.246985
2022-09-13	09:55:27	0.249224
2022-09-13	09:55:27	0.288613
2022-09-13	09:55:27	0.316349
2022-09-13	09:55:28	0.309733
2022-09-13	09:55:28	0.348715
2022-09-13	09:55:28	0.290496
2022-09-13	09:55:28	0.322557
2022-09-13	09:55:29	0.351107
2022-09-13	09:55:29	0.320624
2022-09-13	09:55:29	0.305865
2022-09-13	09:55:29	0.33243
2022-09-13	09:55:30	0.474924
2022-09-13	09:55:30	0.380267
2022-09-13	09:55:30	0.539351
2022-09-13	09:55:30	0.668104
2022-09-13	09:55:31	0.753651
2022-09-13	09:55:31	0.447596
2022-09-13	09:55:31	2.04678
2022-09-13	09:55:32	1.88261
2022-09-13	09:55:32	0.869682
2022-09-13	09:55:32	1.01945
2022-09-13	09:55:32	1.22296
2022-09-13	09:55:33	0.638588
2022-09-13	09:55:33	0.473143
2022-09-13	09:55:33	0.741285
2022-09-13	09:55:33	0.841438
2022-09-13	09:55:34	1.41289
2022-09-13	09:55:34	5.80958
2022-09-13	09:55:34	3.69828
2022-09-13	09:55:34	2.2962
2022-09-13	09:55:35	2.21126
2022-09-13	09:55:35	2.24083
2022-09-13	09:55:35	2.10994
2022-09-13	09:55:36	2.0166
2022-09-13	09:55:36	1.97869
2022-09-13	09:55:36	2.12383
2022-09-13	09:55:36	1.90968
2022-09-13	09:55:37	2.2648
2022-09-13	09:55:37	1.87711
2022-09-13	09:55:37	1.81497
2022-09-13	09:55:37	1.40678
2022-09-13	09:55:38	0.720318
2022-09-13	09:55:38	0.648613
2022-09-13	09:55:38	0.893092
2022-09-13	09:55:38	1.21279
2022-09-13	09:55:39	1.3537
2022-09-13	09:55:39	1.53426
2022-09-13	09:55:39	1.19818
2022-09-13	09:55:39	1.26683
2022-09-13	09:55:40	1.31676
2022-09-13	09:55:40	1.32083
2022-09-13	09:55:40	1.3137
2022-09-13	09:55:41	1.41971
2022-09-13	09:55:41	1.45055
2022-09-13	09:55:41	1.45055
2022-09-13	09:55:41	1.55141
2022-09-13	09:55:42	1.75116
2022-09-13	09:55:42	1.73874
2022-09-13	09:55:42	1.66307
2022-09-13	09:55:42	1.62637
2022-09-13	09:55:43	1.57889
2022-09-13	09:55:43	1.50632
2022-09-13	09:55:43	1.62332
2022-09-13	09:55:43	1.57324
2022-09-13	09:55:44	1.62632
2022-09-13	09:55:44	1.54821
2022-09-13	09:55:44	1.63024
2022-09-13	09:55:45	1.751
2022-09-13	09:55:45	1.63045
2022-09-13	09:55:45	1.48973
2022-09-13	09:55:45	1.43945
2022-09-13	09:55:46	1.55482
2022-09-13	09:55:46	1.61436
2022-09-13	09:55:46	1.53655
2022-09-13	09:55:46	1.50439
2022-09-13	09:55:47	1.49772
2022-09-13	09:55:47	1.73482
2022-09-13	09:55:47	2.02592
2022-09-13	09:55:47	1.77966
2022-09-13	09:55:48	1.63838
2022-09-13	09:55:48	2.31487
2022-09-13	09:55:48	2.36001
2022-09-13	09:55:49	2.88739
2022-09-13	09:55:49	3.51925
2022-09-13	09:55:49	3.27838
2022-09-13	09:55:49	2.59726
2022-09-13	09:55:50	2.83462
2022-09-13	09:55:50	2.53686
2022-09-13	09:55:50	2.12754
2022-09-13	09:55:50	1.16744
2022-09-13	09:55:51	1.2478
2022-09-13	09:55:51	1.10118
2022-09-13	09:55:51	0.965509
2022-09-13	09:55:51	0.957672
2022-09-13	09:55:52	0.527086
2022-09-13	09:55:52	0.646476
2022-09-13	09:55:52	1.9706
2022-09-13	09:55:52	0.587799
2022-09-13	09:55:53	0.506119
2022-09-13	09:55:53	0.645305
2022-09-13	09:55:53	0.58785
2022-09-13	09:55:54	1.27894
2022-09-13	09:55:54	1.31655
2022-09-13	09:55:54	0.960878
2022-09-13	09:55:54	0.917672
2022-09-13	09:55:55	0.749987
2022-09-13	09:55:55	0.595433
2022-09-13	09:55:55	0.302048
2022-09-13	09:55:55	0.266069
2022-09-13	09:55:56	0.263372
2022-09-13	09:55:56	0.306679
