# Supplementary material for: Comparing efficacy in reducing pulling and welfare impacts of four types of leash walking equipment
Source: PeerJ journal article supplement (doi:10.7717/peerj.18131), 2024-10-24
Supplement: Shelter1_Tension_files.zip [file Bubba_martin_202291390336 copy.xlsx]

## Sheet: averaged newtons
Date	Time	Averaged Newtons
2022-09-13	09:03:38	1.93214	1.93214	0		Impulse	2812.43
2022-09-13	09:03:39	1.92293	3.85507	0		Total steps	79
2022-09-13	09:03:40	1.95477	5.80984	0		# > 5sec	2
2022-09-13	09:03:41	1.91522	7.72506	0
2022-09-13	09:03:42	2.0121	9.73717	0
2022-09-13	09:03:43	2.25532	11.9925	0
2022-09-13	09:03:44	2.19048	14.183	0
2022-09-13	09:03:45	1.27498	15.4579	0
2022-09-13	09:03:46	44.2296	59.6875	1
2022-09-13	09:03:47	15.6379	75.3254	2
2022-09-13	09:03:48	7.02346	82.3489	2
2022-09-13	09:03:49	2.56287	84.9117	2
2022-09-13	09:03:50	47.2107	132.122	3
2022-09-13	09:03:51	48.712	180.834	4
2022-09-13	09:03:52	1.92603	182.76	4
2022-09-13	09:03:53	1.82046	184.581	4
2022-09-13	09:03:54	1.591	186.172	4
2022-09-13	09:03:55	1.89269	188.065	4
2022-09-13	09:03:56	2.12546	190.19	4
2022-09-13	09:03:57	38.8194	229.009	5
2022-09-13	09:03:58	10.1395	239.149	5
2022-09-13	09:03:59	2.03525	241.184	5
2022-09-13	09:04:00	0.733558	241.918	5
2022-09-13	09:04:01	17.3311	259.249	6
2022-09-13	09:04:02	23.584	282.833	7
2022-09-13	09:04:03	12.8113	295.644	7
2022-09-13	09:04:04	14.9877	310.632	8
2022-09-13	09:04:05	15.1191	325.751	9
2022-09-13	09:04:06	7.26334	333.014	9
2022-09-13	09:04:07	9.22378	342.238	9
2022-09-13	09:04:08	18.2219	360.46	10
2022-09-13	09:04:09	5.91095	366.371	10
2022-09-13	09:04:10	17.2784	383.649	11
2022-09-13	09:04:11	12.3266	395.976	11
2022-09-13	09:04:12	19.257	415.233	12
2022-09-13	09:04:13	29.0226	444.255	13
2022-09-13	09:04:14	6.89369	451.149	13
2022-09-13	09:04:15	14.7117	465.861	14
2022-09-13	09:04:16	20.3245	486.185	15
2022-09-13	09:04:17	21.5457	507.731	16
2022-09-13	09:04:18	24.2476	531.979	17
2022-09-13	09:04:19	13.8028	545.781	18
2022-09-13	09:04:20	44.508	590.289	19
2022-09-13	09:04:21	31.2884	621.578	20
2022-09-13	09:04:22	47.8304	669.408	21
2022-09-13	09:04:23	20.3416	689.75	22
2022-09-13	09:04:24	15.4518	705.202	23
2022-09-13	09:04:25	29.221	734.423	24
2022-09-13	09:04:26	11.5967	746.019	24
2022-09-13	09:04:27	24.5846	770.604	25
2022-09-13	09:04:28	18.9964	789.6	26
2022-09-13	09:04:29	21.3666	810.967	27
2022-09-13	09:04:30	18.5993	829.566	28
2022-09-13	09:04:31	7.56935	837.136	28
2022-09-13	09:04:32	1.2451	838.381	28
2022-09-13	09:04:33	0.234409	838.615	28
2022-09-13	09:04:34	0.833029	839.448	28
2022-09-13	09:04:35	2.24843	841.697	28
2022-09-13	09:04:36	20.8433	862.54	29
2022-09-13	09:04:37	32.7899	895.33	30
2022-09-13	09:04:38	12.4368	907.767	30
2022-09-13	09:04:39	7.03331	914.8	30
2022-09-13	09:04:40	5.64984	920.45	30
2022-09-13	09:04:41	10.2603	930.71	30
2022-09-13	09:04:42	53.961	984.671	31
2022-09-13	09:04:43	28.5025	1013.17	32
2022-09-13	09:04:44	16.5517	1029.73	33
2022-09-13	09:04:45	4.47763	1034.2	33
2022-09-13	09:04:46	3.313	1037.52	33
2022-09-13	09:04:47	1.73553	1039.25	33
2022-09-13	09:04:48	1.68728	1040.94	33
2022-09-13	09:04:49	1.65025	1042.59	33
2022-09-13	09:04:50	2.07951	1044.67	33
2022-09-13	09:04:51	3.20389	1047.87	33
2022-09-13	09:04:52	1.2774	1049.15	33
2022-09-13	09:04:53	0.68981	1049.84	33
2022-09-13	09:04:54	0.540009	1050.38	33
2022-09-13	09:04:55	1.82982	1052.21	33
2022-09-13	09:04:56	1.41895	1053.63	33
2022-09-13	09:04:57	1.6168	1055.25	33
2022-09-13	09:04:58	1.52467	1056.77	33
2022-09-13	09:04:59	1.44227	1058.21	33
2022-09-13	09:05:00	1.64306	1059.86	33
2022-09-13	09:05:01	2.83189	1062.69	33
2022-09-13	09:05:02	2.02133	1064.71	33
2022-09-13	09:05:03	2.02704	1066.74	33
2022-09-13	09:05:04	1.99728	1068.73	33
2022-09-13	09:05:05	2.00056	1070.73	33
2022-09-13	09:05:06	4.76948	1075.5	33
2022-09-13	09:05:07	2.0125	1077.52	33
2022-09-13	09:05:08	1.93418	1079.45	33
2022-09-13	09:05:09	2.08782	1081.54	33
2022-09-13	09:05:10	2.07136	1083.61	33
2022-09-13	09:05:11	1.94021	1085.55	33
2022-09-13	09:05:12	8.14824	1093.7	33
2022-09-13	09:05:13	15.5256	1109.22	34
2022-09-13	09:05:14	5.29545	1114.52	34
2022-09-13	09:05:15	2.73123	1117.25	34
2022-09-13	09:05:16	2.28392	1119.53	34
2022-09-13	09:05:17	2.08403	1121.62	34
2022-09-13	09:05:18	2.45313	1124.07	34
2022-09-13	09:05:19	2.45217	1126.52	34
2022-09-13	09:05:20	3.3662	1129.89	34
2022-09-13	09:05:21	9.06629	1138.96	34
2022-09-13	09:05:22	2.18324	1141.14	34
2022-09-13	09:05:23	2.1524	1143.29	34
2022-09-13	09:05:24	2.15692	1145.45	34
2022-09-13	09:05:25	3.57763	1149.03	34
2022-09-13	09:05:26	2.08862	1151.11	34
2022-09-13	09:05:27	2.19065	1153.3	34
2022-09-13	09:05:28	2.0404	1155.34	34
2022-09-13	09:05:29	2.19322	1157.54	34
2022-09-13	09:05:30	2.16677	1159.7	34
2022-09-13	09:05:31	1.98862	1161.69	34
2022-09-13	09:05:32	2.20775	1163.9	34
2022-09-13	09:05:33	4.81377	1168.71	34
2022-09-13	09:05:34	9.41597	1178.13	34
2022-09-13	09:05:35	14.1328	1192.26	35
2022-09-13	09:05:36	5.36732	1197.63	35
2022-09-13	09:05:37	29.0788	1226.71	36
2022-09-13	09:05:38	31.4579	1258.17	37
2022-09-13	09:05:39	43.863	1302.03	38
2022-09-13	09:05:40	31.678	1333.71	39
2022-09-13	09:05:41	12.7171	1346.43	39
2022-09-13	09:05:42	3.48126	1349.91	39
2022-09-13	09:05:43	4.9087	1354.82	39
2022-09-13	09:05:44	8.13189	1362.95	39
2022-09-13	09:05:45	15.5899	1378.54	40
2022-09-13	09:05:46	10.8629	1389.4	40
2022-09-13	09:05:47	3.77019	1393.17	40
2022-09-13	09:05:48	25.7204	1418.89	41
2022-09-13	09:05:49	46.6828	1465.57	42
2022-09-13	09:05:50	22.6816	1488.26	43
2022-09-13	09:05:51	9.62028	1497.88	43
2022-09-13	09:05:52	3.33745	1501.21	43
2022-09-13	09:05:53	16.4642	1517.68	44
2022-09-13	09:05:54	3.17792	1520.86	44
2022-09-13	09:05:55	17.4631	1538.32	45
2022-09-13	09:05:56	28.266	1566.58	46
2022-09-13	09:05:57	19.1899	1585.77	47
2022-09-13	09:05:58	16.4464	1602.22	48
2022-09-13	09:05:59	26.3661	1628.59	49
2022-09-13	09:06:00	9.86564	1638.45	49
2022-09-13	09:06:01	3.65098	1642.1	49
2022-09-13	09:06:02	19.2997	1661.4	50
2022-09-13	09:06:03	9.59006	1670.99	50
2022-09-13	09:06:04	28.9681	1699.96	51
2022-09-13	09:06:05	3.96117	1703.92	51
2022-09-13	09:06:06	2.13253	1706.06	51
2022-09-13	09:06:07	3.03977	1709.09	51
2022-09-13	09:06:08	9.34863	1718.44	51
2022-09-13	09:06:09	35.4613	1753.9	52
2022-09-13	09:06:10	12.8398	1766.74	52
2022-09-13	09:06:11	14.7622	1781.51	53
2022-09-13	09:06:12	16.6395	1798.15	54
2022-09-13	09:06:13	15.2942	1813.44	55
2022-09-13	09:06:14	2.0885	1815.53	55
2022-09-13	09:06:15	-0.734668	1815.53	55
2022-09-13	09:06:16	2.04731	1817.58	55
2022-09-13	09:06:17	3.07135	1820.65	55
2022-09-13	09:06:18	3.17418	1823.82	55
2022-09-13	09:06:19	2.51233	1826.33	55
2022-09-13	09:06:20	2.09988	1828.43	55
2022-09-13	09:06:21	1.96253	1830.4	55
2022-09-13	09:06:22	1.88816	1832.28	55
2022-09-13	09:06:23	2.69745	1834.98	55
2022-09-13	09:06:24	8.08319	1843.07	55
2022-09-13	09:06:25	5.71542	1848.78	55
2022-09-13	09:06:26	2.80904	1851.59	55
2022-09-13	09:06:27	7.12787	1858.72	55
2022-09-13	09:06:28	14.291	1873.01	56
2022-09-13	09:06:29	29.4547	1902.46	57
2022-09-13	09:06:30	28.3789	1930.84	58
2022-09-13	09:06:31	9.49499	1940.34	58
2022-09-13	09:06:32	2.99495	1943.33	58
2022-09-13	09:06:33	2.20718	1945.54	58
2022-09-13	09:06:34	24.9418	1970.48	59
2022-09-13	09:06:35	16.6792	1987.16	60
2022-09-13	09:06:36	6.12942	1993.29	60
2022-09-13	09:06:37	4.78402	1998.07	60
2022-09-13	09:06:38	2.93874	2001.01	60
2022-09-13	09:06:39	1.97249	2002.98	60
2022-09-13	09:06:40	1.87124	2004.86	60
2022-09-13	09:06:41	2.41538	2007.27	60
2022-09-13	09:06:42	2.04812	2009.32	60
2022-09-13	09:06:43	2.29009	2011.61	60
2022-09-13	09:06:44	1.79903	2013.41	60
2022-09-13	09:06:45	0.768531	2014.18	60
2022-09-13	09:06:46	0.835971	2015.01	60
2022-09-13	09:06:47	0.835197	2015.85	60
2022-09-13	09:06:48	1.79332	2017.64	60
2022-09-13	09:06:49	1.67424	2019.32	60
2022-09-13	09:06:50	12.6146	2031.93	60
2022-09-13	09:06:51	23.5487	2055.48	61
2022-09-13	09:06:52	18.8623	2074.34	62
2022-09-13	09:06:53	14.8325	2089.17	63
2022-09-13	09:06:54	11.5461	2100.72	63
2022-09-13	09:06:55	14.8071	2115.53	64
2022-09-13	09:06:56	9.54176	2125.07	64
2022-09-13	09:06:57	4.69608	2129.77	64
2022-09-13	09:06:58	9.91174	2139.68	64
2022-09-13	09:06:59	13.8287	2153.51	65
2022-09-13	09:07:00	8.1502	2161.66	65
2022-09-13	09:07:01	9.26085	2170.92	65
2022-09-13	09:07:02	16.8595	2187.78	66
2022-09-13	09:07:03	21.2627	2209.04	67
2022-09-13	09:07:04	30.6092	2239.65	68
2022-09-13	09:07:05	31.9064	2271.55	69
2022-09-13	09:07:06	30.4529	2302.01	70
2022-09-13	09:07:07	1.96971	2303.98	70
2022-09-13	09:07:08	3.83287	2307.81	70
2022-09-13	09:07:09	7.00975	2314.82	70
2022-09-13	09:07:10	1.01405	2315.83	70
2022-09-13	09:07:11	1.92297	2317.76	70
2022-09-13	09:07:12	4.59234	2322.35	70
2022-09-13	09:07:13	4.49105	2326.84	70
2022-09-13	09:07:14	4.3033	2331.14	70
2022-09-13	09:07:15	2.4254	2333.57	70
2022-09-13	09:07:16	2.33033	2335.9	70
2022-09-13	09:07:17	2.58024	2338.48	70
2022-09-13	09:07:18	1.90639	2340.39	70
2022-09-13	09:07:19	2.22521	2342.61	70
2022-09-13	09:07:20	1.83044	2344.44	70
2022-09-13	09:07:21	2.02302	2346.46	70
2022-09-13	09:07:22	2.12676	2348.59	70
2022-09-13	09:07:23	2.14712	2350.74	70
2022-09-13	09:07:24	2.06592	2352.8	70
2022-09-13	09:07:25	2.06258	2354.87	70
2022-09-13	09:07:26	2.10446	2356.97	70
2022-09-13	09:07:27	2.10113	2359.07	70
2022-09-13	09:07:28	2.04706	2361.12	70
2022-09-13	09:07:29	2.08879	2363.21	70
2022-09-13	09:07:30	2.07039	2365.28	70
2022-09-13	09:07:31	2.09252	2367.37	70
2022-09-13	09:07:32	2.04759	2369.42	70
2022-09-13	09:07:33	2.00107	2371.42	70
2022-09-13	09:07:34	3.16988	2374.59	70
2022-09-13	09:07:35	3.13706	2377.73	70
2022-09-13	09:07:36	1.46321	2379.19	70
2022-09-13	09:07:37	6.20807	2385.4	70
2022-09-13	09:07:38	11.3927	2396.79	70
2022-09-13	09:07:39	22.7256	2419.52	71
2022-09-13	09:07:40	12.7433	2432.26	71
2022-09-13	09:07:41	14.2819	2446.54	72
2022-09-13	09:07:42	28.7186	2475.26	73
2022-09-13	09:07:43	40.9169	2516.18	74
2022-09-13	09:07:44	26.4821	2542.66	75
2022-09-13	09:07:45	-0.618786	2542.66	75
2022-09-13	09:07:46	-0.741988	2542.66	75
2022-09-13	09:07:47	11.123	2553.78	75
2022-09-13	09:07:48	24.0667	2577.85	76
2022-09-13	09:07:49	1.43254	2579.28	76
2022-09-13	09:07:50	0.150933	2579.43	76
2022-09-13	09:07:51	0.207113	2579.64	76
2022-09-13	09:07:52	15.8179	2595.46	77
2022-09-13	09:07:53	6.10829	2601.57	77
2022-09-13	09:07:54	3.08324	2604.65	77
2022-09-13	09:07:55	3.71512	2608.36	77
2022-09-13	09:07:56	4.50762	2612.87	77
2022-09-13	09:07:57	5.55561	2618.43	77
2022-09-13	09:07:58	2.62229	2621.05	77
2022-09-13	09:07:59	1.94991	2623	77
2022-09-13	09:08:00	1.97213	2624.97	77
2022-09-13	09:08:01	1.785	2626.76	77
2022-09-13	09:08:02	1.85178	2628.61	77
2022-09-13	09:08:03	2.13712	2630.75	77
2022-09-13	09:08:04	1.76975	2632.52	77
2022-09-13	09:08:05	1.85478	2634.37	77
2022-09-13	09:08:06	35.0576	2669.43	78
2022-09-13	09:08:07	3.53021	2672.96	78
2022-09-13	09:08:08	2.11137	2675.07	78
2022-09-13	09:08:09	2.19126	2677.26	78
2022-09-13	09:08:10	2.37883	2679.64	78
2022-09-13	09:08:11	2.02048	2681.66	78
2022-09-13	09:08:12	1.61454	2683.27	78
2022-09-13	09:08:13	2.38835	2685.66	78
2022-09-13	09:08:14	2.34498	2688.01	78
2022-09-13	09:08:15	4.12143	2692.13	78
2022-09-13	09:08:16	4.64661	2696.78	78
2022-09-13	09:08:17	3.88482	2700.66	78
2022-09-13	09:08:18	3.13674	2703.8	78
2022-09-13	09:08:19	2.08403	2705.88	78
2022-09-13	09:08:20	1.64527	2707.53	78
2022-09-13	09:08:21	1.23129	2708.76	78
2022-09-13	09:08:22	1.2593	2710.02	78
2022-09-13	09:08:23	1.11162	2711.13	78
2022-09-13	09:08:24	7.05736	2718.19	78
2022-09-13	09:08:25	11.006	2729.19	78
2022-09-13	09:08:26	6.79997	2735.99	78
2022-09-13	09:08:27	9.79861	2745.79	78
2022-09-13	09:08:28	8.25281	2754.04	78
2022-09-13	09:08:29	9.95146	2763.99	78
2022-09-13	09:08:30	9.18372	2773.18	78
2022-09-13	09:08:31	6.36715	2779.55	78
2022-09-13	09:08:32	13.7013	2793.25	79
2022-09-13	09:08:33	8.89017	2802.14	79
2022-09-13	09:08:34	1.57577	2803.71	79
2022-09-13	09:08:35	1.65925	2805.37	79
2022-09-13	09:08:36	1.66283	2807.04	79
2022-09-13	09:08:37	2.78539	2809.82	79
2022-09-13	09:08:38	2.60582	2812.43	79

## Sheet: Bubba_martin_202291390336 (4)
Date	Time	Lbs	Newtons	Averaged Newtons	Total force x time	total steps > 13.345		**GoPro Fitting: 853
2022-09-13	09:03:38	0.441234	1.9627	1.93214	1.9627	FALSE	0				Total Force x time	5394.02
2022-09-13	09:03:38	0.429377	1.90995	1.93214	1.90995	FALSE	0				Total steps	256
2022-09-13	09:03:38	0.448512	1.99507	1.93214	3.95777	FALSE	0
2022-09-13	09:03:38	0.418333	1.86083	1.93214	3.77078	FALSE	0
2022-09-13	09:03:39	0.427137	1.89999	1.92293	5.85776	FALSE	0
2022-09-13	09:03:39	0.43014	1.91335	1.92293	5.68413	FALSE	0
2022-09-13	09:03:39	0.439606	1.95546	1.92293	7.81321	FALSE	0
2022-09-13	09:03:40	0.439504	1.955	1.95477	7.63913	FALSE	0
2022-09-13	09:03:40	0.440166	1.95795	1.95477	9.77116	FALSE	0
2022-09-13	09:03:40	0.440725	1.96043	1.95477	9.59957	FALSE	0
2022-09-13	09:03:40	0.437417	1.94572	1.95477	11.7169	FALSE	0
2022-09-13	09:03:41	0.443117	1.97107	1.91522	11.5706	FALSE	0
2022-09-13	09:03:41	0.445916	1.98352	1.91522	13.7004	FALSE	0
2022-09-13	09:03:41	0.431311	1.91856	1.91522	13.4892	FALSE	0
2022-09-13	09:03:41	0.401896	1.78771	1.91522	15.4881	FALSE	0
2022-09-13	09:03:42	0.421438	1.87464	2.0121	15.3638	FALSE	0
2022-09-13	09:03:42	0.445713	1.98262	2.0121	17.4707	FALSE	0
2022-09-13	09:03:42	0.430547	1.91516	2.0121	17.279	FALSE	0
2022-09-13	09:03:42	0.511667	2.276	2.0121	19.7467	FALSE	0
2022-09-13	09:03:43	0.434568	1.93305	2.25532	19.212	FALSE	0
2022-09-13	09:03:43	0.492277	2.18975	2.25532	21.9365	FALSE	0
2022-09-13	09:03:43	0.594211	2.64317	2.25532	21.8552	FALSE	0
2022-09-13	09:03:44	0.486679	2.16485	2.19048	24.1013	FALSE	0
2022-09-13	09:03:44	0.463117	2.06004	2.19048	23.9152	FALSE	0
2022-09-13	09:03:44	0.44729	1.98964	2.19048	26.091	FALSE	0
2022-09-13	09:03:44	0.572684	2.54741	2.19048	26.4627	FALSE	0
2022-09-13	09:03:45	0.325305	1.44702	1.27498	27.538	FALSE	0
2022-09-13	09:03:45	0.243524	1.08324	1.27498	27.5459	FALSE	0
2022-09-13	09:03:45	0.247799	1.10226	1.27498	28.6402	FALSE	0
2022-09-13	09:03:45	0.329886	1.4674	1.27498	29.0133	FALSE	0
2022-09-13	09:03:46	2.38729	10.6191	44.2296	39.2594	FALSE	0
2022-09-13	09:03:46	18.6667	83.0332	44.2296	112.047	1	1
2022-09-13	09:03:46	12.731	56.63	44.2296	95.8894	1	2
2022-09-13	09:03:46	5.988	26.6358	44.2296	138.682	1	3
2022-09-13	09:03:47	4.22342	18.7866	15.6379	114.676	1	4
2022-09-13	09:03:47	3.75782	16.7155	15.6379	155.398	1	5
2022-09-13	09:03:47	2.36083	10.5014	15.6379	125.177	FALSE	5
2022-09-13	09:03:47	3.72016	16.548	15.6379	171.946	1	6
2022-09-13	09:03:48	2.39813	10.6674	7.02346	135.845	FALSE	6
2022-09-13	09:03:48	1.80968	8.04982	7.02346	179.996	FALSE	6
2022-09-13	09:03:48	0.52902	2.35319	7.02346	138.198	FALSE	6
2022-09-13	09:03:49	0.14327	0.637294	2.56287	180.633	FALSE	6
2022-09-13	09:03:49	0.311972	1.38771	2.56287	139.586	FALSE	6
2022-09-13	09:03:49	0.133601	0.594284	2.56287	181.227	FALSE	6
2022-09-13	09:03:49	1.71579	7.63218	2.56287	147.218	FALSE	6
2022-09-13	09:03:50	9.87365	43.92	47.2107	225.147	1	7
2022-09-13	09:03:50	11.9106	52.9807	47.2107	200.199	1	8
2022-09-13	09:03:50	10.1351	45.083	47.2107	270.23	1	9
2022-09-13	09:03:50	10.5344	46.8591	47.2107	247.058	1	10
2022-09-13	09:03:51	11.8471	52.6983	48.712	322.928	1	11
2022-09-13	09:03:51	15.4309	68.6397	48.712	315.697	1	12
2022-09-13	09:03:51	12.2375	54.4348	48.712	377.363	1	13
2022-09-13	09:03:51	4.28826	19.075	48.712	334.773	1	14
2022-09-13	09:03:52	0.385713	1.71573	1.92603	379.079	FALSE	14
2022-09-13	09:03:52	0.579606	2.5782	1.92603	337.351	FALSE	14
2022-09-13	09:03:52	0.368155	1.63763	1.92603	380.717	FALSE	14
2022-09-13	09:03:52	0.398486	1.77255	1.92603	339.123	FALSE	14
2022-09-13	09:03:53	0.457875	2.03672	1.82046	382.753	FALSE	14
2022-09-13	09:03:53	0.219046	0.97436	1.82046	340.098	FALSE	14
2022-09-13	09:03:53	0.550852	2.4503	1.82046	385.204	FALSE	14
2022-09-13	09:03:54	0.559504	2.48879	1.591	342.586	FALSE	14
2022-09-13	09:03:54	0.22785	1.01352	1.591	386.217	FALSE	14
2022-09-13	09:03:54	0.371972	1.65461	1.591	344.241	FALSE	14
2022-09-13	09:03:54	0.271361	1.20707	1.591	387.424	FALSE	14
2022-09-13	09:03:55	0.462965	2.05936	1.89269	346.3	FALSE	14
2022-09-13	09:03:55	0.405356	1.8031	1.89269	389.227	FALSE	14
2022-09-13	09:03:55	0.403117	1.79315	1.89269	348.094	FALSE	14
2022-09-13	09:03:55	0.430547	1.91516	1.89269	391.143	FALSE	14
2022-09-13	09:03:56	0.526069	2.34006	2.12546	350.434	FALSE	14
2022-09-13	09:03:56	0.508664	2.26264	2.12546	393.405	FALSE	14
2022-09-13	09:03:56	0.427392	1.90113	2.12546	352.335	FALSE	14
2022-09-13	09:03:56	0.449173	1.99801	2.12546	395.403	FALSE	14
2022-09-13	09:03:57	8.59706	38.2414	38.8194	390.576	1	15
2022-09-13	09:03:57	15.8772	70.625	38.8194	466.028	1	16
2022-09-13	09:03:57	1.70668	7.59165	38.8194	398.168	FALSE	16
2022-09-13	09:03:58	3.90749	17.3813	10.1395	483.409	1	17
2022-09-13	09:03:58	2.50169	11.128	10.1395	409.296	FALSE	17
2022-09-13	09:03:58	1.13284	5.0391	10.1395	488.449	FALSE	17
2022-09-13	09:03:58	1.57584	7.00965	10.1395	416.305	FALSE	17
2022-09-13	09:03:59	0.701896	3.12217	2.03525	491.571	FALSE	17
2022-09-13	09:03:59	0.678028	3.016	2.03525	419.321	FALSE	17
2022-09-13	09:03:59	0.280216	1.24646	2.03525	492.817	FALSE	17
2022-09-13	09:03:59	0.170038	0.756363	2.03525	420.078	FALSE	17
2022-09-13	09:04:00	0.277723	1.23537	0.733558	494.053	FALSE	17
2022-09-13	09:04:00	0.204644	0.910297	0.733558	420.988	FALSE	17
2022-09-13	09:04:00	0.154873	0.688906	0.733558	494.741	FALSE	17
2022-09-13	09:04:00	0.0224048	0.099661	0.733558	421.088	FALSE	17
2022-09-13	09:04:01	0.0896312	0.398698	17.3311	495.14	FALSE	17
2022-09-13	09:04:01	1.05823	4.70722	17.3311	425.795	FALSE	17
2022-09-13	09:04:01	9.79065	43.5508	17.3311	538.691	1	18
2022-09-13	09:04:01	4.64632	20.6678	17.3311	446.463	1	19
2022-09-13	09:04:02	6.12179	27.2309	23.584	565.922	1	20
2022-09-13	09:04:02	4.92123	21.8906	23.584	468.353	1	21
2022-09-13	09:04:02	4.86276	21.6305	23.584	587.552	1	22
2022-09-13	09:04:03	2.05706	9.15021	12.8113	477.504	FALSE	22
2022-09-13	09:04:03	2.21365	9.84676	12.8113	597.399	FALSE	22
2022-09-13	09:04:03	4.81339	21.4109	12.8113	498.915	1	23
2022-09-13	09:04:03	2.4363	10.8371	12.8113	608.236	FALSE	23
2022-09-13	09:04:04	5.1224	22.7855	14.9877	521.7	1	24
2022-09-13	09:04:04	4.69513	20.8849	14.9877	629.121	1	25
2022-09-13	09:04:04	1.89752	8.44055	14.9877	530.141	FALSE	25
2022-09-13	09:04:04	1.76246	7.83977	14.9877	636.961	FALSE	25
2022-09-13	09:04:05	1.95396	8.6916	15.1191	538.832	FALSE	25
2022-09-13	09:04:05	4.74149	21.0911	15.1191	658.052	1	26
2022-09-13	09:04:05	0.880115	3.91493	15.1191	542.747	FALSE	26
2022-09-13	09:04:05	6.02011	26.7787	15.1191	684.831	1	27
2022-09-13	09:04:06	3.76663	16.7547	7.26334	559.502	1	28
2022-09-13	09:04:06	0.525611	2.33802	7.26334	687.169	FALSE	28
2022-09-13	09:04:06	0.606374	2.69727	7.26334	562.199	FALSE	28
2022-09-13	09:04:07	0.385814	1.71618	9.22378	688.885	FALSE	28
2022-09-13	09:04:07	0.813041	3.61657	9.22378	565.816	FALSE	28
2022-09-13	09:04:07	1.73548	7.71976	9.22378	696.605	FALSE	28
2022-09-13	09:04:07	5.36006	23.8426	9.22378	589.658	1	29
2022-09-13	09:04:08	4.96622	22.0907	18.2219	718.695	1	30
2022-09-13	09:04:08	7.78113	34.612	18.2219	624.27	1	31
2022-09-13	09:04:08	1.21212	5.39175	18.2219	724.087	FALSE	31
2022-09-13	09:04:08	2.42637	10.793	18.2219	635.063	FALSE	31
2022-09-13	09:04:09	1.3138	5.84405	5.91095	729.931	FALSE	31
2022-09-13	09:04:09	0.863575	3.84135	5.91095	638.905	FALSE	31
2022-09-13	09:04:09	1.62312	7.21996	5.91095	737.151	FALSE	31
2022-09-13	09:04:09	1.51487	6.73844	5.91095	645.643	FALSE	31
2022-09-13	09:04:10	4.42724	19.6932	17.2784	756.844	1	32
2022-09-13	09:04:10	2.10556	9.36595	17.2784	655.009	FALSE	32
2022-09-13	09:04:10	6.32973	28.1559	17.2784	785	1	33
2022-09-13	09:04:10	2.67492	11.8986	17.2784	666.908	FALSE	33
2022-09-13	09:04:11	4.35711	19.3813	12.3266	804.382	1	34
2022-09-13	09:04:11	1.51441	6.7364	12.3266	673.644	FALSE	34
2022-09-13	09:04:11	2.4419	10.8621	12.3266	815.244	FALSE	34
2022-09-13	09:04:12	3.08403	13.7184	19.257	687.362	1	35
2022-09-13	09:04:12	2.12841	9.46759	19.257	824.711	FALSE	35
2022-09-13	09:04:12	5.79192	25.7636	19.257	713.126	1	36
2022-09-13	09:04:12	6.31227	28.0782	19.257	852.79	1	37
2022-09-13	09:04:13	11.2661	50.1139	29.0226	763.24	1	38
2022-09-13	09:04:13	4.00113	17.7978	29.0226	870.587	1	39
2022-09-13	09:04:13	4.63696	20.6261	29.0226	783.866	1	40
2022-09-13	09:04:13	6.19411	27.5526	29.0226	898.14	1	41
2022-09-13	09:04:14	3.88011	17.2595	6.89369	801.126	1	42
2022-09-13	09:04:14	0.86958	3.86807	6.89369	902.008	FALSE	42
2022-09-13	09:04:14	0.699555	3.11176	6.89369	804.237	FALSE	42
2022-09-13	09:04:14	0.749835	3.33542	6.89369	905.343	FALSE	42
2022-09-13	09:04:15	0.572226	2.54538	14.7117	806.783	FALSE	42
2022-09-13	09:04:15	1.29192	5.74672	14.7117	911.09	FALSE	42
2022-09-13	09:04:15	1.81304	8.06476	14.7117	814.847	FALSE	42
2022-09-13	09:04:15	9.55217	42.49	14.7117	953.58	1	43
2022-09-13	09:04:16	6.26413	27.8641	20.3245	842.712	1	44
2022-09-13	09:04:16	5.99884	26.684	20.3245	980.264	1	45
2022-09-13	09:04:16	1.44449	6.42538	20.3245	849.137	FALSE	45
2022-09-13	09:04:17	4.04688	18.0013	21.5457	998.266	1	46
2022-09-13	09:04:17	1.27167	5.65664	21.5457	854.794	FALSE	46
2022-09-13	09:04:17	5.25604	23.3799	21.5457	1021.65	1	47
2022-09-13	09:04:17	8.80016	39.1449	21.5457	893.938	1	48
2022-09-13	09:04:18	4.15838	18.4973	24.2476	1040.14	1	49
2022-09-13	09:04:18	7.86082	34.9665	24.2476	928.905	1	50
2022-09-13	09:04:18	2.67828	11.9135	24.2476	1052.06	FALSE	50
2022-09-13	09:04:18	7.10698	31.6133	24.2476	960.518	1	51
2022-09-13	09:04:19	0.386425	1.7189	13.8028	1053.78	FALSE	51
2022-09-13	09:04:19	2.38612	10.6139	13.8028	971.132	FALSE	51
2022-09-13	09:04:19	3.0168	13.4193	13.8028	1067.19	1	52
2022-09-13	09:04:19	6.62266	29.4589	13.8028	1000.59	1	53
2022-09-13	09:04:20	10.7804	47.9534	44.508	1115.15	1	54
2022-09-13	09:04:20	6.89584	30.6741	44.508	1031.27	1	55
2022-09-13	09:04:20	12.3413	54.8966	44.508	1170.04	1	56
2022-09-13	09:04:21	1.66424	7.40287	31.2884	1038.67	FALSE	56
2022-09-13	09:04:21	7.9337	35.2907	31.2884	1205.34	1	57
2022-09-13	09:04:21	9.97161	44.3557	31.2884	1083.02	1	58
2022-09-13	09:04:21	8.56627	38.1045	31.2884	1243.44	1	59
2022-09-13	09:04:22	14.7212	65.4828	47.8304	1148.51	1	60
2022-09-13	09:04:22	10.8385	48.2118	47.8304	1291.65	1	61
2022-09-13	09:04:22	8.16418	36.3159	47.8304	1184.82	1	62
2022-09-13	09:04:22	9.28713	41.311	47.8304	1332.96	1	63
2022-09-13	09:04:23	7.20724	32.0592	20.3416	1216.88	1	64
2022-09-13	09:04:23	1.88475	8.38374	20.3416	1341.35	FALSE	64
2022-09-13	09:04:23	4.22556	18.7961	20.3416	1235.68	1	65
2022-09-13	09:04:23	4.97446	22.1274	20.3416	1363.47	1	66
2022-09-13	09:04:24	1.27416	5.66772	15.4518	1241.35	FALSE	66
2022-09-13	09:04:24	2.72464	12.1197	15.4518	1375.59	FALSE	66
2022-09-13	09:04:24	5.46357	24.3031	15.4518	1265.65	1	67
2022-09-13	09:04:24	4.43253	19.7168	15.4518	1395.31	1	68
2022-09-13	09:04:25	11.7924	52.455	29.221	1318.1	1	69
2022-09-13	09:04:25	5.66378	25.1936	29.221	1420.5	1	70
2022-09-13	09:04:25	2.25131	10.0143	29.221	1328.12	FALSE	70
2022-09-13	09:04:26	1.9935	8.86749	11.5967	1429.37	FALSE	70
2022-09-13	09:04:26	0.905763	4.02901	11.5967	1332.15	FALSE	70
2022-09-13	09:04:26	3.93426	17.5004	11.5967	1446.87	1	71
2022-09-13	09:04:26	3.59472	15.99	11.5967	1348.14	1	72
2022-09-13	09:04:27	3.32296	14.7812	24.5846	1461.65	1	73
2022-09-13	09:04:27	8.12342	36.1346	24.5846	1384.27	1	74
2022-09-13	09:04:27	2.92932	13.0302	24.5846	1474.68	FALSE	74
2022-09-13	09:04:27	7.73176	34.3924	24.5846	1418.66	1	75
2022-09-13	09:04:28	2.71955	12.0971	18.9964	1486.78	FALSE	75
2022-09-13	09:04:28	7.14897	31.8	18.9964	1450.46	1	76
2022-09-13	09:04:28	4.1963	18.666	18.9964	1505.45	1	77
2022-09-13	09:04:28	3.01752	13.4225	18.9964	1463.89	1	78
2022-09-13	09:04:29	4.1623	18.5147	21.3666	1523.96	1	79
2022-09-13	09:04:29	2.25711	10.0401	21.3666	1473.93	FALSE	79
2022-09-13	09:04:29	7.99085	35.5449	21.3666	1559.51	1	80
2022-09-13	09:04:30	3.31533	14.7473	18.5993	1488.67	1	81
2022-09-13	09:04:30	5.38347	23.9468	18.5993	1583.45	1	82
2022-09-13	09:04:30	3.55207	15.8003	18.5993	1504.47	1	83
2022-09-13	09:04:30	4.47441	19.9031	18.5993	1603.36	1	84
2022-09-13	09:04:31	4.42719	19.693	7.56935	1524.17	1	85
2022-09-13	09:04:31	0.74556	3.3164	7.56935	1606.67	FALSE	85
2022-09-13	09:04:31	1.16459	5.18033	7.56935	1529.35	FALSE	85
2022-09-13	09:04:31	0.469326	2.08766	7.56935	1608.76	FALSE	85
2022-09-13	09:04:32	0.413397	1.83887	1.2451	1531.19	FALSE	85
2022-09-13	09:04:32	0.167748	0.746177	1.2451	1609.51	FALSE	85
2022-09-13	09:04:32	0.240267	1.06876	1.2451	1532.26	FALSE	85
2022-09-13	09:04:32	0.298232	1.3266	1.2451	1610.83	FALSE	85
2022-09-13	09:04:33	-0.0864501	-0.384547	0.234409	1532.26	FALSE	85
2022-09-13	09:04:33	0.210751	0.937463	0.234409	1611.77	FALSE	85
2022-09-13	09:04:33	-0.0719463	-0.320032	0.234409	1532.26	FALSE	85
2022-09-13	09:04:33	0.158435	0.704751	0.234409	1612.47	FALSE	85
2022-09-13	09:04:34	-0.0646181	-0.287434	0.833029	1532.26	FALSE	85
2022-09-13	09:04:34	0.236094	1.05019	0.833029	1613.52	FALSE	85
2022-09-13	09:04:34	0.390344	1.73633	0.833029	1533.99	FALSE	85
2022-09-13	09:04:35	0.398639	1.77323	2.24843	1615.3	FALSE	85
2022-09-13	09:04:35	0.396094	1.76191	2.24843	1535.75	FALSE	85
2022-09-13	09:04:35	0.185865	0.826765	2.24843	1616.12	FALSE	85
2022-09-13	09:04:35	1.04128	4.63182	2.24843	1540.39	FALSE	85
2022-09-13	09:04:36	3.40271	15.1359	20.8433	1631.26	1	86
2022-09-13	09:04:36	7.17731	31.9261	20.8433	1572.31	1	87
2022-09-13	09:04:36	4.7307	21.0431	20.8433	1652.3	1	88
2022-09-13	09:04:36	3.43243	15.2681	20.8433	1587.58	1	89
2022-09-13	09:04:37	2.73828	12.1804	32.7899	1664.48	FALSE	89
2022-09-13	09:04:37	5.56617	24.7594	32.7899	1612.34	1	90
2022-09-13	09:04:37	16.695	74.2627	32.7899	1738.75	1	91
2022-09-13	09:04:37	4.48658	19.9572	32.7899	1632.3	1	92
2022-09-13	09:04:38	6.63665	29.5211	12.4368	1768.27	1	93
2022-09-13	09:04:38	0.989784	4.40276	12.4368	1636.7	FALSE	93
2022-09-13	09:04:38	0.761285	3.38635	12.4368	1771.65	FALSE	93
2022-09-13	09:04:39	0.772888	3.43796	7.03331	1640.14	FALSE	93
2022-09-13	09:04:39	0.741234	3.29716	7.03331	1774.95	FALSE	93
2022-09-13	09:04:39	3.03177	13.4859	7.03331	1653.62	1	94
2022-09-13	09:04:39	1.77874	7.91219	7.03331	1782.86	FALSE	94
2022-09-13	09:04:40	2.1221	9.43953	5.64984	1663.06	FALSE	94
2022-09-13	09:04:40	1.31502	5.84947	5.64984	1788.71	FALSE	94
2022-09-13	09:04:40	1.18363	5.26502	5.64984	1668.33	FALSE	94
2022-09-13	09:04:40	0.459809	2.04532	5.64984	1790.76	FALSE	94
2022-09-13	09:04:41	0.520369	2.31471	10.2603	1670.64	FALSE	94
2022-09-13	09:04:41	0.867697	3.85969	10.2603	1794.62	FALSE	94
2022-09-13	09:04:41	1.68525	7.49633	10.2603	1678.14	FALSE	94
2022-09-13	09:04:41	6.15314	27.3704	10.2603	1821.99	1	95
2022-09-13	09:04:42	12.9158	57.4521	53.961	1735.59	1	96
2022-09-13	09:04:42	14.341	63.7916	53.961	1885.78	1	97
2022-09-13	09:04:42	5.44581	24.2241	53.961	1759.81	1	98
2022-09-13	09:04:42	15.8213	70.3763	53.961	1956.16	1	99
2022-09-13	09:04:43	6.88576	30.6292	28.5025	1790.44	1	100
2022-09-13	09:04:43	8.77782	39.0455	28.5025	1995.2	1	101
2022-09-13	09:04:43	3.55935	15.8327	28.5025	1806.28	1	102
2022-09-13	09:04:44	5.61634	24.9826	16.5517	2020.18	1	103
2022-09-13	09:04:44	3.77009	16.7701	16.5517	1823.05	1	104
2022-09-13	09:04:44	2.6193	11.6512	16.5517	2031.84	FALSE	104
2022-09-13	09:04:44	2.87818	12.8027	16.5517	1835.85	FALSE	104
2022-09-13	09:04:45	0.945204	4.20446	4.47763	2036.04	FALSE	104
2022-09-13	09:04:45	1.19543	5.31751	4.47763	1841.17	FALSE	104
2022-09-13	09:04:45	0.672379	2.99088	4.47763	2039.03	FALSE	104
2022-09-13	09:04:45	1.21345	5.39767	4.47763	1846.56	FALSE	104
2022-09-13	09:04:46	1.25126	5.56585	3.313	2044.6	FALSE	104
2022-09-13	09:04:46	0.85645	3.80966	3.313	1850.37	FALSE	104
2022-09-13	09:04:46	0.475026	2.11301	3.313	2046.71	FALSE	104
2022-09-13	09:04:46	0.396451	1.76349	3.313	1852.14	FALSE	104
2022-09-13	09:04:47	0.378791	1.68494	1.73553	2048.39	FALSE	104
2022-09-13	09:04:47	0.400471	1.78138	1.73553	1853.92	FALSE	104
2022-09-13	09:04:47	0.400369	1.78092	1.73553	2050.18	FALSE	104
2022-09-13	09:04:47	0.381031	1.6949	1.73553	1855.61	FALSE	104
2022-09-13	09:04:48	0.380471	1.69241	1.68728	2051.87	FALSE	104
2022-09-13	09:04:48	0.382761	1.7026	1.68728	1857.32	FALSE	104
2022-09-13	09:04:48	0.37472	1.66683	1.68728	2053.54	FALSE	104
2022-09-13	09:04:49	0.366883	1.63197	1.65025	1858.95	FALSE	104
2022-09-13	09:04:49	0.37187	1.65415	1.65025	2055.19	FALSE	104
2022-09-13	09:04:49	0.368003	1.63695	1.65025	1860.59	FALSE	104
2022-09-13	09:04:49	0.377214	1.67792	1.65025	2056.87	FALSE	104
2022-09-13	09:04:50	0.385713	1.71573	2.07951	1862.3	FALSE	104
2022-09-13	09:04:50	0.428461	1.90588	2.07951	2058.77	FALSE	104
2022-09-13	09:04:50	0.495127	2.20242	2.07951	1864.5	FALSE	104
2022-09-13	09:04:50	0.560674	2.49399	2.07951	2061.27	FALSE	104
2022-09-13	09:04:51	0.544135	2.42042	3.20389	1866.92	FALSE	104
2022-09-13	09:04:51	0.58958	2.62257	3.20389	2063.89	FALSE	104
2022-09-13	09:04:51	0.761234	3.38612	3.20389	1870.31	FALSE	104
2022-09-13	09:04:51	0.986119	4.38645	3.20389	2068.28	FALSE	104
2022-09-13	09:04:52	0.373906	1.66321	1.2774	1871.97	FALSE	104
2022-09-13	09:04:52	0.324644	1.44408	1.2774	2069.72	FALSE	104
2022-09-13	09:04:52	0.162965	0.724901	1.2774	1872.7	FALSE	104
2022-09-13	09:04:53	0.160318	0.713127	0.68981	2070.43	FALSE	104
2022-09-13	09:04:53	0.165051	0.73418	0.68981	1873.43	FALSE	104
2022-09-13	09:04:53	0.159351	0.708825	0.68981	2071.14	FALSE	104
2022-09-13	09:04:53	0.135585	0.603109	0.68981	1874.04	FALSE	104
2022-09-13	09:04:54	0.0479519	0.2133	0.540009	2071.36	FALSE	104
2022-09-13	09:04:54	0.0898348	0.399603	0.540009	1874.43	FALSE	104
2022-09-13	09:04:54	0.117875	0.524332	0.540009	2071.88	FALSE	104
2022-09-13	09:04:54	0.229936	1.0228	0.540009	1875.46	FALSE	104
2022-09-13	09:04:55	0.58556	2.60469	1.82982	2074.48	FALSE	104
2022-09-13	09:04:55	0.365611	1.62631	1.82982	1877.08	FALSE	104
2022-09-13	09:04:55	0.389275	1.73157	1.82982	2076.22	FALSE	104
2022-09-13	09:04:55	0.305	1.3567	1.82982	1878.44	FALSE	104
2022-09-13	09:04:56	0.342099	1.52172	1.41895	2077.74	FALSE	104
2022-09-13	09:04:56	0.238995	1.0631	1.41895	1879.5	FALSE	104
2022-09-13	09:04:56	0.310802	1.38251	1.41895	2079.12	FALSE	104
2022-09-13	09:04:56	0.384084	1.70848	1.41895	1881.21	FALSE	104
2022-09-13	09:04:57	0.358893	1.59643	1.6168	2080.72	FALSE	104
2022-09-13	09:04:57	0.382863	1.70305	1.6168	1882.92	FALSE	104
2022-09-13	09:04:57	0.348664	1.55093	1.6168	2082.27	FALSE	104
2022-09-13	09:04:58	0.348155	1.54866	1.52467	1884.46	FALSE	104
2022-09-13	09:04:58	0.342405	1.52309	1.52467	2083.79	FALSE	104
2022-09-13	09:04:58	0.341947	1.52105	1.52467	1885.99	FALSE	104
2022-09-13	09:04:58	0.338537	1.50588	1.52467	2085.3	FALSE	104
2022-09-13	09:04:59	0.327087	1.45495	1.44227	1887.44	FALSE	104
2022-09-13	09:04:59	0.328664	1.46196	1.44227	2086.76	FALSE	104
2022-09-13	09:04:59	0.337468	1.50113	1.44227	1888.94	FALSE	104
2022-09-13	09:04:59	0.303728	1.35104	1.44227	2088.11	FALSE	104
2022-09-13	09:05:00	0.321489	1.43005	1.64306	1890.37	FALSE	104
2022-09-13	09:05:00	0.321387	1.42959	1.64306	2089.54	FALSE	104
2022-09-13	09:05:00	0.405204	1.80243	1.64306	1892.17	FALSE	104
2022-09-13	09:05:00	0.429428	1.91018	1.64306	2091.45	FALSE	104
2022-09-13	09:05:01	0.737824	3.28199	2.83189	1895.46	FALSE	104
2022-09-13	09:05:01	0.714771	3.17944	2.83189	2094.63	FALSE	104
2022-09-13	09:05:01	0.457316	2.03423	2.83189	1897.49	FALSE	104
2022-09-13	09:05:02	0.481692	2.14266	2.02133	2096.77	FALSE	104
2022-09-13	09:05:02	0.436196	1.94029	2.02133	1899.43	FALSE	104
2022-09-13	09:05:02	0.444847	1.97877	2.02133	2098.75	FALSE	104
2022-09-13	09:05:02	0.454924	2.02359	2.02133	1901.45	FALSE	104
2022-09-13	09:05:03	0.459198	2.0426	2.02704	2100.79	FALSE	104
2022-09-13	09:05:03	0.450038	2.00186	2.02704	1903.46	FALSE	104
2022-09-13	09:05:03	0.46215	2.05574	2.02704	2102.85	FALSE	104
2022-09-13	09:05:03	0.451412	2.00797	2.02704	1905.46	FALSE	104
2022-09-13	09:05:04	0.443015	1.97062	1.99728	2104.82	FALSE	104
2022-09-13	09:05:04	0.454873	2.02337	1.99728	1907.49	FALSE	104
2022-09-13	09:05:04	0.453346	2.01657	1.99728	2106.84	FALSE	104
2022-09-13	09:05:04	0.444796	1.97854	1.99728	1909.47	FALSE	104
2022-09-13	09:05:05	0.4507	2.0048	2.00056	2108.84	FALSE	104
2022-09-13	09:05:05	0.428308	1.9052	2.00056	1911.37	FALSE	104
2022-09-13	09:05:05	0.461387	2.05234	2.00056	2110.89	FALSE	104
2022-09-13	09:05:05	0.458588	2.03989	2.00056	1913.41	FALSE	104
2022-09-13	09:05:06	0.582812	2.59246	4.76948	2113.49	FALSE	104
2022-09-13	09:05:06	1.38037	6.14016	4.76948	1919.55	FALSE	104
2022-09-13	09:05:06	1.2535	5.57582	4.76948	2119.06	FALSE	104
2022-09-13	09:05:07	0.508104	2.26015	2.0125	1921.81	FALSE	104
2022-09-13	09:05:07	0.491005	2.18409	2.0125	2121.25	FALSE	104
2022-09-13	09:05:07	0.408461	1.81692	2.0125	1923.63	FALSE	104
2022-09-13	09:05:07	0.40215	1.78884	2.0125	2123.03	FALSE	104
2022-09-13	09:05:08	0.434059	1.93078	1.93418	1925.56	FALSE	104
2022-09-13	09:05:08	0.407901	1.81443	1.93418	2124.85	FALSE	104
2022-09-13	09:05:08	0.408206	1.81578	1.93418	1927.37	FALSE	104
2022-09-13	09:05:08	0.489122	2.17571	1.93418	2127.02	FALSE	104
2022-09-13	09:05:09	0.455076	2.02427	2.08782	1929.4	FALSE	104
2022-09-13	09:05:09	0.380624	1.69309	2.08782	2128.72	FALSE	104
2022-09-13	09:05:09	0.481387	2.14131	2.08782	1931.54	FALSE	104
2022-09-13	09:05:09	0.560369	2.49263	2.08782	2131.21	FALSE	104
2022-09-13	09:05:10	0.522354	2.32354	2.07136	1933.86	FALSE	104
2022-09-13	09:05:10	0.476501	2.11957	2.07136	2133.33	FALSE	104
2022-09-13	09:05:10	0.43014	1.91335	2.07136	1935.78	FALSE	104
2022-09-13	09:05:10	0.433651	1.92897	2.07136	2135.26	FALSE	104
2022-09-13	09:05:11	0.425764	1.89388	1.94021	1937.67	FALSE	104
2022-09-13	09:05:11	0.438486	1.95047	1.94021	2137.21	FALSE	104
2022-09-13	09:05:11	0.444288	1.97628	1.94021	1939.65	FALSE	104
2022-09-13	09:05:12	0.50388	2.24136	8.14824	2139.45	FALSE	104
2022-09-13	09:05:12	2.98347	13.2711	8.14824	1952.92	FALSE	104
2022-09-13	09:05:12	1.91075	8.4994	8.14824	2147.95	FALSE	104
2022-09-13	09:05:12	1.92912	8.58111	8.14824	1961.5	FALSE	104
2022-09-13	09:05:13	2.04795	9.10969	15.5256	2157.06	FALSE	104
2022-09-13	09:05:13	2.10164	9.34852	15.5256	1970.85	FALSE	104
2022-09-13	09:05:13	3.0279	13.4687	15.5256	2170.53	1	105
2022-09-13	09:05:13	6.78378	30.1756	15.5256	2001.02	1	106
2022-09-13	09:05:14	2.37477	10.5635	5.29545	2181.09	FALSE	106
2022-09-13	09:05:14	1.05966	4.71358	5.29545	2005.74	FALSE	106
2022-09-13	09:05:14	0.550598	2.44917	5.29545	2183.54	FALSE	106
2022-09-13	09:05:14	0.776857	3.45562	5.29545	2009.19	FALSE	106
2022-09-13	09:05:15	0.773295	3.43977	2.73123	2186.98	FALSE	106
2022-09-13	09:05:15	0.538181	2.39394	2.73123	2011.59	FALSE	106
2022-09-13	09:05:15	0.530547	2.35998	2.73123	2189.34	FALSE	106
2022-09-13	09:05:16	0.570395	2.53723	2.28392	2014.12	FALSE	106
2022-09-13	09:05:16	0.543473	2.41748	2.28392	2191.76	FALSE	106
2022-09-13	09:05:16	0.478079	2.12659	2.28392	2016.25	FALSE	106
2022-09-13	09:05:16	0.461845	2.05438	2.28392	2193.81	FALSE	106
2022-09-13	09:05:17	0.403575	1.79518	2.08403	2018.05	FALSE	106
2022-09-13	09:05:17	0.455026	2.02405	2.08403	2195.84	FALSE	106
2022-09-13	09:05:17	0.500929	2.22823	2.08403	2020.27	FALSE	106
2022-09-13	09:05:17	0.514517	2.28867	2.08403	2198.13	FALSE	106
2022-09-13	09:05:18	0.535687	2.38284	2.45313	2022.66	FALSE	106
2022-09-13	09:05:18	0.55299	2.45981	2.45313	2200.58	FALSE	106
2022-09-13	09:05:18	0.590649	2.62732	2.45313	2025.28	FALSE	106
2022-09-13	09:05:18	0.526629	2.34255	2.45313	2202.93	FALSE	106
2022-09-13	09:05:19	0.507035	2.25539	2.45217	2027.54	FALSE	106
2022-09-13	09:05:19	0.550598	2.44917	2.45217	2205.38	FALSE	106
2022-09-13	09:05:19	0.55701	2.47769	2.45217	2030.02	FALSE	106
2022-09-13	09:05:19	0.590445	2.62642	2.45217	2208	FALSE	106
2022-09-13	09:05:20	0.614822	2.73485	3.3662	2032.75	FALSE	106
2022-09-13	09:05:20	0.715992	3.18488	3.3662	2211.19	FALSE	106
2022-09-13	09:05:20	0.939453	4.17887	3.3662	2036.93	FALSE	106
2022-09-13	09:05:21	2.73314	12.1576	9.06629	2223.35	FALSE	106
2022-09-13	09:05:21	2.24052	9.96628	9.06629	2046.9	FALSE	106
2022-09-13	09:05:21	2.12658	9.45945	9.06629	2232.8	FALSE	106
2022-09-13	09:05:21	1.05253	4.68186	9.06629	2051.58	FALSE	106
2022-09-13	09:05:22	0.524236	2.33191	2.18324	2235.14	FALSE	106
2022-09-13	09:05:22	0.455585	2.02653	2.18324	2053.61	FALSE	106
2022-09-13	09:05:22	0.492685	2.19156	2.18324	2237.33	FALSE	106
2022-09-13	09:05:22	0.490751	2.18296	2.18324	2055.79	FALSE	106
2022-09-13	09:05:23	0.533957	2.37515	2.1524	2239.7	FALSE	106
2022-09-13	09:05:23	0.35182	1.56497	2.1524	2057.35	FALSE	106
2022-09-13	09:05:23	0.563524	2.50667	2.1524	2242.21	FALSE	106
2022-09-13	09:05:23	0.486221	2.16281	2.1524	2059.52	FALSE	106
2022-09-13	09:05:24	0.429071	1.90859	2.15692	2244.12	FALSE	106
2022-09-13	09:05:24	0.450445	2.00367	2.15692	2061.52	FALSE	106
2022-09-13	09:05:24	0.575178	2.55851	2.15692	2246.68	FALSE	106
2022-09-13	09:05:25	1.09472	4.86953	3.57763	2066.39	FALSE	106
2022-09-13	09:05:25	0.980369	4.36088	3.57763	2251.04	FALSE	106
2022-09-13	09:05:25	0.648511	2.88471	3.57763	2069.27	FALSE	106
2022-09-13	09:05:25	0.49355	2.19541	3.57763	2253.23	FALSE	106
2022-09-13	09:05:26	0.457519	2.03514	2.08862	2071.31	FALSE	106
2022-09-13	09:05:26	0.485611	2.16009	2.08862	2255.39	FALSE	106
2022-09-13	09:05:26	0.484237	2.15398	2.08862	2073.46	FALSE	106
2022-09-13	09:05:26	0.450802	2.00526	2.08862	2257.4	FALSE	106
2022-09-13	09:05:27	0.490598	2.18228	2.19065	2075.65	FALSE	106
2022-09-13	09:05:27	0.444084	1.97537	2.19065	2259.37	FALSE	106
2022-09-13	09:05:27	0.493499	2.19518	2.19065	2077.84	FALSE	106
2022-09-13	09:05:27	0.541743	2.40978	2.19065	2261.78	FALSE	106
2022-09-13	09:05:28	0.408104	1.81533	2.0404	2079.66	FALSE	106
2022-09-13	09:05:28	0.477367	2.12342	2.0404	2263.91	FALSE	106
2022-09-13	09:05:28	0.481845	2.14334	2.0404	2081.8	FALSE	106
2022-09-13	09:05:28	0.467494	2.07951	2.0404	2265.99	FALSE	106
2022-09-13	09:05:29	0.461794	2.05415	2.19322	2083.85	FALSE	106
2022-09-13	09:05:29	0.459962	2.046	2.19322	2268.03	FALSE	106
2022-09-13	09:05:29	0.557417	2.4795	2.19322	2086.33	FALSE	106
2022-09-13	09:05:30	0.494466	2.19948	2.16677	2270.23	FALSE	106
2022-09-13	09:05:30	0.518944	2.30837	2.16677	2088.64	FALSE	106
2022-09-13	09:05:30	0.513855	2.28573	2.16677	2272.52	FALSE	106
2022-09-13	09:05:30	0.421183	1.87351	2.16677	2090.51	FALSE	106
2022-09-13	09:05:31	0.347646	1.5464	1.98862	2274.06	FALSE	106
2022-09-13	09:05:31	0.550394	2.44826	1.98862	2092.96	FALSE	106
2022-09-13	09:05:31	0.449987	2.00163	1.98862	2276.07	FALSE	106
2022-09-13	09:05:31	0.440216	1.95817	1.98862	2094.92	FALSE	106
2022-09-13	09:05:32	0.46271	2.05823	2.20775	2278.12	FALSE	106
2022-09-13	09:05:32	0.461132	2.05121	2.20775	2096.97	FALSE	106
2022-09-13	09:05:32	0.344797	1.53373	2.20775	2279.66	FALSE	106
2022-09-13	09:05:32	0.716654	3.18782	2.20775	2100.16	FALSE	106
2022-09-13	09:05:33	0.934211	4.15556	4.81377	2283.81	FALSE	106
2022-09-13	09:05:33	1.29513	5.761	4.81377	2105.92	FALSE	106
2022-09-13	09:05:33	1.01721	4.52475	4.81377	2288.34	FALSE	106
2022-09-13	09:05:34	0.733855	3.26433	9.41597	2109.19	FALSE	106
2022-09-13	09:05:34	0.778486	3.46286	9.41597	2291.8	FALSE	106
2022-09-13	09:05:34	1.79955	8.00476	9.41597	2117.19	FALSE	106
2022-09-13	09:05:34	5.15533	22.9319	9.41597	2314.73	1	107
2022-09-13	09:05:35	1.90022	8.45256	14.1328	2125.64	FALSE	107
2022-09-13	09:05:35	4.12831	18.3635	14.1328	2333.1	1	108
2022-09-13	09:05:35	3.388	15.0705	14.1328	2140.71	1	109
2022-09-13	09:05:35	3.29228	14.6447	14.1328	2347.74	1	110
2022-09-13	09:05:36	1.93385	8.60215	5.36732	2149.32	FALSE	110
2022-09-13	09:05:36	1.0964	4.87701	5.36732	2352.62	FALSE	110
2022-09-13	09:05:36	1.29686	5.76869	5.36732	2155.08	FALSE	110
2022-09-13	09:05:36	0.499402	2.22144	5.36732	2354.84	FALSE	110
2022-09-13	09:05:37	1.52973	6.80454	29.0788	2161.89	FALSE	110
2022-09-13	09:05:37	3.84871	17.1198	29.0788	2371.96	1	111
2022-09-13	09:05:37	12.2426	54.4575	29.0788	2216.35	1	112
2022-09-13	09:05:37	8.52774	37.9331	29.0788	2409.89	1	113
2022-09-13	09:05:38	6.16006	27.4012	31.4579	2243.75	1	114
2022-09-13	09:05:38	7.26428	32.313	31.4579	2442.21	1	115
2022-09-13	09:05:38	7.79182	34.6596	31.4579	2278.41	1	116
2022-09-13	09:05:39	13.8101	61.4301	43.863	2503.64	1	117
2022-09-13	09:05:39	12.0796	53.7325	43.863	2332.14	1	118
2022-09-13	09:05:39	5.5048	24.4865	43.863	2528.12	1	119
2022-09-13	09:05:39	8.04886	35.8029	43.863	2367.94	1	120
2022-09-13	09:05:40	11.8187	52.5719	31.678	2580.69	1	121
2022-09-13	09:05:40	2.58892	11.516	31.678	2379.46	FALSE	121
2022-09-13	09:05:40	6.05706	26.943	31.678	2607.64	1	122
2022-09-13	09:05:40	8.02143	35.6809	31.678	2415.14	1	123
2022-09-13	09:05:41	1.76973	7.87211	12.7171	2615.51	FALSE	123
2022-09-13	09:05:41	4.78424	21.2813	12.7171	2436.42	1	124
2022-09-13	09:05:41	2.52083	11.2132	12.7171	2626.72	FALSE	124
2022-09-13	09:05:41	2.36093	10.5019	12.7171	2446.92	FALSE	124
2022-09-13	09:05:42	1.31172	5.83479	3.48126	2632.56	FALSE	124
2022-09-13	09:05:42	0.831361	3.69806	3.48126	2450.62	FALSE	124
2022-09-13	09:05:42	0.580522	2.58228	3.48126	2635.14	FALSE	124
2022-09-13	09:05:42	0.406883	1.8099	3.48126	2452.43	FALSE	124
2022-09-13	09:05:43	0.676603	3.00967	4.9087	2638.15	FALSE	124
2022-09-13	09:05:43	1.52556	6.786	4.9087	2459.22	FALSE	124
2022-09-13	09:05:43	1.10841	4.93043	4.9087	2643.08	FALSE	124
2022-09-13	09:05:44	1.70866	7.60046	8.13189	2466.82	FALSE	124
2022-09-13	09:05:44	1.06943	4.75704	8.13189	2647.84	FALSE	124
2022-09-13	09:05:44	2.85121	12.6828	8.13189	2479.5	FALSE	124
2022-09-13	09:05:44	1.68322	7.4873	8.13189	2655.32	FALSE	124
2022-09-13	09:05:45	2.50607	11.1475	15.5899	2490.65	FALSE	124
2022-09-13	09:05:45	2.60973	11.6086	15.5899	2666.93	FALSE	124
2022-09-13	09:05:45	4.18627	18.6214	15.5899	2509.27	1	125
2022-09-13	09:05:45	4.71701	20.9822	15.5899	2687.92	1	126
2022-09-13	09:05:46	2.29777	10.2209	10.8629	2519.49	FALSE	126
2022-09-13	09:05:46	4.54434	20.2141	10.8629	2708.13	1	127
2022-09-13	09:05:46	0.874974	3.89206	10.8629	2523.38	FALSE	127
2022-09-13	09:05:46	2.05126	9.12441	10.8629	2717.25	FALSE	127
2022-09-13	09:05:47	0.515178	2.29161	3.77019	2525.67	FALSE	127
2022-09-13	09:05:47	0.741285	3.29738	3.77019	2720.55	FALSE	127
2022-09-13	09:05:47	1.28627	5.72159	3.77019	2531.39	FALSE	127
2022-09-13	09:05:48	1.33889	5.95565	25.7204	2726.51	FALSE	127
2022-09-13	09:05:48	4.83304	21.4983	25.7204	2552.89	1	128
2022-09-13	09:05:48	6.10225	27.144	25.7204	2753.65	1	129
2022-09-13	09:05:48	10.8546	48.2834	25.7204	2601.18	1	130
2022-09-13	09:05:49	9.77884	43.4982	46.6828	2797.15	1	131
2022-09-13	09:05:49	9.83375	43.7425	46.6828	2644.92	1	132
2022-09-13	09:05:49	16.8087	74.7685	46.6828	2871.92	1	133
2022-09-13	09:05:49	5.55777	24.7221	46.6828	2669.64	1	134
2022-09-13	09:05:50	4.77395	21.2355	22.6816	2893.15	1	135
2022-09-13	09:05:50	8.31049	36.9667	22.6816	2706.61	1	136
2022-09-13	09:05:50	4.02057	17.8843	22.6816	2911.04	1	137
2022-09-13	09:05:50	3.29121	14.64	22.6816	2721.25	1	138
2022-09-13	09:05:51	3.77477	16.7909	9.62028	2927.83	1	139
2022-09-13	09:05:51	3.31075	14.7269	9.62028	2735.97	1	140
2022-09-13	09:05:51	0.934924	4.15873	9.62028	2931.99	FALSE	140
2022-09-13	09:05:51	0.630496	2.80457	9.62028	2738.78	FALSE	140
2022-09-13	09:05:52	0.106985	0.475891	3.33745	2932.46	FALSE	140
2022-09-13	09:05:52	0.448359	1.99439	3.33745	2740.77	FALSE	140
2022-09-13	09:05:52	1.69553	7.54206	3.33745	2940	FALSE	140
2022-09-13	09:05:53	8.35701	37.1737	16.4642	2777.95	1	141
2022-09-13	09:05:53	3.03131	13.4839	16.4642	2953.49	1	142
2022-09-13	09:05:53	2.35075	10.4566	16.4642	2788.4	FALSE	142
2022-09-13	09:05:53	1.06617	4.74254	16.4642	2958.23	FALSE	142
2022-09-13	09:05:54	1.05416	4.68911	3.17792	2793.09	FALSE	142
2022-09-13	09:05:54	0.54327	2.41657	3.17792	2960.65	FALSE	142
2022-09-13	09:05:54	0.914771	4.06908	3.17792	2797.16	FALSE	142
2022-09-13	09:05:54	0.345509	1.53689	3.17792	2962.18	FALSE	142
2022-09-13	09:05:55	1.03691	4.61238	17.4631	2801.77	FALSE	142
2022-09-13	09:05:55	1.29767	5.7723	17.4631	2967.96	FALSE	142
2022-09-13	09:05:55	4.26266	18.9612	17.4631	2820.74	1	143
2022-09-13	09:05:55	9.10632	40.5067	17.4631	3008.46	1	144
2022-09-13	09:05:56	12.0417	53.5639	28.266	2874.3	1	145
2022-09-13	09:05:56	5.17721	23.0293	28.266	3031.49	1	146
2022-09-13	09:05:56	1.84454	8.20488	28.266	2882.5	FALSE	146
2022-09-13	09:05:57	2.90449	12.9198	19.1899	3044.41	FALSE	146
2022-09-13	09:05:57	2.15533	9.58734	19.1899	2892.09	FALSE	146
2022-09-13	09:05:57	4.05294	18.0283	19.1899	3062.44	1	147
2022-09-13	09:05:57	8.14357	36.2242	19.1899	2928.32	1	148
2022-09-13	09:05:58	4.98566	22.1772	16.4464	3084.62	1	149
2022-09-13	09:05:58	7.40378	32.9335	16.4464	2961.25	1	150
2022-09-13	09:05:58	0.922812	4.10485	16.4464	3088.72	FALSE	150
2022-09-13	09:05:58	1.47701	6.57004	16.4464	2967.82	FALSE	150
2022-09-13	09:05:59	1.41788	6.30701	26.3661	3095.03	FALSE	150
2022-09-13	09:05:59	3.63742	16.18	26.3661	2984	1	151
2022-09-13	09:05:59	12.7268	56.6114	26.3661	3151.64	1	152
2022-09-13	09:06:00	5.07996	22.5967	9.86564	3006.6	1	153
2022-09-13	09:06:00	3.14347	13.9828	9.86564	3165.62	1	154
2022-09-13	09:06:00	0.881387	3.92059	9.86564	3010.52	FALSE	154
2022-09-13	09:06:00	1.22846	5.46444	9.86564	3171.09	FALSE	154
2022-09-13	09:06:00	0.756196	3.36371	9.86564	3013.88	FALSE	154
2022-09-13	09:06:01	0.597875	2.65947	3.65098	3173.75	FALSE	154
2022-09-13	09:06:01	0.947443	4.21442	3.65098	3018.09	FALSE	154
2022-09-13	09:06:01	0.91701	4.07904	3.65098	3177.83	FALSE	154
2022-09-13	09:06:02	1.53879	6.84485	19.2997	3024.94	FALSE	154
2022-09-13	09:06:02	2.51787	11.2	19.2997	3189.03	FALSE	154
2022-09-13	09:06:02	7.52973	33.4937	19.2997	3058.43	1	155
2022-09-13	09:06:02	5.76871	25.6604	19.2997	3214.69	1	156
2022-09-13	09:06:03	5.83004	25.9332	9.59006	3084.37	1	157
2022-09-13	09:06:03	0.762303	3.39088	9.59006	3218.08	FALSE	157
2022-09-13	09:06:03	1.28866	5.73222	9.59006	3090.1	FALSE	157
2022-09-13	09:06:03	0.742761	3.30395	9.59006	3221.38	FALSE	157
2022-09-13	09:06:04	0.915483	4.07225	28.9681	3094.17	FALSE	157
2022-09-13	09:06:04	7.61304	33.8643	28.9681	3255.25	1	158
2022-09-13	09:06:04	11.1958	49.8012	28.9681	3143.97	1	159
2022-09-13	09:06:04	6.32495	28.1346	28.9681	3283.38	1	160
2022-09-13	09:06:05	1.16113	5.16494	3.96117	3149.14	FALSE	160
2022-09-13	09:06:05	1.23955	5.51377	3.96117	3288.9	FALSE	160
2022-09-13	09:06:05	0.270853	1.20481	3.96117	3150.34	FALSE	160
2022-09-13	09:06:06	0.546323	2.43015	2.13253	3291.33	FALSE	160
2022-09-13	09:06:06	0.394211	1.75353	2.13253	3152.1	FALSE	160
2022-09-13	09:06:06	0.497163	2.21148	2.13253	3293.54	FALSE	160
2022-09-13	09:06:06	0.479962	2.13497	2.13253	3154.23	FALSE	160
2022-09-13	09:06:07	1.03752	4.6151	3.03977	3298.15	FALSE	160
2022-09-13	09:06:07	0.500013	2.22416	3.03977	3156.45	FALSE	160
2022-09-13	09:06:07	0.84785	3.77141	3.03977	3301.92	FALSE	160
2022-09-13	09:06:07	0.348104	1.54844	3.03977	3158	FALSE	160
2022-09-13	09:06:08	0.876858	3.90044	9.34863	3305.82	FALSE	160
2022-09-13	09:06:08	0.761997	3.38952	9.34863	3161.39	FALSE	160
2022-09-13	09:06:08	2.00083	8.90009	9.34863	3314.72	FALSE	160
2022-09-13	09:06:08	4.76698	21.2045	9.34863	3182.6	1	161
2022-09-13	09:06:09	5.83416	25.9515	35.4613	3340.68	1	162
2022-09-13	09:06:09	6.83212	30.3906	35.4613	3212.99	1	163
2022-09-13	09:06:09	15.6199	69.4804	35.4613	3410.16	1	164
2022-09-13	09:06:09	3.602	16.0224	35.4613	3229.01	1	165
2022-09-13	09:06:10	4.71965	20.9939	12.8398	3431.15	1	166
2022-09-13	09:06:10	1.35111	6.01001	12.8398	3235.02	FALSE	166
2022-09-13	09:06:10	2.58882	11.5156	12.8398	3442.67	FALSE	166
2022-09-13	09:06:11	2.86215	12.7314	14.7622	3247.75	FALSE	166
2022-09-13	09:06:11	4.96551	22.0876	14.7622	3464.75	1	167
2022-09-13	09:06:11	1.26536	5.62857	14.7622	3253.38	FALSE	167
2022-09-13	09:06:11	4.18174	18.6012	14.7622	3483.35	1	168
2022-09-13	09:06:12	0.885407	3.93847	16.6395	3257.32	FALSE	168
2022-09-13	09:06:12	3.32988	14.812	16.6395	3498.17	1	169
2022-09-13	09:06:12	1.94363	8.64565	16.6395	3265.96	FALSE	169
2022-09-13	09:06:12	8.80398	39.1619	16.6395	3537.33	1	170
2022-09-13	09:06:13	3.87202	17.2235	15.2942	3283.19	1	171
2022-09-13	09:06:13	7.37126	32.7888	15.2942	3570.12	1	172
2022-09-13	09:06:13	1.88999	8.40705	15.2942	3291.59	FALSE	172
2022-09-13	09:06:13	0.61986	2.75726	15.2942	3572.87	FALSE	172
2022-09-13	09:06:14	0.499198	2.22053	2.0885	3293.82	FALSE	172
2022-09-13	09:06:14	0.625509	2.78239	2.0885	3575.66	FALSE	172
2022-09-13	09:06:14	0.561539	2.49784	2.0885	3296.31	FALSE	172
2022-09-13	09:06:14	0.191819	0.853249	2.0885	3576.51	FALSE	172
2022-09-13	09:06:15	-0.11103	-0.493884	-0.734668	3296.31	FALSE	172
2022-09-13	09:06:15	-0.267875	-1.19156	-0.734668	3576.51	FALSE	172
2022-09-13	09:06:15	-0.116577	-0.518558	-0.734668	3296.31	FALSE	172
2022-09-13	09:06:16	0.250038	1.11222	2.04731	3577.62	FALSE	172
2022-09-13	09:06:16	0.598232	2.66106	2.04731	3298.97	FALSE	172
2022-09-13	09:06:16	0.515433	2.29275	2.04731	3579.91	FALSE	172
2022-09-13	09:06:16	0.477316	2.1232	2.04731	3301.1	FALSE	172
2022-09-13	09:06:17	0.580776	2.58341	3.07135	3582.5	FALSE	172
2022-09-13	09:06:17	0.737621	3.28109	3.07135	3304.38	FALSE	172
2022-09-13	09:06:17	0.743575	3.30757	3.07135	3585.81	FALSE	172
2022-09-13	09:06:17	0.699911	3.11334	3.07135	3307.49	FALSE	172
2022-09-13	09:06:18	0.706476	3.14255	3.17418	3588.95	FALSE	172
2022-09-13	09:06:18	0.716552	3.18737	3.17418	3310.68	FALSE	172
2022-09-13	09:06:18	0.752379	3.34673	3.17418	3592.29	FALSE	172
2022-09-13	09:06:18	0.678944	3.02008	3.17418	3313.7	FALSE	172
2022-09-13	09:06:19	0.644033	2.86479	2.51233	3595.16	FALSE	172
2022-09-13	09:06:19	0.511768	2.27645	2.51233	3315.98	FALSE	172
2022-09-13	09:06:19	0.538588	2.39575	2.51233	3597.56	FALSE	172
2022-09-13	09:06:20	0.488461	2.17277	2.09988	3318.15	FALSE	172
2022-09-13	09:06:20	0.428512	1.90611	2.09988	3599.46	FALSE	172
2022-09-13	09:06:20	0.531972	2.36632	2.09988	3320.51	FALSE	172
2022-09-13	09:06:20	0.439351	1.95432	2.09988	3601.42	FALSE	172
2022-09-13	09:06:21	0.394466	1.75466	1.96253	3322.27	FALSE	172
2022-09-13	09:06:21	0.380929	1.69445	1.96253	3603.11	FALSE	172
2022-09-13	09:06:21	0.497265	2.21193	1.96253	3324.48	FALSE	172
2022-09-13	09:06:21	0.492125	2.18907	1.96253	3605.3	FALSE	172
2022-09-13	09:06:22	0.559707	2.48969	1.88816	3326.97	FALSE	172
2022-09-13	09:06:22	0.429784	1.91177	1.88816	3607.21	FALSE	172
2022-09-13	09:06:22	0.416654	1.85336	1.88816	3328.82	FALSE	172
2022-09-13	09:06:22	0.291768	1.29784	1.88816	3608.51	FALSE	172
2022-09-13	09:06:23	0.304593	1.35489	2.69745	3330.18	FALSE	172
2022-09-13	09:06:23	0.353295	1.57153	2.69745	3610.08	FALSE	172
2022-09-13	09:06:23	0.726883	3.23332	2.69745	3333.41	FALSE	172
2022-09-13	09:06:23	1.04088	4.63004	2.69745	3614.71	FALSE	172
2022-09-13	09:06:24	1.65961	7.38228	8.08319	3340.8	FALSE	172
2022-09-13	09:06:24	2.56831	11.4244	8.08319	3626.13	FALSE	172
2022-09-13	09:06:24	1.22363	5.44295	8.08319	3346.24	FALSE	172
2022-09-13	09:06:25	1.44342	6.42062	5.71542	3632.56	FALSE	172
2022-09-13	09:06:25	1.70174	7.56968	5.71542	3353.81	FALSE	172
2022-09-13	09:06:25	1.02673	4.5671	5.71542	3637.12	FALSE	172
2022-09-13	09:06:25	0.967646	4.30428	5.71542	3358.11	FALSE	172
2022-09-13	09:06:26	0.903779	4.02019	2.80904	3641.14	FALSE	172
2022-09-13	09:06:26	0.896807	3.98918	2.80904	3362.1	FALSE	172
2022-09-13	09:06:26	0.344746	1.5335	2.80904	3642.68	FALSE	172
2022-09-13	09:06:26	0.380674	1.69331	2.80904	3363.79	FALSE	172
2022-09-13	09:06:27	0.165814	0.737574	7.12787	3643.41	FALSE	172
2022-09-13	09:06:27	0.703015	3.12715	7.12787	3366.92	FALSE	172
2022-09-13	09:06:27	1.31365	5.84338	7.12787	3649.26	FALSE	172
2022-09-13	09:06:27	4.22719	18.8034	7.12787	3385.72	1	173
2022-09-13	09:06:28	3.49838	15.5615	14.291	3664.82	1	174
2022-09-13	09:06:28	3.76999	16.7697	14.291	3402.49	1	175
2022-09-13	09:06:28	2.36989	10.5417	14.291	3675.36	FALSE	175
2022-09-13	09:06:29	3.36413	14.9643	29.4547	3417.46	1	176
2022-09-13	09:06:29	3.27823	14.5822	29.4547	3689.94	1	177
2022-09-13	09:06:29	11.2308	49.9568	29.4547	3467.42	1	178
2022-09-13	09:06:29	8.6137	38.3155	29.4547	3728.26	1	179
2022-09-13	09:06:30	14.3555	63.8561	28.3789	3531.27	1	180
2022-09-13	09:06:30	1.74663	7.76936	28.3789	3736.03	FALSE	180
2022-09-13	09:06:30	6.20851	27.6167	28.3789	3558.89	1	181
2022-09-13	09:06:30	3.20882	14.2735	28.3789	3750.3	1	182
2022-09-13	09:06:31	2.47396	11.0047	9.49499	3569.89	FALSE	182
2022-09-13	09:06:31	3.81289	16.9605	9.49499	3767.26	1	183
2022-09-13	09:06:31	0.887748	3.94888	9.49499	3573.84	FALSE	183
2022-09-13	09:06:31	1.36368	6.06592	9.49499	3773.33	FALSE	183
2022-09-13	09:06:32	0.850903	3.78499	2.99495	3577.63	FALSE	183
2022-09-13	09:06:32	0.872633	3.88165	2.99495	3777.21	FALSE	183
2022-09-13	09:06:32	0.473702	2.10712	2.99495	3579.73	FALSE	183
2022-09-13	09:06:32	0.495942	2.20605	2.99495	3779.42	FALSE	183
2022-09-13	09:06:33	0.388766	1.72931	2.20718	3581.46	FALSE	183
2022-09-13	09:06:33	0.43986	1.95659	2.20718	3781.37	FALSE	183
2022-09-13	09:06:33	0.659962	2.93564	2.20718	3584.4	FALSE	183
2022-09-13	09:06:34	1.08464	4.8247	24.9418	3786.2	FALSE	183
2022-09-13	09:06:34	4.53716	20.1822	24.9418	3604.58	1	184
2022-09-13	09:06:34	6.22067	27.6708	24.9418	3813.87	1	185
2022-09-13	09:06:34	10.5862	47.0895	24.9418	3651.67	1	186
2022-09-13	09:06:35	5.40963	24.0631	16.6792	3837.93	1	187
2022-09-13	09:06:35	5.42469	24.1301	16.6792	3675.8	1	188
2022-09-13	09:06:35	1.54144	6.85663	16.6792	3844.79	FALSE	188
2022-09-13	09:06:35	2.62281	11.6668	16.6792	3687.47	FALSE	188
2022-09-13	09:06:36	1.5648	6.96054	6.12942	3851.75	FALSE	188
2022-09-13	09:06:36	1.73793	7.73066	6.12942	3695.2	FALSE	188
2022-09-13	09:06:36	1.28419	5.71233	6.12942	3857.46	FALSE	188
2022-09-13	09:06:36	0.924898	4.11413	6.12942	3699.31	FALSE	188
2022-09-13	09:06:37	0.984796	4.38057	4.78402	3861.84	FALSE	188
2022-09-13	09:06:37	0.852736	3.79314	4.78402	3703.11	FALSE	188
2022-09-13	09:06:37	1.35294	6.01815	4.78402	3867.86	FALSE	188
2022-09-13	09:06:37	1.11151	4.94422	4.78402	3708.05	FALSE	188
2022-09-13	09:06:38	0.808155	3.59484	2.93874	3871.45	FALSE	188
2022-09-13	09:06:38	0.73243	3.258	2.93874	3711.31	FALSE	188
2022-09-13	09:06:38	0.441387	1.96338	2.93874	3873.42	FALSE	188
2022-09-13	09:06:39	0.489071	2.17549	1.97249	3713.48	FALSE	188
2022-09-13	09:06:39	0.453652	2.01793	1.97249	3875.43	FALSE	188
2022-09-13	09:06:39	0.527392	2.34595	1.97249	3715.83	FALSE	188
2022-09-13	09:06:39	0.303626	1.35059	1.97249	3876.79	FALSE	188
2022-09-13	09:06:40	0.315992	1.4056	1.87124	3717.24	FALSE	188
2022-09-13	09:06:40	0.460725	2.0494	1.87124	3878.83	FALSE	188
2022-09-13	09:06:40	0.360064	1.60164	1.87124	3718.84	FALSE	188
2022-09-13	09:06:40	0.545916	2.42834	1.87124	3881.26	FALSE	188
2022-09-13	09:06:41	0.466221	2.07384	2.41538	3720.91	FALSE	188
2022-09-13	09:06:41	0.6307	2.80548	2.41538	3884.07	FALSE	188
2022-09-13	09:06:41	0.465713	2.07158	2.41538	3722.98	FALSE	188
2022-09-13	09:06:41	0.609377	2.71063	2.41538	3886.78	FALSE	188
2022-09-13	09:06:42	0.354924	1.57877	2.04812	3724.56	FALSE	188
2022-09-13	09:06:42	0.622354	2.76836	2.04812	3889.55	FALSE	188
2022-09-13	09:06:42	0.404033	1.79722	2.04812	3726.36	FALSE	188
2022-09-13	09:06:43	0.583117	2.59382	2.29009	3892.14	FALSE	188
2022-09-13	09:06:43	0.450038	2.00186	2.29009	3728.36	FALSE	188
2022-09-13	09:06:43	0.472379	2.10124	2.29009	3894.24	FALSE	188
2022-09-13	09:06:43	0.553804	2.46343	2.29009	3730.82	FALSE	188
2022-09-13	09:06:44	0.502354	2.23457	1.79903	3896.48	FALSE	188
2022-09-13	09:06:44	0.441438	1.9636	1.79903	3732.79	FALSE	188
2022-09-13	09:06:44	0.363117	1.61522	1.79903	3898.09	FALSE	188
2022-09-13	09:06:44	0.310853	1.38274	1.79903	3734.17	FALSE	188
2022-09-13	09:06:45	0.258333	1.14912	0.768531	3899.24	FALSE	188
2022-09-13	09:06:45	0.265814	1.18239	0.768531	3735.35	FALSE	188
2022-09-13	09:06:45	0.101743	0.452573	0.768531	3899.69	FALSE	188
2022-09-13	09:06:45	0.0652038	0.29004	0.768531	3735.64	FALSE	188
2022-09-13	09:06:46	0.203422	0.904862	0.835971	3900.6	FALSE	188
2022-09-13	09:06:46	0.200115	0.890152	0.835971	3736.53	FALSE	188
2022-09-13	09:06:46	0.160267	0.7129	0.835971	3901.31	FALSE	188
2022-09-13	09:06:47	0.141183	0.62801	0.835197	3737.16	FALSE	188
2022-09-13	09:06:47	0.191361	0.851212	0.835197	3902.16	FALSE	188
2022-09-13	09:06:47	0.244288	1.08664	0.835197	3738.25	FALSE	188
2022-09-13	09:06:47	0.174211	0.774925	0.835197	3902.94	FALSE	188
2022-09-13	09:06:48	0.323728	1.44001	1.79332	3739.69	FALSE	188
2022-09-13	09:06:48	0.476654	2.12025	1.79332	3905.06	FALSE	188
2022-09-13	09:06:48	0.449733	2.0005	1.79332	3741.69	FALSE	188
2022-09-13	09:06:48	0.362507	1.6125	1.79332	3906.67	FALSE	188
2022-09-13	09:06:49	0.429733	1.91154	1.67424	3743.6	FALSE	188
2022-09-13	09:06:49	0.288562	1.28358	1.67424	3907.95	FALSE	188
2022-09-13	09:06:49	0.443168	1.9713	1.67424	3745.57	FALSE	188
2022-09-13	09:06:49	0.344084	1.53055	1.67424	3909.48	FALSE	188
2022-09-13	09:06:50	0.494822	2.20107	12.6146	3747.77	FALSE	188
2022-09-13	09:06:50	1.83696	8.17117	12.6146	3917.66	FALSE	188
2022-09-13	09:06:50	3.69492	16.4357	12.6146	3764.21	1	189
2022-09-13	09:06:50	5.31685	23.6504	12.6146	3941.31	1	190
2022-09-13	09:06:51	5.13533	22.843	23.5487	3787.05	1	191
2022-09-13	09:06:51	6.17253	27.4566	23.5487	3968.76	1	192
2022-09-13	09:06:51	4.57406	20.3463	23.5487	3807.4	1	193
2022-09-13	09:06:52	3.65136	16.242	18.8623	3985	1	194
2022-09-13	09:06:52	4.19283	18.6505	18.8623	3826.05	1	195
2022-09-13	09:06:52	2.19146	9.74805	18.8623	3994.75	FALSE	195
2022-09-13	09:06:52	6.92612	30.8088	18.8623	3856.86	1	196
2022-09-13	09:06:53	4.07681	18.1345	14.8325	4012.89	1	197
2022-09-13	09:06:53	5.04052	22.4212	14.8325	3879.28	1	198
2022-09-13	09:06:53	2.251	10.0129	14.8325	4022.9	FALSE	198
2022-09-13	09:06:53	1.96968	8.76153	14.8325	3888.04	FALSE	198
2022-09-13	09:06:54	3.48016	15.4804	11.5461	4038.38	1	199
2022-09-13	09:06:54	1.71065	7.60931	11.5461	3895.65	FALSE	199
2022-09-13	09:06:54	3.04072	13.5257	11.5461	4051.91	1	200
2022-09-13	09:06:54	2.15116	9.56879	11.5461	3905.22	FALSE	200
2022-09-13	09:06:55	2.78347	12.3814	14.8071	4064.29	FALSE	200
2022-09-13	09:06:55	2.78144	12.3724	14.8071	3917.59	FALSE	200
2022-09-13	09:06:55	3.98408	17.722	14.8071	4082.01	1	201
2022-09-13	09:06:55	3.76612	16.7525	14.8071	3934.34	1	202
2022-09-13	09:06:56	2.66912	11.8728	9.54176	4093.88	FALSE	202
2022-09-13	09:06:56	2.3364	10.3928	9.54176	3944.73	FALSE	202
2022-09-13	09:06:56	1.42973	6.35972	9.54176	4100.24	FALSE	202
2022-09-13	09:06:57	1.01452	4.51279	4.69608	3949.25	FALSE	202
2022-09-13	09:06:57	0.995026	4.42607	4.69608	4104.67	FALSE	202
2022-09-13	09:06:57	0.787748	3.50406	4.69608	3952.75	FALSE	202
2022-09-13	09:06:57	1.42561	6.3414	4.69608	4111.01	FALSE	202
2022-09-13	09:06:58	1.72943	7.69285	9.91174	3960.44	FALSE	202
2022-09-13	09:06:58	2.68561	11.9461	9.91174	4122.96	FALSE	202
2022-09-13	09:06:58	2.00118	8.90165	9.91174	3969.35	FALSE	202
2022-09-13	09:06:58	2.49681	11.1063	9.91174	4134.06	FALSE	202
2022-09-13	09:06:59	2.39065	10.6341	13.8287	3979.98	FALSE	202
2022-09-13	09:06:59	3.70357	16.4742	13.8287	4150.54	1	203
2022-09-13	09:06:59	4.1708	18.5526	13.8287	3998.53	1	204
2022-09-13	09:06:59	2.17034	9.65411	13.8287	4160.19	FALSE	204
2022-09-13	09:07:00	2.56714	11.4192	8.1502	4009.95	FALSE	204
2022-09-13	09:07:00	1.76088	7.83275	8.1502	4168.02	FALSE	204
2022-09-13	09:07:00	1.16872	5.1987	8.1502	4015.15	FALSE	204
2022-09-13	09:07:01	1.31457	5.84747	9.26085	4173.87	FALSE	204
2022-09-13	09:07:01	1.90602	8.47836	9.26085	4023.63	FALSE	204
2022-09-13	09:07:01	2.74535	12.2119	9.26085	4186.08	FALSE	204
2022-09-13	09:07:01	2.36179	10.5057	9.26085	4034.13	FALSE	204
2022-09-13	09:07:02	3.34362	14.8731	16.8595	4200.96	1	205
2022-09-13	09:07:02	2.95787	13.1572	16.8595	4047.29	FALSE	205
2022-09-13	09:07:02	5.23859	23.3023	16.8595	4224.26	1	206
2022-09-13	09:07:02	3.62062	16.1052	16.8595	4063.4	1	207
2022-09-13	09:07:03	4.28831	19.0753	21.2627	4243.33	1	208
2022-09-13	09:07:03	4.17981	18.5926	21.2627	4081.99	1	209
2022-09-13	09:07:03	5.50408	24.4832	21.2627	4267.82	1	210
2022-09-13	09:07:03	5.14805	22.8996	21.2627	4104.89	1	211
2022-09-13	09:07:04	7.22861	32.1543	30.6092	4299.97	1	212
2022-09-13	09:07:04	7.65665	34.0583	30.6092	4138.95	1	213
2022-09-13	09:07:04	6.45187	28.6992	30.6092	4328.67	1	214
2022-09-13	09:07:04	6.18785	27.5248	30.6092	4166.47	1	215
2022-09-13	09:07:05	8.73268	38.8447	31.9064	4367.51	1	216
2022-09-13	09:07:05	6.78133	30.1647	31.9064	4196.64	1	217
2022-09-13	09:07:05	6.00464	26.7098	31.9064	4394.22	1	218
2022-09-13	09:07:06	6.76133	30.0757	30.4529	4226.71	1	219
2022-09-13	09:07:06	5.80408	25.8177	30.4529	4420.04	1	220
2022-09-13	09:07:06	6.71085	29.8512	30.4529	4256.56	1	221
2022-09-13	09:07:06	8.1082	36.0669	30.4529	4456.11	1	222
2022-09-13	09:07:07	1.05767	4.70473	1.96971	4261.27	FALSE	222
2022-09-13	09:07:07	0.397825	1.76961	1.96971	4457.88	FALSE	222
2022-09-13	09:07:07	0.252328	1.12241	1.96971	4262.39	FALSE	222
2022-09-13	09:07:07	0.0634226	0.282116	1.96971	4458.16	FALSE	222
2022-09-13	09:07:08	-0.0718445	-0.319579	3.83287	4262.39	FALSE	222
2022-09-13	09:07:08	-0.106806	-0.475094	3.83287	4458.16	FALSE	222
2022-09-13	09:07:08	0.101387	0.45099	3.83287	4262.84	FALSE	222
2022-09-13	09:07:08	3.52393	15.6751	3.83287	4473.84	1	223
2022-09-13	09:07:09	4.27777	19.0284	7.00975	4281.87	1	224
2022-09-13	09:07:09	1.53787	6.84075	7.00975	4480.68	FALSE	224
2022-09-13	09:07:09	0.318079	1.41488	7.00975	4283.28	FALSE	224
2022-09-13	09:07:09	0.169733	0.755006	7.00975	4481.43	FALSE	224
2022-09-13	09:07:10	0.197214	0.877247	1.01405	4284.16	FALSE	224
2022-09-13	09:07:10	0.296858	1.32048	1.01405	4482.75	FALSE	224
2022-09-13	09:07:10	0.189835	0.844424	1.01405	4285.01	FALSE	224
2022-09-13	09:07:11	0.412227	1.83367	1.92297	4484.59	FALSE	224
2022-09-13	09:07:11	0.350649	1.55976	1.92297	4286.57	FALSE	224
2022-09-13	09:07:11	0.384695	1.7112	1.92297	4486.3	FALSE	224
2022-09-13	09:07:11	0.581641	2.58726	1.92297	4289.15	FALSE	224
2022-09-13	09:07:12	0.891259	3.9645	4.59234	4490.26	FALSE	224
2022-09-13	09:07:12	0.92673	4.12228	4.59234	4293.28	FALSE	224
2022-09-13	09:07:12	1.03823	4.61825	4.59234	4494.88	FALSE	224
2022-09-13	09:07:12	1.2734	5.66434	4.59234	4298.94	FALSE	224
2022-09-13	09:07:13	1.32419	5.89026	4.49105	4500.77	FALSE	224
2022-09-13	09:07:13	1.05813	4.70677	4.49105	4303.65	FALSE	224
2022-09-13	09:07:13	0.822659	3.65935	4.49105	4504.43	FALSE	224
2022-09-13	09:07:13	0.833549	3.70779	4.49105	4307.35	FALSE	224
2022-09-13	09:07:14	0.934008	4.15465	4.3033	4508.58	FALSE	224
2022-09-13	09:07:14	0.981692	4.36676	4.3033	4311.72	FALSE	224
2022-09-13	09:07:14	0.986578	4.3885	4.3033	4512.97	FALSE	224
2022-09-13	09:07:15	0.771412	3.43139	2.4254	4315.15	FALSE	224
2022-09-13	09:07:15	0.547494	2.43536	2.4254	4515.41	FALSE	224
2022-09-13	09:07:15	0.448715	1.99597	2.4254	4317.15	FALSE	224
2022-09-13	09:07:15	0.413397	1.83887	2.4254	4517.25	FALSE	224
2022-09-13	09:07:16	0.383219	1.70463	2.33033	4318.85	FALSE	224
2022-09-13	09:07:16	0.406934	1.81012	2.33033	4519.06	FALSE	224
2022-09-13	09:07:16	0.559402	2.48833	2.33033	4321.34	FALSE	224
2022-09-13	09:07:16	0.745967	3.31821	2.33033	4522.38	FALSE	224
2022-09-13	09:07:17	0.704491	3.13372	2.58024	4324.48	FALSE	224
2022-09-13	09:07:17	0.644288	2.86592	2.58024	4525.24	FALSE	224
2022-09-13	09:07:17	0.524542	2.33327	2.58024	4326.81	FALSE	224
2022-09-13	09:07:17	0.446934	1.98805	2.58024	4527.23	FALSE	224
2022-09-13	09:07:18	0.453753	2.01838	1.90639	4328.83	FALSE	224
2022-09-13	09:07:18	0.418842	1.86309	1.90639	4529.09	FALSE	224
2022-09-13	09:07:18	0.42042	1.87011	1.90639	4330.7	FALSE	224
2022-09-13	09:07:18	0.421285	1.87396	1.90639	4530.97	FALSE	224
2022-09-13	09:07:19	0.438588	1.95093	2.22521	4332.65	FALSE	224
2022-09-13	09:07:19	0.682099	3.03411	2.22521	4534	FALSE	224
2022-09-13	09:07:19	0.380064	1.6906	2.22521	4334.34	FALSE	224
2022-09-13	09:07:20	0.37014	1.64646	1.83044	4535.65	FALSE	224
2022-09-13	09:07:20	0.403015	1.79269	1.83044	4336.13	FALSE	224
2022-09-13	09:07:20	0.432685	1.92467	1.83044	4537.57	FALSE	224
2022-09-13	09:07:20	0.440166	1.95795	1.83044	4338.09	FALSE	224
2022-09-13	09:07:21	0.44444	1.97696	2.02302	4539.55	FALSE	224
2022-09-13	09:07:21	0.454313	2.02088	2.02302	4340.11	FALSE	224
2022-09-13	09:07:21	0.455076	2.02427	2.02302	4541.57	FALSE	224
2022-09-13	09:07:21	0.465356	2.07	2.02302	4342.18	FALSE	224
2022-09-13	09:07:22	0.462965	2.05936	2.12676	4543.63	FALSE	224
2022-09-13	09:07:22	0.482608	2.14674	2.12676	4344.33	FALSE	224
2022-09-13	09:07:22	0.477926	2.12591	2.12676	4545.76	FALSE	224
2022-09-13	09:07:22	0.48897	2.17504	2.12676	4346.5	FALSE	224
2022-09-13	09:07:23	0.492379	2.1902	2.14712	4547.95	FALSE	224
2022-09-13	09:07:23	0.483728	2.15172	2.14712	4348.65	FALSE	224
2022-09-13	09:07:23	0.471972	2.09943	2.14712	4550.05	FALSE	224
2022-09-13	09:07:24	0.472634	2.10237	2.06592	4350.76	FALSE	224
2022-09-13	09:07:24	0.46383	2.06321	2.06592	4552.11	FALSE	224
2022-09-13	09:07:24	0.459555	2.04419	2.06592	4352.8	FALSE	224
2022-09-13	09:07:24	0.461743	2.05393	2.06592	4554.16	FALSE	224
2022-09-13	09:07:25	0.462863	2.05891	2.06258	4354.86	FALSE	224
2022-09-13	09:07:25	0.462557	2.05755	2.06258	4556.22	FALSE	224
2022-09-13	09:07:25	0.461387	2.05234	2.06258	4356.91	FALSE	224
2022-09-13	09:07:25	0.467952	2.08154	2.06258	4558.3	FALSE	224
2022-09-13	09:07:26	0.471565	2.09762	2.10446	4359.01	FALSE	224
2022-09-13	09:07:26	0.478181	2.12704	2.10446	4560.43	FALSE	224
2022-09-13	09:07:26	0.470446	2.09264	2.10446	4361.1	FALSE	224
2022-09-13	09:07:26	0.472227	2.10056	2.10446	4562.53	FALSE	224
2022-09-13	09:07:27	0.474415	2.11029	2.10113	4363.21	FALSE	224
2022-09-13	09:07:27	0.480471	2.13723	2.10113	4564.67	FALSE	224
2022-09-13	09:07:27	0.477723	2.12501	2.10113	4365.34	FALSE	224
2022-09-13	09:07:27	0.456807	2.03197	2.10113	4566.7	FALSE	224
2022-09-13	09:07:28	0.451412	2.00797	2.04706	4367.35	FALSE	224
2022-09-13	09:07:28	0.460064	2.04646	2.04706	4568.75	FALSE	224
2022-09-13	09:07:28	0.469122	2.08675	2.04706	4369.43	FALSE	224
2022-09-13	09:07:29	0.468359	2.08335	2.08879	4570.83	FALSE	224
2022-09-13	09:07:29	0.468817	2.08539	2.08879	4371.52	FALSE	224
2022-09-13	09:07:29	0.469733	2.08947	2.08879	4572.92	FALSE	224
2022-09-13	09:07:29	0.471412	2.09693	2.08879	4373.61	FALSE	224
2022-09-13	09:07:30	0.474517	2.11075	2.07039	4575.03	FALSE	224
2022-09-13	09:07:30	0.463931	2.06366	2.07039	4375.68	FALSE	224
2022-09-13	09:07:30	0.463931	2.06366	2.07039	4577.09	FALSE	224
2022-09-13	09:07:30	0.459402	2.04351	2.07039	4377.72	FALSE	224
2022-09-13	09:07:31	0.47813	2.12682	2.09252	4579.22	FALSE	224
2022-09-13	09:07:31	0.468919	2.08585	2.09252	4379.81	FALSE	224
2022-09-13	09:07:31	0.467239	2.07837	2.09252	4581.3	FALSE	224
2022-09-13	09:07:31	0.467392	2.07905	2.09252	4381.89	FALSE	224
2022-09-13	09:07:32	0.460878	2.05008	2.04759	4583.35	FALSE	224
2022-09-13	09:07:32	0.456501	2.03061	2.04759	4383.92	FALSE	224
2022-09-13	09:07:32	0.463575	2.06207	2.04759	4585.41	FALSE	224
2022-09-13	09:07:33	0.46841	2.08358	2.00107	4386	FALSE	224
2022-09-13	09:07:33	0.47014	2.09128	2.00107	4587.5	FALSE	224
2022-09-13	09:07:33	0.443015	1.97062	2.00107	4387.97	FALSE	224
2022-09-13	09:07:33	0.417875	1.85879	2.00107	4589.36	FALSE	224
2022-09-13	09:07:34	0.440471	1.9593	3.16988	4389.93	FALSE	224
2022-09-13	09:07:34	0.8193	3.64441	3.16988	4593.01	FALSE	224
2022-09-13	09:07:34	0.430242	1.9138	3.16988	4391.84	FALSE	224
2022-09-13	09:07:34	1.16047	5.162	3.16988	4598.17	FALSE	224
2022-09-13	09:07:35	0.68897	3.06468	3.13706	4394.91	FALSE	224
2022-09-13	09:07:35	1.31304	5.84066	3.13706	4604.01	FALSE	224
2022-09-13	09:07:35	0.510242	2.26966	3.13706	4397.18	FALSE	224
2022-09-13	09:07:35	0.308715	1.37323	3.13706	4605.38	FALSE	224
2022-09-13	09:07:36	0.621183	2.76315	1.46321	4399.94	FALSE	224
2022-09-13	09:07:36	0.378384	1.68313	1.46321	4607.07	FALSE	224
2022-09-13	09:07:36	0.126171	0.561234	1.46321	4400.5	FALSE	224
2022-09-13	09:07:36	0.190038	0.845327	1.46321	4607.91	FALSE	224
2022-09-13	09:07:37	0.507087	2.25562	6.20807	4402.76	FALSE	224
2022-09-13	09:07:37	2.04128	9.08002	6.20807	4616.99	FALSE	224
2022-09-13	09:07:37	1.63854	7.28855	6.20807	4410.05	FALSE	224
2022-09-13	09:07:38	2.04836	9.11151	11.3927	4626.1	FALSE	224
2022-09-13	09:07:38	2.1277	9.46444	11.3927	4419.51	FALSE	224
2022-09-13	09:07:38	2.07024	9.20884	11.3927	4635.31	FALSE	224
2022-09-13	09:07:38	3.99848	17.786	11.3927	4437.3	1	225
2022-09-13	09:07:39	5.59273	24.8776	22.7256	4660.19	1	226
2022-09-13	09:07:39	6.20591	27.6051	22.7256	4464.9	1	227
2022-09-13	09:07:39	6.15823	27.393	22.7256	4687.58	1	228
2022-09-13	09:07:39	2.47894	11.0268	22.7256	4475.93	FALSE	228
2022-09-13	09:07:40	3.30882	14.7183	12.7433	4702.3	1	229
2022-09-13	09:07:40	3.30927	14.7203	12.7433	4490.65	1	230
2022-09-13	09:07:40	2.66536	11.8561	12.7433	4714.16	FALSE	230
2022-09-13	09:07:40	2.17584	9.67857	12.7433	4500.33	FALSE	230
2022-09-13	09:07:41	3.12103	13.883	14.2819	4728.04	1	231
2022-09-13	09:07:41	2.65116	11.7929	14.2819	4512.12	FALSE	231
2022-09-13	09:07:41	3.85996	17.1699	14.2819	4745.21	1	232
2022-09-13	09:07:42	2.89192	12.8638	28.7186	4524.99	FALSE	232
2022-09-13	09:07:42	3.15284	14.0245	28.7186	4759.23	1	233
2022-09-13	09:07:42	7.50449	33.3815	28.7186	4558.37	1	234
2022-09-13	09:07:42	12.2757	54.6048	28.7186	4813.84	1	235
2022-09-13	09:07:43	18.4253	81.9594	40.9169	4640.33	1	236
2022-09-13	09:07:43	8.48454	37.7409	40.9169	4851.58	1	237
2022-09-13	09:07:43	6.96902	30.9996	40.9169	4671.33	1	238
2022-09-13	09:07:43	2.91523	12.9675	40.9169	4864.55	FALSE	238
2022-09-13	09:07:44	5.19069	23.0892	26.4821	4694.41	1	239
2022-09-13	09:07:44	4.79925	21.348	26.4821	4885.89	1	240
2022-09-13	09:07:44	10.7987	48.0348	26.4821	4742.45	1	241
2022-09-13	09:07:44	3.0251	13.4562	26.4821	4899.35	1	242
2022-09-13	09:07:45	0.0204201	0.0908327	-0.618786	4742.54	FALSE	242
2022-09-13	09:07:45	-0.197392	-0.878039	-0.618786	4899.35	FALSE	242
2022-09-13	09:07:45	-0.152659	-0.679058	-0.618786	4742.54	FALSE	242
2022-09-13	09:07:45	-0.226806	-1.00888	-0.618786	4899.35	FALSE	242
2022-09-13	09:07:46	-0.131437	-0.584658	-0.741988	4742.54	FALSE	242
2022-09-13	09:07:46	-0.261921	-1.16508	-0.741988	4899.35	FALSE	242
2022-09-13	09:07:46	-0.107061	-0.476229	-0.741988	4742.54	FALSE	242
2022-09-13	09:07:47	-0.0486893	-0.21658	11.123	4899.35	FALSE	242
2022-09-13	09:07:47	0.78271	3.48165	11.123	4746.02	FALSE	242
2022-09-13	09:07:47	3.37421	15.0092	11.123	4914.36	1	243
2022-09-13	09:07:47	5.894	26.2177	11.123	4772.24	1	244
2022-09-13	09:07:48	9.21767	41.002	24.0667	4955.36	1	245
2022-09-13	09:07:48	6.92881	30.8207	24.0667	4803.06	1	246
2022-09-13	09:07:48	4.7366	21.0693	24.0667	4976.43	1	247
2022-09-13	09:07:48	0.75869	3.3748	24.0667	4806.44	FALSE	247
2022-09-13	09:07:49	0.37472	1.66683	1.43254	4978.1	FALSE	247
2022-09-13	09:07:49	0.312277	1.38907	1.43254	4807.82	FALSE	247
2022-09-13	09:07:49	0.264644	1.17719	1.43254	4979.28	FALSE	247
2022-09-13	09:07:49	0.336552	1.49705	1.43254	4809.32	FALSE	247
2022-09-13	09:07:50	0.145814	0.64861	0.150933	4979.92	FALSE	247
2022-09-13	09:07:50	0.224949	1.00062	0.150933	4810.32	FALSE	247
2022-09-13	09:07:50	-0.0904196	-0.402204	0.150933	4979.92	FALSE	247
2022-09-13	09:07:50	-0.144618	-0.64329	0.150933	4810.32	FALSE	247
2022-09-13	09:07:51	-0.238816	-1.0623	0.207113	4979.92	FALSE	247
2022-09-13	09:07:51	-0.0587656	-0.261401	0.207113	4810.32	FALSE	247
2022-09-13	09:07:51	0.437265	1.94504	0.207113	4981.87	FALSE	247
2022-09-13	09:07:52	3.55548	15.8155	15.8179	4826.14	1	248
2022-09-13	09:07:52	3.86276	17.1823	15.8179	4999.05	1	249
2022-09-13	09:07:52	5.27233	23.4524	15.8179	4849.59	1	250
2022-09-13	09:07:52	1.5335	6.82131	15.8179	5005.87	FALSE	250
2022-09-13	09:07:53	2.71436	12.074	6.10829	4861.66	FALSE	250
2022-09-13	09:07:53	0.769478	3.42279	6.10829	5009.3	FALSE	250
2022-09-13	09:07:53	1.03151	4.58836	6.10829	4866.25	FALSE	250
2022-09-13	09:07:53	0.977468	4.34797	6.10829	5013.64	FALSE	250
2022-09-13	09:07:54	0.93299	4.15013	3.08324	4870.4	FALSE	250
2022-09-13	09:07:54	0.750496	3.33836	3.08324	5016.98	FALSE	250
2022-09-13	09:07:54	0.610598	2.71606	3.08324	4873.12	FALSE	250
2022-09-13	09:07:54	0.478486	2.1284	3.08324	5019.11	FALSE	250
2022-09-13	09:07:55	0.547952	2.4374	3.71512	4875.56	FALSE	250
2022-09-13	09:07:55	0.986171	4.38669	3.71512	5023.5	FALSE	250
2022-09-13	09:07:55	0.971463	4.32126	3.71512	4879.88	FALSE	250
2022-09-13	09:07:56	1.19396	5.31097	4.50762	5028.81	FALSE	250
2022-09-13	09:07:56	1.20337	5.35283	4.50762	4885.23	FALSE	250
2022-09-13	09:07:56	0.651565	2.89829	4.50762	5031.71	FALSE	250
2022-09-13	09:07:56	1.00454	4.46839	4.50762	4889.7	FALSE	250
2022-09-13	09:07:57	0.935687	4.16212	5.55561	5035.87	FALSE	250
2022-09-13	09:07:57	1.73141	7.70166	5.55561	4897.4	FALSE	250
2022-09-13	09:07:57	1.16653	5.18896	5.55561	5041.06	FALSE	250
2022-09-13	09:07:57	1.1622	5.1697	5.55561	4902.57	FALSE	250
2022-09-13	09:07:58	0.583219	2.59427	2.62229	5043.65	FALSE	250
2022-09-13	09:07:58	0.741387	3.29784	2.62229	4905.87	FALSE	250
2022-09-13	09:07:58	0.430751	1.91607	2.62229	5045.57	FALSE	250
2022-09-13	09:07:58	0.60271	2.68097	2.62229	4908.55	FALSE	250
2022-09-13	09:07:59	0.440166	1.95795	1.94991	5047.53	FALSE	250
2022-09-13	09:07:59	0.520623	2.31584	1.94991	4910.86	FALSE	250
2022-09-13	09:07:59	0.442048	1.96632	1.94991	5049.49	FALSE	250
2022-09-13	09:07:59	0.350598	1.55953	1.94991	4912.42	FALSE	250
2022-09-13	09:08:00	0.422405	1.87894	1.97213	5051.37	FALSE	250
2022-09-13	09:08:00	0.481997	2.14402	1.97213	4914.57	FALSE	250
2022-09-13	09:08:00	0.425662	1.89343	1.97213	5053.26	FALSE	250
2022-09-13	09:08:01	0.239148	1.06378	1.785	4915.63	FALSE	250
2022-09-13	09:08:01	0.471107	2.09558	1.785	5055.36	FALSE	250
2022-09-13	09:08:01	0.355433	1.58104	1.785	4917.21	FALSE	250
2022-09-13	09:08:01	0.539453	2.39959	1.785	5057.76	FALSE	250
2022-09-13	09:08:02	0.303372	1.34946	1.85178	4918.56	FALSE	250
2022-09-13	09:08:02	0.506781	2.25426	1.85178	5060.01	FALSE	250
2022-09-13	09:08:02	0.373702	1.6623	1.85178	4920.22	FALSE	250
2022-09-13	09:08:02	0.481336	2.14108	1.85178	5062.15	FALSE	250
2022-09-13	09:08:03	0.714211	3.17695	2.13712	4923.4	FALSE	250
2022-09-13	09:08:03	0.394567	1.75511	2.13712	5063.91	FALSE	250
2022-09-13	09:08:03	0.430293	1.91403	2.13712	4925.32	FALSE	250
2022-09-13	09:08:03	0.38271	1.70237	2.13712	5065.61	FALSE	250
2022-09-13	09:08:04	0.423982	1.88596	1.76975	4927.2	FALSE	250
2022-09-13	09:08:04	0.413092	1.83752	1.76975	5067.45	FALSE	250
2022-09-13	09:08:04	0.356501	1.58579	1.76975	4928.79	FALSE	250
2022-09-13	09:08:05	0.28729	1.27792	1.85478	5068.73	FALSE	250
2022-09-13	09:08:05	0.373652	1.66208	1.85478	4930.45	FALSE	250
2022-09-13	09:08:05	0.465713	2.07158	1.85478	5070.8	FALSE	250
2022-09-13	09:08:05	0.541234	2.40752	1.85478	4932.86	FALSE	250
2022-09-13	09:08:06	3.00067	13.3476	35.0576	5084.15	1	251
2022-09-13	09:08:06	11.3448	50.4639	35.0576	4983.32	1	252
2022-09-13	09:08:06	10.226	45.4873	35.0576	5129.63	1	253
2022-09-13	09:08:06	6.9537	30.9314	35.0576	5014.25	1	254
2022-09-13	09:08:07	1.56332	6.95396	3.53021	5136.59	FALSE	254
2022-09-13	09:08:07	0.714313	3.17741	3.53021	5017.43	FALSE	254
2022-09-13	09:08:07	0.510445	2.27056	3.53021	5138.86	FALSE	254
2022-09-13	09:08:07	0.386425	1.7189	3.53021	5019.15	FALSE	254
2022-09-13	09:08:08	0.464237	2.06502	2.11137	5140.92	FALSE	254
2022-09-13	09:08:08	0.453193	2.01589	2.11137	5021.16	FALSE	254
2022-09-13	09:08:08	0.468104	2.08222	2.11137	5143.01	FALSE	254
2022-09-13	09:08:08	0.513092	2.28234	2.11137	5023.45	FALSE	254
2022-09-13	09:08:09	0.483881	2.1524	2.19126	5145.16	FALSE	254
2022-09-13	09:08:09	0.459046	2.04193	2.19126	5025.49	FALSE	254
2022-09-13	09:08:09	0.534924	2.37945	2.19126	5147.54	FALSE	254
2022-09-13	09:08:10	0.508461	2.26174	2.37883	5027.75	FALSE	254
2022-09-13	09:08:10	0.534975	2.37968	2.37883	5149.92	FALSE	254
2022-09-13	09:08:10	0.543219	2.41635	2.37883	5030.17	FALSE	254
2022-09-13	09:08:10	0.552481	2.45755	2.37883	5152.37	FALSE	254
2022-09-13	09:08:11	0.525967	2.33961	2.02048	5032.51	FALSE	254
2022-09-13	09:08:11	0.569733	2.53429	2.02048	5154.91	FALSE	254
2022-09-13	09:08:11	0.41126	1.82937	2.02048	5034.34	FALSE	254
2022-09-13	09:08:11	0.309937	1.37866	2.02048	5156.29	FALSE	254
2022-09-13	09:08:12	0.298028	1.32569	1.61454	5035.66	FALSE	254
2022-09-13	09:08:12	0.256705	1.14188	1.61454	5157.43	FALSE	254
2022-09-13	09:08:12	0.364339	1.62065	1.61454	5037.28	FALSE	254
2022-09-13	09:08:12	0.532786	2.36994	1.61454	5159.8	FALSE	254
2022-09-13	09:08:13	0.581438	2.58635	2.38835	5039.87	FALSE	254
2022-09-13	09:08:13	0.524542	2.33327	2.38835	5162.13	FALSE	254
2022-09-13	09:08:13	0.504796	2.24543	2.38835	5042.11	FALSE	254
2022-09-13	09:08:14	0.511361	2.27464	2.34498	5164.41	FALSE	254
2022-09-13	09:08:14	0.529733	2.35636	2.34498	5044.47	FALSE	254
2022-09-13	09:08:14	0.519657	2.31154	2.34498	5166.72	FALSE	254
2022-09-13	09:08:14	0.547952	2.4374	2.34498	5046.91	FALSE	254
2022-09-13	09:08:15	0.634618	2.82291	4.12143	5169.54	FALSE	254
2022-09-13	09:08:15	0.671209	2.98567	4.12143	5049.89	FALSE	254
2022-09-13	09:08:15	0.851208	3.78634	4.12143	5173.33	FALSE	254
2022-09-13	09:08:15	1.54912	6.8908	4.12143	5056.78	FALSE	254
2022-09-13	09:08:16	0.895738	3.98442	4.64661	5177.31	FALSE	254
2022-09-13	09:08:16	0.996908	4.43445	4.64661	5061.22	FALSE	254
2022-09-13	09:08:16	1.1995	5.33562	4.64661	5182.65	FALSE	254
2022-09-13	09:08:16	1.08627	4.83195	4.64661	5066.05	FALSE	254
2022-09-13	09:08:17	0.943219	4.19563	3.88482	5186.84	FALSE	254
2022-09-13	09:08:17	0.923015	4.10576	3.88482	5070.16	FALSE	254
2022-09-13	09:08:17	0.870344	3.87146	3.88482	5190.72	FALSE	254
2022-09-13	09:08:17	0.756807	3.36643	3.88482	5073.52	FALSE	254
2022-09-13	09:08:18	0.579606	2.5782	3.13674	5193.29	FALSE	254
2022-09-13	09:08:18	0.787443	3.5027	3.13674	5077.03	FALSE	254
2022-09-13	09:08:18	0.748461	3.3293	3.13674	5196.62	FALSE	254
2022-09-13	09:08:19	0.599402	2.66626	2.08403	5079.69	FALSE	254
2022-09-13	09:08:19	0.45355	2.01748	2.08403	5198.64	FALSE	254
2022-09-13	09:08:19	0.46902	2.08629	2.08403	5081.78	FALSE	254
2022-09-13	09:08:19	0.352074	1.5661	2.08403	5200.21	FALSE	254
2022-09-13	09:08:20	0.195229	0.868418	1.64527	5082.65	FALSE	254
2022-09-13	09:08:20	0.309987	1.37888	1.64527	5201.59	FALSE	254
2022-09-13	09:08:20	0.675331	3.00401	1.64527	5085.65	FALSE	254
2022-09-13	09:08:20	0.298944	1.32976	1.64527	5202.92	FALSE	254
2022-09-13	09:08:21	0.226527	1.00764	1.23129	5086.66	FALSE	254
2022-09-13	09:08:21	0.28902	1.28562	1.23129	5204.2	FALSE	254
2022-09-13	09:08:21	0.262914	1.16949	1.23129	5087.83	FALSE	254
2022-09-13	09:08:21	0.328766	1.46242	1.23129	5205.66	FALSE	254
2022-09-13	09:08:22	0.141641	0.630047	1.2593	5088.46	FALSE	254
2022-09-13	09:08:22	0.368206	1.63785	1.2593	5207.3	FALSE	254
2022-09-13	09:08:22	0.212837	0.946742	1.2593	5089.4	FALSE	254
2022-09-13	09:08:22	0.409733	1.82257	1.2593	5209.12	FALSE	254
2022-09-13	09:08:23	0.213346	0.949006	1.11162	5090.35	FALSE	254
2022-09-13	09:08:23	0.309275	1.37572	1.11162	5210.5	FALSE	254
2022-09-13	09:08:23	0.227087	1.01013	1.11162	5091.36	FALSE	254
2022-09-13	09:08:24	0.575993	2.56213	7.05736	5213.06	FALSE	254
2022-09-13	09:08:24	1.57243	6.99448	7.05736	5098.36	FALSE	254
2022-09-13	09:08:24	2.22261	9.88661	7.05736	5222.95	FALSE	254
2022-09-13	09:08:24	1.97523	8.78622	7.05736	5107.14	FALSE	254
2022-09-13	09:08:25	2.16566	9.63329	11.006	5232.58	FALSE	254
2022-09-13	09:08:25	2.99681	13.3304	11.006	5120.47	FALSE	254
2022-09-13	09:08:25	2.13355	9.49046	11.006	5242.07	FALSE	254
2022-09-13	09:08:25	2.60103	11.5699	11.006	5132.04	FALSE	254
2022-09-13	09:08:26	1.87085	8.32191	6.79997	5250.39	FALSE	254
2022-09-13	09:08:26	1.46184	6.50256	6.79997	5138.55	FALSE	254
2022-09-13	09:08:26	1.03788	4.6167	6.79997	5255.01	FALSE	254
2022-09-13	09:08:26	1.74424	7.75873	6.79997	5146.31	FALSE	254
2022-09-13	09:08:27	2.52128	11.2152	9.79861	5266.23	FALSE	254
2022-09-13	09:08:27	1.90912	8.49215	9.79861	5154.8	FALSE	254
2022-09-13	09:08:27	2.17808	9.68854	9.79861	5275.91	FALSE	254
2022-09-13	09:08:28	2.11482	9.40714	8.25281	5164.21	FALSE	254
2022-09-13	09:08:28	2.41156	10.7271	8.25281	5286.64	FALSE	254
2022-09-13	09:08:28	1.80525	8.03011	8.25281	5172.24	FALSE	254
2022-09-13	09:08:28	1.08963	4.84689	8.25281	5291.49	FALSE	254
2022-09-13	09:08:29	2.1024	9.3519	9.95146	5181.59	FALSE	254
2022-09-13	09:08:29	2.76373	12.2936	9.95146	5303.78	FALSE	254
2022-09-13	09:08:29	1.83884	8.17953	9.95146	5189.77	FALSE	254
2022-09-13	09:08:29	2.24378	9.98078	9.95146	5313.76	FALSE	254
2022-09-13	09:08:30	2.98352	13.2713	9.18372	5203.04	FALSE	254
2022-09-13	09:08:30	1.89503	8.42947	9.18372	5322.19	FALSE	254
2022-09-13	09:08:30	2.30439	10.2504	9.18372	5213.29	FALSE	254
2022-09-13	09:08:30	1.07543	4.78373	9.18372	5326.98	FALSE	254
2022-09-13	09:08:31	1.4905	6.63004	6.36715	5219.92	FALSE	254
2022-09-13	09:08:31	0.845967	3.76303	6.36715	5330.74	FALSE	254
2022-09-13	09:08:31	1.15884	5.15475	6.36715	5225.07	FALSE	254
2022-09-13	09:08:31	2.23029	9.92078	6.36715	5340.66	FALSE	254
2022-09-13	09:08:32	3.02149	13.4402	13.7013	5238.51	1	255
2022-09-13	09:08:32	3.4193	15.2097	13.7013	5355.87	1	256
2022-09-13	09:08:32	2.79976	12.4539	13.7013	5250.97	FALSE	256
2022-09-13	09:08:33	2.34744	10.4419	8.89017	5366.31	FALSE	256
2022-09-13	09:08:33	2.57884	11.4712	8.89017	5262.44	FALSE	256
2022-09-13	09:08:33	1.56729	6.97162	8.89017	5373.28	FALSE	256
2022-09-13	09:08:33	1.50083	6.67599	8.89017	5269.11	FALSE	256
2022-09-13	09:08:34	0.426985	1.89931	1.57577	5375.18	FALSE	256
2022-09-13	09:08:34	0.43986	1.95659	1.57577	5271.07	FALSE	256
2022-09-13	09:08:34	0.304389	1.35398	1.57577	5376.54	FALSE	256
2022-09-13	09:08:34	0.245763	1.0932	1.57577	5272.16	FALSE	256
2022-09-13	09:08:35	0.354618	1.57741	1.65925	5378.11	FALSE	256
2022-09-13	09:08:35	0.369224	1.64238	1.65925	5273.81	FALSE	256
2022-09-13	09:08:35	0.374313	1.66502	1.65925	5379.78	FALSE	256
2022-09-13	09:08:35	0.393906	1.75217	1.65925	5275.56	FALSE	256
2022-09-13	09:08:36	0.349224	1.55342	1.66283	5381.33	FALSE	256
2022-09-13	09:08:36	0.389987	1.73474	1.66283	5277.29	FALSE	256
2022-09-13	09:08:36	0.382252	1.70033	1.66283	5383.03	FALSE	256
2022-09-13	09:08:37	0.499707	2.2228	2.78539	5279.52	FALSE	256
2022-09-13	09:08:37	0.588664	2.6185	2.78539	5385.65	FALSE	256
2022-09-13	09:08:37	0.663219	2.95013	2.78539	5282.47	FALSE	256
2022-09-13	09:08:37	0.753142	3.35013	2.78539	5389	FALSE	256
2022-09-13	09:08:38	0.604237	2.68777	2.60582	5285.15	FALSE	256
2022-09-13	09:08:38	0.567952	2.52636	2.60582	5391.53	FALSE	256
2022-09-13	09:08:38	0.610089	2.7138	2.60582	5287.87	FALSE	256
2022-09-13	09:08:38	0.56098	2.49535	2.60582	5394.02	FALSE	256

## Sheet: Bubba_martin_202291390336 (3)
Date	Time	Lbs	Newtons	Total force x time	total steps > 13.345		**GoPro Fitting: 853
2022-09-13	09:03:38	0.441234	1.9627	1.9627	FALSE	0				Total Force x time	5394.02
2022-09-13	09:03:38	0.429377	1.90995	1.90995	FALSE	0				Total steps	256
2022-09-13	09:03:38	0.448512	1.99507	3.95777	FALSE	0
2022-09-13	09:03:38	0.418333	1.86083	3.77078	FALSE	0
2022-09-13	09:03:39	0.427137	1.89999	5.85776	FALSE	0
2022-09-13	09:03:39	0.43014	1.91335	5.68413	FALSE	0
2022-09-13	09:03:39	0.439606	1.95546	7.81321	FALSE	0
2022-09-13	09:03:40	0.439504	1.955	7.63913	FALSE	0
2022-09-13	09:03:40	0.440166	1.95795	9.77116	FALSE	0
2022-09-13	09:03:40	0.440725	1.96043	9.59957	FALSE	0
2022-09-13	09:03:40	0.437417	1.94572	11.7169	FALSE	0
2022-09-13	09:03:41	0.443117	1.97107	11.5706	FALSE	0
2022-09-13	09:03:41	0.445916	1.98352	13.7004	FALSE	0
2022-09-13	09:03:41	0.431311	1.91856	13.4892	FALSE	0
2022-09-13	09:03:41	0.401896	1.78771	15.4881	FALSE	0
2022-09-13	09:03:42	0.421438	1.87464	15.3638	FALSE	0
2022-09-13	09:03:42	0.445713	1.98262	17.4707	FALSE	0
2022-09-13	09:03:42	0.430547	1.91516	17.279	FALSE	0
2022-09-13	09:03:42	0.511667	2.276	19.7467	FALSE	0
2022-09-13	09:03:43	0.434568	1.93305	19.212	FALSE	0
2022-09-13	09:03:43	0.492277	2.18975	21.9365	FALSE	0
2022-09-13	09:03:43	0.594211	2.64317	21.8552	FALSE	0
2022-09-13	09:03:44	0.486679	2.16485	24.1013	FALSE	0
2022-09-13	09:03:44	0.463117	2.06004	23.9152	FALSE	0
2022-09-13	09:03:44	0.44729	1.98964	26.091	FALSE	0
2022-09-13	09:03:44	0.572684	2.54741	26.4627	FALSE	0
2022-09-13	09:03:45	0.325305	1.44702	27.538	FALSE	0
2022-09-13	09:03:45	0.243524	1.08324	27.5459	FALSE	0
2022-09-13	09:03:45	0.247799	1.10226	28.6402	FALSE	0
2022-09-13	09:03:45	0.329886	1.4674	29.0133	FALSE	0
2022-09-13	09:03:46	2.38729	10.6191	39.2594	FALSE	0
2022-09-13	09:03:46	18.6667	83.0332	112.047	1	1
2022-09-13	09:03:46	12.731	56.63	95.8894	1	2
2022-09-13	09:03:46	5.988	26.6358	138.682	1	3
2022-09-13	09:03:47	4.22342	18.7866	114.676	1	4
2022-09-13	09:03:47	3.75782	16.7155	155.398	1	5
2022-09-13	09:03:47	2.36083	10.5014	125.177	FALSE	5
2022-09-13	09:03:47	3.72016	16.548	171.946	1	6
2022-09-13	09:03:48	2.39813	10.6674	135.845	FALSE	6
2022-09-13	09:03:48	1.80968	8.04982	179.996	FALSE	6
2022-09-13	09:03:48	0.52902	2.35319	138.198	FALSE	6
2022-09-13	09:03:49	0.14327	0.637294	180.633	FALSE	6
2022-09-13	09:03:49	0.311972	1.38771	139.586	FALSE	6
2022-09-13	09:03:49	0.133601	0.594284	181.227	FALSE	6
2022-09-13	09:03:49	1.71579	7.63218	147.218	FALSE	6
2022-09-13	09:03:50	9.87365	43.92	225.147	1	7
2022-09-13	09:03:50	11.9106	52.9807	200.199	1	8
2022-09-13	09:03:50	10.1351	45.083	270.23	1	9
2022-09-13	09:03:50	10.5344	46.8591	247.058	1	10
2022-09-13	09:03:51	11.8471	52.6983	322.928	1	11
2022-09-13	09:03:51	15.4309	68.6397	315.697	1	12
2022-09-13	09:03:51	12.2375	54.4348	377.363	1	13
2022-09-13	09:03:51	4.28826	19.075	334.773	1	14
2022-09-13	09:03:52	0.385713	1.71573	379.079	FALSE	14
2022-09-13	09:03:52	0.579606	2.5782	337.351	FALSE	14
2022-09-13	09:03:52	0.368155	1.63763	380.717	FALSE	14
2022-09-13	09:03:52	0.398486	1.77255	339.123	FALSE	14
2022-09-13	09:03:53	0.457875	2.03672	382.753	FALSE	14
2022-09-13	09:03:53	0.219046	0.97436	340.098	FALSE	14
2022-09-13	09:03:53	0.550852	2.4503	385.204	FALSE	14
2022-09-13	09:03:54	0.559504	2.48879	342.586	FALSE	14
2022-09-13	09:03:54	0.22785	1.01352	386.217	FALSE	14
2022-09-13	09:03:54	0.371972	1.65461	344.241	FALSE	14
2022-09-13	09:03:54	0.271361	1.20707	387.424	FALSE	14
2022-09-13	09:03:55	0.462965	2.05936	346.3	FALSE	14
2022-09-13	09:03:55	0.405356	1.8031	389.227	FALSE	14
2022-09-13	09:03:55	0.403117	1.79315	348.094	FALSE	14
2022-09-13	09:03:55	0.430547	1.91516	391.143	FALSE	14
2022-09-13	09:03:56	0.526069	2.34006	350.434	FALSE	14
2022-09-13	09:03:56	0.508664	2.26264	393.405	FALSE	14
2022-09-13	09:03:56	0.427392	1.90113	352.335	FALSE	14
2022-09-13	09:03:56	0.449173	1.99801	395.403	FALSE	14
2022-09-13	09:03:57	8.59706	38.2414	390.576	1	15
2022-09-13	09:03:57	15.8772	70.625	466.028	1	16
2022-09-13	09:03:57	1.70668	7.59165	398.168	FALSE	16
2022-09-13	09:03:58	3.90749	17.3813	483.409	1	17
2022-09-13	09:03:58	2.50169	11.128	409.296	FALSE	17
2022-09-13	09:03:58	1.13284	5.0391	488.449	FALSE	17
2022-09-13	09:03:58	1.57584	7.00965	416.305	FALSE	17
2022-09-13	09:03:59	0.701896	3.12217	491.571	FALSE	17
2022-09-13	09:03:59	0.678028	3.016	419.321	FALSE	17
2022-09-13	09:03:59	0.280216	1.24646	492.817	FALSE	17
2022-09-13	09:03:59	0.170038	0.756363	420.078	FALSE	17
2022-09-13	09:04:00	0.277723	1.23537	494.053	FALSE	17
2022-09-13	09:04:00	0.204644	0.910297	420.988	FALSE	17
2022-09-13	09:04:00	0.154873	0.688906	494.741	FALSE	17
2022-09-13	09:04:00	0.0224048	0.099661	421.088	FALSE	17
2022-09-13	09:04:01	0.0896312	0.398698	495.14	FALSE	17
2022-09-13	09:04:01	1.05823	4.70722	425.795	FALSE	17
2022-09-13	09:04:01	9.79065	43.5508	538.691	1	18
2022-09-13	09:04:01	4.64632	20.6678	446.463	1	19
2022-09-13	09:04:02	6.12179	27.2309	565.922	1	20
2022-09-13	09:04:02	4.92123	21.8906	468.353	1	21
2022-09-13	09:04:02	4.86276	21.6305	587.552	1	22
2022-09-13	09:04:03	2.05706	9.15021	477.504	FALSE	22
2022-09-13	09:04:03	2.21365	9.84676	597.399	FALSE	22
2022-09-13	09:04:03	4.81339	21.4109	498.915	1	23
2022-09-13	09:04:03	2.4363	10.8371	608.236	FALSE	23
2022-09-13	09:04:04	5.1224	22.7855	521.7	1	24
2022-09-13	09:04:04	4.69513	20.8849	629.121	1	25
2022-09-13	09:04:04	1.89752	8.44055	530.141	FALSE	25
2022-09-13	09:04:04	1.76246	7.83977	636.961	FALSE	25
2022-09-13	09:04:05	1.95396	8.6916	538.832	FALSE	25
2022-09-13	09:04:05	4.74149	21.0911	658.052	1	26
2022-09-13	09:04:05	0.880115	3.91493	542.747	FALSE	26
2022-09-13	09:04:05	6.02011	26.7787	684.831	1	27
2022-09-13	09:04:06	3.76663	16.7547	559.502	1	28
2022-09-13	09:04:06	0.525611	2.33802	687.169	FALSE	28
2022-09-13	09:04:06	0.606374	2.69727	562.199	FALSE	28
2022-09-13	09:04:07	0.385814	1.71618	688.885	FALSE	28
2022-09-13	09:04:07	0.813041	3.61657	565.816	FALSE	28
2022-09-13	09:04:07	1.73548	7.71976	696.605	FALSE	28
2022-09-13	09:04:07	5.36006	23.8426	589.658	1	29
2022-09-13	09:04:08	4.96622	22.0907	718.695	1	30
2022-09-13	09:04:08	7.78113	34.612	624.27	1	31
2022-09-13	09:04:08	1.21212	5.39175	724.087	FALSE	31
2022-09-13	09:04:08	2.42637	10.793	635.063	FALSE	31
2022-09-13	09:04:09	1.3138	5.84405	729.931	FALSE	31
2022-09-13	09:04:09	0.863575	3.84135	638.905	FALSE	31
2022-09-13	09:04:09	1.62312	7.21996	737.151	FALSE	31
2022-09-13	09:04:09	1.51487	6.73844	645.643	FALSE	31
2022-09-13	09:04:10	4.42724	19.6932	756.844	1	32
2022-09-13	09:04:10	2.10556	9.36595	655.009	FALSE	32
2022-09-13	09:04:10	6.32973	28.1559	785	1	33
2022-09-13	09:04:10	2.67492	11.8986	666.908	FALSE	33
2022-09-13	09:04:11	4.35711	19.3813	804.382	1	34
2022-09-13	09:04:11	1.51441	6.7364	673.644	FALSE	34
2022-09-13	09:04:11	2.4419	10.8621	815.244	FALSE	34
2022-09-13	09:04:12	3.08403	13.7184	687.362	1	35
2022-09-13	09:04:12	2.12841	9.46759	824.711	FALSE	35
2022-09-13	09:04:12	5.79192	25.7636	713.126	1	36
2022-09-13	09:04:12	6.31227	28.0782	852.79	1	37
2022-09-13	09:04:13	11.2661	50.1139	763.24	1	38
2022-09-13	09:04:13	4.00113	17.7978	870.587	1	39
2022-09-13	09:04:13	4.63696	20.6261	783.866	1	40
2022-09-13	09:04:13	6.19411	27.5526	898.14	1	41
2022-09-13	09:04:14	3.88011	17.2595	801.126	1	42
2022-09-13	09:04:14	0.86958	3.86807	902.008	FALSE	42
2022-09-13	09:04:14	0.699555	3.11176	804.237	FALSE	42
2022-09-13	09:04:14	0.749835	3.33542	905.343	FALSE	42
2022-09-13	09:04:15	0.572226	2.54538	806.783	FALSE	42
2022-09-13	09:04:15	1.29192	5.74672	911.09	FALSE	42
2022-09-13	09:04:15	1.81304	8.06476	814.847	FALSE	42
2022-09-13	09:04:15	9.55217	42.49	953.58	1	43
2022-09-13	09:04:16	6.26413	27.8641	842.712	1	44
2022-09-13	09:04:16	5.99884	26.684	980.264	1	45
2022-09-13	09:04:16	1.44449	6.42538	849.137	FALSE	45
2022-09-13	09:04:17	4.04688	18.0013	998.266	1	46
2022-09-13	09:04:17	1.27167	5.65664	854.794	FALSE	46
2022-09-13	09:04:17	5.25604	23.3799	1021.65	1	47
2022-09-13	09:04:17	8.80016	39.1449	893.938	1	48
2022-09-13	09:04:18	4.15838	18.4973	1040.14	1	49
2022-09-13	09:04:18	7.86082	34.9665	928.905	1	50
2022-09-13	09:04:18	2.67828	11.9135	1052.06	FALSE	50
2022-09-13	09:04:18	7.10698	31.6133	960.518	1	51
2022-09-13	09:04:19	0.386425	1.7189	1053.78	FALSE	51
2022-09-13	09:04:19	2.38612	10.6139	971.132	FALSE	51
2022-09-13	09:04:19	3.0168	13.4193	1067.19	1	52
2022-09-13	09:04:19	6.62266	29.4589	1000.59	1	53
2022-09-13	09:04:20	10.7804	47.9534	1115.15	1	54
2022-09-13	09:04:20	6.89584	30.6741	1031.27	1	55
2022-09-13	09:04:20	12.3413	54.8966	1170.04	1	56
2022-09-13	09:04:21	1.66424	7.40287	1038.67	FALSE	56
2022-09-13	09:04:21	7.9337	35.2907	1205.34	1	57
2022-09-13	09:04:21	9.97161	44.3557	1083.02	1	58
2022-09-13	09:04:21	8.56627	38.1045	1243.44	1	59
2022-09-13	09:04:22	14.7212	65.4828	1148.51	1	60
2022-09-13	09:04:22	10.8385	48.2118	1291.65	1	61
2022-09-13	09:04:22	8.16418	36.3159	1184.82	1	62
2022-09-13	09:04:22	9.28713	41.311	1332.96	1	63
2022-09-13	09:04:23	7.20724	32.0592	1216.88	1	64
2022-09-13	09:04:23	1.88475	8.38374	1341.35	FALSE	64
2022-09-13	09:04:23	4.22556	18.7961	1235.68	1	65
2022-09-13	09:04:23	4.97446	22.1274	1363.47	1	66
2022-09-13	09:04:24	1.27416	5.66772	1241.35	FALSE	66
2022-09-13	09:04:24	2.72464	12.1197	1375.59	FALSE	66
2022-09-13	09:04:24	5.46357	24.3031	1265.65	1	67
2022-09-13	09:04:24	4.43253	19.7168	1395.31	1	68
2022-09-13	09:04:25	11.7924	52.455	1318.1	1	69
2022-09-13	09:04:25	5.66378	25.1936	1420.5	1	70
2022-09-13	09:04:25	2.25131	10.0143	1328.12	FALSE	70
2022-09-13	09:04:26	1.9935	8.86749	1429.37	FALSE	70
2022-09-13	09:04:26	0.905763	4.02901	1332.15	FALSE	70
2022-09-13	09:04:26	3.93426	17.5004	1446.87	1	71
2022-09-13	09:04:26	3.59472	15.99	1348.14	1	72
2022-09-13	09:04:27	3.32296	14.7812	1461.65	1	73
2022-09-13	09:04:27	8.12342	36.1346	1384.27	1	74
2022-09-13	09:04:27	2.92932	13.0302	1474.68	FALSE	74
2022-09-13	09:04:27	7.73176	34.3924	1418.66	1	75
2022-09-13	09:04:28	2.71955	12.0971	1486.78	FALSE	75
2022-09-13	09:04:28	7.14897	31.8	1450.46	1	76
2022-09-13	09:04:28	4.1963	18.666	1505.45	1	77
2022-09-13	09:04:28	3.01752	13.4225	1463.89	1	78
2022-09-13	09:04:29	4.1623	18.5147	1523.96	1	79
2022-09-13	09:04:29	2.25711	10.0401	1473.93	FALSE	79
2022-09-13	09:04:29	7.99085	35.5449	1559.51	1	80
2022-09-13	09:04:30	3.31533	14.7473	1488.67	1	81
2022-09-13	09:04:30	5.38347	23.9468	1583.45	1	82
2022-09-13	09:04:30	3.55207	15.8003	1504.47	1	83
2022-09-13	09:04:30	4.47441	19.9031	1603.36	1	84
2022-09-13	09:04:31	4.42719	19.693	1524.17	1	85
2022-09-13	09:04:31	0.74556	3.3164	1606.67	FALSE	85
2022-09-13	09:04:31	1.16459	5.18033	1529.35	FALSE	85
2022-09-13	09:04:31	0.469326	2.08766	1608.76	FALSE	85
2022-09-13	09:04:32	0.413397	1.83887	1531.19	FALSE	85
2022-09-13	09:04:32	0.167748	0.746177	1609.51	FALSE	85
2022-09-13	09:04:32	0.240267	1.06876	1532.26	FALSE	85
2022-09-13	09:04:32	0.298232	1.3266	1610.83	FALSE	85
2022-09-13	09:04:33	-0.0864501	-0.384547	1532.26	FALSE	85
2022-09-13	09:04:33	0.210751	0.937463	1611.77	FALSE	85
2022-09-13	09:04:33	-0.0719463	-0.320032	1532.26	FALSE	85
2022-09-13	09:04:33	0.158435	0.704751	1612.47	FALSE	85
2022-09-13	09:04:34	-0.0646181	-0.287434	1532.26	FALSE	85
2022-09-13	09:04:34	0.236094	1.05019	1613.52	FALSE	85
2022-09-13	09:04:34	0.390344	1.73633	1533.99	FALSE	85
2022-09-13	09:04:35	0.398639	1.77323	1615.3	FALSE	85
2022-09-13	09:04:35	0.396094	1.76191	1535.75	FALSE	85
2022-09-13	09:04:35	0.185865	0.826765	1616.12	FALSE	85
2022-09-13	09:04:35	1.04128	4.63182	1540.39	FALSE	85
2022-09-13	09:04:36	3.40271	15.1359	1631.26	1	86
2022-09-13	09:04:36	7.17731	31.9261	1572.31	1	87
2022-09-13	09:04:36	4.7307	21.0431	1652.3	1	88
2022-09-13	09:04:36	3.43243	15.2681	1587.58	1	89
2022-09-13	09:04:37	2.73828	12.1804	1664.48	FALSE	89
2022-09-13	09:04:37	5.56617	24.7594	1612.34	1	90
2022-09-13	09:04:37	16.695	74.2627	1738.75	1	91
2022-09-13	09:04:37	4.48658	19.9572	1632.3	1	92
2022-09-13	09:04:38	6.63665	29.5211	1768.27	1	93
2022-09-13	09:04:38	0.989784	4.40276	1636.7	FALSE	93
2022-09-13	09:04:38	0.761285	3.38635	1771.65	FALSE	93
2022-09-13	09:04:39	0.772888	3.43796	1640.14	FALSE	93
2022-09-13	09:04:39	0.741234	3.29716	1774.95	FALSE	93
2022-09-13	09:04:39	3.03177	13.4859	1653.62	1	94
2022-09-13	09:04:39	1.77874	7.91219	1782.86	FALSE	94
2022-09-13	09:04:40	2.1221	9.43953	1663.06	FALSE	94
2022-09-13	09:04:40	1.31502	5.84947	1788.71	FALSE	94
2022-09-13	09:04:40	1.18363	5.26502	1668.33	FALSE	94
2022-09-13	09:04:40	0.459809	2.04532	1790.76	FALSE	94
2022-09-13	09:04:41	0.520369	2.31471	1670.64	FALSE	94
2022-09-13	09:04:41	0.867697	3.85969	1794.62	FALSE	94
2022-09-13	09:04:41	1.68525	7.49633	1678.14	FALSE	94
2022-09-13	09:04:41	6.15314	27.3704	1821.99	1	95
2022-09-13	09:04:42	12.9158	57.4521	1735.59	1	96
2022-09-13	09:04:42	14.341	63.7916	1885.78	1	97
2022-09-13	09:04:42	5.44581	24.2241	1759.81	1	98
2022-09-13	09:04:42	15.8213	70.3763	1956.16	1	99
2022-09-13	09:04:43	6.88576	30.6292	1790.44	1	100
2022-09-13	09:04:43	8.77782	39.0455	1995.2	1	101
2022-09-13	09:04:43	3.55935	15.8327	1806.28	1	102
2022-09-13	09:04:44	5.61634	24.9826	2020.18	1	103
2022-09-13	09:04:44	3.77009	16.7701	1823.05	1	104
2022-09-13	09:04:44	2.6193	11.6512	2031.84	FALSE	104
2022-09-13	09:04:44	2.87818	12.8027	1835.85	FALSE	104
2022-09-13	09:04:45	0.945204	4.20446	2036.04	FALSE	104
2022-09-13	09:04:45	1.19543	5.31751	1841.17	FALSE	104
2022-09-13	09:04:45	0.672379	2.99088	2039.03	FALSE	104
2022-09-13	09:04:45	1.21345	5.39767	1846.56	FALSE	104
2022-09-13	09:04:46	1.25126	5.56585	2044.6	FALSE	104
2022-09-13	09:04:46	0.85645	3.80966	1850.37	FALSE	104
2022-09-13	09:04:46	0.475026	2.11301	2046.71	FALSE	104
2022-09-13	09:04:46	0.396451	1.76349	1852.14	FALSE	104
2022-09-13	09:04:47	0.378791	1.68494	2048.39	FALSE	104
2022-09-13	09:04:47	0.400471	1.78138	1853.92	FALSE	104
2022-09-13	09:04:47	0.400369	1.78092	2050.18	FALSE	104
2022-09-13	09:04:47	0.381031	1.6949	1855.61	FALSE	104
2022-09-13	09:04:48	0.380471	1.69241	2051.87	FALSE	104
2022-09-13	09:04:48	0.382761	1.7026	1857.32	FALSE	104
2022-09-13	09:04:48	0.37472	1.66683	2053.54	FALSE	104
2022-09-13	09:04:49	0.366883	1.63197	1858.95	FALSE	104
2022-09-13	09:04:49	0.37187	1.65415	2055.19	FALSE	104
2022-09-13	09:04:49	0.368003	1.63695	1860.59	FALSE	104
2022-09-13	09:04:49	0.377214	1.67792	2056.87	FALSE	104
2022-09-13	09:04:50	0.385713	1.71573	1862.3	FALSE	104
2022-09-13	09:04:50	0.428461	1.90588	2058.77	FALSE	104
2022-09-13	09:04:50	0.495127	2.20242	1864.5	FALSE	104
2022-09-13	09:04:50	0.560674	2.49399	2061.27	FALSE	104
2022-09-13	09:04:51	0.544135	2.42042	1866.92	FALSE	104
2022-09-13	09:04:51	0.58958	2.62257	2063.89	FALSE	104
2022-09-13	09:04:51	0.761234	3.38612	1870.31	FALSE	104
2022-09-13	09:04:51	0.986119	4.38645	2068.28	FALSE	104
2022-09-13	09:04:52	0.373906	1.66321	1871.97	FALSE	104
2022-09-13	09:04:52	0.324644	1.44408	2069.72	FALSE	104
2022-09-13	09:04:52	0.162965	0.724901	1872.7	FALSE	104
2022-09-13	09:04:53	0.160318	0.713127	2070.43	FALSE	104
2022-09-13	09:04:53	0.165051	0.73418	1873.43	FALSE	104
2022-09-13	09:04:53	0.159351	0.708825	2071.14	FALSE	104
2022-09-13	09:04:53	0.135585	0.603109	1874.04	FALSE	104
2022-09-13	09:04:54	0.0479519	0.2133	2071.36	FALSE	104
2022-09-13	09:04:54	0.0898348	0.399603	1874.43	FALSE	104
2022-09-13	09:04:54	0.117875	0.524332	2071.88	FALSE	104
2022-09-13	09:04:54	0.229936	1.0228	1875.46	FALSE	104
2022-09-13	09:04:55	0.58556	2.60469	2074.48	FALSE	104
2022-09-13	09:04:55	0.365611	1.62631	1877.08	FALSE	104
2022-09-13	09:04:55	0.389275	1.73157	2076.22	FALSE	104
2022-09-13	09:04:55	0.305	1.3567	1878.44	FALSE	104
2022-09-13	09:04:56	0.342099	1.52172	2077.74	FALSE	104
2022-09-13	09:04:56	0.238995	1.0631	1879.5	FALSE	104
2022-09-13	09:04:56	0.310802	1.38251	2079.12	FALSE	104
2022-09-13	09:04:56	0.384084	1.70848	1881.21	FALSE	104
2022-09-13	09:04:57	0.358893	1.59643	2080.72	FALSE	104
2022-09-13	09:04:57	0.382863	1.70305	1882.92	FALSE	104
2022-09-13	09:04:57	0.348664	1.55093	2082.27	FALSE	104
2022-09-13	09:04:58	0.348155	1.54866	1884.46	FALSE	104
2022-09-13	09:04:58	0.342405	1.52309	2083.79	FALSE	104
2022-09-13	09:04:58	0.341947	1.52105	1885.99	FALSE	104
2022-09-13	09:04:58	0.338537	1.50588	2085.3	FALSE	104
2022-09-13	09:04:59	0.327087	1.45495	1887.44	FALSE	104
2022-09-13	09:04:59	0.328664	1.46196	2086.76	FALSE	104
2022-09-13	09:04:59	0.337468	1.50113	1888.94	FALSE	104
2022-09-13	09:04:59	0.303728	1.35104	2088.11	FALSE	104
2022-09-13	09:05:00	0.321489	1.43005	1890.37	FALSE	104
2022-09-13	09:05:00	0.321387	1.42959	2089.54	FALSE	104
2022-09-13	09:05:00	0.405204	1.80243	1892.17	FALSE	104
2022-09-13	09:05:00	0.429428	1.91018	2091.45	FALSE	104
2022-09-13	09:05:01	0.737824	3.28199	1895.46	FALSE	104
2022-09-13	09:05:01	0.714771	3.17944	2094.63	FALSE	104
2022-09-13	09:05:01	0.457316	2.03423	1897.49	FALSE	104
2022-09-13	09:05:02	0.481692	2.14266	2096.77	FALSE	104
2022-09-13	09:05:02	0.436196	1.94029	1899.43	FALSE	104
2022-09-13	09:05:02	0.444847	1.97877	2098.75	FALSE	104
2022-09-13	09:05:02	0.454924	2.02359	1901.45	FALSE	104
2022-09-13	09:05:03	0.459198	2.0426	2100.79	FALSE	104
2022-09-13	09:05:03	0.450038	2.00186	1903.46	FALSE	104
2022-09-13	09:05:03	0.46215	2.05574	2102.85	FALSE	104
2022-09-13	09:05:03	0.451412	2.00797	1905.46	FALSE	104
2022-09-13	09:05:04	0.443015	1.97062	2104.82	FALSE	104
2022-09-13	09:05:04	0.454873	2.02337	1907.49	FALSE	104
2022-09-13	09:05:04	0.453346	2.01657	2106.84	FALSE	104
2022-09-13	09:05:04	0.444796	1.97854	1909.47	FALSE	104
2022-09-13	09:05:05	0.4507	2.0048	2108.84	FALSE	104
2022-09-13	09:05:05	0.428308	1.9052	1911.37	FALSE	104
2022-09-13	09:05:05	0.461387	2.05234	2110.89	FALSE	104
2022-09-13	09:05:05	0.458588	2.03989	1913.41	FALSE	104
2022-09-13	09:05:06	0.582812	2.59246	2113.49	FALSE	104
2022-09-13	09:05:06	1.38037	6.14016	1919.55	FALSE	104
2022-09-13	09:05:06	1.2535	5.57582	2119.06	FALSE	104
2022-09-13	09:05:07	0.508104	2.26015	1921.81	FALSE	104
2022-09-13	09:05:07	0.491005	2.18409	2121.25	FALSE	104
2022-09-13	09:05:07	0.408461	1.81692	1923.63	FALSE	104
2022-09-13	09:05:07	0.40215	1.78884	2123.03	FALSE	104
2022-09-13	09:05:08	0.434059	1.93078	1925.56	FALSE	104
2022-09-13	09:05:08	0.407901	1.81443	2124.85	FALSE	104
2022-09-13	09:05:08	0.408206	1.81578	1927.37	FALSE	104
2022-09-13	09:05:08	0.489122	2.17571	2127.02	FALSE	104
2022-09-13	09:05:09	0.455076	2.02427	1929.4	FALSE	104
2022-09-13	09:05:09	0.380624	1.69309	2128.72	FALSE	104
2022-09-13	09:05:09	0.481387	2.14131	1931.54	FALSE	104
2022-09-13	09:05:09	0.560369	2.49263	2131.21	FALSE	104
2022-09-13	09:05:10	0.522354	2.32354	1933.86	FALSE	104
2022-09-13	09:05:10	0.476501	2.11957	2133.33	FALSE	104
2022-09-13	09:05:10	0.43014	1.91335	1935.78	FALSE	104
2022-09-13	09:05:10	0.433651	1.92897	2135.26	FALSE	104
2022-09-13	09:05:11	0.425764	1.89388	1937.67	FALSE	104
2022-09-13	09:05:11	0.438486	1.95047	2137.21	FALSE	104
2022-09-13	09:05:11	0.444288	1.97628	1939.65	FALSE	104
2022-09-13	09:05:12	0.50388	2.24136	2139.45	FALSE	104
2022-09-13	09:05:12	2.98347	13.2711	1952.92	FALSE	104
2022-09-13	09:05:12	1.91075	8.4994	2147.95	FALSE	104
2022-09-13	09:05:12	1.92912	8.58111	1961.5	FALSE	104
2022-09-13	09:05:13	2.04795	9.10969	2157.06	FALSE	104
2022-09-13	09:05:13	2.10164	9.34852	1970.85	FALSE	104
2022-09-13	09:05:13	3.0279	13.4687	2170.53	1	105
2022-09-13	09:05:13	6.78378	30.1756	2001.02	1	106
2022-09-13	09:05:14	2.37477	10.5635	2181.09	FALSE	106
2022-09-13	09:05:14	1.05966	4.71358	2005.74	FALSE	106
2022-09-13	09:05:14	0.550598	2.44917	2183.54	FALSE	106
2022-09-13	09:05:14	0.776857	3.45562	2009.19	FALSE	106
2022-09-13	09:05:15	0.773295	3.43977	2186.98	FALSE	106
2022-09-13	09:05:15	0.538181	2.39394	2011.59	FALSE	106
2022-09-13	09:05:15	0.530547	2.35998	2189.34	FALSE	106
2022-09-13	09:05:16	0.570395	2.53723	2014.12	FALSE	106
2022-09-13	09:05:16	0.543473	2.41748	2191.76	FALSE	106
2022-09-13	09:05:16	0.478079	2.12659	2016.25	FALSE	106
2022-09-13	09:05:16	0.461845	2.05438	2193.81	FALSE	106
2022-09-13	09:05:17	0.403575	1.79518	2018.05	FALSE	106
2022-09-13	09:05:17	0.455026	2.02405	2195.84	FALSE	106
2022-09-13	09:05:17	0.500929	2.22823	2020.27	FALSE	106
2022-09-13	09:05:17	0.514517	2.28867	2198.13	FALSE	106
2022-09-13	09:05:18	0.535687	2.38284	2022.66	FALSE	106
2022-09-13	09:05:18	0.55299	2.45981	2200.58	FALSE	106
2022-09-13	09:05:18	0.590649	2.62732	2025.28	FALSE	106
2022-09-13	09:05:18	0.526629	2.34255	2202.93	FALSE	106
2022-09-13	09:05:19	0.507035	2.25539	2027.54	FALSE	106
2022-09-13	09:05:19	0.550598	2.44917	2205.38	FALSE	106
2022-09-13	09:05:19	0.55701	2.47769	2030.02	FALSE	106
2022-09-13	09:05:19	0.590445	2.62642	2208	FALSE	106
2022-09-13	09:05:20	0.614822	2.73485	2032.75	FALSE	106
2022-09-13	09:05:20	0.715992	3.18488	2211.19	FALSE	106
2022-09-13	09:05:20	0.939453	4.17887	2036.93	FALSE	106
2022-09-13	09:05:21	2.73314	12.1576	2223.35	FALSE	106
2022-09-13	09:05:21	2.24052	9.96628	2046.9	FALSE	106
2022-09-13	09:05:21	2.12658	9.45945	2232.8	FALSE	106
2022-09-13	09:05:21	1.05253	4.68186	2051.58	FALSE	106
2022-09-13	09:05:22	0.524236	2.33191	2235.14	FALSE	106
2022-09-13	09:05:22	0.455585	2.02653	2053.61	FALSE	106
2022-09-13	09:05:22	0.492685	2.19156	2237.33	FALSE	106
2022-09-13	09:05:22	0.490751	2.18296	2055.79	FALSE	106
2022-09-13	09:05:23	0.533957	2.37515	2239.7	FALSE	106
2022-09-13	09:05:23	0.35182	1.56497	2057.35	FALSE	106
2022-09-13	09:05:23	0.563524	2.50667	2242.21	FALSE	106
2022-09-13	09:05:23	0.486221	2.16281	2059.52	FALSE	106
2022-09-13	09:05:24	0.429071	1.90859	2244.12	FALSE	106
2022-09-13	09:05:24	0.450445	2.00367	2061.52	FALSE	106
2022-09-13	09:05:24	0.575178	2.55851	2246.68	FALSE	106
2022-09-13	09:05:25	1.09472	4.86953	2066.39	FALSE	106
2022-09-13	09:05:25	0.980369	4.36088	2251.04	FALSE	106
2022-09-13	09:05:25	0.648511	2.88471	2069.27	FALSE	106
2022-09-13	09:05:25	0.49355	2.19541	2253.23	FALSE	106
2022-09-13	09:05:26	0.457519	2.03514	2071.31	FALSE	106
2022-09-13	09:05:26	0.485611	2.16009	2255.39	FALSE	106
2022-09-13	09:05:26	0.484237	2.15398	2073.46	FALSE	106
2022-09-13	09:05:26	0.450802	2.00526	2257.4	FALSE	106
2022-09-13	09:05:27	0.490598	2.18228	2075.65	FALSE	106
2022-09-13	09:05:27	0.444084	1.97537	2259.37	FALSE	106
2022-09-13	09:05:27	0.493499	2.19518	2077.84	FALSE	106
2022-09-13	09:05:27	0.541743	2.40978	2261.78	FALSE	106
2022-09-13	09:05:28	0.408104	1.81533	2079.66	FALSE	106
2022-09-13	09:05:28	0.477367	2.12342	2263.91	FALSE	106
2022-09-13	09:05:28	0.481845	2.14334	2081.8	FALSE	106
2022-09-13	09:05:28	0.467494	2.07951	2265.99	FALSE	106
2022-09-13	09:05:29	0.461794	2.05415	2083.85	FALSE	106
2022-09-13	09:05:29	0.459962	2.046	2268.03	FALSE	106
2022-09-13	09:05:29	0.557417	2.4795	2086.33	FALSE	106
2022-09-13	09:05:30	0.494466	2.19948	2270.23	FALSE	106
2022-09-13	09:05:30	0.518944	2.30837	2088.64	FALSE	106
2022-09-13	09:05:30	0.513855	2.28573	2272.52	FALSE	106
2022-09-13	09:05:30	0.421183	1.87351	2090.51	FALSE	106
2022-09-13	09:05:31	0.347646	1.5464	2274.06	FALSE	106
2022-09-13	09:05:31	0.550394	2.44826	2092.96	FALSE	106
2022-09-13	09:05:31	0.449987	2.00163	2276.07	FALSE	106
2022-09-13	09:05:31	0.440216	1.95817	2094.92	FALSE	106
2022-09-13	09:05:32	0.46271	2.05823	2278.12	FALSE	106
2022-09-13	09:05:32	0.461132	2.05121	2096.97	FALSE	106
2022-09-13	09:05:32	0.344797	1.53373	2279.66	FALSE	106
2022-09-13	09:05:32	0.716654	3.18782	2100.16	FALSE	106
2022-09-13	09:05:33	0.934211	4.15556	2283.81	FALSE	106
2022-09-13	09:05:33	1.29513	5.761	2105.92	FALSE	106
2022-09-13	09:05:33	1.01721	4.52475	2288.34	FALSE	106
2022-09-13	09:05:34	0.733855	3.26433	2109.19	FALSE	106
2022-09-13	09:05:34	0.778486	3.46286	2291.8	FALSE	106
2022-09-13	09:05:34	1.79955	8.00476	2117.19	FALSE	106
2022-09-13	09:05:34	5.15533	22.9319	2314.73	1	107
2022-09-13	09:05:35	1.90022	8.45256	2125.64	FALSE	107
2022-09-13	09:05:35	4.12831	18.3635	2333.1	1	108
2022-09-13	09:05:35	3.388	15.0705	2140.71	1	109
2022-09-13	09:05:35	3.29228	14.6447	2347.74	1	110
2022-09-13	09:05:36	1.93385	8.60215	2149.32	FALSE	110
2022-09-13	09:05:36	1.0964	4.87701	2352.62	FALSE	110
2022-09-13	09:05:36	1.29686	5.76869	2155.08	FALSE	110
2022-09-13	09:05:36	0.499402	2.22144	2354.84	FALSE	110
2022-09-13	09:05:37	1.52973	6.80454	2161.89	FALSE	110
2022-09-13	09:05:37	3.84871	17.1198	2371.96	1	111
2022-09-13	09:05:37	12.2426	54.4575	2216.35	1	112
2022-09-13	09:05:37	8.52774	37.9331	2409.89	1	113
2022-09-13	09:05:38	6.16006	27.4012	2243.75	1	114
2022-09-13	09:05:38	7.26428	32.313	2442.21	1	115
2022-09-13	09:05:38	7.79182	34.6596	2278.41	1	116
2022-09-13	09:05:39	13.8101	61.4301	2503.64	1	117
2022-09-13	09:05:39	12.0796	53.7325	2332.14	1	118
2022-09-13	09:05:39	5.5048	24.4865	2528.12	1	119
2022-09-13	09:05:39	8.04886	35.8029	2367.94	1	120
2022-09-13	09:05:40	11.8187	52.5719	2580.69	1	121
2022-09-13	09:05:40	2.58892	11.516	2379.46	FALSE	121
2022-09-13	09:05:40	6.05706	26.943	2607.64	1	122
2022-09-13	09:05:40	8.02143	35.6809	2415.14	1	123
2022-09-13	09:05:41	1.76973	7.87211	2615.51	FALSE	123
2022-09-13	09:05:41	4.78424	21.2813	2436.42	1	124
2022-09-13	09:05:41	2.52083	11.2132	2626.72	FALSE	124
2022-09-13	09:05:41	2.36093	10.5019	2446.92	FALSE	124
2022-09-13	09:05:42	1.31172	5.83479	2632.56	FALSE	124
2022-09-13	09:05:42	0.831361	3.69806	2450.62	FALSE	124
2022-09-13	09:05:42	0.580522	2.58228	2635.14	FALSE	124
2022-09-13	09:05:42	0.406883	1.8099	2452.43	FALSE	124
2022-09-13	09:05:43	0.676603	3.00967	2638.15	FALSE	124
2022-09-13	09:05:43	1.52556	6.786	2459.22	FALSE	124
2022-09-13	09:05:43	1.10841	4.93043	2643.08	FALSE	124
2022-09-13	09:05:44	1.70866	7.60046	2466.82	FALSE	124
2022-09-13	09:05:44	1.06943	4.75704	2647.84	FALSE	124
2022-09-13	09:05:44	2.85121	12.6828	2479.5	FALSE	124
2022-09-13	09:05:44	1.68322	7.4873	2655.32	FALSE	124
2022-09-13	09:05:45	2.50607	11.1475	2490.65	FALSE	124
2022-09-13	09:05:45	2.60973	11.6086	2666.93	FALSE	124
2022-09-13	09:05:45	4.18627	18.6214	2509.27	1	125
2022-09-13	09:05:45	4.71701	20.9822	2687.92	1	126
2022-09-13	09:05:46	2.29777	10.2209	2519.49	FALSE	126
2022-09-13	09:05:46	4.54434	20.2141	2708.13	1	127
2022-09-13	09:05:46	0.874974	3.89206	2523.38	FALSE	127
2022-09-13	09:05:46	2.05126	9.12441	2717.25	FALSE	127
2022-09-13	09:05:47	0.515178	2.29161	2525.67	FALSE	127
2022-09-13	09:05:47	0.741285	3.29738	2720.55	FALSE	127
2022-09-13	09:05:47	1.28627	5.72159	2531.39	FALSE	127
2022-09-13	09:05:48	1.33889	5.95565	2726.51	FALSE	127
2022-09-13	09:05:48	4.83304	21.4983	2552.89	1	128
2022-09-13	09:05:48	6.10225	27.144	2753.65	1	129
2022-09-13	09:05:48	10.8546	48.2834	2601.18	1	130
2022-09-13	09:05:49	9.77884	43.4982	2797.15	1	131
2022-09-13	09:05:49	9.83375	43.7425	2644.92	1	132
2022-09-13	09:05:49	16.8087	74.7685	2871.92	1	133
2022-09-13	09:05:49	5.55777	24.7221	2669.64	1	134
2022-09-13	09:05:50	4.77395	21.2355	2893.15	1	135
2022-09-13	09:05:50	8.31049	36.9667	2706.61	1	136
2022-09-13	09:05:50	4.02057	17.8843	2911.04	1	137
2022-09-13	09:05:50	3.29121	14.64	2721.25	1	138
2022-09-13	09:05:51	3.77477	16.7909	2927.83	1	139
2022-09-13	09:05:51	3.31075	14.7269	2735.97	1	140
2022-09-13	09:05:51	0.934924	4.15873	2931.99	FALSE	140
2022-09-13	09:05:51	0.630496	2.80457	2738.78	FALSE	140
2022-09-13	09:05:52	0.106985	0.475891	2932.46	FALSE	140
2022-09-13	09:05:52	0.448359	1.99439	2740.77	FALSE	140
2022-09-13	09:05:52	1.69553	7.54206	2940	FALSE	140
2022-09-13	09:05:53	8.35701	37.1737	2777.95	1	141
2022-09-13	09:05:53	3.03131	13.4839	2953.49	1	142
2022-09-13	09:05:53	2.35075	10.4566	2788.4	FALSE	142
2022-09-13	09:05:53	1.06617	4.74254	2958.23	FALSE	142
2022-09-13	09:05:54	1.05416	4.68911	2793.09	FALSE	142
2022-09-13	09:05:54	0.54327	2.41657	2960.65	FALSE	142
2022-09-13	09:05:54	0.914771	4.06908	2797.16	FALSE	142
2022-09-13	09:05:54	0.345509	1.53689	2962.18	FALSE	142
2022-09-13	09:05:55	1.03691	4.61238	2801.77	FALSE	142
2022-09-13	09:05:55	1.29767	5.7723	2967.96	FALSE	142
2022-09-13	09:05:55	4.26266	18.9612	2820.74	1	143
2022-09-13	09:05:55	9.10632	40.5067	3008.46	1	144
2022-09-13	09:05:56	12.0417	53.5639	2874.3	1	145
2022-09-13	09:05:56	5.17721	23.0293	3031.49	1	146
2022-09-13	09:05:56	1.84454	8.20488	2882.5	FALSE	146
2022-09-13	09:05:57	2.90449	12.9198	3044.41	FALSE	146
2022-09-13	09:05:57	2.15533	9.58734	2892.09	FALSE	146
2022-09-13	09:05:57	4.05294	18.0283	3062.44	1	147
2022-09-13	09:05:57	8.14357	36.2242	2928.32	1	148
2022-09-13	09:05:58	4.98566	22.1772	3084.62	1	149
2022-09-13	09:05:58	7.40378	32.9335	2961.25	1	150
2022-09-13	09:05:58	0.922812	4.10485	3088.72	FALSE	150
2022-09-13	09:05:58	1.47701	6.57004	2967.82	FALSE	150
2022-09-13	09:05:59	1.41788	6.30701	3095.03	FALSE	150
2022-09-13	09:05:59	3.63742	16.18	2984	1	151
2022-09-13	09:05:59	12.7268	56.6114	3151.64	1	152
2022-09-13	09:06:00	5.07996	22.5967	3006.6	1	153
2022-09-13	09:06:00	3.14347	13.9828	3165.62	1	154
2022-09-13	09:06:00	0.881387	3.92059	3010.52	FALSE	154
2022-09-13	09:06:00	1.22846	5.46444	3171.09	FALSE	154
2022-09-13	09:06:00	0.756196	3.36371	3013.88	FALSE	154
2022-09-13	09:06:01	0.597875	2.65947	3173.75	FALSE	154
2022-09-13	09:06:01	0.947443	4.21442	3018.09	FALSE	154
2022-09-13	09:06:01	0.91701	4.07904	3177.83	FALSE	154
2022-09-13	09:06:02	1.53879	6.84485	3024.94	FALSE	154
2022-09-13	09:06:02	2.51787	11.2	3189.03	FALSE	154
2022-09-13	09:06:02	7.52973	33.4937	3058.43	1	155
2022-09-13	09:06:02	5.76871	25.6604	3214.69	1	156
2022-09-13	09:06:03	5.83004	25.9332	3084.37	1	157
2022-09-13	09:06:03	0.762303	3.39088	3218.08	FALSE	157
2022-09-13	09:06:03	1.28866	5.73222	3090.1	FALSE	157
2022-09-13	09:06:03	0.742761	3.30395	3221.38	FALSE	157
2022-09-13	09:06:04	0.915483	4.07225	3094.17	FALSE	157
2022-09-13	09:06:04	7.61304	33.8643	3255.25	1	158
2022-09-13	09:06:04	11.1958	49.8012	3143.97	1	159
2022-09-13	09:06:04	6.32495	28.1346	3283.38	1	160
2022-09-13	09:06:05	1.16113	5.16494	3149.14	FALSE	160
2022-09-13	09:06:05	1.23955	5.51377	3288.9	FALSE	160
2022-09-13	09:06:05	0.270853	1.20481	3150.34	FALSE	160
2022-09-13	09:06:06	0.546323	2.43015	3291.33	FALSE	160
2022-09-13	09:06:06	0.394211	1.75353	3152.1	FALSE	160
2022-09-13	09:06:06	0.497163	2.21148	3293.54	FALSE	160
2022-09-13	09:06:06	0.479962	2.13497	3154.23	FALSE	160
2022-09-13	09:06:07	1.03752	4.6151	3298.15	FALSE	160
2022-09-13	09:06:07	0.500013	2.22416	3156.45	FALSE	160
2022-09-13	09:06:07	0.84785	3.77141	3301.92	FALSE	160
2022-09-13	09:06:07	0.348104	1.54844	3158	FALSE	160
2022-09-13	09:06:08	0.876858	3.90044	3305.82	FALSE	160
2022-09-13	09:06:08	0.761997	3.38952	3161.39	FALSE	160
2022-09-13	09:06:08	2.00083	8.90009	3314.72	FALSE	160
2022-09-13	09:06:08	4.76698	21.2045	3182.6	1	161
2022-09-13	09:06:09	5.83416	25.9515	3340.68	1	162
2022-09-13	09:06:09	6.83212	30.3906	3212.99	1	163
2022-09-13	09:06:09	15.6199	69.4804	3410.16	1	164
2022-09-13	09:06:09	3.602	16.0224	3229.01	1	165
2022-09-13	09:06:10	4.71965	20.9939	3431.15	1	166
2022-09-13	09:06:10	1.35111	6.01001	3235.02	FALSE	166
2022-09-13	09:06:10	2.58882	11.5156	3442.67	FALSE	166
2022-09-13	09:06:11	2.86215	12.7314	3247.75	FALSE	166
2022-09-13	09:06:11	4.96551	22.0876	3464.75	1	167
2022-09-13	09:06:11	1.26536	5.62857	3253.38	FALSE	167
2022-09-13	09:06:11	4.18174	18.6012	3483.35	1	168
2022-09-13	09:06:12	0.885407	3.93847	3257.32	FALSE	168
2022-09-13	09:06:12	3.32988	14.812	3498.17	1	169
2022-09-13	09:06:12	1.94363	8.64565	3265.96	FALSE	169
2022-09-13	09:06:12	8.80398	39.1619	3537.33	1	170
2022-09-13	09:06:13	3.87202	17.2235	3283.19	1	171
2022-09-13	09:06:13	7.37126	32.7888	3570.12	1	172
2022-09-13	09:06:13	1.88999	8.40705	3291.59	FALSE	172
2022-09-13	09:06:13	0.61986	2.75726	3572.87	FALSE	172
2022-09-13	09:06:14	0.499198	2.22053	3293.82	FALSE	172
2022-09-13	09:06:14	0.625509	2.78239	3575.66	FALSE	172
2022-09-13	09:06:14	0.561539	2.49784	3296.31	FALSE	172
2022-09-13	09:06:14	0.191819	0.853249	3576.51	FALSE	172
2022-09-13	09:06:15	-0.11103	-0.493884	3296.31	FALSE	172
2022-09-13	09:06:15	-0.267875	-1.19156	3576.51	FALSE	172
2022-09-13	09:06:15	-0.116577	-0.518558	3296.31	FALSE	172
2022-09-13	09:06:16	0.250038	1.11222	3577.62	FALSE	172
2022-09-13	09:06:16	0.598232	2.66106	3298.97	FALSE	172
2022-09-13	09:06:16	0.515433	2.29275	3579.91	FALSE	172
2022-09-13	09:06:16	0.477316	2.1232	3301.1	FALSE	172
2022-09-13	09:06:17	0.580776	2.58341	3582.5	FALSE	172
2022-09-13	09:06:17	0.737621	3.28109	3304.38	FALSE	172
2022-09-13	09:06:17	0.743575	3.30757	3585.81	FALSE	172
2022-09-13	09:06:17	0.699911	3.11334	3307.49	FALSE	172
2022-09-13	09:06:18	0.706476	3.14255	3588.95	FALSE	172
2022-09-13	09:06:18	0.716552	3.18737	3310.68	FALSE	172
2022-09-13	09:06:18	0.752379	3.34673	3592.29	FALSE	172
2022-09-13	09:06:18	0.678944	3.02008	3313.7	FALSE	172
2022-09-13	09:06:19	0.644033	2.86479	3595.16	FALSE	172
2022-09-13	09:06:19	0.511768	2.27645	3315.98	FALSE	172
2022-09-13	09:06:19	0.538588	2.39575	3597.56	FALSE	172
2022-09-13	09:06:20	0.488461	2.17277	3318.15	FALSE	172
2022-09-13	09:06:20	0.428512	1.90611	3599.46	FALSE	172
2022-09-13	09:06:20	0.531972	2.36632	3320.51	FALSE	172
2022-09-13	09:06:20	0.439351	1.95432	3601.42	FALSE	172
2022-09-13	09:06:21	0.394466	1.75466	3322.27	FALSE	172
2022-09-13	09:06:21	0.380929	1.69445	3603.11	FALSE	172
2022-09-13	09:06:21	0.497265	2.21193	3324.48	FALSE	172
2022-09-13	09:06:21	0.492125	2.18907	3605.3	FALSE	172
2022-09-13	09:06:22	0.559707	2.48969	3326.97	FALSE	172
2022-09-13	09:06:22	0.429784	1.91177	3607.21	FALSE	172
2022-09-13	09:06:22	0.416654	1.85336	3328.82	FALSE	172
2022-09-13	09:06:22	0.291768	1.29784	3608.51	FALSE	172
2022-09-13	09:06:23	0.304593	1.35489	3330.18	FALSE	172
2022-09-13	09:06:23	0.353295	1.57153	3610.08	FALSE	172
2022-09-13	09:06:23	0.726883	3.23332	3333.41	FALSE	172
2022-09-13	09:06:23	1.04088	4.63004	3614.71	FALSE	172
2022-09-13	09:06:24	1.65961	7.38228	3340.8	FALSE	172
2022-09-13	09:06:24	2.56831	11.4244	3626.13	FALSE	172
2022-09-13	09:06:24	1.22363	5.44295	3346.24	FALSE	172
2022-09-13	09:06:25	1.44342	6.42062	3632.56	FALSE	172
2022-09-13	09:06:25	1.70174	7.56968	3353.81	FALSE	172
2022-09-13	09:06:25	1.02673	4.5671	3637.12	FALSE	172
2022-09-13	09:06:25	0.967646	4.30428	3358.11	FALSE	172
2022-09-13	09:06:26	0.903779	4.02019	3641.14	FALSE	172
2022-09-13	09:06:26	0.896807	3.98918	3362.1	FALSE	172
2022-09-13	09:06:26	0.344746	1.5335	3642.68	FALSE	172
2022-09-13	09:06:26	0.380674	1.69331	3363.79	FALSE	172
2022-09-13	09:06:27	0.165814	0.737574	3643.41	FALSE	172
2022-09-13	09:06:27	0.703015	3.12715	3366.92	FALSE	172
2022-09-13	09:06:27	1.31365	5.84338	3649.26	FALSE	172
2022-09-13	09:06:27	4.22719	18.8034	3385.72	1	173
2022-09-13	09:06:28	3.49838	15.5615	3664.82	1	174
2022-09-13	09:06:28	3.76999	16.7697	3402.49	1	175
2022-09-13	09:06:28	2.36989	10.5417	3675.36	FALSE	175
2022-09-13	09:06:29	3.36413	14.9643	3417.46	1	176
2022-09-13	09:06:29	3.27823	14.5822	3689.94	1	177
2022-09-13	09:06:29	11.2308	49.9568	3467.42	1	178
2022-09-13	09:06:29	8.6137	38.3155	3728.26	1	179
2022-09-13	09:06:30	14.3555	63.8561	3531.27	1	180
2022-09-13	09:06:30	1.74663	7.76936	3736.03	FALSE	180
2022-09-13	09:06:30	6.20851	27.6167	3558.89	1	181
2022-09-13	09:06:30	3.20882	14.2735	3750.3	1	182
2022-09-13	09:06:31	2.47396	11.0047	3569.89	FALSE	182
2022-09-13	09:06:31	3.81289	16.9605	3767.26	1	183
2022-09-13	09:06:31	0.887748	3.94888	3573.84	FALSE	183
2022-09-13	09:06:31	1.36368	6.06592	3773.33	FALSE	183
2022-09-13	09:06:32	0.850903	3.78499	3577.63	FALSE	183
2022-09-13	09:06:32	0.872633	3.88165	3777.21	FALSE	183
2022-09-13	09:06:32	0.473702	2.10712	3579.73	FALSE	183
2022-09-13	09:06:32	0.495942	2.20605	3779.42	FALSE	183
2022-09-13	09:06:33	0.388766	1.72931	3581.46	FALSE	183
2022-09-13	09:06:33	0.43986	1.95659	3781.37	FALSE	183
2022-09-13	09:06:33	0.659962	2.93564	3584.4	FALSE	183
2022-09-13	09:06:34	1.08464	4.8247	3786.2	FALSE	183
2022-09-13	09:06:34	4.53716	20.1822	3604.58	1	184
2022-09-13	09:06:34	6.22067	27.6708	3813.87	1	185
2022-09-13	09:06:34	10.5862	47.0895	3651.67	1	186
2022-09-13	09:06:35	5.40963	24.0631	3837.93	1	187
2022-09-13	09:06:35	5.42469	24.1301	3675.8	1	188
2022-09-13	09:06:35	1.54144	6.85663	3844.79	FALSE	188
2022-09-13	09:06:35	2.62281	11.6668	3687.47	FALSE	188
2022-09-13	09:06:36	1.5648	6.96054	3851.75	FALSE	188
2022-09-13	09:06:36	1.73793	7.73066	3695.2	FALSE	188
2022-09-13	09:06:36	1.28419	5.71233	3857.46	FALSE	188
2022-09-13	09:06:36	0.924898	4.11413	3699.31	FALSE	188
2022-09-13	09:06:37	0.984796	4.38057	3861.84	FALSE	188
2022-09-13	09:06:37	0.852736	3.79314	3703.11	FALSE	188
2022-09-13	09:06:37	1.35294	6.01815	3867.86	FALSE	188
2022-09-13	09:06:37	1.11151	4.94422	3708.05	FALSE	188
2022-09-13	09:06:38	0.808155	3.59484	3871.45	FALSE	188
2022-09-13	09:06:38	0.73243	3.258	3711.31	FALSE	188
2022-09-13	09:06:38	0.441387	1.96338	3873.42	FALSE	188
2022-09-13	09:06:39	0.489071	2.17549	3713.48	FALSE	188
2022-09-13	09:06:39	0.453652	2.01793	3875.43	FALSE	188
2022-09-13	09:06:39	0.527392	2.34595	3715.83	FALSE	188
2022-09-13	09:06:39	0.303626	1.35059	3876.79	FALSE	188
2022-09-13	09:06:40	0.315992	1.4056	3717.24	FALSE	188
2022-09-13	09:06:40	0.460725	2.0494	3878.83	FALSE	188
2022-09-13	09:06:40	0.360064	1.60164	3718.84	FALSE	188
2022-09-13	09:06:40	0.545916	2.42834	3881.26	FALSE	188
2022-09-13	09:06:41	0.466221	2.07384	3720.91	FALSE	188
2022-09-13	09:06:41	0.6307	2.80548	3884.07	FALSE	188
2022-09-13	09:06:41	0.465713	2.07158	3722.98	FALSE	188
2022-09-13	09:06:41	0.609377	2.71063	3886.78	FALSE	188
2022-09-13	09:06:42	0.354924	1.57877	3724.56	FALSE	188
2022-09-13	09:06:42	0.622354	2.76836	3889.55	FALSE	188
2022-09-13	09:06:42	0.404033	1.79722	3726.36	FALSE	188
2022-09-13	09:06:43	0.583117	2.59382	3892.14	FALSE	188
2022-09-13	09:06:43	0.450038	2.00186	3728.36	FALSE	188
2022-09-13	09:06:43	0.472379	2.10124	3894.24	FALSE	188
2022-09-13	09:06:43	0.553804	2.46343	3730.82	FALSE	188
2022-09-13	09:06:44	0.502354	2.23457	3896.48	FALSE	188
2022-09-13	09:06:44	0.441438	1.9636	3732.79	FALSE	188
2022-09-13	09:06:44	0.363117	1.61522	3898.09	FALSE	188
2022-09-13	09:06:44	0.310853	1.38274	3734.17	FALSE	188
2022-09-13	09:06:45	0.258333	1.14912	3899.24	FALSE	188
2022-09-13	09:06:45	0.265814	1.18239	3735.35	FALSE	188
2022-09-13	09:06:45	0.101743	0.452573	3899.69	FALSE	188
2022-09-13	09:06:45	0.0652038	0.29004	3735.64	FALSE	188
2022-09-13	09:06:46	0.203422	0.904862	3900.6	FALSE	188
2022-09-13	09:06:46	0.200115	0.890152	3736.53	FALSE	188
2022-09-13	09:06:46	0.160267	0.7129	3901.31	FALSE	188
2022-09-13	09:06:47	0.141183	0.62801	3737.16	FALSE	188
2022-09-13	09:06:47	0.191361	0.851212	3902.16	FALSE	188
2022-09-13	09:06:47	0.244288	1.08664	3738.25	FALSE	188
2022-09-13	09:06:47	0.174211	0.774925	3902.94	FALSE	188
2022-09-13	09:06:48	0.323728	1.44001	3739.69	FALSE	188
2022-09-13	09:06:48	0.476654	2.12025	3905.06	FALSE	188
2022-09-13	09:06:48	0.449733	2.0005	3741.69	FALSE	188
2022-09-13	09:06:48	0.362507	1.6125	3906.67	FALSE	188
2022-09-13	09:06:49	0.429733	1.91154	3743.6	FALSE	188
2022-09-13	09:06:49	0.288562	1.28358	3907.95	FALSE	188
2022-09-13	09:06:49	0.443168	1.9713	3745.57	FALSE	188
2022-09-13	09:06:49	0.344084	1.53055	3909.48	FALSE	188
2022-09-13	09:06:50	0.494822	2.20107	3747.77	FALSE	188
2022-09-13	09:06:50	1.83696	8.17117	3917.66	FALSE	188
2022-09-13	09:06:50	3.69492	16.4357	3764.21	1	189
2022-09-13	09:06:50	5.31685	23.6504	3941.31	1	190
2022-09-13	09:06:51	5.13533	22.843	3787.05	1	191
2022-09-13	09:06:51	6.17253	27.4566	3968.76	1	192
2022-09-13	09:06:51	4.57406	20.3463	3807.4	1	193
2022-09-13	09:06:52	3.65136	16.242	3985	1	194
2022-09-13	09:06:52	4.19283	18.6505	3826.05	1	195
2022-09-13	09:06:52	2.19146	9.74805	3994.75	FALSE	195
2022-09-13	09:06:52	6.92612	30.8088	3856.86	1	196
2022-09-13	09:06:53	4.07681	18.1345	4012.89	1	197
2022-09-13	09:06:53	5.04052	22.4212	3879.28	1	198
2022-09-13	09:06:53	2.251	10.0129	4022.9	FALSE	198
2022-09-13	09:06:53	1.96968	8.76153	3888.04	FALSE	198
2022-09-13	09:06:54	3.48016	15.4804	4038.38	1	199
2022-09-13	09:06:54	1.71065	7.60931	3895.65	FALSE	199
2022-09-13	09:06:54	3.04072	13.5257	4051.91	1	200
2022-09-13	09:06:54	2.15116	9.56879	3905.22	FALSE	200
2022-09-13	09:06:55	2.78347	12.3814	4064.29	FALSE	200
2022-09-13	09:06:55	2.78144	12.3724	3917.59	FALSE	200
2022-09-13	09:06:55	3.98408	17.722	4082.01	1	201
2022-09-13	09:06:55	3.76612	16.7525	3934.34	1	202
2022-09-13	09:06:56	2.66912	11.8728	4093.88	FALSE	202
2022-09-13	09:06:56	2.3364	10.3928	3944.73	FALSE	202
2022-09-13	09:06:56	1.42973	6.35972	4100.24	FALSE	202
2022-09-13	09:06:57	1.01452	4.51279	3949.25	FALSE	202
2022-09-13	09:06:57	0.995026	4.42607	4104.67	FALSE	202
2022-09-13	09:06:57	0.787748	3.50406	3952.75	FALSE	202
2022-09-13	09:06:57	1.42561	6.3414	4111.01	FALSE	202
2022-09-13	09:06:58	1.72943	7.69285	3960.44	FALSE	202
2022-09-13	09:06:58	2.68561	11.9461	4122.96	FALSE	202
2022-09-13	09:06:58	2.00118	8.90165	3969.35	FALSE	202
2022-09-13	09:06:58	2.49681	11.1063	4134.06	FALSE	202
2022-09-13	09:06:59	2.39065	10.6341	3979.98	FALSE	202
2022-09-13	09:06:59	3.70357	16.4742	4150.54	1	203
2022-09-13	09:06:59	4.1708	18.5526	3998.53	1	204
2022-09-13	09:06:59	2.17034	9.65411	4160.19	FALSE	204
2022-09-13	09:07:00	2.56714	11.4192	4009.95	FALSE	204
2022-09-13	09:07:00	1.76088	7.83275	4168.02	FALSE	204
2022-09-13	09:07:00	1.16872	5.1987	4015.15	FALSE	204
2022-09-13	09:07:01	1.31457	5.84747	4173.87	FALSE	204
2022-09-13	09:07:01	1.90602	8.47836	4023.63	FALSE	204
2022-09-13	09:07:01	2.74535	12.2119	4186.08	FALSE	204
2022-09-13	09:07:01	2.36179	10.5057	4034.13	FALSE	204
2022-09-13	09:07:02	3.34362	14.8731	4200.96	1	205
2022-09-13	09:07:02	2.95787	13.1572	4047.29	FALSE	205
2022-09-13	09:07:02	5.23859	23.3023	4224.26	1	206
2022-09-13	09:07:02	3.62062	16.1052	4063.4	1	207
2022-09-13	09:07:03	4.28831	19.0753	4243.33	1	208
2022-09-13	09:07:03	4.17981	18.5926	4081.99	1	209
2022-09-13	09:07:03	5.50408	24.4832	4267.82	1	210
2022-09-13	09:07:03	5.14805	22.8996	4104.89	1	211
2022-09-13	09:07:04	7.22861	32.1543	4299.97	1	212
2022-09-13	09:07:04	7.65665	34.0583	4138.95	1	213
2022-09-13	09:07:04	6.45187	28.6992	4328.67	1	214
2022-09-13	09:07:04	6.18785	27.5248	4166.47	1	215
2022-09-13	09:07:05	8.73268	38.8447	4367.51	1	216
2022-09-13	09:07:05	6.78133	30.1647	4196.64	1	217
2022-09-13	09:07:05	6.00464	26.7098	4394.22	1	218
2022-09-13	09:07:06	6.76133	30.0757	4226.71	1	219
2022-09-13	09:07:06	5.80408	25.8177	4420.04	1	220
2022-09-13	09:07:06	6.71085	29.8512	4256.56	1	221
2022-09-13	09:07:06	8.1082	36.0669	4456.11	1	222
2022-09-13	09:07:07	1.05767	4.70473	4261.27	FALSE	222
2022-09-13	09:07:07	0.397825	1.76961	4457.88	FALSE	222
2022-09-13	09:07:07	0.252328	1.12241	4262.39	FALSE	222
2022-09-13	09:07:07	0.0634226	0.282116	4458.16	FALSE	222
2022-09-13	09:07:08	-0.0718445	-0.319579	4262.39	FALSE	222
2022-09-13	09:07:08	-0.106806	-0.475094	4458.16	FALSE	222
2022-09-13	09:07:08	0.101387	0.45099	4262.84	FALSE	222
2022-09-13	09:07:08	3.52393	15.6751	4473.84	1	223
2022-09-13	09:07:09	4.27777	19.0284	4281.87	1	224
2022-09-13	09:07:09	1.53787	6.84075	4480.68	FALSE	224
2022-09-13	09:07:09	0.318079	1.41488	4283.28	FALSE	224
2022-09-13	09:07:09	0.169733	0.755006	4481.43	FALSE	224
2022-09-13	09:07:10	0.197214	0.877247	4284.16	FALSE	224
2022-09-13	09:07:10	0.296858	1.32048	4482.75	FALSE	224
2022-09-13	09:07:10	0.189835	0.844424	4285.01	FALSE	224
2022-09-13	09:07:11	0.412227	1.83367	4484.59	FALSE	224
2022-09-13	09:07:11	0.350649	1.55976	4286.57	FALSE	224
2022-09-13	09:07:11	0.384695	1.7112	4486.3	FALSE	224
2022-09-13	09:07:11	0.581641	2.58726	4289.15	FALSE	224
2022-09-13	09:07:12	0.891259	3.9645	4490.26	FALSE	224
2022-09-13	09:07:12	0.92673	4.12228	4293.28	FALSE	224
2022-09-13	09:07:12	1.03823	4.61825	4494.88	FALSE	224
2022-09-13	09:07:12	1.2734	5.66434	4298.94	FALSE	224
2022-09-13	09:07:13	1.32419	5.89026	4500.77	FALSE	224
2022-09-13	09:07:13	1.05813	4.70677	4303.65	FALSE	224
2022-09-13	09:07:13	0.822659	3.65935	4504.43	FALSE	224
2022-09-13	09:07:13	0.833549	3.70779	4307.35	FALSE	224
2022-09-13	09:07:14	0.934008	4.15465	4508.58	FALSE	224
2022-09-13	09:07:14	0.981692	4.36676	4311.72	FALSE	224
2022-09-13	09:07:14	0.986578	4.3885	4512.97	FALSE	224
2022-09-13	09:07:15	0.771412	3.43139	4315.15	FALSE	224
2022-09-13	09:07:15	0.547494	2.43536	4515.41	FALSE	224
2022-09-13	09:07:15	0.448715	1.99597	4317.15	FALSE	224
2022-09-13	09:07:15	0.413397	1.83887	4517.25	FALSE	224
2022-09-13	09:07:16	0.383219	1.70463	4318.85	FALSE	224
2022-09-13	09:07:16	0.406934	1.81012	4519.06	FALSE	224
2022-09-13	09:07:16	0.559402	2.48833	4321.34	FALSE	224
2022-09-13	09:07:16	0.745967	3.31821	4522.38	FALSE	224
2022-09-13	09:07:17	0.704491	3.13372	4324.48	FALSE	224
2022-09-13	09:07:17	0.644288	2.86592	4525.24	FALSE	224
2022-09-13	09:07:17	0.524542	2.33327	4326.81	FALSE	224
2022-09-13	09:07:17	0.446934	1.98805	4527.23	FALSE	224
2022-09-13	09:07:18	0.453753	2.01838	4328.83	FALSE	224
2022-09-13	09:07:18	0.418842	1.86309	4529.09	FALSE	224
2022-09-13	09:07:18	0.42042	1.87011	4330.7	FALSE	224
2022-09-13	09:07:18	0.421285	1.87396	4530.97	FALSE	224
2022-09-13	09:07:19	0.438588	1.95093	4332.65	FALSE	224
2022-09-13	09:07:19	0.682099	3.03411	4534	FALSE	224
2022-09-13	09:07:19	0.380064	1.6906	4334.34	FALSE	224
2022-09-13	09:07:20	0.37014	1.64646	4535.65	FALSE	224
2022-09-13	09:07:20	0.403015	1.79269	4336.13	FALSE	224
2022-09-13	09:07:20	0.432685	1.92467	4537.57	FALSE	224
2022-09-13	09:07:20	0.440166	1.95795	4338.09	FALSE	224
2022-09-13	09:07:21	0.44444	1.97696	4539.55	FALSE	224
2022-09-13	09:07:21	0.454313	2.02088	4340.11	FALSE	224
2022-09-13	09:07:21	0.455076	2.02427	4541.57	FALSE	224
2022-09-13	09:07:21	0.465356	2.07	4342.18	FALSE	224
2022-09-13	09:07:22	0.462965	2.05936	4543.63	FALSE	224
2022-09-13	09:07:22	0.482608	2.14674	4344.33	FALSE	224
2022-09-13	09:07:22	0.477926	2.12591	4545.76	FALSE	224
2022-09-13	09:07:22	0.48897	2.17504	4346.5	FALSE	224
2022-09-13	09:07:23	0.492379	2.1902	4547.95	FALSE	224
2022-09-13	09:07:23	0.483728	2.15172	4348.65	FALSE	224
2022-09-13	09:07:23	0.471972	2.09943	4550.05	FALSE	224
2022-09-13	09:07:24	0.472634	2.10237	4350.76	FALSE	224
2022-09-13	09:07:24	0.46383	2.06321	4552.11	FALSE	224
2022-09-13	09:07:24	0.459555	2.04419	4352.8	FALSE	224
2022-09-13	09:07:24	0.461743	2.05393	4554.16	FALSE	224
2022-09-13	09:07:25	0.462863	2.05891	4354.86	FALSE	224
2022-09-13	09:07:25	0.462557	2.05755	4556.22	FALSE	224
2022-09-13	09:07:25	0.461387	2.05234	4356.91	FALSE	224
2022-09-13	09:07:25	0.467952	2.08154	4558.3	FALSE	224
2022-09-13	09:07:26	0.471565	2.09762	4359.01	FALSE	224
2022-09-13	09:07:26	0.478181	2.12704	4560.43	FALSE	224
2022-09-13	09:07:26	0.470446	2.09264	4361.1	FALSE	224
2022-09-13	09:07:26	0.472227	2.10056	4562.53	FALSE	224
2022-09-13	09:07:27	0.474415	2.11029	4363.21	FALSE	224
2022-09-13	09:07:27	0.480471	2.13723	4564.67	FALSE	224
2022-09-13	09:07:27	0.477723	2.12501	4365.34	FALSE	224
2022-09-13	09:07:27	0.456807	2.03197	4566.7	FALSE	224
2022-09-13	09:07:28	0.451412	2.00797	4367.35	FALSE	224
2022-09-13	09:07:28	0.460064	2.04646	4568.75	FALSE	224
2022-09-13	09:07:28	0.469122	2.08675	4369.43	FALSE	224
2022-09-13	09:07:29	0.468359	2.08335	4570.83	FALSE	224
2022-09-13	09:07:29	0.468817	2.08539	4371.52	FALSE	224
2022-09-13	09:07:29	0.469733	2.08947	4572.92	FALSE	224
2022-09-13	09:07:29	0.471412	2.09693	4373.61	FALSE	224
2022-09-13	09:07:30	0.474517	2.11075	4575.03	FALSE	224
2022-09-13	09:07:30	0.463931	2.06366	4375.68	FALSE	224
2022-09-13	09:07:30	0.463931	2.06366	4577.09	FALSE	224
2022-09-13	09:07:30	0.459402	2.04351	4377.72	FALSE	224
2022-09-13	09:07:31	0.47813	2.12682	4579.22	FALSE	224
2022-09-13	09:07:31	0.468919	2.08585	4379.81	FALSE	224
2022-09-13	09:07:31	0.467239	2.07837	4581.3	FALSE	224
2022-09-13	09:07:31	0.467392	2.07905	4381.89	FALSE	224
2022-09-13	09:07:32	0.460878	2.05008	4583.35	FALSE	224
2022-09-13	09:07:32	0.456501	2.03061	4383.92	FALSE	224
2022-09-13	09:07:32	0.463575	2.06207	4585.41	FALSE	224
2022-09-13	09:07:33	0.46841	2.08358	4386	FALSE	224
2022-09-13	09:07:33	0.47014	2.09128	4587.5	FALSE	224
2022-09-13	09:07:33	0.443015	1.97062	4387.97	FALSE	224
2022-09-13	09:07:33	0.417875	1.85879	4589.36	FALSE	224
2022-09-13	09:07:34	0.440471	1.9593	4389.93	FALSE	224
2022-09-13	09:07:34	0.8193	3.64441	4593.01	FALSE	224
2022-09-13	09:07:34	0.430242	1.9138	4391.84	FALSE	224
2022-09-13	09:07:34	1.16047	5.162	4598.17	FALSE	224
2022-09-13	09:07:35	0.68897	3.06468	4394.91	FALSE	224
2022-09-13	09:07:35	1.31304	5.84066	4604.01	FALSE	224
2022-09-13	09:07:35	0.510242	2.26966	4397.18	FALSE	224
2022-09-13	09:07:35	0.308715	1.37323	4605.38	FALSE	224
2022-09-13	09:07:36	0.621183	2.76315	4399.94	FALSE	224
2022-09-13	09:07:36	0.378384	1.68313	4607.07	FALSE	224
2022-09-13	09:07:36	0.126171	0.561234	4400.5	FALSE	224
2022-09-13	09:07:36	0.190038	0.845327	4607.91	FALSE	224
2022-09-13	09:07:37	0.507087	2.25562	4402.76	FALSE	224
2022-09-13	09:07:37	2.04128	9.08002	4616.99	FALSE	224
2022-09-13	09:07:37	1.63854	7.28855	4410.05	FALSE	224
2022-09-13	09:07:38	2.04836	9.11151	4626.1	FALSE	224
2022-09-13	09:07:38	2.1277	9.46444	4419.51	FALSE	224
2022-09-13	09:07:38	2.07024	9.20884	4635.31	FALSE	224
2022-09-13	09:07:38	3.99848	17.786	4437.3	1	225
2022-09-13	09:07:39	5.59273	24.8776	4660.19	1	226
2022-09-13	09:07:39	6.20591	27.6051	4464.9	1	227
2022-09-13	09:07:39	6.15823	27.393	4687.58	1	228
2022-09-13	09:07:39	2.47894	11.0268	4475.93	FALSE	228
2022-09-13	09:07:40	3.30882	14.7183	4702.3	1	229
2022-09-13	09:07:40	3.30927	14.7203	4490.65	1	230
2022-09-13	09:07:40	2.66536	11.8561	4714.16	FALSE	230
2022-09-13	09:07:40	2.17584	9.67857	4500.33	FALSE	230
2022-09-13	09:07:41	3.12103	13.883	4728.04	1	231
2022-09-13	09:07:41	2.65116	11.7929	4512.12	FALSE	231
2022-09-13	09:07:41	3.85996	17.1699	4745.21	1	232
2022-09-13	09:07:42	2.89192	12.8638	4524.99	FALSE	232
2022-09-13	09:07:42	3.15284	14.0245	4759.23	1	233
2022-09-13	09:07:42	7.50449	33.3815	4558.37	1	234
2022-09-13	09:07:42	12.2757	54.6048	4813.84	1	235
2022-09-13	09:07:43	18.4253	81.9594	4640.33	1	236
2022-09-13	09:07:43	8.48454	37.7409	4851.58	1	237
2022-09-13	09:07:43	6.96902	30.9996	4671.33	1	238
2022-09-13	09:07:43	2.91523	12.9675	4864.55	FALSE	238
2022-09-13	09:07:44	5.19069	23.0892	4694.41	1	239
2022-09-13	09:07:44	4.79925	21.348	4885.89	1	240
2022-09-13	09:07:44	10.7987	48.0348	4742.45	1	241
2022-09-13	09:07:44	3.0251	13.4562	4899.35	1	242
2022-09-13	09:07:45	0.0204201	0.0908327	4742.54	FALSE	242
2022-09-13	09:07:45	-0.197392	-0.878039	4899.35	FALSE	242
2022-09-13	09:07:45	-0.152659	-0.679058	4742.54	FALSE	242
2022-09-13	09:07:45	-0.226806	-1.00888	4899.35	FALSE	242
2022-09-13	09:07:46	-0.131437	-0.584658	4742.54	FALSE	242
2022-09-13	09:07:46	-0.261921	-1.16508	4899.35	FALSE	242
2022-09-13	09:07:46	-0.107061	-0.476229	4742.54	FALSE	242
2022-09-13	09:07:47	-0.0486893	-0.21658	4899.35	FALSE	242
2022-09-13	09:07:47	0.78271	3.48165	4746.02	FALSE	242
2022-09-13	09:07:47	3.37421	15.0092	4914.36	1	243
2022-09-13	09:07:47	5.894	26.2177	4772.24	1	244
2022-09-13	09:07:48	9.21767	41.002	4955.36	1	245
2022-09-13	09:07:48	6.92881	30.8207	4803.06	1	246
2022-09-13	09:07:48	4.7366	21.0693	4976.43	1	247
2022-09-13	09:07:48	0.75869	3.3748	4806.44	FALSE	247
2022-09-13	09:07:49	0.37472	1.66683	4978.1	FALSE	247
2022-09-13	09:07:49	0.312277	1.38907	4807.82	FALSE	247
2022-09-13	09:07:49	0.264644	1.17719	4979.28	FALSE	247
2022-09-13	09:07:49	0.336552	1.49705	4809.32	FALSE	247
2022-09-13	09:07:50	0.145814	0.64861	4979.92	FALSE	247
2022-09-13	09:07:50	0.224949	1.00062	4810.32	FALSE	247
2022-09-13	09:07:50	-0.0904196	-0.402204	4979.92	FALSE	247
2022-09-13	09:07:50	-0.144618	-0.64329	4810.32	FALSE	247
2022-09-13	09:07:51	-0.238816	-1.0623	4979.92	FALSE	247
2022-09-13	09:07:51	-0.0587656	-0.261401	4810.32	FALSE	247
2022-09-13	09:07:51	0.437265	1.94504	4981.87	FALSE	247
2022-09-13	09:07:52	3.55548	15.8155	4826.14	1	248
2022-09-13	09:07:52	3.86276	17.1823	4999.05	1	249
2022-09-13	09:07:52	5.27233	23.4524	4849.59	1	250
2022-09-13	09:07:52	1.5335	6.82131	5005.87	FALSE	250
2022-09-13	09:07:53	2.71436	12.074	4861.66	FALSE	250
2022-09-13	09:07:53	0.769478	3.42279	5009.3	FALSE	250
2022-09-13	09:07:53	1.03151	4.58836	4866.25	FALSE	250
2022-09-13	09:07:53	0.977468	4.34797	5013.64	FALSE	250
2022-09-13	09:07:54	0.93299	4.15013	4870.4	FALSE	250
2022-09-13	09:07:54	0.750496	3.33836	5016.98	FALSE	250
2022-09-13	09:07:54	0.610598	2.71606	4873.12	FALSE	250
2022-09-13	09:07:54	0.478486	2.1284	5019.11	FALSE	250
2022-09-13	09:07:55	0.547952	2.4374	4875.56	FALSE	250
2022-09-13	09:07:55	0.986171	4.38669	5023.5	FALSE	250
2022-09-13	09:07:55	0.971463	4.32126	4879.88	FALSE	250
2022-09-13	09:07:56	1.19396	5.31097	5028.81	FALSE	250
2022-09-13	09:07:56	1.20337	5.35283	4885.23	FALSE	250
2022-09-13	09:07:56	0.651565	2.89829	5031.71	FALSE	250
2022-09-13	09:07:56	1.00454	4.46839	4889.7	FALSE	250
2022-09-13	09:07:57	0.935687	4.16212	5035.87	FALSE	250
2022-09-13	09:07:57	1.73141	7.70166	4897.4	FALSE	250
2022-09-13	09:07:57	1.16653	5.18896	5041.06	FALSE	250
2022-09-13	09:07:57	1.1622	5.1697	4902.57	FALSE	250
2022-09-13	09:07:58	0.583219	2.59427	5043.65	FALSE	250
2022-09-13	09:07:58	0.741387	3.29784	4905.87	FALSE	250
2022-09-13	09:07:58	0.430751	1.91607	5045.57	FALSE	250
2022-09-13	09:07:58	0.60271	2.68097	4908.55	FALSE	250
2022-09-13	09:07:59	0.440166	1.95795	5047.53	FALSE	250
2022-09-13	09:07:59	0.520623	2.31584	4910.86	FALSE	250
2022-09-13	09:07:59	0.442048	1.96632	5049.49	FALSE	250
2022-09-13	09:07:59	0.350598	1.55953	4912.42	FALSE	250
2022-09-13	09:08:00	0.422405	1.87894	5051.37	FALSE	250
2022-09-13	09:08:00	0.481997	2.14402	4914.57	FALSE	250
2022-09-13	09:08:00	0.425662	1.89343	5053.26	FALSE	250
2022-09-13	09:08:01	0.239148	1.06378	4915.63	FALSE	250
2022-09-13	09:08:01	0.471107	2.09558	5055.36	FALSE	250
2022-09-13	09:08:01	0.355433	1.58104	4917.21	FALSE	250
2022-09-13	09:08:01	0.539453	2.39959	5057.76	FALSE	250
2022-09-13	09:08:02	0.303372	1.34946	4918.56	FALSE	250
2022-09-13	09:08:02	0.506781	2.25426	5060.01	FALSE	250
2022-09-13	09:08:02	0.373702	1.6623	4920.22	FALSE	250
2022-09-13	09:08:02	0.481336	2.14108	5062.15	FALSE	250
2022-09-13	09:08:03	0.714211	3.17695	4923.4	FALSE	250
2022-09-13	09:08:03	0.394567	1.75511	5063.91	FALSE	250
2022-09-13	09:08:03	0.430293	1.91403	4925.32	FALSE	250
2022-09-13	09:08:03	0.38271	1.70237	5065.61	FALSE	250
2022-09-13	09:08:04	0.423982	1.88596	4927.2	FALSE	250
2022-09-13	09:08:04	0.413092	1.83752	5067.45	FALSE	250
2022-09-13	09:08:04	0.356501	1.58579	4928.79	FALSE	250
2022-09-13	09:08:05	0.28729	1.27792	5068.73	FALSE	250
2022-09-13	09:08:05	0.373652	1.66208	4930.45	FALSE	250
2022-09-13	09:08:05	0.465713	2.07158	5070.8	FALSE	250
2022-09-13	09:08:05	0.541234	2.40752	4932.86	FALSE	250
2022-09-13	09:08:06	3.00067	13.3476	5084.15	1	251
2022-09-13	09:08:06	11.3448	50.4639	4983.32	1	252
2022-09-13	09:08:06	10.226	45.4873	5129.63	1	253
2022-09-13	09:08:06	6.9537	30.9314	5014.25	1	254
2022-09-13	09:08:07	1.56332	6.95396	5136.59	FALSE	254
2022-09-13	09:08:07	0.714313	3.17741	5017.43	FALSE	254
2022-09-13	09:08:07	0.510445	2.27056	5138.86	FALSE	254
2022-09-13	09:08:07	0.386425	1.7189	5019.15	FALSE	254
2022-09-13	09:08:08	0.464237	2.06502	5140.92	FALSE	254
2022-09-13	09:08:08	0.453193	2.01589	5021.16	FALSE	254
2022-09-13	09:08:08	0.468104	2.08222	5143.01	FALSE	254
2022-09-13	09:08:08	0.513092	2.28234	5023.45	FALSE	254
2022-09-13	09:08:09	0.483881	2.1524	5145.16	FALSE	254
2022-09-13	09:08:09	0.459046	2.04193	5025.49	FALSE	254
2022-09-13	09:08:09	0.534924	2.37945	5147.54	FALSE	254
2022-09-13	09:08:10	0.508461	2.26174	5027.75	FALSE	254
2022-09-13	09:08:10	0.534975	2.37968	5149.92	FALSE	254
2022-09-13	09:08:10	0.543219	2.41635	5030.17	FALSE	254
2022-09-13	09:08:10	0.552481	2.45755	5152.37	FALSE	254
2022-09-13	09:08:11	0.525967	2.33961	5032.51	FALSE	254
2022-09-13	09:08:11	0.569733	2.53429	5154.91	FALSE	254
2022-09-13	09:08:11	0.41126	1.82937	5034.34	FALSE	254
2022-09-13	09:08:11	0.309937	1.37866	5156.29	FALSE	254
2022-09-13	09:08:12	0.298028	1.32569	5035.66	FALSE	254
2022-09-13	09:08:12	0.256705	1.14188	5157.43	FALSE	254
2022-09-13	09:08:12	0.364339	1.62065	5037.28	FALSE	254
2022-09-13	09:08:12	0.532786	2.36994	5159.8	FALSE	254
2022-09-13	09:08:13	0.581438	2.58635	5039.87	FALSE	254
2022-09-13	09:08:13	0.524542	2.33327	5162.13	FALSE	254
2022-09-13	09:08:13	0.504796	2.24543	5042.11	FALSE	254
2022-09-13	09:08:14	0.511361	2.27464	5164.41	FALSE	254
2022-09-13	09:08:14	0.529733	2.35636	5044.47	FALSE	254
2022-09-13	09:08:14	0.519657	2.31154	5166.72	FALSE	254
2022-09-13	09:08:14	0.547952	2.4374	5046.91	FALSE	254
2022-09-13	09:08:15	0.634618	2.82291	5169.54	FALSE	254
2022-09-13	09:08:15	0.671209	2.98567	5049.89	FALSE	254
2022-09-13	09:08:15	0.851208	3.78634	5173.33	FALSE	254
2022-09-13	09:08:15	1.54912	6.8908	5056.78	FALSE	254
2022-09-13	09:08:16	0.895738	3.98442	5177.31	FALSE	254
2022-09-13	09:08:16	0.996908	4.43445	5061.22	FALSE	254
2022-09-13	09:08:16	1.1995	5.33562	5182.65	FALSE	254
2022-09-13	09:08:16	1.08627	4.83195	5066.05	FALSE	254
2022-09-13	09:08:17	0.943219	4.19563	5186.84	FALSE	254
2022-09-13	09:08:17	0.923015	4.10576	5070.16	FALSE	254
2022-09-13	09:08:17	0.870344	3.87146	5190.72	FALSE	254
2022-09-13	09:08:17	0.756807	3.36643	5073.52	FALSE	254
2022-09-13	09:08:18	0.579606	2.5782	5193.29	FALSE	254
2022-09-13	09:08:18	0.787443	3.5027	5077.03	FALSE	254
2022-09-13	09:08:18	0.748461	3.3293	5196.62	FALSE	254
2022-09-13	09:08:19	0.599402	2.66626	5079.69	FALSE	254
2022-09-13	09:08:19	0.45355	2.01748	5198.64	FALSE	254
2022-09-13	09:08:19	0.46902	2.08629	5081.78	FALSE	254
2022-09-13	09:08:19	0.352074	1.5661	5200.21	FALSE	254
2022-09-13	09:08:20	0.195229	0.868418	5082.65	FALSE	254
2022-09-13	09:08:20	0.309987	1.37888	5201.59	FALSE	254
2022-09-13	09:08:20	0.675331	3.00401	5085.65	FALSE	254
2022-09-13	09:08:20	0.298944	1.32976	5202.92	FALSE	254
2022-09-13	09:08:21	0.226527	1.00764	5086.66	FALSE	254
2022-09-13	09:08:21	0.28902	1.28562	5204.2	FALSE	254
2022-09-13	09:08:21	0.262914	1.16949	5087.83	FALSE	254
2022-09-13	09:08:21	0.328766	1.46242	5205.66	FALSE	254
2022-09-13	09:08:22	0.141641	0.630047	5088.46	FALSE	254
2022-09-13	09:08:22	0.368206	1.63785	5207.3	FALSE	254
2022-09-13	09:08:22	0.212837	0.946742	5089.4	FALSE	254
2022-09-13	09:08:22	0.409733	1.82257	5209.12	FALSE	254
2022-09-13	09:08:23	0.213346	0.949006	5090.35	FALSE	254
2022-09-13	09:08:23	0.309275	1.37572	5210.5	FALSE	254
2022-09-13	09:08:23	0.227087	1.01013	5091.36	FALSE	254
2022-09-13	09:08:24	0.575993	2.56213	5213.06	FALSE	254
2022-09-13	09:08:24	1.57243	6.99448	5098.36	FALSE	254
2022-09-13	09:08:24	2.22261	9.88661	5222.95	FALSE	254
2022-09-13	09:08:24	1.97523	8.78622	5107.14	FALSE	254
2022-09-13	09:08:25	2.16566	9.63329	5232.58	FALSE	254
2022-09-13	09:08:25	2.99681	13.3304	5120.47	FALSE	254
2022-09-13	09:08:25	2.13355	9.49046	5242.07	FALSE	254
2022-09-13	09:08:25	2.60103	11.5699	5132.04	FALSE	254
2022-09-13	09:08:26	1.87085	8.32191	5250.39	FALSE	254
2022-09-13	09:08:26	1.46184	6.50256	5138.55	FALSE	254
2022-09-13	09:08:26	1.03788	4.6167	5255.01	FALSE	254
2022-09-13	09:08:26	1.74424	7.75873	5146.31	FALSE	254
2022-09-13	09:08:27	2.52128	11.2152	5266.23	FALSE	254
2022-09-13	09:08:27	1.90912	8.49215	5154.8	FALSE	254
2022-09-13	09:08:27	2.17808	9.68854	5275.91	FALSE	254
2022-09-13	09:08:28	2.11482	9.40714	5164.21	FALSE	254
2022-09-13	09:08:28	2.41156	10.7271	5286.64	FALSE	254
2022-09-13	09:08:28	1.80525	8.03011	5172.24	FALSE	254
2022-09-13	09:08:28	1.08963	4.84689	5291.49	FALSE	254
2022-09-13	09:08:29	2.1024	9.3519	5181.59	FALSE	254
2022-09-13	09:08:29	2.76373	12.2936	5303.78	FALSE	254
2022-09-13	09:08:29	1.83884	8.17953	5189.77	FALSE	254
2022-09-13	09:08:29	2.24378	9.98078	5313.76	FALSE	254
2022-09-13	09:08:30	2.98352	13.2713	5203.04	FALSE	254
2022-09-13	09:08:30	1.89503	8.42947	5322.19	FALSE	254
2022-09-13	09:08:30	2.30439	10.2504	5213.29	FALSE	254
2022-09-13	09:08:30	1.07543	4.78373	5326.98	FALSE	254
2022-09-13	09:08:31	1.4905	6.63004	5219.92	FALSE	254
2022-09-13	09:08:31	0.845967	3.76303	5330.74	FALSE	254
2022-09-13	09:08:31	1.15884	5.15475	5225.07	FALSE	254
2022-09-13	09:08:31	2.23029	9.92078	5340.66	FALSE	254
2022-09-13	09:08:32	3.02149	13.4402	5238.51	1	255
2022-09-13	09:08:32	3.4193	15.2097	5355.87	1	256
2022-09-13	09:08:32	2.79976	12.4539	5250.97	FALSE	256
2022-09-13	09:08:33	2.34744	10.4419	5366.31	FALSE	256
2022-09-13	09:08:33	2.57884	11.4712	5262.44	FALSE	256
2022-09-13	09:08:33	1.56729	6.97162	5373.28	FALSE	256
2022-09-13	09:08:33	1.50083	6.67599	5269.11	FALSE	256
2022-09-13	09:08:34	0.426985	1.89931	5375.18	FALSE	256
2022-09-13	09:08:34	0.43986	1.95659	5271.07	FALSE	256
2022-09-13	09:08:34	0.304389	1.35398	5376.54	FALSE	256
2022-09-13	09:08:34	0.245763	1.0932	5272.16	FALSE	256
2022-09-13	09:08:35	0.354618	1.57741	5378.11	FALSE	256
2022-09-13	09:08:35	0.369224	1.64238	5273.81	FALSE	256
2022-09-13	09:08:35	0.374313	1.66502	5379.78	FALSE	256
2022-09-13	09:08:35	0.393906	1.75217	5275.56	FALSE	256
2022-09-13	09:08:36	0.349224	1.55342	5381.33	FALSE	256
2022-09-13	09:08:36	0.389987	1.73474	5277.29	FALSE	256
2022-09-13	09:08:36	0.382252	1.70033	5383.03	FALSE	256
2022-09-13	09:08:37	0.499707	2.2228	5279.52	FALSE	256
2022-09-13	09:08:37	0.588664	2.6185	5385.65	FALSE	256
2022-09-13	09:08:37	0.663219	2.95013	5282.47	FALSE	256
2022-09-13	09:08:37	0.753142	3.35013	5389	FALSE	256
2022-09-13	09:08:38	0.604237	2.68777	5285.15	FALSE	256
2022-09-13	09:08:38	0.567952	2.52636	5391.53	FALSE	256
2022-09-13	09:08:38	0.610089	2.7138	5287.87	FALSE	256
2022-09-13	09:08:38	0.56098	2.49535	5394.02	FALSE	256

## Sheet: Bubba_martin_202291390336 (2)
Date	Time	Lbs	Total force x time			**GoPro Fitting: 853
2022-09-13	09:03:38	0.441234	0.441234	FALSE	0				Total Force x time	2401.4
2022-09-13	09:03:38	0.429377	0.870611	FALSE	0				Total steps	256
2022-09-13	09:03:38	0.448512	1.31912	FALSE	0
2022-09-13	09:03:38	0.418333	1.73746	FALSE	0
2022-09-13	09:03:39	0.427137	2.16459	FALSE	0
2022-09-13	09:03:39	0.43014	2.59473	FALSE	0
2022-09-13	09:03:39	0.439606	3.03434	FALSE	0
2022-09-13	09:03:40	0.439504	3.47384	FALSE	0
2022-09-13	09:03:40	0.440166	3.91401	FALSE	0
2022-09-13	09:03:40	0.440725	4.35473	FALSE	0
2022-09-13	09:03:40	0.437417	4.79215	FALSE	0
2022-09-13	09:03:41	0.443117	5.23527	FALSE	0
2022-09-13	09:03:41	0.445916	5.68118	FALSE	0
2022-09-13	09:03:41	0.431311	6.1125	FALSE	0
2022-09-13	09:03:41	0.401896	6.51439	FALSE	0
2022-09-13	09:03:42	0.421438	6.93583	FALSE	0
2022-09-13	09:03:42	0.445713	7.38154	FALSE	0
2022-09-13	09:03:42	0.430547	7.81209	FALSE	0
2022-09-13	09:03:42	0.511667	8.32376	FALSE	0
2022-09-13	09:03:43	0.434568	8.75832	FALSE	0
2022-09-13	09:03:43	0.492277	9.2506	FALSE	0
2022-09-13	09:03:43	0.594211	9.84481	FALSE	0
2022-09-13	09:03:44	0.486679	10.3315	FALSE	0
2022-09-13	09:03:44	0.463117	10.7946	FALSE	0
2022-09-13	09:03:44	0.44729	11.2419	FALSE	0
2022-09-13	09:03:44	0.572684	11.8146	FALSE	0
2022-09-13	09:03:45	0.325305	12.1399	FALSE	0
2022-09-13	09:03:45	0.243524	12.3834	FALSE	0
2022-09-13	09:03:45	0.247799	12.6312	FALSE	0
2022-09-13	09:03:45	0.329886	12.9611	FALSE	0
2022-09-13	09:03:46	2.38729	15.3484	FALSE	0
2022-09-13	09:03:46	18.6667	34.0151	1	1
2022-09-13	09:03:46	12.731	46.7461	1	2
2022-09-13	09:03:46	5.988	52.7341	1	3
2022-09-13	09:03:47	4.22342	56.9575	1	4
2022-09-13	09:03:47	3.75782	60.7153	1	5
2022-09-13	09:03:47	2.36083	63.0762	FALSE	5
2022-09-13	09:03:47	3.72016	66.7963	1	6
2022-09-13	09:03:48	2.39813	69.1944	FALSE	6
2022-09-13	09:03:48	1.80968	71.0041	FALSE	6
2022-09-13	09:03:48	0.52902	71.5331	FALSE	6
2022-09-13	09:03:49	0.14327	71.6764	FALSE	6
2022-09-13	09:03:49	0.311972	71.9884	FALSE	6
2022-09-13	09:03:49	0.133601	72.122	FALSE	6
2022-09-13	09:03:49	1.71579	73.8378	FALSE	6
2022-09-13	09:03:50	9.87365	83.7114	1	7
2022-09-13	09:03:50	11.9106	95.622	1	8
2022-09-13	09:03:50	10.1351	105.757	1	9
2022-09-13	09:03:50	10.5344	116.292	1	10
2022-09-13	09:03:51	11.8471	128.139	1	11
2022-09-13	09:03:51	15.4309	143.57	1	12
2022-09-13	09:03:51	12.2375	155.807	1	13
2022-09-13	09:03:51	4.28826	160.095	1	14
2022-09-13	09:03:52	0.385713	160.481	FALSE	14
2022-09-13	09:03:52	0.579606	161.061	FALSE	14
2022-09-13	09:03:52	0.368155	161.429	FALSE	14
2022-09-13	09:03:52	0.398486	161.827	FALSE	14
2022-09-13	09:03:53	0.457875	162.285	FALSE	14
2022-09-13	09:03:53	0.219046	162.504	FALSE	14
2022-09-13	09:03:53	0.550852	163.055	FALSE	14
2022-09-13	09:03:54	0.559504	163.615	FALSE	14
2022-09-13	09:03:54	0.22785	163.842	FALSE	14
2022-09-13	09:03:54	0.371972	164.214	FALSE	14
2022-09-13	09:03:54	0.271361	164.486	FALSE	14
2022-09-13	09:03:55	0.462965	164.949	FALSE	14
2022-09-13	09:03:55	0.405356	165.354	FALSE	14
2022-09-13	09:03:55	0.403117	165.757	FALSE	14
2022-09-13	09:03:55	0.430547	166.188	FALSE	14
2022-09-13	09:03:56	0.526069	166.714	FALSE	14
2022-09-13	09:03:56	0.508664	167.222	FALSE	14
2022-09-13	09:03:56	0.427392	167.65	FALSE	14
2022-09-13	09:03:56	0.449173	168.099	FALSE	14
2022-09-13	09:03:57	8.59706	176.696	1	15
2022-09-13	09:03:57	15.8772	192.573	1	16
2022-09-13	09:03:57	1.70668	194.28	FALSE	16
2022-09-13	09:03:58	3.90749	198.187	1	17
2022-09-13	09:03:58	2.50169	200.689	FALSE	17
2022-09-13	09:03:58	1.13284	201.822	FALSE	17
2022-09-13	09:03:58	1.57584	203.398	FALSE	17
2022-09-13	09:03:59	0.701896	204.1	FALSE	17
2022-09-13	09:03:59	0.678028	204.778	FALSE	17
2022-09-13	09:03:59	0.280216	205.058	FALSE	17
2022-09-13	09:03:59	0.170038	205.228	FALSE	17
2022-09-13	09:04:00	0.277723	205.506	FALSE	17
2022-09-13	09:04:00	0.204644	205.71	FALSE	17
2022-09-13	09:04:00	0.154873	205.865	FALSE	17
2022-09-13	09:04:00	0.0224048	205.888	FALSE	17
2022-09-13	09:04:01	0.0896312	205.977	FALSE	17
2022-09-13	09:04:01	1.05823	207.035	FALSE	17
2022-09-13	09:04:01	9.79065	216.826	1	18
2022-09-13	09:04:01	4.64632	221.472	1	19
2022-09-13	09:04:02	6.12179	227.594	1	20
2022-09-13	09:04:02	4.92123	232.515	1	21
2022-09-13	09:04:02	4.86276	237.378	1	22
2022-09-13	09:04:03	2.05706	239.435	FALSE	22
2022-09-13	09:04:03	2.21365	241.649	FALSE	22
2022-09-13	09:04:03	4.81339	246.462	1	23
2022-09-13	09:04:03	2.4363	248.899	FALSE	23
2022-09-13	09:04:04	5.1224	254.021	1	24
2022-09-13	09:04:04	4.69513	258.716	1	25
2022-09-13	09:04:04	1.89752	260.614	FALSE	25
2022-09-13	09:04:04	1.76246	262.376	FALSE	25
2022-09-13	09:04:05	1.95396	264.33	FALSE	25
2022-09-13	09:04:05	4.74149	269.072	1	26
2022-09-13	09:04:05	0.880115	269.952	FALSE	26
2022-09-13	09:04:05	6.02011	275.972	1	27
2022-09-13	09:04:06	3.76663	279.738	1	28
2022-09-13	09:04:06	0.525611	280.264	FALSE	28
2022-09-13	09:04:06	0.606374	280.87	FALSE	28
2022-09-13	09:04:07	0.385814	281.256	FALSE	28
2022-09-13	09:04:07	0.813041	282.069	FALSE	28
2022-09-13	09:04:07	1.73548	283.805	FALSE	28
2022-09-13	09:04:07	5.36006	289.165	1	29
2022-09-13	09:04:08	4.96622	294.131	1	30
2022-09-13	09:04:08	7.78113	301.912	1	31
2022-09-13	09:04:08	1.21212	303.124	FALSE	31
2022-09-13	09:04:08	2.42637	305.551	FALSE	31
2022-09-13	09:04:09	1.3138	306.864	FALSE	31
2022-09-13	09:04:09	0.863575	307.728	FALSE	31
2022-09-13	09:04:09	1.62312	309.351	FALSE	31
2022-09-13	09:04:09	1.51487	310.866	FALSE	31
2022-09-13	09:04:10	4.42724	315.293	1	32
2022-09-13	09:04:10	2.10556	317.399	FALSE	32
2022-09-13	09:04:10	6.32973	323.729	1	33
2022-09-13	09:04:10	2.67492	326.403	FALSE	33
2022-09-13	09:04:11	4.35711	330.761	1	34
2022-09-13	09:04:11	1.51441	332.275	FALSE	34
2022-09-13	09:04:11	2.4419	334.717	FALSE	34
2022-09-13	09:04:12	3.08403	337.801	1	35
2022-09-13	09:04:12	2.12841	339.929	FALSE	35
2022-09-13	09:04:12	5.79192	345.721	1	36
2022-09-13	09:04:12	6.31227	352.034	1	37
2022-09-13	09:04:13	11.2661	363.3	1	38
2022-09-13	09:04:13	4.00113	367.301	1	39
2022-09-13	09:04:13	4.63696	371.938	1	40
2022-09-13	09:04:13	6.19411	378.132	1	41
2022-09-13	09:04:14	3.88011	382.012	1	42
2022-09-13	09:04:14	0.86958	382.882	FALSE	42
2022-09-13	09:04:14	0.699555	383.581	FALSE	42
2022-09-13	09:04:14	0.749835	384.331	FALSE	42
2022-09-13	09:04:15	0.572226	384.903	FALSE	42
2022-09-13	09:04:15	1.29192	386.195	FALSE	42
2022-09-13	09:04:15	1.81304	388.008	FALSE	42
2022-09-13	09:04:15	9.55217	397.56	1	43
2022-09-13	09:04:16	6.26413	403.824	1	44
2022-09-13	09:04:16	5.99884	409.823	1	45
2022-09-13	09:04:16	1.44449	411.268	FALSE	45
2022-09-13	09:04:17	4.04688	415.315	1	46
2022-09-13	09:04:17	1.27167	416.586	FALSE	46
2022-09-13	09:04:17	5.25604	421.842	1	47
2022-09-13	09:04:17	8.80016	430.642	1	48
2022-09-13	09:04:18	4.15838	434.801	1	49
2022-09-13	09:04:18	7.86082	442.662	1	50
2022-09-13	09:04:18	2.67828	445.34	FALSE	50
2022-09-13	09:04:18	7.10698	452.447	1	51
2022-09-13	09:04:19	0.386425	452.833	FALSE	51
2022-09-13	09:04:19	2.38612	455.219	FALSE	51
2022-09-13	09:04:19	3.0168	458.236	1	52
2022-09-13	09:04:19	6.62266	464.859	1	53
2022-09-13	09:04:20	10.7804	475.639	1	54
2022-09-13	09:04:20	6.89584	482.535	1	55
2022-09-13	09:04:20	12.3413	494.876	1	56
2022-09-13	09:04:21	1.66424	496.541	FALSE	56
2022-09-13	09:04:21	7.9337	504.474	1	57
2022-09-13	09:04:21	9.97161	514.446	1	58
2022-09-13	09:04:21	8.56627	523.012	1	59
2022-09-13	09:04:22	14.7212	537.733	1	60
2022-09-13	09:04:22	10.8385	548.572	1	61
2022-09-13	09:04:22	8.16418	556.736	1	62
2022-09-13	09:04:22	9.28713	566.023	1	63
2022-09-13	09:04:23	7.20724	573.231	1	64
2022-09-13	09:04:23	1.88475	575.115	FALSE	64
2022-09-13	09:04:23	4.22556	579.341	1	65
2022-09-13	09:04:23	4.97446	584.315	1	66
2022-09-13	09:04:24	1.27416	585.589	FALSE	66
2022-09-13	09:04:24	2.72464	588.314	FALSE	66
2022-09-13	09:04:24	5.46357	593.778	1	67
2022-09-13	09:04:24	4.43253	598.21	1	68
2022-09-13	09:04:25	11.7924	610.003	1	69
2022-09-13	09:04:25	5.66378	615.666	1	70
2022-09-13	09:04:25	2.25131	617.918	FALSE	70
2022-09-13	09:04:26	1.9935	619.911	FALSE	70
2022-09-13	09:04:26	0.905763	620.817	FALSE	70
2022-09-13	09:04:26	3.93426	624.751	1	71
2022-09-13	09:04:26	3.59472	628.346	1	72
2022-09-13	09:04:27	3.32296	631.669	1	73
2022-09-13	09:04:27	8.12342	639.792	1	74
2022-09-13	09:04:27	2.92932	642.722	FALSE	74
2022-09-13	09:04:27	7.73176	650.453	1	75
2022-09-13	09:04:28	2.71955	653.173	FALSE	75
2022-09-13	09:04:28	7.14897	660.322	1	76
2022-09-13	09:04:28	4.1963	664.518	1	77
2022-09-13	09:04:28	3.01752	667.536	1	78
2022-09-13	09:04:29	4.1623	671.698	1	79
2022-09-13	09:04:29	2.25711	673.955	FALSE	79
2022-09-13	09:04:29	7.99085	681.946	1	80
2022-09-13	09:04:30	3.31533	685.261	1	81
2022-09-13	09:04:30	5.38347	690.645	1	82
2022-09-13	09:04:30	3.55207	694.197	1	83
2022-09-13	09:04:30	4.47441	698.671	1	84
2022-09-13	09:04:31	4.42719	703.098	1	85
2022-09-13	09:04:31	0.74556	703.844	FALSE	85
2022-09-13	09:04:31	1.16459	705.009	FALSE	85
2022-09-13	09:04:31	0.469326	705.478	FALSE	85
2022-09-13	09:04:32	0.413397	705.891	FALSE	85
2022-09-13	09:04:32	0.167748	706.059	FALSE	85
2022-09-13	09:04:32	0.240267	706.299	FALSE	85
2022-09-13	09:04:32	0.298232	706.598	FALSE	85
2022-09-13	09:04:33	-0.0864501	706.598	FALSE	85
2022-09-13	09:04:33	0.210751	706.808	FALSE	85
2022-09-13	09:04:33	-0.0719463	706.808	FALSE	85
2022-09-13	09:04:33	0.158435	706.967	FALSE	85
2022-09-13	09:04:34	-0.0646181	706.967	FALSE	85
2022-09-13	09:04:34	0.236094	707.203	FALSE	85
2022-09-13	09:04:34	0.390344	707.593	FALSE	85
2022-09-13	09:04:35	0.398639	707.992	FALSE	85
2022-09-13	09:04:35	0.396094	708.388	FALSE	85
2022-09-13	09:04:35	0.185865	708.574	FALSE	85
2022-09-13	09:04:35	1.04128	709.615	FALSE	85
2022-09-13	09:04:36	3.40271	713.018	1	86
2022-09-13	09:04:36	7.17731	720.195	1	87
2022-09-13	09:04:36	4.7307	724.926	1	88
2022-09-13	09:04:36	3.43243	728.358	1	89
2022-09-13	09:04:37	2.73828	731.097	FALSE	89
2022-09-13	09:04:37	5.56617	736.663	1	90
2022-09-13	09:04:37	16.695	753.358	1	91
2022-09-13	09:04:37	4.48658	757.844	1	92
2022-09-13	09:04:38	6.63665	764.481	1	93
2022-09-13	09:04:38	0.989784	765.471	FALSE	93
2022-09-13	09:04:38	0.761285	766.232	FALSE	93
2022-09-13	09:04:39	0.772888	767.005	FALSE	93
2022-09-13	09:04:39	0.741234	767.746	FALSE	93
2022-09-13	09:04:39	3.03177	770.778	1	94
2022-09-13	09:04:39	1.77874	772.557	FALSE	94
2022-09-13	09:04:40	2.1221	774.679	FALSE	94
2022-09-13	09:04:40	1.31502	775.994	FALSE	94
2022-09-13	09:04:40	1.18363	777.177	FALSE	94
2022-09-13	09:04:40	0.459809	777.637	FALSE	94
2022-09-13	09:04:41	0.520369	778.158	FALSE	94
2022-09-13	09:04:41	0.867697	779.025	FALSE	94
2022-09-13	09:04:41	1.68525	780.711	FALSE	94
2022-09-13	09:04:41	6.15314	786.864	1	95
2022-09-13	09:04:42	12.9158	799.779	1	96
2022-09-13	09:04:42	14.341	814.12	1	97
2022-09-13	09:04:42	5.44581	819.566	1	98
2022-09-13	09:04:42	15.8213	835.388	1	99
2022-09-13	09:04:43	6.88576	842.273	1	100
2022-09-13	09:04:43	8.77782	851.051	1	101
2022-09-13	09:04:43	3.55935	854.61	1	102
2022-09-13	09:04:44	5.61634	860.227	1	103
2022-09-13	09:04:44	3.77009	863.997	1	104
2022-09-13	09:04:44	2.6193	866.616	FALSE	104
2022-09-13	09:04:44	2.87818	869.494	FALSE	104
2022-09-13	09:04:45	0.945204	870.44	FALSE	104
2022-09-13	09:04:45	1.19543	871.635	FALSE	104
2022-09-13	09:04:45	0.672379	872.307	FALSE	104
2022-09-13	09:04:45	1.21345	873.521	FALSE	104
2022-09-13	09:04:46	1.25126	874.772	FALSE	104
2022-09-13	09:04:46	0.85645	875.629	FALSE	104
2022-09-13	09:04:46	0.475026	876.104	FALSE	104
2022-09-13	09:04:46	0.396451	876.5	FALSE	104
2022-09-13	09:04:47	0.378791	876.879	FALSE	104
2022-09-13	09:04:47	0.400471	877.279	FALSE	104
2022-09-13	09:04:47	0.400369	877.68	FALSE	104
2022-09-13	09:04:47	0.381031	878.061	FALSE	104
2022-09-13	09:04:48	0.380471	878.441	FALSE	104
2022-09-13	09:04:48	0.382761	878.824	FALSE	104
2022-09-13	09:04:48	0.37472	879.199	FALSE	104
2022-09-13	09:04:49	0.366883	879.566	FALSE	104
2022-09-13	09:04:49	0.37187	879.937	FALSE	104
2022-09-13	09:04:49	0.368003	880.305	FALSE	104
2022-09-13	09:04:49	0.377214	880.683	FALSE	104
2022-09-13	09:04:50	0.385713	881.068	FALSE	104
2022-09-13	09:04:50	0.428461	881.497	FALSE	104
2022-09-13	09:04:50	0.495127	881.992	FALSE	104
2022-09-13	09:04:50	0.560674	882.553	FALSE	104
2022-09-13	09:04:51	0.544135	883.097	FALSE	104
2022-09-13	09:04:51	0.58958	883.686	FALSE	104
2022-09-13	09:04:51	0.761234	884.448	FALSE	104
2022-09-13	09:04:51	0.986119	885.434	FALSE	104
2022-09-13	09:04:52	0.373906	885.808	FALSE	104
2022-09-13	09:04:52	0.324644	886.132	FALSE	104
2022-09-13	09:04:52	0.162965	886.295	FALSE	104
2022-09-13	09:04:53	0.160318	886.456	FALSE	104
2022-09-13	09:04:53	0.165051	886.621	FALSE	104
2022-09-13	09:04:53	0.159351	886.78	FALSE	104
2022-09-13	09:04:53	0.135585	886.915	FALSE	104
2022-09-13	09:04:54	0.0479519	886.963	FALSE	104
2022-09-13	09:04:54	0.0898348	887.053	FALSE	104
2022-09-13	09:04:54	0.117875	887.171	FALSE	104
2022-09-13	09:04:54	0.229936	887.401	FALSE	104
2022-09-13	09:04:55	0.58556	887.987	FALSE	104
2022-09-13	09:04:55	0.365611	888.352	FALSE	104
2022-09-13	09:04:55	0.389275	888.742	FALSE	104
2022-09-13	09:04:55	0.305	889.047	FALSE	104
2022-09-13	09:04:56	0.342099	889.389	FALSE	104
2022-09-13	09:04:56	0.238995	889.628	FALSE	104
2022-09-13	09:04:56	0.310802	889.938	FALSE	104
2022-09-13	09:04:56	0.384084	890.323	FALSE	104
2022-09-13	09:04:57	0.358893	890.681	FALSE	104
2022-09-13	09:04:57	0.382863	891.064	FALSE	104
2022-09-13	09:04:57	0.348664	891.413	FALSE	104
2022-09-13	09:04:58	0.348155	891.761	FALSE	104
2022-09-13	09:04:58	0.342405	892.103	FALSE	104
2022-09-13	09:04:58	0.341947	892.445	FALSE	104
2022-09-13	09:04:58	0.338537	892.784	FALSE	104
2022-09-13	09:04:59	0.327087	893.111	FALSE	104
2022-09-13	09:04:59	0.328664	893.44	FALSE	104
2022-09-13	09:04:59	0.337468	893.777	FALSE	104
2022-09-13	09:04:59	0.303728	894.081	FALSE	104
2022-09-13	09:05:00	0.321489	894.402	FALSE	104
2022-09-13	09:05:00	0.321387	894.724	FALSE	104
2022-09-13	09:05:00	0.405204	895.129	FALSE	104
2022-09-13	09:05:00	0.429428	895.558	FALSE	104
2022-09-13	09:05:01	0.737824	896.296	FALSE	104
2022-09-13	09:05:01	0.714771	897.011	FALSE	104
2022-09-13	09:05:01	0.457316	897.468	FALSE	104
2022-09-13	09:05:02	0.481692	897.95	FALSE	104
2022-09-13	09:05:02	0.436196	898.386	FALSE	104
2022-09-13	09:05:02	0.444847	898.831	FALSE	104
2022-09-13	09:05:02	0.454924	899.286	FALSE	104
2022-09-13	09:05:03	0.459198	899.745	FALSE	104
2022-09-13	09:05:03	0.450038	900.195	FALSE	104
2022-09-13	09:05:03	0.46215	900.657	FALSE	104
2022-09-13	09:05:03	0.451412	901.109	FALSE	104
2022-09-13	09:05:04	0.443015	901.552	FALSE	104
2022-09-13	09:05:04	0.454873	902.007	FALSE	104
2022-09-13	09:05:04	0.453346	902.46	FALSE	104
2022-09-13	09:05:04	0.444796	902.905	FALSE	104
2022-09-13	09:05:05	0.4507	903.356	FALSE	104
2022-09-13	09:05:05	0.428308	903.784	FALSE	104
2022-09-13	09:05:05	0.461387	904.245	FALSE	104
2022-09-13	09:05:05	0.458588	904.704	FALSE	104
2022-09-13	09:05:06	0.582812	905.287	FALSE	104
2022-09-13	09:05:06	1.38037	906.667	FALSE	104
2022-09-13	09:05:06	1.2535	907.921	FALSE	104
2022-09-13	09:05:07	0.508104	908.429	FALSE	104
2022-09-13	09:05:07	0.491005	908.92	FALSE	104
2022-09-13	09:05:07	0.408461	909.328	FALSE	104
2022-09-13	09:05:07	0.40215	909.73	FALSE	104
2022-09-13	09:05:08	0.434059	910.164	FALSE	104
2022-09-13	09:05:08	0.407901	910.572	FALSE	104
2022-09-13	09:05:08	0.408206	910.98	FALSE	104
2022-09-13	09:05:08	0.489122	911.47	FALSE	104
2022-09-13	09:05:09	0.455076	911.925	FALSE	104
2022-09-13	09:05:09	0.380624	912.305	FALSE	104
2022-09-13	09:05:09	0.481387	912.787	FALSE	104
2022-09-13	09:05:09	0.560369	913.347	FALSE	104
2022-09-13	09:05:10	0.522354	913.869	FALSE	104
2022-09-13	09:05:10	0.476501	914.346	FALSE	104
2022-09-13	09:05:10	0.43014	914.776	FALSE	104
2022-09-13	09:05:10	0.433651	915.21	FALSE	104
2022-09-13	09:05:11	0.425764	915.635	FALSE	104
2022-09-13	09:05:11	0.438486	916.074	FALSE	104
2022-09-13	09:05:11	0.444288	916.518	FALSE	104
2022-09-13	09:05:12	0.50388	917.022	FALSE	104
2022-09-13	09:05:12	2.98347	920.005	FALSE	104
2022-09-13	09:05:12	1.91075	921.916	FALSE	104
2022-09-13	09:05:12	1.92912	923.845	FALSE	104
2022-09-13	09:05:13	2.04795	925.893	FALSE	104
2022-09-13	09:05:13	2.10164	927.995	FALSE	104
2022-09-13	09:05:13	3.0279	931.023	1	105
2022-09-13	09:05:13	6.78378	937.807	1	106
2022-09-13	09:05:14	2.37477	940.181	FALSE	106
2022-09-13	09:05:14	1.05966	941.241	FALSE	106
2022-09-13	09:05:14	0.550598	941.792	FALSE	106
2022-09-13	09:05:14	0.776857	942.569	FALSE	106
2022-09-13	09:05:15	0.773295	943.342	FALSE	106
2022-09-13	09:05:15	0.538181	943.88	FALSE	106
2022-09-13	09:05:15	0.530547	944.411	FALSE	106
2022-09-13	09:05:16	0.570395	944.981	FALSE	106
2022-09-13	09:05:16	0.543473	945.524	FALSE	106
2022-09-13	09:05:16	0.478079	946.002	FALSE	106
2022-09-13	09:05:16	0.461845	946.464	FALSE	106
2022-09-13	09:05:17	0.403575	946.868	FALSE	106
2022-09-13	09:05:17	0.455026	947.323	FALSE	106
2022-09-13	09:05:17	0.500929	947.824	FALSE	106
2022-09-13	09:05:17	0.514517	948.338	FALSE	106
2022-09-13	09:05:18	0.535687	948.874	FALSE	106
2022-09-13	09:05:18	0.55299	949.427	FALSE	106
2022-09-13	09:05:18	0.590649	950.018	FALSE	106
2022-09-13	09:05:18	0.526629	950.544	FALSE	106
2022-09-13	09:05:19	0.507035	951.051	FALSE	106
2022-09-13	09:05:19	0.550598	951.602	FALSE	106
2022-09-13	09:05:19	0.55701	952.159	FALSE	106
2022-09-13	09:05:19	0.590445	952.749	FALSE	106
2022-09-13	09:05:20	0.614822	953.364	FALSE	106
2022-09-13	09:05:20	0.715992	954.08	FALSE	106
2022-09-13	09:05:20	0.939453	955.02	FALSE	106
2022-09-13	09:05:21	2.73314	957.753	FALSE	106
2022-09-13	09:05:21	2.24052	959.993	FALSE	106
2022-09-13	09:05:21	2.12658	962.12	FALSE	106
2022-09-13	09:05:21	1.05253	963.172	FALSE	106
2022-09-13	09:05:22	0.524236	963.697	FALSE	106
2022-09-13	09:05:22	0.455585	964.152	FALSE	106
2022-09-13	09:05:22	0.492685	964.645	FALSE	106
2022-09-13	09:05:22	0.490751	965.136	FALSE	106
2022-09-13	09:05:23	0.533957	965.67	FALSE	106
2022-09-13	09:05:23	0.35182	966.021	FALSE	106
2022-09-13	09:05:23	0.563524	966.585	FALSE	106
2022-09-13	09:05:23	0.486221	967.071	FALSE	106
2022-09-13	09:05:24	0.429071	967.5	FALSE	106
2022-09-13	09:05:24	0.450445	967.951	FALSE	106
2022-09-13	09:05:24	0.575178	968.526	FALSE	106
2022-09-13	09:05:25	1.09472	969.621	FALSE	106
2022-09-13	09:05:25	0.980369	970.601	FALSE	106
2022-09-13	09:05:25	0.648511	971.25	FALSE	106
2022-09-13	09:05:25	0.49355	971.743	FALSE	106
2022-09-13	09:05:26	0.457519	972.201	FALSE	106
2022-09-13	09:05:26	0.485611	972.686	FALSE	106
2022-09-13	09:05:26	0.484237	973.17	FALSE	106
2022-09-13	09:05:26	0.450802	973.621	FALSE	106
2022-09-13	09:05:27	0.490598	974.112	FALSE	106
2022-09-13	09:05:27	0.444084	974.556	FALSE	106
2022-09-13	09:05:27	0.493499	975.049	FALSE	106
2022-09-13	09:05:27	0.541743	975.591	FALSE	106
2022-09-13	09:05:28	0.408104	975.999	FALSE	106
2022-09-13	09:05:28	0.477367	976.477	FALSE	106
2022-09-13	09:05:28	0.481845	976.958	FALSE	106
2022-09-13	09:05:28	0.467494	977.426	FALSE	106
2022-09-13	09:05:29	0.461794	977.888	FALSE	106
2022-09-13	09:05:29	0.459962	978.348	FALSE	106
2022-09-13	09:05:29	0.557417	978.905	FALSE	106
2022-09-13	09:05:30	0.494466	979.4	FALSE	106
2022-09-13	09:05:30	0.518944	979.919	FALSE	106
2022-09-13	09:05:30	0.513855	980.432	FALSE	106
2022-09-13	09:05:30	0.421183	980.854	FALSE	106
2022-09-13	09:05:31	0.347646	981.201	FALSE	106
2022-09-13	09:05:31	0.550394	981.752	FALSE	106
2022-09-13	09:05:31	0.449987	982.202	FALSE	106
2022-09-13	09:05:31	0.440216	982.642	FALSE	106
2022-09-13	09:05:32	0.46271	983.105	FALSE	106
2022-09-13	09:05:32	0.461132	983.566	FALSE	106
2022-09-13	09:05:32	0.344797	983.91	FALSE	106
2022-09-13	09:05:32	0.716654	984.627	FALSE	106
2022-09-13	09:05:33	0.934211	985.561	FALSE	106
2022-09-13	09:05:33	1.29513	986.856	FALSE	106
2022-09-13	09:05:33	1.01721	987.874	FALSE	106
2022-09-13	09:05:34	0.733855	988.608	FALSE	106
2022-09-13	09:05:34	0.778486	989.386	FALSE	106
2022-09-13	09:05:34	1.79955	991.186	FALSE	106
2022-09-13	09:05:34	5.15533	996.341	1	107
2022-09-13	09:05:35	1.90022	998.241	FALSE	107
2022-09-13	09:05:35	4.12831	1002.37	1	108
2022-09-13	09:05:35	3.388	1005.76	1	109
2022-09-13	09:05:35	3.29228	1009.05	1	110
2022-09-13	09:05:36	1.93385	1010.98	FALSE	110
2022-09-13	09:05:36	1.0964	1012.08	FALSE	110
2022-09-13	09:05:36	1.29686	1013.38	FALSE	110
2022-09-13	09:05:36	0.499402	1013.88	FALSE	110
2022-09-13	09:05:37	1.52973	1015.41	FALSE	110
2022-09-13	09:05:37	3.84871	1019.25	1	111
2022-09-13	09:05:37	12.2426	1031.5	1	112
2022-09-13	09:05:37	8.52774	1040.03	1	113
2022-09-13	09:05:38	6.16006	1046.19	1	114
2022-09-13	09:05:38	7.26428	1053.45	1	115
2022-09-13	09:05:38	7.79182	1061.24	1	116
2022-09-13	09:05:39	13.8101	1075.05	1	117
2022-09-13	09:05:39	12.0796	1087.13	1	118
2022-09-13	09:05:39	5.5048	1092.64	1	119
2022-09-13	09:05:39	8.04886	1100.68	1	120
2022-09-13	09:05:40	11.8187	1112.5	1	121
2022-09-13	09:05:40	2.58892	1115.09	FALSE	121
2022-09-13	09:05:40	6.05706	1121.15	1	122
2022-09-13	09:05:40	8.02143	1129.17	1	123
2022-09-13	09:05:41	1.76973	1130.94	FALSE	123
2022-09-13	09:05:41	4.78424	1135.72	1	124
2022-09-13	09:05:41	2.52083	1138.25	FALSE	124
2022-09-13	09:05:41	2.36093	1140.61	FALSE	124
2022-09-13	09:05:42	1.31172	1141.92	FALSE	124
2022-09-13	09:05:42	0.831361	1142.75	FALSE	124
2022-09-13	09:05:42	0.580522	1143.33	FALSE	124
2022-09-13	09:05:42	0.406883	1143.74	FALSE	124
2022-09-13	09:05:43	0.676603	1144.41	FALSE	124
2022-09-13	09:05:43	1.52556	1145.94	FALSE	124
2022-09-13	09:05:43	1.10841	1147.05	FALSE	124
2022-09-13	09:05:44	1.70866	1148.76	FALSE	124
2022-09-13	09:05:44	1.06943	1149.83	FALSE	124
2022-09-13	09:05:44	2.85121	1152.68	FALSE	124
2022-09-13	09:05:44	1.68322	1154.36	FALSE	124
2022-09-13	09:05:45	2.50607	1156.87	FALSE	124
2022-09-13	09:05:45	2.60973	1159.48	FALSE	124
2022-09-13	09:05:45	4.18627	1163.66	1	125
2022-09-13	09:05:45	4.71701	1168.38	1	126
2022-09-13	09:05:46	2.29777	1170.68	FALSE	126
2022-09-13	09:05:46	4.54434	1175.22	1	127
2022-09-13	09:05:46	0.874974	1176.1	FALSE	127
2022-09-13	09:05:46	2.05126	1178.15	FALSE	127
2022-09-13	09:05:47	0.515178	1178.66	FALSE	127
2022-09-13	09:05:47	0.741285	1179.4	FALSE	127
2022-09-13	09:05:47	1.28627	1180.69	FALSE	127
2022-09-13	09:05:48	1.33889	1182.03	FALSE	127
2022-09-13	09:05:48	4.83304	1186.86	1	128
2022-09-13	09:05:48	6.10225	1192.96	1	129
2022-09-13	09:05:48	10.8546	1203.82	1	130
2022-09-13	09:05:49	9.77884	1213.6	1	131
2022-09-13	09:05:49	9.83375	1223.43	1	132
2022-09-13	09:05:49	16.8087	1240.24	1	133
2022-09-13	09:05:49	5.55777	1245.8	1	134
2022-09-13	09:05:50	4.77395	1250.57	1	135
2022-09-13	09:05:50	8.31049	1258.88	1	136
2022-09-13	09:05:50	4.02057	1262.9	1	137
2022-09-13	09:05:50	3.29121	1266.19	1	138
2022-09-13	09:05:51	3.77477	1269.97	1	139
2022-09-13	09:05:51	3.31075	1273.28	1	140
2022-09-13	09:05:51	0.934924	1274.21	FALSE	140
2022-09-13	09:05:51	0.630496	1274.85	FALSE	140
2022-09-13	09:05:52	0.106985	1274.95	FALSE	140
2022-09-13	09:05:52	0.448359	1275.4	FALSE	140
2022-09-13	09:05:52	1.69553	1277.1	FALSE	140
2022-09-13	09:05:53	8.35701	1285.45	1	141
2022-09-13	09:05:53	3.03131	1288.48	1	142
2022-09-13	09:05:53	2.35075	1290.84	FALSE	142
2022-09-13	09:05:53	1.06617	1291.9	FALSE	142
2022-09-13	09:05:54	1.05416	1292.96	FALSE	142
2022-09-13	09:05:54	0.54327	1293.5	FALSE	142
2022-09-13	09:05:54	0.914771	1294.41	FALSE	142
2022-09-13	09:05:54	0.345509	1294.76	FALSE	142
2022-09-13	09:05:55	1.03691	1295.8	FALSE	142
2022-09-13	09:05:55	1.29767	1297.09	FALSE	142
2022-09-13	09:05:55	4.26266	1301.36	1	143
2022-09-13	09:05:55	9.10632	1310.46	1	144
2022-09-13	09:05:56	12.0417	1322.5	1	145
2022-09-13	09:05:56	5.17721	1327.68	1	146
2022-09-13	09:05:56	1.84454	1329.53	FALSE	146
2022-09-13	09:05:57	2.90449	1332.43	FALSE	146
2022-09-13	09:05:57	2.15533	1334.59	FALSE	146
2022-09-13	09:05:57	4.05294	1338.64	1	147
2022-09-13	09:05:57	8.14357	1346.78	1	148
2022-09-13	09:05:58	4.98566	1351.77	1	149
2022-09-13	09:05:58	7.40378	1359.17	1	150
2022-09-13	09:05:58	0.922812	1360.09	FALSE	150
2022-09-13	09:05:58	1.47701	1361.57	FALSE	150
2022-09-13	09:05:59	1.41788	1362.99	FALSE	150
2022-09-13	09:05:59	3.63742	1366.63	1	151
2022-09-13	09:05:59	12.7268	1379.35	1	152
2022-09-13	09:06:00	5.07996	1384.43	1	153
2022-09-13	09:06:00	3.14347	1387.58	1	154
2022-09-13	09:06:00	0.881387	1388.46	FALSE	154
2022-09-13	09:06:00	1.22846	1389.69	FALSE	154
2022-09-13	09:06:00	0.756196	1390.44	FALSE	154
2022-09-13	09:06:01	0.597875	1391.04	FALSE	154
2022-09-13	09:06:01	0.947443	1391.99	FALSE	154
2022-09-13	09:06:01	0.91701	1392.91	FALSE	154
2022-09-13	09:06:02	1.53879	1394.44	FALSE	154
2022-09-13	09:06:02	2.51787	1396.96	FALSE	154
2022-09-13	09:06:02	7.52973	1404.49	1	155
2022-09-13	09:06:02	5.76871	1410.26	1	156
2022-09-13	09:06:03	5.83004	1416.09	1	157
2022-09-13	09:06:03	0.762303	1416.85	FALSE	157
2022-09-13	09:06:03	1.28866	1418.14	FALSE	157
2022-09-13	09:06:03	0.742761	1418.88	FALSE	157
2022-09-13	09:06:04	0.915483	1419.8	FALSE	157
2022-09-13	09:06:04	7.61304	1427.41	1	158
2022-09-13	09:06:04	11.1958	1438.61	1	159
2022-09-13	09:06:04	6.32495	1444.93	1	160
2022-09-13	09:06:05	1.16113	1446.09	FALSE	160
2022-09-13	09:06:05	1.23955	1447.33	FALSE	160
2022-09-13	09:06:05	0.270853	1447.61	FALSE	160
2022-09-13	09:06:06	0.546323	1448.15	FALSE	160
2022-09-13	09:06:06	0.394211	1448.55	FALSE	160
2022-09-13	09:06:06	0.497163	1449.04	FALSE	160
2022-09-13	09:06:06	0.479962	1449.52	FALSE	160
2022-09-13	09:06:07	1.03752	1450.56	FALSE	160
2022-09-13	09:06:07	0.500013	1451.06	FALSE	160
2022-09-13	09:06:07	0.84785	1451.91	FALSE	160
2022-09-13	09:06:07	0.348104	1452.26	FALSE	160
2022-09-13	09:06:08	0.876858	1453.13	FALSE	160
2022-09-13	09:06:08	0.761997	1453.9	FALSE	160
2022-09-13	09:06:08	2.00083	1455.9	FALSE	160
2022-09-13	09:06:08	4.76698	1460.66	1	161
2022-09-13	09:06:09	5.83416	1466.5	1	162
2022-09-13	09:06:09	6.83212	1473.33	1	163
2022-09-13	09:06:09	15.6199	1488.95	1	164
2022-09-13	09:06:09	3.602	1492.55	1	165
2022-09-13	09:06:10	4.71965	1497.27	1	166
2022-09-13	09:06:10	1.35111	1498.62	FALSE	166
2022-09-13	09:06:10	2.58882	1501.21	FALSE	166
2022-09-13	09:06:11	2.86215	1504.07	FALSE	166
2022-09-13	09:06:11	4.96551	1509.04	1	167
2022-09-13	09:06:11	1.26536	1510.3	FALSE	167
2022-09-13	09:06:11	4.18174	1514.49	1	168
2022-09-13	09:06:12	0.885407	1515.37	FALSE	168
2022-09-13	09:06:12	3.32988	1518.7	1	169
2022-09-13	09:06:12	1.94363	1520.64	FALSE	169
2022-09-13	09:06:12	8.80398	1529.45	1	170
2022-09-13	09:06:13	3.87202	1533.32	1	171
2022-09-13	09:06:13	7.37126	1540.69	1	172
2022-09-13	09:06:13	1.88999	1542.58	FALSE	172
2022-09-13	09:06:13	0.61986	1543.2	FALSE	172
2022-09-13	09:06:14	0.499198	1543.7	FALSE	172
2022-09-13	09:06:14	0.625509	1544.33	FALSE	172
2022-09-13	09:06:14	0.561539	1544.89	FALSE	172
2022-09-13	09:06:14	0.191819	1545.08	FALSE	172
2022-09-13	09:06:15	-0.11103	1545.08	FALSE	172
2022-09-13	09:06:15	-0.267875	1545.08	FALSE	172
2022-09-13	09:06:15	-0.116577	1545.08	FALSE	172
2022-09-13	09:06:16	0.250038	1545.33	FALSE	172
2022-09-13	09:06:16	0.598232	1545.93	FALSE	172
2022-09-13	09:06:16	0.515433	1546.44	FALSE	172
2022-09-13	09:06:16	0.477316	1546.92	FALSE	172
2022-09-13	09:06:17	0.580776	1547.5	FALSE	172
2022-09-13	09:06:17	0.737621	1548.24	FALSE	172
2022-09-13	09:06:17	0.743575	1548.98	FALSE	172
2022-09-13	09:06:17	0.699911	1549.68	FALSE	172
2022-09-13	09:06:18	0.706476	1550.39	FALSE	172
2022-09-13	09:06:18	0.716552	1551.11	FALSE	172
2022-09-13	09:06:18	0.752379	1551.86	FALSE	172
2022-09-13	09:06:18	0.678944	1552.54	FALSE	172
2022-09-13	09:06:19	0.644033	1553.18	FALSE	172
2022-09-13	09:06:19	0.511768	1553.69	FALSE	172
2022-09-13	09:06:19	0.538588	1554.23	FALSE	172
2022-09-13	09:06:20	0.488461	1554.72	FALSE	172
2022-09-13	09:06:20	0.428512	1555.15	FALSE	172
2022-09-13	09:06:20	0.531972	1555.68	FALSE	172
2022-09-13	09:06:20	0.439351	1556.12	FALSE	172
2022-09-13	09:06:21	0.394466	1556.51	FALSE	172
2022-09-13	09:06:21	0.380929	1556.89	FALSE	172
2022-09-13	09:06:21	0.497265	1557.39	FALSE	172
2022-09-13	09:06:21	0.492125	1557.88	FALSE	172
2022-09-13	09:06:22	0.559707	1558.44	FALSE	172
2022-09-13	09:06:22	0.429784	1558.87	FALSE	172
2022-09-13	09:06:22	0.416654	1559.29	FALSE	172
2022-09-13	09:06:22	0.291768	1559.58	FALSE	172
2022-09-13	09:06:23	0.304593	1559.89	FALSE	172
2022-09-13	09:06:23	0.353295	1560.24	FALSE	172
2022-09-13	09:06:23	0.726883	1560.97	FALSE	172
2022-09-13	09:06:23	1.04088	1562.01	FALSE	172
2022-09-13	09:06:24	1.65961	1563.67	FALSE	172
2022-09-13	09:06:24	2.56831	1566.24	FALSE	172
2022-09-13	09:06:24	1.22363	1567.46	FALSE	172
2022-09-13	09:06:25	1.44342	1568.9	FALSE	172
2022-09-13	09:06:25	1.70174	1570.6	FALSE	172
2022-09-13	09:06:25	1.02673	1571.63	FALSE	172
2022-09-13	09:06:25	0.967646	1572.6	FALSE	172
2022-09-13	09:06:26	0.903779	1573.5	FALSE	172
2022-09-13	09:06:26	0.896807	1574.4	FALSE	172
2022-09-13	09:06:26	0.344746	1574.74	FALSE	172
2022-09-13	09:06:26	0.380674	1575.12	FALSE	172
2022-09-13	09:06:27	0.165814	1575.29	FALSE	172
2022-09-13	09:06:27	0.703015	1575.99	FALSE	172
2022-09-13	09:06:27	1.31365	1577.31	FALSE	172
2022-09-13	09:06:27	4.22719	1581.53	1	173
2022-09-13	09:06:28	3.49838	1585.03	1	174
2022-09-13	09:06:28	3.76999	1588.8	1	175
2022-09-13	09:06:28	2.36989	1591.17	FALSE	175
2022-09-13	09:06:29	3.36413	1594.54	1	176
2022-09-13	09:06:29	3.27823	1597.82	1	177
2022-09-13	09:06:29	11.2308	1609.05	1	178
2022-09-13	09:06:29	8.6137	1617.66	1	179
2022-09-13	09:06:30	14.3555	1632.02	1	180
2022-09-13	09:06:30	1.74663	1633.76	FALSE	180
2022-09-13	09:06:30	6.20851	1639.97	1	181
2022-09-13	09:06:30	3.20882	1643.18	1	182
2022-09-13	09:06:31	2.47396	1645.65	FALSE	182
2022-09-13	09:06:31	3.81289	1649.47	1	183
2022-09-13	09:06:31	0.887748	1650.35	FALSE	183
2022-09-13	09:06:31	1.36368	1651.72	FALSE	183
2022-09-13	09:06:32	0.850903	1652.57	FALSE	183
2022-09-13	09:06:32	0.872633	1653.44	FALSE	183
2022-09-13	09:06:32	0.473702	1653.91	FALSE	183
2022-09-13	09:06:32	0.495942	1654.41	FALSE	183
2022-09-13	09:06:33	0.388766	1654.8	FALSE	183
2022-09-13	09:06:33	0.43986	1655.24	FALSE	183
2022-09-13	09:06:33	0.659962	1655.9	FALSE	183
2022-09-13	09:06:34	1.08464	1656.98	FALSE	183
2022-09-13	09:06:34	4.53716	1661.52	1	184
2022-09-13	09:06:34	6.22067	1667.74	1	185
2022-09-13	09:06:34	10.5862	1678.33	1	186
2022-09-13	09:06:35	5.40963	1683.74	1	187
2022-09-13	09:06:35	5.42469	1689.16	1	188
2022-09-13	09:06:35	1.54144	1690.7	FALSE	188
2022-09-13	09:06:35	2.62281	1693.33	FALSE	188
2022-09-13	09:06:36	1.5648	1694.89	FALSE	188
2022-09-13	09:06:36	1.73793	1696.63	FALSE	188
2022-09-13	09:06:36	1.28419	1697.91	FALSE	188
2022-09-13	09:06:36	0.924898	1698.84	FALSE	188
2022-09-13	09:06:37	0.984796	1699.82	FALSE	188
2022-09-13	09:06:37	0.852736	1700.68	FALSE	188
2022-09-13	09:06:37	1.35294	1702.03	FALSE	188
2022-09-13	09:06:37	1.11151	1703.14	FALSE	188
2022-09-13	09:06:38	0.808155	1703.95	FALSE	188
2022-09-13	09:06:38	0.73243	1704.68	FALSE	188
2022-09-13	09:06:38	0.441387	1705.12	FALSE	188
2022-09-13	09:06:39	0.489071	1705.61	FALSE	188
2022-09-13	09:06:39	0.453652	1706.06	FALSE	188
2022-09-13	09:06:39	0.527392	1706.59	FALSE	188
2022-09-13	09:06:39	0.303626	1706.9	FALSE	188
2022-09-13	09:06:40	0.315992	1707.21	FALSE	188
2022-09-13	09:06:40	0.460725	1707.67	FALSE	188
2022-09-13	09:06:40	0.360064	1708.03	FALSE	188
2022-09-13	09:06:40	0.545916	1708.58	FALSE	188
2022-09-13	09:06:41	0.466221	1709.04	FALSE	188
2022-09-13	09:06:41	0.6307	1709.68	FALSE	188
2022-09-13	09:06:41	0.465713	1710.14	FALSE	188
2022-09-13	09:06:41	0.609377	1710.75	FALSE	188
2022-09-13	09:06:42	0.354924	1711.11	FALSE	188
2022-09-13	09:06:42	0.622354	1711.73	FALSE	188
2022-09-13	09:06:42	0.404033	1712.13	FALSE	188
2022-09-13	09:06:43	0.583117	1712.72	FALSE	188
2022-09-13	09:06:43	0.450038	1713.17	FALSE	188
2022-09-13	09:06:43	0.472379	1713.64	FALSE	188
2022-09-13	09:06:43	0.553804	1714.19	FALSE	188
2022-09-13	09:06:44	0.502354	1714.69	FALSE	188
2022-09-13	09:06:44	0.441438	1715.14	FALSE	188
2022-09-13	09:06:44	0.363117	1715.5	FALSE	188
2022-09-13	09:06:44	0.310853	1715.81	FALSE	188
2022-09-13	09:06:45	0.258333	1716.07	FALSE	188
2022-09-13	09:06:45	0.265814	1716.33	FALSE	188
2022-09-13	09:06:45	0.101743	1716.43	FALSE	188
2022-09-13	09:06:45	0.0652038	1716.5	FALSE	188
2022-09-13	09:06:46	0.203422	1716.7	FALSE	188
2022-09-13	09:06:46	0.200115	1716.9	FALSE	188
2022-09-13	09:06:46	0.160267	1717.06	FALSE	188
2022-09-13	09:06:47	0.141183	1717.21	FALSE	188
2022-09-13	09:06:47	0.191361	1717.4	FALSE	188
2022-09-13	09:06:47	0.244288	1717.64	FALSE	188
2022-09-13	09:06:47	0.174211	1717.82	FALSE	188
2022-09-13	09:06:48	0.323728	1718.14	FALSE	188
2022-09-13	09:06:48	0.476654	1718.62	FALSE	188
2022-09-13	09:06:48	0.449733	1719.07	FALSE	188
2022-09-13	09:06:48	0.362507	1719.43	FALSE	188
2022-09-13	09:06:49	0.429733	1719.86	FALSE	188
2022-09-13	09:06:49	0.288562	1720.15	FALSE	188
2022-09-13	09:06:49	0.443168	1720.59	FALSE	188
2022-09-13	09:06:49	0.344084	1720.93	FALSE	188
2022-09-13	09:06:50	0.494822	1721.43	FALSE	188
2022-09-13	09:06:50	1.83696	1723.26	FALSE	188
2022-09-13	09:06:50	3.69492	1726.96	1	189
2022-09-13	09:06:50	5.31685	1732.28	1	190
2022-09-13	09:06:51	5.13533	1737.41	1	191
2022-09-13	09:06:51	6.17253	1743.58	1	192
2022-09-13	09:06:51	4.57406	1748.16	1	193
2022-09-13	09:06:52	3.65136	1751.81	1	194
2022-09-13	09:06:52	4.19283	1756	1	195
2022-09-13	09:06:52	2.19146	1758.19	FALSE	195
2022-09-13	09:06:52	6.92612	1765.12	1	196
2022-09-13	09:06:53	4.07681	1769.2	1	197
2022-09-13	09:06:53	5.04052	1774.24	1	198
2022-09-13	09:06:53	2.251	1776.49	FALSE	198
2022-09-13	09:06:53	1.96968	1778.46	FALSE	198
2022-09-13	09:06:54	3.48016	1781.94	1	199
2022-09-13	09:06:54	1.71065	1783.65	FALSE	199
2022-09-13	09:06:54	3.04072	1786.69	1	200
2022-09-13	09:06:54	2.15116	1788.84	FALSE	200
2022-09-13	09:06:55	2.78347	1791.62	FALSE	200
2022-09-13	09:06:55	2.78144	1794.41	FALSE	200
2022-09-13	09:06:55	3.98408	1798.39	1	201
2022-09-13	09:06:55	3.76612	1802.16	1	202
2022-09-13	09:06:56	2.66912	1804.83	FALSE	202
2022-09-13	09:06:56	2.3364	1807.16	FALSE	202
2022-09-13	09:06:56	1.42973	1808.59	FALSE	202
2022-09-13	09:06:57	1.01452	1809.61	FALSE	202
2022-09-13	09:06:57	0.995026	1810.6	FALSE	202
2022-09-13	09:06:57	0.787748	1811.39	FALSE	202
2022-09-13	09:06:57	1.42561	1812.81	FALSE	202
2022-09-13	09:06:58	1.72943	1814.54	FALSE	202
2022-09-13	09:06:58	2.68561	1817.23	FALSE	202
2022-09-13	09:06:58	2.00118	1819.23	FALSE	202
2022-09-13	09:06:58	2.49681	1821.73	FALSE	202
2022-09-13	09:06:59	2.39065	1824.12	FALSE	202
2022-09-13	09:06:59	3.70357	1827.82	1	203
2022-09-13	09:06:59	4.1708	1831.99	1	204
2022-09-13	09:06:59	2.17034	1834.16	FALSE	204
2022-09-13	09:07:00	2.56714	1836.73	FALSE	204
2022-09-13	09:07:00	1.76088	1838.49	FALSE	204
2022-09-13	09:07:00	1.16872	1839.66	FALSE	204
2022-09-13	09:07:01	1.31457	1840.97	FALSE	204
2022-09-13	09:07:01	1.90602	1842.88	FALSE	204
2022-09-13	09:07:01	2.74535	1845.63	FALSE	204
2022-09-13	09:07:01	2.36179	1847.99	FALSE	204
2022-09-13	09:07:02	3.34362	1851.33	1	205
2022-09-13	09:07:02	2.95787	1854.29	FALSE	205
2022-09-13	09:07:02	5.23859	1859.53	1	206
2022-09-13	09:07:02	3.62062	1863.15	1	207
2022-09-13	09:07:03	4.28831	1867.44	1	208
2022-09-13	09:07:03	4.17981	1871.62	1	209
2022-09-13	09:07:03	5.50408	1877.12	1	210
2022-09-13	09:07:03	5.14805	1882.27	1	211
2022-09-13	09:07:04	7.22861	1889.5	1	212
2022-09-13	09:07:04	7.65665	1897.15	1	213
2022-09-13	09:07:04	6.45187	1903.61	1	214
2022-09-13	09:07:04	6.18785	1909.79	1	215
2022-09-13	09:07:05	8.73268	1918.53	1	216
2022-09-13	09:07:05	6.78133	1925.31	1	217
2022-09-13	09:07:05	6.00464	1931.31	1	218
2022-09-13	09:07:06	6.76133	1938.07	1	219
2022-09-13	09:07:06	5.80408	1943.88	1	220
2022-09-13	09:07:06	6.71085	1950.59	1	221
2022-09-13	09:07:06	8.1082	1958.7	1	222
2022-09-13	09:07:07	1.05767	1959.75	FALSE	222
2022-09-13	09:07:07	0.397825	1960.15	FALSE	222
2022-09-13	09:07:07	0.252328	1960.4	FALSE	222
2022-09-13	09:07:07	0.0634226	1960.47	FALSE	222
2022-09-13	09:07:08	-0.0718445	1960.47	FALSE	222
2022-09-13	09:07:08	-0.106806	1960.47	FALSE	222
2022-09-13	09:07:08	0.101387	1960.57	FALSE	222
2022-09-13	09:07:08	3.52393	1964.09	1	223
2022-09-13	09:07:09	4.27777	1968.37	1	224
2022-09-13	09:07:09	1.53787	1969.91	FALSE	224
2022-09-13	09:07:09	0.318079	1970.23	FALSE	224
2022-09-13	09:07:09	0.169733	1970.4	FALSE	224
2022-09-13	09:07:10	0.197214	1970.59	FALSE	224
2022-09-13	09:07:10	0.296858	1970.89	FALSE	224
2022-09-13	09:07:10	0.189835	1971.08	FALSE	224
2022-09-13	09:07:11	0.412227	1971.49	FALSE	224
2022-09-13	09:07:11	0.350649	1971.84	FALSE	224
2022-09-13	09:07:11	0.384695	1972.23	FALSE	224
2022-09-13	09:07:11	0.581641	1972.81	FALSE	224
2022-09-13	09:07:12	0.891259	1973.7	FALSE	224
2022-09-13	09:07:12	0.92673	1974.63	FALSE	224
2022-09-13	09:07:12	1.03823	1975.67	FALSE	224
2022-09-13	09:07:12	1.2734	1976.94	FALSE	224
2022-09-13	09:07:13	1.32419	1978.26	FALSE	224
2022-09-13	09:07:13	1.05813	1979.32	FALSE	224
2022-09-13	09:07:13	0.822659	1980.14	FALSE	224
2022-09-13	09:07:13	0.833549	1980.98	FALSE	224
2022-09-13	09:07:14	0.934008	1981.91	FALSE	224
2022-09-13	09:07:14	0.981692	1982.89	FALSE	224
2022-09-13	09:07:14	0.986578	1983.88	FALSE	224
2022-09-13	09:07:15	0.771412	1984.65	FALSE	224
2022-09-13	09:07:15	0.547494	1985.2	FALSE	224
2022-09-13	09:07:15	0.448715	1985.65	FALSE	224
2022-09-13	09:07:15	0.413397	1986.06	FALSE	224
2022-09-13	09:07:16	0.383219	1986.44	FALSE	224
2022-09-13	09:07:16	0.406934	1986.85	FALSE	224
2022-09-13	09:07:16	0.559402	1987.41	FALSE	224
2022-09-13	09:07:16	0.745967	1988.16	FALSE	224
2022-09-13	09:07:17	0.704491	1988.86	FALSE	224
2022-09-13	09:07:17	0.644288	1989.51	FALSE	224
2022-09-13	09:07:17	0.524542	1990.03	FALSE	224
2022-09-13	09:07:17	0.446934	1990.48	FALSE	224
2022-09-13	09:07:18	0.453753	1990.93	FALSE	224
2022-09-13	09:07:18	0.418842	1991.35	FALSE	224
2022-09-13	09:07:18	0.42042	1991.77	FALSE	224
2022-09-13	09:07:18	0.421285	1992.19	FALSE	224
2022-09-13	09:07:19	0.438588	1992.63	FALSE	224
2022-09-13	09:07:19	0.682099	1993.31	FALSE	224
2022-09-13	09:07:19	0.380064	1993.69	FALSE	224
2022-09-13	09:07:20	0.37014	1994.06	FALSE	224
2022-09-13	09:07:20	0.403015	1994.46	FALSE	224
2022-09-13	09:07:20	0.432685	1994.9	FALSE	224
2022-09-13	09:07:20	0.440166	1995.34	FALSE	224
2022-09-13	09:07:21	0.44444	1995.78	FALSE	224
2022-09-13	09:07:21	0.454313	1996.24	FALSE	224
2022-09-13	09:07:21	0.455076	1996.69	FALSE	224
2022-09-13	09:07:21	0.465356	1997.16	FALSE	224
2022-09-13	09:07:22	0.462965	1997.62	FALSE	224
2022-09-13	09:07:22	0.482608	1998.1	FALSE	224
2022-09-13	09:07:22	0.477926	1998.58	FALSE	224
2022-09-13	09:07:22	0.48897	1999.07	FALSE	224
2022-09-13	09:07:23	0.492379	1999.56	FALSE	224
2022-09-13	09:07:23	0.483728	2000.05	FALSE	224
2022-09-13	09:07:23	0.471972	2000.52	FALSE	224
2022-09-13	09:07:24	0.472634	2000.99	FALSE	224
2022-09-13	09:07:24	0.46383	2001.45	FALSE	224
2022-09-13	09:07:24	0.459555	2001.91	FALSE	224
2022-09-13	09:07:24	0.461743	2002.38	FALSE	224
2022-09-13	09:07:25	0.462863	2002.84	FALSE	224
2022-09-13	09:07:25	0.462557	2003.3	FALSE	224
2022-09-13	09:07:25	0.461387	2003.76	FALSE	224
2022-09-13	09:07:25	0.467952	2004.23	FALSE	224
2022-09-13	09:07:26	0.471565	2004.7	FALSE	224
2022-09-13	09:07:26	0.478181	2005.18	FALSE	224
2022-09-13	09:07:26	0.470446	2005.65	FALSE	224
2022-09-13	09:07:26	0.472227	2006.12	FALSE	224
2022-09-13	09:07:27	0.474415	2006.6	FALSE	224
2022-09-13	09:07:27	0.480471	2007.08	FALSE	224
2022-09-13	09:07:27	0.477723	2007.55	FALSE	224
2022-09-13	09:07:27	0.456807	2008.01	FALSE	224
2022-09-13	09:07:28	0.451412	2008.46	FALSE	224
2022-09-13	09:07:28	0.460064	2008.92	FALSE	224
2022-09-13	09:07:28	0.469122	2009.39	FALSE	224
2022-09-13	09:07:29	0.468359	2009.86	FALSE	224
2022-09-13	09:07:29	0.468817	2010.33	FALSE	224
2022-09-13	09:07:29	0.469733	2010.8	FALSE	224
2022-09-13	09:07:29	0.471412	2011.27	FALSE	224
2022-09-13	09:07:30	0.474517	2011.75	FALSE	224
2022-09-13	09:07:30	0.463931	2012.21	FALSE	224
2022-09-13	09:07:30	0.463931	2012.67	FALSE	224
2022-09-13	09:07:30	0.459402	2013.13	FALSE	224
2022-09-13	09:07:31	0.47813	2013.61	FALSE	224
2022-09-13	09:07:31	0.468919	2014.08	FALSE	224
2022-09-13	09:07:31	0.467239	2014.55	FALSE	224
2022-09-13	09:07:31	0.467392	2015.01	FALSE	224
2022-09-13	09:07:32	0.460878	2015.48	FALSE	224
2022-09-13	09:07:32	0.456501	2015.93	FALSE	224
2022-09-13	09:07:32	0.463575	2016.4	FALSE	224
2022-09-13	09:07:33	0.46841	2016.86	FALSE	224
2022-09-13	09:07:33	0.47014	2017.33	FALSE	224
2022-09-13	09:07:33	0.443015	2017.78	FALSE	224
2022-09-13	09:07:33	0.417875	2018.19	FALSE	224
2022-09-13	09:07:34	0.440471	2018.64	FALSE	224
2022-09-13	09:07:34	0.8193	2019.45	FALSE	224
2022-09-13	09:07:34	0.430242	2019.88	FALSE	224
2022-09-13	09:07:34	1.16047	2021.05	FALSE	224
2022-09-13	09:07:35	0.68897	2021.73	FALSE	224
2022-09-13	09:07:35	1.31304	2023.05	FALSE	224
2022-09-13	09:07:35	0.510242	2023.56	FALSE	224
2022-09-13	09:07:35	0.308715	2023.87	FALSE	224
2022-09-13	09:07:36	0.621183	2024.49	FALSE	224
2022-09-13	09:07:36	0.378384	2024.87	FALSE	224
2022-09-13	09:07:36	0.126171	2024.99	FALSE	224
2022-09-13	09:07:36	0.190038	2025.18	FALSE	224
2022-09-13	09:07:37	0.507087	2025.69	FALSE	224
2022-09-13	09:07:37	2.04128	2027.73	FALSE	224
2022-09-13	09:07:37	1.63854	2029.37	FALSE	224
2022-09-13	09:07:38	2.04836	2031.42	FALSE	224
2022-09-13	09:07:38	2.1277	2033.54	FALSE	224
2022-09-13	09:07:38	2.07024	2035.62	FALSE	224
2022-09-13	09:07:38	3.99848	2039.61	1	225
2022-09-13	09:07:39	5.59273	2045.21	1	226
2022-09-13	09:07:39	6.20591	2051.41	1	227
2022-09-13	09:07:39	6.15823	2057.57	1	228
2022-09-13	09:07:39	2.47894	2060.05	FALSE	228
2022-09-13	09:07:40	3.30882	2063.36	1	229
2022-09-13	09:07:40	3.30927	2066.67	1	230
2022-09-13	09:07:40	2.66536	2069.33	FALSE	230
2022-09-13	09:07:40	2.17584	2071.51	FALSE	230
2022-09-13	09:07:41	3.12103	2074.63	1	231
2022-09-13	09:07:41	2.65116	2077.28	FALSE	231
2022-09-13	09:07:41	3.85996	2081.14	1	232
2022-09-13	09:07:42	2.89192	2084.03	FALSE	232
2022-09-13	09:07:42	3.15284	2087.19	1	233
2022-09-13	09:07:42	7.50449	2094.69	1	234
2022-09-13	09:07:42	12.2757	2106.97	1	235
2022-09-13	09:07:43	18.4253	2125.39	1	236
2022-09-13	09:07:43	8.48454	2133.88	1	237
2022-09-13	09:07:43	6.96902	2140.84	1	238
2022-09-13	09:07:43	2.91523	2143.76	FALSE	238
2022-09-13	09:07:44	5.19069	2148.95	1	239
2022-09-13	09:07:44	4.79925	2153.75	1	240
2022-09-13	09:07:44	10.7987	2164.55	1	241
2022-09-13	09:07:44	3.0251	2167.57	1	242
2022-09-13	09:07:45	0.0204201	2167.59	FALSE	242
2022-09-13	09:07:45	-0.197392	2167.59	FALSE	242
2022-09-13	09:07:45	-0.152659	2167.59	FALSE	242
2022-09-13	09:07:45	-0.226806	2167.59	FALSE	242
2022-09-13	09:07:46	-0.131437	2167.59	FALSE	242
2022-09-13	09:07:46	-0.261921	2167.59	FALSE	242
2022-09-13	09:07:46	-0.107061	2167.59	FALSE	242
2022-09-13	09:07:47	-0.0486893	2167.59	FALSE	242
2022-09-13	09:07:47	0.78271	2168.38	FALSE	242
2022-09-13	09:07:47	3.37421	2171.75	1	243
2022-09-13	09:07:47	5.894	2177.64	1	244
2022-09-13	09:07:48	9.21767	2186.86	1	245
2022-09-13	09:07:48	6.92881	2193.79	1	246
2022-09-13	09:07:48	4.7366	2198.53	1	247
2022-09-13	09:07:48	0.75869	2199.29	FALSE	247
2022-09-13	09:07:49	0.37472	2199.66	FALSE	247
2022-09-13	09:07:49	0.312277	2199.97	FALSE	247
2022-09-13	09:07:49	0.264644	2200.24	FALSE	247
2022-09-13	09:07:49	0.336552	2200.57	FALSE	247
2022-09-13	09:07:50	0.145814	2200.72	FALSE	247
2022-09-13	09:07:50	0.224949	2200.95	FALSE	247
2022-09-13	09:07:50	-0.0904196	2200.95	FALSE	247
2022-09-13	09:07:50	-0.144618	2200.95	FALSE	247
2022-09-13	09:07:51	-0.238816	2200.95	FALSE	247
2022-09-13	09:07:51	-0.0587656	2200.95	FALSE	247
2022-09-13	09:07:51	0.437265	2201.38	FALSE	247
2022-09-13	09:07:52	3.55548	2204.94	1	248
2022-09-13	09:07:52	3.86276	2208.8	1	249
2022-09-13	09:07:52	5.27233	2214.07	1	250
2022-09-13	09:07:52	1.5335	2215.61	FALSE	250
2022-09-13	09:07:53	2.71436	2218.32	FALSE	250
2022-09-13	09:07:53	0.769478	2219.09	FALSE	250
2022-09-13	09:07:53	1.03151	2220.12	FALSE	250
2022-09-13	09:07:53	0.977468	2221.1	FALSE	250
2022-09-13	09:07:54	0.93299	2222.03	FALSE	250
2022-09-13	09:07:54	0.750496	2222.78	FALSE	250
2022-09-13	09:07:54	0.610598	2223.39	FALSE	250
2022-09-13	09:07:54	0.478486	2223.87	FALSE	250
2022-09-13	09:07:55	0.547952	2224.42	FALSE	250
2022-09-13	09:07:55	0.986171	2225.41	FALSE	250
2022-09-13	09:07:55	0.971463	2226.38	FALSE	250
2022-09-13	09:07:56	1.19396	2227.57	FALSE	250
2022-09-13	09:07:56	1.20337	2228.78	FALSE	250
2022-09-13	09:07:56	0.651565	2229.43	FALSE	250
2022-09-13	09:07:56	1.00454	2230.43	FALSE	250
2022-09-13	09:07:57	0.935687	2231.37	FALSE	250
2022-09-13	09:07:57	1.73141	2233.1	FALSE	250
2022-09-13	09:07:57	1.16653	2234.26	FALSE	250
2022-09-13	09:07:57	1.1622	2235.43	FALSE	250
2022-09-13	09:07:58	0.583219	2236.01	FALSE	250
2022-09-13	09:07:58	0.741387	2236.75	FALSE	250
2022-09-13	09:07:58	0.430751	2237.18	FALSE	250
2022-09-13	09:07:58	0.60271	2237.79	FALSE	250
2022-09-13	09:07:59	0.440166	2238.23	FALSE	250
2022-09-13	09:07:59	0.520623	2238.75	FALSE	250
2022-09-13	09:07:59	0.442048	2239.19	FALSE	250
2022-09-13	09:07:59	0.350598	2239.54	FALSE	250
2022-09-13	09:08:00	0.422405	2239.96	FALSE	250
2022-09-13	09:08:00	0.481997	2240.44	FALSE	250
2022-09-13	09:08:00	0.425662	2240.87	FALSE	250
2022-09-13	09:08:01	0.239148	2241.11	FALSE	250
2022-09-13	09:08:01	0.471107	2241.58	FALSE	250
2022-09-13	09:08:01	0.355433	2241.93	FALSE	250
2022-09-13	09:08:01	0.539453	2242.47	FALSE	250
2022-09-13	09:08:02	0.303372	2242.78	FALSE	250
2022-09-13	09:08:02	0.506781	2243.28	FALSE	250
2022-09-13	09:08:02	0.373702	2243.66	FALSE	250
2022-09-13	09:08:02	0.481336	2244.14	FALSE	250
2022-09-13	09:08:03	0.714211	2244.85	FALSE	250
2022-09-13	09:08:03	0.394567	2245.25	FALSE	250
2022-09-13	09:08:03	0.430293	2245.68	FALSE	250
2022-09-13	09:08:03	0.38271	2246.06	FALSE	250
2022-09-13	09:08:04	0.423982	2246.48	FALSE	250
2022-09-13	09:08:04	0.413092	2246.9	FALSE	250
2022-09-13	09:08:04	0.356501	2247.25	FALSE	250
2022-09-13	09:08:05	0.28729	2247.54	FALSE	250
2022-09-13	09:08:05	0.373652	2247.92	FALSE	250
2022-09-13	09:08:05	0.465713	2248.38	FALSE	250
2022-09-13	09:08:05	0.541234	2248.92	FALSE	250
2022-09-13	09:08:06	3.00067	2251.92	1	251
2022-09-13	09:08:06	11.3448	2263.27	1	252
2022-09-13	09:08:06	10.226	2273.49	1	253
2022-09-13	09:08:06	6.9537	2280.45	1	254
2022-09-13	09:08:07	1.56332	2282.01	FALSE	254
2022-09-13	09:08:07	0.714313	2282.73	FALSE	254
2022-09-13	09:08:07	0.510445	2283.24	FALSE	254
2022-09-13	09:08:07	0.386425	2283.62	FALSE	254
2022-09-13	09:08:08	0.464237	2284.09	FALSE	254
2022-09-13	09:08:08	0.453193	2284.54	FALSE	254
2022-09-13	09:08:08	0.468104	2285.01	FALSE	254
2022-09-13	09:08:08	0.513092	2285.52	FALSE	254
2022-09-13	09:08:09	0.483881	2286	FALSE	254
2022-09-13	09:08:09	0.459046	2286.46	FALSE	254
2022-09-13	09:08:09	0.534924	2287	FALSE	254
2022-09-13	09:08:10	0.508461	2287.51	FALSE	254
2022-09-13	09:08:10	0.534975	2288.04	FALSE	254
2022-09-13	09:08:10	0.543219	2288.59	FALSE	254
2022-09-13	09:08:10	0.552481	2289.14	FALSE	254
2022-09-13	09:08:11	0.525967	2289.66	FALSE	254
2022-09-13	09:08:11	0.569733	2290.23	FALSE	254
2022-09-13	09:08:11	0.41126	2290.64	FALSE	254
2022-09-13	09:08:11	0.309937	2290.95	FALSE	254
2022-09-13	09:08:12	0.298028	2291.25	FALSE	254
2022-09-13	09:08:12	0.256705	2291.51	FALSE	254
2022-09-13	09:08:12	0.364339	2291.87	FALSE	254
2022-09-13	09:08:12	0.532786	2292.41	FALSE	254
2022-09-13	09:08:13	0.581438	2292.99	FALSE	254
2022-09-13	09:08:13	0.524542	2293.51	FALSE	254
2022-09-13	09:08:13	0.504796	2294.02	FALSE	254
2022-09-13	09:08:14	0.511361	2294.53	FALSE	254
2022-09-13	09:08:14	0.529733	2295.06	FALSE	254
2022-09-13	09:08:14	0.519657	2295.58	FALSE	254
2022-09-13	09:08:14	0.547952	2296.13	FALSE	254
2022-09-13	09:08:15	0.634618	2296.76	FALSE	254
2022-09-13	09:08:15	0.671209	2297.43	FALSE	254
2022-09-13	09:08:15	0.851208	2298.28	FALSE	254
2022-09-13	09:08:15	1.54912	2299.83	FALSE	254
2022-09-13	09:08:16	0.895738	2300.73	FALSE	254
2022-09-13	09:08:16	0.996908	2301.72	FALSE	254
2022-09-13	09:08:16	1.1995	2302.92	FALSE	254
2022-09-13	09:08:16	1.08627	2304.01	FALSE	254
2022-09-13	09:08:17	0.943219	2304.95	FALSE	254
2022-09-13	09:08:17	0.923015	2305.88	FALSE	254
2022-09-13	09:08:17	0.870344	2306.75	FALSE	254
2022-09-13	09:08:17	0.756807	2307.5	FALSE	254
2022-09-13	09:08:18	0.579606	2308.08	FALSE	254
2022-09-13	09:08:18	0.787443	2308.87	FALSE	254
2022-09-13	09:08:18	0.748461	2309.62	FALSE	254
2022-09-13	09:08:19	0.599402	2310.22	FALSE	254
2022-09-13	09:08:19	0.45355	2310.67	FALSE	254
2022-09-13	09:08:19	0.46902	2311.14	FALSE	254
2022-09-13	09:08:19	0.352074	2311.49	FALSE	254
2022-09-13	09:08:20	0.195229	2311.69	FALSE	254
2022-09-13	09:08:20	0.309987	2312	FALSE	254
2022-09-13	09:08:20	0.675331	2312.67	FALSE	254
2022-09-13	09:08:20	0.298944	2312.97	FALSE	254
2022-09-13	09:08:21	0.226527	2313.2	FALSE	254
2022-09-13	09:08:21	0.28902	2313.49	FALSE	254
2022-09-13	09:08:21	0.262914	2313.75	FALSE	254
2022-09-13	09:08:21	0.328766	2314.08	FALSE	254
2022-09-13	09:08:22	0.141641	2314.22	FALSE	254
2022-09-13	09:08:22	0.368206	2314.59	FALSE	254
2022-09-13	09:08:22	0.212837	2314.8	FALSE	254
2022-09-13	09:08:22	0.409733	2315.21	FALSE	254
2022-09-13	09:08:23	0.213346	2315.43	FALSE	254
2022-09-13	09:08:23	0.309275	2315.74	FALSE	254
2022-09-13	09:08:23	0.227087	2315.96	FALSE	254
2022-09-13	09:08:24	0.575993	2316.54	FALSE	254
2022-09-13	09:08:24	1.57243	2318.11	FALSE	254
2022-09-13	09:08:24	2.22261	2320.33	FALSE	254
2022-09-13	09:08:24	1.97523	2322.31	FALSE	254
2022-09-13	09:08:25	2.16566	2324.47	FALSE	254
2022-09-13	09:08:25	2.99681	2327.47	FALSE	254
2022-09-13	09:08:25	2.13355	2329.6	FALSE	254
2022-09-13	09:08:25	2.60103	2332.21	FALSE	254
2022-09-13	09:08:26	1.87085	2334.08	FALSE	254
2022-09-13	09:08:26	1.46184	2335.54	FALSE	254
2022-09-13	09:08:26	1.03788	2336.58	FALSE	254
2022-09-13	09:08:26	1.74424	2338.32	FALSE	254
2022-09-13	09:08:27	2.52128	2340.84	FALSE	254
2022-09-13	09:08:27	1.90912	2342.75	FALSE	254
2022-09-13	09:08:27	2.17808	2344.93	FALSE	254
2022-09-13	09:08:28	2.11482	2347.04	FALSE	254
2022-09-13	09:08:28	2.41156	2349.46	FALSE	254
2022-09-13	09:08:28	1.80525	2351.26	FALSE	254
2022-09-13	09:08:28	1.08963	2352.35	FALSE	254
2022-09-13	09:08:29	2.1024	2354.45	FALSE	254
2022-09-13	09:08:29	2.76373	2357.22	FALSE	254
2022-09-13	09:08:29	1.83884	2359.06	FALSE	254
2022-09-13	09:08:29	2.24378	2361.3	FALSE	254
2022-09-13	09:08:30	2.98352	2364.28	FALSE	254
2022-09-13	09:08:30	1.89503	2366.18	FALSE	254
2022-09-13	09:08:30	2.30439	2368.48	FALSE	254
2022-09-13	09:08:30	1.07543	2369.56	FALSE	254
2022-09-13	09:08:31	1.4905	2371.05	FALSE	254
2022-09-13	09:08:31	0.845967	2371.89	FALSE	254
2022-09-13	09:08:31	1.15884	2373.05	FALSE	254
2022-09-13	09:08:31	2.23029	2375.28	FALSE	254
2022-09-13	09:08:32	3.02149	2378.3	1	255
2022-09-13	09:08:32	3.4193	2381.72	1	256
2022-09-13	09:08:32	2.79976	2384.52	FALSE	256
2022-09-13	09:08:33	2.34744	2386.87	FALSE	256
2022-09-13	09:08:33	2.57884	2389.45	FALSE	256
2022-09-13	09:08:33	1.56729	2391.02	FALSE	256
2022-09-13	09:08:33	1.50083	2392.52	FALSE	256
2022-09-13	09:08:34	0.426985	2392.94	FALSE	256
2022-09-13	09:08:34	0.43986	2393.38	FALSE	256
2022-09-13	09:08:34	0.304389	2393.69	FALSE	256
2022-09-13	09:08:34	0.245763	2393.93	FALSE	256
2022-09-13	09:08:35	0.354618	2394.29	FALSE	256
2022-09-13	09:08:35	0.369224	2394.66	FALSE	256
2022-09-13	09:08:35	0.374313	2395.03	FALSE	256
2022-09-13	09:08:35	0.393906	2395.43	FALSE	256
2022-09-13	09:08:36	0.349224	2395.78	FALSE	256
2022-09-13	09:08:36	0.389987	2396.17	FALSE	256
2022-09-13	09:08:36	0.382252	2396.55	FALSE	256
2022-09-13	09:08:37	0.499707	2397.05	FALSE	256
2022-09-13	09:08:37	0.588664	2397.64	FALSE	256
2022-09-13	09:08:37	0.663219	2398.3	FALSE	256
2022-09-13	09:08:37	0.753142	2399.05	FALSE	256
2022-09-13	09:08:38	0.604237	2399.66	FALSE	256
2022-09-13	09:08:38	0.567952	2400.23	FALSE	256
2022-09-13	09:08:38	0.610089	2400.84	FALSE	256
2022-09-13	09:08:38	0.56098	2401.4	FALSE	256

## Sheet: Bubba_martin_202291390336
						**GoPro Fitting: 853
2022-09-13	09:03:37	0.443982
2022-09-13	09:03:37	0.443168
2022-09-13	09:03:37	0.435992
2022-09-13	09:03:37	0.44098
2022-09-13	09:03:38	0.441234
2022-09-13	09:03:38	0.429377
2022-09-13	09:03:38	0.448512
2022-09-13	09:03:38	0.418333
2022-09-13	09:03:39	0.427137
2022-09-13	09:03:39	0.43014
2022-09-13	09:03:39	0.439606
2022-09-13	09:03:40	0.439504
2022-09-13	09:03:40	0.440166
2022-09-13	09:03:40	0.440725
2022-09-13	09:03:40	0.437417
2022-09-13	09:03:41	0.443117
2022-09-13	09:03:41	0.445916
2022-09-13	09:03:41	0.431311
2022-09-13	09:03:41	0.401896
2022-09-13	09:03:42	0.421438
2022-09-13	09:03:42	0.445713
2022-09-13	09:03:42	0.430547
2022-09-13	09:03:42	0.511667
2022-09-13	09:03:43	0.434568
2022-09-13	09:03:43	0.492277
2022-09-13	09:03:43	0.594211
2022-09-13	09:03:44	0.486679
2022-09-13	09:03:44	0.463117
2022-09-13	09:03:44	0.44729
2022-09-13	09:03:44	0.572684
2022-09-13	09:03:45	0.325305
2022-09-13	09:03:45	0.243524
2022-09-13	09:03:45	0.247799
2022-09-13	09:03:45	0.329886
2022-09-13	09:03:46	2.38729
2022-09-13	09:03:46	18.6667
2022-09-13	09:03:46	12.731
2022-09-13	09:03:46	5.988
2022-09-13	09:03:47	4.22342
2022-09-13	09:03:47	3.75782
2022-09-13	09:03:47	2.36083
2022-09-13	09:03:47	3.72016
2022-09-13	09:03:48	2.39813
2022-09-13	09:03:48	1.80968
2022-09-13	09:03:48	0.52902
2022-09-13	09:03:49	0.14327
2022-09-13	09:03:49	0.311972
2022-09-13	09:03:49	0.133601
2022-09-13	09:03:49	1.71579
2022-09-13	09:03:50	9.87365
2022-09-13	09:03:50	11.9106
2022-09-13	09:03:50	10.1351
2022-09-13	09:03:50	10.5344
2022-09-13	09:03:51	11.8471
2022-09-13	09:03:51	15.4309
2022-09-13	09:03:51	12.2375
2022-09-13	09:03:51	4.28826
2022-09-13	09:03:52	0.385713
2022-09-13	09:03:52	0.579606
2022-09-13	09:03:52	0.368155
2022-09-13	09:03:52	0.398486
2022-09-13	09:03:53	0.457875
2022-09-13	09:03:53	0.219046
2022-09-13	09:03:53	0.550852
2022-09-13	09:03:54	0.559504
2022-09-13	09:03:54	0.22785
2022-09-13	09:03:54	0.371972
2022-09-13	09:03:54	0.271361
2022-09-13	09:03:55	0.462965
2022-09-13	09:03:55	0.405356
2022-09-13	09:03:55	0.403117
2022-09-13	09:03:55	0.430547
2022-09-13	09:03:56	0.526069
2022-09-13	09:03:56	0.508664
2022-09-13	09:03:56	0.427392
2022-09-13	09:03:56	0.449173
2022-09-13	09:03:57	8.59706
2022-09-13	09:03:57	15.8772
2022-09-13	09:03:57	1.70668
2022-09-13	09:03:58	3.90749
2022-09-13	09:03:58	2.50169
2022-09-13	09:03:58	1.13284
2022-09-13	09:03:58	1.57584
2022-09-13	09:03:59	0.701896
2022-09-13	09:03:59	0.678028
2022-09-13	09:03:59	0.280216
2022-09-13	09:03:59	0.170038
2022-09-13	09:04:00	0.277723
2022-09-13	09:04:00	0.204644
2022-09-13	09:04:00	0.154873
2022-09-13	09:04:00	0.0224048
2022-09-13	09:04:01	0.0896312
2022-09-13	09:04:01	1.05823
2022-09-13	09:04:01	9.79065
2022-09-13	09:04:01	4.64632
2022-09-13	09:04:02	6.12179
2022-09-13	09:04:02	4.92123
2022-09-13	09:04:02	4.86276
2022-09-13	09:04:03	2.05706
2022-09-13	09:04:03	2.21365
2022-09-13	09:04:03	4.81339
2022-09-13	09:04:03	2.4363
2022-09-13	09:04:04	5.1224
2022-09-13	09:04:04	4.69513
2022-09-13	09:04:04	1.89752
2022-09-13	09:04:04	1.76246
2022-09-13	09:04:05	1.95396
2022-09-13	09:04:05	4.74149
2022-09-13	09:04:05	0.880115
2022-09-13	09:04:05	6.02011
2022-09-13	09:04:06	3.76663
2022-09-13	09:04:06	0.525611
2022-09-13	09:04:06	0.606374
2022-09-13	09:04:07	0.385814
2022-09-13	09:04:07	0.813041
2022-09-13	09:04:07	1.73548
2022-09-13	09:04:07	5.36006
2022-09-13	09:04:08	4.96622
2022-09-13	09:04:08	7.78113
2022-09-13	09:04:08	1.21212
2022-09-13	09:04:08	2.42637
2022-09-13	09:04:09	1.3138
2022-09-13	09:04:09	0.863575
2022-09-13	09:04:09	1.62312
2022-09-13	09:04:09	1.51487
2022-09-13	09:04:10	4.42724
2022-09-13	09:04:10	2.10556
2022-09-13	09:04:10	6.32973
2022-09-13	09:04:10	2.67492
2022-09-13	09:04:11	4.35711
2022-09-13	09:04:11	1.51441
2022-09-13	09:04:11	2.4419
2022-09-13	09:04:12	3.08403
2022-09-13	09:04:12	2.12841
2022-09-13	09:04:12	5.79192
2022-09-13	09:04:12	6.31227
2022-09-13	09:04:13	11.2661
2022-09-13	09:04:13	4.00113
2022-09-13	09:04:13	4.63696
2022-09-13	09:04:13	6.19411
2022-09-13	09:04:14	3.88011
2022-09-13	09:04:14	0.86958
2022-09-13	09:04:14	0.699555
2022-09-13	09:04:14	0.749835
2022-09-13	09:04:15	0.572226
2022-09-13	09:04:15	1.29192
2022-09-13	09:04:15	1.81304
2022-09-13	09:04:15	9.55217
2022-09-13	09:04:16	6.26413
2022-09-13	09:04:16	5.99884
2022-09-13	09:04:16	1.44449
2022-09-13	09:04:17	4.04688
2022-09-13	09:04:17	1.27167
2022-09-13	09:04:17	5.25604
2022-09-13	09:04:17	8.80016
2022-09-13	09:04:18	4.15838
2022-09-13	09:04:18	7.86082
2022-09-13	09:04:18	2.67828
2022-09-13	09:04:18	7.10698
2022-09-13	09:04:19	0.386425
2022-09-13	09:04:19	2.38612
2022-09-13	09:04:19	3.0168
2022-09-13	09:04:19	6.62266
2022-09-13	09:04:20	10.7804
2022-09-13	09:04:20	6.89584
2022-09-13	09:04:20	12.3413
2022-09-13	09:04:21	1.66424
2022-09-13	09:04:21	7.9337
2022-09-13	09:04:21	9.97161
2022-09-13	09:04:21	8.56627
2022-09-13	09:04:22	14.7212
2022-09-13	09:04:22	10.8385
2022-09-13	09:04:22	8.16418
2022-09-13	09:04:22	9.28713
2022-09-13	09:04:23	7.20724
2022-09-13	09:04:23	1.88475
2022-09-13	09:04:23	4.22556
2022-09-13	09:04:23	4.97446
2022-09-13	09:04:24	1.27416
2022-09-13	09:04:24	2.72464
2022-09-13	09:04:24	5.46357
2022-09-13	09:04:24	4.43253
2022-09-13	09:04:25	11.7924
2022-09-13	09:04:25	5.66378
2022-09-13	09:04:25	2.25131
2022-09-13	09:04:26	1.9935
2022-09-13	09:04:26	0.905763
2022-09-13	09:04:26	3.93426
2022-09-13	09:04:26	3.59472
2022-09-13	09:04:27	3.32296
2022-09-13	09:04:27	8.12342
2022-09-13	09:04:27	2.92932
2022-09-13	09:04:27	7.73176
2022-09-13	09:04:28	2.71955
2022-09-13	09:04:28	7.14897
2022-09-13	09:04:28	4.1963
2022-09-13	09:04:28	3.01752
2022-09-13	09:04:29	4.1623
2022-09-13	09:04:29	2.25711
2022-09-13	09:04:29	7.99085
2022-09-13	09:04:30	3.31533
2022-09-13	09:04:30	5.38347
2022-09-13	09:04:30	3.55207
2022-09-13	09:04:30	4.47441
2022-09-13	09:04:31	4.42719
2022-09-13	09:04:31	0.74556
2022-09-13	09:04:31	1.16459
2022-09-13	09:04:31	0.469326
2022-09-13	09:04:32	0.413397
2022-09-13	09:04:32	0.167748
2022-09-13	09:04:32	0.240267
2022-09-13	09:04:32	0.298232
2022-09-13	09:04:33	-0.0864501
2022-09-13	09:04:33	0.210751
2022-09-13	09:04:33	-0.0719463
2022-09-13	09:04:33	0.158435
2022-09-13	09:04:34	-0.0646181
2022-09-13	09:04:34	0.236094
2022-09-13	09:04:34	0.390344
2022-09-13	09:04:35	0.398639
2022-09-13	09:04:35	0.396094
2022-09-13	09:04:35	0.185865
2022-09-13	09:04:35	1.04128
2022-09-13	09:04:36	3.40271
2022-09-13	09:04:36	7.17731
2022-09-13	09:04:36	4.7307
2022-09-13	09:04:36	3.43243
2022-09-13	09:04:37	2.73828
2022-09-13	09:04:37	5.56617
2022-09-13	09:04:37	16.695
2022-09-13	09:04:37	4.48658
2022-09-13	09:04:38	6.63665
2022-09-13	09:04:38	0.989784
2022-09-13	09:04:38	0.761285
2022-09-13	09:04:39	0.772888
2022-09-13	09:04:39	0.741234
2022-09-13	09:04:39	3.03177
2022-09-13	09:04:39	1.77874
2022-09-13	09:04:40	2.1221
2022-09-13	09:04:40	1.31502
2022-09-13	09:04:40	1.18363
2022-09-13	09:04:40	0.459809
2022-09-13	09:04:41	0.520369
2022-09-13	09:04:41	0.867697
2022-09-13	09:04:41	1.68525
2022-09-13	09:04:41	6.15314
2022-09-13	09:04:42	12.9158
2022-09-13	09:04:42	14.341
2022-09-13	09:04:42	5.44581
2022-09-13	09:04:42	15.8213
2022-09-13	09:04:43	6.88576
2022-09-13	09:04:43	8.77782
2022-09-13	09:04:43	3.55935
2022-09-13	09:04:44	5.61634
2022-09-13	09:04:44	3.77009
2022-09-13	09:04:44	2.6193
2022-09-13	09:04:44	2.87818
2022-09-13	09:04:45	0.945204
2022-09-13	09:04:45	1.19543
2022-09-13	09:04:45	0.672379
2022-09-13	09:04:45	1.21345
2022-09-13	09:04:46	1.25126
2022-09-13	09:04:46	0.85645
2022-09-13	09:04:46	0.475026
2022-09-13	09:04:46	0.396451
2022-09-13	09:04:47	0.378791
2022-09-13	09:04:47	0.400471
2022-09-13	09:04:47	0.400369
2022-09-13	09:04:47	0.381031
2022-09-13	09:04:48	0.380471
2022-09-13	09:04:48	0.382761
2022-09-13	09:04:48	0.37472
2022-09-13	09:04:49	0.366883
2022-09-13	09:04:49	0.37187
2022-09-13	09:04:49	0.368003
2022-09-13	09:04:49	0.377214
2022-09-13	09:04:50	0.385713
2022-09-13	09:04:50	0.428461
2022-09-13	09:04:50	0.495127
2022-09-13	09:04:50	0.560674
2022-09-13	09:04:51	0.544135
2022-09-13	09:04:51	0.58958
2022-09-13	09:04:51	0.761234
2022-09-13	09:04:51	0.986119
2022-09-13	09:04:52	0.373906
2022-09-13	09:04:52	0.324644
2022-09-13	09:04:52	0.162965
2022-09-13	09:04:53	0.160318
2022-09-13	09:04:53	0.165051
2022-09-13	09:04:53	0.159351
2022-09-13	09:04:53	0.135585
2022-09-13	09:04:54	0.0479519
2022-09-13	09:04:54	0.0898348
2022-09-13	09:04:54	0.117875
2022-09-13	09:04:54	0.229936
2022-09-13	09:04:55	0.58556
2022-09-13	09:04:55	0.365611
2022-09-13	09:04:55	0.389275
2022-09-13	09:04:55	0.305
2022-09-13	09:04:56	0.342099
2022-09-13	09:04:56	0.238995
2022-09-13	09:04:56	0.310802
2022-09-13	09:04:56	0.384084
2022-09-13	09:04:57	0.358893
2022-09-13	09:04:57	0.382863
2022-09-13	09:04:57	0.348664
2022-09-13	09:04:58	0.348155
2022-09-13	09:04:58	0.342405
2022-09-13	09:04:58	0.341947
2022-09-13	09:04:58	0.338537
2022-09-13	09:04:59	0.327087
2022-09-13	09:04:59	0.328664
2022-09-13	09:04:59	0.337468
2022-09-13	09:04:59	0.303728
2022-09-13	09:05:00	0.321489
2022-09-13	09:05:00	0.321387
2022-09-13	09:05:00	0.405204
2022-09-13	09:05:00	0.429428
2022-09-13	09:05:01	0.737824
2022-09-13	09:05:01	0.714771
2022-09-13	09:05:01	0.457316
2022-09-13	09:05:02	0.481692
2022-09-13	09:05:02	0.436196
2022-09-13	09:05:02	0.444847
2022-09-13	09:05:02	0.454924
2022-09-13	09:05:03	0.459198
2022-09-13	09:05:03	0.450038
2022-09-13	09:05:03	0.46215
2022-09-13	09:05:03	0.451412
2022-09-13	09:05:04	0.443015
2022-09-13	09:05:04	0.454873
2022-09-13	09:05:04	0.453346
2022-09-13	09:05:04	0.444796
2022-09-13	09:05:05	0.4507
2022-09-13	09:05:05	0.428308
2022-09-13	09:05:05	0.461387
2022-09-13	09:05:05	0.458588
2022-09-13	09:05:06	0.582812
2022-09-13	09:05:06	1.38037
2022-09-13	09:05:06	1.2535
2022-09-13	09:05:07	0.508104
2022-09-13	09:05:07	0.491005
2022-09-13	09:05:07	0.408461
2022-09-13	09:05:07	0.40215
2022-09-13	09:05:08	0.434059
2022-09-13	09:05:08	0.407901
2022-09-13	09:05:08	0.408206
2022-09-13	09:05:08	0.489122
2022-09-13	09:05:09	0.455076
2022-09-13	09:05:09	0.380624
2022-09-13	09:05:09	0.481387
2022-09-13	09:05:09	0.560369
2022-09-13	09:05:10	0.522354
2022-09-13	09:05:10	0.476501
2022-09-13	09:05:10	0.43014
2022-09-13	09:05:10	0.433651
2022-09-13	09:05:11	0.425764
2022-09-13	09:05:11	0.438486
2022-09-13	09:05:11	0.444288
2022-09-13	09:05:12	0.50388
2022-09-13	09:05:12	2.98347
2022-09-13	09:05:12	1.91075
2022-09-13	09:05:12	1.92912
2022-09-13	09:05:13	2.04795
2022-09-13	09:05:13	2.10164
2022-09-13	09:05:13	3.0279
2022-09-13	09:05:13	6.78378
2022-09-13	09:05:14	2.37477
2022-09-13	09:05:14	1.05966
2022-09-13	09:05:14	0.550598
2022-09-13	09:05:14	0.776857
2022-09-13	09:05:15	0.773295
2022-09-13	09:05:15	0.538181
2022-09-13	09:05:15	0.530547
2022-09-13	09:05:16	0.570395
2022-09-13	09:05:16	0.543473
2022-09-13	09:05:16	0.478079
2022-09-13	09:05:16	0.461845
2022-09-13	09:05:17	0.403575
2022-09-13	09:05:17	0.455026
2022-09-13	09:05:17	0.500929
2022-09-13	09:05:17	0.514517
2022-09-13	09:05:18	0.535687
2022-09-13	09:05:18	0.55299
2022-09-13	09:05:18	0.590649
2022-09-13	09:05:18	0.526629
2022-09-13	09:05:19	0.507035
2022-09-13	09:05:19	0.550598
2022-09-13	09:05:19	0.55701
2022-09-13	09:05:19	0.590445
2022-09-13	09:05:20	0.614822
2022-09-13	09:05:20	0.715992
2022-09-13	09:05:20	0.939453
2022-09-13	09:05:21	2.73314
2022-09-13	09:05:21	2.24052
2022-09-13	09:05:21	2.12658
2022-09-13	09:05:21	1.05253
2022-09-13	09:05:22	0.524236
2022-09-13	09:05:22	0.455585
2022-09-13	09:05:22	0.492685
2022-09-13	09:05:22	0.490751
2022-09-13	09:05:23	0.533957
2022-09-13	09:05:23	0.35182
2022-09-13	09:05:23	0.563524
2022-09-13	09:05:23	0.486221
2022-09-13	09:05:24	0.429071
2022-09-13	09:05:24	0.450445
2022-09-13	09:05:24	0.575178
2022-09-13	09:05:25	1.09472
2022-09-13	09:05:25	0.980369
2022-09-13	09:05:25	0.648511
2022-09-13	09:05:25	0.49355
2022-09-13	09:05:26	0.457519
2022-09-13	09:05:26	0.485611
2022-09-13	09:05:26	0.484237
2022-09-13	09:05:26	0.450802
2022-09-13	09:05:27	0.490598
2022-09-13	09:05:27	0.444084
2022-09-13	09:05:27	0.493499
2022-09-13	09:05:27	0.541743
2022-09-13	09:05:28	0.408104
2022-09-13	09:05:28	0.477367
2022-09-13	09:05:28	0.481845
2022-09-13	09:05:28	0.467494
2022-09-13	09:05:29	0.461794
2022-09-13	09:05:29	0.459962
2022-09-13	09:05:29	0.557417
2022-09-13	09:05:30	0.494466
2022-09-13	09:05:30	0.518944
2022-09-13	09:05:30	0.513855
2022-09-13	09:05:30	0.421183
2022-09-13	09:05:31	0.347646
2022-09-13	09:05:31	0.550394
2022-09-13	09:05:31	0.449987
2022-09-13	09:05:31	0.440216
2022-09-13	09:05:32	0.46271
2022-09-13	09:05:32	0.461132
2022-09-13	09:05:32	0.344797
2022-09-13	09:05:32	0.716654
2022-09-13	09:05:33	0.934211
2022-09-13	09:05:33	1.29513
2022-09-13	09:05:33	1.01721
2022-09-13	09:05:34	0.733855
2022-09-13	09:05:34	0.778486
2022-09-13	09:05:34	1.79955
2022-09-13	09:05:34	5.15533
2022-09-13	09:05:35	1.90022
2022-09-13	09:05:35	4.12831
2022-09-13	09:05:35	3.388
2022-09-13	09:05:35	3.29228
2022-09-13	09:05:36	1.93385
2022-09-13	09:05:36	1.0964
2022-09-13	09:05:36	1.29686
2022-09-13	09:05:36	0.499402
2022-09-13	09:05:37	1.52973
2022-09-13	09:05:37	3.84871
2022-09-13	09:05:37	12.2426
2022-09-13	09:05:37	8.52774
2022-09-13	09:05:38	6.16006
2022-09-13	09:05:38	7.26428
2022-09-13	09:05:38	7.79182
2022-09-13	09:05:39	13.8101
2022-09-13	09:05:39	12.0796
2022-09-13	09:05:39	5.5048
2022-09-13	09:05:39	8.04886
2022-09-13	09:05:40	11.8187
2022-09-13	09:05:40	2.58892
2022-09-13	09:05:40	6.05706
2022-09-13	09:05:40	8.02143
2022-09-13	09:05:41	1.76973
2022-09-13	09:05:41	4.78424
2022-09-13	09:05:41	2.52083
2022-09-13	09:05:41	2.36093
2022-09-13	09:05:42	1.31172
2022-09-13	09:05:42	0.831361
2022-09-13	09:05:42	0.580522
2022-09-13	09:05:42	0.406883
2022-09-13	09:05:43	0.676603
2022-09-13	09:05:43	1.52556
2022-09-13	09:05:43	1.10841
2022-09-13	09:05:44	1.70866
2022-09-13	09:05:44	1.06943
2022-09-13	09:05:44	2.85121
2022-09-13	09:05:44	1.68322
2022-09-13	09:05:45	2.50607
2022-09-13	09:05:45	2.60973
2022-09-13	09:05:45	4.18627
2022-09-13	09:05:45	4.71701
2022-09-13	09:05:46	2.29777
2022-09-13	09:05:46	4.54434
2022-09-13	09:05:46	0.874974
2022-09-13	09:05:46	2.05126
2022-09-13	09:05:47	0.515178
2022-09-13	09:05:47	0.741285
2022-09-13	09:05:47	1.28627
2022-09-13	09:05:48	1.33889
2022-09-13	09:05:48	4.83304
2022-09-13	09:05:48	6.10225
2022-09-13	09:05:48	10.8546
2022-09-13	09:05:49	9.77884
2022-09-13	09:05:49	9.83375
2022-09-13	09:05:49	16.8087
2022-09-13	09:05:49	5.55777
2022-09-13	09:05:50	4.77395
2022-09-13	09:05:50	8.31049
2022-09-13	09:05:50	4.02057
2022-09-13	09:05:50	3.29121
2022-09-13	09:05:51	3.77477
2022-09-13	09:05:51	3.31075
2022-09-13	09:05:51	0.934924
2022-09-13	09:05:51	0.630496
2022-09-13	09:05:52	0.106985
2022-09-13	09:05:52	0.448359
2022-09-13	09:05:52	1.69553
2022-09-13	09:05:53	8.35701
2022-09-13	09:05:53	3.03131
2022-09-13	09:05:53	2.35075
2022-09-13	09:05:53	1.06617
2022-09-13	09:05:54	1.05416
2022-09-13	09:05:54	0.54327
2022-09-13	09:05:54	0.914771
2022-09-13	09:05:54	0.345509
2022-09-13	09:05:55	1.03691
2022-09-13	09:05:55	1.29767
2022-09-13	09:05:55	4.26266
2022-09-13	09:05:55	9.10632
2022-09-13	09:05:56	12.0417
2022-09-13	09:05:56	5.17721
2022-09-13	09:05:56	1.84454
2022-09-13	09:05:57	2.90449
2022-09-13	09:05:57	2.15533
2022-09-13	09:05:57	4.05294
2022-09-13	09:05:57	8.14357
2022-09-13	09:05:58	4.98566
2022-09-13	09:05:58	7.40378
2022-09-13	09:05:58	0.922812
2022-09-13	09:05:58	1.47701
2022-09-13	09:05:59	1.41788
2022-09-13	09:05:59	3.63742
2022-09-13	09:05:59	12.7268
2022-09-13	09:06:00	5.07996
2022-09-13	09:06:00	3.14347
2022-09-13	09:06:00	0.881387
2022-09-13	09:06:00	1.22846
2022-09-13	09:06:00	0.756196
2022-09-13	09:06:01	0.597875
2022-09-13	09:06:01	0.947443
2022-09-13	09:06:01	0.91701
2022-09-13	09:06:02	1.53879
2022-09-13	09:06:02	2.51787
2022-09-13	09:06:02	7.52973
2022-09-13	09:06:02	5.76871
2022-09-13	09:06:03	5.83004
2022-09-13	09:06:03	0.762303
2022-09-13	09:06:03	1.28866
2022-09-13	09:06:03	0.742761
2022-09-13	09:06:04	0.915483
2022-09-13	09:06:04	7.61304
2022-09-13	09:06:04	11.1958
2022-09-13	09:06:04	6.32495
2022-09-13	09:06:05	1.16113
2022-09-13	09:06:05	1.23955
2022-09-13	09:06:05	0.270853
2022-09-13	09:06:06	0.546323
2022-09-13	09:06:06	0.394211
2022-09-13	09:06:06	0.497163
2022-09-13	09:06:06	0.479962
2022-09-13	09:06:07	1.03752
2022-09-13	09:06:07	0.500013
2022-09-13	09:06:07	0.84785
2022-09-13	09:06:07	0.348104
2022-09-13	09:06:08	0.876858
2022-09-13	09:06:08	0.761997
2022-09-13	09:06:08	2.00083
2022-09-13	09:06:08	4.76698
2022-09-13	09:06:09	5.83416
2022-09-13	09:06:09	6.83212
2022-09-13	09:06:09	15.6199
2022-09-13	09:06:09	3.602
2022-09-13	09:06:10	4.71965
2022-09-13	09:06:10	1.35111
2022-09-13	09:06:10	2.58882
2022-09-13	09:06:11	2.86215
2022-09-13	09:06:11	4.96551
2022-09-13	09:06:11	1.26536
2022-09-13	09:06:11	4.18174
2022-09-13	09:06:12	0.885407
2022-09-13	09:06:12	3.32988
2022-09-13	09:06:12	1.94363
2022-09-13	09:06:12	8.80398
2022-09-13	09:06:13	3.87202
2022-09-13	09:06:13	7.37126
2022-09-13	09:06:13	1.88999
2022-09-13	09:06:13	0.61986
2022-09-13	09:06:14	0.499198
2022-09-13	09:06:14	0.625509
2022-09-13	09:06:14	0.561539
2022-09-13	09:06:14	0.191819
2022-09-13	09:06:15	-0.11103
2022-09-13	09:06:15	-0.267875
2022-09-13	09:06:15	-0.116577
2022-09-13	09:06:16	0.250038
2022-09-13	09:06:16	0.598232
2022-09-13	09:06:16	0.515433
2022-09-13	09:06:16	0.477316
2022-09-13	09:06:17	0.580776
2022-09-13	09:06:17	0.737621
2022-09-13	09:06:17	0.743575
2022-09-13	09:06:17	0.699911
2022-09-13	09:06:18	0.706476
2022-09-13	09:06:18	0.716552
2022-09-13	09:06:18	0.752379
2022-09-13	09:06:18	0.678944
2022-09-13	09:06:19	0.644033
2022-09-13	09:06:19	0.511768
2022-09-13	09:06:19	0.538588
2022-09-13	09:06:20	0.488461
2022-09-13	09:06:20	0.428512
2022-09-13	09:06:20	0.531972
2022-09-13	09:06:20	0.439351
2022-09-13	09:06:21	0.394466
2022-09-13	09:06:21	0.380929
2022-09-13	09:06:21	0.497265
2022-09-13	09:06:21	0.492125
2022-09-13	09:06:22	0.559707
2022-09-13	09:06:22	0.429784
2022-09-13	09:06:22	0.416654
2022-09-13	09:06:22	0.291768
2022-09-13	09:06:23	0.304593
2022-09-13	09:06:23	0.353295
2022-09-13	09:06:23	0.726883
2022-09-13	09:06:23	1.04088
2022-09-13	09:06:24	1.65961
2022-09-13	09:06:24	2.56831
2022-09-13	09:06:24	1.22363
2022-09-13	09:06:25	1.44342
2022-09-13	09:06:25	1.70174
2022-09-13	09:06:25	1.02673
2022-09-13	09:06:25	0.967646
2022-09-13	09:06:26	0.903779
2022-09-13	09:06:26	0.896807
2022-09-13	09:06:26	0.344746
2022-09-13	09:06:26	0.380674
2022-09-13	09:06:27	0.165814
2022-09-13	09:06:27	0.703015
2022-09-13	09:06:27	1.31365
2022-09-13	09:06:27	4.22719
2022-09-13	09:06:28	3.49838
2022-09-13	09:06:28	3.76999
2022-09-13	09:06:28	2.36989
2022-09-13	09:06:29	3.36413
2022-09-13	09:06:29	3.27823
2022-09-13	09:06:29	11.2308
2022-09-13	09:06:29	8.6137
2022-09-13	09:06:30	14.3555
2022-09-13	09:06:30	1.74663
2022-09-13	09:06:30	6.20851
2022-09-13	09:06:30	3.20882
2022-09-13	09:06:31	2.47396
2022-09-13	09:06:31	3.81289
2022-09-13	09:06:31	0.887748
2022-09-13	09:06:31	1.36368
2022-09-13	09:06:32	0.850903
2022-09-13	09:06:32	0.872633
2022-09-13	09:06:32	0.473702
2022-09-13	09:06:32	0.495942
2022-09-13	09:06:33	0.388766
2022-09-13	09:06:33	0.43986
2022-09-13	09:06:33	0.659962
2022-09-13	09:06:34	1.08464
2022-09-13	09:06:34	4.53716
2022-09-13	09:06:34	6.22067
2022-09-13	09:06:34	10.5862
2022-09-13	09:06:35	5.40963
2022-09-13	09:06:35	5.42469
2022-09-13	09:06:35	1.54144
2022-09-13	09:06:35	2.62281
2022-09-13	09:06:36	1.5648
2022-09-13	09:06:36	1.73793
2022-09-13	09:06:36	1.28419
2022-09-13	09:06:36	0.924898
2022-09-13	09:06:37	0.984796
2022-09-13	09:06:37	0.852736
2022-09-13	09:06:37	1.35294
2022-09-13	09:06:37	1.11151
2022-09-13	09:06:38	0.808155
2022-09-13	09:06:38	0.73243
2022-09-13	09:06:38	0.441387
2022-09-13	09:06:39	0.489071
2022-09-13	09:06:39	0.453652
2022-09-13	09:06:39	0.527392
2022-09-13	09:06:39	0.303626
2022-09-13	09:06:40	0.315992
2022-09-13	09:06:40	0.460725
2022-09-13	09:06:40	0.360064
2022-09-13	09:06:40	0.545916
2022-09-13	09:06:41	0.466221
2022-09-13	09:06:41	0.6307
2022-09-13	09:06:41	0.465713
2022-09-13	09:06:41	0.609377
2022-09-13	09:06:42	0.354924
2022-09-13	09:06:42	0.622354
2022-09-13	09:06:42	0.404033
2022-09-13	09:06:43	0.583117
2022-09-13	09:06:43	0.450038
2022-09-13	09:06:43	0.472379
2022-09-13	09:06:43	0.553804
2022-09-13	09:06:44	0.502354
2022-09-13	09:06:44	0.441438
2022-09-13	09:06:44	0.363117
2022-09-13	09:06:44	0.310853
2022-09-13	09:06:45	0.258333
2022-09-13	09:06:45	0.265814
2022-09-13	09:06:45	0.101743
2022-09-13	09:06:45	0.0652038
2022-09-13	09:06:46	0.203422
2022-09-13	09:06:46	0.200115
2022-09-13	09:06:46	0.160267
2022-09-13	09:06:47	0.141183
2022-09-13	09:06:47	0.191361
2022-09-13	09:06:47	0.244288
2022-09-13	09:06:47	0.174211
2022-09-13	09:06:48	0.323728
2022-09-13	09:06:48	0.476654
2022-09-13	09:06:48	0.449733
2022-09-13	09:06:48	0.362507
2022-09-13	09:06:49	0.429733
2022-09-13	09:06:49	0.288562
2022-09-13	09:06:49	0.443168
2022-09-13	09:06:49	0.344084
2022-09-13	09:06:50	0.494822
2022-09-13	09:06:50	1.83696
2022-09-13	09:06:50	3.69492
2022-09-13	09:06:50	5.31685
2022-09-13	09:06:51	5.13533
2022-09-13	09:06:51	6.17253
2022-09-13	09:06:51	4.57406
2022-09-13	09:06:52	3.65136
2022-09-13	09:06:52	4.19283
2022-09-13	09:06:52	2.19146
2022-09-13	09:06:52	6.92612
2022-09-13	09:06:53	4.07681
2022-09-13	09:06:53	5.04052
2022-09-13	09:06:53	2.251
2022-09-13	09:06:53	1.96968
2022-09-13	09:06:54	3.48016
2022-09-13	09:06:54	1.71065
2022-09-13	09:06:54	3.04072
2022-09-13	09:06:54	2.15116
2022-09-13	09:06:55	2.78347
2022-09-13	09:06:55	2.78144
2022-09-13	09:06:55	3.98408
2022-09-13	09:06:55	3.76612
2022-09-13	09:06:56	2.66912
2022-09-13	09:06:56	2.3364
2022-09-13	09:06:56	1.42973
2022-09-13	09:06:57	1.01452
2022-09-13	09:06:57	0.995026
2022-09-13	09:06:57	0.787748
2022-09-13	09:06:57	1.42561
2022-09-13	09:06:58	1.72943
2022-09-13	09:06:58	2.68561
2022-09-13	09:06:58	2.00118
2022-09-13	09:06:58	2.49681
2022-09-13	09:06:59	2.39065
2022-09-13	09:06:59	3.70357
2022-09-13	09:06:59	4.1708
2022-09-13	09:06:59	2.17034
2022-09-13	09:07:00	2.56714
2022-09-13	09:07:00	1.76088
2022-09-13	09:07:00	1.16872
2022-09-13	09:07:01	1.31457
2022-09-13	09:07:01	1.90602
2022-09-13	09:07:01	2.74535
2022-09-13	09:07:01	2.36179
2022-09-13	09:07:02	3.34362
2022-09-13	09:07:02	2.95787
2022-09-13	09:07:02	5.23859
2022-09-13	09:07:02	3.62062
2022-09-13	09:07:03	4.28831
2022-09-13	09:07:03	4.17981
2022-09-13	09:07:03	5.50408
2022-09-13	09:07:03	5.14805
2022-09-13	09:07:04	7.22861
2022-09-13	09:07:04	7.65665
2022-09-13	09:07:04	6.45187
2022-09-13	09:07:04	6.18785
2022-09-13	09:07:05	8.73268
2022-09-13	09:07:05	6.78133
2022-09-13	09:07:05	6.00464
2022-09-13	09:07:06	6.76133
2022-09-13	09:07:06	5.80408
2022-09-13	09:07:06	6.71085
2022-09-13	09:07:06	8.1082
2022-09-13	09:07:07	1.05767
2022-09-13	09:07:07	0.397825
2022-09-13	09:07:07	0.252328
2022-09-13	09:07:07	0.0634226
2022-09-13	09:07:08	-0.0718445
2022-09-13	09:07:08	-0.106806
2022-09-13	09:07:08	0.101387
2022-09-13	09:07:08	3.52393
2022-09-13	09:07:09	4.27777
2022-09-13	09:07:09	1.53787
2022-09-13	09:07:09	0.318079
2022-09-13	09:07:09	0.169733
2022-09-13	09:07:10	0.197214
2022-09-13	09:07:10	0.296858
2022-09-13	09:07:10	0.189835
2022-09-13	09:07:11	0.412227
2022-09-13	09:07:11	0.350649
2022-09-13	09:07:11	0.384695
2022-09-13	09:07:11	0.581641
2022-09-13	09:07:12	0.891259
2022-09-13	09:07:12	0.92673
2022-09-13	09:07:12	1.03823
2022-09-13	09:07:12	1.2734
2022-09-13	09:07:13	1.32419
2022-09-13	09:07:13	1.05813
2022-09-13	09:07:13	0.822659
2022-09-13	09:07:13	0.833549
2022-09-13	09:07:14	0.934008
2022-09-13	09:07:14	0.981692
2022-09-13	09:07:14	0.986578
2022-09-13	09:07:15	0.771412
2022-09-13	09:07:15	0.547494
2022-09-13	09:07:15	0.448715
2022-09-13	09:07:15	0.413397
2022-09-13	09:07:16	0.383219
2022-09-13	09:07:16	0.406934
2022-09-13	09:07:16	0.559402
2022-09-13	09:07:16	0.745967
2022-09-13	09:07:17	0.704491
2022-09-13	09:07:17	0.644288
2022-09-13	09:07:17	0.524542
2022-09-13	09:07:17	0.446934
2022-09-13	09:07:18	0.453753
2022-09-13	09:07:18	0.418842
2022-09-13	09:07:18	0.42042
2022-09-13	09:07:18	0.421285
2022-09-13	09:07:19	0.438588
2022-09-13	09:07:19	0.682099
2022-09-13	09:07:19	0.380064
2022-09-13	09:07:20	0.37014
2022-09-13	09:07:20	0.403015
2022-09-13	09:07:20	0.432685
2022-09-13	09:07:20	0.440166
2022-09-13	09:07:21	0.44444
2022-09-13	09:07:21	0.454313
2022-09-13	09:07:21	0.455076
2022-09-13	09:07:21	0.465356
2022-09-13	09:07:22	0.462965
2022-09-13	09:07:22	0.482608
2022-09-13	09:07:22	0.477926
2022-09-13	09:07:22	0.48897
2022-09-13	09:07:23	0.492379
2022-09-13	09:07:23	0.483728
2022-09-13	09:07:23	0.471972
2022-09-13	09:07:24	0.472634
2022-09-13	09:07:24	0.46383
2022-09-13	09:07:24	0.459555
2022-09-13	09:07:24	0.461743
2022-09-13	09:07:25	0.462863
2022-09-13	09:07:25	0.462557
2022-09-13	09:07:25	0.461387
2022-09-13	09:07:25	0.467952
2022-09-13	09:07:26	0.471565
2022-09-13	09:07:26	0.478181
2022-09-13	09:07:26	0.470446
2022-09-13	09:07:26	0.472227
2022-09-13	09:07:27	0.474415
2022-09-13	09:07:27	0.480471
2022-09-13	09:07:27	0.477723
2022-09-13	09:07:27	0.456807
2022-09-13	09:07:28	0.451412
2022-09-13	09:07:28	0.460064
2022-09-13	09:07:28	0.469122
2022-09-13	09:07:29	0.468359
2022-09-13	09:07:29	0.468817
2022-09-13	09:07:29	0.469733
2022-09-13	09:07:29	0.471412
2022-09-13	09:07:30	0.474517
2022-09-13	09:07:30	0.463931
2022-09-13	09:07:30	0.463931
2022-09-13	09:07:30	0.459402
2022-09-13	09:07:31	0.47813
2022-09-13	09:07:31	0.468919
2022-09-13	09:07:31	0.467239
2022-09-13	09:07:31	0.467392
2022-09-13	09:07:32	0.460878
2022-09-13	09:07:32	0.456501
2022-09-13	09:07:32	0.463575
2022-09-13	09:07:33	0.46841
2022-09-13	09:07:33	0.47014
2022-09-13	09:07:33	0.443015
2022-09-13	09:07:33	0.417875
2022-09-13	09:07:34	0.440471
2022-09-13	09:07:34	0.8193
2022-09-13	09:07:34	0.430242
2022-09-13	09:07:34	1.16047
2022-09-13	09:07:35	0.68897
2022-09-13	09:07:35	1.31304
2022-09-13	09:07:35	0.510242
2022-09-13	09:07:35	0.308715
2022-09-13	09:07:36	0.621183
2022-09-13	09:07:36	0.378384
2022-09-13	09:07:36	0.126171
2022-09-13	09:07:36	0.190038
2022-09-13	09:07:37	0.507087
2022-09-13	09:07:37	2.04128
2022-09-13	09:07:37	1.63854
2022-09-13	09:07:38	2.04836
2022-09-13	09:07:38	2.1277
2022-09-13	09:07:38	2.07024
2022-09-13	09:07:38	3.99848
2022-09-13	09:07:39	5.59273
2022-09-13	09:07:39	6.20591
2022-09-13	09:07:39	6.15823
2022-09-13	09:07:39	2.47894
2022-09-13	09:07:40	3.30882
2022-09-13	09:07:40	3.30927
2022-09-13	09:07:40	2.66536
2022-09-13	09:07:40	2.17584
2022-09-13	09:07:41	3.12103
2022-09-13	09:07:41	2.65116
2022-09-13	09:07:41	3.85996
2022-09-13	09:07:42	2.89192
2022-09-13	09:07:42	3.15284
2022-09-13	09:07:42	7.50449
2022-09-13	09:07:42	12.2757
2022-09-13	09:07:43	18.4253
2022-09-13	09:07:43	8.48454
2022-09-13	09:07:43	6.96902
2022-09-13	09:07:43	2.91523
2022-09-13	09:07:44	5.19069
2022-09-13	09:07:44	4.79925
2022-09-13	09:07:44	10.7987
2022-09-13	09:07:44	3.0251
2022-09-13	09:07:45	0.0204201
2022-09-13	09:07:45	-0.197392
2022-09-13	09:07:45	-0.152659
2022-09-13	09:07:45	-0.226806
2022-09-13	09:07:46	-0.131437
2022-09-13	09:07:46	-0.261921
2022-09-13	09:07:46	-0.107061
2022-09-13	09:07:47	-0.0486893
2022-09-13	09:07:47	0.78271
2022-09-13	09:07:47	3.37421
2022-09-13	09:07:47	5.894
2022-09-13	09:07:48	9.21767
2022-09-13	09:07:48	6.92881
2022-09-13	09:07:48	4.7366
2022-09-13	09:07:48	0.75869
2022-09-13	09:07:49	0.37472
2022-09-13	09:07:49	0.312277
2022-09-13	09:07:49	0.264644
2022-09-13	09:07:49	0.336552
2022-09-13	09:07:50	0.145814
2022-09-13	09:07:50	0.224949
2022-09-13	09:07:50	-0.0904196
2022-09-13	09:07:50	-0.144618
2022-09-13	09:07:51	-0.238816
2022-09-13	09:07:51	-0.0587656
2022-09-13	09:07:51	0.437265
2022-09-13	09:07:52	3.55548
2022-09-13	09:07:52	3.86276
2022-09-13	09:07:52	5.27233
2022-09-13	09:07:52	1.5335
2022-09-13	09:07:53	2.71436
2022-09-13	09:07:53	0.769478
2022-09-13	09:07:53	1.03151
2022-09-13	09:07:53	0.977468
2022-09-13	09:07:54	0.93299
2022-09-13	09:07:54	0.750496
2022-09-13	09:07:54	0.610598
2022-09-13	09:07:54	0.478486
2022-09-13	09:07:55	0.547952
2022-09-13	09:07:55	0.986171
2022-09-13	09:07:55	0.971463
2022-09-13	09:07:56	1.19396
2022-09-13	09:07:56	1.20337
2022-09-13	09:07:56	0.651565
2022-09-13	09:07:56	1.00454
2022-09-13	09:07:57	0.935687
2022-09-13	09:07:57	1.73141
2022-09-13	09:07:57	1.16653
2022-09-13	09:07:57	1.1622
2022-09-13	09:07:58	0.583219
2022-09-13	09:07:58	0.741387
2022-09-13	09:07:58	0.430751
2022-09-13	09:07:58	0.60271
2022-09-13	09:07:59	0.440166
2022-09-13	09:07:59	0.520623
2022-09-13	09:07:59	0.442048
2022-09-13	09:07:59	0.350598
2022-09-13	09:08:00	0.422405
2022-09-13	09:08:00	0.481997
2022-09-13	09:08:00	0.425662
2022-09-13	09:08:01	0.239148
2022-09-13	09:08:01	0.471107
2022-09-13	09:08:01	0.355433
2022-09-13	09:08:01	0.539453
2022-09-13	09:08:02	0.303372
2022-09-13	09:08:02	0.506781
2022-09-13	09:08:02	0.373702
2022-09-13	09:08:02	0.481336
2022-09-13	09:08:03	0.714211
2022-09-13	09:08:03	0.394567
2022-09-13	09:08:03	0.430293
2022-09-13	09:08:03	0.38271
2022-09-13	09:08:04	0.423982
2022-09-13	09:08:04	0.413092
2022-09-13	09:08:04	0.356501
2022-09-13	09:08:05	0.28729
2022-09-13	09:08:05	0.373652
2022-09-13	09:08:05	0.465713
2022-09-13	09:08:05	0.541234
2022-09-13	09:08:06	3.00067
2022-09-13	09:08:06	11.3448
2022-09-13	09:08:06	10.226
2022-09-13	09:08:06	6.9537
2022-09-13	09:08:07	1.56332
2022-09-13	09:08:07	0.714313
2022-09-13	09:08:07	0.510445
2022-09-13	09:08:07	0.386425
2022-09-13	09:08:08	0.464237
2022-09-13	09:08:08	0.453193
2022-09-13	09:08:08	0.468104
2022-09-13	09:08:08	0.513092
2022-09-13	09:08:09	0.483881
2022-09-13	09:08:09	0.459046
2022-09-13	09:08:09	0.534924
2022-09-13	09:08:10	0.508461
2022-09-13	09:08:10	0.534975
2022-09-13	09:08:10	0.543219
2022-09-13	09:08:10	0.552481
2022-09-13	09:08:11	0.525967
2022-09-13	09:08:11	0.569733
2022-09-13	09:08:11	0.41126
2022-09-13	09:08:11	0.309937
2022-09-13	09:08:12	0.298028
2022-09-13	09:08:12	0.256705
2022-09-13	09:08:12	0.364339
2022-09-13	09:08:12	0.532786
2022-09-13	09:08:13	0.581438
2022-09-13	09:08:13	0.524542
2022-09-13	09:08:13	0.504796
2022-09-13	09:08:14	0.511361
2022-09-13	09:08:14	0.529733
2022-09-13	09:08:14	0.519657
2022-09-13	09:08:14	0.547952
2022-09-13	09:08:15	0.634618
2022-09-13	09:08:15	0.671209
2022-09-13	09:08:15	0.851208
2022-09-13	09:08:15	1.54912
2022-09-13	09:08:16	0.895738
2022-09-13	09:08:16	0.996908
2022-09-13	09:08:16	1.1995
2022-09-13	09:08:16	1.08627
2022-09-13	09:08:17	0.943219
2022-09-13	09:08:17	0.923015
2022-09-13	09:08:17	0.870344
2022-09-13	09:08:17	0.756807
2022-09-13	09:08:18	0.579606
2022-09-13	09:08:18	0.787443
2022-09-13	09:08:18	0.748461
2022-09-13	09:08:19	0.599402
2022-09-13	09:08:19	0.45355
2022-09-13	09:08:19	0.46902
2022-09-13	09:08:19	0.352074
2022-09-13	09:08:20	0.195229
2022-09-13	09:08:20	0.309987
2022-09-13	09:08:20	0.675331
2022-09-13	09:08:20	0.298944
2022-09-13	09:08:21	0.226527
2022-09-13	09:08:21	0.28902
2022-09-13	09:08:21	0.262914
2022-09-13	09:08:21	0.328766
2022-09-13	09:08:22	0.141641
2022-09-13	09:08:22	0.368206
2022-09-13	09:08:22	0.212837
2022-09-13	09:08:22	0.409733
2022-09-13	09:08:23	0.213346
2022-09-13	09:08:23	0.309275
2022-09-13	09:08:23	0.227087
2022-09-13	09:08:24	0.575993
2022-09-13	09:08:24	1.57243
2022-09-13	09:08:24	2.22261
2022-09-13	09:08:24	1.97523
2022-09-13	09:08:25	2.16566
2022-09-13	09:08:25	2.99681
2022-09-13	09:08:25	2.13355
2022-09-13	09:08:25	2.60103
2022-09-13	09:08:26	1.87085
2022-09-13	09:08:26	1.46184
2022-09-13	09:08:26	1.03788
2022-09-13	09:08:26	1.74424
2022-09-13	09:08:27	2.52128
2022-09-13	09:08:27	1.90912
2022-09-13	09:08:27	2.17808
2022-09-13	09:08:28	2.11482
2022-09-13	09:08:28	2.41156
2022-09-13	09:08:28	1.80525
2022-09-13	09:08:28	1.08963
2022-09-13	09:08:29	2.1024
2022-09-13	09:08:29	2.76373
2022-09-13	09:08:29	1.83884
2022-09-13	09:08:29	2.24378
2022-09-13	09:08:30	2.98352
2022-09-13	09:08:30	1.89503
2022-09-13	09:08:30	2.30439
2022-09-13	09:08:30	1.07543
2022-09-13	09:08:31	1.4905
2022-09-13	09:08:31	0.845967
2022-09-13	09:08:31	1.15884
2022-09-13	09:08:31	2.23029
2022-09-13	09:08:32	3.02149
2022-09-13	09:08:32	3.4193
2022-09-13	09:08:32	2.79976
2022-09-13	09:08:33	2.34744
2022-09-13	09:08:33	2.57884
2022-09-13	09:08:33	1.56729
2022-09-13	09:08:33	1.50083
2022-09-13	09:08:34	0.426985
2022-09-13	09:08:34	0.43986
2022-09-13	09:08:34	0.304389
2022-09-13	09:08:34	0.245763
2022-09-13	09:08:35	0.354618
2022-09-13	09:08:35	0.369224
2022-09-13	09:08:35	0.374313
2022-09-13	09:08:35	0.393906
2022-09-13	09:08:36	0.349224
2022-09-13	09:08:36	0.389987
2022-09-13	09:08:36	0.382252
2022-09-13	09:08:37	0.499707
2022-09-13	09:08:37	0.588664
2022-09-13	09:08:37	0.663219
2022-09-13	09:08:37	0.753142
2022-09-13	09:08:38	0.604237
2022-09-13	09:08:38	0.567952
2022-09-13	09:08:38	0.610089
2022-09-13	09:08:38	0.56098
2022-09-13	09:08:39	0.591616
2022-09-13	09:08:39	0.593346
2022-09-13	09:08:39	0.579707
2022-09-13	09:08:39	0.51757
2022-09-13	09:08:40	0.506781
2022-09-13	09:08:40	0.54902
2022-09-13	09:08:40	0.677977
2022-09-13	09:08:40	0.585102
2022-09-13	09:08:41	0.660115
2022-09-13	09:08:41	0.495891
2022-09-13	09:08:41	0.684746
2022-09-13	09:08:42	0.60785
2022-09-13	09:08:42	0.668613
2022-09-13	09:08:42	0.594975
2022-09-13	09:08:42	0.504389
2022-09-13	09:08:43	0.512023
2022-09-13	09:08:43	0.492634
2022-09-13	09:08:43	0.485662
2022-09-13	09:08:43	0.523473
2022-09-13	09:08:44	0.584287
2022-09-13	09:08:44	0.521438
2022-09-13	09:08:44	0.521183
2022-09-13	09:08:44	0.543524
2022-09-13	09:08:45	0.542099
2022-09-13	09:08:45	0.517773
2022-09-13	09:08:45	0.519097
2022-09-13	09:08:46	0.522506
2022-09-13	09:08:46	0.498893
2022-09-13	09:08:46	0.470496
2022-09-13	09:08:46	0.477214
2022-09-13	09:08:47	0.520115
2022-09-13	09:08:47	0.559962
2022-09-13	09:08:47	0.523778
2022-09-13	09:08:47	0.559809
2022-09-13	09:08:48	0.578079
2022-09-13	09:08:48	0.603473
2022-09-13	09:08:48	0.579555
2022-09-13	09:08:48	0.543931
2022-09-13	09:08:49	0.503575
2022-09-13	09:08:49	0.504644
2022-09-13	09:08:49	0.505763
2022-09-13	09:08:49	0.519809
2022-09-13	09:08:50	0.508664
2022-09-13	09:08:50	0.504389
2022-09-13	09:08:50	0.501641
2022-09-13	09:08:51	0.514873
2022-09-13	09:08:51	0.496094
2022-09-13	09:08:51	0.538333
2022-09-13	09:08:51	0.623422
2022-09-13	09:08:52	0.731972
2022-09-13	09:08:52	0.710547
2022-09-13	09:08:52	0.619911
2022-09-13	09:08:52	0.540522
2022-09-13	09:08:53	0.574975
2022-09-13	09:08:53	0.759758
2022-09-13	09:08:53	0.767646
2022-09-13	09:08:53	0.592633
2022-09-13	09:08:54	0.531769
2022-09-13	09:08:54	0.536043
2022-09-13	09:08:54	0.557061
2022-09-13	09:08:54	0.664949
2022-09-13	09:08:55	0.782964
2022-09-13	09:08:55	0.656807
2022-09-13	09:08:55	0.551107
