# Supplementary material for: Comparing efficacy in reducing pulling and welfare impacts of four types of leash walking equipment
Source: PeerJ journal article supplement (doi:10.7717/peerj.18131), 2024-10-24
Supplement: Shelter1_Tension_files.zip [file Bubba_prong_2022913113242 copy.xlsx]

## Sheet: Averaged Newtons
Date	Time	Averaged Newtons	Impulse	Total steps
2022-09-13	11:32:56	-6.45815	0	0
2022-09-13	11:32:57	-4.23249	0	0		Impulse	747.574
2022-09-13	11:32:58	-2.86773	0	0		Total steps	1
2022-09-13	11:32:59	-2.75341	0	0		#> 5sec	0
2022-09-13	11:33:00	-1.80269	0	0
2022-09-13	11:33:01	1.89162	1.89162	0
2022-09-13	11:33:02	2.97288	4.8645	0
2022-09-13	11:33:03	3.26445	8.12895	0
2022-09-13	11:33:04	3.28046	11.4094	0
2022-09-13	11:33:05	3.16586	14.5753	0
2022-09-13	11:33:06	3.27377	17.849	0
2022-09-13	11:33:07	0.60147	18.4505	0
2022-09-13	11:33:08	3.26671	21.7172	0
2022-09-13	11:33:09	3.27905	24.9963	0
2022-09-13	11:33:10	3.26758	28.2638	0
2022-09-13	11:33:11	3.24339	31.5072	0
2022-09-13	11:33:12	3.14255	34.6498	0
2022-09-13	11:33:13	3.15868	37.8085	0
2022-09-13	11:33:14	3.14737	40.9558	0
2022-09-13	11:33:15	3.22987	44.1857	0
2022-09-13	11:33:16	3.20474	47.3904	0
2022-09-13	11:33:17	2.81872	50.2092	0
2022-09-13	11:33:18	2.47204	52.6812	0
2022-09-13	11:33:19	3.16569	55.8469	0
2022-09-13	11:33:20	3.12851	58.9754	0
2022-09-13	11:33:21	2.52229	61.4977	0
2022-09-13	11:33:22	1.17221	62.6699	0
2022-09-13	11:33:23	0.430276	63.1002	0
2022-09-13	11:33:24	2.07894	65.1791	0
2022-09-13	11:33:25	3.09563	68.2747	0
2022-09-13	11:33:26	3.258	71.5327	0
2022-09-13	11:33:27	3.26282	74.7956	0
2022-09-13	11:33:28	3.25024	78.0458	0
2022-09-13	11:33:29	3.27554	81.3213	0
2022-09-13	11:33:30	3.27571	84.597	0
2022-09-13	11:33:31	3.26486	87.8619	0
2022-09-13	11:33:32	3.28074	91.1427	0
2022-09-13	11:33:33	3.2615	94.4042	0
2022-09-13	11:33:34	3.26994	97.6741	0
2022-09-13	11:33:35	3.24977	100.924	0
2022-09-13	11:33:36	3.36388	104.288	0
2022-09-13	11:33:37	3.26405	107.552	0
2022-09-13	11:33:38	3.26054	110.812	0
2022-09-13	11:33:39	3.26728	114.08	0
2022-09-13	11:33:40	3.25522	117.335	0
2022-09-13	11:33:41	3.01442	120.349	0
2022-09-13	11:33:42	1.64714	121.996	0
2022-09-13	11:33:43	3.26916	125.266	0
2022-09-13	11:33:44	3.27396	128.54	0
2022-09-13	11:33:45	3.16377	131.703	0
2022-09-13	11:33:46	3.26863	134.972	0
2022-09-13	11:33:47	3.26207	138.234	0
2022-09-13	11:33:48	2.32678	140.561	0
2022-09-13	11:33:49	0.728295	141.289	0
2022-09-13	11:33:50	2.57232	143.861	0
2022-09-13	11:33:51	3.49926	147.361	0
2022-09-13	11:33:52	2.78065	150.141	0
2022-09-13	11:33:53	3.28312	153.424	0
2022-09-13	11:33:54	3.26631	156.691	0
2022-09-13	11:33:55	3.27299	159.964	0
2022-09-13	11:33:56	3.27603	163.24	0
2022-09-13	11:33:57	3.25398	166.494	0
2022-09-13	11:33:58	3.25788	169.752	0
2022-09-13	11:33:59	3.27011	173.022	0
2022-09-13	11:34:00	3.25513	176.277	0
2022-09-13	11:34:01	3.26066	179.537	0
2022-09-13	11:34:02	3.26247	182.8	0
2022-09-13	11:34:03	3.25137	186.051	0
2022-09-13	11:34:04	3.27128	189.323	0
2022-09-13	11:34:05	3.2572	192.58	0
2022-09-13	11:34:06	3.42308	196.003	0
2022-09-13	11:34:07	3.26648	199.269	0
2022-09-13	11:34:08	3.27112	202.54	0
2022-09-13	11:34:09	3.25086	205.791	0
2022-09-13	11:34:10	2.35308	208.144	0
2022-09-13	11:34:11	3.11317	211.258	0
2022-09-13	11:34:12	3.27486	214.532	0
2022-09-13	11:34:13	6.33937	220.872	0
2022-09-13	11:34:14	3.23932	224.111	0
2022-09-13	11:34:15	3.74628	227.857	0
2022-09-13	11:34:16	4.67377	232.531	0
2022-09-13	11:34:17	2.21488	234.746	0
2022-09-13	11:34:18	2.09365	236.84	0
2022-09-13	11:34:19	-0.290206	236.84	0
2022-09-13	11:34:20	-0.948834	236.84	0
2022-09-13	11:34:21	1.89305	238.733	0
2022-09-13	11:34:22	1.26836	240.001	0
2022-09-13	11:34:23	2.48273	242.484	0
2022-09-13	11:34:24	7.03676	249.521	0
2022-09-13	11:34:25	3.01955	252.54	0
2022-09-13	11:34:26	2.87396	255.414	0
2022-09-13	11:34:27	3.48748	258.902	0
2022-09-13	11:34:28	0.897451	259.799	0
2022-09-13	11:34:29	2.60024	262.399	0
2022-09-13	11:34:30	6.40535	268.805	0
2022-09-13	11:34:31	15.8801	284.685	1
2022-09-13	11:34:32	7.80648	292.491	1
2022-09-13	11:34:33	6.51452	299.006	1
2022-09-13	11:34:34	5.4888	304.495	1
2022-09-13	11:34:35	4.55114	309.046	1
2022-09-13	11:34:36	2.84498	311.891	1
2022-09-13	11:34:37	1.06712	312.958	1
2022-09-13	11:34:38	0.895734	313.853	1
2022-09-13	11:34:39	0.918617	314.772	1
2022-09-13	11:34:40	1.77521	316.547	1
2022-09-13	11:34:41	7.82476	324.372	1
2022-09-13	11:34:42	3.06347	327.436	1
2022-09-13	11:34:43	4.66688	332.102	1
2022-09-13	11:34:44	2.11448	334.217	1
2022-09-13	11:34:45	2.19371	336.411	1
2022-09-13	11:34:46	3.37842	339.789	1
2022-09-13	11:34:47	3.22879	343.018	1
2022-09-13	11:34:48	1.46128	344.479	1
2022-09-13	11:34:49	2.65268	347.132	1
2022-09-13	11:34:50	3.25716	350.389	1
2022-09-13	11:34:51	3.2623	353.651	1
2022-09-13	11:34:52	3.2761	356.927	1
2022-09-13	11:34:53	3.27469	360.202	1
2022-09-13	11:34:54	3.25986	363.462	1
2022-09-13	11:34:55	3.26675	366.729	1
2022-09-13	11:34:56	3.27299	370.002	1
2022-09-13	11:34:57	2.97826	372.98	1
2022-09-13	11:34:58	2.10735	375.087	1
2022-09-13	11:34:59	7.96455	383.052	1
2022-09-13	11:35:00	5.24719	388.299	1
2022-09-13	11:35:01	7.40314	395.702	1
2022-09-13	11:35:02	3.41222	399.114	1
2022-09-13	11:35:03	3.52663	402.641	1
2022-09-13	11:35:04	6.51468	409.156	1
2022-09-13	11:35:05	4.96336	414.119	1
2022-09-13	11:35:06	6.19058	420.31	1
2022-09-13	11:35:07	4.83407	425.144	1
2022-09-13	11:35:08	3.02461	428.168	1
2022-09-13	11:35:09	1.89773	430.066	1
2022-09-13	11:35:10	1.69037	431.756	1
2022-09-13	11:35:11	0.887057	432.643	1
2022-09-13	11:35:12	1.07991	433.723	1
2022-09-13	11:35:13	-0.981885	433.723	1
2022-09-13	11:35:14	2.00685	435.73	1
2022-09-13	11:35:15	1.33474	437.065	1
2022-09-13	11:35:16	1.86847	438.933	1
2022-09-13	11:35:17	1.58754	440.521	1
2022-09-13	11:35:18	1.24086	441.762	1
2022-09-13	11:35:19	-0.625802	441.762	1
2022-09-13	11:35:20	-0.616504	441.762	1
2022-09-13	11:35:21	-0.448837	441.762	1
2022-09-13	11:35:22	0.151783	441.914	1
2022-09-13	11:35:23	0.758685	442.672	1
2022-09-13	11:35:24	2.40344	445.076	1
2022-09-13	11:35:25	5.35822	450.434	1
2022-09-13	11:35:26	6.12958	456.564	1
2022-09-13	11:35:27	1.56609	458.13	1
2022-09-13	11:35:28	1.23552	459.365	1
2022-09-13	11:35:29	0.712958	460.078	1
2022-09-13	11:35:30	0.672154	460.75	1
2022-09-13	11:35:31	1.02263	461.773	1
2022-09-13	11:35:32	3.25724	465.03	1
2022-09-13	11:35:33	3.25969	468.29	1
2022-09-13	11:35:34	3.25302	471.543	1
2022-09-13	11:35:35	3.26071	474.804	1
2022-09-13	11:35:36	3.25573	478.059	1
2022-09-13	11:35:37	3.27265	481.332	1
2022-09-13	11:35:38	3.26829	484.6	1
2022-09-13	11:35:39	3.27294	487.873	1
2022-09-13	11:35:40	2.75811	490.631	1
2022-09-13	11:35:41	1.4809	492.112	1
2022-09-13	11:35:42	3.00106	495.113	1
2022-09-13	11:35:43	0.689869	495.803	1
2022-09-13	11:35:44	3.25732	499.06	1
2022-09-13	11:35:45	1.41895	500.479	1
2022-09-13	11:35:46	-0.606787	500.479	1
2022-09-13	11:35:47	-1.85517	500.479	1
2022-09-13	11:35:48	-2.46184	500.479	1
2022-09-13	11:35:49	-0.750137	500.479	1
2022-09-13	11:35:50	2.00061	502.48	1
2022-09-13	11:35:51	2.66728	505.147	1
2022-09-13	11:35:52	2.56762	507.715	1
2022-09-13	11:35:53	2.14795	509.863	1
2022-09-13	11:35:54	-3.44871	509.863	1
2022-09-13	11:35:55	2.25359	512.116	1
2022-09-13	11:35:56	0.887208	513.004	1
2022-09-13	11:35:57	0.560855	513.564	1
2022-09-13	11:35:58	3.26677	516.831	1
2022-09-13	11:35:59	2.19003	519.021	1
2022-09-13	11:36:00	1.04691	520.068	1
2022-09-13	11:36:01	0.66476	520.733	1
2022-09-13	11:36:02	0.746856	521.48	1
2022-09-13	11:36:03	0.816128	522.296	1
2022-09-13	11:36:04	-2.83949	522.296	1
2022-09-13	11:36:05	-2.22937	522.296	1
2022-09-13	11:36:06	1.08113	523.377	1
2022-09-13	11:36:07	1.37255	524.75	1
2022-09-13	11:36:08	1.1472	525.897	1
2022-09-13	11:36:09	1.02716	526.924	1
2022-09-13	11:36:10	2.94093	529.865	1
2022-09-13	11:36:11	1.558	531.423	1
2022-09-13	11:36:12	1.40147	532.824	1
2022-09-13	11:36:13	1.44589	534.27	1
2022-09-13	11:36:14	1.01156	535.282	1
2022-09-13	11:36:15	-3.8293	535.282	1
2022-09-13	11:36:16	-4.31718	535.282	1
2022-09-13	11:36:17	1.9039	537.186	1
2022-09-13	11:36:18	2.04744	539.233	1
2022-09-13	11:36:19	2.17543	541.409	1
2022-09-13	11:36:20	2.00316	543.412	1
2022-09-13	11:36:21	-0.501355	543.412	1
2022-09-13	11:36:22	1.0966	544.508	1
2022-09-13	11:36:23	1.56655	546.075	1
2022-09-13	11:36:24	2.66552	548.74	1
2022-09-13	11:36:25	1.56836	550.309	1
2022-09-13	11:36:26	1.66162	551.97	1
2022-09-13	11:36:27	-0.0973566	551.97	1
2022-09-13	11:36:28	1.37623	553.347	1
2022-09-13	11:36:29	-1.33497	553.347	1
2022-09-13	11:36:30	-2.59495	553.347	1
2022-09-13	11:36:31	-11.1203	553.347	1
2022-09-13	11:36:32	-7.61315	553.347	1
2022-09-13	11:36:33	-2.80604	553.347	1
2022-09-13	11:36:34	-6.85652	553.347	1
2022-09-13	11:36:35	-4.87501	553.347	1
2022-09-13	11:36:36	0.38155	553.728	1
2022-09-13	11:36:37	0.796601	554.525	1
2022-09-13	11:36:38	0.993093	555.518	1
2022-09-13	11:36:39	1.23023	556.748	1
2022-09-13	11:36:40	-5.83756	556.748	1
2022-09-13	11:36:41	-10.234	556.748	1
2022-09-13	11:36:42	-11.7115	556.748	1
2022-09-13	11:36:43	-12.4839	556.748	1
2022-09-13	11:36:44	-13.8822	556.748	1
2022-09-13	11:36:45	-14.9117	556.748	1
2022-09-13	11:36:46	-14.2646	556.748	1
2022-09-13	11:36:47	-12.6373	556.748	1
2022-09-13	11:36:48	3.62766	560.376	1
2022-09-13	11:36:49	-10.9251	560.376	1
2022-09-13	11:36:50	-9.74556	560.376	1
2022-09-13	11:36:51	1.60435	561.98	1
2022-09-13	11:36:52	4.5496	566.53	1
2022-09-13	11:36:53	6.84875	573.378	1
2022-09-13	11:36:54	2.3267	575.705	1
2022-09-13	11:36:55	1.8816	577.587	1
2022-09-13	11:36:56	1.90611	579.493	1
2022-09-13	11:36:57	3.15307	582.646	1
2022-09-13	11:36:58	7.99007	590.636	1
2022-09-13	11:36:59	3.65935	594.295	1
2022-09-13	11:37:00	3.06913	597.364	1
2022-09-13	11:37:01	2.82393	600.188	1
2022-09-13	11:37:02	2.57967	602.768	1
2022-09-13	11:37:03	2.73632	605.504	1
2022-09-13	11:37:04	3.14133	608.646	1
2022-09-13	11:37:05	3.91697	612.563	1
2022-09-13	11:37:06	3.2357	615.798	1
2022-09-13	11:37:07	1.91771	617.716	1
2022-09-13	11:37:08	1.98021	619.696	1
2022-09-13	11:37:09	4.31629	624.013	1
2022-09-13	11:37:10	1.88262	625.895	1
2022-09-13	11:37:11	2.44719	628.342	1
2022-09-13	11:37:12	3.39331	631.736	1
2022-09-13	11:37:13	3.40462	635.14	1
2022-09-13	11:37:14	3.73451	638.875	1
2022-09-13	11:37:15	2.62223	641.497	1
2022-09-13	11:37:16	0.59564	642.093	1
2022-09-13	11:37:17	3.43374	645.526	1
2022-09-13	11:37:18	12.7343	658.261	1
2022-09-13	11:37:19	0.932652	659.193	1
2022-09-13	11:37:20	-0.172833	659.193	1
2022-09-13	11:37:21	-1.76738	659.193	1
2022-09-13	11:37:22	-2.29263	659.193	1
2022-09-13	11:37:23	-2.06032	659.193	1
2022-09-13	11:37:24	-0.907124	659.193	1
2022-09-13	11:37:25	-0.407864	659.193	1
2022-09-13	11:37:26	1.21092	660.404	1
2022-09-13	11:37:27	1.39343	661.798	1
2022-09-13	11:37:28	-1.37073	661.798	1
2022-09-13	11:37:29	1.22827	663.026	1
2022-09-13	11:37:30	1.20724	664.233	1
2022-09-13	11:37:31	1.1056	665.339	1
2022-09-13	11:37:32	3.13128	668.47	1
2022-09-13	11:37:33	3.95304	672.423	1
2022-09-13	11:37:34	3.27503	675.698	1
2022-09-13	11:37:35	3.27616	678.974	1
2022-09-13	11:37:36	3.2756	682.25	1
2022-09-13	11:37:37	3.26977	685.52	1
2022-09-13	11:37:38	3.25196	688.772	1
2022-09-13	11:37:39	3.26235	692.034	1
2022-09-13	11:37:40	3.26105	695.295	1
2022-09-13	11:37:41	3.27588	698.571	1
2022-09-13	11:37:42	3.27135	701.842	1
2022-09-13	11:37:43	3.27282	705.115	1
2022-09-13	11:37:44	3.28895	708.404	1
2022-09-13	11:37:45	3.25618	711.66	1
2022-09-13	11:37:46	3.2623	714.923	1
2022-09-13	11:37:47	3.26275	718.185	1
2022-09-13	11:37:48	3.26037	721.446	1
2022-09-13	11:37:49	3.27418	724.72	1
2022-09-13	11:37:50	3.27324	727.993	1
2022-09-13	11:37:51	3.27045	731.264	1
2022-09-13	11:37:52	3.26671	734.53	1
2022-09-13	11:37:53	3.25941	737.79	1
2022-09-13	11:37:54	3.25664	741.046	1
2022-09-13	11:37:55	3.26428	744.311	1
2022-09-13	11:37:56	3.26315	747.574	1

## Sheet: Bubba_prong_2022913113242 (4)
Date	Time	Lbs	Newtons	Averaged Newtons	Total force x time	total steps > 13.345		**GoPro Fitting:1122
2022-09-13	11:32:56	-1.48055	-6.58578	-6.45815	0	FALSE	0
2022-09-13	11:32:56	-1.49739	-6.66069	-6.45815	0	FALSE	0					Total Force x time	1448.74
2022-09-13	11:32:56	-1.57174	-6.99141	-6.45815	0	FALSE	0					Total Steps	6
2022-09-13	11:32:56	-1.25775	-5.59472	-6.45815	0	FALSE	0
2022-09-13	11:32:57	-1.06635	-4.74334	-4.23249	0	FALSE	0
2022-09-13	11:32:57	-0.991895	-4.41215	-4.23249	0	FALSE	0
2022-09-13	11:32:57	-0.796272	-3.54198	-4.23249	0	FALSE	0
2022-09-13	11:32:58	-0.667162	-2.96767	-2.86773	0	FALSE	0
2022-09-13	11:32:58	-0.694338	-3.08855	-2.86773	0	FALSE	0
2022-09-13	11:32:58	-0.636678	-2.83207	-2.86773	0	FALSE	0
2022-09-13	11:32:58	-0.580598	-2.58262	-2.86773	0	FALSE	0
2022-09-13	11:32:59	-0.712455	-3.16914	-2.75341	0	FALSE	0
2022-09-13	11:32:59	-0.742836	-3.30428	-2.75341	0	FALSE	0
2022-09-13	11:32:59	-0.557035	-2.4778	-2.75341	0	FALSE	0
2022-09-13	11:32:59	-0.463651	-2.06241	-2.75341	0	FALSE	0
2022-09-13	11:33:00	-0.408435	-1.8168	-1.80269	0	FALSE	0
2022-09-13	11:33:00	-0.380954	-1.69456	-1.80269	0	FALSE	0
2022-09-13	11:33:00	-0.426399	-1.89671	-1.80269	0	FALSE	0
2022-09-13	11:33:01	-0.324465	-1.44329	1.89162	0	FALSE	0
2022-09-13	11:33:01	0.718486	3.19597	1.89162	3.19597	FALSE	0
2022-09-13	11:33:01	0.729071	3.24305	1.89162	3.24305	FALSE	0
2022-09-13	11:33:01	0.577926	2.57073	1.89162	5.7667	FALSE	0
2022-09-13	11:33:02	0.466832	2.07656	2.97288	5.31962	FALSE	0
2022-09-13	11:33:02	0.738486	3.28493	2.97288	9.05163	FALSE	0
2022-09-13	11:33:02	0.737722	3.28154	2.97288	8.60115	FALSE	0
2022-09-13	11:33:02	0.730293	3.24849	2.97288	12.3001	FALSE	0
2022-09-13	11:33:03	0.734008	3.26501	3.26445	11.8662	FALSE	0
2022-09-13	11:33:03	0.735891	3.27339	3.26445	15.5735	FALSE	0
2022-09-13	11:33:03	0.7307	3.2503	3.26445	15.1165	FALSE	0
2022-09-13	11:33:03	0.734924	3.26909	3.26445	18.8426	FALSE	0
2022-09-13	11:33:04	0.737315	3.27972	3.28046	18.3962	FALSE	0
2022-09-13	11:33:04	0.733957	3.26479	3.28046	22.1074	FALSE	0
2022-09-13	11:33:04	0.744287	3.31074	3.28046	21.7069	FALSE	0
2022-09-13	11:33:04	0.734364	3.2666	3.28046	25.374	FALSE	0
2022-09-13	11:33:05	0.739198	3.2881	3.16586	24.995	FALSE	0
2022-09-13	11:33:05	0.736959	3.27814	3.16586	28.6521	FALSE	0
2022-09-13	11:33:05	0.731616	3.25437	3.16586	28.2494	FALSE	0
2022-09-13	11:33:05	0.639097	2.84283	3.16586	31.495	FALSE	0
2022-09-13	11:33:06	0.733346	3.26207	3.27377	31.5115	FALSE	0
2022-09-13	11:33:06	0.733651	3.26343	3.27377	34.7584	FALSE	0
2022-09-13	11:33:06	0.740929	3.2958	3.27377	34.8073	FALSE	0
2022-09-13	11:33:07	0.733092	3.26094	0.60147	38.0193	FALSE	0
2022-09-13	11:33:07	0.451412	2.00797	0.60147	36.8152	FALSE	0
2022-09-13	11:33:07	-0.331437	-1.4743	0.60147	38.0193	FALSE	0
2022-09-13	11:33:07	-0.312201	-1.38873	0.60147	36.8152	FALSE	0
2022-09-13	11:33:08	0.734313	3.26637	3.26671	41.2857	FALSE	0
2022-09-13	11:33:08	0.739758	3.29059	3.26671	40.1058	FALSE	0
2022-09-13	11:33:08	0.728512	3.24057	3.26671	44.5263	FALSE	0
2022-09-13	11:33:08	0.734975	3.26932	3.26671	43.3751	FALSE	0
2022-09-13	11:33:09	0.732481	3.25822	3.27905	47.7845	FALSE	0
2022-09-13	11:33:09	0.735178	3.27022	3.27905	46.6454	FALSE	0
2022-09-13	11:33:09	0.740318	3.29308	3.27905	51.0776	FALSE	0
2022-09-13	11:33:09	0.740674	3.29467	3.27905	49.94	FALSE	0
2022-09-13	11:33:10	0.737315	3.27972	3.26758	54.3573	FALSE	0
2022-09-13	11:33:10	0.727494	3.23604	3.26758	53.1761	FALSE	0
2022-09-13	11:33:10	0.738944	3.28697	3.26758	57.6443	FALSE	0
2022-09-13	11:33:11	0.726934	3.23355	3.24339	56.4096	FALSE	0
2022-09-13	11:33:11	0.736857	3.27769	3.24339	60.922	FALSE	0
2022-09-13	11:33:11	0.727901	3.23785	3.24339	59.6475	FALSE	0
2022-09-13	11:33:11	0.724898	3.22449	3.24339	64.1464	FALSE	0
2022-09-13	11:33:12	0.706527	3.14277	3.14255	62.7902	FALSE	0
2022-09-13	11:33:12	0.719606	3.20095	3.14255	67.3474	FALSE	0
2022-09-13	11:33:12	0.698486	3.10701	3.14255	65.8972	FALSE	0
2022-09-13	11:33:12	0.701285	3.11946	3.14255	70.4668	FALSE	0
2022-09-13	11:33:13	0.689326	3.06626	3.15868	68.9635	FALSE	0
2022-09-13	11:33:13	0.716807	3.1885	3.15868	73.6554	FALSE	0
2022-09-13	11:33:13	0.713346	3.17311	3.15868	72.1366	FALSE	0
2022-09-13	11:33:13	0.720929	3.20684	3.15868	76.8622	FALSE	0
2022-09-13	11:33:14	0.715127	3.18103	3.14737	75.3176	FALSE	0
2022-09-13	11:33:14	0.704644	3.1344	3.14737	79.9966	FALSE	0
2022-09-13	11:33:14	0.702913	3.1267	3.14737	78.4443	FALSE	0
2022-09-13	11:33:15	0.72729	3.23513	3.22987	83.2317	FALSE	0
2022-09-13	11:33:15	0.730445	3.24917	3.22987	81.6935	FALSE	0
2022-09-13	11:33:15	0.724949	3.22472	3.22987	86.4564	FALSE	0
2022-09-13	11:33:15	0.721743	3.21046	3.22987	84.904	FALSE	0
2022-09-13	11:33:16	0.72388	3.21996	3.20474	89.6764	FALSE	0
2022-09-13	11:33:16	0.723575	3.21861	3.20474	88.1226	FALSE	0
2022-09-13	11:33:16	0.719606	3.20095	3.20474	92.8773	FALSE	0
2022-09-13	11:33:16	0.714771	3.17944	3.20474	91.302	FALSE	0
2022-09-13	11:33:17	0.662048	2.94492	2.81872	95.8223	FALSE	0
2022-09-13	11:33:17	0.642048	2.85596	2.81872	94.158	FALSE	0
2022-09-13	11:33:17	0.588613	2.61827	2.81872	98.4405	FALSE	0
2022-09-13	11:33:17	0.641997	2.85573	2.81872	97.0137	FALSE	0
2022-09-13	11:33:18	0.61411	2.73168	2.47204	101.172	FALSE	0
2022-09-13	11:33:18	0.577723	2.56983	2.47204	99.5835	FALSE	0
2022-09-13	11:33:18	0.475382	2.11459	2.47204	103.287	FALSE	0
2022-09-13	11:33:19	0.645458	2.87113	3.16569	102.455	FALSE	0
2022-09-13	11:33:19	0.737112	3.27882	3.16569	106.566	FALSE	0
2022-09-13	11:33:19	0.732481	3.25822	3.16569	105.713	FALSE	0
2022-09-13	11:33:19	0.731667	3.2546	3.16569	109.82	FALSE	0
2022-09-13	11:33:20	0.731717	3.25482	3.12851	108.968	FALSE	0
2022-09-13	11:33:20	0.733092	3.26094	3.12851	113.081	FALSE	0
2022-09-13	11:33:20	0.669987	2.98024	3.12851	111.948	FALSE	0
2022-09-13	11:33:20	0.678486	3.01804	3.12851	116.099	FALSE	0
2022-09-13	11:33:21	0.654007	2.90915	2.52229	114.857	FALSE	0
2022-09-13	11:33:21	0.634669	2.82313	2.52229	118.922	FALSE	0
2022-09-13	11:33:21	0.509733	2.26739	2.52229	117.124	FALSE	0
2022-09-13	11:33:21	0.469733	2.08947	2.52229	121.012	FALSE	0
2022-09-13	11:33:22	0.588257	2.61668	1.17221	119.741	FALSE	0
2022-09-13	11:33:22	0.209224	0.93067	1.17221	121.942	FALSE	0
2022-09-13	11:33:22	-0.00690816	-0.0307289	1.17221	119.741	FALSE	0
2022-09-13	11:33:23	0.0948221	0.421788	0.430276	122.364	FALSE	0
2022-09-13	11:33:23	0.146476	0.651555	0.430276	120.393	FALSE	0
2022-09-13	11:33:23	0.0452038	0.201076	0.430276	122.565	FALSE	0
2022-09-13	11:33:23	0.10042	0.446688	0.430276	120.839	FALSE	0
2022-09-13	11:33:24	0.0139061	0.0618571	2.07894	122.627	FALSE	0
2022-09-13	11:33:24	0.441081	1.96202	2.07894	122.801	FALSE	0
2022-09-13	11:33:24	0.678944	3.02008	2.07894	125.647	FALSE	0
2022-09-13	11:33:24	0.735534	3.2718	2.07894	126.073	FALSE	0
2022-09-13	11:33:25	0.734669	3.26795	3.09563	128.915	FALSE	0
2022-09-13	11:33:25	0.589377	2.62167	3.09563	128.695	FALSE	0
2022-09-13	11:33:25	0.727748	3.23717	3.09563	132.152	FALSE	0
2022-09-13	11:33:25	0.731921	3.25573	3.09563	131.951	FALSE	0
2022-09-13	11:33:26	0.734873	3.26886	3.258	135.421	FALSE	0
2022-09-13	11:33:26	0.731565	3.25415	3.258	135.205	FALSE	0
2022-09-13	11:33:26	0.731412	3.25347	3.258	138.675	FALSE	0
2022-09-13	11:33:26	0.73187	3.2555	3.258	138.46	FALSE	0
2022-09-13	11:33:27	0.727087	3.23423	3.26282	141.909	FALSE	0
2022-09-13	11:33:27	0.734211	3.26592	3.26282	141.726	FALSE	0
2022-09-13	11:33:27	0.739249	3.28833	3.26282	145.197	FALSE	0
2022-09-13	11:33:28	0.74327	3.30621	3.25024	145.032	FALSE	0
2022-09-13	11:33:28	0.707901	3.14889	3.25024	148.346	FALSE	0
2022-09-13	11:33:28	0.737366	3.27995	3.25024	148.312	FALSE	0
2022-09-13	11:33:28	0.734211	3.26592	3.25024	151.612	FALSE	0
2022-09-13	11:33:29	0.733142	3.26116	3.27554	151.574	FALSE	0
2022-09-13	11:33:29	0.735585	3.27203	3.27554	154.884	FALSE	0
2022-09-13	11:33:29	0.740878	3.29557	3.27554	154.869	FALSE	0
2022-09-13	11:33:29	0.735891	3.27339	3.27554	158.158	FALSE	0
2022-09-13	11:33:30	0.73701	3.27837	3.27571	158.147	FALSE	0
2022-09-13	11:33:30	0.736094	3.27429	3.27571	161.432	FALSE	0
2022-09-13	11:33:30	0.737621	3.28109	3.27571	161.429	FALSE	0
2022-09-13	11:33:30	0.734924	3.26909	3.27571	164.701	FALSE	0
2022-09-13	11:33:31	0.729886	3.24668	3.26486	164.675	FALSE	0
2022-09-13	11:33:31	0.738333	3.28425	3.26486	167.985	FALSE	0
2022-09-13	11:33:31	0.733702	3.26365	3.26486	167.939	FALSE	0
2022-09-13	11:33:32	0.738333	3.28425	3.28074	171.269	FALSE	0
2022-09-13	11:33:32	0.732023	3.25618	3.28074	171.195	FALSE	0
2022-09-13	11:33:32	0.741081	3.29648	3.28074	174.566	FALSE	0
2022-09-13	11:33:32	0.73874	3.28606	3.28074	174.481	FALSE	0
2022-09-13	11:33:33	0.730903	3.2512	3.2615	177.817	FALSE	0
2022-09-13	11:33:33	0.732074	3.25641	3.2615	177.738	FALSE	0
2022-09-13	11:33:33	0.735941	3.27361	3.2615	181.091	FALSE	0
2022-09-13	11:33:33	0.733957	3.26479	3.2615	181.002	FALSE	0
2022-09-13	11:33:34	0.734873	3.26886	3.26994	184.36	FALSE	0
2022-09-13	11:33:34	0.732888	3.26003	3.26994	184.262	FALSE	0
2022-09-13	11:33:34	0.736298	3.2752	3.26994	187.635	FALSE	0
2022-09-13	11:33:34	0.736399	3.27565	3.26994	187.538	FALSE	0
2022-09-13	11:33:35	0.729987	3.24713	3.24977	190.882	FALSE	0
2022-09-13	11:33:35	0.726832	3.23309	3.24977	190.771	FALSE	0
2022-09-13	11:33:35	0.734924	3.26909	3.24977	194.151	FALSE	0
2022-09-13	11:33:36	0.732175	3.25686	3.36388	194.028	FALSE	0
2022-09-13	11:33:36	0.736349	3.27543	3.36388	197.426	FALSE	0
2022-09-13	11:33:36	0.820013	3.64758	3.36388	197.676	FALSE	0
2022-09-13	11:33:36	0.736399	3.27565	3.36388	200.702	FALSE	0
2022-09-13	11:33:37	0.740369	3.29331	3.26405	200.969	FALSE	0
2022-09-13	11:33:37	0.732379	3.25777	3.26405	203.96	FALSE	0
2022-09-13	11:33:37	0.729224	3.24373	3.26405	204.213	FALSE	0
2022-09-13	11:33:37	0.733193	3.26139	3.26405	207.221	FALSE	0
2022-09-13	11:33:38	0.733041	3.26071	3.26054	207.473	FALSE	0
2022-09-13	11:33:38	0.735789	3.27294	3.26054	210.494	FALSE	0
2022-09-13	11:33:38	0.729224	3.24373	3.26054	210.717	FALSE	0
2022-09-13	11:33:38	0.733957	3.26479	3.26054	213.759	FALSE	0
2022-09-13	11:33:39	0.735738	3.27271	3.26728	213.99	FALSE	0
2022-09-13	11:33:39	0.733142	3.26116	3.26728	217.02	FALSE	0
2022-09-13	11:33:39	0.734669	3.26795	3.26728	217.258	FALSE	0
2022-09-13	11:33:40	0.733092	3.26094	3.25522	220.281	FALSE	0
2022-09-13	11:33:40	0.72902	3.24283	3.25522	220.501	FALSE	0
2022-09-13	11:33:40	0.72841	3.24011	3.25522	223.521	FALSE	0
2022-09-13	11:33:40	0.736705	3.27701	3.25522	223.778	FALSE	0
2022-09-13	11:33:41	0.739147	3.28787	3.01442	226.809	FALSE	0
2022-09-13	11:33:41	0.644593	2.86728	3.01442	226.645	FALSE	0
2022-09-13	11:33:41	0.624847	2.77944	3.01442	229.588	FALSE	0
2022-09-13	11:33:41	0.702099	3.12308	3.01442	229.768	FALSE	0
2022-09-13	11:33:42	0.737214	3.27928	1.64714	232.868	FALSE	0
2022-09-13	11:33:42	0.246272	1.09547	1.64714	230.863	FALSE	0
2022-09-13	11:33:42	-0.319173	-1.41975	1.64714	232.868	FALSE	0
2022-09-13	11:33:42	0.816857	3.63354	1.64714	234.497	FALSE	0
2022-09-13	11:33:43	0.7307	3.2503	3.26916	236.118	FALSE	0
2022-09-13	11:33:43	0.742913	3.30463	3.26916	237.802	FALSE	0
2022-09-13	11:33:43	0.731209	3.25256	3.26916	239.371	FALSE	0
2022-09-13	11:33:44	0.740929	3.2958	3.27396	241.097	FALSE	0
2022-09-13	11:33:44	0.734415	3.26682	3.27396	242.637	FALSE	0
2022-09-13	11:33:44	0.738537	3.28516	3.27396	244.382	FALSE	0
2022-09-13	11:33:44	0.730191	3.24804	3.27396	245.885	FALSE	0
2022-09-13	11:33:45	0.742761	3.30395	3.16377	247.686	FALSE	0
2022-09-13	11:33:45	0.740827	3.29535	3.16377	249.181	FALSE	0
2022-09-13	11:33:45	0.733601	3.2632	3.16377	250.95	FALSE	0
2022-09-13	11:33:45	0.627799	2.79258	3.16377	251.973	FALSE	0
2022-09-13	11:33:46	0.739147	3.28787	3.26863	254.238	FALSE	0
2022-09-13	11:33:46	0.73584	3.27316	3.26863	255.247	FALSE	0
2022-09-13	11:33:46	0.737366	3.27995	3.26863	257.517	FALSE	0
2022-09-13	11:33:46	0.726934	3.23355	3.26863	258.48	FALSE	0
2022-09-13	11:33:47	0.735076	3.26977	3.26207	260.787	FALSE	0
2022-09-13	11:33:47	0.733804	3.26411	3.26207	261.744	FALSE	0
2022-09-13	11:33:47	0.733804	3.26411	3.26207	264.051	FALSE	0
2022-09-13	11:33:47	0.7307	3.2503	3.26207	264.995	FALSE	0
2022-09-13	11:33:48	0.732532	3.25845	2.32678	267.31	FALSE	0
2022-09-13	11:33:48	0.726272	3.2306	2.32678	268.225	FALSE	0
2022-09-13	11:33:48	0.110445	0.491281	2.32678	267.801	FALSE	0
2022-09-13	11:33:49	0.102354	0.455291	0.728295	268.68	FALSE	0
2022-09-13	11:33:49	0.174364	0.775606	0.728295	268.577	FALSE	0
2022-09-13	11:33:49	0.206527	0.918673	0.728295	269.599	FALSE	0
2022-09-13	11:33:49	0.171667	0.763609	0.728295	269.34	FALSE	0
2022-09-13	11:33:50	0.212735	0.946288	2.57232	270.545	FALSE	0
2022-09-13	11:33:50	0.629784	2.80141	2.57232	272.142	FALSE	0
2022-09-13	11:33:50	0.740776	3.29512	2.57232	273.84	FALSE	0
2022-09-13	11:33:50	0.729835	3.24645	2.57232	275.388	FALSE	0
2022-09-13	11:33:51	1.47391	6.55625	3.49926	280.397	FALSE	0
2022-09-13	11:33:51	1.02327	4.55171	3.49926	279.94	FALSE	0
2022-09-13	11:33:51	0.354822	1.57832	3.49926	281.975	FALSE	0
2022-09-13	11:33:51	0.294669	1.31075	3.49926	281.251	FALSE	0
2022-09-13	11:33:52	0.409529	1.82167	2.78065	283.797	FALSE	0
2022-09-13	11:33:52	0.735941	3.27361	2.78065	284.524	FALSE	0
2022-09-13	11:33:52	0.729886	3.24668	2.78065	287.043	FALSE	0
2022-09-13	11:33:53	0.735331	3.2709	3.28312	287.795	FALSE	0
2022-09-13	11:33:53	0.739147	3.28787	3.28312	290.331	FALSE	0
2022-09-13	11:33:53	0.739504	3.28946	3.28312	291.085	FALSE	0
2022-09-13	11:33:53	0.738333	3.28425	3.28312	293.616	FALSE	0
2022-09-13	11:33:54	0.735585	3.27203	3.26631	294.357	FALSE	0
2022-09-13	11:33:54	0.732277	3.25731	3.26631	296.873	FALSE	0
2022-09-13	11:33:54	0.739351	3.28878	3.26631	297.645	FALSE	0
2022-09-13	11:33:54	0.729987	3.24713	3.26631	300.12	FALSE	0
2022-09-13	11:33:55	0.731463	3.25369	3.27299	300.899	FALSE	0
2022-09-13	11:33:55	0.740013	3.29173	3.27299	303.412	FALSE	0
2022-09-13	11:33:55	0.73528	3.27067	3.27299	304.17	FALSE	0
2022-09-13	11:33:55	0.73645	3.27588	3.27299	306.688	FALSE	0
2022-09-13	11:33:56	0.736501	3.2761	3.27603	307.446	FALSE	0
2022-09-13	11:33:56	0.734517	3.26728	3.27603	309.955	FALSE	0
2022-09-13	11:33:56	0.738435	3.28471	3.27603	310.731	FALSE	0
2022-09-13	11:33:57	0.737061	3.27859	3.25398	313.233	FALSE	0
2022-09-13	11:33:57	0.733193	3.26139	3.25398	313.992	FALSE	0
2022-09-13	11:33:57	0.731616	3.25437	3.25398	316.488	FALSE	0
2022-09-13	11:33:57	0.724237	3.22155	3.25398	317.214	FALSE	0
2022-09-13	11:33:58	0.732837	3.25981	3.25788	319.748	FALSE	0
2022-09-13	11:33:58	0.730242	3.24826	3.25788	320.462	FALSE	0
2022-09-13	11:33:58	0.7307	3.2503	3.25788	322.998	FALSE	0
2022-09-13	11:33:58	0.73584	3.27316	3.25788	323.735	FALSE	0
2022-09-13	11:33:59	0.736501	3.2761	3.27011	326.274	FALSE	0
2022-09-13	11:33:59	0.737926	3.28244	3.27011	327.017	FALSE	0
2022-09-13	11:33:59	0.734262	3.26614	3.27011	329.54	FALSE	0
2022-09-13	11:33:59	0.731921	3.25573	3.27011	330.273	FALSE	0
2022-09-13	11:34:00	0.73014	3.24781	3.25513	332.788	FALSE	0
2022-09-13	11:34:00	0.731565	3.25415	3.25513	333.527	FALSE	0
2022-09-13	11:34:00	0.733651	3.26343	3.25513	336.051	FALSE	0
2022-09-13	11:34:01	0.731158	3.25234	3.26066	336.78	FALSE	0
2022-09-13	11:34:01	0.729478	3.24486	3.26066	339.296	FALSE	0
2022-09-13	11:34:01	0.732888	3.26003	3.26066	340.04	FALSE	0
2022-09-13	11:34:01	0.738588	3.28539	3.26066	342.582	FALSE	0
2022-09-13	11:34:02	0.729122	3.24328	3.26247	343.283	FALSE	0
2022-09-13	11:34:02	0.736603	3.27656	3.26247	345.858	FALSE	0
2022-09-13	11:34:02	0.731463	3.25369	3.26247	346.537	FALSE	0
2022-09-13	11:34:02	0.736552	3.27633	3.26247	349.135	FALSE	0
2022-09-13	11:34:03	0.731412	3.25347	3.25137	349.79	FALSE	0
2022-09-13	11:34:03	0.731565	3.25415	3.25137	352.389	FALSE	0
2022-09-13	11:34:03	0.733499	3.26275	3.25137	353.053	FALSE	0
2022-09-13	11:34:03	0.72729	3.23513	3.25137	355.624	FALSE	0
2022-09-13	11:34:04	0.729784	3.24623	3.27128	356.299	FALSE	0
2022-09-13	11:34:04	0.735483	3.27158	3.27128	358.895	FALSE	0
2022-09-13	11:34:04	0.74098	3.29603	3.27128	359.595	FALSE	0
2022-09-13	11:34:05	0.734008	3.26501	3.2572	362.16	FALSE	0
2022-09-13	11:34:05	0.734771	3.26841	3.2572	362.863	FALSE	0
2022-09-13	11:34:05	0.729428	3.24464	3.2572	365.405	FALSE	0
2022-09-13	11:34:05	0.730801	3.25075	3.2572	366.114	FALSE	0
2022-09-13	11:34:06	0.900725	4.0066	3.42308	369.412	FALSE	0
2022-09-13	11:34:06	0.733142	3.26116	3.42308	369.375	FALSE	0
2022-09-13	11:34:06	0.708257	3.15047	3.42308	372.562	FALSE	0
2022-09-13	11:34:06	0.736043	3.27407	3.42308	372.649	FALSE	0
2022-09-13	11:34:07	0.739758	3.29059	3.26648	375.853	FALSE	0
2022-09-13	11:34:07	0.730038	3.24736	3.26648	375.897	FALSE	0
2022-09-13	11:34:07	0.732786	3.25958	3.26648	379.112	FALSE	0
2022-09-13	11:34:07	0.734771	3.26841	3.26648	379.165	FALSE	0
2022-09-13	11:34:08	0.737926	3.28244	3.27112	382.395	FALSE	0
2022-09-13	11:34:08	0.731209	3.25256	3.27112	382.418	FALSE	0
2022-09-13	11:34:08	0.73701	3.27837	3.27112	385.673	FALSE	0
2022-09-13	11:34:09	0.733244	3.26162	3.25086	385.679	FALSE	0
2022-09-13	11:34:09	0.730089	3.24758	3.25086	388.921	FALSE	0
2022-09-13	11:34:09	0.73355	3.26298	3.25086	388.942	FALSE	0
2022-09-13	11:34:09	0.726425	3.23128	3.25086	392.152	FALSE	0
2022-09-13	11:34:10	0.253346	1.12693	2.35308	390.069	FALSE	0
2022-09-13	11:34:10	0.398384	1.77209	2.35308	393.924	FALSE	0
2022-09-13	11:34:10	0.740013	3.29173	2.35308	393.361	FALSE	0
2022-09-13	11:34:10	0.724237	3.22155	2.35308	397.146	FALSE	0
2022-09-13	11:34:11	0.622354	2.76836	3.11317	396.129	FALSE	0
2022-09-13	11:34:11	0.708817	3.15296	3.11317	400.299	FALSE	0
2022-09-13	11:34:11	0.732328	3.25754	3.11317	399.387	FALSE	0
2022-09-13	11:34:11	0.735992	3.27384	3.11317	403.572	FALSE	0
2022-09-13	11:34:12	0.733499	3.26275	3.27486	402.65	FALSE	0
2022-09-13	11:34:12	0.737519	3.28063	3.27486	406.853	FALSE	0
2022-09-13	11:34:12	0.732125	3.25664	3.27486	405.906	FALSE	0
2022-09-13	11:34:12	0.741743	3.29942	3.27486	410.152	FALSE	0
2022-09-13	11:34:13	1.50882	6.71153	6.33937	412.618	FALSE	0
2022-09-13	11:34:13	1.8362	8.16778	6.33937	418.32	FALSE	0
2022-09-13	11:34:13	0.930445	4.13881	6.33937	416.757	FALSE	0
2022-09-13	11:34:14	0.735738	3.27271	3.23932	421.593	FALSE	0
2022-09-13	11:34:14	0.722557	3.21408	3.23932	419.971	FALSE	0
2022-09-13	11:34:14	0.727188	3.23468	3.23932	424.828	FALSE	0
2022-09-13	11:34:14	0.727443	3.23581	3.23932	423.207	FALSE	0
2022-09-13	11:34:15	0.729936	3.2469	3.74628	428.075	FALSE	0
2022-09-13	11:34:15	0.765712	3.40604	3.74628	426.613	FALSE	0
2022-09-13	11:34:15	0.679606	3.02302	3.74628	431.098	FALSE	0
2022-09-13	11:34:15	1.19355	5.30915	3.74628	431.922	FALSE	0
2022-09-13	11:34:16	0.746221	3.31934	4.67377	434.417	FALSE	0
2022-09-13	11:34:16	1.26586	5.6308	4.67377	437.553	FALSE	0
2022-09-13	11:34:16	1.04123	4.6316	4.67377	439.049	FALSE	0
2022-09-13	11:34:16	1.14953	5.11334	4.67377	442.666	FALSE	0
2022-09-13	11:34:17	0.394109	1.75308	2.21488	440.802	FALSE	0
2022-09-13	11:34:17	0.546018	2.4288	2.21488	445.095	FALSE	0
2022-09-13	11:34:17	0.553652	2.46275	2.21488	443.264	FALSE	0
2022-09-13	11:34:18	0.44673	1.98714	2.09365	447.082	FALSE	0
2022-09-13	11:34:18	0.738181	3.28358	2.09365	446.548	FALSE	0
2022-09-13	11:34:18	0.419046	1.864	2.09365	448.946	FALSE	0
2022-09-13	11:34:18	0.278741	1.2399	2.09365	447.788	FALSE	0
2022-09-13	11:34:19	0.328715	1.46219	-0.290206	450.408	FALSE	0
2022-09-13	11:34:19	0.0968577	0.430842	-0.290206	448.219	FALSE	0
2022-09-13	11:34:19	-0.29332	-1.30475	-0.290206	450.408	FALSE	0
2022-09-13	11:34:19	-0.393218	-1.74911	-0.290206	448.219	FALSE	0
2022-09-13	11:34:20	-0.609758	-2.71233	-0.948834	450.408	FALSE	0
2022-09-13	11:34:20	-0.400648	-1.78216	-0.948834	448.219	FALSE	0
2022-09-13	11:34:20	-0.306399	-1.36292	-0.948834	450.408	FALSE	0
2022-09-13	11:34:20	0.463575	2.06207	-0.948834	450.281	FALSE	0
2022-09-13	11:34:21	0.531056	2.36224	1.89305	452.77	FALSE	0
2022-09-13	11:34:21	0.385102	1.71301	1.89305	451.994	FALSE	0
2022-09-13	11:34:21	0.360573	1.6039	1.89305	454.374	FALSE	0
2022-09-13	11:34:22	0.433346	1.92761	1.26836	453.921	FALSE	0
2022-09-13	11:34:22	0.319707	1.42212	1.26836	455.796	FALSE	0
2022-09-13	11:34:22	0.206934	0.920484	1.26836	454.842	FALSE	0
2022-09-13	11:34:22	0.180573	0.803225	1.26836	456.599	FALSE	0
2022-09-13	11:34:23	0.290293	1.29128	2.48273	456.133	FALSE	0
2022-09-13	11:34:23	0.31299	1.39224	2.48273	457.992	FALSE	0
2022-09-13	11:34:23	0.66556	2.96054	2.48273	459.094	FALSE	0
2022-09-13	11:34:23	0.963728	4.28685	2.48273	462.279	FALSE	0
2022-09-13	11:34:24	1.23452	5.49139	7.03676	464.585	FALSE	0
2022-09-13	11:34:24	2.07192	9.21631	7.03676	471.495	FALSE	0
2022-09-13	11:34:24	1.90765	8.48561	7.03676	473.071	FALSE	0
2022-09-13	11:34:24	1.11365	4.95374	7.03676	476.449	FALSE	0
2022-09-13	11:34:25	1.0993	4.88991	3.01955	477.961	FALSE	0
2022-09-13	11:34:25	0.476705	2.12048	3.01955	478.569	FALSE	0
2022-09-13	11:34:25	0.460471	2.04827	3.01955	480.009	FALSE	0
2022-09-13	11:34:26	0.274008	1.21884	2.87396	479.788	FALSE	0
2022-09-13	11:34:26	0.441845	1.96541	2.87396	481.974	FALSE	0
2022-09-13	11:34:26	0.885153	3.93734	2.87396	483.725	FALSE	0
2022-09-13	11:34:26	0.983372	4.37424	2.87396	486.348	FALSE	0
2022-09-13	11:34:27	1.72327	7.66545	3.48748	491.391	FALSE	0
2022-09-13	11:34:27	0.959453	4.26784	3.48748	490.616	FALSE	0
2022-09-13	11:34:27	0.186374	0.829029	3.48748	492.22	FALSE	0
2022-09-13	11:34:27	0.266985	1.1876	3.48748	491.804	FALSE	0
2022-09-13	11:34:28	0.153906	0.684605	0.897451	492.904	FALSE	0
2022-09-13	11:34:28	0.155891	0.693434	0.897451	492.497	FALSE	0
2022-09-13	11:34:28	0.200827	0.893319	0.897451	493.798	FALSE	0
2022-09-13	11:34:28	0.2964	1.31845	0.897451	493.816	FALSE	0
2022-09-13	11:34:29	0.772634	3.43683	2.60024	497.235	FALSE	0
2022-09-13	11:34:29	0.411361	1.82982	2.60024	495.646	FALSE	0
2022-09-13	11:34:29	0.569682	2.53406	2.60024	499.769	FALSE	0
2022-09-13	11:34:30	0.84729	3.76892	6.40535	499.415	FALSE	0
2022-09-13	11:34:30	0.754516	3.35624	6.40535	503.125	FALSE	0
2022-09-13	11:34:30	1.87289	8.33099	6.40535	507.746	FALSE	0
2022-09-13	11:34:30	2.28525	10.1652	6.40535	513.29	FALSE	0
2022-09-13	11:34:31	3.74479	16.6576	15.8801	524.403	1	1
2022-09-13	11:34:31	6.06988	27	15.8801	540.29	1	2
2022-09-13	11:34:31	3.17904	14.141	15.8801	538.544	1	3
2022-09-13	11:34:31	1.28627	5.72159	15.8801	546.012	FALSE	3
2022-09-13	11:34:32	0.810649	3.60593	7.80648	542.15	FALSE	3
2022-09-13	11:34:32	2.12485	9.45176	7.80648	555.463	FALSE	3
2022-09-13	11:34:32	2.17986	9.69645	7.80648	551.846	FALSE	3
2022-09-13	11:34:32	1.90454	8.47177	7.80648	563.935	FALSE	3
2022-09-13	11:34:33	1.6562	7.36711	6.51452	559.214	FALSE	3
2022-09-13	11:34:33	1.50159	6.67937	6.51452	570.615	FALSE	3
2022-09-13	11:34:33	1.38123	6.14399	6.51452	565.358	FALSE	3
2022-09-13	11:34:33	1.3191	5.86762	6.51452	576.482	FALSE	3
2022-09-13	11:34:34	1.30566	5.80784	5.4888	571.165	FALSE	3
2022-09-13	11:34:34	1.21324	5.39673	5.4888	581.879	FALSE	3
2022-09-13	11:34:34	1.18291	5.26182	5.4888	576.427	FALSE	3
2022-09-13	11:34:35	1.10434	4.91233	4.55114	586.791	FALSE	3
2022-09-13	11:34:35	0.985153	4.38216	4.55114	580.809	FALSE	3
2022-09-13	11:34:35	1.02072	4.54037	4.55114	591.332	FALSE	3
2022-09-13	11:34:35	0.982354	4.36971	4.55114	585.179	FALSE	3
2022-09-13	11:34:36	0.919555	4.09036	2.84498	595.422	FALSE	3
2022-09-13	11:34:36	0.982405	4.36993	2.84498	589.549	FALSE	3
2022-09-13	11:34:36	0.32327	1.43797	2.84498	596.86	FALSE	3
2022-09-13	11:34:36	0.333092	1.48166	2.84498	591.031	FALSE	3
2022-09-13	11:34:37	0.552939	2.45958	1.06712	599.32	FALSE	3
2022-09-13	11:34:37	0.26729	1.18896	1.06712	592.22	FALSE	3
2022-09-13	11:34:37	0.0996058	0.443067	1.06712	599.763	FALSE	3
2022-09-13	11:34:37	0.0397585	0.176854	1.06712	592.397	FALSE	3
2022-09-13	11:34:38	0.155127	0.690036	0.895734	600.453	FALSE	3
2022-09-13	11:34:38	0.212176	0.943801	0.895734	593.34	FALSE	3
2022-09-13	11:34:38	0.236807	1.05336	0.895734	601.506	FALSE	3
2022-09-13	11:34:39	0.234568	1.04341	0.918617	594.384	FALSE	3
2022-09-13	11:34:39	0.212176	0.943801	0.918617	602.45	FALSE	3
2022-09-13	11:34:39	0.236196	1.05065	0.918617	595.434	FALSE	3
2022-09-13	11:34:39	0.143117	0.636613	0.918617	603.086	FALSE	3
2022-09-13	11:34:40	0.309479	1.37662	1.77521	596.811	FALSE	3
2022-09-13	11:34:40	0.198893	0.884716	1.77521	603.971	FALSE	3
2022-09-13	11:34:40	0.452125	2.01114	1.77521	598.822	FALSE	3
2022-09-13	11:34:40	0.63584	2.82834	1.77521	606.8	FALSE	3
2022-09-13	11:34:41	1.51625	6.74458	7.82476	605.567	FALSE	3
2022-09-13	11:34:41	1.75416	7.80285	7.82476	614.602	FALSE	3
2022-09-13	11:34:41	2.00897	8.9363	7.82476	614.503	FALSE	3
2022-09-13	11:34:41	1.75696	7.81531	7.82476	622.418	FALSE	3
2022-09-13	11:34:42	0.851972	3.78974	3.06347	618.293	FALSE	3
2022-09-13	11:34:42	0.6993	3.11063	3.06347	625.528	FALSE	3
2022-09-13	11:34:42	0.514822	2.29003	3.06347	620.583	FALSE	3
2022-09-13	11:34:43	0.917672	4.08199	4.66688	629.61	FALSE	3
2022-09-13	11:34:43	1.3194	5.86896	4.66688	626.452	FALSE	3
2022-09-13	11:34:43	1.36419	6.06819	4.66688	635.678	FALSE	3
2022-09-13	11:34:43	0.595382	2.64838	4.66688	629.1	FALSE	3
2022-09-13	11:34:44	0.555789	2.47226	2.11448	638.151	FALSE	3
2022-09-13	11:34:44	0.517163	2.30044	2.11448	631.401	FALSE	3
2022-09-13	11:34:44	0.34841	1.5498	2.11448	639.701	FALSE	3
2022-09-13	11:34:44	0.480064	2.13542	2.11448	633.536	FALSE	3
2022-09-13	11:34:45	0.512023	2.27758	2.19371	641.978	FALSE	3
2022-09-13	11:34:45	0.469479	2.08834	2.19371	635.624	FALSE	3
2022-09-13	11:34:45	0.422405	1.87894	2.19371	643.857	FALSE	3
2022-09-13	11:34:45	0.568766	2.52998	2.19371	638.154	FALSE	3
2022-09-13	11:34:46	0.772379	3.4357	3.37842	647.293	FALSE	3
2022-09-13	11:34:46	0.766476	3.40944	3.37842	641.564	FALSE	3
2022-09-13	11:34:46	0.739656	3.29014	3.37842	650.583	FALSE	3
2022-09-13	11:34:47	0.788002	3.50519	3.22879	645.069	FALSE	3
2022-09-13	11:34:47	0.792226	3.52398	3.22879	654.107	FALSE	3
2022-09-13	11:34:47	0.801539	3.56541	3.22879	648.634	FALSE	3
2022-09-13	11:34:47	0.521692	2.32059	3.22879	656.427	FALSE	3
2022-09-13	11:34:48	0.154822	0.688679	1.46128	649.323	FALSE	3
2022-09-13	11:34:48	0.160522	0.714034	1.46128	657.142	FALSE	3
2022-09-13	11:34:48	0.262608	1.16813	1.46128	650.491	FALSE	3
2022-09-13	11:34:48	0.736094	3.27429	1.46128	660.416	FALSE	3
2022-09-13	11:34:49	0.719606	3.20095	2.65268	653.692	FALSE	3
2022-09-13	11:34:49	0.825916	3.67384	2.65268	664.09	FALSE	3
2022-09-13	11:34:49	0.579809	2.57911	2.65268	656.271	FALSE	3
2022-09-13	11:34:49	0.260064	1.15682	2.65268	665.246	FALSE	3
2022-09-13	11:34:50	0.728562	3.24079	3.25716	659.512	FALSE	3
2022-09-13	11:34:50	0.733092	3.26094	3.25716	668.507	FALSE	3
2022-09-13	11:34:50	0.735076	3.26977	3.25716	662.782	FALSE	3
2022-09-13	11:34:51	0.730954	3.25143	3.2623	671.759	FALSE	3
2022-09-13	11:34:51	0.73416	3.26569	3.2623	666.047	FALSE	3
2022-09-13	11:34:51	0.735229	3.27045	3.2623	675.029	FALSE	3
2022-09-13	11:34:51	0.733244	3.26162	3.2623	669.309	FALSE	3
2022-09-13	11:34:52	0.732735	3.25935	3.2761	678.289	FALSE	3
2022-09-13	11:34:52	0.738333	3.28425	3.2761	672.593	FALSE	3
2022-09-13	11:34:52	0.734822	3.26864	3.2761	681.557	FALSE	3
2022-09-13	11:34:52	0.740114	3.29218	3.2761	675.886	FALSE	3
2022-09-13	11:34:53	0.73472	3.26818	3.27469	684.825	FALSE	3
2022-09-13	11:34:53	0.735687	3.27248	3.27469	679.158	FALSE	3
2022-09-13	11:34:53	0.74042	3.29354	3.27469	688.119	FALSE	3
2022-09-13	11:34:53	0.733906	3.26456	3.27469	682.423	FALSE	3
2022-09-13	11:34:54	0.730547	3.24962	3.25986	691.369	FALSE	3
2022-09-13	11:34:54	0.73131	3.25301	3.25986	685.676	FALSE	3
2022-09-13	11:34:54	0.73355	3.26298	3.25986	694.632	FALSE	3
2022-09-13	11:34:54	0.735992	3.27384	3.25986	688.949	FALSE	3
2022-09-13	11:34:55	0.731921	3.25573	3.26675	697.887	FALSE	3
2022-09-13	11:34:55	0.737061	3.27859	3.26675	692.228	FALSE	3
2022-09-13	11:34:55	0.734211	3.26592	3.26675	701.153	FALSE	3
2022-09-13	11:34:56	0.733448	3.26252	3.27299	695.491	FALSE	3
2022-09-13	11:34:56	0.733092	3.26094	3.27299	704.414	FALSE	3
2022-09-13	11:34:56	0.73874	3.28606	3.27299	698.777	FALSE	3
2022-09-13	11:34:56	0.737926	3.28244	3.27299	707.697	FALSE	3
2022-09-13	11:34:57	0.730293	3.24849	2.97826	702.025	FALSE	3
2022-09-13	11:34:57	0.73528	3.27067	2.97826	710.967	FALSE	3
2022-09-13	11:34:57	0.731107	3.25211	2.97826	705.277	FALSE	3
2022-09-13	11:34:57	0.481489	2.14176	2.97826	713.109	FALSE	3
2022-09-13	11:34:58	0.424288	1.88732	2.10735	707.164	FALSE	3
2022-09-13	11:34:58	0.417417	1.85675	2.10735	714.966	FALSE	3
2022-09-13	11:34:58	0.317214	1.41103	2.10735	708.576	FALSE	3
2022-09-13	11:34:58	0.736094	3.27429	2.10735	718.24	FALSE	3
2022-09-13	11:34:59	1.11955	4.97998	7.96455	713.556	FALSE	3
2022-09-13	11:34:59	1.63955	7.29305	7.96455	725.533	FALSE	3
2022-09-13	11:34:59	2.61243	11.6206	7.96455	725.176	FALSE	3
2022-09-13	11:35:00	0.873804	3.88685	5.24719	729.42	FALSE	3
2022-09-13	11:35:00	1.58531	7.05178	5.24719	732.228	FALSE	3
2022-09-13	11:35:00	1.16872	5.1987	5.24719	734.619	FALSE	3
2022-09-13	11:35:00	1.09065	4.85143	5.24719	737.079	FALSE	3
2022-09-13	11:35:01	2.5077	11.1548	7.40314	745.773	FALSE	3
2022-09-13	11:35:01	1.92973	8.58382	7.40314	745.663	FALSE	3
2022-09-13	11:35:01	0.680267	3.02596	7.40314	748.799	FALSE	3
2022-09-13	11:35:01	1.5395	6.848	7.40314	752.511	FALSE	3
2022-09-13	11:35:02	0.523932	2.33055	3.41222	751.13	FALSE	3
2022-09-13	11:35:02	1.96129	8.72421	3.41222	761.235	FALSE	3
2022-09-13	11:35:02	0.359504	1.59915	3.41222	752.729	FALSE	3
2022-09-13	11:35:02	0.223677	0.99496	3.41222	762.23	FALSE	3
2022-09-13	11:35:03	0.481692	2.14266	3.52663	754.872	FALSE	3
2022-09-13	11:35:03	0.721591	3.20978	3.52663	765.44	FALSE	3
2022-09-13	11:35:03	1.17518	5.22744	3.52663	760.099	FALSE	3
2022-09-13	11:35:04	0.867697	3.85969	6.51468	769.3	FALSE	3
2022-09-13	11:35:04	1.62235	7.21654	6.51468	767.316	FALSE	3
2022-09-13	11:35:04	0.914415	4.0675	6.51468	773.367	FALSE	3
2022-09-13	11:35:04	2.4538	10.915	6.51468	778.231	FALSE	3
2022-09-13	11:35:05	1.28245	5.70459	4.96336	779.072	FALSE	3
2022-09-13	11:35:05	2.24368	9.98034	4.96336	788.211	FALSE	3
2022-09-13	11:35:05	0.558079	2.48245	4.96336	781.554	FALSE	3
2022-09-13	11:35:05	0.379046	1.68607	4.96336	789.897	FALSE	3
2022-09-13	11:35:06	0.727239	3.2349	6.19058	784.789	FALSE	3
2022-09-13	11:35:06	1.1191	4.97798	6.19058	794.875	FALSE	3
2022-09-13	11:35:06	0.656959	2.92229	6.19058	787.712	FALSE	3
2022-09-13	11:35:06	3.06352	13.6271	6.19058	808.502	1	4
2022-09-13	11:35:07	1.05274	4.6828	4.83407	792.394	FALSE	4
2022-09-13	11:35:07	1.40978	6.27098	4.83407	814.773	FALSE	4
2022-09-13	11:35:07	0.797723	3.54843	4.83407	795.943	FALSE	4
2022-09-13	11:35:08	1.00709	4.47974	3.02461	819.253	FALSE	4
2022-09-13	11:35:08	0.544695	2.42291	3.02461	798.366	FALSE	4
2022-09-13	11:35:08	0.748817	3.33089	3.02461	822.584	FALSE	4
2022-09-13	11:35:08	0.419249	1.8649	3.02461	800.231	FALSE	4
2022-09-13	11:35:09	0.205255	0.913015	1.89773	823.497	FALSE	4
2022-09-13	11:35:09	0.525967	2.33961	1.89773	802.57	FALSE	4
2022-09-13	11:35:09	0.251769	1.11992	1.89773	824.617	FALSE	4
2022-09-13	11:35:09	0.723524	3.21838	1.89773	805.789	FALSE	4
2022-09-13	11:35:10	0.745153	3.31459	1.69037	827.931	FALSE	4
2022-09-13	11:35:10	0.530903	2.36156	1.69037	808.15	FALSE	4
2022-09-13	11:35:10	0.183372	0.815675	1.69037	828.747	FALSE	4
2022-09-13	11:35:10	0.0606237	0.269666	1.69037	808.42	FALSE	4
2022-09-13	11:35:11	-0.0250252	-0.111317	0.887057	828.747	FALSE	4
2022-09-13	11:35:11	0.474568	2.11097	0.887057	810.531	FALSE	4
2022-09-13	11:35:11	0.148715	0.661514	0.887057	829.409	FALSE	4
2022-09-13	11:35:12	0.204491	0.909617	1.07991	811.44	FALSE	4
2022-09-13	11:35:12	0.43869	1.95138	1.07991	831.36	FALSE	4
2022-09-13	11:35:12	0.133652	0.594511	1.07991	812.035	FALSE	4
2022-09-13	11:35:12	0.194262	0.864116	1.07991	832.224	FALSE	4
2022-09-13	11:35:13	-0.10757	-0.478493	-0.981885	812.035	FALSE	4
2022-09-13	11:35:13	-0.344821	-1.53383	-0.981885	832.224	FALSE	4
2022-09-13	11:35:13	-0.290979	-1.29433	-0.981885	812.035	FALSE	4
2022-09-13	11:35:13	-0.13958	-0.62088	-0.981885	832.224	FALSE	4
2022-09-13	11:35:14	-0.123906	-0.551159	2.00685	812.035	FALSE	4
2022-09-13	11:35:14	0.0089188	0.0396726	2.00685	832.264	FALSE	4
2022-09-13	11:35:14	1.52134	6.76722	2.00685	818.802	FALSE	4
2022-09-13	11:35:14	0.398283	1.77164	2.00685	834.035	FALSE	4
2022-09-13	11:35:15	0.380827	1.69399	1.33474	820.496	FALSE	4
2022-09-13	11:35:15	0.336756	1.49796	1.33474	835.533	FALSE	4
2022-09-13	11:35:15	0.182608	0.812277	1.33474	821.308	FALSE	4
2022-09-13	11:35:16	0.275025	1.22337	1.86847	836.757	FALSE	4
2022-09-13	11:35:16	0.385204	1.71346	1.86847	823.022	FALSE	4
2022-09-13	11:35:16	0.440369	1.95885	1.86847	838.716	FALSE	4
2022-09-13	11:35:16	0.579606	2.5782	1.86847	825.6	FALSE	4
2022-09-13	11:35:17	0.213652	0.950367	1.58754	839.666	FALSE	4
2022-09-13	11:35:17	0.482812	2.14764	1.58754	827.748	FALSE	4
2022-09-13	11:35:17	0.202557	0.901014	1.58754	840.567	FALSE	4
2022-09-13	11:35:17	0.528562	2.35115	1.58754	830.099	FALSE	4
2022-09-13	11:35:18	0.333448	1.48324	1.24086	842.05	FALSE	4
2022-09-13	11:35:18	0.363575	1.61725	1.24086	831.716	FALSE	4
2022-09-13	11:35:18	0.205865	0.915729	1.24086	842.966	FALSE	4
2022-09-13	11:35:18	0.212939	0.947195	1.24086	832.663	FALSE	4
2022-09-13	11:35:19	0.0494277	0.219864	-0.625802	843.186	FALSE	4
2022-09-13	11:35:19	-0.155203	-0.690374	-0.625802	832.663	FALSE	4
2022-09-13	11:35:19	-0.249554	-1.11007	-0.625802	843.186	FALSE	4
2022-09-13	11:35:19	-0.207417	-0.922632	-0.625802	832.663	FALSE	4
2022-09-13	11:35:20	-0.192608	-0.856759	-0.616504	843.186	FALSE	4
2022-09-13	11:35:20	-0.166247	-0.7395	-0.616504	832.663	FALSE	4
2022-09-13	11:35:20	-0.0569336	-0.253252	-0.616504	843.186	FALSE	4
2022-09-13	11:35:21	-0.198867	-0.8846	-0.448837	832.663	FALSE	4
2022-09-13	11:35:21	-0.0408013	-0.181492	-0.448837	843.186	FALSE	4
2022-09-13	11:35:21	-0.0513356	-0.228351	-0.448837	832.663	FALSE	4
2022-09-13	11:35:21	-0.112608	-0.500903	-0.448837	843.186	FALSE	4
2022-09-13	11:35:22	-0.0568318	-0.252799	0.151783	832.663	FALSE	4
2022-09-13	11:35:22	0.0866287	0.385342	0.151783	843.571	FALSE	4
2022-09-13	11:35:22	-0.0468064	-0.208204	0.151783	832.663	FALSE	4
2022-09-13	11:35:22	0.153499	0.682794	0.151783	844.254	FALSE	4
2022-09-13	11:35:23	0.0639824	0.284607	0.758685	832.948	FALSE	4
2022-09-13	11:35:23	0.135993	0.604924	0.758685	844.859	FALSE	4
2022-09-13	11:35:23	0.152074	0.676456	0.758685	833.624	FALSE	4
2022-09-13	11:35:23	0.330191	1.46876	0.758685	846.328	FALSE	4
2022-09-13	11:35:24	0.487596	2.16892	2.40344	835.793	FALSE	4
2022-09-13	11:35:24	0.669834	2.97956	2.40344	849.307	FALSE	4
2022-09-13	11:35:24	0.463524	2.06185	2.40344	837.855	FALSE	4
2022-09-13	11:35:25	0.651107	2.89625	5.35822	852.203	FALSE	4
2022-09-13	11:35:25	1.57564	7.00876	5.35822	844.864	FALSE	4
2022-09-13	11:35:25	0.715331	3.18194	5.35822	855.385	FALSE	4
2022-09-13	11:35:25	1.87625	8.34594	5.35822	853.21	FALSE	4
2022-09-13	11:35:26	1.22648	5.45563	6.12958	860.841	FALSE	4
2022-09-13	11:35:26	2.73772	12.1779	6.12958	865.388	FALSE	4
2022-09-13	11:35:26	1.18017	5.24963	6.12958	866.091	FALSE	4
2022-09-13	11:35:26	0.367595	1.63514	6.12958	867.023	FALSE	4
2022-09-13	11:35:27	0.41757	1.85743	1.56609	867.948	FALSE	4
2022-09-13	11:35:27	0.281692	1.25302	1.56609	868.276	FALSE	4
2022-09-13	11:35:27	0.535534	2.38216	1.56609	870.33	FALSE	4
2022-09-13	11:35:27	0.173499	0.771758	1.56609	869.048	FALSE	4
2022-09-13	11:35:28	0.353092	1.57062	1.23552	871.901	FALSE	4
2022-09-13	11:35:28	0.215534	0.958738	1.23552	870.006	FALSE	4
2022-09-13	11:35:28	0.264644	1.17719	1.23552	873.078	FALSE	4
2022-09-13	11:35:29	0.0606745	0.269892	0.712958	870.276	FALSE	4
2022-09-13	11:35:29	0.232583	1.03458	0.712958	874.113	FALSE	4
2022-09-13	11:35:29	0.218181	0.970513	0.712958	871.247	FALSE	4
2022-09-13	11:35:29	0.129682	0.576851	0.712958	874.689	FALSE	4
2022-09-13	11:35:30	-0.0842109	-0.374587	0.672154	871.247	FALSE	4
2022-09-13	11:35:30	0.181234	0.806165	0.672154	875.496	FALSE	4
2022-09-13	11:35:30	0.329326	1.46491	0.672154	872.712	FALSE	4
2022-09-13	11:35:30	0.178079	0.792131	0.672154	876.288	FALSE	4
2022-09-13	11:35:31	0.197214	0.877247	1.02263	873.589	FALSE	4
2022-09-13	11:35:31	0.0808781	0.359762	1.02263	876.648	FALSE	4
2022-09-13	11:35:31	0.381031	1.6949	1.02263	875.284	FALSE	4
2022-09-13	11:35:31	0.260471	1.15863	1.02263	877.806	FALSE	4
2022-09-13	11:35:32	0.734618	3.26773	3.25724	878.552	FALSE	4
2022-09-13	11:35:32	0.730598	3.24985	3.25724	881.056	FALSE	4
2022-09-13	11:35:32	0.731565	3.25415	3.25724	881.806	FALSE	4
2022-09-13	11:35:33	0.732328	3.25754	3.25969	884.314	FALSE	4
2022-09-13	11:35:33	0.729682	3.24577	3.25969	885.052	FALSE	4
2022-09-13	11:35:33	0.73014	3.24781	3.25969	887.561	FALSE	4
2022-09-13	11:35:33	0.739097	3.28765	3.25969	888.339	FALSE	4
2022-09-13	11:35:34	0.72958	3.24532	3.25302	890.807	FALSE	4
2022-09-13	11:35:34	0.729631	3.24554	3.25302	891.585	FALSE	4
2022-09-13	11:35:34	0.734466	3.26705	3.25302	894.074	FALSE	4
2022-09-13	11:35:34	0.731565	3.25415	3.25302	894.839	FALSE	4
2022-09-13	11:35:35	0.733142	3.26116	3.26071	897.335	FALSE	4
2022-09-13	11:35:35	0.731819	3.25528	3.26071	898.094	FALSE	4
2022-09-13	11:35:35	0.734975	3.26932	3.26071	900.604	FALSE	4
2022-09-13	11:35:35	0.732226	3.25709	3.26071	901.351	FALSE	4
2022-09-13	11:35:36	0.731768	3.25505	3.25573	903.859	FALSE	4
2022-09-13	11:35:36	0.732634	3.2589	3.25573	904.61	FALSE	4
2022-09-13	11:35:36	0.731361	3.25324	3.25573	907.112	FALSE	4
2022-09-13	11:35:37	0.730191	3.24804	3.27265	907.858	FALSE	4
2022-09-13	11:35:37	0.736807	3.27746	3.27265	910.39	FALSE	4
2022-09-13	11:35:37	0.734568	3.26751	3.27265	911.126	FALSE	4
2022-09-13	11:35:37	0.741336	3.29761	3.27265	913.688	FALSE	4
2022-09-13	11:35:38	0.738537	3.28516	3.26829	914.411	FALSE	4
2022-09-13	11:35:38	0.73014	3.24781	3.26829	916.935	FALSE	4
2022-09-13	11:35:38	0.732939	3.26026	3.26829	917.671	FALSE	4
2022-09-13	11:35:38	0.737366	3.27995	3.26829	920.215	FALSE	4
2022-09-13	11:35:39	0.741539	3.29851	3.27294	920.97	FALSE	4
2022-09-13	11:35:39	0.734568	3.26751	3.27294	923.483	FALSE	4
2022-09-13	11:35:39	0.734313	3.26637	3.27294	924.236	FALSE	4
2022-09-13	11:35:39	0.732735	3.25935	3.27294	926.742	FALSE	4
2022-09-13	11:35:40	0.614415	2.73304	2.75811	926.969	FALSE	4
2022-09-13	11:35:40	0.728868	3.24215	2.75811	929.984	FALSE	4
2022-09-13	11:35:40	0.6364	2.83083	2.75811	929.8	FALSE	4
2022-09-13	11:35:40	0.500521	2.22642	2.75811	932.211	FALSE	4
2022-09-13	11:35:41	0.310598	1.3816	1.4809	931.181	FALSE	4
2022-09-13	11:35:41	0.346781	1.54255	1.4809	933.753	FALSE	4
2022-09-13	11:35:41	0.341387	1.51856	1.4809	932.7	FALSE	4
2022-09-13	11:35:42	0.736705	3.27701	3.00106	937.03	FALSE	4
2022-09-13	11:35:42	0.738079	3.28312	3.00106	935.983	FALSE	4
2022-09-13	11:35:42	0.734975	3.26932	3.00106	940.3	FALSE	4
2022-09-13	11:35:42	0.488919	2.17481	3.00106	938.158	FALSE	4
2022-09-13	11:35:43	0.342863	1.52512	0.689869	941.825	FALSE	4
2022-09-13	11:35:43	0.297265	1.32229	0.689869	939.48	FALSE	4
2022-09-13	11:35:43	-0.179274	-0.797447	0.689869	941.825	FALSE	4
2022-09-13	11:35:43	0.159504	0.709506	0.689869	940.19	FALSE	4
2022-09-13	11:35:44	0.730852	3.25098	3.25732	945.076	FALSE	4
2022-09-13	11:35:44	0.735076	3.26977	3.25732	943.46	FALSE	4
2022-09-13	11:35:44	0.734008	3.26501	3.25732	948.341	FALSE	4
2022-09-13	11:35:44	0.729173	3.24351	3.25732	946.703	FALSE	4
2022-09-13	11:35:45	-0.323447	-1.43876	1.41895	948.341	FALSE	4
2022-09-13	11:35:45	0.739707	3.29036	1.41895	949.993	FALSE	4
2022-09-13	11:35:45	0.540725	2.40525	1.41895	950.746	FALSE	4
2022-09-13	11:35:46	0.255942	1.13848	-0.606787	951.132	FALSE	4
2022-09-13	11:35:46	-0.214287	-0.953191	-0.606787	950.746	FALSE	4
2022-09-13	11:35:46	-0.250928	-1.11618	-0.606787	951.132	FALSE	4
2022-09-13	11:35:46	-0.336374	-1.49626	-0.606787	950.746	FALSE	4
2022-09-13	11:35:47	-0.336475	-1.49671	-1.85517	951.132	FALSE	4
2022-09-13	11:35:47	-0.427366	-1.90101	-1.85517	950.746	FALSE	4
2022-09-13	11:35:47	-0.432251	-1.92274	-1.85517	951.132	FALSE	4
2022-09-13	11:35:47	-0.47215	-2.10022	-1.85517	950.746	FALSE	4
2022-09-13	11:35:48	-0.513269	-2.28312	-2.46184	951.132	FALSE	4
2022-09-13	11:35:48	-0.495966	-2.20616	-2.46184	950.746	FALSE	4
2022-09-13	11:35:48	-0.597799	-2.65913	-2.46184	951.132	FALSE	4
2022-09-13	11:35:48	-0.606755	-2.69897	-2.46184	950.746	FALSE	4
2022-09-13	11:35:49	-0.761768	-3.3885	-0.750137	951.132	FALSE	4
2022-09-13	11:35:49	0.0189951	0.084494	-0.750137	950.83	FALSE	4
2022-09-13	11:35:49	0.236858	1.05359	-0.750137	952.185	FALSE	4
2022-09-13	11:35:50	0.471005	2.09512	2.00061	952.926	FALSE	4
2022-09-13	11:35:50	0.353651	1.57311	2.00061	953.759	FALSE	4
2022-09-13	11:35:50	0.475942	2.11709	2.00061	955.043	FALSE	4
2022-09-13	11:35:50	0.498435	2.21714	2.00061	955.976	FALSE	4
2022-09-13	11:35:51	0.440522	1.95953	2.66728	957.002	FALSE	4
2022-09-13	11:35:51	0.686374	3.05313	2.66728	959.029	FALSE	4
2022-09-13	11:35:51	0.535127	2.38035	2.66728	959.383	FALSE	4
2022-09-13	11:35:51	0.736501	3.2761	2.66728	962.305	FALSE	4
2022-09-13	11:35:52	0.607036	2.70022	2.56762	962.083	FALSE	4
2022-09-13	11:35:52	0.70444	3.13349	2.56762	965.438	FALSE	4
2022-09-13	11:35:52	0.360522	1.60367	2.56762	963.686	FALSE	4
2022-09-13	11:35:52	0.636909	2.8331	2.56762	968.272	FALSE	4
2022-09-13	11:35:53	0.54159	2.4091	2.14795	966.096	FALSE	4
2022-09-13	11:35:53	0.531311	2.36338	2.14795	970.635	FALSE	4
2022-09-13	11:35:53	0.375738	1.67136	2.14795	967.767	FALSE	4
2022-09-13	11:35:54	-0.845126	-3.75929	-3.44871	970.635	FALSE	4
2022-09-13	11:35:54	-1.01469	-4.51354	-3.44871	967.767	FALSE	4
2022-09-13	11:35:54	-0.594694	-2.64532	-3.44871	970.635	FALSE	4
2022-09-13	11:35:54	-0.646704	-2.87667	-3.44871	967.767	FALSE	4
2022-09-13	11:35:55	0.57528	2.55896	2.25359	973.194	FALSE	4
2022-09-13	11:35:55	0.734517	3.26728	2.25359	971.034	FALSE	4
2022-09-13	11:35:55	0.526527	2.3421	2.25359	975.536	FALSE	4
2022-09-13	11:35:55	0.190191	0.846008	2.25359	971.88	FALSE	4
2022-09-13	11:35:56	-0.0956613	-0.425521	0.887208	975.536	FALSE	4
2022-09-13	11:35:56	0.177265	0.78851	0.887208	972.669	FALSE	4
2022-09-13	11:35:56	0.398741	1.77368	0.887208	977.31	FALSE	4
2022-09-13	11:35:56	0.317468	1.41216	0.887208	974.081	FALSE	4
2022-09-13	11:35:57	0.00866438	0.0385409	0.560855	977.348	FALSE	4
2022-09-13	11:35:57	-0.362684	-1.61329	0.560855	974.081	FALSE	4
2022-09-13	11:35:57	0.732277	3.25731	0.560855	980.605	FALSE	4
2022-09-13	11:35:58	0.732481	3.25822	3.26677	977.339	FALSE	4
2022-09-13	11:35:58	0.733804	3.26411	3.26677	983.87	FALSE	4
2022-09-13	11:35:58	0.737926	3.28244	3.26677	980.622	FALSE	4
2022-09-13	11:35:58	0.733397	3.2623	3.26677	987.132	FALSE	4
2022-09-13	11:35:59	0.736298	3.2752	2.19003	983.897	FALSE	4
2022-09-13	11:35:59	0.667494	2.96915	2.19003	990.101	FALSE	4
2022-09-13	11:35:59	0.285255	1.26887	2.19003	985.166	FALSE	4
2022-09-13	11:35:59	0.280318	1.24691	2.19003	991.348	FALSE	4
2022-09-13	11:36:00	0.245204	1.09072	1.04691	986.256	FALSE	4
2022-09-13	11:36:00	0.231412	1.02937	1.04691	992.377	FALSE	4
2022-09-13	11:36:00	0.239962	1.0674	1.04691	987.324	FALSE	4
2022-09-13	11:36:00	0.224848	1.00017	1.04691	993.377	FALSE	4
2022-09-13	11:36:01	0.109835	0.488568	0.66476	987.812	FALSE	4
2022-09-13	11:36:01	0.17355	0.771985	0.66476	994.149	FALSE	4
2022-09-13	11:36:01	0.164949	0.733726	0.66476	988.546	FALSE	4
2022-09-13	11:36:02	0.16841	0.749121	0.746856	994.899	FALSE	4
2022-09-13	11:36:02	0.159911	0.711316	0.746856	989.257	FALSE	4
2022-09-13	11:36:02	0.164389	0.731235	0.746856	995.63	FALSE	4
2022-09-13	11:36:02	0.178893	0.795752	0.746856	990.053	FALSE	4
2022-09-13	11:36:03	0.172125	0.765646	0.816128	996.395	FALSE	4
2022-09-13	11:36:03	0.184339	0.819977	0.816128	990.873	FALSE	4
2022-09-13	11:36:03	0.185255	0.824051	0.816128	997.22	FALSE	4
2022-09-13	11:36:03	0.192176	0.854837	0.816128	991.728	FALSE	4
2022-09-13	11:36:04	0.227087	1.01013	-2.83949	998.23	FALSE	4
2022-09-13	11:36:04	0.0795041	0.35365	-2.83949	992.082	FALSE	4
2022-09-13	11:36:04	0.0660689	0.293888	-2.83949	998.524	FALSE	4
2022-09-13	11:36:04	-2.92604	-13.0156	-2.83949	992.082	FALSE	4
2022-09-13	11:36:05	-2.45195	-10.9068	-2.22937	998.524	FALSE	4
2022-09-13	11:36:05	0.11355	0.505093	-2.22937	992.587	FALSE	4
2022-09-13	11:36:05	0.0712089	0.316751	-2.22937	998.84	FALSE	4
2022-09-13	11:36:05	0.262456	1.16746	-2.22937	993.754	FALSE	4
2022-09-13	11:36:06	0.279351	1.24261	1.08113	1000.08	FALSE	4
2022-09-13	11:36:06	0.24215	1.07713	1.08113	994.831	FALSE	4
2022-09-13	11:36:06	0.207646	0.923651	1.08113	1001.01	FALSE	4
2022-09-13	11:36:07	0.287188	1.27747	1.37255	996.109	FALSE	4
2022-09-13	11:36:07	0.283779	1.26231	1.37255	1002.27	FALSE	4
2022-09-13	11:36:07	0.322099	1.43276	1.37255	997.541	FALSE	4
2022-09-13	11:36:07	0.341183	1.51765	1.37255	1003.79	FALSE	4
2022-09-13	11:36:08	0.280115	1.24601	1.1472	998.787	FALSE	4
2022-09-13	11:36:08	0.269275	1.19779	1.1472	1004.98	FALSE	4
2022-09-13	11:36:08	0.281031	1.25008	1.1472	1000.04	FALSE	4
2022-09-13	11:36:08	0.201183	0.894902	1.1472	1005.88	FALSE	4
2022-09-13	11:36:09	0.213957	0.951724	1.02716	1000.99	FALSE	4
2022-09-13	11:36:09	0.254924	1.13395	1.02716	1007.01	FALSE	4
2022-09-13	11:36:09	0.208003	0.925239	1.02716	1001.91	FALSE	4
2022-09-13	11:36:09	0.246781	1.09773	1.02716	1008.11	FALSE	4
2022-09-13	11:36:10	1.03121	4.58703	2.94093	1006.5	FALSE	4
2022-09-13	11:36:10	0.535585	2.38239	2.94093	1010.49	FALSE	4
2022-09-13	11:36:10	0.416654	1.85336	2.94093	1008.35	FALSE	4
2022-09-13	11:36:11	0.406934	1.81012	1.558	1012.3	FALSE	4
2022-09-13	11:36:11	0.415687	1.84906	1.558	1010.2	FALSE	4
2022-09-13	11:36:11	0.367952	1.63672	1.558	1013.94	FALSE	4
2022-09-13	11:36:11	0.210445	0.936101	1.558	1011.14	FALSE	4
2022-09-13	11:36:12	0.376705	1.67566	1.40147	1015.62	FALSE	4
2022-09-13	11:36:12	0.238842	1.06242	1.40147	1012.2	FALSE	4
2022-09-13	11:36:12	0.305662	1.35965	1.40147	1016.98	FALSE	4
2022-09-13	11:36:12	0.339046	1.50814	1.40147	1013.71	FALSE	4
2022-09-13	11:36:13	0.280776	1.24895	1.44589	1018.22	FALSE	4
2022-09-13	11:36:13	0.425	1.89048	1.44589	1015.6	FALSE	4
2022-09-13	11:36:13	0.282252	1.25551	1.44589	1019.48	FALSE	4
2022-09-13	11:36:13	0.312176	1.38862	1.44589	1016.99	FALSE	4
2022-09-13	11:36:14	0.197367	0.877928	1.01156	1020.36	FALSE	4
2022-09-13	11:36:14	0.198283	0.882002	1.01156	1017.87	FALSE	4
2022-09-13	11:36:14	0.286578	1.27476	1.01156	1021.63	FALSE	4
2022-09-13	11:36:15	0.312888	1.39179	-3.8293	1019.26	FALSE	4
2022-09-13	11:36:15	0.313855	1.39609	-3.8293	1023.03	FALSE	4
2022-09-13	11:36:15	-2.10273	-9.35336	-3.8293	1019.26	FALSE	4
2022-09-13	11:36:15	-1.96747	-8.7517	-3.8293	1023.03	FALSE	4
2022-09-13	11:36:16	-1.68884	-7.5123	-4.31718	1019.26	FALSE	4
2022-09-13	11:36:16	-1.43703	-6.3922	-4.31718	1023.03	FALSE	4
2022-09-13	11:36:16	-1.23378	-5.4881	-4.31718	1019.26	FALSE	4
2022-09-13	11:36:16	0.477468	2.12387	-4.31718	1025.15	FALSE	4
2022-09-13	11:36:17	0.328766	1.46242	1.9039	1020.73	FALSE	4
2022-09-13	11:36:17	0.508715	2.26287	1.9039	1027.42	FALSE	4
2022-09-13	11:36:17	0.365713	1.62676	1.9039	1022.35	FALSE	4
2022-09-13	11:36:17	0.508868	2.26355	1.9039	1029.68	FALSE	4
2022-09-13	11:36:18	0.513143	2.28256	2.04744	1024.64	FALSE	4
2022-09-13	11:36:18	0.449733	2.0005	2.04744	1031.68	FALSE	4
2022-09-13	11:36:18	0.417977	1.85925	2.04744	1026.49	FALSE	4
2022-09-13	11:36:19	0.477926	2.12591	2.17543	1033.81	FALSE	4
2022-09-13	11:36:19	0.445865	1.9833	2.17543	1028.48	FALSE	4
2022-09-13	11:36:19	0.446221	1.98488	2.17543	1035.79	FALSE	4
2022-09-13	11:36:19	0.586221	2.60763	2.17543	1031.09	FALSE	4
2022-09-13	11:36:20	0.457316	2.03423	2.00316	1037.82	FALSE	4
2022-09-13	11:36:20	0.330242	1.46898	2.00316	1032.55	FALSE	4
2022-09-13	11:36:20	0.435738	1.93825	2.00316	1039.76	FALSE	4
2022-09-13	11:36:20	0.578028	2.57118	2.00316	1035.13	FALSE	4
2022-09-13	11:36:21	0.213855	0.95127	-0.501355	1040.71	FALSE	4
2022-09-13	11:36:21	-0.0294527	-0.131012	-0.501355	1035.13	FALSE	4
2022-09-13	11:36:21	-0.272455	-1.21193	-0.501355	1040.71	FALSE	4
2022-09-13	11:36:21	-0.362786	-1.61374	-0.501355	1035.13	FALSE	4
2022-09-13	11:36:22	-0.074389	-0.330897	1.0966	1040.71	FALSE	4
2022-09-13	11:36:22	0.331769	1.47577	1.0966	1036.6	FALSE	4
2022-09-13	11:36:22	0.482201	2.14493	1.0966	1042.86	FALSE	4
2022-09-13	11:36:23	0.303219	1.34878	1.56655	1037.95	FALSE	4
2022-09-13	11:36:23	0.186781	0.830839	1.56655	1043.69	FALSE	4
2022-09-13	11:36:23	0.408461	1.81692	1.56655	1039.77	FALSE	4
2022-09-13	11:36:23	0.510242	2.26966	1.56655	1045.96	FALSE	4
2022-09-13	11:36:24	0.721437	3.2091	2.66552	1042.98	FALSE	4
2022-09-13	11:36:24	0.537774	2.39213	2.66552	1048.35	FALSE	4
2022-09-13	11:36:24	0.68327	3.03932	2.66552	1046.02	FALSE	4
2022-09-13	11:36:24	0.454466	2.02156	2.66552	1050.37	FALSE	4
2022-09-13	11:36:25	0.371616	1.65302	1.56836	1047.67	FALSE	4
2022-09-13	11:36:25	0.411616	1.83095	1.56836	1052.2	FALSE	4
2022-09-13	11:36:25	0.147596	0.656537	1.56836	1048.33	FALSE	4
2022-09-13	11:36:25	0.479504	2.13293	1.56836	1054.34	FALSE	4
2022-09-13	11:36:26	0.191361	0.851212	1.66162	1049.18	FALSE	4
2022-09-13	11:36:26	0.514364	2.28799	1.66162	1056.62	FALSE	4
2022-09-13	11:36:26	0.301947	1.34312	1.66162	1050.52	FALSE	4
2022-09-13	11:36:26	0.486527	2.16417	1.66162	1058.79	FALSE	4
2022-09-13	11:36:27	-0.391793	-1.74277	-0.0973566	1050.52	FALSE	4
2022-09-13	11:36:27	-0.0459412	-0.204356	-0.0973566	1058.79	FALSE	4
2022-09-13	11:36:27	0.372074	1.65506	-0.0973566	1052.17	FALSE	4
2022-09-13	11:36:28	0.116451	0.517997	1.37623	1059.31	FALSE	4
2022-09-13	11:36:28	0.509631	2.26694	1.37623	1054.44	FALSE	4
2022-09-13	11:36:28	0.291005	1.29445	1.37623	1060.6	FALSE	4
2022-09-13	11:36:28	0.320471	1.42552	1.37623	1055.87	FALSE	4
2022-09-13	11:36:29	0.979911	4.35884	-1.33497	1064.96	FALSE	4
2022-09-13	11:36:29	0.36159	1.60842	-1.33497	1057.48	FALSE	4
2022-09-13	11:36:29	0.260674	1.15953	-1.33497	1066.12	FALSE	4
2022-09-13	11:36:29	-2.80263	-12.4667	-1.33497	1057.48	FALSE	4
2022-09-13	11:36:30	-2.01301	-8.95427	-2.59495	1066.12	FALSE	4
2022-09-13	11:36:30	0.241489	1.07419	-2.59495	1058.55	FALSE	4
2022-09-13	11:36:30	0.545661	2.42721	-2.59495	1068.55	FALSE	4
2022-09-13	11:36:30	-1.10762	-4.92692	-2.59495	1058.55	FALSE	4
2022-09-13	11:36:31	-1.98004	-8.80761	-11.1203	1068.55	FALSE	4
2022-09-13	11:36:31	-2.39617	-10.6586	-11.1203	1058.55	FALSE	4
2022-09-13	11:36:31	-3.12365	-13.8946	-11.1203	1068.55	FALSE	4
2022-09-13	11:36:32	-1.2751	-5.6719	-7.61315	1058.55	FALSE	4
2022-09-13	11:36:32	-1.97637	-8.79129	-7.61315	1068.55	FALSE	4
2022-09-13	11:36:32	-1.71312	-7.6203	-7.61315	1058.55	FALSE	4
2022-09-13	11:36:32	-1.88146	-8.36911	-7.61315	1068.55	FALSE	4
2022-09-13	11:36:33	-1.43373	-6.37752	-2.80604	1058.55	FALSE	4
2022-09-13	11:36:33	0.986832	4.38963	-2.80604	1072.94	FALSE	4
2022-09-13	11:36:33	0.229071	1.01895	-2.80604	1059.57	FALSE	4
2022-09-13	11:36:33	-2.30548	-10.2552	-2.80604	1072.94	FALSE	4
2022-09-13	11:36:34	-1.49256	-6.63921	-6.85652	1059.57	FALSE	4
2022-09-13	11:36:34	-1.44167	-6.41284	-6.85652	1072.94	FALSE	4
2022-09-13	11:36:34	-1.62284	-7.21872	-6.85652	1059.57	FALSE	4
2022-09-13	11:36:34	-1.60859	-7.15533	-6.85652	1072.94	FALSE	4
2022-09-13	11:36:35	-1.39307	-6.19665	-4.87501	1059.57	FALSE	4
2022-09-13	11:36:35	-1.06533	-4.7388	-4.87501	1072.94	FALSE	4
2022-09-13	11:36:35	-0.829452	-3.68957	-4.87501	1059.57	FALSE	4
2022-09-13	11:36:36	-0.0518445	-0.230615	0.38155	1072.94	FALSE	4
2022-09-13	11:36:36	0.0664252	0.295473	0.38155	1059.86	FALSE	4
2022-09-13	11:36:36	0.135789	0.604017	0.38155	1073.54	FALSE	4
2022-09-13	11:36:36	0.192735	0.857324	0.38155	1060.72	FALSE	4
2022-09-13	11:36:37	0.177774	0.790774	0.796601	1074.33	FALSE	4
2022-09-13	11:36:37	0.181845	0.808883	0.796601	1061.53	FALSE	4
2022-09-13	11:36:37	0.165814	0.737574	0.796601	1075.07	FALSE	4
2022-09-13	11:36:37	0.190903	0.849175	0.796601	1062.38	FALSE	4
2022-09-13	11:36:38	0.205153	0.912562	0.993093	1075.98	FALSE	4
2022-09-13	11:36:38	0.191311	0.85099	0.993093	1063.23	FALSE	4
2022-09-13	11:36:38	0.260471	1.15863	0.993093	1077.14	FALSE	4
2022-09-13	11:36:38	0.236094	1.05019	0.993093	1064.28	FALSE	4
2022-09-13	11:36:39	0.239758	1.06649	1.23023	1078.21	FALSE	4
2022-09-13	11:36:39	0.255585	1.13689	1.23023	1065.42	FALSE	4
2022-09-13	11:36:39	0.334364	1.48732	1.23023	1079.69	FALSE	4
2022-09-13	11:36:40	-0.0496562	-0.220881	-5.83756	1065.42	FALSE	4
2022-09-13	11:36:40	-1.26818	-5.64112	-5.83756	1079.69	FALSE	4
2022-09-13	11:36:40	-1.86564	-8.29874	-5.83756	1065.42	FALSE	4
2022-09-13	11:36:40	-2.06589	-9.18949	-5.83756	1079.69	FALSE	4
2022-09-13	11:36:41	-2.14752	-9.5526	-10.234	1065.42	FALSE	4
2022-09-13	11:36:41	-2.44884	-10.8929	-10.234	1079.69	FALSE	4
2022-09-13	11:36:41	-2.39169	-10.6387	-10.234	1065.42	FALSE	4
2022-09-13	11:36:41	-2.2148	-9.85187	-10.234	1079.69	FALSE	4
2022-09-13	11:36:42	-2.59256	-11.5322	-11.7115	1065.42	FALSE	4
2022-09-13	11:36:42	-2.66172	-11.8399	-11.7115	1079.69	FALSE	4
2022-09-13	11:36:42	-2.63602	-11.7255	-11.7115	1065.42	FALSE	4
2022-09-13	11:36:42	-2.64111	-11.7482	-11.7115	1079.69	FALSE	4
2022-09-13	11:36:43	-2.69276	-11.9779	-12.4839	1065.42	FALSE	4
2022-09-13	11:36:43	-2.82166	-12.5513	-12.4839	1079.69	FALSE	4
2022-09-13	11:36:43	-2.90513	-12.9226	-12.4839	1065.42	FALSE	4
2022-09-13	11:36:44	-2.89556	-12.88	-13.8822	1079.69	FALSE	4
2022-09-13	11:36:44	-3.01602	-13.4159	-13.8822	1065.42	FALSE	4
2022-09-13	11:36:44	-3.20976	-14.2777	-13.8822	1079.69	FALSE	4
2022-09-13	11:36:44	-3.36212	-14.9554	-13.8822	1065.42	FALSE	4
2022-09-13	11:36:45	-3.49719	-15.5562	-14.9117	1079.69	FALSE	4
2022-09-13	11:36:45	-3.37785	-15.0254	-14.9117	1065.42	FALSE	4
2022-09-13	11:36:45	-3.35856	-14.9395	-14.9117	1079.69	FALSE	4
2022-09-13	11:36:45	-3.17556	-14.1255	-14.9117	1065.42	FALSE	4
2022-09-13	11:36:46	-3.17271	-14.1128	-14.2646	1079.69	FALSE	4
2022-09-13	11:36:46	-3.10833	-13.8265	-14.2646	1065.42	FALSE	4
2022-09-13	11:36:46	-3.28986	-14.634	-14.2646	1079.69	FALSE	4
2022-09-13	11:36:46	-3.25637	-14.485	-14.2646	1065.42	FALSE	4
2022-09-13	11:36:47	-3.12864	-13.9168	-12.6373	1079.69	FALSE	4
2022-09-13	11:36:47	-3.01194	-13.3977	-12.6373	1065.42	FALSE	4
2022-09-13	11:36:47	-2.73897	-12.1835	-12.6373	1079.69	FALSE	4
2022-09-13	11:36:47	-2.48441	-11.0512	-12.6373	1065.42	FALSE	4
2022-09-13	11:36:48	1.3364	5.94457	3.62766	1085.64	FALSE	4
2022-09-13	11:36:48	0.866221	3.85312	3.62766	1069.27	FALSE	4
2022-09-13	11:36:48	0.243982	1.08528	3.62766	1086.72	FALSE	4
2022-09-13	11:36:49	-0.109351	-0.486415	-10.9251	1069.27	FALSE	4
2022-09-13	11:36:49	-3.17612	-14.128	-10.9251	1086.72	FALSE	4
2022-09-13	11:36:49	-3.20049	-14.2364	-10.9251	1069.27	FALSE	4
2022-09-13	11:36:49	-3.33831	-14.8495	-10.9251	1086.72	FALSE	4
2022-09-13	11:36:50	-3.22909	-14.3636	-9.74556	1069.27	FALSE	4
2022-09-13	11:36:50	-3.40029	-15.1252	-9.74556	1086.72	FALSE	4
2022-09-13	11:36:50	-2.42426	-10.7836	-9.74556	1069.27	FALSE	4
2022-09-13	11:36:50	0.290038	1.29015	-9.74556	1088.01	FALSE	4
2022-09-13	11:36:51	0.238333	1.06015	1.60435	1070.33	FALSE	4
2022-09-13	11:36:51	0.42958	1.91086	1.60435	1089.93	FALSE	4
2022-09-13	11:36:51	0.263575	1.17243	1.60435	1071.5	FALSE	4
2022-09-13	11:36:51	0.511209	2.27396	1.60435	1092.2	FALSE	4
2022-09-13	11:36:52	1.03004	4.58182	4.5496	1076.08	FALSE	4
2022-09-13	11:36:52	1.31472	5.84814	4.5496	1098.05	FALSE	4
2022-09-13	11:36:52	0.723626	3.21883	4.5496	1079.3	FALSE	4
2022-09-13	11:36:53	0.707748	3.1482	6.84875	1101.2	FALSE	4
2022-09-13	11:36:53	1.75212	7.79378	6.84875	1087.1	FALSE	4
2022-09-13	11:36:53	1.56892	6.97887	6.84875	1108.17	FALSE	4
2022-09-13	11:36:53	2.12988	9.47413	6.84875	1096.57	FALSE	4
2022-09-13	11:36:54	0.584593	2.60039	2.3267	1110.77	FALSE	4
2022-09-13	11:36:54	0.60902	2.70904	2.3267	1099.28	FALSE	4
2022-09-13	11:36:54	0.468613	2.08448	2.3267	1112.86	FALSE	4
2022-09-13	11:36:54	0.430038	1.9129	2.3267	1101.19	FALSE	4
2022-09-13	11:36:55	0.633753	2.81906	1.8816	1115.68	FALSE	4
2022-09-13	11:36:55	0.213193	0.948325	1.8816	1102.14	FALSE	4
2022-09-13	11:36:55	0.517468	2.3018	1.8816	1117.98	FALSE	4
2022-09-13	11:36:55	0.327596	1.45721	1.8816	1103.6	FALSE	4
2022-09-13	11:36:56	0.4364	1.94119	1.90611	1119.92	FALSE	4
2022-09-13	11:36:56	0.605204	2.69207	1.90611	1106.29	FALSE	4
2022-09-13	11:36:56	0.243931	1.08505	1.90611	1121.01	FALSE	4
2022-09-13	11:36:57	0.662099	2.94515	3.15307	1109.24	FALSE	4
2022-09-13	11:36:57	0.349886	1.55636	3.15307	1122.56	FALSE	4
2022-09-13	11:36:57	0.902353	4.01385	3.15307	1113.25	FALSE	4
2022-09-13	11:36:57	0.921031	4.09693	3.15307	1126.66	FALSE	4
2022-09-13	11:36:58	1.51518	6.73982	7.99007	1119.99	FALSE	4
2022-09-13	11:36:58	2.32286	10.3325	7.99007	1136.99	FALSE	4
2022-09-13	11:36:58	1.07513	4.78239	7.99007	1124.77	FALSE	4
2022-09-13	11:36:58	2.27182	10.1055	7.99007	1147.1	FALSE	4
2022-09-13	11:36:59	0.484746	2.15625	3.65935	1126.93	FALSE	4
2022-09-13	11:36:59	1.36113	6.05458	3.65935	1153.15	FALSE	4
2022-09-13	11:36:59	0.750853	3.33994	3.65935	1130.27	FALSE	4
2022-09-13	11:36:59	0.693906	3.08663	3.65935	1156.24	FALSE	4
2022-09-13	11:37:00	0.797672	3.5482	3.06913	1133.82	FALSE	4
2022-09-13	11:37:00	0.307188	1.36643	3.06913	1157.61	FALSE	4
2022-09-13	11:37:00	0.965051	4.29274	3.06913	1138.11	FALSE	4
2022-09-13	11:37:01	0.357366	1.58964	2.82393	1159.19	FALSE	4
2022-09-13	11:37:01	0.929427	4.13428	2.82393	1142.24	FALSE	4
2022-09-13	11:37:01	0.53701	2.38873	2.82393	1161.58	FALSE	4
2022-09-13	11:37:01	0.715585	3.18307	2.82393	1145.43	FALSE	4
2022-09-13	11:37:02	0.66673	2.96575	2.57967	1164.55	FALSE	4
2022-09-13	11:37:02	0.696145	3.09659	2.57967	1148.52	FALSE	4
2022-09-13	11:37:02	0.692837	3.08188	2.57967	1167.63	FALSE	4
2022-09-13	11:37:02	0.264033	1.17447	2.57967	1149.7	FALSE	4
2022-09-13	11:37:03	0.670445	2.98227	2.73632	1170.61	FALSE	4
2022-09-13	11:37:03	0.425916	1.89456	2.73632	1151.59	FALSE	4
2022-09-13	11:37:03	0.713753	3.17492	2.73632	1173.79	FALSE	4
2022-09-13	11:37:03	0.650496	2.89354	2.73632	1154.49	FALSE	4
2022-09-13	11:37:04	0.64612	2.87407	3.14133	1176.66	FALSE	4
2022-09-13	11:37:04	1.07782	4.79436	3.14133	1159.28	FALSE	4
2022-09-13	11:37:04	0.394669	1.75557	3.14133	1178.42	FALSE	4
2022-09-13	11:37:05	1.29416	5.75668	3.91697	1165.04	FALSE	4
2022-09-13	11:37:05	0.496349	2.20786	3.91697	1180.63	FALSE	4
2022-09-13	11:37:05	1.21676	5.41239	3.91697	1170.45	FALSE	4
2022-09-13	11:37:05	0.515025	2.29093	3.91697	1182.92	FALSE	4
2022-09-13	11:37:06	0.965764	4.29591	3.2357	1174.75	FALSE	4
2022-09-13	11:37:06	0.85416	3.79947	3.2357	1186.72	FALSE	4
2022-09-13	11:37:06	0.461947	2.05483	3.2357	1176.8	FALSE	4
2022-09-13	11:37:06	0.627799	2.79258	3.2357	1189.51	FALSE	4
2022-09-13	11:37:07	0.364746	1.62246	1.91771	1178.42	FALSE	4
2022-09-13	11:37:07	0.610954	2.71765	1.91771	1192.23	FALSE	4
2022-09-13	11:37:07	0.359606	1.5996	1.91771	1180.02	FALSE	4
2022-09-13	11:37:07	0.389173	1.73112	1.91771	1193.96	FALSE	4
2022-09-13	11:37:08	0.475433	2.11482	1.98021	1182.14	FALSE	4
2022-09-13	11:37:08	0.486425	2.16372	1.98021	1196.12	FALSE	4
2022-09-13	11:37:08	0.373652	1.66208	1.98021	1183.8	FALSE	4
2022-09-13	11:37:09	0.523015	2.32648	4.31629	1198.45	FALSE	4
2022-09-13	11:37:09	1.04816	4.66243	4.31629	1188.46	FALSE	4
2022-09-13	11:37:09	2.03279	9.04226	4.31629	1207.49	FALSE	4
2022-09-13	11:37:09	0.277417	1.23401	4.31629	1189.7	FALSE	4
2022-09-13	11:37:10	0.48444	2.15489	1.88262	1209.64	FALSE	4
2022-09-13	11:37:10	0.394517	1.75489	1.88262	1191.45	FALSE	4
2022-09-13	11:37:10	0.35869	1.59552	1.88262	1211.24	FALSE	4
2022-09-13	11:37:10	0.45528	2.02518	1.88262	1193.48	FALSE	4
2022-09-13	11:37:11	0.31187	1.38726	2.44719	1212.63	FALSE	4
2022-09-13	11:37:11	0.537417	2.39054	2.44719	1195.87	FALSE	4
2022-09-13	11:37:11	0.727341	3.23536	2.44719	1215.86	FALSE	4
2022-09-13	11:37:11	0.623982	2.7756	2.44719	1198.64	FALSE	4
2022-09-13	11:37:12	0.889733	3.95771	3.39331	1219.82	FALSE	4
2022-09-13	11:37:12	0.76673	3.41057	3.39331	1202.05	FALSE	4
2022-09-13	11:37:12	1.09869	4.88719	3.39331	1224.71	FALSE	4
2022-09-13	11:37:12	0.296247	1.31777	3.39331	1203.37	FALSE	4
2022-09-13	11:37:13	0.993092	4.41747	3.40462	1229.13	FALSE	4
2022-09-13	11:37:13	0.270293	1.20232	3.40462	1204.57	FALSE	4
2022-09-13	11:37:13	1.03279	4.59406	3.40462	1233.72	FALSE	4
2022-09-13	11:37:14	0.747036	3.32297	3.73451	1207.9	FALSE	4
2022-09-13	11:37:14	0.81243	3.61385	3.73451	1237.33	FALSE	4
2022-09-13	11:37:14	0.829428	3.68946	3.73451	1211.58	FALSE	4
2022-09-13	11:37:14	0.969326	4.31176	3.73451	1241.65	FALSE	4
2022-09-13	11:37:15	0.658537	2.9293	2.62223	1214.51	FALSE	4
2022-09-13	11:37:15	0.611972	2.72217	2.62223	1244.37	FALSE	4
2022-09-13	11:37:15	0.906272	4.03128	2.62223	1218.55	FALSE	4
2022-09-13	11:37:15	0.181234	0.806165	2.62223	1245.17	FALSE	4
2022-09-13	11:37:16	0.20444	0.90939	0.59564	1219.45	FALSE	4
2022-09-13	11:37:16	0.112837	0.501922	0.59564	1245.68	FALSE	4
2022-09-13	11:37:16	0.124898	0.555571	0.59564	1220.01	FALSE	4
2022-09-13	11:37:16	0.093448	0.415675	0.59564	1246.09	FALSE	4
2022-09-13	11:37:17	0.281692	1.25302	3.43374	1221.26	FALSE	4
2022-09-13	11:37:17	0.281947	1.25416	3.43374	1247.35	FALSE	4
2022-09-13	11:37:17	1.75218	7.79405	3.43374	1229.06	FALSE	4
2022-09-13	11:37:18	3.17146	14.1073	12.7343	1261.45	1	5
2022-09-13	11:37:18	3.65736	16.2687	12.7343	1245.33	1	6
2022-09-13	11:37:18	2.94876	13.1167	12.7343	1274.57	FALSE	6
2022-09-13	11:37:18	1.67365	7.44473	12.7343	1252.77	FALSE	6
2022-09-13	11:37:19	0.358028	1.59258	0.932652	1276.16	FALSE	6
2022-09-13	11:37:19	0.198181	0.881549	0.932652	1253.65	FALSE	6
2022-09-13	11:37:19	0.178283	0.793038	0.932652	1276.95	FALSE	6
2022-09-13	11:37:19	0.104186	0.46344	0.932652	1254.12	FALSE	6
2022-09-13	11:37:20	-0.060445	-0.268871	-0.172833	1276.95	FALSE	6
2022-09-13	11:37:20	0.00179415	0.00798074	-0.172833	1254.12	FALSE	6
2022-09-13	11:37:20	-0.0101651	-0.0452164	-0.172833	1276.95	FALSE	6
2022-09-13	11:37:20	-0.0866028	-0.385227	-0.172833	1254.12	FALSE	6
2022-09-13	11:37:21	-0.242684	-1.07951	-1.76738	1276.95	FALSE	6
2022-09-13	11:37:21	-0.445534	-1.98182	-1.76738	1254.12	FALSE	6
2022-09-13	11:37:21	-0.503753	-2.24079	-1.76738	1276.95	FALSE	6
2022-09-13	11:37:22	-0.544414	-2.42166	-2.29263	1254.12	FALSE	6
2022-09-13	11:37:22	-0.549198	-2.44294	-2.29263	1276.95	FALSE	6
2022-09-13	11:37:22	-0.492099	-2.18895	-2.29263	1254.12	FALSE	6
2022-09-13	11:37:22	-0.475916	-2.11697	-2.29263	1276.95	FALSE	6
2022-09-13	11:37:23	-0.509758	-2.26751	-2.06032	1254.12	FALSE	6
2022-09-13	11:37:23	-0.500852	-2.22789	-2.06032	1276.95	FALSE	6
2022-09-13	11:37:23	-0.434643	-1.93338	-2.06032	1254.12	FALSE	6
2022-09-13	11:37:23	-0.407468	-1.8125	-2.06032	1276.95	FALSE	6
2022-09-13	11:37:24	-0.381666	-1.69773	-0.907124	1254.12	FALSE	6
2022-09-13	11:37:24	-0.218307	-0.971073	-0.907124	1276.95	FALSE	6
2022-09-13	11:37:24	-0.243447	-1.0829	-0.907124	1254.12	FALSE	6
2022-09-13	11:37:24	0.0276974	0.123204	-0.907124	1277.08	FALSE	6
2022-09-13	11:37:25	-0.761615	-3.38782	-0.407864	1254.12	FALSE	6
2022-09-13	11:37:25	0.229936	1.0228	-0.407864	1278.1	FALSE	6
2022-09-13	11:37:25	0.256603	1.14142	-0.407864	1255.27	FALSE	6
2022-09-13	11:37:26	0.272125	1.21047	1.21092	1279.31	FALSE	6
2022-09-13	11:37:26	0.27014	1.20164	1.21092	1256.47	FALSE	6
2022-09-13	11:37:26	0.274771	1.22224	1.21092	1280.53	FALSE	6
2022-09-13	11:37:26	0.27187	1.20933	1.21092	1257.68	FALSE	6
2022-09-13	11:37:27	0.29187	1.2983	1.39343	1281.83	FALSE	6
2022-09-13	11:37:27	0.305	1.3567	1.39343	1259.03	FALSE	6
2022-09-13	11:37:27	0.311514	1.38568	1.39343	1283.22	FALSE	6
2022-09-13	11:37:27	0.344644	1.53305	1.39343	1260.57	FALSE	6
2022-09-13	11:37:28	-1.8009	-8.01076	-1.37073	1283.22	FALSE	6
2022-09-13	11:37:28	-0.00197174	-0.00877069	-1.37073	1260.57	FALSE	6
2022-09-13	11:37:28	0.296349	1.31822	-1.37073	1284.54	FALSE	6
2022-09-13	11:37:28	0.273906	1.21839	-1.37073	1261.78	FALSE	6
2022-09-13	11:37:29	0.268919	1.19621	1.22827	1285.73	FALSE	6
2022-09-13	11:37:29	0.28098	1.24986	1.22827	1263.03	FALSE	6
2022-09-13	11:37:29	0.278486	1.23876	1.22827	1286.97	FALSE	6
2022-09-13	11:37:30	0.278639	1.23944	1.20724	1264.27	FALSE	6
2022-09-13	11:37:30	0.27528	1.2245	1.20724	1288.2	FALSE	6
2022-09-13	11:37:30	0.272125	1.21047	1.20724	1265.48	FALSE	6
2022-09-13	11:37:30	0.259555	1.15455	1.20724	1289.35	FALSE	6
2022-09-13	11:37:31	0.231565	1.03005	1.1056	1266.51	FALSE	6
2022-09-13	11:37:31	0.247494	1.1009	1.1056	1290.45	FALSE	6
2022-09-13	11:37:31	0.262812	1.16904	1.1056	1267.68	FALSE	6
2022-09-13	11:37:31	0.252328	1.12241	1.1056	1291.57	FALSE	6
2022-09-13	11:37:32	0.304746	1.35557	3.13128	1269.04	FALSE	6
2022-09-13	11:37:32	0.318232	1.41556	3.13128	1292.99	FALSE	6
2022-09-13	11:37:32	0.625967	2.78443	3.13128	1271.82	FALSE	6
2022-09-13	11:37:32	1.56683	6.96957	3.13128	1299.96	FALSE	6
2022-09-13	11:37:33	1.50475	6.69343	3.95304	1278.52	FALSE	6
2022-09-13	11:37:33	1.11075	4.94084	3.95304	1304.9	FALSE	6
2022-09-13	11:37:33	0.0505473	0.224844	3.95304	1278.74	FALSE	6
2022-09-13	11:37:34	0.7393	3.28855	3.27503	1308.19	FALSE	6
2022-09-13	11:37:34	0.737722	3.28154	3.27503	1282.02	FALSE	6
2022-09-13	11:37:34	0.731565	3.25415	3.27503	1311.44	FALSE	6
2022-09-13	11:37:34	0.73645	3.27588	3.27503	1285.3	FALSE	6
2022-09-13	11:37:35	0.734669	3.26795	3.27616	1314.71	FALSE	6
2022-09-13	11:37:35	0.741692	3.29919	3.27616	1288.6	FALSE	6
2022-09-13	11:37:35	0.736552	3.27633	3.27616	1317.99	FALSE	6
2022-09-13	11:37:35	0.733142	3.26116	3.27616	1291.86	FALSE	6
2022-09-13	11:37:36	0.734975	3.26932	3.2756	1321.26	FALSE	6
2022-09-13	11:37:36	0.733041	3.26071	3.2756	1295.12	FALSE	6
2022-09-13	11:37:36	0.740165	3.2924	3.2756	1324.55	FALSE	6
2022-09-13	11:37:36	0.737366	3.27995	3.2756	1298.4	FALSE	6
2022-09-13	11:37:37	0.732379	3.25777	3.26977	1327.81	FALSE	6
2022-09-13	11:37:37	0.740216	3.29263	3.26977	1301.69	FALSE	6
2022-09-13	11:37:37	0.732888	3.26003	3.26977	1331.07	FALSE	6
2022-09-13	11:37:37	0.734822	3.26864	3.26977	1304.96	FALSE	6
2022-09-13	11:37:38	0.72958	3.24532	3.25196	1334.31	FALSE	6
2022-09-13	11:37:38	0.729936	3.2469	3.25196	1308.21	FALSE	6
2022-09-13	11:37:38	0.733702	3.26365	3.25196	1337.57	FALSE	6
2022-09-13	11:37:39	0.73472	3.26818	3.26235	1311.48	FALSE	6
2022-09-13	11:37:39	0.728715	3.24147	3.26235	1340.82	FALSE	6
2022-09-13	11:37:39	0.73187	3.2555	3.26235	1314.73	FALSE	6
2022-09-13	11:37:39	0.738333	3.28425	3.26235	1344.1	FALSE	6
2022-09-13	11:37:40	0.731463	3.25369	3.26105	1317.99	FALSE	6
2022-09-13	11:37:40	0.740165	3.2924	3.26105	1347.39	FALSE	6
2022-09-13	11:37:40	0.727748	3.23717	3.26105	1321.22	FALSE	6
2022-09-13	11:37:40	0.733092	3.26094	3.26105	1350.65	FALSE	6
2022-09-13	11:37:41	0.734364	3.2666	3.27588	1324.49	FALSE	6
2022-09-13	11:37:41	0.73701	3.27837	3.27588	1353.93	FALSE	6
2022-09-13	11:37:41	0.735331	3.2709	3.27588	1327.76	FALSE	6
2022-09-13	11:37:41	0.739097	3.28765	3.27588	1357.22	FALSE	6
2022-09-13	11:37:42	0.73416	3.26569	3.27135	1331.03	FALSE	6
2022-09-13	11:37:42	0.737519	3.28063	3.27135	1360.5	FALSE	6
2022-09-13	11:37:42	0.734618	3.26773	3.27135	1334.29	FALSE	6
2022-09-13	11:37:43	0.738079	3.28312	3.27282	1363.78	FALSE	6
2022-09-13	11:37:43	0.731056	3.25188	3.27282	1337.55	FALSE	6
2022-09-13	11:37:43	0.736603	3.27656	3.27282	1367.06	FALSE	6
2022-09-13	11:37:43	0.737315	3.27972	3.27282	1340.83	FALSE	6
2022-09-13	11:37:44	0.737773	3.28176	3.28895	1370.34	FALSE	6
2022-09-13	11:37:44	0.73874	3.28606	3.28895	1344.11	FALSE	6
2022-09-13	11:37:44	0.73986	3.29105	3.28895	1373.63	FALSE	6
2022-09-13	11:37:44	0.741183	3.29693	3.28895	1347.41	FALSE	6
2022-09-13	11:37:45	0.729529	3.24509	3.25618	1376.88	FALSE	6
2022-09-13	11:37:45	0.736399	3.27565	3.25618	1350.68	FALSE	6
2022-09-13	11:37:45	0.730547	3.24962	3.25618	1380.13	FALSE	6
2022-09-13	11:37:45	0.731616	3.25437	3.25618	1353.94	FALSE	6
2022-09-13	11:37:46	0.738028	3.2829	3.2623	1383.41	FALSE	6
2022-09-13	11:37:46	0.731259	3.25279	3.2623	1357.19	FALSE	6
2022-09-13	11:37:46	0.730903	3.2512	3.2623	1386.66	FALSE	6
2022-09-13	11:37:47	0.733193	3.26139	3.26275	1360.45	FALSE	6
2022-09-13	11:37:47	0.734364	3.2666	3.26275	1389.93	FALSE	6
2022-09-13	11:37:47	0.731005	3.25166	3.26275	1363.7	FALSE	6
2022-09-13	11:37:47	0.735433	3.27135	3.26275	1393.2	FALSE	6
2022-09-13	11:37:48	0.728817	3.24192	3.26037	1366.95	FALSE	6
2022-09-13	11:37:48	0.733397	3.2623	3.26037	1396.46	FALSE	6
2022-09-13	11:37:48	0.736247	3.27497	3.26037	1370.22	FALSE	6
2022-09-13	11:37:48	0.733397	3.2623	3.26037	1399.72	FALSE	6
2022-09-13	11:37:49	0.727646	3.23671	3.27418	1373.46	FALSE	6
2022-09-13	11:37:49	0.736705	3.27701	3.27418	1403	FALSE	6
2022-09-13	11:37:49	0.742913	3.30463	3.27418	1376.76	FALSE	6
2022-09-13	11:37:49	0.73701	3.27837	3.27418	1406.28	FALSE	6
2022-09-13	11:37:50	0.736399	3.27565	3.27324	1380.04	FALSE	6
2022-09-13	11:37:50	0.733244	3.26162	3.27324	1409.54	FALSE	6
2022-09-13	11:37:50	0.737926	3.28244	3.27324	1383.32	FALSE	6
2022-09-13	11:37:51	0.730801	3.25075	3.27045	1412.79	FALSE	6
2022-09-13	11:37:51	0.730242	3.24826	3.27045	1386.57	FALSE	6
2022-09-13	11:37:51	0.738588	3.28539	3.27045	1416.08	FALSE	6
2022-09-13	11:37:51	0.741285	3.29738	3.27045	1389.87	FALSE	6
2022-09-13	11:37:52	0.736399	3.27565	3.26671	1419.35	FALSE	6
2022-09-13	11:37:52	0.732786	3.25958	3.26671	1393.13	FALSE	6
2022-09-13	11:37:52	0.733753	3.26388	3.26671	1422.62	FALSE	6
2022-09-13	11:37:52	0.734618	3.26773	3.26671	1396.39	FALSE	6
2022-09-13	11:37:53	0.733906	3.26456	3.25941	1425.88	FALSE	6
2022-09-13	11:37:53	0.735026	3.26954	3.25941	1399.66	FALSE	6
2022-09-13	11:37:53	0.731463	3.25369	3.25941	1429.13	FALSE	6
2022-09-13	11:37:53	0.730598	3.24985	3.25941	1402.91	FALSE	6
2022-09-13	11:37:54	0.731616	3.25437	3.25664	1432.39	FALSE	6
2022-09-13	11:37:54	0.73355	3.26298	3.25664	1406.18	FALSE	6
2022-09-13	11:37:54	0.731209	3.25256	3.25664	1435.64	FALSE	6
2022-09-13	11:37:55	0.733041	3.26071	3.26428	1409.44	FALSE	6
2022-09-13	11:37:55	0.734364	3.2666	3.26428	1438.91	FALSE	6
2022-09-13	11:37:55	0.731259	3.25279	3.26428	1412.69	FALSE	6
2022-09-13	11:37:55	0.736705	3.27701	3.26428	1442.19	FALSE	6
2022-09-13	11:37:56	0.735585	3.27203	3.26315	1415.96	FALSE	6
2022-09-13	11:37:56	0.73584	3.27316	3.26315	1445.46	FALSE	6
2022-09-13	11:37:56	0.725865	3.22879	3.26315	1419.19	FALSE	6
2022-09-13	11:37:56	0.737061	3.27859	3.26315	1448.74	FALSE	6

## Sheet: Bubba_prong_2022913113242 (3)
Date	Time	Lbs	Newtons	Total force x time	total steps > 13.345		**GoPro Fitting:1122
2022-09-13	11:32:56	-1.48055	-6.58578	0	FALSE	0
2022-09-13	11:32:56	-1.49739	-6.66069	0	FALSE	0					Total Force x time	1448.74
2022-09-13	11:32:56	-1.57174	-6.99141	0	FALSE	0					Total Steps	6
2022-09-13	11:32:56	-1.25775	-5.59472	0	FALSE	0
2022-09-13	11:32:57	-1.06635	-4.74334	0	FALSE	0
2022-09-13	11:32:57	-0.991895	-4.41215	0	FALSE	0
2022-09-13	11:32:57	-0.796272	-3.54198	0	FALSE	0
2022-09-13	11:32:58	-0.667162	-2.96767	0	FALSE	0
2022-09-13	11:32:58	-0.694338	-3.08855	0	FALSE	0
2022-09-13	11:32:58	-0.636678	-2.83207	0	FALSE	0
2022-09-13	11:32:58	-0.580598	-2.58262	0	FALSE	0
2022-09-13	11:32:59	-0.712455	-3.16914	0	FALSE	0
2022-09-13	11:32:59	-0.742836	-3.30428	0	FALSE	0
2022-09-13	11:32:59	-0.557035	-2.4778	0	FALSE	0
2022-09-13	11:32:59	-0.463651	-2.06241	0	FALSE	0
2022-09-13	11:33:00	-0.408435	-1.8168	0	FALSE	0
2022-09-13	11:33:00	-0.380954	-1.69456	0	FALSE	0
2022-09-13	11:33:00	-0.426399	-1.89671	0	FALSE	0
2022-09-13	11:33:01	-0.324465	-1.44329	0	FALSE	0
2022-09-13	11:33:01	0.718486	3.19597	3.19597	FALSE	0
2022-09-13	11:33:01	0.729071	3.24305	3.24305	FALSE	0
2022-09-13	11:33:01	0.577926	2.57073	5.7667	FALSE	0
2022-09-13	11:33:02	0.466832	2.07656	5.31962	FALSE	0
2022-09-13	11:33:02	0.738486	3.28493	9.05163	FALSE	0
2022-09-13	11:33:02	0.737722	3.28154	8.60115	FALSE	0
2022-09-13	11:33:02	0.730293	3.24849	12.3001	FALSE	0
2022-09-13	11:33:03	0.734008	3.26501	11.8662	FALSE	0
2022-09-13	11:33:03	0.735891	3.27339	15.5735	FALSE	0
2022-09-13	11:33:03	0.7307	3.2503	15.1165	FALSE	0
2022-09-13	11:33:03	0.734924	3.26909	18.8426	FALSE	0
2022-09-13	11:33:04	0.737315	3.27972	18.3962	FALSE	0
2022-09-13	11:33:04	0.733957	3.26479	22.1074	FALSE	0
2022-09-13	11:33:04	0.744287	3.31074	21.7069	FALSE	0
2022-09-13	11:33:04	0.734364	3.2666	25.374	FALSE	0
2022-09-13	11:33:05	0.739198	3.2881	24.995	FALSE	0
2022-09-13	11:33:05	0.736959	3.27814	28.6521	FALSE	0
2022-09-13	11:33:05	0.731616	3.25437	28.2494	FALSE	0
2022-09-13	11:33:05	0.639097	2.84283	31.495	FALSE	0
2022-09-13	11:33:06	0.733346	3.26207	31.5115	FALSE	0
2022-09-13	11:33:06	0.733651	3.26343	34.7584	FALSE	0
2022-09-13	11:33:06	0.740929	3.2958	34.8073	FALSE	0
2022-09-13	11:33:07	0.733092	3.26094	38.0193	FALSE	0
2022-09-13	11:33:07	0.451412	2.00797	36.8152	FALSE	0
2022-09-13	11:33:07	-0.331437	-1.4743	38.0193	FALSE	0
2022-09-13	11:33:07	-0.312201	-1.38873	36.8152	FALSE	0
2022-09-13	11:33:08	0.734313	3.26637	41.2857	FALSE	0
2022-09-13	11:33:08	0.739758	3.29059	40.1058	FALSE	0
2022-09-13	11:33:08	0.728512	3.24057	44.5263	FALSE	0
2022-09-13	11:33:08	0.734975	3.26932	43.3751	FALSE	0
2022-09-13	11:33:09	0.732481	3.25822	47.7845	FALSE	0
2022-09-13	11:33:09	0.735178	3.27022	46.6454	FALSE	0
2022-09-13	11:33:09	0.740318	3.29308	51.0776	FALSE	0
2022-09-13	11:33:09	0.740674	3.29467	49.94	FALSE	0
2022-09-13	11:33:10	0.737315	3.27972	54.3573	FALSE	0
2022-09-13	11:33:10	0.727494	3.23604	53.1761	FALSE	0
2022-09-13	11:33:10	0.738944	3.28697	57.6443	FALSE	0
2022-09-13	11:33:11	0.726934	3.23355	56.4096	FALSE	0
2022-09-13	11:33:11	0.736857	3.27769	60.922	FALSE	0
2022-09-13	11:33:11	0.727901	3.23785	59.6475	FALSE	0
2022-09-13	11:33:11	0.724898	3.22449	64.1464	FALSE	0
2022-09-13	11:33:12	0.706527	3.14277	62.7902	FALSE	0
2022-09-13	11:33:12	0.719606	3.20095	67.3474	FALSE	0
2022-09-13	11:33:12	0.698486	3.10701	65.8972	FALSE	0
2022-09-13	11:33:12	0.701285	3.11946	70.4668	FALSE	0
2022-09-13	11:33:13	0.689326	3.06626	68.9635	FALSE	0
2022-09-13	11:33:13	0.716807	3.1885	73.6554	FALSE	0
2022-09-13	11:33:13	0.713346	3.17311	72.1366	FALSE	0
2022-09-13	11:33:13	0.720929	3.20684	76.8622	FALSE	0
2022-09-13	11:33:14	0.715127	3.18103	75.3176	FALSE	0
2022-09-13	11:33:14	0.704644	3.1344	79.9966	FALSE	0
2022-09-13	11:33:14	0.702913	3.1267	78.4443	FALSE	0
2022-09-13	11:33:15	0.72729	3.23513	83.2317	FALSE	0
2022-09-13	11:33:15	0.730445	3.24917	81.6935	FALSE	0
2022-09-13	11:33:15	0.724949	3.22472	86.4564	FALSE	0
2022-09-13	11:33:15	0.721743	3.21046	84.904	FALSE	0
2022-09-13	11:33:16	0.72388	3.21996	89.6764	FALSE	0
2022-09-13	11:33:16	0.723575	3.21861	88.1226	FALSE	0
2022-09-13	11:33:16	0.719606	3.20095	92.8773	FALSE	0
2022-09-13	11:33:16	0.714771	3.17944	91.302	FALSE	0
2022-09-13	11:33:17	0.662048	2.94492	95.8223	FALSE	0
2022-09-13	11:33:17	0.642048	2.85596	94.158	FALSE	0
2022-09-13	11:33:17	0.588613	2.61827	98.4405	FALSE	0
2022-09-13	11:33:17	0.641997	2.85573	97.0137	FALSE	0
2022-09-13	11:33:18	0.61411	2.73168	101.172	FALSE	0
2022-09-13	11:33:18	0.577723	2.56983	99.5835	FALSE	0
2022-09-13	11:33:18	0.475382	2.11459	103.287	FALSE	0
2022-09-13	11:33:19	0.645458	2.87113	102.455	FALSE	0
2022-09-13	11:33:19	0.737112	3.27882	106.566	FALSE	0
2022-09-13	11:33:19	0.732481	3.25822	105.713	FALSE	0
2022-09-13	11:33:19	0.731667	3.2546	109.82	FALSE	0
2022-09-13	11:33:20	0.731717	3.25482	108.968	FALSE	0
2022-09-13	11:33:20	0.733092	3.26094	113.081	FALSE	0
2022-09-13	11:33:20	0.669987	2.98024	111.948	FALSE	0
2022-09-13	11:33:20	0.678486	3.01804	116.099	FALSE	0
2022-09-13	11:33:21	0.654007	2.90915	114.857	FALSE	0
2022-09-13	11:33:21	0.634669	2.82313	118.922	FALSE	0
2022-09-13	11:33:21	0.509733	2.26739	117.124	FALSE	0
2022-09-13	11:33:21	0.469733	2.08947	121.012	FALSE	0
2022-09-13	11:33:22	0.588257	2.61668	119.741	FALSE	0
2022-09-13	11:33:22	0.209224	0.93067	121.942	FALSE	0
2022-09-13	11:33:22	-0.00690816	-0.0307289	119.741	FALSE	0
2022-09-13	11:33:23	0.0948221	0.421788	122.364	FALSE	0
2022-09-13	11:33:23	0.146476	0.651555	120.393	FALSE	0
2022-09-13	11:33:23	0.0452038	0.201076	122.565	FALSE	0
2022-09-13	11:33:23	0.10042	0.446688	120.839	FALSE	0
2022-09-13	11:33:24	0.0139061	0.0618571	122.627	FALSE	0
2022-09-13	11:33:24	0.441081	1.96202	122.801	FALSE	0
2022-09-13	11:33:24	0.678944	3.02008	125.647	FALSE	0
2022-09-13	11:33:24	0.735534	3.2718	126.073	FALSE	0
2022-09-13	11:33:25	0.734669	3.26795	128.915	FALSE	0
2022-09-13	11:33:25	0.589377	2.62167	128.695	FALSE	0
2022-09-13	11:33:25	0.727748	3.23717	132.152	FALSE	0
2022-09-13	11:33:25	0.731921	3.25573	131.951	FALSE	0
2022-09-13	11:33:26	0.734873	3.26886	135.421	FALSE	0
2022-09-13	11:33:26	0.731565	3.25415	135.205	FALSE	0
2022-09-13	11:33:26	0.731412	3.25347	138.675	FALSE	0
2022-09-13	11:33:26	0.73187	3.2555	138.46	FALSE	0
2022-09-13	11:33:27	0.727087	3.23423	141.909	FALSE	0
2022-09-13	11:33:27	0.734211	3.26592	141.726	FALSE	0
2022-09-13	11:33:27	0.739249	3.28833	145.197	FALSE	0
2022-09-13	11:33:28	0.74327	3.30621	145.032	FALSE	0
2022-09-13	11:33:28	0.707901	3.14889	148.346	FALSE	0
2022-09-13	11:33:28	0.737366	3.27995	148.312	FALSE	0
2022-09-13	11:33:28	0.734211	3.26592	151.612	FALSE	0
2022-09-13	11:33:29	0.733142	3.26116	151.574	FALSE	0
2022-09-13	11:33:29	0.735585	3.27203	154.884	FALSE	0
2022-09-13	11:33:29	0.740878	3.29557	154.869	FALSE	0
2022-09-13	11:33:29	0.735891	3.27339	158.158	FALSE	0
2022-09-13	11:33:30	0.73701	3.27837	158.147	FALSE	0
2022-09-13	11:33:30	0.736094	3.27429	161.432	FALSE	0
2022-09-13	11:33:30	0.737621	3.28109	161.429	FALSE	0
2022-09-13	11:33:30	0.734924	3.26909	164.701	FALSE	0
2022-09-13	11:33:31	0.729886	3.24668	164.675	FALSE	0
2022-09-13	11:33:31	0.738333	3.28425	167.985	FALSE	0
2022-09-13	11:33:31	0.733702	3.26365	167.939	FALSE	0
2022-09-13	11:33:32	0.738333	3.28425	171.269	FALSE	0
2022-09-13	11:33:32	0.732023	3.25618	171.195	FALSE	0
2022-09-13	11:33:32	0.741081	3.29648	174.566	FALSE	0
2022-09-13	11:33:32	0.73874	3.28606	174.481	FALSE	0
2022-09-13	11:33:33	0.730903	3.2512	177.817	FALSE	0
2022-09-13	11:33:33	0.732074	3.25641	177.738	FALSE	0
2022-09-13	11:33:33	0.735941	3.27361	181.091	FALSE	0
2022-09-13	11:33:33	0.733957	3.26479	181.002	FALSE	0
2022-09-13	11:33:34	0.734873	3.26886	184.36	FALSE	0
2022-09-13	11:33:34	0.732888	3.26003	184.262	FALSE	0
2022-09-13	11:33:34	0.736298	3.2752	187.635	FALSE	0
2022-09-13	11:33:34	0.736399	3.27565	187.538	FALSE	0
2022-09-13	11:33:35	0.729987	3.24713	190.882	FALSE	0
2022-09-13	11:33:35	0.726832	3.23309	190.771	FALSE	0
2022-09-13	11:33:35	0.734924	3.26909	194.151	FALSE	0
2022-09-13	11:33:36	0.732175	3.25686	194.028	FALSE	0
2022-09-13	11:33:36	0.736349	3.27543	197.426	FALSE	0
2022-09-13	11:33:36	0.820013	3.64758	197.676	FALSE	0
2022-09-13	11:33:36	0.736399	3.27565	200.702	FALSE	0
2022-09-13	11:33:37	0.740369	3.29331	200.969	FALSE	0
2022-09-13	11:33:37	0.732379	3.25777	203.96	FALSE	0
2022-09-13	11:33:37	0.729224	3.24373	204.213	FALSE	0
2022-09-13	11:33:37	0.733193	3.26139	207.221	FALSE	0
2022-09-13	11:33:38	0.733041	3.26071	207.473	FALSE	0
2022-09-13	11:33:38	0.735789	3.27294	210.494	FALSE	0
2022-09-13	11:33:38	0.729224	3.24373	210.717	FALSE	0
2022-09-13	11:33:38	0.733957	3.26479	213.759	FALSE	0
2022-09-13	11:33:39	0.735738	3.27271	213.99	FALSE	0
2022-09-13	11:33:39	0.733142	3.26116	217.02	FALSE	0
2022-09-13	11:33:39	0.734669	3.26795	217.258	FALSE	0
2022-09-13	11:33:40	0.733092	3.26094	220.281	FALSE	0
2022-09-13	11:33:40	0.72902	3.24283	220.501	FALSE	0
2022-09-13	11:33:40	0.72841	3.24011	223.521	FALSE	0
2022-09-13	11:33:40	0.736705	3.27701	223.778	FALSE	0
2022-09-13	11:33:41	0.739147	3.28787	226.809	FALSE	0
2022-09-13	11:33:41	0.644593	2.86728	226.645	FALSE	0
2022-09-13	11:33:41	0.624847	2.77944	229.588	FALSE	0
2022-09-13	11:33:41	0.702099	3.12308	229.768	FALSE	0
2022-09-13	11:33:42	0.737214	3.27928	232.868	FALSE	0
2022-09-13	11:33:42	0.246272	1.09547	230.863	FALSE	0
2022-09-13	11:33:42	-0.319173	-1.41975	232.868	FALSE	0
2022-09-13	11:33:42	0.816857	3.63354	234.497	FALSE	0
2022-09-13	11:33:43	0.7307	3.2503	236.118	FALSE	0
2022-09-13	11:33:43	0.742913	3.30463	237.802	FALSE	0
2022-09-13	11:33:43	0.731209	3.25256	239.371	FALSE	0
2022-09-13	11:33:44	0.740929	3.2958	241.097	FALSE	0
2022-09-13	11:33:44	0.734415	3.26682	242.637	FALSE	0
2022-09-13	11:33:44	0.738537	3.28516	244.382	FALSE	0
2022-09-13	11:33:44	0.730191	3.24804	245.885	FALSE	0
2022-09-13	11:33:45	0.742761	3.30395	247.686	FALSE	0
2022-09-13	11:33:45	0.740827	3.29535	249.181	FALSE	0
2022-09-13	11:33:45	0.733601	3.2632	250.95	FALSE	0
2022-09-13	11:33:45	0.627799	2.79258	251.973	FALSE	0
2022-09-13	11:33:46	0.739147	3.28787	254.238	FALSE	0
2022-09-13	11:33:46	0.73584	3.27316	255.247	FALSE	0
2022-09-13	11:33:46	0.737366	3.27995	257.517	FALSE	0
2022-09-13	11:33:46	0.726934	3.23355	258.48	FALSE	0
2022-09-13	11:33:47	0.735076	3.26977	260.787	FALSE	0
2022-09-13	11:33:47	0.733804	3.26411	261.744	FALSE	0
2022-09-13	11:33:47	0.733804	3.26411	264.051	FALSE	0
2022-09-13	11:33:47	0.7307	3.2503	264.995	FALSE	0
2022-09-13	11:33:48	0.732532	3.25845	267.31	FALSE	0
2022-09-13	11:33:48	0.726272	3.2306	268.225	FALSE	0
2022-09-13	11:33:48	0.110445	0.491281	267.801	FALSE	0
2022-09-13	11:33:49	0.102354	0.455291	268.68	FALSE	0
2022-09-13	11:33:49	0.174364	0.775606	268.577	FALSE	0
2022-09-13	11:33:49	0.206527	0.918673	269.599	FALSE	0
2022-09-13	11:33:49	0.171667	0.763609	269.34	FALSE	0
2022-09-13	11:33:50	0.212735	0.946288	270.545	FALSE	0
2022-09-13	11:33:50	0.629784	2.80141	272.142	FALSE	0
2022-09-13	11:33:50	0.740776	3.29512	273.84	FALSE	0
2022-09-13	11:33:50	0.729835	3.24645	275.388	FALSE	0
2022-09-13	11:33:51	1.47391	6.55625	280.397	FALSE	0
2022-09-13	11:33:51	1.02327	4.55171	279.94	FALSE	0
2022-09-13	11:33:51	0.354822	1.57832	281.975	FALSE	0
2022-09-13	11:33:51	0.294669	1.31075	281.251	FALSE	0
2022-09-13	11:33:52	0.409529	1.82167	283.797	FALSE	0
2022-09-13	11:33:52	0.735941	3.27361	284.524	FALSE	0
2022-09-13	11:33:52	0.729886	3.24668	287.043	FALSE	0
2022-09-13	11:33:53	0.735331	3.2709	287.795	FALSE	0
2022-09-13	11:33:53	0.739147	3.28787	290.331	FALSE	0
2022-09-13	11:33:53	0.739504	3.28946	291.085	FALSE	0
2022-09-13	11:33:53	0.738333	3.28425	293.616	FALSE	0
2022-09-13	11:33:54	0.735585	3.27203	294.357	FALSE	0
2022-09-13	11:33:54	0.732277	3.25731	296.873	FALSE	0
2022-09-13	11:33:54	0.739351	3.28878	297.645	FALSE	0
2022-09-13	11:33:54	0.729987	3.24713	300.12	FALSE	0
2022-09-13	11:33:55	0.731463	3.25369	300.899	FALSE	0
2022-09-13	11:33:55	0.740013	3.29173	303.412	FALSE	0
2022-09-13	11:33:55	0.73528	3.27067	304.17	FALSE	0
2022-09-13	11:33:55	0.73645	3.27588	306.688	FALSE	0
2022-09-13	11:33:56	0.736501	3.2761	307.446	FALSE	0
2022-09-13	11:33:56	0.734517	3.26728	309.955	FALSE	0
2022-09-13	11:33:56	0.738435	3.28471	310.731	FALSE	0
2022-09-13	11:33:57	0.737061	3.27859	313.233	FALSE	0
2022-09-13	11:33:57	0.733193	3.26139	313.992	FALSE	0
2022-09-13	11:33:57	0.731616	3.25437	316.488	FALSE	0
2022-09-13	11:33:57	0.724237	3.22155	317.214	FALSE	0
2022-09-13	11:33:58	0.732837	3.25981	319.748	FALSE	0
2022-09-13	11:33:58	0.730242	3.24826	320.462	FALSE	0
2022-09-13	11:33:58	0.7307	3.2503	322.998	FALSE	0
2022-09-13	11:33:58	0.73584	3.27316	323.735	FALSE	0
2022-09-13	11:33:59	0.736501	3.2761	326.274	FALSE	0
2022-09-13	11:33:59	0.737926	3.28244	327.017	FALSE	0
2022-09-13	11:33:59	0.734262	3.26614	329.54	FALSE	0
2022-09-13	11:33:59	0.731921	3.25573	330.273	FALSE	0
2022-09-13	11:34:00	0.73014	3.24781	332.788	FALSE	0
2022-09-13	11:34:00	0.731565	3.25415	333.527	FALSE	0
2022-09-13	11:34:00	0.733651	3.26343	336.051	FALSE	0
2022-09-13	11:34:01	0.731158	3.25234	336.78	FALSE	0
2022-09-13	11:34:01	0.729478	3.24486	339.296	FALSE	0
2022-09-13	11:34:01	0.732888	3.26003	340.04	FALSE	0
2022-09-13	11:34:01	0.738588	3.28539	342.582	FALSE	0
2022-09-13	11:34:02	0.729122	3.24328	343.283	FALSE	0
2022-09-13	11:34:02	0.736603	3.27656	345.858	FALSE	0
2022-09-13	11:34:02	0.731463	3.25369	346.537	FALSE	0
2022-09-13	11:34:02	0.736552	3.27633	349.135	FALSE	0
2022-09-13	11:34:03	0.731412	3.25347	349.79	FALSE	0
2022-09-13	11:34:03	0.731565	3.25415	352.389	FALSE	0
2022-09-13	11:34:03	0.733499	3.26275	353.053	FALSE	0
2022-09-13	11:34:03	0.72729	3.23513	355.624	FALSE	0
2022-09-13	11:34:04	0.729784	3.24623	356.299	FALSE	0
2022-09-13	11:34:04	0.735483	3.27158	358.895	FALSE	0
2022-09-13	11:34:04	0.74098	3.29603	359.595	FALSE	0
2022-09-13	11:34:05	0.734008	3.26501	362.16	FALSE	0
2022-09-13	11:34:05	0.734771	3.26841	362.863	FALSE	0
2022-09-13	11:34:05	0.729428	3.24464	365.405	FALSE	0
2022-09-13	11:34:05	0.730801	3.25075	366.114	FALSE	0
2022-09-13	11:34:06	0.900725	4.0066	369.412	FALSE	0
2022-09-13	11:34:06	0.733142	3.26116	369.375	FALSE	0
2022-09-13	11:34:06	0.708257	3.15047	372.562	FALSE	0
2022-09-13	11:34:06	0.736043	3.27407	372.649	FALSE	0
2022-09-13	11:34:07	0.739758	3.29059	375.853	FALSE	0
2022-09-13	11:34:07	0.730038	3.24736	375.897	FALSE	0
2022-09-13	11:34:07	0.732786	3.25958	379.112	FALSE	0
2022-09-13	11:34:07	0.734771	3.26841	379.165	FALSE	0
2022-09-13	11:34:08	0.737926	3.28244	382.395	FALSE	0
2022-09-13	11:34:08	0.731209	3.25256	382.418	FALSE	0
2022-09-13	11:34:08	0.73701	3.27837	385.673	FALSE	0
2022-09-13	11:34:09	0.733244	3.26162	385.679	FALSE	0
2022-09-13	11:34:09	0.730089	3.24758	388.921	FALSE	0
2022-09-13	11:34:09	0.73355	3.26298	388.942	FALSE	0
2022-09-13	11:34:09	0.726425	3.23128	392.152	FALSE	0
2022-09-13	11:34:10	0.253346	1.12693	390.069	FALSE	0
2022-09-13	11:34:10	0.398384	1.77209	393.924	FALSE	0
2022-09-13	11:34:10	0.740013	3.29173	393.361	FALSE	0
2022-09-13	11:34:10	0.724237	3.22155	397.146	FALSE	0
2022-09-13	11:34:11	0.622354	2.76836	396.129	FALSE	0
2022-09-13	11:34:11	0.708817	3.15296	400.299	FALSE	0
2022-09-13	11:34:11	0.732328	3.25754	399.387	FALSE	0
2022-09-13	11:34:11	0.735992	3.27384	403.572	FALSE	0
2022-09-13	11:34:12	0.733499	3.26275	402.65	FALSE	0
2022-09-13	11:34:12	0.737519	3.28063	406.853	FALSE	0
2022-09-13	11:34:12	0.732125	3.25664	405.906	FALSE	0
2022-09-13	11:34:12	0.741743	3.29942	410.152	FALSE	0
2022-09-13	11:34:13	1.50882	6.71153	412.618	FALSE	0
2022-09-13	11:34:13	1.8362	8.16778	418.32	FALSE	0
2022-09-13	11:34:13	0.930445	4.13881	416.757	FALSE	0
2022-09-13	11:34:14	0.735738	3.27271	421.593	FALSE	0
2022-09-13	11:34:14	0.722557	3.21408	419.971	FALSE	0
2022-09-13	11:34:14	0.727188	3.23468	424.828	FALSE	0
2022-09-13	11:34:14	0.727443	3.23581	423.207	FALSE	0
2022-09-13	11:34:15	0.729936	3.2469	428.075	FALSE	0
2022-09-13	11:34:15	0.765712	3.40604	426.613	FALSE	0
2022-09-13	11:34:15	0.679606	3.02302	431.098	FALSE	0
2022-09-13	11:34:15	1.19355	5.30915	431.922	FALSE	0
2022-09-13	11:34:16	0.746221	3.31934	434.417	FALSE	0
2022-09-13	11:34:16	1.26586	5.6308	437.553	FALSE	0
2022-09-13	11:34:16	1.04123	4.6316	439.049	FALSE	0
2022-09-13	11:34:16	1.14953	5.11334	442.666	FALSE	0
2022-09-13	11:34:17	0.394109	1.75308	440.802	FALSE	0
2022-09-13	11:34:17	0.546018	2.4288	445.095	FALSE	0
2022-09-13	11:34:17	0.553652	2.46275	443.264	FALSE	0
2022-09-13	11:34:18	0.44673	1.98714	447.082	FALSE	0
2022-09-13	11:34:18	0.738181	3.28358	446.548	FALSE	0
2022-09-13	11:34:18	0.419046	1.864	448.946	FALSE	0
2022-09-13	11:34:18	0.278741	1.2399	447.788	FALSE	0
2022-09-13	11:34:19	0.328715	1.46219	450.408	FALSE	0
2022-09-13	11:34:19	0.0968577	0.430842	448.219	FALSE	0
2022-09-13	11:34:19	-0.29332	-1.30475	450.408	FALSE	0
2022-09-13	11:34:19	-0.393218	-1.74911	448.219	FALSE	0
2022-09-13	11:34:20	-0.609758	-2.71233	450.408	FALSE	0
2022-09-13	11:34:20	-0.400648	-1.78216	448.219	FALSE	0
2022-09-13	11:34:20	-0.306399	-1.36292	450.408	FALSE	0
2022-09-13	11:34:20	0.463575	2.06207	450.281	FALSE	0
2022-09-13	11:34:21	0.531056	2.36224	452.77	FALSE	0
2022-09-13	11:34:21	0.385102	1.71301	451.994	FALSE	0
2022-09-13	11:34:21	0.360573	1.6039	454.374	FALSE	0
2022-09-13	11:34:22	0.433346	1.92761	453.921	FALSE	0
2022-09-13	11:34:22	0.319707	1.42212	455.796	FALSE	0
2022-09-13	11:34:22	0.206934	0.920484	454.842	FALSE	0
2022-09-13	11:34:22	0.180573	0.803225	456.599	FALSE	0
2022-09-13	11:34:23	0.290293	1.29128	456.133	FALSE	0
2022-09-13	11:34:23	0.31299	1.39224	457.992	FALSE	0
2022-09-13	11:34:23	0.66556	2.96054	459.094	FALSE	0
2022-09-13	11:34:23	0.963728	4.28685	462.279	FALSE	0
2022-09-13	11:34:24	1.23452	5.49139	464.585	FALSE	0
2022-09-13	11:34:24	2.07192	9.21631	471.495	FALSE	0
2022-09-13	11:34:24	1.90765	8.48561	473.071	FALSE	0
2022-09-13	11:34:24	1.11365	4.95374	476.449	FALSE	0
2022-09-13	11:34:25	1.0993	4.88991	477.961	FALSE	0
2022-09-13	11:34:25	0.476705	2.12048	478.569	FALSE	0
2022-09-13	11:34:25	0.460471	2.04827	480.009	FALSE	0
2022-09-13	11:34:26	0.274008	1.21884	479.788	FALSE	0
2022-09-13	11:34:26	0.441845	1.96541	481.974	FALSE	0
2022-09-13	11:34:26	0.885153	3.93734	483.725	FALSE	0
2022-09-13	11:34:26	0.983372	4.37424	486.348	FALSE	0
2022-09-13	11:34:27	1.72327	7.66545	491.391	FALSE	0
2022-09-13	11:34:27	0.959453	4.26784	490.616	FALSE	0
2022-09-13	11:34:27	0.186374	0.829029	492.22	FALSE	0
2022-09-13	11:34:27	0.266985	1.1876	491.804	FALSE	0
2022-09-13	11:34:28	0.153906	0.684605	492.904	FALSE	0
2022-09-13	11:34:28	0.155891	0.693434	492.497	FALSE	0
2022-09-13	11:34:28	0.200827	0.893319	493.798	FALSE	0
2022-09-13	11:34:28	0.2964	1.31845	493.816	FALSE	0
2022-09-13	11:34:29	0.772634	3.43683	497.235	FALSE	0
2022-09-13	11:34:29	0.411361	1.82982	495.646	FALSE	0
2022-09-13	11:34:29	0.569682	2.53406	499.769	FALSE	0
2022-09-13	11:34:30	0.84729	3.76892	499.415	FALSE	0
2022-09-13	11:34:30	0.754516	3.35624	503.125	FALSE	0
2022-09-13	11:34:30	1.87289	8.33099	507.746	FALSE	0
2022-09-13	11:34:30	2.28525	10.1652	513.29	FALSE	0
2022-09-13	11:34:31	3.74479	16.6576	524.403	1	1
2022-09-13	11:34:31	6.06988	27	540.29	1	2
2022-09-13	11:34:31	3.17904	14.141	538.544	1	3
2022-09-13	11:34:31	1.28627	5.72159	546.012	FALSE	3
2022-09-13	11:34:32	0.810649	3.60593	542.15	FALSE	3
2022-09-13	11:34:32	2.12485	9.45176	555.463	FALSE	3
2022-09-13	11:34:32	2.17986	9.69645	551.846	FALSE	3
2022-09-13	11:34:32	1.90454	8.47177	563.935	FALSE	3
2022-09-13	11:34:33	1.6562	7.36711	559.214	FALSE	3
2022-09-13	11:34:33	1.50159	6.67937	570.615	FALSE	3
2022-09-13	11:34:33	1.38123	6.14399	565.358	FALSE	3
2022-09-13	11:34:33	1.3191	5.86762	576.482	FALSE	3
2022-09-13	11:34:34	1.30566	5.80784	571.165	FALSE	3
2022-09-13	11:34:34	1.21324	5.39673	581.879	FALSE	3
2022-09-13	11:34:34	1.18291	5.26182	576.427	FALSE	3
2022-09-13	11:34:35	1.10434	4.91233	586.791	FALSE	3
2022-09-13	11:34:35	0.985153	4.38216	580.809	FALSE	3
2022-09-13	11:34:35	1.02072	4.54037	591.332	FALSE	3
2022-09-13	11:34:35	0.982354	4.36971	585.179	FALSE	3
2022-09-13	11:34:36	0.919555	4.09036	595.422	FALSE	3
2022-09-13	11:34:36	0.982405	4.36993	589.549	FALSE	3
2022-09-13	11:34:36	0.32327	1.43797	596.86	FALSE	3
2022-09-13	11:34:36	0.333092	1.48166	591.031	FALSE	3
2022-09-13	11:34:37	0.552939	2.45958	599.32	FALSE	3
2022-09-13	11:34:37	0.26729	1.18896	592.22	FALSE	3
2022-09-13	11:34:37	0.0996058	0.443067	599.763	FALSE	3
2022-09-13	11:34:37	0.0397585	0.176854	592.397	FALSE	3
2022-09-13	11:34:38	0.155127	0.690036	600.453	FALSE	3
2022-09-13	11:34:38	0.212176	0.943801	593.34	FALSE	3
2022-09-13	11:34:38	0.236807	1.05336	601.506	FALSE	3
2022-09-13	11:34:39	0.234568	1.04341	594.384	FALSE	3
2022-09-13	11:34:39	0.212176	0.943801	602.45	FALSE	3
2022-09-13	11:34:39	0.236196	1.05065	595.434	FALSE	3
2022-09-13	11:34:39	0.143117	0.636613	603.086	FALSE	3
2022-09-13	11:34:40	0.309479	1.37662	596.811	FALSE	3
2022-09-13	11:34:40	0.198893	0.884716	603.971	FALSE	3
2022-09-13	11:34:40	0.452125	2.01114	598.822	FALSE	3
2022-09-13	11:34:40	0.63584	2.82834	606.8	FALSE	3
2022-09-13	11:34:41	1.51625	6.74458	605.567	FALSE	3
2022-09-13	11:34:41	1.75416	7.80285	614.602	FALSE	3
2022-09-13	11:34:41	2.00897	8.9363	614.503	FALSE	3
2022-09-13	11:34:41	1.75696	7.81531	622.418	FALSE	3
2022-09-13	11:34:42	0.851972	3.78974	618.293	FALSE	3
2022-09-13	11:34:42	0.6993	3.11063	625.528	FALSE	3
2022-09-13	11:34:42	0.514822	2.29003	620.583	FALSE	3
2022-09-13	11:34:43	0.917672	4.08199	629.61	FALSE	3
2022-09-13	11:34:43	1.3194	5.86896	626.452	FALSE	3
2022-09-13	11:34:43	1.36419	6.06819	635.678	FALSE	3
2022-09-13	11:34:43	0.595382	2.64838	629.1	FALSE	3
2022-09-13	11:34:44	0.555789	2.47226	638.151	FALSE	3
2022-09-13	11:34:44	0.517163	2.30044	631.401	FALSE	3
2022-09-13	11:34:44	0.34841	1.5498	639.701	FALSE	3
2022-09-13	11:34:44	0.480064	2.13542	633.536	FALSE	3
2022-09-13	11:34:45	0.512023	2.27758	641.978	FALSE	3
2022-09-13	11:34:45	0.469479	2.08834	635.624	FALSE	3
2022-09-13	11:34:45	0.422405	1.87894	643.857	FALSE	3
2022-09-13	11:34:45	0.568766	2.52998	638.154	FALSE	3
2022-09-13	11:34:46	0.772379	3.4357	647.293	FALSE	3
2022-09-13	11:34:46	0.766476	3.40944	641.564	FALSE	3
2022-09-13	11:34:46	0.739656	3.29014	650.583	FALSE	3
2022-09-13	11:34:47	0.788002	3.50519	645.069	FALSE	3
2022-09-13	11:34:47	0.792226	3.52398	654.107	FALSE	3
2022-09-13	11:34:47	0.801539	3.56541	648.634	FALSE	3
2022-09-13	11:34:47	0.521692	2.32059	656.427	FALSE	3
2022-09-13	11:34:48	0.154822	0.688679	649.323	FALSE	3
2022-09-13	11:34:48	0.160522	0.714034	657.142	FALSE	3
2022-09-13	11:34:48	0.262608	1.16813	650.491	FALSE	3
2022-09-13	11:34:48	0.736094	3.27429	660.416	FALSE	3
2022-09-13	11:34:49	0.719606	3.20095	653.692	FALSE	3
2022-09-13	11:34:49	0.825916	3.67384	664.09	FALSE	3
2022-09-13	11:34:49	0.579809	2.57911	656.271	FALSE	3
2022-09-13	11:34:49	0.260064	1.15682	665.246	FALSE	3
2022-09-13	11:34:50	0.728562	3.24079	659.512	FALSE	3
2022-09-13	11:34:50	0.733092	3.26094	668.507	FALSE	3
2022-09-13	11:34:50	0.735076	3.26977	662.782	FALSE	3
2022-09-13	11:34:51	0.730954	3.25143	671.759	FALSE	3
2022-09-13	11:34:51	0.73416	3.26569	666.047	FALSE	3
2022-09-13	11:34:51	0.735229	3.27045	675.029	FALSE	3
2022-09-13	11:34:51	0.733244	3.26162	669.309	FALSE	3
2022-09-13	11:34:52	0.732735	3.25935	678.289	FALSE	3
2022-09-13	11:34:52	0.738333	3.28425	672.593	FALSE	3
2022-09-13	11:34:52	0.734822	3.26864	681.557	FALSE	3
2022-09-13	11:34:52	0.740114	3.29218	675.886	FALSE	3
2022-09-13	11:34:53	0.73472	3.26818	684.825	FALSE	3
2022-09-13	11:34:53	0.735687	3.27248	679.158	FALSE	3
2022-09-13	11:34:53	0.74042	3.29354	688.119	FALSE	3
2022-09-13	11:34:53	0.733906	3.26456	682.423	FALSE	3
2022-09-13	11:34:54	0.730547	3.24962	691.369	FALSE	3
2022-09-13	11:34:54	0.73131	3.25301	685.676	FALSE	3
2022-09-13	11:34:54	0.73355	3.26298	694.632	FALSE	3
2022-09-13	11:34:54	0.735992	3.27384	688.949	FALSE	3
2022-09-13	11:34:55	0.731921	3.25573	697.887	FALSE	3
2022-09-13	11:34:55	0.737061	3.27859	692.228	FALSE	3
2022-09-13	11:34:55	0.734211	3.26592	701.153	FALSE	3
2022-09-13	11:34:56	0.733448	3.26252	695.491	FALSE	3
2022-09-13	11:34:56	0.733092	3.26094	704.414	FALSE	3
2022-09-13	11:34:56	0.73874	3.28606	698.777	FALSE	3
2022-09-13	11:34:56	0.737926	3.28244	707.697	FALSE	3
2022-09-13	11:34:57	0.730293	3.24849	702.025	FALSE	3
2022-09-13	11:34:57	0.73528	3.27067	710.967	FALSE	3
2022-09-13	11:34:57	0.731107	3.25211	705.277	FALSE	3
2022-09-13	11:34:57	0.481489	2.14176	713.109	FALSE	3
2022-09-13	11:34:58	0.424288	1.88732	707.164	FALSE	3
2022-09-13	11:34:58	0.417417	1.85675	714.966	FALSE	3
2022-09-13	11:34:58	0.317214	1.41103	708.576	FALSE	3
2022-09-13	11:34:58	0.736094	3.27429	718.24	FALSE	3
2022-09-13	11:34:59	1.11955	4.97998	713.556	FALSE	3
2022-09-13	11:34:59	1.63955	7.29305	725.533	FALSE	3
2022-09-13	11:34:59	2.61243	11.6206	725.176	FALSE	3
2022-09-13	11:35:00	0.873804	3.88685	729.42	FALSE	3
2022-09-13	11:35:00	1.58531	7.05178	732.228	FALSE	3
2022-09-13	11:35:00	1.16872	5.1987	734.619	FALSE	3
2022-09-13	11:35:00	1.09065	4.85143	737.079	FALSE	3
2022-09-13	11:35:01	2.5077	11.1548	745.773	FALSE	3
2022-09-13	11:35:01	1.92973	8.58382	745.663	FALSE	3
2022-09-13	11:35:01	0.680267	3.02596	748.799	FALSE	3
2022-09-13	11:35:01	1.5395	6.848	752.511	FALSE	3
2022-09-13	11:35:02	0.523932	2.33055	751.13	FALSE	3
2022-09-13	11:35:02	1.96129	8.72421	761.235	FALSE	3
2022-09-13	11:35:02	0.359504	1.59915	752.729	FALSE	3
2022-09-13	11:35:02	0.223677	0.99496	762.23	FALSE	3
2022-09-13	11:35:03	0.481692	2.14266	754.872	FALSE	3
2022-09-13	11:35:03	0.721591	3.20978	765.44	FALSE	3
2022-09-13	11:35:03	1.17518	5.22744	760.099	FALSE	3
2022-09-13	11:35:04	0.867697	3.85969	769.3	FALSE	3
2022-09-13	11:35:04	1.62235	7.21654	767.316	FALSE	3
2022-09-13	11:35:04	0.914415	4.0675	773.367	FALSE	3
2022-09-13	11:35:04	2.4538	10.915	778.231	FALSE	3
2022-09-13	11:35:05	1.28245	5.70459	779.072	FALSE	3
2022-09-13	11:35:05	2.24368	9.98034	788.211	FALSE	3
2022-09-13	11:35:05	0.558079	2.48245	781.554	FALSE	3
2022-09-13	11:35:05	0.379046	1.68607	789.897	FALSE	3
2022-09-13	11:35:06	0.727239	3.2349	784.789	FALSE	3
2022-09-13	11:35:06	1.1191	4.97798	794.875	FALSE	3
2022-09-13	11:35:06	0.656959	2.92229	787.712	FALSE	3
2022-09-13	11:35:06	3.06352	13.6271	808.502	1	4
2022-09-13	11:35:07	1.05274	4.6828	792.394	FALSE	4
2022-09-13	11:35:07	1.40978	6.27098	814.773	FALSE	4
2022-09-13	11:35:07	0.797723	3.54843	795.943	FALSE	4
2022-09-13	11:35:08	1.00709	4.47974	819.253	FALSE	4
2022-09-13	11:35:08	0.544695	2.42291	798.366	FALSE	4
2022-09-13	11:35:08	0.748817	3.33089	822.584	FALSE	4
2022-09-13	11:35:08	0.419249	1.8649	800.231	FALSE	4
2022-09-13	11:35:09	0.205255	0.913015	823.497	FALSE	4
2022-09-13	11:35:09	0.525967	2.33961	802.57	FALSE	4
2022-09-13	11:35:09	0.251769	1.11992	824.617	FALSE	4
2022-09-13	11:35:09	0.723524	3.21838	805.789	FALSE	4
2022-09-13	11:35:10	0.745153	3.31459	827.931	FALSE	4
2022-09-13	11:35:10	0.530903	2.36156	808.15	FALSE	4
2022-09-13	11:35:10	0.183372	0.815675	828.747	FALSE	4
2022-09-13	11:35:10	0.0606237	0.269666	808.42	FALSE	4
2022-09-13	11:35:11	-0.0250252	-0.111317	828.747	FALSE	4
2022-09-13	11:35:11	0.474568	2.11097	810.531	FALSE	4
2022-09-13	11:35:11	0.148715	0.661514	829.409	FALSE	4
2022-09-13	11:35:12	0.204491	0.909617	811.44	FALSE	4
2022-09-13	11:35:12	0.43869	1.95138	831.36	FALSE	4
2022-09-13	11:35:12	0.133652	0.594511	812.035	FALSE	4
2022-09-13	11:35:12	0.194262	0.864116	832.224	FALSE	4
2022-09-13	11:35:13	-0.10757	-0.478493	812.035	FALSE	4
2022-09-13	11:35:13	-0.344821	-1.53383	832.224	FALSE	4
2022-09-13	11:35:13	-0.290979	-1.29433	812.035	FALSE	4
2022-09-13	11:35:13	-0.13958	-0.62088	832.224	FALSE	4
2022-09-13	11:35:14	-0.123906	-0.551159	812.035	FALSE	4
2022-09-13	11:35:14	0.0089188	0.0396726	832.264	FALSE	4
2022-09-13	11:35:14	1.52134	6.76722	818.802	FALSE	4
2022-09-13	11:35:14	0.398283	1.77164	834.035	FALSE	4
2022-09-13	11:35:15	0.380827	1.69399	820.496	FALSE	4
2022-09-13	11:35:15	0.336756	1.49796	835.533	FALSE	4
2022-09-13	11:35:15	0.182608	0.812277	821.308	FALSE	4
2022-09-13	11:35:16	0.275025	1.22337	836.757	FALSE	4
2022-09-13	11:35:16	0.385204	1.71346	823.022	FALSE	4
2022-09-13	11:35:16	0.440369	1.95885	838.716	FALSE	4
2022-09-13	11:35:16	0.579606	2.5782	825.6	FALSE	4
2022-09-13	11:35:17	0.213652	0.950367	839.666	FALSE	4
2022-09-13	11:35:17	0.482812	2.14764	827.748	FALSE	4
2022-09-13	11:35:17	0.202557	0.901014	840.567	FALSE	4
2022-09-13	11:35:17	0.528562	2.35115	830.099	FALSE	4
2022-09-13	11:35:18	0.333448	1.48324	842.05	FALSE	4
2022-09-13	11:35:18	0.363575	1.61725	831.716	FALSE	4
2022-09-13	11:35:18	0.205865	0.915729	842.966	FALSE	4
2022-09-13	11:35:18	0.212939	0.947195	832.663	FALSE	4
2022-09-13	11:35:19	0.0494277	0.219864	843.186	FALSE	4
2022-09-13	11:35:19	-0.155203	-0.690374	832.663	FALSE	4
2022-09-13	11:35:19	-0.249554	-1.11007	843.186	FALSE	4
2022-09-13	11:35:19	-0.207417	-0.922632	832.663	FALSE	4
2022-09-13	11:35:20	-0.192608	-0.856759	843.186	FALSE	4
2022-09-13	11:35:20	-0.166247	-0.7395	832.663	FALSE	4
2022-09-13	11:35:20	-0.0569336	-0.253252	843.186	FALSE	4
2022-09-13	11:35:21	-0.198867	-0.8846	832.663	FALSE	4
2022-09-13	11:35:21	-0.0408013	-0.181492	843.186	FALSE	4
2022-09-13	11:35:21	-0.0513356	-0.228351	832.663	FALSE	4
2022-09-13	11:35:21	-0.112608	-0.500903	843.186	FALSE	4
2022-09-13	11:35:22	-0.0568318	-0.252799	832.663	FALSE	4
2022-09-13	11:35:22	0.0866287	0.385342	843.571	FALSE	4
2022-09-13	11:35:22	-0.0468064	-0.208204	832.663	FALSE	4
2022-09-13	11:35:22	0.153499	0.682794	844.254	FALSE	4
2022-09-13	11:35:23	0.0639824	0.284607	832.948	FALSE	4
2022-09-13	11:35:23	0.135993	0.604924	844.859	FALSE	4
2022-09-13	11:35:23	0.152074	0.676456	833.624	FALSE	4
2022-09-13	11:35:23	0.330191	1.46876	846.328	FALSE	4
2022-09-13	11:35:24	0.487596	2.16892	835.793	FALSE	4
2022-09-13	11:35:24	0.669834	2.97956	849.307	FALSE	4
2022-09-13	11:35:24	0.463524	2.06185	837.855	FALSE	4
2022-09-13	11:35:25	0.651107	2.89625	852.203	FALSE	4
2022-09-13	11:35:25	1.57564	7.00876	844.864	FALSE	4
2022-09-13	11:35:25	0.715331	3.18194	855.385	FALSE	4
2022-09-13	11:35:25	1.87625	8.34594	853.21	FALSE	4
2022-09-13	11:35:26	1.22648	5.45563	860.841	FALSE	4
2022-09-13	11:35:26	2.73772	12.1779	865.388	FALSE	4
2022-09-13	11:35:26	1.18017	5.24963	866.091	FALSE	4
2022-09-13	11:35:26	0.367595	1.63514	867.023	FALSE	4
2022-09-13	11:35:27	0.41757	1.85743	867.948	FALSE	4
2022-09-13	11:35:27	0.281692	1.25302	868.276	FALSE	4
2022-09-13	11:35:27	0.535534	2.38216	870.33	FALSE	4
2022-09-13	11:35:27	0.173499	0.771758	869.048	FALSE	4
2022-09-13	11:35:28	0.353092	1.57062	871.901	FALSE	4
2022-09-13	11:35:28	0.215534	0.958738	870.006	FALSE	4
2022-09-13	11:35:28	0.264644	1.17719	873.078	FALSE	4
2022-09-13	11:35:29	0.0606745	0.269892	870.276	FALSE	4
2022-09-13	11:35:29	0.232583	1.03458	874.113	FALSE	4
2022-09-13	11:35:29	0.218181	0.970513	871.247	FALSE	4
2022-09-13	11:35:29	0.129682	0.576851	874.689	FALSE	4
2022-09-13	11:35:30	-0.0842109	-0.374587	871.247	FALSE	4
2022-09-13	11:35:30	0.181234	0.806165	875.496	FALSE	4
2022-09-13	11:35:30	0.329326	1.46491	872.712	FALSE	4
2022-09-13	11:35:30	0.178079	0.792131	876.288	FALSE	4
2022-09-13	11:35:31	0.197214	0.877247	873.589	FALSE	4
2022-09-13	11:35:31	0.0808781	0.359762	876.648	FALSE	4
2022-09-13	11:35:31	0.381031	1.6949	875.284	FALSE	4
2022-09-13	11:35:31	0.260471	1.15863	877.806	FALSE	4
2022-09-13	11:35:32	0.734618	3.26773	878.552	FALSE	4
2022-09-13	11:35:32	0.730598	3.24985	881.056	FALSE	4
2022-09-13	11:35:32	0.731565	3.25415	881.806	FALSE	4
2022-09-13	11:35:33	0.732328	3.25754	884.314	FALSE	4
2022-09-13	11:35:33	0.729682	3.24577	885.052	FALSE	4
2022-09-13	11:35:33	0.73014	3.24781	887.561	FALSE	4
2022-09-13	11:35:33	0.739097	3.28765	888.339	FALSE	4
2022-09-13	11:35:34	0.72958	3.24532	890.807	FALSE	4
2022-09-13	11:35:34	0.729631	3.24554	891.585	FALSE	4
2022-09-13	11:35:34	0.734466	3.26705	894.074	FALSE	4
2022-09-13	11:35:34	0.731565	3.25415	894.839	FALSE	4
2022-09-13	11:35:35	0.733142	3.26116	897.335	FALSE	4
2022-09-13	11:35:35	0.731819	3.25528	898.094	FALSE	4
2022-09-13	11:35:35	0.734975	3.26932	900.604	FALSE	4
2022-09-13	11:35:35	0.732226	3.25709	901.351	FALSE	4
2022-09-13	11:35:36	0.731768	3.25505	903.859	FALSE	4
2022-09-13	11:35:36	0.732634	3.2589	904.61	FALSE	4
2022-09-13	11:35:36	0.731361	3.25324	907.112	FALSE	4
2022-09-13	11:35:37	0.730191	3.24804	907.858	FALSE	4
2022-09-13	11:35:37	0.736807	3.27746	910.39	FALSE	4
2022-09-13	11:35:37	0.734568	3.26751	911.126	FALSE	4
2022-09-13	11:35:37	0.741336	3.29761	913.688	FALSE	4
2022-09-13	11:35:38	0.738537	3.28516	914.411	FALSE	4
2022-09-13	11:35:38	0.73014	3.24781	916.935	FALSE	4
2022-09-13	11:35:38	0.732939	3.26026	917.671	FALSE	4
2022-09-13	11:35:38	0.737366	3.27995	920.215	FALSE	4
2022-09-13	11:35:39	0.741539	3.29851	920.97	FALSE	4
2022-09-13	11:35:39	0.734568	3.26751	923.483	FALSE	4
2022-09-13	11:35:39	0.734313	3.26637	924.236	FALSE	4
2022-09-13	11:35:39	0.732735	3.25935	926.742	FALSE	4
2022-09-13	11:35:40	0.614415	2.73304	926.969	FALSE	4
2022-09-13	11:35:40	0.728868	3.24215	929.984	FALSE	4
2022-09-13	11:35:40	0.6364	2.83083	929.8	FALSE	4
2022-09-13	11:35:40	0.500521	2.22642	932.211	FALSE	4
2022-09-13	11:35:41	0.310598	1.3816	931.181	FALSE	4
2022-09-13	11:35:41	0.346781	1.54255	933.753	FALSE	4
2022-09-13	11:35:41	0.341387	1.51856	932.7	FALSE	4
2022-09-13	11:35:42	0.736705	3.27701	937.03	FALSE	4
2022-09-13	11:35:42	0.738079	3.28312	935.983	FALSE	4
2022-09-13	11:35:42	0.734975	3.26932	940.3	FALSE	4
2022-09-13	11:35:42	0.488919	2.17481	938.158	FALSE	4
2022-09-13	11:35:43	0.342863	1.52512	941.825	FALSE	4
2022-09-13	11:35:43	0.297265	1.32229	939.48	FALSE	4
2022-09-13	11:35:43	-0.179274	-0.797447	941.825	FALSE	4
2022-09-13	11:35:43	0.159504	0.709506	940.19	FALSE	4
2022-09-13	11:35:44	0.730852	3.25098	945.076	FALSE	4
2022-09-13	11:35:44	0.735076	3.26977	943.46	FALSE	4
2022-09-13	11:35:44	0.734008	3.26501	948.341	FALSE	4
2022-09-13	11:35:44	0.729173	3.24351	946.703	FALSE	4
2022-09-13	11:35:45	-0.323447	-1.43876	948.341	FALSE	4
2022-09-13	11:35:45	0.739707	3.29036	949.993	FALSE	4
2022-09-13	11:35:45	0.540725	2.40525	950.746	FALSE	4
2022-09-13	11:35:46	0.255942	1.13848	951.132	FALSE	4
2022-09-13	11:35:46	-0.214287	-0.953191	950.746	FALSE	4
2022-09-13	11:35:46	-0.250928	-1.11618	951.132	FALSE	4
2022-09-13	11:35:46	-0.336374	-1.49626	950.746	FALSE	4
2022-09-13	11:35:47	-0.336475	-1.49671	951.132	FALSE	4
2022-09-13	11:35:47	-0.427366	-1.90101	950.746	FALSE	4
2022-09-13	11:35:47	-0.432251	-1.92274	951.132	FALSE	4
2022-09-13	11:35:47	-0.47215	-2.10022	950.746	FALSE	4
2022-09-13	11:35:48	-0.513269	-2.28312	951.132	FALSE	4
2022-09-13	11:35:48	-0.495966	-2.20616	950.746	FALSE	4
2022-09-13	11:35:48	-0.597799	-2.65913	951.132	FALSE	4
2022-09-13	11:35:48	-0.606755	-2.69897	950.746	FALSE	4
2022-09-13	11:35:49	-0.761768	-3.3885	951.132	FALSE	4
2022-09-13	11:35:49	0.0189951	0.084494	950.83	FALSE	4
2022-09-13	11:35:49	0.236858	1.05359	952.185	FALSE	4
2022-09-13	11:35:50	0.471005	2.09512	952.926	FALSE	4
2022-09-13	11:35:50	0.353651	1.57311	953.759	FALSE	4
2022-09-13	11:35:50	0.475942	2.11709	955.043	FALSE	4
2022-09-13	11:35:50	0.498435	2.21714	955.976	FALSE	4
2022-09-13	11:35:51	0.440522	1.95953	957.002	FALSE	4
2022-09-13	11:35:51	0.686374	3.05313	959.029	FALSE	4
2022-09-13	11:35:51	0.535127	2.38035	959.383	FALSE	4
2022-09-13	11:35:51	0.736501	3.2761	962.305	FALSE	4
2022-09-13	11:35:52	0.607036	2.70022	962.083	FALSE	4
2022-09-13	11:35:52	0.70444	3.13349	965.438	FALSE	4
2022-09-13	11:35:52	0.360522	1.60367	963.686	FALSE	4
2022-09-13	11:35:52	0.636909	2.8331	968.272	FALSE	4
2022-09-13	11:35:53	0.54159	2.4091	966.096	FALSE	4
2022-09-13	11:35:53	0.531311	2.36338	970.635	FALSE	4
2022-09-13	11:35:53	0.375738	1.67136	967.767	FALSE	4
2022-09-13	11:35:54	-0.845126	-3.75929	970.635	FALSE	4
2022-09-13	11:35:54	-1.01469	-4.51354	967.767	FALSE	4
2022-09-13	11:35:54	-0.594694	-2.64532	970.635	FALSE	4
2022-09-13	11:35:54	-0.646704	-2.87667	967.767	FALSE	4
2022-09-13	11:35:55	0.57528	2.55896	973.194	FALSE	4
2022-09-13	11:35:55	0.734517	3.26728	971.034	FALSE	4
2022-09-13	11:35:55	0.526527	2.3421	975.536	FALSE	4
2022-09-13	11:35:55	0.190191	0.846008	971.88	FALSE	4
2022-09-13	11:35:56	-0.0956613	-0.425521	975.536	FALSE	4
2022-09-13	11:35:56	0.177265	0.78851	972.669	FALSE	4
2022-09-13	11:35:56	0.398741	1.77368	977.31	FALSE	4
2022-09-13	11:35:56	0.317468	1.41216	974.081	FALSE	4
2022-09-13	11:35:57	0.00866438	0.0385409	977.348	FALSE	4
2022-09-13	11:35:57	-0.362684	-1.61329	974.081	FALSE	4
2022-09-13	11:35:57	0.732277	3.25731	980.605	FALSE	4
2022-09-13	11:35:58	0.732481	3.25822	977.339	FALSE	4
2022-09-13	11:35:58	0.733804	3.26411	983.87	FALSE	4
2022-09-13	11:35:58	0.737926	3.28244	980.622	FALSE	4
2022-09-13	11:35:58	0.733397	3.2623	987.132	FALSE	4
2022-09-13	11:35:59	0.736298	3.2752	983.897	FALSE	4
2022-09-13	11:35:59	0.667494	2.96915	990.101	FALSE	4
2022-09-13	11:35:59	0.285255	1.26887	985.166	FALSE	4
2022-09-13	11:35:59	0.280318	1.24691	991.348	FALSE	4
2022-09-13	11:36:00	0.245204	1.09072	986.256	FALSE	4
2022-09-13	11:36:00	0.231412	1.02937	992.377	FALSE	4
2022-09-13	11:36:00	0.239962	1.0674	987.324	FALSE	4
2022-09-13	11:36:00	0.224848	1.00017	993.377	FALSE	4
2022-09-13	11:36:01	0.109835	0.488568	987.812	FALSE	4
2022-09-13	11:36:01	0.17355	0.771985	994.149	FALSE	4
2022-09-13	11:36:01	0.164949	0.733726	988.546	FALSE	4
2022-09-13	11:36:02	0.16841	0.749121	994.899	FALSE	4
2022-09-13	11:36:02	0.159911	0.711316	989.257	FALSE	4
2022-09-13	11:36:02	0.164389	0.731235	995.63	FALSE	4
2022-09-13	11:36:02	0.178893	0.795752	990.053	FALSE	4
2022-09-13	11:36:03	0.172125	0.765646	996.395	FALSE	4
2022-09-13	11:36:03	0.184339	0.819977	990.873	FALSE	4
2022-09-13	11:36:03	0.185255	0.824051	997.22	FALSE	4
2022-09-13	11:36:03	0.192176	0.854837	991.728	FALSE	4
2022-09-13	11:36:04	0.227087	1.01013	998.23	FALSE	4
2022-09-13	11:36:04	0.0795041	0.35365	992.082	FALSE	4
2022-09-13	11:36:04	0.0660689	0.293888	998.524	FALSE	4
2022-09-13	11:36:04	-2.92604	-13.0156	992.082	FALSE	4
2022-09-13	11:36:05	-2.45195	-10.9068	998.524	FALSE	4
2022-09-13	11:36:05	0.11355	0.505093	992.587	FALSE	4
2022-09-13	11:36:05	0.0712089	0.316751	998.84	FALSE	4
2022-09-13	11:36:05	0.262456	1.16746	993.754	FALSE	4
2022-09-13	11:36:06	0.279351	1.24261	1000.08	FALSE	4
2022-09-13	11:36:06	0.24215	1.07713	994.831	FALSE	4
2022-09-13	11:36:06	0.207646	0.923651	1001.01	FALSE	4
2022-09-13	11:36:07	0.287188	1.27747	996.109	FALSE	4
2022-09-13	11:36:07	0.283779	1.26231	1002.27	FALSE	4
2022-09-13	11:36:07	0.322099	1.43276	997.541	FALSE	4
2022-09-13	11:36:07	0.341183	1.51765	1003.79	FALSE	4
2022-09-13	11:36:08	0.280115	1.24601	998.787	FALSE	4
2022-09-13	11:36:08	0.269275	1.19779	1004.98	FALSE	4
2022-09-13	11:36:08	0.281031	1.25008	1000.04	FALSE	4
2022-09-13	11:36:08	0.201183	0.894902	1005.88	FALSE	4
2022-09-13	11:36:09	0.213957	0.951724	1000.99	FALSE	4
2022-09-13	11:36:09	0.254924	1.13395	1007.01	FALSE	4
2022-09-13	11:36:09	0.208003	0.925239	1001.91	FALSE	4
2022-09-13	11:36:09	0.246781	1.09773	1008.11	FALSE	4
2022-09-13	11:36:10	1.03121	4.58703	1006.5	FALSE	4
2022-09-13	11:36:10	0.535585	2.38239	1010.49	FALSE	4
2022-09-13	11:36:10	0.416654	1.85336	1008.35	FALSE	4
2022-09-13	11:36:11	0.406934	1.81012	1012.3	FALSE	4
2022-09-13	11:36:11	0.415687	1.84906	1010.2	FALSE	4
2022-09-13	11:36:11	0.367952	1.63672	1013.94	FALSE	4
2022-09-13	11:36:11	0.210445	0.936101	1011.14	FALSE	4
2022-09-13	11:36:12	0.376705	1.67566	1015.62	FALSE	4
2022-09-13	11:36:12	0.238842	1.06242	1012.2	FALSE	4
2022-09-13	11:36:12	0.305662	1.35965	1016.98	FALSE	4
2022-09-13	11:36:12	0.339046	1.50814	1013.71	FALSE	4
2022-09-13	11:36:13	0.280776	1.24895	1018.22	FALSE	4
2022-09-13	11:36:13	0.425	1.89048	1015.6	FALSE	4
2022-09-13	11:36:13	0.282252	1.25551	1019.48	FALSE	4
2022-09-13	11:36:13	0.312176	1.38862	1016.99	FALSE	4
2022-09-13	11:36:14	0.197367	0.877928	1020.36	FALSE	4
2022-09-13	11:36:14	0.198283	0.882002	1017.87	FALSE	4
2022-09-13	11:36:14	0.286578	1.27476	1021.63	FALSE	4
2022-09-13	11:36:15	0.312888	1.39179	1019.26	FALSE	4
2022-09-13	11:36:15	0.313855	1.39609	1023.03	FALSE	4
2022-09-13	11:36:15	-2.10273	-9.35336	1019.26	FALSE	4
2022-09-13	11:36:15	-1.96747	-8.7517	1023.03	FALSE	4
2022-09-13	11:36:16	-1.68884	-7.5123	1019.26	FALSE	4
2022-09-13	11:36:16	-1.43703	-6.3922	1023.03	FALSE	4
2022-09-13	11:36:16	-1.23378	-5.4881	1019.26	FALSE	4
2022-09-13	11:36:16	0.477468	2.12387	1025.15	FALSE	4
2022-09-13	11:36:17	0.328766	1.46242	1020.73	FALSE	4
2022-09-13	11:36:17	0.508715	2.26287	1027.42	FALSE	4
2022-09-13	11:36:17	0.365713	1.62676	1022.35	FALSE	4
2022-09-13	11:36:17	0.508868	2.26355	1029.68	FALSE	4
2022-09-13	11:36:18	0.513143	2.28256	1024.64	FALSE	4
2022-09-13	11:36:18	0.449733	2.0005	1031.68	FALSE	4
2022-09-13	11:36:18	0.417977	1.85925	1026.49	FALSE	4
2022-09-13	11:36:19	0.477926	2.12591	1033.81	FALSE	4
2022-09-13	11:36:19	0.445865	1.9833	1028.48	FALSE	4
2022-09-13	11:36:19	0.446221	1.98488	1035.79	FALSE	4
2022-09-13	11:36:19	0.586221	2.60763	1031.09	FALSE	4
2022-09-13	11:36:20	0.457316	2.03423	1037.82	FALSE	4
2022-09-13	11:36:20	0.330242	1.46898	1032.55	FALSE	4
2022-09-13	11:36:20	0.435738	1.93825	1039.76	FALSE	4
2022-09-13	11:36:20	0.578028	2.57118	1035.13	FALSE	4
2022-09-13	11:36:21	0.213855	0.95127	1040.71	FALSE	4
2022-09-13	11:36:21	-0.0294527	-0.131012	1035.13	FALSE	4
2022-09-13	11:36:21	-0.272455	-1.21193	1040.71	FALSE	4
2022-09-13	11:36:21	-0.362786	-1.61374	1035.13	FALSE	4
2022-09-13	11:36:22	-0.074389	-0.330897	1040.71	FALSE	4
2022-09-13	11:36:22	0.331769	1.47577	1036.6	FALSE	4
2022-09-13	11:36:22	0.482201	2.14493	1042.86	FALSE	4
2022-09-13	11:36:23	0.303219	1.34878	1037.95	FALSE	4
2022-09-13	11:36:23	0.186781	0.830839	1043.69	FALSE	4
2022-09-13	11:36:23	0.408461	1.81692	1039.77	FALSE	4
2022-09-13	11:36:23	0.510242	2.26966	1045.96	FALSE	4
2022-09-13	11:36:24	0.721437	3.2091	1042.98	FALSE	4
2022-09-13	11:36:24	0.537774	2.39213	1048.35	FALSE	4
2022-09-13	11:36:24	0.68327	3.03932	1046.02	FALSE	4
2022-09-13	11:36:24	0.454466	2.02156	1050.37	FALSE	4
2022-09-13	11:36:25	0.371616	1.65302	1047.67	FALSE	4
2022-09-13	11:36:25	0.411616	1.83095	1052.2	FALSE	4
2022-09-13	11:36:25	0.147596	0.656537	1048.33	FALSE	4
2022-09-13	11:36:25	0.479504	2.13293	1054.34	FALSE	4
2022-09-13	11:36:26	0.191361	0.851212	1049.18	FALSE	4
2022-09-13	11:36:26	0.514364	2.28799	1056.62	FALSE	4
2022-09-13	11:36:26	0.301947	1.34312	1050.52	FALSE	4
2022-09-13	11:36:26	0.486527	2.16417	1058.79	FALSE	4
2022-09-13	11:36:27	-0.391793	-1.74277	1050.52	FALSE	4
2022-09-13	11:36:27	-0.0459412	-0.204356	1058.79	FALSE	4
2022-09-13	11:36:27	0.372074	1.65506	1052.17	FALSE	4
2022-09-13	11:36:28	0.116451	0.517997	1059.31	FALSE	4
2022-09-13	11:36:28	0.509631	2.26694	1054.44	FALSE	4
2022-09-13	11:36:28	0.291005	1.29445	1060.6	FALSE	4
2022-09-13	11:36:28	0.320471	1.42552	1055.87	FALSE	4
2022-09-13	11:36:29	0.979911	4.35884	1064.96	FALSE	4
2022-09-13	11:36:29	0.36159	1.60842	1057.48	FALSE	4
2022-09-13	11:36:29	0.260674	1.15953	1066.12	FALSE	4
2022-09-13	11:36:29	-2.80263	-12.4667	1057.48	FALSE	4
2022-09-13	11:36:30	-2.01301	-8.95427	1066.12	FALSE	4
2022-09-13	11:36:30	0.241489	1.07419	1058.55	FALSE	4
2022-09-13	11:36:30	0.545661	2.42721	1068.55	FALSE	4
2022-09-13	11:36:30	-1.10762	-4.92692	1058.55	FALSE	4
2022-09-13	11:36:31	-1.98004	-8.80761	1068.55	FALSE	4
2022-09-13	11:36:31	-2.39617	-10.6586	1058.55	FALSE	4
2022-09-13	11:36:31	-3.12365	-13.8946	1068.55	FALSE	4
2022-09-13	11:36:32	-1.2751	-5.6719	1058.55	FALSE	4
2022-09-13	11:36:32	-1.97637	-8.79129	1068.55	FALSE	4
2022-09-13	11:36:32	-1.71312	-7.6203	1058.55	FALSE	4
2022-09-13	11:36:32	-1.88146	-8.36911	1068.55	FALSE	4
2022-09-13	11:36:33	-1.43373	-6.37752	1058.55	FALSE	4
2022-09-13	11:36:33	0.986832	4.38963	1072.94	FALSE	4
2022-09-13	11:36:33	0.229071	1.01895	1059.57	FALSE	4
2022-09-13	11:36:33	-2.30548	-10.2552	1072.94	FALSE	4
2022-09-13	11:36:34	-1.49256	-6.63921	1059.57	FALSE	4
2022-09-13	11:36:34	-1.44167	-6.41284	1072.94	FALSE	4
2022-09-13	11:36:34	-1.62284	-7.21872	1059.57	FALSE	4
2022-09-13	11:36:34	-1.60859	-7.15533	1072.94	FALSE	4
2022-09-13	11:36:35	-1.39307	-6.19665	1059.57	FALSE	4
2022-09-13	11:36:35	-1.06533	-4.7388	1072.94	FALSE	4
2022-09-13	11:36:35	-0.829452	-3.68957	1059.57	FALSE	4
2022-09-13	11:36:36	-0.0518445	-0.230615	1072.94	FALSE	4
2022-09-13	11:36:36	0.0664252	0.295473	1059.86	FALSE	4
2022-09-13	11:36:36	0.135789	0.604017	1073.54	FALSE	4
2022-09-13	11:36:36	0.192735	0.857324	1060.72	FALSE	4
2022-09-13	11:36:37	0.177774	0.790774	1074.33	FALSE	4
2022-09-13	11:36:37	0.181845	0.808883	1061.53	FALSE	4
2022-09-13	11:36:37	0.165814	0.737574	1075.07	FALSE	4
2022-09-13	11:36:37	0.190903	0.849175	1062.38	FALSE	4
2022-09-13	11:36:38	0.205153	0.912562	1075.98	FALSE	4
2022-09-13	11:36:38	0.191311	0.85099	1063.23	FALSE	4
2022-09-13	11:36:38	0.260471	1.15863	1077.14	FALSE	4
2022-09-13	11:36:38	0.236094	1.05019	1064.28	FALSE	4
2022-09-13	11:36:39	0.239758	1.06649	1078.21	FALSE	4
2022-09-13	11:36:39	0.255585	1.13689	1065.42	FALSE	4
2022-09-13	11:36:39	0.334364	1.48732	1079.69	FALSE	4
2022-09-13	11:36:40	-0.0496562	-0.220881	1065.42	FALSE	4
2022-09-13	11:36:40	-1.26818	-5.64112	1079.69	FALSE	4
2022-09-13	11:36:40	-1.86564	-8.29874	1065.42	FALSE	4
2022-09-13	11:36:40	-2.06589	-9.18949	1079.69	FALSE	4
2022-09-13	11:36:41	-2.14752	-9.5526	1065.42	FALSE	4
2022-09-13	11:36:41	-2.44884	-10.8929	1079.69	FALSE	4
2022-09-13	11:36:41	-2.39169	-10.6387	1065.42	FALSE	4
2022-09-13	11:36:41	-2.2148	-9.85187	1079.69	FALSE	4
2022-09-13	11:36:42	-2.59256	-11.5322	1065.42	FALSE	4
2022-09-13	11:36:42	-2.66172	-11.8399	1079.69	FALSE	4
2022-09-13	11:36:42	-2.63602	-11.7255	1065.42	FALSE	4
2022-09-13	11:36:42	-2.64111	-11.7482	1079.69	FALSE	4
2022-09-13	11:36:43	-2.69276	-11.9779	1065.42	FALSE	4
2022-09-13	11:36:43	-2.82166	-12.5513	1079.69	FALSE	4
2022-09-13	11:36:43	-2.90513	-12.9226	1065.42	FALSE	4
2022-09-13	11:36:44	-2.89556	-12.88	1079.69	FALSE	4
2022-09-13	11:36:44	-3.01602	-13.4159	1065.42	FALSE	4
2022-09-13	11:36:44	-3.20976	-14.2777	1079.69	FALSE	4
2022-09-13	11:36:44	-3.36212	-14.9554	1065.42	FALSE	4
2022-09-13	11:36:45	-3.49719	-15.5562	1079.69	FALSE	4
2022-09-13	11:36:45	-3.37785	-15.0254	1065.42	FALSE	4
2022-09-13	11:36:45	-3.35856	-14.9395	1079.69	FALSE	4
2022-09-13	11:36:45	-3.17556	-14.1255	1065.42	FALSE	4
2022-09-13	11:36:46	-3.17271	-14.1128	1079.69	FALSE	4
2022-09-13	11:36:46	-3.10833	-13.8265	1065.42	FALSE	4
2022-09-13	11:36:46	-3.28986	-14.634	1079.69	FALSE	4
2022-09-13	11:36:46	-3.25637	-14.485	1065.42	FALSE	4
2022-09-13	11:36:47	-3.12864	-13.9168	1079.69	FALSE	4
2022-09-13	11:36:47	-3.01194	-13.3977	1065.42	FALSE	4
2022-09-13	11:36:47	-2.73897	-12.1835	1079.69	FALSE	4
2022-09-13	11:36:47	-2.48441	-11.0512	1065.42	FALSE	4
2022-09-13	11:36:48	1.3364	5.94457	1085.64	FALSE	4
2022-09-13	11:36:48	0.866221	3.85312	1069.27	FALSE	4
2022-09-13	11:36:48	0.243982	1.08528	1086.72	FALSE	4
2022-09-13	11:36:49	-0.109351	-0.486415	1069.27	FALSE	4
2022-09-13	11:36:49	-3.17612	-14.128	1086.72	FALSE	4
2022-09-13	11:36:49	-3.20049	-14.2364	1069.27	FALSE	4
2022-09-13	11:36:49	-3.33831	-14.8495	1086.72	FALSE	4
2022-09-13	11:36:50	-3.22909	-14.3636	1069.27	FALSE	4
2022-09-13	11:36:50	-3.40029	-15.1252	1086.72	FALSE	4
2022-09-13	11:36:50	-2.42426	-10.7836	1069.27	FALSE	4
2022-09-13	11:36:50	0.290038	1.29015	1088.01	FALSE	4
2022-09-13	11:36:51	0.238333	1.06015	1070.33	FALSE	4
2022-09-13	11:36:51	0.42958	1.91086	1089.93	FALSE	4
2022-09-13	11:36:51	0.263575	1.17243	1071.5	FALSE	4
2022-09-13	11:36:51	0.511209	2.27396	1092.2	FALSE	4
2022-09-13	11:36:52	1.03004	4.58182	1076.08	FALSE	4
2022-09-13	11:36:52	1.31472	5.84814	1098.05	FALSE	4
2022-09-13	11:36:52	0.723626	3.21883	1079.3	FALSE	4
2022-09-13	11:36:53	0.707748	3.1482	1101.2	FALSE	4
2022-09-13	11:36:53	1.75212	7.79378	1087.1	FALSE	4
2022-09-13	11:36:53	1.56892	6.97887	1108.17	FALSE	4
2022-09-13	11:36:53	2.12988	9.47413	1096.57	FALSE	4
2022-09-13	11:36:54	0.584593	2.60039	1110.77	FALSE	4
2022-09-13	11:36:54	0.60902	2.70904	1099.28	FALSE	4
2022-09-13	11:36:54	0.468613	2.08448	1112.86	FALSE	4
2022-09-13	11:36:54	0.430038	1.9129	1101.19	FALSE	4
2022-09-13	11:36:55	0.633753	2.81906	1115.68	FALSE	4
2022-09-13	11:36:55	0.213193	0.948325	1102.14	FALSE	4
2022-09-13	11:36:55	0.517468	2.3018	1117.98	FALSE	4
2022-09-13	11:36:55	0.327596	1.45721	1103.6	FALSE	4
2022-09-13	11:36:56	0.4364	1.94119	1119.92	FALSE	4
2022-09-13	11:36:56	0.605204	2.69207	1106.29	FALSE	4
2022-09-13	11:36:56	0.243931	1.08505	1121.01	FALSE	4
2022-09-13	11:36:57	0.662099	2.94515	1109.24	FALSE	4
2022-09-13	11:36:57	0.349886	1.55636	1122.56	FALSE	4
2022-09-13	11:36:57	0.902353	4.01385	1113.25	FALSE	4
2022-09-13	11:36:57	0.921031	4.09693	1126.66	FALSE	4
2022-09-13	11:36:58	1.51518	6.73982	1119.99	FALSE	4
2022-09-13	11:36:58	2.32286	10.3325	1136.99	FALSE	4
2022-09-13	11:36:58	1.07513	4.78239	1124.77	FALSE	4
2022-09-13	11:36:58	2.27182	10.1055	1147.1	FALSE	4
2022-09-13	11:36:59	0.484746	2.15625	1126.93	FALSE	4
2022-09-13	11:36:59	1.36113	6.05458	1153.15	FALSE	4
2022-09-13	11:36:59	0.750853	3.33994	1130.27	FALSE	4
2022-09-13	11:36:59	0.693906	3.08663	1156.24	FALSE	4
2022-09-13	11:37:00	0.797672	3.5482	1133.82	FALSE	4
2022-09-13	11:37:00	0.307188	1.36643	1157.61	FALSE	4
2022-09-13	11:37:00	0.965051	4.29274	1138.11	FALSE	4
2022-09-13	11:37:01	0.357366	1.58964	1159.19	FALSE	4
2022-09-13	11:37:01	0.929427	4.13428	1142.24	FALSE	4
2022-09-13	11:37:01	0.53701	2.38873	1161.58	FALSE	4
2022-09-13	11:37:01	0.715585	3.18307	1145.43	FALSE	4
2022-09-13	11:37:02	0.66673	2.96575	1164.55	FALSE	4
2022-09-13	11:37:02	0.696145	3.09659	1148.52	FALSE	4
2022-09-13	11:37:02	0.692837	3.08188	1167.63	FALSE	4
2022-09-13	11:37:02	0.264033	1.17447	1149.7	FALSE	4
2022-09-13	11:37:03	0.670445	2.98227	1170.61	FALSE	4
2022-09-13	11:37:03	0.425916	1.89456	1151.59	FALSE	4
2022-09-13	11:37:03	0.713753	3.17492	1173.79	FALSE	4
2022-09-13	11:37:03	0.650496	2.89354	1154.49	FALSE	4
2022-09-13	11:37:04	0.64612	2.87407	1176.66	FALSE	4
2022-09-13	11:37:04	1.07782	4.79436	1159.28	FALSE	4
2022-09-13	11:37:04	0.394669	1.75557	1178.42	FALSE	4
2022-09-13	11:37:05	1.29416	5.75668	1165.04	FALSE	4
2022-09-13	11:37:05	0.496349	2.20786	1180.63	FALSE	4
2022-09-13	11:37:05	1.21676	5.41239	1170.45	FALSE	4
2022-09-13	11:37:05	0.515025	2.29093	1182.92	FALSE	4
2022-09-13	11:37:06	0.965764	4.29591	1174.75	FALSE	4
2022-09-13	11:37:06	0.85416	3.79947	1186.72	FALSE	4
2022-09-13	11:37:06	0.461947	2.05483	1176.8	FALSE	4
2022-09-13	11:37:06	0.627799	2.79258	1189.51	FALSE	4
2022-09-13	11:37:07	0.364746	1.62246	1178.42	FALSE	4
2022-09-13	11:37:07	0.610954	2.71765	1192.23	FALSE	4
2022-09-13	11:37:07	0.359606	1.5996	1180.02	FALSE	4
2022-09-13	11:37:07	0.389173	1.73112	1193.96	FALSE	4
2022-09-13	11:37:08	0.475433	2.11482	1182.14	FALSE	4
2022-09-13	11:37:08	0.486425	2.16372	1196.12	FALSE	4
2022-09-13	11:37:08	0.373652	1.66208	1183.8	FALSE	4
2022-09-13	11:37:09	0.523015	2.32648	1198.45	FALSE	4
2022-09-13	11:37:09	1.04816	4.66243	1188.46	FALSE	4
2022-09-13	11:37:09	2.03279	9.04226	1207.49	FALSE	4
2022-09-13	11:37:09	0.277417	1.23401	1189.7	FALSE	4
2022-09-13	11:37:10	0.48444	2.15489	1209.64	FALSE	4
2022-09-13	11:37:10	0.394517	1.75489	1191.45	FALSE	4
2022-09-13	11:37:10	0.35869	1.59552	1211.24	FALSE	4
2022-09-13	11:37:10	0.45528	2.02518	1193.48	FALSE	4
2022-09-13	11:37:11	0.31187	1.38726	1212.63	FALSE	4
2022-09-13	11:37:11	0.537417	2.39054	1195.87	FALSE	4
2022-09-13	11:37:11	0.727341	3.23536	1215.86	FALSE	4
2022-09-13	11:37:11	0.623982	2.7756	1198.64	FALSE	4
2022-09-13	11:37:12	0.889733	3.95771	1219.82	FALSE	4
2022-09-13	11:37:12	0.76673	3.41057	1202.05	FALSE	4
2022-09-13	11:37:12	1.09869	4.88719	1224.71	FALSE	4
2022-09-13	11:37:12	0.296247	1.31777	1203.37	FALSE	4
2022-09-13	11:37:13	0.993092	4.41747	1229.13	FALSE	4
2022-09-13	11:37:13	0.270293	1.20232	1204.57	FALSE	4
2022-09-13	11:37:13	1.03279	4.59406	1233.72	FALSE	4
2022-09-13	11:37:14	0.747036	3.32297	1207.9	FALSE	4
2022-09-13	11:37:14	0.81243	3.61385	1237.33	FALSE	4
2022-09-13	11:37:14	0.829428	3.68946	1211.58	FALSE	4
2022-09-13	11:37:14	0.969326	4.31176	1241.65	FALSE	4
2022-09-13	11:37:15	0.658537	2.9293	1214.51	FALSE	4
2022-09-13	11:37:15	0.611972	2.72217	1244.37	FALSE	4
2022-09-13	11:37:15	0.906272	4.03128	1218.55	FALSE	4
2022-09-13	11:37:15	0.181234	0.806165	1245.17	FALSE	4
2022-09-13	11:37:16	0.20444	0.90939	1219.45	FALSE	4
2022-09-13	11:37:16	0.112837	0.501922	1245.68	FALSE	4
2022-09-13	11:37:16	0.124898	0.555571	1220.01	FALSE	4
2022-09-13	11:37:16	0.093448	0.415675	1246.09	FALSE	4
2022-09-13	11:37:17	0.281692	1.25302	1221.26	FALSE	4
2022-09-13	11:37:17	0.281947	1.25416	1247.35	FALSE	4
2022-09-13	11:37:17	1.75218	7.79405	1229.06	FALSE	4
2022-09-13	11:37:18	3.17146	14.1073	1261.45	1	5
2022-09-13	11:37:18	3.65736	16.2687	1245.33	1	6
2022-09-13	11:37:18	2.94876	13.1167	1274.57	FALSE	6
2022-09-13	11:37:18	1.67365	7.44473	1252.77	FALSE	6
2022-09-13	11:37:19	0.358028	1.59258	1276.16	FALSE	6
2022-09-13	11:37:19	0.198181	0.881549	1253.65	FALSE	6
2022-09-13	11:37:19	0.178283	0.793038	1276.95	FALSE	6
2022-09-13	11:37:19	0.104186	0.46344	1254.12	FALSE	6
2022-09-13	11:37:20	-0.060445	-0.268871	1276.95	FALSE	6
2022-09-13	11:37:20	0.00179415	0.00798074	1254.12	FALSE	6
2022-09-13	11:37:20	-0.0101651	-0.0452164	1276.95	FALSE	6
2022-09-13	11:37:20	-0.0866028	-0.385227	1254.12	FALSE	6
2022-09-13	11:37:21	-0.242684	-1.07951	1276.95	FALSE	6
2022-09-13	11:37:21	-0.445534	-1.98182	1254.12	FALSE	6
2022-09-13	11:37:21	-0.503753	-2.24079	1276.95	FALSE	6
2022-09-13	11:37:22	-0.544414	-2.42166	1254.12	FALSE	6
2022-09-13	11:37:22	-0.549198	-2.44294	1276.95	FALSE	6
2022-09-13	11:37:22	-0.492099	-2.18895	1254.12	FALSE	6
2022-09-13	11:37:22	-0.475916	-2.11697	1276.95	FALSE	6
2022-09-13	11:37:23	-0.509758	-2.26751	1254.12	FALSE	6
2022-09-13	11:37:23	-0.500852	-2.22789	1276.95	FALSE	6
2022-09-13	11:37:23	-0.434643	-1.93338	1254.12	FALSE	6
2022-09-13	11:37:23	-0.407468	-1.8125	1276.95	FALSE	6
2022-09-13	11:37:24	-0.381666	-1.69773	1254.12	FALSE	6
2022-09-13	11:37:24	-0.218307	-0.971073	1276.95	FALSE	6
2022-09-13	11:37:24	-0.243447	-1.0829	1254.12	FALSE	6
2022-09-13	11:37:24	0.0276974	0.123204	1277.08	FALSE	6
2022-09-13	11:37:25	-0.761615	-3.38782	1254.12	FALSE	6
2022-09-13	11:37:25	0.229936	1.0228	1278.1	FALSE	6
2022-09-13	11:37:25	0.256603	1.14142	1255.27	FALSE	6
2022-09-13	11:37:26	0.272125	1.21047	1279.31	FALSE	6
2022-09-13	11:37:26	0.27014	1.20164	1256.47	FALSE	6
2022-09-13	11:37:26	0.274771	1.22224	1280.53	FALSE	6
2022-09-13	11:37:26	0.27187	1.20933	1257.68	FALSE	6
2022-09-13	11:37:27	0.29187	1.2983	1281.83	FALSE	6
2022-09-13	11:37:27	0.305	1.3567	1259.03	FALSE	6
2022-09-13	11:37:27	0.311514	1.38568	1283.22	FALSE	6
2022-09-13	11:37:27	0.344644	1.53305	1260.57	FALSE	6
2022-09-13	11:37:28	-1.8009	-8.01076	1283.22	FALSE	6
2022-09-13	11:37:28	-0.00197174	-0.00877069	1260.57	FALSE	6
2022-09-13	11:37:28	0.296349	1.31822	1284.54	FALSE	6
2022-09-13	11:37:28	0.273906	1.21839	1261.78	FALSE	6
2022-09-13	11:37:29	0.268919	1.19621	1285.73	FALSE	6
2022-09-13	11:37:29	0.28098	1.24986	1263.03	FALSE	6
2022-09-13	11:37:29	0.278486	1.23876	1286.97	FALSE	6
2022-09-13	11:37:30	0.278639	1.23944	1264.27	FALSE	6
2022-09-13	11:37:30	0.27528	1.2245	1288.2	FALSE	6
2022-09-13	11:37:30	0.272125	1.21047	1265.48	FALSE	6
2022-09-13	11:37:30	0.259555	1.15455	1289.35	FALSE	6
2022-09-13	11:37:31	0.231565	1.03005	1266.51	FALSE	6
2022-09-13	11:37:31	0.247494	1.1009	1290.45	FALSE	6
2022-09-13	11:37:31	0.262812	1.16904	1267.68	FALSE	6
2022-09-13	11:37:31	0.252328	1.12241	1291.57	FALSE	6
2022-09-13	11:37:32	0.304746	1.35557	1269.04	FALSE	6
2022-09-13	11:37:32	0.318232	1.41556	1292.99	FALSE	6
2022-09-13	11:37:32	0.625967	2.78443	1271.82	FALSE	6
2022-09-13	11:37:32	1.56683	6.96957	1299.96	FALSE	6
2022-09-13	11:37:33	1.50475	6.69343	1278.52	FALSE	6
2022-09-13	11:37:33	1.11075	4.94084	1304.9	FALSE	6
2022-09-13	11:37:33	0.0505473	0.224844	1278.74	FALSE	6
2022-09-13	11:37:34	0.7393	3.28855	1308.19	FALSE	6
2022-09-13	11:37:34	0.737722	3.28154	1282.02	FALSE	6
2022-09-13	11:37:34	0.731565	3.25415	1311.44	FALSE	6
2022-09-13	11:37:34	0.73645	3.27588	1285.3	FALSE	6
2022-09-13	11:37:35	0.734669	3.26795	1314.71	FALSE	6
2022-09-13	11:37:35	0.741692	3.29919	1288.6	FALSE	6
2022-09-13	11:37:35	0.736552	3.27633	1317.99	FALSE	6
2022-09-13	11:37:35	0.733142	3.26116	1291.86	FALSE	6
2022-09-13	11:37:36	0.734975	3.26932	1321.26	FALSE	6
2022-09-13	11:37:36	0.733041	3.26071	1295.12	FALSE	6
2022-09-13	11:37:36	0.740165	3.2924	1324.55	FALSE	6
2022-09-13	11:37:36	0.737366	3.27995	1298.4	FALSE	6
2022-09-13	11:37:37	0.732379	3.25777	1327.81	FALSE	6
2022-09-13	11:37:37	0.740216	3.29263	1301.69	FALSE	6
2022-09-13	11:37:37	0.732888	3.26003	1331.07	FALSE	6
2022-09-13	11:37:37	0.734822	3.26864	1304.96	FALSE	6
2022-09-13	11:37:38	0.72958	3.24532	1334.31	FALSE	6
2022-09-13	11:37:38	0.729936	3.2469	1308.21	FALSE	6
2022-09-13	11:37:38	0.733702	3.26365	1337.57	FALSE	6
2022-09-13	11:37:39	0.73472	3.26818	1311.48	FALSE	6
2022-09-13	11:37:39	0.728715	3.24147	1340.82	FALSE	6
2022-09-13	11:37:39	0.73187	3.2555	1314.73	FALSE	6
2022-09-13	11:37:39	0.738333	3.28425	1344.1	FALSE	6
2022-09-13	11:37:40	0.731463	3.25369	1317.99	FALSE	6
2022-09-13	11:37:40	0.740165	3.2924	1347.39	FALSE	6
2022-09-13	11:37:40	0.727748	3.23717	1321.22	FALSE	6
2022-09-13	11:37:40	0.733092	3.26094	1350.65	FALSE	6
2022-09-13	11:37:41	0.734364	3.2666	1324.49	FALSE	6
2022-09-13	11:37:41	0.73701	3.27837	1353.93	FALSE	6
2022-09-13	11:37:41	0.735331	3.2709	1327.76	FALSE	6
2022-09-13	11:37:41	0.739097	3.28765	1357.22	FALSE	6
2022-09-13	11:37:42	0.73416	3.26569	1331.03	FALSE	6
2022-09-13	11:37:42	0.737519	3.28063	1360.5	FALSE	6
2022-09-13	11:37:42	0.734618	3.26773	1334.29	FALSE	6
2022-09-13	11:37:43	0.738079	3.28312	1363.78	FALSE	6
2022-09-13	11:37:43	0.731056	3.25188	1337.55	FALSE	6
2022-09-13	11:37:43	0.736603	3.27656	1367.06	FALSE	6
2022-09-13	11:37:43	0.737315	3.27972	1340.83	FALSE	6
2022-09-13	11:37:44	0.737773	3.28176	1370.34	FALSE	6
2022-09-13	11:37:44	0.73874	3.28606	1344.11	FALSE	6
2022-09-13	11:37:44	0.73986	3.29105	1373.63	FALSE	6
2022-09-13	11:37:44	0.741183	3.29693	1347.41	FALSE	6
2022-09-13	11:37:45	0.729529	3.24509	1376.88	FALSE	6
2022-09-13	11:37:45	0.736399	3.27565	1350.68	FALSE	6
2022-09-13	11:37:45	0.730547	3.24962	1380.13	FALSE	6
2022-09-13	11:37:45	0.731616	3.25437	1353.94	FALSE	6
2022-09-13	11:37:46	0.738028	3.2829	1383.41	FALSE	6
2022-09-13	11:37:46	0.731259	3.25279	1357.19	FALSE	6
2022-09-13	11:37:46	0.730903	3.2512	1386.66	FALSE	6
2022-09-13	11:37:47	0.733193	3.26139	1360.45	FALSE	6
2022-09-13	11:37:47	0.734364	3.2666	1389.93	FALSE	6
2022-09-13	11:37:47	0.731005	3.25166	1363.7	FALSE	6
2022-09-13	11:37:47	0.735433	3.27135	1393.2	FALSE	6
2022-09-13	11:37:48	0.728817	3.24192	1366.95	FALSE	6
2022-09-13	11:37:48	0.733397	3.2623	1396.46	FALSE	6
2022-09-13	11:37:48	0.736247	3.27497	1370.22	FALSE	6
2022-09-13	11:37:48	0.733397	3.2623	1399.72	FALSE	6
2022-09-13	11:37:49	0.727646	3.23671	1373.46	FALSE	6
2022-09-13	11:37:49	0.736705	3.27701	1403	FALSE	6
2022-09-13	11:37:49	0.742913	3.30463	1376.76	FALSE	6
2022-09-13	11:37:49	0.73701	3.27837	1406.28	FALSE	6
2022-09-13	11:37:50	0.736399	3.27565	1380.04	FALSE	6
2022-09-13	11:37:50	0.733244	3.26162	1409.54	FALSE	6
2022-09-13	11:37:50	0.737926	3.28244	1383.32	FALSE	6
2022-09-13	11:37:51	0.730801	3.25075	1412.79	FALSE	6
2022-09-13	11:37:51	0.730242	3.24826	1386.57	FALSE	6
2022-09-13	11:37:51	0.738588	3.28539	1416.08	FALSE	6
2022-09-13	11:37:51	0.741285	3.29738	1389.87	FALSE	6
2022-09-13	11:37:52	0.736399	3.27565	1419.35	FALSE	6
2022-09-13	11:37:52	0.732786	3.25958	1393.13	FALSE	6
2022-09-13	11:37:52	0.733753	3.26388	1422.62	FALSE	6
2022-09-13	11:37:52	0.734618	3.26773	1396.39	FALSE	6
2022-09-13	11:37:53	0.733906	3.26456	1425.88	FALSE	6
2022-09-13	11:37:53	0.735026	3.26954	1399.66	FALSE	6
2022-09-13	11:37:53	0.731463	3.25369	1429.13	FALSE	6
2022-09-13	11:37:53	0.730598	3.24985	1402.91	FALSE	6
2022-09-13	11:37:54	0.731616	3.25437	1432.39	FALSE	6
2022-09-13	11:37:54	0.73355	3.26298	1406.18	FALSE	6
2022-09-13	11:37:54	0.731209	3.25256	1435.64	FALSE	6
2022-09-13	11:37:55	0.733041	3.26071	1409.44	FALSE	6
2022-09-13	11:37:55	0.734364	3.2666	1438.91	FALSE	6
2022-09-13	11:37:55	0.731259	3.25279	1412.69	FALSE	6
2022-09-13	11:37:55	0.736705	3.27701	1442.19	FALSE	6
2022-09-13	11:37:56	0.735585	3.27203	1415.96	FALSE	6
2022-09-13	11:37:56	0.73584	3.27316	1445.46	FALSE	6
2022-09-13	11:37:56	0.725865	3.22879	1419.19	FALSE	6
2022-09-13	11:37:56	0.737061	3.27859	1448.74	FALSE	6

## Sheet: Bubba_prong_2022913113242 (2)
Date	Time	Lbs	Total force x time			**GoPro Fitting:1122
2022-09-13	11:32:56	-1.48055	0	FALSE	0
2022-09-13	11:32:56	-1.49739	0	FALSE	0					Total Force x time	644.739
2022-09-13	11:32:56	-1.57174	0	FALSE	0					Total Steps	6
2022-09-13	11:32:56	-1.25775	0	FALSE	0
2022-09-13	11:32:57	-1.06635	0	FALSE	0
2022-09-13	11:32:57	-0.991895	0	FALSE	0
2022-09-13	11:32:57	-0.796272	0	FALSE	0
2022-09-13	11:32:58	-0.667162	0	FALSE	0
2022-09-13	11:32:58	-0.694338	0	FALSE	0
2022-09-13	11:32:58	-0.636678	0	FALSE	0
2022-09-13	11:32:58	-0.580598	0	FALSE	0
2022-09-13	11:32:59	-0.712455	0	FALSE	0
2022-09-13	11:32:59	-0.742836	0	FALSE	0
2022-09-13	11:32:59	-0.557035	0	FALSE	0
2022-09-13	11:32:59	-0.463651	0	FALSE	0
2022-09-13	11:33:00	-0.408435	0	FALSE	0
2022-09-13	11:33:00	-0.380954	0	FALSE	0
2022-09-13	11:33:00	-0.426399	0	FALSE	0
2022-09-13	11:33:01	-0.324465	0	FALSE	0
2022-09-13	11:33:01	0.718486	0.718486	FALSE	0
2022-09-13	11:33:01	0.729071	1.44756	FALSE	0
2022-09-13	11:33:01	0.577926	2.02548	FALSE	0
2022-09-13	11:33:02	0.466832	2.49232	FALSE	0
2022-09-13	11:33:02	0.738486	3.2308	FALSE	0
2022-09-13	11:33:02	0.737722	3.96852	FALSE	0
2022-09-13	11:33:02	0.730293	4.69882	FALSE	0
2022-09-13	11:33:03	0.734008	5.43282	FALSE	0
2022-09-13	11:33:03	0.735891	6.16871	FALSE	0
2022-09-13	11:33:03	0.7307	6.89941	FALSE	0
2022-09-13	11:33:03	0.734924	7.63434	FALSE	0
2022-09-13	11:33:04	0.737315	8.37165	FALSE	0
2022-09-13	11:33:04	0.733957	9.10561	FALSE	0
2022-09-13	11:33:04	0.744287	9.8499	FALSE	0
2022-09-13	11:33:04	0.734364	10.5843	FALSE	0
2022-09-13	11:33:05	0.739198	11.3235	FALSE	0
2022-09-13	11:33:05	0.736959	12.0604	FALSE	0
2022-09-13	11:33:05	0.731616	12.792	FALSE	0
2022-09-13	11:33:05	0.639097	13.4311	FALSE	0
2022-09-13	11:33:06	0.733346	14.1645	FALSE	0
2022-09-13	11:33:06	0.733651	14.8981	FALSE	0
2022-09-13	11:33:06	0.740929	15.6391	FALSE	0
2022-09-13	11:33:07	0.733092	16.3721	FALSE	0
2022-09-13	11:33:07	0.451412	16.8236	FALSE	0
2022-09-13	11:33:07	-0.331437	16.8236	FALSE	0
2022-09-13	11:33:07	-0.312201	16.8236	FALSE	0
2022-09-13	11:33:08	0.734313	17.5579	FALSE	0
2022-09-13	11:33:08	0.739758	18.2976	FALSE	0
2022-09-13	11:33:08	0.728512	19.0261	FALSE	0
2022-09-13	11:33:08	0.734975	19.7611	FALSE	0
2022-09-13	11:33:09	0.732481	20.4936	FALSE	0
2022-09-13	11:33:09	0.735178	21.2288	FALSE	0
2022-09-13	11:33:09	0.740318	21.9691	FALSE	0
2022-09-13	11:33:09	0.740674	22.7098	FALSE	0
2022-09-13	11:33:10	0.737315	23.4471	FALSE	0
2022-09-13	11:33:10	0.727494	24.1746	FALSE	0
2022-09-13	11:33:10	0.738944	24.9135	FALSE	0
2022-09-13	11:33:11	0.726934	25.6405	FALSE	0
2022-09-13	11:33:11	0.736857	26.3773	FALSE	0
2022-09-13	11:33:11	0.727901	27.1052	FALSE	0
2022-09-13	11:33:11	0.724898	27.8301	FALSE	0
2022-09-13	11:33:12	0.706527	28.5366	FALSE	0
2022-09-13	11:33:12	0.719606	29.2562	FALSE	0
2022-09-13	11:33:12	0.698486	29.9547	FALSE	0
2022-09-13	11:33:12	0.701285	30.656	FALSE	0
2022-09-13	11:33:13	0.689326	31.3453	FALSE	0
2022-09-13	11:33:13	0.716807	32.0622	FALSE	0
2022-09-13	11:33:13	0.713346	32.7755	FALSE	0
2022-09-13	11:33:13	0.720929	33.4964	FALSE	0
2022-09-13	11:33:14	0.715127	34.2116	FALSE	0
2022-09-13	11:33:14	0.704644	34.9162	FALSE	0
2022-09-13	11:33:14	0.702913	35.6191	FALSE	0
2022-09-13	11:33:15	0.72729	36.3464	FALSE	0
2022-09-13	11:33:15	0.730445	37.0768	FALSE	0
2022-09-13	11:33:15	0.724949	37.8018	FALSE	0
2022-09-13	11:33:15	0.721743	38.5235	FALSE	0
2022-09-13	11:33:16	0.72388	39.2474	FALSE	0
2022-09-13	11:33:16	0.723575	39.971	FALSE	0
2022-09-13	11:33:16	0.719606	40.6906	FALSE	0
2022-09-13	11:33:16	0.714771	41.4054	FALSE	0
2022-09-13	11:33:17	0.662048	42.0674	FALSE	0
2022-09-13	11:33:17	0.642048	42.7095	FALSE	0
2022-09-13	11:33:17	0.588613	43.2981	FALSE	0
2022-09-13	11:33:17	0.641997	43.9401	FALSE	0
2022-09-13	11:33:18	0.61411	44.5542	FALSE	0
2022-09-13	11:33:18	0.577723	45.1319	FALSE	0
2022-09-13	11:33:18	0.475382	45.6073	FALSE	0
2022-09-13	11:33:19	0.645458	46.2527	FALSE	0
2022-09-13	11:33:19	0.737112	46.9899	FALSE	0
2022-09-13	11:33:19	0.732481	47.7223	FALSE	0
2022-09-13	11:33:19	0.731667	48.454	FALSE	0
2022-09-13	11:33:20	0.731717	49.1857	FALSE	0
2022-09-13	11:33:20	0.733092	49.9188	FALSE	0
2022-09-13	11:33:20	0.669987	50.5888	FALSE	0
2022-09-13	11:33:20	0.678486	51.2673	FALSE	0
2022-09-13	11:33:21	0.654007	51.9213	FALSE	0
2022-09-13	11:33:21	0.634669	52.556	FALSE	0
2022-09-13	11:33:21	0.509733	53.0657	FALSE	0
2022-09-13	11:33:21	0.469733	53.5354	FALSE	0
2022-09-13	11:33:22	0.588257	54.1237	FALSE	0
2022-09-13	11:33:22	0.209224	54.3329	FALSE	0
2022-09-13	11:33:22	-0.00690816	54.3329	FALSE	0
2022-09-13	11:33:23	0.0948221	54.4277	FALSE	0
2022-09-13	11:33:23	0.146476	54.5742	FALSE	0
2022-09-13	11:33:23	0.0452038	54.6194	FALSE	0
2022-09-13	11:33:23	0.10042	54.7198	FALSE	0
2022-09-13	11:33:24	0.0139061	54.7337	FALSE	0
2022-09-13	11:33:24	0.441081	55.1748	FALSE	0
2022-09-13	11:33:24	0.678944	55.8538	FALSE	0
2022-09-13	11:33:24	0.735534	56.5893	FALSE	0
2022-09-13	11:33:25	0.734669	57.324	FALSE	0
2022-09-13	11:33:25	0.589377	57.9133	FALSE	0
2022-09-13	11:33:25	0.727748	58.6411	FALSE	0
2022-09-13	11:33:25	0.731921	59.373	FALSE	0
2022-09-13	11:33:26	0.734873	60.1079	FALSE	0
2022-09-13	11:33:26	0.731565	60.8395	FALSE	0
2022-09-13	11:33:26	0.731412	61.5709	FALSE	0
2022-09-13	11:33:26	0.73187	62.3027	FALSE	0
2022-09-13	11:33:27	0.727087	63.0298	FALSE	0
2022-09-13	11:33:27	0.734211	63.764	FALSE	0
2022-09-13	11:33:27	0.739249	64.5033	FALSE	0
2022-09-13	11:33:28	0.74327	65.2466	FALSE	0
2022-09-13	11:33:28	0.707901	65.9545	FALSE	0
2022-09-13	11:33:28	0.737366	66.6918	FALSE	0
2022-09-13	11:33:28	0.734211	67.426	FALSE	0
2022-09-13	11:33:29	0.733142	68.1592	FALSE	0
2022-09-13	11:33:29	0.735585	68.8948	FALSE	0
2022-09-13	11:33:29	0.740878	69.6356	FALSE	0
2022-09-13	11:33:29	0.735891	70.3715	FALSE	0
2022-09-13	11:33:30	0.73701	71.1085	FALSE	0
2022-09-13	11:33:30	0.736094	71.8446	FALSE	0
2022-09-13	11:33:30	0.737621	72.5823	FALSE	0
2022-09-13	11:33:30	0.734924	73.3172	FALSE	0
2022-09-13	11:33:31	0.729886	74.0471	FALSE	0
2022-09-13	11:33:31	0.738333	74.7854	FALSE	0
2022-09-13	11:33:31	0.733702	75.5191	FALSE	0
2022-09-13	11:33:32	0.738333	76.2574	FALSE	0
2022-09-13	11:33:32	0.732023	76.9895	FALSE	0
2022-09-13	11:33:32	0.741081	77.7305	FALSE	0
2022-09-13	11:33:32	0.73874	78.4693	FALSE	0
2022-09-13	11:33:33	0.730903	79.2002	FALSE	0
2022-09-13	11:33:33	0.732074	79.9322	FALSE	0
2022-09-13	11:33:33	0.735941	80.6682	FALSE	0
2022-09-13	11:33:33	0.733957	81.4021	FALSE	0
2022-09-13	11:33:34	0.734873	82.137	FALSE	0
2022-09-13	11:33:34	0.732888	82.8699	FALSE	0
2022-09-13	11:33:34	0.736298	83.6062	FALSE	0
2022-09-13	11:33:34	0.736399	84.3426	FALSE	0
2022-09-13	11:33:35	0.729987	85.0726	FALSE	0
2022-09-13	11:33:35	0.726832	85.7994	FALSE	0
2022-09-13	11:33:35	0.734924	86.5343	FALSE	0
2022-09-13	11:33:36	0.732175	87.2665	FALSE	0
2022-09-13	11:33:36	0.736349	88.0029	FALSE	0
2022-09-13	11:33:36	0.820013	88.8229	FALSE	0
2022-09-13	11:33:36	0.736399	89.5593	FALSE	0
2022-09-13	11:33:37	0.740369	90.2997	FALSE	0
2022-09-13	11:33:37	0.732379	91.032	FALSE	0
2022-09-13	11:33:37	0.729224	91.7613	FALSE	0
2022-09-13	11:33:37	0.733193	92.4944	FALSE	0
2022-09-13	11:33:38	0.733041	93.2275	FALSE	0
2022-09-13	11:33:38	0.735789	93.9633	FALSE	0
2022-09-13	11:33:38	0.729224	94.6925	FALSE	0
2022-09-13	11:33:38	0.733957	95.4265	FALSE	0
2022-09-13	11:33:39	0.735738	96.1622	FALSE	0
2022-09-13	11:33:39	0.733142	96.8953	FALSE	0
2022-09-13	11:33:39	0.734669	97.63	FALSE	0
2022-09-13	11:33:40	0.733092	98.3631	FALSE	0
2022-09-13	11:33:40	0.72902	99.0921	FALSE	0
2022-09-13	11:33:40	0.72841	99.8205	FALSE	0
2022-09-13	11:33:40	0.736705	100.557	FALSE	0
2022-09-13	11:33:41	0.739147	101.296	FALSE	0
2022-09-13	11:33:41	0.644593	101.941	FALSE	0
2022-09-13	11:33:41	0.624847	102.566	FALSE	0
2022-09-13	11:33:41	0.702099	103.268	FALSE	0
2022-09-13	11:33:42	0.737214	104.005	FALSE	0
2022-09-13	11:33:42	0.246272	104.251	FALSE	0
2022-09-13	11:33:42	-0.319173	104.251	FALSE	0
2022-09-13	11:33:42	0.816857	105.068	FALSE	0
2022-09-13	11:33:43	0.7307	105.799	FALSE	0
2022-09-13	11:33:43	0.742913	106.542	FALSE	0
2022-09-13	11:33:43	0.731209	107.273	FALSE	0
2022-09-13	11:33:44	0.740929	108.014	FALSE	0
2022-09-13	11:33:44	0.734415	108.748	FALSE	0
2022-09-13	11:33:44	0.738537	109.487	FALSE	0
2022-09-13	11:33:44	0.730191	110.217	FALSE	0
2022-09-13	11:33:45	0.742761	110.96	FALSE	0
2022-09-13	11:33:45	0.740827	111.701	FALSE	0
2022-09-13	11:33:45	0.733601	112.434	FALSE	0
2022-09-13	11:33:45	0.627799	113.062	FALSE	0
2022-09-13	11:33:46	0.739147	113.801	FALSE	0
2022-09-13	11:33:46	0.73584	114.537	FALSE	0
2022-09-13	11:33:46	0.737366	115.275	FALSE	0
2022-09-13	11:33:46	0.726934	116.001	FALSE	0
2022-09-13	11:33:47	0.735076	116.737	FALSE	0
2022-09-13	11:33:47	0.733804	117.47	FALSE	0
2022-09-13	11:33:47	0.733804	118.204	FALSE	0
2022-09-13	11:33:47	0.7307	118.935	FALSE	0
2022-09-13	11:33:48	0.732532	119.667	FALSE	0
2022-09-13	11:33:48	0.726272	120.394	FALSE	0
2022-09-13	11:33:48	0.110445	120.504	FALSE	0
2022-09-13	11:33:49	0.102354	120.606	FALSE	0
2022-09-13	11:33:49	0.174364	120.781	FALSE	0
2022-09-13	11:33:49	0.206527	120.987	FALSE	0
2022-09-13	11:33:49	0.171667	121.159	FALSE	0
2022-09-13	11:33:50	0.212735	121.372	FALSE	0
2022-09-13	11:33:50	0.629784	122.001	FALSE	0
2022-09-13	11:33:50	0.740776	122.742	FALSE	0
2022-09-13	11:33:50	0.729835	123.472	FALSE	0
2022-09-13	11:33:51	1.47391	124.946	FALSE	0
2022-09-13	11:33:51	1.02327	125.969	FALSE	0
2022-09-13	11:33:51	0.354822	126.324	FALSE	0
2022-09-13	11:33:51	0.294669	126.619	FALSE	0
2022-09-13	11:33:52	0.409529	127.028	FALSE	0
2022-09-13	11:33:52	0.735941	127.764	FALSE	0
2022-09-13	11:33:52	0.729886	128.494	FALSE	0
2022-09-13	11:33:53	0.735331	129.229	FALSE	0
2022-09-13	11:33:53	0.739147	129.969	FALSE	0
2022-09-13	11:33:53	0.739504	130.708	FALSE	0
2022-09-13	11:33:53	0.738333	131.446	FALSE	0
2022-09-13	11:33:54	0.735585	132.182	FALSE	0
2022-09-13	11:33:54	0.732277	132.914	FALSE	0
2022-09-13	11:33:54	0.739351	133.654	FALSE	0
2022-09-13	11:33:54	0.729987	134.384	FALSE	0
2022-09-13	11:33:55	0.731463	135.115	FALSE	0
2022-09-13	11:33:55	0.740013	135.855	FALSE	0
2022-09-13	11:33:55	0.73528	136.59	FALSE	0
2022-09-13	11:33:55	0.73645	137.327	FALSE	0
2022-09-13	11:33:56	0.736501	138.063	FALSE	0
2022-09-13	11:33:56	0.734517	138.798	FALSE	0
2022-09-13	11:33:56	0.738435	139.536	FALSE	0
2022-09-13	11:33:57	0.737061	140.273	FALSE	0
2022-09-13	11:33:57	0.733193	141.007	FALSE	0
2022-09-13	11:33:57	0.731616	141.738	FALSE	0
2022-09-13	11:33:57	0.724237	142.462	FALSE	0
2022-09-13	11:33:58	0.732837	143.195	FALSE	0
2022-09-13	11:33:58	0.730242	143.925	FALSE	0
2022-09-13	11:33:58	0.7307	144.656	FALSE	0
2022-09-13	11:33:58	0.73584	145.392	FALSE	0
2022-09-13	11:33:59	0.736501	146.129	FALSE	0
2022-09-13	11:33:59	0.737926	146.866	FALSE	0
2022-09-13	11:33:59	0.734262	147.601	FALSE	0
2022-09-13	11:33:59	0.731921	148.333	FALSE	0
2022-09-13	11:34:00	0.73014	149.063	FALSE	0
2022-09-13	11:34:00	0.731565	149.794	FALSE	0
2022-09-13	11:34:00	0.733651	150.528	FALSE	0
2022-09-13	11:34:01	0.731158	151.259	FALSE	0
2022-09-13	11:34:01	0.729478	151.989	FALSE	0
2022-09-13	11:34:01	0.732888	152.722	FALSE	0
2022-09-13	11:34:01	0.738588	153.46	FALSE	0
2022-09-13	11:34:02	0.729122	154.189	FALSE	0
2022-09-13	11:34:02	0.736603	154.926	FALSE	0
2022-09-13	11:34:02	0.731463	155.657	FALSE	0
2022-09-13	11:34:02	0.736552	156.394	FALSE	0
2022-09-13	11:34:03	0.731412	157.125	FALSE	0
2022-09-13	11:34:03	0.731565	157.857	FALSE	0
2022-09-13	11:34:03	0.733499	158.59	FALSE	0
2022-09-13	11:34:03	0.72729	159.318	FALSE	0
2022-09-13	11:34:04	0.729784	160.047	FALSE	0
2022-09-13	11:34:04	0.735483	160.783	FALSE	0
2022-09-13	11:34:04	0.74098	161.524	FALSE	0
2022-09-13	11:34:05	0.734008	162.258	FALSE	0
2022-09-13	11:34:05	0.734771	162.993	FALSE	0
2022-09-13	11:34:05	0.729428	163.722	FALSE	0
2022-09-13	11:34:05	0.730801	164.453	FALSE	0
2022-09-13	11:34:06	0.900725	165.354	FALSE	0
2022-09-13	11:34:06	0.733142	166.087	FALSE	0
2022-09-13	11:34:06	0.708257	166.795	FALSE	0
2022-09-13	11:34:06	0.736043	167.531	FALSE	0
2022-09-13	11:34:07	0.739758	168.271	FALSE	0
2022-09-13	11:34:07	0.730038	169.001	FALSE	0
2022-09-13	11:34:07	0.732786	169.734	FALSE	0
2022-09-13	11:34:07	0.734771	170.468	FALSE	0
2022-09-13	11:34:08	0.737926	171.206	FALSE	0
2022-09-13	11:34:08	0.731209	171.938	FALSE	0
2022-09-13	11:34:08	0.73701	172.675	FALSE	0
2022-09-13	11:34:09	0.733244	173.408	FALSE	0
2022-09-13	11:34:09	0.730089	174.138	FALSE	0
2022-09-13	11:34:09	0.73355	174.871	FALSE	0
2022-09-13	11:34:09	0.726425	175.598	FALSE	0
2022-09-13	11:34:10	0.253346	175.851	FALSE	0
2022-09-13	11:34:10	0.398384	176.25	FALSE	0
2022-09-13	11:34:10	0.740013	176.99	FALSE	0
2022-09-13	11:34:10	0.724237	177.714	FALSE	0
2022-09-13	11:34:11	0.622354	178.336	FALSE	0
2022-09-13	11:34:11	0.708817	179.045	FALSE	0
2022-09-13	11:34:11	0.732328	179.777	FALSE	0
2022-09-13	11:34:11	0.735992	180.513	FALSE	0
2022-09-13	11:34:12	0.733499	181.247	FALSE	0
2022-09-13	11:34:12	0.737519	181.984	FALSE	0
2022-09-13	11:34:12	0.732125	182.716	FALSE	0
2022-09-13	11:34:12	0.741743	183.458	FALSE	0
2022-09-13	11:34:13	1.50882	184.967	FALSE	0
2022-09-13	11:34:13	1.8362	186.803	FALSE	0
2022-09-13	11:34:13	0.930445	187.734	FALSE	0
2022-09-13	11:34:14	0.735738	188.469	FALSE	0
2022-09-13	11:34:14	0.722557	189.192	FALSE	0
2022-09-13	11:34:14	0.727188	189.919	FALSE	0
2022-09-13	11:34:14	0.727443	190.647	FALSE	0
2022-09-13	11:34:15	0.729936	191.377	FALSE	0
2022-09-13	11:34:15	0.765712	192.142	FALSE	0
2022-09-13	11:34:15	0.679606	192.822	FALSE	0
2022-09-13	11:34:15	1.19355	194.015	FALSE	0
2022-09-13	11:34:16	0.746221	194.762	FALSE	0
2022-09-13	11:34:16	1.26586	196.027	FALSE	0
2022-09-13	11:34:16	1.04123	197.069	FALSE	0
2022-09-13	11:34:16	1.14953	198.218	FALSE	0
2022-09-13	11:34:17	0.394109	198.612	FALSE	0
2022-09-13	11:34:17	0.546018	199.158	FALSE	0
2022-09-13	11:34:17	0.553652	199.712	FALSE	0
2022-09-13	11:34:18	0.44673	200.159	FALSE	0
2022-09-13	11:34:18	0.738181	200.897	FALSE	0
2022-09-13	11:34:18	0.419046	201.316	FALSE	0
2022-09-13	11:34:18	0.278741	201.595	FALSE	0
2022-09-13	11:34:19	0.328715	201.923	FALSE	0
2022-09-13	11:34:19	0.0968577	202.02	FALSE	0
2022-09-13	11:34:19	-0.29332	202.02	FALSE	0
2022-09-13	11:34:19	-0.393218	202.02	FALSE	0
2022-09-13	11:34:20	-0.609758	202.02	FALSE	0
2022-09-13	11:34:20	-0.400648	202.02	FALSE	0
2022-09-13	11:34:20	-0.306399	202.02	FALSE	0
2022-09-13	11:34:20	0.463575	202.484	FALSE	0
2022-09-13	11:34:21	0.531056	203.015	FALSE	0
2022-09-13	11:34:21	0.385102	203.4	FALSE	0
2022-09-13	11:34:21	0.360573	203.761	FALSE	0
2022-09-13	11:34:22	0.433346	204.194	FALSE	0
2022-09-13	11:34:22	0.319707	204.514	FALSE	0
2022-09-13	11:34:22	0.206934	204.721	FALSE	0
2022-09-13	11:34:22	0.180573	204.901	FALSE	0
2022-09-13	11:34:23	0.290293	205.191	FALSE	0
2022-09-13	11:34:23	0.31299	205.504	FALSE	0
2022-09-13	11:34:23	0.66556	206.17	FALSE	0
2022-09-13	11:34:23	0.963728	207.134	FALSE	0
2022-09-13	11:34:24	1.23452	208.368	FALSE	0
2022-09-13	11:34:24	2.07192	210.44	FALSE	0
2022-09-13	11:34:24	1.90765	212.348	FALSE	0
2022-09-13	11:34:24	1.11365	213.461	FALSE	0
2022-09-13	11:34:25	1.0993	214.561	FALSE	0
2022-09-13	11:34:25	0.476705	215.037	FALSE	0
2022-09-13	11:34:25	0.460471	215.498	FALSE	0
2022-09-13	11:34:26	0.274008	215.772	FALSE	0
2022-09-13	11:34:26	0.441845	216.214	FALSE	0
2022-09-13	11:34:26	0.885153	217.099	FALSE	0
2022-09-13	11:34:26	0.983372	218.082	FALSE	0
2022-09-13	11:34:27	1.72327	219.806	FALSE	0
2022-09-13	11:34:27	0.959453	220.765	FALSE	0
2022-09-13	11:34:27	0.186374	220.951	FALSE	0
2022-09-13	11:34:27	0.266985	221.218	FALSE	0
2022-09-13	11:34:28	0.153906	221.372	FALSE	0
2022-09-13	11:34:28	0.155891	221.528	FALSE	0
2022-09-13	11:34:28	0.200827	221.729	FALSE	0
2022-09-13	11:34:28	0.2964	222.025	FALSE	0
2022-09-13	11:34:29	0.772634	222.798	FALSE	0
2022-09-13	11:34:29	0.411361	223.209	FALSE	0
2022-09-13	11:34:29	0.569682	223.779	FALSE	0
2022-09-13	11:34:30	0.84729	224.626	FALSE	0
2022-09-13	11:34:30	0.754516	225.381	FALSE	0
2022-09-13	11:34:30	1.87289	227.254	FALSE	0
2022-09-13	11:34:30	2.28525	229.539	FALSE	0
2022-09-13	11:34:31	3.74479	233.284	1	1
2022-09-13	11:34:31	6.06988	239.354	1	2
2022-09-13	11:34:31	3.17904	242.533	1	3
2022-09-13	11:34:31	1.28627	243.819	FALSE	3
2022-09-13	11:34:32	0.810649	244.63	FALSE	3
2022-09-13	11:34:32	2.12485	246.755	FALSE	3
2022-09-13	11:34:32	2.17986	248.934	FALSE	3
2022-09-13	11:34:32	1.90454	250.839	FALSE	3
2022-09-13	11:34:33	1.6562	252.495	FALSE	3
2022-09-13	11:34:33	1.50159	253.997	FALSE	3
2022-09-13	11:34:33	1.38123	255.378	FALSE	3
2022-09-13	11:34:33	1.3191	256.697	FALSE	3
2022-09-13	11:34:34	1.30566	258.003	FALSE	3
2022-09-13	11:34:34	1.21324	259.216	FALSE	3
2022-09-13	11:34:34	1.18291	260.399	FALSE	3
2022-09-13	11:34:35	1.10434	261.503	FALSE	3
2022-09-13	11:34:35	0.985153	262.488	FALSE	3
2022-09-13	11:34:35	1.02072	263.509	FALSE	3
2022-09-13	11:34:35	0.982354	264.491	FALSE	3
2022-09-13	11:34:36	0.919555	265.411	FALSE	3
2022-09-13	11:34:36	0.982405	266.393	FALSE	3
2022-09-13	11:34:36	0.32327	266.717	FALSE	3
2022-09-13	11:34:36	0.333092	267.05	FALSE	3
2022-09-13	11:34:37	0.552939	267.603	FALSE	3
2022-09-13	11:34:37	0.26729	267.87	FALSE	3
2022-09-13	11:34:37	0.0996058	267.97	FALSE	3
2022-09-13	11:34:37	0.0397585	268.009	FALSE	3
2022-09-13	11:34:38	0.155127	268.164	FALSE	3
2022-09-13	11:34:38	0.212176	268.377	FALSE	3
2022-09-13	11:34:38	0.236807	268.613	FALSE	3
2022-09-13	11:34:39	0.234568	268.848	FALSE	3
2022-09-13	11:34:39	0.212176	269.06	FALSE	3
2022-09-13	11:34:39	0.236196	269.296	FALSE	3
2022-09-13	11:34:39	0.143117	269.44	FALSE	3
2022-09-13	11:34:40	0.309479	269.749	FALSE	3
2022-09-13	11:34:40	0.198893	269.948	FALSE	3
2022-09-13	11:34:40	0.452125	270.4	FALSE	3
2022-09-13	11:34:40	0.63584	271.036	FALSE	3
2022-09-13	11:34:41	1.51625	272.552	FALSE	3
2022-09-13	11:34:41	1.75416	274.306	FALSE	3
2022-09-13	11:34:41	2.00897	276.315	FALSE	3
2022-09-13	11:34:41	1.75696	278.072	FALSE	3
2022-09-13	11:34:42	0.851972	278.924	FALSE	3
2022-09-13	11:34:42	0.6993	279.623	FALSE	3
2022-09-13	11:34:42	0.514822	280.138	FALSE	3
2022-09-13	11:34:43	0.917672	281.056	FALSE	3
2022-09-13	11:34:43	1.3194	282.375	FALSE	3
2022-09-13	11:34:43	1.36419	283.74	FALSE	3
2022-09-13	11:34:43	0.595382	284.335	FALSE	3
2022-09-13	11:34:44	0.555789	284.891	FALSE	3
2022-09-13	11:34:44	0.517163	285.408	FALSE	3
2022-09-13	11:34:44	0.34841	285.756	FALSE	3
2022-09-13	11:34:44	0.480064	286.236	FALSE	3
2022-09-13	11:34:45	0.512023	286.748	FALSE	3
2022-09-13	11:34:45	0.469479	287.218	FALSE	3
2022-09-13	11:34:45	0.422405	287.64	FALSE	3
2022-09-13	11:34:45	0.568766	288.209	FALSE	3
2022-09-13	11:34:46	0.772379	288.981	FALSE	3
2022-09-13	11:34:46	0.766476	289.748	FALSE	3
2022-09-13	11:34:46	0.739656	290.488	FALSE	3
2022-09-13	11:34:47	0.788002	291.276	FALSE	3
2022-09-13	11:34:47	0.792226	292.068	FALSE	3
2022-09-13	11:34:47	0.801539	292.869	FALSE	3
2022-09-13	11:34:47	0.521692	293.391	FALSE	3
2022-09-13	11:34:48	0.154822	293.546	FALSE	3
2022-09-13	11:34:48	0.160522	293.706	FALSE	3
2022-09-13	11:34:48	0.262608	293.969	FALSE	3
2022-09-13	11:34:48	0.736094	294.705	FALSE	3
2022-09-13	11:34:49	0.719606	295.425	FALSE	3
2022-09-13	11:34:49	0.825916	296.251	FALSE	3
2022-09-13	11:34:49	0.579809	296.83	FALSE	3
2022-09-13	11:34:49	0.260064	297.09	FALSE	3
2022-09-13	11:34:50	0.728562	297.819	FALSE	3
2022-09-13	11:34:50	0.733092	298.552	FALSE	3
2022-09-13	11:34:50	0.735076	299.287	FALSE	3
2022-09-13	11:34:51	0.730954	300.018	FALSE	3
2022-09-13	11:34:51	0.73416	300.752	FALSE	3
2022-09-13	11:34:51	0.735229	301.488	FALSE	3
2022-09-13	11:34:51	0.733244	302.221	FALSE	3
2022-09-13	11:34:52	0.732735	302.953	FALSE	3
2022-09-13	11:34:52	0.738333	303.692	FALSE	3
2022-09-13	11:34:52	0.734822	304.427	FALSE	3
2022-09-13	11:34:52	0.740114	305.167	FALSE	3
2022-09-13	11:34:53	0.73472	305.901	FALSE	3
2022-09-13	11:34:53	0.735687	306.637	FALSE	3
2022-09-13	11:34:53	0.74042	307.378	FALSE	3
2022-09-13	11:34:53	0.733906	308.111	FALSE	3
2022-09-13	11:34:54	0.730547	308.842	FALSE	3
2022-09-13	11:34:54	0.73131	309.573	FALSE	3
2022-09-13	11:34:54	0.73355	310.307	FALSE	3
2022-09-13	11:34:54	0.735992	311.043	FALSE	3
2022-09-13	11:34:55	0.731921	311.775	FALSE	3
2022-09-13	11:34:55	0.737061	312.512	FALSE	3
2022-09-13	11:34:55	0.734211	313.246	FALSE	3
2022-09-13	11:34:56	0.733448	313.98	FALSE	3
2022-09-13	11:34:56	0.733092	314.713	FALSE	3
2022-09-13	11:34:56	0.73874	315.451	FALSE	3
2022-09-13	11:34:56	0.737926	316.189	FALSE	3
2022-09-13	11:34:57	0.730293	316.92	FALSE	3
2022-09-13	11:34:57	0.73528	317.655	FALSE	3
2022-09-13	11:34:57	0.731107	318.386	FALSE	3
2022-09-13	11:34:57	0.481489	318.867	FALSE	3
2022-09-13	11:34:58	0.424288	319.292	FALSE	3
2022-09-13	11:34:58	0.417417	319.709	FALSE	3
2022-09-13	11:34:58	0.317214	320.026	FALSE	3
2022-09-13	11:34:58	0.736094	320.762	FALSE	3
2022-09-13	11:34:59	1.11955	321.882	FALSE	3
2022-09-13	11:34:59	1.63955	323.522	FALSE	3
2022-09-13	11:34:59	2.61243	326.134	FALSE	3
2022-09-13	11:35:00	0.873804	327.008	FALSE	3
2022-09-13	11:35:00	1.58531	328.593	FALSE	3
2022-09-13	11:35:00	1.16872	329.762	FALSE	3
2022-09-13	11:35:00	1.09065	330.852	FALSE	3
2022-09-13	11:35:01	2.5077	333.36	FALSE	3
2022-09-13	11:35:01	1.92973	335.29	FALSE	3
2022-09-13	11:35:01	0.680267	335.97	FALSE	3
2022-09-13	11:35:01	1.5395	337.51	FALSE	3
2022-09-13	11:35:02	0.523932	338.034	FALSE	3
2022-09-13	11:35:02	1.96129	339.995	FALSE	3
2022-09-13	11:35:02	0.359504	340.354	FALSE	3
2022-09-13	11:35:02	0.223677	340.578	FALSE	3
2022-09-13	11:35:03	0.481692	341.06	FALSE	3
2022-09-13	11:35:03	0.721591	341.781	FALSE	3
2022-09-13	11:35:03	1.17518	342.957	FALSE	3
2022-09-13	11:35:04	0.867697	343.824	FALSE	3
2022-09-13	11:35:04	1.62235	345.447	FALSE	3
2022-09-13	11:35:04	0.914415	346.361	FALSE	3
2022-09-13	11:35:04	2.4538	348.815	FALSE	3
2022-09-13	11:35:05	1.28245	350.097	FALSE	3
2022-09-13	11:35:05	2.24368	352.341	FALSE	3
2022-09-13	11:35:05	0.558079	352.899	FALSE	3
2022-09-13	11:35:05	0.379046	353.278	FALSE	3
2022-09-13	11:35:06	0.727239	354.005	FALSE	3
2022-09-13	11:35:06	1.1191	355.124	FALSE	3
2022-09-13	11:35:06	0.656959	355.781	FALSE	3
2022-09-13	11:35:06	3.06352	358.845	1	4
2022-09-13	11:35:07	1.05274	359.898	FALSE	4
2022-09-13	11:35:07	1.40978	361.307	FALSE	4
2022-09-13	11:35:07	0.797723	362.105	FALSE	4
2022-09-13	11:35:08	1.00709	363.112	FALSE	4
2022-09-13	11:35:08	0.544695	363.657	FALSE	4
2022-09-13	11:35:08	0.748817	364.406	FALSE	4
2022-09-13	11:35:08	0.419249	364.825	FALSE	4
2022-09-13	11:35:09	0.205255	365.03	FALSE	4
2022-09-13	11:35:09	0.525967	365.556	FALSE	4
2022-09-13	11:35:09	0.251769	365.808	FALSE	4
2022-09-13	11:35:09	0.723524	366.531	FALSE	4
2022-09-13	11:35:10	0.745153	367.277	FALSE	4
2022-09-13	11:35:10	0.530903	367.808	FALSE	4
2022-09-13	11:35:10	0.183372	367.991	FALSE	4
2022-09-13	11:35:10	0.0606237	368.052	FALSE	4
2022-09-13	11:35:11	-0.0250252	368.052	FALSE	4
2022-09-13	11:35:11	0.474568	368.526	FALSE	4
2022-09-13	11:35:11	0.148715	368.675	FALSE	4
2022-09-13	11:35:12	0.204491	368.879	FALSE	4
2022-09-13	11:35:12	0.43869	369.318	FALSE	4
2022-09-13	11:35:12	0.133652	369.452	FALSE	4
2022-09-13	11:35:12	0.194262	369.646	FALSE	4
2022-09-13	11:35:13	-0.10757	369.646	FALSE	4
2022-09-13	11:35:13	-0.344821	369.646	FALSE	4
2022-09-13	11:35:13	-0.290979	369.646	FALSE	4
2022-09-13	11:35:13	-0.13958	369.646	FALSE	4
2022-09-13	11:35:14	-0.123906	369.646	FALSE	4
2022-09-13	11:35:14	0.0089188	369.655	FALSE	4
2022-09-13	11:35:14	1.52134	371.176	FALSE	4
2022-09-13	11:35:14	0.398283	371.574	FALSE	4
2022-09-13	11:35:15	0.380827	371.955	FALSE	4
2022-09-13	11:35:15	0.336756	372.292	FALSE	4
2022-09-13	11:35:15	0.182608	372.475	FALSE	4
2022-09-13	11:35:16	0.275025	372.75	FALSE	4
2022-09-13	11:35:16	0.385204	373.135	FALSE	4
2022-09-13	11:35:16	0.440369	373.575	FALSE	4
2022-09-13	11:35:16	0.579606	374.155	FALSE	4
2022-09-13	11:35:17	0.213652	374.369	FALSE	4
2022-09-13	11:35:17	0.482812	374.851	FALSE	4
2022-09-13	11:35:17	0.202557	375.054	FALSE	4
2022-09-13	11:35:17	0.528562	375.582	FALSE	4
2022-09-13	11:35:18	0.333448	375.916	FALSE	4
2022-09-13	11:35:18	0.363575	376.279	FALSE	4
2022-09-13	11:35:18	0.205865	376.485	FALSE	4
2022-09-13	11:35:18	0.212939	376.698	FALSE	4
2022-09-13	11:35:19	0.0494277	376.748	FALSE	4
2022-09-13	11:35:19	-0.155203	376.748	FALSE	4
2022-09-13	11:35:19	-0.249554	376.748	FALSE	4
2022-09-13	11:35:19	-0.207417	376.748	FALSE	4
2022-09-13	11:35:20	-0.192608	376.748	FALSE	4
2022-09-13	11:35:20	-0.166247	376.748	FALSE	4
2022-09-13	11:35:20	-0.0569336	376.748	FALSE	4
2022-09-13	11:35:21	-0.198867	376.748	FALSE	4
2022-09-13	11:35:21	-0.0408013	376.748	FALSE	4
2022-09-13	11:35:21	-0.0513356	376.748	FALSE	4
2022-09-13	11:35:21	-0.112608	376.748	FALSE	4
2022-09-13	11:35:22	-0.0568318	376.748	FALSE	4
2022-09-13	11:35:22	0.0866287	376.834	FALSE	4
2022-09-13	11:35:22	-0.0468064	376.834	FALSE	4
2022-09-13	11:35:22	0.153499	376.988	FALSE	4
2022-09-13	11:35:23	0.0639824	377.052	FALSE	4
2022-09-13	11:35:23	0.135993	377.188	FALSE	4
2022-09-13	11:35:23	0.152074	377.34	FALSE	4
2022-09-13	11:35:23	0.330191	377.67	FALSE	4
2022-09-13	11:35:24	0.487596	378.158	FALSE	4
2022-09-13	11:35:24	0.669834	378.827	FALSE	4
2022-09-13	11:35:24	0.463524	379.291	FALSE	4
2022-09-13	11:35:25	0.651107	379.942	FALSE	4
2022-09-13	11:35:25	1.57564	381.518	FALSE	4
2022-09-13	11:35:25	0.715331	382.233	FALSE	4
2022-09-13	11:35:25	1.87625	384.109	FALSE	4
2022-09-13	11:35:26	1.22648	385.336	FALSE	4
2022-09-13	11:35:26	2.73772	388.074	FALSE	4
2022-09-13	11:35:26	1.18017	389.254	FALSE	4
2022-09-13	11:35:26	0.367595	389.621	FALSE	4
2022-09-13	11:35:27	0.41757	390.039	FALSE	4
2022-09-13	11:35:27	0.281692	390.321	FALSE	4
2022-09-13	11:35:27	0.535534	390.856	FALSE	4
2022-09-13	11:35:27	0.173499	391.03	FALSE	4
2022-09-13	11:35:28	0.353092	391.383	FALSE	4
2022-09-13	11:35:28	0.215534	391.598	FALSE	4
2022-09-13	11:35:28	0.264644	391.863	FALSE	4
2022-09-13	11:35:29	0.0606745	391.924	FALSE	4
2022-09-13	11:35:29	0.232583	392.156	FALSE	4
2022-09-13	11:35:29	0.218181	392.374	FALSE	4
2022-09-13	11:35:29	0.129682	392.504	FALSE	4
2022-09-13	11:35:30	-0.0842109	392.504	FALSE	4
2022-09-13	11:35:30	0.181234	392.685	FALSE	4
2022-09-13	11:35:30	0.329326	393.015	FALSE	4
2022-09-13	11:35:30	0.178079	393.193	FALSE	4
2022-09-13	11:35:31	0.197214	393.39	FALSE	4
2022-09-13	11:35:31	0.0808781	393.471	FALSE	4
2022-09-13	11:35:31	0.381031	393.852	FALSE	4
2022-09-13	11:35:31	0.260471	394.112	FALSE	4
2022-09-13	11:35:32	0.734618	394.847	FALSE	4
2022-09-13	11:35:32	0.730598	395.577	FALSE	4
2022-09-13	11:35:32	0.731565	396.309	FALSE	4
2022-09-13	11:35:33	0.732328	397.041	FALSE	4
2022-09-13	11:35:33	0.729682	397.771	FALSE	4
2022-09-13	11:35:33	0.73014	398.501	FALSE	4
2022-09-13	11:35:33	0.739097	399.24	FALSE	4
2022-09-13	11:35:34	0.72958	399.97	FALSE	4
2022-09-13	11:35:34	0.729631	400.699	FALSE	4
2022-09-13	11:35:34	0.734466	401.434	FALSE	4
2022-09-13	11:35:34	0.731565	402.165	FALSE	4
2022-09-13	11:35:35	0.733142	402.899	FALSE	4
2022-09-13	11:35:35	0.731819	403.63	FALSE	4
2022-09-13	11:35:35	0.734975	404.365	FALSE	4
2022-09-13	11:35:35	0.732226	405.098	FALSE	4
2022-09-13	11:35:36	0.731768	405.829	FALSE	4
2022-09-13	11:35:36	0.732634	406.562	FALSE	4
2022-09-13	11:35:36	0.731361	407.293	FALSE	4
2022-09-13	11:35:37	0.730191	408.024	FALSE	4
2022-09-13	11:35:37	0.736807	408.76	FALSE	4
2022-09-13	11:35:37	0.734568	409.495	FALSE	4
2022-09-13	11:35:37	0.741336	410.236	FALSE	4
2022-09-13	11:35:38	0.738537	410.975	FALSE	4
2022-09-13	11:35:38	0.73014	411.705	FALSE	4
2022-09-13	11:35:38	0.732939	412.438	FALSE	4
2022-09-13	11:35:38	0.737366	413.175	FALSE	4
2022-09-13	11:35:39	0.741539	413.917	FALSE	4
2022-09-13	11:35:39	0.734568	414.651	FALSE	4
2022-09-13	11:35:39	0.734313	415.386	FALSE	4
2022-09-13	11:35:39	0.732735	416.118	FALSE	4
2022-09-13	11:35:40	0.614415	416.733	FALSE	4
2022-09-13	11:35:40	0.728868	417.462	FALSE	4
2022-09-13	11:35:40	0.6364	418.098	FALSE	4
2022-09-13	11:35:40	0.500521	418.599	FALSE	4
2022-09-13	11:35:41	0.310598	418.909	FALSE	4
2022-09-13	11:35:41	0.346781	419.256	FALSE	4
2022-09-13	11:35:41	0.341387	419.597	FALSE	4
2022-09-13	11:35:42	0.736705	420.334	FALSE	4
2022-09-13	11:35:42	0.738079	421.072	FALSE	4
2022-09-13	11:35:42	0.734975	421.807	FALSE	4
2022-09-13	11:35:42	0.488919	422.296	FALSE	4
2022-09-13	11:35:43	0.342863	422.639	FALSE	4
2022-09-13	11:35:43	0.297265	422.936	FALSE	4
2022-09-13	11:35:43	-0.179274	422.936	FALSE	4
2022-09-13	11:35:43	0.159504	423.096	FALSE	4
2022-09-13	11:35:44	0.730852	423.827	FALSE	4
2022-09-13	11:35:44	0.735076	424.562	FALSE	4
2022-09-13	11:35:44	0.734008	425.296	FALSE	4
2022-09-13	11:35:44	0.729173	426.025	FALSE	4
2022-09-13	11:35:45	-0.323447	426.025	FALSE	4
2022-09-13	11:35:45	0.739707	426.765	FALSE	4
2022-09-13	11:35:45	0.540725	427.305	FALSE	4
2022-09-13	11:35:46	0.255942	427.561	FALSE	4
2022-09-13	11:35:46	-0.214287	427.561	FALSE	4
2022-09-13	11:35:46	-0.250928	427.561	FALSE	4
2022-09-13	11:35:46	-0.336374	427.561	FALSE	4
2022-09-13	11:35:47	-0.336475	427.561	FALSE	4
2022-09-13	11:35:47	-0.427366	427.561	FALSE	4
2022-09-13	11:35:47	-0.432251	427.561	FALSE	4
2022-09-13	11:35:47	-0.47215	427.561	FALSE	4
2022-09-13	11:35:48	-0.513269	427.561	FALSE	4
2022-09-13	11:35:48	-0.495966	427.561	FALSE	4
2022-09-13	11:35:48	-0.597799	427.561	FALSE	4
2022-09-13	11:35:48	-0.606755	427.561	FALSE	4
2022-09-13	11:35:49	-0.761768	427.561	FALSE	4
2022-09-13	11:35:49	0.0189951	427.58	FALSE	4
2022-09-13	11:35:49	0.236858	427.817	FALSE	4
2022-09-13	11:35:50	0.471005	428.288	FALSE	4
2022-09-13	11:35:50	0.353651	428.642	FALSE	4
2022-09-13	11:35:50	0.475942	429.118	FALSE	4
2022-09-13	11:35:50	0.498435	429.616	FALSE	4
2022-09-13	11:35:51	0.440522	430.057	FALSE	4
2022-09-13	11:35:51	0.686374	430.743	FALSE	4
2022-09-13	11:35:51	0.535127	431.278	FALSE	4
2022-09-13	11:35:51	0.736501	432.015	FALSE	4
2022-09-13	11:35:52	0.607036	432.622	FALSE	4
2022-09-13	11:35:52	0.70444	433.326	FALSE	4
2022-09-13	11:35:52	0.360522	433.687	FALSE	4
2022-09-13	11:35:52	0.636909	434.324	FALSE	4
2022-09-13	11:35:53	0.54159	434.865	FALSE	4
2022-09-13	11:35:53	0.531311	435.396	FALSE	4
2022-09-13	11:35:53	0.375738	435.772	FALSE	4
2022-09-13	11:35:54	-0.845126	435.772	FALSE	4
2022-09-13	11:35:54	-1.01469	435.772	FALSE	4
2022-09-13	11:35:54	-0.594694	435.772	FALSE	4
2022-09-13	11:35:54	-0.646704	435.772	FALSE	4
2022-09-13	11:35:55	0.57528	436.347	FALSE	4
2022-09-13	11:35:55	0.734517	437.082	FALSE	4
2022-09-13	11:35:55	0.526527	437.609	FALSE	4
2022-09-13	11:35:55	0.190191	437.799	FALSE	4
2022-09-13	11:35:56	-0.0956613	437.799	FALSE	4
2022-09-13	11:35:56	0.177265	437.976	FALSE	4
2022-09-13	11:35:56	0.398741	438.375	FALSE	4
2022-09-13	11:35:56	0.317468	438.692	FALSE	4
2022-09-13	11:35:57	0.00866438	438.701	FALSE	4
2022-09-13	11:35:57	-0.362684	438.701	FALSE	4
2022-09-13	11:35:57	0.732277	439.433	FALSE	4
2022-09-13	11:35:58	0.732481	440.166	FALSE	4
2022-09-13	11:35:58	0.733804	440.899	FALSE	4
2022-09-13	11:35:58	0.737926	441.637	FALSE	4
2022-09-13	11:35:58	0.733397	442.371	FALSE	4
2022-09-13	11:35:59	0.736298	443.107	FALSE	4
2022-09-13	11:35:59	0.667494	443.775	FALSE	4
2022-09-13	11:35:59	0.285255	444.06	FALSE	4
2022-09-13	11:35:59	0.280318	444.34	FALSE	4
2022-09-13	11:36:00	0.245204	444.585	FALSE	4
2022-09-13	11:36:00	0.231412	444.817	FALSE	4
2022-09-13	11:36:00	0.239962	445.057	FALSE	4
2022-09-13	11:36:00	0.224848	445.282	FALSE	4
2022-09-13	11:36:01	0.109835	445.391	FALSE	4
2022-09-13	11:36:01	0.17355	445.565	FALSE	4
2022-09-13	11:36:01	0.164949	445.73	FALSE	4
2022-09-13	11:36:02	0.16841	445.898	FALSE	4
2022-09-13	11:36:02	0.159911	446.058	FALSE	4
2022-09-13	11:36:02	0.164389	446.223	FALSE	4
2022-09-13	11:36:02	0.178893	446.401	FALSE	4
2022-09-13	11:36:03	0.172125	446.574	FALSE	4
2022-09-13	11:36:03	0.184339	446.758	FALSE	4
2022-09-13	11:36:03	0.185255	446.943	FALSE	4
2022-09-13	11:36:03	0.192176	447.135	FALSE	4
2022-09-13	11:36:04	0.227087	447.362	FALSE	4
2022-09-13	11:36:04	0.0795041	447.442	FALSE	4
2022-09-13	11:36:04	0.0660689	447.508	FALSE	4
2022-09-13	11:36:04	-2.92604	447.508	FALSE	4
2022-09-13	11:36:05	-2.45195	447.508	FALSE	4
2022-09-13	11:36:05	0.11355	447.622	FALSE	4
2022-09-13	11:36:05	0.0712089	447.693	FALSE	4
2022-09-13	11:36:05	0.262456	447.955	FALSE	4
2022-09-13	11:36:06	0.279351	448.235	FALSE	4
2022-09-13	11:36:06	0.24215	448.477	FALSE	4
2022-09-13	11:36:06	0.207646	448.684	FALSE	4
2022-09-13	11:36:07	0.287188	448.972	FALSE	4
2022-09-13	11:36:07	0.283779	449.255	FALSE	4
2022-09-13	11:36:07	0.322099	449.577	FALSE	4
2022-09-13	11:36:07	0.341183	449.919	FALSE	4
2022-09-13	11:36:08	0.280115	450.199	FALSE	4
2022-09-13	11:36:08	0.269275	450.468	FALSE	4
2022-09-13	11:36:08	0.281031	450.749	FALSE	4
2022-09-13	11:36:08	0.201183	450.95	FALSE	4
2022-09-13	11:36:09	0.213957	451.164	FALSE	4
2022-09-13	11:36:09	0.254924	451.419	FALSE	4
2022-09-13	11:36:09	0.208003	451.627	FALSE	4
2022-09-13	11:36:09	0.246781	451.874	FALSE	4
2022-09-13	11:36:10	1.03121	452.905	FALSE	4
2022-09-13	11:36:10	0.535585	453.441	FALSE	4
2022-09-13	11:36:10	0.416654	453.857	FALSE	4
2022-09-13	11:36:11	0.406934	454.264	FALSE	4
2022-09-13	11:36:11	0.415687	454.68	FALSE	4
2022-09-13	11:36:11	0.367952	455.048	FALSE	4
2022-09-13	11:36:11	0.210445	455.258	FALSE	4
2022-09-13	11:36:12	0.376705	455.635	FALSE	4
2022-09-13	11:36:12	0.238842	455.874	FALSE	4
2022-09-13	11:36:12	0.305662	456.18	FALSE	4
2022-09-13	11:36:12	0.339046	456.519	FALSE	4
2022-09-13	11:36:13	0.280776	456.799	FALSE	4
2022-09-13	11:36:13	0.425	457.224	FALSE	4
2022-09-13	11:36:13	0.282252	457.507	FALSE	4
2022-09-13	11:36:13	0.312176	457.819	FALSE	4
2022-09-13	11:36:14	0.197367	458.016	FALSE	4
2022-09-13	11:36:14	0.198283	458.214	FALSE	4
2022-09-13	11:36:14	0.286578	458.501	FALSE	4
2022-09-13	11:36:15	0.312888	458.814	FALSE	4
2022-09-13	11:36:15	0.313855	459.128	FALSE	4
2022-09-13	11:36:15	-2.10273	459.128	FALSE	4
2022-09-13	11:36:15	-1.96747	459.128	FALSE	4
2022-09-13	11:36:16	-1.68884	459.128	FALSE	4
2022-09-13	11:36:16	-1.43703	459.128	FALSE	4
2022-09-13	11:36:16	-1.23378	459.128	FALSE	4
2022-09-13	11:36:16	0.477468	459.605	FALSE	4
2022-09-13	11:36:17	0.328766	459.934	FALSE	4
2022-09-13	11:36:17	0.508715	460.443	FALSE	4
2022-09-13	11:36:17	0.365713	460.808	FALSE	4
2022-09-13	11:36:17	0.508868	461.317	FALSE	4
2022-09-13	11:36:18	0.513143	461.83	FALSE	4
2022-09-13	11:36:18	0.449733	462.28	FALSE	4
2022-09-13	11:36:18	0.417977	462.698	FALSE	4
2022-09-13	11:36:19	0.477926	463.176	FALSE	4
2022-09-13	11:36:19	0.445865	463.622	FALSE	4
2022-09-13	11:36:19	0.446221	464.068	FALSE	4
2022-09-13	11:36:19	0.586221	464.654	FALSE	4
2022-09-13	11:36:20	0.457316	465.112	FALSE	4
2022-09-13	11:36:20	0.330242	465.442	FALSE	4
2022-09-13	11:36:20	0.435738	465.878	FALSE	4
2022-09-13	11:36:20	0.578028	466.456	FALSE	4
2022-09-13	11:36:21	0.213855	466.67	FALSE	4
2022-09-13	11:36:21	-0.0294527	466.67	FALSE	4
2022-09-13	11:36:21	-0.272455	466.67	FALSE	4
2022-09-13	11:36:21	-0.362786	466.67	FALSE	4
2022-09-13	11:36:22	-0.074389	466.67	FALSE	4
2022-09-13	11:36:22	0.331769	467.001	FALSE	4
2022-09-13	11:36:22	0.482201	467.484	FALSE	4
2022-09-13	11:36:23	0.303219	467.787	FALSE	4
2022-09-13	11:36:23	0.186781	467.974	FALSE	4
2022-09-13	11:36:23	0.408461	468.382	FALSE	4
2022-09-13	11:36:23	0.510242	468.892	FALSE	4
2022-09-13	11:36:24	0.721437	469.614	FALSE	4
2022-09-13	11:36:24	0.537774	470.151	FALSE	4
2022-09-13	11:36:24	0.68327	470.835	FALSE	4
2022-09-13	11:36:24	0.454466	471.289	FALSE	4
2022-09-13	11:36:25	0.371616	471.661	FALSE	4
2022-09-13	11:36:25	0.411616	472.072	FALSE	4
2022-09-13	11:36:25	0.147596	472.22	FALSE	4
2022-09-13	11:36:25	0.479504	472.7	FALSE	4
2022-09-13	11:36:26	0.191361	472.891	FALSE	4
2022-09-13	11:36:26	0.514364	473.405	FALSE	4
2022-09-13	11:36:26	0.301947	473.707	FALSE	4
2022-09-13	11:36:26	0.486527	474.194	FALSE	4
2022-09-13	11:36:27	-0.391793	474.194	FALSE	4
2022-09-13	11:36:27	-0.0459412	474.194	FALSE	4
2022-09-13	11:36:27	0.372074	474.566	FALSE	4
2022-09-13	11:36:28	0.116451	474.682	FALSE	4
2022-09-13	11:36:28	0.509631	475.192	FALSE	4
2022-09-13	11:36:28	0.291005	475.483	FALSE	4
2022-09-13	11:36:28	0.320471	475.803	FALSE	4
2022-09-13	11:36:29	0.979911	476.783	FALSE	4
2022-09-13	11:36:29	0.36159	477.145	FALSE	4
2022-09-13	11:36:29	0.260674	477.406	FALSE	4
2022-09-13	11:36:29	-2.80263	477.406	FALSE	4
2022-09-13	11:36:30	-2.01301	477.406	FALSE	4
2022-09-13	11:36:30	0.241489	477.647	FALSE	4
2022-09-13	11:36:30	0.545661	478.193	FALSE	4
2022-09-13	11:36:30	-1.10762	478.193	FALSE	4
2022-09-13	11:36:31	-1.98004	478.193	FALSE	4
2022-09-13	11:36:31	-2.39617	478.193	FALSE	4
2022-09-13	11:36:31	-3.12365	478.193	FALSE	4
2022-09-13	11:36:32	-1.2751	478.193	FALSE	4
2022-09-13	11:36:32	-1.97637	478.193	FALSE	4
2022-09-13	11:36:32	-1.71312	478.193	FALSE	4
2022-09-13	11:36:32	-1.88146	478.193	FALSE	4
2022-09-13	11:36:33	-1.43373	478.193	FALSE	4
2022-09-13	11:36:33	0.986832	479.18	FALSE	4
2022-09-13	11:36:33	0.229071	479.409	FALSE	4
2022-09-13	11:36:33	-2.30548	479.409	FALSE	4
2022-09-13	11:36:34	-1.49256	479.409	FALSE	4
2022-09-13	11:36:34	-1.44167	479.409	FALSE	4
2022-09-13	11:36:34	-1.62284	479.409	FALSE	4
2022-09-13	11:36:34	-1.60859	479.409	FALSE	4
2022-09-13	11:36:35	-1.39307	479.409	FALSE	4
2022-09-13	11:36:35	-1.06533	479.409	FALSE	4
2022-09-13	11:36:35	-0.829452	479.409	FALSE	4
2022-09-13	11:36:36	-0.0518445	479.409	FALSE	4
2022-09-13	11:36:36	0.0664252	479.475	FALSE	4
2022-09-13	11:36:36	0.135789	479.611	FALSE	4
2022-09-13	11:36:36	0.192735	479.804	FALSE	4
2022-09-13	11:36:37	0.177774	479.981	FALSE	4
2022-09-13	11:36:37	0.181845	480.163	FALSE	4
2022-09-13	11:36:37	0.165814	480.329	FALSE	4
2022-09-13	11:36:37	0.190903	480.52	FALSE	4
2022-09-13	11:36:38	0.205153	480.725	FALSE	4
2022-09-13	11:36:38	0.191311	480.916	FALSE	4
2022-09-13	11:36:38	0.260471	481.177	FALSE	4
2022-09-13	11:36:38	0.236094	481.413	FALSE	4
2022-09-13	11:36:39	0.239758	481.653	FALSE	4
2022-09-13	11:36:39	0.255585	481.908	FALSE	4
2022-09-13	11:36:39	0.334364	482.243	FALSE	4
2022-09-13	11:36:40	-0.0496562	482.243	FALSE	4
2022-09-13	11:36:40	-1.26818	482.243	FALSE	4
2022-09-13	11:36:40	-1.86564	482.243	FALSE	4
2022-09-13	11:36:40	-2.06589	482.243	FALSE	4
2022-09-13	11:36:41	-2.14752	482.243	FALSE	4
2022-09-13	11:36:41	-2.44884	482.243	FALSE	4
2022-09-13	11:36:41	-2.39169	482.243	FALSE	4
2022-09-13	11:36:41	-2.2148	482.243	FALSE	4
2022-09-13	11:36:42	-2.59256	482.243	FALSE	4
2022-09-13	11:36:42	-2.66172	482.243	FALSE	4
2022-09-13	11:36:42	-2.63602	482.243	FALSE	4
2022-09-13	11:36:42	-2.64111	482.243	FALSE	4
2022-09-13	11:36:43	-2.69276	482.243	FALSE	4
2022-09-13	11:36:43	-2.82166	482.243	FALSE	4
2022-09-13	11:36:43	-2.90513	482.243	FALSE	4
2022-09-13	11:36:44	-2.89556	482.243	FALSE	4
2022-09-13	11:36:44	-3.01602	482.243	FALSE	4
2022-09-13	11:36:44	-3.20976	482.243	FALSE	4
2022-09-13	11:36:44	-3.36212	482.243	FALSE	4
2022-09-13	11:36:45	-3.49719	482.243	FALSE	4
2022-09-13	11:36:45	-3.37785	482.243	FALSE	4
2022-09-13	11:36:45	-3.35856	482.243	FALSE	4
2022-09-13	11:36:45	-3.17556	482.243	FALSE	4
2022-09-13	11:36:46	-3.17271	482.243	FALSE	4
2022-09-13	11:36:46	-3.10833	482.243	FALSE	4
2022-09-13	11:36:46	-3.28986	482.243	FALSE	4
2022-09-13	11:36:46	-3.25637	482.243	FALSE	4
2022-09-13	11:36:47	-3.12864	482.243	FALSE	4
2022-09-13	11:36:47	-3.01194	482.243	FALSE	4
2022-09-13	11:36:47	-2.73897	482.243	FALSE	4
2022-09-13	11:36:47	-2.48441	482.243	FALSE	4
2022-09-13	11:36:48	1.3364	483.579	FALSE	4
2022-09-13	11:36:48	0.866221	484.445	FALSE	4
2022-09-13	11:36:48	0.243982	484.689	FALSE	4
2022-09-13	11:36:49	-0.109351	484.689	FALSE	4
2022-09-13	11:36:49	-3.17612	484.689	FALSE	4
2022-09-13	11:36:49	-3.20049	484.689	FALSE	4
2022-09-13	11:36:49	-3.33831	484.689	FALSE	4
2022-09-13	11:36:50	-3.22909	484.689	FALSE	4
2022-09-13	11:36:50	-3.40029	484.689	FALSE	4
2022-09-13	11:36:50	-2.42426	484.689	FALSE	4
2022-09-13	11:36:50	0.290038	484.979	FALSE	4
2022-09-13	11:36:51	0.238333	485.218	FALSE	4
2022-09-13	11:36:51	0.42958	485.647	FALSE	4
2022-09-13	11:36:51	0.263575	485.911	FALSE	4
2022-09-13	11:36:51	0.511209	486.422	FALSE	4
2022-09-13	11:36:52	1.03004	487.452	FALSE	4
2022-09-13	11:36:52	1.31472	488.767	FALSE	4
2022-09-13	11:36:52	0.723626	489.49	FALSE	4
2022-09-13	11:36:53	0.707748	490.198	FALSE	4
2022-09-13	11:36:53	1.75212	491.95	FALSE	4
2022-09-13	11:36:53	1.56892	493.519	FALSE	4
2022-09-13	11:36:53	2.12988	495.649	FALSE	4
2022-09-13	11:36:54	0.584593	496.234	FALSE	4
2022-09-13	11:36:54	0.60902	496.843	FALSE	4
2022-09-13	11:36:54	0.468613	497.311	FALSE	4
2022-09-13	11:36:54	0.430038	497.741	FALSE	4
2022-09-13	11:36:55	0.633753	498.375	FALSE	4
2022-09-13	11:36:55	0.213193	498.588	FALSE	4
2022-09-13	11:36:55	0.517468	499.106	FALSE	4
2022-09-13	11:36:55	0.327596	499.433	FALSE	4
2022-09-13	11:36:56	0.4364	499.87	FALSE	4
2022-09-13	11:36:56	0.605204	500.475	FALSE	4
2022-09-13	11:36:56	0.243931	500.719	FALSE	4
2022-09-13	11:36:57	0.662099	501.381	FALSE	4
2022-09-13	11:36:57	0.349886	501.731	FALSE	4
2022-09-13	11:36:57	0.902353	502.633	FALSE	4
2022-09-13	11:36:57	0.921031	503.554	FALSE	4
2022-09-13	11:36:58	1.51518	505.069	FALSE	4
2022-09-13	11:36:58	2.32286	507.392	FALSE	4
2022-09-13	11:36:58	1.07513	508.467	FALSE	4
2022-09-13	11:36:58	2.27182	510.739	FALSE	4
2022-09-13	11:36:59	0.484746	511.224	FALSE	4
2022-09-13	11:36:59	1.36113	512.585	FALSE	4
2022-09-13	11:36:59	0.750853	513.336	FALSE	4
2022-09-13	11:36:59	0.693906	514.03	FALSE	4
2022-09-13	11:37:00	0.797672	514.827	FALSE	4
2022-09-13	11:37:00	0.307188	515.135	FALSE	4
2022-09-13	11:37:00	0.965051	516.1	FALSE	4
2022-09-13	11:37:01	0.357366	516.457	FALSE	4
2022-09-13	11:37:01	0.929427	517.387	FALSE	4
2022-09-13	11:37:01	0.53701	517.924	FALSE	4
2022-09-13	11:37:01	0.715585	518.639	FALSE	4
2022-09-13	11:37:02	0.66673	519.306	FALSE	4
2022-09-13	11:37:02	0.696145	520.002	FALSE	4
2022-09-13	11:37:02	0.692837	520.695	FALSE	4
2022-09-13	11:37:02	0.264033	520.959	FALSE	4
2022-09-13	11:37:03	0.670445	521.629	FALSE	4
2022-09-13	11:37:03	0.425916	522.055	FALSE	4
2022-09-13	11:37:03	0.713753	522.769	FALSE	4
2022-09-13	11:37:03	0.650496	523.419	FALSE	4
2022-09-13	11:37:04	0.64612	524.066	FALSE	4
2022-09-13	11:37:04	1.07782	525.143	FALSE	4
2022-09-13	11:37:04	0.394669	525.538	FALSE	4
2022-09-13	11:37:05	1.29416	526.832	FALSE	4
2022-09-13	11:37:05	0.496349	527.329	FALSE	4
2022-09-13	11:37:05	1.21676	528.545	FALSE	4
2022-09-13	11:37:05	0.515025	529.06	FALSE	4
2022-09-13	11:37:06	0.965764	530.026	FALSE	4
2022-09-13	11:37:06	0.85416	530.88	FALSE	4
2022-09-13	11:37:06	0.461947	531.342	FALSE	4
2022-09-13	11:37:06	0.627799	531.97	FALSE	4
2022-09-13	11:37:07	0.364746	532.335	FALSE	4
2022-09-13	11:37:07	0.610954	532.946	FALSE	4
2022-09-13	11:37:07	0.359606	533.305	FALSE	4
2022-09-13	11:37:07	0.389173	533.695	FALSE	4
2022-09-13	11:37:08	0.475433	534.17	FALSE	4
2022-09-13	11:37:08	0.486425	534.656	FALSE	4
2022-09-13	11:37:08	0.373652	535.03	FALSE	4
2022-09-13	11:37:09	0.523015	535.553	FALSE	4
2022-09-13	11:37:09	1.04816	536.601	FALSE	4
2022-09-13	11:37:09	2.03279	538.634	FALSE	4
2022-09-13	11:37:09	0.277417	538.911	FALSE	4
2022-09-13	11:37:10	0.48444	539.396	FALSE	4
2022-09-13	11:37:10	0.394517	539.79	FALSE	4
2022-09-13	11:37:10	0.35869	540.149	FALSE	4
2022-09-13	11:37:10	0.45528	540.604	FALSE	4
2022-09-13	11:37:11	0.31187	540.916	FALSE	4
2022-09-13	11:37:11	0.537417	541.454	FALSE	4
2022-09-13	11:37:11	0.727341	542.181	FALSE	4
2022-09-13	11:37:11	0.623982	542.805	FALSE	4
2022-09-13	11:37:12	0.889733	543.695	FALSE	4
2022-09-13	11:37:12	0.76673	544.461	FALSE	4
2022-09-13	11:37:12	1.09869	545.56	FALSE	4
2022-09-13	11:37:12	0.296247	545.856	FALSE	4
2022-09-13	11:37:13	0.993092	546.849	FALSE	4
2022-09-13	11:37:13	0.270293	547.12	FALSE	4
2022-09-13	11:37:13	1.03279	548.153	FALSE	4
2022-09-13	11:37:14	0.747036	548.9	FALSE	4
2022-09-13	11:37:14	0.81243	549.712	FALSE	4
2022-09-13	11:37:14	0.829428	550.541	FALSE	4
2022-09-13	11:37:14	0.969326	551.511	FALSE	4
2022-09-13	11:37:15	0.658537	552.169	FALSE	4
2022-09-13	11:37:15	0.611972	552.781	FALSE	4
2022-09-13	11:37:15	0.906272	553.688	FALSE	4
2022-09-13	11:37:15	0.181234	553.869	FALSE	4
2022-09-13	11:37:16	0.20444	554.073	FALSE	4
2022-09-13	11:37:16	0.112837	554.186	FALSE	4
2022-09-13	11:37:16	0.124898	554.311	FALSE	4
2022-09-13	11:37:16	0.093448	554.404	FALSE	4
2022-09-13	11:37:17	0.281692	554.686	FALSE	4
2022-09-13	11:37:17	0.281947	554.968	FALSE	4
2022-09-13	11:37:17	1.75218	556.72	FALSE	4
2022-09-13	11:37:18	3.17146	559.892	1	5
2022-09-13	11:37:18	3.65736	563.549	1	6
2022-09-13	11:37:18	2.94876	566.498	FALSE	6
2022-09-13	11:37:18	1.67365	568.171	FALSE	6
2022-09-13	11:37:19	0.358028	568.529	FALSE	6
2022-09-13	11:37:19	0.198181	568.728	FALSE	6
2022-09-13	11:37:19	0.178283	568.906	FALSE	6
2022-09-13	11:37:19	0.104186	569.01	FALSE	6
2022-09-13	11:37:20	-0.060445	569.01	FALSE	6
2022-09-13	11:37:20	0.00179415	569.012	FALSE	6
2022-09-13	11:37:20	-0.0101651	569.012	FALSE	6
2022-09-13	11:37:20	-0.0866028	569.012	FALSE	6
2022-09-13	11:37:21	-0.242684	569.012	FALSE	6
2022-09-13	11:37:21	-0.445534	569.012	FALSE	6
2022-09-13	11:37:21	-0.503753	569.012	FALSE	6
2022-09-13	11:37:22	-0.544414	569.012	FALSE	6
2022-09-13	11:37:22	-0.549198	569.012	FALSE	6
2022-09-13	11:37:22	-0.492099	569.012	FALSE	6
2022-09-13	11:37:22	-0.475916	569.012	FALSE	6
2022-09-13	11:37:23	-0.509758	569.012	FALSE	6
2022-09-13	11:37:23	-0.500852	569.012	FALSE	6
2022-09-13	11:37:23	-0.434643	569.012	FALSE	6
2022-09-13	11:37:23	-0.407468	569.012	FALSE	6
2022-09-13	11:37:24	-0.381666	569.012	FALSE	6
2022-09-13	11:37:24	-0.218307	569.012	FALSE	6
2022-09-13	11:37:24	-0.243447	569.012	FALSE	6
2022-09-13	11:37:24	0.0276974	569.04	FALSE	6
2022-09-13	11:37:25	-0.761615	569.04	FALSE	6
2022-09-13	11:37:25	0.229936	569.27	FALSE	6
2022-09-13	11:37:25	0.256603	569.526	FALSE	6
2022-09-13	11:37:26	0.272125	569.798	FALSE	6
2022-09-13	11:37:26	0.27014	570.068	FALSE	6
2022-09-13	11:37:26	0.274771	570.343	FALSE	6
2022-09-13	11:37:26	0.27187	570.615	FALSE	6
2022-09-13	11:37:27	0.29187	570.907	FALSE	6
2022-09-13	11:37:27	0.305	571.212	FALSE	6
2022-09-13	11:37:27	0.311514	571.523	FALSE	6
2022-09-13	11:37:27	0.344644	571.868	FALSE	6
2022-09-13	11:37:28	-1.8009	571.868	FALSE	6
2022-09-13	11:37:28	-0.00197174	571.868	FALSE	6
2022-09-13	11:37:28	0.296349	572.164	FALSE	6
2022-09-13	11:37:28	0.273906	572.438	FALSE	6
2022-09-13	11:37:29	0.268919	572.707	FALSE	6
2022-09-13	11:37:29	0.28098	572.988	FALSE	6
2022-09-13	11:37:29	0.278486	573.267	FALSE	6
2022-09-13	11:37:30	0.278639	573.545	FALSE	6
2022-09-13	11:37:30	0.27528	573.821	FALSE	6
2022-09-13	11:37:30	0.272125	574.093	FALSE	6
2022-09-13	11:37:30	0.259555	574.352	FALSE	6
2022-09-13	11:37:31	0.231565	574.584	FALSE	6
2022-09-13	11:37:31	0.247494	574.831	FALSE	6
2022-09-13	11:37:31	0.262812	575.094	FALSE	6
2022-09-13	11:37:31	0.252328	575.346	FALSE	6
2022-09-13	11:37:32	0.304746	575.651	FALSE	6
2022-09-13	11:37:32	0.318232	575.969	FALSE	6
2022-09-13	11:37:32	0.625967	576.595	FALSE	6
2022-09-13	11:37:32	1.56683	578.162	FALSE	6
2022-09-13	11:37:33	1.50475	579.667	FALSE	6
2022-09-13	11:37:33	1.11075	580.778	FALSE	6
2022-09-13	11:37:33	0.0505473	580.828	FALSE	6
2022-09-13	11:37:34	0.7393	581.568	FALSE	6
2022-09-13	11:37:34	0.737722	582.305	FALSE	6
2022-09-13	11:37:34	0.731565	583.037	FALSE	6
2022-09-13	11:37:34	0.73645	583.773	FALSE	6
2022-09-13	11:37:35	0.734669	584.508	FALSE	6
2022-09-13	11:37:35	0.741692	585.25	FALSE	6
2022-09-13	11:37:35	0.736552	585.986	FALSE	6
2022-09-13	11:37:35	0.733142	586.719	FALSE	6
2022-09-13	11:37:36	0.734975	587.454	FALSE	6
2022-09-13	11:37:36	0.733041	588.187	FALSE	6
2022-09-13	11:37:36	0.740165	588.928	FALSE	6
2022-09-13	11:37:36	0.737366	589.665	FALSE	6
2022-09-13	11:37:37	0.732379	590.397	FALSE	6
2022-09-13	11:37:37	0.740216	591.138	FALSE	6
2022-09-13	11:37:37	0.732888	591.87	FALSE	6
2022-09-13	11:37:37	0.734822	592.605	FALSE	6
2022-09-13	11:37:38	0.72958	593.335	FALSE	6
2022-09-13	11:37:38	0.729936	594.065	FALSE	6
2022-09-13	11:37:38	0.733702	594.798	FALSE	6
2022-09-13	11:37:39	0.73472	595.533	FALSE	6
2022-09-13	11:37:39	0.728715	596.262	FALSE	6
2022-09-13	11:37:39	0.73187	596.994	FALSE	6
2022-09-13	11:37:39	0.738333	597.732	FALSE	6
2022-09-13	11:37:40	0.731463	598.464	FALSE	6
2022-09-13	11:37:40	0.740165	599.204	FALSE	6
2022-09-13	11:37:40	0.727748	599.931	FALSE	6
2022-09-13	11:37:40	0.733092	600.665	FALSE	6
2022-09-13	11:37:41	0.734364	601.399	FALSE	6
2022-09-13	11:37:41	0.73701	602.136	FALSE	6
2022-09-13	11:37:41	0.735331	602.871	FALSE	6
2022-09-13	11:37:41	0.739097	603.61	FALSE	6
2022-09-13	11:37:42	0.73416	604.345	FALSE	6
2022-09-13	11:37:42	0.737519	605.082	FALSE	6
2022-09-13	11:37:42	0.734618	605.817	FALSE	6
2022-09-13	11:37:43	0.738079	606.555	FALSE	6
2022-09-13	11:37:43	0.731056	607.286	FALSE	6
2022-09-13	11:37:43	0.736603	608.022	FALSE	6
2022-09-13	11:37:43	0.737315	608.76	FALSE	6
2022-09-13	11:37:44	0.737773	609.498	FALSE	6
2022-09-13	11:37:44	0.73874	610.236	FALSE	6
2022-09-13	11:37:44	0.73986	610.976	FALSE	6
2022-09-13	11:37:44	0.741183	611.717	FALSE	6
2022-09-13	11:37:45	0.729529	612.447	FALSE	6
2022-09-13	11:37:45	0.736399	613.183	FALSE	6
2022-09-13	11:37:45	0.730547	613.914	FALSE	6
2022-09-13	11:37:45	0.731616	614.645	FALSE	6
2022-09-13	11:37:46	0.738028	615.383	FALSE	6
2022-09-13	11:37:46	0.731259	616.115	FALSE	6
2022-09-13	11:37:46	0.730903	616.846	FALSE	6
2022-09-13	11:37:47	0.733193	617.579	FALSE	6
2022-09-13	11:37:47	0.734364	618.313	FALSE	6
2022-09-13	11:37:47	0.731005	619.044	FALSE	6
2022-09-13	11:37:47	0.735433	619.78	FALSE	6
2022-09-13	11:37:48	0.728817	620.508	FALSE	6
2022-09-13	11:37:48	0.733397	621.242	FALSE	6
2022-09-13	11:37:48	0.736247	621.978	FALSE	6
2022-09-13	11:37:48	0.733397	622.711	FALSE	6
2022-09-13	11:37:49	0.727646	623.439	FALSE	6
2022-09-13	11:37:49	0.736705	624.176	FALSE	6
2022-09-13	11:37:49	0.742913	624.919	FALSE	6
2022-09-13	11:37:49	0.73701	625.656	FALSE	6
2022-09-13	11:37:50	0.736399	626.392	FALSE	6
2022-09-13	11:37:50	0.733244	627.125	FALSE	6
2022-09-13	11:37:50	0.737926	627.863	FALSE	6
2022-09-13	11:37:51	0.730801	628.594	FALSE	6
2022-09-13	11:37:51	0.730242	629.324	FALSE	6
2022-09-13	11:37:51	0.738588	630.063	FALSE	6
2022-09-13	11:37:51	0.741285	630.804	FALSE	6
2022-09-13	11:37:52	0.736399	631.541	FALSE	6
2022-09-13	11:37:52	0.732786	632.273	FALSE	6
2022-09-13	11:37:52	0.733753	633.007	FALSE	6
2022-09-13	11:37:52	0.734618	633.742	FALSE	6
2022-09-13	11:37:53	0.733906	634.476	FALSE	6
2022-09-13	11:37:53	0.735026	635.211	FALSE	6
2022-09-13	11:37:53	0.731463	635.942	FALSE	6
2022-09-13	11:37:53	0.730598	636.673	FALSE	6
2022-09-13	11:37:54	0.731616	637.404	FALSE	6
2022-09-13	11:37:54	0.73355	638.138	FALSE	6
2022-09-13	11:37:54	0.731209	638.869	FALSE	6
2022-09-13	11:37:55	0.733041	639.602	FALSE	6
2022-09-13	11:37:55	0.734364	640.337	FALSE	6
2022-09-13	11:37:55	0.731259	641.068	FALSE	6
2022-09-13	11:37:55	0.736705	641.804	FALSE	6
2022-09-13	11:37:56	0.735585	642.54	FALSE	6
2022-09-13	11:37:56	0.73584	643.276	FALSE	6
2022-09-13	11:37:56	0.725865	644.002	FALSE	6
2022-09-13	11:37:56	0.737061	644.739	FALSE	6

## Sheet: Bubba_prong_2022913113242
						**GoPro Fitting:1122
2022-09-13	11:32:42	0.370954
2022-09-13	11:32:42	0.344186
2022-09-13	11:32:43	0.382608
2022-09-13	11:32:43	0.364593
2022-09-13	11:32:43	0.407494
2022-09-13	11:32:43	0.354924
2022-09-13	11:32:44	0.343779
2022-09-13	11:32:44	0.348613
2022-09-13	11:32:44	0.364237
2022-09-13	11:32:45	0.407341
2022-09-13	11:32:45	0.414975
2022-09-13	11:32:45	0.415229
2022-09-13	11:32:45	0.462252
2022-09-13	11:32:46	0.734466
2022-09-13	11:32:46	0.741845
2022-09-13	11:32:46	0.733855
2022-09-13	11:32:46	0.733702
2022-09-13	11:32:47	0.728155
2022-09-13	11:32:47	0.742455
2022-09-13	11:32:47	0.736043
2022-09-13	11:32:47	0.738282
2022-09-13	11:32:48	0.733753
2022-09-13	11:32:48	0.732888
2022-09-13	11:32:48	0.733244
2022-09-13	11:32:48	0.733244
2022-09-13	11:32:49	0.727748
2022-09-13	11:32:49	0.731259
2022-09-13	11:32:49	0.729886
2022-09-13	11:32:50	0.727239
2022-09-13	11:32:50	0.726781
2022-09-13	11:32:50	0.718384
2022-09-13	11:32:50	0.660012
2022-09-13	11:32:51	0.693091
2022-09-13	11:32:51	0.491667
2022-09-13	11:32:51	0.012074
2022-09-13	11:32:51	0.0332954
2022-09-13	11:32:52	0.0786389
2022-09-13	11:32:52	0.0909544
2022-09-13	11:32:52	0.16729
2022-09-13	11:32:52	0.0710562
2022-09-13	11:32:53	0.247036
2022-09-13	11:32:53	0.186883
2022-09-13	11:32:53	0.714822
2022-09-13	11:32:54	0.47813
2022-09-13	11:32:54	0.43584
2022-09-13	11:32:54	-0.150419
2022-09-13	11:32:54	-0.208995
2022-09-13	11:32:55	-0.212659
2022-09-13	11:32:55	-0.523803
2022-09-13	11:32:55	-0.99159
2022-09-13	11:32:55	-1.2665
2022-09-13	11:32:56	-1.48055
2022-09-13	11:32:56	-1.49739
2022-09-13	11:32:56	-1.57174
2022-09-13	11:32:56	-1.25775
2022-09-13	11:32:57	-1.06635
2022-09-13	11:32:57	-0.991895
2022-09-13	11:32:57	-0.796272
2022-09-13	11:32:58	-0.667162
2022-09-13	11:32:58	-0.694338
2022-09-13	11:32:58	-0.636678
2022-09-13	11:32:58	-0.580598
2022-09-13	11:32:59	-0.712455
2022-09-13	11:32:59	-0.742836
2022-09-13	11:32:59	-0.557035
2022-09-13	11:32:59	-0.463651
2022-09-13	11:33:00	-0.408435
2022-09-13	11:33:00	-0.380954
2022-09-13	11:33:00	-0.426399
2022-09-13	11:33:01	-0.324465
2022-09-13	11:33:01	0.718486
2022-09-13	11:33:01	0.729071
2022-09-13	11:33:01	0.577926
2022-09-13	11:33:02	0.466832
2022-09-13	11:33:02	0.738486
2022-09-13	11:33:02	0.737722
2022-09-13	11:33:02	0.730293
2022-09-13	11:33:03	0.734008
2022-09-13	11:33:03	0.735891
2022-09-13	11:33:03	0.7307
2022-09-13	11:33:03	0.734924
2022-09-13	11:33:04	0.737315
2022-09-13	11:33:04	0.733957
2022-09-13	11:33:04	0.744287
2022-09-13	11:33:04	0.734364
2022-09-13	11:33:05	0.739198
2022-09-13	11:33:05	0.736959
2022-09-13	11:33:05	0.731616
2022-09-13	11:33:05	0.639097
2022-09-13	11:33:06	0.733346
2022-09-13	11:33:06	0.733651
2022-09-13	11:33:06	0.740929
2022-09-13	11:33:07	0.733092
2022-09-13	11:33:07	0.451412
2022-09-13	11:33:07	-0.331437
2022-09-13	11:33:07	-0.312201
2022-09-13	11:33:08	0.734313
2022-09-13	11:33:08	0.739758
2022-09-13	11:33:08	0.728512
2022-09-13	11:33:08	0.734975
2022-09-13	11:33:09	0.732481
2022-09-13	11:33:09	0.735178
2022-09-13	11:33:09	0.740318
2022-09-13	11:33:09	0.740674
2022-09-13	11:33:10	0.737315
2022-09-13	11:33:10	0.727494
2022-09-13	11:33:10	0.738944
2022-09-13	11:33:11	0.726934
2022-09-13	11:33:11	0.736857
2022-09-13	11:33:11	0.727901
2022-09-13	11:33:11	0.724898
2022-09-13	11:33:12	0.706527
2022-09-13	11:33:12	0.719606
2022-09-13	11:33:12	0.698486
2022-09-13	11:33:12	0.701285
2022-09-13	11:33:13	0.689326
2022-09-13	11:33:13	0.716807
2022-09-13	11:33:13	0.713346
2022-09-13	11:33:13	0.720929
2022-09-13	11:33:14	0.715127
2022-09-13	11:33:14	0.704644
2022-09-13	11:33:14	0.702913
2022-09-13	11:33:15	0.72729
2022-09-13	11:33:15	0.730445
2022-09-13	11:33:15	0.724949
2022-09-13	11:33:15	0.721743
2022-09-13	11:33:16	0.72388
2022-09-13	11:33:16	0.723575
2022-09-13	11:33:16	0.719606
2022-09-13	11:33:16	0.714771
2022-09-13	11:33:17	0.662048
2022-09-13	11:33:17	0.642048
2022-09-13	11:33:17	0.588613
2022-09-13	11:33:17	0.641997
2022-09-13	11:33:18	0.61411
2022-09-13	11:33:18	0.577723
2022-09-13	11:33:18	0.475382
2022-09-13	11:33:19	0.645458
2022-09-13	11:33:19	0.737112
2022-09-13	11:33:19	0.732481
2022-09-13	11:33:19	0.731667
2022-09-13	11:33:20	0.731717
2022-09-13	11:33:20	0.733092
2022-09-13	11:33:20	0.669987
2022-09-13	11:33:20	0.678486
2022-09-13	11:33:21	0.654007
2022-09-13	11:33:21	0.634669
2022-09-13	11:33:21	0.509733
2022-09-13	11:33:21	0.469733
2022-09-13	11:33:22	0.588257
2022-09-13	11:33:22	0.209224
2022-09-13	11:33:22	-0.00690816
2022-09-13	11:33:23	0.0948221
2022-09-13	11:33:23	0.146476
2022-09-13	11:33:23	0.0452038
2022-09-13	11:33:23	0.10042
2022-09-13	11:33:24	0.0139061
2022-09-13	11:33:24	0.441081
2022-09-13	11:33:24	0.678944
2022-09-13	11:33:24	0.735534
2022-09-13	11:33:25	0.734669
2022-09-13	11:33:25	0.589377
2022-09-13	11:33:25	0.727748
2022-09-13	11:33:25	0.731921
2022-09-13	11:33:26	0.734873
2022-09-13	11:33:26	0.731565
2022-09-13	11:33:26	0.731412
2022-09-13	11:33:26	0.73187
2022-09-13	11:33:27	0.727087
2022-09-13	11:33:27	0.734211
2022-09-13	11:33:27	0.739249
2022-09-13	11:33:28	0.74327
2022-09-13	11:33:28	0.707901
2022-09-13	11:33:28	0.737366
2022-09-13	11:33:28	0.734211
2022-09-13	11:33:29	0.733142
2022-09-13	11:33:29	0.735585
2022-09-13	11:33:29	0.740878
2022-09-13	11:33:29	0.735891
2022-09-13	11:33:30	0.73701
2022-09-13	11:33:30	0.736094
2022-09-13	11:33:30	0.737621
2022-09-13	11:33:30	0.734924
2022-09-13	11:33:31	0.729886
2022-09-13	11:33:31	0.738333
2022-09-13	11:33:31	0.733702
2022-09-13	11:33:32	0.738333
2022-09-13	11:33:32	0.732023
2022-09-13	11:33:32	0.741081
2022-09-13	11:33:32	0.73874
2022-09-13	11:33:33	0.730903
2022-09-13	11:33:33	0.732074
2022-09-13	11:33:33	0.735941
2022-09-13	11:33:33	0.733957
2022-09-13	11:33:34	0.734873
2022-09-13	11:33:34	0.732888
2022-09-13	11:33:34	0.736298
2022-09-13	11:33:34	0.736399
2022-09-13	11:33:35	0.729987
2022-09-13	11:33:35	0.726832
2022-09-13	11:33:35	0.734924
2022-09-13	11:33:36	0.732175
2022-09-13	11:33:36	0.736349
2022-09-13	11:33:36	0.820013
2022-09-13	11:33:36	0.736399
2022-09-13	11:33:37	0.740369
2022-09-13	11:33:37	0.732379
2022-09-13	11:33:37	0.729224
2022-09-13	11:33:37	0.733193
2022-09-13	11:33:38	0.733041
2022-09-13	11:33:38	0.735789
2022-09-13	11:33:38	0.729224
2022-09-13	11:33:38	0.733957
2022-09-13	11:33:39	0.735738
2022-09-13	11:33:39	0.733142
2022-09-13	11:33:39	0.734669
2022-09-13	11:33:40	0.733092
2022-09-13	11:33:40	0.72902
2022-09-13	11:33:40	0.72841
2022-09-13	11:33:40	0.736705
2022-09-13	11:33:41	0.739147
2022-09-13	11:33:41	0.644593
2022-09-13	11:33:41	0.624847
2022-09-13	11:33:41	0.702099
2022-09-13	11:33:42	0.737214
2022-09-13	11:33:42	0.246272
2022-09-13	11:33:42	-0.319173
2022-09-13	11:33:42	0.816857
2022-09-13	11:33:43	0.7307
2022-09-13	11:33:43	0.742913
2022-09-13	11:33:43	0.731209
2022-09-13	11:33:44	0.740929
2022-09-13	11:33:44	0.734415
2022-09-13	11:33:44	0.738537
2022-09-13	11:33:44	0.730191
2022-09-13	11:33:45	0.742761
2022-09-13	11:33:45	0.740827
2022-09-13	11:33:45	0.733601
2022-09-13	11:33:45	0.627799
2022-09-13	11:33:46	0.739147
2022-09-13	11:33:46	0.73584
2022-09-13	11:33:46	0.737366
2022-09-13	11:33:46	0.726934
2022-09-13	11:33:47	0.735076
2022-09-13	11:33:47	0.733804
2022-09-13	11:33:47	0.733804
2022-09-13	11:33:47	0.7307
2022-09-13	11:33:48	0.732532
2022-09-13	11:33:48	0.726272
2022-09-13	11:33:48	0.110445
2022-09-13	11:33:49	0.102354
2022-09-13	11:33:49	0.174364
2022-09-13	11:33:49	0.206527
2022-09-13	11:33:49	0.171667
2022-09-13	11:33:50	0.212735
2022-09-13	11:33:50	0.629784
2022-09-13	11:33:50	0.740776
2022-09-13	11:33:50	0.729835
2022-09-13	11:33:51	1.47391
2022-09-13	11:33:51	1.02327
2022-09-13	11:33:51	0.354822
2022-09-13	11:33:51	0.294669
2022-09-13	11:33:52	0.409529
2022-09-13	11:33:52	0.735941
2022-09-13	11:33:52	0.729886
2022-09-13	11:33:53	0.735331
2022-09-13	11:33:53	0.739147
2022-09-13	11:33:53	0.739504
2022-09-13	11:33:53	0.738333
2022-09-13	11:33:54	0.735585
2022-09-13	11:33:54	0.732277
2022-09-13	11:33:54	0.739351
2022-09-13	11:33:54	0.729987
2022-09-13	11:33:55	0.731463
2022-09-13	11:33:55	0.740013
2022-09-13	11:33:55	0.73528
2022-09-13	11:33:55	0.73645
2022-09-13	11:33:56	0.736501
2022-09-13	11:33:56	0.734517
2022-09-13	11:33:56	0.738435
2022-09-13	11:33:57	0.737061
2022-09-13	11:33:57	0.733193
2022-09-13	11:33:57	0.731616
2022-09-13	11:33:57	0.724237
2022-09-13	11:33:58	0.732837
2022-09-13	11:33:58	0.730242
2022-09-13	11:33:58	0.7307
2022-09-13	11:33:58	0.73584
2022-09-13	11:33:59	0.736501
2022-09-13	11:33:59	0.737926
2022-09-13	11:33:59	0.734262
2022-09-13	11:33:59	0.731921
2022-09-13	11:34:00	0.73014
2022-09-13	11:34:00	0.731565
2022-09-13	11:34:00	0.733651
2022-09-13	11:34:01	0.731158
2022-09-13	11:34:01	0.729478
2022-09-13	11:34:01	0.732888
2022-09-13	11:34:01	0.738588
2022-09-13	11:34:02	0.729122
2022-09-13	11:34:02	0.736603
2022-09-13	11:34:02	0.731463
2022-09-13	11:34:02	0.736552
2022-09-13	11:34:03	0.731412
2022-09-13	11:34:03	0.731565
2022-09-13	11:34:03	0.733499
2022-09-13	11:34:03	0.72729
2022-09-13	11:34:04	0.729784
2022-09-13	11:34:04	0.735483
2022-09-13	11:34:04	0.74098
2022-09-13	11:34:05	0.734008
2022-09-13	11:34:05	0.734771
2022-09-13	11:34:05	0.729428
2022-09-13	11:34:05	0.730801
2022-09-13	11:34:06	0.900725
2022-09-13	11:34:06	0.733142
2022-09-13	11:34:06	0.708257
2022-09-13	11:34:06	0.736043
2022-09-13	11:34:07	0.739758
2022-09-13	11:34:07	0.730038
2022-09-13	11:34:07	0.732786
2022-09-13	11:34:07	0.734771
2022-09-13	11:34:08	0.737926
2022-09-13	11:34:08	0.731209
2022-09-13	11:34:08	0.73701
2022-09-13	11:34:09	0.733244
2022-09-13	11:34:09	0.730089
2022-09-13	11:34:09	0.73355
2022-09-13	11:34:09	0.726425
2022-09-13	11:34:10	0.253346
2022-09-13	11:34:10	0.398384
2022-09-13	11:34:10	0.740013
2022-09-13	11:34:10	0.724237
2022-09-13	11:34:11	0.622354
2022-09-13	11:34:11	0.708817
2022-09-13	11:34:11	0.732328
2022-09-13	11:34:11	0.735992
2022-09-13	11:34:12	0.733499
2022-09-13	11:34:12	0.737519
2022-09-13	11:34:12	0.732125
2022-09-13	11:34:12	0.741743
2022-09-13	11:34:13	1.50882
2022-09-13	11:34:13	1.8362
2022-09-13	11:34:13	0.930445
2022-09-13	11:34:14	0.735738
2022-09-13	11:34:14	0.722557
2022-09-13	11:34:14	0.727188
2022-09-13	11:34:14	0.727443
2022-09-13	11:34:15	0.729936
2022-09-13	11:34:15	0.765712
2022-09-13	11:34:15	0.679606
2022-09-13	11:34:15	1.19355
2022-09-13	11:34:16	0.746221
2022-09-13	11:34:16	1.26586
2022-09-13	11:34:16	1.04123
2022-09-13	11:34:16	1.14953
2022-09-13	11:34:17	0.394109
2022-09-13	11:34:17	0.546018
2022-09-13	11:34:17	0.553652
2022-09-13	11:34:18	0.44673
2022-09-13	11:34:18	0.738181
2022-09-13	11:34:18	0.419046
2022-09-13	11:34:18	0.278741
2022-09-13	11:34:19	0.328715
2022-09-13	11:34:19	0.0968577
2022-09-13	11:34:19	-0.29332
2022-09-13	11:34:19	-0.393218
2022-09-13	11:34:20	-0.609758
2022-09-13	11:34:20	-0.400648
2022-09-13	11:34:20	-0.306399
2022-09-13	11:34:20	0.463575
2022-09-13	11:34:21	0.531056
2022-09-13	11:34:21	0.385102
2022-09-13	11:34:21	0.360573
2022-09-13	11:34:22	0.433346
2022-09-13	11:34:22	0.319707
2022-09-13	11:34:22	0.206934
2022-09-13	11:34:22	0.180573
2022-09-13	11:34:23	0.290293
2022-09-13	11:34:23	0.31299
2022-09-13	11:34:23	0.66556
2022-09-13	11:34:23	0.963728
2022-09-13	11:34:24	1.23452
2022-09-13	11:34:24	2.07192
2022-09-13	11:34:24	1.90765
2022-09-13	11:34:24	1.11365
2022-09-13	11:34:25	1.0993
2022-09-13	11:34:25	0.476705
2022-09-13	11:34:25	0.460471
2022-09-13	11:34:26	0.274008
2022-09-13	11:34:26	0.441845
2022-09-13	11:34:26	0.885153
2022-09-13	11:34:26	0.983372
2022-09-13	11:34:27	1.72327
2022-09-13	11:34:27	0.959453
2022-09-13	11:34:27	0.186374
2022-09-13	11:34:27	0.266985
2022-09-13	11:34:28	0.153906
2022-09-13	11:34:28	0.155891
2022-09-13	11:34:28	0.200827
2022-09-13	11:34:28	0.2964
2022-09-13	11:34:29	0.772634
2022-09-13	11:34:29	0.411361
2022-09-13	11:34:29	0.569682
2022-09-13	11:34:30	0.84729
2022-09-13	11:34:30	0.754516
2022-09-13	11:34:30	1.87289
2022-09-13	11:34:30	2.28525
2022-09-13	11:34:31	3.74479
2022-09-13	11:34:31	6.06988
2022-09-13	11:34:31	3.17904
2022-09-13	11:34:31	1.28627
2022-09-13	11:34:32	0.810649
2022-09-13	11:34:32	2.12485
2022-09-13	11:34:32	2.17986
2022-09-13	11:34:32	1.90454
2022-09-13	11:34:33	1.6562
2022-09-13	11:34:33	1.50159
2022-09-13	11:34:33	1.38123
2022-09-13	11:34:33	1.3191
2022-09-13	11:34:34	1.30566
2022-09-13	11:34:34	1.21324
2022-09-13	11:34:34	1.18291
2022-09-13	11:34:35	1.10434
2022-09-13	11:34:35	0.985153
2022-09-13	11:34:35	1.02072
2022-09-13	11:34:35	0.982354
2022-09-13	11:34:36	0.919555
2022-09-13	11:34:36	0.982405
2022-09-13	11:34:36	0.32327
2022-09-13	11:34:36	0.333092
2022-09-13	11:34:37	0.552939
2022-09-13	11:34:37	0.26729
2022-09-13	11:34:37	0.0996058
2022-09-13	11:34:37	0.0397585
2022-09-13	11:34:38	0.155127
2022-09-13	11:34:38	0.212176
2022-09-13	11:34:38	0.236807
2022-09-13	11:34:39	0.234568
2022-09-13	11:34:39	0.212176
2022-09-13	11:34:39	0.236196
2022-09-13	11:34:39	0.143117
2022-09-13	11:34:40	0.309479
2022-09-13	11:34:40	0.198893
2022-09-13	11:34:40	0.452125
2022-09-13	11:34:40	0.63584
2022-09-13	11:34:41	1.51625
2022-09-13	11:34:41	1.75416
2022-09-13	11:34:41	2.00897
2022-09-13	11:34:41	1.75696
2022-09-13	11:34:42	0.851972
2022-09-13	11:34:42	0.6993
2022-09-13	11:34:42	0.514822
2022-09-13	11:34:43	0.917672
2022-09-13	11:34:43	1.3194
2022-09-13	11:34:43	1.36419
2022-09-13	11:34:43	0.595382
2022-09-13	11:34:44	0.555789
2022-09-13	11:34:44	0.517163
2022-09-13	11:34:44	0.34841
2022-09-13	11:34:44	0.480064
2022-09-13	11:34:45	0.512023
2022-09-13	11:34:45	0.469479
2022-09-13	11:34:45	0.422405
2022-09-13	11:34:45	0.568766
2022-09-13	11:34:46	0.772379
2022-09-13	11:34:46	0.766476
2022-09-13	11:34:46	0.739656
2022-09-13	11:34:47	0.788002
2022-09-13	11:34:47	0.792226
2022-09-13	11:34:47	0.801539
2022-09-13	11:34:47	0.521692
2022-09-13	11:34:48	0.154822
2022-09-13	11:34:48	0.160522
2022-09-13	11:34:48	0.262608
2022-09-13	11:34:48	0.736094
2022-09-13	11:34:49	0.719606
2022-09-13	11:34:49	0.825916
2022-09-13	11:34:49	0.579809
2022-09-13	11:34:49	0.260064
2022-09-13	11:34:50	0.728562
2022-09-13	11:34:50	0.733092
2022-09-13	11:34:50	0.735076
2022-09-13	11:34:51	0.730954
2022-09-13	11:34:51	0.73416
2022-09-13	11:34:51	0.735229
2022-09-13	11:34:51	0.733244
2022-09-13	11:34:52	0.732735
2022-09-13	11:34:52	0.738333
2022-09-13	11:34:52	0.734822
2022-09-13	11:34:52	0.740114
2022-09-13	11:34:53	0.73472
2022-09-13	11:34:53	0.735687
2022-09-13	11:34:53	0.74042
2022-09-13	11:34:53	0.733906
2022-09-13	11:34:54	0.730547
2022-09-13	11:34:54	0.73131
2022-09-13	11:34:54	0.73355
2022-09-13	11:34:54	0.735992
2022-09-13	11:34:55	0.731921
2022-09-13	11:34:55	0.737061
2022-09-13	11:34:55	0.734211
2022-09-13	11:34:56	0.733448
2022-09-13	11:34:56	0.733092
2022-09-13	11:34:56	0.73874
2022-09-13	11:34:56	0.737926
2022-09-13	11:34:57	0.730293
2022-09-13	11:34:57	0.73528
2022-09-13	11:34:57	0.731107
2022-09-13	11:34:57	0.481489
2022-09-13	11:34:58	0.424288
2022-09-13	11:34:58	0.417417
2022-09-13	11:34:58	0.317214
2022-09-13	11:34:58	0.736094
2022-09-13	11:34:59	1.11955
2022-09-13	11:34:59	1.63955
2022-09-13	11:34:59	2.61243
2022-09-13	11:35:00	0.873804
2022-09-13	11:35:00	1.58531
2022-09-13	11:35:00	1.16872
2022-09-13	11:35:00	1.09065
2022-09-13	11:35:01	2.5077
2022-09-13	11:35:01	1.92973
2022-09-13	11:35:01	0.680267
2022-09-13	11:35:01	1.5395
2022-09-13	11:35:02	0.523932
2022-09-13	11:35:02	1.96129
2022-09-13	11:35:02	0.359504
2022-09-13	11:35:02	0.223677
2022-09-13	11:35:03	0.481692
2022-09-13	11:35:03	0.721591
2022-09-13	11:35:03	1.17518
2022-09-13	11:35:04	0.867697
2022-09-13	11:35:04	1.62235
2022-09-13	11:35:04	0.914415
2022-09-13	11:35:04	2.4538
2022-09-13	11:35:05	1.28245
2022-09-13	11:35:05	2.24368
2022-09-13	11:35:05	0.558079
2022-09-13	11:35:05	0.379046
2022-09-13	11:35:06	0.727239
2022-09-13	11:35:06	1.1191
2022-09-13	11:35:06	0.656959
2022-09-13	11:35:06	3.06352
2022-09-13	11:35:07	1.05274
2022-09-13	11:35:07	1.40978
2022-09-13	11:35:07	0.797723
2022-09-13	11:35:08	1.00709
2022-09-13	11:35:08	0.544695
2022-09-13	11:35:08	0.748817
2022-09-13	11:35:08	0.419249
2022-09-13	11:35:09	0.205255
2022-09-13	11:35:09	0.525967
2022-09-13	11:35:09	0.251769
2022-09-13	11:35:09	0.723524
2022-09-13	11:35:10	0.745153
2022-09-13	11:35:10	0.530903
2022-09-13	11:35:10	0.183372
2022-09-13	11:35:10	0.0606237
2022-09-13	11:35:11	-0.0250252
2022-09-13	11:35:11	0.474568
2022-09-13	11:35:11	0.148715
2022-09-13	11:35:12	0.204491
2022-09-13	11:35:12	0.43869
2022-09-13	11:35:12	0.133652
2022-09-13	11:35:12	0.194262
2022-09-13	11:35:13	-0.10757
2022-09-13	11:35:13	-0.344821
2022-09-13	11:35:13	-0.290979
2022-09-13	11:35:13	-0.13958
2022-09-13	11:35:14	-0.123906
2022-09-13	11:35:14	0.0089188
2022-09-13	11:35:14	1.52134
2022-09-13	11:35:14	0.398283
2022-09-13	11:35:15	0.380827
2022-09-13	11:35:15	0.336756
2022-09-13	11:35:15	0.182608
2022-09-13	11:35:16	0.275025
2022-09-13	11:35:16	0.385204
2022-09-13	11:35:16	0.440369
2022-09-13	11:35:16	0.579606
2022-09-13	11:35:17	0.213652
2022-09-13	11:35:17	0.482812
2022-09-13	11:35:17	0.202557
2022-09-13	11:35:17	0.528562
2022-09-13	11:35:18	0.333448
2022-09-13	11:35:18	0.363575
2022-09-13	11:35:18	0.205865
2022-09-13	11:35:18	0.212939
2022-09-13	11:35:19	0.0494277
2022-09-13	11:35:19	-0.155203
2022-09-13	11:35:19	-0.249554
2022-09-13	11:35:19	-0.207417
2022-09-13	11:35:20	-0.192608
2022-09-13	11:35:20	-0.166247
2022-09-13	11:35:20	-0.0569336
2022-09-13	11:35:21	-0.198867
2022-09-13	11:35:21	-0.0408013
2022-09-13	11:35:21	-0.0513356
2022-09-13	11:35:21	-0.112608
2022-09-13	11:35:22	-0.0568318
2022-09-13	11:35:22	0.0866287
2022-09-13	11:35:22	-0.0468064
2022-09-13	11:35:22	0.153499
2022-09-13	11:35:23	0.0639824
2022-09-13	11:35:23	0.135993
2022-09-13	11:35:23	0.152074
2022-09-13	11:35:23	0.330191
2022-09-13	11:35:24	0.487596
2022-09-13	11:35:24	0.669834
2022-09-13	11:35:24	0.463524
2022-09-13	11:35:25	0.651107
2022-09-13	11:35:25	1.57564
2022-09-13	11:35:25	0.715331
2022-09-13	11:35:25	1.87625
2022-09-13	11:35:26	1.22648
2022-09-13	11:35:26	2.73772
2022-09-13	11:35:26	1.18017
2022-09-13	11:35:26	0.367595
2022-09-13	11:35:27	0.41757
2022-09-13	11:35:27	0.281692
2022-09-13	11:35:27	0.535534
2022-09-13	11:35:27	0.173499
2022-09-13	11:35:28	0.353092
2022-09-13	11:35:28	0.215534
2022-09-13	11:35:28	0.264644
2022-09-13	11:35:29	0.0606745
2022-09-13	11:35:29	0.232583
2022-09-13	11:35:29	0.218181
2022-09-13	11:35:29	0.129682
2022-09-13	11:35:30	-0.0842109
2022-09-13	11:35:30	0.181234
2022-09-13	11:35:30	0.329326
2022-09-13	11:35:30	0.178079
2022-09-13	11:35:31	0.197214
2022-09-13	11:35:31	0.0808781
2022-09-13	11:35:31	0.381031
2022-09-13	11:35:31	0.260471
2022-09-13	11:35:32	0.734618
2022-09-13	11:35:32	0.730598
2022-09-13	11:35:32	0.731565
2022-09-13	11:35:33	0.732328
2022-09-13	11:35:33	0.729682
2022-09-13	11:35:33	0.73014
2022-09-13	11:35:33	0.739097
2022-09-13	11:35:34	0.72958
2022-09-13	11:35:34	0.729631
2022-09-13	11:35:34	0.734466
2022-09-13	11:35:34	0.731565
2022-09-13	11:35:35	0.733142
2022-09-13	11:35:35	0.731819
2022-09-13	11:35:35	0.734975
2022-09-13	11:35:35	0.732226
2022-09-13	11:35:36	0.731768
2022-09-13	11:35:36	0.732634
2022-09-13	11:35:36	0.731361
2022-09-13	11:35:37	0.730191
2022-09-13	11:35:37	0.736807
2022-09-13	11:35:37	0.734568
2022-09-13	11:35:37	0.741336
2022-09-13	11:35:38	0.738537
2022-09-13	11:35:38	0.73014
2022-09-13	11:35:38	0.732939
2022-09-13	11:35:38	0.737366
2022-09-13	11:35:39	0.741539
2022-09-13	11:35:39	0.734568
2022-09-13	11:35:39	0.734313
2022-09-13	11:35:39	0.732735
2022-09-13	11:35:40	0.614415
2022-09-13	11:35:40	0.728868
2022-09-13	11:35:40	0.6364
2022-09-13	11:35:40	0.500521
2022-09-13	11:35:41	0.310598
2022-09-13	11:35:41	0.346781
2022-09-13	11:35:41	0.341387
2022-09-13	11:35:42	0.736705
2022-09-13	11:35:42	0.738079
2022-09-13	11:35:42	0.734975
2022-09-13	11:35:42	0.488919
2022-09-13	11:35:43	0.342863
2022-09-13	11:35:43	0.297265
2022-09-13	11:35:43	-0.179274
2022-09-13	11:35:43	0.159504
2022-09-13	11:35:44	0.730852
2022-09-13	11:35:44	0.735076
2022-09-13	11:35:44	0.734008
2022-09-13	11:35:44	0.729173
2022-09-13	11:35:45	-0.323447
2022-09-13	11:35:45	0.739707
2022-09-13	11:35:45	0.540725
2022-09-13	11:35:46	0.255942
2022-09-13	11:35:46	-0.214287
2022-09-13	11:35:46	-0.250928
2022-09-13	11:35:46	-0.336374
2022-09-13	11:35:47	-0.336475
2022-09-13	11:35:47	-0.427366
2022-09-13	11:35:47	-0.432251
2022-09-13	11:35:47	-0.47215
2022-09-13	11:35:48	-0.513269
2022-09-13	11:35:48	-0.495966
2022-09-13	11:35:48	-0.597799
2022-09-13	11:35:48	-0.606755
2022-09-13	11:35:49	-0.761768
2022-09-13	11:35:49	0.0189951
2022-09-13	11:35:49	0.236858
2022-09-13	11:35:50	0.471005
2022-09-13	11:35:50	0.353651
2022-09-13	11:35:50	0.475942
2022-09-13	11:35:50	0.498435
2022-09-13	11:35:51	0.440522
2022-09-13	11:35:51	0.686374
2022-09-13	11:35:51	0.535127
2022-09-13	11:35:51	0.736501
2022-09-13	11:35:52	0.607036
2022-09-13	11:35:52	0.70444
2022-09-13	11:35:52	0.360522
2022-09-13	11:35:52	0.636909
2022-09-13	11:35:53	0.54159
2022-09-13	11:35:53	0.531311
2022-09-13	11:35:53	0.375738
2022-09-13	11:35:54	-0.845126
2022-09-13	11:35:54	-1.01469
2022-09-13	11:35:54	-0.594694
2022-09-13	11:35:54	-0.646704
2022-09-13	11:35:55	0.57528
2022-09-13	11:35:55	0.734517
2022-09-13	11:35:55	0.526527
2022-09-13	11:35:55	0.190191
2022-09-13	11:35:56	-0.0956613
2022-09-13	11:35:56	0.177265
2022-09-13	11:35:56	0.398741
2022-09-13	11:35:56	0.317468
2022-09-13	11:35:57	0.00866438
2022-09-13	11:35:57	-0.362684
2022-09-13	11:35:57	0.732277
2022-09-13	11:35:58	0.732481
2022-09-13	11:35:58	0.733804
2022-09-13	11:35:58	0.737926
2022-09-13	11:35:58	0.733397
2022-09-13	11:35:59	0.736298
2022-09-13	11:35:59	0.667494
2022-09-13	11:35:59	0.285255
2022-09-13	11:35:59	0.280318
2022-09-13	11:36:00	0.245204
2022-09-13	11:36:00	0.231412
2022-09-13	11:36:00	0.239962
2022-09-13	11:36:00	0.224848
2022-09-13	11:36:01	0.109835
2022-09-13	11:36:01	0.17355
2022-09-13	11:36:01	0.164949
2022-09-13	11:36:02	0.16841
2022-09-13	11:36:02	0.159911
2022-09-13	11:36:02	0.164389
2022-09-13	11:36:02	0.178893
2022-09-13	11:36:03	0.172125
2022-09-13	11:36:03	0.184339
2022-09-13	11:36:03	0.185255
2022-09-13	11:36:03	0.192176
2022-09-13	11:36:04	0.227087
2022-09-13	11:36:04	0.0795041
2022-09-13	11:36:04	0.0660689
2022-09-13	11:36:04	-2.92604
2022-09-13	11:36:05	-2.45195
2022-09-13	11:36:05	0.11355
2022-09-13	11:36:05	0.0712089
2022-09-13	11:36:05	0.262456
2022-09-13	11:36:06	0.279351
2022-09-13	11:36:06	0.24215
2022-09-13	11:36:06	0.207646
2022-09-13	11:36:07	0.287188
2022-09-13	11:36:07	0.283779
2022-09-13	11:36:07	0.322099
2022-09-13	11:36:07	0.341183
2022-09-13	11:36:08	0.280115
2022-09-13	11:36:08	0.269275
2022-09-13	11:36:08	0.281031
2022-09-13	11:36:08	0.201183
2022-09-13	11:36:09	0.213957
2022-09-13	11:36:09	0.254924
2022-09-13	11:36:09	0.208003
2022-09-13	11:36:09	0.246781
2022-09-13	11:36:10	1.03121
2022-09-13	11:36:10	0.535585
2022-09-13	11:36:10	0.416654
2022-09-13	11:36:11	0.406934
2022-09-13	11:36:11	0.415687
2022-09-13	11:36:11	0.367952
2022-09-13	11:36:11	0.210445
2022-09-13	11:36:12	0.376705
2022-09-13	11:36:12	0.238842
2022-09-13	11:36:12	0.305662
2022-09-13	11:36:12	0.339046
2022-09-13	11:36:13	0.280776
2022-09-13	11:36:13	0.425
2022-09-13	11:36:13	0.282252
2022-09-13	11:36:13	0.312176
2022-09-13	11:36:14	0.197367
2022-09-13	11:36:14	0.198283
2022-09-13	11:36:14	0.286578
2022-09-13	11:36:15	0.312888
2022-09-13	11:36:15	0.313855
2022-09-13	11:36:15	-2.10273
2022-09-13	11:36:15	-1.96747
2022-09-13	11:36:16	-1.68884
2022-09-13	11:36:16	-1.43703
2022-09-13	11:36:16	-1.23378
2022-09-13	11:36:16	0.477468
2022-09-13	11:36:17	0.328766
2022-09-13	11:36:17	0.508715
2022-09-13	11:36:17	0.365713
2022-09-13	11:36:17	0.508868
2022-09-13	11:36:18	0.513143
2022-09-13	11:36:18	0.449733
2022-09-13	11:36:18	0.417977
2022-09-13	11:36:19	0.477926
2022-09-13	11:36:19	0.445865
2022-09-13	11:36:19	0.446221
2022-09-13	11:36:19	0.586221
2022-09-13	11:36:20	0.457316
2022-09-13	11:36:20	0.330242
2022-09-13	11:36:20	0.435738
2022-09-13	11:36:20	0.578028
2022-09-13	11:36:21	0.213855
2022-09-13	11:36:21	-0.0294527
2022-09-13	11:36:21	-0.272455
2022-09-13	11:36:21	-0.362786
2022-09-13	11:36:22	-0.074389
2022-09-13	11:36:22	0.331769
2022-09-13	11:36:22	0.482201
2022-09-13	11:36:23	0.303219
2022-09-13	11:36:23	0.186781
2022-09-13	11:36:23	0.408461
2022-09-13	11:36:23	0.510242
2022-09-13	11:36:24	0.721437
2022-09-13	11:36:24	0.537774
2022-09-13	11:36:24	0.68327
2022-09-13	11:36:24	0.454466
2022-09-13	11:36:25	0.371616
2022-09-13	11:36:25	0.411616
2022-09-13	11:36:25	0.147596
2022-09-13	11:36:25	0.479504
2022-09-13	11:36:26	0.191361
2022-09-13	11:36:26	0.514364
2022-09-13	11:36:26	0.301947
2022-09-13	11:36:26	0.486527
2022-09-13	11:36:27	-0.391793
2022-09-13	11:36:27	-0.0459412
2022-09-13	11:36:27	0.372074
2022-09-13	11:36:28	0.116451
2022-09-13	11:36:28	0.509631
2022-09-13	11:36:28	0.291005
2022-09-13	11:36:28	0.320471
2022-09-13	11:36:29	0.979911
2022-09-13	11:36:29	0.36159
2022-09-13	11:36:29	0.260674
2022-09-13	11:36:29	-2.80263
2022-09-13	11:36:30	-2.01301
2022-09-13	11:36:30	0.241489
2022-09-13	11:36:30	0.545661
2022-09-13	11:36:30	-1.10762
2022-09-13	11:36:31	-1.98004
2022-09-13	11:36:31	-2.39617
2022-09-13	11:36:31	-3.12365
2022-09-13	11:36:32	-1.2751
2022-09-13	11:36:32	-1.97637
2022-09-13	11:36:32	-1.71312
2022-09-13	11:36:32	-1.88146
2022-09-13	11:36:33	-1.43373
2022-09-13	11:36:33	0.986832
2022-09-13	11:36:33	0.229071
2022-09-13	11:36:33	-2.30548
2022-09-13	11:36:34	-1.49256
2022-09-13	11:36:34	-1.44167
2022-09-13	11:36:34	-1.62284
2022-09-13	11:36:34	-1.60859
2022-09-13	11:36:35	-1.39307
2022-09-13	11:36:35	-1.06533
2022-09-13	11:36:35	-0.829452
2022-09-13	11:36:36	-0.0518445
2022-09-13	11:36:36	0.0664252
2022-09-13	11:36:36	0.135789
2022-09-13	11:36:36	0.192735
2022-09-13	11:36:37	0.177774
2022-09-13	11:36:37	0.181845
2022-09-13	11:36:37	0.165814
2022-09-13	11:36:37	0.190903
2022-09-13	11:36:38	0.205153
2022-09-13	11:36:38	0.191311
2022-09-13	11:36:38	0.260471
2022-09-13	11:36:38	0.236094
2022-09-13	11:36:39	0.239758
2022-09-13	11:36:39	0.255585
2022-09-13	11:36:39	0.334364
2022-09-13	11:36:40	-0.0496562
2022-09-13	11:36:40	-1.26818
2022-09-13	11:36:40	-1.86564
2022-09-13	11:36:40	-2.06589
2022-09-13	11:36:41	-2.14752
2022-09-13	11:36:41	-2.44884
2022-09-13	11:36:41	-2.39169
2022-09-13	11:36:41	-2.2148
2022-09-13	11:36:42	-2.59256
2022-09-13	11:36:42	-2.66172
2022-09-13	11:36:42	-2.63602
2022-09-13	11:36:42	-2.64111
2022-09-13	11:36:43	-2.69276
2022-09-13	11:36:43	-2.82166
2022-09-13	11:36:43	-2.90513
2022-09-13	11:36:44	-2.89556
2022-09-13	11:36:44	-3.01602
2022-09-13	11:36:44	-3.20976
2022-09-13	11:36:44	-3.36212
2022-09-13	11:36:45	-3.49719
2022-09-13	11:36:45	-3.37785
2022-09-13	11:36:45	-3.35856
2022-09-13	11:36:45	-3.17556
2022-09-13	11:36:46	-3.17271
2022-09-13	11:36:46	-3.10833
2022-09-13	11:36:46	-3.28986
2022-09-13	11:36:46	-3.25637
2022-09-13	11:36:47	-3.12864
2022-09-13	11:36:47	-3.01194
2022-09-13	11:36:47	-2.73897
2022-09-13	11:36:47	-2.48441
2022-09-13	11:36:48	1.3364
2022-09-13	11:36:48	0.866221
2022-09-13	11:36:48	0.243982
2022-09-13	11:36:49	-0.109351
2022-09-13	11:36:49	-3.17612
2022-09-13	11:36:49	-3.20049
2022-09-13	11:36:49	-3.33831
2022-09-13	11:36:50	-3.22909
2022-09-13	11:36:50	-3.40029
2022-09-13	11:36:50	-2.42426
2022-09-13	11:36:50	0.290038
2022-09-13	11:36:51	0.238333
2022-09-13	11:36:51	0.42958
2022-09-13	11:36:51	0.263575
2022-09-13	11:36:51	0.511209
2022-09-13	11:36:52	1.03004
2022-09-13	11:36:52	1.31472
2022-09-13	11:36:52	0.723626
2022-09-13	11:36:53	0.707748
2022-09-13	11:36:53	1.75212
2022-09-13	11:36:53	1.56892
2022-09-13	11:36:53	2.12988
2022-09-13	11:36:54	0.584593
2022-09-13	11:36:54	0.60902
2022-09-13	11:36:54	0.468613
2022-09-13	11:36:54	0.430038
2022-09-13	11:36:55	0.633753
2022-09-13	11:36:55	0.213193
2022-09-13	11:36:55	0.517468
2022-09-13	11:36:55	0.327596
2022-09-13	11:36:56	0.4364
2022-09-13	11:36:56	0.605204
2022-09-13	11:36:56	0.243931
2022-09-13	11:36:57	0.662099
2022-09-13	11:36:57	0.349886
2022-09-13	11:36:57	0.902353
2022-09-13	11:36:57	0.921031
2022-09-13	11:36:58	1.51518
2022-09-13	11:36:58	2.32286
2022-09-13	11:36:58	1.07513
2022-09-13	11:36:58	2.27182
2022-09-13	11:36:59	0.484746
2022-09-13	11:36:59	1.36113
2022-09-13	11:36:59	0.750853
2022-09-13	11:36:59	0.693906
2022-09-13	11:37:00	0.797672
2022-09-13	11:37:00	0.307188
2022-09-13	11:37:00	0.965051
2022-09-13	11:37:01	0.357366
2022-09-13	11:37:01	0.929427
2022-09-13	11:37:01	0.53701
2022-09-13	11:37:01	0.715585
2022-09-13	11:37:02	0.66673
2022-09-13	11:37:02	0.696145
2022-09-13	11:37:02	0.692837
2022-09-13	11:37:02	0.264033
2022-09-13	11:37:03	0.670445
2022-09-13	11:37:03	0.425916
2022-09-13	11:37:03	0.713753
2022-09-13	11:37:03	0.650496
2022-09-13	11:37:04	0.64612
2022-09-13	11:37:04	1.07782
2022-09-13	11:37:04	0.394669
2022-09-13	11:37:05	1.29416
2022-09-13	11:37:05	0.496349
2022-09-13	11:37:05	1.21676
2022-09-13	11:37:05	0.515025
2022-09-13	11:37:06	0.965764
2022-09-13	11:37:06	0.85416
2022-09-13	11:37:06	0.461947
2022-09-13	11:37:06	0.627799
2022-09-13	11:37:07	0.364746
2022-09-13	11:37:07	0.610954
2022-09-13	11:37:07	0.359606
2022-09-13	11:37:07	0.389173
2022-09-13	11:37:08	0.475433
2022-09-13	11:37:08	0.486425
2022-09-13	11:37:08	0.373652
2022-09-13	11:37:09	0.523015
2022-09-13	11:37:09	1.04816
2022-09-13	11:37:09	2.03279
2022-09-13	11:37:09	0.277417
2022-09-13	11:37:10	0.48444
2022-09-13	11:37:10	0.394517
2022-09-13	11:37:10	0.35869
2022-09-13	11:37:10	0.45528
2022-09-13	11:37:11	0.31187
2022-09-13	11:37:11	0.537417
2022-09-13	11:37:11	0.727341
2022-09-13	11:37:11	0.623982
2022-09-13	11:37:12	0.889733
2022-09-13	11:37:12	0.76673
2022-09-13	11:37:12	1.09869
2022-09-13	11:37:12	0.296247
2022-09-13	11:37:13	0.993092
2022-09-13	11:37:13	0.270293
2022-09-13	11:37:13	1.03279
2022-09-13	11:37:14	0.747036
2022-09-13	11:37:14	0.81243
2022-09-13	11:37:14	0.829428
2022-09-13	11:37:14	0.969326
2022-09-13	11:37:15	0.658537
2022-09-13	11:37:15	0.611972
2022-09-13	11:37:15	0.906272
2022-09-13	11:37:15	0.181234
2022-09-13	11:37:16	0.20444
2022-09-13	11:37:16	0.112837
2022-09-13	11:37:16	0.124898
2022-09-13	11:37:16	0.093448
2022-09-13	11:37:17	0.281692
2022-09-13	11:37:17	0.281947
2022-09-13	11:37:17	1.75218
2022-09-13	11:37:18	3.17146
2022-09-13	11:37:18	3.65736
2022-09-13	11:37:18	2.94876
2022-09-13	11:37:18	1.67365
2022-09-13	11:37:19	0.358028
2022-09-13	11:37:19	0.198181
2022-09-13	11:37:19	0.178283
2022-09-13	11:37:19	0.104186
2022-09-13	11:37:20	-0.060445
2022-09-13	11:37:20	0.00179415
2022-09-13	11:37:20	-0.0101651
2022-09-13	11:37:20	-0.0866028
2022-09-13	11:37:21	-0.242684
2022-09-13	11:37:21	-0.445534
2022-09-13	11:37:21	-0.503753
2022-09-13	11:37:22	-0.544414
2022-09-13	11:37:22	-0.549198
2022-09-13	11:37:22	-0.492099
2022-09-13	11:37:22	-0.475916
2022-09-13	11:37:23	-0.509758
2022-09-13	11:37:23	-0.500852
2022-09-13	11:37:23	-0.434643
2022-09-13	11:37:23	-0.407468
2022-09-13	11:37:24	-0.381666
2022-09-13	11:37:24	-0.218307
2022-09-13	11:37:24	-0.243447
2022-09-13	11:37:24	0.0276974
2022-09-13	11:37:25	-0.761615
2022-09-13	11:37:25	0.229936
2022-09-13	11:37:25	0.256603
2022-09-13	11:37:26	0.272125
2022-09-13	11:37:26	0.27014
2022-09-13	11:37:26	0.274771
2022-09-13	11:37:26	0.27187
2022-09-13	11:37:27	0.29187
2022-09-13	11:37:27	0.305
2022-09-13	11:37:27	0.311514
2022-09-13	11:37:27	0.344644
2022-09-13	11:37:28	-1.8009
2022-09-13	11:37:28	-0.00197174
2022-09-13	11:37:28	0.296349
2022-09-13	11:37:28	0.273906
2022-09-13	11:37:29	0.268919
2022-09-13	11:37:29	0.28098
2022-09-13	11:37:29	0.278486
2022-09-13	11:37:30	0.278639
2022-09-13	11:37:30	0.27528
2022-09-13	11:37:30	0.272125
2022-09-13	11:37:30	0.259555
2022-09-13	11:37:31	0.231565
2022-09-13	11:37:31	0.247494
2022-09-13	11:37:31	0.262812
2022-09-13	11:37:31	0.252328
2022-09-13	11:37:32	0.304746
2022-09-13	11:37:32	0.318232
2022-09-13	11:37:32	0.625967
2022-09-13	11:37:32	1.56683
2022-09-13	11:37:33	1.50475
2022-09-13	11:37:33	1.11075
2022-09-13	11:37:33	0.0505473
2022-09-13	11:37:34	0.7393
2022-09-13	11:37:34	0.737722
2022-09-13	11:37:34	0.731565
2022-09-13	11:37:34	0.73645
2022-09-13	11:37:35	0.734669
2022-09-13	11:37:35	0.741692
2022-09-13	11:37:35	0.736552
2022-09-13	11:37:35	0.733142
2022-09-13	11:37:36	0.734975
2022-09-13	11:37:36	0.733041
2022-09-13	11:37:36	0.740165
2022-09-13	11:37:36	0.737366
2022-09-13	11:37:37	0.732379
2022-09-13	11:37:37	0.740216
2022-09-13	11:37:37	0.732888
2022-09-13	11:37:37	0.734822
2022-09-13	11:37:38	0.72958
2022-09-13	11:37:38	0.729936
2022-09-13	11:37:38	0.733702
2022-09-13	11:37:39	0.73472
2022-09-13	11:37:39	0.728715
2022-09-13	11:37:39	0.73187
2022-09-13	11:37:39	0.738333
2022-09-13	11:37:40	0.731463
2022-09-13	11:37:40	0.740165
2022-09-13	11:37:40	0.727748
2022-09-13	11:37:40	0.733092
2022-09-13	11:37:41	0.734364
2022-09-13	11:37:41	0.73701
2022-09-13	11:37:41	0.735331
2022-09-13	11:37:41	0.739097
2022-09-13	11:37:42	0.73416
2022-09-13	11:37:42	0.737519
2022-09-13	11:37:42	0.734618
2022-09-13	11:37:43	0.738079
2022-09-13	11:37:43	0.731056
2022-09-13	11:37:43	0.736603
2022-09-13	11:37:43	0.737315
2022-09-13	11:37:44	0.737773
2022-09-13	11:37:44	0.73874
2022-09-13	11:37:44	0.73986
2022-09-13	11:37:44	0.741183
2022-09-13	11:37:45	0.729529
2022-09-13	11:37:45	0.736399
2022-09-13	11:37:45	0.730547
2022-09-13	11:37:45	0.731616
2022-09-13	11:37:46	0.738028
2022-09-13	11:37:46	0.731259
2022-09-13	11:37:46	0.730903
2022-09-13	11:37:47	0.733193
2022-09-13	11:37:47	0.734364
2022-09-13	11:37:47	0.731005
2022-09-13	11:37:47	0.735433
2022-09-13	11:37:48	0.728817
2022-09-13	11:37:48	0.733397
2022-09-13	11:37:48	0.736247
2022-09-13	11:37:48	0.733397
2022-09-13	11:37:49	0.727646
2022-09-13	11:37:49	0.736705
2022-09-13	11:37:49	0.742913
2022-09-13	11:37:49	0.73701
2022-09-13	11:37:50	0.736399
2022-09-13	11:37:50	0.733244
2022-09-13	11:37:50	0.737926
2022-09-13	11:37:51	0.730801
2022-09-13	11:37:51	0.730242
2022-09-13	11:37:51	0.738588
2022-09-13	11:37:51	0.741285
2022-09-13	11:37:52	0.736399
2022-09-13	11:37:52	0.732786
2022-09-13	11:37:52	0.733753
2022-09-13	11:37:52	0.734618
2022-09-13	11:37:53	0.733906
2022-09-13	11:37:53	0.735026
2022-09-13	11:37:53	0.731463
2022-09-13	11:37:53	0.730598
2022-09-13	11:37:54	0.731616
2022-09-13	11:37:54	0.73355
2022-09-13	11:37:54	0.731209
2022-09-13	11:37:55	0.733041
2022-09-13	11:37:55	0.734364
2022-09-13	11:37:55	0.731259
2022-09-13	11:37:55	0.736705
2022-09-13	11:37:56	0.735585
2022-09-13	11:37:56	0.73584
2022-09-13	11:37:56	0.725865
2022-09-13	11:37:56	0.737061
2022-09-13	11:37:57	0.734924
2022-09-13	11:37:57	0.737061
2022-09-13	11:37:57	0.730445
2022-09-13	11:37:57	0.732226
2022-09-13	11:37:58	0.729428
2022-09-13	11:37:58	0.736908
2022-09-13	11:37:58	0.734924
2022-09-13	11:37:59	0.730394
2022-09-13	11:37:59	0.740929
2022-09-13	11:37:59	0.736298
2022-09-13	11:37:59	0.734517
2022-09-13	11:38:00	0.733753
2022-09-13	11:38:00	0.738486
2022-09-13	11:38:00	0.73472
2022-09-13	11:38:00	0.739249
2022-09-13	11:38:01	0.74439
2022-09-13	11:38:01	0.735382
2022-09-13	11:38:01	0.743778
2022-09-13	11:38:01	0.729784
2022-09-13	11:38:02	0.738689
2022-09-13	11:38:02	0.736959
2022-09-13	11:38:02	0.734313
2022-09-13	11:38:02	0.735738
2022-09-13	11:38:03	0.737315
2022-09-13	11:38:03	0.728766
2022-09-13	11:38:03	0.734568
2022-09-13	11:38:04	0.738537
2022-09-13	11:38:04	0.736857
2022-09-13	11:38:04	0.734669
2022-09-13	11:38:04	0.731158
2022-09-13	11:38:05	0.740216
2022-09-13	11:38:05	0.732379
2022-09-13	11:38:05	0.731768
2022-09-13	11:38:05	0.743829
2022-09-13	11:38:06	0.73813
2022-09-13	11:38:06	0.738791
2022-09-13	11:38:06	0.73645
2022-09-13	11:38:06	0.732481
2022-09-13	11:38:07	0.737366
2022-09-13	11:38:07	0.732277
2022-09-13	11:38:07	0.728512
2022-09-13	11:38:08	0.734211
2022-09-13	11:38:08	0.734568
2022-09-13	11:38:08	0.736043
2022-09-13	11:38:08	0.735534
2022-09-13	11:38:09	0.743778
2022-09-13	11:38:09	0.735076
2022-09-13	11:38:09	0.737061
2022-09-13	11:38:10	0.731259
2022-09-13	11:38:10	0.729173
2022-09-13	11:38:10	0.730801
2022-09-13	11:38:10	0.732939
2022-09-13	11:38:10	0.734008
2022-09-13	11:38:11	0.73416
2022-09-13	11:38:11	0.742252
