# Supplementary material for: Comparing efficacy in reducing pulling and welfare impacts of four types of leash walking equipment
Source: PeerJ journal article supplement (doi:10.7717/peerj.18131), 2024-10-24
Supplement: Shelter1_Tension_files.zip [file Bubba_star_2022913104244 copy.xlsx]

## Sheet: Averaged Newtons
Date	Time	Averaged Newtons	Impulse	Total steps
2022-09-13	10:43:00	1.59094	1.59094	0		Impulse	885.867
2022-09-13	10:43:01	1.45149	3.04243	0		Total steps	4
2022-09-13	10:43:02	2.4251	5.46753	0		# > 5 sec	0
2022-09-13	10:43:03	-0.127163	5.46753	0
2022-09-13	10:43:04	0.0134137	5.48095	0
2022-09-13	10:43:05	-0.732593	5.48095	0
2022-09-13	10:43:06	-2.75556	5.48095	0
2022-09-13	10:43:07	5.016	10.4969	0
2022-09-13	10:43:08	10.2853	20.7822	0
2022-09-13	10:43:09	3.50463	24.2869	0
2022-09-13	10:43:10	6.37518	30.6621	0
2022-09-13	10:43:11	4.76677	35.4288	0
2022-09-13	10:43:12	5.73954	41.1684	0
2022-09-13	10:43:13	7.93743	49.1058	0
2022-09-13	10:43:14	10.6819	59.7877	0
2022-09-13	10:43:15	2.7178	62.5055	0
2022-09-13	10:43:16	2.16128	64.6668	0
2022-09-13	10:43:17	2.28613	66.9529	0
2022-09-13	10:43:18	2.54289	69.4958	0
2022-09-13	10:43:19	2.9038	72.3996	0
2022-09-13	10:43:20	4.28645	76.686	0
2022-09-13	10:43:21	13.4788	90.1648	1
2022-09-13	10:43:22	15.1088	105.274	2
2022-09-13	10:43:23	7.55769	112.831	2
2022-09-13	10:43:24	7.75011	120.581	2
2022-09-13	10:43:25	15.3517	135.933	3
2022-09-13	10:43:26	11.1868	147.12	3
2022-09-13	10:43:27	4.9903	152.11	3
2022-09-13	10:43:28	2.7596	154.87	3
2022-09-13	10:43:29	6.99464	161.864	3
2022-09-13	10:43:30	1.96055	163.825	3
2022-09-13	10:43:31	1.22258	165.048	3
2022-09-13	10:43:32	-0.0351052	165.048	3
2022-09-13	10:43:33	-0.529878	165.048	3
2022-09-13	10:43:34	3.59314	168.641	3
2022-09-13	10:43:35	5.80355	174.444	3
2022-09-13	10:43:36	3.19537	177.64	3
2022-09-13	10:43:37	2.62981	180.269	3
2022-09-13	10:43:38	2.93502	183.204	3
2022-09-13	10:43:39	2.17815	185.383	3
2022-09-13	10:43:40	1.66728	187.05	3
2022-09-13	10:43:41	10.2388	197.289	3
2022-09-13	10:43:42	2.50412	199.793	3
2022-09-13	10:43:43	0.968475	200.761	3
2022-09-13	10:43:44	0.81126	201.573	3
2022-09-13	10:43:45	1.10754	202.68	3
2022-09-13	10:43:46	1.08545	203.766	3
2022-09-13	10:43:47	1.11635	204.882	3
2022-09-13	10:43:48	1.12942	206.011	3
2022-09-13	10:43:49	1.74063	207.752	3
2022-09-13	10:43:50	3.29421	211.046	3
2022-09-13	10:43:51	3.28607	214.332	3
2022-09-13	10:43:52	3.27463	217.607	3
2022-09-13	10:43:53	3.2669	220.874	3
2022-09-13	10:43:54	3.27554	224.149	3
2022-09-13	10:43:55	3.27141	227.421	3
2022-09-13	10:43:56	3.28069	230.701	3
2022-09-13	10:43:57	3.26705	233.968	3
2022-09-13	10:43:58	3.28561	237.254	3
2022-09-13	10:43:59	3.2864	240.54	3
2022-09-13	10:44:00	3.28414	243.825	3
2022-09-13	10:44:01	3.27871	247.103	3
2022-09-13	10:44:02	3.28992	250.393	3
2022-09-13	10:44:03	3.28578	253.679	3
2022-09-13	10:44:04	3.26049	256.939	3
2022-09-13	10:44:05	3.28097	260.22	3
2022-09-13	10:44:06	3.28116	263.502	3
2022-09-13	10:44:07	3.28476	266.786	3
2022-09-13	10:44:08	3.27763	270.064	3
2022-09-13	10:44:09	3.27311	273.337	3
2022-09-13	10:44:10	3.27633	276.613	3
2022-09-13	10:44:11	3.27505	279.888	3
2022-09-13	10:44:12	2.96852	282.857	3
2022-09-13	10:44:13	2.70752	285.565	3
2022-09-13	10:44:14	3.28063	288.845	3
2022-09-13	10:44:15	3.28312	292.128	3
2022-09-13	10:44:16	3.27678	295.405	3
2022-09-13	10:44:17	2.73208	298.137	3
2022-09-13	10:44:18	3.24605	301.383	3
2022-09-13	10:44:19	3.27799	304.661	3
2022-09-13	10:44:20	3.27067	307.932	3
2022-09-13	10:44:21	3.26388	311.196	3
2022-09-13	10:44:22	3.26948	314.465	3
2022-09-13	10:44:23	3.28622	317.751	3
2022-09-13	10:44:24	3.27927	321.031	3
2022-09-13	10:44:25	3.28007	324.311	3
2022-09-13	10:44:26	3.2928	327.604	3
2022-09-13	10:44:27	3.2829	330.886	3
2022-09-13	10:44:28	3.28712	334.174	3
2022-09-13	10:44:29	3.27475	337.448	3
2022-09-13	10:44:30	3.22834	340.677	3
2022-09-13	10:44:31	3.28935	343.966	3
2022-09-13	10:44:32	3.2635	347.23	3
2022-09-13	10:44:33	3.94475	351.174	3
2022-09-13	10:44:34	2.55369	353.728	3
2022-09-13	10:44:35	2.85336	356.581	3
2022-09-13	10:44:36	5.5546	362.136	3
2022-09-13	10:44:37	4.36037	366.496	3
2022-09-13	10:44:38	0.100567	366.597	3
2022-09-13	10:44:39	-2.87333	366.597	3
2022-09-13	10:44:40	-3.71387	366.597	3
2022-09-13	10:44:41	8.97279	375.57	3
2022-09-13	10:44:42	1.02824	376.598	3
2022-09-13	10:44:43	2.14102	378.739	3
2022-09-13	10:44:44	-0.862757	378.739	3
2022-09-13	10:44:45	-1.50976	378.739	3
2022-09-13	10:44:46	0.244482	378.983	3
2022-09-13	10:44:47	0.646914	379.63	3
2022-09-13	10:44:48	1.07996	380.71	3
2022-09-13	10:44:49	-0.462872	380.71	3
2022-09-13	10:44:50	0.998298	381.709	3
2022-09-13	10:44:51	1.46689	383.175	3
2022-09-13	10:44:52	1.37855	384.554	3
2022-09-13	10:44:53	2.35681	386.911	3
2022-09-13	10:44:54	3.28708	390.198	3
2022-09-13	10:44:55	3.27384	393.472	3
2022-09-13	10:44:56	3.21521	396.687	3
2022-09-13	10:44:57	3.15822	399.845	3
2022-09-13	10:44:58	3.13779	402.983	3
2022-09-13	10:44:59	3.05064	406.034	3
2022-09-13	10:45:00	1.20679	407.24	3
2022-09-13	10:45:01	1.49722	408.738	3
2022-09-13	10:45:02	3.27761	412.015	3
2022-09-13	10:45:03	3.26971	415.285	3
2022-09-13	10:45:04	3.27667	418.562	3
2022-09-13	10:45:05	3.27724	421.839	3
2022-09-13	10:45:06	3.27226	425.111	3
2022-09-13	10:45:07	3.27435	428.385	3
2022-09-13	10:45:08	3.28873	431.674	3
2022-09-13	10:45:09	3.27588	434.95	3
2022-09-13	10:45:10	3.29021	438.24	3
2022-09-13	10:45:11	3.28533	441.526	3
2022-09-13	10:45:12	3.28103	444.807	3
2022-09-13	10:45:13	3.27684	448.083	3
2022-09-13	10:45:14	3.2756	451.359	3
2022-09-13	10:45:15	3.28161	454.641	3
2022-09-13	10:45:16	2.34945	456.99	3
2022-09-13	10:45:17	1.52552	458.516	3
2022-09-13	10:45:18	3.37112	461.887	3
2022-09-13	10:45:19	2.38405	464.271	3
2022-09-13	10:45:20	3.28839	467.559	3
2022-09-13	10:45:21	3.27888	470.838	3
2022-09-13	10:45:22	3.27118	474.109	3
2022-09-13	10:45:23	3.25015	477.359	3
2022-09-13	10:45:24	3.26654	480.626	3
2022-09-13	10:45:25	3.2679	483.894	3
2022-09-13	10:45:26	3.28737	487.181	3
2022-09-13	10:45:27	3.27286	490.454	3
2022-09-13	10:45:28	3.2842	493.738	3
2022-09-13	10:45:29	3.27356	497.012	3
2022-09-13	10:45:30	3.26603	500.278	3
2022-09-13	10:45:31	3.2812	503.559	3
2022-09-13	10:45:32	3.27256	506.832	3
2022-09-13	10:45:33	3.26484	510.096	3
2022-09-13	10:45:34	3.28584	513.382	3
2022-09-13	10:45:35	3.27588	516.658	3
2022-09-13	10:45:36	3.25913	519.917	3
2022-09-13	10:45:37	3.28239	523.2	3
2022-09-13	10:45:38	3.70287	526.903	3
2022-09-13	10:45:39	5.68458	532.587	3
2022-09-13	10:45:40	1.95794	534.545	3
2022-09-13	10:45:41	6.78	541.325	3
2022-09-13	10:45:42	4.19488	545.52	3
2022-09-13	10:45:43	8.12623	553.646	3
2022-09-13	10:45:44	4.24101	557.887	3
2022-09-13	10:45:45	2.46894	560.356	3
2022-09-13	10:45:46	2.3254	562.682	3
2022-09-13	10:45:47	1.98539	564.667	3
2022-09-13	10:45:48	2.249	566.916	3
2022-09-13	10:45:49	2.28407	569.2	3
2022-09-13	10:45:50	1.57391	570.774	3
2022-09-13	10:45:51	1.04312	571.817	3
2022-09-13	10:45:52	1.57549	573.393	3
2022-09-13	10:45:53	1.59877	574.991	3
2022-09-13	10:45:54	1.5425	576.534	3
2022-09-13	10:45:55	1.65727	578.191	3
2022-09-13	10:45:56	1.70056	579.892	3
2022-09-13	10:45:57	1.63114	581.523	3
2022-09-13	10:45:58	1.60441	583.127	3
2022-09-13	10:45:59	3.53955	586.667	3
2022-09-13	10:46:00	2.92687	589.594	3
2022-09-13	10:46:01	2.64549	592.239	3
2022-09-13	10:46:02	2.11444	594.354	3
2022-09-13	10:46:03	1.93995	596.293	3
2022-09-13	10:46:04	1.46677	597.76	3
2022-09-13	10:46:05	0.384493	598.145	3
2022-09-13	10:46:06	0.757195	598.902	3
2022-09-13	10:46:07	1.06576	599.968	3
2022-09-13	10:46:08	2.11295	602.081	3
2022-09-13	10:46:09	4.05154	606.132	3
2022-09-13	10:46:10	1.73723	607.869	3
2022-09-13	10:46:11	1.79716	609.667	3
2022-09-13	10:46:12	1.83502	611.502	3
2022-09-13	10:46:13	1.82744	613.329	3
2022-09-13	10:46:14	1.81035	615.139	3
2022-09-13	10:46:15	1.87871	617.018	3
2022-09-13	10:46:16	1.91946	618.938	3
2022-09-13	10:46:17	2.061	620.999	3
2022-09-13	10:46:18	2.06055	623.059	3
2022-09-13	10:46:19	2.06396	625.123	3
2022-09-13	10:46:20	1.45014	626.573	3
2022-09-13	10:46:21	0.613579	627.187	3
2022-09-13	10:46:22	2.53004	629.717	3
2022-09-13	10:46:23	3.27882	632.996	3
2022-09-13	10:46:24	-1.90678	632.996	3
2022-09-13	10:46:25	-3.33015	632.996	3
2022-09-13	10:46:26	-3.36467	632.996	3
2022-09-13	10:46:27	-3.46161	632.996	3
2022-09-13	10:46:28	-0.112279	632.996	3
2022-09-13	10:46:29	-0.64793	632.996	3
2022-09-13	10:46:30	0.822012	633.818	3
2022-09-13	10:46:31	1.15517	634.973	3
2022-09-13	10:46:32	2.58205	637.555	3
2022-09-13	10:46:33	1.27906	638.834	3
2022-09-13	10:46:34	0.415563	639.25	3
2022-09-13	10:46:35	-0.0518388	639.25	3
2022-09-13	10:46:36	1.32237	640.572	3
2022-09-13	10:46:37	1.82597	642.398	3
2022-09-13	10:46:38	1.41047	643.808	3
2022-09-13	10:46:39	0.820542	644.629	3
2022-09-13	10:46:40	0.533615	645.162	3
2022-09-13	10:46:41	0.939952	646.102	3
2022-09-13	10:46:42	1.36859	647.471	3
2022-09-13	10:46:43	7.83737	655.308	3
2022-09-13	10:46:44	4.47957	659.788	3
2022-09-13	10:46:45	-0.054385	659.788	3
2022-09-13	10:46:46	0.530106	660.318	3
2022-09-13	10:46:47	-0.0349735	660.318	3
2022-09-13	10:46:48	-0.934064	660.318	3
2022-09-13	10:46:49	0.640613	660.959	3
2022-09-13	10:46:50	1.76598	662.725	3
2022-09-13	10:46:51	2.2649	664.99	3
2022-09-13	10:46:52	0.543292	665.533	3
2022-09-13	10:46:53	0.542443	666.075	3
2022-09-13	10:46:54	0.880472	666.956	3
2022-09-13	10:46:55	1.79547	668.751	3
2022-09-13	10:46:56	1.63576	670.387	3
2022-09-13	10:46:57	2.38119	672.768	3
2022-09-13	10:46:58	2.01578	674.784	3
2022-09-13	10:46:59	1.44946	676.233	3
2022-09-13	10:47:00	3.13751	679.371	3
2022-09-13	10:47:01	1.73852	681.109	3
2022-09-13	10:47:02	1.20498	682.314	3
2022-09-13	10:47:03	1.60056	683.915	3
2022-09-13	10:47:04	1.78296	685.698	3
2022-09-13	10:47:05	1.01069	686.709	3
2022-09-13	10:47:06	1.06891	687.778	3
2022-09-13	10:47:07	1.75653	689.534	3
2022-09-13	10:47:08	1.20011	690.734	3
2022-09-13	10:47:09	-0.945157	690.734	3
2022-09-13	10:47:10	0.979339	691.714	3
2022-09-13	10:47:11	1.57589	693.289	3
2022-09-13	10:47:12	11.7178	705.007	3
2022-09-13	10:47:13	4.64934	709.657	3
2022-09-13	10:47:14	7.20486	716.861	3
2022-09-13	10:47:15	15.7249	732.586	4
2022-09-13	10:47:16	3.85256	736.439	4
2022-09-13	10:47:17	1.4249	737.864	4
2022-09-13	10:47:18	-0.70939	737.864	4
2022-09-13	10:47:19	12.3457	750.209	4
2022-09-13	10:47:20	3.24889	753.458	4
2022-09-13	10:47:21	2.60084	756.059	4
2022-09-13	10:47:22	1.98573	758.045	4
2022-09-13	10:47:23	5.28417	763.329	4
2022-09-13	10:47:24	1.64679	764.976	4
2022-09-13	10:47:25	1.38228	766.358	4
2022-09-13	10:47:26	1.01035	767.368	4
2022-09-13	10:47:27	3.44294	770.811	4
2022-09-13	10:47:28	2.86145	773.673	4
2022-09-13	10:47:29	2.6039	776.277	4
2022-09-13	10:47:30	1.97469	778.251	4
2022-09-13	10:47:31	1.2279	779.479	4
2022-09-13	10:47:32	5.22261	784.702	4
2022-09-13	10:47:33	9.07535	793.777	4
2022-09-13	10:47:34	7.60495	801.382	4
2022-09-13	10:47:35	11.8026	813.185	4
2022-09-13	10:47:36	6.81798	820.003	4
2022-09-13	10:47:37	2.05789	822.061	4
2022-09-13	10:47:38	1.90378	823.964	4
2022-09-13	10:47:39	1.56123	825.526	4
2022-09-13	10:47:40	1.62284	827.149	4
2022-09-13	10:47:41	1.60514	828.754	4
2022-09-13	10:47:42	1.55789	830.312	4
2022-09-13	10:47:43	5.66443	835.976	4
2022-09-13	10:47:44	7.36732	843.343	4
2022-09-13	10:47:45	5.50394	848.847	4
2022-09-13	10:47:46	1.12507	849.972	4
2022-09-13	10:47:47	1.14386	851.116	4
2022-09-13	10:47:48	1.63604	852.752	4
2022-09-13	10:47:49	2.29743	855.05	4
2022-09-13	10:47:50	1.64657	856.696	4
2022-09-13	10:47:51	2.40961	859.106	4
2022-09-13	10:47:52	3.26258	862.368	4
2022-09-13	10:47:53	3.28018	865.649	4
2022-09-13	10:47:54	3.28012	868.929	4
2022-09-13	10:47:55	3.26173	872.19	4
2022-09-13	10:47:56	3.27814	875.469	4
2022-09-13	10:47:57	3.27422	878.743	4
2022-09-13	10:47:58	2.71136	881.454	4
2022-09-13	10:47:59	2.21318	883.667	4
2022-09-13	10:48:00	2.19971	885.867	4

## Sheet: Bubba_star_2022913104244 (4)
Date	Time	Lbs	Newtons	Averaged Newtons	Total force x time	Total steps >13.345		**GoPro Fitting: 1032
2022-09-13	10:43:00	0.510801	2.27215	1.59094	2.27215	FALSE	0			Total force x time	1702.28
2022-09-13	10:43:00	0.449987	2.00163	1.59094	2.00163	FALSE	0			Total steps	18
2022-09-13	10:43:00	0.19925	0.886304	1.59094	3.15845	FALSE	0
2022-09-13	10:43:00	0.270598	1.20367	1.59094	3.20531	FALSE	0
2022-09-13	10:43:01	0.189936	0.844873	1.45149	4.00332	FALSE	0
2022-09-13	10:43:01	0.181794	0.808656	1.45149	4.01396	FALSE	0
2022-09-13	10:43:01	0.260471	1.15863	1.45149	5.16195	FALSE	0
2022-09-13	10:43:01	0.673041	2.99382	1.45149	7.00778	FALSE	0
2022-09-13	10:43:02	0.660573	2.93836	2.4251	8.10031	FALSE	0
2022-09-13	10:43:02	0.790395	3.51584	2.4251	10.5236	FALSE	0
2022-09-13	10:43:02	0.184593	0.821107	2.4251	8.92142	FALSE	0
2022-09-13	10:43:03	-0.0108776	-0.0483857	-0.127163	10.5236	FALSE	0
2022-09-13	10:43:03	-0.00319315	-0.0142038	-0.127163	8.92142	FALSE	0
2022-09-13	10:43:03	-0.15902	-0.707353	-0.127163	10.5236	FALSE	0
2022-09-13	10:43:03	0.0587407	0.26129	-0.127163	9.18271	FALSE	0
2022-09-13	10:43:04	-0.0325061	-0.144594	0.0134137	10.5236	FALSE	0
2022-09-13	10:43:04	0.0533972	0.237521	0.0134137	9.42023	FALSE	0
2022-09-13	10:43:04	-0.0212084	-0.0943392	0.0134137	10.5236	FALSE	0
2022-09-13	10:43:04	0.0123794	0.055066	0.0134137	9.47529	FALSE	0
2022-09-13	10:43:05	-0.0765264	-0.340405	-0.732593	10.5236	FALSE	0
2022-09-13	10:43:05	-0.150114	-0.667737	-0.732593	9.47529	FALSE	0
2022-09-13	10:43:05	-0.245076	-1.09015	-0.732593	10.5236	FALSE	0
2022-09-13	10:43:05	-0.187061	-0.832085	-0.732593	9.47529	FALSE	0
2022-09-13	10:43:06	-0.334542	-1.48811	-2.75556	10.5236	FALSE	0
2022-09-13	10:43:06	-0.625178	-2.78092	-2.75556	9.47529	FALSE	0
2022-09-13	10:43:06	-0.898714	-3.99766	-2.75556	10.5236	FALSE	0
2022-09-13	10:43:07	-0.524007	-2.33089	5.016	9.47529	FALSE	0
2022-09-13	10:43:07	0.0319214	0.141993	5.016	10.6656	FALSE	0
2022-09-13	10:43:07	1.83375	8.15689	5.016	17.6322	FALSE	0
2022-09-13	10:43:07	3.16892	14.096	5.016	24.7616	1	1
2022-09-13	10:43:08	2.89314	12.8693	10.2853	30.5014	FALSE	1
2022-09-13	10:43:08	4.57518	20.3513	10.2853	45.1129	1	2
2022-09-13	10:43:08	1.27421	5.66794	10.2853	36.1694	FALSE	2
2022-09-13	10:43:08	0.506425	2.25268	10.2853	47.3656	FALSE	2
2022-09-13	10:43:09	0.607392	2.7018	3.50463	38.8712	FALSE	2
2022-09-13	10:43:09	0.738384	3.28448	3.50463	50.6501	FALSE	2
2022-09-13	10:43:09	1.0133	4.50736	3.50463	43.3785	FALSE	2
2022-09-13	10:43:09	0.79243	3.52489	3.50463	54.175	FALSE	2
2022-09-13	10:43:10	1.17991	5.24848	6.37518	48.627	FALSE	2
2022-09-13	10:43:10	1.21986	5.42618	6.37518	59.6011	FALSE	2
2022-09-13	10:43:10	1.06179	4.72305	6.37518	53.3501	FALSE	2
2022-09-13	10:43:10	2.27126	10.103	6.37518	69.7042	FALSE	2
2022-09-13	10:43:11	1.10378	4.90983	4.76677	58.2599	FALSE	2
2022-09-13	10:43:11	1.1763	5.23242	4.76677	74.9366	FALSE	2
2022-09-13	10:43:11	0.934771	4.15805	4.76677	62.418	FALSE	2
2022-09-13	10:43:12	1.59574	7.09817	5.73954	82.0348	FALSE	2
2022-09-13	10:43:12	0.979097	4.35522	5.73954	66.7732	FALSE	2
2022-09-13	10:43:12	1.25106	5.56497	5.73954	87.5997	FALSE	2
2022-09-13	10:43:12	1.33533	5.93981	5.73954	72.713	FALSE	2
2022-09-13	10:43:13	1.32729	5.90405	7.93743	93.5038	FALSE	2
2022-09-13	10:43:13	1.70302	7.57537	7.93743	80.2884	FALSE	2
2022-09-13	10:43:13	1.4451	6.42809	7.93743	99.9319	FALSE	2
2022-09-13	10:43:13	2.66225	11.8422	7.93743	92.1306	FALSE	2
2022-09-13	10:43:14	2.93126	13.0388	10.6819	112.971	FALSE	2
2022-09-13	10:43:14	3.17879	14.1399	10.6819	106.27	1	3
2022-09-13	10:43:14	1.54922	6.89124	10.6819	119.862	FALSE	3
2022-09-13	10:43:14	1.94632	8.65762	10.6819	114.928	FALSE	3
2022-09-13	10:43:15	0.551412	2.45279	2.7178	122.315	FALSE	3
2022-09-13	10:43:15	0.79126	3.51968	2.7178	118.448	FALSE	3
2022-09-13	10:43:15	0.490293	2.18092	2.7178	124.496	FALSE	3
2022-09-13	10:43:16	0.432176	1.92241	2.16128	120.37	FALSE	3
2022-09-13	10:43:16	0.467392	2.07905	2.16128	126.575	FALSE	3
2022-09-13	10:43:16	0.35416	1.57537	2.16128	121.946	FALSE	3
2022-09-13	10:43:16	0.689784	3.0683	2.16128	129.643	FALSE	3
2022-09-13	10:43:17	0.419708	1.86695	2.28613	123.813	FALSE	3
2022-09-13	10:43:17	0.688308	3.06173	2.28613	132.705	FALSE	3
2022-09-13	10:43:17	0.34612	1.53961	2.28613	125.352	FALSE	3
2022-09-13	10:43:17	0.601641	2.67622	2.28613	135.381	FALSE	3
2022-09-13	10:43:18	0.332685	1.47985	2.54289	126.832	FALSE	3
2022-09-13	10:43:18	0.689122	3.06535	2.54289	138.446	FALSE	3
2022-09-13	10:43:18	0.502048	2.23321	2.54289	129.065	FALSE	3
2022-09-13	10:43:18	0.762812	3.39314	2.54289	141.839	FALSE	3
2022-09-13	10:43:19	0.574873	2.55715	2.9038	131.622	FALSE	3
2022-09-13	10:43:19	0.473957	2.10826	2.9038	143.948	FALSE	3
2022-09-13	10:43:19	0.90958	4.04599	2.9038	135.668	FALSE	3
2022-09-13	10:43:20	0.453448	2.01703	4.28645	145.965	FALSE	3
2022-09-13	10:43:20	1.06413	4.73346	4.28645	140.402	FALSE	3
2022-09-13	10:43:20	0.470751	2.09399	4.28645	148.059	FALSE	3
2022-09-13	10:43:20	1.86622	8.30132	4.28645	148.703	FALSE	3
2022-09-13	10:43:21	1.15019	5.11628	13.4788	153.175	FALSE	3
2022-09-13	10:43:21	3.6419	16.1999	13.4788	164.903	1	4
2022-09-13	10:43:21	1.88968	8.40567	13.4788	161.581	FALSE	4
2022-09-13	10:43:21	5.43889	24.1933	13.4788	189.096	1	5
2022-09-13	10:43:22	2.89319	12.8695	15.1088	174.45	FALSE	5
2022-09-13	10:43:22	4.1282	18.3631	15.1088	207.459	1	6
2022-09-13	10:43:22	4.30373	19.1439	15.1088	193.594	1	7
2022-09-13	10:43:22	2.26128	10.0586	15.1088	217.518	FALSE	7
2022-09-13	10:43:23	2.25538	10.0324	7.55769	203.626	FALSE	7
2022-09-13	10:43:23	0.790191	3.51493	7.55769	221.033	FALSE	7
2022-09-13	10:43:23	2.05156	9.12575	7.55769	212.752	FALSE	7
2022-09-13	10:43:24	0.545	2.42427	7.75011	223.457	FALSE	7
2022-09-13	10:43:24	1.72505	7.67337	7.75011	220.426	FALSE	7
2022-09-13	10:43:24	1.3077	5.81691	7.75011	229.274	FALSE	7
2022-09-13	10:43:24	3.39146	15.0859	7.75011	235.511	1	8
2022-09-13	10:43:25	2.22083	9.8787	15.3517	239.153	FALSE	8
2022-09-13	10:43:25	3.81864	16.9861	15.3517	252.497	1	9
2022-09-13	10:43:25	4.30597	19.1538	15.3517	258.307	1	10
2022-09-13	10:43:25	3.4594	15.3881	15.3517	267.886	1	11
2022-09-13	10:43:26	3.91421	17.4112	11.1868	275.718	1	12
2022-09-13	10:43:26	2.40968	10.7187	11.1868	278.604	FALSE	12
2022-09-13	10:43:26	2.75085	12.2363	11.1868	287.954	FALSE	12
2022-09-13	10:43:26	0.984898	4.38102	11.1868	282.985	FALSE	12
2022-09-13	10:43:27	1.20413	5.35621	4.9903	293.31	FALSE	12
2022-09-13	10:43:27	1.52841	6.79867	4.9903	289.784	FALSE	12
2022-09-13	10:43:27	0.660064	2.9361	4.9903	296.246	FALSE	12
2022-09-13	10:43:27	1.09487	4.8702	4.9903	294.654	FALSE	12
2022-09-13	10:43:28	0.350038	1.55704	2.7596	297.803	FALSE	12
2022-09-13	10:43:28	0.896705	3.98872	2.7596	298.643	FALSE	12
2022-09-13	10:43:28	0.614415	2.73304	2.7596	300.536	FALSE	12
2022-09-13	10:43:29	1.7424	7.75054	6.99464	306.393	FALSE	12
2022-09-13	10:43:29	1.10184	4.9012	6.99464	305.438	FALSE	12
2022-09-13	10:43:29	2.4109	10.7242	6.99464	317.118	FALSE	12
2022-09-13	10:43:29	1.03472	4.60264	6.99464	310.04	FALSE	12
2022-09-13	10:43:30	0.52327	2.32761	1.96055	319.445	FALSE	12
2022-09-13	10:43:30	0.417417	1.85675	1.96055	311.897	FALSE	12
2022-09-13	10:43:30	0.444135	1.9756	1.96055	321.421	FALSE	12
2022-09-13	10:43:30	0.378181	1.68222	1.96055	313.579	FALSE	12
2022-09-13	10:43:31	0.140573	0.625297	1.22258	322.046	FALSE	12
2022-09-13	10:43:31	0.29986	1.33384	1.22258	314.913	FALSE	12
2022-09-13	10:43:31	0.17528	0.77968	1.22258	322.826	FALSE	12
2022-09-13	10:43:31	0.483677	2.15149	1.22258	317.065	FALSE	12
2022-09-13	10:43:32	0.276654	1.23061	-0.0351052	324.056	FALSE	12
2022-09-13	10:43:32	-0.187213	-0.832761	-0.0351052	317.065	FALSE	12
2022-09-13	10:43:32	-0.113117	-0.503167	-0.0351052	324.056	FALSE	12
2022-09-13	10:43:33	-0.254033	-1.12999	-0.529878	317.065	FALSE	12
2022-09-13	10:43:33	-0.154185	-0.685846	-0.529878	324.056	FALSE	12
2022-09-13	10:43:33	-0.142837	-0.635368	-0.529878	317.065	FALSE	12
2022-09-13	10:43:33	0.0745676	0.331692	-0.529878	324.388	FALSE	12
2022-09-13	10:43:34	-0.101107	-0.449744	3.59314	317.065	FALSE	12
2022-09-13	10:43:34	0.367545	1.63491	3.59314	326.023	FALSE	12
2022-09-13	10:43:34	1.14093	5.07508	3.59314	322.14	FALSE	12
2022-09-13	10:43:34	1.82373	8.11232	3.59314	334.135	FALSE	12
2022-09-13	10:43:35	1.51508	6.73938	5.80355	328.879	FALSE	12
2022-09-13	10:43:35	1.6706	7.43116	5.80355	341.567	FALSE	12
2022-09-13	10:43:35	1.31579	5.8529	5.80355	334.732	FALSE	12
2022-09-13	10:43:35	0.717316	3.19077	5.80355	344.757	FALSE	12
2022-09-13	10:43:36	1.03391	4.59904	3.19537	339.331	FALSE	12
2022-09-13	10:43:36	0.244237	1.08642	3.19537	345.844	FALSE	12
2022-09-13	10:43:36	0.876908	3.90066	3.19537	343.232	FALSE	12
2022-09-13	10:43:37	0.275687	1.22631	2.62981	347.07	FALSE	12
2022-09-13	10:43:37	0.813143	3.61702	2.62981	346.849	FALSE	12
2022-09-13	10:43:37	0.419351	1.86536	2.62981	348.935	FALSE	12
2022-09-13	10:43:37	0.856654	3.81057	2.62981	350.659	FALSE	12
2022-09-13	10:43:38	0.606578	2.69818	2.93502	351.634	FALSE	12
2022-09-13	10:43:38	0.760979	3.38499	2.93502	354.044	FALSE	12
2022-09-13	10:43:38	0.695433	3.09343	2.93502	354.727	FALSE	12
2022-09-13	10:43:38	0.576298	2.56349	2.93502	356.608	FALSE	12
2022-09-13	10:43:39	0.681081	3.02958	2.17815	357.757	FALSE	12
2022-09-13	10:43:39	0.366832	1.63174	2.17815	358.24	FALSE	12
2022-09-13	10:43:39	0.571514	2.54221	2.17815	360.299	FALSE	12
2022-09-13	10:43:39	0.339249	1.50905	2.17815	359.749	FALSE	12
2022-09-13	10:43:40	0.425764	1.89388	1.66728	362.193	FALSE	12
2022-09-13	10:43:40	0.285509	1.27	1.66728	361.019	FALSE	12
2022-09-13	10:43:40	0.459707	2.04487	1.66728	364.238	FALSE	12
2022-09-13	10:43:40	0.328308	1.46038	1.66728	362.479	FALSE	12
2022-09-13	10:43:41	2.75716	12.2644	10.2388	376.502	FALSE	12
2022-09-13	10:43:41	2.32123	10.3253	10.2388	372.804	FALSE	12
2022-09-13	10:43:41	1.82698	8.12677	10.2388	384.629	FALSE	12
2022-09-13	10:43:42	0.783982	3.48731	2.50412	376.292	FALSE	12
2022-09-13	10:43:42	0.168155	0.747987	2.50412	385.377	FALSE	12
2022-09-13	10:43:42	0.803321	3.57333	2.50412	379.865	FALSE	12
2022-09-13	10:43:42	0.496349	2.20786	2.50412	387.585	FALSE	12
2022-09-13	10:43:43	0.491616	2.18681	0.968475	382.052	FALSE	12
2022-09-13	10:43:43	0.00734122	0.0326552	0.968475	387.617	FALSE	12
2022-09-13	10:43:43	0.139555	0.620769	0.968475	382.672	FALSE	12
2022-09-13	10:43:43	0.232379	1.03367	0.968475	388.651	FALSE	12
2022-09-13	10:43:44	0.175789	0.781945	0.81126	383.454	FALSE	12
2022-09-13	10:43:44	0.0372649	0.165762	0.81126	388.817	FALSE	12
2022-09-13	10:43:44	0.138283	0.61511	0.81126	384.07	FALSE	12
2022-09-13	10:43:44	0.378181	1.68222	0.81126	390.499	FALSE	12
2022-09-13	10:43:45	0.257926	1.14731	1.10754	385.217	FALSE	12
2022-09-13	10:43:45	0.246018	1.09434	1.10754	391.593	FALSE	12
2022-09-13	10:43:45	0.243015	1.08098	1.10754	386.298	FALSE	12
2022-09-13	10:43:46	0.242964	1.08075	1.08545	392.674	FALSE	12
2022-09-13	10:43:46	0.251718	1.11969	1.08545	387.417	FALSE	12
2022-09-13	10:43:46	0.240522	1.06989	1.08545	393.744	FALSE	12
2022-09-13	10:43:46	0.240878	1.07147	1.08545	388.489	FALSE	12
2022-09-13	10:43:47	0.252939	1.12512	1.11635	394.869	FALSE	12
2022-09-13	10:43:47	0.243626	1.0837	1.11635	389.573	FALSE	12
2022-09-13	10:43:47	0.233143	1.03707	1.11635	395.906	FALSE	12
2022-09-13	10:43:47	0.27416	1.21952	1.11635	390.792	FALSE	12
2022-09-13	10:43:48	0.271311	1.20685	1.12942	397.113	FALSE	12
2022-09-13	10:43:48	0.244491	1.08754	1.12942	391.88	FALSE	12
2022-09-13	10:43:48	0.249478	1.10973	1.12942	398.223	FALSE	12
2022-09-13	10:43:48	0.250344	1.11358	1.12942	392.993	FALSE	12
2022-09-13	10:43:49	0.244033	1.08551	1.74063	399.308	FALSE	12
2022-09-13	10:43:49	0.247341	1.10022	1.74063	394.094	FALSE	12
2022-09-13	10:43:49	0.682557	3.03615	1.74063	402.344	FALSE	12
2022-09-13	10:43:50	0.74327	3.30621	3.29421	397.4	FALSE	12
2022-09-13	10:43:50	0.744287	3.31074	3.29421	405.655	FALSE	12
2022-09-13	10:43:50	0.734568	3.26751	3.29421	400.667	FALSE	12
2022-09-13	10:43:50	0.740165	3.2924	3.29421	408.947	FALSE	12
2022-09-13	10:43:51	0.740827	3.29535	3.28607	403.963	FALSE	12
2022-09-13	10:43:51	0.743117	3.30553	3.28607	412.253	FALSE	12
2022-09-13	10:43:51	0.73528	3.27067	3.28607	407.233	FALSE	12
2022-09-13	10:43:51	0.735738	3.27271	3.28607	415.526	FALSE	12
2022-09-13	10:43:52	0.7393	3.28855	3.27463	410.522	FALSE	12
2022-09-13	10:43:52	0.736908	3.27791	3.27463	418.804	FALSE	12
2022-09-13	10:43:52	0.737163	3.27905	3.27463	413.801	FALSE	12
2022-09-13	10:43:52	0.73131	3.25301	3.27463	422.057	FALSE	12
2022-09-13	10:43:53	0.735738	3.27271	3.2669	417.074	FALSE	12
2022-09-13	10:43:53	0.734466	3.26705	3.2669	425.324	FALSE	12
2022-09-13	10:43:53	0.733092	3.26094	3.2669	420.335	FALSE	12
2022-09-13	10:43:54	0.736501	3.2761	3.27554	428.6	FALSE	12
2022-09-13	10:43:54	0.735483	3.27158	3.27554	423.606	FALSE	12
2022-09-13	10:43:54	0.730242	3.24826	3.27554	431.848	FALSE	12
2022-09-13	10:43:54	0.74327	3.30621	3.27554	426.912	FALSE	12
2022-09-13	10:43:55	0.734415	3.26682	3.27141	435.115	FALSE	12
2022-09-13	10:43:55	0.737672	3.28131	3.27141	430.194	FALSE	12
2022-09-13	10:43:55	0.738791	3.28629	3.27141	438.401	FALSE	12
2022-09-13	10:43:55	0.730903	3.2512	3.27141	433.445	FALSE	12
2022-09-13	10:43:56	0.738028	3.2829	3.28069	441.684	FALSE	12
2022-09-13	10:43:56	0.743219	3.30599	3.28069	436.751	FALSE	12
2022-09-13	10:43:56	0.730801	3.25075	3.28069	444.935	FALSE	12
2022-09-13	10:43:56	0.738079	3.28312	3.28069	440.034	FALSE	12
2022-09-13	10:43:57	0.734313	3.26637	3.26705	448.201	FALSE	12
2022-09-13	10:43:57	0.730343	3.24871	3.26705	443.283	FALSE	12
2022-09-13	10:43:57	0.737722	3.28154	3.26705	451.483	FALSE	12
2022-09-13	10:43:57	0.735483	3.27158	3.26705	446.554	FALSE	12
2022-09-13	10:43:58	0.736247	3.27497	3.28561	454.758	FALSE	12
2022-09-13	10:43:58	0.738435	3.28471	3.28561	449.839	FALSE	12
2022-09-13	10:43:58	0.741234	3.29716	3.28561	458.055	FALSE	12
2022-09-13	10:43:59	0.737875	3.28222	3.2864	453.121	FALSE	12
2022-09-13	10:43:59	0.739198	3.2881	3.2864	461.343	FALSE	12
2022-09-13	10:43:59	0.736094	3.27429	3.2864	456.395	FALSE	12
2022-09-13	10:43:59	0.742099	3.301	3.2864	464.644	FALSE	12
2022-09-13	10:44:00	0.734313	3.26637	3.28414	459.662	FALSE	12
2022-09-13	10:44:00	0.74159	3.29874	3.28414	467.943	FALSE	12
2022-09-13	10:44:00	0.739504	3.28946	3.28414	462.951	FALSE	12
2022-09-13	10:44:00	0.737824	3.28199	3.28414	471.225	FALSE	12
2022-09-13	10:44:01	0.733499	3.26275	3.27871	466.214	FALSE	12
2022-09-13	10:44:01	0.738689	3.28584	3.27871	474.51	FALSE	12
2022-09-13	10:44:01	0.737672	3.28131	3.27871	469.495	FALSE	12
2022-09-13	10:44:01	0.738486	3.28493	3.27871	477.795	FALSE	12
2022-09-13	10:44:02	0.741947	3.30033	3.28992	472.796	FALSE	12
2022-09-13	10:44:02	0.732074	3.25641	3.28992	481.052	FALSE	12
2022-09-13	10:44:02	0.744797	3.31301	3.28992	476.109	FALSE	12
2022-09-13	10:44:03	0.736145	3.27452	3.28578	484.326	FALSE	12
2022-09-13	10:44:03	0.740623	3.29444	3.28578	479.403	FALSE	12
2022-09-13	10:44:03	0.736908	3.27791	3.28578	487.604	FALSE	12
2022-09-13	10:44:03	0.741031	3.29625	3.28578	482.699	FALSE	12
2022-09-13	10:44:04	0.740114	3.29218	3.26049	490.896	FALSE	12
2022-09-13	10:44:04	0.73584	3.27316	3.26049	485.973	FALSE	12
2022-09-13	10:44:04	0.730394	3.24894	3.26049	494.145	FALSE	12
2022-09-13	10:44:04	0.725611	3.22766	3.26049	489.2	FALSE	12
2022-09-13	10:44:05	0.735331	3.2709	3.28097	497.416	FALSE	12
2022-09-13	10:44:05	0.73701	3.27837	3.28097	492.479	FALSE	12
2022-09-13	10:44:05	0.737773	3.28176	3.28097	500.698	FALSE	12
2022-09-13	10:44:05	0.740267	3.29286	3.28097	495.771	FALSE	12
2022-09-13	10:44:06	0.743778	3.30847	3.28116	504.006	FALSE	12
2022-09-13	10:44:06	0.736807	3.27746	3.28116	499.049	FALSE	12
2022-09-13	10:44:06	0.732328	3.25754	3.28116	507.264	FALSE	12
2022-09-13	10:44:07	0.743778	3.30847	3.28476	502.357	FALSE	12
2022-09-13	10:44:07	0.736145	3.27452	3.28476	510.539	FALSE	12
2022-09-13	10:44:07	0.73813	3.28335	3.28476	505.641	FALSE	12
2022-09-13	10:44:07	0.735738	3.27271	3.28476	513.811	FALSE	12
2022-09-13	10:44:08	0.738791	3.28629	3.27763	508.927	FALSE	12
2022-09-13	10:44:08	0.733041	3.26071	3.27763	517.072	FALSE	12
2022-09-13	10:44:08	0.732888	3.26003	3.27763	512.187	FALSE	12
2022-09-13	10:44:08	0.742659	3.3035	3.27763	520.375	FALSE	12
2022-09-13	10:44:09	0.731158	3.25234	3.27311	515.439	FALSE	12
2022-09-13	10:44:09	0.735687	3.27248	3.27311	523.648	FALSE	12
2022-09-13	10:44:09	0.734669	3.26795	3.27311	518.707	FALSE	12
2022-09-13	10:44:09	0.741794	3.29965	3.27311	526.948	FALSE	12
2022-09-13	10:44:10	0.731463	3.25369	3.27633	521.961	FALSE	12
2022-09-13	10:44:10	0.73874	3.28606	3.27633	530.234	FALSE	12
2022-09-13	10:44:10	0.73645	3.27588	3.27633	525.237	FALSE	12
2022-09-13	10:44:10	0.739555	3.28969	3.27633	533.523	FALSE	12
2022-09-13	10:44:11	0.737315	3.27972	3.27505	528.517	FALSE	12
2022-09-13	10:44:11	0.732684	3.25912	3.27505	536.782	FALSE	12
2022-09-13	10:44:11	0.738791	3.28629	3.27505	531.803	FALSE	12
2022-09-13	10:44:12	0.74271	3.30372	2.96852	540.086	FALSE	12
2022-09-13	10:44:12	0.739758	3.29059	2.96852	535.093	FALSE	12
2022-09-13	10:44:12	0.738944	3.28697	2.96852	543.373	FALSE	12
2022-09-13	10:44:12	0.448003	1.99281	2.96852	537.086	FALSE	12
2022-09-13	10:44:13	0.737214	3.27928	2.70752	546.652	FALSE	12
2022-09-13	10:44:13	0.739147	3.28787	2.70752	540.374	FALSE	12
2022-09-13	10:44:13	0.48958	2.17775	2.70752	548.83	FALSE	12
2022-09-13	10:44:13	0.468766	2.08516	2.70752	542.459	FALSE	12
2022-09-13	10:44:14	0.741845	3.29987	3.28063	552.13	FALSE	12
2022-09-13	10:44:14	0.739606	3.28992	3.28063	545.749	FALSE	12
2022-09-13	10:44:14	0.733448	3.26252	3.28063	555.393	FALSE	12
2022-09-13	10:44:14	0.735178	3.27022	3.28063	549.019	FALSE	12
2022-09-13	10:44:15	0.740929	3.2958	3.28312	558.688	FALSE	12
2022-09-13	10:44:15	0.73701	3.27837	3.28312	552.298	FALSE	12
2022-09-13	10:44:15	0.736298	3.2752	3.28312	561.964	FALSE	12
2022-09-13	10:44:16	0.734313	3.26637	3.27678	555.564	FALSE	12
2022-09-13	10:44:16	0.742608	3.30327	3.27678	565.267	FALSE	12
2022-09-13	10:44:16	0.735636	3.27226	3.27678	558.836	FALSE	12
2022-09-13	10:44:16	0.734059	3.26524	3.27678	568.532	FALSE	12
2022-09-13	10:44:17	0.723117	3.21657	2.73208	562.053	FALSE	12
2022-09-13	10:44:17	0.693906	3.08663	2.73208	571.619	FALSE	12
2022-09-13	10:44:17	0.693651	3.0855	2.73208	565.139	FALSE	12
2022-09-13	10:44:17	0.34612	1.53961	2.73208	573.158	FALSE	12
2022-09-13	10:44:18	0.728206	3.23921	3.24605	568.378	FALSE	12
2022-09-13	10:44:18	0.722608	3.2143	3.24605	576.373	FALSE	12
2022-09-13	10:44:18	0.733092	3.26094	3.24605	571.639	FALSE	12
2022-09-13	10:44:18	0.735076	3.26977	3.24605	579.642	FALSE	12
2022-09-13	10:44:19	0.739656	3.29014	3.27799	574.929	FALSE	12
2022-09-13	10:44:19	0.732277	3.25731	3.27799	582.9	FALSE	12
2022-09-13	10:44:19	0.738842	3.28652	3.27799	578.215	FALSE	12
2022-09-13	10:44:20	0.734822	3.26864	3.27067	586.168	FALSE	12
2022-09-13	10:44:20	0.737977	3.28267	3.27067	581.498	FALSE	12
2022-09-13	10:44:20	0.734669	3.26795	3.27067	589.436	FALSE	12
2022-09-13	10:44:20	0.733651	3.26343	3.27067	584.761	FALSE	12
2022-09-13	10:44:21	0.735229	3.27045	3.26388	592.707	FALSE	12
2022-09-13	10:44:21	0.733448	3.26252	3.26388	588.024	FALSE	12
2022-09-13	10:44:21	0.733804	3.26411	3.26388	595.971	FALSE	12
2022-09-13	10:44:21	0.732532	3.25845	3.26388	591.282	FALSE	12
2022-09-13	10:44:22	0.73757	3.28086	3.26948	599.252	FALSE	12
2022-09-13	10:44:22	0.727443	3.23581	3.26948	594.518	FALSE	12
2022-09-13	10:44:22	0.734262	3.26614	3.26948	602.518	FALSE	12
2022-09-13	10:44:22	0.740776	3.29512	3.26948	597.813	FALSE	12
2022-09-13	10:44:23	0.739453	3.28923	3.28622	605.807	FALSE	12
2022-09-13	10:44:23	0.738689	3.28584	3.28622	601.099	FALSE	12
2022-09-13	10:44:23	0.738181	3.28358	3.28622	609.091	FALSE	12
2022-09-13	10:44:24	0.740318	3.29308	3.27927	604.392	FALSE	12
2022-09-13	10:44:24	0.735382	3.27113	3.27927	612.362	FALSE	12
2022-09-13	10:44:24	0.74215	3.30123	3.27927	607.693	FALSE	12
2022-09-13	10:44:24	0.731005	3.25166	3.27927	615.613	FALSE	12
2022-09-13	10:44:25	0.732481	3.25822	3.28007	610.952	FALSE	12
2022-09-13	10:44:25	0.743677	3.30802	3.28007	618.921	FALSE	12
2022-09-13	10:44:25	0.740267	3.29286	3.28007	614.245	FALSE	12
2022-09-13	10:44:25	0.733142	3.26116	3.28007	622.183	FALSE	12
2022-09-13	10:44:26	0.740623	3.29444	3.2928	617.539	FALSE	12
2022-09-13	10:44:26	0.743524	3.30734	3.2928	625.49	FALSE	12
2022-09-13	10:44:26	0.739453	3.28923	3.2928	620.828	FALSE	12
2022-09-13	10:44:26	0.737417	3.28018	3.2928	628.77	FALSE	12
2022-09-13	10:44:27	0.740725	3.29489	3.2829	624.123	FALSE	12
2022-09-13	10:44:27	0.738079	3.28312	3.2829	632.053	FALSE	12
2022-09-13	10:44:27	0.741081	3.29648	3.2829	627.42	FALSE	12
2022-09-13	10:44:27	0.732226	3.25709	3.2829	635.31	FALSE	12
2022-09-13	10:44:28	0.740471	3.29376	3.28712	630.713	FALSE	12
2022-09-13	10:44:28	0.737824	3.28199	3.28712	638.592	FALSE	12
2022-09-13	10:44:28	0.738639	3.28561	3.28712	633.999	FALSE	12
2022-09-13	10:44:29	0.734059	3.26524	3.27475	641.858	FALSE	12
2022-09-13	10:44:29	0.738435	3.28471	3.27475	637.284	FALSE	12
2022-09-13	10:44:29	0.73472	3.26818	3.27475	645.126	FALSE	12
2022-09-13	10:44:29	0.73757	3.28086	3.27475	640.565	FALSE	12
2022-09-13	10:44:30	0.737112	3.27882	3.22834	648.405	FALSE	12
2022-09-13	10:44:30	0.737926	3.28244	3.22834	643.847	FALSE	12
2022-09-13	10:44:30	0.69528	3.09274	3.22834	651.497	FALSE	12
2022-09-13	10:44:30	0.732735	3.25935	3.22834	647.106	FALSE	12
2022-09-13	10:44:31	0.731667	3.2546	3.28935	654.752	FALSE	12
2022-09-13	10:44:31	0.745255	3.31504	3.28935	650.421	FALSE	12
2022-09-13	10:44:31	0.7393	3.28855	3.28935	658.041	FALSE	12
2022-09-13	10:44:31	0.741692	3.29919	3.28935	653.721	FALSE	12
2022-09-13	10:44:32	0.734618	3.26773	3.2635	661.308	FALSE	12
2022-09-13	10:44:32	0.730852	3.25098	3.2635	656.972	FALSE	12
2022-09-13	10:44:32	0.735534	3.2718	3.2635	664.58	FALSE	12
2022-09-13	10:44:33	0.738333	3.28425	3.94475	660.256	FALSE	12
2022-09-13	10:44:33	0.74098	3.29603	3.94475	667.876	FALSE	12
2022-09-13	10:44:33	0.737875	3.28222	3.94475	663.538	FALSE	12
2022-09-13	10:44:33	1.33009	5.91651	3.94475	673.793	FALSE	12
2022-09-13	10:44:34	1.09843	4.88604	2.55369	668.424	FALSE	12
2022-09-13	10:44:34	0.0328882	0.146293	2.55369	673.939	FALSE	12
2022-09-13	10:44:34	0.573957	2.55308	2.55369	670.977	FALSE	12
2022-09-13	10:44:34	0.591107	2.62936	2.55369	676.568	FALSE	12
2022-09-13	10:44:35	0.627443	2.79099	2.85336	673.768	FALSE	12
2022-09-13	10:44:35	0.616552	2.74255	2.85336	679.311	FALSE	12
2022-09-13	10:44:35	0.599707	2.66762	2.85336	676.436	FALSE	12
2022-09-13	10:44:35	0.72215	3.21227	2.85336	682.523	FALSE	12
2022-09-13	10:44:36	0.738537	3.28516	5.5546	679.721	FALSE	12
2022-09-13	10:44:36	0.953804	4.24271	5.5546	686.766	FALSE	12
2022-09-13	10:44:36	2.05385	9.13594	5.5546	688.857	FALSE	12
2022-09-13	10:44:37	1.95243	8.6848	4.36037	695.451	FALSE	12
2022-09-13	10:44:37	0.86785	3.86037	4.36037	692.717	FALSE	12
2022-09-13	10:44:37	0.782608	3.4812	4.36037	698.932	FALSE	12
2022-09-13	10:44:37	0.31813	1.41511	4.36037	694.132	FALSE	12
2022-09-13	10:44:38	0.205051	0.912108	0.100567	699.844	FALSE	12
2022-09-13	10:44:38	0.0408781	0.181834	0.100567	694.314	FALSE	12
2022-09-13	10:44:38	-0.0193763	-0.0861897	0.100567	699.844	FALSE	12
2022-09-13	10:44:38	-0.136119	-0.605485	0.100567	694.314	FALSE	12
2022-09-13	10:44:39	-0.415712	-1.84917	-2.87333	699.844	FALSE	12
2022-09-13	10:44:39	-0.622175	-2.76756	-2.87333	694.314	FALSE	12
2022-09-13	10:44:39	-0.704211	-3.13247	-2.87333	699.844	FALSE	12
2022-09-13	10:44:39	-0.841717	-3.74413	-2.87333	694.314	FALSE	12
2022-09-13	10:44:40	-0.809045	-3.59879	-3.71387	699.844	FALSE	12
2022-09-13	10:44:40	-1.06391	-4.73248	-3.71387	694.314	FALSE	12
2022-09-13	10:44:40	-0.631793	-2.81034	-3.71387	699.844	FALSE	12
2022-09-13	10:44:41	-0.126857	-0.564285	8.97279	694.314	FALSE	12
2022-09-13	10:44:41	2.1649	9.62991	8.97279	709.474	FALSE	12
2022-09-13	10:44:41	5.19802	23.1218	8.97279	717.436	1	13
2022-09-13	10:44:41	0.832634	3.70372	8.97279	713.177	FALSE	13
2022-09-13	10:44:42	0.180115	0.801188	1.02824	718.237	FALSE	13
2022-09-13	10:44:42	0.247952	1.10294	1.02824	714.28	FALSE	13
2022-09-13	10:44:42	0.282252	1.25551	1.02824	719.493	FALSE	13
2022-09-13	10:44:42	0.214313	0.953307	1.02824	715.234	FALSE	13
2022-09-13	10:44:43	0.428563	1.90633	2.14102	721.399	FALSE	13
2022-09-13	10:44:43	0.275535	1.22563	2.14102	716.459	FALSE	13
2022-09-13	10:44:43	0.659606	2.93406	2.14102	724.333	FALSE	13
2022-09-13	10:44:43	0.56159	2.49806	2.14102	718.957	FALSE	13
2022-09-13	10:44:44	-0.0853305	-0.379567	-0.862757	724.333	FALSE	13
2022-09-13	10:44:44	-0.0310303	-0.138029	-0.862757	718.957	FALSE	13
2022-09-13	10:44:44	-0.203244	-0.90407	-0.862757	724.333	FALSE	13
2022-09-13	10:44:44	-0.456221	-2.02936	-0.862757	718.957	FALSE	13
2022-09-13	10:44:45	-0.419529	-1.86615	-1.50976	724.333	FALSE	13
2022-09-13	10:44:45	-0.360241	-1.60242	-1.50976	718.957	FALSE	13
2022-09-13	10:44:45	-0.23846	-1.06072	-1.50976	724.333	FALSE	13
2022-09-13	10:44:46	-0.00115753	-0.00514892	0.244482	718.957	FALSE	13
2022-09-13	10:44:46	0.0647967	0.288229	0.244482	724.621	FALSE	13
2022-09-13	10:44:46	0.074415	0.331013	0.244482	719.288	FALSE	13
2022-09-13	10:44:46	0.0817941	0.363837	0.244482	724.985	FALSE	13
2022-09-13	10:44:47	0.10897	0.48472	0.646914	719.773	FALSE	13
2022-09-13	10:44:47	0.115229	0.512562	0.646914	725.498	FALSE	13
2022-09-13	10:44:47	0.0808781	0.359762	0.646914	720.133	FALSE	13
2022-09-13	10:44:47	0.276654	1.23061	0.646914	726.728	FALSE	13
2022-09-13	10:44:48	0.802354	3.56903	1.07996	723.702	FALSE	13
2022-09-13	10:44:48	0.0373157	0.165988	1.07996	726.894	FALSE	13
2022-09-13	10:44:48	0.21243	0.944931	1.07996	724.647	FALSE	13
2022-09-13	10:44:48	-0.0809539	-0.360099	1.07996	726.894	FALSE	13
2022-09-13	10:44:49	-0.256425	-1.14063	-0.462872	724.647	FALSE	13
2022-09-13	10:44:49	-0.1893	-0.842044	-0.462872	726.894	FALSE	13
2022-09-13	10:44:49	0.13355	0.594057	-0.462872	725.241	FALSE	13
2022-09-13	10:44:50	0.152583	0.67872	0.998298	727.573	FALSE	13
2022-09-13	10:44:50	0.237417	1.05608	0.998298	726.297	FALSE	13
2022-09-13	10:44:50	0.22729	1.01103	0.998298	728.584	FALSE	13
2022-09-13	10:44:50	0.28042	1.24736	0.998298	727.544	FALSE	13
2022-09-13	10:44:51	0.243677	1.08392	1.46689	729.668	FALSE	13
2022-09-13	10:44:51	0.361743	1.60911	1.46689	729.154	FALSE	13
2022-09-13	10:44:51	0.338791	1.50701	1.46689	731.175	FALSE	13
2022-09-13	10:44:51	0.374873	1.66751	1.46689	730.821	FALSE	13
2022-09-13	10:44:52	0.296145	1.31731	1.37855	732.492	FALSE	13
2022-09-13	10:44:52	0.398181	1.77119	1.37855	732.592	FALSE	13
2022-09-13	10:44:52	0.252379	1.12263	1.37855	733.615	FALSE	13
2022-09-13	10:44:52	0.292939	1.30305	1.37855	733.895	FALSE	13
2022-09-13	10:44:53	0.389071	1.73067	2.35681	735.346	FALSE	13
2022-09-13	10:44:53	0.466832	2.07656	2.35681	735.972	FALSE	13
2022-09-13	10:44:53	0.733601	3.2632	2.35681	738.609	FALSE	13
2022-09-13	10:44:54	0.743371	3.30666	3.28708	739.278	FALSE	13
2022-09-13	10:44:54	0.736399	3.27565	3.28708	741.884	FALSE	13
2022-09-13	10:44:54	0.736247	3.27497	3.28708	742.553	FALSE	13
2022-09-13	10:44:54	0.73986	3.29105	3.28708	745.175	FALSE	13
2022-09-13	10:44:55	0.74098	3.29603	3.27384	745.849	FALSE	13
2022-09-13	10:44:55	0.730751	3.25053	3.27384	748.426	FALSE	13
2022-09-13	10:44:55	0.740522	3.29399	3.27384	749.143	FALSE	13
2022-09-13	10:44:55	0.731717	3.25482	3.27384	751.681	FALSE	13
2022-09-13	10:44:56	0.734059	3.26524	3.21521	752.409	FALSE	13
2022-09-13	10:44:56	0.720064	3.20299	3.21521	754.884	FALSE	13
2022-09-13	10:44:56	0.717977	3.19371	3.21521	755.602	FALSE	13
2022-09-13	10:44:56	0.719148	3.19891	3.21521	758.083	FALSE	13
2022-09-13	10:44:57	0.71757	3.19189	3.15822	758.794	FALSE	13
2022-09-13	10:44:57	0.713397	3.17333	3.15822	761.256	FALSE	13
2022-09-13	10:44:57	0.698944	3.10904	3.15822	761.903	FALSE	13
2022-09-13	10:44:57	0.710089	3.15862	3.15822	764.415	FALSE	13
2022-09-13	10:44:58	0.70673	3.14368	3.13779	765.047	FALSE	13
2022-09-13	10:44:58	0.706425	3.14232	3.13779	767.557	FALSE	13
2022-09-13	10:44:58	0.703066	3.12738	3.13779	768.174	FALSE	13
2022-09-13	10:44:59	0.692481	3.08029	3.05064	770.637	FALSE	13
2022-09-13	10:44:59	0.687086	3.0563	3.05064	771.231	FALSE	13
2022-09-13	10:44:59	0.68729	3.0572	3.05064	773.695	FALSE	13
2022-09-13	10:44:59	0.676399	3.00876	3.05064	774.239	FALSE	13
2022-09-13	10:45:00	0.461082	2.05098	1.20679	775.745	FALSE	13
2022-09-13	10:45:00	0.222099	0.987941	1.20679	775.227	FALSE	13
2022-09-13	10:45:00	0.203881	0.906903	1.20679	776.652	FALSE	13
2022-09-13	10:45:00	0.19813	0.881322	1.20679	776.109	FALSE	13
2022-09-13	10:45:01	0.198232	0.881776	1.49722	777.534	FALSE	13
2022-09-13	10:45:01	0.202303	0.899884	1.49722	777.009	FALSE	13
2022-09-13	10:45:01	0.213804	0.951043	1.49722	778.485	FALSE	13
2022-09-13	10:45:01	0.732023	3.25618	1.49722	780.265	FALSE	13
2022-09-13	10:45:02	0.736247	3.27497	3.27761	781.76	FALSE	13
2022-09-13	10:45:02	0.735534	3.2718	3.27761	783.537	FALSE	13
2022-09-13	10:45:02	0.73874	3.28606	3.27761	785.046	FALSE	13
2022-09-13	10:45:03	0.731056	3.25188	3.26971	786.788	FALSE	13
2022-09-13	10:45:03	0.733448	3.26252	3.26971	788.309	FALSE	13
2022-09-13	10:45:03	0.737722	3.28154	3.26971	790.07	FALSE	13
2022-09-13	10:45:03	0.738028	3.2829	3.26971	791.592	FALSE	13
2022-09-13	10:45:04	0.73874	3.28606	3.27667	793.356	FALSE	13
2022-09-13	10:45:04	0.732023	3.25618	3.27667	794.848	FALSE	13
2022-09-13	10:45:04	0.736094	3.27429	3.27667	796.63	FALSE	13
2022-09-13	10:45:04	0.739656	3.29014	3.27667	798.138	FALSE	13
2022-09-13	10:45:05	0.740573	3.29422	3.27724	799.925	FALSE	13
2022-09-13	10:45:05	0.734008	3.26501	3.27724	801.403	FALSE	13
2022-09-13	10:45:05	0.735382	3.27113	3.27724	803.196	FALSE	13
2022-09-13	10:45:05	0.737061	3.27859	3.27724	804.682	FALSE	13
2022-09-13	10:45:06	0.732888	3.26003	3.27226	806.456	FALSE	13
2022-09-13	10:45:06	0.741234	3.29716	3.27226	807.979	FALSE	13
2022-09-13	10:45:06	0.732786	3.25958	3.27226	809.715	FALSE	13
2022-09-13	10:45:07	0.738689	3.28584	3.27435	811.265	FALSE	13
2022-09-13	10:45:07	0.732277	3.25731	3.27435	812.973	FALSE	13
2022-09-13	10:45:07	0.736654	3.27678	3.27435	814.541	FALSE	13
2022-09-13	10:45:07	0.736807	3.27746	3.27435	816.25	FALSE	13
2022-09-13	10:45:08	0.743423	3.30689	3.28873	817.848	FALSE	13
2022-09-13	10:45:08	0.741845	3.29987	3.28873	819.55	FALSE	13
2022-09-13	10:45:08	0.740216	3.29263	3.28873	821.141	FALSE	13
2022-09-13	10:45:08	0.73187	3.2555	3.28873	822.805	FALSE	13
2022-09-13	10:45:09	0.739453	3.28923	3.27588	824.43	FALSE	13
2022-09-13	10:45:09	0.737061	3.27859	3.27588	826.084	FALSE	13
2022-09-13	10:45:09	0.733499	3.26275	3.27588	827.693	FALSE	13
2022-09-13	10:45:09	0.735789	3.27294	3.27588	829.357	FALSE	13
2022-09-13	10:45:10	0.741081	3.29648	3.29021	830.989	FALSE	13
2022-09-13	10:45:10	0.746781	3.32183	3.29021	832.679	FALSE	13
2022-09-13	10:45:10	0.731158	3.25234	3.29021	834.242	FALSE	13
2022-09-13	10:45:11	0.736043	3.27407	3.28533	835.953	FALSE	13
2022-09-13	10:45:11	0.740725	3.29489	3.28533	837.537	FALSE	13
2022-09-13	10:45:11	0.740369	3.29331	3.28533	839.246	FALSE	13
2022-09-13	10:45:11	0.737163	3.27905	3.28533	840.816	FALSE	13
2022-09-13	10:45:12	0.739147	3.28787	3.28103	842.534	FALSE	13
2022-09-13	10:45:12	0.739758	3.29059	3.28103	844.106	FALSE	13
2022-09-13	10:45:12	0.735382	3.27113	3.28103	845.805	FALSE	13
2022-09-13	10:45:12	0.736145	3.27452	3.28103	847.381	FALSE	13
2022-09-13	10:45:13	0.735636	3.27226	3.27684	849.077	FALSE	13
2022-09-13	10:45:13	0.737926	3.28244	3.27684	850.663	FALSE	13
2022-09-13	10:45:13	0.738537	3.28516	3.27684	852.363	FALSE	13
2022-09-13	10:45:13	0.734568	3.26751	3.27684	853.931	FALSE	13
2022-09-13	10:45:14	0.735738	3.27271	3.2756	855.635	FALSE	13
2022-09-13	10:45:14	0.734466	3.26705	3.2756	857.198	FALSE	13
2022-09-13	10:45:14	0.740471	3.29376	3.2756	858.929	FALSE	13
2022-09-13	10:45:14	0.734873	3.26886	3.2756	860.467	FALSE	13
2022-09-13	10:45:15	0.737417	3.28018	3.28161	862.209	FALSE	13
2022-09-13	10:45:15	0.734364	3.2666	3.28161	863.733	FALSE	13
2022-09-13	10:45:15	0.741438	3.29806	3.28161	865.507	FALSE	13
2022-09-13	10:45:16	0.738944	3.28697	2.34945	867.02	FALSE	13
2022-09-13	10:45:16	0.733041	3.26071	2.34945	868.768	FALSE	13
2022-09-13	10:45:16	0.293753	1.30667	2.34945	868.327	FALSE	13
2022-09-13	10:45:16	0.346985	1.54346	2.34945	870.312	FALSE	13
2022-09-13	10:45:17	0.343423	1.52761	1.52552	869.854	FALSE	13
2022-09-13	10:45:17	0.228817	1.01782	1.52552	871.329	FALSE	13
2022-09-13	10:45:17	0.441947	1.96587	1.52552	871.82	FALSE	13
2022-09-13	10:45:17	0.357621	1.59077	1.52552	872.92	FALSE	13
2022-09-13	10:45:18	0.748359	3.32885	3.37112	875.149	FALSE	13
2022-09-13	10:45:18	1.09426	4.86749	3.37112	877.788	FALSE	13
2022-09-13	10:45:18	0.581794	2.58794	3.37112	877.737	FALSE	13
2022-09-13	10:45:18	0.607036	2.70022	3.37112	880.488	FALSE	13
2022-09-13	10:45:19	0.517417	2.30157	2.38405	880.039	FALSE	13
2022-09-13	10:45:19	0.360115	1.60186	2.38405	882.09	FALSE	13
2022-09-13	10:45:19	0.730343	3.24871	2.38405	883.287	FALSE	13
2022-09-13	10:45:20	0.73584	3.27316	3.28839	885.363	FALSE	13
2022-09-13	10:45:20	0.739707	3.29036	3.28839	886.578	FALSE	13
2022-09-13	10:45:20	0.73986	3.29105	3.28839	888.654	FALSE	13
2022-09-13	10:45:20	0.741641	3.29897	3.28839	889.877	FALSE	13
2022-09-13	10:45:21	0.739046	3.28742	3.27888	891.941	FALSE	13
2022-09-13	10:45:21	0.735229	3.27045	3.27888	893.147	FALSE	13
2022-09-13	10:45:21	0.743728	3.30825	3.27888	895.25	FALSE	13
2022-09-13	10:45:21	0.730496	3.24939	3.27888	896.397	FALSE	13
2022-09-13	10:45:22	0.735992	3.27384	3.27118	898.523	FALSE	13
2022-09-13	10:45:22	0.735229	3.27045	3.27118	899.667	FALSE	13
2022-09-13	10:45:22	0.735789	3.27294	3.27118	901.796	FALSE	13
2022-09-13	10:45:22	0.734568	3.26751	3.27118	902.935	FALSE	13
2022-09-13	10:45:23	0.729326	3.24419	3.25015	905.041	FALSE	13
2022-09-13	10:45:23	0.729275	3.24396	3.25015	906.179	FALSE	13
2022-09-13	10:45:23	0.733397	3.2623	3.25015	908.303	FALSE	13
2022-09-13	10:45:24	0.733193	3.26139	3.26654	909.44	FALSE	13
2022-09-13	10:45:24	0.735382	3.27113	3.26654	911.574	FALSE	13
2022-09-13	10:45:24	0.737112	3.27882	3.26654	912.719	FALSE	13
2022-09-13	10:45:24	0.731717	3.25482	3.26654	914.829	FALSE	13
2022-09-13	10:45:25	0.732634	3.2589	3.2679	915.978	FALSE	13
2022-09-13	10:45:25	0.733142	3.26116	3.2679	918.09	FALSE	13
2022-09-13	10:45:25	0.730903	3.2512	3.2679	919.229	FALSE	13
2022-09-13	10:45:25	0.741947	3.30033	3.2679	921.39	FALSE	13
2022-09-13	10:45:26	0.737926	3.28244	3.28737	922.511	FALSE	13
2022-09-13	10:45:26	0.736908	3.27791	3.28737	924.668	FALSE	13
2022-09-13	10:45:26	0.743219	3.30599	3.28737	925.817	FALSE	13
2022-09-13	10:45:26	0.738079	3.28312	3.28737	927.951	FALSE	13
2022-09-13	10:45:27	0.733651	3.26343	3.27286	929.081	FALSE	13
2022-09-13	10:45:27	0.739911	3.29127	3.27286	931.243	FALSE	13
2022-09-13	10:45:27	0.733753	3.26388	3.27286	932.345	FALSE	13
2022-09-13	10:45:28	0.738588	3.28539	3.2842	934.528	FALSE	13
2022-09-13	10:45:28	0.735789	3.27294	3.2842	935.617	FALSE	13
2022-09-13	10:45:28	0.737468	3.28041	3.2842	937.808	FALSE	13
2022-09-13	10:45:28	0.741438	3.29806	3.2842	938.916	FALSE	13
2022-09-13	10:45:29	0.734822	3.26864	3.27356	941.077	FALSE	13
2022-09-13	10:45:29	0.738282	3.28403	3.27356	942.2	FALSE	13
2022-09-13	10:45:29	0.734669	3.26795	3.27356	944.345	FALSE	13
2022-09-13	10:45:29	0.735941	3.27361	3.27356	945.473	FALSE	13
2022-09-13	10:45:30	0.732226	3.25709	3.26603	947.602	FALSE	13
2022-09-13	10:45:30	0.731361	3.25324	3.26603	948.726	FALSE	13
2022-09-13	10:45:30	0.737417	3.28018	3.26603	950.882	FALSE	13
2022-09-13	10:45:30	0.735941	3.27361	3.26603	952	FALSE	13
2022-09-13	10:45:31	0.738842	3.28652	3.2812	954.169	FALSE	13
2022-09-13	10:45:31	0.737417	3.28018	3.2812	955.28	FALSE	13
2022-09-13	10:45:31	0.734059	3.26524	3.2812	957.434	FALSE	13
2022-09-13	10:45:31	0.740267	3.29286	3.2812	958.573	FALSE	13
2022-09-13	10:45:32	0.736399	3.27565	3.27256	960.71	FALSE	13
2022-09-13	10:45:32	0.734975	3.26932	3.27256	961.842	FALSE	13
2022-09-13	10:45:32	0.735738	3.27271	3.27256	963.982	FALSE	13
2022-09-13	10:45:33	0.732277	3.25731	3.26484	965.1	FALSE	13
2022-09-13	10:45:33	0.733193	3.26139	3.26484	967.244	FALSE	13
2022-09-13	10:45:33	0.740573	3.29422	3.26484	968.394	FALSE	13
2022-09-13	10:45:33	0.729835	3.24645	3.26484	970.49	FALSE	13
2022-09-13	10:45:34	0.746832	3.32206	3.28584	971.716	FALSE	13
2022-09-13	10:45:34	0.736247	3.27497	3.28584	973.765	FALSE	13
2022-09-13	10:45:34	0.741081	3.29648	3.28584	975.012	FALSE	13
2022-09-13	10:45:34	0.730598	3.24985	3.28584	977.015	FALSE	13
2022-09-13	10:45:35	0.734568	3.26751	3.27588	978.28	FALSE	13
2022-09-13	10:45:35	0.737621	3.28109	3.27588	980.296	FALSE	13
2022-09-13	10:45:35	0.74042	3.29354	3.27588	981.574	FALSE	13
2022-09-13	10:45:35	0.733193	3.26139	3.27588	983.557	FALSE	13
2022-09-13	10:45:36	0.732634	3.2589	3.25913	984.832	FALSE	13
2022-09-13	10:45:36	0.730954	3.25143	3.25913	986.809	FALSE	13
2022-09-13	10:45:36	0.734466	3.26705	3.25913	988.099	FALSE	13
2022-09-13	10:45:37	0.741539	3.29851	3.28239	990.107	FALSE	13
2022-09-13	10:45:37	0.732175	3.25686	3.28239	991.356	FALSE	13
2022-09-13	10:45:37	0.734313	3.26637	3.28239	993.374	FALSE	13
2022-09-13	10:45:37	0.743626	3.3078	3.28239	994.664	FALSE	13
2022-09-13	10:45:38	0.737672	3.28131	3.70287	996.655	FALSE	13
2022-09-13	10:45:38	0.729886	3.24668	3.70287	997.911	FALSE	13
2022-09-13	10:45:38	0.726985	3.23377	3.70287	999.889	FALSE	13
2022-09-13	10:45:38	1.13523	5.04973	3.70287	1002.96	FALSE	13
2022-09-13	10:45:39	1.64098	7.29941	5.68458	1007.19	FALSE	13
2022-09-13	10:45:39	1.59034	7.07415	5.68458	1010.03	FALSE	13
2022-09-13	10:45:39	1.46032	6.4958	5.68458	1013.68	FALSE	13
2022-09-13	10:45:39	0.420166	1.86898	5.68458	1011.9	FALSE	13
2022-09-13	10:45:40	0.611819	2.72149	1.95794	1016.41	FALSE	13
2022-09-13	10:45:40	0.348664	1.55093	1.95794	1013.45	FALSE	13
2022-09-13	10:45:40	0.360013	1.60141	1.95794	1018.01	FALSE	13
2022-09-13	10:45:41	0.626527	2.78692	6.78	1016.24	FALSE	13
2022-09-13	10:45:41	0.875992	3.89659	6.78	1021.9	FALSE	13
2022-09-13	10:45:41	1.70383	7.57898	6.78	1023.82	FALSE	13
2022-09-13	10:45:41	2.8905	12.8575	6.78	1034.76	FALSE	13
2022-09-13	10:45:42	1.71955	7.6489	4.19488	1031.47	FALSE	13
2022-09-13	10:45:42	1.05991	4.71469	4.19488	1039.48	FALSE	13
2022-09-13	10:45:42	0.440318	1.95862	4.19488	1033.43	FALSE	13
2022-09-13	10:45:42	0.55243	2.45732	4.19488	1041.93	FALSE	13
2022-09-13	10:45:43	1.37136	6.10008	8.12623	1039.53	FALSE	13
2022-09-13	10:45:43	2.69721	11.9977	8.12623	1053.93	FALSE	13
2022-09-13	10:45:43	2.09854	9.33473	8.12623	1048.86	FALSE	13
2022-09-13	10:45:43	1.14032	5.07237	8.12623	1059	FALSE	13
2022-09-13	10:45:44	1.21757	5.41599	4.24101	1054.28	FALSE	13
2022-09-13	10:45:44	1.63813	7.28673	4.24101	1066.29	FALSE	13
2022-09-13	10:45:44	0.50271	2.23615	4.24101	1056.51	FALSE	13
2022-09-13	10:45:44	0.45528	2.02518	4.24101	1068.32	FALSE	13
2022-09-13	10:45:45	0.603066	2.68256	2.46894	1059.2	FALSE	13
2022-09-13	10:45:45	0.612532	2.72466	2.46894	1071.04	FALSE	13
2022-09-13	10:45:45	0.449529	1.99959	2.46894	1061.2	FALSE	13
2022-09-13	10:45:46	0.640471	2.84894	2.3254	1073.89	FALSE	13
2022-09-13	10:45:46	0.447901	1.99235	2.3254	1063.19	FALSE	13
2022-09-13	10:45:46	0.465153	2.06909	2.3254	1075.96	FALSE	13
2022-09-13	10:45:46	0.53757	2.39122	2.3254	1065.58	FALSE	13
2022-09-13	10:45:47	0.502608	2.2357	1.98539	1078.19	FALSE	13
2022-09-13	10:45:47	0.426781	1.89841	1.98539	1067.48	FALSE	13
2022-09-13	10:45:47	0.403372	1.79428	1.98539	1079.99	FALSE	13
2022-09-13	10:45:47	0.452583	2.01318	1.98539	1069.49	FALSE	13
2022-09-13	10:45:48	0.447952	1.99258	2.249	1081.98	FALSE	13
2022-09-13	10:45:48	0.471412	2.09693	2.249	1071.59	FALSE	13
2022-09-13	10:45:48	0.694313	3.08844	2.249	1085.07	FALSE	13
2022-09-13	10:45:48	0.408715	1.81805	2.249	1073.41	FALSE	13
2022-09-13	10:45:49	0.436196	1.94029	2.28407	1087.01	FALSE	13
2022-09-13	10:45:49	0.468919	2.08585	2.28407	1075.49	FALSE	13
2022-09-13	10:45:49	0.635331	2.82608	2.28407	1089.84	FALSE	13
2022-09-13	10:45:50	0.504389	2.24362	1.57391	1077.74	FALSE	13
2022-09-13	10:45:50	0.146985	0.653819	1.57391	1090.49	FALSE	13
2022-09-13	10:45:50	0.344339	1.53169	1.57391	1079.27	FALSE	13
2022-09-13	10:45:50	0.419606	1.86649	1.57391	1092.36	FALSE	13
2022-09-13	10:45:51	0.161947	0.720373	1.04312	1079.99	FALSE	13
2022-09-13	10:45:51	0.266374	1.18488	1.04312	1093.54	FALSE	13
2022-09-13	10:45:51	0.162812	0.72422	1.04312	1080.71	FALSE	13
2022-09-13	10:45:51	0.346883	1.543	1.04312	1095.08	FALSE	13
2022-09-13	10:45:52	0.234415	1.04272	1.57549	1081.76	FALSE	13
2022-09-13	10:45:52	0.444898	1.979	1.57549	1097.06	FALSE	13
2022-09-13	10:45:52	0.341896	1.52082	1.57549	1083.28	FALSE	13
2022-09-13	10:45:52	0.395534	1.75941	1.57549	1098.82	FALSE	13
2022-09-13	10:45:53	0.319606	1.42167	1.59877	1084.7	FALSE	13
2022-09-13	10:45:53	0.377723	1.68019	1.59877	1100.5	FALSE	13
2022-09-13	10:45:53	0.380929	1.69445	1.59877	1086.39	FALSE	13
2022-09-13	10:45:54	0.301998	1.34335	1.5425	1101.85	FALSE	13
2022-09-13	10:45:54	0.339911	1.51199	1.5425	1087.9	FALSE	13
2022-09-13	10:45:54	0.400878	1.78319	1.5425	1103.63	FALSE	13
2022-09-13	10:45:54	0.344288	1.53146	1.5425	1089.44	FALSE	13
2022-09-13	10:45:55	0.345509	1.53689	1.65727	1105.17	FALSE	13
2022-09-13	10:45:55	0.401997	1.78816	1.65727	1091.22	FALSE	13
2022-09-13	10:45:55	0.368308	1.63831	1.65727	1106.8	FALSE	13
2022-09-13	10:45:55	0.374466	1.6657	1.65727	1092.89	FALSE	13
2022-09-13	10:45:56	0.381336	1.69626	1.70056	1108.5	FALSE	13
2022-09-13	10:45:56	0.37243	1.65664	1.70056	1094.55	FALSE	13
2022-09-13	10:45:56	0.390649	1.73768	1.70056	1110.24	FALSE	13
2022-09-13	10:45:56	0.384797	1.71165	1.70056	1096.26	FALSE	13
2022-09-13	10:45:57	0.390089	1.73519	1.63114	1111.97	FALSE	13
2022-09-13	10:45:57	0.400674	1.78228	1.63114	1098.04	FALSE	13
2022-09-13	10:45:57	0.309326	1.37594	1.63114	1113.35	FALSE	13
2022-09-13	10:45:58	0.316247	1.40673	1.60441	1099.45	FALSE	13
2022-09-13	10:45:58	0.330903	1.47192	1.60441	1114.82	FALSE	13
2022-09-13	10:45:58	0.353702	1.57334	1.60441	1101.02	FALSE	13
2022-09-13	10:45:58	0.441896	1.96564	1.60441	1116.79	FALSE	13
2022-09-13	10:45:59	0.700674	3.11674	3.53955	1104.14	FALSE	13
2022-09-13	10:45:59	0.70042	3.11561	3.53955	1119.9	FALSE	13
2022-09-13	10:45:59	0.848206	3.77299	3.53955	1107.91	FALSE	13
2022-09-13	10:45:59	0.933601	4.15284	3.53955	1124.05	FALSE	13
2022-09-13	10:46:00	0.878639	3.90836	2.92687	1111.82	FALSE	13
2022-09-13	10:46:00	0.746934	3.32251	2.92687	1127.38	FALSE	13
2022-09-13	10:46:00	0.557672	2.48064	2.92687	1114.3	FALSE	13
2022-09-13	10:46:00	0.448715	1.99597	2.92687	1129.37	FALSE	13
2022-09-13	10:46:01	0.616807	2.74368	2.64549	1117.04	FALSE	13
2022-09-13	10:46:01	0.958028	4.2615	2.64549	1133.63	FALSE	13
2022-09-13	10:46:01	0.418079	1.8597	2.64549	1118.9	FALSE	13
2022-09-13	10:46:01	0.386018	1.71709	2.64549	1135.35	FALSE	13
2022-09-13	10:46:02	0.459198	2.0426	2.11444	1120.95	FALSE	13
2022-09-13	10:46:02	0.514517	2.28867	2.11444	1137.64	FALSE	13
2022-09-13	10:46:02	0.452328	2.01205	2.11444	1122.96	FALSE	13
2022-09-13	10:46:03	0.39472	1.75579	1.93995	1139.4	FALSE	13
2022-09-13	10:46:03	-0.120903	-0.537801	1.93995	1122.96	FALSE	13
2022-09-13	10:46:03	0.734364	3.2666	1.93995	1142.66	FALSE	13
2022-09-13	10:46:03	0.736298	3.2752	1.93995	1126.23	FALSE	13
2022-09-13	10:46:04	0.502913	2.23706	1.46677	1144.9	FALSE	13
2022-09-13	10:46:04	0.374008	1.66366	1.46677	1127.9	FALSE	13
2022-09-13	10:46:04	0.206883	0.920257	1.46677	1145.82	FALSE	13
2022-09-13	10:46:04	0.235178	1.04612	1.46677	1128.94	FALSE	13
2022-09-13	10:46:05	0.138995	0.618278	0.384493	1146.44	FALSE	13
2022-09-13	10:46:05	0.107545	0.478382	0.384493	1129.42	FALSE	13
2022-09-13	10:46:05	0.1307	0.58138	0.384493	1147.02	FALSE	13
2022-09-13	10:46:05	-0.0314883	-0.140066	0.384493	1129.42	FALSE	13
2022-09-13	10:46:06	0.0879009	0.391001	0.757195	1147.41	FALSE	13
2022-09-13	10:46:06	0.151005	0.6717	0.757195	1130.09	FALSE	13
2022-09-13	10:46:06	0.271769	1.20888	0.757195	1148.62	FALSE	13
2022-09-13	10:46:07	0.2107	0.937236	1.06576	1131.03	FALSE	13
2022-09-13	10:46:07	0.247952	1.10294	1.06576	1149.72	FALSE	13
2022-09-13	10:46:07	0.216603	0.963493	1.06576	1131.99	FALSE	13
2022-09-13	10:46:07	0.283117	1.25936	1.06576	1150.98	FALSE	13
2022-09-13	10:46:08	0.254262	1.13101	2.11295	1133.12	FALSE	13
2022-09-13	10:46:08	0.311769	1.38681	2.11295	1152.37	FALSE	13
2022-09-13	10:46:08	0.465204	2.06932	2.11295	1135.19	FALSE	13
2022-09-13	10:46:08	0.868817	3.86467	2.11295	1156.23	FALSE	13
2022-09-13	10:46:09	0.813753	3.61974	4.05154	1138.81	FALSE	13
2022-09-13	10:46:09	1.57513	7.00649	4.05154	1163.24	FALSE	13
2022-09-13	10:46:09	0.862405	3.83615	4.05154	1142.65	FALSE	13
2022-09-13	10:46:09	0.392023	1.7438	4.05154	1164.98	FALSE	13
2022-09-13	10:46:10	0.375636	1.6709	1.73723	1144.32	FALSE	13
2022-09-13	10:46:10	0.39131	1.74063	1.73723	1166.72	FALSE	13
2022-09-13	10:46:10	0.404695	1.80016	1.73723	1146.12	FALSE	13
2022-09-13	10:46:11	0.405509	1.80379	1.79716	1168.53	FALSE	13
2022-09-13	10:46:11	0.409326	1.82076	1.79716	1147.94	FALSE	13
2022-09-13	10:46:11	0.404746	1.80039	1.79716	1170.33	FALSE	13
2022-09-13	10:46:11	0.396501	1.76372	1.79716	1149.7	FALSE	13
2022-09-13	10:46:12	0.41472	1.84476	1.83502	1172.17	FALSE	13
2022-09-13	10:46:12	0.405916	1.8056	1.83502	1151.51	FALSE	13
2022-09-13	10:46:12	0.415636	1.84883	1.83502	1174.02	FALSE	13
2022-09-13	10:46:12	0.413855	1.84091	1.83502	1153.35	FALSE	13
2022-09-13	10:46:13	0.409428	1.82122	1.82744	1175.84	FALSE	13
2022-09-13	10:46:13	0.412277	1.83389	1.82744	1155.19	FALSE	13
2022-09-13	10:46:13	0.411819	1.83185	1.82744	1177.68	FALSE	13
2022-09-13	10:46:13	0.409784	1.8228	1.82744	1157.01	FALSE	13
2022-09-13	10:46:14	0.400267	1.78047	1.81035	1179.46	FALSE	13
2022-09-13	10:46:14	0.412176	1.83344	1.81035	1158.84	FALSE	13
2022-09-13	10:46:14	0.408512	1.81714	1.81035	1181.27	FALSE	13
2022-09-13	10:46:15	0.420929	1.87238	1.87871	1160.71	FALSE	13
2022-09-13	10:46:15	0.420725	1.87147	1.87871	1183.14	FALSE	13
2022-09-13	10:46:15	0.44327	1.97175	1.87871	1162.69	FALSE	13
2022-09-13	10:46:15	0.404491	1.79926	1.87871	1184.94	FALSE	13
2022-09-13	10:46:16	0.425916	1.89456	1.91946	1164.58	FALSE	13
2022-09-13	10:46:16	0.427748	1.90271	1.91946	1186.85	FALSE	13
2022-09-13	10:46:16	0.423168	1.88234	1.91946	1166.46	FALSE	13
2022-09-13	10:46:16	0.449224	1.99824	1.91946	1188.84	FALSE	13
2022-09-13	10:46:17	0.445255	1.98058	2.061	1168.44	FALSE	13
2022-09-13	10:46:17	0.463779	2.06298	2.061	1190.91	FALSE	13
2022-09-13	10:46:17	0.468206	2.08267	2.061	1170.53	FALSE	13
2022-09-13	10:46:17	0.476094	2.11776	2.061	1193.03	FALSE	13
2022-09-13	10:46:18	0.475585	2.1155	2.06055	1172.64	FALSE	13
2022-09-13	10:46:18	0.480674	2.13813	2.06055	1195.16	FALSE	13
2022-09-13	10:46:18	0.455942	2.02812	2.06055	1174.67	FALSE	13
2022-09-13	10:46:18	0.440725	1.96043	2.06055	1197.12	FALSE	13
2022-09-13	10:46:19	0.460369	2.04781	2.06396	1176.72	FALSE	13
2022-09-13	10:46:19	0.41243	1.83457	2.06396	1198.96	FALSE	13
2022-09-13	10:46:19	0.519198	2.3095	2.06396	1179.03	FALSE	13
2022-09-13	10:46:20	0.403117	1.79315	1.45014	1200.75	FALSE	13
2022-09-13	10:46:20	0.483372	2.15014	1.45014	1181.18	FALSE	13
2022-09-13	10:46:20	0.233244	1.03752	1.45014	1201.79	FALSE	13
2022-09-13	10:46:20	0.184288	0.81975	1.45014	1182	FALSE	13
2022-09-13	10:46:21	0.153346	0.682114	0.613579	1202.47	FALSE	13
2022-09-13	10:46:21	0.148104	0.658796	0.613579	1182.66	FALSE	13
2022-09-13	10:46:21	0.124898	0.555571	0.613579	1203.03	FALSE	13
2022-09-13	10:46:21	0.125407	0.557835	0.613579	1183.21	FALSE	13
2022-09-13	10:46:22	0.37528	1.66932	2.53004	1204.7	FALSE	13
2022-09-13	10:46:22	0.452328	2.01205	2.53004	1185.23	FALSE	13
2022-09-13	10:46:22	0.716603	3.18759	2.53004	1207.88	FALSE	13
2022-09-13	10:46:22	0.730903	3.2512	2.53004	1188.48	FALSE	13
2022-09-13	10:46:23	0.730954	3.25143	3.27882	1211.14	FALSE	13
2022-09-13	10:46:23	0.736959	3.27814	3.27882	1191.75	FALSE	13
2022-09-13	10:46:23	0.743423	3.30689	3.27882	1214.44	FALSE	13
2022-09-13	10:46:24	-0.159732	-0.71052	-1.90678	1191.75	FALSE	13
2022-09-13	10:46:24	-1.46971	-6.53756	-1.90678	1214.44	FALSE	13
2022-09-13	10:46:24	0.428868	1.90769	-1.90678	1193.66	FALSE	13
2022-09-13	10:46:24	-0.514083	-2.28674	-1.90678	1214.44	FALSE	13
2022-09-13	10:46:25	-1.21434	-5.40163	-3.33015	1193.66	FALSE	13
2022-09-13	10:46:25	-0.845432	-3.76065	-3.33015	1214.44	FALSE	13
2022-09-13	10:46:25	-0.347315	-1.54493	-3.33015	1193.66	FALSE	13
2022-09-13	10:46:25	-0.587519	-2.6134	-3.33015	1214.44	FALSE	13
2022-09-13	10:46:26	-1.30706	-5.81406	-3.36467	1193.66	FALSE	13
2022-09-13	10:46:26	-1.71678	-7.63658	-3.36467	1214.44	FALSE	13
2022-09-13	10:46:26	-0.741106	-3.29659	-3.36467	1193.66	FALSE	13
2022-09-13	10:46:26	0.7393	3.28855	-3.36467	1217.73	FALSE	13
2022-09-13	10:46:27	0.501896	2.23253	-3.46161	1195.89	FALSE	13
2022-09-13	10:46:27	-1.24726	-5.54806	-3.46161	1217.73	FALSE	13
2022-09-13	10:46:27	-1.58925	-7.0693	-3.46161	1195.89	FALSE	13
2022-09-13	10:46:28	-0.0622262	-0.276795	-0.112279	1217.73	FALSE	13
2022-09-13	10:46:28	0.348613	1.5507	-0.112279	1197.45	FALSE	13
2022-09-13	10:46:28	-0.0266028	-0.118335	-0.112279	1217.73	FALSE	13
2022-09-13	10:46:28	-0.36075	-1.60469	-0.112279	1197.45	FALSE	13
2022-09-13	10:46:29	-0.324262	-1.44238	-0.64793	1217.73	FALSE	13
2022-09-13	10:46:29	-0.279325	-1.24249	-0.64793	1197.45	FALSE	13
2022-09-13	10:46:29	-0.689809	-3.06841	-0.64793	1217.73	FALSE	13
2022-09-13	10:46:29	0.710751	3.16156	-0.64793	1200.61	FALSE	13
2022-09-13	10:46:30	0.0960943	0.427447	0.822012	1218.16	FALSE	13
2022-09-13	10:46:30	0.155433	0.691397	0.822012	1201.3	FALSE	13
2022-09-13	10:46:30	0.178537	0.794168	0.822012	1218.95	FALSE	13
2022-09-13	10:46:30	0.309122	1.37504	0.822012	1202.67	FALSE	13
2022-09-13	10:46:31	-0.216017	-0.960887	1.15517	1218.95	FALSE	13
2022-09-13	10:46:31	0.365	1.62359	1.15517	1204.3	FALSE	13
2022-09-13	10:46:31	0.260827	1.16021	1.15517	1220.11	FALSE	13
2022-09-13	10:46:31	0.628969	2.79778	1.15517	1207.09	FALSE	13
2022-09-13	10:46:32	0.766629	3.41012	2.58205	1223.52	FALSE	13
2022-09-13	10:46:32	0.582506	2.5911	2.58205	1209.69	FALSE	13
2022-09-13	10:46:32	0.392277	1.74493	2.58205	1225.27	FALSE	13
2022-09-13	10:46:33	0.194008	0.862986	1.27906	1210.55	FALSE	13
2022-09-13	10:46:33	0.0870359	0.387153	1.27906	1225.65	FALSE	13
2022-09-13	10:46:33	0.19416	0.863663	1.27906	1211.41	FALSE	13
2022-09-13	10:46:33	0.674974	3.00242	1.27906	1228.66	FALSE	13
2022-09-13	10:46:34	0.191209	0.850536	0.415563	1212.26	FALSE	13
2022-09-13	10:46:34	0.17126	0.761799	0.415563	1229.42	FALSE	13
2022-09-13	10:46:34	0.0540587	0.240464	0.415563	1212.5	FALSE	13
2022-09-13	10:46:34	-0.0428369	-0.190547	0.415563	1229.42	FALSE	13
2022-09-13	10:46:35	-0.0775442	-0.344932	-0.0518388	1212.5	FALSE	13
2022-09-13	10:46:35	-0.14528	-0.646234	-0.0518388	1229.42	FALSE	13
2022-09-13	10:46:35	-0.0221753	-0.0986402	-0.0518388	1212.5	FALSE	13
2022-09-13	10:46:35	0.198384	0.882452	-0.0518388	1230.3	FALSE	13
2022-09-13	10:46:36	0.496807	2.2099	1.32237	1214.71	FALSE	13
2022-09-13	10:46:36	0.235636	1.04816	1.32237	1231.35	FALSE	13
2022-09-13	10:46:36	0.159402	0.709052	1.32237	1215.42	FALSE	13
2022-09-13	10:46:37	0.297926	1.32523	1.82597	1232.67	FALSE	13
2022-09-13	10:46:37	0.361438	1.60775	1.82597	1217.03	FALSE	13
2022-09-13	10:46:37	0.507035	2.25539	1.82597	1234.93	FALSE	13
2022-09-13	10:46:37	0.475585	2.1155	1.82597	1219.15	FALSE	13
2022-09-13	10:46:38	0.238588	1.06129	1.41047	1235.99	FALSE	13
2022-09-13	10:46:38	0.460064	2.04646	1.41047	1221.19	FALSE	13
2022-09-13	10:46:38	0.327087	1.45495	1.41047	1237.45	FALSE	13
2022-09-13	10:46:38	0.242608	1.07917	1.41047	1222.27	FALSE	13
2022-09-13	10:46:39	0.154466	0.687096	0.820542	1238.13	FALSE	13
2022-09-13	10:46:39	0.257672	1.14618	0.820542	1223.42	FALSE	13
2022-09-13	10:46:39	0.130853	0.58206	0.820542	1238.72	FALSE	13
2022-09-13	10:46:39	0.194873	0.866834	0.820542	1224.28	FALSE	13
2022-09-13	10:46:40	0.0288679	0.12841	0.533615	1238.84	FALSE	13
2022-09-13	10:46:40	0.23014	1.02371	0.533615	1225.31	FALSE	13
2022-09-13	10:46:40	0.100878	0.448726	0.533615	1239.29	FALSE	13
2022-09-13	10:46:41	0.25355	1.12784	0.939952	1226.44	FALSE	13
2022-09-13	10:46:41	0.0614888	0.273514	0.939952	1239.57	FALSE	13
2022-09-13	10:46:41	0.366476	1.63016	0.939952	1228.07	FALSE	13
2022-09-13	10:46:41	0.163728	0.728295	0.939952	1240.29	FALSE	13
2022-09-13	10:46:42	0.249733	1.11086	1.36859	1229.18	FALSE	13
2022-09-13	10:46:42	0.172583	0.767684	1.36859	1241.06	FALSE	13
2022-09-13	10:46:42	0.235738	1.04861	1.36859	1230.23	FALSE	13
2022-09-13	10:46:42	0.572634	2.54719	1.36859	1243.61	FALSE	13
2022-09-13	10:46:43	1.28973	5.73698	7.83737	1235.96	FALSE	13
2022-09-13	10:46:43	1.69991	7.56154	7.83737	1251.17	FALSE	13
2022-09-13	10:46:43	1.86062	8.27641	7.83737	1244.24	FALSE	13
2022-09-13	10:46:43	2.19742	9.77456	7.83737	1260.95	FALSE	13
2022-09-13	10:46:44	1.93681	8.61532	4.47957	1252.85	FALSE	13
2022-09-13	10:46:44	1.0424	4.6368	4.47957	1265.58	FALSE	13
2022-09-13	10:46:44	0.0419468	0.186588	4.47957	1253.04	FALSE	13
2022-09-13	10:46:45	0.0452547	0.201302	-0.054385	1265.78	FALSE	13
2022-09-13	10:46:45	0.0712597	0.316977	-0.054385	1253.36	FALSE	13
2022-09-13	10:46:45	-0.151743	-0.674983	-0.054385	1265.78	FALSE	13
2022-09-13	10:46:45	-0.0136766	-0.0608363	-0.054385	1253.36	FALSE	13
2022-09-13	10:46:46	0.0281554	0.125241	0.530106	1265.91	FALSE	13
2022-09-13	10:46:46	0.142303	0.632992	0.530106	1253.99	FALSE	13
2022-09-13	10:46:46	0.0770613	0.342784	0.530106	1266.25	FALSE	13
2022-09-13	10:46:46	0.229173	1.01941	0.530106	1255.01	FALSE	13
2022-09-13	10:46:47	0.284338	1.26479	-0.0349735	1267.52	FALSE	13
2022-09-13	10:46:47	0.0588934	0.26197	-0.0349735	1255.27	FALSE	13
2022-09-13	10:46:47	-0.213422	-0.949344	-0.0349735	1267.52	FALSE	13
2022-09-13	10:46:47	-0.161259	-0.717312	-0.0349735	1255.27	FALSE	13
2022-09-13	10:46:48	-0.345178	-1.53542	-0.934064	1267.52	FALSE	13
2022-09-13	10:46:48	-0.316119	-1.40616	-0.934064	1255.27	FALSE	13
2022-09-13	10:46:48	-0.121208	-0.539157	-0.934064	1267.52	FALSE	13
2022-09-13	10:46:48	-0.0574425	-0.255516	-0.934064	1255.27	FALSE	13
2022-09-13	10:46:49	0.0588934	0.26197	0.640613	1267.78	FALSE	13
2022-09-13	10:46:49	0.196654	0.874756	0.640613	1256.15	FALSE	13
2022-09-13	10:46:49	0.176501	0.785112	0.640613	1268.56	FALSE	13
2022-09-13	10:46:50	0.423524	1.88392	1.76598	1258.03	FALSE	13
2022-09-13	10:46:50	0.477468	2.12387	1.76598	1270.69	FALSE	13
2022-09-13	10:46:50	0.287646	1.27951	1.76598	1259.31	FALSE	13
2022-09-13	10:46:50	0.399402	1.77662	1.76598	1272.46	FALSE	13
2022-09-13	10:46:51	0.428461	1.90588	2.2649	1261.22	FALSE	13
2022-09-13	10:46:51	0.637112	2.834	2.2649	1275.3	FALSE	13
2022-09-13	10:46:51	0.738486	3.28493	2.2649	1264.5	FALSE	13
2022-09-13	10:46:51	0.232634	1.0348	2.2649	1276.33	FALSE	13
2022-09-13	10:46:52	0.267748	1.191	0.543292	1265.69	FALSE	13
2022-09-13	10:46:52	0.194211	0.863889	0.543292	1277.2	FALSE	13
2022-09-13	10:46:52	0.0728883	0.324222	0.543292	1266.02	FALSE	13
2022-09-13	10:46:52	-0.0462974	-0.20594	0.543292	1277.2	FALSE	13
2022-09-13	10:46:53	0.0339061	0.150821	0.542443	1266.17	FALSE	13
2022-09-13	10:46:53	0.219962	0.978435	0.542443	1278.18	FALSE	13
2022-09-13	10:46:53	0.111972	0.498074	0.542443	1266.67	FALSE	13
2022-09-13	10:46:54	0.115585	0.514145	0.880472	1278.69	FALSE	13
2022-09-13	10:46:54	0.266374	1.18488	0.880472	1267.85	FALSE	13
2022-09-13	10:46:54	0.141591	0.629825	0.880472	1279.32	FALSE	13
2022-09-13	10:46:54	0.268206	1.19303	0.880472	1269.04	FALSE	13
2022-09-13	10:46:55	0.516349	2.29682	1.79547	1281.62	FALSE	13
2022-09-13	10:46:55	0.331616	1.47509	1.79547	1270.52	FALSE	13
2022-09-13	10:46:55	0.303015	1.34787	1.79547	1282.96	FALSE	13
2022-09-13	10:46:55	0.463575	2.06207	1.79547	1272.58	FALSE	13
2022-09-13	10:46:56	0.384135	1.70871	1.63576	1284.67	FALSE	13
2022-09-13	10:46:56	0.458028	2.0374	1.63576	1274.62	FALSE	13
2022-09-13	10:46:56	0.322659	1.43525	1.63576	1286.11	FALSE	13
2022-09-13	10:46:56	0.30612	1.36168	1.63576	1275.98	FALSE	13
2022-09-13	10:46:57	0.302863	1.3472	2.38119	1287.45	FALSE	13
2022-09-13	10:46:57	0.361082	1.60616	2.38119	1277.59	FALSE	13
2022-09-13	10:46:57	0.941998	4.1902	2.38119	1291.65	FALSE	13
2022-09-13	10:46:58	0.574211	2.55421	2.01578	1280.14	FALSE	13
2022-09-13	10:46:58	0.215433	0.958289	2.01578	1292.6	FALSE	13
2022-09-13	10:46:58	0.416196	1.85132	2.01578	1281.99	FALSE	13
2022-09-13	10:46:58	0.606832	2.69931	2.01578	1295.3	FALSE	13
2022-09-13	10:46:59	0.30556	1.35919	1.44946	1283.35	FALSE	13
2022-09-13	10:46:59	0.258639	1.15048	1.44946	1296.45	FALSE	13
2022-09-13	10:46:59	0.41472	1.84476	1.44946	1285.2	FALSE	13
2022-09-13	10:46:59	0.324491	1.4434	1.44946	1297.9	FALSE	13
2022-09-13	10:47:00	0.718588	3.19642	3.13751	1288.39	FALSE	13
2022-09-13	10:47:00	1.09645	4.87723	3.13751	1302.77	FALSE	13
2022-09-13	10:47:00	0.240216	1.06853	3.13751	1289.46	FALSE	13
2022-09-13	10:47:00	0.766119	3.40785	3.13751	1306.18	FALSE	13
2022-09-13	10:47:01	0.495738	2.20514	1.73852	1291.67	FALSE	13
2022-09-13	10:47:01	0.303372	1.34946	1.73852	1307.53	FALSE	13
2022-09-13	10:47:01	0.373397	1.66094	1.73852	1293.33	FALSE	13
2022-09-13	10:47:02	0.335178	1.49094	1.20498	1309.02	FALSE	13
2022-09-13	10:47:02	0.174415	0.775833	1.20498	1294.1	FALSE	13
2022-09-13	10:47:02	0.420573	1.87079	1.20498	1310.89	FALSE	13
2022-09-13	10:47:02	0.153397	0.682341	1.20498	1294.78	FALSE	13
2022-09-13	10:47:03	0.365204	1.6245	1.60056	1312.52	FALSE	13
2022-09-13	10:47:03	0.433092	1.92648	1.60056	1296.71	FALSE	13
2022-09-13	10:47:03	0.340013	1.51245	1.60056	1314.03	FALSE	13
2022-09-13	10:47:03	0.30098	1.33882	1.60056	1298.05	FALSE	13
2022-09-13	10:47:04	0.616756	2.74345	1.78296	1316.77	FALSE	13
2022-09-13	10:47:04	0.174975	0.778324	1.78296	1298.83	FALSE	13
2022-09-13	10:47:04	0.290853	1.29377	1.78296	1318.07	FALSE	13
2022-09-13	10:47:04	0.520725	2.31629	1.78296	1301.14	FALSE	13
2022-09-13	10:47:05	0.191667	0.852573	1.01069	1318.92	FALSE	13
2022-09-13	10:47:05	0.250344	1.11358	1.01069	1302.26	FALSE	13
2022-09-13	10:47:05	0.240776	1.07102	1.01069	1319.99	FALSE	13
2022-09-13	10:47:05	0.226069	1.0056	1.01069	1303.26	FALSE	13
2022-09-13	10:47:06	0.179402	0.798016	1.06891	1320.79	FALSE	13
2022-09-13	10:47:06	0.383422	1.70554	1.06891	1304.97	FALSE	13
2022-09-13	10:47:06	0.158079	0.703167	1.06891	1321.49	FALSE	13
2022-09-13	10:47:07	0.147392	0.655629	1.75653	1305.62	FALSE	13
2022-09-13	10:47:07	0.547239	2.43423	1.75653	1323.93	FALSE	13
2022-09-13	10:47:07	0.377112	1.67747	1.75653	1307.3	FALSE	13
2022-09-13	10:47:07	0.507799	2.25879	1.75653	1326.18	FALSE	13
2022-09-13	10:47:08	0.36444	1.6211	1.20011	1308.92	FALSE	13
2022-09-13	10:47:08	0.440013	1.95727	1.20011	1328.14	FALSE	13
2022-09-13	10:47:08	0.165509	0.736217	1.20011	1309.66	FALSE	13
2022-09-13	10:47:08	0.109224	0.48585	1.20011	1328.63	FALSE	13
2022-09-13	10:47:09	-0.221412	-0.984885	-0.945157	1309.66	FALSE	13
2022-09-13	10:47:09	-0.282175	-1.25517	-0.945157	1328.63	FALSE	13
2022-09-13	10:47:09	-0.246145	-1.0949	-0.945157	1309.66	FALSE	13
2022-09-13	10:47:09	-0.100191	-0.44567	-0.945157	1328.63	FALSE	13
2022-09-13	10:47:10	0.189529	0.843063	0.979339	1310.5	FALSE	13
2022-09-13	10:47:10	0.0972139	0.432427	0.979339	1329.06	FALSE	13
2022-09-13	10:47:10	0.373753	1.66253	0.979339	1312.17	FALSE	13
2022-09-13	10:47:11	0.119708	0.532485	1.57589	1329.59	FALSE	13
2022-09-13	10:47:11	0.375433	1.67	1.57589	1313.84	FALSE	13
2022-09-13	10:47:11	0.294211	1.30871	1.57589	1330.9	FALSE	13
2022-09-13	10:47:11	0.627748	2.79235	1.57589	1316.63	FALSE	13
2022-09-13	10:47:12	2.32617	10.3473	11.7178	1341.25	FALSE	13
2022-09-13	10:47:12	2.05818	9.1552	11.7178	1325.78	FALSE	13
2022-09-13	10:47:12	3.37441	15.0101	11.7178	1356.26	1	14
2022-09-13	10:47:12	2.77833	12.3586	11.7178	1338.14	FALSE	14
2022-09-13	10:47:13	0.716807	3.1885	4.64934	1359.45	FALSE	14
2022-09-13	10:47:13	2.14943	9.56109	4.64934	1347.7	FALSE	14
2022-09-13	10:47:13	0.253855	1.1292	4.64934	1360.58	FALSE	14
2022-09-13	10:47:13	1.06078	4.71856	4.64934	1352.42	FALSE	14
2022-09-13	10:47:14	1.24805	5.55158	7.20486	1366.13	FALSE	14
2022-09-13	10:47:14	0.590293	2.62574	7.20486	1355.05	FALSE	14
2022-09-13	10:47:14	3.02083	13.4373	7.20486	1379.57	1	15
2022-09-13	10:47:15	1.96444	8.73822	15.7249	1363.78	FALSE	15
2022-09-13	10:47:15	4.67436	20.7925	15.7249	1400.36	1	16
2022-09-13	10:47:15	4.96001	22.0631	15.7249	1385.85	1	17
2022-09-13	10:47:15	2.54164	11.3057	15.7249	1411.66	FALSE	17
2022-09-13	10:47:16	1.64062	7.29781	3.85256	1393.15	FALSE	17
2022-09-13	10:47:16	1.06531	4.73871	3.85256	1416.4	FALSE	17
2022-09-13	10:47:16	0.255636	1.13712	3.85256	1394.28	FALSE	17
2022-09-13	10:47:16	0.502812	2.23661	3.85256	1418.64	FALSE	17
2022-09-13	10:47:17	0.18215	0.81024	1.4249	1395.09	FALSE	17
2022-09-13	10:47:17	0.559046	2.48675	1.4249	1421.13	FALSE	17
2022-09-13	10:47:17	0.582761	2.59224	1.4249	1397.69	FALSE	17
2022-09-13	10:47:17	-0.0426333	-0.189641	1.4249	1421.13	FALSE	17
2022-09-13	10:47:18	-0.312964	-1.39213	-0.70939	1397.69	FALSE	17
2022-09-13	10:47:18	-0.385483	-1.71471	-0.70939	1421.13	FALSE	17
2022-09-13	10:47:18	-0.158155	-0.703505	-0.70939	1397.69	FALSE	17
2022-09-13	10:47:18	0.21869	0.972777	-0.70939	1422.1	FALSE	17
2022-09-13	10:47:19	2.58541	11.5004	12.3457	1409.19	FALSE	17
2022-09-13	10:47:19	2.91945	12.9863	12.3457	1435.08	FALSE	17
2022-09-13	10:47:19	2.82144	12.5503	12.3457	1421.74	FALSE	17
2022-09-13	10:47:20	1.1248	5.00334	3.24889	1440.09	FALSE	17
2022-09-13	10:47:20	0.798028	3.54979	3.24889	1425.29	FALSE	17
2022-09-13	10:47:20	0.452074	2.01092	3.24889	1442.1	FALSE	17
2022-09-13	10:47:20	0.546628	2.43151	3.24889	1427.72	FALSE	17
2022-09-13	10:47:21	0.397417	1.76779	2.60084	1443.87	FALSE	17
2022-09-13	10:47:21	0.499504	2.22189	2.60084	1429.94	FALSE	17
2022-09-13	10:47:21	0.70841	3.15115	2.60084	1447.02	FALSE	17
2022-09-13	10:47:21	0.733448	3.26252	2.60084	1433.2	FALSE	17
2022-09-13	10:47:22	0.738842	3.28652	1.98573	1450.3	FALSE	17
2022-09-13	10:47:22	0.640165	2.84758	1.98573	1436.05	FALSE	17
2022-09-13	10:47:22	0.0786898	0.350028	1.98573	1450.65	FALSE	17
2022-09-13	10:47:22	0.327952	1.4588	1.98573	1437.51	FALSE	17
2022-09-13	10:47:23	1.10525	4.91637	5.28417	1455.57	FALSE	17
2022-09-13	10:47:23	1.37701	6.12522	5.28417	1443.63	FALSE	17
2022-09-13	10:47:23	1.08154	4.81091	5.28417	1460.38	FALSE	17
2022-09-13	10:47:24	0.50673	2.25404	1.64679	1445.89	FALSE	17
2022-09-13	10:47:24	0.381132	1.69535	1.64679	1462.08	FALSE	17
2022-09-13	10:47:24	0.372735	1.658	1.64679	1447.55	FALSE	17
2022-09-13	10:47:24	0.220267	0.979792	1.64679	1463.06	FALSE	17
2022-09-13	10:47:25	0.435331	1.93644	1.38228	1449.48	FALSE	17
2022-09-13	10:47:25	0.32556	1.44816	1.38228	1464.51	FALSE	17
2022-09-13	10:47:25	0.30383	1.3515	1.38228	1450.83	FALSE	17
2022-09-13	10:47:25	0.178283	0.793038	1.38228	1465.3	FALSE	17
2022-09-13	10:47:26	0.302456	1.34538	1.01035	1452.18	FALSE	17
2022-09-13	10:47:26	0.149479	0.664912	1.01035	1465.96	FALSE	17
2022-09-13	10:47:26	0.171565	0.763155	1.01035	1452.94	FALSE	17
2022-09-13	10:47:26	0.285051	1.26796	1.01035	1467.23	FALSE	17
2022-09-13	10:47:27	1.68785	7.50789	3.44294	1460.45	FALSE	17
2022-09-13	10:47:27	0.392583	1.74629	3.44294	1468.98	FALSE	17
2022-09-13	10:47:27	0.24159	1.07464	3.44294	1461.52	FALSE	17
2022-09-13	10:47:28	1.29503	5.76055	2.86145	1474.74	FALSE	17
2022-09-13	10:47:28	0.300624	1.33724	2.86145	1462.86	FALSE	17
2022-09-13	10:47:28	0.495127	2.20242	2.86145	1476.94	FALSE	17
2022-09-13	10:47:28	0.482354	2.14561	2.86145	1465.01	FALSE	17
2022-09-13	10:47:29	0.46444	2.06592	2.6039	1479.01	FALSE	17
2022-09-13	10:47:29	0.505814	2.24996	2.6039	1467.26	FALSE	17
2022-09-13	10:47:29	0.727901	3.23785	2.6039	1482.24	FALSE	17
2022-09-13	10:47:29	0.643372	2.86185	2.6039	1470.12	FALSE	17
2022-09-13	10:47:30	0.739758	3.29059	1.97469	1485.53	FALSE	17
2022-09-13	10:47:30	0.564389	2.51052	1.97469	1472.63	FALSE	17
2022-09-13	10:47:30	0.255484	1.13644	1.97469	1486.67	FALSE	17
2022-09-13	10:47:30	0.216094	0.961229	1.97469	1473.59	FALSE	17
2022-09-13	10:47:31	0.27014	1.20164	1.2279	1487.87	FALSE	17
2022-09-13	10:47:31	0.285458	1.26977	1.2279	1474.86	FALSE	17
2022-09-13	10:47:31	0.272532	1.21228	1.2279	1489.08	FALSE	17
2022-09-13	10:47:32	0.544033	2.41997	5.22261	1477.28	FALSE	17
2022-09-13	10:47:32	1.13584	5.05244	5.22261	1494.14	FALSE	17
2022-09-13	10:47:32	1.18724	5.28108	5.22261	1482.56	FALSE	17
2022-09-13	10:47:32	1.82927	8.13696	5.22261	1502.27	FALSE	17
2022-09-13	10:47:33	2.3908	10.6348	9.07535	1493.2	FALSE	17
2022-09-13	10:47:33	2.25462	10.029	9.07535	1512.3	FALSE	17
2022-09-13	10:47:33	2.36892	10.5374	9.07535	1503.73	FALSE	17
2022-09-13	10:47:33	1.14658	5.10022	9.07535	1517.4	FALSE	17
2022-09-13	10:47:34	1.56505	6.96166	7.60495	1510.7	FALSE	17
2022-09-13	10:47:34	1.09691	4.87928	7.60495	1522.28	FALSE	17
2022-09-13	10:47:34	1.25406	5.57831	7.60495	1516.27	FALSE	17
2022-09-13	10:47:34	2.92266	13.0006	7.60495	1535.28	FALSE	17
2022-09-13	10:47:35	1.80607	8.03376	11.8026	1524.31	FALSE	17
2022-09-13	10:47:35	4.94485	21.9957	11.8026	1557.28	1	18
2022-09-13	10:47:35	2.05711	9.15044	11.8026	1533.46	FALSE	18
2022-09-13	10:47:35	1.80531	8.03038	11.8026	1565.31	FALSE	18
2022-09-13	10:47:36	2.36276	10.51	6.81798	1543.97	FALSE	18
2022-09-13	10:47:36	1.11024	4.93857	6.81798	1570.25	FALSE	18
2022-09-13	10:47:36	1.12525	5.00534	6.81798	1548.97	FALSE	18
2022-09-13	10:47:37	0.528715	2.35183	2.05789	1572.6	FALSE	18
2022-09-13	10:47:37	0.577265	2.56779	2.05789	1551.54	FALSE	18
2022-09-13	10:47:37	0.355484	1.58126	2.05789	1574.18	FALSE	18
2022-09-13	10:47:37	0.389071	1.73067	2.05789	1553.27	FALSE	18
2022-09-13	10:47:38	0.438791	1.95183	1.90378	1576.13	FALSE	18
2022-09-13	10:47:38	0.444644	1.97787	1.90378	1555.25	FALSE	18
2022-09-13	10:47:38	0.428613	1.90656	1.90378	1578.04	FALSE	18
2022-09-13	10:47:38	0.399911	1.77888	1.90378	1557.03	FALSE	18
2022-09-13	10:47:39	0.396654	1.7644	1.56123	1579.8	FALSE	18
2022-09-13	10:47:39	0.399657	1.77775	1.56123	1558.81	FALSE	18
2022-09-13	10:47:39	0.290649	1.29286	1.56123	1581.1	FALSE	18
2022-09-13	10:47:39	0.316959	1.4099	1.56123	1560.22	FALSE	18
2022-09-13	10:47:40	0.37645	1.67452	1.62284	1582.77	FALSE	18
2022-09-13	10:47:40	0.396807	1.76508	1.62284	1561.98	FALSE	18
2022-09-13	10:47:40	0.321234	1.42891	1.62284	1584.2	FALSE	18
2022-09-13	10:47:41	0.425458	1.89252	1.60514	1563.87	FALSE	18
2022-09-13	10:47:41	0.276043	1.22789	1.60514	1585.43	FALSE	18
2022-09-13	10:47:41	0.38383	1.70735	1.60514	1565.58	FALSE	18
2022-09-13	10:47:41	0.358079	1.59281	1.60514	1587.02	FALSE	18
2022-09-13	10:47:42	0.302863	1.3472	1.55789	1566.93	FALSE	18
2022-09-13	10:47:42	0.381285	1.69603	1.55789	1588.72	FALSE	18
2022-09-13	10:47:42	0.307392	1.36734	1.55789	1568.3	FALSE	18
2022-09-13	10:47:42	0.409377	1.82099	1.55789	1590.54	FALSE	18
2022-09-13	10:47:43	0.297519	1.32342	5.66443	1569.62	FALSE	18
2022-09-13	10:47:43	2.79085	12.4143	5.66443	1602.95	FALSE	18
2022-09-13	10:47:43	1.19874	5.33224	5.66443	1574.95	FALSE	18
2022-09-13	10:47:43	0.806577	3.58782	5.66443	1606.54	FALSE	18
2022-09-13	10:47:44	1.87828	8.35497	7.36732	1583.31	FALSE	18
2022-09-13	10:47:44	1.39798	6.21849	7.36732	1612.76	FALSE	18
2022-09-13	10:47:44	1.69248	7.52849	7.36732	1590.83	FALSE	18
2022-09-13	10:47:45	1.91966	8.53903	5.50394	1621.3	FALSE	18
2022-09-13	10:47:45	0.413295	1.83842	5.50394	1592.67	FALSE	18
2022-09-13	10:47:45	1.68235	7.48343	5.50394	1628.78	FALSE	18
2022-09-13	10:47:45	0.934058	4.15488	5.50394	1596.83	FALSE	18
2022-09-13	10:47:46	0.265102	1.17923	1.12507	1629.96	FALSE	18
2022-09-13	10:47:46	0.180878	0.804582	1.12507	1597.63	FALSE	18
2022-09-13	10:47:46	0.386629	1.7198	1.12507	1631.68	FALSE	18
2022-09-13	10:47:46	0.179097	0.796659	1.12507	1598.43	FALSE	18
2022-09-13	10:47:47	0.312125	1.38839	1.14386	1633.07	FALSE	18
2022-09-13	10:47:47	0.188308	0.837632	1.14386	1599.27	FALSE	18
2022-09-13	10:47:47	0.220216	0.979565	1.14386	1634.05	FALSE	18
2022-09-13	10:47:47	0.307952	1.36983	1.14386	1600.64	FALSE	18
2022-09-13	10:47:48	0.742862	3.3044	1.63604	1637.35	FALSE	18
2022-09-13	10:47:48	0.0120231	0.0534812	1.63604	1600.69	FALSE	18
2022-09-13	10:47:48	0.223117	0.992469	1.63604	1638.34	FALSE	18
2022-09-13	10:47:48	0.493193	2.19382	1.63604	1602.88	FALSE	18
2022-09-13	10:47:49	0.759097	3.37662	2.29743	1641.72	FALSE	18
2022-09-13	10:47:49	0.423015	1.88166	2.29743	1604.77	FALSE	18
2022-09-13	10:47:49	0.367341	1.63401	2.29743	1643.36	FALSE	18
2022-09-13	10:47:50	0.311819	1.38703	1.64657	1606.15	FALSE	18
2022-09-13	10:47:50	0.356552	1.58601	1.64657	1644.94	FALSE	18
2022-09-13	10:47:50	0.35126	1.56247	1.64657	1607.72	FALSE	18
2022-09-13	10:47:50	0.461031	2.05076	1.64657	1646.99	FALSE	18
2022-09-13	10:47:51	0.368461	1.63899	2.40961	1609.35	FALSE	18
2022-09-13	10:47:51	0.368613	1.63966	2.40961	1648.63	FALSE	18
2022-09-13	10:47:51	0.688003	3.06037	2.40961	1612.41	FALSE	18
2022-09-13	10:47:51	0.741743	3.29942	2.40961	1651.93	FALSE	18
2022-09-13	10:47:52	0.731514	3.25392	3.26258	1615.67	FALSE	18
2022-09-13	10:47:52	0.738282	3.28403	3.26258	1655.22	FALSE	18
2022-09-13	10:47:52	0.734415	3.26682	3.26258	1618.94	FALSE	18
2022-09-13	10:47:52	0.729631	3.24554	3.26258	1658.46	FALSE	18
2022-09-13	10:47:53	0.733702	3.26365	3.28018	1622.2	FALSE	18
2022-09-13	10:47:53	0.734364	3.2666	3.28018	1661.73	FALSE	18
2022-09-13	10:47:53	0.744186	3.31029	3.28018	1625.51	FALSE	18
2022-09-13	10:47:54	0.734924	3.26909	3.28012	1665	FALSE	18
2022-09-13	10:47:54	0.737366	3.27995	3.28012	1628.79	FALSE	18
2022-09-13	10:47:54	0.737824	3.28199	3.28012	1668.28	FALSE	18
2022-09-13	10:47:54	0.739504	3.28946	3.28012	1632.08	FALSE	18
2022-09-13	10:47:55	0.731616	3.25437	3.26173	1671.53	FALSE	18
2022-09-13	10:47:55	0.738588	3.28539	3.26173	1635.36	FALSE	18
2022-09-13	10:47:55	0.732481	3.25822	3.26173	1674.79	FALSE	18
2022-09-13	10:47:55	0.730394	3.24894	3.26173	1638.61	FALSE	18
2022-09-13	10:47:56	0.73757	3.28086	3.27814	1678.07	FALSE	18
2022-09-13	10:47:56	0.735585	3.27203	3.27814	1641.89	FALSE	18
2022-09-13	10:47:56	0.741285	3.29738	3.27814	1681.37	FALSE	18
2022-09-13	10:47:56	0.733397	3.2623	3.27814	1645.15	FALSE	18
2022-09-13	10:47:57	0.731361	3.25324	3.27422	1684.62	FALSE	18
2022-09-13	10:47:57	0.742405	3.30237	3.27422	1648.45	FALSE	18
2022-09-13	10:47:57	0.734466	3.26705	3.27422	1687.89	FALSE	18
2022-09-13	10:47:58	0.726069	3.2297	2.71136	1651.68	FALSE	18
2022-09-13	10:47:58	0.730598	3.24985	2.71136	1691.14	FALSE	18
2022-09-13	10:47:58	0.465967	2.07271	2.71136	1653.75	FALSE	18
2022-09-13	10:47:58	0.515534	2.2932	2.71136	1693.43	FALSE	18
2022-09-13	10:47:59	0.472684	2.10259	2.21318	1655.85	FALSE	18
2022-09-13	10:47:59	0.515891	2.29479	2.21318	1695.73	FALSE	18
2022-09-13	10:47:59	0.508817	2.26332	2.21318	1658.12	FALSE	18
2022-09-13	10:47:59	0.492786	2.19201	2.21318	1697.92	FALSE	18
2022-09-13	10:48:00	0.509224	2.26513	2.19971	1660.38	FALSE	18
2022-09-13	10:48:00	0.500979	2.22845	2.19971	1700.15	FALSE	18
2022-09-13	10:48:00	0.489682	2.1782	2.19971	1662.56	FALSE	18
2022-09-13	10:48:00	0.478181	2.12704	2.19971	1702.28	FALSE	18

## Sheet: Bubba_star_2022913104244 (3)
Date	Time	Lbs	Newtons	Total force x time	Total steps >13.345		**GoPro Fitting: 1032
2022-09-13	10:43:00	0.510801	2.27215	2.27215	FALSE	0			Total force x time	1702.28
2022-09-13	10:43:00	0.449987	2.00163	2.00163	FALSE	0			Total steps	18
2022-09-13	10:43:00	0.19925	0.886304	3.15845	FALSE	0
2022-09-13	10:43:00	0.270598	1.20367	3.20531	FALSE	0
2022-09-13	10:43:01	0.189936	0.844873	4.00332	FALSE	0
2022-09-13	10:43:01	0.181794	0.808656	4.01396	FALSE	0
2022-09-13	10:43:01	0.260471	1.15863	5.16195	FALSE	0
2022-09-13	10:43:01	0.673041	2.99382	7.00778	FALSE	0
2022-09-13	10:43:02	0.660573	2.93836	8.10031	FALSE	0
2022-09-13	10:43:02	0.790395	3.51584	10.5236	FALSE	0
2022-09-13	10:43:02	0.184593	0.821107	8.92142	FALSE	0
2022-09-13	10:43:03	-0.0108776	-0.0483857	10.5236	FALSE	0
2022-09-13	10:43:03	-0.00319315	-0.0142038	8.92142	FALSE	0
2022-09-13	10:43:03	-0.15902	-0.707353	10.5236	FALSE	0
2022-09-13	10:43:03	0.0587407	0.26129	9.18271	FALSE	0
2022-09-13	10:43:04	-0.0325061	-0.144594	10.5236	FALSE	0
2022-09-13	10:43:04	0.0533972	0.237521	9.42023	FALSE	0
2022-09-13	10:43:04	-0.0212084	-0.0943392	10.5236	FALSE	0
2022-09-13	10:43:04	0.0123794	0.055066	9.47529	FALSE	0
2022-09-13	10:43:05	-0.0765264	-0.340405	10.5236	FALSE	0
2022-09-13	10:43:05	-0.150114	-0.667737	9.47529	FALSE	0
2022-09-13	10:43:05	-0.245076	-1.09015	10.5236	FALSE	0
2022-09-13	10:43:05	-0.187061	-0.832085	9.47529	FALSE	0
2022-09-13	10:43:06	-0.334542	-1.48811	10.5236	FALSE	0
2022-09-13	10:43:06	-0.625178	-2.78092	9.47529	FALSE	0
2022-09-13	10:43:06	-0.898714	-3.99766	10.5236	FALSE	0
2022-09-13	10:43:07	-0.524007	-2.33089	9.47529	FALSE	0
2022-09-13	10:43:07	0.0319214	0.141993	10.6656	FALSE	0
2022-09-13	10:43:07	1.83375	8.15689	17.6322	FALSE	0
2022-09-13	10:43:07	3.16892	14.096	24.7616	1	1
2022-09-13	10:43:08	2.89314	12.8693	30.5014	FALSE	1
2022-09-13	10:43:08	4.57518	20.3513	45.1129	1	2
2022-09-13	10:43:08	1.27421	5.66794	36.1694	FALSE	2
2022-09-13	10:43:08	0.506425	2.25268	47.3656	FALSE	2
2022-09-13	10:43:09	0.607392	2.7018	38.8712	FALSE	2
2022-09-13	10:43:09	0.738384	3.28448	50.6501	FALSE	2
2022-09-13	10:43:09	1.0133	4.50736	43.3785	FALSE	2
2022-09-13	10:43:09	0.79243	3.52489	54.175	FALSE	2
2022-09-13	10:43:10	1.17991	5.24848	48.627	FALSE	2
2022-09-13	10:43:10	1.21986	5.42618	59.6011	FALSE	2
2022-09-13	10:43:10	1.06179	4.72305	53.3501	FALSE	2
2022-09-13	10:43:10	2.27126	10.103	69.7042	FALSE	2
2022-09-13	10:43:11	1.10378	4.90983	58.2599	FALSE	2
2022-09-13	10:43:11	1.1763	5.23242	74.9366	FALSE	2
2022-09-13	10:43:11	0.934771	4.15805	62.418	FALSE	2
2022-09-13	10:43:12	1.59574	7.09817	82.0348	FALSE	2
2022-09-13	10:43:12	0.979097	4.35522	66.7732	FALSE	2
2022-09-13	10:43:12	1.25106	5.56497	87.5997	FALSE	2
2022-09-13	10:43:12	1.33533	5.93981	72.713	FALSE	2
2022-09-13	10:43:13	1.32729	5.90405	93.5038	FALSE	2
2022-09-13	10:43:13	1.70302	7.57537	80.2884	FALSE	2
2022-09-13	10:43:13	1.4451	6.42809	99.9319	FALSE	2
2022-09-13	10:43:13	2.66225	11.8422	92.1306	FALSE	2
2022-09-13	10:43:14	2.93126	13.0388	112.971	FALSE	2
2022-09-13	10:43:14	3.17879	14.1399	106.27	1	3
2022-09-13	10:43:14	1.54922	6.89124	119.862	FALSE	3
2022-09-13	10:43:14	1.94632	8.65762	114.928	FALSE	3
2022-09-13	10:43:15	0.551412	2.45279	122.315	FALSE	3
2022-09-13	10:43:15	0.79126	3.51968	118.448	FALSE	3
2022-09-13	10:43:15	0.490293	2.18092	124.496	FALSE	3
2022-09-13	10:43:16	0.432176	1.92241	120.37	FALSE	3
2022-09-13	10:43:16	0.467392	2.07905	126.575	FALSE	3
2022-09-13	10:43:16	0.35416	1.57537	121.946	FALSE	3
2022-09-13	10:43:16	0.689784	3.0683	129.643	FALSE	3
2022-09-13	10:43:17	0.419708	1.86695	123.813	FALSE	3
2022-09-13	10:43:17	0.688308	3.06173	132.705	FALSE	3
2022-09-13	10:43:17	0.34612	1.53961	125.352	FALSE	3
2022-09-13	10:43:17	0.601641	2.67622	135.381	FALSE	3
2022-09-13	10:43:18	0.332685	1.47985	126.832	FALSE	3
2022-09-13	10:43:18	0.689122	3.06535	138.446	FALSE	3
2022-09-13	10:43:18	0.502048	2.23321	129.065	FALSE	3
2022-09-13	10:43:18	0.762812	3.39314	141.839	FALSE	3
2022-09-13	10:43:19	0.574873	2.55715	131.622	FALSE	3
2022-09-13	10:43:19	0.473957	2.10826	143.948	FALSE	3
2022-09-13	10:43:19	0.90958	4.04599	135.668	FALSE	3
2022-09-13	10:43:20	0.453448	2.01703	145.965	FALSE	3
2022-09-13	10:43:20	1.06413	4.73346	140.402	FALSE	3
2022-09-13	10:43:20	0.470751	2.09399	148.059	FALSE	3
2022-09-13	10:43:20	1.86622	8.30132	148.703	FALSE	3
2022-09-13	10:43:21	1.15019	5.11628	153.175	FALSE	3
2022-09-13	10:43:21	3.6419	16.1999	164.903	1	4
2022-09-13	10:43:21	1.88968	8.40567	161.581	FALSE	4
2022-09-13	10:43:21	5.43889	24.1933	189.096	1	5
2022-09-13	10:43:22	2.89319	12.8695	174.45	FALSE	5
2022-09-13	10:43:22	4.1282	18.3631	207.459	1	6
2022-09-13	10:43:22	4.30373	19.1439	193.594	1	7
2022-09-13	10:43:22	2.26128	10.0586	217.518	FALSE	7
2022-09-13	10:43:23	2.25538	10.0324	203.626	FALSE	7
2022-09-13	10:43:23	0.790191	3.51493	221.033	FALSE	7
2022-09-13	10:43:23	2.05156	9.12575	212.752	FALSE	7
2022-09-13	10:43:24	0.545	2.42427	223.457	FALSE	7
2022-09-13	10:43:24	1.72505	7.67337	220.426	FALSE	7
2022-09-13	10:43:24	1.3077	5.81691	229.274	FALSE	7
2022-09-13	10:43:24	3.39146	15.0859	235.511	1	8
2022-09-13	10:43:25	2.22083	9.8787	239.153	FALSE	8
2022-09-13	10:43:25	3.81864	16.9861	252.497	1	9
2022-09-13	10:43:25	4.30597	19.1538	258.307	1	10
2022-09-13	10:43:25	3.4594	15.3881	267.886	1	11
2022-09-13	10:43:26	3.91421	17.4112	275.718	1	12
2022-09-13	10:43:26	2.40968	10.7187	278.604	FALSE	12
2022-09-13	10:43:26	2.75085	12.2363	287.954	FALSE	12
2022-09-13	10:43:26	0.984898	4.38102	282.985	FALSE	12
2022-09-13	10:43:27	1.20413	5.35621	293.31	FALSE	12
2022-09-13	10:43:27	1.52841	6.79867	289.784	FALSE	12
2022-09-13	10:43:27	0.660064	2.9361	296.246	FALSE	12
2022-09-13	10:43:27	1.09487	4.8702	294.654	FALSE	12
2022-09-13	10:43:28	0.350038	1.55704	297.803	FALSE	12
2022-09-13	10:43:28	0.896705	3.98872	298.643	FALSE	12
2022-09-13	10:43:28	0.614415	2.73304	300.536	FALSE	12
2022-09-13	10:43:29	1.7424	7.75054	306.393	FALSE	12
2022-09-13	10:43:29	1.10184	4.9012	305.438	FALSE	12
2022-09-13	10:43:29	2.4109	10.7242	317.118	FALSE	12
2022-09-13	10:43:29	1.03472	4.60264	310.04	FALSE	12
2022-09-13	10:43:30	0.52327	2.32761	319.445	FALSE	12
2022-09-13	10:43:30	0.417417	1.85675	311.897	FALSE	12
2022-09-13	10:43:30	0.444135	1.9756	321.421	FALSE	12
2022-09-13	10:43:30	0.378181	1.68222	313.579	FALSE	12
2022-09-13	10:43:31	0.140573	0.625297	322.046	FALSE	12
2022-09-13	10:43:31	0.29986	1.33384	314.913	FALSE	12
2022-09-13	10:43:31	0.17528	0.77968	322.826	FALSE	12
2022-09-13	10:43:31	0.483677	2.15149	317.065	FALSE	12
2022-09-13	10:43:32	0.276654	1.23061	324.056	FALSE	12
2022-09-13	10:43:32	-0.187213	-0.832761	317.065	FALSE	12
2022-09-13	10:43:32	-0.113117	-0.503167	324.056	FALSE	12
2022-09-13	10:43:33	-0.254033	-1.12999	317.065	FALSE	12
2022-09-13	10:43:33	-0.154185	-0.685846	324.056	FALSE	12
2022-09-13	10:43:33	-0.142837	-0.635368	317.065	FALSE	12
2022-09-13	10:43:33	0.0745676	0.331692	324.388	FALSE	12
2022-09-13	10:43:34	-0.101107	-0.449744	317.065	FALSE	12
2022-09-13	10:43:34	0.367545	1.63491	326.023	FALSE	12
2022-09-13	10:43:34	1.14093	5.07508	322.14	FALSE	12
2022-09-13	10:43:34	1.82373	8.11232	334.135	FALSE	12
2022-09-13	10:43:35	1.51508	6.73938	328.879	FALSE	12
2022-09-13	10:43:35	1.6706	7.43116	341.567	FALSE	12
2022-09-13	10:43:35	1.31579	5.8529	334.732	FALSE	12
2022-09-13	10:43:35	0.717316	3.19077	344.757	FALSE	12
2022-09-13	10:43:36	1.03391	4.59904	339.331	FALSE	12
2022-09-13	10:43:36	0.244237	1.08642	345.844	FALSE	12
2022-09-13	10:43:36	0.876908	3.90066	343.232	FALSE	12
2022-09-13	10:43:37	0.275687	1.22631	347.07	FALSE	12
2022-09-13	10:43:37	0.813143	3.61702	346.849	FALSE	12
2022-09-13	10:43:37	0.419351	1.86536	348.935	FALSE	12
2022-09-13	10:43:37	0.856654	3.81057	350.659	FALSE	12
2022-09-13	10:43:38	0.606578	2.69818	351.634	FALSE	12
2022-09-13	10:43:38	0.760979	3.38499	354.044	FALSE	12
2022-09-13	10:43:38	0.695433	3.09343	354.727	FALSE	12
2022-09-13	10:43:38	0.576298	2.56349	356.608	FALSE	12
2022-09-13	10:43:39	0.681081	3.02958	357.757	FALSE	12
2022-09-13	10:43:39	0.366832	1.63174	358.24	FALSE	12
2022-09-13	10:43:39	0.571514	2.54221	360.299	FALSE	12
2022-09-13	10:43:39	0.339249	1.50905	359.749	FALSE	12
2022-09-13	10:43:40	0.425764	1.89388	362.193	FALSE	12
2022-09-13	10:43:40	0.285509	1.27	361.019	FALSE	12
2022-09-13	10:43:40	0.459707	2.04487	364.238	FALSE	12
2022-09-13	10:43:40	0.328308	1.46038	362.479	FALSE	12
2022-09-13	10:43:41	2.75716	12.2644	376.502	FALSE	12
2022-09-13	10:43:41	2.32123	10.3253	372.804	FALSE	12
2022-09-13	10:43:41	1.82698	8.12677	384.629	FALSE	12
2022-09-13	10:43:42	0.783982	3.48731	376.292	FALSE	12
2022-09-13	10:43:42	0.168155	0.747987	385.377	FALSE	12
2022-09-13	10:43:42	0.803321	3.57333	379.865	FALSE	12
2022-09-13	10:43:42	0.496349	2.20786	387.585	FALSE	12
2022-09-13	10:43:43	0.491616	2.18681	382.052	FALSE	12
2022-09-13	10:43:43	0.00734122	0.0326552	387.617	FALSE	12
2022-09-13	10:43:43	0.139555	0.620769	382.672	FALSE	12
2022-09-13	10:43:43	0.232379	1.03367	388.651	FALSE	12
2022-09-13	10:43:44	0.175789	0.781945	383.454	FALSE	12
2022-09-13	10:43:44	0.0372649	0.165762	388.817	FALSE	12
2022-09-13	10:43:44	0.138283	0.61511	384.07	FALSE	12
2022-09-13	10:43:44	0.378181	1.68222	390.499	FALSE	12
2022-09-13	10:43:45	0.257926	1.14731	385.217	FALSE	12
2022-09-13	10:43:45	0.246018	1.09434	391.593	FALSE	12
2022-09-13	10:43:45	0.243015	1.08098	386.298	FALSE	12
2022-09-13	10:43:46	0.242964	1.08075	392.674	FALSE	12
2022-09-13	10:43:46	0.251718	1.11969	387.417	FALSE	12
2022-09-13	10:43:46	0.240522	1.06989	393.744	FALSE	12
2022-09-13	10:43:46	0.240878	1.07147	388.489	FALSE	12
2022-09-13	10:43:47	0.252939	1.12512	394.869	FALSE	12
2022-09-13	10:43:47	0.243626	1.0837	389.573	FALSE	12
2022-09-13	10:43:47	0.233143	1.03707	395.906	FALSE	12
2022-09-13	10:43:47	0.27416	1.21952	390.792	FALSE	12
2022-09-13	10:43:48	0.271311	1.20685	397.113	FALSE	12
2022-09-13	10:43:48	0.244491	1.08754	391.88	FALSE	12
2022-09-13	10:43:48	0.249478	1.10973	398.223	FALSE	12
2022-09-13	10:43:48	0.250344	1.11358	392.993	FALSE	12
2022-09-13	10:43:49	0.244033	1.08551	399.308	FALSE	12
2022-09-13	10:43:49	0.247341	1.10022	394.094	FALSE	12
2022-09-13	10:43:49	0.682557	3.03615	402.344	FALSE	12
2022-09-13	10:43:50	0.74327	3.30621	397.4	FALSE	12
2022-09-13	10:43:50	0.744287	3.31074	405.655	FALSE	12
2022-09-13	10:43:50	0.734568	3.26751	400.667	FALSE	12
2022-09-13	10:43:50	0.740165	3.2924	408.947	FALSE	12
2022-09-13	10:43:51	0.740827	3.29535	403.963	FALSE	12
2022-09-13	10:43:51	0.743117	3.30553	412.253	FALSE	12
2022-09-13	10:43:51	0.73528	3.27067	407.233	FALSE	12
2022-09-13	10:43:51	0.735738	3.27271	415.526	FALSE	12
2022-09-13	10:43:52	0.7393	3.28855	410.522	FALSE	12
2022-09-13	10:43:52	0.736908	3.27791	418.804	FALSE	12
2022-09-13	10:43:52	0.737163	3.27905	413.801	FALSE	12
2022-09-13	10:43:52	0.73131	3.25301	422.057	FALSE	12
2022-09-13	10:43:53	0.735738	3.27271	417.074	FALSE	12
2022-09-13	10:43:53	0.734466	3.26705	425.324	FALSE	12
2022-09-13	10:43:53	0.733092	3.26094	420.335	FALSE	12
2022-09-13	10:43:54	0.736501	3.2761	428.6	FALSE	12
2022-09-13	10:43:54	0.735483	3.27158	423.606	FALSE	12
2022-09-13	10:43:54	0.730242	3.24826	431.848	FALSE	12
2022-09-13	10:43:54	0.74327	3.30621	426.912	FALSE	12
2022-09-13	10:43:55	0.734415	3.26682	435.115	FALSE	12
2022-09-13	10:43:55	0.737672	3.28131	430.194	FALSE	12
2022-09-13	10:43:55	0.738791	3.28629	438.401	FALSE	12
2022-09-13	10:43:55	0.730903	3.2512	433.445	FALSE	12
2022-09-13	10:43:56	0.738028	3.2829	441.684	FALSE	12
2022-09-13	10:43:56	0.743219	3.30599	436.751	FALSE	12
2022-09-13	10:43:56	0.730801	3.25075	444.935	FALSE	12
2022-09-13	10:43:56	0.738079	3.28312	440.034	FALSE	12
2022-09-13	10:43:57	0.734313	3.26637	448.201	FALSE	12
2022-09-13	10:43:57	0.730343	3.24871	443.283	FALSE	12
2022-09-13	10:43:57	0.737722	3.28154	451.483	FALSE	12
2022-09-13	10:43:57	0.735483	3.27158	446.554	FALSE	12
2022-09-13	10:43:58	0.736247	3.27497	454.758	FALSE	12
2022-09-13	10:43:58	0.738435	3.28471	449.839	FALSE	12
2022-09-13	10:43:58	0.741234	3.29716	458.055	FALSE	12
2022-09-13	10:43:59	0.737875	3.28222	453.121	FALSE	12
2022-09-13	10:43:59	0.739198	3.2881	461.343	FALSE	12
2022-09-13	10:43:59	0.736094	3.27429	456.395	FALSE	12
2022-09-13	10:43:59	0.742099	3.301	464.644	FALSE	12
2022-09-13	10:44:00	0.734313	3.26637	459.662	FALSE	12
2022-09-13	10:44:00	0.74159	3.29874	467.943	FALSE	12
2022-09-13	10:44:00	0.739504	3.28946	462.951	FALSE	12
2022-09-13	10:44:00	0.737824	3.28199	471.225	FALSE	12
2022-09-13	10:44:01	0.733499	3.26275	466.214	FALSE	12
2022-09-13	10:44:01	0.738689	3.28584	474.51	FALSE	12
2022-09-13	10:44:01	0.737672	3.28131	469.495	FALSE	12
2022-09-13	10:44:01	0.738486	3.28493	477.795	FALSE	12
2022-09-13	10:44:02	0.741947	3.30033	472.796	FALSE	12
2022-09-13	10:44:02	0.732074	3.25641	481.052	FALSE	12
2022-09-13	10:44:02	0.744797	3.31301	476.109	FALSE	12
2022-09-13	10:44:03	0.736145	3.27452	484.326	FALSE	12
2022-09-13	10:44:03	0.740623	3.29444	479.403	FALSE	12
2022-09-13	10:44:03	0.736908	3.27791	487.604	FALSE	12
2022-09-13	10:44:03	0.741031	3.29625	482.699	FALSE	12
2022-09-13	10:44:04	0.740114	3.29218	490.896	FALSE	12
2022-09-13	10:44:04	0.73584	3.27316	485.973	FALSE	12
2022-09-13	10:44:04	0.730394	3.24894	494.145	FALSE	12
2022-09-13	10:44:04	0.725611	3.22766	489.2	FALSE	12
2022-09-13	10:44:05	0.735331	3.2709	497.416	FALSE	12
2022-09-13	10:44:05	0.73701	3.27837	492.479	FALSE	12
2022-09-13	10:44:05	0.737773	3.28176	500.698	FALSE	12
2022-09-13	10:44:05	0.740267	3.29286	495.771	FALSE	12
2022-09-13	10:44:06	0.743778	3.30847	504.006	FALSE	12
2022-09-13	10:44:06	0.736807	3.27746	499.049	FALSE	12
2022-09-13	10:44:06	0.732328	3.25754	507.264	FALSE	12
2022-09-13	10:44:07	0.743778	3.30847	502.357	FALSE	12
2022-09-13	10:44:07	0.736145	3.27452	510.539	FALSE	12
2022-09-13	10:44:07	0.73813	3.28335	505.641	FALSE	12
2022-09-13	10:44:07	0.735738	3.27271	513.811	FALSE	12
2022-09-13	10:44:08	0.738791	3.28629	508.927	FALSE	12
2022-09-13	10:44:08	0.733041	3.26071	517.072	FALSE	12
2022-09-13	10:44:08	0.732888	3.26003	512.187	FALSE	12
2022-09-13	10:44:08	0.742659	3.3035	520.375	FALSE	12
2022-09-13	10:44:09	0.731158	3.25234	515.439	FALSE	12
2022-09-13	10:44:09	0.735687	3.27248	523.648	FALSE	12
2022-09-13	10:44:09	0.734669	3.26795	518.707	FALSE	12
2022-09-13	10:44:09	0.741794	3.29965	526.948	FALSE	12
2022-09-13	10:44:10	0.731463	3.25369	521.961	FALSE	12
2022-09-13	10:44:10	0.73874	3.28606	530.234	FALSE	12
2022-09-13	10:44:10	0.73645	3.27588	525.237	FALSE	12
2022-09-13	10:44:10	0.739555	3.28969	533.523	FALSE	12
2022-09-13	10:44:11	0.737315	3.27972	528.517	FALSE	12
2022-09-13	10:44:11	0.732684	3.25912	536.782	FALSE	12
2022-09-13	10:44:11	0.738791	3.28629	531.803	FALSE	12
2022-09-13	10:44:12	0.74271	3.30372	540.086	FALSE	12
2022-09-13	10:44:12	0.739758	3.29059	535.093	FALSE	12
2022-09-13	10:44:12	0.738944	3.28697	543.373	FALSE	12
2022-09-13	10:44:12	0.448003	1.99281	537.086	FALSE	12
2022-09-13	10:44:13	0.737214	3.27928	546.652	FALSE	12
2022-09-13	10:44:13	0.739147	3.28787	540.374	FALSE	12
2022-09-13	10:44:13	0.48958	2.17775	548.83	FALSE	12
2022-09-13	10:44:13	0.468766	2.08516	542.459	FALSE	12
2022-09-13	10:44:14	0.741845	3.29987	552.13	FALSE	12
2022-09-13	10:44:14	0.739606	3.28992	545.749	FALSE	12
2022-09-13	10:44:14	0.733448	3.26252	555.393	FALSE	12
2022-09-13	10:44:14	0.735178	3.27022	549.019	FALSE	12
2022-09-13	10:44:15	0.740929	3.2958	558.688	FALSE	12
2022-09-13	10:44:15	0.73701	3.27837	552.298	FALSE	12
2022-09-13	10:44:15	0.736298	3.2752	561.964	FALSE	12
2022-09-13	10:44:16	0.734313	3.26637	555.564	FALSE	12
2022-09-13	10:44:16	0.742608	3.30327	565.267	FALSE	12
2022-09-13	10:44:16	0.735636	3.27226	558.836	FALSE	12
2022-09-13	10:44:16	0.734059	3.26524	568.532	FALSE	12
2022-09-13	10:44:17	0.723117	3.21657	562.053	FALSE	12
2022-09-13	10:44:17	0.693906	3.08663	571.619	FALSE	12
2022-09-13	10:44:17	0.693651	3.0855	565.139	FALSE	12
2022-09-13	10:44:17	0.34612	1.53961	573.158	FALSE	12
2022-09-13	10:44:18	0.728206	3.23921	568.378	FALSE	12
2022-09-13	10:44:18	0.722608	3.2143	576.373	FALSE	12
2022-09-13	10:44:18	0.733092	3.26094	571.639	FALSE	12
2022-09-13	10:44:18	0.735076	3.26977	579.642	FALSE	12
2022-09-13	10:44:19	0.739656	3.29014	574.929	FALSE	12
2022-09-13	10:44:19	0.732277	3.25731	582.9	FALSE	12
2022-09-13	10:44:19	0.738842	3.28652	578.215	FALSE	12
2022-09-13	10:44:20	0.734822	3.26864	586.168	FALSE	12
2022-09-13	10:44:20	0.737977	3.28267	581.498	FALSE	12
2022-09-13	10:44:20	0.734669	3.26795	589.436	FALSE	12
2022-09-13	10:44:20	0.733651	3.26343	584.761	FALSE	12
2022-09-13	10:44:21	0.735229	3.27045	592.707	FALSE	12
2022-09-13	10:44:21	0.733448	3.26252	588.024	FALSE	12
2022-09-13	10:44:21	0.733804	3.26411	595.971	FALSE	12
2022-09-13	10:44:21	0.732532	3.25845	591.282	FALSE	12
2022-09-13	10:44:22	0.73757	3.28086	599.252	FALSE	12
2022-09-13	10:44:22	0.727443	3.23581	594.518	FALSE	12
2022-09-13	10:44:22	0.734262	3.26614	602.518	FALSE	12
2022-09-13	10:44:22	0.740776	3.29512	597.813	FALSE	12
2022-09-13	10:44:23	0.739453	3.28923	605.807	FALSE	12
2022-09-13	10:44:23	0.738689	3.28584	601.099	FALSE	12
2022-09-13	10:44:23	0.738181	3.28358	609.091	FALSE	12
2022-09-13	10:44:24	0.740318	3.29308	604.392	FALSE	12
2022-09-13	10:44:24	0.735382	3.27113	612.362	FALSE	12
2022-09-13	10:44:24	0.74215	3.30123	607.693	FALSE	12
2022-09-13	10:44:24	0.731005	3.25166	615.613	FALSE	12
2022-09-13	10:44:25	0.732481	3.25822	610.952	FALSE	12
2022-09-13	10:44:25	0.743677	3.30802	618.921	FALSE	12
2022-09-13	10:44:25	0.740267	3.29286	614.245	FALSE	12
2022-09-13	10:44:25	0.733142	3.26116	622.183	FALSE	12
2022-09-13	10:44:26	0.740623	3.29444	617.539	FALSE	12
2022-09-13	10:44:26	0.743524	3.30734	625.49	FALSE	12
2022-09-13	10:44:26	0.739453	3.28923	620.828	FALSE	12
2022-09-13	10:44:26	0.737417	3.28018	628.77	FALSE	12
2022-09-13	10:44:27	0.740725	3.29489	624.123	FALSE	12
2022-09-13	10:44:27	0.738079	3.28312	632.053	FALSE	12
2022-09-13	10:44:27	0.741081	3.29648	627.42	FALSE	12
2022-09-13	10:44:27	0.732226	3.25709	635.31	FALSE	12
2022-09-13	10:44:28	0.740471	3.29376	630.713	FALSE	12
2022-09-13	10:44:28	0.737824	3.28199	638.592	FALSE	12
2022-09-13	10:44:28	0.738639	3.28561	633.999	FALSE	12
2022-09-13	10:44:29	0.734059	3.26524	641.858	FALSE	12
2022-09-13	10:44:29	0.738435	3.28471	637.284	FALSE	12
2022-09-13	10:44:29	0.73472	3.26818	645.126	FALSE	12
2022-09-13	10:44:29	0.73757	3.28086	640.565	FALSE	12
2022-09-13	10:44:30	0.737112	3.27882	648.405	FALSE	12
2022-09-13	10:44:30	0.737926	3.28244	643.847	FALSE	12
2022-09-13	10:44:30	0.69528	3.09274	651.497	FALSE	12
2022-09-13	10:44:30	0.732735	3.25935	647.106	FALSE	12
2022-09-13	10:44:31	0.731667	3.2546	654.752	FALSE	12
2022-09-13	10:44:31	0.745255	3.31504	650.421	FALSE	12
2022-09-13	10:44:31	0.7393	3.28855	658.041	FALSE	12
2022-09-13	10:44:31	0.741692	3.29919	653.721	FALSE	12
2022-09-13	10:44:32	0.734618	3.26773	661.308	FALSE	12
2022-09-13	10:44:32	0.730852	3.25098	656.972	FALSE	12
2022-09-13	10:44:32	0.735534	3.2718	664.58	FALSE	12
2022-09-13	10:44:33	0.738333	3.28425	660.256	FALSE	12
2022-09-13	10:44:33	0.74098	3.29603	667.876	FALSE	12
2022-09-13	10:44:33	0.737875	3.28222	663.538	FALSE	12
2022-09-13	10:44:33	1.33009	5.91651	673.793	FALSE	12
2022-09-13	10:44:34	1.09843	4.88604	668.424	FALSE	12
2022-09-13	10:44:34	0.0328882	0.146293	673.939	FALSE	12
2022-09-13	10:44:34	0.573957	2.55308	670.977	FALSE	12
2022-09-13	10:44:34	0.591107	2.62936	676.568	FALSE	12
2022-09-13	10:44:35	0.627443	2.79099	673.768	FALSE	12
2022-09-13	10:44:35	0.616552	2.74255	679.311	FALSE	12
2022-09-13	10:44:35	0.599707	2.66762	676.436	FALSE	12
2022-09-13	10:44:35	0.72215	3.21227	682.523	FALSE	12
2022-09-13	10:44:36	0.738537	3.28516	679.721	FALSE	12
2022-09-13	10:44:36	0.953804	4.24271	686.766	FALSE	12
2022-09-13	10:44:36	2.05385	9.13594	688.857	FALSE	12
2022-09-13	10:44:37	1.95243	8.6848	695.451	FALSE	12
2022-09-13	10:44:37	0.86785	3.86037	692.717	FALSE	12
2022-09-13	10:44:37	0.782608	3.4812	698.932	FALSE	12
2022-09-13	10:44:37	0.31813	1.41511	694.132	FALSE	12
2022-09-13	10:44:38	0.205051	0.912108	699.844	FALSE	12
2022-09-13	10:44:38	0.0408781	0.181834	694.314	FALSE	12
2022-09-13	10:44:38	-0.0193763	-0.0861897	699.844	FALSE	12
2022-09-13	10:44:38	-0.136119	-0.605485	694.314	FALSE	12
2022-09-13	10:44:39	-0.415712	-1.84917	699.844	FALSE	12
2022-09-13	10:44:39	-0.622175	-2.76756	694.314	FALSE	12
2022-09-13	10:44:39	-0.704211	-3.13247	699.844	FALSE	12
2022-09-13	10:44:39	-0.841717	-3.74413	694.314	FALSE	12
2022-09-13	10:44:40	-0.809045	-3.59879	699.844	FALSE	12
2022-09-13	10:44:40	-1.06391	-4.73248	694.314	FALSE	12
2022-09-13	10:44:40	-0.631793	-2.81034	699.844	FALSE	12
2022-09-13	10:44:41	-0.126857	-0.564285	694.314	FALSE	12
2022-09-13	10:44:41	2.1649	9.62991	709.474	FALSE	12
2022-09-13	10:44:41	5.19802	23.1218	717.436	1	13
2022-09-13	10:44:41	0.832634	3.70372	713.177	FALSE	13
2022-09-13	10:44:42	0.180115	0.801188	718.237	FALSE	13
2022-09-13	10:44:42	0.247952	1.10294	714.28	FALSE	13
2022-09-13	10:44:42	0.282252	1.25551	719.493	FALSE	13
2022-09-13	10:44:42	0.214313	0.953307	715.234	FALSE	13
2022-09-13	10:44:43	0.428563	1.90633	721.399	FALSE	13
2022-09-13	10:44:43	0.275535	1.22563	716.459	FALSE	13
2022-09-13	10:44:43	0.659606	2.93406	724.333	FALSE	13
2022-09-13	10:44:43	0.56159	2.49806	718.957	FALSE	13
2022-09-13	10:44:44	-0.0853305	-0.379567	724.333	FALSE	13
2022-09-13	10:44:44	-0.0310303	-0.138029	718.957	FALSE	13
2022-09-13	10:44:44	-0.203244	-0.90407	724.333	FALSE	13
2022-09-13	10:44:44	-0.456221	-2.02936	718.957	FALSE	13
2022-09-13	10:44:45	-0.419529	-1.86615	724.333	FALSE	13
2022-09-13	10:44:45	-0.360241	-1.60242	718.957	FALSE	13
2022-09-13	10:44:45	-0.23846	-1.06072	724.333	FALSE	13
2022-09-13	10:44:46	-0.00115753	-0.00514892	718.957	FALSE	13
2022-09-13	10:44:46	0.0647967	0.288229	724.621	FALSE	13
2022-09-13	10:44:46	0.074415	0.331013	719.288	FALSE	13
2022-09-13	10:44:46	0.0817941	0.363837	724.985	FALSE	13
2022-09-13	10:44:47	0.10897	0.48472	719.773	FALSE	13
2022-09-13	10:44:47	0.115229	0.512562	725.498	FALSE	13
2022-09-13	10:44:47	0.0808781	0.359762	720.133	FALSE	13
2022-09-13	10:44:47	0.276654	1.23061	726.728	FALSE	13
2022-09-13	10:44:48	0.802354	3.56903	723.702	FALSE	13
2022-09-13	10:44:48	0.0373157	0.165988	726.894	FALSE	13
2022-09-13	10:44:48	0.21243	0.944931	724.647	FALSE	13
2022-09-13	10:44:48	-0.0809539	-0.360099	726.894	FALSE	13
2022-09-13	10:44:49	-0.256425	-1.14063	724.647	FALSE	13
2022-09-13	10:44:49	-0.1893	-0.842044	726.894	FALSE	13
2022-09-13	10:44:49	0.13355	0.594057	725.241	FALSE	13
2022-09-13	10:44:50	0.152583	0.67872	727.573	FALSE	13
2022-09-13	10:44:50	0.237417	1.05608	726.297	FALSE	13
2022-09-13	10:44:50	0.22729	1.01103	728.584	FALSE	13
2022-09-13	10:44:50	0.28042	1.24736	727.544	FALSE	13
2022-09-13	10:44:51	0.243677	1.08392	729.668	FALSE	13
2022-09-13	10:44:51	0.361743	1.60911	729.154	FALSE	13
2022-09-13	10:44:51	0.338791	1.50701	731.175	FALSE	13
2022-09-13	10:44:51	0.374873	1.66751	730.821	FALSE	13
2022-09-13	10:44:52	0.296145	1.31731	732.492	FALSE	13
2022-09-13	10:44:52	0.398181	1.77119	732.592	FALSE	13
2022-09-13	10:44:52	0.252379	1.12263	733.615	FALSE	13
2022-09-13	10:44:52	0.292939	1.30305	733.895	FALSE	13
2022-09-13	10:44:53	0.389071	1.73067	735.346	FALSE	13
2022-09-13	10:44:53	0.466832	2.07656	735.972	FALSE	13
2022-09-13	10:44:53	0.733601	3.2632	738.609	FALSE	13
2022-09-13	10:44:54	0.743371	3.30666	739.278	FALSE	13
2022-09-13	10:44:54	0.736399	3.27565	741.884	FALSE	13
2022-09-13	10:44:54	0.736247	3.27497	742.553	FALSE	13
2022-09-13	10:44:54	0.73986	3.29105	745.175	FALSE	13
2022-09-13	10:44:55	0.74098	3.29603	745.849	FALSE	13
2022-09-13	10:44:55	0.730751	3.25053	748.426	FALSE	13
2022-09-13	10:44:55	0.740522	3.29399	749.143	FALSE	13
2022-09-13	10:44:55	0.731717	3.25482	751.681	FALSE	13
2022-09-13	10:44:56	0.734059	3.26524	752.409	FALSE	13
2022-09-13	10:44:56	0.720064	3.20299	754.884	FALSE	13
2022-09-13	10:44:56	0.717977	3.19371	755.602	FALSE	13
2022-09-13	10:44:56	0.719148	3.19891	758.083	FALSE	13
2022-09-13	10:44:57	0.71757	3.19189	758.794	FALSE	13
2022-09-13	10:44:57	0.713397	3.17333	761.256	FALSE	13
2022-09-13	10:44:57	0.698944	3.10904	761.903	FALSE	13
2022-09-13	10:44:57	0.710089	3.15862	764.415	FALSE	13
2022-09-13	10:44:58	0.70673	3.14368	765.047	FALSE	13
2022-09-13	10:44:58	0.706425	3.14232	767.557	FALSE	13
2022-09-13	10:44:58	0.703066	3.12738	768.174	FALSE	13
2022-09-13	10:44:59	0.692481	3.08029	770.637	FALSE	13
2022-09-13	10:44:59	0.687086	3.0563	771.231	FALSE	13
2022-09-13	10:44:59	0.68729	3.0572	773.695	FALSE	13
2022-09-13	10:44:59	0.676399	3.00876	774.239	FALSE	13
2022-09-13	10:45:00	0.461082	2.05098	775.745	FALSE	13
2022-09-13	10:45:00	0.222099	0.987941	775.227	FALSE	13
2022-09-13	10:45:00	0.203881	0.906903	776.652	FALSE	13
2022-09-13	10:45:00	0.19813	0.881322	776.109	FALSE	13
2022-09-13	10:45:01	0.198232	0.881776	777.534	FALSE	13
2022-09-13	10:45:01	0.202303	0.899884	777.009	FALSE	13
2022-09-13	10:45:01	0.213804	0.951043	778.485	FALSE	13
2022-09-13	10:45:01	0.732023	3.25618	780.265	FALSE	13
2022-09-13	10:45:02	0.736247	3.27497	781.76	FALSE	13
2022-09-13	10:45:02	0.735534	3.2718	783.537	FALSE	13
2022-09-13	10:45:02	0.73874	3.28606	785.046	FALSE	13
2022-09-13	10:45:03	0.731056	3.25188	786.788	FALSE	13
2022-09-13	10:45:03	0.733448	3.26252	788.309	FALSE	13
2022-09-13	10:45:03	0.737722	3.28154	790.07	FALSE	13
2022-09-13	10:45:03	0.738028	3.2829	791.592	FALSE	13
2022-09-13	10:45:04	0.73874	3.28606	793.356	FALSE	13
2022-09-13	10:45:04	0.732023	3.25618	794.848	FALSE	13
2022-09-13	10:45:04	0.736094	3.27429	796.63	FALSE	13
2022-09-13	10:45:04	0.739656	3.29014	798.138	FALSE	13
2022-09-13	10:45:05	0.740573	3.29422	799.925	FALSE	13
2022-09-13	10:45:05	0.734008	3.26501	801.403	FALSE	13
2022-09-13	10:45:05	0.735382	3.27113	803.196	FALSE	13
2022-09-13	10:45:05	0.737061	3.27859	804.682	FALSE	13
2022-09-13	10:45:06	0.732888	3.26003	806.456	FALSE	13
2022-09-13	10:45:06	0.741234	3.29716	807.979	FALSE	13
2022-09-13	10:45:06	0.732786	3.25958	809.715	FALSE	13
2022-09-13	10:45:07	0.738689	3.28584	811.265	FALSE	13
2022-09-13	10:45:07	0.732277	3.25731	812.973	FALSE	13
2022-09-13	10:45:07	0.736654	3.27678	814.541	FALSE	13
2022-09-13	10:45:07	0.736807	3.27746	816.25	FALSE	13
2022-09-13	10:45:08	0.743423	3.30689	817.848	FALSE	13
2022-09-13	10:45:08	0.741845	3.29987	819.55	FALSE	13
2022-09-13	10:45:08	0.740216	3.29263	821.141	FALSE	13
2022-09-13	10:45:08	0.73187	3.2555	822.805	FALSE	13
2022-09-13	10:45:09	0.739453	3.28923	824.43	FALSE	13
2022-09-13	10:45:09	0.737061	3.27859	826.084	FALSE	13
2022-09-13	10:45:09	0.733499	3.26275	827.693	FALSE	13
2022-09-13	10:45:09	0.735789	3.27294	829.357	FALSE	13
2022-09-13	10:45:10	0.741081	3.29648	830.989	FALSE	13
2022-09-13	10:45:10	0.746781	3.32183	832.679	FALSE	13
2022-09-13	10:45:10	0.731158	3.25234	834.242	FALSE	13
2022-09-13	10:45:11	0.736043	3.27407	835.953	FALSE	13
2022-09-13	10:45:11	0.740725	3.29489	837.537	FALSE	13
2022-09-13	10:45:11	0.740369	3.29331	839.246	FALSE	13
2022-09-13	10:45:11	0.737163	3.27905	840.816	FALSE	13
2022-09-13	10:45:12	0.739147	3.28787	842.534	FALSE	13
2022-09-13	10:45:12	0.739758	3.29059	844.106	FALSE	13
2022-09-13	10:45:12	0.735382	3.27113	845.805	FALSE	13
2022-09-13	10:45:12	0.736145	3.27452	847.381	FALSE	13
2022-09-13	10:45:13	0.735636	3.27226	849.077	FALSE	13
2022-09-13	10:45:13	0.737926	3.28244	850.663	FALSE	13
2022-09-13	10:45:13	0.738537	3.28516	852.363	FALSE	13
2022-09-13	10:45:13	0.734568	3.26751	853.931	FALSE	13
2022-09-13	10:45:14	0.735738	3.27271	855.635	FALSE	13
2022-09-13	10:45:14	0.734466	3.26705	857.198	FALSE	13
2022-09-13	10:45:14	0.740471	3.29376	858.929	FALSE	13
2022-09-13	10:45:14	0.734873	3.26886	860.467	FALSE	13
2022-09-13	10:45:15	0.737417	3.28018	862.209	FALSE	13
2022-09-13	10:45:15	0.734364	3.2666	863.733	FALSE	13
2022-09-13	10:45:15	0.741438	3.29806	865.507	FALSE	13
2022-09-13	10:45:16	0.738944	3.28697	867.02	FALSE	13
2022-09-13	10:45:16	0.733041	3.26071	868.768	FALSE	13
2022-09-13	10:45:16	0.293753	1.30667	868.327	FALSE	13
2022-09-13	10:45:16	0.346985	1.54346	870.312	FALSE	13
2022-09-13	10:45:17	0.343423	1.52761	869.854	FALSE	13
2022-09-13	10:45:17	0.228817	1.01782	871.329	FALSE	13
2022-09-13	10:45:17	0.441947	1.96587	871.82	FALSE	13
2022-09-13	10:45:17	0.357621	1.59077	872.92	FALSE	13
2022-09-13	10:45:18	0.748359	3.32885	875.149	FALSE	13
2022-09-13	10:45:18	1.09426	4.86749	877.788	FALSE	13
2022-09-13	10:45:18	0.581794	2.58794	877.737	FALSE	13
2022-09-13	10:45:18	0.607036	2.70022	880.488	FALSE	13
2022-09-13	10:45:19	0.517417	2.30157	880.039	FALSE	13
2022-09-13	10:45:19	0.360115	1.60186	882.09	FALSE	13
2022-09-13	10:45:19	0.730343	3.24871	883.287	FALSE	13
2022-09-13	10:45:20	0.73584	3.27316	885.363	FALSE	13
2022-09-13	10:45:20	0.739707	3.29036	886.578	FALSE	13
2022-09-13	10:45:20	0.73986	3.29105	888.654	FALSE	13
2022-09-13	10:45:20	0.741641	3.29897	889.877	FALSE	13
2022-09-13	10:45:21	0.739046	3.28742	891.941	FALSE	13
2022-09-13	10:45:21	0.735229	3.27045	893.147	FALSE	13
2022-09-13	10:45:21	0.743728	3.30825	895.25	FALSE	13
2022-09-13	10:45:21	0.730496	3.24939	896.397	FALSE	13
2022-09-13	10:45:22	0.735992	3.27384	898.523	FALSE	13
2022-09-13	10:45:22	0.735229	3.27045	899.667	FALSE	13
2022-09-13	10:45:22	0.735789	3.27294	901.796	FALSE	13
2022-09-13	10:45:22	0.734568	3.26751	902.935	FALSE	13
2022-09-13	10:45:23	0.729326	3.24419	905.041	FALSE	13
2022-09-13	10:45:23	0.729275	3.24396	906.179	FALSE	13
2022-09-13	10:45:23	0.733397	3.2623	908.303	FALSE	13
2022-09-13	10:45:24	0.733193	3.26139	909.44	FALSE	13
2022-09-13	10:45:24	0.735382	3.27113	911.574	FALSE	13
2022-09-13	10:45:24	0.737112	3.27882	912.719	FALSE	13
2022-09-13	10:45:24	0.731717	3.25482	914.829	FALSE	13
2022-09-13	10:45:25	0.732634	3.2589	915.978	FALSE	13
2022-09-13	10:45:25	0.733142	3.26116	918.09	FALSE	13
2022-09-13	10:45:25	0.730903	3.2512	919.229	FALSE	13
2022-09-13	10:45:25	0.741947	3.30033	921.39	FALSE	13
2022-09-13	10:45:26	0.737926	3.28244	922.511	FALSE	13
2022-09-13	10:45:26	0.736908	3.27791	924.668	FALSE	13
2022-09-13	10:45:26	0.743219	3.30599	925.817	FALSE	13
2022-09-13	10:45:26	0.738079	3.28312	927.951	FALSE	13
2022-09-13	10:45:27	0.733651	3.26343	929.081	FALSE	13
2022-09-13	10:45:27	0.739911	3.29127	931.243	FALSE	13
2022-09-13	10:45:27	0.733753	3.26388	932.345	FALSE	13
2022-09-13	10:45:28	0.738588	3.28539	934.528	FALSE	13
2022-09-13	10:45:28	0.735789	3.27294	935.617	FALSE	13
2022-09-13	10:45:28	0.737468	3.28041	937.808	FALSE	13
2022-09-13	10:45:28	0.741438	3.29806	938.916	FALSE	13
2022-09-13	10:45:29	0.734822	3.26864	941.077	FALSE	13
2022-09-13	10:45:29	0.738282	3.28403	942.2	FALSE	13
2022-09-13	10:45:29	0.734669	3.26795	944.345	FALSE	13
2022-09-13	10:45:29	0.735941	3.27361	945.473	FALSE	13
2022-09-13	10:45:30	0.732226	3.25709	947.602	FALSE	13
2022-09-13	10:45:30	0.731361	3.25324	948.726	FALSE	13
2022-09-13	10:45:30	0.737417	3.28018	950.882	FALSE	13
2022-09-13	10:45:30	0.735941	3.27361	952	FALSE	13
2022-09-13	10:45:31	0.738842	3.28652	954.169	FALSE	13
2022-09-13	10:45:31	0.737417	3.28018	955.28	FALSE	13
2022-09-13	10:45:31	0.734059	3.26524	957.434	FALSE	13
2022-09-13	10:45:31	0.740267	3.29286	958.573	FALSE	13
2022-09-13	10:45:32	0.736399	3.27565	960.71	FALSE	13
2022-09-13	10:45:32	0.734975	3.26932	961.842	FALSE	13
2022-09-13	10:45:32	0.735738	3.27271	963.982	FALSE	13
2022-09-13	10:45:33	0.732277	3.25731	965.1	FALSE	13
2022-09-13	10:45:33	0.733193	3.26139	967.244	FALSE	13
2022-09-13	10:45:33	0.740573	3.29422	968.394	FALSE	13
2022-09-13	10:45:33	0.729835	3.24645	970.49	FALSE	13
2022-09-13	10:45:34	0.746832	3.32206	971.716	FALSE	13
2022-09-13	10:45:34	0.736247	3.27497	973.765	FALSE	13
2022-09-13	10:45:34	0.741081	3.29648	975.012	FALSE	13
2022-09-13	10:45:34	0.730598	3.24985	977.015	FALSE	13
2022-09-13	10:45:35	0.734568	3.26751	978.28	FALSE	13
2022-09-13	10:45:35	0.737621	3.28109	980.296	FALSE	13
2022-09-13	10:45:35	0.74042	3.29354	981.574	FALSE	13
2022-09-13	10:45:35	0.733193	3.26139	983.557	FALSE	13
2022-09-13	10:45:36	0.732634	3.2589	984.832	FALSE	13
2022-09-13	10:45:36	0.730954	3.25143	986.809	FALSE	13
2022-09-13	10:45:36	0.734466	3.26705	988.099	FALSE	13
2022-09-13	10:45:37	0.741539	3.29851	990.107	FALSE	13
2022-09-13	10:45:37	0.732175	3.25686	991.356	FALSE	13
2022-09-13	10:45:37	0.734313	3.26637	993.374	FALSE	13
2022-09-13	10:45:37	0.743626	3.3078	994.664	FALSE	13
2022-09-13	10:45:38	0.737672	3.28131	996.655	FALSE	13
2022-09-13	10:45:38	0.729886	3.24668	997.911	FALSE	13
2022-09-13	10:45:38	0.726985	3.23377	999.889	FALSE	13
2022-09-13	10:45:38	1.13523	5.04973	1002.96	FALSE	13
2022-09-13	10:45:39	1.64098	7.29941	1007.19	FALSE	13
2022-09-13	10:45:39	1.59034	7.07415	1010.03	FALSE	13
2022-09-13	10:45:39	1.46032	6.4958	1013.68	FALSE	13
2022-09-13	10:45:39	0.420166	1.86898	1011.9	FALSE	13
2022-09-13	10:45:40	0.611819	2.72149	1016.41	FALSE	13
2022-09-13	10:45:40	0.348664	1.55093	1013.45	FALSE	13
2022-09-13	10:45:40	0.360013	1.60141	1018.01	FALSE	13
2022-09-13	10:45:41	0.626527	2.78692	1016.24	FALSE	13
2022-09-13	10:45:41	0.875992	3.89659	1021.9	FALSE	13
2022-09-13	10:45:41	1.70383	7.57898	1023.82	FALSE	13
2022-09-13	10:45:41	2.8905	12.8575	1034.76	FALSE	13
2022-09-13	10:45:42	1.71955	7.6489	1031.47	FALSE	13
2022-09-13	10:45:42	1.05991	4.71469	1039.48	FALSE	13
2022-09-13	10:45:42	0.440318	1.95862	1033.43	FALSE	13
2022-09-13	10:45:42	0.55243	2.45732	1041.93	FALSE	13
2022-09-13	10:45:43	1.37136	6.10008	1039.53	FALSE	13
2022-09-13	10:45:43	2.69721	11.9977	1053.93	FALSE	13
2022-09-13	10:45:43	2.09854	9.33473	1048.86	FALSE	13
2022-09-13	10:45:43	1.14032	5.07237	1059	FALSE	13
2022-09-13	10:45:44	1.21757	5.41599	1054.28	FALSE	13
2022-09-13	10:45:44	1.63813	7.28673	1066.29	FALSE	13
2022-09-13	10:45:44	0.50271	2.23615	1056.51	FALSE	13
2022-09-13	10:45:44	0.45528	2.02518	1068.32	FALSE	13
2022-09-13	10:45:45	0.603066	2.68256	1059.2	FALSE	13
2022-09-13	10:45:45	0.612532	2.72466	1071.04	FALSE	13
2022-09-13	10:45:45	0.449529	1.99959	1061.2	FALSE	13
2022-09-13	10:45:46	0.640471	2.84894	1073.89	FALSE	13
2022-09-13	10:45:46	0.447901	1.99235	1063.19	FALSE	13
2022-09-13	10:45:46	0.465153	2.06909	1075.96	FALSE	13
2022-09-13	10:45:46	0.53757	2.39122	1065.58	FALSE	13
2022-09-13	10:45:47	0.502608	2.2357	1078.19	FALSE	13
2022-09-13	10:45:47	0.426781	1.89841	1067.48	FALSE	13
2022-09-13	10:45:47	0.403372	1.79428	1079.99	FALSE	13
2022-09-13	10:45:47	0.452583	2.01318	1069.49	FALSE	13
2022-09-13	10:45:48	0.447952	1.99258	1081.98	FALSE	13
2022-09-13	10:45:48	0.471412	2.09693	1071.59	FALSE	13
2022-09-13	10:45:48	0.694313	3.08844	1085.07	FALSE	13
2022-09-13	10:45:48	0.408715	1.81805	1073.41	FALSE	13
2022-09-13	10:45:49	0.436196	1.94029	1087.01	FALSE	13
2022-09-13	10:45:49	0.468919	2.08585	1075.49	FALSE	13
2022-09-13	10:45:49	0.635331	2.82608	1089.84	FALSE	13
2022-09-13	10:45:50	0.504389	2.24362	1077.74	FALSE	13
2022-09-13	10:45:50	0.146985	0.653819	1090.49	FALSE	13
2022-09-13	10:45:50	0.344339	1.53169	1079.27	FALSE	13
2022-09-13	10:45:50	0.419606	1.86649	1092.36	FALSE	13
2022-09-13	10:45:51	0.161947	0.720373	1079.99	FALSE	13
2022-09-13	10:45:51	0.266374	1.18488	1093.54	FALSE	13
2022-09-13	10:45:51	0.162812	0.72422	1080.71	FALSE	13
2022-09-13	10:45:51	0.346883	1.543	1095.08	FALSE	13
2022-09-13	10:45:52	0.234415	1.04272	1081.76	FALSE	13
2022-09-13	10:45:52	0.444898	1.979	1097.06	FALSE	13
2022-09-13	10:45:52	0.341896	1.52082	1083.28	FALSE	13
2022-09-13	10:45:52	0.395534	1.75941	1098.82	FALSE	13
2022-09-13	10:45:53	0.319606	1.42167	1084.7	FALSE	13
2022-09-13	10:45:53	0.377723	1.68019	1100.5	FALSE	13
2022-09-13	10:45:53	0.380929	1.69445	1086.39	FALSE	13
2022-09-13	10:45:54	0.301998	1.34335	1101.85	FALSE	13
2022-09-13	10:45:54	0.339911	1.51199	1087.9	FALSE	13
2022-09-13	10:45:54	0.400878	1.78319	1103.63	FALSE	13
2022-09-13	10:45:54	0.344288	1.53146	1089.44	FALSE	13
2022-09-13	10:45:55	0.345509	1.53689	1105.17	FALSE	13
2022-09-13	10:45:55	0.401997	1.78816	1091.22	FALSE	13
2022-09-13	10:45:55	0.368308	1.63831	1106.8	FALSE	13
2022-09-13	10:45:55	0.374466	1.6657	1092.89	FALSE	13
2022-09-13	10:45:56	0.381336	1.69626	1108.5	FALSE	13
2022-09-13	10:45:56	0.37243	1.65664	1094.55	FALSE	13
2022-09-13	10:45:56	0.390649	1.73768	1110.24	FALSE	13
2022-09-13	10:45:56	0.384797	1.71165	1096.26	FALSE	13
2022-09-13	10:45:57	0.390089	1.73519	1111.97	FALSE	13
2022-09-13	10:45:57	0.400674	1.78228	1098.04	FALSE	13
2022-09-13	10:45:57	0.309326	1.37594	1113.35	FALSE	13
2022-09-13	10:45:58	0.316247	1.40673	1099.45	FALSE	13
2022-09-13	10:45:58	0.330903	1.47192	1114.82	FALSE	13
2022-09-13	10:45:58	0.353702	1.57334	1101.02	FALSE	13
2022-09-13	10:45:58	0.441896	1.96564	1116.79	FALSE	13
2022-09-13	10:45:59	0.700674	3.11674	1104.14	FALSE	13
2022-09-13	10:45:59	0.70042	3.11561	1119.9	FALSE	13
2022-09-13	10:45:59	0.848206	3.77299	1107.91	FALSE	13
2022-09-13	10:45:59	0.933601	4.15284	1124.05	FALSE	13
2022-09-13	10:46:00	0.878639	3.90836	1111.82	FALSE	13
2022-09-13	10:46:00	0.746934	3.32251	1127.38	FALSE	13
2022-09-13	10:46:00	0.557672	2.48064	1114.3	FALSE	13
2022-09-13	10:46:00	0.448715	1.99597	1129.37	FALSE	13
2022-09-13	10:46:01	0.616807	2.74368	1117.04	FALSE	13
2022-09-13	10:46:01	0.958028	4.2615	1133.63	FALSE	13
2022-09-13	10:46:01	0.418079	1.8597	1118.9	FALSE	13
2022-09-13	10:46:01	0.386018	1.71709	1135.35	FALSE	13
2022-09-13	10:46:02	0.459198	2.0426	1120.95	FALSE	13
2022-09-13	10:46:02	0.514517	2.28867	1137.64	FALSE	13
2022-09-13	10:46:02	0.452328	2.01205	1122.96	FALSE	13
2022-09-13	10:46:03	0.39472	1.75579	1139.4	FALSE	13
2022-09-13	10:46:03	-0.120903	-0.537801	1122.96	FALSE	13
2022-09-13	10:46:03	0.734364	3.2666	1142.66	FALSE	13
2022-09-13	10:46:03	0.736298	3.2752	1126.23	FALSE	13
2022-09-13	10:46:04	0.502913	2.23706	1144.9	FALSE	13
2022-09-13	10:46:04	0.374008	1.66366	1127.9	FALSE	13
2022-09-13	10:46:04	0.206883	0.920257	1145.82	FALSE	13
2022-09-13	10:46:04	0.235178	1.04612	1128.94	FALSE	13
2022-09-13	10:46:05	0.138995	0.618278	1146.44	FALSE	13
2022-09-13	10:46:05	0.107545	0.478382	1129.42	FALSE	13
2022-09-13	10:46:05	0.1307	0.58138	1147.02	FALSE	13
2022-09-13	10:46:05	-0.0314883	-0.140066	1129.42	FALSE	13
2022-09-13	10:46:06	0.0879009	0.391001	1147.41	FALSE	13
2022-09-13	10:46:06	0.151005	0.6717	1130.09	FALSE	13
2022-09-13	10:46:06	0.271769	1.20888	1148.62	FALSE	13
2022-09-13	10:46:07	0.2107	0.937236	1131.03	FALSE	13
2022-09-13	10:46:07	0.247952	1.10294	1149.72	FALSE	13
2022-09-13	10:46:07	0.216603	0.963493	1131.99	FALSE	13
2022-09-13	10:46:07	0.283117	1.25936	1150.98	FALSE	13
2022-09-13	10:46:08	0.254262	1.13101	1133.12	FALSE	13
2022-09-13	10:46:08	0.311769	1.38681	1152.37	FALSE	13
2022-09-13	10:46:08	0.465204	2.06932	1135.19	FALSE	13
2022-09-13	10:46:08	0.868817	3.86467	1156.23	FALSE	13
2022-09-13	10:46:09	0.813753	3.61974	1138.81	FALSE	13
2022-09-13	10:46:09	1.57513	7.00649	1163.24	FALSE	13
2022-09-13	10:46:09	0.862405	3.83615	1142.65	FALSE	13
2022-09-13	10:46:09	0.392023	1.7438	1164.98	FALSE	13
2022-09-13	10:46:10	0.375636	1.6709	1144.32	FALSE	13
2022-09-13	10:46:10	0.39131	1.74063	1166.72	FALSE	13
2022-09-13	10:46:10	0.404695	1.80016	1146.12	FALSE	13
2022-09-13	10:46:11	0.405509	1.80379	1168.53	FALSE	13
2022-09-13	10:46:11	0.409326	1.82076	1147.94	FALSE	13
2022-09-13	10:46:11	0.404746	1.80039	1170.33	FALSE	13
2022-09-13	10:46:11	0.396501	1.76372	1149.7	FALSE	13
2022-09-13	10:46:12	0.41472	1.84476	1172.17	FALSE	13
2022-09-13	10:46:12	0.405916	1.8056	1151.51	FALSE	13
2022-09-13	10:46:12	0.415636	1.84883	1174.02	FALSE	13
2022-09-13	10:46:12	0.413855	1.84091	1153.35	FALSE	13
2022-09-13	10:46:13	0.409428	1.82122	1175.84	FALSE	13
2022-09-13	10:46:13	0.412277	1.83389	1155.19	FALSE	13
2022-09-13	10:46:13	0.411819	1.83185	1177.68	FALSE	13
2022-09-13	10:46:13	0.409784	1.8228	1157.01	FALSE	13
2022-09-13	10:46:14	0.400267	1.78047	1179.46	FALSE	13
2022-09-13	10:46:14	0.412176	1.83344	1158.84	FALSE	13
2022-09-13	10:46:14	0.408512	1.81714	1181.27	FALSE	13
2022-09-13	10:46:15	0.420929	1.87238	1160.71	FALSE	13
2022-09-13	10:46:15	0.420725	1.87147	1183.14	FALSE	13
2022-09-13	10:46:15	0.44327	1.97175	1162.69	FALSE	13
2022-09-13	10:46:15	0.404491	1.79926	1184.94	FALSE	13
2022-09-13	10:46:16	0.425916	1.89456	1164.58	FALSE	13
2022-09-13	10:46:16	0.427748	1.90271	1186.85	FALSE	13
2022-09-13	10:46:16	0.423168	1.88234	1166.46	FALSE	13
2022-09-13	10:46:16	0.449224	1.99824	1188.84	FALSE	13
2022-09-13	10:46:17	0.445255	1.98058	1168.44	FALSE	13
2022-09-13	10:46:17	0.463779	2.06298	1190.91	FALSE	13
2022-09-13	10:46:17	0.468206	2.08267	1170.53	FALSE	13
2022-09-13	10:46:17	0.476094	2.11776	1193.03	FALSE	13
2022-09-13	10:46:18	0.475585	2.1155	1172.64	FALSE	13
2022-09-13	10:46:18	0.480674	2.13813	1195.16	FALSE	13
2022-09-13	10:46:18	0.455942	2.02812	1174.67	FALSE	13
2022-09-13	10:46:18	0.440725	1.96043	1197.12	FALSE	13
2022-09-13	10:46:19	0.460369	2.04781	1176.72	FALSE	13
2022-09-13	10:46:19	0.41243	1.83457	1198.96	FALSE	13
2022-09-13	10:46:19	0.519198	2.3095	1179.03	FALSE	13
2022-09-13	10:46:20	0.403117	1.79315	1200.75	FALSE	13
2022-09-13	10:46:20	0.483372	2.15014	1181.18	FALSE	13
2022-09-13	10:46:20	0.233244	1.03752	1201.79	FALSE	13
2022-09-13	10:46:20	0.184288	0.81975	1182	FALSE	13
2022-09-13	10:46:21	0.153346	0.682114	1202.47	FALSE	13
2022-09-13	10:46:21	0.148104	0.658796	1182.66	FALSE	13
2022-09-13	10:46:21	0.124898	0.555571	1203.03	FALSE	13
2022-09-13	10:46:21	0.125407	0.557835	1183.21	FALSE	13
2022-09-13	10:46:22	0.37528	1.66932	1204.7	FALSE	13
2022-09-13	10:46:22	0.452328	2.01205	1185.23	FALSE	13
2022-09-13	10:46:22	0.716603	3.18759	1207.88	FALSE	13
2022-09-13	10:46:22	0.730903	3.2512	1188.48	FALSE	13
2022-09-13	10:46:23	0.730954	3.25143	1211.14	FALSE	13
2022-09-13	10:46:23	0.736959	3.27814	1191.75	FALSE	13
2022-09-13	10:46:23	0.743423	3.30689	1214.44	FALSE	13
2022-09-13	10:46:24	-0.159732	-0.71052	1191.75	FALSE	13
2022-09-13	10:46:24	-1.46971	-6.53756	1214.44	FALSE	13
2022-09-13	10:46:24	0.428868	1.90769	1193.66	FALSE	13
2022-09-13	10:46:24	-0.514083	-2.28674	1214.44	FALSE	13
2022-09-13	10:46:25	-1.21434	-5.40163	1193.66	FALSE	13
2022-09-13	10:46:25	-0.845432	-3.76065	1214.44	FALSE	13
2022-09-13	10:46:25	-0.347315	-1.54493	1193.66	FALSE	13
2022-09-13	10:46:25	-0.587519	-2.6134	1214.44	FALSE	13
2022-09-13	10:46:26	-1.30706	-5.81406	1193.66	FALSE	13
2022-09-13	10:46:26	-1.71678	-7.63658	1214.44	FALSE	13
2022-09-13	10:46:26	-0.741106	-3.29659	1193.66	FALSE	13
2022-09-13	10:46:26	0.7393	3.28855	1217.73	FALSE	13
2022-09-13	10:46:27	0.501896	2.23253	1195.89	FALSE	13
2022-09-13	10:46:27	-1.24726	-5.54806	1217.73	FALSE	13
2022-09-13	10:46:27	-1.58925	-7.0693	1195.89	FALSE	13
2022-09-13	10:46:28	-0.0622262	-0.276795	1217.73	FALSE	13
2022-09-13	10:46:28	0.348613	1.5507	1197.45	FALSE	13
2022-09-13	10:46:28	-0.0266028	-0.118335	1217.73	FALSE	13
2022-09-13	10:46:28	-0.36075	-1.60469	1197.45	FALSE	13
2022-09-13	10:46:29	-0.324262	-1.44238	1217.73	FALSE	13
2022-09-13	10:46:29	-0.279325	-1.24249	1197.45	FALSE	13
2022-09-13	10:46:29	-0.689809	-3.06841	1217.73	FALSE	13
2022-09-13	10:46:29	0.710751	3.16156	1200.61	FALSE	13
2022-09-13	10:46:30	0.0960943	0.427447	1218.16	FALSE	13
2022-09-13	10:46:30	0.155433	0.691397	1201.3	FALSE	13
2022-09-13	10:46:30	0.178537	0.794168	1218.95	FALSE	13
2022-09-13	10:46:30	0.309122	1.37504	1202.67	FALSE	13
2022-09-13	10:46:31	-0.216017	-0.960887	1218.95	FALSE	13
2022-09-13	10:46:31	0.365	1.62359	1204.3	FALSE	13
2022-09-13	10:46:31	0.260827	1.16021	1220.11	FALSE	13
2022-09-13	10:46:31	0.628969	2.79778	1207.09	FALSE	13
2022-09-13	10:46:32	0.766629	3.41012	1223.52	FALSE	13
2022-09-13	10:46:32	0.582506	2.5911	1209.69	FALSE	13
2022-09-13	10:46:32	0.392277	1.74493	1225.27	FALSE	13
2022-09-13	10:46:33	0.194008	0.862986	1210.55	FALSE	13
2022-09-13	10:46:33	0.0870359	0.387153	1225.65	FALSE	13
2022-09-13	10:46:33	0.19416	0.863663	1211.41	FALSE	13
2022-09-13	10:46:33	0.674974	3.00242	1228.66	FALSE	13
2022-09-13	10:46:34	0.191209	0.850536	1212.26	FALSE	13
2022-09-13	10:46:34	0.17126	0.761799	1229.42	FALSE	13
2022-09-13	10:46:34	0.0540587	0.240464	1212.5	FALSE	13
2022-09-13	10:46:34	-0.0428369	-0.190547	1229.42	FALSE	13
2022-09-13	10:46:35	-0.0775442	-0.344932	1212.5	FALSE	13
2022-09-13	10:46:35	-0.14528	-0.646234	1229.42	FALSE	13
2022-09-13	10:46:35	-0.0221753	-0.0986402	1212.5	FALSE	13
2022-09-13	10:46:35	0.198384	0.882452	1230.3	FALSE	13
2022-09-13	10:46:36	0.496807	2.2099	1214.71	FALSE	13
2022-09-13	10:46:36	0.235636	1.04816	1231.35	FALSE	13
2022-09-13	10:46:36	0.159402	0.709052	1215.42	FALSE	13
2022-09-13	10:46:37	0.297926	1.32523	1232.67	FALSE	13
2022-09-13	10:46:37	0.361438	1.60775	1217.03	FALSE	13
2022-09-13	10:46:37	0.507035	2.25539	1234.93	FALSE	13
2022-09-13	10:46:37	0.475585	2.1155	1219.15	FALSE	13
2022-09-13	10:46:38	0.238588	1.06129	1235.99	FALSE	13
2022-09-13	10:46:38	0.460064	2.04646	1221.19	FALSE	13
2022-09-13	10:46:38	0.327087	1.45495	1237.45	FALSE	13
2022-09-13	10:46:38	0.242608	1.07917	1222.27	FALSE	13
2022-09-13	10:46:39	0.154466	0.687096	1238.13	FALSE	13
2022-09-13	10:46:39	0.257672	1.14618	1223.42	FALSE	13
2022-09-13	10:46:39	0.130853	0.58206	1238.72	FALSE	13
2022-09-13	10:46:39	0.194873	0.866834	1224.28	FALSE	13
2022-09-13	10:46:40	0.0288679	0.12841	1238.84	FALSE	13
2022-09-13	10:46:40	0.23014	1.02371	1225.31	FALSE	13
2022-09-13	10:46:40	0.100878	0.448726	1239.29	FALSE	13
2022-09-13	10:46:41	0.25355	1.12784	1226.44	FALSE	13
2022-09-13	10:46:41	0.0614888	0.273514	1239.57	FALSE	13
2022-09-13	10:46:41	0.366476	1.63016	1228.07	FALSE	13
2022-09-13	10:46:41	0.163728	0.728295	1240.29	FALSE	13
2022-09-13	10:46:42	0.249733	1.11086	1229.18	FALSE	13
2022-09-13	10:46:42	0.172583	0.767684	1241.06	FALSE	13
2022-09-13	10:46:42	0.235738	1.04861	1230.23	FALSE	13
2022-09-13	10:46:42	0.572634	2.54719	1243.61	FALSE	13
2022-09-13	10:46:43	1.28973	5.73698	1235.96	FALSE	13
2022-09-13	10:46:43	1.69991	7.56154	1251.17	FALSE	13
2022-09-13	10:46:43	1.86062	8.27641	1244.24	FALSE	13
2022-09-13	10:46:43	2.19742	9.77456	1260.95	FALSE	13
2022-09-13	10:46:44	1.93681	8.61532	1252.85	FALSE	13
2022-09-13	10:46:44	1.0424	4.6368	1265.58	FALSE	13
2022-09-13	10:46:44	0.0419468	0.186588	1253.04	FALSE	13
2022-09-13	10:46:45	0.0452547	0.201302	1265.78	FALSE	13
2022-09-13	10:46:45	0.0712597	0.316977	1253.36	FALSE	13
2022-09-13	10:46:45	-0.151743	-0.674983	1265.78	FALSE	13
2022-09-13	10:46:45	-0.0136766	-0.0608363	1253.36	FALSE	13
2022-09-13	10:46:46	0.0281554	0.125241	1265.91	FALSE	13
2022-09-13	10:46:46	0.142303	0.632992	1253.99	FALSE	13
2022-09-13	10:46:46	0.0770613	0.342784	1266.25	FALSE	13
2022-09-13	10:46:46	0.229173	1.01941	1255.01	FALSE	13
2022-09-13	10:46:47	0.284338	1.26479	1267.52	FALSE	13
2022-09-13	10:46:47	0.0588934	0.26197	1255.27	FALSE	13
2022-09-13	10:46:47	-0.213422	-0.949344	1267.52	FALSE	13
2022-09-13	10:46:47	-0.161259	-0.717312	1255.27	FALSE	13
2022-09-13	10:46:48	-0.345178	-1.53542	1267.52	FALSE	13
2022-09-13	10:46:48	-0.316119	-1.40616	1255.27	FALSE	13
2022-09-13	10:46:48	-0.121208	-0.539157	1267.52	FALSE	13
2022-09-13	10:46:48	-0.0574425	-0.255516	1255.27	FALSE	13
2022-09-13	10:46:49	0.0588934	0.26197	1267.78	FALSE	13
2022-09-13	10:46:49	0.196654	0.874756	1256.15	FALSE	13
2022-09-13	10:46:49	0.176501	0.785112	1268.56	FALSE	13
2022-09-13	10:46:50	0.423524	1.88392	1258.03	FALSE	13
2022-09-13	10:46:50	0.477468	2.12387	1270.69	FALSE	13
2022-09-13	10:46:50	0.287646	1.27951	1259.31	FALSE	13
2022-09-13	10:46:50	0.399402	1.77662	1272.46	FALSE	13
2022-09-13	10:46:51	0.428461	1.90588	1261.22	FALSE	13
2022-09-13	10:46:51	0.637112	2.834	1275.3	FALSE	13
2022-09-13	10:46:51	0.738486	3.28493	1264.5	FALSE	13
2022-09-13	10:46:51	0.232634	1.0348	1276.33	FALSE	13
2022-09-13	10:46:52	0.267748	1.191	1265.69	FALSE	13
2022-09-13	10:46:52	0.194211	0.863889	1277.2	FALSE	13
2022-09-13	10:46:52	0.0728883	0.324222	1266.02	FALSE	13
2022-09-13	10:46:52	-0.0462974	-0.20594	1277.2	FALSE	13
2022-09-13	10:46:53	0.0339061	0.150821	1266.17	FALSE	13
2022-09-13	10:46:53	0.219962	0.978435	1278.18	FALSE	13
2022-09-13	10:46:53	0.111972	0.498074	1266.67	FALSE	13
2022-09-13	10:46:54	0.115585	0.514145	1278.69	FALSE	13
2022-09-13	10:46:54	0.266374	1.18488	1267.85	FALSE	13
2022-09-13	10:46:54	0.141591	0.629825	1279.32	FALSE	13
2022-09-13	10:46:54	0.268206	1.19303	1269.04	FALSE	13
2022-09-13	10:46:55	0.516349	2.29682	1281.62	FALSE	13
2022-09-13	10:46:55	0.331616	1.47509	1270.52	FALSE	13
2022-09-13	10:46:55	0.303015	1.34787	1282.96	FALSE	13
2022-09-13	10:46:55	0.463575	2.06207	1272.58	FALSE	13
2022-09-13	10:46:56	0.384135	1.70871	1284.67	FALSE	13
2022-09-13	10:46:56	0.458028	2.0374	1274.62	FALSE	13
2022-09-13	10:46:56	0.322659	1.43525	1286.11	FALSE	13
2022-09-13	10:46:56	0.30612	1.36168	1275.98	FALSE	13
2022-09-13	10:46:57	0.302863	1.3472	1287.45	FALSE	13
2022-09-13	10:46:57	0.361082	1.60616	1277.59	FALSE	13
2022-09-13	10:46:57	0.941998	4.1902	1291.65	FALSE	13
2022-09-13	10:46:58	0.574211	2.55421	1280.14	FALSE	13
2022-09-13	10:46:58	0.215433	0.958289	1292.6	FALSE	13
2022-09-13	10:46:58	0.416196	1.85132	1281.99	FALSE	13
2022-09-13	10:46:58	0.606832	2.69931	1295.3	FALSE	13
2022-09-13	10:46:59	0.30556	1.35919	1283.35	FALSE	13
2022-09-13	10:46:59	0.258639	1.15048	1296.45	FALSE	13
2022-09-13	10:46:59	0.41472	1.84476	1285.2	FALSE	13
2022-09-13	10:46:59	0.324491	1.4434	1297.9	FALSE	13
2022-09-13	10:47:00	0.718588	3.19642	1288.39	FALSE	13
2022-09-13	10:47:00	1.09645	4.87723	1302.77	FALSE	13
2022-09-13	10:47:00	0.240216	1.06853	1289.46	FALSE	13
2022-09-13	10:47:00	0.766119	3.40785	1306.18	FALSE	13
2022-09-13	10:47:01	0.495738	2.20514	1291.67	FALSE	13
2022-09-13	10:47:01	0.303372	1.34946	1307.53	FALSE	13
2022-09-13	10:47:01	0.373397	1.66094	1293.33	FALSE	13
2022-09-13	10:47:02	0.335178	1.49094	1309.02	FALSE	13
2022-09-13	10:47:02	0.174415	0.775833	1294.1	FALSE	13
2022-09-13	10:47:02	0.420573	1.87079	1310.89	FALSE	13
2022-09-13	10:47:02	0.153397	0.682341	1294.78	FALSE	13
2022-09-13	10:47:03	0.365204	1.6245	1312.52	FALSE	13
2022-09-13	10:47:03	0.433092	1.92648	1296.71	FALSE	13
2022-09-13	10:47:03	0.340013	1.51245	1314.03	FALSE	13
2022-09-13	10:47:03	0.30098	1.33882	1298.05	FALSE	13
2022-09-13	10:47:04	0.616756	2.74345	1316.77	FALSE	13
2022-09-13	10:47:04	0.174975	0.778324	1298.83	FALSE	13
2022-09-13	10:47:04	0.290853	1.29377	1318.07	FALSE	13
2022-09-13	10:47:04	0.520725	2.31629	1301.14	FALSE	13
2022-09-13	10:47:05	0.191667	0.852573	1318.92	FALSE	13
2022-09-13	10:47:05	0.250344	1.11358	1302.26	FALSE	13
2022-09-13	10:47:05	0.240776	1.07102	1319.99	FALSE	13
2022-09-13	10:47:05	0.226069	1.0056	1303.26	FALSE	13
2022-09-13	10:47:06	0.179402	0.798016	1320.79	FALSE	13
2022-09-13	10:47:06	0.383422	1.70554	1304.97	FALSE	13
2022-09-13	10:47:06	0.158079	0.703167	1321.49	FALSE	13
2022-09-13	10:47:07	0.147392	0.655629	1305.62	FALSE	13
2022-09-13	10:47:07	0.547239	2.43423	1323.93	FALSE	13
2022-09-13	10:47:07	0.377112	1.67747	1307.3	FALSE	13
2022-09-13	10:47:07	0.507799	2.25879	1326.18	FALSE	13
2022-09-13	10:47:08	0.36444	1.6211	1308.92	FALSE	13
2022-09-13	10:47:08	0.440013	1.95727	1328.14	FALSE	13
2022-09-13	10:47:08	0.165509	0.736217	1309.66	FALSE	13
2022-09-13	10:47:08	0.109224	0.48585	1328.63	FALSE	13
2022-09-13	10:47:09	-0.221412	-0.984885	1309.66	FALSE	13
2022-09-13	10:47:09	-0.282175	-1.25517	1328.63	FALSE	13
2022-09-13	10:47:09	-0.246145	-1.0949	1309.66	FALSE	13
2022-09-13	10:47:09	-0.100191	-0.44567	1328.63	FALSE	13
2022-09-13	10:47:10	0.189529	0.843063	1310.5	FALSE	13
2022-09-13	10:47:10	0.0972139	0.432427	1329.06	FALSE	13
2022-09-13	10:47:10	0.373753	1.66253	1312.17	FALSE	13
2022-09-13	10:47:11	0.119708	0.532485	1329.59	FALSE	13
2022-09-13	10:47:11	0.375433	1.67	1313.84	FALSE	13
2022-09-13	10:47:11	0.294211	1.30871	1330.9	FALSE	13
2022-09-13	10:47:11	0.627748	2.79235	1316.63	FALSE	13
2022-09-13	10:47:12	2.32617	10.3473	1341.25	FALSE	13
2022-09-13	10:47:12	2.05818	9.1552	1325.78	FALSE	13
2022-09-13	10:47:12	3.37441	15.0101	1356.26	1	14
2022-09-13	10:47:12	2.77833	12.3586	1338.14	FALSE	14
2022-09-13	10:47:13	0.716807	3.1885	1359.45	FALSE	14
2022-09-13	10:47:13	2.14943	9.56109	1347.7	FALSE	14
2022-09-13	10:47:13	0.253855	1.1292	1360.58	FALSE	14
2022-09-13	10:47:13	1.06078	4.71856	1352.42	FALSE	14
2022-09-13	10:47:14	1.24805	5.55158	1366.13	FALSE	14
2022-09-13	10:47:14	0.590293	2.62574	1355.05	FALSE	14
2022-09-13	10:47:14	3.02083	13.4373	1379.57	1	15
2022-09-13	10:47:15	1.96444	8.73822	1363.78	FALSE	15
2022-09-13	10:47:15	4.67436	20.7925	1400.36	1	16
2022-09-13	10:47:15	4.96001	22.0631	1385.85	1	17
2022-09-13	10:47:15	2.54164	11.3057	1411.66	FALSE	17
2022-09-13	10:47:16	1.64062	7.29781	1393.15	FALSE	17
2022-09-13	10:47:16	1.06531	4.73871	1416.4	FALSE	17
2022-09-13	10:47:16	0.255636	1.13712	1394.28	FALSE	17
2022-09-13	10:47:16	0.502812	2.23661	1418.64	FALSE	17
2022-09-13	10:47:17	0.18215	0.81024	1395.09	FALSE	17
2022-09-13	10:47:17	0.559046	2.48675	1421.13	FALSE	17
2022-09-13	10:47:17	0.582761	2.59224	1397.69	FALSE	17
2022-09-13	10:47:17	-0.0426333	-0.189641	1421.13	FALSE	17
2022-09-13	10:47:18	-0.312964	-1.39213	1397.69	FALSE	17
2022-09-13	10:47:18	-0.385483	-1.71471	1421.13	FALSE	17
2022-09-13	10:47:18	-0.158155	-0.703505	1397.69	FALSE	17
2022-09-13	10:47:18	0.21869	0.972777	1422.1	FALSE	17
2022-09-13	10:47:19	2.58541	11.5004	1409.19	FALSE	17
2022-09-13	10:47:19	2.91945	12.9863	1435.08	FALSE	17
2022-09-13	10:47:19	2.82144	12.5503	1421.74	FALSE	17
2022-09-13	10:47:20	1.1248	5.00334	1440.09	FALSE	17
2022-09-13	10:47:20	0.798028	3.54979	1425.29	FALSE	17
2022-09-13	10:47:20	0.452074	2.01092	1442.1	FALSE	17
2022-09-13	10:47:20	0.546628	2.43151	1427.72	FALSE	17
2022-09-13	10:47:21	0.397417	1.76779	1443.87	FALSE	17
2022-09-13	10:47:21	0.499504	2.22189	1429.94	FALSE	17
2022-09-13	10:47:21	0.70841	3.15115	1447.02	FALSE	17
2022-09-13	10:47:21	0.733448	3.26252	1433.2	FALSE	17
2022-09-13	10:47:22	0.738842	3.28652	1450.3	FALSE	17
2022-09-13	10:47:22	0.640165	2.84758	1436.05	FALSE	17
2022-09-13	10:47:22	0.0786898	0.350028	1450.65	FALSE	17
2022-09-13	10:47:22	0.327952	1.4588	1437.51	FALSE	17
2022-09-13	10:47:23	1.10525	4.91637	1455.57	FALSE	17
2022-09-13	10:47:23	1.37701	6.12522	1443.63	FALSE	17
2022-09-13	10:47:23	1.08154	4.81091	1460.38	FALSE	17
2022-09-13	10:47:24	0.50673	2.25404	1445.89	FALSE	17
2022-09-13	10:47:24	0.381132	1.69535	1462.08	FALSE	17
2022-09-13	10:47:24	0.372735	1.658	1447.55	FALSE	17
2022-09-13	10:47:24	0.220267	0.979792	1463.06	FALSE	17
2022-09-13	10:47:25	0.435331	1.93644	1449.48	FALSE	17
2022-09-13	10:47:25	0.32556	1.44816	1464.51	FALSE	17
2022-09-13	10:47:25	0.30383	1.3515	1450.83	FALSE	17
2022-09-13	10:47:25	0.178283	0.793038	1465.3	FALSE	17
2022-09-13	10:47:26	0.302456	1.34538	1452.18	FALSE	17
2022-09-13	10:47:26	0.149479	0.664912	1465.96	FALSE	17
2022-09-13	10:47:26	0.171565	0.763155	1452.94	FALSE	17
2022-09-13	10:47:26	0.285051	1.26796	1467.23	FALSE	17
2022-09-13	10:47:27	1.68785	7.50789	1460.45	FALSE	17
2022-09-13	10:47:27	0.392583	1.74629	1468.98	FALSE	17
2022-09-13	10:47:27	0.24159	1.07464	1461.52	FALSE	17
2022-09-13	10:47:28	1.29503	5.76055	1474.74	FALSE	17
2022-09-13	10:47:28	0.300624	1.33724	1462.86	FALSE	17
2022-09-13	10:47:28	0.495127	2.20242	1476.94	FALSE	17
2022-09-13	10:47:28	0.482354	2.14561	1465.01	FALSE	17
2022-09-13	10:47:29	0.46444	2.06592	1479.01	FALSE	17
2022-09-13	10:47:29	0.505814	2.24996	1467.26	FALSE	17
2022-09-13	10:47:29	0.727901	3.23785	1482.24	FALSE	17
2022-09-13	10:47:29	0.643372	2.86185	1470.12	FALSE	17
2022-09-13	10:47:30	0.739758	3.29059	1485.53	FALSE	17
2022-09-13	10:47:30	0.564389	2.51052	1472.63	FALSE	17
2022-09-13	10:47:30	0.255484	1.13644	1486.67	FALSE	17
2022-09-13	10:47:30	0.216094	0.961229	1473.59	FALSE	17
2022-09-13	10:47:31	0.27014	1.20164	1487.87	FALSE	17
2022-09-13	10:47:31	0.285458	1.26977	1474.86	FALSE	17
2022-09-13	10:47:31	0.272532	1.21228	1489.08	FALSE	17
2022-09-13	10:47:32	0.544033	2.41997	1477.28	FALSE	17
2022-09-13	10:47:32	1.13584	5.05244	1494.14	FALSE	17
2022-09-13	10:47:32	1.18724	5.28108	1482.56	FALSE	17
2022-09-13	10:47:32	1.82927	8.13696	1502.27	FALSE	17
2022-09-13	10:47:33	2.3908	10.6348	1493.2	FALSE	17
2022-09-13	10:47:33	2.25462	10.029	1512.3	FALSE	17
2022-09-13	10:47:33	2.36892	10.5374	1503.73	FALSE	17
2022-09-13	10:47:33	1.14658	5.10022	1517.4	FALSE	17
2022-09-13	10:47:34	1.56505	6.96166	1510.7	FALSE	17
2022-09-13	10:47:34	1.09691	4.87928	1522.28	FALSE	17
2022-09-13	10:47:34	1.25406	5.57831	1516.27	FALSE	17
2022-09-13	10:47:34	2.92266	13.0006	1535.28	FALSE	17
2022-09-13	10:47:35	1.80607	8.03376	1524.31	FALSE	17
2022-09-13	10:47:35	4.94485	21.9957	1557.28	1	18
2022-09-13	10:47:35	2.05711	9.15044	1533.46	FALSE	18
2022-09-13	10:47:35	1.80531	8.03038	1565.31	FALSE	18
2022-09-13	10:47:36	2.36276	10.51	1543.97	FALSE	18
2022-09-13	10:47:36	1.11024	4.93857	1570.25	FALSE	18
2022-09-13	10:47:36	1.12525	5.00534	1548.97	FALSE	18
2022-09-13	10:47:37	0.528715	2.35183	1572.6	FALSE	18
2022-09-13	10:47:37	0.577265	2.56779	1551.54	FALSE	18
2022-09-13	10:47:37	0.355484	1.58126	1574.18	FALSE	18
2022-09-13	10:47:37	0.389071	1.73067	1553.27	FALSE	18
2022-09-13	10:47:38	0.438791	1.95183	1576.13	FALSE	18
2022-09-13	10:47:38	0.444644	1.97787	1555.25	FALSE	18
2022-09-13	10:47:38	0.428613	1.90656	1578.04	FALSE	18
2022-09-13	10:47:38	0.399911	1.77888	1557.03	FALSE	18
2022-09-13	10:47:39	0.396654	1.7644	1579.8	FALSE	18
2022-09-13	10:47:39	0.399657	1.77775	1558.81	FALSE	18
2022-09-13	10:47:39	0.290649	1.29286	1581.1	FALSE	18
2022-09-13	10:47:39	0.316959	1.4099	1560.22	FALSE	18
2022-09-13	10:47:40	0.37645	1.67452	1582.77	FALSE	18
2022-09-13	10:47:40	0.396807	1.76508	1561.98	FALSE	18
2022-09-13	10:47:40	0.321234	1.42891	1584.2	FALSE	18
2022-09-13	10:47:41	0.425458	1.89252	1563.87	FALSE	18
2022-09-13	10:47:41	0.276043	1.22789	1585.43	FALSE	18
2022-09-13	10:47:41	0.38383	1.70735	1565.58	FALSE	18
2022-09-13	10:47:41	0.358079	1.59281	1587.02	FALSE	18
2022-09-13	10:47:42	0.302863	1.3472	1566.93	FALSE	18
2022-09-13	10:47:42	0.381285	1.69603	1588.72	FALSE	18
2022-09-13	10:47:42	0.307392	1.36734	1568.3	FALSE	18
2022-09-13	10:47:42	0.409377	1.82099	1590.54	FALSE	18
2022-09-13	10:47:43	0.297519	1.32342	1569.62	FALSE	18
2022-09-13	10:47:43	2.79085	12.4143	1602.95	FALSE	18
2022-09-13	10:47:43	1.19874	5.33224	1574.95	FALSE	18
2022-09-13	10:47:43	0.806577	3.58782	1606.54	FALSE	18
2022-09-13	10:47:44	1.87828	8.35497	1583.31	FALSE	18
2022-09-13	10:47:44	1.39798	6.21849	1612.76	FALSE	18
2022-09-13	10:47:44	1.69248	7.52849	1590.83	FALSE	18
2022-09-13	10:47:45	1.91966	8.53903	1621.3	FALSE	18
2022-09-13	10:47:45	0.413295	1.83842	1592.67	FALSE	18
2022-09-13	10:47:45	1.68235	7.48343	1628.78	FALSE	18
2022-09-13	10:47:45	0.934058	4.15488	1596.83	FALSE	18
2022-09-13	10:47:46	0.265102	1.17923	1629.96	FALSE	18
2022-09-13	10:47:46	0.180878	0.804582	1597.63	FALSE	18
2022-09-13	10:47:46	0.386629	1.7198	1631.68	FALSE	18
2022-09-13	10:47:46	0.179097	0.796659	1598.43	FALSE	18
2022-09-13	10:47:47	0.312125	1.38839	1633.07	FALSE	18
2022-09-13	10:47:47	0.188308	0.837632	1599.27	FALSE	18
2022-09-13	10:47:47	0.220216	0.979565	1634.05	FALSE	18
2022-09-13	10:47:47	0.307952	1.36983	1600.64	FALSE	18
2022-09-13	10:47:48	0.742862	3.3044	1637.35	FALSE	18
2022-09-13	10:47:48	0.0120231	0.0534812	1600.69	FALSE	18
2022-09-13	10:47:48	0.223117	0.992469	1638.34	FALSE	18
2022-09-13	10:47:48	0.493193	2.19382	1602.88	FALSE	18
2022-09-13	10:47:49	0.759097	3.37662	1641.72	FALSE	18
2022-09-13	10:47:49	0.423015	1.88166	1604.77	FALSE	18
2022-09-13	10:47:49	0.367341	1.63401	1643.36	FALSE	18
2022-09-13	10:47:50	0.311819	1.38703	1606.15	FALSE	18
2022-09-13	10:47:50	0.356552	1.58601	1644.94	FALSE	18
2022-09-13	10:47:50	0.35126	1.56247	1607.72	FALSE	18
2022-09-13	10:47:50	0.461031	2.05076	1646.99	FALSE	18
2022-09-13	10:47:51	0.368461	1.63899	1609.35	FALSE	18
2022-09-13	10:47:51	0.368613	1.63966	1648.63	FALSE	18
2022-09-13	10:47:51	0.688003	3.06037	1612.41	FALSE	18
2022-09-13	10:47:51	0.741743	3.29942	1651.93	FALSE	18
2022-09-13	10:47:52	0.731514	3.25392	1615.67	FALSE	18
2022-09-13	10:47:52	0.738282	3.28403	1655.22	FALSE	18
2022-09-13	10:47:52	0.734415	3.26682	1618.94	FALSE	18
2022-09-13	10:47:52	0.729631	3.24554	1658.46	FALSE	18
2022-09-13	10:47:53	0.733702	3.26365	1622.2	FALSE	18
2022-09-13	10:47:53	0.734364	3.2666	1661.73	FALSE	18
2022-09-13	10:47:53	0.744186	3.31029	1625.51	FALSE	18
2022-09-13	10:47:54	0.734924	3.26909	1665	FALSE	18
2022-09-13	10:47:54	0.737366	3.27995	1628.79	FALSE	18
2022-09-13	10:47:54	0.737824	3.28199	1668.28	FALSE	18
2022-09-13	10:47:54	0.739504	3.28946	1632.08	FALSE	18
2022-09-13	10:47:55	0.731616	3.25437	1671.53	FALSE	18
2022-09-13	10:47:55	0.738588	3.28539	1635.36	FALSE	18
2022-09-13	10:47:55	0.732481	3.25822	1674.79	FALSE	18
2022-09-13	10:47:55	0.730394	3.24894	1638.61	FALSE	18
2022-09-13	10:47:56	0.73757	3.28086	1678.07	FALSE	18
2022-09-13	10:47:56	0.735585	3.27203	1641.89	FALSE	18
2022-09-13	10:47:56	0.741285	3.29738	1681.37	FALSE	18
2022-09-13	10:47:56	0.733397	3.2623	1645.15	FALSE	18
2022-09-13	10:47:57	0.731361	3.25324	1684.62	FALSE	18
2022-09-13	10:47:57	0.742405	3.30237	1648.45	FALSE	18
2022-09-13	10:47:57	0.734466	3.26705	1687.89	FALSE	18
2022-09-13	10:47:58	0.726069	3.2297	1651.68	FALSE	18
2022-09-13	10:47:58	0.730598	3.24985	1691.14	FALSE	18
2022-09-13	10:47:58	0.465967	2.07271	1653.75	FALSE	18
2022-09-13	10:47:58	0.515534	2.2932	1693.43	FALSE	18
2022-09-13	10:47:59	0.472684	2.10259	1655.85	FALSE	18
2022-09-13	10:47:59	0.515891	2.29479	1695.73	FALSE	18
2022-09-13	10:47:59	0.508817	2.26332	1658.12	FALSE	18
2022-09-13	10:47:59	0.492786	2.19201	1697.92	FALSE	18
2022-09-13	10:48:00	0.509224	2.26513	1660.38	FALSE	18
2022-09-13	10:48:00	0.500979	2.22845	1700.15	FALSE	18
2022-09-13	10:48:00	0.489682	2.1782	1662.56	FALSE	18
2022-09-13	10:48:00	0.478181	2.12704	1702.28	FALSE	18

## Sheet: Bubba_star_2022913104244 (2)
Date	Time	Lbs	Total force x time			**GoPro Fitting: 1032
2022-09-13	10:43:00	0.510801	0.510801	FALSE	0			Total force x time	756.449
2022-09-13	10:43:00	0.449987	0.960788	FALSE	0			Total steps	18
2022-09-13	10:43:00	0.19925	1.16004	FALSE	0
2022-09-13	10:43:00	0.270598	1.43064	FALSE	0
2022-09-13	10:43:01	0.189936	1.62057	FALSE	0
2022-09-13	10:43:01	0.181794	1.80237	FALSE	0
2022-09-13	10:43:01	0.260471	2.06284	FALSE	0
2022-09-13	10:43:01	0.673041	2.73588	FALSE	0
2022-09-13	10:43:02	0.660573	3.39645	FALSE	0
2022-09-13	10:43:02	0.790395	4.18685	FALSE	0
2022-09-13	10:43:02	0.184593	4.37144	FALSE	0
2022-09-13	10:43:03	-0.0108776	4.37144	FALSE	0
2022-09-13	10:43:03	-0.00319315	4.37144	FALSE	0
2022-09-13	10:43:03	-0.15902	4.37144	FALSE	0
2022-09-13	10:43:03	0.0587407	4.43018	FALSE	0
2022-09-13	10:43:04	-0.0325061	4.43018	FALSE	0
2022-09-13	10:43:04	0.0533972	4.48358	FALSE	0
2022-09-13	10:43:04	-0.0212084	4.48358	FALSE	0
2022-09-13	10:43:04	0.0123794	4.49596	FALSE	0
2022-09-13	10:43:05	-0.0765264	4.49596	FALSE	0
2022-09-13	10:43:05	-0.150114	4.49596	FALSE	0
2022-09-13	10:43:05	-0.245076	4.49596	FALSE	0
2022-09-13	10:43:05	-0.187061	4.49596	FALSE	0
2022-09-13	10:43:06	-0.334542	4.49596	FALSE	0
2022-09-13	10:43:06	-0.625178	4.49596	FALSE	0
2022-09-13	10:43:06	-0.898714	4.49596	FALSE	0
2022-09-13	10:43:07	-0.524007	4.49596	FALSE	0
2022-09-13	10:43:07	0.0319214	4.52788	FALSE	0
2022-09-13	10:43:07	1.83375	6.36163	FALSE	0
2022-09-13	10:43:07	3.16892	9.53055	1	1
2022-09-13	10:43:08	2.89314	12.4237	FALSE	1
2022-09-13	10:43:08	4.57518	16.9989	1	2
2022-09-13	10:43:08	1.27421	18.2731	FALSE	2
2022-09-13	10:43:08	0.506425	18.7795	FALSE	2
2022-09-13	10:43:09	0.607392	19.3869	FALSE	2
2022-09-13	10:43:09	0.738384	20.1253	FALSE	2
2022-09-13	10:43:09	1.0133	21.1386	FALSE	2
2022-09-13	10:43:09	0.79243	21.931	FALSE	2
2022-09-13	10:43:10	1.17991	23.1109	FALSE	2
2022-09-13	10:43:10	1.21986	24.3308	FALSE	2
2022-09-13	10:43:10	1.06179	25.3926	FALSE	2
2022-09-13	10:43:10	2.27126	27.6638	FALSE	2
2022-09-13	10:43:11	1.10378	28.7676	FALSE	2
2022-09-13	10:43:11	1.1763	29.9439	FALSE	2
2022-09-13	10:43:11	0.934771	30.8787	FALSE	2
2022-09-13	10:43:12	1.59574	32.4744	FALSE	2
2022-09-13	10:43:12	0.979097	33.4535	FALSE	2
2022-09-13	10:43:12	1.25106	34.7046	FALSE	2
2022-09-13	10:43:12	1.33533	36.0399	FALSE	2
2022-09-13	10:43:13	1.32729	37.3672	FALSE	2
2022-09-13	10:43:13	1.70302	39.0702	FALSE	2
2022-09-13	10:43:13	1.4451	40.5153	FALSE	2
2022-09-13	10:43:13	2.66225	43.1776	FALSE	2
2022-09-13	10:43:14	2.93126	46.1088	FALSE	2
2022-09-13	10:43:14	3.17879	49.2876	1	3
2022-09-13	10:43:14	1.54922	50.8368	FALSE	3
2022-09-13	10:43:14	1.94632	52.7832	FALSE	3
2022-09-13	10:43:15	0.551412	53.3346	FALSE	3
2022-09-13	10:43:15	0.79126	54.1258	FALSE	3
2022-09-13	10:43:15	0.490293	54.6161	FALSE	3
2022-09-13	10:43:16	0.432176	55.0483	FALSE	3
2022-09-13	10:43:16	0.467392	55.5157	FALSE	3
2022-09-13	10:43:16	0.35416	55.8698	FALSE	3
2022-09-13	10:43:16	0.689784	56.5596	FALSE	3
2022-09-13	10:43:17	0.419708	56.9793	FALSE	3
2022-09-13	10:43:17	0.688308	57.6676	FALSE	3
2022-09-13	10:43:17	0.34612	58.0138	FALSE	3
2022-09-13	10:43:17	0.601641	58.6154	FALSE	3
2022-09-13	10:43:18	0.332685	58.9481	FALSE	3
2022-09-13	10:43:18	0.689122	59.6372	FALSE	3
2022-09-13	10:43:18	0.502048	60.1393	FALSE	3
2022-09-13	10:43:18	0.762812	60.9021	FALSE	3
2022-09-13	10:43:19	0.574873	61.477	FALSE	3
2022-09-13	10:43:19	0.473957	61.9509	FALSE	3
2022-09-13	10:43:19	0.90958	62.8605	FALSE	3
2022-09-13	10:43:20	0.453448	63.3139	FALSE	3
2022-09-13	10:43:20	1.06413	64.3781	FALSE	3
2022-09-13	10:43:20	0.470751	64.8488	FALSE	3
2022-09-13	10:43:20	1.86622	66.715	FALSE	3
2022-09-13	10:43:21	1.15019	67.8652	FALSE	3
2022-09-13	10:43:21	3.6419	71.5071	1	4
2022-09-13	10:43:21	1.88968	73.3968	FALSE	4
2022-09-13	10:43:21	5.43889	78.8357	1	5
2022-09-13	10:43:22	2.89319	81.7289	FALSE	5
2022-09-13	10:43:22	4.1282	85.8571	1	6
2022-09-13	10:43:22	4.30373	90.1608	1	7
2022-09-13	10:43:22	2.26128	92.4221	FALSE	7
2022-09-13	10:43:23	2.25538	94.6775	FALSE	7
2022-09-13	10:43:23	0.790191	95.4677	FALSE	7
2022-09-13	10:43:23	2.05156	97.5192	FALSE	7
2022-09-13	10:43:24	0.545	98.0642	FALSE	7
2022-09-13	10:43:24	1.72505	99.7893	FALSE	7
2022-09-13	10:43:24	1.3077	101.097	FALSE	7
2022-09-13	10:43:24	3.39146	104.488	1	8
2022-09-13	10:43:25	2.22083	106.709	FALSE	8
2022-09-13	10:43:25	3.81864	110.528	1	9
2022-09-13	10:43:25	4.30597	114.834	1	10
2022-09-13	10:43:25	3.4594	118.293	1	11
2022-09-13	10:43:26	3.91421	122.207	1	12
2022-09-13	10:43:26	2.40968	124.617	FALSE	12
2022-09-13	10:43:26	2.75085	127.368	FALSE	12
2022-09-13	10:43:26	0.984898	128.353	FALSE	12
2022-09-13	10:43:27	1.20413	129.557	FALSE	12
2022-09-13	10:43:27	1.52841	131.085	FALSE	12
2022-09-13	10:43:27	0.660064	131.746	FALSE	12
2022-09-13	10:43:27	1.09487	132.84	FALSE	12
2022-09-13	10:43:28	0.350038	133.19	FALSE	12
2022-09-13	10:43:28	0.896705	134.087	FALSE	12
2022-09-13	10:43:28	0.614415	134.702	FALSE	12
2022-09-13	10:43:29	1.7424	136.444	FALSE	12
2022-09-13	10:43:29	1.10184	137.546	FALSE	12
2022-09-13	10:43:29	2.4109	139.957	FALSE	12
2022-09-13	10:43:29	1.03472	140.991	FALSE	12
2022-09-13	10:43:30	0.52327	141.515	FALSE	12
2022-09-13	10:43:30	0.417417	141.932	FALSE	12
2022-09-13	10:43:30	0.444135	142.376	FALSE	12
2022-09-13	10:43:30	0.378181	142.754	FALSE	12
2022-09-13	10:43:31	0.140573	142.895	FALSE	12
2022-09-13	10:43:31	0.29986	143.195	FALSE	12
2022-09-13	10:43:31	0.17528	143.37	FALSE	12
2022-09-13	10:43:31	0.483677	143.854	FALSE	12
2022-09-13	10:43:32	0.276654	144.13	FALSE	12
2022-09-13	10:43:32	-0.187213	144.13	FALSE	12
2022-09-13	10:43:32	-0.113117	144.13	FALSE	12
2022-09-13	10:43:33	-0.254033	144.13	FALSE	12
2022-09-13	10:43:33	-0.154185	144.13	FALSE	12
2022-09-13	10:43:33	-0.142837	144.13	FALSE	12
2022-09-13	10:43:33	0.0745676	144.205	FALSE	12
2022-09-13	10:43:34	-0.101107	144.205	FALSE	12
2022-09-13	10:43:34	0.367545	144.573	FALSE	12
2022-09-13	10:43:34	1.14093	145.713	FALSE	12
2022-09-13	10:43:34	1.82373	147.537	FALSE	12
2022-09-13	10:43:35	1.51508	149.052	FALSE	12
2022-09-13	10:43:35	1.6706	150.723	FALSE	12
2022-09-13	10:43:35	1.31579	152.039	FALSE	12
2022-09-13	10:43:35	0.717316	152.756	FALSE	12
2022-09-13	10:43:36	1.03391	153.79	FALSE	12
2022-09-13	10:43:36	0.244237	154.034	FALSE	12
2022-09-13	10:43:36	0.876908	154.911	FALSE	12
2022-09-13	10:43:37	0.275687	155.187	FALSE	12
2022-09-13	10:43:37	0.813143	156	FALSE	12
2022-09-13	10:43:37	0.419351	156.419	FALSE	12
2022-09-13	10:43:37	0.856654	157.276	FALSE	12
2022-09-13	10:43:38	0.606578	157.882	FALSE	12
2022-09-13	10:43:38	0.760979	158.643	FALSE	12
2022-09-13	10:43:38	0.695433	159.339	FALSE	12
2022-09-13	10:43:38	0.576298	159.915	FALSE	12
2022-09-13	10:43:39	0.681081	160.596	FALSE	12
2022-09-13	10:43:39	0.366832	160.963	FALSE	12
2022-09-13	10:43:39	0.571514	161.535	FALSE	12
2022-09-13	10:43:39	0.339249	161.874	FALSE	12
2022-09-13	10:43:40	0.425764	162.3	FALSE	12
2022-09-13	10:43:40	0.285509	162.585	FALSE	12
2022-09-13	10:43:40	0.459707	163.045	FALSE	12
2022-09-13	10:43:40	0.328308	163.373	FALSE	12
2022-09-13	10:43:41	2.75716	166.13	FALSE	12
2022-09-13	10:43:41	2.32123	168.452	FALSE	12
2022-09-13	10:43:41	1.82698	170.279	FALSE	12
2022-09-13	10:43:42	0.783982	171.063	FALSE	12
2022-09-13	10:43:42	0.168155	171.231	FALSE	12
2022-09-13	10:43:42	0.803321	172.034	FALSE	12
2022-09-13	10:43:42	0.496349	172.53	FALSE	12
2022-09-13	10:43:43	0.491616	173.022	FALSE	12
2022-09-13	10:43:43	0.00734122	173.029	FALSE	12
2022-09-13	10:43:43	0.139555	173.169	FALSE	12
2022-09-13	10:43:43	0.232379	173.401	FALSE	12
2022-09-13	10:43:44	0.175789	173.577	FALSE	12
2022-09-13	10:43:44	0.0372649	173.614	FALSE	12
2022-09-13	10:43:44	0.138283	173.753	FALSE	12
2022-09-13	10:43:44	0.378181	174.131	FALSE	12
2022-09-13	10:43:45	0.257926	174.389	FALSE	12
2022-09-13	10:43:45	0.246018	174.635	FALSE	12
2022-09-13	10:43:45	0.243015	174.878	FALSE	12
2022-09-13	10:43:46	0.242964	175.121	FALSE	12
2022-09-13	10:43:46	0.251718	175.372	FALSE	12
2022-09-13	10:43:46	0.240522	175.613	FALSE	12
2022-09-13	10:43:46	0.240878	175.854	FALSE	12
2022-09-13	10:43:47	0.252939	176.107	FALSE	12
2022-09-13	10:43:47	0.243626	176.35	FALSE	12
2022-09-13	10:43:47	0.233143	176.583	FALSE	12
2022-09-13	10:43:47	0.27416	176.858	FALSE	12
2022-09-13	10:43:48	0.271311	177.129	FALSE	12
2022-09-13	10:43:48	0.244491	177.373	FALSE	12
2022-09-13	10:43:48	0.249478	177.623	FALSE	12
2022-09-13	10:43:48	0.250344	177.873	FALSE	12
2022-09-13	10:43:49	0.244033	178.117	FALSE	12
2022-09-13	10:43:49	0.247341	178.365	FALSE	12
2022-09-13	10:43:49	0.682557	179.047	FALSE	12
2022-09-13	10:43:50	0.74327	179.79	FALSE	12
2022-09-13	10:43:50	0.744287	180.535	FALSE	12
2022-09-13	10:43:50	0.734568	181.269	FALSE	12
2022-09-13	10:43:50	0.740165	182.009	FALSE	12
2022-09-13	10:43:51	0.740827	182.75	FALSE	12
2022-09-13	10:43:51	0.743117	183.493	FALSE	12
2022-09-13	10:43:51	0.73528	184.229	FALSE	12
2022-09-13	10:43:51	0.735738	184.964	FALSE	12
2022-09-13	10:43:52	0.7393	185.704	FALSE	12
2022-09-13	10:43:52	0.736908	186.441	FALSE	12
2022-09-13	10:43:52	0.737163	187.178	FALSE	12
2022-09-13	10:43:52	0.73131	187.909	FALSE	12
2022-09-13	10:43:53	0.735738	188.645	FALSE	12
2022-09-13	10:43:53	0.734466	189.379	FALSE	12
2022-09-13	10:43:53	0.733092	190.112	FALSE	12
2022-09-13	10:43:54	0.736501	190.849	FALSE	12
2022-09-13	10:43:54	0.735483	191.584	FALSE	12
2022-09-13	10:43:54	0.730242	192.315	FALSE	12
2022-09-13	10:43:54	0.74327	193.058	FALSE	12
2022-09-13	10:43:55	0.734415	193.792	FALSE	12
2022-09-13	10:43:55	0.737672	194.53	FALSE	12
2022-09-13	10:43:55	0.738791	195.269	FALSE	12
2022-09-13	10:43:55	0.730903	196	FALSE	12
2022-09-13	10:43:56	0.738028	196.738	FALSE	12
2022-09-13	10:43:56	0.743219	197.481	FALSE	12
2022-09-13	10:43:56	0.730801	198.212	FALSE	12
2022-09-13	10:43:56	0.738079	198.95	FALSE	12
2022-09-13	10:43:57	0.734313	199.684	FALSE	12
2022-09-13	10:43:57	0.730343	200.414	FALSE	12
2022-09-13	10:43:57	0.737722	201.152	FALSE	12
2022-09-13	10:43:57	0.735483	201.888	FALSE	12
2022-09-13	10:43:58	0.736247	202.624	FALSE	12
2022-09-13	10:43:58	0.738435	203.362	FALSE	12
2022-09-13	10:43:58	0.741234	204.104	FALSE	12
2022-09-13	10:43:59	0.737875	204.841	FALSE	12
2022-09-13	10:43:59	0.739198	205.581	FALSE	12
2022-09-13	10:43:59	0.736094	206.317	FALSE	12
2022-09-13	10:43:59	0.742099	207.059	FALSE	12
2022-09-13	10:44:00	0.734313	207.793	FALSE	12
2022-09-13	10:44:00	0.74159	208.535	FALSE	12
2022-09-13	10:44:00	0.739504	209.274	FALSE	12
2022-09-13	10:44:00	0.737824	210.012	FALSE	12
2022-09-13	10:44:01	0.733499	210.746	FALSE	12
2022-09-13	10:44:01	0.738689	211.484	FALSE	12
2022-09-13	10:44:01	0.737672	212.222	FALSE	12
2022-09-13	10:44:01	0.738486	212.96	FALSE	12
2022-09-13	10:44:02	0.741947	213.702	FALSE	12
2022-09-13	10:44:02	0.732074	214.434	FALSE	12
2022-09-13	10:44:02	0.744797	215.179	FALSE	12
2022-09-13	10:44:03	0.736145	215.915	FALSE	12
2022-09-13	10:44:03	0.740623	216.656	FALSE	12
2022-09-13	10:44:03	0.736908	217.393	FALSE	12
2022-09-13	10:44:03	0.741031	218.134	FALSE	12
2022-09-13	10:44:04	0.740114	218.874	FALSE	12
2022-09-13	10:44:04	0.73584	219.61	FALSE	12
2022-09-13	10:44:04	0.730394	220.34	FALSE	12
2022-09-13	10:44:04	0.725611	221.066	FALSE	12
2022-09-13	10:44:05	0.735331	221.801	FALSE	12
2022-09-13	10:44:05	0.73701	222.538	FALSE	12
2022-09-13	10:44:05	0.737773	223.276	FALSE	12
2022-09-13	10:44:05	0.740267	224.016	FALSE	12
2022-09-13	10:44:06	0.743778	224.76	FALSE	12
2022-09-13	10:44:06	0.736807	225.497	FALSE	12
2022-09-13	10:44:06	0.732328	226.229	FALSE	12
2022-09-13	10:44:07	0.743778	226.973	FALSE	12
2022-09-13	10:44:07	0.736145	227.709	FALSE	12
2022-09-13	10:44:07	0.73813	228.447	FALSE	12
2022-09-13	10:44:07	0.735738	229.183	FALSE	12
2022-09-13	10:44:08	0.738791	229.922	FALSE	12
2022-09-13	10:44:08	0.733041	230.655	FALSE	12
2022-09-13	10:44:08	0.732888	231.388	FALSE	12
2022-09-13	10:44:08	0.742659	232.13	FALSE	12
2022-09-13	10:44:09	0.731158	232.862	FALSE	12
2022-09-13	10:44:09	0.735687	233.597	FALSE	12
2022-09-13	10:44:09	0.734669	234.332	FALSE	12
2022-09-13	10:44:09	0.741794	235.074	FALSE	12
2022-09-13	10:44:10	0.731463	235.805	FALSE	12
2022-09-13	10:44:10	0.73874	236.544	FALSE	12
2022-09-13	10:44:10	0.73645	237.28	FALSE	12
2022-09-13	10:44:10	0.739555	238.02	FALSE	12
2022-09-13	10:44:11	0.737315	238.757	FALSE	12
2022-09-13	10:44:11	0.732684	239.49	FALSE	12
2022-09-13	10:44:11	0.738791	240.229	FALSE	12
2022-09-13	10:44:12	0.74271	240.971	FALSE	12
2022-09-13	10:44:12	0.739758	241.711	FALSE	12
2022-09-13	10:44:12	0.738944	242.45	FALSE	12
2022-09-13	10:44:12	0.448003	242.898	FALSE	12
2022-09-13	10:44:13	0.737214	243.635	FALSE	12
2022-09-13	10:44:13	0.739147	244.374	FALSE	12
2022-09-13	10:44:13	0.48958	244.864	FALSE	12
2022-09-13	10:44:13	0.468766	245.333	FALSE	12
2022-09-13	10:44:14	0.741845	246.075	FALSE	12
2022-09-13	10:44:14	0.739606	246.814	FALSE	12
2022-09-13	10:44:14	0.733448	247.548	FALSE	12
2022-09-13	10:44:14	0.735178	248.283	FALSE	12
2022-09-13	10:44:15	0.740929	249.024	FALSE	12
2022-09-13	10:44:15	0.73701	249.761	FALSE	12
2022-09-13	10:44:15	0.736298	250.497	FALSE	12
2022-09-13	10:44:16	0.734313	251.231	FALSE	12
2022-09-13	10:44:16	0.742608	251.974	FALSE	12
2022-09-13	10:44:16	0.735636	252.71	FALSE	12
2022-09-13	10:44:16	0.734059	253.444	FALSE	12
2022-09-13	10:44:17	0.723117	254.167	FALSE	12
2022-09-13	10:44:17	0.693906	254.861	FALSE	12
2022-09-13	10:44:17	0.693651	255.554	FALSE	12
2022-09-13	10:44:17	0.34612	255.901	FALSE	12
2022-09-13	10:44:18	0.728206	256.629	FALSE	12
2022-09-13	10:44:18	0.722608	257.351	FALSE	12
2022-09-13	10:44:18	0.733092	258.084	FALSE	12
2022-09-13	10:44:18	0.735076	258.82	FALSE	12
2022-09-13	10:44:19	0.739656	259.559	FALSE	12
2022-09-13	10:44:19	0.732277	260.291	FALSE	12
2022-09-13	10:44:19	0.738842	261.03	FALSE	12
2022-09-13	10:44:20	0.734822	261.765	FALSE	12
2022-09-13	10:44:20	0.737977	262.503	FALSE	12
2022-09-13	10:44:20	0.734669	263.238	FALSE	12
2022-09-13	10:44:20	0.733651	263.971	FALSE	12
2022-09-13	10:44:21	0.735229	264.707	FALSE	12
2022-09-13	10:44:21	0.733448	265.44	FALSE	12
2022-09-13	10:44:21	0.733804	266.174	FALSE	12
2022-09-13	10:44:21	0.732532	266.906	FALSE	12
2022-09-13	10:44:22	0.73757	267.644	FALSE	12
2022-09-13	10:44:22	0.727443	268.371	FALSE	12
2022-09-13	10:44:22	0.734262	269.106	FALSE	12
2022-09-13	10:44:22	0.740776	269.846	FALSE	12
2022-09-13	10:44:23	0.739453	270.586	FALSE	12
2022-09-13	10:44:23	0.738689	271.325	FALSE	12
2022-09-13	10:44:23	0.738181	272.063	FALSE	12
2022-09-13	10:44:24	0.740318	272.803	FALSE	12
2022-09-13	10:44:24	0.735382	273.539	FALSE	12
2022-09-13	10:44:24	0.74215	274.281	FALSE	12
2022-09-13	10:44:24	0.731005	275.012	FALSE	12
2022-09-13	10:44:25	0.732481	275.744	FALSE	12
2022-09-13	10:44:25	0.743677	276.488	FALSE	12
2022-09-13	10:44:25	0.740267	277.228	FALSE	12
2022-09-13	10:44:25	0.733142	277.961	FALSE	12
2022-09-13	10:44:26	0.740623	278.702	FALSE	12
2022-09-13	10:44:26	0.743524	279.445	FALSE	12
2022-09-13	10:44:26	0.739453	280.185	FALSE	12
2022-09-13	10:44:26	0.737417	280.922	FALSE	12
2022-09-13	10:44:27	0.740725	281.663	FALSE	12
2022-09-13	10:44:27	0.738079	282.401	FALSE	12
2022-09-13	10:44:27	0.741081	283.142	FALSE	12
2022-09-13	10:44:27	0.732226	283.874	FALSE	12
2022-09-13	10:44:28	0.740471	284.615	FALSE	12
2022-09-13	10:44:28	0.737824	285.353	FALSE	12
2022-09-13	10:44:28	0.738639	286.091	FALSE	12
2022-09-13	10:44:29	0.734059	286.825	FALSE	12
2022-09-13	10:44:29	0.738435	287.564	FALSE	12
2022-09-13	10:44:29	0.73472	288.299	FALSE	12
2022-09-13	10:44:29	0.73757	289.036	FALSE	12
2022-09-13	10:44:30	0.737112	289.773	FALSE	12
2022-09-13	10:44:30	0.737926	290.511	FALSE	12
2022-09-13	10:44:30	0.69528	291.206	FALSE	12
2022-09-13	10:44:30	0.732735	291.939	FALSE	12
2022-09-13	10:44:31	0.731667	292.671	FALSE	12
2022-09-13	10:44:31	0.745255	293.416	FALSE	12
2022-09-13	10:44:31	0.7393	294.155	FALSE	12
2022-09-13	10:44:31	0.741692	294.897	FALSE	12
2022-09-13	10:44:32	0.734618	295.632	FALSE	12
2022-09-13	10:44:32	0.730852	296.363	FALSE	12
2022-09-13	10:44:32	0.735534	297.098	FALSE	12
2022-09-13	10:44:33	0.738333	297.836	FALSE	12
2022-09-13	10:44:33	0.74098	298.577	FALSE	12
2022-09-13	10:44:33	0.737875	299.315	FALSE	12
2022-09-13	10:44:33	1.33009	300.645	FALSE	12
2022-09-13	10:44:34	1.09843	301.744	FALSE	12
2022-09-13	10:44:34	0.0328882	301.777	FALSE	12
2022-09-13	10:44:34	0.573957	302.351	FALSE	12
2022-09-13	10:44:34	0.591107	302.942	FALSE	12
2022-09-13	10:44:35	0.627443	303.569	FALSE	12
2022-09-13	10:44:35	0.616552	304.186	FALSE	12
2022-09-13	10:44:35	0.599707	304.785	FALSE	12
2022-09-13	10:44:35	0.72215	305.508	FALSE	12
2022-09-13	10:44:36	0.738537	306.246	FALSE	12
2022-09-13	10:44:36	0.953804	307.2	FALSE	12
2022-09-13	10:44:36	2.05385	309.254	FALSE	12
2022-09-13	10:44:37	1.95243	311.206	FALSE	12
2022-09-13	10:44:37	0.86785	312.074	FALSE	12
2022-09-13	10:44:37	0.782608	312.857	FALSE	12
2022-09-13	10:44:37	0.31813	313.175	FALSE	12
2022-09-13	10:44:38	0.205051	313.38	FALSE	12
2022-09-13	10:44:38	0.0408781	313.421	FALSE	12
2022-09-13	10:44:38	-0.0193763	313.421	FALSE	12
2022-09-13	10:44:38	-0.136119	313.421	FALSE	12
2022-09-13	10:44:39	-0.415712	313.421	FALSE	12
2022-09-13	10:44:39	-0.622175	313.421	FALSE	12
2022-09-13	10:44:39	-0.704211	313.421	FALSE	12
2022-09-13	10:44:39	-0.841717	313.421	FALSE	12
2022-09-13	10:44:40	-0.809045	313.421	FALSE	12
2022-09-13	10:44:40	-1.06391	313.421	FALSE	12
2022-09-13	10:44:40	-0.631793	313.421	FALSE	12
2022-09-13	10:44:41	-0.126857	313.421	FALSE	12
2022-09-13	10:44:41	2.1649	315.586	FALSE	12
2022-09-13	10:44:41	5.19802	320.784	1	13
2022-09-13	10:44:41	0.832634	321.616	FALSE	13
2022-09-13	10:44:42	0.180115	321.796	FALSE	13
2022-09-13	10:44:42	0.247952	322.044	FALSE	13
2022-09-13	10:44:42	0.282252	322.327	FALSE	13
2022-09-13	10:44:42	0.214313	322.541	FALSE	13
2022-09-13	10:44:43	0.428563	322.969	FALSE	13
2022-09-13	10:44:43	0.275535	323.245	FALSE	13
2022-09-13	10:44:43	0.659606	323.905	FALSE	13
2022-09-13	10:44:43	0.56159	324.466	FALSE	13
2022-09-13	10:44:44	-0.0853305	324.466	FALSE	13
2022-09-13	10:44:44	-0.0310303	324.466	FALSE	13
2022-09-13	10:44:44	-0.203244	324.466	FALSE	13
2022-09-13	10:44:44	-0.456221	324.466	FALSE	13
2022-09-13	10:44:45	-0.419529	324.466	FALSE	13
2022-09-13	10:44:45	-0.360241	324.466	FALSE	13
2022-09-13	10:44:45	-0.23846	324.466	FALSE	13
2022-09-13	10:44:46	-0.00115753	324.466	FALSE	13
2022-09-13	10:44:46	0.0647967	324.531	FALSE	13
2022-09-13	10:44:46	0.074415	324.605	FALSE	13
2022-09-13	10:44:46	0.0817941	324.687	FALSE	13
2022-09-13	10:44:47	0.10897	324.796	FALSE	13
2022-09-13	10:44:47	0.115229	324.911	FALSE	13
2022-09-13	10:44:47	0.0808781	324.992	FALSE	13
2022-09-13	10:44:47	0.276654	325.269	FALSE	13
2022-09-13	10:44:48	0.802354	326.071	FALSE	13
2022-09-13	10:44:48	0.0373157	326.109	FALSE	13
2022-09-13	10:44:48	0.21243	326.321	FALSE	13
2022-09-13	10:44:48	-0.0809539	326.321	FALSE	13
2022-09-13	10:44:49	-0.256425	326.321	FALSE	13
2022-09-13	10:44:49	-0.1893	326.321	FALSE	13
2022-09-13	10:44:49	0.13355	326.455	FALSE	13
2022-09-13	10:44:50	0.152583	326.607	FALSE	13
2022-09-13	10:44:50	0.237417	326.845	FALSE	13
2022-09-13	10:44:50	0.22729	327.072	FALSE	13
2022-09-13	10:44:50	0.28042	327.352	FALSE	13
2022-09-13	10:44:51	0.243677	327.596	FALSE	13
2022-09-13	10:44:51	0.361743	327.958	FALSE	13
2022-09-13	10:44:51	0.338791	328.296	FALSE	13
2022-09-13	10:44:51	0.374873	328.671	FALSE	13
2022-09-13	10:44:52	0.296145	328.968	FALSE	13
2022-09-13	10:44:52	0.398181	329.366	FALSE	13
2022-09-13	10:44:52	0.252379	329.618	FALSE	13
2022-09-13	10:44:52	0.292939	329.911	FALSE	13
2022-09-13	10:44:53	0.389071	330.3	FALSE	13
2022-09-13	10:44:53	0.466832	330.767	FALSE	13
2022-09-13	10:44:53	0.733601	331.501	FALSE	13
2022-09-13	10:44:54	0.743371	332.244	FALSE	13
2022-09-13	10:44:54	0.736399	332.98	FALSE	13
2022-09-13	10:44:54	0.736247	333.717	FALSE	13
2022-09-13	10:44:54	0.73986	334.456	FALSE	13
2022-09-13	10:44:55	0.74098	335.197	FALSE	13
2022-09-13	10:44:55	0.730751	335.928	FALSE	13
2022-09-13	10:44:55	0.740522	336.669	FALSE	13
2022-09-13	10:44:55	0.731717	337.4	FALSE	13
2022-09-13	10:44:56	0.734059	338.134	FALSE	13
2022-09-13	10:44:56	0.720064	338.854	FALSE	13
2022-09-13	10:44:56	0.717977	339.572	FALSE	13
2022-09-13	10:44:56	0.719148	340.292	FALSE	13
2022-09-13	10:44:57	0.71757	341.009	FALSE	13
2022-09-13	10:44:57	0.713397	341.723	FALSE	13
2022-09-13	10:44:57	0.698944	342.422	FALSE	13
2022-09-13	10:44:57	0.710089	343.132	FALSE	13
2022-09-13	10:44:58	0.70673	343.838	FALSE	13
2022-09-13	10:44:58	0.706425	344.545	FALSE	13
2022-09-13	10:44:58	0.703066	345.248	FALSE	13
2022-09-13	10:44:59	0.692481	345.94	FALSE	13
2022-09-13	10:44:59	0.687086	346.627	FALSE	13
2022-09-13	10:44:59	0.68729	347.315	FALSE	13
2022-09-13	10:44:59	0.676399	347.991	FALSE	13
2022-09-13	10:45:00	0.461082	348.452	FALSE	13
2022-09-13	10:45:00	0.222099	348.674	FALSE	13
2022-09-13	10:45:00	0.203881	348.878	FALSE	13
2022-09-13	10:45:00	0.19813	349.076	FALSE	13
2022-09-13	10:45:01	0.198232	349.275	FALSE	13
2022-09-13	10:45:01	0.202303	349.477	FALSE	13
2022-09-13	10:45:01	0.213804	349.691	FALSE	13
2022-09-13	10:45:01	0.732023	350.423	FALSE	13
2022-09-13	10:45:02	0.736247	351.159	FALSE	13
2022-09-13	10:45:02	0.735534	351.894	FALSE	13
2022-09-13	10:45:02	0.73874	352.633	FALSE	13
2022-09-13	10:45:03	0.731056	353.364	FALSE	13
2022-09-13	10:45:03	0.733448	354.098	FALSE	13
2022-09-13	10:45:03	0.737722	354.835	FALSE	13
2022-09-13	10:45:03	0.738028	355.573	FALSE	13
2022-09-13	10:45:04	0.73874	356.312	FALSE	13
2022-09-13	10:45:04	0.732023	357.044	FALSE	13
2022-09-13	10:45:04	0.736094	357.78	FALSE	13
2022-09-13	10:45:04	0.739656	358.52	FALSE	13
2022-09-13	10:45:05	0.740573	359.261	FALSE	13
2022-09-13	10:45:05	0.734008	359.995	FALSE	13
2022-09-13	10:45:05	0.735382	360.73	FALSE	13
2022-09-13	10:45:05	0.737061	361.467	FALSE	13
2022-09-13	10:45:06	0.732888	362.2	FALSE	13
2022-09-13	10:45:06	0.741234	362.941	FALSE	13
2022-09-13	10:45:06	0.732786	363.674	FALSE	13
2022-09-13	10:45:07	0.738689	364.413	FALSE	13
2022-09-13	10:45:07	0.732277	365.145	FALSE	13
2022-09-13	10:45:07	0.736654	365.881	FALSE	13
2022-09-13	10:45:07	0.736807	366.618	FALSE	13
2022-09-13	10:45:08	0.743423	367.362	FALSE	13
2022-09-13	10:45:08	0.741845	368.104	FALSE	13
2022-09-13	10:45:08	0.740216	368.844	FALSE	13
2022-09-13	10:45:08	0.73187	369.576	FALSE	13
2022-09-13	10:45:09	0.739453	370.315	FALSE	13
2022-09-13	10:45:09	0.737061	371.052	FALSE	13
2022-09-13	10:45:09	0.733499	371.786	FALSE	13
2022-09-13	10:45:09	0.735789	372.521	FALSE	13
2022-09-13	10:45:10	0.741081	373.263	FALSE	13
2022-09-13	10:45:10	0.746781	374.009	FALSE	13
2022-09-13	10:45:10	0.731158	374.74	FALSE	13
2022-09-13	10:45:11	0.736043	375.477	FALSE	13
2022-09-13	10:45:11	0.740725	376.217	FALSE	13
2022-09-13	10:45:11	0.740369	376.958	FALSE	13
2022-09-13	10:45:11	0.737163	377.695	FALSE	13
2022-09-13	10:45:12	0.739147	378.434	FALSE	13
2022-09-13	10:45:12	0.739758	379.174	FALSE	13
2022-09-13	10:45:12	0.735382	379.909	FALSE	13
2022-09-13	10:45:12	0.736145	380.645	FALSE	13
2022-09-13	10:45:13	0.735636	381.381	FALSE	13
2022-09-13	10:45:13	0.737926	382.119	FALSE	13
2022-09-13	10:45:13	0.738537	382.857	FALSE	13
2022-09-13	10:45:13	0.734568	383.592	FALSE	13
2022-09-13	10:45:14	0.735738	384.328	FALSE	13
2022-09-13	10:45:14	0.734466	385.062	FALSE	13
2022-09-13	10:45:14	0.740471	385.803	FALSE	13
2022-09-13	10:45:14	0.734873	386.537	FALSE	13
2022-09-13	10:45:15	0.737417	387.275	FALSE	13
2022-09-13	10:45:15	0.734364	388.009	FALSE	13
2022-09-13	10:45:15	0.741438	388.751	FALSE	13
2022-09-13	10:45:16	0.738944	389.49	FALSE	13
2022-09-13	10:45:16	0.733041	390.223	FALSE	13
2022-09-13	10:45:16	0.293753	390.516	FALSE	13
2022-09-13	10:45:16	0.346985	390.863	FALSE	13
2022-09-13	10:45:17	0.343423	391.207	FALSE	13
2022-09-13	10:45:17	0.228817	391.436	FALSE	13
2022-09-13	10:45:17	0.441947	391.878	FALSE	13
2022-09-13	10:45:17	0.357621	392.235	FALSE	13
2022-09-13	10:45:18	0.748359	392.984	FALSE	13
2022-09-13	10:45:18	1.09426	394.078	FALSE	13
2022-09-13	10:45:18	0.581794	394.66	FALSE	13
2022-09-13	10:45:18	0.607036	395.267	FALSE	13
2022-09-13	10:45:19	0.517417	395.784	FALSE	13
2022-09-13	10:45:19	0.360115	396.144	FALSE	13
2022-09-13	10:45:19	0.730343	396.874	FALSE	13
2022-09-13	10:45:20	0.73584	397.61	FALSE	13
2022-09-13	10:45:20	0.739707	398.35	FALSE	13
2022-09-13	10:45:20	0.73986	399.09	FALSE	13
2022-09-13	10:45:20	0.741641	399.832	FALSE	13
2022-09-13	10:45:21	0.739046	400.571	FALSE	13
2022-09-13	10:45:21	0.735229	401.306	FALSE	13
2022-09-13	10:45:21	0.743728	402.05	FALSE	13
2022-09-13	10:45:21	0.730496	402.78	FALSE	13
2022-09-13	10:45:22	0.735992	403.516	FALSE	13
2022-09-13	10:45:22	0.735229	404.251	FALSE	13
2022-09-13	10:45:22	0.735789	404.987	FALSE	13
2022-09-13	10:45:22	0.734568	405.722	FALSE	13
2022-09-13	10:45:23	0.729326	406.451	FALSE	13
2022-09-13	10:45:23	0.729275	407.18	FALSE	13
2022-09-13	10:45:23	0.733397	407.914	FALSE	13
2022-09-13	10:45:24	0.733193	408.647	FALSE	13
2022-09-13	10:45:24	0.735382	409.382	FALSE	13
2022-09-13	10:45:24	0.737112	410.119	FALSE	13
2022-09-13	10:45:24	0.731717	410.851	FALSE	13
2022-09-13	10:45:25	0.732634	411.584	FALSE	13
2022-09-13	10:45:25	0.733142	412.317	FALSE	13
2022-09-13	10:45:25	0.730903	413.048	FALSE	13
2022-09-13	10:45:25	0.741947	413.79	FALSE	13
2022-09-13	10:45:26	0.737926	414.528	FALSE	13
2022-09-13	10:45:26	0.736908	415.264	FALSE	13
2022-09-13	10:45:26	0.743219	416.008	FALSE	13
2022-09-13	10:45:26	0.738079	416.746	FALSE	13
2022-09-13	10:45:27	0.733651	417.479	FALSE	13
2022-09-13	10:45:27	0.739911	418.219	FALSE	13
2022-09-13	10:45:27	0.733753	418.953	FALSE	13
2022-09-13	10:45:28	0.738588	419.692	FALSE	13
2022-09-13	10:45:28	0.735789	420.427	FALSE	13
2022-09-13	10:45:28	0.737468	421.165	FALSE	13
2022-09-13	10:45:28	0.741438	421.906	FALSE	13
2022-09-13	10:45:29	0.734822	422.641	FALSE	13
2022-09-13	10:45:29	0.738282	423.379	FALSE	13
2022-09-13	10:45:29	0.734669	424.114	FALSE	13
2022-09-13	10:45:29	0.735941	424.85	FALSE	13
2022-09-13	10:45:30	0.732226	425.582	FALSE	13
2022-09-13	10:45:30	0.731361	426.314	FALSE	13
2022-09-13	10:45:30	0.737417	427.051	FALSE	13
2022-09-13	10:45:30	0.735941	427.787	FALSE	13
2022-09-13	10:45:31	0.738842	428.526	FALSE	13
2022-09-13	10:45:31	0.737417	429.263	FALSE	13
2022-09-13	10:45:31	0.734059	429.997	FALSE	13
2022-09-13	10:45:31	0.740267	430.738	FALSE	13
2022-09-13	10:45:32	0.736399	431.474	FALSE	13
2022-09-13	10:45:32	0.734975	432.209	FALSE	13
2022-09-13	10:45:32	0.735738	432.945	FALSE	13
2022-09-13	10:45:33	0.732277	433.677	FALSE	13
2022-09-13	10:45:33	0.733193	434.41	FALSE	13
2022-09-13	10:45:33	0.740573	435.151	FALSE	13
2022-09-13	10:45:33	0.729835	435.881	FALSE	13
2022-09-13	10:45:34	0.746832	436.627	FALSE	13
2022-09-13	10:45:34	0.736247	437.364	FALSE	13
2022-09-13	10:45:34	0.741081	438.105	FALSE	13
2022-09-13	10:45:34	0.730598	438.835	FALSE	13
2022-09-13	10:45:35	0.734568	439.57	FALSE	13
2022-09-13	10:45:35	0.737621	440.308	FALSE	13
2022-09-13	10:45:35	0.74042	441.048	FALSE	13
2022-09-13	10:45:35	0.733193	441.781	FALSE	13
2022-09-13	10:45:36	0.732634	442.514	FALSE	13
2022-09-13	10:45:36	0.730954	443.245	FALSE	13
2022-09-13	10:45:36	0.734466	443.979	FALSE	13
2022-09-13	10:45:37	0.741539	444.721	FALSE	13
2022-09-13	10:45:37	0.732175	445.453	FALSE	13
2022-09-13	10:45:37	0.734313	446.187	FALSE	13
2022-09-13	10:45:37	0.743626	446.931	FALSE	13
2022-09-13	10:45:38	0.737672	447.669	FALSE	13
2022-09-13	10:45:38	0.729886	448.398	FALSE	13
2022-09-13	10:45:38	0.726985	449.125	FALSE	13
2022-09-13	10:45:38	1.13523	450.261	FALSE	13
2022-09-13	10:45:39	1.64098	451.902	FALSE	13
2022-09-13	10:45:39	1.59034	453.492	FALSE	13
2022-09-13	10:45:39	1.46032	454.952	FALSE	13
2022-09-13	10:45:39	0.420166	455.372	FALSE	13
2022-09-13	10:45:40	0.611819	455.984	FALSE	13
2022-09-13	10:45:40	0.348664	456.333	FALSE	13
2022-09-13	10:45:40	0.360013	456.693	FALSE	13
2022-09-13	10:45:41	0.626527	457.319	FALSE	13
2022-09-13	10:45:41	0.875992	458.195	FALSE	13
2022-09-13	10:45:41	1.70383	459.899	FALSE	13
2022-09-13	10:45:41	2.8905	462.79	FALSE	13
2022-09-13	10:45:42	1.71955	464.509	FALSE	13
2022-09-13	10:45:42	1.05991	465.569	FALSE	13
2022-09-13	10:45:42	0.440318	466.01	FALSE	13
2022-09-13	10:45:42	0.55243	466.562	FALSE	13
2022-09-13	10:45:43	1.37136	467.933	FALSE	13
2022-09-13	10:45:43	2.69721	470.631	FALSE	13
2022-09-13	10:45:43	2.09854	472.729	FALSE	13
2022-09-13	10:45:43	1.14032	473.869	FALSE	13
2022-09-13	10:45:44	1.21757	475.087	FALSE	13
2022-09-13	10:45:44	1.63813	476.725	FALSE	13
2022-09-13	10:45:44	0.50271	477.228	FALSE	13
2022-09-13	10:45:44	0.45528	477.683	FALSE	13
2022-09-13	10:45:45	0.603066	478.286	FALSE	13
2022-09-13	10:45:45	0.612532	478.899	FALSE	13
2022-09-13	10:45:45	0.449529	479.348	FALSE	13
2022-09-13	10:45:46	0.640471	479.989	FALSE	13
2022-09-13	10:45:46	0.447901	480.437	FALSE	13
2022-09-13	10:45:46	0.465153	480.902	FALSE	13
2022-09-13	10:45:46	0.53757	481.439	FALSE	13
2022-09-13	10:45:47	0.502608	481.942	FALSE	13
2022-09-13	10:45:47	0.426781	482.369	FALSE	13
2022-09-13	10:45:47	0.403372	482.772	FALSE	13
2022-09-13	10:45:47	0.452583	483.225	FALSE	13
2022-09-13	10:45:48	0.447952	483.673	FALSE	13
2022-09-13	10:45:48	0.471412	484.144	FALSE	13
2022-09-13	10:45:48	0.694313	484.838	FALSE	13
2022-09-13	10:45:48	0.408715	485.247	FALSE	13
2022-09-13	10:45:49	0.436196	485.683	FALSE	13
2022-09-13	10:45:49	0.468919	486.152	FALSE	13
2022-09-13	10:45:49	0.635331	486.788	FALSE	13
2022-09-13	10:45:50	0.504389	487.292	FALSE	13
2022-09-13	10:45:50	0.146985	487.439	FALSE	13
2022-09-13	10:45:50	0.344339	487.783	FALSE	13
2022-09-13	10:45:50	0.419606	488.203	FALSE	13
2022-09-13	10:45:51	0.161947	488.365	FALSE	13
2022-09-13	10:45:51	0.266374	488.631	FALSE	13
2022-09-13	10:45:51	0.162812	488.794	FALSE	13
2022-09-13	10:45:51	0.346883	489.141	FALSE	13
2022-09-13	10:45:52	0.234415	489.375	FALSE	13
2022-09-13	10:45:52	0.444898	489.82	FALSE	13
2022-09-13	10:45:52	0.341896	490.162	FALSE	13
2022-09-13	10:45:52	0.395534	490.558	FALSE	13
2022-09-13	10:45:53	0.319606	490.877	FALSE	13
2022-09-13	10:45:53	0.377723	491.255	FALSE	13
2022-09-13	10:45:53	0.380929	491.636	FALSE	13
2022-09-13	10:45:54	0.301998	491.938	FALSE	13
2022-09-13	10:45:54	0.339911	492.278	FALSE	13
2022-09-13	10:45:54	0.400878	492.679	FALSE	13
2022-09-13	10:45:54	0.344288	493.023	FALSE	13
2022-09-13	10:45:55	0.345509	493.368	FALSE	13
2022-09-13	10:45:55	0.401997	493.77	FALSE	13
2022-09-13	10:45:55	0.368308	494.139	FALSE	13
2022-09-13	10:45:55	0.374466	494.513	FALSE	13
2022-09-13	10:45:56	0.381336	494.895	FALSE	13
2022-09-13	10:45:56	0.37243	495.267	FALSE	13
2022-09-13	10:45:56	0.390649	495.658	FALSE	13
2022-09-13	10:45:56	0.384797	496.042	FALSE	13
2022-09-13	10:45:57	0.390089	496.433	FALSE	13
2022-09-13	10:45:57	0.400674	496.833	FALSE	13
2022-09-13	10:45:57	0.309326	497.143	FALSE	13
2022-09-13	10:45:58	0.316247	497.459	FALSE	13
2022-09-13	10:45:58	0.330903	497.79	FALSE	13
2022-09-13	10:45:58	0.353702	498.143	FALSE	13
2022-09-13	10:45:58	0.441896	498.585	FALSE	13
2022-09-13	10:45:59	0.700674	499.286	FALSE	13
2022-09-13	10:45:59	0.70042	499.986	FALSE	13
2022-09-13	10:45:59	0.848206	500.835	FALSE	13
2022-09-13	10:45:59	0.933601	501.768	FALSE	13
2022-09-13	10:46:00	0.878639	502.647	FALSE	13
2022-09-13	10:46:00	0.746934	503.394	FALSE	13
2022-09-13	10:46:00	0.557672	503.951	FALSE	13
2022-09-13	10:46:00	0.448715	504.4	FALSE	13
2022-09-13	10:46:01	0.616807	505.017	FALSE	13
2022-09-13	10:46:01	0.958028	505.975	FALSE	13
2022-09-13	10:46:01	0.418079	506.393	FALSE	13
2022-09-13	10:46:01	0.386018	506.779	FALSE	13
2022-09-13	10:46:02	0.459198	507.238	FALSE	13
2022-09-13	10:46:02	0.514517	507.753	FALSE	13
2022-09-13	10:46:02	0.452328	508.205	FALSE	13
2022-09-13	10:46:03	0.39472	508.6	FALSE	13
2022-09-13	10:46:03	-0.120903	508.6	FALSE	13
2022-09-13	10:46:03	0.734364	509.334	FALSE	13
2022-09-13	10:46:03	0.736298	510.07	FALSE	13
2022-09-13	10:46:04	0.502913	510.573	FALSE	13
2022-09-13	10:46:04	0.374008	510.947	FALSE	13
2022-09-13	10:46:04	0.206883	511.154	FALSE	13
2022-09-13	10:46:04	0.235178	511.389	FALSE	13
2022-09-13	10:46:05	0.138995	511.528	FALSE	13
2022-09-13	10:46:05	0.107545	511.636	FALSE	13
2022-09-13	10:46:05	0.1307	511.767	FALSE	13
2022-09-13	10:46:05	-0.0314883	511.767	FALSE	13
2022-09-13	10:46:06	0.0879009	511.855	FALSE	13
2022-09-13	10:46:06	0.151005	512.006	FALSE	13
2022-09-13	10:46:06	0.271769	512.277	FALSE	13
2022-09-13	10:46:07	0.2107	512.488	FALSE	13
2022-09-13	10:46:07	0.247952	512.736	FALSE	13
2022-09-13	10:46:07	0.216603	512.953	FALSE	13
2022-09-13	10:46:07	0.283117	513.236	FALSE	13
2022-09-13	10:46:08	0.254262	513.49	FALSE	13
2022-09-13	10:46:08	0.311769	513.802	FALSE	13
2022-09-13	10:46:08	0.465204	514.267	FALSE	13
2022-09-13	10:46:08	0.868817	515.136	FALSE	13
2022-09-13	10:46:09	0.813753	515.95	FALSE	13
2022-09-13	10:46:09	1.57513	517.525	FALSE	13
2022-09-13	10:46:09	0.862405	518.387	FALSE	13
2022-09-13	10:46:09	0.392023	518.779	FALSE	13
2022-09-13	10:46:10	0.375636	519.155	FALSE	13
2022-09-13	10:46:10	0.39131	519.546	FALSE	13
2022-09-13	10:46:10	0.404695	519.951	FALSE	13
2022-09-13	10:46:11	0.405509	520.356	FALSE	13
2022-09-13	10:46:11	0.409326	520.766	FALSE	13
2022-09-13	10:46:11	0.404746	521.17	FALSE	13
2022-09-13	10:46:11	0.396501	521.567	FALSE	13
2022-09-13	10:46:12	0.41472	521.982	FALSE	13
2022-09-13	10:46:12	0.405916	522.387	FALSE	13
2022-09-13	10:46:12	0.415636	522.803	FALSE	13
2022-09-13	10:46:12	0.413855	523.217	FALSE	13
2022-09-13	10:46:13	0.409428	523.626	FALSE	13
2022-09-13	10:46:13	0.412277	524.039	FALSE	13
2022-09-13	10:46:13	0.411819	524.45	FALSE	13
2022-09-13	10:46:13	0.409784	524.86	FALSE	13
2022-09-13	10:46:14	0.400267	525.261	FALSE	13
2022-09-13	10:46:14	0.412176	525.673	FALSE	13
2022-09-13	10:46:14	0.408512	526.081	FALSE	13
2022-09-13	10:46:15	0.420929	526.502	FALSE	13
2022-09-13	10:46:15	0.420725	526.923	FALSE	13
2022-09-13	10:46:15	0.44327	527.366	FALSE	13
2022-09-13	10:46:15	0.404491	527.771	FALSE	13
2022-09-13	10:46:16	0.425916	528.197	FALSE	13
2022-09-13	10:46:16	0.427748	528.624	FALSE	13
2022-09-13	10:46:16	0.423168	529.047	FALSE	13
2022-09-13	10:46:16	0.449224	529.497	FALSE	13
2022-09-13	10:46:17	0.445255	529.942	FALSE	13
2022-09-13	10:46:17	0.463779	530.406	FALSE	13
2022-09-13	10:46:17	0.468206	530.874	FALSE	13
2022-09-13	10:46:17	0.476094	531.35	FALSE	13
2022-09-13	10:46:18	0.475585	531.826	FALSE	13
2022-09-13	10:46:18	0.480674	532.306	FALSE	13
2022-09-13	10:46:18	0.455942	532.762	FALSE	13
2022-09-13	10:46:18	0.440725	533.203	FALSE	13
2022-09-13	10:46:19	0.460369	533.663	FALSE	13
2022-09-13	10:46:19	0.41243	534.076	FALSE	13
2022-09-13	10:46:19	0.519198	534.595	FALSE	13
2022-09-13	10:46:20	0.403117	534.998	FALSE	13
2022-09-13	10:46:20	0.483372	535.481	FALSE	13
2022-09-13	10:46:20	0.233244	535.715	FALSE	13
2022-09-13	10:46:20	0.184288	535.899	FALSE	13
2022-09-13	10:46:21	0.153346	536.052	FALSE	13
2022-09-13	10:46:21	0.148104	536.2	FALSE	13
2022-09-13	10:46:21	0.124898	536.325	FALSE	13
2022-09-13	10:46:21	0.125407	536.451	FALSE	13
2022-09-13	10:46:22	0.37528	536.826	FALSE	13
2022-09-13	10:46:22	0.452328	537.278	FALSE	13
2022-09-13	10:46:22	0.716603	537.995	FALSE	13
2022-09-13	10:46:22	0.730903	538.726	FALSE	13
2022-09-13	10:46:23	0.730954	539.457	FALSE	13
2022-09-13	10:46:23	0.736959	540.194	FALSE	13
2022-09-13	10:46:23	0.743423	540.937	FALSE	13
2022-09-13	10:46:24	-0.159732	540.937	FALSE	13
2022-09-13	10:46:24	-1.46971	540.937	FALSE	13
2022-09-13	10:46:24	0.428868	541.366	FALSE	13
2022-09-13	10:46:24	-0.514083	541.366	FALSE	13
2022-09-13	10:46:25	-1.21434	541.366	FALSE	13
2022-09-13	10:46:25	-0.845432	541.366	FALSE	13
2022-09-13	10:46:25	-0.347315	541.366	FALSE	13
2022-09-13	10:46:25	-0.587519	541.366	FALSE	13
2022-09-13	10:46:26	-1.30706	541.366	FALSE	13
2022-09-13	10:46:26	-1.71678	541.366	FALSE	13
2022-09-13	10:46:26	-0.741106	541.366	FALSE	13
2022-09-13	10:46:26	0.7393	542.105	FALSE	13
2022-09-13	10:46:27	0.501896	542.607	FALSE	13
2022-09-13	10:46:27	-1.24726	542.607	FALSE	13
2022-09-13	10:46:27	-1.58925	542.607	FALSE	13
2022-09-13	10:46:28	-0.0622262	542.607	FALSE	13
2022-09-13	10:46:28	0.348613	542.956	FALSE	13
2022-09-13	10:46:28	-0.0266028	542.956	FALSE	13
2022-09-13	10:46:28	-0.36075	542.956	FALSE	13
2022-09-13	10:46:29	-0.324262	542.956	FALSE	13
2022-09-13	10:46:29	-0.279325	542.956	FALSE	13
2022-09-13	10:46:29	-0.689809	542.956	FALSE	13
2022-09-13	10:46:29	0.710751	543.667	FALSE	13
2022-09-13	10:46:30	0.0960943	543.763	FALSE	13
2022-09-13	10:46:30	0.155433	543.918	FALSE	13
2022-09-13	10:46:30	0.178537	544.097	FALSE	13
2022-09-13	10:46:30	0.309122	544.406	FALSE	13
2022-09-13	10:46:31	-0.216017	544.406	FALSE	13
2022-09-13	10:46:31	0.365	544.771	FALSE	13
2022-09-13	10:46:31	0.260827	545.032	FALSE	13
2022-09-13	10:46:31	0.628969	545.661	FALSE	13
2022-09-13	10:46:32	0.766629	546.427	FALSE	13
2022-09-13	10:46:32	0.582506	547.01	FALSE	13
2022-09-13	10:46:32	0.392277	547.402	FALSE	13
2022-09-13	10:46:33	0.194008	547.596	FALSE	13
2022-09-13	10:46:33	0.0870359	547.683	FALSE	13
2022-09-13	10:46:33	0.19416	547.877	FALSE	13
2022-09-13	10:46:33	0.674974	548.552	FALSE	13
2022-09-13	10:46:34	0.191209	548.743	FALSE	13
2022-09-13	10:46:34	0.17126	548.915	FALSE	13
2022-09-13	10:46:34	0.0540587	548.969	FALSE	13
2022-09-13	10:46:34	-0.0428369	548.969	FALSE	13
2022-09-13	10:46:35	-0.0775442	548.969	FALSE	13
2022-09-13	10:46:35	-0.14528	548.969	FALSE	13
2022-09-13	10:46:35	-0.0221753	548.969	FALSE	13
2022-09-13	10:46:35	0.198384	549.167	FALSE	13
2022-09-13	10:46:36	0.496807	549.664	FALSE	13
2022-09-13	10:46:36	0.235636	549.9	FALSE	13
2022-09-13	10:46:36	0.159402	550.059	FALSE	13
2022-09-13	10:46:37	0.297926	550.357	FALSE	13
2022-09-13	10:46:37	0.361438	550.718	FALSE	13
2022-09-13	10:46:37	0.507035	551.225	FALSE	13
2022-09-13	10:46:37	0.475585	551.701	FALSE	13
2022-09-13	10:46:38	0.238588	551.94	FALSE	13
2022-09-13	10:46:38	0.460064	552.4	FALSE	13
2022-09-13	10:46:38	0.327087	552.727	FALSE	13
2022-09-13	10:46:38	0.242608	552.969	FALSE	13
2022-09-13	10:46:39	0.154466	553.124	FALSE	13
2022-09-13	10:46:39	0.257672	553.381	FALSE	13
2022-09-13	10:46:39	0.130853	553.512	FALSE	13
2022-09-13	10:46:39	0.194873	553.707	FALSE	13
2022-09-13	10:46:40	0.0288679	553.736	FALSE	13
2022-09-13	10:46:40	0.23014	553.966	FALSE	13
2022-09-13	10:46:40	0.100878	554.067	FALSE	13
2022-09-13	10:46:41	0.25355	554.321	FALSE	13
2022-09-13	10:46:41	0.0614888	554.382	FALSE	13
2022-09-13	10:46:41	0.366476	554.749	FALSE	13
2022-09-13	10:46:41	0.163728	554.912	FALSE	13
2022-09-13	10:46:42	0.249733	555.162	FALSE	13
2022-09-13	10:46:42	0.172583	555.335	FALSE	13
2022-09-13	10:46:42	0.235738	555.57	FALSE	13
2022-09-13	10:46:42	0.572634	556.143	FALSE	13
2022-09-13	10:46:43	1.28973	557.433	FALSE	13
2022-09-13	10:46:43	1.69991	559.133	FALSE	13
2022-09-13	10:46:43	1.86062	560.993	FALSE	13
2022-09-13	10:46:43	2.19742	563.191	FALSE	13
2022-09-13	10:46:44	1.93681	565.127	FALSE	13
2022-09-13	10:46:44	1.0424	566.17	FALSE	13
2022-09-13	10:46:44	0.0419468	566.212	FALSE	13
2022-09-13	10:46:45	0.0452547	566.257	FALSE	13
2022-09-13	10:46:45	0.0712597	566.328	FALSE	13
2022-09-13	10:46:45	-0.151743	566.328	FALSE	13
2022-09-13	10:46:45	-0.0136766	566.328	FALSE	13
2022-09-13	10:46:46	0.0281554	566.356	FALSE	13
2022-09-13	10:46:46	0.142303	566.499	FALSE	13
2022-09-13	10:46:46	0.0770613	566.576	FALSE	13
2022-09-13	10:46:46	0.229173	566.805	FALSE	13
2022-09-13	10:46:47	0.284338	567.089	FALSE	13
2022-09-13	10:46:47	0.0588934	567.148	FALSE	13
2022-09-13	10:46:47	-0.213422	567.148	FALSE	13
2022-09-13	10:46:47	-0.161259	567.148	FALSE	13
2022-09-13	10:46:48	-0.345178	567.148	FALSE	13
2022-09-13	10:46:48	-0.316119	567.148	FALSE	13
2022-09-13	10:46:48	-0.121208	567.148	FALSE	13
2022-09-13	10:46:48	-0.0574425	567.148	FALSE	13
2022-09-13	10:46:49	0.0588934	567.207	FALSE	13
2022-09-13	10:46:49	0.196654	567.404	FALSE	13
2022-09-13	10:46:49	0.176501	567.58	FALSE	13
2022-09-13	10:46:50	0.423524	568.004	FALSE	13
2022-09-13	10:46:50	0.477468	568.481	FALSE	13
2022-09-13	10:46:50	0.287646	568.769	FALSE	13
2022-09-13	10:46:50	0.399402	569.168	FALSE	13
2022-09-13	10:46:51	0.428461	569.597	FALSE	13
2022-09-13	10:46:51	0.637112	570.234	FALSE	13
2022-09-13	10:46:51	0.738486	570.972	FALSE	13
2022-09-13	10:46:51	0.232634	571.205	FALSE	13
2022-09-13	10:46:52	0.267748	571.473	FALSE	13
2022-09-13	10:46:52	0.194211	571.667	FALSE	13
2022-09-13	10:46:52	0.0728883	571.74	FALSE	13
2022-09-13	10:46:52	-0.0462974	571.74	FALSE	13
2022-09-13	10:46:53	0.0339061	571.774	FALSE	13
2022-09-13	10:46:53	0.219962	571.994	FALSE	13
2022-09-13	10:46:53	0.111972	572.106	FALSE	13
2022-09-13	10:46:54	0.115585	572.221	FALSE	13
2022-09-13	10:46:54	0.266374	572.488	FALSE	13
2022-09-13	10:46:54	0.141591	572.629	FALSE	13
2022-09-13	10:46:54	0.268206	572.897	FALSE	13
2022-09-13	10:46:55	0.516349	573.414	FALSE	13
2022-09-13	10:46:55	0.331616	573.745	FALSE	13
2022-09-13	10:46:55	0.303015	574.048	FALSE	13
2022-09-13	10:46:55	0.463575	574.512	FALSE	13
2022-09-13	10:46:56	0.384135	574.896	FALSE	13
2022-09-13	10:46:56	0.458028	575.354	FALSE	13
2022-09-13	10:46:56	0.322659	575.677	FALSE	13
2022-09-13	10:46:56	0.30612	575.983	FALSE	13
2022-09-13	10:46:57	0.302863	576.286	FALSE	13
2022-09-13	10:46:57	0.361082	576.647	FALSE	13
2022-09-13	10:46:57	0.941998	577.589	FALSE	13
2022-09-13	10:46:58	0.574211	578.163	FALSE	13
2022-09-13	10:46:58	0.215433	578.379	FALSE	13
2022-09-13	10:46:58	0.416196	578.795	FALSE	13
2022-09-13	10:46:58	0.606832	579.402	FALSE	13
2022-09-13	10:46:59	0.30556	579.707	FALSE	13
2022-09-13	10:46:59	0.258639	579.966	FALSE	13
2022-09-13	10:46:59	0.41472	580.38	FALSE	13
2022-09-13	10:46:59	0.324491	580.705	FALSE	13
2022-09-13	10:47:00	0.718588	581.424	FALSE	13
2022-09-13	10:47:00	1.09645	582.52	FALSE	13
2022-09-13	10:47:00	0.240216	582.76	FALSE	13
2022-09-13	10:47:00	0.766119	583.526	FALSE	13
2022-09-13	10:47:01	0.495738	584.022	FALSE	13
2022-09-13	10:47:01	0.303372	584.325	FALSE	13
2022-09-13	10:47:01	0.373397	584.699	FALSE	13
2022-09-13	10:47:02	0.335178	585.034	FALSE	13
2022-09-13	10:47:02	0.174415	585.208	FALSE	13
2022-09-13	10:47:02	0.420573	585.629	FALSE	13
2022-09-13	10:47:02	0.153397	585.782	FALSE	13
2022-09-13	10:47:03	0.365204	586.148	FALSE	13
2022-09-13	10:47:03	0.433092	586.581	FALSE	13
2022-09-13	10:47:03	0.340013	586.921	FALSE	13
2022-09-13	10:47:03	0.30098	587.222	FALSE	13
2022-09-13	10:47:04	0.616756	587.838	FALSE	13
2022-09-13	10:47:04	0.174975	588.013	FALSE	13
2022-09-13	10:47:04	0.290853	588.304	FALSE	13
2022-09-13	10:47:04	0.520725	588.825	FALSE	13
2022-09-13	10:47:05	0.191667	589.017	FALSE	13
2022-09-13	10:47:05	0.250344	589.267	FALSE	13
2022-09-13	10:47:05	0.240776	589.508	FALSE	13
2022-09-13	10:47:05	0.226069	589.734	FALSE	13
2022-09-13	10:47:06	0.179402	589.913	FALSE	13
2022-09-13	10:47:06	0.383422	590.297	FALSE	13
2022-09-13	10:47:06	0.158079	590.455	FALSE	13
2022-09-13	10:47:07	0.147392	590.602	FALSE	13
2022-09-13	10:47:07	0.547239	591.149	FALSE	13
2022-09-13	10:47:07	0.377112	591.527	FALSE	13
2022-09-13	10:47:07	0.507799	592.034	FALSE	13
2022-09-13	10:47:08	0.36444	592.399	FALSE	13
2022-09-13	10:47:08	0.440013	592.839	FALSE	13
2022-09-13	10:47:08	0.165509	593.004	FALSE	13
2022-09-13	10:47:08	0.109224	593.114	FALSE	13
2022-09-13	10:47:09	-0.221412	593.114	FALSE	13
2022-09-13	10:47:09	-0.282175	593.114	FALSE	13
2022-09-13	10:47:09	-0.246145	593.114	FALSE	13
2022-09-13	10:47:09	-0.100191	593.114	FALSE	13
2022-09-13	10:47:10	0.189529	593.303	FALSE	13
2022-09-13	10:47:10	0.0972139	593.4	FALSE	13
2022-09-13	10:47:10	0.373753	593.774	FALSE	13
2022-09-13	10:47:11	0.119708	593.894	FALSE	13
2022-09-13	10:47:11	0.375433	594.269	FALSE	13
2022-09-13	10:47:11	0.294211	594.563	FALSE	13
2022-09-13	10:47:11	0.627748	595.191	FALSE	13
2022-09-13	10:47:12	2.32617	597.517	FALSE	13
2022-09-13	10:47:12	2.05818	599.575	FALSE	13
2022-09-13	10:47:12	3.37441	602.95	1	14
2022-09-13	10:47:12	2.77833	605.728	FALSE	14
2022-09-13	10:47:13	0.716807	606.445	FALSE	14
2022-09-13	10:47:13	2.14943	608.594	FALSE	14
2022-09-13	10:47:13	0.253855	608.848	FALSE	14
2022-09-13	10:47:13	1.06078	609.909	FALSE	14
2022-09-13	10:47:14	1.24805	611.157	FALSE	14
2022-09-13	10:47:14	0.590293	611.747	FALSE	14
2022-09-13	10:47:14	3.02083	614.768	1	15
2022-09-13	10:47:15	1.96444	616.733	FALSE	15
2022-09-13	10:47:15	4.67436	621.407	1	16
2022-09-13	10:47:15	4.96001	626.367	1	17
2022-09-13	10:47:15	2.54164	628.909	FALSE	17
2022-09-13	10:47:16	1.64062	630.549	FALSE	17
2022-09-13	10:47:16	1.06531	631.615	FALSE	17
2022-09-13	10:47:16	0.255636	631.87	FALSE	17
2022-09-13	10:47:16	0.502812	632.373	FALSE	17
2022-09-13	10:47:17	0.18215	632.555	FALSE	17
2022-09-13	10:47:17	0.559046	633.114	FALSE	17
2022-09-13	10:47:17	0.582761	633.697	FALSE	17
2022-09-13	10:47:17	-0.0426333	633.697	FALSE	17
2022-09-13	10:47:18	-0.312964	633.697	FALSE	17
2022-09-13	10:47:18	-0.385483	633.697	FALSE	17
2022-09-13	10:47:18	-0.158155	633.697	FALSE	17
2022-09-13	10:47:18	0.21869	633.916	FALSE	17
2022-09-13	10:47:19	2.58541	636.501	FALSE	17
2022-09-13	10:47:19	2.91945	639.421	FALSE	17
2022-09-13	10:47:19	2.82144	642.242	FALSE	17
2022-09-13	10:47:20	1.1248	643.367	FALSE	17
2022-09-13	10:47:20	0.798028	644.165	FALSE	17
2022-09-13	10:47:20	0.452074	644.617	FALSE	17
2022-09-13	10:47:20	0.546628	645.164	FALSE	17
2022-09-13	10:47:21	0.397417	645.561	FALSE	17
2022-09-13	10:47:21	0.499504	646.06	FALSE	17
2022-09-13	10:47:21	0.70841	646.769	FALSE	17
2022-09-13	10:47:21	0.733448	647.502	FALSE	17
2022-09-13	10:47:22	0.738842	648.241	FALSE	17
2022-09-13	10:47:22	0.640165	648.881	FALSE	17
2022-09-13	10:47:22	0.0786898	648.96	FALSE	17
2022-09-13	10:47:22	0.327952	649.288	FALSE	17
2022-09-13	10:47:23	1.10525	650.393	FALSE	17
2022-09-13	10:47:23	1.37701	651.77	FALSE	17
2022-09-13	10:47:23	1.08154	652.852	FALSE	17
2022-09-13	10:47:24	0.50673	653.358	FALSE	17
2022-09-13	10:47:24	0.381132	653.74	FALSE	17
2022-09-13	10:47:24	0.372735	654.112	FALSE	17
2022-09-13	10:47:24	0.220267	654.333	FALSE	17
2022-09-13	10:47:25	0.435331	654.768	FALSE	17
2022-09-13	10:47:25	0.32556	655.094	FALSE	17
2022-09-13	10:47:25	0.30383	655.397	FALSE	17
2022-09-13	10:47:25	0.178283	655.576	FALSE	17
2022-09-13	10:47:26	0.302456	655.878	FALSE	17
2022-09-13	10:47:26	0.149479	656.028	FALSE	17
2022-09-13	10:47:26	0.171565	656.199	FALSE	17
2022-09-13	10:47:26	0.285051	656.484	FALSE	17
2022-09-13	10:47:27	1.68785	658.172	FALSE	17
2022-09-13	10:47:27	0.392583	658.565	FALSE	17
2022-09-13	10:47:27	0.24159	658.806	FALSE	17
2022-09-13	10:47:28	1.29503	660.101	FALSE	17
2022-09-13	10:47:28	0.300624	660.402	FALSE	17
2022-09-13	10:47:28	0.495127	660.897	FALSE	17
2022-09-13	10:47:28	0.482354	661.379	FALSE	17
2022-09-13	10:47:29	0.46444	661.844	FALSE	17
2022-09-13	10:47:29	0.505814	662.35	FALSE	17
2022-09-13	10:47:29	0.727901	663.078	FALSE	17
2022-09-13	10:47:29	0.643372	663.721	FALSE	17
2022-09-13	10:47:30	0.739758	664.461	FALSE	17
2022-09-13	10:47:30	0.564389	665.025	FALSE	17
2022-09-13	10:47:30	0.255484	665.281	FALSE	17
2022-09-13	10:47:30	0.216094	665.497	FALSE	17
2022-09-13	10:47:31	0.27014	665.767	FALSE	17
2022-09-13	10:47:31	0.285458	666.052	FALSE	17
2022-09-13	10:47:31	0.272532	666.325	FALSE	17
2022-09-13	10:47:32	0.544033	666.869	FALSE	17
2022-09-13	10:47:32	1.13584	668.005	FALSE	17
2022-09-13	10:47:32	1.18724	669.192	FALSE	17
2022-09-13	10:47:32	1.82927	671.021	FALSE	17
2022-09-13	10:47:33	2.3908	673.412	FALSE	17
2022-09-13	10:47:33	2.25462	675.667	FALSE	17
2022-09-13	10:47:33	2.36892	678.035	FALSE	17
2022-09-13	10:47:33	1.14658	679.182	FALSE	17
2022-09-13	10:47:34	1.56505	680.747	FALSE	17
2022-09-13	10:47:34	1.09691	681.844	FALSE	17
2022-09-13	10:47:34	1.25406	683.098	FALSE	17
2022-09-13	10:47:34	2.92266	686.021	FALSE	17
2022-09-13	10:47:35	1.80607	687.827	FALSE	17
2022-09-13	10:47:35	4.94485	692.772	1	18
2022-09-13	10:47:35	2.05711	694.829	FALSE	18
2022-09-13	10:47:35	1.80531	696.634	FALSE	18
2022-09-13	10:47:36	2.36276	698.997	FALSE	18
2022-09-13	10:47:36	1.11024	700.107	FALSE	18
2022-09-13	10:47:36	1.12525	701.232	FALSE	18
2022-09-13	10:47:37	0.528715	701.761	FALSE	18
2022-09-13	10:47:37	0.577265	702.338	FALSE	18
2022-09-13	10:47:37	0.355484	702.694	FALSE	18
2022-09-13	10:47:37	0.389071	703.083	FALSE	18
2022-09-13	10:47:38	0.438791	703.522	FALSE	18
2022-09-13	10:47:38	0.444644	703.966	FALSE	18
2022-09-13	10:47:38	0.428613	704.395	FALSE	18
2022-09-13	10:47:38	0.399911	704.795	FALSE	18
2022-09-13	10:47:39	0.396654	705.191	FALSE	18
2022-09-13	10:47:39	0.399657	705.591	FALSE	18
2022-09-13	10:47:39	0.290649	705.882	FALSE	18
2022-09-13	10:47:39	0.316959	706.199	FALSE	18
2022-09-13	10:47:40	0.37645	706.575	FALSE	18
2022-09-13	10:47:40	0.396807	706.972	FALSE	18
2022-09-13	10:47:40	0.321234	707.293	FALSE	18
2022-09-13	10:47:41	0.425458	707.719	FALSE	18
2022-09-13	10:47:41	0.276043	707.995	FALSE	18
2022-09-13	10:47:41	0.38383	708.379	FALSE	18
2022-09-13	10:47:41	0.358079	708.737	FALSE	18
2022-09-13	10:47:42	0.302863	709.039	FALSE	18
2022-09-13	10:47:42	0.381285	709.421	FALSE	18
2022-09-13	10:47:42	0.307392	709.728	FALSE	18
2022-09-13	10:47:42	0.409377	710.138	FALSE	18
2022-09-13	10:47:43	0.297519	710.435	FALSE	18
2022-09-13	10:47:43	2.79085	713.226	FALSE	18
2022-09-13	10:47:43	1.19874	714.425	FALSE	18
2022-09-13	10:47:43	0.806577	715.231	FALSE	18
2022-09-13	10:47:44	1.87828	717.109	FALSE	18
2022-09-13	10:47:44	1.39798	718.507	FALSE	18
2022-09-13	10:47:44	1.69248	720.2	FALSE	18
2022-09-13	10:47:45	1.91966	722.12	FALSE	18
2022-09-13	10:47:45	0.413295	722.533	FALSE	18
2022-09-13	10:47:45	1.68235	724.215	FALSE	18
2022-09-13	10:47:45	0.934058	725.149	FALSE	18
2022-09-13	10:47:46	0.265102	725.414	FALSE	18
2022-09-13	10:47:46	0.180878	725.595	FALSE	18
2022-09-13	10:47:46	0.386629	725.982	FALSE	18
2022-09-13	10:47:46	0.179097	726.161	FALSE	18
2022-09-13	10:47:47	0.312125	726.473	FALSE	18
2022-09-13	10:47:47	0.188308	726.661	FALSE	18
2022-09-13	10:47:47	0.220216	726.882	FALSE	18
2022-09-13	10:47:47	0.307952	727.19	FALSE	18
2022-09-13	10:47:48	0.742862	727.932	FALSE	18
2022-09-13	10:47:48	0.0120231	727.945	FALSE	18
2022-09-13	10:47:48	0.223117	728.168	FALSE	18
2022-09-13	10:47:48	0.493193	728.661	FALSE	18
2022-09-13	10:47:49	0.759097	729.42	FALSE	18
2022-09-13	10:47:49	0.423015	729.843	FALSE	18
2022-09-13	10:47:49	0.367341	730.21	FALSE	18
2022-09-13	10:47:50	0.311819	730.522	FALSE	18
2022-09-13	10:47:50	0.356552	730.879	FALSE	18
2022-09-13	10:47:50	0.35126	731.23	FALSE	18
2022-09-13	10:47:50	0.461031	731.691	FALSE	18
2022-09-13	10:47:51	0.368461	732.059	FALSE	18
2022-09-13	10:47:51	0.368613	732.428	FALSE	18
2022-09-13	10:47:51	0.688003	733.116	FALSE	18
2022-09-13	10:47:51	0.741743	733.858	FALSE	18
2022-09-13	10:47:52	0.731514	734.589	FALSE	18
2022-09-13	10:47:52	0.738282	735.328	FALSE	18
2022-09-13	10:47:52	0.734415	736.062	FALSE	18
2022-09-13	10:47:52	0.729631	736.792	FALSE	18
2022-09-13	10:47:53	0.733702	737.525	FALSE	18
2022-09-13	10:47:53	0.734364	738.26	FALSE	18
2022-09-13	10:47:53	0.744186	739.004	FALSE	18
2022-09-13	10:47:54	0.734924	739.739	FALSE	18
2022-09-13	10:47:54	0.737366	740.476	FALSE	18
2022-09-13	10:47:54	0.737824	741.214	FALSE	18
2022-09-13	10:47:54	0.739504	741.953	FALSE	18
2022-09-13	10:47:55	0.731616	742.685	FALSE	18
2022-09-13	10:47:55	0.738588	743.424	FALSE	18
2022-09-13	10:47:55	0.732481	744.156	FALSE	18
2022-09-13	10:47:55	0.730394	744.887	FALSE	18
2022-09-13	10:47:56	0.73757	745.624	FALSE	18
2022-09-13	10:47:56	0.735585	746.36	FALSE	18
2022-09-13	10:47:56	0.741285	747.101	FALSE	18
2022-09-13	10:47:56	0.733397	747.834	FALSE	18
2022-09-13	10:47:57	0.731361	748.566	FALSE	18
2022-09-13	10:47:57	0.742405	749.308	FALSE	18
2022-09-13	10:47:57	0.734466	750.043	FALSE	18
2022-09-13	10:47:58	0.726069	750.769	FALSE	18
2022-09-13	10:47:58	0.730598	751.499	FALSE	18
2022-09-13	10:47:58	0.465967	751.965	FALSE	18
2022-09-13	10:47:58	0.515534	752.481	FALSE	18
2022-09-13	10:47:59	0.472684	752.953	FALSE	18
2022-09-13	10:47:59	0.515891	753.469	FALSE	18
2022-09-13	10:47:59	0.508817	753.978	FALSE	18
2022-09-13	10:47:59	0.492786	754.471	FALSE	18
2022-09-13	10:48:00	0.509224	754.98	FALSE	18
2022-09-13	10:48:00	0.500979	755.481	FALSE	18
2022-09-13	10:48:00	0.489682	755.971	FALSE	18
2022-09-13	10:48:00	0.478181	756.449	FALSE	18

## Sheet: Bubba_star_2022913104244
						**GoPro Fitting: 1032
2022-09-13	10:42:45	0.374059
2022-09-13	10:42:45	0.40042
2022-09-13	10:42:45	0.412837
2022-09-13	10:42:45	0.612939
2022-09-13	10:42:46	0.574109
2022-09-13	10:42:46	0.487494
2022-09-13	10:42:46	0.388359
2022-09-13	10:42:46	0.397519
2022-09-13	10:42:47	0.413346
2022-09-13	10:42:47	0.380064
2022-09-13	10:42:47	0.387137
2022-09-13	10:42:47	0.376807
2022-09-13	10:42:48	0.372888
2022-09-13	10:42:48	0.383422
2022-09-13	10:42:48	0.389224
2022-09-13	10:42:48	0.391514
2022-09-13	10:42:49	0.40098
2022-09-13	10:42:49	0.387341
2022-09-13	10:42:49	0.381896
2022-09-13	10:42:50	0.393346
2022-09-13	10:42:50	0.401489
2022-09-13	10:42:50	0.382099
2022-09-13	10:42:50	0.405153
2022-09-13	10:42:51	0.356756
2022-09-13	10:42:51	0.399504
2022-09-13	10:42:51	0.389835
2022-09-13	10:42:51	0.447137
2022-09-13	10:42:52	0.369733
2022-09-13	10:42:52	0.377265
2022-09-13	10:42:52	0.361438
2022-09-13	10:42:52	0.388919
2022-09-13	10:42:53	0.419606
2022-09-13	10:42:53	0.431361
2022-09-13	10:42:53	0.437265
2022-09-13	10:42:54	0.375127
2022-09-13	10:42:54	0.308868
2022-09-13	10:42:54	0.528664
2022-09-13	10:42:54	0.303779
2022-09-13	10:42:55	0.347341
2022-09-13	10:42:55	0.494008
2022-09-13	10:42:55	7.36617
2022-09-13	10:42:55	8.19706
2022-09-13	10:42:56	1.26754
2022-09-13	10:42:56	0.420725
2022-09-13	10:42:56	0.553295
2022-09-13	10:42:56	0.540776
2022-09-13	10:42:57	2.26805
2022-09-13	10:42:57	4.8621
2022-09-13	10:42:57	7.93726
2022-09-13	10:42:57	4.80439
2022-09-13	10:42:58	1.03701
2022-09-13	10:42:58	1.11793
2022-09-13	10:42:58	0.505814
2022-09-13	10:42:59	0.439606
2022-09-13	10:42:59	0.461183
2022-09-13	10:42:59	0.40612
2022-09-13	10:42:59	0.283219
2022-09-13	10:43:00	0.510801
2022-09-13	10:43:00	0.449987
2022-09-13	10:43:00	0.19925
2022-09-13	10:43:00	0.270598
2022-09-13	10:43:01	0.189936
2022-09-13	10:43:01	0.181794
2022-09-13	10:43:01	0.260471
2022-09-13	10:43:01	0.673041
2022-09-13	10:43:02	0.660573
2022-09-13	10:43:02	0.790395
2022-09-13	10:43:02	0.184593
2022-09-13	10:43:03	-0.0108776
2022-09-13	10:43:03	-0.00319315
2022-09-13	10:43:03	-0.15902
2022-09-13	10:43:03	0.0587407
2022-09-13	10:43:04	-0.0325061
2022-09-13	10:43:04	0.0533972
2022-09-13	10:43:04	-0.0212084
2022-09-13	10:43:04	0.0123794
2022-09-13	10:43:05	-0.0765264
2022-09-13	10:43:05	-0.150114
2022-09-13	10:43:05	-0.245076
2022-09-13	10:43:05	-0.187061
2022-09-13	10:43:06	-0.334542
2022-09-13	10:43:06	-0.625178
2022-09-13	10:43:06	-0.898714
2022-09-13	10:43:07	-0.524007
2022-09-13	10:43:07	0.0319214
2022-09-13	10:43:07	1.83375
2022-09-13	10:43:07	3.16892
2022-09-13	10:43:08	2.89314
2022-09-13	10:43:08	4.57518
2022-09-13	10:43:08	1.27421
2022-09-13	10:43:08	0.506425
2022-09-13	10:43:09	0.607392
2022-09-13	10:43:09	0.738384
2022-09-13	10:43:09	1.0133
2022-09-13	10:43:09	0.79243
2022-09-13	10:43:10	1.17991
2022-09-13	10:43:10	1.21986
2022-09-13	10:43:10	1.06179
2022-09-13	10:43:10	2.27126
2022-09-13	10:43:11	1.10378
2022-09-13	10:43:11	1.1763
2022-09-13	10:43:11	0.934771
2022-09-13	10:43:12	1.59574
2022-09-13	10:43:12	0.979097
2022-09-13	10:43:12	1.25106
2022-09-13	10:43:12	1.33533
2022-09-13	10:43:13	1.32729
2022-09-13	10:43:13	1.70302
2022-09-13	10:43:13	1.4451
2022-09-13	10:43:13	2.66225
2022-09-13	10:43:14	2.93126
2022-09-13	10:43:14	3.17879
2022-09-13	10:43:14	1.54922
2022-09-13	10:43:14	1.94632
2022-09-13	10:43:15	0.551412
2022-09-13	10:43:15	0.79126
2022-09-13	10:43:15	0.490293
2022-09-13	10:43:16	0.432176
2022-09-13	10:43:16	0.467392
2022-09-13	10:43:16	0.35416
2022-09-13	10:43:16	0.689784
2022-09-13	10:43:17	0.419708
2022-09-13	10:43:17	0.688308
2022-09-13	10:43:17	0.34612
2022-09-13	10:43:17	0.601641
2022-09-13	10:43:18	0.332685
2022-09-13	10:43:18	0.689122
2022-09-13	10:43:18	0.502048
2022-09-13	10:43:18	0.762812
2022-09-13	10:43:19	0.574873
2022-09-13	10:43:19	0.473957
2022-09-13	10:43:19	0.90958
2022-09-13	10:43:20	0.453448
2022-09-13	10:43:20	1.06413
2022-09-13	10:43:20	0.470751
2022-09-13	10:43:20	1.86622
2022-09-13	10:43:21	1.15019
2022-09-13	10:43:21	3.6419
2022-09-13	10:43:21	1.88968
2022-09-13	10:43:21	5.43889
2022-09-13	10:43:22	2.89319
2022-09-13	10:43:22	4.1282
2022-09-13	10:43:22	4.30373
2022-09-13	10:43:22	2.26128
2022-09-13	10:43:23	2.25538
2022-09-13	10:43:23	0.790191
2022-09-13	10:43:23	2.05156
2022-09-13	10:43:24	0.545
2022-09-13	10:43:24	1.72505
2022-09-13	10:43:24	1.3077
2022-09-13	10:43:24	3.39146
2022-09-13	10:43:25	2.22083
2022-09-13	10:43:25	3.81864
2022-09-13	10:43:25	4.30597
2022-09-13	10:43:25	3.4594
2022-09-13	10:43:26	3.91421
2022-09-13	10:43:26	2.40968
2022-09-13	10:43:26	2.75085
2022-09-13	10:43:26	0.984898
2022-09-13	10:43:27	1.20413
2022-09-13	10:43:27	1.52841
2022-09-13	10:43:27	0.660064
2022-09-13	10:43:27	1.09487
2022-09-13	10:43:28	0.350038
2022-09-13	10:43:28	0.896705
2022-09-13	10:43:28	0.614415
2022-09-13	10:43:29	1.7424
2022-09-13	10:43:29	1.10184
2022-09-13	10:43:29	2.4109
2022-09-13	10:43:29	1.03472
2022-09-13	10:43:30	0.52327
2022-09-13	10:43:30	0.417417
2022-09-13	10:43:30	0.444135
2022-09-13	10:43:30	0.378181
2022-09-13	10:43:31	0.140573
2022-09-13	10:43:31	0.29986
2022-09-13	10:43:31	0.17528
2022-09-13	10:43:31	0.483677
2022-09-13	10:43:32	0.276654
2022-09-13	10:43:32	-0.187213
2022-09-13	10:43:32	-0.113117
2022-09-13	10:43:33	-0.254033
2022-09-13	10:43:33	-0.154185
2022-09-13	10:43:33	-0.142837
2022-09-13	10:43:33	0.0745676
2022-09-13	10:43:34	-0.101107
2022-09-13	10:43:34	0.367545
2022-09-13	10:43:34	1.14093
2022-09-13	10:43:34	1.82373
2022-09-13	10:43:35	1.51508
2022-09-13	10:43:35	1.6706
2022-09-13	10:43:35	1.31579
2022-09-13	10:43:35	0.717316
2022-09-13	10:43:36	1.03391
2022-09-13	10:43:36	0.244237
2022-09-13	10:43:36	0.876908
2022-09-13	10:43:37	0.275687
2022-09-13	10:43:37	0.813143
2022-09-13	10:43:37	0.419351
2022-09-13	10:43:37	0.856654
2022-09-13	10:43:38	0.606578
2022-09-13	10:43:38	0.760979
2022-09-13	10:43:38	0.695433
2022-09-13	10:43:38	0.576298
2022-09-13	10:43:39	0.681081
2022-09-13	10:43:39	0.366832
2022-09-13	10:43:39	0.571514
2022-09-13	10:43:39	0.339249
2022-09-13	10:43:40	0.425764
2022-09-13	10:43:40	0.285509
2022-09-13	10:43:40	0.459707
2022-09-13	10:43:40	0.328308
2022-09-13	10:43:41	2.75716
2022-09-13	10:43:41	2.32123
2022-09-13	10:43:41	1.82698
2022-09-13	10:43:42	0.783982
2022-09-13	10:43:42	0.168155
2022-09-13	10:43:42	0.803321
2022-09-13	10:43:42	0.496349
2022-09-13	10:43:43	0.491616
2022-09-13	10:43:43	0.00734122
2022-09-13	10:43:43	0.139555
2022-09-13	10:43:43	0.232379
2022-09-13	10:43:44	0.175789
2022-09-13	10:43:44	0.0372649
2022-09-13	10:43:44	0.138283
2022-09-13	10:43:44	0.378181
2022-09-13	10:43:45	0.257926
2022-09-13	10:43:45	0.246018
2022-09-13	10:43:45	0.243015
2022-09-13	10:43:46	0.242964
2022-09-13	10:43:46	0.251718
2022-09-13	10:43:46	0.240522
2022-09-13	10:43:46	0.240878
2022-09-13	10:43:47	0.252939
2022-09-13	10:43:47	0.243626
2022-09-13	10:43:47	0.233143
2022-09-13	10:43:47	0.27416
2022-09-13	10:43:48	0.271311
2022-09-13	10:43:48	0.244491
2022-09-13	10:43:48	0.249478
2022-09-13	10:43:48	0.250344
2022-09-13	10:43:49	0.244033
2022-09-13	10:43:49	0.247341
2022-09-13	10:43:49	0.682557
2022-09-13	10:43:50	0.74327
2022-09-13	10:43:50	0.744287
2022-09-13	10:43:50	0.734568
2022-09-13	10:43:50	0.740165
2022-09-13	10:43:51	0.740827
2022-09-13	10:43:51	0.743117
2022-09-13	10:43:51	0.73528
2022-09-13	10:43:51	0.735738
2022-09-13	10:43:52	0.7393
2022-09-13	10:43:52	0.736908
2022-09-13	10:43:52	0.737163
2022-09-13	10:43:52	0.73131
2022-09-13	10:43:53	0.735738
2022-09-13	10:43:53	0.734466
2022-09-13	10:43:53	0.733092
2022-09-13	10:43:54	0.736501
2022-09-13	10:43:54	0.735483
2022-09-13	10:43:54	0.730242
2022-09-13	10:43:54	0.74327
2022-09-13	10:43:55	0.734415
2022-09-13	10:43:55	0.737672
2022-09-13	10:43:55	0.738791
2022-09-13	10:43:55	0.730903
2022-09-13	10:43:56	0.738028
2022-09-13	10:43:56	0.743219
2022-09-13	10:43:56	0.730801
2022-09-13	10:43:56	0.738079
2022-09-13	10:43:57	0.734313
2022-09-13	10:43:57	0.730343
2022-09-13	10:43:57	0.737722
2022-09-13	10:43:57	0.735483
2022-09-13	10:43:58	0.736247
2022-09-13	10:43:58	0.738435
2022-09-13	10:43:58	0.741234
2022-09-13	10:43:59	0.737875
2022-09-13	10:43:59	0.739198
2022-09-13	10:43:59	0.736094
2022-09-13	10:43:59	0.742099
2022-09-13	10:44:00	0.734313
2022-09-13	10:44:00	0.74159
2022-09-13	10:44:00	0.739504
2022-09-13	10:44:00	0.737824
2022-09-13	10:44:01	0.733499
2022-09-13	10:44:01	0.738689
2022-09-13	10:44:01	0.737672
2022-09-13	10:44:01	0.738486
2022-09-13	10:44:02	0.741947
2022-09-13	10:44:02	0.732074
2022-09-13	10:44:02	0.744797
2022-09-13	10:44:03	0.736145
2022-09-13	10:44:03	0.740623
2022-09-13	10:44:03	0.736908
2022-09-13	10:44:03	0.741031
2022-09-13	10:44:04	0.740114
2022-09-13	10:44:04	0.73584
2022-09-13	10:44:04	0.730394
2022-09-13	10:44:04	0.725611
2022-09-13	10:44:05	0.735331
2022-09-13	10:44:05	0.73701
2022-09-13	10:44:05	0.737773
2022-09-13	10:44:05	0.740267
2022-09-13	10:44:06	0.743778
2022-09-13	10:44:06	0.736807
2022-09-13	10:44:06	0.732328
2022-09-13	10:44:07	0.743778
2022-09-13	10:44:07	0.736145
2022-09-13	10:44:07	0.73813
2022-09-13	10:44:07	0.735738
2022-09-13	10:44:08	0.738791
2022-09-13	10:44:08	0.733041
2022-09-13	10:44:08	0.732888
2022-09-13	10:44:08	0.742659
2022-09-13	10:44:09	0.731158
2022-09-13	10:44:09	0.735687
2022-09-13	10:44:09	0.734669
2022-09-13	10:44:09	0.741794
2022-09-13	10:44:10	0.731463
2022-09-13	10:44:10	0.73874
2022-09-13	10:44:10	0.73645
2022-09-13	10:44:10	0.739555
2022-09-13	10:44:11	0.737315
2022-09-13	10:44:11	0.732684
2022-09-13	10:44:11	0.738791
2022-09-13	10:44:12	0.74271
2022-09-13	10:44:12	0.739758
2022-09-13	10:44:12	0.738944
2022-09-13	10:44:12	0.448003
2022-09-13	10:44:13	0.737214
2022-09-13	10:44:13	0.739147
2022-09-13	10:44:13	0.48958
2022-09-13	10:44:13	0.468766
2022-09-13	10:44:14	0.741845
2022-09-13	10:44:14	0.739606
2022-09-13	10:44:14	0.733448
2022-09-13	10:44:14	0.735178
2022-09-13	10:44:15	0.740929
2022-09-13	10:44:15	0.73701
2022-09-13	10:44:15	0.736298
2022-09-13	10:44:16	0.734313
2022-09-13	10:44:16	0.742608
2022-09-13	10:44:16	0.735636
2022-09-13	10:44:16	0.734059
2022-09-13	10:44:17	0.723117
2022-09-13	10:44:17	0.693906
2022-09-13	10:44:17	0.693651
2022-09-13	10:44:17	0.34612
2022-09-13	10:44:18	0.728206
2022-09-13	10:44:18	0.722608
2022-09-13	10:44:18	0.733092
2022-09-13	10:44:18	0.735076
2022-09-13	10:44:19	0.739656
2022-09-13	10:44:19	0.732277
2022-09-13	10:44:19	0.738842
2022-09-13	10:44:20	0.734822
2022-09-13	10:44:20	0.737977
2022-09-13	10:44:20	0.734669
2022-09-13	10:44:20	0.733651
2022-09-13	10:44:21	0.735229
2022-09-13	10:44:21	0.733448
2022-09-13	10:44:21	0.733804
2022-09-13	10:44:21	0.732532
2022-09-13	10:44:22	0.73757
2022-09-13	10:44:22	0.727443
2022-09-13	10:44:22	0.734262
2022-09-13	10:44:22	0.740776
2022-09-13	10:44:23	0.739453
2022-09-13	10:44:23	0.738689
2022-09-13	10:44:23	0.738181
2022-09-13	10:44:24	0.740318
2022-09-13	10:44:24	0.735382
2022-09-13	10:44:24	0.74215
2022-09-13	10:44:24	0.731005
2022-09-13	10:44:25	0.732481
2022-09-13	10:44:25	0.743677
2022-09-13	10:44:25	0.740267
2022-09-13	10:44:25	0.733142
2022-09-13	10:44:26	0.740623
2022-09-13	10:44:26	0.743524
2022-09-13	10:44:26	0.739453
2022-09-13	10:44:26	0.737417
2022-09-13	10:44:27	0.740725
2022-09-13	10:44:27	0.738079
2022-09-13	10:44:27	0.741081
2022-09-13	10:44:27	0.732226
2022-09-13	10:44:28	0.740471
2022-09-13	10:44:28	0.737824
2022-09-13	10:44:28	0.738639
2022-09-13	10:44:29	0.734059
2022-09-13	10:44:29	0.738435
2022-09-13	10:44:29	0.73472
2022-09-13	10:44:29	0.73757
2022-09-13	10:44:30	0.737112
2022-09-13	10:44:30	0.737926
2022-09-13	10:44:30	0.69528
2022-09-13	10:44:30	0.732735
2022-09-13	10:44:31	0.731667
2022-09-13	10:44:31	0.745255
2022-09-13	10:44:31	0.7393
2022-09-13	10:44:31	0.741692
2022-09-13	10:44:32	0.734618
2022-09-13	10:44:32	0.730852
2022-09-13	10:44:32	0.735534
2022-09-13	10:44:33	0.738333
2022-09-13	10:44:33	0.74098
2022-09-13	10:44:33	0.737875
2022-09-13	10:44:33	1.33009
2022-09-13	10:44:34	1.09843
2022-09-13	10:44:34	0.0328882
2022-09-13	10:44:34	0.573957
2022-09-13	10:44:34	0.591107
2022-09-13	10:44:35	0.627443
2022-09-13	10:44:35	0.616552
2022-09-13	10:44:35	0.599707
2022-09-13	10:44:35	0.72215
2022-09-13	10:44:36	0.738537
2022-09-13	10:44:36	0.953804
2022-09-13	10:44:36	2.05385
2022-09-13	10:44:37	1.95243
2022-09-13	10:44:37	0.86785
2022-09-13	10:44:37	0.782608
2022-09-13	10:44:37	0.31813
2022-09-13	10:44:38	0.205051
2022-09-13	10:44:38	0.0408781
2022-09-13	10:44:38	-0.0193763
2022-09-13	10:44:38	-0.136119
2022-09-13	10:44:39	-0.415712
2022-09-13	10:44:39	-0.622175
2022-09-13	10:44:39	-0.704211
2022-09-13	10:44:39	-0.841717
2022-09-13	10:44:40	-0.809045
2022-09-13	10:44:40	-1.06391
2022-09-13	10:44:40	-0.631793
2022-09-13	10:44:41	-0.126857
2022-09-13	10:44:41	2.1649
2022-09-13	10:44:41	5.19802
2022-09-13	10:44:41	0.832634
2022-09-13	10:44:42	0.180115
2022-09-13	10:44:42	0.247952
2022-09-13	10:44:42	0.282252
2022-09-13	10:44:42	0.214313
2022-09-13	10:44:43	0.428563
2022-09-13	10:44:43	0.275535
2022-09-13	10:44:43	0.659606
2022-09-13	10:44:43	0.56159
2022-09-13	10:44:44	-0.0853305
2022-09-13	10:44:44	-0.0310303
2022-09-13	10:44:44	-0.203244
2022-09-13	10:44:44	-0.456221
2022-09-13	10:44:45	-0.419529
2022-09-13	10:44:45	-0.360241
2022-09-13	10:44:45	-0.23846
2022-09-13	10:44:46	-0.00115753
2022-09-13	10:44:46	0.0647967
2022-09-13	10:44:46	0.074415
2022-09-13	10:44:46	0.0817941
2022-09-13	10:44:47	0.10897
2022-09-13	10:44:47	0.115229
2022-09-13	10:44:47	0.0808781
2022-09-13	10:44:47	0.276654
2022-09-13	10:44:48	0.802354
2022-09-13	10:44:48	0.0373157
2022-09-13	10:44:48	0.21243
2022-09-13	10:44:48	-0.0809539
2022-09-13	10:44:49	-0.256425
2022-09-13	10:44:49	-0.1893
2022-09-13	10:44:49	0.13355
2022-09-13	10:44:50	0.152583
2022-09-13	10:44:50	0.237417
2022-09-13	10:44:50	0.22729
2022-09-13	10:44:50	0.28042
2022-09-13	10:44:51	0.243677
2022-09-13	10:44:51	0.361743
2022-09-13	10:44:51	0.338791
2022-09-13	10:44:51	0.374873
2022-09-13	10:44:52	0.296145
2022-09-13	10:44:52	0.398181
2022-09-13	10:44:52	0.252379
2022-09-13	10:44:52	0.292939
2022-09-13	10:44:53	0.389071
2022-09-13	10:44:53	0.466832
2022-09-13	10:44:53	0.733601
2022-09-13	10:44:54	0.743371
2022-09-13	10:44:54	0.736399
2022-09-13	10:44:54	0.736247
2022-09-13	10:44:54	0.73986
2022-09-13	10:44:55	0.74098
2022-09-13	10:44:55	0.730751
2022-09-13	10:44:55	0.740522
2022-09-13	10:44:55	0.731717
2022-09-13	10:44:56	0.734059
2022-09-13	10:44:56	0.720064
2022-09-13	10:44:56	0.717977
2022-09-13	10:44:56	0.719148
2022-09-13	10:44:57	0.71757
2022-09-13	10:44:57	0.713397
2022-09-13	10:44:57	0.698944
2022-09-13	10:44:57	0.710089
2022-09-13	10:44:58	0.70673
2022-09-13	10:44:58	0.706425
2022-09-13	10:44:58	0.703066
2022-09-13	10:44:59	0.692481
2022-09-13	10:44:59	0.687086
2022-09-13	10:44:59	0.68729
2022-09-13	10:44:59	0.676399
2022-09-13	10:45:00	0.461082
2022-09-13	10:45:00	0.222099
2022-09-13	10:45:00	0.203881
2022-09-13	10:45:00	0.19813
2022-09-13	10:45:01	0.198232
2022-09-13	10:45:01	0.202303
2022-09-13	10:45:01	0.213804
2022-09-13	10:45:01	0.732023
2022-09-13	10:45:02	0.736247
2022-09-13	10:45:02	0.735534
2022-09-13	10:45:02	0.73874
2022-09-13	10:45:03	0.731056
2022-09-13	10:45:03	0.733448
2022-09-13	10:45:03	0.737722
2022-09-13	10:45:03	0.738028
2022-09-13	10:45:04	0.73874
2022-09-13	10:45:04	0.732023
2022-09-13	10:45:04	0.736094
2022-09-13	10:45:04	0.739656
2022-09-13	10:45:05	0.740573
2022-09-13	10:45:05	0.734008
2022-09-13	10:45:05	0.735382
2022-09-13	10:45:05	0.737061
2022-09-13	10:45:06	0.732888
2022-09-13	10:45:06	0.741234
2022-09-13	10:45:06	0.732786
2022-09-13	10:45:07	0.738689
2022-09-13	10:45:07	0.732277
2022-09-13	10:45:07	0.736654
2022-09-13	10:45:07	0.736807
2022-09-13	10:45:08	0.743423
2022-09-13	10:45:08	0.741845
2022-09-13	10:45:08	0.740216
2022-09-13	10:45:08	0.73187
2022-09-13	10:45:09	0.739453
2022-09-13	10:45:09	0.737061
2022-09-13	10:45:09	0.733499
2022-09-13	10:45:09	0.735789
2022-09-13	10:45:10	0.741081
2022-09-13	10:45:10	0.746781
2022-09-13	10:45:10	0.731158
2022-09-13	10:45:11	0.736043
2022-09-13	10:45:11	0.740725
2022-09-13	10:45:11	0.740369
2022-09-13	10:45:11	0.737163
2022-09-13	10:45:12	0.739147
2022-09-13	10:45:12	0.739758
2022-09-13	10:45:12	0.735382
2022-09-13	10:45:12	0.736145
2022-09-13	10:45:13	0.735636
2022-09-13	10:45:13	0.737926
2022-09-13	10:45:13	0.738537
2022-09-13	10:45:13	0.734568
2022-09-13	10:45:14	0.735738
2022-09-13	10:45:14	0.734466
2022-09-13	10:45:14	0.740471
2022-09-13	10:45:14	0.734873
2022-09-13	10:45:15	0.737417
2022-09-13	10:45:15	0.734364
2022-09-13	10:45:15	0.741438
2022-09-13	10:45:16	0.738944
2022-09-13	10:45:16	0.733041
2022-09-13	10:45:16	0.293753
2022-09-13	10:45:16	0.346985
2022-09-13	10:45:17	0.343423
2022-09-13	10:45:17	0.228817
2022-09-13	10:45:17	0.441947
2022-09-13	10:45:17	0.357621
2022-09-13	10:45:18	0.748359
2022-09-13	10:45:18	1.09426
2022-09-13	10:45:18	0.581794
2022-09-13	10:45:18	0.607036
2022-09-13	10:45:19	0.517417
2022-09-13	10:45:19	0.360115
2022-09-13	10:45:19	0.730343
2022-09-13	10:45:20	0.73584
2022-09-13	10:45:20	0.739707
2022-09-13	10:45:20	0.73986
2022-09-13	10:45:20	0.741641
2022-09-13	10:45:21	0.739046
2022-09-13	10:45:21	0.735229
2022-09-13	10:45:21	0.743728
2022-09-13	10:45:21	0.730496
2022-09-13	10:45:22	0.735992
2022-09-13	10:45:22	0.735229
2022-09-13	10:45:22	0.735789
2022-09-13	10:45:22	0.734568
2022-09-13	10:45:23	0.729326
2022-09-13	10:45:23	0.729275
2022-09-13	10:45:23	0.733397
2022-09-13	10:45:24	0.733193
2022-09-13	10:45:24	0.735382
2022-09-13	10:45:24	0.737112
2022-09-13	10:45:24	0.731717
2022-09-13	10:45:25	0.732634
2022-09-13	10:45:25	0.733142
2022-09-13	10:45:25	0.730903
2022-09-13	10:45:25	0.741947
2022-09-13	10:45:26	0.737926
2022-09-13	10:45:26	0.736908
2022-09-13	10:45:26	0.743219
2022-09-13	10:45:26	0.738079
2022-09-13	10:45:27	0.733651
2022-09-13	10:45:27	0.739911
2022-09-13	10:45:27	0.733753
2022-09-13	10:45:28	0.738588
2022-09-13	10:45:28	0.735789
2022-09-13	10:45:28	0.737468
2022-09-13	10:45:28	0.741438
2022-09-13	10:45:29	0.734822
2022-09-13	10:45:29	0.738282
2022-09-13	10:45:29	0.734669
2022-09-13	10:45:29	0.735941
2022-09-13	10:45:30	0.732226
2022-09-13	10:45:30	0.731361
2022-09-13	10:45:30	0.737417
2022-09-13	10:45:30	0.735941
2022-09-13	10:45:31	0.738842
2022-09-13	10:45:31	0.737417
2022-09-13	10:45:31	0.734059
2022-09-13	10:45:31	0.740267
2022-09-13	10:45:32	0.736399
2022-09-13	10:45:32	0.734975
2022-09-13	10:45:32	0.735738
2022-09-13	10:45:33	0.732277
2022-09-13	10:45:33	0.733193
2022-09-13	10:45:33	0.740573
2022-09-13	10:45:33	0.729835
2022-09-13	10:45:34	0.746832
2022-09-13	10:45:34	0.736247
2022-09-13	10:45:34	0.741081
2022-09-13	10:45:34	0.730598
2022-09-13	10:45:35	0.734568
2022-09-13	10:45:35	0.737621
2022-09-13	10:45:35	0.74042
2022-09-13	10:45:35	0.733193
2022-09-13	10:45:36	0.732634
2022-09-13	10:45:36	0.730954
2022-09-13	10:45:36	0.734466
2022-09-13	10:45:37	0.741539
2022-09-13	10:45:37	0.732175
2022-09-13	10:45:37	0.734313
2022-09-13	10:45:37	0.743626
2022-09-13	10:45:38	0.737672
2022-09-13	10:45:38	0.729886
2022-09-13	10:45:38	0.726985
2022-09-13	10:45:38	1.13523
2022-09-13	10:45:39	1.64098
2022-09-13	10:45:39	1.59034
2022-09-13	10:45:39	1.46032
2022-09-13	10:45:39	0.420166
2022-09-13	10:45:40	0.611819
2022-09-13	10:45:40	0.348664
2022-09-13	10:45:40	0.360013
2022-09-13	10:45:41	0.626527
2022-09-13	10:45:41	0.875992
2022-09-13	10:45:41	1.70383
2022-09-13	10:45:41	2.8905
2022-09-13	10:45:42	1.71955
2022-09-13	10:45:42	1.05991
2022-09-13	10:45:42	0.440318
2022-09-13	10:45:42	0.55243
2022-09-13	10:45:43	1.37136
2022-09-13	10:45:43	2.69721
2022-09-13	10:45:43	2.09854
2022-09-13	10:45:43	1.14032
2022-09-13	10:45:44	1.21757
2022-09-13	10:45:44	1.63813
2022-09-13	10:45:44	0.50271
2022-09-13	10:45:44	0.45528
2022-09-13	10:45:45	0.603066
2022-09-13	10:45:45	0.612532
2022-09-13	10:45:45	0.449529
2022-09-13	10:45:46	0.640471
2022-09-13	10:45:46	0.447901
2022-09-13	10:45:46	0.465153
2022-09-13	10:45:46	0.53757
2022-09-13	10:45:47	0.502608
2022-09-13	10:45:47	0.426781
2022-09-13	10:45:47	0.403372
2022-09-13	10:45:47	0.452583
2022-09-13	10:45:48	0.447952
2022-09-13	10:45:48	0.471412
2022-09-13	10:45:48	0.694313
2022-09-13	10:45:48	0.408715
2022-09-13	10:45:49	0.436196
2022-09-13	10:45:49	0.468919
2022-09-13	10:45:49	0.635331
2022-09-13	10:45:50	0.504389
2022-09-13	10:45:50	0.146985
2022-09-13	10:45:50	0.344339
2022-09-13	10:45:50	0.419606
2022-09-13	10:45:51	0.161947
2022-09-13	10:45:51	0.266374
2022-09-13	10:45:51	0.162812
2022-09-13	10:45:51	0.346883
2022-09-13	10:45:52	0.234415
2022-09-13	10:45:52	0.444898
2022-09-13	10:45:52	0.341896
2022-09-13	10:45:52	0.395534
2022-09-13	10:45:53	0.319606
2022-09-13	10:45:53	0.377723
2022-09-13	10:45:53	0.380929
2022-09-13	10:45:54	0.301998
2022-09-13	10:45:54	0.339911
2022-09-13	10:45:54	0.400878
2022-09-13	10:45:54	0.344288
2022-09-13	10:45:55	0.345509
2022-09-13	10:45:55	0.401997
2022-09-13	10:45:55	0.368308
2022-09-13	10:45:55	0.374466
2022-09-13	10:45:56	0.381336
2022-09-13	10:45:56	0.37243
2022-09-13	10:45:56	0.390649
2022-09-13	10:45:56	0.384797
2022-09-13	10:45:57	0.390089
2022-09-13	10:45:57	0.400674
2022-09-13	10:45:57	0.309326
2022-09-13	10:45:58	0.316247
2022-09-13	10:45:58	0.330903
2022-09-13	10:45:58	0.353702
2022-09-13	10:45:58	0.441896
2022-09-13	10:45:59	0.700674
2022-09-13	10:45:59	0.70042
2022-09-13	10:45:59	0.848206
2022-09-13	10:45:59	0.933601
2022-09-13	10:46:00	0.878639
2022-09-13	10:46:00	0.746934
2022-09-13	10:46:00	0.557672
2022-09-13	10:46:00	0.448715
2022-09-13	10:46:01	0.616807
2022-09-13	10:46:01	0.958028
2022-09-13	10:46:01	0.418079
2022-09-13	10:46:01	0.386018
2022-09-13	10:46:02	0.459198
2022-09-13	10:46:02	0.514517
2022-09-13	10:46:02	0.452328
2022-09-13	10:46:03	0.39472
2022-09-13	10:46:03	-0.120903
2022-09-13	10:46:03	0.734364
2022-09-13	10:46:03	0.736298
2022-09-13	10:46:04	0.502913
2022-09-13	10:46:04	0.374008
2022-09-13	10:46:04	0.206883
2022-09-13	10:46:04	0.235178
2022-09-13	10:46:05	0.138995
2022-09-13	10:46:05	0.107545
2022-09-13	10:46:05	0.1307
2022-09-13	10:46:05	-0.0314883
2022-09-13	10:46:06	0.0879009
2022-09-13	10:46:06	0.151005
2022-09-13	10:46:06	0.271769
2022-09-13	10:46:07	0.2107
2022-09-13	10:46:07	0.247952
2022-09-13	10:46:07	0.216603
2022-09-13	10:46:07	0.283117
2022-09-13	10:46:08	0.254262
2022-09-13	10:46:08	0.311769
2022-09-13	10:46:08	0.465204
2022-09-13	10:46:08	0.868817
2022-09-13	10:46:09	0.813753
2022-09-13	10:46:09	1.57513
2022-09-13	10:46:09	0.862405
2022-09-13	10:46:09	0.392023
2022-09-13	10:46:10	0.375636
2022-09-13	10:46:10	0.39131
2022-09-13	10:46:10	0.404695
2022-09-13	10:46:11	0.405509
2022-09-13	10:46:11	0.409326
2022-09-13	10:46:11	0.404746
2022-09-13	10:46:11	0.396501
2022-09-13	10:46:12	0.41472
2022-09-13	10:46:12	0.405916
2022-09-13	10:46:12	0.415636
2022-09-13	10:46:12	0.413855
2022-09-13	10:46:13	0.409428
2022-09-13	10:46:13	0.412277
2022-09-13	10:46:13	0.411819
2022-09-13	10:46:13	0.409784
2022-09-13	10:46:14	0.400267
2022-09-13	10:46:14	0.412176
2022-09-13	10:46:14	0.408512
2022-09-13	10:46:15	0.420929
2022-09-13	10:46:15	0.420725
2022-09-13	10:46:15	0.44327
2022-09-13	10:46:15	0.404491
2022-09-13	10:46:16	0.425916
2022-09-13	10:46:16	0.427748
2022-09-13	10:46:16	0.423168
2022-09-13	10:46:16	0.449224
2022-09-13	10:46:17	0.445255
2022-09-13	10:46:17	0.463779
2022-09-13	10:46:17	0.468206
2022-09-13	10:46:17	0.476094
2022-09-13	10:46:18	0.475585
2022-09-13	10:46:18	0.480674
2022-09-13	10:46:18	0.455942
2022-09-13	10:46:18	0.440725
2022-09-13	10:46:19	0.460369
2022-09-13	10:46:19	0.41243
2022-09-13	10:46:19	0.519198
2022-09-13	10:46:20	0.403117
2022-09-13	10:46:20	0.483372
2022-09-13	10:46:20	0.233244
2022-09-13	10:46:20	0.184288
2022-09-13	10:46:21	0.153346
2022-09-13	10:46:21	0.148104
2022-09-13	10:46:21	0.124898
2022-09-13	10:46:21	0.125407
2022-09-13	10:46:22	0.37528
2022-09-13	10:46:22	0.452328
2022-09-13	10:46:22	0.716603
2022-09-13	10:46:22	0.730903
2022-09-13	10:46:23	0.730954
2022-09-13	10:46:23	0.736959
2022-09-13	10:46:23	0.743423
2022-09-13	10:46:24	-0.159732
2022-09-13	10:46:24	-1.46971
2022-09-13	10:46:24	0.428868
2022-09-13	10:46:24	-0.514083
2022-09-13	10:46:25	-1.21434
2022-09-13	10:46:25	-0.845432
2022-09-13	10:46:25	-0.347315
2022-09-13	10:46:25	-0.587519
2022-09-13	10:46:26	-1.30706
2022-09-13	10:46:26	-1.71678
2022-09-13	10:46:26	-0.741106
2022-09-13	10:46:26	0.7393
2022-09-13	10:46:27	0.501896
2022-09-13	10:46:27	-1.24726
2022-09-13	10:46:27	-1.58925
2022-09-13	10:46:28	-0.0622262
2022-09-13	10:46:28	0.348613
2022-09-13	10:46:28	-0.0266028
2022-09-13	10:46:28	-0.36075
2022-09-13	10:46:29	-0.324262
2022-09-13	10:46:29	-0.279325
2022-09-13	10:46:29	-0.689809
2022-09-13	10:46:29	0.710751
2022-09-13	10:46:30	0.0960943
2022-09-13	10:46:30	0.155433
2022-09-13	10:46:30	0.178537
2022-09-13	10:46:30	0.309122
2022-09-13	10:46:31	-0.216017
2022-09-13	10:46:31	0.365
2022-09-13	10:46:31	0.260827
2022-09-13	10:46:31	0.628969
2022-09-13	10:46:32	0.766629
2022-09-13	10:46:32	0.582506
2022-09-13	10:46:32	0.392277
2022-09-13	10:46:33	0.194008
2022-09-13	10:46:33	0.0870359
2022-09-13	10:46:33	0.19416
2022-09-13	10:46:33	0.674974
2022-09-13	10:46:34	0.191209
2022-09-13	10:46:34	0.17126
2022-09-13	10:46:34	0.0540587
2022-09-13	10:46:34	-0.0428369
2022-09-13	10:46:35	-0.0775442
2022-09-13	10:46:35	-0.14528
2022-09-13	10:46:35	-0.0221753
2022-09-13	10:46:35	0.198384
2022-09-13	10:46:36	0.496807
2022-09-13	10:46:36	0.235636
2022-09-13	10:46:36	0.159402
2022-09-13	10:46:37	0.297926
2022-09-13	10:46:37	0.361438
2022-09-13	10:46:37	0.507035
2022-09-13	10:46:37	0.475585
2022-09-13	10:46:38	0.238588
2022-09-13	10:46:38	0.460064
2022-09-13	10:46:38	0.327087
2022-09-13	10:46:38	0.242608
2022-09-13	10:46:39	0.154466
2022-09-13	10:46:39	0.257672
2022-09-13	10:46:39	0.130853
2022-09-13	10:46:39	0.194873
2022-09-13	10:46:40	0.0288679
2022-09-13	10:46:40	0.23014
2022-09-13	10:46:40	0.100878
2022-09-13	10:46:41	0.25355
2022-09-13	10:46:41	0.0614888
2022-09-13	10:46:41	0.366476
2022-09-13	10:46:41	0.163728
2022-09-13	10:46:42	0.249733
2022-09-13	10:46:42	0.172583
2022-09-13	10:46:42	0.235738
2022-09-13	10:46:42	0.572634
2022-09-13	10:46:43	1.28973
2022-09-13	10:46:43	1.69991
2022-09-13	10:46:43	1.86062
2022-09-13	10:46:43	2.19742
2022-09-13	10:46:44	1.93681
2022-09-13	10:46:44	1.0424
2022-09-13	10:46:44	0.0419468
2022-09-13	10:46:45	0.0452547
2022-09-13	10:46:45	0.0712597
2022-09-13	10:46:45	-0.151743
2022-09-13	10:46:45	-0.0136766
2022-09-13	10:46:46	0.0281554
2022-09-13	10:46:46	0.142303
2022-09-13	10:46:46	0.0770613
2022-09-13	10:46:46	0.229173
2022-09-13	10:46:47	0.284338
2022-09-13	10:46:47	0.0588934
2022-09-13	10:46:47	-0.213422
2022-09-13	10:46:47	-0.161259
2022-09-13	10:46:48	-0.345178
2022-09-13	10:46:48	-0.316119
2022-09-13	10:46:48	-0.121208
2022-09-13	10:46:48	-0.0574425
2022-09-13	10:46:49	0.0588934
2022-09-13	10:46:49	0.196654
2022-09-13	10:46:49	0.176501
2022-09-13	10:46:50	0.423524
2022-09-13	10:46:50	0.477468
2022-09-13	10:46:50	0.287646
2022-09-13	10:46:50	0.399402
2022-09-13	10:46:51	0.428461
2022-09-13	10:46:51	0.637112
2022-09-13	10:46:51	0.738486
2022-09-13	10:46:51	0.232634
2022-09-13	10:46:52	0.267748
2022-09-13	10:46:52	0.194211
2022-09-13	10:46:52	0.0728883
2022-09-13	10:46:52	-0.0462974
2022-09-13	10:46:53	0.0339061
2022-09-13	10:46:53	0.219962
2022-09-13	10:46:53	0.111972
2022-09-13	10:46:54	0.115585
2022-09-13	10:46:54	0.266374
2022-09-13	10:46:54	0.141591
2022-09-13	10:46:54	0.268206
2022-09-13	10:46:55	0.516349
2022-09-13	10:46:55	0.331616
2022-09-13	10:46:55	0.303015
2022-09-13	10:46:55	0.463575
2022-09-13	10:46:56	0.384135
2022-09-13	10:46:56	0.458028
2022-09-13	10:46:56	0.322659
2022-09-13	10:46:56	0.30612
2022-09-13	10:46:57	0.302863
2022-09-13	10:46:57	0.361082
2022-09-13	10:46:57	0.941998
2022-09-13	10:46:58	0.574211
2022-09-13	10:46:58	0.215433
2022-09-13	10:46:58	0.416196
2022-09-13	10:46:58	0.606832
2022-09-13	10:46:59	0.30556
2022-09-13	10:46:59	0.258639
2022-09-13	10:46:59	0.41472
2022-09-13	10:46:59	0.324491
2022-09-13	10:47:00	0.718588
2022-09-13	10:47:00	1.09645
2022-09-13	10:47:00	0.240216
2022-09-13	10:47:00	0.766119
2022-09-13	10:47:01	0.495738
2022-09-13	10:47:01	0.303372
2022-09-13	10:47:01	0.373397
2022-09-13	10:47:02	0.335178
2022-09-13	10:47:02	0.174415
2022-09-13	10:47:02	0.420573
2022-09-13	10:47:02	0.153397
2022-09-13	10:47:03	0.365204
2022-09-13	10:47:03	0.433092
2022-09-13	10:47:03	0.340013
2022-09-13	10:47:03	0.30098
2022-09-13	10:47:04	0.616756
2022-09-13	10:47:04	0.174975
2022-09-13	10:47:04	0.290853
2022-09-13	10:47:04	0.520725
2022-09-13	10:47:05	0.191667
2022-09-13	10:47:05	0.250344
2022-09-13	10:47:05	0.240776
2022-09-13	10:47:05	0.226069
2022-09-13	10:47:06	0.179402
2022-09-13	10:47:06	0.383422
2022-09-13	10:47:06	0.158079
2022-09-13	10:47:07	0.147392
2022-09-13	10:47:07	0.547239
2022-09-13	10:47:07	0.377112
2022-09-13	10:47:07	0.507799
2022-09-13	10:47:08	0.36444
2022-09-13	10:47:08	0.440013
2022-09-13	10:47:08	0.165509
2022-09-13	10:47:08	0.109224
2022-09-13	10:47:09	-0.221412
2022-09-13	10:47:09	-0.282175
2022-09-13	10:47:09	-0.246145
2022-09-13	10:47:09	-0.100191
2022-09-13	10:47:10	0.189529
2022-09-13	10:47:10	0.0972139
2022-09-13	10:47:10	0.373753
2022-09-13	10:47:11	0.119708
2022-09-13	10:47:11	0.375433
2022-09-13	10:47:11	0.294211
2022-09-13	10:47:11	0.627748
2022-09-13	10:47:12	2.32617
2022-09-13	10:47:12	2.05818
2022-09-13	10:47:12	3.37441
2022-09-13	10:47:12	2.77833
2022-09-13	10:47:13	0.716807
2022-09-13	10:47:13	2.14943
2022-09-13	10:47:13	0.253855
2022-09-13	10:47:13	1.06078
2022-09-13	10:47:14	1.24805
2022-09-13	10:47:14	0.590293
2022-09-13	10:47:14	3.02083
2022-09-13	10:47:15	1.96444
2022-09-13	10:47:15	4.67436
2022-09-13	10:47:15	4.96001
2022-09-13	10:47:15	2.54164
2022-09-13	10:47:16	1.64062
2022-09-13	10:47:16	1.06531
2022-09-13	10:47:16	0.255636
2022-09-13	10:47:16	0.502812
2022-09-13	10:47:17	0.18215
2022-09-13	10:47:17	0.559046
2022-09-13	10:47:17	0.582761
2022-09-13	10:47:17	-0.0426333
2022-09-13	10:47:18	-0.312964
2022-09-13	10:47:18	-0.385483
2022-09-13	10:47:18	-0.158155
2022-09-13	10:47:18	0.21869
2022-09-13	10:47:19	2.58541
2022-09-13	10:47:19	2.91945
2022-09-13	10:47:19	2.82144
2022-09-13	10:47:20	1.1248
2022-09-13	10:47:20	0.798028
2022-09-13	10:47:20	0.452074
2022-09-13	10:47:20	0.546628
2022-09-13	10:47:21	0.397417
2022-09-13	10:47:21	0.499504
2022-09-13	10:47:21	0.70841
2022-09-13	10:47:21	0.733448
2022-09-13	10:47:22	0.738842
2022-09-13	10:47:22	0.640165
2022-09-13	10:47:22	0.0786898
2022-09-13	10:47:22	0.327952
2022-09-13	10:47:23	1.10525
2022-09-13	10:47:23	1.37701
2022-09-13	10:47:23	1.08154
2022-09-13	10:47:24	0.50673
2022-09-13	10:47:24	0.381132
2022-09-13	10:47:24	0.372735
2022-09-13	10:47:24	0.220267
2022-09-13	10:47:25	0.435331
2022-09-13	10:47:25	0.32556
2022-09-13	10:47:25	0.30383
2022-09-13	10:47:25	0.178283
2022-09-13	10:47:26	0.302456
2022-09-13	10:47:26	0.149479
2022-09-13	10:47:26	0.171565
2022-09-13	10:47:26	0.285051
2022-09-13	10:47:27	1.68785
2022-09-13	10:47:27	0.392583
2022-09-13	10:47:27	0.24159
2022-09-13	10:47:28	1.29503
2022-09-13	10:47:28	0.300624
2022-09-13	10:47:28	0.495127
2022-09-13	10:47:28	0.482354
2022-09-13	10:47:29	0.46444
2022-09-13	10:47:29	0.505814
2022-09-13	10:47:29	0.727901
2022-09-13	10:47:29	0.643372
2022-09-13	10:47:30	0.739758
2022-09-13	10:47:30	0.564389
2022-09-13	10:47:30	0.255484
2022-09-13	10:47:30	0.216094
2022-09-13	10:47:31	0.27014
2022-09-13	10:47:31	0.285458
2022-09-13	10:47:31	0.272532
2022-09-13	10:47:32	0.544033
2022-09-13	10:47:32	1.13584
2022-09-13	10:47:32	1.18724
2022-09-13	10:47:32	1.82927
2022-09-13	10:47:33	2.3908
2022-09-13	10:47:33	2.25462
2022-09-13	10:47:33	2.36892
2022-09-13	10:47:33	1.14658
2022-09-13	10:47:34	1.56505
2022-09-13	10:47:34	1.09691
2022-09-13	10:47:34	1.25406
2022-09-13	10:47:34	2.92266
2022-09-13	10:47:35	1.80607
2022-09-13	10:47:35	4.94485
2022-09-13	10:47:35	2.05711
2022-09-13	10:47:35	1.80531
2022-09-13	10:47:36	2.36276
2022-09-13	10:47:36	1.11024
2022-09-13	10:47:36	1.12525
2022-09-13	10:47:37	0.528715
2022-09-13	10:47:37	0.577265
2022-09-13	10:47:37	0.355484
2022-09-13	10:47:37	0.389071
2022-09-13	10:47:38	0.438791
2022-09-13	10:47:38	0.444644
2022-09-13	10:47:38	0.428613
2022-09-13	10:47:38	0.399911
2022-09-13	10:47:39	0.396654
2022-09-13	10:47:39	0.399657
2022-09-13	10:47:39	0.290649
2022-09-13	10:47:39	0.316959
2022-09-13	10:47:40	0.37645
2022-09-13	10:47:40	0.396807
2022-09-13	10:47:40	0.321234
2022-09-13	10:47:41	0.425458
2022-09-13	10:47:41	0.276043
2022-09-13	10:47:41	0.38383
2022-09-13	10:47:41	0.358079
2022-09-13	10:47:42	0.302863
2022-09-13	10:47:42	0.381285
2022-09-13	10:47:42	0.307392
2022-09-13	10:47:42	0.409377
2022-09-13	10:47:43	0.297519
2022-09-13	10:47:43	2.79085
2022-09-13	10:47:43	1.19874
2022-09-13	10:47:43	0.806577
2022-09-13	10:47:44	1.87828
2022-09-13	10:47:44	1.39798
2022-09-13	10:47:44	1.69248
2022-09-13	10:47:45	1.91966
2022-09-13	10:47:45	0.413295
2022-09-13	10:47:45	1.68235
2022-09-13	10:47:45	0.934058
2022-09-13	10:47:46	0.265102
2022-09-13	10:47:46	0.180878
2022-09-13	10:47:46	0.386629
2022-09-13	10:47:46	0.179097
2022-09-13	10:47:47	0.312125
2022-09-13	10:47:47	0.188308
2022-09-13	10:47:47	0.220216
2022-09-13	10:47:47	0.307952
2022-09-13	10:47:48	0.742862
2022-09-13	10:47:48	0.0120231
2022-09-13	10:47:48	0.223117
2022-09-13	10:47:48	0.493193
2022-09-13	10:47:49	0.759097
2022-09-13	10:47:49	0.423015
2022-09-13	10:47:49	0.367341
2022-09-13	10:47:50	0.311819
2022-09-13	10:47:50	0.356552
2022-09-13	10:47:50	0.35126
2022-09-13	10:47:50	0.461031
2022-09-13	10:47:51	0.368461
2022-09-13	10:47:51	0.368613
2022-09-13	10:47:51	0.688003
2022-09-13	10:47:51	0.741743
2022-09-13	10:47:52	0.731514
2022-09-13	10:47:52	0.738282
2022-09-13	10:47:52	0.734415
2022-09-13	10:47:52	0.729631
2022-09-13	10:47:53	0.733702
2022-09-13	10:47:53	0.734364
2022-09-13	10:47:53	0.744186
2022-09-13	10:47:54	0.734924
2022-09-13	10:47:54	0.737366
2022-09-13	10:47:54	0.737824
2022-09-13	10:47:54	0.739504
2022-09-13	10:47:55	0.731616
2022-09-13	10:47:55	0.738588
2022-09-13	10:47:55	0.732481
2022-09-13	10:47:55	0.730394
2022-09-13	10:47:56	0.73757
2022-09-13	10:47:56	0.735585
2022-09-13	10:47:56	0.741285
2022-09-13	10:47:56	0.733397
2022-09-13	10:47:57	0.731361
2022-09-13	10:47:57	0.742405
2022-09-13	10:47:57	0.734466
2022-09-13	10:47:58	0.726069
2022-09-13	10:47:58	0.730598
2022-09-13	10:47:58	0.465967
2022-09-13	10:47:58	0.515534
2022-09-13	10:47:59	0.472684
2022-09-13	10:47:59	0.515891
2022-09-13	10:47:59	0.508817
2022-09-13	10:47:59	0.492786
2022-09-13	10:48:00	0.509224
2022-09-13	10:48:00	0.500979
2022-09-13	10:48:00	0.489682
2022-09-13	10:48:00	0.478181
