# Supplementary material for: Comparing efficacy in reducing pulling and welfare impacts of four types of leash walking equipment
Source: PeerJ journal article supplement (doi:10.7717/peerj.18131), 2024-10-24
Supplement: Shelter1_Tension_files.zip [file Buzz_harness_202291313394 copy.xlsx]

## Sheet: Averaged Newtons
Date	Time	Averaged Newtons	Impulse	Total steps
2022-09-13	13:39:04	1.79066	1.79066	0
2022-09-13	13:39:05	1.93118	3.72183	0
2022-09-13	13:39:06	2.08545	5.80728	0		Impulse	504.428
2022-09-13	13:39:07	2.05591	7.86318	0		Total steps	0
2022-09-13	13:39:08	2.54477	10.408	0
2022-09-13	13:39:09	2.16106	12.569	0
2022-09-13	13:39:10	2.31516	14.8842	0
2022-09-13	13:39:11	2.173	17.0572	0
2022-09-13	13:39:12	2.14885	19.206	0
2022-09-13	13:39:13	1.73723	20.9433	0
2022-09-13	13:39:14	-2.34577	20.9433	0
2022-09-13	13:39:15	-0.448667	20.9433	0
2022-09-13	13:39:16	-0.244499	20.9433	0
2022-09-13	13:39:17	0.813864	21.7571	0
2022-09-13	13:39:18	0.754836	22.512	0
2022-09-13	13:39:19	1.04793	23.5599	0
2022-09-13	13:39:20	0.949006	24.5089	0
2022-09-13	13:39:21	1.17204	25.6809	0
2022-09-13	13:39:22	0.999375	26.6803	0
2022-09-13	13:39:23	0.0994346	26.7797	0
2022-09-13	13:39:24	-0.561946	26.7797	0
2022-09-13	13:39:25	0.456649	27.2364	0
2022-09-13	13:39:26	1.03282	28.2692	0
2022-09-13	13:39:27	2.04436	30.3136	0
2022-09-13	13:39:28	3.24803	33.5616	0
2022-09-13	13:39:29	3.25234	36.8139	0
2022-09-13	13:39:30	3.26337	40.0773	0
2022-09-13	13:39:31	3.2765	43.3538	0
2022-09-13	13:39:32	3.26109	46.6149	0
2022-09-13	13:39:33	3.24424	49.8591	0
2022-09-13	13:39:34	3.27265	53.1318	0
2022-09-13	13:39:35	3.23972	56.3715	0
2022-09-13	13:39:36	3.31278	59.6843	0
2022-09-13	13:39:37	3.25624	62.9405	0
2022-09-13	13:39:38	3.24747	66.188	0
2022-09-13	13:39:39	3.27684	69.4648	0
2022-09-13	13:39:40	3.24883	72.7137	0
2022-09-13	13:39:41	3.26999	75.9837	0
2022-09-13	13:39:42	3.26082	79.2445	0
2022-09-13	13:39:43	3.27356	82.518	0
2022-09-13	13:39:44	3.27214	85.7902	0
2022-09-13	13:39:45	3.26117	89.0514	0
2022-09-13	13:39:46	3.27361	92.325	0
2022-09-13	13:39:47	3.27548	95.6005	0
2022-09-13	13:39:48	3.28171	98.8822	0
2022-09-13	13:39:49	3.26818	102.15	0
2022-09-13	13:39:50	3.24537	105.396	0
2022-09-13	13:39:51	3.26309	108.659	0
2022-09-13	13:39:52	3.26614	111.925	0
2022-09-13	13:39:53	3.2626	115.188	0
2022-09-13	13:39:54	3.26281	118.45	0
2022-09-13	13:39:55	2.61476	121.065	0
2022-09-13	13:39:56	3.27197	124.337	0
2022-09-13	13:39:57	3.26735	127.604	0
2022-09-13	13:39:58	3.28533	130.89	0
2022-09-13	13:39:59	3.25754	134.147	0
2022-09-13	13:40:00	3.2799	137.427	0
2022-09-13	13:40:01	3.28041	140.708	0
2022-09-13	13:40:02	3.27158	143.979	0
2022-09-13	13:40:03	3.26705	147.246	0
2022-09-13	13:40:04	3.26959	150.516	0
2022-09-13	13:40:05	3.25588	153.772	0
2022-09-13	13:40:06	3.26122	157.033	0
2022-09-13	13:40:07	3.26026	160.293	0
2022-09-13	13:40:08	3.26977	163.563	0
2022-09-13	13:40:09	2.55639	166.119	0
2022-09-13	13:40:10	3.26326	169.383	0
2022-09-13	13:40:11	0.832368	170.215	0
2022-09-13	13:40:12	3.28165	173.497	0
2022-09-13	13:40:13	3.25913	176.756	0
2022-09-13	13:40:14	2.73259	179.488	0
2022-09-13	13:40:15	3.15296	182.641	0
2022-09-13	13:40:16	2.57662	185.218	0
2022-09-13	13:40:17	1.99763	187.216	0
2022-09-13	13:40:18	-2.15098	187.216	0
2022-09-13	13:40:19	-1.21873	187.216	0
2022-09-13	13:40:20	0.859193	188.075	0
2022-09-13	13:40:21	1.10369	189.178	0
2022-09-13	13:40:22	0.307583	189.486	0
2022-09-13	13:40:23	0.204867	189.691	0
2022-09-13	13:40:24	-0.0158448	189.691	0
2022-09-13	13:40:25	-0.124975	189.691	0
2022-09-13	13:40:26	-0.585848	189.691	0
2022-09-13	13:40:27	0.541822	190.233	0
2022-09-13	13:40:28	1.02727	191.26	0
2022-09-13	13:40:29	0.892187	192.152	0
2022-09-13	13:40:30	0.191454	192.344	0
2022-09-13	13:40:31	0.485172	192.829	0
2022-09-13	13:40:32	1.95596	194.785	0
2022-09-13	13:40:33	1.652	196.437	0
2022-09-13	13:40:34	2.01454	198.451	0
2022-09-13	13:40:35	0.729257	199.181	0
2022-09-13	13:40:36	0.875491	200.056	0
2022-09-13	13:40:37	1.45596	201.512	0
2022-09-13	13:40:38	2.42887	203.941	0
2022-09-13	13:40:39	3.04922	206.99	0
2022-09-13	13:40:40	3.38052	210.371	0
2022-09-13	13:40:41	3.26971	213.64	0
2022-09-13	13:40:42	3.24917	216.89	0
2022-09-13	13:40:43	3.26218	220.152	0
2022-09-13	13:40:44	3.2619	223.414	0
2022-09-13	13:40:45	3.2636	226.677	0
2022-09-13	13:40:46	3.26675	229.944	0
2022-09-13	13:40:47	3.20287	233.147	0
2022-09-13	13:40:48	3.26739	236.414	0
2022-09-13	13:40:49	3.25019	239.664	0
2022-09-13	13:40:50	3.2663	242.931	0
2022-09-13	13:40:51	2.94209	245.873	0
2022-09-13	13:40:52	0.0631022	245.936	0
2022-09-13	13:40:53	1.63219	247.568	0
2022-09-13	13:40:54	1.24042	248.809	0
2022-09-13	13:40:55	0.726597	249.535	0
2022-09-13	13:40:56	1.90486	251.44	0
2022-09-13	13:40:57	2.00061	253.441	0
2022-09-13	13:40:58	1.70086	255.141	0
2022-09-13	13:40:59	1.74165	256.883	0
2022-09-13	13:41:00	2.42914	259.312	0
2022-09-13	13:41:01	0.517825	259.83	0
2022-09-13	13:41:02	2.81815	262.648	0
2022-09-13	13:41:03	2.06089	264.709	0
2022-09-13	13:41:04	2.31454	267.024	0
2022-09-13	13:41:05	2.70395	269.728	0
2022-09-13	13:41:06	1.7724	271.5	0
2022-09-13	13:41:07	1.4533	272.953	0
2022-09-13	13:41:08	-0.498015	272.953	0
2022-09-13	13:41:09	-1.14527	272.953	0
2022-09-13	13:41:10	-1.35198	272.953	0
2022-09-13	13:41:11	-1.15534	272.953	0
2022-09-13	13:41:12	-1.87832	272.953	0
2022-09-13	13:41:13	-3.07305	272.953	0
2022-09-13	13:41:14	-3.5548	272.953	0
2022-09-13	13:41:15	-3.84944	272.953	0
2022-09-13	13:41:16	-4.40348	272.953	0
2022-09-13	13:41:17	-3.12426	272.953	0
2022-09-13	13:41:18	-0.348026	272.953	0
2022-09-13	13:41:19	-1.65749	272.953	0
2022-09-13	13:41:20	-1.83615	272.953	0
2022-09-13	13:41:21	1.68307	274.636	0
2022-09-13	13:41:22	2.02601	276.662	0
2022-09-13	13:41:23	1.86994	278.532	0
2022-09-13	13:41:24	2.24742	280.78	0
2022-09-13	13:41:25	2.19331	282.973	0
2022-09-13	13:41:26	1.34169	284.315	0
2022-09-13	13:41:27	1.66411	285.979	0
2022-09-13	13:41:28	0.821275	286.8	0
2022-09-13	13:41:29	1.34397	288.144	0
2022-09-13	13:41:30	1.2534	289.397	0
2022-09-13	13:41:31	0.978945	290.376	0
2022-09-13	13:41:32	0.429653	290.806	0
2022-09-13	13:41:33	0.576852	291.383	0
2022-09-13	13:41:34	0.0780049	291.461	0
2022-09-13	13:41:35	-0.14799	291.461	0
2022-09-13	13:41:36	-0.917142	291.461	0
2022-09-13	13:41:37	0.432315	291.893	0
2022-09-13	13:41:38	0.991338	292.885	0
2022-09-13	13:41:39	1.22648	294.111	0
2022-09-13	13:41:40	1.42433	295.535	0
2022-09-13	13:41:41	1.50333	297.039	0
2022-09-13	13:41:42	1.40305	298.442	0
2022-09-13	13:41:43	1.01013	299.452	0
2022-09-13	13:41:44	0.58319	300.035	0
2022-09-13	13:41:45	1.16157	301.197	0
2022-09-13	13:41:46	3.23858	304.435	0
2022-09-13	13:41:47	3.55779	307.993	0
2022-09-13	13:41:48	3.59738	311.59	0
2022-09-13	13:41:49	3.43655	315.027	0
2022-09-13	13:41:50	3.26728	318.294	0
2022-09-13	13:41:51	3.23423	321.528	0
2022-09-13	13:41:52	3.25918	324.788	0
2022-09-13	13:41:53	2.16349	326.951	0
2022-09-13	13:41:54	2.10933	329.06	0
2022-09-13	13:41:55	2.28467	331.345	0
2022-09-13	13:41:56	1.92059	333.266	0
2022-09-13	13:41:57	1.42263	334.688	0
2022-09-13	13:41:58	1.51261	336.201	0
2022-09-13	13:41:59	1.74433	337.945	0
2022-09-13	13:42:00	1.7816	339.727	0
2022-09-13	13:42:01	1.83978	341.567	0
2022-09-13	13:42:02	1.79818	343.365	0
2022-09-13	13:42:03	0.953986	344.319	0
2022-09-13	13:42:04	1.53825	345.857	0
2022-09-13	13:42:05	2.93904	348.796	0
2022-09-13	13:42:06	3.48901	352.285	0
2022-09-13	13:42:07	3.20495	355.49	0
2022-09-13	13:42:08	1.97306	357.463	0
2022-09-13	13:42:09	0.601696	358.065	0
2022-09-13	13:42:10	0.462478	358.527	0
2022-09-13	13:42:11	0.0908317	358.618	0
2022-09-13	13:42:12	1.61069	360.229	0
2022-09-13	13:42:13	1.18624	361.415	0
2022-09-13	13:42:14	0.836669	362.252	0
2022-09-13	13:42:15	1.01314	363.265	0
2022-09-13	13:42:16	0.708884	363.974	0
2022-09-13	13:42:17	0.671984	364.646	0
2022-09-13	13:42:18	0.054387	364.7	0
2022-09-13	13:42:19	3.17303	367.873	0
2022-09-13	13:42:20	3.25324	371.126	0
2022-09-13	13:42:21	3.18561	374.312	0
2022-09-13	13:42:22	3.20972	377.522	0
2022-09-13	13:42:23	3.24924	380.771	0
2022-09-13	13:42:24	2.68527	383.456	0
2022-09-13	13:42:25	3.2552	386.711	0
2022-09-13	13:42:26	3.24482	389.956	0
2022-09-13	13:42:27	3.26381	393.22	0
2022-09-13	13:42:28	3.25019	396.47	0
2022-09-13	13:42:29	3.25086	399.721	0
2022-09-13	13:42:30	3.26761	402.989	0
2022-09-13	13:42:31	2.97088	405.96	0
2022-09-13	13:42:32	3.11204	409.072	0
2022-09-13	13:42:33	2.80904	411.881	0
2022-09-13	13:42:34	0.4764	412.357	0
2022-09-13	13:42:35	1.63288	413.99	0
2022-09-13	13:42:36	3.26829	417.258	0
2022-09-13	13:42:37	3.26581	420.524	0
2022-09-13	13:42:38	3.27305	423.797	0
2022-09-13	13:42:39	3.27671	427.074	0
2022-09-13	13:42:40	3.25041	430.324	0
2022-09-13	13:42:41	3.24809	433.572	0
2022-09-13	13:42:42	3.24475	436.817	0
2022-09-13	13:42:43	3.21219	440.029	0
2022-09-13	13:42:44	3.22908	443.258	0
2022-09-13	13:42:45	3.21436	446.473	0
2022-09-13	13:42:46	3.18437	449.657	0
2022-09-13	13:42:47	3.06271	452.72	0
2022-09-13	13:42:48	2.94566	455.666	0
2022-09-13	13:42:49	2.87141	458.537	0
2022-09-13	13:42:50	3.16869	461.706	0
2022-09-13	13:42:51	3.26441	464.97	0
2022-09-13	13:42:52	3.26297	468.233	0
2022-09-13	13:42:53	3.258	471.491	0
2022-09-13	13:42:54	3.23219	474.723	0
2022-09-13	13:42:55	3.22727	477.95	0
2022-09-13	13:42:56	3.18095	481.131	0
2022-09-13	13:42:57	5.55482	486.686	0
2022-09-13	13:42:58	2.87995	489.566	0
2022-09-13	13:42:59	1.72712	491.293	0
2022-09-13	13:43:00	1.78245	493.076	0
2022-09-13	13:43:01	1.82914	494.905	0
2022-09-13	13:43:02	1.22937	496.134	0
2022-09-13	13:43:03	-0.853362	496.134	0
2022-09-13	13:43:04	-0.631971	496.134	0
2022-09-13	13:43:05	2.39914	498.533	0
2022-09-13	13:43:06	2.30656	500.84	0
2022-09-13	13:43:07	1.59773	502.438	0
2022-09-13	13:43:08	-1.06849	502.438	0
2022-09-13	13:43:09	-1.86094	502.438	0
2022-09-13	13:43:10	-0.428237	502.438	0
2022-09-13	13:43:11	0.350028	502.788	0
2022-09-13	13:43:12	0.918598	503.706	0
2022-09-13	13:43:13	0.0576687	503.764	0
2022-09-13	13:43:14	-2.57079	503.764	0
2022-09-13	13:43:15	-3.70083	503.764	0
2022-09-13	13:43:16	-2.87939	503.764	0
2022-09-13	13:43:17	-2.51436	503.764	0
2022-09-13	13:43:18	-2.93173	503.764	0
2022-09-13	13:43:19	-2.42104	503.764	0
2022-09-13	13:43:20	-1.99729	503.764	0
2022-09-13	13:43:21	-2.23485	503.764	0
2022-09-13	13:43:22	-2.18245	503.764	0
2022-09-13	13:43:23	0.270968	504.035	0
2022-09-13	13:43:24	-2.2841	504.035	0
2022-09-13	13:43:25	0.393209	504.428	0
2022-09-13	13:43:26	-2.37446	504.428	0
2022-09-13	13:43:27	-2.00214	504.428	0
2022-09-13	13:43:28	-2.67573	504.428	0
2022-09-13	13:43:29	-3.15731	504.428	0
2022-09-13	13:43:30	-3.88589	504.428	0
2022-09-13	13:43:31	-3.90745	504.428	0
2022-09-13	13:43:32	-3.29161	504.428	0
2022-09-13	13:43:33	-3.40745	504.428	0
2022-09-13	13:43:34	-3.84169	504.428	0
2022-09-13	13:43:35	-3.66105	504.428	0
2022-09-13	13:43:36	-3.18408	504.428	0
2022-09-13	13:43:37	-2.91555	504.428	0
2022-09-13	13:43:38	-2.81187	504.428	0
2022-09-13	13:43:39	-2.53474	504.428	0
2022-09-13	13:43:40	-2.15885	504.428	0
2022-09-13	13:43:41	-1.65607	504.428	0
2022-09-13	13:43:42	-1.58941	504.428	0
2022-09-13	13:43:43	-1.79609	504.428	0
2022-09-13	13:43:44	-2.00499	504.428	0
2022-09-13	13:43:45	-1.68748	504.428	0
2022-09-13	13:43:46	-1.9906	504.428	0
2022-09-13	13:43:47	-1.19943	504.428	0
2022-09-13	13:43:48	-0.668718	504.428	0
2022-09-13	13:43:49	-0.175663	504.428	0
2022-09-13	13:43:50	-0.227503	504.428	0
2022-09-13	13:43:51	-0.253026	504.428	0
2022-09-13	13:43:52	-0.736932	504.428	0
2022-09-13	13:43:53	-0.650307	504.428	0
2022-09-13	13:43:54	-0.821444	504.428	0
2022-09-13	13:43:55	-0.904013	504.428	0
2022-09-13	13:43:56	-0.814879	504.428	0
2022-09-13	13:43:57	-1.10141	504.428	0
2022-09-13	13:43:58	-0.830782	504.428	0
2022-09-13	13:43:59	-1.14663	504.428	0
2022-09-13	13:44:00	-1.38111	504.428	0
2022-09-13	13:44:01	-1.19954	504.428	0
2022-09-13	13:44:02	-1.27526	504.428	0
2022-09-13	13:44:03	-1.6649	504.428	0
2022-09-13	13:44:04	-1.97488	504.428	0

## Sheet: Buzz_harness_202291313394 ( (3)
Date	Time	Lbs	Newtons	Averaged Newtons	Total force x time	Total steps > 13.345		**GoPro Fitting: 1328
2022-09-13	13:39:04	0.390547	1.73723	1.79066	1.73723	FALSE	0			Total force x time	959.751
2022-09-13	13:39:04	0.401692	1.78681	1.79066	1.78681	FALSE	0			Total steps	0
2022-09-13	13:39:04	0.415433	1.84793	1.79066	3.58516	FALSE	0
2022-09-13	13:39:05	0.394415	1.75444	1.93118	3.54124	FALSE	0
2022-09-13	13:39:05	0.416858	1.85427	1.93118	5.43943	FALSE	0
2022-09-13	13:39:05	0.463524	2.06185	1.93118	5.60309	FALSE	0
2022-09-13	13:39:05	0.461794	2.05415	1.93118	7.49358	FALSE	0
2022-09-13	13:39:06	0.458384	2.03898	2.08545	7.64207	FALSE	0
2022-09-13	13:39:06	0.436959	1.94368	2.08545	9.43726	FALSE	0
2022-09-13	13:39:06	0.474364	2.11007	2.08545	9.75214	FALSE	0
2022-09-13	13:39:06	0.505611	2.24906	2.08545	11.6863	FALSE	0
2022-09-13	13:39:07	0.458842	2.04102	2.05591	11.7932	FALSE	0
2022-09-13	13:39:07	0.48098	2.1395	2.05591	13.8258	FALSE	0
2022-09-13	13:39:07	0.427239	1.90044	2.05591	13.6936	FALSE	0
2022-09-13	13:39:07	0.481692	2.14266	2.05591	15.9685	FALSE	0
2022-09-13	13:39:08	0.499351	2.22121	2.54477	15.9148	FALSE	0
2022-09-13	13:39:08	0.630903	2.80638	2.54477	18.7749	FALSE	0
2022-09-13	13:39:08	0.586018	2.60673	2.54477	18.5215	FALSE	0
2022-09-13	13:39:09	0.470395	2.09241	2.16106	20.8673	FALSE	0
2022-09-13	13:39:09	0.438333	1.94979	2.16106	20.4713	FALSE	0
2022-09-13	13:39:09	0.532277	2.36767	2.16106	23.2349	FALSE	0
2022-09-13	13:39:09	0.502303	2.23434	2.16106	22.7057	FALSE	0
2022-09-13	13:39:10	0.419962	1.86807	2.31516	25.103	FALSE	0
2022-09-13	13:39:10	0.852837	3.79359	2.31516	26.4993	FALSE	0
2022-09-13	13:39:10	0.397417	1.76779	2.31516	26.8708	FALSE	0
2022-09-13	13:39:10	0.411667	1.83118	2.31516	28.3304	FALSE	0
2022-09-13	13:39:11	0.469275	2.08743	2.173	28.9582	FALSE	0
2022-09-13	13:39:11	0.403372	1.79428	2.173	30.1247	FALSE	0
2022-09-13	13:39:11	0.557315	2.47905	2.173	31.4373	FALSE	0
2022-09-13	13:39:11	0.524084	2.33123	2.173	32.456	FALSE	0
2022-09-13	13:39:12	0.473194	2.10486	2.14885	33.5422	FALSE	0
2022-09-13	13:39:12	0.39187	1.74312	2.14885	34.1991	FALSE	0
2022-09-13	13:39:12	0.584186	2.59858	2.14885	36.1407	FALSE	0
2022-09-13	13:39:13	0.756858	3.36666	1.73723	37.5657	FALSE	0
2022-09-13	13:39:13	0.485611	2.16009	1.73723	38.3008	FALSE	0
2022-09-13	13:39:13	0.648308	2.8838	1.73723	40.4495	FALSE	0
2022-09-13	13:39:13	-0.328587	-1.46162	1.73723	38.3008	FALSE	0
2022-09-13	13:39:14	-0.623142	-2.77186	-2.34577	40.4495	FALSE	0
2022-09-13	13:39:14	-0.599071	-2.66479	-2.34577	38.3008	FALSE	0
2022-09-13	13:39:14	-0.55159	-2.45358	-2.34577	40.4495	FALSE	0
2022-09-13	13:39:14	-0.33561	-1.49286	-2.34577	38.3008	FALSE	0
2022-09-13	13:39:15	-0.233982	-1.0408	-0.448667	40.4495	FALSE	0
2022-09-13	13:39:15	-0.139478	-0.620426	-0.448667	38.3008	FALSE	0
2022-09-13	13:39:15	0.0443386	0.197227	-0.448667	40.6468	FALSE	0
2022-09-13	13:39:15	-0.0743381	-0.330671	-0.448667	38.3008	FALSE	0
2022-09-13	13:39:16	-0.240954	-1.07181	-0.244499	40.6468	FALSE	0
2022-09-13	13:39:16	-0.0752033	-0.334519	-0.244499	38.3008	FALSE	0
2022-09-13	13:39:16	0.15126	0.672835	-0.244499	41.3196	FALSE	0
2022-09-13	13:39:17	0.274466	1.22088	0.813864	39.5217	FALSE	0
2022-09-13	13:39:17	0.13411	0.596548	0.813864	41.9161	FALSE	0
2022-09-13	13:39:17	0.223728	0.995187	0.813864	40.5169	FALSE	0
2022-09-13	13:39:17	0.0995549	0.44284	0.813864	42.359	FALSE	0
2022-09-13	13:39:18	0.140624	0.625524	0.754836	41.1424	FALSE	0
2022-09-13	13:39:18	0.137061	0.609675	0.754836	42.9687	FALSE	0
2022-09-13	13:39:18	0.0952292	0.423599	0.754836	41.566	FALSE	0
2022-09-13	13:39:18	0.305865	1.36055	0.754836	44.3292	FALSE	0
2022-09-13	13:39:19	0.108512	0.482683	1.04793	42.0487	FALSE	0
2022-09-13	13:39:19	0.297214	1.32207	1.04793	45.6513	FALSE	0
2022-09-13	13:39:19	0.136705	0.608091	1.04793	42.6568	FALSE	0
2022-09-13	13:39:19	0.399911	1.77888	1.04793	47.4302	FALSE	0
2022-09-13	13:39:20	0.0176211	0.0783822	0.949006	42.7352	FALSE	0
2022-09-13	13:39:20	0.365916	1.62767	0.949006	49.0578	FALSE	0
2022-09-13	13:39:20	0.256501	1.14097	0.949006	43.8761	FALSE	0
2022-09-13	13:39:21	0.327545	1.45699	1.17204	50.5148	FALSE	0
2022-09-13	13:39:21	0.126222	0.561461	1.17204	44.4376	FALSE	0
2022-09-13	13:39:21	0.30617	1.36191	1.17204	51.8767	FALSE	0
2022-09-13	13:39:21	0.294008	1.30781	1.17204	45.7454	FALSE	0
2022-09-13	13:39:22	0.215331	0.957835	0.999375	52.8346	FALSE	0
2022-09-13	13:39:22	0.311667	1.38636	0.999375	47.1318	FALSE	0
2022-09-13	13:39:22	0.083728	0.372439	0.999375	53.207	FALSE	0
2022-09-13	13:39:22	0.287952	1.28087	0.999375	48.4126	FALSE	0
2022-09-13	13:39:23	0.0545168	0.242502	0.0994346	53.4495	FALSE	0
2022-09-13	13:39:23	0.16215	0.721276	0.0994346	49.1339	FALSE	0
2022-09-13	13:39:23	-0.118053	-0.525123	0.0994346	53.4495	FALSE	0
2022-09-13	13:39:23	-0.00919824	-0.0409156	0.0994346	49.1339	FALSE	0
2022-09-13	13:39:24	-0.180343	-0.802202	-0.561946	53.4495	FALSE	0
2022-09-13	13:39:24	-0.0830404	-0.36938	-0.561946	49.1339	FALSE	0
2022-09-13	13:39:24	-0.11561	-0.514256	-0.561946	53.4495	FALSE	0
2022-09-13	13:39:25	0.0588934	0.26197	0.456649	49.3959	FALSE	0
2022-09-13	13:39:25	0.0699875	0.311318	0.456649	53.7608	FALSE	0
2022-09-13	13:39:25	0.195331	0.868871	0.456649	50.2647	FALSE	0
2022-09-13	13:39:25	0.0864252	0.384437	0.456649	54.1452	FALSE	0
2022-09-13	13:39:26	0.182965	0.813865	1.03282	51.0786	FALSE	0
2022-09-13	13:39:26	0.262303	1.16678	1.03282	55.312	FALSE	0
2022-09-13	13:39:26	0.368359	1.63853	1.03282	52.7171	FALSE	0
2022-09-13	13:39:26	0.115127	0.512108	1.03282	55.8241	FALSE	0
2022-09-13	13:39:27	0.109173	0.485623	2.04436	53.2028	FALSE	0
2022-09-13	13:39:27	0.262608	1.16813	2.04436	56.9923	FALSE	0
2022-09-13	13:39:27	0.735382	3.27113	2.04436	56.4739	FALSE	0
2022-09-13	13:39:27	0.731209	3.25256	2.04436	60.2448	FALSE	0
2022-09-13	13:39:28	0.730445	3.24917	3.24803	59.7231	FALSE	0
2022-09-13	13:39:28	0.726018	3.22947	3.24803	63.4743	FALSE	0
2022-09-13	13:39:28	0.734109	3.26546	3.24803	62.9885	FALSE	0
2022-09-13	13:39:29	0.732888	3.26003	3.25234	66.7343	FALSE	0
2022-09-13	13:39:29	0.737722	3.28154	3.25234	66.2701	FALSE	0
2022-09-13	13:39:29	0.726629	3.23219	3.25234	69.9665	FALSE	0
2022-09-13	13:39:29	0.727392	3.23559	3.25234	69.5056	FALSE	0
2022-09-13	13:39:30	0.731616	3.25437	3.26337	73.2209	FALSE	0
2022-09-13	13:39:30	0.737265	3.2795	3.26337	72.7851	FALSE	0
2022-09-13	13:39:30	0.734211	3.26592	3.26337	76.4868	FALSE	0
2022-09-13	13:39:30	0.731463	3.25369	3.26337	76.0388	FALSE	0
2022-09-13	13:39:31	0.738079	3.28312	3.2765	79.7699	FALSE	0
2022-09-13	13:39:31	0.738282	3.28403	3.2765	79.3229	FALSE	0
2022-09-13	13:39:31	0.737265	3.2795	3.2765	83.0494	FALSE	0
2022-09-13	13:39:31	0.732735	3.25935	3.2765	82.5822	FALSE	0
2022-09-13	13:39:32	0.736094	3.27429	3.26109	86.3237	FALSE	0
2022-09-13	13:39:32	0.732328	3.25754	3.26109	85.8398	FALSE	0
2022-09-13	13:39:32	0.730954	3.25143	3.26109	89.5752	FALSE	0
2022-09-13	13:39:33	0.722914	3.21567	3.24424	89.0554	FALSE	0
2022-09-13	13:39:33	0.720369	3.20435	3.24424	92.7795	FALSE	0
2022-09-13	13:39:33	0.73355	3.26298	3.24424	92.3184	FALSE	0
2022-09-13	13:39:33	0.740522	3.29399	3.24424	96.0735	FALSE	0
2022-09-13	13:39:34	0.736959	3.27814	3.27265	95.5965	FALSE	0
2022-09-13	13:39:34	0.738537	3.28516	3.27265	99.3587	FALSE	0
2022-09-13	13:39:34	0.732125	3.25664	3.27265	98.8532	FALSE	0
2022-09-13	13:39:34	0.73528	3.27067	3.27265	102.629	FALSE	0
2022-09-13	13:39:35	0.733092	3.26094	3.23972	102.114	FALSE	0
2022-09-13	13:39:35	0.734466	3.26705	3.23972	105.896	FALSE	0
2022-09-13	13:39:35	0.737519	3.28063	3.23972	105.395	FALSE	0
2022-09-13	13:39:35	0.708206	3.15024	3.23972	109.047	FALSE	0
2022-09-13	13:39:36	0.761641	3.38793	3.31278	108.783	FALSE	0
2022-09-13	13:39:36	0.743015	3.30508	3.31278	112.352	FALSE	0
2022-09-13	13:39:36	0.72958	3.24532	3.31278	112.028	FALSE	0
2022-09-13	13:39:37	0.726934	3.23355	3.25624	115.585	FALSE	0
2022-09-13	13:39:37	0.734517	3.26728	3.25624	115.295	FALSE	0
2022-09-13	13:39:37	0.734618	3.26773	3.25624	118.853	FALSE	0
2022-09-13	13:39:37	0.732074	3.25641	3.25624	118.552	FALSE	0
2022-09-13	13:39:38	0.726578	3.23196	3.24747	122.085	FALSE	0
2022-09-13	13:39:38	0.73355	3.26298	3.24747	121.815	FALSE	0
2022-09-13	13:39:38	0.724898	3.22449	3.24747	125.309	FALSE	0
2022-09-13	13:39:38	0.735229	3.27045	3.24747	125.085	FALSE	0
2022-09-13	13:39:39	0.736705	3.27701	3.27684	128.586	FALSE	0
2022-09-13	13:39:39	0.740064	3.29195	3.27684	128.377	FALSE	0
2022-09-13	13:39:39	0.736705	3.27701	3.27684	131.863	FALSE	0
2022-09-13	13:39:39	0.733193	3.26139	3.27684	131.638	FALSE	0
2022-09-13	13:39:40	0.727036	3.234	3.24883	135.097	FALSE	0
2022-09-13	13:39:40	0.728257	3.23943	3.24883	134.878	FALSE	0
2022-09-13	13:39:40	0.731565	3.25415	3.24883	138.352	FALSE	0
2022-09-13	13:39:40	0.734618	3.26773	3.24883	138.146	FALSE	0
2022-09-13	13:39:41	0.733448	3.26252	3.26999	141.614	FALSE	0
2022-09-13	13:39:41	0.733193	3.26139	3.26999	141.407	FALSE	0
2022-09-13	13:39:41	0.73874	3.28606	3.26999	144.9	FALSE	0
2022-09-13	13:39:42	0.734669	3.26795	3.26082	144.675	FALSE	0
2022-09-13	13:39:42	0.736043	3.27407	3.26082	148.174	FALSE	0
2022-09-13	13:39:42	0.724949	3.22472	3.26082	147.9	FALSE	0
2022-09-13	13:39:42	0.736603	3.27656	3.26082	151.451	FALSE	0
2022-09-13	13:39:43	0.732735	3.25935	3.27356	151.159	FALSE	0
2022-09-13	13:39:43	0.739758	3.29059	3.27356	154.741	FALSE	0
2022-09-13	13:39:43	0.730954	3.25143	3.27356	154.41	FALSE	0
2022-09-13	13:39:43	0.740267	3.29286	3.27356	158.034	FALSE	0
2022-09-13	13:39:44	0.732532	3.25845	3.27214	157.669	FALSE	0
2022-09-13	13:39:44	0.733041	3.26071	3.27214	161.295	FALSE	0
2022-09-13	13:39:44	0.743066	3.30531	3.27214	160.974	FALSE	0
2022-09-13	13:39:44	0.733804	3.26411	3.27214	164.559	FALSE	0
2022-09-13	13:39:45	0.732939	3.26026	3.26117	164.234	FALSE	0
2022-09-13	13:39:45	0.732888	3.26003	3.26117	167.819	FALSE	0
2022-09-13	13:39:45	0.733601	3.2632	3.26117	167.498	FALSE	0
2022-09-13	13:39:46	0.736603	3.27656	3.27361	171.096	FALSE	0
2022-09-13	13:39:46	0.734313	3.26637	3.27361	170.764	FALSE	0
2022-09-13	13:39:46	0.736756	3.27724	3.27361	174.373	FALSE	0
2022-09-13	13:39:46	0.736094	3.27429	3.27361	174.038	FALSE	0
2022-09-13	13:39:47	0.736807	3.27746	3.27548	177.65	FALSE	0
2022-09-13	13:39:47	0.731717	3.25482	3.27548	177.293	FALSE	0
2022-09-13	13:39:47	0.740216	3.29263	3.27548	180.943	FALSE	0
2022-09-13	13:39:47	0.736705	3.27701	3.27548	180.57	FALSE	0
2022-09-13	13:39:48	0.737112	3.27882	3.28171	184.222	FALSE	0
2022-09-13	13:39:48	0.734822	3.26864	3.28171	183.839	FALSE	0
2022-09-13	13:39:48	0.736399	3.27565	3.28171	187.497	FALSE	0
2022-09-13	13:39:48	0.74271	3.30372	3.28171	187.143	FALSE	0
2022-09-13	13:39:49	0.732125	3.25664	3.26818	190.754	FALSE	0
2022-09-13	13:39:49	0.737417	3.28018	3.26818	190.423	FALSE	0
2022-09-13	13:39:49	0.734618	3.26773	3.26818	194.022	FALSE	0
2022-09-13	13:39:50	0.72729	3.23513	3.24537	193.658	FALSE	0
2022-09-13	13:39:50	0.733804	3.26411	3.24537	197.286	FALSE	0
2022-09-13	13:39:50	0.729478	3.24486	3.24537	196.903	FALSE	0
2022-09-13	13:39:50	0.727799	3.2374	3.24537	200.523	FALSE	0
2022-09-13	13:39:51	0.735585	3.27203	3.26309	200.175	FALSE	0
2022-09-13	13:39:51	0.732023	3.25618	3.26309	203.78	FALSE	0
2022-09-13	13:39:51	0.728715	3.24147	3.26309	203.416	FALSE	0
2022-09-13	13:39:51	0.737977	3.28267	3.26309	207.062	FALSE	0
2022-09-13	13:39:52	0.733855	3.26433	3.26614	206.681	FALSE	0
2022-09-13	13:39:52	0.723779	3.21951	3.26614	210.282	FALSE	0
2022-09-13	13:39:52	0.737722	3.28154	3.26614	209.962	FALSE	0
2022-09-13	13:39:52	0.741692	3.29919	3.26614	213.581	FALSE	0
2022-09-13	13:39:53	0.732481	3.25822	3.2626	213.22	FALSE	0
2022-09-13	13:39:53	0.73243	3.258	3.2626	216.839	FALSE	0
2022-09-13	13:39:53	0.735483	3.27158	3.2626	216.492	FALSE	0
2022-09-13	13:39:54	0.733957	3.26479	3.26281	220.104	FALSE	0
2022-09-13	13:39:54	0.734364	3.2666	3.26281	219.758	FALSE	0
2022-09-13	13:39:54	0.732837	3.25981	3.26281	223.363	FALSE	0
2022-09-13	13:39:54	0.732888	3.26003	3.26281	223.019	FALSE	0
2022-09-13	13:39:55	0.739962	3.2915	2.61476	226.655	FALSE	0
2022-09-13	13:39:55	0.734059	3.26524	2.61476	226.284	FALSE	0
2022-09-13	13:39:55	0.170089	0.75659	2.61476	227.412	FALSE	0
2022-09-13	13:39:55	0.707188	3.14571	2.61476	229.429	FALSE	0
2022-09-13	13:39:56	0.735229	3.27045	3.27197	230.682	FALSE	0
2022-09-13	13:39:56	0.739809	3.29082	3.27197	232.72	FALSE	0
2022-09-13	13:39:56	0.735636	3.27226	3.27197	233.954	FALSE	0
2022-09-13	13:39:56	0.731616	3.25437	3.27197	235.975	FALSE	0
2022-09-13	13:39:57	0.733244	3.26162	3.26735	237.216	FALSE	0
2022-09-13	13:39:57	0.73645	3.27588	3.26735	239.251	FALSE	0
2022-09-13	13:39:57	0.733906	3.26456	3.26735	240.48	FALSE	0
2022-09-13	13:39:58	0.735687	3.27248	3.28533	242.523	FALSE	0
2022-09-13	13:39:58	0.742099	3.301	3.28533	243.781	FALSE	0
2022-09-13	13:39:58	0.738435	3.28471	3.28533	245.808	FALSE	0
2022-09-13	13:39:58	0.738079	3.28312	3.28533	247.065	FALSE	0
2022-09-13	13:39:59	0.733295	3.26184	3.25754	249.07	FALSE	0
2022-09-13	13:39:59	0.734568	3.26751	3.25754	250.332	FALSE	0
2022-09-13	13:39:59	0.730801	3.25075	3.25754	252.32	FALSE	0
2022-09-13	13:39:59	0.730649	3.25007	3.25754	253.582	FALSE	0
2022-09-13	13:40:00	0.733193	3.26139	3.2799	255.582	FALSE	0
2022-09-13	13:40:00	0.733499	3.26275	3.2799	256.845	FALSE	0
2022-09-13	13:40:00	0.743117	3.30553	3.2799	258.887	FALSE	0
2022-09-13	13:40:00	0.739606	3.28992	3.2799	260.135	FALSE	0
2022-09-13	13:40:01	0.73584	3.27316	3.28041	262.16	FALSE	0
2022-09-13	13:40:01	0.740573	3.29422	3.28041	263.429	FALSE	0
2022-09-13	13:40:01	0.735992	3.27384	3.28041	265.434	FALSE	0
2022-09-13	13:40:02	0.738893	3.28674	3.27158	266.716	FALSE	0
2022-09-13	13:40:02	0.736501	3.2761	3.27158	268.71	FALSE	0
2022-09-13	13:40:02	0.732532	3.25845	3.27158	269.974	FALSE	0
2022-09-13	13:40:02	0.734008	3.26501	3.27158	271.975	FALSE	0
2022-09-13	13:40:03	0.735026	3.26954	3.26705	273.244	FALSE	0
2022-09-13	13:40:03	0.737315	3.27972	3.26705	275.255	FALSE	0
2022-09-13	13:40:03	0.732939	3.26026	3.26705	276.504	FALSE	0
2022-09-13	13:40:03	0.732583	3.25868	3.26705	278.514	FALSE	0
2022-09-13	13:40:04	0.733753	3.26388	3.26959	279.768	FALSE	0
2022-09-13	13:40:04	0.735941	3.27361	3.26959	281.787	FALSE	0
2022-09-13	13:40:04	0.737722	3.28154	3.26959	283.049	FALSE	0
2022-09-13	13:40:04	0.732735	3.25935	3.26959	285.047	FALSE	0
2022-09-13	13:40:05	0.735026	3.26954	3.25588	286.319	FALSE	0
2022-09-13	13:40:05	0.729478	3.24486	3.25588	288.292	FALSE	0
2022-09-13	13:40:05	0.731361	3.25324	3.25588	289.572	FALSE	0
2022-09-13	13:40:06	0.735026	3.26954	3.26122	291.561	FALSE	0
2022-09-13	13:40:06	0.732074	3.25641	3.26122	292.829	FALSE	0
2022-09-13	13:40:06	0.73528	3.27067	3.26122	294.832	FALSE	0
2022-09-13	13:40:06	0.730242	3.24826	3.26122	296.077	FALSE	0
2022-09-13	13:40:07	0.740013	3.29173	3.26026	298.124	FALSE	0
2022-09-13	13:40:07	0.731107	3.25211	3.26026	299.329	FALSE	0
2022-09-13	13:40:07	0.731209	3.25256	3.26026	301.376	FALSE	0
2022-09-13	13:40:07	0.729428	3.24464	3.26026	302.574	FALSE	0
2022-09-13	13:40:08	0.729886	3.24668	3.26977	304.623	FALSE	0
2022-09-13	13:40:08	0.732837	3.25981	3.26977	305.833	FALSE	0
2022-09-13	13:40:08	0.740827	3.29535	3.26977	307.918	FALSE	0
2022-09-13	13:40:08	0.736756	3.27724	3.26977	309.111	FALSE	0
2022-09-13	13:40:09	0.257366	1.14482	2.55639	309.063	FALSE	0
2022-09-13	13:40:09	0.734364	3.2666	2.55639	312.377	FALSE	0
2022-09-13	13:40:09	0.732379	3.25777	2.55639	312.321	FALSE	0
2022-09-13	13:40:10	0.738079	3.28312	3.26326	315.66	FALSE	0
2022-09-13	13:40:10	0.734211	3.26592	3.26326	315.587	FALSE	0
2022-09-13	13:40:10	0.725305	3.2263	3.26326	318.887	FALSE	0
2022-09-13	13:40:10	0.736857	3.27769	3.26326	318.864	FALSE	0
2022-09-13	13:40:11	0.643575	2.86275	0.832368	321.749	FALSE	0
2022-09-13	13:40:11	0.165662	0.736898	0.832368	319.601	FALSE	0
2022-09-13	13:40:11	-0.405127	-1.80209	0.832368	321.749	FALSE	0
2022-09-13	13:40:11	0.344389	1.53191	0.832368	321.133	FALSE	0
2022-09-13	13:40:12	0.739758	3.29059	3.28165	325.04	FALSE	0
2022-09-13	13:40:12	0.734618	3.26773	3.28165	324.401	FALSE	0
2022-09-13	13:40:12	0.735789	3.27294	3.28165	328.313	FALSE	0
2022-09-13	13:40:12	0.740827	3.29535	3.28165	327.696	FALSE	0
2022-09-13	13:40:13	0.729428	3.24464	3.25913	331.558	FALSE	0
2022-09-13	13:40:13	0.734618	3.26773	3.25913	330.964	FALSE	0
2022-09-13	13:40:13	0.734008	3.26501	3.25913	334.823	FALSE	0
2022-09-13	13:40:14	0.72902	3.24283	2.73259	334.207	FALSE	0
2022-09-13	13:40:14	0.252888	1.1249	2.73259	335.948	FALSE	0
2022-09-13	13:40:14	0.737722	3.28154	2.73259	337.488	FALSE	0
2022-09-13	13:40:14	0.737621	3.28109	2.73259	339.229	FALSE	0
2022-09-13	13:40:15	0.649173	2.88765	3.15296	340.376	FALSE	0
2022-09-13	13:40:15	0.73645	3.27588	3.15296	342.505	FALSE	0
2022-09-13	13:40:15	0.737214	3.27928	3.15296	343.655	FALSE	0
2022-09-13	13:40:15	0.71243	3.16903	3.15296	345.674	FALSE	0
2022-09-13	13:40:16	0.620471	2.75998	2.57662	346.415	FALSE	0
2022-09-13	13:40:16	0.646272	2.87475	2.57662	348.548	FALSE	0
2022-09-13	13:40:16	0.559758	2.48992	2.57662	348.905	FALSE	0
2022-09-13	13:40:16	0.490496	2.18182	2.57662	350.73	FALSE	0
2022-09-13	13:40:17	0.422252	1.87826	1.99763	350.783	FALSE	0
2022-09-13	13:40:17	0.494059	2.19767	1.99763	352.928	FALSE	0
2022-09-13	13:40:17	0.430954	1.91697	1.99763	352.7	FALSE	0
2022-09-13	13:40:18	-0.370725	-1.64906	-2.15098	352.928	FALSE	0
2022-09-13	13:40:18	-0.706552	-3.14288	-2.15098	352.7	FALSE	0
2022-09-13	13:40:18	-0.510826	-2.27226	-2.15098	352.928	FALSE	0
2022-09-13	13:40:18	-0.346145	-1.53972	-2.15098	352.7	FALSE	0
2022-09-13	13:40:19	-0.36701	-1.63253	-1.21873	352.928	FALSE	0
2022-09-13	13:40:19	-0.413066	-1.8374	-1.21873	352.7	FALSE	0
2022-09-13	13:40:19	-0.283651	-1.26174	-1.21873	352.928	FALSE	0
2022-09-13	13:40:19	-0.0322008	-0.143236	-1.21873	352.7	FALSE	0
2022-09-13	13:40:20	0.0258654	0.115054	0.859193	353.043	FALSE	0
2022-09-13	13:40:20	0.220318	0.980019	0.859193	353.68	FALSE	0
2022-09-13	13:40:20	0.167646	0.745723	0.859193	353.789	FALSE	0
2022-09-13	13:40:20	0.358791	1.59597	0.859193	355.276	FALSE	0
2022-09-13	13:40:21	0.35355	1.57266	1.10369	355.361	FALSE	0
2022-09-13	13:40:21	0.229377	1.02031	1.10369	356.297	FALSE	0
2022-09-13	13:40:21	0.161438	0.718109	1.10369	356.079	FALSE	0
2022-09-13	13:40:22	0.0838297	0.372891	0.307583	356.67	FALSE	0
2022-09-13	13:40:22	0.0842877	0.374929	0.307583	356.454	FALSE	0
2022-09-13	13:40:22	-0.00227712	-0.0101291	0.307583	356.67	FALSE	0
2022-09-13	13:40:22	0.110751	0.492643	0.307583	356.947	FALSE	0
2022-09-13	13:40:23	0.0573158	0.254952	0.204867	356.924	FALSE	0
2022-09-13	13:40:23	0.102252	0.454837	0.204867	357.402	FALSE	0
2022-09-13	13:40:23	0.000470984	0.00209503	0.204867	356.927	FALSE	0
2022-09-13	13:40:23	0.024186	0.107584	0.204867	357.509	FALSE	0
2022-09-13	13:40:24	-0.0775442	-0.344932	-0.0158448	356.927	FALSE	0
2022-09-13	13:40:24	0.0425066	0.189078	-0.0158448	357.698	FALSE	0
2022-09-13	13:40:24	-0.0254832	-0.113354	-0.0158448	356.927	FALSE	0
2022-09-13	13:40:24	0.0462725	0.205829	-0.0158448	357.904	FALSE	0
2022-09-13	13:40:25	-0.00248066	-0.0110345	-0.124975	356.927	FALSE	0
2022-09-13	13:40:25	0.00026741	0.00118949	-0.124975	357.905	FALSE	0
2022-09-13	13:40:25	-0.0820735	-0.365079	-0.124975	356.927	FALSE	0
2022-09-13	13:40:26	-0.0992745	-0.441593	-0.585848	357.905	FALSE	0
2022-09-13	13:40:26	-0.187112	-0.832312	-0.585848	356.927	FALSE	0
2022-09-13	13:40:26	-0.150572	-0.669774	-0.585848	357.905	FALSE	0
2022-09-13	13:40:26	-0.0898598	-0.399714	-0.585848	356.927	FALSE	0
2022-09-13	13:40:27	0.0368577	0.16395	0.541822	358.069	FALSE	0
2022-09-13	13:40:27	0.13126	0.583871	0.541822	357.51	FALSE	0
2022-09-13	13:40:27	0.129428	0.575722	0.541822	358.645	FALSE	0
2022-09-13	13:40:27	0.189682	0.843743	0.541822	358.354	FALSE	0
2022-09-13	13:40:28	0.15813	0.703394	1.02727	359.349	FALSE	0
2022-09-13	13:40:28	0.262354	1.167	1.02727	359.521	FALSE	0
2022-09-13	13:40:28	0.23701	1.05427	1.02727	360.403	FALSE	0
2022-09-13	13:40:28	0.266272	1.18443	1.02727	360.706	FALSE	0
2022-09-13	13:40:29	0.224084	0.99677	0.892187	361.4	FALSE	0
2022-09-13	13:40:29	0.19355	0.860949	0.892187	361.567	FALSE	0
2022-09-13	13:40:29	0.184084	0.818842	0.892187	362.218	FALSE	0
2022-09-13	13:40:30	0.173295	0.770851	0.191454	362.337	FALSE	0
2022-09-13	13:40:30	0.0288679	0.12841	0.191454	362.347	FALSE	0
2022-09-13	13:40:30	0.0261707	0.116413	0.191454	362.454	FALSE	0
2022-09-13	13:40:30	-0.0561702	-0.249856	0.191454	362.347	FALSE	0
2022-09-13	13:40:31	0.014415	0.0641208	0.485172	362.518	FALSE	0
2022-09-13	13:40:31	-0.00502519	-0.0223531	0.485172	362.347	FALSE	0
2022-09-13	13:40:31	0.15869	0.705885	0.485172	363.224	FALSE	0
2022-09-13	13:40:31	0.268206	1.19303	0.485172	363.54	FALSE	0
2022-09-13	13:40:32	0.388512	1.72818	1.95596	364.952	FALSE	0
2022-09-13	13:40:32	0.509835	2.26785	1.95596	365.808	FALSE	0
2022-09-13	13:40:32	0.383015	1.70373	1.95596	366.656	FALSE	0
2022-09-13	13:40:32	0.477519	2.1241	1.95596	367.932	FALSE	0
2022-09-13	13:40:33	0.365916	1.62767	1.652	368.283	FALSE	0
2022-09-13	13:40:33	0.393957	1.7524	1.652	369.684	FALSE	0
2022-09-13	13:40:33	0.389835	1.73406	1.652	370.017	FALSE	0
2022-09-13	13:40:33	0.33584	1.49388	1.652	371.178	FALSE	0
2022-09-13	13:40:34	0.606883	2.69954	2.01454	372.717	FALSE	0
2022-09-13	13:40:34	0.454415	2.02133	2.01454	373.199	FALSE	0
2022-09-13	13:40:34	0.297367	1.32275	2.01454	374.04	FALSE	0
2022-09-13	13:40:35	0.251158	1.1172	0.729257	374.317	FALSE	0
2022-09-13	13:40:35	0.0997585	0.443746	0.729257	374.484	FALSE	0
2022-09-13	13:40:35	0.179555	0.798697	0.729257	375.115	FALSE	0
2022-09-13	13:40:35	0.125306	0.557386	0.729257	375.041	FALSE	0
2022-09-13	13:40:36	0.202099	0.898977	0.875491	376.014	FALSE	0
2022-09-13	13:40:36	0.090191	0.401188	0.875491	375.442	FALSE	0
2022-09-13	13:40:36	0.257417	1.14504	0.875491	377.159	FALSE	0
2022-09-13	13:40:36	0.23757	1.05676	0.875491	376.499	FALSE	0
2022-09-13	13:40:37	0.285814	1.27136	1.45596	378.431	FALSE	0
2022-09-13	13:40:37	0.25355	1.12784	1.45596	377.627	FALSE	0
2022-09-13	13:40:37	0.338842	1.50724	1.45596	379.938	FALSE	0
2022-09-13	13:40:37	0.431056	1.91742	1.45596	379.544	FALSE	0
2022-09-13	13:40:38	0.457774	2.03627	2.42887	381.974	FALSE	0
2022-09-13	13:40:38	0.587952	2.61533	2.42887	382.159	FALSE	0
2022-09-13	13:40:38	0.592379	2.63502	2.42887	384.609	FALSE	0
2022-09-13	13:40:39	0.645254	2.87022	3.04922	385.03	FALSE	0
2022-09-13	13:40:39	0.622405	2.76858	3.04922	387.378	FALSE	0
2022-09-13	13:40:39	0.732481	3.25822	3.04922	388.288	FALSE	0
2022-09-13	13:40:39	0.741845	3.29987	3.04922	390.678	FALSE	0
2022-09-13	13:40:40	0.815025	3.62539	3.38052	391.913	FALSE	0
2022-09-13	13:40:40	0.732175	3.25686	3.38052	393.935	FALSE	0
2022-09-13	13:40:40	0.758028	3.37186	3.38052	395.285	FALSE	0
2022-09-13	13:40:40	0.734669	3.26795	3.38052	397.202	FALSE	0
2022-09-13	13:40:41	0.736908	3.27791	3.26971	398.563	FALSE	0
2022-09-13	13:40:41	0.737366	3.27995	3.26971	400.482	FALSE	0
2022-09-13	13:40:41	0.736094	3.27429	3.26971	401.837	FALSE	0
2022-09-13	13:40:41	0.729886	3.24668	3.26971	403.729	FALSE	0
2022-09-13	13:40:42	0.73187	3.2555	3.24917	405.093	FALSE	0
2022-09-13	13:40:42	0.734364	3.2666	3.24917	406.996	FALSE	0
2022-09-13	13:40:42	0.725102	3.2254	3.24917	408.318	FALSE	0
2022-09-13	13:40:43	0.734924	3.26909	3.26218	410.265	FALSE	0
2022-09-13	13:40:43	0.733499	3.26275	3.26218	411.581	FALSE	0
2022-09-13	13:40:43	0.735687	3.27248	3.26218	413.537	FALSE	0
2022-09-13	13:40:43	0.729377	3.24441	3.26218	414.825	FALSE	0
2022-09-13	13:40:44	0.736501	3.2761	3.2619	416.813	FALSE	0
2022-09-13	13:40:44	0.739351	3.28878	3.2619	418.114	FALSE	0
2022-09-13	13:40:44	0.726374	3.23106	3.2619	420.044	FALSE	0
2022-09-13	13:40:44	0.731005	3.25166	3.2619	421.366	FALSE	0
2022-09-13	13:40:45	0.732837	3.25981	3.2636	423.304	FALSE	0
2022-09-13	13:40:45	0.732481	3.25822	3.2636	424.624	FALSE	0
2022-09-13	13:40:45	0.733346	3.26207	3.2636	426.566	FALSE	0
2022-09-13	13:40:45	0.736094	3.27429	3.2636	427.898	FALSE	0
2022-09-13	13:40:46	0.733041	3.26071	3.26675	429.827	FALSE	0
2022-09-13	13:40:46	0.739758	3.29059	3.26675	431.189	FALSE	0
2022-09-13	13:40:46	0.730394	3.24894	3.26675	433.076	FALSE	0
2022-09-13	13:40:47	0.725102	3.2254	3.20287	434.414	FALSE	0
2022-09-13	13:40:47	0.73584	3.27316	3.20287	436.349	FALSE	0
2022-09-13	13:40:47	0.699046	3.1095	3.20287	437.524	FALSE	0
2022-09-13	13:40:47	0.720165	3.20344	3.20287	439.553	FALSE	0
2022-09-13	13:40:48	0.736552	3.27633	3.26739	440.8	FALSE	0
2022-09-13	13:40:48	0.7307	3.2503	3.26739	442.803	FALSE	0
2022-09-13	13:40:48	0.735992	3.27384	3.26739	444.074	FALSE	0
2022-09-13	13:40:48	0.734924	3.26909	3.26739	446.072	FALSE	0
2022-09-13	13:40:49	0.725407	3.22676	3.25019	447.301	FALSE	0
2022-09-13	13:40:49	0.738588	3.28539	3.25019	449.357	FALSE	0
2022-09-13	13:40:49	0.731158	3.25234	3.25019	450.553	FALSE	0
2022-09-13	13:40:49	0.727545	3.23627	3.25019	452.594	FALSE	0
2022-09-13	13:40:50	0.731921	3.25573	3.2663	453.809	FALSE	0
2022-09-13	13:40:50	0.735636	3.27226	3.2663	455.866	FALSE	0
2022-09-13	13:40:50	0.735331	3.2709	3.2663	457.08	FALSE	0
2022-09-13	13:40:51	0.735534	3.2718	2.94209	459.138	FALSE	0
2022-09-13	13:40:51	0.703626	3.12987	2.94209	460.21	FALSE	0
2022-09-13	13:40:51	0.557774	2.48109	2.94209	461.619	FALSE	0
2022-09-13	13:40:51	0.648715	2.88561	2.94209	463.095	FALSE	0
2022-09-13	13:40:52	0.271005	1.20548	0.0631022	462.824	FALSE	0
2022-09-13	13:40:52	-0.0034476	-0.0153356	0.0631022	463.095	FALSE	0
2022-09-13	13:40:52	-0.271895	-1.20944	0.0631022	462.824	FALSE	0
2022-09-13	13:40:52	0.0610816	0.271703	0.0631022	463.367	FALSE	0
2022-09-13	13:40:53	0.34327	1.52693	1.63219	464.351	FALSE	0
2022-09-13	13:40:53	0.4736	2.10667	1.63219	465.474	FALSE	0
2022-09-13	13:40:53	0.320776	1.42688	1.63219	465.778	FALSE	0
2022-09-13	13:40:53	0.330089	1.4683	1.63219	466.942	FALSE	0
2022-09-13	13:40:54	0.355433	1.58104	1.24042	467.359	FALSE	0
2022-09-13	13:40:54	0.345967	1.53893	1.24042	468.481	FALSE	0
2022-09-13	13:40:54	0.135178	0.601299	1.24042	467.96	FALSE	0
2022-09-13	13:40:55	0.264186	1.17515	0.726597	469.656	FALSE	0
2022-09-13	13:40:55	0.0947712	0.421561	0.726597	468.382	FALSE	0
2022-09-13	13:40:55	0.120471	0.535879	0.726597	470.192	FALSE	0
2022-09-13	13:40:55	0.173957	0.773796	0.726597	469.156	FALSE	0
2022-09-13	13:40:56	0.351768	1.56473	1.90486	471.757	FALSE	0
2022-09-13	13:40:56	0.30388	1.35172	1.90486	470.507	FALSE	0
2022-09-13	13:40:56	0.448868	1.99665	1.90486	473.753	FALSE	0
2022-09-13	13:40:56	0.60841	2.70633	1.90486	473.214	FALSE	0
2022-09-13	13:40:57	0.485356	2.15896	2.00061	475.912	FALSE	0
2022-09-13	13:40:57	0.388155	1.72659	2.00061	474.94	FALSE	0
2022-09-13	13:40:57	0.437621	1.94663	2.00061	477.859	FALSE	0
2022-09-13	13:40:57	0.487901	2.17028	2.00061	477.111	FALSE	0
2022-09-13	13:40:58	0.348206	1.54889	1.70086	479.408	FALSE	0
2022-09-13	13:40:58	0.425254	1.89161	1.70086	479.002	FALSE	0
2022-09-13	13:40:58	0.373652	1.66208	1.70086	481.07	FALSE	0
2022-09-13	13:40:59	0.378893	1.68539	1.74165	480.688	FALSE	0
2022-09-13	13:40:59	0.273193	1.21522	1.74165	482.285	FALSE	0
2022-09-13	13:40:59	0.517214	2.30067	1.74165	482.988	FALSE	0
2022-09-13	13:40:59	0.396858	1.7653	1.74165	484.05	FALSE	0
2022-09-13	13:41:00	1.11584	4.96348	2.42914	487.952	FALSE	0
2022-09-13	13:41:00	0.739147	3.28787	2.42914	487.338	FALSE	0
2022-09-13	13:41:00	0.206679	0.91935	2.42914	488.871	FALSE	0
2022-09-13	13:41:00	0.12271	0.545839	2.42914	487.884	FALSE	0
2022-09-13	13:41:01	-0.464567	-2.06649	0.517825	488.871	FALSE	0
2022-09-13	13:41:01	-0.0182567	-0.0812095	0.517825	487.884	FALSE	0
2022-09-13	13:41:01	0.0501401	0.223033	0.517825	489.094	FALSE	0
2022-09-13	13:41:01	0.898333	3.99596	0.517825	491.88	FALSE	0
2022-09-13	13:41:02	0.592175	2.63411	2.81815	491.728	FALSE	0
2022-09-13	13:41:02	0.761794	3.38861	2.81815	495.269	FALSE	0
2022-09-13	13:41:02	0.546679	2.43174	2.81815	494.16	FALSE	0
2022-09-13	13:41:03	0.450089	2.00209	2.06089	497.271	FALSE	0
2022-09-13	13:41:03	0.466272	2.07407	2.06089	496.234	FALSE	0
2022-09-13	13:41:03	0.436756	1.94278	2.06089	499.213	FALSE	0
2022-09-13	13:41:03	0.500114	2.22461	2.06089	498.459	FALSE	0
2022-09-13	13:41:04	0.319504	1.42122	2.31454	500.635	FALSE	0
2022-09-13	13:41:04	0.518639	2.30701	2.31454	500.766	FALSE	0
2022-09-13	13:41:04	0.733702	3.26365	2.31454	503.898	FALSE	0
2022-09-13	13:41:04	0.509478	2.26626	2.31454	503.032	FALSE	0
2022-09-13	13:41:05	0.460623	2.04894	2.70395	505.947	FALSE	0
2022-09-13	13:41:05	0.347341	1.54504	2.70395	504.577	FALSE	0
2022-09-13	13:41:05	0.35757	1.59054	2.70395	507.538	FALSE	0
2022-09-13	13:41:05	1.26597	5.63129	2.70395	510.208	FALSE	0
2022-09-13	13:41:06	0.399046	1.77504	1.7724	509.313	FALSE	0
2022-09-13	13:41:06	0.426985	1.89931	1.7724	512.108	FALSE	0
2022-09-13	13:41:06	0.369326	1.64284	1.7724	510.956	FALSE	0
2022-09-13	13:41:07	0.368919	1.64103	1.4533	513.749	FALSE	0
2022-09-13	13:41:07	0.35131	1.5627	1.4533	512.518	FALSE	0
2022-09-13	13:41:07	0.290954	1.29422	1.4533	515.043	FALSE	0
2022-09-13	13:41:07	0.295687	1.31527	1.4533	513.834	FALSE	0
2022-09-13	13:41:08	0.259708	1.15523	-0.498015	516.198	FALSE	0
2022-09-13	13:41:08	0.0759417	0.337804	-0.498015	514.171	FALSE	0
2022-09-13	13:41:08	-0.378155	-1.68211	-0.498015	516.198	FALSE	0
2022-09-13	13:41:08	-0.40533	-1.80299	-0.498015	514.171	FALSE	0
2022-09-13	13:41:09	-0.288638	-1.28392	-1.14527	516.198	FALSE	0
2022-09-13	13:41:09	-0.209453	-0.931689	-1.14527	514.171	FALSE	0
2022-09-13	13:41:09	-0.219071	-0.974472	-1.14527	516.198	FALSE	0
2022-09-13	13:41:09	-0.312709	-1.39099	-1.14527	514.171	FALSE	0
2022-09-13	13:41:10	-0.240699	-1.07068	-1.35198	516.198	FALSE	0
2022-09-13	13:41:10	-0.390776	-1.73825	-1.35198	514.171	FALSE	0
2022-09-13	13:41:10	-0.280343	-1.24702	-1.35198	516.198	FALSE	0
2022-09-13	13:41:11	-0.299376	-1.33168	-1.15534	514.171	FALSE	0
2022-09-13	13:41:11	-0.126297	-0.561794	-1.15534	516.198	FALSE	0
2022-09-13	13:41:11	-0.286755	-1.27554	-1.15534	514.171	FALSE	0
2022-09-13	13:41:11	-0.326501	-1.45234	-1.15534	516.198	FALSE	0
2022-09-13	13:41:12	-0.304211	-1.35319	-1.87832	514.171	FALSE	0
2022-09-13	13:41:12	-0.408384	-1.81657	-1.87832	516.198	FALSE	0
2022-09-13	13:41:12	-0.431844	-1.92093	-1.87832	514.171	FALSE	0
2022-09-13	13:41:12	-0.544618	-2.42257	-1.87832	516.198	FALSE	0
2022-09-13	13:41:13	-0.546602	-2.4314	-3.07305	514.171	FALSE	0
2022-09-13	13:41:13	-0.679478	-3.02245	-3.07305	516.198	FALSE	0
2022-09-13	13:41:13	-0.783345	-3.48448	-3.07305	514.171	FALSE	0
2022-09-13	13:41:13	-0.753981	-3.35386	-3.07305	516.198	FALSE	0
2022-09-13	13:41:14	-0.872811	-3.88244	-3.5548	514.171	FALSE	0
2022-09-13	13:41:14	-0.731793	-3.25516	-3.5548	516.198	FALSE	0
2022-09-13	13:41:14	-0.792862	-3.52681	-3.5548	514.171	FALSE	0
2022-09-13	13:41:15	-0.843447	-3.75182	-3.84944	516.198	FALSE	0
2022-09-13	13:41:15	-0.829757	-3.69093	-3.84944	514.171	FALSE	0
2022-09-13	13:41:15	-0.956933	-4.25663	-3.84944	516.198	FALSE	0
2022-09-13	13:41:15	-0.831437	-3.6984	-3.84944	514.171	FALSE	0
2022-09-13	13:41:16	-1.02716	-4.56901	-4.40348	516.198	FALSE	0
2022-09-13	13:41:16	-1.17408	-5.22254	-4.40348	514.171	FALSE	0
2022-09-13	13:41:16	-0.899732	-4.00219	-4.40348	516.198	FALSE	0
2022-09-13	13:41:16	-0.858816	-3.82019	-4.40348	514.171	FALSE	0
2022-09-13	13:41:17	-0.850317	-3.78238	-3.12426	516.198	FALSE	0
2022-09-13	13:41:17	-0.754643	-3.3568	-3.12426	514.171	FALSE	0
2022-09-13	13:41:17	-0.798613	-3.55239	-3.12426	516.198	FALSE	0
2022-09-13	13:41:17	-0.40589	-1.80548	-3.12426	514.171	FALSE	0
2022-09-13	13:41:18	-0.136781	-0.608429	-0.348026	516.198	FALSE	0
2022-09-13	13:41:18	0.0944659	0.420203	-0.348026	514.592	FALSE	0
2022-09-13	13:41:18	-0.192404	-0.855851	-0.348026	516.198	FALSE	0
2022-09-13	13:41:19	-0.424262	-1.8872	-1.65749	514.592	FALSE	0
2022-09-13	13:41:19	-0.31047	-1.38103	-1.65749	516.198	FALSE	0
2022-09-13	13:41:19	-0.364414	-1.62099	-1.65749	514.592	FALSE	0
2022-09-13	13:41:19	-0.391335	-1.74074	-1.65749	516.198	FALSE	0
2022-09-13	13:41:20	-0.419376	-1.86547	-1.83615	514.592	FALSE	0
2022-09-13	13:41:20	-0.723752	-3.21939	-1.83615	516.198	FALSE	0
2022-09-13	13:41:20	-0.407112	-1.81092	-1.83615	514.592	FALSE	0
2022-09-13	13:41:20	-0.100903	-0.448837	-1.83615	516.198	FALSE	0
2022-09-13	13:41:21	0.356908	1.5876	1.68307	516.179	FALSE	0
2022-09-13	13:41:21	0.419962	1.86807	1.68307	518.066	FALSE	0
2022-09-13	13:41:21	0.404949	1.80129	1.68307	517.981	FALSE	0
2022-09-13	13:41:21	0.331667	1.47532	1.68307	519.542	FALSE	0
2022-09-13	13:41:22	0.444644	1.97787	2.02601	519.958	FALSE	0
2022-09-13	13:41:22	0.434771	1.93395	2.02601	521.475	FALSE	0
2022-09-13	13:41:22	0.486985	2.16621	2.02601	522.125	FALSE	0
2022-09-13	13:41:23	0.396807	1.76508	1.86994	523.241	FALSE	0
2022-09-13	13:41:23	0.422201	1.87803	1.86994	524.003	FALSE	0
2022-09-13	13:41:23	0.401692	1.78681	1.86994	525.027	FALSE	0
2022-09-13	13:41:23	0.460827	2.04985	1.86994	526.053	FALSE	0
2022-09-13	13:41:24	0.339657	1.51086	2.24742	526.538	FALSE	0
2022-09-13	13:41:24	0.540165	2.40276	2.24742	528.455	FALSE	0
2022-09-13	13:41:24	0.542506	2.41318	2.24742	528.951	FALSE	0
2022-09-13	13:41:24	0.598639	2.66287	2.24742	531.118	FALSE	0
2022-09-13	13:41:25	0.433804	1.92965	2.19331	530.881	FALSE	0
2022-09-13	13:41:25	0.656298	2.91934	2.19331	534.038	FALSE	0
2022-09-13	13:41:25	0.211667	0.941537	2.19331	531.823	FALSE	0
2022-09-13	13:41:25	0.670547	2.98273	2.19331	537.02	FALSE	0
2022-09-13	13:41:26	0.271361	1.20707	1.34169	533.03	FALSE	0
2022-09-13	13:41:26	0.342201	1.52218	1.34169	538.542	FALSE	0
2022-09-13	13:41:26	0.291311	1.29581	1.34169	534.325	FALSE	0
2022-09-13	13:41:27	0.533499	2.37311	1.66411	540.916	FALSE	0
2022-09-13	13:41:27	0.247392	1.10045	1.66411	535.426	FALSE	0
2022-09-13	13:41:27	0.469071	2.08652	1.66411	543.002	FALSE	0
2022-09-13	13:41:27	0.246476	1.09637	1.66411	536.522	FALSE	0
2022-09-13	13:41:28	0.167188	0.743686	0.821275	543.746	FALSE	0
2022-09-13	13:41:28	0.208562	0.927725	0.821275	537.45	FALSE	0
2022-09-13	13:41:28	0.0754327	0.33554	0.821275	544.081	FALSE	0
2022-09-13	13:41:28	0.287341	1.27815	0.821275	538.728	FALSE	0
2022-09-13	13:41:29	0.351616	1.56406	1.34397	545.645	FALSE	0
2022-09-13	13:41:29	0.312074	1.38817	1.34397	540.116	FALSE	0
2022-09-13	13:41:29	0.258232	1.14867	1.34397	546.794	FALSE	0
2022-09-13	13:41:29	0.286628	1.27498	1.34397	541.391	FALSE	0
2022-09-13	13:41:30	0.294211	1.30871	1.2534	548.103	FALSE	0
2022-09-13	13:41:30	0.340267	1.51358	1.2534	542.905	FALSE	0
2022-09-13	13:41:30	0.210853	0.937916	1.2534	549.041	FALSE	0
2022-09-13	13:41:31	0.282405	1.25619	0.978945	544.161	FALSE	0
2022-09-13	13:41:31	0.0491733	0.218733	0.978945	549.259	FALSE	0
2022-09-13	13:41:31	0.397774	1.76938	0.978945	545.93	FALSE	0
2022-09-13	13:41:31	0.150954	0.671474	0.978945	549.931	FALSE	0
2022-09-13	13:41:32	0.235076	1.04567	0.429653	546.976	FALSE	0
2022-09-13	13:41:32	0.0723284	0.321731	0.429653	550.253	FALSE	0
2022-09-13	13:41:32	-0.0194781	-0.0866425	0.429653	546.976	FALSE	0
2022-09-13	13:41:32	0.0984353	0.43786	0.429653	550.69	FALSE	0
2022-09-13	13:41:33	0.159504	0.709506	0.576852	547.686	FALSE	0
2022-09-13	13:41:33	0.263728	1.17311	0.576852	551.864	FALSE	0
2022-09-13	13:41:33	0.0491733	0.218733	0.576852	547.904	FALSE	0
2022-09-13	13:41:33	0.0463234	0.206056	0.576852	552.07	FALSE	0
2022-09-13	13:41:34	-0.0912847	-0.406053	0.0780049	547.904	FALSE	0
2022-09-13	13:41:34	0.139504	0.620542	0.0780049	552.69	FALSE	0
2022-09-13	13:41:34	0.00438957	0.0195257	0.0780049	547.924	FALSE	0
2022-09-13	13:41:35	0.160725	0.714937	-0.14799	553.405	FALSE	0
2022-09-13	13:41:35	-0.205534	-0.914256	-0.14799	547.924	FALSE	0
2022-09-13	13:41:35	0.000470984	0.00209503	-0.14799	553.407	FALSE	0
2022-09-13	13:41:35	-0.0887402	-0.394734	-0.14799	547.924	FALSE	0
2022-09-13	13:41:36	-0.205738	-0.915164	-0.917142	553.407	FALSE	0
2022-09-13	13:41:36	-0.185432	-0.824839	-0.917142	547.924	FALSE	0
2022-09-13	13:41:36	-0.249096	-1.10803	-0.917142	553.407	FALSE	0
2022-09-13	13:41:36	-0.184465	-0.820537	-0.917142	547.924	FALSE	0
2022-09-13	13:41:37	-0.217544	-0.967679	0.432315	553.407	FALSE	0
2022-09-13	13:41:37	0.178741	0.795076	0.432315	548.719	FALSE	0
2022-09-13	13:41:37	0.0921249	0.40979	0.432315	553.817	FALSE	0
2022-09-13	13:41:37	0.335433	1.49207	0.432315	550.211	FALSE	0
2022-09-13	13:41:38	0.177417	0.789186	0.991338	554.606	FALSE	0
2022-09-13	13:41:38	0.422812	1.88075	0.991338	552.092	FALSE	0
2022-09-13	13:41:38	0.068359	0.304075	0.991338	554.91	FALSE	0
2022-09-13	13:41:39	0.459453	2.04374	1.22648	554.136	FALSE	0
2022-09-13	13:41:39	0.187087	0.8322	1.22648	555.742	FALSE	0
2022-09-13	13:41:39	0.291107	1.2949	1.22648	555.43	FALSE	0
2022-09-13	13:41:39	0.165255	0.735087	1.22648	556.477	FALSE	0
2022-09-13	13:41:40	0.213499	0.949686	1.42433	556.38	FALSE	0
2022-09-13	13:41:40	0.333244	1.48234	1.42433	557.96	FALSE	0
2022-09-13	13:41:40	0.334262	1.48686	1.42433	557.867	FALSE	0
2022-09-13	13:41:40	0.399809	1.77843	1.42433	559.738	FALSE	0
2022-09-13	13:41:41	0.320573	1.42597	1.50333	559.293	FALSE	0
2022-09-13	13:41:41	0.377265	1.67815	1.50333	561.416	FALSE	0
2022-09-13	13:41:41	0.336654	1.4975	1.50333	560.79	FALSE	0
2022-09-13	13:41:41	0.317366	1.41171	1.50333	562.828	FALSE	0
2022-09-13	13:41:42	0.315992	1.4056	1.40305	562.196	FALSE	0
2022-09-13	13:41:42	0.305713	1.35987	1.40305	564.188	FALSE	0
2022-09-13	13:41:42	0.310395	1.3807	1.40305	563.577	FALSE	0
2022-09-13	13:41:42	0.32958	1.46604	1.40305	565.654	FALSE	0
2022-09-13	13:41:43	0.163779	0.728522	1.01013	564.305	FALSE	0
2022-09-13	13:41:43	0.464339	2.06547	1.01013	567.72	FALSE	0
2022-09-13	13:41:43	0.0531427	0.236389	1.01013	564.542	FALSE	0
2022-09-13	13:41:44	0.0880536	0.39168	0.58319	568.111	FALSE	0
2022-09-13	13:41:44	0.121743	0.541537	0.58319	565.083	FALSE	0
2022-09-13	13:41:44	0.174313	0.775379	0.58319	568.887	FALSE	0
2022-09-13	13:41:44	0.140318	0.624163	0.58319	565.707	FALSE	0
2022-09-13	13:41:45	0.295942	1.31641	1.16157	570.203	FALSE	0
2022-09-13	13:41:45	0.123626	0.549913	1.16157	566.257	FALSE	0
2022-09-13	13:41:45	0.394109	1.75308	1.16157	571.956	FALSE	0
2022-09-13	13:41:45	0.230853	1.02688	1.16157	567.284	FALSE	0
2022-09-13	13:41:46	0.545814	2.42789	3.23858	574.384	FALSE	0
2022-09-13	13:41:46	0.776857	3.45562	3.23858	570.74	FALSE	0
2022-09-13	13:41:46	0.794517	3.53417	3.23858	577.918	FALSE	0
2022-09-13	13:41:46	0.795076	3.53666	3.23858	574.276	FALSE	0
2022-09-13	13:41:47	0.794415	3.53372	3.55779	581.452	FALSE	0
2022-09-13	13:41:47	0.810547	3.60548	3.55779	577.882	FALSE	0
2022-09-13	13:41:47	0.794517	3.53417	3.55779	584.986	FALSE	0
2022-09-13	13:41:48	0.802048	3.56767	3.59738	581.45	FALSE	0
2022-09-13	13:41:48	0.78846	3.50723	3.59738	588.493	FALSE	0
2022-09-13	13:41:48	0.785509	3.4941	3.59738	584.944	FALSE	0
2022-09-13	13:41:48	0.858893	3.82053	3.59738	592.314	FALSE	0
2022-09-13	13:41:49	0.80841	3.59597	3.43655	588.54	FALSE	0
2022-09-13	13:41:49	0.746018	3.31844	3.43655	595.632	FALSE	0
2022-09-13	13:41:49	0.763321	3.3954	3.43655	591.935	FALSE	0
2022-09-13	13:41:49	0.772532	3.43638	3.43655	599.069	FALSE	0
2022-09-13	13:41:50	0.764593	3.40106	3.26728	595.336	FALSE	0
2022-09-13	13:41:50	0.729275	3.24396	3.26728	602.313	FALSE	0
2022-09-13	13:41:50	0.706272	3.14164	3.26728	598.478	FALSE	0
2022-09-13	13:41:50	0.737926	3.28244	3.26728	605.595	FALSE	0
2022-09-13	13:41:51	0.731667	3.2546	3.23423	601.732	FALSE	0
2022-09-13	13:41:51	0.723219	3.21702	3.23423	608.812	FALSE	0
2022-09-13	13:41:51	0.726374	3.23106	3.23423	604.963	FALSE	0
2022-09-13	13:41:52	0.731259	3.25279	3.25918	612.065	FALSE	0
2022-09-13	13:41:52	0.720471	3.2048	3.25918	608.168	FALSE	0
2022-09-13	13:41:52	0.714669	3.17899	3.25918	615.244	FALSE	0
2022-09-13	13:41:52	0.764389	3.40016	3.25918	611.568	FALSE	0
2022-09-13	13:41:53	-0.166857	-0.742213	2.16349	615.244	FALSE	0
2022-09-13	13:41:53	0.735738	3.27271	2.16349	614.841	FALSE	0
2022-09-13	13:41:53	0.743575	3.30757	2.16349	618.551	FALSE	0
2022-09-13	13:41:53	0.633041	2.81589	2.16349	617.657	FALSE	0
2022-09-13	13:41:54	0.429631	1.91108	2.10933	620.462	FALSE	0
2022-09-13	13:41:54	0.50897	2.264	2.10933	619.921	FALSE	0
2022-09-13	13:41:54	0.502405	2.2348	2.10933	622.697	FALSE	0
2022-09-13	13:41:54	0.455789	2.02744	2.10933	621.948	FALSE	0
2022-09-13	13:41:55	0.480318	2.13655	2.28467	624.834	FALSE	0
2022-09-13	13:41:55	0.508104	2.26015	2.28467	624.209	FALSE	0
2022-09-13	13:41:55	0.55243	2.45732	2.28467	627.291	FALSE	0
2022-09-13	13:41:56	0.411616	1.83095	1.92059	626.039	FALSE	0
2022-09-13	13:41:56	0.43411	1.93101	1.92059	629.222	FALSE	0
2022-09-13	13:41:56	0.599606	2.66717	1.92059	628.707	FALSE	0
2022-09-13	13:41:56	0.281743	1.25325	1.92059	630.475	FALSE	0
2022-09-13	13:41:57	0.269733	1.19983	1.42263	629.906	FALSE	0
2022-09-13	13:41:57	0.260623	1.1593	1.42263	631.635	FALSE	0
2022-09-13	13:41:57	0.453041	2.01522	1.42263	631.922	FALSE	0
2022-09-13	13:41:57	0.295891	1.31618	1.42263	632.951	FALSE	0
2022-09-13	13:41:58	0.198944	0.884943	1.51261	632.807	FALSE	0
2022-09-13	13:41:58	0.281387	1.25167	1.51261	634.202	FALSE	0
2022-09-13	13:41:58	0.356705	1.5867	1.51261	634.393	FALSE	0
2022-09-13	13:41:58	0.523168	2.32716	1.51261	636.53	FALSE	0
2022-09-13	13:41:59	0.318232	1.41556	1.74433	635.809	FALSE	0
2022-09-13	13:41:59	0.456247	2.02948	1.74433	638.559	FALSE	0
2022-09-13	13:41:59	0.401947	1.78794	1.74433	637.597	FALSE	0
2022-09-13	13:42:00	0.388206	1.72682	1.7816	640.286	FALSE	0
2022-09-13	13:42:00	0.408817	1.8185	1.7816	639.415	FALSE	0
2022-09-13	13:42:00	0.407646	1.81329	1.7816	642.099	FALSE	0
2022-09-13	13:42:00	0.397417	1.76779	1.7816	641.183	FALSE	0
2022-09-13	13:42:01	0.402761	1.79156	1.83978	643.891	FALSE	0
2022-09-13	13:42:01	0.413855	1.84091	1.83978	643.024	FALSE	0
2022-09-13	13:42:01	0.422303	1.87849	1.83978	645.769	FALSE	0
2022-09-13	13:42:01	0.415484	1.84816	1.83978	644.872	FALSE	0
2022-09-13	13:42:02	0.408919	1.81895	1.79818	647.588	FALSE	0
2022-09-13	13:42:02	0.403321	1.79405	1.79818	646.666	FALSE	0
2022-09-13	13:42:02	0.391616	1.74199	1.79818	649.33	FALSE	0
2022-09-13	13:42:02	0.413143	1.83774	1.79818	648.504	FALSE	0
2022-09-13	13:42:03	0.28327	1.26004	0.953986	650.59	FALSE	0
2022-09-13	13:42:03	0.202608	0.901241	0.953986	649.405	FALSE	0
2022-09-13	13:42:03	0.157519	0.700676	0.953986	651.291	FALSE	0
2022-09-13	13:42:04	0.110853	0.493096	1.53825	649.898	FALSE	0
2022-09-13	13:42:04	0.0629137	0.279853	1.53825	651.571	FALSE	0
2022-09-13	13:42:04	0.659351	2.93293	1.53825	652.831	FALSE	0
2022-09-13	13:42:04	0.55014	2.44713	1.53825	654.018	FALSE	0
2022-09-13	13:42:05	0.414466	1.84363	2.93904	654.675	FALSE	0
2022-09-13	13:42:05	0.715992	3.18488	2.93904	657.203	FALSE	0
2022-09-13	13:42:05	0.736552	3.27633	2.93904	657.951	FALSE	0
2022-09-13	13:42:05	0.775891	3.45132	2.93904	660.654	FALSE	0
2022-09-13	13:42:06	0.729071	3.24305	3.48901	661.194	FALSE	0
2022-09-13	13:42:06	0.787443	3.5027	3.48901	664.157	FALSE	0
2022-09-13	13:42:06	0.76673	3.41057	3.48901	664.605	FALSE	0
2022-09-13	13:42:06	0.854211	3.7997	3.48901	667.957	FALSE	0
2022-09-13	13:42:07	0.730293	3.24849	3.20495	667.853	FALSE	0
2022-09-13	13:42:07	0.729784	3.24623	3.20495	671.203	FALSE	0
2022-09-13	13:42:07	0.701438	3.12014	3.20495	670.973	FALSE	0
2022-09-13	13:42:08	0.690191	3.07011	1.97306	674.273	FALSE	0
2022-09-13	13:42:08	0.270344	1.20254	1.97306	672.176	FALSE	0
2022-09-13	13:42:08	0.288054	1.28132	1.97306	675.554	FALSE	0
2022-09-13	13:42:08	0.525662	2.33825	1.97306	674.514	FALSE	0
2022-09-13	13:42:09	-0.0450761	-0.200508	0.601696	675.554	FALSE	0
2022-09-13	13:42:09	0.209377	0.931351	0.601696	675.446	FALSE	0
2022-09-13	13:42:09	0.197519	0.878604	0.601696	676.433	FALSE	0
2022-09-13	13:42:09	0.179249	0.797335	0.601696	676.243	FALSE	0
2022-09-13	13:42:10	0.197367	0.877928	0.462478	677.311	FALSE	0
2022-09-13	13:42:10	0.0178246	0.0792874	0.462478	676.322	FALSE	0
2022-09-13	13:42:10	0.112888	0.502148	0.462478	677.813	FALSE	0
2022-09-13	13:42:10	0.0877992	0.390548	0.462478	676.713	FALSE	0
2022-09-13	13:42:11	0.0503946	0.224165	0.0908317	678.037	FALSE	0
2022-09-13	13:42:11	0.112837	0.501922	0.0908317	677.215	FALSE	0
2022-09-13	13:42:11	-0.101972	-0.453592	0.0908317	678.037	FALSE	0
2022-09-13	13:42:12	0.129835	0.577532	1.61069	677.792	FALSE	0
2022-09-13	13:42:12	0.371107	1.65076	1.61069	679.688	FALSE	0
2022-09-13	13:42:12	0.454059	2.01975	1.61069	679.812	FALSE	0
2022-09-13	13:42:12	0.493397	2.19473	1.61069	681.883	FALSE	0
2022-09-13	13:42:13	0.330344	1.46944	1.18624	681.281	FALSE	0
2022-09-13	13:42:13	0.308919	1.37413	1.18624	683.257	FALSE	0
2022-09-13	13:42:13	0.186069	0.827672	1.18624	682.109	FALSE	0
2022-09-13	13:42:13	0.241387	1.07374	1.18624	684.33	FALSE	0
2022-09-13	13:42:14	0.179046	0.796432	0.836669	682.906	FALSE	0
2022-09-13	13:42:14	0.102608	0.456421	0.836669	684.787	FALSE	0
2022-09-13	13:42:14	0.337468	1.50113	0.836669	684.407	FALSE	0
2022-09-13	13:42:14	0.133244	0.592696	0.836669	685.38	FALSE	0
2022-09-13	13:42:15	0.286578	1.27476	1.01314	685.681	FALSE	0
2022-09-13	13:42:15	0.207697	0.923878	1.01314	686.303	FALSE	0
2022-09-13	13:42:15	0.18902	0.840799	1.01314	686.522	FALSE	0
2022-09-13	13:42:16	0.198181	0.881549	0.708884	687.185	FALSE	0
2022-09-13	13:42:16	0.0960943	0.427447	0.708884	686.95	FALSE	0
2022-09-13	13:42:16	0.327036	1.45472	0.708884	688.64	FALSE	0
2022-09-13	13:42:16	0.0161453	0.0718175	0.708884	687.021	FALSE	0
2022-09-13	13:42:17	0.10327	0.459366	0.671984	689.099	FALSE	0
2022-09-13	13:42:17	0.117926	0.524558	0.671984	687.546	FALSE	0
2022-09-13	13:42:17	0.120013	0.533842	0.671984	689.633	FALSE	0
2022-09-13	13:42:17	0.263066	1.17017	0.671984	688.716	FALSE	0
2022-09-13	13:42:18	-0.0331677	-0.147537	0.054387	689.633	FALSE	0
2022-09-13	13:42:18	0.143321	0.63752	0.054387	689.354	FALSE	0
2022-09-13	13:42:18	-0.0321499	-0.143009	0.054387	689.633	FALSE	0
2022-09-13	13:42:18	-0.0290964	-0.129427	0.054387	689.354	FALSE	0
2022-09-13	13:42:19	0.668461	2.97345	3.17303	692.606	FALSE	0
2022-09-13	13:42:19	0.738995	3.2872	3.17303	692.641	FALSE	0
2022-09-13	13:42:19	0.732532	3.25845	3.17303	695.865	FALSE	0
2022-09-13	13:42:20	0.734873	3.26886	3.25324	695.91	FALSE	0
2022-09-13	13:42:20	0.731209	3.25256	3.25324	699.117	FALSE	0
2022-09-13	13:42:20	0.726985	3.23377	3.25324	699.144	FALSE	0
2022-09-13	13:42:20	0.732379	3.25777	3.25324	702.375	FALSE	0
2022-09-13	13:42:21	0.731616	3.25437	3.18561	702.398	FALSE	0
2022-09-13	13:42:21	0.737163	3.27905	3.18561	705.654	FALSE	0
2022-09-13	13:42:21	0.727748	3.23717	3.18561	705.635	FALSE	0
2022-09-13	13:42:21	0.668104	2.97186	3.18561	708.626	FALSE	0
2022-09-13	13:42:22	0.713448	3.17356	3.20972	708.809	FALSE	0
2022-09-13	13:42:22	0.712328	3.16858	3.20972	711.795	FALSE	0
2022-09-13	13:42:22	0.724796	3.22404	3.20972	712.033	FALSE	0
2022-09-13	13:42:22	0.735738	3.27271	3.20972	715.067	FALSE	0
2022-09-13	13:42:23	0.733601	3.2632	3.24924	715.296	FALSE	0
2022-09-13	13:42:23	0.727646	3.23671	3.24924	718.304	FALSE	0
2022-09-13	13:42:23	0.73014	3.24781	3.24924	718.544	FALSE	0
2022-09-13	13:42:24	0.68042	3.02664	2.68527	721.331	FALSE	0
2022-09-13	13:42:24	0.461132	2.05121	2.68527	720.595	FALSE	0
2022-09-13	13:42:24	0.726985	3.23377	2.68527	724.564	FALSE	0
2022-09-13	13:42:24	0.54617	2.42947	2.68527	723.024	FALSE	0
2022-09-13	13:42:25	0.735229	3.27045	3.2552	727.835	FALSE	0
2022-09-13	13:42:25	0.729275	3.24396	3.2552	726.268	FALSE	0
2022-09-13	13:42:25	0.730903	3.2512	3.2552	731.086	FALSE	0
2022-09-13	13:42:26	0.732379	3.25777	3.24482	729.526	FALSE	0
2022-09-13	13:42:26	0.724491	3.22268	3.24482	734.309	FALSE	0
2022-09-13	13:42:26	0.739555	3.28969	3.24482	732.816	FALSE	0
2022-09-13	13:42:26	0.724135	3.2211	3.24482	737.53	FALSE	0
2022-09-13	13:42:26	0.726781	3.23287	3.24482	736.049	FALSE	0
2022-09-13	13:42:27	0.741387	3.29784	3.26381	740.828	FALSE	0
2022-09-13	13:42:27	0.733295	3.26184	3.26381	739.31	FALSE	0
2022-09-13	13:42:27	0.726527	3.23174	3.26381	744.059	FALSE	0
2022-09-13	13:42:28	0.730191	3.24804	3.25019	742.559	FALSE	0
2022-09-13	13:42:28	0.728054	3.23853	3.25019	747.298	FALSE	0
2022-09-13	13:42:28	0.731972	3.25596	3.25019	745.814	FALSE	0
2022-09-13	13:42:28	0.732481	3.25822	3.25019	750.556	FALSE	0
2022-09-13	13:42:29	0.730903	3.2512	3.25086	749.066	FALSE	0
2022-09-13	13:42:29	0.726527	3.23174	3.25086	753.788	FALSE	0
2022-09-13	13:42:29	0.732175	3.25686	3.25086	752.323	FALSE	0
2022-09-13	13:42:29	0.733702	3.26365	3.25086	757.052	FALSE	0
2022-09-13	13:42:30	0.733142	3.26116	3.26761	755.584	FALSE	0
2022-09-13	13:42:30	0.734109	3.26546	3.26761	760.317	FALSE	0
2022-09-13	13:42:30	0.73187	3.2555	3.26761	758.839	FALSE	0
2022-09-13	13:42:30	0.739249	3.28833	3.26761	763.605	FALSE	0
2022-09-13	13:42:31	0.73701	3.27837	2.97088	762.118	FALSE	0
2022-09-13	13:42:31	0.71243	3.16903	2.97088	766.774	FALSE	0
2022-09-13	13:42:31	0.554211	2.46524	2.97088	764.583	FALSE	0
2022-09-13	13:42:32	0.603015	2.68233	3.11204	769.457	FALSE	0
2022-09-13	13:42:32	0.734313	3.26637	3.11204	767.849	FALSE	0
2022-09-13	13:42:32	0.730343	3.24871	3.11204	772.705	FALSE	0
2022-09-13	13:42:32	0.730801	3.25075	3.11204	771.1	FALSE	0
2022-09-13	13:42:33	0.736247	3.27497	2.80904	775.98	FALSE	0
2022-09-13	13:42:33	0.728562	3.24079	2.80904	774.341	FALSE	0
2022-09-13	13:42:33	0.693957	3.08686	2.80904	779.067	FALSE	0
2022-09-13	13:42:33	0.367239	1.63355	2.80904	775.974	FALSE	0
2022-09-13	13:42:34	0.147952	0.65812	0.4764	779.725	FALSE	0
2022-09-13	13:42:34	0.105865	0.470909	0.4764	776.445	FALSE	0
2022-09-13	13:42:34	0.113194	0.50351	0.4764	780.229	FALSE	0
2022-09-13	13:42:34	0.061387	0.273062	0.4764	776.718	FALSE	0
2022-09-13	13:42:35	-0.112302	-0.499542	1.63288	780.229	FALSE	0
2022-09-13	13:42:35	0.474008	2.10848	1.63288	778.827	FALSE	0
2022-09-13	13:42:35	0.739555	3.28969	1.63288	783.519	FALSE	0
2022-09-13	13:42:36	0.729173	3.24351	3.26829	782.07	FALSE	0
2022-09-13	13:42:36	0.736908	3.27791	3.26829	786.796	FALSE	0
2022-09-13	13:42:36	0.735992	3.27384	3.26829	785.344	FALSE	0
2022-09-13	13:42:36	0.736908	3.27791	3.26829	790.074	FALSE	0
2022-09-13	13:42:37	0.732532	3.25845	3.26581	788.603	FALSE	0
2022-09-13	13:42:37	0.738842	3.28652	3.26581	793.361	FALSE	0
2022-09-13	13:42:37	0.735941	3.27361	3.26581	791.876	FALSE	0
2022-09-13	13:42:37	0.729428	3.24464	3.26581	796.606	FALSE	0
2022-09-13	13:42:38	0.732939	3.26026	3.27305	795.136	FALSE	0
2022-09-13	13:42:38	0.736807	3.27746	3.27305	799.883	FALSE	0
2022-09-13	13:42:38	0.736501	3.2761	3.27305	798.413	FALSE	0
2022-09-13	13:42:38	0.73701	3.27837	3.27305	803.161	FALSE	0
2022-09-13	13:42:39	0.73528	3.27067	3.27671	801.683	FALSE	0
2022-09-13	13:42:39	0.738028	3.2829	3.27671	806.444	FALSE	0
2022-09-13	13:42:39	0.736603	3.27656	3.27671	804.96	FALSE	0
2022-09-13	13:42:40	0.728613	3.24102	3.25041	809.685	FALSE	0
2022-09-13	13:42:40	0.729784	3.24623	3.25041	808.206	FALSE	0
2022-09-13	13:42:40	0.734669	3.26795	3.25041	812.953	FALSE	0
2022-09-13	13:42:40	0.729835	3.24645	3.25041	811.452	FALSE	0
2022-09-13	13:42:41	0.73131	3.25301	3.24809	816.206	FALSE	0
2022-09-13	13:42:41	0.72897	3.2426	3.24809	814.695	FALSE	0
2022-09-13	13:42:41	0.727341	3.23536	3.24809	819.442	FALSE	0
2022-09-13	13:42:41	0.733193	3.26139	3.24809	817.956	FALSE	0
2022-09-13	13:42:42	0.730445	3.24917	3.24475	822.691	FALSE	0
2022-09-13	13:42:42	0.727188	3.23468	3.24475	821.191	FALSE	0
2022-09-13	13:42:42	0.728613	3.24102	3.24475	825.932	FALSE	0
2022-09-13	13:42:42	0.731565	3.25415	3.24475	824.445	FALSE	0
2022-09-13	13:42:43	0.725814	3.22857	3.21219	829.16	FALSE	0
2022-09-13	13:42:43	0.721132	3.20774	3.21219	827.653	FALSE	0
2022-09-13	13:42:43	0.719453	3.20027	3.21219	832.361	FALSE	0
2022-09-13	13:42:44	0.729987	3.24713	3.22908	830.9	FALSE	0
2022-09-13	13:42:44	0.721539	3.20955	3.22908	835.57	FALSE	0
2022-09-13	13:42:44	0.726781	3.23287	3.22908	834.133	FALSE	0
2022-09-13	13:42:44	0.725407	3.22676	3.22908	838.797	FALSE	0
2022-09-13	13:42:45	0.726272	3.2306	3.21436	837.364	FALSE	0
2022-09-13	13:42:45	0.719707	3.2014	3.21436	841.998	FALSE	0
2022-09-13	13:42:45	0.72902	3.24283	3.21436	840.606	FALSE	0
2022-09-13	13:42:45	0.715483	3.18261	3.21436	845.181	FALSE	0
2022-09-13	13:42:46	0.713651	3.17446	3.18437	843.781	FALSE	0
2022-09-13	13:42:46	0.722659	3.21453	3.18437	848.396	FALSE	0
2022-09-13	13:42:46	0.716501	3.18714	3.18437	846.968	FALSE	0
2022-09-13	13:42:46	0.7107	3.16134	3.18437	851.557	FALSE	0
2022-09-13	13:42:47	0.697163	3.10112	3.06271	850.069	FALSE	0
2022-09-13	13:42:47	0.684033	3.04272	3.06271	854.6	FALSE	0
2022-09-13	13:42:47	0.684389	3.0443	3.06271	853.113	FALSE	0
2022-09-13	13:42:48	0.685204	3.04792	2.94566	857.647	FALSE	0
2022-09-13	13:42:48	0.66098	2.94017	2.94566	856.054	FALSE	0
2022-09-13	13:42:48	0.659351	2.93293	2.94566	860.58	FALSE	0
2022-09-13	13:42:48	0.643321	2.86162	2.94566	858.915	FALSE	0
2022-09-13	13:42:49	0.656705	2.92116	2.87141	863.502	FALSE	0
2022-09-13	13:42:49	0.632328	2.81272	2.87141	861.728	FALSE	0
2022-09-13	13:42:49	0.640064	2.84713	2.87141	866.349	FALSE	0
2022-09-13	13:42:49	0.65299	2.90463	2.87141	864.633	FALSE	0
2022-09-13	13:42:50	0.659351	2.93293	3.16869	869.282	FALSE	0
2022-09-13	13:42:50	0.724389	3.22223	3.16869	867.855	FALSE	0
2022-09-13	13:42:50	0.737824	3.28199	3.16869	872.564	FALSE	0
2022-09-13	13:42:50	0.72785	3.23762	3.16869	871.092	FALSE	0
2022-09-13	13:42:51	0.738486	3.28493	3.26441	875.849	FALSE	0
2022-09-13	13:42:51	0.728308	3.23966	3.26441	874.332	FALSE	0
2022-09-13	13:42:51	0.734822	3.26864	3.26441	879.117	FALSE	0
2022-09-13	13:42:52	0.73243	3.258	3.26297	877.59	FALSE	0
2022-09-13	13:42:52	0.736094	3.27429	3.26297	882.391	FALSE	0
2022-09-13	13:42:52	0.73472	3.26818	3.26297	880.858	FALSE	0
2022-09-13	13:42:52	0.730954	3.25143	3.26297	885.643	FALSE	0
2022-09-13	13:42:53	0.737112	3.27882	3.258	884.137	FALSE	0
2022-09-13	13:42:53	0.728512	3.24057	3.258	888.883	FALSE	0
2022-09-13	13:42:53	0.731361	3.25324	3.258	887.39	FALSE	0
2022-09-13	13:42:53	0.732735	3.25935	3.258	892.143	FALSE	0
2022-09-13	13:42:54	0.728919	3.24238	3.23219	890.633	FALSE	0
2022-09-13	13:42:54	0.720827	3.20638	3.23219	895.349	FALSE	0
2022-09-13	13:42:54	0.732786	3.25958	3.23219	893.892	FALSE	0
2022-09-13	13:42:54	0.723982	3.22042	3.23219	898.57	FALSE	0
2022-09-13	13:42:55	0.724847	3.22426	3.22727	897.117	FALSE	0
2022-09-13	13:42:55	0.728868	3.24215	3.22727	901.812	FALSE	0
2022-09-13	13:42:55	0.724237	3.22155	3.22727	900.338	FALSE	0
2022-09-13	13:42:55	0.724135	3.2211	3.22727	905.033	FALSE	0
2022-09-13	13:42:56	0.723728	3.21929	3.18095	903.557	FALSE	0
2022-09-13	13:42:56	0.716298	3.18624	3.18095	908.219	FALSE	0
2022-09-13	13:42:56	0.705305	3.13734	3.18095	906.695	FALSE	0
2022-09-13	13:42:57	0.711209	3.1636	5.55482	911.383	FALSE	0
2022-09-13	13:42:57	0.417672	1.85789	5.55482	908.553	FALSE	0
2022-09-13	13:42:57	1.60134	7.12308	5.55482	918.506	FALSE	0
2022-09-13	13:42:57	2.2649	10.0747	5.55482	918.627	FALSE	0
2022-09-13	13:42:58	1.20352	5.3535	2.87995	923.859	FALSE	0
2022-09-13	13:42:58	0.527544	2.34662	2.87995	920.974	FALSE	0
2022-09-13	13:42:58	0.511921	2.27713	2.87995	926.136	FALSE	0
2022-09-13	13:42:58	0.346781	1.54255	2.87995	922.517	FALSE	0
2022-09-13	13:42:59	0.365356	1.62518	1.72712	927.762	FALSE	0
2022-09-13	13:42:59	0.482608	2.14674	1.72712	924.663	FALSE	0
2022-09-13	13:42:59	0.316858	1.40945	1.72712	929.171	FALSE	0
2022-09-13	13:43:00	0.45528	2.02518	1.78245	926.688	FALSE	0
2022-09-13	13:43:00	0.348766	1.55138	1.78245	930.722	FALSE	0
2022-09-13	13:43:00	0.462252	2.05619	1.78245	928.745	FALSE	0
2022-09-13	13:43:00	0.336552	1.49705	1.78245	932.219	FALSE	0
2022-09-13	13:43:01	0.428308	1.9052	1.82914	930.65	FALSE	0
2022-09-13	13:43:01	0.328155	1.4597	1.82914	933.679	FALSE	0
2022-09-13	13:43:01	0.428817	1.90746	1.82914	932.557	FALSE	0
2022-09-13	13:43:01	0.459555	2.04419	1.82914	935.723	FALSE	0
2022-09-13	13:43:02	0.402252	1.7893	1.22937	934.347	FALSE	0
2022-09-13	13:43:02	0.451718	2.00933	1.22937	937.733	FALSE	0
2022-09-13	13:43:02	0.530598	2.36021	1.22937	936.707	FALSE	0
2022-09-13	13:43:02	-0.279071	-1.24136	1.22937	937.733	FALSE	0
2022-09-13	13:43:03	-0.361615	-1.60854	-0.853362	936.707	FALSE	0
2022-09-13	13:43:03	-0.0678241	-0.301695	-0.853362	937.733	FALSE	0
2022-09-13	13:43:03	-0.248893	-1.10713	-0.853362	936.707	FALSE	0
2022-09-13	13:43:03	-0.0890455	-0.396092	-0.853362	937.733	FALSE	0
2022-09-13	13:43:04	0.220471	0.980699	-0.631971	937.687	FALSE	0
2022-09-13	13:43:04	-0.300496	-1.33667	-0.631971	937.733	FALSE	0
2022-09-13	13:43:04	-0.346195	-1.53994	-0.631971	937.687	FALSE	0
2022-09-13	13:43:05	0.639606	2.8451	2.39914	940.578	FALSE	0
2022-09-13	13:43:05	0.40444	1.79903	2.39914	939.487	FALSE	0
2022-09-13	13:43:05	0.457061	2.0331	2.39914	942.611	FALSE	0
2022-09-13	13:43:05	0.656298	2.91934	2.39914	942.406	FALSE	0
2022-09-13	13:43:06	0.479097	2.13112	2.30656	944.742	FALSE	0
2022-09-13	13:43:06	0.403575	1.79518	2.30656	944.201	FALSE	0
2022-09-13	13:43:06	0.679504	3.02257	2.30656	947.765	FALSE	0
2022-09-13	13:43:06	0.511972	2.27735	2.30656	946.478	FALSE	0
2022-09-13	13:43:07	0.570242	2.53655	1.59773	950.301	FALSE	0
2022-09-13	13:43:07	0.377774	1.68041	1.59773	948.159	FALSE	0
2022-09-13	13:43:07	0.278792	1.24012	1.59773	951.541	FALSE	0
2022-09-13	13:43:07	0.209936	0.933837	1.59773	949.093	FALSE	0
2022-09-13	13:43:08	-0.108028	-0.48053	-1.06849	951.541	FALSE	0
2022-09-13	13:43:08	-0.423396	-1.88335	-1.06849	949.093	FALSE	0
2022-09-13	13:43:08	-0.189198	-0.841591	-1.06849	951.541	FALSE	0
2022-09-13	13:43:09	-0.292353	-1.30044	-1.86094	949.093	FALSE	0
2022-09-13	13:43:09	-0.486603	-2.16451	-1.86094	951.541	FALSE	0
2022-09-13	13:43:09	-0.532048	-2.36666	-1.86094	949.093	FALSE	0
2022-09-13	13:43:09	-0.362429	-1.61216	-1.86094	951.541	FALSE	0
2022-09-13	13:43:10	-0.118358	-0.52648	-0.428237	949.093	FALSE	0
2022-09-13	13:43:10	-0.25271	-1.1241	-0.428237	951.541	FALSE	0
2022-09-13	13:43:10	0.0791987	0.352292	-0.428237	949.445	FALSE	0
2022-09-13	13:43:10	-0.0932185	-0.414655	-0.428237	951.541	FALSE	0
2022-09-13	13:43:11	6.3875e-05	0.000284129	0.350028	949.445	FALSE	0
2022-09-13	13:43:11	-0.0518954	-0.230841	0.350028	951.541	FALSE	0
2022-09-13	13:43:11	0.147901	0.657893	0.350028	950.103	FALSE	0
2022-09-13	13:43:11	0.21869	0.972777	0.350028	952.514	FALSE	0
2022-09-13	13:43:12	0.175636	0.781264	0.918598	950.884	FALSE	0
2022-09-13	13:43:12	0.111311	0.495134	0.918598	953.009	FALSE	0
2022-09-13	13:43:12	0.332583	1.4794	0.918598	952.364	FALSE	0
2022-09-13	13:43:13	0.298893	1.32954	0.0576687	954.339	FALSE	0
2022-09-13	13:43:13	0.43126	1.91833	0.0576687	954.282	FALSE	0
2022-09-13	13:43:13	-0.103855	-0.461968	0.0576687	954.339	FALSE	0
2022-09-13	13:43:13	-0.57444	-2.55522	0.0576687	954.282	FALSE	0
2022-09-13	13:43:14	-0.398358	-1.77198	-2.57079	954.339	FALSE	0
2022-09-13	13:43:14	-0.642328	-2.8572	-2.57079	954.282	FALSE	0
2022-09-13	13:43:14	-0.627417	-2.79088	-2.57079	954.339	FALSE	0
2022-09-13	13:43:14	-0.643651	-2.86309	-2.57079	954.282	FALSE	0
2022-09-13	13:43:15	-0.651284	-2.89704	-3.70083	954.339	FALSE	0
2022-09-13	13:43:15	-0.73505	-3.26965	-3.70083	954.282	FALSE	0
2022-09-13	13:43:15	-1.03805	-4.61745	-3.70083	954.339	FALSE	0
2022-09-13	13:43:15	-0.903549	-4.01917	-3.70083	954.282	FALSE	0
2022-09-13	13:43:16	-0.658969	-2.93123	-2.87939	954.339	FALSE	0
2022-09-13	13:43:16	-0.715661	-3.1834	-2.87939	954.282	FALSE	0
2022-09-13	13:43:16	-0.567315	-2.52353	-2.87939	954.339	FALSE	0
2022-09-13	13:43:17	-0.682786	-3.03717	-2.51436	954.282	FALSE	0
2022-09-13	13:43:17	-0.494134	-2.19801	-2.51436	954.339	FALSE	0
2022-09-13	13:43:17	-0.565686	-2.51628	-2.51436	954.282	FALSE	0
2022-09-13	13:43:17	-0.518409	-2.30599	-2.51436	954.339	FALSE	0
2022-09-13	13:43:18	-0.622073	-2.76711	-2.93173	954.282	FALSE	0
2022-09-13	13:43:18	-0.634643	-2.82302	-2.93173	954.339	FALSE	0
2022-09-13	13:43:18	-0.677595	-3.01408	-2.93173	954.282	FALSE	0
2022-09-13	13:43:18	-0.702022	-3.12273	-2.93173	954.339	FALSE	0
2022-09-13	13:43:19	-0.653421	-2.90655	-2.42104	954.282	FALSE	0
2022-09-13	13:43:19	-0.621259	-2.76348	-2.42104	954.339	FALSE	0
2022-09-13	13:43:19	-0.589096	-2.62042	-2.42104	954.282	FALSE	0
2022-09-13	13:43:19	-0.31332	-1.39371	-2.42104	954.339	FALSE	0
2022-09-13	13:43:20	-0.418511	-1.86162	-1.99729	954.282	FALSE	0
2022-09-13	13:43:20	-0.443549	-1.97299	-1.99729	954.339	FALSE	0
2022-09-13	13:43:20	-0.484974	-2.15726	-1.99729	954.282	FALSE	0
2022-09-13	13:43:21	-0.496984	-2.21068	-2.23485	954.339	FALSE	0
2022-09-13	13:43:21	-0.506145	-2.25143	-2.23485	954.282	FALSE	0
2022-09-13	13:43:21	-0.524363	-2.33247	-2.23485	954.339	FALSE	0
2022-09-13	13:43:21	-0.482175	-2.14481	-2.23485	954.282	FALSE	0
2022-09-13	13:43:22	-0.483498	-2.1507	-2.18245	954.339	FALSE	0
2022-09-13	13:43:22	-0.517137	-2.30033	-2.18245	954.282	FALSE	0
2022-09-13	13:43:22	-0.470267	-2.09184	-2.18245	954.339	FALSE	0
2022-09-13	13:43:22	-0.491641	-2.18692	-2.18245	954.282	FALSE	0
2022-09-13	13:43:23	-0.369402	-1.64317	0.270968	954.339	FALSE	0
2022-09-13	13:43:23	0.235789	1.04884	0.270968	955.331	FALSE	0
2022-09-13	13:43:23	0.601845	2.67713	0.270968	957.016	FALSE	0
2022-09-13	13:43:23	-0.224567	-0.998919	0.270968	955.331	FALSE	0
2022-09-13	13:43:24	-0.174287	-0.775263	-2.2841	957.016	FALSE	0
2022-09-13	13:43:24	-0.584058	-2.59801	-2.2841	955.331	FALSE	0
2022-09-13	13:43:24	-0.782124	-3.47904	-2.2841	957.016	FALSE	0
2022-09-13	13:43:25	-0.853981	-3.79868	0.393209	955.331	FALSE	0
2022-09-13	13:43:25	0.483473	2.15058	0.393209	959.166	FALSE	0
2022-09-13	13:43:25	0.598639	2.66287	0.393209	957.994	FALSE	0
2022-09-13	13:43:25	0.125458	0.558062	0.393209	959.724	FALSE	0
2022-09-13	13:43:26	-0.562887	-2.50383	-2.37446	957.994	FALSE	0
2022-09-13	13:43:26	-0.554796	-2.46784	-2.37446	959.724	FALSE	0
2022-09-13	13:43:26	-0.551539	-2.45336	-2.37446	957.994	FALSE	0
2022-09-13	13:43:26	-0.465992	-2.07283	-2.37446	959.724	FALSE	0
2022-09-13	13:43:27	-0.563956	-2.50859	-2.00214	957.994	FALSE	0
2022-09-13	13:43:27	-0.430317	-1.91414	-2.00214	959.724	FALSE	0
2022-09-13	13:43:27	-0.241157	-1.07271	-2.00214	957.994	FALSE	0
2022-09-13	13:43:27	-0.564974	-2.51312	-2.00214	959.724	FALSE	0
2022-09-13	13:43:28	-0.520241	-2.31414	-2.67573	957.994	FALSE	0
2022-09-13	13:43:28	-0.668333	-2.97288	-2.67573	959.724	FALSE	0
2022-09-13	13:43:28	-0.616017	-2.74017	-2.67573	957.994	FALSE	0
2022-09-13	13:43:29	-0.638206	-2.83887	-3.15731	959.724	FALSE	0
2022-09-13	13:43:29	-0.702633	-3.12545	-3.15731	957.994	FALSE	0
2022-09-13	13:43:29	-0.680902	-3.02879	-3.15731	959.724	FALSE	0
2022-09-13	13:43:29	-0.817442	-3.63615	-3.15731	957.994	FALSE	0
2022-09-13	13:43:30	-0.813982	-3.62075	-3.88589	959.724	FALSE	0
2022-09-13	13:43:30	-0.877646	-3.90394	-3.88589	957.994	FALSE	0
2022-09-13	13:43:30	-0.983854	-4.37638	-3.88589	959.724	FALSE	0
2022-09-13	13:43:30	-0.818867	-3.64248	-3.88589	957.994	FALSE	0
2022-09-13	13:43:31	-0.988943	-4.39902	-3.90745	959.724	FALSE	0
2022-09-13	13:43:31	-0.895152	-3.98182	-3.90745	957.994	FALSE	0
2022-09-13	13:43:31	-0.841259	-3.74209	-3.90745	959.724	FALSE	0
2022-09-13	13:43:31	-0.788383	-3.50689	-3.90745	957.994	FALSE	0
2022-09-13	13:43:32	-0.722226	-3.21261	-3.29161	959.724	FALSE	0
2022-09-13	13:43:32	-0.836577	-3.72126	-3.29161	957.994	FALSE	0
2022-09-13	13:43:32	-0.661157	-2.94096	-3.29161	959.724	FALSE	0
2022-09-13	13:43:33	-0.767213	-3.41272	-3.40745	957.994	FALSE	0
2022-09-13	13:43:33	-0.773269	-3.43966	-3.40745	959.724	FALSE	0
2022-09-13	13:43:33	-0.709401	-3.15556	-3.40745	957.994	FALSE	0
2022-09-13	13:43:33	-0.814236	-3.62188	-3.40745	959.724	FALSE	0
2022-09-13	13:43:34	-0.763142	-3.39461	-3.84169	957.994	FALSE	0
2022-09-13	13:43:34	-0.897544	-3.99246	-3.84169	959.724	FALSE	0
2022-09-13	13:43:34	-0.87159	-3.87701	-3.84169	957.994	FALSE	0
2022-09-13	13:43:34	-0.922328	-4.1027	-3.84169	959.724	FALSE	0
2022-09-13	13:43:35	-0.873218	-3.88425	-3.66105	957.994	FALSE	0
2022-09-13	13:43:35	-0.842735	-3.74865	-3.66105	959.724	FALSE	0
2022-09-13	13:43:35	-0.843294	-3.75114	-3.66105	957.994	FALSE	0
2022-09-13	13:43:35	-0.732913	-3.26014	-3.66105	959.724	FALSE	0
2022-09-13	13:43:36	-0.82533	-3.67123	-3.18408	957.994	FALSE	0
2022-09-13	13:43:36	-0.67449	-3.00027	-3.18408	959.724	FALSE	0
2022-09-13	13:43:36	-0.64762	-2.88074	-3.18408	957.994	FALSE	0
2022-09-13	13:43:37	-0.721666	-3.21011	-2.91555	959.724	FALSE	0
2022-09-13	13:43:37	-0.568231	-2.52761	-2.91555	957.994	FALSE	0
2022-09-13	13:43:37	-0.706195	-3.1413	-2.91555	959.724	FALSE	0
2022-09-13	13:43:37	-0.625687	-2.78318	-2.91555	957.994	FALSE	0
2022-09-13	13:43:38	-0.66706	-2.96722	-2.81187	959.724	FALSE	0
2022-09-13	13:43:38	-0.629808	-2.80151	-2.81187	957.994	FALSE	0
2022-09-13	13:43:38	-0.570623	-2.53825	-2.81187	959.724	FALSE	0
2022-09-13	13:43:38	-0.661055	-2.9405	-2.81187	957.994	FALSE	0
2022-09-13	13:43:39	-0.528435	-2.35058	-2.53474	959.724	FALSE	0
2022-09-13	13:43:39	-0.638918	-2.84204	-2.53474	957.994	FALSE	0
2022-09-13	13:43:39	-0.577595	-2.56926	-2.53474	959.724	FALSE	0
2022-09-13	13:43:39	-0.534389	-2.37707	-2.53474	957.994	FALSE	0
2022-09-13	13:43:40	-0.557799	-2.4812	-2.15885	959.724	FALSE	0
2022-09-13	13:43:40	-0.445636	-1.98228	-2.15885	957.994	FALSE	0
2022-09-13	13:43:40	-0.452557	-2.01306	-2.15885	959.724	FALSE	0
2022-09-13	13:43:41	-0.452251	-2.0117	-1.65607	957.994	FALSE	0
2022-09-13	13:43:41	-0.377442	-1.67894	-1.65607	959.724	FALSE	0
2022-09-13	13:43:41	-0.388842	-1.72965	-1.65607	957.994	FALSE	0
2022-09-13	13:43:41	-0.270674	-1.20401	-1.65607	959.724	FALSE	0
2022-09-13	13:43:42	-0.405534	-1.8039	-1.58941	957.994	FALSE	0
2022-09-13	13:43:42	-0.293015	-1.30339	-1.58941	959.724	FALSE	0
2022-09-13	13:43:42	-0.294491	-1.30995	-1.58941	957.994	FALSE	0
2022-09-13	13:43:42	-0.436221	-1.9404	-1.58941	959.724	FALSE	0
2022-09-13	13:43:43	-0.386297	-1.71833	-1.79609	957.994	FALSE	0
2022-09-13	13:43:43	-0.371895	-1.65426	-1.79609	959.724	FALSE	0
2022-09-13	13:43:43	-0.426399	-1.89671	-1.79609	957.994	FALSE	0
2022-09-13	13:43:43	-0.430521	-1.91504	-1.79609	959.724	FALSE	0
2022-09-13	13:43:44	-0.433117	-1.92659	-2.00499	957.994	FALSE	0
2022-09-13	13:43:44	-0.440699	-1.96032	-2.00499	959.724	FALSE	0
2022-09-13	13:43:44	-0.478409	-2.12806	-2.00499	957.994	FALSE	0
2022-09-13	13:43:45	-0.319427	-1.42088	-1.68748	959.724	FALSE	0
2022-09-13	13:43:45	-0.43159	-1.9198	-1.68748	957.994	FALSE	0
2022-09-13	13:43:45	-0.333727	-1.48448	-1.68748	959.724	FALSE	0
2022-09-13	13:43:45	-0.432709	-1.92478	-1.68748	957.994	FALSE	0
2022-09-13	13:43:46	-0.397442	-1.7679	-1.9906	959.724	FALSE	0
2022-09-13	13:43:46	-0.498816	-2.21883	-1.9906	957.994	FALSE	0
2022-09-13	13:43:46	-0.429096	-1.9087	-1.9906	959.724	FALSE	0
2022-09-13	13:43:46	-0.464669	-2.06694	-1.9906	957.994	FALSE	0
2022-09-13	13:43:47	-0.387264	-1.72263	-1.19943	959.724	FALSE	0
2022-09-13	13:43:47	-0.287671	-1.27962	-1.19943	957.994	FALSE	0
2022-09-13	13:43:47	-0.187671	-0.834798	-1.19943	959.724	FALSE	0
2022-09-13	13:43:47	-0.215967	-0.960664	-1.19943	957.994	FALSE	0
2022-09-13	13:43:48	-0.168791	-0.750816	-0.668718	959.724	FALSE	0
2022-09-13	13:43:48	-0.0828877	-0.368701	-0.668718	957.994	FALSE	0
2022-09-13	13:43:48	-0.199325	-0.886637	-0.668718	959.724	FALSE	0
2022-09-13	13:43:49	0.0515142	0.229145	-0.175663	958.223	FALSE	0
2022-09-13	13:43:49	-0.119834	-0.533046	-0.175663	959.724	FALSE	0
2022-09-13	13:43:49	-0.0236003	-0.104979	-0.175663	958.223	FALSE	0
2022-09-13	13:43:49	-0.066043	-0.293772	-0.175663	959.724	FALSE	0
2022-09-13	13:43:50	-0.077646	-0.345385	-0.227503	958.223	FALSE	0
2022-09-13	13:43:50	0.0004201	0.00186869	-0.227503	959.726	FALSE	0
2022-09-13	13:43:50	-0.115	-0.511543	-0.227503	958.223	FALSE	0
2022-09-13	13:43:50	-0.0123535	-0.0549508	-0.227503	959.726	FALSE	0
2022-09-13	13:43:51	-0.130318	-0.579681	-0.253026	958.223	FALSE	0
2022-09-13	13:43:51	0.00550917	0.0245059	-0.253026	959.751	FALSE	0
2022-09-13	13:43:51	-0.0983585	-0.437518	-0.253026	958.223	FALSE	0
2022-09-13	13:43:51	-0.00436363	-0.0194103	-0.253026	959.751	FALSE	0
2022-09-13	13:43:52	-0.218613	-0.972434	-0.736932	958.223	FALSE	0
2022-09-13	13:43:52	-0.178409	-0.793599	-0.736932	959.751	FALSE	0
2022-09-13	13:43:52	-0.099987	-0.444762	-0.736932	958.223	FALSE	0
2022-09-13	13:43:53	-0.176476	-0.785001	-0.650307	959.751	FALSE	0
2022-09-13	13:43:53	-0.0872643	-0.388169	-0.650307	958.223	FALSE	0
2022-09-13	13:43:53	-0.188129	-0.836835	-0.650307	959.751	FALSE	0
2022-09-13	13:43:53	-0.132913	-0.591224	-0.650307	958.223	FALSE	0
2022-09-13	13:43:54	-0.221208	-0.983977	-0.821444	959.751	FALSE	0
2022-09-13	13:43:54	-0.0917936	-0.408316	-0.821444	958.223	FALSE	0
2022-09-13	13:43:54	-0.298206	-1.32648	-0.821444	959.751	FALSE	0
2022-09-13	13:43:54	-0.127468	-0.567003	-0.821444	958.223	FALSE	0
2022-09-13	13:43:55	-0.254287	-1.13112	-0.904013	959.751	FALSE	0
2022-09-13	13:43:55	-0.185127	-0.823482	-0.904013	958.223	FALSE	0
2022-09-13	13:43:55	-0.198206	-0.88166	-0.904013	959.751	FALSE	0
2022-09-13	13:43:55	-0.175305	-0.779792	-0.904013	958.223	FALSE	0
2022-09-13	13:43:56	-0.169249	-0.752853	-0.814879	959.751	FALSE	0
2022-09-13	13:43:56	-0.241921	-1.07611	-0.814879	958.223	FALSE	0
2022-09-13	13:43:56	-0.138409	-0.615671	-0.814879	959.751	FALSE	0
2022-09-13	13:43:57	-0.310623	-1.38171	-1.10141	958.223	FALSE	0
2022-09-13	13:43:57	-0.217392	-0.967003	-1.10141	959.751	FALSE	0
2022-09-13	13:43:57	-0.259936	-1.15625	-1.10141	958.223	FALSE	0
2022-09-13	13:43:57	-0.202481	-0.900676	-1.10141	959.751	FALSE	0
2022-09-13	13:43:58	-0.206043	-0.91652	-0.830782	958.223	FALSE	0
2022-09-13	13:43:58	-0.221107	-0.983528	-0.830782	959.751	FALSE	0
2022-09-13	13:43:58	-0.0447707	-0.199149	-0.830782	958.223	FALSE	0
2022-09-13	13:43:58	-0.275152	-1.22393	-0.830782	959.751	FALSE	0
2022-09-13	13:43:59	-0.177188	-0.788168	-1.14663	958.223	FALSE	0
2022-09-13	13:43:59	-0.325687	-1.44872	-1.14663	959.751	FALSE	0
2022-09-13	13:43:59	-0.22874	-1.01748	-1.14663	958.223	FALSE	0
2022-09-13	13:43:59	-0.299478	-1.33214	-1.14663	959.751	FALSE	0
2022-09-13	13:44:00	-0.293218	-1.30429	-1.38111	958.223	FALSE	0
2022-09-13	13:44:00	-0.305738	-1.35998	-1.38111	959.751	FALSE	0
2022-09-13	13:44:00	-0.332506	-1.47905	-1.38111	958.223	FALSE	0
2022-09-13	13:44:01	-0.298766	-1.32897	-1.19954	959.751	FALSE	0
2022-09-13	13:44:01	-0.300699	-1.33757	-1.19954	958.223	FALSE	0
2022-09-13	13:44:01	-0.228435	-1.01612	-1.19954	959.751	FALSE	0
2022-09-13	13:44:01	-0.250776	-1.1155	-1.19954	958.223	FALSE	0
2022-09-13	13:44:02	-0.316832	-1.40933	-1.27526	959.751	FALSE	0
2022-09-13	13:44:02	-0.242786	-1.07996	-1.27526	958.223	FALSE	0
2022-09-13	13:44:02	-0.293422	-1.3052	-1.27526	959.751	FALSE	0
2022-09-13	13:44:02	-0.293727	-1.30656	-1.27526	958.223	FALSE	0
2022-09-13	13:44:03	-0.380801	-1.69388	-1.6649	959.751	FALSE	0
2022-09-13	13:44:03	-0.294287	-1.30905	-1.6649	958.223	FALSE	0
2022-09-13	13:44:03	-0.414185	-1.84238	-1.6649	959.751	FALSE	0
2022-09-13	13:44:03	-0.407875	-1.81431	-1.6649	958.223	FALSE	0
2022-09-13	13:44:04	-0.443091	-1.97096	-1.97488	959.751	FALSE	0
2022-09-13	13:44:04	-0.418816	-1.86298	-1.97488	958.223	FALSE	0
2022-09-13	13:44:04	-0.470012	-2.09071	-1.97488	959.751	FALSE	0

## Sheet: Buzz_harness_202291313394 ( (2)
Date	Time	Lbs	Newtons	Total force x time	Total steps > 13.345		**GoPro Fitting: 1328
2022-09-13	13:39:04	0.390547	1.73723	1.73723	FALSE	0			Total force x time	959.751
2022-09-13	13:39:04	0.401692	1.78681	1.78681	FALSE	0			Total steps	0
2022-09-13	13:39:04	0.415433	1.84793	3.58516	FALSE	0
2022-09-13	13:39:05	0.394415	1.75444	3.54124	FALSE	0
2022-09-13	13:39:05	0.416858	1.85427	5.43943	FALSE	0
2022-09-13	13:39:05	0.463524	2.06185	5.60309	FALSE	0
2022-09-13	13:39:05	0.461794	2.05415	7.49358	FALSE	0
2022-09-13	13:39:06	0.458384	2.03898	7.64207	FALSE	0
2022-09-13	13:39:06	0.436959	1.94368	9.43726	FALSE	0
2022-09-13	13:39:06	0.474364	2.11007	9.75214	FALSE	0
2022-09-13	13:39:06	0.505611	2.24906	11.6863	FALSE	0
2022-09-13	13:39:07	0.458842	2.04102	11.7932	FALSE	0
2022-09-13	13:39:07	0.48098	2.1395	13.8258	FALSE	0
2022-09-13	13:39:07	0.427239	1.90044	13.6936	FALSE	0
2022-09-13	13:39:07	0.481692	2.14266	15.9685	FALSE	0
2022-09-13	13:39:08	0.499351	2.22121	15.9148	FALSE	0
2022-09-13	13:39:08	0.630903	2.80638	18.7749	FALSE	0
2022-09-13	13:39:08	0.586018	2.60673	18.5215	FALSE	0
2022-09-13	13:39:09	0.470395	2.09241	20.8673	FALSE	0
2022-09-13	13:39:09	0.438333	1.94979	20.4713	FALSE	0
2022-09-13	13:39:09	0.532277	2.36767	23.2349	FALSE	0
2022-09-13	13:39:09	0.502303	2.23434	22.7057	FALSE	0
2022-09-13	13:39:10	0.419962	1.86807	25.103	FALSE	0
2022-09-13	13:39:10	0.852837	3.79359	26.4993	FALSE	0
2022-09-13	13:39:10	0.397417	1.76779	26.8708	FALSE	0
2022-09-13	13:39:10	0.411667	1.83118	28.3304	FALSE	0
2022-09-13	13:39:11	0.469275	2.08743	28.9582	FALSE	0
2022-09-13	13:39:11	0.403372	1.79428	30.1247	FALSE	0
2022-09-13	13:39:11	0.557315	2.47905	31.4373	FALSE	0
2022-09-13	13:39:11	0.524084	2.33123	32.456	FALSE	0
2022-09-13	13:39:12	0.473194	2.10486	33.5422	FALSE	0
2022-09-13	13:39:12	0.39187	1.74312	34.1991	FALSE	0
2022-09-13	13:39:12	0.584186	2.59858	36.1407	FALSE	0
2022-09-13	13:39:13	0.756858	3.36666	37.5657	FALSE	0
2022-09-13	13:39:13	0.485611	2.16009	38.3008	FALSE	0
2022-09-13	13:39:13	0.648308	2.8838	40.4495	FALSE	0
2022-09-13	13:39:13	-0.328587	-1.46162	38.3008	FALSE	0
2022-09-13	13:39:14	-0.623142	-2.77186	40.4495	FALSE	0
2022-09-13	13:39:14	-0.599071	-2.66479	38.3008	FALSE	0
2022-09-13	13:39:14	-0.55159	-2.45358	40.4495	FALSE	0
2022-09-13	13:39:14	-0.33561	-1.49286	38.3008	FALSE	0
2022-09-13	13:39:15	-0.233982	-1.0408	40.4495	FALSE	0
2022-09-13	13:39:15	-0.139478	-0.620426	38.3008	FALSE	0
2022-09-13	13:39:15	0.0443386	0.197227	40.6468	FALSE	0
2022-09-13	13:39:15	-0.0743381	-0.330671	38.3008	FALSE	0
2022-09-13	13:39:16	-0.240954	-1.07181	40.6468	FALSE	0
2022-09-13	13:39:16	-0.0752033	-0.334519	38.3008	FALSE	0
2022-09-13	13:39:16	0.15126	0.672835	41.3196	FALSE	0
2022-09-13	13:39:17	0.274466	1.22088	39.5217	FALSE	0
2022-09-13	13:39:17	0.13411	0.596548	41.9161	FALSE	0
2022-09-13	13:39:17	0.223728	0.995187	40.5169	FALSE	0
2022-09-13	13:39:17	0.0995549	0.44284	42.359	FALSE	0
2022-09-13	13:39:18	0.140624	0.625524	41.1424	FALSE	0
2022-09-13	13:39:18	0.137061	0.609675	42.9687	FALSE	0
2022-09-13	13:39:18	0.0952292	0.423599	41.566	FALSE	0
2022-09-13	13:39:18	0.305865	1.36055	44.3292	FALSE	0
2022-09-13	13:39:19	0.108512	0.482683	42.0487	FALSE	0
2022-09-13	13:39:19	0.297214	1.32207	45.6513	FALSE	0
2022-09-13	13:39:19	0.136705	0.608091	42.6568	FALSE	0
2022-09-13	13:39:19	0.399911	1.77888	47.4302	FALSE	0
2022-09-13	13:39:20	0.0176211	0.0783822	42.7352	FALSE	0
2022-09-13	13:39:20	0.365916	1.62767	49.0578	FALSE	0
2022-09-13	13:39:20	0.256501	1.14097	43.8761	FALSE	0
2022-09-13	13:39:21	0.327545	1.45699	50.5148	FALSE	0
2022-09-13	13:39:21	0.126222	0.561461	44.4376	FALSE	0
2022-09-13	13:39:21	0.30617	1.36191	51.8767	FALSE	0
2022-09-13	13:39:21	0.294008	1.30781	45.7454	FALSE	0
2022-09-13	13:39:22	0.215331	0.957835	52.8346	FALSE	0
2022-09-13	13:39:22	0.311667	1.38636	47.1318	FALSE	0
2022-09-13	13:39:22	0.083728	0.372439	53.207	FALSE	0
2022-09-13	13:39:22	0.287952	1.28087	48.4126	FALSE	0
2022-09-13	13:39:23	0.0545168	0.242502	53.4495	FALSE	0
2022-09-13	13:39:23	0.16215	0.721276	49.1339	FALSE	0
2022-09-13	13:39:23	-0.118053	-0.525123	53.4495	FALSE	0
2022-09-13	13:39:23	-0.00919824	-0.0409156	49.1339	FALSE	0
2022-09-13	13:39:24	-0.180343	-0.802202	53.4495	FALSE	0
2022-09-13	13:39:24	-0.0830404	-0.36938	49.1339	FALSE	0
2022-09-13	13:39:24	-0.11561	-0.514256	53.4495	FALSE	0
2022-09-13	13:39:25	0.0588934	0.26197	49.3959	FALSE	0
2022-09-13	13:39:25	0.0699875	0.311318	53.7608	FALSE	0
2022-09-13	13:39:25	0.195331	0.868871	50.2647	FALSE	0
2022-09-13	13:39:25	0.0864252	0.384437	54.1452	FALSE	0
2022-09-13	13:39:26	0.182965	0.813865	51.0786	FALSE	0
2022-09-13	13:39:26	0.262303	1.16678	55.312	FALSE	0
2022-09-13	13:39:26	0.368359	1.63853	52.7171	FALSE	0
2022-09-13	13:39:26	0.115127	0.512108	55.8241	FALSE	0
2022-09-13	13:39:27	0.109173	0.485623	53.2028	FALSE	0
2022-09-13	13:39:27	0.262608	1.16813	56.9923	FALSE	0
2022-09-13	13:39:27	0.735382	3.27113	56.4739	FALSE	0
2022-09-13	13:39:27	0.731209	3.25256	60.2448	FALSE	0
2022-09-13	13:39:28	0.730445	3.24917	59.7231	FALSE	0
2022-09-13	13:39:28	0.726018	3.22947	63.4743	FALSE	0
2022-09-13	13:39:28	0.734109	3.26546	62.9885	FALSE	0
2022-09-13	13:39:29	0.732888	3.26003	66.7343	FALSE	0
2022-09-13	13:39:29	0.737722	3.28154	66.2701	FALSE	0
2022-09-13	13:39:29	0.726629	3.23219	69.9665	FALSE	0
2022-09-13	13:39:29	0.727392	3.23559	69.5056	FALSE	0
2022-09-13	13:39:30	0.731616	3.25437	73.2209	FALSE	0
2022-09-13	13:39:30	0.737265	3.2795	72.7851	FALSE	0
2022-09-13	13:39:30	0.734211	3.26592	76.4868	FALSE	0
2022-09-13	13:39:30	0.731463	3.25369	76.0388	FALSE	0
2022-09-13	13:39:31	0.738079	3.28312	79.7699	FALSE	0
2022-09-13	13:39:31	0.738282	3.28403	79.3229	FALSE	0
2022-09-13	13:39:31	0.737265	3.2795	83.0494	FALSE	0
2022-09-13	13:39:31	0.732735	3.25935	82.5822	FALSE	0
2022-09-13	13:39:32	0.736094	3.27429	86.3237	FALSE	0
2022-09-13	13:39:32	0.732328	3.25754	85.8398	FALSE	0
2022-09-13	13:39:32	0.730954	3.25143	89.5752	FALSE	0
2022-09-13	13:39:33	0.722914	3.21567	89.0554	FALSE	0
2022-09-13	13:39:33	0.720369	3.20435	92.7795	FALSE	0
2022-09-13	13:39:33	0.73355	3.26298	92.3184	FALSE	0
2022-09-13	13:39:33	0.740522	3.29399	96.0735	FALSE	0
2022-09-13	13:39:34	0.736959	3.27814	95.5965	FALSE	0
2022-09-13	13:39:34	0.738537	3.28516	99.3587	FALSE	0
2022-09-13	13:39:34	0.732125	3.25664	98.8532	FALSE	0
2022-09-13	13:39:34	0.73528	3.27067	102.629	FALSE	0
2022-09-13	13:39:35	0.733092	3.26094	102.114	FALSE	0
2022-09-13	13:39:35	0.734466	3.26705	105.896	FALSE	0
2022-09-13	13:39:35	0.737519	3.28063	105.395	FALSE	0
2022-09-13	13:39:35	0.708206	3.15024	109.047	FALSE	0
2022-09-13	13:39:36	0.761641	3.38793	108.783	FALSE	0
2022-09-13	13:39:36	0.743015	3.30508	112.352	FALSE	0
2022-09-13	13:39:36	0.72958	3.24532	112.028	FALSE	0
2022-09-13	13:39:37	0.726934	3.23355	115.585	FALSE	0
2022-09-13	13:39:37	0.734517	3.26728	115.295	FALSE	0
2022-09-13	13:39:37	0.734618	3.26773	118.853	FALSE	0
2022-09-13	13:39:37	0.732074	3.25641	118.552	FALSE	0
2022-09-13	13:39:38	0.726578	3.23196	122.085	FALSE	0
2022-09-13	13:39:38	0.73355	3.26298	121.815	FALSE	0
2022-09-13	13:39:38	0.724898	3.22449	125.309	FALSE	0
2022-09-13	13:39:38	0.735229	3.27045	125.085	FALSE	0
2022-09-13	13:39:39	0.736705	3.27701	128.586	FALSE	0
2022-09-13	13:39:39	0.740064	3.29195	128.377	FALSE	0
2022-09-13	13:39:39	0.736705	3.27701	131.863	FALSE	0
2022-09-13	13:39:39	0.733193	3.26139	131.638	FALSE	0
2022-09-13	13:39:40	0.727036	3.234	135.097	FALSE	0
2022-09-13	13:39:40	0.728257	3.23943	134.878	FALSE	0
2022-09-13	13:39:40	0.731565	3.25415	138.352	FALSE	0
2022-09-13	13:39:40	0.734618	3.26773	138.146	FALSE	0
2022-09-13	13:39:41	0.733448	3.26252	141.614	FALSE	0
2022-09-13	13:39:41	0.733193	3.26139	141.407	FALSE	0
2022-09-13	13:39:41	0.73874	3.28606	144.9	FALSE	0
2022-09-13	13:39:42	0.734669	3.26795	144.675	FALSE	0
2022-09-13	13:39:42	0.736043	3.27407	148.174	FALSE	0
2022-09-13	13:39:42	0.724949	3.22472	147.9	FALSE	0
2022-09-13	13:39:42	0.736603	3.27656	151.451	FALSE	0
2022-09-13	13:39:43	0.732735	3.25935	151.159	FALSE	0
2022-09-13	13:39:43	0.739758	3.29059	154.741	FALSE	0
2022-09-13	13:39:43	0.730954	3.25143	154.41	FALSE	0
2022-09-13	13:39:43	0.740267	3.29286	158.034	FALSE	0
2022-09-13	13:39:44	0.732532	3.25845	157.669	FALSE	0
2022-09-13	13:39:44	0.733041	3.26071	161.295	FALSE	0
2022-09-13	13:39:44	0.743066	3.30531	160.974	FALSE	0
2022-09-13	13:39:44	0.733804	3.26411	164.559	FALSE	0
2022-09-13	13:39:45	0.732939	3.26026	164.234	FALSE	0
2022-09-13	13:39:45	0.732888	3.26003	167.819	FALSE	0
2022-09-13	13:39:45	0.733601	3.2632	167.498	FALSE	0
2022-09-13	13:39:46	0.736603	3.27656	171.096	FALSE	0
2022-09-13	13:39:46	0.734313	3.26637	170.764	FALSE	0
2022-09-13	13:39:46	0.736756	3.27724	174.373	FALSE	0
2022-09-13	13:39:46	0.736094	3.27429	174.038	FALSE	0
2022-09-13	13:39:47	0.736807	3.27746	177.65	FALSE	0
2022-09-13	13:39:47	0.731717	3.25482	177.293	FALSE	0
2022-09-13	13:39:47	0.740216	3.29263	180.943	FALSE	0
2022-09-13	13:39:47	0.736705	3.27701	180.57	FALSE	0
2022-09-13	13:39:48	0.737112	3.27882	184.222	FALSE	0
2022-09-13	13:39:48	0.734822	3.26864	183.839	FALSE	0
2022-09-13	13:39:48	0.736399	3.27565	187.497	FALSE	0
2022-09-13	13:39:48	0.74271	3.30372	187.143	FALSE	0
2022-09-13	13:39:49	0.732125	3.25664	190.754	FALSE	0
2022-09-13	13:39:49	0.737417	3.28018	190.423	FALSE	0
2022-09-13	13:39:49	0.734618	3.26773	194.022	FALSE	0
2022-09-13	13:39:50	0.72729	3.23513	193.658	FALSE	0
2022-09-13	13:39:50	0.733804	3.26411	197.286	FALSE	0
2022-09-13	13:39:50	0.729478	3.24486	196.903	FALSE	0
2022-09-13	13:39:50	0.727799	3.2374	200.523	FALSE	0
2022-09-13	13:39:51	0.735585	3.27203	200.175	FALSE	0
2022-09-13	13:39:51	0.732023	3.25618	203.78	FALSE	0
2022-09-13	13:39:51	0.728715	3.24147	203.416	FALSE	0
2022-09-13	13:39:51	0.737977	3.28267	207.062	FALSE	0
2022-09-13	13:39:52	0.733855	3.26433	206.681	FALSE	0
2022-09-13	13:39:52	0.723779	3.21951	210.282	FALSE	0
2022-09-13	13:39:52	0.737722	3.28154	209.962	FALSE	0
2022-09-13	13:39:52	0.741692	3.29919	213.581	FALSE	0
2022-09-13	13:39:53	0.732481	3.25822	213.22	FALSE	0
2022-09-13	13:39:53	0.73243	3.258	216.839	FALSE	0
2022-09-13	13:39:53	0.735483	3.27158	216.492	FALSE	0
2022-09-13	13:39:54	0.733957	3.26479	220.104	FALSE	0
2022-09-13	13:39:54	0.734364	3.2666	219.758	FALSE	0
2022-09-13	13:39:54	0.732837	3.25981	223.363	FALSE	0
2022-09-13	13:39:54	0.732888	3.26003	223.019	FALSE	0
2022-09-13	13:39:55	0.739962	3.2915	226.655	FALSE	0
2022-09-13	13:39:55	0.734059	3.26524	226.284	FALSE	0
2022-09-13	13:39:55	0.170089	0.75659	227.412	FALSE	0
2022-09-13	13:39:55	0.707188	3.14571	229.429	FALSE	0
2022-09-13	13:39:56	0.735229	3.27045	230.682	FALSE	0
2022-09-13	13:39:56	0.739809	3.29082	232.72	FALSE	0
2022-09-13	13:39:56	0.735636	3.27226	233.954	FALSE	0
2022-09-13	13:39:56	0.731616	3.25437	235.975	FALSE	0
2022-09-13	13:39:57	0.733244	3.26162	237.216	FALSE	0
2022-09-13	13:39:57	0.73645	3.27588	239.251	FALSE	0
2022-09-13	13:39:57	0.733906	3.26456	240.48	FALSE	0
2022-09-13	13:39:58	0.735687	3.27248	242.523	FALSE	0
2022-09-13	13:39:58	0.742099	3.301	243.781	FALSE	0
2022-09-13	13:39:58	0.738435	3.28471	245.808	FALSE	0
2022-09-13	13:39:58	0.738079	3.28312	247.065	FALSE	0
2022-09-13	13:39:59	0.733295	3.26184	249.07	FALSE	0
2022-09-13	13:39:59	0.734568	3.26751	250.332	FALSE	0
2022-09-13	13:39:59	0.730801	3.25075	252.32	FALSE	0
2022-09-13	13:39:59	0.730649	3.25007	253.582	FALSE	0
2022-09-13	13:40:00	0.733193	3.26139	255.582	FALSE	0
2022-09-13	13:40:00	0.733499	3.26275	256.845	FALSE	0
2022-09-13	13:40:00	0.743117	3.30553	258.887	FALSE	0
2022-09-13	13:40:00	0.739606	3.28992	260.135	FALSE	0
2022-09-13	13:40:01	0.73584	3.27316	262.16	FALSE	0
2022-09-13	13:40:01	0.740573	3.29422	263.429	FALSE	0
2022-09-13	13:40:01	0.735992	3.27384	265.434	FALSE	0
2022-09-13	13:40:02	0.738893	3.28674	266.716	FALSE	0
2022-09-13	13:40:02	0.736501	3.2761	268.71	FALSE	0
2022-09-13	13:40:02	0.732532	3.25845	269.974	FALSE	0
2022-09-13	13:40:02	0.734008	3.26501	271.975	FALSE	0
2022-09-13	13:40:03	0.735026	3.26954	273.244	FALSE	0
2022-09-13	13:40:03	0.737315	3.27972	275.255	FALSE	0
2022-09-13	13:40:03	0.732939	3.26026	276.504	FALSE	0
2022-09-13	13:40:03	0.732583	3.25868	278.514	FALSE	0
2022-09-13	13:40:04	0.733753	3.26388	279.768	FALSE	0
2022-09-13	13:40:04	0.735941	3.27361	281.787	FALSE	0
2022-09-13	13:40:04	0.737722	3.28154	283.049	FALSE	0
2022-09-13	13:40:04	0.732735	3.25935	285.047	FALSE	0
2022-09-13	13:40:05	0.735026	3.26954	286.319	FALSE	0
2022-09-13	13:40:05	0.729478	3.24486	288.292	FALSE	0
2022-09-13	13:40:05	0.731361	3.25324	289.572	FALSE	0
2022-09-13	13:40:06	0.735026	3.26954	291.561	FALSE	0
2022-09-13	13:40:06	0.732074	3.25641	292.829	FALSE	0
2022-09-13	13:40:06	0.73528	3.27067	294.832	FALSE	0
2022-09-13	13:40:06	0.730242	3.24826	296.077	FALSE	0
2022-09-13	13:40:07	0.740013	3.29173	298.124	FALSE	0
2022-09-13	13:40:07	0.731107	3.25211	299.329	FALSE	0
2022-09-13	13:40:07	0.731209	3.25256	301.376	FALSE	0
2022-09-13	13:40:07	0.729428	3.24464	302.574	FALSE	0
2022-09-13	13:40:08	0.729886	3.24668	304.623	FALSE	0
2022-09-13	13:40:08	0.732837	3.25981	305.833	FALSE	0
2022-09-13	13:40:08	0.740827	3.29535	307.918	FALSE	0
2022-09-13	13:40:08	0.736756	3.27724	309.111	FALSE	0
2022-09-13	13:40:09	0.257366	1.14482	309.063	FALSE	0
2022-09-13	13:40:09	0.734364	3.2666	312.377	FALSE	0
2022-09-13	13:40:09	0.732379	3.25777	312.321	FALSE	0
2022-09-13	13:40:10	0.738079	3.28312	315.66	FALSE	0
2022-09-13	13:40:10	0.734211	3.26592	315.587	FALSE	0
2022-09-13	13:40:10	0.725305	3.2263	318.887	FALSE	0
2022-09-13	13:40:10	0.736857	3.27769	318.864	FALSE	0
2022-09-13	13:40:11	0.643575	2.86275	321.749	FALSE	0
2022-09-13	13:40:11	0.165662	0.736898	319.601	FALSE	0
2022-09-13	13:40:11	-0.405127	-1.80209	321.749	FALSE	0
2022-09-13	13:40:11	0.344389	1.53191	321.133	FALSE	0
2022-09-13	13:40:12	0.739758	3.29059	325.04	FALSE	0
2022-09-13	13:40:12	0.734618	3.26773	324.401	FALSE	0
2022-09-13	13:40:12	0.735789	3.27294	328.313	FALSE	0
2022-09-13	13:40:12	0.740827	3.29535	327.696	FALSE	0
2022-09-13	13:40:13	0.729428	3.24464	331.558	FALSE	0
2022-09-13	13:40:13	0.734618	3.26773	330.964	FALSE	0
2022-09-13	13:40:13	0.734008	3.26501	334.823	FALSE	0
2022-09-13	13:40:14	0.72902	3.24283	334.207	FALSE	0
2022-09-13	13:40:14	0.252888	1.1249	335.948	FALSE	0
2022-09-13	13:40:14	0.737722	3.28154	337.488	FALSE	0
2022-09-13	13:40:14	0.737621	3.28109	339.229	FALSE	0
2022-09-13	13:40:15	0.649173	2.88765	340.376	FALSE	0
2022-09-13	13:40:15	0.73645	3.27588	342.505	FALSE	0
2022-09-13	13:40:15	0.737214	3.27928	343.655	FALSE	0
2022-09-13	13:40:15	0.71243	3.16903	345.674	FALSE	0
2022-09-13	13:40:16	0.620471	2.75998	346.415	FALSE	0
2022-09-13	13:40:16	0.646272	2.87475	348.548	FALSE	0
2022-09-13	13:40:16	0.559758	2.48992	348.905	FALSE	0
2022-09-13	13:40:16	0.490496	2.18182	350.73	FALSE	0
2022-09-13	13:40:17	0.422252	1.87826	350.783	FALSE	0
2022-09-13	13:40:17	0.494059	2.19767	352.928	FALSE	0
2022-09-13	13:40:17	0.430954	1.91697	352.7	FALSE	0
2022-09-13	13:40:18	-0.370725	-1.64906	352.928	FALSE	0
2022-09-13	13:40:18	-0.706552	-3.14288	352.7	FALSE	0
2022-09-13	13:40:18	-0.510826	-2.27226	352.928	FALSE	0
2022-09-13	13:40:18	-0.346145	-1.53972	352.7	FALSE	0
2022-09-13	13:40:19	-0.36701	-1.63253	352.928	FALSE	0
2022-09-13	13:40:19	-0.413066	-1.8374	352.7	FALSE	0
2022-09-13	13:40:19	-0.283651	-1.26174	352.928	FALSE	0
2022-09-13	13:40:19	-0.0322008	-0.143236	352.7	FALSE	0
2022-09-13	13:40:20	0.0258654	0.115054	353.043	FALSE	0
2022-09-13	13:40:20	0.220318	0.980019	353.68	FALSE	0
2022-09-13	13:40:20	0.167646	0.745723	353.789	FALSE	0
2022-09-13	13:40:20	0.358791	1.59597	355.276	FALSE	0
2022-09-13	13:40:21	0.35355	1.57266	355.361	FALSE	0
2022-09-13	13:40:21	0.229377	1.02031	356.297	FALSE	0
2022-09-13	13:40:21	0.161438	0.718109	356.079	FALSE	0
2022-09-13	13:40:22	0.0838297	0.372891	356.67	FALSE	0
2022-09-13	13:40:22	0.0842877	0.374929	356.454	FALSE	0
2022-09-13	13:40:22	-0.00227712	-0.0101291	356.67	FALSE	0
2022-09-13	13:40:22	0.110751	0.492643	356.947	FALSE	0
2022-09-13	13:40:23	0.0573158	0.254952	356.924	FALSE	0
2022-09-13	13:40:23	0.102252	0.454837	357.402	FALSE	0
2022-09-13	13:40:23	0.000470984	0.00209503	356.927	FALSE	0
2022-09-13	13:40:23	0.024186	0.107584	357.509	FALSE	0
2022-09-13	13:40:24	-0.0775442	-0.344932	356.927	FALSE	0
2022-09-13	13:40:24	0.0425066	0.189078	357.698	FALSE	0
2022-09-13	13:40:24	-0.0254832	-0.113354	356.927	FALSE	0
2022-09-13	13:40:24	0.0462725	0.205829	357.904	FALSE	0
2022-09-13	13:40:25	-0.00248066	-0.0110345	356.927	FALSE	0
2022-09-13	13:40:25	0.00026741	0.00118949	357.905	FALSE	0
2022-09-13	13:40:25	-0.0820735	-0.365079	356.927	FALSE	0
2022-09-13	13:40:26	-0.0992745	-0.441593	357.905	FALSE	0
2022-09-13	13:40:26	-0.187112	-0.832312	356.927	FALSE	0
2022-09-13	13:40:26	-0.150572	-0.669774	357.905	FALSE	0
2022-09-13	13:40:26	-0.0898598	-0.399714	356.927	FALSE	0
2022-09-13	13:40:27	0.0368577	0.16395	358.069	FALSE	0
2022-09-13	13:40:27	0.13126	0.583871	357.51	FALSE	0
2022-09-13	13:40:27	0.129428	0.575722	358.645	FALSE	0
2022-09-13	13:40:27	0.189682	0.843743	358.354	FALSE	0
2022-09-13	13:40:28	0.15813	0.703394	359.349	FALSE	0
2022-09-13	13:40:28	0.262354	1.167	359.521	FALSE	0
2022-09-13	13:40:28	0.23701	1.05427	360.403	FALSE	0
2022-09-13	13:40:28	0.266272	1.18443	360.706	FALSE	0
2022-09-13	13:40:29	0.224084	0.99677	361.4	FALSE	0
2022-09-13	13:40:29	0.19355	0.860949	361.567	FALSE	0
2022-09-13	13:40:29	0.184084	0.818842	362.218	FALSE	0
2022-09-13	13:40:30	0.173295	0.770851	362.337	FALSE	0
2022-09-13	13:40:30	0.0288679	0.12841	362.347	FALSE	0
2022-09-13	13:40:30	0.0261707	0.116413	362.454	FALSE	0
2022-09-13	13:40:30	-0.0561702	-0.249856	362.347	FALSE	0
2022-09-13	13:40:31	0.014415	0.0641208	362.518	FALSE	0
2022-09-13	13:40:31	-0.00502519	-0.0223531	362.347	FALSE	0
2022-09-13	13:40:31	0.15869	0.705885	363.224	FALSE	0
2022-09-13	13:40:31	0.268206	1.19303	363.54	FALSE	0
2022-09-13	13:40:32	0.388512	1.72818	364.952	FALSE	0
2022-09-13	13:40:32	0.509835	2.26785	365.808	FALSE	0
2022-09-13	13:40:32	0.383015	1.70373	366.656	FALSE	0
2022-09-13	13:40:32	0.477519	2.1241	367.932	FALSE	0
2022-09-13	13:40:33	0.365916	1.62767	368.283	FALSE	0
2022-09-13	13:40:33	0.393957	1.7524	369.684	FALSE	0
2022-09-13	13:40:33	0.389835	1.73406	370.017	FALSE	0
2022-09-13	13:40:33	0.33584	1.49388	371.178	FALSE	0
2022-09-13	13:40:34	0.606883	2.69954	372.717	FALSE	0
2022-09-13	13:40:34	0.454415	2.02133	373.199	FALSE	0
2022-09-13	13:40:34	0.297367	1.32275	374.04	FALSE	0
2022-09-13	13:40:35	0.251158	1.1172	374.317	FALSE	0
2022-09-13	13:40:35	0.0997585	0.443746	374.484	FALSE	0
2022-09-13	13:40:35	0.179555	0.798697	375.115	FALSE	0
2022-09-13	13:40:35	0.125306	0.557386	375.041	FALSE	0
2022-09-13	13:40:36	0.202099	0.898977	376.014	FALSE	0
2022-09-13	13:40:36	0.090191	0.401188	375.442	FALSE	0
2022-09-13	13:40:36	0.257417	1.14504	377.159	FALSE	0
2022-09-13	13:40:36	0.23757	1.05676	376.499	FALSE	0
2022-09-13	13:40:37	0.285814	1.27136	378.431	FALSE	0
2022-09-13	13:40:37	0.25355	1.12784	377.627	FALSE	0
2022-09-13	13:40:37	0.338842	1.50724	379.938	FALSE	0
2022-09-13	13:40:37	0.431056	1.91742	379.544	FALSE	0
2022-09-13	13:40:38	0.457774	2.03627	381.974	FALSE	0
2022-09-13	13:40:38	0.587952	2.61533	382.159	FALSE	0
2022-09-13	13:40:38	0.592379	2.63502	384.609	FALSE	0
2022-09-13	13:40:39	0.645254	2.87022	385.03	FALSE	0
2022-09-13	13:40:39	0.622405	2.76858	387.378	FALSE	0
2022-09-13	13:40:39	0.732481	3.25822	388.288	FALSE	0
2022-09-13	13:40:39	0.741845	3.29987	390.678	FALSE	0
2022-09-13	13:40:40	0.815025	3.62539	391.913	FALSE	0
2022-09-13	13:40:40	0.732175	3.25686	393.935	FALSE	0
2022-09-13	13:40:40	0.758028	3.37186	395.285	FALSE	0
2022-09-13	13:40:40	0.734669	3.26795	397.202	FALSE	0
2022-09-13	13:40:41	0.736908	3.27791	398.563	FALSE	0
2022-09-13	13:40:41	0.737366	3.27995	400.482	FALSE	0
2022-09-13	13:40:41	0.736094	3.27429	401.837	FALSE	0
2022-09-13	13:40:41	0.729886	3.24668	403.729	FALSE	0
2022-09-13	13:40:42	0.73187	3.2555	405.093	FALSE	0
2022-09-13	13:40:42	0.734364	3.2666	406.996	FALSE	0
2022-09-13	13:40:42	0.725102	3.2254	408.318	FALSE	0
2022-09-13	13:40:43	0.734924	3.26909	410.265	FALSE	0
2022-09-13	13:40:43	0.733499	3.26275	411.581	FALSE	0
2022-09-13	13:40:43	0.735687	3.27248	413.537	FALSE	0
2022-09-13	13:40:43	0.729377	3.24441	414.825	FALSE	0
2022-09-13	13:40:44	0.736501	3.2761	416.813	FALSE	0
2022-09-13	13:40:44	0.739351	3.28878	418.114	FALSE	0
2022-09-13	13:40:44	0.726374	3.23106	420.044	FALSE	0
2022-09-13	13:40:44	0.731005	3.25166	421.366	FALSE	0
2022-09-13	13:40:45	0.732837	3.25981	423.304	FALSE	0
2022-09-13	13:40:45	0.732481	3.25822	424.624	FALSE	0
2022-09-13	13:40:45	0.733346	3.26207	426.566	FALSE	0
2022-09-13	13:40:45	0.736094	3.27429	427.898	FALSE	0
2022-09-13	13:40:46	0.733041	3.26071	429.827	FALSE	0
2022-09-13	13:40:46	0.739758	3.29059	431.189	FALSE	0
2022-09-13	13:40:46	0.730394	3.24894	433.076	FALSE	0
2022-09-13	13:40:47	0.725102	3.2254	434.414	FALSE	0
2022-09-13	13:40:47	0.73584	3.27316	436.349	FALSE	0
2022-09-13	13:40:47	0.699046	3.1095	437.524	FALSE	0
2022-09-13	13:40:47	0.720165	3.20344	439.553	FALSE	0
2022-09-13	13:40:48	0.736552	3.27633	440.8	FALSE	0
2022-09-13	13:40:48	0.7307	3.2503	442.803	FALSE	0
2022-09-13	13:40:48	0.735992	3.27384	444.074	FALSE	0
2022-09-13	13:40:48	0.734924	3.26909	446.072	FALSE	0
2022-09-13	13:40:49	0.725407	3.22676	447.301	FALSE	0
2022-09-13	13:40:49	0.738588	3.28539	449.357	FALSE	0
2022-09-13	13:40:49	0.731158	3.25234	450.553	FALSE	0
2022-09-13	13:40:49	0.727545	3.23627	452.594	FALSE	0
2022-09-13	13:40:50	0.731921	3.25573	453.809	FALSE	0
2022-09-13	13:40:50	0.735636	3.27226	455.866	FALSE	0
2022-09-13	13:40:50	0.735331	3.2709	457.08	FALSE	0
2022-09-13	13:40:51	0.735534	3.2718	459.138	FALSE	0
2022-09-13	13:40:51	0.703626	3.12987	460.21	FALSE	0
2022-09-13	13:40:51	0.557774	2.48109	461.619	FALSE	0
2022-09-13	13:40:51	0.648715	2.88561	463.095	FALSE	0
2022-09-13	13:40:52	0.271005	1.20548	462.824	FALSE	0
2022-09-13	13:40:52	-0.0034476	-0.0153356	463.095	FALSE	0
2022-09-13	13:40:52	-0.271895	-1.20944	462.824	FALSE	0
2022-09-13	13:40:52	0.0610816	0.271703	463.367	FALSE	0
2022-09-13	13:40:53	0.34327	1.52693	464.351	FALSE	0
2022-09-13	13:40:53	0.4736	2.10667	465.474	FALSE	0
2022-09-13	13:40:53	0.320776	1.42688	465.778	FALSE	0
2022-09-13	13:40:53	0.330089	1.4683	466.942	FALSE	0
2022-09-13	13:40:54	0.355433	1.58104	467.359	FALSE	0
2022-09-13	13:40:54	0.345967	1.53893	468.481	FALSE	0
2022-09-13	13:40:54	0.135178	0.601299	467.96	FALSE	0
2022-09-13	13:40:55	0.264186	1.17515	469.656	FALSE	0
2022-09-13	13:40:55	0.0947712	0.421561	468.382	FALSE	0
2022-09-13	13:40:55	0.120471	0.535879	470.192	FALSE	0
2022-09-13	13:40:55	0.173957	0.773796	469.156	FALSE	0
2022-09-13	13:40:56	0.351768	1.56473	471.757	FALSE	0
2022-09-13	13:40:56	0.30388	1.35172	470.507	FALSE	0
2022-09-13	13:40:56	0.448868	1.99665	473.753	FALSE	0
2022-09-13	13:40:56	0.60841	2.70633	473.214	FALSE	0
2022-09-13	13:40:57	0.485356	2.15896	475.912	FALSE	0
2022-09-13	13:40:57	0.388155	1.72659	474.94	FALSE	0
2022-09-13	13:40:57	0.437621	1.94663	477.859	FALSE	0
2022-09-13	13:40:57	0.487901	2.17028	477.111	FALSE	0
2022-09-13	13:40:58	0.348206	1.54889	479.408	FALSE	0
2022-09-13	13:40:58	0.425254	1.89161	479.002	FALSE	0
2022-09-13	13:40:58	0.373652	1.66208	481.07	FALSE	0
2022-09-13	13:40:59	0.378893	1.68539	480.688	FALSE	0
2022-09-13	13:40:59	0.273193	1.21522	482.285	FALSE	0
2022-09-13	13:40:59	0.517214	2.30067	482.988	FALSE	0
2022-09-13	13:40:59	0.396858	1.7653	484.05	FALSE	0
2022-09-13	13:41:00	1.11584	4.96348	487.952	FALSE	0
2022-09-13	13:41:00	0.739147	3.28787	487.338	FALSE	0
2022-09-13	13:41:00	0.206679	0.91935	488.871	FALSE	0
2022-09-13	13:41:00	0.12271	0.545839	487.884	FALSE	0
2022-09-13	13:41:01	-0.464567	-2.06649	488.871	FALSE	0
2022-09-13	13:41:01	-0.0182567	-0.0812095	487.884	FALSE	0
2022-09-13	13:41:01	0.0501401	0.223033	489.094	FALSE	0
2022-09-13	13:41:01	0.898333	3.99596	491.88	FALSE	0
2022-09-13	13:41:02	0.592175	2.63411	491.728	FALSE	0
2022-09-13	13:41:02	0.761794	3.38861	495.269	FALSE	0
2022-09-13	13:41:02	0.546679	2.43174	494.16	FALSE	0
2022-09-13	13:41:03	0.450089	2.00209	497.271	FALSE	0
2022-09-13	13:41:03	0.466272	2.07407	496.234	FALSE	0
2022-09-13	13:41:03	0.436756	1.94278	499.213	FALSE	0
2022-09-13	13:41:03	0.500114	2.22461	498.459	FALSE	0
2022-09-13	13:41:04	0.319504	1.42122	500.635	FALSE	0
2022-09-13	13:41:04	0.518639	2.30701	500.766	FALSE	0
2022-09-13	13:41:04	0.733702	3.26365	503.898	FALSE	0
2022-09-13	13:41:04	0.509478	2.26626	503.032	FALSE	0
2022-09-13	13:41:05	0.460623	2.04894	505.947	FALSE	0
2022-09-13	13:41:05	0.347341	1.54504	504.577	FALSE	0
2022-09-13	13:41:05	0.35757	1.59054	507.538	FALSE	0
2022-09-13	13:41:05	1.26597	5.63129	510.208	FALSE	0
2022-09-13	13:41:06	0.399046	1.77504	509.313	FALSE	0
2022-09-13	13:41:06	0.426985	1.89931	512.108	FALSE	0
2022-09-13	13:41:06	0.369326	1.64284	510.956	FALSE	0
2022-09-13	13:41:07	0.368919	1.64103	513.749	FALSE	0
2022-09-13	13:41:07	0.35131	1.5627	512.518	FALSE	0
2022-09-13	13:41:07	0.290954	1.29422	515.043	FALSE	0
2022-09-13	13:41:07	0.295687	1.31527	513.834	FALSE	0
2022-09-13	13:41:08	0.259708	1.15523	516.198	FALSE	0
2022-09-13	13:41:08	0.0759417	0.337804	514.171	FALSE	0
2022-09-13	13:41:08	-0.378155	-1.68211	516.198	FALSE	0
2022-09-13	13:41:08	-0.40533	-1.80299	514.171	FALSE	0
2022-09-13	13:41:09	-0.288638	-1.28392	516.198	FALSE	0
2022-09-13	13:41:09	-0.209453	-0.931689	514.171	FALSE	0
2022-09-13	13:41:09	-0.219071	-0.974472	516.198	FALSE	0
2022-09-13	13:41:09	-0.312709	-1.39099	514.171	FALSE	0
2022-09-13	13:41:10	-0.240699	-1.07068	516.198	FALSE	0
2022-09-13	13:41:10	-0.390776	-1.73825	514.171	FALSE	0
2022-09-13	13:41:10	-0.280343	-1.24702	516.198	FALSE	0
2022-09-13	13:41:11	-0.299376	-1.33168	514.171	FALSE	0
2022-09-13	13:41:11	-0.126297	-0.561794	516.198	FALSE	0
2022-09-13	13:41:11	-0.286755	-1.27554	514.171	FALSE	0
2022-09-13	13:41:11	-0.326501	-1.45234	516.198	FALSE	0
2022-09-13	13:41:12	-0.304211	-1.35319	514.171	FALSE	0
2022-09-13	13:41:12	-0.408384	-1.81657	516.198	FALSE	0
2022-09-13	13:41:12	-0.431844	-1.92093	514.171	FALSE	0
2022-09-13	13:41:12	-0.544618	-2.42257	516.198	FALSE	0
2022-09-13	13:41:13	-0.546602	-2.4314	514.171	FALSE	0
2022-09-13	13:41:13	-0.679478	-3.02245	516.198	FALSE	0
2022-09-13	13:41:13	-0.783345	-3.48448	514.171	FALSE	0
2022-09-13	13:41:13	-0.753981	-3.35386	516.198	FALSE	0
2022-09-13	13:41:14	-0.872811	-3.88244	514.171	FALSE	0
2022-09-13	13:41:14	-0.731793	-3.25516	516.198	FALSE	0
2022-09-13	13:41:14	-0.792862	-3.52681	514.171	FALSE	0
2022-09-13	13:41:15	-0.843447	-3.75182	516.198	FALSE	0
2022-09-13	13:41:15	-0.829757	-3.69093	514.171	FALSE	0
2022-09-13	13:41:15	-0.956933	-4.25663	516.198	FALSE	0
2022-09-13	13:41:15	-0.831437	-3.6984	514.171	FALSE	0
2022-09-13	13:41:16	-1.02716	-4.56901	516.198	FALSE	0
2022-09-13	13:41:16	-1.17408	-5.22254	514.171	FALSE	0
2022-09-13	13:41:16	-0.899732	-4.00219	516.198	FALSE	0
2022-09-13	13:41:16	-0.858816	-3.82019	514.171	FALSE	0
2022-09-13	13:41:17	-0.850317	-3.78238	516.198	FALSE	0
2022-09-13	13:41:17	-0.754643	-3.3568	514.171	FALSE	0
2022-09-13	13:41:17	-0.798613	-3.55239	516.198	FALSE	0
2022-09-13	13:41:17	-0.40589	-1.80548	514.171	FALSE	0
2022-09-13	13:41:18	-0.136781	-0.608429	516.198	FALSE	0
2022-09-13	13:41:18	0.0944659	0.420203	514.592	FALSE	0
2022-09-13	13:41:18	-0.192404	-0.855851	516.198	FALSE	0
2022-09-13	13:41:19	-0.424262	-1.8872	514.592	FALSE	0
2022-09-13	13:41:19	-0.31047	-1.38103	516.198	FALSE	0
2022-09-13	13:41:19	-0.364414	-1.62099	514.592	FALSE	0
2022-09-13	13:41:19	-0.391335	-1.74074	516.198	FALSE	0
2022-09-13	13:41:20	-0.419376	-1.86547	514.592	FALSE	0
2022-09-13	13:41:20	-0.723752	-3.21939	516.198	FALSE	0
2022-09-13	13:41:20	-0.407112	-1.81092	514.592	FALSE	0
2022-09-13	13:41:20	-0.100903	-0.448837	516.198	FALSE	0
2022-09-13	13:41:21	0.356908	1.5876	516.179	FALSE	0
2022-09-13	13:41:21	0.419962	1.86807	518.066	FALSE	0
2022-09-13	13:41:21	0.404949	1.80129	517.981	FALSE	0
2022-09-13	13:41:21	0.331667	1.47532	519.542	FALSE	0
2022-09-13	13:41:22	0.444644	1.97787	519.958	FALSE	0
2022-09-13	13:41:22	0.434771	1.93395	521.475	FALSE	0
2022-09-13	13:41:22	0.486985	2.16621	522.125	FALSE	0
2022-09-13	13:41:23	0.396807	1.76508	523.241	FALSE	0
2022-09-13	13:41:23	0.422201	1.87803	524.003	FALSE	0
2022-09-13	13:41:23	0.401692	1.78681	525.027	FALSE	0
2022-09-13	13:41:23	0.460827	2.04985	526.053	FALSE	0
2022-09-13	13:41:24	0.339657	1.51086	526.538	FALSE	0
2022-09-13	13:41:24	0.540165	2.40276	528.455	FALSE	0
2022-09-13	13:41:24	0.542506	2.41318	528.951	FALSE	0
2022-09-13	13:41:24	0.598639	2.66287	531.118	FALSE	0
2022-09-13	13:41:25	0.433804	1.92965	530.881	FALSE	0
2022-09-13	13:41:25	0.656298	2.91934	534.038	FALSE	0
2022-09-13	13:41:25	0.211667	0.941537	531.823	FALSE	0
2022-09-13	13:41:25	0.670547	2.98273	537.02	FALSE	0
2022-09-13	13:41:26	0.271361	1.20707	533.03	FALSE	0
2022-09-13	13:41:26	0.342201	1.52218	538.542	FALSE	0
2022-09-13	13:41:26	0.291311	1.29581	534.325	FALSE	0
2022-09-13	13:41:27	0.533499	2.37311	540.916	FALSE	0
2022-09-13	13:41:27	0.247392	1.10045	535.426	FALSE	0
2022-09-13	13:41:27	0.469071	2.08652	543.002	FALSE	0
2022-09-13	13:41:27	0.246476	1.09637	536.522	FALSE	0
2022-09-13	13:41:28	0.167188	0.743686	543.746	FALSE	0
2022-09-13	13:41:28	0.208562	0.927725	537.45	FALSE	0
2022-09-13	13:41:28	0.0754327	0.33554	544.081	FALSE	0
2022-09-13	13:41:28	0.287341	1.27815	538.728	FALSE	0
2022-09-13	13:41:29	0.351616	1.56406	545.645	FALSE	0
2022-09-13	13:41:29	0.312074	1.38817	540.116	FALSE	0
2022-09-13	13:41:29	0.258232	1.14867	546.794	FALSE	0
2022-09-13	13:41:29	0.286628	1.27498	541.391	FALSE	0
2022-09-13	13:41:30	0.294211	1.30871	548.103	FALSE	0
2022-09-13	13:41:30	0.340267	1.51358	542.905	FALSE	0
2022-09-13	13:41:30	0.210853	0.937916	549.041	FALSE	0
2022-09-13	13:41:31	0.282405	1.25619	544.161	FALSE	0
2022-09-13	13:41:31	0.0491733	0.218733	549.259	FALSE	0
2022-09-13	13:41:31	0.397774	1.76938	545.93	FALSE	0
2022-09-13	13:41:31	0.150954	0.671474	549.931	FALSE	0
2022-09-13	13:41:32	0.235076	1.04567	546.976	FALSE	0
2022-09-13	13:41:32	0.0723284	0.321731	550.253	FALSE	0
2022-09-13	13:41:32	-0.0194781	-0.0866425	546.976	FALSE	0
2022-09-13	13:41:32	0.0984353	0.43786	550.69	FALSE	0
2022-09-13	13:41:33	0.159504	0.709506	547.686	FALSE	0
2022-09-13	13:41:33	0.263728	1.17311	551.864	FALSE	0
2022-09-13	13:41:33	0.0491733	0.218733	547.904	FALSE	0
2022-09-13	13:41:33	0.0463234	0.206056	552.07	FALSE	0
2022-09-13	13:41:34	-0.0912847	-0.406053	547.904	FALSE	0
2022-09-13	13:41:34	0.139504	0.620542	552.69	FALSE	0
2022-09-13	13:41:34	0.00438957	0.0195257	547.924	FALSE	0
2022-09-13	13:41:35	0.160725	0.714937	553.405	FALSE	0
2022-09-13	13:41:35	-0.205534	-0.914256	547.924	FALSE	0
2022-09-13	13:41:35	0.000470984	0.00209503	553.407	FALSE	0
2022-09-13	13:41:35	-0.0887402	-0.394734	547.924	FALSE	0
2022-09-13	13:41:36	-0.205738	-0.915164	553.407	FALSE	0
2022-09-13	13:41:36	-0.185432	-0.824839	547.924	FALSE	0
2022-09-13	13:41:36	-0.249096	-1.10803	553.407	FALSE	0
2022-09-13	13:41:36	-0.184465	-0.820537	547.924	FALSE	0
2022-09-13	13:41:37	-0.217544	-0.967679	553.407	FALSE	0
2022-09-13	13:41:37	0.178741	0.795076	548.719	FALSE	0
2022-09-13	13:41:37	0.0921249	0.40979	553.817	FALSE	0
2022-09-13	13:41:37	0.335433	1.49207	550.211	FALSE	0
2022-09-13	13:41:38	0.177417	0.789186	554.606	FALSE	0
2022-09-13	13:41:38	0.422812	1.88075	552.092	FALSE	0
2022-09-13	13:41:38	0.068359	0.304075	554.91	FALSE	0
2022-09-13	13:41:39	0.459453	2.04374	554.136	FALSE	0
2022-09-13	13:41:39	0.187087	0.8322	555.742	FALSE	0
2022-09-13	13:41:39	0.291107	1.2949	555.43	FALSE	0
2022-09-13	13:41:39	0.165255	0.735087	556.477	FALSE	0
2022-09-13	13:41:40	0.213499	0.949686	556.38	FALSE	0
2022-09-13	13:41:40	0.333244	1.48234	557.96	FALSE	0
2022-09-13	13:41:40	0.334262	1.48686	557.867	FALSE	0
2022-09-13	13:41:40	0.399809	1.77843	559.738	FALSE	0
2022-09-13	13:41:41	0.320573	1.42597	559.293	FALSE	0
2022-09-13	13:41:41	0.377265	1.67815	561.416	FALSE	0
2022-09-13	13:41:41	0.336654	1.4975	560.79	FALSE	0
2022-09-13	13:41:41	0.317366	1.41171	562.828	FALSE	0
2022-09-13	13:41:42	0.315992	1.4056	562.196	FALSE	0
2022-09-13	13:41:42	0.305713	1.35987	564.188	FALSE	0
2022-09-13	13:41:42	0.310395	1.3807	563.577	FALSE	0
2022-09-13	13:41:42	0.32958	1.46604	565.654	FALSE	0
2022-09-13	13:41:43	0.163779	0.728522	564.305	FALSE	0
2022-09-13	13:41:43	0.464339	2.06547	567.72	FALSE	0
2022-09-13	13:41:43	0.0531427	0.236389	564.542	FALSE	0
2022-09-13	13:41:44	0.0880536	0.39168	568.111	FALSE	0
2022-09-13	13:41:44	0.121743	0.541537	565.083	FALSE	0
2022-09-13	13:41:44	0.174313	0.775379	568.887	FALSE	0
2022-09-13	13:41:44	0.140318	0.624163	565.707	FALSE	0
2022-09-13	13:41:45	0.295942	1.31641	570.203	FALSE	0
2022-09-13	13:41:45	0.123626	0.549913	566.257	FALSE	0
2022-09-13	13:41:45	0.394109	1.75308	571.956	FALSE	0
2022-09-13	13:41:45	0.230853	1.02688	567.284	FALSE	0
2022-09-13	13:41:46	0.545814	2.42789	574.384	FALSE	0
2022-09-13	13:41:46	0.776857	3.45562	570.74	FALSE	0
2022-09-13	13:41:46	0.794517	3.53417	577.918	FALSE	0
2022-09-13	13:41:46	0.795076	3.53666	574.276	FALSE	0
2022-09-13	13:41:47	0.794415	3.53372	581.452	FALSE	0
2022-09-13	13:41:47	0.810547	3.60548	577.882	FALSE	0
2022-09-13	13:41:47	0.794517	3.53417	584.986	FALSE	0
2022-09-13	13:41:48	0.802048	3.56767	581.45	FALSE	0
2022-09-13	13:41:48	0.78846	3.50723	588.493	FALSE	0
2022-09-13	13:41:48	0.785509	3.4941	584.944	FALSE	0
2022-09-13	13:41:48	0.858893	3.82053	592.314	FALSE	0
2022-09-13	13:41:49	0.80841	3.59597	588.54	FALSE	0
2022-09-13	13:41:49	0.746018	3.31844	595.632	FALSE	0
2022-09-13	13:41:49	0.763321	3.3954	591.935	FALSE	0
2022-09-13	13:41:49	0.772532	3.43638	599.069	FALSE	0
2022-09-13	13:41:50	0.764593	3.40106	595.336	FALSE	0
2022-09-13	13:41:50	0.729275	3.24396	602.313	FALSE	0
2022-09-13	13:41:50	0.706272	3.14164	598.478	FALSE	0
2022-09-13	13:41:50	0.737926	3.28244	605.595	FALSE	0
2022-09-13	13:41:51	0.731667	3.2546	601.732	FALSE	0
2022-09-13	13:41:51	0.723219	3.21702	608.812	FALSE	0
2022-09-13	13:41:51	0.726374	3.23106	604.963	FALSE	0
2022-09-13	13:41:52	0.731259	3.25279	612.065	FALSE	0
2022-09-13	13:41:52	0.720471	3.2048	608.168	FALSE	0
2022-09-13	13:41:52	0.714669	3.17899	615.244	FALSE	0
2022-09-13	13:41:52	0.764389	3.40016	611.568	FALSE	0
2022-09-13	13:41:53	-0.166857	-0.742213	615.244	FALSE	0
2022-09-13	13:41:53	0.735738	3.27271	614.841	FALSE	0
2022-09-13	13:41:53	0.743575	3.30757	618.551	FALSE	0
2022-09-13	13:41:53	0.633041	2.81589	617.657	FALSE	0
2022-09-13	13:41:54	0.429631	1.91108	620.462	FALSE	0
2022-09-13	13:41:54	0.50897	2.264	619.921	FALSE	0
2022-09-13	13:41:54	0.502405	2.2348	622.697	FALSE	0
2022-09-13	13:41:54	0.455789	2.02744	621.948	FALSE	0
2022-09-13	13:41:55	0.480318	2.13655	624.834	FALSE	0
2022-09-13	13:41:55	0.508104	2.26015	624.209	FALSE	0
2022-09-13	13:41:55	0.55243	2.45732	627.291	FALSE	0
2022-09-13	13:41:56	0.411616	1.83095	626.039	FALSE	0
2022-09-13	13:41:56	0.43411	1.93101	629.222	FALSE	0
2022-09-13	13:41:56	0.599606	2.66717	628.707	FALSE	0
2022-09-13	13:41:56	0.281743	1.25325	630.475	FALSE	0
2022-09-13	13:41:57	0.269733	1.19983	629.906	FALSE	0
2022-09-13	13:41:57	0.260623	1.1593	631.635	FALSE	0
2022-09-13	13:41:57	0.453041	2.01522	631.922	FALSE	0
2022-09-13	13:41:57	0.295891	1.31618	632.951	FALSE	0
2022-09-13	13:41:58	0.198944	0.884943	632.807	FALSE	0
2022-09-13	13:41:58	0.281387	1.25167	634.202	FALSE	0
2022-09-13	13:41:58	0.356705	1.5867	634.393	FALSE	0
2022-09-13	13:41:58	0.523168	2.32716	636.53	FALSE	0
2022-09-13	13:41:59	0.318232	1.41556	635.809	FALSE	0
2022-09-13	13:41:59	0.456247	2.02948	638.559	FALSE	0
2022-09-13	13:41:59	0.401947	1.78794	637.597	FALSE	0
2022-09-13	13:42:00	0.388206	1.72682	640.286	FALSE	0
2022-09-13	13:42:00	0.408817	1.8185	639.415	FALSE	0
2022-09-13	13:42:00	0.407646	1.81329	642.099	FALSE	0
2022-09-13	13:42:00	0.397417	1.76779	641.183	FALSE	0
2022-09-13	13:42:01	0.402761	1.79156	643.891	FALSE	0
2022-09-13	13:42:01	0.413855	1.84091	643.024	FALSE	0
2022-09-13	13:42:01	0.422303	1.87849	645.769	FALSE	0
2022-09-13	13:42:01	0.415484	1.84816	644.872	FALSE	0
2022-09-13	13:42:02	0.408919	1.81895	647.588	FALSE	0
2022-09-13	13:42:02	0.403321	1.79405	646.666	FALSE	0
2022-09-13	13:42:02	0.391616	1.74199	649.33	FALSE	0
2022-09-13	13:42:02	0.413143	1.83774	648.504	FALSE	0
2022-09-13	13:42:03	0.28327	1.26004	650.59	FALSE	0
2022-09-13	13:42:03	0.202608	0.901241	649.405	FALSE	0
2022-09-13	13:42:03	0.157519	0.700676	651.291	FALSE	0
2022-09-13	13:42:04	0.110853	0.493096	649.898	FALSE	0
2022-09-13	13:42:04	0.0629137	0.279853	651.571	FALSE	0
2022-09-13	13:42:04	0.659351	2.93293	652.831	FALSE	0
2022-09-13	13:42:04	0.55014	2.44713	654.018	FALSE	0
2022-09-13	13:42:05	0.414466	1.84363	654.675	FALSE	0
2022-09-13	13:42:05	0.715992	3.18488	657.203	FALSE	0
2022-09-13	13:42:05	0.736552	3.27633	657.951	FALSE	0
2022-09-13	13:42:05	0.775891	3.45132	660.654	FALSE	0
2022-09-13	13:42:06	0.729071	3.24305	661.194	FALSE	0
2022-09-13	13:42:06	0.787443	3.5027	664.157	FALSE	0
2022-09-13	13:42:06	0.76673	3.41057	664.605	FALSE	0
2022-09-13	13:42:06	0.854211	3.7997	667.957	FALSE	0
2022-09-13	13:42:07	0.730293	3.24849	667.853	FALSE	0
2022-09-13	13:42:07	0.729784	3.24623	671.203	FALSE	0
2022-09-13	13:42:07	0.701438	3.12014	670.973	FALSE	0
2022-09-13	13:42:08	0.690191	3.07011	674.273	FALSE	0
2022-09-13	13:42:08	0.270344	1.20254	672.176	FALSE	0
2022-09-13	13:42:08	0.288054	1.28132	675.554	FALSE	0
2022-09-13	13:42:08	0.525662	2.33825	674.514	FALSE	0
2022-09-13	13:42:09	-0.0450761	-0.200508	675.554	FALSE	0
2022-09-13	13:42:09	0.209377	0.931351	675.446	FALSE	0
2022-09-13	13:42:09	0.197519	0.878604	676.433	FALSE	0
2022-09-13	13:42:09	0.179249	0.797335	676.243	FALSE	0
2022-09-13	13:42:10	0.197367	0.877928	677.311	FALSE	0
2022-09-13	13:42:10	0.0178246	0.0792874	676.322	FALSE	0
2022-09-13	13:42:10	0.112888	0.502148	677.813	FALSE	0
2022-09-13	13:42:10	0.0877992	0.390548	676.713	FALSE	0
2022-09-13	13:42:11	0.0503946	0.224165	678.037	FALSE	0
2022-09-13	13:42:11	0.112837	0.501922	677.215	FALSE	0
2022-09-13	13:42:11	-0.101972	-0.453592	678.037	FALSE	0
2022-09-13	13:42:12	0.129835	0.577532	677.792	FALSE	0
2022-09-13	13:42:12	0.371107	1.65076	679.688	FALSE	0
2022-09-13	13:42:12	0.454059	2.01975	679.812	FALSE	0
2022-09-13	13:42:12	0.493397	2.19473	681.883	FALSE	0
2022-09-13	13:42:13	0.330344	1.46944	681.281	FALSE	0
2022-09-13	13:42:13	0.308919	1.37413	683.257	FALSE	0
2022-09-13	13:42:13	0.186069	0.827672	682.109	FALSE	0
2022-09-13	13:42:13	0.241387	1.07374	684.33	FALSE	0
2022-09-13	13:42:14	0.179046	0.796432	682.906	FALSE	0
2022-09-13	13:42:14	0.102608	0.456421	684.787	FALSE	0
2022-09-13	13:42:14	0.337468	1.50113	684.407	FALSE	0
2022-09-13	13:42:14	0.133244	0.592696	685.38	FALSE	0
2022-09-13	13:42:15	0.286578	1.27476	685.681	FALSE	0
2022-09-13	13:42:15	0.207697	0.923878	686.303	FALSE	0
2022-09-13	13:42:15	0.18902	0.840799	686.522	FALSE	0
2022-09-13	13:42:16	0.198181	0.881549	687.185	FALSE	0
2022-09-13	13:42:16	0.0960943	0.427447	686.95	FALSE	0
2022-09-13	13:42:16	0.327036	1.45472	688.64	FALSE	0
2022-09-13	13:42:16	0.0161453	0.0718175	687.021	FALSE	0
2022-09-13	13:42:17	0.10327	0.459366	689.099	FALSE	0
2022-09-13	13:42:17	0.117926	0.524558	687.546	FALSE	0
2022-09-13	13:42:17	0.120013	0.533842	689.633	FALSE	0
2022-09-13	13:42:17	0.263066	1.17017	688.716	FALSE	0
2022-09-13	13:42:18	-0.0331677	-0.147537	689.633	FALSE	0
2022-09-13	13:42:18	0.143321	0.63752	689.354	FALSE	0
2022-09-13	13:42:18	-0.0321499	-0.143009	689.633	FALSE	0
2022-09-13	13:42:18	-0.0290964	-0.129427	689.354	FALSE	0
2022-09-13	13:42:19	0.668461	2.97345	692.606	FALSE	0
2022-09-13	13:42:19	0.738995	3.2872	692.641	FALSE	0
2022-09-13	13:42:19	0.732532	3.25845	695.865	FALSE	0
2022-09-13	13:42:20	0.734873	3.26886	695.91	FALSE	0
2022-09-13	13:42:20	0.731209	3.25256	699.117	FALSE	0
2022-09-13	13:42:20	0.726985	3.23377	699.144	FALSE	0
2022-09-13	13:42:20	0.732379	3.25777	702.375	FALSE	0
2022-09-13	13:42:21	0.731616	3.25437	702.398	FALSE	0
2022-09-13	13:42:21	0.737163	3.27905	705.654	FALSE	0
2022-09-13	13:42:21	0.727748	3.23717	705.635	FALSE	0
2022-09-13	13:42:21	0.668104	2.97186	708.626	FALSE	0
2022-09-13	13:42:22	0.713448	3.17356	708.809	FALSE	0
2022-09-13	13:42:22	0.712328	3.16858	711.795	FALSE	0
2022-09-13	13:42:22	0.724796	3.22404	712.033	FALSE	0
2022-09-13	13:42:22	0.735738	3.27271	715.067	FALSE	0
2022-09-13	13:42:23	0.733601	3.2632	715.296	FALSE	0
2022-09-13	13:42:23	0.727646	3.23671	718.304	FALSE	0
2022-09-13	13:42:23	0.73014	3.24781	718.544	FALSE	0
2022-09-13	13:42:24	0.68042	3.02664	721.331	FALSE	0
2022-09-13	13:42:24	0.461132	2.05121	720.595	FALSE	0
2022-09-13	13:42:24	0.726985	3.23377	724.564	FALSE	0
2022-09-13	13:42:24	0.54617	2.42947	723.024	FALSE	0
2022-09-13	13:42:25	0.735229	3.27045	727.835	FALSE	0
2022-09-13	13:42:25	0.729275	3.24396	726.268	FALSE	0
2022-09-13	13:42:25	0.730903	3.2512	731.086	FALSE	0
2022-09-13	13:42:26	0.732379	3.25777	729.526	FALSE	0
2022-09-13	13:42:26	0.724491	3.22268	734.309	FALSE	0
2022-09-13	13:42:26	0.739555	3.28969	732.816	FALSE	0
2022-09-13	13:42:26	0.724135	3.2211	737.53	FALSE	0
2022-09-13	13:42:26	0.726781	3.23287	736.049	FALSE	0
2022-09-13	13:42:27	0.741387	3.29784	740.828	FALSE	0
2022-09-13	13:42:27	0.733295	3.26184	739.31	FALSE	0
2022-09-13	13:42:27	0.726527	3.23174	744.059	FALSE	0
2022-09-13	13:42:28	0.730191	3.24804	742.559	FALSE	0
2022-09-13	13:42:28	0.728054	3.23853	747.298	FALSE	0
2022-09-13	13:42:28	0.731972	3.25596	745.814	FALSE	0
2022-09-13	13:42:28	0.732481	3.25822	750.556	FALSE	0
2022-09-13	13:42:29	0.730903	3.2512	749.066	FALSE	0
2022-09-13	13:42:29	0.726527	3.23174	753.788	FALSE	0
2022-09-13	13:42:29	0.732175	3.25686	752.323	FALSE	0
2022-09-13	13:42:29	0.733702	3.26365	757.052	FALSE	0
2022-09-13	13:42:30	0.733142	3.26116	755.584	FALSE	0
2022-09-13	13:42:30	0.734109	3.26546	760.317	FALSE	0
2022-09-13	13:42:30	0.73187	3.2555	758.839	FALSE	0
2022-09-13	13:42:30	0.739249	3.28833	763.605	FALSE	0
2022-09-13	13:42:31	0.73701	3.27837	762.118	FALSE	0
2022-09-13	13:42:31	0.71243	3.16903	766.774	FALSE	0
2022-09-13	13:42:31	0.554211	2.46524	764.583	FALSE	0
2022-09-13	13:42:32	0.603015	2.68233	769.457	FALSE	0
2022-09-13	13:42:32	0.734313	3.26637	767.849	FALSE	0
2022-09-13	13:42:32	0.730343	3.24871	772.705	FALSE	0
2022-09-13	13:42:32	0.730801	3.25075	771.1	FALSE	0
2022-09-13	13:42:33	0.736247	3.27497	775.98	FALSE	0
2022-09-13	13:42:33	0.728562	3.24079	774.341	FALSE	0
2022-09-13	13:42:33	0.693957	3.08686	779.067	FALSE	0
2022-09-13	13:42:33	0.367239	1.63355	775.974	FALSE	0
2022-09-13	13:42:34	0.147952	0.65812	779.725	FALSE	0
2022-09-13	13:42:34	0.105865	0.470909	776.445	FALSE	0
2022-09-13	13:42:34	0.113194	0.50351	780.229	FALSE	0
2022-09-13	13:42:34	0.061387	0.273062	776.718	FALSE	0
2022-09-13	13:42:35	-0.112302	-0.499542	780.229	FALSE	0
2022-09-13	13:42:35	0.474008	2.10848	778.827	FALSE	0
2022-09-13	13:42:35	0.739555	3.28969	783.519	FALSE	0
2022-09-13	13:42:36	0.729173	3.24351	782.07	FALSE	0
2022-09-13	13:42:36	0.736908	3.27791	786.796	FALSE	0
2022-09-13	13:42:36	0.735992	3.27384	785.344	FALSE	0
2022-09-13	13:42:36	0.736908	3.27791	790.074	FALSE	0
2022-09-13	13:42:37	0.732532	3.25845	788.603	FALSE	0
2022-09-13	13:42:37	0.738842	3.28652	793.361	FALSE	0
2022-09-13	13:42:37	0.735941	3.27361	791.876	FALSE	0
2022-09-13	13:42:37	0.729428	3.24464	796.606	FALSE	0
2022-09-13	13:42:38	0.732939	3.26026	795.136	FALSE	0
2022-09-13	13:42:38	0.736807	3.27746	799.883	FALSE	0
2022-09-13	13:42:38	0.736501	3.2761	798.413	FALSE	0
2022-09-13	13:42:38	0.73701	3.27837	803.161	FALSE	0
2022-09-13	13:42:39	0.73528	3.27067	801.683	FALSE	0
2022-09-13	13:42:39	0.738028	3.2829	806.444	FALSE	0
2022-09-13	13:42:39	0.736603	3.27656	804.96	FALSE	0
2022-09-13	13:42:40	0.728613	3.24102	809.685	FALSE	0
2022-09-13	13:42:40	0.729784	3.24623	808.206	FALSE	0
2022-09-13	13:42:40	0.734669	3.26795	812.953	FALSE	0
2022-09-13	13:42:40	0.729835	3.24645	811.452	FALSE	0
2022-09-13	13:42:41	0.73131	3.25301	816.206	FALSE	0
2022-09-13	13:42:41	0.72897	3.2426	814.695	FALSE	0
2022-09-13	13:42:41	0.727341	3.23536	819.442	FALSE	0
2022-09-13	13:42:41	0.733193	3.26139	817.956	FALSE	0
2022-09-13	13:42:42	0.730445	3.24917	822.691	FALSE	0
2022-09-13	13:42:42	0.727188	3.23468	821.191	FALSE	0
2022-09-13	13:42:42	0.728613	3.24102	825.932	FALSE	0
2022-09-13	13:42:42	0.731565	3.25415	824.445	FALSE	0
2022-09-13	13:42:43	0.725814	3.22857	829.16	FALSE	0
2022-09-13	13:42:43	0.721132	3.20774	827.653	FALSE	0
2022-09-13	13:42:43	0.719453	3.20027	832.361	FALSE	0
2022-09-13	13:42:44	0.729987	3.24713	830.9	FALSE	0
2022-09-13	13:42:44	0.721539	3.20955	835.57	FALSE	0
2022-09-13	13:42:44	0.726781	3.23287	834.133	FALSE	0
2022-09-13	13:42:44	0.725407	3.22676	838.797	FALSE	0
2022-09-13	13:42:45	0.726272	3.2306	837.364	FALSE	0
2022-09-13	13:42:45	0.719707	3.2014	841.998	FALSE	0
2022-09-13	13:42:45	0.72902	3.24283	840.606	FALSE	0
2022-09-13	13:42:45	0.715483	3.18261	845.181	FALSE	0
2022-09-13	13:42:46	0.713651	3.17446	843.781	FALSE	0
2022-09-13	13:42:46	0.722659	3.21453	848.396	FALSE	0
2022-09-13	13:42:46	0.716501	3.18714	846.968	FALSE	0
2022-09-13	13:42:46	0.7107	3.16134	851.557	FALSE	0
2022-09-13	13:42:47	0.697163	3.10112	850.069	FALSE	0
2022-09-13	13:42:47	0.684033	3.04272	854.6	FALSE	0
2022-09-13	13:42:47	0.684389	3.0443	853.113	FALSE	0
2022-09-13	13:42:48	0.685204	3.04792	857.647	FALSE	0
2022-09-13	13:42:48	0.66098	2.94017	856.054	FALSE	0
2022-09-13	13:42:48	0.659351	2.93293	860.58	FALSE	0
2022-09-13	13:42:48	0.643321	2.86162	858.915	FALSE	0
2022-09-13	13:42:49	0.656705	2.92116	863.502	FALSE	0
2022-09-13	13:42:49	0.632328	2.81272	861.728	FALSE	0
2022-09-13	13:42:49	0.640064	2.84713	866.349	FALSE	0
2022-09-13	13:42:49	0.65299	2.90463	864.633	FALSE	0
2022-09-13	13:42:50	0.659351	2.93293	869.282	FALSE	0
2022-09-13	13:42:50	0.724389	3.22223	867.855	FALSE	0
2022-09-13	13:42:50	0.737824	3.28199	872.564	FALSE	0
2022-09-13	13:42:50	0.72785	3.23762	871.092	FALSE	0
2022-09-13	13:42:51	0.738486	3.28493	875.849	FALSE	0
2022-09-13	13:42:51	0.728308	3.23966	874.332	FALSE	0
2022-09-13	13:42:51	0.734822	3.26864	879.117	FALSE	0
2022-09-13	13:42:52	0.73243	3.258	877.59	FALSE	0
2022-09-13	13:42:52	0.736094	3.27429	882.391	FALSE	0
2022-09-13	13:42:52	0.73472	3.26818	880.858	FALSE	0
2022-09-13	13:42:52	0.730954	3.25143	885.643	FALSE	0
2022-09-13	13:42:53	0.737112	3.27882	884.137	FALSE	0
2022-09-13	13:42:53	0.728512	3.24057	888.883	FALSE	0
2022-09-13	13:42:53	0.731361	3.25324	887.39	FALSE	0
2022-09-13	13:42:53	0.732735	3.25935	892.143	FALSE	0
2022-09-13	13:42:54	0.728919	3.24238	890.633	FALSE	0
2022-09-13	13:42:54	0.720827	3.20638	895.349	FALSE	0
2022-09-13	13:42:54	0.732786	3.25958	893.892	FALSE	0
2022-09-13	13:42:54	0.723982	3.22042	898.57	FALSE	0
2022-09-13	13:42:55	0.724847	3.22426	897.117	FALSE	0
2022-09-13	13:42:55	0.728868	3.24215	901.812	FALSE	0
2022-09-13	13:42:55	0.724237	3.22155	900.338	FALSE	0
2022-09-13	13:42:55	0.724135	3.2211	905.033	FALSE	0
2022-09-13	13:42:56	0.723728	3.21929	903.557	FALSE	0
2022-09-13	13:42:56	0.716298	3.18624	908.219	FALSE	0
2022-09-13	13:42:56	0.705305	3.13734	906.695	FALSE	0
2022-09-13	13:42:57	0.711209	3.1636	911.383	FALSE	0
2022-09-13	13:42:57	0.417672	1.85789	908.553	FALSE	0
2022-09-13	13:42:57	1.60134	7.12308	918.506	FALSE	0
2022-09-13	13:42:57	2.2649	10.0747	918.627	FALSE	0
2022-09-13	13:42:58	1.20352	5.3535	923.859	FALSE	0
2022-09-13	13:42:58	0.527544	2.34662	920.974	FALSE	0
2022-09-13	13:42:58	0.511921	2.27713	926.136	FALSE	0
2022-09-13	13:42:58	0.346781	1.54255	922.517	FALSE	0
2022-09-13	13:42:59	0.365356	1.62518	927.762	FALSE	0
2022-09-13	13:42:59	0.482608	2.14674	924.663	FALSE	0
2022-09-13	13:42:59	0.316858	1.40945	929.171	FALSE	0
2022-09-13	13:43:00	0.45528	2.02518	926.688	FALSE	0
2022-09-13	13:43:00	0.348766	1.55138	930.722	FALSE	0
2022-09-13	13:43:00	0.462252	2.05619	928.745	FALSE	0
2022-09-13	13:43:00	0.336552	1.49705	932.219	FALSE	0
2022-09-13	13:43:01	0.428308	1.9052	930.65	FALSE	0
2022-09-13	13:43:01	0.328155	1.4597	933.679	FALSE	0
2022-09-13	13:43:01	0.428817	1.90746	932.557	FALSE	0
2022-09-13	13:43:01	0.459555	2.04419	935.723	FALSE	0
2022-09-13	13:43:02	0.402252	1.7893	934.347	FALSE	0
2022-09-13	13:43:02	0.451718	2.00933	937.733	FALSE	0
2022-09-13	13:43:02	0.530598	2.36021	936.707	FALSE	0
2022-09-13	13:43:02	-0.279071	-1.24136	937.733	FALSE	0
2022-09-13	13:43:03	-0.361615	-1.60854	936.707	FALSE	0
2022-09-13	13:43:03	-0.0678241	-0.301695	937.733	FALSE	0
2022-09-13	13:43:03	-0.248893	-1.10713	936.707	FALSE	0
2022-09-13	13:43:03	-0.0890455	-0.396092	937.733	FALSE	0
2022-09-13	13:43:04	0.220471	0.980699	937.687	FALSE	0
2022-09-13	13:43:04	-0.300496	-1.33667	937.733	FALSE	0
2022-09-13	13:43:04	-0.346195	-1.53994	937.687	FALSE	0
2022-09-13	13:43:05	0.639606	2.8451	940.578	FALSE	0
2022-09-13	13:43:05	0.40444	1.79903	939.487	FALSE	0
2022-09-13	13:43:05	0.457061	2.0331	942.611	FALSE	0
2022-09-13	13:43:05	0.656298	2.91934	942.406	FALSE	0
2022-09-13	13:43:06	0.479097	2.13112	944.742	FALSE	0
2022-09-13	13:43:06	0.403575	1.79518	944.201	FALSE	0
2022-09-13	13:43:06	0.679504	3.02257	947.765	FALSE	0
2022-09-13	13:43:06	0.511972	2.27735	946.478	FALSE	0
2022-09-13	13:43:07	0.570242	2.53655	950.301	FALSE	0
2022-09-13	13:43:07	0.377774	1.68041	948.159	FALSE	0
2022-09-13	13:43:07	0.278792	1.24012	951.541	FALSE	0
2022-09-13	13:43:07	0.209936	0.933837	949.093	FALSE	0
2022-09-13	13:43:08	-0.108028	-0.48053	951.541	FALSE	0
2022-09-13	13:43:08	-0.423396	-1.88335	949.093	FALSE	0
2022-09-13	13:43:08	-0.189198	-0.841591	951.541	FALSE	0
2022-09-13	13:43:09	-0.292353	-1.30044	949.093	FALSE	0
2022-09-13	13:43:09	-0.486603	-2.16451	951.541	FALSE	0
2022-09-13	13:43:09	-0.532048	-2.36666	949.093	FALSE	0
2022-09-13	13:43:09	-0.362429	-1.61216	951.541	FALSE	0
2022-09-13	13:43:10	-0.118358	-0.52648	949.093	FALSE	0
2022-09-13	13:43:10	-0.25271	-1.1241	951.541	FALSE	0
2022-09-13	13:43:10	0.0791987	0.352292	949.445	FALSE	0
2022-09-13	13:43:10	-0.0932185	-0.414655	951.541	FALSE	0
2022-09-13	13:43:11	6.3875e-05	0.000284129	949.445	FALSE	0
2022-09-13	13:43:11	-0.0518954	-0.230841	951.541	FALSE	0
2022-09-13	13:43:11	0.147901	0.657893	950.103	FALSE	0
2022-09-13	13:43:11	0.21869	0.972777	952.514	FALSE	0
2022-09-13	13:43:12	0.175636	0.781264	950.884	FALSE	0
2022-09-13	13:43:12	0.111311	0.495134	953.009	FALSE	0
2022-09-13	13:43:12	0.332583	1.4794	952.364	FALSE	0
2022-09-13	13:43:13	0.298893	1.32954	954.339	FALSE	0
2022-09-13	13:43:13	0.43126	1.91833	954.282	FALSE	0
2022-09-13	13:43:13	-0.103855	-0.461968	954.339	FALSE	0
2022-09-13	13:43:13	-0.57444	-2.55522	954.282	FALSE	0
2022-09-13	13:43:14	-0.398358	-1.77198	954.339	FALSE	0
2022-09-13	13:43:14	-0.642328	-2.8572	954.282	FALSE	0
2022-09-13	13:43:14	-0.627417	-2.79088	954.339	FALSE	0
2022-09-13	13:43:14	-0.643651	-2.86309	954.282	FALSE	0
2022-09-13	13:43:15	-0.651284	-2.89704	954.339	FALSE	0
2022-09-13	13:43:15	-0.73505	-3.26965	954.282	FALSE	0
2022-09-13	13:43:15	-1.03805	-4.61745	954.339	FALSE	0
2022-09-13	13:43:15	-0.903549	-4.01917	954.282	FALSE	0
2022-09-13	13:43:16	-0.658969	-2.93123	954.339	FALSE	0
2022-09-13	13:43:16	-0.715661	-3.1834	954.282	FALSE	0
2022-09-13	13:43:16	-0.567315	-2.52353	954.339	FALSE	0
2022-09-13	13:43:17	-0.682786	-3.03717	954.282	FALSE	0
2022-09-13	13:43:17	-0.494134	-2.19801	954.339	FALSE	0
2022-09-13	13:43:17	-0.565686	-2.51628	954.282	FALSE	0
2022-09-13	13:43:17	-0.518409	-2.30599	954.339	FALSE	0
2022-09-13	13:43:18	-0.622073	-2.76711	954.282	FALSE	0
2022-09-13	13:43:18	-0.634643	-2.82302	954.339	FALSE	0
2022-09-13	13:43:18	-0.677595	-3.01408	954.282	FALSE	0
2022-09-13	13:43:18	-0.702022	-3.12273	954.339	FALSE	0
2022-09-13	13:43:19	-0.653421	-2.90655	954.282	FALSE	0
2022-09-13	13:43:19	-0.621259	-2.76348	954.339	FALSE	0
2022-09-13	13:43:19	-0.589096	-2.62042	954.282	FALSE	0
2022-09-13	13:43:19	-0.31332	-1.39371	954.339	FALSE	0
2022-09-13	13:43:20	-0.418511	-1.86162	954.282	FALSE	0
2022-09-13	13:43:20	-0.443549	-1.97299	954.339	FALSE	0
2022-09-13	13:43:20	-0.484974	-2.15726	954.282	FALSE	0
2022-09-13	13:43:21	-0.496984	-2.21068	954.339	FALSE	0
2022-09-13	13:43:21	-0.506145	-2.25143	954.282	FALSE	0
2022-09-13	13:43:21	-0.524363	-2.33247	954.339	FALSE	0
2022-09-13	13:43:21	-0.482175	-2.14481	954.282	FALSE	0
2022-09-13	13:43:22	-0.483498	-2.1507	954.339	FALSE	0
2022-09-13	13:43:22	-0.517137	-2.30033	954.282	FALSE	0
2022-09-13	13:43:22	-0.470267	-2.09184	954.339	FALSE	0
2022-09-13	13:43:22	-0.491641	-2.18692	954.282	FALSE	0
2022-09-13	13:43:23	-0.369402	-1.64317	954.339	FALSE	0
2022-09-13	13:43:23	0.235789	1.04884	955.331	FALSE	0
2022-09-13	13:43:23	0.601845	2.67713	957.016	FALSE	0
2022-09-13	13:43:23	-0.224567	-0.998919	955.331	FALSE	0
2022-09-13	13:43:24	-0.174287	-0.775263	957.016	FALSE	0
2022-09-13	13:43:24	-0.584058	-2.59801	955.331	FALSE	0
2022-09-13	13:43:24	-0.782124	-3.47904	957.016	FALSE	0
2022-09-13	13:43:25	-0.853981	-3.79868	955.331	FALSE	0
2022-09-13	13:43:25	0.483473	2.15058	959.166	FALSE	0
2022-09-13	13:43:25	0.598639	2.66287	957.994	FALSE	0
2022-09-13	13:43:25	0.125458	0.558062	959.724	FALSE	0
2022-09-13	13:43:26	-0.562887	-2.50383	957.994	FALSE	0
2022-09-13	13:43:26	-0.554796	-2.46784	959.724	FALSE	0
2022-09-13	13:43:26	-0.551539	-2.45336	957.994	FALSE	0
2022-09-13	13:43:26	-0.465992	-2.07283	959.724	FALSE	0
2022-09-13	13:43:27	-0.563956	-2.50859	957.994	FALSE	0
2022-09-13	13:43:27	-0.430317	-1.91414	959.724	FALSE	0
2022-09-13	13:43:27	-0.241157	-1.07271	957.994	FALSE	0
2022-09-13	13:43:27	-0.564974	-2.51312	959.724	FALSE	0
2022-09-13	13:43:28	-0.520241	-2.31414	957.994	FALSE	0
2022-09-13	13:43:28	-0.668333	-2.97288	959.724	FALSE	0
2022-09-13	13:43:28	-0.616017	-2.74017	957.994	FALSE	0
2022-09-13	13:43:29	-0.638206	-2.83887	959.724	FALSE	0
2022-09-13	13:43:29	-0.702633	-3.12545	957.994	FALSE	0
2022-09-13	13:43:29	-0.680902	-3.02879	959.724	FALSE	0
2022-09-13	13:43:29	-0.817442	-3.63615	957.994	FALSE	0
2022-09-13	13:43:30	-0.813982	-3.62075	959.724	FALSE	0
2022-09-13	13:43:30	-0.877646	-3.90394	957.994	FALSE	0
2022-09-13	13:43:30	-0.983854	-4.37638	959.724	FALSE	0
2022-09-13	13:43:30	-0.818867	-3.64248	957.994	FALSE	0
2022-09-13	13:43:31	-0.988943	-4.39902	959.724	FALSE	0
2022-09-13	13:43:31	-0.895152	-3.98182	957.994	FALSE	0
2022-09-13	13:43:31	-0.841259	-3.74209	959.724	FALSE	0
2022-09-13	13:43:31	-0.788383	-3.50689	957.994	FALSE	0
2022-09-13	13:43:32	-0.722226	-3.21261	959.724	FALSE	0
2022-09-13	13:43:32	-0.836577	-3.72126	957.994	FALSE	0
2022-09-13	13:43:32	-0.661157	-2.94096	959.724	FALSE	0
2022-09-13	13:43:33	-0.767213	-3.41272	957.994	FALSE	0
2022-09-13	13:43:33	-0.773269	-3.43966	959.724	FALSE	0
2022-09-13	13:43:33	-0.709401	-3.15556	957.994	FALSE	0
2022-09-13	13:43:33	-0.814236	-3.62188	959.724	FALSE	0
2022-09-13	13:43:34	-0.763142	-3.39461	957.994	FALSE	0
2022-09-13	13:43:34	-0.897544	-3.99246	959.724	FALSE	0
2022-09-13	13:43:34	-0.87159	-3.87701	957.994	FALSE	0
2022-09-13	13:43:34	-0.922328	-4.1027	959.724	FALSE	0
2022-09-13	13:43:35	-0.873218	-3.88425	957.994	FALSE	0
2022-09-13	13:43:35	-0.842735	-3.74865	959.724	FALSE	0
2022-09-13	13:43:35	-0.843294	-3.75114	957.994	FALSE	0
2022-09-13	13:43:35	-0.732913	-3.26014	959.724	FALSE	0
2022-09-13	13:43:36	-0.82533	-3.67123	957.994	FALSE	0
2022-09-13	13:43:36	-0.67449	-3.00027	959.724	FALSE	0
2022-09-13	13:43:36	-0.64762	-2.88074	957.994	FALSE	0
2022-09-13	13:43:37	-0.721666	-3.21011	959.724	FALSE	0
2022-09-13	13:43:37	-0.568231	-2.52761	957.994	FALSE	0
2022-09-13	13:43:37	-0.706195	-3.1413	959.724	FALSE	0
2022-09-13	13:43:37	-0.625687	-2.78318	957.994	FALSE	0
2022-09-13	13:43:38	-0.66706	-2.96722	959.724	FALSE	0
2022-09-13	13:43:38	-0.629808	-2.80151	957.994	FALSE	0
2022-09-13	13:43:38	-0.570623	-2.53825	959.724	FALSE	0
2022-09-13	13:43:38	-0.661055	-2.9405	957.994	FALSE	0
2022-09-13	13:43:39	-0.528435	-2.35058	959.724	FALSE	0
2022-09-13	13:43:39	-0.638918	-2.84204	957.994	FALSE	0
2022-09-13	13:43:39	-0.577595	-2.56926	959.724	FALSE	0
2022-09-13	13:43:39	-0.534389	-2.37707	957.994	FALSE	0
2022-09-13	13:43:40	-0.557799	-2.4812	959.724	FALSE	0
2022-09-13	13:43:40	-0.445636	-1.98228	957.994	FALSE	0
2022-09-13	13:43:40	-0.452557	-2.01306	959.724	FALSE	0
2022-09-13	13:43:41	-0.452251	-2.0117	957.994	FALSE	0
2022-09-13	13:43:41	-0.377442	-1.67894	959.724	FALSE	0
2022-09-13	13:43:41	-0.388842	-1.72965	957.994	FALSE	0
2022-09-13	13:43:41	-0.270674	-1.20401	959.724	FALSE	0
2022-09-13	13:43:42	-0.405534	-1.8039	957.994	FALSE	0
2022-09-13	13:43:42	-0.293015	-1.30339	959.724	FALSE	0
2022-09-13	13:43:42	-0.294491	-1.30995	957.994	FALSE	0
2022-09-13	13:43:42	-0.436221	-1.9404	959.724	FALSE	0
2022-09-13	13:43:43	-0.386297	-1.71833	957.994	FALSE	0
2022-09-13	13:43:43	-0.371895	-1.65426	959.724	FALSE	0
2022-09-13	13:43:43	-0.426399	-1.89671	957.994	FALSE	0
2022-09-13	13:43:43	-0.430521	-1.91504	959.724	FALSE	0
2022-09-13	13:43:44	-0.433117	-1.92659	957.994	FALSE	0
2022-09-13	13:43:44	-0.440699	-1.96032	959.724	FALSE	0
2022-09-13	13:43:44	-0.478409	-2.12806	957.994	FALSE	0
2022-09-13	13:43:45	-0.319427	-1.42088	959.724	FALSE	0
2022-09-13	13:43:45	-0.43159	-1.9198	957.994	FALSE	0
2022-09-13	13:43:45	-0.333727	-1.48448	959.724	FALSE	0
2022-09-13	13:43:45	-0.432709	-1.92478	957.994	FALSE	0
2022-09-13	13:43:46	-0.397442	-1.7679	959.724	FALSE	0
2022-09-13	13:43:46	-0.498816	-2.21883	957.994	FALSE	0
2022-09-13	13:43:46	-0.429096	-1.9087	959.724	FALSE	0
2022-09-13	13:43:46	-0.464669	-2.06694	957.994	FALSE	0
2022-09-13	13:43:47	-0.387264	-1.72263	959.724	FALSE	0
2022-09-13	13:43:47	-0.287671	-1.27962	957.994	FALSE	0
2022-09-13	13:43:47	-0.187671	-0.834798	959.724	FALSE	0
2022-09-13	13:43:47	-0.215967	-0.960664	957.994	FALSE	0
2022-09-13	13:43:48	-0.168791	-0.750816	959.724	FALSE	0
2022-09-13	13:43:48	-0.0828877	-0.368701	957.994	FALSE	0
2022-09-13	13:43:48	-0.199325	-0.886637	959.724	FALSE	0
2022-09-13	13:43:49	0.0515142	0.229145	958.223	FALSE	0
2022-09-13	13:43:49	-0.119834	-0.533046	959.724	FALSE	0
2022-09-13	13:43:49	-0.0236003	-0.104979	958.223	FALSE	0
2022-09-13	13:43:49	-0.066043	-0.293772	959.724	FALSE	0
2022-09-13	13:43:50	-0.077646	-0.345385	958.223	FALSE	0
2022-09-13	13:43:50	0.0004201	0.00186869	959.726	FALSE	0
2022-09-13	13:43:50	-0.115	-0.511543	958.223	FALSE	0
2022-09-13	13:43:50	-0.0123535	-0.0549508	959.726	FALSE	0
2022-09-13	13:43:51	-0.130318	-0.579681	958.223	FALSE	0
2022-09-13	13:43:51	0.00550917	0.0245059	959.751	FALSE	0
2022-09-13	13:43:51	-0.0983585	-0.437518	958.223	FALSE	0
2022-09-13	13:43:51	-0.00436363	-0.0194103	959.751	FALSE	0
2022-09-13	13:43:52	-0.218613	-0.972434	958.223	FALSE	0
2022-09-13	13:43:52	-0.178409	-0.793599	959.751	FALSE	0
2022-09-13	13:43:52	-0.099987	-0.444762	958.223	FALSE	0
2022-09-13	13:43:53	-0.176476	-0.785001	959.751	FALSE	0
2022-09-13	13:43:53	-0.0872643	-0.388169	958.223	FALSE	0
2022-09-13	13:43:53	-0.188129	-0.836835	959.751	FALSE	0
2022-09-13	13:43:53	-0.132913	-0.591224	958.223	FALSE	0
2022-09-13	13:43:54	-0.221208	-0.983977	959.751	FALSE	0
2022-09-13	13:43:54	-0.0917936	-0.408316	958.223	FALSE	0
2022-09-13	13:43:54	-0.298206	-1.32648	959.751	FALSE	0
2022-09-13	13:43:54	-0.127468	-0.567003	958.223	FALSE	0
2022-09-13	13:43:55	-0.254287	-1.13112	959.751	FALSE	0
2022-09-13	13:43:55	-0.185127	-0.823482	958.223	FALSE	0
2022-09-13	13:43:55	-0.198206	-0.88166	959.751	FALSE	0
2022-09-13	13:43:55	-0.175305	-0.779792	958.223	FALSE	0
2022-09-13	13:43:56	-0.169249	-0.752853	959.751	FALSE	0
2022-09-13	13:43:56	-0.241921	-1.07611	958.223	FALSE	0
2022-09-13	13:43:56	-0.138409	-0.615671	959.751	FALSE	0
2022-09-13	13:43:57	-0.310623	-1.38171	958.223	FALSE	0
2022-09-13	13:43:57	-0.217392	-0.967003	959.751	FALSE	0
2022-09-13	13:43:57	-0.259936	-1.15625	958.223	FALSE	0
2022-09-13	13:43:57	-0.202481	-0.900676	959.751	FALSE	0
2022-09-13	13:43:58	-0.206043	-0.91652	958.223	FALSE	0
2022-09-13	13:43:58	-0.221107	-0.983528	959.751	FALSE	0
2022-09-13	13:43:58	-0.0447707	-0.199149	958.223	FALSE	0
2022-09-13	13:43:58	-0.275152	-1.22393	959.751	FALSE	0
2022-09-13	13:43:59	-0.177188	-0.788168	958.223	FALSE	0
2022-09-13	13:43:59	-0.325687	-1.44872	959.751	FALSE	0
2022-09-13	13:43:59	-0.22874	-1.01748	958.223	FALSE	0
2022-09-13	13:43:59	-0.299478	-1.33214	959.751	FALSE	0
2022-09-13	13:44:00	-0.293218	-1.30429	958.223	FALSE	0
2022-09-13	13:44:00	-0.305738	-1.35998	959.751	FALSE	0
2022-09-13	13:44:00	-0.332506	-1.47905	958.223	FALSE	0
2022-09-13	13:44:01	-0.298766	-1.32897	959.751	FALSE	0
2022-09-13	13:44:01	-0.300699	-1.33757	958.223	FALSE	0
2022-09-13	13:44:01	-0.228435	-1.01612	959.751	FALSE	0
2022-09-13	13:44:01	-0.250776	-1.1155	958.223	FALSE	0
2022-09-13	13:44:02	-0.316832	-1.40933	959.751	FALSE	0
2022-09-13	13:44:02	-0.242786	-1.07996	958.223	FALSE	0
2022-09-13	13:44:02	-0.293422	-1.3052	959.751	FALSE	0
2022-09-13	13:44:02	-0.293727	-1.30656	958.223	FALSE	0
2022-09-13	13:44:03	-0.380801	-1.69388	959.751	FALSE	0
2022-09-13	13:44:03	-0.294287	-1.30905	958.223	FALSE	0
2022-09-13	13:44:03	-0.414185	-1.84238	959.751	FALSE	0
2022-09-13	13:44:03	-0.407875	-1.81431	958.223	FALSE	0
2022-09-13	13:44:04	-0.443091	-1.97096	959.751	FALSE	0
2022-09-13	13:44:04	-0.418816	-1.86298	958.223	FALSE	0
2022-09-13	13:44:04	-0.470012	-2.09071	959.751	FALSE	0

## Sheet: Buzz_harness_202291313394 (E)
Date	Time	Lbs	Total force x time			**GoPro Fitting: 1328
2022-09-13	13:39:04	0.390547	0.390547	FALSE	0			Total force x time	431.18
2022-09-13	13:39:04	0.401692	0.792239	FALSE	0			Total steps	0
2022-09-13	13:39:04	0.415433	1.20767	FALSE	0
2022-09-13	13:39:05	0.394415	1.60209	FALSE	0
2022-09-13	13:39:05	0.416858	2.01894	FALSE	0
2022-09-13	13:39:05	0.463524	2.48247	FALSE	0
2022-09-13	13:39:05	0.461794	2.94426	FALSE	0
2022-09-13	13:39:06	0.458384	3.40265	FALSE	0
2022-09-13	13:39:06	0.436959	3.83961	FALSE	0
2022-09-13	13:39:06	0.474364	4.31397	FALSE	0
2022-09-13	13:39:06	0.505611	4.81958	FALSE	0
2022-09-13	13:39:07	0.458842	5.27842	FALSE	0
2022-09-13	13:39:07	0.48098	5.7594	FALSE	0
2022-09-13	13:39:07	0.427239	6.18664	FALSE	0
2022-09-13	13:39:07	0.481692	6.66833	FALSE	0
2022-09-13	13:39:08	0.499351	7.16768	FALSE	0
2022-09-13	13:39:08	0.630903	7.79859	FALSE	0
2022-09-13	13:39:08	0.586018	8.38461	FALSE	0
2022-09-13	13:39:09	0.470395	8.855	FALSE	0
2022-09-13	13:39:09	0.438333	9.29333	FALSE	0
2022-09-13	13:39:09	0.532277	9.82561	FALSE	0
2022-09-13	13:39:09	0.502303	10.3279	FALSE	0
2022-09-13	13:39:10	0.419962	10.7479	FALSE	0
2022-09-13	13:39:10	0.852837	11.6007	FALSE	0
2022-09-13	13:39:10	0.397417	11.9981	FALSE	0
2022-09-13	13:39:10	0.411667	12.4098	FALSE	0
2022-09-13	13:39:11	0.469275	12.8791	FALSE	0
2022-09-13	13:39:11	0.403372	13.2824	FALSE	0
2022-09-13	13:39:11	0.557315	13.8398	FALSE	0
2022-09-13	13:39:11	0.524084	14.3638	FALSE	0
2022-09-13	13:39:12	0.473194	14.837	FALSE	0
2022-09-13	13:39:12	0.39187	15.2289	FALSE	0
2022-09-13	13:39:12	0.584186	15.8131	FALSE	0
2022-09-13	13:39:13	0.756858	16.57	FALSE	0
2022-09-13	13:39:13	0.485611	17.0556	FALSE	0
2022-09-13	13:39:13	0.648308	17.7039	FALSE	0
2022-09-13	13:39:13	-0.328587	17.7039	FALSE	0
2022-09-13	13:39:14	-0.623142	17.7039	FALSE	0
2022-09-13	13:39:14	-0.599071	17.7039	FALSE	0
2022-09-13	13:39:14	-0.55159	17.7039	FALSE	0
2022-09-13	13:39:14	-0.33561	17.7039	FALSE	0
2022-09-13	13:39:15	-0.233982	17.7039	FALSE	0
2022-09-13	13:39:15	-0.139478	17.7039	FALSE	0
2022-09-13	13:39:15	0.0443386	17.7482	FALSE	0
2022-09-13	13:39:15	-0.0743381	17.7482	FALSE	0
2022-09-13	13:39:16	-0.240954	17.7482	FALSE	0
2022-09-13	13:39:16	-0.0752033	17.7482	FALSE	0
2022-09-13	13:39:16	0.15126	17.8995	FALSE	0
2022-09-13	13:39:17	0.274466	18.1739	FALSE	0
2022-09-13	13:39:17	0.13411	18.308	FALSE	0
2022-09-13	13:39:17	0.223728	18.5318	FALSE	0
2022-09-13	13:39:17	0.0995549	18.6313	FALSE	0
2022-09-13	13:39:18	0.140624	18.772	FALSE	0
2022-09-13	13:39:18	0.137061	18.909	FALSE	0
2022-09-13	13:39:18	0.0952292	19.0042	FALSE	0
2022-09-13	13:39:18	0.305865	19.3101	FALSE	0
2022-09-13	13:39:19	0.108512	19.4186	FALSE	0
2022-09-13	13:39:19	0.297214	19.7158	FALSE	0
2022-09-13	13:39:19	0.136705	19.8525	FALSE	0
2022-09-13	13:39:19	0.399911	20.2524	FALSE	0
2022-09-13	13:39:20	0.0176211	20.2701	FALSE	0
2022-09-13	13:39:20	0.365916	20.636	FALSE	0
2022-09-13	13:39:20	0.256501	20.8925	FALSE	0
2022-09-13	13:39:21	0.327545	21.22	FALSE	0
2022-09-13	13:39:21	0.126222	21.3463	FALSE	0
2022-09-13	13:39:21	0.30617	21.6524	FALSE	0
2022-09-13	13:39:21	0.294008	21.9464	FALSE	0
2022-09-13	13:39:22	0.215331	22.1618	FALSE	0
2022-09-13	13:39:22	0.311667	22.4734	FALSE	0
2022-09-13	13:39:22	0.083728	22.5572	FALSE	0
2022-09-13	13:39:22	0.287952	22.8451	FALSE	0
2022-09-13	13:39:23	0.0545168	22.8996	FALSE	0
2022-09-13	13:39:23	0.16215	23.0618	FALSE	0
2022-09-13	13:39:23	-0.118053	23.0618	FALSE	0
2022-09-13	13:39:23	-0.00919824	23.0618	FALSE	0
2022-09-13	13:39:24	-0.180343	23.0618	FALSE	0
2022-09-13	13:39:24	-0.0830404	23.0618	FALSE	0
2022-09-13	13:39:24	-0.11561	23.0618	FALSE	0
2022-09-13	13:39:25	0.0588934	23.1207	FALSE	0
2022-09-13	13:39:25	0.0699875	23.1907	FALSE	0
2022-09-13	13:39:25	0.195331	23.386	FALSE	0
2022-09-13	13:39:25	0.0864252	23.4724	FALSE	0
2022-09-13	13:39:26	0.182965	23.6554	FALSE	0
2022-09-13	13:39:26	0.262303	23.9177	FALSE	0
2022-09-13	13:39:26	0.368359	24.286	FALSE	0
2022-09-13	13:39:26	0.115127	24.4012	FALSE	0
2022-09-13	13:39:27	0.109173	24.5103	FALSE	0
2022-09-13	13:39:27	0.262608	24.7729	FALSE	0
2022-09-13	13:39:27	0.735382	25.5083	FALSE	0
2022-09-13	13:39:27	0.731209	26.2395	FALSE	0
2022-09-13	13:39:28	0.730445	26.97	FALSE	0
2022-09-13	13:39:28	0.726018	27.696	FALSE	0
2022-09-13	13:39:28	0.734109	28.4301	FALSE	0
2022-09-13	13:39:29	0.732888	29.163	FALSE	0
2022-09-13	13:39:29	0.737722	29.9007	FALSE	0
2022-09-13	13:39:29	0.726629	30.6274	FALSE	0
2022-09-13	13:39:29	0.727392	31.3547	FALSE	0
2022-09-13	13:39:30	0.731616	32.0864	FALSE	0
2022-09-13	13:39:30	0.737265	32.8236	FALSE	0
2022-09-13	13:39:30	0.734211	33.5578	FALSE	0
2022-09-13	13:39:30	0.731463	34.2893	FALSE	0
2022-09-13	13:39:31	0.738079	35.0274	FALSE	0
2022-09-13	13:39:31	0.738282	35.7657	FALSE	0
2022-09-13	13:39:31	0.737265	36.5029	FALSE	0
2022-09-13	13:39:31	0.732735	37.2357	FALSE	0
2022-09-13	13:39:32	0.736094	37.9718	FALSE	0
2022-09-13	13:39:32	0.732328	38.7041	FALSE	0
2022-09-13	13:39:32	0.730954	39.435	FALSE	0
2022-09-13	13:39:33	0.722914	40.1579	FALSE	0
2022-09-13	13:39:33	0.720369	40.8783	FALSE	0
2022-09-13	13:39:33	0.73355	41.6119	FALSE	0
2022-09-13	13:39:33	0.740522	42.3524	FALSE	0
2022-09-13	13:39:34	0.736959	43.0893	FALSE	0
2022-09-13	13:39:34	0.738537	43.8279	FALSE	0
2022-09-13	13:39:34	0.732125	44.56	FALSE	0
2022-09-13	13:39:34	0.73528	45.2953	FALSE	0
2022-09-13	13:39:35	0.733092	46.0284	FALSE	0
2022-09-13	13:39:35	0.734466	46.7628	FALSE	0
2022-09-13	13:39:35	0.737519	47.5004	FALSE	0
2022-09-13	13:39:35	0.708206	48.2086	FALSE	0
2022-09-13	13:39:36	0.761641	48.9702	FALSE	0
2022-09-13	13:39:36	0.743015	49.7132	FALSE	0
2022-09-13	13:39:36	0.72958	50.4428	FALSE	0
2022-09-13	13:39:37	0.726934	51.1697	FALSE	0
2022-09-13	13:39:37	0.734517	51.9043	FALSE	0
2022-09-13	13:39:37	0.734618	52.6389	FALSE	0
2022-09-13	13:39:37	0.732074	53.371	FALSE	0
2022-09-13	13:39:38	0.726578	54.0975	FALSE	0
2022-09-13	13:39:38	0.73355	54.8311	FALSE	0
2022-09-13	13:39:38	0.724898	55.556	FALSE	0
2022-09-13	13:39:38	0.735229	56.2912	FALSE	0
2022-09-13	13:39:39	0.736705	57.0279	FALSE	0
2022-09-13	13:39:39	0.740064	57.768	FALSE	0
2022-09-13	13:39:39	0.736705	58.5047	FALSE	0
2022-09-13	13:39:39	0.733193	59.2379	FALSE	0
2022-09-13	13:39:40	0.727036	59.9649	FALSE	0
2022-09-13	13:39:40	0.728257	60.6932	FALSE	0
2022-09-13	13:39:40	0.731565	61.4247	FALSE	0
2022-09-13	13:39:40	0.734618	62.1594	FALSE	0
2022-09-13	13:39:41	0.733448	62.8928	FALSE	0
2022-09-13	13:39:41	0.733193	63.626	FALSE	0
2022-09-13	13:39:41	0.73874	64.3647	FALSE	0
2022-09-13	13:39:42	0.734669	65.0994	FALSE	0
2022-09-13	13:39:42	0.736043	65.8354	FALSE	0
2022-09-13	13:39:42	0.724949	66.5604	FALSE	0
2022-09-13	13:39:42	0.736603	67.297	FALSE	0
2022-09-13	13:39:43	0.732735	68.0297	FALSE	0
2022-09-13	13:39:43	0.739758	68.7695	FALSE	0
2022-09-13	13:39:43	0.730954	69.5004	FALSE	0
2022-09-13	13:39:43	0.740267	70.2407	FALSE	0
2022-09-13	13:39:44	0.732532	70.9732	FALSE	0
2022-09-13	13:39:44	0.733041	71.7063	FALSE	0
2022-09-13	13:39:44	0.743066	72.4493	FALSE	0
2022-09-13	13:39:44	0.733804	73.1832	FALSE	0
2022-09-13	13:39:45	0.732939	73.9161	FALSE	0
2022-09-13	13:39:45	0.732888	74.649	FALSE	0
2022-09-13	13:39:45	0.733601	75.3826	FALSE	0
2022-09-13	13:39:46	0.736603	76.1192	FALSE	0
2022-09-13	13:39:46	0.734313	76.8535	FALSE	0
2022-09-13	13:39:46	0.736756	77.5903	FALSE	0
2022-09-13	13:39:46	0.736094	78.3263	FALSE	0
2022-09-13	13:39:47	0.736807	79.0632	FALSE	0
2022-09-13	13:39:47	0.731717	79.7949	FALSE	0
2022-09-13	13:39:47	0.740216	80.5351	FALSE	0
2022-09-13	13:39:47	0.736705	81.2718	FALSE	0
2022-09-13	13:39:48	0.737112	82.0089	FALSE	0
2022-09-13	13:39:48	0.734822	82.7437	FALSE	0
2022-09-13	13:39:48	0.736399	83.4801	FALSE	0
2022-09-13	13:39:48	0.74271	84.2228	FALSE	0
2022-09-13	13:39:49	0.732125	84.955	FALSE	0
2022-09-13	13:39:49	0.737417	85.6924	FALSE	0
2022-09-13	13:39:49	0.734618	86.427	FALSE	0
2022-09-13	13:39:50	0.72729	87.1543	FALSE	0
2022-09-13	13:39:50	0.733804	87.8881	FALSE	0
2022-09-13	13:39:50	0.729478	88.6176	FALSE	0
2022-09-13	13:39:50	0.727799	89.3454	FALSE	0
2022-09-13	13:39:51	0.735585	90.081	FALSE	0
2022-09-13	13:39:51	0.732023	90.813	FALSE	0
2022-09-13	13:39:51	0.728715	91.5417	FALSE	0
2022-09-13	13:39:51	0.737977	92.2797	FALSE	0
2022-09-13	13:39:52	0.733855	93.0135	FALSE	0
2022-09-13	13:39:52	0.723779	93.7373	FALSE	0
2022-09-13	13:39:52	0.737722	94.475	FALSE	0
2022-09-13	13:39:52	0.741692	95.2167	FALSE	0
2022-09-13	13:39:53	0.732481	95.9492	FALSE	0
2022-09-13	13:39:53	0.73243	96.6816	FALSE	0
2022-09-13	13:39:53	0.735483	97.4171	FALSE	0
2022-09-13	13:39:54	0.733957	98.1511	FALSE	0
2022-09-13	13:39:54	0.734364	98.8854	FALSE	0
2022-09-13	13:39:54	0.732837	99.6183	FALSE	0
2022-09-13	13:39:54	0.732888	100.351	FALSE	0
2022-09-13	13:39:55	0.739962	101.091	FALSE	0
2022-09-13	13:39:55	0.734059	101.825	FALSE	0
2022-09-13	13:39:55	0.170089	101.995	FALSE	0
2022-09-13	13:39:55	0.707188	102.702	FALSE	0
2022-09-13	13:39:56	0.735229	103.438	FALSE	0
2022-09-13	13:39:56	0.739809	104.177	FALSE	0
2022-09-13	13:39:56	0.735636	104.913	FALSE	0
2022-09-13	13:39:56	0.731616	105.645	FALSE	0
2022-09-13	13:39:57	0.733244	106.378	FALSE	0
2022-09-13	13:39:57	0.73645	107.114	FALSE	0
2022-09-13	13:39:57	0.733906	107.848	FALSE	0
2022-09-13	13:39:58	0.735687	108.584	FALSE	0
2022-09-13	13:39:58	0.742099	109.326	FALSE	0
2022-09-13	13:39:58	0.738435	110.065	FALSE	0
2022-09-13	13:39:58	0.738079	110.803	FALSE	0
2022-09-13	13:39:59	0.733295	111.536	FALSE	0
2022-09-13	13:39:59	0.734568	112.271	FALSE	0
2022-09-13	13:39:59	0.730801	113.001	FALSE	0
2022-09-13	13:39:59	0.730649	113.732	FALSE	0
2022-09-13	13:40:00	0.733193	114.465	FALSE	0
2022-09-13	13:40:00	0.733499	115.199	FALSE	0
2022-09-13	13:40:00	0.743117	115.942	FALSE	0
2022-09-13	13:40:00	0.739606	116.681	FALSE	0
2022-09-13	13:40:01	0.73584	117.417	FALSE	0
2022-09-13	13:40:01	0.740573	118.158	FALSE	0
2022-09-13	13:40:01	0.735992	118.894	FALSE	0
2022-09-13	13:40:02	0.738893	119.633	FALSE	0
2022-09-13	13:40:02	0.736501	120.369	FALSE	0
2022-09-13	13:40:02	0.732532	121.102	FALSE	0
2022-09-13	13:40:02	0.734008	121.836	FALSE	0
2022-09-13	13:40:03	0.735026	122.571	FALSE	0
2022-09-13	13:40:03	0.737315	123.308	FALSE	0
2022-09-13	13:40:03	0.732939	124.041	FALSE	0
2022-09-13	13:40:03	0.732583	124.774	FALSE	0
2022-09-13	13:40:04	0.733753	125.507	FALSE	0
2022-09-13	13:40:04	0.735941	126.243	FALSE	0
2022-09-13	13:40:04	0.737722	126.981	FALSE	0
2022-09-13	13:40:04	0.732735	127.714	FALSE	0
2022-09-13	13:40:05	0.735026	128.449	FALSE	0
2022-09-13	13:40:05	0.729478	129.178	FALSE	0
2022-09-13	13:40:05	0.731361	129.91	FALSE	0
2022-09-13	13:40:06	0.735026	130.645	FALSE	0
2022-09-13	13:40:06	0.732074	131.377	FALSE	0
2022-09-13	13:40:06	0.73528	132.112	FALSE	0
2022-09-13	13:40:06	0.730242	132.842	FALSE	0
2022-09-13	13:40:07	0.740013	133.582	FALSE	0
2022-09-13	13:40:07	0.731107	134.313	FALSE	0
2022-09-13	13:40:07	0.731209	135.045	FALSE	0
2022-09-13	13:40:07	0.729428	135.774	FALSE	0
2022-09-13	13:40:08	0.729886	136.504	FALSE	0
2022-09-13	13:40:08	0.732837	137.237	FALSE	0
2022-09-13	13:40:08	0.740827	137.978	FALSE	0
2022-09-13	13:40:08	0.736756	138.714	FALSE	0
2022-09-13	13:40:09	0.257366	138.972	FALSE	0
2022-09-13	13:40:09	0.734364	139.706	FALSE	0
2022-09-13	13:40:09	0.732379	140.438	FALSE	0
2022-09-13	13:40:10	0.738079	141.176	FALSE	0
2022-09-13	13:40:10	0.734211	141.911	FALSE	0
2022-09-13	13:40:10	0.725305	142.636	FALSE	0
2022-09-13	13:40:10	0.736857	143.373	FALSE	0
2022-09-13	13:40:11	0.643575	144.016	FALSE	0
2022-09-13	13:40:11	0.165662	144.182	FALSE	0
2022-09-13	13:40:11	-0.405127	144.182	FALSE	0
2022-09-13	13:40:11	0.344389	144.526	FALSE	0
2022-09-13	13:40:12	0.739758	145.266	FALSE	0
2022-09-13	13:40:12	0.734618	146.001	FALSE	0
2022-09-13	13:40:12	0.735789	146.737	FALSE	0
2022-09-13	13:40:12	0.740827	147.477	FALSE	0
2022-09-13	13:40:13	0.729428	148.207	FALSE	0
2022-09-13	13:40:13	0.734618	148.941	FALSE	0
2022-09-13	13:40:13	0.734008	149.676	FALSE	0
2022-09-13	13:40:14	0.72902	150.405	FALSE	0
2022-09-13	13:40:14	0.252888	150.657	FALSE	0
2022-09-13	13:40:14	0.737722	151.395	FALSE	0
2022-09-13	13:40:14	0.737621	152.133	FALSE	0
2022-09-13	13:40:15	0.649173	152.782	FALSE	0
2022-09-13	13:40:15	0.73645	153.518	FALSE	0
2022-09-13	13:40:15	0.737214	154.256	FALSE	0
2022-09-13	13:40:15	0.71243	154.968	FALSE	0
2022-09-13	13:40:16	0.620471	155.588	FALSE	0
2022-09-13	13:40:16	0.646272	156.235	FALSE	0
2022-09-13	13:40:16	0.559758	156.795	FALSE	0
2022-09-13	13:40:16	0.490496	157.285	FALSE	0
2022-09-13	13:40:17	0.422252	157.707	FALSE	0
2022-09-13	13:40:17	0.494059	158.201	FALSE	0
2022-09-13	13:40:17	0.430954	158.632	FALSE	0
2022-09-13	13:40:18	-0.370725	158.632	FALSE	0
2022-09-13	13:40:18	-0.706552	158.632	FALSE	0
2022-09-13	13:40:18	-0.510826	158.632	FALSE	0
2022-09-13	13:40:18	-0.346145	158.632	FALSE	0
2022-09-13	13:40:19	-0.36701	158.632	FALSE	0
2022-09-13	13:40:19	-0.413066	158.632	FALSE	0
2022-09-13	13:40:19	-0.283651	158.632	FALSE	0
2022-09-13	13:40:19	-0.0322008	158.632	FALSE	0
2022-09-13	13:40:20	0.0258654	158.658	FALSE	0
2022-09-13	13:40:20	0.220318	158.878	FALSE	0
2022-09-13	13:40:20	0.167646	159.046	FALSE	0
2022-09-13	13:40:20	0.358791	159.405	FALSE	0
2022-09-13	13:40:21	0.35355	159.758	FALSE	0
2022-09-13	13:40:21	0.229377	159.988	FALSE	0
2022-09-13	13:40:21	0.161438	160.149	FALSE	0
2022-09-13	13:40:22	0.0838297	160.233	FALSE	0
2022-09-13	13:40:22	0.0842877	160.317	FALSE	0
2022-09-13	13:40:22	-0.00227712	160.317	FALSE	0
2022-09-13	13:40:22	0.110751	160.428	FALSE	0
2022-09-13	13:40:23	0.0573158	160.485	FALSE	0
2022-09-13	13:40:23	0.102252	160.588	FALSE	0
2022-09-13	13:40:23	0.000470984	160.588	FALSE	0
2022-09-13	13:40:23	0.024186	160.612	FALSE	0
2022-09-13	13:40:24	-0.0775442	160.612	FALSE	0
2022-09-13	13:40:24	0.0425066	160.655	FALSE	0
2022-09-13	13:40:24	-0.0254832	160.655	FALSE	0
2022-09-13	13:40:24	0.0462725	160.701	FALSE	0
2022-09-13	13:40:25	-0.00248066	160.701	FALSE	0
2022-09-13	13:40:25	0.00026741	160.701	FALSE	0
2022-09-13	13:40:25	-0.0820735	160.701	FALSE	0
2022-09-13	13:40:26	-0.0992745	160.701	FALSE	0
2022-09-13	13:40:26	-0.187112	160.701	FALSE	0
2022-09-13	13:40:26	-0.150572	160.701	FALSE	0
2022-09-13	13:40:26	-0.0898598	160.701	FALSE	0
2022-09-13	13:40:27	0.0368577	160.738	FALSE	0
2022-09-13	13:40:27	0.13126	160.87	FALSE	0
2022-09-13	13:40:27	0.129428	160.999	FALSE	0
2022-09-13	13:40:27	0.189682	161.189	FALSE	0
2022-09-13	13:40:28	0.15813	161.347	FALSE	0
2022-09-13	13:40:28	0.262354	161.609	FALSE	0
2022-09-13	13:40:28	0.23701	161.846	FALSE	0
2022-09-13	13:40:28	0.266272	162.112	FALSE	0
2022-09-13	13:40:29	0.224084	162.336	FALSE	0
2022-09-13	13:40:29	0.19355	162.53	FALSE	0
2022-09-13	13:40:29	0.184084	162.714	FALSE	0
2022-09-13	13:40:30	0.173295	162.887	FALSE	0
2022-09-13	13:40:30	0.0288679	162.916	FALSE	0
2022-09-13	13:40:30	0.0261707	162.942	FALSE	0
2022-09-13	13:40:30	-0.0561702	162.942	FALSE	0
2022-09-13	13:40:31	0.014415	162.957	FALSE	0
2022-09-13	13:40:31	-0.00502519	162.957	FALSE	0
2022-09-13	13:40:31	0.15869	163.116	FALSE	0
2022-09-13	13:40:31	0.268206	163.384	FALSE	0
2022-09-13	13:40:32	0.388512	163.772	FALSE	0
2022-09-13	13:40:32	0.509835	164.282	FALSE	0
2022-09-13	13:40:32	0.383015	164.665	FALSE	0
2022-09-13	13:40:32	0.477519	165.143	FALSE	0
2022-09-13	13:40:33	0.365916	165.509	FALSE	0
2022-09-13	13:40:33	0.393957	165.903	FALSE	0
2022-09-13	13:40:33	0.389835	166.292	FALSE	0
2022-09-13	13:40:33	0.33584	166.628	FALSE	0
2022-09-13	13:40:34	0.606883	167.235	FALSE	0
2022-09-13	13:40:34	0.454415	167.689	FALSE	0
2022-09-13	13:40:34	0.297367	167.987	FALSE	0
2022-09-13	13:40:35	0.251158	168.238	FALSE	0
2022-09-13	13:40:35	0.0997585	168.338	FALSE	0
2022-09-13	13:40:35	0.179555	168.517	FALSE	0
2022-09-13	13:40:35	0.125306	168.643	FALSE	0
2022-09-13	13:40:36	0.202099	168.845	FALSE	0
2022-09-13	13:40:36	0.090191	168.935	FALSE	0
2022-09-13	13:40:36	0.257417	169.192	FALSE	0
2022-09-13	13:40:36	0.23757	169.43	FALSE	0
2022-09-13	13:40:37	0.285814	169.716	FALSE	0
2022-09-13	13:40:37	0.25355	169.969	FALSE	0
2022-09-13	13:40:37	0.338842	170.308	FALSE	0
2022-09-13	13:40:37	0.431056	170.739	FALSE	0
2022-09-13	13:40:38	0.457774	171.197	FALSE	0
2022-09-13	13:40:38	0.587952	171.785	FALSE	0
2022-09-13	13:40:38	0.592379	172.377	FALSE	0
2022-09-13	13:40:39	0.645254	173.023	FALSE	0
2022-09-13	13:40:39	0.622405	173.645	FALSE	0
2022-09-13	13:40:39	0.732481	174.377	FALSE	0
2022-09-13	13:40:39	0.741845	175.119	FALSE	0
2022-09-13	13:40:40	0.815025	175.934	FALSE	0
2022-09-13	13:40:40	0.732175	176.666	FALSE	0
2022-09-13	13:40:40	0.758028	177.424	FALSE	0
2022-09-13	13:40:40	0.734669	178.159	FALSE	0
2022-09-13	13:40:41	0.736908	178.896	FALSE	0
2022-09-13	13:40:41	0.737366	179.633	FALSE	0
2022-09-13	13:40:41	0.736094	180.37	FALSE	0
2022-09-13	13:40:41	0.729886	181.099	FALSE	0
2022-09-13	13:40:42	0.73187	181.831	FALSE	0
2022-09-13	13:40:42	0.734364	182.566	FALSE	0
2022-09-13	13:40:42	0.725102	183.291	FALSE	0
2022-09-13	13:40:43	0.734924	184.026	FALSE	0
2022-09-13	13:40:43	0.733499	184.759	FALSE	0
2022-09-13	13:40:43	0.735687	185.495	FALSE	0
2022-09-13	13:40:43	0.729377	186.224	FALSE	0
2022-09-13	13:40:44	0.736501	186.961	FALSE	0
2022-09-13	13:40:44	0.739351	187.7	FALSE	0
2022-09-13	13:40:44	0.726374	188.426	FALSE	0
2022-09-13	13:40:44	0.731005	189.157	FALSE	0
2022-09-13	13:40:45	0.732837	189.89	FALSE	0
2022-09-13	13:40:45	0.732481	190.623	FALSE	0
2022-09-13	13:40:45	0.733346	191.356	FALSE	0
2022-09-13	13:40:45	0.736094	192.092	FALSE	0
2022-09-13	13:40:46	0.733041	192.825	FALSE	0
2022-09-13	13:40:46	0.739758	193.565	FALSE	0
2022-09-13	13:40:46	0.730394	194.295	FALSE	0
2022-09-13	13:40:47	0.725102	195.021	FALSE	0
2022-09-13	13:40:47	0.73584	195.756	FALSE	0
2022-09-13	13:40:47	0.699046	196.455	FALSE	0
2022-09-13	13:40:47	0.720165	197.176	FALSE	0
2022-09-13	13:40:48	0.736552	197.912	FALSE	0
2022-09-13	13:40:48	0.7307	198.643	FALSE	0
2022-09-13	13:40:48	0.735992	199.379	FALSE	0
2022-09-13	13:40:48	0.734924	200.114	FALSE	0
2022-09-13	13:40:49	0.725407	200.839	FALSE	0
2022-09-13	13:40:49	0.738588	201.578	FALSE	0
2022-09-13	13:40:49	0.731158	202.309	FALSE	0
2022-09-13	13:40:49	0.727545	203.036	FALSE	0
2022-09-13	13:40:50	0.731921	203.768	FALSE	0
2022-09-13	13:40:50	0.735636	204.504	FALSE	0
2022-09-13	13:40:50	0.735331	205.239	FALSE	0
2022-09-13	13:40:51	0.735534	205.975	FALSE	0
2022-09-13	13:40:51	0.703626	206.678	FALSE	0
2022-09-13	13:40:51	0.557774	207.236	FALSE	0
2022-09-13	13:40:51	0.648715	207.885	FALSE	0
2022-09-13	13:40:52	0.271005	208.156	FALSE	0
2022-09-13	13:40:52	-0.0034476	208.156	FALSE	0
2022-09-13	13:40:52	-0.271895	208.156	FALSE	0
2022-09-13	13:40:52	0.0610816	208.217	FALSE	0
2022-09-13	13:40:53	0.34327	208.56	FALSE	0
2022-09-13	13:40:53	0.4736	209.034	FALSE	0
2022-09-13	13:40:53	0.320776	209.355	FALSE	0
2022-09-13	13:40:53	0.330089	209.685	FALSE	0
2022-09-13	13:40:54	0.355433	210.04	FALSE	0
2022-09-13	13:40:54	0.345967	210.386	FALSE	0
2022-09-13	13:40:54	0.135178	210.521	FALSE	0
2022-09-13	13:40:55	0.264186	210.786	FALSE	0
2022-09-13	13:40:55	0.0947712	210.88	FALSE	0
2022-09-13	13:40:55	0.120471	211.001	FALSE	0
2022-09-13	13:40:55	0.173957	211.175	FALSE	0
2022-09-13	13:40:56	0.351768	211.527	FALSE	0
2022-09-13	13:40:56	0.30388	211.83	FALSE	0
2022-09-13	13:40:56	0.448868	212.279	FALSE	0
2022-09-13	13:40:56	0.60841	212.888	FALSE	0
2022-09-13	13:40:57	0.485356	213.373	FALSE	0
2022-09-13	13:40:57	0.388155	213.761	FALSE	0
2022-09-13	13:40:57	0.437621	214.199	FALSE	0
2022-09-13	13:40:57	0.487901	214.687	FALSE	0
2022-09-13	13:40:58	0.348206	215.035	FALSE	0
2022-09-13	13:40:58	0.425254	215.46	FALSE	0
2022-09-13	13:40:58	0.373652	215.834	FALSE	0
2022-09-13	13:40:59	0.378893	216.213	FALSE	0
2022-09-13	13:40:59	0.273193	216.486	FALSE	0
2022-09-13	13:40:59	0.517214	217.003	FALSE	0
2022-09-13	13:40:59	0.396858	217.4	FALSE	0
2022-09-13	13:41:00	1.11584	218.516	FALSE	0
2022-09-13	13:41:00	0.739147	219.255	FALSE	0
2022-09-13	13:41:00	0.206679	219.462	FALSE	0
2022-09-13	13:41:00	0.12271	219.584	FALSE	0
2022-09-13	13:41:01	-0.464567	219.584	FALSE	0
2022-09-13	13:41:01	-0.0182567	219.584	FALSE	0
2022-09-13	13:41:01	0.0501401	219.635	FALSE	0
2022-09-13	13:41:01	0.898333	220.533	FALSE	0
2022-09-13	13:41:02	0.592175	221.125	FALSE	0
2022-09-13	13:41:02	0.761794	221.887	FALSE	0
2022-09-13	13:41:02	0.546679	222.433	FALSE	0
2022-09-13	13:41:03	0.450089	222.884	FALSE	0
2022-09-13	13:41:03	0.466272	223.35	FALSE	0
2022-09-13	13:41:03	0.436756	223.787	FALSE	0
2022-09-13	13:41:03	0.500114	224.287	FALSE	0
2022-09-13	13:41:04	0.319504	224.606	FALSE	0
2022-09-13	13:41:04	0.518639	225.125	FALSE	0
2022-09-13	13:41:04	0.733702	225.859	FALSE	0
2022-09-13	13:41:04	0.509478	226.368	FALSE	0
2022-09-13	13:41:05	0.460623	226.829	FALSE	0
2022-09-13	13:41:05	0.347341	227.176	FALSE	0
2022-09-13	13:41:05	0.35757	227.534	FALSE	0
2022-09-13	13:41:05	1.26597	228.8	FALSE	0
2022-09-13	13:41:06	0.399046	229.199	FALSE	0
2022-09-13	13:41:06	0.426985	229.626	FALSE	0
2022-09-13	13:41:06	0.369326	229.995	FALSE	0
2022-09-13	13:41:07	0.368919	230.364	FALSE	0
2022-09-13	13:41:07	0.35131	230.715	FALSE	0
2022-09-13	13:41:07	0.290954	231.006	FALSE	0
2022-09-13	13:41:07	0.295687	231.302	FALSE	0
2022-09-13	13:41:08	0.259708	231.561	FALSE	0
2022-09-13	13:41:08	0.0759417	231.637	FALSE	0
2022-09-13	13:41:08	-0.378155	231.637	FALSE	0
2022-09-13	13:41:08	-0.40533	231.637	FALSE	0
2022-09-13	13:41:09	-0.288638	231.637	FALSE	0
2022-09-13	13:41:09	-0.209453	231.637	FALSE	0
2022-09-13	13:41:09	-0.219071	231.637	FALSE	0
2022-09-13	13:41:09	-0.312709	231.637	FALSE	0
2022-09-13	13:41:10	-0.240699	231.637	FALSE	0
2022-09-13	13:41:10	-0.390776	231.637	FALSE	0
2022-09-13	13:41:10	-0.280343	231.637	FALSE	0
2022-09-13	13:41:11	-0.299376	231.637	FALSE	0
2022-09-13	13:41:11	-0.126297	231.637	FALSE	0
2022-09-13	13:41:11	-0.286755	231.637	FALSE	0
2022-09-13	13:41:11	-0.326501	231.637	FALSE	0
2022-09-13	13:41:12	-0.304211	231.637	FALSE	0
2022-09-13	13:41:12	-0.408384	231.637	FALSE	0
2022-09-13	13:41:12	-0.431844	231.637	FALSE	0
2022-09-13	13:41:12	-0.544618	231.637	FALSE	0
2022-09-13	13:41:13	-0.546602	231.637	FALSE	0
2022-09-13	13:41:13	-0.679478	231.637	FALSE	0
2022-09-13	13:41:13	-0.783345	231.637	FALSE	0
2022-09-13	13:41:13	-0.753981	231.637	FALSE	0
2022-09-13	13:41:14	-0.872811	231.637	FALSE	0
2022-09-13	13:41:14	-0.731793	231.637	FALSE	0
2022-09-13	13:41:14	-0.792862	231.637	FALSE	0
2022-09-13	13:41:15	-0.843447	231.637	FALSE	0
2022-09-13	13:41:15	-0.829757	231.637	FALSE	0
2022-09-13	13:41:15	-0.956933	231.637	FALSE	0
2022-09-13	13:41:15	-0.831437	231.637	FALSE	0
2022-09-13	13:41:16	-1.02716	231.637	FALSE	0
2022-09-13	13:41:16	-1.17408	231.637	FALSE	0
2022-09-13	13:41:16	-0.899732	231.637	FALSE	0
2022-09-13	13:41:16	-0.858816	231.637	FALSE	0
2022-09-13	13:41:17	-0.850317	231.637	FALSE	0
2022-09-13	13:41:17	-0.754643	231.637	FALSE	0
2022-09-13	13:41:17	-0.798613	231.637	FALSE	0
2022-09-13	13:41:17	-0.40589	231.637	FALSE	0
2022-09-13	13:41:18	-0.136781	231.637	FALSE	0
2022-09-13	13:41:18	0.0944659	231.732	FALSE	0
2022-09-13	13:41:18	-0.192404	231.732	FALSE	0
2022-09-13	13:41:19	-0.424262	231.732	FALSE	0
2022-09-13	13:41:19	-0.31047	231.732	FALSE	0
2022-09-13	13:41:19	-0.364414	231.732	FALSE	0
2022-09-13	13:41:19	-0.391335	231.732	FALSE	0
2022-09-13	13:41:20	-0.419376	231.732	FALSE	0
2022-09-13	13:41:20	-0.723752	231.732	FALSE	0
2022-09-13	13:41:20	-0.407112	231.732	FALSE	0
2022-09-13	13:41:20	-0.100903	231.732	FALSE	0
2022-09-13	13:41:21	0.356908	232.089	FALSE	0
2022-09-13	13:41:21	0.419962	232.509	FALSE	0
2022-09-13	13:41:21	0.404949	232.914	FALSE	0
2022-09-13	13:41:21	0.331667	233.245	FALSE	0
2022-09-13	13:41:22	0.444644	233.69	FALSE	0
2022-09-13	13:41:22	0.434771	234.125	FALSE	0
2022-09-13	13:41:22	0.486985	234.612	FALSE	0
2022-09-13	13:41:23	0.396807	235.009	FALSE	0
2022-09-13	13:41:23	0.422201	235.431	FALSE	0
2022-09-13	13:41:23	0.401692	235.832	FALSE	0
2022-09-13	13:41:23	0.460827	236.293	FALSE	0
2022-09-13	13:41:24	0.339657	236.633	FALSE	0
2022-09-13	13:41:24	0.540165	237.173	FALSE	0
2022-09-13	13:41:24	0.542506	237.716	FALSE	0
2022-09-13	13:41:24	0.598639	238.314	FALSE	0
2022-09-13	13:41:25	0.433804	238.748	FALSE	0
2022-09-13	13:41:25	0.656298	239.404	FALSE	0
2022-09-13	13:41:25	0.211667	239.616	FALSE	0
2022-09-13	13:41:25	0.670547	240.287	FALSE	0
2022-09-13	13:41:26	0.271361	240.558	FALSE	0
2022-09-13	13:41:26	0.342201	240.9	FALSE	0
2022-09-13	13:41:26	0.291311	241.191	FALSE	0
2022-09-13	13:41:27	0.533499	241.725	FALSE	0
2022-09-13	13:41:27	0.247392	241.972	FALSE	0
2022-09-13	13:41:27	0.469071	242.441	FALSE	0
2022-09-13	13:41:27	0.246476	242.688	FALSE	0
2022-09-13	13:41:28	0.167188	242.855	FALSE	0
2022-09-13	13:41:28	0.208562	243.064	FALSE	0
2022-09-13	13:41:28	0.0754327	243.139	FALSE	0
2022-09-13	13:41:28	0.287341	243.426	FALSE	0
2022-09-13	13:41:29	0.351616	243.778	FALSE	0
2022-09-13	13:41:29	0.312074	244.09	FALSE	0
2022-09-13	13:41:29	0.258232	244.348	FALSE	0
2022-09-13	13:41:29	0.286628	244.635	FALSE	0
2022-09-13	13:41:30	0.294211	244.929	FALSE	0
2022-09-13	13:41:30	0.340267	245.269	FALSE	0
2022-09-13	13:41:30	0.210853	245.48	FALSE	0
2022-09-13	13:41:31	0.282405	245.763	FALSE	0
2022-09-13	13:41:31	0.0491733	245.812	FALSE	0
2022-09-13	13:41:31	0.397774	246.21	FALSE	0
2022-09-13	13:41:31	0.150954	246.361	FALSE	0
2022-09-13	13:41:32	0.235076	246.596	FALSE	0
2022-09-13	13:41:32	0.0723284	246.668	FALSE	0
2022-09-13	13:41:32	-0.0194781	246.668	FALSE	0
2022-09-13	13:41:32	0.0984353	246.766	FALSE	0
2022-09-13	13:41:33	0.159504	246.926	FALSE	0
2022-09-13	13:41:33	0.263728	247.19	FALSE	0
2022-09-13	13:41:33	0.0491733	247.239	FALSE	0
2022-09-13	13:41:33	0.0463234	247.285	FALSE	0
2022-09-13	13:41:34	-0.0912847	247.285	FALSE	0
2022-09-13	13:41:34	0.139504	247.425	FALSE	0
2022-09-13	13:41:34	0.00438957	247.429	FALSE	0
2022-09-13	13:41:35	0.160725	247.59	FALSE	0
2022-09-13	13:41:35	-0.205534	247.59	FALSE	0
2022-09-13	13:41:35	0.000470984	247.59	FALSE	0
2022-09-13	13:41:35	-0.0887402	247.59	FALSE	0
2022-09-13	13:41:36	-0.205738	247.59	FALSE	0
2022-09-13	13:41:36	-0.185432	247.59	FALSE	0
2022-09-13	13:41:36	-0.249096	247.59	FALSE	0
2022-09-13	13:41:36	-0.184465	247.59	FALSE	0
2022-09-13	13:41:37	-0.217544	247.59	FALSE	0
2022-09-13	13:41:37	0.178741	247.769	FALSE	0
2022-09-13	13:41:37	0.0921249	247.861	FALSE	0
2022-09-13	13:41:37	0.335433	248.197	FALSE	0
2022-09-13	13:41:38	0.177417	248.374	FALSE	0
2022-09-13	13:41:38	0.422812	248.797	FALSE	0
2022-09-13	13:41:38	0.068359	248.865	FALSE	0
2022-09-13	13:41:39	0.459453	249.325	FALSE	0
2022-09-13	13:41:39	0.187087	249.512	FALSE	0
2022-09-13	13:41:39	0.291107	249.803	FALSE	0
2022-09-13	13:41:39	0.165255	249.968	FALSE	0
2022-09-13	13:41:40	0.213499	250.182	FALSE	0
2022-09-13	13:41:40	0.333244	250.515	FALSE	0
2022-09-13	13:41:40	0.334262	250.849	FALSE	0
2022-09-13	13:41:40	0.399809	251.249	FALSE	0
2022-09-13	13:41:41	0.320573	251.569	FALSE	0
2022-09-13	13:41:41	0.377265	251.947	FALSE	0
2022-09-13	13:41:41	0.336654	252.283	FALSE	0
2022-09-13	13:41:41	0.317366	252.601	FALSE	0
2022-09-13	13:41:42	0.315992	252.917	FALSE	0
2022-09-13	13:41:42	0.305713	253.222	FALSE	0
2022-09-13	13:41:42	0.310395	253.533	FALSE	0
2022-09-13	13:41:42	0.32958	253.862	FALSE	0
2022-09-13	13:41:43	0.163779	254.026	FALSE	0
2022-09-13	13:41:43	0.464339	254.491	FALSE	0
2022-09-13	13:41:43	0.0531427	254.544	FALSE	0
2022-09-13	13:41:44	0.0880536	254.632	FALSE	0
2022-09-13	13:41:44	0.121743	254.753	FALSE	0
2022-09-13	13:41:44	0.174313	254.928	FALSE	0
2022-09-13	13:41:44	0.140318	255.068	FALSE	0
2022-09-13	13:41:45	0.295942	255.364	FALSE	0
2022-09-13	13:41:45	0.123626	255.488	FALSE	0
2022-09-13	13:41:45	0.394109	255.882	FALSE	0
2022-09-13	13:41:45	0.230853	256.113	FALSE	0
2022-09-13	13:41:46	0.545814	256.658	FALSE	0
2022-09-13	13:41:46	0.776857	257.435	FALSE	0
2022-09-13	13:41:46	0.794517	258.23	FALSE	0
2022-09-13	13:41:46	0.795076	259.025	FALSE	0
2022-09-13	13:41:47	0.794415	259.819	FALSE	0
2022-09-13	13:41:47	0.810547	260.63	FALSE	0
2022-09-13	13:41:47	0.794517	261.424	FALSE	0
2022-09-13	13:41:48	0.802048	262.226	FALSE	0
2022-09-13	13:41:48	0.78846	263.015	FALSE	0
2022-09-13	13:41:48	0.785509	263.8	FALSE	0
2022-09-13	13:41:48	0.858893	264.659	FALSE	0
2022-09-13	13:41:49	0.80841	265.468	FALSE	0
2022-09-13	13:41:49	0.746018	266.214	FALSE	0
2022-09-13	13:41:49	0.763321	266.977	FALSE	0
2022-09-13	13:41:49	0.772532	267.75	FALSE	0
2022-09-13	13:41:50	0.764593	268.514	FALSE	0
2022-09-13	13:41:50	0.729275	269.243	FALSE	0
2022-09-13	13:41:50	0.706272	269.95	FALSE	0
2022-09-13	13:41:50	0.737926	270.688	FALSE	0
2022-09-13	13:41:51	0.731667	271.419	FALSE	0
2022-09-13	13:41:51	0.723219	272.143	FALSE	0
2022-09-13	13:41:51	0.726374	272.869	FALSE	0
2022-09-13	13:41:52	0.731259	273.6	FALSE	0
2022-09-13	13:41:52	0.720471	274.321	FALSE	0
2022-09-13	13:41:52	0.714669	275.035	FALSE	0
2022-09-13	13:41:52	0.764389	275.8	FALSE	0
2022-09-13	13:41:53	-0.166857	275.8	FALSE	0
2022-09-13	13:41:53	0.735738	276.535	FALSE	0
2022-09-13	13:41:53	0.743575	277.279	FALSE	0
2022-09-13	13:41:53	0.633041	277.912	FALSE	0
2022-09-13	13:41:54	0.429631	278.342	FALSE	0
2022-09-13	13:41:54	0.50897	278.851	FALSE	0
2022-09-13	13:41:54	0.502405	279.353	FALSE	0
2022-09-13	13:41:54	0.455789	279.809	FALSE	0
2022-09-13	13:41:55	0.480318	280.289	FALSE	0
2022-09-13	13:41:55	0.508104	280.797	FALSE	0
2022-09-13	13:41:55	0.55243	281.35	FALSE	0
2022-09-13	13:41:56	0.411616	281.761	FALSE	0
2022-09-13	13:41:56	0.43411	282.195	FALSE	0
2022-09-13	13:41:56	0.599606	282.795	FALSE	0
2022-09-13	13:41:56	0.281743	283.077	FALSE	0
2022-09-13	13:41:57	0.269733	283.346	FALSE	0
2022-09-13	13:41:57	0.260623	283.607	FALSE	0
2022-09-13	13:41:57	0.453041	284.06	FALSE	0
2022-09-13	13:41:57	0.295891	284.356	FALSE	0
2022-09-13	13:41:58	0.198944	284.555	FALSE	0
2022-09-13	13:41:58	0.281387	284.836	FALSE	0
2022-09-13	13:41:58	0.356705	285.193	FALSE	0
2022-09-13	13:41:58	0.523168	285.716	FALSE	0
2022-09-13	13:41:59	0.318232	286.034	FALSE	0
2022-09-13	13:41:59	0.456247	286.491	FALSE	0
2022-09-13	13:41:59	0.401947	286.893	FALSE	0
2022-09-13	13:42:00	0.388206	287.281	FALSE	0
2022-09-13	13:42:00	0.408817	287.69	FALSE	0
2022-09-13	13:42:00	0.407646	288.097	FALSE	0
2022-09-13	13:42:00	0.397417	288.495	FALSE	0
2022-09-13	13:42:01	0.402761	288.898	FALSE	0
2022-09-13	13:42:01	0.413855	289.311	FALSE	0
2022-09-13	13:42:01	0.422303	289.734	FALSE	0
2022-09-13	13:42:01	0.415484	290.149	FALSE	0
2022-09-13	13:42:02	0.408919	290.558	FALSE	0
2022-09-13	13:42:02	0.403321	290.961	FALSE	0
2022-09-13	13:42:02	0.391616	291.353	FALSE	0
2022-09-13	13:42:02	0.413143	291.766	FALSE	0
2022-09-13	13:42:03	0.28327	292.049	FALSE	0
2022-09-13	13:42:03	0.202608	292.252	FALSE	0
2022-09-13	13:42:03	0.157519	292.41	FALSE	0
2022-09-13	13:42:04	0.110853	292.52	FALSE	0
2022-09-13	13:42:04	0.0629137	292.583	FALSE	0
2022-09-13	13:42:04	0.659351	293.243	FALSE	0
2022-09-13	13:42:04	0.55014	293.793	FALSE	0
2022-09-13	13:42:05	0.414466	294.207	FALSE	0
2022-09-13	13:42:05	0.715992	294.923	FALSE	0
2022-09-13	13:42:05	0.736552	295.66	FALSE	0
2022-09-13	13:42:05	0.775891	296.436	FALSE	0
2022-09-13	13:42:06	0.729071	297.165	FALSE	0
2022-09-13	13:42:06	0.787443	297.952	FALSE	0
2022-09-13	13:42:06	0.76673	298.719	FALSE	0
2022-09-13	13:42:06	0.854211	299.573	FALSE	0
2022-09-13	13:42:07	0.730293	300.303	FALSE	0
2022-09-13	13:42:07	0.729784	301.033	FALSE	0
2022-09-13	13:42:07	0.701438	301.735	FALSE	0
2022-09-13	13:42:08	0.690191	302.425	FALSE	0
2022-09-13	13:42:08	0.270344	302.695	FALSE	0
2022-09-13	13:42:08	0.288054	302.983	FALSE	0
2022-09-13	13:42:08	0.525662	303.509	FALSE	0
2022-09-13	13:42:09	-0.0450761	303.509	FALSE	0
2022-09-13	13:42:09	0.209377	303.718	FALSE	0
2022-09-13	13:42:09	0.197519	303.916	FALSE	0
2022-09-13	13:42:09	0.179249	304.095	FALSE	0
2022-09-13	13:42:10	0.197367	304.292	FALSE	0
2022-09-13	13:42:10	0.0178246	304.31	FALSE	0
2022-09-13	13:42:10	0.112888	304.423	FALSE	0
2022-09-13	13:42:10	0.0877992	304.511	FALSE	0
2022-09-13	13:42:11	0.0503946	304.561	FALSE	0
2022-09-13	13:42:11	0.112837	304.674	FALSE	0
2022-09-13	13:42:11	-0.101972	304.674	FALSE	0
2022-09-13	13:42:12	0.129835	304.804	FALSE	0
2022-09-13	13:42:12	0.371107	305.175	FALSE	0
2022-09-13	13:42:12	0.454059	305.629	FALSE	0
2022-09-13	13:42:12	0.493397	306.123	FALSE	0
2022-09-13	13:42:13	0.330344	306.453	FALSE	0
2022-09-13	13:42:13	0.308919	306.762	FALSE	0
2022-09-13	13:42:13	0.186069	306.948	FALSE	0
2022-09-13	13:42:13	0.241387	307.189	FALSE	0
2022-09-13	13:42:14	0.179046	307.368	FALSE	0
2022-09-13	13:42:14	0.102608	307.471	FALSE	0
2022-09-13	13:42:14	0.337468	307.808	FALSE	0
2022-09-13	13:42:14	0.133244	307.942	FALSE	0
2022-09-13	13:42:15	0.286578	308.228	FALSE	0
2022-09-13	13:42:15	0.207697	308.436	FALSE	0
2022-09-13	13:42:15	0.18902	308.625	FALSE	0
2022-09-13	13:42:16	0.198181	308.823	FALSE	0
2022-09-13	13:42:16	0.0960943	308.919	FALSE	0
2022-09-13	13:42:16	0.327036	309.246	FALSE	0
2022-09-13	13:42:16	0.0161453	309.262	FALSE	0
2022-09-13	13:42:17	0.10327	309.366	FALSE	0
2022-09-13	13:42:17	0.117926	309.484	FALSE	0
2022-09-13	13:42:17	0.120013	309.604	FALSE	0
2022-09-13	13:42:17	0.263066	309.867	FALSE	0
2022-09-13	13:42:18	-0.0331677	309.867	FALSE	0
2022-09-13	13:42:18	0.143321	310.01	FALSE	0
2022-09-13	13:42:18	-0.0321499	310.01	FALSE	0
2022-09-13	13:42:18	-0.0290964	310.01	FALSE	0
2022-09-13	13:42:19	0.668461	310.678	FALSE	0
2022-09-13	13:42:19	0.738995	311.417	FALSE	0
2022-09-13	13:42:19	0.732532	312.15	FALSE	0
2022-09-13	13:42:20	0.734873	312.885	FALSE	0
2022-09-13	13:42:20	0.731209	313.616	FALSE	0
2022-09-13	13:42:20	0.726985	314.343	FALSE	0
2022-09-13	13:42:20	0.732379	315.075	FALSE	0
2022-09-13	13:42:21	0.731616	315.807	FALSE	0
2022-09-13	13:42:21	0.737163	316.544	FALSE	0
2022-09-13	13:42:21	0.727748	317.272	FALSE	0
2022-09-13	13:42:21	0.668104	317.94	FALSE	0
2022-09-13	13:42:22	0.713448	318.654	FALSE	0
2022-09-13	13:42:22	0.712328	319.366	FALSE	0
2022-09-13	13:42:22	0.724796	320.091	FALSE	0
2022-09-13	13:42:22	0.735738	320.826	FALSE	0
2022-09-13	13:42:23	0.733601	321.56	FALSE	0
2022-09-13	13:42:23	0.727646	322.288	FALSE	0
2022-09-13	13:42:23	0.73014	323.018	FALSE	0
2022-09-13	13:42:24	0.68042	323.698	FALSE	0
2022-09-13	13:42:24	0.461132	324.159	FALSE	0
2022-09-13	13:42:24	0.726985	324.886	FALSE	0
2022-09-13	13:42:24	0.54617	325.432	FALSE	0
2022-09-13	13:42:25	0.735229	326.168	FALSE	0
2022-09-13	13:42:25	0.729275	326.897	FALSE	0
2022-09-13	13:42:25	0.730903	327.628	FALSE	0
2022-09-13	13:42:26	0.732379	328.36	FALSE	0
2022-09-13	13:42:26	0.724491	329.085	FALSE	0
2022-09-13	13:42:26	0.739555	329.824	FALSE	0
2022-09-13	13:42:26	0.724135	330.548	FALSE	0
2022-09-13	13:42:26	0.726781	331.275	FALSE	0
2022-09-13	13:42:27	0.741387	332.017	FALSE	0
2022-09-13	13:42:27	0.733295	332.75	FALSE	0
2022-09-13	13:42:27	0.726527	333.476	FALSE	0
2022-09-13	13:42:28	0.730191	334.207	FALSE	0
2022-09-13	13:42:28	0.728054	334.935	FALSE	0
2022-09-13	13:42:28	0.731972	335.667	FALSE	0
2022-09-13	13:42:28	0.732481	336.399	FALSE	0
2022-09-13	13:42:29	0.730903	337.13	FALSE	0
2022-09-13	13:42:29	0.726527	337.857	FALSE	0
2022-09-13	13:42:29	0.732175	338.589	FALSE	0
2022-09-13	13:42:29	0.733702	339.322	FALSE	0
2022-09-13	13:42:30	0.733142	340.056	FALSE	0
2022-09-13	13:42:30	0.734109	340.79	FALSE	0
2022-09-13	13:42:30	0.73187	341.522	FALSE	0
2022-09-13	13:42:30	0.739249	342.261	FALSE	0
2022-09-13	13:42:31	0.73701	342.998	FALSE	0
2022-09-13	13:42:31	0.71243	343.71	FALSE	0
2022-09-13	13:42:31	0.554211	344.264	FALSE	0
2022-09-13	13:42:32	0.603015	344.867	FALSE	0
2022-09-13	13:42:32	0.734313	345.602	FALSE	0
2022-09-13	13:42:32	0.730343	346.332	FALSE	0
2022-09-13	13:42:32	0.730801	347.063	FALSE	0
2022-09-13	13:42:33	0.736247	347.799	FALSE	0
2022-09-13	13:42:33	0.728562	348.528	FALSE	0
2022-09-13	13:42:33	0.693957	349.222	FALSE	0
2022-09-13	13:42:33	0.367239	349.589	FALSE	0
2022-09-13	13:42:34	0.147952	349.737	FALSE	0
2022-09-13	13:42:34	0.105865	349.843	FALSE	0
2022-09-13	13:42:34	0.113194	349.956	FALSE	0
2022-09-13	13:42:34	0.061387	350.017	FALSE	0
2022-09-13	13:42:35	-0.112302	350.017	FALSE	0
2022-09-13	13:42:35	0.474008	350.491	FALSE	0
2022-09-13	13:42:35	0.739555	351.231	FALSE	0
2022-09-13	13:42:36	0.729173	351.96	FALSE	0
2022-09-13	13:42:36	0.736908	352.697	FALSE	0
2022-09-13	13:42:36	0.735992	353.433	FALSE	0
2022-09-13	13:42:36	0.736908	354.17	FALSE	0
2022-09-13	13:42:37	0.732532	354.902	FALSE	0
2022-09-13	13:42:37	0.738842	355.641	FALSE	0
2022-09-13	13:42:37	0.735941	356.377	FALSE	0
2022-09-13	13:42:37	0.729428	357.107	FALSE	0
2022-09-13	13:42:38	0.732939	357.84	FALSE	0
2022-09-13	13:42:38	0.736807	358.576	FALSE	0
2022-09-13	13:42:38	0.736501	359.313	FALSE	0
2022-09-13	13:42:38	0.73701	360.05	FALSE	0
2022-09-13	13:42:39	0.73528	360.785	FALSE	0
2022-09-13	13:42:39	0.738028	361.523	FALSE	0
2022-09-13	13:42:39	0.736603	362.26	FALSE	0
2022-09-13	13:42:40	0.728613	362.988	FALSE	0
2022-09-13	13:42:40	0.729784	363.718	FALSE	0
2022-09-13	13:42:40	0.734669	364.453	FALSE	0
2022-09-13	13:42:40	0.729835	365.183	FALSE	0
2022-09-13	13:42:41	0.73131	365.914	FALSE	0
2022-09-13	13:42:41	0.72897	366.643	FALSE	0
2022-09-13	13:42:41	0.727341	367.37	FALSE	0
2022-09-13	13:42:41	0.733193	368.104	FALSE	0
2022-09-13	13:42:42	0.730445	368.834	FALSE	0
2022-09-13	13:42:42	0.727188	369.561	FALSE	0
2022-09-13	13:42:42	0.728613	370.29	FALSE	0
2022-09-13	13:42:42	0.731565	371.021	FALSE	0
2022-09-13	13:42:43	0.725814	371.747	FALSE	0
2022-09-13	13:42:43	0.721132	372.468	FALSE	0
2022-09-13	13:42:43	0.719453	373.188	FALSE	0
2022-09-13	13:42:44	0.729987	373.918	FALSE	0
2022-09-13	13:42:44	0.721539	374.639	FALSE	0
2022-09-13	13:42:44	0.726781	375.366	FALSE	0
2022-09-13	13:42:44	0.725407	376.091	FALSE	0
2022-09-13	13:42:45	0.726272	376.818	FALSE	0
2022-09-13	13:42:45	0.719707	377.537	FALSE	0
2022-09-13	13:42:45	0.72902	378.266	FALSE	0
2022-09-13	13:42:45	0.715483	378.982	FALSE	0
2022-09-13	13:42:46	0.713651	379.696	FALSE	0
2022-09-13	13:42:46	0.722659	380.418	FALSE	0
2022-09-13	13:42:46	0.716501	381.135	FALSE	0
2022-09-13	13:42:46	0.7107	381.845	FALSE	0
2022-09-13	13:42:47	0.697163	382.543	FALSE	0
2022-09-13	13:42:47	0.684033	383.227	FALSE	0
2022-09-13	13:42:47	0.684389	383.911	FALSE	0
2022-09-13	13:42:48	0.685204	384.596	FALSE	0
2022-09-13	13:42:48	0.66098	385.257	FALSE	0
2022-09-13	13:42:48	0.659351	385.917	FALSE	0
2022-09-13	13:42:48	0.643321	386.56	FALSE	0
2022-09-13	13:42:49	0.656705	387.217	FALSE	0
2022-09-13	13:42:49	0.632328	387.849	FALSE	0
2022-09-13	13:42:49	0.640064	388.489	FALSE	0
2022-09-13	13:42:49	0.65299	389.142	FALSE	0
2022-09-13	13:42:50	0.659351	389.801	FALSE	0
2022-09-13	13:42:50	0.724389	390.526	FALSE	0
2022-09-13	13:42:50	0.737824	391.264	FALSE	0
2022-09-13	13:42:50	0.72785	391.991	FALSE	0
2022-09-13	13:42:51	0.738486	392.73	FALSE	0
2022-09-13	13:42:51	0.728308	393.458	FALSE	0
2022-09-13	13:42:51	0.734822	394.193	FALSE	0
2022-09-13	13:42:52	0.73243	394.925	FALSE	0
2022-09-13	13:42:52	0.736094	395.662	FALSE	0
2022-09-13	13:42:52	0.73472	396.396	FALSE	0
2022-09-13	13:42:52	0.730954	397.127	FALSE	0
2022-09-13	13:42:53	0.737112	397.864	FALSE	0
2022-09-13	13:42:53	0.728512	398.593	FALSE	0
2022-09-13	13:42:53	0.731361	399.324	FALSE	0
2022-09-13	13:42:53	0.732735	400.057	FALSE	0
2022-09-13	13:42:54	0.728919	400.786	FALSE	0
2022-09-13	13:42:54	0.720827	401.507	FALSE	0
2022-09-13	13:42:54	0.732786	402.239	FALSE	0
2022-09-13	13:42:54	0.723982	402.963	FALSE	0
2022-09-13	13:42:55	0.724847	403.688	FALSE	0
2022-09-13	13:42:55	0.728868	404.417	FALSE	0
2022-09-13	13:42:55	0.724237	405.141	FALSE	0
2022-09-13	13:42:55	0.724135	405.866	FALSE	0
2022-09-13	13:42:56	0.723728	406.589	FALSE	0
2022-09-13	13:42:56	0.716298	407.306	FALSE	0
2022-09-13	13:42:56	0.705305	408.011	FALSE	0
2022-09-13	13:42:57	0.711209	408.722	FALSE	0
2022-09-13	13:42:57	0.417672	409.14	FALSE	0
2022-09-13	13:42:57	1.60134	410.741	FALSE	0
2022-09-13	13:42:57	2.2649	413.006	FALSE	0
2022-09-13	13:42:58	1.20352	414.209	FALSE	0
2022-09-13	13:42:58	0.527544	414.737	FALSE	0
2022-09-13	13:42:58	0.511921	415.249	FALSE	0
2022-09-13	13:42:58	0.346781	415.596	FALSE	0
2022-09-13	13:42:59	0.365356	415.961	FALSE	0
2022-09-13	13:42:59	0.482608	416.444	FALSE	0
2022-09-13	13:42:59	0.316858	416.761	FALSE	0
2022-09-13	13:43:00	0.45528	417.216	FALSE	0
2022-09-13	13:43:00	0.348766	417.565	FALSE	0
2022-09-13	13:43:00	0.462252	418.027	FALSE	0
2022-09-13	13:43:00	0.336552	418.363	FALSE	0
2022-09-13	13:43:01	0.428308	418.792	FALSE	0
2022-09-13	13:43:01	0.328155	419.12	FALSE	0
2022-09-13	13:43:01	0.428817	419.549	FALSE	0
2022-09-13	13:43:01	0.459555	420.008	FALSE	0
2022-09-13	13:43:02	0.402252	420.41	FALSE	0
2022-09-13	13:43:02	0.451718	420.862	FALSE	0
2022-09-13	13:43:02	0.530598	421.393	FALSE	0
2022-09-13	13:43:02	-0.279071	421.393	FALSE	0
2022-09-13	13:43:03	-0.361615	421.393	FALSE	0
2022-09-13	13:43:03	-0.0678241	421.393	FALSE	0
2022-09-13	13:43:03	-0.248893	421.393	FALSE	0
2022-09-13	13:43:03	-0.0890455	421.393	FALSE	0
2022-09-13	13:43:04	0.220471	421.613	FALSE	0
2022-09-13	13:43:04	-0.300496	421.613	FALSE	0
2022-09-13	13:43:04	-0.346195	421.613	FALSE	0
2022-09-13	13:43:05	0.639606	422.253	FALSE	0
2022-09-13	13:43:05	0.40444	422.657	FALSE	0
2022-09-13	13:43:05	0.457061	423.114	FALSE	0
2022-09-13	13:43:05	0.656298	423.771	FALSE	0
2022-09-13	13:43:06	0.479097	424.25	FALSE	0
2022-09-13	13:43:06	0.403575	424.653	FALSE	0
2022-09-13	13:43:06	0.679504	425.333	FALSE	0
2022-09-13	13:43:06	0.511972	425.845	FALSE	0
2022-09-13	13:43:07	0.570242	426.415	FALSE	0
2022-09-13	13:43:07	0.377774	426.793	FALSE	0
2022-09-13	13:43:07	0.278792	427.072	FALSE	0
2022-09-13	13:43:07	0.209936	427.282	FALSE	0
2022-09-13	13:43:08	-0.108028	427.282	FALSE	0
2022-09-13	13:43:08	-0.423396	427.282	FALSE	0
2022-09-13	13:43:08	-0.189198	427.282	FALSE	0
2022-09-13	13:43:09	-0.292353	427.282	FALSE	0
2022-09-13	13:43:09	-0.486603	427.282	FALSE	0
2022-09-13	13:43:09	-0.532048	427.282	FALSE	0
2022-09-13	13:43:09	-0.362429	427.282	FALSE	0
2022-09-13	13:43:10	-0.118358	427.282	FALSE	0
2022-09-13	13:43:10	-0.25271	427.282	FALSE	0
2022-09-13	13:43:10	0.0791987	427.361	FALSE	0
2022-09-13	13:43:10	-0.0932185	427.361	FALSE	0
2022-09-13	13:43:11	6.3875e-05	427.361	FALSE	0
2022-09-13	13:43:11	-0.0518954	427.361	FALSE	0
2022-09-13	13:43:11	0.147901	427.509	FALSE	0
2022-09-13	13:43:11	0.21869	427.727	FALSE	0
2022-09-13	13:43:12	0.175636	427.903	FALSE	0
2022-09-13	13:43:12	0.111311	428.014	FALSE	0
2022-09-13	13:43:12	0.332583	428.347	FALSE	0
2022-09-13	13:43:13	0.298893	428.646	FALSE	0
2022-09-13	13:43:13	0.43126	429.077	FALSE	0
2022-09-13	13:43:13	-0.103855	429.077	FALSE	0
2022-09-13	13:43:13	-0.57444	429.077	FALSE	0
2022-09-13	13:43:14	-0.398358	429.077	FALSE	0
2022-09-13	13:43:14	-0.642328	429.077	FALSE	0
2022-09-13	13:43:14	-0.627417	429.077	FALSE	0
2022-09-13	13:43:14	-0.643651	429.077	FALSE	0
2022-09-13	13:43:15	-0.651284	429.077	FALSE	0
2022-09-13	13:43:15	-0.73505	429.077	FALSE	0
2022-09-13	13:43:15	-1.03805	429.077	FALSE	0
2022-09-13	13:43:15	-0.903549	429.077	FALSE	0
2022-09-13	13:43:16	-0.658969	429.077	FALSE	0
2022-09-13	13:43:16	-0.715661	429.077	FALSE	0
2022-09-13	13:43:16	-0.567315	429.077	FALSE	0
2022-09-13	13:43:17	-0.682786	429.077	FALSE	0
2022-09-13	13:43:17	-0.494134	429.077	FALSE	0
2022-09-13	13:43:17	-0.565686	429.077	FALSE	0
2022-09-13	13:43:17	-0.518409	429.077	FALSE	0
2022-09-13	13:43:18	-0.622073	429.077	FALSE	0
2022-09-13	13:43:18	-0.634643	429.077	FALSE	0
2022-09-13	13:43:18	-0.677595	429.077	FALSE	0
2022-09-13	13:43:18	-0.702022	429.077	FALSE	0
2022-09-13	13:43:19	-0.653421	429.077	FALSE	0
2022-09-13	13:43:19	-0.621259	429.077	FALSE	0
2022-09-13	13:43:19	-0.589096	429.077	FALSE	0
2022-09-13	13:43:19	-0.31332	429.077	FALSE	0
2022-09-13	13:43:20	-0.418511	429.077	FALSE	0
2022-09-13	13:43:20	-0.443549	429.077	FALSE	0
2022-09-13	13:43:20	-0.484974	429.077	FALSE	0
2022-09-13	13:43:21	-0.496984	429.077	FALSE	0
2022-09-13	13:43:21	-0.506145	429.077	FALSE	0
2022-09-13	13:43:21	-0.524363	429.077	FALSE	0
2022-09-13	13:43:21	-0.482175	429.077	FALSE	0
2022-09-13	13:43:22	-0.483498	429.077	FALSE	0
2022-09-13	13:43:22	-0.517137	429.077	FALSE	0
2022-09-13	13:43:22	-0.470267	429.077	FALSE	0
2022-09-13	13:43:22	-0.491641	429.077	FALSE	0
2022-09-13	13:43:23	-0.369402	429.077	FALSE	0
2022-09-13	13:43:23	0.235789	429.313	FALSE	0
2022-09-13	13:43:23	0.601845	429.915	FALSE	0
2022-09-13	13:43:23	-0.224567	429.915	FALSE	0
2022-09-13	13:43:24	-0.174287	429.915	FALSE	0
2022-09-13	13:43:24	-0.584058	429.915	FALSE	0
2022-09-13	13:43:24	-0.782124	429.915	FALSE	0
2022-09-13	13:43:25	-0.853981	429.915	FALSE	0
2022-09-13	13:43:25	0.483473	430.398	FALSE	0
2022-09-13	13:43:25	0.598639	430.997	FALSE	0
2022-09-13	13:43:25	0.125458	431.122	FALSE	0
2022-09-13	13:43:26	-0.562887	431.122	FALSE	0
2022-09-13	13:43:26	-0.554796	431.122	FALSE	0
2022-09-13	13:43:26	-0.551539	431.122	FALSE	0
2022-09-13	13:43:26	-0.465992	431.122	FALSE	0
2022-09-13	13:43:27	-0.563956	431.122	FALSE	0
2022-09-13	13:43:27	-0.430317	431.122	FALSE	0
2022-09-13	13:43:27	-0.241157	431.122	FALSE	0
2022-09-13	13:43:27	-0.564974	431.122	FALSE	0
2022-09-13	13:43:28	-0.520241	431.122	FALSE	0
2022-09-13	13:43:28	-0.668333	431.122	FALSE	0
2022-09-13	13:43:28	-0.616017	431.122	FALSE	0
2022-09-13	13:43:29	-0.638206	431.122	FALSE	0
2022-09-13	13:43:29	-0.702633	431.122	FALSE	0
2022-09-13	13:43:29	-0.680902	431.122	FALSE	0
2022-09-13	13:43:29	-0.817442	431.122	FALSE	0
2022-09-13	13:43:30	-0.813982	431.122	FALSE	0
2022-09-13	13:43:30	-0.877646	431.122	FALSE	0
2022-09-13	13:43:30	-0.983854	431.122	FALSE	0
2022-09-13	13:43:30	-0.818867	431.122	FALSE	0
2022-09-13	13:43:31	-0.988943	431.122	FALSE	0
2022-09-13	13:43:31	-0.895152	431.122	FALSE	0
2022-09-13	13:43:31	-0.841259	431.122	FALSE	0
2022-09-13	13:43:31	-0.788383	431.122	FALSE	0
2022-09-13	13:43:32	-0.722226	431.122	FALSE	0
2022-09-13	13:43:32	-0.836577	431.122	FALSE	0
2022-09-13	13:43:32	-0.661157	431.122	FALSE	0
2022-09-13	13:43:33	-0.767213	431.122	FALSE	0
2022-09-13	13:43:33	-0.773269	431.122	FALSE	0
2022-09-13	13:43:33	-0.709401	431.122	FALSE	0
2022-09-13	13:43:33	-0.814236	431.122	FALSE	0
2022-09-13	13:43:34	-0.763142	431.122	FALSE	0
2022-09-13	13:43:34	-0.897544	431.122	FALSE	0
2022-09-13	13:43:34	-0.87159	431.122	FALSE	0
2022-09-13	13:43:34	-0.922328	431.122	FALSE	0
2022-09-13	13:43:35	-0.873218	431.122	FALSE	0
2022-09-13	13:43:35	-0.842735	431.122	FALSE	0
2022-09-13	13:43:35	-0.843294	431.122	FALSE	0
2022-09-13	13:43:35	-0.732913	431.122	FALSE	0
2022-09-13	13:43:36	-0.82533	431.122	FALSE	0
2022-09-13	13:43:36	-0.67449	431.122	FALSE	0
2022-09-13	13:43:36	-0.64762	431.122	FALSE	0
2022-09-13	13:43:37	-0.721666	431.122	FALSE	0
2022-09-13	13:43:37	-0.568231	431.122	FALSE	0
2022-09-13	13:43:37	-0.706195	431.122	FALSE	0
2022-09-13	13:43:37	-0.625687	431.122	FALSE	0
2022-09-13	13:43:38	-0.66706	431.122	FALSE	0
2022-09-13	13:43:38	-0.629808	431.122	FALSE	0
2022-09-13	13:43:38	-0.570623	431.122	FALSE	0
2022-09-13	13:43:38	-0.661055	431.122	FALSE	0
2022-09-13	13:43:39	-0.528435	431.122	FALSE	0
2022-09-13	13:43:39	-0.638918	431.122	FALSE	0
2022-09-13	13:43:39	-0.577595	431.122	FALSE	0
2022-09-13	13:43:39	-0.534389	431.122	FALSE	0
2022-09-13	13:43:40	-0.557799	431.122	FALSE	0
2022-09-13	13:43:40	-0.445636	431.122	FALSE	0
2022-09-13	13:43:40	-0.452557	431.122	FALSE	0
2022-09-13	13:43:41	-0.452251	431.122	FALSE	0
2022-09-13	13:43:41	-0.377442	431.122	FALSE	0
2022-09-13	13:43:41	-0.388842	431.122	FALSE	0
2022-09-13	13:43:41	-0.270674	431.122	FALSE	0
2022-09-13	13:43:42	-0.405534	431.122	FALSE	0
2022-09-13	13:43:42	-0.293015	431.122	FALSE	0
2022-09-13	13:43:42	-0.294491	431.122	FALSE	0
2022-09-13	13:43:42	-0.436221	431.122	FALSE	0
2022-09-13	13:43:43	-0.386297	431.122	FALSE	0
2022-09-13	13:43:43	-0.371895	431.122	FALSE	0
2022-09-13	13:43:43	-0.426399	431.122	FALSE	0
2022-09-13	13:43:43	-0.430521	431.122	FALSE	0
2022-09-13	13:43:44	-0.433117	431.122	FALSE	0
2022-09-13	13:43:44	-0.440699	431.122	FALSE	0
2022-09-13	13:43:44	-0.478409	431.122	FALSE	0
2022-09-13	13:43:45	-0.319427	431.122	FALSE	0
2022-09-13	13:43:45	-0.43159	431.122	FALSE	0
2022-09-13	13:43:45	-0.333727	431.122	FALSE	0
2022-09-13	13:43:45	-0.432709	431.122	FALSE	0
2022-09-13	13:43:46	-0.397442	431.122	FALSE	0
2022-09-13	13:43:46	-0.498816	431.122	FALSE	0
2022-09-13	13:43:46	-0.429096	431.122	FALSE	0
2022-09-13	13:43:46	-0.464669	431.122	FALSE	0
2022-09-13	13:43:47	-0.387264	431.122	FALSE	0
2022-09-13	13:43:47	-0.287671	431.122	FALSE	0
2022-09-13	13:43:47	-0.187671	431.122	FALSE	0
2022-09-13	13:43:47	-0.215967	431.122	FALSE	0
2022-09-13	13:43:48	-0.168791	431.122	FALSE	0
2022-09-13	13:43:48	-0.0828877	431.122	FALSE	0
2022-09-13	13:43:48	-0.199325	431.122	FALSE	0
2022-09-13	13:43:49	0.0515142	431.174	FALSE	0
2022-09-13	13:43:49	-0.119834	431.174	FALSE	0
2022-09-13	13:43:49	-0.0236003	431.174	FALSE	0
2022-09-13	13:43:49	-0.066043	431.174	FALSE	0
2022-09-13	13:43:50	-0.077646	431.174	FALSE	0
2022-09-13	13:43:50	0.0004201	431.174	FALSE	0
2022-09-13	13:43:50	-0.115	431.174	FALSE	0
2022-09-13	13:43:50	-0.0123535	431.174	FALSE	0
2022-09-13	13:43:51	-0.130318	431.174	FALSE	0
2022-09-13	13:43:51	0.00550917	431.18	FALSE	0
2022-09-13	13:43:51	-0.0983585	431.18	FALSE	0
2022-09-13	13:43:51	-0.00436363	431.18	FALSE	0
2022-09-13	13:43:52	-0.218613	431.18	FALSE	0
2022-09-13	13:43:52	-0.178409	431.18	FALSE	0
2022-09-13	13:43:52	-0.099987	431.18	FALSE	0
2022-09-13	13:43:53	-0.176476	431.18	FALSE	0
2022-09-13	13:43:53	-0.0872643	431.18	FALSE	0
2022-09-13	13:43:53	-0.188129	431.18	FALSE	0
2022-09-13	13:43:53	-0.132913	431.18	FALSE	0
2022-09-13	13:43:54	-0.221208	431.18	FALSE	0
2022-09-13	13:43:54	-0.0917936	431.18	FALSE	0
2022-09-13	13:43:54	-0.298206	431.18	FALSE	0
2022-09-13	13:43:54	-0.127468	431.18	FALSE	0
2022-09-13	13:43:55	-0.254287	431.18	FALSE	0
2022-09-13	13:43:55	-0.185127	431.18	FALSE	0
2022-09-13	13:43:55	-0.198206	431.18	FALSE	0
2022-09-13	13:43:55	-0.175305	431.18	FALSE	0
2022-09-13	13:43:56	-0.169249	431.18	FALSE	0
2022-09-13	13:43:56	-0.241921	431.18	FALSE	0
2022-09-13	13:43:56	-0.138409	431.18	FALSE	0
2022-09-13	13:43:57	-0.310623	431.18	FALSE	0
2022-09-13	13:43:57	-0.217392	431.18	FALSE	0
2022-09-13	13:43:57	-0.259936	431.18	FALSE	0
2022-09-13	13:43:57	-0.202481	431.18	FALSE	0
2022-09-13	13:43:58	-0.206043	431.18	FALSE	0
2022-09-13	13:43:58	-0.221107	431.18	FALSE	0
2022-09-13	13:43:58	-0.0447707	431.18	FALSE	0
2022-09-13	13:43:58	-0.275152	431.18	FALSE	0
2022-09-13	13:43:59	-0.177188	431.18	FALSE	0
2022-09-13	13:43:59	-0.325687	431.18	FALSE	0
2022-09-13	13:43:59	-0.22874	431.18	FALSE	0
2022-09-13	13:43:59	-0.299478	431.18	FALSE	0
2022-09-13	13:44:00	-0.293218	431.18	FALSE	0
2022-09-13	13:44:00	-0.305738	431.18	FALSE	0
2022-09-13	13:44:00	-0.332506	431.18	FALSE	0
2022-09-13	13:44:01	-0.298766	431.18	FALSE	0
2022-09-13	13:44:01	-0.300699	431.18	FALSE	0
2022-09-13	13:44:01	-0.228435	431.18	FALSE	0
2022-09-13	13:44:01	-0.250776	431.18	FALSE	0
2022-09-13	13:44:02	-0.316832	431.18	FALSE	0
2022-09-13	13:44:02	-0.242786	431.18	FALSE	0
2022-09-13	13:44:02	-0.293422	431.18	FALSE	0
2022-09-13	13:44:02	-0.293727	431.18	FALSE	0
2022-09-13	13:44:03	-0.380801	431.18	FALSE	0
2022-09-13	13:44:03	-0.294287	431.18	FALSE	0
2022-09-13	13:44:03	-0.414185	431.18	FALSE	0
2022-09-13	13:44:03	-0.407875	431.18	FALSE	0
2022-09-13	13:44:04	-0.443091	431.18	FALSE	0
2022-09-13	13:44:04	-0.418816	431.18	FALSE	0
2022-09-13	13:44:04	-0.470012	431.18	FALSE	0

## Sheet: Buzz_harness_202291313394
						**GoPro Fitting: 1328
2022-09-13	13:39:04	0.390547
2022-09-13	13:39:04	0.401692
2022-09-13	13:39:04	0.415433
2022-09-13	13:39:05	0.394415
2022-09-13	13:39:05	0.416858
2022-09-13	13:39:05	0.463524
2022-09-13	13:39:05	0.461794
2022-09-13	13:39:06	0.458384
2022-09-13	13:39:06	0.436959
2022-09-13	13:39:06	0.474364
2022-09-13	13:39:06	0.505611
2022-09-13	13:39:07	0.458842
2022-09-13	13:39:07	0.48098
2022-09-13	13:39:07	0.427239
2022-09-13	13:39:07	0.481692
2022-09-13	13:39:08	0.499351
2022-09-13	13:39:08	0.630903
2022-09-13	13:39:08	0.586018
2022-09-13	13:39:09	0.470395
2022-09-13	13:39:09	0.438333
2022-09-13	13:39:09	0.532277
2022-09-13	13:39:09	0.502303
2022-09-13	13:39:10	0.419962
2022-09-13	13:39:10	0.852837
2022-09-13	13:39:10	0.397417
2022-09-13	13:39:10	0.411667
2022-09-13	13:39:11	0.469275
2022-09-13	13:39:11	0.403372
2022-09-13	13:39:11	0.557315
2022-09-13	13:39:11	0.524084
2022-09-13	13:39:12	0.473194
2022-09-13	13:39:12	0.39187
2022-09-13	13:39:12	0.584186
2022-09-13	13:39:13	0.756858
2022-09-13	13:39:13	0.485611
2022-09-13	13:39:13	0.648308
2022-09-13	13:39:13	-0.328587
2022-09-13	13:39:14	-0.623142
2022-09-13	13:39:14	-0.599071
2022-09-13	13:39:14	-0.55159
2022-09-13	13:39:14	-0.33561
2022-09-13	13:39:15	-0.233982
2022-09-13	13:39:15	-0.139478
2022-09-13	13:39:15	0.0443386
2022-09-13	13:39:15	-0.0743381
2022-09-13	13:39:16	-0.240954
2022-09-13	13:39:16	-0.0752033
2022-09-13	13:39:16	0.15126
2022-09-13	13:39:17	0.274466
2022-09-13	13:39:17	0.13411
2022-09-13	13:39:17	0.223728
2022-09-13	13:39:17	0.0995549
2022-09-13	13:39:18	0.140624
2022-09-13	13:39:18	0.137061
2022-09-13	13:39:18	0.0952292
2022-09-13	13:39:18	0.305865
2022-09-13	13:39:19	0.108512
2022-09-13	13:39:19	0.297214
2022-09-13	13:39:19	0.136705
2022-09-13	13:39:19	0.399911
2022-09-13	13:39:20	0.0176211
2022-09-13	13:39:20	0.365916
2022-09-13	13:39:20	0.256501
2022-09-13	13:39:21	0.327545
2022-09-13	13:39:21	0.126222
2022-09-13	13:39:21	0.30617
2022-09-13	13:39:21	0.294008
2022-09-13	13:39:22	0.215331
2022-09-13	13:39:22	0.311667
2022-09-13	13:39:22	0.083728
2022-09-13	13:39:22	0.287952
2022-09-13	13:39:23	0.0545168
2022-09-13	13:39:23	0.16215
2022-09-13	13:39:23	-0.118053
2022-09-13	13:39:23	-0.00919824
2022-09-13	13:39:24	-0.180343
2022-09-13	13:39:24	-0.0830404
2022-09-13	13:39:24	-0.11561
2022-09-13	13:39:25	0.0588934
2022-09-13	13:39:25	0.0699875
2022-09-13	13:39:25	0.195331
2022-09-13	13:39:25	0.0864252
2022-09-13	13:39:26	0.182965
2022-09-13	13:39:26	0.262303
2022-09-13	13:39:26	0.368359
2022-09-13	13:39:26	0.115127
2022-09-13	13:39:27	0.109173
2022-09-13	13:39:27	0.262608
2022-09-13	13:39:27	0.735382
2022-09-13	13:39:27	0.731209
2022-09-13	13:39:28	0.730445
2022-09-13	13:39:28	0.726018
2022-09-13	13:39:28	0.734109
2022-09-13	13:39:29	0.732888
2022-09-13	13:39:29	0.737722
2022-09-13	13:39:29	0.726629
2022-09-13	13:39:29	0.727392
2022-09-13	13:39:30	0.731616
2022-09-13	13:39:30	0.737265
2022-09-13	13:39:30	0.734211
2022-09-13	13:39:30	0.731463
2022-09-13	13:39:31	0.738079
2022-09-13	13:39:31	0.738282
2022-09-13	13:39:31	0.737265
2022-09-13	13:39:31	0.732735
2022-09-13	13:39:32	0.736094
2022-09-13	13:39:32	0.732328
2022-09-13	13:39:32	0.730954
2022-09-13	13:39:33	0.722914
2022-09-13	13:39:33	0.720369
2022-09-13	13:39:33	0.73355
2022-09-13	13:39:33	0.740522
2022-09-13	13:39:34	0.736959
2022-09-13	13:39:34	0.738537
2022-09-13	13:39:34	0.732125
2022-09-13	13:39:34	0.73528
2022-09-13	13:39:35	0.733092
2022-09-13	13:39:35	0.734466
2022-09-13	13:39:35	0.737519
2022-09-13	13:39:35	0.708206
2022-09-13	13:39:36	0.761641
2022-09-13	13:39:36	0.743015
2022-09-13	13:39:36	0.72958
2022-09-13	13:39:37	0.726934
2022-09-13	13:39:37	0.734517
2022-09-13	13:39:37	0.734618
2022-09-13	13:39:37	0.732074
2022-09-13	13:39:38	0.726578
2022-09-13	13:39:38	0.73355
2022-09-13	13:39:38	0.724898
2022-09-13	13:39:38	0.735229
2022-09-13	13:39:39	0.736705
2022-09-13	13:39:39	0.740064
2022-09-13	13:39:39	0.736705
2022-09-13	13:39:39	0.733193
2022-09-13	13:39:40	0.727036
2022-09-13	13:39:40	0.728257
2022-09-13	13:39:40	0.731565
2022-09-13	13:39:40	0.734618
2022-09-13	13:39:41	0.733448
2022-09-13	13:39:41	0.733193
2022-09-13	13:39:41	0.73874
2022-09-13	13:39:42	0.734669
2022-09-13	13:39:42	0.736043
2022-09-13	13:39:42	0.724949
2022-09-13	13:39:42	0.736603
2022-09-13	13:39:43	0.732735
2022-09-13	13:39:43	0.739758
2022-09-13	13:39:43	0.730954
2022-09-13	13:39:43	0.740267
2022-09-13	13:39:44	0.732532
2022-09-13	13:39:44	0.733041
2022-09-13	13:39:44	0.743066
2022-09-13	13:39:44	0.733804
2022-09-13	13:39:45	0.732939
2022-09-13	13:39:45	0.732888
2022-09-13	13:39:45	0.733601
2022-09-13	13:39:46	0.736603
2022-09-13	13:39:46	0.734313
2022-09-13	13:39:46	0.736756
2022-09-13	13:39:46	0.736094
2022-09-13	13:39:47	0.736807
2022-09-13	13:39:47	0.731717
2022-09-13	13:39:47	0.740216
2022-09-13	13:39:47	0.736705
2022-09-13	13:39:48	0.737112
2022-09-13	13:39:48	0.734822
2022-09-13	13:39:48	0.736399
2022-09-13	13:39:48	0.74271
2022-09-13	13:39:49	0.732125
2022-09-13	13:39:49	0.737417
2022-09-13	13:39:49	0.734618
2022-09-13	13:39:50	0.72729
2022-09-13	13:39:50	0.733804
2022-09-13	13:39:50	0.729478
2022-09-13	13:39:50	0.727799
2022-09-13	13:39:51	0.735585
2022-09-13	13:39:51	0.732023
2022-09-13	13:39:51	0.728715
2022-09-13	13:39:51	0.737977
2022-09-13	13:39:52	0.733855
2022-09-13	13:39:52	0.723779
2022-09-13	13:39:52	0.737722
2022-09-13	13:39:52	0.741692
2022-09-13	13:39:53	0.732481
2022-09-13	13:39:53	0.73243
2022-09-13	13:39:53	0.735483
2022-09-13	13:39:54	0.733957
2022-09-13	13:39:54	0.734364
2022-09-13	13:39:54	0.732837
2022-09-13	13:39:54	0.732888
2022-09-13	13:39:55	0.739962
2022-09-13	13:39:55	0.734059
2022-09-13	13:39:55	0.170089
2022-09-13	13:39:55	0.707188
2022-09-13	13:39:56	0.735229
2022-09-13	13:39:56	0.739809
2022-09-13	13:39:56	0.735636
2022-09-13	13:39:56	0.731616
2022-09-13	13:39:57	0.733244
2022-09-13	13:39:57	0.73645
2022-09-13	13:39:57	0.733906
2022-09-13	13:39:58	0.735687
2022-09-13	13:39:58	0.742099
2022-09-13	13:39:58	0.738435
2022-09-13	13:39:58	0.738079
2022-09-13	13:39:59	0.733295
2022-09-13	13:39:59	0.734568
2022-09-13	13:39:59	0.730801
2022-09-13	13:39:59	0.730649
2022-09-13	13:40:00	0.733193
2022-09-13	13:40:00	0.733499
2022-09-13	13:40:00	0.743117
2022-09-13	13:40:00	0.739606
2022-09-13	13:40:01	0.73584
2022-09-13	13:40:01	0.740573
2022-09-13	13:40:01	0.735992
2022-09-13	13:40:02	0.738893
2022-09-13	13:40:02	0.736501
2022-09-13	13:40:02	0.732532
2022-09-13	13:40:02	0.734008
2022-09-13	13:40:03	0.735026
2022-09-13	13:40:03	0.737315
2022-09-13	13:40:03	0.732939
2022-09-13	13:40:03	0.732583
2022-09-13	13:40:04	0.733753
2022-09-13	13:40:04	0.735941
2022-09-13	13:40:04	0.737722
2022-09-13	13:40:04	0.732735
2022-09-13	13:40:05	0.735026
2022-09-13	13:40:05	0.729478
2022-09-13	13:40:05	0.731361
2022-09-13	13:40:06	0.735026
2022-09-13	13:40:06	0.732074
2022-09-13	13:40:06	0.73528
2022-09-13	13:40:06	0.730242
2022-09-13	13:40:07	0.740013
2022-09-13	13:40:07	0.731107
2022-09-13	13:40:07	0.731209
2022-09-13	13:40:07	0.729428
2022-09-13	13:40:08	0.729886
2022-09-13	13:40:08	0.732837
2022-09-13	13:40:08	0.740827
2022-09-13	13:40:08	0.736756
2022-09-13	13:40:09	0.257366
2022-09-13	13:40:09	0.734364
2022-09-13	13:40:09	0.732379
2022-09-13	13:40:10	0.738079
2022-09-13	13:40:10	0.734211
2022-09-13	13:40:10	0.725305
2022-09-13	13:40:10	0.736857
2022-09-13	13:40:11	0.643575
2022-09-13	13:40:11	0.165662
2022-09-13	13:40:11	-0.405127
2022-09-13	13:40:11	0.344389
2022-09-13	13:40:12	0.739758
2022-09-13	13:40:12	0.734618
2022-09-13	13:40:12	0.735789
2022-09-13	13:40:12	0.740827
2022-09-13	13:40:13	0.729428
2022-09-13	13:40:13	0.734618
2022-09-13	13:40:13	0.734008
2022-09-13	13:40:14	0.72902
2022-09-13	13:40:14	0.252888
2022-09-13	13:40:14	0.737722
2022-09-13	13:40:14	0.737621
2022-09-13	13:40:15	0.649173
2022-09-13	13:40:15	0.73645
2022-09-13	13:40:15	0.737214
2022-09-13	13:40:15	0.71243
2022-09-13	13:40:16	0.620471
2022-09-13	13:40:16	0.646272
2022-09-13	13:40:16	0.559758
2022-09-13	13:40:16	0.490496
2022-09-13	13:40:17	0.422252
2022-09-13	13:40:17	0.494059
2022-09-13	13:40:17	0.430954
2022-09-13	13:40:18	-0.370725
2022-09-13	13:40:18	-0.706552
2022-09-13	13:40:18	-0.510826
2022-09-13	13:40:18	-0.346145
2022-09-13	13:40:19	-0.36701
2022-09-13	13:40:19	-0.413066
2022-09-13	13:40:19	-0.283651
2022-09-13	13:40:19	-0.0322008
2022-09-13	13:40:20	0.0258654
2022-09-13	13:40:20	0.220318
2022-09-13	13:40:20	0.167646
2022-09-13	13:40:20	0.358791
2022-09-13	13:40:21	0.35355
2022-09-13	13:40:21	0.229377
2022-09-13	13:40:21	0.161438
2022-09-13	13:40:22	0.0838297
2022-09-13	13:40:22	0.0842877
2022-09-13	13:40:22	-0.00227712
2022-09-13	13:40:22	0.110751
2022-09-13	13:40:23	0.0573158
2022-09-13	13:40:23	0.102252
2022-09-13	13:40:23	0.000470984
2022-09-13	13:40:23	0.024186
2022-09-13	13:40:24	-0.0775442
2022-09-13	13:40:24	0.0425066
2022-09-13	13:40:24	-0.0254832
2022-09-13	13:40:24	0.0462725
2022-09-13	13:40:25	-0.00248066
2022-09-13	13:40:25	0.00026741
2022-09-13	13:40:25	-0.0820735
2022-09-13	13:40:26	-0.0992745
2022-09-13	13:40:26	-0.187112
2022-09-13	13:40:26	-0.150572
2022-09-13	13:40:26	-0.0898598
2022-09-13	13:40:27	0.0368577
2022-09-13	13:40:27	0.13126
2022-09-13	13:40:27	0.129428
2022-09-13	13:40:27	0.189682
2022-09-13	13:40:28	0.15813
2022-09-13	13:40:28	0.262354
2022-09-13	13:40:28	0.23701
2022-09-13	13:40:28	0.266272
2022-09-13	13:40:29	0.224084
2022-09-13	13:40:29	0.19355
2022-09-13	13:40:29	0.184084
2022-09-13	13:40:30	0.173295
2022-09-13	13:40:30	0.0288679
2022-09-13	13:40:30	0.0261707
2022-09-13	13:40:30	-0.0561702
2022-09-13	13:40:31	0.014415
2022-09-13	13:40:31	-0.00502519
2022-09-13	13:40:31	0.15869
2022-09-13	13:40:31	0.268206
2022-09-13	13:40:32	0.388512
2022-09-13	13:40:32	0.509835
2022-09-13	13:40:32	0.383015
2022-09-13	13:40:32	0.477519
2022-09-13	13:40:33	0.365916
2022-09-13	13:40:33	0.393957
2022-09-13	13:40:33	0.389835
2022-09-13	13:40:33	0.33584
2022-09-13	13:40:34	0.606883
2022-09-13	13:40:34	0.454415
2022-09-13	13:40:34	0.297367
2022-09-13	13:40:35	0.251158
2022-09-13	13:40:35	0.0997585
2022-09-13	13:40:35	0.179555
2022-09-13	13:40:35	0.125306
2022-09-13	13:40:36	0.202099
2022-09-13	13:40:36	0.090191
2022-09-13	13:40:36	0.257417
2022-09-13	13:40:36	0.23757
2022-09-13	13:40:37	0.285814
2022-09-13	13:40:37	0.25355
2022-09-13	13:40:37	0.338842
2022-09-13	13:40:37	0.431056
2022-09-13	13:40:38	0.457774
2022-09-13	13:40:38	0.587952
2022-09-13	13:40:38	0.592379
2022-09-13	13:40:39	0.645254
2022-09-13	13:40:39	0.622405
2022-09-13	13:40:39	0.732481
2022-09-13	13:40:39	0.741845
2022-09-13	13:40:40	0.815025
2022-09-13	13:40:40	0.732175
2022-09-13	13:40:40	0.758028
2022-09-13	13:40:40	0.734669
2022-09-13	13:40:41	0.736908
2022-09-13	13:40:41	0.737366
2022-09-13	13:40:41	0.736094
2022-09-13	13:40:41	0.729886
2022-09-13	13:40:42	0.73187
2022-09-13	13:40:42	0.734364
2022-09-13	13:40:42	0.725102
2022-09-13	13:40:43	0.734924
2022-09-13	13:40:43	0.733499
2022-09-13	13:40:43	0.735687
2022-09-13	13:40:43	0.729377
2022-09-13	13:40:44	0.736501
2022-09-13	13:40:44	0.739351
2022-09-13	13:40:44	0.726374
2022-09-13	13:40:44	0.731005
2022-09-13	13:40:45	0.732837
2022-09-13	13:40:45	0.732481
2022-09-13	13:40:45	0.733346
2022-09-13	13:40:45	0.736094
2022-09-13	13:40:46	0.733041
2022-09-13	13:40:46	0.739758
2022-09-13	13:40:46	0.730394
2022-09-13	13:40:47	0.725102
2022-09-13	13:40:47	0.73584
2022-09-13	13:40:47	0.699046
2022-09-13	13:40:47	0.720165
2022-09-13	13:40:48	0.736552
2022-09-13	13:40:48	0.7307
2022-09-13	13:40:48	0.735992
2022-09-13	13:40:48	0.734924
2022-09-13	13:40:49	0.725407
2022-09-13	13:40:49	0.738588
2022-09-13	13:40:49	0.731158
2022-09-13	13:40:49	0.727545
2022-09-13	13:40:50	0.731921
2022-09-13	13:40:50	0.735636
2022-09-13	13:40:50	0.735331
2022-09-13	13:40:51	0.735534
2022-09-13	13:40:51	0.703626
2022-09-13	13:40:51	0.557774
2022-09-13	13:40:51	0.648715
2022-09-13	13:40:52	0.271005
2022-09-13	13:40:52	-0.0034476
2022-09-13	13:40:52	-0.271895
2022-09-13	13:40:52	0.0610816
2022-09-13	13:40:53	0.34327
2022-09-13	13:40:53	0.4736
2022-09-13	13:40:53	0.320776
2022-09-13	13:40:53	0.330089
2022-09-13	13:40:54	0.355433
2022-09-13	13:40:54	0.345967
2022-09-13	13:40:54	0.135178
2022-09-13	13:40:55	0.264186
2022-09-13	13:40:55	0.0947712
2022-09-13	13:40:55	0.120471
2022-09-13	13:40:55	0.173957
2022-09-13	13:40:56	0.351768
2022-09-13	13:40:56	0.30388
2022-09-13	13:40:56	0.448868
2022-09-13	13:40:56	0.60841
2022-09-13	13:40:57	0.485356
2022-09-13	13:40:57	0.388155
2022-09-13	13:40:57	0.437621
2022-09-13	13:40:57	0.487901
2022-09-13	13:40:58	0.348206
2022-09-13	13:40:58	0.425254
2022-09-13	13:40:58	0.373652
2022-09-13	13:40:59	0.378893
2022-09-13	13:40:59	0.273193
2022-09-13	13:40:59	0.517214
2022-09-13	13:40:59	0.396858
2022-09-13	13:41:00	1.11584
2022-09-13	13:41:00	0.739147
2022-09-13	13:41:00	0.206679
2022-09-13	13:41:00	0.12271
2022-09-13	13:41:01	-0.464567
2022-09-13	13:41:01	-0.0182567
2022-09-13	13:41:01	0.0501401
2022-09-13	13:41:01	0.898333
2022-09-13	13:41:02	0.592175
2022-09-13	13:41:02	0.761794
2022-09-13	13:41:02	0.546679
2022-09-13	13:41:03	0.450089
2022-09-13	13:41:03	0.466272
2022-09-13	13:41:03	0.436756
2022-09-13	13:41:03	0.500114
2022-09-13	13:41:04	0.319504
2022-09-13	13:41:04	0.518639
2022-09-13	13:41:04	0.733702
2022-09-13	13:41:04	0.509478
2022-09-13	13:41:05	0.460623
2022-09-13	13:41:05	0.347341
2022-09-13	13:41:05	0.35757
2022-09-13	13:41:05	1.26597
2022-09-13	13:41:06	0.399046
2022-09-13	13:41:06	0.426985
2022-09-13	13:41:06	0.369326
2022-09-13	13:41:07	0.368919
2022-09-13	13:41:07	0.35131
2022-09-13	13:41:07	0.290954
2022-09-13	13:41:07	0.295687
2022-09-13	13:41:08	0.259708
2022-09-13	13:41:08	0.0759417
2022-09-13	13:41:08	-0.378155
2022-09-13	13:41:08	-0.40533
2022-09-13	13:41:09	-0.288638
2022-09-13	13:41:09	-0.209453
2022-09-13	13:41:09	-0.219071
2022-09-13	13:41:09	-0.312709
2022-09-13	13:41:10	-0.240699
2022-09-13	13:41:10	-0.390776
2022-09-13	13:41:10	-0.280343
2022-09-13	13:41:11	-0.299376
2022-09-13	13:41:11	-0.126297
2022-09-13	13:41:11	-0.286755
2022-09-13	13:41:11	-0.326501
2022-09-13	13:41:12	-0.304211
2022-09-13	13:41:12	-0.408384
2022-09-13	13:41:12	-0.431844
2022-09-13	13:41:12	-0.544618
2022-09-13	13:41:13	-0.546602
2022-09-13	13:41:13	-0.679478
2022-09-13	13:41:13	-0.783345
2022-09-13	13:41:13	-0.753981
2022-09-13	13:41:14	-0.872811
2022-09-13	13:41:14	-0.731793
2022-09-13	13:41:14	-0.792862
2022-09-13	13:41:15	-0.843447
2022-09-13	13:41:15	-0.829757
2022-09-13	13:41:15	-0.956933
2022-09-13	13:41:15	-0.831437
2022-09-13	13:41:16	-1.02716
2022-09-13	13:41:16	-1.17408
2022-09-13	13:41:16	-0.899732
2022-09-13	13:41:16	-0.858816
2022-09-13	13:41:17	-0.850317
2022-09-13	13:41:17	-0.754643
2022-09-13	13:41:17	-0.798613
2022-09-13	13:41:17	-0.40589
2022-09-13	13:41:18	-0.136781
2022-09-13	13:41:18	0.0944659
2022-09-13	13:41:18	-0.192404
2022-09-13	13:41:19	-0.424262
2022-09-13	13:41:19	-0.31047
2022-09-13	13:41:19	-0.364414
2022-09-13	13:41:19	-0.391335
2022-09-13	13:41:20	-0.419376
2022-09-13	13:41:20	-0.723752
2022-09-13	13:41:20	-0.407112
2022-09-13	13:41:20	-0.100903
2022-09-13	13:41:21	0.356908
2022-09-13	13:41:21	0.419962
2022-09-13	13:41:21	0.404949
2022-09-13	13:41:21	0.331667
2022-09-13	13:41:22	0.444644
2022-09-13	13:41:22	0.434771
2022-09-13	13:41:22	0.486985
2022-09-13	13:41:23	0.396807
2022-09-13	13:41:23	0.422201
2022-09-13	13:41:23	0.401692
2022-09-13	13:41:23	0.460827
2022-09-13	13:41:24	0.339657
2022-09-13	13:41:24	0.540165
2022-09-13	13:41:24	0.542506
2022-09-13	13:41:24	0.598639
2022-09-13	13:41:25	0.433804
2022-09-13	13:41:25	0.656298
2022-09-13	13:41:25	0.211667
2022-09-13	13:41:25	0.670547
2022-09-13	13:41:26	0.271361
2022-09-13	13:41:26	0.342201
2022-09-13	13:41:26	0.291311
2022-09-13	13:41:27	0.533499
2022-09-13	13:41:27	0.247392
2022-09-13	13:41:27	0.469071
2022-09-13	13:41:27	0.246476
2022-09-13	13:41:28	0.167188
2022-09-13	13:41:28	0.208562
2022-09-13	13:41:28	0.0754327
2022-09-13	13:41:28	0.287341
2022-09-13	13:41:29	0.351616
2022-09-13	13:41:29	0.312074
2022-09-13	13:41:29	0.258232
2022-09-13	13:41:29	0.286628
2022-09-13	13:41:30	0.294211
2022-09-13	13:41:30	0.340267
2022-09-13	13:41:30	0.210853
2022-09-13	13:41:31	0.282405
2022-09-13	13:41:31	0.0491733
2022-09-13	13:41:31	0.397774
2022-09-13	13:41:31	0.150954
2022-09-13	13:41:32	0.235076
2022-09-13	13:41:32	0.0723284
2022-09-13	13:41:32	-0.0194781
2022-09-13	13:41:32	0.0984353
2022-09-13	13:41:33	0.159504
2022-09-13	13:41:33	0.263728
2022-09-13	13:41:33	0.0491733
2022-09-13	13:41:33	0.0463234
2022-09-13	13:41:34	-0.0912847
2022-09-13	13:41:34	0.139504
2022-09-13	13:41:34	0.00438957
2022-09-13	13:41:35	0.160725
2022-09-13	13:41:35	-0.205534
2022-09-13	13:41:35	0.000470984
2022-09-13	13:41:35	-0.0887402
2022-09-13	13:41:36	-0.205738
2022-09-13	13:41:36	-0.185432
2022-09-13	13:41:36	-0.249096
2022-09-13	13:41:36	-0.184465
2022-09-13	13:41:37	-0.217544
2022-09-13	13:41:37	0.178741
2022-09-13	13:41:37	0.0921249
2022-09-13	13:41:37	0.335433
2022-09-13	13:41:38	0.177417
2022-09-13	13:41:38	0.422812
2022-09-13	13:41:38	0.068359
2022-09-13	13:41:39	0.459453
2022-09-13	13:41:39	0.187087
2022-09-13	13:41:39	0.291107
2022-09-13	13:41:39	0.165255
2022-09-13	13:41:40	0.213499
2022-09-13	13:41:40	0.333244
2022-09-13	13:41:40	0.334262
2022-09-13	13:41:40	0.399809
2022-09-13	13:41:41	0.320573
2022-09-13	13:41:41	0.377265
2022-09-13	13:41:41	0.336654
2022-09-13	13:41:41	0.317366
2022-09-13	13:41:42	0.315992
2022-09-13	13:41:42	0.305713
2022-09-13	13:41:42	0.310395
2022-09-13	13:41:42	0.32958
2022-09-13	13:41:43	0.163779
2022-09-13	13:41:43	0.464339
2022-09-13	13:41:43	0.0531427
2022-09-13	13:41:44	0.0880536
2022-09-13	13:41:44	0.121743
2022-09-13	13:41:44	0.174313
2022-09-13	13:41:44	0.140318
2022-09-13	13:41:45	0.295942
2022-09-13	13:41:45	0.123626
2022-09-13	13:41:45	0.394109
2022-09-13	13:41:45	0.230853
2022-09-13	13:41:46	0.545814
2022-09-13	13:41:46	0.776857
2022-09-13	13:41:46	0.794517
2022-09-13	13:41:46	0.795076
2022-09-13	13:41:47	0.794415
2022-09-13	13:41:47	0.810547
2022-09-13	13:41:47	0.794517
2022-09-13	13:41:48	0.802048
2022-09-13	13:41:48	0.78846
2022-09-13	13:41:48	0.785509
2022-09-13	13:41:48	0.858893
2022-09-13	13:41:49	0.80841
2022-09-13	13:41:49	0.746018
2022-09-13	13:41:49	0.763321
2022-09-13	13:41:49	0.772532
2022-09-13	13:41:50	0.764593
2022-09-13	13:41:50	0.729275
2022-09-13	13:41:50	0.706272
2022-09-13	13:41:50	0.737926
2022-09-13	13:41:51	0.731667
2022-09-13	13:41:51	0.723219
2022-09-13	13:41:51	0.726374
2022-09-13	13:41:52	0.731259
2022-09-13	13:41:52	0.720471
2022-09-13	13:41:52	0.714669
2022-09-13	13:41:52	0.764389
2022-09-13	13:41:53	-0.166857
2022-09-13	13:41:53	0.735738
2022-09-13	13:41:53	0.743575
2022-09-13	13:41:53	0.633041
2022-09-13	13:41:54	0.429631
2022-09-13	13:41:54	0.50897
2022-09-13	13:41:54	0.502405
2022-09-13	13:41:54	0.455789
2022-09-13	13:41:55	0.480318
2022-09-13	13:41:55	0.508104
2022-09-13	13:41:55	0.55243
2022-09-13	13:41:56	0.411616
2022-09-13	13:41:56	0.43411
2022-09-13	13:41:56	0.599606
2022-09-13	13:41:56	0.281743
2022-09-13	13:41:57	0.269733
2022-09-13	13:41:57	0.260623
2022-09-13	13:41:57	0.453041
2022-09-13	13:41:57	0.295891
2022-09-13	13:41:58	0.198944
2022-09-13	13:41:58	0.281387
2022-09-13	13:41:58	0.356705
2022-09-13	13:41:58	0.523168
2022-09-13	13:41:59	0.318232
2022-09-13	13:41:59	0.456247
2022-09-13	13:41:59	0.401947
2022-09-13	13:42:00	0.388206
2022-09-13	13:42:00	0.408817
2022-09-13	13:42:00	0.407646
2022-09-13	13:42:00	0.397417
2022-09-13	13:42:01	0.402761
2022-09-13	13:42:01	0.413855
2022-09-13	13:42:01	0.422303
2022-09-13	13:42:01	0.415484
2022-09-13	13:42:02	0.408919
2022-09-13	13:42:02	0.403321
2022-09-13	13:42:02	0.391616
2022-09-13	13:42:02	0.413143
2022-09-13	13:42:03	0.28327
2022-09-13	13:42:03	0.202608
2022-09-13	13:42:03	0.157519
2022-09-13	13:42:04	0.110853
2022-09-13	13:42:04	0.0629137
2022-09-13	13:42:04	0.659351
2022-09-13	13:42:04	0.55014
2022-09-13	13:42:05	0.414466
2022-09-13	13:42:05	0.715992
2022-09-13	13:42:05	0.736552
2022-09-13	13:42:05	0.775891
2022-09-13	13:42:06	0.729071
2022-09-13	13:42:06	0.787443
2022-09-13	13:42:06	0.76673
2022-09-13	13:42:06	0.854211
2022-09-13	13:42:07	0.730293
2022-09-13	13:42:07	0.729784
2022-09-13	13:42:07	0.701438
2022-09-13	13:42:08	0.690191
2022-09-13	13:42:08	0.270344
2022-09-13	13:42:08	0.288054
2022-09-13	13:42:08	0.525662
2022-09-13	13:42:09	-0.0450761
2022-09-13	13:42:09	0.209377
2022-09-13	13:42:09	0.197519
2022-09-13	13:42:09	0.179249
2022-09-13	13:42:10	0.197367
2022-09-13	13:42:10	0.0178246
2022-09-13	13:42:10	0.112888
2022-09-13	13:42:10	0.0877992
2022-09-13	13:42:11	0.0503946
2022-09-13	13:42:11	0.112837
2022-09-13	13:42:11	-0.101972
2022-09-13	13:42:12	0.129835
2022-09-13	13:42:12	0.371107
2022-09-13	13:42:12	0.454059
2022-09-13	13:42:12	0.493397
2022-09-13	13:42:13	0.330344
2022-09-13	13:42:13	0.308919
2022-09-13	13:42:13	0.186069
2022-09-13	13:42:13	0.241387
2022-09-13	13:42:14	0.179046
2022-09-13	13:42:14	0.102608
2022-09-13	13:42:14	0.337468
2022-09-13	13:42:14	0.133244
2022-09-13	13:42:15	0.286578
2022-09-13	13:42:15	0.207697
2022-09-13	13:42:15	0.18902
2022-09-13	13:42:16	0.198181
2022-09-13	13:42:16	0.0960943
2022-09-13	13:42:16	0.327036
2022-09-13	13:42:16	0.0161453
2022-09-13	13:42:17	0.10327
2022-09-13	13:42:17	0.117926
2022-09-13	13:42:17	0.120013
2022-09-13	13:42:17	0.263066
2022-09-13	13:42:18	-0.0331677
2022-09-13	13:42:18	0.143321
2022-09-13	13:42:18	-0.0321499
2022-09-13	13:42:18	-0.0290964
2022-09-13	13:42:19	0.668461
2022-09-13	13:42:19	0.738995
2022-09-13	13:42:19	0.732532
2022-09-13	13:42:20	0.734873
2022-09-13	13:42:20	0.731209
2022-09-13	13:42:20	0.726985
2022-09-13	13:42:20	0.732379
2022-09-13	13:42:21	0.731616
2022-09-13	13:42:21	0.737163
2022-09-13	13:42:21	0.727748
2022-09-13	13:42:21	0.668104
2022-09-13	13:42:22	0.713448
2022-09-13	13:42:22	0.712328
2022-09-13	13:42:22	0.724796
2022-09-13	13:42:22	0.735738
2022-09-13	13:42:23	0.733601
2022-09-13	13:42:23	0.727646
2022-09-13	13:42:23	0.73014
2022-09-13	13:42:24	0.68042
2022-09-13	13:42:24	0.461132
2022-09-13	13:42:24	0.726985
2022-09-13	13:42:24	0.54617
2022-09-13	13:42:25	0.735229
2022-09-13	13:42:25	0.729275
2022-09-13	13:42:25	0.730903
2022-09-13	13:42:26	0.732379
2022-09-13	13:42:26	0.724491
2022-09-13	13:42:26	0.739555
2022-09-13	13:42:26	0.724135
2022-09-13	13:42:26	0.726781
2022-09-13	13:42:27	0.741387
2022-09-13	13:42:27	0.733295
2022-09-13	13:42:27	0.726527
2022-09-13	13:42:28	0.730191
2022-09-13	13:42:28	0.728054
2022-09-13	13:42:28	0.731972
2022-09-13	13:42:28	0.732481
2022-09-13	13:42:29	0.730903
2022-09-13	13:42:29	0.726527
2022-09-13	13:42:29	0.732175
2022-09-13	13:42:29	0.733702
2022-09-13	13:42:30	0.733142
2022-09-13	13:42:30	0.734109
2022-09-13	13:42:30	0.73187
2022-09-13	13:42:30	0.739249
2022-09-13	13:42:31	0.73701
2022-09-13	13:42:31	0.71243
2022-09-13	13:42:31	0.554211
2022-09-13	13:42:32	0.603015
2022-09-13	13:42:32	0.734313
2022-09-13	13:42:32	0.730343
2022-09-13	13:42:32	0.730801
2022-09-13	13:42:33	0.736247
2022-09-13	13:42:33	0.728562
2022-09-13	13:42:33	0.693957
2022-09-13	13:42:33	0.367239
2022-09-13	13:42:34	0.147952
2022-09-13	13:42:34	0.105865
2022-09-13	13:42:34	0.113194
2022-09-13	13:42:34	0.061387
2022-09-13	13:42:35	-0.112302
2022-09-13	13:42:35	0.474008
2022-09-13	13:42:35	0.739555
2022-09-13	13:42:36	0.729173
2022-09-13	13:42:36	0.736908
2022-09-13	13:42:36	0.735992
2022-09-13	13:42:36	0.736908
2022-09-13	13:42:37	0.732532
2022-09-13	13:42:37	0.738842
2022-09-13	13:42:37	0.735941
2022-09-13	13:42:37	0.729428
2022-09-13	13:42:38	0.732939
2022-09-13	13:42:38	0.736807
2022-09-13	13:42:38	0.736501
2022-09-13	13:42:38	0.73701
2022-09-13	13:42:39	0.73528
2022-09-13	13:42:39	0.738028
2022-09-13	13:42:39	0.736603
2022-09-13	13:42:40	0.728613
2022-09-13	13:42:40	0.729784
2022-09-13	13:42:40	0.734669
2022-09-13	13:42:40	0.729835
2022-09-13	13:42:41	0.73131
2022-09-13	13:42:41	0.72897
2022-09-13	13:42:41	0.727341
2022-09-13	13:42:41	0.733193
2022-09-13	13:42:42	0.730445
2022-09-13	13:42:42	0.727188
2022-09-13	13:42:42	0.728613
2022-09-13	13:42:42	0.731565
2022-09-13	13:42:43	0.725814
2022-09-13	13:42:43	0.721132
2022-09-13	13:42:43	0.719453
2022-09-13	13:42:44	0.729987
2022-09-13	13:42:44	0.721539
2022-09-13	13:42:44	0.726781
2022-09-13	13:42:44	0.725407
2022-09-13	13:42:45	0.726272
2022-09-13	13:42:45	0.719707
2022-09-13	13:42:45	0.72902
2022-09-13	13:42:45	0.715483
2022-09-13	13:42:46	0.713651
2022-09-13	13:42:46	0.722659
2022-09-13	13:42:46	0.716501
2022-09-13	13:42:46	0.7107
2022-09-13	13:42:47	0.697163
2022-09-13	13:42:47	0.684033
2022-09-13	13:42:47	0.684389
2022-09-13	13:42:48	0.685204
2022-09-13	13:42:48	0.66098
2022-09-13	13:42:48	0.659351
2022-09-13	13:42:48	0.643321
2022-09-13	13:42:49	0.656705
2022-09-13	13:42:49	0.632328
2022-09-13	13:42:49	0.640064
2022-09-13	13:42:49	0.65299
2022-09-13	13:42:50	0.659351
2022-09-13	13:42:50	0.724389
2022-09-13	13:42:50	0.737824
2022-09-13	13:42:50	0.72785
2022-09-13	13:42:51	0.738486
2022-09-13	13:42:51	0.728308
2022-09-13	13:42:51	0.734822
2022-09-13	13:42:52	0.73243
2022-09-13	13:42:52	0.736094
2022-09-13	13:42:52	0.73472
2022-09-13	13:42:52	0.730954
2022-09-13	13:42:53	0.737112
2022-09-13	13:42:53	0.728512
2022-09-13	13:42:53	0.731361
2022-09-13	13:42:53	0.732735
2022-09-13	13:42:54	0.728919
2022-09-13	13:42:54	0.720827
2022-09-13	13:42:54	0.732786
2022-09-13	13:42:54	0.723982
2022-09-13	13:42:55	0.724847
2022-09-13	13:42:55	0.728868
2022-09-13	13:42:55	0.724237
2022-09-13	13:42:55	0.724135
2022-09-13	13:42:56	0.723728
2022-09-13	13:42:56	0.716298
2022-09-13	13:42:56	0.705305
2022-09-13	13:42:57	0.711209
2022-09-13	13:42:57	0.417672
2022-09-13	13:42:57	1.60134
2022-09-13	13:42:57	2.2649
2022-09-13	13:42:58	1.20352
2022-09-13	13:42:58	0.527544
2022-09-13	13:42:58	0.511921
2022-09-13	13:42:58	0.346781
2022-09-13	13:42:59	0.365356
2022-09-13	13:42:59	0.482608
2022-09-13	13:42:59	0.316858
2022-09-13	13:43:00	0.45528
2022-09-13	13:43:00	0.348766
2022-09-13	13:43:00	0.462252
2022-09-13	13:43:00	0.336552
2022-09-13	13:43:01	0.428308
2022-09-13	13:43:01	0.328155
2022-09-13	13:43:01	0.428817
2022-09-13	13:43:01	0.459555
2022-09-13	13:43:02	0.402252
2022-09-13	13:43:02	0.451718
2022-09-13	13:43:02	0.530598
2022-09-13	13:43:02	-0.279071
2022-09-13	13:43:03	-0.361615
2022-09-13	13:43:03	-0.0678241
2022-09-13	13:43:03	-0.248893
2022-09-13	13:43:03	-0.0890455
2022-09-13	13:43:04	0.220471
2022-09-13	13:43:04	-0.300496
2022-09-13	13:43:04	-0.346195
2022-09-13	13:43:05	0.639606
2022-09-13	13:43:05	0.40444
2022-09-13	13:43:05	0.457061
2022-09-13	13:43:05	0.656298
2022-09-13	13:43:06	0.479097
2022-09-13	13:43:06	0.403575
2022-09-13	13:43:06	0.679504
2022-09-13	13:43:06	0.511972
2022-09-13	13:43:07	0.570242
2022-09-13	13:43:07	0.377774
2022-09-13	13:43:07	0.278792
2022-09-13	13:43:07	0.209936
2022-09-13	13:43:08	-0.108028
2022-09-13	13:43:08	-0.423396
2022-09-13	13:43:08	-0.189198
2022-09-13	13:43:09	-0.292353
2022-09-13	13:43:09	-0.486603
2022-09-13	13:43:09	-0.532048
2022-09-13	13:43:09	-0.362429
2022-09-13	13:43:10	-0.118358
2022-09-13	13:43:10	-0.25271
2022-09-13	13:43:10	0.0791987
2022-09-13	13:43:10	-0.0932185
2022-09-13	13:43:11	6.3875e-05
2022-09-13	13:43:11	-0.0518954
2022-09-13	13:43:11	0.147901
2022-09-13	13:43:11	0.21869
2022-09-13	13:43:12	0.175636
2022-09-13	13:43:12	0.111311
2022-09-13	13:43:12	0.332583
2022-09-13	13:43:13	0.298893
2022-09-13	13:43:13	0.43126
2022-09-13	13:43:13	-0.103855
2022-09-13	13:43:13	-0.57444
2022-09-13	13:43:14	-0.398358
2022-09-13	13:43:14	-0.642328
2022-09-13	13:43:14	-0.627417
2022-09-13	13:43:14	-0.643651
2022-09-13	13:43:15	-0.651284
2022-09-13	13:43:15	-0.73505
2022-09-13	13:43:15	-1.03805
2022-09-13	13:43:15	-0.903549
2022-09-13	13:43:16	-0.658969
2022-09-13	13:43:16	-0.715661
2022-09-13	13:43:16	-0.567315
2022-09-13	13:43:17	-0.682786
2022-09-13	13:43:17	-0.494134
2022-09-13	13:43:17	-0.565686
2022-09-13	13:43:17	-0.518409
2022-09-13	13:43:18	-0.622073
2022-09-13	13:43:18	-0.634643
2022-09-13	13:43:18	-0.677595
2022-09-13	13:43:18	-0.702022
2022-09-13	13:43:19	-0.653421
2022-09-13	13:43:19	-0.621259
2022-09-13	13:43:19	-0.589096
2022-09-13	13:43:19	-0.31332
2022-09-13	13:43:20	-0.418511
2022-09-13	13:43:20	-0.443549
2022-09-13	13:43:20	-0.484974
2022-09-13	13:43:21	-0.496984
2022-09-13	13:43:21	-0.506145
2022-09-13	13:43:21	-0.524363
2022-09-13	13:43:21	-0.482175
2022-09-13	13:43:22	-0.483498
2022-09-13	13:43:22	-0.517137
2022-09-13	13:43:22	-0.470267
2022-09-13	13:43:22	-0.491641
2022-09-13	13:43:23	-0.369402
2022-09-13	13:43:23	0.235789
2022-09-13	13:43:23	0.601845
2022-09-13	13:43:23	-0.224567
2022-09-13	13:43:24	-0.174287
2022-09-13	13:43:24	-0.584058
2022-09-13	13:43:24	-0.782124
2022-09-13	13:43:25	-0.853981
2022-09-13	13:43:25	0.483473
2022-09-13	13:43:25	0.598639
2022-09-13	13:43:25	0.125458
2022-09-13	13:43:26	-0.562887
2022-09-13	13:43:26	-0.554796
2022-09-13	13:43:26	-0.551539
2022-09-13	13:43:26	-0.465992
2022-09-13	13:43:27	-0.563956
2022-09-13	13:43:27	-0.430317
2022-09-13	13:43:27	-0.241157
2022-09-13	13:43:27	-0.564974
2022-09-13	13:43:28	-0.520241
2022-09-13	13:43:28	-0.668333
2022-09-13	13:43:28	-0.616017
2022-09-13	13:43:29	-0.638206
2022-09-13	13:43:29	-0.702633
2022-09-13	13:43:29	-0.680902
2022-09-13	13:43:29	-0.817442
2022-09-13	13:43:30	-0.813982
2022-09-13	13:43:30	-0.877646
2022-09-13	13:43:30	-0.983854
2022-09-13	13:43:30	-0.818867
2022-09-13	13:43:31	-0.988943
2022-09-13	13:43:31	-0.895152
2022-09-13	13:43:31	-0.841259
2022-09-13	13:43:31	-0.788383
2022-09-13	13:43:32	-0.722226
2022-09-13	13:43:32	-0.836577
2022-09-13	13:43:32	-0.661157
2022-09-13	13:43:33	-0.767213
2022-09-13	13:43:33	-0.773269
2022-09-13	13:43:33	-0.709401
2022-09-13	13:43:33	-0.814236
2022-09-13	13:43:34	-0.763142
2022-09-13	13:43:34	-0.897544
2022-09-13	13:43:34	-0.87159
2022-09-13	13:43:34	-0.922328
2022-09-13	13:43:35	-0.873218
2022-09-13	13:43:35	-0.842735
2022-09-13	13:43:35	-0.843294
2022-09-13	13:43:35	-0.732913
2022-09-13	13:43:36	-0.82533
2022-09-13	13:43:36	-0.67449
2022-09-13	13:43:36	-0.64762
2022-09-13	13:43:37	-0.721666
2022-09-13	13:43:37	-0.568231
2022-09-13	13:43:37	-0.706195
2022-09-13	13:43:37	-0.625687
2022-09-13	13:43:38	-0.66706
2022-09-13	13:43:38	-0.629808
2022-09-13	13:43:38	-0.570623
2022-09-13	13:43:38	-0.661055
2022-09-13	13:43:39	-0.528435
2022-09-13	13:43:39	-0.638918
2022-09-13	13:43:39	-0.577595
2022-09-13	13:43:39	-0.534389
2022-09-13	13:43:40	-0.557799
2022-09-13	13:43:40	-0.445636
2022-09-13	13:43:40	-0.452557
2022-09-13	13:43:41	-0.452251
2022-09-13	13:43:41	-0.377442
2022-09-13	13:43:41	-0.388842
2022-09-13	13:43:41	-0.270674
2022-09-13	13:43:42	-0.405534
2022-09-13	13:43:42	-0.293015
2022-09-13	13:43:42	-0.294491
2022-09-13	13:43:42	-0.436221
2022-09-13	13:43:43	-0.386297
2022-09-13	13:43:43	-0.371895
2022-09-13	13:43:43	-0.426399
2022-09-13	13:43:43	-0.430521
2022-09-13	13:43:44	-0.433117
2022-09-13	13:43:44	-0.440699
2022-09-13	13:43:44	-0.478409
2022-09-13	13:43:45	-0.319427
2022-09-13	13:43:45	-0.43159
2022-09-13	13:43:45	-0.333727
2022-09-13	13:43:45	-0.432709
2022-09-13	13:43:46	-0.397442
2022-09-13	13:43:46	-0.498816
2022-09-13	13:43:46	-0.429096
2022-09-13	13:43:46	-0.464669
2022-09-13	13:43:47	-0.387264
2022-09-13	13:43:47	-0.287671
2022-09-13	13:43:47	-0.187671
2022-09-13	13:43:47	-0.215967
2022-09-13	13:43:48	-0.168791
2022-09-13	13:43:48	-0.0828877
2022-09-13	13:43:48	-0.199325
2022-09-13	13:43:49	0.0515142
2022-09-13	13:43:49	-0.119834
2022-09-13	13:43:49	-0.0236003
2022-09-13	13:43:49	-0.066043
2022-09-13	13:43:50	-0.077646
2022-09-13	13:43:50	0.0004201
2022-09-13	13:43:50	-0.115
2022-09-13	13:43:50	-0.0123535
2022-09-13	13:43:51	-0.130318
2022-09-13	13:43:51	0.00550917
2022-09-13	13:43:51	-0.0983585
2022-09-13	13:43:51	-0.00436363
2022-09-13	13:43:52	-0.218613
2022-09-13	13:43:52	-0.178409
2022-09-13	13:43:52	-0.099987
2022-09-13	13:43:53	-0.176476
2022-09-13	13:43:53	-0.0872643
2022-09-13	13:43:53	-0.188129
2022-09-13	13:43:53	-0.132913
2022-09-13	13:43:54	-0.221208
2022-09-13	13:43:54	-0.0917936
2022-09-13	13:43:54	-0.298206
2022-09-13	13:43:54	-0.127468
2022-09-13	13:43:55	-0.254287
2022-09-13	13:43:55	-0.185127
2022-09-13	13:43:55	-0.198206
2022-09-13	13:43:55	-0.175305
2022-09-13	13:43:56	-0.169249
2022-09-13	13:43:56	-0.241921
2022-09-13	13:43:56	-0.138409
2022-09-13	13:43:57	-0.310623
2022-09-13	13:43:57	-0.217392
2022-09-13	13:43:57	-0.259936
2022-09-13	13:43:57	-0.202481
2022-09-13	13:43:58	-0.206043
2022-09-13	13:43:58	-0.221107
2022-09-13	13:43:58	-0.0447707
2022-09-13	13:43:58	-0.275152
2022-09-13	13:43:59	-0.177188
2022-09-13	13:43:59	-0.325687
2022-09-13	13:43:59	-0.22874
2022-09-13	13:43:59	-0.299478
2022-09-13	13:44:00	-0.293218
2022-09-13	13:44:00	-0.305738
2022-09-13	13:44:00	-0.332506
2022-09-13	13:44:01	-0.298766
2022-09-13	13:44:01	-0.300699
2022-09-13	13:44:01	-0.228435
2022-09-13	13:44:01	-0.250776
2022-09-13	13:44:02	-0.316832
2022-09-13	13:44:02	-0.242786
2022-09-13	13:44:02	-0.293422
2022-09-13	13:44:02	-0.293727
2022-09-13	13:44:03	-0.380801
2022-09-13	13:44:03	-0.294287
2022-09-13	13:44:03	-0.414185
2022-09-13	13:44:03	-0.407875
2022-09-13	13:44:04	-0.443091
2022-09-13	13:44:04	-0.418816
2022-09-13	13:44:04	-0.470012
2022-09-13	13:44:05	-0.468129
2022-09-13	13:44:05	-0.493625
2022-09-13	13:44:05	-0.5379
2022-09-13	13:44:05	-0.480801
2022-09-13	13:44:06	-0.55332
2022-09-13	13:44:06	-0.499223
2022-09-13	13:44:06	-0.652709
2022-09-13	13:44:06	-0.477798
2022-09-13	13:44:07	-0.632709
2022-09-13	13:44:07	-0.550674
2022-09-13	13:44:07	-0.624058
2022-09-13	13:44:07	0.239351
2022-09-13	13:44:08	0.347952
2022-09-13	13:44:08	0.560369
2022-09-13	13:44:08	0.152888
2022-09-13	13:44:09	0.262201
2022-09-13	13:44:09	0.734059
2022-09-13	13:44:09	0.726272
2022-09-13	13:44:09	0.736603
2022-09-13	13:44:10	0.736399
2022-09-13	13:44:10	0.734568
2022-09-13	13:44:10	0.731209
2022-09-13	13:44:10	0.73187
2022-09-13	13:44:11	0.731158
2022-09-13	13:44:11	0.734568
2022-09-13	13:44:11	0.728054
2022-09-13	13:44:11	0.729682
2022-09-13	13:44:12	0.738486
2022-09-13	13:44:12	0.733448
2022-09-13	13:44:12	0.730394
2022-09-13	13:44:13	0.730343
2022-09-13	13:44:13	0.730547
2022-09-13	13:44:13	0.734313
2022-09-13	13:44:13	0.729987
2022-09-13	13:44:14	0.742761
2022-09-13	13:44:14	0.736807
2022-09-13	13:44:14	0.738282
2022-09-13	13:44:14	0.737672
2022-09-13	13:44:15	0.734517
2022-09-13	13:44:15	0.734059
2022-09-13	13:44:15	0.735331
2022-09-13	13:44:15	0.729478
2022-09-13	13:44:16	0.735178
2022-09-13	13:44:16	0.730089
2022-09-13	13:44:16	0.732277
2022-09-13	13:44:17	0.737112
2022-09-13	13:44:17	0.736145
2022-09-13	13:44:17	0.735636
2022-09-13	13:44:17	0.733092
2022-09-13	13:44:18	0.728766
2022-09-13	13:44:18	0.728257
2022-09-13	13:44:18	0.731158
2022-09-13	13:44:18	0.734771
2022-09-13	13:44:19	0.732532
2022-09-13	13:44:19	0.734262
2022-09-13	13:44:19	0.730751
2022-09-13	13:44:19	0.733753
2022-09-13	13:44:20	0.739198
2022-09-13	13:44:20	0.728104
2022-09-13	13:44:20	0.733092
2022-09-13	13:44:21	0.732226
2022-09-13	13:44:21	0.731158
2022-09-13	13:44:21	0.731463
2022-09-13	13:44:21	0.729835
2022-09-13	13:44:22	0.726476
2022-09-13	13:44:22	0.731005
2022-09-13	13:44:22	0.734059
2022-09-13	13:44:22	0.742557
2022-09-13	13:44:23	0.729377
