# Supplementary material for: Comparing efficacy in reducing pulling and welfare impacts of four types of leash walking equipment
Source: PeerJ journal article supplement (doi:10.7717/peerj.18131), 2024-10-24
Supplement: Shelter1_Tension_files.zip [file Buzz_martin_2022913130220 copy.xlsx]

## Sheet: Averaged Newtons
Date	Time	Averaged Newtons	Impulse	Total steps
2022-09-13	13:02:33	1.94691	1.94691	0		Impulse	693.306
2022-09-13	13:02:34	0.698753	2.64566	0		Total steps	1
2022-09-13	13:02:35	0.335597	2.98126	0
2022-09-13	13:02:36	1.77809	4.75935	0
2022-09-13	13:02:37	2.20295	6.9623	0
2022-09-13	13:02:38	2.2125	9.1748	0
2022-09-13	13:02:39	1.68828	10.8631	0
2022-09-13	13:02:40	2.14504	13.0081	0
2022-09-13	13:02:41	1.75934	14.7675	0
2022-09-13	13:02:42	1.70073	16.4682	0
2022-09-13	13:02:43	0.781662	17.2499	0
2022-09-13	13:02:44	1.76536	19.0152	0
2022-09-13	13:02:45	2.20612	21.2213	0
2022-09-13	13:02:46	1.41103	22.6324	0
2022-09-13	13:02:47	-0.677819	22.6324	0
2022-09-13	13:02:48	3.17028	25.8026	0
2022-09-13	13:02:49	2.59895	28.4016	0
2022-09-13	13:02:50	1.98177	30.3834	0
2022-09-13	13:02:51	3.25686	33.6402	0
2022-09-13	13:02:52	3.04311	36.6833	0
2022-09-13	13:02:53	3.07494	39.7583	0
2022-09-13	13:02:54	2.91917	42.6775	0
2022-09-13	13:02:55	3.27492	45.9524	0
2022-09-13	13:02:56	3.26654	49.2189	0
2022-09-13	13:02:57	3.26509	52.484	0
2022-09-13	13:02:58	3.25873	55.7427	0
2022-09-13	13:02:59	2.93145	58.6742	0
2022-09-13	13:03:00	1.60944	60.2836	0
2022-09-13	13:03:01	1.00749	61.2911	0
2022-09-13	13:03:02	3.24402	64.5351	0
2022-09-13	13:03:03	3.25352	67.7887	0
2022-09-13	13:03:04	3.26943	71.0581	0
2022-09-13	13:03:05	3.27192	74.33	0
2022-09-13	13:03:06	3.25498	77.585	0
2022-09-13	13:03:07	3.25669	80.8417	0
2022-09-13	13:03:08	3.25324	84.0949	0
2022-09-13	13:03:09	3.27158	87.3665	0
2022-09-13	13:03:10	3.2709	90.6374	0
2022-09-13	13:03:11	3.27305	93.9104	0
2022-09-13	13:03:12	3.26818	97.1786	0
2022-09-13	13:03:13	3.25403	100.433	0
2022-09-13	13:03:14	3.2669	103.7	0
2022-09-13	13:03:15	3.27633	106.976	0
2022-09-13	13:03:16	3.25901	110.235	0
2022-09-13	13:03:17	3.27039	113.505	0
2022-09-13	13:03:18	3.2632	116.768	0
2022-09-13	13:03:19	3.28692	120.055	0
2022-09-13	13:03:20	2.92885	122.984	0
2022-09-13	13:03:21	3.27588	126.26	0
2022-09-13	13:03:22	2.8958	129.156	0
2022-09-13	13:03:23	2.66388	131.82	0
2022-09-13	13:03:24	0.570965	132.391	0
2022-09-13	13:03:25	-0.516466	132.391	0
2022-09-13	13:03:26	-0.569794	132.391	0
2022-09-13	13:03:27	-0.464965	132.391	0
2022-09-13	13:03:28	-0.812106	132.391	0
2022-09-13	13:03:29	0.660835	133.052	0
2022-09-13	13:03:30	2.01538	135.067	0
2022-09-13	13:03:31	2.15313	137.22	0
2022-09-13	13:03:32	3.21968	140.44	0
2022-09-13	13:03:33	2.99246	143.432	0
2022-09-13	13:03:34	1.59484	145.027	0
2022-09-13	13:03:35	1.28562	146.313	0
2022-09-13	13:03:36	0.126033	146.439	0
2022-09-13	13:03:37	-0.522408	146.439	0
2022-09-13	13:03:38	-2.78635	146.439	0
2022-09-13	13:03:39	-1.93436	146.439	0
2022-09-13	13:03:40	0.622635	147.061	0
2022-09-13	13:03:41	2.45732	149.519	0
2022-09-13	13:03:42	2.73768	152.256	0
2022-09-13	13:03:43	2.18967	154.446	0
2022-09-13	13:03:44	1.36689	155.813	0
2022-09-13	13:03:45	1.39552	157.208	0
2022-09-13	13:03:46	1.74266	158.951	0
2022-09-13	13:03:47	2.30806	161.259	0
2022-09-13	13:03:48	2.11052	163.37	0
2022-09-13	13:03:49	1.86015	165.23	0
2022-09-13	13:03:50	1.50441	166.734	0
2022-09-13	13:03:51	1.78907	168.523	0
2022-09-13	13:03:52	3.26303	171.786	0
2022-09-13	13:03:53	3.27384	175.06	0
2022-09-13	13:03:54	3.19676	178.257	0
2022-09-13	13:03:55	3.21151	181.469	0
2022-09-13	13:03:56	3.29274	184.761	0
2022-09-13	13:03:57	3.27978	188.041	0
2022-09-13	13:03:58	3.27497	191.316	0
2022-09-13	13:03:59	3.27731	194.593	0
2022-09-13	13:04:00	3.27033	197.864	0
2022-09-13	13:04:01	3.25341	201.117	0
2022-09-13	13:04:02	2.50084	203.618	0
2022-09-13	13:04:03	2.63502	206.253	0
2022-09-13	13:04:04	2.81827	209.071	0
2022-09-13	13:04:05	2.36768	211.439	0
2022-09-13	13:04:06	3.74543	215.184	0
2022-09-13	13:04:07	3.7606	218.945	0
2022-09-13	13:04:08	3.28191	222.227	0
2022-09-13	13:04:09	3.20429	225.431	0
2022-09-13	13:04:10	3.0902	228.521	0
2022-09-13	13:04:11	3.10457	231.626	0
2022-09-13	13:04:12	3.03064	234.657	0
2022-09-13	13:04:13	3.14832	237.805	0
2022-09-13	13:04:14	3.14294	240.948	0
2022-09-13	13:04:15	2.13632	243.084	0
2022-09-13	13:04:16	3.60088	246.685	0
2022-09-13	13:04:17	2.52517	249.21	0
2022-09-13	13:04:18	3.07537	252.286	0
2022-09-13	13:04:19	3.28408	255.57	0
2022-09-13	13:04:20	3.27271	258.842	0
2022-09-13	13:04:21	2.2099	261.052	0
2022-09-13	13:04:22	1.63768	262.69	0
2022-09-13	13:04:23	2.84487	265.535	0
2022-09-13	13:04:24	3.59001	269.125	0
2022-09-13	13:04:25	3.61504	272.74	0
2022-09-13	13:04:26	1.00611	273.746	0
2022-09-13	13:04:27	-1.13372	273.746	0
2022-09-13	13:04:28	-1.21224	273.746	0
2022-09-13	13:04:29	0.615732	274.362	0
2022-09-13	13:04:30	1.99988	276.362	0
2022-09-13	13:04:31	2.85879	279.22	0
2022-09-13	13:04:32	3.26811	282.488	0
2022-09-13	13:04:33	3.27005	285.758	0
2022-09-13	13:04:34	3.26665	289.025	0
2022-09-13	13:04:35	3.25749	292.283	0
2022-09-13	13:04:36	3.26116	295.544	0
2022-09-13	13:04:37	3.6769	299.221	0
2022-09-13	13:04:38	4.14011	303.361	0
2022-09-13	13:04:39	3.87486	307.236	0
2022-09-13	13:04:40	-0.116579	307.236	0
2022-09-13	13:04:41	2.38171	309.617	0
2022-09-13	13:04:42	1.07979	310.697	0
2022-09-13	13:04:43	2.29326	312.99	0
2022-09-13	13:04:44	3.70847	316.699	0
2022-09-13	13:04:45	3.35669	320.056	0
2022-09-13	13:04:46	3.44668	323.502	0
2022-09-13	13:04:47	3.53796	327.04	0
2022-09-13	13:04:48	3.81662	330.857	0
2022-09-13	13:04:49	3.87629	334.733	0
2022-09-13	13:04:50	3.11901	337.852	0
2022-09-13	13:04:51	2.9031	340.755	0
2022-09-13	13:04:52	2.50678	343.262	0
2022-09-13	13:04:53	1.74002	345.002	0
2022-09-13	13:04:54	2.4464	347.448	0
2022-09-13	13:04:55	2.77288	350.221	0
2022-09-13	13:04:56	3.83122	354.053	0
2022-09-13	13:04:57	4.62785	358.68	0
2022-09-13	13:04:58	4.54492	363.225	0
2022-09-13	13:04:59	4.88505	368.11	0
2022-09-13	13:05:00	2.48261	370.593	0
2022-09-13	13:05:01	1.57825	372.171	0
2022-09-13	13:05:02	6.69596	378.867	0
2022-09-13	13:05:03	14.548	393.415	1
2022-09-13	13:05:04	2.03774	395.453	1
2022-09-13	13:05:05	2.23683	397.69	1
2022-09-13	13:05:06	1.94804	399.638	1
2022-09-13	13:05:07	2.02257	401.66	1
2022-09-13	13:05:08	2.16004	403.82	1
2022-09-13	13:05:09	2.13753	405.958	1
2022-09-13	13:05:10	9.2711	415.229	1
2022-09-13	13:05:11	0.78319	416.012	1
2022-09-13	13:05:12	3.33439	419.347	1
2022-09-13	13:05:13	2.2614	421.608	1
2022-09-13	13:05:14	1.55229	423.16	1
2022-09-13	13:05:15	2.98256	426.143	1
2022-09-13	13:05:16	6.05747	432.2	1
2022-09-13	13:05:17	3.45539	435.656	1
2022-09-13	13:05:18	-1.64657	435.656	1
2022-09-13	13:05:19	-1.9507	435.656	1
2022-09-13	13:05:20	-0.599883	435.656	1
2022-09-13	13:05:21	-0.0235415	435.656	1
2022-09-13	13:05:22	-0.863172	435.656	1
2022-09-13	13:05:23	-0.829991	435.656	1
2022-09-13	13:05:24	-1.03803	435.656	1
2022-09-13	13:05:25	-1.0816	435.656	1
2022-09-13	13:05:26	-1.59156	435.656	1
2022-09-13	13:05:27	-0.2129	435.656	1
2022-09-13	13:05:28	1.09122	436.747	1
2022-09-13	13:05:29	1.67673	438.424	1
2022-09-13	13:05:30	3.26117	441.685	1
2022-09-13	13:05:31	2.93875	444.624	1
2022-09-13	13:05:32	-1.19722	444.624	1
2022-09-13	13:05:33	-1.4052	444.624	1
2022-09-13	13:05:34	-0.646685	444.624	1
2022-09-13	13:05:35	0.821955	445.446	1
2022-09-13	13:05:36	1.4627	446.908	1
2022-09-13	13:05:37	2.83836	449.747	1
2022-09-13	13:05:38	1.53025	451.277	1
2022-09-13	13:05:39	2.75771	454.035	1
2022-09-13	13:05:40	2.84011	456.875	1
2022-09-13	13:05:41	2.16904	459.044	1
2022-09-13	13:05:42	0.32573	459.369	1
2022-09-13	13:05:43	2.07305	461.443	1
2022-09-13	13:05:44	1.87045	463.313	1
2022-09-13	13:05:45	1.93208	465.245	1
2022-09-13	13:05:46	4.47667	469.722	1
2022-09-13	13:05:47	9.79402	479.516	1
2022-09-13	13:05:48	1.3567	480.872	1
2022-09-13	13:05:49	-2.08024	480.872	1
2022-09-13	13:05:50	-2.57339	480.872	1
2022-09-13	13:05:51	-3.36608	480.872	1
2022-09-13	13:05:52	-2.24973	480.872	1
2022-09-13	13:05:53	2.64277	483.515	1
2022-09-13	13:05:54	3.44424	486.959	1
2022-09-13	13:05:55	0.255179	487.215	1
2022-09-13	13:05:56	-0.103508	487.215	1
2022-09-13	13:05:57	1.25133	488.466	1
2022-09-13	13:05:58	0.645838	489.112	1
2022-09-13	13:05:59	2.24687	491.359	1
2022-09-13	13:06:00	0.0938893	491.453	1
2022-09-13	13:06:01	1.62693	493.079	1
2022-09-13	13:06:02	-1.22953	493.079	1
2022-09-13	13:06:03	3.76635	496.846	1
2022-09-13	13:06:04	-0.858624	496.846	1
2022-09-13	13:06:05	-4.25527	496.846	1
2022-09-13	13:06:06	-0.531405	496.846	1
2022-09-13	13:06:07	3.26577	500.112	1
2022-09-13	13:06:08	3.25154	503.363	1
2022-09-13	13:06:09	3.26405	506.627	1
2022-09-13	13:06:10	3.26484	509.892	1
2022-09-13	13:06:11	3.28418	513.176	1
2022-09-13	13:06:12	3.26037	516.437	1
2022-09-13	13:06:13	2.24102	518.678	1
2022-09-13	13:06:14	3.25551	521.933	1
2022-09-13	13:06:15	3.25943	525.193	1
2022-09-13	13:06:16	2.18386	527.376	1
2022-09-13	13:06:17	3.25601	530.632	1
2022-09-13	13:06:18	3.24871	533.881	1
2022-09-13	13:06:19	3.2506	537.132	1
2022-09-13	13:06:20	3.24724	540.379	1
2022-09-13	13:06:21	3.25613	543.635	1
2022-09-13	13:06:22	3.25386	546.889	1
2022-09-13	13:06:23	3.2439	550.133	1
2022-09-13	13:06:24	3.25566	553.389	1
2022-09-13	13:06:25	3.25415	556.643	1
2022-09-13	13:06:26	3.26382	559.907	1
2022-09-13	13:06:27	3.06354	562.97	1
2022-09-13	13:06:28	3.26162	566.232	1
2022-09-13	13:06:29	3.0181	569.25	1
2022-09-13	13:06:30	3.04657	572.296	1
2022-09-13	13:06:31	3.26196	575.558	1
2022-09-13	13:06:32	3.27309	578.831	1
2022-09-13	13:06:33	2.9117	581.743	1
2022-09-13	13:06:34	3.27011	585.013	1
2022-09-13	13:06:35	2.29252	587.306	1
2022-09-13	13:06:36	3.25852	590.564	1
2022-09-13	13:06:37	2.25647	592.821	1
2022-09-13	13:06:38	2.28443	595.105	1
2022-09-13	13:06:39	1.63904	596.744	1
2022-09-13	13:06:40	1.47389	598.218	1
2022-09-13	13:06:41	0.81426	599.032	1
2022-09-13	13:06:42	-0.194677	599.032	1
2022-09-13	13:06:43	-5.1114	599.032	1
2022-09-13	13:06:44	-3.8146	599.032	1
2022-09-13	13:06:45	-2.84894	599.032	1
2022-09-13	13:06:46	-2.3469	599.032	1
2022-09-13	13:06:47	-3.04243	599.032	1
2022-09-13	13:06:48	-2.73753	599.032	1
2022-09-13	13:06:49	-2.51883	599.032	1
2022-09-13	13:06:50	-2.77922	599.032	1
2022-09-13	13:06:51	-5.12035	599.032	1
2022-09-13	13:06:52	-5.27892	599.032	1
2022-09-13	13:06:53	-3.18125	599.032	1
2022-09-13	13:06:54	-1.89552	599.032	1
2022-09-13	13:06:55	1.49292	600.525	1
2022-09-13	13:06:56	1.40658	601.932	1
2022-09-13	13:06:57	1.63084	603.563	1
2022-09-13	13:06:58	2.26428	605.827	1
2022-09-13	13:06:59	6.66658	612.494	1
2022-09-13	13:07:00	6.51577	619.009	1
2022-09-13	13:07:01	2.20695	621.216	1
2022-09-13	13:07:02	1.82648	623.043	1
2022-09-13	13:07:03	1.61414	624.657	1
2022-09-13	13:07:04	1.43553	626.092	1
2022-09-13	13:07:05	1.13365	627.226	1
2022-09-13	13:07:06	0.00266069	627.229	1
2022-09-13	13:07:07	0.120997	627.35	1
2022-09-13	13:07:08	1.8168	629.167	1
2022-09-13	13:07:09	1.82906	630.996	1
2022-09-13	13:07:10	1.59479	632.59	1
2022-09-13	13:07:11	0.885622	633.476	1
2022-09-13	13:07:12	0.0520098	633.528	1
2022-09-13	13:07:13	-1.3009	633.528	1
2022-09-13	13:07:14	0.080533	633.609	1
2022-09-13	13:07:15	-0.16757	633.609	1
2022-09-13	13:07:16	0.665363	634.274	1
2022-09-13	13:07:17	1.56391	635.838	1
2022-09-13	13:07:18	4.41402	640.252	1
2022-09-13	13:07:19	2.33287	642.585	1
2022-09-13	13:07:20	1.60939	644.194	1
2022-09-13	13:07:21	1.50022	645.694	1
2022-09-13	13:07:22	1.42886	647.123	1
2022-09-13	13:07:23	1.78986	648.913	1
2022-09-13	13:07:24	1.67238	650.585	1
2022-09-13	13:07:25	1.94587	652.531	1
2022-09-13	13:07:26	3.19048	655.722	1
2022-09-13	13:07:27	8.08197	663.804	1
2022-09-13	13:07:28	2.18811	665.992	1
2022-09-13	13:07:29	2.03899	668.031	1
2022-09-13	13:07:30	5.80552	673.836	1
2022-09-13	13:07:31	7.55672	681.393	1
2022-09-13	13:07:32	3.97531	685.368	1
2022-09-13	13:07:33	7.93784	693.306	1

## Sheet: Buzz_martin_2022913130220 ( (3)
Date	Time	lbs	Newtons	Averaged Newtons	Total force x time	total steps > 13.345		**GoPro Fitting: 1251
2022-09-13	13:02:33	0.605305	2.69252	1.94691	2.69252	FALSE	0			Total force x time	1359.61
2022-09-13	13:02:33	0.191005	0.849628	1.94691	0.849628	FALSE	0			Total steps	6
2022-09-13	13:02:33	0.53355	2.37334	1.94691	5.06585	FALSE	0
2022-09-13	13:02:33	0.420878	1.87215	1.94691	2.72178	FALSE	0
2022-09-13	13:02:34	0.189733	0.84397	0.698753	5.90983	FALSE	0
2022-09-13	13:02:34	0.373753	1.66253	0.698753	4.38431	FALSE	0
2022-09-13	13:02:34	0.00688318	0.0306178	0.698753	5.94044	FALSE	0
2022-09-13	13:02:34	0.0579773	0.257895	0.698753	4.6422	FALSE	0
2022-09-13	13:02:35	-0.0333204	-0.148216	0.335597	5.94044	FALSE	0
2022-09-13	13:02:35	0.233448	1.03842	0.335597	5.68062	FALSE	0
2022-09-13	13:02:35	0.0598094	0.266044	0.335597	6.20649	FALSE	0
2022-09-13	13:02:35	0.041845	0.186135	0.335597	5.86676	FALSE	0
2022-09-13	13:02:36	0.101438	0.451217	1.77809	6.6577	FALSE	0
2022-09-13	13:02:36	0.358741	1.59575	1.77809	7.46251	FALSE	0
2022-09-13	13:02:36	0.663728	2.95239	1.77809	9.6101	FALSE	0
2022-09-13	13:02:36	0.475026	2.11301	1.77809	9.57552	FALSE	0
2022-09-13	13:02:37	0.684898	3.04656	2.20295	12.6567	FALSE	0
2022-09-13	13:02:37	0.234313	1.04227	2.20295	10.6178	FALSE	0
2022-09-13	13:02:37	0.566527	2.52003	2.20295	15.1767	FALSE	0
2022-09-13	13:02:38	0.386171	1.71777	2.2125	12.3356	FALSE	0
2022-09-13	13:02:38	0.446883	1.98782	2.2125	17.1645	FALSE	0
2022-09-13	13:02:38	0.749275	3.33293	2.2125	15.6685	FALSE	0
2022-09-13	13:02:38	0.407239	1.81148	2.2125	18.976	FALSE	0
2022-09-13	13:02:39	0.409784	1.8228	1.68828	17.4913	FALSE	0
2022-09-13	13:02:39	0.148512	0.660611	1.68828	19.6366	FALSE	0
2022-09-13	13:02:39	0.553499	2.46207	1.68828	19.9534	FALSE	0
2022-09-13	13:02:39	0.406374	1.80763	1.68828	21.4442	FALSE	0
2022-09-13	13:02:40	0.640114	2.84736	2.14504	22.8007	FALSE	0
2022-09-13	13:02:40	0.408969	1.81918	2.14504	23.2634	FALSE	0
2022-09-13	13:02:40	0.536145	2.38488	2.14504	25.1856	FALSE	0
2022-09-13	13:02:40	0.343677	1.52874	2.14504	24.7922	FALSE	0
2022-09-13	13:02:41	0.441031	1.96179	1.75934	27.1474	FALSE	0
2022-09-13	13:02:41	0.369224	1.64238	1.75934	26.4345	FALSE	0
2022-09-13	13:02:41	0.376298	1.67385	1.75934	28.8212	FALSE	0
2022-09-13	13:02:42	0.397875	1.76983	1.70073	28.2044	FALSE	0
2022-09-13	13:02:42	0.325611	1.44838	1.70073	30.2696	FALSE	0
2022-09-13	13:02:42	0.341641	1.51969	1.70073	29.7241	FALSE	0
2022-09-13	13:02:42	0.464237	2.06502	1.70073	32.3346	FALSE	0
2022-09-13	13:02:43	0.321489	1.43005	0.781662	31.1541	FALSE	0
2022-09-13	13:02:43	0.173143	0.770175	0.781662	33.1048	FALSE	0
2022-09-13	13:02:43	-0.00914732	-0.0406891	0.781662	31.1541	FALSE	0
2022-09-13	13:02:43	0.217417	0.967114	0.781662	34.0719	FALSE	0
2022-09-13	13:02:44	0.191107	0.850082	1.76536	32.0042	FALSE	0
2022-09-13	13:02:44	0.32785	1.45834	1.76536	35.5303	FALSE	0
2022-09-13	13:02:44	0.581183	2.58522	1.76536	34.5894	FALSE	0
2022-09-13	13:02:44	0.487341	2.16779	1.76536	37.6981	FALSE	0
2022-09-13	13:02:45	0.60098	2.67328	2.20612	37.2627	FALSE	0
2022-09-13	13:02:45	0.440216	1.95817	2.20612	39.6562	FALSE	0
2022-09-13	13:02:45	0.446679	1.98692	2.20612	39.2496	FALSE	0
2022-09-13	13:02:46	0.548562	2.44011	1.41103	42.0963	FALSE	0
2022-09-13	13:02:46	0.733906	3.26456	1.41103	42.5142	FALSE	0
2022-09-13	13:02:46	0.239504	1.06536	1.41103	43.1617	FALSE	0
2022-09-13	13:02:46	-0.253117	-1.12592	1.41103	42.5142	FALSE	0
2022-09-13	13:02:47	-1.04009	-4.62653	-0.677819	43.1617	FALSE	0
2022-09-13	13:02:47	-0.568282	-2.52783	-0.677819	42.5142	FALSE	0
2022-09-13	13:02:47	-0.09673	-0.430274	-0.677819	43.1617	FALSE	0
2022-09-13	13:02:47	1.09558	4.87336	-0.677819	47.3875	FALSE	0
2022-09-13	13:02:48	0.714415	3.17786	3.17028	46.3396	FALSE	0
2022-09-13	13:02:48	0.732837	3.25981	3.17028	50.6473	FALSE	0
2022-09-13	13:02:48	0.729784	3.24623	3.17028	49.5858	FALSE	0
2022-09-13	13:02:48	0.673804	2.99721	3.17028	53.6445	FALSE	0
2022-09-13	13:02:49	0.712074	3.16745	2.59895	52.7532	FALSE	0
2022-09-13	13:02:49	0.620267	2.75907	2.59895	56.4036	FALSE	0
2022-09-13	13:02:49	0.420471	1.87034	2.59895	54.6236	FALSE	0
2022-09-13	13:02:50	0.157672	0.701357	1.98177	57.105	FALSE	0
2022-09-13	13:02:50	0.160624	0.714488	1.98177	55.3381	FALSE	0
2022-09-13	13:02:50	0.731972	3.25596	1.98177	60.3609	FALSE	0
2022-09-13	13:02:50	0.731819	3.25528	1.98177	58.5933	FALSE	0
2022-09-13	13:02:51	0.736807	3.27746	3.25686	63.6384	FALSE	0
2022-09-13	13:02:51	0.730191	3.24804	3.25686	61.8414	FALSE	0
2022-09-13	13:02:51	0.726323	3.23083	3.25686	66.8692	FALSE	0
2022-09-13	13:02:51	0.735382	3.27113	3.25686	65.1125	FALSE	0
2022-09-13	13:02:52	0.53299	2.37085	3.04311	69.2401	FALSE	0
2022-09-13	13:02:52	0.729224	3.24373	3.04311	68.3562	FALSE	0
2022-09-13	13:02:52	0.738079	3.28312	3.04311	72.5232	FALSE	0
2022-09-13	13:02:52	0.736196	3.27475	3.04311	71.631	FALSE	0
2022-09-13	13:02:53	0.713143	3.1722	3.07494	75.6954	FALSE	0
2022-09-13	13:02:53	0.693804	3.08618	3.07494	74.7172	FALSE	0
2022-09-13	13:02:53	0.666883	2.96643	3.07494	78.6618	FALSE	0
2022-09-13	13:02:54	0.625305	2.78148	2.91917	77.4986	FALSE	0
2022-09-13	13:02:54	0.554211	2.46524	2.91917	81.1271	FALSE	0
2022-09-13	13:02:54	0.713651	3.17446	2.91917	80.6731	FALSE	0
2022-09-13	13:02:54	0.73187	3.2555	2.91917	84.3826	FALSE	0
2022-09-13	13:02:55	0.733601	3.2632	3.27492	83.9363	FALSE	0
2022-09-13	13:02:55	0.744339	3.31097	3.27492	87.6935	FALSE	0
2022-09-13	13:02:55	0.733295	3.26184	3.27492	87.1982	FALSE	0
2022-09-13	13:02:55	0.733702	3.26365	3.27492	90.9572	FALSE	0
2022-09-13	13:02:56	0.734873	3.26886	3.26654	90.467	FALSE	0
2022-09-13	13:02:56	0.741743	3.29942	3.26654	94.2566	FALSE	0
2022-09-13	13:02:56	0.731921	3.25573	3.26654	93.7227	FALSE	0
2022-09-13	13:02:56	0.728868	3.24215	3.26654	97.4988	FALSE	0
2022-09-13	13:02:57	0.737519	3.28063	3.26509	97.0034	FALSE	0
2022-09-13	13:02:57	0.737926	3.28244	3.26509	100.781	FALSE	0
2022-09-13	13:02:57	0.726629	3.23219	3.26509	100.236	FALSE	0
2022-09-13	13:02:58	0.731921	3.25573	3.25873	104.037	FALSE	0
2022-09-13	13:02:58	0.731463	3.25369	3.25873	103.489	FALSE	0
2022-09-13	13:02:58	0.731514	3.25392	3.25873	107.291	FALSE	0
2022-09-13	13:02:58	0.735483	3.27158	3.25873	106.761	FALSE	0
2022-09-13	13:02:59	0.730852	3.25098	2.93145	110.542	FALSE	0
2022-09-13	13:02:59	0.719148	3.19891	2.93145	109.96	FALSE	0
2022-09-13	13:02:59	0.681081	3.02958	2.93145	113.571	FALSE	0
2022-09-13	13:02:59	0.505	2.24634	2.93145	112.206	FALSE	0
2022-09-13	13:03:00	0.525407	2.33712	1.60944	115.909	FALSE	0
2022-09-13	13:03:00	0.482557	2.14651	1.60944	114.353	FALSE	0
2022-09-13	13:03:00	0.202659	0.901468	1.60944	116.81	FALSE	0
2022-09-13	13:03:00	0.236654	1.05268	1.60944	115.405	FALSE	0
2022-09-13	13:03:01	0.301387	1.34063	1.00749	118.151	FALSE	0
2022-09-13	13:03:01	0.121489	0.540407	1.00749	115.946	FALSE	0
2022-09-13	13:03:01	0.256603	1.14142	1.00749	119.292	FALSE	0
2022-09-13	13:03:02	0.739555	3.28969	3.24402	119.235	FALSE	0
2022-09-13	13:03:02	0.733906	3.26456	3.24402	122.557	FALSE	0
2022-09-13	13:03:02	0.739606	3.28992	3.24402	122.525	FALSE	0
2022-09-13	13:03:02	0.704084	3.13191	3.24402	125.689	FALSE	0
2022-09-13	13:03:03	0.723321	3.21748	3.25352	125.743	FALSE	0
2022-09-13	13:03:03	0.735178	3.27022	3.25352	128.959	FALSE	0
2022-09-13	13:03:03	0.734059	3.26524	3.25352	129.008	FALSE	0
2022-09-13	13:03:03	0.733142	3.26116	3.25352	132.22	FALSE	0
2022-09-13	13:03:04	0.735687	3.27248	3.26943	132.281	FALSE	0
2022-09-13	13:03:04	0.734211	3.26592	3.26943	135.486	FALSE	0
2022-09-13	13:03:04	0.734262	3.26614	3.26943	135.547	FALSE	0
2022-09-13	13:03:04	0.73584	3.27316	3.26943	138.759	FALSE	0
2022-09-13	13:03:05	0.736756	3.27724	3.27192	138.824	FALSE	0
2022-09-13	13:03:05	0.740165	3.2924	3.27192	142.051	FALSE	0
2022-09-13	13:03:05	0.735076	3.26977	3.27192	142.094	FALSE	0
2022-09-13	13:03:05	0.730242	3.24826	3.27192	145.3	FALSE	0
2022-09-13	13:03:06	0.735585	3.27203	3.25498	145.366	FALSE	0
2022-09-13	13:03:06	0.728868	3.24215	3.25498	148.542	FALSE	0
2022-09-13	13:03:06	0.730801	3.25075	3.25498	148.616	FALSE	0
2022-09-13	13:03:07	0.73299	3.26049	3.25669	151.802	FALSE	0
2022-09-13	13:03:07	0.735382	3.27113	3.25669	151.888	FALSE	0
2022-09-13	13:03:07	0.729224	3.24373	3.25669	155.046	FALSE	0
2022-09-13	13:03:07	0.730954	3.25143	3.25669	155.139	FALSE	0
2022-09-13	13:03:08	0.738333	3.28425	3.25324	158.33	FALSE	0
2022-09-13	13:03:08	0.729784	3.24623	3.25324	158.385	FALSE	0
2022-09-13	13:03:08	0.730852	3.25098	3.25324	161.581	FALSE	0
2022-09-13	13:03:08	0.726476	3.23151	3.25324	161.617	FALSE	0
2022-09-13	13:03:09	0.735941	3.27361	3.27158	164.855	FALSE	0
2022-09-13	13:03:09	0.738181	3.28358	3.27158	164.9	FALSE	0
2022-09-13	13:03:09	0.734262	3.26614	3.27158	168.121	FALSE	0
2022-09-13	13:03:09	0.73355	3.26298	3.27158	168.163	FALSE	0
2022-09-13	13:03:10	0.736654	3.27678	3.2709	171.398	FALSE	0
2022-09-13	13:03:10	0.736145	3.27452	3.2709	171.438	FALSE	0
2022-09-13	13:03:10	0.733193	3.26139	3.2709	174.659	FALSE	0
2022-09-13	13:03:11	0.732023	3.25618	3.27305	174.694	FALSE	0
2022-09-13	13:03:11	0.737519	3.28063	3.27305	177.94	FALSE	0
2022-09-13	13:03:11	0.737417	3.28018	3.27305	177.974	FALSE	0
2022-09-13	13:03:11	0.736298	3.2752	3.27305	181.215	FALSE	0
2022-09-13	13:03:12	0.729784	3.24623	3.26818	181.22	FALSE	0
2022-09-13	13:03:12	0.736756	3.27724	3.26818	184.492	FALSE	0
2022-09-13	13:03:12	0.741794	3.29965	3.26818	184.52	FALSE	0
2022-09-13	13:03:12	0.730547	3.24962	3.26818	187.742	FALSE	0
2022-09-13	13:03:13	0.728512	3.24057	3.25403	187.761	FALSE	0
2022-09-13	13:03:13	0.73645	3.27588	3.25403	191.018	FALSE	0
2022-09-13	13:03:13	0.735127	3.26999	3.25403	191.031	FALSE	0
2022-09-13	13:03:13	0.726069	3.2297	3.25403	194.247	FALSE	0
2022-09-13	13:03:14	0.732786	3.25958	3.2669	194.29	FALSE	0
2022-09-13	13:03:14	0.732786	3.25958	3.2669	197.507	FALSE	0
2022-09-13	13:03:14	0.737722	3.28154	3.2669	197.572	FALSE	0
2022-09-13	13:03:15	0.736857	3.27769	3.27633	200.785	FALSE	0
2022-09-13	13:03:15	0.733753	3.26388	3.27633	200.836	FALSE	0
2022-09-13	13:03:15	0.736857	3.27769	3.27633	204.062	FALSE	0
2022-09-13	13:03:15	0.73874	3.28606	3.27633	204.122	FALSE	0
2022-09-13	13:03:16	0.731361	3.25324	3.25901	207.316	FALSE	0
2022-09-13	13:03:16	0.728257	3.23943	3.25901	207.361	FALSE	0
2022-09-13	13:03:16	0.736501	3.2761	3.25901	210.592	FALSE	0
2022-09-13	13:03:16	0.734517	3.26728	3.25901	210.628	FALSE	0
2022-09-13	13:03:17	0.737417	3.28018	3.27039	213.872	FALSE	0
2022-09-13	13:03:17	0.739046	3.28742	3.27039	213.916	FALSE	0
2022-09-13	13:03:17	0.724796	3.22404	3.27039	217.096	FALSE	0
2022-09-13	13:03:17	0.739606	3.28992	3.27039	217.206	FALSE	0
2022-09-13	13:03:18	0.733448	3.26252	3.2632	220.358	FALSE	0
2022-09-13	13:03:18	0.730547	3.24962	3.2632	220.455	FALSE	0
2022-09-13	13:03:18	0.736807	3.27746	3.2632	223.636	FALSE	0
2022-09-13	13:03:19	0.734975	3.26932	3.28692	223.725	FALSE	0
2022-09-13	13:03:19	0.735789	3.27294	3.28692	226.909	FALSE	0
2022-09-13	13:03:19	0.741438	3.29806	3.28692	227.023	FALSE	0
2022-09-13	13:03:19	0.743524	3.30734	3.28692	230.216	FALSE	0
2022-09-13	13:03:20	0.741743	3.29942	2.92885	230.322	FALSE	0
2022-09-13	13:03:20	0.734873	3.26886	2.92885	233.485	FALSE	0
2022-09-13	13:03:20	0.49869	2.21827	2.92885	232.54	FALSE	0
2022-09-13	13:03:21	0.740165	3.2924	3.27588	236.777	FALSE	0
2022-09-13	13:03:21	0.740623	3.29444	3.27588	235.835	FALSE	0
2022-09-13	13:03:21	0.730242	3.24826	3.27588	240.026	FALSE	0
2022-09-13	13:03:21	0.735534	3.2718	3.27588	239.107	FALSE	0
2022-09-13	13:03:21	0.735687	3.27248	3.27588	243.298	FALSE	0
2022-09-13	13:03:22	0.735026	3.26954	2.8958	242.376	FALSE	0
2022-09-13	13:03:22	0.728664	3.24124	2.8958	246.539	FALSE	0
2022-09-13	13:03:22	0.489326	2.17662	2.8958	244.553	FALSE	0
2022-09-13	13:03:23	0.737875	3.28222	2.66388	249.822	FALSE	0
2022-09-13	13:03:23	0.735178	3.27022	2.66388	247.823	FALSE	0
2022-09-13	13:03:23	0.70103	3.11832	2.66388	252.94	FALSE	0
2022-09-13	13:03:23	0.221387	0.984774	2.66388	248.808	FALSE	0
2022-09-13	13:03:24	0.444695	1.97809	0.570965	254.918	FALSE	0
2022-09-13	13:03:24	0.413295	1.83842	0.570965	250.646	FALSE	0
2022-09-13	13:03:24	-0.243906	-1.08494	0.570965	254.918	FALSE	0
2022-09-13	13:03:24	-0.100649	-0.447707	0.570965	250.646	FALSE	0
2022-09-13	13:03:25	-0.0514374	-0.228804	-0.516466	254.918	FALSE	0
2022-09-13	13:03:25	-0.0857376	-0.381378	-0.516466	250.646	FALSE	0
2022-09-13	13:03:25	-0.214542	-0.954326	-0.516466	254.918	FALSE	0
2022-09-13	13:03:25	-0.11271	-0.501357	-0.516466	250.646	FALSE	0
2022-09-13	13:03:26	-0.177035	-0.787487	-0.569794	254.918	FALSE	0
2022-09-13	13:03:26	-0.0755595	-0.336104	-0.569794	250.646	FALSE	0
2022-09-13	13:03:26	-0.131692	-0.585792	-0.569794	254.918	FALSE	0
2022-09-13	13:03:27	-0.00329491	-0.0146564	-0.464965	250.646	FALSE	0
2022-09-13	13:03:27	-0.19617	-0.872603	-0.464965	254.918	FALSE	0
2022-09-13	13:03:27	-0.0472135	-0.210015	-0.464965	250.646	FALSE	0
2022-09-13	13:03:27	-0.171437	-0.762586	-0.464965	254.918	FALSE	0
2022-09-13	13:03:28	-0.0757631	-0.337009	-0.812106	250.646	FALSE	0
2022-09-13	13:03:28	-0.207417	-0.922632	-0.812106	254.918	FALSE	0
2022-09-13	13:03:28	-0.191844	-0.85336	-0.812106	250.646	FALSE	0
2022-09-13	13:03:28	-0.255254	-1.13542	-0.812106	254.918	FALSE	0
2022-09-13	13:03:29	-0.0256868	-0.11426	0.660835	250.646	FALSE	0
2022-09-13	13:03:29	0.117875	0.524332	0.660835	255.442	FALSE	0
2022-09-13	13:03:29	0.353499	1.57243	0.660835	252.219	FALSE	0
2022-09-13	13:03:30	1.01319	4.50687	2.01538	259.949	FALSE	0
2022-09-13	13:03:30	0.48902	2.17526	2.01538	254.394	FALSE	0
2022-09-13	13:03:30	0.22612	1.00583	2.01538	260.955	FALSE	0
2022-09-13	13:03:30	0.0839824	0.373571	2.01538	254.767	FALSE	0
2022-09-13	13:03:31	0.352125	1.56632	2.15313	262.521	FALSE	0
2022-09-13	13:03:31	0.0798094	0.355008	2.15313	255.122	FALSE	0
2022-09-13	13:03:31	0.911921	4.05641	2.15313	266.578	FALSE	0
2022-09-13	13:03:31	0.592328	2.63479	2.15313	257.757	FALSE	0
2022-09-13	13:03:32	1.18663	5.27837	3.21968	271.856	FALSE	0
2022-09-13	13:03:32	0.295229	1.31324	3.21968	259.071	FALSE	0
2022-09-13	13:03:32	0.711769	3.16609	3.21968	275.022	FALSE	0
2022-09-13	13:03:32	0.701641	3.12104	3.21968	262.192	FALSE	0
2022-09-13	13:03:33	0.674008	2.99812	2.99246	278.02	FALSE	0
2022-09-13	13:03:33	0.71813	3.19439	2.99246	265.386	FALSE	0
2022-09-13	13:03:33	0.61299	2.7267	2.99246	280.747	FALSE	0
2022-09-13	13:03:33	0.685814	3.05064	2.99246	268.437	FALSE	0
2022-09-13	13:03:34	0.185204	0.823824	1.59484	281.571	FALSE	0
2022-09-13	13:03:34	0.605916	2.69524	1.59484	271.132	FALSE	0
2022-09-13	13:03:34	0.295076	1.31256	1.59484	282.884	FALSE	0
2022-09-13	13:03:34	0.347952	1.54776	1.59484	272.68	FALSE	0
2022-09-13	13:03:35	0.279097	1.24148	1.28562	284.125	FALSE	0
2022-09-13	13:03:35	0.276094	1.22812	1.28562	273.908	FALSE	0
2022-09-13	13:03:35	0.31187	1.38726	1.28562	285.512	FALSE	0
2022-09-13	13:03:36	-0.031641	-0.140745	0.126033	273.908	FALSE	0
2022-09-13	13:03:36	0.0503438	0.223939	0.126033	285.736	FALSE	0
2022-09-13	13:03:36	0.00927507	0.0412574	0.126033	273.949	FALSE	0
2022-09-13	13:03:36	0.0853564	0.379682	0.126033	286.116	FALSE	0
2022-09-13	13:03:37	-0.0898089	-0.399488	-0.522408	273.949	FALSE	0
2022-09-13	13:03:37	-0.0262975	-0.116977	-0.522408	286.116	FALSE	0
2022-09-13	13:03:37	-0.159275	-0.708487	-0.522408	273.949	FALSE	0
2022-09-13	13:03:37	-0.194389	-0.864681	-0.522408	286.116	FALSE	0
2022-09-13	13:03:38	-0.500954	-2.22834	-2.78635	273.949	FALSE	0
2022-09-13	13:03:38	-0.621921	-2.76643	-2.78635	286.116	FALSE	0
2022-09-13	13:03:38	-0.610521	-2.71572	-2.78635	273.949	FALSE	0
2022-09-13	13:03:38	-0.7722	-3.4349	-2.78635	286.116	FALSE	0
2022-09-13	13:03:39	-0.583295	-2.59461	-1.93436	273.949	FALSE	0
2022-09-13	13:03:39	-0.453931	-2.01918	-1.93436	286.116	FALSE	0
2022-09-13	13:03:39	-0.267366	-1.1893	-1.93436	273.949	FALSE	0
2022-09-13	13:03:40	-0.0484348	-0.215448	0.622635	286.116	FALSE	0
2022-09-13	13:03:40	0.0151274	0.0672897	0.622635	274.016	FALSE	0
2022-09-13	13:03:40	0.363066	1.61499	0.622635	287.731	FALSE	0
2022-09-13	13:03:40	0.23014	1.02371	0.622635	275.04	FALSE	0
2022-09-13	13:03:41	0.634873	2.82404	2.45732	290.555	FALSE	0
2022-09-13	13:03:41	0.443219	1.97153	2.45732	277.011	FALSE	0
2022-09-13	13:03:41	0.621285	2.7636	2.45732	293.319	FALSE	0
2022-09-13	13:03:41	0.510343	2.27011	2.45732	279.282	FALSE	0
2022-09-13	13:03:42	0.511921	2.27713	2.73768	295.596	FALSE	0
2022-09-13	13:03:42	0.545153	2.42495	2.73768	281.707	FALSE	0
2022-09-13	13:03:42	0.411972	1.83253	2.73768	297.428	FALSE	0
2022-09-13	13:03:42	0.992786	4.41611	2.73768	286.123	FALSE	0
2022-09-13	13:03:43	0.690802	3.07283	2.18967	300.501	FALSE	0
2022-09-13	13:03:43	0.622252	2.7679	2.18967	288.891	FALSE	0
2022-09-13	13:03:43	0.163728	0.728295	2.18967	301.229	FALSE	0
2022-09-13	13:03:44	0.477977	2.12614	1.36689	291.017	FALSE	0
2022-09-13	13:03:44	0.161489	0.718335	1.36689	301.948	FALSE	0
2022-09-13	13:03:44	0.411209	1.82914	1.36689	292.846	FALSE	0
2022-09-13	13:03:44	0.178486	0.793941	1.36689	302.742	FALSE	0
2022-09-13	13:03:45	0.378588	1.68404	1.39552	294.53	FALSE	0
2022-09-13	13:03:45	0.130242	0.579342	1.39552	303.321	FALSE	0
2022-09-13	13:03:45	0.468206	2.08267	1.39552	296.613	FALSE	0
2022-09-13	13:03:45	0.277875	1.23604	1.39552	304.557	FALSE	0
2022-09-13	13:03:46	0.393244	1.74923	1.74266	298.362	FALSE	0
2022-09-13	13:03:46	0.336959	1.49886	1.74266	306.056	FALSE	0
2022-09-13	13:03:46	0.416501	1.85268	1.74266	300.214	FALSE	0
2022-09-13	13:03:46	0.420369	1.86989	1.74266	307.926	FALSE	0
2022-09-13	13:03:47	0.503677	2.24046	2.30806	302.455	FALSE	0
2022-09-13	13:03:47	0.654007	2.90915	2.30806	310.835	FALSE	0
2022-09-13	13:03:47	0.398944	1.77458	2.30806	304.229	FALSE	0
2022-09-13	13:03:48	0.607595	2.7027	2.11052	313.538	FALSE	0
2022-09-13	13:03:48	0.42388	1.8855	2.11052	306.115	FALSE	0
2022-09-13	13:03:48	0.475026	2.11301	2.11052	315.651	FALSE	0
2022-09-13	13:03:48	0.391361	1.74085	2.11052	307.856	FALSE	0
2022-09-13	13:03:49	0.53869	2.3962	1.86015	318.047	FALSE	0
2022-09-13	13:03:49	0.32673	1.45336	1.86015	309.309	FALSE	0
2022-09-13	13:03:49	0.52215	2.32263	1.86015	320.369	FALSE	0
2022-09-13	13:03:49	0.285153	1.26842	1.86015	310.578	FALSE	0
2022-09-13	13:03:50	0.449733	2.0005	1.50441	322.37	FALSE	0
2022-09-13	13:03:50	0.226374	1.00696	1.50441	311.585	FALSE	0
2022-09-13	13:03:50	0.343728	1.52897	1.50441	323.899	FALSE	0
2022-09-13	13:03:50	0.33299	1.48121	1.50441	313.066	FALSE	0
2022-09-13	13:03:51	0.310344	1.38047	1.78907	325.279	FALSE	0
2022-09-13	13:03:51	0.40159	1.78635	1.78907	314.852	FALSE	0
2022-09-13	13:03:51	0.494669	2.20039	1.78907	327.48	FALSE	0
2022-09-13	13:03:52	0.737366	3.27995	3.26303	318.132	FALSE	0
2022-09-13	13:03:52	0.734924	3.26909	3.26303	330.749	FALSE	0
2022-09-13	13:03:52	0.732074	3.25641	3.26303	321.388	FALSE	0
2022-09-13	13:03:52	0.729886	3.24668	3.26303	333.996	FALSE	0
2022-09-13	13:03:53	0.73299	3.26049	3.27384	324.649	FALSE	0
2022-09-13	13:03:53	0.739046	3.28742	3.27384	337.283	FALSE	0
2022-09-13	13:03:53	0.73874	3.28606	3.27384	327.935	FALSE	0
2022-09-13	13:03:53	0.733193	3.26139	3.27384	340.544	FALSE	0
2022-09-13	13:03:54	0.71126	3.16383	3.19676	331.099	FALSE	0
2022-09-13	13:03:54	0.71986	3.20208	3.19676	343.746	FALSE	0
2022-09-13	13:03:54	0.715382	3.18216	3.19676	334.281	FALSE	0
2022-09-13	13:03:54	0.728155	3.23898	3.19676	346.985	FALSE	0
2022-09-13	13:03:55	0.728715	3.24147	3.21151	337.522	FALSE	0
2022-09-13	13:03:55	0.724237	3.22155	3.21151	350.207	FALSE	0
2022-09-13	13:03:55	0.71299	3.17152	3.21151	340.694	FALSE	0
2022-09-13	13:03:56	0.737672	3.28131	3.29274	353.488	FALSE	0
2022-09-13	13:03:56	0.745611	3.31663	3.29274	344.011	FALSE	0
2022-09-13	13:03:56	0.741031	3.29625	3.29274	356.784	FALSE	0
2022-09-13	13:03:56	0.736654	3.27678	3.29274	347.287	FALSE	0
2022-09-13	13:03:57	0.740725	3.29489	3.27978	360.079	FALSE	0
2022-09-13	13:03:57	0.737315	3.27972	3.27978	350.567	FALSE	0
2022-09-13	13:03:57	0.735076	3.26977	3.27978	363.349	FALSE	0
2022-09-13	13:03:57	0.736196	3.27475	3.27978	353.842	FALSE	0
2022-09-13	13:03:58	0.738995	3.2872	3.27497	366.636	FALSE	0
2022-09-13	13:03:58	0.735992	3.27384	3.27497	357.116	FALSE	0
2022-09-13	13:03:58	0.732837	3.25981	3.27497	369.896	FALSE	0
2022-09-13	13:03:58	0.737163	3.27905	3.27497	360.395	FALSE	0
2022-09-13	13:03:59	0.73131	3.25301	3.27731	373.149	FALSE	0
2022-09-13	13:03:59	0.73584	3.27316	3.27731	363.668	FALSE	0
2022-09-13	13:03:59	0.743168	3.30576	3.27731	376.455	FALSE	0
2022-09-13	13:04:00	0.737417	3.28018	3.27033	366.948	FALSE	0
2022-09-13	13:04:00	0.724237	3.22155	3.27033	379.676	FALSE	0
2022-09-13	13:04:00	0.740013	3.29173	3.27033	370.24	FALSE	0
2022-09-13	13:04:00	0.739147	3.28787	3.27033	382.964	FALSE	0
2022-09-13	13:04:01	0.740623	3.29444	3.25341	373.534	FALSE	0
2022-09-13	13:04:01	0.743219	3.30599	3.25341	386.27	FALSE	0
2022-09-13	13:04:01	0.730191	3.24804	3.25341	376.782	FALSE	0
2022-09-13	13:04:01	0.711565	3.16518	3.25341	389.436	FALSE	0
2022-09-13	13:04:02	0.637774	2.83695	2.50084	379.619	FALSE	0
2022-09-13	13:04:02	0.5307	2.36066	2.50084	391.796	FALSE	0
2022-09-13	13:04:02	0.517264	2.30089	2.50084	381.92	FALSE	0
2022-09-13	13:04:02	0.563117	2.50486	2.50084	394.301	FALSE	0
2022-09-13	13:04:03	0.587748	2.61442	2.63502	384.535	FALSE	0
2022-09-13	13:04:03	0.601743	2.67667	2.63502	396.978	FALSE	0
2022-09-13	13:04:03	0.587646	2.61397	2.63502	387.149	FALSE	0
2022-09-13	13:04:04	0.606069	2.69592	2.81827	399.674	FALSE	0
2022-09-13	13:04:04	0.650344	2.89286	2.81827	390.041	FALSE	0
2022-09-13	13:04:04	0.648359	2.88403	2.81827	402.558	FALSE	0
2022-09-13	13:04:04	0.629529	2.80027	2.81827	392.842	FALSE	0
2022-09-13	13:04:05	0.580878	2.58386	2.36768	405.142	FALSE	0
2022-09-13	13:04:05	0.507647	2.25812	2.36768	395.1	FALSE	0
2022-09-13	13:04:05	0.519758	2.31199	2.36768	407.454	FALSE	0
2022-09-13	13:04:05	0.520827	2.31674	2.36768	397.417	FALSE	0
2022-09-13	13:04:06	0.534211	2.37628	3.74543	409.83	FALSE	0
2022-09-13	13:04:06	0.657519	2.92478	3.74543	400.341	FALSE	0
2022-09-13	13:04:06	0.814669	3.62381	3.74543	413.454	FALSE	0
2022-09-13	13:04:06	1.36164	6.05685	3.74543	406.398	FALSE	0
2022-09-13	13:04:07	1.02444	4.55691	3.7606	418.011	FALSE	0
2022-09-13	13:04:07	0.849733	3.77978	3.7606	410.178	FALSE	0
2022-09-13	13:04:07	0.758435	3.37367	3.7606	421.384	FALSE	0
2022-09-13	13:04:07	0.749071	3.33202	3.7606	413.51	FALSE	0
2022-09-13	13:04:08	0.736603	3.27656	3.28191	424.661	FALSE	0
2022-09-13	13:04:08	0.741641	3.29897	3.28191	416.809	FALSE	0
2022-09-13	13:04:08	0.735178	3.27022	3.28191	427.931	FALSE	0
2022-09-13	13:04:09	0.739504	3.28946	3.20429	420.098	FALSE	0
2022-09-13	13:04:09	0.739911	3.29127	3.20429	431.222	FALSE	0
2022-09-13	13:04:09	0.721743	3.21046	3.20429	423.309	FALSE	0
2022-09-13	13:04:09	0.680267	3.02596	3.20429	434.248	FALSE	0
2022-09-13	13:04:10	0.66159	2.94288	3.0902	426.252	FALSE	0
2022-09-13	13:04:10	0.678333	3.01736	3.0902	437.266	FALSE	0
2022-09-13	13:04:10	0.733397	3.2623	3.0902	429.514	FALSE	0
2022-09-13	13:04:10	0.705509	3.13825	3.0902	440.404	FALSE	0
2022-09-13	13:04:11	0.707087	3.14526	3.10457	432.659	FALSE	0
2022-09-13	13:04:11	0.696094	3.09637	3.10457	443.5	FALSE	0
2022-09-13	13:04:11	0.706832	3.14413	3.10457	435.803	FALSE	0
2022-09-13	13:04:11	0.681743	3.03253	3.10457	446.533	FALSE	0
2022-09-13	13:04:12	0.663117	2.94968	3.03064	438.753	FALSE	0
2022-09-13	13:04:12	0.686985	3.05585	3.03064	449.589	FALSE	0
2022-09-13	13:04:12	0.693855	3.08641	3.03064	441.84	FALSE	0
2022-09-13	13:04:13	0.708918	3.15341	3.14832	452.742	FALSE	0
2022-09-13	13:04:13	0.687239	3.05698	3.14832	444.896	FALSE	0
2022-09-13	13:04:13	0.722608	3.2143	3.14832	455.956	FALSE	0
2022-09-13	13:04:13	0.712328	3.16858	3.14832	448.065	FALSE	0
2022-09-13	13:04:14	0.711005	3.16269	3.14294	459.119	FALSE	0
2022-09-13	13:04:14	0.693448	3.0846	3.14294	451.15	FALSE	0
2022-09-13	13:04:14	0.715636	3.18329	3.14294	462.302	FALSE	0
2022-09-13	13:04:14	0.706171	3.14119	3.14294	454.291	FALSE	0
2022-09-13	13:04:15	0.630343	2.80389	2.13632	465.106	FALSE	0
2022-09-13	13:04:15	0.438639	1.95115	2.13632	456.242	FALSE	0
2022-09-13	13:04:15	0.463015	2.05958	2.13632	467.166	FALSE	0
2022-09-13	13:04:15	0.389071	1.73067	2.13632	457.973	FALSE	0
2022-09-13	13:04:16	0.706323	3.14187	3.60088	470.308	FALSE	0
2022-09-13	13:04:16	1.00022	4.44918	3.60088	462.422	FALSE	0
2022-09-13	13:04:16	0.721997	3.21159	3.60088	473.519	FALSE	0
2022-09-13	13:04:17	0.669885	2.97978	2.52517	465.402	FALSE	0
2022-09-13	13:04:17	0.704644	3.1344	2.52517	476.654	FALSE	0
2022-09-13	13:04:17	0.180471	0.802771	2.52517	466.204	FALSE	0
2022-09-13	13:04:17	0.715738	3.18375	2.52517	479.837	FALSE	0
2022-09-13	13:04:18	0.726934	3.23355	3.07537	469.438	FALSE	0
2022-09-13	13:04:18	0.571565	2.54244	3.07537	482.38	FALSE	0
2022-09-13	13:04:18	0.732888	3.26003	3.07537	472.698	FALSE	0
2022-09-13	13:04:18	0.734109	3.26546	3.07537	485.645	FALSE	0
2022-09-13	13:04:19	0.739198	3.2881	3.28408	475.986	FALSE	0
2022-09-13	13:04:19	0.739606	3.28992	3.28408	488.935	FALSE	0
2022-09-13	13:04:19	0.732379	3.25777	3.28408	479.244	FALSE	0
2022-09-13	13:04:19	0.741997	3.30055	3.28408	492.236	FALSE	0
2022-09-13	13:04:20	0.741285	3.29738	3.27271	482.541	FALSE	0
2022-09-13	13:04:20	0.73645	3.27588	3.27271	495.512	FALSE	0
2022-09-13	13:04:20	0.729478	3.24486	3.27271	485.786	FALSE	0
2022-09-13	13:04:21	0.710242	3.1593	2.2099	498.671	FALSE	0
2022-09-13	13:04:21	0.621336	2.76383	2.2099	488.55	FALSE	0
2022-09-13	13:04:21	0.52159	2.32014	2.2099	500.991	FALSE	0
2022-09-13	13:04:21	0.134059	0.596321	2.2099	489.146	FALSE	0
2022-09-13	13:04:22	0.33645	1.4966	1.63768	502.488	FALSE	0
2022-09-13	13:04:22	0.32383	1.44046	1.63768	490.587	FALSE	0
2022-09-13	13:04:22	0.330852	1.4717	1.63768	503.959	FALSE	0
2022-09-13	13:04:22	0.481539	2.14198	1.63768	492.729	FALSE	0
2022-09-13	13:04:23	0.626832	2.78827	2.84487	506.748	FALSE	0
2022-09-13	13:04:23	0.422354	1.87872	2.84487	494.607	FALSE	0
2022-09-13	13:04:23	0.774568	3.44543	2.84487	510.193	FALSE	0
2022-09-13	13:04:23	0.734466	3.26705	2.84487	497.874	FALSE	0
2022-09-13	13:04:24	0.815585	3.62789	3.59001	513.821	FALSE	0
2022-09-13	13:04:24	0.788104	3.50564	3.59001	501.38	FALSE	0
2022-09-13	13:04:24	0.817519	3.63649	3.59001	517.457	FALSE	0
2022-09-13	13:04:25	0.782761	3.48188	3.61504	504.862	FALSE	0
2022-09-13	13:04:25	0.870598	3.87259	3.61504	521.33	FALSE	0
2022-09-13	13:04:25	0.773295	3.43977	3.61504	508.302	FALSE	0
2022-09-13	13:04:25	0.824135	3.66592	3.61504	524.996	FALSE	0
2022-09-13	13:04:26	0.70444	3.13349	1.00611	511.435	FALSE	0
2022-09-13	13:04:26	1.29532e-05	5.76184e-05	1.00611	524.996	FALSE	0
2022-09-13	13:04:26	0.289275	1.28675	1.00611	512.722	FALSE	0
2022-09-13	13:04:26	-0.0889946	-0.395866	1.00611	524.996	FALSE	0
2022-09-13	13:04:27	-0.18131	-0.806503	-1.13372	512.722	FALSE	0
2022-09-13	13:04:27	-0.317035	-1.41024	-1.13372	524.996	FALSE	0
2022-09-13	13:04:27	-0.240801	-1.07113	-1.13372	512.722	FALSE	0
2022-09-13	13:04:27	-0.280343	-1.24702	-1.13372	524.996	FALSE	0
2022-09-13	13:04:28	-0.28528	-1.26898	-1.21224	512.722	FALSE	0
2022-09-13	13:04:28	-0.330725	-1.47113	-1.21224	524.996	FALSE	0
2022-09-13	13:04:28	-0.201565	-0.896601	-1.21224	512.722	FALSE	0
2022-09-13	13:04:29	-0.0755595	-0.336104	0.615732	524.996	FALSE	0
2022-09-13	13:04:29	-0.0235494	-0.104752	0.615732	512.722	FALSE	0
2022-09-13	13:04:29	0.0545168	0.242502	0.615732	525.238	FALSE	0
2022-09-13	13:04:29	0.598283	2.66128	0.615732	515.383	FALSE	0
2022-09-13	13:04:30	0.773601	3.44113	1.99988	528.68	FALSE	0
2022-09-13	13:04:30	0.504135	2.24249	1.99988	517.626	FALSE	0
2022-09-13	13:04:30	0.179351	0.797789	1.99988	529.477	FALSE	0
2022-09-13	13:04:30	0.341285	1.5181	1.99988	519.144	FALSE	0
2022-09-13	13:04:31	0.744033	3.30961	2.85879	532.787	FALSE	0
2022-09-13	13:04:31	0.370903	1.64985	2.85879	520.794	FALSE	0
2022-09-13	13:04:31	0.716552	3.18737	2.85879	535.974	FALSE	0
2022-09-13	13:04:31	0.739249	3.28833	2.85879	524.082	FALSE	0
2022-09-13	13:04:32	0.740165	3.2924	3.26811	539.267	FALSE	0
2022-09-13	13:04:32	0.733397	3.2623	3.26811	527.344	FALSE	0
2022-09-13	13:04:32	0.730547	3.24962	3.26811	542.516	FALSE	0
2022-09-13	13:04:33	0.736501	3.2761	3.27005	530.62	FALSE	0
2022-09-13	13:04:33	0.733804	3.26411	3.27005	545.78	FALSE	0
2022-09-13	13:04:33	0.736196	3.27475	3.27005	533.895	FALSE	0
2022-09-13	13:04:33	0.734059	3.26524	3.27005	549.046	FALSE	0
2022-09-13	13:04:34	0.736959	3.27814	3.26665	537.173	FALSE	0
2022-09-13	13:04:34	0.736094	3.27429	3.26665	552.32	FALSE	0
2022-09-13	13:04:34	0.733448	3.26252	3.26665	540.436	FALSE	0
2022-09-13	13:04:34	0.731005	3.25166	3.26665	555.572	FALSE	0
2022-09-13	13:04:35	0.73584	3.27316	3.25749	543.709	FALSE	0
2022-09-13	13:04:35	0.734669	3.26795	3.25749	558.84	FALSE	0
2022-09-13	13:04:35	0.731361	3.25324	3.25749	546.962	FALSE	0
2022-09-13	13:04:35	0.727392	3.23559	3.25749	562.075	FALSE	0
2022-09-13	13:04:36	0.731259	3.25279	3.26116	550.215	FALSE	0
2022-09-13	13:04:36	0.732379	3.25777	3.26116	565.333	FALSE	0
2022-09-13	13:04:36	0.735789	3.27294	3.26116	553.488	FALSE	0
2022-09-13	13:04:37	0.763321	3.3954	3.6769	568.728	FALSE	0
2022-09-13	13:04:37	0.805865	3.58465	3.6769	557.073	FALSE	0
2022-09-13	13:04:37	0.820878	3.65143	3.6769	572.38	FALSE	0
2022-09-13	13:04:37	0.916349	4.0761	3.6769	561.149	FALSE	0
2022-09-13	13:04:38	0.920522	4.09467	4.14011	576.474	FALSE	0
2022-09-13	13:04:38	0.963219	4.28459	4.14011	565.433	FALSE	0
2022-09-13	13:04:38	0.837672	3.72613	4.14011	580.201	FALSE	0
2022-09-13	13:04:38	1.00154	4.45505	4.14011	569.888	FALSE	0
2022-09-13	13:04:39	0.996908	4.43445	3.87486	584.635	FALSE	0
2022-09-13	13:04:39	0.993092	4.41747	3.87486	574.306	FALSE	0
2022-09-13	13:04:39	0.900216	4.00434	3.87486	588.639	FALSE	0
2022-09-13	13:04:39	0.594211	2.64317	3.87486	576.949	FALSE	0
2022-09-13	13:04:40	0.210242	0.935198	-0.116579	589.575	FALSE	0
2022-09-13	13:04:40	-0.192353	-0.855625	-0.116579	576.949	FALSE	0
2022-09-13	13:04:40	-0.00700993	-0.0311816	-0.116579	589.575	FALSE	0
2022-09-13	13:04:40	-0.115712	-0.51471	-0.116579	576.949	FALSE	0
2022-09-13	13:04:41	-0.0509794	-0.226767	2.38171	589.575	FALSE	0
2022-09-13	13:04:41	0.701132	3.11878	2.38171	580.068	FALSE	0
2022-09-13	13:04:41	0.956145	4.25312	2.38171	593.828	FALSE	0
2022-09-13	13:04:42	0.036247	0.161234	1.07979	580.229	FALSE	0
2022-09-13	13:04:42	0.430547	1.91516	1.07979	595.743	FALSE	0
2022-09-13	13:04:42	0.284542	1.2657	1.07979	581.495	FALSE	0
2022-09-13	13:04:42	0.219657	0.977078	1.07979	596.72	FALSE	0
2022-09-13	13:04:43	0.208664	0.928179	2.29326	582.423	FALSE	0
2022-09-13	13:04:43	0.36444	1.6211	2.29326	598.341	FALSE	0
2022-09-13	13:04:43	0.735992	3.27384	2.29326	585.697	FALSE	0
2022-09-13	13:04:43	0.753092	3.3499	2.29326	601.691	FALSE	0
2022-09-13	13:04:44	1.01833	4.52974	3.70847	590.226	FALSE	0
2022-09-13	13:04:44	0.746527	3.3207	3.70847	605.012	FALSE	0
2022-09-13	13:04:44	0.838689	3.73066	3.70847	593.957	FALSE	0
2022-09-13	13:04:44	0.731259	3.25279	3.70847	608.264	FALSE	0
2022-09-13	13:04:45	0.73645	3.27588	3.35669	597.233	FALSE	0
2022-09-13	13:04:45	0.767239	3.41283	3.35669	611.677	FALSE	0
2022-09-13	13:04:45	0.760165	3.38137	3.35669	600.614	FALSE	0
2022-09-13	13:04:46	0.762048	3.38974	3.44668	615.067	FALSE	0
2022-09-13	13:04:46	0.771972	3.43389	3.44668	604.048	FALSE	0
2022-09-13	13:04:46	0.77701	3.4563	3.44668	618.523	FALSE	0
2022-09-13	13:04:46	0.788359	3.50678	3.44668	607.555	FALSE	0
2022-09-13	13:04:47	0.785102	3.49229	3.53796	622.016	FALSE	0
2022-09-13	13:04:47	0.796349	3.54232	3.53796	611.097	FALSE	0
2022-09-13	13:04:47	0.797366	3.54684	3.53796	625.562	FALSE	0
2022-09-13	13:04:47	0.802659	3.57039	3.53796	614.668	FALSE	0
2022-09-13	13:04:48	0.816043	3.62992	3.81662	629.192	FALSE	0
2022-09-13	13:04:48	0.830903	3.69602	3.81662	618.364	FALSE	0
2022-09-13	13:04:48	0.914873	4.06954	3.81662	633.262	FALSE	0
2022-09-13	13:04:48	0.870242	3.87101	3.81662	622.235	FALSE	0
2022-09-13	13:04:49	0.867748	3.85992	3.87629	637.122	FALSE	0
2022-09-13	13:04:49	0.869784	3.86897	3.87629	626.104	FALSE	0
2022-09-13	13:04:49	0.876756	3.89999	3.87629	641.022	FALSE	0
2022-09-13	13:04:50	1.03915	4.62235	3.11901	630.726	FALSE	0
2022-09-13	13:04:50	0.909478	4.04554	3.11901	645.067	FALSE	0
2022-09-13	13:04:50	0.538232	2.39416	3.11901	633.12	FALSE	0
2022-09-13	13:04:50	0.317876	1.41398	3.11901	646.481	FALSE	0
2022-09-13	13:04:51	0.471311	2.09649	2.9031	635.217	FALSE	0
2022-09-13	13:04:51	0.585254	2.60333	2.9031	649.085	FALSE	0
2022-09-13	13:04:51	0.735076	3.26977	2.9031	638.487	FALSE	0
2022-09-13	13:04:51	0.818944	3.64283	2.9031	652.727	FALSE	0
2022-09-13	13:04:52	0.948766	4.2203	2.50678	642.707	FALSE	0
2022-09-13	13:04:52	0.14383	0.639785	2.50678	653.367	FALSE	0
2022-09-13	13:04:52	0.704389	3.13326	2.50678	645.84	FALSE	0
2022-09-13	13:04:52	0.457214	2.03378	2.50678	655.401	FALSE	0
2022-09-13	13:04:53	0.465051	2.06864	1.74002	647.909	FALSE	0
2022-09-13	13:04:53	0.340267	1.51358	1.74002	656.915	FALSE	0
2022-09-13	13:04:53	0.368206	1.63785	1.74002	649.547	FALSE	0
2022-09-13	13:04:54	0.419351	1.86536	2.4464	658.78	FALSE	0
2022-09-13	13:04:54	0.456247	2.02948	2.4464	651.576	FALSE	0
2022-09-13	13:04:54	0.601234	2.67441	2.4464	661.454	FALSE	0
2022-09-13	13:04:54	0.723066	3.21634	2.4464	654.792	FALSE	0
2022-09-13	13:04:55	0.745763	3.3173	2.77288	664.772	FALSE	0
2022-09-13	13:04:55	0.442201	1.967	2.77288	656.759	FALSE	0
2022-09-13	13:04:55	0.587494	2.61329	2.77288	667.385	FALSE	0
2022-09-13	13:04:55	0.718028	3.19393	2.77288	659.953	FALSE	0
2022-09-13	13:04:56	0.493855	2.19677	3.83122	669.582	FALSE	0
2022-09-13	13:04:56	0.929885	4.13631	3.83122	664.09	FALSE	0
2022-09-13	13:04:56	0.993346	4.4186	3.83122	674	FALSE	0
2022-09-13	13:04:56	1.0281	4.57319	3.83122	668.663	FALSE	0
2022-09-13	13:04:57	0.968002	4.30587	4.62785	678.306	FALSE	0
2022-09-13	13:04:57	1.05966	4.71358	4.62785	673.376	FALSE	0
2022-09-13	13:04:57	1.0935	4.86411	4.62785	683.17	FALSE	0
2022-09-13	13:04:58	1.1221	4.99133	4.54492	678.368	FALSE	0
2022-09-13	13:04:58	1.09523	4.8718	4.54492	688.042	FALSE	0
2022-09-13	13:04:58	0.971107	4.31968	4.54492	682.687	FALSE	0
2022-09-13	13:04:58	0.898537	3.99687	4.54492	692.039	FALSE	0
2022-09-13	13:04:59	1.06149	4.72172	4.88505	687.409	FALSE	0
2022-09-13	13:04:59	1.11589	4.9637	4.88505	697.003	FALSE	0
2022-09-13	13:04:59	1.10307	4.90668	4.88505	692.316	FALSE	0
2022-09-13	13:04:59	1.11238	4.94809	4.88505	701.951	FALSE	0
2022-09-13	13:05:00	1.11726	4.9698	2.48261	697.286	FALSE	0
2022-09-13	13:05:00	0.75014	3.33677	2.48261	705.288	FALSE	0
2022-09-13	13:05:00	0.340318	1.5138	2.48261	698.799	FALSE	0
2022-09-13	13:05:00	0.0247458	0.110074	2.48261	705.398	FALSE	0
2022-09-13	13:05:01	0.245204	1.09072	1.57825	699.89	FALSE	0
2022-09-13	13:05:01	0.30154	1.34131	1.57825	706.739	FALSE	0
2022-09-13	13:05:01	0.517672	2.30271	1.57825	702.193	FALSE	0
2022-09-13	13:05:02	0.86673	3.85539	6.69596	710.594	FALSE	0
2022-09-13	13:05:02	0.583168	2.59405	6.69596	704.787	FALSE	0
2022-09-13	13:05:02	1.39691	6.21374	6.69596	716.808	FALSE	0
2022-09-13	13:05:02	3.17447	14.1207	6.69596	718.908	1	1
2022-09-13	13:05:03	6.03807	26.8585	14.548	743.667	1	2
2022-09-13	13:05:03	4.35009	19.3501	14.548	738.258	1	3
2022-09-13	13:05:03	2.20968	9.8291	14.548	753.496	FALSE	3
2022-09-13	13:05:03	0.484339	2.15444	14.548	740.412	FALSE	3
2022-09-13	13:05:04	0.503524	2.23978	2.03774	755.735	FALSE	3
2022-09-13	13:05:04	0.429377	1.90995	2.03774	742.322	FALSE	3
2022-09-13	13:05:04	0.428613	1.90656	2.03774	757.642	FALSE	3
2022-09-13	13:05:04	0.470903	2.09467	2.03774	744.417	FALSE	3
2022-09-13	13:05:05	0.451565	2.00865	2.23683	759.651	FALSE	3
2022-09-13	13:05:05	0.496959	2.21057	2.23683	746.627	FALSE	3
2022-09-13	13:05:05	0.560064	2.49128	2.23683	762.142	FALSE	3
2022-09-13	13:05:06	0.524796	2.3344	1.94804	748.962	FALSE	3
2022-09-13	13:05:06	0.538435	2.39507	1.94804	764.537	FALSE	3
2022-09-13	13:05:06	0.438893	1.95228	1.94804	750.914	FALSE	3
2022-09-13	13:05:06	0.249631	1.11041	1.94804	765.647	FALSE	3
2022-09-13	13:05:07	0.358079	1.59281	2.02257	752.507	FALSE	3
2022-09-13	13:05:07	0.535178	2.38058	2.02257	768.028	FALSE	3
2022-09-13	13:05:07	0.496399	2.20808	2.02257	754.715	FALSE	3
2022-09-13	13:05:07	0.429122	1.90882	2.02257	769.937	FALSE	3
2022-09-13	13:05:08	0.419809	1.86739	2.16004	756.582	FALSE	3
2022-09-13	13:05:08	0.470446	2.09264	2.16004	772.029	FALSE	3
2022-09-13	13:05:08	0.561336	2.49693	2.16004	759.079	FALSE	3
2022-09-13	13:05:08	0.490802	2.18319	2.16004	774.213	FALSE	3
2022-09-13	13:05:09	0.340878	1.51629	2.13753	760.595	FALSE	3
2022-09-13	13:05:09	0.626679	2.78759	2.13753	777	FALSE	3
2022-09-13	13:05:09	0.474059	2.10871	2.13753	762.704	FALSE	3
2022-09-13	13:05:10	0.566272	2.51889	9.2711	779.519	FALSE	3
2022-09-13	13:05:10	0.669122	2.97639	9.2711	765.681	FALSE	3
2022-09-13	13:05:10	4.34515	19.3281	9.2711	798.847	1	4
2022-09-13	13:05:10	2.7564	12.261	9.2711	777.942	FALSE	4
2022-09-13	13:05:11	0.297774	1.32456	0.78319	800.172	FALSE	4
2022-09-13	13:05:11	0.0117687	0.0523495	0.78319	777.994	FALSE	4
2022-09-13	13:05:11	0.0953819	0.424278	0.78319	800.596	FALSE	4
2022-09-13	13:05:11	0.299351	1.33157	0.78319	779.326	FALSE	4
2022-09-13	13:05:12	0.45416	2.02019	3.33439	802.616	FALSE	4
2022-09-13	13:05:12	0.481285	2.14085	3.33439	781.466	FALSE	4
2022-09-13	13:05:12	0.743015	3.30508	3.33439	805.921	FALSE	4
2022-09-13	13:05:12	1.31996	5.87145	3.33439	787.338	FALSE	4
2022-09-13	13:05:13	0.7964	3.54255	2.2614	809.464	FALSE	4
2022-09-13	13:05:13	0.418028	1.85947	2.2614	789.197	FALSE	4
2022-09-13	13:05:13	0.20154	0.89649	2.2614	810.36	FALSE	4
2022-09-13	13:05:13	0.61757	2.74707	2.2614	791.944	FALSE	4
2022-09-13	13:05:14	0.439758	1.95613	1.55229	812.317	FALSE	4
2022-09-13	13:05:14	0.289784	1.28902	1.55229	793.233	FALSE	4
2022-09-13	13:05:14	0.317366	1.41171	1.55229	813.728	FALSE	4
2022-09-13	13:05:15	0.502201	2.23389	2.98256	795.467	FALSE	4
2022-09-13	13:05:15	0.69584	3.09524	2.98256	816.823	FALSE	4
2022-09-13	13:05:15	0.550293	2.44781	2.98256	797.915	FALSE	4
2022-09-13	13:05:15	0.933702	4.15329	2.98256	820.977	FALSE	4
2022-09-13	13:05:16	1.03955	4.62413	6.05747	802.539	FALSE	4
2022-09-13	13:05:16	1.34485	5.98216	6.05747	826.959	FALSE	4
2022-09-13	13:05:16	1.67207	7.4377	6.05747	809.977	FALSE	4
2022-09-13	13:05:16	1.39065	6.18589	6.05747	833.145	FALSE	4
2022-09-13	13:05:17	0.830038	3.69218	3.45539	813.669	FALSE	4
2022-09-13	13:05:17	0.836196	3.71957	3.45539	836.864	FALSE	4
2022-09-13	13:05:17	0.759198	3.37706	3.45539	817.046	FALSE	4
2022-09-13	13:05:17	0.681794	3.03276	3.45539	839.897	FALSE	4
2022-09-13	13:05:18	-0.270369	-1.20266	-1.64657	817.046	FALSE	4
2022-09-13	13:05:18	-0.391488	-1.74142	-1.64657	839.897	FALSE	4
2022-09-13	13:05:18	-0.448638	-1.99563	-1.64657	817.046	FALSE	4
2022-09-13	13:05:19	-0.478613	-2.12897	-1.9507	839.897	FALSE	4
2022-09-13	13:05:19	-0.528587	-2.35126	-1.9507	817.046	FALSE	4
2022-09-13	13:05:19	-0.412506	-1.83491	-1.9507	839.897	FALSE	4
2022-09-13	13:05:19	-0.33444	-1.48766	-1.9507	817.046	FALSE	4
2022-09-13	13:05:20	-0.216832	-0.964512	-0.599883	839.897	FALSE	4
2022-09-13	13:05:20	-0.223142	-0.99258	-0.599883	817.046	FALSE	4
2022-09-13	13:05:20	-0.0301142	-0.133954	-0.599883	839.897	FALSE	4
2022-09-13	13:05:20	-0.0693509	-0.308487	-0.599883	817.046	FALSE	4
2022-09-13	13:05:21	0.0595549	0.264912	-0.0235415	840.162	FALSE	4
2022-09-13	13:05:21	-0.0895035	-0.398129	-0.0235415	817.046	FALSE	4
2022-09-13	13:05:21	0.0821503	0.365421	-0.0235415	840.527	FALSE	4
2022-09-13	13:05:21	-0.0733712	-0.32637	-0.0235415	817.046	FALSE	4
2022-09-13	13:05:22	-0.189758	-0.844082	-0.863172	840.527	FALSE	4
2022-09-13	13:05:22	-0.207468	-0.922859	-0.863172	817.046	FALSE	4
2022-09-13	13:05:22	-0.184923	-0.822574	-0.863172	840.527	FALSE	4
2022-09-13	13:05:23	-0.117493	-0.522632	-0.829991	817.046	FALSE	4
2022-09-13	13:05:23	-0.123906	-0.551159	-0.829991	840.527	FALSE	4
2022-09-13	13:05:23	-0.182023	-0.809675	-0.829991	817.046	FALSE	4
2022-09-13	13:05:23	-0.322939	-1.4365	-0.829991	840.527	FALSE	4
2022-09-13	13:05:24	-0.191692	-0.852684	-1.03803	817.046	FALSE	4
2022-09-13	13:05:24	-0.234796	-1.04442	-1.03803	840.527	FALSE	4
2022-09-13	13:05:24	-0.246094	-1.09468	-1.03803	817.046	FALSE	4
2022-09-13	13:05:24	-0.260852	-1.16032	-1.03803	840.527	FALSE	4
2022-09-13	13:05:25	-0.254745	-1.13316	-1.0816	817.046	FALSE	4
2022-09-13	13:05:25	-0.204058	-0.907691	-1.0816	840.527	FALSE	4
2022-09-13	13:05:25	-0.132404	-0.588959	-1.0816	817.046	FALSE	4
2022-09-13	13:05:25	-0.381412	-1.6966	-1.0816	840.527	FALSE	4
2022-09-13	13:05:26	-0.438002	-1.94832	-1.59156	817.046	FALSE	4
2022-09-13	13:05:26	-0.339274	-1.50916	-1.59156	840.527	FALSE	4
2022-09-13	13:05:26	-0.296119	-1.3172	-1.59156	817.046	FALSE	4
2022-09-13	13:05:27	-0.279834	-1.24476	-0.2129	840.527	FALSE	4
2022-09-13	13:05:27	-0.127264	-0.566096	-0.2129	817.046	FALSE	4
2022-09-13	13:05:27	0.0546694	0.24318	-0.2129	840.771	FALSE	4
2022-09-13	13:05:27	0.16098	0.716071	-0.2129	817.762	FALSE	4
2022-09-13	13:05:28	0.31187	1.38726	1.09122	842.158	FALSE	4
2022-09-13	13:05:28	0.150751	0.670571	1.09122	818.433	FALSE	4
2022-09-13	13:05:28	0.27986	1.24487	1.09122	843.403	FALSE	4
2022-09-13	13:05:28	0.238792	1.06219	1.09122	819.495	FALSE	4
2022-09-13	13:05:29	0.301438	1.34086	1.67673	844.744	FALSE	4
2022-09-13	13:05:29	0.160115	0.712224	1.67673	820.207	FALSE	4
2022-09-13	13:05:29	0.42271	1.8803	1.67673	846.624	FALSE	4
2022-09-13	13:05:29	0.623524	2.77356	1.67673	822.981	FALSE	4
2022-09-13	13:05:30	0.734924	3.26909	3.26117	849.893	FALSE	4
2022-09-13	13:05:30	0.736807	3.27746	3.26117	826.258	FALSE	4
2022-09-13	13:05:30	0.727697	3.23694	3.26117	853.13	FALSE	4
2022-09-13	13:05:31	0.73355	3.26298	2.93875	829.521	FALSE	4
2022-09-13	13:05:31	0.63416	2.82087	2.93875	855.951	FALSE	4
2022-09-13	13:05:31	0.563575	2.50689	2.93875	832.028	FALSE	4
2022-09-13	13:05:31	0.711361	3.16428	2.93875	859.115	FALSE	4
2022-09-13	13:05:32	-0.0199361	-0.0886798	-1.19722	832.028	FALSE	4
2022-09-13	13:05:32	-0.236832	-1.05348	-1.19722	859.115	FALSE	4
2022-09-13	13:05:32	-0.374084	-1.664	-1.19722	832.028	FALSE	4
2022-09-13	13:05:32	-0.445737	-1.98273	-1.19722	859.115	FALSE	4
2022-09-13	13:05:33	-0.367926	-1.63661	-1.4052	832.028	FALSE	4
2022-09-13	13:05:33	-0.392455	-1.74572	-1.4052	859.115	FALSE	4
2022-09-13	13:05:33	-0.301107	-1.33938	-1.4052	832.028	FALSE	4
2022-09-13	13:05:33	-0.202124	-0.899088	-1.4052	859.115	FALSE	4
2022-09-13	13:05:34	-0.146246	-0.650531	-0.646685	832.028	FALSE	4
2022-09-13	13:05:34	-0.120954	-0.538028	-0.646685	859.115	FALSE	4
2022-09-13	13:05:34	-0.168944	-0.751497	-0.646685	832.028	FALSE	4
2022-09-13	13:05:35	0.101336	0.450763	0.821955	859.566	FALSE	4
2022-09-13	13:05:35	0.0971122	0.431974	0.821955	832.46	FALSE	4
2022-09-13	13:05:35	0.320827	1.4271	0.821955	860.993	FALSE	4
2022-09-13	13:05:35	0.21986	0.977981	0.821955	833.438	FALSE	4
2022-09-13	13:05:36	0.354517	1.57696	1.4627	862.57	FALSE	4
2022-09-13	13:05:36	0.263168	1.17062	1.4627	834.609	FALSE	4
2022-09-13	13:05:36	0.485153	2.15806	1.4627	864.728	FALSE	4
2022-09-13	13:05:36	0.212481	0.945158	1.4627	835.554	FALSE	4
2022-09-13	13:05:37	0.377316	1.67838	2.83836	866.406	FALSE	4
2022-09-13	13:05:37	0.700776	3.11719	2.83836	838.671	FALSE	4
2022-09-13	13:05:37	0.733295	3.26184	2.83836	869.668	FALSE	4
2022-09-13	13:05:37	0.74098	3.29603	2.83836	841.967	FALSE	4
2022-09-13	13:05:38	0.281641	1.2528	1.53025	870.921	FALSE	4
2022-09-13	13:05:38	0.281132	1.25053	1.53025	843.218	FALSE	4
2022-09-13	13:05:38	0.469275	2.08743	1.53025	873.008	FALSE	4
2022-09-13	13:05:39	0.739402	3.28901	2.75771	846.507	FALSE	4
2022-09-13	13:05:39	0.539198	2.39846	2.75771	875.407	FALSE	4
2022-09-13	13:05:39	0.725509	3.22721	2.75771	849.734	FALSE	4
2022-09-13	13:05:39	0.475738	2.11618	2.75771	877.523	FALSE	4
2022-09-13	13:05:40	0.674211	2.99903	2.84011	852.733	FALSE	4
2022-09-13	13:05:40	0.431718	1.92037	2.84011	879.443	FALSE	4
2022-09-13	13:05:40	0.719809	3.20185	2.84011	855.935	FALSE	4
2022-09-13	13:05:40	0.728206	3.23921	2.84011	882.683	FALSE	4
2022-09-13	13:05:41	0.594466	2.6443	2.16904	858.579	FALSE	4
2022-09-13	13:05:41	0.723321	3.21748	2.16904	885.9	FALSE	4
2022-09-13	13:05:41	0.649733	2.89014	2.16904	861.469	FALSE	4
2022-09-13	13:05:41	-0.0170354	-0.0757769	2.16904	885.9	FALSE	4
2022-09-13	13:05:42	-0.495051	-2.20209	0.32573	861.469	FALSE	4
2022-09-13	13:05:42	-0.0512338	-0.227898	0.32573	885.9	FALSE	4
2022-09-13	13:05:42	0.765967	3.40717	0.32573	864.876	FALSE	4
2022-09-13	13:05:43	0.84042	3.73836	2.07305	889.638	FALSE	4
2022-09-13	13:05:43	0.335891	1.49411	2.07305	866.37	FALSE	4
2022-09-13	13:05:43	0.289682	1.28856	2.07305	890.927	FALSE	4
2022-09-13	13:05:43	0.398181	1.77119	2.07305	868.142	FALSE	4
2022-09-13	13:05:44	0.402812	1.79179	1.87045	892.719	FALSE	4
2022-09-13	13:05:44	0.431718	1.92037	1.87045	870.062	FALSE	4
2022-09-13	13:05:44	0.444644	1.97787	1.87045	894.697	FALSE	4
2022-09-13	13:05:44	0.402812	1.79179	1.87045	871.854	FALSE	4
2022-09-13	13:05:45	0.463473	2.06162	1.93208	896.758	FALSE	4
2022-09-13	13:05:45	0.388766	1.72931	1.93208	873.583	FALSE	4
2022-09-13	13:05:45	0.468664	2.08471	1.93208	898.843	FALSE	4
2022-09-13	13:05:45	0.416501	1.85268	1.93208	875.436	FALSE	4
2022-09-13	13:05:46	0.494415	2.19926	4.47667	901.042	FALSE	4
2022-09-13	13:05:46	0.428461	1.90588	4.47667	877.342	FALSE	4
2022-09-13	13:05:46	0.853244	3.7954	4.47667	904.838	FALSE	4
2022-09-13	13:05:46	2.24948	10.0061	4.47667	887.348	FALSE	4
2022-09-13	13:05:47	4.37696	19.4696	9.79402	924.307	1	5
2022-09-13	13:05:47	1.21009	5.38272	9.79402	892.73	FALSE	5
2022-09-13	13:05:47	1.01833	4.52974	9.79402	928.837	FALSE	5
2022-09-13	13:05:48	0.482405	2.14583	1.3567	894.876	FALSE	5
2022-09-13	13:05:48	0.740827	3.29535	1.3567	932.132	FALSE	5
2022-09-13	13:05:48	0.133753	0.59496	1.3567	895.471	FALSE	5
2022-09-13	13:05:48	-0.136984	-0.609332	1.3567	932.132	FALSE	5
2022-09-13	13:05:49	-0.485941	-2.16156	-2.08024	895.471	FALSE	5
2022-09-13	13:05:49	-0.684109	-3.04305	-2.08024	932.132	FALSE	5
2022-09-13	13:05:49	-0.406094	-1.80639	-2.08024	895.471	FALSE	5
2022-09-13	13:05:49	-0.294491	-1.30995	-2.08024	932.132	FALSE	5
2022-09-13	13:05:50	-0.343905	-1.52976	-2.57339	895.471	FALSE	5
2022-09-13	13:05:50	-0.546806	-2.4323	-2.57339	932.132	FALSE	5
2022-09-13	13:05:50	-0.703651	-3.12998	-2.57339	895.471	FALSE	5
2022-09-13	13:05:50	-0.719732	-3.20151	-2.57339	932.132	FALSE	5
2022-09-13	13:05:51	-0.712251	-3.16823	-3.36608	895.471	FALSE	5
2022-09-13	13:05:51	-0.79047	-3.51617	-3.36608	932.132	FALSE	5
2022-09-13	13:05:51	-0.767467	-3.41385	-3.36608	895.471	FALSE	5
2022-09-13	13:05:52	-0.804312	-3.57774	-2.24973	932.132	FALSE	5
2022-09-13	13:05:52	-0.581361	-2.58601	-2.24973	895.471	FALSE	5
2022-09-13	13:05:52	-0.487061	-2.16654	-2.24973	932.132	FALSE	5
2022-09-13	13:05:52	-0.150318	-0.668645	-2.24973	895.471	FALSE	5
2022-09-13	13:05:53	0.117875	0.524332	2.64277	932.657	FALSE	5
2022-09-13	13:05:53	0.430751	1.91607	2.64277	897.387	FALSE	5
2022-09-13	13:05:53	0.889987	3.95884	2.64277	936.616	FALSE	5
2022-09-13	13:05:53	0.937875	4.17186	2.64277	901.559	FALSE	5
2022-09-13	13:05:54	1.96307	8.73213	3.44424	945.348	FALSE	5
2022-09-13	13:05:54	1.1452	5.09408	3.44424	906.653	FALSE	5
2022-09-13	13:05:54	0.0433718	0.192926	3.44424	945.541	FALSE	5
2022-09-13	13:05:54	-0.0544399	-0.24216	3.44424	906.653	FALSE	5
2022-09-13	13:05:55	-0.262124	-1.16598	0.255179	945.541	FALSE	5
2022-09-13	13:05:55	0.33986	1.51177	0.255179	908.165	FALSE	5
2022-09-13	13:05:55	0.0943641	0.41975	0.255179	945.96	FALSE	5
2022-09-13	13:05:56	-0.0613102	-0.27272	-0.103508	908.165	FALSE	5
2022-09-13	13:05:56	-0.150878	-0.671136	-0.103508	945.96	FALSE	5
2022-09-13	13:05:56	-0.195661	-0.870339	-0.103508	908.165	FALSE	5
2022-09-13	13:05:56	0.314771	1.40016	-0.103508	947.361	FALSE	5
2022-09-13	13:05:57	0.351463	1.56338	1.25133	909.728	FALSE	5
2022-09-13	13:05:57	0.316043	1.40582	1.25133	948.766	FALSE	5
2022-09-13	13:05:57	0.26897	1.19643	1.25133	910.925	FALSE	5
2022-09-13	13:05:57	0.188766	0.839669	1.25133	949.606	FALSE	5
2022-09-13	13:05:58	0.243066	1.08121	0.645838	912.006	FALSE	5
2022-09-13	13:05:58	-0.0537784	-0.239217	0.645838	949.606	FALSE	5
2022-09-13	13:05:58	0.115636	0.514372	0.645838	912.52	FALSE	5
2022-09-13	13:05:58	0.27584	1.22699	0.645838	950.833	FALSE	5
2022-09-13	13:05:59	0.49472	2.20061	2.24687	914.721	FALSE	5
2022-09-13	13:05:59	0.464542	2.06638	2.24687	952.899	FALSE	5
2022-09-13	13:05:59	0.556094	2.47362	2.24687	917.195	FALSE	5
2022-09-13	13:06:00	0.313092	1.3927	0.0938893	954.292	FALSE	5
2022-09-13	13:06:00	0.260776	1.15998	0.0938893	918.355	FALSE	5
2022-09-13	13:06:00	0.134873	0.599942	0.0938893	954.892	FALSE	5
2022-09-13	13:06:00	-0.624312	-2.77706	0.0938893	918.355	FALSE	5
2022-09-13	13:06:01	0.430242	1.9138	1.62693	956.806	FALSE	5
2022-09-13	13:06:01	0.465814	2.07203	1.62693	920.427	FALSE	5
2022-09-13	13:06:01	0.194059	0.863213	1.62693	957.669	FALSE	5
2022-09-13	13:06:01	0.372888	1.65868	1.62693	922.085	FALSE	5
2022-09-13	13:06:02	0.327036	1.45472	-1.22953	959.124	FALSE	5
2022-09-13	13:06:02	-0.597544	-2.658	-1.22953	922.085	FALSE	5
2022-09-13	13:06:02	-1.07174	-4.76731	-1.22953	959.124	FALSE	5
2022-09-13	13:06:02	0.236603	1.05246	-1.22953	923.138	FALSE	5
2022-09-13	13:06:03	1.14317	5.08505	3.76635	964.209	FALSE	5
2022-09-13	13:06:03	0.938079	4.17276	3.76635	927.311	FALSE	5
2022-09-13	13:06:03	0.458893	2.04125	3.76635	966.25	FALSE	5
2022-09-13	13:06:04	0.699147	3.10995	-0.858624	930.421	FALSE	5
2022-09-13	13:06:04	0.444135	1.9756	-0.858624	968.226	FALSE	5
2022-09-13	13:06:04	-0.861411	-3.83173	-0.858624	930.421	FALSE	5
2022-09-13	13:06:04	-1.05398	-4.68831	-0.858624	968.226	FALSE	5
2022-09-13	13:06:05	-0.978511	-4.35261	-4.25527	930.421	FALSE	5
2022-09-13	13:06:05	-1.01291	-4.50563	-4.25527	968.226	FALSE	5
2022-09-13	13:06:05	-0.886908	-3.94514	-4.25527	930.421	FALSE	5
2022-09-13	13:06:05	-0.94818	-4.21769	-4.25527	968.226	FALSE	5
2022-09-13	13:06:06	-0.985635	-4.3843	-0.531405	930.421	FALSE	5
2022-09-13	13:06:06	0.0858654	0.381946	-0.531405	968.608	FALSE	5
2022-09-13	13:06:06	-0.30645	-1.36315	-0.531405	930.421	FALSE	5
2022-09-13	13:06:06	0.728359	3.23989	-0.531405	971.847	FALSE	5
2022-09-13	13:06:07	0.740064	3.29195	3.26577	933.712	FALSE	5
2022-09-13	13:06:07	0.728868	3.24215	3.26577	975.09	FALSE	5
2022-09-13	13:06:07	0.733601	3.2632	3.26577	936.976	FALSE	5
2022-09-13	13:06:08	0.732888	3.26003	3.25154	978.35	FALSE	5
2022-09-13	13:06:08	0.73528	3.27067	3.25154	940.246	FALSE	5
2022-09-13	13:06:08	0.728308	3.23966	3.25154	981.589	FALSE	5
2022-09-13	13:06:08	0.727443	3.23581	3.25154	943.482	FALSE	5
2022-09-13	13:06:09	0.733295	3.26184	3.26405	984.851	FALSE	5
2022-09-13	13:06:09	0.737672	3.28131	3.26405	946.763	FALSE	5
2022-09-13	13:06:09	0.734415	3.26682	3.26405	988.118	FALSE	5
2022-09-13	13:06:09	0.729784	3.24623	3.26405	950.01	FALSE	5
2022-09-13	13:06:10	0.733499	3.26275	3.26484	991.381	FALSE	5
2022-09-13	13:06:10	0.734822	3.26864	3.26484	953.278	FALSE	5
2022-09-13	13:06:10	0.732583	3.25868	3.26484	994.639	FALSE	5
2022-09-13	13:06:10	0.734975	3.26932	3.26484	956.548	FALSE	5
2022-09-13	13:06:11	0.738842	3.28652	3.28418	997.926	FALSE	5
2022-09-13	13:06:11	0.734771	3.26841	3.28418	959.816	FALSE	5
2022-09-13	13:06:11	0.741336	3.29761	3.28418	1001.22	FALSE	5
2022-09-13	13:06:12	0.737468	3.28041	3.26037	963.096	FALSE	5
2022-09-13	13:06:12	0.731361	3.25324	3.26037	1004.48	FALSE	5
2022-09-13	13:06:12	0.738537	3.28516	3.26037	966.382	FALSE	5
2022-09-13	13:06:12	0.724491	3.22268	3.26037	1007.7	FALSE	5
2022-09-13	13:06:13	0.734262	3.26614	2.24102	969.648	FALSE	5
2022-09-13	13:06:13	-0.154694	-0.68811	2.24102	1007.7	FALSE	5
2022-09-13	13:06:13	0.407799	1.81397	2.24102	971.462	FALSE	5
2022-09-13	13:06:13	1.02785	4.57208	2.24102	1012.27	FALSE	5
2022-09-13	13:06:14	0.73355	3.26298	3.25551	974.725	FALSE	5
2022-09-13	13:06:14	0.732786	3.25958	3.25551	1015.53	FALSE	5
2022-09-13	13:06:14	0.72841	3.24011	3.25551	977.965	FALSE	5
2022-09-13	13:06:14	0.732735	3.25935	3.25551	1018.79	FALSE	5
2022-09-13	13:06:15	0.72958	3.24532	3.25943	981.21	FALSE	5
2022-09-13	13:06:15	0.733448	3.26252	3.25943	1022.05	FALSE	5
2022-09-13	13:06:15	0.735229	3.27045	3.25943	984.481	FALSE	5
2022-09-13	13:06:16	0.736908	3.27791	2.18386	1025.33	FALSE	5
2022-09-13	13:06:16	0.735433	3.27135	2.18386	987.752	FALSE	5
2022-09-13	13:06:16	-0.229962	-1.02292	2.18386	1025.33	FALSE	5
2022-09-13	13:06:16	0.721437	3.2091	2.18386	990.961	FALSE	5
2022-09-13	13:06:17	0.737265	3.2795	3.25601	1028.61	FALSE	5
2022-09-13	13:06:17	0.734822	3.26864	3.25601	994.23	FALSE	5
2022-09-13	13:06:17	0.722608	3.2143	3.25601	1031.82	FALSE	5
2022-09-13	13:06:17	0.733244	3.26162	3.25601	997.491	FALSE	5
2022-09-13	13:06:18	0.730954	3.25143	3.24871	1035.08	FALSE	5
2022-09-13	13:06:18	0.730954	3.25143	3.24871	1000.74	FALSE	5
2022-09-13	13:06:18	0.729377	3.24441	3.24871	1038.32	FALSE	5
2022-09-13	13:06:18	0.730089	3.24758	3.24871	1003.99	FALSE	5
2022-09-13	13:06:19	0.729682	3.24577	3.2506	1041.57	FALSE	5
2022-09-13	13:06:19	0.732532	3.25845	3.2506	1007.25	FALSE	5
2022-09-13	13:06:19	0.730089	3.24758	3.2506	1044.81	FALSE	5
2022-09-13	13:06:20	0.725611	3.22766	3.24724	1010.48	FALSE	5
2022-09-13	13:06:20	0.725458	3.22698	3.24724	1048.04	FALSE	5
2022-09-13	13:06:20	0.735483	3.27158	3.24724	1013.75	FALSE	5
2022-09-13	13:06:20	0.733499	3.26275	3.24724	1051.3	FALSE	5
2022-09-13	13:06:21	0.730038	3.24736	3.25613	1017	FALSE	5
2022-09-13	13:06:21	0.734109	3.26546	3.25613	1054.57	FALSE	5
2022-09-13	13:06:21	0.733244	3.26162	3.25613	1020.26	FALSE	5
2022-09-13	13:06:21	0.730649	3.25007	3.25613	1057.82	FALSE	5
2022-09-13	13:06:22	0.73187	3.2555	3.25386	1023.51	FALSE	5
2022-09-13	13:06:22	0.729529	3.24509	3.25386	1061.06	FALSE	5
2022-09-13	13:06:22	0.732379	3.25777	3.25386	1026.77	FALSE	5
2022-09-13	13:06:22	0.732226	3.25709	3.25386	1064.32	FALSE	5
2022-09-13	13:06:23	0.729682	3.24577	3.2439	1030.02	FALSE	5
2022-09-13	13:06:23	0.730547	3.24962	3.2439	1067.57	FALSE	5
2022-09-13	13:06:23	0.723117	3.21657	3.2439	1033.23	FALSE	5
2022-09-13	13:06:23	0.733702	3.26365	3.2439	1070.83	FALSE	5
2022-09-13	13:06:24	0.732583	3.25868	3.25566	1036.49	FALSE	5
2022-09-13	13:06:24	0.73131	3.25301	3.25566	1074.09	FALSE	5
2022-09-13	13:06:24	0.731819	3.25528	3.25566	1039.75	FALSE	5
2022-09-13	13:06:25	0.727697	3.23694	3.25415	1077.32	FALSE	5
2022-09-13	13:06:25	0.727596	3.23649	3.25415	1042.98	FALSE	5
2022-09-13	13:06:25	0.736552	3.27633	3.25415	1080.6	FALSE	5
2022-09-13	13:06:25	0.734415	3.26682	3.25415	1046.25	FALSE	5
2022-09-13	13:06:26	0.739097	3.28765	3.26382	1083.89	FALSE	5
2022-09-13	13:06:26	0.728359	3.23989	3.26382	1049.49	FALSE	5
2022-09-13	13:06:26	0.732684	3.25912	3.26382	1087.15	FALSE	5
2022-09-13	13:06:26	0.734822	3.26864	3.26382	1052.76	FALSE	5
2022-09-13	13:06:27	0.591565	2.6314	3.06354	1089.78	FALSE	5
2022-09-13	13:06:27	0.737824	3.28199	3.06354	1056.04	FALSE	5
2022-09-13	13:06:27	0.690802	3.07283	3.06354	1092.85	FALSE	5
2022-09-13	13:06:27	0.734669	3.26795	3.06354	1059.31	FALSE	5
2022-09-13	13:06:28	0.730598	3.24985	3.26162	1096.1	FALSE	5
2022-09-13	13:06:28	0.733804	3.26411	3.26162	1062.57	FALSE	5
2022-09-13	13:06:28	0.735331	3.2709	3.26162	1099.37	FALSE	5
2022-09-13	13:06:29	0.651667	2.89875	3.0181	1065.47	FALSE	5
2022-09-13	13:06:29	0.591921	2.63298	3.0181	1102.01	FALSE	5
2022-09-13	13:06:29	0.723219	3.21702	3.0181	1068.69	FALSE	5
2022-09-13	13:06:29	0.747188	3.32364	3.0181	1105.33	FALSE	5
2022-09-13	13:06:30	0.788766	3.50859	3.04657	1072.2	FALSE	5
2022-09-13	13:06:30	0.845509	3.76099	3.04657	1109.09	FALSE	5
2022-09-13	13:06:30	0.370344	1.64736	3.04657	1073.84	FALSE	5
2022-09-13	13:06:30	0.734975	3.26932	3.04657	1112.36	FALSE	5
2022-09-13	13:06:31	0.721387	3.20887	3.26196	1077.05	FALSE	5
2022-09-13	13:06:31	0.737519	3.28063	3.26196	1115.64	FALSE	5
2022-09-13	13:06:31	0.738791	3.28629	3.26196	1080.34	FALSE	5
2022-09-13	13:06:31	0.735585	3.27203	3.26196	1118.91	FALSE	5
2022-09-13	13:06:32	0.736196	3.27475	3.27309	1083.61	FALSE	5
2022-09-13	13:06:32	0.735076	3.26977	3.27309	1122.18	FALSE	5
2022-09-13	13:06:32	0.736196	3.27475	3.27309	1086.89	FALSE	5
2022-09-13	13:06:33	0.734618	3.26773	2.9117	1125.45	FALSE	5
2022-09-13	13:06:33	0.739198	3.2881	2.9117	1090.18	FALSE	5
2022-09-13	13:06:33	0.45416	2.02019	2.9117	1127.47	FALSE	5
2022-09-13	13:06:33	0.690344	3.07079	2.9117	1093.25	FALSE	5
2022-09-13	13:06:34	0.738028	3.2829	3.27011	1130.75	FALSE	5
2022-09-13	13:06:34	0.728104	3.23875	3.27011	1096.49	FALSE	5
2022-09-13	13:06:34	0.737061	3.27859	3.27011	1134.03	FALSE	5
2022-09-13	13:06:34	0.737417	3.28018	3.27011	1099.77	FALSE	5
2022-09-13	13:06:35	0.736298	3.2752	2.29252	1137.31	FALSE	5
2022-09-13	13:06:35	0.278741	1.2399	2.29252	1101.01	FALSE	5
2022-09-13	13:06:35	0.52612	2.34029	2.29252	1139.65	FALSE	5
2022-09-13	13:06:35	0.520369	2.31471	2.29252	1103.32	FALSE	5
2022-09-13	13:06:36	0.731158	3.25234	3.25852	1142.9	FALSE	5
2022-09-13	13:06:36	0.734415	3.26682	3.25852	1106.59	FALSE	5
2022-09-13	13:06:36	0.732074	3.25641	3.25852	1146.16	FALSE	5
2022-09-13	13:06:37	0.493193	2.19382	2.25647	1108.78	FALSE	5
2022-09-13	13:06:37	0.391361	1.74085	2.25647	1147.9	FALSE	5
2022-09-13	13:06:37	0.579656	2.57843	2.25647	1111.36	FALSE	5
2022-09-13	13:06:37	0.564898	2.51278	2.25647	1150.41	FALSE	5
2022-09-13	13:06:38	0.613041	2.72693	2.28443	1114.09	FALSE	5
2022-09-13	13:06:38	0.480318	2.13655	2.28443	1152.55	FALSE	5
2022-09-13	13:06:38	0.726476	3.23151	2.28443	1117.32	FALSE	5
2022-09-13	13:06:38	0.234415	1.04272	2.28443	1153.59	FALSE	5
2022-09-13	13:06:39	0.368104	1.6374	1.63904	1118.96	FALSE	5
2022-09-13	13:06:39	0.337417	1.5009	1.63904	1155.09	FALSE	5
2022-09-13	13:06:39	0.298334	1.32705	1.63904	1120.28	FALSE	5
2022-09-13	13:06:39	0.470038	2.09082	1.63904	1157.18	FALSE	5
2022-09-13	13:06:40	0.220827	0.982283	1.47389	1121.27	FALSE	5
2022-09-13	13:06:40	0.490547	2.18205	1.47389	1159.36	FALSE	5
2022-09-13	13:06:40	0.282659	1.25732	1.47389	1122.52	FALSE	5
2022-09-13	13:06:41	0.340522	1.51471	0.81426	1160.88	FALSE	5
2022-09-13	13:06:41	0.354211	1.5756	0.81426	1124.1	FALSE	5
2022-09-13	13:06:41	0.643728	2.86343	0.81426	1163.74	FALSE	5
2022-09-13	13:06:41	-0.606246	-2.6967	0.81426	1124.1	FALSE	5
2022-09-13	13:06:42	0.192837	0.857778	-0.194677	1164.6	FALSE	5
2022-09-13	13:06:42	0.547443	2.43514	-0.194677	1126.53	FALSE	5
2022-09-13	13:06:42	0.226629	1.00809	-0.194677	1165.61	FALSE	5
2022-09-13	13:06:42	-1.14197	-5.07971	-0.194677	1126.53	FALSE	5
2022-09-13	13:06:43	-1.42874	-6.35532	-5.1114	1165.61	FALSE	5
2022-09-13	13:06:43	-1.3124	-5.83782	-5.1114	1126.53	FALSE	5
2022-09-13	13:06:43	-1.26543	-5.62889	-5.1114	1165.61	FALSE	5
2022-09-13	13:06:43	-0.589809	-2.62359	-5.1114	1126.53	FALSE	5
2022-09-13	13:06:44	-0.908282	-4.04022	-3.8146	1165.61	FALSE	5
2022-09-13	13:06:44	-0.911335	-4.0538	-3.8146	1126.53	FALSE	5
2022-09-13	13:06:44	-0.753065	-3.34978	-3.8146	1165.61	FALSE	5
2022-09-13	13:06:45	-0.815355	-3.62686	-2.84894	1126.53	FALSE	5
2022-09-13	13:06:45	-0.711437	-3.16461	-2.84894	1165.61	FALSE	5
2022-09-13	13:06:45	-0.503956	-2.2417	-2.84894	1126.53	FALSE	5
2022-09-13	13:06:45	-0.531132	-2.36258	-2.84894	1165.61	FALSE	5
2022-09-13	13:06:46	-0.598765	-2.66343	-2.3469	1126.53	FALSE	5
2022-09-13	13:06:46	-0.501971	-2.23287	-2.3469	1165.61	FALSE	5
2022-09-13	13:06:46	-0.565025	-2.51334	-2.3469	1126.53	FALSE	5
2022-09-13	13:06:46	-0.444669	-1.97798	-2.3469	1165.61	FALSE	5
2022-09-13	13:06:47	-0.694236	-3.0881	-3.04243	1126.53	FALSE	5
2022-09-13	13:06:47	-0.738256	-3.28391	-3.04243	1165.61	FALSE	5
2022-09-13	13:06:47	-0.616425	-2.74198	-3.04243	1126.53	FALSE	5
2022-09-13	13:06:47	-0.686959	-3.05573	-3.04243	1165.61	FALSE	5
2022-09-13	13:06:48	-0.782836	-3.48221	-2.73753	1126.53	FALSE	5
2022-09-13	13:06:48	-0.541463	-2.40854	-2.73753	1165.61	FALSE	5
2022-09-13	13:06:48	-0.521971	-2.32183	-2.73753	1126.53	FALSE	5
2022-09-13	13:06:49	-0.517239	-2.30078	-2.51883	1165.61	FALSE	5
2022-09-13	13:06:49	-0.571946	-2.54413	-2.51883	1126.53	FALSE	5
2022-09-13	13:06:49	-0.626501	-2.7868	-2.51883	1165.61	FALSE	5
2022-09-13	13:06:49	-0.549351	-2.44362	-2.51883	1126.53	FALSE	5
2022-09-13	13:06:50	-0.465483	-2.07056	-2.77922	1165.61	FALSE	5
2022-09-13	13:06:50	-0.569554	-2.53349	-2.77922	1126.53	FALSE	5
2022-09-13	13:06:50	-0.665076	-2.95839	-2.77922	1165.61	FALSE	5
2022-09-13	13:06:50	-0.79907	-3.55442	-2.77922	1126.53	FALSE	5
2022-09-13	13:06:51	-1.08833	-4.84111	-5.12035	1165.61	FALSE	5
2022-09-13	13:06:51	-1.16528	-5.1834	-5.12035	1126.53	FALSE	5
2022-09-13	13:06:51	-1.15408	-5.13358	-5.12035	1165.61	FALSE	5
2022-09-13	13:06:51	-1.19673	-5.32329	-5.12035	1126.53	FALSE	5
2022-09-13	13:06:52	-1.14635	-5.09919	-5.27892	1165.61	FALSE	5
2022-09-13	13:06:52	-1.20436	-5.35723	-5.27892	1126.53	FALSE	5
2022-09-13	13:06:52	-1.20955	-5.38032	-5.27892	1165.61	FALSE	5
2022-09-13	13:06:53	-1.13892	-5.06614	-3.18125	1126.53	FALSE	5
2022-09-13	13:06:53	-0.899172	-3.9997	-3.18125	1165.61	FALSE	5
2022-09-13	13:06:53	-0.484211	-2.15387	-3.18125	1126.53	FALSE	5
2022-09-13	13:06:53	-0.338409	-1.50531	-3.18125	1165.61	FALSE	5
2022-09-13	13:06:54	-0.287468	-1.27872	-1.89552	1126.53	FALSE	5
2022-09-13	13:06:54	-0.53047	-2.35964	-1.89552	1165.61	FALSE	5
2022-09-13	13:06:54	-0.360648	-1.60423	-1.89552	1126.53	FALSE	5
2022-09-13	13:06:54	-0.525941	-2.33949	-1.89552	1165.61	FALSE	5
2022-09-13	13:06:55	0.325509	1.44793	1.49292	1127.98	FALSE	5
2022-09-13	13:06:55	0.370852	1.64962	1.49292	1167.26	FALSE	5
2022-09-13	13:06:55	0.308003	1.37006	1.49292	1129.35	FALSE	5
2022-09-13	13:06:55	0.33813	1.50407	1.49292	1168.76	FALSE	5
2022-09-13	13:06:56	0.323575	1.43933	1.40658	1130.79	FALSE	5
2022-09-13	13:06:56	0.393906	1.75217	1.40658	1170.51	FALSE	5
2022-09-13	13:06:56	0.231158	1.02824	1.40658	1131.82	FALSE	5
2022-09-13	13:06:57	0.485	2.15738	1.63084	1172.67	FALSE	5
2022-09-13	13:06:57	0.282761	1.25778	1.63084	1133.08	FALSE	5
2022-09-13	13:06:57	0.436094	1.93983	1.63084	1174.61	FALSE	5
2022-09-13	13:06:57	0.262659	1.16836	1.63084	1134.25	FALSE	5
2022-09-13	13:06:58	0.412176	1.83344	2.26428	1176.44	FALSE	5
2022-09-13	13:06:58	0.318893	1.4185	2.26428	1135.66	FALSE	5
2022-09-13	13:06:58	0.502354	2.23457	2.26428	1178.68	FALSE	5
2022-09-13	13:06:58	0.80271	3.57061	2.26428	1139.23	FALSE	5
2022-09-13	13:06:59	0.763779	3.39744	6.66658	1182.07	FALSE	5
2022-09-13	13:06:59	1.16093	5.16405	6.66658	1144.4	FALSE	5
2022-09-13	13:06:59	2.05411	9.13709	6.66658	1191.21	FALSE	5
2022-09-13	13:06:59	2.01604	8.96775	6.66658	1153.37	FALSE	5
2022-09-13	13:07:00	1.72485	7.67248	6.51577	1198.88	FALSE	5
2022-09-13	13:07:00	3.27106	14.5503	6.51577	1167.92	1	6
2022-09-13	13:07:00	0.391107	1.73972	6.51577	1200.62	FALSE	6
2022-09-13	13:07:00	0.472227	2.10056	6.51577	1170.02	FALSE	6
2022-09-13	13:07:01	0.578282	2.57231	2.20695	1203.2	FALSE	6
2022-09-13	13:07:01	0.509835	2.26785	2.20695	1172.28	FALSE	6
2022-09-13	13:07:01	0.400318	1.78069	2.20695	1204.98	FALSE	6
2022-09-13	13:07:02	0.294059	1.30803	1.82648	1173.59	FALSE	6
2022-09-13	13:07:02	0.437163	1.94459	1.82648	1206.92	FALSE	6
2022-09-13	13:07:02	0.478384	2.12795	1.82648	1175.72	FALSE	6
2022-09-13	13:07:02	0.432837	1.92535	1.82648	1208.85	FALSE	6
2022-09-13	13:07:03	0.441234	1.9627	1.61414	1177.68	FALSE	6
2022-09-13	13:07:03	0.3764	1.6743	1.61414	1210.52	FALSE	6
2022-09-13	13:07:03	0.408308	1.81624	1.61414	1179.5	FALSE	6
2022-09-13	13:07:03	0.22556	1.00334	1.61414	1211.52	FALSE	6
2022-09-13	13:07:04	0.478893	2.13021	1.43553	1181.63	FALSE	6
2022-09-13	13:07:04	0.222761	0.990885	1.43553	1212.52	FALSE	6
2022-09-13	13:07:04	0.348053	1.54821	1.43553	1183.18	FALSE	6
2022-09-13	13:07:04	0.241183	1.07283	1.43553	1213.59	FALSE	6
2022-09-13	13:07:05	0.171107	0.761118	1.13365	1183.94	FALSE	6
2022-09-13	13:07:05	0.3393	1.50927	1.13365	1215.1	FALSE	6
2022-09-13	13:07:05	0.25416	1.13055	1.13365	1185.07	FALSE	6
2022-09-13	13:07:06	0.33528	1.49139	0.00266069	1216.59	FALSE	6
2022-09-13	13:07:06	0.0611326	0.27193	0.00266069	1185.34	FALSE	6
2022-09-13	13:07:06	-0.144771	-0.64397	0.00266069	1216.59	FALSE	6
2022-09-13	13:07:06	-0.249249	-1.10871	0.00266069	1185.34	FALSE	6
2022-09-13	13:07:07	-0.141666	-0.630159	0.120997	1216.59	FALSE	6
2022-09-13	13:07:07	0.0941096	0.418618	0.120997	1185.76	FALSE	6
2022-09-13	13:07:07	-0.0241092	-0.107243	0.120997	1216.59	FALSE	6
2022-09-13	13:07:07	0.180471	0.802771	0.120997	1186.56	FALSE	6
2022-09-13	13:07:08	0.328766	1.46242	1.8168	1218.05	FALSE	6
2022-09-13	13:07:08	0.465611	2.07113	1.8168	1188.63	FALSE	6
2022-09-13	13:07:08	0.325255	1.4468	1.8168	1219.5	FALSE	6
2022-09-13	13:07:08	0.51411	2.28686	1.8168	1190.92	FALSE	6
2022-09-13	13:07:09	0.408715	1.81805	1.82906	1221.32	FALSE	6
2022-09-13	13:07:09	0.480216	2.1361	1.82906	1193.06	FALSE	6
2022-09-13	13:07:09	0.344644	1.53305	1.82906	1222.85	FALSE	6
2022-09-13	13:07:10	0.520776	2.31652	1.59479	1195.37	FALSE	6
2022-09-13	13:07:10	0.370547	1.64827	1.59479	1224.5	FALSE	6
2022-09-13	13:07:10	0.370649	1.64872	1.59479	1197.02	FALSE	6
2022-09-13	13:07:10	0.172125	0.765646	1.59479	1225.26	FALSE	6
2022-09-13	13:07:11	0.208308	0.926596	0.885622	1197.95	FALSE	6
2022-09-13	13:07:11	0.209173	0.930443	0.885622	1226.19	FALSE	6
2022-09-13	13:07:11	0.155687	0.692527	0.885622	1198.64	FALSE	6
2022-09-13	13:07:11	0.223219	0.992923	0.885622	1227.19	FALSE	6
2022-09-13	13:07:12	0.0484099	0.215337	0.0520098	1198.86	FALSE	6
2022-09-13	13:07:12	0.0545676	0.242728	0.0520098	1227.43	FALSE	6
2022-09-13	13:07:12	-0.0440074	-0.195754	0.0520098	1198.86	FALSE	6
2022-09-13	13:07:12	-0.0122008	-0.0542716	0.0520098	1227.43	FALSE	6
2022-09-13	13:07:13	-0.172404	-0.766887	-1.3009	1198.86	FALSE	6
2022-09-13	13:07:13	-0.31673	-1.40888	-1.3009	1227.43	FALSE	6
2022-09-13	13:07:13	-0.388231	-1.72693	-1.3009	1198.86	FALSE	6
2022-09-13	13:07:14	-0.216628	-0.963605	0.080533	1227.43	FALSE	6
2022-09-13	13:07:14	-0.0518954	-0.230841	0.080533	1198.86	FALSE	6
2022-09-13	13:07:14	0.280471	1.24759	0.080533	1228.68	FALSE	6
2022-09-13	13:07:14	0.0604709	0.268987	0.080533	1199.13	FALSE	6
2022-09-13	13:07:15	0.265102	1.17923	-0.16757	1229.86	FALSE	6
2022-09-13	13:07:15	-0.0667554	-0.296941	-0.16757	1199.13	FALSE	6
2022-09-13	13:07:15	-0.31561	-1.4039	-0.16757	1229.86	FALSE	6
2022-09-13	13:07:15	-0.0334221	-0.148668	-0.16757	1199.13	FALSE	6
2022-09-13	13:07:16	0.133295	0.592923	0.665363	1230.45	FALSE	6
2022-09-13	13:07:16	0.0467305	0.207867	0.665363	1199.33	FALSE	6
2022-09-13	13:07:16	0.313041	1.39247	0.665363	1231.84	FALSE	6
2022-09-13	13:07:16	0.105255	0.468195	0.665363	1199.8	FALSE	6
2022-09-13	13:07:17	0.47584	2.11663	1.56391	1233.96	FALSE	6
2022-09-13	13:07:17	0.0537025	0.238879	1.56391	1200.04	FALSE	6
2022-09-13	13:07:17	0.525203	2.33621	1.56391	1236.29	FALSE	6
2022-09-13	13:07:18	0.2564	1.14052	4.41402	1201.18	FALSE	6
2022-09-13	13:07:18	0.696654	3.09886	4.41402	1239.39	FALSE	6
2022-09-13	13:07:18	0.92902	4.13247	4.41402	1205.31	FALSE	6
2022-09-13	13:07:18	2.08719	9.28424	4.41402	1248.68	FALSE	6
2022-09-13	13:07:19	0.37126	1.65144	2.33287	1206.97	FALSE	6
2022-09-13	13:07:19	0.640267	2.84804	2.33287	1251.53	FALSE	6
2022-09-13	13:07:19	0.58556	2.60469	2.33287	1209.57	FALSE	6
2022-09-13	13:07:19	0.500725	2.22732	2.33287	1253.75	FALSE	6
2022-09-13	13:07:20	0.244135	1.08596	1.60939	1210.66	FALSE	6
2022-09-13	13:07:20	0.511616	2.27577	1.60939	1256.03	FALSE	6
2022-09-13	13:07:20	0.227901	1.01375	1.60939	1211.67	FALSE	6
2022-09-13	13:07:20	0.463575	2.06207	1.60939	1258.09	FALSE	6
2022-09-13	13:07:21	0.231565	1.03005	1.50022	1212.7	FALSE	6
2022-09-13	13:07:21	0.475585	2.1155	1.50022	1260.21	FALSE	6
2022-09-13	13:07:21	0.304644	1.35512	1.50022	1214.05	FALSE	6
2022-09-13	13:07:22	0.399046	1.77504	1.42886	1261.98	FALSE	6
2022-09-13	13:07:22	0.291107	1.2949	1.42886	1215.35	FALSE	6
2022-09-13	13:07:22	0.376858	1.67634	1.42886	1263.66	FALSE	6
2022-09-13	13:07:22	0.217875	0.969152	1.42886	1216.32	FALSE	6
2022-09-13	13:07:23	0.522761	2.32535	1.78986	1265.98	FALSE	6
2022-09-13	13:07:23	0.296298	1.31799	1.78986	1217.64	FALSE	6
2022-09-13	13:07:23	0.572532	2.54674	1.78986	1268.53	FALSE	6
2022-09-13	13:07:23	0.217926	0.969378	1.78986	1218.61	FALSE	6
2022-09-13	13:07:24	0.443168	1.9713	1.67238	1270.5	FALSE	6
2022-09-13	13:07:24	0.290089	1.29037	1.67238	1219.9	FALSE	6
2022-09-13	13:07:24	0.500776	2.22755	1.67238	1272.73	FALSE	6
2022-09-13	13:07:24	0.269835	1.20028	1.67238	1221.1	FALSE	6
2022-09-13	13:07:25	0.445713	1.98262	1.94587	1274.71	FALSE	6
2022-09-13	13:07:25	0.372735	1.658	1.94587	1222.75	FALSE	6
2022-09-13	13:07:25	0.493906	2.19699	1.94587	1276.91	FALSE	6
2022-09-13	13:07:26	0.282863	1.25823	3.19048	1224.01	FALSE	6
2022-09-13	13:07:26	0.529835	2.35681	3.19048	1279.27	FALSE	6
2022-09-13	13:07:26	0.80042	3.56043	3.19048	1227.57	FALSE	6
2022-09-13	13:07:26	1.25589	5.58645	3.19048	1284.85	FALSE	6
2022-09-13	13:07:27	2.62378	11.6711	8.08197	1239.24	FALSE	6
2022-09-13	13:07:27	2.0823	9.26249	8.08197	1294.11	FALSE	6
2022-09-13	13:07:27	1.65767	7.37365	8.08197	1246.62	FALSE	6
2022-09-13	13:07:27	0.903881	4.02064	8.08197	1298.13	FALSE	6
2022-09-13	13:07:28	0.441132	1.96224	2.18811	1248.58	FALSE	6
2022-09-13	13:07:28	0.571259	2.54107	2.18811	1300.68	FALSE	6
2022-09-13	13:07:28	0.443575	1.97311	2.18811	1250.55	FALSE	6
2022-09-13	13:07:28	0.511667	2.276	2.18811	1302.95	FALSE	6
2022-09-13	13:07:29	0.419097	1.86423	2.03899	1252.42	FALSE	6
2022-09-13	13:07:29	0.601234	2.67441	2.03899	1305.63	FALSE	6
2022-09-13	13:07:29	0.354822	1.57832	2.03899	1254	FALSE	6
2022-09-13	13:07:30	0.680165	3.02551	5.80552	1308.65	FALSE	6
2022-09-13	13:07:30	0.755331	3.35986	5.80552	1257.36	FALSE	6
2022-09-13	13:07:30	1.54383	6.86726	5.80552	1315.52	FALSE	6
2022-09-13	13:07:30	2.24123	9.96944	5.80552	1267.33	FALSE	6
2022-09-13	13:07:31	2.12281	9.44268	7.55672	1324.96	FALSE	6
2022-09-13	13:07:31	1.33365	5.93234	7.55672	1273.26	FALSE	6
2022-09-13	13:07:31	2.32225	10.3298	7.55672	1335.29	FALSE	6
2022-09-13	13:07:31	1.0166	4.52204	7.55672	1277.78	FALSE	6
2022-09-13	13:07:32	1.14627	5.09884	3.97531	1340.39	FALSE	6
2022-09-13	13:07:32	0.581794	2.58794	3.97531	1280.37	FALSE	6
2022-09-13	13:07:32	0.802761	3.57084	3.97531	1343.96	FALSE	6
2022-09-13	13:07:32	1.04393	4.64361	3.97531	1285.01	FALSE	6
2022-09-13	13:07:33	1.29884	5.7775	7.93784	1349.74	FALSE	6
2022-09-13	13:07:33	1.83487	8.16187	7.93784	1293.17	FALSE	6
2022-09-13	13:07:33	2.21981	9.87416	7.93784	1359.61	FALSE	6

## Sheet: Buzz_martin_2022913130220 ( (2)
Date	Time	lbs	Newtons	Total force x time	total steps > 13.345		**GoPro Fitting: 1251
2022-09-13	13:02:33	0.605305	2.69252	2.69252	FALSE	0			Total force x time	1359.61
2022-09-13	13:02:33	0.191005	0.849628	0.849628	FALSE	0			Total steps	6
2022-09-13	13:02:33	0.53355	2.37334	5.06585	FALSE	0
2022-09-13	13:02:33	0.420878	1.87215	2.72178	FALSE	0
2022-09-13	13:02:34	0.189733	0.84397	5.90983	FALSE	0
2022-09-13	13:02:34	0.373753	1.66253	4.38431	FALSE	0
2022-09-13	13:02:34	0.00688318	0.0306178	5.94044	FALSE	0
2022-09-13	13:02:34	0.0579773	0.257895	4.6422	FALSE	0
2022-09-13	13:02:35	-0.0333204	-0.148216	5.94044	FALSE	0
2022-09-13	13:02:35	0.233448	1.03842	5.68062	FALSE	0
2022-09-13	13:02:35	0.0598094	0.266044	6.20649	FALSE	0
2022-09-13	13:02:35	0.041845	0.186135	5.86676	FALSE	0
2022-09-13	13:02:36	0.101438	0.451217	6.6577	FALSE	0
2022-09-13	13:02:36	0.358741	1.59575	7.46251	FALSE	0
2022-09-13	13:02:36	0.663728	2.95239	9.6101	FALSE	0
2022-09-13	13:02:36	0.475026	2.11301	9.57552	FALSE	0
2022-09-13	13:02:37	0.684898	3.04656	12.6567	FALSE	0
2022-09-13	13:02:37	0.234313	1.04227	10.6178	FALSE	0
2022-09-13	13:02:37	0.566527	2.52003	15.1767	FALSE	0
2022-09-13	13:02:38	0.386171	1.71777	12.3356	FALSE	0
2022-09-13	13:02:38	0.446883	1.98782	17.1645	FALSE	0
2022-09-13	13:02:38	0.749275	3.33293	15.6685	FALSE	0
2022-09-13	13:02:38	0.407239	1.81148	18.976	FALSE	0
2022-09-13	13:02:39	0.409784	1.8228	17.4913	FALSE	0
2022-09-13	13:02:39	0.148512	0.660611	19.6366	FALSE	0
2022-09-13	13:02:39	0.553499	2.46207	19.9534	FALSE	0
2022-09-13	13:02:39	0.406374	1.80763	21.4442	FALSE	0
2022-09-13	13:02:40	0.640114	2.84736	22.8007	FALSE	0
2022-09-13	13:02:40	0.408969	1.81918	23.2634	FALSE	0
2022-09-13	13:02:40	0.536145	2.38488	25.1856	FALSE	0
2022-09-13	13:02:40	0.343677	1.52874	24.7922	FALSE	0
2022-09-13	13:02:41	0.441031	1.96179	27.1474	FALSE	0
2022-09-13	13:02:41	0.369224	1.64238	26.4345	FALSE	0
2022-09-13	13:02:41	0.376298	1.67385	28.8212	FALSE	0
2022-09-13	13:02:42	0.397875	1.76983	28.2044	FALSE	0
2022-09-13	13:02:42	0.325611	1.44838	30.2696	FALSE	0
2022-09-13	13:02:42	0.341641	1.51969	29.7241	FALSE	0
2022-09-13	13:02:42	0.464237	2.06502	32.3346	FALSE	0
2022-09-13	13:02:43	0.321489	1.43005	31.1541	FALSE	0
2022-09-13	13:02:43	0.173143	0.770175	33.1048	FALSE	0
2022-09-13	13:02:43	-0.00914732	-0.0406891	31.1541	FALSE	0
2022-09-13	13:02:43	0.217417	0.967114	34.0719	FALSE	0
2022-09-13	13:02:44	0.191107	0.850082	32.0042	FALSE	0
2022-09-13	13:02:44	0.32785	1.45834	35.5303	FALSE	0
2022-09-13	13:02:44	0.581183	2.58522	34.5894	FALSE	0
2022-09-13	13:02:44	0.487341	2.16779	37.6981	FALSE	0
2022-09-13	13:02:45	0.60098	2.67328	37.2627	FALSE	0
2022-09-13	13:02:45	0.440216	1.95817	39.6562	FALSE	0
2022-09-13	13:02:45	0.446679	1.98692	39.2496	FALSE	0
2022-09-13	13:02:46	0.548562	2.44011	42.0963	FALSE	0
2022-09-13	13:02:46	0.733906	3.26456	42.5142	FALSE	0
2022-09-13	13:02:46	0.239504	1.06536	43.1617	FALSE	0
2022-09-13	13:02:46	-0.253117	-1.12592	42.5142	FALSE	0
2022-09-13	13:02:47	-1.04009	-4.62653	43.1617	FALSE	0
2022-09-13	13:02:47	-0.568282	-2.52783	42.5142	FALSE	0
2022-09-13	13:02:47	-0.09673	-0.430274	43.1617	FALSE	0
2022-09-13	13:02:47	1.09558	4.87336	47.3875	FALSE	0
2022-09-13	13:02:48	0.714415	3.17786	46.3396	FALSE	0
2022-09-13	13:02:48	0.732837	3.25981	50.6473	FALSE	0
2022-09-13	13:02:48	0.729784	3.24623	49.5858	FALSE	0
2022-09-13	13:02:48	0.673804	2.99721	53.6445	FALSE	0
2022-09-13	13:02:49	0.712074	3.16745	52.7532	FALSE	0
2022-09-13	13:02:49	0.620267	2.75907	56.4036	FALSE	0
2022-09-13	13:02:49	0.420471	1.87034	54.6236	FALSE	0
2022-09-13	13:02:50	0.157672	0.701357	57.105	FALSE	0
2022-09-13	13:02:50	0.160624	0.714488	55.3381	FALSE	0
2022-09-13	13:02:50	0.731972	3.25596	60.3609	FALSE	0
2022-09-13	13:02:50	0.731819	3.25528	58.5933	FALSE	0
2022-09-13	13:02:51	0.736807	3.27746	63.6384	FALSE	0
2022-09-13	13:02:51	0.730191	3.24804	61.8414	FALSE	0
2022-09-13	13:02:51	0.726323	3.23083	66.8692	FALSE	0
2022-09-13	13:02:51	0.735382	3.27113	65.1125	FALSE	0
2022-09-13	13:02:52	0.53299	2.37085	69.2401	FALSE	0
2022-09-13	13:02:52	0.729224	3.24373	68.3562	FALSE	0
2022-09-13	13:02:52	0.738079	3.28312	72.5232	FALSE	0
2022-09-13	13:02:52	0.736196	3.27475	71.631	FALSE	0
2022-09-13	13:02:53	0.713143	3.1722	75.6954	FALSE	0
2022-09-13	13:02:53	0.693804	3.08618	74.7172	FALSE	0
2022-09-13	13:02:53	0.666883	2.96643	78.6618	FALSE	0
2022-09-13	13:02:54	0.625305	2.78148	77.4986	FALSE	0
2022-09-13	13:02:54	0.554211	2.46524	81.1271	FALSE	0
2022-09-13	13:02:54	0.713651	3.17446	80.6731	FALSE	0
2022-09-13	13:02:54	0.73187	3.2555	84.3826	FALSE	0
2022-09-13	13:02:55	0.733601	3.2632	83.9363	FALSE	0
2022-09-13	13:02:55	0.744339	3.31097	87.6935	FALSE	0
2022-09-13	13:02:55	0.733295	3.26184	87.1982	FALSE	0
2022-09-13	13:02:55	0.733702	3.26365	90.9572	FALSE	0
2022-09-13	13:02:56	0.734873	3.26886	90.467	FALSE	0
2022-09-13	13:02:56	0.741743	3.29942	94.2566	FALSE	0
2022-09-13	13:02:56	0.731921	3.25573	93.7227	FALSE	0
2022-09-13	13:02:56	0.728868	3.24215	97.4988	FALSE	0
2022-09-13	13:02:57	0.737519	3.28063	97.0034	FALSE	0
2022-09-13	13:02:57	0.737926	3.28244	100.781	FALSE	0
2022-09-13	13:02:57	0.726629	3.23219	100.236	FALSE	0
2022-09-13	13:02:58	0.731921	3.25573	104.037	FALSE	0
2022-09-13	13:02:58	0.731463	3.25369	103.489	FALSE	0
2022-09-13	13:02:58	0.731514	3.25392	107.291	FALSE	0
2022-09-13	13:02:58	0.735483	3.27158	106.761	FALSE	0
2022-09-13	13:02:59	0.730852	3.25098	110.542	FALSE	0
2022-09-13	13:02:59	0.719148	3.19891	109.96	FALSE	0
2022-09-13	13:02:59	0.681081	3.02958	113.571	FALSE	0
2022-09-13	13:02:59	0.505	2.24634	112.206	FALSE	0
2022-09-13	13:03:00	0.525407	2.33712	115.909	FALSE	0
2022-09-13	13:03:00	0.482557	2.14651	114.353	FALSE	0
2022-09-13	13:03:00	0.202659	0.901468	116.81	FALSE	0
2022-09-13	13:03:00	0.236654	1.05268	115.405	FALSE	0
2022-09-13	13:03:01	0.301387	1.34063	118.151	FALSE	0
2022-09-13	13:03:01	0.121489	0.540407	115.946	FALSE	0
2022-09-13	13:03:01	0.256603	1.14142	119.292	FALSE	0
2022-09-13	13:03:02	0.739555	3.28969	119.235	FALSE	0
2022-09-13	13:03:02	0.733906	3.26456	122.557	FALSE	0
2022-09-13	13:03:02	0.739606	3.28992	122.525	FALSE	0
2022-09-13	13:03:02	0.704084	3.13191	125.689	FALSE	0
2022-09-13	13:03:03	0.723321	3.21748	125.743	FALSE	0
2022-09-13	13:03:03	0.735178	3.27022	128.959	FALSE	0
2022-09-13	13:03:03	0.734059	3.26524	129.008	FALSE	0
2022-09-13	13:03:03	0.733142	3.26116	132.22	FALSE	0
2022-09-13	13:03:04	0.735687	3.27248	132.281	FALSE	0
2022-09-13	13:03:04	0.734211	3.26592	135.486	FALSE	0
2022-09-13	13:03:04	0.734262	3.26614	135.547	FALSE	0
2022-09-13	13:03:04	0.73584	3.27316	138.759	FALSE	0
2022-09-13	13:03:05	0.736756	3.27724	138.824	FALSE	0
2022-09-13	13:03:05	0.740165	3.2924	142.051	FALSE	0
2022-09-13	13:03:05	0.735076	3.26977	142.094	FALSE	0
2022-09-13	13:03:05	0.730242	3.24826	145.3	FALSE	0
2022-09-13	13:03:06	0.735585	3.27203	145.366	FALSE	0
2022-09-13	13:03:06	0.728868	3.24215	148.542	FALSE	0
2022-09-13	13:03:06	0.730801	3.25075	148.616	FALSE	0
2022-09-13	13:03:07	0.73299	3.26049	151.802	FALSE	0
2022-09-13	13:03:07	0.735382	3.27113	151.888	FALSE	0
2022-09-13	13:03:07	0.729224	3.24373	155.046	FALSE	0
2022-09-13	13:03:07	0.730954	3.25143	155.139	FALSE	0
2022-09-13	13:03:08	0.738333	3.28425	158.33	FALSE	0
2022-09-13	13:03:08	0.729784	3.24623	158.385	FALSE	0
2022-09-13	13:03:08	0.730852	3.25098	161.581	FALSE	0
2022-09-13	13:03:08	0.726476	3.23151	161.617	FALSE	0
2022-09-13	13:03:09	0.735941	3.27361	164.855	FALSE	0
2022-09-13	13:03:09	0.738181	3.28358	164.9	FALSE	0
2022-09-13	13:03:09	0.734262	3.26614	168.121	FALSE	0
2022-09-13	13:03:09	0.73355	3.26298	168.163	FALSE	0
2022-09-13	13:03:10	0.736654	3.27678	171.398	FALSE	0
2022-09-13	13:03:10	0.736145	3.27452	171.438	FALSE	0
2022-09-13	13:03:10	0.733193	3.26139	174.659	FALSE	0
2022-09-13	13:03:11	0.732023	3.25618	174.694	FALSE	0
2022-09-13	13:03:11	0.737519	3.28063	177.94	FALSE	0
2022-09-13	13:03:11	0.737417	3.28018	177.974	FALSE	0
2022-09-13	13:03:11	0.736298	3.2752	181.215	FALSE	0
2022-09-13	13:03:12	0.729784	3.24623	181.22	FALSE	0
2022-09-13	13:03:12	0.736756	3.27724	184.492	FALSE	0
2022-09-13	13:03:12	0.741794	3.29965	184.52	FALSE	0
2022-09-13	13:03:12	0.730547	3.24962	187.742	FALSE	0
2022-09-13	13:03:13	0.728512	3.24057	187.761	FALSE	0
2022-09-13	13:03:13	0.73645	3.27588	191.018	FALSE	0
2022-09-13	13:03:13	0.735127	3.26999	191.031	FALSE	0
2022-09-13	13:03:13	0.726069	3.2297	194.247	FALSE	0
2022-09-13	13:03:14	0.732786	3.25958	194.29	FALSE	0
2022-09-13	13:03:14	0.732786	3.25958	197.507	FALSE	0
2022-09-13	13:03:14	0.737722	3.28154	197.572	FALSE	0
2022-09-13	13:03:15	0.736857	3.27769	200.785	FALSE	0
2022-09-13	13:03:15	0.733753	3.26388	200.836	FALSE	0
2022-09-13	13:03:15	0.736857	3.27769	204.062	FALSE	0
2022-09-13	13:03:15	0.73874	3.28606	204.122	FALSE	0
2022-09-13	13:03:16	0.731361	3.25324	207.316	FALSE	0
2022-09-13	13:03:16	0.728257	3.23943	207.361	FALSE	0
2022-09-13	13:03:16	0.736501	3.2761	210.592	FALSE	0
2022-09-13	13:03:16	0.734517	3.26728	210.628	FALSE	0
2022-09-13	13:03:17	0.737417	3.28018	213.872	FALSE	0
2022-09-13	13:03:17	0.739046	3.28742	213.916	FALSE	0
2022-09-13	13:03:17	0.724796	3.22404	217.096	FALSE	0
2022-09-13	13:03:17	0.739606	3.28992	217.206	FALSE	0
2022-09-13	13:03:18	0.733448	3.26252	220.358	FALSE	0
2022-09-13	13:03:18	0.730547	3.24962	220.455	FALSE	0
2022-09-13	13:03:18	0.736807	3.27746	223.636	FALSE	0
2022-09-13	13:03:19	0.734975	3.26932	223.725	FALSE	0
2022-09-13	13:03:19	0.735789	3.27294	226.909	FALSE	0
2022-09-13	13:03:19	0.741438	3.29806	227.023	FALSE	0
2022-09-13	13:03:19	0.743524	3.30734	230.216	FALSE	0
2022-09-13	13:03:20	0.741743	3.29942	230.322	FALSE	0
2022-09-13	13:03:20	0.734873	3.26886	233.485	FALSE	0
2022-09-13	13:03:20	0.49869	2.21827	232.54	FALSE	0
2022-09-13	13:03:21	0.740165	3.2924	236.777	FALSE	0
2022-09-13	13:03:21	0.740623	3.29444	235.835	FALSE	0
2022-09-13	13:03:21	0.730242	3.24826	240.026	FALSE	0
2022-09-13	13:03:21	0.735534	3.2718	239.107	FALSE	0
2022-09-13	13:03:21	0.735687	3.27248	243.298	FALSE	0
2022-09-13	13:03:22	0.735026	3.26954	242.376	FALSE	0
2022-09-13	13:03:22	0.728664	3.24124	246.539	FALSE	0
2022-09-13	13:03:22	0.489326	2.17662	244.553	FALSE	0
2022-09-13	13:03:23	0.737875	3.28222	249.822	FALSE	0
2022-09-13	13:03:23	0.735178	3.27022	247.823	FALSE	0
2022-09-13	13:03:23	0.70103	3.11832	252.94	FALSE	0
2022-09-13	13:03:23	0.221387	0.984774	248.808	FALSE	0
2022-09-13	13:03:24	0.444695	1.97809	254.918	FALSE	0
2022-09-13	13:03:24	0.413295	1.83842	250.646	FALSE	0
2022-09-13	13:03:24	-0.243906	-1.08494	254.918	FALSE	0
2022-09-13	13:03:24	-0.100649	-0.447707	250.646	FALSE	0
2022-09-13	13:03:25	-0.0514374	-0.228804	254.918	FALSE	0
2022-09-13	13:03:25	-0.0857376	-0.381378	250.646	FALSE	0
2022-09-13	13:03:25	-0.214542	-0.954326	254.918	FALSE	0
2022-09-13	13:03:25	-0.11271	-0.501357	250.646	FALSE	0
2022-09-13	13:03:26	-0.177035	-0.787487	254.918	FALSE	0
2022-09-13	13:03:26	-0.0755595	-0.336104	250.646	FALSE	0
2022-09-13	13:03:26	-0.131692	-0.585792	254.918	FALSE	0
2022-09-13	13:03:27	-0.00329491	-0.0146564	250.646	FALSE	0
2022-09-13	13:03:27	-0.19617	-0.872603	254.918	FALSE	0
2022-09-13	13:03:27	-0.0472135	-0.210015	250.646	FALSE	0
2022-09-13	13:03:27	-0.171437	-0.762586	254.918	FALSE	0
2022-09-13	13:03:28	-0.0757631	-0.337009	250.646	FALSE	0
2022-09-13	13:03:28	-0.207417	-0.922632	254.918	FALSE	0
2022-09-13	13:03:28	-0.191844	-0.85336	250.646	FALSE	0
2022-09-13	13:03:28	-0.255254	-1.13542	254.918	FALSE	0
2022-09-13	13:03:29	-0.0256868	-0.11426	250.646	FALSE	0
2022-09-13	13:03:29	0.117875	0.524332	255.442	FALSE	0
2022-09-13	13:03:29	0.353499	1.57243	252.219	FALSE	0
2022-09-13	13:03:30	1.01319	4.50687	259.949	FALSE	0
2022-09-13	13:03:30	0.48902	2.17526	254.394	FALSE	0
2022-09-13	13:03:30	0.22612	1.00583	260.955	FALSE	0
2022-09-13	13:03:30	0.0839824	0.373571	254.767	FALSE	0
2022-09-13	13:03:31	0.352125	1.56632	262.521	FALSE	0
2022-09-13	13:03:31	0.0798094	0.355008	255.122	FALSE	0
2022-09-13	13:03:31	0.911921	4.05641	266.578	FALSE	0
2022-09-13	13:03:31	0.592328	2.63479	257.757	FALSE	0
2022-09-13	13:03:32	1.18663	5.27837	271.856	FALSE	0
2022-09-13	13:03:32	0.295229	1.31324	259.071	FALSE	0
2022-09-13	13:03:32	0.711769	3.16609	275.022	FALSE	0
2022-09-13	13:03:32	0.701641	3.12104	262.192	FALSE	0
2022-09-13	13:03:33	0.674008	2.99812	278.02	FALSE	0
2022-09-13	13:03:33	0.71813	3.19439	265.386	FALSE	0
2022-09-13	13:03:33	0.61299	2.7267	280.747	FALSE	0
2022-09-13	13:03:33	0.685814	3.05064	268.437	FALSE	0
2022-09-13	13:03:34	0.185204	0.823824	281.571	FALSE	0
2022-09-13	13:03:34	0.605916	2.69524	271.132	FALSE	0
2022-09-13	13:03:34	0.295076	1.31256	282.884	FALSE	0
2022-09-13	13:03:34	0.347952	1.54776	272.68	FALSE	0
2022-09-13	13:03:35	0.279097	1.24148	284.125	FALSE	0
2022-09-13	13:03:35	0.276094	1.22812	273.908	FALSE	0
2022-09-13	13:03:35	0.31187	1.38726	285.512	FALSE	0
2022-09-13	13:03:36	-0.031641	-0.140745	273.908	FALSE	0
2022-09-13	13:03:36	0.0503438	0.223939	285.736	FALSE	0
2022-09-13	13:03:36	0.00927507	0.0412574	273.949	FALSE	0
2022-09-13	13:03:36	0.0853564	0.379682	286.116	FALSE	0
2022-09-13	13:03:37	-0.0898089	-0.399488	273.949	FALSE	0
2022-09-13	13:03:37	-0.0262975	-0.116977	286.116	FALSE	0
2022-09-13	13:03:37	-0.159275	-0.708487	273.949	FALSE	0
2022-09-13	13:03:37	-0.194389	-0.864681	286.116	FALSE	0
2022-09-13	13:03:38	-0.500954	-2.22834	273.949	FALSE	0
2022-09-13	13:03:38	-0.621921	-2.76643	286.116	FALSE	0
2022-09-13	13:03:38	-0.610521	-2.71572	273.949	FALSE	0
2022-09-13	13:03:38	-0.7722	-3.4349	286.116	FALSE	0
2022-09-13	13:03:39	-0.583295	-2.59461	273.949	FALSE	0
2022-09-13	13:03:39	-0.453931	-2.01918	286.116	FALSE	0
2022-09-13	13:03:39	-0.267366	-1.1893	273.949	FALSE	0
2022-09-13	13:03:40	-0.0484348	-0.215448	286.116	FALSE	0
2022-09-13	13:03:40	0.0151274	0.0672897	274.016	FALSE	0
2022-09-13	13:03:40	0.363066	1.61499	287.731	FALSE	0
2022-09-13	13:03:40	0.23014	1.02371	275.04	FALSE	0
2022-09-13	13:03:41	0.634873	2.82404	290.555	FALSE	0
2022-09-13	13:03:41	0.443219	1.97153	277.011	FALSE	0
2022-09-13	13:03:41	0.621285	2.7636	293.319	FALSE	0
2022-09-13	13:03:41	0.510343	2.27011	279.282	FALSE	0
2022-09-13	13:03:42	0.511921	2.27713	295.596	FALSE	0
2022-09-13	13:03:42	0.545153	2.42495	281.707	FALSE	0
2022-09-13	13:03:42	0.411972	1.83253	297.428	FALSE	0
2022-09-13	13:03:42	0.992786	4.41611	286.123	FALSE	0
2022-09-13	13:03:43	0.690802	3.07283	300.501	FALSE	0
2022-09-13	13:03:43	0.622252	2.7679	288.891	FALSE	0
2022-09-13	13:03:43	0.163728	0.728295	301.229	FALSE	0
2022-09-13	13:03:44	0.477977	2.12614	291.017	FALSE	0
2022-09-13	13:03:44	0.161489	0.718335	301.948	FALSE	0
2022-09-13	13:03:44	0.411209	1.82914	292.846	FALSE	0
2022-09-13	13:03:44	0.178486	0.793941	302.742	FALSE	0
2022-09-13	13:03:45	0.378588	1.68404	294.53	FALSE	0
2022-09-13	13:03:45	0.130242	0.579342	303.321	FALSE	0
2022-09-13	13:03:45	0.468206	2.08267	296.613	FALSE	0
2022-09-13	13:03:45	0.277875	1.23604	304.557	FALSE	0
2022-09-13	13:03:46	0.393244	1.74923	298.362	FALSE	0
2022-09-13	13:03:46	0.336959	1.49886	306.056	FALSE	0
2022-09-13	13:03:46	0.416501	1.85268	300.214	FALSE	0
2022-09-13	13:03:46	0.420369	1.86989	307.926	FALSE	0
2022-09-13	13:03:47	0.503677	2.24046	302.455	FALSE	0
2022-09-13	13:03:47	0.654007	2.90915	310.835	FALSE	0
2022-09-13	13:03:47	0.398944	1.77458	304.229	FALSE	0
2022-09-13	13:03:48	0.607595	2.7027	313.538	FALSE	0
2022-09-13	13:03:48	0.42388	1.8855	306.115	FALSE	0
2022-09-13	13:03:48	0.475026	2.11301	315.651	FALSE	0
2022-09-13	13:03:48	0.391361	1.74085	307.856	FALSE	0
2022-09-13	13:03:49	0.53869	2.3962	318.047	FALSE	0
2022-09-13	13:03:49	0.32673	1.45336	309.309	FALSE	0
2022-09-13	13:03:49	0.52215	2.32263	320.369	FALSE	0
2022-09-13	13:03:49	0.285153	1.26842	310.578	FALSE	0
2022-09-13	13:03:50	0.449733	2.0005	322.37	FALSE	0
2022-09-13	13:03:50	0.226374	1.00696	311.585	FALSE	0
2022-09-13	13:03:50	0.343728	1.52897	323.899	FALSE	0
2022-09-13	13:03:50	0.33299	1.48121	313.066	FALSE	0
2022-09-13	13:03:51	0.310344	1.38047	325.279	FALSE	0
2022-09-13	13:03:51	0.40159	1.78635	314.852	FALSE	0
2022-09-13	13:03:51	0.494669	2.20039	327.48	FALSE	0
2022-09-13	13:03:52	0.737366	3.27995	318.132	FALSE	0
2022-09-13	13:03:52	0.734924	3.26909	330.749	FALSE	0
2022-09-13	13:03:52	0.732074	3.25641	321.388	FALSE	0
2022-09-13	13:03:52	0.729886	3.24668	333.996	FALSE	0
2022-09-13	13:03:53	0.73299	3.26049	324.649	FALSE	0
2022-09-13	13:03:53	0.739046	3.28742	337.283	FALSE	0
2022-09-13	13:03:53	0.73874	3.28606	327.935	FALSE	0
2022-09-13	13:03:53	0.733193	3.26139	340.544	FALSE	0
2022-09-13	13:03:54	0.71126	3.16383	331.099	FALSE	0
2022-09-13	13:03:54	0.71986	3.20208	343.746	FALSE	0
2022-09-13	13:03:54	0.715382	3.18216	334.281	FALSE	0
2022-09-13	13:03:54	0.728155	3.23898	346.985	FALSE	0
2022-09-13	13:03:55	0.728715	3.24147	337.522	FALSE	0
2022-09-13	13:03:55	0.724237	3.22155	350.207	FALSE	0
2022-09-13	13:03:55	0.71299	3.17152	340.694	FALSE	0
2022-09-13	13:03:56	0.737672	3.28131	353.488	FALSE	0
2022-09-13	13:03:56	0.745611	3.31663	344.011	FALSE	0
2022-09-13	13:03:56	0.741031	3.29625	356.784	FALSE	0
2022-09-13	13:03:56	0.736654	3.27678	347.287	FALSE	0
2022-09-13	13:03:57	0.740725	3.29489	360.079	FALSE	0
2022-09-13	13:03:57	0.737315	3.27972	350.567	FALSE	0
2022-09-13	13:03:57	0.735076	3.26977	363.349	FALSE	0
2022-09-13	13:03:57	0.736196	3.27475	353.842	FALSE	0
2022-09-13	13:03:58	0.738995	3.2872	366.636	FALSE	0
2022-09-13	13:03:58	0.735992	3.27384	357.116	FALSE	0
2022-09-13	13:03:58	0.732837	3.25981	369.896	FALSE	0
2022-09-13	13:03:58	0.737163	3.27905	360.395	FALSE	0
2022-09-13	13:03:59	0.73131	3.25301	373.149	FALSE	0
2022-09-13	13:03:59	0.73584	3.27316	363.668	FALSE	0
2022-09-13	13:03:59	0.743168	3.30576	376.455	FALSE	0
2022-09-13	13:04:00	0.737417	3.28018	366.948	FALSE	0
2022-09-13	13:04:00	0.724237	3.22155	379.676	FALSE	0
2022-09-13	13:04:00	0.740013	3.29173	370.24	FALSE	0
2022-09-13	13:04:00	0.739147	3.28787	382.964	FALSE	0
2022-09-13	13:04:01	0.740623	3.29444	373.534	FALSE	0
2022-09-13	13:04:01	0.743219	3.30599	386.27	FALSE	0
2022-09-13	13:04:01	0.730191	3.24804	376.782	FALSE	0
2022-09-13	13:04:01	0.711565	3.16518	389.436	FALSE	0
2022-09-13	13:04:02	0.637774	2.83695	379.619	FALSE	0
2022-09-13	13:04:02	0.5307	2.36066	391.796	FALSE	0
2022-09-13	13:04:02	0.517264	2.30089	381.92	FALSE	0
2022-09-13	13:04:02	0.563117	2.50486	394.301	FALSE	0
2022-09-13	13:04:03	0.587748	2.61442	384.535	FALSE	0
2022-09-13	13:04:03	0.601743	2.67667	396.978	FALSE	0
2022-09-13	13:04:03	0.587646	2.61397	387.149	FALSE	0
2022-09-13	13:04:04	0.606069	2.69592	399.674	FALSE	0
2022-09-13	13:04:04	0.650344	2.89286	390.041	FALSE	0
2022-09-13	13:04:04	0.648359	2.88403	402.558	FALSE	0
2022-09-13	13:04:04	0.629529	2.80027	392.842	FALSE	0
2022-09-13	13:04:05	0.580878	2.58386	405.142	FALSE	0
2022-09-13	13:04:05	0.507647	2.25812	395.1	FALSE	0
2022-09-13	13:04:05	0.519758	2.31199	407.454	FALSE	0
2022-09-13	13:04:05	0.520827	2.31674	397.417	FALSE	0
2022-09-13	13:04:06	0.534211	2.37628	409.83	FALSE	0
2022-09-13	13:04:06	0.657519	2.92478	400.341	FALSE	0
2022-09-13	13:04:06	0.814669	3.62381	413.454	FALSE	0
2022-09-13	13:04:06	1.36164	6.05685	406.398	FALSE	0
2022-09-13	13:04:07	1.02444	4.55691	418.011	FALSE	0
2022-09-13	13:04:07	0.849733	3.77978	410.178	FALSE	0
2022-09-13	13:04:07	0.758435	3.37367	421.384	FALSE	0
2022-09-13	13:04:07	0.749071	3.33202	413.51	FALSE	0
2022-09-13	13:04:08	0.736603	3.27656	424.661	FALSE	0
2022-09-13	13:04:08	0.741641	3.29897	416.809	FALSE	0
2022-09-13	13:04:08	0.735178	3.27022	427.931	FALSE	0
2022-09-13	13:04:09	0.739504	3.28946	420.098	FALSE	0
2022-09-13	13:04:09	0.739911	3.29127	431.222	FALSE	0
2022-09-13	13:04:09	0.721743	3.21046	423.309	FALSE	0
2022-09-13	13:04:09	0.680267	3.02596	434.248	FALSE	0
2022-09-13	13:04:10	0.66159	2.94288	426.252	FALSE	0
2022-09-13	13:04:10	0.678333	3.01736	437.266	FALSE	0
2022-09-13	13:04:10	0.733397	3.2623	429.514	FALSE	0
2022-09-13	13:04:10	0.705509	3.13825	440.404	FALSE	0
2022-09-13	13:04:11	0.707087	3.14526	432.659	FALSE	0
2022-09-13	13:04:11	0.696094	3.09637	443.5	FALSE	0
2022-09-13	13:04:11	0.706832	3.14413	435.803	FALSE	0
2022-09-13	13:04:11	0.681743	3.03253	446.533	FALSE	0
2022-09-13	13:04:12	0.663117	2.94968	438.753	FALSE	0
2022-09-13	13:04:12	0.686985	3.05585	449.589	FALSE	0
2022-09-13	13:04:12	0.693855	3.08641	441.84	FALSE	0
2022-09-13	13:04:13	0.708918	3.15341	452.742	FALSE	0
2022-09-13	13:04:13	0.687239	3.05698	444.896	FALSE	0
2022-09-13	13:04:13	0.722608	3.2143	455.956	FALSE	0
2022-09-13	13:04:13	0.712328	3.16858	448.065	FALSE	0
2022-09-13	13:04:14	0.711005	3.16269	459.119	FALSE	0
2022-09-13	13:04:14	0.693448	3.0846	451.15	FALSE	0
2022-09-13	13:04:14	0.715636	3.18329	462.302	FALSE	0
2022-09-13	13:04:14	0.706171	3.14119	454.291	FALSE	0
2022-09-13	13:04:15	0.630343	2.80389	465.106	FALSE	0
2022-09-13	13:04:15	0.438639	1.95115	456.242	FALSE	0
2022-09-13	13:04:15	0.463015	2.05958	467.166	FALSE	0
2022-09-13	13:04:15	0.389071	1.73067	457.973	FALSE	0
2022-09-13	13:04:16	0.706323	3.14187	470.308	FALSE	0
2022-09-13	13:04:16	1.00022	4.44918	462.422	FALSE	0
2022-09-13	13:04:16	0.721997	3.21159	473.519	FALSE	0
2022-09-13	13:04:17	0.669885	2.97978	465.402	FALSE	0
2022-09-13	13:04:17	0.704644	3.1344	476.654	FALSE	0
2022-09-13	13:04:17	0.180471	0.802771	466.204	FALSE	0
2022-09-13	13:04:17	0.715738	3.18375	479.837	FALSE	0
2022-09-13	13:04:18	0.726934	3.23355	469.438	FALSE	0
2022-09-13	13:04:18	0.571565	2.54244	482.38	FALSE	0
2022-09-13	13:04:18	0.732888	3.26003	472.698	FALSE	0
2022-09-13	13:04:18	0.734109	3.26546	485.645	FALSE	0
2022-09-13	13:04:19	0.739198	3.2881	475.986	FALSE	0
2022-09-13	13:04:19	0.739606	3.28992	488.935	FALSE	0
2022-09-13	13:04:19	0.732379	3.25777	479.244	FALSE	0
2022-09-13	13:04:19	0.741997	3.30055	492.236	FALSE	0
2022-09-13	13:04:20	0.741285	3.29738	482.541	FALSE	0
2022-09-13	13:04:20	0.73645	3.27588	495.512	FALSE	0
2022-09-13	13:04:20	0.729478	3.24486	485.786	FALSE	0
2022-09-13	13:04:21	0.710242	3.1593	498.671	FALSE	0
2022-09-13	13:04:21	0.621336	2.76383	488.55	FALSE	0
2022-09-13	13:04:21	0.52159	2.32014	500.991	FALSE	0
2022-09-13	13:04:21	0.134059	0.596321	489.146	FALSE	0
2022-09-13	13:04:22	0.33645	1.4966	502.488	FALSE	0
2022-09-13	13:04:22	0.32383	1.44046	490.587	FALSE	0
2022-09-13	13:04:22	0.330852	1.4717	503.959	FALSE	0
2022-09-13	13:04:22	0.481539	2.14198	492.729	FALSE	0
2022-09-13	13:04:23	0.626832	2.78827	506.748	FALSE	0
2022-09-13	13:04:23	0.422354	1.87872	494.607	FALSE	0
2022-09-13	13:04:23	0.774568	3.44543	510.193	FALSE	0
2022-09-13	13:04:23	0.734466	3.26705	497.874	FALSE	0
2022-09-13	13:04:24	0.815585	3.62789	513.821	FALSE	0
2022-09-13	13:04:24	0.788104	3.50564	501.38	FALSE	0
2022-09-13	13:04:24	0.817519	3.63649	517.457	FALSE	0
2022-09-13	13:04:25	0.782761	3.48188	504.862	FALSE	0
2022-09-13	13:04:25	0.870598	3.87259	521.33	FALSE	0
2022-09-13	13:04:25	0.773295	3.43977	508.302	FALSE	0
2022-09-13	13:04:25	0.824135	3.66592	524.996	FALSE	0
2022-09-13	13:04:26	0.70444	3.13349	511.435	FALSE	0
2022-09-13	13:04:26	1.29532e-05	5.76184e-05	524.996	FALSE	0
2022-09-13	13:04:26	0.289275	1.28675	512.722	FALSE	0
2022-09-13	13:04:26	-0.0889946	-0.395866	524.996	FALSE	0
2022-09-13	13:04:27	-0.18131	-0.806503	512.722	FALSE	0
2022-09-13	13:04:27	-0.317035	-1.41024	524.996	FALSE	0
2022-09-13	13:04:27	-0.240801	-1.07113	512.722	FALSE	0
2022-09-13	13:04:27	-0.280343	-1.24702	524.996	FALSE	0
2022-09-13	13:04:28	-0.28528	-1.26898	512.722	FALSE	0
2022-09-13	13:04:28	-0.330725	-1.47113	524.996	FALSE	0
2022-09-13	13:04:28	-0.201565	-0.896601	512.722	FALSE	0
2022-09-13	13:04:29	-0.0755595	-0.336104	524.996	FALSE	0
2022-09-13	13:04:29	-0.0235494	-0.104752	512.722	FALSE	0
2022-09-13	13:04:29	0.0545168	0.242502	525.238	FALSE	0
2022-09-13	13:04:29	0.598283	2.66128	515.383	FALSE	0
2022-09-13	13:04:30	0.773601	3.44113	528.68	FALSE	0
2022-09-13	13:04:30	0.504135	2.24249	517.626	FALSE	0
2022-09-13	13:04:30	0.179351	0.797789	529.477	FALSE	0
2022-09-13	13:04:30	0.341285	1.5181	519.144	FALSE	0
2022-09-13	13:04:31	0.744033	3.30961	532.787	FALSE	0
2022-09-13	13:04:31	0.370903	1.64985	520.794	FALSE	0
2022-09-13	13:04:31	0.716552	3.18737	535.974	FALSE	0
2022-09-13	13:04:31	0.739249	3.28833	524.082	FALSE	0
2022-09-13	13:04:32	0.740165	3.2924	539.267	FALSE	0
2022-09-13	13:04:32	0.733397	3.2623	527.344	FALSE	0
2022-09-13	13:04:32	0.730547	3.24962	542.516	FALSE	0
2022-09-13	13:04:33	0.736501	3.2761	530.62	FALSE	0
2022-09-13	13:04:33	0.733804	3.26411	545.78	FALSE	0
2022-09-13	13:04:33	0.736196	3.27475	533.895	FALSE	0
2022-09-13	13:04:33	0.734059	3.26524	549.046	FALSE	0
2022-09-13	13:04:34	0.736959	3.27814	537.173	FALSE	0
2022-09-13	13:04:34	0.736094	3.27429	552.32	FALSE	0
2022-09-13	13:04:34	0.733448	3.26252	540.436	FALSE	0
2022-09-13	13:04:34	0.731005	3.25166	555.572	FALSE	0
2022-09-13	13:04:35	0.73584	3.27316	543.709	FALSE	0
2022-09-13	13:04:35	0.734669	3.26795	558.84	FALSE	0
2022-09-13	13:04:35	0.731361	3.25324	546.962	FALSE	0
2022-09-13	13:04:35	0.727392	3.23559	562.075	FALSE	0
2022-09-13	13:04:36	0.731259	3.25279	550.215	FALSE	0
2022-09-13	13:04:36	0.732379	3.25777	565.333	FALSE	0
2022-09-13	13:04:36	0.735789	3.27294	553.488	FALSE	0
2022-09-13	13:04:37	0.763321	3.3954	568.728	FALSE	0
2022-09-13	13:04:37	0.805865	3.58465	557.073	FALSE	0
2022-09-13	13:04:37	0.820878	3.65143	572.38	FALSE	0
2022-09-13	13:04:37	0.916349	4.0761	561.149	FALSE	0
2022-09-13	13:04:38	0.920522	4.09467	576.474	FALSE	0
2022-09-13	13:04:38	0.963219	4.28459	565.433	FALSE	0
2022-09-13	13:04:38	0.837672	3.72613	580.201	FALSE	0
2022-09-13	13:04:38	1.00154	4.45505	569.888	FALSE	0
2022-09-13	13:04:39	0.996908	4.43445	584.635	FALSE	0
2022-09-13	13:04:39	0.993092	4.41747	574.306	FALSE	0
2022-09-13	13:04:39	0.900216	4.00434	588.639	FALSE	0
2022-09-13	13:04:39	0.594211	2.64317	576.949	FALSE	0
2022-09-13	13:04:40	0.210242	0.935198	589.575	FALSE	0
2022-09-13	13:04:40	-0.192353	-0.855625	576.949	FALSE	0
2022-09-13	13:04:40	-0.00700993	-0.0311816	589.575	FALSE	0
2022-09-13	13:04:40	-0.115712	-0.51471	576.949	FALSE	0
2022-09-13	13:04:41	-0.0509794	-0.226767	589.575	FALSE	0
2022-09-13	13:04:41	0.701132	3.11878	580.068	FALSE	0
2022-09-13	13:04:41	0.956145	4.25312	593.828	FALSE	0
2022-09-13	13:04:42	0.036247	0.161234	580.229	FALSE	0
2022-09-13	13:04:42	0.430547	1.91516	595.743	FALSE	0
2022-09-13	13:04:42	0.284542	1.2657	581.495	FALSE	0
2022-09-13	13:04:42	0.219657	0.977078	596.72	FALSE	0
2022-09-13	13:04:43	0.208664	0.928179	582.423	FALSE	0
2022-09-13	13:04:43	0.36444	1.6211	598.341	FALSE	0
2022-09-13	13:04:43	0.735992	3.27384	585.697	FALSE	0
2022-09-13	13:04:43	0.753092	3.3499	601.691	FALSE	0
2022-09-13	13:04:44	1.01833	4.52974	590.226	FALSE	0
2022-09-13	13:04:44	0.746527	3.3207	605.012	FALSE	0
2022-09-13	13:04:44	0.838689	3.73066	593.957	FALSE	0
2022-09-13	13:04:44	0.731259	3.25279	608.264	FALSE	0
2022-09-13	13:04:45	0.73645	3.27588	597.233	FALSE	0
2022-09-13	13:04:45	0.767239	3.41283	611.677	FALSE	0
2022-09-13	13:04:45	0.760165	3.38137	600.614	FALSE	0
2022-09-13	13:04:46	0.762048	3.38974	615.067	FALSE	0
2022-09-13	13:04:46	0.771972	3.43389	604.048	FALSE	0
2022-09-13	13:04:46	0.77701	3.4563	618.523	FALSE	0
2022-09-13	13:04:46	0.788359	3.50678	607.555	FALSE	0
2022-09-13	13:04:47	0.785102	3.49229	622.016	FALSE	0
2022-09-13	13:04:47	0.796349	3.54232	611.097	FALSE	0
2022-09-13	13:04:47	0.797366	3.54684	625.562	FALSE	0
2022-09-13	13:04:47	0.802659	3.57039	614.668	FALSE	0
2022-09-13	13:04:48	0.816043	3.62992	629.192	FALSE	0
2022-09-13	13:04:48	0.830903	3.69602	618.364	FALSE	0
2022-09-13	13:04:48	0.914873	4.06954	633.262	FALSE	0
2022-09-13	13:04:48	0.870242	3.87101	622.235	FALSE	0
2022-09-13	13:04:49	0.867748	3.85992	637.122	FALSE	0
2022-09-13	13:04:49	0.869784	3.86897	626.104	FALSE	0
2022-09-13	13:04:49	0.876756	3.89999	641.022	FALSE	0
2022-09-13	13:04:50	1.03915	4.62235	630.726	FALSE	0
2022-09-13	13:04:50	0.909478	4.04554	645.067	FALSE	0
2022-09-13	13:04:50	0.538232	2.39416	633.12	FALSE	0
2022-09-13	13:04:50	0.317876	1.41398	646.481	FALSE	0
2022-09-13	13:04:51	0.471311	2.09649	635.217	FALSE	0
2022-09-13	13:04:51	0.585254	2.60333	649.085	FALSE	0
2022-09-13	13:04:51	0.735076	3.26977	638.487	FALSE	0
2022-09-13	13:04:51	0.818944	3.64283	652.727	FALSE	0
2022-09-13	13:04:52	0.948766	4.2203	642.707	FALSE	0
2022-09-13	13:04:52	0.14383	0.639785	653.367	FALSE	0
2022-09-13	13:04:52	0.704389	3.13326	645.84	FALSE	0
2022-09-13	13:04:52	0.457214	2.03378	655.401	FALSE	0
2022-09-13	13:04:53	0.465051	2.06864	647.909	FALSE	0
2022-09-13	13:04:53	0.340267	1.51358	656.915	FALSE	0
2022-09-13	13:04:53	0.368206	1.63785	649.547	FALSE	0
2022-09-13	13:04:54	0.419351	1.86536	658.78	FALSE	0
2022-09-13	13:04:54	0.456247	2.02948	651.576	FALSE	0
2022-09-13	13:04:54	0.601234	2.67441	661.454	FALSE	0
2022-09-13	13:04:54	0.723066	3.21634	654.792	FALSE	0
2022-09-13	13:04:55	0.745763	3.3173	664.772	FALSE	0
2022-09-13	13:04:55	0.442201	1.967	656.759	FALSE	0
2022-09-13	13:04:55	0.587494	2.61329	667.385	FALSE	0
2022-09-13	13:04:55	0.718028	3.19393	659.953	FALSE	0
2022-09-13	13:04:56	0.493855	2.19677	669.582	FALSE	0
2022-09-13	13:04:56	0.929885	4.13631	664.09	FALSE	0
2022-09-13	13:04:56	0.993346	4.4186	674	FALSE	0
2022-09-13	13:04:56	1.0281	4.57319	668.663	FALSE	0
2022-09-13	13:04:57	0.968002	4.30587	678.306	FALSE	0
2022-09-13	13:04:57	1.05966	4.71358	673.376	FALSE	0
2022-09-13	13:04:57	1.0935	4.86411	683.17	FALSE	0
2022-09-13	13:04:58	1.1221	4.99133	678.368	FALSE	0
2022-09-13	13:04:58	1.09523	4.8718	688.042	FALSE	0
2022-09-13	13:04:58	0.971107	4.31968	682.687	FALSE	0
2022-09-13	13:04:58	0.898537	3.99687	692.039	FALSE	0
2022-09-13	13:04:59	1.06149	4.72172	687.409	FALSE	0
2022-09-13	13:04:59	1.11589	4.9637	697.003	FALSE	0
2022-09-13	13:04:59	1.10307	4.90668	692.316	FALSE	0
2022-09-13	13:04:59	1.11238	4.94809	701.951	FALSE	0
2022-09-13	13:05:00	1.11726	4.9698	697.286	FALSE	0
2022-09-13	13:05:00	0.75014	3.33677	705.288	FALSE	0
2022-09-13	13:05:00	0.340318	1.5138	698.799	FALSE	0
2022-09-13	13:05:00	0.0247458	0.110074	705.398	FALSE	0
2022-09-13	13:05:01	0.245204	1.09072	699.89	FALSE	0
2022-09-13	13:05:01	0.30154	1.34131	706.739	FALSE	0
2022-09-13	13:05:01	0.517672	2.30271	702.193	FALSE	0
2022-09-13	13:05:02	0.86673	3.85539	710.594	FALSE	0
2022-09-13	13:05:02	0.583168	2.59405	704.787	FALSE	0
2022-09-13	13:05:02	1.39691	6.21374	716.808	FALSE	0
2022-09-13	13:05:02	3.17447	14.1207	718.908	1	1
2022-09-13	13:05:03	6.03807	26.8585	743.667	1	2
2022-09-13	13:05:03	4.35009	19.3501	738.258	1	3
2022-09-13	13:05:03	2.20968	9.8291	753.496	FALSE	3
2022-09-13	13:05:03	0.484339	2.15444	740.412	FALSE	3
2022-09-13	13:05:04	0.503524	2.23978	755.735	FALSE	3
2022-09-13	13:05:04	0.429377	1.90995	742.322	FALSE	3
2022-09-13	13:05:04	0.428613	1.90656	757.642	FALSE	3
2022-09-13	13:05:04	0.470903	2.09467	744.417	FALSE	3
2022-09-13	13:05:05	0.451565	2.00865	759.651	FALSE	3
2022-09-13	13:05:05	0.496959	2.21057	746.627	FALSE	3
2022-09-13	13:05:05	0.560064	2.49128	762.142	FALSE	3
2022-09-13	13:05:06	0.524796	2.3344	748.962	FALSE	3
2022-09-13	13:05:06	0.538435	2.39507	764.537	FALSE	3
2022-09-13	13:05:06	0.438893	1.95228	750.914	FALSE	3
2022-09-13	13:05:06	0.249631	1.11041	765.647	FALSE	3
2022-09-13	13:05:07	0.358079	1.59281	752.507	FALSE	3
2022-09-13	13:05:07	0.535178	2.38058	768.028	FALSE	3
2022-09-13	13:05:07	0.496399	2.20808	754.715	FALSE	3
2022-09-13	13:05:07	0.429122	1.90882	769.937	FALSE	3
2022-09-13	13:05:08	0.419809	1.86739	756.582	FALSE	3
2022-09-13	13:05:08	0.470446	2.09264	772.029	FALSE	3
2022-09-13	13:05:08	0.561336	2.49693	759.079	FALSE	3
2022-09-13	13:05:08	0.490802	2.18319	774.213	FALSE	3
2022-09-13	13:05:09	0.340878	1.51629	760.595	FALSE	3
2022-09-13	13:05:09	0.626679	2.78759	777	FALSE	3
2022-09-13	13:05:09	0.474059	2.10871	762.704	FALSE	3
2022-09-13	13:05:10	0.566272	2.51889	779.519	FALSE	3
2022-09-13	13:05:10	0.669122	2.97639	765.681	FALSE	3
2022-09-13	13:05:10	4.34515	19.3281	798.847	1	4
2022-09-13	13:05:10	2.7564	12.261	777.942	FALSE	4
2022-09-13	13:05:11	0.297774	1.32456	800.172	FALSE	4
2022-09-13	13:05:11	0.0117687	0.0523495	777.994	FALSE	4
2022-09-13	13:05:11	0.0953819	0.424278	800.596	FALSE	4
2022-09-13	13:05:11	0.299351	1.33157	779.326	FALSE	4
2022-09-13	13:05:12	0.45416	2.02019	802.616	FALSE	4
2022-09-13	13:05:12	0.481285	2.14085	781.466	FALSE	4
2022-09-13	13:05:12	0.743015	3.30508	805.921	FALSE	4
2022-09-13	13:05:12	1.31996	5.87145	787.338	FALSE	4
2022-09-13	13:05:13	0.7964	3.54255	809.464	FALSE	4
2022-09-13	13:05:13	0.418028	1.85947	789.197	FALSE	4
2022-09-13	13:05:13	0.20154	0.89649	810.36	FALSE	4
2022-09-13	13:05:13	0.61757	2.74707	791.944	FALSE	4
2022-09-13	13:05:14	0.439758	1.95613	812.317	FALSE	4
2022-09-13	13:05:14	0.289784	1.28902	793.233	FALSE	4
2022-09-13	13:05:14	0.317366	1.41171	813.728	FALSE	4
2022-09-13	13:05:15	0.502201	2.23389	795.467	FALSE	4
2022-09-13	13:05:15	0.69584	3.09524	816.823	FALSE	4
2022-09-13	13:05:15	0.550293	2.44781	797.915	FALSE	4
2022-09-13	13:05:15	0.933702	4.15329	820.977	FALSE	4
2022-09-13	13:05:16	1.03955	4.62413	802.539	FALSE	4
2022-09-13	13:05:16	1.34485	5.98216	826.959	FALSE	4
2022-09-13	13:05:16	1.67207	7.4377	809.977	FALSE	4
2022-09-13	13:05:16	1.39065	6.18589	833.145	FALSE	4
2022-09-13	13:05:17	0.830038	3.69218	813.669	FALSE	4
2022-09-13	13:05:17	0.836196	3.71957	836.864	FALSE	4
2022-09-13	13:05:17	0.759198	3.37706	817.046	FALSE	4
2022-09-13	13:05:17	0.681794	3.03276	839.897	FALSE	4
2022-09-13	13:05:18	-0.270369	-1.20266	817.046	FALSE	4
2022-09-13	13:05:18	-0.391488	-1.74142	839.897	FALSE	4
2022-09-13	13:05:18	-0.448638	-1.99563	817.046	FALSE	4
2022-09-13	13:05:19	-0.478613	-2.12897	839.897	FALSE	4
2022-09-13	13:05:19	-0.528587	-2.35126	817.046	FALSE	4
2022-09-13	13:05:19	-0.412506	-1.83491	839.897	FALSE	4
2022-09-13	13:05:19	-0.33444	-1.48766	817.046	FALSE	4
2022-09-13	13:05:20	-0.216832	-0.964512	839.897	FALSE	4
2022-09-13	13:05:20	-0.223142	-0.99258	817.046	FALSE	4
2022-09-13	13:05:20	-0.0301142	-0.133954	839.897	FALSE	4
2022-09-13	13:05:20	-0.0693509	-0.308487	817.046	FALSE	4
2022-09-13	13:05:21	0.0595549	0.264912	840.162	FALSE	4
2022-09-13	13:05:21	-0.0895035	-0.398129	817.046	FALSE	4
2022-09-13	13:05:21	0.0821503	0.365421	840.527	FALSE	4
2022-09-13	13:05:21	-0.0733712	-0.32637	817.046	FALSE	4
2022-09-13	13:05:22	-0.189758	-0.844082	840.527	FALSE	4
2022-09-13	13:05:22	-0.207468	-0.922859	817.046	FALSE	4
2022-09-13	13:05:22	-0.184923	-0.822574	840.527	FALSE	4
2022-09-13	13:05:23	-0.117493	-0.522632	817.046	FALSE	4
2022-09-13	13:05:23	-0.123906	-0.551159	840.527	FALSE	4
2022-09-13	13:05:23	-0.182023	-0.809675	817.046	FALSE	4
2022-09-13	13:05:23	-0.322939	-1.4365	840.527	FALSE	4
2022-09-13	13:05:24	-0.191692	-0.852684	817.046	FALSE	4
2022-09-13	13:05:24	-0.234796	-1.04442	840.527	FALSE	4
2022-09-13	13:05:24	-0.246094	-1.09468	817.046	FALSE	4
2022-09-13	13:05:24	-0.260852	-1.16032	840.527	FALSE	4
2022-09-13	13:05:25	-0.254745	-1.13316	817.046	FALSE	4
2022-09-13	13:05:25	-0.204058	-0.907691	840.527	FALSE	4
2022-09-13	13:05:25	-0.132404	-0.588959	817.046	FALSE	4
2022-09-13	13:05:25	-0.381412	-1.6966	840.527	FALSE	4
2022-09-13	13:05:26	-0.438002	-1.94832	817.046	FALSE	4
2022-09-13	13:05:26	-0.339274	-1.50916	840.527	FALSE	4
2022-09-13	13:05:26	-0.296119	-1.3172	817.046	FALSE	4
2022-09-13	13:05:27	-0.279834	-1.24476	840.527	FALSE	4
2022-09-13	13:05:27	-0.127264	-0.566096	817.046	FALSE	4
2022-09-13	13:05:27	0.0546694	0.24318	840.771	FALSE	4
2022-09-13	13:05:27	0.16098	0.716071	817.762	FALSE	4
2022-09-13	13:05:28	0.31187	1.38726	842.158	FALSE	4
2022-09-13	13:05:28	0.150751	0.670571	818.433	FALSE	4
2022-09-13	13:05:28	0.27986	1.24487	843.403	FALSE	4
2022-09-13	13:05:28	0.238792	1.06219	819.495	FALSE	4
2022-09-13	13:05:29	0.301438	1.34086	844.744	FALSE	4
2022-09-13	13:05:29	0.160115	0.712224	820.207	FALSE	4
2022-09-13	13:05:29	0.42271	1.8803	846.624	FALSE	4
2022-09-13	13:05:29	0.623524	2.77356	822.981	FALSE	4
2022-09-13	13:05:30	0.734924	3.26909	849.893	FALSE	4
2022-09-13	13:05:30	0.736807	3.27746	826.258	FALSE	4
2022-09-13	13:05:30	0.727697	3.23694	853.13	FALSE	4
2022-09-13	13:05:31	0.73355	3.26298	829.521	FALSE	4
2022-09-13	13:05:31	0.63416	2.82087	855.951	FALSE	4
2022-09-13	13:05:31	0.563575	2.50689	832.028	FALSE	4
2022-09-13	13:05:31	0.711361	3.16428	859.115	FALSE	4
2022-09-13	13:05:32	-0.0199361	-0.0886798	832.028	FALSE	4
2022-09-13	13:05:32	-0.236832	-1.05348	859.115	FALSE	4
2022-09-13	13:05:32	-0.374084	-1.664	832.028	FALSE	4
2022-09-13	13:05:32	-0.445737	-1.98273	859.115	FALSE	4
2022-09-13	13:05:33	-0.367926	-1.63661	832.028	FALSE	4
2022-09-13	13:05:33	-0.392455	-1.74572	859.115	FALSE	4
2022-09-13	13:05:33	-0.301107	-1.33938	832.028	FALSE	4
2022-09-13	13:05:33	-0.202124	-0.899088	859.115	FALSE	4
2022-09-13	13:05:34	-0.146246	-0.650531	832.028	FALSE	4
2022-09-13	13:05:34	-0.120954	-0.538028	859.115	FALSE	4
2022-09-13	13:05:34	-0.168944	-0.751497	832.028	FALSE	4
2022-09-13	13:05:35	0.101336	0.450763	859.566	FALSE	4
2022-09-13	13:05:35	0.0971122	0.431974	832.46	FALSE	4
2022-09-13	13:05:35	0.320827	1.4271	860.993	FALSE	4
2022-09-13	13:05:35	0.21986	0.977981	833.438	FALSE	4
2022-09-13	13:05:36	0.354517	1.57696	862.57	FALSE	4
2022-09-13	13:05:36	0.263168	1.17062	834.609	FALSE	4
2022-09-13	13:05:36	0.485153	2.15806	864.728	FALSE	4
2022-09-13	13:05:36	0.212481	0.945158	835.554	FALSE	4
2022-09-13	13:05:37	0.377316	1.67838	866.406	FALSE	4
2022-09-13	13:05:37	0.700776	3.11719	838.671	FALSE	4
2022-09-13	13:05:37	0.733295	3.26184	869.668	FALSE	4
2022-09-13	13:05:37	0.74098	3.29603	841.967	FALSE	4
2022-09-13	13:05:38	0.281641	1.2528	870.921	FALSE	4
2022-09-13	13:05:38	0.281132	1.25053	843.218	FALSE	4
2022-09-13	13:05:38	0.469275	2.08743	873.008	FALSE	4
2022-09-13	13:05:39	0.739402	3.28901	846.507	FALSE	4
2022-09-13	13:05:39	0.539198	2.39846	875.407	FALSE	4
2022-09-13	13:05:39	0.725509	3.22721	849.734	FALSE	4
2022-09-13	13:05:39	0.475738	2.11618	877.523	FALSE	4
2022-09-13	13:05:40	0.674211	2.99903	852.733	FALSE	4
2022-09-13	13:05:40	0.431718	1.92037	879.443	FALSE	4
2022-09-13	13:05:40	0.719809	3.20185	855.935	FALSE	4
2022-09-13	13:05:40	0.728206	3.23921	882.683	FALSE	4
2022-09-13	13:05:41	0.594466	2.6443	858.579	FALSE	4
2022-09-13	13:05:41	0.723321	3.21748	885.9	FALSE	4
2022-09-13	13:05:41	0.649733	2.89014	861.469	FALSE	4
2022-09-13	13:05:41	-0.0170354	-0.0757769	885.9	FALSE	4
2022-09-13	13:05:42	-0.495051	-2.20209	861.469	FALSE	4
2022-09-13	13:05:42	-0.0512338	-0.227898	885.9	FALSE	4
2022-09-13	13:05:42	0.765967	3.40717	864.876	FALSE	4
2022-09-13	13:05:43	0.84042	3.73836	889.638	FALSE	4
2022-09-13	13:05:43	0.335891	1.49411	866.37	FALSE	4
2022-09-13	13:05:43	0.289682	1.28856	890.927	FALSE	4
2022-09-13	13:05:43	0.398181	1.77119	868.142	FALSE	4
2022-09-13	13:05:44	0.402812	1.79179	892.719	FALSE	4
2022-09-13	13:05:44	0.431718	1.92037	870.062	FALSE	4
2022-09-13	13:05:44	0.444644	1.97787	894.697	FALSE	4
2022-09-13	13:05:44	0.402812	1.79179	871.854	FALSE	4
2022-09-13	13:05:45	0.463473	2.06162	896.758	FALSE	4
2022-09-13	13:05:45	0.388766	1.72931	873.583	FALSE	4
2022-09-13	13:05:45	0.468664	2.08471	898.843	FALSE	4
2022-09-13	13:05:45	0.416501	1.85268	875.436	FALSE	4
2022-09-13	13:05:46	0.494415	2.19926	901.042	FALSE	4
2022-09-13	13:05:46	0.428461	1.90588	877.342	FALSE	4
2022-09-13	13:05:46	0.853244	3.7954	904.838	FALSE	4
2022-09-13	13:05:46	2.24948	10.0061	887.348	FALSE	4
2022-09-13	13:05:47	4.37696	19.4696	924.307	1	5
2022-09-13	13:05:47	1.21009	5.38272	892.73	FALSE	5
2022-09-13	13:05:47	1.01833	4.52974	928.837	FALSE	5
2022-09-13	13:05:48	0.482405	2.14583	894.876	FALSE	5
2022-09-13	13:05:48	0.740827	3.29535	932.132	FALSE	5
2022-09-13	13:05:48	0.133753	0.59496	895.471	FALSE	5
2022-09-13	13:05:48	-0.136984	-0.609332	932.132	FALSE	5
2022-09-13	13:05:49	-0.485941	-2.16156	895.471	FALSE	5
2022-09-13	13:05:49	-0.684109	-3.04305	932.132	FALSE	5
2022-09-13	13:05:49	-0.406094	-1.80639	895.471	FALSE	5
2022-09-13	13:05:49	-0.294491	-1.30995	932.132	FALSE	5
2022-09-13	13:05:50	-0.343905	-1.52976	895.471	FALSE	5
2022-09-13	13:05:50	-0.546806	-2.4323	932.132	FALSE	5
2022-09-13	13:05:50	-0.703651	-3.12998	895.471	FALSE	5
2022-09-13	13:05:50	-0.719732	-3.20151	932.132	FALSE	5
2022-09-13	13:05:51	-0.712251	-3.16823	895.471	FALSE	5
2022-09-13	13:05:51	-0.79047	-3.51617	932.132	FALSE	5
2022-09-13	13:05:51	-0.767467	-3.41385	895.471	FALSE	5
2022-09-13	13:05:52	-0.804312	-3.57774	932.132	FALSE	5
2022-09-13	13:05:52	-0.581361	-2.58601	895.471	FALSE	5
2022-09-13	13:05:52	-0.487061	-2.16654	932.132	FALSE	5
2022-09-13	13:05:52	-0.150318	-0.668645	895.471	FALSE	5
2022-09-13	13:05:53	0.117875	0.524332	932.657	FALSE	5
2022-09-13	13:05:53	0.430751	1.91607	897.387	FALSE	5
2022-09-13	13:05:53	0.889987	3.95884	936.616	FALSE	5
2022-09-13	13:05:53	0.937875	4.17186	901.559	FALSE	5
2022-09-13	13:05:54	1.96307	8.73213	945.348	FALSE	5
2022-09-13	13:05:54	1.1452	5.09408	906.653	FALSE	5
2022-09-13	13:05:54	0.0433718	0.192926	945.541	FALSE	5
2022-09-13	13:05:54	-0.0544399	-0.24216	906.653	FALSE	5
2022-09-13	13:05:55	-0.262124	-1.16598	945.541	FALSE	5
2022-09-13	13:05:55	0.33986	1.51177	908.165	FALSE	5
2022-09-13	13:05:55	0.0943641	0.41975	945.96	FALSE	5
2022-09-13	13:05:56	-0.0613102	-0.27272	908.165	FALSE	5
2022-09-13	13:05:56	-0.150878	-0.671136	945.96	FALSE	5
2022-09-13	13:05:56	-0.195661	-0.870339	908.165	FALSE	5
2022-09-13	13:05:56	0.314771	1.40016	947.361	FALSE	5
2022-09-13	13:05:57	0.351463	1.56338	909.728	FALSE	5
2022-09-13	13:05:57	0.316043	1.40582	948.766	FALSE	5
2022-09-13	13:05:57	0.26897	1.19643	910.925	FALSE	5
2022-09-13	13:05:57	0.188766	0.839669	949.606	FALSE	5
2022-09-13	13:05:58	0.243066	1.08121	912.006	FALSE	5
2022-09-13	13:05:58	-0.0537784	-0.239217	949.606	FALSE	5
2022-09-13	13:05:58	0.115636	0.514372	912.52	FALSE	5
2022-09-13	13:05:58	0.27584	1.22699	950.833	FALSE	5
2022-09-13	13:05:59	0.49472	2.20061	914.721	FALSE	5
2022-09-13	13:05:59	0.464542	2.06638	952.899	FALSE	5
2022-09-13	13:05:59	0.556094	2.47362	917.195	FALSE	5
2022-09-13	13:06:00	0.313092	1.3927	954.292	FALSE	5
2022-09-13	13:06:00	0.260776	1.15998	918.355	FALSE	5
2022-09-13	13:06:00	0.134873	0.599942	954.892	FALSE	5
2022-09-13	13:06:00	-0.624312	-2.77706	918.355	FALSE	5
2022-09-13	13:06:01	0.430242	1.9138	956.806	FALSE	5
2022-09-13	13:06:01	0.465814	2.07203	920.427	FALSE	5
2022-09-13	13:06:01	0.194059	0.863213	957.669	FALSE	5
2022-09-13	13:06:01	0.372888	1.65868	922.085	FALSE	5
2022-09-13	13:06:02	0.327036	1.45472	959.124	FALSE	5
2022-09-13	13:06:02	-0.597544	-2.658	922.085	FALSE	5
2022-09-13	13:06:02	-1.07174	-4.76731	959.124	FALSE	5
2022-09-13	13:06:02	0.236603	1.05246	923.138	FALSE	5
2022-09-13	13:06:03	1.14317	5.08505	964.209	FALSE	5
2022-09-13	13:06:03	0.938079	4.17276	927.311	FALSE	5
2022-09-13	13:06:03	0.458893	2.04125	966.25	FALSE	5
2022-09-13	13:06:04	0.699147	3.10995	930.421	FALSE	5
2022-09-13	13:06:04	0.444135	1.9756	968.226	FALSE	5
2022-09-13	13:06:04	-0.861411	-3.83173	930.421	FALSE	5
2022-09-13	13:06:04	-1.05398	-4.68831	968.226	FALSE	5
2022-09-13	13:06:05	-0.978511	-4.35261	930.421	FALSE	5
2022-09-13	13:06:05	-1.01291	-4.50563	968.226	FALSE	5
2022-09-13	13:06:05	-0.886908	-3.94514	930.421	FALSE	5
2022-09-13	13:06:05	-0.94818	-4.21769	968.226	FALSE	5
2022-09-13	13:06:06	-0.985635	-4.3843	930.421	FALSE	5
2022-09-13	13:06:06	0.0858654	0.381946	968.608	FALSE	5
2022-09-13	13:06:06	-0.30645	-1.36315	930.421	FALSE	5
2022-09-13	13:06:06	0.728359	3.23989	971.847	FALSE	5
2022-09-13	13:06:07	0.740064	3.29195	933.712	FALSE	5
2022-09-13	13:06:07	0.728868	3.24215	975.09	FALSE	5
2022-09-13	13:06:07	0.733601	3.2632	936.976	FALSE	5
2022-09-13	13:06:08	0.732888	3.26003	978.35	FALSE	5
2022-09-13	13:06:08	0.73528	3.27067	940.246	FALSE	5
2022-09-13	13:06:08	0.728308	3.23966	981.589	FALSE	5
2022-09-13	13:06:08	0.727443	3.23581	943.482	FALSE	5
2022-09-13	13:06:09	0.733295	3.26184	984.851	FALSE	5
2022-09-13	13:06:09	0.737672	3.28131	946.763	FALSE	5
2022-09-13	13:06:09	0.734415	3.26682	988.118	FALSE	5
2022-09-13	13:06:09	0.729784	3.24623	950.01	FALSE	5
2022-09-13	13:06:10	0.733499	3.26275	991.381	FALSE	5
2022-09-13	13:06:10	0.734822	3.26864	953.278	FALSE	5
2022-09-13	13:06:10	0.732583	3.25868	994.639	FALSE	5
2022-09-13	13:06:10	0.734975	3.26932	956.548	FALSE	5
2022-09-13	13:06:11	0.738842	3.28652	997.926	FALSE	5
2022-09-13	13:06:11	0.734771	3.26841	959.816	FALSE	5
2022-09-13	13:06:11	0.741336	3.29761	1001.22	FALSE	5
2022-09-13	13:06:12	0.737468	3.28041	963.096	FALSE	5
2022-09-13	13:06:12	0.731361	3.25324	1004.48	FALSE	5
2022-09-13	13:06:12	0.738537	3.28516	966.382	FALSE	5
2022-09-13	13:06:12	0.724491	3.22268	1007.7	FALSE	5
2022-09-13	13:06:13	0.734262	3.26614	969.648	FALSE	5
2022-09-13	13:06:13	-0.154694	-0.68811	1007.7	FALSE	5
2022-09-13	13:06:13	0.407799	1.81397	971.462	FALSE	5
2022-09-13	13:06:13	1.02785	4.57208	1012.27	FALSE	5
2022-09-13	13:06:14	0.73355	3.26298	974.725	FALSE	5
2022-09-13	13:06:14	0.732786	3.25958	1015.53	FALSE	5
2022-09-13	13:06:14	0.72841	3.24011	977.965	FALSE	5
2022-09-13	13:06:14	0.732735	3.25935	1018.79	FALSE	5
2022-09-13	13:06:15	0.72958	3.24532	981.21	FALSE	5
2022-09-13	13:06:15	0.733448	3.26252	1022.05	FALSE	5
2022-09-13	13:06:15	0.735229	3.27045	984.481	FALSE	5
2022-09-13	13:06:16	0.736908	3.27791	1025.33	FALSE	5
2022-09-13	13:06:16	0.735433	3.27135	987.752	FALSE	5
2022-09-13	13:06:16	-0.229962	-1.02292	1025.33	FALSE	5
2022-09-13	13:06:16	0.721437	3.2091	990.961	FALSE	5
2022-09-13	13:06:17	0.737265	3.2795	1028.61	FALSE	5
2022-09-13	13:06:17	0.734822	3.26864	994.23	FALSE	5
2022-09-13	13:06:17	0.722608	3.2143	1031.82	FALSE	5
2022-09-13	13:06:17	0.733244	3.26162	997.491	FALSE	5
2022-09-13	13:06:18	0.730954	3.25143	1035.08	FALSE	5
2022-09-13	13:06:18	0.730954	3.25143	1000.74	FALSE	5
2022-09-13	13:06:18	0.729377	3.24441	1038.32	FALSE	5
2022-09-13	13:06:18	0.730089	3.24758	1003.99	FALSE	5
2022-09-13	13:06:19	0.729682	3.24577	1041.57	FALSE	5
2022-09-13	13:06:19	0.732532	3.25845	1007.25	FALSE	5
2022-09-13	13:06:19	0.730089	3.24758	1044.81	FALSE	5
2022-09-13	13:06:20	0.725611	3.22766	1010.48	FALSE	5
2022-09-13	13:06:20	0.725458	3.22698	1048.04	FALSE	5
2022-09-13	13:06:20	0.735483	3.27158	1013.75	FALSE	5
2022-09-13	13:06:20	0.733499	3.26275	1051.3	FALSE	5
2022-09-13	13:06:21	0.730038	3.24736	1017	FALSE	5
2022-09-13	13:06:21	0.734109	3.26546	1054.57	FALSE	5
2022-09-13	13:06:21	0.733244	3.26162	1020.26	FALSE	5
2022-09-13	13:06:21	0.730649	3.25007	1057.82	FALSE	5
2022-09-13	13:06:22	0.73187	3.2555	1023.51	FALSE	5
2022-09-13	13:06:22	0.729529	3.24509	1061.06	FALSE	5
2022-09-13	13:06:22	0.732379	3.25777	1026.77	FALSE	5
2022-09-13	13:06:22	0.732226	3.25709	1064.32	FALSE	5
2022-09-13	13:06:23	0.729682	3.24577	1030.02	FALSE	5
2022-09-13	13:06:23	0.730547	3.24962	1067.57	FALSE	5
2022-09-13	13:06:23	0.723117	3.21657	1033.23	FALSE	5
2022-09-13	13:06:23	0.733702	3.26365	1070.83	FALSE	5
2022-09-13	13:06:24	0.732583	3.25868	1036.49	FALSE	5
2022-09-13	13:06:24	0.73131	3.25301	1074.09	FALSE	5
2022-09-13	13:06:24	0.731819	3.25528	1039.75	FALSE	5
2022-09-13	13:06:25	0.727697	3.23694	1077.32	FALSE	5
2022-09-13	13:06:25	0.727596	3.23649	1042.98	FALSE	5
2022-09-13	13:06:25	0.736552	3.27633	1080.6	FALSE	5
2022-09-13	13:06:25	0.734415	3.26682	1046.25	FALSE	5
2022-09-13	13:06:26	0.739097	3.28765	1083.89	FALSE	5
2022-09-13	13:06:26	0.728359	3.23989	1049.49	FALSE	5
2022-09-13	13:06:26	0.732684	3.25912	1087.15	FALSE	5
2022-09-13	13:06:26	0.734822	3.26864	1052.76	FALSE	5
2022-09-13	13:06:27	0.591565	2.6314	1089.78	FALSE	5
2022-09-13	13:06:27	0.737824	3.28199	1056.04	FALSE	5
2022-09-13	13:06:27	0.690802	3.07283	1092.85	FALSE	5
2022-09-13	13:06:27	0.734669	3.26795	1059.31	FALSE	5
2022-09-13	13:06:28	0.730598	3.24985	1096.1	FALSE	5
2022-09-13	13:06:28	0.733804	3.26411	1062.57	FALSE	5
2022-09-13	13:06:28	0.735331	3.2709	1099.37	FALSE	5
2022-09-13	13:06:29	0.651667	2.89875	1065.47	FALSE	5
2022-09-13	13:06:29	0.591921	2.63298	1102.01	FALSE	5
2022-09-13	13:06:29	0.723219	3.21702	1068.69	FALSE	5
2022-09-13	13:06:29	0.747188	3.32364	1105.33	FALSE	5
2022-09-13	13:06:30	0.788766	3.50859	1072.2	FALSE	5
2022-09-13	13:06:30	0.845509	3.76099	1109.09	FALSE	5
2022-09-13	13:06:30	0.370344	1.64736	1073.84	FALSE	5
2022-09-13	13:06:30	0.734975	3.26932	1112.36	FALSE	5
2022-09-13	13:06:31	0.721387	3.20887	1077.05	FALSE	5
2022-09-13	13:06:31	0.737519	3.28063	1115.64	FALSE	5
2022-09-13	13:06:31	0.738791	3.28629	1080.34	FALSE	5
2022-09-13	13:06:31	0.735585	3.27203	1118.91	FALSE	5
2022-09-13	13:06:32	0.736196	3.27475	1083.61	FALSE	5
2022-09-13	13:06:32	0.735076	3.26977	1122.18	FALSE	5
2022-09-13	13:06:32	0.736196	3.27475	1086.89	FALSE	5
2022-09-13	13:06:33	0.734618	3.26773	1125.45	FALSE	5
2022-09-13	13:06:33	0.739198	3.2881	1090.18	FALSE	5
2022-09-13	13:06:33	0.45416	2.02019	1127.47	FALSE	5
2022-09-13	13:06:33	0.690344	3.07079	1093.25	FALSE	5
2022-09-13	13:06:34	0.738028	3.2829	1130.75	FALSE	5
2022-09-13	13:06:34	0.728104	3.23875	1096.49	FALSE	5
2022-09-13	13:06:34	0.737061	3.27859	1134.03	FALSE	5
2022-09-13	13:06:34	0.737417	3.28018	1099.77	FALSE	5
2022-09-13	13:06:35	0.736298	3.2752	1137.31	FALSE	5
2022-09-13	13:06:35	0.278741	1.2399	1101.01	FALSE	5
2022-09-13	13:06:35	0.52612	2.34029	1139.65	FALSE	5
2022-09-13	13:06:35	0.520369	2.31471	1103.32	FALSE	5
2022-09-13	13:06:36	0.731158	3.25234	1142.9	FALSE	5
2022-09-13	13:06:36	0.734415	3.26682	1106.59	FALSE	5
2022-09-13	13:06:36	0.732074	3.25641	1146.16	FALSE	5
2022-09-13	13:06:37	0.493193	2.19382	1108.78	FALSE	5
2022-09-13	13:06:37	0.391361	1.74085	1147.9	FALSE	5
2022-09-13	13:06:37	0.579656	2.57843	1111.36	FALSE	5
2022-09-13	13:06:37	0.564898	2.51278	1150.41	FALSE	5
2022-09-13	13:06:38	0.613041	2.72693	1114.09	FALSE	5
2022-09-13	13:06:38	0.480318	2.13655	1152.55	FALSE	5
2022-09-13	13:06:38	0.726476	3.23151	1117.32	FALSE	5
2022-09-13	13:06:38	0.234415	1.04272	1153.59	FALSE	5
2022-09-13	13:06:39	0.368104	1.6374	1118.96	FALSE	5
2022-09-13	13:06:39	0.337417	1.5009	1155.09	FALSE	5
2022-09-13	13:06:39	0.298334	1.32705	1120.28	FALSE	5
2022-09-13	13:06:39	0.470038	2.09082	1157.18	FALSE	5
2022-09-13	13:06:40	0.220827	0.982283	1121.27	FALSE	5
2022-09-13	13:06:40	0.490547	2.18205	1159.36	FALSE	5
2022-09-13	13:06:40	0.282659	1.25732	1122.52	FALSE	5
2022-09-13	13:06:41	0.340522	1.51471	1160.88	FALSE	5
2022-09-13	13:06:41	0.354211	1.5756	1124.1	FALSE	5
2022-09-13	13:06:41	0.643728	2.86343	1163.74	FALSE	5
2022-09-13	13:06:41	-0.606246	-2.6967	1124.1	FALSE	5
2022-09-13	13:06:42	0.192837	0.857778	1164.6	FALSE	5
2022-09-13	13:06:42	0.547443	2.43514	1126.53	FALSE	5
2022-09-13	13:06:42	0.226629	1.00809	1165.61	FALSE	5
2022-09-13	13:06:42	-1.14197	-5.07971	1126.53	FALSE	5
2022-09-13	13:06:43	-1.42874	-6.35532	1165.61	FALSE	5
2022-09-13	13:06:43	-1.3124	-5.83782	1126.53	FALSE	5
2022-09-13	13:06:43	-1.26543	-5.62889	1165.61	FALSE	5
2022-09-13	13:06:43	-0.589809	-2.62359	1126.53	FALSE	5
2022-09-13	13:06:44	-0.908282	-4.04022	1165.61	FALSE	5
2022-09-13	13:06:44	-0.911335	-4.0538	1126.53	FALSE	5
2022-09-13	13:06:44	-0.753065	-3.34978	1165.61	FALSE	5
2022-09-13	13:06:45	-0.815355	-3.62686	1126.53	FALSE	5
2022-09-13	13:06:45	-0.711437	-3.16461	1165.61	FALSE	5
2022-09-13	13:06:45	-0.503956	-2.2417	1126.53	FALSE	5
2022-09-13	13:06:45	-0.531132	-2.36258	1165.61	FALSE	5
2022-09-13	13:06:46	-0.598765	-2.66343	1126.53	FALSE	5
2022-09-13	13:06:46	-0.501971	-2.23287	1165.61	FALSE	5
2022-09-13	13:06:46	-0.565025	-2.51334	1126.53	FALSE	5
2022-09-13	13:06:46	-0.444669	-1.97798	1165.61	FALSE	5
2022-09-13	13:06:47	-0.694236	-3.0881	1126.53	FALSE	5
2022-09-13	13:06:47	-0.738256	-3.28391	1165.61	FALSE	5
2022-09-13	13:06:47	-0.616425	-2.74198	1126.53	FALSE	5
2022-09-13	13:06:47	-0.686959	-3.05573	1165.61	FALSE	5
2022-09-13	13:06:48	-0.782836	-3.48221	1126.53	FALSE	5
2022-09-13	13:06:48	-0.541463	-2.40854	1165.61	FALSE	5
2022-09-13	13:06:48	-0.521971	-2.32183	1126.53	FALSE	5
2022-09-13	13:06:49	-0.517239	-2.30078	1165.61	FALSE	5
2022-09-13	13:06:49	-0.571946	-2.54413	1126.53	FALSE	5
2022-09-13	13:06:49	-0.626501	-2.7868	1165.61	FALSE	5
2022-09-13	13:06:49	-0.549351	-2.44362	1126.53	FALSE	5
2022-09-13	13:06:50	-0.465483	-2.07056	1165.61	FALSE	5
2022-09-13	13:06:50	-0.569554	-2.53349	1126.53	FALSE	5
2022-09-13	13:06:50	-0.665076	-2.95839	1165.61	FALSE	5
2022-09-13	13:06:50	-0.79907	-3.55442	1126.53	FALSE	5
2022-09-13	13:06:51	-1.08833	-4.84111	1165.61	FALSE	5
2022-09-13	13:06:51	-1.16528	-5.1834	1126.53	FALSE	5
2022-09-13	13:06:51	-1.15408	-5.13358	1165.61	FALSE	5
2022-09-13	13:06:51	-1.19673	-5.32329	1126.53	FALSE	5
2022-09-13	13:06:52	-1.14635	-5.09919	1165.61	FALSE	5
2022-09-13	13:06:52	-1.20436	-5.35723	1126.53	FALSE	5
2022-09-13	13:06:52	-1.20955	-5.38032	1165.61	FALSE	5
2022-09-13	13:06:53	-1.13892	-5.06614	1126.53	FALSE	5
2022-09-13	13:06:53	-0.899172	-3.9997	1165.61	FALSE	5
2022-09-13	13:06:53	-0.484211	-2.15387	1126.53	FALSE	5
2022-09-13	13:06:53	-0.338409	-1.50531	1165.61	FALSE	5
2022-09-13	13:06:54	-0.287468	-1.27872	1126.53	FALSE	5
2022-09-13	13:06:54	-0.53047	-2.35964	1165.61	FALSE	5
2022-09-13	13:06:54	-0.360648	-1.60423	1126.53	FALSE	5
2022-09-13	13:06:54	-0.525941	-2.33949	1165.61	FALSE	5
2022-09-13	13:06:55	0.325509	1.44793	1127.98	FALSE	5
2022-09-13	13:06:55	0.370852	1.64962	1167.26	FALSE	5
2022-09-13	13:06:55	0.308003	1.37006	1129.35	FALSE	5
2022-09-13	13:06:55	0.33813	1.50407	1168.76	FALSE	5
2022-09-13	13:06:56	0.323575	1.43933	1130.79	FALSE	5
2022-09-13	13:06:56	0.393906	1.75217	1170.51	FALSE	5
2022-09-13	13:06:56	0.231158	1.02824	1131.82	FALSE	5
2022-09-13	13:06:57	0.485	2.15738	1172.67	FALSE	5
2022-09-13	13:06:57	0.282761	1.25778	1133.08	FALSE	5
2022-09-13	13:06:57	0.436094	1.93983	1174.61	FALSE	5
2022-09-13	13:06:57	0.262659	1.16836	1134.25	FALSE	5
2022-09-13	13:06:58	0.412176	1.83344	1176.44	FALSE	5
2022-09-13	13:06:58	0.318893	1.4185	1135.66	FALSE	5
2022-09-13	13:06:58	0.502354	2.23457	1178.68	FALSE	5
2022-09-13	13:06:58	0.80271	3.57061	1139.23	FALSE	5
2022-09-13	13:06:59	0.763779	3.39744	1182.07	FALSE	5
2022-09-13	13:06:59	1.16093	5.16405	1144.4	FALSE	5
2022-09-13	13:06:59	2.05411	9.13709	1191.21	FALSE	5
2022-09-13	13:06:59	2.01604	8.96775	1153.37	FALSE	5
2022-09-13	13:07:00	1.72485	7.67248	1198.88	FALSE	5
2022-09-13	13:07:00	3.27106	14.5503	1167.92	1	6
2022-09-13	13:07:00	0.391107	1.73972	1200.62	FALSE	6
2022-09-13	13:07:00	0.472227	2.10056	1170.02	FALSE	6
2022-09-13	13:07:01	0.578282	2.57231	1203.2	FALSE	6
2022-09-13	13:07:01	0.509835	2.26785	1172.28	FALSE	6
2022-09-13	13:07:01	0.400318	1.78069	1204.98	FALSE	6
2022-09-13	13:07:02	0.294059	1.30803	1173.59	FALSE	6
2022-09-13	13:07:02	0.437163	1.94459	1206.92	FALSE	6
2022-09-13	13:07:02	0.478384	2.12795	1175.72	FALSE	6
2022-09-13	13:07:02	0.432837	1.92535	1208.85	FALSE	6
2022-09-13	13:07:03	0.441234	1.9627	1177.68	FALSE	6
2022-09-13	13:07:03	0.3764	1.6743	1210.52	FALSE	6
2022-09-13	13:07:03	0.408308	1.81624	1179.5	FALSE	6
2022-09-13	13:07:03	0.22556	1.00334	1211.52	FALSE	6
2022-09-13	13:07:04	0.478893	2.13021	1181.63	FALSE	6
2022-09-13	13:07:04	0.222761	0.990885	1212.52	FALSE	6
2022-09-13	13:07:04	0.348053	1.54821	1183.18	FALSE	6
2022-09-13	13:07:04	0.241183	1.07283	1213.59	FALSE	6
2022-09-13	13:07:05	0.171107	0.761118	1183.94	FALSE	6
2022-09-13	13:07:05	0.3393	1.50927	1215.1	FALSE	6
2022-09-13	13:07:05	0.25416	1.13055	1185.07	FALSE	6
2022-09-13	13:07:06	0.33528	1.49139	1216.59	FALSE	6
2022-09-13	13:07:06	0.0611326	0.27193	1185.34	FALSE	6
2022-09-13	13:07:06	-0.144771	-0.64397	1216.59	FALSE	6
2022-09-13	13:07:06	-0.249249	-1.10871	1185.34	FALSE	6
2022-09-13	13:07:07	-0.141666	-0.630159	1216.59	FALSE	6
2022-09-13	13:07:07	0.0941096	0.418618	1185.76	FALSE	6
2022-09-13	13:07:07	-0.0241092	-0.107243	1216.59	FALSE	6
2022-09-13	13:07:07	0.180471	0.802771	1186.56	FALSE	6
2022-09-13	13:07:08	0.328766	1.46242	1218.05	FALSE	6
2022-09-13	13:07:08	0.465611	2.07113	1188.63	FALSE	6
2022-09-13	13:07:08	0.325255	1.4468	1219.5	FALSE	6
2022-09-13	13:07:08	0.51411	2.28686	1190.92	FALSE	6
2022-09-13	13:07:09	0.408715	1.81805	1221.32	FALSE	6
2022-09-13	13:07:09	0.480216	2.1361	1193.06	FALSE	6
2022-09-13	13:07:09	0.344644	1.53305	1222.85	FALSE	6
2022-09-13	13:07:10	0.520776	2.31652	1195.37	FALSE	6
2022-09-13	13:07:10	0.370547	1.64827	1224.5	FALSE	6
2022-09-13	13:07:10	0.370649	1.64872	1197.02	FALSE	6
2022-09-13	13:07:10	0.172125	0.765646	1225.26	FALSE	6
2022-09-13	13:07:11	0.208308	0.926596	1197.95	FALSE	6
2022-09-13	13:07:11	0.209173	0.930443	1226.19	FALSE	6
2022-09-13	13:07:11	0.155687	0.692527	1198.64	FALSE	6
2022-09-13	13:07:11	0.223219	0.992923	1227.19	FALSE	6
2022-09-13	13:07:12	0.0484099	0.215337	1198.86	FALSE	6
2022-09-13	13:07:12	0.0545676	0.242728	1227.43	FALSE	6
2022-09-13	13:07:12	-0.0440074	-0.195754	1198.86	FALSE	6
2022-09-13	13:07:12	-0.0122008	-0.0542716	1227.43	FALSE	6
2022-09-13	13:07:13	-0.172404	-0.766887	1198.86	FALSE	6
2022-09-13	13:07:13	-0.31673	-1.40888	1227.43	FALSE	6
2022-09-13	13:07:13	-0.388231	-1.72693	1198.86	FALSE	6
2022-09-13	13:07:14	-0.216628	-0.963605	1227.43	FALSE	6
2022-09-13	13:07:14	-0.0518954	-0.230841	1198.86	FALSE	6
2022-09-13	13:07:14	0.280471	1.24759	1228.68	FALSE	6
2022-09-13	13:07:14	0.0604709	0.268987	1199.13	FALSE	6
2022-09-13	13:07:15	0.265102	1.17923	1229.86	FALSE	6
2022-09-13	13:07:15	-0.0667554	-0.296941	1199.13	FALSE	6
2022-09-13	13:07:15	-0.31561	-1.4039	1229.86	FALSE	6
2022-09-13	13:07:15	-0.0334221	-0.148668	1199.13	FALSE	6
2022-09-13	13:07:16	0.133295	0.592923	1230.45	FALSE	6
2022-09-13	13:07:16	0.0467305	0.207867	1199.33	FALSE	6
2022-09-13	13:07:16	0.313041	1.39247	1231.84	FALSE	6
2022-09-13	13:07:16	0.105255	0.468195	1199.8	FALSE	6
2022-09-13	13:07:17	0.47584	2.11663	1233.96	FALSE	6
2022-09-13	13:07:17	0.0537025	0.238879	1200.04	FALSE	6
2022-09-13	13:07:17	0.525203	2.33621	1236.29	FALSE	6
2022-09-13	13:07:18	0.2564	1.14052	1201.18	FALSE	6
2022-09-13	13:07:18	0.696654	3.09886	1239.39	FALSE	6
2022-09-13	13:07:18	0.92902	4.13247	1205.31	FALSE	6
2022-09-13	13:07:18	2.08719	9.28424	1248.68	FALSE	6
2022-09-13	13:07:19	0.37126	1.65144	1206.97	FALSE	6
2022-09-13	13:07:19	0.640267	2.84804	1251.53	FALSE	6
2022-09-13	13:07:19	0.58556	2.60469	1209.57	FALSE	6
2022-09-13	13:07:19	0.500725	2.22732	1253.75	FALSE	6
2022-09-13	13:07:20	0.244135	1.08596	1210.66	FALSE	6
2022-09-13	13:07:20	0.511616	2.27577	1256.03	FALSE	6
2022-09-13	13:07:20	0.227901	1.01375	1211.67	FALSE	6
2022-09-13	13:07:20	0.463575	2.06207	1258.09	FALSE	6
2022-09-13	13:07:21	0.231565	1.03005	1212.7	FALSE	6
2022-09-13	13:07:21	0.475585	2.1155	1260.21	FALSE	6
2022-09-13	13:07:21	0.304644	1.35512	1214.05	FALSE	6
2022-09-13	13:07:22	0.399046	1.77504	1261.98	FALSE	6
2022-09-13	13:07:22	0.291107	1.2949	1215.35	FALSE	6
2022-09-13	13:07:22	0.376858	1.67634	1263.66	FALSE	6
2022-09-13	13:07:22	0.217875	0.969152	1216.32	FALSE	6
2022-09-13	13:07:23	0.522761	2.32535	1265.98	FALSE	6
2022-09-13	13:07:23	0.296298	1.31799	1217.64	FALSE	6
2022-09-13	13:07:23	0.572532	2.54674	1268.53	FALSE	6
2022-09-13	13:07:23	0.217926	0.969378	1218.61	FALSE	6
2022-09-13	13:07:24	0.443168	1.9713	1270.5	FALSE	6
2022-09-13	13:07:24	0.290089	1.29037	1219.9	FALSE	6
2022-09-13	13:07:24	0.500776	2.22755	1272.73	FALSE	6
2022-09-13	13:07:24	0.269835	1.20028	1221.1	FALSE	6
2022-09-13	13:07:25	0.445713	1.98262	1274.71	FALSE	6
2022-09-13	13:07:25	0.372735	1.658	1222.75	FALSE	6
2022-09-13	13:07:25	0.493906	2.19699	1276.91	FALSE	6
2022-09-13	13:07:26	0.282863	1.25823	1224.01	FALSE	6
2022-09-13	13:07:26	0.529835	2.35681	1279.27	FALSE	6
2022-09-13	13:07:26	0.80042	3.56043	1227.57	FALSE	6
2022-09-13	13:07:26	1.25589	5.58645	1284.85	FALSE	6
2022-09-13	13:07:27	2.62378	11.6711	1239.24	FALSE	6
2022-09-13	13:07:27	2.0823	9.26249	1294.11	FALSE	6
2022-09-13	13:07:27	1.65767	7.37365	1246.62	FALSE	6
2022-09-13	13:07:27	0.903881	4.02064	1298.13	FALSE	6
2022-09-13	13:07:28	0.441132	1.96224	1248.58	FALSE	6
2022-09-13	13:07:28	0.571259	2.54107	1300.68	FALSE	6
2022-09-13	13:07:28	0.443575	1.97311	1250.55	FALSE	6
2022-09-13	13:07:28	0.511667	2.276	1302.95	FALSE	6
2022-09-13	13:07:29	0.419097	1.86423	1252.42	FALSE	6
2022-09-13	13:07:29	0.601234	2.67441	1305.63	FALSE	6
2022-09-13	13:07:29	0.354822	1.57832	1254	FALSE	6
2022-09-13	13:07:30	0.680165	3.02551	1308.65	FALSE	6
2022-09-13	13:07:30	0.755331	3.35986	1257.36	FALSE	6
2022-09-13	13:07:30	1.54383	6.86726	1315.52	FALSE	6
2022-09-13	13:07:30	2.24123	9.96944	1267.33	FALSE	6
2022-09-13	13:07:31	2.12281	9.44268	1324.96	FALSE	6
2022-09-13	13:07:31	1.33365	5.93234	1273.26	FALSE	6
2022-09-13	13:07:31	2.32225	10.3298	1335.29	FALSE	6
2022-09-13	13:07:31	1.0166	4.52204	1277.78	FALSE	6
2022-09-13	13:07:32	1.14627	5.09884	1340.39	FALSE	6
2022-09-13	13:07:32	0.581794	2.58794	1280.37	FALSE	6
2022-09-13	13:07:32	0.802761	3.57084	1343.96	FALSE	6
2022-09-13	13:07:32	1.04393	4.64361	1285.01	FALSE	6
2022-09-13	13:07:33	1.29884	5.7775	1349.74	FALSE	6
2022-09-13	13:07:33	1.83487	8.16187	1293.17	FALSE	6
2022-09-13	13:07:33	2.21981	9.87416	1359.61	FALSE	6

## Sheet: Buzz_martin_2022913130220 (E)
Date	Time	lbs	Total force x time			**GoPro Fitting: 1251
2022-09-13	13:02:33	0.605305	0.605305	FALSE	0			Total force x time	596.373
2022-09-13	13:02:33	0.191005	0.79631	FALSE	0			Total steps	6
2022-09-13	13:02:33	0.53355	1.32986	FALSE	0
2022-09-13	13:02:33	0.420878	1.75074	FALSE	0
2022-09-13	13:02:34	0.189733	1.94047	FALSE	0
2022-09-13	13:02:34	0.373753	2.31422	FALSE	0
2022-09-13	13:02:34	0.00688318	2.32111	FALSE	0
2022-09-13	13:02:34	0.0579773	2.37908	FALSE	0
2022-09-13	13:02:35	-0.0333204	2.37908	FALSE	0
2022-09-13	13:02:35	0.233448	2.61253	FALSE	0
2022-09-13	13:02:35	0.0598094	2.67234	FALSE	0
2022-09-13	13:02:35	0.041845	2.71419	FALSE	0
2022-09-13	13:02:36	0.101438	2.81562	FALSE	0
2022-09-13	13:02:36	0.358741	3.17437	FALSE	0
2022-09-13	13:02:36	0.663728	3.83809	FALSE	0
2022-09-13	13:02:36	0.475026	4.31312	FALSE	0
2022-09-13	13:02:37	0.684898	4.99802	FALSE	0
2022-09-13	13:02:37	0.234313	5.23233	FALSE	0
2022-09-13	13:02:37	0.566527	5.79886	FALSE	0
2022-09-13	13:02:38	0.386171	6.18503	FALSE	0
2022-09-13	13:02:38	0.446883	6.63191	FALSE	0
2022-09-13	13:02:38	0.749275	7.38119	FALSE	0
2022-09-13	13:02:38	0.407239	7.78843	FALSE	0
2022-09-13	13:02:39	0.409784	8.19821	FALSE	0
2022-09-13	13:02:39	0.148512	8.34672	FALSE	0
2022-09-13	13:02:39	0.553499	8.90022	FALSE	0
2022-09-13	13:02:39	0.406374	9.30659	FALSE	0
2022-09-13	13:02:40	0.640114	9.94671	FALSE	0
2022-09-13	13:02:40	0.408969	10.3557	FALSE	0
2022-09-13	13:02:40	0.536145	10.8918	FALSE	0
2022-09-13	13:02:40	0.343677	11.2355	FALSE	0
2022-09-13	13:02:41	0.441031	11.6765	FALSE	0
2022-09-13	13:02:41	0.369224	12.0458	FALSE	0
2022-09-13	13:02:41	0.376298	12.4221	FALSE	0
2022-09-13	13:02:42	0.397875	12.8199	FALSE	0
2022-09-13	13:02:42	0.325611	13.1455	FALSE	0
2022-09-13	13:02:42	0.341641	13.4872	FALSE	0
2022-09-13	13:02:42	0.464237	13.9514	FALSE	0
2022-09-13	13:02:43	0.321489	14.2729	FALSE	0
2022-09-13	13:02:43	0.173143	14.446	FALSE	0
2022-09-13	13:02:43	-0.00914732	14.446	FALSE	0
2022-09-13	13:02:43	0.217417	14.6635	FALSE	0
2022-09-13	13:02:44	0.191107	14.8546	FALSE	0
2022-09-13	13:02:44	0.32785	15.1824	FALSE	0
2022-09-13	13:02:44	0.581183	15.7636	FALSE	0
2022-09-13	13:02:44	0.487341	16.2509	FALSE	0
2022-09-13	13:02:45	0.60098	16.8519	FALSE	0
2022-09-13	13:02:45	0.440216	17.2921	FALSE	0
2022-09-13	13:02:45	0.446679	17.7388	FALSE	0
2022-09-13	13:02:46	0.548562	18.2874	FALSE	0
2022-09-13	13:02:46	0.733906	19.0213	FALSE	0
2022-09-13	13:02:46	0.239504	19.2608	FALSE	0
2022-09-13	13:02:46	-0.253117	19.2608	FALSE	0
2022-09-13	13:02:47	-1.04009	19.2608	FALSE	0
2022-09-13	13:02:47	-0.568282	19.2608	FALSE	0
2022-09-13	13:02:47	-0.09673	19.2608	FALSE	0
2022-09-13	13:02:47	1.09558	20.3564	FALSE	0
2022-09-13	13:02:48	0.714415	21.0708	FALSE	0
2022-09-13	13:02:48	0.732837	21.8036	FALSE	0
2022-09-13	13:02:48	0.729784	22.5334	FALSE	0
2022-09-13	13:02:48	0.673804	23.2072	FALSE	0
2022-09-13	13:02:49	0.712074	23.9193	FALSE	0
2022-09-13	13:02:49	0.620267	24.5396	FALSE	0
2022-09-13	13:02:49	0.420471	24.96	FALSE	0
2022-09-13	13:02:50	0.157672	25.1177	FALSE	0
2022-09-13	13:02:50	0.160624	25.2783	FALSE	0
2022-09-13	13:02:50	0.731972	26.0103	FALSE	0
2022-09-13	13:02:50	0.731819	26.7421	FALSE	0
2022-09-13	13:02:51	0.736807	27.4789	FALSE	0
2022-09-13	13:02:51	0.730191	28.2091	FALSE	0
2022-09-13	13:02:51	0.726323	28.9354	FALSE	0
2022-09-13	13:02:51	0.735382	29.6708	FALSE	0
2022-09-13	13:02:52	0.53299	30.2038	FALSE	0
2022-09-13	13:02:52	0.729224	30.933	FALSE	0
2022-09-13	13:02:52	0.738079	31.6711	FALSE	0
2022-09-13	13:02:52	0.736196	32.4073	FALSE	0
2022-09-13	13:02:53	0.713143	33.1204	FALSE	0
2022-09-13	13:02:53	0.693804	33.8143	FALSE	0
2022-09-13	13:02:53	0.666883	34.4811	FALSE	0
2022-09-13	13:02:54	0.625305	35.1064	FALSE	0
2022-09-13	13:02:54	0.554211	35.6607	FALSE	0
2022-09-13	13:02:54	0.713651	36.3743	FALSE	0
2022-09-13	13:02:54	0.73187	37.1062	FALSE	0
2022-09-13	13:02:55	0.733601	37.8398	FALSE	0
2022-09-13	13:02:55	0.744339	38.5841	FALSE	0
2022-09-13	13:02:55	0.733295	39.3174	FALSE	0
2022-09-13	13:02:55	0.733702	40.0511	FALSE	0
2022-09-13	13:02:56	0.734873	40.786	FALSE	0
2022-09-13	13:02:56	0.741743	41.5277	FALSE	0
2022-09-13	13:02:56	0.731921	42.2596	FALSE	0
2022-09-13	13:02:56	0.728868	42.9885	FALSE	0
2022-09-13	13:02:57	0.737519	43.726	FALSE	0
2022-09-13	13:02:57	0.737926	44.464	FALSE	0
2022-09-13	13:02:57	0.726629	45.1906	FALSE	0
2022-09-13	13:02:58	0.731921	45.9225	FALSE	0
2022-09-13	13:02:58	0.731463	46.654	FALSE	0
2022-09-13	13:02:58	0.731514	47.3855	FALSE	0
2022-09-13	13:02:58	0.735483	48.121	FALSE	0
2022-09-13	13:02:59	0.730852	48.8518	FALSE	0
2022-09-13	13:02:59	0.719148	49.571	FALSE	0
2022-09-13	13:02:59	0.681081	50.252	FALSE	0
2022-09-13	13:02:59	0.505	50.757	FALSE	0
2022-09-13	13:03:00	0.525407	51.2825	FALSE	0
2022-09-13	13:03:00	0.482557	51.765	FALSE	0
2022-09-13	13:03:00	0.202659	51.9677	FALSE	0
2022-09-13	13:03:00	0.236654	52.2043	FALSE	0
2022-09-13	13:03:01	0.301387	52.5057	FALSE	0
2022-09-13	13:03:01	0.121489	52.6272	FALSE	0
2022-09-13	13:03:01	0.256603	52.8838	FALSE	0
2022-09-13	13:03:02	0.739555	53.6234	FALSE	0
2022-09-13	13:03:02	0.733906	54.3573	FALSE	0
2022-09-13	13:03:02	0.739606	55.0969	FALSE	0
2022-09-13	13:03:02	0.704084	55.801	FALSE	0
2022-09-13	13:03:03	0.723321	56.5243	FALSE	0
2022-09-13	13:03:03	0.735178	57.2595	FALSE	0
2022-09-13	13:03:03	0.734059	57.9935	FALSE	0
2022-09-13	13:03:03	0.733142	58.7267	FALSE	0
2022-09-13	13:03:04	0.735687	59.4623	FALSE	0
2022-09-13	13:03:04	0.734211	60.1966	FALSE	0
2022-09-13	13:03:04	0.734262	60.9308	FALSE	0
2022-09-13	13:03:04	0.73584	61.6667	FALSE	0
2022-09-13	13:03:05	0.736756	62.4034	FALSE	0
2022-09-13	13:03:05	0.740165	63.1436	FALSE	0
2022-09-13	13:03:05	0.735076	63.8787	FALSE	0
2022-09-13	13:03:05	0.730242	64.6089	FALSE	0
2022-09-13	13:03:06	0.735585	65.3445	FALSE	0
2022-09-13	13:03:06	0.728868	66.0733	FALSE	0
2022-09-13	13:03:06	0.730801	66.8041	FALSE	0
2022-09-13	13:03:07	0.73299	67.5371	FALSE	0
2022-09-13	13:03:07	0.735382	68.2725	FALSE	0
2022-09-13	13:03:07	0.729224	69.0017	FALSE	0
2022-09-13	13:03:07	0.730954	69.7327	FALSE	0
2022-09-13	13:03:08	0.738333	70.471	FALSE	0
2022-09-13	13:03:08	0.729784	71.2008	FALSE	0
2022-09-13	13:03:08	0.730852	71.9317	FALSE	0
2022-09-13	13:03:08	0.726476	72.6581	FALSE	0
2022-09-13	13:03:09	0.735941	73.3941	FALSE	0
2022-09-13	13:03:09	0.738181	74.1323	FALSE	0
2022-09-13	13:03:09	0.734262	74.8665	FALSE	0
2022-09-13	13:03:09	0.73355	75.6001	FALSE	0
2022-09-13	13:03:10	0.736654	76.3367	FALSE	0
2022-09-13	13:03:10	0.736145	77.0729	FALSE	0
2022-09-13	13:03:10	0.733193	77.8061	FALSE	0
2022-09-13	13:03:11	0.732023	78.5381	FALSE	0
2022-09-13	13:03:11	0.737519	79.2756	FALSE	0
2022-09-13	13:03:11	0.737417	80.013	FALSE	0
2022-09-13	13:03:11	0.736298	80.7493	FALSE	0
2022-09-13	13:03:12	0.729784	81.4791	FALSE	0
2022-09-13	13:03:12	0.736756	82.2159	FALSE	0
2022-09-13	13:03:12	0.741794	82.9577	FALSE	0
2022-09-13	13:03:12	0.730547	83.6882	FALSE	0
2022-09-13	13:03:13	0.728512	84.4167	FALSE	0
2022-09-13	13:03:13	0.73645	85.1532	FALSE	0
2022-09-13	13:03:13	0.735127	85.8883	FALSE	0
2022-09-13	13:03:13	0.726069	86.6144	FALSE	0
2022-09-13	13:03:14	0.732786	87.3472	FALSE	0
2022-09-13	13:03:14	0.732786	88.0799	FALSE	0
2022-09-13	13:03:14	0.737722	88.8177	FALSE	0
2022-09-13	13:03:15	0.736857	89.5545	FALSE	0
2022-09-13	13:03:15	0.733753	90.2883	FALSE	0
2022-09-13	13:03:15	0.736857	91.0251	FALSE	0
2022-09-13	13:03:15	0.73874	91.7639	FALSE	0
2022-09-13	13:03:16	0.731361	92.4952	FALSE	0
2022-09-13	13:03:16	0.728257	93.2235	FALSE	0
2022-09-13	13:03:16	0.736501	93.96	FALSE	0
2022-09-13	13:03:16	0.734517	94.6945	FALSE	0
2022-09-13	13:03:17	0.737417	95.4319	FALSE	0
2022-09-13	13:03:17	0.739046	96.171	FALSE	0
2022-09-13	13:03:17	0.724796	96.8958	FALSE	0
2022-09-13	13:03:17	0.739606	97.6354	FALSE	0
2022-09-13	13:03:18	0.733448	98.3688	FALSE	0
2022-09-13	13:03:18	0.730547	99.0994	FALSE	0
2022-09-13	13:03:18	0.736807	99.8362	FALSE	0
2022-09-13	13:03:19	0.734975	100.571	FALSE	0
2022-09-13	13:03:19	0.735789	101.307	FALSE	0
2022-09-13	13:03:19	0.741438	102.048	FALSE	0
2022-09-13	13:03:19	0.743524	102.792	FALSE	0
2022-09-13	13:03:20	0.741743	103.534	FALSE	0
2022-09-13	13:03:20	0.734873	104.269	FALSE	0
2022-09-13	13:03:20	0.49869	104.767	FALSE	0
2022-09-13	13:03:21	0.740165	105.507	FALSE	0
2022-09-13	13:03:21	0.740623	106.248	FALSE	0
2022-09-13	13:03:21	0.730242	106.978	FALSE	0
2022-09-13	13:03:21	0.735534	107.714	FALSE	0
2022-09-13	13:03:21	0.735687	108.449	FALSE	0
2022-09-13	13:03:22	0.735026	109.184	FALSE	0
2022-09-13	13:03:22	0.728664	109.913	FALSE	0
2022-09-13	13:03:22	0.489326	110.402	FALSE	0
2022-09-13	13:03:23	0.737875	111.14	FALSE	0
2022-09-13	13:03:23	0.735178	111.876	FALSE	0
2022-09-13	13:03:23	0.70103	112.577	FALSE	0
2022-09-13	13:03:23	0.221387	112.798	FALSE	0
2022-09-13	13:03:24	0.444695	113.243	FALSE	0
2022-09-13	13:03:24	0.413295	113.656	FALSE	0
2022-09-13	13:03:24	-0.243906	113.656	FALSE	0
2022-09-13	13:03:24	-0.100649	113.656	FALSE	0
2022-09-13	13:03:25	-0.0514374	113.656	FALSE	0
2022-09-13	13:03:25	-0.0857376	113.656	FALSE	0
2022-09-13	13:03:25	-0.214542	113.656	FALSE	0
2022-09-13	13:03:25	-0.11271	113.656	FALSE	0
2022-09-13	13:03:26	-0.177035	113.656	FALSE	0
2022-09-13	13:03:26	-0.0755595	113.656	FALSE	0
2022-09-13	13:03:26	-0.131692	113.656	FALSE	0
2022-09-13	13:03:27	-0.00329491	113.656	FALSE	0
2022-09-13	13:03:27	-0.19617	113.656	FALSE	0
2022-09-13	13:03:27	-0.0472135	113.656	FALSE	0
2022-09-13	13:03:27	-0.171437	113.656	FALSE	0
2022-09-13	13:03:28	-0.0757631	113.656	FALSE	0
2022-09-13	13:03:28	-0.207417	113.656	FALSE	0
2022-09-13	13:03:28	-0.191844	113.656	FALSE	0
2022-09-13	13:03:28	-0.255254	113.656	FALSE	0
2022-09-13	13:03:29	-0.0256868	113.656	FALSE	0
2022-09-13	13:03:29	0.117875	113.774	FALSE	0
2022-09-13	13:03:29	0.353499	114.127	FALSE	0
2022-09-13	13:03:30	1.01319	115.14	FALSE	0
2022-09-13	13:03:30	0.48902	115.63	FALSE	0
2022-09-13	13:03:30	0.22612	115.856	FALSE	0
2022-09-13	13:03:30	0.0839824	115.94	FALSE	0
2022-09-13	13:03:31	0.352125	116.292	FALSE	0
2022-09-13	13:03:31	0.0798094	116.372	FALSE	0
2022-09-13	13:03:31	0.911921	117.283	FALSE	0
2022-09-13	13:03:31	0.592328	117.876	FALSE	0
2022-09-13	13:03:32	1.18663	119.062	FALSE	0
2022-09-13	13:03:32	0.295229	119.358	FALSE	0
2022-09-13	13:03:32	0.711769	120.069	FALSE	0
2022-09-13	13:03:32	0.701641	120.771	FALSE	0
2022-09-13	13:03:33	0.674008	121.445	FALSE	0
2022-09-13	13:03:33	0.71813	122.163	FALSE	0
2022-09-13	13:03:33	0.61299	122.776	FALSE	0
2022-09-13	13:03:33	0.685814	123.462	FALSE	0
2022-09-13	13:03:34	0.185204	123.647	FALSE	0
2022-09-13	13:03:34	0.605916	124.253	FALSE	0
2022-09-13	13:03:34	0.295076	124.548	FALSE	0
2022-09-13	13:03:34	0.347952	124.896	FALSE	0
2022-09-13	13:03:35	0.279097	125.175	FALSE	0
2022-09-13	13:03:35	0.276094	125.451	FALSE	0
2022-09-13	13:03:35	0.31187	125.763	FALSE	0
2022-09-13	13:03:36	-0.031641	125.763	FALSE	0
2022-09-13	13:03:36	0.0503438	125.814	FALSE	0
2022-09-13	13:03:36	0.00927507	125.823	FALSE	0
2022-09-13	13:03:36	0.0853564	125.908	FALSE	0
2022-09-13	13:03:37	-0.0898089	125.908	FALSE	0
2022-09-13	13:03:37	-0.0262975	125.908	FALSE	0
2022-09-13	13:03:37	-0.159275	125.908	FALSE	0
2022-09-13	13:03:37	-0.194389	125.908	FALSE	0
2022-09-13	13:03:38	-0.500954	125.908	FALSE	0
2022-09-13	13:03:38	-0.621921	125.908	FALSE	0
2022-09-13	13:03:38	-0.610521	125.908	FALSE	0
2022-09-13	13:03:38	-0.7722	125.908	FALSE	0
2022-09-13	13:03:39	-0.583295	125.908	FALSE	0
2022-09-13	13:03:39	-0.453931	125.908	FALSE	0
2022-09-13	13:03:39	-0.267366	125.908	FALSE	0
2022-09-13	13:03:40	-0.0484348	125.908	FALSE	0
2022-09-13	13:03:40	0.0151274	125.923	FALSE	0
2022-09-13	13:03:40	0.363066	126.286	FALSE	0
2022-09-13	13:03:40	0.23014	126.517	FALSE	0
2022-09-13	13:03:41	0.634873	127.151	FALSE	0
2022-09-13	13:03:41	0.443219	127.595	FALSE	0
2022-09-13	13:03:41	0.621285	128.216	FALSE	0
2022-09-13	13:03:41	0.510343	128.726	FALSE	0
2022-09-13	13:03:42	0.511921	129.238	FALSE	0
2022-09-13	13:03:42	0.545153	129.783	FALSE	0
2022-09-13	13:03:42	0.411972	130.195	FALSE	0
2022-09-13	13:03:42	0.992786	131.188	FALSE	0
2022-09-13	13:03:43	0.690802	131.879	FALSE	0
2022-09-13	13:03:43	0.622252	132.501	FALSE	0
2022-09-13	13:03:43	0.163728	132.665	FALSE	0
2022-09-13	13:03:44	0.477977	133.143	FALSE	0
2022-09-13	13:03:44	0.161489	133.304	FALSE	0
2022-09-13	13:03:44	0.411209	133.716	FALSE	0
2022-09-13	13:03:44	0.178486	133.894	FALSE	0
2022-09-13	13:03:45	0.378588	134.273	FALSE	0
2022-09-13	13:03:45	0.130242	134.403	FALSE	0
2022-09-13	13:03:45	0.468206	134.871	FALSE	0
2022-09-13	13:03:45	0.277875	135.149	FALSE	0
2022-09-13	13:03:46	0.393244	135.542	FALSE	0
2022-09-13	13:03:46	0.336959	135.879	FALSE	0
2022-09-13	13:03:46	0.416501	136.296	FALSE	0
2022-09-13	13:03:46	0.420369	136.716	FALSE	0
2022-09-13	13:03:47	0.503677	137.22	FALSE	0
2022-09-13	13:03:47	0.654007	137.874	FALSE	0
2022-09-13	13:03:47	0.398944	138.273	FALSE	0
2022-09-13	13:03:48	0.607595	138.88	FALSE	0
2022-09-13	13:03:48	0.42388	139.304	FALSE	0
2022-09-13	13:03:48	0.475026	139.779	FALSE	0
2022-09-13	13:03:48	0.391361	140.17	FALSE	0
2022-09-13	13:03:49	0.53869	140.709	FALSE	0
2022-09-13	13:03:49	0.32673	141.036	FALSE	0
2022-09-13	13:03:49	0.52215	141.558	FALSE	0
2022-09-13	13:03:49	0.285153	141.843	FALSE	0
2022-09-13	13:03:50	0.449733	142.293	FALSE	0
2022-09-13	13:03:50	0.226374	142.519	FALSE	0
2022-09-13	13:03:50	0.343728	142.863	FALSE	0
2022-09-13	13:03:50	0.33299	143.196	FALSE	0
2022-09-13	13:03:51	0.310344	143.506	FALSE	0
2022-09-13	13:03:51	0.40159	143.908	FALSE	0
2022-09-13	13:03:51	0.494669	144.403	FALSE	0
2022-09-13	13:03:52	0.737366	145.14	FALSE	0
2022-09-13	13:03:52	0.734924	145.875	FALSE	0
2022-09-13	13:03:52	0.732074	146.607	FALSE	0
2022-09-13	13:03:52	0.729886	147.337	FALSE	0
2022-09-13	13:03:53	0.73299	148.07	FALSE	0
2022-09-13	13:03:53	0.739046	148.809	FALSE	0
2022-09-13	13:03:53	0.73874	149.548	FALSE	0
2022-09-13	13:03:53	0.733193	150.281	FALSE	0
2022-09-13	13:03:54	0.71126	150.992	FALSE	0
2022-09-13	13:03:54	0.71986	151.712	FALSE	0
2022-09-13	13:03:54	0.715382	152.427	FALSE	0
2022-09-13	13:03:54	0.728155	153.156	FALSE	0
2022-09-13	13:03:55	0.728715	153.884	FALSE	0
2022-09-13	13:03:55	0.724237	154.608	FALSE	0
2022-09-13	13:03:55	0.71299	155.321	FALSE	0
2022-09-13	13:03:56	0.737672	156.059	FALSE	0
2022-09-13	13:03:56	0.745611	156.805	FALSE	0
2022-09-13	13:03:56	0.741031	157.546	FALSE	0
2022-09-13	13:03:56	0.736654	158.282	FALSE	0
2022-09-13	13:03:57	0.740725	159.023	FALSE	0
2022-09-13	13:03:57	0.737315	159.76	FALSE	0
2022-09-13	13:03:57	0.735076	160.496	FALSE	0
2022-09-13	13:03:57	0.736196	161.232	FALSE	0
2022-09-13	13:03:58	0.738995	161.971	FALSE	0
2022-09-13	13:03:58	0.735992	162.707	FALSE	0
2022-09-13	13:03:58	0.732837	163.44	FALSE	0
2022-09-13	13:03:58	0.737163	164.177	FALSE	0
2022-09-13	13:03:59	0.73131	164.908	FALSE	0
2022-09-13	13:03:59	0.73584	165.644	FALSE	0
2022-09-13	13:03:59	0.743168	166.387	FALSE	0
2022-09-13	13:04:00	0.737417	167.124	FALSE	0
2022-09-13	13:04:00	0.724237	167.849	FALSE	0
2022-09-13	13:04:00	0.740013	168.589	FALSE	0
2022-09-13	13:04:00	0.739147	169.328	FALSE	0
2022-09-13	13:04:01	0.740623	170.068	FALSE	0
2022-09-13	13:04:01	0.743219	170.812	FALSE	0
2022-09-13	13:04:01	0.730191	171.542	FALSE	0
2022-09-13	13:04:01	0.711565	172.253	FALSE	0
2022-09-13	13:04:02	0.637774	172.891	FALSE	0
2022-09-13	13:04:02	0.5307	173.422	FALSE	0
2022-09-13	13:04:02	0.517264	173.939	FALSE	0
2022-09-13	13:04:02	0.563117	174.502	FALSE	0
2022-09-13	13:04:03	0.587748	175.09	FALSE	0
2022-09-13	13:04:03	0.601743	175.692	FALSE	0
2022-09-13	13:04:03	0.587646	176.279	FALSE	0
2022-09-13	13:04:04	0.606069	176.886	FALSE	0
2022-09-13	13:04:04	0.650344	177.536	FALSE	0
2022-09-13	13:04:04	0.648359	178.184	FALSE	0
2022-09-13	13:04:04	0.629529	178.814	FALSE	0
2022-09-13	13:04:05	0.580878	179.395	FALSE	0
2022-09-13	13:04:05	0.507647	179.902	FALSE	0
2022-09-13	13:04:05	0.519758	180.422	FALSE	0
2022-09-13	13:04:05	0.520827	180.943	FALSE	0
2022-09-13	13:04:06	0.534211	181.477	FALSE	0
2022-09-13	13:04:06	0.657519	182.135	FALSE	0
2022-09-13	13:04:06	0.814669	182.949	FALSE	0
2022-09-13	13:04:06	1.36164	184.311	FALSE	0
2022-09-13	13:04:07	1.02444	185.335	FALSE	0
2022-09-13	13:04:07	0.849733	186.185	FALSE	0
2022-09-13	13:04:07	0.758435	186.944	FALSE	0
2022-09-13	13:04:07	0.749071	187.693	FALSE	0
2022-09-13	13:04:08	0.736603	188.429	FALSE	0
2022-09-13	13:04:08	0.741641	189.171	FALSE	0
2022-09-13	13:04:08	0.735178	189.906	FALSE	0
2022-09-13	13:04:09	0.739504	190.646	FALSE	0
2022-09-13	13:04:09	0.739911	191.385	FALSE	0
2022-09-13	13:04:09	0.721743	192.107	FALSE	0
2022-09-13	13:04:09	0.680267	192.787	FALSE	0
2022-09-13	13:04:10	0.66159	193.449	FALSE	0
2022-09-13	13:04:10	0.678333	194.127	FALSE	0
2022-09-13	13:04:10	0.733397	194.861	FALSE	0
2022-09-13	13:04:10	0.705509	195.566	FALSE	0
2022-09-13	13:04:11	0.707087	196.273	FALSE	0
2022-09-13	13:04:11	0.696094	196.969	FALSE	0
2022-09-13	13:04:11	0.706832	197.676	FALSE	0
2022-09-13	13:04:11	0.681743	198.358	FALSE	0
2022-09-13	13:04:12	0.663117	199.021	FALSE	0
2022-09-13	13:04:12	0.686985	199.708	FALSE	0
2022-09-13	13:04:12	0.693855	200.402	FALSE	0
2022-09-13	13:04:13	0.708918	201.111	FALSE	0
2022-09-13	13:04:13	0.687239	201.798	FALSE	0
2022-09-13	13:04:13	0.722608	202.521	FALSE	0
2022-09-13	13:04:13	0.712328	203.233	FALSE	0
2022-09-13	13:04:14	0.711005	203.944	FALSE	0
2022-09-13	13:04:14	0.693448	204.638	FALSE	0
2022-09-13	13:04:14	0.715636	205.353	FALSE	0
2022-09-13	13:04:14	0.706171	206.059	FALSE	0
2022-09-13	13:04:15	0.630343	206.69	FALSE	0
2022-09-13	13:04:15	0.438639	207.128	FALSE	0
2022-09-13	13:04:15	0.463015	207.591	FALSE	0
2022-09-13	13:04:15	0.389071	207.98	FALSE	0
2022-09-13	13:04:16	0.706323	208.687	FALSE	0
2022-09-13	13:04:16	1.00022	209.687	FALSE	0
2022-09-13	13:04:16	0.721997	210.409	FALSE	0
2022-09-13	13:04:17	0.669885	211.079	FALSE	0
2022-09-13	13:04:17	0.704644	211.783	FALSE	0
2022-09-13	13:04:17	0.180471	211.964	FALSE	0
2022-09-13	13:04:17	0.715738	212.68	FALSE	0
2022-09-13	13:04:18	0.726934	213.407	FALSE	0
2022-09-13	13:04:18	0.571565	213.978	FALSE	0
2022-09-13	13:04:18	0.732888	214.711	FALSE	0
2022-09-13	13:04:18	0.734109	215.445	FALSE	0
2022-09-13	13:04:19	0.739198	216.184	FALSE	0
2022-09-13	13:04:19	0.739606	216.924	FALSE	0
2022-09-13	13:04:19	0.732379	217.656	FALSE	0
2022-09-13	13:04:19	0.741997	218.398	FALSE	0
2022-09-13	13:04:20	0.741285	219.14	FALSE	0
2022-09-13	13:04:20	0.73645	219.876	FALSE	0
2022-09-13	13:04:20	0.729478	220.606	FALSE	0
2022-09-13	13:04:21	0.710242	221.316	FALSE	0
2022-09-13	13:04:21	0.621336	221.937	FALSE	0
2022-09-13	13:04:21	0.52159	222.459	FALSE	0
2022-09-13	13:04:21	0.134059	222.593	FALSE	0
2022-09-13	13:04:22	0.33645	222.929	FALSE	0
2022-09-13	13:04:22	0.32383	223.253	FALSE	0
2022-09-13	13:04:22	0.330852	223.584	FALSE	0
2022-09-13	13:04:22	0.481539	224.065	FALSE	0
2022-09-13	13:04:23	0.626832	224.692	FALSE	0
2022-09-13	13:04:23	0.422354	225.115	FALSE	0
2022-09-13	13:04:23	0.774568	225.889	FALSE	0
2022-09-13	13:04:23	0.734466	226.624	FALSE	0
2022-09-13	13:04:24	0.815585	227.439	FALSE	0
2022-09-13	13:04:24	0.788104	228.227	FALSE	0
2022-09-13	13:04:24	0.817519	229.045	FALSE	0
2022-09-13	13:04:25	0.782761	229.828	FALSE	0
2022-09-13	13:04:25	0.870598	230.698	FALSE	0
2022-09-13	13:04:25	0.773295	231.472	FALSE	0
2022-09-13	13:04:25	0.824135	232.296	FALSE	0
2022-09-13	13:04:26	0.70444	233	FALSE	0
2022-09-13	13:04:26	1.29532e-05	233	FALSE	0
2022-09-13	13:04:26	0.289275	233.289	FALSE	0
2022-09-13	13:04:26	-0.0889946	233.289	FALSE	0
2022-09-13	13:04:27	-0.18131	233.289	FALSE	0
2022-09-13	13:04:27	-0.317035	233.289	FALSE	0
2022-09-13	13:04:27	-0.240801	233.289	FALSE	0
2022-09-13	13:04:27	-0.280343	233.289	FALSE	0
2022-09-13	13:04:28	-0.28528	233.289	FALSE	0
2022-09-13	13:04:28	-0.330725	233.289	FALSE	0
2022-09-13	13:04:28	-0.201565	233.289	FALSE	0
2022-09-13	13:04:29	-0.0755595	233.289	FALSE	0
2022-09-13	13:04:29	-0.0235494	233.289	FALSE	0
2022-09-13	13:04:29	0.0545168	233.344	FALSE	0
2022-09-13	13:04:29	0.598283	233.942	FALSE	0
2022-09-13	13:04:30	0.773601	234.716	FALSE	0
2022-09-13	13:04:30	0.504135	235.22	FALSE	0
2022-09-13	13:04:30	0.179351	235.399	FALSE	0
2022-09-13	13:04:30	0.341285	235.741	FALSE	0
2022-09-13	13:04:31	0.744033	236.485	FALSE	0
2022-09-13	13:04:31	0.370903	236.856	FALSE	0
2022-09-13	13:04:31	0.716552	237.572	FALSE	0
2022-09-13	13:04:31	0.739249	238.311	FALSE	0
2022-09-13	13:04:32	0.740165	239.051	FALSE	0
2022-09-13	13:04:32	0.733397	239.785	FALSE	0
2022-09-13	13:04:32	0.730547	240.515	FALSE	0
2022-09-13	13:04:33	0.736501	241.252	FALSE	0
2022-09-13	13:04:33	0.733804	241.986	FALSE	0
2022-09-13	13:04:33	0.736196	242.722	FALSE	0
2022-09-13	13:04:33	0.734059	243.456	FALSE	0
2022-09-13	13:04:34	0.736959	244.193	FALSE	0
2022-09-13	13:04:34	0.736094	244.929	FALSE	0
2022-09-13	13:04:34	0.733448	245.662	FALSE	0
2022-09-13	13:04:34	0.731005	246.393	FALSE	0
2022-09-13	13:04:35	0.73584	247.129	FALSE	0
2022-09-13	13:04:35	0.734669	247.864	FALSE	0
2022-09-13	13:04:35	0.731361	248.595	FALSE	0
2022-09-13	13:04:35	0.727392	249.323	FALSE	0
2022-09-13	13:04:36	0.731259	250.054	FALSE	0
2022-09-13	13:04:36	0.732379	250.786	FALSE	0
2022-09-13	13:04:36	0.735789	251.522	FALSE	0
2022-09-13	13:04:37	0.763321	252.285	FALSE	0
2022-09-13	13:04:37	0.805865	253.091	FALSE	0
2022-09-13	13:04:37	0.820878	253.912	FALSE	0
2022-09-13	13:04:37	0.916349	254.829	FALSE	0
2022-09-13	13:04:38	0.920522	255.749	FALSE	0
2022-09-13	13:04:38	0.963219	256.712	FALSE	0
2022-09-13	13:04:38	0.837672	257.55	FALSE	0
2022-09-13	13:04:38	1.00154	258.552	FALSE	0
2022-09-13	13:04:39	0.996908	259.548	FALSE	0
2022-09-13	13:04:39	0.993092	260.542	FALSE	0
2022-09-13	13:04:39	0.900216	261.442	FALSE	0
2022-09-13	13:04:39	0.594211	262.036	FALSE	0
2022-09-13	13:04:40	0.210242	262.246	FALSE	0
2022-09-13	13:04:40	-0.192353	262.246	FALSE	0
2022-09-13	13:04:40	-0.00700993	262.246	FALSE	0
2022-09-13	13:04:40	-0.115712	262.246	FALSE	0
2022-09-13	13:04:41	-0.0509794	262.246	FALSE	0
2022-09-13	13:04:41	0.701132	262.947	FALSE	0
2022-09-13	13:04:41	0.956145	263.903	FALSE	0
2022-09-13	13:04:42	0.036247	263.94	FALSE	0
2022-09-13	13:04:42	0.430547	264.37	FALSE	0
2022-09-13	13:04:42	0.284542	264.655	FALSE	0
2022-09-13	13:04:42	0.219657	264.874	FALSE	0
2022-09-13	13:04:43	0.208664	265.083	FALSE	0
2022-09-13	13:04:43	0.36444	265.448	FALSE	0
2022-09-13	13:04:43	0.735992	266.184	FALSE	0
2022-09-13	13:04:43	0.753092	266.937	FALSE	0
2022-09-13	13:04:44	1.01833	267.955	FALSE	0
2022-09-13	13:04:44	0.746527	268.702	FALSE	0
2022-09-13	13:04:44	0.838689	269.54	FALSE	0
2022-09-13	13:04:44	0.731259	270.271	FALSE	0
2022-09-13	13:04:45	0.73645	271.008	FALSE	0
2022-09-13	13:04:45	0.767239	271.775	FALSE	0
2022-09-13	13:04:45	0.760165	272.535	FALSE	0
2022-09-13	13:04:46	0.762048	273.297	FALSE	0
2022-09-13	13:04:46	0.771972	274.069	FALSE	0
2022-09-13	13:04:46	0.77701	274.846	FALSE	0
2022-09-13	13:04:46	0.788359	275.635	FALSE	0
2022-09-13	13:04:47	0.785102	276.42	FALSE	0
2022-09-13	13:04:47	0.796349	277.216	FALSE	0
2022-09-13	13:04:47	0.797366	278.014	FALSE	0
2022-09-13	13:04:47	0.802659	278.816	FALSE	0
2022-09-13	13:04:48	0.816043	279.632	FALSE	0
2022-09-13	13:04:48	0.830903	280.463	FALSE	0
2022-09-13	13:04:48	0.914873	281.378	FALSE	0
2022-09-13	13:04:48	0.870242	282.248	FALSE	0
2022-09-13	13:04:49	0.867748	283.116	FALSE	0
2022-09-13	13:04:49	0.869784	283.986	FALSE	0
2022-09-13	13:04:49	0.876756	284.863	FALSE	0
2022-09-13	13:04:50	1.03915	285.902	FALSE	0
2022-09-13	13:04:50	0.909478	286.811	FALSE	0
2022-09-13	13:04:50	0.538232	287.349	FALSE	0
2022-09-13	13:04:50	0.317876	287.667	FALSE	0
2022-09-13	13:04:51	0.471311	288.139	FALSE	0
2022-09-13	13:04:51	0.585254	288.724	FALSE	0
2022-09-13	13:04:51	0.735076	289.459	FALSE	0
2022-09-13	13:04:51	0.818944	290.278	FALSE	0
2022-09-13	13:04:52	0.948766	291.227	FALSE	0
2022-09-13	13:04:52	0.14383	291.37	FALSE	0
2022-09-13	13:04:52	0.704389	292.075	FALSE	0
2022-09-13	13:04:52	0.457214	292.532	FALSE	0
2022-09-13	13:04:53	0.465051	292.997	FALSE	0
2022-09-13	13:04:53	0.340267	293.337	FALSE	0
2022-09-13	13:04:53	0.368206	293.706	FALSE	0
2022-09-13	13:04:54	0.419351	294.125	FALSE	0
2022-09-13	13:04:54	0.456247	294.581	FALSE	0
2022-09-13	13:04:54	0.601234	295.182	FALSE	0
2022-09-13	13:04:54	0.723066	295.905	FALSE	0
2022-09-13	13:04:55	0.745763	296.651	FALSE	0
2022-09-13	13:04:55	0.442201	297.093	FALSE	0
2022-09-13	13:04:55	0.587494	297.681	FALSE	0
2022-09-13	13:04:55	0.718028	298.399	FALSE	0
2022-09-13	13:04:56	0.493855	298.893	FALSE	0
2022-09-13	13:04:56	0.929885	299.823	FALSE	0
2022-09-13	13:04:56	0.993346	300.816	FALSE	0
2022-09-13	13:04:56	1.0281	301.844	FALSE	0
2022-09-13	13:04:57	0.968002	302.812	FALSE	0
2022-09-13	13:04:57	1.05966	303.872	FALSE	0
2022-09-13	13:04:57	1.0935	304.965	FALSE	0
2022-09-13	13:04:58	1.1221	306.087	FALSE	0
2022-09-13	13:04:58	1.09523	307.183	FALSE	0
2022-09-13	13:04:58	0.971107	308.154	FALSE	0
2022-09-13	13:04:58	0.898537	309.052	FALSE	0
2022-09-13	13:04:59	1.06149	310.114	FALSE	0
2022-09-13	13:04:59	1.11589	311.23	FALSE	0
2022-09-13	13:04:59	1.10307	312.333	FALSE	0
2022-09-13	13:04:59	1.11238	313.445	FALSE	0
2022-09-13	13:05:00	1.11726	314.562	FALSE	0
2022-09-13	13:05:00	0.75014	315.313	FALSE	0
2022-09-13	13:05:00	0.340318	315.653	FALSE	0
2022-09-13	13:05:00	0.0247458	315.678	FALSE	0
2022-09-13	13:05:01	0.245204	315.923	FALSE	0
2022-09-13	13:05:01	0.30154	316.224	FALSE	0
2022-09-13	13:05:01	0.517672	316.742	FALSE	0
2022-09-13	13:05:02	0.86673	317.609	FALSE	0
2022-09-13	13:05:02	0.583168	318.192	FALSE	0
2022-09-13	13:05:02	1.39691	319.589	FALSE	0
2022-09-13	13:05:02	3.17447	322.763	1	1
2022-09-13	13:05:03	6.03807	328.801	1	2
2022-09-13	13:05:03	4.35009	333.151	1	3
2022-09-13	13:05:03	2.20968	335.361	FALSE	3
2022-09-13	13:05:03	0.484339	335.845	FALSE	3
2022-09-13	13:05:04	0.503524	336.349	FALSE	3
2022-09-13	13:05:04	0.429377	336.778	FALSE	3
2022-09-13	13:05:04	0.428613	337.207	FALSE	3
2022-09-13	13:05:04	0.470903	337.678	FALSE	3
2022-09-13	13:05:05	0.451565	338.129	FALSE	3
2022-09-13	13:05:05	0.496959	338.626	FALSE	3
2022-09-13	13:05:05	0.560064	339.186	FALSE	3
2022-09-13	13:05:06	0.524796	339.711	FALSE	3
2022-09-13	13:05:06	0.538435	340.25	FALSE	3
2022-09-13	13:05:06	0.438893	340.689	FALSE	3
2022-09-13	13:05:06	0.249631	340.938	FALSE	3
2022-09-13	13:05:07	0.358079	341.296	FALSE	3
2022-09-13	13:05:07	0.535178	341.831	FALSE	3
2022-09-13	13:05:07	0.496399	342.328	FALSE	3
2022-09-13	13:05:07	0.429122	342.757	FALSE	3
2022-09-13	13:05:08	0.419809	343.177	FALSE	3
2022-09-13	13:05:08	0.470446	343.647	FALSE	3
2022-09-13	13:05:08	0.561336	344.209	FALSE	3
2022-09-13	13:05:08	0.490802	344.699	FALSE	3
2022-09-13	13:05:09	0.340878	345.04	FALSE	3
2022-09-13	13:05:09	0.626679	345.667	FALSE	3
2022-09-13	13:05:09	0.474059	346.141	FALSE	3
2022-09-13	13:05:10	0.566272	346.707	FALSE	3
2022-09-13	13:05:10	0.669122	347.376	FALSE	3
2022-09-13	13:05:10	4.34515	351.722	1	4
2022-09-13	13:05:10	2.7564	354.478	FALSE	4
2022-09-13	13:05:11	0.297774	354.776	FALSE	4
2022-09-13	13:05:11	0.0117687	354.787	FALSE	4
2022-09-13	13:05:11	0.0953819	354.883	FALSE	4
2022-09-13	13:05:11	0.299351	355.182	FALSE	4
2022-09-13	13:05:12	0.45416	355.636	FALSE	4
2022-09-13	13:05:12	0.481285	356.118	FALSE	4
2022-09-13	13:05:12	0.743015	356.861	FALSE	4
2022-09-13	13:05:12	1.31996	358.181	FALSE	4
2022-09-13	13:05:13	0.7964	358.977	FALSE	4
2022-09-13	13:05:13	0.418028	359.395	FALSE	4
2022-09-13	13:05:13	0.20154	359.597	FALSE	4
2022-09-13	13:05:13	0.61757	360.214	FALSE	4
2022-09-13	13:05:14	0.439758	360.654	FALSE	4
2022-09-13	13:05:14	0.289784	360.944	FALSE	4
2022-09-13	13:05:14	0.317366	361.261	FALSE	4
2022-09-13	13:05:15	0.502201	361.763	FALSE	4
2022-09-13	13:05:15	0.69584	362.459	FALSE	4
2022-09-13	13:05:15	0.550293	363.009	FALSE	4
2022-09-13	13:05:15	0.933702	363.943	FALSE	4
2022-09-13	13:05:16	1.03955	364.983	FALSE	4
2022-09-13	13:05:16	1.34485	366.328	FALSE	4
2022-09-13	13:05:16	1.67207	368	FALSE	4
2022-09-13	13:05:16	1.39065	369.39	FALSE	4
2022-09-13	13:05:17	0.830038	370.22	FALSE	4
2022-09-13	13:05:17	0.836196	371.056	FALSE	4
2022-09-13	13:05:17	0.759198	371.816	FALSE	4
2022-09-13	13:05:17	0.681794	372.497	FALSE	4
2022-09-13	13:05:18	-0.270369	372.497	FALSE	4
2022-09-13	13:05:18	-0.391488	372.497	FALSE	4
2022-09-13	13:05:18	-0.448638	372.497	FALSE	4
2022-09-13	13:05:19	-0.478613	372.497	FALSE	4
2022-09-13	13:05:19	-0.528587	372.497	FALSE	4
2022-09-13	13:05:19	-0.412506	372.497	FALSE	4
2022-09-13	13:05:19	-0.33444	372.497	FALSE	4
2022-09-13	13:05:20	-0.216832	372.497	FALSE	4
2022-09-13	13:05:20	-0.223142	372.497	FALSE	4
2022-09-13	13:05:20	-0.0301142	372.497	FALSE	4
2022-09-13	13:05:20	-0.0693509	372.497	FALSE	4
2022-09-13	13:05:21	0.0595549	372.557	FALSE	4
2022-09-13	13:05:21	-0.0895035	372.557	FALSE	4
2022-09-13	13:05:21	0.0821503	372.639	FALSE	4
2022-09-13	13:05:21	-0.0733712	372.639	FALSE	4
2022-09-13	13:05:22	-0.189758	372.639	FALSE	4
2022-09-13	13:05:22	-0.207468	372.639	FALSE	4
2022-09-13	13:05:22	-0.184923	372.639	FALSE	4
2022-09-13	13:05:23	-0.117493	372.639	FALSE	4
2022-09-13	13:05:23	-0.123906	372.639	FALSE	4
2022-09-13	13:05:23	-0.182023	372.639	FALSE	4
2022-09-13	13:05:23	-0.322939	372.639	FALSE	4
2022-09-13	13:05:24	-0.191692	372.639	FALSE	4
2022-09-13	13:05:24	-0.234796	372.639	FALSE	4
2022-09-13	13:05:24	-0.246094	372.639	FALSE	4
2022-09-13	13:05:24	-0.260852	372.639	FALSE	4
2022-09-13	13:05:25	-0.254745	372.639	FALSE	4
2022-09-13	13:05:25	-0.204058	372.639	FALSE	4
2022-09-13	13:05:25	-0.132404	372.639	FALSE	4
2022-09-13	13:05:25	-0.381412	372.639	FALSE	4
2022-09-13	13:05:26	-0.438002	372.639	FALSE	4
2022-09-13	13:05:26	-0.339274	372.639	FALSE	4
2022-09-13	13:05:26	-0.296119	372.639	FALSE	4
2022-09-13	13:05:27	-0.279834	372.639	FALSE	4
2022-09-13	13:05:27	-0.127264	372.639	FALSE	4
2022-09-13	13:05:27	0.0546694	372.694	FALSE	4
2022-09-13	13:05:27	0.16098	372.855	FALSE	4
2022-09-13	13:05:28	0.31187	373.167	FALSE	4
2022-09-13	13:05:28	0.150751	373.317	FALSE	4
2022-09-13	13:05:28	0.27986	373.597	FALSE	4
2022-09-13	13:05:28	0.238792	373.836	FALSE	4
2022-09-13	13:05:29	0.301438	374.138	FALSE	4
2022-09-13	13:05:29	0.160115	374.298	FALSE	4
2022-09-13	13:05:29	0.42271	374.72	FALSE	4
2022-09-13	13:05:29	0.623524	375.344	FALSE	4
2022-09-13	13:05:30	0.734924	376.079	FALSE	4
2022-09-13	13:05:30	0.736807	376.816	FALSE	4
2022-09-13	13:05:30	0.727697	377.543	FALSE	4
2022-09-13	13:05:31	0.73355	378.277	FALSE	4
2022-09-13	13:05:31	0.63416	378.911	FALSE	4
2022-09-13	13:05:31	0.563575	379.475	FALSE	4
2022-09-13	13:05:31	0.711361	380.186	FALSE	4
2022-09-13	13:05:32	-0.0199361	380.186	FALSE	4
2022-09-13	13:05:32	-0.236832	380.186	FALSE	4
2022-09-13	13:05:32	-0.374084	380.186	FALSE	4
2022-09-13	13:05:32	-0.445737	380.186	FALSE	4
2022-09-13	13:05:33	-0.367926	380.186	FALSE	4
2022-09-13	13:05:33	-0.392455	380.186	FALSE	4
2022-09-13	13:05:33	-0.301107	380.186	FALSE	4
2022-09-13	13:05:33	-0.202124	380.186	FALSE	4
2022-09-13	13:05:34	-0.146246	380.186	FALSE	4
2022-09-13	13:05:34	-0.120954	380.186	FALSE	4
2022-09-13	13:05:34	-0.168944	380.186	FALSE	4
2022-09-13	13:05:35	0.101336	380.287	FALSE	4
2022-09-13	13:05:35	0.0971122	380.384	FALSE	4
2022-09-13	13:05:35	0.320827	380.705	FALSE	4
2022-09-13	13:05:35	0.21986	380.925	FALSE	4
2022-09-13	13:05:36	0.354517	381.28	FALSE	4
2022-09-13	13:05:36	0.263168	381.543	FALSE	4
2022-09-13	13:05:36	0.485153	382.028	FALSE	4
2022-09-13	13:05:36	0.212481	382.24	FALSE	4
2022-09-13	13:05:37	0.377316	382.618	FALSE	4
2022-09-13	13:05:37	0.700776	383.319	FALSE	4
2022-09-13	13:05:37	0.733295	384.052	FALSE	4
2022-09-13	13:05:37	0.74098	384.793	FALSE	4
2022-09-13	13:05:38	0.281641	385.074	FALSE	4
2022-09-13	13:05:38	0.281132	385.356	FALSE	4
2022-09-13	13:05:38	0.469275	385.825	FALSE	4
2022-09-13	13:05:39	0.739402	386.564	FALSE	4
2022-09-13	13:05:39	0.539198	387.103	FALSE	4
2022-09-13	13:05:39	0.725509	387.829	FALSE	4
2022-09-13	13:05:39	0.475738	388.305	FALSE	4
2022-09-13	13:05:40	0.674211	388.979	FALSE	4
2022-09-13	13:05:40	0.431718	389.411	FALSE	4
2022-09-13	13:05:40	0.719809	390.13	FALSE	4
2022-09-13	13:05:40	0.728206	390.859	FALSE	4
2022-09-13	13:05:41	0.594466	391.453	FALSE	4
2022-09-13	13:05:41	0.723321	392.176	FALSE	4
2022-09-13	13:05:41	0.649733	392.826	FALSE	4
2022-09-13	13:05:41	-0.0170354	392.826	FALSE	4
2022-09-13	13:05:42	-0.495051	392.826	FALSE	4
2022-09-13	13:05:42	-0.0512338	392.826	FALSE	4
2022-09-13	13:05:42	0.765967	393.592	FALSE	4
2022-09-13	13:05:43	0.84042	394.433	FALSE	4
2022-09-13	13:05:43	0.335891	394.768	FALSE	4
2022-09-13	13:05:43	0.289682	395.058	FALSE	4
2022-09-13	13:05:43	0.398181	395.456	FALSE	4
2022-09-13	13:05:44	0.402812	395.859	FALSE	4
2022-09-13	13:05:44	0.431718	396.291	FALSE	4
2022-09-13	13:05:44	0.444644	396.735	FALSE	4
2022-09-13	13:05:44	0.402812	397.138	FALSE	4
2022-09-13	13:05:45	0.463473	397.602	FALSE	4
2022-09-13	13:05:45	0.388766	397.991	FALSE	4
2022-09-13	13:05:45	0.468664	398.459	FALSE	4
2022-09-13	13:05:45	0.416501	398.876	FALSE	4
2022-09-13	13:05:46	0.494415	399.37	FALSE	4
2022-09-13	13:05:46	0.428461	399.799	FALSE	4
2022-09-13	13:05:46	0.853244	400.652	FALSE	4
2022-09-13	13:05:46	2.24948	402.901	FALSE	4
2022-09-13	13:05:47	4.37696	407.278	1	5
2022-09-13	13:05:47	1.21009	408.488	FALSE	5
2022-09-13	13:05:47	1.01833	409.507	FALSE	5
2022-09-13	13:05:48	0.482405	409.989	FALSE	5
2022-09-13	13:05:48	0.740827	410.73	FALSE	5
2022-09-13	13:05:48	0.133753	410.864	FALSE	5
2022-09-13	13:05:48	-0.136984	410.864	FALSE	5
2022-09-13	13:05:49	-0.485941	410.864	FALSE	5
2022-09-13	13:05:49	-0.684109	410.864	FALSE	5
2022-09-13	13:05:49	-0.406094	410.864	FALSE	5
2022-09-13	13:05:49	-0.294491	410.864	FALSE	5
2022-09-13	13:05:50	-0.343905	410.864	FALSE	5
2022-09-13	13:05:50	-0.546806	410.864	FALSE	5
2022-09-13	13:05:50	-0.703651	410.864	FALSE	5
2022-09-13	13:05:50	-0.719732	410.864	FALSE	5
2022-09-13	13:05:51	-0.712251	410.864	FALSE	5
2022-09-13	13:05:51	-0.79047	410.864	FALSE	5
2022-09-13	13:05:51	-0.767467	410.864	FALSE	5
2022-09-13	13:05:52	-0.804312	410.864	FALSE	5
2022-09-13	13:05:52	-0.581361	410.864	FALSE	5
2022-09-13	13:05:52	-0.487061	410.864	FALSE	5
2022-09-13	13:05:52	-0.150318	410.864	FALSE	5
2022-09-13	13:05:53	0.117875	410.982	FALSE	5
2022-09-13	13:05:53	0.430751	411.412	FALSE	5
2022-09-13	13:05:53	0.889987	412.302	FALSE	5
2022-09-13	13:05:53	0.937875	413.24	FALSE	5
2022-09-13	13:05:54	1.96307	415.203	FALSE	5
2022-09-13	13:05:54	1.1452	416.348	FALSE	5
2022-09-13	13:05:54	0.0433718	416.392	FALSE	5
2022-09-13	13:05:54	-0.0544399	416.392	FALSE	5
2022-09-13	13:05:55	-0.262124	416.392	FALSE	5
2022-09-13	13:05:55	0.33986	416.732	FALSE	5
2022-09-13	13:05:55	0.0943641	416.826	FALSE	5
2022-09-13	13:05:56	-0.0613102	416.826	FALSE	5
2022-09-13	13:05:56	-0.150878	416.826	FALSE	5
2022-09-13	13:05:56	-0.195661	416.826	FALSE	5
2022-09-13	13:05:56	0.314771	417.141	FALSE	5
2022-09-13	13:05:57	0.351463	417.492	FALSE	5
2022-09-13	13:05:57	0.316043	417.808	FALSE	5
2022-09-13	13:05:57	0.26897	418.077	FALSE	5
2022-09-13	13:05:57	0.188766	418.266	FALSE	5
2022-09-13	13:05:58	0.243066	418.509	FALSE	5
2022-09-13	13:05:58	-0.0537784	418.509	FALSE	5
2022-09-13	13:05:58	0.115636	418.625	FALSE	5
2022-09-13	13:05:58	0.27584	418.901	FALSE	5
2022-09-13	13:05:59	0.49472	419.395	FALSE	5
2022-09-13	13:05:59	0.464542	419.86	FALSE	5
2022-09-13	13:05:59	0.556094	420.416	FALSE	5
2022-09-13	13:06:00	0.313092	420.729	FALSE	5
2022-09-13	13:06:00	0.260776	420.99	FALSE	5
2022-09-13	13:06:00	0.134873	421.125	FALSE	5
2022-09-13	13:06:00	-0.624312	421.125	FALSE	5
2022-09-13	13:06:01	0.430242	421.555	FALSE	5
2022-09-13	13:06:01	0.465814	422.021	FALSE	5
2022-09-13	13:06:01	0.194059	422.215	FALSE	5
2022-09-13	13:06:01	0.372888	422.588	FALSE	5
2022-09-13	13:06:02	0.327036	422.915	FALSE	5
2022-09-13	13:06:02	-0.597544	422.915	FALSE	5
2022-09-13	13:06:02	-1.07174	422.915	FALSE	5
2022-09-13	13:06:02	0.236603	423.151	FALSE	5
2022-09-13	13:06:03	1.14317	424.294	FALSE	5
2022-09-13	13:06:03	0.938079	425.233	FALSE	5
2022-09-13	13:06:03	0.458893	425.691	FALSE	5
2022-09-13	13:06:04	0.699147	426.391	FALSE	5
2022-09-13	13:06:04	0.444135	426.835	FALSE	5
2022-09-13	13:06:04	-0.861411	426.835	FALSE	5
2022-09-13	13:06:04	-1.05398	426.835	FALSE	5
2022-09-13	13:06:05	-0.978511	426.835	FALSE	5
2022-09-13	13:06:05	-1.01291	426.835	FALSE	5
2022-09-13	13:06:05	-0.886908	426.835	FALSE	5
2022-09-13	13:06:05	-0.94818	426.835	FALSE	5
2022-09-13	13:06:06	-0.985635	426.835	FALSE	5
2022-09-13	13:06:06	0.0858654	426.921	FALSE	5
2022-09-13	13:06:06	-0.30645	426.921	FALSE	5
2022-09-13	13:06:06	0.728359	427.649	FALSE	5
2022-09-13	13:06:07	0.740064	428.389	FALSE	5
2022-09-13	13:06:07	0.728868	429.118	FALSE	5
2022-09-13	13:06:07	0.733601	429.851	FALSE	5
2022-09-13	13:06:08	0.732888	430.584	FALSE	5
2022-09-13	13:06:08	0.73528	431.32	FALSE	5
2022-09-13	13:06:08	0.728308	432.048	FALSE	5
2022-09-13	13:06:08	0.727443	432.775	FALSE	5
2022-09-13	13:06:09	0.733295	433.509	FALSE	5
2022-09-13	13:06:09	0.737672	434.246	FALSE	5
2022-09-13	13:06:09	0.734415	434.981	FALSE	5
2022-09-13	13:06:09	0.729784	435.711	FALSE	5
2022-09-13	13:06:10	0.733499	436.444	FALSE	5
2022-09-13	13:06:10	0.734822	437.179	FALSE	5
2022-09-13	13:06:10	0.732583	437.911	FALSE	5
2022-09-13	13:06:10	0.734975	438.646	FALSE	5
2022-09-13	13:06:11	0.738842	439.385	FALSE	5
2022-09-13	13:06:11	0.734771	440.12	FALSE	5
2022-09-13	13:06:11	0.741336	440.861	FALSE	5
2022-09-13	13:06:12	0.737468	441.599	FALSE	5
2022-09-13	13:06:12	0.731361	442.33	FALSE	5
2022-09-13	13:06:12	0.738537	443.069	FALSE	5
2022-09-13	13:06:12	0.724491	443.793	FALSE	5
2022-09-13	13:06:13	0.734262	444.528	FALSE	5
2022-09-13	13:06:13	-0.154694	444.528	FALSE	5
2022-09-13	13:06:13	0.407799	444.935	FALSE	5
2022-09-13	13:06:13	1.02785	445.963	FALSE	5
2022-09-13	13:06:14	0.73355	446.697	FALSE	5
2022-09-13	13:06:14	0.732786	447.429	FALSE	5
2022-09-13	13:06:14	0.72841	448.158	FALSE	5
2022-09-13	13:06:14	0.732735	448.891	FALSE	5
2022-09-13	13:06:15	0.72958	449.62	FALSE	5
2022-09-13	13:06:15	0.733448	450.354	FALSE	5
2022-09-13	13:06:15	0.735229	451.089	FALSE	5
2022-09-13	13:06:16	0.736908	451.826	FALSE	5
2022-09-13	13:06:16	0.735433	452.561	FALSE	5
2022-09-13	13:06:16	-0.229962	452.561	FALSE	5
2022-09-13	13:06:16	0.721437	453.283	FALSE	5
2022-09-13	13:06:17	0.737265	454.02	FALSE	5
2022-09-13	13:06:17	0.734822	454.755	FALSE	5
2022-09-13	13:06:17	0.722608	455.477	FALSE	5
2022-09-13	13:06:17	0.733244	456.211	FALSE	5
2022-09-13	13:06:18	0.730954	456.942	FALSE	5
2022-09-13	13:06:18	0.730954	457.673	FALSE	5
2022-09-13	13:06:18	0.729377	458.402	FALSE	5
2022-09-13	13:06:18	0.730089	459.132	FALSE	5
2022-09-13	13:06:19	0.729682	459.862	FALSE	5
2022-09-13	13:06:19	0.732532	460.594	FALSE	5
2022-09-13	13:06:19	0.730089	461.324	FALSE	5
2022-09-13	13:06:20	0.725611	462.05	FALSE	5
2022-09-13	13:06:20	0.725458	462.775	FALSE	5
2022-09-13	13:06:20	0.735483	463.511	FALSE	5
2022-09-13	13:06:20	0.733499	464.244	FALSE	5
2022-09-13	13:06:21	0.730038	464.974	FALSE	5
2022-09-13	13:06:21	0.734109	465.708	FALSE	5
2022-09-13	13:06:21	0.733244	466.442	FALSE	5
2022-09-13	13:06:21	0.730649	467.172	FALSE	5
2022-09-13	13:06:22	0.73187	467.904	FALSE	5
2022-09-13	13:06:22	0.729529	468.634	FALSE	5
2022-09-13	13:06:22	0.732379	469.366	FALSE	5
2022-09-13	13:06:22	0.732226	470.098	FALSE	5
2022-09-13	13:06:23	0.729682	470.828	FALSE	5
2022-09-13	13:06:23	0.730547	471.559	FALSE	5
2022-09-13	13:06:23	0.723117	472.282	FALSE	5
2022-09-13	13:06:23	0.733702	473.015	FALSE	5
2022-09-13	13:06:24	0.732583	473.748	FALSE	5
2022-09-13	13:06:24	0.73131	474.479	FALSE	5
2022-09-13	13:06:24	0.731819	475.211	FALSE	5
2022-09-13	13:06:25	0.727697	475.939	FALSE	5
2022-09-13	13:06:25	0.727596	476.666	FALSE	5
2022-09-13	13:06:25	0.736552	477.403	FALSE	5
2022-09-13	13:06:25	0.734415	478.137	FALSE	5
2022-09-13	13:06:26	0.739097	478.876	FALSE	5
2022-09-13	13:06:26	0.728359	479.605	FALSE	5
2022-09-13	13:06:26	0.732684	480.338	FALSE	5
2022-09-13	13:06:26	0.734822	481.072	FALSE	5
2022-09-13	13:06:27	0.591565	481.664	FALSE	5
2022-09-13	13:06:27	0.737824	482.402	FALSE	5
2022-09-13	13:06:27	0.690802	483.093	FALSE	5
2022-09-13	13:06:27	0.734669	483.827	FALSE	5
2022-09-13	13:06:28	0.730598	484.558	FALSE	5
2022-09-13	13:06:28	0.733804	485.292	FALSE	5
2022-09-13	13:06:28	0.735331	486.027	FALSE	5
2022-09-13	13:06:29	0.651667	486.679	FALSE	5
2022-09-13	13:06:29	0.591921	487.271	FALSE	5
2022-09-13	13:06:29	0.723219	487.994	FALSE	5
2022-09-13	13:06:29	0.747188	488.741	FALSE	5
2022-09-13	13:06:30	0.788766	489.53	FALSE	5
2022-09-13	13:06:30	0.845509	490.375	FALSE	5
2022-09-13	13:06:30	0.370344	490.746	FALSE	5
2022-09-13	13:06:30	0.734975	491.481	FALSE	5
2022-09-13	13:06:31	0.721387	492.202	FALSE	5
2022-09-13	13:06:31	0.737519	492.939	FALSE	5
2022-09-13	13:06:31	0.738791	493.678	FALSE	5
2022-09-13	13:06:31	0.735585	494.414	FALSE	5
2022-09-13	13:06:32	0.736196	495.15	FALSE	5
2022-09-13	13:06:32	0.735076	495.885	FALSE	5
2022-09-13	13:06:32	0.736196	496.621	FALSE	5
2022-09-13	13:06:33	0.734618	497.356	FALSE	5
2022-09-13	13:06:33	0.739198	498.095	FALSE	5
2022-09-13	13:06:33	0.45416	498.549	FALSE	5
2022-09-13	13:06:33	0.690344	499.24	FALSE	5
2022-09-13	13:06:34	0.738028	499.978	FALSE	5
2022-09-13	13:06:34	0.728104	500.706	FALSE	5
2022-09-13	13:06:34	0.737061	501.443	FALSE	5
2022-09-13	13:06:34	0.737417	502.18	FALSE	5
2022-09-13	13:06:35	0.736298	502.917	FALSE	5
2022-09-13	13:06:35	0.278741	503.195	FALSE	5
2022-09-13	13:06:35	0.52612	503.721	FALSE	5
2022-09-13	13:06:35	0.520369	504.242	FALSE	5
2022-09-13	13:06:36	0.731158	504.973	FALSE	5
2022-09-13	13:06:36	0.734415	505.707	FALSE	5
2022-09-13	13:06:36	0.732074	506.439	FALSE	5
2022-09-13	13:06:37	0.493193	506.933	FALSE	5
2022-09-13	13:06:37	0.391361	507.324	FALSE	5
2022-09-13	13:06:37	0.579656	507.904	FALSE	5
2022-09-13	13:06:37	0.564898	508.469	FALSE	5
2022-09-13	13:06:38	0.613041	509.082	FALSE	5
2022-09-13	13:06:38	0.480318	509.562	FALSE	5
2022-09-13	13:06:38	0.726476	510.288	FALSE	5
2022-09-13	13:06:38	0.234415	510.523	FALSE	5
2022-09-13	13:06:39	0.368104	510.891	FALSE	5
2022-09-13	13:06:39	0.337417	511.228	FALSE	5
2022-09-13	13:06:39	0.298334	511.527	FALSE	5
2022-09-13	13:06:39	0.470038	511.997	FALSE	5
2022-09-13	13:06:40	0.220827	512.217	FALSE	5
2022-09-13	13:06:40	0.490547	512.708	FALSE	5
2022-09-13	13:06:40	0.282659	512.991	FALSE	5
2022-09-13	13:06:41	0.340522	513.331	FALSE	5
2022-09-13	13:06:41	0.354211	513.685	FALSE	5
2022-09-13	13:06:41	0.643728	514.329	FALSE	5
2022-09-13	13:06:41	-0.606246	514.329	FALSE	5
2022-09-13	13:06:42	0.192837	514.522	FALSE	5
2022-09-13	13:06:42	0.547443	515.069	FALSE	5
2022-09-13	13:06:42	0.226629	515.296	FALSE	5
2022-09-13	13:06:42	-1.14197	515.296	FALSE	5
2022-09-13	13:06:43	-1.42874	515.296	FALSE	5
2022-09-13	13:06:43	-1.3124	515.296	FALSE	5
2022-09-13	13:06:43	-1.26543	515.296	FALSE	5
2022-09-13	13:06:43	-0.589809	515.296	FALSE	5
2022-09-13	13:06:44	-0.908282	515.296	FALSE	5
2022-09-13	13:06:44	-0.911335	515.296	FALSE	5
2022-09-13	13:06:44	-0.753065	515.296	FALSE	5
2022-09-13	13:06:45	-0.815355	515.296	FALSE	5
2022-09-13	13:06:45	-0.711437	515.296	FALSE	5
2022-09-13	13:06:45	-0.503956	515.296	FALSE	5
2022-09-13	13:06:45	-0.531132	515.296	FALSE	5
2022-09-13	13:06:46	-0.598765	515.296	FALSE	5
2022-09-13	13:06:46	-0.501971	515.296	FALSE	5
2022-09-13	13:06:46	-0.565025	515.296	FALSE	5
2022-09-13	13:06:46	-0.444669	515.296	FALSE	5
2022-09-13	13:06:47	-0.694236	515.296	FALSE	5
2022-09-13	13:06:47	-0.738256	515.296	FALSE	5
2022-09-13	13:06:47	-0.616425	515.296	FALSE	5
2022-09-13	13:06:47	-0.686959	515.296	FALSE	5
2022-09-13	13:06:48	-0.782836	515.296	FALSE	5
2022-09-13	13:06:48	-0.541463	515.296	FALSE	5
2022-09-13	13:06:48	-0.521971	515.296	FALSE	5
2022-09-13	13:06:49	-0.517239	515.296	FALSE	5
2022-09-13	13:06:49	-0.571946	515.296	FALSE	5
2022-09-13	13:06:49	-0.626501	515.296	FALSE	5
2022-09-13	13:06:49	-0.549351	515.296	FALSE	5
2022-09-13	13:06:50	-0.465483	515.296	FALSE	5
2022-09-13	13:06:50	-0.569554	515.296	FALSE	5
2022-09-13	13:06:50	-0.665076	515.296	FALSE	5
2022-09-13	13:06:50	-0.79907	515.296	FALSE	5
2022-09-13	13:06:51	-1.08833	515.296	FALSE	5
2022-09-13	13:06:51	-1.16528	515.296	FALSE	5
2022-09-13	13:06:51	-1.15408	515.296	FALSE	5
2022-09-13	13:06:51	-1.19673	515.296	FALSE	5
2022-09-13	13:06:52	-1.14635	515.296	FALSE	5
2022-09-13	13:06:52	-1.20436	515.296	FALSE	5
2022-09-13	13:06:52	-1.20955	515.296	FALSE	5
2022-09-13	13:06:53	-1.13892	515.296	FALSE	5
2022-09-13	13:06:53	-0.899172	515.296	FALSE	5
2022-09-13	13:06:53	-0.484211	515.296	FALSE	5
2022-09-13	13:06:53	-0.338409	515.296	FALSE	5
2022-09-13	13:06:54	-0.287468	515.296	FALSE	5
2022-09-13	13:06:54	-0.53047	515.296	FALSE	5
2022-09-13	13:06:54	-0.360648	515.296	FALSE	5
2022-09-13	13:06:54	-0.525941	515.296	FALSE	5
2022-09-13	13:06:55	0.325509	515.622	FALSE	5
2022-09-13	13:06:55	0.370852	515.992	FALSE	5
2022-09-13	13:06:55	0.308003	516.3	FALSE	5
2022-09-13	13:06:55	0.33813	516.639	FALSE	5
2022-09-13	13:06:56	0.323575	516.962	FALSE	5
2022-09-13	13:06:56	0.393906	517.356	FALSE	5
2022-09-13	13:06:56	0.231158	517.587	FALSE	5
2022-09-13	13:06:57	0.485	518.072	FALSE	5
2022-09-13	13:06:57	0.282761	518.355	FALSE	5
2022-09-13	13:06:57	0.436094	518.791	FALSE	5
2022-09-13	13:06:57	0.262659	519.054	FALSE	5
2022-09-13	13:06:58	0.412176	519.466	FALSE	5
2022-09-13	13:06:58	0.318893	519.785	FALSE	5
2022-09-13	13:06:58	0.502354	520.287	FALSE	5
2022-09-13	13:06:58	0.80271	521.09	FALSE	5
2022-09-13	13:06:59	0.763779	521.854	FALSE	5
2022-09-13	13:06:59	1.16093	523.015	FALSE	5
2022-09-13	13:06:59	2.05411	525.069	FALSE	5
2022-09-13	13:06:59	2.01604	527.085	FALSE	5
2022-09-13	13:07:00	1.72485	528.81	FALSE	5
2022-09-13	13:07:00	3.27106	532.081	1	6
2022-09-13	13:07:00	0.391107	532.472	FALSE	6
2022-09-13	13:07:00	0.472227	532.944	FALSE	6
2022-09-13	13:07:01	0.578282	533.522	FALSE	6
2022-09-13	13:07:01	0.509835	534.032	FALSE	6
2022-09-13	13:07:01	0.400318	534.432	FALSE	6
2022-09-13	13:07:02	0.294059	534.726	FALSE	6
2022-09-13	13:07:02	0.437163	535.164	FALSE	6
2022-09-13	13:07:02	0.478384	535.642	FALSE	6
2022-09-13	13:07:02	0.432837	536.075	FALSE	6
2022-09-13	13:07:03	0.441234	536.516	FALSE	6
2022-09-13	13:07:03	0.3764	536.892	FALSE	6
2022-09-13	13:07:03	0.408308	537.301	FALSE	6
2022-09-13	13:07:03	0.22556	537.526	FALSE	6
2022-09-13	13:07:04	0.478893	538.005	FALSE	6
2022-09-13	13:07:04	0.222761	538.228	FALSE	6
2022-09-13	13:07:04	0.348053	538.576	FALSE	6
2022-09-13	13:07:04	0.241183	538.817	FALSE	6
2022-09-13	13:07:05	0.171107	538.988	FALSE	6
2022-09-13	13:07:05	0.3393	539.328	FALSE	6
2022-09-13	13:07:05	0.25416	539.582	FALSE	6
2022-09-13	13:07:06	0.33528	539.917	FALSE	6
2022-09-13	13:07:06	0.0611326	539.978	FALSE	6
2022-09-13	13:07:06	-0.144771	539.978	FALSE	6
2022-09-13	13:07:06	-0.249249	539.978	FALSE	6
2022-09-13	13:07:07	-0.141666	539.978	FALSE	6
2022-09-13	13:07:07	0.0941096	540.072	FALSE	6
2022-09-13	13:07:07	-0.0241092	540.072	FALSE	6
2022-09-13	13:07:07	0.180471	540.253	FALSE	6
2022-09-13	13:07:08	0.328766	540.582	FALSE	6
2022-09-13	13:07:08	0.465611	541.047	FALSE	6
2022-09-13	13:07:08	0.325255	541.372	FALSE	6
2022-09-13	13:07:08	0.51411	541.887	FALSE	6
2022-09-13	13:07:09	0.408715	542.295	FALSE	6
2022-09-13	13:07:09	0.480216	542.775	FALSE	6
2022-09-13	13:07:09	0.344644	543.12	FALSE	6
2022-09-13	13:07:10	0.520776	543.641	FALSE	6
2022-09-13	13:07:10	0.370547	544.011	FALSE	6
2022-09-13	13:07:10	0.370649	544.382	FALSE	6
2022-09-13	13:07:10	0.172125	544.554	FALSE	6
2022-09-13	13:07:11	0.208308	544.762	FALSE	6
2022-09-13	13:07:11	0.209173	544.972	FALSE	6
2022-09-13	13:07:11	0.155687	545.127	FALSE	6
2022-09-13	13:07:11	0.223219	545.351	FALSE	6
2022-09-13	13:07:12	0.0484099	545.399	FALSE	6
2022-09-13	13:07:12	0.0545676	545.454	FALSE	6
2022-09-13	13:07:12	-0.0440074	545.454	FALSE	6
2022-09-13	13:07:12	-0.0122008	545.454	FALSE	6
2022-09-13	13:07:13	-0.172404	545.454	FALSE	6
2022-09-13	13:07:13	-0.31673	545.454	FALSE	6
2022-09-13	13:07:13	-0.388231	545.454	FALSE	6
2022-09-13	13:07:14	-0.216628	545.454	FALSE	6
2022-09-13	13:07:14	-0.0518954	545.454	FALSE	6
2022-09-13	13:07:14	0.280471	545.734	FALSE	6
2022-09-13	13:07:14	0.0604709	545.794	FALSE	6
2022-09-13	13:07:15	0.265102	546.06	FALSE	6
2022-09-13	13:07:15	-0.0667554	546.06	FALSE	6
2022-09-13	13:07:15	-0.31561	546.06	FALSE	6
2022-09-13	13:07:15	-0.0334221	546.06	FALSE	6
2022-09-13	13:07:16	0.133295	546.193	FALSE	6
2022-09-13	13:07:16	0.0467305	546.24	FALSE	6
2022-09-13	13:07:16	0.313041	546.553	FALSE	6
2022-09-13	13:07:16	0.105255	546.658	FALSE	6
2022-09-13	13:07:17	0.47584	547.134	FALSE	6
2022-09-13	13:07:17	0.0537025	547.187	FALSE	6
2022-09-13	13:07:17	0.525203	547.713	FALSE	6
2022-09-13	13:07:18	0.2564	547.969	FALSE	6
2022-09-13	13:07:18	0.696654	548.666	FALSE	6
2022-09-13	13:07:18	0.92902	549.595	FALSE	6
2022-09-13	13:07:18	2.08719	551.682	FALSE	6
2022-09-13	13:07:19	0.37126	552.053	FALSE	6
2022-09-13	13:07:19	0.640267	552.693	FALSE	6
2022-09-13	13:07:19	0.58556	553.279	FALSE	6
2022-09-13	13:07:19	0.500725	553.78	FALSE	6
2022-09-13	13:07:20	0.244135	554.024	FALSE	6
2022-09-13	13:07:20	0.511616	554.535	FALSE	6
2022-09-13	13:07:20	0.227901	554.763	FALSE	6
2022-09-13	13:07:20	0.463575	555.227	FALSE	6
2022-09-13	13:07:21	0.231565	555.459	FALSE	6
2022-09-13	13:07:21	0.475585	555.934	FALSE	6
2022-09-13	13:07:21	0.304644	556.239	FALSE	6
2022-09-13	13:07:22	0.399046	556.638	FALSE	6
2022-09-13	13:07:22	0.291107	556.929	FALSE	6
2022-09-13	13:07:22	0.376858	557.306	FALSE	6
2022-09-13	13:07:22	0.217875	557.524	FALSE	6
2022-09-13	13:07:23	0.522761	558.046	FALSE	6
2022-09-13	13:07:23	0.296298	558.343	FALSE	6
2022-09-13	13:07:23	0.572532	558.915	FALSE	6
2022-09-13	13:07:23	0.217926	559.133	FALSE	6
2022-09-13	13:07:24	0.443168	559.576	FALSE	6
2022-09-13	13:07:24	0.290089	559.866	FALSE	6
2022-09-13	13:07:24	0.500776	560.367	FALSE	6
2022-09-13	13:07:24	0.269835	560.637	FALSE	6
2022-09-13	13:07:25	0.445713	561.083	FALSE	6
2022-09-13	13:07:25	0.372735	561.455	FALSE	6
2022-09-13	13:07:25	0.493906	561.949	FALSE	6
2022-09-13	13:07:26	0.282863	562.232	FALSE	6
2022-09-13	13:07:26	0.529835	562.762	FALSE	6
2022-09-13	13:07:26	0.80042	563.562	FALSE	6
2022-09-13	13:07:26	1.25589	564.818	FALSE	6
2022-09-13	13:07:27	2.62378	567.442	FALSE	6
2022-09-13	13:07:27	2.0823	569.524	FALSE	6
2022-09-13	13:07:27	1.65767	571.182	FALSE	6
2022-09-13	13:07:27	0.903881	572.086	FALSE	6
2022-09-13	13:07:28	0.441132	572.527	FALSE	6
2022-09-13	13:07:28	0.571259	573.098	FALSE	6
2022-09-13	13:07:28	0.443575	573.542	FALSE	6
2022-09-13	13:07:28	0.511667	574.054	FALSE	6
2022-09-13	13:07:29	0.419097	574.473	FALSE	6
2022-09-13	13:07:29	0.601234	575.074	FALSE	6
2022-09-13	13:07:29	0.354822	575.429	FALSE	6
2022-09-13	13:07:30	0.680165	576.109	FALSE	6
2022-09-13	13:07:30	0.755331	576.864	FALSE	6
2022-09-13	13:07:30	1.54383	578.408	FALSE	6
2022-09-13	13:07:30	2.24123	580.649	FALSE	6
2022-09-13	13:07:31	2.12281	582.772	FALSE	6
2022-09-13	13:07:31	1.33365	584.106	FALSE	6
2022-09-13	13:07:31	2.32225	586.428	FALSE	6
2022-09-13	13:07:31	1.0166	587.445	FALSE	6
2022-09-13	13:07:32	1.14627	588.591	FALSE	6
2022-09-13	13:07:32	0.581794	589.173	FALSE	6
2022-09-13	13:07:32	0.802761	589.975	FALSE	6
2022-09-13	13:07:32	1.04393	591.019	FALSE	6
2022-09-13	13:07:33	1.29884	592.318	FALSE	6
2022-09-13	13:07:33	1.83487	594.153	FALSE	6
2022-09-13	13:07:33	2.21981	596.373	FALSE	6

## Sheet: Buzz_martin_2022913130220
						**GoPro Fitting: 1251
2022-09-13	13:02:20	0.734873
2022-09-13	13:02:21	0.761946
2022-09-13	13:02:21	0.730801
2022-09-13	13:02:21	0.734822
2022-09-13	13:02:21	0.739046
2022-09-13	13:02:22	0.743829
2022-09-13	13:02:22	0.72958
2022-09-13	13:02:22	0.731056
2022-09-13	13:02:22	0.724949
2022-09-13	13:02:23	0.735891
2022-09-13	13:02:23	0.727748
2022-09-13	13:02:23	0.728919
2022-09-13	13:02:23	0.732634
2022-09-13	13:02:24	0.728257
2022-09-13	13:02:24	0.728308
2022-09-13	13:02:24	0.733651
2022-09-13	13:02:25	0.727188
2022-09-13	13:02:25	0.738435
2022-09-13	13:02:25	0.732175
2022-09-13	13:02:25	0.745255
2022-09-13	13:02:26	0.727341
2022-09-13	13:02:26	0.739198
2022-09-13	13:02:26	0.718791
2022-09-13	13:02:26	0.740114
2022-09-13	13:02:27	0.736756
2022-09-13	13:02:27	0.736756
2022-09-13	13:02:27	0.726272
2022-09-13	13:02:27	0.729377
2022-09-13	13:02:28	0.736247
2022-09-13	13:02:28	0.738231
2022-09-13	13:02:28	0.73813
2022-09-13	13:02:29	0.736857
2022-09-13	13:02:29	0.732175
2022-09-13	13:02:29	0.726832
2022-09-13	13:02:29	0.730038
2022-09-13	13:02:30	0.730954
2022-09-13	13:02:30	0.7393
2022-09-13	13:02:30	0.740114
2022-09-13	13:02:30	0.736196
2022-09-13	13:02:31	0.729326
2022-09-13	13:02:31	0.740827
2022-09-13	13:02:31	0.737163
2022-09-13	13:02:31	0.735026
2022-09-13	13:02:32	0.868715
2022-09-13	13:02:32	0.754211
2022-09-13	13:02:32	0.301234
2022-09-13	13:02:33	0.605305
2022-09-13	13:02:33	0.191005
2022-09-13	13:02:33	0.53355
2022-09-13	13:02:33	0.420878
2022-09-13	13:02:34	0.189733
2022-09-13	13:02:34	0.373753
2022-09-13	13:02:34	0.00688318
2022-09-13	13:02:34	0.0579773
2022-09-13	13:02:35	-0.0333204
2022-09-13	13:02:35	0.233448
2022-09-13	13:02:35	0.0598094
2022-09-13	13:02:35	0.041845
2022-09-13	13:02:36	0.101438
2022-09-13	13:02:36	0.358741
2022-09-13	13:02:36	0.663728
2022-09-13	13:02:36	0.475026
2022-09-13	13:02:37	0.684898
2022-09-13	13:02:37	0.234313
2022-09-13	13:02:37	0.566527
2022-09-13	13:02:38	0.386171
2022-09-13	13:02:38	0.446883
2022-09-13	13:02:38	0.749275
2022-09-13	13:02:38	0.407239
2022-09-13	13:02:39	0.409784
2022-09-13	13:02:39	0.148512
2022-09-13	13:02:39	0.553499
2022-09-13	13:02:39	0.406374
2022-09-13	13:02:40	0.640114
2022-09-13	13:02:40	0.408969
2022-09-13	13:02:40	0.536145
2022-09-13	13:02:40	0.343677
2022-09-13	13:02:41	0.441031
2022-09-13	13:02:41	0.369224
2022-09-13	13:02:41	0.376298
2022-09-13	13:02:42	0.397875
2022-09-13	13:02:42	0.325611
2022-09-13	13:02:42	0.341641
2022-09-13	13:02:42	0.464237
2022-09-13	13:02:43	0.321489
2022-09-13	13:02:43	0.173143
2022-09-13	13:02:43	-0.00914732
2022-09-13	13:02:43	0.217417
2022-09-13	13:02:44	0.191107
2022-09-13	13:02:44	0.32785
2022-09-13	13:02:44	0.581183
2022-09-13	13:02:44	0.487341
2022-09-13	13:02:45	0.60098
2022-09-13	13:02:45	0.440216
2022-09-13	13:02:45	0.446679
2022-09-13	13:02:46	0.548562
2022-09-13	13:02:46	0.733906
2022-09-13	13:02:46	0.239504
2022-09-13	13:02:46	-0.253117
2022-09-13	13:02:47	-1.04009
2022-09-13	13:02:47	-0.568282
2022-09-13	13:02:47	-0.09673
2022-09-13	13:02:47	1.09558
2022-09-13	13:02:48	0.714415
2022-09-13	13:02:48	0.732837
2022-09-13	13:02:48	0.729784
2022-09-13	13:02:48	0.673804
2022-09-13	13:02:49	0.712074
2022-09-13	13:02:49	0.620267
2022-09-13	13:02:49	0.420471
2022-09-13	13:02:50	0.157672
2022-09-13	13:02:50	0.160624
2022-09-13	13:02:50	0.731972
2022-09-13	13:02:50	0.731819
2022-09-13	13:02:51	0.736807
2022-09-13	13:02:51	0.730191
2022-09-13	13:02:51	0.726323
2022-09-13	13:02:51	0.735382
2022-09-13	13:02:52	0.53299
2022-09-13	13:02:52	0.729224
2022-09-13	13:02:52	0.738079
2022-09-13	13:02:52	0.736196
2022-09-13	13:02:53	0.713143
2022-09-13	13:02:53	0.693804
2022-09-13	13:02:53	0.666883
2022-09-13	13:02:54	0.625305
2022-09-13	13:02:54	0.554211
2022-09-13	13:02:54	0.713651
2022-09-13	13:02:54	0.73187
2022-09-13	13:02:55	0.733601
2022-09-13	13:02:55	0.744339
2022-09-13	13:02:55	0.733295
2022-09-13	13:02:55	0.733702
2022-09-13	13:02:56	0.734873
2022-09-13	13:02:56	0.741743
2022-09-13	13:02:56	0.731921
2022-09-13	13:02:56	0.728868
2022-09-13	13:02:57	0.737519
2022-09-13	13:02:57	0.737926
2022-09-13	13:02:57	0.726629
2022-09-13	13:02:58	0.731921
2022-09-13	13:02:58	0.731463
2022-09-13	13:02:58	0.731514
2022-09-13	13:02:58	0.735483
2022-09-13	13:02:59	0.730852
2022-09-13	13:02:59	0.719148
2022-09-13	13:02:59	0.681081
2022-09-13	13:02:59	0.505
2022-09-13	13:03:00	0.525407
2022-09-13	13:03:00	0.482557
2022-09-13	13:03:00	0.202659
2022-09-13	13:03:00	0.236654
2022-09-13	13:03:01	0.301387
2022-09-13	13:03:01	0.121489
2022-09-13	13:03:01	0.256603
2022-09-13	13:03:02	0.739555
2022-09-13	13:03:02	0.733906
2022-09-13	13:03:02	0.739606
2022-09-13	13:03:02	0.704084
2022-09-13	13:03:03	0.723321
2022-09-13	13:03:03	0.735178
2022-09-13	13:03:03	0.734059
2022-09-13	13:03:03	0.733142
2022-09-13	13:03:04	0.735687
2022-09-13	13:03:04	0.734211
2022-09-13	13:03:04	0.734262
2022-09-13	13:03:04	0.73584
2022-09-13	13:03:05	0.736756
2022-09-13	13:03:05	0.740165
2022-09-13	13:03:05	0.735076
2022-09-13	13:03:05	0.730242
2022-09-13	13:03:06	0.735585
2022-09-13	13:03:06	0.728868
2022-09-13	13:03:06	0.730801
2022-09-13	13:03:07	0.73299
2022-09-13	13:03:07	0.735382
2022-09-13	13:03:07	0.729224
2022-09-13	13:03:07	0.730954
2022-09-13	13:03:08	0.738333
2022-09-13	13:03:08	0.729784
2022-09-13	13:03:08	0.730852
2022-09-13	13:03:08	0.726476
2022-09-13	13:03:09	0.735941
2022-09-13	13:03:09	0.738181
2022-09-13	13:03:09	0.734262
2022-09-13	13:03:09	0.73355
2022-09-13	13:03:10	0.736654
2022-09-13	13:03:10	0.736145
2022-09-13	13:03:10	0.733193
2022-09-13	13:03:11	0.732023
2022-09-13	13:03:11	0.737519
2022-09-13	13:03:11	0.737417
2022-09-13	13:03:11	0.736298
2022-09-13	13:03:12	0.729784
2022-09-13	13:03:12	0.736756
2022-09-13	13:03:12	0.741794
2022-09-13	13:03:12	0.730547
2022-09-13	13:03:13	0.728512
2022-09-13	13:03:13	0.73645
2022-09-13	13:03:13	0.735127
2022-09-13	13:03:13	0.726069
2022-09-13	13:03:14	0.732786
2022-09-13	13:03:14	0.732786
2022-09-13	13:03:14	0.737722
2022-09-13	13:03:15	0.736857
2022-09-13	13:03:15	0.733753
2022-09-13	13:03:15	0.736857
2022-09-13	13:03:15	0.73874
2022-09-13	13:03:16	0.731361
2022-09-13	13:03:16	0.728257
2022-09-13	13:03:16	0.736501
2022-09-13	13:03:16	0.734517
2022-09-13	13:03:17	0.737417
2022-09-13	13:03:17	0.739046
2022-09-13	13:03:17	0.724796
2022-09-13	13:03:17	0.739606
2022-09-13	13:03:18	0.733448
2022-09-13	13:03:18	0.730547
2022-09-13	13:03:18	0.736807
2022-09-13	13:03:19	0.734975
2022-09-13	13:03:19	0.735789
2022-09-13	13:03:19	0.741438
2022-09-13	13:03:19	0.743524
2022-09-13	13:03:20	0.741743
2022-09-13	13:03:20	0.734873
2022-09-13	13:03:20	0.49869
2022-09-13	13:03:21	0.740165
2022-09-13	13:03:21	0.740623
2022-09-13	13:03:21	0.730242
2022-09-13	13:03:21	0.735534
2022-09-13	13:03:21	0.735687
2022-09-13	13:03:22	0.735026
2022-09-13	13:03:22	0.728664
2022-09-13	13:03:22	0.489326
2022-09-13	13:03:23	0.737875
2022-09-13	13:03:23	0.735178
2022-09-13	13:03:23	0.70103
2022-09-13	13:03:23	0.221387
2022-09-13	13:03:24	0.444695
2022-09-13	13:03:24	0.413295
2022-09-13	13:03:24	-0.243906
2022-09-13	13:03:24	-0.100649
2022-09-13	13:03:25	-0.0514374
2022-09-13	13:03:25	-0.0857376
2022-09-13	13:03:25	-0.214542
2022-09-13	13:03:25	-0.11271
2022-09-13	13:03:26	-0.177035
2022-09-13	13:03:26	-0.0755595
2022-09-13	13:03:26	-0.131692
2022-09-13	13:03:27	-0.00329491
2022-09-13	13:03:27	-0.19617
2022-09-13	13:03:27	-0.0472135
2022-09-13	13:03:27	-0.171437
2022-09-13	13:03:28	-0.0757631
2022-09-13	13:03:28	-0.207417
2022-09-13	13:03:28	-0.191844
2022-09-13	13:03:28	-0.255254
2022-09-13	13:03:29	-0.0256868
2022-09-13	13:03:29	0.117875
2022-09-13	13:03:29	0.353499
2022-09-13	13:03:30	1.01319
2022-09-13	13:03:30	0.48902
2022-09-13	13:03:30	0.22612
2022-09-13	13:03:30	0.0839824
2022-09-13	13:03:31	0.352125
2022-09-13	13:03:31	0.0798094
2022-09-13	13:03:31	0.911921
2022-09-13	13:03:31	0.592328
2022-09-13	13:03:32	1.18663
2022-09-13	13:03:32	0.295229
2022-09-13	13:03:32	0.711769
2022-09-13	13:03:32	0.701641
2022-09-13	13:03:33	0.674008
2022-09-13	13:03:33	0.71813
2022-09-13	13:03:33	0.61299
2022-09-13	13:03:33	0.685814
2022-09-13	13:03:34	0.185204
2022-09-13	13:03:34	0.605916
2022-09-13	13:03:34	0.295076
2022-09-13	13:03:34	0.347952
2022-09-13	13:03:35	0.279097
2022-09-13	13:03:35	0.276094
2022-09-13	13:03:35	0.31187
2022-09-13	13:03:36	-0.031641
2022-09-13	13:03:36	0.0503438
2022-09-13	13:03:36	0.00927507
2022-09-13	13:03:36	0.0853564
2022-09-13	13:03:37	-0.0898089
2022-09-13	13:03:37	-0.0262975
2022-09-13	13:03:37	-0.159275
2022-09-13	13:03:37	-0.194389
2022-09-13	13:03:38	-0.500954
2022-09-13	13:03:38	-0.621921
2022-09-13	13:03:38	-0.610521
2022-09-13	13:03:38	-0.7722
2022-09-13	13:03:39	-0.583295
2022-09-13	13:03:39	-0.453931
2022-09-13	13:03:39	-0.267366
2022-09-13	13:03:40	-0.0484348
2022-09-13	13:03:40	0.0151274
2022-09-13	13:03:40	0.363066
2022-09-13	13:03:40	0.23014
2022-09-13	13:03:41	0.634873
2022-09-13	13:03:41	0.443219
2022-09-13	13:03:41	0.621285
2022-09-13	13:03:41	0.510343
2022-09-13	13:03:42	0.511921
2022-09-13	13:03:42	0.545153
2022-09-13	13:03:42	0.411972
2022-09-13	13:03:42	0.992786
2022-09-13	13:03:43	0.690802
2022-09-13	13:03:43	0.622252
2022-09-13	13:03:43	0.163728
2022-09-13	13:03:44	0.477977
2022-09-13	13:03:44	0.161489
2022-09-13	13:03:44	0.411209
2022-09-13	13:03:44	0.178486
2022-09-13	13:03:45	0.378588
2022-09-13	13:03:45	0.130242
2022-09-13	13:03:45	0.468206
2022-09-13	13:03:45	0.277875
2022-09-13	13:03:46	0.393244
2022-09-13	13:03:46	0.336959
2022-09-13	13:03:46	0.416501
2022-09-13	13:03:46	0.420369
2022-09-13	13:03:47	0.503677
2022-09-13	13:03:47	0.654007
2022-09-13	13:03:47	0.398944
2022-09-13	13:03:48	0.607595
2022-09-13	13:03:48	0.42388
2022-09-13	13:03:48	0.475026
2022-09-13	13:03:48	0.391361
2022-09-13	13:03:49	0.53869
2022-09-13	13:03:49	0.32673
2022-09-13	13:03:49	0.52215
2022-09-13	13:03:49	0.285153
2022-09-13	13:03:50	0.449733
2022-09-13	13:03:50	0.226374
2022-09-13	13:03:50	0.343728
2022-09-13	13:03:50	0.33299
2022-09-13	13:03:51	0.310344
2022-09-13	13:03:51	0.40159
2022-09-13	13:03:51	0.494669
2022-09-13	13:03:52	0.737366
2022-09-13	13:03:52	0.734924
2022-09-13	13:03:52	0.732074
2022-09-13	13:03:52	0.729886
2022-09-13	13:03:53	0.73299
2022-09-13	13:03:53	0.739046
2022-09-13	13:03:53	0.73874
2022-09-13	13:03:53	0.733193
2022-09-13	13:03:54	0.71126
2022-09-13	13:03:54	0.71986
2022-09-13	13:03:54	0.715382
2022-09-13	13:03:54	0.728155
2022-09-13	13:03:55	0.728715
2022-09-13	13:03:55	0.724237
2022-09-13	13:03:55	0.71299
2022-09-13	13:03:56	0.737672
2022-09-13	13:03:56	0.745611
2022-09-13	13:03:56	0.741031
2022-09-13	13:03:56	0.736654
2022-09-13	13:03:57	0.740725
2022-09-13	13:03:57	0.737315
2022-09-13	13:03:57	0.735076
2022-09-13	13:03:57	0.736196
2022-09-13	13:03:58	0.738995
2022-09-13	13:03:58	0.735992
2022-09-13	13:03:58	0.732837
2022-09-13	13:03:58	0.737163
2022-09-13	13:03:59	0.73131
2022-09-13	13:03:59	0.73584
2022-09-13	13:03:59	0.743168
2022-09-13	13:04:00	0.737417
2022-09-13	13:04:00	0.724237
2022-09-13	13:04:00	0.740013
2022-09-13	13:04:00	0.739147
2022-09-13	13:04:01	0.740623
2022-09-13	13:04:01	0.743219
2022-09-13	13:04:01	0.730191
2022-09-13	13:04:01	0.711565
2022-09-13	13:04:02	0.637774
2022-09-13	13:04:02	0.5307
2022-09-13	13:04:02	0.517264
2022-09-13	13:04:02	0.563117
2022-09-13	13:04:03	0.587748
2022-09-13	13:04:03	0.601743
2022-09-13	13:04:03	0.587646
2022-09-13	13:04:04	0.606069
2022-09-13	13:04:04	0.650344
2022-09-13	13:04:04	0.648359
2022-09-13	13:04:04	0.629529
2022-09-13	13:04:05	0.580878
2022-09-13	13:04:05	0.507647
2022-09-13	13:04:05	0.519758
2022-09-13	13:04:05	0.520827
2022-09-13	13:04:06	0.534211
2022-09-13	13:04:06	0.657519
2022-09-13	13:04:06	0.814669
2022-09-13	13:04:06	1.36164
2022-09-13	13:04:07	1.02444
2022-09-13	13:04:07	0.849733
2022-09-13	13:04:07	0.758435
2022-09-13	13:04:07	0.749071
2022-09-13	13:04:08	0.736603
2022-09-13	13:04:08	0.741641
2022-09-13	13:04:08	0.735178
2022-09-13	13:04:09	0.739504
2022-09-13	13:04:09	0.739911
2022-09-13	13:04:09	0.721743
2022-09-13	13:04:09	0.680267
2022-09-13	13:04:10	0.66159
2022-09-13	13:04:10	0.678333
2022-09-13	13:04:10	0.733397
2022-09-13	13:04:10	0.705509
2022-09-13	13:04:11	0.707087
2022-09-13	13:04:11	0.696094
2022-09-13	13:04:11	0.706832
2022-09-13	13:04:11	0.681743
2022-09-13	13:04:12	0.663117
2022-09-13	13:04:12	0.686985
2022-09-13	13:04:12	0.693855
2022-09-13	13:04:13	0.708918
2022-09-13	13:04:13	0.687239
2022-09-13	13:04:13	0.722608
2022-09-13	13:04:13	0.712328
2022-09-13	13:04:14	0.711005
2022-09-13	13:04:14	0.693448
2022-09-13	13:04:14	0.715636
2022-09-13	13:04:14	0.706171
2022-09-13	13:04:15	0.630343
2022-09-13	13:04:15	0.438639
2022-09-13	13:04:15	0.463015
2022-09-13	13:04:15	0.389071
2022-09-13	13:04:16	0.706323
2022-09-13	13:04:16	1.00022
2022-09-13	13:04:16	0.721997
2022-09-13	13:04:17	0.669885
2022-09-13	13:04:17	0.704644
2022-09-13	13:04:17	0.180471
2022-09-13	13:04:17	0.715738
2022-09-13	13:04:18	0.726934
2022-09-13	13:04:18	0.571565
2022-09-13	13:04:18	0.732888
2022-09-13	13:04:18	0.734109
2022-09-13	13:04:19	0.739198
2022-09-13	13:04:19	0.739606
2022-09-13	13:04:19	0.732379
2022-09-13	13:04:19	0.741997
2022-09-13	13:04:20	0.741285
2022-09-13	13:04:20	0.73645
2022-09-13	13:04:20	0.729478
2022-09-13	13:04:21	0.710242
2022-09-13	13:04:21	0.621336
2022-09-13	13:04:21	0.52159
2022-09-13	13:04:21	0.134059
2022-09-13	13:04:22	0.33645
2022-09-13	13:04:22	0.32383
2022-09-13	13:04:22	0.330852
2022-09-13	13:04:22	0.481539
2022-09-13	13:04:23	0.626832
2022-09-13	13:04:23	0.422354
2022-09-13	13:04:23	0.774568
2022-09-13	13:04:23	0.734466
2022-09-13	13:04:24	0.815585
2022-09-13	13:04:24	0.788104
2022-09-13	13:04:24	0.817519
2022-09-13	13:04:25	0.782761
2022-09-13	13:04:25	0.870598
2022-09-13	13:04:25	0.773295
2022-09-13	13:04:25	0.824135
2022-09-13	13:04:26	0.70444
2022-09-13	13:04:26	1.29532e-05
2022-09-13	13:04:26	0.289275
2022-09-13	13:04:26	-0.0889946
2022-09-13	13:04:27	-0.18131
2022-09-13	13:04:27	-0.317035
2022-09-13	13:04:27	-0.240801
2022-09-13	13:04:27	-0.280343
2022-09-13	13:04:28	-0.28528
2022-09-13	13:04:28	-0.330725
2022-09-13	13:04:28	-0.201565
2022-09-13	13:04:29	-0.0755595
2022-09-13	13:04:29	-0.0235494
2022-09-13	13:04:29	0.0545168
2022-09-13	13:04:29	0.598283
2022-09-13	13:04:30	0.773601
2022-09-13	13:04:30	0.504135
2022-09-13	13:04:30	0.179351
2022-09-13	13:04:30	0.341285
2022-09-13	13:04:31	0.744033
2022-09-13	13:04:31	0.370903
2022-09-13	13:04:31	0.716552
2022-09-13	13:04:31	0.739249
2022-09-13	13:04:32	0.740165
2022-09-13	13:04:32	0.733397
2022-09-13	13:04:32	0.730547
2022-09-13	13:04:33	0.736501
2022-09-13	13:04:33	0.733804
2022-09-13	13:04:33	0.736196
2022-09-13	13:04:33	0.734059
2022-09-13	13:04:34	0.736959
2022-09-13	13:04:34	0.736094
2022-09-13	13:04:34	0.733448
2022-09-13	13:04:34	0.731005
2022-09-13	13:04:35	0.73584
2022-09-13	13:04:35	0.734669
2022-09-13	13:04:35	0.731361
2022-09-13	13:04:35	0.727392
2022-09-13	13:04:36	0.731259
2022-09-13	13:04:36	0.732379
2022-09-13	13:04:36	0.735789
2022-09-13	13:04:37	0.763321
2022-09-13	13:04:37	0.805865
2022-09-13	13:04:37	0.820878
2022-09-13	13:04:37	0.916349
2022-09-13	13:04:38	0.920522
2022-09-13	13:04:38	0.963219
2022-09-13	13:04:38	0.837672
2022-09-13	13:04:38	1.00154
2022-09-13	13:04:39	0.996908
2022-09-13	13:04:39	0.993092
2022-09-13	13:04:39	0.900216
2022-09-13	13:04:39	0.594211
2022-09-13	13:04:40	0.210242
2022-09-13	13:04:40	-0.192353
2022-09-13	13:04:40	-0.00700993
2022-09-13	13:04:40	-0.115712
2022-09-13	13:04:41	-0.0509794
2022-09-13	13:04:41	0.701132
2022-09-13	13:04:41	0.956145
2022-09-13	13:04:42	0.036247
2022-09-13	13:04:42	0.430547
2022-09-13	13:04:42	0.284542
2022-09-13	13:04:42	0.219657
2022-09-13	13:04:43	0.208664
2022-09-13	13:04:43	0.36444
2022-09-13	13:04:43	0.735992
2022-09-13	13:04:43	0.753092
2022-09-13	13:04:44	1.01833
2022-09-13	13:04:44	0.746527
2022-09-13	13:04:44	0.838689
2022-09-13	13:04:44	0.731259
2022-09-13	13:04:45	0.73645
2022-09-13	13:04:45	0.767239
2022-09-13	13:04:45	0.760165
2022-09-13	13:04:46	0.762048
2022-09-13	13:04:46	0.771972
2022-09-13	13:04:46	0.77701
2022-09-13	13:04:46	0.788359
2022-09-13	13:04:47	0.785102
2022-09-13	13:04:47	0.796349
2022-09-13	13:04:47	0.797366
2022-09-13	13:04:47	0.802659
2022-09-13	13:04:48	0.816043
2022-09-13	13:04:48	0.830903
2022-09-13	13:04:48	0.914873
2022-09-13	13:04:48	0.870242
2022-09-13	13:04:49	0.867748
2022-09-13	13:04:49	0.869784
2022-09-13	13:04:49	0.876756
2022-09-13	13:04:50	1.03915
2022-09-13	13:04:50	0.909478
2022-09-13	13:04:50	0.538232
2022-09-13	13:04:50	0.317876
2022-09-13	13:04:51	0.471311
2022-09-13	13:04:51	0.585254
2022-09-13	13:04:51	0.735076
2022-09-13	13:04:51	0.818944
2022-09-13	13:04:52	0.948766
2022-09-13	13:04:52	0.14383
2022-09-13	13:04:52	0.704389
2022-09-13	13:04:52	0.457214
2022-09-13	13:04:53	0.465051
2022-09-13	13:04:53	0.340267
2022-09-13	13:04:53	0.368206
2022-09-13	13:04:54	0.419351
2022-09-13	13:04:54	0.456247
2022-09-13	13:04:54	0.601234
2022-09-13	13:04:54	0.723066
2022-09-13	13:04:55	0.745763
2022-09-13	13:04:55	0.442201
2022-09-13	13:04:55	0.587494
2022-09-13	13:04:55	0.718028
2022-09-13	13:04:56	0.493855
2022-09-13	13:04:56	0.929885
2022-09-13	13:04:56	0.993346
2022-09-13	13:04:56	1.0281
2022-09-13	13:04:57	0.968002
2022-09-13	13:04:57	1.05966
2022-09-13	13:04:57	1.0935
2022-09-13	13:04:58	1.1221
2022-09-13	13:04:58	1.09523
2022-09-13	13:04:58	0.971107
2022-09-13	13:04:58	0.898537
2022-09-13	13:04:59	1.06149
2022-09-13	13:04:59	1.11589
2022-09-13	13:04:59	1.10307
2022-09-13	13:04:59	1.11238
2022-09-13	13:05:00	1.11726
2022-09-13	13:05:00	0.75014
2022-09-13	13:05:00	0.340318
2022-09-13	13:05:00	0.0247458
2022-09-13	13:05:01	0.245204
2022-09-13	13:05:01	0.30154
2022-09-13	13:05:01	0.517672
2022-09-13	13:05:02	0.86673
2022-09-13	13:05:02	0.583168
2022-09-13	13:05:02	1.39691
2022-09-13	13:05:02	3.17447
2022-09-13	13:05:03	6.03807
2022-09-13	13:05:03	4.35009
2022-09-13	13:05:03	2.20968
2022-09-13	13:05:03	0.484339
2022-09-13	13:05:04	0.503524
2022-09-13	13:05:04	0.429377
2022-09-13	13:05:04	0.428613
2022-09-13	13:05:04	0.470903
2022-09-13	13:05:05	0.451565
2022-09-13	13:05:05	0.496959
2022-09-13	13:05:05	0.560064
2022-09-13	13:05:06	0.524796
2022-09-13	13:05:06	0.538435
2022-09-13	13:05:06	0.438893
2022-09-13	13:05:06	0.249631
2022-09-13	13:05:07	0.358079
2022-09-13	13:05:07	0.535178
2022-09-13	13:05:07	0.496399
2022-09-13	13:05:07	0.429122
2022-09-13	13:05:08	0.419809
2022-09-13	13:05:08	0.470446
2022-09-13	13:05:08	0.561336
2022-09-13	13:05:08	0.490802
2022-09-13	13:05:09	0.340878
2022-09-13	13:05:09	0.626679
2022-09-13	13:05:09	0.474059
2022-09-13	13:05:10	0.566272
2022-09-13	13:05:10	0.669122
2022-09-13	13:05:10	4.34515
2022-09-13	13:05:10	2.7564
2022-09-13	13:05:11	0.297774
2022-09-13	13:05:11	0.0117687
2022-09-13	13:05:11	0.0953819
2022-09-13	13:05:11	0.299351
2022-09-13	13:05:12	0.45416
2022-09-13	13:05:12	0.481285
2022-09-13	13:05:12	0.743015
2022-09-13	13:05:12	1.31996
2022-09-13	13:05:13	0.7964
2022-09-13	13:05:13	0.418028
2022-09-13	13:05:13	0.20154
2022-09-13	13:05:13	0.61757
2022-09-13	13:05:14	0.439758
2022-09-13	13:05:14	0.289784
2022-09-13	13:05:14	0.317366
2022-09-13	13:05:15	0.502201
2022-09-13	13:05:15	0.69584
2022-09-13	13:05:15	0.550293
2022-09-13	13:05:15	0.933702
2022-09-13	13:05:16	1.03955
2022-09-13	13:05:16	1.34485
2022-09-13	13:05:16	1.67207
2022-09-13	13:05:16	1.39065
2022-09-13	13:05:17	0.830038
2022-09-13	13:05:17	0.836196
2022-09-13	13:05:17	0.759198
2022-09-13	13:05:17	0.681794
2022-09-13	13:05:18	-0.270369
2022-09-13	13:05:18	-0.391488
2022-09-13	13:05:18	-0.448638
2022-09-13	13:05:19	-0.478613
2022-09-13	13:05:19	-0.528587
2022-09-13	13:05:19	-0.412506
2022-09-13	13:05:19	-0.33444
2022-09-13	13:05:20	-0.216832
2022-09-13	13:05:20	-0.223142
2022-09-13	13:05:20	-0.0301142
2022-09-13	13:05:20	-0.0693509
2022-09-13	13:05:21	0.0595549
2022-09-13	13:05:21	-0.0895035
2022-09-13	13:05:21	0.0821503
2022-09-13	13:05:21	-0.0733712
2022-09-13	13:05:22	-0.189758
2022-09-13	13:05:22	-0.207468
2022-09-13	13:05:22	-0.184923
2022-09-13	13:05:23	-0.117493
2022-09-13	13:05:23	-0.123906
2022-09-13	13:05:23	-0.182023
2022-09-13	13:05:23	-0.322939
2022-09-13	13:05:24	-0.191692
2022-09-13	13:05:24	-0.234796
2022-09-13	13:05:24	-0.246094
2022-09-13	13:05:24	-0.260852
2022-09-13	13:05:25	-0.254745
2022-09-13	13:05:25	-0.204058
2022-09-13	13:05:25	-0.132404
2022-09-13	13:05:25	-0.381412
2022-09-13	13:05:26	-0.438002
2022-09-13	13:05:26	-0.339274
2022-09-13	13:05:26	-0.296119
2022-09-13	13:05:27	-0.279834
2022-09-13	13:05:27	-0.127264
2022-09-13	13:05:27	0.0546694
2022-09-13	13:05:27	0.16098
2022-09-13	13:05:28	0.31187
2022-09-13	13:05:28	0.150751
2022-09-13	13:05:28	0.27986
2022-09-13	13:05:28	0.238792
2022-09-13	13:05:29	0.301438
2022-09-13	13:05:29	0.160115
2022-09-13	13:05:29	0.42271
2022-09-13	13:05:29	0.623524
2022-09-13	13:05:30	0.734924
2022-09-13	13:05:30	0.736807
2022-09-13	13:05:30	0.727697
2022-09-13	13:05:31	0.73355
2022-09-13	13:05:31	0.63416
2022-09-13	13:05:31	0.563575
2022-09-13	13:05:31	0.711361
2022-09-13	13:05:32	-0.0199361
2022-09-13	13:05:32	-0.236832
2022-09-13	13:05:32	-0.374084
2022-09-13	13:05:32	-0.445737
2022-09-13	13:05:33	-0.367926
2022-09-13	13:05:33	-0.392455
2022-09-13	13:05:33	-0.301107
2022-09-13	13:05:33	-0.202124
2022-09-13	13:05:34	-0.146246
2022-09-13	13:05:34	-0.120954
2022-09-13	13:05:34	-0.168944
2022-09-13	13:05:35	0.101336
2022-09-13	13:05:35	0.0971122
2022-09-13	13:05:35	0.320827
2022-09-13	13:05:35	0.21986
2022-09-13	13:05:36	0.354517
2022-09-13	13:05:36	0.263168
2022-09-13	13:05:36	0.485153
2022-09-13	13:05:36	0.212481
2022-09-13	13:05:37	0.377316
2022-09-13	13:05:37	0.700776
2022-09-13	13:05:37	0.733295
2022-09-13	13:05:37	0.74098
2022-09-13	13:05:38	0.281641
2022-09-13	13:05:38	0.281132
2022-09-13	13:05:38	0.469275
2022-09-13	13:05:39	0.739402
2022-09-13	13:05:39	0.539198
2022-09-13	13:05:39	0.725509
2022-09-13	13:05:39	0.475738
2022-09-13	13:05:40	0.674211
2022-09-13	13:05:40	0.431718
2022-09-13	13:05:40	0.719809
2022-09-13	13:05:40	0.728206
2022-09-13	13:05:41	0.594466
2022-09-13	13:05:41	0.723321
2022-09-13	13:05:41	0.649733
2022-09-13	13:05:41	-0.0170354
2022-09-13	13:05:42	-0.495051
2022-09-13	13:05:42	-0.0512338
2022-09-13	13:05:42	0.765967
2022-09-13	13:05:43	0.84042
2022-09-13	13:05:43	0.335891
2022-09-13	13:05:43	0.289682
2022-09-13	13:05:43	0.398181
2022-09-13	13:05:44	0.402812
2022-09-13	13:05:44	0.431718
2022-09-13	13:05:44	0.444644
2022-09-13	13:05:44	0.402812
2022-09-13	13:05:45	0.463473
2022-09-13	13:05:45	0.388766
2022-09-13	13:05:45	0.468664
2022-09-13	13:05:45	0.416501
2022-09-13	13:05:46	0.494415
2022-09-13	13:05:46	0.428461
2022-09-13	13:05:46	0.853244
2022-09-13	13:05:46	2.24948
2022-09-13	13:05:47	4.37696
2022-09-13	13:05:47	1.21009
2022-09-13	13:05:47	1.01833
2022-09-13	13:05:48	0.482405
2022-09-13	13:05:48	0.740827
2022-09-13	13:05:48	0.133753
2022-09-13	13:05:48	-0.136984
2022-09-13	13:05:49	-0.485941
2022-09-13	13:05:49	-0.684109
2022-09-13	13:05:49	-0.406094
2022-09-13	13:05:49	-0.294491
2022-09-13	13:05:50	-0.343905
2022-09-13	13:05:50	-0.546806
2022-09-13	13:05:50	-0.703651
2022-09-13	13:05:50	-0.719732
2022-09-13	13:05:51	-0.712251
2022-09-13	13:05:51	-0.79047
2022-09-13	13:05:51	-0.767467
2022-09-13	13:05:52	-0.804312
2022-09-13	13:05:52	-0.581361
2022-09-13	13:05:52	-0.487061
2022-09-13	13:05:52	-0.150318
2022-09-13	13:05:53	0.117875
2022-09-13	13:05:53	0.430751
2022-09-13	13:05:53	0.889987
2022-09-13	13:05:53	0.937875
2022-09-13	13:05:54	1.96307
2022-09-13	13:05:54	1.1452
2022-09-13	13:05:54	0.0433718
2022-09-13	13:05:54	-0.0544399
2022-09-13	13:05:55	-0.262124
2022-09-13	13:05:55	0.33986
2022-09-13	13:05:55	0.0943641
2022-09-13	13:05:56	-0.0613102
2022-09-13	13:05:56	-0.150878
2022-09-13	13:05:56	-0.195661
2022-09-13	13:05:56	0.314771
2022-09-13	13:05:57	0.351463
2022-09-13	13:05:57	0.316043
2022-09-13	13:05:57	0.26897
2022-09-13	13:05:57	0.188766
2022-09-13	13:05:58	0.243066
2022-09-13	13:05:58	-0.0537784
2022-09-13	13:05:58	0.115636
2022-09-13	13:05:58	0.27584
2022-09-13	13:05:59	0.49472
2022-09-13	13:05:59	0.464542
2022-09-13	13:05:59	0.556094
2022-09-13	13:06:00	0.313092
2022-09-13	13:06:00	0.260776
2022-09-13	13:06:00	0.134873
2022-09-13	13:06:00	-0.624312
2022-09-13	13:06:01	0.430242
2022-09-13	13:06:01	0.465814
2022-09-13	13:06:01	0.194059
2022-09-13	13:06:01	0.372888
2022-09-13	13:06:02	0.327036
2022-09-13	13:06:02	-0.597544
2022-09-13	13:06:02	-1.07174
2022-09-13	13:06:02	0.236603
2022-09-13	13:06:03	1.14317
2022-09-13	13:06:03	0.938079
2022-09-13	13:06:03	0.458893
2022-09-13	13:06:04	0.699147
2022-09-13	13:06:04	0.444135
2022-09-13	13:06:04	-0.861411
2022-09-13	13:06:04	-1.05398
2022-09-13	13:06:05	-0.978511
2022-09-13	13:06:05	-1.01291
2022-09-13	13:06:05	-0.886908
2022-09-13	13:06:05	-0.94818
2022-09-13	13:06:06	-0.985635
2022-09-13	13:06:06	0.0858654
2022-09-13	13:06:06	-0.30645
2022-09-13	13:06:06	0.728359
2022-09-13	13:06:07	0.740064
2022-09-13	13:06:07	0.728868
2022-09-13	13:06:07	0.733601
2022-09-13	13:06:08	0.732888
2022-09-13	13:06:08	0.73528
2022-09-13	13:06:08	0.728308
2022-09-13	13:06:08	0.727443
2022-09-13	13:06:09	0.733295
2022-09-13	13:06:09	0.737672
2022-09-13	13:06:09	0.734415
2022-09-13	13:06:09	0.729784
2022-09-13	13:06:10	0.733499
2022-09-13	13:06:10	0.734822
2022-09-13	13:06:10	0.732583
2022-09-13	13:06:10	0.734975
2022-09-13	13:06:11	0.738842
2022-09-13	13:06:11	0.734771
2022-09-13	13:06:11	0.741336
2022-09-13	13:06:12	0.737468
2022-09-13	13:06:12	0.731361
2022-09-13	13:06:12	0.738537
2022-09-13	13:06:12	0.724491
2022-09-13	13:06:13	0.734262
2022-09-13	13:06:13	-0.154694
2022-09-13	13:06:13	0.407799
2022-09-13	13:06:13	1.02785
2022-09-13	13:06:14	0.73355
2022-09-13	13:06:14	0.732786
2022-09-13	13:06:14	0.72841
2022-09-13	13:06:14	0.732735
2022-09-13	13:06:15	0.72958
2022-09-13	13:06:15	0.733448
2022-09-13	13:06:15	0.735229
2022-09-13	13:06:16	0.736908
2022-09-13	13:06:16	0.735433
2022-09-13	13:06:16	-0.229962
2022-09-13	13:06:16	0.721437
2022-09-13	13:06:17	0.737265
2022-09-13	13:06:17	0.734822
2022-09-13	13:06:17	0.722608
2022-09-13	13:06:17	0.733244
2022-09-13	13:06:18	0.730954
2022-09-13	13:06:18	0.730954
2022-09-13	13:06:18	0.729377
2022-09-13	13:06:18	0.730089
2022-09-13	13:06:19	0.729682
2022-09-13	13:06:19	0.732532
2022-09-13	13:06:19	0.730089
2022-09-13	13:06:20	0.725611
2022-09-13	13:06:20	0.725458
2022-09-13	13:06:20	0.735483
2022-09-13	13:06:20	0.733499
2022-09-13	13:06:21	0.730038
2022-09-13	13:06:21	0.734109
2022-09-13	13:06:21	0.733244
2022-09-13	13:06:21	0.730649
2022-09-13	13:06:22	0.73187
2022-09-13	13:06:22	0.729529
2022-09-13	13:06:22	0.732379
2022-09-13	13:06:22	0.732226
2022-09-13	13:06:23	0.729682
2022-09-13	13:06:23	0.730547
2022-09-13	13:06:23	0.723117
2022-09-13	13:06:23	0.733702
2022-09-13	13:06:24	0.732583
2022-09-13	13:06:24	0.73131
2022-09-13	13:06:24	0.731819
2022-09-13	13:06:25	0.727697
2022-09-13	13:06:25	0.727596
2022-09-13	13:06:25	0.736552
2022-09-13	13:06:25	0.734415
2022-09-13	13:06:26	0.739097
2022-09-13	13:06:26	0.728359
2022-09-13	13:06:26	0.732684
2022-09-13	13:06:26	0.734822
2022-09-13	13:06:27	0.591565
2022-09-13	13:06:27	0.737824
2022-09-13	13:06:27	0.690802
2022-09-13	13:06:27	0.734669
2022-09-13	13:06:28	0.730598
2022-09-13	13:06:28	0.733804
2022-09-13	13:06:28	0.735331
2022-09-13	13:06:29	0.651667
2022-09-13	13:06:29	0.591921
2022-09-13	13:06:29	0.723219
2022-09-13	13:06:29	0.747188
2022-09-13	13:06:30	0.788766
2022-09-13	13:06:30	0.845509
2022-09-13	13:06:30	0.370344
2022-09-13	13:06:30	0.734975
2022-09-13	13:06:31	0.721387
2022-09-13	13:06:31	0.737519
2022-09-13	13:06:31	0.738791
2022-09-13	13:06:31	0.735585
2022-09-13	13:06:32	0.736196
2022-09-13	13:06:32	0.735076
2022-09-13	13:06:32	0.736196
2022-09-13	13:06:33	0.734618
2022-09-13	13:06:33	0.739198
2022-09-13	13:06:33	0.45416
2022-09-13	13:06:33	0.690344
2022-09-13	13:06:34	0.738028
2022-09-13	13:06:34	0.728104
2022-09-13	13:06:34	0.737061
2022-09-13	13:06:34	0.737417
2022-09-13	13:06:35	0.736298
2022-09-13	13:06:35	0.278741
2022-09-13	13:06:35	0.52612
2022-09-13	13:06:35	0.520369
2022-09-13	13:06:36	0.731158
2022-09-13	13:06:36	0.734415
2022-09-13	13:06:36	0.732074
2022-09-13	13:06:37	0.493193
2022-09-13	13:06:37	0.391361
2022-09-13	13:06:37	0.579656
2022-09-13	13:06:37	0.564898
2022-09-13	13:06:38	0.613041
2022-09-13	13:06:38	0.480318
2022-09-13	13:06:38	0.726476
2022-09-13	13:06:38	0.234415
2022-09-13	13:06:39	0.368104
2022-09-13	13:06:39	0.337417
2022-09-13	13:06:39	0.298334
2022-09-13	13:06:39	0.470038
2022-09-13	13:06:40	0.220827
2022-09-13	13:06:40	0.490547
2022-09-13	13:06:40	0.282659
2022-09-13	13:06:41	0.340522
2022-09-13	13:06:41	0.354211
2022-09-13	13:06:41	0.643728
2022-09-13	13:06:41	-0.606246
2022-09-13	13:06:42	0.192837
2022-09-13	13:06:42	0.547443
2022-09-13	13:06:42	0.226629
2022-09-13	13:06:42	-1.14197
2022-09-13	13:06:43	-1.42874
2022-09-13	13:06:43	-1.3124
2022-09-13	13:06:43	-1.26543
2022-09-13	13:06:43	-0.589809
2022-09-13	13:06:44	-0.908282
2022-09-13	13:06:44	-0.911335
2022-09-13	13:06:44	-0.753065
2022-09-13	13:06:45	-0.815355
2022-09-13	13:06:45	-0.711437
2022-09-13	13:06:45	-0.503956
2022-09-13	13:06:45	-0.531132
2022-09-13	13:06:46	-0.598765
2022-09-13	13:06:46	-0.501971
2022-09-13	13:06:46	-0.565025
2022-09-13	13:06:46	-0.444669
2022-09-13	13:06:47	-0.694236
2022-09-13	13:06:47	-0.738256
2022-09-13	13:06:47	-0.616425
2022-09-13	13:06:47	-0.686959
2022-09-13	13:06:48	-0.782836
2022-09-13	13:06:48	-0.541463
2022-09-13	13:06:48	-0.521971
2022-09-13	13:06:49	-0.517239
2022-09-13	13:06:49	-0.571946
2022-09-13	13:06:49	-0.626501
2022-09-13	13:06:49	-0.549351
2022-09-13	13:06:50	-0.465483
2022-09-13	13:06:50	-0.569554
2022-09-13	13:06:50	-0.665076
2022-09-13	13:06:50	-0.79907
2022-09-13	13:06:51	-1.08833
2022-09-13	13:06:51	-1.16528
2022-09-13	13:06:51	-1.15408
2022-09-13	13:06:51	-1.19673
2022-09-13	13:06:52	-1.14635
2022-09-13	13:06:52	-1.20436
2022-09-13	13:06:52	-1.20955
2022-09-13	13:06:53	-1.13892
2022-09-13	13:06:53	-0.899172
2022-09-13	13:06:53	-0.484211
2022-09-13	13:06:53	-0.338409
2022-09-13	13:06:54	-0.287468
2022-09-13	13:06:54	-0.53047
2022-09-13	13:06:54	-0.360648
2022-09-13	13:06:54	-0.525941
2022-09-13	13:06:55	0.325509
2022-09-13	13:06:55	0.370852
2022-09-13	13:06:55	0.308003
2022-09-13	13:06:55	0.33813
2022-09-13	13:06:56	0.323575
2022-09-13	13:06:56	0.393906
2022-09-13	13:06:56	0.231158
2022-09-13	13:06:57	0.485
2022-09-13	13:06:57	0.282761
2022-09-13	13:06:57	0.436094
2022-09-13	13:06:57	0.262659
2022-09-13	13:06:58	0.412176
2022-09-13	13:06:58	0.318893
2022-09-13	13:06:58	0.502354
2022-09-13	13:06:58	0.80271
2022-09-13	13:06:59	0.763779
2022-09-13	13:06:59	1.16093
2022-09-13	13:06:59	2.05411
2022-09-13	13:06:59	2.01604
2022-09-13	13:07:00	1.72485
2022-09-13	13:07:00	3.27106
2022-09-13	13:07:00	0.391107
2022-09-13	13:07:00	0.472227
2022-09-13	13:07:01	0.578282
2022-09-13	13:07:01	0.509835
2022-09-13	13:07:01	0.400318
2022-09-13	13:07:02	0.294059
2022-09-13	13:07:02	0.437163
2022-09-13	13:07:02	0.478384
2022-09-13	13:07:02	0.432837
2022-09-13	13:07:03	0.441234
2022-09-13	13:07:03	0.3764
2022-09-13	13:07:03	0.408308
2022-09-13	13:07:03	0.22556
2022-09-13	13:07:04	0.478893
2022-09-13	13:07:04	0.222761
2022-09-13	13:07:04	0.348053
2022-09-13	13:07:04	0.241183
2022-09-13	13:07:05	0.171107
2022-09-13	13:07:05	0.3393
2022-09-13	13:07:05	0.25416
2022-09-13	13:07:06	0.33528
2022-09-13	13:07:06	0.0611326
2022-09-13	13:07:06	-0.144771
2022-09-13	13:07:06	-0.249249
2022-09-13	13:07:07	-0.141666
2022-09-13	13:07:07	0.0941096
2022-09-13	13:07:07	-0.0241092
2022-09-13	13:07:07	0.180471
2022-09-13	13:07:08	0.328766
2022-09-13	13:07:08	0.465611
2022-09-13	13:07:08	0.325255
2022-09-13	13:07:08	0.51411
2022-09-13	13:07:09	0.408715
2022-09-13	13:07:09	0.480216
2022-09-13	13:07:09	0.344644
2022-09-13	13:07:10	0.520776
2022-09-13	13:07:10	0.370547
2022-09-13	13:07:10	0.370649
2022-09-13	13:07:10	0.172125
2022-09-13	13:07:11	0.208308
2022-09-13	13:07:11	0.209173
2022-09-13	13:07:11	0.155687
2022-09-13	13:07:11	0.223219
2022-09-13	13:07:12	0.0484099
2022-09-13	13:07:12	0.0545676
2022-09-13	13:07:12	-0.0440074
2022-09-13	13:07:12	-0.0122008
2022-09-13	13:07:13	-0.172404
2022-09-13	13:07:13	-0.31673
2022-09-13	13:07:13	-0.388231
2022-09-13	13:07:14	-0.216628
2022-09-13	13:07:14	-0.0518954
2022-09-13	13:07:14	0.280471
2022-09-13	13:07:14	0.0604709
2022-09-13	13:07:15	0.265102
2022-09-13	13:07:15	-0.0667554
2022-09-13	13:07:15	-0.31561
2022-09-13	13:07:15	-0.0334221
2022-09-13	13:07:16	0.133295
2022-09-13	13:07:16	0.0467305
2022-09-13	13:07:16	0.313041
2022-09-13	13:07:16	0.105255
2022-09-13	13:07:17	0.47584
2022-09-13	13:07:17	0.0537025
2022-09-13	13:07:17	0.525203
2022-09-13	13:07:18	0.2564
2022-09-13	13:07:18	0.696654
2022-09-13	13:07:18	0.92902
2022-09-13	13:07:18	2.08719
2022-09-13	13:07:19	0.37126
2022-09-13	13:07:19	0.640267
2022-09-13	13:07:19	0.58556
2022-09-13	13:07:19	0.500725
2022-09-13	13:07:20	0.244135
2022-09-13	13:07:20	0.511616
2022-09-13	13:07:20	0.227901
2022-09-13	13:07:20	0.463575
2022-09-13	13:07:21	0.231565
2022-09-13	13:07:21	0.475585
2022-09-13	13:07:21	0.304644
2022-09-13	13:07:22	0.399046
2022-09-13	13:07:22	0.291107
2022-09-13	13:07:22	0.376858
2022-09-13	13:07:22	0.217875
2022-09-13	13:07:23	0.522761
2022-09-13	13:07:23	0.296298
2022-09-13	13:07:23	0.572532
2022-09-13	13:07:23	0.217926
2022-09-13	13:07:24	0.443168
2022-09-13	13:07:24	0.290089
2022-09-13	13:07:24	0.500776
2022-09-13	13:07:24	0.269835
2022-09-13	13:07:25	0.445713
2022-09-13	13:07:25	0.372735
2022-09-13	13:07:25	0.493906
2022-09-13	13:07:26	0.282863
2022-09-13	13:07:26	0.529835
2022-09-13	13:07:26	0.80042
2022-09-13	13:07:26	1.25589
2022-09-13	13:07:27	2.62378
2022-09-13	13:07:27	2.0823
2022-09-13	13:07:27	1.65767
2022-09-13	13:07:27	0.903881
2022-09-13	13:07:28	0.441132
2022-09-13	13:07:28	0.571259
2022-09-13	13:07:28	0.443575
2022-09-13	13:07:28	0.511667
2022-09-13	13:07:29	0.419097
2022-09-13	13:07:29	0.601234
2022-09-13	13:07:29	0.354822
2022-09-13	13:07:30	0.680165
2022-09-13	13:07:30	0.755331
2022-09-13	13:07:30	1.54383
2022-09-13	13:07:30	2.24123
2022-09-13	13:07:31	2.12281
2022-09-13	13:07:31	1.33365
2022-09-13	13:07:31	2.32225
2022-09-13	13:07:31	1.0166
2022-09-13	13:07:32	1.14627
2022-09-13	13:07:32	0.581794
2022-09-13	13:07:32	0.802761
2022-09-13	13:07:32	1.04393
2022-09-13	13:07:33	1.29884
2022-09-13	13:07:33	1.83487
2022-09-13	13:07:33	2.21981
2022-09-13	13:07:34	2.11034
2022-09-13	13:07:34	2.74047
2022-09-13	13:07:34	1.35569
2022-09-13	13:07:34	1.30887
2022-09-13	13:07:35	0.581132
2022-09-13	13:07:35	1.01238
2022-09-13	13:07:35	1.05543
2022-09-13	13:07:35	1.75467
2022-09-13	13:07:36	1.75452
2022-09-13	13:07:36	1.45518
2022-09-13	13:07:36	0.969936
2022-09-13	13:07:36	0.899504
2022-09-13	13:07:37	0.800522
2022-09-13	13:07:37	0.948766
2022-09-13	13:07:37	0.978028
2022-09-13	13:07:38	1.11782
2022-09-13	13:07:38	0.888969
2022-09-13	13:07:38	0.757621
