# Supplementary material for: Comparing efficacy in reducing pulling and welfare impacts of four types of leash walking equipment
Source: PeerJ journal article supplement (doi:10.7717/peerj.18131), 2024-10-24
Supplement: Shelter1_Tension_files.zip [file Buzz_prong_2022913152025 copy.xlsx]

## Sheet: Averaged Newtons
Date	Time	Averaged Newtons	Impulse	Total steps
2022-09-13	15:20:33	3.81051	3.81051	0		Impulse	357.273
2022-09-13	15:20:34	5.57967	9.39018	0		Total steps	0
2022-09-13	15:20:35	0.881398	10.2716	0
2022-09-13	15:20:36	-1.10175	10.2716	0
2022-09-13	15:20:37	0.707638	10.9792	0
2022-09-13	15:20:38	0.113639	11.0929	0
2022-09-13	15:20:39	0.327315	11.4202	0
2022-09-13	15:20:40	-0.0919054	11.4202	0
2022-09-13	15:20:41	-1.34396	11.4202	0
2022-09-13	15:20:42	-1.18121	11.4202	0
2022-09-13	15:20:43	0.485322	11.9055	0
2022-09-13	15:20:44	1.24663	13.1521	0
2022-09-13	15:20:45	1.26762	14.4197	0
2022-09-13	15:20:46	1.42931	15.8491	0
2022-09-13	15:20:47	1.26691	17.116	0
2022-09-13	15:20:48	1.85562	18.9716	0
2022-09-13	15:20:49	1.88171	20.8533	0
2022-09-13	15:20:50	1.79383	22.6471	0
2022-09-13	15:20:51	1.46445	24.1116	0
2022-09-13	15:20:52	2.03016	26.1417	0
2022-09-13	15:20:53	1.3228	27.4645	0
2022-09-13	15:20:54	-0.0835869	27.4645	0
2022-09-13	15:20:55	-1.90697	27.4645	0
2022-09-13	15:20:56	-1.54945	27.4645	0
2022-09-13	15:20:57	-2.3683	27.4645	0
2022-09-13	15:20:58	-3.58018	27.4645	0
2022-09-13	15:20:59	-3.54537	27.4645	0
2022-09-13	15:21:00	-0.514542	27.4645	0
2022-09-13	15:21:01	1.28279	28.7473	0
2022-09-13	15:21:02	1.79937	30.5467	0
2022-09-13	15:21:03	1.7561	32.3028	0
2022-09-13	15:21:04	1.91142	34.2142	0
2022-09-13	15:21:05	1.92953	36.1438	0
2022-09-13	15:21:06	1.90396	38.0477	0
2022-09-13	15:21:07	1.78115	39.8289	0
2022-09-13	15:21:08	2.03525	41.8641	0
2022-09-13	15:21:09	1.95019	43.8143	0
2022-09-13	15:21:10	1.87747	45.6918	0
2022-09-13	15:21:11	1.69835	47.3901	0
2022-09-13	15:21:12	2.29184	49.682	0
2022-09-13	15:21:13	1.73995	51.4219	0
2022-09-13	15:21:14	1.68811	53.11	0
2022-09-13	15:21:15	1.73084	54.8409	0
2022-09-13	15:21:16	1.42997	56.2708	0
2022-09-13	15:21:17	1.51873	57.7896	0
2022-09-13	15:21:18	1.23406	59.0236	0
2022-09-13	15:21:19	1.46757	60.4912	0
2022-09-13	15:21:20	1.09011	61.5813	0
2022-09-13	15:21:21	0.926539	62.5078	0
2022-09-13	15:21:22	0.944367	63.4522	0
2022-09-13	15:21:23	1.097	64.5492	0
2022-09-13	15:21:24	0.782096	65.3313	0
2022-09-13	15:21:25	0.784152	66.1154	0
2022-09-13	15:21:26	-0.64346	66.1154	0
2022-09-13	15:21:27	-0.0221276	66.1154	0
2022-09-13	15:21:28	1.91871	68.0341	0
2022-09-13	15:21:29	1.79015	69.8243	0
2022-09-13	15:21:30	1.64312	71.4674	0
2022-09-13	15:21:31	1.82133	73.2887	0
2022-09-13	15:21:32	2.09263	75.3814	0
2022-09-13	15:21:33	1.78907	77.1704	0
2022-09-13	15:21:34	1.79858	78.969	0
2022-09-13	15:21:35	1.91176	80.8808	0
2022-09-13	15:21:36	2.00058	82.8814	0
2022-09-13	15:21:37	1.79513	84.6765	0
2022-09-13	15:21:38	1.79484	86.4713	0
2022-09-13	15:21:39	1.8953	88.3666	0
2022-09-13	15:21:40	2.00209	90.3687	0
2022-09-13	15:21:41	1.661	92.0297	0
2022-09-13	15:21:42	1.71143	93.7412	0
2022-09-13	15:21:43	1.71595	95.4571	0
2022-09-13	15:21:44	1.78417	97.2413	0
2022-09-13	15:21:45	1.81448	99.0557	0
2022-09-13	15:21:46	1.73746	100.793	0
2022-09-13	15:21:47	1.80147	102.595	0
2022-09-13	15:21:48	0.525693	103.12	0
2022-09-13	15:21:49	1.464	104.584	0
2022-09-13	15:21:50	1.63565	106.22	0
2022-09-13	15:21:51	1.9597	108.18	0
2022-09-13	15:21:52	1.72644	109.906	0
2022-09-13	15:21:53	1.88567	111.792	0
2022-09-13	15:21:54	1.80486	113.597	0
2022-09-13	15:21:55	1.83995	115.437	0
2022-09-13	15:21:56	1.88558	117.322	0
2022-09-13	15:21:57	1.66757	118.99	0
2022-09-13	15:21:58	0.580757	119.571	0
2022-09-13	15:21:59	-0.566664	119.571	0
2022-09-13	15:22:00	0.130976	119.702	0
2022-09-13	15:22:01	-2.34187	119.702	0
2022-09-13	15:22:02	-1.6275	119.702	0
2022-09-13	15:22:03	0.527843	120.229	0
2022-09-13	15:22:04	0.122297	120.352	0
2022-09-13	15:22:05	0.884038	121.236	0
2022-09-13	15:22:06	-0.232991	121.236	0
2022-09-13	15:22:07	1.26027	122.496	0
2022-09-13	15:22:08	1.54821	124.044	0
2022-09-13	15:22:09	1.15495	125.199	0
2022-09-13	15:22:10	1.36242	126.562	0
2022-09-13	15:22:11	-1.15438	126.562	0
2022-09-13	15:22:12	-0.623823	126.562	0
2022-09-13	15:22:13	0.427617	126.989	0
2022-09-13	15:22:14	0.623371	127.613	0
2022-09-13	15:22:15	-0.140746	127.613	0
2022-09-13	15:22:16	-0.445818	127.613	0
2022-09-13	15:22:17	-0.443857	127.613	0
2022-09-13	15:22:18	-0.479962	127.613	0
2022-09-13	15:22:19	-0.389302	127.613	0
2022-09-13	15:22:20	-0.702374	127.613	0
2022-09-13	15:22:21	-1.24866	127.613	0
2022-09-13	15:22:22	0.816636	128.429	0
2022-09-13	15:22:23	2.71069	131.14	0
2022-09-13	15:22:24	1.67943	132.819	0
2022-09-13	15:22:25	1.26672	134.086	0
2022-09-13	15:22:26	1.27244	135.358	0
2022-09-13	15:22:27	1.36474	136.723	0
2022-09-13	15:22:28	1.44397	138.167	0
2022-09-13	15:22:29	2.03793	140.205	0
2022-09-13	15:22:30	2.78533	142.99	0
2022-09-13	15:22:31	2.88012	145.871	0
2022-09-13	15:22:32	1.97039	147.841	0
2022-09-13	15:22:33	1.68992	149.531	0
2022-09-13	15:22:34	1.54499	151.076	0
2022-09-13	15:22:35	1.18771	152.264	0
2022-09-13	15:22:36	1.43265	153.696	0
2022-09-13	15:22:37	1.56443	155.261	0
2022-09-13	15:22:38	1.49252	156.753	0
2022-09-13	15:22:39	1.70452	158.458	0
2022-09-13	15:22:40	1.2666	159.724	0
2022-09-13	15:22:41	1.24435	160.969	0
2022-09-13	15:22:42	1.52637	162.495	0
2022-09-13	15:22:43	1.4893	163.984	0
2022-09-13	15:22:44	1.30515	165.289	0
2022-09-13	15:22:45	1.28894	166.578	0
2022-09-13	15:22:46	1.30911	167.887	0
2022-09-13	15:22:47	3.08624	170.974	0
2022-09-13	15:22:48	1.13684	172.111	0
2022-09-13	15:22:49	1.08189	173.192	0
2022-09-13	15:22:50	1.46734	174.66	0
2022-09-13	15:22:51	3.28573	177.946	0
2022-09-13	15:22:52	1.08121	179.027	0
2022-09-13	15:22:53	0.33124	179.358	0
2022-09-13	15:22:54	0.0050943	179.363	0
2022-09-13	15:22:55	1.07329	180.436	0
2022-09-13	15:22:56	1.72156	182.158	0
2022-09-13	15:22:57	2.10682	184.265	0
2022-09-13	15:22:58	1.60905	185.874	0
2022-09-13	15:22:59	1.58375	187.458	0
2022-09-13	15:23:00	1.38189	188.839	0
2022-09-13	15:23:01	1.00598	189.845	0
2022-09-13	15:23:02	1.24318	191.089	0
2022-09-13	15:23:03	1.16168	192.25	0
2022-09-13	15:23:04	1.43418	193.684	0
2022-09-13	15:23:05	1.31799	195.002	0
2022-09-13	15:23:06	2.3121	197.315	0
2022-09-13	15:23:07	1.91788	199.232	0
2022-09-13	15:23:08	1.45257	200.685	0
2022-09-13	15:23:09	2.22476	202.91	0
2022-09-13	15:23:10	2.07011	204.98	0
2022-09-13	15:23:11	1.6262	206.606	0
2022-09-13	15:23:12	0.631011	207.237	0
2022-09-13	15:23:13	-0.562325	207.237	0
2022-09-13	15:23:14	-0.795412	207.237	0
2022-09-13	15:23:15	-0.176568	207.237	0
2022-09-13	15:23:16	-0.482283	207.237	0
2022-09-13	15:23:17	-1.49452	207.237	0
2022-09-13	15:23:18	-1.364	207.237	0
2022-09-13	15:23:19	-1.3481	207.237	0
2022-09-13	15:23:20	-1.67322	207.237	0
2022-09-13	15:23:21	-0.939384	207.237	0
2022-09-13	15:23:22	-1.09394	207.237	0
2022-09-13	15:23:23	-1.21697	207.237	0
2022-09-13	15:23:24	-0.856929	207.237	0
2022-09-13	15:23:25	-0.614238	207.237	0
2022-09-13	15:23:26	-0.200224	207.237	0
2022-09-13	15:23:27	-0.266551	207.237	0
2022-09-13	15:23:28	-0.425974	207.237	0
2022-09-13	15:23:29	-0.152139	207.237	0
2022-09-13	15:23:30	1.61454	208.852	0
2022-09-13	15:23:31	1.85093	210.702	0
2022-09-13	15:23:32	2.13468	212.837	0
2022-09-13	15:23:33	1.85449	214.692	0
2022-09-13	15:23:34	0.923823	215.615	0
2022-09-13	15:23:35	-2.45239	215.615	0
2022-09-13	15:23:36	-1.3992	215.615	0
2022-09-13	15:23:37	-1.50614	215.615	0
2022-09-13	15:23:38	-1.20978	215.615	0
2022-09-13	15:23:39	-1.92897	215.615	0
2022-09-13	15:23:40	-1.56281	215.615	0
2022-09-13	15:23:41	-0.751344	215.615	0
2022-09-13	15:23:42	-0.0548936	215.615	0
2022-09-13	15:23:43	0.172892	215.788	0
2022-09-13	15:23:44	-0.160666	215.788	0
2022-09-13	15:23:45	0.408054	216.196	0
2022-09-13	15:23:46	-0.0970554	216.196	0
2022-09-13	15:23:47	-0.97283	216.196	0
2022-09-13	15:23:48	1.90735	218.104	0
2022-09-13	15:23:49	3.07418	221.178	0
2022-09-13	15:23:50	1.94266	223.121	0
2022-09-13	15:23:51	0.242331	223.363	0
2022-09-13	15:23:52	0.769042	224.132	0
2022-09-13	15:23:53	0.653743	224.786	0
2022-09-13	15:23:54	0.602431	225.388	0
2022-09-13	15:23:55	0.349745	225.738	0
2022-09-13	15:23:56	-0.631009	225.738	0
2022-09-13	15:23:57	0.0777786	225.816	0
2022-09-13	15:23:58	-0.145725	225.816	0
2022-09-13	15:23:59	0.579795	226.395	0
2022-09-13	15:24:00	0.923823	227.319	0
2022-09-13	15:24:01	0.665666	227.985	0
2022-09-13	15:24:02	0.272042	228.257	0
2022-09-13	15:24:03	-0.486982	228.257	0
2022-09-13	15:24:04	-0.71901	228.257	0
2022-09-13	15:24:05	-1.15844	228.257	0
2022-09-13	15:24:06	-0.544818	228.257	0
2022-09-13	15:24:07	1.26513	229.522	0
2022-09-13	15:24:08	1.33899	230.861	0
2022-09-13	15:24:09	1.02105	231.882	0
2022-09-13	15:24:10	1.1	232.982	0
2022-09-13	15:24:11	1.1292	234.111	0
2022-09-13	15:24:12	1.38466	235.496	0
2022-09-13	15:24:13	1.57175	237.068	0
2022-09-13	15:24:14	1.07306	238.141	0
2022-09-13	15:24:15	1.24844	239.389	0
2022-09-13	15:24:16	1.51035	240.9	0
2022-09-13	15:24:17	1.2198	242.119	0
2022-09-13	15:24:18	1.62088	243.74	0
2022-09-13	15:24:19	1.46536	245.206	0
2022-09-13	15:24:20	1.65178	246.857	0
2022-09-13	15:24:21	1.8464	248.704	0
2022-09-13	15:24:22	2.60182	251.306	0
2022-09-13	15:24:23	2.0451	253.351	0
2022-09-13	15:24:24	1.74516	255.096	0
2022-09-13	15:24:25	1.70554	256.801	0
2022-09-13	15:24:26	1.71988	258.521	0
2022-09-13	15:24:27	1.82897	260.35	0
2022-09-13	15:24:28	1.74549	262.096	0
2022-09-13	15:24:29	1.78568	263.882	0
2022-09-13	15:24:30	1.78152	265.663	0
2022-09-13	15:24:31	1.7747	267.438	0
2022-09-13	15:24:32	1.71709	269.155	0
2022-09-13	15:24:33	1.68528	270.84	0
2022-09-13	15:24:34	1.69015	272.53	0
2022-09-13	15:24:35	1.75908	274.289	0
2022-09-13	15:24:36	1.42591	275.715	0
2022-09-13	15:24:37	1.23327	276.948	0
2022-09-13	15:24:38	2.40367	279.352	0
2022-09-13	15:24:39	3.07956	282.432	0
2022-09-13	15:24:40	1.65008	284.082	0
2022-09-13	15:24:41	-0.0992638	284.082	0
2022-09-13	15:24:42	-1.13052	284.082	0
2022-09-13	15:24:43	0.616072	284.698	0
2022-09-13	15:24:44	-1.60361	284.698	0
2022-09-13	15:24:45	5.52471	290.223	0
2022-09-13	15:24:46	2.86139	293.084	0
2022-09-13	15:24:47	1.16395	294.248	0
2022-09-13	15:24:48	0.569835	294.818	0
2022-09-13	15:24:49	-0.293263	294.818	0
2022-09-13	15:24:50	0.0879652	294.906	0
2022-09-13	15:24:51	0.716298	295.622	0
2022-09-13	15:24:52	0.373344	295.995	0
2022-09-13	15:24:53	-0.764003	295.995	0
2022-09-13	15:24:54	-0.869209	295.995	0
2022-09-13	15:24:55	-0.774416	295.995	0
2022-09-13	15:24:56	-1.03576	295.995	0
2022-09-13	15:24:57	-0.76536	295.995	0
2022-09-13	15:24:58	-0.767418	295.995	0
2022-09-13	15:24:59	-0.391904	295.995	0
2022-09-13	15:25:00	0.411601	296.407	0
2022-09-13	15:25:01	2.1743	298.581	0
2022-09-13	15:25:02	1.7902	300.371	0
2022-09-13	15:25:03	1.88862	302.26	0
2022-09-13	15:25:04	2.16055	304.421	0
2022-09-13	15:25:05	2.14006	306.561	0
2022-09-13	15:25:06	2.71334	309.274	0
2022-09-13	15:25:07	2.30848	311.583	0
2022-09-13	15:25:08	2.14334	313.726	0
2022-09-13	15:25:09	2.38205	316.108	0
2022-09-13	15:25:10	2.46736	318.575	0
2022-09-13	15:25:11	2.22795	320.803	0
2022-09-13	15:25:12	1.66496	322.468	0
2022-09-13	15:25:13	1.87962	324.348	0
2022-09-13	15:25:14	1.85208	326.2	0
2022-09-13	15:25:15	2.22863	328.429	0
2022-09-13	15:25:16	2.24436	330.673	0
2022-09-13	15:25:17	1.90735	332.58	0
2022-09-13	15:25:18	1.78598	334.366	0
2022-09-13	15:25:19	1.40599	335.772	0
2022-09-13	15:25:20	1.17911	336.951	0
2022-09-13	15:25:21	1.19671	338.148	0
2022-09-13	15:25:22	1.3847	339.533	0
2022-09-13	15:25:23	1.41646	340.949	0
2022-09-13	15:25:24	2.09405	343.043	0
2022-09-13	15:25:25	1.67753	344.721	0
2022-09-13	15:25:26	0.319996	345.041	0
2022-09-13	15:25:27	3.44107	348.482	0
2022-09-13	15:25:28	0.837292	349.319	0
2022-09-13	15:25:29	0.883247	350.202	0
2022-09-13	15:25:30	1.41141	351.614	0
2022-09-13	15:25:31	1.75155	353.365	0
2022-09-13	15:25:32	1.97662	355.342	0
2022-09-13	15:25:33	1.93084	357.273	0

## Sheet: Buzz_prong_2022913152025 (4)
Date	Time	Lbs	Newtons	Averaged Newtons	Total Force x time	Total steps > 13.345		**GoPro Fitting: 1510
2022-09-13	15:20:33	0.367799	1.63604	3.81051	1.63604	FALSE	0
2022-09-13	15:20:33	0.483728	2.15172	3.81051	2.15172	FALSE	0
2022-09-13	15:20:33	0.881234	3.91991	3.81051	5.55595	FALSE	0
2022-09-13	15:20:33	1.6938	7.53436	3.81051	9.68608	FALSE	0
2022-09-13	15:20:34	2.23396	9.9371	5.57967	15.493	FALSE	0
2022-09-13	15:20:34	1.82424	8.11458	5.57967	17.8007	FALSE	0
2022-09-13	15:20:34	0.549987	2.44645	5.57967	17.9395	FALSE	0
2022-09-13	15:20:34	0.409275	1.82054	5.57967	19.6212	FALSE	0
2022-09-13	15:20:35	0.466425	2.07475	0.881398	20.0143	FALSE	0
2022-09-13	15:20:35	0.222507	0.989756	0.881398	20.611	FALSE	0
2022-09-13	15:20:35	-0.0944908	-0.420314	0.881398	20.0143	FALSE	0
2022-09-13	15:20:36	-0.294491	-1.30995	-1.10175	20.611	FALSE	0
2022-09-13	15:20:36	-0.477646	-2.12466	-1.10175	20.0143	FALSE	0
2022-09-13	15:20:36	-0.325992	-1.45008	-1.10175	20.611	FALSE	0
2022-09-13	15:20:36	0.107392	0.477701	-1.10175	20.492	FALSE	0
2022-09-13	15:20:37	0.0747712	0.332597	0.707638	20.9436	FALSE	0
2022-09-13	15:20:37	-0.101107	-0.449744	0.707638	20.492	FALSE	0
2022-09-13	15:20:37	0.468868	2.08562	0.707638	23.0292	FALSE	0
2022-09-13	15:20:37	0.193804	0.862079	0.707638	21.354	FALSE	0
2022-09-13	15:20:38	0.035789	0.159197	0.113639	23.1884	FALSE	0
2022-09-13	15:20:38	-0.0327097	-0.145499	0.113639	21.354	FALSE	0
2022-09-13	15:20:38	0.126934	0.564628	0.113639	23.753	FALSE	0
2022-09-13	15:20:38	-0.0278242	-0.123768	0.113639	21.354	FALSE	0
2022-09-13	15:20:39	-0.00263335	-0.0117137	0.327315	23.753	FALSE	0
2022-09-13	15:20:39	0.0560435	0.249293	0.327315	21.6033	FALSE	0
2022-09-13	15:20:39	0.167341	0.744366	0.327315	24.4974	FALSE	0
2022-09-13	15:20:40	0.215026	0.956479	-0.0919054	22.5598	FALSE	0
2022-09-13	15:20:40	-0.0545417	-0.242612	-0.0919054	24.4974	FALSE	0
2022-09-13	15:20:40	0.0154837	0.0688746	-0.0919054	22.6287	FALSE	0
2022-09-13	15:20:40	-0.258613	-1.15036	-0.0919054	24.4974	FALSE	0
2022-09-13	15:20:41	-0.370928	-1.64996	-1.34396	22.6287	FALSE	0
2022-09-13	15:20:41	-0.350368	-1.55851	-1.34396	24.4974	FALSE	0
2022-09-13	15:20:41	-0.241717	-1.07521	-1.34396	22.6287	FALSE	0
2022-09-13	15:20:41	-0.245534	-1.09218	-1.34396	24.4974	FALSE	0
2022-09-13	15:20:42	-0.416374	-1.85211	-1.18121	22.6287	FALSE	0
2022-09-13	15:20:42	-0.41846	-1.86139	-1.18121	24.4974	FALSE	0
2022-09-13	15:20:42	-0.249351	-1.10916	-1.18121	22.6287	FALSE	0
2022-09-13	15:20:42	0.0219977	0.0978502	-1.18121	24.5952	FALSE	0
2022-09-13	15:20:43	0.1764	0.784662	0.485322	23.4133	FALSE	0
2022-09-13	15:20:43	0.181132	0.805711	0.485322	25.4009	FALSE	0
2022-09-13	15:20:43	-0.030216	-0.134407	0.485322	23.4133	FALSE	0
2022-09-13	15:20:44	0.193957	0.86276	1.24663	26.2637	FALSE	0
2022-09-13	15:20:44	0.086934	0.3867	1.24663	23.8	FALSE	0
2022-09-13	15:20:44	0.4507	2.0048	1.24663	28.2685	FALSE	0
2022-09-13	15:20:44	0.389428	1.73225	1.24663	25.5323	FALSE	0
2022-09-13	15:20:45	0.402099	1.78862	1.26762	30.0571	FALSE	0
2022-09-13	15:20:45	0.205051	0.912108	1.26762	26.4444	FALSE	0
2022-09-13	15:20:45	0.214415	0.953761	1.26762	31.0109	FALSE	0
2022-09-13	15:20:45	0.318334	1.41601	1.26762	27.8604	FALSE	0
2022-09-13	15:20:46	0.14271	0.634803	1.42931	31.6457	FALSE	0
2022-09-13	15:20:46	0.473855	2.1078	1.42931	29.9682	FALSE	0
2022-09-13	15:20:46	0.187494	0.834011	1.42931	32.4797	FALSE	0
2022-09-13	15:20:46	0.481234	2.14063	1.42931	32.1088	FALSE	0
2022-09-13	15:20:47	0.0787916	0.350481	1.26691	32.8302	FALSE	0
2022-09-13	15:20:47	0.444644	1.97787	1.26691	34.0867	FALSE	0
2022-09-13	15:20:47	0.331005	1.47238	1.26691	34.3025	FALSE	0
2022-09-13	15:20:48	0.336705	1.49773	1.85562	35.5844	FALSE	0
2022-09-13	15:20:48	0.453244	2.01612	1.85562	36.3187	FALSE	0
2022-09-13	15:20:48	0.298588	1.32818	1.85562	36.9126	FALSE	0
2022-09-13	15:20:48	0.580114	2.58046	1.85562	38.8991	FALSE	0
2022-09-13	15:20:49	0.243473	1.08302	1.88171	37.9956	FALSE	0
2022-09-13	15:20:49	0.626781	2.78805	1.88171	41.6872	FALSE	0
2022-09-13	15:20:49	0.394313	1.75398	1.88171	39.7496	FALSE	0
2022-09-13	15:20:49	0.427545	1.90181	1.88171	43.589	FALSE	0
2022-09-13	15:20:50	0.484339	2.15444	1.79383	41.9041	FALSE	0
2022-09-13	15:20:50	0.397112	1.76643	1.79383	45.3554	FALSE	0
2022-09-13	15:20:50	0.506374	2.25245	1.79383	44.1565	FALSE	0
2022-09-13	15:20:50	0.225255	1.00198	1.79383	46.3574	FALSE	0
2022-09-13	15:20:51	0.39584	1.76078	1.46445	45.9173	FALSE	0
2022-09-13	15:20:51	0.120471	0.535879	1.46445	46.8933	FALSE	0
2022-09-13	15:20:51	0.471361	2.09671	1.46445	48.014	FALSE	0
2022-09-13	15:20:52	0.436349	1.94097	2.03016	48.8342	FALSE	0
2022-09-13	15:20:52	0.358384	1.59416	2.03016	49.6082	FALSE	0
2022-09-13	15:20:52	0.391005	1.73927	2.03016	50.5735	FALSE	0
2022-09-13	15:20:52	0.63986	2.84623	2.03016	52.4544	FALSE	0
2022-09-13	15:20:53	0.315891	1.40515	1.3228	51.9786	FALSE	0
2022-09-13	15:20:53	0.276451	1.22971	1.3228	53.6841	FALSE	0
2022-09-13	15:20:53	0.44902	1.99733	1.3228	53.976	FALSE	0
2022-09-13	15:20:53	0.148155	0.659023	1.3228	54.3431	FALSE	0
2022-09-13	15:20:54	0.18612	0.827899	-0.0835869	54.8039	FALSE	0
2022-09-13	15:20:54	0.0510053	0.226882	-0.0835869	54.57	FALSE	0
2022-09-13	15:20:54	-0.12243	-0.544593	-0.0835869	54.8039	FALSE	0
2022-09-13	15:20:54	-0.18986	-0.844535	-0.0835869	54.57	FALSE	0
2022-09-13	15:20:55	-0.484058	-2.15319	-1.90697	54.8039	FALSE	0
2022-09-13	15:20:55	-0.432811	-1.92523	-1.90697	54.57	FALSE	0
2022-09-13	15:20:55	-0.369249	-1.64249	-1.90697	54.8039	FALSE	0
2022-09-13	15:20:56	-0.435508	-1.93723	-1.54945	54.57	FALSE	0
2022-09-13	15:20:56	-0.17444	-0.775944	-1.54945	54.8039	FALSE	0
2022-09-13	15:20:56	-0.419681	-1.86683	-1.54945	54.57	FALSE	0
2022-09-13	15:20:56	-0.363702	-1.61782	-1.54945	54.8039	FALSE	0
2022-09-13	15:20:57	-0.408129	-1.81544	-2.3683	54.57	FALSE	0
2022-09-13	15:20:57	-0.48243	-2.14595	-2.3683	54.8039	FALSE	0
2022-09-13	15:20:57	-0.580343	-2.58148	-2.3683	54.57	FALSE	0
2022-09-13	15:20:57	-0.658765	-2.93032	-2.3683	54.8039	FALSE	0
2022-09-13	15:20:58	-0.79047	-3.51617	-3.58018	54.57	FALSE	0
2022-09-13	15:20:58	-0.79673	-3.54401	-3.58018	54.8039	FALSE	0
2022-09-13	15:20:58	-0.755814	-3.36201	-3.58018	54.57	FALSE	0
2022-09-13	15:20:58	-0.876424	-3.89851	-3.58018	54.8039	FALSE	0
2022-09-13	15:20:59	-0.720343	-3.20423	-3.54537	54.57	FALSE	0
2022-09-13	15:20:59	-0.902938	-4.01645	-3.54537	54.8039	FALSE	0
2022-09-13	15:20:59	-0.767824	-3.41543	-3.54537	54.57	FALSE	0
2022-09-13	15:21:00	-0.696679	-3.09897	-0.514542	54.8039	FALSE	0
2022-09-13	15:21:00	-0.324211	-1.44216	-0.514542	54.57	FALSE	0
2022-09-13	15:21:00	0.390954	1.73904	-0.514542	56.5429	FALSE	0
2022-09-13	15:21:00	0.167239	0.743913	-0.514542	55.3139	FALSE	0
2022-09-13	15:21:01	0.275433	1.22518	1.28279	57.7681	FALSE	0
2022-09-13	15:21:01	0.16612	0.738935	1.28279	56.0528	FALSE	0
2022-09-13	15:21:01	0.48612	2.16236	1.28279	59.9305	FALSE	0
2022-09-13	15:21:01	0.225865	1.00469	1.28279	57.0575	FALSE	0
2022-09-13	15:21:02	0.458333	2.03876	1.79937	61.9692	FALSE	0
2022-09-13	15:21:02	0.424796	1.88958	1.79937	58.9471	FALSE	0
2022-09-13	15:21:02	0.478232	2.12727	1.79937	64.0965	FALSE	0
2022-09-13	15:21:02	0.256705	1.14188	1.79937	60.089	FALSE	0
2022-09-13	15:21:03	0.326425	1.452	1.7561	65.5485	FALSE	0
2022-09-13	15:21:03	0.542506	2.41318	1.7561	62.5022	FALSE	0
2022-09-13	15:21:03	0.315433	1.40311	1.7561	66.9516	FALSE	0
2022-09-13	15:21:04	0.702048	3.12285	1.91142	65.625	FALSE	0
2022-09-13	15:21:04	0.209377	0.931351	1.91142	67.883	FALSE	0
2022-09-13	15:21:04	0.586985	2.61103	1.91142	68.236	FALSE	0
2022-09-13	15:21:04	0.22042	0.980472	1.91142	68.8634	FALSE	0
2022-09-13	15:21:05	0.614568	2.73372	1.92953	70.9698	FALSE	0
2022-09-13	15:21:05	0.195127	0.867964	1.92953	69.7314	FALSE	0
2022-09-13	15:21:05	0.534517	2.37764	1.92953	73.3474	FALSE	0
2022-09-13	15:21:05	0.390903	1.73881	1.92953	71.4702	FALSE	0
2022-09-13	15:21:06	0.302863	1.3472	1.90396	74.6946	FALSE	0
2022-09-13	15:21:06	0.524644	2.33372	1.90396	73.8039	FALSE	0
2022-09-13	15:21:06	0.255993	1.13871	1.90396	75.8333	FALSE	0
2022-09-13	15:21:06	0.628613	2.7962	1.90396	76.6001	FALSE	0
2022-09-13	15:21:07	0.179962	0.800507	1.78115	76.6338	FALSE	0
2022-09-13	15:21:07	0.659809	2.93496	1.78115	79.5351	FALSE	0
2022-09-13	15:21:07	0.361489	1.60798	1.78115	78.2418	FALSE	0
2022-09-13	15:21:08	0.468461	2.08381	2.03525	81.6189	FALSE	0
2022-09-13	15:21:08	0.478486	2.1284	2.03525	80.3702	FALSE	0
2022-09-13	15:21:08	0.40327	1.79383	2.03525	83.4127	FALSE	0
2022-09-13	15:21:08	0.479962	2.13497	2.03525	82.5052	FALSE	0
2022-09-13	15:21:09	0.247901	1.10271	1.95019	84.5154	FALSE	0
2022-09-13	15:21:09	0.638079	2.8383	1.95019	85.3435	FALSE	0
2022-09-13	15:21:09	0.208868	0.929087	1.95019	85.4445	FALSE	0
2022-09-13	15:21:09	0.658842	2.93066	1.95019	88.2741	FALSE	0
2022-09-13	15:21:10	0.248104	1.10362	1.87747	86.5481	FALSE	0
2022-09-13	15:21:10	0.657163	2.92319	1.87747	91.1973	FALSE	0
2022-09-13	15:21:10	0.267341	1.18919	1.87747	87.7373	FALSE	0
2022-09-13	15:21:10	0.515687	2.29388	1.87747	93.4912	FALSE	0
2022-09-13	15:21:11	0.451361	2.00774	1.69835	89.7451	FALSE	0
2022-09-13	15:21:11	0.311718	1.38658	1.69835	94.8778	FALSE	0
2022-09-13	15:21:11	0.530598	2.36021	1.69835	92.1053	FALSE	0
2022-09-13	15:21:11	0.23355	1.03888	1.69835	95.9167	FALSE	0
2022-09-13	15:21:12	0.653091	2.90508	2.29184	95.0103	FALSE	0
2022-09-13	15:21:12	0.233397	1.0382	2.29184	96.9548	FALSE	0
2022-09-13	15:21:12	0.659199	2.93225	2.29184	97.9426	FALSE	0
2022-09-13	15:21:13	0.199962	0.889471	1.73995	97.8443	FALSE	0
2022-09-13	15:21:13	0.636501	2.83128	1.73995	100.774	FALSE	0
2022-09-13	15:21:13	0.278537	1.23899	1.73995	99.0833	FALSE	0
2022-09-13	15:21:13	0.449631	2.00005	1.73995	102.774	FALSE	0
2022-09-13	15:21:14	0.564338	2.51029	1.68811	101.594	FALSE	0
2022-09-13	15:21:14	0.232736	1.03526	1.68811	103.809	FALSE	0
2022-09-13	15:21:14	0.541234	2.40752	1.68811	104.001	FALSE	0
2022-09-13	15:21:14	0.179708	0.799377	1.68811	104.609	FALSE	0
2022-09-13	15:21:15	0.559606	2.48924	1.73084	106.49	FALSE	0
2022-09-13	15:21:15	0.15416	0.685735	1.73084	105.294	FALSE	0
2022-09-13	15:21:15	0.58556	2.60469	1.73084	109.095	FALSE	0
2022-09-13	15:21:15	0.257112	1.14369	1.73084	106.438	FALSE	0
2022-09-13	15:21:16	0.364542	1.62156	1.42997	110.717	FALSE	0
2022-09-13	15:21:16	0.253651	1.12829	1.42997	107.566	FALSE	0
2022-09-13	15:21:16	0.346221	1.54006	1.42997	112.257	FALSE	0
2022-09-13	15:21:17	0.465916	2.07249	1.51873	109.639	FALSE	0
2022-09-13	15:21:17	0.24612	1.09479	1.51873	113.351	FALSE	0
2022-09-13	15:21:17	0.438283	1.94957	1.51873	111.588	FALSE	0
2022-09-13	15:21:17	0.215382	0.958062	1.51873	114.31	FALSE	0
2022-09-13	15:21:18	0.567443	2.5241	1.23406	114.112	FALSE	0
2022-09-13	15:21:18	0.200318	0.891055	1.23406	115.201	FALSE	0
2022-09-13	15:21:18	0.240776	1.07102	1.23406	115.183	FALSE	0
2022-09-13	15:21:18	0.101183	0.450082	1.23406	115.651	FALSE	0
2022-09-13	15:21:19	0.271463	1.20752	1.46757	116.391	FALSE	0
2022-09-13	15:21:19	0.400674	1.78228	1.46757	117.433	FALSE	0
2022-09-13	15:21:19	0.252786	1.12444	1.46757	117.515	FALSE	0
2022-09-13	15:21:19	0.394771	1.75602	1.46757	119.189	FALSE	0
2022-09-13	15:21:20	0.290547	1.29241	1.09011	118.808	FALSE	0
2022-09-13	15:21:20	0.385407	1.71437	1.09011	120.903	FALSE	0
2022-09-13	15:21:20	0.0592496	0.263554	1.09011	119.071	FALSE	0
2022-09-13	15:21:21	0.368155	1.63763	0.926539	122.541	FALSE	0
2022-09-13	15:21:21	0.0380282	0.169157	0.926539	119.241	FALSE	0
2022-09-13	15:21:21	0.315433	1.40311	0.926539	123.944	FALSE	0
2022-09-13	15:21:21	0.111565	0.496263	0.926539	119.737	FALSE	0
2022-09-13	15:21:22	0.278741	1.2399	0.944367	125.184	FALSE	0
2022-09-13	15:21:22	0.164746	0.732823	0.944367	120.47	FALSE	0
2022-09-13	15:21:22	0.125713	0.559197	0.944367	125.743	FALSE	0
2022-09-13	15:21:22	0.280013	1.24555	0.944367	121.715	FALSE	0
2022-09-13	15:21:23	0.11701	0.520484	1.097	126.264	FALSE	0
2022-09-13	15:21:23	0.350394	1.55862	1.097	123.274	FALSE	0
2022-09-13	15:21:23	0.101998	0.453708	1.097	126.717	FALSE	0
2022-09-13	15:21:23	0.417061	1.85517	1.097	125.129	FALSE	0
2022-09-13	15:21:24	0.0618959	0.275325	0.782096	126.993	FALSE	0
2022-09-13	15:21:24	0.304644	1.35512	0.782096	126.484	FALSE	0
2022-09-13	15:21:24	0.160929	0.715844	0.782096	127.708	FALSE	0
2022-09-13	15:21:25	0.22729	1.01103	0.784152	127.495	FALSE	0
2022-09-13	15:21:25	0.131209	0.583644	0.784152	128.292	FALSE	0
2022-09-13	15:21:25	0.158283	0.704074	0.784152	128.199	FALSE	0
2022-09-13	15:21:25	0.188359	0.837859	0.784152	129.13	FALSE	0
2022-09-13	15:21:26	-0.132303	-0.58851	-0.64346	128.199	FALSE	0
2022-09-13	15:21:26	-0.0711829	-0.316636	-0.64346	129.13	FALSE	0
2022-09-13	15:21:26	-0.10645	-0.473511	-0.64346	128.199	FALSE	0
2022-09-13	15:21:26	-0.268689	-1.19518	-0.64346	129.13	FALSE	0
2022-09-13	15:21:27	-0.287162	-1.27735	-0.0221276	128.199	FALSE	0
2022-09-13	15:21:27	-0.118257	-0.526031	-0.0221276	129.13	FALSE	0
2022-09-13	15:21:27	0.113244	0.503732	-0.0221276	128.703	FALSE	0
2022-09-13	15:21:27	0.272277	1.21114	-0.0221276	130.341	FALSE	0
2022-09-13	15:21:28	0.126018	0.560553	1.91871	129.263	FALSE	0
2022-09-13	15:21:28	0.434415	1.93236	1.91871	132.274	FALSE	0
2022-09-13	15:21:28	0.733601	3.2632	1.91871	132.527	FALSE	0
2022-09-13	15:21:29	0.245255	1.09094	1.79015	133.364	FALSE	0
2022-09-13	15:21:29	0.567188	2.52297	1.79015	135.05	FALSE	0
2022-09-13	15:21:29	0.364593	1.62178	1.79015	134.986	FALSE	0
2022-09-13	15:21:29	0.432735	1.92489	1.79015	136.975	FALSE	0
2022-09-13	15:21:30	0.388308	1.72727	1.64312	136.714	FALSE	0
2022-09-13	15:21:30	0.301947	1.34312	1.64312	138.318	FALSE	0
2022-09-13	15:21:30	0.542761	2.41431	1.64312	139.128	FALSE	0
2022-09-13	15:21:30	0.244542	1.08777	1.64312	139.405	FALSE	0
2022-09-13	15:21:31	0.559046	2.48675	1.82133	141.615	FALSE	0
2022-09-13	15:21:31	0.270954	1.20526	1.82133	140.611	FALSE	0
2022-09-13	15:21:31	0.598079	2.66038	1.82133	144.275	FALSE	0
2022-09-13	15:21:31	0.209733	0.932934	1.82133	141.544	FALSE	0
2022-09-13	15:21:32	0.60098	2.67328	2.09263	146.948	FALSE	0
2022-09-13	15:21:32	0.381641	1.69762	2.09263	143.241	FALSE	0
2022-09-13	15:21:32	0.428715	1.90701	2.09263	148.855	FALSE	0
2022-09-13	15:21:33	0.419962	1.86807	1.78907	145.109	FALSE	0
2022-09-13	15:21:33	0.345458	1.53667	1.78907	150.392	FALSE	0
2022-09-13	15:21:33	0.586679	2.60967	1.78907	147.719	FALSE	0
2022-09-13	15:21:33	0.256705	1.14188	1.78907	151.534	FALSE	0
2022-09-13	15:21:34	0.602659	2.68075	1.79858	150.4	FALSE	0
2022-09-13	15:21:34	0.225153	1.00153	1.79858	152.535	FALSE	0
2022-09-13	15:21:34	0.586476	2.60876	1.79858	153.008	FALSE	0
2022-09-13	15:21:34	0.203066	0.903278	1.79858	153.439	FALSE	0
2022-09-13	15:21:35	0.585051	2.60242	1.91176	155.611	FALSE	0
2022-09-13	15:21:35	0.321183	1.42869	1.91176	154.867	FALSE	0
2022-09-13	15:21:35	0.507443	2.25721	1.91176	157.868	FALSE	0
2022-09-13	15:21:35	0.305458	1.35874	1.91176	156.226	FALSE	0
2022-09-13	15:21:36	0.493244	2.19405	2.00058	160.062	FALSE	0
2022-09-13	15:21:36	0.424237	1.88709	2.00058	158.113	FALSE	0
2022-09-13	15:21:36	0.431769	1.92059	2.00058	161.983	FALSE	0
2022-09-13	15:21:37	0.410445	1.82574	1.79513	159.939	FALSE	0
2022-09-13	15:21:37	0.358944	1.59665	1.79513	163.579	FALSE	0
2022-09-13	15:21:37	0.568104	2.52704	1.79513	162.466	FALSE	0
2022-09-13	15:21:37	0.276756	1.23107	1.79513	164.81	FALSE	0
2022-09-13	15:21:38	0.524084	2.33123	1.79484	164.797	FALSE	0
2022-09-13	15:21:38	0.305611	1.35942	1.79484	166.17	FALSE	0
2022-09-13	15:21:38	0.516705	2.29841	1.79484	167.096	FALSE	0
2022-09-13	15:21:38	0.267596	1.19032	1.79484	167.36	FALSE	0
2022-09-13	15:21:39	0.584847	2.60152	1.8953	169.697	FALSE	0
2022-09-13	15:21:39	0.289428	1.28743	1.8953	168.648	FALSE	0
2022-09-13	15:21:39	0.574669	2.55624	1.8953	172.253	FALSE	0
2022-09-13	15:21:39	0.255382	1.13599	1.8953	169.784	FALSE	0
2022-09-13	15:21:40	0.559148	2.4872	2.00209	174.74	FALSE	0
2022-09-13	15:21:40	0.295127	1.31278	2.00209	171.096	FALSE	0
2022-09-13	15:21:40	0.495993	2.20628	2.00209	176.947	FALSE	0
2022-09-13	15:21:41	0.261998	1.16542	1.661	172.262	FALSE	0
2022-09-13	15:21:41	0.507545	2.25766	1.661	179.204	FALSE	0
2022-09-13	15:21:41	0.334618	1.48845	1.661	173.75	FALSE	0
2022-09-13	15:21:41	0.389479	1.73248	1.661	180.937	FALSE	0
2022-09-13	15:21:42	0.309733	1.37775	1.71143	175.128	FALSE	0
2022-09-13	15:21:42	0.442405	1.96791	1.71143	182.905	FALSE	0
2022-09-13	15:21:42	0.417519	1.85721	1.71143	176.985	FALSE	0
2022-09-13	15:21:42	0.369326	1.64284	1.71143	184.548	FALSE	0
2022-09-13	15:21:43	0.337672	1.50203	1.71595	178.487	FALSE	0
2022-09-13	15:21:43	0.428257	1.90497	1.71595	186.453	FALSE	0
2022-09-13	15:21:43	0.428308	1.9052	1.71595	180.392	FALSE	0
2022-09-13	15:21:43	0.348817	1.55161	1.71595	188.004	FALSE	0
2022-09-13	15:21:44	0.357723	1.59122	1.78417	181.984	FALSE	0
2022-09-13	15:21:44	0.400267	1.78047	1.78417	189.785	FALSE	0
2022-09-13	15:21:44	0.445305	1.98081	1.78417	183.965	FALSE	0
2022-09-13	15:21:45	0.391972	1.74357	1.81448	191.528	FALSE	0
2022-09-13	15:21:45	0.378639	1.68426	1.81448	185.649	FALSE	0
2022-09-13	15:21:45	0.412379	1.83434	1.81448	193.363	FALSE	0
2022-09-13	15:21:45	0.448664	1.99575	1.81448	187.645	FALSE	0
2022-09-13	15:21:46	0.312634	1.39066	1.73746	194.753	FALSE	0
2022-09-13	15:21:46	0.381641	1.69762	1.73746	189.342	FALSE	0
2022-09-13	15:21:46	0.361132	1.60639	1.73746	196.36	FALSE	0
2022-09-13	15:21:46	0.506984	2.25517	1.73746	191.597	FALSE	0
2022-09-13	15:21:47	0.307137	1.36621	1.80147	197.726	FALSE	0
2022-09-13	15:21:47	0.466018	2.07294	1.80147	193.67	FALSE	0
2022-09-13	15:21:47	0.293194	1.30419	1.80147	199.03	FALSE	0
2022-09-13	15:21:47	0.553601	2.46253	1.80147	196.133	FALSE	0
2022-09-13	15:21:48	0.171158	0.761345	0.525693	199.791	FALSE	0
2022-09-13	15:21:48	0.304339	1.35376	0.525693	197.487	FALSE	0
2022-09-13	15:21:48	-0.120954	-0.538028	0.525693	199.791	FALSE	0
2022-09-13	15:21:49	0.206832	0.92003	1.464	198.407	FALSE	0
2022-09-13	15:21:49	0.42897	1.90814	1.464	201.7	FALSE	0
2022-09-13	15:21:49	0.302761	1.34674	1.464	199.753	FALSE	0
2022-09-13	15:21:49	0.377926	1.68109	1.464	203.381	FALSE	0
2022-09-13	15:21:50	0.340675	1.51539	1.63565	201.269	FALSE	0
2022-09-13	15:21:50	0.386171	1.71777	1.63565	205.098	FALSE	0
2022-09-13	15:21:50	0.413244	1.83819	1.63565	203.107	FALSE	0
2022-09-13	15:21:50	0.330751	1.47125	1.63565	206.57	FALSE	0
2022-09-13	15:21:51	0.557315	2.47905	1.9597	205.586	FALSE	0
2022-09-13	15:21:51	0.35986	1.60073	1.9597	208.17	FALSE	0
2022-09-13	15:21:51	0.504237	2.24295	1.9597	207.829	FALSE	0
2022-09-13	15:21:51	0.340827	1.51607	1.9597	209.686	FALSE	0
2022-09-13	15:21:52	0.386069	1.71731	1.72644	209.546	FALSE	0
2022-09-13	15:21:52	0.410496	1.82597	1.72644	211.512	FALSE	0
2022-09-13	15:21:52	0.367799	1.63604	1.72644	211.182	FALSE	0
2022-09-13	15:21:53	0.450547	2.00412	1.88567	213.517	FALSE	0
2022-09-13	15:21:53	0.347748	1.54685	1.88567	212.729	FALSE	0
2022-09-13	15:21:53	0.360216	1.60231	1.88567	215.119	FALSE	0
2022-09-13	15:21:53	0.537163	2.38941	1.88567	215.119	FALSE	0
2022-09-13	15:21:54	0.400929	1.78341	1.80486	216.902	FALSE	0
2022-09-13	15:21:54	0.4193	1.86513	1.80486	216.984	FALSE	0
2022-09-13	15:21:54	0.390852	1.73859	1.80486	218.641	FALSE	0
2022-09-13	15:21:54	0.411921	1.83231	1.80486	218.816	FALSE	0
2022-09-13	15:21:55	0.397621	1.7687	1.83995	220.41	FALSE	0
2022-09-13	15:21:55	0.421387	1.87441	1.83995	220.69	FALSE	0
2022-09-13	15:21:55	0.40841	1.81669	1.83995	222.226	FALSE	0
2022-09-13	15:21:55	0.427137	1.89999	1.83995	222.59	FALSE	0
2022-09-13	15:21:56	0.416349	1.852	1.88558	224.078	FALSE	0
2022-09-13	15:21:56	0.42902	1.90837	1.88558	224.499	FALSE	0
2022-09-13	15:21:56	0.426323	1.89637	1.88558	225.975	FALSE	0
2022-09-13	15:21:57	0.371158	1.65099	1.66757	226.15	FALSE	0
2022-09-13	15:21:57	0.380878	1.69422	1.66757	227.669	FALSE	0
2022-09-13	15:21:57	0.330191	1.46876	1.66757	227.618	FALSE	0
2022-09-13	15:21:57	0.417316	1.85631	1.66757	229.525	FALSE	0
2022-09-13	15:21:58	0.620776	2.76134	0.580757	230.38	FALSE	0
2022-09-13	15:21:58	0.538435	2.39507	0.580757	231.92	FALSE	0
2022-09-13	15:21:58	-0.172557	-0.767568	0.580757	230.38	FALSE	0
2022-09-13	15:21:58	-0.464414	-2.06581	0.580757	231.92	FALSE	0
2022-09-13	15:21:59	-0.427519	-1.90169	-0.566664	230.38	FALSE	0
2022-09-13	15:21:59	-0.359631	-1.59971	-0.566664	231.92	FALSE	0
2022-09-13	15:21:59	0.307748	1.36892	-0.566664	231.749	FALSE	0
2022-09-13	15:21:59	-0.0301652	-0.134181	-0.566664	231.92	FALSE	0
2022-09-13	15:22:00	0.497621	2.21352	0.130976	233.962	FALSE	0
2022-09-13	15:22:00	-0.147112	-0.654384	0.130976	231.92	FALSE	0
2022-09-13	15:22:00	-0.262175	-1.16621	0.130976	233.962	FALSE	0
2022-09-13	15:22:01	-0.180089	-0.801072	-2.34187	231.92	FALSE	0
2022-09-13	15:22:01	-0.561361	-2.49705	-2.34187	233.962	FALSE	0
2022-09-13	15:22:01	-0.646908	-2.87758	-2.34187	231.92	FALSE	0
2022-09-13	15:22:01	-0.717544	-3.19178	-2.34187	233.962	FALSE	0
2022-09-13	15:22:02	-0.604923	-2.69082	-1.6275	231.92	FALSE	0
2022-09-13	15:22:02	-0.434185	-1.93134	-1.6275	233.962	FALSE	0
2022-09-13	15:22:02	-0.244007	-1.08539	-1.6275	231.92	FALSE	0
2022-09-13	15:22:02	-0.180394	-0.802429	-1.6275	233.962	FALSE	0
2022-09-13	15:22:03	0.00459311	0.0204311	0.527843	231.941	FALSE	0
2022-09-13	15:22:03	0.0708017	0.31494	0.527843	234.277	FALSE	0
2022-09-13	15:22:03	0.109428	0.486758	0.527843	232.427	FALSE	0
2022-09-13	15:22:03	0.289835	1.28924	0.527843	235.566	FALSE	0
2022-09-13	15:22:04	0.153041	0.680757	0.122297	233.108	FALSE	0
2022-09-13	15:22:04	-0.174491	-0.776171	0.122297	235.566	FALSE	0
2022-09-13	15:22:04	0.103931	0.462306	0.122297	233.57	FALSE	0
2022-09-13	15:22:05	0.228054	1.01443	0.884038	236.581	FALSE	0
2022-09-13	15:22:05	0.169122	0.752288	0.884038	234.323	FALSE	0
2022-09-13	15:22:05	0.309326	1.37594	0.884038	237.957	FALSE	0
2022-09-13	15:22:05	0.0884607	0.393491	0.884038	234.716	FALSE	0
2022-09-13	15:22:06	-0.352353	-1.56734	-0.232991	237.957	FALSE	0
2022-09-13	15:22:06	0.0527356	0.234578	-0.232991	234.951	FALSE	0
2022-09-13	15:22:06	0.0735498	0.327164	-0.232991	238.284	FALSE	0
2022-09-13	15:22:06	0.0165524	0.0736284	-0.232991	235.024	FALSE	0
2022-09-13	15:22:07	0.315026	1.4013	1.26027	239.685	FALSE	0
2022-09-13	15:22:07	0.384339	1.70962	1.26027	236.734	FALSE	0
2022-09-13	15:22:07	0.223931	0.99609	1.26027	240.681	FALSE	0
2022-09-13	15:22:07	0.209987	0.934064	1.26027	237.668	FALSE	0
2022-09-13	15:22:08	0.372735	1.658	1.54821	242.339	FALSE	0
2022-09-13	15:22:08	0.248359	1.10475	1.54821	238.773	FALSE	0
2022-09-13	15:22:08	0.423066	1.88188	1.54821	244.221	FALSE	0
2022-09-13	15:22:09	0.144237	0.641595	1.15495	239.414	FALSE	0
2022-09-13	15:22:09	0.320522	1.42575	1.15495	245.647	FALSE	0
2022-09-13	15:22:09	0.245814	1.09343	1.15495	240.508	FALSE	0
2022-09-13	15:22:09	0.328003	1.45902	1.15495	247.106	FALSE	0
2022-09-13	15:22:10	0.0874938	0.38919	1.36242	240.897	FALSE	0
2022-09-13	15:22:10	0.406425	1.80786	1.36242	248.914	FALSE	0
2022-09-13	15:22:10	0.306985	1.36553	1.36242	242.263	FALSE	0
2022-09-13	15:22:10	0.424237	1.88709	1.36242	250.801	FALSE	0
2022-09-13	15:22:11	0.168868	0.751159	-1.15438	243.014	FALSE	0
2022-09-13	15:22:11	-0.262023	-1.16553	-1.15438	250.801	FALSE	0
2022-09-13	15:22:11	-0.516882	-2.29919	-1.15438	243.014	FALSE	0
2022-09-13	15:22:11	-0.428028	-1.90395	-1.15438	250.801	FALSE	0
2022-09-13	15:22:12	-0.285992	-1.27215	-0.623823	243.014	FALSE	0
2022-09-13	15:22:12	-0.133219	-0.592585	-0.623823	250.801	FALSE	0
2022-09-13	15:22:12	-0.00151375	-0.00673346	-0.623823	243.014	FALSE	0
2022-09-13	15:22:13	0.0888679	0.395302	0.427617	251.196	FALSE	0
2022-09-13	15:22:13	0.0874429	0.388964	0.427617	243.403	FALSE	0
2022-09-13	15:22:13	0.109021	0.484947	0.427617	251.681	FALSE	0
2022-09-13	15:22:13	0.0991987	0.441256	0.427617	243.844	FALSE	0
2022-09-13	15:22:14	0.109835	0.488568	0.623371	252.17	FALSE	0
2022-09-13	15:22:14	0.16159	0.718785	0.623371	244.563	FALSE	0
2022-09-13	15:22:14	0.218741	0.973004	0.623371	253.143	FALSE	0
2022-09-13	15:22:14	0.0703946	0.313129	0.623371	244.876	FALSE	0
2022-09-13	15:22:15	0.101387	0.45099	-0.140746	253.594	FALSE	0
2022-09-13	15:22:15	0.00281194	0.0125081	-0.140746	244.888	FALSE	0
2022-09-13	15:22:15	-0.125534	-0.5584	-0.140746	253.594	FALSE	0
2022-09-13	15:22:15	-0.105229	-0.46808	-0.140746	244.888	FALSE	0
2022-09-13	15:22:16	-0.164923	-0.73361	-0.445818	253.594	FALSE	0
2022-09-13	15:22:16	-0.0210048	-0.0934336	-0.445818	244.888	FALSE	0
2022-09-13	15:22:16	-0.114745	-0.510409	-0.445818	253.594	FALSE	0
2022-09-13	15:22:17	-0.0380023	-0.169042	-0.443857	244.888	FALSE	0
2022-09-13	15:22:17	-0.121565	-0.540745	-0.443857	253.594	FALSE	0
2022-09-13	15:22:17	-0.10589	-0.47102	-0.443857	244.888	FALSE	0
2022-09-13	15:22:17	-0.133677	-0.594622	-0.443857	253.594	FALSE	0
2022-09-13	15:22:18	-0.116679	-0.519012	-0.479962	244.888	FALSE	0
2022-09-13	15:22:18	-0.102735	-0.456986	-0.479962	253.594	FALSE	0
2022-09-13	15:22:18	-0.144516	-0.642836	-0.479962	244.888	FALSE	0
2022-09-13	15:22:18	-0.0676715	-0.301016	-0.479962	253.594	FALSE	0
2022-09-13	15:22:19	-0.0580023	-0.258006	-0.389302	244.888	FALSE	0
2022-09-13	15:22:19	-0.0616664	-0.274304	-0.389302	253.594	FALSE	0
2022-09-13	15:22:19	-0.116934	-0.520146	-0.389302	244.888	FALSE	0
2022-09-13	15:22:19	-0.113473	-0.504751	-0.389302	253.594	FALSE	0
2022-09-13	15:22:20	-0.116628	-0.518785	-0.702374	244.888	FALSE	0
2022-09-13	15:22:20	-0.153219	-0.681549	-0.702374	253.594	FALSE	0
2022-09-13	15:22:20	-0.203855	-0.906788	-0.702374	244.888	FALSE	0
2022-09-13	15:22:21	-0.123906	-0.551159	-1.24866	253.594	FALSE	0
2022-09-13	15:22:21	-0.235509	-1.04759	-1.24866	244.888	FALSE	0
2022-09-13	15:22:21	-0.333269	-1.48245	-1.24866	253.594	FALSE	0
2022-09-13	15:22:21	-0.430165	-1.91346	-1.24866	244.888	FALSE	0
2022-09-13	15:22:22	-0.270369	-1.20266	0.816636	253.594	FALSE	0
2022-09-13	15:22:22	0.24785	1.10249	0.816636	245.991	FALSE	0
2022-09-13	15:22:22	0.437723	1.94708	0.816636	255.541	FALSE	0
2022-09-13	15:22:22	0.319148	1.41963	0.816636	247.411	FALSE	0
2022-09-13	15:22:23	0.823779	3.66433	2.71069	259.205	FALSE	0
2022-09-13	15:22:23	0.911717	4.0555	2.71069	251.466	FALSE	0
2022-09-13	15:22:23	0.359453	1.59892	2.71069	260.804	FALSE	0
2022-09-13	15:22:23	0.342608	1.52399	2.71069	252.99	FALSE	0
2022-09-13	15:22:24	0.506781	2.25426	1.67943	263.058	FALSE	0
2022-09-13	15:22:24	0.330649	1.47079	1.67943	254.461	FALSE	0
2022-09-13	15:22:24	0.295229	1.31324	1.67943	264.372	FALSE	0
2022-09-13	15:22:25	0.234618	1.04363	1.26672	255.504	FALSE	0
2022-09-13	15:22:25	0.365305	1.62495	1.26672	265.997	FALSE	0
2022-09-13	15:22:25	0.293397	1.30509	1.26672	256.81	FALSE	0
2022-09-13	15:22:25	0.245763	1.0932	1.26672	267.09	FALSE	0
2022-09-13	15:22:26	0.261845	1.16474	1.27244	257.974	FALSE	0
2022-09-13	15:22:26	0.304746	1.35557	1.27244	268.445	FALSE	0
2022-09-13	15:22:26	0.30729	1.36689	1.27244	259.341	FALSE	0
2022-09-13	15:22:26	0.270344	1.20254	1.27244	269.648	FALSE	0
2022-09-13	15:22:27	0.325356	1.44725	1.36474	260.788	FALSE	0
2022-09-13	15:22:27	0.307596	1.36825	1.36474	271.016	FALSE	0
2022-09-13	15:22:27	0.340827	1.51607	1.36474	262.304	FALSE	0
2022-09-13	15:22:27	0.253448	1.12739	1.36474	272.143	FALSE	0
2022-09-13	15:22:28	0.327138	1.45518	1.44397	263.76	FALSE	0
2022-09-13	15:22:28	0.302048	1.34357	1.44397	273.487	FALSE	0
2022-09-13	15:22:28	0.35584	1.58285	1.44397	265.342	FALSE	0
2022-09-13	15:22:28	0.313448	1.39428	1.44397	274.881	FALSE	0
2022-09-13	15:22:29	0.337875	1.50294	2.03793	266.845	FALSE	0
2022-09-13	15:22:29	0.442048	1.96632	2.03793	276.848	FALSE	0
2022-09-13	15:22:29	0.594517	2.64453	2.03793	269.49	FALSE	0
2022-09-13	15:22:30	0.775534	3.44973	2.78533	280.297	FALSE	0
2022-09-13	15:22:30	0.536145	2.38488	2.78533	271.875	FALSE	0
2022-09-13	15:22:30	0.588359	2.61714	2.78533	282.915	FALSE	0
2022-09-13	15:22:30	0.604644	2.68958	2.78533	274.564	FALSE	0
2022-09-13	15:22:31	0.617875	2.74843	2.88012	285.663	FALSE	0
2022-09-13	15:22:31	0.783219	3.48391	2.88012	278.048	FALSE	0
2022-09-13	15:22:31	0.469682	2.08924	2.88012	287.752	FALSE	0
2022-09-13	15:22:31	0.719148	3.19891	2.88012	281.247	FALSE	0
2022-09-13	15:22:32	0.505916	2.25042	1.97039	290.003	FALSE	0
2022-09-13	15:22:32	0.399046	1.77504	1.97039	283.022	FALSE	0
2022-09-13	15:22:32	0.445916	1.98352	1.97039	291.986	FALSE	0
2022-09-13	15:22:32	0.42098	1.8726	1.97039	284.895	FALSE	0
2022-09-13	15:22:33	0.385254	1.71369	1.68992	293.7	FALSE	0
2022-09-13	15:22:33	0.343321	1.52716	1.68992	286.422	FALSE	0
2022-09-13	15:22:33	0.411158	1.82891	1.68992	295.529	FALSE	0
2022-09-13	15:22:34	0.326527	1.45246	1.54499	287.874	FALSE	0
2022-09-13	15:22:34	0.324491	1.4434	1.54499	296.972	FALSE	0
2022-09-13	15:22:34	0.336807	1.49818	1.54499	289.373	FALSE	0
2022-09-13	15:22:34	0.401489	1.7859	1.54499	298.758	FALSE	0
2022-09-13	15:22:35	0.31416	1.39745	1.18771	290.77	FALSE	0
2022-09-13	15:22:35	0.241387	1.07374	1.18771	299.832	FALSE	0
2022-09-13	15:22:35	0.270191	1.20186	1.18771	291.972	FALSE	0
2022-09-13	15:22:35	0.242303	1.07781	1.18771	300.91	FALSE	0
2022-09-13	15:22:36	0.368715	1.64012	1.43265	293.612	FALSE	0
2022-09-13	15:22:36	0.216552	0.963267	1.43265	301.873	FALSE	0
2022-09-13	15:22:36	0.364186	1.61997	1.43265	295.232	FALSE	0
2022-09-13	15:22:36	0.338842	1.50724	1.43265	303.38	FALSE	0
2022-09-13	15:22:37	0.40327	1.79383	1.56443	297.026	FALSE	0
2022-09-13	15:22:37	0.278842	1.24034	1.56443	304.62	FALSE	0
2022-09-13	15:22:37	0.37299	1.65913	1.56443	298.685	FALSE	0
2022-09-13	15:22:38	0.362659	1.61318	1.49252	306.234	FALSE	0
2022-09-13	15:22:38	0.331209	1.47328	1.49252	300.158	FALSE	0
2022-09-13	15:22:38	0.288715	1.28426	1.49252	307.518	FALSE	0
2022-09-13	15:22:38	0.359555	1.59937	1.49252	301.758	FALSE	0
2022-09-13	15:22:39	0.386425	1.7189	1.70452	309.237	FALSE	0
2022-09-13	15:22:39	0.397112	1.76643	1.70452	303.524	FALSE	0
2022-09-13	15:22:39	0.333193	1.48211	1.70452	310.719	FALSE	0
2022-09-13	15:22:39	0.416043	1.85064	1.70452	305.375	FALSE	0
2022-09-13	15:22:40	0.270903	1.20503	1.2666	311.924	FALSE	0
2022-09-13	15:22:40	0.295687	1.31527	1.2666	306.69	FALSE	0
2022-09-13	15:22:40	0.177316	0.788737	1.2666	312.713	FALSE	0
2022-09-13	15:22:40	0.395076	1.75738	1.2666	308.447	FALSE	0
2022-09-13	15:22:41	0.291005	1.29445	1.24435	314.007	FALSE	0
2022-09-13	15:22:41	0.327799	1.45812	1.24435	309.906	FALSE	0
2022-09-13	15:22:41	0.22042	0.980472	1.24435	314.988	FALSE	0
2022-09-13	15:22:42	0.42215	1.87781	1.52637	311.783	FALSE	0
2022-09-13	15:22:42	0.261132	1.16157	1.52637	316.149	FALSE	0
2022-09-13	15:22:42	0.323066	1.43706	1.52637	313.22	FALSE	0
2022-09-13	15:22:42	0.366222	1.62903	1.52637	317.778	FALSE	0
2022-09-13	15:22:43	0.341387	1.51856	1.4893	314.739	FALSE	0
2022-09-13	15:22:43	0.380013	1.69037	1.4893	319.469	FALSE	0
2022-09-13	15:22:43	0.311005	1.38341	1.4893	316.122	FALSE	0
2022-09-13	15:22:43	0.306832	1.36485	1.4893	320.833	FALSE	0
2022-09-13	15:22:44	0.297163	1.32184	1.30515	317.444	FALSE	0
2022-09-13	15:22:44	0.29187	1.2983	1.30515	322.132	FALSE	0
2022-09-13	15:22:44	0.296654	1.31958	1.30515	318.764	FALSE	0
2022-09-13	15:22:44	0.287952	1.28087	1.30515	323.413	FALSE	0
2022-09-13	15:22:45	0.278893	1.24057	1.28894	320.004	FALSE	0
2022-09-13	15:22:45	0.275941	1.22744	1.28894	324.64	FALSE	0
2022-09-13	15:22:45	0.314466	1.39881	1.28894	321.403	FALSE	0
2022-09-13	15:22:46	0.300471	1.33656	1.30911	325.977	FALSE	0
2022-09-13	15:22:46	0.287392	1.27838	1.30911	322.682	FALSE	0
2022-09-13	15:22:46	0.28785	1.28041	1.30911	327.257	FALSE	0
2022-09-13	15:22:46	0.301489	1.34108	1.30911	324.023	FALSE	0
2022-09-13	15:22:47	0.527392	2.34595	3.08624	329.603	FALSE	0
2022-09-13	15:22:47	1.39218	6.1927	3.08624	330.215	FALSE	0
2022-09-13	15:22:47	0.419606	1.86649	3.08624	331.469	FALSE	0
2022-09-13	15:22:47	0.436094	1.93983	3.08624	332.155	FALSE	0
2022-09-13	15:22:48	0.252226	1.12195	1.13684	332.591	FALSE	0
2022-09-13	15:22:48	0.314262	1.3979	1.13684	333.553	FALSE	0
2022-09-13	15:22:48	0.250344	1.11358	1.13684	333.705	FALSE	0
2022-09-13	15:22:48	0.205458	0.913918	1.13684	334.467	FALSE	0
2022-09-13	15:22:49	0.304288	1.35353	1.08189	335.058	FALSE	0
2022-09-13	15:22:49	0.200878	0.893546	1.08189	335.361	FALSE	0
2022-09-13	15:22:49	0.224491	0.998581	1.08189	336.057	FALSE	0
2022-09-13	15:22:50	0.31131	1.38477	1.46734	336.745	FALSE	0
2022-09-13	15:22:50	0.317417	1.41193	1.46734	337.469	FALSE	0
2022-09-13	15:22:50	0.281132	1.25053	1.46734	337.996	FALSE	0
2022-09-13	15:22:50	0.409631	1.82212	1.46734	339.291	FALSE	0
2022-09-13	15:22:51	0.888257	3.95114	3.28573	341.947	FALSE	0
2022-09-13	15:22:51	0.790445	3.51606	3.28573	342.807	FALSE	0
2022-09-13	15:22:51	0.824746	3.66864	3.28573	345.616	FALSE	0
2022-09-13	15:22:51	0.451209	2.00707	3.28573	344.814	FALSE	0
2022-09-13	15:22:52	0.309529	1.37685	1.08121	346.992	FALSE	0
2022-09-13	15:22:52	0.362608	1.61295	1.08121	346.427	FALSE	0
2022-09-13	15:22:52	0.174771	0.777416	1.08121	347.77	FALSE	0
2022-09-13	15:22:52	0.125356	0.557609	1.08121	346.985	FALSE	0
2022-09-13	15:22:53	0.105764	0.470459	0.33124	348.24	FALSE	0
2022-09-13	15:22:53	0.116705	0.519127	0.33124	347.504	FALSE	0
2022-09-13	15:22:53	0.000929014	0.00413244	0.33124	348.244	FALSE	0
2022-09-13	15:22:54	-0.013931	-0.0619679	0.0050943	347.504	FALSE	0
2022-09-13	15:22:54	0.0151783	0.0675161	0.0050943	348.312	FALSE	0
2022-09-13	15:22:54	0.0393004	0.174816	0.0050943	347.679	FALSE	0
2022-09-13	15:22:54	-0.0359667	-0.159987	0.0050943	348.312	FALSE	0
2022-09-13	15:22:55	0.188766	0.839669	1.07329	348.518	FALSE	0
2022-09-13	15:22:55	0.16383	0.728749	1.07329	349.041	FALSE	0
2022-09-13	15:22:55	0.218181	0.970513	1.07329	349.489	FALSE	0
2022-09-13	15:22:55	0.394364	1.75421	1.07329	350.795	FALSE	0
2022-09-13	15:22:56	0.471209	2.09603	1.72156	351.585	FALSE	0
2022-09-13	15:22:56	0.439097	1.95319	1.72156	352.748	FALSE	0
2022-09-13	15:22:56	0.409936	1.82348	1.72156	353.408	FALSE	0
2022-09-13	15:22:56	0.22785	1.01352	1.72156	353.762	FALSE	0
2022-09-13	15:22:57	0.591107	2.62936	2.10682	356.038	FALSE	0
2022-09-13	15:22:57	0.306476	1.36327	2.10682	355.125	FALSE	0
2022-09-13	15:22:57	0.52332	2.32783	2.10682	358.366	FALSE	0
2022-09-13	15:22:58	0.25416	1.13055	1.60905	356.255	FALSE	0
2022-09-13	15:22:58	0.475076	2.11323	1.60905	360.479	FALSE	0
2022-09-13	15:22:58	0.268919	1.19621	1.60905	357.452	FALSE	0
2022-09-13	15:22:58	0.448766	1.9962	1.60905	362.475	FALSE	0
2022-09-13	15:22:59	0.279911	1.2451	1.58375	358.697	FALSE	0
2022-09-13	15:22:59	0.42841	1.90565	1.58375	364.381	FALSE	0
2022-09-13	15:22:59	0.268257	1.19326	1.58375	359.89	FALSE	0
2022-09-13	15:22:59	0.447596	1.991	1.58375	366.372	FALSE	0
2022-09-13	15:23:00	0.283219	1.25981	1.38189	361.15	FALSE	0
2022-09-13	15:23:00	0.352939	1.56994	1.38189	367.942	FALSE	0
2022-09-13	15:23:00	0.246476	1.09637	1.38189	362.246	FALSE	0
2022-09-13	15:23:00	0.360013	1.60141	1.38189	369.543	FALSE	0
2022-09-13	15:23:01	0.241692	1.07509	1.00598	363.321	FALSE	0
2022-09-13	15:23:01	0.194364	0.86457	1.00598	370.408	FALSE	0
2022-09-13	15:23:01	0.242405	1.07827	1.00598	364.4	FALSE	0
2022-09-13	15:23:02	0.251361	1.1181	1.24318	371.526	FALSE	0
2022-09-13	15:23:02	0.33528	1.49139	1.24318	365.891	FALSE	0
2022-09-13	15:23:02	0.184898	0.822463	1.24318	372.348	FALSE	0
2022-09-13	15:23:02	0.346374	1.54074	1.24318	367.432	FALSE	0
2022-09-13	15:23:03	0.232125	1.03254	1.16168	373.381	FALSE	0
2022-09-13	15:23:03	0.300624	1.33724	1.16168	368.769	FALSE	0
2022-09-13	15:23:03	0.132939	0.591339	1.16168	373.972	FALSE	0
2022-09-13	15:23:03	0.378944	1.68562	1.16168	370.455	FALSE	0
2022-09-13	15:23:04	0.237316	1.05563	1.43418	375.028	FALSE	0
2022-09-13	15:23:04	0.449784	2.00073	1.43418	372.455	FALSE	0
2022-09-13	15:23:04	0.16271	0.723767	1.43418	375.751	FALSE	0
2022-09-13	15:23:04	0.43986	1.95659	1.43418	374.412	FALSE	0
2022-09-13	15:23:05	0.216756	0.964174	1.31799	376.716	FALSE	0
2022-09-13	15:23:05	0.416858	1.85427	1.31799	376.266	FALSE	0
2022-09-13	15:23:05	0.25528	1.13554	1.31799	377.851	FALSE	0
2022-09-13	15:23:06	0.613855	2.73055	2.3121	378.997	FALSE	0
2022-09-13	15:23:06	0.554415	2.46615	2.3121	380.317	FALSE	0
2022-09-13	15:23:06	0.397926	1.77005	2.3121	380.767	FALSE	0
2022-09-13	15:23:06	0.512939	2.28166	2.3121	382.599	FALSE	0
2022-09-13	15:23:07	0.456654	2.03129	1.91788	382.798	FALSE	0
2022-09-13	15:23:07	0.365458	1.62563	1.91788	384.225	FALSE	0
2022-09-13	15:23:07	0.354669	1.57764	1.91788	384.376	FALSE	0
2022-09-13	15:23:07	0.54785	2.43695	1.91788	386.662	FALSE	0
2022-09-13	15:23:08	0.284746	1.26661	1.45257	385.642	FALSE	0
2022-09-13	15:23:08	0.331463	1.47441	1.45257	388.136	FALSE	0
2022-09-13	15:23:08	0.294822	1.31143	1.45257	386.954	FALSE	0
2022-09-13	15:23:08	0.395178	1.75783	1.45257	389.894	FALSE	0
2022-09-13	15:23:09	0.341489	1.51901	2.22476	388.473	FALSE	0
2022-09-13	15:23:09	0.386934	1.72116	2.22476	391.615	FALSE	0
2022-09-13	15:23:09	0.772023	3.43411	2.22476	391.907	FALSE	0
2022-09-13	15:23:10	0.827952	3.6829	2.07011	395.298	FALSE	0
2022-09-13	15:23:10	0.338944	1.50769	2.07011	393.415	FALSE	0
2022-09-13	15:23:10	0.35299	1.57017	2.07011	396.868	FALSE	0
2022-09-13	15:23:10	0.341641	1.51969	2.07011	394.934	FALSE	0
2022-09-13	15:23:11	0.354211	1.5756	1.6262	398.444	FALSE	0
2022-09-13	15:23:11	0.305102	1.35715	1.6262	396.291	FALSE	0
2022-09-13	15:23:11	0.352176	1.56655	1.6262	400.01	FALSE	0
2022-09-13	15:23:11	0.450852	2.00548	1.6262	398.297	FALSE	0
2022-09-13	15:23:12	0.29645	1.31867	0.631011	401.329	FALSE	0
2022-09-13	15:23:12	0.150293	0.668533	0.631011	398.965	FALSE	0
2022-09-13	15:23:12	0.0640842	0.285059	0.631011	401.614	FALSE	0
2022-09-13	15:23:12	0.0566033	0.251783	0.631011	399.217	FALSE	0
2022-09-13	15:23:13	-0.118715	-0.528068	-0.562325	401.614	FALSE	0
2022-09-13	15:23:13	-0.153117	-0.681095	-0.562325	399.217	FALSE	0
2022-09-13	15:23:13	-0.107417	-0.477812	-0.562325	401.614	FALSE	0
2022-09-13	15:23:14	-0.210369	-0.935763	-0.795412	399.217	FALSE	0
2022-09-13	15:23:14	-0.128231	-0.570397	-0.795412	401.614	FALSE	0
2022-09-13	15:23:14	-0.187213	-0.832761	-0.795412	399.217	FALSE	0
2022-09-13	15:23:14	-0.189453	-0.842725	-0.795412	401.614	FALSE	0
2022-09-13	15:23:15	-0.146348	-0.650985	-0.176568	399.217	FALSE	0
2022-09-13	15:23:15	-0.127264	-0.566096	-0.176568	401.614	FALSE	0
2022-09-13	15:23:15	-0.0195799	-0.0870953	-0.176568	399.217	FALSE	0
2022-09-13	15:23:15	0.134415	0.597905	-0.176568	402.212	FALSE	0
2022-09-13	15:23:16	0.0997585	0.443746	-0.482283	399.661	FALSE	0
2022-09-13	15:23:16	-0.0855849	-0.380699	-0.482283	402.212	FALSE	0
2022-09-13	15:23:16	-0.132506	-0.589413	-0.482283	399.661	FALSE	0
2022-09-13	15:23:16	-0.315356	-1.40277	-0.482283	402.212	FALSE	0
2022-09-13	15:23:17	-0.303753	-1.35115	-1.49452	399.661	FALSE	0
2022-09-13	15:23:17	-0.351844	-1.56507	-1.49452	402.212	FALSE	0
2022-09-13	15:23:17	-0.352353	-1.56734	-1.49452	399.661	FALSE	0
2022-09-13	15:23:18	-0.317188	-1.41092	-1.364	402.212	FALSE	0
2022-09-13	15:23:18	-0.347773	-1.54696	-1.364	399.661	FALSE	0
2022-09-13	15:23:18	-0.222175	-0.988279	-1.364	402.212	FALSE	0
2022-09-13	15:23:18	-0.339427	-1.50984	-1.364	399.661	FALSE	0
2022-09-13	15:23:19	-0.288384	-1.28279	-1.3481	402.212	FALSE	0
2022-09-13	15:23:19	-0.332404	-1.4786	-1.3481	399.661	FALSE	0
2022-09-13	15:23:19	-0.29785	-1.3249	-1.3481	402.212	FALSE	0
2022-09-13	15:23:19	-0.293626	-1.30611	-1.3481	399.661	FALSE	0
2022-09-13	15:23:20	-0.4122	-1.83355	-1.67322	402.212	FALSE	0
2022-09-13	15:23:20	-0.346195	-1.53994	-1.67322	399.661	FALSE	0
2022-09-13	15:23:20	-0.37388	-1.66309	-1.67322	402.212	FALSE	0
2022-09-13	15:23:20	-0.372353	-1.6563	-1.67322	399.661	FALSE	0
2022-09-13	15:23:21	-0.216679	-0.963832	-0.939384	402.212	FALSE	0
2022-09-13	15:23:21	-0.219733	-0.977416	-0.939384	399.661	FALSE	0
2022-09-13	15:23:21	-0.197137	-0.876905	-0.939384	402.212	FALSE	0
2022-09-13	15:23:22	-0.260292	-1.15783	-1.09394	399.661	FALSE	0
2022-09-13	15:23:22	-0.174694	-0.777074	-1.09394	402.212	FALSE	0
2022-09-13	15:23:22	-0.193473	-0.860607	-1.09394	399.661	FALSE	0
2022-09-13	15:23:22	-0.355254	-1.58024	-1.09394	402.212	FALSE	0
2022-09-13	15:23:23	-0.31388	-1.3962	-1.21697	399.661	FALSE	0
2022-09-13	15:23:23	-0.359274	-1.59812	-1.21697	402.212	FALSE	0
2022-09-13	15:23:23	-0.160598	-0.714372	-1.21697	399.661	FALSE	0
2022-09-13	15:23:23	-0.260598	-1.15919	-1.21697	402.212	FALSE	0
2022-09-13	15:23:24	-0.154389	-0.686753	-0.856929	399.661	FALSE	0
2022-09-13	15:23:24	-0.247977	-1.10305	-0.856929	402.212	FALSE	0
2022-09-13	15:23:24	-0.179224	-0.797224	-0.856929	399.661	FALSE	0
2022-09-13	15:23:24	-0.188995	-0.840688	-0.856929	402.212	FALSE	0
2022-09-13	15:23:25	-0.238409	-1.06049	-0.614238	399.661	FALSE	0
2022-09-13	15:23:25	-0.0720989	-0.32071	-0.614238	402.212	FALSE	0
2022-09-13	15:23:25	-0.103753	-0.461514	-0.614238	399.661	FALSE	0
2022-09-13	15:23:26	-0.0306231	-0.136218	-0.200224	402.212	FALSE	0
2022-09-13	15:23:26	-0.128638	-0.572208	-0.200224	399.661	FALSE	0
2022-09-13	15:23:26	0.0865269	0.384889	-0.200224	402.597	FALSE	0
2022-09-13	15:23:26	-0.107315	-0.477359	-0.200224	399.661	FALSE	0
2022-09-13	15:23:27	-0.0154577	-0.0687589	-0.266551	402.597	FALSE	0
2022-09-13	15:23:27	-0.0178496	-0.0793986	-0.266551	399.661	FALSE	0
2022-09-13	15:23:27	-0.094847	-0.421898	-0.266551	402.597	FALSE	0
2022-09-13	15:23:27	-0.111539	-0.496148	-0.266551	399.661	FALSE	0
2022-09-13	15:23:28	-0.139224	-0.619296	-0.425974	402.597	FALSE	0
2022-09-13	15:23:28	-0.060445	-0.268871	-0.425974	399.661	FALSE	0
2022-09-13	15:23:28	-0.167977	-0.747195	-0.425974	402.597	FALSE	0
2022-09-13	15:23:28	-0.0154069	-0.068533	-0.425974	399.661	FALSE	0
2022-09-13	15:23:29	-0.0983585	-0.437518	-0.152139	402.597	FALSE	0
2022-09-13	15:23:29	-0.00828218	-0.0368408	-0.152139	399.661	FALSE	0
2022-09-13	15:23:29	0.00403331	0.017941	-0.152139	402.615	FALSE	0
2022-09-13	15:23:30	0.354313	1.57606	1.61454	401.237	FALSE	0
2022-09-13	15:23:30	0.327697	1.45766	1.61454	404.072	FALSE	0
2022-09-13	15:23:30	0.431769	1.92059	1.61454	403.158	FALSE	0
2022-09-13	15:23:30	0.338079	1.50384	1.61454	405.576	FALSE	0
2022-09-13	15:23:31	0.55355	2.4623	1.85093	405.62	FALSE	0
2022-09-13	15:23:31	0.27925	1.24216	1.85093	406.818	FALSE	0
2022-09-13	15:23:31	0.404847	1.80084	1.85093	407.421	FALSE	0
2022-09-13	15:23:31	0.426781	1.89841	1.85093	408.717	FALSE	0
2022-09-13	15:23:32	0.374059	1.66389	2.13468	409.085	FALSE	0
2022-09-13	15:23:32	0.641081	2.85166	2.13468	411.568	FALSE	0
2022-09-13	15:23:32	0.348257	1.54912	2.13468	410.634	FALSE	0
2022-09-13	15:23:32	0.556196	2.47407	2.13468	414.042	FALSE	0
2022-09-13	15:23:33	0.390445	1.73678	1.85449	412.37	FALSE	0
2022-09-13	15:23:33	0.547392	2.43491	1.85449	416.477	FALSE	0
2022-09-13	15:23:33	0.312888	1.39179	1.85449	413.762	FALSE	0
2022-09-13	15:23:34	0.446934	1.98805	0.923823	418.465	FALSE	0
2022-09-13	15:23:34	0.407494	1.81261	0.923823	415.575	FALSE	0
2022-09-13	15:23:34	0.264949	1.17855	0.923823	419.644	FALSE	0
2022-09-13	15:23:34	-0.288638	-1.28392	0.923823	415.575	FALSE	0
2022-09-13	15:23:35	-0.612048	-2.72251	-2.45239	419.644	FALSE	0
2022-09-13	15:23:35	-0.732913	-3.26014	-2.45239	415.575	FALSE	0
2022-09-13	15:23:35	-0.533575	-2.37345	-2.45239	419.644	FALSE	0
2022-09-13	15:23:35	-0.326755	-1.45347	-2.45239	415.575	FALSE	0
2022-09-13	15:23:36	-0.324465	-1.44329	-1.3992	419.644	FALSE	0
2022-09-13	15:23:36	-0.417849	-1.85868	-1.3992	415.575	FALSE	0
2022-09-13	15:23:36	-0.245229	-1.09083	-1.3992	419.644	FALSE	0
2022-09-13	15:23:36	-0.270674	-1.20401	-1.3992	415.575	FALSE	0
2022-09-13	15:23:37	-0.251895	-1.12048	-1.50614	419.644	FALSE	0
2022-09-13	15:23:37	-0.380547	-1.69275	-1.50614	415.575	FALSE	0
2022-09-13	15:23:37	-0.383346	-1.7052	-1.50614	419.644	FALSE	0
2022-09-13	15:23:38	-0.36304	-1.61487	-1.20978	415.575	FALSE	0
2022-09-13	15:23:38	-0.268129	-1.19269	-1.20978	419.644	FALSE	0
2022-09-13	15:23:38	-0.239733	-1.06638	-1.20978	415.575	FALSE	0
2022-09-13	15:23:38	-0.216984	-0.965188	-1.20978	419.644	FALSE	0
2022-09-13	15:23:39	-0.315356	-1.40277	-1.92897	415.575	FALSE	0
2022-09-13	15:23:39	-0.466246	-2.07396	-1.92897	419.644	FALSE	0
2022-09-13	15:23:39	-0.509605	-2.26682	-1.92897	415.575	FALSE	0
2022-09-13	15:23:39	-0.443396	-1.97231	-1.92897	419.644	FALSE	0
2022-09-13	15:23:40	-0.348027	-1.54809	-1.56281	415.575	FALSE	0
2022-09-13	15:23:40	-0.367977	-1.63684	-1.56281	419.644	FALSE	0
2022-09-13	15:23:40	-0.365534	-1.62597	-1.56281	415.575	FALSE	0
2022-09-13	15:23:40	-0.323804	-1.44034	-1.56281	419.644	FALSE	0
2022-09-13	15:23:41	-0.332302	-1.47815	-0.751344	415.575	FALSE	0
2022-09-13	15:23:41	-0.077646	-0.345385	-0.751344	419.644	FALSE	0
2022-09-13	15:23:41	-0.0967809	-0.430501	-0.751344	415.575	FALSE	0
2022-09-13	15:23:42	0.0159417	0.0709119	-0.0548936	419.715	FALSE	0
2022-09-13	15:23:42	-0.136119	-0.605485	-0.0548936	415.575	FALSE	0
2022-09-13	15:23:42	0.105153	0.467742	-0.0548936	420.183	FALSE	0
2022-09-13	15:23:42	-0.0343382	-0.152743	-0.0548936	415.575	FALSE	0
2022-09-13	15:23:43	0.152837	0.67985	0.172892	420.862	FALSE	0
2022-09-13	15:23:43	-0.055356	-0.246235	0.172892	415.575	FALSE	0
2022-09-13	15:23:43	0.0486135	0.216243	0.172892	421.079	FALSE	0
2022-09-13	15:23:43	0.00937683	0.04171	0.172892	415.617	FALSE	0
2022-09-13	15:23:44	-0.0140837	-0.0626471	-0.160666	421.079	FALSE	0
2022-09-13	15:23:44	-0.0261957	-0.116524	-0.160666	415.617	FALSE	0
2022-09-13	15:23:44	-0.109402	-0.486642	-0.160666	421.079	FALSE	0
2022-09-13	15:23:44	0.00520383	0.0231477	-0.160666	415.64	FALSE	0
2022-09-13	15:23:45	0.096247	0.428126	0.408054	421.507	FALSE	0
2022-09-13	15:23:45	0.0801147	0.356366	0.408054	415.996	FALSE	0
2022-09-13	15:23:45	0.0988424	0.439671	0.408054	421.947	FALSE	0
2022-09-13	15:23:46	0.18729	0.833103	-0.0970554	416.829	FALSE	0
2022-09-13	15:23:46	0.0377229	0.167799	-0.0970554	422.114	FALSE	0
2022-09-13	15:23:46	-0.156475	-0.696032	-0.0970554	416.829	FALSE	0
2022-09-13	15:23:46	-0.155814	-0.693092	-0.0970554	422.114	FALSE	0
2022-09-13	15:23:47	-0.223702	-0.995071	-0.97283	416.829	FALSE	0
2022-09-13	15:23:47	-0.293015	-1.30339	-0.97283	422.114	FALSE	0
2022-09-13	15:23:47	-0.324567	-1.44374	-0.97283	416.829	FALSE	0
2022-09-13	15:23:47	-0.0335239	-0.149121	-0.97283	422.114	FALSE	0
2022-09-13	15:23:48	0.0462725	0.205829	1.90735	417.035	FALSE	0
2022-09-13	15:23:48	0.388359	1.7275	1.90735	423.842	FALSE	0
2022-09-13	15:23:48	0.582761	2.59224	1.90735	419.627	FALSE	0
2022-09-13	15:23:48	0.697773	3.10383	1.90735	426.946	FALSE	0
2022-09-13	15:23:49	0.611412	2.71968	3.07418	422.347	FALSE	0
2022-09-13	15:23:49	0.689173	3.06558	3.07418	430.011	FALSE	0
2022-09-13	15:23:49	0.772735	3.43728	3.07418	425.784	FALSE	0
2022-09-13	15:23:50	0.526578	2.34232	1.94266	432.354	FALSE	0
2022-09-13	15:23:50	0.36159	1.60842	1.94266	427.393	FALSE	0
2022-09-13	15:23:50	0.502659	2.23593	1.94266	434.589	FALSE	0
2022-09-13	15:23:50	0.356094	1.58398	1.94266	428.977	FALSE	0
2022-09-13	15:23:51	0.0486644	0.216469	0.242331	434.806	FALSE	0
2022-09-13	15:23:51	0.00779924	0.0346926	0.242331	429.011	FALSE	0
2022-09-13	15:23:51	0.00215038	0.00956532	0.242331	434.815	FALSE	0
2022-09-13	15:23:51	0.1593	0.708598	0.242331	429.72	FALSE	0
2022-09-13	15:23:52	0.0568577	0.252914	0.769042	435.068	FALSE	0
2022-09-13	15:23:52	0.320013	1.42348	0.769042	431.143	FALSE	0
2022-09-13	15:23:52	0.0294786	0.131127	0.769042	435.2	FALSE	0
2022-09-13	15:23:52	0.285204	1.26864	0.769042	432.412	FALSE	0
2022-09-13	15:23:53	0.0763997	0.339841	0.653743	435.539	FALSE	0
2022-09-13	15:23:53	0.234211	1.04182	0.653743	433.454	FALSE	0
2022-09-13	15:23:53	0.130293	0.579569	0.653743	436.119	FALSE	0
2022-09-13	15:23:54	0.191514	0.851893	0.602431	434.306	FALSE	0
2022-09-13	15:23:54	0.0947203	0.421335	0.602431	436.54	FALSE	0
2022-09-13	15:23:54	0.0599111	0.266497	0.602431	434.572	FALSE	0
2022-09-13	15:23:54	0.195585	0.870001	0.602431	437.41	FALSE	0
2022-09-13	15:23:55	0.0266287	0.11845	0.349745	434.691	FALSE	0
2022-09-13	15:23:55	0.149835	0.666496	0.349745	438.077	FALSE	0
2022-09-13	15:23:55	-0.00288781	-0.0128456	0.349745	434.691	FALSE	0
2022-09-13	15:23:55	0.140929	0.62688	0.349745	438.704	FALSE	0
2022-09-13	15:23:56	-0.105738	-0.470344	-0.631009	434.691	FALSE	0
2022-09-13	15:23:56	-0.201615	-0.896824	-0.631009	438.704	FALSE	0
2022-09-13	15:23:56	-0.122939	-0.546857	-0.631009	434.691	FALSE	0
2022-09-13	15:23:56	-0.137137	-0.610013	-0.631009	438.704	FALSE	0
2022-09-13	15:23:57	0.0545676	0.242728	0.0777786	434.933	FALSE	0
2022-09-13	15:23:57	-0.0979004	-0.435481	0.0777786	438.704	FALSE	0
2022-09-13	15:23:57	0.095789	0.426089	0.0777786	435.36	FALSE	0
2022-09-13	15:23:58	-0.122124	-0.543232	-0.145725	438.704	FALSE	0
2022-09-13	15:23:58	0.0394532	0.175496	-0.145725	435.535	FALSE	0
2022-09-13	15:23:58	-0.0118954	-0.0529131	-0.145725	438.704	FALSE	0
2022-09-13	15:23:58	-0.0364756	-0.162251	-0.145725	435.535	FALSE	0
2022-09-13	15:23:59	0.227545	1.01217	0.579795	439.716	FALSE	0
2022-09-13	15:23:59	0.0178755	0.0795138	0.579795	435.615	FALSE	0
2022-09-13	15:23:59	0.269936	1.20073	0.579795	440.917	FALSE	0
2022-09-13	15:23:59	0.00601804	0.0267694	0.579795	435.641	FALSE	0
2022-09-13	15:24:00	0.138283	0.61511	0.923823	441.532	FALSE	0
2022-09-13	15:24:00	0.169224	0.752742	0.923823	436.394	FALSE	0
2022-09-13	15:24:00	0.184186	0.819296	0.923823	442.351	FALSE	0
2022-09-13	15:24:00	0.339046	1.50814	0.923823	437.902	FALSE	0
2022-09-13	15:24:01	0.0623539	0.277363	0.665666	442.628	FALSE	0
2022-09-13	15:24:01	0.289835	1.28924	0.665666	439.191	FALSE	0
2022-09-13	15:24:01	0.096756	0.43039	0.665666	443.059	FALSE	0
2022-09-13	15:24:02	0.23187	1.0314	0.272042	440.223	FALSE	0
2022-09-13	15:24:02	-0.071132	-0.316409	0.272042	443.059	FALSE	0
2022-09-13	15:24:02	0.152837	0.67985	0.272042	440.903	FALSE	0
2022-09-13	15:24:02	-0.0689437	-0.306675	0.272042	443.059	FALSE	0
2022-09-13	15:24:03	0.133804	0.595187	-0.486982	441.498	FALSE	0
2022-09-13	15:24:03	-0.109046	-0.485058	-0.486982	443.059	FALSE	0
2022-09-13	15:24:03	-0.232252	-1.0331	-0.486982	441.498	FALSE	0
2022-09-13	15:24:03	-0.23042	-1.02495	-0.486982	443.059	FALSE	0
2022-09-13	15:24:04	-0.196832	-0.875548	-0.71901	441.498	FALSE	0
2022-09-13	15:24:04	-0.166908	-0.74244	-0.71901	443.059	FALSE	0
2022-09-13	15:24:04	-0.171437	-0.762586	-0.71901	441.498	FALSE	0
2022-09-13	15:24:04	-0.111386	-0.495467	-0.71901	443.059	FALSE	0
2022-09-13	15:24:05	-0.269605	-1.19926	-1.15844	441.498	FALSE	0
2022-09-13	15:24:05	-0.23388	-1.04035	-1.15844	443.059	FALSE	0
2022-09-13	15:24:05	-0.277799	-1.23571	-1.15844	441.498	FALSE	0
2022-09-13	15:24:06	-0.124109	-0.552062	-0.544818	443.059	FALSE	0
2022-09-13	15:24:06	-0.159936	-0.711427	-0.544818	441.498	FALSE	0
2022-09-13	15:24:06	-0.0918954	-0.408769	-0.544818	443.059	FALSE	0
2022-09-13	15:24:06	-0.113982	-0.507015	-0.544818	441.498	FALSE	0
2022-09-13	15:24:07	0.028359	0.126147	1.26513	443.185	FALSE	0
2022-09-13	15:24:07	0.439708	1.95591	1.26513	443.454	FALSE	0
2022-09-13	15:24:07	0.344695	1.53327	1.26513	444.718	FALSE	0
2022-09-13	15:24:07	0.324898	1.44521	1.26513	444.899	FALSE	0
2022-09-13	15:24:08	0.154059	0.685285	1.33899	445.403	FALSE	0
2022-09-13	15:24:08	0.448104	1.99326	1.33899	446.892	FALSE	0
2022-09-13	15:24:08	0.217214	0.966211	1.33899	446.37	FALSE	0
2022-09-13	15:24:08	0.384695	1.7112	1.33899	448.603	FALSE	0
2022-09-13	15:24:09	0.211412	0.940403	1.02105	447.31	FALSE	0
2022-09-13	15:24:09	0.217468	0.967341	1.02105	449.571	FALSE	0
2022-09-13	15:24:09	0.27243	1.21182	1.02105	448.522	FALSE	0
2022-09-13	15:24:09	0.216858	0.964628	1.02105	450.535	FALSE	0
2022-09-13	15:24:10	0.33299	1.48121	1.1	450.003	FALSE	0
2022-09-13	15:24:10	0.123524	0.549459	1.1	451.085	FALSE	0
2022-09-13	15:24:10	0.285356	1.26932	1.1	451.272	FALSE	0
2022-09-13	15:24:11	0.272125	1.21047	1.1292	452.295	FALSE	0
2022-09-13	15:24:11	0.282812	1.258	1.1292	452.53	FALSE	0
2022-09-13	15:24:11	0.249326	1.10905	1.1292	453.404	FALSE	0
2022-09-13	15:24:11	0.211158	0.939273	1.1292	453.47	FALSE	0
2022-09-13	15:24:12	0.320827	1.4271	1.38466	454.832	FALSE	0
2022-09-13	15:24:12	0.253397	1.12716	1.38466	454.597	FALSE	0
2022-09-13	15:24:12	0.404644	1.79994	1.38466	456.631	FALSE	0
2022-09-13	15:24:12	0.266272	1.18443	1.38466	455.781	FALSE	0
2022-09-13	15:24:13	0.32042	1.42529	1.57175	458.057	FALSE	0
2022-09-13	15:24:13	0.40215	1.78884	1.57175	457.57	FALSE	0
2022-09-13	15:24:13	0.337468	1.50113	1.57175	459.558	FALSE	0
2022-09-13	15:24:14	0.247646	1.10158	1.07306	458.672	FALSE	0
2022-09-13	15:24:14	0.350089	1.55727	1.07306	461.115	FALSE	0
2022-09-13	15:24:14	0.132176	0.587945	1.07306	459.26	FALSE	0
2022-09-13	15:24:14	0.235026	1.04544	1.07306	462.161	FALSE	0
2022-09-13	15:24:15	0.181387	0.806846	1.24844	460.066	FALSE	0
2022-09-13	15:24:15	0.22785	1.01352	1.24844	463.174	FALSE	0
2022-09-13	15:24:15	0.21411	0.952404	1.24844	461.019	FALSE	0
2022-09-13	15:24:15	0.4993	2.22099	1.24844	465.395	FALSE	0
2022-09-13	15:24:16	0.491972	2.18839	1.51035	463.207	FALSE	0
2022-09-13	15:24:16	0.245356	1.09139	1.51035	466.486	FALSE	0
2022-09-13	15:24:16	0.319097	1.41941	1.51035	464.627	FALSE	0
2022-09-13	15:24:16	0.301743	1.34221	1.51035	467.829	FALSE	0
2022-09-13	15:24:17	0.209122	0.930216	1.2198	465.557	FALSE	0
2022-09-13	15:24:17	0.310598	1.3816	1.2198	469.21	FALSE	0
2022-09-13	15:24:17	0.438435	1.95025	1.2198	467.507	FALSE	0
2022-09-13	15:24:17	0.138741	0.617148	1.2198	469.827	FALSE	0
2022-09-13	15:24:18	0.417061	1.85517	1.62088	469.362	FALSE	0
2022-09-13	15:24:18	0.336043	1.49479	1.62088	471.322	FALSE	0
2022-09-13	15:24:18	0.340064	1.51267	1.62088	470.875	FALSE	0
2022-09-13	15:24:19	0.374924	1.66774	1.46536	472.99	FALSE	0
2022-09-13	15:24:19	0.245051	1.09004	1.46536	471.965	FALSE	0
2022-09-13	15:24:19	0.336298	1.49592	1.46536	474.486	FALSE	0
2022-09-13	15:24:19	0.361438	1.60775	1.46536	473.573	FALSE	0
2022-09-13	15:24:20	0.310751	1.38228	1.65178	475.868	FALSE	0
2022-09-13	15:24:20	0.479504	2.13293	1.65178	475.706	FALSE	0
2022-09-13	15:24:20	0.30612	1.36168	1.65178	477.23	FALSE	0
2022-09-13	15:24:20	0.38897	1.73022	1.65178	477.436	FALSE	0
2022-09-13	15:24:21	0.371463	1.65234	1.8464	478.882	FALSE	0
2022-09-13	15:24:21	0.386629	1.7198	1.8464	479.156	FALSE	0
2022-09-13	15:24:21	0.480522	2.13746	1.8464	481.02	FALSE	0
2022-09-13	15:24:21	0.421743	1.876	1.8464	481.032	FALSE	0
2022-09-13	15:24:22	0.671819	2.98839	2.60182	484.008	FALSE	0
2022-09-13	15:24:22	0.542456	2.41295	2.60182	483.445	FALSE	0
2022-09-13	15:24:22	0.540471	2.40412	2.60182	486.412	FALSE	0
2022-09-13	15:24:23	0.498995	2.21963	2.0451	485.664	FALSE	0
2022-09-13	15:24:23	0.414109	1.84204	2.0451	488.254	FALSE	0
2022-09-13	15:24:23	0.550343	2.44804	2.0451	488.112	FALSE	0
2022-09-13	15:24:23	0.375585	1.67068	2.0451	489.925	FALSE	0
2022-09-13	15:24:24	0.520064	2.31335	1.74516	490.426	FALSE	0
2022-09-13	15:24:24	0.323626	1.43955	1.74516	491.364	FALSE	0
2022-09-13	15:24:24	0.376298	1.67385	1.74516	492.1	FALSE	0
2022-09-13	15:24:24	0.349326	1.55387	1.74516	492.918	FALSE	0
2022-09-13	15:24:25	0.369377	1.64306	1.70554	493.743	FALSE	0
2022-09-13	15:24:25	0.447341	1.98986	1.70554	494.908	FALSE	0
2022-09-13	15:24:25	0.330802	1.47147	1.70554	495.214	FALSE	0
2022-09-13	15:24:25	0.386171	1.71777	1.70554	496.626	FALSE	0
2022-09-13	15:24:26	0.38612	1.71754	1.71988	496.932	FALSE	0
2022-09-13	15:24:26	0.412735	1.83593	1.71988	498.462	FALSE	0
2022-09-13	15:24:26	0.361082	1.60616	1.71988	498.538	FALSE	0
2022-09-13	15:24:27	0.424237	1.88709	1.82897	500.349	FALSE	0
2022-09-13	15:24:27	0.375076	1.66841	1.82897	500.206	FALSE	0
2022-09-13	15:24:27	0.4393	1.95409	1.82897	502.303	FALSE	0
2022-09-13	15:24:27	0.406069	1.80628	1.82897	502.012	FALSE	0
2022-09-13	15:24:28	0.383168	1.70441	1.74549	504.007	FALSE	0
2022-09-13	15:24:28	0.396349	1.76304	1.74549	503.775	FALSE	0
2022-09-13	15:24:28	0.391107	1.73972	1.74549	505.747	FALSE	0
2022-09-13	15:24:28	0.398995	1.77481	1.74549	505.55	FALSE	0
2022-09-13	15:24:29	0.393397	1.74991	1.78568	507.497	FALSE	0
2022-09-13	15:24:29	0.42383	1.88528	1.78568	507.436	FALSE	0
2022-09-13	15:24:29	0.394109	1.75308	1.78568	509.25	FALSE	0
2022-09-13	15:24:29	0.394415	1.75444	1.78568	509.19	FALSE	0
2022-09-13	15:24:30	0.392685	1.74674	1.78152	510.997	FALSE	0
2022-09-13	15:24:30	0.407646	1.81329	1.78152	511.003	FALSE	0
2022-09-13	15:24:30	0.401183	1.78454	1.78152	512.781	FALSE	0
2022-09-13	15:24:31	0.399758	1.7782	1.7747	512.782	FALSE	0
2022-09-13	15:24:31	0.402557	1.79065	1.7747	514.572	FALSE	0
2022-09-13	15:24:31	0.396603	1.76417	1.7747	514.546	FALSE	0
2022-09-13	15:24:31	0.396959	1.76575	1.7747	516.338	FALSE	0
2022-09-13	15:24:32	0.403321	1.79405	1.71709	516.34	FALSE	0
2022-09-13	15:24:32	0.389936	1.73451	1.71709	518.072	FALSE	0
2022-09-13	15:24:32	0.386222	1.71799	1.71709	518.058	FALSE	0
2022-09-13	15:24:32	0.364593	1.62178	1.71709	519.694	FALSE	0
2022-09-13	15:24:33	0.375127	1.66864	1.68528	519.726	FALSE	0
2022-09-13	15:24:33	0.378232	1.68245	1.68528	521.377	FALSE	0
2022-09-13	15:24:33	0.386018	1.71709	1.68528	521.443	FALSE	0
2022-09-13	15:24:33	0.376094	1.67294	1.68528	523.05	FALSE	0
2022-09-13	15:24:34	0.378995	1.68585	1.69015	523.129	FALSE	0
2022-09-13	15:24:34	0.377468	1.67905	1.69015	524.729	FALSE	0
2022-09-13	15:24:34	0.383422	1.70554	1.69015	524.835	FALSE	0
2022-09-13	15:24:35	0.373753	1.66253	1.75908	526.391	FALSE	0
2022-09-13	15:24:35	0.377875	1.68086	1.75908	526.516	FALSE	0
2022-09-13	15:24:35	0.404186	1.7979	1.75908	528.189	FALSE	0
2022-09-13	15:24:35	0.426018	1.89501	1.75908	528.411	FALSE	0
2022-09-13	15:24:36	0.347799	1.54708	1.42591	529.736	FALSE	0
2022-09-13	15:24:36	0.272634	1.21273	1.42591	529.623	FALSE	0
2022-09-13	15:24:36	0.32444	1.44317	1.42591	531.179	FALSE	0
2022-09-13	15:24:36	0.337366	1.50067	1.42591	531.124	FALSE	0
2022-09-13	15:24:37	0.228613	1.01692	1.23327	532.196	FALSE	0
2022-09-13	15:24:37	0.360216	1.60231	1.23327	532.726	FALSE	0
2022-09-13	15:24:37	0.262914	1.16949	1.23327	533.366	FALSE	0
2022-09-13	15:24:37	0.257265	1.14437	1.23327	533.871	FALSE	0
2022-09-13	15:24:38	0.571209	2.54085	2.40367	535.907	FALSE	0
2022-09-13	15:24:38	0.552736	2.45868	2.40367	536.329	FALSE	0
2022-09-13	15:24:38	0.497163	2.21148	2.40367	538.118	FALSE	0
2022-09-13	15:24:39	0.620064	2.75817	3.07956	539.088	FALSE	0
2022-09-13	15:24:39	0.829885	3.69149	3.07956	541.81	FALSE	0
2022-09-13	15:24:39	0.681234	3.03027	3.07956	542.118	FALSE	0
2022-09-13	15:24:39	0.638079	2.8383	3.07956	544.648	FALSE	0
2022-09-13	15:24:40	0.333499	1.48347	1.65008	543.601	FALSE	0
2022-09-13	15:24:40	0.526221	2.34074	1.65008	546.989	FALSE	0
2022-09-13	15:24:40	0.375789	1.67158	1.65008	545.273	FALSE	0
2022-09-13	15:24:40	0.248308	1.10452	1.65008	548.093	FALSE	0
2022-09-13	15:24:41	0.181132	0.805711	-0.0992638	546.079	FALSE	0
2022-09-13	15:24:41	0.151412	0.673511	-0.0992638	548.767	FALSE	0
2022-09-13	15:24:41	-0.095814	-0.4262	-0.0992638	546.079	FALSE	0
2022-09-13	15:24:41	-0.325992	-1.45008	-0.0992638	548.767	FALSE	0
2022-09-13	15:24:42	-0.402888	-1.79213	-1.13052	546.079	FALSE	0
2022-09-13	15:24:42	-0.359783	-1.60039	-1.13052	548.767	FALSE	0
2022-09-13	15:24:42	0.000216527	0.000963155	-1.13052	546.08	FALSE	0
2022-09-13	15:24:43	0.337265	1.50022	0.616072	550.267	FALSE	0
2022-09-13	15:24:43	0.147596	0.656537	0.616072	546.736	FALSE	0
2022-09-13	15:24:43	-0.172811	-0.768698	0.616072	550.267	FALSE	0
2022-09-13	15:24:43	0.241947	1.07623	0.616072	547.812	FALSE	0
2022-09-13	15:24:44	-0.297137	-1.32172	-1.60361	550.267	FALSE	0
2022-09-13	15:24:44	-0.342684	-1.52433	-1.60361	547.812	FALSE	0
2022-09-13	15:24:44	-0.48187	-2.14345	-1.60361	550.267	FALSE	0
2022-09-13	15:24:44	-0.320343	-1.42495	-1.60361	547.812	FALSE	0
2022-09-13	15:24:45	0.909173	4.04418	5.52471	554.311	FALSE	0
2022-09-13	15:24:45	1.26149	5.61136	5.52471	553.424	FALSE	0
2022-09-13	15:24:45	1.23564	5.49637	5.52471	559.807	FALSE	0
2022-09-13	15:24:45	1.56174	6.94693	5.52471	560.371	FALSE	0
2022-09-13	15:24:46	0.870496	3.87214	2.86139	563.68	FALSE	0
2022-09-13	15:24:46	0.509733	2.26739	2.86139	562.638	FALSE	0
2022-09-13	15:24:46	0.54958	2.44464	2.86139	566.124	FALSE	0
2022-09-13	15:24:47	0.390903	1.73881	1.16395	564.377	FALSE	0
2022-09-13	15:24:47	0.399657	1.77775	1.16395	567.902	FALSE	0
2022-09-13	15:24:47	0.106781	0.474983	1.16395	564.852	FALSE	0
2022-09-13	15:24:47	0.149326	0.664232	1.16395	568.566	FALSE	0
2022-09-13	15:24:48	0.123677	0.55014	0.569835	565.402	FALSE	0
2022-09-13	15:24:48	0.125764	0.559423	0.569835	569.126	FALSE	0
2022-09-13	15:24:48	0.0793513	0.35297	0.569835	565.755	FALSE	0
2022-09-13	15:24:48	0.183626	0.816805	0.569835	569.942	FALSE	0
2022-09-13	15:24:49	-0.0575951	-0.256195	-0.293263	565.755	FALSE	0
2022-09-13	15:24:49	0.0319723	0.142219	-0.293263	570.085	FALSE	0
2022-09-13	15:24:49	-0.163295	-0.726369	-0.293263	565.755	FALSE	0
2022-09-13	15:24:49	-0.0747962	-0.332708	-0.293263	570.085	FALSE	0
2022-09-13	15:24:50	-0.0394272	-0.17538	0.0879652	565.755	FALSE	0
2022-09-13	15:24:50	0.071616	0.318562	0.0879652	570.403	FALSE	0
2022-09-13	15:24:50	0.0271376	0.120713	0.0879652	565.876	FALSE	0
2022-09-13	15:24:51	0.314008	1.39677	0.716298	571.8	FALSE	0
2022-09-13	15:24:51	0.184288	0.81975	0.716298	566.695	FALSE	0
2022-09-13	15:24:51	0.185611	0.825635	0.716298	572.626	FALSE	0
2022-09-13	15:24:51	-0.0397834	-0.176965	0.716298	566.695	FALSE	0
2022-09-13	15:24:52	0.0460689	0.204924	0.373344	572.83	FALSE	0
2022-09-13	15:24:52	0.0443386	0.197227	0.373344	566.893	FALSE	0
2022-09-13	15:24:52	0.0667305	0.296831	0.373344	573.127	FALSE	0
2022-09-13	15:24:52	0.178588	0.794395	0.373344	567.687	FALSE	0
2022-09-13	15:24:53	-0.180903	-0.804693	-0.764003	573.127	FALSE	0
2022-09-13	15:24:53	-0.13042	-0.580134	-0.764003	567.687	FALSE	0
2022-09-13	15:24:53	-0.197035	-0.876451	-0.764003	573.127	FALSE	0
2022-09-13	15:24:53	-0.178664	-0.794733	-0.764003	567.687	FALSE	0
2022-09-13	15:24:54	-0.296323	-1.3181	-0.869209	573.127	FALSE	0
2022-09-13	15:24:54	-0.146094	-0.649855	-0.869209	567.687	FALSE	0
2022-09-13	15:24:54	-0.143804	-0.639669	-0.869209	573.127	FALSE	0
2022-09-13	15:24:55	-0.0768318	-0.341763	-0.774416	567.687	FALSE	0
2022-09-13	15:24:55	-0.225229	-1.00186	-0.774416	573.127	FALSE	0
2022-09-13	15:24:55	-0.129402	-0.575606	-0.774416	567.687	FALSE	0
2022-09-13	15:24:55	-0.264923	-1.17843	-0.774416	573.127	FALSE	0
2022-09-13	15:24:56	-0.219122	-0.974698	-1.03576	567.687	FALSE	0
2022-09-13	15:24:56	-0.331844	-1.47611	-1.03576	573.127	FALSE	0
2022-09-13	15:24:56	-0.181565	-0.807637	-1.03576	567.687	FALSE	0
2022-09-13	15:24:56	-0.198867	-0.8846	-1.03576	573.127	FALSE	0
2022-09-13	15:24:57	-0.154287	-0.686299	-0.76536	567.687	FALSE	0
2022-09-13	15:24:57	-0.217035	-0.965415	-0.76536	573.127	FALSE	0
2022-09-13	15:24:57	-0.161768	-0.719576	-0.76536	567.687	FALSE	0
2022-09-13	15:24:57	-0.155152	-0.690147	-0.76536	573.127	FALSE	0
2022-09-13	15:24:58	-0.13215	-0.58783	-0.767418	567.687	FALSE	0
2022-09-13	15:24:58	-0.221565	-0.985565	-0.767418	573.127	FALSE	0
2022-09-13	15:24:58	-0.163855	-0.72886	-0.767418	567.687	FALSE	0
2022-09-13	15:24:59	-0.166959	-0.742667	-0.391904	573.127	FALSE	0
2022-09-13	15:24:59	-0.0990709	-0.440687	-0.391904	567.687	FALSE	0
2022-09-13	15:24:59	-0.0691982	-0.307807	-0.391904	573.127	FALSE	0
2022-09-13	15:24:59	-0.017188	-0.0764557	-0.391904	567.687	FALSE	0
2022-09-13	15:25:00	-0.0380532	-0.169268	0.411601	573.127	FALSE	0
2022-09-13	15:25:00	0.0484099	0.215337	0.411601	567.902	FALSE	0
2022-09-13	15:25:00	0.099046	0.440576	0.411601	573.568	FALSE	0
2022-09-13	15:25:00	0.260725	1.15976	0.411601	569.062	FALSE	0
2022-09-13	15:25:01	0.555891	2.47271	2.1743	576.041	FALSE	0
2022-09-13	15:25:01	0.522608	2.32466	2.1743	571.387	FALSE	0
2022-09-13	15:25:01	0.380165	1.69105	2.1743	577.732	FALSE	0
2022-09-13	15:25:01	0.496552	2.20876	2.1743	573.596	FALSE	0
2022-09-13	15:25:02	0.452277	2.01182	1.7902	579.743	FALSE	0
2022-09-13	15:25:02	0.477774	2.12523	1.7902	575.721	FALSE	0
2022-09-13	15:25:02	0.277316	1.23356	1.7902	580.977	FALSE	0
2022-09-13	15:25:03	0.480776	2.13859	1.88862	577.859	FALSE	0
2022-09-13	15:25:03	0.309326	1.37594	1.88862	582.353	FALSE	0
2022-09-13	15:25:03	0.607188	2.70089	1.88862	580.56	FALSE	0
2022-09-13	15:25:03	0.301031	1.33905	1.88862	583.692	FALSE	0
2022-09-13	15:25:04	0.634262	2.82132	2.16055	583.382	FALSE	0
2022-09-13	15:25:04	0.347494	1.54572	2.16055	585.238	FALSE	0
2022-09-13	15:25:04	0.669987	2.98024	2.16055	586.362	FALSE	0
2022-09-13	15:25:04	0.291107	1.2949	2.16055	586.533	FALSE	0
2022-09-13	15:25:05	0.641845	2.85505	2.14006	589.217	FALSE	0
2022-09-13	15:25:05	0.371718	1.65348	2.14006	588.186	FALSE	0
2022-09-13	15:25:05	0.601997	2.6778	2.14006	591.895	FALSE	0
2022-09-13	15:25:05	0.308868	1.37391	2.14006	589.56	FALSE	0
2022-09-13	15:25:06	0.663473	2.95126	2.71334	594.846	FALSE	0
2022-09-13	15:25:06	0.550445	2.44849	2.71334	592.009	FALSE	0
2022-09-13	15:25:06	0.616043	2.74028	2.71334	597.586	FALSE	0
2022-09-13	15:25:07	0.519402	2.3104	2.30848	594.319	FALSE	0
2022-09-13	15:25:07	0.612226	2.7233	2.30848	600.31	FALSE	0
2022-09-13	15:25:07	0.480064	2.13542	2.30848	596.454	FALSE	0
2022-09-13	15:25:07	0.464186	2.06479	2.30848	602.374	FALSE	0
2022-09-13	15:25:08	0.608053	2.70474	2.14334	599.159	FALSE	0
2022-09-13	15:25:08	0.432481	1.92376	2.14334	604.298	FALSE	0
2022-09-13	15:25:08	0.399657	1.77775	2.14334	600.937	FALSE	0
2022-09-13	15:25:08	0.487188	2.16711	2.14334	606.465	FALSE	0
2022-09-13	15:25:09	0.550547	2.44894	2.38205	603.386	FALSE	0
2022-09-13	15:25:09	0.41355	1.83955	2.38205	608.305	FALSE	0
2022-09-13	15:25:09	0.692125	3.07871	2.38205	606.464	FALSE	0
2022-09-13	15:25:09	0.485814	2.161	2.38205	610.466	FALSE	0
2022-09-13	15:25:10	0.675178	3.00333	2.46736	609.468	FALSE	0
2022-09-13	15:25:10	0.490242	2.18069	2.46736	612.646	FALSE	0
2022-09-13	15:25:10	0.498639	2.21805	2.46736	611.686	FALSE	0
2022-09-13	15:25:11	0.420369	1.86989	2.22795	614.516	FALSE	0
2022-09-13	15:25:11	0.600165	2.66965	2.22795	614.356	FALSE	0
2022-09-13	15:25:11	0.31869	1.4176	2.22795	615.934	FALSE	0
2022-09-13	15:25:11	0.664237	2.95466	2.22795	617.31	FALSE	0
2022-09-13	15:25:12	0.439402	1.95455	1.66496	617.889	FALSE	0
2022-09-13	15:25:12	0.336705	1.49773	1.66496	618.808	FALSE	0
2022-09-13	15:25:12	0.34897	1.55229	1.66496	619.441	FALSE	0
2022-09-13	15:25:12	0.372125	1.65529	1.66496	620.463	FALSE	0
2022-09-13	15:25:13	0.296908	1.32071	1.87962	620.762	FALSE	0
2022-09-13	15:25:13	0.497316	2.21216	1.87962	622.675	FALSE	0
2022-09-13	15:25:13	0.380674	1.69331	1.87962	622.455	FALSE	0
2022-09-13	15:25:13	0.515331	2.2923	1.87962	624.968	FALSE	0
2022-09-13	15:25:14	0.315738	1.40447	1.85208	623.859	FALSE	0
2022-09-13	15:25:14	0.590191	2.62529	1.85208	627.593	FALSE	0
2022-09-13	15:25:14	0.343168	1.52648	1.85208	625.386	FALSE	0
2022-09-13	15:25:15	0.673957	2.9979	2.22863	630.591	FALSE	0
2022-09-13	15:25:15	0.421438	1.87464	2.22863	627.26	FALSE	0
2022-09-13	15:25:15	0.604746	2.69003	2.22863	633.281	FALSE	0
2022-09-13	15:25:15	0.303931	1.35195	2.22863	628.612	FALSE	0
2022-09-13	15:25:16	0.659809	2.93496	2.24436	636.216	FALSE	0
2022-09-13	15:25:16	0.498791	2.21872	2.24436	630.831	FALSE	0
2022-09-13	15:25:16	0.414262	1.84272	2.24436	638.059	FALSE	0
2022-09-13	15:25:16	0.445356	1.98103	2.24436	632.812	FALSE	0
2022-09-13	15:25:17	0.527239	2.34526	1.90735	640.404	FALSE	0
2022-09-13	15:25:17	0.414822	1.84521	1.90735	634.657	FALSE	0
2022-09-13	15:25:17	0.416298	1.85178	1.90735	642.256	FALSE	0
2022-09-13	15:25:17	0.356807	1.58715	1.90735	636.244	FALSE	0
2022-09-13	15:25:18	0.432176	1.92241	1.78598	644.178	FALSE	0
2022-09-13	15:25:18	0.369428	1.64329	1.78598	637.888	FALSE	0
2022-09-13	15:25:18	0.402914	1.79224	1.78598	645.97	FALSE	0
2022-09-13	15:25:19	0.331921	1.47645	1.40599	639.364	FALSE	0
2022-09-13	15:25:19	0.277977	1.2365	1.40599	647.207	FALSE	0
2022-09-13	15:25:19	0.382354	1.70079	1.40599	641.065	FALSE	0
2022-09-13	15:25:19	0.272074	1.21024	1.40599	648.417	FALSE	0
2022-09-13	15:25:20	0.370293	1.64714	1.17911	642.712	FALSE	0
2022-09-13	15:25:20	0.0930918	0.414091	1.17911	648.831	FALSE	0
2022-09-13	15:25:20	0.378283	1.68268	1.17911	644.395	FALSE	0
2022-09-13	15:25:20	0.218639	0.97255	1.17911	649.804	FALSE	0
2022-09-13	15:25:21	0.325102	1.44612	1.19671	645.841	FALSE	0
2022-09-13	15:25:21	0.134262	0.597224	1.19671	650.401	FALSE	0
2022-09-13	15:25:21	0.344949	1.5344	1.19671	647.375	FALSE	0
2022-09-13	15:25:21	0.271819	1.20911	1.19671	651.61	FALSE	0
2022-09-13	15:25:22	0.444593	1.97764	1.3847	649.353	FALSE	0
2022-09-13	15:25:22	0.197367	0.877928	1.3847	652.488	FALSE	0
2022-09-13	15:25:22	0.291921	1.29852	1.3847	650.652	FALSE	0
2022-09-13	15:25:23	0.234924	1.04499	1.41646	653.533	FALSE	0
2022-09-13	15:25:23	0.407596	1.81307	1.41646	652.465	FALSE	0
2022-09-13	15:25:23	0.315891	1.40515	1.41646	654.938	FALSE	0
2022-09-13	15:25:23	0.315331	1.40266	1.41646	653.867	FALSE	0
2022-09-13	15:25:24	0.563677	2.50735	2.09405	657.445	FALSE	0
2022-09-13	15:25:24	0.371667	1.65325	2.09405	655.52	FALSE	0
2022-09-13	15:25:24	0.561387	2.49716	2.09405	659.943	FALSE	0
2022-09-13	15:25:24	0.386323	1.71844	2.09405	657.239	FALSE	0
2022-09-13	15:25:25	0.543066	2.41567	1.67753	662.358	FALSE	0
2022-09-13	15:25:25	0.476909	2.12139	1.67753	659.36	FALSE	0
2022-09-13	15:25:25	0.445407	1.98126	1.67753	664.339	FALSE	0
2022-09-13	15:25:25	0.0431173	0.191794	1.67753	659.552	FALSE	0
2022-09-13	15:25:26	0.164491	0.731689	0.319996	665.071	FALSE	0
2022-09-13	15:25:26	0.0576211	0.25631	0.319996	659.808	FALSE	0
2022-09-13	15:25:26	-0.00629748	-0.0280125	0.319996	665.071	FALSE	0
2022-09-13	15:25:27	2.35182	10.4614	3.44107	670.27	FALSE	0
2022-09-13	15:25:27	0.466476	2.07498	3.44107	667.146	FALSE	0
2022-09-13	15:25:27	0.146883	0.653365	3.44107	670.923	FALSE	0
2022-09-13	15:25:27	0.129173	0.574587	3.44107	667.721	FALSE	0
2022-09-13	15:25:28	0.25014	1.11267	0.837292	672.036	FALSE	0
2022-09-13	15:25:28	0.11696	0.520261	0.837292	668.241	FALSE	0
2022-09-13	15:25:28	0.273397	1.21612	0.837292	673.252	FALSE	0
2022-09-13	15:25:28	0.11243	0.500111	0.837292	668.741	FALSE	0
2022-09-13	15:25:29	0.228766	1.0176	0.883247	674.27	FALSE	0
2022-09-13	15:25:29	0.17126	0.761799	0.883247	669.503	FALSE	0
2022-09-13	15:25:29	0.19126	0.850763	0.883247	675.12	FALSE	0
2022-09-13	15:25:29	0.202965	0.902829	0.883247	670.406	FALSE	0
2022-09-13	15:25:30	0.203931	0.907126	1.41141	676.027	FALSE	0
2022-09-13	15:25:30	0.388308	1.72727	1.41141	672.133	FALSE	0
2022-09-13	15:25:30	0.359657	1.59983	1.41141	677.627	FALSE	0
2022-09-13	15:25:31	0.52444	2.33281	1.75155	674.466	FALSE	0
2022-09-13	15:25:31	0.263321	1.1713	1.75155	678.799	FALSE	0
2022-09-13	15:25:31	0.577061	2.56688	1.75155	677.033	FALSE	0
2022-09-13	15:25:31	0.210242	0.935198	1.75155	679.734	FALSE	0
2022-09-13	15:25:32	0.478435	2.12817	1.97662	679.161	FALSE	0
2022-09-13	15:25:32	0.365763	1.62699	1.97662	681.361	FALSE	0
2022-09-13	15:25:32	0.505203	2.24724	1.97662	681.408	FALSE	0
2022-09-13	15:25:32	0.428053	1.90407	1.97662	683.265	FALSE	0
2022-09-13	15:25:33	0.46729	2.0786	1.93084	683.487	FALSE	0
2022-09-13	15:25:33	0.400267	1.78047	1.93084	685.045	FALSE	0
2022-09-13	15:25:33	0.432074	1.92195	1.93084	685.409	FALSE	0
2022-09-13	15:25:33	0.436654	1.94232	1.93084	686.988	FALSE	0

## Sheet: Buzz_prong_2022913152025 (3)
Date	Time	Lbs	Newtons	Total Force x time	Total steps > 13.345		**GoPro Fitting: 1510
2022-09-13	15:20:33	0.367799	1.63604	1.63604	FALSE	0
2022-09-13	15:20:33	0.483728	2.15172	2.15172	FALSE	0
2022-09-13	15:20:33	0.881234	3.91991	5.55595	FALSE	0
2022-09-13	15:20:33	1.6938	7.53436	9.68608	FALSE	0
2022-09-13	15:20:34	2.23396	9.9371	15.493	FALSE	0
2022-09-13	15:20:34	1.82424	8.11458	17.8007	FALSE	0
2022-09-13	15:20:34	0.549987	2.44645	17.9395	FALSE	0
2022-09-13	15:20:34	0.409275	1.82054	19.6212	FALSE	0
2022-09-13	15:20:35	0.466425	2.07475	20.0143	FALSE	0
2022-09-13	15:20:35	0.222507	0.989756	20.611	FALSE	0
2022-09-13	15:20:35	-0.0944908	-0.420314	20.0143	FALSE	0
2022-09-13	15:20:36	-0.294491	-1.30995	20.611	FALSE	0
2022-09-13	15:20:36	-0.477646	-2.12466	20.0143	FALSE	0
2022-09-13	15:20:36	-0.325992	-1.45008	20.611	FALSE	0
2022-09-13	15:20:36	0.107392	0.477701	20.492	FALSE	0
2022-09-13	15:20:37	0.0747712	0.332597	20.9436	FALSE	0
2022-09-13	15:20:37	-0.101107	-0.449744	20.492	FALSE	0
2022-09-13	15:20:37	0.468868	2.08562	23.0292	FALSE	0
2022-09-13	15:20:37	0.193804	0.862079	21.354	FALSE	0
2022-09-13	15:20:38	0.035789	0.159197	23.1884	FALSE	0
2022-09-13	15:20:38	-0.0327097	-0.145499	21.354	FALSE	0
2022-09-13	15:20:38	0.126934	0.564628	23.753	FALSE	0
2022-09-13	15:20:38	-0.0278242	-0.123768	21.354	FALSE	0
2022-09-13	15:20:39	-0.00263335	-0.0117137	23.753	FALSE	0
2022-09-13	15:20:39	0.0560435	0.249293	21.6033	FALSE	0
2022-09-13	15:20:39	0.167341	0.744366	24.4974	FALSE	0
2022-09-13	15:20:40	0.215026	0.956479	22.5598	FALSE	0
2022-09-13	15:20:40	-0.0545417	-0.242612	24.4974	FALSE	0
2022-09-13	15:20:40	0.0154837	0.0688746	22.6287	FALSE	0
2022-09-13	15:20:40	-0.258613	-1.15036	24.4974	FALSE	0
2022-09-13	15:20:41	-0.370928	-1.64996	22.6287	FALSE	0
2022-09-13	15:20:41	-0.350368	-1.55851	24.4974	FALSE	0
2022-09-13	15:20:41	-0.241717	-1.07521	22.6287	FALSE	0
2022-09-13	15:20:41	-0.245534	-1.09218	24.4974	FALSE	0
2022-09-13	15:20:42	-0.416374	-1.85211	22.6287	FALSE	0
2022-09-13	15:20:42	-0.41846	-1.86139	24.4974	FALSE	0
2022-09-13	15:20:42	-0.249351	-1.10916	22.6287	FALSE	0
2022-09-13	15:20:42	0.0219977	0.0978502	24.5952	FALSE	0
2022-09-13	15:20:43	0.1764	0.784662	23.4133	FALSE	0
2022-09-13	15:20:43	0.181132	0.805711	25.4009	FALSE	0
2022-09-13	15:20:43	-0.030216	-0.134407	23.4133	FALSE	0
2022-09-13	15:20:44	0.193957	0.86276	26.2637	FALSE	0
2022-09-13	15:20:44	0.086934	0.3867	23.8	FALSE	0
2022-09-13	15:20:44	0.4507	2.0048	28.2685	FALSE	0
2022-09-13	15:20:44	0.389428	1.73225	25.5323	FALSE	0
2022-09-13	15:20:45	0.402099	1.78862	30.0571	FALSE	0
2022-09-13	15:20:45	0.205051	0.912108	26.4444	FALSE	0
2022-09-13	15:20:45	0.214415	0.953761	31.0109	FALSE	0
2022-09-13	15:20:45	0.318334	1.41601	27.8604	FALSE	0
2022-09-13	15:20:46	0.14271	0.634803	31.6457	FALSE	0
2022-09-13	15:20:46	0.473855	2.1078	29.9682	FALSE	0
2022-09-13	15:20:46	0.187494	0.834011	32.4797	FALSE	0
2022-09-13	15:20:46	0.481234	2.14063	32.1088	FALSE	0
2022-09-13	15:20:47	0.0787916	0.350481	32.8302	FALSE	0
2022-09-13	15:20:47	0.444644	1.97787	34.0867	FALSE	0
2022-09-13	15:20:47	0.331005	1.47238	34.3025	FALSE	0
2022-09-13	15:20:48	0.336705	1.49773	35.5844	FALSE	0
2022-09-13	15:20:48	0.453244	2.01612	36.3187	FALSE	0
2022-09-13	15:20:48	0.298588	1.32818	36.9126	FALSE	0
2022-09-13	15:20:48	0.580114	2.58046	38.8991	FALSE	0
2022-09-13	15:20:49	0.243473	1.08302	37.9956	FALSE	0
2022-09-13	15:20:49	0.626781	2.78805	41.6872	FALSE	0
2022-09-13	15:20:49	0.394313	1.75398	39.7496	FALSE	0
2022-09-13	15:20:49	0.427545	1.90181	43.589	FALSE	0
2022-09-13	15:20:50	0.484339	2.15444	41.9041	FALSE	0
2022-09-13	15:20:50	0.397112	1.76643	45.3554	FALSE	0
2022-09-13	15:20:50	0.506374	2.25245	44.1565	FALSE	0
2022-09-13	15:20:50	0.225255	1.00198	46.3574	FALSE	0
2022-09-13	15:20:51	0.39584	1.76078	45.9173	FALSE	0
2022-09-13	15:20:51	0.120471	0.535879	46.8933	FALSE	0
2022-09-13	15:20:51	0.471361	2.09671	48.014	FALSE	0
2022-09-13	15:20:52	0.436349	1.94097	48.8342	FALSE	0
2022-09-13	15:20:52	0.358384	1.59416	49.6082	FALSE	0
2022-09-13	15:20:52	0.391005	1.73927	50.5735	FALSE	0
2022-09-13	15:20:52	0.63986	2.84623	52.4544	FALSE	0
2022-09-13	15:20:53	0.315891	1.40515	51.9786	FALSE	0
2022-09-13	15:20:53	0.276451	1.22971	53.6841	FALSE	0
2022-09-13	15:20:53	0.44902	1.99733	53.976	FALSE	0
2022-09-13	15:20:53	0.148155	0.659023	54.3431	FALSE	0
2022-09-13	15:20:54	0.18612	0.827899	54.8039	FALSE	0
2022-09-13	15:20:54	0.0510053	0.226882	54.57	FALSE	0
2022-09-13	15:20:54	-0.12243	-0.544593	54.8039	FALSE	0
2022-09-13	15:20:54	-0.18986	-0.844535	54.57	FALSE	0
2022-09-13	15:20:55	-0.484058	-2.15319	54.8039	FALSE	0
2022-09-13	15:20:55	-0.432811	-1.92523	54.57	FALSE	0
2022-09-13	15:20:55	-0.369249	-1.64249	54.8039	FALSE	0
2022-09-13	15:20:56	-0.435508	-1.93723	54.57	FALSE	0
2022-09-13	15:20:56	-0.17444	-0.775944	54.8039	FALSE	0
2022-09-13	15:20:56	-0.419681	-1.86683	54.57	FALSE	0
2022-09-13	15:20:56	-0.363702	-1.61782	54.8039	FALSE	0
2022-09-13	15:20:57	-0.408129	-1.81544	54.57	FALSE	0
2022-09-13	15:20:57	-0.48243	-2.14595	54.8039	FALSE	0
2022-09-13	15:20:57	-0.580343	-2.58148	54.57	FALSE	0
2022-09-13	15:20:57	-0.658765	-2.93032	54.8039	FALSE	0
2022-09-13	15:20:58	-0.79047	-3.51617	54.57	FALSE	0
2022-09-13	15:20:58	-0.79673	-3.54401	54.8039	FALSE	0
2022-09-13	15:20:58	-0.755814	-3.36201	54.57	FALSE	0
2022-09-13	15:20:58	-0.876424	-3.89851	54.8039	FALSE	0
2022-09-13	15:20:59	-0.720343	-3.20423	54.57	FALSE	0
2022-09-13	15:20:59	-0.902938	-4.01645	54.8039	FALSE	0
2022-09-13	15:20:59	-0.767824	-3.41543	54.57	FALSE	0
2022-09-13	15:21:00	-0.696679	-3.09897	54.8039	FALSE	0
2022-09-13	15:21:00	-0.324211	-1.44216	54.57	FALSE	0
2022-09-13	15:21:00	0.390954	1.73904	56.5429	FALSE	0
2022-09-13	15:21:00	0.167239	0.743913	55.3139	FALSE	0
2022-09-13	15:21:01	0.275433	1.22518	57.7681	FALSE	0
2022-09-13	15:21:01	0.16612	0.738935	56.0528	FALSE	0
2022-09-13	15:21:01	0.48612	2.16236	59.9305	FALSE	0
2022-09-13	15:21:01	0.225865	1.00469	57.0575	FALSE	0
2022-09-13	15:21:02	0.458333	2.03876	61.9692	FALSE	0
2022-09-13	15:21:02	0.424796	1.88958	58.9471	FALSE	0
2022-09-13	15:21:02	0.478232	2.12727	64.0965	FALSE	0
2022-09-13	15:21:02	0.256705	1.14188	60.089	FALSE	0
2022-09-13	15:21:03	0.326425	1.452	65.5485	FALSE	0
2022-09-13	15:21:03	0.542506	2.41318	62.5022	FALSE	0
2022-09-13	15:21:03	0.315433	1.40311	66.9516	FALSE	0
2022-09-13	15:21:04	0.702048	3.12285	65.625	FALSE	0
2022-09-13	15:21:04	0.209377	0.931351	67.883	FALSE	0
2022-09-13	15:21:04	0.586985	2.61103	68.236	FALSE	0
2022-09-13	15:21:04	0.22042	0.980472	68.8634	FALSE	0
2022-09-13	15:21:05	0.614568	2.73372	70.9698	FALSE	0
2022-09-13	15:21:05	0.195127	0.867964	69.7314	FALSE	0
2022-09-13	15:21:05	0.534517	2.37764	73.3474	FALSE	0
2022-09-13	15:21:05	0.390903	1.73881	71.4702	FALSE	0
2022-09-13	15:21:06	0.302863	1.3472	74.6946	FALSE	0
2022-09-13	15:21:06	0.524644	2.33372	73.8039	FALSE	0
2022-09-13	15:21:06	0.255993	1.13871	75.8333	FALSE	0
2022-09-13	15:21:06	0.628613	2.7962	76.6001	FALSE	0
2022-09-13	15:21:07	0.179962	0.800507	76.6338	FALSE	0
2022-09-13	15:21:07	0.659809	2.93496	79.5351	FALSE	0
2022-09-13	15:21:07	0.361489	1.60798	78.2418	FALSE	0
2022-09-13	15:21:08	0.468461	2.08381	81.6189	FALSE	0
2022-09-13	15:21:08	0.478486	2.1284	80.3702	FALSE	0
2022-09-13	15:21:08	0.40327	1.79383	83.4127	FALSE	0
2022-09-13	15:21:08	0.479962	2.13497	82.5052	FALSE	0
2022-09-13	15:21:09	0.247901	1.10271	84.5154	FALSE	0
2022-09-13	15:21:09	0.638079	2.8383	85.3435	FALSE	0
2022-09-13	15:21:09	0.208868	0.929087	85.4445	FALSE	0
2022-09-13	15:21:09	0.658842	2.93066	88.2741	FALSE	0
2022-09-13	15:21:10	0.248104	1.10362	86.5481	FALSE	0
2022-09-13	15:21:10	0.657163	2.92319	91.1973	FALSE	0
2022-09-13	15:21:10	0.267341	1.18919	87.7373	FALSE	0
2022-09-13	15:21:10	0.515687	2.29388	93.4912	FALSE	0
2022-09-13	15:21:11	0.451361	2.00774	89.7451	FALSE	0
2022-09-13	15:21:11	0.311718	1.38658	94.8778	FALSE	0
2022-09-13	15:21:11	0.530598	2.36021	92.1053	FALSE	0
2022-09-13	15:21:11	0.23355	1.03888	95.9167	FALSE	0
2022-09-13	15:21:12	0.653091	2.90508	95.0103	FALSE	0
2022-09-13	15:21:12	0.233397	1.0382	96.9548	FALSE	0
2022-09-13	15:21:12	0.659199	2.93225	97.9426	FALSE	0
2022-09-13	15:21:13	0.199962	0.889471	97.8443	FALSE	0
2022-09-13	15:21:13	0.636501	2.83128	100.774	FALSE	0
2022-09-13	15:21:13	0.278537	1.23899	99.0833	FALSE	0
2022-09-13	15:21:13	0.449631	2.00005	102.774	FALSE	0
2022-09-13	15:21:14	0.564338	2.51029	101.594	FALSE	0
2022-09-13	15:21:14	0.232736	1.03526	103.809	FALSE	0
2022-09-13	15:21:14	0.541234	2.40752	104.001	FALSE	0
2022-09-13	15:21:14	0.179708	0.799377	104.609	FALSE	0
2022-09-13	15:21:15	0.559606	2.48924	106.49	FALSE	0
2022-09-13	15:21:15	0.15416	0.685735	105.294	FALSE	0
2022-09-13	15:21:15	0.58556	2.60469	109.095	FALSE	0
2022-09-13	15:21:15	0.257112	1.14369	106.438	FALSE	0
2022-09-13	15:21:16	0.364542	1.62156	110.717	FALSE	0
2022-09-13	15:21:16	0.253651	1.12829	107.566	FALSE	0
2022-09-13	15:21:16	0.346221	1.54006	112.257	FALSE	0
2022-09-13	15:21:17	0.465916	2.07249	109.639	FALSE	0
2022-09-13	15:21:17	0.24612	1.09479	113.351	FALSE	0
2022-09-13	15:21:17	0.438283	1.94957	111.588	FALSE	0
2022-09-13	15:21:17	0.215382	0.958062	114.31	FALSE	0
2022-09-13	15:21:18	0.567443	2.5241	114.112	FALSE	0
2022-09-13	15:21:18	0.200318	0.891055	115.201	FALSE	0
2022-09-13	15:21:18	0.240776	1.07102	115.183	FALSE	0
2022-09-13	15:21:18	0.101183	0.450082	115.651	FALSE	0
2022-09-13	15:21:19	0.271463	1.20752	116.391	FALSE	0
2022-09-13	15:21:19	0.400674	1.78228	117.433	FALSE	0
2022-09-13	15:21:19	0.252786	1.12444	117.515	FALSE	0
2022-09-13	15:21:19	0.394771	1.75602	119.189	FALSE	0
2022-09-13	15:21:20	0.290547	1.29241	118.808	FALSE	0
2022-09-13	15:21:20	0.385407	1.71437	120.903	FALSE	0
2022-09-13	15:21:20	0.0592496	0.263554	119.071	FALSE	0
2022-09-13	15:21:21	0.368155	1.63763	122.541	FALSE	0
2022-09-13	15:21:21	0.0380282	0.169157	119.241	FALSE	0
2022-09-13	15:21:21	0.315433	1.40311	123.944	FALSE	0
2022-09-13	15:21:21	0.111565	0.496263	119.737	FALSE	0
2022-09-13	15:21:22	0.278741	1.2399	125.184	FALSE	0
2022-09-13	15:21:22	0.164746	0.732823	120.47	FALSE	0
2022-09-13	15:21:22	0.125713	0.559197	125.743	FALSE	0
2022-09-13	15:21:22	0.280013	1.24555	121.715	FALSE	0
2022-09-13	15:21:23	0.11701	0.520484	126.264	FALSE	0
2022-09-13	15:21:23	0.350394	1.55862	123.274	FALSE	0
2022-09-13	15:21:23	0.101998	0.453708	126.717	FALSE	0
2022-09-13	15:21:23	0.417061	1.85517	125.129	FALSE	0
2022-09-13	15:21:24	0.0618959	0.275325	126.993	FALSE	0
2022-09-13	15:21:24	0.304644	1.35512	126.484	FALSE	0
2022-09-13	15:21:24	0.160929	0.715844	127.708	FALSE	0
2022-09-13	15:21:25	0.22729	1.01103	127.495	FALSE	0
2022-09-13	15:21:25	0.131209	0.583644	128.292	FALSE	0
2022-09-13	15:21:25	0.158283	0.704074	128.199	FALSE	0
2022-09-13	15:21:25	0.188359	0.837859	129.13	FALSE	0
2022-09-13	15:21:26	-0.132303	-0.58851	128.199	FALSE	0
2022-09-13	15:21:26	-0.0711829	-0.316636	129.13	FALSE	0
2022-09-13	15:21:26	-0.10645	-0.473511	128.199	FALSE	0
2022-09-13	15:21:26	-0.268689	-1.19518	129.13	FALSE	0
2022-09-13	15:21:27	-0.287162	-1.27735	128.199	FALSE	0
2022-09-13	15:21:27	-0.118257	-0.526031	129.13	FALSE	0
2022-09-13	15:21:27	0.113244	0.503732	128.703	FALSE	0
2022-09-13	15:21:27	0.272277	1.21114	130.341	FALSE	0
2022-09-13	15:21:28	0.126018	0.560553	129.263	FALSE	0
2022-09-13	15:21:28	0.434415	1.93236	132.274	FALSE	0
2022-09-13	15:21:28	0.733601	3.2632	132.527	FALSE	0
2022-09-13	15:21:29	0.245255	1.09094	133.364	FALSE	0
2022-09-13	15:21:29	0.567188	2.52297	135.05	FALSE	0
2022-09-13	15:21:29	0.364593	1.62178	134.986	FALSE	0
2022-09-13	15:21:29	0.432735	1.92489	136.975	FALSE	0
2022-09-13	15:21:30	0.388308	1.72727	136.714	FALSE	0
2022-09-13	15:21:30	0.301947	1.34312	138.318	FALSE	0
2022-09-13	15:21:30	0.542761	2.41431	139.128	FALSE	0
2022-09-13	15:21:30	0.244542	1.08777	139.405	FALSE	0
2022-09-13	15:21:31	0.559046	2.48675	141.615	FALSE	0
2022-09-13	15:21:31	0.270954	1.20526	140.611	FALSE	0
2022-09-13	15:21:31	0.598079	2.66038	144.275	FALSE	0
2022-09-13	15:21:31	0.209733	0.932934	141.544	FALSE	0
2022-09-13	15:21:32	0.60098	2.67328	146.948	FALSE	0
2022-09-13	15:21:32	0.381641	1.69762	143.241	FALSE	0
2022-09-13	15:21:32	0.428715	1.90701	148.855	FALSE	0
2022-09-13	15:21:33	0.419962	1.86807	145.109	FALSE	0
2022-09-13	15:21:33	0.345458	1.53667	150.392	FALSE	0
2022-09-13	15:21:33	0.586679	2.60967	147.719	FALSE	0
2022-09-13	15:21:33	0.256705	1.14188	151.534	FALSE	0
2022-09-13	15:21:34	0.602659	2.68075	150.4	FALSE	0
2022-09-13	15:21:34	0.225153	1.00153	152.535	FALSE	0
2022-09-13	15:21:34	0.586476	2.60876	153.008	FALSE	0
2022-09-13	15:21:34	0.203066	0.903278	153.439	FALSE	0
2022-09-13	15:21:35	0.585051	2.60242	155.611	FALSE	0
2022-09-13	15:21:35	0.321183	1.42869	154.867	FALSE	0
2022-09-13	15:21:35	0.507443	2.25721	157.868	FALSE	0
2022-09-13	15:21:35	0.305458	1.35874	156.226	FALSE	0
2022-09-13	15:21:36	0.493244	2.19405	160.062	FALSE	0
2022-09-13	15:21:36	0.424237	1.88709	158.113	FALSE	0
2022-09-13	15:21:36	0.431769	1.92059	161.983	FALSE	0
2022-09-13	15:21:37	0.410445	1.82574	159.939	FALSE	0
2022-09-13	15:21:37	0.358944	1.59665	163.579	FALSE	0
2022-09-13	15:21:37	0.568104	2.52704	162.466	FALSE	0
2022-09-13	15:21:37	0.276756	1.23107	164.81	FALSE	0
2022-09-13	15:21:38	0.524084	2.33123	164.797	FALSE	0
2022-09-13	15:21:38	0.305611	1.35942	166.17	FALSE	0
2022-09-13	15:21:38	0.516705	2.29841	167.096	FALSE	0
2022-09-13	15:21:38	0.267596	1.19032	167.36	FALSE	0
2022-09-13	15:21:39	0.584847	2.60152	169.697	FALSE	0
2022-09-13	15:21:39	0.289428	1.28743	168.648	FALSE	0
2022-09-13	15:21:39	0.574669	2.55624	172.253	FALSE	0
2022-09-13	15:21:39	0.255382	1.13599	169.784	FALSE	0
2022-09-13	15:21:40	0.559148	2.4872	174.74	FALSE	0
2022-09-13	15:21:40	0.295127	1.31278	171.096	FALSE	0
2022-09-13	15:21:40	0.495993	2.20628	176.947	FALSE	0
2022-09-13	15:21:41	0.261998	1.16542	172.262	FALSE	0
2022-09-13	15:21:41	0.507545	2.25766	179.204	FALSE	0
2022-09-13	15:21:41	0.334618	1.48845	173.75	FALSE	0
2022-09-13	15:21:41	0.389479	1.73248	180.937	FALSE	0
2022-09-13	15:21:42	0.309733	1.37775	175.128	FALSE	0
2022-09-13	15:21:42	0.442405	1.96791	182.905	FALSE	0
2022-09-13	15:21:42	0.417519	1.85721	176.985	FALSE	0
2022-09-13	15:21:42	0.369326	1.64284	184.548	FALSE	0
2022-09-13	15:21:43	0.337672	1.50203	178.487	FALSE	0
2022-09-13	15:21:43	0.428257	1.90497	186.453	FALSE	0
2022-09-13	15:21:43	0.428308	1.9052	180.392	FALSE	0
2022-09-13	15:21:43	0.348817	1.55161	188.004	FALSE	0
2022-09-13	15:21:44	0.357723	1.59122	181.984	FALSE	0
2022-09-13	15:21:44	0.400267	1.78047	189.785	FALSE	0
2022-09-13	15:21:44	0.445305	1.98081	183.965	FALSE	0
2022-09-13	15:21:45	0.391972	1.74357	191.528	FALSE	0
2022-09-13	15:21:45	0.378639	1.68426	185.649	FALSE	0
2022-09-13	15:21:45	0.412379	1.83434	193.363	FALSE	0
2022-09-13	15:21:45	0.448664	1.99575	187.645	FALSE	0
2022-09-13	15:21:46	0.312634	1.39066	194.753	FALSE	0
2022-09-13	15:21:46	0.381641	1.69762	189.342	FALSE	0
2022-09-13	15:21:46	0.361132	1.60639	196.36	FALSE	0
2022-09-13	15:21:46	0.506984	2.25517	191.597	FALSE	0
2022-09-13	15:21:47	0.307137	1.36621	197.726	FALSE	0
2022-09-13	15:21:47	0.466018	2.07294	193.67	FALSE	0
2022-09-13	15:21:47	0.293194	1.30419	199.03	FALSE	0
2022-09-13	15:21:47	0.553601	2.46253	196.133	FALSE	0
2022-09-13	15:21:48	0.171158	0.761345	199.791	FALSE	0
2022-09-13	15:21:48	0.304339	1.35376	197.487	FALSE	0
2022-09-13	15:21:48	-0.120954	-0.538028	199.791	FALSE	0
2022-09-13	15:21:49	0.206832	0.92003	198.407	FALSE	0
2022-09-13	15:21:49	0.42897	1.90814	201.7	FALSE	0
2022-09-13	15:21:49	0.302761	1.34674	199.753	FALSE	0
2022-09-13	15:21:49	0.377926	1.68109	203.381	FALSE	0
2022-09-13	15:21:50	0.340675	1.51539	201.269	FALSE	0
2022-09-13	15:21:50	0.386171	1.71777	205.098	FALSE	0
2022-09-13	15:21:50	0.413244	1.83819	203.107	FALSE	0
2022-09-13	15:21:50	0.330751	1.47125	206.57	FALSE	0
2022-09-13	15:21:51	0.557315	2.47905	205.586	FALSE	0
2022-09-13	15:21:51	0.35986	1.60073	208.17	FALSE	0
2022-09-13	15:21:51	0.504237	2.24295	207.829	FALSE	0
2022-09-13	15:21:51	0.340827	1.51607	209.686	FALSE	0
2022-09-13	15:21:52	0.386069	1.71731	209.546	FALSE	0
2022-09-13	15:21:52	0.410496	1.82597	211.512	FALSE	0
2022-09-13	15:21:52	0.367799	1.63604	211.182	FALSE	0
2022-09-13	15:21:53	0.450547	2.00412	213.517	FALSE	0
2022-09-13	15:21:53	0.347748	1.54685	212.729	FALSE	0
2022-09-13	15:21:53	0.360216	1.60231	215.119	FALSE	0
2022-09-13	15:21:53	0.537163	2.38941	215.119	FALSE	0
2022-09-13	15:21:54	0.400929	1.78341	216.902	FALSE	0
2022-09-13	15:21:54	0.4193	1.86513	216.984	FALSE	0
2022-09-13	15:21:54	0.390852	1.73859	218.641	FALSE	0
2022-09-13	15:21:54	0.411921	1.83231	218.816	FALSE	0
2022-09-13	15:21:55	0.397621	1.7687	220.41	FALSE	0
2022-09-13	15:21:55	0.421387	1.87441	220.69	FALSE	0
2022-09-13	15:21:55	0.40841	1.81669	222.226	FALSE	0
2022-09-13	15:21:55	0.427137	1.89999	222.59	FALSE	0
2022-09-13	15:21:56	0.416349	1.852	224.078	FALSE	0
2022-09-13	15:21:56	0.42902	1.90837	224.499	FALSE	0
2022-09-13	15:21:56	0.426323	1.89637	225.975	FALSE	0
2022-09-13	15:21:57	0.371158	1.65099	226.15	FALSE	0
2022-09-13	15:21:57	0.380878	1.69422	227.669	FALSE	0
2022-09-13	15:21:57	0.330191	1.46876	227.618	FALSE	0
2022-09-13	15:21:57	0.417316	1.85631	229.525	FALSE	0
2022-09-13	15:21:58	0.620776	2.76134	230.38	FALSE	0
2022-09-13	15:21:58	0.538435	2.39507	231.92	FALSE	0
2022-09-13	15:21:58	-0.172557	-0.767568	230.38	FALSE	0
2022-09-13	15:21:58	-0.464414	-2.06581	231.92	FALSE	0
2022-09-13	15:21:59	-0.427519	-1.90169	230.38	FALSE	0
2022-09-13	15:21:59	-0.359631	-1.59971	231.92	FALSE	0
2022-09-13	15:21:59	0.307748	1.36892	231.749	FALSE	0
2022-09-13	15:21:59	-0.0301652	-0.134181	231.92	FALSE	0
2022-09-13	15:22:00	0.497621	2.21352	233.962	FALSE	0
2022-09-13	15:22:00	-0.147112	-0.654384	231.92	FALSE	0
2022-09-13	15:22:00	-0.262175	-1.16621	233.962	FALSE	0
2022-09-13	15:22:01	-0.180089	-0.801072	231.92	FALSE	0
2022-09-13	15:22:01	-0.561361	-2.49705	233.962	FALSE	0
2022-09-13	15:22:01	-0.646908	-2.87758	231.92	FALSE	0
2022-09-13	15:22:01	-0.717544	-3.19178	233.962	FALSE	0
2022-09-13	15:22:02	-0.604923	-2.69082	231.92	FALSE	0
2022-09-13	15:22:02	-0.434185	-1.93134	233.962	FALSE	0
2022-09-13	15:22:02	-0.244007	-1.08539	231.92	FALSE	0
2022-09-13	15:22:02	-0.180394	-0.802429	233.962	FALSE	0
2022-09-13	15:22:03	0.00459311	0.0204311	231.941	FALSE	0
2022-09-13	15:22:03	0.0708017	0.31494	234.277	FALSE	0
2022-09-13	15:22:03	0.109428	0.486758	232.427	FALSE	0
2022-09-13	15:22:03	0.289835	1.28924	235.566	FALSE	0
2022-09-13	15:22:04	0.153041	0.680757	233.108	FALSE	0
2022-09-13	15:22:04	-0.174491	-0.776171	235.566	FALSE	0
2022-09-13	15:22:04	0.103931	0.462306	233.57	FALSE	0
2022-09-13	15:22:05	0.228054	1.01443	236.581	FALSE	0
2022-09-13	15:22:05	0.169122	0.752288	234.323	FALSE	0
2022-09-13	15:22:05	0.309326	1.37594	237.957	FALSE	0
2022-09-13	15:22:05	0.0884607	0.393491	234.716	FALSE	0
2022-09-13	15:22:06	-0.352353	-1.56734	237.957	FALSE	0
2022-09-13	15:22:06	0.0527356	0.234578	234.951	FALSE	0
2022-09-13	15:22:06	0.0735498	0.327164	238.284	FALSE	0
2022-09-13	15:22:06	0.0165524	0.0736284	235.024	FALSE	0
2022-09-13	15:22:07	0.315026	1.4013	239.685	FALSE	0
2022-09-13	15:22:07	0.384339	1.70962	236.734	FALSE	0
2022-09-13	15:22:07	0.223931	0.99609	240.681	FALSE	0
2022-09-13	15:22:07	0.209987	0.934064	237.668	FALSE	0
2022-09-13	15:22:08	0.372735	1.658	242.339	FALSE	0
2022-09-13	15:22:08	0.248359	1.10475	238.773	FALSE	0
2022-09-13	15:22:08	0.423066	1.88188	244.221	FALSE	0
2022-09-13	15:22:09	0.144237	0.641595	239.414	FALSE	0
2022-09-13	15:22:09	0.320522	1.42575	245.647	FALSE	0
2022-09-13	15:22:09	0.245814	1.09343	240.508	FALSE	0
2022-09-13	15:22:09	0.328003	1.45902	247.106	FALSE	0
2022-09-13	15:22:10	0.0874938	0.38919	240.897	FALSE	0
2022-09-13	15:22:10	0.406425	1.80786	248.914	FALSE	0
2022-09-13	15:22:10	0.306985	1.36553	242.263	FALSE	0
2022-09-13	15:22:10	0.424237	1.88709	250.801	FALSE	0
2022-09-13	15:22:11	0.168868	0.751159	243.014	FALSE	0
2022-09-13	15:22:11	-0.262023	-1.16553	250.801	FALSE	0
2022-09-13	15:22:11	-0.516882	-2.29919	243.014	FALSE	0
2022-09-13	15:22:11	-0.428028	-1.90395	250.801	FALSE	0
2022-09-13	15:22:12	-0.285992	-1.27215	243.014	FALSE	0
2022-09-13	15:22:12	-0.133219	-0.592585	250.801	FALSE	0
2022-09-13	15:22:12	-0.00151375	-0.00673346	243.014	FALSE	0
2022-09-13	15:22:13	0.0888679	0.395302	251.196	FALSE	0
2022-09-13	15:22:13	0.0874429	0.388964	243.403	FALSE	0
2022-09-13	15:22:13	0.109021	0.484947	251.681	FALSE	0
2022-09-13	15:22:13	0.0991987	0.441256	243.844	FALSE	0
2022-09-13	15:22:14	0.109835	0.488568	252.17	FALSE	0
2022-09-13	15:22:14	0.16159	0.718785	244.563	FALSE	0
2022-09-13	15:22:14	0.218741	0.973004	253.143	FALSE	0
2022-09-13	15:22:14	0.0703946	0.313129	244.876	FALSE	0
2022-09-13	15:22:15	0.101387	0.45099	253.594	FALSE	0
2022-09-13	15:22:15	0.00281194	0.0125081	244.888	FALSE	0
2022-09-13	15:22:15	-0.125534	-0.5584	253.594	FALSE	0
2022-09-13	15:22:15	-0.105229	-0.46808	244.888	FALSE	0
2022-09-13	15:22:16	-0.164923	-0.73361	253.594	FALSE	0
2022-09-13	15:22:16	-0.0210048	-0.0934336	244.888	FALSE	0
2022-09-13	15:22:16	-0.114745	-0.510409	253.594	FALSE	0
2022-09-13	15:22:17	-0.0380023	-0.169042	244.888	FALSE	0
2022-09-13	15:22:17	-0.121565	-0.540745	253.594	FALSE	0
2022-09-13	15:22:17	-0.10589	-0.47102	244.888	FALSE	0
2022-09-13	15:22:17	-0.133677	-0.594622	253.594	FALSE	0
2022-09-13	15:22:18	-0.116679	-0.519012	244.888	FALSE	0
2022-09-13	15:22:18	-0.102735	-0.456986	253.594	FALSE	0
2022-09-13	15:22:18	-0.144516	-0.642836	244.888	FALSE	0
2022-09-13	15:22:18	-0.0676715	-0.301016	253.594	FALSE	0
2022-09-13	15:22:19	-0.0580023	-0.258006	244.888	FALSE	0
2022-09-13	15:22:19	-0.0616664	-0.274304	253.594	FALSE	0
2022-09-13	15:22:19	-0.116934	-0.520146	244.888	FALSE	0
2022-09-13	15:22:19	-0.113473	-0.504751	253.594	FALSE	0
2022-09-13	15:22:20	-0.116628	-0.518785	244.888	FALSE	0
2022-09-13	15:22:20	-0.153219	-0.681549	253.594	FALSE	0
2022-09-13	15:22:20	-0.203855	-0.906788	244.888	FALSE	0
2022-09-13	15:22:21	-0.123906	-0.551159	253.594	FALSE	0
2022-09-13	15:22:21	-0.235509	-1.04759	244.888	FALSE	0
2022-09-13	15:22:21	-0.333269	-1.48245	253.594	FALSE	0
2022-09-13	15:22:21	-0.430165	-1.91346	244.888	FALSE	0
2022-09-13	15:22:22	-0.270369	-1.20266	253.594	FALSE	0
2022-09-13	15:22:22	0.24785	1.10249	245.991	FALSE	0
2022-09-13	15:22:22	0.437723	1.94708	255.541	FALSE	0
2022-09-13	15:22:22	0.319148	1.41963	247.411	FALSE	0
2022-09-13	15:22:23	0.823779	3.66433	259.205	FALSE	0
2022-09-13	15:22:23	0.911717	4.0555	251.466	FALSE	0
2022-09-13	15:22:23	0.359453	1.59892	260.804	FALSE	0
2022-09-13	15:22:23	0.342608	1.52399	252.99	FALSE	0
2022-09-13	15:22:24	0.506781	2.25426	263.058	FALSE	0
2022-09-13	15:22:24	0.330649	1.47079	254.461	FALSE	0
2022-09-13	15:22:24	0.295229	1.31324	264.372	FALSE	0
2022-09-13	15:22:25	0.234618	1.04363	255.504	FALSE	0
2022-09-13	15:22:25	0.365305	1.62495	265.997	FALSE	0
2022-09-13	15:22:25	0.293397	1.30509	256.81	FALSE	0
2022-09-13	15:22:25	0.245763	1.0932	267.09	FALSE	0
2022-09-13	15:22:26	0.261845	1.16474	257.974	FALSE	0
2022-09-13	15:22:26	0.304746	1.35557	268.445	FALSE	0
2022-09-13	15:22:26	0.30729	1.36689	259.341	FALSE	0
2022-09-13	15:22:26	0.270344	1.20254	269.648	FALSE	0
2022-09-13	15:22:27	0.325356	1.44725	260.788	FALSE	0
2022-09-13	15:22:27	0.307596	1.36825	271.016	FALSE	0
2022-09-13	15:22:27	0.340827	1.51607	262.304	FALSE	0
2022-09-13	15:22:27	0.253448	1.12739	272.143	FALSE	0
2022-09-13	15:22:28	0.327138	1.45518	263.76	FALSE	0
2022-09-13	15:22:28	0.302048	1.34357	273.487	FALSE	0
2022-09-13	15:22:28	0.35584	1.58285	265.342	FALSE	0
2022-09-13	15:22:28	0.313448	1.39428	274.881	FALSE	0
2022-09-13	15:22:29	0.337875	1.50294	266.845	FALSE	0
2022-09-13	15:22:29	0.442048	1.96632	276.848	FALSE	0
2022-09-13	15:22:29	0.594517	2.64453	269.49	FALSE	0
2022-09-13	15:22:30	0.775534	3.44973	280.297	FALSE	0
2022-09-13	15:22:30	0.536145	2.38488	271.875	FALSE	0
2022-09-13	15:22:30	0.588359	2.61714	282.915	FALSE	0
2022-09-13	15:22:30	0.604644	2.68958	274.564	FALSE	0
2022-09-13	15:22:31	0.617875	2.74843	285.663	FALSE	0
2022-09-13	15:22:31	0.783219	3.48391	278.048	FALSE	0
2022-09-13	15:22:31	0.469682	2.08924	287.752	FALSE	0
2022-09-13	15:22:31	0.719148	3.19891	281.247	FALSE	0
2022-09-13	15:22:32	0.505916	2.25042	290.003	FALSE	0
2022-09-13	15:22:32	0.399046	1.77504	283.022	FALSE	0
2022-09-13	15:22:32	0.445916	1.98352	291.986	FALSE	0
2022-09-13	15:22:32	0.42098	1.8726	284.895	FALSE	0
2022-09-13	15:22:33	0.385254	1.71369	293.7	FALSE	0
2022-09-13	15:22:33	0.343321	1.52716	286.422	FALSE	0
2022-09-13	15:22:33	0.411158	1.82891	295.529	FALSE	0
2022-09-13	15:22:34	0.326527	1.45246	287.874	FALSE	0
2022-09-13	15:22:34	0.324491	1.4434	296.972	FALSE	0
2022-09-13	15:22:34	0.336807	1.49818	289.373	FALSE	0
2022-09-13	15:22:34	0.401489	1.7859	298.758	FALSE	0
2022-09-13	15:22:35	0.31416	1.39745	290.77	FALSE	0
2022-09-13	15:22:35	0.241387	1.07374	299.832	FALSE	0
2022-09-13	15:22:35	0.270191	1.20186	291.972	FALSE	0
2022-09-13	15:22:35	0.242303	1.07781	300.91	FALSE	0
2022-09-13	15:22:36	0.368715	1.64012	293.612	FALSE	0
2022-09-13	15:22:36	0.216552	0.963267	301.873	FALSE	0
2022-09-13	15:22:36	0.364186	1.61997	295.232	FALSE	0
2022-09-13	15:22:36	0.338842	1.50724	303.38	FALSE	0
2022-09-13	15:22:37	0.40327	1.79383	297.026	FALSE	0
2022-09-13	15:22:37	0.278842	1.24034	304.62	FALSE	0
2022-09-13	15:22:37	0.37299	1.65913	298.685	FALSE	0
2022-09-13	15:22:38	0.362659	1.61318	306.234	FALSE	0
2022-09-13	15:22:38	0.331209	1.47328	300.158	FALSE	0
2022-09-13	15:22:38	0.288715	1.28426	307.518	FALSE	0
2022-09-13	15:22:38	0.359555	1.59937	301.758	FALSE	0
2022-09-13	15:22:39	0.386425	1.7189	309.237	FALSE	0
2022-09-13	15:22:39	0.397112	1.76643	303.524	FALSE	0
2022-09-13	15:22:39	0.333193	1.48211	310.719	FALSE	0
2022-09-13	15:22:39	0.416043	1.85064	305.375	FALSE	0
2022-09-13	15:22:40	0.270903	1.20503	311.924	FALSE	0
2022-09-13	15:22:40	0.295687	1.31527	306.69	FALSE	0
2022-09-13	15:22:40	0.177316	0.788737	312.713	FALSE	0
2022-09-13	15:22:40	0.395076	1.75738	308.447	FALSE	0
2022-09-13	15:22:41	0.291005	1.29445	314.007	FALSE	0
2022-09-13	15:22:41	0.327799	1.45812	309.906	FALSE	0
2022-09-13	15:22:41	0.22042	0.980472	314.988	FALSE	0
2022-09-13	15:22:42	0.42215	1.87781	311.783	FALSE	0
2022-09-13	15:22:42	0.261132	1.16157	316.149	FALSE	0
2022-09-13	15:22:42	0.323066	1.43706	313.22	FALSE	0
2022-09-13	15:22:42	0.366222	1.62903	317.778	FALSE	0
2022-09-13	15:22:43	0.341387	1.51856	314.739	FALSE	0
2022-09-13	15:22:43	0.380013	1.69037	319.469	FALSE	0
2022-09-13	15:22:43	0.311005	1.38341	316.122	FALSE	0
2022-09-13	15:22:43	0.306832	1.36485	320.833	FALSE	0
2022-09-13	15:22:44	0.297163	1.32184	317.444	FALSE	0
2022-09-13	15:22:44	0.29187	1.2983	322.132	FALSE	0
2022-09-13	15:22:44	0.296654	1.31958	318.764	FALSE	0
2022-09-13	15:22:44	0.287952	1.28087	323.413	FALSE	0
2022-09-13	15:22:45	0.278893	1.24057	320.004	FALSE	0
2022-09-13	15:22:45	0.275941	1.22744	324.64	FALSE	0
2022-09-13	15:22:45	0.314466	1.39881	321.403	FALSE	0
2022-09-13	15:22:46	0.300471	1.33656	325.977	FALSE	0
2022-09-13	15:22:46	0.287392	1.27838	322.682	FALSE	0
2022-09-13	15:22:46	0.28785	1.28041	327.257	FALSE	0
2022-09-13	15:22:46	0.301489	1.34108	324.023	FALSE	0
2022-09-13	15:22:47	0.527392	2.34595	329.603	FALSE	0
2022-09-13	15:22:47	1.39218	6.1927	330.215	FALSE	0
2022-09-13	15:22:47	0.419606	1.86649	331.469	FALSE	0
2022-09-13	15:22:47	0.436094	1.93983	332.155	FALSE	0
2022-09-13	15:22:48	0.252226	1.12195	332.591	FALSE	0
2022-09-13	15:22:48	0.314262	1.3979	333.553	FALSE	0
2022-09-13	15:22:48	0.250344	1.11358	333.705	FALSE	0
2022-09-13	15:22:48	0.205458	0.913918	334.467	FALSE	0
2022-09-13	15:22:49	0.304288	1.35353	335.058	FALSE	0
2022-09-13	15:22:49	0.200878	0.893546	335.361	FALSE	0
2022-09-13	15:22:49	0.224491	0.998581	336.057	FALSE	0
2022-09-13	15:22:50	0.31131	1.38477	336.745	FALSE	0
2022-09-13	15:22:50	0.317417	1.41193	337.469	FALSE	0
2022-09-13	15:22:50	0.281132	1.25053	337.996	FALSE	0
2022-09-13	15:22:50	0.409631	1.82212	339.291	FALSE	0
2022-09-13	15:22:51	0.888257	3.95114	341.947	FALSE	0
2022-09-13	15:22:51	0.790445	3.51606	342.807	FALSE	0
2022-09-13	15:22:51	0.824746	3.66864	345.616	FALSE	0
2022-09-13	15:22:51	0.451209	2.00707	344.814	FALSE	0
2022-09-13	15:22:52	0.309529	1.37685	346.992	FALSE	0
2022-09-13	15:22:52	0.362608	1.61295	346.427	FALSE	0
2022-09-13	15:22:52	0.174771	0.777416	347.77	FALSE	0
2022-09-13	15:22:52	0.125356	0.557609	346.985	FALSE	0
2022-09-13	15:22:53	0.105764	0.470459	348.24	FALSE	0
2022-09-13	15:22:53	0.116705	0.519127	347.504	FALSE	0
2022-09-13	15:22:53	0.000929014	0.00413244	348.244	FALSE	0
2022-09-13	15:22:54	-0.013931	-0.0619679	347.504	FALSE	0
2022-09-13	15:22:54	0.0151783	0.0675161	348.312	FALSE	0
2022-09-13	15:22:54	0.0393004	0.174816	347.679	FALSE	0
2022-09-13	15:22:54	-0.0359667	-0.159987	348.312	FALSE	0
2022-09-13	15:22:55	0.188766	0.839669	348.518	FALSE	0
2022-09-13	15:22:55	0.16383	0.728749	349.041	FALSE	0
2022-09-13	15:22:55	0.218181	0.970513	349.489	FALSE	0
2022-09-13	15:22:55	0.394364	1.75421	350.795	FALSE	0
2022-09-13	15:22:56	0.471209	2.09603	351.585	FALSE	0
2022-09-13	15:22:56	0.439097	1.95319	352.748	FALSE	0
2022-09-13	15:22:56	0.409936	1.82348	353.408	FALSE	0
2022-09-13	15:22:56	0.22785	1.01352	353.762	FALSE	0
2022-09-13	15:22:57	0.591107	2.62936	356.038	FALSE	0
2022-09-13	15:22:57	0.306476	1.36327	355.125	FALSE	0
2022-09-13	15:22:57	0.52332	2.32783	358.366	FALSE	0
2022-09-13	15:22:58	0.25416	1.13055	356.255	FALSE	0
2022-09-13	15:22:58	0.475076	2.11323	360.479	FALSE	0
2022-09-13	15:22:58	0.268919	1.19621	357.452	FALSE	0
2022-09-13	15:22:58	0.448766	1.9962	362.475	FALSE	0
2022-09-13	15:22:59	0.279911	1.2451	358.697	FALSE	0
2022-09-13	15:22:59	0.42841	1.90565	364.381	FALSE	0
2022-09-13	15:22:59	0.268257	1.19326	359.89	FALSE	0
2022-09-13	15:22:59	0.447596	1.991	366.372	FALSE	0
2022-09-13	15:23:00	0.283219	1.25981	361.15	FALSE	0
2022-09-13	15:23:00	0.352939	1.56994	367.942	FALSE	0
2022-09-13	15:23:00	0.246476	1.09637	362.246	FALSE	0
2022-09-13	15:23:00	0.360013	1.60141	369.543	FALSE	0
2022-09-13	15:23:01	0.241692	1.07509	363.321	FALSE	0
2022-09-13	15:23:01	0.194364	0.86457	370.408	FALSE	0
2022-09-13	15:23:01	0.242405	1.07827	364.4	FALSE	0
2022-09-13	15:23:02	0.251361	1.1181	371.526	FALSE	0
2022-09-13	15:23:02	0.33528	1.49139	365.891	FALSE	0
2022-09-13	15:23:02	0.184898	0.822463	372.348	FALSE	0
2022-09-13	15:23:02	0.346374	1.54074	367.432	FALSE	0
2022-09-13	15:23:03	0.232125	1.03254	373.381	FALSE	0
2022-09-13	15:23:03	0.300624	1.33724	368.769	FALSE	0
2022-09-13	15:23:03	0.132939	0.591339	373.972	FALSE	0
2022-09-13	15:23:03	0.378944	1.68562	370.455	FALSE	0
2022-09-13	15:23:04	0.237316	1.05563	375.028	FALSE	0
2022-09-13	15:23:04	0.449784	2.00073	372.455	FALSE	0
2022-09-13	15:23:04	0.16271	0.723767	375.751	FALSE	0
2022-09-13	15:23:04	0.43986	1.95659	374.412	FALSE	0
2022-09-13	15:23:05	0.216756	0.964174	376.716	FALSE	0
2022-09-13	15:23:05	0.416858	1.85427	376.266	FALSE	0
2022-09-13	15:23:05	0.25528	1.13554	377.851	FALSE	0
2022-09-13	15:23:06	0.613855	2.73055	378.997	FALSE	0
2022-09-13	15:23:06	0.554415	2.46615	380.317	FALSE	0
2022-09-13	15:23:06	0.397926	1.77005	380.767	FALSE	0
2022-09-13	15:23:06	0.512939	2.28166	382.599	FALSE	0
2022-09-13	15:23:07	0.456654	2.03129	382.798	FALSE	0
2022-09-13	15:23:07	0.365458	1.62563	384.225	FALSE	0
2022-09-13	15:23:07	0.354669	1.57764	384.376	FALSE	0
2022-09-13	15:23:07	0.54785	2.43695	386.662	FALSE	0
2022-09-13	15:23:08	0.284746	1.26661	385.642	FALSE	0
2022-09-13	15:23:08	0.331463	1.47441	388.136	FALSE	0
2022-09-13	15:23:08	0.294822	1.31143	386.954	FALSE	0
2022-09-13	15:23:08	0.395178	1.75783	389.894	FALSE	0
2022-09-13	15:23:09	0.341489	1.51901	388.473	FALSE	0
2022-09-13	15:23:09	0.386934	1.72116	391.615	FALSE	0
2022-09-13	15:23:09	0.772023	3.43411	391.907	FALSE	0
2022-09-13	15:23:10	0.827952	3.6829	395.298	FALSE	0
2022-09-13	15:23:10	0.338944	1.50769	393.415	FALSE	0
2022-09-13	15:23:10	0.35299	1.57017	396.868	FALSE	0
2022-09-13	15:23:10	0.341641	1.51969	394.934	FALSE	0
2022-09-13	15:23:11	0.354211	1.5756	398.444	FALSE	0
2022-09-13	15:23:11	0.305102	1.35715	396.291	FALSE	0
2022-09-13	15:23:11	0.352176	1.56655	400.01	FALSE	0
2022-09-13	15:23:11	0.450852	2.00548	398.297	FALSE	0
2022-09-13	15:23:12	0.29645	1.31867	401.329	FALSE	0
2022-09-13	15:23:12	0.150293	0.668533	398.965	FALSE	0
2022-09-13	15:23:12	0.0640842	0.285059	401.614	FALSE	0
2022-09-13	15:23:12	0.0566033	0.251783	399.217	FALSE	0
2022-09-13	15:23:13	-0.118715	-0.528068	401.614	FALSE	0
2022-09-13	15:23:13	-0.153117	-0.681095	399.217	FALSE	0
2022-09-13	15:23:13	-0.107417	-0.477812	401.614	FALSE	0
2022-09-13	15:23:14	-0.210369	-0.935763	399.217	FALSE	0
2022-09-13	15:23:14	-0.128231	-0.570397	401.614	FALSE	0
2022-09-13	15:23:14	-0.187213	-0.832761	399.217	FALSE	0
2022-09-13	15:23:14	-0.189453	-0.842725	401.614	FALSE	0
2022-09-13	15:23:15	-0.146348	-0.650985	399.217	FALSE	0
2022-09-13	15:23:15	-0.127264	-0.566096	401.614	FALSE	0
2022-09-13	15:23:15	-0.0195799	-0.0870953	399.217	FALSE	0
2022-09-13	15:23:15	0.134415	0.597905	402.212	FALSE	0
2022-09-13	15:23:16	0.0997585	0.443746	399.661	FALSE	0
2022-09-13	15:23:16	-0.0855849	-0.380699	402.212	FALSE	0
2022-09-13	15:23:16	-0.132506	-0.589413	399.661	FALSE	0
2022-09-13	15:23:16	-0.315356	-1.40277	402.212	FALSE	0
2022-09-13	15:23:17	-0.303753	-1.35115	399.661	FALSE	0
2022-09-13	15:23:17	-0.351844	-1.56507	402.212	FALSE	0
2022-09-13	15:23:17	-0.352353	-1.56734	399.661	FALSE	0
2022-09-13	15:23:18	-0.317188	-1.41092	402.212	FALSE	0
2022-09-13	15:23:18	-0.347773	-1.54696	399.661	FALSE	0
2022-09-13	15:23:18	-0.222175	-0.988279	402.212	FALSE	0
2022-09-13	15:23:18	-0.339427	-1.50984	399.661	FALSE	0
2022-09-13	15:23:19	-0.288384	-1.28279	402.212	FALSE	0
2022-09-13	15:23:19	-0.332404	-1.4786	399.661	FALSE	0
2022-09-13	15:23:19	-0.29785	-1.3249	402.212	FALSE	0
2022-09-13	15:23:19	-0.293626	-1.30611	399.661	FALSE	0
2022-09-13	15:23:20	-0.4122	-1.83355	402.212	FALSE	0
2022-09-13	15:23:20	-0.346195	-1.53994	399.661	FALSE	0
2022-09-13	15:23:20	-0.37388	-1.66309	402.212	FALSE	0
2022-09-13	15:23:20	-0.372353	-1.6563	399.661	FALSE	0
2022-09-13	15:23:21	-0.216679	-0.963832	402.212	FALSE	0
2022-09-13	15:23:21	-0.219733	-0.977416	399.661	FALSE	0
2022-09-13	15:23:21	-0.197137	-0.876905	402.212	FALSE	0
2022-09-13	15:23:22	-0.260292	-1.15783	399.661	FALSE	0
2022-09-13	15:23:22	-0.174694	-0.777074	402.212	FALSE	0
2022-09-13	15:23:22	-0.193473	-0.860607	399.661	FALSE	0
2022-09-13	15:23:22	-0.355254	-1.58024	402.212	FALSE	0
2022-09-13	15:23:23	-0.31388	-1.3962	399.661	FALSE	0
2022-09-13	15:23:23	-0.359274	-1.59812	402.212	FALSE	0
2022-09-13	15:23:23	-0.160598	-0.714372	399.661	FALSE	0
2022-09-13	15:23:23	-0.260598	-1.15919	402.212	FALSE	0
2022-09-13	15:23:24	-0.154389	-0.686753	399.661	FALSE	0
2022-09-13	15:23:24	-0.247977	-1.10305	402.212	FALSE	0
2022-09-13	15:23:24	-0.179224	-0.797224	399.661	FALSE	0
2022-09-13	15:23:24	-0.188995	-0.840688	402.212	FALSE	0
2022-09-13	15:23:25	-0.238409	-1.06049	399.661	FALSE	0
2022-09-13	15:23:25	-0.0720989	-0.32071	402.212	FALSE	0
2022-09-13	15:23:25	-0.103753	-0.461514	399.661	FALSE	0
2022-09-13	15:23:26	-0.0306231	-0.136218	402.212	FALSE	0
2022-09-13	15:23:26	-0.128638	-0.572208	399.661	FALSE	0
2022-09-13	15:23:26	0.0865269	0.384889	402.597	FALSE	0
2022-09-13	15:23:26	-0.107315	-0.477359	399.661	FALSE	0
2022-09-13	15:23:27	-0.0154577	-0.0687589	402.597	FALSE	0
2022-09-13	15:23:27	-0.0178496	-0.0793986	399.661	FALSE	0
2022-09-13	15:23:27	-0.094847	-0.421898	402.597	FALSE	0
2022-09-13	15:23:27	-0.111539	-0.496148	399.661	FALSE	0
2022-09-13	15:23:28	-0.139224	-0.619296	402.597	FALSE	0
2022-09-13	15:23:28	-0.060445	-0.268871	399.661	FALSE	0
2022-09-13	15:23:28	-0.167977	-0.747195	402.597	FALSE	0
2022-09-13	15:23:28	-0.0154069	-0.068533	399.661	FALSE	0
2022-09-13	15:23:29	-0.0983585	-0.437518	402.597	FALSE	0
2022-09-13	15:23:29	-0.00828218	-0.0368408	399.661	FALSE	0
2022-09-13	15:23:29	0.00403331	0.017941	402.615	FALSE	0
2022-09-13	15:23:30	0.354313	1.57606	401.237	FALSE	0
2022-09-13	15:23:30	0.327697	1.45766	404.072	FALSE	0
2022-09-13	15:23:30	0.431769	1.92059	403.158	FALSE	0
2022-09-13	15:23:30	0.338079	1.50384	405.576	FALSE	0
2022-09-13	15:23:31	0.55355	2.4623	405.62	FALSE	0
2022-09-13	15:23:31	0.27925	1.24216	406.818	FALSE	0
2022-09-13	15:23:31	0.404847	1.80084	407.421	FALSE	0
2022-09-13	15:23:31	0.426781	1.89841	408.717	FALSE	0
2022-09-13	15:23:32	0.374059	1.66389	409.085	FALSE	0
2022-09-13	15:23:32	0.641081	2.85166	411.568	FALSE	0
2022-09-13	15:23:32	0.348257	1.54912	410.634	FALSE	0
2022-09-13	15:23:32	0.556196	2.47407	414.042	FALSE	0
2022-09-13	15:23:33	0.390445	1.73678	412.37	FALSE	0
2022-09-13	15:23:33	0.547392	2.43491	416.477	FALSE	0
2022-09-13	15:23:33	0.312888	1.39179	413.762	FALSE	0
2022-09-13	15:23:34	0.446934	1.98805	418.465	FALSE	0
2022-09-13	15:23:34	0.407494	1.81261	415.575	FALSE	0
2022-09-13	15:23:34	0.264949	1.17855	419.644	FALSE	0
2022-09-13	15:23:34	-0.288638	-1.28392	415.575	FALSE	0
2022-09-13	15:23:35	-0.612048	-2.72251	419.644	FALSE	0
2022-09-13	15:23:35	-0.732913	-3.26014	415.575	FALSE	0
2022-09-13	15:23:35	-0.533575	-2.37345	419.644	FALSE	0
2022-09-13	15:23:35	-0.326755	-1.45347	415.575	FALSE	0
2022-09-13	15:23:36	-0.324465	-1.44329	419.644	FALSE	0
2022-09-13	15:23:36	-0.417849	-1.85868	415.575	FALSE	0
2022-09-13	15:23:36	-0.245229	-1.09083	419.644	FALSE	0
2022-09-13	15:23:36	-0.270674	-1.20401	415.575	FALSE	0
2022-09-13	15:23:37	-0.251895	-1.12048	419.644	FALSE	0
2022-09-13	15:23:37	-0.380547	-1.69275	415.575	FALSE	0
2022-09-13	15:23:37	-0.383346	-1.7052	419.644	FALSE	0
2022-09-13	15:23:38	-0.36304	-1.61487	415.575	FALSE	0
2022-09-13	15:23:38	-0.268129	-1.19269	419.644	FALSE	0
2022-09-13	15:23:38	-0.239733	-1.06638	415.575	FALSE	0
2022-09-13	15:23:38	-0.216984	-0.965188	419.644	FALSE	0
2022-09-13	15:23:39	-0.315356	-1.40277	415.575	FALSE	0
2022-09-13	15:23:39	-0.466246	-2.07396	419.644	FALSE	0
2022-09-13	15:23:39	-0.509605	-2.26682	415.575	FALSE	0
2022-09-13	15:23:39	-0.443396	-1.97231	419.644	FALSE	0
2022-09-13	15:23:40	-0.348027	-1.54809	415.575	FALSE	0
2022-09-13	15:23:40	-0.367977	-1.63684	419.644	FALSE	0
2022-09-13	15:23:40	-0.365534	-1.62597	415.575	FALSE	0
2022-09-13	15:23:40	-0.323804	-1.44034	419.644	FALSE	0
2022-09-13	15:23:41	-0.332302	-1.47815	415.575	FALSE	0
2022-09-13	15:23:41	-0.077646	-0.345385	419.644	FALSE	0
2022-09-13	15:23:41	-0.0967809	-0.430501	415.575	FALSE	0
2022-09-13	15:23:42	0.0159417	0.0709119	419.715	FALSE	0
2022-09-13	15:23:42	-0.136119	-0.605485	415.575	FALSE	0
2022-09-13	15:23:42	0.105153	0.467742	420.183	FALSE	0
2022-09-13	15:23:42	-0.0343382	-0.152743	415.575	FALSE	0
2022-09-13	15:23:43	0.152837	0.67985	420.862	FALSE	0
2022-09-13	15:23:43	-0.055356	-0.246235	415.575	FALSE	0
2022-09-13	15:23:43	0.0486135	0.216243	421.079	FALSE	0
2022-09-13	15:23:43	0.00937683	0.04171	415.617	FALSE	0
2022-09-13	15:23:44	-0.0140837	-0.0626471	421.079	FALSE	0
2022-09-13	15:23:44	-0.0261957	-0.116524	415.617	FALSE	0
2022-09-13	15:23:44	-0.109402	-0.486642	421.079	FALSE	0
2022-09-13	15:23:44	0.00520383	0.0231477	415.64	FALSE	0
2022-09-13	15:23:45	0.096247	0.428126	421.507	FALSE	0
2022-09-13	15:23:45	0.0801147	0.356366	415.996	FALSE	0
2022-09-13	15:23:45	0.0988424	0.439671	421.947	FALSE	0
2022-09-13	15:23:46	0.18729	0.833103	416.829	FALSE	0
2022-09-13	15:23:46	0.0377229	0.167799	422.114	FALSE	0
2022-09-13	15:23:46	-0.156475	-0.696032	416.829	FALSE	0
2022-09-13	15:23:46	-0.155814	-0.693092	422.114	FALSE	0
2022-09-13	15:23:47	-0.223702	-0.995071	416.829	FALSE	0
2022-09-13	15:23:47	-0.293015	-1.30339	422.114	FALSE	0
2022-09-13	15:23:47	-0.324567	-1.44374	416.829	FALSE	0
2022-09-13	15:23:47	-0.0335239	-0.149121	422.114	FALSE	0
2022-09-13	15:23:48	0.0462725	0.205829	417.035	FALSE	0
2022-09-13	15:23:48	0.388359	1.7275	423.842	FALSE	0
2022-09-13	15:23:48	0.582761	2.59224	419.627	FALSE	0
2022-09-13	15:23:48	0.697773	3.10383	426.946	FALSE	0
2022-09-13	15:23:49	0.611412	2.71968	422.347	FALSE	0
2022-09-13	15:23:49	0.689173	3.06558	430.011	FALSE	0
2022-09-13	15:23:49	0.772735	3.43728	425.784	FALSE	0
2022-09-13	15:23:50	0.526578	2.34232	432.354	FALSE	0
2022-09-13	15:23:50	0.36159	1.60842	427.393	FALSE	0
2022-09-13	15:23:50	0.502659	2.23593	434.589	FALSE	0
2022-09-13	15:23:50	0.356094	1.58398	428.977	FALSE	0
2022-09-13	15:23:51	0.0486644	0.216469	434.806	FALSE	0
2022-09-13	15:23:51	0.00779924	0.0346926	429.011	FALSE	0
2022-09-13	15:23:51	0.00215038	0.00956532	434.815	FALSE	0
2022-09-13	15:23:51	0.1593	0.708598	429.72	FALSE	0
2022-09-13	15:23:52	0.0568577	0.252914	435.068	FALSE	0
2022-09-13	15:23:52	0.320013	1.42348	431.143	FALSE	0
2022-09-13	15:23:52	0.0294786	0.131127	435.2	FALSE	0
2022-09-13	15:23:52	0.285204	1.26864	432.412	FALSE	0
2022-09-13	15:23:53	0.0763997	0.339841	435.539	FALSE	0
2022-09-13	15:23:53	0.234211	1.04182	433.454	FALSE	0
2022-09-13	15:23:53	0.130293	0.579569	436.119	FALSE	0
2022-09-13	15:23:54	0.191514	0.851893	434.306	FALSE	0
2022-09-13	15:23:54	0.0947203	0.421335	436.54	FALSE	0
2022-09-13	15:23:54	0.0599111	0.266497	434.572	FALSE	0
2022-09-13	15:23:54	0.195585	0.870001	437.41	FALSE	0
2022-09-13	15:23:55	0.0266287	0.11845	434.691	FALSE	0
2022-09-13	15:23:55	0.149835	0.666496	438.077	FALSE	0
2022-09-13	15:23:55	-0.00288781	-0.0128456	434.691	FALSE	0
2022-09-13	15:23:55	0.140929	0.62688	438.704	FALSE	0
2022-09-13	15:23:56	-0.105738	-0.470344	434.691	FALSE	0
2022-09-13	15:23:56	-0.201615	-0.896824	438.704	FALSE	0
2022-09-13	15:23:56	-0.122939	-0.546857	434.691	FALSE	0
2022-09-13	15:23:56	-0.137137	-0.610013	438.704	FALSE	0
2022-09-13	15:23:57	0.0545676	0.242728	434.933	FALSE	0
2022-09-13	15:23:57	-0.0979004	-0.435481	438.704	FALSE	0
2022-09-13	15:23:57	0.095789	0.426089	435.36	FALSE	0
2022-09-13	15:23:58	-0.122124	-0.543232	438.704	FALSE	0
2022-09-13	15:23:58	0.0394532	0.175496	435.535	FALSE	0
2022-09-13	15:23:58	-0.0118954	-0.0529131	438.704	FALSE	0
2022-09-13	15:23:58	-0.0364756	-0.162251	435.535	FALSE	0
2022-09-13	15:23:59	0.227545	1.01217	439.716	FALSE	0
2022-09-13	15:23:59	0.0178755	0.0795138	435.615	FALSE	0
2022-09-13	15:23:59	0.269936	1.20073	440.917	FALSE	0
2022-09-13	15:23:59	0.00601804	0.0267694	435.641	FALSE	0
2022-09-13	15:24:00	0.138283	0.61511	441.532	FALSE	0
2022-09-13	15:24:00	0.169224	0.752742	436.394	FALSE	0
2022-09-13	15:24:00	0.184186	0.819296	442.351	FALSE	0
2022-09-13	15:24:00	0.339046	1.50814	437.902	FALSE	0
2022-09-13	15:24:01	0.0623539	0.277363	442.628	FALSE	0
2022-09-13	15:24:01	0.289835	1.28924	439.191	FALSE	0
2022-09-13	15:24:01	0.096756	0.43039	443.059	FALSE	0
2022-09-13	15:24:02	0.23187	1.0314	440.223	FALSE	0
2022-09-13	15:24:02	-0.071132	-0.316409	443.059	FALSE	0
2022-09-13	15:24:02	0.152837	0.67985	440.903	FALSE	0
2022-09-13	15:24:02	-0.0689437	-0.306675	443.059	FALSE	0
2022-09-13	15:24:03	0.133804	0.595187	441.498	FALSE	0
2022-09-13	15:24:03	-0.109046	-0.485058	443.059	FALSE	0
2022-09-13	15:24:03	-0.232252	-1.0331	441.498	FALSE	0
2022-09-13	15:24:03	-0.23042	-1.02495	443.059	FALSE	0
2022-09-13	15:24:04	-0.196832	-0.875548	441.498	FALSE	0
2022-09-13	15:24:04	-0.166908	-0.74244	443.059	FALSE	0
2022-09-13	15:24:04	-0.171437	-0.762586	441.498	FALSE	0
2022-09-13	15:24:04	-0.111386	-0.495467	443.059	FALSE	0
2022-09-13	15:24:05	-0.269605	-1.19926	441.498	FALSE	0
2022-09-13	15:24:05	-0.23388	-1.04035	443.059	FALSE	0
2022-09-13	15:24:05	-0.277799	-1.23571	441.498	FALSE	0
2022-09-13	15:24:06	-0.124109	-0.552062	443.059	FALSE	0
2022-09-13	15:24:06	-0.159936	-0.711427	441.498	FALSE	0
2022-09-13	15:24:06	-0.0918954	-0.408769	443.059	FALSE	0
2022-09-13	15:24:06	-0.113982	-0.507015	441.498	FALSE	0
2022-09-13	15:24:07	0.028359	0.126147	443.185	FALSE	0
2022-09-13	15:24:07	0.439708	1.95591	443.454	FALSE	0
2022-09-13	15:24:07	0.344695	1.53327	444.718	FALSE	0
2022-09-13	15:24:07	0.324898	1.44521	444.899	FALSE	0
2022-09-13	15:24:08	0.154059	0.685285	445.403	FALSE	0
2022-09-13	15:24:08	0.448104	1.99326	446.892	FALSE	0
2022-09-13	15:24:08	0.217214	0.966211	446.37	FALSE	0
2022-09-13	15:24:08	0.384695	1.7112	448.603	FALSE	0
2022-09-13	15:24:09	0.211412	0.940403	447.31	FALSE	0
2022-09-13	15:24:09	0.217468	0.967341	449.571	FALSE	0
2022-09-13	15:24:09	0.27243	1.21182	448.522	FALSE	0
2022-09-13	15:24:09	0.216858	0.964628	450.535	FALSE	0
2022-09-13	15:24:10	0.33299	1.48121	450.003	FALSE	0
2022-09-13	15:24:10	0.123524	0.549459	451.085	FALSE	0
2022-09-13	15:24:10	0.285356	1.26932	451.272	FALSE	0
2022-09-13	15:24:11	0.272125	1.21047	452.295	FALSE	0
2022-09-13	15:24:11	0.282812	1.258	452.53	FALSE	0
2022-09-13	15:24:11	0.249326	1.10905	453.404	FALSE	0
2022-09-13	15:24:11	0.211158	0.939273	453.47	FALSE	0
2022-09-13	15:24:12	0.320827	1.4271	454.832	FALSE	0
2022-09-13	15:24:12	0.253397	1.12716	454.597	FALSE	0
2022-09-13	15:24:12	0.404644	1.79994	456.631	FALSE	0
2022-09-13	15:24:12	0.266272	1.18443	455.781	FALSE	0
2022-09-13	15:24:13	0.32042	1.42529	458.057	FALSE	0
2022-09-13	15:24:13	0.40215	1.78884	457.57	FALSE	0
2022-09-13	15:24:13	0.337468	1.50113	459.558	FALSE	0
2022-09-13	15:24:14	0.247646	1.10158	458.672	FALSE	0
2022-09-13	15:24:14	0.350089	1.55727	461.115	FALSE	0
2022-09-13	15:24:14	0.132176	0.587945	459.26	FALSE	0
2022-09-13	15:24:14	0.235026	1.04544	462.161	FALSE	0
2022-09-13	15:24:15	0.181387	0.806846	460.066	FALSE	0
2022-09-13	15:24:15	0.22785	1.01352	463.174	FALSE	0
2022-09-13	15:24:15	0.21411	0.952404	461.019	FALSE	0
2022-09-13	15:24:15	0.4993	2.22099	465.395	FALSE	0
2022-09-13	15:24:16	0.491972	2.18839	463.207	FALSE	0
2022-09-13	15:24:16	0.245356	1.09139	466.486	FALSE	0
2022-09-13	15:24:16	0.319097	1.41941	464.627	FALSE	0
2022-09-13	15:24:16	0.301743	1.34221	467.829	FALSE	0
2022-09-13	15:24:17	0.209122	0.930216	465.557	FALSE	0
2022-09-13	15:24:17	0.310598	1.3816	469.21	FALSE	0
2022-09-13	15:24:17	0.438435	1.95025	467.507	FALSE	0
2022-09-13	15:24:17	0.138741	0.617148	469.827	FALSE	0
2022-09-13	15:24:18	0.417061	1.85517	469.362	FALSE	0
2022-09-13	15:24:18	0.336043	1.49479	471.322	FALSE	0
2022-09-13	15:24:18	0.340064	1.51267	470.875	FALSE	0
2022-09-13	15:24:19	0.374924	1.66774	472.99	FALSE	0
2022-09-13	15:24:19	0.245051	1.09004	471.965	FALSE	0
2022-09-13	15:24:19	0.336298	1.49592	474.486	FALSE	0
2022-09-13	15:24:19	0.361438	1.60775	473.573	FALSE	0
2022-09-13	15:24:20	0.310751	1.38228	475.868	FALSE	0
2022-09-13	15:24:20	0.479504	2.13293	475.706	FALSE	0
2022-09-13	15:24:20	0.30612	1.36168	477.23	FALSE	0
2022-09-13	15:24:20	0.38897	1.73022	477.436	FALSE	0
2022-09-13	15:24:21	0.371463	1.65234	478.882	FALSE	0
2022-09-13	15:24:21	0.386629	1.7198	479.156	FALSE	0
2022-09-13	15:24:21	0.480522	2.13746	481.02	FALSE	0
2022-09-13	15:24:21	0.421743	1.876	481.032	FALSE	0
2022-09-13	15:24:22	0.671819	2.98839	484.008	FALSE	0
2022-09-13	15:24:22	0.542456	2.41295	483.445	FALSE	0
2022-09-13	15:24:22	0.540471	2.40412	486.412	FALSE	0
2022-09-13	15:24:23	0.498995	2.21963	485.664	FALSE	0
2022-09-13	15:24:23	0.414109	1.84204	488.254	FALSE	0
2022-09-13	15:24:23	0.550343	2.44804	488.112	FALSE	0
2022-09-13	15:24:23	0.375585	1.67068	489.925	FALSE	0
2022-09-13	15:24:24	0.520064	2.31335	490.426	FALSE	0
2022-09-13	15:24:24	0.323626	1.43955	491.364	FALSE	0
2022-09-13	15:24:24	0.376298	1.67385	492.1	FALSE	0
2022-09-13	15:24:24	0.349326	1.55387	492.918	FALSE	0
2022-09-13	15:24:25	0.369377	1.64306	493.743	FALSE	0
2022-09-13	15:24:25	0.447341	1.98986	494.908	FALSE	0
2022-09-13	15:24:25	0.330802	1.47147	495.214	FALSE	0
2022-09-13	15:24:25	0.386171	1.71777	496.626	FALSE	0
2022-09-13	15:24:26	0.38612	1.71754	496.932	FALSE	0
2022-09-13	15:24:26	0.412735	1.83593	498.462	FALSE	0
2022-09-13	15:24:26	0.361082	1.60616	498.538	FALSE	0
2022-09-13	15:24:27	0.424237	1.88709	500.349	FALSE	0
2022-09-13	15:24:27	0.375076	1.66841	500.206	FALSE	0
2022-09-13	15:24:27	0.4393	1.95409	502.303	FALSE	0
2022-09-13	15:24:27	0.406069	1.80628	502.012	FALSE	0
2022-09-13	15:24:28	0.383168	1.70441	504.007	FALSE	0
2022-09-13	15:24:28	0.396349	1.76304	503.775	FALSE	0
2022-09-13	15:24:28	0.391107	1.73972	505.747	FALSE	0
2022-09-13	15:24:28	0.398995	1.77481	505.55	FALSE	0
2022-09-13	15:24:29	0.393397	1.74991	507.497	FALSE	0
2022-09-13	15:24:29	0.42383	1.88528	507.436	FALSE	0
2022-09-13	15:24:29	0.394109	1.75308	509.25	FALSE	0
2022-09-13	15:24:29	0.394415	1.75444	509.19	FALSE	0
2022-09-13	15:24:30	0.392685	1.74674	510.997	FALSE	0
2022-09-13	15:24:30	0.407646	1.81329	511.003	FALSE	0
2022-09-13	15:24:30	0.401183	1.78454	512.781	FALSE	0
2022-09-13	15:24:31	0.399758	1.7782	512.782	FALSE	0
2022-09-13	15:24:31	0.402557	1.79065	514.572	FALSE	0
2022-09-13	15:24:31	0.396603	1.76417	514.546	FALSE	0
2022-09-13	15:24:31	0.396959	1.76575	516.338	FALSE	0
2022-09-13	15:24:32	0.403321	1.79405	516.34	FALSE	0
2022-09-13	15:24:32	0.389936	1.73451	518.072	FALSE	0
2022-09-13	15:24:32	0.386222	1.71799	518.058	FALSE	0
2022-09-13	15:24:32	0.364593	1.62178	519.694	FALSE	0
2022-09-13	15:24:33	0.375127	1.66864	519.726	FALSE	0
2022-09-13	15:24:33	0.378232	1.68245	521.377	FALSE	0
2022-09-13	15:24:33	0.386018	1.71709	521.443	FALSE	0
2022-09-13	15:24:33	0.376094	1.67294	523.05	FALSE	0
2022-09-13	15:24:34	0.378995	1.68585	523.129	FALSE	0
2022-09-13	15:24:34	0.377468	1.67905	524.729	FALSE	0
2022-09-13	15:24:34	0.383422	1.70554	524.835	FALSE	0
2022-09-13	15:24:35	0.373753	1.66253	526.391	FALSE	0
2022-09-13	15:24:35	0.377875	1.68086	526.516	FALSE	0
2022-09-13	15:24:35	0.404186	1.7979	528.189	FALSE	0
2022-09-13	15:24:35	0.426018	1.89501	528.411	FALSE	0
2022-09-13	15:24:36	0.347799	1.54708	529.736	FALSE	0
2022-09-13	15:24:36	0.272634	1.21273	529.623	FALSE	0
2022-09-13	15:24:36	0.32444	1.44317	531.179	FALSE	0
2022-09-13	15:24:36	0.337366	1.50067	531.124	FALSE	0
2022-09-13	15:24:37	0.228613	1.01692	532.196	FALSE	0
2022-09-13	15:24:37	0.360216	1.60231	532.726	FALSE	0
2022-09-13	15:24:37	0.262914	1.16949	533.366	FALSE	0
2022-09-13	15:24:37	0.257265	1.14437	533.871	FALSE	0
2022-09-13	15:24:38	0.571209	2.54085	535.907	FALSE	0
2022-09-13	15:24:38	0.552736	2.45868	536.329	FALSE	0
2022-09-13	15:24:38	0.497163	2.21148	538.118	FALSE	0
2022-09-13	15:24:39	0.620064	2.75817	539.088	FALSE	0
2022-09-13	15:24:39	0.829885	3.69149	541.81	FALSE	0
2022-09-13	15:24:39	0.681234	3.03027	542.118	FALSE	0
2022-09-13	15:24:39	0.638079	2.8383	544.648	FALSE	0
2022-09-13	15:24:40	0.333499	1.48347	543.601	FALSE	0
2022-09-13	15:24:40	0.526221	2.34074	546.989	FALSE	0
2022-09-13	15:24:40	0.375789	1.67158	545.273	FALSE	0
2022-09-13	15:24:40	0.248308	1.10452	548.093	FALSE	0
2022-09-13	15:24:41	0.181132	0.805711	546.079	FALSE	0
2022-09-13	15:24:41	0.151412	0.673511	548.767	FALSE	0
2022-09-13	15:24:41	-0.095814	-0.4262	546.079	FALSE	0
2022-09-13	15:24:41	-0.325992	-1.45008	548.767	FALSE	0
2022-09-13	15:24:42	-0.402888	-1.79213	546.079	FALSE	0
2022-09-13	15:24:42	-0.359783	-1.60039	548.767	FALSE	0
2022-09-13	15:24:42	0.000216527	0.000963155	546.08	FALSE	0
2022-09-13	15:24:43	0.337265	1.50022	550.267	FALSE	0
2022-09-13	15:24:43	0.147596	0.656537	546.736	FALSE	0
2022-09-13	15:24:43	-0.172811	-0.768698	550.267	FALSE	0
2022-09-13	15:24:43	0.241947	1.07623	547.812	FALSE	0
2022-09-13	15:24:44	-0.297137	-1.32172	550.267	FALSE	0
2022-09-13	15:24:44	-0.342684	-1.52433	547.812	FALSE	0
2022-09-13	15:24:44	-0.48187	-2.14345	550.267	FALSE	0
2022-09-13	15:24:44	-0.320343	-1.42495	547.812	FALSE	0
2022-09-13	15:24:45	0.909173	4.04418	554.311	FALSE	0
2022-09-13	15:24:45	1.26149	5.61136	553.424	FALSE	0
2022-09-13	15:24:45	1.23564	5.49637	559.807	FALSE	0
2022-09-13	15:24:45	1.56174	6.94693	560.371	FALSE	0
2022-09-13	15:24:46	0.870496	3.87214	563.68	FALSE	0
2022-09-13	15:24:46	0.509733	2.26739	562.638	FALSE	0
2022-09-13	15:24:46	0.54958	2.44464	566.124	FALSE	0
2022-09-13	15:24:47	0.390903	1.73881	564.377	FALSE	0
2022-09-13	15:24:47	0.399657	1.77775	567.902	FALSE	0
2022-09-13	15:24:47	0.106781	0.474983	564.852	FALSE	0
2022-09-13	15:24:47	0.149326	0.664232	568.566	FALSE	0
2022-09-13	15:24:48	0.123677	0.55014	565.402	FALSE	0
2022-09-13	15:24:48	0.125764	0.559423	569.126	FALSE	0
2022-09-13	15:24:48	0.0793513	0.35297	565.755	FALSE	0
2022-09-13	15:24:48	0.183626	0.816805	569.942	FALSE	0
2022-09-13	15:24:49	-0.0575951	-0.256195	565.755	FALSE	0
2022-09-13	15:24:49	0.0319723	0.142219	570.085	FALSE	0
2022-09-13	15:24:49	-0.163295	-0.726369	565.755	FALSE	0
2022-09-13	15:24:49	-0.0747962	-0.332708	570.085	FALSE	0
2022-09-13	15:24:50	-0.0394272	-0.17538	565.755	FALSE	0
2022-09-13	15:24:50	0.071616	0.318562	570.403	FALSE	0
2022-09-13	15:24:50	0.0271376	0.120713	565.876	FALSE	0
2022-09-13	15:24:51	0.314008	1.39677	571.8	FALSE	0
2022-09-13	15:24:51	0.184288	0.81975	566.695	FALSE	0
2022-09-13	15:24:51	0.185611	0.825635	572.626	FALSE	0
2022-09-13	15:24:51	-0.0397834	-0.176965	566.695	FALSE	0
2022-09-13	15:24:52	0.0460689	0.204924	572.83	FALSE	0
2022-09-13	15:24:52	0.0443386	0.197227	566.893	FALSE	0
2022-09-13	15:24:52	0.0667305	0.296831	573.127	FALSE	0
2022-09-13	15:24:52	0.178588	0.794395	567.687	FALSE	0
2022-09-13	15:24:53	-0.180903	-0.804693	573.127	FALSE	0
2022-09-13	15:24:53	-0.13042	-0.580134	567.687	FALSE	0
2022-09-13	15:24:53	-0.197035	-0.876451	573.127	FALSE	0
2022-09-13	15:24:53	-0.178664	-0.794733	567.687	FALSE	0
2022-09-13	15:24:54	-0.296323	-1.3181	573.127	FALSE	0
2022-09-13	15:24:54	-0.146094	-0.649855	567.687	FALSE	0
2022-09-13	15:24:54	-0.143804	-0.639669	573.127	FALSE	0
2022-09-13	15:24:55	-0.0768318	-0.341763	567.687	FALSE	0
2022-09-13	15:24:55	-0.225229	-1.00186	573.127	FALSE	0
2022-09-13	15:24:55	-0.129402	-0.575606	567.687	FALSE	0
2022-09-13	15:24:55	-0.264923	-1.17843	573.127	FALSE	0
2022-09-13	15:24:56	-0.219122	-0.974698	567.687	FALSE	0
2022-09-13	15:24:56	-0.331844	-1.47611	573.127	FALSE	0
2022-09-13	15:24:56	-0.181565	-0.807637	567.687	FALSE	0
2022-09-13	15:24:56	-0.198867	-0.8846	573.127	FALSE	0
2022-09-13	15:24:57	-0.154287	-0.686299	567.687	FALSE	0
2022-09-13	15:24:57	-0.217035	-0.965415	573.127	FALSE	0
2022-09-13	15:24:57	-0.161768	-0.719576	567.687	FALSE	0
2022-09-13	15:24:57	-0.155152	-0.690147	573.127	FALSE	0
2022-09-13	15:24:58	-0.13215	-0.58783	567.687	FALSE	0
2022-09-13	15:24:58	-0.221565	-0.985565	573.127	FALSE	0
2022-09-13	15:24:58	-0.163855	-0.72886	567.687	FALSE	0
2022-09-13	15:24:59	-0.166959	-0.742667	573.127	FALSE	0
2022-09-13	15:24:59	-0.0990709	-0.440687	567.687	FALSE	0
2022-09-13	15:24:59	-0.0691982	-0.307807	573.127	FALSE	0
2022-09-13	15:24:59	-0.017188	-0.0764557	567.687	FALSE	0
2022-09-13	15:25:00	-0.0380532	-0.169268	573.127	FALSE	0
2022-09-13	15:25:00	0.0484099	0.215337	567.902	FALSE	0
2022-09-13	15:25:00	0.099046	0.440576	573.568	FALSE	0
2022-09-13	15:25:00	0.260725	1.15976	569.062	FALSE	0
2022-09-13	15:25:01	0.555891	2.47271	576.041	FALSE	0
2022-09-13	15:25:01	0.522608	2.32466	571.387	FALSE	0
2022-09-13	15:25:01	0.380165	1.69105	577.732	FALSE	0
2022-09-13	15:25:01	0.496552	2.20876	573.596	FALSE	0
2022-09-13	15:25:02	0.452277	2.01182	579.743	FALSE	0
2022-09-13	15:25:02	0.477774	2.12523	575.721	FALSE	0
2022-09-13	15:25:02	0.277316	1.23356	580.977	FALSE	0
2022-09-13	15:25:03	0.480776	2.13859	577.859	FALSE	0
2022-09-13	15:25:03	0.309326	1.37594	582.353	FALSE	0
2022-09-13	15:25:03	0.607188	2.70089	580.56	FALSE	0
2022-09-13	15:25:03	0.301031	1.33905	583.692	FALSE	0
2022-09-13	15:25:04	0.634262	2.82132	583.382	FALSE	0
2022-09-13	15:25:04	0.347494	1.54572	585.238	FALSE	0
2022-09-13	15:25:04	0.669987	2.98024	586.362	FALSE	0
2022-09-13	15:25:04	0.291107	1.2949	586.533	FALSE	0
2022-09-13	15:25:05	0.641845	2.85505	589.217	FALSE	0
2022-09-13	15:25:05	0.371718	1.65348	588.186	FALSE	0
2022-09-13	15:25:05	0.601997	2.6778	591.895	FALSE	0
2022-09-13	15:25:05	0.308868	1.37391	589.56	FALSE	0
2022-09-13	15:25:06	0.663473	2.95126	594.846	FALSE	0
2022-09-13	15:25:06	0.550445	2.44849	592.009	FALSE	0
2022-09-13	15:25:06	0.616043	2.74028	597.586	FALSE	0
2022-09-13	15:25:07	0.519402	2.3104	594.319	FALSE	0
2022-09-13	15:25:07	0.612226	2.7233	600.31	FALSE	0
2022-09-13	15:25:07	0.480064	2.13542	596.454	FALSE	0
2022-09-13	15:25:07	0.464186	2.06479	602.374	FALSE	0
2022-09-13	15:25:08	0.608053	2.70474	599.159	FALSE	0
2022-09-13	15:25:08	0.432481	1.92376	604.298	FALSE	0
2022-09-13	15:25:08	0.399657	1.77775	600.937	FALSE	0
2022-09-13	15:25:08	0.487188	2.16711	606.465	FALSE	0
2022-09-13	15:25:09	0.550547	2.44894	603.386	FALSE	0
2022-09-13	15:25:09	0.41355	1.83955	608.305	FALSE	0
2022-09-13	15:25:09	0.692125	3.07871	606.464	FALSE	0
2022-09-13	15:25:09	0.485814	2.161	610.466	FALSE	0
2022-09-13	15:25:10	0.675178	3.00333	609.468	FALSE	0
2022-09-13	15:25:10	0.490242	2.18069	612.646	FALSE	0
2022-09-13	15:25:10	0.498639	2.21805	611.686	FALSE	0
2022-09-13	15:25:11	0.420369	1.86989	614.516	FALSE	0
2022-09-13	15:25:11	0.600165	2.66965	614.356	FALSE	0
2022-09-13	15:25:11	0.31869	1.4176	615.934	FALSE	0
2022-09-13	15:25:11	0.664237	2.95466	617.31	FALSE	0
2022-09-13	15:25:12	0.439402	1.95455	617.889	FALSE	0
2022-09-13	15:25:12	0.336705	1.49773	618.808	FALSE	0
2022-09-13	15:25:12	0.34897	1.55229	619.441	FALSE	0
2022-09-13	15:25:12	0.372125	1.65529	620.463	FALSE	0
2022-09-13	15:25:13	0.296908	1.32071	620.762	FALSE	0
2022-09-13	15:25:13	0.497316	2.21216	622.675	FALSE	0
2022-09-13	15:25:13	0.380674	1.69331	622.455	FALSE	0
2022-09-13	15:25:13	0.515331	2.2923	624.968	FALSE	0
2022-09-13	15:25:14	0.315738	1.40447	623.859	FALSE	0
2022-09-13	15:25:14	0.590191	2.62529	627.593	FALSE	0
2022-09-13	15:25:14	0.343168	1.52648	625.386	FALSE	0
2022-09-13	15:25:15	0.673957	2.9979	630.591	FALSE	0
2022-09-13	15:25:15	0.421438	1.87464	627.26	FALSE	0
2022-09-13	15:25:15	0.604746	2.69003	633.281	FALSE	0
2022-09-13	15:25:15	0.303931	1.35195	628.612	FALSE	0
2022-09-13	15:25:16	0.659809	2.93496	636.216	FALSE	0
2022-09-13	15:25:16	0.498791	2.21872	630.831	FALSE	0
2022-09-13	15:25:16	0.414262	1.84272	638.059	FALSE	0
2022-09-13	15:25:16	0.445356	1.98103	632.812	FALSE	0
2022-09-13	15:25:17	0.527239	2.34526	640.404	FALSE	0
2022-09-13	15:25:17	0.414822	1.84521	634.657	FALSE	0
2022-09-13	15:25:17	0.416298	1.85178	642.256	FALSE	0
2022-09-13	15:25:17	0.356807	1.58715	636.244	FALSE	0
2022-09-13	15:25:18	0.432176	1.92241	644.178	FALSE	0
2022-09-13	15:25:18	0.369428	1.64329	637.888	FALSE	0
2022-09-13	15:25:18	0.402914	1.79224	645.97	FALSE	0
2022-09-13	15:25:19	0.331921	1.47645	639.364	FALSE	0
2022-09-13	15:25:19	0.277977	1.2365	647.207	FALSE	0
2022-09-13	15:25:19	0.382354	1.70079	641.065	FALSE	0
2022-09-13	15:25:19	0.272074	1.21024	648.417	FALSE	0
2022-09-13	15:25:20	0.370293	1.64714	642.712	FALSE	0
2022-09-13	15:25:20	0.0930918	0.414091	648.831	FALSE	0
2022-09-13	15:25:20	0.378283	1.68268	644.395	FALSE	0
2022-09-13	15:25:20	0.218639	0.97255	649.804	FALSE	0
2022-09-13	15:25:21	0.325102	1.44612	645.841	FALSE	0
2022-09-13	15:25:21	0.134262	0.597224	650.401	FALSE	0
2022-09-13	15:25:21	0.344949	1.5344	647.375	FALSE	0
2022-09-13	15:25:21	0.271819	1.20911	651.61	FALSE	0
2022-09-13	15:25:22	0.444593	1.97764	649.353	FALSE	0
2022-09-13	15:25:22	0.197367	0.877928	652.488	FALSE	0
2022-09-13	15:25:22	0.291921	1.29852	650.652	FALSE	0
2022-09-13	15:25:23	0.234924	1.04499	653.533	FALSE	0
2022-09-13	15:25:23	0.407596	1.81307	652.465	FALSE	0
2022-09-13	15:25:23	0.315891	1.40515	654.938	FALSE	0
2022-09-13	15:25:23	0.315331	1.40266	653.867	FALSE	0
2022-09-13	15:25:24	0.563677	2.50735	657.445	FALSE	0
2022-09-13	15:25:24	0.371667	1.65325	655.52	FALSE	0
2022-09-13	15:25:24	0.561387	2.49716	659.943	FALSE	0
2022-09-13	15:25:24	0.386323	1.71844	657.239	FALSE	0
2022-09-13	15:25:25	0.543066	2.41567	662.358	FALSE	0
2022-09-13	15:25:25	0.476909	2.12139	659.36	FALSE	0
2022-09-13	15:25:25	0.445407	1.98126	664.339	FALSE	0
2022-09-13	15:25:25	0.0431173	0.191794	659.552	FALSE	0
2022-09-13	15:25:26	0.164491	0.731689	665.071	FALSE	0
2022-09-13	15:25:26	0.0576211	0.25631	659.808	FALSE	0
2022-09-13	15:25:26	-0.00629748	-0.0280125	665.071	FALSE	0
2022-09-13	15:25:27	2.35182	10.4614	670.27	FALSE	0
2022-09-13	15:25:27	0.466476	2.07498	667.146	FALSE	0
2022-09-13	15:25:27	0.146883	0.653365	670.923	FALSE	0
2022-09-13	15:25:27	0.129173	0.574587	667.721	FALSE	0
2022-09-13	15:25:28	0.25014	1.11267	672.036	FALSE	0
2022-09-13	15:25:28	0.11696	0.520261	668.241	FALSE	0
2022-09-13	15:25:28	0.273397	1.21612	673.252	FALSE	0
2022-09-13	15:25:28	0.11243	0.500111	668.741	FALSE	0
2022-09-13	15:25:29	0.228766	1.0176	674.27	FALSE	0
2022-09-13	15:25:29	0.17126	0.761799	669.503	FALSE	0
2022-09-13	15:25:29	0.19126	0.850763	675.12	FALSE	0
2022-09-13	15:25:29	0.202965	0.902829	670.406	FALSE	0
2022-09-13	15:25:30	0.203931	0.907126	676.027	FALSE	0
2022-09-13	15:25:30	0.388308	1.72727	672.133	FALSE	0
2022-09-13	15:25:30	0.359657	1.59983	677.627	FALSE	0
2022-09-13	15:25:31	0.52444	2.33281	674.466	FALSE	0
2022-09-13	15:25:31	0.263321	1.1713	678.799	FALSE	0
2022-09-13	15:25:31	0.577061	2.56688	677.033	FALSE	0
2022-09-13	15:25:31	0.210242	0.935198	679.734	FALSE	0
2022-09-13	15:25:32	0.478435	2.12817	679.161	FALSE	0
2022-09-13	15:25:32	0.365763	1.62699	681.361	FALSE	0
2022-09-13	15:25:32	0.505203	2.24724	681.408	FALSE	0
2022-09-13	15:25:32	0.428053	1.90407	683.265	FALSE	0
2022-09-13	15:25:33	0.46729	2.0786	683.487	FALSE	0
2022-09-13	15:25:33	0.400267	1.78047	685.045	FALSE	0
2022-09-13	15:25:33	0.432074	1.92195	685.409	FALSE	0
2022-09-13	15:25:33	0.436654	1.94232	686.988	FALSE	0

## Sheet: Buzz_prong_2022913152025 (2)
Date	Time	Lbs	Total Force x time			**GoPro Fitting: 1510
2022-09-13	15:20:26	0.322303	0.322303	FALSE	0
2022-09-13	15:20:26	0.313499	0.635802	FALSE	0
2022-09-13	15:20:26	0.331209	0.967011	FALSE	0
2022-09-13	15:20:26	0.323422	1.29043	FALSE	0
2022-09-13	15:20:26	0.31813	1.60856	FALSE	0
2022-09-13	15:20:27	0.342863	1.95143	FALSE	0
2022-09-13	15:20:27	0.353753	2.30518	FALSE	0
2022-09-13	15:20:27	0.364644	2.66982	FALSE	0
2022-09-13	15:20:28	0.39986	3.06968	FALSE	0
2022-09-13	15:20:28	0.410598	3.48028	FALSE	0
2022-09-13	15:20:28	0.414059	3.89434	FALSE	0
2022-09-13	15:20:28	0.359148	4.25349	FALSE	0
2022-09-13	15:20:29	0.34785	4.60134	FALSE	0
2022-09-13	15:20:29	0.351361	4.9527	FALSE	0
2022-09-13	15:20:29	0.360267	5.31297	FALSE	0
2022-09-13	15:20:29	0.357723	5.67069	FALSE	0
2022-09-13	15:20:30	0.338741	6.00943	FALSE	0
2022-09-13	15:20:30	0.352125	6.36156	FALSE	0
2022-09-13	15:20:30	0.381285	6.74284	FALSE	0
2022-09-13	15:20:30	0.391463	7.1343	FALSE	0
2022-09-13	15:20:31	0.337672	7.47198	FALSE	0
2022-09-13	15:20:31	0.363066	7.83504	FALSE	0
2022-09-13	15:20:31	0.339402	8.17444	FALSE	0
2022-09-13	15:20:32	0.347952	8.52239	FALSE	0
2022-09-13	15:20:32	0.414059	8.93645	FALSE	0
2022-09-13	15:20:32	0.392939	9.32939	FALSE	0
2022-09-13	15:20:32	0.318232	9.64762	FALSE	0
2022-09-13	15:20:33	0.367799	10.0154	FALSE	0
2022-09-13	15:20:33	0.483728	10.4992	FALSE	0
2022-09-13	15:20:33	0.881234	11.3804	FALSE	0
2022-09-13	15:20:33	1.6938	13.0742	FALSE	0
2022-09-13	15:20:34	2.23396	15.3081	FALSE	0
2022-09-13	15:20:34	1.82424	17.1324	FALSE	0
2022-09-13	15:20:34	0.549987	17.6824	FALSE	0
2022-09-13	15:20:34	0.409275	18.0916	FALSE	0
2022-09-13	15:20:35	0.466425	18.5581	FALSE	0
2022-09-13	15:20:35	0.222507	18.7806	FALSE	0
2022-09-13	15:20:35	-0.0944908	18.7806	FALSE	0
2022-09-13	15:20:36	-0.294491	18.7806	FALSE	0
2022-09-13	15:20:36	-0.477646	18.7806	FALSE	0
2022-09-13	15:20:36	-0.325992	18.7806	FALSE	0
2022-09-13	15:20:36	0.107392	18.888	FALSE	0
2022-09-13	15:20:37	0.0747712	18.9627	FALSE	0
2022-09-13	15:20:37	-0.101107	18.9627	FALSE	0
2022-09-13	15:20:37	0.468868	19.4316	FALSE	0
2022-09-13	15:20:37	0.193804	19.6254	FALSE	0
2022-09-13	15:20:38	0.035789	19.6612	FALSE	0
2022-09-13	15:20:38	-0.0327097	19.6612	FALSE	0
2022-09-13	15:20:38	0.126934	19.7881	FALSE	0
2022-09-13	15:20:38	-0.0278242	19.7881	FALSE	0
2022-09-13	15:20:39	-0.00263335	19.7881	FALSE	0
2022-09-13	15:20:39	0.0560435	19.8442	FALSE	0
2022-09-13	15:20:39	0.167341	20.0115	FALSE	0
2022-09-13	15:20:40	0.215026	20.2265	FALSE	0
2022-09-13	15:20:40	-0.0545417	20.2265	FALSE	0
2022-09-13	15:20:40	0.0154837	20.242	FALSE	0
2022-09-13	15:20:40	-0.258613	20.242	FALSE	0
2022-09-13	15:20:41	-0.370928	20.242	FALSE	0
2022-09-13	15:20:41	-0.350368	20.242	FALSE	0
2022-09-13	15:20:41	-0.241717	20.242	FALSE	0
2022-09-13	15:20:41	-0.245534	20.242	FALSE	0
2022-09-13	15:20:42	-0.416374	20.242	FALSE	0
2022-09-13	15:20:42	-0.41846	20.242	FALSE	0
2022-09-13	15:20:42	-0.249351	20.242	FALSE	0
2022-09-13	15:20:42	0.0219977	20.264	FALSE	0
2022-09-13	15:20:43	0.1764	20.4404	FALSE	0
2022-09-13	15:20:43	0.181132	20.6216	FALSE	0
2022-09-13	15:20:43	-0.030216	20.6216	FALSE	0
2022-09-13	15:20:44	0.193957	20.8155	FALSE	0
2022-09-13	15:20:44	0.086934	20.9025	FALSE	0
2022-09-13	15:20:44	0.4507	21.3532	FALSE	0
2022-09-13	15:20:44	0.389428	21.7426	FALSE	0
2022-09-13	15:20:45	0.402099	22.1447	FALSE	0
2022-09-13	15:20:45	0.205051	22.3497	FALSE	0
2022-09-13	15:20:45	0.214415	22.5641	FALSE	0
2022-09-13	15:20:45	0.318334	22.8825	FALSE	0
2022-09-13	15:20:46	0.14271	23.0252	FALSE	0
2022-09-13	15:20:46	0.473855	23.499	FALSE	0
2022-09-13	15:20:46	0.187494	23.6865	FALSE	0
2022-09-13	15:20:46	0.481234	24.1678	FALSE	0
2022-09-13	15:20:47	0.0787916	24.2466	FALSE	0
2022-09-13	15:20:47	0.444644	24.6912	FALSE	0
2022-09-13	15:20:47	0.331005	25.0222	FALSE	0
2022-09-13	15:20:48	0.336705	25.3589	FALSE	0
2022-09-13	15:20:48	0.453244	25.8122	FALSE	0
2022-09-13	15:20:48	0.298588	26.1108	FALSE	0
2022-09-13	15:20:48	0.580114	26.6909	FALSE	0
2022-09-13	15:20:49	0.243473	26.9343	FALSE	0
2022-09-13	15:20:49	0.626781	27.5611	FALSE	0
2022-09-13	15:20:49	0.394313	27.9554	FALSE	0
2022-09-13	15:20:49	0.427545	28.383	FALSE	0
2022-09-13	15:20:50	0.484339	28.8673	FALSE	0
2022-09-13	15:20:50	0.397112	29.2644	FALSE	0
2022-09-13	15:20:50	0.506374	29.7708	FALSE	0
2022-09-13	15:20:50	0.225255	29.9961	FALSE	0
2022-09-13	15:20:51	0.39584	30.3919	FALSE	0
2022-09-13	15:20:51	0.120471	30.5124	FALSE	0
2022-09-13	15:20:51	0.471361	30.9837	FALSE	0
2022-09-13	15:20:52	0.436349	31.4201	FALSE	0
2022-09-13	15:20:52	0.358384	31.7785	FALSE	0
2022-09-13	15:20:52	0.391005	32.1695	FALSE	0
2022-09-13	15:20:52	0.63986	32.8093	FALSE	0
2022-09-13	15:20:53	0.315891	33.1252	FALSE	0
2022-09-13	15:20:53	0.276451	33.4017	FALSE	0
2022-09-13	15:20:53	0.44902	33.8507	FALSE	0
2022-09-13	15:20:53	0.148155	33.9988	FALSE	0
2022-09-13	15:20:54	0.18612	34.185	FALSE	0
2022-09-13	15:20:54	0.0510053	34.236	FALSE	0
2022-09-13	15:20:54	-0.12243	34.236	FALSE	0
2022-09-13	15:20:54	-0.18986	34.236	FALSE	0
2022-09-13	15:20:55	-0.484058	34.236	FALSE	0
2022-09-13	15:20:55	-0.432811	34.236	FALSE	0
2022-09-13	15:20:55	-0.369249	34.236	FALSE	0
2022-09-13	15:20:56	-0.435508	34.236	FALSE	0
2022-09-13	15:20:56	-0.17444	34.236	FALSE	0
2022-09-13	15:20:56	-0.419681	34.236	FALSE	0
2022-09-13	15:20:56	-0.363702	34.236	FALSE	0
2022-09-13	15:20:57	-0.408129	34.236	FALSE	0
2022-09-13	15:20:57	-0.48243	34.236	FALSE	0
2022-09-13	15:20:57	-0.580343	34.236	FALSE	0
2022-09-13	15:20:57	-0.658765	34.236	FALSE	0
2022-09-13	15:20:58	-0.79047	34.236	FALSE	0
2022-09-13	15:20:58	-0.79673	34.236	FALSE	0
2022-09-13	15:20:58	-0.755814	34.236	FALSE	0
2022-09-13	15:20:58	-0.876424	34.236	FALSE	0
2022-09-13	15:20:59	-0.720343	34.236	FALSE	0
2022-09-13	15:20:59	-0.902938	34.236	FALSE	0
2022-09-13	15:20:59	-0.767824	34.236	FALSE	0
2022-09-13	15:21:00	-0.696679	34.236	FALSE	0
2022-09-13	15:21:00	-0.324211	34.236	FALSE	0
2022-09-13	15:21:00	0.390954	34.6269	FALSE	0
2022-09-13	15:21:00	0.167239	34.7942	FALSE	0
2022-09-13	15:21:01	0.275433	35.0696	FALSE	0
2022-09-13	15:21:01	0.16612	35.2357	FALSE	0
2022-09-13	15:21:01	0.48612	35.7218	FALSE	0
2022-09-13	15:21:01	0.225865	35.9477	FALSE	0
2022-09-13	15:21:02	0.458333	36.406	FALSE	0
2022-09-13	15:21:02	0.424796	36.8308	FALSE	0
2022-09-13	15:21:02	0.478232	37.3091	FALSE	0
2022-09-13	15:21:02	0.256705	37.5658	FALSE	0
2022-09-13	15:21:03	0.326425	37.8922	FALSE	0
2022-09-13	15:21:03	0.542506	38.4347	FALSE	0
2022-09-13	15:21:03	0.315433	38.7501	FALSE	0
2022-09-13	15:21:04	0.702048	39.4522	FALSE	0
2022-09-13	15:21:04	0.209377	39.6616	FALSE	0
2022-09-13	15:21:04	0.586985	40.2485	FALSE	0
2022-09-13	15:21:04	0.22042	40.469	FALSE	0
2022-09-13	15:21:05	0.614568	41.0835	FALSE	0
2022-09-13	15:21:05	0.195127	41.2787	FALSE	0
2022-09-13	15:21:05	0.534517	41.8132	FALSE	0
2022-09-13	15:21:05	0.390903	42.2041	FALSE	0
2022-09-13	15:21:06	0.302863	42.5069	FALSE	0
2022-09-13	15:21:06	0.524644	43.0316	FALSE	0
2022-09-13	15:21:06	0.255993	43.2876	FALSE	0
2022-09-13	15:21:06	0.628613	43.9162	FALSE	0
2022-09-13	15:21:07	0.179962	44.0962	FALSE	0
2022-09-13	15:21:07	0.659809	44.756	FALSE	0
2022-09-13	15:21:07	0.361489	45.1174	FALSE	0
2022-09-13	15:21:08	0.468461	45.5859	FALSE	0
2022-09-13	15:21:08	0.478486	46.0644	FALSE	0
2022-09-13	15:21:08	0.40327	46.4677	FALSE	0
2022-09-13	15:21:08	0.479962	46.9476	FALSE	0
2022-09-13	15:21:09	0.247901	47.1955	FALSE	0
2022-09-13	15:21:09	0.638079	47.8336	FALSE	0
2022-09-13	15:21:09	0.208868	48.0425	FALSE	0
2022-09-13	15:21:09	0.658842	48.7013	FALSE	0
2022-09-13	15:21:10	0.248104	48.9494	FALSE	0
2022-09-13	15:21:10	0.657163	49.6066	FALSE	0
2022-09-13	15:21:10	0.267341	49.8739	FALSE	0
2022-09-13	15:21:10	0.515687	50.3896	FALSE	0
2022-09-13	15:21:11	0.451361	50.841	FALSE	0
2022-09-13	15:21:11	0.311718	51.1527	FALSE	0
2022-09-13	15:21:11	0.530598	51.6833	FALSE	0
2022-09-13	15:21:11	0.23355	51.9168	FALSE	0
2022-09-13	15:21:12	0.653091	52.5699	FALSE	0
2022-09-13	15:21:12	0.233397	52.8033	FALSE	0
2022-09-13	15:21:12	0.659199	53.4625	FALSE	0
2022-09-13	15:21:13	0.199962	53.6625	FALSE	0
2022-09-13	15:21:13	0.636501	54.299	FALSE	0
2022-09-13	15:21:13	0.278537	54.5775	FALSE	0
2022-09-13	15:21:13	0.449631	55.0272	FALSE	0
2022-09-13	15:21:14	0.564338	55.5915	FALSE	0
2022-09-13	15:21:14	0.232736	55.8242	FALSE	0
2022-09-13	15:21:14	0.541234	56.3655	FALSE	0
2022-09-13	15:21:14	0.179708	56.5452	FALSE	0
2022-09-13	15:21:15	0.559606	57.1048	FALSE	0
2022-09-13	15:21:15	0.15416	57.2589	FALSE	0
2022-09-13	15:21:15	0.58556	57.8445	FALSE	0
2022-09-13	15:21:15	0.257112	58.1016	FALSE	0
2022-09-13	15:21:16	0.364542	58.4662	FALSE	0
2022-09-13	15:21:16	0.253651	58.7198	FALSE	0
2022-09-13	15:21:16	0.346221	59.066	FALSE	0
2022-09-13	15:21:17	0.465916	59.5319	FALSE	0
2022-09-13	15:21:17	0.24612	59.7781	FALSE	0
2022-09-13	15:21:17	0.438283	60.2163	FALSE	0
2022-09-13	15:21:17	0.215382	60.4317	FALSE	0
2022-09-13	15:21:18	0.567443	60.9992	FALSE	0
2022-09-13	15:21:18	0.200318	61.1995	FALSE	0
2022-09-13	15:21:18	0.240776	61.4403	FALSE	0
2022-09-13	15:21:18	0.101183	61.5414	FALSE	0
2022-09-13	15:21:19	0.271463	61.8129	FALSE	0
2022-09-13	15:21:19	0.400674	62.2136	FALSE	0
2022-09-13	15:21:19	0.252786	62.4664	FALSE	0
2022-09-13	15:21:19	0.394771	62.8611	FALSE	0
2022-09-13	15:21:20	0.290547	63.1517	FALSE	0
2022-09-13	15:21:20	0.385407	63.5371	FALSE	0
2022-09-13	15:21:20	0.0592496	63.5963	FALSE	0
2022-09-13	15:21:21	0.368155	63.9645	FALSE	0
2022-09-13	15:21:21	0.0380282	64.0025	FALSE	0
2022-09-13	15:21:21	0.315433	64.318	FALSE	0
2022-09-13	15:21:21	0.111565	64.4295	FALSE	0
2022-09-13	15:21:22	0.278741	64.7083	FALSE	0
2022-09-13	15:21:22	0.164746	64.873	FALSE	0
2022-09-13	15:21:22	0.125713	64.9987	FALSE	0
2022-09-13	15:21:22	0.280013	65.2787	FALSE	0
2022-09-13	15:21:23	0.11701	65.3957	FALSE	0
2022-09-13	15:21:23	0.350394	65.7461	FALSE	0
2022-09-13	15:21:23	0.101998	65.8481	FALSE	0
2022-09-13	15:21:23	0.417061	66.2652	FALSE	0
2022-09-13	15:21:24	0.0618959	66.3271	FALSE	0
2022-09-13	15:21:24	0.304644	66.6317	FALSE	0
2022-09-13	15:21:24	0.160929	66.7927	FALSE	0
2022-09-13	15:21:25	0.22729	67.02	FALSE	0
2022-09-13	15:21:25	0.131209	67.1512	FALSE	0
2022-09-13	15:21:25	0.158283	67.3095	FALSE	0
2022-09-13	15:21:25	0.188359	67.4978	FALSE	0
2022-09-13	15:21:26	-0.132303	67.4978	FALSE	0
2022-09-13	15:21:26	-0.0711829	67.4978	FALSE	0
2022-09-13	15:21:26	-0.10645	67.4978	FALSE	0
2022-09-13	15:21:26	-0.268689	67.4978	FALSE	0
2022-09-13	15:21:27	-0.287162	67.4978	FALSE	0
2022-09-13	15:21:27	-0.118257	67.4978	FALSE	0
2022-09-13	15:21:27	0.113244	67.6111	FALSE	0
2022-09-13	15:21:27	0.272277	67.8833	FALSE	0
2022-09-13	15:21:28	0.126018	68.0093	FALSE	0
2022-09-13	15:21:28	0.434415	68.4438	FALSE	0
2022-09-13	15:21:28	0.733601	69.1774	FALSE	0
2022-09-13	15:21:29	0.245255	69.4226	FALSE	0
2022-09-13	15:21:29	0.567188	69.9898	FALSE	0
2022-09-13	15:21:29	0.364593	70.3544	FALSE	0
2022-09-13	15:21:29	0.432735	70.7871	FALSE	0
2022-09-13	15:21:30	0.388308	71.1754	FALSE	0
2022-09-13	15:21:30	0.301947	71.4774	FALSE	0
2022-09-13	15:21:30	0.542761	72.0202	FALSE	0
2022-09-13	15:21:30	0.244542	72.2647	FALSE	0
2022-09-13	15:21:31	0.559046	72.8237	FALSE	0
2022-09-13	15:21:31	0.270954	73.0947	FALSE	0
2022-09-13	15:21:31	0.598079	73.6928	FALSE	0
2022-09-13	15:21:31	0.209733	73.9025	FALSE	0
2022-09-13	15:21:32	0.60098	74.5035	FALSE	0
2022-09-13	15:21:32	0.381641	74.8851	FALSE	0
2022-09-13	15:21:32	0.428715	75.3138	FALSE	0
2022-09-13	15:21:33	0.419962	75.7338	FALSE	0
2022-09-13	15:21:33	0.345458	76.0793	FALSE	0
2022-09-13	15:21:33	0.586679	76.6659	FALSE	0
2022-09-13	15:21:33	0.256705	76.9226	FALSE	0
2022-09-13	15:21:34	0.602659	77.5253	FALSE	0
2022-09-13	15:21:34	0.225153	77.7505	FALSE	0
2022-09-13	15:21:34	0.586476	78.3369	FALSE	0
2022-09-13	15:21:34	0.203066	78.54	FALSE	0
2022-09-13	15:21:35	0.585051	79.1251	FALSE	0
2022-09-13	15:21:35	0.321183	79.4462	FALSE	0
2022-09-13	15:21:35	0.507443	79.9537	FALSE	0
2022-09-13	15:21:35	0.305458	80.2591	FALSE	0
2022-09-13	15:21:36	0.493244	80.7524	FALSE	0
2022-09-13	15:21:36	0.424237	81.1766	FALSE	0
2022-09-13	15:21:36	0.431769	81.6084	FALSE	0
2022-09-13	15:21:37	0.410445	82.0188	FALSE	0
2022-09-13	15:21:37	0.358944	82.3778	FALSE	0
2022-09-13	15:21:37	0.568104	82.9459	FALSE	0
2022-09-13	15:21:37	0.276756	83.2226	FALSE	0
2022-09-13	15:21:38	0.524084	83.7467	FALSE	0
2022-09-13	15:21:38	0.305611	84.0523	FALSE	0
2022-09-13	15:21:38	0.516705	84.569	FALSE	0
2022-09-13	15:21:38	0.267596	84.8366	FALSE	0
2022-09-13	15:21:39	0.584847	85.4215	FALSE	0
2022-09-13	15:21:39	0.289428	85.7109	FALSE	0
2022-09-13	15:21:39	0.574669	86.2856	FALSE	0
2022-09-13	15:21:39	0.255382	86.541	FALSE	0
2022-09-13	15:21:40	0.559148	87.1001	FALSE	0
2022-09-13	15:21:40	0.295127	87.3952	FALSE	0
2022-09-13	15:21:40	0.495993	87.8912	FALSE	0
2022-09-13	15:21:41	0.261998	88.1532	FALSE	0
2022-09-13	15:21:41	0.507545	88.6608	FALSE	0
2022-09-13	15:21:41	0.334618	88.9954	FALSE	0
2022-09-13	15:21:41	0.389479	89.3849	FALSE	0
2022-09-13	15:21:42	0.309733	89.6946	FALSE	0
2022-09-13	15:21:42	0.442405	90.137	FALSE	0
2022-09-13	15:21:42	0.417519	90.5545	FALSE	0
2022-09-13	15:21:42	0.369326	90.9238	FALSE	0
2022-09-13	15:21:43	0.337672	91.2615	FALSE	0
2022-09-13	15:21:43	0.428257	91.6898	FALSE	0
2022-09-13	15:21:43	0.428308	92.1181	FALSE	0
2022-09-13	15:21:43	0.348817	92.4669	FALSE	0
2022-09-13	15:21:44	0.357723	92.8246	FALSE	0
2022-09-13	15:21:44	0.400267	93.2249	FALSE	0
2022-09-13	15:21:44	0.445305	93.6702	FALSE	0
2022-09-13	15:21:45	0.391972	94.0622	FALSE	0
2022-09-13	15:21:45	0.378639	94.4408	FALSE	0
2022-09-13	15:21:45	0.412379	94.8532	FALSE	0
2022-09-13	15:21:45	0.448664	95.3019	FALSE	0
2022-09-13	15:21:46	0.312634	95.6145	FALSE	0
2022-09-13	15:21:46	0.381641	95.9961	FALSE	0
2022-09-13	15:21:46	0.361132	96.3573	FALSE	0
2022-09-13	15:21:46	0.506984	96.8642	FALSE	0
2022-09-13	15:21:47	0.307137	97.1714	FALSE	0
2022-09-13	15:21:47	0.466018	97.6374	FALSE	0
2022-09-13	15:21:47	0.293194	97.9306	FALSE	0
2022-09-13	15:21:47	0.553601	98.4842	FALSE	0
2022-09-13	15:21:48	0.171158	98.6553	FALSE	0
2022-09-13	15:21:48	0.304339	98.9597	FALSE	0
2022-09-13	15:21:48	-0.120954	98.9597	FALSE	0
2022-09-13	15:21:49	0.206832	99.1665	FALSE	0
2022-09-13	15:21:49	0.42897	99.5955	FALSE	0
2022-09-13	15:21:49	0.302761	99.8983	FALSE	0
2022-09-13	15:21:49	0.377926	100.276	FALSE	0
2022-09-13	15:21:50	0.340675	100.617	FALSE	0
2022-09-13	15:21:50	0.386171	101.003	FALSE	0
2022-09-13	15:21:50	0.413244	101.416	FALSE	0
2022-09-13	15:21:50	0.330751	101.747	FALSE	0
2022-09-13	15:21:51	0.557315	102.304	FALSE	0
2022-09-13	15:21:51	0.35986	102.664	FALSE	0
2022-09-13	15:21:51	0.504237	103.168	FALSE	0
2022-09-13	15:21:51	0.340827	103.509	FALSE	0
2022-09-13	15:21:52	0.386069	103.895	FALSE	0
2022-09-13	15:21:52	0.410496	104.306	FALSE	0
2022-09-13	15:21:52	0.367799	104.674	FALSE	0
2022-09-13	15:21:53	0.450547	105.124	FALSE	0
2022-09-13	15:21:53	0.347748	105.472	FALSE	0
2022-09-13	15:21:53	0.360216	105.832	FALSE	0
2022-09-13	15:21:53	0.537163	106.369	FALSE	0
2022-09-13	15:21:54	0.400929	106.77	FALSE	0
2022-09-13	15:21:54	0.4193	107.19	FALSE	0
2022-09-13	15:21:54	0.390852	107.58	FALSE	0
2022-09-13	15:21:54	0.411921	107.992	FALSE	0
2022-09-13	15:21:55	0.397621	108.39	FALSE	0
2022-09-13	15:21:55	0.421387	108.811	FALSE	0
2022-09-13	15:21:55	0.40841	109.22	FALSE	0
2022-09-13	15:21:55	0.427137	109.647	FALSE	0
2022-09-13	15:21:56	0.416349	110.063	FALSE	0
2022-09-13	15:21:56	0.42902	110.492	FALSE	0
2022-09-13	15:21:56	0.426323	110.919	FALSE	0
2022-09-13	15:21:57	0.371158	111.29	FALSE	0
2022-09-13	15:21:57	0.380878	111.671	FALSE	0
2022-09-13	15:21:57	0.330191	112.001	FALSE	0
2022-09-13	15:21:57	0.417316	112.418	FALSE	0
2022-09-13	15:21:58	0.620776	113.039	FALSE	0
2022-09-13	15:21:58	0.538435	113.577	FALSE	0
2022-09-13	15:21:58	-0.172557	113.577	FALSE	0
2022-09-13	15:21:58	-0.464414	113.577	FALSE	0
2022-09-13	15:21:59	-0.427519	113.577	FALSE	0
2022-09-13	15:21:59	-0.359631	113.577	FALSE	0
2022-09-13	15:21:59	0.307748	113.885	FALSE	0
2022-09-13	15:21:59	-0.0301652	113.885	FALSE	0
2022-09-13	15:22:00	0.497621	114.383	FALSE	0
2022-09-13	15:22:00	-0.147112	114.383	FALSE	0
2022-09-13	15:22:00	-0.262175	114.383	FALSE	0
2022-09-13	15:22:01	-0.180089	114.383	FALSE	0
2022-09-13	15:22:01	-0.561361	114.383	FALSE	0
2022-09-13	15:22:01	-0.646908	114.383	FALSE	0
2022-09-13	15:22:01	-0.717544	114.383	FALSE	0
2022-09-13	15:22:02	-0.604923	114.383	FALSE	0
2022-09-13	15:22:02	-0.434185	114.383	FALSE	0
2022-09-13	15:22:02	-0.244007	114.383	FALSE	0
2022-09-13	15:22:02	-0.180394	114.383	FALSE	0
2022-09-13	15:22:03	0.00459311	114.387	FALSE	0
2022-09-13	15:22:03	0.0708017	114.458	FALSE	0
2022-09-13	15:22:03	0.109428	114.567	FALSE	0
2022-09-13	15:22:03	0.289835	114.857	FALSE	0
2022-09-13	15:22:04	0.153041	115.01	FALSE	0
2022-09-13	15:22:04	-0.174491	115.01	FALSE	0
2022-09-13	15:22:04	0.103931	115.114	FALSE	0
2022-09-13	15:22:05	0.228054	115.342	FALSE	0
2022-09-13	15:22:05	0.169122	115.511	FALSE	0
2022-09-13	15:22:05	0.309326	115.821	FALSE	0
2022-09-13	15:22:05	0.0884607	115.909	FALSE	0
2022-09-13	15:22:06	-0.352353	115.909	FALSE	0
2022-09-13	15:22:06	0.0527356	115.962	FALSE	0
2022-09-13	15:22:06	0.0735498	116.036	FALSE	0
2022-09-13	15:22:06	0.0165524	116.052	FALSE	0
2022-09-13	15:22:07	0.315026	116.367	FALSE	0
2022-09-13	15:22:07	0.384339	116.751	FALSE	0
2022-09-13	15:22:07	0.223931	116.975	FALSE	0
2022-09-13	15:22:07	0.209987	117.185	FALSE	0
2022-09-13	15:22:08	0.372735	117.558	FALSE	0
2022-09-13	15:22:08	0.248359	117.806	FALSE	0
2022-09-13	15:22:08	0.423066	118.23	FALSE	0
2022-09-13	15:22:09	0.144237	118.374	FALSE	0
2022-09-13	15:22:09	0.320522	118.694	FALSE	0
2022-09-13	15:22:09	0.245814	118.94	FALSE	0
2022-09-13	15:22:09	0.328003	119.268	FALSE	0
2022-09-13	15:22:10	0.0874938	119.356	FALSE	0
2022-09-13	15:22:10	0.406425	119.762	FALSE	0
2022-09-13	15:22:10	0.306985	120.069	FALSE	0
2022-09-13	15:22:10	0.424237	120.493	FALSE	0
2022-09-13	15:22:11	0.168868	120.662	FALSE	0
2022-09-13	15:22:11	-0.262023	120.662	FALSE	0
2022-09-13	15:22:11	-0.516882	120.662	FALSE	0
2022-09-13	15:22:11	-0.428028	120.662	FALSE	0
2022-09-13	15:22:12	-0.285992	120.662	FALSE	0
2022-09-13	15:22:12	-0.133219	120.662	FALSE	0
2022-09-13	15:22:12	-0.00151375	120.662	FALSE	0
2022-09-13	15:22:13	0.0888679	120.751	FALSE	0
2022-09-13	15:22:13	0.0874429	120.838	FALSE	0
2022-09-13	15:22:13	0.109021	120.947	FALSE	0
2022-09-13	15:22:13	0.0991987	121.047	FALSE	0
2022-09-13	15:22:14	0.109835	121.156	FALSE	0
2022-09-13	15:22:14	0.16159	121.318	FALSE	0
2022-09-13	15:22:14	0.218741	121.537	FALSE	0
2022-09-13	15:22:14	0.0703946	121.607	FALSE	0
2022-09-13	15:22:15	0.101387	121.709	FALSE	0
2022-09-13	15:22:15	0.00281194	121.711	FALSE	0
2022-09-13	15:22:15	-0.125534	121.711	FALSE	0
2022-09-13	15:22:15	-0.105229	121.711	FALSE	0
2022-09-13	15:22:16	-0.164923	121.711	FALSE	0
2022-09-13	15:22:16	-0.0210048	121.711	FALSE	0
2022-09-13	15:22:16	-0.114745	121.711	FALSE	0
2022-09-13	15:22:17	-0.0380023	121.711	FALSE	0
2022-09-13	15:22:17	-0.121565	121.711	FALSE	0
2022-09-13	15:22:17	-0.10589	121.711	FALSE	0
2022-09-13	15:22:17	-0.133677	121.711	FALSE	0
2022-09-13	15:22:18	-0.116679	121.711	FALSE	0
2022-09-13	15:22:18	-0.102735	121.711	FALSE	0
2022-09-13	15:22:18	-0.144516	121.711	FALSE	0
2022-09-13	15:22:18	-0.0676715	121.711	FALSE	0
2022-09-13	15:22:19	-0.0580023	121.711	FALSE	0
2022-09-13	15:22:19	-0.0616664	121.711	FALSE	0
2022-09-13	15:22:19	-0.116934	121.711	FALSE	0
2022-09-13	15:22:19	-0.113473	121.711	FALSE	0
2022-09-13	15:22:20	-0.116628	121.711	FALSE	0
2022-09-13	15:22:20	-0.153219	121.711	FALSE	0
2022-09-13	15:22:20	-0.203855	121.711	FALSE	0
2022-09-13	15:22:21	-0.123906	121.711	FALSE	0
2022-09-13	15:22:21	-0.235509	121.711	FALSE	0
2022-09-13	15:22:21	-0.333269	121.711	FALSE	0
2022-09-13	15:22:21	-0.430165	121.711	FALSE	0
2022-09-13	15:22:22	-0.270369	121.711	FALSE	0
2022-09-13	15:22:22	0.24785	121.959	FALSE	0
2022-09-13	15:22:22	0.437723	122.397	FALSE	0
2022-09-13	15:22:22	0.319148	122.716	FALSE	0
2022-09-13	15:22:23	0.823779	123.54	FALSE	0
2022-09-13	15:22:23	0.911717	124.452	FALSE	0
2022-09-13	15:22:23	0.359453	124.811	FALSE	0
2022-09-13	15:22:23	0.342608	125.154	FALSE	0
2022-09-13	15:22:24	0.506781	125.66	FALSE	0
2022-09-13	15:22:24	0.330649	125.991	FALSE	0
2022-09-13	15:22:24	0.295229	126.286	FALSE	0
2022-09-13	15:22:25	0.234618	126.521	FALSE	0
2022-09-13	15:22:25	0.365305	126.886	FALSE	0
2022-09-13	15:22:25	0.293397	127.18	FALSE	0
2022-09-13	15:22:25	0.245763	127.425	FALSE	0
2022-09-13	15:22:26	0.261845	127.687	FALSE	0
2022-09-13	15:22:26	0.304746	127.992	FALSE	0
2022-09-13	15:22:26	0.30729	128.299	FALSE	0
2022-09-13	15:22:26	0.270344	128.57	FALSE	0
2022-09-13	15:22:27	0.325356	128.895	FALSE	0
2022-09-13	15:22:27	0.307596	129.203	FALSE	0
2022-09-13	15:22:27	0.340827	129.543	FALSE	0
2022-09-13	15:22:27	0.253448	129.797	FALSE	0
2022-09-13	15:22:28	0.327138	130.124	FALSE	0
2022-09-13	15:22:28	0.302048	130.426	FALSE	0
2022-09-13	15:22:28	0.35584	130.782	FALSE	0
2022-09-13	15:22:28	0.313448	131.095	FALSE	0
2022-09-13	15:22:29	0.337875	131.433	FALSE	0
2022-09-13	15:22:29	0.442048	131.875	FALSE	0
2022-09-13	15:22:29	0.594517	132.47	FALSE	0
2022-09-13	15:22:30	0.775534	133.245	FALSE	0
2022-09-13	15:22:30	0.536145	133.781	FALSE	0
2022-09-13	15:22:30	0.588359	134.37	FALSE	0
2022-09-13	15:22:30	0.604644	134.974	FALSE	0
2022-09-13	15:22:31	0.617875	135.592	FALSE	0
2022-09-13	15:22:31	0.783219	136.376	FALSE	0
2022-09-13	15:22:31	0.469682	136.845	FALSE	0
2022-09-13	15:22:31	0.719148	137.564	FALSE	0
2022-09-13	15:22:32	0.505916	138.07	FALSE	0
2022-09-13	15:22:32	0.399046	138.469	FALSE	0
2022-09-13	15:22:32	0.445916	138.915	FALSE	0
2022-09-13	15:22:32	0.42098	139.336	FALSE	0
2022-09-13	15:22:33	0.385254	139.722	FALSE	0
2022-09-13	15:22:33	0.343321	140.065	FALSE	0
2022-09-13	15:22:33	0.411158	140.476	FALSE	0
2022-09-13	15:22:34	0.326527	140.803	FALSE	0
2022-09-13	15:22:34	0.324491	141.127	FALSE	0
2022-09-13	15:22:34	0.336807	141.464	FALSE	0
2022-09-13	15:22:34	0.401489	141.865	FALSE	0
2022-09-13	15:22:35	0.31416	142.179	FALSE	0
2022-09-13	15:22:35	0.241387	142.421	FALSE	0
2022-09-13	15:22:35	0.270191	142.691	FALSE	0
2022-09-13	15:22:35	0.242303	142.933	FALSE	0
2022-09-13	15:22:36	0.368715	143.302	FALSE	0
2022-09-13	15:22:36	0.216552	143.519	FALSE	0
2022-09-13	15:22:36	0.364186	143.883	FALSE	0
2022-09-13	15:22:36	0.338842	144.222	FALSE	0
2022-09-13	15:22:37	0.40327	144.625	FALSE	0
2022-09-13	15:22:37	0.278842	144.904	FALSE	0
2022-09-13	15:22:37	0.37299	145.277	FALSE	0
2022-09-13	15:22:38	0.362659	145.639	FALSE	0
2022-09-13	15:22:38	0.331209	145.971	FALSE	0
2022-09-13	15:22:38	0.288715	146.259	FALSE	0
2022-09-13	15:22:38	0.359555	146.619	FALSE	0
2022-09-13	15:22:39	0.386425	147.005	FALSE	0
2022-09-13	15:22:39	0.397112	147.402	FALSE	0
2022-09-13	15:22:39	0.333193	147.736	FALSE	0
2022-09-13	15:22:39	0.416043	148.152	FALSE	0
2022-09-13	15:22:40	0.270903	148.423	FALSE	0
2022-09-13	15:22:40	0.295687	148.718	FALSE	0
2022-09-13	15:22:40	0.177316	148.896	FALSE	0
2022-09-13	15:22:40	0.395076	149.291	FALSE	0
2022-09-13	15:22:41	0.291005	149.582	FALSE	0
2022-09-13	15:22:41	0.327799	149.909	FALSE	0
2022-09-13	15:22:41	0.22042	150.13	FALSE	0
2022-09-13	15:22:42	0.42215	150.552	FALSE	0
2022-09-13	15:22:42	0.261132	150.813	FALSE	0
2022-09-13	15:22:42	0.323066	151.136	FALSE	0
2022-09-13	15:22:42	0.366222	151.502	FALSE	0
2022-09-13	15:22:43	0.341387	151.844	FALSE	0
2022-09-13	15:22:43	0.380013	152.224	FALSE	0
2022-09-13	15:22:43	0.311005	152.535	FALSE	0
2022-09-13	15:22:43	0.306832	152.842	FALSE	0
2022-09-13	15:22:44	0.297163	153.139	FALSE	0
2022-09-13	15:22:44	0.29187	153.431	FALSE	0
2022-09-13	15:22:44	0.296654	153.727	FALSE	0
2022-09-13	15:22:44	0.287952	154.015	FALSE	0
2022-09-13	15:22:45	0.278893	154.294	FALSE	0
2022-09-13	15:22:45	0.275941	154.57	FALSE	0
2022-09-13	15:22:45	0.314466	154.885	FALSE	0
2022-09-13	15:22:46	0.300471	155.185	FALSE	0
2022-09-13	15:22:46	0.287392	155.472	FALSE	0
2022-09-13	15:22:46	0.28785	155.76	FALSE	0
2022-09-13	15:22:46	0.301489	156.062	FALSE	0
2022-09-13	15:22:47	0.527392	156.589	FALSE	0
2022-09-13	15:22:47	1.39218	157.981	FALSE	0
2022-09-13	15:22:47	0.419606	158.401	FALSE	0
2022-09-13	15:22:47	0.436094	158.837	FALSE	0
2022-09-13	15:22:48	0.252226	159.089	FALSE	0
2022-09-13	15:22:48	0.314262	159.404	FALSE	0
2022-09-13	15:22:48	0.250344	159.654	FALSE	0
2022-09-13	15:22:48	0.205458	159.859	FALSE	0
2022-09-13	15:22:49	0.304288	160.164	FALSE	0
2022-09-13	15:22:49	0.200878	160.365	FALSE	0
2022-09-13	15:22:49	0.224491	160.589	FALSE	0
2022-09-13	15:22:50	0.31131	160.9	FALSE	0
2022-09-13	15:22:50	0.317417	161.218	FALSE	0
2022-09-13	15:22:50	0.281132	161.499	FALSE	0
2022-09-13	15:22:50	0.409631	161.909	FALSE	0
2022-09-13	15:22:51	0.888257	162.797	FALSE	0
2022-09-13	15:22:51	0.790445	163.587	FALSE	0
2022-09-13	15:22:51	0.824746	164.412	FALSE	0
2022-09-13	15:22:51	0.451209	164.863	FALSE	0
2022-09-13	15:22:52	0.309529	165.173	FALSE	0
2022-09-13	15:22:52	0.362608	165.535	FALSE	0
2022-09-13	15:22:52	0.174771	165.71	FALSE	0
2022-09-13	15:22:52	0.125356	165.835	FALSE	0
2022-09-13	15:22:53	0.105764	165.941	FALSE	0
2022-09-13	15:22:53	0.116705	166.058	FALSE	0
2022-09-13	15:22:53	0.000929014	166.059	FALSE	0
2022-09-13	15:22:54	-0.013931	166.059	FALSE	0
2022-09-13	15:22:54	0.0151783	166.074	FALSE	0
2022-09-13	15:22:54	0.0393004	166.113	FALSE	0
2022-09-13	15:22:54	-0.0359667	166.113	FALSE	0
2022-09-13	15:22:55	0.188766	166.302	FALSE	0
2022-09-13	15:22:55	0.16383	166.466	FALSE	0
2022-09-13	15:22:55	0.218181	166.684	FALSE	0
2022-09-13	15:22:55	0.394364	167.078	FALSE	0
2022-09-13	15:22:56	0.471209	167.55	FALSE	0
2022-09-13	15:22:56	0.439097	167.989	FALSE	0
2022-09-13	15:22:56	0.409936	168.399	FALSE	0
2022-09-13	15:22:56	0.22785	168.627	FALSE	0
2022-09-13	15:22:57	0.591107	169.218	FALSE	0
2022-09-13	15:22:57	0.306476	169.524	FALSE	0
2022-09-13	15:22:57	0.52332	170.047	FALSE	0
2022-09-13	15:22:58	0.25416	170.302	FALSE	0
2022-09-13	15:22:58	0.475076	170.777	FALSE	0
2022-09-13	15:22:58	0.268919	171.046	FALSE	0
2022-09-13	15:22:58	0.448766	171.494	FALSE	0
2022-09-13	15:22:59	0.279911	171.774	FALSE	0
2022-09-13	15:22:59	0.42841	172.203	FALSE	0
2022-09-13	15:22:59	0.268257	172.471	FALSE	0
2022-09-13	15:22:59	0.447596	172.919	FALSE	0
2022-09-13	15:23:00	0.283219	173.202	FALSE	0
2022-09-13	15:23:00	0.352939	173.555	FALSE	0
2022-09-13	15:23:00	0.246476	173.801	FALSE	0
2022-09-13	15:23:00	0.360013	174.161	FALSE	0
2022-09-13	15:23:01	0.241692	174.403	FALSE	0
2022-09-13	15:23:01	0.194364	174.597	FALSE	0
2022-09-13	15:23:01	0.242405	174.84	FALSE	0
2022-09-13	15:23:02	0.251361	175.091	FALSE	0
2022-09-13	15:23:02	0.33528	175.426	FALSE	0
2022-09-13	15:23:02	0.184898	175.611	FALSE	0
2022-09-13	15:23:02	0.346374	175.958	FALSE	0
2022-09-13	15:23:03	0.232125	176.19	FALSE	0
2022-09-13	15:23:03	0.300624	176.49	FALSE	0
2022-09-13	15:23:03	0.132939	176.623	FALSE	0
2022-09-13	15:23:03	0.378944	177.002	FALSE	0
2022-09-13	15:23:04	0.237316	177.24	FALSE	0
2022-09-13	15:23:04	0.449784	177.689	FALSE	0
2022-09-13	15:23:04	0.16271	177.852	FALSE	0
2022-09-13	15:23:04	0.43986	178.292	FALSE	0
2022-09-13	15:23:05	0.216756	178.509	FALSE	0
2022-09-13	15:23:05	0.416858	178.925	FALSE	0
2022-09-13	15:23:05	0.25528	179.181	FALSE	0
2022-09-13	15:23:06	0.613855	179.795	FALSE	0
2022-09-13	15:23:06	0.554415	180.349	FALSE	0
2022-09-13	15:23:06	0.397926	180.747	FALSE	0
2022-09-13	15:23:06	0.512939	181.26	FALSE	0
2022-09-13	15:23:07	0.456654	181.717	FALSE	0
2022-09-13	15:23:07	0.365458	182.082	FALSE	0
2022-09-13	15:23:07	0.354669	182.437	FALSE	0
2022-09-13	15:23:07	0.54785	182.985	FALSE	0
2022-09-13	15:23:08	0.284746	183.269	FALSE	0
2022-09-13	15:23:08	0.331463	183.601	FALSE	0
2022-09-13	15:23:08	0.294822	183.896	FALSE	0
2022-09-13	15:23:08	0.395178	184.291	FALSE	0
2022-09-13	15:23:09	0.341489	184.632	FALSE	0
2022-09-13	15:23:09	0.386934	185.019	FALSE	0
2022-09-13	15:23:09	0.772023	185.791	FALSE	0
2022-09-13	15:23:10	0.827952	186.619	FALSE	0
2022-09-13	15:23:10	0.338944	186.958	FALSE	0
2022-09-13	15:23:10	0.35299	187.311	FALSE	0
2022-09-13	15:23:10	0.341641	187.653	FALSE	0
2022-09-13	15:23:11	0.354211	188.007	FALSE	0
2022-09-13	15:23:11	0.305102	188.312	FALSE	0
2022-09-13	15:23:11	0.352176	188.664	FALSE	0
2022-09-13	15:23:11	0.450852	189.115	FALSE	0
2022-09-13	15:23:12	0.29645	189.412	FALSE	0
2022-09-13	15:23:12	0.150293	189.562	FALSE	0
2022-09-13	15:23:12	0.0640842	189.626	FALSE	0
2022-09-13	15:23:12	0.0566033	189.682	FALSE	0
2022-09-13	15:23:13	-0.118715	189.682	FALSE	0
2022-09-13	15:23:13	-0.153117	189.682	FALSE	0
2022-09-13	15:23:13	-0.107417	189.682	FALSE	0
2022-09-13	15:23:14	-0.210369	189.682	FALSE	0
2022-09-13	15:23:14	-0.128231	189.682	FALSE	0
2022-09-13	15:23:14	-0.187213	189.682	FALSE	0
2022-09-13	15:23:14	-0.189453	189.682	FALSE	0
2022-09-13	15:23:15	-0.146348	189.682	FALSE	0
2022-09-13	15:23:15	-0.127264	189.682	FALSE	0
2022-09-13	15:23:15	-0.0195799	189.682	FALSE	0
2022-09-13	15:23:15	0.134415	189.817	FALSE	0
2022-09-13	15:23:16	0.0997585	189.917	FALSE	0
2022-09-13	15:23:16	-0.0855849	189.917	FALSE	0
2022-09-13	15:23:16	-0.132506	189.917	FALSE	0
2022-09-13	15:23:16	-0.315356	189.917	FALSE	0
2022-09-13	15:23:17	-0.303753	189.917	FALSE	0
2022-09-13	15:23:17	-0.351844	189.917	FALSE	0
2022-09-13	15:23:17	-0.352353	189.917	FALSE	0
2022-09-13	15:23:18	-0.317188	189.917	FALSE	0
2022-09-13	15:23:18	-0.347773	189.917	FALSE	0
2022-09-13	15:23:18	-0.222175	189.917	FALSE	0
2022-09-13	15:23:18	-0.339427	189.917	FALSE	0
2022-09-13	15:23:19	-0.288384	189.917	FALSE	0
2022-09-13	15:23:19	-0.332404	189.917	FALSE	0
2022-09-13	15:23:19	-0.29785	189.917	FALSE	0
2022-09-13	15:23:19	-0.293626	189.917	FALSE	0
2022-09-13	15:23:20	-0.4122	189.917	FALSE	0
2022-09-13	15:23:20	-0.346195	189.917	FALSE	0
2022-09-13	15:23:20	-0.37388	189.917	FALSE	0
2022-09-13	15:23:20	-0.372353	189.917	FALSE	0
2022-09-13	15:23:21	-0.216679	189.917	FALSE	0
2022-09-13	15:23:21	-0.219733	189.917	FALSE	0
2022-09-13	15:23:21	-0.197137	189.917	FALSE	0
2022-09-13	15:23:22	-0.260292	189.917	FALSE	0
2022-09-13	15:23:22	-0.174694	189.917	FALSE	0
2022-09-13	15:23:22	-0.193473	189.917	FALSE	0
2022-09-13	15:23:22	-0.355254	189.917	FALSE	0
2022-09-13	15:23:23	-0.31388	189.917	FALSE	0
2022-09-13	15:23:23	-0.359274	189.917	FALSE	0
2022-09-13	15:23:23	-0.160598	189.917	FALSE	0
2022-09-13	15:23:23	-0.260598	189.917	FALSE	0
2022-09-13	15:23:24	-0.154389	189.917	FALSE	0
2022-09-13	15:23:24	-0.247977	189.917	FALSE	0
2022-09-13	15:23:24	-0.179224	189.917	FALSE	0
2022-09-13	15:23:24	-0.188995	189.917	FALSE	0
2022-09-13	15:23:25	-0.238409	189.917	FALSE	0
2022-09-13	15:23:25	-0.0720989	189.917	FALSE	0
2022-09-13	15:23:25	-0.103753	189.917	FALSE	0
2022-09-13	15:23:26	-0.0306231	189.917	FALSE	0
2022-09-13	15:23:26	-0.128638	189.917	FALSE	0
2022-09-13	15:23:26	0.0865269	190.003	FALSE	0
2022-09-13	15:23:26	-0.107315	190.003	FALSE	0
2022-09-13	15:23:27	-0.0154577	190.003	FALSE	0
2022-09-13	15:23:27	-0.0178496	190.003	FALSE	0
2022-09-13	15:23:27	-0.094847	190.003	FALSE	0
2022-09-13	15:23:27	-0.111539	190.003	FALSE	0
2022-09-13	15:23:28	-0.139224	190.003	FALSE	0
2022-09-13	15:23:28	-0.060445	190.003	FALSE	0
2022-09-13	15:23:28	-0.167977	190.003	FALSE	0
2022-09-13	15:23:28	-0.0154069	190.003	FALSE	0
2022-09-13	15:23:29	-0.0983585	190.003	FALSE	0
2022-09-13	15:23:29	-0.00828218	190.003	FALSE	0
2022-09-13	15:23:29	0.00403331	190.007	FALSE	0
2022-09-13	15:23:30	0.354313	190.362	FALSE	0
2022-09-13	15:23:30	0.327697	190.689	FALSE	0
2022-09-13	15:23:30	0.431769	191.121	FALSE	0
2022-09-13	15:23:30	0.338079	191.459	FALSE	0
2022-09-13	15:23:31	0.55355	192.013	FALSE	0
2022-09-13	15:23:31	0.27925	192.292	FALSE	0
2022-09-13	15:23:31	0.404847	192.697	FALSE	0
2022-09-13	15:23:31	0.426781	193.124	FALSE	0
2022-09-13	15:23:32	0.374059	193.498	FALSE	0
2022-09-13	15:23:32	0.641081	194.139	FALSE	0
2022-09-13	15:23:32	0.348257	194.487	FALSE	0
2022-09-13	15:23:32	0.556196	195.043	FALSE	0
2022-09-13	15:23:33	0.390445	195.434	FALSE	0
2022-09-13	15:23:33	0.547392	195.981	FALSE	0
2022-09-13	15:23:33	0.312888	196.294	FALSE	0
2022-09-13	15:23:34	0.446934	196.741	FALSE	0
2022-09-13	15:23:34	0.407494	197.148	FALSE	0
2022-09-13	15:23:34	0.264949	197.413	FALSE	0
2022-09-13	15:23:34	-0.288638	197.413	FALSE	0
2022-09-13	15:23:35	-0.612048	197.413	FALSE	0
2022-09-13	15:23:35	-0.732913	197.413	FALSE	0
2022-09-13	15:23:35	-0.533575	197.413	FALSE	0
2022-09-13	15:23:35	-0.326755	197.413	FALSE	0
2022-09-13	15:23:36	-0.324465	197.413	FALSE	0
2022-09-13	15:23:36	-0.417849	197.413	FALSE	0
2022-09-13	15:23:36	-0.245229	197.413	FALSE	0
2022-09-13	15:23:36	-0.270674	197.413	FALSE	0
2022-09-13	15:23:37	-0.251895	197.413	FALSE	0
2022-09-13	15:23:37	-0.380547	197.413	FALSE	0
2022-09-13	15:23:37	-0.383346	197.413	FALSE	0
2022-09-13	15:23:38	-0.36304	197.413	FALSE	0
2022-09-13	15:23:38	-0.268129	197.413	FALSE	0
2022-09-13	15:23:38	-0.239733	197.413	FALSE	0
2022-09-13	15:23:38	-0.216984	197.413	FALSE	0
2022-09-13	15:23:39	-0.315356	197.413	FALSE	0
2022-09-13	15:23:39	-0.466246	197.413	FALSE	0
2022-09-13	15:23:39	-0.509605	197.413	FALSE	0
2022-09-13	15:23:39	-0.443396	197.413	FALSE	0
2022-09-13	15:23:40	-0.348027	197.413	FALSE	0
2022-09-13	15:23:40	-0.367977	197.413	FALSE	0
2022-09-13	15:23:40	-0.365534	197.413	FALSE	0
2022-09-13	15:23:40	-0.323804	197.413	FALSE	0
2022-09-13	15:23:41	-0.332302	197.413	FALSE	0
2022-09-13	15:23:41	-0.077646	197.413	FALSE	0
2022-09-13	15:23:41	-0.0967809	197.413	FALSE	0
2022-09-13	15:23:42	0.0159417	197.429	FALSE	0
2022-09-13	15:23:42	-0.136119	197.429	FALSE	0
2022-09-13	15:23:42	0.105153	197.534	FALSE	0
2022-09-13	15:23:42	-0.0343382	197.534	FALSE	0
2022-09-13	15:23:43	0.152837	197.687	FALSE	0
2022-09-13	15:23:43	-0.055356	197.687	FALSE	0
2022-09-13	15:23:43	0.0486135	197.736	FALSE	0
2022-09-13	15:23:43	0.00937683	197.745	FALSE	0
2022-09-13	15:23:44	-0.0140837	197.745	FALSE	0
2022-09-13	15:23:44	-0.0261957	197.745	FALSE	0
2022-09-13	15:23:44	-0.109402	197.745	FALSE	0
2022-09-13	15:23:44	0.00520383	197.75	FALSE	0
2022-09-13	15:23:45	0.096247	197.847	FALSE	0
2022-09-13	15:23:45	0.0801147	197.927	FALSE	0
2022-09-13	15:23:45	0.0988424	198.026	FALSE	0
2022-09-13	15:23:46	0.18729	198.213	FALSE	0
2022-09-13	15:23:46	0.0377229	198.251	FALSE	0
2022-09-13	15:23:46	-0.156475	198.251	FALSE	0
2022-09-13	15:23:46	-0.155814	198.251	FALSE	0
2022-09-13	15:23:47	-0.223702	198.251	FALSE	0
2022-09-13	15:23:47	-0.293015	198.251	FALSE	0
2022-09-13	15:23:47	-0.324567	198.251	FALSE	0
2022-09-13	15:23:47	-0.0335239	198.251	FALSE	0
2022-09-13	15:23:48	0.0462725	198.297	FALSE	0
2022-09-13	15:23:48	0.388359	198.685	FALSE	0
2022-09-13	15:23:48	0.582761	199.268	FALSE	0
2022-09-13	15:23:48	0.697773	199.966	FALSE	0
2022-09-13	15:23:49	0.611412	200.577	FALSE	0
2022-09-13	15:23:49	0.689173	201.266	FALSE	0
2022-09-13	15:23:49	0.772735	202.039	FALSE	0
2022-09-13	15:23:50	0.526578	202.566	FALSE	0
2022-09-13	15:23:50	0.36159	202.927	FALSE	0
2022-09-13	15:23:50	0.502659	203.43	FALSE	0
2022-09-13	15:23:50	0.356094	203.786	FALSE	0
2022-09-13	15:23:51	0.0486644	203.835	FALSE	0
2022-09-13	15:23:51	0.00779924	203.842	FALSE	0
2022-09-13	15:23:51	0.00215038	203.845	FALSE	0
2022-09-13	15:23:51	0.1593	204.004	FALSE	0
2022-09-13	15:23:52	0.0568577	204.061	FALSE	0
2022-09-13	15:23:52	0.320013	204.381	FALSE	0
2022-09-13	15:23:52	0.0294786	204.41	FALSE	0
2022-09-13	15:23:52	0.285204	204.695	FALSE	0
2022-09-13	15:23:53	0.0763997	204.772	FALSE	0
2022-09-13	15:23:53	0.234211	205.006	FALSE	0
2022-09-13	15:23:53	0.130293	205.136	FALSE	0
2022-09-13	15:23:54	0.191514	205.328	FALSE	0
2022-09-13	15:23:54	0.0947203	205.423	FALSE	0
2022-09-13	15:23:54	0.0599111	205.482	FALSE	0
2022-09-13	15:23:54	0.195585	205.678	FALSE	0
2022-09-13	15:23:55	0.0266287	205.705	FALSE	0
2022-09-13	15:23:55	0.149835	205.855	FALSE	0
2022-09-13	15:23:55	-0.00288781	205.855	FALSE	0
2022-09-13	15:23:55	0.140929	205.995	FALSE	0
2022-09-13	15:23:56	-0.105738	205.995	FALSE	0
2022-09-13	15:23:56	-0.201615	205.995	FALSE	0
2022-09-13	15:23:56	-0.122939	205.995	FALSE	0
2022-09-13	15:23:56	-0.137137	205.995	FALSE	0
2022-09-13	15:23:57	0.0545676	206.05	FALSE	0
2022-09-13	15:23:57	-0.0979004	206.05	FALSE	0
2022-09-13	15:23:57	0.095789	206.146	FALSE	0
2022-09-13	15:23:58	-0.122124	206.146	FALSE	0
2022-09-13	15:23:58	0.0394532	206.185	FALSE	0
2022-09-13	15:23:58	-0.0118954	206.185	FALSE	0
2022-09-13	15:23:58	-0.0364756	206.185	FALSE	0
2022-09-13	15:23:59	0.227545	206.413	FALSE	0
2022-09-13	15:23:59	0.0178755	206.431	FALSE	0
2022-09-13	15:23:59	0.269936	206.701	FALSE	0
2022-09-13	15:23:59	0.00601804	206.707	FALSE	0
2022-09-13	15:24:00	0.138283	206.845	FALSE	0
2022-09-13	15:24:00	0.169224	207.014	FALSE	0
2022-09-13	15:24:00	0.184186	207.198	FALSE	0
2022-09-13	15:24:00	0.339046	207.537	FALSE	0
2022-09-13	15:24:01	0.0623539	207.6	FALSE	0
2022-09-13	15:24:01	0.289835	207.89	FALSE	0
2022-09-13	15:24:01	0.096756	207.986	FALSE	0
2022-09-13	15:24:02	0.23187	208.218	FALSE	0
2022-09-13	15:24:02	-0.071132	208.218	FALSE	0
2022-09-13	15:24:02	0.152837	208.371	FALSE	0
2022-09-13	15:24:02	-0.0689437	208.371	FALSE	0
2022-09-13	15:24:03	0.133804	208.505	FALSE	0
2022-09-13	15:24:03	-0.109046	208.505	FALSE	0
2022-09-13	15:24:03	-0.232252	208.505	FALSE	0
2022-09-13	15:24:03	-0.23042	208.505	FALSE	0
2022-09-13	15:24:04	-0.196832	208.505	FALSE	0
2022-09-13	15:24:04	-0.166908	208.505	FALSE	0
2022-09-13	15:24:04	-0.171437	208.505	FALSE	0
2022-09-13	15:24:04	-0.111386	208.505	FALSE	0
2022-09-13	15:24:05	-0.269605	208.505	FALSE	0
2022-09-13	15:24:05	-0.23388	208.505	FALSE	0
2022-09-13	15:24:05	-0.277799	208.505	FALSE	0
2022-09-13	15:24:06	-0.124109	208.505	FALSE	0
2022-09-13	15:24:06	-0.159936	208.505	FALSE	0
2022-09-13	15:24:06	-0.0918954	208.505	FALSE	0
2022-09-13	15:24:06	-0.113982	208.505	FALSE	0
2022-09-13	15:24:07	0.028359	208.533	FALSE	0
2022-09-13	15:24:07	0.439708	208.973	FALSE	0
2022-09-13	15:24:07	0.344695	209.318	FALSE	0
2022-09-13	15:24:07	0.324898	209.642	FALSE	0
2022-09-13	15:24:08	0.154059	209.797	FALSE	0
2022-09-13	15:24:08	0.448104	210.245	FALSE	0
2022-09-13	15:24:08	0.217214	210.462	FALSE	0
2022-09-13	15:24:08	0.384695	210.847	FALSE	0
2022-09-13	15:24:09	0.211412	211.058	FALSE	0
2022-09-13	15:24:09	0.217468	211.275	FALSE	0
2022-09-13	15:24:09	0.27243	211.548	FALSE	0
2022-09-13	15:24:09	0.216858	211.765	FALSE	0
2022-09-13	15:24:10	0.33299	212.098	FALSE	0
2022-09-13	15:24:10	0.123524	212.221	FALSE	0
2022-09-13	15:24:10	0.285356	212.507	FALSE	0
2022-09-13	15:24:11	0.272125	212.779	FALSE	0
2022-09-13	15:24:11	0.282812	213.062	FALSE	0
2022-09-13	15:24:11	0.249326	213.311	FALSE	0
2022-09-13	15:24:11	0.211158	213.522	FALSE	0
2022-09-13	15:24:12	0.320827	213.843	FALSE	0
2022-09-13	15:24:12	0.253397	214.096	FALSE	0
2022-09-13	15:24:12	0.404644	214.501	FALSE	0
2022-09-13	15:24:12	0.266272	214.767	FALSE	0
2022-09-13	15:24:13	0.32042	215.088	FALSE	0
2022-09-13	15:24:13	0.40215	215.49	FALSE	0
2022-09-13	15:24:13	0.337468	215.827	FALSE	0
2022-09-13	15:24:14	0.247646	216.075	FALSE	0
2022-09-13	15:24:14	0.350089	216.425	FALSE	0
2022-09-13	15:24:14	0.132176	216.557	FALSE	0
2022-09-13	15:24:14	0.235026	216.792	FALSE	0
2022-09-13	15:24:15	0.181387	216.974	FALSE	0
2022-09-13	15:24:15	0.22785	217.201	FALSE	0
2022-09-13	15:24:15	0.21411	217.415	FALSE	0
2022-09-13	15:24:15	0.4993	217.915	FALSE	0
2022-09-13	15:24:16	0.491972	218.407	FALSE	0
2022-09-13	15:24:16	0.245356	218.652	FALSE	0
2022-09-13	15:24:16	0.319097	218.971	FALSE	0
2022-09-13	15:24:16	0.301743	219.273	FALSE	0
2022-09-13	15:24:17	0.209122	219.482	FALSE	0
2022-09-13	15:24:17	0.310598	219.793	FALSE	0
2022-09-13	15:24:17	0.438435	220.231	FALSE	0
2022-09-13	15:24:17	0.138741	220.37	FALSE	0
2022-09-13	15:24:18	0.417061	220.787	FALSE	0
2022-09-13	15:24:18	0.336043	221.123	FALSE	0
2022-09-13	15:24:18	0.340064	221.463	FALSE	0
2022-09-13	15:24:19	0.374924	221.838	FALSE	0
2022-09-13	15:24:19	0.245051	222.083	FALSE	0
2022-09-13	15:24:19	0.336298	222.419	FALSE	0
2022-09-13	15:24:19	0.361438	222.781	FALSE	0
2022-09-13	15:24:20	0.310751	223.091	FALSE	0
2022-09-13	15:24:20	0.479504	223.571	FALSE	0
2022-09-13	15:24:20	0.30612	223.877	FALSE	0
2022-09-13	15:24:20	0.38897	224.266	FALSE	0
2022-09-13	15:24:21	0.371463	224.638	FALSE	0
2022-09-13	15:24:21	0.386629	225.024	FALSE	0
2022-09-13	15:24:21	0.480522	225.505	FALSE	0
2022-09-13	15:24:21	0.421743	225.926	FALSE	0
2022-09-13	15:24:22	0.671819	226.598	FALSE	0
2022-09-13	15:24:22	0.542456	227.141	FALSE	0
2022-09-13	15:24:22	0.540471	227.681	FALSE	0
2022-09-13	15:24:23	0.498995	228.18	FALSE	0
2022-09-13	15:24:23	0.414109	228.594	FALSE	0
2022-09-13	15:24:23	0.550343	229.145	FALSE	0
2022-09-13	15:24:23	0.375585	229.52	FALSE	0
2022-09-13	15:24:24	0.520064	230.04	FALSE	0
2022-09-13	15:24:24	0.323626	230.364	FALSE	0
2022-09-13	15:24:24	0.376298	230.74	FALSE	0
2022-09-13	15:24:24	0.349326	231.09	FALSE	0
2022-09-13	15:24:25	0.369377	231.459	FALSE	0
2022-09-13	15:24:25	0.447341	231.906	FALSE	0
2022-09-13	15:24:25	0.330802	232.237	FALSE	0
2022-09-13	15:24:25	0.386171	232.623	FALSE	0
2022-09-13	15:24:26	0.38612	233.009	FALSE	0
2022-09-13	15:24:26	0.412735	233.422	FALSE	0
2022-09-13	15:24:26	0.361082	233.783	FALSE	0
2022-09-13	15:24:27	0.424237	234.207	FALSE	0
2022-09-13	15:24:27	0.375076	234.582	FALSE	0
2022-09-13	15:24:27	0.4393	235.022	FALSE	0
2022-09-13	15:24:27	0.406069	235.428	FALSE	0
2022-09-13	15:24:28	0.383168	235.811	FALSE	0
2022-09-13	15:24:28	0.396349	236.207	FALSE	0
2022-09-13	15:24:28	0.391107	236.598	FALSE	0
2022-09-13	15:24:28	0.398995	236.997	FALSE	0
2022-09-13	15:24:29	0.393397	237.391	FALSE	0
2022-09-13	15:24:29	0.42383	237.815	FALSE	0
2022-09-13	15:24:29	0.394109	238.209	FALSE	0
2022-09-13	15:24:29	0.394415	238.603	FALSE	0
2022-09-13	15:24:30	0.392685	238.996	FALSE	0
2022-09-13	15:24:30	0.407646	239.404	FALSE	0
2022-09-13	15:24:30	0.401183	239.805	FALSE	0
2022-09-13	15:24:31	0.399758	240.204	FALSE	0
2022-09-13	15:24:31	0.402557	240.607	FALSE	0
2022-09-13	15:24:31	0.396603	241.004	FALSE	0
2022-09-13	15:24:31	0.396959	241.401	FALSE	0
2022-09-13	15:24:32	0.403321	241.804	FALSE	0
2022-09-13	15:24:32	0.389936	242.194	FALSE	0
2022-09-13	15:24:32	0.386222	242.58	FALSE	0
2022-09-13	15:24:32	0.364593	242.945	FALSE	0
2022-09-13	15:24:33	0.375127	243.32	FALSE	0
2022-09-13	15:24:33	0.378232	243.698	FALSE	0
2022-09-13	15:24:33	0.386018	244.084	FALSE	0
2022-09-13	15:24:33	0.376094	244.46	FALSE	0
2022-09-13	15:24:34	0.378995	244.839	FALSE	0
2022-09-13	15:24:34	0.377468	245.217	FALSE	0
2022-09-13	15:24:34	0.383422	245.6	FALSE	0
2022-09-13	15:24:35	0.373753	245.974	FALSE	0
2022-09-13	15:24:35	0.377875	246.352	FALSE	0
2022-09-13	15:24:35	0.404186	246.756	FALSE	0
2022-09-13	15:24:35	0.426018	247.182	FALSE	0
2022-09-13	15:24:36	0.347799	247.53	FALSE	0
2022-09-13	15:24:36	0.272634	247.802	FALSE	0
2022-09-13	15:24:36	0.32444	248.127	FALSE	0
2022-09-13	15:24:36	0.337366	248.464	FALSE	0
2022-09-13	15:24:37	0.228613	248.693	FALSE	0
2022-09-13	15:24:37	0.360216	249.053	FALSE	0
2022-09-13	15:24:37	0.262914	249.316	FALSE	0
2022-09-13	15:24:37	0.257265	249.573	FALSE	0
2022-09-13	15:24:38	0.571209	250.144	FALSE	0
2022-09-13	15:24:38	0.552736	250.697	FALSE	0
2022-09-13	15:24:38	0.497163	251.194	FALSE	0
2022-09-13	15:24:39	0.620064	251.814	FALSE	0
2022-09-13	15:24:39	0.829885	252.644	FALSE	0
2022-09-13	15:24:39	0.681234	253.325	FALSE	0
2022-09-13	15:24:39	0.638079	253.963	FALSE	0
2022-09-13	15:24:40	0.333499	254.297	FALSE	0
2022-09-13	15:24:40	0.526221	254.823	FALSE	0
2022-09-13	15:24:40	0.375789	255.199	FALSE	0
2022-09-13	15:24:40	0.248308	255.447	FALSE	0
2022-09-13	15:24:41	0.181132	255.628	FALSE	0
2022-09-13	15:24:41	0.151412	255.78	FALSE	0
2022-09-13	15:24:41	-0.095814	255.78	FALSE	0
2022-09-13	15:24:41	-0.325992	255.78	FALSE	0
2022-09-13	15:24:42	-0.402888	255.78	FALSE	0
2022-09-13	15:24:42	-0.359783	255.78	FALSE	0
2022-09-13	15:24:42	0.000216527	255.78	FALSE	0
2022-09-13	15:24:43	0.337265	256.117	FALSE	0
2022-09-13	15:24:43	0.147596	256.265	FALSE	0
2022-09-13	15:24:43	-0.172811	256.265	FALSE	0
2022-09-13	15:24:43	0.241947	256.507	FALSE	0
2022-09-13	15:24:44	-0.297137	256.507	FALSE	0
2022-09-13	15:24:44	-0.342684	256.507	FALSE	0
2022-09-13	15:24:44	-0.48187	256.507	FALSE	0
2022-09-13	15:24:44	-0.320343	256.507	FALSE	0
2022-09-13	15:24:45	0.909173	257.416	FALSE	0
2022-09-13	15:24:45	1.26149	258.678	FALSE	0
2022-09-13	15:24:45	1.23564	259.913	FALSE	0
2022-09-13	15:24:45	1.56174	261.475	FALSE	0
2022-09-13	15:24:46	0.870496	262.345	FALSE	0
2022-09-13	15:24:46	0.509733	262.855	FALSE	0
2022-09-13	15:24:46	0.54958	263.405	FALSE	0
2022-09-13	15:24:47	0.390903	263.796	FALSE	0
2022-09-13	15:24:47	0.399657	264.195	FALSE	0
2022-09-13	15:24:47	0.106781	264.302	FALSE	0
2022-09-13	15:24:47	0.149326	264.451	FALSE	0
2022-09-13	15:24:48	0.123677	264.575	FALSE	0
2022-09-13	15:24:48	0.125764	264.701	FALSE	0
2022-09-13	15:24:48	0.0793513	264.78	FALSE	0
2022-09-13	15:24:48	0.183626	264.964	FALSE	0
2022-09-13	15:24:49	-0.0575951	264.964	FALSE	0
2022-09-13	15:24:49	0.0319723	264.996	FALSE	0
2022-09-13	15:24:49	-0.163295	264.996	FALSE	0
2022-09-13	15:24:49	-0.0747962	264.996	FALSE	0
2022-09-13	15:24:50	-0.0394272	264.996	FALSE	0
2022-09-13	15:24:50	0.071616	265.067	FALSE	0
2022-09-13	15:24:50	0.0271376	265.095	FALSE	0
2022-09-13	15:24:51	0.314008	265.409	FALSE	0
2022-09-13	15:24:51	0.184288	265.593	FALSE	0
2022-09-13	15:24:51	0.185611	265.778	FALSE	0
2022-09-13	15:24:51	-0.0397834	265.778	FALSE	0
2022-09-13	15:24:52	0.0460689	265.824	FALSE	0
2022-09-13	15:24:52	0.0443386	265.869	FALSE	0
2022-09-13	15:24:52	0.0667305	265.936	FALSE	0
2022-09-13	15:24:52	0.178588	266.114	FALSE	0
2022-09-13	15:24:53	-0.180903	266.114	FALSE	0
2022-09-13	15:24:53	-0.13042	266.114	FALSE	0
2022-09-13	15:24:53	-0.197035	266.114	FALSE	0
2022-09-13	15:24:53	-0.178664	266.114	FALSE	0
2022-09-13	15:24:54	-0.296323	266.114	FALSE	0
2022-09-13	15:24:54	-0.146094	266.114	FALSE	0
2022-09-13	15:24:54	-0.143804	266.114	FALSE	0
2022-09-13	15:24:55	-0.0768318	266.114	FALSE	0
2022-09-13	15:24:55	-0.225229	266.114	FALSE	0
2022-09-13	15:24:55	-0.129402	266.114	FALSE	0
2022-09-13	15:24:55	-0.264923	266.114	FALSE	0
2022-09-13	15:24:56	-0.219122	266.114	FALSE	0
2022-09-13	15:24:56	-0.331844	266.114	FALSE	0
2022-09-13	15:24:56	-0.181565	266.114	FALSE	0
2022-09-13	15:24:56	-0.198867	266.114	FALSE	0
2022-09-13	15:24:57	-0.154287	266.114	FALSE	0
2022-09-13	15:24:57	-0.217035	266.114	FALSE	0
2022-09-13	15:24:57	-0.161768	266.114	FALSE	0
2022-09-13	15:24:57	-0.155152	266.114	FALSE	0
2022-09-13	15:24:58	-0.13215	266.114	FALSE	0
2022-09-13	15:24:58	-0.221565	266.114	FALSE	0
2022-09-13	15:24:58	-0.163855	266.114	FALSE	0
2022-09-13	15:24:59	-0.166959	266.114	FALSE	0
2022-09-13	15:24:59	-0.0990709	266.114	FALSE	0
2022-09-13	15:24:59	-0.0691982	266.114	FALSE	0
2022-09-13	15:24:59	-0.017188	266.114	FALSE	0
2022-09-13	15:25:00	-0.0380532	266.114	FALSE	0
2022-09-13	15:25:00	0.0484099	266.163	FALSE	0
2022-09-13	15:25:00	0.099046	266.262	FALSE	0
2022-09-13	15:25:00	0.260725	266.522	FALSE	0
2022-09-13	15:25:01	0.555891	267.078	FALSE	0
2022-09-13	15:25:01	0.522608	267.601	FALSE	0
2022-09-13	15:25:01	0.380165	267.981	FALSE	0
2022-09-13	15:25:01	0.496552	268.478	FALSE	0
2022-09-13	15:25:02	0.452277	268.93	FALSE	0
2022-09-13	15:25:02	0.477774	269.408	FALSE	0
2022-09-13	15:25:02	0.277316	269.685	FALSE	0
2022-09-13	15:25:03	0.480776	270.166	FALSE	0
2022-09-13	15:25:03	0.309326	270.475	FALSE	0
2022-09-13	15:25:03	0.607188	271.082	FALSE	0
2022-09-13	15:25:03	0.301031	271.383	FALSE	0
2022-09-13	15:25:04	0.634262	272.017	FALSE	0
2022-09-13	15:25:04	0.347494	272.365	FALSE	0
2022-09-13	15:25:04	0.669987	273.035	FALSE	0
2022-09-13	15:25:04	0.291107	273.326	FALSE	0
2022-09-13	15:25:05	0.641845	273.968	FALSE	0
2022-09-13	15:25:05	0.371718	274.34	FALSE	0
2022-09-13	15:25:05	0.601997	274.942	FALSE	0
2022-09-13	15:25:05	0.308868	275.251	FALSE	0
2022-09-13	15:25:06	0.663473	275.914	FALSE	0
2022-09-13	15:25:06	0.550445	276.464	FALSE	0
2022-09-13	15:25:06	0.616043	277.08	FALSE	0
2022-09-13	15:25:07	0.519402	277.6	FALSE	0
2022-09-13	15:25:07	0.612226	278.212	FALSE	0
2022-09-13	15:25:07	0.480064	278.692	FALSE	0
2022-09-13	15:25:07	0.464186	279.156	FALSE	0
2022-09-13	15:25:08	0.608053	279.764	FALSE	0
2022-09-13	15:25:08	0.432481	280.197	FALSE	0
2022-09-13	15:25:08	0.399657	280.597	FALSE	0
2022-09-13	15:25:08	0.487188	281.084	FALSE	0
2022-09-13	15:25:09	0.550547	281.634	FALSE	0
2022-09-13	15:25:09	0.41355	282.048	FALSE	0
2022-09-13	15:25:09	0.692125	282.74	FALSE	0
2022-09-13	15:25:09	0.485814	283.226	FALSE	0
2022-09-13	15:25:10	0.675178	283.901	FALSE	0
2022-09-13	15:25:10	0.490242	284.391	FALSE	0
2022-09-13	15:25:10	0.498639	284.89	FALSE	0
2022-09-13	15:25:11	0.420369	285.31	FALSE	0
2022-09-13	15:25:11	0.600165	285.91	FALSE	0
2022-09-13	15:25:11	0.31869	286.229	FALSE	0
2022-09-13	15:25:11	0.664237	286.893	FALSE	0
2022-09-13	15:25:12	0.439402	287.333	FALSE	0
2022-09-13	15:25:12	0.336705	287.669	FALSE	0
2022-09-13	15:25:12	0.34897	288.018	FALSE	0
2022-09-13	15:25:12	0.372125	288.39	FALSE	0
2022-09-13	15:25:13	0.296908	288.687	FALSE	0
2022-09-13	15:25:13	0.497316	289.185	FALSE	0
2022-09-13	15:25:13	0.380674	289.565	FALSE	0
2022-09-13	15:25:13	0.515331	290.081	FALSE	0
2022-09-13	15:25:14	0.315738	290.396	FALSE	0
2022-09-13	15:25:14	0.590191	290.987	FALSE	0
2022-09-13	15:25:14	0.343168	291.33	FALSE	0
2022-09-13	15:25:15	0.673957	292.004	FALSE	0
2022-09-13	15:25:15	0.421438	292.425	FALSE	0
2022-09-13	15:25:15	0.604746	293.03	FALSE	0
2022-09-13	15:25:15	0.303931	293.334	FALSE	0
2022-09-13	15:25:16	0.659809	293.994	FALSE	0
2022-09-13	15:25:16	0.498791	294.492	FALSE	0
2022-09-13	15:25:16	0.414262	294.907	FALSE	0
2022-09-13	15:25:16	0.445356	295.352	FALSE	0
2022-09-13	15:25:17	0.527239	295.879	FALSE	0
2022-09-13	15:25:17	0.414822	296.294	FALSE	0
2022-09-13	15:25:17	0.416298	296.71	FALSE	0
2022-09-13	15:25:17	0.356807	297.067	FALSE	0
2022-09-13	15:25:18	0.432176	297.499	FALSE	0
2022-09-13	15:25:18	0.369428	297.869	FALSE	0
2022-09-13	15:25:18	0.402914	298.272	FALSE	0
2022-09-13	15:25:19	0.331921	298.604	FALSE	0
2022-09-13	15:25:19	0.277977	298.882	FALSE	0
2022-09-13	15:25:19	0.382354	299.264	FALSE	0
2022-09-13	15:25:19	0.272074	299.536	FALSE	0
2022-09-13	15:25:20	0.370293	299.906	FALSE	0
2022-09-13	15:25:20	0.0930918	299.999	FALSE	0
2022-09-13	15:25:20	0.378283	300.378	FALSE	0
2022-09-13	15:25:20	0.218639	300.596	FALSE	0
2022-09-13	15:25:21	0.325102	300.922	FALSE	0
2022-09-13	15:25:21	0.134262	301.056	FALSE	0
2022-09-13	15:25:21	0.344949	301.401	FALSE	0
2022-09-13	15:25:21	0.271819	301.673	FALSE	0
2022-09-13	15:25:22	0.444593	302.117	FALSE	0
2022-09-13	15:25:22	0.197367	302.315	FALSE	0
2022-09-13	15:25:22	0.291921	302.606	FALSE	0
2022-09-13	15:25:23	0.234924	302.841	FALSE	0
2022-09-13	15:25:23	0.407596	303.249	FALSE	0
2022-09-13	15:25:23	0.315891	303.565	FALSE	0
2022-09-13	15:25:23	0.315331	303.88	FALSE	0
2022-09-13	15:25:24	0.563677	304.444	FALSE	0
2022-09-13	15:25:24	0.371667	304.816	FALSE	0
2022-09-13	15:25:24	0.561387	305.377	FALSE	0
2022-09-13	15:25:24	0.386323	305.763	FALSE	0
2022-09-13	15:25:25	0.543066	306.306	FALSE	0
2022-09-13	15:25:25	0.476909	306.783	FALSE	0
2022-09-13	15:25:25	0.445407	307.229	FALSE	0
2022-09-13	15:25:25	0.0431173	307.272	FALSE	0
2022-09-13	15:25:26	0.164491	307.436	FALSE	0
2022-09-13	15:25:26	0.0576211	307.494	FALSE	0
2022-09-13	15:25:26	-0.00629748	307.494	FALSE	0
2022-09-13	15:25:27	2.35182	309.846	FALSE	0
2022-09-13	15:25:27	0.466476	310.312	FALSE	0
2022-09-13	15:25:27	0.146883	310.459	FALSE	0
2022-09-13	15:25:27	0.129173	310.588	FALSE	0
2022-09-13	15:25:28	0.25014	310.838	FALSE	0
2022-09-13	15:25:28	0.11696	310.955	FALSE	0
2022-09-13	15:25:28	0.273397	311.229	FALSE	0
2022-09-13	15:25:28	0.11243	311.341	FALSE	0
2022-09-13	15:25:29	0.228766	311.57	FALSE	0
2022-09-13	15:25:29	0.17126	311.741	FALSE	0
2022-09-13	15:25:29	0.19126	311.932	FALSE	0
2022-09-13	15:25:29	0.202965	312.135	FALSE	0
2022-09-13	15:25:30	0.203931	312.339	FALSE	0
2022-09-13	15:25:30	0.388308	312.728	FALSE	0
2022-09-13	15:25:30	0.359657	313.087	FALSE	0
2022-09-13	15:25:31	0.52444	313.612	FALSE	0
2022-09-13	15:25:31	0.263321	313.875	FALSE	0
2022-09-13	15:25:31	0.577061	314.452	FALSE	0
2022-09-13	15:25:31	0.210242	314.662	FALSE	0
2022-09-13	15:25:32	0.478435	315.141	FALSE	0
2022-09-13	15:25:32	0.365763	315.507	FALSE	0
2022-09-13	15:25:32	0.505203	316.012	FALSE	0
2022-09-13	15:25:32	0.428053	316.44	FALSE	0
2022-09-13	15:25:33	0.46729	316.907	FALSE	0
2022-09-13	15:25:33	0.400267	317.307	FALSE	0
2022-09-13	15:25:33	0.432074	317.739	FALSE	0
2022-09-13	15:25:33	0.436654	318.176	FALSE	0
2022-09-13	15:25:34	0.377774	318.554	FALSE	0
2022-09-13	15:25:34	0.575382	319.129	FALSE	0
2022-09-13	15:25:34	0.308969	319.438	FALSE	0
2022-09-13	15:25:35	0.583422	320.022	FALSE	0
2022-09-13	15:25:35	0.333143	320.355	FALSE	0
2022-09-13	15:25:35	0.677214	321.032	FALSE	0
2022-09-13	15:25:35	0.281489	321.313	FALSE	0
2022-09-13	15:25:36	0.55701	321.87	FALSE	0
2022-09-13	15:25:36	0.365509	322.236	FALSE	0
2022-09-13	15:25:36	0.557875	322.794	FALSE	0
2022-09-13	15:25:36	0.364847	323.159	FALSE	0
2022-09-13	15:25:37	0.492125	323.651	FALSE	0
2022-09-13	15:25:37	0.465255	324.116	FALSE	0
2022-09-13	15:25:37	0.453193	324.569	FALSE	0
2022-09-13	15:25:37	0.429631	324.999	FALSE	0
2022-09-13	15:25:38	0.441234	325.44	FALSE	0
2022-09-13	15:25:38	0.398842	325.839	FALSE	0
2022-09-13	15:25:38	0.443982	326.283	FALSE	0
2022-09-13	15:25:39	0.517366	326.8	FALSE	0
2022-09-13	15:25:39	2.32363	329.124	FALSE	0
2022-09-13	15:25:39	2.47823	331.602	FALSE	0
2022-09-13	15:25:39	0.567036	332.169	FALSE	0
2022-09-13	15:25:40	0.415382	332.585	FALSE	0
2022-09-13	15:25:40	0.414822	332.999	FALSE	0
2022-09-13	15:25:40	0.459402	333.459	FALSE	0
2022-09-13	15:25:40	0.470344	333.929	FALSE	0
2022-09-13	15:25:41	0.575993	334.505	FALSE	0
2022-09-13	15:25:41	0.345305	334.85	FALSE	0
2022-09-13	15:25:41	0.478893	335.329	FALSE	0
2022-09-13	15:25:41	0.284033	335.613	FALSE	0
2022-09-13	15:25:42	0.245305	335.859	FALSE	0
2022-09-13	15:25:42	0.536349	336.395	FALSE	0
2022-09-13	15:25:42	0.311005	336.706	FALSE	0
2022-09-13	15:25:43	0.593091	337.299	FALSE	0
2022-09-13	15:25:43	0.242914	337.542	FALSE	0
2022-09-13	15:25:43	0.606679	338.149	FALSE	0
2022-09-13	15:25:43	0.365713	338.514	FALSE	0
2022-09-13	15:25:44	0.457214	338.972	FALSE	0
2022-09-13	15:25:44	0.428155	339.4	FALSE	0
2022-09-13	15:25:44	0.446425	339.846	FALSE	0
2022-09-13	15:25:44	0.356145	340.202	FALSE	0
2022-09-13	15:25:45	0.376858	340.579	FALSE	0
2022-09-13	15:25:45	0.493651	341.073	FALSE	0
2022-09-13	15:25:45	0.360318	341.433	FALSE	0
2022-09-13	15:25:45	0.585407	342.019	FALSE	0
2022-09-13	15:25:46	0.403677	342.422	FALSE	0
2022-09-13	15:25:46	0.534109	342.956	FALSE	0
2022-09-13	15:25:46	0.378893	343.335	FALSE	0
2022-09-13	15:25:47	0.620878	343.956	FALSE	0
2022-09-13	15:25:47	0.321794	344.278	FALSE	0
2022-09-13	15:25:47	0.666069	344.944	FALSE	0
2022-09-13	15:25:47	0.268512	345.213	FALSE	0
2022-09-13	15:25:48	0.499707	345.712	FALSE	0
2022-09-13	15:25:48	0.393702	346.106	FALSE	0
2022-09-13	15:25:48	0.449733	346.556	FALSE	0
2022-09-13	15:25:48	-0.0451778	346.556	FALSE	0
2022-09-13	15:25:49	0.378384	346.934	FALSE	0
2022-09-13	15:25:49	0.251107	347.185	FALSE	0
2022-09-13	15:25:49	0.390394	347.576	FALSE	0
2022-09-13	15:25:49	0.114262	347.69	FALSE	0
2022-09-13	15:25:50	0.500114	348.19	FALSE	0
2022-09-13	15:25:50	0.477621	348.668	FALSE	0
2022-09-13	15:25:50	0.517723	349.185	FALSE	0
2022-09-13	15:25:51	0.145255	349.331	FALSE	0
2022-09-13	15:25:51	0.247188	349.578	FALSE	0

## Sheet: Buzz_prong_2022913152025
						**GoPro Fitting: 1510
2022-09-13	15:20:26	0.322303
2022-09-13	15:20:26	0.313499
2022-09-13	15:20:26	0.331209
2022-09-13	15:20:26	0.323422
2022-09-13	15:20:26	0.31813
2022-09-13	15:20:27	0.342863
2022-09-13	15:20:27	0.353753
2022-09-13	15:20:27	0.364644
2022-09-13	15:20:28	0.39986
2022-09-13	15:20:28	0.410598
2022-09-13	15:20:28	0.414059
2022-09-13	15:20:28	0.359148
2022-09-13	15:20:29	0.34785
2022-09-13	15:20:29	0.351361
2022-09-13	15:20:29	0.360267
2022-09-13	15:20:29	0.357723
2022-09-13	15:20:30	0.338741
2022-09-13	15:20:30	0.352125
2022-09-13	15:20:30	0.381285
2022-09-13	15:20:30	0.391463
2022-09-13	15:20:31	0.337672
2022-09-13	15:20:31	0.363066
2022-09-13	15:20:31	0.339402
2022-09-13	15:20:32	0.347952
2022-09-13	15:20:32	0.414059
2022-09-13	15:20:32	0.392939
2022-09-13	15:20:32	0.318232
2022-09-13	15:20:33	0.367799
2022-09-13	15:20:33	0.483728
2022-09-13	15:20:33	0.881234
2022-09-13	15:20:33	1.6938
2022-09-13	15:20:34	2.23396
2022-09-13	15:20:34	1.82424
2022-09-13	15:20:34	0.549987
2022-09-13	15:20:34	0.409275
2022-09-13	15:20:35	0.466425
2022-09-13	15:20:35	0.222507
2022-09-13	15:20:35	-0.0944908
2022-09-13	15:20:36	-0.294491
2022-09-13	15:20:36	-0.477646
2022-09-13	15:20:36	-0.325992
2022-09-13	15:20:36	0.107392
2022-09-13	15:20:37	0.0747712
2022-09-13	15:20:37	-0.101107
2022-09-13	15:20:37	0.468868
2022-09-13	15:20:37	0.193804
2022-09-13	15:20:38	0.035789
2022-09-13	15:20:38	-0.0327097
2022-09-13	15:20:38	0.126934
2022-09-13	15:20:38	-0.0278242
2022-09-13	15:20:39	-0.00263335
2022-09-13	15:20:39	0.0560435
2022-09-13	15:20:39	0.167341
2022-09-13	15:20:40	0.215026
2022-09-13	15:20:40	-0.0545417
2022-09-13	15:20:40	0.0154837
2022-09-13	15:20:40	-0.258613
2022-09-13	15:20:41	-0.370928
2022-09-13	15:20:41	-0.350368
2022-09-13	15:20:41	-0.241717
2022-09-13	15:20:41	-0.245534
2022-09-13	15:20:42	-0.416374
2022-09-13	15:20:42	-0.41846
2022-09-13	15:20:42	-0.249351
2022-09-13	15:20:42	0.0219977
2022-09-13	15:20:43	0.1764
2022-09-13	15:20:43	0.181132
2022-09-13	15:20:43	-0.030216
2022-09-13	15:20:44	0.193957
2022-09-13	15:20:44	0.086934
2022-09-13	15:20:44	0.4507
2022-09-13	15:20:44	0.389428
2022-09-13	15:20:45	0.402099
2022-09-13	15:20:45	0.205051
2022-09-13	15:20:45	0.214415
2022-09-13	15:20:45	0.318334
2022-09-13	15:20:46	0.14271
2022-09-13	15:20:46	0.473855
2022-09-13	15:20:46	0.187494
2022-09-13	15:20:46	0.481234
2022-09-13	15:20:47	0.0787916
2022-09-13	15:20:47	0.444644
2022-09-13	15:20:47	0.331005
2022-09-13	15:20:48	0.336705
2022-09-13	15:20:48	0.453244
2022-09-13	15:20:48	0.298588
2022-09-13	15:20:48	0.580114
2022-09-13	15:20:49	0.243473
2022-09-13	15:20:49	0.626781
2022-09-13	15:20:49	0.394313
2022-09-13	15:20:49	0.427545
2022-09-13	15:20:50	0.484339
2022-09-13	15:20:50	0.397112
2022-09-13	15:20:50	0.506374
2022-09-13	15:20:50	0.225255
2022-09-13	15:20:51	0.39584
2022-09-13	15:20:51	0.120471
2022-09-13	15:20:51	0.471361
2022-09-13	15:20:52	0.436349
2022-09-13	15:20:52	0.358384
2022-09-13	15:20:52	0.391005
2022-09-13	15:20:52	0.63986
2022-09-13	15:20:53	0.315891
2022-09-13	15:20:53	0.276451
2022-09-13	15:20:53	0.44902
2022-09-13	15:20:53	0.148155
2022-09-13	15:20:54	0.18612
2022-09-13	15:20:54	0.0510053
2022-09-13	15:20:54	-0.12243
2022-09-13	15:20:54	-0.18986
2022-09-13	15:20:55	-0.484058
2022-09-13	15:20:55	-0.432811
2022-09-13	15:20:55	-0.369249
2022-09-13	15:20:56	-0.435508
2022-09-13	15:20:56	-0.17444
2022-09-13	15:20:56	-0.419681
2022-09-13	15:20:56	-0.363702
2022-09-13	15:20:57	-0.408129
2022-09-13	15:20:57	-0.48243
2022-09-13	15:20:57	-0.580343
2022-09-13	15:20:57	-0.658765
2022-09-13	15:20:58	-0.79047
2022-09-13	15:20:58	-0.79673
2022-09-13	15:20:58	-0.755814
2022-09-13	15:20:58	-0.876424
2022-09-13	15:20:59	-0.720343
2022-09-13	15:20:59	-0.902938
2022-09-13	15:20:59	-0.767824
2022-09-13	15:21:00	-0.696679
2022-09-13	15:21:00	-0.324211
2022-09-13	15:21:00	0.390954
2022-09-13	15:21:00	0.167239
2022-09-13	15:21:01	0.275433
2022-09-13	15:21:01	0.16612
2022-09-13	15:21:01	0.48612
2022-09-13	15:21:01	0.225865
2022-09-13	15:21:02	0.458333
2022-09-13	15:21:02	0.424796
2022-09-13	15:21:02	0.478232
2022-09-13	15:21:02	0.256705
2022-09-13	15:21:03	0.326425
2022-09-13	15:21:03	0.542506
2022-09-13	15:21:03	0.315433
2022-09-13	15:21:04	0.702048
2022-09-13	15:21:04	0.209377
2022-09-13	15:21:04	0.586985
2022-09-13	15:21:04	0.22042
2022-09-13	15:21:05	0.614568
2022-09-13	15:21:05	0.195127
2022-09-13	15:21:05	0.534517
2022-09-13	15:21:05	0.390903
2022-09-13	15:21:06	0.302863
2022-09-13	15:21:06	0.524644
2022-09-13	15:21:06	0.255993
2022-09-13	15:21:06	0.628613
2022-09-13	15:21:07	0.179962
2022-09-13	15:21:07	0.659809
2022-09-13	15:21:07	0.361489
2022-09-13	15:21:08	0.468461
2022-09-13	15:21:08	0.478486
2022-09-13	15:21:08	0.40327
2022-09-13	15:21:08	0.479962
2022-09-13	15:21:09	0.247901
2022-09-13	15:21:09	0.638079
2022-09-13	15:21:09	0.208868
2022-09-13	15:21:09	0.658842
2022-09-13	15:21:10	0.248104
2022-09-13	15:21:10	0.657163
2022-09-13	15:21:10	0.267341
2022-09-13	15:21:10	0.515687
2022-09-13	15:21:11	0.451361
2022-09-13	15:21:11	0.311718
2022-09-13	15:21:11	0.530598
2022-09-13	15:21:11	0.23355
2022-09-13	15:21:12	0.653091
2022-09-13	15:21:12	0.233397
2022-09-13	15:21:12	0.659199
2022-09-13	15:21:13	0.199962
2022-09-13	15:21:13	0.636501
2022-09-13	15:21:13	0.278537
2022-09-13	15:21:13	0.449631
2022-09-13	15:21:14	0.564338
2022-09-13	15:21:14	0.232736
2022-09-13	15:21:14	0.541234
2022-09-13	15:21:14	0.179708
2022-09-13	15:21:15	0.559606
2022-09-13	15:21:15	0.15416
2022-09-13	15:21:15	0.58556
2022-09-13	15:21:15	0.257112
2022-09-13	15:21:16	0.364542
2022-09-13	15:21:16	0.253651
2022-09-13	15:21:16	0.346221
2022-09-13	15:21:17	0.465916
2022-09-13	15:21:17	0.24612
2022-09-13	15:21:17	0.438283
2022-09-13	15:21:17	0.215382
2022-09-13	15:21:18	0.567443
2022-09-13	15:21:18	0.200318
2022-09-13	15:21:18	0.240776
2022-09-13	15:21:18	0.101183
2022-09-13	15:21:19	0.271463
2022-09-13	15:21:19	0.400674
2022-09-13	15:21:19	0.252786
2022-09-13	15:21:19	0.394771
2022-09-13	15:21:20	0.290547
2022-09-13	15:21:20	0.385407
2022-09-13	15:21:20	0.0592496
2022-09-13	15:21:21	0.368155
2022-09-13	15:21:21	0.0380282
2022-09-13	15:21:21	0.315433
2022-09-13	15:21:21	0.111565
2022-09-13	15:21:22	0.278741
2022-09-13	15:21:22	0.164746
2022-09-13	15:21:22	0.125713
2022-09-13	15:21:22	0.280013
2022-09-13	15:21:23	0.11701
2022-09-13	15:21:23	0.350394
2022-09-13	15:21:23	0.101998
2022-09-13	15:21:23	0.417061
2022-09-13	15:21:24	0.0618959
2022-09-13	15:21:24	0.304644
2022-09-13	15:21:24	0.160929
2022-09-13	15:21:25	0.22729
2022-09-13	15:21:25	0.131209
2022-09-13	15:21:25	0.158283
2022-09-13	15:21:25	0.188359
2022-09-13	15:21:26	-0.132303
2022-09-13	15:21:26	-0.0711829
2022-09-13	15:21:26	-0.10645
2022-09-13	15:21:26	-0.268689
2022-09-13	15:21:27	-0.287162
2022-09-13	15:21:27	-0.118257
2022-09-13	15:21:27	0.113244
2022-09-13	15:21:27	0.272277
2022-09-13	15:21:28	0.126018
2022-09-13	15:21:28	0.434415
2022-09-13	15:21:28	0.733601
2022-09-13	15:21:29	0.245255
2022-09-13	15:21:29	0.567188
2022-09-13	15:21:29	0.364593
2022-09-13	15:21:29	0.432735
2022-09-13	15:21:30	0.388308
2022-09-13	15:21:30	0.301947
2022-09-13	15:21:30	0.542761
2022-09-13	15:21:30	0.244542
2022-09-13	15:21:31	0.559046
2022-09-13	15:21:31	0.270954
2022-09-13	15:21:31	0.598079
2022-09-13	15:21:31	0.209733
2022-09-13	15:21:32	0.60098
2022-09-13	15:21:32	0.381641
2022-09-13	15:21:32	0.428715
2022-09-13	15:21:33	0.419962
2022-09-13	15:21:33	0.345458
2022-09-13	15:21:33	0.586679
2022-09-13	15:21:33	0.256705
2022-09-13	15:21:34	0.602659
2022-09-13	15:21:34	0.225153
2022-09-13	15:21:34	0.586476
2022-09-13	15:21:34	0.203066
2022-09-13	15:21:35	0.585051
2022-09-13	15:21:35	0.321183
2022-09-13	15:21:35	0.507443
2022-09-13	15:21:35	0.305458
2022-09-13	15:21:36	0.493244
2022-09-13	15:21:36	0.424237
2022-09-13	15:21:36	0.431769
2022-09-13	15:21:37	0.410445
2022-09-13	15:21:37	0.358944
2022-09-13	15:21:37	0.568104
2022-09-13	15:21:37	0.276756
2022-09-13	15:21:38	0.524084
2022-09-13	15:21:38	0.305611
2022-09-13	15:21:38	0.516705
2022-09-13	15:21:38	0.267596
2022-09-13	15:21:39	0.584847
2022-09-13	15:21:39	0.289428
2022-09-13	15:21:39	0.574669
2022-09-13	15:21:39	0.255382
2022-09-13	15:21:40	0.559148
2022-09-13	15:21:40	0.295127
2022-09-13	15:21:40	0.495993
2022-09-13	15:21:41	0.261998
2022-09-13	15:21:41	0.507545
2022-09-13	15:21:41	0.334618
2022-09-13	15:21:41	0.389479
2022-09-13	15:21:42	0.309733
2022-09-13	15:21:42	0.442405
2022-09-13	15:21:42	0.417519
2022-09-13	15:21:42	0.369326
2022-09-13	15:21:43	0.337672
2022-09-13	15:21:43	0.428257
2022-09-13	15:21:43	0.428308
2022-09-13	15:21:43	0.348817
2022-09-13	15:21:44	0.357723
2022-09-13	15:21:44	0.400267
2022-09-13	15:21:44	0.445305
2022-09-13	15:21:45	0.391972
2022-09-13	15:21:45	0.378639
2022-09-13	15:21:45	0.412379
2022-09-13	15:21:45	0.448664
2022-09-13	15:21:46	0.312634
2022-09-13	15:21:46	0.381641
2022-09-13	15:21:46	0.361132
2022-09-13	15:21:46	0.506984
2022-09-13	15:21:47	0.307137
2022-09-13	15:21:47	0.466018
2022-09-13	15:21:47	0.293194
2022-09-13	15:21:47	0.553601
2022-09-13	15:21:48	0.171158
2022-09-13	15:21:48	0.304339
2022-09-13	15:21:48	-0.120954
2022-09-13	15:21:49	0.206832
2022-09-13	15:21:49	0.42897
2022-09-13	15:21:49	0.302761
2022-09-13	15:21:49	0.377926
2022-09-13	15:21:50	0.340675
2022-09-13	15:21:50	0.386171
2022-09-13	15:21:50	0.413244
2022-09-13	15:21:50	0.330751
2022-09-13	15:21:51	0.557315
2022-09-13	15:21:51	0.35986
2022-09-13	15:21:51	0.504237
2022-09-13	15:21:51	0.340827
2022-09-13	15:21:52	0.386069
2022-09-13	15:21:52	0.410496
2022-09-13	15:21:52	0.367799
2022-09-13	15:21:53	0.450547
2022-09-13	15:21:53	0.347748
2022-09-13	15:21:53	0.360216
2022-09-13	15:21:53	0.537163
2022-09-13	15:21:54	0.400929
2022-09-13	15:21:54	0.4193
2022-09-13	15:21:54	0.390852
2022-09-13	15:21:54	0.411921
2022-09-13	15:21:55	0.397621
2022-09-13	15:21:55	0.421387
2022-09-13	15:21:55	0.40841
2022-09-13	15:21:55	0.427137
2022-09-13	15:21:56	0.416349
2022-09-13	15:21:56	0.42902
2022-09-13	15:21:56	0.426323
2022-09-13	15:21:57	0.371158
2022-09-13	15:21:57	0.380878
2022-09-13	15:21:57	0.330191
2022-09-13	15:21:57	0.417316
2022-09-13	15:21:58	0.620776
2022-09-13	15:21:58	0.538435
2022-09-13	15:21:58	-0.172557
2022-09-13	15:21:58	-0.464414
2022-09-13	15:21:59	-0.427519
2022-09-13	15:21:59	-0.359631
2022-09-13	15:21:59	0.307748
2022-09-13	15:21:59	-0.0301652
2022-09-13	15:22:00	0.497621
2022-09-13	15:22:00	-0.147112
2022-09-13	15:22:00	-0.262175
2022-09-13	15:22:01	-0.180089
2022-09-13	15:22:01	-0.561361
2022-09-13	15:22:01	-0.646908
2022-09-13	15:22:01	-0.717544
2022-09-13	15:22:02	-0.604923
2022-09-13	15:22:02	-0.434185
2022-09-13	15:22:02	-0.244007
2022-09-13	15:22:02	-0.180394
2022-09-13	15:22:03	0.00459311
2022-09-13	15:22:03	0.0708017
2022-09-13	15:22:03	0.109428
2022-09-13	15:22:03	0.289835
2022-09-13	15:22:04	0.153041
2022-09-13	15:22:04	-0.174491
2022-09-13	15:22:04	0.103931
2022-09-13	15:22:05	0.228054
2022-09-13	15:22:05	0.169122
2022-09-13	15:22:05	0.309326
2022-09-13	15:22:05	0.0884607
2022-09-13	15:22:06	-0.352353
2022-09-13	15:22:06	0.0527356
2022-09-13	15:22:06	0.0735498
2022-09-13	15:22:06	0.0165524
2022-09-13	15:22:07	0.315026
2022-09-13	15:22:07	0.384339
2022-09-13	15:22:07	0.223931
2022-09-13	15:22:07	0.209987
2022-09-13	15:22:08	0.372735
2022-09-13	15:22:08	0.248359
2022-09-13	15:22:08	0.423066
2022-09-13	15:22:09	0.144237
2022-09-13	15:22:09	0.320522
2022-09-13	15:22:09	0.245814
2022-09-13	15:22:09	0.328003
2022-09-13	15:22:10	0.0874938
2022-09-13	15:22:10	0.406425
2022-09-13	15:22:10	0.306985
2022-09-13	15:22:10	0.424237
2022-09-13	15:22:11	0.168868
2022-09-13	15:22:11	-0.262023
2022-09-13	15:22:11	-0.516882
2022-09-13	15:22:11	-0.428028
2022-09-13	15:22:12	-0.285992
2022-09-13	15:22:12	-0.133219
2022-09-13	15:22:12	-0.00151375
2022-09-13	15:22:13	0.0888679
2022-09-13	15:22:13	0.0874429
2022-09-13	15:22:13	0.109021
2022-09-13	15:22:13	0.0991987
2022-09-13	15:22:14	0.109835
2022-09-13	15:22:14	0.16159
2022-09-13	15:22:14	0.218741
2022-09-13	15:22:14	0.0703946
2022-09-13	15:22:15	0.101387
2022-09-13	15:22:15	0.00281194
2022-09-13	15:22:15	-0.125534
2022-09-13	15:22:15	-0.105229
2022-09-13	15:22:16	-0.164923
2022-09-13	15:22:16	-0.0210048
2022-09-13	15:22:16	-0.114745
2022-09-13	15:22:17	-0.0380023
2022-09-13	15:22:17	-0.121565
2022-09-13	15:22:17	-0.10589
2022-09-13	15:22:17	-0.133677
2022-09-13	15:22:18	-0.116679
2022-09-13	15:22:18	-0.102735
2022-09-13	15:22:18	-0.144516
2022-09-13	15:22:18	-0.0676715
2022-09-13	15:22:19	-0.0580023
2022-09-13	15:22:19	-0.0616664
2022-09-13	15:22:19	-0.116934
2022-09-13	15:22:19	-0.113473
2022-09-13	15:22:20	-0.116628
2022-09-13	15:22:20	-0.153219
2022-09-13	15:22:20	-0.203855
2022-09-13	15:22:21	-0.123906
2022-09-13	15:22:21	-0.235509
2022-09-13	15:22:21	-0.333269
2022-09-13	15:22:21	-0.430165
2022-09-13	15:22:22	-0.270369
2022-09-13	15:22:22	0.24785
2022-09-13	15:22:22	0.437723
2022-09-13	15:22:22	0.319148
2022-09-13	15:22:23	0.823779
2022-09-13	15:22:23	0.911717
2022-09-13	15:22:23	0.359453
2022-09-13	15:22:23	0.342608
2022-09-13	15:22:24	0.506781
2022-09-13	15:22:24	0.330649
2022-09-13	15:22:24	0.295229
2022-09-13	15:22:25	0.234618
2022-09-13	15:22:25	0.365305
2022-09-13	15:22:25	0.293397
2022-09-13	15:22:25	0.245763
2022-09-13	15:22:26	0.261845
2022-09-13	15:22:26	0.304746
2022-09-13	15:22:26	0.30729
2022-09-13	15:22:26	0.270344
2022-09-13	15:22:27	0.325356
2022-09-13	15:22:27	0.307596
2022-09-13	15:22:27	0.340827
2022-09-13	15:22:27	0.253448
2022-09-13	15:22:28	0.327138
2022-09-13	15:22:28	0.302048
2022-09-13	15:22:28	0.35584
2022-09-13	15:22:28	0.313448
2022-09-13	15:22:29	0.337875
2022-09-13	15:22:29	0.442048
2022-09-13	15:22:29	0.594517
2022-09-13	15:22:30	0.775534
2022-09-13	15:22:30	0.536145
2022-09-13	15:22:30	0.588359
2022-09-13	15:22:30	0.604644
2022-09-13	15:22:31	0.617875
2022-09-13	15:22:31	0.783219
2022-09-13	15:22:31	0.469682
2022-09-13	15:22:31	0.719148
2022-09-13	15:22:32	0.505916
2022-09-13	15:22:32	0.399046
2022-09-13	15:22:32	0.445916
2022-09-13	15:22:32	0.42098
2022-09-13	15:22:33	0.385254
2022-09-13	15:22:33	0.343321
2022-09-13	15:22:33	0.411158
2022-09-13	15:22:34	0.326527
2022-09-13	15:22:34	0.324491
2022-09-13	15:22:34	0.336807
2022-09-13	15:22:34	0.401489
2022-09-13	15:22:35	0.31416
2022-09-13	15:22:35	0.241387
2022-09-13	15:22:35	0.270191
2022-09-13	15:22:35	0.242303
2022-09-13	15:22:36	0.368715
2022-09-13	15:22:36	0.216552
2022-09-13	15:22:36	0.364186
2022-09-13	15:22:36	0.338842
2022-09-13	15:22:37	0.40327
2022-09-13	15:22:37	0.278842
2022-09-13	15:22:37	0.37299
2022-09-13	15:22:38	0.362659
2022-09-13	15:22:38	0.331209
2022-09-13	15:22:38	0.288715
2022-09-13	15:22:38	0.359555
2022-09-13	15:22:39	0.386425
2022-09-13	15:22:39	0.397112
2022-09-13	15:22:39	0.333193
2022-09-13	15:22:39	0.416043
2022-09-13	15:22:40	0.270903
2022-09-13	15:22:40	0.295687
2022-09-13	15:22:40	0.177316
2022-09-13	15:22:40	0.395076
2022-09-13	15:22:41	0.291005
2022-09-13	15:22:41	0.327799
2022-09-13	15:22:41	0.22042
2022-09-13	15:22:42	0.42215
2022-09-13	15:22:42	0.261132
2022-09-13	15:22:42	0.323066
2022-09-13	15:22:42	0.366222
2022-09-13	15:22:43	0.341387
2022-09-13	15:22:43	0.380013
2022-09-13	15:22:43	0.311005
2022-09-13	15:22:43	0.306832
2022-09-13	15:22:44	0.297163
2022-09-13	15:22:44	0.29187
2022-09-13	15:22:44	0.296654
2022-09-13	15:22:44	0.287952
2022-09-13	15:22:45	0.278893
2022-09-13	15:22:45	0.275941
2022-09-13	15:22:45	0.314466
2022-09-13	15:22:46	0.300471
2022-09-13	15:22:46	0.287392
2022-09-13	15:22:46	0.28785
2022-09-13	15:22:46	0.301489
2022-09-13	15:22:47	0.527392
2022-09-13	15:22:47	1.39218
2022-09-13	15:22:47	0.419606
2022-09-13	15:22:47	0.436094
2022-09-13	15:22:48	0.252226
2022-09-13	15:22:48	0.314262
2022-09-13	15:22:48	0.250344
2022-09-13	15:22:48	0.205458
2022-09-13	15:22:49	0.304288
2022-09-13	15:22:49	0.200878
2022-09-13	15:22:49	0.224491
2022-09-13	15:22:50	0.31131
2022-09-13	15:22:50	0.317417
2022-09-13	15:22:50	0.281132
2022-09-13	15:22:50	0.409631
2022-09-13	15:22:51	0.888257
2022-09-13	15:22:51	0.790445
2022-09-13	15:22:51	0.824746
2022-09-13	15:22:51	0.451209
2022-09-13	15:22:52	0.309529
2022-09-13	15:22:52	0.362608
2022-09-13	15:22:52	0.174771
2022-09-13	15:22:52	0.125356
2022-09-13	15:22:53	0.105764
2022-09-13	15:22:53	0.116705
2022-09-13	15:22:53	0.000929014
2022-09-13	15:22:54	-0.013931
2022-09-13	15:22:54	0.0151783
2022-09-13	15:22:54	0.0393004
2022-09-13	15:22:54	-0.0359667
2022-09-13	15:22:55	0.188766
2022-09-13	15:22:55	0.16383
2022-09-13	15:22:55	0.218181
2022-09-13	15:22:55	0.394364
2022-09-13	15:22:56	0.471209
2022-09-13	15:22:56	0.439097
2022-09-13	15:22:56	0.409936
2022-09-13	15:22:56	0.22785
2022-09-13	15:22:57	0.591107
2022-09-13	15:22:57	0.306476
2022-09-13	15:22:57	0.52332
2022-09-13	15:22:58	0.25416
2022-09-13	15:22:58	0.475076
2022-09-13	15:22:58	0.268919
2022-09-13	15:22:58	0.448766
2022-09-13	15:22:59	0.279911
2022-09-13	15:22:59	0.42841
2022-09-13	15:22:59	0.268257
2022-09-13	15:22:59	0.447596
2022-09-13	15:23:00	0.283219
2022-09-13	15:23:00	0.352939
2022-09-13	15:23:00	0.246476
2022-09-13	15:23:00	0.360013
2022-09-13	15:23:01	0.241692
2022-09-13	15:23:01	0.194364
2022-09-13	15:23:01	0.242405
2022-09-13	15:23:02	0.251361
2022-09-13	15:23:02	0.33528
2022-09-13	15:23:02	0.184898
2022-09-13	15:23:02	0.346374
2022-09-13	15:23:03	0.232125
2022-09-13	15:23:03	0.300624
2022-09-13	15:23:03	0.132939
2022-09-13	15:23:03	0.378944
2022-09-13	15:23:04	0.237316
2022-09-13	15:23:04	0.449784
2022-09-13	15:23:04	0.16271
2022-09-13	15:23:04	0.43986
2022-09-13	15:23:05	0.216756
2022-09-13	15:23:05	0.416858
2022-09-13	15:23:05	0.25528
2022-09-13	15:23:06	0.613855
2022-09-13	15:23:06	0.554415
2022-09-13	15:23:06	0.397926
2022-09-13	15:23:06	0.512939
2022-09-13	15:23:07	0.456654
2022-09-13	15:23:07	0.365458
2022-09-13	15:23:07	0.354669
2022-09-13	15:23:07	0.54785
2022-09-13	15:23:08	0.284746
2022-09-13	15:23:08	0.331463
2022-09-13	15:23:08	0.294822
2022-09-13	15:23:08	0.395178
2022-09-13	15:23:09	0.341489
2022-09-13	15:23:09	0.386934
2022-09-13	15:23:09	0.772023
2022-09-13	15:23:10	0.827952
2022-09-13	15:23:10	0.338944
2022-09-13	15:23:10	0.35299
2022-09-13	15:23:10	0.341641
2022-09-13	15:23:11	0.354211
2022-09-13	15:23:11	0.305102
2022-09-13	15:23:11	0.352176
2022-09-13	15:23:11	0.450852
2022-09-13	15:23:12	0.29645
2022-09-13	15:23:12	0.150293
2022-09-13	15:23:12	0.0640842
2022-09-13	15:23:12	0.0566033
2022-09-13	15:23:13	-0.118715
2022-09-13	15:23:13	-0.153117
2022-09-13	15:23:13	-0.107417
2022-09-13	15:23:14	-0.210369
2022-09-13	15:23:14	-0.128231
2022-09-13	15:23:14	-0.187213
2022-09-13	15:23:14	-0.189453
2022-09-13	15:23:15	-0.146348
2022-09-13	15:23:15	-0.127264
2022-09-13	15:23:15	-0.0195799
2022-09-13	15:23:15	0.134415
2022-09-13	15:23:16	0.0997585
2022-09-13	15:23:16	-0.0855849
2022-09-13	15:23:16	-0.132506
2022-09-13	15:23:16	-0.315356
2022-09-13	15:23:17	-0.303753
2022-09-13	15:23:17	-0.351844
2022-09-13	15:23:17	-0.352353
2022-09-13	15:23:18	-0.317188
2022-09-13	15:23:18	-0.347773
2022-09-13	15:23:18	-0.222175
2022-09-13	15:23:18	-0.339427
2022-09-13	15:23:19	-0.288384
2022-09-13	15:23:19	-0.332404
2022-09-13	15:23:19	-0.29785
2022-09-13	15:23:19	-0.293626
2022-09-13	15:23:20	-0.4122
2022-09-13	15:23:20	-0.346195
2022-09-13	15:23:20	-0.37388
2022-09-13	15:23:20	-0.372353
2022-09-13	15:23:21	-0.216679
2022-09-13	15:23:21	-0.219733
2022-09-13	15:23:21	-0.197137
2022-09-13	15:23:22	-0.260292
2022-09-13	15:23:22	-0.174694
2022-09-13	15:23:22	-0.193473
2022-09-13	15:23:22	-0.355254
2022-09-13	15:23:23	-0.31388
2022-09-13	15:23:23	-0.359274
2022-09-13	15:23:23	-0.160598
2022-09-13	15:23:23	-0.260598
2022-09-13	15:23:24	-0.154389
2022-09-13	15:23:24	-0.247977
2022-09-13	15:23:24	-0.179224
2022-09-13	15:23:24	-0.188995
2022-09-13	15:23:25	-0.238409
2022-09-13	15:23:25	-0.0720989
2022-09-13	15:23:25	-0.103753
2022-09-13	15:23:26	-0.0306231
2022-09-13	15:23:26	-0.128638
2022-09-13	15:23:26	0.0865269
2022-09-13	15:23:26	-0.107315
2022-09-13	15:23:27	-0.0154577
2022-09-13	15:23:27	-0.0178496
2022-09-13	15:23:27	-0.094847
2022-09-13	15:23:27	-0.111539
2022-09-13	15:23:28	-0.139224
2022-09-13	15:23:28	-0.060445
2022-09-13	15:23:28	-0.167977
2022-09-13	15:23:28	-0.0154069
2022-09-13	15:23:29	-0.0983585
2022-09-13	15:23:29	-0.00828218
2022-09-13	15:23:29	0.00403331
2022-09-13	15:23:30	0.354313
2022-09-13	15:23:30	0.327697
2022-09-13	15:23:30	0.431769
2022-09-13	15:23:30	0.338079
2022-09-13	15:23:31	0.55355
2022-09-13	15:23:31	0.27925
2022-09-13	15:23:31	0.404847
2022-09-13	15:23:31	0.426781
2022-09-13	15:23:32	0.374059
2022-09-13	15:23:32	0.641081
2022-09-13	15:23:32	0.348257
2022-09-13	15:23:32	0.556196
2022-09-13	15:23:33	0.390445
2022-09-13	15:23:33	0.547392
2022-09-13	15:23:33	0.312888
2022-09-13	15:23:34	0.446934
2022-09-13	15:23:34	0.407494
2022-09-13	15:23:34	0.264949
2022-09-13	15:23:34	-0.288638
2022-09-13	15:23:35	-0.612048
2022-09-13	15:23:35	-0.732913
2022-09-13	15:23:35	-0.533575
2022-09-13	15:23:35	-0.326755
2022-09-13	15:23:36	-0.324465
2022-09-13	15:23:36	-0.417849
2022-09-13	15:23:36	-0.245229
2022-09-13	15:23:36	-0.270674
2022-09-13	15:23:37	-0.251895
2022-09-13	15:23:37	-0.380547
2022-09-13	15:23:37	-0.383346
2022-09-13	15:23:38	-0.36304
2022-09-13	15:23:38	-0.268129
2022-09-13	15:23:38	-0.239733
2022-09-13	15:23:38	-0.216984
2022-09-13	15:23:39	-0.315356
2022-09-13	15:23:39	-0.466246
2022-09-13	15:23:39	-0.509605
2022-09-13	15:23:39	-0.443396
2022-09-13	15:23:40	-0.348027
2022-09-13	15:23:40	-0.367977
2022-09-13	15:23:40	-0.365534
2022-09-13	15:23:40	-0.323804
2022-09-13	15:23:41	-0.332302
2022-09-13	15:23:41	-0.077646
2022-09-13	15:23:41	-0.0967809
2022-09-13	15:23:42	0.0159417
2022-09-13	15:23:42	-0.136119
2022-09-13	15:23:42	0.105153
2022-09-13	15:23:42	-0.0343382
2022-09-13	15:23:43	0.152837
2022-09-13	15:23:43	-0.055356
2022-09-13	15:23:43	0.0486135
2022-09-13	15:23:43	0.00937683
2022-09-13	15:23:44	-0.0140837
2022-09-13	15:23:44	-0.0261957
2022-09-13	15:23:44	-0.109402
2022-09-13	15:23:44	0.00520383
2022-09-13	15:23:45	0.096247
2022-09-13	15:23:45	0.0801147
2022-09-13	15:23:45	0.0988424
2022-09-13	15:23:46	0.18729
2022-09-13	15:23:46	0.0377229
2022-09-13	15:23:46	-0.156475
2022-09-13	15:23:46	-0.155814
2022-09-13	15:23:47	-0.223702
2022-09-13	15:23:47	-0.293015
2022-09-13	15:23:47	-0.324567
2022-09-13	15:23:47	-0.0335239
2022-09-13	15:23:48	0.0462725
2022-09-13	15:23:48	0.388359
2022-09-13	15:23:48	0.582761
2022-09-13	15:23:48	0.697773
2022-09-13	15:23:49	0.611412
2022-09-13	15:23:49	0.689173
2022-09-13	15:23:49	0.772735
2022-09-13	15:23:50	0.526578
2022-09-13	15:23:50	0.36159
2022-09-13	15:23:50	0.502659
2022-09-13	15:23:50	0.356094
2022-09-13	15:23:51	0.0486644
2022-09-13	15:23:51	0.00779924
2022-09-13	15:23:51	0.00215038
2022-09-13	15:23:51	0.1593
2022-09-13	15:23:52	0.0568577
2022-09-13	15:23:52	0.320013
2022-09-13	15:23:52	0.0294786
2022-09-13	15:23:52	0.285204
2022-09-13	15:23:53	0.0763997
2022-09-13	15:23:53	0.234211
2022-09-13	15:23:53	0.130293
2022-09-13	15:23:54	0.191514
2022-09-13	15:23:54	0.0947203
2022-09-13	15:23:54	0.0599111
2022-09-13	15:23:54	0.195585
2022-09-13	15:23:55	0.0266287
2022-09-13	15:23:55	0.149835
2022-09-13	15:23:55	-0.00288781
2022-09-13	15:23:55	0.140929
2022-09-13	15:23:56	-0.105738
2022-09-13	15:23:56	-0.201615
2022-09-13	15:23:56	-0.122939
2022-09-13	15:23:56	-0.137137
2022-09-13	15:23:57	0.0545676
2022-09-13	15:23:57	-0.0979004
2022-09-13	15:23:57	0.095789
2022-09-13	15:23:58	-0.122124
2022-09-13	15:23:58	0.0394532
2022-09-13	15:23:58	-0.0118954
2022-09-13	15:23:58	-0.0364756
2022-09-13	15:23:59	0.227545
2022-09-13	15:23:59	0.0178755
2022-09-13	15:23:59	0.269936
2022-09-13	15:23:59	0.00601804
2022-09-13	15:24:00	0.138283
2022-09-13	15:24:00	0.169224
2022-09-13	15:24:00	0.184186
2022-09-13	15:24:00	0.339046
2022-09-13	15:24:01	0.0623539
2022-09-13	15:24:01	0.289835
2022-09-13	15:24:01	0.096756
2022-09-13	15:24:02	0.23187
2022-09-13	15:24:02	-0.071132
2022-09-13	15:24:02	0.152837
2022-09-13	15:24:02	-0.0689437
2022-09-13	15:24:03	0.133804
2022-09-13	15:24:03	-0.109046
2022-09-13	15:24:03	-0.232252
2022-09-13	15:24:03	-0.23042
2022-09-13	15:24:04	-0.196832
2022-09-13	15:24:04	-0.166908
2022-09-13	15:24:04	-0.171437
2022-09-13	15:24:04	-0.111386
2022-09-13	15:24:05	-0.269605
2022-09-13	15:24:05	-0.23388
2022-09-13	15:24:05	-0.277799
2022-09-13	15:24:06	-0.124109
2022-09-13	15:24:06	-0.159936
2022-09-13	15:24:06	-0.0918954
2022-09-13	15:24:06	-0.113982
2022-09-13	15:24:07	0.028359
2022-09-13	15:24:07	0.439708
2022-09-13	15:24:07	0.344695
2022-09-13	15:24:07	0.324898
2022-09-13	15:24:08	0.154059
2022-09-13	15:24:08	0.448104
2022-09-13	15:24:08	0.217214
2022-09-13	15:24:08	0.384695
2022-09-13	15:24:09	0.211412
2022-09-13	15:24:09	0.217468
2022-09-13	15:24:09	0.27243
2022-09-13	15:24:09	0.216858
2022-09-13	15:24:10	0.33299
2022-09-13	15:24:10	0.123524
2022-09-13	15:24:10	0.285356
2022-09-13	15:24:11	0.272125
2022-09-13	15:24:11	0.282812
2022-09-13	15:24:11	0.249326
2022-09-13	15:24:11	0.211158
2022-09-13	15:24:12	0.320827
2022-09-13	15:24:12	0.253397
2022-09-13	15:24:12	0.404644
2022-09-13	15:24:12	0.266272
2022-09-13	15:24:13	0.32042
2022-09-13	15:24:13	0.40215
2022-09-13	15:24:13	0.337468
2022-09-13	15:24:14	0.247646
2022-09-13	15:24:14	0.350089
2022-09-13	15:24:14	0.132176
2022-09-13	15:24:14	0.235026
2022-09-13	15:24:15	0.181387
2022-09-13	15:24:15	0.22785
2022-09-13	15:24:15	0.21411
2022-09-13	15:24:15	0.4993
2022-09-13	15:24:16	0.491972
2022-09-13	15:24:16	0.245356
2022-09-13	15:24:16	0.319097
2022-09-13	15:24:16	0.301743
2022-09-13	15:24:17	0.209122
2022-09-13	15:24:17	0.310598
2022-09-13	15:24:17	0.438435
2022-09-13	15:24:17	0.138741
2022-09-13	15:24:18	0.417061
2022-09-13	15:24:18	0.336043
2022-09-13	15:24:18	0.340064
2022-09-13	15:24:19	0.374924
2022-09-13	15:24:19	0.245051
2022-09-13	15:24:19	0.336298
2022-09-13	15:24:19	0.361438
2022-09-13	15:24:20	0.310751
2022-09-13	15:24:20	0.479504
2022-09-13	15:24:20	0.30612
2022-09-13	15:24:20	0.38897
2022-09-13	15:24:21	0.371463
2022-09-13	15:24:21	0.386629
2022-09-13	15:24:21	0.480522
2022-09-13	15:24:21	0.421743
2022-09-13	15:24:22	0.671819
2022-09-13	15:24:22	0.542456
2022-09-13	15:24:22	0.540471
2022-09-13	15:24:23	0.498995
2022-09-13	15:24:23	0.414109
2022-09-13	15:24:23	0.550343
2022-09-13	15:24:23	0.375585
2022-09-13	15:24:24	0.520064
2022-09-13	15:24:24	0.323626
2022-09-13	15:24:24	0.376298
2022-09-13	15:24:24	0.349326
2022-09-13	15:24:25	0.369377
2022-09-13	15:24:25	0.447341
2022-09-13	15:24:25	0.330802
2022-09-13	15:24:25	0.386171
2022-09-13	15:24:26	0.38612
2022-09-13	15:24:26	0.412735
2022-09-13	15:24:26	0.361082
2022-09-13	15:24:27	0.424237
2022-09-13	15:24:27	0.375076
2022-09-13	15:24:27	0.4393
2022-09-13	15:24:27	0.406069
2022-09-13	15:24:28	0.383168
2022-09-13	15:24:28	0.396349
2022-09-13	15:24:28	0.391107
2022-09-13	15:24:28	0.398995
2022-09-13	15:24:29	0.393397
2022-09-13	15:24:29	0.42383
2022-09-13	15:24:29	0.394109
2022-09-13	15:24:29	0.394415
2022-09-13	15:24:30	0.392685
2022-09-13	15:24:30	0.407646
2022-09-13	15:24:30	0.401183
2022-09-13	15:24:31	0.399758
2022-09-13	15:24:31	0.402557
2022-09-13	15:24:31	0.396603
2022-09-13	15:24:31	0.396959
2022-09-13	15:24:32	0.403321
2022-09-13	15:24:32	0.389936
2022-09-13	15:24:32	0.386222
2022-09-13	15:24:32	0.364593
2022-09-13	15:24:33	0.375127
2022-09-13	15:24:33	0.378232
2022-09-13	15:24:33	0.386018
2022-09-13	15:24:33	0.376094
2022-09-13	15:24:34	0.378995
2022-09-13	15:24:34	0.377468
2022-09-13	15:24:34	0.383422
2022-09-13	15:24:35	0.373753
2022-09-13	15:24:35	0.377875
2022-09-13	15:24:35	0.404186
2022-09-13	15:24:35	0.426018
2022-09-13	15:24:36	0.347799
2022-09-13	15:24:36	0.272634
2022-09-13	15:24:36	0.32444
2022-09-13	15:24:36	0.337366
2022-09-13	15:24:37	0.228613
2022-09-13	15:24:37	0.360216
2022-09-13	15:24:37	0.262914
2022-09-13	15:24:37	0.257265
2022-09-13	15:24:38	0.571209
2022-09-13	15:24:38	0.552736
2022-09-13	15:24:38	0.497163
2022-09-13	15:24:39	0.620064
2022-09-13	15:24:39	0.829885
2022-09-13	15:24:39	0.681234
2022-09-13	15:24:39	0.638079
2022-09-13	15:24:40	0.333499
2022-09-13	15:24:40	0.526221
2022-09-13	15:24:40	0.375789
2022-09-13	15:24:40	0.248308
2022-09-13	15:24:41	0.181132
2022-09-13	15:24:41	0.151412
2022-09-13	15:24:41	-0.095814
2022-09-13	15:24:41	-0.325992
2022-09-13	15:24:42	-0.402888
2022-09-13	15:24:42	-0.359783
2022-09-13	15:24:42	0.000216527
2022-09-13	15:24:43	0.337265
2022-09-13	15:24:43	0.147596
2022-09-13	15:24:43	-0.172811
2022-09-13	15:24:43	0.241947
2022-09-13	15:24:44	-0.297137
2022-09-13	15:24:44	-0.342684
2022-09-13	15:24:44	-0.48187
2022-09-13	15:24:44	-0.320343
2022-09-13	15:24:45	0.909173
2022-09-13	15:24:45	1.26149
2022-09-13	15:24:45	1.23564
2022-09-13	15:24:45	1.56174
2022-09-13	15:24:46	0.870496
2022-09-13	15:24:46	0.509733
2022-09-13	15:24:46	0.54958
2022-09-13	15:24:47	0.390903
2022-09-13	15:24:47	0.399657
2022-09-13	15:24:47	0.106781
2022-09-13	15:24:47	0.149326
2022-09-13	15:24:48	0.123677
2022-09-13	15:24:48	0.125764
2022-09-13	15:24:48	0.0793513
2022-09-13	15:24:48	0.183626
2022-09-13	15:24:49	-0.0575951
2022-09-13	15:24:49	0.0319723
2022-09-13	15:24:49	-0.163295
2022-09-13	15:24:49	-0.0747962
2022-09-13	15:24:50	-0.0394272
2022-09-13	15:24:50	0.071616
2022-09-13	15:24:50	0.0271376
2022-09-13	15:24:51	0.314008
2022-09-13	15:24:51	0.184288
2022-09-13	15:24:51	0.185611
2022-09-13	15:24:51	-0.0397834
2022-09-13	15:24:52	0.0460689
2022-09-13	15:24:52	0.0443386
2022-09-13	15:24:52	0.0667305
2022-09-13	15:24:52	0.178588
2022-09-13	15:24:53	-0.180903
2022-09-13	15:24:53	-0.13042
2022-09-13	15:24:53	-0.197035
2022-09-13	15:24:53	-0.178664
2022-09-13	15:24:54	-0.296323
2022-09-13	15:24:54	-0.146094
2022-09-13	15:24:54	-0.143804
2022-09-13	15:24:55	-0.0768318
2022-09-13	15:24:55	-0.225229
2022-09-13	15:24:55	-0.129402
2022-09-13	15:24:55	-0.264923
2022-09-13	15:24:56	-0.219122
2022-09-13	15:24:56	-0.331844
2022-09-13	15:24:56	-0.181565
2022-09-13	15:24:56	-0.198867
2022-09-13	15:24:57	-0.154287
2022-09-13	15:24:57	-0.217035
2022-09-13	15:24:57	-0.161768
2022-09-13	15:24:57	-0.155152
2022-09-13	15:24:58	-0.13215
2022-09-13	15:24:58	-0.221565
2022-09-13	15:24:58	-0.163855
2022-09-13	15:24:59	-0.166959
2022-09-13	15:24:59	-0.0990709
2022-09-13	15:24:59	-0.0691982
2022-09-13	15:24:59	-0.017188
2022-09-13	15:25:00	-0.0380532
2022-09-13	15:25:00	0.0484099
2022-09-13	15:25:00	0.099046
2022-09-13	15:25:00	0.260725
2022-09-13	15:25:01	0.555891
2022-09-13	15:25:01	0.522608
2022-09-13	15:25:01	0.380165
2022-09-13	15:25:01	0.496552
2022-09-13	15:25:02	0.452277
2022-09-13	15:25:02	0.477774
2022-09-13	15:25:02	0.277316
2022-09-13	15:25:03	0.480776
2022-09-13	15:25:03	0.309326
2022-09-13	15:25:03	0.607188
2022-09-13	15:25:03	0.301031
2022-09-13	15:25:04	0.634262
2022-09-13	15:25:04	0.347494
2022-09-13	15:25:04	0.669987
2022-09-13	15:25:04	0.291107
2022-09-13	15:25:05	0.641845
2022-09-13	15:25:05	0.371718
2022-09-13	15:25:05	0.601997
2022-09-13	15:25:05	0.308868
2022-09-13	15:25:06	0.663473
2022-09-13	15:25:06	0.550445
2022-09-13	15:25:06	0.616043
2022-09-13	15:25:07	0.519402
2022-09-13	15:25:07	0.612226
2022-09-13	15:25:07	0.480064
2022-09-13	15:25:07	0.464186
2022-09-13	15:25:08	0.608053
2022-09-13	15:25:08	0.432481
2022-09-13	15:25:08	0.399657
2022-09-13	15:25:08	0.487188
2022-09-13	15:25:09	0.550547
2022-09-13	15:25:09	0.41355
2022-09-13	15:25:09	0.692125
2022-09-13	15:25:09	0.485814
2022-09-13	15:25:10	0.675178
2022-09-13	15:25:10	0.490242
2022-09-13	15:25:10	0.498639
2022-09-13	15:25:11	0.420369
2022-09-13	15:25:11	0.600165
2022-09-13	15:25:11	0.31869
2022-09-13	15:25:11	0.664237
2022-09-13	15:25:12	0.439402
2022-09-13	15:25:12	0.336705
2022-09-13	15:25:12	0.34897
2022-09-13	15:25:12	0.372125
2022-09-13	15:25:13	0.296908
2022-09-13	15:25:13	0.497316
2022-09-13	15:25:13	0.380674
2022-09-13	15:25:13	0.515331
2022-09-13	15:25:14	0.315738
2022-09-13	15:25:14	0.590191
2022-09-13	15:25:14	0.343168
2022-09-13	15:25:15	0.673957
2022-09-13	15:25:15	0.421438
2022-09-13	15:25:15	0.604746
2022-09-13	15:25:15	0.303931
2022-09-13	15:25:16	0.659809
2022-09-13	15:25:16	0.498791
2022-09-13	15:25:16	0.414262
2022-09-13	15:25:16	0.445356
2022-09-13	15:25:17	0.527239
2022-09-13	15:25:17	0.414822
2022-09-13	15:25:17	0.416298
2022-09-13	15:25:17	0.356807
2022-09-13	15:25:18	0.432176
2022-09-13	15:25:18	0.369428
2022-09-13	15:25:18	0.402914
2022-09-13	15:25:19	0.331921
2022-09-13	15:25:19	0.277977
2022-09-13	15:25:19	0.382354
2022-09-13	15:25:19	0.272074
2022-09-13	15:25:20	0.370293
2022-09-13	15:25:20	0.0930918
2022-09-13	15:25:20	0.378283
2022-09-13	15:25:20	0.218639
2022-09-13	15:25:21	0.325102
2022-09-13	15:25:21	0.134262
2022-09-13	15:25:21	0.344949
2022-09-13	15:25:21	0.271819
2022-09-13	15:25:22	0.444593
2022-09-13	15:25:22	0.197367
2022-09-13	15:25:22	0.291921
2022-09-13	15:25:23	0.234924
2022-09-13	15:25:23	0.407596
2022-09-13	15:25:23	0.315891
2022-09-13	15:25:23	0.315331
2022-09-13	15:25:24	0.563677
2022-09-13	15:25:24	0.371667
2022-09-13	15:25:24	0.561387
2022-09-13	15:25:24	0.386323
2022-09-13	15:25:25	0.543066
2022-09-13	15:25:25	0.476909
2022-09-13	15:25:25	0.445407
2022-09-13	15:25:25	0.0431173
2022-09-13	15:25:26	0.164491
2022-09-13	15:25:26	0.0576211
2022-09-13	15:25:26	-0.00629748
2022-09-13	15:25:27	2.35182
2022-09-13	15:25:27	0.466476
2022-09-13	15:25:27	0.146883
2022-09-13	15:25:27	0.129173
2022-09-13	15:25:28	0.25014
2022-09-13	15:25:28	0.11696
2022-09-13	15:25:28	0.273397
2022-09-13	15:25:28	0.11243
2022-09-13	15:25:29	0.228766
2022-09-13	15:25:29	0.17126
2022-09-13	15:25:29	0.19126
2022-09-13	15:25:29	0.202965
2022-09-13	15:25:30	0.203931
2022-09-13	15:25:30	0.388308
2022-09-13	15:25:30	0.359657
2022-09-13	15:25:31	0.52444
2022-09-13	15:25:31	0.263321
2022-09-13	15:25:31	0.577061
2022-09-13	15:25:31	0.210242
2022-09-13	15:25:32	0.478435
2022-09-13	15:25:32	0.365763
2022-09-13	15:25:32	0.505203
2022-09-13	15:25:32	0.428053
2022-09-13	15:25:33	0.46729
2022-09-13	15:25:33	0.400267
2022-09-13	15:25:33	0.432074
2022-09-13	15:25:33	0.436654
2022-09-13	15:25:34	0.377774
2022-09-13	15:25:34	0.575382
2022-09-13	15:25:34	0.308969
2022-09-13	15:25:35	0.583422
2022-09-13	15:25:35	0.333143
2022-09-13	15:25:35	0.677214
2022-09-13	15:25:35	0.281489
2022-09-13	15:25:36	0.55701
2022-09-13	15:25:36	0.365509
2022-09-13	15:25:36	0.557875
2022-09-13	15:25:36	0.364847
2022-09-13	15:25:37	0.492125
2022-09-13	15:25:37	0.465255
2022-09-13	15:25:37	0.453193
2022-09-13	15:25:37	0.429631
2022-09-13	15:25:38	0.441234
2022-09-13	15:25:38	0.398842
2022-09-13	15:25:38	0.443982
2022-09-13	15:25:39	0.517366
2022-09-13	15:25:39	2.32363
2022-09-13	15:25:39	2.47823
2022-09-13	15:25:39	0.567036
2022-09-13	15:25:40	0.415382
2022-09-13	15:25:40	0.414822
2022-09-13	15:25:40	0.459402
2022-09-13	15:25:40	0.470344
2022-09-13	15:25:41	0.575993
2022-09-13	15:25:41	0.345305
2022-09-13	15:25:41	0.478893
2022-09-13	15:25:41	0.284033
2022-09-13	15:25:42	0.245305
2022-09-13	15:25:42	0.536349
2022-09-13	15:25:42	0.311005
2022-09-13	15:25:43	0.593091
2022-09-13	15:25:43	0.242914
2022-09-13	15:25:43	0.606679
2022-09-13	15:25:43	0.365713
2022-09-13	15:25:44	0.457214
2022-09-13	15:25:44	0.428155
2022-09-13	15:25:44	0.446425
2022-09-13	15:25:44	0.356145
2022-09-13	15:25:45	0.376858
2022-09-13	15:25:45	0.493651
2022-09-13	15:25:45	0.360318
2022-09-13	15:25:45	0.585407
2022-09-13	15:25:46	0.403677
2022-09-13	15:25:46	0.534109
2022-09-13	15:25:46	0.378893
2022-09-13	15:25:47	0.620878
2022-09-13	15:25:47	0.321794
2022-09-13	15:25:47	0.666069
2022-09-13	15:25:47	0.268512
2022-09-13	15:25:48	0.499707
2022-09-13	15:25:48	0.393702
2022-09-13	15:25:48	0.449733
2022-09-13	15:25:48	-0.0451778
2022-09-13	15:25:49	0.378384
2022-09-13	15:25:49	0.251107
2022-09-13	15:25:49	0.390394
2022-09-13	15:25:49	0.114262
2022-09-13	15:25:50	0.500114
2022-09-13	15:25:50	0.477621
2022-09-13	15:25:50	0.517723
2022-09-13	15:25:51	0.145255
2022-09-13	15:25:51	0.247188
