# Supplementary material for: Comparing efficacy in reducing pulling and welfare impacts of four types of leash walking equipment
Source: PeerJ journal article supplement (doi:10.7717/peerj.18131), 2024-10-24
Supplement: Shelter1_Tension_files.zip [file Buzz_star_2022913143527 copy.xlsx]

## Sheet: Averaged Newtons
Date	Time	Averaged Newtons	Impulse	Total steps
2022-09-13	14:35:30	1.9292	1.9292	0
2022-09-13	14:35:31	1.95862	3.88782	0		Impulse	465.137
2022-09-13	14:35:32	2.08147	5.96928	0		Total steps	0
2022-09-13	14:35:33	2.04855	8.01783	0
2022-09-13	14:35:34	1.95698	9.97482	0
2022-09-13	14:35:35	2.09133	12.0662	0
2022-09-13	14:35:36	2.06245	14.1286	0
2022-09-13	14:35:37	2.03763	16.1662	0
2022-09-13	14:35:38	1.86694	18.0332	0
2022-09-13	14:35:39	0.955797	18.989	0
2022-09-13	14:35:40	0.717957	19.7069	0
2022-09-13	14:35:41	1.37062	21.0775	0
2022-09-13	14:35:42	-0.417881	21.0775	0
2022-09-13	14:35:43	0.259762	21.3373	0
2022-09-13	14:35:44	0.183947	21.5213	0
2022-09-13	14:35:45	0.75393	22.2752	0
2022-09-13	14:35:46	1.93514	24.2103	0
2022-09-13	14:35:47	1.48296	25.6933	0
2022-09-13	14:35:48	1.66887	27.3622	0
2022-09-13	14:35:49	1.73378	29.0959	0
2022-09-13	14:35:50	1.46564	30.5616	0
2022-09-13	14:35:51	1.35393	31.9155	0
2022-09-13	14:35:52	1.38439	33.2999	0
2022-09-13	14:35:53	1.39575	34.6957	0
2022-09-13	14:35:54	1.41228	36.1079	0
2022-09-13	14:35:55	1.37996	37.4879	0
2022-09-13	14:35:56	1.54912	39.037	0
2022-09-13	14:35:57	1.55212	40.5891	0
2022-09-13	14:35:58	0.930274	41.5194	0
2022-09-13	14:35:59	2.12336	43.6428	0
2022-09-13	14:36:00	1.93357	45.5763	0
2022-09-13	14:36:01	2.0159	47.5922	0
2022-09-13	14:36:02	1.75127	49.3435	0
2022-09-13	14:36:03	2.23225	51.5757	0
2022-09-13	14:36:04	2.18869	53.7644	0
2022-09-13	14:36:05	2.21691	55.9813	0
2022-09-13	14:36:06	1.94742	57.9288	0
2022-09-13	14:36:07	2.09977	60.0285	0
2022-09-13	14:36:08	1.59092	61.6195	0
2022-09-13	14:36:09	-0.0279562	61.6195	0
2022-09-13	14:36:10	-2.07362	61.6195	0
2022-09-13	14:36:11	-2.13508	61.6195	0
2022-09-13	14:36:12	-1.82321	61.6195	0
2022-09-13	14:36:13	-0.754098	61.6195	0
2022-09-13	14:36:14	0.712845	62.3323	0
2022-09-13	14:36:15	-1.62059	62.3323	0
2022-09-13	14:36:16	6.50672	68.839	0
2022-09-13	14:36:17	5.5736	74.4126	0
2022-09-13	14:36:18	3.06128	77.4739	0
2022-09-13	14:36:19	1.64465	79.1185	0
2022-09-13	14:36:20	1.48973	80.6083	0
2022-09-13	14:36:21	1.60028	82.2086	0
2022-09-13	14:36:22	1.79586	84.0044	0
2022-09-13	14:36:23	1.98211	85.9865	0
2022-09-13	14:36:24	2.15436	88.1409	0
2022-09-13	14:36:25	1.6219	89.7628	0
2022-09-13	14:36:26	1.59173	91.3545	0
2022-09-13	14:36:27	1.60179	92.9563	0
2022-09-13	14:36:28	1.52331	94.4796	0
2022-09-13	14:36:29	1.71754	96.1972	0
2022-09-13	14:36:30	1.63016	97.8273	0
2022-09-13	14:36:31	1.60526	99.4326	0
2022-09-13	14:36:32	1.55585	100.988	0
2022-09-13	14:36:33	1.7066	102.695	0
2022-09-13	14:36:34	1.51505	104.21	0
2022-09-13	14:36:35	1.52467	105.735	0
2022-09-13	14:36:36	1.10339	106.838	0
2022-09-13	14:36:37	1.51516	108.353	0
2022-09-13	14:36:38	2.21193	110.565	0
2022-09-13	14:36:39	1.80322	112.368	0
2022-09-13	14:36:40	1.41216	113.781	0
2022-09-13	14:36:41	1.30645	115.087	0
2022-09-13	14:36:42	1.57079	116.658	0
2022-09-13	14:36:43	1.67911	118.337	0
2022-09-13	14:36:44	1.61126	119.948	0
2022-09-13	14:36:45	1.64027	121.588	0
2022-09-13	14:36:46	1.52201	123.11	0
2022-09-13	14:36:47	1.38562	124.496	0
2022-09-13	14:36:48	1.33248	125.829	0
2022-09-13	14:36:49	-0.154101	125.829	0
2022-09-13	14:36:50	-0.150876	125.829	0
2022-09-13	14:36:51	1.61952	127.448	0
2022-09-13	14:36:52	1.59258	129.041	0
2022-09-13	14:36:53	1.4524	130.493	0
2022-09-13	14:36:54	1.42812	131.921	0
2022-09-13	14:36:55	1.36281	133.284	0
2022-09-13	14:36:56	1.52156	134.806	0
2022-09-13	14:36:57	1.72048	136.526	0
2022-09-13	14:36:58	1.58856	138.115	0
2022-09-13	14:36:59	1.38324	139.498	0
2022-09-13	14:37:00	0.579568	140.077	0
2022-09-13	14:37:01	0.779153	140.857	0
2022-09-13	14:37:02	1.7391	142.596	0
2022-09-13	14:37:03	1.76394	144.36	0
2022-09-13	14:37:04	2.00327	146.363	0
2022-09-13	14:37:05	0.999035	147.362	0
2022-09-13	14:37:06	1.38166	148.744	0
2022-09-13	14:37:07	5.14412	153.888	0
2022-09-13	14:37:08	6.65147	160.539	0
2022-09-13	14:37:09	-0.66887	160.539	0
2022-09-13	14:37:10	-3.19076	160.539	0
2022-09-13	14:37:11	-3.25312	160.539	0
2022-09-13	14:37:12	-2.01369	160.539	0
2022-09-13	14:37:13	0.990961	161.53	0
2022-09-13	14:37:14	1.46032	162.99	0
2022-09-13	14:37:15	1.21828	164.209	0
2022-09-13	14:37:16	1.44521	165.654	0
2022-09-13	14:37:17	1.27083	166.925	0
2022-09-13	14:37:18	1.44561	168.37	0
2022-09-13	14:37:19	1.09892	169.469	0
2022-09-13	14:37:20	-0.344536	169.469	0
2022-09-13	14:37:21	-0.728631	169.469	0
2022-09-13	14:37:22	1.41109	170.88	0
2022-09-13	14:37:23	1.92161	172.802	0
2022-09-13	14:37:24	1.60911	174.411	0
2022-09-13	14:37:25	1.30984	175.721	0
2022-09-13	14:37:26	1.55398	177.275	0
2022-09-13	14:37:27	1.42699	178.702	0
2022-09-13	14:37:28	1.58851	180.29	0
2022-09-13	14:37:29	1.91765	182.208	0
2022-09-13	14:37:30	1.70011	183.908	0
2022-09-13	14:37:31	1.69779	185.606	0
2022-09-13	14:37:32	1.8318	187.438	0
2022-09-13	14:37:33	1.69603	189.134	0
2022-09-13	14:37:34	1.70073	190.835	0
2022-09-13	14:37:35	1.68851	192.523	0
2022-09-13	14:37:36	1.80769	194.331	0
2022-09-13	14:37:37	1.87577	196.207	0
2022-09-13	14:37:38	1.93117	198.138	0
2022-09-13	14:37:39	2.48465	200.622	0
2022-09-13	14:37:40	1.68471	202.307	0
2022-09-13	14:37:41	1.39851	203.706	0
2022-09-13	14:37:42	1.46094	205.167	0
2022-09-13	14:37:43	1.4026	206.569	0
2022-09-13	14:37:44	1.38002	207.949	0
2022-09-13	14:37:45	1.54406	209.493	0
2022-09-13	14:37:46	1.2438	210.737	0
2022-09-13	14:37:47	0.673455	211.41	0
2022-09-13	14:37:48	1.68732	213.098	0
2022-09-13	14:37:49	1.95145	215.049	0
2022-09-13	14:37:50	2.06734	217.117	0
2022-09-13	14:37:51	1.71431	218.831	0
2022-09-13	14:37:52	1.88296	220.714	0
2022-09-13	14:37:53	2.01378	222.728	0
2022-09-13	14:37:54	1.59366	224.321	0
2022-09-13	14:37:55	1.91974	226.241	0
2022-09-13	14:37:56	1.38562	227.627	0
2022-09-13	14:37:57	1.02537	228.652	0
2022-09-13	14:37:58	1.25931	229.911	0
2022-09-13	14:37:59	1.52376	231.435	0
2022-09-13	14:38:00	1.34572	232.781	0
2022-09-13	14:38:01	1.26768	234.048	0
2022-09-13	14:38:02	1.24834	235.297	0
2022-09-13	14:38:03	1.42088	236.718	0
2022-09-13	14:38:04	1.39501	238.113	0
2022-09-13	14:38:05	1.05336	239.166	0
2022-09-13	14:38:06	1.26049	240.427	0
2022-09-13	14:38:07	1.19813	241.625	0
2022-09-13	14:38:08	1.27725	242.902	0
2022-09-13	14:38:09	1.21816	244.12	0
2022-09-13	14:38:10	1.03412	245.154	0
2022-09-13	14:38:11	1.22195	246.376	0
2022-09-13	14:38:12	2.07781	248.454	0
2022-09-13	14:38:13	2.86858	251.323	0
2022-09-13	14:38:14	2.37281	253.695	0
2022-09-13	14:38:15	2.19297	255.888	0
2022-09-13	14:38:16	1.98081	257.869	0
2022-09-13	14:38:17	1.33729	259.206	0
2022-09-13	14:38:18	1.05759	260.264	0
2022-09-13	14:38:19	0.702262	260.966	0
2022-09-13	14:38:20	0.381493	261.348	0
2022-09-13	14:38:21	0.479738	261.828	0
2022-09-13	14:38:22	1.12739	262.955	0
2022-09-13	14:38:23	1.11737	264.072	0
2022-09-13	14:38:24	1.29388	265.366	0
2022-09-13	14:38:25	1.16672	266.533	0
2022-09-13	14:38:26	0.869098	267.402	0
2022-09-13	14:38:27	0.792584	268.195	0
2022-09-13	14:38:28	0.955797	269.15	0
2022-09-13	14:38:29	0.823992	269.974	0
2022-09-13	14:38:30	0.822841	270.797	0
2022-09-13	14:38:31	1.04561	271.843	0
2022-09-13	14:38:32	1.0447	272.887	0
2022-09-13	14:38:33	1.14697	274.034	0
2022-09-13	14:38:34	1.04076	275.075	0
2022-09-13	14:38:35	1.19881	276.274	0
2022-09-13	14:38:36	1.3404	277.614	0
2022-09-13	14:38:37	1.44781	279.062	0
2022-09-13	14:38:38	1.43397	280.496	0
2022-09-13	14:38:39	1.59003	282.086	0
2022-09-13	14:38:40	1.99847	284.085	0
2022-09-13	14:38:41	1.96236	286.047	0
2022-09-13	14:38:42	-1.3209	286.047	0
2022-09-13	14:38:43	-0.178267	286.047	0
2022-09-13	14:38:44	1.75749	287.805	0
2022-09-13	14:38:45	1.82999	289.635	0
2022-09-13	14:38:46	1.71271	291.347	0
2022-09-13	14:38:47	1.49824	292.846	0
2022-09-13	14:38:48	1.6653	294.511	0
2022-09-13	14:38:49	1.35285	295.864	0
2022-09-13	14:38:50	1.38009	297.244	0
2022-09-13	14:38:51	1.70016	298.944	0
2022-09-13	14:38:52	1.06706	300.011	0
2022-09-13	14:38:53	3.40072	303.412	0
2022-09-13	14:38:54	2.02276	305.434	0
2022-09-13	14:38:55	1.83655	307.271	0
2022-09-13	14:38:56	1.83525	309.106	0
2022-09-13	14:38:57	0.389303	309.496	0
2022-09-13	14:38:58	-0.158327	309.496	0
2022-09-13	14:38:59	0.986697	310.482	0
2022-09-13	14:39:00	0.588454	311.071	0
2022-09-13	14:39:01	-0.953305	311.071	0
2022-09-13	14:39:02	-0.990693	311.071	0
2022-09-13	14:39:03	0.211658	311.282	0
2022-09-13	14:39:04	0.94182	312.224	0
2022-09-13	14:39:05	1.11505	313.339	0
2022-09-13	14:39:06	1.64525	314.984	0
2022-09-13	14:39:07	10.2135	325.198	0
2022-09-13	14:39:08	5.43546	330.633	0
2022-09-13	14:39:09	1.28296	331.916	0
2022-09-13	14:39:10	1.10898	333.025	0
2022-09-13	14:39:11	1.31143	334.337	0
2022-09-13	14:39:12	-0.376455	334.337	0
2022-09-13	14:39:13	-1.76711	334.337	0
2022-09-13	14:39:14	-1.11271	334.337	0
2022-09-13	14:39:15	0.0206013	334.357	0
2022-09-13	14:39:16	0.365817	334.723	0
2022-09-13	14:39:17	2.25919	336.982	0
2022-09-13	14:39:18	9.04728	346.03	0
2022-09-13	14:39:19	1.16395	347.194	0
2022-09-13	14:39:20	0.387379	347.581	0
2022-09-13	14:39:21	2.49009	350.071	0
2022-09-13	14:39:22	1.03556	351.107	0
2022-09-13	14:39:23	-0.744987	351.107	0
2022-09-13	14:39:24	0.248839	351.356	0
2022-09-13	14:39:25	2.07589	353.431	0
2022-09-13	14:39:26	-0.62269	353.431	0
2022-09-13	14:39:27	-2.01753	353.431	0
2022-09-13	14:39:28	-2.06898	353.431	0
2022-09-13	14:39:29	-1.91086	353.431	0
2022-09-13	14:39:30	-1.85309	353.431	0
2022-09-13	14:39:31	-1.29892	353.431	0
2022-09-13	14:39:32	0.0740251	353.505	0
2022-09-13	14:39:33	0.227222	353.733	0
2022-09-13	14:39:34	1.4271	355.16	0
2022-09-13	14:39:35	2.00616	357.166	0
2022-09-13	14:39:36	1.69275	358.859	0
2022-09-13	14:39:37	1.57306	360.432	0
2022-09-13	14:39:38	1.35874	361.79	0
2022-09-13	14:39:39	1.3374	363.128	0
2022-09-13	14:39:40	1.74017	364.868	0
2022-09-13	14:39:41	2.20248	367.071	0
2022-09-13	14:39:42	1.63967	368.71	0
2022-09-13	14:39:43	1.22716	369.937	0
2022-09-13	14:39:44	0.423373	370.361	0
2022-09-13	14:39:45	0.824729	371.185	0
2022-09-13	14:39:46	1.80484	372.99	0
2022-09-13	14:39:47	1.47108	374.461	0
2022-09-13	14:39:48	1.75636	376.218	0
2022-09-13	14:39:49	1.90356	378.121	0
2022-09-13	14:39:50	1.40447	379.526	0
2022-09-13	14:39:51	1.94781	381.474	0
2022-09-13	14:39:52	2.37373	383.847	0
2022-09-13	14:39:53	1.96281	385.81	0
2022-09-13	14:39:54	2.15685	387.967	0
2022-09-13	14:39:55	2.10803	390.075	0
2022-09-13	14:39:56	1.94425	392.019	0
2022-09-13	14:39:57	1.77436	393.794	0
2022-09-13	14:39:58	1.83321	395.627	0
2022-09-13	14:39:59	1.79111	397.418	0
2022-09-13	14:40:00	1.64363	399.062	0
2022-09-13	14:40:01	1.77011	400.832	0
2022-09-13	14:40:02	1.89124	402.723	0
2022-09-13	14:40:03	1.59699	404.32	0
2022-09-13	14:40:04	1.70956	406.029	0
2022-09-13	14:40:05	1.71776	407.747	0
2022-09-13	14:40:06	1.52625	409.273	0
2022-09-13	14:40:07	1.73338	411.007	0
2022-09-13	14:40:08	1.55019	412.557	0
2022-09-13	14:40:09	1.93316	414.49	0
2022-09-13	14:40:10	1.84136	416.332	0
2022-09-13	14:40:11	1.9125	418.244	0
2022-09-13	14:40:12	1.87034	420.114	0
2022-09-13	14:40:13	1.78522	421.9	0
2022-09-13	14:40:14	1.81971	423.719	0
2022-09-13	14:40:15	5.46166	429.181	0
2022-09-13	14:40:16	2.24906	431.43	0
2022-09-13	14:40:17	2.5095	433.94	0
2022-09-13	14:40:18	4.92863	438.868	0
2022-09-13	14:40:19	1.95732	440.825	0
2022-09-13	14:40:20	1.30735	442.133	0
2022-09-13	14:40:21	6.30392	448.437	0
2022-09-13	14:40:22	3.22767	451.664	0
2022-09-13	14:40:23	1.64674	453.311	0
2022-09-13	14:40:24	1.88069	455.192	0
2022-09-13	14:40:25	1.8112	457.003	0
2022-09-13	14:40:26	1.40967	458.413	0
2022-09-13	14:40:27	1.67656	460.089	0
2022-09-13	14:40:28	1.59705	461.686	0
2022-09-13	14:40:29	1.64634	463.333	0
2022-09-13	14:40:30	1.80477	465.137	0

## Sheet: Buzz_star_2022913143527 (4)
Date	Time	Lbs	Newtons	Averaged Newtons	Total force x time	total steps > 13.345		**GoPro Fitting: 1424
2022-09-13	14:35:30	0.442456	1.96813	1.9292	1.96813	FALSE	0
2022-09-13	14:35:30	0.39986	1.77866	1.9292	1.77866	FALSE	0
2022-09-13	14:35:30	0.471209	2.09603	1.9292	4.06416	FALSE	0
2022-09-13	14:35:30	0.421285	1.87396	1.9292	3.65262	FALSE	0
2022-09-13	14:35:31	0.434262	1.93168	1.95862	5.99585	FALSE	0
2022-09-13	14:35:31	0.446832	1.9876	1.95862	5.64022	FALSE	0
2022-09-13	14:35:31	0.433041	1.92625	1.95862	7.9221	FALSE	0
2022-09-13	14:35:31	0.447137	1.98895	1.95862	7.62917	FALSE	0
2022-09-13	14:35:32	0.450547	2.00412	2.08147	9.92623	FALSE	0
2022-09-13	14:35:32	0.494313	2.1988	2.08147	9.82797	FALSE	0
2022-09-13	14:35:32	0.458944	2.04147	2.08147	11.9677	FALSE	0
2022-09-13	14:35:33	0.470649	2.09354	2.04855	11.9215	FALSE	0
2022-09-13	14:35:33	0.440471	1.9593	2.04855	13.927	FALSE	0
2022-09-13	14:35:33	0.465713	2.07158	2.04855	13.9931	FALSE	0
2022-09-13	14:35:33	0.465305	2.06977	2.04855	15.9968	FALSE	0
2022-09-13	14:35:34	0.445509	1.98171	1.95698	15.9748	FALSE	0
2022-09-13	14:35:34	0.466527	2.07521	1.95698	18.072	FALSE	0
2022-09-13	14:35:34	0.394109	1.75308	1.95698	17.7279	FALSE	0
2022-09-13	14:35:34	0.453652	2.01793	1.95698	20.0899	FALSE	0
2022-09-13	14:35:35	0.534771	2.37877	2.09133	20.1067	FALSE	0
2022-09-13	14:35:35	0.427036	1.89954	2.09133	21.9895	FALSE	0
2022-09-13	14:35:35	0.471921	2.0992	2.09133	22.2059	FALSE	0
2022-09-13	14:35:35	0.446883	1.98782	2.09133	23.9773	FALSE	0
2022-09-13	14:35:36	0.465356	2.07	2.06245	24.2759	FALSE	0
2022-09-13	14:35:36	0.468664	2.08471	2.06245	26.062	FALSE	0
2022-09-13	14:35:36	0.456959	2.03265	2.06245	26.3085	FALSE	0
2022-09-13	14:35:37	0.458028	2.0374	2.03763	28.0994	FALSE	0
2022-09-13	14:35:37	0.427952	1.90362	2.03763	28.2121	FALSE	0
2022-09-13	14:35:37	0.529325	2.35454	2.03763	30.4539	FALSE	0
2022-09-13	14:35:37	0.41701	1.85494	2.03763	30.0671	FALSE	0
2022-09-13	14:35:38	0.424237	1.88709	1.86694	32.341	FALSE	0
2022-09-13	14:35:38	0.45014	2.00231	1.86694	32.0694	FALSE	0
2022-09-13	14:35:38	0.474364	2.11007	1.86694	34.4511	FALSE	0
2022-09-13	14:35:38	0.330089	1.4683	1.86694	33.5377	FALSE	0
2022-09-13	14:35:39	0.382099	1.69965	0.955797	36.1507	FALSE	0
2022-09-13	14:35:39	0.164135	0.730105	0.955797	34.2678	FALSE	0
2022-09-13	14:35:39	0.0721758	0.321052	0.955797	36.4718	FALSE	0
2022-09-13	14:35:39	0.241081	1.07238	0.955797	35.3402	FALSE	0
2022-09-13	14:35:40	0.10439	0.464348	0.717957	36.9361	FALSE	0
2022-09-13	14:35:40	0.208817	0.92886	0.717957	36.269	FALSE	0
2022-09-13	14:35:40	0.171005	0.760664	0.717957	37.6968	FALSE	0
2022-09-13	14:35:41	0.389733	1.73361	1.37062	38.0026	FALSE	0
2022-09-13	14:35:41	0.691717	3.0769	1.37062	40.7737	FALSE	0
2022-09-13	14:35:41	0.281336	1.25144	1.37062	39.2541	FALSE	0
2022-09-13	14:35:41	-0.130267	-0.579454	1.37062	40.7737	FALSE	0
2022-09-13	14:35:42	-0.627824	-2.79269	-0.417881	39.2541	FALSE	0
2022-09-13	14:35:42	-0.0515392	-0.229257	-0.417881	40.7737	FALSE	0
2022-09-13	14:35:42	0.138893	0.617824	-0.417881	39.8719	FALSE	0
2022-09-13	14:35:42	0.164695	0.732596	-0.417881	41.5063	FALSE	0
2022-09-13	14:35:43	0.179911	0.80028	0.259762	40.6722	FALSE	0
2022-09-13	14:35:43	0.0211326	0.094002	0.259762	41.6003	FALSE	0
2022-09-13	14:35:43	0.0900384	0.400509	0.259762	41.0727	FALSE	0
2022-09-13	14:35:43	-0.0574934	-0.255742	0.259762	41.6003	FALSE	0
2022-09-13	14:35:44	-0.0823788	-0.366437	0.183947	41.0727	FALSE	0
2022-09-13	14:35:44	0.069733	0.310186	0.183947	41.9105	FALSE	0
2022-09-13	14:35:44	0.136705	0.608091	0.183947	41.6808	FALSE	0
2022-09-13	14:35:45	0.0495803	0.220543	0.75393	42.131	FALSE	0
2022-09-13	14:35:45	0.109529	0.487207	0.75393	42.168	FALSE	0
2022-09-13	14:35:45	0.115636	0.514372	0.75393	42.6454	FALSE	0
2022-09-13	14:35:45	0.403219	1.7936	0.75393	43.9616	FALSE	0
2022-09-13	14:35:46	1.00307	4.46186	1.93514	47.1073	FALSE	0
2022-09-13	14:35:46	1.11024	4.93857	1.93514	48.9001	FALSE	0
2022-09-13	14:35:46	0.150191	0.66808	1.93514	47.7753	FALSE	0
2022-09-13	14:35:46	-0.523345	-2.32794	1.93514	48.9001	FALSE	0
2022-09-13	14:35:47	0.0207763	0.0924171	1.48296	47.8678	FALSE	0
2022-09-13	14:35:47	0.299046	1.33022	1.48296	50.2304	FALSE	0
2022-09-13	14:35:47	0.472176	2.10033	1.48296	49.9681	FALSE	0
2022-09-13	14:35:47	0.541539	2.40887	1.48296	52.6392	FALSE	0
2022-09-13	14:35:48	0.496858	2.21012	1.66887	52.1782	FALSE	0
2022-09-13	14:35:48	0.326578	1.45268	1.66887	54.0919	FALSE	0
2022-09-13	14:35:48	0.302099	1.3438	1.66887	53.522	FALSE	0
2022-09-13	14:35:49	0.402252	1.7893	1.73378	55.8812	FALSE	0
2022-09-13	14:35:49	0.389428	1.73225	1.73378	55.2543	FALSE	0
2022-09-13	14:35:49	0.379758	1.68924	1.73378	57.5705	FALSE	0
2022-09-13	14:35:49	0.387646	1.72433	1.73378	56.9786	FALSE	0
2022-09-13	14:35:50	0.322099	1.43276	1.46564	59.0032	FALSE	0
2022-09-13	14:35:50	0.475789	2.1164	1.46564	59.095	FALSE	0
2022-09-13	14:35:50	0.293448	1.30532	1.46564	60.3085	FALSE	0
2022-09-13	14:35:50	0.226629	1.00809	1.46564	60.1031	FALSE	0
2022-09-13	14:35:51	0.146171	0.650198	1.35393	60.9587	FALSE	0
2022-09-13	14:35:51	0.158842	0.706561	1.35393	60.8096	FALSE	0
2022-09-13	14:35:51	0.356196	1.58443	1.35393	62.5432	FALSE	0
2022-09-13	14:35:51	0.556298	2.47452	1.35393	63.2842	FALSE	0
2022-09-13	14:35:52	0.231056	1.02778	1.38439	63.5709	FALSE	0
2022-09-13	14:35:52	0.517875	2.30361	1.38439	65.5878	FALSE	0
2022-09-13	14:35:52	0.184746	0.821787	1.38439	64.3927	FALSE	0
2022-09-13	14:35:53	0.459657	2.04465	1.39575	67.6324	FALSE	0
2022-09-13	14:35:53	0.230802	1.02665	1.39575	65.4194	FALSE	0
2022-09-13	14:35:53	0.412685	1.83571	1.39575	69.4681	FALSE	0
2022-09-13	14:35:53	0.151972	0.676002	1.39575	66.0954	FALSE	0
2022-09-13	14:35:54	0.433244	1.92716	1.41228	71.3953	FALSE	0
2022-09-13	14:35:54	0.182812	0.813184	1.41228	66.9086	FALSE	0
2022-09-13	14:35:54	0.465102	2.06887	1.41228	73.4642	FALSE	0
2022-09-13	14:35:54	0.188817	0.839896	1.41228	67.7485	FALSE	0
2022-09-13	14:35:55	0.426476	1.89705	1.37996	75.3612	FALSE	0
2022-09-13	14:35:55	0.253855	1.1292	1.37996	68.8777	FALSE	0
2022-09-13	14:35:55	0.373193	1.66004	1.37996	77.0212	FALSE	0
2022-09-13	14:35:55	0.187392	0.833557	1.37996	69.7112	FALSE	0
2022-09-13	14:35:56	0.263015	1.16994	1.54912	78.1912	FALSE	0
2022-09-13	14:35:56	0.278588	1.23922	1.54912	70.9504	FALSE	0
2022-09-13	14:35:56	0.503168	2.23819	1.54912	80.4294	FALSE	0
2022-09-13	14:35:57	0.45645	2.03038	1.55212	72.9808	FALSE	0
2022-09-13	14:35:57	0.2993	1.33135	1.55212	81.7607	FALSE	0
2022-09-13	14:35:57	0.350649	1.55976	1.55212	74.5406	FALSE	0
2022-09-13	14:35:57	0.289326	1.28698	1.55212	83.0477	FALSE	0
2022-09-13	14:35:58	0.148766	0.661741	0.930274	75.2023	FALSE	0
2022-09-13	14:35:58	-0.281615	-1.25268	0.930274	83.0477	FALSE	0
2022-09-13	14:35:58	0.52159	2.32014	0.930274	77.5224	FALSE	0
2022-09-13	14:35:58	0.447799	1.9919	0.930274	85.0396	FALSE	0
2022-09-13	14:35:59	0.691158	3.07441	2.12336	80.5969	FALSE	0
2022-09-13	14:35:59	0.330852	1.4717	2.12336	86.5113	FALSE	0
2022-09-13	14:35:59	0.481081	2.13994	2.12336	82.7368	FALSE	0
2022-09-13	14:35:59	0.406323	1.80741	2.12336	88.3187	FALSE	0
2022-09-13	14:36:00	0.365255	1.62473	1.93357	84.3615	FALSE	0
2022-09-13	14:36:00	0.440878	1.96111	1.93357	90.2798	FALSE	0
2022-09-13	14:36:00	0.497926	2.21487	1.93357	86.5764	FALSE	0
2022-09-13	14:36:01	0.41187	1.83208	2.0159	92.1119	FALSE	0
2022-09-13	14:36:01	0.554059	2.46457	2.0159	89.041	FALSE	0
2022-09-13	14:36:01	0.340318	1.5138	2.0159	93.6257	FALSE	0
2022-09-13	14:36:01	0.506527	2.25313	2.0159	91.2941	FALSE	0
2022-09-13	14:36:02	0.380369	1.69196	1.75127	95.3177	FALSE	0
2022-09-13	14:36:02	0.414771	1.84498	1.75127	93.1391	FALSE	0
2022-09-13	14:36:02	0.331819	1.476	1.75127	96.7937	FALSE	0
2022-09-13	14:36:02	0.44785	1.99213	1.75127	95.1312	FALSE	0
2022-09-13	14:36:03	0.537417	2.39054	2.23225	99.1842	FALSE	0
2022-09-13	14:36:03	0.512786	2.28097	2.23225	97.4122	FALSE	0
2022-09-13	14:36:03	0.522201	2.32285	2.23225	101.507	FALSE	0
2022-09-13	14:36:03	0.434924	1.93463	2.23225	99.3468	FALSE	0
2022-09-13	14:36:04	0.499707	2.2228	2.18869	103.73	FALSE	0
2022-09-13	14:36:04	0.506832	2.25449	2.18869	101.601	FALSE	0
2022-09-13	14:36:04	0.46958	2.08879	2.18869	105.819	FALSE	0
2022-09-13	14:36:05	0.456909	2.03242	2.21691	103.634	FALSE	0
2022-09-13	14:36:05	0.516552	2.29773	2.21691	108.116	FALSE	0
2022-09-13	14:36:05	0.453753	2.01838	2.21691	105.652	FALSE	0
2022-09-13	14:36:05	0.566323	2.51912	2.21691	110.635	FALSE	0
2022-09-13	14:36:06	0.391667	1.74221	1.94742	107.394	FALSE	0
2022-09-13	14:36:06	0.466527	2.07521	1.94742	112.711	FALSE	0
2022-09-13	14:36:06	0.369428	1.64329	1.94742	109.038	FALSE	0
2022-09-13	14:36:06	0.523575	2.32897	1.94742	115.04	FALSE	0
2022-09-13	14:36:07	0.429631	1.91108	2.09977	110.949	FALSE	0
2022-09-13	14:36:07	0.507545	2.25766	2.09977	117.297	FALSE	0
2022-09-13	14:36:07	0.410191	1.82461	2.09977	112.773	FALSE	0
2022-09-13	14:36:07	0.540827	2.40571	2.09977	119.703	FALSE	0
2022-09-13	14:36:08	0.298232	1.3266	1.59092	114.1	FALSE	0
2022-09-13	14:36:08	0.578282	2.57231	1.59092	122.275	FALSE	0
2022-09-13	14:36:08	0.196451	0.873853	1.59092	114.974	FALSE	0
2022-09-13	14:36:09	0.249733	1.11086	-0.0279562	123.386	FALSE	0
2022-09-13	14:36:09	0.165916	0.738028	-0.0279562	115.712	FALSE	0
2022-09-13	14:36:09	-0.0700633	-0.311656	-0.0279562	123.386	FALSE	0
2022-09-13	14:36:09	-0.370725	-1.64906	-0.0279562	115.712	FALSE	0
2022-09-13	14:36:10	-0.416323	-1.85189	-2.07362	123.386	FALSE	0
2022-09-13	14:36:10	-0.545432	-2.42619	-2.07362	115.712	FALSE	0
2022-09-13	14:36:10	-0.429707	-1.91142	-2.07362	123.386	FALSE	0
2022-09-13	14:36:10	-0.473218	-2.10497	-2.07362	115.712	FALSE	0
2022-09-13	14:36:11	-0.502277	-2.23423	-2.13508	123.386	FALSE	0
2022-09-13	14:36:11	-0.511895	-2.27701	-2.13508	115.712	FALSE	0
2022-09-13	14:36:11	-0.535559	-2.38227	-2.13508	123.386	FALSE	0
2022-09-13	14:36:11	-0.370216	-1.64679	-2.13508	115.712	FALSE	0
2022-09-13	14:36:12	-0.350012	-1.55692	-1.82321	123.386	FALSE	0
2022-09-13	14:36:12	-0.36533	-1.62506	-1.82321	115.712	FALSE	0
2022-09-13	14:36:12	-0.514287	-2.28765	-1.82321	123.386	FALSE	0
2022-09-13	14:36:13	-0.334287	-1.48698	-0.754098	115.712	FALSE	0
2022-09-13	14:36:13	-0.330572	-1.47045	-0.754098	123.386	FALSE	0
2022-09-13	14:36:13	-0.0723534	-0.321842	-0.754098	115.712	FALSE	0
2022-09-13	14:36:13	0.0590969	0.262875	-0.754098	123.649	FALSE	0
2022-09-13	14:36:14	0.134975	0.600396	0.712845	116.312	FALSE	0
2022-09-13	14:36:14	0.499097	2.22008	0.712845	125.869	FALSE	0
2022-09-13	14:36:14	0.139148	0.618958	0.712845	116.931	FALSE	0
2022-09-13	14:36:14	-0.132201	-0.588056	0.712845	125.869	FALSE	0
2022-09-13	14:36:15	-0.455508	-2.02619	-1.62059	116.931	FALSE	0
2022-09-13	14:36:15	-0.449911	-2.00129	-1.62059	125.869	FALSE	0
2022-09-13	14:36:15	-0.551895	-2.45494	-1.62059	116.931	FALSE	0
2022-09-13	14:36:15	1.29532e-05	5.76184e-05	-1.62059	125.869	FALSE	0
2022-09-13	14:36:16	0.308969	1.37436	6.50672	118.305	FALSE	0
2022-09-13	14:36:16	0.853651	3.79721	6.50672	129.666	FALSE	0
2022-09-13	14:36:16	3.22571	14.3486	6.50672	132.654	1	1
2022-09-13	14:36:17	3.15996	14.0561	5.5736	143.723	1	2
2022-09-13	14:36:17	0.685305	3.04837	5.5736	135.702	FALSE	2
2022-09-13	14:36:17	0.812074	3.61227	5.5736	147.335	FALSE	2
2022-09-13	14:36:17	0.354669	1.57764	5.5736	137.28	FALSE	2
2022-09-13	14:36:18	0.668817	2.97503	3.06128	150.31	FALSE	2
2022-09-13	14:36:18	0.544237	2.42088	3.06128	139.701	FALSE	2
2022-09-13	14:36:18	0.618282	2.75024	3.06128	153.06	FALSE	2
2022-09-13	14:36:18	0.921489	4.09897	3.06128	143.8	FALSE	2
2022-09-13	14:36:19	0.440471	1.9593	1.64465	155.019	FALSE	2
2022-09-13	14:36:19	0.390852	1.73859	1.64465	145.539	FALSE	2
2022-09-13	14:36:19	0.253346	1.12693	1.64465	156.146	FALSE	2
2022-09-13	14:36:19	0.394262	1.75376	1.64465	147.292	FALSE	2
2022-09-13	14:36:20	0.332532	1.47917	1.48973	157.626	FALSE	2
2022-09-13	14:36:20	0.284898	1.26728	1.48973	148.56	FALSE	2
2022-09-13	14:36:20	0.38729	1.72274	1.48973	159.348	FALSE	2
2022-09-13	14:36:21	0.235789	1.04884	1.60028	149.608	FALSE	2
2022-09-13	14:36:21	0.477112	2.12229	1.60028	161.471	FALSE	2
2022-09-13	14:36:21	0.189173	0.841479	1.60028	150.45	FALSE	2
2022-09-13	14:36:21	0.536959	2.3885	1.60028	163.859	FALSE	2
2022-09-13	14:36:22	0.243779	1.08438	1.79586	151.534	FALSE	2
2022-09-13	14:36:22	0.592278	2.63457	1.79586	166.494	FALSE	2
2022-09-13	14:36:22	0.273244	1.21544	1.79586	152.75	FALSE	2
2022-09-13	14:36:22	0.505611	2.24906	1.79586	168.743	FALSE	2
2022-09-13	14:36:23	0.440522	1.95953	1.98211	154.709	FALSE	2
2022-09-13	14:36:23	0.524949	2.33508	1.98211	171.078	FALSE	2
2022-09-13	14:36:23	0.490903	2.18363	1.98211	156.893	FALSE	2
2022-09-13	14:36:23	0.326018	1.45019	1.98211	172.528	FALSE	2
2022-09-13	14:36:24	0.613499	2.72897	2.15436	159.622	FALSE	2
2022-09-13	14:36:24	0.279148	1.24171	2.15436	173.77	FALSE	2
2022-09-13	14:36:24	0.560318	2.49241	2.15436	162.114	FALSE	2
2022-09-13	14:36:25	0.242354	1.07804	1.6219	174.848	FALSE	2
2022-09-13	14:36:25	0.523168	2.32716	1.6219	164.441	FALSE	2
2022-09-13	14:36:25	0.275636	1.22608	1.6219	176.074	FALSE	2
2022-09-13	14:36:25	0.417316	1.85631	1.6219	166.298	FALSE	2
2022-09-13	14:36:26	0.486527	2.16417	1.59173	178.238	FALSE	2
2022-09-13	14:36:26	0.269275	1.19779	1.59173	167.496	FALSE	2
2022-09-13	14:36:26	0.437825	1.94753	1.59173	180.185	FALSE	2
2022-09-13	14:36:26	0.237723	1.05744	1.59173	168.553	FALSE	2
2022-09-13	14:36:27	0.476756	2.12071	1.60179	182.306	FALSE	2
2022-09-13	14:36:27	0.152685	0.679173	1.60179	169.232	FALSE	2
2022-09-13	14:36:27	0.450852	2.00548	1.60179	184.312	FALSE	2
2022-09-13	14:36:28	0.183779	0.817486	1.52331	170.05	FALSE	2
2022-09-13	14:36:28	0.514262	2.28754	1.52331	186.599	FALSE	2
2022-09-13	14:36:28	0.140573	0.625297	1.52331	170.675	FALSE	2
2022-09-13	14:36:28	0.65757	2.925	1.52331	189.524	FALSE	2
2022-09-13	14:36:28	0.216094	0.961229	1.52331	171.636	FALSE	2
2022-09-13	14:36:29	0.486985	2.16621	1.71754	191.69	FALSE	2
2022-09-13	14:36:29	0.306476	1.36327	1.71754	172.999	FALSE	2
2022-09-13	14:36:29	0.364898	1.62314	1.71754	193.314	FALSE	2
2022-09-13	14:36:30	0.401896	1.78771	1.63016	174.787	FALSE	2
2022-09-13	14:36:30	0.354618	1.57741	1.63016	194.891	FALSE	2
2022-09-13	14:36:30	0.3593	1.59824	1.63016	176.385	FALSE	2
2022-09-13	14:36:30	0.350089	1.55727	1.63016	196.448	FALSE	2
2022-09-13	14:36:31	0.455331	2.0254	1.60526	178.411	FALSE	2
2022-09-13	14:36:31	0.318791	1.41805	1.60526	197.866	FALSE	2
2022-09-13	14:36:31	0.38042	1.69218	1.60526	180.103	FALSE	2
2022-09-13	14:36:31	0.28897	1.2854	1.60526	199.152	FALSE	2
2022-09-13	14:36:32	0.521997	2.32195	1.55585	182.425	FALSE	2
2022-09-13	14:36:32	0.203168	0.903732	1.55585	200.055	FALSE	2
2022-09-13	14:36:32	0.488104	2.17118	1.55585	184.596	FALSE	2
2022-09-13	14:36:32	0.185814	0.826538	1.55585	200.882	FALSE	2
2022-09-13	14:36:33	0.524593	2.33349	1.7066	186.93	FALSE	2
2022-09-13	14:36:33	0.144898	0.644535	1.7066	201.526	FALSE	2
2022-09-13	14:36:33	0.481489	2.14176	1.7066	189.071	FALSE	2
2022-09-13	14:36:34	0.23986	1.06695	1.51505	202.593	FALSE	2
2022-09-13	14:36:34	0.424033	1.88618	1.51505	190.958	FALSE	2
2022-09-13	14:36:34	0.26444	1.17628	1.51505	203.77	FALSE	2
2022-09-13	14:36:34	0.434059	1.93078	1.51505	192.888	FALSE	2
2022-09-13	14:36:35	0.34215	1.52195	1.52467	205.292	FALSE	2
2022-09-13	14:36:35	0.370649	1.64872	1.52467	194.537	FALSE	2
2022-09-13	14:36:35	0.300267	1.33565	1.52467	206.627	FALSE	2
2022-09-13	14:36:35	0.357977	1.59235	1.52467	196.129	FALSE	2
2022-09-13	14:36:36	0.289122	1.28607	1.10339	207.913	FALSE	2
2022-09-13	14:36:36	0.282456	1.25642	1.10339	197.386	FALSE	2
2022-09-13	14:36:36	0.170853	0.759988	1.10339	208.673	FALSE	2
2022-09-13	14:36:36	0.249784	1.11109	1.10339	198.497	FALSE	2
2022-09-13	14:36:37	0.289733	1.28879	1.51516	209.962	FALSE	2
2022-09-13	14:36:37	0.357265	1.58919	1.51516	200.086	FALSE	2
2022-09-13	14:36:37	0.374873	1.66751	1.51516	211.63	FALSE	2
2022-09-13	14:36:38	0.302201	1.34425	2.21193	201.43	FALSE	2
2022-09-13	14:36:38	0.657672	2.92546	2.21193	214.555	FALSE	2
2022-09-13	14:36:38	0.478232	2.12727	2.21193	203.558	FALSE	2
2022-09-13	14:36:38	0.550954	2.45075	2.21193	217.006	FALSE	2
2022-09-13	14:36:39	0.364033	1.61929	1.80322	205.177	FALSE	2
2022-09-13	14:36:39	0.571921	2.54402	1.80322	219.55	FALSE	2
2022-09-13	14:36:39	0.239708	1.06627	1.80322	206.243	FALSE	2
2022-09-13	14:36:39	0.445865	1.9833	1.80322	221.533	FALSE	2
2022-09-13	14:36:40	0.158842	0.706561	1.41216	206.95	FALSE	2
2022-09-13	14:36:40	0.53701	2.38873	1.41216	223.922	FALSE	2
2022-09-13	14:36:40	0.123677	0.55014	1.41216	207.5	FALSE	2
2022-09-13	14:36:40	0.450344	2.00322	1.41216	225.925	FALSE	2
2022-09-13	14:36:41	0.185255	0.824051	1.30645	208.324	FALSE	2
2022-09-13	14:36:41	0.509224	2.26513	1.30645	228.19	FALSE	2
2022-09-13	14:36:41	0.186629	0.830163	1.30645	209.154	FALSE	2
2022-09-13	14:36:42	0.512125	2.27803	1.57079	230.468	FALSE	2
2022-09-13	14:36:42	0.266629	1.18602	1.57079	210.34	FALSE	2
2022-09-13	14:36:42	0.421489	1.87487	1.57079	232.343	FALSE	2
2022-09-13	14:36:42	0.212277	0.944251	1.57079	211.284	FALSE	2
2022-09-13	14:36:43	0.469529	2.08856	1.67911	234.432	FALSE	2
2022-09-13	14:36:43	0.269936	1.20073	1.67911	212.485	FALSE	2
2022-09-13	14:36:43	0.410445	1.82574	1.67911	236.257	FALSE	2
2022-09-13	14:36:43	0.360013	1.60141	1.67911	214.086	FALSE	2
2022-09-13	14:36:44	0.345102	1.53508	1.61126	237.793	FALSE	2
2022-09-13	14:36:44	0.392074	1.74402	1.61126	215.83	FALSE	2
2022-09-13	14:36:44	0.311107	1.38387	1.61126	239.176	FALSE	2
2022-09-13	14:36:44	0.400624	1.78206	1.61126	217.613	FALSE	2
2022-09-13	14:36:45	0.342252	1.52241	1.64027	240.699	FALSE	2
2022-09-13	14:36:45	0.465204	2.06932	1.64027	219.682	FALSE	2
2022-09-13	14:36:45	0.298792	1.32909	1.64027	242.028	FALSE	2
2022-09-13	14:36:46	0.408868	1.81873	1.52201	221.501	FALSE	2
2022-09-13	14:36:46	0.307087	1.36598	1.52201	243.394	FALSE	2
2022-09-13	14:36:46	0.487137	2.16688	1.52201	223.667	FALSE	2
2022-09-13	14:36:46	0.16556	0.736444	1.52201	244.13	FALSE	2
2022-09-13	14:36:47	0.406883	1.8099	1.38562	225.477	FALSE	2
2022-09-13	14:36:47	0.20042	0.891508	1.38562	245.022	FALSE	2
2022-09-13	14:36:47	0.475687	2.11595	1.38562	227.593	FALSE	2
2022-09-13	14:36:47	0.163015	0.725123	1.38562	245.747	FALSE	2
2022-09-13	14:36:48	0.472939	2.10373	1.33248	229.697	FALSE	2
2022-09-13	14:36:48	0.170191	0.757044	1.33248	246.504	FALSE	2
2022-09-13	14:36:48	0.468919	2.08585	1.33248	231.783	FALSE	2
2022-09-13	14:36:48	0.0861707	0.383305	1.33248	246.887	FALSE	2
2022-09-13	14:36:49	0.204695	0.910524	-0.154101	232.693	FALSE	2
2022-09-13	14:36:49	-0.0422771	-0.188057	-0.154101	246.887	FALSE	2
2022-09-13	14:36:49	-0.266348	-1.18477	-0.154101	232.693	FALSE	2
2022-09-13	14:36:50	-0.45159	-2.00876	-0.150876	246.887	FALSE	2
2022-09-13	14:36:50	-0.265636	-1.1816	-0.150876	232.693	FALSE	2
2022-09-13	14:36:50	0.127646	0.567795	-0.150876	247.455	FALSE	2
2022-09-13	14:36:50	0.453906	2.01906	-0.150876	234.712	FALSE	2
2022-09-13	14:36:51	0.236145	1.05042	1.61952	248.506	FALSE	2
2022-09-13	14:36:51	0.522201	2.32285	1.61952	237.035	FALSE	2
2022-09-13	14:36:51	0.337417	1.5009	1.61952	250.006	FALSE	2
2022-09-13	14:36:51	0.360573	1.6039	1.61952	238.639	FALSE	2
2022-09-13	14:36:52	0.314975	1.40107	1.59258	251.407	FALSE	2
2022-09-13	14:36:52	0.395585	1.75964	1.59258	240.399	FALSE	2
2022-09-13	14:36:52	0.363524	1.61703	1.59258	253.025	FALSE	2
2022-09-13	14:36:53	0.295127	1.31278	1.4524	241.712	FALSE	2
2022-09-13	14:36:53	0.346934	1.54323	1.4524	254.568	FALSE	2
2022-09-13	14:36:53	0.278842	1.24034	1.4524	242.952	FALSE	2
2022-09-13	14:36:53	0.385153	1.71324	1.4524	256.281	FALSE	2
2022-09-13	14:36:54	0.210089	0.934518	1.42812	243.887	FALSE	2
2022-09-13	14:36:54	0.392176	1.74448	1.42812	258.025	FALSE	2
2022-09-13	14:36:54	0.226679	1.00831	1.42812	244.895	FALSE	2
2022-09-13	14:36:54	0.45528	2.02518	1.42812	260.051	FALSE	2
2022-09-13	14:36:55	0.134364	0.597678	1.36281	245.493	FALSE	2
2022-09-13	14:36:55	0.482507	2.14629	1.36281	262.197	FALSE	2
2022-09-13	14:36:55	0.217214	0.966211	1.36281	246.459	FALSE	2
2022-09-13	14:36:55	0.391412	1.74108	1.36281	263.938	FALSE	2
2022-09-13	14:36:56	0.235229	1.04635	1.52156	247.505	FALSE	2
2022-09-13	14:36:56	0.408003	1.81488	1.52156	265.753	FALSE	2
2022-09-13	14:36:56	0.346527	1.54142	1.52156	249.046	FALSE	2
2022-09-13	14:36:56	0.378486	1.68358	1.52156	267.436	FALSE	2
2022-09-13	14:36:57	0.331005	1.47238	1.72048	250.519	FALSE	2
2022-09-13	14:36:57	0.374873	1.66751	1.72048	269.104	FALSE	2
2022-09-13	14:36:57	0.454466	2.02156	1.72048	252.54	FALSE	2
2022-09-13	14:36:58	0.275127	1.22382	1.58856	270.328	FALSE	2
2022-09-13	14:36:58	0.384389	1.70984	1.58856	254.25	FALSE	2
2022-09-13	14:36:58	0.280267	1.24668	1.58856	271.574	FALSE	2
2022-09-13	14:36:58	0.488715	2.1739	1.58856	256.424	FALSE	2
2022-09-13	14:36:59	0.204237	0.908487	1.38324	272.483	FALSE	2
2022-09-13	14:36:59	0.401845	1.78749	1.38324	258.212	FALSE	2
2022-09-13	14:36:59	0.249631	1.11041	1.38324	273.593	FALSE	2
2022-09-13	14:36:59	0.388155	1.72659	1.38324	259.938	FALSE	2
2022-09-13	14:37:00	0.134313	0.597451	0.579568	274.191	FALSE	2
2022-09-13	14:37:00	0.258079	1.14799	0.579568	261.086	FALSE	2
2022-09-13	14:37:00	0.152888	0.680076	0.579568	274.871	FALSE	2
2022-09-13	14:37:00	-0.0241092	-0.107243	0.579568	261.086	FALSE	2
2022-09-13	14:37:01	-0.12701	-0.564966	0.779153	274.871	FALSE	2
2022-09-13	14:37:01	0.45187	2.01001	0.779153	263.096	FALSE	2
2022-09-13	14:37:01	0.200624	0.892416	0.779153	275.763	FALSE	2
2022-09-13	14:37:02	0.453244	2.01612	1.7391	265.112	FALSE	2
2022-09-13	14:37:02	0.309275	1.37572	1.7391	277.139	FALSE	2
2022-09-13	14:37:02	0.477468	2.12387	1.7391	267.236	FALSE	2
2022-09-13	14:37:02	0.323881	1.44069	1.7391	278.58	FALSE	2
2022-09-13	14:37:03	0.442812	1.96972	1.76394	269.206	FALSE	2
2022-09-13	14:37:03	0.338181	1.5043	1.76394	280.084	FALSE	2
2022-09-13	14:37:03	0.46042	2.04804	1.76394	271.254	FALSE	2
2022-09-13	14:37:03	0.344797	1.53373	1.76394	281.618	FALSE	2
2022-09-13	14:37:04	0.488766	2.17413	2.00327	273.428	FALSE	2
2022-09-13	14:37:04	0.324593	1.44385	2.00327	283.062	FALSE	2
2022-09-13	14:37:04	0.573753	2.55217	2.00327	275.98	FALSE	2
2022-09-13	14:37:04	0.414313	1.84295	2.00327	284.905	FALSE	2
2022-09-13	14:37:05	0.196756	0.87521	0.999035	276.856	FALSE	2
2022-09-13	14:37:05	0.270344	1.20254	0.999035	286.107	FALSE	2
2022-09-13	14:37:05	0.206679	0.91935	0.999035	277.775	FALSE	2
2022-09-13	14:37:06	0.191718	0.8528	1.38166	286.96	FALSE	2
2022-09-13	14:37:06	0.366476	1.63016	1.38166	279.405	FALSE	2
2022-09-13	14:37:06	0.203219	0.903959	1.38166	287.864	FALSE	2
2022-09-13	14:37:06	0.481031	2.13972	1.38166	281.545	FALSE	2
2022-09-13	14:37:07	0.353957	1.57447	5.14412	289.438	FALSE	2
2022-09-13	14:37:07	1.04927	4.66736	5.14412	286.212	FALSE	2
2022-09-13	14:37:07	1.19462	5.31391	5.14412	294.752	FALSE	2
2022-09-13	14:37:07	2.02795	9.02073	5.14412	295.233	FALSE	2
2022-09-13	14:37:08	2.58342	11.4916	6.65147	306.244	FALSE	2
2022-09-13	14:37:08	2.69594	11.9921	6.65147	307.225	FALSE	2
2022-09-13	14:37:08	0.632532	2.81363	6.65147	309.057	FALSE	2
2022-09-13	14:37:08	0.0693768	0.308602	6.65147	307.534	FALSE	2
2022-09-13	14:37:09	0.175585	0.781037	-0.66887	309.838	FALSE	2
2022-09-13	14:37:09	-0.190419	-0.847022	-0.66887	307.534	FALSE	2
2022-09-13	14:37:09	-0.436272	-1.94063	-0.66887	309.838	FALSE	2
2022-09-13	14:37:10	-0.648791	-2.88595	-3.19076	307.534	FALSE	2
2022-09-13	14:37:10	-0.72192	-3.21124	-3.19076	309.838	FALSE	2
2022-09-13	14:37:10	-0.768027	-3.41634	-3.19076	307.534	FALSE	2
2022-09-13	14:37:10	-0.730521	-3.2495	-3.19076	309.838	FALSE	2
2022-09-13	14:37:11	-0.776068	-3.45211	-3.25312	307.534	FALSE	2
2022-09-13	14:37:11	-0.739376	-3.28889	-3.25312	309.838	FALSE	2
2022-09-13	14:37:11	-0.693014	-3.08266	-3.25312	307.534	FALSE	2
2022-09-13	14:37:11	-0.716882	-3.18883	-3.25312	309.838	FALSE	2
2022-09-13	14:37:12	-0.570928	-2.5396	-2.01369	307.534	FALSE	2
2022-09-13	14:37:12	-0.605636	-2.69399	-2.01369	309.838	FALSE	2
2022-09-13	14:37:12	-0.457188	-2.03366	-2.01369	307.534	FALSE	2
2022-09-13	14:37:12	-0.177035	-0.787487	-2.01369	309.838	FALSE	2
2022-09-13	14:37:13	0.285051	1.26796	0.990961	308.801	FALSE	2
2022-09-13	14:37:13	-0.0125061	-0.0556296	0.990961	309.838	FALSE	2
2022-09-13	14:37:13	0.395789	1.76055	0.990961	310.562	FALSE	2
2022-09-13	14:37:14	0.284389	1.26502	1.46032	311.103	FALSE	2
2022-09-13	14:37:14	0.538842	2.39688	1.46032	312.959	FALSE	2
2022-09-13	14:37:14	0.119046	0.52954	1.46032	311.633	FALSE	2
2022-09-13	14:37:14	0.370903	1.64985	1.46032	314.609	FALSE	2
2022-09-13	14:37:15	0.138639	0.616694	1.21828	312.25	FALSE	2
2022-09-13	14:37:15	0.353499	1.57243	1.21828	316.181	FALSE	2
2022-09-13	14:37:15	0.142608	0.634349	1.21828	312.884	FALSE	2
2022-09-13	14:37:15	0.460776	2.04962	1.21828	318.231	FALSE	2
2022-09-13	14:37:16	0.210547	0.936555	1.44521	313.821	FALSE	2
2022-09-13	14:37:16	0.450089	2.00209	1.44521	320.233	FALSE	2
2022-09-13	14:37:16	0.142812	0.635256	1.44521	314.456	FALSE	2
2022-09-13	14:37:16	0.496145	2.20695	1.44521	322.44	FALSE	2
2022-09-13	14:37:17	0.195789	0.870909	1.27083	315.327	FALSE	2
2022-09-13	14:37:17	0.48556	2.15987	1.27083	324.6	FALSE	2
2022-09-13	14:37:17	0.175738	0.781718	1.27083	316.109	FALSE	2
2022-09-13	14:37:18	0.508766	2.26309	1.44561	326.863	FALSE	2
2022-09-13	14:37:18	0.201132	0.894675	1.44561	317.003	FALSE	2
2022-09-13	14:37:18	0.386832	1.72071	1.44561	328.584	FALSE	2
2022-09-13	14:37:18	0.203219	0.903959	1.44561	317.907	FALSE	2
2022-09-13	14:37:19	0.381183	1.69558	1.09892	330.279	FALSE	2
2022-09-13	14:37:19	0.225967	1.00515	1.09892	318.912	FALSE	2
2022-09-13	14:37:19	0.395636	1.75987	1.09892	332.039	FALSE	2
2022-09-13	14:37:19	-0.0145926	-0.0649108	1.09892	318.912	FALSE	2
2022-09-13	14:37:20	-0.0712847	-0.317089	-0.344536	332.039	FALSE	2
2022-09-13	14:37:20	-0.0810557	-0.360552	-0.344536	318.912	FALSE	2
2022-09-13	14:37:20	-0.0638038	-0.283812	-0.344536	332.039	FALSE	2
2022-09-13	14:37:20	-0.0936765	-0.416692	-0.344536	318.912	FALSE	2
2022-09-13	14:37:21	-0.177544	-0.789751	-0.728631	332.039	FALSE	2
2022-09-13	14:37:21	-0.183651	-0.816916	-0.728631	318.912	FALSE	2
2022-09-13	14:37:21	-0.130216	-0.579227	-0.728631	332.039	FALSE	2
2022-09-13	14:37:22	0.0776211	0.345274	1.41109	319.258	FALSE	2
2022-09-13	14:37:22	0.340165	1.51312	1.41109	333.552	FALSE	2
2022-09-13	14:37:22	0.262914	1.16949	1.41109	320.427	FALSE	2
2022-09-13	14:37:22	0.588206	2.61646	1.41109	336.169	FALSE	2
2022-09-13	14:37:23	0.338741	1.50679	1.92161	321.934	FALSE	2
2022-09-13	14:37:23	0.606374	2.69727	1.92161	338.866	FALSE	2
2022-09-13	14:37:23	0.269326	1.19802	1.92161	323.132	FALSE	2
2022-09-13	14:37:23	0.51355	2.28437	1.92161	341.15	FALSE	2
2022-09-13	14:37:24	0.227901	1.01375	1.60911	324.146	FALSE	2
2022-09-13	14:37:24	0.509326	2.26558	1.60911	343.416	FALSE	2
2022-09-13	14:37:24	0.238384	1.06038	1.60911	325.206	FALSE	2
2022-09-13	14:37:24	0.471361	2.09671	1.60911	345.512	FALSE	2
2022-09-13	14:37:25	0.177621	0.790094	1.30984	325.996	FALSE	2
2022-09-13	14:37:25	0.494567	2.19993	1.30984	347.712	FALSE	2
2022-09-13	14:37:25	0.211209	0.9395	1.30984	326.936	FALSE	2
2022-09-13	14:37:26	0.514568	2.2889	1.55398	350.001	FALSE	2
2022-09-13	14:37:26	0.165509	0.736217	1.55398	327.672	FALSE	2
2022-09-13	14:37:26	0.486272	2.16304	1.55398	352.164	FALSE	2
2022-09-13	14:37:26	0.231056	1.02778	1.55398	328.7	FALSE	2
2022-09-13	14:37:27	0.475433	2.11482	1.42699	354.279	FALSE	2
2022-09-13	14:37:27	0.189631	0.843517	1.42699	329.543	FALSE	2
2022-09-13	14:37:27	0.401692	1.78681	1.42699	356.066	FALSE	2
2022-09-13	14:37:27	0.216451	0.962817	1.42699	330.506	FALSE	2
2022-09-13	14:37:28	0.477316	2.1232	1.58851	358.189	FALSE	2
2022-09-13	14:37:28	0.178028	0.791904	1.58851	331.298	FALSE	2
2022-09-13	14:37:28	0.486018	2.16191	1.58851	360.351	FALSE	2
2022-09-13	14:37:28	0.287087	1.27702	1.58851	332.575	FALSE	2
2022-09-13	14:37:29	0.511463	2.27509	1.91765	362.626	FALSE	2
2022-09-13	14:37:29	0.215026	0.956479	1.91765	333.531	FALSE	2
2022-09-13	14:37:29	0.566832	2.52138	1.91765	365.148	FALSE	2
2022-09-13	14:37:30	0.220623	0.981375	1.70011	334.513	FALSE	2
2022-09-13	14:37:30	0.544389	2.42155	1.70011	367.569	FALSE	2
2022-09-13	14:37:30	0.194517	0.865251	1.70011	335.378	FALSE	2
2022-09-13	14:37:30	0.569275	2.53225	1.70011	370.101	FALSE	2
2022-09-13	14:37:31	0.264949	1.17855	1.69779	336.556	FALSE	2
2022-09-13	14:37:31	0.52897	2.35296	1.69779	372.454	FALSE	2
2022-09-13	14:37:31	0.179351	0.797789	1.69779	337.354	FALSE	2
2022-09-13	14:37:31	0.553448	2.46185	1.69779	374.916	FALSE	2
2022-09-13	14:37:32	0.254211	1.13078	1.8318	338.485	FALSE	2
2022-09-13	14:37:32	0.502812	2.23661	1.8318	377.153	FALSE	2
2022-09-13	14:37:32	0.33986	1.51177	1.8318	339.997	FALSE	2
2022-09-13	14:37:32	0.550343	2.44804	1.8318	379.601	FALSE	2
2022-09-13	14:37:33	0.348257	1.54912	1.69603	341.546	FALSE	2
2022-09-13	14:37:33	0.521234	2.31855	1.69603	381.919	FALSE	2
2022-09-13	14:37:33	0.274364	1.22043	1.69603	342.766	FALSE	2
2022-09-13	14:37:34	0.517264	2.30089	1.70073	384.22	FALSE	2
2022-09-13	14:37:34	0.269478	1.19869	1.70073	343.965	FALSE	2
2022-09-13	14:37:34	0.496043	2.2065	1.70073	386.427	FALSE	2
2022-09-13	14:37:34	0.246578	1.09683	1.70073	345.062	FALSE	2
2022-09-13	14:37:35	0.536552	2.38669	1.68851	388.813	FALSE	2
2022-09-13	14:37:35	0.271056	1.20571	1.68851	346.268	FALSE	2
2022-09-13	14:37:35	0.504593	2.24453	1.68851	391.058	FALSE	2
2022-09-13	14:37:35	0.206171	0.91709	1.68851	347.185	FALSE	2
2022-09-13	14:37:36	0.512837	2.2812	1.80769	393.339	FALSE	2
2022-09-13	14:37:36	0.308359	1.37164	1.80769	348.556	FALSE	2
2022-09-13	14:37:36	0.529275	2.35432	1.80769	395.693	FALSE	2
2022-09-13	14:37:36	0.275076	1.22359	1.80769	349.78	FALSE	2
2022-09-13	14:37:37	0.478944	2.13044	1.87577	397.824	FALSE	2
2022-09-13	14:37:37	0.35411	1.57515	1.87577	351.355	FALSE	2
2022-09-13	14:37:37	0.432023	1.92172	1.87577	399.746	FALSE	2
2022-09-13	14:37:38	0.318944	1.41873	1.93117	352.774	FALSE	2
2022-09-13	14:37:38	0.480471	2.13723	1.93117	401.883	FALSE	2
2022-09-13	14:37:38	0.235992	1.04974	1.93117	353.824	FALSE	2
2022-09-13	14:37:38	0.701183	3.119	1.93117	405.002	FALSE	2
2022-09-13	14:37:39	0.530853	2.36134	2.48465	356.185	FALSE	2
2022-09-13	14:37:39	0.643931	2.86433	2.48465	407.866	FALSE	2
2022-09-13	14:37:39	0.365407	1.6254	2.48465	357.81	FALSE	2
2022-09-13	14:37:39	0.694109	3.08754	2.48465	410.954	FALSE	2
2022-09-13	14:37:40	0.2964	1.31845	1.68471	359.129	FALSE	2
2022-09-13	14:37:40	0.392786	1.74719	1.68471	412.701	FALSE	2
2022-09-13	14:37:40	0.322252	1.43344	1.68471	360.562	FALSE	2
2022-09-13	14:37:40	0.503524	2.23978	1.68471	414.941	FALSE	2
2022-09-13	14:37:41	0.194975	0.867288	1.39851	361.429	FALSE	2
2022-09-13	14:37:41	0.487087	2.16666	1.39851	417.107	FALSE	2
2022-09-13	14:37:41	0.261132	1.16157	1.39851	362.591	FALSE	2
2022-09-13	14:37:42	0.446832	1.9876	1.46094	419.095	FALSE	2
2022-09-13	14:37:42	0.205814	0.915502	1.46094	363.507	FALSE	2
2022-09-13	14:37:42	0.44215	1.96677	1.46094	421.062	FALSE	2
2022-09-13	14:37:42	0.218944	0.973907	1.46094	364.48	FALSE	2
2022-09-13	14:37:43	0.460064	2.04646	1.4026	423.108	FALSE	2
2022-09-13	14:37:43	0.198486	0.882905	1.4026	365.363	FALSE	2
2022-09-13	14:37:43	0.413957	1.84136	1.4026	424.95	FALSE	2
2022-09-13	14:37:43	0.188766	0.839669	1.4026	366.203	FALSE	2
2022-09-13	14:37:44	0.445662	1.98239	1.38002	426.932	FALSE	2
2022-09-13	14:37:44	0.166425	0.740292	1.38002	366.943	FALSE	2
2022-09-13	14:37:44	0.431056	1.91742	1.38002	428.849	FALSE	2
2022-09-13	14:37:44	0.197825	0.879965	1.38002	367.823	FALSE	2
2022-09-13	14:37:45	0.438995	1.95274	1.54406	430.802	FALSE	2
2022-09-13	14:37:45	0.190751	0.848499	1.54406	368.672	FALSE	2
2022-09-13	14:37:45	0.411616	1.83095	1.54406	432.633	FALSE	2
2022-09-13	14:37:46	0.196501	0.874076	1.2438	369.546	FALSE	2
2022-09-13	14:37:46	0.414517	1.84385	1.2438	434.477	FALSE	2
2022-09-13	14:37:46	0.193702	0.861625	1.2438	370.407	FALSE	2
2022-09-13	14:37:46	0.313753	1.39564	1.2438	435.873	FALSE	2
2022-09-13	14:37:47	0.245	1.08981	0.673455	371.497	FALSE	2
2022-09-13	14:37:47	0.350852	1.56066	0.673455	437.433	FALSE	2
2022-09-13	14:37:47	0.0740587	0.329428	0.673455	371.827	FALSE	2
2022-09-13	14:37:47	-0.0643127	-0.286076	0.673455	437.433	FALSE	2
2022-09-13	14:37:48	0.0787407	0.350254	1.68732	372.177	FALSE	2
2022-09-13	14:37:48	0.34785	1.54731	1.68732	438.981	FALSE	2
2022-09-13	14:37:48	0.368664	1.63989	1.68732	373.817	FALSE	2
2022-09-13	14:37:48	0.722049	3.21182	1.68732	442.192	FALSE	2
2022-09-13	14:37:49	0.416603	1.85313	1.95145	375.67	FALSE	2
2022-09-13	14:37:49	0.548461	2.43966	1.95145	444.632	FALSE	2
2022-09-13	14:37:49	0.351056	1.56157	1.95145	377.232	FALSE	2
2022-09-13	14:37:50	0.633753	2.81906	2.06734	447.451	FALSE	2
2022-09-13	14:37:50	0.323015	1.43684	2.06734	378.668	FALSE	2
2022-09-13	14:37:50	0.534618	2.37809	2.06734	449.829	FALSE	2
2022-09-13	14:37:50	0.367646	1.63536	2.06734	380.304	FALSE	2
2022-09-13	14:37:51	0.446832	1.9876	1.71431	451.817	FALSE	2
2022-09-13	14:37:51	0.366934	1.6322	1.71431	381.936	FALSE	2
2022-09-13	14:37:51	0.340929	1.51652	1.71431	453.333	FALSE	2
2022-09-13	14:37:51	0.386883	1.72093	1.71431	383.657	FALSE	2
2022-09-13	14:37:52	0.391565	1.74176	1.88296	455.075	FALSE	2
2022-09-13	14:37:52	0.389886	1.73429	1.88296	385.391	FALSE	2
2022-09-13	14:37:52	0.466272	2.07407	1.88296	457.149	FALSE	2
2022-09-13	14:37:52	0.445509	1.98171	1.88296	387.373	FALSE	2
2022-09-13	14:37:53	0.506119	2.25132	2.01378	459.4	FALSE	2
2022-09-13	14:37:53	0.470649	2.09354	2.01378	389.466	FALSE	2
2022-09-13	14:37:53	0.381387	1.69649	2.01378	461.097	FALSE	2
2022-09-13	14:37:54	0.318282	1.41578	1.59366	390.882	FALSE	2
2022-09-13	14:37:54	0.366069	1.62835	1.59366	462.725	FALSE	2
2022-09-13	14:37:54	0.288817	1.28472	1.59366	392.167	FALSE	2
2022-09-13	14:37:54	0.459911	2.04578	1.59366	464.771	FALSE	2
2022-09-13	14:37:55	0.422659	1.88007	1.91974	394.047	FALSE	2
2022-09-13	14:37:55	0.40271	1.79133	1.91974	466.562	FALSE	2
2022-09-13	14:37:55	0.393906	1.75217	1.91974	395.799	FALSE	2
2022-09-13	14:37:55	0.507035	2.25539	1.91974	468.818	FALSE	2
2022-09-13	14:37:56	0.397977	1.77028	1.38562	397.569	FALSE	2
2022-09-13	14:37:56	0.354568	1.57719	1.38562	470.395	FALSE	2
2022-09-13	14:37:56	0.190547	0.847591	1.38562	398.417	FALSE	2
2022-09-13	14:37:56	0.302914	1.34742	1.38562	471.742	FALSE	2
2022-09-13	14:37:57	0.212074	0.943348	1.02537	399.36	FALSE	2
2022-09-13	14:37:57	0.271718	1.20866	1.02537	472.951	FALSE	2
2022-09-13	14:37:57	0.207748	0.924105	1.02537	400.285	FALSE	2
2022-09-13	14:37:58	0.256451	1.14075	1.25931	474.092	FALSE	2
2022-09-13	14:37:58	0.349275	1.55365	1.25931	401.838	FALSE	2
2022-09-13	14:37:58	0.167341	0.744366	1.25931	474.836	FALSE	2
2022-09-13	14:37:58	0.359351	1.59847	1.25931	403.437	FALSE	2
2022-09-13	14:37:59	0.399351	1.77639	1.52376	476.613	FALSE	2
2022-09-13	14:37:59	0.400725	1.7825	1.52376	405.219	FALSE	2
2022-09-13	14:37:59	0.216909	0.964855	1.52376	477.577	FALSE	2
2022-09-13	14:37:59	0.353244	1.5713	1.52376	406.79	FALSE	2
2022-09-13	14:38:00	0.299707	1.33316	1.34572	478.911	FALSE	2
2022-09-13	14:38:00	0.370445	1.64781	1.34572	408.438	FALSE	2
2022-09-13	14:38:00	0.171667	0.763609	1.34572	479.674	FALSE	2
2022-09-13	14:38:00	0.368308	1.63831	1.34572	410.077	FALSE	2
2022-09-13	14:38:01	0.211718	0.941764	1.26768	480.616	FALSE	2
2022-09-13	14:38:01	0.409021	1.81941	1.26768	411.896	FALSE	2
2022-09-13	14:38:01	0.155993	0.693888	1.26768	481.31	FALSE	2
2022-09-13	14:38:01	0.363219	1.61567	1.26768	413.512	FALSE	2
2022-09-13	14:38:02	0.225153	1.00153	1.24834	482.311	FALSE	2
2022-09-13	14:38:02	0.421692	1.87577	1.24834	415.387	FALSE	2
2022-09-13	14:38:02	0.195076	0.867737	1.24834	483.179	FALSE	2
2022-09-13	14:38:03	0.395687	1.76009	1.42088	417.147	FALSE	2
2022-09-13	14:38:03	0.218588	0.972323	1.42088	484.151	FALSE	2
2022-09-13	14:38:03	0.401031	1.78387	1.42088	418.931	FALSE	2
2022-09-13	14:38:03	0.262405	1.16723	1.42088	485.319	FALSE	2
2022-09-13	14:38:04	0.243524	1.08324	1.39501	420.015	FALSE	2
2022-09-13	14:38:04	0.370242	1.64691	1.39501	486.966	FALSE	2
2022-09-13	14:38:04	0.210903	0.938139	1.39501	420.953	FALSE	2
2022-09-13	14:38:04	0.429784	1.91177	1.39501	488.877	FALSE	2
2022-09-13	14:38:05	0.200471	0.891735	1.05336	421.844	FALSE	2
2022-09-13	14:38:05	0.252023	1.12105	1.05336	489.998	FALSE	2
2022-09-13	14:38:05	0.237468	1.05631	1.05336	422.901	FALSE	2
2022-09-13	14:38:05	0.257265	1.14437	1.05336	491.143	FALSE	2
2022-09-13	14:38:06	0.327188	1.4554	1.26049	424.356	FALSE	2
2022-09-13	14:38:06	0.176349	0.784436	1.26049	491.927	FALSE	2
2022-09-13	14:38:06	0.346578	1.54165	1.26049	425.898	FALSE	2
2022-09-13	14:38:07	0.227646	1.01261	1.19813	492.94	FALSE	2
2022-09-13	14:38:07	0.345662	1.53757	1.19813	427.435	FALSE	2
2022-09-13	14:38:07	0.244949	1.08958	1.19813	494.029	FALSE	2
2022-09-13	14:38:07	0.259148	1.15274	1.19813	428.588	FALSE	2
2022-09-13	14:38:08	0.340573	1.51494	1.27725	495.544	FALSE	2
2022-09-13	14:38:08	0.226781	1.00877	1.27725	429.597	FALSE	2
2022-09-13	14:38:08	0.379555	1.68834	1.27725	497.233	FALSE	2
2022-09-13	14:38:08	0.201641	0.896939	1.27725	430.494	FALSE	2
2022-09-13	14:38:09	0.259148	1.15274	1.21816	498.385	FALSE	2
2022-09-13	14:38:09	0.271158	1.20617	1.21816	431.7	FALSE	2
2022-09-13	14:38:09	0.214059	0.952177	1.21816	499.338	FALSE	2
2022-09-13	14:38:09	0.351056	1.56157	1.21816	433.262	FALSE	2
2022-09-13	14:38:10	0.183423	0.815902	1.03412	500.153	FALSE	2
2022-09-13	14:38:10	0.270649	1.2039	1.03412	434.465	FALSE	2
2022-09-13	14:38:10	0.243372	1.08257	1.03412	501.236	FALSE	2
2022-09-13	14:38:11	0.265865	1.18262	1.22195	435.648	FALSE	2
2022-09-13	14:38:11	0.329275	1.46468	1.22195	502.701	FALSE	2
2022-09-13	14:38:11	0.230954	1.02733	1.22195	436.675	FALSE	2
2022-09-13	14:38:11	0.272735	1.21318	1.22195	503.914	FALSE	2
2022-09-13	14:38:12	0.394771	1.75602	2.07781	438.431	FALSE	2
2022-09-13	14:38:12	0.358791	1.59597	2.07781	505.51	FALSE	2
2022-09-13	14:38:12	0.414822	1.84521	2.07781	440.277	FALSE	2
2022-09-13	14:38:12	0.700063	3.11402	2.07781	508.624	FALSE	2
2022-09-13	14:38:13	0.651107	2.89625	2.86858	443.173	FALSE	2
2022-09-13	14:38:13	0.712786	3.17061	2.86858	511.794	FALSE	2
2022-09-13	14:38:13	0.55528	2.47	2.86858	445.643	FALSE	2
2022-09-13	14:38:13	0.660369	2.93745	2.86858	514.732	FALSE	2
2022-09-13	14:38:14	0.522048	2.32217	2.37281	447.965	FALSE	2
2022-09-13	14:38:14	0.600216	2.66988	2.37281	517.402	FALSE	2
2022-09-13	14:38:14	0.478028	2.12636	2.37281	450.091	FALSE	2
2022-09-13	14:38:15	0.494059	2.19767	2.19297	519.599	FALSE	2
2022-09-13	14:38:15	0.496603	2.20899	2.19297	452.3	FALSE	2
2022-09-13	14:38:15	0.496349	2.20786	2.19297	521.807	FALSE	2
2022-09-13	14:38:15	0.485	2.15738	2.19297	454.458	FALSE	2
2022-09-13	14:38:16	0.444593	1.97764	1.98081	523.785	FALSE	2
2022-09-13	14:38:16	0.463015	2.05958	1.98081	456.517	FALSE	2
2022-09-13	14:38:16	0.431819	1.92082	1.98081	525.706	FALSE	2
2022-09-13	14:38:16	0.441794	1.96519	1.98081	458.483	FALSE	2
2022-09-13	14:38:17	0.411667	1.83118	1.33729	527.537	FALSE	2
2022-09-13	14:38:17	0.42271	1.8803	1.33729	460.363	FALSE	2
2022-09-13	14:38:17	0.274364	1.22043	1.33729	528.757	FALSE	2
2022-09-13	14:38:17	0.0938042	0.41726	1.33729	460.78	FALSE	2
2022-09-13	14:38:18	0.202659	0.901468	1.05759	529.659	FALSE	2
2022-09-13	14:38:18	0.269733	1.19983	1.05759	461.98	FALSE	2
2022-09-13	14:38:18	0.240878	1.07147	1.05759	530.73	FALSE	2
2022-09-13	14:38:19	0.159046	0.707468	0.702262	462.687	FALSE	2
2022-09-13	14:38:19	0.0774684	0.344595	0.702262	531.075	FALSE	2
2022-09-13	14:38:19	0.300318	1.33587	0.702262	464.023	FALSE	2
2022-09-13	14:38:19	0.0946694	0.421108	0.702262	531.496	FALSE	2
2022-09-13	14:38:20	0.130751	0.581607	0.381493	464.605	FALSE	2
2022-09-13	14:38:20	0.0620994	0.276231	0.381493	531.772	FALSE	2
2022-09-13	14:38:20	0.0442877	0.197001	0.381493	464.802	FALSE	2
2022-09-13	14:38:20	0.105916	0.471136	0.381493	532.243	FALSE	2
2022-09-13	14:38:21	0.0600639	0.267176	0.479738	465.069	FALSE	2
2022-09-13	14:38:21	0.188715	0.839442	0.479738	533.083	FALSE	2
2022-09-13	14:38:21	0.0920739	0.409563	0.479738	465.479	FALSE	2
2022-09-13	14:38:21	0.0905473	0.402772	0.479738	533.486	FALSE	2
2022-09-13	14:38:22	0.19869	0.883813	1.12739	466.362	FALSE	2
2022-09-13	14:38:22	0.193193	0.859361	1.12739	534.345	FALSE	2
2022-09-13	14:38:22	0.368461	1.63899	1.12739	468.001	FALSE	2
2022-09-13	14:38:23	0.202914	0.902602	1.11737	535.248	FALSE	2
2022-09-13	14:38:23	0.322405	1.43412	1.11737	469.436	FALSE	2
2022-09-13	14:38:23	0.229275	1.01986	1.11737	536.267	FALSE	2
2022-09-13	14:38:23	0.250191	1.1129	1.11737	470.548	FALSE	2
2022-09-13	14:38:24	0.312328	1.3893	1.29388	537.657	FALSE	2
2022-09-13	14:38:24	0.180318	0.802091	1.29388	471.351	FALSE	2
2022-09-13	14:38:24	0.368868	1.6408	1.29388	539.298	FALSE	2
2022-09-13	14:38:24	0.301998	1.34335	1.29388	472.694	FALSE	2
2022-09-13	14:38:25	0.26271	1.16859	1.16672	540.466	FALSE	2
2022-09-13	14:38:25	0.297723	1.32433	1.16672	474.018	FALSE	2
2022-09-13	14:38:25	0.161387	0.717882	1.16672	541.184	FALSE	2
2022-09-13	14:38:25	0.327341	1.45608	1.16672	475.474	FALSE	2
2022-09-13	14:38:26	0.148919	0.662421	0.869098	541.846	FALSE	2
2022-09-13	14:38:26	0.331209	1.47328	0.869098	476.948	FALSE	2
2022-09-13	14:38:26	0.106018	0.471589	0.869098	542.318	FALSE	2
2022-09-13	14:38:27	0.201743	0.897393	0.792584	477.845	FALSE	2
2022-09-13	14:38:27	0.132328	0.588621	0.792584	542.907	FALSE	2
2022-09-13	14:38:27	0.170598	0.758854	0.792584	478.604	FALSE	2
2022-09-13	14:38:27	0.208054	0.925466	0.792584	543.832	FALSE	2
2022-09-13	14:38:28	0.141183	0.62801	0.955797	479.232	FALSE	2
2022-09-13	14:38:28	0.292328	1.30033	0.955797	545.132	FALSE	2
2022-09-13	14:38:28	0.133346	0.59315	0.955797	479.825	FALSE	2
2022-09-13	14:38:28	0.292634	1.30169	0.955797	546.434	FALSE	2
2022-09-13	14:38:29	0.117316	0.521845	0.823992	480.347	FALSE	2
2022-09-13	14:38:29	0.328562	1.46151	0.823992	547.896	FALSE	2
2022-09-13	14:38:29	0.127443	0.566892	0.823992	480.914	FALSE	2
2022-09-13	14:38:29	0.167646	0.745723	0.823992	548.641	FALSE	2
2022-09-13	14:38:30	0.182608	0.812277	0.822841	481.726	FALSE	2
2022-09-13	14:38:30	0.0902419	0.401414	0.822841	549.043	FALSE	2
2022-09-13	14:38:30	0.282099	1.25483	0.822841	482.981	FALSE	2
2022-09-13	14:38:31	0.201081	0.894449	1.04561	549.937	FALSE	2
2022-09-13	14:38:31	0.333753	1.4846	1.04561	484.465	FALSE	2
2022-09-13	14:38:31	0.18388	0.817935	1.04561	550.755	FALSE	2
2022-09-13	14:38:31	0.221539	0.98545	1.04561	485.451	FALSE	2
2022-09-13	14:38:32	0.240318	1.06898	1.0447	551.824	FALSE	2
2022-09-13	14:38:32	0.167239	0.743913	1.0447	486.195	FALSE	2
2022-09-13	14:38:32	0.343626	1.52852	1.0447	553.353	FALSE	2
2022-09-13	14:38:32	0.188257	0.837405	1.0447	487.032	FALSE	2
2022-09-13	14:38:33	0.326629	1.45291	1.14697	554.806	FALSE	2
2022-09-13	14:38:33	0.24673	1.0975	1.14697	488.13	FALSE	2
2022-09-13	14:38:33	0.224898	1.00039	1.14697	555.806	FALSE	2
2022-09-13	14:38:33	0.233143	1.03707	1.14697	489.167	FALSE	2
2022-09-13	14:38:34	0.201896	0.898074	1.04076	556.704	FALSE	2
2022-09-13	14:38:34	0.295585	1.31482	1.04076	490.482	FALSE	2
2022-09-13	14:38:34	0.20444	0.90939	1.04076	557.613	FALSE	2
2022-09-13	14:38:35	0.341336	1.51833	1.19881	492	FALSE	2
2022-09-13	14:38:35	0.225407	1.00266	1.19881	558.616	FALSE	2
2022-09-13	14:38:35	0.229478	1.02076	1.19881	493.021	FALSE	2
2022-09-13	14:38:35	0.281794	1.25348	1.19881	559.87	FALSE	2
2022-09-13	14:38:36	0.290089	1.29037	1.3404	494.311	FALSE	2
2022-09-13	14:38:36	0.350751	1.56021	1.3404	561.43	FALSE	2
2022-09-13	14:38:36	0.272735	1.21318	1.3404	495.524	FALSE	2
2022-09-13	14:38:36	0.291768	1.29784	1.3404	562.728	FALSE	2
2022-09-13	14:38:37	0.360165	1.60209	1.44781	497.126	FALSE	2
2022-09-13	14:38:37	0.289122	1.28607	1.44781	564.014	FALSE	2
2022-09-13	14:38:37	0.288664	1.28404	1.44781	498.41	FALSE	2
2022-09-13	14:38:37	0.363982	1.61906	1.44781	565.633	FALSE	2
2022-09-13	14:38:38	0.22958	1.02122	1.43397	499.432	FALSE	2
2022-09-13	14:38:38	0.413397	1.83887	1.43397	567.472	FALSE	2
2022-09-13	14:38:38	0.324135	1.44182	1.43397	500.873	FALSE	2
2022-09-13	14:38:39	0.358079	1.59281	1.59003	569.064	FALSE	2
2022-09-13	14:38:39	0.348817	1.55161	1.59003	502.425	FALSE	2
2022-09-13	14:38:39	0.261132	1.16157	1.59003	570.226	FALSE	2
2022-09-13	14:38:39	0.461794	2.05415	1.59003	504.479	FALSE	2
2022-09-13	14:38:40	0.481489	2.14176	1.99847	572.368	FALSE	2
2022-09-13	14:38:40	0.404288	1.79835	1.99847	506.278	FALSE	2
2022-09-13	14:38:40	0.487036	2.16643	1.99847	574.534	FALSE	2
2022-09-13	14:38:40	0.424288	1.88732	1.99847	508.165	FALSE	2
2022-09-13	14:38:41	0.415992	1.85042	1.96236	576.385	FALSE	2
2022-09-13	14:38:41	0.444898	1.979	1.96236	510.144	FALSE	2
2022-09-13	14:38:41	0.714873	3.1799	1.96236	579.565	FALSE	2
2022-09-13	14:38:41	0.188868	0.840123	1.96236	510.984	FALSE	2
2022-09-13	14:38:42	-0.200598	-0.8923	-1.3209	579.565	FALSE	2
2022-09-13	14:38:42	-0.378664	-1.68437	-1.3209	510.984	FALSE	2
2022-09-13	14:38:42	-0.31159	-1.38601	-1.3209	579.565	FALSE	2
2022-09-13	14:38:43	-0.188333	-0.837743	-0.178267	510.984	FALSE	2
2022-09-13	14:38:43	-0.0290964	-0.129427	-0.178267	579.565	FALSE	2
2022-09-13	14:38:43	-0.0608522	-0.270683	-0.178267	510.984	FALSE	2
2022-09-13	14:38:43	0.117977	0.524785	-0.178267	580.089	FALSE	2
2022-09-13	14:38:44	0.195127	0.867964	1.75749	511.852	FALSE	2
2022-09-13	14:38:44	0.543422	2.41725	1.75749	582.507	FALSE	2
2022-09-13	14:38:44	0.328461	1.46106	1.75749	513.313	FALSE	2
2022-09-13	14:38:44	0.513397	2.28369	1.75749	584.79	FALSE	2
2022-09-13	14:38:45	0.318334	1.41601	1.82999	514.729	FALSE	2
2022-09-13	14:38:45	0.468562	2.08426	1.82999	586.875	FALSE	2
2022-09-13	14:38:45	0.398232	1.77142	1.82999	516.5	FALSE	2
2022-09-13	14:38:45	0.460471	2.04827	1.82999	588.923	FALSE	2
2022-09-13	14:38:46	0.386069	1.71731	1.71271	518.218	FALSE	2
2022-09-13	14:38:46	0.303931	1.35195	1.71271	590.275	FALSE	2
2022-09-13	14:38:46	0.465102	2.06887	1.71271	520.287	FALSE	2
2022-09-13	14:38:47	0.194873	0.866834	1.49824	591.142	FALSE	2
2022-09-13	14:38:47	0.470089	2.09105	1.49824	522.378	FALSE	2
2022-09-13	14:38:47	0.348308	1.54934	1.49824	592.691	FALSE	2
2022-09-13	14:38:47	0.334008	1.48573	1.49824	523.863	FALSE	2
2022-09-13	14:38:48	0.419504	1.86604	1.6653	594.557	FALSE	2
2022-09-13	14:38:48	0.421641	1.87554	1.6653	525.739	FALSE	2
2022-09-13	14:38:48	0.405051	1.80175	1.6653	596.359	FALSE	2
2022-09-13	14:38:48	0.251311	1.11788	1.6653	526.857	FALSE	2
2022-09-13	14:38:49	0.442812	1.96972	1.35285	598.328	FALSE	2
2022-09-13	14:38:49	0.392532	1.74606	1.35285	528.603	FALSE	2
2022-09-13	14:38:49	0.250242	1.11313	1.35285	599.442	FALSE	2
2022-09-13	14:38:49	0.130954	0.58251	1.35285	529.185	FALSE	2
2022-09-13	14:38:50	0.265356	1.18036	1.38009	600.622	FALSE	2
2022-09-13	14:38:50	0.292277	1.30011	1.38009	530.485	FALSE	2
2022-09-13	14:38:50	0.373143	1.65981	1.38009	602.282	FALSE	2
2022-09-13	14:38:51	0.412227	1.83367	1.70016	532.319	FALSE	2
2022-09-13	14:38:51	0.351107	1.56179	1.70016	603.843	FALSE	2
2022-09-13	14:38:51	0.448919	1.99688	1.70016	534.316	FALSE	2
2022-09-13	14:38:51	0.316603	1.40831	1.70016	605.252	FALSE	2
2022-09-13	14:38:52	0.193702	0.861625	1.06706	535.178	FALSE	2
2022-09-13	14:38:52	0.30785	1.36938	1.06706	606.621	FALSE	2
2022-09-13	14:38:52	0.26327	1.17108	1.06706	536.349	FALSE	2
2022-09-13	14:38:52	0.19472	0.866154	1.06706	607.487	FALSE	2
2022-09-13	14:38:53	0.36444	1.6211	3.40072	537.97	FALSE	2
2022-09-13	14:38:53	0.956349	4.25403	3.40072	611.741	FALSE	2
2022-09-13	14:38:53	1.11131	4.94333	3.40072	542.913	FALSE	2
2022-09-13	14:38:53	0.625967	2.78443	3.40072	614.526	FALSE	2
2022-09-13	14:38:54	0.425713	1.89366	2.02276	544.807	FALSE	2
2022-09-13	14:38:54	0.425458	1.89252	2.02276	616.418	FALSE	2
2022-09-13	14:38:54	0.513041	2.28211	2.02276	547.089	FALSE	2
2022-09-13	14:38:55	0.328969	1.46332	1.83655	617.882	FALSE	2
2022-09-13	14:38:55	0.329428	1.46536	1.83655	548.554	FALSE	2
2022-09-13	14:38:55	0.501845	2.23231	1.83655	620.114	FALSE	2
2022-09-13	14:38:55	0.49126	2.18522	1.83655	550.74	FALSE	2
2022-09-13	14:38:56	0.565916	2.51731	1.83525	622.631	FALSE	2
2022-09-13	14:38:56	0.391972	1.74357	1.83525	552.483	FALSE	2
2022-09-13	14:38:56	0.374466	1.6657	1.83525	624.297	FALSE	2
2022-09-13	14:38:56	0.317977	1.41443	1.83525	553.898	FALSE	2
2022-09-13	14:38:57	0.275636	1.22608	0.389303	625.523	FALSE	2
2022-09-13	14:38:57	0.0843386	0.375155	0.389303	554.273	FALSE	2
2022-09-13	14:38:57	0.0437788	0.194737	0.389303	625.718	FALSE	2
2022-09-13	14:38:57	-0.0536766	-0.238764	0.389303	554.273	FALSE	2
2022-09-13	14:38:58	-0.0168827	-0.0750976	-0.158327	625.718	FALSE	2
2022-09-13	14:38:58	-0.0637529	-0.283586	-0.158327	554.273	FALSE	2
2022-09-13	14:38:58	-0.0261448	-0.116297	-0.158327	625.718	FALSE	2
2022-09-13	14:38:59	0.0984353	0.43786	0.986697	554.711	FALSE	2
2022-09-13	14:38:59	0.145662	0.647934	0.986697	626.366	FALSE	2
2022-09-13	14:38:59	0.377875	1.68086	0.986697	556.391	FALSE	2
2022-09-13	14:38:59	0.265305	1.18013	0.986697	627.546	FALSE	2
2022-09-13	14:39:00	0.366883	1.63197	0.588454	558.023	FALSE	2
2022-09-13	14:39:00	0.0459163	0.204245	0.588454	627.75	FALSE	2
2022-09-13	14:39:00	0.164644	0.732369	0.588454	558.756	FALSE	2
2022-09-13	14:39:00	-0.0482822	-0.214769	0.588454	627.75	FALSE	2
2022-09-13	14:39:01	-0.269503	-1.1988	-0.953305	558.756	FALSE	2
2022-09-13	14:39:01	-0.174796	-0.777528	-0.953305	627.75	FALSE	2
2022-09-13	14:39:01	-0.252659	-1.12388	-0.953305	558.756	FALSE	2
2022-09-13	14:39:01	-0.160292	-0.713011	-0.953305	627.75	FALSE	2
2022-09-13	14:39:02	-0.234643	-1.04374	-0.990693	558.756	FALSE	2
2022-09-13	14:39:02	-0.147213	-0.654833	-0.990693	627.75	FALSE	2
2022-09-13	14:39:02	-0.286297	-1.27351	-0.990693	558.756	FALSE	2
2022-09-13	14:39:03	0.0685116	0.304753	0.211658	628.055	FALSE	2
2022-09-13	14:39:03	0.154466	0.687096	0.211658	559.443	FALSE	2
2022-09-13	14:39:03	0.0103947	0.0462377	0.211658	628.101	FALSE	2
2022-09-13	14:39:03	-0.0430405	-0.191453	0.211658	559.443	FALSE	2
2022-09-13	14:39:04	0.036247	0.161234	0.94182	628.262	FALSE	2
2022-09-13	14:39:04	0.340929	1.51652	0.94182	560.959	FALSE	2
2022-09-13	14:39:04	0.289377	1.28721	0.94182	629.55	FALSE	2
2022-09-13	14:39:04	0.180369	0.802317	0.94182	561.762	FALSE	2
2022-09-13	14:39:05	0.18897	0.840576	1.11505	630.39	FALSE	2
2022-09-13	14:39:05	0.245967	1.09411	1.11505	562.856	FALSE	2
2022-09-13	14:39:05	0.272735	1.21318	1.11505	631.603	FALSE	2
2022-09-13	14:39:05	0.295025	1.31233	1.11505	564.168	FALSE	2
2022-09-13	14:39:06	0.422201	1.87803	1.64525	633.481	FALSE	2
2022-09-13	14:39:06	0.208919	0.929313	1.64525	565.097	FALSE	2
2022-09-13	14:39:06	0.478486	2.1284	1.64525	635.61	FALSE	2
2022-09-13	14:39:07	0.65701	2.92251	10.2135	568.02	FALSE	2
2022-09-13	14:39:07	0.881234	3.91991	10.2135	639.53	FALSE	2
2022-09-13	14:39:07	2.54337	11.3134	10.2135	579.333	FALSE	2
2022-09-13	14:39:07	5.10276	22.6981	10.2135	662.228	1	3
2022-09-13	14:39:08	3.60617	16.041	5.43546	595.374	1	4
2022-09-13	14:39:08	0.528308	2.35002	5.43546	664.578	FALSE	4
2022-09-13	14:39:08	0.34098	1.51675	5.43546	596.891	FALSE	4
2022-09-13	14:39:08	0.412328	1.83412	5.43546	666.412	FALSE	4
2022-09-13	14:39:09	0.371412	1.65211	1.28296	598.543	FALSE	4
2022-09-13	14:39:09	0.267952	1.1919	1.28296	667.604	FALSE	4
2022-09-13	14:39:09	0.313753	1.39564	1.28296	599.939	FALSE	4
2022-09-13	14:39:09	0.200573	0.892189	1.28296	668.496	FALSE	4
2022-09-13	14:39:10	0.240878	1.07147	1.10898	601.01	FALSE	4
2022-09-13	14:39:10	0.138232	0.614884	1.10898	669.111	FALSE	4
2022-09-13	14:39:10	0.368817	1.64057	1.10898	602.651	FALSE	4
2022-09-13	14:39:11	0.218028	0.969832	1.31143	670.081	FALSE	4
2022-09-13	14:39:11	0.428104	1.90429	1.31143	604.555	FALSE	4
2022-09-13	14:39:11	0.217977	0.969605	1.31143	671.05	FALSE	4
2022-09-13	14:39:11	0.315178	1.40197	1.31143	605.957	FALSE	4
2022-09-13	14:39:12	0.149987	0.667172	-0.376455	671.717	FALSE	4
2022-09-13	14:39:12	-0.00258246	-0.0114873	-0.376455	605.957	FALSE	4
2022-09-13	14:39:12	-0.209249	-0.930781	-0.376455	671.717	FALSE	4
2022-09-13	14:39:12	-0.276679	-1.23072	-0.376455	605.957	FALSE	4
2022-09-13	14:39:13	-0.409351	-1.82088	-1.76711	671.717	FALSE	4
2022-09-13	14:39:13	-0.537391	-2.39042	-1.76711	605.957	FALSE	4
2022-09-13	14:39:13	-0.446246	-1.98499	-1.76711	671.717	FALSE	4
2022-09-13	14:39:13	-0.196068	-0.87215	-1.76711	605.957	FALSE	4
2022-09-13	14:39:14	-0.255814	-1.13791	-1.11271	671.717	FALSE	4
2022-09-13	14:39:14	-0.211132	-0.939157	-1.11271	605.957	FALSE	4
2022-09-13	14:39:14	-0.283498	-1.26106	-1.11271	671.717	FALSE	4
2022-09-13	14:39:15	-0.225381	-1.00254	0.0206013	605.957	FALSE	4
2022-09-13	14:39:15	-0.053931	-0.239896	0.0206013	671.717	FALSE	4
2022-09-13	14:39:15	0.00484756	0.0215629	0.0206013	605.979	FALSE	4
2022-09-13	14:39:15	0.29299	1.30328	0.0206013	673.021	FALSE	4
2022-09-13	14:39:16	0.234873	1.04476	0.365817	607.023	FALSE	4
2022-09-13	14:39:16	0.129987	0.578208	0.365817	673.599	FALSE	4
2022-09-13	14:39:16	0.0461198	0.20515	0.365817	607.229	FALSE	4
2022-09-13	14:39:16	-0.0820226	-0.364853	0.365817	673.599	FALSE	4
2022-09-13	14:39:17	0.0606237	0.269666	2.25919	607.498	FALSE	4
2022-09-13	14:39:17	0.52617	2.34051	2.25919	675.939	FALSE	4
2022-09-13	14:39:17	0.644644	2.86751	2.25919	610.366	FALSE	4
2022-09-13	14:39:17	0.800114	3.55907	2.25919	679.498	FALSE	4
2022-09-13	14:39:18	1.33614	5.94342	9.04728	616.309	FALSE	4
2022-09-13	14:39:18	2.06169	9.17081	9.04728	688.669	FALSE	4
2022-09-13	14:39:18	2.70393	12.0276	9.04728	628.337	FALSE	4
2022-09-13	14:39:19	0.268664	1.19507	1.16395	689.864	FALSE	4
2022-09-13	14:39:19	0.505814	2.24996	1.16395	630.587	FALSE	4
2022-09-13	14:39:19	0.149784	0.666269	1.16395	690.531	FALSE	4
2022-09-13	14:39:19	0.122405	0.544482	1.16395	631.131	FALSE	4
2022-09-13	14:39:20	-0.103702	-0.461287	0.387379	690.531	FALSE	4
2022-09-13	14:39:20	-0.0640583	-0.284944	0.387379	631.131	FALSE	4
2022-09-13	14:39:20	0.130751	0.581607	0.387379	691.112	FALSE	4
2022-09-13	14:39:20	0.385356	1.71414	0.387379	632.845	FALSE	4
2022-09-13	14:39:21	0.808766	3.59755	2.49009	694.71	FALSE	4
2022-09-13	14:39:21	0.657824	2.92613	2.49009	635.772	FALSE	4
2022-09-13	14:39:21	0.460573	2.04872	2.49009	696.759	FALSE	4
2022-09-13	14:39:21	0.312023	1.38794	2.49009	637.159	FALSE	4
2022-09-13	14:39:22	0.28327	1.26004	1.03556	698.019	FALSE	4
2022-09-13	14:39:22	0.320624	1.4262	1.03556	638.586	FALSE	4
2022-09-13	14:39:22	0.0945168	0.42043	1.03556	698.439	FALSE	4
2022-09-13	14:39:23	-0.219376	-0.975828	-0.744987	638.586	FALSE	4
2022-09-13	14:39:23	-0.221565	-0.985565	-0.744987	698.439	FALSE	4
2022-09-13	14:39:23	-0.210572	-0.936666	-0.744987	638.586	FALSE	4
2022-09-13	14:39:23	-0.0184094	-0.0818887	-0.744987	698.439	FALSE	4
2022-09-13	14:39:24	-0.186603	-0.830047	0.248839	638.586	FALSE	4
2022-09-13	14:39:24	0.036247	0.161234	0.248839	698.6	FALSE	4
2022-09-13	14:39:24	0.16902	0.751835	0.248839	639.338	FALSE	4
2022-09-13	14:39:24	0.205102	0.912335	0.248839	699.513	FALSE	4
2022-09-13	14:39:25	0.132125	0.587718	2.07589	639.925	FALSE	4
2022-09-13	14:39:25	0.170853	0.759988	2.07589	700.273	FALSE	4
2022-09-13	14:39:25	1.00653	4.47725	2.07589	644.402	FALSE	4
2022-09-13	14:39:25	0.557214	2.4786	2.07589	702.751	FALSE	4
2022-09-13	14:39:26	-0.113219	-0.503621	-0.62269	644.402	FALSE	4
2022-09-13	14:39:26	-0.146399	-0.651212	-0.62269	702.751	FALSE	4
2022-09-13	14:39:26	-0.160343	-0.713238	-0.62269	644.402	FALSE	4
2022-09-13	14:39:27	-0.362023	-1.61035	-2.01753	702.751	FALSE	4
2022-09-13	14:39:27	-0.441819	-1.9653	-2.01753	644.402	FALSE	4
2022-09-13	14:39:27	-0.521513	-2.31979	-2.01753	702.751	FALSE	4
2022-09-13	14:39:27	-0.488893	-2.17469	-2.01753	644.402	FALSE	4
2022-09-13	14:39:28	-0.445534	-1.98182	-2.06898	702.751	FALSE	4
2022-09-13	14:39:28	-0.464414	-2.06581	-2.06898	644.402	FALSE	4
2022-09-13	14:39:28	-0.439885	-1.9567	-2.06898	702.751	FALSE	4
2022-09-13	14:39:28	-0.510674	-2.27158	-2.06898	644.402	FALSE	4
2022-09-13	14:39:29	-0.435712	-1.93813	-1.91086	702.751	FALSE	4
2022-09-13	14:39:29	-0.444872	-1.97888	-1.91086	644.402	FALSE	4
2022-09-13	14:39:29	-0.421921	-1.87679	-1.91086	702.751	FALSE	4
2022-09-13	14:39:29	-0.415814	-1.84962	-1.91086	644.402	FALSE	4
2022-09-13	14:39:30	-0.442175	-1.96688	-1.85309	702.751	FALSE	4
2022-09-13	14:39:30	-0.418816	-1.86298	-1.85309	644.402	FALSE	4
2022-09-13	14:39:30	-0.388791	-1.72942	-1.85309	702.751	FALSE	4
2022-09-13	14:39:31	-0.339834	-1.51165	-1.29892	644.402	FALSE	4
2022-09-13	14:39:31	-0.421972	-1.87702	-1.29892	702.751	FALSE	4
2022-09-13	14:39:31	-0.202837	-0.90226	-1.29892	644.402	FALSE	4
2022-09-13	14:39:31	-0.203397	-0.904751	-1.29892	702.751	FALSE	4
2022-09-13	14:39:32	0.121998	0.542672	0.0740251	644.945	FALSE	4
2022-09-13	14:39:32	-0.0916409	-0.407637	0.0740251	702.751	FALSE	4
2022-09-13	14:39:32	0.0971122	0.431974	0.0740251	645.377	FALSE	4
2022-09-13	14:39:32	-0.060903	-0.270909	0.0740251	702.751	FALSE	4
2022-09-13	14:39:33	0.0244913	0.108942	0.227222	645.486	FALSE	4
2022-09-13	14:39:33	-0.00288781	-0.0128456	0.227222	702.751	FALSE	4
2022-09-13	14:39:33	-0.0183076	-0.0814359	0.227222	645.486	FALSE	4
2022-09-13	14:39:33	0.201031	0.894226	0.227222	703.645	FALSE	4
2022-09-13	14:39:34	0.200573	0.892189	1.4271	646.378	FALSE	4
2022-09-13	14:39:34	0.317621	1.41284	1.4271	705.058	FALSE	4
2022-09-13	14:39:34	0.444288	1.97628	1.4271	648.355	FALSE	4
2022-09-13	14:39:35	0.744339	3.31097	2.00616	708.369	FALSE	4
2022-09-13	14:39:35	0.265305	1.18013	2.00616	649.535	FALSE	4
2022-09-13	14:39:35	0.436247	1.94051	2.00616	710.31	FALSE	4
2022-09-13	14:39:35	0.35813	1.59303	2.00616	651.128	FALSE	4
2022-09-13	14:39:36	0.381845	1.69852	1.69275	712.008	FALSE	4
2022-09-13	14:39:36	0.363677	1.61771	1.69275	652.745	FALSE	4
2022-09-13	14:39:36	0.459046	2.04193	1.69275	714.05	FALSE	4
2022-09-13	14:39:36	0.317621	1.41284	1.69275	654.158	FALSE	4
2022-09-13	14:39:37	0.521132	2.3181	1.57306	716.368	FALSE	4
2022-09-13	14:39:37	0.308868	1.37391	1.57306	655.532	FALSE	4
2022-09-13	14:39:37	0.420573	1.87079	1.57306	718.239	FALSE	4
2022-09-13	14:39:37	0.163982	0.729425	1.57306	656.262	FALSE	4
2022-09-13	14:39:38	0.320929	1.42756	1.35874	719.667	FALSE	4
2022-09-13	14:39:38	0.266069	1.18353	1.35874	657.445	FALSE	4
2022-09-13	14:39:38	0.329377	1.46513	1.35874	721.132	FALSE	4
2022-09-13	14:39:39	0.29813	1.32614	1.3374	658.771	FALSE	4
2022-09-13	14:39:39	0.305458	1.35874	1.3374	722.49	FALSE	4
2022-09-13	14:39:39	0.352685	1.56881	1.3374	660.34	FALSE	4
2022-09-13	14:39:39	0.246374	1.09592	1.3374	723.586	FALSE	4
2022-09-13	14:39:40	0.608002	2.70451	1.74017	663.045	FALSE	4
2022-09-13	14:39:40	0.193244	0.859588	1.74017	724.446	FALSE	4
2022-09-13	14:39:40	0.40042	1.78115	1.74017	664.826	FALSE	4
2022-09-13	14:39:40	0.363168	1.61544	1.74017	726.061	FALSE	4
2022-09-13	14:39:41	0.519555	2.31108	2.20248	667.137	FALSE	4
2022-09-13	14:39:41	0.467697	2.08041	2.20248	728.142	FALSE	4
2022-09-13	14:39:41	0.473244	2.10508	2.20248	669.242	FALSE	4
2022-09-13	14:39:41	0.520064	2.31335	2.20248	730.455	FALSE	4
2022-09-13	14:39:42	0.390191	1.73565	1.63967	670.978	FALSE	4
2022-09-13	14:39:42	0.411463	1.83027	1.63967	732.285	FALSE	4
2022-09-13	14:39:42	0.304186	1.35308	1.63967	672.331	FALSE	4
2022-09-13	14:39:43	0.17528	0.77968	1.22716	733.065	FALSE	4
2022-09-13	14:39:43	0.404949	1.80129	1.22716	674.132	FALSE	4
2022-09-13	14:39:43	0.165051	0.73418	1.22716	733.799	FALSE	4
2022-09-13	14:39:43	0.358232	1.59349	1.22716	675.725	FALSE	4
2022-09-13	14:39:44	0.190242	0.846234	0.423373	734.646	FALSE	4
2022-09-13	14:39:44	0.107189	0.476798	0.423373	676.202	FALSE	4
2022-09-13	14:39:44	0.0673411	0.299547	0.423373	734.945	FALSE	4
2022-09-13	14:39:44	0.0159417	0.0709119	0.423373	676.273	FALSE	4
2022-09-13	14:39:45	0.111209	0.49468	0.824729	735.44	FALSE	4
2022-09-13	14:39:45	-0.00288781	-0.0128456	0.824729	676.273	FALSE	4
2022-09-13	14:39:45	0.216247	0.96191	0.824729	736.402	FALSE	4
2022-09-13	14:39:45	0.417061	1.85517	0.824729	678.128	FALSE	4
2022-09-13	14:39:46	0.29299	1.30328	1.80484	737.705	FALSE	4
2022-09-13	14:39:46	0.529987	2.35749	1.80484	680.486	FALSE	4
2022-09-13	14:39:46	0.394262	1.75376	1.80484	739.459	FALSE	4
2022-09-13	14:39:47	0.384237	1.70916	1.47108	682.195	FALSE	4
2022-09-13	14:39:47	0.405967	1.80582	1.47108	741.265	FALSE	4
2022-09-13	14:39:47	0.305916	1.36078	1.47108	683.556	FALSE	4
2022-09-13	14:39:47	0.22673	1.00854	1.47108	742.273	FALSE	4
2022-09-13	14:39:48	0.350445	1.55885	1.75636	685.115	FALSE	4
2022-09-13	14:39:48	0.381743	1.69807	1.75636	743.971	FALSE	4
2022-09-13	14:39:48	0.382964	1.7035	1.75636	686.818	FALSE	4
2022-09-13	14:39:48	0.464237	2.06502	1.75636	746.036	FALSE	4
2022-09-13	14:39:49	0.402252	1.7893	1.90356	688.607	FALSE	4
2022-09-13	14:39:49	0.367392	1.63423	1.90356	747.67	FALSE	4
2022-09-13	14:39:49	0.546781	2.43219	1.90356	691.04	FALSE	4
2022-09-13	14:39:49	0.395331	1.75851	1.90356	749.429	FALSE	4
2022-09-13	14:39:50	0.281998	1.25438	1.40447	692.294	FALSE	4
2022-09-13	14:39:50	0.181234	0.806165	1.40447	750.235	FALSE	4
2022-09-13	14:39:50	0.483982	2.15285	1.40447	694.447	FALSE	4
2022-09-13	14:39:51	0.394669	1.75557	1.94781	751.991	FALSE	4
2022-09-13	14:39:51	0.548613	2.44034	1.94781	696.887	FALSE	4
2022-09-13	14:39:51	0.349886	1.55636	1.94781	753.547	FALSE	4
2022-09-13	14:39:51	0.458384	2.03898	1.94781	698.926	FALSE	4
2022-09-13	14:39:52	0.449122	1.99778	2.37373	755.545	FALSE	4
2022-09-13	14:39:52	0.500318	2.22551	2.37373	701.152	FALSE	4
2022-09-13	14:39:52	0.648969	2.88674	2.37373	758.432	FALSE	4
2022-09-13	14:39:52	0.536145	2.38488	2.37373	703.537	FALSE	4
2022-09-13	14:39:53	0.466679	2.07588	1.96281	760.507	FALSE	4
2022-09-13	14:39:53	0.418283	1.86061	1.96281	705.397	FALSE	4
2022-09-13	14:39:53	0.414262	1.84272	1.96281	762.35	FALSE	4
2022-09-13	14:39:53	0.465814	2.07203	1.96281	707.469	FALSE	4
2022-09-13	14:39:54	0.476909	2.12139	2.15685	764.472	FALSE	4
2022-09-13	14:39:54	0.485967	2.16168	2.15685	709.631	FALSE	4
2022-09-13	14:39:54	0.491769	2.18749	2.15685	766.659	FALSE	4
2022-09-13	14:39:55	0.523677	2.32942	2.10803	711.96	FALSE	4
2022-09-13	14:39:55	0.475178	2.11369	2.10803	768.773	FALSE	4
2022-09-13	14:39:55	0.448919	1.99688	2.10803	713.957	FALSE	4
2022-09-13	14:39:55	0.44785	1.99213	2.10803	770.765	FALSE	4
2022-09-13	14:39:56	0.428308	1.9052	1.94425	715.862	FALSE	4
2022-09-13	14:39:56	0.465204	2.06932	1.94425	772.834	FALSE	4
2022-09-13	14:39:56	0.409173	1.82008	1.94425	717.682	FALSE	4
2022-09-13	14:39:56	0.445662	1.98239	1.94425	774.817	FALSE	4
2022-09-13	14:39:57	0.382506	1.70146	1.77436	719.384	FALSE	4
2022-09-13	14:39:57	0.435891	1.93893	1.77436	776.755	FALSE	4
2022-09-13	14:39:57	0.408308	1.81624	1.77436	721.2	FALSE	4
2022-09-13	14:39:57	0.368868	1.6408	1.77436	778.396	FALSE	4
2022-09-13	14:39:58	0.350903	1.56089	1.83321	722.761	FALSE	4
2022-09-13	14:39:58	0.357265	1.58919	1.83321	779.985	FALSE	4
2022-09-13	14:39:58	0.528206	2.34957	1.83321	725.111	FALSE	4
2022-09-13	14:39:59	0.242099	1.0769	1.79111	781.062	FALSE	4
2022-09-13	14:39:59	0.505203	2.24724	1.79111	727.358	FALSE	4
2022-09-13	14:39:59	0.430598	1.91539	1.79111	782.978	FALSE	4
2022-09-13	14:39:59	0.432735	1.92489	1.79111	729.283	FALSE	4
2022-09-13	14:40:00	0.390242	1.73587	1.64363	784.714	FALSE	4
2022-09-13	14:40:00	0.318079	1.41488	1.64363	730.698	FALSE	4
2022-09-13	14:40:00	0.433499	1.92829	1.64363	786.642	FALSE	4
2022-09-13	14:40:00	0.336196	1.49547	1.64363	732.193	FALSE	4
2022-09-13	14:40:01	0.566476	2.5198	1.77011	789.162	FALSE	4
2022-09-13	14:40:01	0.231005	1.02756	1.77011	733.221	FALSE	4
2022-09-13	14:40:01	0.489936	2.17933	1.77011	791.341	FALSE	4
2022-09-13	14:40:01	0.304339	1.35376	1.77011	734.574	FALSE	4
2022-09-13	14:40:02	0.46673	2.07611	1.89124	793.417	FALSE	4
2022-09-13	14:40:02	0.401387	1.78545	1.89124	736.36	FALSE	4
2022-09-13	14:40:02	0.407392	1.81216	1.89124	795.229	FALSE	4
2022-09-13	14:40:03	0.363423	1.61658	1.59699	737.976	FALSE	4
2022-09-13	14:40:03	0.353651	1.57311	1.59699	796.802	FALSE	4
2022-09-13	14:40:03	0.437163	1.94459	1.59699	739.921	FALSE	4
2022-09-13	14:40:03	0.281845	1.2537	1.59699	798.056	FALSE	4
2022-09-13	14:40:04	0.500929	2.22823	1.70956	742.149	FALSE	4
2022-09-13	14:40:04	0.222659	0.990432	1.70956	799.047	FALSE	4
2022-09-13	14:40:04	0.530802	2.36111	1.70956	744.51	FALSE	4
2022-09-13	14:40:04	0.282914	1.25846	1.70956	800.305	FALSE	4
2022-09-13	14:40:05	0.433397	1.92784	1.71776	746.438	FALSE	4
2022-09-13	14:40:05	0.318944	1.41873	1.71776	801.724	FALSE	4
2022-09-13	14:40:05	0.450649	2.00458	1.71776	748.443	FALSE	4
2022-09-13	14:40:05	0.341692	1.51991	1.71776	803.244	FALSE	4
2022-09-13	14:40:06	0.331565	1.47487	1.52625	749.918	FALSE	4
2022-09-13	14:40:06	0.390242	1.73587	1.52625	804.98	FALSE	4
2022-09-13	14:40:06	0.307545	1.36802	1.52625	751.286	FALSE	4
2022-09-13	14:40:07	0.511463	2.27509	1.73338	807.255	FALSE	4
2022-09-13	14:40:07	0.24841	1.10498	1.73338	752.391	FALSE	4
2022-09-13	14:40:07	0.466527	2.07521	1.73338	809.33	FALSE	4
2022-09-13	14:40:07	0.332328	1.47826	1.73338	753.869	FALSE	4
2022-09-13	14:40:08	0.445	1.97945	1.55019	811.309	FALSE	4
2022-09-13	14:40:08	0.273397	1.21612	1.55019	755.085	FALSE	4
2022-09-13	14:40:08	0.354313	1.57606	1.55019	812.885	FALSE	4
2022-09-13	14:40:08	0.321285	1.42914	1.55019	756.514	FALSE	4
2022-09-13	14:40:09	0.416349	1.852	1.93316	814.737	FALSE	4
2022-09-13	14:40:09	0.429173	1.90905	1.93316	758.423	FALSE	4
2022-09-13	14:40:09	0.373906	1.66321	1.93316	816.401	FALSE	4
2022-09-13	14:40:09	0.518944	2.30837	1.93316	760.732	FALSE	4
2022-09-13	14:40:10	0.356247	1.58466	1.84136	817.985	FALSE	4
2022-09-13	14:40:10	0.508512	2.26196	1.84136	762.994	FALSE	4
2022-09-13	14:40:10	0.377112	1.67747	1.84136	819.663	FALSE	4
2022-09-13	14:40:11	0.379351	1.68743	1.9125	764.681	FALSE	4
2022-09-13	14:40:11	0.407545	1.81284	1.9125	821.476	FALSE	4
2022-09-13	14:40:11	0.375891	1.67204	1.9125	766.353	FALSE	4
2022-09-13	14:40:11	0.55701	2.47769	1.9125	823.953	FALSE	4
2022-09-13	14:40:12	0.392074	1.74402	1.87034	768.097	FALSE	4
2022-09-13	14:40:12	0.467036	2.07747	1.87034	826.031	FALSE	4
2022-09-13	14:40:12	0.381794	1.6983	1.87034	769.795	FALSE	4
2022-09-13	14:40:12	0.44098	1.96157	1.87034	827.992	FALSE	4
2022-09-13	14:40:13	0.504695	2.24498	1.78522	772.04	FALSE	4
2022-09-13	14:40:13	0.313194	1.39315	1.78522	829.385	FALSE	4
2022-09-13	14:40:13	0.465713	2.07158	1.78522	774.112	FALSE	4
2022-09-13	14:40:13	0.321743	1.43118	1.78522	830.817	FALSE	4
2022-09-13	14:40:14	0.435941	1.93915	1.81971	776.051	FALSE	4
2022-09-13	14:40:14	0.372328	1.65619	1.81971	832.473	FALSE	4
2022-09-13	14:40:14	0.418995	1.86377	1.81971	777.915	FALSE	4
2022-09-13	14:40:15	0.835127	3.71481	5.46166	836.188	FALSE	4
2022-09-13	14:40:15	1.32912	5.91219	5.46166	783.827	FALSE	4
2022-09-13	14:40:15	1.55294	6.90779	5.46166	843.095	FALSE	4
2022-09-13	14:40:15	1.19416	5.31186	5.46166	789.139	FALSE	4
2022-09-13	14:40:16	0.586578	2.60922	2.24906	845.705	FALSE	4
2022-09-13	14:40:16	0.592736	2.63661	2.24906	791.775	FALSE	4
2022-09-13	14:40:16	0.43299	1.92603	2.24906	847.631	FALSE	4
2022-09-13	14:40:16	0.41014	1.82438	2.24906	793.6	FALSE	4
2022-09-13	14:40:17	0.404389	1.7988	2.5095	849.429	FALSE	4
2022-09-13	14:40:17	0.345305	1.53599	2.5095	795.136	FALSE	4
2022-09-13	14:40:17	0.715534	3.18284	2.5095	852.612	FALSE	4
2022-09-13	14:40:17	0.791412	3.52036	2.5095	798.656	FALSE	4
2022-09-13	14:40:18	1.22709	5.45834	4.92863	858.071	FALSE	4
2022-09-13	14:40:18	0.864644	3.84611	4.92863	802.502	FALSE	4
2022-09-13	14:40:18	1.23228	5.48143	4.92863	863.552	FALSE	4
2022-09-13	14:40:19	0.580318	2.58137	1.95732	805.084	FALSE	4
2022-09-13	14:40:19	0.515025	2.29093	1.95732	865.843	FALSE	4
2022-09-13	14:40:19	0.301031	1.33905	1.95732	806.423	FALSE	4
2022-09-13	14:40:19	0.363728	1.61793	1.95732	867.461	FALSE	4
2022-09-13	14:40:20	0.243168	1.08166	1.30735	807.504	FALSE	4
2022-09-13	14:40:20	0.372074	1.65506	1.30735	869.116	FALSE	4
2022-09-13	14:40:20	0.266476	1.18534	1.30735	808.69	FALSE	4
2022-09-13	14:40:21	0.291972	1.29875	6.30392	870.415	FALSE	4
2022-09-13	14:40:21	0.302608	1.34606	6.30392	810.036	FALSE	4
2022-09-13	14:40:21	0.586781	2.61012	6.30392	873.025	FALSE	4
2022-09-13	14:40:21	1.84816	8.22099	6.30392	818.257	FALSE	4
2022-09-13	14:40:21	4.0564	18.0437	6.30392	891.068	1	5
2022-09-13	14:40:22	1.13854	5.06445	3.22767	823.321	FALSE	5
2022-09-13	14:40:22	0.640674	2.84985	3.22767	893.918	FALSE	5
2022-09-13	14:40:22	0.397621	1.7687	3.22767	825.09	FALSE	5
2022-09-13	14:40:23	0.389071	1.73067	1.64674	895.649	FALSE	5
2022-09-13	14:40:23	0.361998	1.61024	1.64674	826.7	FALSE	5
2022-09-13	14:40:23	0.270598	1.20367	1.64674	896.853	FALSE	5
2022-09-13	14:40:23	0.459148	2.04238	1.64674	828.743	FALSE	5
2022-09-13	14:40:24	0.316858	1.40945	1.88069	898.262	FALSE	5
2022-09-13	14:40:24	0.49472	2.20061	1.88069	830.943	FALSE	5
2022-09-13	14:40:24	0.328562	1.46151	1.88069	899.724	FALSE	5
2022-09-13	14:40:24	0.551056	2.45121	1.88069	833.394	FALSE	5
2022-09-13	14:40:25	0.321183	1.42869	1.8112	901.152	FALSE	5
2022-09-13	14:40:25	0.522201	2.32285	1.8112	835.717	FALSE	5
2022-09-13	14:40:25	0.268766	1.19552	1.8112	902.348	FALSE	5
2022-09-13	14:40:25	0.516552	2.29773	1.8112	838.015	FALSE	5
2022-09-13	14:40:26	0.230496	1.02529	1.40967	903.373	FALSE	5
2022-09-13	14:40:26	0.506018	2.25087	1.40967	840.266	FALSE	5
2022-09-13	14:40:26	0.214211	0.952853	1.40967	904.326	FALSE	5
2022-09-13	14:40:27	0.528461	2.3507	1.67656	842.616	FALSE	5
2022-09-13	14:40:27	0.222761	0.990885	1.67656	905.317	FALSE	5
2022-09-13	14:40:27	0.479707	2.13383	1.67656	844.75	FALSE	5
2022-09-13	14:40:27	0.276705	1.23084	1.67656	906.548	FALSE	5
2022-09-13	14:40:28	0.483524	2.15081	1.59705	846.901	FALSE	5
2022-09-13	14:40:28	0.208206	0.926142	1.59705	907.474	FALSE	5
2022-09-13	14:40:28	0.459097	2.04216	1.59705	848.943	FALSE	5
2022-09-13	14:40:28	0.285305	1.26909	1.59705	908.743	FALSE	5
2022-09-13	14:40:29	0.438181	1.94912	1.64634	850.892	FALSE	5
2022-09-13	14:40:29	0.296959	1.32093	1.64634	910.064	FALSE	5
2022-09-13	14:40:29	0.443677	1.97356	1.64634	852.866	FALSE	5
2022-09-13	14:40:29	0.301641	1.34176	1.64634	911.406	FALSE	5
2022-09-13	14:40:30	0.480013	2.13519	1.80477	855.001	FALSE	5
2022-09-13	14:40:30	0.312583	1.39043	1.80477	912.796	FALSE	5
2022-09-13	14:40:30	0.424593	1.88867	1.80477	856.89	FALSE	5

## Sheet: Buzz_star_2022913143527 (3)
Date	Time	Lbs	Newtons	Total force x time	total steps > 13.345		**GoPro Fitting: 1424
2022-09-13	14:35:30	0.442456	1.96813	1.96813	FALSE	0
2022-09-13	14:35:30	0.39986	1.77866	1.77866	FALSE	0
2022-09-13	14:35:30	0.471209	2.09603	4.06416	FALSE	0
2022-09-13	14:35:30	0.421285	1.87396	3.65262	FALSE	0
2022-09-13	14:35:31	0.434262	1.93168	5.99585	FALSE	0
2022-09-13	14:35:31	0.446832	1.9876	5.64022	FALSE	0
2022-09-13	14:35:31	0.433041	1.92625	7.9221	FALSE	0
2022-09-13	14:35:31	0.447137	1.98895	7.62917	FALSE	0
2022-09-13	14:35:32	0.450547	2.00412	9.92623	FALSE	0
2022-09-13	14:35:32	0.494313	2.1988	9.82797	FALSE	0
2022-09-13	14:35:32	0.458944	2.04147	11.9677	FALSE	0
2022-09-13	14:35:33	0.470649	2.09354	11.9215	FALSE	0
2022-09-13	14:35:33	0.440471	1.9593	13.927	FALSE	0
2022-09-13	14:35:33	0.465713	2.07158	13.9931	FALSE	0
2022-09-13	14:35:33	0.465305	2.06977	15.9968	FALSE	0
2022-09-13	14:35:34	0.445509	1.98171	15.9748	FALSE	0
2022-09-13	14:35:34	0.466527	2.07521	18.072	FALSE	0
2022-09-13	14:35:34	0.394109	1.75308	17.7279	FALSE	0
2022-09-13	14:35:34	0.453652	2.01793	20.0899	FALSE	0
2022-09-13	14:35:35	0.534771	2.37877	20.1067	FALSE	0
2022-09-13	14:35:35	0.427036	1.89954	21.9895	FALSE	0
2022-09-13	14:35:35	0.471921	2.0992	22.2059	FALSE	0
2022-09-13	14:35:35	0.446883	1.98782	23.9773	FALSE	0
2022-09-13	14:35:36	0.465356	2.07	24.2759	FALSE	0
2022-09-13	14:35:36	0.468664	2.08471	26.062	FALSE	0
2022-09-13	14:35:36	0.456959	2.03265	26.3085	FALSE	0
2022-09-13	14:35:37	0.458028	2.0374	28.0994	FALSE	0
2022-09-13	14:35:37	0.427952	1.90362	28.2121	FALSE	0
2022-09-13	14:35:37	0.529325	2.35454	30.4539	FALSE	0
2022-09-13	14:35:37	0.41701	1.85494	30.0671	FALSE	0
2022-09-13	14:35:38	0.424237	1.88709	32.341	FALSE	0
2022-09-13	14:35:38	0.45014	2.00231	32.0694	FALSE	0
2022-09-13	14:35:38	0.474364	2.11007	34.4511	FALSE	0
2022-09-13	14:35:38	0.330089	1.4683	33.5377	FALSE	0
2022-09-13	14:35:39	0.382099	1.69965	36.1507	FALSE	0
2022-09-13	14:35:39	0.164135	0.730105	34.2678	FALSE	0
2022-09-13	14:35:39	0.0721758	0.321052	36.4718	FALSE	0
2022-09-13	14:35:39	0.241081	1.07238	35.3402	FALSE	0
2022-09-13	14:35:40	0.10439	0.464348	36.9361	FALSE	0
2022-09-13	14:35:40	0.208817	0.92886	36.269	FALSE	0
2022-09-13	14:35:40	0.171005	0.760664	37.6968	FALSE	0
2022-09-13	14:35:41	0.389733	1.73361	38.0026	FALSE	0
2022-09-13	14:35:41	0.691717	3.0769	40.7737	FALSE	0
2022-09-13	14:35:41	0.281336	1.25144	39.2541	FALSE	0
2022-09-13	14:35:41	-0.130267	-0.579454	40.7737	FALSE	0
2022-09-13	14:35:42	-0.627824	-2.79269	39.2541	FALSE	0
2022-09-13	14:35:42	-0.0515392	-0.229257	40.7737	FALSE	0
2022-09-13	14:35:42	0.138893	0.617824	39.8719	FALSE	0
2022-09-13	14:35:42	0.164695	0.732596	41.5063	FALSE	0
2022-09-13	14:35:43	0.179911	0.80028	40.6722	FALSE	0
2022-09-13	14:35:43	0.0211326	0.094002	41.6003	FALSE	0
2022-09-13	14:35:43	0.0900384	0.400509	41.0727	FALSE	0
2022-09-13	14:35:43	-0.0574934	-0.255742	41.6003	FALSE	0
2022-09-13	14:35:44	-0.0823788	-0.366437	41.0727	FALSE	0
2022-09-13	14:35:44	0.069733	0.310186	41.9105	FALSE	0
2022-09-13	14:35:44	0.136705	0.608091	41.6808	FALSE	0
2022-09-13	14:35:45	0.0495803	0.220543	42.131	FALSE	0
2022-09-13	14:35:45	0.109529	0.487207	42.168	FALSE	0
2022-09-13	14:35:45	0.115636	0.514372	42.6454	FALSE	0
2022-09-13	14:35:45	0.403219	1.7936	43.9616	FALSE	0
2022-09-13	14:35:46	1.00307	4.46186	47.1073	FALSE	0
2022-09-13	14:35:46	1.11024	4.93857	48.9001	FALSE	0
2022-09-13	14:35:46	0.150191	0.66808	47.7753	FALSE	0
2022-09-13	14:35:46	-0.523345	-2.32794	48.9001	FALSE	0
2022-09-13	14:35:47	0.0207763	0.0924171	47.8678	FALSE	0
2022-09-13	14:35:47	0.299046	1.33022	50.2304	FALSE	0
2022-09-13	14:35:47	0.472176	2.10033	49.9681	FALSE	0
2022-09-13	14:35:47	0.541539	2.40887	52.6392	FALSE	0
2022-09-13	14:35:48	0.496858	2.21012	52.1782	FALSE	0
2022-09-13	14:35:48	0.326578	1.45268	54.0919	FALSE	0
2022-09-13	14:35:48	0.302099	1.3438	53.522	FALSE	0
2022-09-13	14:35:49	0.402252	1.7893	55.8812	FALSE	0
2022-09-13	14:35:49	0.389428	1.73225	55.2543	FALSE	0
2022-09-13	14:35:49	0.379758	1.68924	57.5705	FALSE	0
2022-09-13	14:35:49	0.387646	1.72433	56.9786	FALSE	0
2022-09-13	14:35:50	0.322099	1.43276	59.0032	FALSE	0
2022-09-13	14:35:50	0.475789	2.1164	59.095	FALSE	0
2022-09-13	14:35:50	0.293448	1.30532	60.3085	FALSE	0
2022-09-13	14:35:50	0.226629	1.00809	60.1031	FALSE	0
2022-09-13	14:35:51	0.146171	0.650198	60.9587	FALSE	0
2022-09-13	14:35:51	0.158842	0.706561	60.8096	FALSE	0
2022-09-13	14:35:51	0.356196	1.58443	62.5432	FALSE	0
2022-09-13	14:35:51	0.556298	2.47452	63.2842	FALSE	0
2022-09-13	14:35:52	0.231056	1.02778	63.5709	FALSE	0
2022-09-13	14:35:52	0.517875	2.30361	65.5878	FALSE	0
2022-09-13	14:35:52	0.184746	0.821787	64.3927	FALSE	0
2022-09-13	14:35:53	0.459657	2.04465	67.6324	FALSE	0
2022-09-13	14:35:53	0.230802	1.02665	65.4194	FALSE	0
2022-09-13	14:35:53	0.412685	1.83571	69.4681	FALSE	0
2022-09-13	14:35:53	0.151972	0.676002	66.0954	FALSE	0
2022-09-13	14:35:54	0.433244	1.92716	71.3953	FALSE	0
2022-09-13	14:35:54	0.182812	0.813184	66.9086	FALSE	0
2022-09-13	14:35:54	0.465102	2.06887	73.4642	FALSE	0
2022-09-13	14:35:54	0.188817	0.839896	67.7485	FALSE	0
2022-09-13	14:35:55	0.426476	1.89705	75.3612	FALSE	0
2022-09-13	14:35:55	0.253855	1.1292	68.8777	FALSE	0
2022-09-13	14:35:55	0.373193	1.66004	77.0212	FALSE	0
2022-09-13	14:35:55	0.187392	0.833557	69.7112	FALSE	0
2022-09-13	14:35:56	0.263015	1.16994	78.1912	FALSE	0
2022-09-13	14:35:56	0.278588	1.23922	70.9504	FALSE	0
2022-09-13	14:35:56	0.503168	2.23819	80.4294	FALSE	0
2022-09-13	14:35:57	0.45645	2.03038	72.9808	FALSE	0
2022-09-13	14:35:57	0.2993	1.33135	81.7607	FALSE	0
2022-09-13	14:35:57	0.350649	1.55976	74.5406	FALSE	0
2022-09-13	14:35:57	0.289326	1.28698	83.0477	FALSE	0
2022-09-13	14:35:58	0.148766	0.661741	75.2023	FALSE	0
2022-09-13	14:35:58	-0.281615	-1.25268	83.0477	FALSE	0
2022-09-13	14:35:58	0.52159	2.32014	77.5224	FALSE	0
2022-09-13	14:35:58	0.447799	1.9919	85.0396	FALSE	0
2022-09-13	14:35:59	0.691158	3.07441	80.5969	FALSE	0
2022-09-13	14:35:59	0.330852	1.4717	86.5113	FALSE	0
2022-09-13	14:35:59	0.481081	2.13994	82.7368	FALSE	0
2022-09-13	14:35:59	0.406323	1.80741	88.3187	FALSE	0
2022-09-13	14:36:00	0.365255	1.62473	84.3615	FALSE	0
2022-09-13	14:36:00	0.440878	1.96111	90.2798	FALSE	0
2022-09-13	14:36:00	0.497926	2.21487	86.5764	FALSE	0
2022-09-13	14:36:01	0.41187	1.83208	92.1119	FALSE	0
2022-09-13	14:36:01	0.554059	2.46457	89.041	FALSE	0
2022-09-13	14:36:01	0.340318	1.5138	93.6257	FALSE	0
2022-09-13	14:36:01	0.506527	2.25313	91.2941	FALSE	0
2022-09-13	14:36:02	0.380369	1.69196	95.3177	FALSE	0
2022-09-13	14:36:02	0.414771	1.84498	93.1391	FALSE	0
2022-09-13	14:36:02	0.331819	1.476	96.7937	FALSE	0
2022-09-13	14:36:02	0.44785	1.99213	95.1312	FALSE	0
2022-09-13	14:36:03	0.537417	2.39054	99.1842	FALSE	0
2022-09-13	14:36:03	0.512786	2.28097	97.4122	FALSE	0
2022-09-13	14:36:03	0.522201	2.32285	101.507	FALSE	0
2022-09-13	14:36:03	0.434924	1.93463	99.3468	FALSE	0
2022-09-13	14:36:04	0.499707	2.2228	103.73	FALSE	0
2022-09-13	14:36:04	0.506832	2.25449	101.601	FALSE	0
2022-09-13	14:36:04	0.46958	2.08879	105.819	FALSE	0
2022-09-13	14:36:05	0.456909	2.03242	103.634	FALSE	0
2022-09-13	14:36:05	0.516552	2.29773	108.116	FALSE	0
2022-09-13	14:36:05	0.453753	2.01838	105.652	FALSE	0
2022-09-13	14:36:05	0.566323	2.51912	110.635	FALSE	0
2022-09-13	14:36:06	0.391667	1.74221	107.394	FALSE	0
2022-09-13	14:36:06	0.466527	2.07521	112.711	FALSE	0
2022-09-13	14:36:06	0.369428	1.64329	109.038	FALSE	0
2022-09-13	14:36:06	0.523575	2.32897	115.04	FALSE	0
2022-09-13	14:36:07	0.429631	1.91108	110.949	FALSE	0
2022-09-13	14:36:07	0.507545	2.25766	117.297	FALSE	0
2022-09-13	14:36:07	0.410191	1.82461	112.773	FALSE	0
2022-09-13	14:36:07	0.540827	2.40571	119.703	FALSE	0
2022-09-13	14:36:08	0.298232	1.3266	114.1	FALSE	0
2022-09-13	14:36:08	0.578282	2.57231	122.275	FALSE	0
2022-09-13	14:36:08	0.196451	0.873853	114.974	FALSE	0
2022-09-13	14:36:09	0.249733	1.11086	123.386	FALSE	0
2022-09-13	14:36:09	0.165916	0.738028	115.712	FALSE	0
2022-09-13	14:36:09	-0.0700633	-0.311656	123.386	FALSE	0
2022-09-13	14:36:09	-0.370725	-1.64906	115.712	FALSE	0
2022-09-13	14:36:10	-0.416323	-1.85189	123.386	FALSE	0
2022-09-13	14:36:10	-0.545432	-2.42619	115.712	FALSE	0
2022-09-13	14:36:10	-0.429707	-1.91142	123.386	FALSE	0
2022-09-13	14:36:10	-0.473218	-2.10497	115.712	FALSE	0
2022-09-13	14:36:11	-0.502277	-2.23423	123.386	FALSE	0
2022-09-13	14:36:11	-0.511895	-2.27701	115.712	FALSE	0
2022-09-13	14:36:11	-0.535559	-2.38227	123.386	FALSE	0
2022-09-13	14:36:11	-0.370216	-1.64679	115.712	FALSE	0
2022-09-13	14:36:12	-0.350012	-1.55692	123.386	FALSE	0
2022-09-13	14:36:12	-0.36533	-1.62506	115.712	FALSE	0
2022-09-13	14:36:12	-0.514287	-2.28765	123.386	FALSE	0
2022-09-13	14:36:13	-0.334287	-1.48698	115.712	FALSE	0
2022-09-13	14:36:13	-0.330572	-1.47045	123.386	FALSE	0
2022-09-13	14:36:13	-0.0723534	-0.321842	115.712	FALSE	0
2022-09-13	14:36:13	0.0590969	0.262875	123.649	FALSE	0
2022-09-13	14:36:14	0.134975	0.600396	116.312	FALSE	0
2022-09-13	14:36:14	0.499097	2.22008	125.869	FALSE	0
2022-09-13	14:36:14	0.139148	0.618958	116.931	FALSE	0
2022-09-13	14:36:14	-0.132201	-0.588056	125.869	FALSE	0
2022-09-13	14:36:15	-0.455508	-2.02619	116.931	FALSE	0
2022-09-13	14:36:15	-0.449911	-2.00129	125.869	FALSE	0
2022-09-13	14:36:15	-0.551895	-2.45494	116.931	FALSE	0
2022-09-13	14:36:15	1.29532e-05	5.76184e-05	125.869	FALSE	0
2022-09-13	14:36:16	0.308969	1.37436	118.305	FALSE	0
2022-09-13	14:36:16	0.853651	3.79721	129.666	FALSE	0
2022-09-13	14:36:16	3.22571	14.3486	132.654	1	1
2022-09-13	14:36:17	3.15996	14.0561	143.723	1	2
2022-09-13	14:36:17	0.685305	3.04837	135.702	FALSE	2
2022-09-13	14:36:17	0.812074	3.61227	147.335	FALSE	2
2022-09-13	14:36:17	0.354669	1.57764	137.28	FALSE	2
2022-09-13	14:36:18	0.668817	2.97503	150.31	FALSE	2
2022-09-13	14:36:18	0.544237	2.42088	139.701	FALSE	2
2022-09-13	14:36:18	0.618282	2.75024	153.06	FALSE	2
2022-09-13	14:36:18	0.921489	4.09897	143.8	FALSE	2
2022-09-13	14:36:19	0.440471	1.9593	155.019	FALSE	2
2022-09-13	14:36:19	0.390852	1.73859	145.539	FALSE	2
2022-09-13	14:36:19	0.253346	1.12693	156.146	FALSE	2
2022-09-13	14:36:19	0.394262	1.75376	147.292	FALSE	2
2022-09-13	14:36:20	0.332532	1.47917	157.626	FALSE	2
2022-09-13	14:36:20	0.284898	1.26728	148.56	FALSE	2
2022-09-13	14:36:20	0.38729	1.72274	159.348	FALSE	2
2022-09-13	14:36:21	0.235789	1.04884	149.608	FALSE	2
2022-09-13	14:36:21	0.477112	2.12229	161.471	FALSE	2
2022-09-13	14:36:21	0.189173	0.841479	150.45	FALSE	2
2022-09-13	14:36:21	0.536959	2.3885	163.859	FALSE	2
2022-09-13	14:36:22	0.243779	1.08438	151.534	FALSE	2
2022-09-13	14:36:22	0.592278	2.63457	166.494	FALSE	2
2022-09-13	14:36:22	0.273244	1.21544	152.75	FALSE	2
2022-09-13	14:36:22	0.505611	2.24906	168.743	FALSE	2
2022-09-13	14:36:23	0.440522	1.95953	154.709	FALSE	2
2022-09-13	14:36:23	0.524949	2.33508	171.078	FALSE	2
2022-09-13	14:36:23	0.490903	2.18363	156.893	FALSE	2
2022-09-13	14:36:23	0.326018	1.45019	172.528	FALSE	2
2022-09-13	14:36:24	0.613499	2.72897	159.622	FALSE	2
2022-09-13	14:36:24	0.279148	1.24171	173.77	FALSE	2
2022-09-13	14:36:24	0.560318	2.49241	162.114	FALSE	2
2022-09-13	14:36:25	0.242354	1.07804	174.848	FALSE	2
2022-09-13	14:36:25	0.523168	2.32716	164.441	FALSE	2
2022-09-13	14:36:25	0.275636	1.22608	176.074	FALSE	2
2022-09-13	14:36:25	0.417316	1.85631	166.298	FALSE	2
2022-09-13	14:36:26	0.486527	2.16417	178.238	FALSE	2
2022-09-13	14:36:26	0.269275	1.19779	167.496	FALSE	2
2022-09-13	14:36:26	0.437825	1.94753	180.185	FALSE	2
2022-09-13	14:36:26	0.237723	1.05744	168.553	FALSE	2
2022-09-13	14:36:27	0.476756	2.12071	182.306	FALSE	2
2022-09-13	14:36:27	0.152685	0.679173	169.232	FALSE	2
2022-09-13	14:36:27	0.450852	2.00548	184.312	FALSE	2
2022-09-13	14:36:28	0.183779	0.817486	170.05	FALSE	2
2022-09-13	14:36:28	0.514262	2.28754	186.599	FALSE	2
2022-09-13	14:36:28	0.140573	0.625297	170.675	FALSE	2
2022-09-13	14:36:28	0.65757	2.925	189.524	FALSE	2
2022-09-13	14:36:28	0.216094	0.961229	171.636	FALSE	2
2022-09-13	14:36:29	0.486985	2.16621	191.69	FALSE	2
2022-09-13	14:36:29	0.306476	1.36327	172.999	FALSE	2
2022-09-13	14:36:29	0.364898	1.62314	193.314	FALSE	2
2022-09-13	14:36:30	0.401896	1.78771	174.787	FALSE	2
2022-09-13	14:36:30	0.354618	1.57741	194.891	FALSE	2
2022-09-13	14:36:30	0.3593	1.59824	176.385	FALSE	2
2022-09-13	14:36:30	0.350089	1.55727	196.448	FALSE	2
2022-09-13	14:36:31	0.455331	2.0254	178.411	FALSE	2
2022-09-13	14:36:31	0.318791	1.41805	197.866	FALSE	2
2022-09-13	14:36:31	0.38042	1.69218	180.103	FALSE	2
2022-09-13	14:36:31	0.28897	1.2854	199.152	FALSE	2
2022-09-13	14:36:32	0.521997	2.32195	182.425	FALSE	2
2022-09-13	14:36:32	0.203168	0.903732	200.055	FALSE	2
2022-09-13	14:36:32	0.488104	2.17118	184.596	FALSE	2
2022-09-13	14:36:32	0.185814	0.826538	200.882	FALSE	2
2022-09-13	14:36:33	0.524593	2.33349	186.93	FALSE	2
2022-09-13	14:36:33	0.144898	0.644535	201.526	FALSE	2
2022-09-13	14:36:33	0.481489	2.14176	189.071	FALSE	2
2022-09-13	14:36:34	0.23986	1.06695	202.593	FALSE	2
2022-09-13	14:36:34	0.424033	1.88618	190.958	FALSE	2
2022-09-13	14:36:34	0.26444	1.17628	203.77	FALSE	2
2022-09-13	14:36:34	0.434059	1.93078	192.888	FALSE	2
2022-09-13	14:36:35	0.34215	1.52195	205.292	FALSE	2
2022-09-13	14:36:35	0.370649	1.64872	194.537	FALSE	2
2022-09-13	14:36:35	0.300267	1.33565	206.627	FALSE	2
2022-09-13	14:36:35	0.357977	1.59235	196.129	FALSE	2
2022-09-13	14:36:36	0.289122	1.28607	207.913	FALSE	2
2022-09-13	14:36:36	0.282456	1.25642	197.386	FALSE	2
2022-09-13	14:36:36	0.170853	0.759988	208.673	FALSE	2
2022-09-13	14:36:36	0.249784	1.11109	198.497	FALSE	2
2022-09-13	14:36:37	0.289733	1.28879	209.962	FALSE	2
2022-09-13	14:36:37	0.357265	1.58919	200.086	FALSE	2
2022-09-13	14:36:37	0.374873	1.66751	211.63	FALSE	2
2022-09-13	14:36:38	0.302201	1.34425	201.43	FALSE	2
2022-09-13	14:36:38	0.657672	2.92546	214.555	FALSE	2
2022-09-13	14:36:38	0.478232	2.12727	203.558	FALSE	2
2022-09-13	14:36:38	0.550954	2.45075	217.006	FALSE	2
2022-09-13	14:36:39	0.364033	1.61929	205.177	FALSE	2
2022-09-13	14:36:39	0.571921	2.54402	219.55	FALSE	2
2022-09-13	14:36:39	0.239708	1.06627	206.243	FALSE	2
2022-09-13	14:36:39	0.445865	1.9833	221.533	FALSE	2
2022-09-13	14:36:40	0.158842	0.706561	206.95	FALSE	2
2022-09-13	14:36:40	0.53701	2.38873	223.922	FALSE	2
2022-09-13	14:36:40	0.123677	0.55014	207.5	FALSE	2
2022-09-13	14:36:40	0.450344	2.00322	225.925	FALSE	2
2022-09-13	14:36:41	0.185255	0.824051	208.324	FALSE	2
2022-09-13	14:36:41	0.509224	2.26513	228.19	FALSE	2
2022-09-13	14:36:41	0.186629	0.830163	209.154	FALSE	2
2022-09-13	14:36:42	0.512125	2.27803	230.468	FALSE	2
2022-09-13	14:36:42	0.266629	1.18602	210.34	FALSE	2
2022-09-13	14:36:42	0.421489	1.87487	232.343	FALSE	2
2022-09-13	14:36:42	0.212277	0.944251	211.284	FALSE	2
2022-09-13	14:36:43	0.469529	2.08856	234.432	FALSE	2
2022-09-13	14:36:43	0.269936	1.20073	212.485	FALSE	2
2022-09-13	14:36:43	0.410445	1.82574	236.257	FALSE	2
2022-09-13	14:36:43	0.360013	1.60141	214.086	FALSE	2
2022-09-13	14:36:44	0.345102	1.53508	237.793	FALSE	2
2022-09-13	14:36:44	0.392074	1.74402	215.83	FALSE	2
2022-09-13	14:36:44	0.311107	1.38387	239.176	FALSE	2
2022-09-13	14:36:44	0.400624	1.78206	217.613	FALSE	2
2022-09-13	14:36:45	0.342252	1.52241	240.699	FALSE	2
2022-09-13	14:36:45	0.465204	2.06932	219.682	FALSE	2
2022-09-13	14:36:45	0.298792	1.32909	242.028	FALSE	2
2022-09-13	14:36:46	0.408868	1.81873	221.501	FALSE	2
2022-09-13	14:36:46	0.307087	1.36598	243.394	FALSE	2
2022-09-13	14:36:46	0.487137	2.16688	223.667	FALSE	2
2022-09-13	14:36:46	0.16556	0.736444	244.13	FALSE	2
2022-09-13	14:36:47	0.406883	1.8099	225.477	FALSE	2
2022-09-13	14:36:47	0.20042	0.891508	245.022	FALSE	2
2022-09-13	14:36:47	0.475687	2.11595	227.593	FALSE	2
2022-09-13	14:36:47	0.163015	0.725123	245.747	FALSE	2
2022-09-13	14:36:48	0.472939	2.10373	229.697	FALSE	2
2022-09-13	14:36:48	0.170191	0.757044	246.504	FALSE	2
2022-09-13	14:36:48	0.468919	2.08585	231.783	FALSE	2
2022-09-13	14:36:48	0.0861707	0.383305	246.887	FALSE	2
2022-09-13	14:36:49	0.204695	0.910524	232.693	FALSE	2
2022-09-13	14:36:49	-0.0422771	-0.188057	246.887	FALSE	2
2022-09-13	14:36:49	-0.266348	-1.18477	232.693	FALSE	2
2022-09-13	14:36:50	-0.45159	-2.00876	246.887	FALSE	2
2022-09-13	14:36:50	-0.265636	-1.1816	232.693	FALSE	2
2022-09-13	14:36:50	0.127646	0.567795	247.455	FALSE	2
2022-09-13	14:36:50	0.453906	2.01906	234.712	FALSE	2
2022-09-13	14:36:51	0.236145	1.05042	248.506	FALSE	2
2022-09-13	14:36:51	0.522201	2.32285	237.035	FALSE	2
2022-09-13	14:36:51	0.337417	1.5009	250.006	FALSE	2
2022-09-13	14:36:51	0.360573	1.6039	238.639	FALSE	2
2022-09-13	14:36:52	0.314975	1.40107	251.407	FALSE	2
2022-09-13	14:36:52	0.395585	1.75964	240.399	FALSE	2
2022-09-13	14:36:52	0.363524	1.61703	253.025	FALSE	2
2022-09-13	14:36:53	0.295127	1.31278	241.712	FALSE	2
2022-09-13	14:36:53	0.346934	1.54323	254.568	FALSE	2
2022-09-13	14:36:53	0.278842	1.24034	242.952	FALSE	2
2022-09-13	14:36:53	0.385153	1.71324	256.281	FALSE	2
2022-09-13	14:36:54	0.210089	0.934518	243.887	FALSE	2
2022-09-13	14:36:54	0.392176	1.74448	258.025	FALSE	2
2022-09-13	14:36:54	0.226679	1.00831	244.895	FALSE	2
2022-09-13	14:36:54	0.45528	2.02518	260.051	FALSE	2
2022-09-13	14:36:55	0.134364	0.597678	245.493	FALSE	2
2022-09-13	14:36:55	0.482507	2.14629	262.197	FALSE	2
2022-09-13	14:36:55	0.217214	0.966211	246.459	FALSE	2
2022-09-13	14:36:55	0.391412	1.74108	263.938	FALSE	2
2022-09-13	14:36:56	0.235229	1.04635	247.505	FALSE	2
2022-09-13	14:36:56	0.408003	1.81488	265.753	FALSE	2
2022-09-13	14:36:56	0.346527	1.54142	249.046	FALSE	2
2022-09-13	14:36:56	0.378486	1.68358	267.436	FALSE	2
2022-09-13	14:36:57	0.331005	1.47238	250.519	FALSE	2
2022-09-13	14:36:57	0.374873	1.66751	269.104	FALSE	2
2022-09-13	14:36:57	0.454466	2.02156	252.54	FALSE	2
2022-09-13	14:36:58	0.275127	1.22382	270.328	FALSE	2
2022-09-13	14:36:58	0.384389	1.70984	254.25	FALSE	2
2022-09-13	14:36:58	0.280267	1.24668	271.574	FALSE	2
2022-09-13	14:36:58	0.488715	2.1739	256.424	FALSE	2
2022-09-13	14:36:59	0.204237	0.908487	272.483	FALSE	2
2022-09-13	14:36:59	0.401845	1.78749	258.212	FALSE	2
2022-09-13	14:36:59	0.249631	1.11041	273.593	FALSE	2
2022-09-13	14:36:59	0.388155	1.72659	259.938	FALSE	2
2022-09-13	14:37:00	0.134313	0.597451	274.191	FALSE	2
2022-09-13	14:37:00	0.258079	1.14799	261.086	FALSE	2
2022-09-13	14:37:00	0.152888	0.680076	274.871	FALSE	2
2022-09-13	14:37:00	-0.0241092	-0.107243	261.086	FALSE	2
2022-09-13	14:37:01	-0.12701	-0.564966	274.871	FALSE	2
2022-09-13	14:37:01	0.45187	2.01001	263.096	FALSE	2
2022-09-13	14:37:01	0.200624	0.892416	275.763	FALSE	2
2022-09-13	14:37:02	0.453244	2.01612	265.112	FALSE	2
2022-09-13	14:37:02	0.309275	1.37572	277.139	FALSE	2
2022-09-13	14:37:02	0.477468	2.12387	267.236	FALSE	2
2022-09-13	14:37:02	0.323881	1.44069	278.58	FALSE	2
2022-09-13	14:37:03	0.442812	1.96972	269.206	FALSE	2
2022-09-13	14:37:03	0.338181	1.5043	280.084	FALSE	2
2022-09-13	14:37:03	0.46042	2.04804	271.254	FALSE	2
2022-09-13	14:37:03	0.344797	1.53373	281.618	FALSE	2
2022-09-13	14:37:04	0.488766	2.17413	273.428	FALSE	2
2022-09-13	14:37:04	0.324593	1.44385	283.062	FALSE	2
2022-09-13	14:37:04	0.573753	2.55217	275.98	FALSE	2
2022-09-13	14:37:04	0.414313	1.84295	284.905	FALSE	2
2022-09-13	14:37:05	0.196756	0.87521	276.856	FALSE	2
2022-09-13	14:37:05	0.270344	1.20254	286.107	FALSE	2
2022-09-13	14:37:05	0.206679	0.91935	277.775	FALSE	2
2022-09-13	14:37:06	0.191718	0.8528	286.96	FALSE	2
2022-09-13	14:37:06	0.366476	1.63016	279.405	FALSE	2
2022-09-13	14:37:06	0.203219	0.903959	287.864	FALSE	2
2022-09-13	14:37:06	0.481031	2.13972	281.545	FALSE	2
2022-09-13	14:37:07	0.353957	1.57447	289.438	FALSE	2
2022-09-13	14:37:07	1.04927	4.66736	286.212	FALSE	2
2022-09-13	14:37:07	1.19462	5.31391	294.752	FALSE	2
2022-09-13	14:37:07	2.02795	9.02073	295.233	FALSE	2
2022-09-13	14:37:08	2.58342	11.4916	306.244	FALSE	2
2022-09-13	14:37:08	2.69594	11.9921	307.225	FALSE	2
2022-09-13	14:37:08	0.632532	2.81363	309.057	FALSE	2
2022-09-13	14:37:08	0.0693768	0.308602	307.534	FALSE	2
2022-09-13	14:37:09	0.175585	0.781037	309.838	FALSE	2
2022-09-13	14:37:09	-0.190419	-0.847022	307.534	FALSE	2
2022-09-13	14:37:09	-0.436272	-1.94063	309.838	FALSE	2
2022-09-13	14:37:10	-0.648791	-2.88595	307.534	FALSE	2
2022-09-13	14:37:10	-0.72192	-3.21124	309.838	FALSE	2
2022-09-13	14:37:10	-0.768027	-3.41634	307.534	FALSE	2
2022-09-13	14:37:10	-0.730521	-3.2495	309.838	FALSE	2
2022-09-13	14:37:11	-0.776068	-3.45211	307.534	FALSE	2
2022-09-13	14:37:11	-0.739376	-3.28889	309.838	FALSE	2
2022-09-13	14:37:11	-0.693014	-3.08266	307.534	FALSE	2
2022-09-13	14:37:11	-0.716882	-3.18883	309.838	FALSE	2
2022-09-13	14:37:12	-0.570928	-2.5396	307.534	FALSE	2
2022-09-13	14:37:12	-0.605636	-2.69399	309.838	FALSE	2
2022-09-13	14:37:12	-0.457188	-2.03366	307.534	FALSE	2
2022-09-13	14:37:12	-0.177035	-0.787487	309.838	FALSE	2
2022-09-13	14:37:13	0.285051	1.26796	308.801	FALSE	2
2022-09-13	14:37:13	-0.0125061	-0.0556296	309.838	FALSE	2
2022-09-13	14:37:13	0.395789	1.76055	310.562	FALSE	2
2022-09-13	14:37:14	0.284389	1.26502	311.103	FALSE	2
2022-09-13	14:37:14	0.538842	2.39688	312.959	FALSE	2
2022-09-13	14:37:14	0.119046	0.52954	311.633	FALSE	2
2022-09-13	14:37:14	0.370903	1.64985	314.609	FALSE	2
2022-09-13	14:37:15	0.138639	0.616694	312.25	FALSE	2
2022-09-13	14:37:15	0.353499	1.57243	316.181	FALSE	2
2022-09-13	14:37:15	0.142608	0.634349	312.884	FALSE	2
2022-09-13	14:37:15	0.460776	2.04962	318.231	FALSE	2
2022-09-13	14:37:16	0.210547	0.936555	313.821	FALSE	2
2022-09-13	14:37:16	0.450089	2.00209	320.233	FALSE	2
2022-09-13	14:37:16	0.142812	0.635256	314.456	FALSE	2
2022-09-13	14:37:16	0.496145	2.20695	322.44	FALSE	2
2022-09-13	14:37:17	0.195789	0.870909	315.327	FALSE	2
2022-09-13	14:37:17	0.48556	2.15987	324.6	FALSE	2
2022-09-13	14:37:17	0.175738	0.781718	316.109	FALSE	2
2022-09-13	14:37:18	0.508766	2.26309	326.863	FALSE	2
2022-09-13	14:37:18	0.201132	0.894675	317.003	FALSE	2
2022-09-13	14:37:18	0.386832	1.72071	328.584	FALSE	2
2022-09-13	14:37:18	0.203219	0.903959	317.907	FALSE	2
2022-09-13	14:37:19	0.381183	1.69558	330.279	FALSE	2
2022-09-13	14:37:19	0.225967	1.00515	318.912	FALSE	2
2022-09-13	14:37:19	0.395636	1.75987	332.039	FALSE	2
2022-09-13	14:37:19	-0.0145926	-0.0649108	318.912	FALSE	2
2022-09-13	14:37:20	-0.0712847	-0.317089	332.039	FALSE	2
2022-09-13	14:37:20	-0.0810557	-0.360552	318.912	FALSE	2
2022-09-13	14:37:20	-0.0638038	-0.283812	332.039	FALSE	2
2022-09-13	14:37:20	-0.0936765	-0.416692	318.912	FALSE	2
2022-09-13	14:37:21	-0.177544	-0.789751	332.039	FALSE	2
2022-09-13	14:37:21	-0.183651	-0.816916	318.912	FALSE	2
2022-09-13	14:37:21	-0.130216	-0.579227	332.039	FALSE	2
2022-09-13	14:37:22	0.0776211	0.345274	319.258	FALSE	2
2022-09-13	14:37:22	0.340165	1.51312	333.552	FALSE	2
2022-09-13	14:37:22	0.262914	1.16949	320.427	FALSE	2
2022-09-13	14:37:22	0.588206	2.61646	336.169	FALSE	2
2022-09-13	14:37:23	0.338741	1.50679	321.934	FALSE	2
2022-09-13	14:37:23	0.606374	2.69727	338.866	FALSE	2
2022-09-13	14:37:23	0.269326	1.19802	323.132	FALSE	2
2022-09-13	14:37:23	0.51355	2.28437	341.15	FALSE	2
2022-09-13	14:37:24	0.227901	1.01375	324.146	FALSE	2
2022-09-13	14:37:24	0.509326	2.26558	343.416	FALSE	2
2022-09-13	14:37:24	0.238384	1.06038	325.206	FALSE	2
2022-09-13	14:37:24	0.471361	2.09671	345.512	FALSE	2
2022-09-13	14:37:25	0.177621	0.790094	325.996	FALSE	2
2022-09-13	14:37:25	0.494567	2.19993	347.712	FALSE	2
2022-09-13	14:37:25	0.211209	0.9395	326.936	FALSE	2
2022-09-13	14:37:26	0.514568	2.2889	350.001	FALSE	2
2022-09-13	14:37:26	0.165509	0.736217	327.672	FALSE	2
2022-09-13	14:37:26	0.486272	2.16304	352.164	FALSE	2
2022-09-13	14:37:26	0.231056	1.02778	328.7	FALSE	2
2022-09-13	14:37:27	0.475433	2.11482	354.279	FALSE	2
2022-09-13	14:37:27	0.189631	0.843517	329.543	FALSE	2
2022-09-13	14:37:27	0.401692	1.78681	356.066	FALSE	2
2022-09-13	14:37:27	0.216451	0.962817	330.506	FALSE	2
2022-09-13	14:37:28	0.477316	2.1232	358.189	FALSE	2
2022-09-13	14:37:28	0.178028	0.791904	331.298	FALSE	2
2022-09-13	14:37:28	0.486018	2.16191	360.351	FALSE	2
2022-09-13	14:37:28	0.287087	1.27702	332.575	FALSE	2
2022-09-13	14:37:29	0.511463	2.27509	362.626	FALSE	2
2022-09-13	14:37:29	0.215026	0.956479	333.531	FALSE	2
2022-09-13	14:37:29	0.566832	2.52138	365.148	FALSE	2
2022-09-13	14:37:30	0.220623	0.981375	334.513	FALSE	2
2022-09-13	14:37:30	0.544389	2.42155	367.569	FALSE	2
2022-09-13	14:37:30	0.194517	0.865251	335.378	FALSE	2
2022-09-13	14:37:30	0.569275	2.53225	370.101	FALSE	2
2022-09-13	14:37:31	0.264949	1.17855	336.556	FALSE	2
2022-09-13	14:37:31	0.52897	2.35296	372.454	FALSE	2
2022-09-13	14:37:31	0.179351	0.797789	337.354	FALSE	2
2022-09-13	14:37:31	0.553448	2.46185	374.916	FALSE	2
2022-09-13	14:37:32	0.254211	1.13078	338.485	FALSE	2
2022-09-13	14:37:32	0.502812	2.23661	377.153	FALSE	2
2022-09-13	14:37:32	0.33986	1.51177	339.997	FALSE	2
2022-09-13	14:37:32	0.550343	2.44804	379.601	FALSE	2
2022-09-13	14:37:33	0.348257	1.54912	341.546	FALSE	2
2022-09-13	14:37:33	0.521234	2.31855	381.919	FALSE	2
2022-09-13	14:37:33	0.274364	1.22043	342.766	FALSE	2
2022-09-13	14:37:34	0.517264	2.30089	384.22	FALSE	2
2022-09-13	14:37:34	0.269478	1.19869	343.965	FALSE	2
2022-09-13	14:37:34	0.496043	2.2065	386.427	FALSE	2
2022-09-13	14:37:34	0.246578	1.09683	345.062	FALSE	2
2022-09-13	14:37:35	0.536552	2.38669	388.813	FALSE	2
2022-09-13	14:37:35	0.271056	1.20571	346.268	FALSE	2
2022-09-13	14:37:35	0.504593	2.24453	391.058	FALSE	2
2022-09-13	14:37:35	0.206171	0.91709	347.185	FALSE	2
2022-09-13	14:37:36	0.512837	2.2812	393.339	FALSE	2
2022-09-13	14:37:36	0.308359	1.37164	348.556	FALSE	2
2022-09-13	14:37:36	0.529275	2.35432	395.693	FALSE	2
2022-09-13	14:37:36	0.275076	1.22359	349.78	FALSE	2
2022-09-13	14:37:37	0.478944	2.13044	397.824	FALSE	2
2022-09-13	14:37:37	0.35411	1.57515	351.355	FALSE	2
2022-09-13	14:37:37	0.432023	1.92172	399.746	FALSE	2
2022-09-13	14:37:38	0.318944	1.41873	352.774	FALSE	2
2022-09-13	14:37:38	0.480471	2.13723	401.883	FALSE	2
2022-09-13	14:37:38	0.235992	1.04974	353.824	FALSE	2
2022-09-13	14:37:38	0.701183	3.119	405.002	FALSE	2
2022-09-13	14:37:39	0.530853	2.36134	356.185	FALSE	2
2022-09-13	14:37:39	0.643931	2.86433	407.866	FALSE	2
2022-09-13	14:37:39	0.365407	1.6254	357.81	FALSE	2
2022-09-13	14:37:39	0.694109	3.08754	410.954	FALSE	2
2022-09-13	14:37:40	0.2964	1.31845	359.129	FALSE	2
2022-09-13	14:37:40	0.392786	1.74719	412.701	FALSE	2
2022-09-13	14:37:40	0.322252	1.43344	360.562	FALSE	2
2022-09-13	14:37:40	0.503524	2.23978	414.941	FALSE	2
2022-09-13	14:37:41	0.194975	0.867288	361.429	FALSE	2
2022-09-13	14:37:41	0.487087	2.16666	417.107	FALSE	2
2022-09-13	14:37:41	0.261132	1.16157	362.591	FALSE	2
2022-09-13	14:37:42	0.446832	1.9876	419.095	FALSE	2
2022-09-13	14:37:42	0.205814	0.915502	363.507	FALSE	2
2022-09-13	14:37:42	0.44215	1.96677	421.062	FALSE	2
2022-09-13	14:37:42	0.218944	0.973907	364.48	FALSE	2
2022-09-13	14:37:43	0.460064	2.04646	423.108	FALSE	2
2022-09-13	14:37:43	0.198486	0.882905	365.363	FALSE	2
2022-09-13	14:37:43	0.413957	1.84136	424.95	FALSE	2
2022-09-13	14:37:43	0.188766	0.839669	366.203	FALSE	2
2022-09-13	14:37:44	0.445662	1.98239	426.932	FALSE	2
2022-09-13	14:37:44	0.166425	0.740292	366.943	FALSE	2
2022-09-13	14:37:44	0.431056	1.91742	428.849	FALSE	2
2022-09-13	14:37:44	0.197825	0.879965	367.823	FALSE	2
2022-09-13	14:37:45	0.438995	1.95274	430.802	FALSE	2
2022-09-13	14:37:45	0.190751	0.848499	368.672	FALSE	2
2022-09-13	14:37:45	0.411616	1.83095	432.633	FALSE	2
2022-09-13	14:37:46	0.196501	0.874076	369.546	FALSE	2
2022-09-13	14:37:46	0.414517	1.84385	434.477	FALSE	2
2022-09-13	14:37:46	0.193702	0.861625	370.407	FALSE	2
2022-09-13	14:37:46	0.313753	1.39564	435.873	FALSE	2
2022-09-13	14:37:47	0.245	1.08981	371.497	FALSE	2
2022-09-13	14:37:47	0.350852	1.56066	437.433	FALSE	2
2022-09-13	14:37:47	0.0740587	0.329428	371.827	FALSE	2
2022-09-13	14:37:47	-0.0643127	-0.286076	437.433	FALSE	2
2022-09-13	14:37:48	0.0787407	0.350254	372.177	FALSE	2
2022-09-13	14:37:48	0.34785	1.54731	438.981	FALSE	2
2022-09-13	14:37:48	0.368664	1.63989	373.817	FALSE	2
2022-09-13	14:37:48	0.722049	3.21182	442.192	FALSE	2
2022-09-13	14:37:49	0.416603	1.85313	375.67	FALSE	2
2022-09-13	14:37:49	0.548461	2.43966	444.632	FALSE	2
2022-09-13	14:37:49	0.351056	1.56157	377.232	FALSE	2
2022-09-13	14:37:50	0.633753	2.81906	447.451	FALSE	2
2022-09-13	14:37:50	0.323015	1.43684	378.668	FALSE	2
2022-09-13	14:37:50	0.534618	2.37809	449.829	FALSE	2
2022-09-13	14:37:50	0.367646	1.63536	380.304	FALSE	2
2022-09-13	14:37:51	0.446832	1.9876	451.817	FALSE	2
2022-09-13	14:37:51	0.366934	1.6322	381.936	FALSE	2
2022-09-13	14:37:51	0.340929	1.51652	453.333	FALSE	2
2022-09-13	14:37:51	0.386883	1.72093	383.657	FALSE	2
2022-09-13	14:37:52	0.391565	1.74176	455.075	FALSE	2
2022-09-13	14:37:52	0.389886	1.73429	385.391	FALSE	2
2022-09-13	14:37:52	0.466272	2.07407	457.149	FALSE	2
2022-09-13	14:37:52	0.445509	1.98171	387.373	FALSE	2
2022-09-13	14:37:53	0.506119	2.25132	459.4	FALSE	2
2022-09-13	14:37:53	0.470649	2.09354	389.466	FALSE	2
2022-09-13	14:37:53	0.381387	1.69649	461.097	FALSE	2
2022-09-13	14:37:54	0.318282	1.41578	390.882	FALSE	2
2022-09-13	14:37:54	0.366069	1.62835	462.725	FALSE	2
2022-09-13	14:37:54	0.288817	1.28472	392.167	FALSE	2
2022-09-13	14:37:54	0.459911	2.04578	464.771	FALSE	2
2022-09-13	14:37:55	0.422659	1.88007	394.047	FALSE	2
2022-09-13	14:37:55	0.40271	1.79133	466.562	FALSE	2
2022-09-13	14:37:55	0.393906	1.75217	395.799	FALSE	2
2022-09-13	14:37:55	0.507035	2.25539	468.818	FALSE	2
2022-09-13	14:37:56	0.397977	1.77028	397.569	FALSE	2
2022-09-13	14:37:56	0.354568	1.57719	470.395	FALSE	2
2022-09-13	14:37:56	0.190547	0.847591	398.417	FALSE	2
2022-09-13	14:37:56	0.302914	1.34742	471.742	FALSE	2
2022-09-13	14:37:57	0.212074	0.943348	399.36	FALSE	2
2022-09-13	14:37:57	0.271718	1.20866	472.951	FALSE	2
2022-09-13	14:37:57	0.207748	0.924105	400.285	FALSE	2
2022-09-13	14:37:58	0.256451	1.14075	474.092	FALSE	2
2022-09-13	14:37:58	0.349275	1.55365	401.838	FALSE	2
2022-09-13	14:37:58	0.167341	0.744366	474.836	FALSE	2
2022-09-13	14:37:58	0.359351	1.59847	403.437	FALSE	2
2022-09-13	14:37:59	0.399351	1.77639	476.613	FALSE	2
2022-09-13	14:37:59	0.400725	1.7825	405.219	FALSE	2
2022-09-13	14:37:59	0.216909	0.964855	477.577	FALSE	2
2022-09-13	14:37:59	0.353244	1.5713	406.79	FALSE	2
2022-09-13	14:38:00	0.299707	1.33316	478.911	FALSE	2
2022-09-13	14:38:00	0.370445	1.64781	408.438	FALSE	2
2022-09-13	14:38:00	0.171667	0.763609	479.674	FALSE	2
2022-09-13	14:38:00	0.368308	1.63831	410.077	FALSE	2
2022-09-13	14:38:01	0.211718	0.941764	480.616	FALSE	2
2022-09-13	14:38:01	0.409021	1.81941	411.896	FALSE	2
2022-09-13	14:38:01	0.155993	0.693888	481.31	FALSE	2
2022-09-13	14:38:01	0.363219	1.61567	413.512	FALSE	2
2022-09-13	14:38:02	0.225153	1.00153	482.311	FALSE	2
2022-09-13	14:38:02	0.421692	1.87577	415.387	FALSE	2
2022-09-13	14:38:02	0.195076	0.867737	483.179	FALSE	2
2022-09-13	14:38:03	0.395687	1.76009	417.147	FALSE	2
2022-09-13	14:38:03	0.218588	0.972323	484.151	FALSE	2
2022-09-13	14:38:03	0.401031	1.78387	418.931	FALSE	2
2022-09-13	14:38:03	0.262405	1.16723	485.319	FALSE	2
2022-09-13	14:38:04	0.243524	1.08324	420.015	FALSE	2
2022-09-13	14:38:04	0.370242	1.64691	486.966	FALSE	2
2022-09-13	14:38:04	0.210903	0.938139	420.953	FALSE	2
2022-09-13	14:38:04	0.429784	1.91177	488.877	FALSE	2
2022-09-13	14:38:05	0.200471	0.891735	421.844	FALSE	2
2022-09-13	14:38:05	0.252023	1.12105	489.998	FALSE	2
2022-09-13	14:38:05	0.237468	1.05631	422.901	FALSE	2
2022-09-13	14:38:05	0.257265	1.14437	491.143	FALSE	2
2022-09-13	14:38:06	0.327188	1.4554	424.356	FALSE	2
2022-09-13	14:38:06	0.176349	0.784436	491.927	FALSE	2
2022-09-13	14:38:06	0.346578	1.54165	425.898	FALSE	2
2022-09-13	14:38:07	0.227646	1.01261	492.94	FALSE	2
2022-09-13	14:38:07	0.345662	1.53757	427.435	FALSE	2
2022-09-13	14:38:07	0.244949	1.08958	494.029	FALSE	2
2022-09-13	14:38:07	0.259148	1.15274	428.588	FALSE	2
2022-09-13	14:38:08	0.340573	1.51494	495.544	FALSE	2
2022-09-13	14:38:08	0.226781	1.00877	429.597	FALSE	2
2022-09-13	14:38:08	0.379555	1.68834	497.233	FALSE	2
2022-09-13	14:38:08	0.201641	0.896939	430.494	FALSE	2
2022-09-13	14:38:09	0.259148	1.15274	498.385	FALSE	2
2022-09-13	14:38:09	0.271158	1.20617	431.7	FALSE	2
2022-09-13	14:38:09	0.214059	0.952177	499.338	FALSE	2
2022-09-13	14:38:09	0.351056	1.56157	433.262	FALSE	2
2022-09-13	14:38:10	0.183423	0.815902	500.153	FALSE	2
2022-09-13	14:38:10	0.270649	1.2039	434.465	FALSE	2
2022-09-13	14:38:10	0.243372	1.08257	501.236	FALSE	2
2022-09-13	14:38:11	0.265865	1.18262	435.648	FALSE	2
2022-09-13	14:38:11	0.329275	1.46468	502.701	FALSE	2
2022-09-13	14:38:11	0.230954	1.02733	436.675	FALSE	2
2022-09-13	14:38:11	0.272735	1.21318	503.914	FALSE	2
2022-09-13	14:38:12	0.394771	1.75602	438.431	FALSE	2
2022-09-13	14:38:12	0.358791	1.59597	505.51	FALSE	2
2022-09-13	14:38:12	0.414822	1.84521	440.277	FALSE	2
2022-09-13	14:38:12	0.700063	3.11402	508.624	FALSE	2
2022-09-13	14:38:13	0.651107	2.89625	443.173	FALSE	2
2022-09-13	14:38:13	0.712786	3.17061	511.794	FALSE	2
2022-09-13	14:38:13	0.55528	2.47	445.643	FALSE	2
2022-09-13	14:38:13	0.660369	2.93745	514.732	FALSE	2
2022-09-13	14:38:14	0.522048	2.32217	447.965	FALSE	2
2022-09-13	14:38:14	0.600216	2.66988	517.402	FALSE	2
2022-09-13	14:38:14	0.478028	2.12636	450.091	FALSE	2
2022-09-13	14:38:15	0.494059	2.19767	519.599	FALSE	2
2022-09-13	14:38:15	0.496603	2.20899	452.3	FALSE	2
2022-09-13	14:38:15	0.496349	2.20786	521.807	FALSE	2
2022-09-13	14:38:15	0.485	2.15738	454.458	FALSE	2
2022-09-13	14:38:16	0.444593	1.97764	523.785	FALSE	2
2022-09-13	14:38:16	0.463015	2.05958	456.517	FALSE	2
2022-09-13	14:38:16	0.431819	1.92082	525.706	FALSE	2
2022-09-13	14:38:16	0.441794	1.96519	458.483	FALSE	2
2022-09-13	14:38:17	0.411667	1.83118	527.537	FALSE	2
2022-09-13	14:38:17	0.42271	1.8803	460.363	FALSE	2
2022-09-13	14:38:17	0.274364	1.22043	528.757	FALSE	2
2022-09-13	14:38:17	0.0938042	0.41726	460.78	FALSE	2
2022-09-13	14:38:18	0.202659	0.901468	529.659	FALSE	2
2022-09-13	14:38:18	0.269733	1.19983	461.98	FALSE	2
2022-09-13	14:38:18	0.240878	1.07147	530.73	FALSE	2
2022-09-13	14:38:19	0.159046	0.707468	462.687	FALSE	2
2022-09-13	14:38:19	0.0774684	0.344595	531.075	FALSE	2
2022-09-13	14:38:19	0.300318	1.33587	464.023	FALSE	2
2022-09-13	14:38:19	0.0946694	0.421108	531.496	FALSE	2
2022-09-13	14:38:20	0.130751	0.581607	464.605	FALSE	2
2022-09-13	14:38:20	0.0620994	0.276231	531.772	FALSE	2
2022-09-13	14:38:20	0.0442877	0.197001	464.802	FALSE	2
2022-09-13	14:38:20	0.105916	0.471136	532.243	FALSE	2
2022-09-13	14:38:21	0.0600639	0.267176	465.069	FALSE	2
2022-09-13	14:38:21	0.188715	0.839442	533.083	FALSE	2
2022-09-13	14:38:21	0.0920739	0.409563	465.479	FALSE	2
2022-09-13	14:38:21	0.0905473	0.402772	533.486	FALSE	2
2022-09-13	14:38:22	0.19869	0.883813	466.362	FALSE	2
2022-09-13	14:38:22	0.193193	0.859361	534.345	FALSE	2
2022-09-13	14:38:22	0.368461	1.63899	468.001	FALSE	2
2022-09-13	14:38:23	0.202914	0.902602	535.248	FALSE	2
2022-09-13	14:38:23	0.322405	1.43412	469.436	FALSE	2
2022-09-13	14:38:23	0.229275	1.01986	536.267	FALSE	2
2022-09-13	14:38:23	0.250191	1.1129	470.548	FALSE	2
2022-09-13	14:38:24	0.312328	1.3893	537.657	FALSE	2
2022-09-13	14:38:24	0.180318	0.802091	471.351	FALSE	2
2022-09-13	14:38:24	0.368868	1.6408	539.298	FALSE	2
2022-09-13	14:38:24	0.301998	1.34335	472.694	FALSE	2
2022-09-13	14:38:25	0.26271	1.16859	540.466	FALSE	2
2022-09-13	14:38:25	0.297723	1.32433	474.018	FALSE	2
2022-09-13	14:38:25	0.161387	0.717882	541.184	FALSE	2
2022-09-13	14:38:25	0.327341	1.45608	475.474	FALSE	2
2022-09-13	14:38:26	0.148919	0.662421	541.846	FALSE	2
2022-09-13	14:38:26	0.331209	1.47328	476.948	FALSE	2
2022-09-13	14:38:26	0.106018	0.471589	542.318	FALSE	2
2022-09-13	14:38:27	0.201743	0.897393	477.845	FALSE	2
2022-09-13	14:38:27	0.132328	0.588621	542.907	FALSE	2
2022-09-13	14:38:27	0.170598	0.758854	478.604	FALSE	2
2022-09-13	14:38:27	0.208054	0.925466	543.832	FALSE	2
2022-09-13	14:38:28	0.141183	0.62801	479.232	FALSE	2
2022-09-13	14:38:28	0.292328	1.30033	545.132	FALSE	2
2022-09-13	14:38:28	0.133346	0.59315	479.825	FALSE	2
2022-09-13	14:38:28	0.292634	1.30169	546.434	FALSE	2
2022-09-13	14:38:29	0.117316	0.521845	480.347	FALSE	2
2022-09-13	14:38:29	0.328562	1.46151	547.896	FALSE	2
2022-09-13	14:38:29	0.127443	0.566892	480.914	FALSE	2
2022-09-13	14:38:29	0.167646	0.745723	548.641	FALSE	2
2022-09-13	14:38:30	0.182608	0.812277	481.726	FALSE	2
2022-09-13	14:38:30	0.0902419	0.401414	549.043	FALSE	2
2022-09-13	14:38:30	0.282099	1.25483	482.981	FALSE	2
2022-09-13	14:38:31	0.201081	0.894449	549.937	FALSE	2
2022-09-13	14:38:31	0.333753	1.4846	484.465	FALSE	2
2022-09-13	14:38:31	0.18388	0.817935	550.755	FALSE	2
2022-09-13	14:38:31	0.221539	0.98545	485.451	FALSE	2
2022-09-13	14:38:32	0.240318	1.06898	551.824	FALSE	2
2022-09-13	14:38:32	0.167239	0.743913	486.195	FALSE	2
2022-09-13	14:38:32	0.343626	1.52852	553.353	FALSE	2
2022-09-13	14:38:32	0.188257	0.837405	487.032	FALSE	2
2022-09-13	14:38:33	0.326629	1.45291	554.806	FALSE	2
2022-09-13	14:38:33	0.24673	1.0975	488.13	FALSE	2
2022-09-13	14:38:33	0.224898	1.00039	555.806	FALSE	2
2022-09-13	14:38:33	0.233143	1.03707	489.167	FALSE	2
2022-09-13	14:38:34	0.201896	0.898074	556.704	FALSE	2
2022-09-13	14:38:34	0.295585	1.31482	490.482	FALSE	2
2022-09-13	14:38:34	0.20444	0.90939	557.613	FALSE	2
2022-09-13	14:38:35	0.341336	1.51833	492	FALSE	2
2022-09-13	14:38:35	0.225407	1.00266	558.616	FALSE	2
2022-09-13	14:38:35	0.229478	1.02076	493.021	FALSE	2
2022-09-13	14:38:35	0.281794	1.25348	559.87	FALSE	2
2022-09-13	14:38:36	0.290089	1.29037	494.311	FALSE	2
2022-09-13	14:38:36	0.350751	1.56021	561.43	FALSE	2
2022-09-13	14:38:36	0.272735	1.21318	495.524	FALSE	2
2022-09-13	14:38:36	0.291768	1.29784	562.728	FALSE	2
2022-09-13	14:38:37	0.360165	1.60209	497.126	FALSE	2
2022-09-13	14:38:37	0.289122	1.28607	564.014	FALSE	2
2022-09-13	14:38:37	0.288664	1.28404	498.41	FALSE	2
2022-09-13	14:38:37	0.363982	1.61906	565.633	FALSE	2
2022-09-13	14:38:38	0.22958	1.02122	499.432	FALSE	2
2022-09-13	14:38:38	0.413397	1.83887	567.472	FALSE	2
2022-09-13	14:38:38	0.324135	1.44182	500.873	FALSE	2
2022-09-13	14:38:39	0.358079	1.59281	569.064	FALSE	2
2022-09-13	14:38:39	0.348817	1.55161	502.425	FALSE	2
2022-09-13	14:38:39	0.261132	1.16157	570.226	FALSE	2
2022-09-13	14:38:39	0.461794	2.05415	504.479	FALSE	2
2022-09-13	14:38:40	0.481489	2.14176	572.368	FALSE	2
2022-09-13	14:38:40	0.404288	1.79835	506.278	FALSE	2
2022-09-13	14:38:40	0.487036	2.16643	574.534	FALSE	2
2022-09-13	14:38:40	0.424288	1.88732	508.165	FALSE	2
2022-09-13	14:38:41	0.415992	1.85042	576.385	FALSE	2
2022-09-13	14:38:41	0.444898	1.979	510.144	FALSE	2
2022-09-13	14:38:41	0.714873	3.1799	579.565	FALSE	2
2022-09-13	14:38:41	0.188868	0.840123	510.984	FALSE	2
2022-09-13	14:38:42	-0.200598	-0.8923	579.565	FALSE	2
2022-09-13	14:38:42	-0.378664	-1.68437	510.984	FALSE	2
2022-09-13	14:38:42	-0.31159	-1.38601	579.565	FALSE	2
2022-09-13	14:38:43	-0.188333	-0.837743	510.984	FALSE	2
2022-09-13	14:38:43	-0.0290964	-0.129427	579.565	FALSE	2
2022-09-13	14:38:43	-0.0608522	-0.270683	510.984	FALSE	2
2022-09-13	14:38:43	0.117977	0.524785	580.089	FALSE	2
2022-09-13	14:38:44	0.195127	0.867964	511.852	FALSE	2
2022-09-13	14:38:44	0.543422	2.41725	582.507	FALSE	2
2022-09-13	14:38:44	0.328461	1.46106	513.313	FALSE	2
2022-09-13	14:38:44	0.513397	2.28369	584.79	FALSE	2
2022-09-13	14:38:45	0.318334	1.41601	514.729	FALSE	2
2022-09-13	14:38:45	0.468562	2.08426	586.875	FALSE	2
2022-09-13	14:38:45	0.398232	1.77142	516.5	FALSE	2
2022-09-13	14:38:45	0.460471	2.04827	588.923	FALSE	2
2022-09-13	14:38:46	0.386069	1.71731	518.218	FALSE	2
2022-09-13	14:38:46	0.303931	1.35195	590.275	FALSE	2
2022-09-13	14:38:46	0.465102	2.06887	520.287	FALSE	2
2022-09-13	14:38:47	0.194873	0.866834	591.142	FALSE	2
2022-09-13	14:38:47	0.470089	2.09105	522.378	FALSE	2
2022-09-13	14:38:47	0.348308	1.54934	592.691	FALSE	2
2022-09-13	14:38:47	0.334008	1.48573	523.863	FALSE	2
2022-09-13	14:38:48	0.419504	1.86604	594.557	FALSE	2
2022-09-13	14:38:48	0.421641	1.87554	525.739	FALSE	2
2022-09-13	14:38:48	0.405051	1.80175	596.359	FALSE	2
2022-09-13	14:38:48	0.251311	1.11788	526.857	FALSE	2
2022-09-13	14:38:49	0.442812	1.96972	598.328	FALSE	2
2022-09-13	14:38:49	0.392532	1.74606	528.603	FALSE	2
2022-09-13	14:38:49	0.250242	1.11313	599.442	FALSE	2
2022-09-13	14:38:49	0.130954	0.58251	529.185	FALSE	2
2022-09-13	14:38:50	0.265356	1.18036	600.622	FALSE	2
2022-09-13	14:38:50	0.292277	1.30011	530.485	FALSE	2
2022-09-13	14:38:50	0.373143	1.65981	602.282	FALSE	2
2022-09-13	14:38:51	0.412227	1.83367	532.319	FALSE	2
2022-09-13	14:38:51	0.351107	1.56179	603.843	FALSE	2
2022-09-13	14:38:51	0.448919	1.99688	534.316	FALSE	2
2022-09-13	14:38:51	0.316603	1.40831	605.252	FALSE	2
2022-09-13	14:38:52	0.193702	0.861625	535.178	FALSE	2
2022-09-13	14:38:52	0.30785	1.36938	606.621	FALSE	2
2022-09-13	14:38:52	0.26327	1.17108	536.349	FALSE	2
2022-09-13	14:38:52	0.19472	0.866154	607.487	FALSE	2
2022-09-13	14:38:53	0.36444	1.6211	537.97	FALSE	2
2022-09-13	14:38:53	0.956349	4.25403	611.741	FALSE	2
2022-09-13	14:38:53	1.11131	4.94333	542.913	FALSE	2
2022-09-13	14:38:53	0.625967	2.78443	614.526	FALSE	2
2022-09-13	14:38:54	0.425713	1.89366	544.807	FALSE	2
2022-09-13	14:38:54	0.425458	1.89252	616.418	FALSE	2
2022-09-13	14:38:54	0.513041	2.28211	547.089	FALSE	2
2022-09-13	14:38:55	0.328969	1.46332	617.882	FALSE	2
2022-09-13	14:38:55	0.329428	1.46536	548.554	FALSE	2
2022-09-13	14:38:55	0.501845	2.23231	620.114	FALSE	2
2022-09-13	14:38:55	0.49126	2.18522	550.74	FALSE	2
2022-09-13	14:38:56	0.565916	2.51731	622.631	FALSE	2
2022-09-13	14:38:56	0.391972	1.74357	552.483	FALSE	2
2022-09-13	14:38:56	0.374466	1.6657	624.297	FALSE	2
2022-09-13	14:38:56	0.317977	1.41443	553.898	FALSE	2
2022-09-13	14:38:57	0.275636	1.22608	625.523	FALSE	2
2022-09-13	14:38:57	0.0843386	0.375155	554.273	FALSE	2
2022-09-13	14:38:57	0.0437788	0.194737	625.718	FALSE	2
2022-09-13	14:38:57	-0.0536766	-0.238764	554.273	FALSE	2
2022-09-13	14:38:58	-0.0168827	-0.0750976	625.718	FALSE	2
2022-09-13	14:38:58	-0.0637529	-0.283586	554.273	FALSE	2
2022-09-13	14:38:58	-0.0261448	-0.116297	625.718	FALSE	2
2022-09-13	14:38:59	0.0984353	0.43786	554.711	FALSE	2
2022-09-13	14:38:59	0.145662	0.647934	626.366	FALSE	2
2022-09-13	14:38:59	0.377875	1.68086	556.391	FALSE	2
2022-09-13	14:38:59	0.265305	1.18013	627.546	FALSE	2
2022-09-13	14:39:00	0.366883	1.63197	558.023	FALSE	2
2022-09-13	14:39:00	0.0459163	0.204245	627.75	FALSE	2
2022-09-13	14:39:00	0.164644	0.732369	558.756	FALSE	2
2022-09-13	14:39:00	-0.0482822	-0.214769	627.75	FALSE	2
2022-09-13	14:39:01	-0.269503	-1.1988	558.756	FALSE	2
2022-09-13	14:39:01	-0.174796	-0.777528	627.75	FALSE	2
2022-09-13	14:39:01	-0.252659	-1.12388	558.756	FALSE	2
2022-09-13	14:39:01	-0.160292	-0.713011	627.75	FALSE	2
2022-09-13	14:39:02	-0.234643	-1.04374	558.756	FALSE	2
2022-09-13	14:39:02	-0.147213	-0.654833	627.75	FALSE	2
2022-09-13	14:39:02	-0.286297	-1.27351	558.756	FALSE	2
2022-09-13	14:39:03	0.0685116	0.304753	628.055	FALSE	2
2022-09-13	14:39:03	0.154466	0.687096	559.443	FALSE	2
2022-09-13	14:39:03	0.0103947	0.0462377	628.101	FALSE	2
2022-09-13	14:39:03	-0.0430405	-0.191453	559.443	FALSE	2
2022-09-13	14:39:04	0.036247	0.161234	628.262	FALSE	2
2022-09-13	14:39:04	0.340929	1.51652	560.959	FALSE	2
2022-09-13	14:39:04	0.289377	1.28721	629.55	FALSE	2
2022-09-13	14:39:04	0.180369	0.802317	561.762	FALSE	2
2022-09-13	14:39:05	0.18897	0.840576	630.39	FALSE	2
2022-09-13	14:39:05	0.245967	1.09411	562.856	FALSE	2
2022-09-13	14:39:05	0.272735	1.21318	631.603	FALSE	2
2022-09-13	14:39:05	0.295025	1.31233	564.168	FALSE	2
2022-09-13	14:39:06	0.422201	1.87803	633.481	FALSE	2
2022-09-13	14:39:06	0.208919	0.929313	565.097	FALSE	2
2022-09-13	14:39:06	0.478486	2.1284	635.61	FALSE	2
2022-09-13	14:39:07	0.65701	2.92251	568.02	FALSE	2
2022-09-13	14:39:07	0.881234	3.91991	639.53	FALSE	2
2022-09-13	14:39:07	2.54337	11.3134	579.333	FALSE	2
2022-09-13	14:39:07	5.10276	22.6981	662.228	1	3
2022-09-13	14:39:08	3.60617	16.041	595.374	1	4
2022-09-13	14:39:08	0.528308	2.35002	664.578	FALSE	4
2022-09-13	14:39:08	0.34098	1.51675	596.891	FALSE	4
2022-09-13	14:39:08	0.412328	1.83412	666.412	FALSE	4
2022-09-13	14:39:09	0.371412	1.65211	598.543	FALSE	4
2022-09-13	14:39:09	0.267952	1.1919	667.604	FALSE	4
2022-09-13	14:39:09	0.313753	1.39564	599.939	FALSE	4
2022-09-13	14:39:09	0.200573	0.892189	668.496	FALSE	4
2022-09-13	14:39:10	0.240878	1.07147	601.01	FALSE	4
2022-09-13	14:39:10	0.138232	0.614884	669.111	FALSE	4
2022-09-13	14:39:10	0.368817	1.64057	602.651	FALSE	4
2022-09-13	14:39:11	0.218028	0.969832	670.081	FALSE	4
2022-09-13	14:39:11	0.428104	1.90429	604.555	FALSE	4
2022-09-13	14:39:11	0.217977	0.969605	671.05	FALSE	4
2022-09-13	14:39:11	0.315178	1.40197	605.957	FALSE	4
2022-09-13	14:39:12	0.149987	0.667172	671.717	FALSE	4
2022-09-13	14:39:12	-0.00258246	-0.0114873	605.957	FALSE	4
2022-09-13	14:39:12	-0.209249	-0.930781	671.717	FALSE	4
2022-09-13	14:39:12	-0.276679	-1.23072	605.957	FALSE	4
2022-09-13	14:39:13	-0.409351	-1.82088	671.717	FALSE	4
2022-09-13	14:39:13	-0.537391	-2.39042	605.957	FALSE	4
2022-09-13	14:39:13	-0.446246	-1.98499	671.717	FALSE	4
2022-09-13	14:39:13	-0.196068	-0.87215	605.957	FALSE	4
2022-09-13	14:39:14	-0.255814	-1.13791	671.717	FALSE	4
2022-09-13	14:39:14	-0.211132	-0.939157	605.957	FALSE	4
2022-09-13	14:39:14	-0.283498	-1.26106	671.717	FALSE	4
2022-09-13	14:39:15	-0.225381	-1.00254	605.957	FALSE	4
2022-09-13	14:39:15	-0.053931	-0.239896	671.717	FALSE	4
2022-09-13	14:39:15	0.00484756	0.0215629	605.979	FALSE	4
2022-09-13	14:39:15	0.29299	1.30328	673.021	FALSE	4
2022-09-13	14:39:16	0.234873	1.04476	607.023	FALSE	4
2022-09-13	14:39:16	0.129987	0.578208	673.599	FALSE	4
2022-09-13	14:39:16	0.0461198	0.20515	607.229	FALSE	4
2022-09-13	14:39:16	-0.0820226	-0.364853	673.599	FALSE	4
2022-09-13	14:39:17	0.0606237	0.269666	607.498	FALSE	4
2022-09-13	14:39:17	0.52617	2.34051	675.939	FALSE	4
2022-09-13	14:39:17	0.644644	2.86751	610.366	FALSE	4
2022-09-13	14:39:17	0.800114	3.55907	679.498	FALSE	4
2022-09-13	14:39:18	1.33614	5.94342	616.309	FALSE	4
2022-09-13	14:39:18	2.06169	9.17081	688.669	FALSE	4
2022-09-13	14:39:18	2.70393	12.0276	628.337	FALSE	4
2022-09-13	14:39:19	0.268664	1.19507	689.864	FALSE	4
2022-09-13	14:39:19	0.505814	2.24996	630.587	FALSE	4
2022-09-13	14:39:19	0.149784	0.666269	690.531	FALSE	4
2022-09-13	14:39:19	0.122405	0.544482	631.131	FALSE	4
2022-09-13	14:39:20	-0.103702	-0.461287	690.531	FALSE	4
2022-09-13	14:39:20	-0.0640583	-0.284944	631.131	FALSE	4
2022-09-13	14:39:20	0.130751	0.581607	691.112	FALSE	4
2022-09-13	14:39:20	0.385356	1.71414	632.845	FALSE	4
2022-09-13	14:39:21	0.808766	3.59755	694.71	FALSE	4
2022-09-13	14:39:21	0.657824	2.92613	635.772	FALSE	4
2022-09-13	14:39:21	0.460573	2.04872	696.759	FALSE	4
2022-09-13	14:39:21	0.312023	1.38794	637.159	FALSE	4
2022-09-13	14:39:22	0.28327	1.26004	698.019	FALSE	4
2022-09-13	14:39:22	0.320624	1.4262	638.586	FALSE	4
2022-09-13	14:39:22	0.0945168	0.42043	698.439	FALSE	4
2022-09-13	14:39:23	-0.219376	-0.975828	638.586	FALSE	4
2022-09-13	14:39:23	-0.221565	-0.985565	698.439	FALSE	4
2022-09-13	14:39:23	-0.210572	-0.936666	638.586	FALSE	4
2022-09-13	14:39:23	-0.0184094	-0.0818887	698.439	FALSE	4
2022-09-13	14:39:24	-0.186603	-0.830047	638.586	FALSE	4
2022-09-13	14:39:24	0.036247	0.161234	698.6	FALSE	4
2022-09-13	14:39:24	0.16902	0.751835	639.338	FALSE	4
2022-09-13	14:39:24	0.205102	0.912335	699.513	FALSE	4
2022-09-13	14:39:25	0.132125	0.587718	639.925	FALSE	4
2022-09-13	14:39:25	0.170853	0.759988	700.273	FALSE	4
2022-09-13	14:39:25	1.00653	4.47725	644.402	FALSE	4
2022-09-13	14:39:25	0.557214	2.4786	702.751	FALSE	4
2022-09-13	14:39:26	-0.113219	-0.503621	644.402	FALSE	4
2022-09-13	14:39:26	-0.146399	-0.651212	702.751	FALSE	4
2022-09-13	14:39:26	-0.160343	-0.713238	644.402	FALSE	4
2022-09-13	14:39:27	-0.362023	-1.61035	702.751	FALSE	4
2022-09-13	14:39:27	-0.441819	-1.9653	644.402	FALSE	4
2022-09-13	14:39:27	-0.521513	-2.31979	702.751	FALSE	4
2022-09-13	14:39:27	-0.488893	-2.17469	644.402	FALSE	4
2022-09-13	14:39:28	-0.445534	-1.98182	702.751	FALSE	4
2022-09-13	14:39:28	-0.464414	-2.06581	644.402	FALSE	4
2022-09-13	14:39:28	-0.439885	-1.9567	702.751	FALSE	4
2022-09-13	14:39:28	-0.510674	-2.27158	644.402	FALSE	4
2022-09-13	14:39:29	-0.435712	-1.93813	702.751	FALSE	4
2022-09-13	14:39:29	-0.444872	-1.97888	644.402	FALSE	4
2022-09-13	14:39:29	-0.421921	-1.87679	702.751	FALSE	4
2022-09-13	14:39:29	-0.415814	-1.84962	644.402	FALSE	4
2022-09-13	14:39:30	-0.442175	-1.96688	702.751	FALSE	4
2022-09-13	14:39:30	-0.418816	-1.86298	644.402	FALSE	4
2022-09-13	14:39:30	-0.388791	-1.72942	702.751	FALSE	4
2022-09-13	14:39:31	-0.339834	-1.51165	644.402	FALSE	4
2022-09-13	14:39:31	-0.421972	-1.87702	702.751	FALSE	4
2022-09-13	14:39:31	-0.202837	-0.90226	644.402	FALSE	4
2022-09-13	14:39:31	-0.203397	-0.904751	702.751	FALSE	4
2022-09-13	14:39:32	0.121998	0.542672	644.945	FALSE	4
2022-09-13	14:39:32	-0.0916409	-0.407637	702.751	FALSE	4
2022-09-13	14:39:32	0.0971122	0.431974	645.377	FALSE	4
2022-09-13	14:39:32	-0.060903	-0.270909	702.751	FALSE	4
2022-09-13	14:39:33	0.0244913	0.108942	645.486	FALSE	4
2022-09-13	14:39:33	-0.00288781	-0.0128456	702.751	FALSE	4
2022-09-13	14:39:33	-0.0183076	-0.0814359	645.486	FALSE	4
2022-09-13	14:39:33	0.201031	0.894226	703.645	FALSE	4
2022-09-13	14:39:34	0.200573	0.892189	646.378	FALSE	4
2022-09-13	14:39:34	0.317621	1.41284	705.058	FALSE	4
2022-09-13	14:39:34	0.444288	1.97628	648.355	FALSE	4
2022-09-13	14:39:35	0.744339	3.31097	708.369	FALSE	4
2022-09-13	14:39:35	0.265305	1.18013	649.535	FALSE	4
2022-09-13	14:39:35	0.436247	1.94051	710.31	FALSE	4
2022-09-13	14:39:35	0.35813	1.59303	651.128	FALSE	4
2022-09-13	14:39:36	0.381845	1.69852	712.008	FALSE	4
2022-09-13	14:39:36	0.363677	1.61771	652.745	FALSE	4
2022-09-13	14:39:36	0.459046	2.04193	714.05	FALSE	4
2022-09-13	14:39:36	0.317621	1.41284	654.158	FALSE	4
2022-09-13	14:39:37	0.521132	2.3181	716.368	FALSE	4
2022-09-13	14:39:37	0.308868	1.37391	655.532	FALSE	4
2022-09-13	14:39:37	0.420573	1.87079	718.239	FALSE	4
2022-09-13	14:39:37	0.163982	0.729425	656.262	FALSE	4
2022-09-13	14:39:38	0.320929	1.42756	719.667	FALSE	4
2022-09-13	14:39:38	0.266069	1.18353	657.445	FALSE	4
2022-09-13	14:39:38	0.329377	1.46513	721.132	FALSE	4
2022-09-13	14:39:39	0.29813	1.32614	658.771	FALSE	4
2022-09-13	14:39:39	0.305458	1.35874	722.49	FALSE	4
2022-09-13	14:39:39	0.352685	1.56881	660.34	FALSE	4
2022-09-13	14:39:39	0.246374	1.09592	723.586	FALSE	4
2022-09-13	14:39:40	0.608002	2.70451	663.045	FALSE	4
2022-09-13	14:39:40	0.193244	0.859588	724.446	FALSE	4
2022-09-13	14:39:40	0.40042	1.78115	664.826	FALSE	4
2022-09-13	14:39:40	0.363168	1.61544	726.061	FALSE	4
2022-09-13	14:39:41	0.519555	2.31108	667.137	FALSE	4
2022-09-13	14:39:41	0.467697	2.08041	728.142	FALSE	4
2022-09-13	14:39:41	0.473244	2.10508	669.242	FALSE	4
2022-09-13	14:39:41	0.520064	2.31335	730.455	FALSE	4
2022-09-13	14:39:42	0.390191	1.73565	670.978	FALSE	4
2022-09-13	14:39:42	0.411463	1.83027	732.285	FALSE	4
2022-09-13	14:39:42	0.304186	1.35308	672.331	FALSE	4
2022-09-13	14:39:43	0.17528	0.77968	733.065	FALSE	4
2022-09-13	14:39:43	0.404949	1.80129	674.132	FALSE	4
2022-09-13	14:39:43	0.165051	0.73418	733.799	FALSE	4
2022-09-13	14:39:43	0.358232	1.59349	675.725	FALSE	4
2022-09-13	14:39:44	0.190242	0.846234	734.646	FALSE	4
2022-09-13	14:39:44	0.107189	0.476798	676.202	FALSE	4
2022-09-13	14:39:44	0.0673411	0.299547	734.945	FALSE	4
2022-09-13	14:39:44	0.0159417	0.0709119	676.273	FALSE	4
2022-09-13	14:39:45	0.111209	0.49468	735.44	FALSE	4
2022-09-13	14:39:45	-0.00288781	-0.0128456	676.273	FALSE	4
2022-09-13	14:39:45	0.216247	0.96191	736.402	FALSE	4
2022-09-13	14:39:45	0.417061	1.85517	678.128	FALSE	4
2022-09-13	14:39:46	0.29299	1.30328	737.705	FALSE	4
2022-09-13	14:39:46	0.529987	2.35749	680.486	FALSE	4
2022-09-13	14:39:46	0.394262	1.75376	739.459	FALSE	4
2022-09-13	14:39:47	0.384237	1.70916	682.195	FALSE	4
2022-09-13	14:39:47	0.405967	1.80582	741.265	FALSE	4
2022-09-13	14:39:47	0.305916	1.36078	683.556	FALSE	4
2022-09-13	14:39:47	0.22673	1.00854	742.273	FALSE	4
2022-09-13	14:39:48	0.350445	1.55885	685.115	FALSE	4
2022-09-13	14:39:48	0.381743	1.69807	743.971	FALSE	4
2022-09-13	14:39:48	0.382964	1.7035	686.818	FALSE	4
2022-09-13	14:39:48	0.464237	2.06502	746.036	FALSE	4
2022-09-13	14:39:49	0.402252	1.7893	688.607	FALSE	4
2022-09-13	14:39:49	0.367392	1.63423	747.67	FALSE	4
2022-09-13	14:39:49	0.546781	2.43219	691.04	FALSE	4
2022-09-13	14:39:49	0.395331	1.75851	749.429	FALSE	4
2022-09-13	14:39:50	0.281998	1.25438	692.294	FALSE	4
2022-09-13	14:39:50	0.181234	0.806165	750.235	FALSE	4
2022-09-13	14:39:50	0.483982	2.15285	694.447	FALSE	4
2022-09-13	14:39:51	0.394669	1.75557	751.991	FALSE	4
2022-09-13	14:39:51	0.548613	2.44034	696.887	FALSE	4
2022-09-13	14:39:51	0.349886	1.55636	753.547	FALSE	4
2022-09-13	14:39:51	0.458384	2.03898	698.926	FALSE	4
2022-09-13	14:39:52	0.449122	1.99778	755.545	FALSE	4
2022-09-13	14:39:52	0.500318	2.22551	701.152	FALSE	4
2022-09-13	14:39:52	0.648969	2.88674	758.432	FALSE	4
2022-09-13	14:39:52	0.536145	2.38488	703.537	FALSE	4
2022-09-13	14:39:53	0.466679	2.07588	760.507	FALSE	4
2022-09-13	14:39:53	0.418283	1.86061	705.397	FALSE	4
2022-09-13	14:39:53	0.414262	1.84272	762.35	FALSE	4
2022-09-13	14:39:53	0.465814	2.07203	707.469	FALSE	4
2022-09-13	14:39:54	0.476909	2.12139	764.472	FALSE	4
2022-09-13	14:39:54	0.485967	2.16168	709.631	FALSE	4
2022-09-13	14:39:54	0.491769	2.18749	766.659	FALSE	4
2022-09-13	14:39:55	0.523677	2.32942	711.96	FALSE	4
2022-09-13	14:39:55	0.475178	2.11369	768.773	FALSE	4
2022-09-13	14:39:55	0.448919	1.99688	713.957	FALSE	4
2022-09-13	14:39:55	0.44785	1.99213	770.765	FALSE	4
2022-09-13	14:39:56	0.428308	1.9052	715.862	FALSE	4
2022-09-13	14:39:56	0.465204	2.06932	772.834	FALSE	4
2022-09-13	14:39:56	0.409173	1.82008	717.682	FALSE	4
2022-09-13	14:39:56	0.445662	1.98239	774.817	FALSE	4
2022-09-13	14:39:57	0.382506	1.70146	719.384	FALSE	4
2022-09-13	14:39:57	0.435891	1.93893	776.755	FALSE	4
2022-09-13	14:39:57	0.408308	1.81624	721.2	FALSE	4
2022-09-13	14:39:57	0.368868	1.6408	778.396	FALSE	4
2022-09-13	14:39:58	0.350903	1.56089	722.761	FALSE	4
2022-09-13	14:39:58	0.357265	1.58919	779.985	FALSE	4
2022-09-13	14:39:58	0.528206	2.34957	725.111	FALSE	4
2022-09-13	14:39:59	0.242099	1.0769	781.062	FALSE	4
2022-09-13	14:39:59	0.505203	2.24724	727.358	FALSE	4
2022-09-13	14:39:59	0.430598	1.91539	782.978	FALSE	4
2022-09-13	14:39:59	0.432735	1.92489	729.283	FALSE	4
2022-09-13	14:40:00	0.390242	1.73587	784.714	FALSE	4
2022-09-13	14:40:00	0.318079	1.41488	730.698	FALSE	4
2022-09-13	14:40:00	0.433499	1.92829	786.642	FALSE	4
2022-09-13	14:40:00	0.336196	1.49547	732.193	FALSE	4
2022-09-13	14:40:01	0.566476	2.5198	789.162	FALSE	4
2022-09-13	14:40:01	0.231005	1.02756	733.221	FALSE	4
2022-09-13	14:40:01	0.489936	2.17933	791.341	FALSE	4
2022-09-13	14:40:01	0.304339	1.35376	734.574	FALSE	4
2022-09-13	14:40:02	0.46673	2.07611	793.417	FALSE	4
2022-09-13	14:40:02	0.401387	1.78545	736.36	FALSE	4
2022-09-13	14:40:02	0.407392	1.81216	795.229	FALSE	4
2022-09-13	14:40:03	0.363423	1.61658	737.976	FALSE	4
2022-09-13	14:40:03	0.353651	1.57311	796.802	FALSE	4
2022-09-13	14:40:03	0.437163	1.94459	739.921	FALSE	4
2022-09-13	14:40:03	0.281845	1.2537	798.056	FALSE	4
2022-09-13	14:40:04	0.500929	2.22823	742.149	FALSE	4
2022-09-13	14:40:04	0.222659	0.990432	799.047	FALSE	4
2022-09-13	14:40:04	0.530802	2.36111	744.51	FALSE	4
2022-09-13	14:40:04	0.282914	1.25846	800.305	FALSE	4
2022-09-13	14:40:05	0.433397	1.92784	746.438	FALSE	4
2022-09-13	14:40:05	0.318944	1.41873	801.724	FALSE	4
2022-09-13	14:40:05	0.450649	2.00458	748.443	FALSE	4
2022-09-13	14:40:05	0.341692	1.51991	803.244	FALSE	4
2022-09-13	14:40:06	0.331565	1.47487	749.918	FALSE	4
2022-09-13	14:40:06	0.390242	1.73587	804.98	FALSE	4
2022-09-13	14:40:06	0.307545	1.36802	751.286	FALSE	4
2022-09-13	14:40:07	0.511463	2.27509	807.255	FALSE	4
2022-09-13	14:40:07	0.24841	1.10498	752.391	FALSE	4
2022-09-13	14:40:07	0.466527	2.07521	809.33	FALSE	4
2022-09-13	14:40:07	0.332328	1.47826	753.869	FALSE	4
2022-09-13	14:40:08	0.445	1.97945	811.309	FALSE	4
2022-09-13	14:40:08	0.273397	1.21612	755.085	FALSE	4
2022-09-13	14:40:08	0.354313	1.57606	812.885	FALSE	4
2022-09-13	14:40:08	0.321285	1.42914	756.514	FALSE	4
2022-09-13	14:40:09	0.416349	1.852	814.737	FALSE	4
2022-09-13	14:40:09	0.429173	1.90905	758.423	FALSE	4
2022-09-13	14:40:09	0.373906	1.66321	816.401	FALSE	4
2022-09-13	14:40:09	0.518944	2.30837	760.732	FALSE	4
2022-09-13	14:40:10	0.356247	1.58466	817.985	FALSE	4
2022-09-13	14:40:10	0.508512	2.26196	762.994	FALSE	4
2022-09-13	14:40:10	0.377112	1.67747	819.663	FALSE	4
2022-09-13	14:40:11	0.379351	1.68743	764.681	FALSE	4
2022-09-13	14:40:11	0.407545	1.81284	821.476	FALSE	4
2022-09-13	14:40:11	0.375891	1.67204	766.353	FALSE	4
2022-09-13	14:40:11	0.55701	2.47769	823.953	FALSE	4
2022-09-13	14:40:12	0.392074	1.74402	768.097	FALSE	4
2022-09-13	14:40:12	0.467036	2.07747	826.031	FALSE	4
2022-09-13	14:40:12	0.381794	1.6983	769.795	FALSE	4
2022-09-13	14:40:12	0.44098	1.96157	827.992	FALSE	4
2022-09-13	14:40:13	0.504695	2.24498	772.04	FALSE	4
2022-09-13	14:40:13	0.313194	1.39315	829.385	FALSE	4
2022-09-13	14:40:13	0.465713	2.07158	774.112	FALSE	4
2022-09-13	14:40:13	0.321743	1.43118	830.817	FALSE	4
2022-09-13	14:40:14	0.435941	1.93915	776.051	FALSE	4
2022-09-13	14:40:14	0.372328	1.65619	832.473	FALSE	4
2022-09-13	14:40:14	0.418995	1.86377	777.915	FALSE	4
2022-09-13	14:40:15	0.835127	3.71481	836.188	FALSE	4
2022-09-13	14:40:15	1.32912	5.91219	783.827	FALSE	4
2022-09-13	14:40:15	1.55294	6.90779	843.095	FALSE	4
2022-09-13	14:40:15	1.19416	5.31186	789.139	FALSE	4
2022-09-13	14:40:16	0.586578	2.60922	845.705	FALSE	4
2022-09-13	14:40:16	0.592736	2.63661	791.775	FALSE	4
2022-09-13	14:40:16	0.43299	1.92603	847.631	FALSE	4
2022-09-13	14:40:16	0.41014	1.82438	793.6	FALSE	4
2022-09-13	14:40:17	0.404389	1.7988	849.429	FALSE	4
2022-09-13	14:40:17	0.345305	1.53599	795.136	FALSE	4
2022-09-13	14:40:17	0.715534	3.18284	852.612	FALSE	4
2022-09-13	14:40:17	0.791412	3.52036	798.656	FALSE	4
2022-09-13	14:40:18	1.22709	5.45834	858.071	FALSE	4
2022-09-13	14:40:18	0.864644	3.84611	802.502	FALSE	4
2022-09-13	14:40:18	1.23228	5.48143	863.552	FALSE	4
2022-09-13	14:40:19	0.580318	2.58137	805.084	FALSE	4
2022-09-13	14:40:19	0.515025	2.29093	865.843	FALSE	4
2022-09-13	14:40:19	0.301031	1.33905	806.423	FALSE	4
2022-09-13	14:40:19	0.363728	1.61793	867.461	FALSE	4
2022-09-13	14:40:20	0.243168	1.08166	807.504	FALSE	4
2022-09-13	14:40:20	0.372074	1.65506	869.116	FALSE	4
2022-09-13	14:40:20	0.266476	1.18534	808.69	FALSE	4
2022-09-13	14:40:21	0.291972	1.29875	870.415	FALSE	4
2022-09-13	14:40:21	0.302608	1.34606	810.036	FALSE	4
2022-09-13	14:40:21	0.586781	2.61012	873.025	FALSE	4
2022-09-13	14:40:21	1.84816	8.22099	818.257	FALSE	4
2022-09-13	14:40:21	4.0564	18.0437	891.068	1	5
2022-09-13	14:40:22	1.13854	5.06445	823.321	FALSE	5
2022-09-13	14:40:22	0.640674	2.84985	893.918	FALSE	5
2022-09-13	14:40:22	0.397621	1.7687	825.09	FALSE	5
2022-09-13	14:40:23	0.389071	1.73067	895.649	FALSE	5
2022-09-13	14:40:23	0.361998	1.61024	826.7	FALSE	5
2022-09-13	14:40:23	0.270598	1.20367	896.853	FALSE	5
2022-09-13	14:40:23	0.459148	2.04238	828.743	FALSE	5
2022-09-13	14:40:24	0.316858	1.40945	898.262	FALSE	5
2022-09-13	14:40:24	0.49472	2.20061	830.943	FALSE	5
2022-09-13	14:40:24	0.328562	1.46151	899.724	FALSE	5
2022-09-13	14:40:24	0.551056	2.45121	833.394	FALSE	5
2022-09-13	14:40:25	0.321183	1.42869	901.152	FALSE	5
2022-09-13	14:40:25	0.522201	2.32285	835.717	FALSE	5
2022-09-13	14:40:25	0.268766	1.19552	902.348	FALSE	5
2022-09-13	14:40:25	0.516552	2.29773	838.015	FALSE	5
2022-09-13	14:40:26	0.230496	1.02529	903.373	FALSE	5
2022-09-13	14:40:26	0.506018	2.25087	840.266	FALSE	5
2022-09-13	14:40:26	0.214211	0.952853	904.326	FALSE	5
2022-09-13	14:40:27	0.528461	2.3507	842.616	FALSE	5
2022-09-13	14:40:27	0.222761	0.990885	905.317	FALSE	5
2022-09-13	14:40:27	0.479707	2.13383	844.75	FALSE	5
2022-09-13	14:40:27	0.276705	1.23084	906.548	FALSE	5
2022-09-13	14:40:28	0.483524	2.15081	846.901	FALSE	5
2022-09-13	14:40:28	0.208206	0.926142	907.474	FALSE	5
2022-09-13	14:40:28	0.459097	2.04216	848.943	FALSE	5
2022-09-13	14:40:28	0.285305	1.26909	908.743	FALSE	5
2022-09-13	14:40:29	0.438181	1.94912	850.892	FALSE	5
2022-09-13	14:40:29	0.296959	1.32093	910.064	FALSE	5
2022-09-13	14:40:29	0.443677	1.97356	852.866	FALSE	5
2022-09-13	14:40:29	0.301641	1.34176	911.406	FALSE	5
2022-09-13	14:40:30	0.480013	2.13519	855.001	FALSE	5
2022-09-13	14:40:30	0.312583	1.39043	912.796	FALSE	5
2022-09-13	14:40:30	0.424593	1.88867	856.89	FALSE	5

## Sheet: Buzz_star_2022913143527 (2)
Date	Time	Lbs	Total force x time			**GoPro Fitting: 1424
2022-09-13	14:35:27	1.31625	1.31625	FALSE	0
2022-09-13	14:35:27	0.785204	2.10145	FALSE	0
2022-09-13	14:35:27	0.705509	2.80696	FALSE	0
2022-09-13	14:35:27	0.51757	3.32453	FALSE	0
2022-09-13	14:35:28	0.370903	3.69544	FALSE	0
2022-09-13	14:35:28	0.460573	4.15601	FALSE	0
2022-09-13	14:35:28	0.447545	4.60355	FALSE	0
2022-09-13	14:35:29	0.420471	5.02402	FALSE	0
2022-09-13	14:35:29	0.404542	5.42857	FALSE	0
2022-09-13	14:35:29	0.413702	5.84227	FALSE	0
2022-09-13	14:35:29	0.418944	6.26121	FALSE	0
2022-09-13	14:35:30	0.442456	6.70367	FALSE	0
2022-09-13	14:35:30	0.39986	7.10353	FALSE	0
2022-09-13	14:35:30	0.471209	7.57474	FALSE	0
2022-09-13	14:35:30	0.421285	7.99602	FALSE	0
2022-09-13	14:35:31	0.434262	8.43028	FALSE	0
2022-09-13	14:35:31	0.446832	8.87712	FALSE	0
2022-09-13	14:35:31	0.433041	9.31016	FALSE	0
2022-09-13	14:35:31	0.447137	9.75729	FALSE	0
2022-09-13	14:35:32	0.450547	10.2078	FALSE	0
2022-09-13	14:35:32	0.494313	10.7022	FALSE	0
2022-09-13	14:35:32	0.458944	11.1611	FALSE	0
2022-09-13	14:35:33	0.470649	11.6317	FALSE	0
2022-09-13	14:35:33	0.440471	12.0722	FALSE	0
2022-09-13	14:35:33	0.465713	12.5379	FALSE	0
2022-09-13	14:35:33	0.465305	13.0032	FALSE	0
2022-09-13	14:35:34	0.445509	13.4487	FALSE	0
2022-09-13	14:35:34	0.466527	13.9153	FALSE	0
2022-09-13	14:35:34	0.394109	14.3094	FALSE	0
2022-09-13	14:35:34	0.453652	14.763	FALSE	0
2022-09-13	14:35:35	0.534771	15.2978	FALSE	0
2022-09-13	14:35:35	0.427036	15.7248	FALSE	0
2022-09-13	14:35:35	0.471921	16.1968	FALSE	0
2022-09-13	14:35:35	0.446883	16.6436	FALSE	0
2022-09-13	14:35:36	0.465356	17.109	FALSE	0
2022-09-13	14:35:36	0.468664	17.5777	FALSE	0
2022-09-13	14:35:36	0.456959	18.0346	FALSE	0
2022-09-13	14:35:37	0.458028	18.4927	FALSE	0
2022-09-13	14:35:37	0.427952	18.9206	FALSE	0
2022-09-13	14:35:37	0.529325	19.4499	FALSE	0
2022-09-13	14:35:37	0.41701	19.8669	FALSE	0
2022-09-13	14:35:38	0.424237	20.2912	FALSE	0
2022-09-13	14:35:38	0.45014	20.7413	FALSE	0
2022-09-13	14:35:38	0.474364	21.2157	FALSE	0
2022-09-13	14:35:38	0.330089	21.5458	FALSE	0
2022-09-13	14:35:39	0.382099	21.9279	FALSE	0
2022-09-13	14:35:39	0.164135	22.092	FALSE	0
2022-09-13	14:35:39	0.0721758	22.1642	FALSE	0
2022-09-13	14:35:39	0.241081	22.4053	FALSE	0
2022-09-13	14:35:40	0.10439	22.5096	FALSE	0
2022-09-13	14:35:40	0.208817	22.7185	FALSE	0
2022-09-13	14:35:40	0.171005	22.8895	FALSE	0
2022-09-13	14:35:41	0.389733	23.2792	FALSE	0
2022-09-13	14:35:41	0.691717	23.9709	FALSE	0
2022-09-13	14:35:41	0.281336	24.2523	FALSE	0
2022-09-13	14:35:41	-0.130267	24.2523	FALSE	0
2022-09-13	14:35:42	-0.627824	24.2523	FALSE	0
2022-09-13	14:35:42	-0.0515392	24.2523	FALSE	0
2022-09-13	14:35:42	0.138893	24.3912	FALSE	0
2022-09-13	14:35:42	0.164695	24.5558	FALSE	0
2022-09-13	14:35:43	0.179911	24.7358	FALSE	0
2022-09-13	14:35:43	0.0211326	24.7569	FALSE	0
2022-09-13	14:35:43	0.0900384	24.8469	FALSE	0
2022-09-13	14:35:43	-0.0574934	24.8469	FALSE	0
2022-09-13	14:35:44	-0.0823788	24.8469	FALSE	0
2022-09-13	14:35:44	0.069733	24.9167	FALSE	0
2022-09-13	14:35:44	0.136705	25.0534	FALSE	0
2022-09-13	14:35:45	0.0495803	25.1029	FALSE	0
2022-09-13	14:35:45	0.109529	25.2125	FALSE	0
2022-09-13	14:35:45	0.115636	25.3281	FALSE	0
2022-09-13	14:35:45	0.403219	25.7313	FALSE	0
2022-09-13	14:35:46	1.00307	26.7344	FALSE	0
2022-09-13	14:35:46	1.11024	27.8446	FALSE	0
2022-09-13	14:35:46	0.150191	27.9948	FALSE	0
2022-09-13	14:35:46	-0.523345	27.9948	FALSE	0
2022-09-13	14:35:47	0.0207763	28.0156	FALSE	0
2022-09-13	14:35:47	0.299046	28.3147	FALSE	0
2022-09-13	14:35:47	0.472176	28.7868	FALSE	0
2022-09-13	14:35:47	0.541539	29.3284	FALSE	0
2022-09-13	14:35:48	0.496858	29.8252	FALSE	0
2022-09-13	14:35:48	0.326578	30.1518	FALSE	0
2022-09-13	14:35:48	0.302099	30.4539	FALSE	0
2022-09-13	14:35:49	0.402252	30.8562	FALSE	0
2022-09-13	14:35:49	0.389428	31.2456	FALSE	0
2022-09-13	14:35:49	0.379758	31.6253	FALSE	0
2022-09-13	14:35:49	0.387646	32.013	FALSE	0
2022-09-13	14:35:50	0.322099	32.3351	FALSE	0
2022-09-13	14:35:50	0.475789	32.8109	FALSE	0
2022-09-13	14:35:50	0.293448	33.1043	FALSE	0
2022-09-13	14:35:50	0.226629	33.331	FALSE	0
2022-09-13	14:35:51	0.146171	33.4771	FALSE	0
2022-09-13	14:35:51	0.158842	33.636	FALSE	0
2022-09-13	14:35:51	0.356196	33.9922	FALSE	0
2022-09-13	14:35:51	0.556298	34.5485	FALSE	0
2022-09-13	14:35:52	0.231056	34.7795	FALSE	0
2022-09-13	14:35:52	0.517875	35.2974	FALSE	0
2022-09-13	14:35:52	0.184746	35.4821	FALSE	0
2022-09-13	14:35:53	0.459657	35.9418	FALSE	0
2022-09-13	14:35:53	0.230802	36.1726	FALSE	0
2022-09-13	14:35:53	0.412685	36.5853	FALSE	0
2022-09-13	14:35:53	0.151972	36.7373	FALSE	0
2022-09-13	14:35:54	0.433244	37.1705	FALSE	0
2022-09-13	14:35:54	0.182812	37.3533	FALSE	0
2022-09-13	14:35:54	0.465102	37.8184	FALSE	0
2022-09-13	14:35:54	0.188817	38.0072	FALSE	0
2022-09-13	14:35:55	0.426476	38.4337	FALSE	0
2022-09-13	14:35:55	0.253855	38.6876	FALSE	0
2022-09-13	14:35:55	0.373193	39.0608	FALSE	0
2022-09-13	14:35:55	0.187392	39.2481	FALSE	0
2022-09-13	14:35:56	0.263015	39.5112	FALSE	0
2022-09-13	14:35:56	0.278588	39.7897	FALSE	0
2022-09-13	14:35:56	0.503168	40.2929	FALSE	0
2022-09-13	14:35:57	0.45645	40.7494	FALSE	0
2022-09-13	14:35:57	0.2993	41.0487	FALSE	0
2022-09-13	14:35:57	0.350649	41.3993	FALSE	0
2022-09-13	14:35:57	0.289326	41.6886	FALSE	0
2022-09-13	14:35:58	0.148766	41.8374	FALSE	0
2022-09-13	14:35:58	-0.281615	41.8374	FALSE	0
2022-09-13	14:35:58	0.52159	42.359	FALSE	0
2022-09-13	14:35:58	0.447799	42.8068	FALSE	0
2022-09-13	14:35:59	0.691158	43.498	FALSE	0
2022-09-13	14:35:59	0.330852	43.8288	FALSE	0
2022-09-13	14:35:59	0.481081	44.3099	FALSE	0
2022-09-13	14:35:59	0.406323	44.7162	FALSE	0
2022-09-13	14:36:00	0.365255	45.0815	FALSE	0
2022-09-13	14:36:00	0.440878	45.5223	FALSE	0
2022-09-13	14:36:00	0.497926	46.0203	FALSE	0
2022-09-13	14:36:01	0.41187	46.4321	FALSE	0
2022-09-13	14:36:01	0.554059	46.9862	FALSE	0
2022-09-13	14:36:01	0.340318	47.3265	FALSE	0
2022-09-13	14:36:01	0.506527	47.833	FALSE	0
2022-09-13	14:36:02	0.380369	48.2134	FALSE	0
2022-09-13	14:36:02	0.414771	48.6282	FALSE	0
2022-09-13	14:36:02	0.331819	48.96	FALSE	0
2022-09-13	14:36:02	0.44785	49.4079	FALSE	0
2022-09-13	14:36:03	0.537417	49.9453	FALSE	0
2022-09-13	14:36:03	0.512786	50.4581	FALSE	0
2022-09-13	14:36:03	0.522201	50.9803	FALSE	0
2022-09-13	14:36:03	0.434924	51.4152	FALSE	0
2022-09-13	14:36:04	0.499707	51.9149	FALSE	0
2022-09-13	14:36:04	0.506832	52.4217	FALSE	0
2022-09-13	14:36:04	0.46958	52.8913	FALSE	0
2022-09-13	14:36:05	0.456909	53.3482	FALSE	0
2022-09-13	14:36:05	0.516552	53.8648	FALSE	0
2022-09-13	14:36:05	0.453753	54.3185	FALSE	0
2022-09-13	14:36:05	0.566323	54.8848	FALSE	0
2022-09-13	14:36:06	0.391667	55.2765	FALSE	0
2022-09-13	14:36:06	0.466527	55.743	FALSE	0
2022-09-13	14:36:06	0.369428	56.1125	FALSE	0
2022-09-13	14:36:06	0.523575	56.636	FALSE	0
2022-09-13	14:36:07	0.429631	57.0657	FALSE	0
2022-09-13	14:36:07	0.507545	57.5732	FALSE	0
2022-09-13	14:36:07	0.410191	57.9834	FALSE	0
2022-09-13	14:36:07	0.540827	58.5242	FALSE	0
2022-09-13	14:36:08	0.298232	58.8225	FALSE	0
2022-09-13	14:36:08	0.578282	59.4007	FALSE	0
2022-09-13	14:36:08	0.196451	59.5972	FALSE	0
2022-09-13	14:36:09	0.249733	59.8469	FALSE	0
2022-09-13	14:36:09	0.165916	60.0128	FALSE	0
2022-09-13	14:36:09	-0.0700633	60.0128	FALSE	0
2022-09-13	14:36:09	-0.370725	60.0128	FALSE	0
2022-09-13	14:36:10	-0.416323	60.0128	FALSE	0
2022-09-13	14:36:10	-0.545432	60.0128	FALSE	0
2022-09-13	14:36:10	-0.429707	60.0128	FALSE	0
2022-09-13	14:36:10	-0.473218	60.0128	FALSE	0
2022-09-13	14:36:11	-0.502277	60.0128	FALSE	0
2022-09-13	14:36:11	-0.511895	60.0128	FALSE	0
2022-09-13	14:36:11	-0.535559	60.0128	FALSE	0
2022-09-13	14:36:11	-0.370216	60.0128	FALSE	0
2022-09-13	14:36:12	-0.350012	60.0128	FALSE	0
2022-09-13	14:36:12	-0.36533	60.0128	FALSE	0
2022-09-13	14:36:12	-0.514287	60.0128	FALSE	0
2022-09-13	14:36:13	-0.334287	60.0128	FALSE	0
2022-09-13	14:36:13	-0.330572	60.0128	FALSE	0
2022-09-13	14:36:13	-0.0723534	60.0128	FALSE	0
2022-09-13	14:36:13	0.0590969	60.0719	FALSE	0
2022-09-13	14:36:14	0.134975	60.2069	FALSE	0
2022-09-13	14:36:14	0.499097	60.706	FALSE	0
2022-09-13	14:36:14	0.139148	60.8452	FALSE	0
2022-09-13	14:36:14	-0.132201	60.8452	FALSE	0
2022-09-13	14:36:15	-0.455508	60.8452	FALSE	0
2022-09-13	14:36:15	-0.449911	60.8452	FALSE	0
2022-09-13	14:36:15	-0.551895	60.8452	FALSE	0
2022-09-13	14:36:15	1.29532e-05	60.8452	FALSE	0
2022-09-13	14:36:16	0.308969	61.1541	FALSE	0
2022-09-13	14:36:16	0.853651	62.0078	FALSE	0
2022-09-13	14:36:16	3.22571	65.2335	1	1
2022-09-13	14:36:17	3.15996	68.3935	1	2
2022-09-13	14:36:17	0.685305	69.0788	FALSE	2
2022-09-13	14:36:17	0.812074	69.8908	FALSE	2
2022-09-13	14:36:17	0.354669	70.2455	FALSE	2
2022-09-13	14:36:18	0.668817	70.9143	FALSE	2
2022-09-13	14:36:18	0.544237	71.4586	FALSE	2
2022-09-13	14:36:18	0.618282	72.0768	FALSE	2
2022-09-13	14:36:18	0.921489	72.9983	FALSE	2
2022-09-13	14:36:19	0.440471	73.4388	FALSE	2
2022-09-13	14:36:19	0.390852	73.8297	FALSE	2
2022-09-13	14:36:19	0.253346	74.083	FALSE	2
2022-09-13	14:36:19	0.394262	74.4773	FALSE	2
2022-09-13	14:36:20	0.332532	74.8098	FALSE	2
2022-09-13	14:36:20	0.284898	75.0947	FALSE	2
2022-09-13	14:36:20	0.38729	75.482	FALSE	2
2022-09-13	14:36:21	0.235789	75.7178	FALSE	2
2022-09-13	14:36:21	0.477112	76.1949	FALSE	2
2022-09-13	14:36:21	0.189173	76.3841	FALSE	2
2022-09-13	14:36:21	0.536959	76.921	FALSE	2
2022-09-13	14:36:22	0.243779	77.1648	FALSE	2
2022-09-13	14:36:22	0.592278	77.7571	FALSE	2
2022-09-13	14:36:22	0.273244	78.0303	FALSE	2
2022-09-13	14:36:22	0.505611	78.5359	FALSE	2
2022-09-13	14:36:23	0.440522	78.9765	FALSE	2
2022-09-13	14:36:23	0.524949	79.5014	FALSE	2
2022-09-13	14:36:23	0.490903	79.9923	FALSE	2
2022-09-13	14:36:23	0.326018	80.3183	FALSE	2
2022-09-13	14:36:24	0.613499	80.9318	FALSE	2
2022-09-13	14:36:24	0.279148	81.211	FALSE	2
2022-09-13	14:36:24	0.560318	81.7713	FALSE	2
2022-09-13	14:36:25	0.242354	82.0136	FALSE	2
2022-09-13	14:36:25	0.523168	82.5368	FALSE	2
2022-09-13	14:36:25	0.275636	82.8124	FALSE	2
2022-09-13	14:36:25	0.417316	83.2298	FALSE	2
2022-09-13	14:36:26	0.486527	83.7163	FALSE	2
2022-09-13	14:36:26	0.269275	83.9856	FALSE	2
2022-09-13	14:36:26	0.437825	84.4234	FALSE	2
2022-09-13	14:36:26	0.237723	84.6611	FALSE	2
2022-09-13	14:36:27	0.476756	85.1379	FALSE	2
2022-09-13	14:36:27	0.152685	85.2906	FALSE	2
2022-09-13	14:36:27	0.450852	85.7414	FALSE	2
2022-09-13	14:36:28	0.183779	85.9252	FALSE	2
2022-09-13	14:36:28	0.514262	86.4394	FALSE	2
2022-09-13	14:36:28	0.140573	86.58	FALSE	2
2022-09-13	14:36:28	0.65757	87.2376	FALSE	2
2022-09-13	14:36:28	0.216094	87.4537	FALSE	2
2022-09-13	14:36:29	0.486985	87.9407	FALSE	2
2022-09-13	14:36:29	0.306476	88.2471	FALSE	2
2022-09-13	14:36:29	0.364898	88.612	FALSE	2
2022-09-13	14:36:30	0.401896	89.0139	FALSE	2
2022-09-13	14:36:30	0.354618	89.3686	FALSE	2
2022-09-13	14:36:30	0.3593	89.7279	FALSE	2
2022-09-13	14:36:30	0.350089	90.0779	FALSE	2
2022-09-13	14:36:31	0.455331	90.5333	FALSE	2
2022-09-13	14:36:31	0.318791	90.8521	FALSE	2
2022-09-13	14:36:31	0.38042	91.2325	FALSE	2
2022-09-13	14:36:31	0.28897	91.5215	FALSE	2
2022-09-13	14:36:32	0.521997	92.0435	FALSE	2
2022-09-13	14:36:32	0.203168	92.2466	FALSE	2
2022-09-13	14:36:32	0.488104	92.7347	FALSE	2
2022-09-13	14:36:32	0.185814	92.9205	FALSE	2
2022-09-13	14:36:33	0.524593	93.4451	FALSE	2
2022-09-13	14:36:33	0.144898	93.59	FALSE	2
2022-09-13	14:36:33	0.481489	94.0715	FALSE	2
2022-09-13	14:36:34	0.23986	94.3114	FALSE	2
2022-09-13	14:36:34	0.424033	94.7354	FALSE	2
2022-09-13	14:36:34	0.26444	94.9999	FALSE	2
2022-09-13	14:36:34	0.434059	95.4339	FALSE	2
2022-09-13	14:36:35	0.34215	95.7761	FALSE	2
2022-09-13	14:36:35	0.370649	96.1467	FALSE	2
2022-09-13	14:36:35	0.300267	96.447	FALSE	2
2022-09-13	14:36:35	0.357977	96.805	FALSE	2
2022-09-13	14:36:36	0.289122	97.0941	FALSE	2
2022-09-13	14:36:36	0.282456	97.3765	FALSE	2
2022-09-13	14:36:36	0.170853	97.5474	FALSE	2
2022-09-13	14:36:36	0.249784	97.7972	FALSE	2
2022-09-13	14:36:37	0.289733	98.0869	FALSE	2
2022-09-13	14:36:37	0.357265	98.4442	FALSE	2
2022-09-13	14:36:37	0.374873	98.819	FALSE	2
2022-09-13	14:36:38	0.302201	99.1212	FALSE	2
2022-09-13	14:36:38	0.657672	99.7789	FALSE	2
2022-09-13	14:36:38	0.478232	100.257	FALSE	2
2022-09-13	14:36:38	0.550954	100.808	FALSE	2
2022-09-13	14:36:39	0.364033	101.172	FALSE	2
2022-09-13	14:36:39	0.571921	101.744	FALSE	2
2022-09-13	14:36:39	0.239708	101.984	FALSE	2
2022-09-13	14:36:39	0.445865	102.43	FALSE	2
2022-09-13	14:36:40	0.158842	102.588	FALSE	2
2022-09-13	14:36:40	0.53701	103.125	FALSE	2
2022-09-13	14:36:40	0.123677	103.249	FALSE	2
2022-09-13	14:36:40	0.450344	103.699	FALSE	2
2022-09-13	14:36:41	0.185255	103.885	FALSE	2
2022-09-13	14:36:41	0.509224	104.394	FALSE	2
2022-09-13	14:36:41	0.186629	104.581	FALSE	2
2022-09-13	14:36:42	0.512125	105.093	FALSE	2
2022-09-13	14:36:42	0.266629	105.359	FALSE	2
2022-09-13	14:36:42	0.421489	105.781	FALSE	2
2022-09-13	14:36:42	0.212277	105.993	FALSE	2
2022-09-13	14:36:43	0.469529	106.463	FALSE	2
2022-09-13	14:36:43	0.269936	106.733	FALSE	2
2022-09-13	14:36:43	0.410445	107.143	FALSE	2
2022-09-13	14:36:43	0.360013	107.503	FALSE	2
2022-09-13	14:36:44	0.345102	107.848	FALSE	2
2022-09-13	14:36:44	0.392074	108.24	FALSE	2
2022-09-13	14:36:44	0.311107	108.551	FALSE	2
2022-09-13	14:36:44	0.400624	108.952	FALSE	2
2022-09-13	14:36:45	0.342252	109.294	FALSE	2
2022-09-13	14:36:45	0.465204	109.759	FALSE	2
2022-09-13	14:36:45	0.298792	110.058	FALSE	2
2022-09-13	14:36:46	0.408868	110.467	FALSE	2
2022-09-13	14:36:46	0.307087	110.774	FALSE	2
2022-09-13	14:36:46	0.487137	111.261	FALSE	2
2022-09-13	14:36:46	0.16556	111.427	FALSE	2
2022-09-13	14:36:47	0.406883	111.834	FALSE	2
2022-09-13	14:36:47	0.20042	112.034	FALSE	2
2022-09-13	14:36:47	0.475687	112.51	FALSE	2
2022-09-13	14:36:47	0.163015	112.673	FALSE	2
2022-09-13	14:36:48	0.472939	113.146	FALSE	2
2022-09-13	14:36:48	0.170191	113.316	FALSE	2
2022-09-13	14:36:48	0.468919	113.785	FALSE	2
2022-09-13	14:36:48	0.0861707	113.871	FALSE	2
2022-09-13	14:36:49	0.204695	114.076	FALSE	2
2022-09-13	14:36:49	-0.0422771	114.076	FALSE	2
2022-09-13	14:36:49	-0.266348	114.076	FALSE	2
2022-09-13	14:36:50	-0.45159	114.076	FALSE	2
2022-09-13	14:36:50	-0.265636	114.076	FALSE	2
2022-09-13	14:36:50	0.127646	114.203	FALSE	2
2022-09-13	14:36:50	0.453906	114.657	FALSE	2
2022-09-13	14:36:51	0.236145	114.893	FALSE	2
2022-09-13	14:36:51	0.522201	115.416	FALSE	2
2022-09-13	14:36:51	0.337417	115.753	FALSE	2
2022-09-13	14:36:51	0.360573	116.114	FALSE	2
2022-09-13	14:36:52	0.314975	116.429	FALSE	2
2022-09-13	14:36:52	0.395585	116.824	FALSE	2
2022-09-13	14:36:52	0.363524	117.188	FALSE	2
2022-09-13	14:36:53	0.295127	117.483	FALSE	2
2022-09-13	14:36:53	0.346934	117.83	FALSE	2
2022-09-13	14:36:53	0.278842	118.109	FALSE	2
2022-09-13	14:36:53	0.385153	118.494	FALSE	2
2022-09-13	14:36:54	0.210089	118.704	FALSE	2
2022-09-13	14:36:54	0.392176	119.096	FALSE	2
2022-09-13	14:36:54	0.226679	119.323	FALSE	2
2022-09-13	14:36:54	0.45528	119.778	FALSE	2
2022-09-13	14:36:55	0.134364	119.912	FALSE	2
2022-09-13	14:36:55	0.482507	120.395	FALSE	2
2022-09-13	14:36:55	0.217214	120.612	FALSE	2
2022-09-13	14:36:55	0.391412	121.004	FALSE	2
2022-09-13	14:36:56	0.235229	121.239	FALSE	2
2022-09-13	14:36:56	0.408003	121.647	FALSE	2
2022-09-13	14:36:56	0.346527	121.993	FALSE	2
2022-09-13	14:36:56	0.378486	122.372	FALSE	2
2022-09-13	14:36:57	0.331005	122.703	FALSE	2
2022-09-13	14:36:57	0.374873	123.078	FALSE	2
2022-09-13	14:36:57	0.454466	123.532	FALSE	2
2022-09-13	14:36:58	0.275127	123.807	FALSE	2
2022-09-13	14:36:58	0.384389	124.192	FALSE	2
2022-09-13	14:36:58	0.280267	124.472	FALSE	2
2022-09-13	14:36:58	0.488715	124.961	FALSE	2
2022-09-13	14:36:59	0.204237	125.165	FALSE	2
2022-09-13	14:36:59	0.401845	125.567	FALSE	2
2022-09-13	14:36:59	0.249631	125.816	FALSE	2
2022-09-13	14:36:59	0.388155	126.204	FALSE	2
2022-09-13	14:37:00	0.134313	126.339	FALSE	2
2022-09-13	14:37:00	0.258079	126.597	FALSE	2
2022-09-13	14:37:00	0.152888	126.75	FALSE	2
2022-09-13	14:37:00	-0.0241092	126.75	FALSE	2
2022-09-13	14:37:01	-0.12701	126.75	FALSE	2
2022-09-13	14:37:01	0.45187	127.202	FALSE	2
2022-09-13	14:37:01	0.200624	127.402	FALSE	2
2022-09-13	14:37:02	0.453244	127.855	FALSE	2
2022-09-13	14:37:02	0.309275	128.165	FALSE	2
2022-09-13	14:37:02	0.477468	128.642	FALSE	2
2022-09-13	14:37:02	0.323881	128.966	FALSE	2
2022-09-13	14:37:03	0.442812	129.409	FALSE	2
2022-09-13	14:37:03	0.338181	129.747	FALSE	2
2022-09-13	14:37:03	0.46042	130.208	FALSE	2
2022-09-13	14:37:03	0.344797	130.552	FALSE	2
2022-09-13	14:37:04	0.488766	131.041	FALSE	2
2022-09-13	14:37:04	0.324593	131.366	FALSE	2
2022-09-13	14:37:04	0.573753	131.939	FALSE	2
2022-09-13	14:37:04	0.414313	132.354	FALSE	2
2022-09-13	14:37:05	0.196756	132.551	FALSE	2
2022-09-13	14:37:05	0.270344	132.821	FALSE	2
2022-09-13	14:37:05	0.206679	133.028	FALSE	2
2022-09-13	14:37:06	0.191718	133.219	FALSE	2
2022-09-13	14:37:06	0.366476	133.586	FALSE	2
2022-09-13	14:37:06	0.203219	133.789	FALSE	2
2022-09-13	14:37:06	0.481031	134.27	FALSE	2
2022-09-13	14:37:07	0.353957	134.624	FALSE	2
2022-09-13	14:37:07	1.04927	135.673	FALSE	2
2022-09-13	14:37:07	1.19462	136.868	FALSE	2
2022-09-13	14:37:07	2.02795	138.896	FALSE	2
2022-09-13	14:37:08	2.58342	141.479	FALSE	2
2022-09-13	14:37:08	2.69594	144.175	FALSE	2
2022-09-13	14:37:08	0.632532	144.808	FALSE	2
2022-09-13	14:37:08	0.0693768	144.877	FALSE	2
2022-09-13	14:37:09	0.175585	145.053	FALSE	2
2022-09-13	14:37:09	-0.190419	145.053	FALSE	2
2022-09-13	14:37:09	-0.436272	145.053	FALSE	2
2022-09-13	14:37:10	-0.648791	145.053	FALSE	2
2022-09-13	14:37:10	-0.72192	145.053	FALSE	2
2022-09-13	14:37:10	-0.768027	145.053	FALSE	2
2022-09-13	14:37:10	-0.730521	145.053	FALSE	2
2022-09-13	14:37:11	-0.776068	145.053	FALSE	2
2022-09-13	14:37:11	-0.739376	145.053	FALSE	2
2022-09-13	14:37:11	-0.693014	145.053	FALSE	2
2022-09-13	14:37:11	-0.716882	145.053	FALSE	2
2022-09-13	14:37:12	-0.570928	145.053	FALSE	2
2022-09-13	14:37:12	-0.605636	145.053	FALSE	2
2022-09-13	14:37:12	-0.457188	145.053	FALSE	2
2022-09-13	14:37:12	-0.177035	145.053	FALSE	2
2022-09-13	14:37:13	0.285051	145.338	FALSE	2
2022-09-13	14:37:13	-0.0125061	145.338	FALSE	2
2022-09-13	14:37:13	0.395789	145.733	FALSE	2
2022-09-13	14:37:14	0.284389	146.018	FALSE	2
2022-09-13	14:37:14	0.538842	146.557	FALSE	2
2022-09-13	14:37:14	0.119046	146.676	FALSE	2
2022-09-13	14:37:14	0.370903	147.047	FALSE	2
2022-09-13	14:37:15	0.138639	147.185	FALSE	2
2022-09-13	14:37:15	0.353499	147.539	FALSE	2
2022-09-13	14:37:15	0.142608	147.681	FALSE	2
2022-09-13	14:37:15	0.460776	148.142	FALSE	2
2022-09-13	14:37:16	0.210547	148.353	FALSE	2
2022-09-13	14:37:16	0.450089	148.803	FALSE	2
2022-09-13	14:37:16	0.142812	148.946	FALSE	2
2022-09-13	14:37:16	0.496145	149.442	FALSE	2
2022-09-13	14:37:17	0.195789	149.638	FALSE	2
2022-09-13	14:37:17	0.48556	150.123	FALSE	2
2022-09-13	14:37:17	0.175738	150.299	FALSE	2
2022-09-13	14:37:18	0.508766	150.808	FALSE	2
2022-09-13	14:37:18	0.201132	151.009	FALSE	2
2022-09-13	14:37:18	0.386832	151.396	FALSE	2
2022-09-13	14:37:18	0.203219	151.599	FALSE	2
2022-09-13	14:37:19	0.381183	151.98	FALSE	2
2022-09-13	14:37:19	0.225967	152.206	FALSE	2
2022-09-13	14:37:19	0.395636	152.602	FALSE	2
2022-09-13	14:37:19	-0.0145926	152.602	FALSE	2
2022-09-13	14:37:20	-0.0712847	152.602	FALSE	2
2022-09-13	14:37:20	-0.0810557	152.602	FALSE	2
2022-09-13	14:37:20	-0.0638038	152.602	FALSE	2
2022-09-13	14:37:20	-0.0936765	152.602	FALSE	2
2022-09-13	14:37:21	-0.177544	152.602	FALSE	2
2022-09-13	14:37:21	-0.183651	152.602	FALSE	2
2022-09-13	14:37:21	-0.130216	152.602	FALSE	2
2022-09-13	14:37:22	0.0776211	152.679	FALSE	2
2022-09-13	14:37:22	0.340165	153.019	FALSE	2
2022-09-13	14:37:22	0.262914	153.282	FALSE	2
2022-09-13	14:37:22	0.588206	153.87	FALSE	2
2022-09-13	14:37:23	0.338741	154.209	FALSE	2
2022-09-13	14:37:23	0.606374	154.816	FALSE	2
2022-09-13	14:37:23	0.269326	155.085	FALSE	2
2022-09-13	14:37:23	0.51355	155.598	FALSE	2
2022-09-13	14:37:24	0.227901	155.826	FALSE	2
2022-09-13	14:37:24	0.509326	156.336	FALSE	2
2022-09-13	14:37:24	0.238384	156.574	FALSE	2
2022-09-13	14:37:24	0.471361	157.045	FALSE	2
2022-09-13	14:37:25	0.177621	157.223	FALSE	2
2022-09-13	14:37:25	0.494567	157.718	FALSE	2
2022-09-13	14:37:25	0.211209	157.929	FALSE	2
2022-09-13	14:37:26	0.514568	158.443	FALSE	2
2022-09-13	14:37:26	0.165509	158.609	FALSE	2
2022-09-13	14:37:26	0.486272	159.095	FALSE	2
2022-09-13	14:37:26	0.231056	159.326	FALSE	2
2022-09-13	14:37:27	0.475433	159.802	FALSE	2
2022-09-13	14:37:27	0.189631	159.991	FALSE	2
2022-09-13	14:37:27	0.401692	160.393	FALSE	2
2022-09-13	14:37:27	0.216451	160.609	FALSE	2
2022-09-13	14:37:28	0.477316	161.087	FALSE	2
2022-09-13	14:37:28	0.178028	161.265	FALSE	2
2022-09-13	14:37:28	0.486018	161.751	FALSE	2
2022-09-13	14:37:28	0.287087	162.038	FALSE	2
2022-09-13	14:37:29	0.511463	162.549	FALSE	2
2022-09-13	14:37:29	0.215026	162.764	FALSE	2
2022-09-13	14:37:29	0.566832	163.331	FALSE	2
2022-09-13	14:37:30	0.220623	163.552	FALSE	2
2022-09-13	14:37:30	0.544389	164.096	FALSE	2
2022-09-13	14:37:30	0.194517	164.291	FALSE	2
2022-09-13	14:37:30	0.569275	164.86	FALSE	2
2022-09-13	14:37:31	0.264949	165.125	FALSE	2
2022-09-13	14:37:31	0.52897	165.654	FALSE	2
2022-09-13	14:37:31	0.179351	165.833	FALSE	2
2022-09-13	14:37:31	0.553448	166.387	FALSE	2
2022-09-13	14:37:32	0.254211	166.641	FALSE	2
2022-09-13	14:37:32	0.502812	167.144	FALSE	2
2022-09-13	14:37:32	0.33986	167.484	FALSE	2
2022-09-13	14:37:32	0.550343	168.034	FALSE	2
2022-09-13	14:37:33	0.348257	168.382	FALSE	2
2022-09-13	14:37:33	0.521234	168.903	FALSE	2
2022-09-13	14:37:33	0.274364	169.178	FALSE	2
2022-09-13	14:37:34	0.517264	169.695	FALSE	2
2022-09-13	14:37:34	0.269478	169.965	FALSE	2
2022-09-13	14:37:34	0.496043	170.461	FALSE	2
2022-09-13	14:37:34	0.246578	170.707	FALSE	2
2022-09-13	14:37:35	0.536552	171.244	FALSE	2
2022-09-13	14:37:35	0.271056	171.515	FALSE	2
2022-09-13	14:37:35	0.504593	172.019	FALSE	2
2022-09-13	14:37:35	0.206171	172.226	FALSE	2
2022-09-13	14:37:36	0.512837	172.738	FALSE	2
2022-09-13	14:37:36	0.308359	173.047	FALSE	2
2022-09-13	14:37:36	0.529275	173.576	FALSE	2
2022-09-13	14:37:36	0.275076	173.851	FALSE	2
2022-09-13	14:37:37	0.478944	174.33	FALSE	2
2022-09-13	14:37:37	0.35411	174.684	FALSE	2
2022-09-13	14:37:37	0.432023	175.116	FALSE	2
2022-09-13	14:37:38	0.318944	175.435	FALSE	2
2022-09-13	14:37:38	0.480471	175.916	FALSE	2
2022-09-13	14:37:38	0.235992	176.152	FALSE	2
2022-09-13	14:37:38	0.701183	176.853	FALSE	2
2022-09-13	14:37:39	0.530853	177.384	FALSE	2
2022-09-13	14:37:39	0.643931	178.028	FALSE	2
2022-09-13	14:37:39	0.365407	178.393	FALSE	2
2022-09-13	14:37:39	0.694109	179.087	FALSE	2
2022-09-13	14:37:40	0.2964	179.383	FALSE	2
2022-09-13	14:37:40	0.392786	179.776	FALSE	2
2022-09-13	14:37:40	0.322252	180.099	FALSE	2
2022-09-13	14:37:40	0.503524	180.602	FALSE	2
2022-09-13	14:37:41	0.194975	180.797	FALSE	2
2022-09-13	14:37:41	0.487087	181.284	FALSE	2
2022-09-13	14:37:41	0.261132	181.545	FALSE	2
2022-09-13	14:37:42	0.446832	181.992	FALSE	2
2022-09-13	14:37:42	0.205814	182.198	FALSE	2
2022-09-13	14:37:42	0.44215	182.64	FALSE	2
2022-09-13	14:37:42	0.218944	182.859	FALSE	2
2022-09-13	14:37:43	0.460064	183.319	FALSE	2
2022-09-13	14:37:43	0.198486	183.518	FALSE	2
2022-09-13	14:37:43	0.413957	183.931	FALSE	2
2022-09-13	14:37:43	0.188766	184.12	FALSE	2
2022-09-13	14:37:44	0.445662	184.566	FALSE	2
2022-09-13	14:37:44	0.166425	184.732	FALSE	2
2022-09-13	14:37:44	0.431056	185.163	FALSE	2
2022-09-13	14:37:44	0.197825	185.361	FALSE	2
2022-09-13	14:37:45	0.438995	185.8	FALSE	2
2022-09-13	14:37:45	0.190751	185.991	FALSE	2
2022-09-13	14:37:45	0.411616	186.403	FALSE	2
2022-09-13	14:37:46	0.196501	186.599	FALSE	2
2022-09-13	14:37:46	0.414517	187.014	FALSE	2
2022-09-13	14:37:46	0.193702	187.207	FALSE	2
2022-09-13	14:37:46	0.313753	187.521	FALSE	2
2022-09-13	14:37:47	0.245	187.766	FALSE	2
2022-09-13	14:37:47	0.350852	188.117	FALSE	2
2022-09-13	14:37:47	0.0740587	188.191	FALSE	2
2022-09-13	14:37:47	-0.0643127	188.191	FALSE	2
2022-09-13	14:37:48	0.0787407	188.27	FALSE	2
2022-09-13	14:37:48	0.34785	188.618	FALSE	2
2022-09-13	14:37:48	0.368664	188.986	FALSE	2
2022-09-13	14:37:48	0.722049	189.708	FALSE	2
2022-09-13	14:37:49	0.416603	190.125	FALSE	2
2022-09-13	14:37:49	0.548461	190.673	FALSE	2
2022-09-13	14:37:49	0.351056	191.024	FALSE	2
2022-09-13	14:37:50	0.633753	191.658	FALSE	2
2022-09-13	14:37:50	0.323015	191.981	FALSE	2
2022-09-13	14:37:50	0.534618	192.516	FALSE	2
2022-09-13	14:37:50	0.367646	192.883	FALSE	2
2022-09-13	14:37:51	0.446832	193.33	FALSE	2
2022-09-13	14:37:51	0.366934	193.697	FALSE	2
2022-09-13	14:37:51	0.340929	194.038	FALSE	2
2022-09-13	14:37:51	0.386883	194.425	FALSE	2
2022-09-13	14:37:52	0.391565	194.817	FALSE	2
2022-09-13	14:37:52	0.389886	195.206	FALSE	2
2022-09-13	14:37:52	0.466272	195.673	FALSE	2
2022-09-13	14:37:52	0.445509	196.118	FALSE	2
2022-09-13	14:37:53	0.506119	196.624	FALSE	2
2022-09-13	14:37:53	0.470649	197.095	FALSE	2
2022-09-13	14:37:53	0.381387	197.476	FALSE	2
2022-09-13	14:37:54	0.318282	197.795	FALSE	2
2022-09-13	14:37:54	0.366069	198.161	FALSE	2
2022-09-13	14:37:54	0.288817	198.45	FALSE	2
2022-09-13	14:37:54	0.459911	198.909	FALSE	2
2022-09-13	14:37:55	0.422659	199.332	FALSE	2
2022-09-13	14:37:55	0.40271	199.735	FALSE	2
2022-09-13	14:37:55	0.393906	200.129	FALSE	2
2022-09-13	14:37:55	0.507035	200.636	FALSE	2
2022-09-13	14:37:56	0.397977	201.034	FALSE	2
2022-09-13	14:37:56	0.354568	201.388	FALSE	2
2022-09-13	14:37:56	0.190547	201.579	FALSE	2
2022-09-13	14:37:56	0.302914	201.882	FALSE	2
2022-09-13	14:37:57	0.212074	202.094	FALSE	2
2022-09-13	14:37:57	0.271718	202.366	FALSE	2
2022-09-13	14:37:57	0.207748	202.573	FALSE	2
2022-09-13	14:37:58	0.256451	202.83	FALSE	2
2022-09-13	14:37:58	0.349275	203.179	FALSE	2
2022-09-13	14:37:58	0.167341	203.346	FALSE	2
2022-09-13	14:37:58	0.359351	203.706	FALSE	2
2022-09-13	14:37:59	0.399351	204.105	FALSE	2
2022-09-13	14:37:59	0.400725	204.506	FALSE	2
2022-09-13	14:37:59	0.216909	204.723	FALSE	2
2022-09-13	14:37:59	0.353244	205.076	FALSE	2
2022-09-13	14:38:00	0.299707	205.376	FALSE	2
2022-09-13	14:38:00	0.370445	205.746	FALSE	2
2022-09-13	14:38:00	0.171667	205.918	FALSE	2
2022-09-13	14:38:00	0.368308	206.286	FALSE	2
2022-09-13	14:38:01	0.211718	206.498	FALSE	2
2022-09-13	14:38:01	0.409021	206.907	FALSE	2
2022-09-13	14:38:01	0.155993	207.063	FALSE	2
2022-09-13	14:38:01	0.363219	207.426	FALSE	2
2022-09-13	14:38:02	0.225153	207.651	FALSE	2
2022-09-13	14:38:02	0.421692	208.073	FALSE	2
2022-09-13	14:38:02	0.195076	208.268	FALSE	2
2022-09-13	14:38:03	0.395687	208.664	FALSE	2
2022-09-13	14:38:03	0.218588	208.882	FALSE	2
2022-09-13	14:38:03	0.401031	209.283	FALSE	2
2022-09-13	14:38:03	0.262405	209.546	FALSE	2
2022-09-13	14:38:04	0.243524	209.789	FALSE	2
2022-09-13	14:38:04	0.370242	210.159	FALSE	2
2022-09-13	14:38:04	0.210903	210.37	FALSE	2
2022-09-13	14:38:04	0.429784	210.8	FALSE	2
2022-09-13	14:38:05	0.200471	211.001	FALSE	2
2022-09-13	14:38:05	0.252023	211.253	FALSE	2
2022-09-13	14:38:05	0.237468	211.49	FALSE	2
2022-09-13	14:38:05	0.257265	211.747	FALSE	2
2022-09-13	14:38:06	0.327188	212.075	FALSE	2
2022-09-13	14:38:06	0.176349	212.251	FALSE	2
2022-09-13	14:38:06	0.346578	212.597	FALSE	2
2022-09-13	14:38:07	0.227646	212.825	FALSE	2
2022-09-13	14:38:07	0.345662	213.171	FALSE	2
2022-09-13	14:38:07	0.244949	213.416	FALSE	2
2022-09-13	14:38:07	0.259148	213.675	FALSE	2
2022-09-13	14:38:08	0.340573	214.015	FALSE	2
2022-09-13	14:38:08	0.226781	214.242	FALSE	2
2022-09-13	14:38:08	0.379555	214.622	FALSE	2
2022-09-13	14:38:08	0.201641	214.823	FALSE	2
2022-09-13	14:38:09	0.259148	215.083	FALSE	2
2022-09-13	14:38:09	0.271158	215.354	FALSE	2
2022-09-13	14:38:09	0.214059	215.568	FALSE	2
2022-09-13	14:38:09	0.351056	215.919	FALSE	2
2022-09-13	14:38:10	0.183423	216.102	FALSE	2
2022-09-13	14:38:10	0.270649	216.373	FALSE	2
2022-09-13	14:38:10	0.243372	216.616	FALSE	2
2022-09-13	14:38:11	0.265865	216.882	FALSE	2
2022-09-13	14:38:11	0.329275	217.211	FALSE	2
2022-09-13	14:38:11	0.230954	217.442	FALSE	2
2022-09-13	14:38:11	0.272735	217.715	FALSE	2
2022-09-13	14:38:12	0.394771	218.11	FALSE	2
2022-09-13	14:38:12	0.358791	218.469	FALSE	2
2022-09-13	14:38:12	0.414822	218.884	FALSE	2
2022-09-13	14:38:12	0.700063	219.584	FALSE	2
2022-09-13	14:38:13	0.651107	220.235	FALSE	2
2022-09-13	14:38:13	0.712786	220.947	FALSE	2
2022-09-13	14:38:13	0.55528	221.503	FALSE	2
2022-09-13	14:38:13	0.660369	222.163	FALSE	2
2022-09-13	14:38:14	0.522048	222.685	FALSE	2
2022-09-13	14:38:14	0.600216	223.285	FALSE	2
2022-09-13	14:38:14	0.478028	223.763	FALSE	2
2022-09-13	14:38:15	0.494059	224.257	FALSE	2
2022-09-13	14:38:15	0.496603	224.754	FALSE	2
2022-09-13	14:38:15	0.496349	225.25	FALSE	2
2022-09-13	14:38:15	0.485	225.735	FALSE	2
2022-09-13	14:38:16	0.444593	226.18	FALSE	2
2022-09-13	14:38:16	0.463015	226.643	FALSE	2
2022-09-13	14:38:16	0.431819	227.075	FALSE	2
2022-09-13	14:38:16	0.441794	227.517	FALSE	2
2022-09-13	14:38:17	0.411667	227.928	FALSE	2
2022-09-13	14:38:17	0.42271	228.351	FALSE	2
2022-09-13	14:38:17	0.274364	228.625	FALSE	2
2022-09-13	14:38:17	0.0938042	228.719	FALSE	2
2022-09-13	14:38:18	0.202659	228.922	FALSE	2
2022-09-13	14:38:18	0.269733	229.192	FALSE	2
2022-09-13	14:38:18	0.240878	229.432	FALSE	2
2022-09-13	14:38:19	0.159046	229.592	FALSE	2
2022-09-13	14:38:19	0.0774684	229.669	FALSE	2
2022-09-13	14:38:19	0.300318	229.969	FALSE	2
2022-09-13	14:38:19	0.0946694	230.064	FALSE	2
2022-09-13	14:38:20	0.130751	230.195	FALSE	2
2022-09-13	14:38:20	0.0620994	230.257	FALSE	2
2022-09-13	14:38:20	0.0442877	230.301	FALSE	2
2022-09-13	14:38:20	0.105916	230.407	FALSE	2
2022-09-13	14:38:21	0.0600639	230.467	FALSE	2
2022-09-13	14:38:21	0.188715	230.656	FALSE	2
2022-09-13	14:38:21	0.0920739	230.748	FALSE	2
2022-09-13	14:38:21	0.0905473	230.838	FALSE	2
2022-09-13	14:38:22	0.19869	231.037	FALSE	2
2022-09-13	14:38:22	0.193193	231.23	FALSE	2
2022-09-13	14:38:22	0.368461	231.599	FALSE	2
2022-09-13	14:38:23	0.202914	231.802	FALSE	2
2022-09-13	14:38:23	0.322405	232.124	FALSE	2
2022-09-13	14:38:23	0.229275	232.353	FALSE	2
2022-09-13	14:38:23	0.250191	232.604	FALSE	2
2022-09-13	14:38:24	0.312328	232.916	FALSE	2
2022-09-13	14:38:24	0.180318	233.096	FALSE	2
2022-09-13	14:38:24	0.368868	233.465	FALSE	2
2022-09-13	14:38:24	0.301998	233.767	FALSE	2
2022-09-13	14:38:25	0.26271	234.03	FALSE	2
2022-09-13	14:38:25	0.297723	234.327	FALSE	2
2022-09-13	14:38:25	0.161387	234.489	FALSE	2
2022-09-13	14:38:25	0.327341	234.816	FALSE	2
2022-09-13	14:38:26	0.148919	234.965	FALSE	2
2022-09-13	14:38:26	0.331209	235.296	FALSE	2
2022-09-13	14:38:26	0.106018	235.402	FALSE	2
2022-09-13	14:38:27	0.201743	235.604	FALSE	2
2022-09-13	14:38:27	0.132328	235.736	FALSE	2
2022-09-13	14:38:27	0.170598	235.907	FALSE	2
2022-09-13	14:38:27	0.208054	236.115	FALSE	2
2022-09-13	14:38:28	0.141183	236.256	FALSE	2
2022-09-13	14:38:28	0.292328	236.549	FALSE	2
2022-09-13	14:38:28	0.133346	236.682	FALSE	2
2022-09-13	14:38:28	0.292634	236.975	FALSE	2
2022-09-13	14:38:29	0.117316	237.092	FALSE	2
2022-09-13	14:38:29	0.328562	237.42	FALSE	2
2022-09-13	14:38:29	0.127443	237.548	FALSE	2
2022-09-13	14:38:29	0.167646	237.716	FALSE	2
2022-09-13	14:38:30	0.182608	237.898	FALSE	2
2022-09-13	14:38:30	0.0902419	237.988	FALSE	2
2022-09-13	14:38:30	0.282099	238.27	FALSE	2
2022-09-13	14:38:31	0.201081	238.472	FALSE	2
2022-09-13	14:38:31	0.333753	238.805	FALSE	2
2022-09-13	14:38:31	0.18388	238.989	FALSE	2
2022-09-13	14:38:31	0.221539	239.211	FALSE	2
2022-09-13	14:38:32	0.240318	239.451	FALSE	2
2022-09-13	14:38:32	0.167239	239.618	FALSE	2
2022-09-13	14:38:32	0.343626	239.962	FALSE	2
2022-09-13	14:38:32	0.188257	240.15	FALSE	2
2022-09-13	14:38:33	0.326629	240.477	FALSE	2
2022-09-13	14:38:33	0.24673	240.724	FALSE	2
2022-09-13	14:38:33	0.224898	240.948	FALSE	2
2022-09-13	14:38:33	0.233143	241.182	FALSE	2
2022-09-13	14:38:34	0.201896	241.383	FALSE	2
2022-09-13	14:38:34	0.295585	241.679	FALSE	2
2022-09-13	14:38:34	0.20444	241.884	FALSE	2
2022-09-13	14:38:35	0.341336	242.225	FALSE	2
2022-09-13	14:38:35	0.225407	242.45	FALSE	2
2022-09-13	14:38:35	0.229478	242.68	FALSE	2
2022-09-13	14:38:35	0.281794	242.962	FALSE	2
2022-09-13	14:38:36	0.290089	243.252	FALSE	2
2022-09-13	14:38:36	0.350751	243.602	FALSE	2
2022-09-13	14:38:36	0.272735	243.875	FALSE	2
2022-09-13	14:38:36	0.291768	244.167	FALSE	2
2022-09-13	14:38:37	0.360165	244.527	FALSE	2
2022-09-13	14:38:37	0.289122	244.816	FALSE	2
2022-09-13	14:38:37	0.288664	245.105	FALSE	2
2022-09-13	14:38:37	0.363982	245.469	FALSE	2
2022-09-13	14:38:38	0.22958	245.698	FALSE	2
2022-09-13	14:38:38	0.413397	246.112	FALSE	2
2022-09-13	14:38:38	0.324135	246.436	FALSE	2
2022-09-13	14:38:39	0.358079	246.794	FALSE	2
2022-09-13	14:38:39	0.348817	247.143	FALSE	2
2022-09-13	14:38:39	0.261132	247.404	FALSE	2
2022-09-13	14:38:39	0.461794	247.866	FALSE	2
2022-09-13	14:38:40	0.481489	248.347	FALSE	2
2022-09-13	14:38:40	0.404288	248.752	FALSE	2
2022-09-13	14:38:40	0.487036	249.239	FALSE	2
2022-09-13	14:38:40	0.424288	249.663	FALSE	2
2022-09-13	14:38:41	0.415992	250.079	FALSE	2
2022-09-13	14:38:41	0.444898	250.524	FALSE	2
2022-09-13	14:38:41	0.714873	251.239	FALSE	2
2022-09-13	14:38:41	0.188868	251.427	FALSE	2
2022-09-13	14:38:42	-0.200598	251.427	FALSE	2
2022-09-13	14:38:42	-0.378664	251.427	FALSE	2
2022-09-13	14:38:42	-0.31159	251.427	FALSE	2
2022-09-13	14:38:43	-0.188333	251.427	FALSE	2
2022-09-13	14:38:43	-0.0290964	251.427	FALSE	2
2022-09-13	14:38:43	-0.0608522	251.427	FALSE	2
2022-09-13	14:38:43	0.117977	251.545	FALSE	2
2022-09-13	14:38:44	0.195127	251.741	FALSE	2
2022-09-13	14:38:44	0.543422	252.284	FALSE	2
2022-09-13	14:38:44	0.328461	252.612	FALSE	2
2022-09-13	14:38:44	0.513397	253.126	FALSE	2
2022-09-13	14:38:45	0.318334	253.444	FALSE	2
2022-09-13	14:38:45	0.468562	253.913	FALSE	2
2022-09-13	14:38:45	0.398232	254.311	FALSE	2
2022-09-13	14:38:45	0.460471	254.771	FALSE	2
2022-09-13	14:38:46	0.386069	255.158	FALSE	2
2022-09-13	14:38:46	0.303931	255.461	FALSE	2
2022-09-13	14:38:46	0.465102	255.927	FALSE	2
2022-09-13	14:38:47	0.194873	256.121	FALSE	2
2022-09-13	14:38:47	0.470089	256.592	FALSE	2
2022-09-13	14:38:47	0.348308	256.94	FALSE	2
2022-09-13	14:38:47	0.334008	257.274	FALSE	2
2022-09-13	14:38:48	0.419504	257.693	FALSE	2
2022-09-13	14:38:48	0.421641	258.115	FALSE	2
2022-09-13	14:38:48	0.405051	258.52	FALSE	2
2022-09-13	14:38:48	0.251311	258.771	FALSE	2
2022-09-13	14:38:49	0.442812	259.214	FALSE	2
2022-09-13	14:38:49	0.392532	259.607	FALSE	2
2022-09-13	14:38:49	0.250242	259.857	FALSE	2
2022-09-13	14:38:49	0.130954	259.988	FALSE	2
2022-09-13	14:38:50	0.265356	260.253	FALSE	2
2022-09-13	14:38:50	0.292277	260.546	FALSE	2
2022-09-13	14:38:50	0.373143	260.919	FALSE	2
2022-09-13	14:38:51	0.412227	261.331	FALSE	2
2022-09-13	14:38:51	0.351107	261.682	FALSE	2
2022-09-13	14:38:51	0.448919	262.131	FALSE	2
2022-09-13	14:38:51	0.316603	262.448	FALSE	2
2022-09-13	14:38:52	0.193702	262.641	FALSE	2
2022-09-13	14:38:52	0.30785	262.949	FALSE	2
2022-09-13	14:38:52	0.26327	263.212	FALSE	2
2022-09-13	14:38:52	0.19472	263.407	FALSE	2
2022-09-13	14:38:53	0.36444	263.771	FALSE	2
2022-09-13	14:38:53	0.956349	264.728	FALSE	2
2022-09-13	14:38:53	1.11131	265.839	FALSE	2
2022-09-13	14:38:53	0.625967	266.465	FALSE	2
2022-09-13	14:38:54	0.425713	266.891	FALSE	2
2022-09-13	14:38:54	0.425458	267.316	FALSE	2
2022-09-13	14:38:54	0.513041	267.829	FALSE	2
2022-09-13	14:38:55	0.328969	268.158	FALSE	2
2022-09-13	14:38:55	0.329428	268.488	FALSE	2
2022-09-13	14:38:55	0.501845	268.99	FALSE	2
2022-09-13	14:38:55	0.49126	269.481	FALSE	2
2022-09-13	14:38:56	0.565916	270.047	FALSE	2
2022-09-13	14:38:56	0.391972	270.439	FALSE	2
2022-09-13	14:38:56	0.374466	270.813	FALSE	2
2022-09-13	14:38:56	0.317977	271.131	FALSE	2
2022-09-13	14:38:57	0.275636	271.407	FALSE	2
2022-09-13	14:38:57	0.0843386	271.491	FALSE	2
2022-09-13	14:38:57	0.0437788	271.535	FALSE	2
2022-09-13	14:38:57	-0.0536766	271.535	FALSE	2
2022-09-13	14:38:58	-0.0168827	271.535	FALSE	2
2022-09-13	14:38:58	-0.0637529	271.535	FALSE	2
2022-09-13	14:38:58	-0.0261448	271.535	FALSE	2
2022-09-13	14:38:59	0.0984353	271.633	FALSE	2
2022-09-13	14:38:59	0.145662	271.779	FALSE	2
2022-09-13	14:38:59	0.377875	272.157	FALSE	2
2022-09-13	14:38:59	0.265305	272.422	FALSE	2
2022-09-13	14:39:00	0.366883	272.789	FALSE	2
2022-09-13	14:39:00	0.0459163	272.835	FALSE	2
2022-09-13	14:39:00	0.164644	273	FALSE	2
2022-09-13	14:39:00	-0.0482822	273	FALSE	2
2022-09-13	14:39:01	-0.269503	273	FALSE	2
2022-09-13	14:39:01	-0.174796	273	FALSE	2
2022-09-13	14:39:01	-0.252659	273	FALSE	2
2022-09-13	14:39:01	-0.160292	273	FALSE	2
2022-09-13	14:39:02	-0.234643	273	FALSE	2
2022-09-13	14:39:02	-0.147213	273	FALSE	2
2022-09-13	14:39:02	-0.286297	273	FALSE	2
2022-09-13	14:39:03	0.0685116	273.068	FALSE	2
2022-09-13	14:39:03	0.154466	273.223	FALSE	2
2022-09-13	14:39:03	0.0103947	273.233	FALSE	2
2022-09-13	14:39:03	-0.0430405	273.233	FALSE	2
2022-09-13	14:39:04	0.036247	273.269	FALSE	2
2022-09-13	14:39:04	0.340929	273.61	FALSE	2
2022-09-13	14:39:04	0.289377	273.9	FALSE	2
2022-09-13	14:39:04	0.180369	274.08	FALSE	2
2022-09-13	14:39:05	0.18897	274.269	FALSE	2
2022-09-13	14:39:05	0.245967	274.515	FALSE	2
2022-09-13	14:39:05	0.272735	274.788	FALSE	2
2022-09-13	14:39:05	0.295025	275.083	FALSE	2
2022-09-13	14:39:06	0.422201	275.505	FALSE	2
2022-09-13	14:39:06	0.208919	275.714	FALSE	2
2022-09-13	14:39:06	0.478486	276.192	FALSE	2
2022-09-13	14:39:07	0.65701	276.849	FALSE	2
2022-09-13	14:39:07	0.881234	277.73	FALSE	2
2022-09-13	14:39:07	2.54337	280.274	FALSE	2
2022-09-13	14:39:07	5.10276	285.377	1	3
2022-09-13	14:39:08	3.60617	288.983	1	4
2022-09-13	14:39:08	0.528308	289.511	FALSE	4
2022-09-13	14:39:08	0.34098	289.852	FALSE	4
2022-09-13	14:39:08	0.412328	290.264	FALSE	4
2022-09-13	14:39:09	0.371412	290.636	FALSE	4
2022-09-13	14:39:09	0.267952	290.904	FALSE	4
2022-09-13	14:39:09	0.313753	291.218	FALSE	4
2022-09-13	14:39:09	0.200573	291.418	FALSE	4
2022-09-13	14:39:10	0.240878	291.659	FALSE	4
2022-09-13	14:39:10	0.138232	291.797	FALSE	4
2022-09-13	14:39:10	0.368817	292.166	FALSE	4
2022-09-13	14:39:11	0.218028	292.384	FALSE	4
2022-09-13	14:39:11	0.428104	292.812	FALSE	4
2022-09-13	14:39:11	0.217977	293.03	FALSE	4
2022-09-13	14:39:11	0.315178	293.345	FALSE	4
2022-09-13	14:39:12	0.149987	293.495	FALSE	4
2022-09-13	14:39:12	-0.00258246	293.495	FALSE	4
2022-09-13	14:39:12	-0.209249	293.495	FALSE	4
2022-09-13	14:39:12	-0.276679	293.495	FALSE	4
2022-09-13	14:39:13	-0.409351	293.495	FALSE	4
2022-09-13	14:39:13	-0.537391	293.495	FALSE	4
2022-09-13	14:39:13	-0.446246	293.495	FALSE	4
2022-09-13	14:39:13	-0.196068	293.495	FALSE	4
2022-09-13	14:39:14	-0.255814	293.495	FALSE	4
2022-09-13	14:39:14	-0.211132	293.495	FALSE	4
2022-09-13	14:39:14	-0.283498	293.495	FALSE	4
2022-09-13	14:39:15	-0.225381	293.495	FALSE	4
2022-09-13	14:39:15	-0.053931	293.495	FALSE	4
2022-09-13	14:39:15	0.00484756	293.5	FALSE	4
2022-09-13	14:39:15	0.29299	293.793	FALSE	4
2022-09-13	14:39:16	0.234873	294.028	FALSE	4
2022-09-13	14:39:16	0.129987	294.158	FALSE	4
2022-09-13	14:39:16	0.0461198	294.204	FALSE	4
2022-09-13	14:39:16	-0.0820226	294.204	FALSE	4
2022-09-13	14:39:17	0.0606237	294.265	FALSE	4
2022-09-13	14:39:17	0.52617	294.791	FALSE	4
2022-09-13	14:39:17	0.644644	295.436	FALSE	4
2022-09-13	14:39:17	0.800114	296.236	FALSE	4
2022-09-13	14:39:18	1.33614	297.572	FALSE	4
2022-09-13	14:39:18	2.06169	299.633	FALSE	4
2022-09-13	14:39:18	2.70393	302.337	FALSE	4
2022-09-13	14:39:19	0.268664	302.606	FALSE	4
2022-09-13	14:39:19	0.505814	303.112	FALSE	4
2022-09-13	14:39:19	0.149784	303.262	FALSE	4
2022-09-13	14:39:19	0.122405	303.384	FALSE	4
2022-09-13	14:39:20	-0.103702	303.384	FALSE	4
2022-09-13	14:39:20	-0.0640583	303.384	FALSE	4
2022-09-13	14:39:20	0.130751	303.515	FALSE	4
2022-09-13	14:39:20	0.385356	303.9	FALSE	4
2022-09-13	14:39:21	0.808766	304.709	FALSE	4
2022-09-13	14:39:21	0.657824	305.367	FALSE	4
2022-09-13	14:39:21	0.460573	305.827	FALSE	4
2022-09-13	14:39:21	0.312023	306.139	FALSE	4
2022-09-13	14:39:22	0.28327	306.423	FALSE	4
2022-09-13	14:39:22	0.320624	306.743	FALSE	4
2022-09-13	14:39:22	0.0945168	306.838	FALSE	4
2022-09-13	14:39:23	-0.219376	306.838	FALSE	4
2022-09-13	14:39:23	-0.221565	306.838	FALSE	4
2022-09-13	14:39:23	-0.210572	306.838	FALSE	4
2022-09-13	14:39:23	-0.0184094	306.838	FALSE	4
2022-09-13	14:39:24	-0.186603	306.838	FALSE	4
2022-09-13	14:39:24	0.036247	306.874	FALSE	4
2022-09-13	14:39:24	0.16902	307.043	FALSE	4
2022-09-13	14:39:24	0.205102	307.248	FALSE	4
2022-09-13	14:39:25	0.132125	307.38	FALSE	4
2022-09-13	14:39:25	0.170853	307.551	FALSE	4
2022-09-13	14:39:25	1.00653	308.558	FALSE	4
2022-09-13	14:39:25	0.557214	309.115	FALSE	4
2022-09-13	14:39:26	-0.113219	309.115	FALSE	4
2022-09-13	14:39:26	-0.146399	309.115	FALSE	4
2022-09-13	14:39:26	-0.160343	309.115	FALSE	4
2022-09-13	14:39:27	-0.362023	309.115	FALSE	4
2022-09-13	14:39:27	-0.441819	309.115	FALSE	4
2022-09-13	14:39:27	-0.521513	309.115	FALSE	4
2022-09-13	14:39:27	-0.488893	309.115	FALSE	4
2022-09-13	14:39:28	-0.445534	309.115	FALSE	4
2022-09-13	14:39:28	-0.464414	309.115	FALSE	4
2022-09-13	14:39:28	-0.439885	309.115	FALSE	4
2022-09-13	14:39:28	-0.510674	309.115	FALSE	4
2022-09-13	14:39:29	-0.435712	309.115	FALSE	4
2022-09-13	14:39:29	-0.444872	309.115	FALSE	4
2022-09-13	14:39:29	-0.421921	309.115	FALSE	4
2022-09-13	14:39:29	-0.415814	309.115	FALSE	4
2022-09-13	14:39:30	-0.442175	309.115	FALSE	4
2022-09-13	14:39:30	-0.418816	309.115	FALSE	4
2022-09-13	14:39:30	-0.388791	309.115	FALSE	4
2022-09-13	14:39:31	-0.339834	309.115	FALSE	4
2022-09-13	14:39:31	-0.421972	309.115	FALSE	4
2022-09-13	14:39:31	-0.202837	309.115	FALSE	4
2022-09-13	14:39:31	-0.203397	309.115	FALSE	4
2022-09-13	14:39:32	0.121998	309.237	FALSE	4
2022-09-13	14:39:32	-0.0916409	309.237	FALSE	4
2022-09-13	14:39:32	0.0971122	309.334	FALSE	4
2022-09-13	14:39:32	-0.060903	309.334	FALSE	4
2022-09-13	14:39:33	0.0244913	309.358	FALSE	4
2022-09-13	14:39:33	-0.00288781	309.358	FALSE	4
2022-09-13	14:39:33	-0.0183076	309.358	FALSE	4
2022-09-13	14:39:33	0.201031	309.56	FALSE	4
2022-09-13	14:39:34	0.200573	309.76	FALSE	4
2022-09-13	14:39:34	0.317621	310.078	FALSE	4
2022-09-13	14:39:34	0.444288	310.522	FALSE	4
2022-09-13	14:39:35	0.744339	311.266	FALSE	4
2022-09-13	14:39:35	0.265305	311.532	FALSE	4
2022-09-13	14:39:35	0.436247	311.968	FALSE	4
2022-09-13	14:39:35	0.35813	312.326	FALSE	4
2022-09-13	14:39:36	0.381845	312.708	FALSE	4
2022-09-13	14:39:36	0.363677	313.072	FALSE	4
2022-09-13	14:39:36	0.459046	313.531	FALSE	4
2022-09-13	14:39:36	0.317621	313.848	FALSE	4
2022-09-13	14:39:37	0.521132	314.369	FALSE	4
2022-09-13	14:39:37	0.308868	314.678	FALSE	4
2022-09-13	14:39:37	0.420573	315.099	FALSE	4
2022-09-13	14:39:37	0.163982	315.263	FALSE	4
2022-09-13	14:39:38	0.320929	315.584	FALSE	4
2022-09-13	14:39:38	0.266069	315.85	FALSE	4
2022-09-13	14:39:38	0.329377	316.179	FALSE	4
2022-09-13	14:39:39	0.29813	316.477	FALSE	4
2022-09-13	14:39:39	0.305458	316.783	FALSE	4
2022-09-13	14:39:39	0.352685	317.135	FALSE	4
2022-09-13	14:39:39	0.246374	317.382	FALSE	4
2022-09-13	14:39:40	0.608002	317.99	FALSE	4
2022-09-13	14:39:40	0.193244	318.183	FALSE	4
2022-09-13	14:39:40	0.40042	318.583	FALSE	4
2022-09-13	14:39:40	0.363168	318.947	FALSE	4
2022-09-13	14:39:41	0.519555	319.466	FALSE	4
2022-09-13	14:39:41	0.467697	319.934	FALSE	4
2022-09-13	14:39:41	0.473244	320.407	FALSE	4
2022-09-13	14:39:41	0.520064	320.927	FALSE	4
2022-09-13	14:39:42	0.390191	321.317	FALSE	4
2022-09-13	14:39:42	0.411463	321.729	FALSE	4
2022-09-13	14:39:42	0.304186	322.033	FALSE	4
2022-09-13	14:39:43	0.17528	322.208	FALSE	4
2022-09-13	14:39:43	0.404949	322.613	FALSE	4
2022-09-13	14:39:43	0.165051	322.778	FALSE	4
2022-09-13	14:39:43	0.358232	323.137	FALSE	4
2022-09-13	14:39:44	0.190242	323.327	FALSE	4
2022-09-13	14:39:44	0.107189	323.434	FALSE	4
2022-09-13	14:39:44	0.0673411	323.501	FALSE	4
2022-09-13	14:39:44	0.0159417	323.517	FALSE	4
2022-09-13	14:39:45	0.111209	323.628	FALSE	4
2022-09-13	14:39:45	-0.00288781	323.628	FALSE	4
2022-09-13	14:39:45	0.216247	323.845	FALSE	4
2022-09-13	14:39:45	0.417061	324.262	FALSE	4
2022-09-13	14:39:46	0.29299	324.555	FALSE	4
2022-09-13	14:39:46	0.529987	325.085	FALSE	4
2022-09-13	14:39:46	0.394262	325.479	FALSE	4
2022-09-13	14:39:47	0.384237	325.863	FALSE	4
2022-09-13	14:39:47	0.405967	326.269	FALSE	4
2022-09-13	14:39:47	0.305916	326.575	FALSE	4
2022-09-13	14:39:47	0.22673	326.802	FALSE	4
2022-09-13	14:39:48	0.350445	327.152	FALSE	4
2022-09-13	14:39:48	0.381743	327.534	FALSE	4
2022-09-13	14:39:48	0.382964	327.917	FALSE	4
2022-09-13	14:39:48	0.464237	328.381	FALSE	4
2022-09-13	14:39:49	0.402252	328.783	FALSE	4
2022-09-13	14:39:49	0.367392	329.151	FALSE	4
2022-09-13	14:39:49	0.546781	329.698	FALSE	4
2022-09-13	14:39:49	0.395331	330.093	FALSE	4
2022-09-13	14:39:50	0.281998	330.375	FALSE	4
2022-09-13	14:39:50	0.181234	330.556	FALSE	4
2022-09-13	14:39:50	0.483982	331.04	FALSE	4
2022-09-13	14:39:51	0.394669	331.435	FALSE	4
2022-09-13	14:39:51	0.548613	331.983	FALSE	4
2022-09-13	14:39:51	0.349886	332.333	FALSE	4
2022-09-13	14:39:51	0.458384	332.792	FALSE	4
2022-09-13	14:39:52	0.449122	333.241	FALSE	4
2022-09-13	14:39:52	0.500318	333.741	FALSE	4
2022-09-13	14:39:52	0.648969	334.39	FALSE	4
2022-09-13	14:39:52	0.536145	334.926	FALSE	4
2022-09-13	14:39:53	0.466679	335.393	FALSE	4
2022-09-13	14:39:53	0.418283	335.811	FALSE	4
2022-09-13	14:39:53	0.414262	336.226	FALSE	4
2022-09-13	14:39:53	0.465814	336.691	FALSE	4
2022-09-13	14:39:54	0.476909	337.168	FALSE	4
2022-09-13	14:39:54	0.485967	337.654	FALSE	4
2022-09-13	14:39:54	0.491769	338.146	FALSE	4
2022-09-13	14:39:55	0.523677	338.67	FALSE	4
2022-09-13	14:39:55	0.475178	339.145	FALSE	4
2022-09-13	14:39:55	0.448919	339.594	FALSE	4
2022-09-13	14:39:55	0.44785	340.042	FALSE	4
2022-09-13	14:39:56	0.428308	340.47	FALSE	4
2022-09-13	14:39:56	0.465204	340.935	FALSE	4
2022-09-13	14:39:56	0.409173	341.344	FALSE	4
2022-09-13	14:39:56	0.445662	341.79	FALSE	4
2022-09-13	14:39:57	0.382506	342.172	FALSE	4
2022-09-13	14:39:57	0.435891	342.608	FALSE	4
2022-09-13	14:39:57	0.408308	343.017	FALSE	4
2022-09-13	14:39:57	0.368868	343.386	FALSE	4
2022-09-13	14:39:58	0.350903	343.736	FALSE	4
2022-09-13	14:39:58	0.357265	344.094	FALSE	4
2022-09-13	14:39:58	0.528206	344.622	FALSE	4
2022-09-13	14:39:59	0.242099	344.864	FALSE	4
2022-09-13	14:39:59	0.505203	345.369	FALSE	4
2022-09-13	14:39:59	0.430598	345.8	FALSE	4
2022-09-13	14:39:59	0.432735	346.233	FALSE	4
2022-09-13	14:40:00	0.390242	346.623	FALSE	4
2022-09-13	14:40:00	0.318079	346.941	FALSE	4
2022-09-13	14:40:00	0.433499	347.374	FALSE	4
2022-09-13	14:40:00	0.336196	347.711	FALSE	4
2022-09-13	14:40:01	0.566476	348.277	FALSE	4
2022-09-13	14:40:01	0.231005	348.508	FALSE	4
2022-09-13	14:40:01	0.489936	348.998	FALSE	4
2022-09-13	14:40:01	0.304339	349.302	FALSE	4
2022-09-13	14:40:02	0.46673	349.769	FALSE	4
2022-09-13	14:40:02	0.401387	350.17	FALSE	4
2022-09-13	14:40:02	0.407392	350.578	FALSE	4
2022-09-13	14:40:03	0.363423	350.941	FALSE	4
2022-09-13	14:40:03	0.353651	351.295	FALSE	4
2022-09-13	14:40:03	0.437163	351.732	FALSE	4
2022-09-13	14:40:03	0.281845	352.014	FALSE	4
2022-09-13	14:40:04	0.500929	352.515	FALSE	4
2022-09-13	14:40:04	0.222659	352.737	FALSE	4
2022-09-13	14:40:04	0.530802	353.268	FALSE	4
2022-09-13	14:40:04	0.282914	353.551	FALSE	4
2022-09-13	14:40:05	0.433397	353.985	FALSE	4
2022-09-13	14:40:05	0.318944	354.304	FALSE	4
2022-09-13	14:40:05	0.450649	354.754	FALSE	4
2022-09-13	14:40:05	0.341692	355.096	FALSE	4
2022-09-13	14:40:06	0.331565	355.427	FALSE	4
2022-09-13	14:40:06	0.390242	355.818	FALSE	4
2022-09-13	14:40:06	0.307545	356.125	FALSE	4
2022-09-13	14:40:07	0.511463	356.637	FALSE	4
2022-09-13	14:40:07	0.24841	356.885	FALSE	4
2022-09-13	14:40:07	0.466527	357.352	FALSE	4
2022-09-13	14:40:07	0.332328	357.684	FALSE	4
2022-09-13	14:40:08	0.445	358.129	FALSE	4
2022-09-13	14:40:08	0.273397	358.402	FALSE	4
2022-09-13	14:40:08	0.354313	358.757	FALSE	4
2022-09-13	14:40:08	0.321285	359.078	FALSE	4
2022-09-13	14:40:09	0.416349	359.494	FALSE	4
2022-09-13	14:40:09	0.429173	359.923	FALSE	4
2022-09-13	14:40:09	0.373906	360.297	FALSE	4
2022-09-13	14:40:09	0.518944	360.816	FALSE	4
2022-09-13	14:40:10	0.356247	361.173	FALSE	4
2022-09-13	14:40:10	0.508512	361.681	FALSE	4
2022-09-13	14:40:10	0.377112	362.058	FALSE	4
2022-09-13	14:40:11	0.379351	362.438	FALSE	4
2022-09-13	14:40:11	0.407545	362.845	FALSE	4
2022-09-13	14:40:11	0.375891	363.221	FALSE	4
2022-09-13	14:40:11	0.55701	363.778	FALSE	4
2022-09-13	14:40:12	0.392074	364.17	FALSE	4
2022-09-13	14:40:12	0.467036	364.637	FALSE	4
2022-09-13	14:40:12	0.381794	365.019	FALSE	4
2022-09-13	14:40:12	0.44098	365.46	FALSE	4
2022-09-13	14:40:13	0.504695	365.965	FALSE	4
2022-09-13	14:40:13	0.313194	366.278	FALSE	4
2022-09-13	14:40:13	0.465713	366.743	FALSE	4
2022-09-13	14:40:13	0.321743	367.065	FALSE	4
2022-09-13	14:40:14	0.435941	367.501	FALSE	4
2022-09-13	14:40:14	0.372328	367.873	FALSE	4
2022-09-13	14:40:14	0.418995	368.292	FALSE	4
2022-09-13	14:40:15	0.835127	369.128	FALSE	4
2022-09-13	14:40:15	1.32912	370.457	FALSE	4
2022-09-13	14:40:15	1.55294	372.01	FALSE	4
2022-09-13	14:40:15	1.19416	373.204	FALSE	4
2022-09-13	14:40:16	0.586578	373.79	FALSE	4
2022-09-13	14:40:16	0.592736	374.383	FALSE	4
2022-09-13	14:40:16	0.43299	374.816	FALSE	4
2022-09-13	14:40:16	0.41014	375.226	FALSE	4
2022-09-13	14:40:17	0.404389	375.631	FALSE	4
2022-09-13	14:40:17	0.345305	375.976	FALSE	4
2022-09-13	14:40:17	0.715534	376.692	FALSE	4
2022-09-13	14:40:17	0.791412	377.483	FALSE	4
2022-09-13	14:40:18	1.22709	378.71	FALSE	4
2022-09-13	14:40:18	0.864644	379.575	FALSE	4
2022-09-13	14:40:18	1.23228	380.807	FALSE	4
2022-09-13	14:40:19	0.580318	381.387	FALSE	4
2022-09-13	14:40:19	0.515025	381.902	FALSE	4
2022-09-13	14:40:19	0.301031	382.203	FALSE	4
2022-09-13	14:40:19	0.363728	382.567	FALSE	4
2022-09-13	14:40:20	0.243168	382.81	FALSE	4
2022-09-13	14:40:20	0.372074	383.182	FALSE	4
2022-09-13	14:40:20	0.266476	383.449	FALSE	4
2022-09-13	14:40:21	0.291972	383.741	FALSE	4
2022-09-13	14:40:21	0.302608	384.043	FALSE	4
2022-09-13	14:40:21	0.586781	384.63	FALSE	4
2022-09-13	14:40:21	1.84816	386.478	FALSE	4
2022-09-13	14:40:21	4.0564	390.535	1	5
2022-09-13	14:40:22	1.13854	391.673	FALSE	5
2022-09-13	14:40:22	0.640674	392.314	FALSE	5
2022-09-13	14:40:22	0.397621	392.712	FALSE	5
2022-09-13	14:40:23	0.389071	393.101	FALSE	5
2022-09-13	14:40:23	0.361998	393.463	FALSE	5
2022-09-13	14:40:23	0.270598	393.733	FALSE	5
2022-09-13	14:40:23	0.459148	394.192	FALSE	5
2022-09-13	14:40:24	0.316858	394.509	FALSE	5
2022-09-13	14:40:24	0.49472	395.004	FALSE	5
2022-09-13	14:40:24	0.328562	395.332	FALSE	5
2022-09-13	14:40:24	0.551056	395.884	FALSE	5
2022-09-13	14:40:25	0.321183	396.205	FALSE	5
2022-09-13	14:40:25	0.522201	396.727	FALSE	5
2022-09-13	14:40:25	0.268766	396.996	FALSE	5
2022-09-13	14:40:25	0.516552	397.512	FALSE	5
2022-09-13	14:40:26	0.230496	397.743	FALSE	5
2022-09-13	14:40:26	0.506018	398.249	FALSE	5
2022-09-13	14:40:26	0.214211	398.463	FALSE	5
2022-09-13	14:40:27	0.528461	398.991	FALSE	5
2022-09-13	14:40:27	0.222761	399.214	FALSE	5
2022-09-13	14:40:27	0.479707	399.694	FALSE	5
2022-09-13	14:40:27	0.276705	399.971	FALSE	5
2022-09-13	14:40:28	0.483524	400.454	FALSE	5
2022-09-13	14:40:28	0.208206	400.662	FALSE	5
2022-09-13	14:40:28	0.459097	401.121	FALSE	5
2022-09-13	14:40:28	0.285305	401.407	FALSE	5
2022-09-13	14:40:29	0.438181	401.845	FALSE	5
2022-09-13	14:40:29	0.296959	402.142	FALSE	5
2022-09-13	14:40:29	0.443677	402.586	FALSE	5
2022-09-13	14:40:29	0.301641	402.887	FALSE	5
2022-09-13	14:40:30	0.480013	403.367	FALSE	5
2022-09-13	14:40:30	0.312583	403.68	FALSE	5
2022-09-13	14:40:30	0.424593	404.104	FALSE	5
2022-09-13	14:40:31	0.34098	404.445	FALSE	5
2022-09-13	14:40:31	0.433092	404.878	FALSE	5
2022-09-13	14:40:31	0.357112	405.236	FALSE	5
2022-09-13	14:40:31	0.411158	405.647	FALSE	5
2022-09-13	14:40:32	0.313753	405.96	FALSE	5
2022-09-13	14:40:32	0.353397	406.314	FALSE	5
2022-09-13	14:40:32	0.318334	406.632	FALSE	5
2022-09-13	14:40:32	0.291158	406.923	FALSE	5
2022-09-13	14:40:33	0.303321	407.227	FALSE	5
2022-09-13	14:40:33	0.220827	407.447	FALSE	5
2022-09-13	14:40:33	0.334669	407.782	FALSE	5
2022-09-13	14:40:33	0.284797	408.067	FALSE	5
2022-09-13	14:40:34	0.395026	408.462	FALSE	5
2022-09-13	14:40:34	0.20215	408.664	FALSE	5
2022-09-13	14:40:34	0.298792	408.963	FALSE	5
2022-09-13	14:40:35	0.247596	409.211	FALSE	5
2022-09-13	14:40:35	0.378232	409.589	FALSE	5
2022-09-13	14:40:35	0.279453	409.868	FALSE	5
2022-09-13	14:40:35	0.489886	410.358	FALSE	5
2022-09-13	14:40:36	0.308512	410.667	FALSE	5
2022-09-13	14:40:36	0.492023	411.159	FALSE	5
2022-09-13	14:40:36	0.387494	411.546	FALSE	5
2022-09-13	14:40:36	0.441387	411.988	FALSE	5
2022-09-13	14:40:37	0.34729	412.335	FALSE	5
2022-09-13	14:40:37	0.524898	412.86	FALSE	5
2022-09-13	14:40:37	0.44271	413.302	FALSE	5
2022-09-13	14:40:37	0.545254	413.848	FALSE	5
2022-09-13	14:40:38	1.02022	414.868	FALSE	5
2022-09-13	14:40:38	0.974669	415.843	FALSE	5
2022-09-13	14:40:38	1.0852	416.928	FALSE	5
2022-09-13	14:40:39	1.08872	418.016	FALSE	5
2022-09-13	14:40:39	1.58505	419.602	FALSE	5
2022-09-13	14:40:39	0.880929	420.482	FALSE	5
2022-09-13	14:40:39	0.661997	421.144	FALSE	5
2022-09-13	14:40:40	0.672786	421.817	FALSE	5
2022-09-13	14:40:40	0.571768	422.389	FALSE	5
2022-09-13	14:40:40	0.644237	423.033	FALSE	5
2022-09-13	14:40:40	0.480013	423.513	FALSE	5
2022-09-13	14:40:41	0.445	423.958	FALSE	5
2022-09-13	14:40:41	0.480064	424.438	FALSE	5
2022-09-13	14:40:41	0.456654	424.895	FALSE	5
2022-09-13	14:40:41	0.460573	425.356	FALSE	5
2022-09-13	14:40:42	0.340827	425.696	FALSE	5
2022-09-13	14:40:42	0.483219	426.18	FALSE	5
2022-09-13	14:40:42	0.38958	426.569	FALSE	5
2022-09-13	14:40:42	0.496349	427.066	FALSE	5
2022-09-13	14:40:43	0.396858	427.462	FALSE	5
2022-09-13	14:40:43	0.462914	427.925	FALSE	5
2022-09-13	14:40:43	0.224084	428.149	FALSE	5
2022-09-13	14:40:44	0.58902	428.738	FALSE	5
2022-09-13	14:40:44	0.271718	429.01	FALSE	5
2022-09-13	14:40:44	0.394618	429.405	FALSE	5
2022-09-13	14:40:44	0.169428	429.574	FALSE	5
2022-09-13	14:40:45	0.331718	429.906	FALSE	5
2022-09-13	14:40:45	0.130038	430.036	FALSE	5
2022-09-13	14:40:45	0.446578	430.482	FALSE	5
2022-09-13	14:40:45	0.262761	430.745	FALSE	5
2022-09-13	14:40:46	0.289326	431.035	FALSE	5
2022-09-13	14:40:46	0.18958	431.224	FALSE	5
2022-09-13	14:40:46	0.357875	431.582	FALSE	5
2022-09-13	14:40:47	0.165611	431.748	FALSE	5
2022-09-13	14:40:47	0.330038	432.078	FALSE	5
2022-09-13	14:40:47	0.152736	432.23	FALSE	5
2022-09-13	14:40:47	0.394669	432.625	FALSE	5
2022-09-13	14:40:48	0.12042	432.746	FALSE	5
2022-09-13	14:40:48	0.302964	433.048	FALSE	5
2022-09-13	14:40:48	0.160674	433.209	FALSE	5
2022-09-13	14:40:48	0.418537	433.628	FALSE	5
2022-09-13	14:40:49	0.241285	433.869	FALSE	5
2022-09-13	14:40:49	0.278333	434.147	FALSE	5
2022-09-13	14:40:49	0.266781	434.414	FALSE	5
2022-09-13	14:40:49	0.299911	434.714	FALSE	5
2022-09-13	14:40:50	0.327901	435.042	FALSE	5
2022-09-13	14:40:50	0.2964	435.338	FALSE	5
2022-09-13	14:40:50	0.309173	435.647	FALSE	5
2022-09-13	14:40:50	0.251718	435.899	FALSE	5
2022-09-13	14:40:51	0.363779	436.263	FALSE	5
2022-09-13	14:40:51	0.306883	436.57	FALSE	5
2022-09-13	14:40:51	0.382761	436.953	FALSE	5
2022-09-13	14:40:52	0.238181	437.191	FALSE	5
2022-09-13	14:40:52	0.471819	437.663	FALSE	5
2022-09-13	14:40:52	0.117774	437.78	FALSE	5
2022-09-13	14:40:52	0.369428	438.15	FALSE	5
2022-09-13	14:40:53	0.31645	438.466	FALSE	5
2022-09-13	14:40:53	0.459351	438.926	FALSE	5
2022-09-13	14:40:53	0.484746	439.41	FALSE	5
2022-09-13	14:40:53	0.353957	439.764	FALSE	5
2022-09-13	14:40:54	0.21528	439.98	FALSE	5
2022-09-13	14:40:54	0.490496	440.47	FALSE	5
2022-09-13	14:40:54	0.16612	440.636	FALSE	5
2022-09-13	14:40:54	0.177926	440.814	FALSE	5
2022-09-13	14:40:55	0.160674	440.975	FALSE	5
2022-09-13	14:40:55	0.0215906	440.996	FALSE	5
2022-09-13	14:40:55	0.131412	441.128	FALSE	5
2022-09-13	14:40:56	0.127901	441.256	FALSE	5
2022-09-13	14:40:56	0.31131	441.567	FALSE	5
2022-09-13	14:40:56	0.0579264	441.625	FALSE	5
2022-09-13	14:40:56	0.256909	441.882	FALSE	5
2022-09-13	14:40:57	0.0998602	441.982	FALSE	5
2022-09-13	14:40:57	0.0894277	442.071	FALSE	5

## Sheet: Buzz_star_2022913143527
						**GoPro Fitting: 1424
2022-09-13	14:35:27	1.31625
2022-09-13	14:35:27	0.785204
2022-09-13	14:35:27	0.705509
2022-09-13	14:35:27	0.51757
2022-09-13	14:35:28	0.370903
2022-09-13	14:35:28	0.460573
2022-09-13	14:35:28	0.447545
2022-09-13	14:35:29	0.420471
2022-09-13	14:35:29	0.404542
2022-09-13	14:35:29	0.413702
2022-09-13	14:35:29	0.418944
2022-09-13	14:35:30	0.442456
2022-09-13	14:35:30	0.39986
2022-09-13	14:35:30	0.471209
2022-09-13	14:35:30	0.421285
2022-09-13	14:35:31	0.434262
2022-09-13	14:35:31	0.446832
2022-09-13	14:35:31	0.433041
2022-09-13	14:35:31	0.447137
2022-09-13	14:35:32	0.450547
2022-09-13	14:35:32	0.494313
2022-09-13	14:35:32	0.458944
2022-09-13	14:35:33	0.470649
2022-09-13	14:35:33	0.440471
2022-09-13	14:35:33	0.465713
2022-09-13	14:35:33	0.465305
2022-09-13	14:35:34	0.445509
2022-09-13	14:35:34	0.466527
2022-09-13	14:35:34	0.394109
2022-09-13	14:35:34	0.453652
2022-09-13	14:35:35	0.534771
2022-09-13	14:35:35	0.427036
2022-09-13	14:35:35	0.471921
2022-09-13	14:35:35	0.446883
2022-09-13	14:35:36	0.465356
2022-09-13	14:35:36	0.468664
2022-09-13	14:35:36	0.456959
2022-09-13	14:35:37	0.458028
2022-09-13	14:35:37	0.427952
2022-09-13	14:35:37	0.529325
2022-09-13	14:35:37	0.41701
2022-09-13	14:35:38	0.424237
2022-09-13	14:35:38	0.45014
2022-09-13	14:35:38	0.474364
2022-09-13	14:35:38	0.330089
2022-09-13	14:35:39	0.382099
2022-09-13	14:35:39	0.164135
2022-09-13	14:35:39	0.0721758
2022-09-13	14:35:39	0.241081
2022-09-13	14:35:40	0.10439
2022-09-13	14:35:40	0.208817
2022-09-13	14:35:40	0.171005
2022-09-13	14:35:41	0.389733
2022-09-13	14:35:41	0.691717
2022-09-13	14:35:41	0.281336
2022-09-13	14:35:41	-0.130267
2022-09-13	14:35:42	-0.627824
2022-09-13	14:35:42	-0.0515392
2022-09-13	14:35:42	0.138893
2022-09-13	14:35:42	0.164695
2022-09-13	14:35:43	0.179911
2022-09-13	14:35:43	0.0211326
2022-09-13	14:35:43	0.0900384
2022-09-13	14:35:43	-0.0574934
2022-09-13	14:35:44	-0.0823788
2022-09-13	14:35:44	0.069733
2022-09-13	14:35:44	0.136705
2022-09-13	14:35:45	0.0495803
2022-09-13	14:35:45	0.109529
2022-09-13	14:35:45	0.115636
2022-09-13	14:35:45	0.403219
2022-09-13	14:35:46	1.00307
2022-09-13	14:35:46	1.11024
2022-09-13	14:35:46	0.150191
2022-09-13	14:35:46	-0.523345
2022-09-13	14:35:47	0.0207763
2022-09-13	14:35:47	0.299046
2022-09-13	14:35:47	0.472176
2022-09-13	14:35:47	0.541539
2022-09-13	14:35:48	0.496858
2022-09-13	14:35:48	0.326578
2022-09-13	14:35:48	0.302099
2022-09-13	14:35:49	0.402252
2022-09-13	14:35:49	0.389428
2022-09-13	14:35:49	0.379758
2022-09-13	14:35:49	0.387646
2022-09-13	14:35:50	0.322099
2022-09-13	14:35:50	0.475789
2022-09-13	14:35:50	0.293448
2022-09-13	14:35:50	0.226629
2022-09-13	14:35:51	0.146171
2022-09-13	14:35:51	0.158842
2022-09-13	14:35:51	0.356196
2022-09-13	14:35:51	0.556298
2022-09-13	14:35:52	0.231056
2022-09-13	14:35:52	0.517875
2022-09-13	14:35:52	0.184746
2022-09-13	14:35:53	0.459657
2022-09-13	14:35:53	0.230802
2022-09-13	14:35:53	0.412685
2022-09-13	14:35:53	0.151972
2022-09-13	14:35:54	0.433244
2022-09-13	14:35:54	0.182812
2022-09-13	14:35:54	0.465102
2022-09-13	14:35:54	0.188817
2022-09-13	14:35:55	0.426476
2022-09-13	14:35:55	0.253855
2022-09-13	14:35:55	0.373193
2022-09-13	14:35:55	0.187392
2022-09-13	14:35:56	0.263015
2022-09-13	14:35:56	0.278588
2022-09-13	14:35:56	0.503168
2022-09-13	14:35:57	0.45645
2022-09-13	14:35:57	0.2993
2022-09-13	14:35:57	0.350649
2022-09-13	14:35:57	0.289326
2022-09-13	14:35:58	0.148766
2022-09-13	14:35:58	-0.281615
2022-09-13	14:35:58	0.52159
2022-09-13	14:35:58	0.447799
2022-09-13	14:35:59	0.691158
2022-09-13	14:35:59	0.330852
2022-09-13	14:35:59	0.481081
2022-09-13	14:35:59	0.406323
2022-09-13	14:36:00	0.365255
2022-09-13	14:36:00	0.440878
2022-09-13	14:36:00	0.497926
2022-09-13	14:36:01	0.41187
2022-09-13	14:36:01	0.554059
2022-09-13	14:36:01	0.340318
2022-09-13	14:36:01	0.506527
2022-09-13	14:36:02	0.380369
2022-09-13	14:36:02	0.414771
2022-09-13	14:36:02	0.331819
2022-09-13	14:36:02	0.44785
2022-09-13	14:36:03	0.537417
2022-09-13	14:36:03	0.512786
2022-09-13	14:36:03	0.522201
2022-09-13	14:36:03	0.434924
2022-09-13	14:36:04	0.499707
2022-09-13	14:36:04	0.506832
2022-09-13	14:36:04	0.46958
2022-09-13	14:36:05	0.456909
2022-09-13	14:36:05	0.516552
2022-09-13	14:36:05	0.453753
2022-09-13	14:36:05	0.566323
2022-09-13	14:36:06	0.391667
2022-09-13	14:36:06	0.466527
2022-09-13	14:36:06	0.369428
2022-09-13	14:36:06	0.523575
2022-09-13	14:36:07	0.429631
2022-09-13	14:36:07	0.507545
2022-09-13	14:36:07	0.410191
2022-09-13	14:36:07	0.540827
2022-09-13	14:36:08	0.298232
2022-09-13	14:36:08	0.578282
2022-09-13	14:36:08	0.196451
2022-09-13	14:36:09	0.249733
2022-09-13	14:36:09	0.165916
2022-09-13	14:36:09	-0.0700633
2022-09-13	14:36:09	-0.370725
2022-09-13	14:36:10	-0.416323
2022-09-13	14:36:10	-0.545432
2022-09-13	14:36:10	-0.429707
2022-09-13	14:36:10	-0.473218
2022-09-13	14:36:11	-0.502277
2022-09-13	14:36:11	-0.511895
2022-09-13	14:36:11	-0.535559
2022-09-13	14:36:11	-0.370216
2022-09-13	14:36:12	-0.350012
2022-09-13	14:36:12	-0.36533
2022-09-13	14:36:12	-0.514287
2022-09-13	14:36:13	-0.334287
2022-09-13	14:36:13	-0.330572
2022-09-13	14:36:13	-0.0723534
2022-09-13	14:36:13	0.0590969
2022-09-13	14:36:14	0.134975
2022-09-13	14:36:14	0.499097
2022-09-13	14:36:14	0.139148
2022-09-13	14:36:14	-0.132201
2022-09-13	14:36:15	-0.455508
2022-09-13	14:36:15	-0.449911
2022-09-13	14:36:15	-0.551895
2022-09-13	14:36:15	1.29532e-05
2022-09-13	14:36:16	0.308969
2022-09-13	14:36:16	0.853651
2022-09-13	14:36:16	3.22571
2022-09-13	14:36:17	3.15996
2022-09-13	14:36:17	0.685305
2022-09-13	14:36:17	0.812074
2022-09-13	14:36:17	0.354669
2022-09-13	14:36:18	0.668817
2022-09-13	14:36:18	0.544237
2022-09-13	14:36:18	0.618282
2022-09-13	14:36:18	0.921489
2022-09-13	14:36:19	0.440471
2022-09-13	14:36:19	0.390852
2022-09-13	14:36:19	0.253346
2022-09-13	14:36:19	0.394262
2022-09-13	14:36:20	0.332532
2022-09-13	14:36:20	0.284898
2022-09-13	14:36:20	0.38729
2022-09-13	14:36:21	0.235789
2022-09-13	14:36:21	0.477112
2022-09-13	14:36:21	0.189173
2022-09-13	14:36:21	0.536959
2022-09-13	14:36:22	0.243779
2022-09-13	14:36:22	0.592278
2022-09-13	14:36:22	0.273244
2022-09-13	14:36:22	0.505611
2022-09-13	14:36:23	0.440522
2022-09-13	14:36:23	0.524949
2022-09-13	14:36:23	0.490903
2022-09-13	14:36:23	0.326018
2022-09-13	14:36:24	0.613499
2022-09-13	14:36:24	0.279148
2022-09-13	14:36:24	0.560318
2022-09-13	14:36:25	0.242354
2022-09-13	14:36:25	0.523168
2022-09-13	14:36:25	0.275636
2022-09-13	14:36:25	0.417316
2022-09-13	14:36:26	0.486527
2022-09-13	14:36:26	0.269275
2022-09-13	14:36:26	0.437825
2022-09-13	14:36:26	0.237723
2022-09-13	14:36:27	0.476756
2022-09-13	14:36:27	0.152685
2022-09-13	14:36:27	0.450852
2022-09-13	14:36:28	0.183779
2022-09-13	14:36:28	0.514262
2022-09-13	14:36:28	0.140573
2022-09-13	14:36:28	0.65757
2022-09-13	14:36:28	0.216094
2022-09-13	14:36:29	0.486985
2022-09-13	14:36:29	0.306476
2022-09-13	14:36:29	0.364898
2022-09-13	14:36:30	0.401896
2022-09-13	14:36:30	0.354618
2022-09-13	14:36:30	0.3593
2022-09-13	14:36:30	0.350089
2022-09-13	14:36:31	0.455331
2022-09-13	14:36:31	0.318791
2022-09-13	14:36:31	0.38042
2022-09-13	14:36:31	0.28897
2022-09-13	14:36:32	0.521997
2022-09-13	14:36:32	0.203168
2022-09-13	14:36:32	0.488104
2022-09-13	14:36:32	0.185814
2022-09-13	14:36:33	0.524593
2022-09-13	14:36:33	0.144898
2022-09-13	14:36:33	0.481489
2022-09-13	14:36:34	0.23986
2022-09-13	14:36:34	0.424033
2022-09-13	14:36:34	0.26444
2022-09-13	14:36:34	0.434059
2022-09-13	14:36:35	0.34215
2022-09-13	14:36:35	0.370649
2022-09-13	14:36:35	0.300267
2022-09-13	14:36:35	0.357977
2022-09-13	14:36:36	0.289122
2022-09-13	14:36:36	0.282456
2022-09-13	14:36:36	0.170853
2022-09-13	14:36:36	0.249784
2022-09-13	14:36:37	0.289733
2022-09-13	14:36:37	0.357265
2022-09-13	14:36:37	0.374873
2022-09-13	14:36:38	0.302201
2022-09-13	14:36:38	0.657672
2022-09-13	14:36:38	0.478232
2022-09-13	14:36:38	0.550954
2022-09-13	14:36:39	0.364033
2022-09-13	14:36:39	0.571921
2022-09-13	14:36:39	0.239708
2022-09-13	14:36:39	0.445865
2022-09-13	14:36:40	0.158842
2022-09-13	14:36:40	0.53701
2022-09-13	14:36:40	0.123677
2022-09-13	14:36:40	0.450344
2022-09-13	14:36:41	0.185255
2022-09-13	14:36:41	0.509224
2022-09-13	14:36:41	0.186629
2022-09-13	14:36:42	0.512125
2022-09-13	14:36:42	0.266629
2022-09-13	14:36:42	0.421489
2022-09-13	14:36:42	0.212277
2022-09-13	14:36:43	0.469529
2022-09-13	14:36:43	0.269936
2022-09-13	14:36:43	0.410445
2022-09-13	14:36:43	0.360013
2022-09-13	14:36:44	0.345102
2022-09-13	14:36:44	0.392074
2022-09-13	14:36:44	0.311107
2022-09-13	14:36:44	0.400624
2022-09-13	14:36:45	0.342252
2022-09-13	14:36:45	0.465204
2022-09-13	14:36:45	0.298792
2022-09-13	14:36:46	0.408868
2022-09-13	14:36:46	0.307087
2022-09-13	14:36:46	0.487137
2022-09-13	14:36:46	0.16556
2022-09-13	14:36:47	0.406883
2022-09-13	14:36:47	0.20042
2022-09-13	14:36:47	0.475687
2022-09-13	14:36:47	0.163015
2022-09-13	14:36:48	0.472939
2022-09-13	14:36:48	0.170191
2022-09-13	14:36:48	0.468919
2022-09-13	14:36:48	0.0861707
2022-09-13	14:36:49	0.204695
2022-09-13	14:36:49	-0.0422771
2022-09-13	14:36:49	-0.266348
2022-09-13	14:36:50	-0.45159
2022-09-13	14:36:50	-0.265636
2022-09-13	14:36:50	0.127646
2022-09-13	14:36:50	0.453906
2022-09-13	14:36:51	0.236145
2022-09-13	14:36:51	0.522201
2022-09-13	14:36:51	0.337417
2022-09-13	14:36:51	0.360573
2022-09-13	14:36:52	0.314975
2022-09-13	14:36:52	0.395585
2022-09-13	14:36:52	0.363524
2022-09-13	14:36:53	0.295127
2022-09-13	14:36:53	0.346934
2022-09-13	14:36:53	0.278842
2022-09-13	14:36:53	0.385153
2022-09-13	14:36:54	0.210089
2022-09-13	14:36:54	0.392176
2022-09-13	14:36:54	0.226679
2022-09-13	14:36:54	0.45528
2022-09-13	14:36:55	0.134364
2022-09-13	14:36:55	0.482507
2022-09-13	14:36:55	0.217214
2022-09-13	14:36:55	0.391412
2022-09-13	14:36:56	0.235229
2022-09-13	14:36:56	0.408003
2022-09-13	14:36:56	0.346527
2022-09-13	14:36:56	0.378486
2022-09-13	14:36:57	0.331005
2022-09-13	14:36:57	0.374873
2022-09-13	14:36:57	0.454466
2022-09-13	14:36:58	0.275127
2022-09-13	14:36:58	0.384389
2022-09-13	14:36:58	0.280267
2022-09-13	14:36:58	0.488715
2022-09-13	14:36:59	0.204237
2022-09-13	14:36:59	0.401845
2022-09-13	14:36:59	0.249631
2022-09-13	14:36:59	0.388155
2022-09-13	14:37:00	0.134313
2022-09-13	14:37:00	0.258079
2022-09-13	14:37:00	0.152888
2022-09-13	14:37:00	-0.0241092
2022-09-13	14:37:01	-0.12701
2022-09-13	14:37:01	0.45187
2022-09-13	14:37:01	0.200624
2022-09-13	14:37:02	0.453244
2022-09-13	14:37:02	0.309275
2022-09-13	14:37:02	0.477468
2022-09-13	14:37:02	0.323881
2022-09-13	14:37:03	0.442812
2022-09-13	14:37:03	0.338181
2022-09-13	14:37:03	0.46042
2022-09-13	14:37:03	0.344797
2022-09-13	14:37:04	0.488766
2022-09-13	14:37:04	0.324593
2022-09-13	14:37:04	0.573753
2022-09-13	14:37:04	0.414313
2022-09-13	14:37:05	0.196756
2022-09-13	14:37:05	0.270344
2022-09-13	14:37:05	0.206679
2022-09-13	14:37:06	0.191718
2022-09-13	14:37:06	0.366476
2022-09-13	14:37:06	0.203219
2022-09-13	14:37:06	0.481031
2022-09-13	14:37:07	0.353957
2022-09-13	14:37:07	1.04927
2022-09-13	14:37:07	1.19462
2022-09-13	14:37:07	2.02795
2022-09-13	14:37:08	2.58342
2022-09-13	14:37:08	2.69594
2022-09-13	14:37:08	0.632532
2022-09-13	14:37:08	0.0693768
2022-09-13	14:37:09	0.175585
2022-09-13	14:37:09	-0.190419
2022-09-13	14:37:09	-0.436272
2022-09-13	14:37:10	-0.648791
2022-09-13	14:37:10	-0.72192
2022-09-13	14:37:10	-0.768027
2022-09-13	14:37:10	-0.730521
2022-09-13	14:37:11	-0.776068
2022-09-13	14:37:11	-0.739376
2022-09-13	14:37:11	-0.693014
2022-09-13	14:37:11	-0.716882
2022-09-13	14:37:12	-0.570928
2022-09-13	14:37:12	-0.605636
2022-09-13	14:37:12	-0.457188
2022-09-13	14:37:12	-0.177035
2022-09-13	14:37:13	0.285051
2022-09-13	14:37:13	-0.0125061
2022-09-13	14:37:13	0.395789
2022-09-13	14:37:14	0.284389
2022-09-13	14:37:14	0.538842
2022-09-13	14:37:14	0.119046
2022-09-13	14:37:14	0.370903
2022-09-13	14:37:15	0.138639
2022-09-13	14:37:15	0.353499
2022-09-13	14:37:15	0.142608
2022-09-13	14:37:15	0.460776
2022-09-13	14:37:16	0.210547
2022-09-13	14:37:16	0.450089
2022-09-13	14:37:16	0.142812
2022-09-13	14:37:16	0.496145
2022-09-13	14:37:17	0.195789
2022-09-13	14:37:17	0.48556
2022-09-13	14:37:17	0.175738
2022-09-13	14:37:18	0.508766
2022-09-13	14:37:18	0.201132
2022-09-13	14:37:18	0.386832
2022-09-13	14:37:18	0.203219
2022-09-13	14:37:19	0.381183
2022-09-13	14:37:19	0.225967
2022-09-13	14:37:19	0.395636
2022-09-13	14:37:19	-0.0145926
2022-09-13	14:37:20	-0.0712847
2022-09-13	14:37:20	-0.0810557
2022-09-13	14:37:20	-0.0638038
2022-09-13	14:37:20	-0.0936765
2022-09-13	14:37:21	-0.177544
2022-09-13	14:37:21	-0.183651
2022-09-13	14:37:21	-0.130216
2022-09-13	14:37:22	0.0776211
2022-09-13	14:37:22	0.340165
2022-09-13	14:37:22	0.262914
2022-09-13	14:37:22	0.588206
2022-09-13	14:37:23	0.338741
2022-09-13	14:37:23	0.606374
2022-09-13	14:37:23	0.269326
2022-09-13	14:37:23	0.51355
2022-09-13	14:37:24	0.227901
2022-09-13	14:37:24	0.509326
2022-09-13	14:37:24	0.238384
2022-09-13	14:37:24	0.471361
2022-09-13	14:37:25	0.177621
2022-09-13	14:37:25	0.494567
2022-09-13	14:37:25	0.211209
2022-09-13	14:37:26	0.514568
2022-09-13	14:37:26	0.165509
2022-09-13	14:37:26	0.486272
2022-09-13	14:37:26	0.231056
2022-09-13	14:37:27	0.475433
2022-09-13	14:37:27	0.189631
2022-09-13	14:37:27	0.401692
2022-09-13	14:37:27	0.216451
2022-09-13	14:37:28	0.477316
2022-09-13	14:37:28	0.178028
2022-09-13	14:37:28	0.486018
2022-09-13	14:37:28	0.287087
2022-09-13	14:37:29	0.511463
2022-09-13	14:37:29	0.215026
2022-09-13	14:37:29	0.566832
2022-09-13	14:37:30	0.220623
2022-09-13	14:37:30	0.544389
2022-09-13	14:37:30	0.194517
2022-09-13	14:37:30	0.569275
2022-09-13	14:37:31	0.264949
2022-09-13	14:37:31	0.52897
2022-09-13	14:37:31	0.179351
2022-09-13	14:37:31	0.553448
2022-09-13	14:37:32	0.254211
2022-09-13	14:37:32	0.502812
2022-09-13	14:37:32	0.33986
2022-09-13	14:37:32	0.550343
2022-09-13	14:37:33	0.348257
2022-09-13	14:37:33	0.521234
2022-09-13	14:37:33	0.274364
2022-09-13	14:37:34	0.517264
2022-09-13	14:37:34	0.269478
2022-09-13	14:37:34	0.496043
2022-09-13	14:37:34	0.246578
2022-09-13	14:37:35	0.536552
2022-09-13	14:37:35	0.271056
2022-09-13	14:37:35	0.504593
2022-09-13	14:37:35	0.206171
2022-09-13	14:37:36	0.512837
2022-09-13	14:37:36	0.308359
2022-09-13	14:37:36	0.529275
2022-09-13	14:37:36	0.275076
2022-09-13	14:37:37	0.478944
2022-09-13	14:37:37	0.35411
2022-09-13	14:37:37	0.432023
2022-09-13	14:37:38	0.318944
2022-09-13	14:37:38	0.480471
2022-09-13	14:37:38	0.235992
2022-09-13	14:37:38	0.701183
2022-09-13	14:37:39	0.530853
2022-09-13	14:37:39	0.643931
2022-09-13	14:37:39	0.365407
2022-09-13	14:37:39	0.694109
2022-09-13	14:37:40	0.2964
2022-09-13	14:37:40	0.392786
2022-09-13	14:37:40	0.322252
2022-09-13	14:37:40	0.503524
2022-09-13	14:37:41	0.194975
2022-09-13	14:37:41	0.487087
2022-09-13	14:37:41	0.261132
2022-09-13	14:37:42	0.446832
2022-09-13	14:37:42	0.205814
2022-09-13	14:37:42	0.44215
2022-09-13	14:37:42	0.218944
2022-09-13	14:37:43	0.460064
2022-09-13	14:37:43	0.198486
2022-09-13	14:37:43	0.413957
2022-09-13	14:37:43	0.188766
2022-09-13	14:37:44	0.445662
2022-09-13	14:37:44	0.166425
2022-09-13	14:37:44	0.431056
2022-09-13	14:37:44	0.197825
2022-09-13	14:37:45	0.438995
2022-09-13	14:37:45	0.190751
2022-09-13	14:37:45	0.411616
2022-09-13	14:37:46	0.196501
2022-09-13	14:37:46	0.414517
2022-09-13	14:37:46	0.193702
2022-09-13	14:37:46	0.313753
2022-09-13	14:37:47	0.245
2022-09-13	14:37:47	0.350852
2022-09-13	14:37:47	0.0740587
2022-09-13	14:37:47	-0.0643127
2022-09-13	14:37:48	0.0787407
2022-09-13	14:37:48	0.34785
2022-09-13	14:37:48	0.368664
2022-09-13	14:37:48	0.722049
2022-09-13	14:37:49	0.416603
2022-09-13	14:37:49	0.548461
2022-09-13	14:37:49	0.351056
2022-09-13	14:37:50	0.633753
2022-09-13	14:37:50	0.323015
2022-09-13	14:37:50	0.534618
2022-09-13	14:37:50	0.367646
2022-09-13	14:37:51	0.446832
2022-09-13	14:37:51	0.366934
2022-09-13	14:37:51	0.340929
2022-09-13	14:37:51	0.386883
2022-09-13	14:37:52	0.391565
2022-09-13	14:37:52	0.389886
2022-09-13	14:37:52	0.466272
2022-09-13	14:37:52	0.445509
2022-09-13	14:37:53	0.506119
2022-09-13	14:37:53	0.470649
2022-09-13	14:37:53	0.381387
2022-09-13	14:37:54	0.318282
2022-09-13	14:37:54	0.366069
2022-09-13	14:37:54	0.288817
2022-09-13	14:37:54	0.459911
2022-09-13	14:37:55	0.422659
2022-09-13	14:37:55	0.40271
2022-09-13	14:37:55	0.393906
2022-09-13	14:37:55	0.507035
2022-09-13	14:37:56	0.397977
2022-09-13	14:37:56	0.354568
2022-09-13	14:37:56	0.190547
2022-09-13	14:37:56	0.302914
2022-09-13	14:37:57	0.212074
2022-09-13	14:37:57	0.271718
2022-09-13	14:37:57	0.207748
2022-09-13	14:37:58	0.256451
2022-09-13	14:37:58	0.349275
2022-09-13	14:37:58	0.167341
2022-09-13	14:37:58	0.359351
2022-09-13	14:37:59	0.399351
2022-09-13	14:37:59	0.400725
2022-09-13	14:37:59	0.216909
2022-09-13	14:37:59	0.353244
2022-09-13	14:38:00	0.299707
2022-09-13	14:38:00	0.370445
2022-09-13	14:38:00	0.171667
2022-09-13	14:38:00	0.368308
2022-09-13	14:38:01	0.211718
2022-09-13	14:38:01	0.409021
2022-09-13	14:38:01	0.155993
2022-09-13	14:38:01	0.363219
2022-09-13	14:38:02	0.225153
2022-09-13	14:38:02	0.421692
2022-09-13	14:38:02	0.195076
2022-09-13	14:38:03	0.395687
2022-09-13	14:38:03	0.218588
2022-09-13	14:38:03	0.401031
2022-09-13	14:38:03	0.262405
2022-09-13	14:38:04	0.243524
2022-09-13	14:38:04	0.370242
2022-09-13	14:38:04	0.210903
2022-09-13	14:38:04	0.429784
2022-09-13	14:38:05	0.200471
2022-09-13	14:38:05	0.252023
2022-09-13	14:38:05	0.237468
2022-09-13	14:38:05	0.257265
2022-09-13	14:38:06	0.327188
2022-09-13	14:38:06	0.176349
2022-09-13	14:38:06	0.346578
2022-09-13	14:38:07	0.227646
2022-09-13	14:38:07	0.345662
2022-09-13	14:38:07	0.244949
2022-09-13	14:38:07	0.259148
2022-09-13	14:38:08	0.340573
2022-09-13	14:38:08	0.226781
2022-09-13	14:38:08	0.379555
2022-09-13	14:38:08	0.201641
2022-09-13	14:38:09	0.259148
2022-09-13	14:38:09	0.271158
2022-09-13	14:38:09	0.214059
2022-09-13	14:38:09	0.351056
2022-09-13	14:38:10	0.183423
2022-09-13	14:38:10	0.270649
2022-09-13	14:38:10	0.243372
2022-09-13	14:38:11	0.265865
2022-09-13	14:38:11	0.329275
2022-09-13	14:38:11	0.230954
2022-09-13	14:38:11	0.272735
2022-09-13	14:38:12	0.394771
2022-09-13	14:38:12	0.358791
2022-09-13	14:38:12	0.414822
2022-09-13	14:38:12	0.700063
2022-09-13	14:38:13	0.651107
2022-09-13	14:38:13	0.712786
2022-09-13	14:38:13	0.55528
2022-09-13	14:38:13	0.660369
2022-09-13	14:38:14	0.522048
2022-09-13	14:38:14	0.600216
2022-09-13	14:38:14	0.478028
2022-09-13	14:38:15	0.494059
2022-09-13	14:38:15	0.496603
2022-09-13	14:38:15	0.496349
2022-09-13	14:38:15	0.485
2022-09-13	14:38:16	0.444593
2022-09-13	14:38:16	0.463015
2022-09-13	14:38:16	0.431819
2022-09-13	14:38:16	0.441794
2022-09-13	14:38:17	0.411667
2022-09-13	14:38:17	0.42271
2022-09-13	14:38:17	0.274364
2022-09-13	14:38:17	0.0938042
2022-09-13	14:38:18	0.202659
2022-09-13	14:38:18	0.269733
2022-09-13	14:38:18	0.240878
2022-09-13	14:38:19	0.159046
2022-09-13	14:38:19	0.0774684
2022-09-13	14:38:19	0.300318
2022-09-13	14:38:19	0.0946694
2022-09-13	14:38:20	0.130751
2022-09-13	14:38:20	0.0620994
2022-09-13	14:38:20	0.0442877
2022-09-13	14:38:20	0.105916
2022-09-13	14:38:21	0.0600639
2022-09-13	14:38:21	0.188715
2022-09-13	14:38:21	0.0920739
2022-09-13	14:38:21	0.0905473
2022-09-13	14:38:22	0.19869
2022-09-13	14:38:22	0.193193
2022-09-13	14:38:22	0.368461
2022-09-13	14:38:23	0.202914
2022-09-13	14:38:23	0.322405
2022-09-13	14:38:23	0.229275
2022-09-13	14:38:23	0.250191
2022-09-13	14:38:24	0.312328
2022-09-13	14:38:24	0.180318
2022-09-13	14:38:24	0.368868
2022-09-13	14:38:24	0.301998
2022-09-13	14:38:25	0.26271
2022-09-13	14:38:25	0.297723
2022-09-13	14:38:25	0.161387
2022-09-13	14:38:25	0.327341
2022-09-13	14:38:26	0.148919
2022-09-13	14:38:26	0.331209
2022-09-13	14:38:26	0.106018
2022-09-13	14:38:27	0.201743
2022-09-13	14:38:27	0.132328
2022-09-13	14:38:27	0.170598
2022-09-13	14:38:27	0.208054
2022-09-13	14:38:28	0.141183
2022-09-13	14:38:28	0.292328
2022-09-13	14:38:28	0.133346
2022-09-13	14:38:28	0.292634
2022-09-13	14:38:29	0.117316
2022-09-13	14:38:29	0.328562
2022-09-13	14:38:29	0.127443
2022-09-13	14:38:29	0.167646
2022-09-13	14:38:30	0.182608
2022-09-13	14:38:30	0.0902419
2022-09-13	14:38:30	0.282099
2022-09-13	14:38:31	0.201081
2022-09-13	14:38:31	0.333753
2022-09-13	14:38:31	0.18388
2022-09-13	14:38:31	0.221539
2022-09-13	14:38:32	0.240318
2022-09-13	14:38:32	0.167239
2022-09-13	14:38:32	0.343626
2022-09-13	14:38:32	0.188257
2022-09-13	14:38:33	0.326629
2022-09-13	14:38:33	0.24673
2022-09-13	14:38:33	0.224898
2022-09-13	14:38:33	0.233143
2022-09-13	14:38:34	0.201896
2022-09-13	14:38:34	0.295585
2022-09-13	14:38:34	0.20444
2022-09-13	14:38:35	0.341336
2022-09-13	14:38:35	0.225407
2022-09-13	14:38:35	0.229478
2022-09-13	14:38:35	0.281794
2022-09-13	14:38:36	0.290089
2022-09-13	14:38:36	0.350751
2022-09-13	14:38:36	0.272735
2022-09-13	14:38:36	0.291768
2022-09-13	14:38:37	0.360165
2022-09-13	14:38:37	0.289122
2022-09-13	14:38:37	0.288664
2022-09-13	14:38:37	0.363982
2022-09-13	14:38:38	0.22958
2022-09-13	14:38:38	0.413397
2022-09-13	14:38:38	0.324135
2022-09-13	14:38:39	0.358079
2022-09-13	14:38:39	0.348817
2022-09-13	14:38:39	0.261132
2022-09-13	14:38:39	0.461794
2022-09-13	14:38:40	0.481489
2022-09-13	14:38:40	0.404288
2022-09-13	14:38:40	0.487036
2022-09-13	14:38:40	0.424288
2022-09-13	14:38:41	0.415992
2022-09-13	14:38:41	0.444898
2022-09-13	14:38:41	0.714873
2022-09-13	14:38:41	0.188868
2022-09-13	14:38:42	-0.200598
2022-09-13	14:38:42	-0.378664
2022-09-13	14:38:42	-0.31159
2022-09-13	14:38:43	-0.188333
2022-09-13	14:38:43	-0.0290964
2022-09-13	14:38:43	-0.0608522
2022-09-13	14:38:43	0.117977
2022-09-13	14:38:44	0.195127
2022-09-13	14:38:44	0.543422
2022-09-13	14:38:44	0.328461
2022-09-13	14:38:44	0.513397
2022-09-13	14:38:45	0.318334
2022-09-13	14:38:45	0.468562
2022-09-13	14:38:45	0.398232
2022-09-13	14:38:45	0.460471
2022-09-13	14:38:46	0.386069
2022-09-13	14:38:46	0.303931
2022-09-13	14:38:46	0.465102
2022-09-13	14:38:47	0.194873
2022-09-13	14:38:47	0.470089
2022-09-13	14:38:47	0.348308
2022-09-13	14:38:47	0.334008
2022-09-13	14:38:48	0.419504
2022-09-13	14:38:48	0.421641
2022-09-13	14:38:48	0.405051
2022-09-13	14:38:48	0.251311
2022-09-13	14:38:49	0.442812
2022-09-13	14:38:49	0.392532
2022-09-13	14:38:49	0.250242
2022-09-13	14:38:49	0.130954
2022-09-13	14:38:50	0.265356
2022-09-13	14:38:50	0.292277
2022-09-13	14:38:50	0.373143
2022-09-13	14:38:51	0.412227
2022-09-13	14:38:51	0.351107
2022-09-13	14:38:51	0.448919
2022-09-13	14:38:51	0.316603
2022-09-13	14:38:52	0.193702
2022-09-13	14:38:52	0.30785
2022-09-13	14:38:52	0.26327
2022-09-13	14:38:52	0.19472
2022-09-13	14:38:53	0.36444
2022-09-13	14:38:53	0.956349
2022-09-13	14:38:53	1.11131
2022-09-13	14:38:53	0.625967
2022-09-13	14:38:54	0.425713
2022-09-13	14:38:54	0.425458
2022-09-13	14:38:54	0.513041
2022-09-13	14:38:55	0.328969
2022-09-13	14:38:55	0.329428
2022-09-13	14:38:55	0.501845
2022-09-13	14:38:55	0.49126
2022-09-13	14:38:56	0.565916
2022-09-13	14:38:56	0.391972
2022-09-13	14:38:56	0.374466
2022-09-13	14:38:56	0.317977
2022-09-13	14:38:57	0.275636
2022-09-13	14:38:57	0.0843386
2022-09-13	14:38:57	0.0437788
2022-09-13	14:38:57	-0.0536766
2022-09-13	14:38:58	-0.0168827
2022-09-13	14:38:58	-0.0637529
2022-09-13	14:38:58	-0.0261448
2022-09-13	14:38:59	0.0984353
2022-09-13	14:38:59	0.145662
2022-09-13	14:38:59	0.377875
2022-09-13	14:38:59	0.265305
2022-09-13	14:39:00	0.366883
2022-09-13	14:39:00	0.0459163
2022-09-13	14:39:00	0.164644
2022-09-13	14:39:00	-0.0482822
2022-09-13	14:39:01	-0.269503
2022-09-13	14:39:01	-0.174796
2022-09-13	14:39:01	-0.252659
2022-09-13	14:39:01	-0.160292
2022-09-13	14:39:02	-0.234643
2022-09-13	14:39:02	-0.147213
2022-09-13	14:39:02	-0.286297
2022-09-13	14:39:03	0.0685116
2022-09-13	14:39:03	0.154466
2022-09-13	14:39:03	0.0103947
2022-09-13	14:39:03	-0.0430405
2022-09-13	14:39:04	0.036247
2022-09-13	14:39:04	0.340929
2022-09-13	14:39:04	0.289377
2022-09-13	14:39:04	0.180369
2022-09-13	14:39:05	0.18897
2022-09-13	14:39:05	0.245967
2022-09-13	14:39:05	0.272735
2022-09-13	14:39:05	0.295025
2022-09-13	14:39:06	0.422201
2022-09-13	14:39:06	0.208919
2022-09-13	14:39:06	0.478486
2022-09-13	14:39:07	0.65701
2022-09-13	14:39:07	0.881234
2022-09-13	14:39:07	2.54337
2022-09-13	14:39:07	5.10276
2022-09-13	14:39:08	3.60617
2022-09-13	14:39:08	0.528308
2022-09-13	14:39:08	0.34098
2022-09-13	14:39:08	0.412328
2022-09-13	14:39:09	0.371412
2022-09-13	14:39:09	0.267952
2022-09-13	14:39:09	0.313753
2022-09-13	14:39:09	0.200573
2022-09-13	14:39:10	0.240878
2022-09-13	14:39:10	0.138232
2022-09-13	14:39:10	0.368817
2022-09-13	14:39:11	0.218028
2022-09-13	14:39:11	0.428104
2022-09-13	14:39:11	0.217977
2022-09-13	14:39:11	0.315178
2022-09-13	14:39:12	0.149987
2022-09-13	14:39:12	-0.00258246
2022-09-13	14:39:12	-0.209249
2022-09-13	14:39:12	-0.276679
2022-09-13	14:39:13	-0.409351
2022-09-13	14:39:13	-0.537391
2022-09-13	14:39:13	-0.446246
2022-09-13	14:39:13	-0.196068
2022-09-13	14:39:14	-0.255814
2022-09-13	14:39:14	-0.211132
2022-09-13	14:39:14	-0.283498
2022-09-13	14:39:15	-0.225381
2022-09-13	14:39:15	-0.053931
2022-09-13	14:39:15	0.00484756
2022-09-13	14:39:15	0.29299
2022-09-13	14:39:16	0.234873
2022-09-13	14:39:16	0.129987
2022-09-13	14:39:16	0.0461198
2022-09-13	14:39:16	-0.0820226
2022-09-13	14:39:17	0.0606237
2022-09-13	14:39:17	0.52617
2022-09-13	14:39:17	0.644644
2022-09-13	14:39:17	0.800114
2022-09-13	14:39:18	1.33614
2022-09-13	14:39:18	2.06169
2022-09-13	14:39:18	2.70393
2022-09-13	14:39:19	0.268664
2022-09-13	14:39:19	0.505814
2022-09-13	14:39:19	0.149784
2022-09-13	14:39:19	0.122405
2022-09-13	14:39:20	-0.103702
2022-09-13	14:39:20	-0.0640583
2022-09-13	14:39:20	0.130751
2022-09-13	14:39:20	0.385356
2022-09-13	14:39:21	0.808766
2022-09-13	14:39:21	0.657824
2022-09-13	14:39:21	0.460573
2022-09-13	14:39:21	0.312023
2022-09-13	14:39:22	0.28327
2022-09-13	14:39:22	0.320624
2022-09-13	14:39:22	0.0945168
2022-09-13	14:39:23	-0.219376
2022-09-13	14:39:23	-0.221565
2022-09-13	14:39:23	-0.210572
2022-09-13	14:39:23	-0.0184094
2022-09-13	14:39:24	-0.186603
2022-09-13	14:39:24	0.036247
2022-09-13	14:39:24	0.16902
2022-09-13	14:39:24	0.205102
2022-09-13	14:39:25	0.132125
2022-09-13	14:39:25	0.170853
2022-09-13	14:39:25	1.00653
2022-09-13	14:39:25	0.557214
2022-09-13	14:39:26	-0.113219
2022-09-13	14:39:26	-0.146399
2022-09-13	14:39:26	-0.160343
2022-09-13	14:39:27	-0.362023
2022-09-13	14:39:27	-0.441819
2022-09-13	14:39:27	-0.521513
2022-09-13	14:39:27	-0.488893
2022-09-13	14:39:28	-0.445534
2022-09-13	14:39:28	-0.464414
2022-09-13	14:39:28	-0.439885
2022-09-13	14:39:28	-0.510674
2022-09-13	14:39:29	-0.435712
2022-09-13	14:39:29	-0.444872
2022-09-13	14:39:29	-0.421921
2022-09-13	14:39:29	-0.415814
2022-09-13	14:39:30	-0.442175
2022-09-13	14:39:30	-0.418816
2022-09-13	14:39:30	-0.388791
2022-09-13	14:39:31	-0.339834
2022-09-13	14:39:31	-0.421972
2022-09-13	14:39:31	-0.202837
2022-09-13	14:39:31	-0.203397
2022-09-13	14:39:32	0.121998
2022-09-13	14:39:32	-0.0916409
2022-09-13	14:39:32	0.0971122
2022-09-13	14:39:32	-0.060903
2022-09-13	14:39:33	0.0244913
2022-09-13	14:39:33	-0.00288781
2022-09-13	14:39:33	-0.0183076
2022-09-13	14:39:33	0.201031
2022-09-13	14:39:34	0.200573
2022-09-13	14:39:34	0.317621
2022-09-13	14:39:34	0.444288
2022-09-13	14:39:35	0.744339
2022-09-13	14:39:35	0.265305
2022-09-13	14:39:35	0.436247
2022-09-13	14:39:35	0.35813
2022-09-13	14:39:36	0.381845
2022-09-13	14:39:36	0.363677
2022-09-13	14:39:36	0.459046
2022-09-13	14:39:36	0.317621
2022-09-13	14:39:37	0.521132
2022-09-13	14:39:37	0.308868
2022-09-13	14:39:37	0.420573
2022-09-13	14:39:37	0.163982
2022-09-13	14:39:38	0.320929
2022-09-13	14:39:38	0.266069
2022-09-13	14:39:38	0.329377
2022-09-13	14:39:39	0.29813
2022-09-13	14:39:39	0.305458
2022-09-13	14:39:39	0.352685
2022-09-13	14:39:39	0.246374
2022-09-13	14:39:40	0.608002
2022-09-13	14:39:40	0.193244
2022-09-13	14:39:40	0.40042
2022-09-13	14:39:40	0.363168
2022-09-13	14:39:41	0.519555
2022-09-13	14:39:41	0.467697
2022-09-13	14:39:41	0.473244
2022-09-13	14:39:41	0.520064
2022-09-13	14:39:42	0.390191
2022-09-13	14:39:42	0.411463
2022-09-13	14:39:42	0.304186
2022-09-13	14:39:43	0.17528
2022-09-13	14:39:43	0.404949
2022-09-13	14:39:43	0.165051
2022-09-13	14:39:43	0.358232
2022-09-13	14:39:44	0.190242
2022-09-13	14:39:44	0.107189
2022-09-13	14:39:44	0.0673411
2022-09-13	14:39:44	0.0159417
2022-09-13	14:39:45	0.111209
2022-09-13	14:39:45	-0.00288781
2022-09-13	14:39:45	0.216247
2022-09-13	14:39:45	0.417061
2022-09-13	14:39:46	0.29299
2022-09-13	14:39:46	0.529987
2022-09-13	14:39:46	0.394262
2022-09-13	14:39:47	0.384237
2022-09-13	14:39:47	0.405967
2022-09-13	14:39:47	0.305916
2022-09-13	14:39:47	0.22673
2022-09-13	14:39:48	0.350445
2022-09-13	14:39:48	0.381743
2022-09-13	14:39:48	0.382964
2022-09-13	14:39:48	0.464237
2022-09-13	14:39:49	0.402252
2022-09-13	14:39:49	0.367392
2022-09-13	14:39:49	0.546781
2022-09-13	14:39:49	0.395331
2022-09-13	14:39:50	0.281998
2022-09-13	14:39:50	0.181234
2022-09-13	14:39:50	0.483982
2022-09-13	14:39:51	0.394669
2022-09-13	14:39:51	0.548613
2022-09-13	14:39:51	0.349886
2022-09-13	14:39:51	0.458384
2022-09-13	14:39:52	0.449122
2022-09-13	14:39:52	0.500318
2022-09-13	14:39:52	0.648969
2022-09-13	14:39:52	0.536145
2022-09-13	14:39:53	0.466679
2022-09-13	14:39:53	0.418283
2022-09-13	14:39:53	0.414262
2022-09-13	14:39:53	0.465814
2022-09-13	14:39:54	0.476909
2022-09-13	14:39:54	0.485967
2022-09-13	14:39:54	0.491769
2022-09-13	14:39:55	0.523677
2022-09-13	14:39:55	0.475178
2022-09-13	14:39:55	0.448919
2022-09-13	14:39:55	0.44785
2022-09-13	14:39:56	0.428308
2022-09-13	14:39:56	0.465204
2022-09-13	14:39:56	0.409173
2022-09-13	14:39:56	0.445662
2022-09-13	14:39:57	0.382506
2022-09-13	14:39:57	0.435891
2022-09-13	14:39:57	0.408308
2022-09-13	14:39:57	0.368868
2022-09-13	14:39:58	0.350903
2022-09-13	14:39:58	0.357265
2022-09-13	14:39:58	0.528206
2022-09-13	14:39:59	0.242099
2022-09-13	14:39:59	0.505203
2022-09-13	14:39:59	0.430598
2022-09-13	14:39:59	0.432735
2022-09-13	14:40:00	0.390242
2022-09-13	14:40:00	0.318079
2022-09-13	14:40:00	0.433499
2022-09-13	14:40:00	0.336196
2022-09-13	14:40:01	0.566476
2022-09-13	14:40:01	0.231005
2022-09-13	14:40:01	0.489936
2022-09-13	14:40:01	0.304339
2022-09-13	14:40:02	0.46673
2022-09-13	14:40:02	0.401387
2022-09-13	14:40:02	0.407392
2022-09-13	14:40:03	0.363423
2022-09-13	14:40:03	0.353651
2022-09-13	14:40:03	0.437163
2022-09-13	14:40:03	0.281845
2022-09-13	14:40:04	0.500929
2022-09-13	14:40:04	0.222659
2022-09-13	14:40:04	0.530802
2022-09-13	14:40:04	0.282914
2022-09-13	14:40:05	0.433397
2022-09-13	14:40:05	0.318944
2022-09-13	14:40:05	0.450649
2022-09-13	14:40:05	0.341692
2022-09-13	14:40:06	0.331565
2022-09-13	14:40:06	0.390242
2022-09-13	14:40:06	0.307545
2022-09-13	14:40:07	0.511463
2022-09-13	14:40:07	0.24841
2022-09-13	14:40:07	0.466527
2022-09-13	14:40:07	0.332328
2022-09-13	14:40:08	0.445
2022-09-13	14:40:08	0.273397
2022-09-13	14:40:08	0.354313
2022-09-13	14:40:08	0.321285
2022-09-13	14:40:09	0.416349
2022-09-13	14:40:09	0.429173
2022-09-13	14:40:09	0.373906
2022-09-13	14:40:09	0.518944
2022-09-13	14:40:10	0.356247
2022-09-13	14:40:10	0.508512
2022-09-13	14:40:10	0.377112
2022-09-13	14:40:11	0.379351
2022-09-13	14:40:11	0.407545
2022-09-13	14:40:11	0.375891
2022-09-13	14:40:11	0.55701
2022-09-13	14:40:12	0.392074
2022-09-13	14:40:12	0.467036
2022-09-13	14:40:12	0.381794
2022-09-13	14:40:12	0.44098
2022-09-13	14:40:13	0.504695
2022-09-13	14:40:13	0.313194
2022-09-13	14:40:13	0.465713
2022-09-13	14:40:13	0.321743
2022-09-13	14:40:14	0.435941
2022-09-13	14:40:14	0.372328
2022-09-13	14:40:14	0.418995
2022-09-13	14:40:15	0.835127
2022-09-13	14:40:15	1.32912
2022-09-13	14:40:15	1.55294
2022-09-13	14:40:15	1.19416
2022-09-13	14:40:16	0.586578
2022-09-13	14:40:16	0.592736
2022-09-13	14:40:16	0.43299
2022-09-13	14:40:16	0.41014
2022-09-13	14:40:17	0.404389
2022-09-13	14:40:17	0.345305
2022-09-13	14:40:17	0.715534
2022-09-13	14:40:17	0.791412
2022-09-13	14:40:18	1.22709
2022-09-13	14:40:18	0.864644
2022-09-13	14:40:18	1.23228
2022-09-13	14:40:19	0.580318
2022-09-13	14:40:19	0.515025
2022-09-13	14:40:19	0.301031
2022-09-13	14:40:19	0.363728
2022-09-13	14:40:20	0.243168
2022-09-13	14:40:20	0.372074
2022-09-13	14:40:20	0.266476
2022-09-13	14:40:21	0.291972
2022-09-13	14:40:21	0.302608
2022-09-13	14:40:21	0.586781
2022-09-13	14:40:21	1.84816
2022-09-13	14:40:21	4.0564
2022-09-13	14:40:22	1.13854
2022-09-13	14:40:22	0.640674
2022-09-13	14:40:22	0.397621
2022-09-13	14:40:23	0.389071
2022-09-13	14:40:23	0.361998
2022-09-13	14:40:23	0.270598
2022-09-13	14:40:23	0.459148
2022-09-13	14:40:24	0.316858
2022-09-13	14:40:24	0.49472
2022-09-13	14:40:24	0.328562
2022-09-13	14:40:24	0.551056
2022-09-13	14:40:25	0.321183
2022-09-13	14:40:25	0.522201
2022-09-13	14:40:25	0.268766
2022-09-13	14:40:25	0.516552
2022-09-13	14:40:26	0.230496
2022-09-13	14:40:26	0.506018
2022-09-13	14:40:26	0.214211
2022-09-13	14:40:27	0.528461
2022-09-13	14:40:27	0.222761
2022-09-13	14:40:27	0.479707
2022-09-13	14:40:27	0.276705
2022-09-13	14:40:28	0.483524
2022-09-13	14:40:28	0.208206
2022-09-13	14:40:28	0.459097
2022-09-13	14:40:28	0.285305
2022-09-13	14:40:29	0.438181
2022-09-13	14:40:29	0.296959
2022-09-13	14:40:29	0.443677
2022-09-13	14:40:29	0.301641
2022-09-13	14:40:30	0.480013
2022-09-13	14:40:30	0.312583
2022-09-13	14:40:30	0.424593
2022-09-13	14:40:31	0.34098
2022-09-13	14:40:31	0.433092
2022-09-13	14:40:31	0.357112
2022-09-13	14:40:31	0.411158
2022-09-13	14:40:32	0.313753
2022-09-13	14:40:32	0.353397
2022-09-13	14:40:32	0.318334
2022-09-13	14:40:32	0.291158
2022-09-13	14:40:33	0.303321
2022-09-13	14:40:33	0.220827
2022-09-13	14:40:33	0.334669
2022-09-13	14:40:33	0.284797
2022-09-13	14:40:34	0.395026
2022-09-13	14:40:34	0.20215
2022-09-13	14:40:34	0.298792
2022-09-13	14:40:35	0.247596
2022-09-13	14:40:35	0.378232
2022-09-13	14:40:35	0.279453
2022-09-13	14:40:35	0.489886
2022-09-13	14:40:36	0.308512
2022-09-13	14:40:36	0.492023
2022-09-13	14:40:36	0.387494
2022-09-13	14:40:36	0.441387
2022-09-13	14:40:37	0.34729
2022-09-13	14:40:37	0.524898
2022-09-13	14:40:37	0.44271
2022-09-13	14:40:37	0.545254
2022-09-13	14:40:38	1.02022
2022-09-13	14:40:38	0.974669
2022-09-13	14:40:38	1.0852
2022-09-13	14:40:39	1.08872
2022-09-13	14:40:39	1.58505
2022-09-13	14:40:39	0.880929
2022-09-13	14:40:39	0.661997
2022-09-13	14:40:40	0.672786
2022-09-13	14:40:40	0.571768
2022-09-13	14:40:40	0.644237
2022-09-13	14:40:40	0.480013
2022-09-13	14:40:41	0.445
2022-09-13	14:40:41	0.480064
2022-09-13	14:40:41	0.456654
2022-09-13	14:40:41	0.460573
2022-09-13	14:40:42	0.340827
2022-09-13	14:40:42	0.483219
2022-09-13	14:40:42	0.38958
2022-09-13	14:40:42	0.496349
2022-09-13	14:40:43	0.396858
2022-09-13	14:40:43	0.462914
2022-09-13	14:40:43	0.224084
2022-09-13	14:40:44	0.58902
2022-09-13	14:40:44	0.271718
2022-09-13	14:40:44	0.394618
2022-09-13	14:40:44	0.169428
2022-09-13	14:40:45	0.331718
2022-09-13	14:40:45	0.130038
2022-09-13	14:40:45	0.446578
2022-09-13	14:40:45	0.262761
2022-09-13	14:40:46	0.289326
2022-09-13	14:40:46	0.18958
2022-09-13	14:40:46	0.357875
2022-09-13	14:40:47	0.165611
2022-09-13	14:40:47	0.330038
2022-09-13	14:40:47	0.152736
2022-09-13	14:40:47	0.394669
2022-09-13	14:40:48	0.12042
2022-09-13	14:40:48	0.302964
2022-09-13	14:40:48	0.160674
2022-09-13	14:40:48	0.418537
2022-09-13	14:40:49	0.241285
2022-09-13	14:40:49	0.278333
2022-09-13	14:40:49	0.266781
2022-09-13	14:40:49	0.299911
2022-09-13	14:40:50	0.327901
2022-09-13	14:40:50	0.2964
2022-09-13	14:40:50	0.309173
2022-09-13	14:40:50	0.251718
2022-09-13	14:40:51	0.363779
2022-09-13	14:40:51	0.306883
2022-09-13	14:40:51	0.382761
2022-09-13	14:40:52	0.238181
2022-09-13	14:40:52	0.471819
2022-09-13	14:40:52	0.117774
2022-09-13	14:40:52	0.369428
2022-09-13	14:40:53	0.31645
2022-09-13	14:40:53	0.459351
2022-09-13	14:40:53	0.484746
2022-09-13	14:40:53	0.353957
2022-09-13	14:40:54	0.21528
2022-09-13	14:40:54	0.490496
2022-09-13	14:40:54	0.16612
2022-09-13	14:40:54	0.177926
2022-09-13	14:40:55	0.160674
2022-09-13	14:40:55	0.0215906
2022-09-13	14:40:55	0.131412
2022-09-13	14:40:56	0.127901
2022-09-13	14:40:56	0.31131
2022-09-13	14:40:56	0.0579264
2022-09-13	14:40:56	0.256909
2022-09-13	14:40:57	0.0998602
2022-09-13	14:40:57	0.0894277
