# Supplementary material for: Comparing efficacy in reducing pulling and welfare impacts of four types of leash walking equipment
Source: PeerJ journal article supplement (doi:10.7717/peerj.18131), 2024-10-24
Supplement: Shelter1_Tension_files.zip [file Daisy_harness_2022913132646 copy.xlsx]

## Sheet: Sheet2
Date	Time	Averaged Newtons	Impulse	Total steps
2022-09-13	13:26:59	2.8786	2.8786	0		Impulse	1138.98
2022-09-13	13:27:00	3.25834	6.13693	0		Total steps	6
2022-09-13	13:27:01	3.27618	9.41311	0		# > 5sec	0
2022-09-13	13:27:02	2.71618	12.1293	0
2022-09-13	13:27:03	3.12981	15.2591	0
2022-09-13	13:27:04	-0.321956	15.2591	0
2022-09-13	13:27:05	-0.528065	15.2591	0
2022-09-13	13:27:06	-2.91742	15.2591	0
2022-09-13	13:27:07	-3.67576	15.2591	0
2022-09-13	13:27:08	-4.58158	15.2591	0
2022-09-13	13:27:09	-5.59532	15.2591	0
2022-09-13	13:27:10	-4.4903	15.2591	0
2022-09-13	13:27:11	-0.71154	15.2591	0
2022-09-13	13:27:12	3.26609	18.5252	0
2022-09-13	13:27:13	3.27852	21.8037	0
2022-09-13	13:27:14	3.27622	25.0799	0
2022-09-13	13:27:15	3.27825	28.3582	0
2022-09-13	13:27:16	3.2688	31.627	0
2022-09-13	13:27:17	3.26994	34.8969	0
2022-09-13	13:27:18	3.25694	38.1539	0
2022-09-13	13:27:19	3.26467	41.4185	0
2022-09-13	13:27:20	3.25488	44.6734	0
2022-09-13	13:27:21	3.25709	47.9305	0
2022-09-13	13:27:22	3.25686	51.1874	0
2022-09-13	13:27:23	3.26722	54.4546	0
2022-09-13	13:27:24	3.27673	57.7313	0
2022-09-13	13:27:25	3.27842	61.0097	0
2022-09-13	13:27:26	3.26056	64.2703	0
2022-09-13	13:27:27	3.25601	67.5263	0
2022-09-13	13:27:28	3.29297	70.8193	0
2022-09-13	13:27:29	3.25573	74.075	0
2022-09-13	13:27:30	3.24758	77.3226	0
2022-09-13	13:27:31	3.25432	80.5769	0
2022-09-13	13:27:32	3.26156	83.8385	0
2022-09-13	13:27:33	3.26711	87.1056	0
2022-09-13	13:27:34	3.26675	90.3723	0
2022-09-13	13:27:35	3.25522	93.6275	0
2022-09-13	13:27:36	3.24879	96.8763	0
2022-09-13	13:27:37	3.27126	100.148	0
2022-09-13	13:27:38	3.27942	103.427	0
2022-09-13	13:27:39	3.2705	106.698	0
2022-09-13	13:27:40	3.27214	109.97	0
2022-09-13	13:27:41	3.28305	113.253	0
2022-09-13	13:27:42	3.25856	116.511	0
2022-09-13	13:27:43	3.27684	119.788	0
2022-09-13	13:27:44	3.26878	123.057	0
2022-09-13	13:27:45	3.26298	126.32	0
2022-09-13	13:27:46	3.27663	129.597	0
2022-09-13	13:27:47	3.25754	132.854	0
2022-09-13	13:27:48	3.26049	136.115	0
2022-09-13	13:27:49	3.25137	139.366	0
2022-09-13	13:27:50	3.27322	142.639	0
2022-09-13	13:27:51	3.27633	145.915	0
2022-09-13	13:27:52	3.27577	149.191	0
2022-09-13	13:27:53	3.26518	152.456	0
2022-09-13	13:27:54	3.25675	155.713	0
2022-09-13	13:27:55	2.34232	158.055	0
2022-09-13	13:27:56	2.14878	160.204	0
2022-09-13	13:27:57	2.32501	162.529	0
2022-09-13	13:27:58	2.21369	164.743	0
2022-09-13	13:27:59	2.99767	167.741	0
2022-09-13	13:28:00	1.93865	169.679	0
2022-09-13	13:28:01	1.88777	171.567	0
2022-09-13	13:28:02	1.94906	173.516	0
2022-09-13	13:28:03	2.84962	176.366	0
2022-09-13	13:28:04	2.35183	178.718	0
2022-09-13	13:28:05	2.96507	181.683	0
2022-09-13	13:28:06	1.68211	183.365	0
2022-09-13	13:28:07	1.83699	185.202	0
2022-09-13	13:28:08	2.21069	187.412	0
2022-09-13	13:28:09	3.26479	190.677	0
2022-09-13	13:28:10	3.26829	193.945	0
2022-09-13	13:28:11	3.24532	197.191	0
2022-09-13	13:28:12	3.26835	200.459	0
2022-09-13	13:28:13	3.25452	203.714	0
2022-09-13	13:28:14	3.2704	206.984	0
2022-09-13	13:28:15	3.43366	210.418	0
2022-09-13	13:28:16	3.19308	213.611	0
2022-09-13	13:28:17	2.81334	216.424	0
2022-09-13	13:28:18	2.73083	219.155	0
2022-09-13	13:28:19	6.30495	225.46	0
2022-09-13	13:28:20	8.81474	234.275	0
2022-09-13	13:28:21	12.3057	246.58	0
2022-09-13	13:28:22	15.6226	262.203	1
2022-09-13	13:28:23	9.26824	271.471	1
2022-09-13	13:28:24	7.90653	279.378	1
2022-09-13	13:28:25	9.50482	288.882	1
2022-09-13	13:28:26	5.61621	294.499	1
2022-09-13	13:28:27	2.28641	296.785	1
2022-09-13	13:28:28	1.29275	298.078	1
2022-09-13	13:28:29	5.12414	303.202	1
2022-09-13	13:28:30	6.91344	310.115	1
2022-09-13	13:28:31	5.76466	315.88	1
2022-09-13	13:28:32	4.78509	320.665	1
2022-09-13	13:28:33	5.2121	325.877	1
2022-09-13	13:28:34	4.49087	330.368	1
2022-09-13	13:28:35	4.444	334.812	1
2022-09-13	13:28:36	4.5856	339.398	1
2022-09-13	13:28:37	2.22229	341.62	1
2022-09-13	13:28:38	0.873173	342.493	1
2022-09-13	13:28:39	1.54968	344.043	1
2022-09-13	13:28:40	3.26652	347.309	1
2022-09-13	13:28:41	3.27214	350.582	1
2022-09-13	13:28:42	3.26716	353.849	1
2022-09-13	13:28:43	3.27045	357.119	1
2022-09-13	13:28:44	3.26645	360.386	1
2022-09-13	13:28:45	3.26382	363.649	1
2022-09-13	13:28:46	3.25477	366.904	1
2022-09-13	13:28:47	3.25183	370.156	1
2022-09-13	13:28:48	3.25679	373.413	1
2022-09-13	13:28:49	3.27095	376.684	1
2022-09-13	13:28:50	3.26411	379.948	1
2022-09-13	13:28:51	3.25952	383.207	1
2022-09-13	13:28:52	3.26079	386.468	1
2022-09-13	13:28:53	3.26258	389.731	1
2022-09-13	13:28:54	2.8387	392.569	1
2022-09-13	13:28:55	4.11045	396.68	1
2022-09-13	13:28:56	4.31537	400.995	1
2022-09-13	13:28:57	3.89229	404.888	1
2022-09-13	13:28:58	3.62466	408.512	1
2022-09-13	13:28:59	3.41357	411.926	1
2022-09-13	13:29:00	3.97574	415.902	1
2022-09-13	13:29:01	3.99025	419.892	1
2022-09-13	13:29:02	4.03349	423.925	1
2022-09-13	13:29:03	4.32041	428.246	1
2022-09-13	13:29:04	3.46701	431.713	1
2022-09-13	13:29:05	2.07175	433.784	1
2022-09-13	13:29:06	1.58053	435.365	1
2022-09-13	13:29:07	3.17113	438.536	1
2022-09-13	13:29:08	3.13183	441.668	1
2022-09-13	13:29:09	3.4138	445.082	1
2022-09-13	13:29:10	1.59722	446.679	1
2022-09-13	13:29:11	1.35783	448.037	1
2022-09-13	13:29:12	0.589643	448.626	1
2022-09-13	13:29:13	-1.62054	448.626	1
2022-09-13	13:29:14	5.27021	453.897	1
2022-09-13	13:29:15	8.92311	462.82	1
2022-09-13	13:29:16	9.28399	472.104	1
2022-09-13	13:29:17	7.47068	479.574	1
2022-09-13	13:29:18	2.90248	482.477	1
2022-09-13	13:29:19	2.57667	485.054	1
2022-09-13	13:29:20	1.68058	486.734	1
2022-09-13	13:29:21	-0.576888	486.734	1
2022-09-13	13:29:22	9.09753	495.832	1
2022-09-13	13:29:23	8.59532	504.427	1
2022-09-13	13:29:24	11.4433	515.87	1
2022-09-13	13:29:25	3.42196	519.292	1
2022-09-13	13:29:26	4.08453	523.377	1
2022-09-13	13:29:27	14.0625	537.439	2
2022-09-13	13:29:28	9.47496	546.914	2
2022-09-13	13:29:29	8.03413	554.948	2
2022-09-13	13:29:30	5.61481	560.563	2
2022-09-13	13:29:31	4.4632	565.026	2
2022-09-13	13:29:32	3.51193	568.538	2
2022-09-13	13:29:33	4.03792	572.576	2
2022-09-13	13:29:34	3.64153	576.218	2
2022-09-13	13:29:35	4.46885	580.687	2
2022-09-13	13:29:36	8.64683	589.333	2
2022-09-13	13:29:37	16.5716	605.905	3
2022-09-13	13:29:38	16.129	622.034	4
2022-09-13	13:29:39	12.6422	634.676	4
2022-09-13	13:29:40	9.42272	644.099	4
2022-09-13	13:29:41	8.45601	652.555	4
2022-09-13	13:29:42	9.83297	662.388	4
2022-09-13	13:29:43	18.2161	680.604	5
2022-09-13	13:29:44	8.71558	689.32	5
2022-09-13	13:29:45	4.81	694.13	5
2022-09-13	13:29:46	4.38159	698.511	5
2022-09-13	13:29:47	4.60869	703.12	5
2022-09-13	13:29:48	3.34566	706.466	5
2022-09-13	13:29:49	3.39752	709.863	5
2022-09-13	13:29:50	16.5826	726.446	6
2022-09-13	13:29:51	8.14988	734.596	6
2022-09-13	13:29:52	7.50507	742.101	6
2022-09-13	13:29:53	6.54446	748.645	6
2022-09-13	13:29:54	5.46482	754.11	6
2022-09-13	13:29:55	7.93478	762.045	6
2022-09-13	13:29:56	9.82021	771.865	6
2022-09-13	13:29:57	10.3586	782.224	6
2022-09-13	13:29:58	4.48153	786.705	6
2022-09-13	13:29:59	4.02194	790.727	6
2022-09-13	13:30:00	12.0311	802.758	6
2022-09-13	13:30:01	3.24979	806.008	6
2022-09-13	13:30:02	0.409941	806.418	6
2022-09-13	13:30:03	8.16108	814.579	6
2022-09-13	13:30:04	4.30616	818.885	6
2022-09-13	13:30:05	3.39914	822.284	6
2022-09-13	13:30:06	3.61951	825.904	6
2022-09-13	13:30:07	3.26914	829.173	6
2022-09-13	13:30:08	3.24967	832.423	6
2022-09-13	13:30:09	3.2696	835.692	6
2022-09-13	13:30:10	3.26177	838.954	6
2022-09-13	13:30:11	3.2675	842.221	6
2022-09-13	13:30:12	3.25545	845.477	6
2022-09-13	13:30:13	3.26535	848.742	6
2022-09-13	13:30:14	3.24698	851.989	6
2022-09-13	13:30:15	3.25183	855.241	6
2022-09-13	13:30:16	3.26552	858.507	6
2022-09-13	13:30:17	3.26258	861.769	6
2022-09-13	13:30:18	3.26584	865.035	6
2022-09-13	13:30:19	3.25771	868.293	6
2022-09-13	13:30:20	3.26716	871.56	6
2022-09-13	13:30:21	3.33191	874.892	6
2022-09-13	13:30:22	3.25483	878.147	6
2022-09-13	13:30:23	3.26643	881.413	6
2022-09-13	13:30:24	3.25918	884.672	6
2022-09-13	13:30:25	3.26054	887.933	6
2022-09-13	13:30:26	3.26773	891.2	6
2022-09-13	13:30:27	3.27429	894.475	6
2022-09-13	13:30:28	3.26552	897.74	6
2022-09-13	13:30:29	3.25205	900.992	6
2022-09-13	13:30:30	3.27618	904.268	6
2022-09-13	13:30:31	3.26999	907.538	6
2022-09-13	13:30:32	2.94758	910.486	6
2022-09-13	13:30:33	1.86706	912.353	6
2022-09-13	13:30:34	1.66887	914.022	6
2022-09-13	13:30:35	2.60214	916.624	6
2022-09-13	13:30:36	3.26846	919.893	6
2022-09-13	13:30:37	3.26813	923.161	6
2022-09-13	13:30:38	3.23643	926.397	6
2022-09-13	13:30:39	1.92278	928.32	6
2022-09-13	13:30:40	1.96813	930.288	6
2022-09-13	13:30:41	1.96825	932.256	6
2022-09-13	13:30:42	1.96706	934.223	6
2022-09-13	13:30:43	2.74806	936.971	6
2022-09-13	13:30:44	2.92749	939.899	6
2022-09-13	13:30:45	1.4421	941.341	6
2022-09-13	13:30:46	1.00798	942.349	6
2022-09-13	13:30:47	2.37824	944.727	6
2022-09-13	13:30:48	3.97452	948.702	6
2022-09-13	13:30:49	2.47724	951.179	6
2022-09-13	13:30:50	1.48947	952.668	6
2022-09-13	13:30:51	0.932028	953.6	6
2022-09-13	13:30:52	1.74499	955.345	6
2022-09-13	13:30:53	1.51182	956.857	6
2022-09-13	13:30:54	0.438652	957.296	6
2022-09-13	13:30:55	1.10188	958.398	6
2022-09-13	13:30:56	0.634236	959.032	6
2022-09-13	13:30:57	1.33395	960.366	6
2022-09-13	13:30:58	1.62671	961.993	6
2022-09-13	13:30:59	1.91599	963.909	6
2022-09-13	13:31:00	1.69518	965.604	6
2022-09-13	13:31:01	1.685	967.289	6
2022-09-13	13:31:02	1.2146	968.503	6
2022-09-13	13:31:03	3.25913	971.763	6
2022-09-13	13:31:04	2.81889	974.582	6
2022-09-13	13:31:05	0.301981	974.883	6
2022-09-13	13:31:06	0.527277	975.411	6
2022-09-13	13:31:07	0.565986	975.977	6
2022-09-13	13:31:08	2.13802	978.115	6
2022-09-13	13:31:09	3.25884	981.374	6
2022-09-13	13:31:10	3.28165	984.655	6
2022-09-13	13:31:11	3.28289	987.938	6
2022-09-13	13:31:12	3.27203	991.21	6
2022-09-13	13:31:13	3.27107	994.481	6
2022-09-13	13:31:14	3.26309	997.744	6
2022-09-13	13:31:15	3.26743	1001.01	6
2022-09-13	13:31:16	3.26943	1004.28	6
2022-09-13	13:31:17	2.74702	1007.03	6
2022-09-13	13:31:18	0.976226	1008	6
2022-09-13	13:31:19	1.87298	1009.88	6
2022-09-13	13:31:20	2.95352	1012.83	6
2022-09-13	13:31:21	3.26156	1016.09	6
2022-09-13	13:31:22	3.27486	1019.37	6
2022-09-13	13:31:23	3.26711	1022.63	6
2022-09-13	13:31:24	2.84057	1025.48	6
2022-09-13	13:31:25	0.267573	1025.74	6
2022-09-13	13:31:26	-0.387999	1025.74	6
2022-09-13	13:31:27	0.144539	1025.89	6
2022-09-13	13:31:28	0.343313	1026.23	6
2022-09-13	13:31:29	3.47175	1029.7	6
2022-09-13	13:31:30	9.36318	1039.07	6
2022-09-13	13:31:31	11.507	1050.57	6
2022-09-13	13:31:32	8.23605	1058.81	6
2022-09-13	13:31:33	1.05472	1059.86	6
2022-09-13	13:31:34	1.1086	1060.97	6
2022-09-13	13:31:35	3.00389	1063.98	6
2022-09-13	13:31:36	3.27195	1067.25	6
2022-09-13	13:31:37	3.2709	1070.52	6
2022-09-13	13:31:38	3.27424	1073.79	6
2022-09-13	13:31:39	3.26394	1077.06	6
2022-09-13	13:31:40	3.25868	1080.32	6
2022-09-13	13:31:41	3.25913	1083.57	6
2022-09-13	13:31:42	3.26762	1086.84	6
2022-09-13	13:31:43	3.25409	1090.1	6
2022-09-13	13:31:44	3.26313	1093.36	6
2022-09-13	13:31:45	3.26411	1096.62	6
2022-09-13	13:31:46	3.26603	1099.89	6
2022-09-13	13:31:47	3.25907	1103.15	6
2022-09-13	13:31:48	3.24939	1106.4	6
2022-09-13	13:31:49	3.24079	1109.64	6
2022-09-13	13:31:50	3.23943	1112.88	6
2022-09-13	13:31:51	3.2593	1116.14	6
2022-09-13	13:31:52	3.25641	1119.39	6
2022-09-13	13:31:53	3.2662	1122.66	6
2022-09-13	13:31:54	3.25517	1125.92	6
2022-09-13	13:31:55	3.26275	1129.18	6
2022-09-13	13:31:56	3.27286	1132.45	6
2022-09-13	13:31:57	3.26275	1135.71	6
2022-09-13	13:31:58	3.26354	1138.98	6
2022-09-13	13:31:59	-0.252403	1138.98	6

## Sheet: Daisy_harness_2022913132646 (4)
Date	Time	Lbs	Newtons	Averaged Newtons	Total force x time	total steps > 13.345		**GoPro Fitting: 1316
2022-09-13	13:26:59	0.814211	3.62177	2.8786	3.62177	FALSE	0			Total force x time	2142.13
2022-09-13	13:26:59	0.660012	2.93587	2.8786	2.93587	FALSE	0			Total steps	30
2022-09-13	13:26:59	0.386985	1.72139	2.8786	5.34316	FALSE	0
2022-09-13	13:26:59	0.727341	3.23536	2.8786	6.17122	FALSE	0
2022-09-13	13:27:00	0.733499	3.26275	3.25834	8.60591	FALSE	0
2022-09-13	13:27:00	0.73014	3.24781	3.25834	9.41903	FALSE	0
2022-09-13	13:27:00	0.734822	3.26864	3.25834	11.8745	FALSE	0
2022-09-13	13:27:00	0.731565	3.25415	3.25834	12.6732	FALSE	0
2022-09-13	13:27:01	0.734568	3.26751	3.27618	15.1421	FALSE	0
2022-09-13	13:27:01	0.737722	3.28154	3.27618	15.9547	FALSE	0
2022-09-13	13:27:01	0.737265	3.2795	3.27618	18.4216	FALSE	0
2022-09-13	13:27:02	0.727952	3.23808	2.71618	19.1928	FALSE	0
2022-09-13	13:27:02	0.736908	3.27791	2.71618	21.6995	FALSE	0
2022-09-13	13:27:02	0.252532	1.12331	2.71618	20.3161	FALSE	0
2022-09-13	13:27:02	0.725102	3.2254	2.71618	24.9249	FALSE	0
2022-09-13	13:27:03	0.732837	3.25981	3.12981	23.5759	FALSE	0
2022-09-13	13:27:03	0.739097	3.28765	3.12981	28.2125	FALSE	0
2022-09-13	13:27:03	0.730394	3.24894	3.12981	26.8248	FALSE	0
2022-09-13	13:27:03	0.612125	2.72285	3.12981	30.9354	FALSE	0
2022-09-13	13:27:04	-0.195865	-0.871247	-0.321956	26.8248	FALSE	0
2022-09-13	13:27:04	0.146781	0.652911	-0.321956	31.5883	FALSE	0
2022-09-13	13:27:04	-0.123091	-0.547533	-0.321956	26.8248	FALSE	0
2022-09-13	13:27:04	-0.117341	-0.521956	-0.321956	31.5883	FALSE	0
2022-09-13	13:27:05	-0.486704	-2.16496	-0.528065	26.8248	FALSE	0
2022-09-13	13:27:05	-0.208129	-0.925799	-0.528065	31.5883	FALSE	0
2022-09-13	13:27:05	0.33869	1.50656	-0.528065	28.3314	FALSE	0
2022-09-13	13:27:06	-0.228231	-1.01522	-2.91742	31.5883	FALSE	0
2022-09-13	13:27:06	-0.78986	-3.51346	-2.91742	28.3314	FALSE	0
2022-09-13	13:27:06	-0.858002	-3.81656	-2.91742	31.5883	FALSE	0
2022-09-13	13:27:06	-0.747366	-3.32443	-2.91742	28.3314	FALSE	0
2022-09-13	13:27:07	-0.878002	-3.90553	-3.67576	31.5883	FALSE	0
2022-09-13	13:27:07	-0.811131	-3.60807	-3.67576	28.3314	FALSE	0
2022-09-13	13:27:07	-0.826348	-3.67576	-3.67576	31.5883	FALSE	0
2022-09-13	13:27:07	-0.78991	-3.51368	-3.67576	28.3314	FALSE	0
2022-09-13	13:27:08	-1.00182	-4.4563	-4.58158	31.5883	FALSE	0
2022-09-13	13:27:08	-0.990674	-4.40672	-4.58158	28.3314	FALSE	0
2022-09-13	13:27:08	-1.0952	-4.87167	-4.58158	31.5883	FALSE	0
2022-09-13	13:27:08	-1.03225	-4.59165	-4.58158	28.3314	FALSE	0
2022-09-13	13:27:09	-1.32762	-5.90552	-5.59532	31.5883	FALSE	0
2022-09-13	13:27:09	-1.17067	-5.20737	-5.59532	28.3314	FALSE	0
2022-09-13	13:27:09	-1.27536	-5.67306	-5.59532	31.5883	FALSE	0
2022-09-13	13:27:10	-1.18594	-5.2753	-4.4903	28.3314	FALSE	0
2022-09-13	13:27:10	-1.06599	-4.74174	-4.4903	31.5883	FALSE	0
2022-09-13	13:27:10	-0.84477	-3.75771	-4.4903	28.3314	FALSE	0
2022-09-13	13:27:10	-0.941157	-4.18645	-4.4903	31.5883	FALSE	0
2022-09-13	13:27:11	-0.946348	-4.20955	-0.71154	28.3314	FALSE	0
2022-09-13	13:27:11	-0.920444	-4.09432	-0.71154	31.5883	FALSE	0
2022-09-13	13:27:11	0.493499	2.19518	-0.71154	30.5266	FALSE	0
2022-09-13	13:27:11	0.733448	3.26252	-0.71154	34.8508	FALSE	0
2022-09-13	13:27:12	0.732786	3.25958	3.26609	33.7862	FALSE	0
2022-09-13	13:27:12	0.740827	3.29535	3.26609	38.1462	FALSE	0
2022-09-13	13:27:12	0.735534	3.2718	3.26609	37.058	FALSE	0
2022-09-13	13:27:12	0.72785	3.23762	3.26609	41.3838	FALSE	0
2022-09-13	13:27:13	0.738282	3.28403	3.27852	40.342	FALSE	0
2022-09-13	13:27:13	0.733041	3.26071	3.27852	44.6445	FALSE	0
2022-09-13	13:27:13	0.739809	3.29082	3.27852	43.6328	FALSE	0
2022-09-13	13:27:14	0.73813	3.28335	3.27622	47.9278	FALSE	0
2022-09-13	13:27:14	0.734873	3.26886	3.27622	46.9017	FALSE	0
2022-09-13	13:27:14	0.737163	3.27905	3.27622	51.2069	FALSE	0
2022-09-13	13:27:14	0.735941	3.27361	3.27622	50.1753	FALSE	0
2022-09-13	13:27:15	0.733804	3.26411	3.27825	54.471	FALSE	0
2022-09-13	13:27:15	0.742608	3.30327	3.27825	53.4786	FALSE	0
2022-09-13	13:27:15	0.737773	3.28176	3.27825	57.7528	FALSE	0
2022-09-13	13:27:15	0.733753	3.26388	3.27825	56.7424	FALSE	0
2022-09-13	13:27:16	0.730242	3.24826	3.2688	61.001	FALSE	0
2022-09-13	13:27:16	0.733346	3.26207	3.2688	60.0045	FALSE	0
2022-09-13	13:27:16	0.738689	3.28584	3.2688	64.2869	FALSE	0
2022-09-13	13:27:16	0.737163	3.27905	3.2688	63.2836	FALSE	0
2022-09-13	13:27:17	0.731158	3.25234	3.26994	67.5392	FALSE	0
2022-09-13	13:27:17	0.737214	3.27928	3.26994	66.5628	FALSE	0
2022-09-13	13:27:17	0.734669	3.26795	3.26994	70.8071	FALSE	0
2022-09-13	13:27:17	0.737417	3.28018	3.26994	69.843	FALSE	0
2022-09-13	13:27:18	0.731463	3.25369	3.25694	74.0608	FALSE	0
2022-09-13	13:27:18	0.735483	3.27158	3.25694	73.1146	FALSE	0
2022-09-13	13:27:18	0.729631	3.24554	3.25694	77.3064	FALSE	0
2022-09-13	13:27:19	0.73416	3.26569	3.26467	76.3803	FALSE	0
2022-09-13	13:27:19	0.731565	3.25415	3.26467	80.5605	FALSE	0
2022-09-13	13:27:19	0.732175	3.25686	3.26467	79.6371	FALSE	0
2022-09-13	13:27:19	0.737824	3.28199	3.26467	83.8425	FALSE	0
2022-09-13	13:27:20	0.737417	3.28018	3.25488	82.9173	FALSE	0
2022-09-13	13:27:20	0.730903	3.2512	3.25488	87.0937	FALSE	0
2022-09-13	13:27:20	0.728715	3.24147	3.25488	86.1588	FALSE	0
2022-09-13	13:27:20	0.729886	3.24668	3.25488	90.3404	FALSE	0
2022-09-13	13:27:21	0.728359	3.23989	3.25709	89.3987	FALSE	0
2022-09-13	13:27:21	0.732583	3.25868	3.25709	93.5991	FALSE	0
2022-09-13	13:27:21	0.731565	3.25415	3.25709	92.6528	FALSE	0
2022-09-13	13:27:21	0.736399	3.27565	3.25709	96.8747	FALSE	0
2022-09-13	13:27:22	0.732888	3.26003	3.25686	95.9129	FALSE	0
2022-09-13	13:27:22	0.733041	3.26071	3.25686	100.135	FALSE	0
2022-09-13	13:27:22	0.730598	3.24985	3.25686	99.1627	FALSE	0
2022-09-13	13:27:23	0.725967	3.22925	3.26722	103.365	FALSE	0
2022-09-13	13:27:23	0.739453	3.28923	3.26722	102.452	FALSE	0
2022-09-13	13:27:23	0.735483	3.27158	3.26722	106.636	FALSE	0
2022-09-13	13:27:23	0.737112	3.27882	3.26722	105.731	FALSE	0
2022-09-13	13:27:24	0.738384	3.28448	3.27673	109.921	FALSE	0
2022-09-13	13:27:24	0.736654	3.27678	3.27673	109.008	FALSE	0
2022-09-13	13:27:24	0.731514	3.25392	3.27673	113.175	FALSE	0
2022-09-13	13:27:24	0.740013	3.29173	3.27673	112.299	FALSE	0
2022-09-13	13:27:25	0.73701	3.27837	3.27842	116.453	FALSE	0
2022-09-13	13:27:25	0.735178	3.27022	3.27842	115.569	FALSE	0
2022-09-13	13:27:25	0.736247	3.27497	3.27842	119.728	FALSE	0
2022-09-13	13:27:25	0.739656	3.29014	3.27842	118.86	FALSE	0
2022-09-13	13:27:26	0.735433	3.27135	3.26056	122.999	FALSE	0
2022-09-13	13:27:26	0.732277	3.25731	3.26056	122.117	FALSE	0
2022-09-13	13:27:26	0.73131	3.25301	3.26056	126.252	FALSE	0
2022-09-13	13:27:27	0.736501	3.2761	3.25601	125.393	FALSE	0
2022-09-13	13:27:27	0.729886	3.24668	3.25601	129.499	FALSE	0
2022-09-13	13:27:27	0.735178	3.27022	3.25601	128.663	FALSE	0
2022-09-13	13:27:27	0.726374	3.23106	3.25601	132.73	FALSE	0
2022-09-13	13:27:28	0.73874	3.28606	3.29297	131.949	FALSE	0
2022-09-13	13:27:28	0.735127	3.26999	3.29297	136	FALSE	0
2022-09-13	13:27:28	0.745814	3.31753	3.29297	135.267	FALSE	0
2022-09-13	13:27:28	0.741489	3.29829	3.29297	139.298	FALSE	0
2022-09-13	13:27:29	0.732226	3.25709	3.25573	138.524	FALSE	0
2022-09-13	13:27:29	0.733957	3.26479	3.25573	142.563	FALSE	0
2022-09-13	13:27:29	0.726781	3.23287	3.25573	141.757	FALSE	0
2022-09-13	13:27:29	0.73472	3.26818	3.25573	145.831	FALSE	0
2022-09-13	13:27:30	0.730598	3.24985	3.24758	145.007	FALSE	0
2022-09-13	13:27:30	0.72673	3.23264	3.24758	149.064	FALSE	0
2022-09-13	13:27:30	0.732939	3.26026	3.24758	148.267	FALSE	0
2022-09-13	13:27:31	0.734364	3.2666	3.25432	152.331	FALSE	0
2022-09-13	13:27:31	0.735483	3.27158	3.25432	151.538	FALSE	0
2022-09-13	13:27:31	0.726578	3.23196	3.25432	155.563	FALSE	0
2022-09-13	13:27:31	0.729987	3.24713	3.25432	154.786	FALSE	0
2022-09-13	13:27:32	0.738537	3.28516	3.26156	158.848	FALSE	0
2022-09-13	13:27:32	0.730852	3.25098	3.26156	158.037	FALSE	0
2022-09-13	13:27:32	0.733906	3.26456	3.26156	162.112	FALSE	0
2022-09-13	13:27:32	0.729631	3.24554	3.26156	161.282	FALSE	0
2022-09-13	13:27:33	0.734873	3.26886	3.26711	165.381	FALSE	0
2022-09-13	13:27:33	0.733651	3.26343	3.26711	164.546	FALSE	0
2022-09-13	13:27:33	0.73528	3.27067	3.26711	168.652	FALSE	0
2022-09-13	13:27:33	0.734109	3.26546	3.26711	167.811	FALSE	0
2022-09-13	13:27:34	0.733142	3.26116	3.26675	171.913	FALSE	0
2022-09-13	13:27:34	0.738689	3.28584	3.26675	171.097	FALSE	0
2022-09-13	13:27:34	0.731361	3.25324	3.26675	175.166	FALSE	0
2022-09-13	13:27:35	0.733753	3.26388	3.25522	174.361	FALSE	0
2022-09-13	13:27:35	0.733244	3.26162	3.25522	178.428	FALSE	0
2022-09-13	13:27:35	0.732074	3.25641	3.25522	177.617	FALSE	0
2022-09-13	13:27:35	0.728155	3.23898	3.25522	181.667	FALSE	0
2022-09-13	13:27:36	0.730547	3.24962	3.24879	180.867	FALSE	0
2022-09-13	13:27:36	0.731717	3.25482	3.24879	184.922	FALSE	0
2022-09-13	13:27:36	0.728817	3.24192	3.24879	184.109	FALSE	0
2022-09-13	13:27:37	0.740013	3.29173	3.27126	188.213	FALSE	0
2022-09-13	13:27:37	0.734008	3.26501	3.27126	187.374	FALSE	0
2022-09-13	13:27:37	0.731921	3.25573	3.27126	191.469	FALSE	0
2022-09-13	13:27:37	0.739453	3.28923	3.27126	190.663	FALSE	0
2022-09-13	13:27:37	0.731667	3.2546	3.27126	194.724	FALSE	0
2022-09-13	13:27:38	0.737417	3.28018	3.27942	193.943	FALSE	0
2022-09-13	13:27:38	0.740216	3.29263	3.27942	198.016	FALSE	0
2022-09-13	13:27:38	0.734109	3.26546	3.27942	197.209	FALSE	0
2022-09-13	13:27:39	0.729478	3.24486	3.2705	201.261	FALSE	0
2022-09-13	13:27:39	0.731667	3.2546	3.2705	200.463	FALSE	0
2022-09-13	13:27:39	0.739249	3.28833	3.2705	204.55	FALSE	0
2022-09-13	13:27:39	0.740573	3.29422	3.2705	203.757	FALSE	0
2022-09-13	13:27:40	0.737824	3.28199	3.27214	207.832	FALSE	0
2022-09-13	13:27:40	0.732328	3.25754	3.27214	207.015	FALSE	0
2022-09-13	13:27:40	0.732583	3.25868	3.27214	211.09	FALSE	0
2022-09-13	13:27:40	0.739707	3.29036	3.27214	210.305	FALSE	0
2022-09-13	13:27:41	0.737061	3.27859	3.28305	214.369	FALSE	0
2022-09-13	13:27:41	0.737824	3.28199	3.28305	213.587	FALSE	0
2022-09-13	13:27:41	0.7393	3.28855	3.28305	217.657	FALSE	0
2022-09-13	13:27:42	0.738435	3.28471	3.25856	216.872	FALSE	0
2022-09-13	13:27:42	0.728715	3.24147	3.25856	220.899	FALSE	0
2022-09-13	13:27:42	0.732023	3.25618	3.25856	220.128	FALSE	0
2022-09-13	13:27:42	0.731056	3.25188	3.25856	224.151	FALSE	0
2022-09-13	13:27:43	0.739046	3.28742	3.27684	223.416	FALSE	0
2022-09-13	13:27:43	0.732328	3.25754	3.27684	227.408	FALSE	0
2022-09-13	13:27:43	0.739504	3.28946	3.27684	226.705	FALSE	0
2022-09-13	13:27:43	0.735789	3.27294	3.27684	230.681	FALSE	0
2022-09-13	13:27:44	0.73645	3.27588	3.26878	229.981	FALSE	0
2022-09-13	13:27:44	0.731209	3.25256	3.26878	233.934	FALSE	0
2022-09-13	13:27:44	0.736908	3.27791	3.26878	233.259	FALSE	0
2022-09-13	13:27:45	0.73528	3.27067	3.26298	237.204	FALSE	0
2022-09-13	13:27:45	0.73416	3.26569	3.26298	236.525	FALSE	0
2022-09-13	13:27:45	0.734669	3.26795	3.26298	240.472	FALSE	0
2022-09-13	13:27:45	0.728003	3.2383	3.26298	239.763	FALSE	0
2022-09-13	13:27:45	0.735636	3.27226	3.26298	243.745	FALSE	0
2022-09-13	13:27:46	0.736603	3.27656	3.27663	243.039	FALSE	0
2022-09-13	13:27:46	0.739097	3.28765	3.27663	247.032	FALSE	0
2022-09-13	13:27:46	0.73416	3.26569	3.27663	246.305	FALSE	0
2022-09-13	13:27:47	0.734059	3.26524	3.25754	250.298	FALSE	0
2022-09-13	13:27:47	0.731259	3.25279	3.25754	249.558	FALSE	0
2022-09-13	13:27:47	0.739147	3.28787	3.25754	253.585	FALSE	0
2022-09-13	13:27:47	0.724847	3.22426	3.25754	252.782	FALSE	0
2022-09-13	13:27:48	0.73528	3.27067	3.26049	256.856	FALSE	0
2022-09-13	13:27:48	0.735891	3.27339	3.26049	256.056	FALSE	0
2022-09-13	13:27:48	0.73416	3.26569	3.26049	260.122	FALSE	0
2022-09-13	13:27:48	0.726629	3.23219	3.26049	259.288	FALSE	0
2022-09-13	13:27:49	0.72902	3.24283	3.25137	263.365	FALSE	0
2022-09-13	13:27:49	0.726018	3.22947	3.25137	262.517	FALSE	0
2022-09-13	13:27:49	0.734364	3.2666	3.25137	266.631	FALSE	0
2022-09-13	13:27:49	0.734364	3.2666	3.25137	265.784	FALSE	0
2022-09-13	13:27:50	0.738486	3.28493	3.27322	269.916	FALSE	0
2022-09-13	13:27:50	0.736756	3.27724	3.27322	269.061	FALSE	0
2022-09-13	13:27:50	0.739758	3.29059	3.27322	273.207	FALSE	0
2022-09-13	13:27:50	0.72841	3.24011	3.27322	272.301	FALSE	0
2022-09-13	13:27:51	0.737875	3.28222	3.27633	276.489	FALSE	0
2022-09-13	13:27:51	0.730293	3.24849	3.27633	275.55	FALSE	0
2022-09-13	13:27:51	0.741489	3.29829	3.27633	279.787	FALSE	0
2022-09-13	13:27:52	0.740216	3.29263	3.27577	278.842	FALSE	0
2022-09-13	13:27:52	0.735331	3.2709	3.27577	283.058	FALSE	0
2022-09-13	13:27:52	0.730293	3.24849	3.27577	282.091	FALSE	0
2022-09-13	13:27:52	0.73986	3.29105	3.27577	286.349	FALSE	0
2022-09-13	13:27:53	0.738842	3.28652	3.26518	285.377	FALSE	0
2022-09-13	13:27:53	0.733957	3.26479	3.26518	289.614	FALSE	0
2022-09-13	13:27:53	0.733346	3.26207	3.26518	288.639	FALSE	0
2022-09-13	13:27:53	0.730038	3.24736	3.26518	292.861	FALSE	0
2022-09-13	13:27:54	0.728715	3.24147	3.25675	291.881	FALSE	0
2022-09-13	13:27:54	0.736603	3.27656	3.25675	296.138	FALSE	0
2022-09-13	13:27:54	0.734364	3.2666	3.25675	295.147	FALSE	0
2022-09-13	13:27:54	0.728919	3.24238	3.25675	299.38	FALSE	0
2022-09-13	13:27:55	0.463422	2.06139	2.34232	297.209	FALSE	0
2022-09-13	13:27:55	0.722608	3.2143	2.34232	302.595	FALSE	0
2022-09-13	13:27:55	0.393702	1.75127	2.34232	298.96	FALSE	0
2022-09-13	13:27:56	0.623779	2.77469	2.14878	305.369	FALSE	0
2022-09-13	13:27:56	0.475178	2.11369	2.14878	301.074	FALSE	0
2022-09-13	13:27:56	0.407748	1.81374	2.14878	307.183	FALSE	0
2022-09-13	13:27:56	0.42556	1.89298	2.14878	302.967	FALSE	0
2022-09-13	13:27:57	0.277774	1.23559	2.32501	308.419	FALSE	0
2022-09-13	13:27:57	0.558282	2.48335	2.32501	305.45	FALSE	0
2022-09-13	13:27:57	0.590547	2.62687	2.32501	311.045	FALSE	0
2022-09-13	13:27:57	0.664135	2.95421	2.32501	308.404	FALSE	0
2022-09-13	13:27:58	0.53243	2.36836	2.21369	313.414	FALSE	0
2022-09-13	13:27:58	0.664593	2.95624	2.21369	311.361	FALSE	0
2022-09-13	13:27:58	0.0939061	0.417713	2.21369	313.831	FALSE	0
2022-09-13	13:27:58	0.699708	3.11244	2.21369	314.473	FALSE	0
2022-09-13	13:27:59	0.71874	3.1971	2.99767	317.029	FALSE	0
2022-09-13	13:27:59	0.69584	3.09524	2.99767	317.568	FALSE	0
2022-09-13	13:27:59	0.607137	2.70067	2.99767	319.729	FALSE	0
2022-09-13	13:28:00	0.552583	2.458	1.93865	320.026	FALSE	0
2022-09-13	13:28:00	0.496247	2.20741	1.93865	321.937	FALSE	0
2022-09-13	13:28:00	0.383066	1.70395	1.93865	321.73	FALSE	0
2022-09-13	13:28:00	0.311412	1.38522	1.93865	323.322	FALSE	0
2022-09-13	13:28:01	0.367036	1.63265	1.88777	323.363	FALSE	0
2022-09-13	13:28:01	0.381896	1.69875	1.88777	325.021	FALSE	0
2022-09-13	13:28:01	0.427697	1.90248	1.88777	325.265	FALSE	0
2022-09-13	13:28:01	0.520929	2.3172	1.88777	327.338	FALSE	0
2022-09-13	13:28:02	0.376807	1.67611	1.94906	326.941	FALSE	0
2022-09-13	13:28:02	0.383117	1.70418	1.94906	329.042	FALSE	0
2022-09-13	13:28:02	0.431005	1.9172	1.94906	328.859	FALSE	0
2022-09-13	13:28:02	0.561743	2.49875	1.94906	331.541	FALSE	0
2022-09-13	13:28:03	0.609529	2.71131	2.84962	331.57	FALSE	0
2022-09-13	13:28:03	0.678537	3.01827	2.84962	334.559	FALSE	0
2022-09-13	13:28:03	0.633804	2.81929	2.84962	334.389	FALSE	0
2022-09-13	13:28:04	0.678333	3.01736	2.35183	337.576	FALSE	0
2022-09-13	13:28:04	0.335382	1.49185	2.35183	335.881	FALSE	0
2022-09-13	13:28:04	0.373601	1.66185	2.35183	339.238	FALSE	0
2022-09-13	13:28:04	0.727545	3.23627	2.35183	339.117	FALSE	0
2022-09-13	13:28:05	0.735891	3.27339	2.96507	342.512	FALSE	0
2022-09-13	13:28:05	0.739198	3.2881	2.96507	342.405	FALSE	0
2022-09-13	13:28:05	0.613702	2.72987	2.96507	345.242	FALSE	0
2022-09-13	13:28:05	0.577519	2.56892	2.96507	344.974	FALSE	0
2022-09-13	13:28:06	0.375687	1.67113	1.68211	346.913	FALSE	0
2022-09-13	13:28:06	0.443982	1.97492	1.68211	346.949	FALSE	0
2022-09-13	13:28:06	0.335026	1.49026	1.68211	348.403	FALSE	0
2022-09-13	13:28:06	0.357926	1.59213	1.68211	348.541	FALSE	0
2022-09-13	13:28:07	0.395178	1.75783	1.83699	350.161	FALSE	0
2022-09-13	13:28:07	0.396298	1.76281	1.83699	350.304	FALSE	0
2022-09-13	13:28:07	0.447443	1.99032	1.83699	352.151	FALSE	0
2022-09-13	13:28:08	0.381998	1.6992	2.21069	352.003	FALSE	0
2022-09-13	13:28:08	0.515331	2.2923	2.21069	354.443	FALSE	0
2022-09-13	13:28:08	0.368868	1.6408	2.21069	353.644	FALSE	0
2022-09-13	13:28:08	0.721743	3.21046	2.21069	357.654	FALSE	0
2022-09-13	13:28:09	0.730852	3.25098	3.26479	356.895	FALSE	0
2022-09-13	13:28:09	0.731158	3.25234	3.26479	360.906	FALSE	0
2022-09-13	13:28:09	0.736349	3.27543	3.26479	360.171	FALSE	0
2022-09-13	13:28:09	0.737468	3.28041	3.26479	364.187	FALSE	0
2022-09-13	13:28:10	0.740369	3.29331	3.26829	363.464	FALSE	0
2022-09-13	13:28:10	0.731667	3.2546	3.26829	367.441	FALSE	0
2022-09-13	13:28:10	0.729529	3.24509	3.26829	366.709	FALSE	0
2022-09-13	13:28:10	0.737417	3.28018	3.26829	370.721	FALSE	0
2022-09-13	13:28:11	0.732226	3.25709	3.24532	369.966	FALSE	0
2022-09-13	13:28:11	0.721387	3.20887	3.24532	373.93	FALSE	0
2022-09-13	13:28:11	0.735127	3.26999	3.24532	373.236	FALSE	0
2022-09-13	13:28:12	0.733244	3.26162	3.26835	377.192	FALSE	0
2022-09-13	13:28:12	0.735433	3.27135	3.26835	376.507	FALSE	0
2022-09-13	13:28:12	0.736857	3.27769	3.26835	380.469	FALSE	0
2022-09-13	13:28:12	0.733499	3.26275	3.26835	379.77	FALSE	0
2022-09-13	13:28:13	0.730038	3.24736	3.25452	383.717	FALSE	0
2022-09-13	13:28:13	0.733753	3.26388	3.25452	383.034	FALSE	0
2022-09-13	13:28:13	0.731158	3.25234	3.25452	386.969	FALSE	0
2022-09-13	13:28:14	0.728003	3.2383	3.2704	386.272	FALSE	0
2022-09-13	13:28:14	0.735738	3.27271	3.2704	390.242	FALSE	0
2022-09-13	13:28:14	0.737265	3.2795	3.2704	389.552	FALSE	0
2022-09-13	13:28:14	0.73355	3.26298	3.2704	393.505	FALSE	0
2022-09-13	13:28:14	0.741539	3.29851	3.2704	392.85	FALSE	0
2022-09-13	13:28:15	0.81528	3.62653	3.43366	397.131	FALSE	0
2022-09-13	13:28:15	0.767239	3.41283	3.43366	396.263	FALSE	0
2022-09-13	13:28:15	0.733244	3.26162	3.43366	400.393	FALSE	0
2022-09-13	13:28:16	0.738588	3.28539	3.19308	399.549	FALSE	0
2022-09-13	13:28:16	0.737722	3.28154	3.19308	403.675	FALSE	0
2022-09-13	13:28:16	0.729936	3.2469	3.19308	402.796	FALSE	0
2022-09-13	13:28:16	0.665102	2.95851	3.19308	406.633	FALSE	0
2022-09-13	13:28:17	0.527544	2.34662	2.81334	405.142	FALSE	0
2022-09-13	13:28:17	0.728766	3.2417	2.81334	409.875	FALSE	0
2022-09-13	13:28:17	0.544745	2.42313	2.81334	407.565	FALSE	0
2022-09-13	13:28:17	0.728817	3.24192	2.81334	413.117	FALSE	0
2022-09-13	13:28:18	0.442303	1.96745	2.73083	409.533	FALSE	0
2022-09-13	13:28:18	0.671412	2.98657	2.73083	416.103	FALSE	0
2022-09-13	13:28:18	0.653397	2.90644	2.73083	412.439	FALSE	0
2022-09-13	13:28:18	0.688562	3.06286	2.73083	419.166	FALSE	0
2022-09-13	13:28:19	1.01655	4.52182	6.30495	416.961	FALSE	0
2022-09-13	13:28:19	0.874007	3.88776	6.30495	423.054	FALSE	0
2022-09-13	13:28:19	2.36169	10.5053	6.30495	427.466	FALSE	0
2022-09-13	13:28:20	1.96057	8.72101	8.81474	431.775	FALSE	0
2022-09-13	13:28:20	1.06882	4.75433	8.81474	432.221	FALSE	0
2022-09-13	13:28:20	1.58032	7.02958	8.81474	438.804	FALSE	0
2022-09-13	13:28:20	3.31686	14.7541	8.81474	446.975	1	1
2022-09-13	13:28:21	2.36286	10.5105	12.3057	449.315	FALSE	1
2022-09-13	13:28:21	2.35441	10.4729	12.3057	457.448	FALSE	1
2022-09-13	13:28:21	2.5338	11.2708	12.3057	460.586	FALSE	1
2022-09-13	13:28:21	3.81467	16.9684	12.3057	474.416	1	2
2022-09-13	13:28:22	3.52057	15.6602	15.6226	476.246	1	3
2022-09-13	13:28:22	2.05558	9.14363	15.6226	483.56	FALSE	3
2022-09-13	13:28:22	3.4277	15.2471	15.6226	491.493	1	4
2022-09-13	13:28:22	5.04459	22.4393	15.6226	505.999	1	5
2022-09-13	13:28:23	3.62882	16.1417	9.26824	507.635	1	6
2022-09-13	13:28:23	1.70902	7.60206	9.26824	513.601	FALSE	6
2022-09-13	13:28:23	0.912939	4.06094	9.26824	511.696	FALSE	6
2022-09-13	13:28:24	2.57686	11.4624	7.90653	525.063	FALSE	6
2022-09-13	13:28:24	2.08739	9.28513	7.90653	520.981	FALSE	6
2022-09-13	13:28:24	1.20836	5.37503	7.90653	530.438	FALSE	6
2022-09-13	13:28:24	1.23726	5.50358	7.90653	526.484	FALSE	6
2022-09-13	13:28:25	2.21197	9.83928	9.50482	540.278	FALSE	6
2022-09-13	13:28:25	1.61818	7.19799	9.50482	533.682	FALSE	6
2022-09-13	13:28:25	2.04016	9.07504	9.50482	549.353	FALSE	6
2022-09-13	13:28:25	2.67681	11.907	9.50482	545.589	FALSE	6
2022-09-13	13:28:26	2.29146	10.1929	5.61621	559.546	FALSE	6
2022-09-13	13:28:26	1.17604	5.23126	5.61621	550.821	FALSE	6
2022-09-13	13:28:26	0.851666	3.78838	5.61621	563.334	FALSE	6
2022-09-13	13:28:26	0.731158	3.25234	5.61621	554.073	FALSE	6
2022-09-13	13:28:27	0.627341	2.79054	2.28641	566.125	FALSE	6
2022-09-13	13:28:27	0.470089	2.09105	2.28641	556.164	FALSE	6
2022-09-13	13:28:27	0.444593	1.97764	2.28641	568.102	FALSE	6
2022-09-13	13:28:28	0.327799	1.45812	1.29275	557.622	FALSE	6
2022-09-13	13:28:28	0.245967	1.09411	1.29275	569.196	FALSE	6
2022-09-13	13:28:28	0.22042	0.980472	1.29275	558.603	FALSE	6
2022-09-13	13:28:28	0.368308	1.63831	1.29275	570.835	FALSE	6
2022-09-13	13:28:29	0.50103	2.22868	5.12414	560.831	FALSE	6
2022-09-13	13:28:29	0.825102	3.67022	5.12414	574.505	FALSE	6
2022-09-13	13:28:29	1.59777	7.1072	5.12414	567.939	FALSE	6
2022-09-13	13:28:29	1.68393	7.49046	5.12414	581.995	FALSE	6
2022-09-13	13:28:30	1.81294	8.06432	6.91344	576.003	FALSE	6
2022-09-13	13:28:30	1.25329	5.57488	6.91344	587.57	FALSE	6
2022-09-13	13:28:30	1.35772	6.03941	6.91344	582.042	FALSE	6
2022-09-13	13:28:30	1.79289	7.97513	6.91344	595.545	FALSE	6
2022-09-13	13:28:31	1.44067	6.40839	5.76466	588.451	FALSE	6
2022-09-13	13:28:31	1.40678	6.25764	5.76466	601.803	FALSE	6
2022-09-13	13:28:31	1.15034	5.11694	5.76466	593.568	FALSE	6
2022-09-13	13:28:31	1.18602	5.27565	5.76466	607.079	FALSE	6
2022-09-13	13:28:32	1.01961	4.53543	4.78509	598.103	FALSE	6
2022-09-13	13:28:32	1.08403	4.82198	4.78509	611.901	FALSE	6
2022-09-13	13:28:32	1.12357	4.99786	4.78509	603.101	FALSE	6
2022-09-13	13:28:33	1.22363	5.44295	5.2121	617.343	FALSE	6
2022-09-13	13:28:33	1.15457	5.13576	5.2121	608.237	FALSE	6
2022-09-13	13:28:33	1.1619	5.16836	5.2121	622.512	FALSE	6
2022-09-13	13:28:33	1.14683	5.10133	5.2121	613.338	FALSE	6
2022-09-13	13:28:34	1.15309	5.12917	4.49087	627.641	FALSE	6
2022-09-13	13:28:34	0.996603	4.43309	4.49087	617.771	FALSE	6
2022-09-13	13:28:34	0.925102	4.11504	4.49087	631.756	FALSE	6
2022-09-13	13:28:34	0.963575	4.28617	4.49087	622.057	FALSE	6
2022-09-13	13:28:35	1.00571	4.4736	4.444	636.23	FALSE	6
2022-09-13	13:28:35	1.10637	4.92136	4.444	626.979	FALSE	6
2022-09-13	13:28:35	0.750344	3.33768	4.444	639.567	FALSE	6
2022-09-13	13:28:35	1.1338	5.04337	4.444	632.022	FALSE	6
2022-09-13	13:28:36	1.08765	4.83808	4.5856	644.405	FALSE	6
2022-09-13	13:28:36	1.03228	4.59179	4.5856	636.614	FALSE	6
2022-09-13	13:28:36	0.972735	4.32692	4.5856	648.732	FALSE	6
2022-09-13	13:28:37	1.16144	5.16632	2.22229	641.78	FALSE	6
2022-09-13	13:28:37	0.430547	1.91516	2.22229	650.648	FALSE	6
2022-09-13	13:28:37	0.198028	0.880868	2.22229	642.661	FALSE	6
2022-09-13	13:28:37	0.208359	0.926823	2.22229	651.574	FALSE	6
2022-09-13	13:28:38	0.200013	0.889698	0.873173	643.551	FALSE	6
2022-09-13	13:28:38	0.201743	0.897393	0.873173	652.472	FALSE	6
2022-09-13	13:28:38	0.194008	0.862986	0.873173	644.414	FALSE	6
2022-09-13	13:28:38	0.189428	0.842614	0.873173	653.314	FALSE	6
2022-09-13	13:28:39	0.194618	0.8657	1.54968	645.279	FALSE	6
2022-09-13	13:28:39	0.199453	0.887207	1.54968	654.202	FALSE	6
2022-09-13	13:28:39	0.263677	1.17289	1.54968	646.452	FALSE	6
2022-09-13	13:28:39	0.735789	3.27294	1.54968	657.474	FALSE	6
2022-09-13	13:28:40	0.737163	3.27905	3.26652	649.731	FALSE	6
2022-09-13	13:28:40	0.73472	3.26818	3.26652	660.743	FALSE	6
2022-09-13	13:28:40	0.731158	3.25234	3.26652	652.984	FALSE	6
2022-09-13	13:28:41	0.732684	3.25912	3.27214	664.002	FALSE	6
2022-09-13	13:28:41	0.731514	3.25392	3.27214	656.238	FALSE	6
2022-09-13	13:28:41	0.742099	3.301	3.27214	667.303	FALSE	6
2022-09-13	13:28:41	0.736145	3.27452	3.27214	659.512	FALSE	6
2022-09-13	13:28:42	0.732277	3.25731	3.26716	670.56	FALSE	6
2022-09-13	13:28:42	0.734008	3.26501	3.26716	662.777	FALSE	6
2022-09-13	13:28:42	0.736857	3.27769	3.26716	673.838	FALSE	6
2022-09-13	13:28:42	0.734822	3.26864	3.26716	666.046	FALSE	6
2022-09-13	13:28:43	0.73131	3.25301	3.27045	677.091	FALSE	6
2022-09-13	13:28:43	0.736247	3.27497	3.27045	669.321	FALSE	6
2022-09-13	13:28:43	0.736247	3.27497	3.27045	680.366	FALSE	6
2022-09-13	13:28:43	0.737112	3.27882	3.27045	672.599	FALSE	6
2022-09-13	13:28:44	0.732634	3.2589	3.26645	683.625	FALSE	6
2022-09-13	13:28:44	0.732125	3.25664	3.26645	675.856	FALSE	6
2022-09-13	13:28:44	0.738231	3.2838	3.26645	686.908	FALSE	6
2022-09-13	13:28:45	0.733651	3.26343	3.26382	679.12	FALSE	6
2022-09-13	13:28:45	0.730496	3.24939	3.26382	690.158	FALSE	6
2022-09-13	13:28:45	0.731616	3.25437	3.26382	682.374	FALSE	6
2022-09-13	13:28:45	0.739198	3.2881	3.26382	693.446	FALSE	6
2022-09-13	13:28:46	0.732786	3.25958	3.25477	685.633	FALSE	6
2022-09-13	13:28:46	0.730852	3.25098	3.25477	696.697	FALSE	6
2022-09-13	13:28:46	0.732634	3.2589	3.25477	688.892	FALSE	6
2022-09-13	13:28:46	0.730547	3.24962	3.25477	699.947	FALSE	6
2022-09-13	13:28:47	0.729631	3.24554	3.25183	692.138	FALSE	6
2022-09-13	13:28:47	0.730954	3.25143	3.25183	703.198	FALSE	6
2022-09-13	13:28:47	0.729122	3.24328	3.25183	695.381	FALSE	6
2022-09-13	13:28:47	0.734466	3.26705	3.25183	706.465	FALSE	6
2022-09-13	13:28:48	0.726374	3.23106	3.25679	698.612	FALSE	6
2022-09-13	13:28:48	0.745306	3.31527	3.25679	709.78	FALSE	6
2022-09-13	13:28:48	0.724796	3.22404	3.25679	701.836	FALSE	6
2022-09-13	13:28:49	0.757061	3.36756	3.27095	713.148	FALSE	6
2022-09-13	13:28:49	0.716603	3.18759	3.27095	705.024	FALSE	6
2022-09-13	13:28:49	0.743168	3.30576	3.27095	716.454	FALSE	6
2022-09-13	13:28:49	0.724542	3.22291	3.27095	708.247	FALSE	6
2022-09-13	13:28:50	0.73701	3.27837	3.26411	719.732	FALSE	6
2022-09-13	13:28:50	0.731717	3.25482	3.26411	711.502	FALSE	6
2022-09-13	13:28:50	0.734517	3.26728	3.26411	722.999	FALSE	6
2022-09-13	13:28:50	0.731972	3.25596	3.26411	714.758	FALSE	6
2022-09-13	13:28:51	0.733448	3.26252	3.25952	726.262	FALSE	6
2022-09-13	13:28:51	0.736552	3.27633	3.25952	718.034	FALSE	6
2022-09-13	13:28:51	0.72673	3.23264	3.25952	729.494	FALSE	6
2022-09-13	13:28:51	0.734364	3.2666	3.25952	721.301	FALSE	6
2022-09-13	13:28:52	0.735941	3.27361	3.26079	732.768	FALSE	6
2022-09-13	13:28:52	0.737417	3.28018	3.26079	724.581	FALSE	6
2022-09-13	13:28:52	0.725814	3.22857	3.26079	735.997	FALSE	6
2022-09-13	13:28:53	0.734822	3.26864	3.26258	727.849	FALSE	6
2022-09-13	13:28:53	0.726934	3.23355	3.26258	739.23	FALSE	6
2022-09-13	13:28:53	0.739351	3.28878	3.26258	731.138	FALSE	6
2022-09-13	13:28:53	0.732735	3.25935	3.26258	742.49	FALSE	6
2022-09-13	13:28:54	0.548664	2.44057	2.8387	733.579	FALSE	6
2022-09-13	13:28:54	0.451819	2.00978	2.8387	744.499	FALSE	6
2022-09-13	13:28:54	0.730496	3.24939	2.8387	736.828	FALSE	6
2022-09-13	13:28:54	0.821692	3.65505	2.8387	748.154	FALSE	6
2022-09-13	13:28:55	0.991819	4.41181	4.11045	741.24	FALSE	6
2022-09-13	13:28:55	0.776196	3.45268	4.11045	751.607	FALSE	6
2022-09-13	13:28:55	0.977824	4.34956	4.11045	745.589	FALSE	6
2022-09-13	13:28:55	0.950445	4.22777	4.11045	755.835	FALSE	6
2022-09-13	13:28:56	1.04627	4.65402	4.31537	750.243	FALSE	6
2022-09-13	13:28:56	0.958995	4.2658	4.31537	760.101	FALSE	6
2022-09-13	13:28:56	0.905153	4.0263	4.31537	754.27	FALSE	6
2022-09-13	13:28:57	1.02724	4.56937	3.89229	764.67	FALSE	6
2022-09-13	13:28:57	0.738079	3.28312	3.89229	757.553	FALSE	6
2022-09-13	13:28:57	0.995534	4.42833	3.89229	769.098	FALSE	6
2022-09-13	13:28:57	0.739249	3.28833	3.89229	760.841	FALSE	6
2022-09-13	13:28:58	0.85299	3.79427	3.62466	772.893	FALSE	6
2022-09-13	13:28:58	0.774211	3.44385	3.62466	764.285	FALSE	6
2022-09-13	13:28:58	0.778384	3.46241	3.62466	776.355	FALSE	6
2022-09-13	13:28:58	0.853855	3.79812	3.62466	768.083	FALSE	6
2022-09-13	13:28:59	0.79874	3.55296	3.41357	779.908	FALSE	6
2022-09-13	13:28:59	0.759555	3.37865	3.41357	771.462	FALSE	6
2022-09-13	13:28:59	0.760114	3.38114	3.41357	783.289	FALSE	6
2022-09-13	13:28:59	0.751209	3.34153	3.41357	774.803	FALSE	6
2022-09-13	13:29:00	0.964949	4.29229	3.97574	787.581	FALSE	6
2022-09-13	13:29:00	0.829122	3.6881	3.97574	778.491	FALSE	6
2022-09-13	13:29:00	0.88729	3.94684	3.97574	791.528	FALSE	6
2022-09-13	13:29:01	0.929376	4.13405	3.99025	782.626	FALSE	6
2022-09-13	13:29:01	0.895636	3.98397	3.99025	795.512	FALSE	6
2022-09-13	13:29:01	0.870293	3.87124	3.99025	786.497	FALSE	6
2022-09-13	13:29:01	0.892888	3.97174	3.99025	799.484	FALSE	6
2022-09-13	13:29:02	0.898333	3.99596	4.03349	790.493	FALSE	6
2022-09-13	13:29:02	0.933193	4.15103	4.03349	803.635	FALSE	6
2022-09-13	13:29:02	0.890292	3.9602	4.03349	794.453	FALSE	6
2022-09-13	13:29:02	0.905254	4.02675	4.03349	807.662	FALSE	6
2022-09-13	13:29:03	0.946018	4.20808	4.32041	798.661	FALSE	6
2022-09-13	13:29:03	0.974313	4.33394	4.32041	811.996	FALSE	6
2022-09-13	13:29:03	1.01497	4.51479	4.32041	803.176	FALSE	6
2022-09-13	13:29:03	0.949784	4.22483	4.32041	816.22	FALSE	6
2022-09-13	13:29:04	0.854618	3.80151	3.46701	806.977	FALSE	6
2022-09-13	13:29:04	0.721692	3.21023	3.46701	819.431	FALSE	6
2022-09-13	13:29:04	0.761946	3.38929	3.46701	810.367	FALSE	6
2022-09-13	13:29:05	0.586425	2.60854	2.07175	822.039	FALSE	6
2022-09-13	13:29:05	0.573702	2.55194	2.07175	812.919	FALSE	6
2022-09-13	13:29:05	0.334415	1.48754	2.07175	823.527	FALSE	6
2022-09-13	13:29:05	0.368461	1.63899	2.07175	814.558	FALSE	6
2022-09-13	13:29:06	0.344644	1.53305	1.58053	825.06	FALSE	6
2022-09-13	13:29:06	0.301336	1.3404	1.58053	815.898	FALSE	6
2022-09-13	13:29:06	0.331158	1.47306	1.58053	826.533	FALSE	6
2022-09-13	13:29:06	0.444135	1.9756	1.58053	817.874	FALSE	6
2022-09-13	13:29:07	0.642761	2.85913	3.17113	829.392	FALSE	6
2022-09-13	13:29:07	0.743473	3.30712	3.17113	821.181	FALSE	6
2022-09-13	13:29:07	0.730954	3.25143	3.17113	832.643	FALSE	6
2022-09-13	13:29:07	0.734415	3.26682	3.17113	824.447	FALSE	6
2022-09-13	13:29:08	0.741031	3.29625	3.13183	835.94	FALSE	6
2022-09-13	13:29:08	0.747494	3.325	3.13183	827.772	FALSE	6
2022-09-13	13:29:08	0.623677	2.77424	3.13183	838.714	FALSE	6
2022-09-13	13:29:09	0.741081	3.29648	3.4138	831.069	FALSE	6
2022-09-13	13:29:09	0.73584	3.27316	3.4138	841.987	FALSE	6
2022-09-13	13:29:09	0.846527	3.76552	3.4138	834.834	FALSE	6
2022-09-13	13:29:09	0.746374	3.32002	3.4138	845.307	FALSE	6
2022-09-13	13:29:10	0.283422	1.26072	1.59722	836.095	FALSE	6
2022-09-13	13:29:10	0.388919	1.72999	1.59722	847.037	FALSE	6
2022-09-13	13:29:10	0.273652	1.21726	1.59722	837.312	FALSE	6
2022-09-13	13:29:10	0.490293	2.18092	1.59722	849.218	FALSE	6
2022-09-13	13:29:11	0.125	0.556025	1.35783	837.868	FALSE	6
2022-09-13	13:29:11	0.592023	2.63344	1.35783	851.851	FALSE	6
2022-09-13	13:29:11	0.132379	0.588848	1.35783	838.457	FALSE	6
2022-09-13	13:29:11	0.371616	1.65302	1.35783	853.504	FALSE	6
2022-09-13	13:29:12	0.130649	0.581153	0.589643	839.038	FALSE	6
2022-09-13	13:29:12	0.251158	1.1172	0.589643	854.622	FALSE	6
2022-09-13	13:29:12	0.163881	0.728975	0.589643	839.767	FALSE	6
2022-09-13	13:29:12	-0.0154577	-0.0687589	0.589643	854.622	FALSE	6
2022-09-13	13:29:13	-0.246552	-1.09671	-1.62054	839.767	FALSE	6
2022-09-13	13:29:13	-0.376374	-1.67419	-1.62054	854.622	FALSE	6
2022-09-13	13:29:13	-0.470012	-2.09071	-1.62054	839.767	FALSE	6
2022-09-13	13:29:14	-0.0859921	-0.38251	5.27021	854.622	FALSE	6
2022-09-13	13:29:14	0.564084	2.50916	5.27021	842.277	FALSE	6
2022-09-13	13:29:14	1.90622	8.47925	5.27021	863.101	FALSE	6
2022-09-13	13:29:14	2.35487	10.4749	5.27021	852.752	FALSE	6
2022-09-13	13:29:15	2.96459	13.1871	8.92311	876.288	FALSE	6
2022-09-13	13:29:15	1.80139	8.01294	8.92311	860.764	FALSE	6
2022-09-13	13:29:15	1.96022	8.71945	8.92311	885.007	FALSE	6
2022-09-13	13:29:15	1.29782	5.77296	8.92311	866.537	FALSE	6
2022-09-13	13:29:16	1.70861	7.60024	9.28399	892.608	FALSE	6
2022-09-13	13:29:16	1.97726	8.79525	9.28399	875.333	FALSE	6
2022-09-13	13:29:16	2.33136	10.3704	9.28399	902.978	FALSE	6
2022-09-13	13:29:16	2.33131	10.3701	9.28399	885.703	FALSE	6
2022-09-13	13:29:17	2.72006	12.0994	7.47068	915.077	FALSE	6
2022-09-13	13:29:17	1.30693	5.81349	7.47068	891.516	FALSE	6
2022-09-13	13:29:17	1.01146	4.49918	7.47068	919.577	FALSE	6
2022-09-13	13:29:18	0.644644	2.86751	2.90248	894.384	FALSE	6
2022-09-13	13:29:18	0.740471	3.29376	2.90248	922.87	FALSE	6
2022-09-13	13:29:18	0.582506	2.5911	2.90248	896.975	FALSE	6
2022-09-13	13:29:18	0.642405	2.85755	2.90248	925.728	FALSE	6
2022-09-13	13:29:19	0.732532	3.25845	2.57667	900.233	FALSE	6
2022-09-13	13:29:19	0.62154	2.76473	2.57667	928.493	FALSE	6
2022-09-13	13:29:19	0.485509	2.15964	2.57667	902.393	FALSE	6
2022-09-13	13:29:19	0.477468	2.12387	2.57667	930.617	FALSE	6
2022-09-13	13:29:20	0.755687	3.36145	1.68058	905.754	FALSE	6
2022-09-13	13:29:20	0.385814	1.71618	1.68058	932.333	FALSE	6
2022-09-13	13:29:20	0.393601	1.75082	1.68058	907.505	FALSE	6
2022-09-13	13:29:20	-0.0238547	-0.10611	1.68058	932.333	FALSE	6
2022-09-13	13:29:21	-0.241056	-1.07227	-0.576888	907.505	FALSE	6
2022-09-13	13:29:21	-0.185076	-0.823255	-0.576888	932.333	FALSE	6
2022-09-13	13:29:21	0.0370613	0.164856	-0.576888	907.67	FALSE	6
2022-09-13	13:29:22	0.217977	0.969605	9.09753	933.302	FALSE	6
2022-09-13	13:29:22	1.90134	8.45754	9.09753	916.128	FALSE	6
2022-09-13	13:29:22	2.98734	13.2883	9.09753	946.591	FALSE	6
2022-09-13	13:29:22	3.07421	13.6747	9.09753	929.802	1	7
2022-09-13	13:29:23	1.1737	5.22085	8.59532	951.811	FALSE	7
2022-09-13	13:29:23	0.918791	4.08697	8.59532	933.889	FALSE	7
2022-09-13	13:29:23	1.70378	7.57875	8.59532	959.39	FALSE	7
2022-09-13	13:29:23	3.93299	17.4947	8.59532	951.384	1	8
2022-09-13	13:29:24	2.87477	12.7876	11.4433	972.178	FALSE	8
2022-09-13	13:29:24	3.76622	16.7529	11.4433	968.137	1	9
2022-09-13	13:29:24	2.67609	11.9038	11.4433	984.082	FALSE	9
2022-09-13	13:29:24	0.973193	4.32896	11.4433	972.466	FALSE	9
2022-09-13	13:29:25	0.736857	3.27769	3.42196	987.359	FALSE	9
2022-09-13	13:29:25	0.779606	3.46784	3.42196	975.934	FALSE	9
2022-09-13	13:29:25	0.791412	3.52036	3.42196	990.88	FALSE	9
2022-09-13	13:29:26	1.09462	4.86909	4.08453	980.803	FALSE	9
2022-09-13	13:29:26	0.721591	3.20978	4.08453	994.089	FALSE	9
2022-09-13	13:29:26	0.736756	3.27724	4.08453	984.08	FALSE	9
2022-09-13	13:29:26	1.12001	4.98203	4.08453	999.071	FALSE	9
2022-09-13	13:29:27	2.01579	8.96664	14.0625	993.047	FALSE	9
2022-09-13	13:29:27	4.63304	20.6087	14.0625	1019.68	1	10
2022-09-13	13:29:27	2.96703	13.1979	14.0625	1006.24	FALSE	10
2022-09-13	13:29:27	3.02968	13.4766	14.0625	1033.16	1	11
2022-09-13	13:29:28	2.322	10.3287	9.47496	1016.57	FALSE	11
2022-09-13	13:29:28	2.0936	9.31275	9.47496	1042.47	FALSE	11
2022-09-13	13:29:28	1.93126	8.59063	9.47496	1025.16	FALSE	11
2022-09-13	13:29:28	2.1734	9.66772	9.47496	1052.14	FALSE	11
2022-09-13	13:29:29	1.9281	8.57657	8.03413	1033.74	FALSE	11
2022-09-13	13:29:29	2.39559	10.6561	8.03413	1062.79	FALSE	11
2022-09-13	13:29:29	1.09477	4.86976	8.03413	1038.61	FALSE	11
2022-09-13	13:29:30	1.30159	5.78973	5.61481	1068.58	FALSE	11
2022-09-13	13:29:30	1.90933	8.49308	5.61481	1047.1	FALSE	11
2022-09-13	13:29:30	1.03701	4.61283	5.61481	1073.2	FALSE	11
2022-09-13	13:29:30	0.801132	3.5636	5.61481	1050.67	FALSE	11
2022-09-13	13:29:31	1.18556	5.27361	4.4632	1078.47	FALSE	11
2022-09-13	13:29:31	1.31421	5.84587	4.4632	1056.51	FALSE	11
2022-09-13	13:29:31	0.775585	3.44996	4.4632	1081.92	FALSE	11
2022-09-13	13:29:31	0.73813	3.28335	4.4632	1059.8	FALSE	11
2022-09-13	13:29:32	0.736094	3.27429	3.51193	1085.19	FALSE	11
2022-09-13	13:29:32	0.730089	3.24758	3.51193	1063.04	FALSE	11
2022-09-13	13:29:32	0.752532	3.34741	3.51193	1088.54	FALSE	11
2022-09-13	13:29:32	0.939351	4.17842	3.51193	1067.22	FALSE	11
2022-09-13	13:29:33	0.777112	3.45675	4.03792	1092	FALSE	11
2022-09-13	13:29:33	0.854466	3.80084	4.03792	1071.02	FALSE	11
2022-09-13	13:29:33	1.09172	4.85619	4.03792	1096.85	FALSE	11
2022-09-13	13:29:34	0.760929	3.38476	3.64153	1074.41	FALSE	11
2022-09-13	13:29:34	0.79299	3.52738	3.64153	1100.38	FALSE	11
2022-09-13	13:29:34	0.834415	3.71164	3.64153	1078.12	FALSE	11
2022-09-13	13:29:34	0.886272	3.94232	3.64153	1104.32	FALSE	11
2022-09-13	13:29:35	0.934313	4.15601	4.46885	1082.28	FALSE	11
2022-09-13	13:29:35	0.960318	4.27169	4.46885	1108.6	FALSE	11
2022-09-13	13:29:35	0.97528	4.33824	4.46885	1086.61	FALSE	11
2022-09-13	13:29:35	1.14866	5.10947	4.46885	1113.7	FALSE	11
2022-09-13	13:29:36	1.03477	4.60286	8.64683	1091.22	FALSE	11
2022-09-13	13:29:36	1.66134	7.38997	8.64683	1121.09	FALSE	11
2022-09-13	13:29:36	1.81167	8.05867	8.64683	1099.28	FALSE	11
2022-09-13	13:29:36	3.2678	14.5358	8.64683	1135.63	1	12
2022-09-13	13:29:37	3.64897	16.2313	16.5716	1115.51	1	13
2022-09-13	13:29:37	3.93228	17.4916	16.5716	1153.12	1	14
2022-09-13	13:29:37	3.59513	15.9919	16.5716	1131.5	1	15
2022-09-13	13:29:38	3.465	15.413	16.129	1168.54	1	16
2022-09-13	13:29:38	2.53599	11.2806	16.129	1142.78	FALSE	16
2022-09-13	13:29:38	3.59986	16.0129	16.129	1184.55	1	17
2022-09-13	13:29:38	4.90296	21.8093	16.129	1164.59	1	18
2022-09-13	13:29:39	3.96164	17.6222	12.6422	1202.17	1	19
2022-09-13	13:29:39	2.43879	10.8482	12.6422	1175.44	FALSE	19
2022-09-13	13:29:39	2.60027	11.5665	12.6422	1213.74	FALSE	19
2022-09-13	13:29:39	2.3677	10.532	12.6422	1185.97	FALSE	19
2022-09-13	13:29:40	2.30902	10.271	9.42272	1224.01	FALSE	19
2022-09-13	13:29:40	2.06307	9.17695	9.42272	1195.15	FALSE	19
2022-09-13	13:29:40	2.07732	9.24033	9.42272	1233.25	FALSE	19
2022-09-13	13:29:40	2.02388	9.00262	9.42272	1204.15	FALSE	19
2022-09-13	13:29:41	1.96139	8.72465	8.45601	1241.97	FALSE	19
2022-09-13	13:29:41	1.88866	8.40114	8.45601	1212.55	FALSE	19
2022-09-13	13:29:41	1.85294	8.24225	8.45601	1250.22	FALSE	19
2022-09-13	13:29:42	1.83523	8.16347	9.83297	1220.71	FALSE	19
2022-09-13	13:29:42	1.75961	7.8271	9.83297	1258.04	FALSE	19
2022-09-13	13:29:42	1.97559	8.78782	9.83297	1229.5	FALSE	19
2022-09-13	13:29:42	3.27177	14.5535	9.83297	1272.6	1	20
2022-09-13	13:29:43	4.12495	18.3486	18.2161	1247.85	1	21
2022-09-13	13:29:43	4.4649	19.8608	18.2161	1292.46	1	22
2022-09-13	13:29:43	3.9739	17.6767	18.2161	1265.53	1	23
2022-09-13	13:29:43	3.81686	16.9782	18.2161	1309.43	1	24
2022-09-13	13:29:44	3.44912	15.3424	8.71558	1280.87	1	25
2022-09-13	13:29:44	2.10882	9.38045	8.71558	1318.82	FALSE	25
2022-09-13	13:29:44	1.18795	5.28424	8.71558	1286.15	FALSE	25
2022-09-13	13:29:44	1.09151	4.85525	8.71558	1323.67	FALSE	25
2022-09-13	13:29:45	1.07935	4.80116	4.81	1290.95	FALSE	25
2022-09-13	13:29:45	1.0419	4.63458	4.81	1328.3	FALSE	25
2022-09-13	13:29:45	1.12276	4.99426	4.81	1295.95	FALSE	25
2022-09-13	13:29:46	1.0852	4.82719	4.38159	1333.13	FALSE	25
2022-09-13	13:29:46	1.01111	4.49762	4.38159	1300.45	FALSE	25
2022-09-13	13:29:46	0.94729	4.21374	4.38159	1337.35	FALSE	25
2022-09-13	13:29:46	0.896501	3.98782	4.38159	1304.43	FALSE	25
2022-09-13	13:29:47	1.10067	4.896	4.60869	1342.24	FALSE	25
2022-09-13	13:29:47	1.13289	5.03932	4.60869	1309.47	FALSE	25
2022-09-13	13:29:47	0.962608	4.28187	4.60869	1346.52	FALSE	25
2022-09-13	13:29:47	0.948155	4.21758	4.60869	1313.69	FALSE	25
2022-09-13	13:29:48	0.80902	3.59868	3.34566	1350.12	FALSE	25
2022-09-13	13:29:48	0.735992	3.27384	3.34566	1316.96	FALSE	25
2022-09-13	13:29:48	0.732939	3.26026	3.34566	1353.38	FALSE	25
2022-09-13	13:29:48	0.730598	3.24985	3.34566	1320.21	FALSE	25
2022-09-13	13:29:49	0.73701	3.27837	3.39752	1356.66	FALSE	25
2022-09-13	13:29:49	0.741234	3.29716	3.39752	1323.51	FALSE	25
2022-09-13	13:29:49	0.813143	3.61702	3.39752	1360.28	FALSE	25
2022-09-13	13:29:50	1.38973	6.1818	16.5826	1329.69	FALSE	25
2022-09-13	13:29:50	8.98087	39.9487	16.5826	1400.23	1	26
2022-09-13	13:29:50	2.6796	11.9194	16.5826	1341.61	FALSE	26
2022-09-13	13:29:50	1.86154	8.2805	16.5826	1408.51	FALSE	26
2022-09-13	13:29:51	1.64912	7.33562	8.14988	1348.95	FALSE	26
2022-09-13	13:29:51	1.53238	6.81633	8.14988	1415.32	FALSE	26
2022-09-13	13:29:51	2.35889	10.4928	8.14988	1359.44	FALSE	26
2022-09-13	13:29:51	1.78831	7.95476	8.14988	1423.28	FALSE	26
2022-09-13	13:29:52	1.91625	8.52386	7.50507	1367.96	FALSE	26
2022-09-13	13:29:52	1.55838	6.93199	7.50507	1430.21	FALSE	26
2022-09-13	13:29:52	1.52378	6.77808	7.50507	1374.74	FALSE	26
2022-09-13	13:29:52	1.75045	7.78635	7.50507	1438	FALSE	26
2022-09-13	13:29:53	1.57665	7.01325	6.54446	1381.76	FALSE	26
2022-09-13	13:29:53	1.34037	5.96223	6.54446	1443.96	FALSE	26
2022-09-13	13:29:53	1.35228	6.01521	6.54446	1387.77	FALSE	26
2022-09-13	13:29:53	1.61574	7.18713	6.54446	1451.15	FALSE	26
2022-09-13	13:29:54	1.51335	6.73168	5.46482	1394.5	FALSE	26
2022-09-13	13:29:54	1.07986	4.80343	5.46482	1455.95	FALSE	26
2022-09-13	13:29:54	1.09243	4.85935	5.46482	1399.36	FALSE	26
2022-09-13	13:29:55	1.47894	6.57862	7.93478	1462.53	FALSE	26
2022-09-13	13:29:55	1.60505	7.13958	7.93478	1406.5	FALSE	26
2022-09-13	13:29:55	1.87162	8.32534	7.93478	1470.85	FALSE	26
2022-09-13	13:29:55	2.17966	9.69556	7.93478	1416.2	FALSE	26
2022-09-13	13:29:56	2.14836	9.55633	9.82021	1480.41	FALSE	26
2022-09-13	13:29:56	2.22576	9.90063	9.82021	1426.1	FALSE	26
2022-09-13	13:29:56	2.17823	9.6892	9.82021	1490.1	FALSE	26
2022-09-13	13:29:56	2.27838	10.1347	9.82021	1436.23	FALSE	26
2022-09-13	13:29:57	2.37375	10.5589	10.3586	1500.66	FALSE	26
2022-09-13	13:29:57	2.39411	10.6495	10.3586	1446.88	FALSE	26
2022-09-13	13:29:57	2.5539	11.3603	10.3586	1512.02	FALSE	26
2022-09-13	13:29:57	1.99314	8.86589	10.3586	1455.75	FALSE	26
2022-09-13	13:29:58	1.30495	5.80468	4.48153	1517.82	FALSE	26
2022-09-13	13:29:58	0.979555	4.35726	4.48153	1460.11	FALSE	26
2022-09-13	13:29:58	0.737977	3.28267	4.48153	1521.11	FALSE	26
2022-09-13	13:29:59	0.588003	2.61555	4.02194	1462.72	FALSE	26
2022-09-13	13:29:59	0.248104	1.10362	4.02194	1522.21	FALSE	26
2022-09-13	13:29:59	1.03258	4.59312	4.02194	1467.31	FALSE	26
2022-09-13	13:29:59	1.748	7.77545	4.02194	1529.98	FALSE	26
2022-09-13	13:30:00	2.55701	11.3741	12.0311	1478.69	FALSE	26
2022-09-13	13:30:00	4.55278	20.2517	12.0311	1550.24	1	27
2022-09-13	13:30:00	2.81055	12.5019	12.0311	1491.19	FALSE	27
2022-09-13	13:30:00	0.898537	3.99687	12.0311	1554.23	FALSE	27
2022-09-13	13:30:01	0.729428	3.24464	3.24979	1494.43	FALSE	27
2022-09-13	13:30:01	0.725662	3.22789	3.24979	1557.46	FALSE	27
2022-09-13	13:30:01	0.736349	3.27543	3.24979	1497.71	FALSE	27
2022-09-13	13:30:01	0.730903	3.2512	3.24979	1560.71	FALSE	27
2022-09-13	13:30:02	0.0694277	0.308828	0.409941	1498.02	FALSE	27
2022-09-13	13:30:02	-0.0363229	-0.161572	0.409941	1560.71	FALSE	27
2022-09-13	13:30:02	0.243372	1.08257	0.409941	1499.1	FALSE	27
2022-09-13	13:30:03	0.452125	2.01114	8.16108	1562.72	FALSE	27
2022-09-13	13:30:03	1.07263	4.77127	8.16108	1503.87	FALSE	27
2022-09-13	13:30:03	0.735229	3.27045	8.16108	1565.99	FALSE	27
2022-09-13	13:30:03	5.07879	22.5915	8.16108	1526.46	1	28
2022-09-13	13:30:04	0.761539	3.38748	4.30616	1569.38	FALSE	28
2022-09-13	13:30:04	1.62419	7.22472	4.30616	1533.69	FALSE	28
2022-09-13	13:30:04	0.733499	3.26275	4.30616	1572.64	FALSE	28
2022-09-13	13:30:04	0.753041	3.34968	4.30616	1537.04	FALSE	28
2022-09-13	13:30:05	0.727392	3.23559	3.39914	1575.88	FALSE	28
2022-09-13	13:30:05	0.738995	3.2872	3.39914	1540.33	FALSE	28
2022-09-13	13:30:05	0.735789	3.27294	3.39914	1579.15	FALSE	28
2022-09-13	13:30:05	0.854466	3.80084	3.39914	1544.13	FALSE	28
2022-09-13	13:30:06	0.831921	3.70055	3.61951	1582.85	FALSE	28
2022-09-13	13:30:06	0.871412	3.87621	3.61951	1548	FALSE	28
2022-09-13	13:30:06	0.737773	3.28176	3.61951	1586.13	FALSE	28
2022-09-13	13:30:07	0.743575	3.30757	3.26914	1551.31	FALSE	28
2022-09-13	13:30:07	0.729733	3.246	3.26914	1589.38	FALSE	28
2022-09-13	13:30:07	0.735127	3.26999	3.26914	1554.58	FALSE	28
2022-09-13	13:30:07	0.73131	3.25301	3.26914	1592.63	FALSE	28
2022-09-13	13:30:08	0.731259	3.25279	3.24967	1557.83	FALSE	28
2022-09-13	13:30:08	0.729936	3.2469	3.24967	1595.88	FALSE	28
2022-09-13	13:30:08	0.728359	3.23989	3.24967	1561.07	FALSE	28
2022-09-13	13:30:08	0.732684	3.25912	3.24967	1599.14	FALSE	28
2022-09-13	13:30:09	0.733142	3.26116	3.2696	1564.33	FALSE	28
2022-09-13	13:30:09	0.735992	3.27384	3.2696	1602.41	FALSE	28
2022-09-13	13:30:09	0.734873	3.26886	3.2696	1567.6	FALSE	28
2022-09-13	13:30:09	0.736145	3.27452	3.2696	1605.69	FALSE	28
2022-09-13	13:30:10	0.731972	3.25596	3.26177	1570.86	FALSE	28
2022-09-13	13:30:10	0.738537	3.28516	3.26177	1608.97	FALSE	28
2022-09-13	13:30:10	0.729326	3.24419	3.26177	1574.1	FALSE	28
2022-09-13	13:30:11	0.732175	3.25686	3.2675	1612.23	FALSE	28
2022-09-13	13:30:11	0.738689	3.28584	3.2675	1577.39	FALSE	28
2022-09-13	13:30:11	0.733651	3.26343	3.2675	1615.49	FALSE	28
2022-09-13	13:30:11	0.733753	3.26388	3.2675	1580.65	FALSE	28
2022-09-13	13:30:12	0.734313	3.26637	3.25545	1618.76	FALSE	28
2022-09-13	13:30:12	0.732837	3.25981	3.25545	1583.91	FALSE	28
2022-09-13	13:30:12	0.731514	3.25392	3.25545	1622.01	FALSE	28
2022-09-13	13:30:12	0.728766	3.2417	3.25545	1587.15	FALSE	28
2022-09-13	13:30:13	0.734873	3.26886	3.26535	1625.28	FALSE	28
2022-09-13	13:30:13	0.732888	3.26003	3.26535	1590.41	FALSE	28
2022-09-13	13:30:13	0.732532	3.25845	3.26535	1628.54	FALSE	28
2022-09-13	13:30:13	0.736043	3.27407	3.26535	1593.69	FALSE	28
2022-09-13	13:30:14	0.733295	3.26184	3.24698	1631.8	FALSE	28
2022-09-13	13:30:14	0.729733	3.246	3.24698	1596.93	FALSE	28
2022-09-13	13:30:14	0.726832	3.23309	3.24698	1635.04	FALSE	28
2022-09-13	13:30:15	0.728613	3.24102	3.25183	1600.18	FALSE	28
2022-09-13	13:30:15	0.732277	3.25731	3.25183	1638.29	FALSE	28
2022-09-13	13:30:15	0.727137	3.23445	3.25183	1603.41	FALSE	28
2022-09-13	13:30:15	0.736145	3.27452	3.25183	1641.57	FALSE	28
2022-09-13	13:30:16	0.728054	3.23853	3.26552	1606.65	FALSE	28
2022-09-13	13:30:16	0.734975	3.26932	3.26552	1644.84	FALSE	28
2022-09-13	13:30:16	0.735687	3.27248	3.26552	1609.92	FALSE	28
2022-09-13	13:30:16	0.737773	3.28176	3.26552	1648.12	FALSE	28
2022-09-13	13:30:17	0.733804	3.26411	3.26258	1613.19	FALSE	28
2022-09-13	13:30:17	0.730242	3.24826	3.26258	1651.37	FALSE	28
2022-09-13	13:30:17	0.73299	3.26049	3.26258	1616.45	FALSE	28
2022-09-13	13:30:17	0.736807	3.27746	3.26258	1654.64	FALSE	28
2022-09-13	13:30:18	0.740776	3.29512	3.26584	1619.74	FALSE	28
2022-09-13	13:30:18	0.732583	3.25868	3.26584	1657.9	FALSE	28
2022-09-13	13:30:18	0.729224	3.24373	3.26584	1622.98	FALSE	28
2022-09-13	13:30:19	0.730903	3.2512	3.25771	1661.15	FALSE	28
2022-09-13	13:30:19	0.735178	3.27022	3.25771	1626.25	FALSE	28
2022-09-13	13:30:19	0.731667	3.2546	3.25771	1664.41	FALSE	28
2022-09-13	13:30:19	0.731717	3.25482	3.25771	1629.51	FALSE	28
2022-09-13	13:30:20	0.734211	3.26592	3.26716	1667.68	FALSE	28
2022-09-13	13:30:20	0.732837	3.25981	3.26716	1632.77	FALSE	28
2022-09-13	13:30:20	0.739198	3.2881	3.26716	1670.96	FALSE	28
2022-09-13	13:30:20	0.731717	3.25482	3.26716	1636.02	FALSE	28
2022-09-13	13:30:21	0.786629	3.49908	3.33191	1674.46	FALSE	28
2022-09-13	13:30:21	0.742048	3.30078	3.33191	1639.32	FALSE	28
2022-09-13	13:30:21	0.739402	3.28901	3.33191	1677.75	FALSE	28
2022-09-13	13:30:21	0.728104	3.23875	3.33191	1642.56	FALSE	28
2022-09-13	13:30:22	0.737163	3.27905	3.25483	1681.03	FALSE	28
2022-09-13	13:30:22	0.726629	3.23219	3.25483	1645.8	FALSE	28
2022-09-13	13:30:22	0.731361	3.25324	3.25483	1684.28	FALSE	28
2022-09-13	13:30:23	0.731259	3.25279	3.26643	1649.05	FALSE	28
2022-09-13	13:30:23	0.735382	3.27113	3.26643	1687.55	FALSE	28
2022-09-13	13:30:23	0.731768	3.25505	3.26643	1652.3	FALSE	28
2022-09-13	13:30:23	0.738893	3.28674	3.26643	1690.84	FALSE	28
2022-09-13	13:30:24	0.731921	3.25573	3.25918	1655.56	FALSE	28
2022-09-13	13:30:24	0.732583	3.25868	3.25918	1694.1	FALSE	28
2022-09-13	13:30:24	0.729275	3.24396	3.25918	1658.8	FALSE	28
2022-09-13	13:30:24	0.73701	3.27837	3.25918	1697.38	FALSE	28
2022-09-13	13:30:25	0.73355	3.26298	3.26054	1662.07	FALSE	28
2022-09-13	13:30:25	0.733193	3.26139	3.26054	1700.64	FALSE	28
2022-09-13	13:30:25	0.732125	3.25664	3.26054	1665.32	FALSE	28
2022-09-13	13:30:25	0.733142	3.26116	3.26054	1703.9	FALSE	28
2022-09-13	13:30:26	0.73416	3.26569	3.26773	1668.59	FALSE	28
2022-09-13	13:30:26	0.735483	3.27158	3.26773	1707.17	FALSE	28
2022-09-13	13:30:26	0.734211	3.26592	3.26773	1671.85	FALSE	28
2022-09-13	13:30:27	0.73701	3.27837	3.27429	1710.45	FALSE	28
2022-09-13	13:30:27	0.731005	3.25166	3.27429	1675.11	FALSE	28
2022-09-13	13:30:27	0.73416	3.26569	3.27429	1713.72	FALSE	28
2022-09-13	13:30:27	0.742201	3.30146	3.27429	1678.41	FALSE	28
2022-09-13	13:30:28	0.729987	3.24713	3.26552	1716.96	FALSE	28
2022-09-13	13:30:28	0.737366	3.27995	3.26552	1681.69	FALSE	28
2022-09-13	13:30:28	0.733142	3.26116	3.26552	1720.23	FALSE	28
2022-09-13	13:30:28	0.735992	3.27384	3.26552	1684.96	FALSE	28
2022-09-13	13:30:29	0.729173	3.24351	3.25205	1723.47	FALSE	28
2022-09-13	13:30:29	0.733651	3.26343	3.25205	1688.22	FALSE	28
2022-09-13	13:30:29	0.73416	3.26569	3.25205	1726.73	FALSE	28
2022-09-13	13:30:29	0.727392	3.23559	3.25205	1691.46	FALSE	28
2022-09-13	13:30:30	0.737977	3.28267	3.27618	1730.02	FALSE	28
2022-09-13	13:30:30	0.736043	3.27407	3.27618	1694.73	FALSE	28
2022-09-13	13:30:30	0.735534	3.2718	3.27618	1733.29	FALSE	28
2022-09-13	13:30:31	0.73243	3.258	3.26999	1697.99	FALSE	28
2022-09-13	13:30:31	0.735585	3.27203	3.26999	1736.56	FALSE	28
2022-09-13	13:30:31	0.73299	3.26049	3.26999	1701.25	FALSE	28
2022-09-13	13:30:31	0.739504	3.28946	3.26999	1739.85	FALSE	28
2022-09-13	13:30:32	0.730547	3.24962	2.94758	1704.5	FALSE	28
2022-09-13	13:30:32	0.733651	3.26343	2.94758	1743.11	FALSE	28
2022-09-13	13:30:32	0.735992	3.27384	2.94758	1707.78	FALSE	28
2022-09-13	13:30:32	0.450395	2.00345	2.94758	1745.12	FALSE	28
2022-09-13	13:30:33	0.523728	2.32965	1.86706	1710.11	FALSE	28
2022-09-13	13:30:33	0.396501	1.76372	1.86706	1746.88	FALSE	28
2022-09-13	13:30:33	0.187646	0.834687	1.86706	1710.94	FALSE	28
2022-09-13	13:30:33	0.571056	2.54017	1.86706	1749.42	FALSE	28
2022-09-13	13:30:34	0.474415	2.11029	1.66887	1713.05	FALSE	28
2022-09-13	13:30:34	0.348104	1.54844	1.66887	1750.97	FALSE	28
2022-09-13	13:30:34	0.303015	1.34787	1.66887	1714.4	FALSE	28
2022-09-13	13:30:35	0.310802	1.38251	2.60214	1752.35	FALSE	28
2022-09-13	13:30:35	0.55869	2.48516	2.60214	1716.88	FALSE	28
2022-09-13	13:30:35	0.73472	3.26818	2.60214	1755.62	FALSE	28
2022-09-13	13:30:35	0.735738	3.27271	2.60214	1720.16	FALSE	28
2022-09-13	13:30:36	0.730649	3.25007	3.26846	1758.87	FALSE	28
2022-09-13	13:30:36	0.735534	3.2718	3.26846	1723.43	FALSE	28
2022-09-13	13:30:36	0.73874	3.28606	3.26846	1762.16	FALSE	28
2022-09-13	13:30:36	0.734211	3.26592	3.26846	1726.69	FALSE	28
2022-09-13	13:30:37	0.735382	3.27113	3.26813	1765.43	FALSE	28
2022-09-13	13:30:37	0.734313	3.26637	3.26813	1729.96	FALSE	28
2022-09-13	13:30:37	0.739249	3.28833	3.26813	1768.72	FALSE	28
2022-09-13	13:30:37	0.729886	3.24668	3.26813	1733.21	FALSE	28
2022-09-13	13:30:38	0.728257	3.23943	3.23643	1771.96	FALSE	28
2022-09-13	13:30:38	0.733651	3.26343	3.23643	1736.47	FALSE	28
2022-09-13	13:30:38	0.733092	3.26094	3.23643	1775.22	FALSE	28
2022-09-13	13:30:38	0.715331	3.18194	3.23643	1739.65	FALSE	28
2022-09-13	13:30:39	0.424389	1.88777	1.92278	1777.1	FALSE	28
2022-09-13	13:30:39	0.48098	2.1395	1.92278	1741.79	FALSE	28
2022-09-13	13:30:39	0.391412	1.74108	1.92278	1778.84	FALSE	28
2022-09-13	13:30:40	0.546985	2.4331	1.96813	1744.23	FALSE	28
2022-09-13	13:30:40	0.394567	1.75511	1.96813	1780.6	FALSE	28
2022-09-13	13:30:40	0.461947	2.05483	1.96813	1746.28	FALSE	28
2022-09-13	13:30:40	0.366323	1.62948	1.96813	1782.23	FALSE	28
2022-09-13	13:30:41	0.4764	2.11912	1.96825	1748.4	FALSE	28
2022-09-13	13:30:41	0.411616	1.83095	1.96825	1784.06	FALSE	28
2022-09-13	13:30:41	0.45528	2.02518	1.96825	1750.42	FALSE	28
2022-09-13	13:30:41	0.426629	1.89773	1.96825	1785.96	FALSE	28
2022-09-13	13:30:42	0.474873	2.11233	1.96706	1752.54	FALSE	28
2022-09-13	13:30:42	0.413855	1.84091	1.96706	1787.8	FALSE	28
2022-09-13	13:30:42	0.477316	2.1232	1.96706	1754.66	FALSE	28
2022-09-13	13:30:42	0.402812	1.79179	1.96706	1789.59	FALSE	28
2022-09-13	13:30:43	0.52612	2.34029	2.74806	1757	FALSE	28
2022-09-13	13:30:43	0.566069	2.51799	2.74806	1792.11	FALSE	28
2022-09-13	13:30:43	0.761183	3.38589	2.74806	1760.39	FALSE	28
2022-09-13	13:30:44	1.11574	4.96303	2.92749	1797.07	FALSE	28
2022-09-13	13:30:44	0.582557	2.59133	2.92749	1762.98	FALSE	28
2022-09-13	13:30:44	0.518588	2.30678	2.92749	1799.38	FALSE	28
2022-09-13	13:30:44	0.415636	1.84883	2.92749	1764.83	FALSE	28
2022-09-13	13:30:45	0.360165	1.60209	1.4421	1800.98	FALSE	28
2022-09-13	13:30:45	0.374619	1.66638	1.4421	1766.49	FALSE	28
2022-09-13	13:30:45	0.290496	1.29218	1.4421	1802.27	FALSE	28
2022-09-13	13:30:45	0.271514	1.20775	1.4421	1767.7	FALSE	28
2022-09-13	13:30:46	0.165255	0.735087	1.00798	1803.01	FALSE	28
2022-09-13	13:30:46	0.225356	1.00243	1.00798	1768.7	FALSE	28
2022-09-13	13:30:46	0.266883	1.18715	1.00798	1804.2	FALSE	28
2022-09-13	13:30:46	0.248919	1.10724	1.00798	1769.81	FALSE	28
2022-09-13	13:30:47	0.54103	2.40661	2.37824	1806.6	FALSE	28
2022-09-13	13:30:47	0.452379	2.01227	2.37824	1771.82	FALSE	28
2022-09-13	13:30:47	0.610547	2.71584	2.37824	1809.32	FALSE	28
2022-09-13	13:30:48	1.32108	5.87643	3.97452	1777.7	FALSE	28
2022-09-13	13:30:48	0.714567	3.17854	3.97452	1812.5	FALSE	28
2022-09-13	13:30:48	0.711921	3.16677	3.97452	1780.87	FALSE	28
2022-09-13	13:30:48	0.826476	3.67633	3.97452	1816.17	FALSE	28
2022-09-13	13:30:49	0.541438	2.40842	2.47724	1783.27	FALSE	28
2022-09-13	13:30:49	0.683066	3.03841	2.47724	1819.21	FALSE	28
2022-09-13	13:30:49	0.574059	2.55353	2.47724	1785.83	FALSE	28
2022-09-13	13:30:49	0.429071	1.90859	2.47724	1821.12	FALSE	28
2022-09-13	13:30:50	0.460776	2.04962	1.48947	1787.88	FALSE	28
2022-09-13	13:30:50	0.396959	1.76575	1.48947	1822.89	FALSE	28
2022-09-13	13:30:50	0.288868	1.28494	1.48947	1789.16	FALSE	28
2022-09-13	13:30:50	0.192786	0.857551	1.48947	1823.74	FALSE	28
2022-09-13	13:30:51	0.151107	0.672154	0.932028	1789.83	FALSE	28
2022-09-13	13:30:51	0.220878	0.98251	0.932028	1824.73	FALSE	28
2022-09-13	13:30:51	0.256603	1.14142	0.932028	1790.98	FALSE	28
2022-09-13	13:30:52	0.310751	1.38228	1.74499	1826.11	FALSE	28
2022-09-13	13:30:52	0.349377	1.5541	1.74499	1792.53	FALSE	28
2022-09-13	13:30:52	0.426883	1.89886	1.74499	1828.01	FALSE	28
2022-09-13	13:30:52	0.48215	2.1447	1.74499	1794.67	FALSE	28
2022-09-13	13:30:53	0.460166	2.04691	1.51182	1830.05	FALSE	28
2022-09-13	13:30:53	0.292888	1.30282	1.51182	1795.98	FALSE	28
2022-09-13	13:30:53	0.296247	1.31777	1.51182	1831.37	FALSE	28
2022-09-13	13:30:53	0.310191	1.37979	1.51182	1797.36	FALSE	28
2022-09-13	13:30:54	0.0947712	0.421561	0.438652	1831.79	FALSE	28
2022-09-13	13:30:54	-0.0918954	-0.408769	0.438652	1797.36	FALSE	28
2022-09-13	13:30:54	0.13701	0.609448	0.438652	1832.4	FALSE	28
2022-09-13	13:30:54	0.254568	1.13237	0.438652	1798.49	FALSE	28
2022-09-13	13:30:55	0.233855	1.04023	1.10188	1833.44	FALSE	28
2022-09-13	13:30:55	0.297824	1.32478	1.10188	1799.81	FALSE	28
2022-09-13	13:30:55	0.211463	0.94063	1.10188	1834.38	FALSE	28
2022-09-13	13:30:56	0.0886643	0.394397	0.634236	1800.21	FALSE	28
2022-09-13	13:30:56	0.0797076	0.354555	0.634236	1834.74	FALSE	28
2022-09-13	13:30:56	0.118079	0.525239	0.634236	1800.73	FALSE	28
2022-09-13	13:30:56	0.28388	1.26276	0.634236	1836	FALSE	28
2022-09-13	13:30:57	0.216909	0.964855	1.33395	1801.7	FALSE	28
2022-09-13	13:30:57	0.296501	1.3189	1.33395	1837.32	FALSE	28
2022-09-13	13:30:57	0.300827	1.33814	1.33395	1803.04	FALSE	28
2022-09-13	13:30:57	0.385305	1.71391	1.33395	1839.03	FALSE	28
2022-09-13	13:30:58	0.343575	1.52829	1.62671	1804.57	FALSE	28
2022-09-13	13:30:58	0.340573	1.51494	1.62671	1840.55	FALSE	28
2022-09-13	13:30:58	0.36159	1.60842	1.62671	1806.17	FALSE	28
2022-09-13	13:30:58	0.417061	1.85517	1.62671	1842.4	FALSE	28
2022-09-13	13:30:59	0.466171	2.07362	1.91599	1808.25	FALSE	28
2022-09-13	13:30:59	0.426985	1.89931	1.91599	1844.3	FALSE	28
2022-09-13	13:30:59	0.399046	1.77504	1.91599	1810.02	FALSE	28
2022-09-13	13:31:00	0.383168	1.70441	1.69518	1846.01	FALSE	28
2022-09-13	13:31:00	0.394822	1.75625	1.69518	1811.78	FALSE	28
2022-09-13	13:31:00	0.37701	1.67702	1.69518	1847.68	FALSE	28
2022-09-13	13:31:00	0.369377	1.64306	1.69518	1813.42	FALSE	28
2022-09-13	13:31:01	0.367392	1.63423	1.685	1849.32	FALSE	28
2022-09-13	13:31:01	0.371158	1.65099	1.685	1815.07	FALSE	28
2022-09-13	13:31:01	0.381031	1.6949	1.685	1851.01	FALSE	28
2022-09-13	13:31:01	0.395636	1.75987	1.685	1816.83	FALSE	28
2022-09-13	13:31:02	0.3707	1.64895	1.2146	1852.66	FALSE	28
2022-09-13	13:31:02	0.378181	1.68222	1.2146	1818.51	FALSE	28
2022-09-13	13:31:02	0.222099	0.987941	1.2146	1853.65	FALSE	28
2022-09-13	13:31:02	0.121234	0.539273	1.2146	1819.05	FALSE	28
2022-09-13	13:31:03	0.733448	3.26252	3.25913	1856.91	FALSE	28
2022-09-13	13:31:03	0.730191	3.24804	3.25913	1822.3	FALSE	28
2022-09-13	13:31:03	0.734415	3.26682	3.25913	1860.18	FALSE	28
2022-09-13	13:31:04	0.735483	3.27158	2.81889	1825.57	FALSE	28
2022-09-13	13:31:04	0.736349	3.27543	2.81889	1863.45	FALSE	28
2022-09-13	13:31:04	0.73187	3.2555	2.81889	1828.83	FALSE	28
2022-09-13	13:31:04	0.331158	1.47306	2.81889	1864.93	FALSE	28
2022-09-13	13:31:05	0.0146695	0.0652529	0.301981	1828.89	FALSE	28
2022-09-13	13:31:05	0.047443	0.211036	0.301981	1865.14	FALSE	28
2022-09-13	13:31:05	0.10897	0.48472	0.301981	1829.38	FALSE	28
2022-09-13	13:31:05	0.100471	0.446915	0.301981	1865.59	FALSE	28
2022-09-13	13:31:06	0.100929	0.448952	0.527277	1829.83	FALSE	28
2022-09-13	13:31:06	0.112583	0.500792	0.527277	1866.09	FALSE	28
2022-09-13	13:31:06	0.125204	0.556932	0.527277	1830.39	FALSE	28
2022-09-13	13:31:06	0.135433	0.602433	0.527277	1866.69	FALSE	28
2022-09-13	13:31:07	0.125356	0.557609	0.565986	1830.94	FALSE	28
2022-09-13	13:31:07	0.130395	0.580023	0.565986	1867.27	FALSE	28
2022-09-13	13:31:07	0.125967	0.560326	0.565986	1831.5	FALSE	28
2022-09-13	13:31:08	0.0954328	0.424504	2.13802	1867.69	FALSE	28
2022-09-13	13:31:08	0.35187	1.56519	2.13802	1833.07	FALSE	28
2022-09-13	13:31:08	0.741132	3.2967	2.13802	1870.99	FALSE	28
2022-09-13	13:31:08	0.73416	3.26569	2.13802	1836.33	FALSE	28
2022-09-13	13:31:09	0.731412	3.25347	3.25884	1874.24	FALSE	28
2022-09-13	13:31:09	0.734008	3.26501	3.25884	1839.6	FALSE	28
2022-09-13	13:31:09	0.731463	3.25369	3.25884	1877.5	FALSE	28
2022-09-13	13:31:09	0.733601	3.2632	3.25884	1842.86	FALSE	28
2022-09-13	13:31:10	0.740165	3.2924	3.28165	1880.79	FALSE	28
2022-09-13	13:31:10	0.739198	3.2881	3.28165	1846.15	FALSE	28
2022-09-13	13:31:10	0.73416	3.26569	3.28165	1884.06	FALSE	28
2022-09-13	13:31:10	0.737468	3.28041	3.28165	1849.43	FALSE	28
2022-09-13	13:31:11	0.736094	3.27429	3.28289	1887.33	FALSE	28
2022-09-13	13:31:11	0.738791	3.28629	3.28289	1852.72	FALSE	28
2022-09-13	13:31:11	0.739198	3.2881	3.28289	1890.62	FALSE	28
2022-09-13	13:31:12	0.737672	3.28131	3.27203	1856	FALSE	28
2022-09-13	13:31:12	0.732684	3.25912	3.27203	1893.88	FALSE	28
2022-09-13	13:31:12	0.735229	3.27045	3.27203	1859.27	FALSE	28
2022-09-13	13:31:12	0.736756	3.27724	3.27203	1897.15	FALSE	28
2022-09-13	13:31:13	0.739555	3.28969	3.27107	1862.56	FALSE	28
2022-09-13	13:31:13	0.732786	3.25958	3.27107	1900.41	FALSE	28
2022-09-13	13:31:13	0.732074	3.25641	3.27107	1865.81	FALSE	28
2022-09-13	13:31:13	0.737061	3.27859	3.27107	1903.69	FALSE	28
2022-09-13	13:31:14	0.733804	3.26411	3.26309	1869.08	FALSE	28
2022-09-13	13:31:14	0.736094	3.27429	3.26309	1906.97	FALSE	28
2022-09-13	13:31:14	0.732328	3.25754	3.26309	1872.34	FALSE	28
2022-09-13	13:31:14	0.732074	3.25641	3.26309	1910.22	FALSE	28
2022-09-13	13:31:15	0.732481	3.25822	3.26743	1875.59	FALSE	28
2022-09-13	13:31:15	0.735992	3.27384	3.26743	1913.5	FALSE	28
2022-09-13	13:31:15	0.735178	3.27022	3.26743	1878.86	FALSE	28
2022-09-13	13:31:16	0.734924	3.26909	3.26943	1916.77	FALSE	28
2022-09-13	13:31:16	0.734415	3.26682	3.26943	1882.13	FALSE	28
2022-09-13	13:31:16	0.738079	3.28312	3.26943	1920.05	FALSE	28
2022-09-13	13:31:16	0.732583	3.25868	3.26943	1885.39	FALSE	28
2022-09-13	13:31:17	0.738944	3.28697	2.74702	1923.34	FALSE	28
2022-09-13	13:31:17	0.741183	3.29693	2.74702	1888.69	FALSE	28
2022-09-13	13:31:17	0.73187	3.2555	2.74702	1926.59	FALSE	28
2022-09-13	13:31:17	0.258232	1.14867	2.74702	1889.84	FALSE	28
2022-09-13	13:31:18	0.223422	0.993826	0.976226	1927.59	FALSE	28
2022-09-13	13:31:18	0.190496	0.847364	0.976226	1890.68	FALSE	28
2022-09-13	13:31:18	0.199453	0.887207	0.976226	1928.47	FALSE	28
2022-09-13	13:31:18	0.264491	1.17651	0.976226	1891.86	FALSE	28
2022-09-13	13:31:19	0.325662	1.44861	1.87298	1929.92	FALSE	28
2022-09-13	13:31:19	0.380165	1.69105	1.87298	1893.55	FALSE	28
2022-09-13	13:31:19	0.557366	2.47928	1.87298	1932.4	FALSE	28
2022-09-13	13:31:20	0.458384	2.03898	2.95352	1895.59	FALSE	28
2022-09-13	13:31:20	0.736807	3.27746	2.95352	1935.68	FALSE	28
2022-09-13	13:31:20	0.732175	3.25686	2.95352	1898.85	FALSE	28
2022-09-13	13:31:20	0.728562	3.24079	2.95352	1938.92	FALSE	28
2022-09-13	13:31:21	0.738435	3.28471	3.26156	1902.13	FALSE	28
2022-09-13	13:31:21	0.737926	3.28244	3.26156	1942.2	FALSE	28
2022-09-13	13:31:21	0.729275	3.24396	3.26156	1905.38	FALSE	28
2022-09-13	13:31:21	0.72729	3.23513	3.26156	1945.44	FALSE	28
2022-09-13	13:31:22	0.731209	3.25256	3.27486	1908.63	FALSE	28
2022-09-13	13:31:22	0.734364	3.2666	3.27486	1948.7	FALSE	28
2022-09-13	13:31:22	0.73986	3.29105	3.27486	1911.92	FALSE	28
2022-09-13	13:31:22	0.739453	3.28923	3.27486	1951.99	FALSE	28
2022-09-13	13:31:23	0.734109	3.26546	3.26711	1915.18	FALSE	28
2022-09-13	13:31:23	0.737773	3.28176	3.26711	1955.27	FALSE	28
2022-09-13	13:31:23	0.733092	3.26094	3.26711	1918.45	FALSE	28
2022-09-13	13:31:23	0.732939	3.26026	3.26711	1958.53	FALSE	28
2022-09-13	13:31:24	0.732634	3.2589	2.84057	1921.7	FALSE	28
2022-09-13	13:31:24	0.738588	3.28539	2.84057	1961.82	FALSE	28
2022-09-13	13:31:24	0.444542	1.97741	2.84057	1923.68	FALSE	28
2022-09-13	13:31:25	0.259046	1.15229	0.267573	1962.97	FALSE	28
2022-09-13	13:31:25	0.21869	0.972777	0.267573	1924.65	FALSE	28
2022-09-13	13:31:25	-0.0493	-0.219296	0.267573	1962.97	FALSE	28
2022-09-13	13:31:25	-0.187824	-0.835479	0.267573	1924.65	FALSE	28
2022-09-13	13:31:26	-0.100954	-0.449064	-0.387999	1962.97	FALSE	28
2022-09-13	13:31:26	-0.141157	-0.627895	-0.387999	1924.65	FALSE	28
2022-09-13	13:31:26	-0.0279768	-0.124446	-0.387999	1962.97	FALSE	28
2022-09-13	13:31:26	-0.0788165	-0.350592	-0.387999	1924.65	FALSE	28
2022-09-13	13:31:27	0.0476974	0.212168	0.144539	1963.18	FALSE	28
2022-09-13	13:31:27	0.00276106	0.0122817	0.144539	1924.67	FALSE	28
2022-09-13	13:31:27	0.0437788	0.194737	0.144539	1963.38	FALSE	28
2022-09-13	13:31:27	0.0357381	0.15897	0.144539	1924.83	FALSE	28
2022-09-13	13:31:28	0.0458654	0.204018	0.343313	1963.58	FALSE	28
2022-09-13	13:31:28	0.0818959	0.364289	0.343313	1925.19	FALSE	28
2022-09-13	13:31:28	0.103779	0.46163	0.343313	1964.04	FALSE	28
2022-09-13	13:31:29	0.242049	1.07668	3.47175	1926.27	FALSE	28
2022-09-13	13:31:29	0.385356	1.71414	3.47175	1965.76	FALSE	28
2022-09-13	13:31:29	0.371514	1.65257	3.47175	1927.92	FALSE	28
2022-09-13	13:31:29	2.12302	9.44362	3.47175	1975.2	FALSE	28
2022-09-13	13:31:30	3.02174	13.4413	9.36318	1941.36	1	29
2022-09-13	13:31:30	2.07559	9.23264	9.36318	1984.43	FALSE	29
2022-09-13	13:31:30	2.43487	10.8308	9.36318	1952.19	FALSE	29
2022-09-13	13:31:30	0.887545	3.94798	9.36318	1988.38	FALSE	29
2022-09-13	13:31:31	1.85701	8.26035	11.507	1960.45	FALSE	29
2022-09-13	13:31:31	3.08072	13.7037	11.507	2002.09	1	30
2022-09-13	13:31:31	2.52296	11.2226	11.507	1971.67	FALSE	30
2022-09-13	13:31:31	2.88683	12.8412	11.507	2014.93	FALSE	30
2022-09-13	13:31:32	2.5052	11.1436	8.23605	1982.82	FALSE	30
2022-09-13	13:31:32	0.864491	3.84543	8.23605	2018.77	FALSE	30
2022-09-13	13:31:32	2.18495	9.71909	8.23605	1992.54	FALSE	30
2022-09-13	13:31:33	0.239962	1.0674	1.05472	2019.84	FALSE	30
2022-09-13	13:31:33	0.283524	1.26117	1.05472	1993.8	FALSE	30
2022-09-13	13:31:33	0.348766	1.55138	1.05472	2021.39	FALSE	30
2022-09-13	13:31:33	0.0761962	0.338936	1.05472	1994.14	FALSE	30
2022-09-13	13:31:34	0.3707	1.64895	1.1086	2023.04	FALSE	30
2022-09-13	13:31:34	0.0589443	0.262196	1.1086	1994.4	FALSE	30
2022-09-13	13:31:34	0.324084	1.44159	1.1086	2024.48	FALSE	30
2022-09-13	13:31:34	0.243168	1.08166	1.1086	1995.48	FALSE	30
2022-09-13	13:31:35	0.584033	2.5979	3.00389	2027.08	FALSE	30
2022-09-13	13:31:35	0.729224	3.24373	3.00389	1998.72	FALSE	30
2022-09-13	13:31:35	0.659351	2.93293	3.00389	2030.01	FALSE	30
2022-09-13	13:31:35	0.728613	3.24102	3.00389	2001.97	FALSE	30
2022-09-13	13:31:36	0.738435	3.28471	3.27195	2033.3	FALSE	30
2022-09-13	13:31:36	0.732684	3.25912	3.27195	2005.23	FALSE	30
2022-09-13	13:31:36	0.735585	3.27203	3.27195	2036.57	FALSE	30
2022-09-13	13:31:37	0.73874	3.28606	3.2709	2008.51	FALSE	30
2022-09-13	13:31:37	0.734059	3.26524	3.2709	2039.84	FALSE	30
2022-09-13	13:31:37	0.733244	3.26162	3.2709	2011.77	FALSE	30
2022-09-13	13:31:37	0.73528	3.27067	3.2709	2043.11	FALSE	30
2022-09-13	13:31:38	0.729326	3.24419	3.27424	2015.02	FALSE	30
2022-09-13	13:31:38	0.744287	3.31074	3.27424	2046.42	FALSE	30
2022-09-13	13:31:38	0.737977	3.28267	3.27424	2018.3	FALSE	30
2022-09-13	13:31:38	0.732735	3.25935	3.27424	2049.68	FALSE	30
2022-09-13	13:31:39	0.731361	3.25324	3.26394	2021.55	FALSE	30
2022-09-13	13:31:39	0.738028	3.2829	3.26394	2052.96	FALSE	30
2022-09-13	13:31:39	0.73131	3.25301	3.26394	2024.81	FALSE	30
2022-09-13	13:31:39	0.734364	3.2666	3.26394	2056.23	FALSE	30
2022-09-13	13:31:40	0.733957	3.26479	3.25868	2028.07	FALSE	30
2022-09-13	13:31:40	0.729224	3.24373	3.25868	2059.47	FALSE	30
2022-09-13	13:31:40	0.734568	3.26751	3.25868	2031.34	FALSE	30
2022-09-13	13:31:41	0.738028	3.2829	3.25913	2062.75	FALSE	30
2022-09-13	13:31:41	0.724135	3.2211	3.25913	2034.56	FALSE	30
2022-09-13	13:31:41	0.728206	3.23921	3.25913	2065.99	FALSE	30
2022-09-13	13:31:41	0.740369	3.29331	3.25913	2037.85	FALSE	30
2022-09-13	13:31:42	0.731005	3.25166	3.26762	2069.24	FALSE	30
2022-09-13	13:31:42	0.737875	3.28222	3.26762	2041.13	FALSE	30
2022-09-13	13:31:42	0.731667	3.2546	3.26762	2072.5	FALSE	30
2022-09-13	13:31:42	0.737824	3.28199	3.26762	2044.42	FALSE	30
2022-09-13	13:31:43	0.731361	3.25324	3.25409	2075.75	FALSE	30
2022-09-13	13:31:43	0.732786	3.25958	3.25409	2047.68	FALSE	30
2022-09-13	13:31:43	0.732939	3.26026	3.25409	2079.01	FALSE	30
2022-09-13	13:31:43	0.729122	3.24328	3.25409	2050.92	FALSE	30
2022-09-13	13:31:44	0.731819	3.25528	3.26313	2082.27	FALSE	30
2022-09-13	13:31:44	0.731056	3.25188	3.26313	2054.17	FALSE	30
2022-09-13	13:31:44	0.737875	3.28222	3.26313	2085.55	FALSE	30
2022-09-13	13:31:45	0.732023	3.25618	3.26411	2057.43	FALSE	30
2022-09-13	13:31:45	0.73528	3.27067	3.26411	2088.82	FALSE	30
2022-09-13	13:31:45	0.734568	3.26751	3.26411	2060.7	FALSE	30
2022-09-13	13:31:45	0.733346	3.26207	3.26411	2092.08	FALSE	30
2022-09-13	13:31:46	0.730903	3.2512	3.26603	2063.95	FALSE	30
2022-09-13	13:31:46	0.735789	3.27294	3.26603	2095.35	FALSE	30
2022-09-13	13:31:46	0.735738	3.27271	3.26603	2067.22	FALSE	30
2022-09-13	13:31:46	0.734517	3.26728	3.26603	2098.62	FALSE	30
2022-09-13	13:31:47	0.736654	3.27678	3.25907	2070.5	FALSE	30
2022-09-13	13:31:47	0.731972	3.25596	3.25907	2101.88	FALSE	30
2022-09-13	13:31:47	0.736959	3.27814	3.25907	2073.77	FALSE	30
2022-09-13	13:31:47	0.725102	3.2254	3.25907	2105.1	FALSE	30
2022-09-13	13:31:48	0.725509	3.22721	3.24939	2077	FALSE	30
2022-09-13	13:31:48	0.734008	3.26501	3.24939	2108.37	FALSE	30
2022-09-13	13:31:48	0.731972	3.25596	3.24939	2080.26	FALSE	30
2022-09-13	13:31:49	0.731463	3.25369	3.24079	2111.62	FALSE	30
2022-09-13	13:31:49	0.728104	3.23875	3.24079	2083.5	FALSE	30
2022-09-13	13:31:49	0.728919	3.24238	3.24079	2114.86	FALSE	30
2022-09-13	13:31:49	0.725763	3.22834	3.24079	2086.72	FALSE	30
2022-09-13	13:31:50	0.726985	3.23377	3.23943	2118.1	FALSE	30
2022-09-13	13:31:50	0.724644	3.22336	3.23943	2089.95	FALSE	30
2022-09-13	13:31:50	0.731107	3.25211	3.23943	2121.35	FALSE	30
2022-09-13	13:31:50	0.730293	3.24849	3.23943	2093.2	FALSE	30
2022-09-13	13:31:51	0.736145	3.27452	3.2593	2124.62	FALSE	30
2022-09-13	13:31:51	0.726018	3.22947	3.2593	2096.43	FALSE	30
2022-09-13	13:31:51	0.737112	3.27882	3.2593	2127.9	FALSE	30
2022-09-13	13:31:51	0.731616	3.25437	3.2593	2099.68	FALSE	30
2022-09-13	13:31:52	0.729326	3.24419	3.25641	2131.15	FALSE	30
2022-09-13	13:31:52	0.737366	3.27995	3.25641	2102.96	FALSE	30
2022-09-13	13:31:52	0.729529	3.24509	3.25641	2134.39	FALSE	30
2022-09-13	13:31:53	0.739758	3.29059	3.2662	2106.25	FALSE	30
2022-09-13	13:31:53	0.730903	3.2512	3.2662	2137.64	FALSE	30
2022-09-13	13:31:53	0.732939	3.26026	3.2662	2109.51	FALSE	30
2022-09-13	13:31:53	0.733499	3.26275	3.2662	2140.91	FALSE	30
2022-09-13	13:31:54	0.73528	3.27067	3.25517	2112.78	FALSE	30
2022-09-13	13:31:54	0.738079	3.28312	3.25517	2144.19	FALSE	30
2022-09-13	13:31:54	0.722252	3.21272	3.25517	2115.99	FALSE	30
2022-09-13	13:31:54	0.731565	3.25415	3.25517	2147.44	FALSE	30
2022-09-13	13:31:55	0.729428	3.24464	3.26275	2119.24	FALSE	30
2022-09-13	13:31:55	0.734211	3.26592	3.26275	2150.71	FALSE	30
2022-09-13	13:31:55	0.73645	3.27588	3.26275	2122.51	FALSE	30
2022-09-13	13:31:55	0.733906	3.26456	3.26275	2153.97	FALSE	30
2022-09-13	13:31:56	0.733753	3.26388	3.27286	2125.78	FALSE	30
2022-09-13	13:31:56	0.735382	3.27113	3.27286	2157.25	FALSE	30
2022-09-13	13:31:56	0.738181	3.28358	3.27286	2129.06	FALSE	30
2022-09-13	13:31:57	0.72902	3.24283	3.26275	2160.49	FALSE	30
2022-09-13	13:31:57	0.734669	3.26795	3.26275	2132.33	FALSE	30
2022-09-13	13:31:57	0.734364	3.2666	3.26275	2163.75	FALSE	30
2022-09-13	13:31:57	0.735941	3.27361	3.26275	2135.6	FALSE	30
2022-09-13	13:31:58	0.728359	3.23989	3.26354	2166.99	FALSE	30
2022-09-13	13:31:58	0.737875	3.28222	3.26354	2138.89	FALSE	30
2022-09-13	13:31:58	0.740267	3.29286	3.26354	2170.29	FALSE	30
2022-09-13	13:31:58	0.728206	3.23921	3.26354	2142.13	FALSE	30
2022-09-13	13:31:59	0.735483	3.27158	-0.252403	2173.56	FALSE	30
2022-09-13	13:31:59	-0.406246	-1.80706	-0.252403	2142.13	FALSE	30
2022-09-13	13:31:59	-0.208028	-0.92535	-0.252403	2173.56	FALSE	30
2022-09-13	13:31:59	-0.34818	-1.54877	-0.252403	2142.13	FALSE	30

## Sheet: Daisy_harness_2022913132646 (3)
Date	Time	Lbs	Newtons	Total force x time	total steps > 13.345		**GoPro Fitting: 1316
2022-09-13	13:26:59	0.814211	3.62177	3.62177	FALSE	0			Total force x time	2142.13
2022-09-13	13:26:59	0.660012	2.93587	2.93587	FALSE	0			Total steps	30
2022-09-13	13:26:59	0.386985	1.72139	5.34316	FALSE	0
2022-09-13	13:26:59	0.727341	3.23536	6.17122	FALSE	0
2022-09-13	13:27:00	0.733499	3.26275	8.60591	FALSE	0
2022-09-13	13:27:00	0.73014	3.24781	9.41903	FALSE	0
2022-09-13	13:27:00	0.734822	3.26864	11.8745	FALSE	0
2022-09-13	13:27:00	0.731565	3.25415	12.6732	FALSE	0
2022-09-13	13:27:01	0.734568	3.26751	15.1421	FALSE	0
2022-09-13	13:27:01	0.737722	3.28154	15.9547	FALSE	0
2022-09-13	13:27:01	0.737265	3.2795	18.4216	FALSE	0
2022-09-13	13:27:02	0.727952	3.23808	19.1928	FALSE	0
2022-09-13	13:27:02	0.736908	3.27791	21.6995	FALSE	0
2022-09-13	13:27:02	0.252532	1.12331	20.3161	FALSE	0
2022-09-13	13:27:02	0.725102	3.2254	24.9249	FALSE	0
2022-09-13	13:27:03	0.732837	3.25981	23.5759	FALSE	0
2022-09-13	13:27:03	0.739097	3.28765	28.2125	FALSE	0
2022-09-13	13:27:03	0.730394	3.24894	26.8248	FALSE	0
2022-09-13	13:27:03	0.612125	2.72285	30.9354	FALSE	0
2022-09-13	13:27:04	-0.195865	-0.871247	26.8248	FALSE	0
2022-09-13	13:27:04	0.146781	0.652911	31.5883	FALSE	0
2022-09-13	13:27:04	-0.123091	-0.547533	26.8248	FALSE	0
2022-09-13	13:27:04	-0.117341	-0.521956	31.5883	FALSE	0
2022-09-13	13:27:05	-0.486704	-2.16496	26.8248	FALSE	0
2022-09-13	13:27:05	-0.208129	-0.925799	31.5883	FALSE	0
2022-09-13	13:27:05	0.33869	1.50656	28.3314	FALSE	0
2022-09-13	13:27:06	-0.228231	-1.01522	31.5883	FALSE	0
2022-09-13	13:27:06	-0.78986	-3.51346	28.3314	FALSE	0
2022-09-13	13:27:06	-0.858002	-3.81656	31.5883	FALSE	0
2022-09-13	13:27:06	-0.747366	-3.32443	28.3314	FALSE	0
2022-09-13	13:27:07	-0.878002	-3.90553	31.5883	FALSE	0
2022-09-13	13:27:07	-0.811131	-3.60807	28.3314	FALSE	0
2022-09-13	13:27:07	-0.826348	-3.67576	31.5883	FALSE	0
2022-09-13	13:27:07	-0.78991	-3.51368	28.3314	FALSE	0
2022-09-13	13:27:08	-1.00182	-4.4563	31.5883	FALSE	0
2022-09-13	13:27:08	-0.990674	-4.40672	28.3314	FALSE	0
2022-09-13	13:27:08	-1.0952	-4.87167	31.5883	FALSE	0
2022-09-13	13:27:08	-1.03225	-4.59165	28.3314	FALSE	0
2022-09-13	13:27:09	-1.32762	-5.90552	31.5883	FALSE	0
2022-09-13	13:27:09	-1.17067	-5.20737	28.3314	FALSE	0
2022-09-13	13:27:09	-1.27536	-5.67306	31.5883	FALSE	0
2022-09-13	13:27:10	-1.18594	-5.2753	28.3314	FALSE	0
2022-09-13	13:27:10	-1.06599	-4.74174	31.5883	FALSE	0
2022-09-13	13:27:10	-0.84477	-3.75771	28.3314	FALSE	0
2022-09-13	13:27:10	-0.941157	-4.18645	31.5883	FALSE	0
2022-09-13	13:27:11	-0.946348	-4.20955	28.3314	FALSE	0
2022-09-13	13:27:11	-0.920444	-4.09432	31.5883	FALSE	0
2022-09-13	13:27:11	0.493499	2.19518	30.5266	FALSE	0
2022-09-13	13:27:11	0.733448	3.26252	34.8508	FALSE	0
2022-09-13	13:27:12	0.732786	3.25958	33.7862	FALSE	0
2022-09-13	13:27:12	0.740827	3.29535	38.1462	FALSE	0
2022-09-13	13:27:12	0.735534	3.2718	37.058	FALSE	0
2022-09-13	13:27:12	0.72785	3.23762	41.3838	FALSE	0
2022-09-13	13:27:13	0.738282	3.28403	40.342	FALSE	0
2022-09-13	13:27:13	0.733041	3.26071	44.6445	FALSE	0
2022-09-13	13:27:13	0.739809	3.29082	43.6328	FALSE	0
2022-09-13	13:27:14	0.73813	3.28335	47.9278	FALSE	0
2022-09-13	13:27:14	0.734873	3.26886	46.9017	FALSE	0
2022-09-13	13:27:14	0.737163	3.27905	51.2069	FALSE	0
2022-09-13	13:27:14	0.735941	3.27361	50.1753	FALSE	0
2022-09-13	13:27:15	0.733804	3.26411	54.471	FALSE	0
2022-09-13	13:27:15	0.742608	3.30327	53.4786	FALSE	0
2022-09-13	13:27:15	0.737773	3.28176	57.7528	FALSE	0
2022-09-13	13:27:15	0.733753	3.26388	56.7424	FALSE	0
2022-09-13	13:27:16	0.730242	3.24826	61.001	FALSE	0
2022-09-13	13:27:16	0.733346	3.26207	60.0045	FALSE	0
2022-09-13	13:27:16	0.738689	3.28584	64.2869	FALSE	0
2022-09-13	13:27:16	0.737163	3.27905	63.2836	FALSE	0
2022-09-13	13:27:17	0.731158	3.25234	67.5392	FALSE	0
2022-09-13	13:27:17	0.737214	3.27928	66.5628	FALSE	0
2022-09-13	13:27:17	0.734669	3.26795	70.8071	FALSE	0
2022-09-13	13:27:17	0.737417	3.28018	69.843	FALSE	0
2022-09-13	13:27:18	0.731463	3.25369	74.0608	FALSE	0
2022-09-13	13:27:18	0.735483	3.27158	73.1146	FALSE	0
2022-09-13	13:27:18	0.729631	3.24554	77.3064	FALSE	0
2022-09-13	13:27:19	0.73416	3.26569	76.3803	FALSE	0
2022-09-13	13:27:19	0.731565	3.25415	80.5605	FALSE	0
2022-09-13	13:27:19	0.732175	3.25686	79.6371	FALSE	0
2022-09-13	13:27:19	0.737824	3.28199	83.8425	FALSE	0
2022-09-13	13:27:20	0.737417	3.28018	82.9173	FALSE	0
2022-09-13	13:27:20	0.730903	3.2512	87.0937	FALSE	0
2022-09-13	13:27:20	0.728715	3.24147	86.1588	FALSE	0
2022-09-13	13:27:20	0.729886	3.24668	90.3404	FALSE	0
2022-09-13	13:27:21	0.728359	3.23989	89.3987	FALSE	0
2022-09-13	13:27:21	0.732583	3.25868	93.5991	FALSE	0
2022-09-13	13:27:21	0.731565	3.25415	92.6528	FALSE	0
2022-09-13	13:27:21	0.736399	3.27565	96.8747	FALSE	0
2022-09-13	13:27:22	0.732888	3.26003	95.9129	FALSE	0
2022-09-13	13:27:22	0.733041	3.26071	100.135	FALSE	0
2022-09-13	13:27:22	0.730598	3.24985	99.1627	FALSE	0
2022-09-13	13:27:23	0.725967	3.22925	103.365	FALSE	0
2022-09-13	13:27:23	0.739453	3.28923	102.452	FALSE	0
2022-09-13	13:27:23	0.735483	3.27158	106.636	FALSE	0
2022-09-13	13:27:23	0.737112	3.27882	105.731	FALSE	0
2022-09-13	13:27:24	0.738384	3.28448	109.921	FALSE	0
2022-09-13	13:27:24	0.736654	3.27678	109.008	FALSE	0
2022-09-13	13:27:24	0.731514	3.25392	113.175	FALSE	0
2022-09-13	13:27:24	0.740013	3.29173	112.299	FALSE	0
2022-09-13	13:27:25	0.73701	3.27837	116.453	FALSE	0
2022-09-13	13:27:25	0.735178	3.27022	115.569	FALSE	0
2022-09-13	13:27:25	0.736247	3.27497	119.728	FALSE	0
2022-09-13	13:27:25	0.739656	3.29014	118.86	FALSE	0
2022-09-13	13:27:26	0.735433	3.27135	122.999	FALSE	0
2022-09-13	13:27:26	0.732277	3.25731	122.117	FALSE	0
2022-09-13	13:27:26	0.73131	3.25301	126.252	FALSE	0
2022-09-13	13:27:27	0.736501	3.2761	125.393	FALSE	0
2022-09-13	13:27:27	0.729886	3.24668	129.499	FALSE	0
2022-09-13	13:27:27	0.735178	3.27022	128.663	FALSE	0
2022-09-13	13:27:27	0.726374	3.23106	132.73	FALSE	0
2022-09-13	13:27:28	0.73874	3.28606	131.949	FALSE	0
2022-09-13	13:27:28	0.735127	3.26999	136	FALSE	0
2022-09-13	13:27:28	0.745814	3.31753	135.267	FALSE	0
2022-09-13	13:27:28	0.741489	3.29829	139.298	FALSE	0
2022-09-13	13:27:29	0.732226	3.25709	138.524	FALSE	0
2022-09-13	13:27:29	0.733957	3.26479	142.563	FALSE	0
2022-09-13	13:27:29	0.726781	3.23287	141.757	FALSE	0
2022-09-13	13:27:29	0.73472	3.26818	145.831	FALSE	0
2022-09-13	13:27:30	0.730598	3.24985	145.007	FALSE	0
2022-09-13	13:27:30	0.72673	3.23264	149.064	FALSE	0
2022-09-13	13:27:30	0.732939	3.26026	148.267	FALSE	0
2022-09-13	13:27:31	0.734364	3.2666	152.331	FALSE	0
2022-09-13	13:27:31	0.735483	3.27158	151.538	FALSE	0
2022-09-13	13:27:31	0.726578	3.23196	155.563	FALSE	0
2022-09-13	13:27:31	0.729987	3.24713	154.786	FALSE	0
2022-09-13	13:27:32	0.738537	3.28516	158.848	FALSE	0
2022-09-13	13:27:32	0.730852	3.25098	158.037	FALSE	0
2022-09-13	13:27:32	0.733906	3.26456	162.112	FALSE	0
2022-09-13	13:27:32	0.729631	3.24554	161.282	FALSE	0
2022-09-13	13:27:33	0.734873	3.26886	165.381	FALSE	0
2022-09-13	13:27:33	0.733651	3.26343	164.546	FALSE	0
2022-09-13	13:27:33	0.73528	3.27067	168.652	FALSE	0
2022-09-13	13:27:33	0.734109	3.26546	167.811	FALSE	0
2022-09-13	13:27:34	0.733142	3.26116	171.913	FALSE	0
2022-09-13	13:27:34	0.738689	3.28584	171.097	FALSE	0
2022-09-13	13:27:34	0.731361	3.25324	175.166	FALSE	0
2022-09-13	13:27:35	0.733753	3.26388	174.361	FALSE	0
2022-09-13	13:27:35	0.733244	3.26162	178.428	FALSE	0
2022-09-13	13:27:35	0.732074	3.25641	177.617	FALSE	0
2022-09-13	13:27:35	0.728155	3.23898	181.667	FALSE	0
2022-09-13	13:27:36	0.730547	3.24962	180.867	FALSE	0
2022-09-13	13:27:36	0.731717	3.25482	184.922	FALSE	0
2022-09-13	13:27:36	0.728817	3.24192	184.109	FALSE	0
2022-09-13	13:27:37	0.740013	3.29173	188.213	FALSE	0
2022-09-13	13:27:37	0.734008	3.26501	187.374	FALSE	0
2022-09-13	13:27:37	0.731921	3.25573	191.469	FALSE	0
2022-09-13	13:27:37	0.739453	3.28923	190.663	FALSE	0
2022-09-13	13:27:37	0.731667	3.2546	194.724	FALSE	0
2022-09-13	13:27:38	0.737417	3.28018	193.943	FALSE	0
2022-09-13	13:27:38	0.740216	3.29263	198.016	FALSE	0
2022-09-13	13:27:38	0.734109	3.26546	197.209	FALSE	0
2022-09-13	13:27:39	0.729478	3.24486	201.261	FALSE	0
2022-09-13	13:27:39	0.731667	3.2546	200.463	FALSE	0
2022-09-13	13:27:39	0.739249	3.28833	204.55	FALSE	0
2022-09-13	13:27:39	0.740573	3.29422	203.757	FALSE	0
2022-09-13	13:27:40	0.737824	3.28199	207.832	FALSE	0
2022-09-13	13:27:40	0.732328	3.25754	207.015	FALSE	0
2022-09-13	13:27:40	0.732583	3.25868	211.09	FALSE	0
2022-09-13	13:27:40	0.739707	3.29036	210.305	FALSE	0
2022-09-13	13:27:41	0.737061	3.27859	214.369	FALSE	0
2022-09-13	13:27:41	0.737824	3.28199	213.587	FALSE	0
2022-09-13	13:27:41	0.7393	3.28855	217.657	FALSE	0
2022-09-13	13:27:42	0.738435	3.28471	216.872	FALSE	0
2022-09-13	13:27:42	0.728715	3.24147	220.899	FALSE	0
2022-09-13	13:27:42	0.732023	3.25618	220.128	FALSE	0
2022-09-13	13:27:42	0.731056	3.25188	224.151	FALSE	0
2022-09-13	13:27:43	0.739046	3.28742	223.416	FALSE	0
2022-09-13	13:27:43	0.732328	3.25754	227.408	FALSE	0
2022-09-13	13:27:43	0.739504	3.28946	226.705	FALSE	0
2022-09-13	13:27:43	0.735789	3.27294	230.681	FALSE	0
2022-09-13	13:27:44	0.73645	3.27588	229.981	FALSE	0
2022-09-13	13:27:44	0.731209	3.25256	233.934	FALSE	0
2022-09-13	13:27:44	0.736908	3.27791	233.259	FALSE	0
2022-09-13	13:27:45	0.73528	3.27067	237.204	FALSE	0
2022-09-13	13:27:45	0.73416	3.26569	236.525	FALSE	0
2022-09-13	13:27:45	0.734669	3.26795	240.472	FALSE	0
2022-09-13	13:27:45	0.728003	3.2383	239.763	FALSE	0
2022-09-13	13:27:45	0.735636	3.27226	243.745	FALSE	0
2022-09-13	13:27:46	0.736603	3.27656	243.039	FALSE	0
2022-09-13	13:27:46	0.739097	3.28765	247.032	FALSE	0
2022-09-13	13:27:46	0.73416	3.26569	246.305	FALSE	0
2022-09-13	13:27:47	0.734059	3.26524	250.298	FALSE	0
2022-09-13	13:27:47	0.731259	3.25279	249.558	FALSE	0
2022-09-13	13:27:47	0.739147	3.28787	253.585	FALSE	0
2022-09-13	13:27:47	0.724847	3.22426	252.782	FALSE	0
2022-09-13	13:27:48	0.73528	3.27067	256.856	FALSE	0
2022-09-13	13:27:48	0.735891	3.27339	256.056	FALSE	0
2022-09-13	13:27:48	0.73416	3.26569	260.122	FALSE	0
2022-09-13	13:27:48	0.726629	3.23219	259.288	FALSE	0
2022-09-13	13:27:49	0.72902	3.24283	263.365	FALSE	0
2022-09-13	13:27:49	0.726018	3.22947	262.517	FALSE	0
2022-09-13	13:27:49	0.734364	3.2666	266.631	FALSE	0
2022-09-13	13:27:49	0.734364	3.2666	265.784	FALSE	0
2022-09-13	13:27:50	0.738486	3.28493	269.916	FALSE	0
2022-09-13	13:27:50	0.736756	3.27724	269.061	FALSE	0
2022-09-13	13:27:50	0.739758	3.29059	273.207	FALSE	0
2022-09-13	13:27:50	0.72841	3.24011	272.301	FALSE	0
2022-09-13	13:27:51	0.737875	3.28222	276.489	FALSE	0
2022-09-13	13:27:51	0.730293	3.24849	275.55	FALSE	0
2022-09-13	13:27:51	0.741489	3.29829	279.787	FALSE	0
2022-09-13	13:27:52	0.740216	3.29263	278.842	FALSE	0
2022-09-13	13:27:52	0.735331	3.2709	283.058	FALSE	0
2022-09-13	13:27:52	0.730293	3.24849	282.091	FALSE	0
2022-09-13	13:27:52	0.73986	3.29105	286.349	FALSE	0
2022-09-13	13:27:53	0.738842	3.28652	285.377	FALSE	0
2022-09-13	13:27:53	0.733957	3.26479	289.614	FALSE	0
2022-09-13	13:27:53	0.733346	3.26207	288.639	FALSE	0
2022-09-13	13:27:53	0.730038	3.24736	292.861	FALSE	0
2022-09-13	13:27:54	0.728715	3.24147	291.881	FALSE	0
2022-09-13	13:27:54	0.736603	3.27656	296.138	FALSE	0
2022-09-13	13:27:54	0.734364	3.2666	295.147	FALSE	0
2022-09-13	13:27:54	0.728919	3.24238	299.38	FALSE	0
2022-09-13	13:27:55	0.463422	2.06139	297.209	FALSE	0
2022-09-13	13:27:55	0.722608	3.2143	302.595	FALSE	0
2022-09-13	13:27:55	0.393702	1.75127	298.96	FALSE	0
2022-09-13	13:27:56	0.623779	2.77469	305.369	FALSE	0
2022-09-13	13:27:56	0.475178	2.11369	301.074	FALSE	0
2022-09-13	13:27:56	0.407748	1.81374	307.183	FALSE	0
2022-09-13	13:27:56	0.42556	1.89298	302.967	FALSE	0
2022-09-13	13:27:57	0.277774	1.23559	308.419	FALSE	0
2022-09-13	13:27:57	0.558282	2.48335	305.45	FALSE	0
2022-09-13	13:27:57	0.590547	2.62687	311.045	FALSE	0
2022-09-13	13:27:57	0.664135	2.95421	308.404	FALSE	0
2022-09-13	13:27:58	0.53243	2.36836	313.414	FALSE	0
2022-09-13	13:27:58	0.664593	2.95624	311.361	FALSE	0
2022-09-13	13:27:58	0.0939061	0.417713	313.831	FALSE	0
2022-09-13	13:27:58	0.699708	3.11244	314.473	FALSE	0
2022-09-13	13:27:59	0.71874	3.1971	317.029	FALSE	0
2022-09-13	13:27:59	0.69584	3.09524	317.568	FALSE	0
2022-09-13	13:27:59	0.607137	2.70067	319.729	FALSE	0
2022-09-13	13:28:00	0.552583	2.458	320.026	FALSE	0
2022-09-13	13:28:00	0.496247	2.20741	321.937	FALSE	0
2022-09-13	13:28:00	0.383066	1.70395	321.73	FALSE	0
2022-09-13	13:28:00	0.311412	1.38522	323.322	FALSE	0
2022-09-13	13:28:01	0.367036	1.63265	323.363	FALSE	0
2022-09-13	13:28:01	0.381896	1.69875	325.021	FALSE	0
2022-09-13	13:28:01	0.427697	1.90248	325.265	FALSE	0
2022-09-13	13:28:01	0.520929	2.3172	327.338	FALSE	0
2022-09-13	13:28:02	0.376807	1.67611	326.941	FALSE	0
2022-09-13	13:28:02	0.383117	1.70418	329.042	FALSE	0
2022-09-13	13:28:02	0.431005	1.9172	328.859	FALSE	0
2022-09-13	13:28:02	0.561743	2.49875	331.541	FALSE	0
2022-09-13	13:28:03	0.609529	2.71131	331.57	FALSE	0
2022-09-13	13:28:03	0.678537	3.01827	334.559	FALSE	0
2022-09-13	13:28:03	0.633804	2.81929	334.389	FALSE	0
2022-09-13	13:28:04	0.678333	3.01736	337.576	FALSE	0
2022-09-13	13:28:04	0.335382	1.49185	335.881	FALSE	0
2022-09-13	13:28:04	0.373601	1.66185	339.238	FALSE	0
2022-09-13	13:28:04	0.727545	3.23627	339.117	FALSE	0
2022-09-13	13:28:05	0.735891	3.27339	342.512	FALSE	0
2022-09-13	13:28:05	0.739198	3.2881	342.405	FALSE	0
2022-09-13	13:28:05	0.613702	2.72987	345.242	FALSE	0
2022-09-13	13:28:05	0.577519	2.56892	344.974	FALSE	0
2022-09-13	13:28:06	0.375687	1.67113	346.913	FALSE	0
2022-09-13	13:28:06	0.443982	1.97492	346.949	FALSE	0
2022-09-13	13:28:06	0.335026	1.49026	348.403	FALSE	0
2022-09-13	13:28:06	0.357926	1.59213	348.541	FALSE	0
2022-09-13	13:28:07	0.395178	1.75783	350.161	FALSE	0
2022-09-13	13:28:07	0.396298	1.76281	350.304	FALSE	0
2022-09-13	13:28:07	0.447443	1.99032	352.151	FALSE	0
2022-09-13	13:28:08	0.381998	1.6992	352.003	FALSE	0
2022-09-13	13:28:08	0.515331	2.2923	354.443	FALSE	0
2022-09-13	13:28:08	0.368868	1.6408	353.644	FALSE	0
2022-09-13	13:28:08	0.721743	3.21046	357.654	FALSE	0
2022-09-13	13:28:09	0.730852	3.25098	356.895	FALSE	0
2022-09-13	13:28:09	0.731158	3.25234	360.906	FALSE	0
2022-09-13	13:28:09	0.736349	3.27543	360.171	FALSE	0
2022-09-13	13:28:09	0.737468	3.28041	364.187	FALSE	0
2022-09-13	13:28:10	0.740369	3.29331	363.464	FALSE	0
2022-09-13	13:28:10	0.731667	3.2546	367.441	FALSE	0
2022-09-13	13:28:10	0.729529	3.24509	366.709	FALSE	0
2022-09-13	13:28:10	0.737417	3.28018	370.721	FALSE	0
2022-09-13	13:28:11	0.732226	3.25709	369.966	FALSE	0
2022-09-13	13:28:11	0.721387	3.20887	373.93	FALSE	0
2022-09-13	13:28:11	0.735127	3.26999	373.236	FALSE	0
2022-09-13	13:28:12	0.733244	3.26162	377.192	FALSE	0
2022-09-13	13:28:12	0.735433	3.27135	376.507	FALSE	0
2022-09-13	13:28:12	0.736857	3.27769	380.469	FALSE	0
2022-09-13	13:28:12	0.733499	3.26275	379.77	FALSE	0
2022-09-13	13:28:13	0.730038	3.24736	383.717	FALSE	0
2022-09-13	13:28:13	0.733753	3.26388	383.034	FALSE	0
2022-09-13	13:28:13	0.731158	3.25234	386.969	FALSE	0
2022-09-13	13:28:14	0.728003	3.2383	386.272	FALSE	0
2022-09-13	13:28:14	0.735738	3.27271	390.242	FALSE	0
2022-09-13	13:28:14	0.737265	3.2795	389.552	FALSE	0
2022-09-13	13:28:14	0.73355	3.26298	393.505	FALSE	0
2022-09-13	13:28:14	0.741539	3.29851	392.85	FALSE	0
2022-09-13	13:28:15	0.81528	3.62653	397.131	FALSE	0
2022-09-13	13:28:15	0.767239	3.41283	396.263	FALSE	0
2022-09-13	13:28:15	0.733244	3.26162	400.393	FALSE	0
2022-09-13	13:28:16	0.738588	3.28539	399.549	FALSE	0
2022-09-13	13:28:16	0.737722	3.28154	403.675	FALSE	0
2022-09-13	13:28:16	0.729936	3.2469	402.796	FALSE	0
2022-09-13	13:28:16	0.665102	2.95851	406.633	FALSE	0
2022-09-13	13:28:17	0.527544	2.34662	405.142	FALSE	0
2022-09-13	13:28:17	0.728766	3.2417	409.875	FALSE	0
2022-09-13	13:28:17	0.544745	2.42313	407.565	FALSE	0
2022-09-13	13:28:17	0.728817	3.24192	413.117	FALSE	0
2022-09-13	13:28:18	0.442303	1.96745	409.533	FALSE	0
2022-09-13	13:28:18	0.671412	2.98657	416.103	FALSE	0
2022-09-13	13:28:18	0.653397	2.90644	412.439	FALSE	0
2022-09-13	13:28:18	0.688562	3.06286	419.166	FALSE	0
2022-09-13	13:28:19	1.01655	4.52182	416.961	FALSE	0
2022-09-13	13:28:19	0.874007	3.88776	423.054	FALSE	0
2022-09-13	13:28:19	2.36169	10.5053	427.466	FALSE	0
2022-09-13	13:28:20	1.96057	8.72101	431.775	FALSE	0
2022-09-13	13:28:20	1.06882	4.75433	432.221	FALSE	0
2022-09-13	13:28:20	1.58032	7.02958	438.804	FALSE	0
2022-09-13	13:28:20	3.31686	14.7541	446.975	1	1
2022-09-13	13:28:21	2.36286	10.5105	449.315	FALSE	1
2022-09-13	13:28:21	2.35441	10.4729	457.448	FALSE	1
2022-09-13	13:28:21	2.5338	11.2708	460.586	FALSE	1
2022-09-13	13:28:21	3.81467	16.9684	474.416	1	2
2022-09-13	13:28:22	3.52057	15.6602	476.246	1	3
2022-09-13	13:28:22	2.05558	9.14363	483.56	FALSE	3
2022-09-13	13:28:22	3.4277	15.2471	491.493	1	4
2022-09-13	13:28:22	5.04459	22.4393	505.999	1	5
2022-09-13	13:28:23	3.62882	16.1417	507.635	1	6
2022-09-13	13:28:23	1.70902	7.60206	513.601	FALSE	6
2022-09-13	13:28:23	0.912939	4.06094	511.696	FALSE	6
2022-09-13	13:28:24	2.57686	11.4624	525.063	FALSE	6
2022-09-13	13:28:24	2.08739	9.28513	520.981	FALSE	6
2022-09-13	13:28:24	1.20836	5.37503	530.438	FALSE	6
2022-09-13	13:28:24	1.23726	5.50358	526.484	FALSE	6
2022-09-13	13:28:25	2.21197	9.83928	540.278	FALSE	6
2022-09-13	13:28:25	1.61818	7.19799	533.682	FALSE	6
2022-09-13	13:28:25	2.04016	9.07504	549.353	FALSE	6
2022-09-13	13:28:25	2.67681	11.907	545.589	FALSE	6
2022-09-13	13:28:26	2.29146	10.1929	559.546	FALSE	6
2022-09-13	13:28:26	1.17604	5.23126	550.821	FALSE	6
2022-09-13	13:28:26	0.851666	3.78838	563.334	FALSE	6
2022-09-13	13:28:26	0.731158	3.25234	554.073	FALSE	6
2022-09-13	13:28:27	0.627341	2.79054	566.125	FALSE	6
2022-09-13	13:28:27	0.470089	2.09105	556.164	FALSE	6
2022-09-13	13:28:27	0.444593	1.97764	568.102	FALSE	6
2022-09-13	13:28:28	0.327799	1.45812	557.622	FALSE	6
2022-09-13	13:28:28	0.245967	1.09411	569.196	FALSE	6
2022-09-13	13:28:28	0.22042	0.980472	558.603	FALSE	6
2022-09-13	13:28:28	0.368308	1.63831	570.835	FALSE	6
2022-09-13	13:28:29	0.50103	2.22868	560.831	FALSE	6
2022-09-13	13:28:29	0.825102	3.67022	574.505	FALSE	6
2022-09-13	13:28:29	1.59777	7.1072	567.939	FALSE	6
2022-09-13	13:28:29	1.68393	7.49046	581.995	FALSE	6
2022-09-13	13:28:30	1.81294	8.06432	576.003	FALSE	6
2022-09-13	13:28:30	1.25329	5.57488	587.57	FALSE	6
2022-09-13	13:28:30	1.35772	6.03941	582.042	FALSE	6
2022-09-13	13:28:30	1.79289	7.97513	595.545	FALSE	6
2022-09-13	13:28:31	1.44067	6.40839	588.451	FALSE	6
2022-09-13	13:28:31	1.40678	6.25764	601.803	FALSE	6
2022-09-13	13:28:31	1.15034	5.11694	593.568	FALSE	6
2022-09-13	13:28:31	1.18602	5.27565	607.079	FALSE	6
2022-09-13	13:28:32	1.01961	4.53543	598.103	FALSE	6
2022-09-13	13:28:32	1.08403	4.82198	611.901	FALSE	6
2022-09-13	13:28:32	1.12357	4.99786	603.101	FALSE	6
2022-09-13	13:28:33	1.22363	5.44295	617.343	FALSE	6
2022-09-13	13:28:33	1.15457	5.13576	608.237	FALSE	6
2022-09-13	13:28:33	1.1619	5.16836	622.512	FALSE	6
2022-09-13	13:28:33	1.14683	5.10133	613.338	FALSE	6
2022-09-13	13:28:34	1.15309	5.12917	627.641	FALSE	6
2022-09-13	13:28:34	0.996603	4.43309	617.771	FALSE	6
2022-09-13	13:28:34	0.925102	4.11504	631.756	FALSE	6
2022-09-13	13:28:34	0.963575	4.28617	622.057	FALSE	6
2022-09-13	13:28:35	1.00571	4.4736	636.23	FALSE	6
2022-09-13	13:28:35	1.10637	4.92136	626.979	FALSE	6
2022-09-13	13:28:35	0.750344	3.33768	639.567	FALSE	6
2022-09-13	13:28:35	1.1338	5.04337	632.022	FALSE	6
2022-09-13	13:28:36	1.08765	4.83808	644.405	FALSE	6
2022-09-13	13:28:36	1.03228	4.59179	636.614	FALSE	6
2022-09-13	13:28:36	0.972735	4.32692	648.732	FALSE	6
2022-09-13	13:28:37	1.16144	5.16632	641.78	FALSE	6
2022-09-13	13:28:37	0.430547	1.91516	650.648	FALSE	6
2022-09-13	13:28:37	0.198028	0.880868	642.661	FALSE	6
2022-09-13	13:28:37	0.208359	0.926823	651.574	FALSE	6
2022-09-13	13:28:38	0.200013	0.889698	643.551	FALSE	6
2022-09-13	13:28:38	0.201743	0.897393	652.472	FALSE	6
2022-09-13	13:28:38	0.194008	0.862986	644.414	FALSE	6
2022-09-13	13:28:38	0.189428	0.842614	653.314	FALSE	6
2022-09-13	13:28:39	0.194618	0.8657	645.279	FALSE	6
2022-09-13	13:28:39	0.199453	0.887207	654.202	FALSE	6
2022-09-13	13:28:39	0.263677	1.17289	646.452	FALSE	6
2022-09-13	13:28:39	0.735789	3.27294	657.474	FALSE	6
2022-09-13	13:28:40	0.737163	3.27905	649.731	FALSE	6
2022-09-13	13:28:40	0.73472	3.26818	660.743	FALSE	6
2022-09-13	13:28:40	0.731158	3.25234	652.984	FALSE	6
2022-09-13	13:28:41	0.732684	3.25912	664.002	FALSE	6
2022-09-13	13:28:41	0.731514	3.25392	656.238	FALSE	6
2022-09-13	13:28:41	0.742099	3.301	667.303	FALSE	6
2022-09-13	13:28:41	0.736145	3.27452	659.512	FALSE	6
2022-09-13	13:28:42	0.732277	3.25731	670.56	FALSE	6
2022-09-13	13:28:42	0.734008	3.26501	662.777	FALSE	6
2022-09-13	13:28:42	0.736857	3.27769	673.838	FALSE	6
2022-09-13	13:28:42	0.734822	3.26864	666.046	FALSE	6
2022-09-13	13:28:43	0.73131	3.25301	677.091	FALSE	6
2022-09-13	13:28:43	0.736247	3.27497	669.321	FALSE	6
2022-09-13	13:28:43	0.736247	3.27497	680.366	FALSE	6
2022-09-13	13:28:43	0.737112	3.27882	672.599	FALSE	6
2022-09-13	13:28:44	0.732634	3.2589	683.625	FALSE	6
2022-09-13	13:28:44	0.732125	3.25664	675.856	FALSE	6
2022-09-13	13:28:44	0.738231	3.2838	686.908	FALSE	6
2022-09-13	13:28:45	0.733651	3.26343	679.12	FALSE	6
2022-09-13	13:28:45	0.730496	3.24939	690.158	FALSE	6
2022-09-13	13:28:45	0.731616	3.25437	682.374	FALSE	6
2022-09-13	13:28:45	0.739198	3.2881	693.446	FALSE	6
2022-09-13	13:28:46	0.732786	3.25958	685.633	FALSE	6
2022-09-13	13:28:46	0.730852	3.25098	696.697	FALSE	6
2022-09-13	13:28:46	0.732634	3.2589	688.892	FALSE	6
2022-09-13	13:28:46	0.730547	3.24962	699.947	FALSE	6
2022-09-13	13:28:47	0.729631	3.24554	692.138	FALSE	6
2022-09-13	13:28:47	0.730954	3.25143	703.198	FALSE	6
2022-09-13	13:28:47	0.729122	3.24328	695.381	FALSE	6
2022-09-13	13:28:47	0.734466	3.26705	706.465	FALSE	6
2022-09-13	13:28:48	0.726374	3.23106	698.612	FALSE	6
2022-09-13	13:28:48	0.745306	3.31527	709.78	FALSE	6
2022-09-13	13:28:48	0.724796	3.22404	701.836	FALSE	6
2022-09-13	13:28:49	0.757061	3.36756	713.148	FALSE	6
2022-09-13	13:28:49	0.716603	3.18759	705.024	FALSE	6
2022-09-13	13:28:49	0.743168	3.30576	716.454	FALSE	6
2022-09-13	13:28:49	0.724542	3.22291	708.247	FALSE	6
2022-09-13	13:28:50	0.73701	3.27837	719.732	FALSE	6
2022-09-13	13:28:50	0.731717	3.25482	711.502	FALSE	6
2022-09-13	13:28:50	0.734517	3.26728	722.999	FALSE	6
2022-09-13	13:28:50	0.731972	3.25596	714.758	FALSE	6
2022-09-13	13:28:51	0.733448	3.26252	726.262	FALSE	6
2022-09-13	13:28:51	0.736552	3.27633	718.034	FALSE	6
2022-09-13	13:28:51	0.72673	3.23264	729.494	FALSE	6
2022-09-13	13:28:51	0.734364	3.2666	721.301	FALSE	6
2022-09-13	13:28:52	0.735941	3.27361	732.768	FALSE	6
2022-09-13	13:28:52	0.737417	3.28018	724.581	FALSE	6
2022-09-13	13:28:52	0.725814	3.22857	735.997	FALSE	6
2022-09-13	13:28:53	0.734822	3.26864	727.849	FALSE	6
2022-09-13	13:28:53	0.726934	3.23355	739.23	FALSE	6
2022-09-13	13:28:53	0.739351	3.28878	731.138	FALSE	6
2022-09-13	13:28:53	0.732735	3.25935	742.49	FALSE	6
2022-09-13	13:28:54	0.548664	2.44057	733.579	FALSE	6
2022-09-13	13:28:54	0.451819	2.00978	744.499	FALSE	6
2022-09-13	13:28:54	0.730496	3.24939	736.828	FALSE	6
2022-09-13	13:28:54	0.821692	3.65505	748.154	FALSE	6
2022-09-13	13:28:55	0.991819	4.41181	741.24	FALSE	6
2022-09-13	13:28:55	0.776196	3.45268	751.607	FALSE	6
2022-09-13	13:28:55	0.977824	4.34956	745.589	FALSE	6
2022-09-13	13:28:55	0.950445	4.22777	755.835	FALSE	6
2022-09-13	13:28:56	1.04627	4.65402	750.243	FALSE	6
2022-09-13	13:28:56	0.958995	4.2658	760.101	FALSE	6
2022-09-13	13:28:56	0.905153	4.0263	754.27	FALSE	6
2022-09-13	13:28:57	1.02724	4.56937	764.67	FALSE	6
2022-09-13	13:28:57	0.738079	3.28312	757.553	FALSE	6
2022-09-13	13:28:57	0.995534	4.42833	769.098	FALSE	6
2022-09-13	13:28:57	0.739249	3.28833	760.841	FALSE	6
2022-09-13	13:28:58	0.85299	3.79427	772.893	FALSE	6
2022-09-13	13:28:58	0.774211	3.44385	764.285	FALSE	6
2022-09-13	13:28:58	0.778384	3.46241	776.355	FALSE	6
2022-09-13	13:28:58	0.853855	3.79812	768.083	FALSE	6
2022-09-13	13:28:59	0.79874	3.55296	779.908	FALSE	6
2022-09-13	13:28:59	0.759555	3.37865	771.462	FALSE	6
2022-09-13	13:28:59	0.760114	3.38114	783.289	FALSE	6
2022-09-13	13:28:59	0.751209	3.34153	774.803	FALSE	6
2022-09-13	13:29:00	0.964949	4.29229	787.581	FALSE	6
2022-09-13	13:29:00	0.829122	3.6881	778.491	FALSE	6
2022-09-13	13:29:00	0.88729	3.94684	791.528	FALSE	6
2022-09-13	13:29:01	0.929376	4.13405	782.626	FALSE	6
2022-09-13	13:29:01	0.895636	3.98397	795.512	FALSE	6
2022-09-13	13:29:01	0.870293	3.87124	786.497	FALSE	6
2022-09-13	13:29:01	0.892888	3.97174	799.484	FALSE	6
2022-09-13	13:29:02	0.898333	3.99596	790.493	FALSE	6
2022-09-13	13:29:02	0.933193	4.15103	803.635	FALSE	6
2022-09-13	13:29:02	0.890292	3.9602	794.453	FALSE	6
2022-09-13	13:29:02	0.905254	4.02675	807.662	FALSE	6
2022-09-13	13:29:03	0.946018	4.20808	798.661	FALSE	6
2022-09-13	13:29:03	0.974313	4.33394	811.996	FALSE	6
2022-09-13	13:29:03	1.01497	4.51479	803.176	FALSE	6
2022-09-13	13:29:03	0.949784	4.22483	816.22	FALSE	6
2022-09-13	13:29:04	0.854618	3.80151	806.977	FALSE	6
2022-09-13	13:29:04	0.721692	3.21023	819.431	FALSE	6
2022-09-13	13:29:04	0.761946	3.38929	810.367	FALSE	6
2022-09-13	13:29:05	0.586425	2.60854	822.039	FALSE	6
2022-09-13	13:29:05	0.573702	2.55194	812.919	FALSE	6
2022-09-13	13:29:05	0.334415	1.48754	823.527	FALSE	6
2022-09-13	13:29:05	0.368461	1.63899	814.558	FALSE	6
2022-09-13	13:29:06	0.344644	1.53305	825.06	FALSE	6
2022-09-13	13:29:06	0.301336	1.3404	815.898	FALSE	6
2022-09-13	13:29:06	0.331158	1.47306	826.533	FALSE	6
2022-09-13	13:29:06	0.444135	1.9756	817.874	FALSE	6
2022-09-13	13:29:07	0.642761	2.85913	829.392	FALSE	6
2022-09-13	13:29:07	0.743473	3.30712	821.181	FALSE	6
2022-09-13	13:29:07	0.730954	3.25143	832.643	FALSE	6
2022-09-13	13:29:07	0.734415	3.26682	824.447	FALSE	6
2022-09-13	13:29:08	0.741031	3.29625	835.94	FALSE	6
2022-09-13	13:29:08	0.747494	3.325	827.772	FALSE	6
2022-09-13	13:29:08	0.623677	2.77424	838.714	FALSE	6
2022-09-13	13:29:09	0.741081	3.29648	831.069	FALSE	6
2022-09-13	13:29:09	0.73584	3.27316	841.987	FALSE	6
2022-09-13	13:29:09	0.846527	3.76552	834.834	FALSE	6
2022-09-13	13:29:09	0.746374	3.32002	845.307	FALSE	6
2022-09-13	13:29:10	0.283422	1.26072	836.095	FALSE	6
2022-09-13	13:29:10	0.388919	1.72999	847.037	FALSE	6
2022-09-13	13:29:10	0.273652	1.21726	837.312	FALSE	6
2022-09-13	13:29:10	0.490293	2.18092	849.218	FALSE	6
2022-09-13	13:29:11	0.125	0.556025	837.868	FALSE	6
2022-09-13	13:29:11	0.592023	2.63344	851.851	FALSE	6
2022-09-13	13:29:11	0.132379	0.588848	838.457	FALSE	6
2022-09-13	13:29:11	0.371616	1.65302	853.504	FALSE	6
2022-09-13	13:29:12	0.130649	0.581153	839.038	FALSE	6
2022-09-13	13:29:12	0.251158	1.1172	854.622	FALSE	6
2022-09-13	13:29:12	0.163881	0.728975	839.767	FALSE	6
2022-09-13	13:29:12	-0.0154577	-0.0687589	854.622	FALSE	6
2022-09-13	13:29:13	-0.246552	-1.09671	839.767	FALSE	6
2022-09-13	13:29:13	-0.376374	-1.67419	854.622	FALSE	6
2022-09-13	13:29:13	-0.470012	-2.09071	839.767	FALSE	6
2022-09-13	13:29:14	-0.0859921	-0.38251	854.622	FALSE	6
2022-09-13	13:29:14	0.564084	2.50916	842.277	FALSE	6
2022-09-13	13:29:14	1.90622	8.47925	863.101	FALSE	6
2022-09-13	13:29:14	2.35487	10.4749	852.752	FALSE	6
2022-09-13	13:29:15	2.96459	13.1871	876.288	FALSE	6
2022-09-13	13:29:15	1.80139	8.01294	860.764	FALSE	6
2022-09-13	13:29:15	1.96022	8.71945	885.007	FALSE	6
2022-09-13	13:29:15	1.29782	5.77296	866.537	FALSE	6
2022-09-13	13:29:16	1.70861	7.60024	892.608	FALSE	6
2022-09-13	13:29:16	1.97726	8.79525	875.333	FALSE	6
2022-09-13	13:29:16	2.33136	10.3704	902.978	FALSE	6
2022-09-13	13:29:16	2.33131	10.3701	885.703	FALSE	6
2022-09-13	13:29:17	2.72006	12.0994	915.077	FALSE	6
2022-09-13	13:29:17	1.30693	5.81349	891.516	FALSE	6
2022-09-13	13:29:17	1.01146	4.49918	919.577	FALSE	6
2022-09-13	13:29:18	0.644644	2.86751	894.384	FALSE	6
2022-09-13	13:29:18	0.740471	3.29376	922.87	FALSE	6
2022-09-13	13:29:18	0.582506	2.5911	896.975	FALSE	6
2022-09-13	13:29:18	0.642405	2.85755	925.728	FALSE	6
2022-09-13	13:29:19	0.732532	3.25845	900.233	FALSE	6
2022-09-13	13:29:19	0.62154	2.76473	928.493	FALSE	6
2022-09-13	13:29:19	0.485509	2.15964	902.393	FALSE	6
2022-09-13	13:29:19	0.477468	2.12387	930.617	FALSE	6
2022-09-13	13:29:20	0.755687	3.36145	905.754	FALSE	6
2022-09-13	13:29:20	0.385814	1.71618	932.333	FALSE	6
2022-09-13	13:29:20	0.393601	1.75082	907.505	FALSE	6
2022-09-13	13:29:20	-0.0238547	-0.10611	932.333	FALSE	6
2022-09-13	13:29:21	-0.241056	-1.07227	907.505	FALSE	6
2022-09-13	13:29:21	-0.185076	-0.823255	932.333	FALSE	6
2022-09-13	13:29:21	0.0370613	0.164856	907.67	FALSE	6
2022-09-13	13:29:22	0.217977	0.969605	933.302	FALSE	6
2022-09-13	13:29:22	1.90134	8.45754	916.128	FALSE	6
2022-09-13	13:29:22	2.98734	13.2883	946.591	FALSE	6
2022-09-13	13:29:22	3.07421	13.6747	929.802	1	7
2022-09-13	13:29:23	1.1737	5.22085	951.811	FALSE	7
2022-09-13	13:29:23	0.918791	4.08697	933.889	FALSE	7
2022-09-13	13:29:23	1.70378	7.57875	959.39	FALSE	7
2022-09-13	13:29:23	3.93299	17.4947	951.384	1	8
2022-09-13	13:29:24	2.87477	12.7876	972.178	FALSE	8
2022-09-13	13:29:24	3.76622	16.7529	968.137	1	9
2022-09-13	13:29:24	2.67609	11.9038	984.082	FALSE	9
2022-09-13	13:29:24	0.973193	4.32896	972.466	FALSE	9
2022-09-13	13:29:25	0.736857	3.27769	987.359	FALSE	9
2022-09-13	13:29:25	0.779606	3.46784	975.934	FALSE	9
2022-09-13	13:29:25	0.791412	3.52036	990.88	FALSE	9
2022-09-13	13:29:26	1.09462	4.86909	980.803	FALSE	9
2022-09-13	13:29:26	0.721591	3.20978	994.089	FALSE	9
2022-09-13	13:29:26	0.736756	3.27724	984.08	FALSE	9
2022-09-13	13:29:26	1.12001	4.98203	999.071	FALSE	9
2022-09-13	13:29:27	2.01579	8.96664	993.047	FALSE	9
2022-09-13	13:29:27	4.63304	20.6087	1019.68	1	10
2022-09-13	13:29:27	2.96703	13.1979	1006.24	FALSE	10
2022-09-13	13:29:27	3.02968	13.4766	1033.16	1	11
2022-09-13	13:29:28	2.322	10.3287	1016.57	FALSE	11
2022-09-13	13:29:28	2.0936	9.31275	1042.47	FALSE	11
2022-09-13	13:29:28	1.93126	8.59063	1025.16	FALSE	11
2022-09-13	13:29:28	2.1734	9.66772	1052.14	FALSE	11
2022-09-13	13:29:29	1.9281	8.57657	1033.74	FALSE	11
2022-09-13	13:29:29	2.39559	10.6561	1062.79	FALSE	11
2022-09-13	13:29:29	1.09477	4.86976	1038.61	FALSE	11
2022-09-13	13:29:30	1.30159	5.78973	1068.58	FALSE	11
2022-09-13	13:29:30	1.90933	8.49308	1047.1	FALSE	11
2022-09-13	13:29:30	1.03701	4.61283	1073.2	FALSE	11
2022-09-13	13:29:30	0.801132	3.5636	1050.67	FALSE	11
2022-09-13	13:29:31	1.18556	5.27361	1078.47	FALSE	11
2022-09-13	13:29:31	1.31421	5.84587	1056.51	FALSE	11
2022-09-13	13:29:31	0.775585	3.44996	1081.92	FALSE	11
2022-09-13	13:29:31	0.73813	3.28335	1059.8	FALSE	11
2022-09-13	13:29:32	0.736094	3.27429	1085.19	FALSE	11
2022-09-13	13:29:32	0.730089	3.24758	1063.04	FALSE	11
2022-09-13	13:29:32	0.752532	3.34741	1088.54	FALSE	11
2022-09-13	13:29:32	0.939351	4.17842	1067.22	FALSE	11
2022-09-13	13:29:33	0.777112	3.45675	1092	FALSE	11
2022-09-13	13:29:33	0.854466	3.80084	1071.02	FALSE	11
2022-09-13	13:29:33	1.09172	4.85619	1096.85	FALSE	11
2022-09-13	13:29:34	0.760929	3.38476	1074.41	FALSE	11
2022-09-13	13:29:34	0.79299	3.52738	1100.38	FALSE	11
2022-09-13	13:29:34	0.834415	3.71164	1078.12	FALSE	11
2022-09-13	13:29:34	0.886272	3.94232	1104.32	FALSE	11
2022-09-13	13:29:35	0.934313	4.15601	1082.28	FALSE	11
2022-09-13	13:29:35	0.960318	4.27169	1108.6	FALSE	11
2022-09-13	13:29:35	0.97528	4.33824	1086.61	FALSE	11
2022-09-13	13:29:35	1.14866	5.10947	1113.7	FALSE	11
2022-09-13	13:29:36	1.03477	4.60286	1091.22	FALSE	11
2022-09-13	13:29:36	1.66134	7.38997	1121.09	FALSE	11
2022-09-13	13:29:36	1.81167	8.05867	1099.28	FALSE	11
2022-09-13	13:29:36	3.2678	14.5358	1135.63	1	12
2022-09-13	13:29:37	3.64897	16.2313	1115.51	1	13
2022-09-13	13:29:37	3.93228	17.4916	1153.12	1	14
2022-09-13	13:29:37	3.59513	15.9919	1131.5	1	15
2022-09-13	13:29:38	3.465	15.413	1168.54	1	16
2022-09-13	13:29:38	2.53599	11.2806	1142.78	FALSE	16
2022-09-13	13:29:38	3.59986	16.0129	1184.55	1	17
2022-09-13	13:29:38	4.90296	21.8093	1164.59	1	18
2022-09-13	13:29:39	3.96164	17.6222	1202.17	1	19
2022-09-13	13:29:39	2.43879	10.8482	1175.44	FALSE	19
2022-09-13	13:29:39	2.60027	11.5665	1213.74	FALSE	19
2022-09-13	13:29:39	2.3677	10.532	1185.97	FALSE	19
2022-09-13	13:29:40	2.30902	10.271	1224.01	FALSE	19
2022-09-13	13:29:40	2.06307	9.17695	1195.15	FALSE	19
2022-09-13	13:29:40	2.07732	9.24033	1233.25	FALSE	19
2022-09-13	13:29:40	2.02388	9.00262	1204.15	FALSE	19
2022-09-13	13:29:41	1.96139	8.72465	1241.97	FALSE	19
2022-09-13	13:29:41	1.88866	8.40114	1212.55	FALSE	19
2022-09-13	13:29:41	1.85294	8.24225	1250.22	FALSE	19
2022-09-13	13:29:42	1.83523	8.16347	1220.71	FALSE	19
2022-09-13	13:29:42	1.75961	7.8271	1258.04	FALSE	19
2022-09-13	13:29:42	1.97559	8.78782	1229.5	FALSE	19
2022-09-13	13:29:42	3.27177	14.5535	1272.6	1	20
2022-09-13	13:29:43	4.12495	18.3486	1247.85	1	21
2022-09-13	13:29:43	4.4649	19.8608	1292.46	1	22
2022-09-13	13:29:43	3.9739	17.6767	1265.53	1	23
2022-09-13	13:29:43	3.81686	16.9782	1309.43	1	24
2022-09-13	13:29:44	3.44912	15.3424	1280.87	1	25
2022-09-13	13:29:44	2.10882	9.38045	1318.82	FALSE	25
2022-09-13	13:29:44	1.18795	5.28424	1286.15	FALSE	25
2022-09-13	13:29:44	1.09151	4.85525	1323.67	FALSE	25
2022-09-13	13:29:45	1.07935	4.80116	1290.95	FALSE	25
2022-09-13	13:29:45	1.0419	4.63458	1328.3	FALSE	25
2022-09-13	13:29:45	1.12276	4.99426	1295.95	FALSE	25
2022-09-13	13:29:46	1.0852	4.82719	1333.13	FALSE	25
2022-09-13	13:29:46	1.01111	4.49762	1300.45	FALSE	25
2022-09-13	13:29:46	0.94729	4.21374	1337.35	FALSE	25
2022-09-13	13:29:46	0.896501	3.98782	1304.43	FALSE	25
2022-09-13	13:29:47	1.10067	4.896	1342.24	FALSE	25
2022-09-13	13:29:47	1.13289	5.03932	1309.47	FALSE	25
2022-09-13	13:29:47	0.962608	4.28187	1346.52	FALSE	25
2022-09-13	13:29:47	0.948155	4.21758	1313.69	FALSE	25
2022-09-13	13:29:48	0.80902	3.59868	1350.12	FALSE	25
2022-09-13	13:29:48	0.735992	3.27384	1316.96	FALSE	25
2022-09-13	13:29:48	0.732939	3.26026	1353.38	FALSE	25
2022-09-13	13:29:48	0.730598	3.24985	1320.21	FALSE	25
2022-09-13	13:29:49	0.73701	3.27837	1356.66	FALSE	25
2022-09-13	13:29:49	0.741234	3.29716	1323.51	FALSE	25
2022-09-13	13:29:49	0.813143	3.61702	1360.28	FALSE	25
2022-09-13	13:29:50	1.38973	6.1818	1329.69	FALSE	25
2022-09-13	13:29:50	8.98087	39.9487	1400.23	1	26
2022-09-13	13:29:50	2.6796	11.9194	1341.61	FALSE	26
2022-09-13	13:29:50	1.86154	8.2805	1408.51	FALSE	26
2022-09-13	13:29:51	1.64912	7.33562	1348.95	FALSE	26
2022-09-13	13:29:51	1.53238	6.81633	1415.32	FALSE	26
2022-09-13	13:29:51	2.35889	10.4928	1359.44	FALSE	26
2022-09-13	13:29:51	1.78831	7.95476	1423.28	FALSE	26
2022-09-13	13:29:52	1.91625	8.52386	1367.96	FALSE	26
2022-09-13	13:29:52	1.55838	6.93199	1430.21	FALSE	26
2022-09-13	13:29:52	1.52378	6.77808	1374.74	FALSE	26
2022-09-13	13:29:52	1.75045	7.78635	1438	FALSE	26
2022-09-13	13:29:53	1.57665	7.01325	1381.76	FALSE	26
2022-09-13	13:29:53	1.34037	5.96223	1443.96	FALSE	26
2022-09-13	13:29:53	1.35228	6.01521	1387.77	FALSE	26
2022-09-13	13:29:53	1.61574	7.18713	1451.15	FALSE	26
2022-09-13	13:29:54	1.51335	6.73168	1394.5	FALSE	26
2022-09-13	13:29:54	1.07986	4.80343	1455.95	FALSE	26
2022-09-13	13:29:54	1.09243	4.85935	1399.36	FALSE	26
2022-09-13	13:29:55	1.47894	6.57862	1462.53	FALSE	26
2022-09-13	13:29:55	1.60505	7.13958	1406.5	FALSE	26
2022-09-13	13:29:55	1.87162	8.32534	1470.85	FALSE	26
2022-09-13	13:29:55	2.17966	9.69556	1416.2	FALSE	26
2022-09-13	13:29:56	2.14836	9.55633	1480.41	FALSE	26
2022-09-13	13:29:56	2.22576	9.90063	1426.1	FALSE	26
2022-09-13	13:29:56	2.17823	9.6892	1490.1	FALSE	26
2022-09-13	13:29:56	2.27838	10.1347	1436.23	FALSE	26
2022-09-13	13:29:57	2.37375	10.5589	1500.66	FALSE	26
2022-09-13	13:29:57	2.39411	10.6495	1446.88	FALSE	26
2022-09-13	13:29:57	2.5539	11.3603	1512.02	FALSE	26
2022-09-13	13:29:57	1.99314	8.86589	1455.75	FALSE	26
2022-09-13	13:29:58	1.30495	5.80468	1517.82	FALSE	26
2022-09-13	13:29:58	0.979555	4.35726	1460.11	FALSE	26
2022-09-13	13:29:58	0.737977	3.28267	1521.11	FALSE	26
2022-09-13	13:29:59	0.588003	2.61555	1462.72	FALSE	26
2022-09-13	13:29:59	0.248104	1.10362	1522.21	FALSE	26
2022-09-13	13:29:59	1.03258	4.59312	1467.31	FALSE	26
2022-09-13	13:29:59	1.748	7.77545	1529.98	FALSE	26
2022-09-13	13:30:00	2.55701	11.3741	1478.69	FALSE	26
2022-09-13	13:30:00	4.55278	20.2517	1550.24	1	27
2022-09-13	13:30:00	2.81055	12.5019	1491.19	FALSE	27
2022-09-13	13:30:00	0.898537	3.99687	1554.23	FALSE	27
2022-09-13	13:30:01	0.729428	3.24464	1494.43	FALSE	27
2022-09-13	13:30:01	0.725662	3.22789	1557.46	FALSE	27
2022-09-13	13:30:01	0.736349	3.27543	1497.71	FALSE	27
2022-09-13	13:30:01	0.730903	3.2512	1560.71	FALSE	27
2022-09-13	13:30:02	0.0694277	0.308828	1498.02	FALSE	27
2022-09-13	13:30:02	-0.0363229	-0.161572	1560.71	FALSE	27
2022-09-13	13:30:02	0.243372	1.08257	1499.1	FALSE	27
2022-09-13	13:30:03	0.452125	2.01114	1562.72	FALSE	27
2022-09-13	13:30:03	1.07263	4.77127	1503.87	FALSE	27
2022-09-13	13:30:03	0.735229	3.27045	1565.99	FALSE	27
2022-09-13	13:30:03	5.07879	22.5915	1526.46	1	28
2022-09-13	13:30:04	0.761539	3.38748	1569.38	FALSE	28
2022-09-13	13:30:04	1.62419	7.22472	1533.69	FALSE	28
2022-09-13	13:30:04	0.733499	3.26275	1572.64	FALSE	28
2022-09-13	13:30:04	0.753041	3.34968	1537.04	FALSE	28
2022-09-13	13:30:05	0.727392	3.23559	1575.88	FALSE	28
2022-09-13	13:30:05	0.738995	3.2872	1540.33	FALSE	28
2022-09-13	13:30:05	0.735789	3.27294	1579.15	FALSE	28
2022-09-13	13:30:05	0.854466	3.80084	1544.13	FALSE	28
2022-09-13	13:30:06	0.831921	3.70055	1582.85	FALSE	28
2022-09-13	13:30:06	0.871412	3.87621	1548	FALSE	28
2022-09-13	13:30:06	0.737773	3.28176	1586.13	FALSE	28
2022-09-13	13:30:07	0.743575	3.30757	1551.31	FALSE	28
2022-09-13	13:30:07	0.729733	3.246	1589.38	FALSE	28
2022-09-13	13:30:07	0.735127	3.26999	1554.58	FALSE	28
2022-09-13	13:30:07	0.73131	3.25301	1592.63	FALSE	28
2022-09-13	13:30:08	0.731259	3.25279	1557.83	FALSE	28
2022-09-13	13:30:08	0.729936	3.2469	1595.88	FALSE	28
2022-09-13	13:30:08	0.728359	3.23989	1561.07	FALSE	28
2022-09-13	13:30:08	0.732684	3.25912	1599.14	FALSE	28
2022-09-13	13:30:09	0.733142	3.26116	1564.33	FALSE	28
2022-09-13	13:30:09	0.735992	3.27384	1602.41	FALSE	28
2022-09-13	13:30:09	0.734873	3.26886	1567.6	FALSE	28
2022-09-13	13:30:09	0.736145	3.27452	1605.69	FALSE	28
2022-09-13	13:30:10	0.731972	3.25596	1570.86	FALSE	28
2022-09-13	13:30:10	0.738537	3.28516	1608.97	FALSE	28
2022-09-13	13:30:10	0.729326	3.24419	1574.1	FALSE	28
2022-09-13	13:30:11	0.732175	3.25686	1612.23	FALSE	28
2022-09-13	13:30:11	0.738689	3.28584	1577.39	FALSE	28
2022-09-13	13:30:11	0.733651	3.26343	1615.49	FALSE	28
2022-09-13	13:30:11	0.733753	3.26388	1580.65	FALSE	28
2022-09-13	13:30:12	0.734313	3.26637	1618.76	FALSE	28
2022-09-13	13:30:12	0.732837	3.25981	1583.91	FALSE	28
2022-09-13	13:30:12	0.731514	3.25392	1622.01	FALSE	28
2022-09-13	13:30:12	0.728766	3.2417	1587.15	FALSE	28
2022-09-13	13:30:13	0.734873	3.26886	1625.28	FALSE	28
2022-09-13	13:30:13	0.732888	3.26003	1590.41	FALSE	28
2022-09-13	13:30:13	0.732532	3.25845	1628.54	FALSE	28
2022-09-13	13:30:13	0.736043	3.27407	1593.69	FALSE	28
2022-09-13	13:30:14	0.733295	3.26184	1631.8	FALSE	28
2022-09-13	13:30:14	0.729733	3.246	1596.93	FALSE	28
2022-09-13	13:30:14	0.726832	3.23309	1635.04	FALSE	28
2022-09-13	13:30:15	0.728613	3.24102	1600.18	FALSE	28
2022-09-13	13:30:15	0.732277	3.25731	1638.29	FALSE	28
2022-09-13	13:30:15	0.727137	3.23445	1603.41	FALSE	28
2022-09-13	13:30:15	0.736145	3.27452	1641.57	FALSE	28
2022-09-13	13:30:16	0.728054	3.23853	1606.65	FALSE	28
2022-09-13	13:30:16	0.734975	3.26932	1644.84	FALSE	28
2022-09-13	13:30:16	0.735687	3.27248	1609.92	FALSE	28
2022-09-13	13:30:16	0.737773	3.28176	1648.12	FALSE	28
2022-09-13	13:30:17	0.733804	3.26411	1613.19	FALSE	28
2022-09-13	13:30:17	0.730242	3.24826	1651.37	FALSE	28
2022-09-13	13:30:17	0.73299	3.26049	1616.45	FALSE	28
2022-09-13	13:30:17	0.736807	3.27746	1654.64	FALSE	28
2022-09-13	13:30:18	0.740776	3.29512	1619.74	FALSE	28
2022-09-13	13:30:18	0.732583	3.25868	1657.9	FALSE	28
2022-09-13	13:30:18	0.729224	3.24373	1622.98	FALSE	28
2022-09-13	13:30:19	0.730903	3.2512	1661.15	FALSE	28
2022-09-13	13:30:19	0.735178	3.27022	1626.25	FALSE	28
2022-09-13	13:30:19	0.731667	3.2546	1664.41	FALSE	28
2022-09-13	13:30:19	0.731717	3.25482	1629.51	FALSE	28
2022-09-13	13:30:20	0.734211	3.26592	1667.68	FALSE	28
2022-09-13	13:30:20	0.732837	3.25981	1632.77	FALSE	28
2022-09-13	13:30:20	0.739198	3.2881	1670.96	FALSE	28
2022-09-13	13:30:20	0.731717	3.25482	1636.02	FALSE	28
2022-09-13	13:30:21	0.786629	3.49908	1674.46	FALSE	28
2022-09-13	13:30:21	0.742048	3.30078	1639.32	FALSE	28
2022-09-13	13:30:21	0.739402	3.28901	1677.75	FALSE	28
2022-09-13	13:30:21	0.728104	3.23875	1642.56	FALSE	28
2022-09-13	13:30:22	0.737163	3.27905	1681.03	FALSE	28
2022-09-13	13:30:22	0.726629	3.23219	1645.8	FALSE	28
2022-09-13	13:30:22	0.731361	3.25324	1684.28	FALSE	28
2022-09-13	13:30:23	0.731259	3.25279	1649.05	FALSE	28
2022-09-13	13:30:23	0.735382	3.27113	1687.55	FALSE	28
2022-09-13	13:30:23	0.731768	3.25505	1652.3	FALSE	28
2022-09-13	13:30:23	0.738893	3.28674	1690.84	FALSE	28
2022-09-13	13:30:24	0.731921	3.25573	1655.56	FALSE	28
2022-09-13	13:30:24	0.732583	3.25868	1694.1	FALSE	28
2022-09-13	13:30:24	0.729275	3.24396	1658.8	FALSE	28
2022-09-13	13:30:24	0.73701	3.27837	1697.38	FALSE	28
2022-09-13	13:30:25	0.73355	3.26298	1662.07	FALSE	28
2022-09-13	13:30:25	0.733193	3.26139	1700.64	FALSE	28
2022-09-13	13:30:25	0.732125	3.25664	1665.32	FALSE	28
2022-09-13	13:30:25	0.733142	3.26116	1703.9	FALSE	28
2022-09-13	13:30:26	0.73416	3.26569	1668.59	FALSE	28
2022-09-13	13:30:26	0.735483	3.27158	1707.17	FALSE	28
2022-09-13	13:30:26	0.734211	3.26592	1671.85	FALSE	28
2022-09-13	13:30:27	0.73701	3.27837	1710.45	FALSE	28
2022-09-13	13:30:27	0.731005	3.25166	1675.11	FALSE	28
2022-09-13	13:30:27	0.73416	3.26569	1713.72	FALSE	28
2022-09-13	13:30:27	0.742201	3.30146	1678.41	FALSE	28
2022-09-13	13:30:28	0.729987	3.24713	1716.96	FALSE	28
2022-09-13	13:30:28	0.737366	3.27995	1681.69	FALSE	28
2022-09-13	13:30:28	0.733142	3.26116	1720.23	FALSE	28
2022-09-13	13:30:28	0.735992	3.27384	1684.96	FALSE	28
2022-09-13	13:30:29	0.729173	3.24351	1723.47	FALSE	28
2022-09-13	13:30:29	0.733651	3.26343	1688.22	FALSE	28
2022-09-13	13:30:29	0.73416	3.26569	1726.73	FALSE	28
2022-09-13	13:30:29	0.727392	3.23559	1691.46	FALSE	28
2022-09-13	13:30:30	0.737977	3.28267	1730.02	FALSE	28
2022-09-13	13:30:30	0.736043	3.27407	1694.73	FALSE	28
2022-09-13	13:30:30	0.735534	3.2718	1733.29	FALSE	28
2022-09-13	13:30:31	0.73243	3.258	1697.99	FALSE	28
2022-09-13	13:30:31	0.735585	3.27203	1736.56	FALSE	28
2022-09-13	13:30:31	0.73299	3.26049	1701.25	FALSE	28
2022-09-13	13:30:31	0.739504	3.28946	1739.85	FALSE	28
2022-09-13	13:30:32	0.730547	3.24962	1704.5	FALSE	28
2022-09-13	13:30:32	0.733651	3.26343	1743.11	FALSE	28
2022-09-13	13:30:32	0.735992	3.27384	1707.78	FALSE	28
2022-09-13	13:30:32	0.450395	2.00345	1745.12	FALSE	28
2022-09-13	13:30:33	0.523728	2.32965	1710.11	FALSE	28
2022-09-13	13:30:33	0.396501	1.76372	1746.88	FALSE	28
2022-09-13	13:30:33	0.187646	0.834687	1710.94	FALSE	28
2022-09-13	13:30:33	0.571056	2.54017	1749.42	FALSE	28
2022-09-13	13:30:34	0.474415	2.11029	1713.05	FALSE	28
2022-09-13	13:30:34	0.348104	1.54844	1750.97	FALSE	28
2022-09-13	13:30:34	0.303015	1.34787	1714.4	FALSE	28
2022-09-13	13:30:35	0.310802	1.38251	1752.35	FALSE	28
2022-09-13	13:30:35	0.55869	2.48516	1716.88	FALSE	28
2022-09-13	13:30:35	0.73472	3.26818	1755.62	FALSE	28
2022-09-13	13:30:35	0.735738	3.27271	1720.16	FALSE	28
2022-09-13	13:30:36	0.730649	3.25007	1758.87	FALSE	28
2022-09-13	13:30:36	0.735534	3.2718	1723.43	FALSE	28
2022-09-13	13:30:36	0.73874	3.28606	1762.16	FALSE	28
2022-09-13	13:30:36	0.734211	3.26592	1726.69	FALSE	28
2022-09-13	13:30:37	0.735382	3.27113	1765.43	FALSE	28
2022-09-13	13:30:37	0.734313	3.26637	1729.96	FALSE	28
2022-09-13	13:30:37	0.739249	3.28833	1768.72	FALSE	28
2022-09-13	13:30:37	0.729886	3.24668	1733.21	FALSE	28
2022-09-13	13:30:38	0.728257	3.23943	1771.96	FALSE	28
2022-09-13	13:30:38	0.733651	3.26343	1736.47	FALSE	28
2022-09-13	13:30:38	0.733092	3.26094	1775.22	FALSE	28
2022-09-13	13:30:38	0.715331	3.18194	1739.65	FALSE	28
2022-09-13	13:30:39	0.424389	1.88777	1777.1	FALSE	28
2022-09-13	13:30:39	0.48098	2.1395	1741.79	FALSE	28
2022-09-13	13:30:39	0.391412	1.74108	1778.84	FALSE	28
2022-09-13	13:30:40	0.546985	2.4331	1744.23	FALSE	28
2022-09-13	13:30:40	0.394567	1.75511	1780.6	FALSE	28
2022-09-13	13:30:40	0.461947	2.05483	1746.28	FALSE	28
2022-09-13	13:30:40	0.366323	1.62948	1782.23	FALSE	28
2022-09-13	13:30:41	0.4764	2.11912	1748.4	FALSE	28
2022-09-13	13:30:41	0.411616	1.83095	1784.06	FALSE	28
2022-09-13	13:30:41	0.45528	2.02518	1750.42	FALSE	28
2022-09-13	13:30:41	0.426629	1.89773	1785.96	FALSE	28
2022-09-13	13:30:42	0.474873	2.11233	1752.54	FALSE	28
2022-09-13	13:30:42	0.413855	1.84091	1787.8	FALSE	28
2022-09-13	13:30:42	0.477316	2.1232	1754.66	FALSE	28
2022-09-13	13:30:42	0.402812	1.79179	1789.59	FALSE	28
2022-09-13	13:30:43	0.52612	2.34029	1757	FALSE	28
2022-09-13	13:30:43	0.566069	2.51799	1792.11	FALSE	28
2022-09-13	13:30:43	0.761183	3.38589	1760.39	FALSE	28
2022-09-13	13:30:44	1.11574	4.96303	1797.07	FALSE	28
2022-09-13	13:30:44	0.582557	2.59133	1762.98	FALSE	28
2022-09-13	13:30:44	0.518588	2.30678	1799.38	FALSE	28
2022-09-13	13:30:44	0.415636	1.84883	1764.83	FALSE	28
2022-09-13	13:30:45	0.360165	1.60209	1800.98	FALSE	28
2022-09-13	13:30:45	0.374619	1.66638	1766.49	FALSE	28
2022-09-13	13:30:45	0.290496	1.29218	1802.27	FALSE	28
2022-09-13	13:30:45	0.271514	1.20775	1767.7	FALSE	28
2022-09-13	13:30:46	0.165255	0.735087	1803.01	FALSE	28
2022-09-13	13:30:46	0.225356	1.00243	1768.7	FALSE	28
2022-09-13	13:30:46	0.266883	1.18715	1804.2	FALSE	28
2022-09-13	13:30:46	0.248919	1.10724	1769.81	FALSE	28
2022-09-13	13:30:47	0.54103	2.40661	1806.6	FALSE	28
2022-09-13	13:30:47	0.452379	2.01227	1771.82	FALSE	28
2022-09-13	13:30:47	0.610547	2.71584	1809.32	FALSE	28
2022-09-13	13:30:48	1.32108	5.87643	1777.7	FALSE	28
2022-09-13	13:30:48	0.714567	3.17854	1812.5	FALSE	28
2022-09-13	13:30:48	0.711921	3.16677	1780.87	FALSE	28
2022-09-13	13:30:48	0.826476	3.67633	1816.17	FALSE	28
2022-09-13	13:30:49	0.541438	2.40842	1783.27	FALSE	28
2022-09-13	13:30:49	0.683066	3.03841	1819.21	FALSE	28
2022-09-13	13:30:49	0.574059	2.55353	1785.83	FALSE	28
2022-09-13	13:30:49	0.429071	1.90859	1821.12	FALSE	28
2022-09-13	13:30:50	0.460776	2.04962	1787.88	FALSE	28
2022-09-13	13:30:50	0.396959	1.76575	1822.89	FALSE	28
2022-09-13	13:30:50	0.288868	1.28494	1789.16	FALSE	28
2022-09-13	13:30:50	0.192786	0.857551	1823.74	FALSE	28
2022-09-13	13:30:51	0.151107	0.672154	1789.83	FALSE	28
2022-09-13	13:30:51	0.220878	0.98251	1824.73	FALSE	28
2022-09-13	13:30:51	0.256603	1.14142	1790.98	FALSE	28
2022-09-13	13:30:52	0.310751	1.38228	1826.11	FALSE	28
2022-09-13	13:30:52	0.349377	1.5541	1792.53	FALSE	28
2022-09-13	13:30:52	0.426883	1.89886	1828.01	FALSE	28
2022-09-13	13:30:52	0.48215	2.1447	1794.67	FALSE	28
2022-09-13	13:30:53	0.460166	2.04691	1830.05	FALSE	28
2022-09-13	13:30:53	0.292888	1.30282	1795.98	FALSE	28
2022-09-13	13:30:53	0.296247	1.31777	1831.37	FALSE	28
2022-09-13	13:30:53	0.310191	1.37979	1797.36	FALSE	28
2022-09-13	13:30:54	0.0947712	0.421561	1831.79	FALSE	28
2022-09-13	13:30:54	-0.0918954	-0.408769	1797.36	FALSE	28
2022-09-13	13:30:54	0.13701	0.609448	1832.4	FALSE	28
2022-09-13	13:30:54	0.254568	1.13237	1798.49	FALSE	28
2022-09-13	13:30:55	0.233855	1.04023	1833.44	FALSE	28
2022-09-13	13:30:55	0.297824	1.32478	1799.81	FALSE	28
2022-09-13	13:30:55	0.211463	0.94063	1834.38	FALSE	28
2022-09-13	13:30:56	0.0886643	0.394397	1800.21	FALSE	28
2022-09-13	13:30:56	0.0797076	0.354555	1834.74	FALSE	28
2022-09-13	13:30:56	0.118079	0.525239	1800.73	FALSE	28
2022-09-13	13:30:56	0.28388	1.26276	1836	FALSE	28
2022-09-13	13:30:57	0.216909	0.964855	1801.7	FALSE	28
2022-09-13	13:30:57	0.296501	1.3189	1837.32	FALSE	28
2022-09-13	13:30:57	0.300827	1.33814	1803.04	FALSE	28
2022-09-13	13:30:57	0.385305	1.71391	1839.03	FALSE	28
2022-09-13	13:30:58	0.343575	1.52829	1804.57	FALSE	28
2022-09-13	13:30:58	0.340573	1.51494	1840.55	FALSE	28
2022-09-13	13:30:58	0.36159	1.60842	1806.17	FALSE	28
2022-09-13	13:30:58	0.417061	1.85517	1842.4	FALSE	28
2022-09-13	13:30:59	0.466171	2.07362	1808.25	FALSE	28
2022-09-13	13:30:59	0.426985	1.89931	1844.3	FALSE	28
2022-09-13	13:30:59	0.399046	1.77504	1810.02	FALSE	28
2022-09-13	13:31:00	0.383168	1.70441	1846.01	FALSE	28
2022-09-13	13:31:00	0.394822	1.75625	1811.78	FALSE	28
2022-09-13	13:31:00	0.37701	1.67702	1847.68	FALSE	28
2022-09-13	13:31:00	0.369377	1.64306	1813.42	FALSE	28
2022-09-13	13:31:01	0.367392	1.63423	1849.32	FALSE	28
2022-09-13	13:31:01	0.371158	1.65099	1815.07	FALSE	28
2022-09-13	13:31:01	0.381031	1.6949	1851.01	FALSE	28
2022-09-13	13:31:01	0.395636	1.75987	1816.83	FALSE	28
2022-09-13	13:31:02	0.3707	1.64895	1852.66	FALSE	28
2022-09-13	13:31:02	0.378181	1.68222	1818.51	FALSE	28
2022-09-13	13:31:02	0.222099	0.987941	1853.65	FALSE	28
2022-09-13	13:31:02	0.121234	0.539273	1819.05	FALSE	28
2022-09-13	13:31:03	0.733448	3.26252	1856.91	FALSE	28
2022-09-13	13:31:03	0.730191	3.24804	1822.3	FALSE	28
2022-09-13	13:31:03	0.734415	3.26682	1860.18	FALSE	28
2022-09-13	13:31:04	0.735483	3.27158	1825.57	FALSE	28
2022-09-13	13:31:04	0.736349	3.27543	1863.45	FALSE	28
2022-09-13	13:31:04	0.73187	3.2555	1828.83	FALSE	28
2022-09-13	13:31:04	0.331158	1.47306	1864.93	FALSE	28
2022-09-13	13:31:05	0.0146695	0.0652529	1828.89	FALSE	28
2022-09-13	13:31:05	0.047443	0.211036	1865.14	FALSE	28
2022-09-13	13:31:05	0.10897	0.48472	1829.38	FALSE	28
2022-09-13	13:31:05	0.100471	0.446915	1865.59	FALSE	28
2022-09-13	13:31:06	0.100929	0.448952	1829.83	FALSE	28
2022-09-13	13:31:06	0.112583	0.500792	1866.09	FALSE	28
2022-09-13	13:31:06	0.125204	0.556932	1830.39	FALSE	28
2022-09-13	13:31:06	0.135433	0.602433	1866.69	FALSE	28
2022-09-13	13:31:07	0.125356	0.557609	1830.94	FALSE	28
2022-09-13	13:31:07	0.130395	0.580023	1867.27	FALSE	28
2022-09-13	13:31:07	0.125967	0.560326	1831.5	FALSE	28
2022-09-13	13:31:08	0.0954328	0.424504	1867.69	FALSE	28
2022-09-13	13:31:08	0.35187	1.56519	1833.07	FALSE	28
2022-09-13	13:31:08	0.741132	3.2967	1870.99	FALSE	28
2022-09-13	13:31:08	0.73416	3.26569	1836.33	FALSE	28
2022-09-13	13:31:09	0.731412	3.25347	1874.24	FALSE	28
2022-09-13	13:31:09	0.734008	3.26501	1839.6	FALSE	28
2022-09-13	13:31:09	0.731463	3.25369	1877.5	FALSE	28
2022-09-13	13:31:09	0.733601	3.2632	1842.86	FALSE	28
2022-09-13	13:31:10	0.740165	3.2924	1880.79	FALSE	28
2022-09-13	13:31:10	0.739198	3.2881	1846.15	FALSE	28
2022-09-13	13:31:10	0.73416	3.26569	1884.06	FALSE	28
2022-09-13	13:31:10	0.737468	3.28041	1849.43	FALSE	28
2022-09-13	13:31:11	0.736094	3.27429	1887.33	FALSE	28
2022-09-13	13:31:11	0.738791	3.28629	1852.72	FALSE	28
2022-09-13	13:31:11	0.739198	3.2881	1890.62	FALSE	28
2022-09-13	13:31:12	0.737672	3.28131	1856	FALSE	28
2022-09-13	13:31:12	0.732684	3.25912	1893.88	FALSE	28
2022-09-13	13:31:12	0.735229	3.27045	1859.27	FALSE	28
2022-09-13	13:31:12	0.736756	3.27724	1897.15	FALSE	28
2022-09-13	13:31:13	0.739555	3.28969	1862.56	FALSE	28
2022-09-13	13:31:13	0.732786	3.25958	1900.41	FALSE	28
2022-09-13	13:31:13	0.732074	3.25641	1865.81	FALSE	28
2022-09-13	13:31:13	0.737061	3.27859	1903.69	FALSE	28
2022-09-13	13:31:14	0.733804	3.26411	1869.08	FALSE	28
2022-09-13	13:31:14	0.736094	3.27429	1906.97	FALSE	28
2022-09-13	13:31:14	0.732328	3.25754	1872.34	FALSE	28
2022-09-13	13:31:14	0.732074	3.25641	1910.22	FALSE	28
2022-09-13	13:31:15	0.732481	3.25822	1875.59	FALSE	28
2022-09-13	13:31:15	0.735992	3.27384	1913.5	FALSE	28
2022-09-13	13:31:15	0.735178	3.27022	1878.86	FALSE	28
2022-09-13	13:31:16	0.734924	3.26909	1916.77	FALSE	28
2022-09-13	13:31:16	0.734415	3.26682	1882.13	FALSE	28
2022-09-13	13:31:16	0.738079	3.28312	1920.05	FALSE	28
2022-09-13	13:31:16	0.732583	3.25868	1885.39	FALSE	28
2022-09-13	13:31:17	0.738944	3.28697	1923.34	FALSE	28
2022-09-13	13:31:17	0.741183	3.29693	1888.69	FALSE	28
2022-09-13	13:31:17	0.73187	3.2555	1926.59	FALSE	28
2022-09-13	13:31:17	0.258232	1.14867	1889.84	FALSE	28
2022-09-13	13:31:18	0.223422	0.993826	1927.59	FALSE	28
2022-09-13	13:31:18	0.190496	0.847364	1890.68	FALSE	28
2022-09-13	13:31:18	0.199453	0.887207	1928.47	FALSE	28
2022-09-13	13:31:18	0.264491	1.17651	1891.86	FALSE	28
2022-09-13	13:31:19	0.325662	1.44861	1929.92	FALSE	28
2022-09-13	13:31:19	0.380165	1.69105	1893.55	FALSE	28
2022-09-13	13:31:19	0.557366	2.47928	1932.4	FALSE	28
2022-09-13	13:31:20	0.458384	2.03898	1895.59	FALSE	28
2022-09-13	13:31:20	0.736807	3.27746	1935.68	FALSE	28
2022-09-13	13:31:20	0.732175	3.25686	1898.85	FALSE	28
2022-09-13	13:31:20	0.728562	3.24079	1938.92	FALSE	28
2022-09-13	13:31:21	0.738435	3.28471	1902.13	FALSE	28
2022-09-13	13:31:21	0.737926	3.28244	1942.2	FALSE	28
2022-09-13	13:31:21	0.729275	3.24396	1905.38	FALSE	28
2022-09-13	13:31:21	0.72729	3.23513	1945.44	FALSE	28
2022-09-13	13:31:22	0.731209	3.25256	1908.63	FALSE	28
2022-09-13	13:31:22	0.734364	3.2666	1948.7	FALSE	28
2022-09-13	13:31:22	0.73986	3.29105	1911.92	FALSE	28
2022-09-13	13:31:22	0.739453	3.28923	1951.99	FALSE	28
2022-09-13	13:31:23	0.734109	3.26546	1915.18	FALSE	28
2022-09-13	13:31:23	0.737773	3.28176	1955.27	FALSE	28
2022-09-13	13:31:23	0.733092	3.26094	1918.45	FALSE	28
2022-09-13	13:31:23	0.732939	3.26026	1958.53	FALSE	28
2022-09-13	13:31:24	0.732634	3.2589	1921.7	FALSE	28
2022-09-13	13:31:24	0.738588	3.28539	1961.82	FALSE	28
2022-09-13	13:31:24	0.444542	1.97741	1923.68	FALSE	28
2022-09-13	13:31:25	0.259046	1.15229	1962.97	FALSE	28
2022-09-13	13:31:25	0.21869	0.972777	1924.65	FALSE	28
2022-09-13	13:31:25	-0.0493	-0.219296	1962.97	FALSE	28
2022-09-13	13:31:25	-0.187824	-0.835479	1924.65	FALSE	28
2022-09-13	13:31:26	-0.100954	-0.449064	1962.97	FALSE	28
2022-09-13	13:31:26	-0.141157	-0.627895	1924.65	FALSE	28
2022-09-13	13:31:26	-0.0279768	-0.124446	1962.97	FALSE	28
2022-09-13	13:31:26	-0.0788165	-0.350592	1924.65	FALSE	28
2022-09-13	13:31:27	0.0476974	0.212168	1963.18	FALSE	28
2022-09-13	13:31:27	0.00276106	0.0122817	1924.67	FALSE	28
2022-09-13	13:31:27	0.0437788	0.194737	1963.38	FALSE	28
2022-09-13	13:31:27	0.0357381	0.15897	1924.83	FALSE	28
2022-09-13	13:31:28	0.0458654	0.204018	1963.58	FALSE	28
2022-09-13	13:31:28	0.0818959	0.364289	1925.19	FALSE	28
2022-09-13	13:31:28	0.103779	0.46163	1964.04	FALSE	28
2022-09-13	13:31:29	0.242049	1.07668	1926.27	FALSE	28
2022-09-13	13:31:29	0.385356	1.71414	1965.76	FALSE	28
2022-09-13	13:31:29	0.371514	1.65257	1927.92	FALSE	28
2022-09-13	13:31:29	2.12302	9.44362	1975.2	FALSE	28
2022-09-13	13:31:30	3.02174	13.4413	1941.36	1	29
2022-09-13	13:31:30	2.07559	9.23264	1984.43	FALSE	29
2022-09-13	13:31:30	2.43487	10.8308	1952.19	FALSE	29
2022-09-13	13:31:30	0.887545	3.94798	1988.38	FALSE	29
2022-09-13	13:31:31	1.85701	8.26035	1960.45	FALSE	29
2022-09-13	13:31:31	3.08072	13.7037	2002.09	1	30
2022-09-13	13:31:31	2.52296	11.2226	1971.67	FALSE	30
2022-09-13	13:31:31	2.88683	12.8412	2014.93	FALSE	30
2022-09-13	13:31:32	2.5052	11.1436	1982.82	FALSE	30
2022-09-13	13:31:32	0.864491	3.84543	2018.77	FALSE	30
2022-09-13	13:31:32	2.18495	9.71909	1992.54	FALSE	30
2022-09-13	13:31:33	0.239962	1.0674	2019.84	FALSE	30
2022-09-13	13:31:33	0.283524	1.26117	1993.8	FALSE	30
2022-09-13	13:31:33	0.348766	1.55138	2021.39	FALSE	30
2022-09-13	13:31:33	0.0761962	0.338936	1994.14	FALSE	30
2022-09-13	13:31:34	0.3707	1.64895	2023.04	FALSE	30
2022-09-13	13:31:34	0.0589443	0.262196	1994.4	FALSE	30
2022-09-13	13:31:34	0.324084	1.44159	2024.48	FALSE	30
2022-09-13	13:31:34	0.243168	1.08166	1995.48	FALSE	30
2022-09-13	13:31:35	0.584033	2.5979	2027.08	FALSE	30
2022-09-13	13:31:35	0.729224	3.24373	1998.72	FALSE	30
2022-09-13	13:31:35	0.659351	2.93293	2030.01	FALSE	30
2022-09-13	13:31:35	0.728613	3.24102	2001.97	FALSE	30
2022-09-13	13:31:36	0.738435	3.28471	2033.3	FALSE	30
2022-09-13	13:31:36	0.732684	3.25912	2005.23	FALSE	30
2022-09-13	13:31:36	0.735585	3.27203	2036.57	FALSE	30
2022-09-13	13:31:37	0.73874	3.28606	2008.51	FALSE	30
2022-09-13	13:31:37	0.734059	3.26524	2039.84	FALSE	30
2022-09-13	13:31:37	0.733244	3.26162	2011.77	FALSE	30
2022-09-13	13:31:37	0.73528	3.27067	2043.11	FALSE	30
2022-09-13	13:31:38	0.729326	3.24419	2015.02	FALSE	30
2022-09-13	13:31:38	0.744287	3.31074	2046.42	FALSE	30
2022-09-13	13:31:38	0.737977	3.28267	2018.3	FALSE	30
2022-09-13	13:31:38	0.732735	3.25935	2049.68	FALSE	30
2022-09-13	13:31:39	0.731361	3.25324	2021.55	FALSE	30
2022-09-13	13:31:39	0.738028	3.2829	2052.96	FALSE	30
2022-09-13	13:31:39	0.73131	3.25301	2024.81	FALSE	30
2022-09-13	13:31:39	0.734364	3.2666	2056.23	FALSE	30
2022-09-13	13:31:40	0.733957	3.26479	2028.07	FALSE	30
2022-09-13	13:31:40	0.729224	3.24373	2059.47	FALSE	30
2022-09-13	13:31:40	0.734568	3.26751	2031.34	FALSE	30
2022-09-13	13:31:41	0.738028	3.2829	2062.75	FALSE	30
2022-09-13	13:31:41	0.724135	3.2211	2034.56	FALSE	30
2022-09-13	13:31:41	0.728206	3.23921	2065.99	FALSE	30
2022-09-13	13:31:41	0.740369	3.29331	2037.85	FALSE	30
2022-09-13	13:31:42	0.731005	3.25166	2069.24	FALSE	30
2022-09-13	13:31:42	0.737875	3.28222	2041.13	FALSE	30
2022-09-13	13:31:42	0.731667	3.2546	2072.5	FALSE	30
2022-09-13	13:31:42	0.737824	3.28199	2044.42	FALSE	30
2022-09-13	13:31:43	0.731361	3.25324	2075.75	FALSE	30
2022-09-13	13:31:43	0.732786	3.25958	2047.68	FALSE	30
2022-09-13	13:31:43	0.732939	3.26026	2079.01	FALSE	30
2022-09-13	13:31:43	0.729122	3.24328	2050.92	FALSE	30
2022-09-13	13:31:44	0.731819	3.25528	2082.27	FALSE	30
2022-09-13	13:31:44	0.731056	3.25188	2054.17	FALSE	30
2022-09-13	13:31:44	0.737875	3.28222	2085.55	FALSE	30
2022-09-13	13:31:45	0.732023	3.25618	2057.43	FALSE	30
2022-09-13	13:31:45	0.73528	3.27067	2088.82	FALSE	30
2022-09-13	13:31:45	0.734568	3.26751	2060.7	FALSE	30
2022-09-13	13:31:45	0.733346	3.26207	2092.08	FALSE	30
2022-09-13	13:31:46	0.730903	3.2512	2063.95	FALSE	30
2022-09-13	13:31:46	0.735789	3.27294	2095.35	FALSE	30
2022-09-13	13:31:46	0.735738	3.27271	2067.22	FALSE	30
2022-09-13	13:31:46	0.734517	3.26728	2098.62	FALSE	30
2022-09-13	13:31:47	0.736654	3.27678	2070.5	FALSE	30
2022-09-13	13:31:47	0.731972	3.25596	2101.88	FALSE	30
2022-09-13	13:31:47	0.736959	3.27814	2073.77	FALSE	30
2022-09-13	13:31:47	0.725102	3.2254	2105.1	FALSE	30
2022-09-13	13:31:48	0.725509	3.22721	2077	FALSE	30
2022-09-13	13:31:48	0.734008	3.26501	2108.37	FALSE	30
2022-09-13	13:31:48	0.731972	3.25596	2080.26	FALSE	30
2022-09-13	13:31:49	0.731463	3.25369	2111.62	FALSE	30
2022-09-13	13:31:49	0.728104	3.23875	2083.5	FALSE	30
2022-09-13	13:31:49	0.728919	3.24238	2114.86	FALSE	30
2022-09-13	13:31:49	0.725763	3.22834	2086.72	FALSE	30
2022-09-13	13:31:50	0.726985	3.23377	2118.1	FALSE	30
2022-09-13	13:31:50	0.724644	3.22336	2089.95	FALSE	30
2022-09-13	13:31:50	0.731107	3.25211	2121.35	FALSE	30
2022-09-13	13:31:50	0.730293	3.24849	2093.2	FALSE	30
2022-09-13	13:31:51	0.736145	3.27452	2124.62	FALSE	30
2022-09-13	13:31:51	0.726018	3.22947	2096.43	FALSE	30
2022-09-13	13:31:51	0.737112	3.27882	2127.9	FALSE	30
2022-09-13	13:31:51	0.731616	3.25437	2099.68	FALSE	30
2022-09-13	13:31:52	0.729326	3.24419	2131.15	FALSE	30
2022-09-13	13:31:52	0.737366	3.27995	2102.96	FALSE	30
2022-09-13	13:31:52	0.729529	3.24509	2134.39	FALSE	30
2022-09-13	13:31:53	0.739758	3.29059	2106.25	FALSE	30
2022-09-13	13:31:53	0.730903	3.2512	2137.64	FALSE	30
2022-09-13	13:31:53	0.732939	3.26026	2109.51	FALSE	30
2022-09-13	13:31:53	0.733499	3.26275	2140.91	FALSE	30
2022-09-13	13:31:54	0.73528	3.27067	2112.78	FALSE	30
2022-09-13	13:31:54	0.738079	3.28312	2144.19	FALSE	30
2022-09-13	13:31:54	0.722252	3.21272	2115.99	FALSE	30
2022-09-13	13:31:54	0.731565	3.25415	2147.44	FALSE	30
2022-09-13	13:31:55	0.729428	3.24464	2119.24	FALSE	30
2022-09-13	13:31:55	0.734211	3.26592	2150.71	FALSE	30
2022-09-13	13:31:55	0.73645	3.27588	2122.51	FALSE	30
2022-09-13	13:31:55	0.733906	3.26456	2153.97	FALSE	30
2022-09-13	13:31:56	0.733753	3.26388	2125.78	FALSE	30
2022-09-13	13:31:56	0.735382	3.27113	2157.25	FALSE	30
2022-09-13	13:31:56	0.738181	3.28358	2129.06	FALSE	30
2022-09-13	13:31:57	0.72902	3.24283	2160.49	FALSE	30
2022-09-13	13:31:57	0.734669	3.26795	2132.33	FALSE	30
2022-09-13	13:31:57	0.734364	3.2666	2163.75	FALSE	30
2022-09-13	13:31:57	0.735941	3.27361	2135.6	FALSE	30
2022-09-13	13:31:58	0.728359	3.23989	2166.99	FALSE	30
2022-09-13	13:31:58	0.737875	3.28222	2138.89	FALSE	30
2022-09-13	13:31:58	0.740267	3.29286	2170.29	FALSE	30
2022-09-13	13:31:58	0.728206	3.23921	2142.13	FALSE	30
2022-09-13	13:31:59	0.735483	3.27158	2173.56	FALSE	30
2022-09-13	13:31:59	-0.406246	-1.80706	2142.13	FALSE	30
2022-09-13	13:31:59	-0.208028	-0.92535	2173.56	FALSE	30
2022-09-13	13:31:59	-0.34818	-1.54877	2142.13	FALSE	30

## Sheet: Daisy_harness_2022913132646 (2)
Date	Time	Lbs	Total force x time			**GoPro Fitting: 1316
2022-09-13	13:26:59	0.814211	0.814211	FALSE	0			Total force x time	970.209
2022-09-13	13:26:59	0.660012	1.47422	FALSE	0			Total steps	30
2022-09-13	13:26:59	0.386985	1.86121	FALSE	0
2022-09-13	13:26:59	0.727341	2.58855	FALSE	0
2022-09-13	13:27:00	0.733499	3.32205	FALSE	0
2022-09-13	13:27:00	0.73014	4.05219	FALSE	0
2022-09-13	13:27:00	0.734822	4.78701	FALSE	0
2022-09-13	13:27:00	0.731565	5.51858	FALSE	0
2022-09-13	13:27:01	0.734568	6.25314	FALSE	0
2022-09-13	13:27:01	0.737722	6.99087	FALSE	0
2022-09-13	13:27:01	0.737265	7.72813	FALSE	0
2022-09-13	13:27:02	0.727952	8.45608	FALSE	0
2022-09-13	13:27:02	0.736908	9.19299	FALSE	0
2022-09-13	13:27:02	0.252532	9.44552	FALSE	0
2022-09-13	13:27:02	0.725102	10.1706	FALSE	0
2022-09-13	13:27:03	0.732837	10.9035	FALSE	0
2022-09-13	13:27:03	0.739097	11.6426	FALSE	0
2022-09-13	13:27:03	0.730394	12.373	FALSE	0
2022-09-13	13:27:03	0.612125	12.9851	FALSE	0
2022-09-13	13:27:04	-0.195865	12.9851	FALSE	0
2022-09-13	13:27:04	0.146781	13.1319	FALSE	0
2022-09-13	13:27:04	-0.123091	13.1319	FALSE	0
2022-09-13	13:27:04	-0.117341	13.1319	FALSE	0
2022-09-13	13:27:05	-0.486704	13.1319	FALSE	0
2022-09-13	13:27:05	-0.208129	13.1319	FALSE	0
2022-09-13	13:27:05	0.33869	13.4705	FALSE	0
2022-09-13	13:27:06	-0.228231	13.4705	FALSE	0
2022-09-13	13:27:06	-0.78986	13.4705	FALSE	0
2022-09-13	13:27:06	-0.858002	13.4705	FALSE	0
2022-09-13	13:27:06	-0.747366	13.4705	FALSE	0
2022-09-13	13:27:07	-0.878002	13.4705	FALSE	0
2022-09-13	13:27:07	-0.811131	13.4705	FALSE	0
2022-09-13	13:27:07	-0.826348	13.4705	FALSE	0
2022-09-13	13:27:07	-0.78991	13.4705	FALSE	0
2022-09-13	13:27:08	-1.00182	13.4705	FALSE	0
2022-09-13	13:27:08	-0.990674	13.4705	FALSE	0
2022-09-13	13:27:08	-1.0952	13.4705	FALSE	0
2022-09-13	13:27:08	-1.03225	13.4705	FALSE	0
2022-09-13	13:27:09	-1.32762	13.4705	FALSE	0
2022-09-13	13:27:09	-1.17067	13.4705	FALSE	0
2022-09-13	13:27:09	-1.27536	13.4705	FALSE	0
2022-09-13	13:27:10	-1.18594	13.4705	FALSE	0
2022-09-13	13:27:10	-1.06599	13.4705	FALSE	0
2022-09-13	13:27:10	-0.84477	13.4705	FALSE	0
2022-09-13	13:27:10	-0.941157	13.4705	FALSE	0
2022-09-13	13:27:11	-0.946348	13.4705	FALSE	0
2022-09-13	13:27:11	-0.920444	13.4705	FALSE	0
2022-09-13	13:27:11	0.493499	13.964	FALSE	0
2022-09-13	13:27:11	0.733448	14.6975	FALSE	0
2022-09-13	13:27:12	0.732786	15.4303	FALSE	0
2022-09-13	13:27:12	0.740827	16.1711	FALSE	0
2022-09-13	13:27:12	0.735534	16.9066	FALSE	0
2022-09-13	13:27:12	0.72785	17.6345	FALSE	0
2022-09-13	13:27:13	0.738282	18.3728	FALSE	0
2022-09-13	13:27:13	0.733041	19.1058	FALSE	0
2022-09-13	13:27:13	0.739809	19.8456	FALSE	0
2022-09-13	13:27:14	0.73813	20.5838	FALSE	0
2022-09-13	13:27:14	0.734873	21.3186	FALSE	0
2022-09-13	13:27:14	0.737163	22.0558	FALSE	0
2022-09-13	13:27:14	0.735941	22.7917	FALSE	0
2022-09-13	13:27:15	0.733804	23.5255	FALSE	0
2022-09-13	13:27:15	0.742608	24.2681	FALSE	0
2022-09-13	13:27:15	0.737773	25.0059	FALSE	0
2022-09-13	13:27:15	0.733753	25.7397	FALSE	0
2022-09-13	13:27:16	0.730242	26.4699	FALSE	0
2022-09-13	13:27:16	0.733346	27.2033	FALSE	0
2022-09-13	13:27:16	0.738689	27.9419	FALSE	0
2022-09-13	13:27:16	0.737163	28.6791	FALSE	0
2022-09-13	13:27:17	0.731158	29.4103	FALSE	0
2022-09-13	13:27:17	0.737214	30.1475	FALSE	0
2022-09-13	13:27:17	0.734669	30.8822	FALSE	0
2022-09-13	13:27:17	0.737417	31.6196	FALSE	0
2022-09-13	13:27:18	0.731463	32.351	FALSE	0
2022-09-13	13:27:18	0.735483	33.0865	FALSE	0
2022-09-13	13:27:18	0.729631	33.8161	FALSE	0
2022-09-13	13:27:19	0.73416	34.5503	FALSE	0
2022-09-13	13:27:19	0.731565	35.2819	FALSE	0
2022-09-13	13:27:19	0.732175	36.014	FALSE	0
2022-09-13	13:27:19	0.737824	36.7519	FALSE	0
2022-09-13	13:27:20	0.737417	37.4893	FALSE	0
2022-09-13	13:27:20	0.730903	38.2202	FALSE	0
2022-09-13	13:27:20	0.728715	38.9489	FALSE	0
2022-09-13	13:27:20	0.729886	39.6788	FALSE	0
2022-09-13	13:27:21	0.728359	40.4071	FALSE	0
2022-09-13	13:27:21	0.732583	41.1397	FALSE	0
2022-09-13	13:27:21	0.731565	41.8713	FALSE	0
2022-09-13	13:27:21	0.736399	42.6077	FALSE	0
2022-09-13	13:27:22	0.732888	43.3406	FALSE	0
2022-09-13	13:27:22	0.733041	44.0736	FALSE	0
2022-09-13	13:27:22	0.730598	44.8042	FALSE	0
2022-09-13	13:27:23	0.725967	45.5302	FALSE	0
2022-09-13	13:27:23	0.739453	46.2696	FALSE	0
2022-09-13	13:27:23	0.735483	47.0051	FALSE	0
2022-09-13	13:27:23	0.737112	47.7422	FALSE	0
2022-09-13	13:27:24	0.738384	48.4806	FALSE	0
2022-09-13	13:27:24	0.736654	49.2173	FALSE	0
2022-09-13	13:27:24	0.731514	49.9488	FALSE	0
2022-09-13	13:27:24	0.740013	50.6888	FALSE	0
2022-09-13	13:27:25	0.73701	51.4258	FALSE	0
2022-09-13	13:27:25	0.735178	52.161	FALSE	0
2022-09-13	13:27:25	0.736247	52.8972	FALSE	0
2022-09-13	13:27:25	0.739656	53.6369	FALSE	0
2022-09-13	13:27:26	0.735433	54.3723	FALSE	0
2022-09-13	13:27:26	0.732277	55.1046	FALSE	0
2022-09-13	13:27:26	0.73131	55.8359	FALSE	0
2022-09-13	13:27:27	0.736501	56.5724	FALSE	0
2022-09-13	13:27:27	0.729886	57.3023	FALSE	0
2022-09-13	13:27:27	0.735178	58.0375	FALSE	0
2022-09-13	13:27:27	0.726374	58.7639	FALSE	0
2022-09-13	13:27:28	0.73874	59.5026	FALSE	0
2022-09-13	13:27:28	0.735127	60.2377	FALSE	0
2022-09-13	13:27:28	0.745814	60.9835	FALSE	0
2022-09-13	13:27:28	0.741489	61.725	FALSE	0
2022-09-13	13:27:29	0.732226	62.4572	FALSE	0
2022-09-13	13:27:29	0.733957	63.1912	FALSE	0
2022-09-13	13:27:29	0.726781	63.918	FALSE	0
2022-09-13	13:27:29	0.73472	64.6527	FALSE	0
2022-09-13	13:27:30	0.730598	65.3833	FALSE	0
2022-09-13	13:27:30	0.72673	66.11	FALSE	0
2022-09-13	13:27:30	0.732939	66.843	FALSE	0
2022-09-13	13:27:31	0.734364	67.5773	FALSE	0
2022-09-13	13:27:31	0.735483	68.3128	FALSE	0
2022-09-13	13:27:31	0.726578	69.0394	FALSE	0
2022-09-13	13:27:31	0.729987	69.7694	FALSE	0
2022-09-13	13:27:32	0.738537	70.5079	FALSE	0
2022-09-13	13:27:32	0.730852	71.2388	FALSE	0
2022-09-13	13:27:32	0.733906	71.9727	FALSE	0
2022-09-13	13:27:32	0.729631	72.7023	FALSE	0
2022-09-13	13:27:33	0.734873	73.4372	FALSE	0
2022-09-13	13:27:33	0.733651	74.1708	FALSE	0
2022-09-13	13:27:33	0.73528	74.9061	FALSE	0
2022-09-13	13:27:33	0.734109	75.6402	FALSE	0
2022-09-13	13:27:34	0.733142	76.3734	FALSE	0
2022-09-13	13:27:34	0.738689	77.1121	FALSE	0
2022-09-13	13:27:34	0.731361	77.8434	FALSE	0
2022-09-13	13:27:35	0.733753	78.5772	FALSE	0
2022-09-13	13:27:35	0.733244	79.3104	FALSE	0
2022-09-13	13:27:35	0.732074	80.0425	FALSE	0
2022-09-13	13:27:35	0.728155	80.7706	FALSE	0
2022-09-13	13:27:36	0.730547	81.5012	FALSE	0
2022-09-13	13:27:36	0.731717	82.2329	FALSE	0
2022-09-13	13:27:36	0.728817	82.9617	FALSE	0
2022-09-13	13:27:37	0.740013	83.7017	FALSE	0
2022-09-13	13:27:37	0.734008	84.4357	FALSE	0
2022-09-13	13:27:37	0.731921	85.1677	FALSE	0
2022-09-13	13:27:37	0.739453	85.9071	FALSE	0
2022-09-13	13:27:37	0.731667	86.6388	FALSE	0
2022-09-13	13:27:38	0.737417	87.3762	FALSE	0
2022-09-13	13:27:38	0.740216	88.1164	FALSE	0
2022-09-13	13:27:38	0.734109	88.8505	FALSE	0
2022-09-13	13:27:39	0.729478	89.58	FALSE	0
2022-09-13	13:27:39	0.731667	90.3117	FALSE	0
2022-09-13	13:27:39	0.739249	91.0509	FALSE	0
2022-09-13	13:27:39	0.740573	91.7915	FALSE	0
2022-09-13	13:27:40	0.737824	92.5293	FALSE	0
2022-09-13	13:27:40	0.732328	93.2616	FALSE	0
2022-09-13	13:27:40	0.732583	93.9942	FALSE	0
2022-09-13	13:27:40	0.739707	94.7339	FALSE	0
2022-09-13	13:27:41	0.737061	95.471	FALSE	0
2022-09-13	13:27:41	0.737824	96.2088	FALSE	0
2022-09-13	13:27:41	0.7393	96.9481	FALSE	0
2022-09-13	13:27:42	0.738435	97.6866	FALSE	0
2022-09-13	13:27:42	0.728715	98.4153	FALSE	0
2022-09-13	13:27:42	0.732023	99.1473	FALSE	0
2022-09-13	13:27:42	0.731056	99.8783	FALSE	0
2022-09-13	13:27:43	0.739046	100.617	FALSE	0
2022-09-13	13:27:43	0.732328	101.35	FALSE	0
2022-09-13	13:27:43	0.739504	102.089	FALSE	0
2022-09-13	13:27:43	0.735789	102.825	FALSE	0
2022-09-13	13:27:44	0.73645	103.561	FALSE	0
2022-09-13	13:27:44	0.731209	104.293	FALSE	0
2022-09-13	13:27:44	0.736908	105.03	FALSE	0
2022-09-13	13:27:45	0.73528	105.765	FALSE	0
2022-09-13	13:27:45	0.73416	106.499	FALSE	0
2022-09-13	13:27:45	0.734669	107.234	FALSE	0
2022-09-13	13:27:45	0.728003	107.962	FALSE	0
2022-09-13	13:27:45	0.735636	108.697	FALSE	0
2022-09-13	13:27:46	0.736603	109.434	FALSE	0
2022-09-13	13:27:46	0.739097	110.173	FALSE	0
2022-09-13	13:27:46	0.73416	110.907	FALSE	0
2022-09-13	13:27:47	0.734059	111.641	FALSE	0
2022-09-13	13:27:47	0.731259	112.373	FALSE	0
2022-09-13	13:27:47	0.739147	113.112	FALSE	0
2022-09-13	13:27:47	0.724847	113.837	FALSE	0
2022-09-13	13:27:48	0.73528	114.572	FALSE	0
2022-09-13	13:27:48	0.735891	115.308	FALSE	0
2022-09-13	13:27:48	0.73416	116.042	FALSE	0
2022-09-13	13:27:48	0.726629	116.768	FALSE	0
2022-09-13	13:27:49	0.72902	117.497	FALSE	0
2022-09-13	13:27:49	0.726018	118.224	FALSE	0
2022-09-13	13:27:49	0.734364	118.958	FALSE	0
2022-09-13	13:27:49	0.734364	119.692	FALSE	0
2022-09-13	13:27:50	0.738486	120.431	FALSE	0
2022-09-13	13:27:50	0.736756	121.167	FALSE	0
2022-09-13	13:27:50	0.739758	121.907	FALSE	0
2022-09-13	13:27:50	0.72841	122.636	FALSE	0
2022-09-13	13:27:51	0.737875	123.374	FALSE	0
2022-09-13	13:27:51	0.730293	124.104	FALSE	0
2022-09-13	13:27:51	0.741489	124.845	FALSE	0
2022-09-13	13:27:52	0.740216	125.586	FALSE	0
2022-09-13	13:27:52	0.735331	126.321	FALSE	0
2022-09-13	13:27:52	0.730293	127.051	FALSE	0
2022-09-13	13:27:52	0.73986	127.791	FALSE	0
2022-09-13	13:27:53	0.738842	128.53	FALSE	0
2022-09-13	13:27:53	0.733957	129.264	FALSE	0
2022-09-13	13:27:53	0.733346	129.997	FALSE	0
2022-09-13	13:27:53	0.730038	130.727	FALSE	0
2022-09-13	13:27:54	0.728715	131.456	FALSE	0
2022-09-13	13:27:54	0.736603	132.192	FALSE	0
2022-09-13	13:27:54	0.734364	132.927	FALSE	0
2022-09-13	13:27:54	0.728919	133.656	FALSE	0
2022-09-13	13:27:55	0.463422	134.119	FALSE	0
2022-09-13	13:27:55	0.722608	134.842	FALSE	0
2022-09-13	13:27:55	0.393702	135.236	FALSE	0
2022-09-13	13:27:56	0.623779	135.859	FALSE	0
2022-09-13	13:27:56	0.475178	136.334	FALSE	0
2022-09-13	13:27:56	0.407748	136.742	FALSE	0
2022-09-13	13:27:56	0.42556	137.168	FALSE	0
2022-09-13	13:27:57	0.277774	137.446	FALSE	0
2022-09-13	13:27:57	0.558282	138.004	FALSE	0
2022-09-13	13:27:57	0.590547	138.594	FALSE	0
2022-09-13	13:27:57	0.664135	139.259	FALSE	0
2022-09-13	13:27:58	0.53243	139.791	FALSE	0
2022-09-13	13:27:58	0.664593	140.456	FALSE	0
2022-09-13	13:27:58	0.0939061	140.549	FALSE	0
2022-09-13	13:27:58	0.699708	141.249	FALSE	0
2022-09-13	13:27:59	0.71874	141.968	FALSE	0
2022-09-13	13:27:59	0.69584	142.664	FALSE	0
2022-09-13	13:27:59	0.607137	143.271	FALSE	0
2022-09-13	13:28:00	0.552583	143.823	FALSE	0
2022-09-13	13:28:00	0.496247	144.32	FALSE	0
2022-09-13	13:28:00	0.383066	144.703	FALSE	0
2022-09-13	13:28:00	0.311412	145.014	FALSE	0
2022-09-13	13:28:01	0.367036	145.381	FALSE	0
2022-09-13	13:28:01	0.381896	145.763	FALSE	0
2022-09-13	13:28:01	0.427697	146.191	FALSE	0
2022-09-13	13:28:01	0.520929	146.712	FALSE	0
2022-09-13	13:28:02	0.376807	147.089	FALSE	0
2022-09-13	13:28:02	0.383117	147.472	FALSE	0
2022-09-13	13:28:02	0.431005	147.903	FALSE	0
2022-09-13	13:28:02	0.561743	148.464	FALSE	0
2022-09-13	13:28:03	0.609529	149.074	FALSE	0
2022-09-13	13:28:03	0.678537	149.752	FALSE	0
2022-09-13	13:28:03	0.633804	150.386	FALSE	0
2022-09-13	13:28:04	0.678333	151.065	FALSE	0
2022-09-13	13:28:04	0.335382	151.4	FALSE	0
2022-09-13	13:28:04	0.373601	151.774	FALSE	0
2022-09-13	13:28:04	0.727545	152.501	FALSE	0
2022-09-13	13:28:05	0.735891	153.237	FALSE	0
2022-09-13	13:28:05	0.739198	153.976	FALSE	0
2022-09-13	13:28:05	0.613702	154.59	FALSE	0
2022-09-13	13:28:05	0.577519	155.167	FALSE	0
2022-09-13	13:28:06	0.375687	155.543	FALSE	0
2022-09-13	13:28:06	0.443982	155.987	FALSE	0
2022-09-13	13:28:06	0.335026	156.322	FALSE	0
2022-09-13	13:28:06	0.357926	156.68	FALSE	0
2022-09-13	13:28:07	0.395178	157.075	FALSE	0
2022-09-13	13:28:07	0.396298	157.472	FALSE	0
2022-09-13	13:28:07	0.447443	157.919	FALSE	0
2022-09-13	13:28:08	0.381998	158.301	FALSE	0
2022-09-13	13:28:08	0.515331	158.816	FALSE	0
2022-09-13	13:28:08	0.368868	159.185	FALSE	0
2022-09-13	13:28:08	0.721743	159.907	FALSE	0
2022-09-13	13:28:09	0.730852	160.638	FALSE	0
2022-09-13	13:28:09	0.731158	161.369	FALSE	0
2022-09-13	13:28:09	0.736349	162.105	FALSE	0
2022-09-13	13:28:09	0.737468	162.843	FALSE	0
2022-09-13	13:28:10	0.740369	163.583	FALSE	0
2022-09-13	13:28:10	0.731667	164.315	FALSE	0
2022-09-13	13:28:10	0.729529	165.044	FALSE	0
2022-09-13	13:28:10	0.737417	165.782	FALSE	0
2022-09-13	13:28:11	0.732226	166.514	FALSE	0
2022-09-13	13:28:11	0.721387	167.235	FALSE	0
2022-09-13	13:28:11	0.735127	167.97	FALSE	0
2022-09-13	13:28:12	0.733244	168.704	FALSE	0
2022-09-13	13:28:12	0.735433	169.439	FALSE	0
2022-09-13	13:28:12	0.736857	170.176	FALSE	0
2022-09-13	13:28:12	0.733499	170.91	FALSE	0
2022-09-13	13:28:13	0.730038	171.64	FALSE	0
2022-09-13	13:28:13	0.733753	172.373	FALSE	0
2022-09-13	13:28:13	0.731158	173.104	FALSE	0
2022-09-13	13:28:14	0.728003	173.832	FALSE	0
2022-09-13	13:28:14	0.735738	174.568	FALSE	0
2022-09-13	13:28:14	0.737265	175.305	FALSE	0
2022-09-13	13:28:14	0.73355	176.039	FALSE	0
2022-09-13	13:28:14	0.741539	176.781	FALSE	0
2022-09-13	13:28:15	0.81528	177.596	FALSE	0
2022-09-13	13:28:15	0.767239	178.363	FALSE	0
2022-09-13	13:28:15	0.733244	179.096	FALSE	0
2022-09-13	13:28:16	0.738588	179.835	FALSE	0
2022-09-13	13:28:16	0.737722	180.573	FALSE	0
2022-09-13	13:28:16	0.729936	181.303	FALSE	0
2022-09-13	13:28:16	0.665102	181.968	FALSE	0
2022-09-13	13:28:17	0.527544	182.495	FALSE	0
2022-09-13	13:28:17	0.728766	183.224	FALSE	0
2022-09-13	13:28:17	0.544745	183.769	FALSE	0
2022-09-13	13:28:17	0.728817	184.498	FALSE	0
2022-09-13	13:28:18	0.442303	184.94	FALSE	0
2022-09-13	13:28:18	0.671412	185.611	FALSE	0
2022-09-13	13:28:18	0.653397	186.265	FALSE	0
2022-09-13	13:28:18	0.688562	186.953	FALSE	0
2022-09-13	13:28:19	1.01655	187.97	FALSE	0
2022-09-13	13:28:19	0.874007	188.844	FALSE	0
2022-09-13	13:28:19	2.36169	191.205	FALSE	0
2022-09-13	13:28:20	1.96057	193.166	FALSE	0
2022-09-13	13:28:20	1.06882	194.235	FALSE	0
2022-09-13	13:28:20	1.58032	195.815	FALSE	0
2022-09-13	13:28:20	3.31686	199.132	1	1
2022-09-13	13:28:21	2.36286	201.495	FALSE	1
2022-09-13	13:28:21	2.35441	203.849	FALSE	1
2022-09-13	13:28:21	2.5338	206.383	FALSE	1
2022-09-13	13:28:21	3.81467	210.198	1	2
2022-09-13	13:28:22	3.52057	213.718	1	3
2022-09-13	13:28:22	2.05558	215.774	FALSE	3
2022-09-13	13:28:22	3.4277	219.202	1	4
2022-09-13	13:28:22	5.04459	224.246	1	5
2022-09-13	13:28:23	3.62882	227.875	1	6
2022-09-13	13:28:23	1.70902	229.584	FALSE	6
2022-09-13	13:28:23	0.912939	230.497	FALSE	6
2022-09-13	13:28:24	2.57686	233.074	FALSE	6
2022-09-13	13:28:24	2.08739	235.161	FALSE	6
2022-09-13	13:28:24	1.20836	236.37	FALSE	6
2022-09-13	13:28:24	1.23726	237.607	FALSE	6
2022-09-13	13:28:25	2.21197	239.819	FALSE	6
2022-09-13	13:28:25	1.61818	241.437	FALSE	6
2022-09-13	13:28:25	2.04016	243.477	FALSE	6
2022-09-13	13:28:25	2.67681	246.154	FALSE	6
2022-09-13	13:28:26	2.29146	248.445	FALSE	6
2022-09-13	13:28:26	1.17604	249.621	FALSE	6
2022-09-13	13:28:26	0.851666	250.473	FALSE	6
2022-09-13	13:28:26	0.731158	251.204	FALSE	6
2022-09-13	13:28:27	0.627341	251.832	FALSE	6
2022-09-13	13:28:27	0.470089	252.302	FALSE	6
2022-09-13	13:28:27	0.444593	252.746	FALSE	6
2022-09-13	13:28:28	0.327799	253.074	FALSE	6
2022-09-13	13:28:28	0.245967	253.32	FALSE	6
2022-09-13	13:28:28	0.22042	253.541	FALSE	6
2022-09-13	13:28:28	0.368308	253.909	FALSE	6
2022-09-13	13:28:29	0.50103	254.41	FALSE	6
2022-09-13	13:28:29	0.825102	255.235	FALSE	6
2022-09-13	13:28:29	1.59777	256.833	FALSE	6
2022-09-13	13:28:29	1.68393	258.517	FALSE	6
2022-09-13	13:28:30	1.81294	260.33	FALSE	6
2022-09-13	13:28:30	1.25329	261.583	FALSE	6
2022-09-13	13:28:30	1.35772	262.941	FALSE	6
2022-09-13	13:28:30	1.79289	264.733	FALSE	6
2022-09-13	13:28:31	1.44067	266.174	FALSE	6
2022-09-13	13:28:31	1.40678	267.581	FALSE	6
2022-09-13	13:28:31	1.15034	268.731	FALSE	6
2022-09-13	13:28:31	1.18602	269.917	FALSE	6
2022-09-13	13:28:32	1.01961	270.937	FALSE	6
2022-09-13	13:28:32	1.08403	272.021	FALSE	6
2022-09-13	13:28:32	1.12357	273.145	FALSE	6
2022-09-13	13:28:33	1.22363	274.368	FALSE	6
2022-09-13	13:28:33	1.15457	275.523	FALSE	6
2022-09-13	13:28:33	1.1619	276.685	FALSE	6
2022-09-13	13:28:33	1.14683	277.831	FALSE	6
2022-09-13	13:28:34	1.15309	278.985	FALSE	6
2022-09-13	13:28:34	0.996603	279.981	FALSE	6
2022-09-13	13:28:34	0.925102	280.906	FALSE	6
2022-09-13	13:28:34	0.963575	281.87	FALSE	6
2022-09-13	13:28:35	1.00571	282.876	FALSE	6
2022-09-13	13:28:35	1.10637	283.982	FALSE	6
2022-09-13	13:28:35	0.750344	284.732	FALSE	6
2022-09-13	13:28:35	1.1338	285.866	FALSE	6
2022-09-13	13:28:36	1.08765	286.954	FALSE	6
2022-09-13	13:28:36	1.03228	287.986	FALSE	6
2022-09-13	13:28:36	0.972735	288.959	FALSE	6
2022-09-13	13:28:37	1.16144	290.12	FALSE	6
2022-09-13	13:28:37	0.430547	290.551	FALSE	6
2022-09-13	13:28:37	0.198028	290.749	FALSE	6
2022-09-13	13:28:37	0.208359	290.957	FALSE	6
2022-09-13	13:28:38	0.200013	291.157	FALSE	6
2022-09-13	13:28:38	0.201743	291.359	FALSE	6
2022-09-13	13:28:38	0.194008	291.553	FALSE	6
2022-09-13	13:28:38	0.189428	291.742	FALSE	6
2022-09-13	13:28:39	0.194618	291.937	FALSE	6
2022-09-13	13:28:39	0.199453	292.136	FALSE	6
2022-09-13	13:28:39	0.263677	292.4	FALSE	6
2022-09-13	13:28:39	0.735789	293.136	FALSE	6
2022-09-13	13:28:40	0.737163	293.873	FALSE	6
2022-09-13	13:28:40	0.73472	294.608	FALSE	6
2022-09-13	13:28:40	0.731158	295.339	FALSE	6
2022-09-13	13:28:41	0.732684	296.072	FALSE	6
2022-09-13	13:28:41	0.731514	296.803	FALSE	6
2022-09-13	13:28:41	0.742099	297.545	FALSE	6
2022-09-13	13:28:41	0.736145	298.281	FALSE	6
2022-09-13	13:28:42	0.732277	299.014	FALSE	6
2022-09-13	13:28:42	0.734008	299.748	FALSE	6
2022-09-13	13:28:42	0.736857	300.484	FALSE	6
2022-09-13	13:28:42	0.734822	301.219	FALSE	6
2022-09-13	13:28:43	0.73131	301.951	FALSE	6
2022-09-13	13:28:43	0.736247	302.687	FALSE	6
2022-09-13	13:28:43	0.736247	303.423	FALSE	6
2022-09-13	13:28:43	0.737112	304.16	FALSE	6
2022-09-13	13:28:44	0.732634	304.893	FALSE	6
2022-09-13	13:28:44	0.732125	305.625	FALSE	6
2022-09-13	13:28:44	0.738231	306.363	FALSE	6
2022-09-13	13:28:45	0.733651	307.097	FALSE	6
2022-09-13	13:28:45	0.730496	307.827	FALSE	6
2022-09-13	13:28:45	0.731616	308.559	FALSE	6
2022-09-13	13:28:45	0.739198	309.298	FALSE	6
2022-09-13	13:28:46	0.732786	310.031	FALSE	6
2022-09-13	13:28:46	0.730852	310.762	FALSE	6
2022-09-13	13:28:46	0.732634	311.494	FALSE	6
2022-09-13	13:28:46	0.730547	312.225	FALSE	6
2022-09-13	13:28:47	0.729631	312.955	FALSE	6
2022-09-13	13:28:47	0.730954	313.686	FALSE	6
2022-09-13	13:28:47	0.729122	314.415	FALSE	6
2022-09-13	13:28:47	0.734466	315.149	FALSE	6
2022-09-13	13:28:48	0.726374	315.875	FALSE	6
2022-09-13	13:28:48	0.745306	316.621	FALSE	6
2022-09-13	13:28:48	0.724796	317.346	FALSE	6
2022-09-13	13:28:49	0.757061	318.103	FALSE	6
2022-09-13	13:28:49	0.716603	318.819	FALSE	6
2022-09-13	13:28:49	0.743168	319.562	FALSE	6
2022-09-13	13:28:49	0.724542	320.287	FALSE	6
2022-09-13	13:28:50	0.73701	321.024	FALSE	6
2022-09-13	13:28:50	0.731717	321.756	FALSE	6
2022-09-13	13:28:50	0.734517	322.49	FALSE	6
2022-09-13	13:28:50	0.731972	323.222	FALSE	6
2022-09-13	13:28:51	0.733448	323.956	FALSE	6
2022-09-13	13:28:51	0.736552	324.692	FALSE	6
2022-09-13	13:28:51	0.72673	325.419	FALSE	6
2022-09-13	13:28:51	0.734364	326.153	FALSE	6
2022-09-13	13:28:52	0.735941	326.889	FALSE	6
2022-09-13	13:28:52	0.737417	327.627	FALSE	6
2022-09-13	13:28:52	0.725814	328.352	FALSE	6
2022-09-13	13:28:53	0.734822	329.087	FALSE	6
2022-09-13	13:28:53	0.726934	329.814	FALSE	6
2022-09-13	13:28:53	0.739351	330.554	FALSE	6
2022-09-13	13:28:53	0.732735	331.286	FALSE	6
2022-09-13	13:28:54	0.548664	331.835	FALSE	6
2022-09-13	13:28:54	0.451819	332.287	FALSE	6
2022-09-13	13:28:54	0.730496	333.017	FALSE	6
2022-09-13	13:28:54	0.821692	333.839	FALSE	6
2022-09-13	13:28:55	0.991819	334.831	FALSE	6
2022-09-13	13:28:55	0.776196	335.607	FALSE	6
2022-09-13	13:28:55	0.977824	336.585	FALSE	6
2022-09-13	13:28:55	0.950445	337.535	FALSE	6
2022-09-13	13:28:56	1.04627	338.582	FALSE	6
2022-09-13	13:28:56	0.958995	339.541	FALSE	6
2022-09-13	13:28:56	0.905153	340.446	FALSE	6
2022-09-13	13:28:57	1.02724	341.473	FALSE	6
2022-09-13	13:28:57	0.738079	342.211	FALSE	6
2022-09-13	13:28:57	0.995534	343.207	FALSE	6
2022-09-13	13:28:57	0.739249	343.946	FALSE	6
2022-09-13	13:28:58	0.85299	344.799	FALSE	6
2022-09-13	13:28:58	0.774211	345.573	FALSE	6
2022-09-13	13:28:58	0.778384	346.351	FALSE	6
2022-09-13	13:28:58	0.853855	347.205	FALSE	6
2022-09-13	13:28:59	0.79874	348.004	FALSE	6
2022-09-13	13:28:59	0.759555	348.763	FALSE	6
2022-09-13	13:28:59	0.760114	349.524	FALSE	6
2022-09-13	13:28:59	0.751209	350.275	FALSE	6
2022-09-13	13:29:00	0.964949	351.24	FALSE	6
2022-09-13	13:29:00	0.829122	352.069	FALSE	6
2022-09-13	13:29:00	0.88729	352.956	FALSE	6
2022-09-13	13:29:01	0.929376	353.886	FALSE	6
2022-09-13	13:29:01	0.895636	354.781	FALSE	6
2022-09-13	13:29:01	0.870293	355.651	FALSE	6
2022-09-13	13:29:01	0.892888	356.544	FALSE	6
2022-09-13	13:29:02	0.898333	357.443	FALSE	6
2022-09-13	13:29:02	0.933193	358.376	FALSE	6
2022-09-13	13:29:02	0.890292	359.266	FALSE	6
2022-09-13	13:29:02	0.905254	360.171	FALSE	6
2022-09-13	13:29:03	0.946018	361.117	FALSE	6
2022-09-13	13:29:03	0.974313	362.092	FALSE	6
2022-09-13	13:29:03	1.01497	363.107	FALSE	6
2022-09-13	13:29:03	0.949784	364.057	FALSE	6
2022-09-13	13:29:04	0.854618	364.911	FALSE	6
2022-09-13	13:29:04	0.721692	365.633	FALSE	6
2022-09-13	13:29:04	0.761946	366.395	FALSE	6
2022-09-13	13:29:05	0.586425	366.981	FALSE	6
2022-09-13	13:29:05	0.573702	367.555	FALSE	6
2022-09-13	13:29:05	0.334415	367.889	FALSE	6
2022-09-13	13:29:05	0.368461	368.258	FALSE	6
2022-09-13	13:29:06	0.344644	368.602	FALSE	6
2022-09-13	13:29:06	0.301336	368.904	FALSE	6
2022-09-13	13:29:06	0.331158	369.235	FALSE	6
2022-09-13	13:29:06	0.444135	369.679	FALSE	6
2022-09-13	13:29:07	0.642761	370.322	FALSE	6
2022-09-13	13:29:07	0.743473	371.065	FALSE	6
2022-09-13	13:29:07	0.730954	371.796	FALSE	6
2022-09-13	13:29:07	0.734415	372.531	FALSE	6
2022-09-13	13:29:08	0.741031	373.272	FALSE	6
2022-09-13	13:29:08	0.747494	374.019	FALSE	6
2022-09-13	13:29:08	0.623677	374.643	FALSE	6
2022-09-13	13:29:09	0.741081	375.384	FALSE	6
2022-09-13	13:29:09	0.73584	376.12	FALSE	6
2022-09-13	13:29:09	0.846527	376.966	FALSE	6
2022-09-13	13:29:09	0.746374	377.713	FALSE	6
2022-09-13	13:29:10	0.283422	377.996	FALSE	6
2022-09-13	13:29:10	0.388919	378.385	FALSE	6
2022-09-13	13:29:10	0.273652	378.659	FALSE	6
2022-09-13	13:29:10	0.490293	379.149	FALSE	6
2022-09-13	13:29:11	0.125	379.274	FALSE	6
2022-09-13	13:29:11	0.592023	379.866	FALSE	6
2022-09-13	13:29:11	0.132379	379.998	FALSE	6
2022-09-13	13:29:11	0.371616	380.37	FALSE	6
2022-09-13	13:29:12	0.130649	380.501	FALSE	6
2022-09-13	13:29:12	0.251158	380.752	FALSE	6
2022-09-13	13:29:12	0.163881	380.916	FALSE	6
2022-09-13	13:29:12	-0.0154577	380.916	FALSE	6
2022-09-13	13:29:13	-0.246552	380.916	FALSE	6
2022-09-13	13:29:13	-0.376374	380.916	FALSE	6
2022-09-13	13:29:13	-0.470012	380.916	FALSE	6
2022-09-13	13:29:14	-0.0859921	380.916	FALSE	6
2022-09-13	13:29:14	0.564084	381.48	FALSE	6
2022-09-13	13:29:14	1.90622	383.386	FALSE	6
2022-09-13	13:29:14	2.35487	385.741	FALSE	6
2022-09-13	13:29:15	2.96459	388.705	FALSE	6
2022-09-13	13:29:15	1.80139	390.507	FALSE	6
2022-09-13	13:29:15	1.96022	392.467	FALSE	6
2022-09-13	13:29:15	1.29782	393.765	FALSE	6
2022-09-13	13:29:16	1.70861	395.473	FALSE	6
2022-09-13	13:29:16	1.97726	397.451	FALSE	6
2022-09-13	13:29:16	2.33136	399.782	FALSE	6
2022-09-13	13:29:16	2.33131	402.113	FALSE	6
2022-09-13	13:29:17	2.72006	404.833	FALSE	6
2022-09-13	13:29:17	1.30693	406.14	FALSE	6
2022-09-13	13:29:17	1.01146	407.152	FALSE	6
2022-09-13	13:29:18	0.644644	407.797	FALSE	6
2022-09-13	13:29:18	0.740471	408.537	FALSE	6
2022-09-13	13:29:18	0.582506	409.119	FALSE	6
2022-09-13	13:29:18	0.642405	409.762	FALSE	6
2022-09-13	13:29:19	0.732532	410.494	FALSE	6
2022-09-13	13:29:19	0.62154	411.116	FALSE	6
2022-09-13	13:29:19	0.485509	411.601	FALSE	6
2022-09-13	13:29:19	0.477468	412.079	FALSE	6
2022-09-13	13:29:20	0.755687	412.835	FALSE	6
2022-09-13	13:29:20	0.385814	413.22	FALSE	6
2022-09-13	13:29:20	0.393601	413.614	FALSE	6
2022-09-13	13:29:20	-0.0238547	413.614	FALSE	6
2022-09-13	13:29:21	-0.241056	413.614	FALSE	6
2022-09-13	13:29:21	-0.185076	413.614	FALSE	6
2022-09-13	13:29:21	0.0370613	413.651	FALSE	6
2022-09-13	13:29:22	0.217977	413.869	FALSE	6
2022-09-13	13:29:22	1.90134	415.77	FALSE	6
2022-09-13	13:29:22	2.98734	418.758	FALSE	6
2022-09-13	13:29:22	3.07421	421.832	1	7
2022-09-13	13:29:23	1.1737	423.006	FALSE	7
2022-09-13	13:29:23	0.918791	423.924	FALSE	7
2022-09-13	13:29:23	1.70378	425.628	FALSE	7
2022-09-13	13:29:23	3.93299	429.561	1	8
2022-09-13	13:29:24	2.87477	432.436	FALSE	8
2022-09-13	13:29:24	3.76622	436.202	1	9
2022-09-13	13:29:24	2.67609	438.878	FALSE	9
2022-09-13	13:29:24	0.973193	439.852	FALSE	9
2022-09-13	13:29:25	0.736857	440.588	FALSE	9
2022-09-13	13:29:25	0.779606	441.368	FALSE	9
2022-09-13	13:29:25	0.791412	442.159	FALSE	9
2022-09-13	13:29:26	1.09462	443.254	FALSE	9
2022-09-13	13:29:26	0.721591	443.976	FALSE	9
2022-09-13	13:29:26	0.736756	444.712	FALSE	9
2022-09-13	13:29:26	1.12001	445.832	FALSE	9
2022-09-13	13:29:27	2.01579	447.848	FALSE	9
2022-09-13	13:29:27	4.63304	452.481	1	10
2022-09-13	13:29:27	2.96703	455.448	FALSE	10
2022-09-13	13:29:27	3.02968	458.478	1	11
2022-09-13	13:29:28	2.322	460.8	FALSE	11
2022-09-13	13:29:28	2.0936	462.893	FALSE	11
2022-09-13	13:29:28	1.93126	464.825	FALSE	11
2022-09-13	13:29:28	2.1734	466.998	FALSE	11
2022-09-13	13:29:29	1.9281	468.926	FALSE	11
2022-09-13	13:29:29	2.39559	471.322	FALSE	11
2022-09-13	13:29:29	1.09477	472.417	FALSE	11
2022-09-13	13:29:30	1.30159	473.718	FALSE	11
2022-09-13	13:29:30	1.90933	475.628	FALSE	11
2022-09-13	13:29:30	1.03701	476.665	FALSE	11
2022-09-13	13:29:30	0.801132	477.466	FALSE	11
2022-09-13	13:29:31	1.18556	478.651	FALSE	11
2022-09-13	13:29:31	1.31421	479.965	FALSE	11
2022-09-13	13:29:31	0.775585	480.741	FALSE	11
2022-09-13	13:29:31	0.73813	481.479	FALSE	11
2022-09-13	13:29:32	0.736094	482.215	FALSE	11
2022-09-13	13:29:32	0.730089	482.945	FALSE	11
2022-09-13	13:29:32	0.752532	483.698	FALSE	11
2022-09-13	13:29:32	0.939351	484.637	FALSE	11
2022-09-13	13:29:33	0.777112	485.414	FALSE	11
2022-09-13	13:29:33	0.854466	486.269	FALSE	11
2022-09-13	13:29:33	1.09172	487.361	FALSE	11
2022-09-13	13:29:34	0.760929	488.121	FALSE	11
2022-09-13	13:29:34	0.79299	488.914	FALSE	11
2022-09-13	13:29:34	0.834415	489.749	FALSE	11
2022-09-13	13:29:34	0.886272	490.635	FALSE	11
2022-09-13	13:29:35	0.934313	491.569	FALSE	11
2022-09-13	13:29:35	0.960318	492.53	FALSE	11
2022-09-13	13:29:35	0.97528	493.505	FALSE	11
2022-09-13	13:29:35	1.14866	494.654	FALSE	11
2022-09-13	13:29:36	1.03477	495.688	FALSE	11
2022-09-13	13:29:36	1.66134	497.35	FALSE	11
2022-09-13	13:29:36	1.81167	499.161	FALSE	11
2022-09-13	13:29:36	3.2678	502.429	1	12
2022-09-13	13:29:37	3.64897	506.078	1	13
2022-09-13	13:29:37	3.93228	510.011	1	14
2022-09-13	13:29:37	3.59513	513.606	1	15
2022-09-13	13:29:38	3.465	517.071	1	16
2022-09-13	13:29:38	2.53599	519.607	FALSE	16
2022-09-13	13:29:38	3.59986	523.207	1	17
2022-09-13	13:29:38	4.90296	528.109	1	18
2022-09-13	13:29:39	3.96164	532.071	1	19
2022-09-13	13:29:39	2.43879	534.51	FALSE	19
2022-09-13	13:29:39	2.60027	537.11	FALSE	19
2022-09-13	13:29:39	2.3677	539.478	FALSE	19
2022-09-13	13:29:40	2.30902	541.787	FALSE	19
2022-09-13	13:29:40	2.06307	543.85	FALSE	19
2022-09-13	13:29:40	2.07732	545.927	FALSE	19
2022-09-13	13:29:40	2.02388	547.951	FALSE	19
2022-09-13	13:29:41	1.96139	549.913	FALSE	19
2022-09-13	13:29:41	1.88866	551.801	FALSE	19
2022-09-13	13:29:41	1.85294	553.654	FALSE	19
2022-09-13	13:29:42	1.83523	555.489	FALSE	19
2022-09-13	13:29:42	1.75961	557.249	FALSE	19
2022-09-13	13:29:42	1.97559	559.225	FALSE	19
2022-09-13	13:29:42	3.27177	562.496	1	20
2022-09-13	13:29:43	4.12495	566.621	1	21
2022-09-13	13:29:43	4.4649	571.086	1	22
2022-09-13	13:29:43	3.9739	575.06	1	23
2022-09-13	13:29:43	3.81686	578.877	1	24
2022-09-13	13:29:44	3.44912	582.326	1	25
2022-09-13	13:29:44	2.10882	584.435	FALSE	25
2022-09-13	13:29:44	1.18795	585.623	FALSE	25
2022-09-13	13:29:44	1.09151	586.714	FALSE	25
2022-09-13	13:29:45	1.07935	587.794	FALSE	25
2022-09-13	13:29:45	1.0419	588.836	FALSE	25
2022-09-13	13:29:45	1.12276	589.958	FALSE	25
2022-09-13	13:29:46	1.0852	591.044	FALSE	25
2022-09-13	13:29:46	1.01111	592.055	FALSE	25
2022-09-13	13:29:46	0.94729	593.002	FALSE	25
2022-09-13	13:29:46	0.896501	593.898	FALSE	25
2022-09-13	13:29:47	1.10067	594.999	FALSE	25
2022-09-13	13:29:47	1.13289	596.132	FALSE	25
2022-09-13	13:29:47	0.962608	597.095	FALSE	25
2022-09-13	13:29:47	0.948155	598.043	FALSE	25
2022-09-13	13:29:48	0.80902	598.852	FALSE	25
2022-09-13	13:29:48	0.735992	599.588	FALSE	25
2022-09-13	13:29:48	0.732939	600.321	FALSE	25
2022-09-13	13:29:48	0.730598	601.051	FALSE	25
2022-09-13	13:29:49	0.73701	601.788	FALSE	25
2022-09-13	13:29:49	0.741234	602.53	FALSE	25
2022-09-13	13:29:49	0.813143	603.343	FALSE	25
2022-09-13	13:29:50	1.38973	604.732	FALSE	25
2022-09-13	13:29:50	8.98087	613.713	1	26
2022-09-13	13:29:50	2.6796	616.393	FALSE	26
2022-09-13	13:29:50	1.86154	618.254	FALSE	26
2022-09-13	13:29:51	1.64912	619.904	FALSE	26
2022-09-13	13:29:51	1.53238	621.436	FALSE	26
2022-09-13	13:29:51	2.35889	623.795	FALSE	26
2022-09-13	13:29:51	1.78831	625.583	FALSE	26
2022-09-13	13:29:52	1.91625	627.499	FALSE	26
2022-09-13	13:29:52	1.55838	629.058	FALSE	26
2022-09-13	13:29:52	1.52378	630.582	FALSE	26
2022-09-13	13:29:52	1.75045	632.332	FALSE	26
2022-09-13	13:29:53	1.57665	633.909	FALSE	26
2022-09-13	13:29:53	1.34037	635.249	FALSE	26
2022-09-13	13:29:53	1.35228	636.601	FALSE	26
2022-09-13	13:29:53	1.61574	638.217	FALSE	26
2022-09-13	13:29:54	1.51335	639.73	FALSE	26
2022-09-13	13:29:54	1.07986	640.81	FALSE	26
2022-09-13	13:29:54	1.09243	641.903	FALSE	26
2022-09-13	13:29:55	1.47894	643.382	FALSE	26
2022-09-13	13:29:55	1.60505	644.987	FALSE	26
2022-09-13	13:29:55	1.87162	646.858	FALSE	26
2022-09-13	13:29:55	2.17966	649.038	FALSE	26
2022-09-13	13:29:56	2.14836	651.186	FALSE	26
2022-09-13	13:29:56	2.22576	653.412	FALSE	26
2022-09-13	13:29:56	2.17823	655.59	FALSE	26
2022-09-13	13:29:56	2.27838	657.869	FALSE	26
2022-09-13	13:29:57	2.37375	660.242	FALSE	26
2022-09-13	13:29:57	2.39411	662.637	FALSE	26
2022-09-13	13:29:57	2.5539	665.19	FALSE	26
2022-09-13	13:29:57	1.99314	667.184	FALSE	26
2022-09-13	13:29:58	1.30495	668.489	FALSE	26
2022-09-13	13:29:58	0.979555	669.468	FALSE	26
2022-09-13	13:29:58	0.737977	670.206	FALSE	26
2022-09-13	13:29:59	0.588003	670.794	FALSE	26
2022-09-13	13:29:59	0.248104	671.042	FALSE	26
2022-09-13	13:29:59	1.03258	672.075	FALSE	26
2022-09-13	13:29:59	1.748	673.823	FALSE	26
2022-09-13	13:30:00	2.55701	676.38	FALSE	26
2022-09-13	13:30:00	4.55278	680.933	1	27
2022-09-13	13:30:00	2.81055	683.743	FALSE	27
2022-09-13	13:30:00	0.898537	684.642	FALSE	27
2022-09-13	13:30:01	0.729428	685.371	FALSE	27
2022-09-13	13:30:01	0.725662	686.097	FALSE	27
2022-09-13	13:30:01	0.736349	686.833	FALSE	27
2022-09-13	13:30:01	0.730903	687.564	FALSE	27
2022-09-13	13:30:02	0.0694277	687.633	FALSE	27
2022-09-13	13:30:02	-0.0363229	687.633	FALSE	27
2022-09-13	13:30:02	0.243372	687.877	FALSE	27
2022-09-13	13:30:03	0.452125	688.329	FALSE	27
2022-09-13	13:30:03	1.07263	689.402	FALSE	27
2022-09-13	13:30:03	0.735229	690.137	FALSE	27
2022-09-13	13:30:03	5.07879	695.216	1	28
2022-09-13	13:30:04	0.761539	695.977	FALSE	28
2022-09-13	13:30:04	1.62419	697.601	FALSE	28
2022-09-13	13:30:04	0.733499	698.335	FALSE	28
2022-09-13	13:30:04	0.753041	699.088	FALSE	28
2022-09-13	13:30:05	0.727392	699.815	FALSE	28
2022-09-13	13:30:05	0.738995	700.554	FALSE	28
2022-09-13	13:30:05	0.735789	701.29	FALSE	28
2022-09-13	13:30:05	0.854466	702.144	FALSE	28
2022-09-13	13:30:06	0.831921	702.976	FALSE	28
2022-09-13	13:30:06	0.871412	703.848	FALSE	28
2022-09-13	13:30:06	0.737773	704.586	FALSE	28
2022-09-13	13:30:07	0.743575	705.329	FALSE	28
2022-09-13	13:30:07	0.729733	706.059	FALSE	28
2022-09-13	13:30:07	0.735127	706.794	FALSE	28
2022-09-13	13:30:07	0.73131	707.525	FALSE	28
2022-09-13	13:30:08	0.731259	708.257	FALSE	28
2022-09-13	13:30:08	0.729936	708.987	FALSE	28
2022-09-13	13:30:08	0.728359	709.715	FALSE	28
2022-09-13	13:30:08	0.732684	710.448	FALSE	28
2022-09-13	13:30:09	0.733142	711.181	FALSE	28
2022-09-13	13:30:09	0.735992	711.917	FALSE	28
2022-09-13	13:30:09	0.734873	712.652	FALSE	28
2022-09-13	13:30:09	0.736145	713.388	FALSE	28
2022-09-13	13:30:10	0.731972	714.12	FALSE	28
2022-09-13	13:30:10	0.738537	714.858	FALSE	28
2022-09-13	13:30:10	0.729326	715.588	FALSE	28
2022-09-13	13:30:11	0.732175	716.32	FALSE	28
2022-09-13	13:30:11	0.738689	717.058	FALSE	28
2022-09-13	13:30:11	0.733651	717.792	FALSE	28
2022-09-13	13:30:11	0.733753	718.526	FALSE	28
2022-09-13	13:30:12	0.734313	719.26	FALSE	28
2022-09-13	13:30:12	0.732837	719.993	FALSE	28
2022-09-13	13:30:12	0.731514	720.724	FALSE	28
2022-09-13	13:30:12	0.728766	721.453	FALSE	28
2022-09-13	13:30:13	0.734873	722.188	FALSE	28
2022-09-13	13:30:13	0.732888	722.921	FALSE	28
2022-09-13	13:30:13	0.732532	723.654	FALSE	28
2022-09-13	13:30:13	0.736043	724.39	FALSE	28
2022-09-13	13:30:14	0.733295	725.123	FALSE	28
2022-09-13	13:30:14	0.729733	725.853	FALSE	28
2022-09-13	13:30:14	0.726832	726.579	FALSE	28
2022-09-13	13:30:15	0.728613	727.308	FALSE	28
2022-09-13	13:30:15	0.732277	728.04	FALSE	28
2022-09-13	13:30:15	0.727137	728.767	FALSE	28
2022-09-13	13:30:15	0.736145	729.504	FALSE	28
2022-09-13	13:30:16	0.728054	730.232	FALSE	28
2022-09-13	13:30:16	0.734975	730.967	FALSE	28
2022-09-13	13:30:16	0.735687	731.702	FALSE	28
2022-09-13	13:30:16	0.737773	732.44	FALSE	28
2022-09-13	13:30:17	0.733804	733.174	FALSE	28
2022-09-13	13:30:17	0.730242	733.904	FALSE	28
2022-09-13	13:30:17	0.73299	734.637	FALSE	28
2022-09-13	13:30:17	0.736807	735.374	FALSE	28
2022-09-13	13:30:18	0.740776	736.115	FALSE	28
2022-09-13	13:30:18	0.732583	736.847	FALSE	28
2022-09-13	13:30:18	0.729224	737.577	FALSE	28
2022-09-13	13:30:19	0.730903	738.307	FALSE	28
2022-09-13	13:30:19	0.735178	739.043	FALSE	28
2022-09-13	13:30:19	0.731667	739.774	FALSE	28
2022-09-13	13:30:19	0.731717	740.506	FALSE	28
2022-09-13	13:30:20	0.734211	741.24	FALSE	28
2022-09-13	13:30:20	0.732837	741.973	FALSE	28
2022-09-13	13:30:20	0.739198	742.712	FALSE	28
2022-09-13	13:30:20	0.731717	743.444	FALSE	28
2022-09-13	13:30:21	0.786629	744.231	FALSE	28
2022-09-13	13:30:21	0.742048	744.973	FALSE	28
2022-09-13	13:30:21	0.739402	745.712	FALSE	28
2022-09-13	13:30:21	0.728104	746.44	FALSE	28
2022-09-13	13:30:22	0.737163	747.177	FALSE	28
2022-09-13	13:30:22	0.726629	747.904	FALSE	28
2022-09-13	13:30:22	0.731361	748.635	FALSE	28
2022-09-13	13:30:23	0.731259	749.367	FALSE	28
2022-09-13	13:30:23	0.735382	750.102	FALSE	28
2022-09-13	13:30:23	0.731768	750.834	FALSE	28
2022-09-13	13:30:23	0.738893	751.573	FALSE	28
2022-09-13	13:30:24	0.731921	752.305	FALSE	28
2022-09-13	13:30:24	0.732583	753.037	FALSE	28
2022-09-13	13:30:24	0.729275	753.766	FALSE	28
2022-09-13	13:30:24	0.73701	754.503	FALSE	28
2022-09-13	13:30:25	0.73355	755.237	FALSE	28
2022-09-13	13:30:25	0.733193	755.97	FALSE	28
2022-09-13	13:30:25	0.732125	756.702	FALSE	28
2022-09-13	13:30:25	0.733142	757.435	FALSE	28
2022-09-13	13:30:26	0.73416	758.17	FALSE	28
2022-09-13	13:30:26	0.735483	758.905	FALSE	28
2022-09-13	13:30:26	0.734211	759.639	FALSE	28
2022-09-13	13:30:27	0.73701	760.376	FALSE	28
2022-09-13	13:30:27	0.731005	761.107	FALSE	28
2022-09-13	13:30:27	0.73416	761.841	FALSE	28
2022-09-13	13:30:27	0.742201	762.584	FALSE	28
2022-09-13	13:30:28	0.729987	763.314	FALSE	28
2022-09-13	13:30:28	0.737366	764.051	FALSE	28
2022-09-13	13:30:28	0.733142	764.784	FALSE	28
2022-09-13	13:30:28	0.735992	765.52	FALSE	28
2022-09-13	13:30:29	0.729173	766.249	FALSE	28
2022-09-13	13:30:29	0.733651	766.983	FALSE	28
2022-09-13	13:30:29	0.73416	767.717	FALSE	28
2022-09-13	13:30:29	0.727392	768.444	FALSE	28
2022-09-13	13:30:30	0.737977	769.182	FALSE	28
2022-09-13	13:30:30	0.736043	769.919	FALSE	28
2022-09-13	13:30:30	0.735534	770.654	FALSE	28
2022-09-13	13:30:31	0.73243	771.386	FALSE	28
2022-09-13	13:30:31	0.735585	772.122	FALSE	28
2022-09-13	13:30:31	0.73299	772.855	FALSE	28
2022-09-13	13:30:31	0.739504	773.595	FALSE	28
2022-09-13	13:30:32	0.730547	774.325	FALSE	28
2022-09-13	13:30:32	0.733651	775.059	FALSE	28
2022-09-13	13:30:32	0.735992	775.795	FALSE	28
2022-09-13	13:30:32	0.450395	776.245	FALSE	28
2022-09-13	13:30:33	0.523728	776.769	FALSE	28
2022-09-13	13:30:33	0.396501	777.165	FALSE	28
2022-09-13	13:30:33	0.187646	777.353	FALSE	28
2022-09-13	13:30:33	0.571056	777.924	FALSE	28
2022-09-13	13:30:34	0.474415	778.398	FALSE	28
2022-09-13	13:30:34	0.348104	778.747	FALSE	28
2022-09-13	13:30:34	0.303015	779.05	FALSE	28
2022-09-13	13:30:35	0.310802	779.36	FALSE	28
2022-09-13	13:30:35	0.55869	779.919	FALSE	28
2022-09-13	13:30:35	0.73472	780.654	FALSE	28
2022-09-13	13:30:35	0.735738	781.39	FALSE	28
2022-09-13	13:30:36	0.730649	782.12	FALSE	28
2022-09-13	13:30:36	0.735534	782.856	FALSE	28
2022-09-13	13:30:36	0.73874	783.594	FALSE	28
2022-09-13	13:30:36	0.734211	784.329	FALSE	28
2022-09-13	13:30:37	0.735382	785.064	FALSE	28
2022-09-13	13:30:37	0.734313	785.798	FALSE	28
2022-09-13	13:30:37	0.739249	786.538	FALSE	28
2022-09-13	13:30:37	0.729886	787.268	FALSE	28
2022-09-13	13:30:38	0.728257	787.996	FALSE	28
2022-09-13	13:30:38	0.733651	788.729	FALSE	28
2022-09-13	13:30:38	0.733092	789.463	FALSE	28
2022-09-13	13:30:38	0.715331	790.178	FALSE	28
2022-09-13	13:30:39	0.424389	790.602	FALSE	28
2022-09-13	13:30:39	0.48098	791.083	FALSE	28
2022-09-13	13:30:39	0.391412	791.475	FALSE	28
2022-09-13	13:30:40	0.546985	792.022	FALSE	28
2022-09-13	13:30:40	0.394567	792.416	FALSE	28
2022-09-13	13:30:40	0.461947	792.878	FALSE	28
2022-09-13	13:30:40	0.366323	793.244	FALSE	28
2022-09-13	13:30:41	0.4764	793.721	FALSE	28
2022-09-13	13:30:41	0.411616	794.132	FALSE	28
2022-09-13	13:30:41	0.45528	794.588	FALSE	28
2022-09-13	13:30:41	0.426629	795.014	FALSE	28
2022-09-13	13:30:42	0.474873	795.489	FALSE	28
2022-09-13	13:30:42	0.413855	795.903	FALSE	28
2022-09-13	13:30:42	0.477316	796.38	FALSE	28
2022-09-13	13:30:42	0.402812	796.783	FALSE	28
2022-09-13	13:30:43	0.52612	797.309	FALSE	28
2022-09-13	13:30:43	0.566069	797.875	FALSE	28
2022-09-13	13:30:43	0.761183	798.637	FALSE	28
2022-09-13	13:30:44	1.11574	799.752	FALSE	28
2022-09-13	13:30:44	0.582557	800.335	FALSE	28
2022-09-13	13:30:44	0.518588	800.853	FALSE	28
2022-09-13	13:30:44	0.415636	801.269	FALSE	28
2022-09-13	13:30:45	0.360165	801.629	FALSE	28
2022-09-13	13:30:45	0.374619	802.004	FALSE	28
2022-09-13	13:30:45	0.290496	802.294	FALSE	28
2022-09-13	13:30:45	0.271514	802.566	FALSE	28
2022-09-13	13:30:46	0.165255	802.731	FALSE	28
2022-09-13	13:30:46	0.225356	802.957	FALSE	28
2022-09-13	13:30:46	0.266883	803.223	FALSE	28
2022-09-13	13:30:46	0.248919	803.472	FALSE	28
2022-09-13	13:30:47	0.54103	804.013	FALSE	28
2022-09-13	13:30:47	0.452379	804.466	FALSE	28
2022-09-13	13:30:47	0.610547	805.076	FALSE	28
2022-09-13	13:30:48	1.32108	806.397	FALSE	28
2022-09-13	13:30:48	0.714567	807.112	FALSE	28
2022-09-13	13:30:48	0.711921	807.824	FALSE	28
2022-09-13	13:30:48	0.826476	808.65	FALSE	28
2022-09-13	13:30:49	0.541438	809.192	FALSE	28
2022-09-13	13:30:49	0.683066	809.875	FALSE	28
2022-09-13	13:30:49	0.574059	810.449	FALSE	28
2022-09-13	13:30:49	0.429071	810.878	FALSE	28
2022-09-13	13:30:50	0.460776	811.339	FALSE	28
2022-09-13	13:30:50	0.396959	811.736	FALSE	28
2022-09-13	13:30:50	0.288868	812.025	FALSE	28
2022-09-13	13:30:50	0.192786	812.217	FALSE	28
2022-09-13	13:30:51	0.151107	812.368	FALSE	28
2022-09-13	13:30:51	0.220878	812.589	FALSE	28
2022-09-13	13:30:51	0.256603	812.846	FALSE	28
2022-09-13	13:30:52	0.310751	813.157	FALSE	28
2022-09-13	13:30:52	0.349377	813.506	FALSE	28
2022-09-13	13:30:52	0.426883	813.933	FALSE	28
2022-09-13	13:30:52	0.48215	814.415	FALSE	28
2022-09-13	13:30:53	0.460166	814.875	FALSE	28
2022-09-13	13:30:53	0.292888	815.168	FALSE	28
2022-09-13	13:30:53	0.296247	815.464	FALSE	28
2022-09-13	13:30:53	0.310191	815.775	FALSE	28
2022-09-13	13:30:54	0.0947712	815.869	FALSE	28
2022-09-13	13:30:54	-0.0918954	815.869	FALSE	28
2022-09-13	13:30:54	0.13701	816.006	FALSE	28
2022-09-13	13:30:54	0.254568	816.261	FALSE	28
2022-09-13	13:30:55	0.233855	816.495	FALSE	28
2022-09-13	13:30:55	0.297824	816.793	FALSE	28
2022-09-13	13:30:55	0.211463	817.004	FALSE	28
2022-09-13	13:30:56	0.0886643	817.093	FALSE	28
2022-09-13	13:30:56	0.0797076	817.172	FALSE	28
2022-09-13	13:30:56	0.118079	817.291	FALSE	28
2022-09-13	13:30:56	0.28388	817.574	FALSE	28
2022-09-13	13:30:57	0.216909	817.791	FALSE	28
2022-09-13	13:30:57	0.296501	818.088	FALSE	28
2022-09-13	13:30:57	0.300827	818.389	FALSE	28
2022-09-13	13:30:57	0.385305	818.774	FALSE	28
2022-09-13	13:30:58	0.343575	819.118	FALSE	28
2022-09-13	13:30:58	0.340573	819.458	FALSE	28
2022-09-13	13:30:58	0.36159	819.82	FALSE	28
2022-09-13	13:30:58	0.417061	820.237	FALSE	28
2022-09-13	13:30:59	0.466171	820.703	FALSE	28
2022-09-13	13:30:59	0.426985	821.13	FALSE	28
2022-09-13	13:30:59	0.399046	821.529	FALSE	28
2022-09-13	13:31:00	0.383168	821.912	FALSE	28
2022-09-13	13:31:00	0.394822	822.307	FALSE	28
2022-09-13	13:31:00	0.37701	822.684	FALSE	28
2022-09-13	13:31:00	0.369377	823.053	FALSE	28
2022-09-13	13:31:01	0.367392	823.421	FALSE	28
2022-09-13	13:31:01	0.371158	823.792	FALSE	28
2022-09-13	13:31:01	0.381031	824.173	FALSE	28
2022-09-13	13:31:01	0.395636	824.569	FALSE	28
2022-09-13	13:31:02	0.3707	824.939	FALSE	28
2022-09-13	13:31:02	0.378181	825.317	FALSE	28
2022-09-13	13:31:02	0.222099	825.54	FALSE	28
2022-09-13	13:31:02	0.121234	825.661	FALSE	28
2022-09-13	13:31:03	0.733448	826.394	FALSE	28
2022-09-13	13:31:03	0.730191	827.124	FALSE	28
2022-09-13	13:31:03	0.734415	827.859	FALSE	28
2022-09-13	13:31:04	0.735483	828.594	FALSE	28
2022-09-13	13:31:04	0.736349	829.331	FALSE	28
2022-09-13	13:31:04	0.73187	830.063	FALSE	28
2022-09-13	13:31:04	0.331158	830.394	FALSE	28
2022-09-13	13:31:05	0.0146695	830.408	FALSE	28
2022-09-13	13:31:05	0.047443	830.456	FALSE	28
2022-09-13	13:31:05	0.10897	830.565	FALSE	28
2022-09-13	13:31:05	0.100471	830.665	FALSE	28
2022-09-13	13:31:06	0.100929	830.766	FALSE	28
2022-09-13	13:31:06	0.112583	830.879	FALSE	28
2022-09-13	13:31:06	0.125204	831.004	FALSE	28
2022-09-13	13:31:06	0.135433	831.139	FALSE	28
2022-09-13	13:31:07	0.125356	831.265	FALSE	28
2022-09-13	13:31:07	0.130395	831.395	FALSE	28
2022-09-13	13:31:07	0.125967	831.521	FALSE	28
2022-09-13	13:31:08	0.0954328	831.617	FALSE	28
2022-09-13	13:31:08	0.35187	831.968	FALSE	28
2022-09-13	13:31:08	0.741132	832.71	FALSE	28
2022-09-13	13:31:08	0.73416	833.444	FALSE	28
2022-09-13	13:31:09	0.731412	834.175	FALSE	28
2022-09-13	13:31:09	0.734008	834.909	FALSE	28
2022-09-13	13:31:09	0.731463	835.641	FALSE	28
2022-09-13	13:31:09	0.733601	836.374	FALSE	28
2022-09-13	13:31:10	0.740165	837.114	FALSE	28
2022-09-13	13:31:10	0.739198	837.854	FALSE	28
2022-09-13	13:31:10	0.73416	838.588	FALSE	28
2022-09-13	13:31:10	0.737468	839.325	FALSE	28
2022-09-13	13:31:11	0.736094	840.061	FALSE	28
2022-09-13	13:31:11	0.738791	840.8	FALSE	28
2022-09-13	13:31:11	0.739198	841.539	FALSE	28
2022-09-13	13:31:12	0.737672	842.277	FALSE	28
2022-09-13	13:31:12	0.732684	843.01	FALSE	28
2022-09-13	13:31:12	0.735229	843.745	FALSE	28
2022-09-13	13:31:12	0.736756	844.482	FALSE	28
2022-09-13	13:31:13	0.739555	845.221	FALSE	28
2022-09-13	13:31:13	0.732786	845.954	FALSE	28
2022-09-13	13:31:13	0.732074	846.686	FALSE	28
2022-09-13	13:31:13	0.737061	847.423	FALSE	28
2022-09-13	13:31:14	0.733804	848.157	FALSE	28
2022-09-13	13:31:14	0.736094	848.893	FALSE	28
2022-09-13	13:31:14	0.732328	849.625	FALSE	28
2022-09-13	13:31:14	0.732074	850.357	FALSE	28
2022-09-13	13:31:15	0.732481	851.09	FALSE	28
2022-09-13	13:31:15	0.735992	851.826	FALSE	28
2022-09-13	13:31:15	0.735178	852.561	FALSE	28
2022-09-13	13:31:16	0.734924	853.296	FALSE	28
2022-09-13	13:31:16	0.734415	854.03	FALSE	28
2022-09-13	13:31:16	0.738079	854.768	FALSE	28
2022-09-13	13:31:16	0.732583	855.501	FALSE	28
2022-09-13	13:31:17	0.738944	856.24	FALSE	28
2022-09-13	13:31:17	0.741183	856.981	FALSE	28
2022-09-13	13:31:17	0.73187	857.713	FALSE	28
2022-09-13	13:31:17	0.258232	857.971	FALSE	28
2022-09-13	13:31:18	0.223422	858.195	FALSE	28
2022-09-13	13:31:18	0.190496	858.385	FALSE	28
2022-09-13	13:31:18	0.199453	858.585	FALSE	28
2022-09-13	13:31:18	0.264491	858.849	FALSE	28
2022-09-13	13:31:19	0.325662	859.175	FALSE	28
2022-09-13	13:31:19	0.380165	859.555	FALSE	28
2022-09-13	13:31:19	0.557366	860.112	FALSE	28
2022-09-13	13:31:20	0.458384	860.571	FALSE	28
2022-09-13	13:31:20	0.736807	861.308	FALSE	28
2022-09-13	13:31:20	0.732175	862.04	FALSE	28
2022-09-13	13:31:20	0.728562	862.768	FALSE	28
2022-09-13	13:31:21	0.738435	863.507	FALSE	28
2022-09-13	13:31:21	0.737926	864.245	FALSE	28
2022-09-13	13:31:21	0.729275	864.974	FALSE	28
2022-09-13	13:31:21	0.72729	865.701	FALSE	28
2022-09-13	13:31:22	0.731209	866.432	FALSE	28
2022-09-13	13:31:22	0.734364	867.167	FALSE	28
2022-09-13	13:31:22	0.73986	867.907	FALSE	28
2022-09-13	13:31:22	0.739453	868.646	FALSE	28
2022-09-13	13:31:23	0.734109	869.38	FALSE	28
2022-09-13	13:31:23	0.737773	870.118	FALSE	28
2022-09-13	13:31:23	0.733092	870.851	FALSE	28
2022-09-13	13:31:23	0.732939	871.584	FALSE	28
2022-09-13	13:31:24	0.732634	872.317	FALSE	28
2022-09-13	13:31:24	0.738588	873.055	FALSE	28
2022-09-13	13:31:24	0.444542	873.5	FALSE	28
2022-09-13	13:31:25	0.259046	873.759	FALSE	28
2022-09-13	13:31:25	0.21869	873.977	FALSE	28
2022-09-13	13:31:25	-0.0493	873.977	FALSE	28
2022-09-13	13:31:25	-0.187824	873.977	FALSE	28
2022-09-13	13:31:26	-0.100954	873.977	FALSE	28
2022-09-13	13:31:26	-0.141157	873.977	FALSE	28
2022-09-13	13:31:26	-0.0279768	873.977	FALSE	28
2022-09-13	13:31:26	-0.0788165	873.977	FALSE	28
2022-09-13	13:31:27	0.0476974	874.025	FALSE	28
2022-09-13	13:31:27	0.00276106	874.028	FALSE	28
2022-09-13	13:31:27	0.0437788	874.072	FALSE	28
2022-09-13	13:31:27	0.0357381	874.107	FALSE	28
2022-09-13	13:31:28	0.0458654	874.153	FALSE	28
2022-09-13	13:31:28	0.0818959	874.235	FALSE	28
2022-09-13	13:31:28	0.103779	874.339	FALSE	28
2022-09-13	13:31:29	0.242049	874.581	FALSE	28
2022-09-13	13:31:29	0.385356	874.966	FALSE	28
2022-09-13	13:31:29	0.371514	875.338	FALSE	28
2022-09-13	13:31:29	2.12302	877.461	FALSE	28
2022-09-13	13:31:30	3.02174	880.483	1	29
2022-09-13	13:31:30	2.07559	882.558	FALSE	29
2022-09-13	13:31:30	2.43487	884.993	FALSE	29
2022-09-13	13:31:30	0.887545	885.881	FALSE	29
2022-09-13	13:31:31	1.85701	887.738	FALSE	29
2022-09-13	13:31:31	3.08072	890.818	1	30
2022-09-13	13:31:31	2.52296	893.341	FALSE	30
2022-09-13	13:31:31	2.88683	896.228	FALSE	30
2022-09-13	13:31:32	2.5052	898.733	FALSE	30
2022-09-13	13:31:32	0.864491	899.598	FALSE	30
2022-09-13	13:31:32	2.18495	901.783	FALSE	30
2022-09-13	13:31:33	0.239962	902.023	FALSE	30
2022-09-13	13:31:33	0.283524	902.306	FALSE	30
2022-09-13	13:31:33	0.348766	902.655	FALSE	30
2022-09-13	13:31:33	0.0761962	902.731	FALSE	30
2022-09-13	13:31:34	0.3707	903.102	FALSE	30
2022-09-13	13:31:34	0.0589443	903.161	FALSE	30
2022-09-13	13:31:34	0.324084	903.485	FALSE	30
2022-09-13	13:31:34	0.243168	903.728	FALSE	30
2022-09-13	13:31:35	0.584033	904.312	FALSE	30
2022-09-13	13:31:35	0.729224	905.041	FALSE	30
2022-09-13	13:31:35	0.659351	905.701	FALSE	30
2022-09-13	13:31:35	0.728613	906.429	FALSE	30
2022-09-13	13:31:36	0.738435	907.168	FALSE	30
2022-09-13	13:31:36	0.732684	907.901	FALSE	30
2022-09-13	13:31:36	0.735585	908.636	FALSE	30
2022-09-13	13:31:37	0.73874	909.375	FALSE	30
2022-09-13	13:31:37	0.734059	910.109	FALSE	30
2022-09-13	13:31:37	0.733244	910.842	FALSE	30
2022-09-13	13:31:37	0.73528	911.577	FALSE	30
2022-09-13	13:31:38	0.729326	912.307	FALSE	30
2022-09-13	13:31:38	0.744287	913.051	FALSE	30
2022-09-13	13:31:38	0.737977	913.789	FALSE	30
2022-09-13	13:31:38	0.732735	914.522	FALSE	30
2022-09-13	13:31:39	0.731361	915.253	FALSE	30
2022-09-13	13:31:39	0.738028	915.991	FALSE	30
2022-09-13	13:31:39	0.73131	916.722	FALSE	30
2022-09-13	13:31:39	0.734364	917.457	FALSE	30
2022-09-13	13:31:40	0.733957	918.191	FALSE	30
2022-09-13	13:31:40	0.729224	918.92	FALSE	30
2022-09-13	13:31:40	0.734568	919.655	FALSE	30
2022-09-13	13:31:41	0.738028	920.393	FALSE	30
2022-09-13	13:31:41	0.724135	921.117	FALSE	30
2022-09-13	13:31:41	0.728206	921.845	FALSE	30
2022-09-13	13:31:41	0.740369	922.585	FALSE	30
2022-09-13	13:31:42	0.731005	923.316	FALSE	30
2022-09-13	13:31:42	0.737875	924.054	FALSE	30
2022-09-13	13:31:42	0.731667	924.786	FALSE	30
2022-09-13	13:31:42	0.737824	925.524	FALSE	30
2022-09-13	13:31:43	0.731361	926.255	FALSE	30
2022-09-13	13:31:43	0.732786	926.988	FALSE	30
2022-09-13	13:31:43	0.732939	927.721	FALSE	30
2022-09-13	13:31:43	0.729122	928.45	FALSE	30
2022-09-13	13:31:44	0.731819	929.182	FALSE	30
2022-09-13	13:31:44	0.731056	929.913	FALSE	30
2022-09-13	13:31:44	0.737875	930.651	FALSE	30
2022-09-13	13:31:45	0.732023	931.383	FALSE	30
2022-09-13	13:31:45	0.73528	932.118	FALSE	30
2022-09-13	13:31:45	0.734568	932.852	FALSE	30
2022-09-13	13:31:45	0.733346	933.586	FALSE	30
2022-09-13	13:31:46	0.730903	934.317	FALSE	30
2022-09-13	13:31:46	0.735789	935.053	FALSE	30
2022-09-13	13:31:46	0.735738	935.788	FALSE	30
2022-09-13	13:31:46	0.734517	936.523	FALSE	30
2022-09-13	13:31:47	0.736654	937.259	FALSE	30
2022-09-13	13:31:47	0.731972	937.991	FALSE	30
2022-09-13	13:31:47	0.736959	938.728	FALSE	30
2022-09-13	13:31:47	0.725102	939.453	FALSE	30
2022-09-13	13:31:48	0.725509	940.179	FALSE	30
2022-09-13	13:31:48	0.734008	940.913	FALSE	30
2022-09-13	13:31:48	0.731972	941.645	FALSE	30
2022-09-13	13:31:49	0.731463	942.376	FALSE	30
2022-09-13	13:31:49	0.728104	943.105	FALSE	30
2022-09-13	13:31:49	0.728919	943.833	FALSE	30
2022-09-13	13:31:49	0.725763	944.559	FALSE	30
2022-09-13	13:31:50	0.726985	945.286	FALSE	30
2022-09-13	13:31:50	0.724644	946.011	FALSE	30
2022-09-13	13:31:50	0.731107	946.742	FALSE	30
2022-09-13	13:31:50	0.730293	947.472	FALSE	30
2022-09-13	13:31:51	0.736145	948.208	FALSE	30
2022-09-13	13:31:51	0.726018	948.934	FALSE	30
2022-09-13	13:31:51	0.737112	949.672	FALSE	30
2022-09-13	13:31:51	0.731616	950.403	FALSE	30
2022-09-13	13:31:52	0.729326	951.132	FALSE	30
2022-09-13	13:31:52	0.737366	951.87	FALSE	30
2022-09-13	13:31:52	0.729529	952.599	FALSE	30
2022-09-13	13:31:53	0.739758	953.339	FALSE	30
2022-09-13	13:31:53	0.730903	954.07	FALSE	30
2022-09-13	13:31:53	0.732939	954.803	FALSE	30
2022-09-13	13:31:53	0.733499	955.536	FALSE	30
2022-09-13	13:31:54	0.73528	956.272	FALSE	30
2022-09-13	13:31:54	0.738079	957.01	FALSE	30
2022-09-13	13:31:54	0.722252	957.732	FALSE	30
2022-09-13	13:31:54	0.731565	958.464	FALSE	30
2022-09-13	13:31:55	0.729428	959.193	FALSE	30
2022-09-13	13:31:55	0.734211	959.927	FALSE	30
2022-09-13	13:31:55	0.73645	960.664	FALSE	30
2022-09-13	13:31:55	0.733906	961.398	FALSE	30
2022-09-13	13:31:56	0.733753	962.131	FALSE	30
2022-09-13	13:31:56	0.735382	962.867	FALSE	30
2022-09-13	13:31:56	0.738181	963.605	FALSE	30
2022-09-13	13:31:57	0.72902	964.334	FALSE	30
2022-09-13	13:31:57	0.734669	965.069	FALSE	30
2022-09-13	13:31:57	0.734364	965.803	FALSE	30
2022-09-13	13:31:57	0.735941	966.539	FALSE	30
2022-09-13	13:31:58	0.728359	967.267	FALSE	30
2022-09-13	13:31:58	0.737875	968.005	FALSE	30
2022-09-13	13:31:58	0.740267	968.745	FALSE	30
2022-09-13	13:31:58	0.728206	969.474	FALSE	30
2022-09-13	13:31:59	0.735483	970.209	FALSE	30
2022-09-13	13:31:59	-0.406246	970.209	FALSE	30
2022-09-13	13:31:59	-0.208028	970.209	FALSE	30
2022-09-13	13:31:59	-0.34818	970.209	FALSE	30

## Sheet: Daisy_harness_2022913132646
						**GoPro Fitting: 1316
2022-09-13	13:26:47	0.722557
2022-09-13	13:26:47	0.502913
2022-09-13	13:26:47	0.736807
2022-09-13	13:26:47	0.742964
2022-09-13	13:26:48	0.733448
2022-09-13	13:26:48	0.729071
2022-09-13	13:26:48	0.728257
2022-09-13	13:26:48	0.734059
2022-09-13	13:26:49	0.73131
2022-09-13	13:26:49	-0.370012
2022-09-13	13:26:49	-0.557188
2022-09-13	13:26:50	-0.555152
2022-09-13	13:26:50	-0.741971
2022-09-13	13:26:50	-0.915305
2022-09-13	13:26:50	-0.876831
2022-09-13	13:26:51	0.563931
2022-09-13	13:26:51	0.51701
2022-09-13	13:26:51	0.453957
2022-09-13	13:26:51	0.40841
2022-09-13	13:26:52	0.371056
2022-09-13	13:26:52	0.339504
2022-09-13	13:26:52	0.317468
2022-09-13	13:26:52	0.346578
2022-09-13	13:26:53	0.372481
2022-09-13	13:26:53	0.164084
2022-09-13	13:26:53	0.243168
2022-09-13	13:26:54	0.287188
2022-09-13	13:26:54	0.281082
2022-09-13	13:26:54	-0.0807503
2022-09-13	13:26:54	0.701285
2022-09-13	13:26:55	-0.477391
2022-09-13	13:26:55	-0.476323
2022-09-13	13:26:55	-0.500292
2022-09-13	13:26:55	-0.609554
2022-09-13	13:26:56	-0.634694
2022-09-13	13:26:56	-0.515559
2022-09-13	13:26:56	-0.507162
2022-09-13	13:26:56	-0.432913
2022-09-13	13:26:57	-0.471997
2022-09-13	13:26:57	-0.52818
2022-09-13	13:26:57	-0.567671
2022-09-13	13:26:58	-0.459173
2022-09-13	13:26:58	-0.394185
2022-09-13	13:26:58	0.641692
2022-09-13	13:26:58	0.914008
2022-09-13	13:26:59	0.814211
2022-09-13	13:26:59	0.660012
2022-09-13	13:26:59	0.386985
2022-09-13	13:26:59	0.727341
2022-09-13	13:27:00	0.733499
2022-09-13	13:27:00	0.73014
2022-09-13	13:27:00	0.734822
2022-09-13	13:27:00	0.731565
2022-09-13	13:27:01	0.734568
2022-09-13	13:27:01	0.737722
2022-09-13	13:27:01	0.737265
2022-09-13	13:27:02	0.727952
2022-09-13	13:27:02	0.736908
2022-09-13	13:27:02	0.252532
2022-09-13	13:27:02	0.725102
2022-09-13	13:27:03	0.732837
2022-09-13	13:27:03	0.739097
2022-09-13	13:27:03	0.730394
2022-09-13	13:27:03	0.612125
2022-09-13	13:27:04	-0.195865
2022-09-13	13:27:04	0.146781
2022-09-13	13:27:04	-0.123091
2022-09-13	13:27:04	-0.117341
2022-09-13	13:27:05	-0.486704
2022-09-13	13:27:05	-0.208129
2022-09-13	13:27:05	0.33869
2022-09-13	13:27:06	-0.228231
2022-09-13	13:27:06	-0.78986
2022-09-13	13:27:06	-0.858002
2022-09-13	13:27:06	-0.747366
2022-09-13	13:27:07	-0.878002
2022-09-13	13:27:07	-0.811131
2022-09-13	13:27:07	-0.826348
2022-09-13	13:27:07	-0.78991
2022-09-13	13:27:08	-1.00182
2022-09-13	13:27:08	-0.990674
2022-09-13	13:27:08	-1.0952
2022-09-13	13:27:08	-1.03225
2022-09-13	13:27:09	-1.32762
2022-09-13	13:27:09	-1.17067
2022-09-13	13:27:09	-1.27536
2022-09-13	13:27:10	-1.18594
2022-09-13	13:27:10	-1.06599
2022-09-13	13:27:10	-0.84477
2022-09-13	13:27:10	-0.941157
2022-09-13	13:27:11	-0.946348
2022-09-13	13:27:11	-0.920444
2022-09-13	13:27:11	0.493499
2022-09-13	13:27:11	0.733448
2022-09-13	13:27:12	0.732786
2022-09-13	13:27:12	0.740827
2022-09-13	13:27:12	0.735534
2022-09-13	13:27:12	0.72785
2022-09-13	13:27:13	0.738282
2022-09-13	13:27:13	0.733041
2022-09-13	13:27:13	0.739809
2022-09-13	13:27:14	0.73813
2022-09-13	13:27:14	0.734873
2022-09-13	13:27:14	0.737163
2022-09-13	13:27:14	0.735941
2022-09-13	13:27:15	0.733804
2022-09-13	13:27:15	0.742608
2022-09-13	13:27:15	0.737773
2022-09-13	13:27:15	0.733753
2022-09-13	13:27:16	0.730242
2022-09-13	13:27:16	0.733346
2022-09-13	13:27:16	0.738689
2022-09-13	13:27:16	0.737163
2022-09-13	13:27:17	0.731158
2022-09-13	13:27:17	0.737214
2022-09-13	13:27:17	0.734669
2022-09-13	13:27:17	0.737417
2022-09-13	13:27:18	0.731463
2022-09-13	13:27:18	0.735483
2022-09-13	13:27:18	0.729631
2022-09-13	13:27:19	0.73416
2022-09-13	13:27:19	0.731565
2022-09-13	13:27:19	0.732175
2022-09-13	13:27:19	0.737824
2022-09-13	13:27:20	0.737417
2022-09-13	13:27:20	0.730903
2022-09-13	13:27:20	0.728715
2022-09-13	13:27:20	0.729886
2022-09-13	13:27:21	0.728359
2022-09-13	13:27:21	0.732583
2022-09-13	13:27:21	0.731565
2022-09-13	13:27:21	0.736399
2022-09-13	13:27:22	0.732888
2022-09-13	13:27:22	0.733041
2022-09-13	13:27:22	0.730598
2022-09-13	13:27:23	0.725967
2022-09-13	13:27:23	0.739453
2022-09-13	13:27:23	0.735483
2022-09-13	13:27:23	0.737112
2022-09-13	13:27:24	0.738384
2022-09-13	13:27:24	0.736654
2022-09-13	13:27:24	0.731514
2022-09-13	13:27:24	0.740013
2022-09-13	13:27:25	0.73701
2022-09-13	13:27:25	0.735178
2022-09-13	13:27:25	0.736247
2022-09-13	13:27:25	0.739656
2022-09-13	13:27:26	0.735433
2022-09-13	13:27:26	0.732277
2022-09-13	13:27:26	0.73131
2022-09-13	13:27:27	0.736501
2022-09-13	13:27:27	0.729886
2022-09-13	13:27:27	0.735178
2022-09-13	13:27:27	0.726374
2022-09-13	13:27:28	0.73874
2022-09-13	13:27:28	0.735127
2022-09-13	13:27:28	0.745814
2022-09-13	13:27:28	0.741489
2022-09-13	13:27:29	0.732226
2022-09-13	13:27:29	0.733957
2022-09-13	13:27:29	0.726781
2022-09-13	13:27:29	0.73472
2022-09-13	13:27:30	0.730598
2022-09-13	13:27:30	0.72673
2022-09-13	13:27:30	0.732939
2022-09-13	13:27:31	0.734364
2022-09-13	13:27:31	0.735483
2022-09-13	13:27:31	0.726578
2022-09-13	13:27:31	0.729987
2022-09-13	13:27:32	0.738537
2022-09-13	13:27:32	0.730852
2022-09-13	13:27:32	0.733906
2022-09-13	13:27:32	0.729631
2022-09-13	13:27:33	0.734873
2022-09-13	13:27:33	0.733651
2022-09-13	13:27:33	0.73528
2022-09-13	13:27:33	0.734109
2022-09-13	13:27:34	0.733142
2022-09-13	13:27:34	0.738689
2022-09-13	13:27:34	0.731361
2022-09-13	13:27:35	0.733753
2022-09-13	13:27:35	0.733244
2022-09-13	13:27:35	0.732074
2022-09-13	13:27:35	0.728155
2022-09-13	13:27:36	0.730547
2022-09-13	13:27:36	0.731717
2022-09-13	13:27:36	0.728817
2022-09-13	13:27:37	0.740013
2022-09-13	13:27:37	0.734008
2022-09-13	13:27:37	0.731921
2022-09-13	13:27:37	0.739453
2022-09-13	13:27:37	0.731667
2022-09-13	13:27:38	0.737417
2022-09-13	13:27:38	0.740216
2022-09-13	13:27:38	0.734109
2022-09-13	13:27:39	0.729478
2022-09-13	13:27:39	0.731667
2022-09-13	13:27:39	0.739249
2022-09-13	13:27:39	0.740573
2022-09-13	13:27:40	0.737824
2022-09-13	13:27:40	0.732328
2022-09-13	13:27:40	0.732583
2022-09-13	13:27:40	0.739707
2022-09-13	13:27:41	0.737061
2022-09-13	13:27:41	0.737824
2022-09-13	13:27:41	0.7393
2022-09-13	13:27:42	0.738435
2022-09-13	13:27:42	0.728715
2022-09-13	13:27:42	0.732023
2022-09-13	13:27:42	0.731056
2022-09-13	13:27:43	0.739046
2022-09-13	13:27:43	0.732328
2022-09-13	13:27:43	0.739504
2022-09-13	13:27:43	0.735789
2022-09-13	13:27:44	0.73645
2022-09-13	13:27:44	0.731209
2022-09-13	13:27:44	0.736908
2022-09-13	13:27:45	0.73528
2022-09-13	13:27:45	0.73416
2022-09-13	13:27:45	0.734669
2022-09-13	13:27:45	0.728003
2022-09-13	13:27:45	0.735636
2022-09-13	13:27:46	0.736603
2022-09-13	13:27:46	0.739097
2022-09-13	13:27:46	0.73416
2022-09-13	13:27:47	0.734059
2022-09-13	13:27:47	0.731259
2022-09-13	13:27:47	0.739147
2022-09-13	13:27:47	0.724847
2022-09-13	13:27:48	0.73528
2022-09-13	13:27:48	0.735891
2022-09-13	13:27:48	0.73416
2022-09-13	13:27:48	0.726629
2022-09-13	13:27:49	0.72902
2022-09-13	13:27:49	0.726018
2022-09-13	13:27:49	0.734364
2022-09-13	13:27:49	0.734364
2022-09-13	13:27:50	0.738486
2022-09-13	13:27:50	0.736756
2022-09-13	13:27:50	0.739758
2022-09-13	13:27:50	0.72841
2022-09-13	13:27:51	0.737875
2022-09-13	13:27:51	0.730293
2022-09-13	13:27:51	0.741489
2022-09-13	13:27:52	0.740216
2022-09-13	13:27:52	0.735331
2022-09-13	13:27:52	0.730293
2022-09-13	13:27:52	0.73986
2022-09-13	13:27:53	0.738842
2022-09-13	13:27:53	0.733957
2022-09-13	13:27:53	0.733346
2022-09-13	13:27:53	0.730038
2022-09-13	13:27:54	0.728715
2022-09-13	13:27:54	0.736603
2022-09-13	13:27:54	0.734364
2022-09-13	13:27:54	0.728919
2022-09-13	13:27:55	0.463422
2022-09-13	13:27:55	0.722608
2022-09-13	13:27:55	0.393702
2022-09-13	13:27:56	0.623779
2022-09-13	13:27:56	0.475178
2022-09-13	13:27:56	0.407748
2022-09-13	13:27:56	0.42556
2022-09-13	13:27:57	0.277774
2022-09-13	13:27:57	0.558282
2022-09-13	13:27:57	0.590547
2022-09-13	13:27:57	0.664135
2022-09-13	13:27:58	0.53243
2022-09-13	13:27:58	0.664593
2022-09-13	13:27:58	0.0939061
2022-09-13	13:27:58	0.699708
2022-09-13	13:27:59	0.71874
2022-09-13	13:27:59	0.69584
2022-09-13	13:27:59	0.607137
2022-09-13	13:28:00	0.552583
2022-09-13	13:28:00	0.496247
2022-09-13	13:28:00	0.383066
2022-09-13	13:28:00	0.311412
2022-09-13	13:28:01	0.367036
2022-09-13	13:28:01	0.381896
2022-09-13	13:28:01	0.427697
2022-09-13	13:28:01	0.520929
2022-09-13	13:28:02	0.376807
2022-09-13	13:28:02	0.383117
2022-09-13	13:28:02	0.431005
2022-09-13	13:28:02	0.561743
2022-09-13	13:28:03	0.609529
2022-09-13	13:28:03	0.678537
2022-09-13	13:28:03	0.633804
2022-09-13	13:28:04	0.678333
2022-09-13	13:28:04	0.335382
2022-09-13	13:28:04	0.373601
2022-09-13	13:28:04	0.727545
2022-09-13	13:28:05	0.735891
2022-09-13	13:28:05	0.739198
2022-09-13	13:28:05	0.613702
2022-09-13	13:28:05	0.577519
2022-09-13	13:28:06	0.375687
2022-09-13	13:28:06	0.443982
2022-09-13	13:28:06	0.335026
2022-09-13	13:28:06	0.357926
2022-09-13	13:28:07	0.395178
2022-09-13	13:28:07	0.396298
2022-09-13	13:28:07	0.447443
2022-09-13	13:28:08	0.381998
2022-09-13	13:28:08	0.515331
2022-09-13	13:28:08	0.368868
2022-09-13	13:28:08	0.721743
2022-09-13	13:28:09	0.730852
2022-09-13	13:28:09	0.731158
2022-09-13	13:28:09	0.736349
2022-09-13	13:28:09	0.737468
2022-09-13	13:28:10	0.740369
2022-09-13	13:28:10	0.731667
2022-09-13	13:28:10	0.729529
2022-09-13	13:28:10	0.737417
2022-09-13	13:28:11	0.732226
2022-09-13	13:28:11	0.721387
2022-09-13	13:28:11	0.735127
2022-09-13	13:28:12	0.733244
2022-09-13	13:28:12	0.735433
2022-09-13	13:28:12	0.736857
2022-09-13	13:28:12	0.733499
2022-09-13	13:28:13	0.730038
2022-09-13	13:28:13	0.733753
2022-09-13	13:28:13	0.731158
2022-09-13	13:28:14	0.728003
2022-09-13	13:28:14	0.735738
2022-09-13	13:28:14	0.737265
2022-09-13	13:28:14	0.73355
2022-09-13	13:28:14	0.741539
2022-09-13	13:28:15	0.81528
2022-09-13	13:28:15	0.767239
2022-09-13	13:28:15	0.733244
2022-09-13	13:28:16	0.738588
2022-09-13	13:28:16	0.737722
2022-09-13	13:28:16	0.729936
2022-09-13	13:28:16	0.665102
2022-09-13	13:28:17	0.527544
2022-09-13	13:28:17	0.728766
2022-09-13	13:28:17	0.544745
2022-09-13	13:28:17	0.728817
2022-09-13	13:28:18	0.442303
2022-09-13	13:28:18	0.671412
2022-09-13	13:28:18	0.653397
2022-09-13	13:28:18	0.688562
2022-09-13	13:28:19	1.01655
2022-09-13	13:28:19	0.874007
2022-09-13	13:28:19	2.36169
2022-09-13	13:28:20	1.96057
2022-09-13	13:28:20	1.06882
2022-09-13	13:28:20	1.58032
2022-09-13	13:28:20	3.31686
2022-09-13	13:28:21	2.36286
2022-09-13	13:28:21	2.35441
2022-09-13	13:28:21	2.5338
2022-09-13	13:28:21	3.81467
2022-09-13	13:28:22	3.52057
2022-09-13	13:28:22	2.05558
2022-09-13	13:28:22	3.4277
2022-09-13	13:28:22	5.04459
2022-09-13	13:28:23	3.62882
2022-09-13	13:28:23	1.70902
2022-09-13	13:28:23	0.912939
2022-09-13	13:28:24	2.57686
2022-09-13	13:28:24	2.08739
2022-09-13	13:28:24	1.20836
2022-09-13	13:28:24	1.23726
2022-09-13	13:28:25	2.21197
2022-09-13	13:28:25	1.61818
2022-09-13	13:28:25	2.04016
2022-09-13	13:28:25	2.67681
2022-09-13	13:28:26	2.29146
2022-09-13	13:28:26	1.17604
2022-09-13	13:28:26	0.851666
2022-09-13	13:28:26	0.731158
2022-09-13	13:28:27	0.627341
2022-09-13	13:28:27	0.470089
2022-09-13	13:28:27	0.444593
2022-09-13	13:28:28	0.327799
2022-09-13	13:28:28	0.245967
2022-09-13	13:28:28	0.22042
2022-09-13	13:28:28	0.368308
2022-09-13	13:28:29	0.50103
2022-09-13	13:28:29	0.825102
2022-09-13	13:28:29	1.59777
2022-09-13	13:28:29	1.68393
2022-09-13	13:28:30	1.81294
2022-09-13	13:28:30	1.25329
2022-09-13	13:28:30	1.35772
2022-09-13	13:28:30	1.79289
2022-09-13	13:28:31	1.44067
2022-09-13	13:28:31	1.40678
2022-09-13	13:28:31	1.15034
2022-09-13	13:28:31	1.18602
2022-09-13	13:28:32	1.01961
2022-09-13	13:28:32	1.08403
2022-09-13	13:28:32	1.12357
2022-09-13	13:28:33	1.22363
2022-09-13	13:28:33	1.15457
2022-09-13	13:28:33	1.1619
2022-09-13	13:28:33	1.14683
2022-09-13	13:28:34	1.15309
2022-09-13	13:28:34	0.996603
2022-09-13	13:28:34	0.925102
2022-09-13	13:28:34	0.963575
2022-09-13	13:28:35	1.00571
2022-09-13	13:28:35	1.10637
2022-09-13	13:28:35	0.750344
2022-09-13	13:28:35	1.1338
2022-09-13	13:28:36	1.08765
2022-09-13	13:28:36	1.03228
2022-09-13	13:28:36	0.972735
2022-09-13	13:28:37	1.16144
2022-09-13	13:28:37	0.430547
2022-09-13	13:28:37	0.198028
2022-09-13	13:28:37	0.208359
2022-09-13	13:28:38	0.200013
2022-09-13	13:28:38	0.201743
2022-09-13	13:28:38	0.194008
2022-09-13	13:28:38	0.189428
2022-09-13	13:28:39	0.194618
2022-09-13	13:28:39	0.199453
2022-09-13	13:28:39	0.263677
2022-09-13	13:28:39	0.735789
2022-09-13	13:28:40	0.737163
2022-09-13	13:28:40	0.73472
2022-09-13	13:28:40	0.731158
2022-09-13	13:28:41	0.732684
2022-09-13	13:28:41	0.731514
2022-09-13	13:28:41	0.742099
2022-09-13	13:28:41	0.736145
2022-09-13	13:28:42	0.732277
2022-09-13	13:28:42	0.734008
2022-09-13	13:28:42	0.736857
2022-09-13	13:28:42	0.734822
2022-09-13	13:28:43	0.73131
2022-09-13	13:28:43	0.736247
2022-09-13	13:28:43	0.736247
2022-09-13	13:28:43	0.737112
2022-09-13	13:28:44	0.732634
2022-09-13	13:28:44	0.732125
2022-09-13	13:28:44	0.738231
2022-09-13	13:28:45	0.733651
2022-09-13	13:28:45	0.730496
2022-09-13	13:28:45	0.731616
2022-09-13	13:28:45	0.739198
2022-09-13	13:28:46	0.732786
2022-09-13	13:28:46	0.730852
2022-09-13	13:28:46	0.732634
2022-09-13	13:28:46	0.730547
2022-09-13	13:28:47	0.729631
2022-09-13	13:28:47	0.730954
2022-09-13	13:28:47	0.729122
2022-09-13	13:28:47	0.734466
2022-09-13	13:28:48	0.726374
2022-09-13	13:28:48	0.745306
2022-09-13	13:28:48	0.724796
2022-09-13	13:28:49	0.757061
2022-09-13	13:28:49	0.716603
2022-09-13	13:28:49	0.743168
2022-09-13	13:28:49	0.724542
2022-09-13	13:28:50	0.73701
2022-09-13	13:28:50	0.731717
2022-09-13	13:28:50	0.734517
2022-09-13	13:28:50	0.731972
2022-09-13	13:28:51	0.733448
2022-09-13	13:28:51	0.736552
2022-09-13	13:28:51	0.72673
2022-09-13	13:28:51	0.734364
2022-09-13	13:28:52	0.735941
2022-09-13	13:28:52	0.737417
2022-09-13	13:28:52	0.725814
2022-09-13	13:28:53	0.734822
2022-09-13	13:28:53	0.726934
2022-09-13	13:28:53	0.739351
2022-09-13	13:28:53	0.732735
2022-09-13	13:28:54	0.548664
2022-09-13	13:28:54	0.451819
2022-09-13	13:28:54	0.730496
2022-09-13	13:28:54	0.821692
2022-09-13	13:28:55	0.991819
2022-09-13	13:28:55	0.776196
2022-09-13	13:28:55	0.977824
2022-09-13	13:28:55	0.950445
2022-09-13	13:28:56	1.04627
2022-09-13	13:28:56	0.958995
2022-09-13	13:28:56	0.905153
2022-09-13	13:28:57	1.02724
2022-09-13	13:28:57	0.738079
2022-09-13	13:28:57	0.995534
2022-09-13	13:28:57	0.739249
2022-09-13	13:28:58	0.85299
2022-09-13	13:28:58	0.774211
2022-09-13	13:28:58	0.778384
2022-09-13	13:28:58	0.853855
2022-09-13	13:28:59	0.79874
2022-09-13	13:28:59	0.759555
2022-09-13	13:28:59	0.760114
2022-09-13	13:28:59	0.751209
2022-09-13	13:29:00	0.964949
2022-09-13	13:29:00	0.829122
2022-09-13	13:29:00	0.88729
2022-09-13	13:29:01	0.929376
2022-09-13	13:29:01	0.895636
2022-09-13	13:29:01	0.870293
2022-09-13	13:29:01	0.892888
2022-09-13	13:29:02	0.898333
2022-09-13	13:29:02	0.933193
2022-09-13	13:29:02	0.890292
2022-09-13	13:29:02	0.905254
2022-09-13	13:29:03	0.946018
2022-09-13	13:29:03	0.974313
2022-09-13	13:29:03	1.01497
2022-09-13	13:29:03	0.949784
2022-09-13	13:29:04	0.854618
2022-09-13	13:29:04	0.721692
2022-09-13	13:29:04	0.761946
2022-09-13	13:29:05	0.586425
2022-09-13	13:29:05	0.573702
2022-09-13	13:29:05	0.334415
2022-09-13	13:29:05	0.368461
2022-09-13	13:29:06	0.344644
2022-09-13	13:29:06	0.301336
2022-09-13	13:29:06	0.331158
2022-09-13	13:29:06	0.444135
2022-09-13	13:29:07	0.642761
2022-09-13	13:29:07	0.743473
2022-09-13	13:29:07	0.730954
2022-09-13	13:29:07	0.734415
2022-09-13	13:29:08	0.741031
2022-09-13	13:29:08	0.747494
2022-09-13	13:29:08	0.623677
2022-09-13	13:29:09	0.741081
2022-09-13	13:29:09	0.73584
2022-09-13	13:29:09	0.846527
2022-09-13	13:29:09	0.746374
2022-09-13	13:29:10	0.283422
2022-09-13	13:29:10	0.388919
2022-09-13	13:29:10	0.273652
2022-09-13	13:29:10	0.490293
2022-09-13	13:29:11	0.125
2022-09-13	13:29:11	0.592023
2022-09-13	13:29:11	0.132379
2022-09-13	13:29:11	0.371616
2022-09-13	13:29:12	0.130649
2022-09-13	13:29:12	0.251158
2022-09-13	13:29:12	0.163881
2022-09-13	13:29:12	-0.0154577
2022-09-13	13:29:13	-0.246552
2022-09-13	13:29:13	-0.376374
2022-09-13	13:29:13	-0.470012
2022-09-13	13:29:14	-0.0859921
2022-09-13	13:29:14	0.564084
2022-09-13	13:29:14	1.90622
2022-09-13	13:29:14	2.35487
2022-09-13	13:29:15	2.96459
2022-09-13	13:29:15	1.80139
2022-09-13	13:29:15	1.96022
2022-09-13	13:29:15	1.29782
2022-09-13	13:29:16	1.70861
2022-09-13	13:29:16	1.97726
2022-09-13	13:29:16	2.33136
2022-09-13	13:29:16	2.33131
2022-09-13	13:29:17	2.72006
2022-09-13	13:29:17	1.30693
2022-09-13	13:29:17	1.01146
2022-09-13	13:29:18	0.644644
2022-09-13	13:29:18	0.740471
2022-09-13	13:29:18	0.582506
2022-09-13	13:29:18	0.642405
2022-09-13	13:29:19	0.732532
2022-09-13	13:29:19	0.62154
2022-09-13	13:29:19	0.485509
2022-09-13	13:29:19	0.477468
2022-09-13	13:29:20	0.755687
2022-09-13	13:29:20	0.385814
2022-09-13	13:29:20	0.393601
2022-09-13	13:29:20	-0.0238547
2022-09-13	13:29:21	-0.241056
2022-09-13	13:29:21	-0.185076
2022-09-13	13:29:21	0.0370613
2022-09-13	13:29:22	0.217977
2022-09-13	13:29:22	1.90134
2022-09-13	13:29:22	2.98734
2022-09-13	13:29:22	3.07421
2022-09-13	13:29:23	1.1737
2022-09-13	13:29:23	0.918791
2022-09-13	13:29:23	1.70378
2022-09-13	13:29:23	3.93299
2022-09-13	13:29:24	2.87477
2022-09-13	13:29:24	3.76622
2022-09-13	13:29:24	2.67609
2022-09-13	13:29:24	0.973193
2022-09-13	13:29:25	0.736857
2022-09-13	13:29:25	0.779606
2022-09-13	13:29:25	0.791412
2022-09-13	13:29:26	1.09462
2022-09-13	13:29:26	0.721591
2022-09-13	13:29:26	0.736756
2022-09-13	13:29:26	1.12001
2022-09-13	13:29:27	2.01579
2022-09-13	13:29:27	4.63304
2022-09-13	13:29:27	2.96703
2022-09-13	13:29:27	3.02968
2022-09-13	13:29:28	2.322
2022-09-13	13:29:28	2.0936
2022-09-13	13:29:28	1.93126
2022-09-13	13:29:28	2.1734
2022-09-13	13:29:29	1.9281
2022-09-13	13:29:29	2.39559
2022-09-13	13:29:29	1.09477
2022-09-13	13:29:30	1.30159
2022-09-13	13:29:30	1.90933
2022-09-13	13:29:30	1.03701
2022-09-13	13:29:30	0.801132
2022-09-13	13:29:31	1.18556
2022-09-13	13:29:31	1.31421
2022-09-13	13:29:31	0.775585
2022-09-13	13:29:31	0.73813
2022-09-13	13:29:32	0.736094
2022-09-13	13:29:32	0.730089
2022-09-13	13:29:32	0.752532
2022-09-13	13:29:32	0.939351
2022-09-13	13:29:33	0.777112
2022-09-13	13:29:33	0.854466
2022-09-13	13:29:33	1.09172
2022-09-13	13:29:34	0.760929
2022-09-13	13:29:34	0.79299
2022-09-13	13:29:34	0.834415
2022-09-13	13:29:34	0.886272
2022-09-13	13:29:35	0.934313
2022-09-13	13:29:35	0.960318
2022-09-13	13:29:35	0.97528
2022-09-13	13:29:35	1.14866
2022-09-13	13:29:36	1.03477
2022-09-13	13:29:36	1.66134
2022-09-13	13:29:36	1.81167
2022-09-13	13:29:36	3.2678
2022-09-13	13:29:37	3.64897
2022-09-13	13:29:37	3.93228
2022-09-13	13:29:37	3.59513
2022-09-13	13:29:38	3.465
2022-09-13	13:29:38	2.53599
2022-09-13	13:29:38	3.59986
2022-09-13	13:29:38	4.90296
2022-09-13	13:29:39	3.96164
2022-09-13	13:29:39	2.43879
2022-09-13	13:29:39	2.60027
2022-09-13	13:29:39	2.3677
2022-09-13	13:29:40	2.30902
2022-09-13	13:29:40	2.06307
2022-09-13	13:29:40	2.07732
2022-09-13	13:29:40	2.02388
2022-09-13	13:29:41	1.96139
2022-09-13	13:29:41	1.88866
2022-09-13	13:29:41	1.85294
2022-09-13	13:29:42	1.83523
2022-09-13	13:29:42	1.75961
2022-09-13	13:29:42	1.97559
2022-09-13	13:29:42	3.27177
2022-09-13	13:29:43	4.12495
2022-09-13	13:29:43	4.4649
2022-09-13	13:29:43	3.9739
2022-09-13	13:29:43	3.81686
2022-09-13	13:29:44	3.44912
2022-09-13	13:29:44	2.10882
2022-09-13	13:29:44	1.18795
2022-09-13	13:29:44	1.09151
2022-09-13	13:29:45	1.07935
2022-09-13	13:29:45	1.0419
2022-09-13	13:29:45	1.12276
2022-09-13	13:29:46	1.0852
2022-09-13	13:29:46	1.01111
2022-09-13	13:29:46	0.94729
2022-09-13	13:29:46	0.896501
2022-09-13	13:29:47	1.10067
2022-09-13	13:29:47	1.13289
2022-09-13	13:29:47	0.962608
2022-09-13	13:29:47	0.948155
2022-09-13	13:29:48	0.80902
2022-09-13	13:29:48	0.735992
2022-09-13	13:29:48	0.732939
2022-09-13	13:29:48	0.730598
2022-09-13	13:29:49	0.73701
2022-09-13	13:29:49	0.741234
2022-09-13	13:29:49	0.813143
2022-09-13	13:29:50	1.38973
2022-09-13	13:29:50	8.98087
2022-09-13	13:29:50	2.6796
2022-09-13	13:29:50	1.86154
2022-09-13	13:29:51	1.64912
2022-09-13	13:29:51	1.53238
2022-09-13	13:29:51	2.35889
2022-09-13	13:29:51	1.78831
2022-09-13	13:29:52	1.91625
2022-09-13	13:29:52	1.55838
2022-09-13	13:29:52	1.52378
2022-09-13	13:29:52	1.75045
2022-09-13	13:29:53	1.57665
2022-09-13	13:29:53	1.34037
2022-09-13	13:29:53	1.35228
2022-09-13	13:29:53	1.61574
2022-09-13	13:29:54	1.51335
2022-09-13	13:29:54	1.07986
2022-09-13	13:29:54	1.09243
2022-09-13	13:29:55	1.47894
2022-09-13	13:29:55	1.60505
2022-09-13	13:29:55	1.87162
2022-09-13	13:29:55	2.17966
2022-09-13	13:29:56	2.14836
2022-09-13	13:29:56	2.22576
2022-09-13	13:29:56	2.17823
2022-09-13	13:29:56	2.27838
2022-09-13	13:29:57	2.37375
2022-09-13	13:29:57	2.39411
2022-09-13	13:29:57	2.5539
2022-09-13	13:29:57	1.99314
2022-09-13	13:29:58	1.30495
2022-09-13	13:29:58	0.979555
2022-09-13	13:29:58	0.737977
2022-09-13	13:29:59	0.588003
2022-09-13	13:29:59	0.248104
2022-09-13	13:29:59	1.03258
2022-09-13	13:29:59	1.748
2022-09-13	13:30:00	2.55701
2022-09-13	13:30:00	4.55278
2022-09-13	13:30:00	2.81055
2022-09-13	13:30:00	0.898537
2022-09-13	13:30:01	0.729428
2022-09-13	13:30:01	0.725662
2022-09-13	13:30:01	0.736349
2022-09-13	13:30:01	0.730903
2022-09-13	13:30:02	0.0694277
2022-09-13	13:30:02	-0.0363229
2022-09-13	13:30:02	0.243372
2022-09-13	13:30:03	0.452125
2022-09-13	13:30:03	1.07263
2022-09-13	13:30:03	0.735229
2022-09-13	13:30:03	5.07879
2022-09-13	13:30:04	0.761539
2022-09-13	13:30:04	1.62419
2022-09-13	13:30:04	0.733499
2022-09-13	13:30:04	0.753041
2022-09-13	13:30:05	0.727392
2022-09-13	13:30:05	0.738995
2022-09-13	13:30:05	0.735789
2022-09-13	13:30:05	0.854466
2022-09-13	13:30:06	0.831921
2022-09-13	13:30:06	0.871412
2022-09-13	13:30:06	0.737773
2022-09-13	13:30:07	0.743575
2022-09-13	13:30:07	0.729733
2022-09-13	13:30:07	0.735127
2022-09-13	13:30:07	0.73131
2022-09-13	13:30:08	0.731259
2022-09-13	13:30:08	0.729936
2022-09-13	13:30:08	0.728359
2022-09-13	13:30:08	0.732684
2022-09-13	13:30:09	0.733142
2022-09-13	13:30:09	0.735992
2022-09-13	13:30:09	0.734873
2022-09-13	13:30:09	0.736145
2022-09-13	13:30:10	0.731972
2022-09-13	13:30:10	0.738537
2022-09-13	13:30:10	0.729326
2022-09-13	13:30:11	0.732175
2022-09-13	13:30:11	0.738689
2022-09-13	13:30:11	0.733651
2022-09-13	13:30:11	0.733753
2022-09-13	13:30:12	0.734313
2022-09-13	13:30:12	0.732837
2022-09-13	13:30:12	0.731514
2022-09-13	13:30:12	0.728766
2022-09-13	13:30:13	0.734873
2022-09-13	13:30:13	0.732888
2022-09-13	13:30:13	0.732532
2022-09-13	13:30:13	0.736043
2022-09-13	13:30:14	0.733295
2022-09-13	13:30:14	0.729733
2022-09-13	13:30:14	0.726832
2022-09-13	13:30:15	0.728613
2022-09-13	13:30:15	0.732277
2022-09-13	13:30:15	0.727137
2022-09-13	13:30:15	0.736145
2022-09-13	13:30:16	0.728054
2022-09-13	13:30:16	0.734975
2022-09-13	13:30:16	0.735687
2022-09-13	13:30:16	0.737773
2022-09-13	13:30:17	0.733804
2022-09-13	13:30:17	0.730242
2022-09-13	13:30:17	0.73299
2022-09-13	13:30:17	0.736807
2022-09-13	13:30:18	0.740776
2022-09-13	13:30:18	0.732583
2022-09-13	13:30:18	0.729224
2022-09-13	13:30:19	0.730903
2022-09-13	13:30:19	0.735178
2022-09-13	13:30:19	0.731667
2022-09-13	13:30:19	0.731717
2022-09-13	13:30:20	0.734211
2022-09-13	13:30:20	0.732837
2022-09-13	13:30:20	0.739198
2022-09-13	13:30:20	0.731717
2022-09-13	13:30:21	0.786629
2022-09-13	13:30:21	0.742048
2022-09-13	13:30:21	0.739402
2022-09-13	13:30:21	0.728104
2022-09-13	13:30:22	0.737163
2022-09-13	13:30:22	0.726629
2022-09-13	13:30:22	0.731361
2022-09-13	13:30:23	0.731259
2022-09-13	13:30:23	0.735382
2022-09-13	13:30:23	0.731768
2022-09-13	13:30:23	0.738893
2022-09-13	13:30:24	0.731921
2022-09-13	13:30:24	0.732583
2022-09-13	13:30:24	0.729275
2022-09-13	13:30:24	0.73701
2022-09-13	13:30:25	0.73355
2022-09-13	13:30:25	0.733193
2022-09-13	13:30:25	0.732125
2022-09-13	13:30:25	0.733142
2022-09-13	13:30:26	0.73416
2022-09-13	13:30:26	0.735483
2022-09-13	13:30:26	0.734211
2022-09-13	13:30:27	0.73701
2022-09-13	13:30:27	0.731005
2022-09-13	13:30:27	0.73416
2022-09-13	13:30:27	0.742201
2022-09-13	13:30:28	0.729987
2022-09-13	13:30:28	0.737366
2022-09-13	13:30:28	0.733142
2022-09-13	13:30:28	0.735992
2022-09-13	13:30:29	0.729173
2022-09-13	13:30:29	0.733651
2022-09-13	13:30:29	0.73416
2022-09-13	13:30:29	0.727392
2022-09-13	13:30:30	0.737977
2022-09-13	13:30:30	0.736043
2022-09-13	13:30:30	0.735534
2022-09-13	13:30:31	0.73243
2022-09-13	13:30:31	0.735585
2022-09-13	13:30:31	0.73299
2022-09-13	13:30:31	0.739504
2022-09-13	13:30:32	0.730547
2022-09-13	13:30:32	0.733651
2022-09-13	13:30:32	0.735992
2022-09-13	13:30:32	0.450395
2022-09-13	13:30:33	0.523728
2022-09-13	13:30:33	0.396501
2022-09-13	13:30:33	0.187646
2022-09-13	13:30:33	0.571056
2022-09-13	13:30:34	0.474415
2022-09-13	13:30:34	0.348104
2022-09-13	13:30:34	0.303015
2022-09-13	13:30:35	0.310802
2022-09-13	13:30:35	0.55869
2022-09-13	13:30:35	0.73472
2022-09-13	13:30:35	0.735738
2022-09-13	13:30:36	0.730649
2022-09-13	13:30:36	0.735534
2022-09-13	13:30:36	0.73874
2022-09-13	13:30:36	0.734211
2022-09-13	13:30:37	0.735382
2022-09-13	13:30:37	0.734313
2022-09-13	13:30:37	0.739249
2022-09-13	13:30:37	0.729886
2022-09-13	13:30:38	0.728257
2022-09-13	13:30:38	0.733651
2022-09-13	13:30:38	0.733092
2022-09-13	13:30:38	0.715331
2022-09-13	13:30:39	0.424389
2022-09-13	13:30:39	0.48098
2022-09-13	13:30:39	0.391412
2022-09-13	13:30:40	0.546985
2022-09-13	13:30:40	0.394567
2022-09-13	13:30:40	0.461947
2022-09-13	13:30:40	0.366323
2022-09-13	13:30:41	0.4764
2022-09-13	13:30:41	0.411616
2022-09-13	13:30:41	0.45528
2022-09-13	13:30:41	0.426629
2022-09-13	13:30:42	0.474873
2022-09-13	13:30:42	0.413855
2022-09-13	13:30:42	0.477316
2022-09-13	13:30:42	0.402812
2022-09-13	13:30:43	0.52612
2022-09-13	13:30:43	0.566069
2022-09-13	13:30:43	0.761183
2022-09-13	13:30:44	1.11574
2022-09-13	13:30:44	0.582557
2022-09-13	13:30:44	0.518588
2022-09-13	13:30:44	0.415636
2022-09-13	13:30:45	0.360165
2022-09-13	13:30:45	0.374619
2022-09-13	13:30:45	0.290496
2022-09-13	13:30:45	0.271514
2022-09-13	13:30:46	0.165255
2022-09-13	13:30:46	0.225356
2022-09-13	13:30:46	0.266883
2022-09-13	13:30:46	0.248919
2022-09-13	13:30:47	0.54103
2022-09-13	13:30:47	0.452379
2022-09-13	13:30:47	0.610547
2022-09-13	13:30:48	1.32108
2022-09-13	13:30:48	0.714567
2022-09-13	13:30:48	0.711921
2022-09-13	13:30:48	0.826476
2022-09-13	13:30:49	0.541438
2022-09-13	13:30:49	0.683066
2022-09-13	13:30:49	0.574059
2022-09-13	13:30:49	0.429071
2022-09-13	13:30:50	0.460776
2022-09-13	13:30:50	0.396959
2022-09-13	13:30:50	0.288868
2022-09-13	13:30:50	0.192786
2022-09-13	13:30:51	0.151107
2022-09-13	13:30:51	0.220878
2022-09-13	13:30:51	0.256603
2022-09-13	13:30:52	0.310751
2022-09-13	13:30:52	0.349377
2022-09-13	13:30:52	0.426883
2022-09-13	13:30:52	0.48215
2022-09-13	13:30:53	0.460166
2022-09-13	13:30:53	0.292888
2022-09-13	13:30:53	0.296247
2022-09-13	13:30:53	0.310191
2022-09-13	13:30:54	0.0947712
2022-09-13	13:30:54	-0.0918954
2022-09-13	13:30:54	0.13701
2022-09-13	13:30:54	0.254568
2022-09-13	13:30:55	0.233855
2022-09-13	13:30:55	0.297824
2022-09-13	13:30:55	0.211463
2022-09-13	13:30:56	0.0886643
2022-09-13	13:30:56	0.0797076
2022-09-13	13:30:56	0.118079
2022-09-13	13:30:56	0.28388
2022-09-13	13:30:57	0.216909
2022-09-13	13:30:57	0.296501
2022-09-13	13:30:57	0.300827
2022-09-13	13:30:57	0.385305
2022-09-13	13:30:58	0.343575
2022-09-13	13:30:58	0.340573
2022-09-13	13:30:58	0.36159
2022-09-13	13:30:58	0.417061
2022-09-13	13:30:59	0.466171
2022-09-13	13:30:59	0.426985
2022-09-13	13:30:59	0.399046
2022-09-13	13:31:00	0.383168
2022-09-13	13:31:00	0.394822
2022-09-13	13:31:00	0.37701
2022-09-13	13:31:00	0.369377
2022-09-13	13:31:01	0.367392
2022-09-13	13:31:01	0.371158
2022-09-13	13:31:01	0.381031
2022-09-13	13:31:01	0.395636
2022-09-13	13:31:02	0.3707
2022-09-13	13:31:02	0.378181
2022-09-13	13:31:02	0.222099
2022-09-13	13:31:02	0.121234
2022-09-13	13:31:03	0.733448
2022-09-13	13:31:03	0.730191
2022-09-13	13:31:03	0.734415
2022-09-13	13:31:04	0.735483
2022-09-13	13:31:04	0.736349
2022-09-13	13:31:04	0.73187
2022-09-13	13:31:04	0.331158
2022-09-13	13:31:05	0.0146695
2022-09-13	13:31:05	0.047443
2022-09-13	13:31:05	0.10897
2022-09-13	13:31:05	0.100471
2022-09-13	13:31:06	0.100929
2022-09-13	13:31:06	0.112583
2022-09-13	13:31:06	0.125204
2022-09-13	13:31:06	0.135433
2022-09-13	13:31:07	0.125356
2022-09-13	13:31:07	0.130395
2022-09-13	13:31:07	0.125967
2022-09-13	13:31:08	0.0954328
2022-09-13	13:31:08	0.35187
2022-09-13	13:31:08	0.741132
2022-09-13	13:31:08	0.73416
2022-09-13	13:31:09	0.731412
2022-09-13	13:31:09	0.734008
2022-09-13	13:31:09	0.731463
2022-09-13	13:31:09	0.733601
2022-09-13	13:31:10	0.740165
2022-09-13	13:31:10	0.739198
2022-09-13	13:31:10	0.73416
2022-09-13	13:31:10	0.737468
2022-09-13	13:31:11	0.736094
2022-09-13	13:31:11	0.738791
2022-09-13	13:31:11	0.739198
2022-09-13	13:31:12	0.737672
2022-09-13	13:31:12	0.732684
2022-09-13	13:31:12	0.735229
2022-09-13	13:31:12	0.736756
2022-09-13	13:31:13	0.739555
2022-09-13	13:31:13	0.732786
2022-09-13	13:31:13	0.732074
2022-09-13	13:31:13	0.737061
2022-09-13	13:31:14	0.733804
2022-09-13	13:31:14	0.736094
2022-09-13	13:31:14	0.732328
2022-09-13	13:31:14	0.732074
2022-09-13	13:31:15	0.732481
2022-09-13	13:31:15	0.735992
2022-09-13	13:31:15	0.735178
2022-09-13	13:31:16	0.734924
2022-09-13	13:31:16	0.734415
2022-09-13	13:31:16	0.738079
2022-09-13	13:31:16	0.732583
2022-09-13	13:31:17	0.738944
2022-09-13	13:31:17	0.741183
2022-09-13	13:31:17	0.73187
2022-09-13	13:31:17	0.258232
2022-09-13	13:31:18	0.223422
2022-09-13	13:31:18	0.190496
2022-09-13	13:31:18	0.199453
2022-09-13	13:31:18	0.264491
2022-09-13	13:31:19	0.325662
2022-09-13	13:31:19	0.380165
2022-09-13	13:31:19	0.557366
2022-09-13	13:31:20	0.458384
2022-09-13	13:31:20	0.736807
2022-09-13	13:31:20	0.732175
2022-09-13	13:31:20	0.728562
2022-09-13	13:31:21	0.738435
2022-09-13	13:31:21	0.737926
2022-09-13	13:31:21	0.729275
2022-09-13	13:31:21	0.72729
2022-09-13	13:31:22	0.731209
2022-09-13	13:31:22	0.734364
2022-09-13	13:31:22	0.73986
2022-09-13	13:31:22	0.739453
2022-09-13	13:31:23	0.734109
2022-09-13	13:31:23	0.737773
2022-09-13	13:31:23	0.733092
2022-09-13	13:31:23	0.732939
2022-09-13	13:31:24	0.732634
2022-09-13	13:31:24	0.738588
2022-09-13	13:31:24	0.444542
2022-09-13	13:31:25	0.259046
2022-09-13	13:31:25	0.21869
2022-09-13	13:31:25	-0.0493
2022-09-13	13:31:25	-0.187824
2022-09-13	13:31:26	-0.100954
2022-09-13	13:31:26	-0.141157
2022-09-13	13:31:26	-0.0279768
2022-09-13	13:31:26	-0.0788165
2022-09-13	13:31:27	0.0476974
2022-09-13	13:31:27	0.00276106
2022-09-13	13:31:27	0.0437788
2022-09-13	13:31:27	0.0357381
2022-09-13	13:31:28	0.0458654
2022-09-13	13:31:28	0.0818959
2022-09-13	13:31:28	0.103779
2022-09-13	13:31:29	0.242049
2022-09-13	13:31:29	0.385356
2022-09-13	13:31:29	0.371514
2022-09-13	13:31:29	2.12302
2022-09-13	13:31:30	3.02174
2022-09-13	13:31:30	2.07559
2022-09-13	13:31:30	2.43487
2022-09-13	13:31:30	0.887545
2022-09-13	13:31:31	1.85701
2022-09-13	13:31:31	3.08072
2022-09-13	13:31:31	2.52296
2022-09-13	13:31:31	2.88683
2022-09-13	13:31:32	2.5052
2022-09-13	13:31:32	0.864491
2022-09-13	13:31:32	2.18495
2022-09-13	13:31:33	0.239962
2022-09-13	13:31:33	0.283524
2022-09-13	13:31:33	0.348766
2022-09-13	13:31:33	0.0761962
2022-09-13	13:31:34	0.3707
2022-09-13	13:31:34	0.0589443
2022-09-13	13:31:34	0.324084
2022-09-13	13:31:34	0.243168
2022-09-13	13:31:35	0.584033
2022-09-13	13:31:35	0.729224
2022-09-13	13:31:35	0.659351
2022-09-13	13:31:35	0.728613
2022-09-13	13:31:36	0.738435
2022-09-13	13:31:36	0.732684
2022-09-13	13:31:36	0.735585
2022-09-13	13:31:37	0.73874
2022-09-13	13:31:37	0.734059
2022-09-13	13:31:37	0.733244
2022-09-13	13:31:37	0.73528
2022-09-13	13:31:38	0.729326
2022-09-13	13:31:38	0.744287
2022-09-13	13:31:38	0.737977
2022-09-13	13:31:38	0.732735
2022-09-13	13:31:39	0.731361
2022-09-13	13:31:39	0.738028
2022-09-13	13:31:39	0.73131
2022-09-13	13:31:39	0.734364
2022-09-13	13:31:40	0.733957
2022-09-13	13:31:40	0.729224
2022-09-13	13:31:40	0.734568
2022-09-13	13:31:41	0.738028
2022-09-13	13:31:41	0.724135
2022-09-13	13:31:41	0.728206
2022-09-13	13:31:41	0.740369
2022-09-13	13:31:42	0.731005
2022-09-13	13:31:42	0.737875
2022-09-13	13:31:42	0.731667
2022-09-13	13:31:42	0.737824
2022-09-13	13:31:43	0.731361
2022-09-13	13:31:43	0.732786
2022-09-13	13:31:43	0.732939
2022-09-13	13:31:43	0.729122
2022-09-13	13:31:44	0.731819
2022-09-13	13:31:44	0.731056
2022-09-13	13:31:44	0.737875
2022-09-13	13:31:45	0.732023
2022-09-13	13:31:45	0.73528
2022-09-13	13:31:45	0.734568
2022-09-13	13:31:45	0.733346
2022-09-13	13:31:46	0.730903
2022-09-13	13:31:46	0.735789
2022-09-13	13:31:46	0.735738
2022-09-13	13:31:46	0.734517
2022-09-13	13:31:47	0.736654
2022-09-13	13:31:47	0.731972
2022-09-13	13:31:47	0.736959
2022-09-13	13:31:47	0.725102
2022-09-13	13:31:48	0.725509
2022-09-13	13:31:48	0.734008
2022-09-13	13:31:48	0.731972
2022-09-13	13:31:49	0.731463
2022-09-13	13:31:49	0.728104
2022-09-13	13:31:49	0.728919
2022-09-13	13:31:49	0.725763
2022-09-13	13:31:50	0.726985
2022-09-13	13:31:50	0.724644
2022-09-13	13:31:50	0.731107
2022-09-13	13:31:50	0.730293
2022-09-13	13:31:51	0.736145
2022-09-13	13:31:51	0.726018
2022-09-13	13:31:51	0.737112
2022-09-13	13:31:51	0.731616
2022-09-13	13:31:52	0.729326
2022-09-13	13:31:52	0.737366
2022-09-13	13:31:52	0.729529
2022-09-13	13:31:53	0.739758
2022-09-13	13:31:53	0.730903
2022-09-13	13:31:53	0.732939
2022-09-13	13:31:53	0.733499
2022-09-13	13:31:54	0.73528
2022-09-13	13:31:54	0.738079
2022-09-13	13:31:54	0.722252
2022-09-13	13:31:54	0.731565
2022-09-13	13:31:55	0.729428
2022-09-13	13:31:55	0.734211
2022-09-13	13:31:55	0.73645
2022-09-13	13:31:55	0.733906
2022-09-13	13:31:56	0.733753
2022-09-13	13:31:56	0.735382
2022-09-13	13:31:56	0.738181
2022-09-13	13:31:57	0.72902
2022-09-13	13:31:57	0.734669
2022-09-13	13:31:57	0.734364
2022-09-13	13:31:57	0.735941
2022-09-13	13:31:58	0.728359
2022-09-13	13:31:58	0.737875
2022-09-13	13:31:58	0.740267
2022-09-13	13:31:58	0.728206
2022-09-13	13:31:59	0.735483
2022-09-13	13:31:59	-0.406246
2022-09-13	13:31:59	-0.208028
2022-09-13	13:31:59	-0.34818
2022-09-13	13:32:00	-0.203549
2022-09-13	13:32:00	0.094873
2022-09-13	13:32:00	0.731209
2022-09-13	13:32:01	0.732481
2022-09-13	13:32:01	0.732532
2022-09-13	13:32:01	0.727494
2022-09-13	13:32:01	0.729631
2022-09-13	13:32:02	0.736908
2022-09-13	13:32:02	0.730954
2022-09-13	13:32:02	0.731717
2022-09-13	13:32:02	0.741641
2022-09-13	13:32:03	0.737366
2022-09-13	13:32:03	0.731005
2022-09-13	13:32:03	0.736145
2022-09-13	13:32:03	0.734059
2022-09-13	13:32:04	0.734568
2022-09-13	13:32:04	0.730242
2022-09-13	13:32:04	0.730089
2022-09-13	13:32:05	0.736298
2022-09-13	13:32:05	0.732939
2022-09-13	13:32:05	0.732379
2022-09-13	13:32:05	0.732735
2022-09-13	13:32:06	0.737265
2022-09-13	13:32:06	0.725153
2022-09-13	13:32:06	0.737315
2022-09-13	13:32:06	0.736705
2022-09-13	13:32:07	0.731972
2022-09-13	13:32:07	0.728919
2022-09-13	13:32:07	0.732226
2022-09-13	13:32:07	0.727036
2022-09-13	13:32:08	0.733804
2022-09-13	13:32:08	0.729224
2022-09-13	13:32:08	0.732125
2022-09-13	13:32:09	0.734618
2022-09-13	13:32:09	0.718181
2022-09-13	13:32:09	0.731768
