# Supplementary material for: Comparing efficacy in reducing pulling and welfare impacts of four types of leash walking equipment
Source: PeerJ journal article supplement (doi:10.7717/peerj.18131), 2024-10-24
Supplement: Shelter1_Tension_files.zip [file Daisy_martin_2022913125011 copy.xlsx]

## Sheet: Averaged Newtons
Date	Time	Averaged Newtons	Impulse	Total steps
2022-09-13	12:50:25	4.86037	4.86037	0		Impulse	1403.93
2022-09-13	12:50:26	8.24128	13.1016	0		Total steps	15
2022-09-13	12:50:27	1.68477	14.7864	0
2022-09-13	12:50:28	1.57477	16.3612	0
2022-09-13	12:50:29	1.83463	18.1958	0
2022-09-13	12:50:30	1.83508	20.0309	0
2022-09-13	12:50:31	1.32218	21.3531	0
2022-09-13	12:50:32	1.7075	23.0606	0
2022-09-13	12:50:33	8.27377	31.3343	0
2022-09-13	12:50:34	8.00801	39.3423	0
2022-09-13	12:50:35	3.59353	42.9359	0
2022-09-13	12:50:36	3.02634	45.9622	0
2022-09-13	12:50:37	3.25573	49.218	0
2022-09-13	12:50:38	1.87939	51.0973	0
2022-09-13	12:50:39	1.67436	52.7717	0
2022-09-13	12:50:40	2.46245	55.2342	0
2022-09-13	12:50:41	1.57685	56.811	0
2022-09-13	12:50:42	1.99128	58.8023	0
2022-09-13	12:50:43	5.08877	63.891	0
2022-09-13	12:50:44	1.61695	65.508	0
2022-09-13	12:50:45	2.25019	67.7582	0
2022-09-13	12:50:46	7.24672	75.0049	0
2022-09-13	12:50:47	1.37498	76.3799	0
2022-09-13	12:50:48	1.41148	77.7914	0
2022-09-13	12:50:49	2.99261	80.784	0
2022-09-13	12:50:50	7.69629	88.4803	0
2022-09-13	12:50:51	9.48112	97.9614	0
2022-09-13	12:50:52	4.59031	102.552	0
2022-09-13	12:50:53	4.79672	107.348	0
2022-09-13	12:50:54	2.66728	110.016	0
2022-09-13	12:50:55	3.56869	113.584	0
2022-09-13	12:50:56	8.51327	122.098	0
2022-09-13	12:50:57	2.8294	124.927	0
2022-09-13	12:50:58	2.58431	127.511	0
2022-09-13	12:50:59	6.21571	133.727	0
2022-09-13	12:51:00	12.2267	145.954	0
2022-09-13	12:51:01	7.81719	153.771	0
2022-09-13	12:51:02	14.575	168.346	1
2022-09-13	12:51:03	5.22556	173.572	1
2022-09-13	12:51:04	4.19692	177.769	1
2022-09-13	12:51:05	7.06013	184.829	1
2022-09-13	12:51:06	7.43908	192.268	1
2022-09-13	12:51:07	6.54689	198.815	1
2022-09-13	12:51:08	4.32184	203.136	1
2022-09-13	12:51:09	-0.905088	203.136	1
2022-09-13	12:51:10	0.855515	203.992	1
2022-09-13	12:51:11	2.0653	206.057	1
2022-09-13	12:51:12	1.95868	208.016	1
2022-09-13	12:51:13	2.26292	210.279	1
2022-09-13	12:51:14	2.62529	212.904	1
2022-09-13	12:51:15	2.2151	215.119	1
2022-09-13	12:51:16	1.68228	216.802	1
2022-09-13	12:51:17	2.25664	219.058	1
2022-09-13	12:51:18	2.50161	221.56	1
2022-09-13	12:51:19	2.56558	224.125	1
2022-09-13	12:51:20	2.14045	226.266	1
2022-09-13	12:51:21	1.12003	227.386	1
2022-09-13	12:51:22	1.558	228.944	1
2022-09-13	12:51:23	1.96723	230.911	1
2022-09-13	12:51:24	1.91199	232.823	1
2022-09-13	12:51:25	1.76423	234.587	1
2022-09-13	12:51:26	3.18578	237.773	1
2022-09-13	12:51:27	4.72842	242.501	1
2022-09-13	12:51:28	3.92805	246.43	1
2022-09-13	12:51:29	3.57837	250.008	1
2022-09-13	12:51:30	3.64951	253.657	1
2022-09-13	12:51:31	2.854	256.511	1
2022-09-13	12:51:32	3.74289	260.254	1
2022-09-13	12:51:33	2.61765	262.872	1
2022-09-13	12:51:34	4.09958	266.972	1
2022-09-13	12:51:35	2.32663	269.298	1
2022-09-13	12:51:36	3.26773	272.566	1
2022-09-13	12:51:37	3.5529	276.119	1
2022-09-13	12:51:38	3.1971	279.316	1
2022-09-13	12:51:39	3.26931	282.585	1
2022-09-13	12:51:40	3.27407	285.859	1
2022-09-13	12:51:41	3.2894	289.149	1
2022-09-13	12:51:42	3.37327	292.522	1
2022-09-13	12:51:43	2.15715	294.679	1
2022-09-13	12:51:44	19.0636	313.743	2
2022-09-13	12:51:45	3.31011	317.053	2
2022-09-13	12:51:46	7.62408	324.677	2
2022-09-13	12:51:47	9.92706	334.604	2
2022-09-13	12:51:48	7.467	342.071	2
2022-09-13	12:51:49	6.777	348.848	2
2022-09-13	12:51:50	5.81848	354.666	2
2022-09-13	12:51:51	10.2813	364.948	2
2022-09-13	12:51:52	2.21299	367.161	2
2022-09-13	12:51:53	2.14781	369.309	2
2022-09-13	12:51:54	4.28102	373.59	2
2022-09-13	12:51:55	1.2189	374.809	2
2022-09-13	12:51:56	1.33897	376.147	2
2022-09-13	12:51:57	0.253424	376.401	2
2022-09-13	12:51:58	-0.689242	376.401	2
2022-09-13	12:51:59	-0.0337274	376.401	2
2022-09-13	12:52:00	6.89754	383.298	2
2022-09-13	12:52:01	0.53052	383.829	2
2022-09-13	12:52:02	-1.71793	383.829	2
2022-09-13	12:52:03	0.536105	384.365	2
2022-09-13	12:52:04	1.62665	385.992	2
2022-09-13	12:52:05	1.60367	387.595	2
2022-09-13	12:52:06	1.43078	389.026	2
2022-09-13	12:52:07	1.09564	390.122	2
2022-09-13	12:52:08	3.26988	393.392	2
2022-09-13	12:52:09	3.26019	396.652	2
2022-09-13	12:52:10	3.27656	399.928	2
2022-09-13	12:52:11	1.97368	401.902	2
2022-09-13	12:52:12	-3.13609	401.902	2
2022-09-13	12:52:13	-1.2674	401.902	2
2022-09-13	12:52:14	1.85178	403.754	2
2022-09-13	12:52:15	-0.88347	403.754	2
2022-09-13	12:52:16	-2.06134	403.754	2
2022-09-13	12:52:17	4.19555	407.949	2
2022-09-13	12:52:18	10.9308	418.88	2
2022-09-13	12:52:19	5.60796	424.488	2
2022-09-13	12:52:20	16.3169	440.805	3
2022-09-13	12:52:21	16.0857	456.891	4
2022-09-13	12:52:22	7.5746	464.465	4
2022-09-13	12:52:23	7.62396	472.089	4
2022-09-13	12:52:24	10.5659	482.655	4
2022-09-13	12:52:25	-1.2473	482.655	4
2022-09-13	12:52:26	-0.313391	482.655	4
2022-09-13	12:52:27	-0.437575	482.655	4
2022-09-13	12:52:28	12.7915	495.447	4
2022-09-13	12:52:29	16.9415	512.388	5
2022-09-13	12:52:30	6.48559	518.874	5
2022-09-13	12:52:31	0.0438615	518.918	5
2022-09-13	12:52:32	0.941707	519.859	5
2022-09-13	12:52:33	3.1829	523.042	5
2022-09-13	12:52:34	3.17462	526.217	5
2022-09-13	12:52:35	2.4207	528.638	5
2022-09-13	12:52:36	1.68262	530.32	5
2022-09-13	12:52:37	-0.776227	530.32	5
2022-09-13	12:52:38	-3.88885	530.32	5
2022-09-13	12:52:39	-4.68758	530.32	5
2022-09-13	12:52:40	-2.19693	530.32	5
2022-09-13	12:52:41	1.05506	531.375	5
2022-09-13	12:52:42	2.63689	534.012	5
2022-09-13	12:52:43	3.27128	537.283	5
2022-09-13	12:52:44	2.44272	539.726	5
2022-09-13	12:52:45	3.09003	542.816	5
2022-09-13	12:52:46	3.4409	546.257	5
2022-09-13	12:52:47	3.29806	549.555	5
2022-09-13	12:52:48	3.28414	552.839	5
2022-09-13	12:52:49	7.6998	560.539	5
2022-09-13	12:52:50	6.35911	566.898	5
2022-09-13	12:52:51	7.7513	574.649	5
2022-09-13	12:52:52	1.20871	575.858	5
2022-09-13	12:52:53	1.56072	577.419	5
2022-09-13	12:52:54	2.44991	579.869	5
2022-09-13	12:52:55	2.53526	582.404	5
2022-09-13	12:52:56	3.29461	585.699	5
2022-09-13	12:52:57	4.53642	590.235	5
2022-09-13	12:52:58	5.49285	595.728	5
2022-09-13	12:52:59	3.25905	598.987	5
2022-09-13	12:53:00	3.27826	602.265	5
2022-09-13	12:53:01	3.26705	605.532	5
2022-09-13	12:53:02	3.27538	608.808	5
2022-09-13	12:53:03	3.27062	612.078	5
2022-09-13	12:53:04	3.27618	615.354	5
2022-09-13	12:53:05	3.25709	618.612	5
2022-09-13	12:53:06	3.28686	621.898	5
2022-09-13	12:53:07	3.28454	625.183	5
2022-09-13	12:53:08	3.26713	628.45	5
2022-09-13	12:53:09	3.26575	631.716	5
2022-09-13	12:53:10	3.27543	634.991	5
2022-09-13	12:53:11	3.27011	638.261	5
2022-09-13	12:53:12	3.27022	641.532	5
2022-09-13	12:53:13	3.2756	644.807	5
2022-09-13	12:53:14	3.28867	648.096	5
2022-09-13	12:53:15	3.26971	651.366	5
2022-09-13	12:53:16	3.27437	654.64	5
2022-09-13	12:53:17	3.26207	657.902	5
2022-09-13	12:53:18	3.26575	661.168	5
2022-09-13	12:53:19	3.27378	664.442	5
2022-09-13	12:53:20	3.27776	667.719	5
2022-09-13	12:53:21	10.4254	678.145	5
2022-09-13	12:53:22	32.4864	710.631	6
2022-09-13	12:53:23	33.8692	744.5	7
2022-09-13	12:53:24	9.67359	754.174	7
2022-09-13	12:53:25	4.77151	758.945	7
2022-09-13	12:53:26	43.7398	802.685	8
2022-09-13	12:53:27	63.2818	865.967	9
2022-09-13	12:53:28	6.12556	872.093	9
2022-09-13	12:53:29	3.15847	875.251	9
2022-09-13	12:53:30	-0.165533	875.251	9
2022-09-13	12:53:31	1.07436	876.326	9
2022-09-13	12:53:32	3.25733	879.583	9
2022-09-13	12:53:33	13.4891	893.072	10
2022-09-13	12:53:34	7.7389	900.811	10
2022-09-13	12:53:35	9.38994	910.201	10
2022-09-13	12:53:36	18.9334	929.134	11
2022-09-13	12:53:37	3.09569	932.23	11
2022-09-13	12:53:38	3.75579	935.986	11
2022-09-13	12:53:39	2.51086	938.496	11
2022-09-13	12:53:40	3.28437	941.781	11
2022-09-13	12:53:41	3.29074	945.072	11
2022-09-13	12:53:42	3.26818	948.34	11
2022-09-13	12:53:43	3.26337	951.603	11
2022-09-13	12:53:44	3.28199	954.885	11
2022-09-13	12:53:45	3.25671	958.142	11
2022-09-13	12:53:46	3.25386	961.396	11
2022-09-13	12:53:47	3.2649	964.661	11
2022-09-13	12:53:48	3.28312	967.944	11
2022-09-13	12:53:49	3.27871	971.222	11
2022-09-13	12:53:50	3.26947	974.492	11
2022-09-13	12:53:51	3.28437	977.776	11
2022-09-13	12:53:52	3.26037	981.037	11
2022-09-13	12:53:53	3.27203	984.309	11
2022-09-13	12:53:54	3.25792	987.567	11
2022-09-13	12:53:55	3.26263	990.829	11
2022-09-13	12:53:56	3.27061	994.1	11
2022-09-13	12:53:57	3.28295	997.383	11
2022-09-13	12:53:58	3.26547	1000.65	11
2022-09-13	12:53:59	3.26835	1003.92	11
2022-09-13	12:54:00	3.30814	1007.22	11
2022-09-13	12:54:01	3.261	1010.49	11
2022-09-13	12:54:02	3.28312	1013.77	11
2022-09-13	12:54:03	3.2722	1017.04	11
2022-09-13	12:54:04	3.2636	1020.3	11
2022-09-13	12:54:05	3.28188	1023.59	11
2022-09-13	12:54:06	3.27211	1026.86	11
2022-09-13	12:54:07	3.27786	1030.14	11
2022-09-13	12:54:08	3.26847	1033.4	11
2022-09-13	12:54:09	3.26948	1036.67	11
2022-09-13	12:54:10	3.26388	1039.94	11
2022-09-13	12:54:11	3.28691	1043.23	11
2022-09-13	12:54:12	3.27741	1046.5	11
2022-09-13	12:54:13	3.27741	1049.78	11
2022-09-13	12:54:14	3.25924	1053.04	11
2022-09-13	12:54:15	3.27128	1056.31	11
2022-09-13	12:54:16	3.28193	1059.59	11
2022-09-13	12:54:17	3.26671	1062.86	11
2022-09-13	12:54:18	3.10027	1065.96	11
2022-09-13	12:54:19	2.0903	1068.05	11
2022-09-13	12:54:20	2.91001	1070.96	11
2022-09-13	12:54:21	3.26547	1074.23	11
2022-09-13	12:54:22	3.26937	1077.49	11
2022-09-13	12:54:23	3.28297	1080.78	11
2022-09-13	12:54:24	3.26943	1084.05	11
2022-09-13	12:54:25	3.45981	1087.51	11
2022-09-13	12:54:26	3.24113	1090.75	11
2022-09-13	12:54:27	3.2918	1094.04	11
2022-09-13	12:54:28	3.30944	1097.35	11
2022-09-13	12:54:29	10.9076	1108.26	11
2022-09-13	12:54:30	6.57887	1114.84	11
2022-09-13	12:54:31	8.65166	1123.49	11
2022-09-13	12:54:32	4.38493	1127.87	11
2022-09-13	12:54:33	2.70401	1130.58	11
2022-09-13	12:54:34	3.28595	1133.86	11
2022-09-13	12:54:35	2.27117	1136.13	11
2022-09-13	12:54:36	3.20174	1139.34	11
2022-09-13	12:54:37	9.77715	1149.11	11
2022-09-13	12:54:38	3.92557	1153.04	11
2022-09-13	12:54:39	2.71776	1155.76	11
2022-09-13	12:54:40	8.2762	1164.03	11
2022-09-13	12:54:41	5.66924	1169.7	11
2022-09-13	12:54:42	-0.168929	1169.7	11
2022-09-13	12:54:43	-1.47526	1169.7	11
2022-09-13	12:54:44	11.2401	1180.94	11
2022-09-13	12:54:45	9.86364	1190.8	11
2022-09-13	12:54:46	17.2754	1208.08	12
2022-09-13	12:54:47	7.21275	1215.29	12
2022-09-13	12:54:48	2.70407	1218	12
2022-09-13	12:54:49	5.15345	1223.15	12
2022-09-13	12:54:50	27.8053	1250.96	13
2022-09-13	12:54:51	4.60598	1255.56	13
2022-09-13	12:54:52	2.03227	1257.59	13
2022-09-13	12:54:53	1.63333	1259.23	13
2022-09-13	12:54:54	0.323995	1259.55	13
2022-09-13	12:54:55	0.59779	1260.15	13
2022-09-13	12:54:56	6.1892	1266.34	13
2022-09-13	12:54:57	3.75285	1270.09	13
2022-09-13	12:54:58	0.980021	1271.07	13
2022-09-13	12:54:59	6.00948	1277.08	13
2022-09-13	12:55:00	3.53433	1280.61	13
2022-09-13	12:55:01	2.4752	1283.09	13
2022-09-13	12:55:02	5.33438	1288.42	13
2022-09-13	12:55:03	3.23366	1291.66	13
2022-09-13	12:55:04	3.43723	1295.1	13
2022-09-13	12:55:05	3.26743	1298.36	13
2022-09-13	12:55:06	3.27695	1301.64	13
2022-09-13	12:55:07	3.26586	1304.91	13
2022-09-13	12:55:08	3.25511	1308.16	13
2022-09-13	12:55:09	2.33161	1310.49	13
2022-09-13	12:55:10	-2.02082	1310.49	13
2022-09-13	12:55:11	0.535709	1311.03	13
2022-09-13	12:55:12	0.627956	1311.66	13
2022-09-13	12:55:13	1.27657	1312.93	13
2022-09-13	12:55:14	1.78539	1314.72	13
2022-09-13	12:55:15	2.10888	1316.83	13
2022-09-13	12:55:16	1.19196	1318.02	13
2022-09-13	12:55:17	2.64438	1320.66	13
2022-09-13	12:55:18	9.94689	1330.61	13
2022-09-13	12:55:19	15.8579	1346.47	14
2022-09-13	12:55:20	5.62618	1352.09	14
2022-09-13	12:55:21	11.221	1363.32	14
2022-09-13	12:55:22	4.10762	1367.42	14
2022-09-13	12:55:23	5.29794	1372.72	14
2022-09-13	12:55:24	25.0768	1397.8	15
2022-09-13	12:55:25	6.13208	1403.93	15

## Sheet: Daisy_martin_2022913125011  (3)
Date	Time	Lbs	Newtons	Averaged Newtons	Total force x time	total steps > 13.345		**GoPro Fitting: 1239
2022-09-13	12:50:25	0.37299	1.65913	4.86037	1.65913	FALSE	0			Total force x time	2648.35
2022-09-13	12:50:25	0.672277	2.99042	4.86037	2.99042	FALSE	0			Total Steps	68
2022-09-13	12:50:25	1.51869	6.75544	4.86037	8.41457	FALSE	0
2022-09-13	12:50:25	1.80668	8.03647	4.86037	11.0269	FALSE	0
2022-09-13	12:50:26	3.6594	16.2777	8.24128	24.6923	1	1
2022-09-13	12:50:26	1.79462	7.98283	8.24128	19.0097	FALSE	1
2022-09-13	12:50:26	1.28576	5.71932	8.24128	30.4116	FALSE	1
2022-09-13	12:50:26	0.671107	2.98522	8.24128	21.9949	FALSE	1
2022-09-13	12:50:27	0.2193	0.97549	1.68477	31.3871	FALSE	1
2022-09-13	12:50:27	0.392481	1.74583	1.68477	23.7408	FALSE	1
2022-09-13	12:50:27	0.478282	2.12749	1.68477	33.5146	FALSE	1
2022-09-13	12:50:27	0.424949	1.89026	1.68477	25.631	FALSE	1
2022-09-13	12:50:28	0.36154	1.6082	1.57477	35.1228	FALSE	1
2022-09-13	12:50:28	0.359606	1.5996	1.57477	27.2306	FALSE	1
2022-09-13	12:50:28	0.340929	1.51652	1.57477	36.6393	FALSE	1
2022-09-13	12:50:29	0.32841	1.46083	1.83463	28.6915	FALSE	1
2022-09-13	12:50:29	0.429478	1.9104	1.83463	38.5497	FALSE	1
2022-09-13	12:50:29	0.357723	1.59122	1.83463	30.2827	FALSE	1
2022-09-13	12:50:29	0.53416	2.37605	1.83463	40.9258	FALSE	1
2022-09-13	12:50:30	0.416247	1.85155	1.83508	32.1342	FALSE	1
2022-09-13	12:50:30	0.562862	2.50372	1.83508	43.4295	FALSE	1
2022-09-13	12:50:30	0.225509	1.00311	1.83508	33.1374	FALSE	1
2022-09-13	12:50:30	0.44556	1.98194	1.83508	45.4115	FALSE	1
2022-09-13	12:50:31	0.127239	0.565985	1.32218	33.7033	FALSE	1
2022-09-13	12:50:31	0.303473	1.34991	1.32218	46.7614	FALSE	1
2022-09-13	12:50:31	0.23584	1.04906	1.32218	34.7524	FALSE	1
2022-09-13	12:50:31	0.522404	2.32376	1.32218	49.0851	FALSE	1
2022-09-13	12:50:32	0.337417	1.5009	1.7075	36.2533	FALSE	1
2022-09-13	12:50:32	0.420369	1.86989	1.7075	50.955	FALSE	1
2022-09-13	12:50:32	0.393804	1.75172	1.7075	38.005	FALSE	1
2022-09-13	12:50:33	0.517112	2.30022	8.27377	53.2552	FALSE	1
2022-09-13	12:50:33	1.55299	6.90801	8.27377	44.913	FALSE	1
2022-09-13	12:50:33	2.62179	11.6622	8.27377	64.9175	FALSE	1
2022-09-13	12:50:33	2.74821	12.2246	8.27377	57.1376	FALSE	1
2022-09-13	12:50:34	1.77747	7.90654	8.00801	72.824	FALSE	1
2022-09-13	12:50:34	1.61548	7.18598	8.00801	64.3236	FALSE	1
2022-09-13	12:50:34	1.08846	4.84169	8.00801	77.6657	FALSE	1
2022-09-13	12:50:34	2.71971	12.0978	8.00801	76.4214	FALSE	1
2022-09-13	12:50:35	1.46846	6.532	3.59353	84.1977	FALSE	1
2022-09-13	12:50:35	1.01019	4.49353	3.59353	80.9149	FALSE	1
2022-09-13	12:50:35	0.336145	1.49524	3.59353	85.6929	FALSE	1
2022-09-13	12:50:35	0.416654	1.85336	3.59353	82.7683	FALSE	1
2022-09-13	12:50:36	0.480929	2.13927	3.02634	87.8322	FALSE	1
2022-09-13	12:50:36	0.846323	3.76461	3.02634	86.5329	FALSE	1
2022-09-13	12:50:36	0.713804	3.17514	3.02634	91.0074	FALSE	1
2022-09-13	12:50:37	1.68322	7.4873	3.25573	94.0202	FALSE	1
2022-09-13	12:50:37	0.874873	3.89161	3.25573	94.899	FALSE	1
2022-09-13	12:50:37	0.478028	2.12636	3.25573	96.1466	FALSE	1
2022-09-13	12:50:37	-0.108435	-0.482341	3.25573	94.899	FALSE	1
2022-09-13	12:50:38	0.179402	0.798016	1.87939	96.9446	FALSE	1
2022-09-13	12:50:38	0.333346	1.48279	1.87939	96.3818	FALSE	1
2022-09-13	12:50:38	0.589733	2.62325	1.87939	99.5678	FALSE	1
2022-09-13	12:50:38	0.587545	2.61352	1.87939	98.9953	FALSE	1
2022-09-13	12:50:39	0.64042	2.84872	1.67436	102.417	FALSE	1
2022-09-13	12:50:39	0.263372	1.17153	1.67436	100.167	FALSE	1
2022-09-13	12:50:39	0.25126	1.11765	1.67436	103.534	FALSE	1
2022-09-13	12:50:39	0.350598	1.55953	1.67436	101.726	FALSE	1
2022-09-13	12:50:40	0.459249	2.04283	2.46245	105.577	FALSE	1
2022-09-13	12:50:40	0.47355	2.10645	2.46245	103.833	FALSE	1
2022-09-13	12:50:40	0.727952	3.23808	2.46245	108.815	FALSE	1
2022-09-13	12:50:41	0.365967	1.62789	1.57685	105.461	FALSE	1
2022-09-13	12:50:41	0.392583	1.74629	1.57685	110.561	FALSE	1
2022-09-13	12:50:41	0.315178	1.40197	1.57685	106.863	FALSE	1
2022-09-13	12:50:41	0.344237	1.53124	1.57685	112.093	FALSE	1
2022-09-13	12:50:42	0.402456	1.7902	1.99128	108.653	FALSE	1
2022-09-13	12:50:42	0.494008	2.19745	1.99128	114.29	FALSE	1
2022-09-13	12:50:42	0.434211	1.93146	1.99128	110.584	FALSE	1
2022-09-13	12:50:42	0.459962	2.046	1.99128	116.336	FALSE	1
2022-09-13	12:50:43	0.701845	3.12195	5.08877	113.706	FALSE	1
2022-09-13	12:50:43	2.75568	12.2578	5.08877	128.594	FALSE	1
2022-09-13	12:50:43	0.576807	2.56575	5.08877	116.272	FALSE	1
2022-09-13	12:50:43	0.541692	2.40955	5.08877	131.003	FALSE	1
2022-09-13	12:50:44	0.43986	1.95659	1.61695	118.229	FALSE	1
2022-09-13	12:50:44	0.290038	1.29015	1.61695	132.294	FALSE	1
2022-09-13	12:50:44	0.360623	1.60412	1.61695	119.833	FALSE	1
2022-09-13	12:50:45	0.289631	1.28834	2.25019	133.582	FALSE	1
2022-09-13	12:50:45	0.294924	1.31188	2.25019	121.145	FALSE	1
2022-09-13	12:50:45	0.535178	2.38058	2.25019	135.963	FALSE	1
2022-09-13	12:50:45	0.903728	4.01996	2.25019	125.165	FALSE	1
2022-09-13	12:50:46	1.07492	4.78146	7.24672	140.744	FALSE	1
2022-09-13	12:50:46	2.26083	10.0566	7.24672	135.221	FALSE	1
2022-09-13	12:50:46	2.67696	11.9077	7.24672	152.652	FALSE	1
2022-09-13	12:50:46	0.50383	2.24114	7.24672	137.462	FALSE	1
2022-09-13	12:50:47	0.348206	1.54889	1.37498	154.201	FALSE	1
2022-09-13	12:50:47	0.313906	1.39632	1.37498	138.859	FALSE	1
2022-09-13	12:50:47	0.293804	1.3069	1.37498	155.507	FALSE	1
2022-09-13	12:50:47	0.280522	1.24782	1.37498	140.106	FALSE	1
2022-09-13	12:50:48	0.330649	1.47079	1.41148	156.978	FALSE	1
2022-09-13	12:50:48	0.324797	1.44476	1.41148	141.551	FALSE	1
2022-09-13	12:50:48	0.242456	1.07849	1.41148	158.057	FALSE	1
2022-09-13	12:50:48	0.371361	1.65189	1.41148	143.203	FALSE	1
2022-09-13	12:50:49	0.368206	1.63785	2.99261	159.695	FALSE	1
2022-09-13	12:50:49	0.618893	2.75296	2.99261	145.956	FALSE	1
2022-09-13	12:50:49	1.03121	4.58703	2.99261	164.282	FALSE	1
2022-09-13	12:50:50	1.97045	8.76496	7.69629	154.721	FALSE	1
2022-09-13	12:50:50	1.44235	6.41586	7.69629	170.697	FALSE	1
2022-09-13	12:50:50	1.93706	8.61643	7.69629	163.337	FALSE	1
2022-09-13	12:50:50	1.57095	6.9879	7.69629	177.685	FALSE	1
2022-09-13	12:50:51	2.65645	11.8164	9.48112	175.154	FALSE	1
2022-09-13	12:50:51	1.82856	8.1338	9.48112	185.819	FALSE	1
2022-09-13	12:50:51	1.66291	7.39696	9.48112	182.551	FALSE	1
2022-09-13	12:50:51	2.37788	10.5773	9.48112	196.396	FALSE	1
2022-09-13	12:50:52	1.62999	7.25052	4.59031	189.801	FALSE	1
2022-09-13	12:50:52	0.991514	4.41045	4.59031	200.807	FALSE	1
2022-09-13	12:50:52	0.763626	3.39676	4.59031	193.198	FALSE	1
2022-09-13	12:50:52	0.742659	3.3035	4.59031	204.11	FALSE	1
2022-09-13	12:50:53	1.32627	5.89951	4.79672	199.098	FALSE	1
2022-09-13	12:50:53	0.849122	3.77706	4.79672	207.887	FALSE	1
2022-09-13	12:50:53	1.05966	4.71358	4.79672	203.811	FALSE	1
2022-09-13	12:50:54	0.357875	1.5919	2.66728	209.479	FALSE	1
2022-09-13	12:50:54	0.850292	3.78227	2.66728	207.593	FALSE	1
2022-09-13	12:50:54	0.477214	2.12274	2.66728	211.602	FALSE	1
2022-09-13	12:50:54	0.713143	3.1722	2.66728	210.766	FALSE	1
2022-09-13	12:50:55	0.444389	1.97673	3.56869	213.579	FALSE	1
2022-09-13	12:50:55	0.787799	3.50429	3.56869	214.27	FALSE	1
2022-09-13	12:50:55	1.20581	5.36368	3.56869	218.943	FALSE	1
2022-09-13	12:50:55	0.771107	3.43004	3.56869	217.7	FALSE	1
2022-09-13	12:50:56	2.15039	9.56536	8.51327	228.508	FALSE	1
2022-09-13	12:50:56	1.54139	6.85641	8.51327	224.556	FALSE	1
2022-09-13	12:50:56	2.84724	12.6651	8.51327	241.173	FALSE	1
2022-09-13	12:50:56	1.11645	4.96619	8.51327	229.523	FALSE	1
2022-09-13	12:50:57	1.10088	4.89693	2.8294	246.07	FALSE	1
2022-09-13	12:50:57	0.570649	2.53836	2.8294	232.061	FALSE	1
2022-09-13	12:50:57	0.236705	1.05291	2.8294	247.123	FALSE	1
2022-09-13	12:50:58	0.615738	2.73893	2.58431	234.8	FALSE	1
2022-09-13	12:50:58	0.311209	1.38432	2.58431	248.507	FALSE	1
2022-09-13	12:50:58	0.728359	3.23989	2.58431	238.04	FALSE	1
2022-09-13	12:50:58	0.668613	2.97412	2.58431	251.481	FALSE	1
2022-09-13	12:50:59	1.10215	4.90258	6.21571	242.942	FALSE	1
2022-09-13	12:50:59	0.990242	4.40479	6.21571	255.886	FALSE	1
2022-09-13	12:50:59	1.38093	6.14265	6.21571	249.085	FALSE	1
2022-09-13	12:50:59	2.11609	9.41279	6.21571	265.299	FALSE	1
2022-09-13	12:51:00	2.19167	9.74899	12.2267	258.834	FALSE	1
2022-09-13	12:51:00	2.67065	11.8796	12.2267	277.178	FALSE	1
2022-09-13	12:51:00	1.98994	8.85165	12.2267	267.686	FALSE	1
2022-09-13	12:51:00	4.1425	18.4267	12.2267	295.605	1	2
2022-09-13	12:51:01	0.567544	2.52455	7.81719	270.21	FALSE	2
2022-09-13	12:51:01	3.76276	16.7375	7.81719	312.343	1	3
2022-09-13	12:51:01	0.941845	4.18951	7.81719	274.4	FALSE	3
2022-09-13	12:51:02	4.14525	18.4389	14.575	330.782	1	4
2022-09-13	12:51:02	2.37508	10.5648	14.575	284.965	FALSE	4
2022-09-13	12:51:02	4.05273	18.0274	14.575	348.809	1	5
2022-09-13	12:51:02	2.5334	11.2691	14.575	296.234	FALSE	5
2022-09-13	12:51:03	0.713448	3.17356	5.22556	351.982	FALSE	5
2022-09-13	12:51:03	2.03177	9.03772	5.22556	305.271	FALSE	5
2022-09-13	12:51:03	0.761946	3.38929	5.22556	355.372	FALSE	5
2022-09-13	12:51:03	1.19187	5.30168	5.22556	310.573	FALSE	5
2022-09-13	12:51:04	0.850394	3.78272	4.19692	359.154	FALSE	5
2022-09-13	12:51:04	0.546628	2.43151	4.19692	313.005	FALSE	5
2022-09-13	12:51:04	1.40851	6.26533	4.19692	365.42	FALSE	5
2022-09-13	12:51:04	0.968511	4.30813	4.19692	317.313	FALSE	5
2022-09-13	12:51:05	1.31385	5.84427	7.06013	371.264	FALSE	5
2022-09-13	12:51:05	1.01401	4.51052	7.06013	321.823	FALSE	5
2022-09-13	12:51:05	1.56322	6.95352	7.06013	378.218	FALSE	5
2022-09-13	12:51:05	2.45767	10.9322	7.06013	332.755	FALSE	5
2022-09-13	12:51:06	1.41864	6.31039	7.43908	384.528	FALSE	5
2022-09-13	12:51:06	2.60251	11.5765	7.43908	344.332	FALSE	5
2022-09-13	12:51:06	0.995992	4.43037	7.43908	388.958	FALSE	5
2022-09-13	12:51:07	1.79207	7.97149	6.54689	352.303	FALSE	5
2022-09-13	12:51:07	0.575942	2.56191	6.54689	391.52	FALSE	5
2022-09-13	12:51:07	2.64159	11.7503	6.54689	364.054	FALSE	5
2022-09-13	12:51:07	0.877621	3.90383	6.54689	395.424	FALSE	5
2022-09-13	12:51:08	1.54129	6.85597	4.32184	370.91	FALSE	5
2022-09-13	12:51:08	1.29009	5.73858	4.32184	401.163	FALSE	5
2022-09-13	12:51:08	0.413499	1.83933	4.32184	372.749	FALSE	5
2022-09-13	12:51:08	0.641489	2.85347	4.32184	404.016	FALSE	5
2022-09-13	12:51:09	0.294008	1.30781	-0.905088	374.057	FALSE	5
2022-09-13	12:51:09	-0.0489437	-0.217711	-0.905088	404.016	FALSE	5
2022-09-13	12:51:09	-0.505839	-2.25007	-0.905088	374.057	FALSE	5
2022-09-13	12:51:09	-0.553117	-2.46038	-0.905088	404.016	FALSE	5
2022-09-13	12:51:10	0.00128524	0.005717	0.855515	374.062	FALSE	5
2022-09-13	12:51:10	0.240827	1.07125	0.855515	405.087	FALSE	5
2022-09-13	12:51:10	0.334873	1.48958	0.855515	375.552	FALSE	5
2022-09-13	12:51:11	0.562252	2.50101	2.0653	407.588	FALSE	5
2022-09-13	12:51:11	0.398283	1.77164	2.0653	377.324	FALSE	5
2022-09-13	12:51:11	0.475534	2.11527	2.0653	409.704	FALSE	5
2022-09-13	12:51:11	0.421132	1.87328	2.0653	379.197	FALSE	5
2022-09-13	12:51:12	0.441081	1.96202	1.95868	411.666	FALSE	5
2022-09-13	12:51:12	0.464746	2.06728	1.95868	381.264	FALSE	5
2022-09-13	12:51:12	0.425	1.89048	1.95868	413.556	FALSE	5
2022-09-13	12:51:12	0.430496	1.91493	1.95868	383.179	FALSE	5
2022-09-13	12:51:13	0.461082	2.05098	2.26292	415.607	FALSE	5
2022-09-13	12:51:13	0.54729	2.43446	2.26292	385.614	FALSE	5
2022-09-13	12:51:13	0.378944	1.68562	2.26292	417.293	FALSE	5
2022-09-13	12:51:13	0.647595	2.88063	2.26292	388.494	FALSE	5
2022-09-13	12:51:14	0.610852	2.71719	2.62529	420.01	FALSE	5
2022-09-13	12:51:14	0.590547	2.62687	2.62529	391.121	FALSE	5
2022-09-13	12:51:14	0.569173	2.5318	2.62529	422.542	FALSE	5
2022-09-13	12:51:15	0.682507	3.03593	2.2151	394.157	FALSE	5
2022-09-13	12:51:15	0.413804	1.84068	2.2151	424.382	FALSE	5
2022-09-13	12:51:15	0.479504	2.13293	2.2151	396.29	FALSE	5
2022-09-13	12:51:15	0.416094	1.85087	2.2151	426.233	FALSE	5
2022-09-13	12:51:16	0.268359	1.19371	1.68228	397.484	FALSE	5
2022-09-13	12:51:16	0.345967	1.53893	1.68228	427.772	FALSE	5
2022-09-13	12:51:16	0.440573	1.95976	1.68228	399.443	FALSE	5
2022-09-13	12:51:16	0.457875	2.03672	1.68228	429.809	FALSE	5
2022-09-13	12:51:17	0.500267	2.22529	2.25664	401.669	FALSE	5
2022-09-13	12:51:17	0.503066	2.23774	2.25664	432.047	FALSE	5
2022-09-13	12:51:17	0.52271	2.32512	2.25664	403.994	FALSE	5
2022-09-13	12:51:17	0.503219	2.23842	2.25664	434.285	FALSE	5
2022-09-13	12:51:18	0.532837	2.37017	2.50161	406.364	FALSE	5
2022-09-13	12:51:18	0.559504	2.48879	2.50161	436.774	FALSE	5
2022-09-13	12:51:18	0.594822	2.64589	2.50161	409.01	FALSE	5
2022-09-13	12:51:19	0.531718	2.36519	2.56558	439.139	FALSE	5
2022-09-13	12:51:19	0.584847	2.60152	2.56558	411.611	FALSE	5
2022-09-13	12:51:19	0.605712	2.69433	2.56558	441.833	FALSE	5
2022-09-13	12:51:19	0.584796	2.60129	2.56558	414.213	FALSE	5
2022-09-13	12:51:20	0.544796	2.42336	2.14045	444.257	FALSE	5
2022-09-13	12:51:20	0.460623	2.04894	2.14045	416.262	FALSE	5
2022-09-13	12:51:20	0.443422	1.97243	2.14045	446.229	FALSE	5
2022-09-13	12:51:20	0.475942	2.11709	2.14045	418.379	FALSE	5
2022-09-13	12:51:21	0.28159	1.25257	1.12003	447.482	FALSE	5
2022-09-13	12:51:21	0.367138	1.6331	1.12003	420.012	FALSE	5
2022-09-13	12:51:21	0.205356	0.913465	1.12003	448.395	FALSE	5
2022-09-13	12:51:21	0.153092	0.680984	1.12003	420.693	FALSE	5
2022-09-13	12:51:22	0.000572752	0.00254772	1.558	448.398	FALSE	5
2022-09-13	12:51:22	0.494873	2.20129	1.558	422.894	FALSE	5
2022-09-13	12:51:22	0.484237	2.15398	1.558	450.552	FALSE	5
2022-09-13	12:51:22	0.421336	1.87419	1.558	424.768	FALSE	5
2022-09-13	12:51:23	0.428868	1.90769	1.96723	452.459	FALSE	5
2022-09-13	12:51:23	0.327443	1.45653	1.96723	426.225	FALSE	5
2022-09-13	12:51:23	0.570445	2.53745	1.96723	454.997	FALSE	5
2022-09-13	12:51:24	0.339809	1.51154	1.91199	427.736	FALSE	5
2022-09-13	12:51:24	0.54215	2.41159	1.91199	457.408	FALSE	5
2022-09-13	12:51:24	0.284084	1.26366	1.91199	429	FALSE	5
2022-09-13	12:51:24	0.553295	2.46117	1.91199	459.87	FALSE	5
2022-09-13	12:51:25	0.293397	1.30509	1.76423	430.305	FALSE	5
2022-09-13	12:51:25	0.483728	2.15172	1.76423	462.021	FALSE	5
2022-09-13	12:51:25	0.342914	1.52535	1.76423	431.831	FALSE	5
2022-09-13	12:51:25	0.466425	2.07475	1.76423	464.096	FALSE	5
2022-09-13	12:51:26	0.657163	2.92319	3.18578	434.754	FALSE	5
2022-09-13	12:51:26	0.734975	3.26932	3.18578	467.365	FALSE	5
2022-09-13	12:51:26	0.736959	3.27814	3.18578	438.032	FALSE	5
2022-09-13	12:51:26	0.735687	3.27248	3.18578	470.638	FALSE	5
2022-09-13	12:51:27	1.14805	5.10676	4.72842	443.139	FALSE	5
2022-09-13	12:51:27	1.32729	5.90405	4.72842	476.542	FALSE	5
2022-09-13	12:51:27	0.713651	3.17446	4.72842	446.313	FALSE	5
2022-09-13	12:51:28	0.713448	3.17356	3.92805	479.716	FALSE	5
2022-09-13	12:51:28	0.776756	3.45517	3.92805	449.768	FALSE	5
2022-09-13	12:51:28	1.0277	4.57142	3.92805	484.287	FALSE	5
2022-09-13	12:51:28	1.01436	4.51208	3.92805	454.28	FALSE	5
2022-09-13	12:51:29	0.749835	3.33542	3.57837	487.622	FALSE	5
2022-09-13	12:51:29	0.949173	4.22211	3.57837	458.502	FALSE	5
2022-09-13	12:51:29	0.776196	3.45268	3.57837	491.075	FALSE	5
2022-09-13	12:51:29	0.742608	3.30327	3.57837	461.806	FALSE	5
2022-09-13	12:51:30	0.979962	4.35907	3.64951	495.434	FALSE	5
2022-09-13	12:51:30	0.764288	3.39971	3.64951	465.205	FALSE	5
2022-09-13	12:51:30	0.753041	3.34968	3.64951	498.784	FALSE	5
2022-09-13	12:51:30	0.784491	3.48957	3.64951	468.695	FALSE	5
2022-09-13	12:51:31	0.811666	3.61045	2.854	502.394	FALSE	5
2022-09-13	12:51:31	0.546679	2.43174	2.854	471.127	FALSE	5
2022-09-13	12:51:31	0.566476	2.5198	2.854	504.914	FALSE	5
2022-09-13	12:51:32	1.06709	4.74663	3.74289	475.873	FALSE	5
2022-09-13	12:51:32	0.977977	4.35024	3.74289	509.264	FALSE	5
2022-09-13	12:51:32	0.667239	2.96801	3.74289	478.841	FALSE	5
2022-09-13	12:51:32	0.653448	2.90667	3.74289	512.171	FALSE	5
2022-09-13	12:51:33	0.550547	2.44894	2.61765	481.29	FALSE	5
2022-09-13	12:51:33	0.237163	1.05495	2.61765	513.226	FALSE	5
2022-09-13	12:51:33	0.810445	3.60502	2.61765	484.895	FALSE	5
2022-09-13	12:51:33	0.755738	3.36167	2.61765	516.588	FALSE	5
2022-09-13	12:51:34	1.42052	6.31876	4.09958	491.214	FALSE	5
2022-09-13	12:51:34	0.780013	3.46965	4.09958	520.057	FALSE	5
2022-09-13	12:51:34	1.00922	4.48921	4.09958	495.703	FALSE	5
2022-09-13	12:51:34	0.476756	2.12071	4.09958	522.178	FALSE	5
2022-09-13	12:51:35	0.110038	0.489471	2.32663	496.193	FALSE	5
2022-09-13	12:51:35	0.69701	3.10044	2.32663	525.278	FALSE	5
2022-09-13	12:51:35	0.762099	3.38997	2.32663	499.583	FALSE	5
2022-09-13	12:51:36	0.726374	3.23106	3.26773	528.509	FALSE	5
2022-09-13	12:51:36	0.737875	3.28222	3.26773	502.865	FALSE	5
2022-09-13	12:51:36	0.735992	3.27384	3.26773	531.783	FALSE	5
2022-09-13	12:51:36	0.738231	3.2838	3.26773	506.149	FALSE	5
2022-09-13	12:51:37	0.737621	3.28109	3.5529	535.064	FALSE	5
2022-09-13	12:51:37	0.753142	3.35013	3.5529	509.499	FALSE	5
2022-09-13	12:51:37	1.17579	5.23015	3.5529	540.294	FALSE	5
2022-09-13	12:51:37	0.528359	2.35025	3.5529	511.849	FALSE	5
2022-09-13	12:51:38	0.661743	2.94357	3.1971	543.238	FALSE	5
2022-09-13	12:51:38	0.738333	3.28425	3.1971	515.133	FALSE	5
2022-09-13	12:51:38	0.736959	3.27814	3.1971	546.516	FALSE	5
2022-09-13	12:51:38	0.737926	3.28244	3.1971	518.416	FALSE	5
2022-09-13	12:51:39	0.73416	3.26569	3.26931	549.782	FALSE	5
2022-09-13	12:51:39	0.733193	3.26139	3.26931	521.677	FALSE	5
2022-09-13	12:51:39	0.73757	3.28086	3.26931	553.063	FALSE	5
2022-09-13	12:51:40	0.740827	3.29535	3.27407	524.973	FALSE	5
2022-09-13	12:51:40	0.734669	3.26795	3.27407	556.331	FALSE	5
2022-09-13	12:51:40	0.729784	3.24623	3.27407	528.219	FALSE	5
2022-09-13	12:51:40	0.738893	3.28674	3.27407	559.617	FALSE	5
2022-09-13	12:51:41	0.739656	3.29014	3.2894	531.509	FALSE	5
2022-09-13	12:51:41	0.739504	3.28946	3.2894	562.907	FALSE	5
2022-09-13	12:51:41	0.742201	3.30146	3.2894	534.81	FALSE	5
2022-09-13	12:51:41	0.736603	3.27656	3.2894	566.183	FALSE	5
2022-09-13	12:51:42	0.735891	3.27339	3.37327	538.084	FALSE	5
2022-09-13	12:51:42	0.738689	3.28584	3.37327	569.469	FALSE	5
2022-09-13	12:51:42	0.751616	3.34334	3.37327	541.427	FALSE	5
2022-09-13	12:51:42	0.807188	3.59053	3.37327	573.06	FALSE	5
2022-09-13	12:51:43	0.335942	1.49434	2.15715	542.921	FALSE	5
2022-09-13	12:51:43	0.542252	2.41205	2.15715	575.472	FALSE	5
2022-09-13	12:51:43	0.489173	2.17594	2.15715	545.097	FALSE	5
2022-09-13	12:51:43	0.57243	2.54628	2.15715	578.018	FALSE	5
2022-09-13	12:51:44	4.71874	20.9899	19.0636	566.087	1	6
2022-09-13	12:51:44	6.75177	30.0332	19.0636	608.051	1	7
2022-09-13	12:51:44	1.38658	6.16779	19.0636	572.255	FALSE	7
2022-09-13	12:51:45	1.50296	6.68547	3.31011	614.737	FALSE	7
2022-09-13	12:51:45	0.303677	1.35082	3.31011	573.606	FALSE	7
2022-09-13	12:51:45	0.569326	2.53248	3.31011	617.269	FALSE	7
2022-09-13	12:51:45	0.600623	2.67169	3.31011	576.278	FALSE	7
2022-09-13	12:51:46	0.649886	2.89082	7.62408	620.16	FALSE	7
2022-09-13	12:51:46	1.3048	5.80401	7.62408	582.082	FALSE	7
2022-09-13	12:51:46	1.17263	5.21609	7.62408	625.376	FALSE	7
2022-09-13	12:51:46	3.72856	16.5854	7.62408	598.667	1	8
2022-09-13	12:51:47	1.91406	8.51412	9.92706	633.89	FALSE	8
2022-09-13	12:51:47	3.69258	16.4253	9.92706	615.092	1	9
2022-09-13	12:51:47	1.97095	8.76718	9.92706	642.658	FALSE	9
2022-09-13	12:51:47	1.34922	6.0016	9.92706	621.094	FALSE	9
2022-09-13	12:51:48	2.25808	10.0444	7.467	652.702	FALSE	9
2022-09-13	12:51:48	1.4221	6.32579	7.467	627.42	FALSE	9
2022-09-13	12:51:48	1.35579	6.03083	7.467	658.733	FALSE	9
2022-09-13	12:51:49	1.77497	7.89542	6.777	635.315	FALSE	9
2022-09-13	12:51:49	1.08943	4.846	6.777	663.579	FALSE	9
2022-09-13	12:51:49	2.92439	13.0083	6.777	648.323	FALSE	9
2022-09-13	12:51:49	0.305356	1.35828	6.777	664.937	FALSE	9
2022-09-13	12:51:50	0.769377	3.42234	5.81848	651.746	FALSE	9
2022-09-13	12:51:50	1.04515	4.64904	5.81848	669.586	FALSE	9
2022-09-13	12:51:50	1.48123	6.58881	5.81848	658.335	FALSE	9
2022-09-13	12:51:50	1.93645	8.61372	5.81848	678.2	FALSE	9
2022-09-13	12:51:51	1.54276	6.86251	10.2813	665.197	FALSE	9
2022-09-13	12:51:51	4.62194	20.5593	10.2813	698.759	1	10
2022-09-13	12:51:51	2.19732	9.77412	10.2813	674.971	FALSE	10
2022-09-13	12:51:51	0.883371	3.92941	10.2813	702.689	FALSE	10
2022-09-13	12:51:52	0.764644	3.40129	2.21299	678.372	FALSE	10
2022-09-13	12:51:52	0.467443	2.07928	2.21299	704.768	FALSE	10
2022-09-13	12:51:52	0.26042	1.1584	2.21299	679.531	FALSE	10
2022-09-13	12:51:53	0.137112	0.609902	2.14781	705.378	FALSE	10
2022-09-13	12:51:53	0.0838806	0.373118	2.14781	679.904	FALSE	10
2022-09-13	12:51:53	0.728512	3.24057	2.14781	708.618	FALSE	10
2022-09-13	12:51:53	0.981896	4.36767	2.14781	684.272	FALSE	10
2022-09-13	12:51:54	1.60683	7.1475	4.28102	715.766	FALSE	10
2022-09-13	12:51:54	1.18927	5.29011	4.28102	689.562	FALSE	10
2022-09-13	12:51:54	0.602201	2.67871	4.28102	718.444	FALSE	10
2022-09-13	12:51:54	0.451361	2.00774	4.28102	691.569	FALSE	10
2022-09-13	12:51:55	0.209682	0.932707	1.2189	719.377	FALSE	10
2022-09-13	12:51:55	0.270038	1.20118	1.2189	692.771	FALSE	10
2022-09-13	12:51:55	0.162456	0.722637	1.2189	720.1	FALSE	10
2022-09-13	12:51:55	0.453906	2.01906	1.2189	694.79	FALSE	10
2022-09-13	12:51:56	0.719351	3.19982	1.33897	723.3	FALSE	10
2022-09-13	12:51:56	0.0337534	0.150142	1.33897	694.94	FALSE	10
2022-09-13	12:51:56	0.149937	0.66695	1.33897	723.967	FALSE	10
2022-09-13	12:51:57	0.330903	1.47192	0.253424	696.412	FALSE	10
2022-09-13	12:51:57	0.0213361	0.0949072	0.253424	724.061	FALSE	10
2022-09-13	12:51:57	-0.0166283	-0.073966	0.253424	696.412	FALSE	10
2022-09-13	12:51:57	-0.107722	-0.479169	0.253424	724.061	FALSE	10
2022-09-13	12:51:58	-0.124923	-0.555682	-0.689242	696.412	FALSE	10
2022-09-13	12:51:58	-0.179783	-0.799711	-0.689242	724.061	FALSE	10
2022-09-13	12:51:58	-0.201615	-0.896824	-0.689242	696.412	FALSE	10
2022-09-13	12:51:58	-0.113473	-0.504751	-0.689242	724.061	FALSE	10
2022-09-13	12:51:59	-0.189045	-0.84091	-0.0337274	696.412	FALSE	10
2022-09-13	12:51:59	-0.312302	-1.38918	-0.0337274	724.061	FALSE	10
2022-09-13	12:51:59	0.042812	0.190436	-0.0337274	696.602	FALSE	10
2022-09-13	12:51:59	0.428206	1.90475	-0.0337274	725.966	FALSE	10
2022-09-13	12:52:00	0.790038	3.51425	6.89754	700.116	FALSE	10
2022-09-13	12:52:00	2.70556	12.0349	6.89754	738.001	FALSE	10
2022-09-13	12:52:00	2.31192	10.2839	6.89754	710.4	FALSE	10
2022-09-13	12:52:00	0.395026	1.75715	6.89754	739.758	FALSE	10
2022-09-13	12:52:01	0.174618	0.776736	0.53052	711.177	FALSE	10
2022-09-13	12:52:01	0.215178	0.957155	0.53052	740.715	FALSE	10
2022-09-13	12:52:01	-0.0319972	-0.14233	0.53052	711.177	FALSE	10
2022-09-13	12:52:02	-0.318053	-1.41476	-1.71793	740.715	FALSE	10
2022-09-13	12:52:02	-0.430317	-1.91414	-1.71793	711.177	FALSE	10
2022-09-13	12:52:02	-0.352557	-1.56824	-1.71793	740.715	FALSE	10
2022-09-13	12:52:02	-0.443905	-1.97458	-1.71793	711.177	FALSE	10
2022-09-13	12:52:03	-0.304363	-1.35387	0.536105	740.715	FALSE	10
2022-09-13	12:52:03	0.0575702	0.256084	0.536105	711.433	FALSE	10
2022-09-13	12:52:03	0.344847	1.53395	0.536105	742.249	FALSE	10
2022-09-13	12:52:03	0.384033	1.70826	0.536105	713.141	FALSE	10
2022-09-13	12:52:04	0.35757	1.59054	1.62665	743.84	FALSE	10
2022-09-13	12:52:04	0.337926	1.50316	1.62665	714.645	FALSE	10
2022-09-13	12:52:04	0.38327	1.70486	1.62665	745.545	FALSE	10
2022-09-13	12:52:04	0.383982	1.70803	1.62665	716.353	FALSE	10
2022-09-13	12:52:05	0.368919	1.64103	1.60367	747.186	FALSE	10
2022-09-13	12:52:05	0.36271	1.61341	1.60367	717.966	FALSE	10
2022-09-13	12:52:05	0.349936	1.55659	1.60367	748.742	FALSE	10
2022-09-13	12:52:06	0.341896	1.52082	1.43078	719.487	FALSE	10
2022-09-13	12:52:06	0.354975	1.579	1.43078	750.321	FALSE	10
2022-09-13	12:52:06	0.32159	1.4305	1.43078	720.917	FALSE	10
2022-09-13	12:52:06	0.268155	1.19281	1.43078	751.514	FALSE	10
2022-09-13	12:52:07	0.122456	0.544709	1.09564	721.462	FALSE	10
2022-09-13	12:52:07	0.0926338	0.412054	1.09564	751.926	FALSE	10
2022-09-13	12:52:07	0.111005	0.493772	1.09564	721.956	FALSE	10
2022-09-13	12:52:07	0.659148	2.93202	1.09564	754.858	FALSE	10
2022-09-13	12:52:08	0.735941	3.27361	3.26988	725.229	FALSE	10
2022-09-13	12:52:08	0.741539	3.29851	3.26988	758.157	FALSE	10
2022-09-13	12:52:08	0.732684	3.25912	3.26988	728.489	FALSE	10
2022-09-13	12:52:08	0.730242	3.24826	3.26988	761.405	FALSE	10
2022-09-13	12:52:09	0.733092	3.26094	3.26019	731.75	FALSE	10
2022-09-13	12:52:09	0.733092	3.26094	3.26019	764.666	FALSE	10
2022-09-13	12:52:09	0.732583	3.25868	3.26019	735.008	FALSE	10
2022-09-13	12:52:10	0.738181	3.28358	3.27656	767.95	FALSE	10
2022-09-13	12:52:10	0.735127	3.26999	3.27656	738.278	FALSE	10
2022-09-13	12:52:10	0.738893	3.28674	3.27656	771.236	FALSE	10
2022-09-13	12:52:10	0.734211	3.26592	3.27656	741.544	FALSE	10
2022-09-13	12:52:11	0.730293	3.24849	1.97368	774.485	FALSE	10
2022-09-13	12:52:11	0.752176	3.34583	1.97368	744.89	FALSE	10
2022-09-13	12:52:11	0.587443	2.61306	1.97368	777.098	FALSE	10
2022-09-13	12:52:11	-0.295101	-1.31267	1.97368	744.89	FALSE	10
2022-09-13	12:52:12	-0.572557	-2.54685	-3.13609	777.098	FALSE	10
2022-09-13	12:52:12	-0.740648	-3.29455	-3.13609	744.89	FALSE	10
2022-09-13	12:52:12	-0.840546	-3.73892	-3.13609	777.098	FALSE	10
2022-09-13	12:52:12	-0.666348	-2.96405	-3.13609	744.89	FALSE	10
2022-09-13	12:52:13	-0.524669	-2.33383	-1.2674	777.098	FALSE	10
2022-09-13	12:52:13	-0.229809	-1.02224	-1.2674	744.89	FALSE	10
2022-09-13	12:52:13	-0.100292	-0.446119	-1.2674	777.098	FALSE	10
2022-09-13	12:52:14	1.32785	5.90654	1.85178	750.796	FALSE	10
2022-09-13	12:52:14	0.189784	0.844197	1.85178	777.942	FALSE	10
2022-09-13	12:52:14	0.164746	0.732823	1.85178	751.529	FALSE	10
2022-09-13	12:52:14	-0.017188	-0.0764557	1.85178	777.942	FALSE	10
2022-09-13	12:52:15	-0.0764756	-0.340179	-0.88347	751.529	FALSE	10
2022-09-13	12:52:15	-0.220699	-0.981713	-0.88347	777.942	FALSE	10
2022-09-13	12:52:15	-0.215407	-0.958173	-0.88347	751.529	FALSE	10
2022-09-13	12:52:15	-0.28187	-1.25381	-0.88347	777.942	FALSE	10
2022-09-13	12:52:16	-0.417188	-1.85574	-2.06134	751.529	FALSE	10
2022-09-13	12:52:16	-0.50589	-2.2503	-2.06134	777.942	FALSE	10
2022-09-13	12:52:16	-0.525381	-2.337	-2.06134	751.529	FALSE	10
2022-09-13	12:52:16	-0.405178	-1.80231	-2.06134	777.942	FALSE	10
2022-09-13	12:52:17	-0.136934	-0.60911	4.19555	751.529	FALSE	10
2022-09-13	12:52:17	0.5764	2.56394	4.19555	780.506	FALSE	10
2022-09-13	12:52:17	2.39014	10.6318	4.19555	762.161	FALSE	10
2022-09-13	12:52:18	4.47614	19.9108	10.9308	800.417	1	11
2022-09-13	12:52:18	3.41604	15.1952	10.9308	777.356	1	12
2022-09-13	12:52:18	1.57737	7.01646	10.9308	807.433	FALSE	12
2022-09-13	12:52:18	0.35986	1.60073	10.9308	778.957	FALSE	12
2022-09-13	12:52:19	0.625916	2.7842	5.60796	810.217	FALSE	12
2022-09-13	12:52:19	0.460573	2.04872	5.60796	781.006	FALSE	12
2022-09-13	12:52:19	1.91915	8.53676	5.60796	818.754	FALSE	12
2022-09-13	12:52:19	2.03726	9.06214	5.60796	790.068	FALSE	12
2022-09-13	12:52:20	3.365	14.9682	16.3169	833.722	1	13
2022-09-13	12:52:20	4.47965	19.9264	16.3169	809.994	1	14
2022-09-13	12:52:20	2.63899	11.7388	16.3169	845.461	FALSE	14
2022-09-13	12:52:20	4.18917	18.6343	16.3169	828.629	1	15
2022-09-13	12:52:21	3.97299	17.6727	16.0857	863.134	1	16
2022-09-13	12:52:21	2.7196	12.0973	16.0857	840.726	FALSE	16
2022-09-13	12:52:21	4.55441	20.2589	16.0857	883.393	1	17
2022-09-13	12:52:21	3.21787	14.3137	16.0857	855.04	1	18
2022-09-13	12:52:22	1.9049	8.47338	7.5746	891.866	FALSE	18
2022-09-13	12:52:22	2.72627	12.127	7.5746	867.167	FALSE	18
2022-09-13	12:52:22	0.477367	2.12342	7.5746	893.99	FALSE	18
2022-09-13	12:52:23	3.3052	14.7022	7.62396	881.869	1	19
2022-09-13	12:52:23	0.437163	1.94459	7.62396	895.934	FALSE	19
2022-09-13	12:52:23	2.29146	10.1929	7.62396	892.062	FALSE	19
2022-09-13	12:52:23	0.821946	3.65618	7.62396	899.59	FALSE	19
2022-09-13	12:52:24	1.09747	4.88177	10.5659	896.943	FALSE	19
2022-09-13	12:52:24	1.72337	7.66589	10.5659	907.256	FALSE	19
2022-09-13	12:52:24	2.95894	13.162	10.5659	910.105	FALSE	19
2022-09-13	12:52:24	3.72154	16.5542	10.5659	923.81	1	20
2022-09-13	12:52:25	2.13803	9.51039	-1.2473	919.616	FALSE	20
2022-09-13	12:52:25	0.63014	2.80299	-1.2473	926.613	FALSE	20
2022-09-13	12:52:25	-4.07907	-18.1445	-1.2473	919.616	FALSE	20
2022-09-13	12:52:25	0.189275	0.841933	-1.2473	927.455	FALSE	20
2022-09-13	12:52:26	-0.118053	-0.525123	-0.313391	919.616	FALSE	20
2022-09-13	12:52:26	-0.0216155	-0.0961501	-0.313391	927.455	FALSE	20
2022-09-13	12:52:26	-0.0716918	-0.318899	-0.313391	919.616	FALSE	20
2022-09-13	12:52:27	-0.12757	-0.567457	-0.437575	927.455	FALSE	20
2022-09-13	12:52:27	-0.192811	-0.857662	-0.437575	919.616	FALSE	20
2022-09-13	12:52:27	-0.0262466	-0.11675	-0.437575	927.455	FALSE	20
2022-09-13	12:52:27	-0.0468572	-0.20843	-0.437575	919.616	FALSE	20
2022-09-13	12:52:28	1.2992	5.7791	12.7915	933.234	FALSE	20
2022-09-13	12:52:28	3.4137	15.1848	12.7915	934.801	1	21
2022-09-13	12:52:28	3.68383	16.3864	12.7915	949.621	1	22
2022-09-13	12:52:28	3.10586	13.8155	12.7915	948.616	1	23
2022-09-13	12:52:29	3.18215	14.1548	16.9415	963.776	1	24
2022-09-13	12:52:29	3.46948	15.4329	16.9415	964.049	1	25
2022-09-13	12:52:29	5.1021	22.6952	16.9415	986.471	1	26
2022-09-13	12:52:29	3.48072	15.4829	16.9415	979.532	1	27
2022-09-13	12:52:30	2.10927	9.38245	6.48559	995.853	FALSE	27
2022-09-13	12:52:30	1.54347	6.86566	6.48559	986.398	FALSE	27
2022-09-13	12:52:30	0.721336	3.20865	6.48559	999.062	FALSE	27
2022-09-13	12:52:31	0.693041	3.08278	0.0438615	989.48	FALSE	27
2022-09-13	12:52:31	0.310293	1.38025	0.0438615	1000.44	FALSE	27
2022-09-13	12:52:31	0.324898	1.44521	0.0438615	990.926	FALSE	27
2022-09-13	12:52:31	-1.28879	-5.7328	0.0438615	1000.44	FALSE	27
2022-09-13	12:52:32	0.0748221	0.332824	0.941707	991.258	FALSE	27
2022-09-13	12:52:32	0.227545	1.01217	0.941707	1001.45	FALSE	27
2022-09-13	12:52:32	0.28897	1.2854	0.941707	992.544	FALSE	27
2022-09-13	12:52:32	0.255484	1.13644	0.941707	1002.59	FALSE	27
2022-09-13	12:52:33	0.407901	1.81443	3.1829	994.358	FALSE	27
2022-09-13	12:52:33	0.44388	1.97447	3.1829	1004.57	FALSE	27
2022-09-13	12:52:33	1.05024	4.67168	3.1829	999.03	FALSE	27
2022-09-13	12:52:33	0.960166	4.27101	3.1829	1008.84	FALSE	27
2022-09-13	12:52:34	0.963524	4.28595	3.17462	1003.32	FALSE	27
2022-09-13	12:52:34	0.771209	3.43049	3.17462	1012.27	FALSE	27
2022-09-13	12:52:34	0.406323	1.80741	3.17462	1005.12	FALSE	27
2022-09-13	12:52:35	0.527901	2.34821	2.4207	1014.61	FALSE	27
2022-09-13	12:52:35	0.427341	1.9009	2.4207	1007.02	FALSE	27
2022-09-13	12:52:35	0.622099	2.76722	2.4207	1017.38	FALSE	27
2022-09-13	12:52:35	0.599453	2.66649	2.4207	1009.69	FALSE	27
2022-09-13	12:52:36	0.507392	2.25698	1.68262	1019.64	FALSE	27
2022-09-13	12:52:36	0.642252	2.85687	1.68262	1012.55	FALSE	27
2022-09-13	12:52:36	0.153143	0.681211	1.68262	1020.32	FALSE	27
2022-09-13	12:52:36	0.210293	0.935425	1.68262	1013.48	FALSE	27
2022-09-13	12:52:37	0.268512	1.1944	-0.776227	1021.51	FALSE	27
2022-09-13	12:52:37	0.0596567	0.265365	-0.776227	1013.75	FALSE	27
2022-09-13	12:52:37	-0.421056	-1.87294	-0.776227	1021.51	FALSE	27
2022-09-13	12:52:37	-0.605127	-2.69173	-0.776227	1013.75	FALSE	27
2022-09-13	12:52:38	-0.789351	-3.51119	-3.88885	1021.51	FALSE	27
2022-09-13	12:52:38	-0.836017	-3.71877	-3.88885	1013.75	FALSE	27
2022-09-13	12:52:38	-0.997391	-4.43659	-3.88885	1021.51	FALSE	27
2022-09-13	12:52:39	-0.966959	-4.30123	-4.68758	1013.75	FALSE	27
2022-09-13	12:52:39	-1.05759	-4.70437	-4.68758	1021.51	FALSE	27
2022-09-13	12:52:39	-0.994745	-4.42482	-4.68758	1013.75	FALSE	27
2022-09-13	12:52:39	-1.19597	-5.31991	-4.68758	1021.51	FALSE	27
2022-09-13	12:52:40	-1.01067	-4.49566	-2.19693	1013.75	FALSE	27
2022-09-13	12:52:40	-0.414643	-1.84441	-2.19693	1021.51	FALSE	27
2022-09-13	12:52:40	-0.327417	-1.45642	-2.19693	1013.75	FALSE	27
2022-09-13	12:52:40	-0.222837	-0.991224	-2.19693	1021.51	FALSE	27
2022-09-13	12:52:41	0.0524302	0.23322	1.05506	1013.98	FALSE	27
2022-09-13	12:52:41	0.176705	0.786019	1.05506	1022.3	FALSE	27
2022-09-13	12:52:41	0.389224	1.73135	1.05506	1015.71	FALSE	27
2022-09-13	12:52:41	0.330395	1.46966	1.05506	1023.77	FALSE	27
2022-09-13	12:52:42	0.242761	1.07985	2.63689	1016.79	FALSE	27
2022-09-13	12:52:42	0.66902	2.97593	2.63689	1026.75	FALSE	27
2022-09-13	12:52:42	0.726527	3.23174	2.63689	1020.02	FALSE	27
2022-09-13	12:52:42	0.732888	3.26003	2.63689	1030.01	FALSE	27
2022-09-13	12:52:43	0.734415	3.26682	3.27128	1023.29	FALSE	27
2022-09-13	12:52:43	0.739504	3.28946	3.27128	1033.3	FALSE	27
2022-09-13	12:52:43	0.732328	3.25754	3.27128	1026.55	FALSE	27
2022-09-13	12:52:44	0.623473	2.77333	2.44272	1036.07	FALSE	27
2022-09-13	12:52:44	0.53874	2.39642	2.44272	1028.95	FALSE	27
2022-09-13	12:52:44	0.534058	2.3756	2.44272	1038.44	FALSE	27
2022-09-13	12:52:44	0.500318	2.22551	2.44272	1031.17	FALSE	27
2022-09-13	12:52:45	0.468715	2.08494	3.09003	1040.53	FALSE	27
2022-09-13	12:52:45	0.459351	2.04329	3.09003	1033.21	FALSE	27
2022-09-13	12:52:45	0.447799	1.9919	3.09003	1042.52	FALSE	27
2022-09-13	12:52:45	1.40281	6.23998	3.09003	1039.45	FALSE	27
2022-09-13	12:52:46	0.884593	3.93485	3.4409	1046.46	FALSE	27
2022-09-13	12:52:46	0.741997	3.30055	3.4409	1042.75	FALSE	27
2022-09-13	12:52:46	0.73014	3.24781	3.4409	1049.7	FALSE	27
2022-09-13	12:52:46	0.737468	3.28041	3.4409	1046.04	FALSE	27
2022-09-13	12:52:47	0.746374	3.32002	3.29806	1053.02	FALSE	27
2022-09-13	12:52:47	0.740674	3.29467	3.29806	1049.33	FALSE	27
2022-09-13	12:52:47	0.737265	3.2795	3.29806	1056.3	FALSE	27
2022-09-13	12:52:48	0.740318	3.29308	3.28414	1052.62	FALSE	27
2022-09-13	12:52:48	0.742201	3.30146	3.28414	1059.61	FALSE	27
2022-09-13	12:52:48	0.737214	3.27928	3.28414	1055.9	FALSE	27
2022-09-13	12:52:48	0.733499	3.26275	3.28414	1062.87	FALSE	27
2022-09-13	12:52:49	1.36973	6.09283	7.6998	1061.99	FALSE	27
2022-09-13	12:52:49	1.95518	8.69703	7.6998	1071.57	FALSE	27
2022-09-13	12:52:49	2.02032	8.98679	7.6998	1070.98	FALSE	27
2022-09-13	12:52:49	1.57874	7.02255	7.6998	1078.59	FALSE	27
2022-09-13	12:52:50	1.43309	6.37467	6.35911	1077.36	FALSE	27
2022-09-13	12:52:50	1.35986	6.04893	6.35911	1084.64	FALSE	27
2022-09-13	12:52:50	1.38505	6.16098	6.35911	1083.52	FALSE	27
2022-09-13	12:52:50	1.54037	6.85187	6.35911	1091.49	FALSE	27
2022-09-13	12:52:51	1.71604	7.63329	7.7513	1091.15	FALSE	27
2022-09-13	12:52:51	2.08352	9.26791	7.7513	1100.76	FALSE	27
2022-09-13	12:52:51	1.42815	6.3527	7.7513	1097.5	FALSE	27
2022-09-13	12:52:52	0.31472	1.39994	1.20871	1102.16	FALSE	27
2022-09-13	12:52:52	0.300522	1.33678	1.20871	1098.84	FALSE	27
2022-09-13	12:52:52	0.195484	0.869552	1.20871	1103.03	FALSE	27
2022-09-13	12:52:52	0.276196	1.22858	1.20871	1100.07	FALSE	27
2022-09-13	12:52:53	0.34042	1.51426	1.56072	1104.54	FALSE	27
2022-09-13	12:52:53	0.360522	1.60367	1.56072	1101.67	FALSE	27
2022-09-13	12:52:53	0.348562	1.55047	1.56072	1106.09	FALSE	27
2022-09-13	12:52:53	0.353957	1.57447	1.56072	1103.25	FALSE	27
2022-09-13	12:52:54	0.366476	1.63016	2.44991	1107.72	FALSE	27
2022-09-13	12:52:54	0.672125	2.98975	2.44991	1106.24	FALSE	27
2022-09-13	12:52:54	0.518181	2.30497	2.44991	1110.03	FALSE	27
2022-09-13	12:52:54	0.646272	2.87475	2.44991	1109.11	FALSE	27
2022-09-13	12:52:55	0.331819	1.476	2.53526	1111.5	FALSE	27
2022-09-13	12:52:55	0.646323	2.87497	2.53526	1111.99	FALSE	27
2022-09-13	12:52:55	0.731717	3.25482	2.53526	1114.76	FALSE	27
2022-09-13	12:52:56	0.752786	3.34854	3.29461	1115.33	FALSE	27
2022-09-13	12:52:56	0.735789	3.27294	3.29461	1118.03	FALSE	27
2022-09-13	12:52:56	0.739147	3.28787	3.29461	1118.62	FALSE	27
2022-09-13	12:52:56	0.734924	3.26909	3.29461	1121.3	FALSE	27
2022-09-13	12:52:57	0.720471	3.2048	4.53642	1121.83	FALSE	27
2022-09-13	12:52:57	0.893753	3.97559	4.53642	1125.27	FALSE	27
2022-09-13	12:52:57	0.738791	3.28629	4.53642	1125.11	FALSE	27
2022-09-13	12:52:57	1.72632	7.67902	4.53642	1132.95	FALSE	27
2022-09-13	12:52:58	0.765509	3.40514	5.49285	1128.52	FALSE	27
2022-09-13	12:52:58	2.70617	12.0376	5.49285	1144.99	FALSE	27
2022-09-13	12:52:58	0.736196	3.27475	5.49285	1131.79	FALSE	27
2022-09-13	12:52:58	0.731514	3.25392	5.49285	1148.24	FALSE	27
2022-09-13	12:52:59	0.729224	3.24373	3.25905	1135.04	FALSE	27
2022-09-13	12:52:59	0.729987	3.24713	3.25905	1151.49	FALSE	27
2022-09-13	12:52:59	0.738791	3.28629	3.25905	1138.32	FALSE	27
2022-09-13	12:53:00	0.728206	3.23921	3.27826	1154.73	FALSE	27
2022-09-13	12:53:00	0.739402	3.28901	3.27826	1141.61	FALSE	27
2022-09-13	12:53:00	0.738384	3.28448	3.27826	1158.02	FALSE	27
2022-09-13	12:53:00	0.741947	3.30033	3.27826	1144.91	FALSE	27
2022-09-13	12:53:01	0.736247	3.27497	3.26705	1161.29	FALSE	27
2022-09-13	12:53:01	0.732074	3.25641	3.26705	1148.17	FALSE	27
2022-09-13	12:53:01	0.735076	3.26977	3.26705	1164.56	FALSE	27
2022-09-13	12:53:02	0.736705	3.27701	3.27538	1151.45	FALSE	27
2022-09-13	12:53:02	0.736807	3.27746	3.27538	1167.84	FALSE	27
2022-09-13	12:53:02	0.73472	3.26818	3.27538	1154.71	FALSE	27
2022-09-13	12:53:02	0.734873	3.26886	3.27538	1171.11	FALSE	27
2022-09-13	12:53:02	0.738588	3.28539	3.27538	1158	FALSE	27
2022-09-13	12:53:03	0.731565	3.25415	3.27062	1174.36	FALSE	27
2022-09-13	12:53:03	0.735687	3.27248	3.27062	1161.27	FALSE	27
2022-09-13	12:53:03	0.73813	3.28335	3.27062	1177.64	FALSE	27
2022-09-13	12:53:03	0.735687	3.27248	3.27062	1164.54	FALSE	27
2022-09-13	12:53:04	0.735483	3.27158	3.27618	1180.92	FALSE	27
2022-09-13	12:53:04	0.740064	3.29195	3.27618	1167.84	FALSE	27
2022-09-13	12:53:04	0.734008	3.26501	3.27618	1184.18	FALSE	27
2022-09-13	12:53:05	0.735687	3.27248	3.25709	1171.11	FALSE	27
2022-09-13	12:53:05	0.729428	3.24464	3.25709	1187.43	FALSE	27
2022-09-13	12:53:05	0.732786	3.25958	3.25709	1174.37	FALSE	27
2022-09-13	12:53:05	0.731005	3.25166	3.25709	1190.68	FALSE	27
2022-09-13	12:53:06	0.735483	3.27158	3.28686	1177.64	FALSE	27
2022-09-13	12:53:06	0.74332	3.30644	3.28686	1193.98	FALSE	27
2022-09-13	12:53:06	0.734975	3.26932	3.28686	1180.91	FALSE	27
2022-09-13	12:53:06	0.741896	3.3001	3.28686	1197.28	FALSE	27
2022-09-13	12:53:07	0.738282	3.28403	3.28454	1184.19	FALSE	27
2022-09-13	12:53:07	0.7393	3.28855	3.28454	1200.57	FALSE	27
2022-09-13	12:53:07	0.735891	3.27339	3.28454	1187.47	FALSE	27
2022-09-13	12:53:07	0.740114	3.29218	3.28454	1203.86	FALSE	27
2022-09-13	12:53:08	0.738486	3.28493	3.26713	1190.75	FALSE	27
2022-09-13	12:53:08	0.735076	3.26977	3.26713	1207.13	FALSE	27
2022-09-13	12:53:08	0.729886	3.24668	3.26713	1194	FALSE	27
2022-09-13	12:53:09	0.736501	3.2761	3.26575	1210.41	FALSE	27
2022-09-13	12:53:09	0.73528	3.27067	3.26575	1197.27	FALSE	27
2022-09-13	12:53:09	0.734059	3.26524	3.26575	1213.68	FALSE	27
2022-09-13	12:53:09	0.730852	3.25098	3.26575	1200.52	FALSE	27
2022-09-13	12:53:10	0.739453	3.28923	3.27543	1216.96	FALSE	27
2022-09-13	12:53:10	0.736298	3.2752	3.27543	1203.8	FALSE	27
2022-09-13	12:53:10	0.734466	3.26705	3.27543	1220.23	FALSE	27
2022-09-13	12:53:10	0.735178	3.27022	3.27543	1207.07	FALSE	27
2022-09-13	12:53:11	0.734618	3.26773	3.27011	1223.5	FALSE	27
2022-09-13	12:53:11	0.735483	3.27158	3.27011	1210.34	FALSE	27
2022-09-13	12:53:11	0.735076	3.26977	3.27011	1226.77	FALSE	27
2022-09-13	12:53:11	0.735433	3.27135	3.27011	1213.61	FALSE	27
2022-09-13	12:53:12	0.736857	3.27769	3.27022	1230.05	FALSE	27
2022-09-13	12:53:12	0.733651	3.26343	3.27022	1216.87	FALSE	27
2022-09-13	12:53:12	0.735026	3.26954	3.27022	1233.32	FALSE	27
2022-09-13	12:53:13	0.738588	3.28539	3.2756	1220.16	FALSE	27
2022-09-13	12:53:13	0.733804	3.26411	3.2756	1236.58	FALSE	27
2022-09-13	12:53:13	0.735382	3.27113	3.2756	1223.43	FALSE	27
2022-09-13	12:53:13	0.737773	3.28176	3.2756	1239.86	FALSE	27
2022-09-13	12:53:14	0.738791	3.28629	3.28867	1226.72	FALSE	27
2022-09-13	12:53:14	0.738282	3.28403	3.28867	1243.15	FALSE	27
2022-09-13	12:53:14	0.738333	3.28425	3.28867	1230	FALSE	27
2022-09-13	12:53:14	0.741896	3.3001	3.28867	1246.45	FALSE	27
2022-09-13	12:53:15	0.73243	3.258	3.26971	1233.26	FALSE	27
2022-09-13	12:53:15	0.738333	3.28425	3.26971	1249.73	FALSE	27
2022-09-13	12:53:15	0.728206	3.23921	3.26971	1236.5	FALSE	27
2022-09-13	12:53:15	0.741285	3.29738	3.26971	1253.03	FALSE	27
2022-09-13	12:53:16	0.734568	3.26751	3.27437	1239.76	FALSE	27
2022-09-13	12:53:16	0.738384	3.28448	3.27437	1256.31	FALSE	27
2022-09-13	12:53:16	0.735382	3.27113	3.27437	1243.04	FALSE	27
2022-09-13	12:53:17	0.741896	3.3001	3.26207	1259.61	FALSE	27
2022-09-13	12:53:17	0.731972	3.25596	3.26207	1246.29	FALSE	27
2022-09-13	12:53:17	0.728257	3.23943	3.26207	1262.85	FALSE	27
2022-09-13	12:53:17	0.731259	3.25279	3.26207	1249.54	FALSE	27
2022-09-13	12:53:18	0.730343	3.24871	3.26575	1266.1	FALSE	27
2022-09-13	12:53:18	0.733855	3.26433	3.26575	1252.81	FALSE	27
2022-09-13	12:53:18	0.734059	3.26524	3.26575	1269.37	FALSE	27
2022-09-13	12:53:18	0.738435	3.28471	3.26575	1256.09	FALSE	27
2022-09-13	12:53:19	0.728766	3.2417	3.27378	1272.61	FALSE	27
2022-09-13	12:53:19	0.738231	3.2838	3.27378	1259.38	FALSE	27
2022-09-13	12:53:19	0.74042	3.29354	3.27378	1275.9	FALSE	27
2022-09-13	12:53:19	0.736501	3.2761	3.27378	1262.65	FALSE	27
2022-09-13	12:53:20	0.735992	3.27384	3.27776	1279.17	FALSE	27
2022-09-13	12:53:20	0.736807	3.27746	3.27776	1265.93	FALSE	27
2022-09-13	12:53:20	0.737824	3.28199	3.27776	1282.46	FALSE	27
2022-09-13	12:53:21	0.73416	3.26569	10.4254	1269.2	FALSE	27
2022-09-13	12:53:21	0.738995	3.2872	10.4254	1285.74	FALSE	27
2022-09-13	12:53:21	1.96994	8.76269	10.4254	1277.96	FALSE	27
2022-09-13	12:53:21	5.93187	26.3861	10.4254	1312.13	1	28
2022-09-13	12:53:22	9.03487	40.1889	32.4864	1318.15	1	29
2022-09-13	12:53:22	5.85446	26.0418	32.4864	1338.17	1	30
2022-09-13	12:53:22	8.76097	38.9705	32.4864	1357.12	1	31
2022-09-13	12:53:22	5.56281	24.7445	32.4864	1362.92	1	32
2022-09-13	12:53:23	6.15009	27.3568	33.8692	1384.48	1	33
2022-09-13	12:53:23	6.46306	28.749	33.8692	1391.67	1	34
2022-09-13	12:53:23	8.70601	38.7261	33.8692	1423.2	1	35
2022-09-13	12:53:23	9.13741	40.645	33.8692	1432.31	1	36
2022-09-13	12:53:24	4.34836	19.3424	9.67359	1442.54	1	37
2022-09-13	12:53:24	1.74541	7.76393	9.67359	1440.07	FALSE	37
2022-09-13	12:53:24	1.64067	7.29803	9.67359	1449.84	FALSE	37
2022-09-13	12:53:24	0.96444	4.29002	9.67359	1444.36	FALSE	37
2022-09-13	12:53:25	0.84388	3.75375	4.77151	1453.6	FALSE	37
2022-09-13	12:53:25	1.09095	4.85276	4.77151	1449.22	FALSE	37
2022-09-13	12:53:25	1.28322	5.70802	4.77151	1459.3	FALSE	37
2022-09-13	12:53:26	4.02535	17.9056	43.7398	1467.12	1	38
2022-09-13	12:53:26	8.09207	35.9951	43.7398	1495.3	1	39
2022-09-13	12:53:26	15.0964	67.1518	43.7398	1534.27	1	40
2022-09-13	12:53:26	12.1188	53.9068	43.7398	1549.21	1	41
2022-09-13	12:53:27	14.4598	64.3201	63.2818	1598.59	1	42
2022-09-13	12:53:27	25.7309	114.456	63.2818	1663.66	1	43
2022-09-13	12:53:27	11.9367	53.0968	63.2818	1651.69	1	44
2022-09-13	12:53:27	4.77813	21.2541	63.2818	1684.92	1	45
2022-09-13	12:53:28	2.62495	11.6763	6.12556	1663.37	FALSE	45
2022-09-13	12:53:28	1.04816	4.66243	6.12556	1689.58	FALSE	45
2022-09-13	12:53:28	1.04062	4.62889	6.12556	1668	FALSE	45
2022-09-13	12:53:28	0.794618	3.53462	6.12556	1693.11	FALSE	45
2022-09-13	12:53:29	1.4648	6.51572	3.15847	1674.51	FALSE	45
2022-09-13	12:53:29	0.350496	1.55908	3.15847	1694.67	FALSE	45
2022-09-13	12:53:29	0.314873	1.40062	3.15847	1675.91	FALSE	45
2022-09-13	12:53:30	0.225865	1.00469	-0.165533	1695.68	FALSE	45
2022-09-13	12:53:30	0.121845	0.541991	-0.165533	1676.46	FALSE	45
2022-09-13	12:53:30	-0.247264	-1.09988	-0.165533	1695.68	FALSE	45
2022-09-13	12:53:30	-0.2493	-1.10894	-0.165533	1676.46	FALSE	45
2022-09-13	12:53:31	0.405204	1.80243	1.07436	1697.48	FALSE	45
2022-09-13	12:53:31	0.0349239	0.155348	1.07436	1676.61	FALSE	45
2022-09-13	12:53:31	0.408715	1.81805	1.07436	1699.3	FALSE	45
2022-09-13	12:53:31	0.117265	0.521618	1.07436	1677.13	FALSE	45
2022-09-13	12:53:32	0.476807	2.12093	3.25733	1701.42	FALSE	45
2022-09-13	12:53:32	1.05279	4.68302	3.25733	1681.82	FALSE	45
2022-09-13	12:53:32	0.235891	1.04929	3.25733	1702.47	FALSE	45
2022-09-13	12:53:32	1.16363	5.17606	3.25733	1686.99	FALSE	45
2022-09-13	12:53:33	0.985967	4.38578	13.4891	1706.85	FALSE	45
2022-09-13	12:53:33	3.26968	14.5442	13.4891	1701.54	1	46
2022-09-13	12:53:33	4.84179	21.5373	13.4891	1728.39	1	47
2022-09-13	12:53:34	2.32943	10.3618	7.7389	1711.9	FALSE	47
2022-09-13	12:53:34	2.63268	11.7107	7.7389	1740.1	FALSE	47
2022-09-13	12:53:34	1.32408	5.88977	7.7389	1717.79	FALSE	47
2022-09-13	12:53:34	0.672939	2.99337	7.7389	1743.09	FALSE	47
2022-09-13	12:53:35	0.785	3.49184	9.38994	1721.28	FALSE	47
2022-09-13	12:53:35	0.899148	3.99959	9.38994	1747.09	FALSE	47
2022-09-13	12:53:35	1.23319	5.48548	9.38994	1726.76	FALSE	47
2022-09-13	12:53:35	5.52647	24.5828	9.38994	1771.68	1	48
2022-09-13	12:53:36	4.94139	21.9803	18.9334	1748.74	1	49
2022-09-13	12:53:36	7.44973	33.1379	18.9334	1804.81	1	50
2022-09-13	12:53:36	1.9051	8.47427	18.9334	1757.22	FALSE	50
2022-09-13	12:53:36	2.72943	12.1411	18.9334	1816.96	FALSE	50
2022-09-13	12:53:37	0.699147	3.10995	3.09569	1760.33	FALSE	50
2022-09-13	12:53:37	0.795076	3.53666	3.09569	1820.49	FALSE	50
2022-09-13	12:53:37	0.593601	2.64046	3.09569	1762.97	FALSE	50
2022-09-13	12:53:38	0.553957	2.46411	3.75579	1822.96	FALSE	50
2022-09-13	12:53:38	1.00378	4.46501	3.75579	1767.43	FALSE	50
2022-09-13	12:53:38	1.30673	5.8126	3.75579	1828.77	FALSE	50
2022-09-13	12:53:38	0.512888	2.28143	3.75579	1769.72	FALSE	50
2022-09-13	12:53:39	0.565305	2.51459	2.51086	1831.28	FALSE	50
2022-09-13	12:53:39	0.33187	1.47622	2.51086	1771.19	FALSE	50
2022-09-13	12:53:39	0.629529	2.80027	2.51086	1834.08	FALSE	50
2022-09-13	12:53:39	0.731158	3.25234	2.51086	1774.44	FALSE	50
2022-09-13	12:53:40	0.738893	3.28674	3.28437	1837.37	FALSE	50
2022-09-13	12:53:40	0.738537	3.28516	3.28437	1777.73	FALSE	50
2022-09-13	12:53:40	0.737519	3.28063	3.28437	1840.65	FALSE	50
2022-09-13	12:53:40	0.738486	3.28493	3.28437	1781.01	FALSE	50
2022-09-13	12:53:41	0.740471	3.29376	3.29074	1843.94	FALSE	50
2022-09-13	12:53:41	0.739809	3.29082	3.29074	1784.31	FALSE	50
2022-09-13	12:53:41	0.739097	3.28765	3.29074	1847.23	FALSE	50
2022-09-13	12:53:42	0.730242	3.24826	3.26818	1787.55	FALSE	50
2022-09-13	12:53:42	0.728562	3.24079	3.26818	1850.47	FALSE	50
2022-09-13	12:53:42	0.743423	3.30689	3.26818	1790.86	FALSE	50
2022-09-13	12:53:42	0.736654	3.27678	3.26818	1853.75	FALSE	50
2022-09-13	12:53:43	0.741081	3.29648	3.26337	1794.16	FALSE	50
2022-09-13	12:53:43	0.729428	3.24464	3.26337	1856.99	FALSE	50
2022-09-13	12:53:43	0.731616	3.25437	3.26337	1797.41	FALSE	50
2022-09-13	12:53:43	0.73243	3.258	3.26337	1860.25	FALSE	50
2022-09-13	12:53:44	0.741997	3.30055	3.28199	1800.71	FALSE	50
2022-09-13	12:53:44	0.739147	3.28787	3.28199	1863.54	FALSE	50
2022-09-13	12:53:44	0.734669	3.26795	3.28199	1803.98	FALSE	50
2022-09-13	12:53:44	0.735483	3.27158	3.28199	1866.81	FALSE	50
2022-09-13	12:53:45	0.731717	3.25482	3.25671	1807.23	FALSE	50
2022-09-13	12:53:45	0.730496	3.24939	3.25671	1870.06	FALSE	50
2022-09-13	12:53:45	0.734211	3.26592	3.25671	1810.5	FALSE	50
2022-09-13	12:53:46	0.731107	3.25211	3.25386	1873.31	FALSE	50
2022-09-13	12:53:46	0.728359	3.23989	3.25386	1813.74	FALSE	50
2022-09-13	12:53:46	0.734771	3.26841	3.25386	1876.58	FALSE	50
2022-09-13	12:53:46	0.731768	3.25505	3.25386	1817	FALSE	50
2022-09-13	12:53:47	0.736959	3.27814	3.2649	1879.86	FALSE	50
2022-09-13	12:53:47	0.73355	3.26298	3.2649	1820.26	FALSE	50
2022-09-13	12:53:47	0.732837	3.25981	3.2649	1883.12	FALSE	50
2022-09-13	12:53:47	0.732583	3.25868	3.2649	1823.52	FALSE	50
2022-09-13	12:53:48	0.737824	3.28199	3.28312	1886.4	FALSE	50
2022-09-13	12:53:48	0.741489	3.29829	3.28312	1826.82	FALSE	50
2022-09-13	12:53:48	0.739809	3.29082	3.28312	1889.69	FALSE	50
2022-09-13	12:53:48	0.733193	3.26139	3.28312	1830.08	FALSE	50
2022-09-13	12:53:49	0.737519	3.28063	3.27871	1892.97	FALSE	50
2022-09-13	12:53:49	0.732074	3.25641	3.27871	1833.33	FALSE	50
2022-09-13	12:53:49	0.741997	3.30055	3.27871	1896.27	FALSE	50
2022-09-13	12:53:49	0.736756	3.27724	3.27871	1836.61	FALSE	50
2022-09-13	12:53:50	0.736196	3.27475	3.26947	1899.55	FALSE	50
2022-09-13	12:53:50	0.731667	3.2546	3.26947	1839.86	FALSE	50
2022-09-13	12:53:50	0.737163	3.27905	3.26947	1902.83	FALSE	50
2022-09-13	12:53:51	0.738944	3.28697	3.28437	1843.15	FALSE	50
2022-09-13	12:53:51	0.734262	3.26614	3.28437	1906.09	FALSE	50
2022-09-13	12:53:51	0.741997	3.30055	3.28437	1846.45	FALSE	50
2022-09-13	12:53:51	0.738231	3.2838	3.28437	1909.38	FALSE	50
2022-09-13	12:53:52	0.729529	3.24509	3.26037	1849.7	FALSE	50
2022-09-13	12:53:52	0.738384	3.28448	3.26037	1912.66	FALSE	50
2022-09-13	12:53:52	0.729733	3.246	3.26037	1852.94	FALSE	50
2022-09-13	12:53:52	0.734211	3.26592	3.26037	1915.93	FALSE	50
2022-09-13	12:53:53	0.741234	3.29716	3.27203	1856.24	FALSE	50
2022-09-13	12:53:53	0.737417	3.28018	3.27203	1919.21	FALSE	50
2022-09-13	12:53:53	0.734873	3.26886	3.27203	1859.51	FALSE	50
2022-09-13	12:53:53	0.728817	3.24192	3.27203	1922.45	FALSE	50
2022-09-13	12:53:54	0.735941	3.27361	3.25792	1862.78	FALSE	50
2022-09-13	12:53:54	0.730242	3.24826	3.25792	1925.7	FALSE	50
2022-09-13	12:53:54	0.731056	3.25188	3.25792	1866.03	FALSE	50
2022-09-13	12:53:55	0.73131	3.25301	3.26263	1928.95	FALSE	50
2022-09-13	12:53:55	0.731005	3.25166	3.26263	1869.29	FALSE	50
2022-09-13	12:53:55	0.73472	3.26818	3.26263	1932.22	FALSE	50
2022-09-13	12:53:55	0.736857	3.27769	3.26263	1872.56	FALSE	50
2022-09-13	12:53:56	0.736399	3.27565	3.27061	1935.5	FALSE	50
2022-09-13	12:53:56	0.733855	3.26433	3.27061	1875.83	FALSE	50
2022-09-13	12:53:56	0.73243	3.258	3.27061	1938.75	FALSE	50
2022-09-13	12:53:56	0.738384	3.28448	3.27061	1879.11	FALSE	50
2022-09-13	12:53:57	0.733346	3.26207	3.28295	1942.02	FALSE	50
2022-09-13	12:53:57	0.733193	3.26139	3.28295	1882.37	FALSE	50
2022-09-13	12:53:57	0.738079	3.28312	3.28295	1945.3	FALSE	50
2022-09-13	12:53:57	0.747544	3.32523	3.28295	1885.7	FALSE	50
2022-09-13	12:53:58	0.733397	3.2623	3.26547	1948.56	FALSE	50
2022-09-13	12:53:58	0.737061	3.27859	3.26547	1888.98	FALSE	50
2022-09-13	12:53:58	0.73187	3.2555	3.26547	1951.82	FALSE	50
2022-09-13	12:53:59	0.729377	3.24441	3.26835	1892.22	FALSE	50
2022-09-13	12:53:59	0.739555	3.28969	3.26835	1955.11	FALSE	50
2022-09-13	12:53:59	0.739097	3.28765	3.26835	1895.51	FALSE	50
2022-09-13	12:53:59	0.731005	3.25166	3.26835	1958.36	FALSE	50
2022-09-13	12:54:00	0.744797	3.31301	3.30814	1898.82	FALSE	50
2022-09-13	12:54:00	0.730801	3.25075	3.30814	1961.61	FALSE	50
2022-09-13	12:54:00	0.736959	3.27814	3.30814	1902.1	FALSE	50
2022-09-13	12:54:00	0.762252	3.39065	3.30814	1965	FALSE	50
2022-09-13	12:54:01	0.733601	3.2632	3.261	1905.36	FALSE	50
2022-09-13	12:54:01	0.735534	3.2718	3.261	1968.27	FALSE	50
2022-09-13	12:54:01	0.734364	3.2666	3.261	1908.63	FALSE	50
2022-09-13	12:54:01	0.728919	3.24238	3.261	1971.51	FALSE	50
2022-09-13	12:54:02	0.733142	3.26116	3.28312	1911.89	FALSE	50
2022-09-13	12:54:02	0.743778	3.30847	3.28312	1974.82	FALSE	50
2022-09-13	12:54:02	0.737315	3.27972	3.28312	1915.17	FALSE	50
2022-09-13	12:54:03	0.735891	3.27339	3.2722	1978.1	FALSE	50
2022-09-13	12:54:03	0.734364	3.2666	3.2722	1918.44	FALSE	50
2022-09-13	12:54:03	0.739606	3.28992	3.2722	1981.39	FALSE	50
2022-09-13	12:54:03	0.732634	3.2589	3.2722	1921.7	FALSE	50
2022-09-13	12:54:04	0.733448	3.26252	3.2636	1984.65	FALSE	50
2022-09-13	12:54:04	0.737519	3.28063	3.2636	1924.98	FALSE	50
2022-09-13	12:54:04	0.731768	3.25505	3.2636	1987.9	FALSE	50
2022-09-13	12:54:04	0.732023	3.25618	3.2636	1928.23	FALSE	50
2022-09-13	12:54:05	0.737621	3.28109	3.28188	1991.18	FALSE	50
2022-09-13	12:54:05	0.733193	3.26139	3.28188	1931.5	FALSE	50
2022-09-13	12:54:05	0.743982	3.30938	3.28188	1994.49	FALSE	50
2022-09-13	12:54:05	0.736399	3.27565	3.28188	1934.77	FALSE	50
2022-09-13	12:54:06	0.732379	3.25777	3.27211	1997.75	FALSE	50
2022-09-13	12:54:06	0.739962	3.2915	3.27211	1938.06	FALSE	50
2022-09-13	12:54:06	0.734466	3.26705	3.27211	2001.02	FALSE	50
2022-09-13	12:54:07	0.736807	3.27746	3.27786	1941.34	FALSE	50
2022-09-13	12:54:07	0.731819	3.25528	3.27786	2004.27	FALSE	50
2022-09-13	12:54:07	0.738689	3.28584	3.27786	1944.63	FALSE	50
2022-09-13	12:54:07	0.740267	3.29286	3.27786	2007.57	FALSE	50
2022-09-13	12:54:08	0.738333	3.28425	3.26847	1947.91	FALSE	50
2022-09-13	12:54:08	0.738079	3.28312	3.26847	2010.85	FALSE	50
2022-09-13	12:54:08	0.730242	3.24826	3.26847	1951.16	FALSE	50
2022-09-13	12:54:08	0.732481	3.25822	3.26847	2014.11	FALSE	50
2022-09-13	12:54:09	0.733855	3.26433	3.26948	1954.42	FALSE	50
2022-09-13	12:54:09	0.737468	3.28041	3.26948	2017.39	FALSE	50
2022-09-13	12:54:09	0.736094	3.27429	3.26948	1957.7	FALSE	50
2022-09-13	12:54:09	0.732634	3.2589	3.26948	2020.65	FALSE	50
2022-09-13	12:54:10	0.72958	3.24532	3.26388	1960.94	FALSE	50
2022-09-13	12:54:10	0.735585	3.27203	3.26388	2023.92	FALSE	50
2022-09-13	12:54:10	0.736094	3.27429	3.26388	1964.22	FALSE	50
2022-09-13	12:54:11	0.737621	3.28109	3.28691	2027.2	FALSE	50
2022-09-13	12:54:11	0.739656	3.29014	3.28691	1967.51	FALSE	50
2022-09-13	12:54:11	0.736654	3.27678	3.28691	2030.48	FALSE	50
2022-09-13	12:54:11	0.741794	3.29965	3.28691	1970.81	FALSE	50
2022-09-13	12:54:12	0.733397	3.2623	3.27741	2033.74	FALSE	50
2022-09-13	12:54:12	0.738639	3.28561	3.27741	1974.09	FALSE	50
2022-09-13	12:54:12	0.738791	3.28629	3.27741	2037.03	FALSE	50
2022-09-13	12:54:12	0.736349	3.27543	3.27741	1977.37	FALSE	50
2022-09-13	12:54:13	0.738486	3.28493	3.27741	2040.31	FALSE	50
2022-09-13	12:54:13	0.743728	3.30825	3.27741	1980.68	FALSE	50
2022-09-13	12:54:13	0.731921	3.25573	3.27741	2043.57	FALSE	50
2022-09-13	12:54:13	0.733041	3.26071	3.27741	1983.94	FALSE	50
2022-09-13	12:54:14	0.737315	3.27972	3.25924	2046.85	FALSE	50
2022-09-13	12:54:14	0.727087	3.23423	3.25924	1987.17	FALSE	50
2022-09-13	12:54:14	0.735941	3.27361	3.25924	2050.12	FALSE	50
2022-09-13	12:54:14	0.730496	3.24939	3.25924	1990.42	FALSE	50
2022-09-13	12:54:15	0.734975	3.26932	3.27128	2053.39	FALSE	50
2022-09-13	12:54:15	0.734618	3.26773	3.27128	1993.69	FALSE	50
2022-09-13	12:54:15	0.736654	3.27678	3.27128	2056.67	FALSE	50
2022-09-13	12:54:16	0.740013	3.29173	3.28193	1996.98	FALSE	50
2022-09-13	12:54:16	0.735534	3.2718	3.28193	2059.94	FALSE	50
2022-09-13	12:54:16	0.735433	3.27135	3.28193	2000.25	FALSE	50
2022-09-13	12:54:16	0.740267	3.29286	3.28193	2063.23	FALSE	50
2022-09-13	12:54:17	0.72958	3.24532	3.26671	2003.5	FALSE	50
2022-09-13	12:54:17	0.736959	3.27814	3.26671	2066.51	FALSE	50
2022-09-13	12:54:17	0.737061	3.27859	3.26671	2006.78	FALSE	50
2022-09-13	12:54:17	0.733957	3.26479	3.26671	2069.77	FALSE	50
2022-09-13	12:54:18	0.73986	3.29105	3.10027	2010.07	FALSE	50
2022-09-13	12:54:18	0.739249	3.28833	3.10027	2073.06	FALSE	50
2022-09-13	12:54:18	0.711769	3.16609	3.10027	2013.23	FALSE	50
2022-09-13	12:54:18	0.59701	2.65562	3.10027	2075.72	FALSE	50
2022-09-13	12:54:19	0.528919	2.35274	2.0903	2015.59	FALSE	50
2022-09-13	12:54:19	0.540725	2.40525	2.0903	2078.12	FALSE	50
2022-09-13	12:54:19	0.340115	1.5129	2.0903	2017.1	FALSE	50
2022-09-13	12:54:20	0.490802	2.18319	2.91001	2080.31	FALSE	50
2022-09-13	12:54:20	0.645712	2.87226	2.91001	2019.97	FALSE	50
2022-09-13	12:54:20	0.741489	3.29829	2.91001	2083.6	FALSE	50
2022-09-13	12:54:20	0.738791	3.28629	2.91001	2023.26	FALSE	50
2022-09-13	12:54:21	0.731463	3.25369	3.26547	2086.86	FALSE	50
2022-09-13	12:54:21	0.731361	3.25324	3.26547	2026.51	FALSE	50
2022-09-13	12:54:21	0.738588	3.28539	3.26547	2090.14	FALSE	50
2022-09-13	12:54:21	0.735026	3.26954	3.26547	2029.78	FALSE	50
2022-09-13	12:54:22	0.740573	3.29422	3.26937	2093.44	FALSE	50
2022-09-13	12:54:22	0.733804	3.26411	3.26937	2033.04	FALSE	50
2022-09-13	12:54:22	0.730394	3.24894	3.26937	2096.69	FALSE	50
2022-09-13	12:54:22	0.735178	3.27022	3.26937	2036.31	FALSE	50
2022-09-13	12:54:23	0.738028	3.2829	3.28297	2099.97	FALSE	50
2022-09-13	12:54:23	0.736552	3.27633	3.28297	2039.59	FALSE	50
2022-09-13	12:54:23	0.739555	3.28969	3.28297	2103.26	FALSE	50
2022-09-13	12:54:24	0.737621	3.28109	3.26943	2042.87	FALSE	50
2022-09-13	12:54:24	0.7307	3.2503	3.26943	2106.51	FALSE	50
2022-09-13	12:54:24	0.733397	3.2623	3.26943	2046.13	FALSE	50
2022-09-13	12:54:24	0.738282	3.28403	3.26943	2109.79	FALSE	50
2022-09-13	12:54:25	0.741947	3.30033	3.45981	2049.43	FALSE	50
2022-09-13	12:54:25	0.749987	3.33609	3.45981	2113.13	FALSE	50
2022-09-13	12:54:25	0.869631	3.86829	3.45981	2053.3	FALSE	50
2022-09-13	12:54:25	0.749631	3.33451	3.45981	2116.46	FALSE	50
2022-09-13	12:54:26	0.73243	3.258	3.24113	2056.56	FALSE	50
2022-09-13	12:54:26	0.727646	3.23671	3.24113	2119.7	FALSE	50
2022-09-13	12:54:26	0.728257	3.23943	3.24113	2059.8	FALSE	50
2022-09-13	12:54:26	0.726221	3.23038	3.24113	2122.93	FALSE	50
2022-09-13	12:54:27	0.741641	3.29897	3.2918	2063.1	FALSE	50
2022-09-13	12:54:27	0.741539	3.29851	3.2918	2126.23	FALSE	50
2022-09-13	12:54:27	0.736908	3.27791	3.2918	2066.38	FALSE	50
2022-09-13	12:54:28	0.732583	3.25868	3.30944	2129.49	FALSE	50
2022-09-13	12:54:28	0.732735	3.25935	3.30944	2069.64	FALSE	50
2022-09-13	12:54:28	0.770598	3.42777	3.30944	2132.92	FALSE	50
2022-09-13	12:54:28	0.740064	3.29195	3.30944	2072.93	FALSE	50
2022-09-13	12:54:29	2.23044	9.92144	10.9076	2142.84	FALSE	50
2022-09-13	12:54:29	1.68169	7.48049	10.9076	2080.41	FALSE	50
2022-09-13	12:54:29	2.35915	10.494	10.9076	2153.33	FALSE	50
2022-09-13	12:54:29	3.53731	15.7347	10.9076	2096.14	1	51
2022-09-13	12:54:30	0.893295	3.97355	6.57887	2157.3	FALSE	51
2022-09-13	12:54:30	1.79162	7.96948	6.57887	2104.11	FALSE	51
2022-09-13	12:54:30	1.79345	7.97762	6.57887	2165.28	FALSE	51
2022-09-13	12:54:30	1.43762	6.39482	6.57887	2110.51	FALSE	51
2022-09-13	12:54:31	2.40871	10.7144	8.65166	2176	FALSE	51
2022-09-13	12:54:31	1.22159	5.43388	8.65166	2115.94	FALSE	51
2022-09-13	12:54:31	2.20464	9.80668	8.65166	2185.8	FALSE	51
2022-09-13	12:54:32	1.02251	4.54833	4.38493	2120.49	FALSE	51
2022-09-13	12:54:32	1.00037	4.44985	4.38493	2190.25	FALSE	51
2022-09-13	12:54:32	0.984847	4.3808	4.38493	2124.87	FALSE	51
2022-09-13	12:54:32	0.935382	4.16077	4.38493	2194.41	FALSE	51
2022-09-13	12:54:33	0.673601	2.99631	2.70401	2127.87	FALSE	51
2022-09-13	12:54:33	0.296603	1.31935	2.70401	2195.73	FALSE	51
2022-09-13	12:54:33	0.728054	3.23853	2.70401	2131.1	FALSE	51
2022-09-13	12:54:33	0.733295	3.26184	2.70401	2198.99	FALSE	51
2022-09-13	12:54:34	0.733753	3.26388	3.28595	2134.37	FALSE	51
2022-09-13	12:54:34	0.739147	3.28787	3.28595	2202.28	FALSE	51
2022-09-13	12:54:34	0.735483	3.27158	3.28595	2137.64	FALSE	51
2022-09-13	12:54:34	0.746476	3.32047	3.28595	2205.6	FALSE	51
2022-09-13	12:54:35	0.485763	2.16077	2.27117	2139.8	FALSE	51
2022-09-13	12:54:35	0.739555	3.28969	2.27117	2208.89	FALSE	51
2022-09-13	12:54:35	0.306425	1.36304	2.27117	2141.16	FALSE	51
2022-09-13	12:54:36	0.301845	1.34267	3.20174	2210.24	FALSE	51
2022-09-13	12:54:36	0.590954	2.62868	3.20174	2143.79	FALSE	51
2022-09-13	12:54:36	0.668817	2.97503	3.20174	2213.21	FALSE	51
2022-09-13	12:54:36	1.31752	5.86059	3.20174	2149.65	FALSE	51
2022-09-13	12:54:37	2.59416	11.5393	9.77715	2224.75	FALSE	51
2022-09-13	12:54:37	2.81177	12.5073	9.77715	2162.16	FALSE	51
2022-09-13	12:54:37	1.83197	8.14897	9.77715	2232.9	FALSE	51
2022-09-13	12:54:37	1.55411	6.91299	9.77715	2169.07	FALSE	51
2022-09-13	12:54:38	1.77854	7.9113	3.92557	2240.81	FALSE	51
2022-09-13	12:54:38	0.654516	2.91142	3.92557	2171.99	FALSE	51
2022-09-13	12:54:38	0.856196	3.80853	3.92557	2244.62	FALSE	51
2022-09-13	12:54:38	0.240776	1.07102	3.92557	2173.06	FALSE	51
2022-09-13	12:54:39	0.804695	3.57944	2.71776	2248.2	FALSE	51
2022-09-13	12:54:39	0.245255	1.09094	2.71776	2174.15	FALSE	51
2022-09-13	12:54:39	0.5593	2.48788	2.71776	2250.69	FALSE	51
2022-09-13	12:54:39	0.834669	3.71277	2.71776	2177.86	FALSE	51
2022-09-13	12:54:40	0.937417	4.16982	8.2762	2254.86	FALSE	51
2022-09-13	12:54:40	2.70841	12.0475	8.2762	2189.91	FALSE	51
2022-09-13	12:54:40	1.93589	8.61123	8.2762	2263.47	FALSE	51
2022-09-13	12:54:41	2.68281	11.9337	5.66924	2201.84	FALSE	51
2022-09-13	12:54:41	2.07141	9.21405	5.66924	2272.68	FALSE	51
2022-09-13	12:54:41	0.230598	1.02575	5.66924	2202.87	FALSE	51
2022-09-13	12:54:41	0.113194	0.50351	5.66924	2273.18	FALSE	51
2022-09-13	12:54:42	-0.00304046	-0.0135246	-0.168929	2202.87	FALSE	51
2022-09-13	12:54:42	-0.0510302	-0.226993	-0.168929	2273.18	FALSE	51
2022-09-13	12:54:42	0.022303	0.0992082	-0.168929	2202.97	FALSE	51
2022-09-13	12:54:42	-0.12014	-0.534407	-0.168929	2273.18	FALSE	51
2022-09-13	12:54:43	-0.0645671	-0.287207	-1.47526	2202.97	FALSE	51
2022-09-13	12:54:43	-0.305483	-1.35885	-1.47526	2273.18	FALSE	51
2022-09-13	12:54:43	-0.444618	-1.97775	-1.47526	2202.97	FALSE	51
2022-09-13	12:54:43	-0.511946	-2.27724	-1.47526	2273.18	FALSE	51
2022-09-13	12:54:44	1.0224	4.54784	11.2401	2207.51	FALSE	51
2022-09-13	12:54:44	1.22597	5.45336	11.2401	2278.64	FALSE	51
2022-09-13	12:54:44	5.33227	23.719	11.2401	2231.23	1	52
2022-09-13	12:54:45	1.37055	6.09648	9.86364	2284.73	FALSE	52
2022-09-13	12:54:45	2.47513	11.0099	9.86364	2242.24	FALSE	52
2022-09-13	12:54:45	1.12892	5.02166	9.86364	2289.76	FALSE	52
2022-09-13	12:54:45	3.89518	17.3265	9.86364	2259.57	1	53
2022-09-13	12:54:46	4.24016	18.8611	17.2754	2308.62	1	54
2022-09-13	12:54:46	5.43925	24.1949	17.2754	2283.76	1	55
2022-09-13	12:54:46	3.20057	14.2368	17.2754	2322.85	1	56
2022-09-13	12:54:46	2.65477	11.8089	17.2754	2295.57	FALSE	56
2022-09-13	12:54:47	2.43426	10.8281	7.21275	2333.68	FALSE	56
2022-09-13	12:54:47	1.62515	7.22899	7.21275	2302.8	FALSE	56
2022-09-13	12:54:47	1.62515	7.22899	7.21275	2340.91	FALSE	56
2022-09-13	12:54:47	0.801438	3.56496	7.21275	2306.37	FALSE	56
2022-09-13	12:54:48	0.755891	3.36235	2.70407	2344.27	FALSE	56
2022-09-13	12:54:48	0.549733	2.44532	2.70407	2308.81	FALSE	56
2022-09-13	12:54:48	0.518079	2.30452	2.70407	2346.58	FALSE	56
2022-09-13	12:54:49	0.528868	2.35251	5.15345	2311.16	FALSE	56
2022-09-13	12:54:49	0.708613	3.15205	5.15345	2349.73	FALSE	56
2022-09-13	12:54:49	1.11375	4.95418	5.15345	2316.12	FALSE	56
2022-09-13	12:54:49	2.28296	10.1551	5.15345	2359.89	FALSE	56
2022-09-13	12:54:50	10.4809	46.6211	27.8053	2362.74	1	57
2022-09-13	12:54:50	7.95227	35.3733	27.8053	2395.26	1	58
2022-09-13	12:54:50	0.87187	3.87825	27.8053	2366.62	FALSE	58
2022-09-13	12:54:50	5.69858	25.3484	27.8053	2420.61	1	59
2022-09-13	12:54:51	2.26678	10.0831	4.60598	2376.7	FALSE	59
2022-09-13	12:54:51	0.898741	3.99778	4.60598	2424.6	FALSE	59
2022-09-13	12:54:51	0.526425	2.34164	4.60598	2379.04	FALSE	59
2022-09-13	12:54:51	0.449936	2.00141	4.60598	2426.61	FALSE	59
2022-09-13	12:54:52	0.334364	1.48732	2.03227	2380.53	FALSE	59
2022-09-13	12:54:52	0.405356	1.8031	2.03227	2428.41	FALSE	59
2022-09-13	12:54:52	0.630903	2.80638	2.03227	2383.34	FALSE	59
2022-09-13	12:54:53	0.477112	2.12229	1.63333	2430.53	FALSE	59
2022-09-13	12:54:53	0.372685	1.65778	1.63333	2384.99	FALSE	59
2022-09-13	12:54:53	0.337265	1.50022	1.63333	2432.03	FALSE	59
2022-09-13	12:54:53	0.281692	1.25302	1.63333	2386.25	FALSE	59
2022-09-13	12:54:54	0.245916	1.09388	0.323995	2433.13	FALSE	59
2022-09-13	12:54:54	0.0859671	0.382399	0.323995	2386.63	FALSE	59
2022-09-13	12:54:54	-0.0201906	-0.0898118	0.323995	2433.13	FALSE	59
2022-09-13	12:54:54	-0.0203432	-0.0904906	0.323995	2386.63	FALSE	59
2022-09-13	12:54:55	-0.166501	-0.74063	0.59779	2433.13	FALSE	59
2022-09-13	12:54:55	-0.0544399	-0.24216	0.59779	2386.63	FALSE	59
2022-09-13	12:54:55	0.236959	1.05404	0.59779	2434.18	FALSE	59
2022-09-13	12:54:55	0.521539	2.31991	0.59779	2388.95	FALSE	59
2022-09-13	12:54:56	0.901539	4.01023	6.1892	2438.19	FALSE	59
2022-09-13	12:54:56	0.888715	3.95318	6.1892	2392.9	FALSE	59
2022-09-13	12:54:56	2.38393	10.6042	6.1892	2448.79	FALSE	59
2022-09-13	12:54:57	1.51457	6.73711	3.75285	2399.64	FALSE	59
2022-09-13	12:54:57	0.700776	3.11719	3.75285	2451.91	FALSE	59
2022-09-13	12:54:57	0.469224	2.0872	3.75285	2401.73	FALSE	59
2022-09-13	12:54:57	0.69014	3.06988	3.75285	2454.98	FALSE	59
2022-09-13	12:54:58	-1.33286	-5.92883	0.980021	2401.73	FALSE	59
2022-09-13	12:54:58	0.738486	3.28493	0.980021	2458.27	FALSE	59
2022-09-13	12:54:58	0.739147	3.28787	0.980021	2405.02	FALSE	59
2022-09-13	12:54:58	0.736501	3.2761	0.980021	2461.54	FALSE	59
2022-09-13	12:54:59	0.554669	2.46728	6.00948	2407.48	FALSE	59
2022-09-13	12:54:59	0.741997	3.30055	6.00948	2464.84	FALSE	59
2022-09-13	12:54:59	1.30286	5.79538	6.00948	2413.28	FALSE	59
2022-09-13	12:54:59	2.80444	12.4747	6.00948	2477.32	FALSE	59
2022-09-13	12:55:00	1.15045	5.11743	3.53433	2418.4	FALSE	59
2022-09-13	12:55:00	0.89528	3.98238	3.53433	2481.3	FALSE	59
2022-09-13	12:55:00	0.337926	1.50316	3.53433	2419.9	FALSE	59
2022-09-13	12:55:01	0.624287	2.77695	2.4752	2484.08	FALSE	59
2022-09-13	12:55:01	0.285051	1.26796	2.4752	2421.17	FALSE	59
2022-09-13	12:55:01	0.565254	2.51436	2.4752	2486.59	FALSE	59
2022-09-13	12:55:01	0.751209	3.34153	2.4752	2424.51	FALSE	59
2022-09-13	12:55:02	0.778384	3.46241	5.33438	2490.05	FALSE	59
2022-09-13	12:55:02	1.39757	6.21667	5.33438	2430.72	FALSE	59
2022-09-13	12:55:02	1.87833	8.35519	5.33438	2498.41	FALSE	59
2022-09-13	12:55:02	0.742608	3.30327	5.33438	2434.03	FALSE	59
2022-09-13	12:55:03	0.738079	3.28312	3.23366	2501.69	FALSE	59
2022-09-13	12:55:03	0.730547	3.24962	3.23366	2437.28	FALSE	59
2022-09-13	12:55:03	0.726832	3.23309	3.23366	2504.92	FALSE	59
2022-09-13	12:55:03	0.712379	3.1688	3.23366	2440.45	FALSE	59
2022-09-13	12:55:04	0.738639	3.28561	3.43723	2508.21	FALSE	59
2022-09-13	12:55:04	0.713244	3.17265	3.43723	2443.62	FALSE	59
2022-09-13	12:55:04	0.845967	3.76303	3.43723	2511.97	FALSE	59
2022-09-13	12:55:04	0.793041	3.5276	3.43723	2447.15	FALSE	59
2022-09-13	12:55:05	0.735534	3.2718	3.26743	2515.25	FALSE	59
2022-09-13	12:55:05	0.734313	3.26637	3.26743	2450.41	FALSE	59
2022-09-13	12:55:05	0.733804	3.26411	3.26743	2518.51	FALSE	59
2022-09-13	12:55:06	0.740776	3.29512	3.27695	2453.71	FALSE	59
2022-09-13	12:55:06	0.738079	3.28312	3.27695	2521.79	FALSE	59
2022-09-13	12:55:06	0.737265	3.2795	3.27695	2456.99	FALSE	59
2022-09-13	12:55:06	0.730649	3.25007	3.27695	2525.04	FALSE	59
2022-09-13	12:55:07	0.72958	3.24532	3.26586	2460.23	FALSE	59
2022-09-13	12:55:07	0.732481	3.25822	3.26586	2528.3	FALSE	59
2022-09-13	12:55:07	0.740165	3.2924	3.26586	2463.53	FALSE	59
2022-09-13	12:55:07	0.734568	3.26751	3.26586	2531.57	FALSE	59
2022-09-13	12:55:08	0.730954	3.25143	3.25511	2466.78	FALSE	59
2022-09-13	12:55:08	0.737875	3.28222	3.25511	2534.85	FALSE	59
2022-09-13	12:55:08	0.714109	3.1765	3.25511	2469.95	FALSE	59
2022-09-13	12:55:08	0.744186	3.31029	3.25511	2538.16	FALSE	59
2022-09-13	12:55:09	0.740623	3.29444	2.33161	2473.25	FALSE	59
2022-09-13	12:55:09	0.732888	3.26003	2.33161	2541.42	FALSE	59
2022-09-13	12:55:09	0.0989951	0.44035	2.33161	2473.69	FALSE	59
2022-09-13	12:55:10	-2.21205	-9.83964	-2.02082	2541.42	FALSE	59
2022-09-13	12:55:10	0.386425	1.7189	-2.02082	2475.41	FALSE	59
2022-09-13	12:55:10	0.101285	0.450536	-2.02082	2541.87	FALSE	59
2022-09-13	12:55:10	-0.0928623	-0.41307	-2.02082	2475.41	FALSE	59
2022-09-13	12:55:11	0.196603	0.874529	0.535709	2542.75	FALSE	59
2022-09-13	12:55:11	0.0734989	0.326938	0.535709	2475.73	FALSE	59
2022-09-13	12:55:11	0.115077	0.511886	0.535709	2543.26	FALSE	59
2022-09-13	12:55:11	0.0965523	0.429484	0.535709	2476.16	FALSE	59
2022-09-13	12:55:12	0.102303	0.455064	0.627956	2543.71	FALSE	59
2022-09-13	12:55:12	0.260318	1.15795	0.627956	2477.32	FALSE	59
2022-09-13	12:55:12	-0.0181041	-0.0805307	0.627956	2543.71	FALSE	59
2022-09-13	12:55:12	0.220166	0.979342	0.627956	2478.3	FALSE	59
2022-09-13	12:55:13	0.218842	0.973453	1.27657	2544.69	FALSE	59
2022-09-13	12:55:13	0.488054	2.17096	1.27657	2480.47	FALSE	59
2022-09-13	12:55:13	0.154059	0.685285	1.27657	2545.37	FALSE	59
2022-09-13	12:55:14	0.461896	2.05461	1.78539	2482.53	FALSE	59
2022-09-13	12:55:14	0.343575	1.52829	1.78539	2546.9	FALSE	59
2022-09-13	12:55:14	0.331819	1.476	1.78539	2484	FALSE	59
2022-09-13	12:55:14	0.468206	2.08267	1.78539	2548.98	FALSE	59
2022-09-13	12:55:15	0.513092	2.28234	2.10888	2486.28	FALSE	59
2022-09-13	12:55:15	0.498232	2.21624	2.10888	2551.2	FALSE	59
2022-09-13	12:55:15	0.419911	1.86785	2.10888	2488.15	FALSE	59
2022-09-13	12:55:15	0.465153	2.06909	2.10888	2553.27	FALSE	59
2022-09-13	12:55:16	0.197621	0.879058	1.19196	2489.03	FALSE	59
2022-09-13	12:55:16	0.235534	1.0477	1.19196	2554.32	FALSE	59
2022-09-13	12:55:16	0.181947	0.809337	1.19196	2489.84	FALSE	59
2022-09-13	12:55:16	0.456756	2.03174	1.19196	2556.35	FALSE	59
2022-09-13	12:55:17	0.705204	3.13689	2.64438	2492.98	FALSE	59
2022-09-13	12:55:17	0.731361	3.25324	2.64438	2559.6	FALSE	59
2022-09-13	12:55:17	0.346883	1.543	2.64438	2494.52	FALSE	59
2022-09-13	12:55:18	0.429173	1.90905	9.94689	2561.51	FALSE	59
2022-09-13	12:55:18	1.30587	5.80877	9.94689	2500.33	FALSE	59
2022-09-13	12:55:18	2.50536	11.1443	9.94689	2572.65	FALSE	59
2022-09-13	12:55:18	4.70424	20.9254	9.94689	2521.26	1	60
2022-09-13	12:55:19	4.58266	20.3846	15.8579	2593.04	1	61
2022-09-13	12:55:19	3.7537	16.6972	15.8579	2537.95	1	62
2022-09-13	12:55:19	2.89731	12.8878	15.8579	2605.93	FALSE	62
2022-09-13	12:55:19	3.02637	13.4619	15.8579	2551.41	1	63
2022-09-13	12:55:20	0.952481	4.23683	5.62618	2610.16	FALSE	63
2022-09-13	12:55:20	1.44424	6.42427	5.62618	2557.84	FALSE	63
2022-09-13	12:55:20	1.05981	4.71425	5.62618	2614.88	FALSE	63
2022-09-13	12:55:20	1.60276	7.1294	5.62618	2564.97	FALSE	63
2022-09-13	12:55:21	1.52856	6.79934	11.221	2621.68	FALSE	63
2022-09-13	12:55:21	3.45945	15.3883	11.221	2580.36	1	64
2022-09-13	12:55:21	2.57976	11.4753	11.221	2633.15	FALSE	64
2022-09-13	12:55:22	0.877163	3.9018	4.10762	2584.26	FALSE	64
2022-09-13	12:55:22	0.855127	3.80378	4.10762	2636.96	FALSE	64
2022-09-13	12:55:22	0.760979	3.38499	4.10762	2587.64	FALSE	64
2022-09-13	12:55:22	1.20047	5.33993	4.10762	2642.3	FALSE	64
2022-09-13	12:55:23	0.49757	2.21329	5.29794	2589.86	FALSE	64
2022-09-13	12:55:23	0.631921	2.81091	5.29794	2645.11	FALSE	64
2022-09-13	12:55:23	0.790751	3.51742	5.29794	2593.37	FALSE	64
2022-09-13	12:55:23	2.84388	12.6501	5.29794	2657.76	FALSE	64
2022-09-13	12:55:24	5.48769	24.4103	25.0768	2617.78	1	65
2022-09-13	12:55:24	7.5854	33.7414	25.0768	2691.5	1	66
2022-09-13	12:55:24	3.47451	15.4553	25.0768	2633.24	1	67
2022-09-13	12:55:24	6.0025	26.7003	25.0768	2718.2	1	68
2022-09-13	12:55:25	2.63029	11.7001	6.13208	2644.94	FALSE	68
2022-09-13	12:55:25	0.73757	3.28086	6.13208	2721.48	FALSE	68
2022-09-13	12:55:25	0.767799	3.41532	6.13208	2648.35	FALSE	68

## Sheet: Daisy_martin_2022913125011  (2)
Date	Time	Lbs	Newtons	Total force x time	total steps > 13.345		**GoPro Fitting: 1239
2022-09-13	12:50:25	0.37299	1.65913	1.65913	FALSE	0			Total force x time	2648.35
2022-09-13	12:50:25	0.672277	2.99042	2.99042	FALSE	0			Total Steps	68
2022-09-13	12:50:25	1.51869	6.75544	8.41457	FALSE	0
2022-09-13	12:50:25	1.80668	8.03647	11.0269	FALSE	0
2022-09-13	12:50:26	3.6594	16.2777	24.6923	1	1
2022-09-13	12:50:26	1.79462	7.98283	19.0097	FALSE	1
2022-09-13	12:50:26	1.28576	5.71932	30.4116	FALSE	1
2022-09-13	12:50:26	0.671107	2.98522	21.9949	FALSE	1
2022-09-13	12:50:27	0.2193	0.97549	31.3871	FALSE	1
2022-09-13	12:50:27	0.392481	1.74583	23.7408	FALSE	1
2022-09-13	12:50:27	0.478282	2.12749	33.5146	FALSE	1
2022-09-13	12:50:27	0.424949	1.89026	25.631	FALSE	1
2022-09-13	12:50:28	0.36154	1.6082	35.1228	FALSE	1
2022-09-13	12:50:28	0.359606	1.5996	27.2306	FALSE	1
2022-09-13	12:50:28	0.340929	1.51652	36.6393	FALSE	1
2022-09-13	12:50:29	0.32841	1.46083	28.6915	FALSE	1
2022-09-13	12:50:29	0.429478	1.9104	38.5497	FALSE	1
2022-09-13	12:50:29	0.357723	1.59122	30.2827	FALSE	1
2022-09-13	12:50:29	0.53416	2.37605	40.9258	FALSE	1
2022-09-13	12:50:30	0.416247	1.85155	32.1342	FALSE	1
2022-09-13	12:50:30	0.562862	2.50372	43.4295	FALSE	1
2022-09-13	12:50:30	0.225509	1.00311	33.1374	FALSE	1
2022-09-13	12:50:30	0.44556	1.98194	45.4115	FALSE	1
2022-09-13	12:50:31	0.127239	0.565985	33.7033	FALSE	1
2022-09-13	12:50:31	0.303473	1.34991	46.7614	FALSE	1
2022-09-13	12:50:31	0.23584	1.04906	34.7524	FALSE	1
2022-09-13	12:50:31	0.522404	2.32376	49.0851	FALSE	1
2022-09-13	12:50:32	0.337417	1.5009	36.2533	FALSE	1
2022-09-13	12:50:32	0.420369	1.86989	50.955	FALSE	1
2022-09-13	12:50:32	0.393804	1.75172	38.005	FALSE	1
2022-09-13	12:50:33	0.517112	2.30022	53.2552	FALSE	1
2022-09-13	12:50:33	1.55299	6.90801	44.913	FALSE	1
2022-09-13	12:50:33	2.62179	11.6622	64.9175	FALSE	1
2022-09-13	12:50:33	2.74821	12.2246	57.1376	FALSE	1
2022-09-13	12:50:34	1.77747	7.90654	72.824	FALSE	1
2022-09-13	12:50:34	1.61548	7.18598	64.3236	FALSE	1
2022-09-13	12:50:34	1.08846	4.84169	77.6657	FALSE	1
2022-09-13	12:50:34	2.71971	12.0978	76.4214	FALSE	1
2022-09-13	12:50:35	1.46846	6.532	84.1977	FALSE	1
2022-09-13	12:50:35	1.01019	4.49353	80.9149	FALSE	1
2022-09-13	12:50:35	0.336145	1.49524	85.6929	FALSE	1
2022-09-13	12:50:35	0.416654	1.85336	82.7683	FALSE	1
2022-09-13	12:50:36	0.480929	2.13927	87.8322	FALSE	1
2022-09-13	12:50:36	0.846323	3.76461	86.5329	FALSE	1
2022-09-13	12:50:36	0.713804	3.17514	91.0074	FALSE	1
2022-09-13	12:50:37	1.68322	7.4873	94.0202	FALSE	1
2022-09-13	12:50:37	0.874873	3.89161	94.899	FALSE	1
2022-09-13	12:50:37	0.478028	2.12636	96.1466	FALSE	1
2022-09-13	12:50:37	-0.108435	-0.482341	94.899	FALSE	1
2022-09-13	12:50:38	0.179402	0.798016	96.9446	FALSE	1
2022-09-13	12:50:38	0.333346	1.48279	96.3818	FALSE	1
2022-09-13	12:50:38	0.589733	2.62325	99.5678	FALSE	1
2022-09-13	12:50:38	0.587545	2.61352	98.9953	FALSE	1
2022-09-13	12:50:39	0.64042	2.84872	102.417	FALSE	1
2022-09-13	12:50:39	0.263372	1.17153	100.167	FALSE	1
2022-09-13	12:50:39	0.25126	1.11765	103.534	FALSE	1
2022-09-13	12:50:39	0.350598	1.55953	101.726	FALSE	1
2022-09-13	12:50:40	0.459249	2.04283	105.577	FALSE	1
2022-09-13	12:50:40	0.47355	2.10645	103.833	FALSE	1
2022-09-13	12:50:40	0.727952	3.23808	108.815	FALSE	1
2022-09-13	12:50:41	0.365967	1.62789	105.461	FALSE	1
2022-09-13	12:50:41	0.392583	1.74629	110.561	FALSE	1
2022-09-13	12:50:41	0.315178	1.40197	106.863	FALSE	1
2022-09-13	12:50:41	0.344237	1.53124	112.093	FALSE	1
2022-09-13	12:50:42	0.402456	1.7902	108.653	FALSE	1
2022-09-13	12:50:42	0.494008	2.19745	114.29	FALSE	1
2022-09-13	12:50:42	0.434211	1.93146	110.584	FALSE	1
2022-09-13	12:50:42	0.459962	2.046	116.336	FALSE	1
2022-09-13	12:50:43	0.701845	3.12195	113.706	FALSE	1
2022-09-13	12:50:43	2.75568	12.2578	128.594	FALSE	1
2022-09-13	12:50:43	0.576807	2.56575	116.272	FALSE	1
2022-09-13	12:50:43	0.541692	2.40955	131.003	FALSE	1
2022-09-13	12:50:44	0.43986	1.95659	118.229	FALSE	1
2022-09-13	12:50:44	0.290038	1.29015	132.294	FALSE	1
2022-09-13	12:50:44	0.360623	1.60412	119.833	FALSE	1
2022-09-13	12:50:45	0.289631	1.28834	133.582	FALSE	1
2022-09-13	12:50:45	0.294924	1.31188	121.145	FALSE	1
2022-09-13	12:50:45	0.535178	2.38058	135.963	FALSE	1
2022-09-13	12:50:45	0.903728	4.01996	125.165	FALSE	1
2022-09-13	12:50:46	1.07492	4.78146	140.744	FALSE	1
2022-09-13	12:50:46	2.26083	10.0566	135.221	FALSE	1
2022-09-13	12:50:46	2.67696	11.9077	152.652	FALSE	1
2022-09-13	12:50:46	0.50383	2.24114	137.462	FALSE	1
2022-09-13	12:50:47	0.348206	1.54889	154.201	FALSE	1
2022-09-13	12:50:47	0.313906	1.39632	138.859	FALSE	1
2022-09-13	12:50:47	0.293804	1.3069	155.507	FALSE	1
2022-09-13	12:50:47	0.280522	1.24782	140.106	FALSE	1
2022-09-13	12:50:48	0.330649	1.47079	156.978	FALSE	1
2022-09-13	12:50:48	0.324797	1.44476	141.551	FALSE	1
2022-09-13	12:50:48	0.242456	1.07849	158.057	FALSE	1
2022-09-13	12:50:48	0.371361	1.65189	143.203	FALSE	1
2022-09-13	12:50:49	0.368206	1.63785	159.695	FALSE	1
2022-09-13	12:50:49	0.618893	2.75296	145.956	FALSE	1
2022-09-13	12:50:49	1.03121	4.58703	164.282	FALSE	1
2022-09-13	12:50:50	1.97045	8.76496	154.721	FALSE	1
2022-09-13	12:50:50	1.44235	6.41586	170.697	FALSE	1
2022-09-13	12:50:50	1.93706	8.61643	163.337	FALSE	1
2022-09-13	12:50:50	1.57095	6.9879	177.685	FALSE	1
2022-09-13	12:50:51	2.65645	11.8164	175.154	FALSE	1
2022-09-13	12:50:51	1.82856	8.1338	185.819	FALSE	1
2022-09-13	12:50:51	1.66291	7.39696	182.551	FALSE	1
2022-09-13	12:50:51	2.37788	10.5773	196.396	FALSE	1
2022-09-13	12:50:52	1.62999	7.25052	189.801	FALSE	1
2022-09-13	12:50:52	0.991514	4.41045	200.807	FALSE	1
2022-09-13	12:50:52	0.763626	3.39676	193.198	FALSE	1
2022-09-13	12:50:52	0.742659	3.3035	204.11	FALSE	1
2022-09-13	12:50:53	1.32627	5.89951	199.098	FALSE	1
2022-09-13	12:50:53	0.849122	3.77706	207.887	FALSE	1
2022-09-13	12:50:53	1.05966	4.71358	203.811	FALSE	1
2022-09-13	12:50:54	0.357875	1.5919	209.479	FALSE	1
2022-09-13	12:50:54	0.850292	3.78227	207.593	FALSE	1
2022-09-13	12:50:54	0.477214	2.12274	211.602	FALSE	1
2022-09-13	12:50:54	0.713143	3.1722	210.766	FALSE	1
2022-09-13	12:50:55	0.444389	1.97673	213.579	FALSE	1
2022-09-13	12:50:55	0.787799	3.50429	214.27	FALSE	1
2022-09-13	12:50:55	1.20581	5.36368	218.943	FALSE	1
2022-09-13	12:50:55	0.771107	3.43004	217.7	FALSE	1
2022-09-13	12:50:56	2.15039	9.56536	228.508	FALSE	1
2022-09-13	12:50:56	1.54139	6.85641	224.556	FALSE	1
2022-09-13	12:50:56	2.84724	12.6651	241.173	FALSE	1
2022-09-13	12:50:56	1.11645	4.96619	229.523	FALSE	1
2022-09-13	12:50:57	1.10088	4.89693	246.07	FALSE	1
2022-09-13	12:50:57	0.570649	2.53836	232.061	FALSE	1
2022-09-13	12:50:57	0.236705	1.05291	247.123	FALSE	1
2022-09-13	12:50:58	0.615738	2.73893	234.8	FALSE	1
2022-09-13	12:50:58	0.311209	1.38432	248.507	FALSE	1
2022-09-13	12:50:58	0.728359	3.23989	238.04	FALSE	1
2022-09-13	12:50:58	0.668613	2.97412	251.481	FALSE	1
2022-09-13	12:50:59	1.10215	4.90258	242.942	FALSE	1
2022-09-13	12:50:59	0.990242	4.40479	255.886	FALSE	1
2022-09-13	12:50:59	1.38093	6.14265	249.085	FALSE	1
2022-09-13	12:50:59	2.11609	9.41279	265.299	FALSE	1
2022-09-13	12:51:00	2.19167	9.74899	258.834	FALSE	1
2022-09-13	12:51:00	2.67065	11.8796	277.178	FALSE	1
2022-09-13	12:51:00	1.98994	8.85165	267.686	FALSE	1
2022-09-13	12:51:00	4.1425	18.4267	295.605	1	2
2022-09-13	12:51:01	0.567544	2.52455	270.21	FALSE	2
2022-09-13	12:51:01	3.76276	16.7375	312.343	1	3
2022-09-13	12:51:01	0.941845	4.18951	274.4	FALSE	3
2022-09-13	12:51:02	4.14525	18.4389	330.782	1	4
2022-09-13	12:51:02	2.37508	10.5648	284.965	FALSE	4
2022-09-13	12:51:02	4.05273	18.0274	348.809	1	5
2022-09-13	12:51:02	2.5334	11.2691	296.234	FALSE	5
2022-09-13	12:51:03	0.713448	3.17356	351.982	FALSE	5
2022-09-13	12:51:03	2.03177	9.03772	305.271	FALSE	5
2022-09-13	12:51:03	0.761946	3.38929	355.372	FALSE	5
2022-09-13	12:51:03	1.19187	5.30168	310.573	FALSE	5
2022-09-13	12:51:04	0.850394	3.78272	359.154	FALSE	5
2022-09-13	12:51:04	0.546628	2.43151	313.005	FALSE	5
2022-09-13	12:51:04	1.40851	6.26533	365.42	FALSE	5
2022-09-13	12:51:04	0.968511	4.30813	317.313	FALSE	5
2022-09-13	12:51:05	1.31385	5.84427	371.264	FALSE	5
2022-09-13	12:51:05	1.01401	4.51052	321.823	FALSE	5
2022-09-13	12:51:05	1.56322	6.95352	378.218	FALSE	5
2022-09-13	12:51:05	2.45767	10.9322	332.755	FALSE	5
2022-09-13	12:51:06	1.41864	6.31039	384.528	FALSE	5
2022-09-13	12:51:06	2.60251	11.5765	344.332	FALSE	5
2022-09-13	12:51:06	0.995992	4.43037	388.958	FALSE	5
2022-09-13	12:51:07	1.79207	7.97149	352.303	FALSE	5
2022-09-13	12:51:07	0.575942	2.56191	391.52	FALSE	5
2022-09-13	12:51:07	2.64159	11.7503	364.054	FALSE	5
2022-09-13	12:51:07	0.877621	3.90383	395.424	FALSE	5
2022-09-13	12:51:08	1.54129	6.85597	370.91	FALSE	5
2022-09-13	12:51:08	1.29009	5.73858	401.163	FALSE	5
2022-09-13	12:51:08	0.413499	1.83933	372.749	FALSE	5
2022-09-13	12:51:08	0.641489	2.85347	404.016	FALSE	5
2022-09-13	12:51:09	0.294008	1.30781	374.057	FALSE	5
2022-09-13	12:51:09	-0.0489437	-0.217711	404.016	FALSE	5
2022-09-13	12:51:09	-0.505839	-2.25007	374.057	FALSE	5
2022-09-13	12:51:09	-0.553117	-2.46038	404.016	FALSE	5
2022-09-13	12:51:10	0.00128524	0.005717	374.062	FALSE	5
2022-09-13	12:51:10	0.240827	1.07125	405.087	FALSE	5
2022-09-13	12:51:10	0.334873	1.48958	375.552	FALSE	5
2022-09-13	12:51:11	0.562252	2.50101	407.588	FALSE	5
2022-09-13	12:51:11	0.398283	1.77164	377.324	FALSE	5
2022-09-13	12:51:11	0.475534	2.11527	409.704	FALSE	5
2022-09-13	12:51:11	0.421132	1.87328	379.197	FALSE	5
2022-09-13	12:51:12	0.441081	1.96202	411.666	FALSE	5
2022-09-13	12:51:12	0.464746	2.06728	381.264	FALSE	5
2022-09-13	12:51:12	0.425	1.89048	413.556	FALSE	5
2022-09-13	12:51:12	0.430496	1.91493	383.179	FALSE	5
2022-09-13	12:51:13	0.461082	2.05098	415.607	FALSE	5
2022-09-13	12:51:13	0.54729	2.43446	385.614	FALSE	5
2022-09-13	12:51:13	0.378944	1.68562	417.293	FALSE	5
2022-09-13	12:51:13	0.647595	2.88063	388.494	FALSE	5
2022-09-13	12:51:14	0.610852	2.71719	420.01	FALSE	5
2022-09-13	12:51:14	0.590547	2.62687	391.121	FALSE	5
2022-09-13	12:51:14	0.569173	2.5318	422.542	FALSE	5
2022-09-13	12:51:15	0.682507	3.03593	394.157	FALSE	5
2022-09-13	12:51:15	0.413804	1.84068	424.382	FALSE	5
2022-09-13	12:51:15	0.479504	2.13293	396.29	FALSE	5
2022-09-13	12:51:15	0.416094	1.85087	426.233	FALSE	5
2022-09-13	12:51:16	0.268359	1.19371	397.484	FALSE	5
2022-09-13	12:51:16	0.345967	1.53893	427.772	FALSE	5
2022-09-13	12:51:16	0.440573	1.95976	399.443	FALSE	5
2022-09-13	12:51:16	0.457875	2.03672	429.809	FALSE	5
2022-09-13	12:51:17	0.500267	2.22529	401.669	FALSE	5
2022-09-13	12:51:17	0.503066	2.23774	432.047	FALSE	5
2022-09-13	12:51:17	0.52271	2.32512	403.994	FALSE	5
2022-09-13	12:51:17	0.503219	2.23842	434.285	FALSE	5
2022-09-13	12:51:18	0.532837	2.37017	406.364	FALSE	5
2022-09-13	12:51:18	0.559504	2.48879	436.774	FALSE	5
2022-09-13	12:51:18	0.594822	2.64589	409.01	FALSE	5
2022-09-13	12:51:19	0.531718	2.36519	439.139	FALSE	5
2022-09-13	12:51:19	0.584847	2.60152	411.611	FALSE	5
2022-09-13	12:51:19	0.605712	2.69433	441.833	FALSE	5
2022-09-13	12:51:19	0.584796	2.60129	414.213	FALSE	5
2022-09-13	12:51:20	0.544796	2.42336	444.257	FALSE	5
2022-09-13	12:51:20	0.460623	2.04894	416.262	FALSE	5
2022-09-13	12:51:20	0.443422	1.97243	446.229	FALSE	5
2022-09-13	12:51:20	0.475942	2.11709	418.379	FALSE	5
2022-09-13	12:51:21	0.28159	1.25257	447.482	FALSE	5
2022-09-13	12:51:21	0.367138	1.6331	420.012	FALSE	5
2022-09-13	12:51:21	0.205356	0.913465	448.395	FALSE	5
2022-09-13	12:51:21	0.153092	0.680984	420.693	FALSE	5
2022-09-13	12:51:22	0.000572752	0.00254772	448.398	FALSE	5
2022-09-13	12:51:22	0.494873	2.20129	422.894	FALSE	5
2022-09-13	12:51:22	0.484237	2.15398	450.552	FALSE	5
2022-09-13	12:51:22	0.421336	1.87419	424.768	FALSE	5
2022-09-13	12:51:23	0.428868	1.90769	452.459	FALSE	5
2022-09-13	12:51:23	0.327443	1.45653	426.225	FALSE	5
2022-09-13	12:51:23	0.570445	2.53745	454.997	FALSE	5
2022-09-13	12:51:24	0.339809	1.51154	427.736	FALSE	5
2022-09-13	12:51:24	0.54215	2.41159	457.408	FALSE	5
2022-09-13	12:51:24	0.284084	1.26366	429	FALSE	5
2022-09-13	12:51:24	0.553295	2.46117	459.87	FALSE	5
2022-09-13	12:51:25	0.293397	1.30509	430.305	FALSE	5
2022-09-13	12:51:25	0.483728	2.15172	462.021	FALSE	5
2022-09-13	12:51:25	0.342914	1.52535	431.831	FALSE	5
2022-09-13	12:51:25	0.466425	2.07475	464.096	FALSE	5
2022-09-13	12:51:26	0.657163	2.92319	434.754	FALSE	5
2022-09-13	12:51:26	0.734975	3.26932	467.365	FALSE	5
2022-09-13	12:51:26	0.736959	3.27814	438.032	FALSE	5
2022-09-13	12:51:26	0.735687	3.27248	470.638	FALSE	5
2022-09-13	12:51:27	1.14805	5.10676	443.139	FALSE	5
2022-09-13	12:51:27	1.32729	5.90405	476.542	FALSE	5
2022-09-13	12:51:27	0.713651	3.17446	446.313	FALSE	5
2022-09-13	12:51:28	0.713448	3.17356	479.716	FALSE	5
2022-09-13	12:51:28	0.776756	3.45517	449.768	FALSE	5
2022-09-13	12:51:28	1.0277	4.57142	484.287	FALSE	5
2022-09-13	12:51:28	1.01436	4.51208	454.28	FALSE	5
2022-09-13	12:51:29	0.749835	3.33542	487.622	FALSE	5
2022-09-13	12:51:29	0.949173	4.22211	458.502	FALSE	5
2022-09-13	12:51:29	0.776196	3.45268	491.075	FALSE	5
2022-09-13	12:51:29	0.742608	3.30327	461.806	FALSE	5
2022-09-13	12:51:30	0.979962	4.35907	495.434	FALSE	5
2022-09-13	12:51:30	0.764288	3.39971	465.205	FALSE	5
2022-09-13	12:51:30	0.753041	3.34968	498.784	FALSE	5
2022-09-13	12:51:30	0.784491	3.48957	468.695	FALSE	5
2022-09-13	12:51:31	0.811666	3.61045	502.394	FALSE	5
2022-09-13	12:51:31	0.546679	2.43174	471.127	FALSE	5
2022-09-13	12:51:31	0.566476	2.5198	504.914	FALSE	5
2022-09-13	12:51:32	1.06709	4.74663	475.873	FALSE	5
2022-09-13	12:51:32	0.977977	4.35024	509.264	FALSE	5
2022-09-13	12:51:32	0.667239	2.96801	478.841	FALSE	5
2022-09-13	12:51:32	0.653448	2.90667	512.171	FALSE	5
2022-09-13	12:51:33	0.550547	2.44894	481.29	FALSE	5
2022-09-13	12:51:33	0.237163	1.05495	513.226	FALSE	5
2022-09-13	12:51:33	0.810445	3.60502	484.895	FALSE	5
2022-09-13	12:51:33	0.755738	3.36167	516.588	FALSE	5
2022-09-13	12:51:34	1.42052	6.31876	491.214	FALSE	5
2022-09-13	12:51:34	0.780013	3.46965	520.057	FALSE	5
2022-09-13	12:51:34	1.00922	4.48921	495.703	FALSE	5
2022-09-13	12:51:34	0.476756	2.12071	522.178	FALSE	5
2022-09-13	12:51:35	0.110038	0.489471	496.193	FALSE	5
2022-09-13	12:51:35	0.69701	3.10044	525.278	FALSE	5
2022-09-13	12:51:35	0.762099	3.38997	499.583	FALSE	5
2022-09-13	12:51:36	0.726374	3.23106	528.509	FALSE	5
2022-09-13	12:51:36	0.737875	3.28222	502.865	FALSE	5
2022-09-13	12:51:36	0.735992	3.27384	531.783	FALSE	5
2022-09-13	12:51:36	0.738231	3.2838	506.149	FALSE	5
2022-09-13	12:51:37	0.737621	3.28109	535.064	FALSE	5
2022-09-13	12:51:37	0.753142	3.35013	509.499	FALSE	5
2022-09-13	12:51:37	1.17579	5.23015	540.294	FALSE	5
2022-09-13	12:51:37	0.528359	2.35025	511.849	FALSE	5
2022-09-13	12:51:38	0.661743	2.94357	543.238	FALSE	5
2022-09-13	12:51:38	0.738333	3.28425	515.133	FALSE	5
2022-09-13	12:51:38	0.736959	3.27814	546.516	FALSE	5
2022-09-13	12:51:38	0.737926	3.28244	518.416	FALSE	5
2022-09-13	12:51:39	0.73416	3.26569	549.782	FALSE	5
2022-09-13	12:51:39	0.733193	3.26139	521.677	FALSE	5
2022-09-13	12:51:39	0.73757	3.28086	553.063	FALSE	5
2022-09-13	12:51:40	0.740827	3.29535	524.973	FALSE	5
2022-09-13	12:51:40	0.734669	3.26795	556.331	FALSE	5
2022-09-13	12:51:40	0.729784	3.24623	528.219	FALSE	5
2022-09-13	12:51:40	0.738893	3.28674	559.617	FALSE	5
2022-09-13	12:51:41	0.739656	3.29014	531.509	FALSE	5
2022-09-13	12:51:41	0.739504	3.28946	562.907	FALSE	5
2022-09-13	12:51:41	0.742201	3.30146	534.81	FALSE	5
2022-09-13	12:51:41	0.736603	3.27656	566.183	FALSE	5
2022-09-13	12:51:42	0.735891	3.27339	538.084	FALSE	5
2022-09-13	12:51:42	0.738689	3.28584	569.469	FALSE	5
2022-09-13	12:51:42	0.751616	3.34334	541.427	FALSE	5
2022-09-13	12:51:42	0.807188	3.59053	573.06	FALSE	5
2022-09-13	12:51:43	0.335942	1.49434	542.921	FALSE	5
2022-09-13	12:51:43	0.542252	2.41205	575.472	FALSE	5
2022-09-13	12:51:43	0.489173	2.17594	545.097	FALSE	5
2022-09-13	12:51:43	0.57243	2.54628	578.018	FALSE	5
2022-09-13	12:51:44	4.71874	20.9899	566.087	1	6
2022-09-13	12:51:44	6.75177	30.0332	608.051	1	7
2022-09-13	12:51:44	1.38658	6.16779	572.255	FALSE	7
2022-09-13	12:51:45	1.50296	6.68547	614.737	FALSE	7
2022-09-13	12:51:45	0.303677	1.35082	573.606	FALSE	7
2022-09-13	12:51:45	0.569326	2.53248	617.269	FALSE	7
2022-09-13	12:51:45	0.600623	2.67169	576.278	FALSE	7
2022-09-13	12:51:46	0.649886	2.89082	620.16	FALSE	7
2022-09-13	12:51:46	1.3048	5.80401	582.082	FALSE	7
2022-09-13	12:51:46	1.17263	5.21609	625.376	FALSE	7
2022-09-13	12:51:46	3.72856	16.5854	598.667	1	8
2022-09-13	12:51:47	1.91406	8.51412	633.89	FALSE	8
2022-09-13	12:51:47	3.69258	16.4253	615.092	1	9
2022-09-13	12:51:47	1.97095	8.76718	642.658	FALSE	9
2022-09-13	12:51:47	1.34922	6.0016	621.094	FALSE	9
2022-09-13	12:51:48	2.25808	10.0444	652.702	FALSE	9
2022-09-13	12:51:48	1.4221	6.32579	627.42	FALSE	9
2022-09-13	12:51:48	1.35579	6.03083	658.733	FALSE	9
2022-09-13	12:51:49	1.77497	7.89542	635.315	FALSE	9
2022-09-13	12:51:49	1.08943	4.846	663.579	FALSE	9
2022-09-13	12:51:49	2.92439	13.0083	648.323	FALSE	9
2022-09-13	12:51:49	0.305356	1.35828	664.937	FALSE	9
2022-09-13	12:51:50	0.769377	3.42234	651.746	FALSE	9
2022-09-13	12:51:50	1.04515	4.64904	669.586	FALSE	9
2022-09-13	12:51:50	1.48123	6.58881	658.335	FALSE	9
2022-09-13	12:51:50	1.93645	8.61372	678.2	FALSE	9
2022-09-13	12:51:51	1.54276	6.86251	665.197	FALSE	9
2022-09-13	12:51:51	4.62194	20.5593	698.759	1	10
2022-09-13	12:51:51	2.19732	9.77412	674.971	FALSE	10
2022-09-13	12:51:51	0.883371	3.92941	702.689	FALSE	10
2022-09-13	12:51:52	0.764644	3.40129	678.372	FALSE	10
2022-09-13	12:51:52	0.467443	2.07928	704.768	FALSE	10
2022-09-13	12:51:52	0.26042	1.1584	679.531	FALSE	10
2022-09-13	12:51:53	0.137112	0.609902	705.378	FALSE	10
2022-09-13	12:51:53	0.0838806	0.373118	679.904	FALSE	10
2022-09-13	12:51:53	0.728512	3.24057	708.618	FALSE	10
2022-09-13	12:51:53	0.981896	4.36767	684.272	FALSE	10
2022-09-13	12:51:54	1.60683	7.1475	715.766	FALSE	10
2022-09-13	12:51:54	1.18927	5.29011	689.562	FALSE	10
2022-09-13	12:51:54	0.602201	2.67871	718.444	FALSE	10
2022-09-13	12:51:54	0.451361	2.00774	691.569	FALSE	10
2022-09-13	12:51:55	0.209682	0.932707	719.377	FALSE	10
2022-09-13	12:51:55	0.270038	1.20118	692.771	FALSE	10
2022-09-13	12:51:55	0.162456	0.722637	720.1	FALSE	10
2022-09-13	12:51:55	0.453906	2.01906	694.79	FALSE	10
2022-09-13	12:51:56	0.719351	3.19982	723.3	FALSE	10
2022-09-13	12:51:56	0.0337534	0.150142	694.94	FALSE	10
2022-09-13	12:51:56	0.149937	0.66695	723.967	FALSE	10
2022-09-13	12:51:57	0.330903	1.47192	696.412	FALSE	10
2022-09-13	12:51:57	0.0213361	0.0949072	724.061	FALSE	10
2022-09-13	12:51:57	-0.0166283	-0.073966	696.412	FALSE	10
2022-09-13	12:51:57	-0.107722	-0.479169	724.061	FALSE	10
2022-09-13	12:51:58	-0.124923	-0.555682	696.412	FALSE	10
2022-09-13	12:51:58	-0.179783	-0.799711	724.061	FALSE	10
2022-09-13	12:51:58	-0.201615	-0.896824	696.412	FALSE	10
2022-09-13	12:51:58	-0.113473	-0.504751	724.061	FALSE	10
2022-09-13	12:51:59	-0.189045	-0.84091	696.412	FALSE	10
2022-09-13	12:51:59	-0.312302	-1.38918	724.061	FALSE	10
2022-09-13	12:51:59	0.042812	0.190436	696.602	FALSE	10
2022-09-13	12:51:59	0.428206	1.90475	725.966	FALSE	10
2022-09-13	12:52:00	0.790038	3.51425	700.116	FALSE	10
2022-09-13	12:52:00	2.70556	12.0349	738.001	FALSE	10
2022-09-13	12:52:00	2.31192	10.2839	710.4	FALSE	10
2022-09-13	12:52:00	0.395026	1.75715	739.758	FALSE	10
2022-09-13	12:52:01	0.174618	0.776736	711.177	FALSE	10
2022-09-13	12:52:01	0.215178	0.957155	740.715	FALSE	10
2022-09-13	12:52:01	-0.0319972	-0.14233	711.177	FALSE	10
2022-09-13	12:52:02	-0.318053	-1.41476	740.715	FALSE	10
2022-09-13	12:52:02	-0.430317	-1.91414	711.177	FALSE	10
2022-09-13	12:52:02	-0.352557	-1.56824	740.715	FALSE	10
2022-09-13	12:52:02	-0.443905	-1.97458	711.177	FALSE	10
2022-09-13	12:52:03	-0.304363	-1.35387	740.715	FALSE	10
2022-09-13	12:52:03	0.0575702	0.256084	711.433	FALSE	10
2022-09-13	12:52:03	0.344847	1.53395	742.249	FALSE	10
2022-09-13	12:52:03	0.384033	1.70826	713.141	FALSE	10
2022-09-13	12:52:04	0.35757	1.59054	743.84	FALSE	10
2022-09-13	12:52:04	0.337926	1.50316	714.645	FALSE	10
2022-09-13	12:52:04	0.38327	1.70486	745.545	FALSE	10
2022-09-13	12:52:04	0.383982	1.70803	716.353	FALSE	10
2022-09-13	12:52:05	0.368919	1.64103	747.186	FALSE	10
2022-09-13	12:52:05	0.36271	1.61341	717.966	FALSE	10
2022-09-13	12:52:05	0.349936	1.55659	748.742	FALSE	10
2022-09-13	12:52:06	0.341896	1.52082	719.487	FALSE	10
2022-09-13	12:52:06	0.354975	1.579	750.321	FALSE	10
2022-09-13	12:52:06	0.32159	1.4305	720.917	FALSE	10
2022-09-13	12:52:06	0.268155	1.19281	751.514	FALSE	10
2022-09-13	12:52:07	0.122456	0.544709	721.462	FALSE	10
2022-09-13	12:52:07	0.0926338	0.412054	751.926	FALSE	10
2022-09-13	12:52:07	0.111005	0.493772	721.956	FALSE	10
2022-09-13	12:52:07	0.659148	2.93202	754.858	FALSE	10
2022-09-13	12:52:08	0.735941	3.27361	725.229	FALSE	10
2022-09-13	12:52:08	0.741539	3.29851	758.157	FALSE	10
2022-09-13	12:52:08	0.732684	3.25912	728.489	FALSE	10
2022-09-13	12:52:08	0.730242	3.24826	761.405	FALSE	10
2022-09-13	12:52:09	0.733092	3.26094	731.75	FALSE	10
2022-09-13	12:52:09	0.733092	3.26094	764.666	FALSE	10
2022-09-13	12:52:09	0.732583	3.25868	735.008	FALSE	10
2022-09-13	12:52:10	0.738181	3.28358	767.95	FALSE	10
2022-09-13	12:52:10	0.735127	3.26999	738.278	FALSE	10
2022-09-13	12:52:10	0.738893	3.28674	771.236	FALSE	10
2022-09-13	12:52:10	0.734211	3.26592	741.544	FALSE	10
2022-09-13	12:52:11	0.730293	3.24849	774.485	FALSE	10
2022-09-13	12:52:11	0.752176	3.34583	744.89	FALSE	10
2022-09-13	12:52:11	0.587443	2.61306	777.098	FALSE	10
2022-09-13	12:52:11	-0.295101	-1.31267	744.89	FALSE	10
2022-09-13	12:52:12	-0.572557	-2.54685	777.098	FALSE	10
2022-09-13	12:52:12	-0.740648	-3.29455	744.89	FALSE	10
2022-09-13	12:52:12	-0.840546	-3.73892	777.098	FALSE	10
2022-09-13	12:52:12	-0.666348	-2.96405	744.89	FALSE	10
2022-09-13	12:52:13	-0.524669	-2.33383	777.098	FALSE	10
2022-09-13	12:52:13	-0.229809	-1.02224	744.89	FALSE	10
2022-09-13	12:52:13	-0.100292	-0.446119	777.098	FALSE	10
2022-09-13	12:52:14	1.32785	5.90654	750.796	FALSE	10
2022-09-13	12:52:14	0.189784	0.844197	777.942	FALSE	10
2022-09-13	12:52:14	0.164746	0.732823	751.529	FALSE	10
2022-09-13	12:52:14	-0.017188	-0.0764557	777.942	FALSE	10
2022-09-13	12:52:15	-0.0764756	-0.340179	751.529	FALSE	10
2022-09-13	12:52:15	-0.220699	-0.981713	777.942	FALSE	10
2022-09-13	12:52:15	-0.215407	-0.958173	751.529	FALSE	10
2022-09-13	12:52:15	-0.28187	-1.25381	777.942	FALSE	10
2022-09-13	12:52:16	-0.417188	-1.85574	751.529	FALSE	10
2022-09-13	12:52:16	-0.50589	-2.2503	777.942	FALSE	10
2022-09-13	12:52:16	-0.525381	-2.337	751.529	FALSE	10
2022-09-13	12:52:16	-0.405178	-1.80231	777.942	FALSE	10
2022-09-13	12:52:17	-0.136934	-0.60911	751.529	FALSE	10
2022-09-13	12:52:17	0.5764	2.56394	780.506	FALSE	10
2022-09-13	12:52:17	2.39014	10.6318	762.161	FALSE	10
2022-09-13	12:52:18	4.47614	19.9108	800.417	1	11
2022-09-13	12:52:18	3.41604	15.1952	777.356	1	12
2022-09-13	12:52:18	1.57737	7.01646	807.433	FALSE	12
2022-09-13	12:52:18	0.35986	1.60073	778.957	FALSE	12
2022-09-13	12:52:19	0.625916	2.7842	810.217	FALSE	12
2022-09-13	12:52:19	0.460573	2.04872	781.006	FALSE	12
2022-09-13	12:52:19	1.91915	8.53676	818.754	FALSE	12
2022-09-13	12:52:19	2.03726	9.06214	790.068	FALSE	12
2022-09-13	12:52:20	3.365	14.9682	833.722	1	13
2022-09-13	12:52:20	4.47965	19.9264	809.994	1	14
2022-09-13	12:52:20	2.63899	11.7388	845.461	FALSE	14
2022-09-13	12:52:20	4.18917	18.6343	828.629	1	15
2022-09-13	12:52:21	3.97299	17.6727	863.134	1	16
2022-09-13	12:52:21	2.7196	12.0973	840.726	FALSE	16
2022-09-13	12:52:21	4.55441	20.2589	883.393	1	17
2022-09-13	12:52:21	3.21787	14.3137	855.04	1	18
2022-09-13	12:52:22	1.9049	8.47338	891.866	FALSE	18
2022-09-13	12:52:22	2.72627	12.127	867.167	FALSE	18
2022-09-13	12:52:22	0.477367	2.12342	893.99	FALSE	18
2022-09-13	12:52:23	3.3052	14.7022	881.869	1	19
2022-09-13	12:52:23	0.437163	1.94459	895.934	FALSE	19
2022-09-13	12:52:23	2.29146	10.1929	892.062	FALSE	19
2022-09-13	12:52:23	0.821946	3.65618	899.59	FALSE	19
2022-09-13	12:52:24	1.09747	4.88177	896.943	FALSE	19
2022-09-13	12:52:24	1.72337	7.66589	907.256	FALSE	19
2022-09-13	12:52:24	2.95894	13.162	910.105	FALSE	19
2022-09-13	12:52:24	3.72154	16.5542	923.81	1	20
2022-09-13	12:52:25	2.13803	9.51039	919.616	FALSE	20
2022-09-13	12:52:25	0.63014	2.80299	926.613	FALSE	20
2022-09-13	12:52:25	-4.07907	-18.1445	919.616	FALSE	20
2022-09-13	12:52:25	0.189275	0.841933	927.455	FALSE	20
2022-09-13	12:52:26	-0.118053	-0.525123	919.616	FALSE	20
2022-09-13	12:52:26	-0.0216155	-0.0961501	927.455	FALSE	20
2022-09-13	12:52:26	-0.0716918	-0.318899	919.616	FALSE	20
2022-09-13	12:52:27	-0.12757	-0.567457	927.455	FALSE	20
2022-09-13	12:52:27	-0.192811	-0.857662	919.616	FALSE	20
2022-09-13	12:52:27	-0.0262466	-0.11675	927.455	FALSE	20
2022-09-13	12:52:27	-0.0468572	-0.20843	919.616	FALSE	20
2022-09-13	12:52:28	1.2992	5.7791	933.234	FALSE	20
2022-09-13	12:52:28	3.4137	15.1848	934.801	1	21
2022-09-13	12:52:28	3.68383	16.3864	949.621	1	22
2022-09-13	12:52:28	3.10586	13.8155	948.616	1	23
2022-09-13	12:52:29	3.18215	14.1548	963.776	1	24
2022-09-13	12:52:29	3.46948	15.4329	964.049	1	25
2022-09-13	12:52:29	5.1021	22.6952	986.471	1	26
2022-09-13	12:52:29	3.48072	15.4829	979.532	1	27
2022-09-13	12:52:30	2.10927	9.38245	995.853	FALSE	27
2022-09-13	12:52:30	1.54347	6.86566	986.398	FALSE	27
2022-09-13	12:52:30	0.721336	3.20865	999.062	FALSE	27
2022-09-13	12:52:31	0.693041	3.08278	989.48	FALSE	27
2022-09-13	12:52:31	0.310293	1.38025	1000.44	FALSE	27
2022-09-13	12:52:31	0.324898	1.44521	990.926	FALSE	27
2022-09-13	12:52:31	-1.28879	-5.7328	1000.44	FALSE	27
2022-09-13	12:52:32	0.0748221	0.332824	991.258	FALSE	27
2022-09-13	12:52:32	0.227545	1.01217	1001.45	FALSE	27
2022-09-13	12:52:32	0.28897	1.2854	992.544	FALSE	27
2022-09-13	12:52:32	0.255484	1.13644	1002.59	FALSE	27
2022-09-13	12:52:33	0.407901	1.81443	994.358	FALSE	27
2022-09-13	12:52:33	0.44388	1.97447	1004.57	FALSE	27
2022-09-13	12:52:33	1.05024	4.67168	999.03	FALSE	27
2022-09-13	12:52:33	0.960166	4.27101	1008.84	FALSE	27
2022-09-13	12:52:34	0.963524	4.28595	1003.32	FALSE	27
2022-09-13	12:52:34	0.771209	3.43049	1012.27	FALSE	27
2022-09-13	12:52:34	0.406323	1.80741	1005.12	FALSE	27
2022-09-13	12:52:35	0.527901	2.34821	1014.61	FALSE	27
2022-09-13	12:52:35	0.427341	1.9009	1007.02	FALSE	27
2022-09-13	12:52:35	0.622099	2.76722	1017.38	FALSE	27
2022-09-13	12:52:35	0.599453	2.66649	1009.69	FALSE	27
2022-09-13	12:52:36	0.507392	2.25698	1019.64	FALSE	27
2022-09-13	12:52:36	0.642252	2.85687	1012.55	FALSE	27
2022-09-13	12:52:36	0.153143	0.681211	1020.32	FALSE	27
2022-09-13	12:52:36	0.210293	0.935425	1013.48	FALSE	27
2022-09-13	12:52:37	0.268512	1.1944	1021.51	FALSE	27
2022-09-13	12:52:37	0.0596567	0.265365	1013.75	FALSE	27
2022-09-13	12:52:37	-0.421056	-1.87294	1021.51	FALSE	27
2022-09-13	12:52:37	-0.605127	-2.69173	1013.75	FALSE	27
2022-09-13	12:52:38	-0.789351	-3.51119	1021.51	FALSE	27
2022-09-13	12:52:38	-0.836017	-3.71877	1013.75	FALSE	27
2022-09-13	12:52:38	-0.997391	-4.43659	1021.51	FALSE	27
2022-09-13	12:52:39	-0.966959	-4.30123	1013.75	FALSE	27
2022-09-13	12:52:39	-1.05759	-4.70437	1021.51	FALSE	27
2022-09-13	12:52:39	-0.994745	-4.42482	1013.75	FALSE	27
2022-09-13	12:52:39	-1.19597	-5.31991	1021.51	FALSE	27
2022-09-13	12:52:40	-1.01067	-4.49566	1013.75	FALSE	27
2022-09-13	12:52:40	-0.414643	-1.84441	1021.51	FALSE	27
2022-09-13	12:52:40	-0.327417	-1.45642	1013.75	FALSE	27
2022-09-13	12:52:40	-0.222837	-0.991224	1021.51	FALSE	27
2022-09-13	12:52:41	0.0524302	0.23322	1013.98	FALSE	27
2022-09-13	12:52:41	0.176705	0.786019	1022.3	FALSE	27
2022-09-13	12:52:41	0.389224	1.73135	1015.71	FALSE	27
2022-09-13	12:52:41	0.330395	1.46966	1023.77	FALSE	27
2022-09-13	12:52:42	0.242761	1.07985	1016.79	FALSE	27
2022-09-13	12:52:42	0.66902	2.97593	1026.75	FALSE	27
2022-09-13	12:52:42	0.726527	3.23174	1020.02	FALSE	27
2022-09-13	12:52:42	0.732888	3.26003	1030.01	FALSE	27
2022-09-13	12:52:43	0.734415	3.26682	1023.29	FALSE	27
2022-09-13	12:52:43	0.739504	3.28946	1033.3	FALSE	27
2022-09-13	12:52:43	0.732328	3.25754	1026.55	FALSE	27
2022-09-13	12:52:44	0.623473	2.77333	1036.07	FALSE	27
2022-09-13	12:52:44	0.53874	2.39642	1028.95	FALSE	27
2022-09-13	12:52:44	0.534058	2.3756	1038.44	FALSE	27
2022-09-13	12:52:44	0.500318	2.22551	1031.17	FALSE	27
2022-09-13	12:52:45	0.468715	2.08494	1040.53	FALSE	27
2022-09-13	12:52:45	0.459351	2.04329	1033.21	FALSE	27
2022-09-13	12:52:45	0.447799	1.9919	1042.52	FALSE	27
2022-09-13	12:52:45	1.40281	6.23998	1039.45	FALSE	27
2022-09-13	12:52:46	0.884593	3.93485	1046.46	FALSE	27
2022-09-13	12:52:46	0.741997	3.30055	1042.75	FALSE	27
2022-09-13	12:52:46	0.73014	3.24781	1049.7	FALSE	27
2022-09-13	12:52:46	0.737468	3.28041	1046.04	FALSE	27
2022-09-13	12:52:47	0.746374	3.32002	1053.02	FALSE	27
2022-09-13	12:52:47	0.740674	3.29467	1049.33	FALSE	27
2022-09-13	12:52:47	0.737265	3.2795	1056.3	FALSE	27
2022-09-13	12:52:48	0.740318	3.29308	1052.62	FALSE	27
2022-09-13	12:52:48	0.742201	3.30146	1059.61	FALSE	27
2022-09-13	12:52:48	0.737214	3.27928	1055.9	FALSE	27
2022-09-13	12:52:48	0.733499	3.26275	1062.87	FALSE	27
2022-09-13	12:52:49	1.36973	6.09283	1061.99	FALSE	27
2022-09-13	12:52:49	1.95518	8.69703	1071.57	FALSE	27
2022-09-13	12:52:49	2.02032	8.98679	1070.98	FALSE	27
2022-09-13	12:52:49	1.57874	7.02255	1078.59	FALSE	27
2022-09-13	12:52:50	1.43309	6.37467	1077.36	FALSE	27
2022-09-13	12:52:50	1.35986	6.04893	1084.64	FALSE	27
2022-09-13	12:52:50	1.38505	6.16098	1083.52	FALSE	27
2022-09-13	12:52:50	1.54037	6.85187	1091.49	FALSE	27
2022-09-13	12:52:51	1.71604	7.63329	1091.15	FALSE	27
2022-09-13	12:52:51	2.08352	9.26791	1100.76	FALSE	27
2022-09-13	12:52:51	1.42815	6.3527	1097.5	FALSE	27
2022-09-13	12:52:52	0.31472	1.39994	1102.16	FALSE	27
2022-09-13	12:52:52	0.300522	1.33678	1098.84	FALSE	27
2022-09-13	12:52:52	0.195484	0.869552	1103.03	FALSE	27
2022-09-13	12:52:52	0.276196	1.22858	1100.07	FALSE	27
2022-09-13	12:52:53	0.34042	1.51426	1104.54	FALSE	27
2022-09-13	12:52:53	0.360522	1.60367	1101.67	FALSE	27
2022-09-13	12:52:53	0.348562	1.55047	1106.09	FALSE	27
2022-09-13	12:52:53	0.353957	1.57447	1103.25	FALSE	27
2022-09-13	12:52:54	0.366476	1.63016	1107.72	FALSE	27
2022-09-13	12:52:54	0.672125	2.98975	1106.24	FALSE	27
2022-09-13	12:52:54	0.518181	2.30497	1110.03	FALSE	27
2022-09-13	12:52:54	0.646272	2.87475	1109.11	FALSE	27
2022-09-13	12:52:55	0.331819	1.476	1111.5	FALSE	27
2022-09-13	12:52:55	0.646323	2.87497	1111.99	FALSE	27
2022-09-13	12:52:55	0.731717	3.25482	1114.76	FALSE	27
2022-09-13	12:52:56	0.752786	3.34854	1115.33	FALSE	27
2022-09-13	12:52:56	0.735789	3.27294	1118.03	FALSE	27
2022-09-13	12:52:56	0.739147	3.28787	1118.62	FALSE	27
2022-09-13	12:52:56	0.734924	3.26909	1121.3	FALSE	27
2022-09-13	12:52:57	0.720471	3.2048	1121.83	FALSE	27
2022-09-13	12:52:57	0.893753	3.97559	1125.27	FALSE	27
2022-09-13	12:52:57	0.738791	3.28629	1125.11	FALSE	27
2022-09-13	12:52:57	1.72632	7.67902	1132.95	FALSE	27
2022-09-13	12:52:58	0.765509	3.40514	1128.52	FALSE	27
2022-09-13	12:52:58	2.70617	12.0376	1144.99	FALSE	27
2022-09-13	12:52:58	0.736196	3.27475	1131.79	FALSE	27
2022-09-13	12:52:58	0.731514	3.25392	1148.24	FALSE	27
2022-09-13	12:52:59	0.729224	3.24373	1135.04	FALSE	27
2022-09-13	12:52:59	0.729987	3.24713	1151.49	FALSE	27
2022-09-13	12:52:59	0.738791	3.28629	1138.32	FALSE	27
2022-09-13	12:53:00	0.728206	3.23921	1154.73	FALSE	27
2022-09-13	12:53:00	0.739402	3.28901	1141.61	FALSE	27
2022-09-13	12:53:00	0.738384	3.28448	1158.02	FALSE	27
2022-09-13	12:53:00	0.741947	3.30033	1144.91	FALSE	27
2022-09-13	12:53:01	0.736247	3.27497	1161.29	FALSE	27
2022-09-13	12:53:01	0.732074	3.25641	1148.17	FALSE	27
2022-09-13	12:53:01	0.735076	3.26977	1164.56	FALSE	27
2022-09-13	12:53:02	0.736705	3.27701	1151.45	FALSE	27
2022-09-13	12:53:02	0.736807	3.27746	1167.84	FALSE	27
2022-09-13	12:53:02	0.73472	3.26818	1154.71	FALSE	27
2022-09-13	12:53:02	0.734873	3.26886	1171.11	FALSE	27
2022-09-13	12:53:02	0.738588	3.28539	1158	FALSE	27
2022-09-13	12:53:03	0.731565	3.25415	1174.36	FALSE	27
2022-09-13	12:53:03	0.735687	3.27248	1161.27	FALSE	27
2022-09-13	12:53:03	0.73813	3.28335	1177.64	FALSE	27
2022-09-13	12:53:03	0.735687	3.27248	1164.54	FALSE	27
2022-09-13	12:53:04	0.735483	3.27158	1180.92	FALSE	27
2022-09-13	12:53:04	0.740064	3.29195	1167.84	FALSE	27
2022-09-13	12:53:04	0.734008	3.26501	1184.18	FALSE	27
2022-09-13	12:53:05	0.735687	3.27248	1171.11	FALSE	27
2022-09-13	12:53:05	0.729428	3.24464	1187.43	FALSE	27
2022-09-13	12:53:05	0.732786	3.25958	1174.37	FALSE	27
2022-09-13	12:53:05	0.731005	3.25166	1190.68	FALSE	27
2022-09-13	12:53:06	0.735483	3.27158	1177.64	FALSE	27
2022-09-13	12:53:06	0.74332	3.30644	1193.98	FALSE	27
2022-09-13	12:53:06	0.734975	3.26932	1180.91	FALSE	27
2022-09-13	12:53:06	0.741896	3.3001	1197.28	FALSE	27
2022-09-13	12:53:07	0.738282	3.28403	1184.19	FALSE	27
2022-09-13	12:53:07	0.7393	3.28855	1200.57	FALSE	27
2022-09-13	12:53:07	0.735891	3.27339	1187.47	FALSE	27
2022-09-13	12:53:07	0.740114	3.29218	1203.86	FALSE	27
2022-09-13	12:53:08	0.738486	3.28493	1190.75	FALSE	27
2022-09-13	12:53:08	0.735076	3.26977	1207.13	FALSE	27
2022-09-13	12:53:08	0.729886	3.24668	1194	FALSE	27
2022-09-13	12:53:09	0.736501	3.2761	1210.41	FALSE	27
2022-09-13	12:53:09	0.73528	3.27067	1197.27	FALSE	27
2022-09-13	12:53:09	0.734059	3.26524	1213.68	FALSE	27
2022-09-13	12:53:09	0.730852	3.25098	1200.52	FALSE	27
2022-09-13	12:53:10	0.739453	3.28923	1216.96	FALSE	27
2022-09-13	12:53:10	0.736298	3.2752	1203.8	FALSE	27
2022-09-13	12:53:10	0.734466	3.26705	1220.23	FALSE	27
2022-09-13	12:53:10	0.735178	3.27022	1207.07	FALSE	27
2022-09-13	12:53:11	0.734618	3.26773	1223.5	FALSE	27
2022-09-13	12:53:11	0.735483	3.27158	1210.34	FALSE	27
2022-09-13	12:53:11	0.735076	3.26977	1226.77	FALSE	27
2022-09-13	12:53:11	0.735433	3.27135	1213.61	FALSE	27
2022-09-13	12:53:12	0.736857	3.27769	1230.05	FALSE	27
2022-09-13	12:53:12	0.733651	3.26343	1216.87	FALSE	27
2022-09-13	12:53:12	0.735026	3.26954	1233.32	FALSE	27
2022-09-13	12:53:13	0.738588	3.28539	1220.16	FALSE	27
2022-09-13	12:53:13	0.733804	3.26411	1236.58	FALSE	27
2022-09-13	12:53:13	0.735382	3.27113	1223.43	FALSE	27
2022-09-13	12:53:13	0.737773	3.28176	1239.86	FALSE	27
2022-09-13	12:53:14	0.738791	3.28629	1226.72	FALSE	27
2022-09-13	12:53:14	0.738282	3.28403	1243.15	FALSE	27
2022-09-13	12:53:14	0.738333	3.28425	1230	FALSE	27
2022-09-13	12:53:14	0.741896	3.3001	1246.45	FALSE	27
2022-09-13	12:53:15	0.73243	3.258	1233.26	FALSE	27
2022-09-13	12:53:15	0.738333	3.28425	1249.73	FALSE	27
2022-09-13	12:53:15	0.728206	3.23921	1236.5	FALSE	27
2022-09-13	12:53:15	0.741285	3.29738	1253.03	FALSE	27
2022-09-13	12:53:16	0.734568	3.26751	1239.76	FALSE	27
2022-09-13	12:53:16	0.738384	3.28448	1256.31	FALSE	27
2022-09-13	12:53:16	0.735382	3.27113	1243.04	FALSE	27
2022-09-13	12:53:17	0.741896	3.3001	1259.61	FALSE	27
2022-09-13	12:53:17	0.731972	3.25596	1246.29	FALSE	27
2022-09-13	12:53:17	0.728257	3.23943	1262.85	FALSE	27
2022-09-13	12:53:17	0.731259	3.25279	1249.54	FALSE	27
2022-09-13	12:53:18	0.730343	3.24871	1266.1	FALSE	27
2022-09-13	12:53:18	0.733855	3.26433	1252.81	FALSE	27
2022-09-13	12:53:18	0.734059	3.26524	1269.37	FALSE	27
2022-09-13	12:53:18	0.738435	3.28471	1256.09	FALSE	27
2022-09-13	12:53:19	0.728766	3.2417	1272.61	FALSE	27
2022-09-13	12:53:19	0.738231	3.2838	1259.38	FALSE	27
2022-09-13	12:53:19	0.74042	3.29354	1275.9	FALSE	27
2022-09-13	12:53:19	0.736501	3.2761	1262.65	FALSE	27
2022-09-13	12:53:20	0.735992	3.27384	1279.17	FALSE	27
2022-09-13	12:53:20	0.736807	3.27746	1265.93	FALSE	27
2022-09-13	12:53:20	0.737824	3.28199	1282.46	FALSE	27
2022-09-13	12:53:21	0.73416	3.26569	1269.2	FALSE	27
2022-09-13	12:53:21	0.738995	3.2872	1285.74	FALSE	27
2022-09-13	12:53:21	1.96994	8.76269	1277.96	FALSE	27
2022-09-13	12:53:21	5.93187	26.3861	1312.13	1	28
2022-09-13	12:53:22	9.03487	40.1889	1318.15	1	29
2022-09-13	12:53:22	5.85446	26.0418	1338.17	1	30
2022-09-13	12:53:22	8.76097	38.9705	1357.12	1	31
2022-09-13	12:53:22	5.56281	24.7445	1362.92	1	32
2022-09-13	12:53:23	6.15009	27.3568	1384.48	1	33
2022-09-13	12:53:23	6.46306	28.749	1391.67	1	34
2022-09-13	12:53:23	8.70601	38.7261	1423.2	1	35
2022-09-13	12:53:23	9.13741	40.645	1432.31	1	36
2022-09-13	12:53:24	4.34836	19.3424	1442.54	1	37
2022-09-13	12:53:24	1.74541	7.76393	1440.07	FALSE	37
2022-09-13	12:53:24	1.64067	7.29803	1449.84	FALSE	37
2022-09-13	12:53:24	0.96444	4.29002	1444.36	FALSE	37
2022-09-13	12:53:25	0.84388	3.75375	1453.6	FALSE	37
2022-09-13	12:53:25	1.09095	4.85276	1449.22	FALSE	37
2022-09-13	12:53:25	1.28322	5.70802	1459.3	FALSE	37
2022-09-13	12:53:26	4.02535	17.9056	1467.12	1	38
2022-09-13	12:53:26	8.09207	35.9951	1495.3	1	39
2022-09-13	12:53:26	15.0964	67.1518	1534.27	1	40
2022-09-13	12:53:26	12.1188	53.9068	1549.21	1	41
2022-09-13	12:53:27	14.4598	64.3201	1598.59	1	42
2022-09-13	12:53:27	25.7309	114.456	1663.66	1	43
2022-09-13	12:53:27	11.9367	53.0968	1651.69	1	44
2022-09-13	12:53:27	4.77813	21.2541	1684.92	1	45
2022-09-13	12:53:28	2.62495	11.6763	1663.37	FALSE	45
2022-09-13	12:53:28	1.04816	4.66243	1689.58	FALSE	45
2022-09-13	12:53:28	1.04062	4.62889	1668	FALSE	45
2022-09-13	12:53:28	0.794618	3.53462	1693.11	FALSE	45
2022-09-13	12:53:29	1.4648	6.51572	1674.51	FALSE	45
2022-09-13	12:53:29	0.350496	1.55908	1694.67	FALSE	45
2022-09-13	12:53:29	0.314873	1.40062	1675.91	FALSE	45
2022-09-13	12:53:30	0.225865	1.00469	1695.68	FALSE	45
2022-09-13	12:53:30	0.121845	0.541991	1676.46	FALSE	45
2022-09-13	12:53:30	-0.247264	-1.09988	1695.68	FALSE	45
2022-09-13	12:53:30	-0.2493	-1.10894	1676.46	FALSE	45
2022-09-13	12:53:31	0.405204	1.80243	1697.48	FALSE	45
2022-09-13	12:53:31	0.0349239	0.155348	1676.61	FALSE	45
2022-09-13	12:53:31	0.408715	1.81805	1699.3	FALSE	45
2022-09-13	12:53:31	0.117265	0.521618	1677.13	FALSE	45
2022-09-13	12:53:32	0.476807	2.12093	1701.42	FALSE	45
2022-09-13	12:53:32	1.05279	4.68302	1681.82	FALSE	45
2022-09-13	12:53:32	0.235891	1.04929	1702.47	FALSE	45
2022-09-13	12:53:32	1.16363	5.17606	1686.99	FALSE	45
2022-09-13	12:53:33	0.985967	4.38578	1706.85	FALSE	45
2022-09-13	12:53:33	3.26968	14.5442	1701.54	1	46
2022-09-13	12:53:33	4.84179	21.5373	1728.39	1	47
2022-09-13	12:53:34	2.32943	10.3618	1711.9	FALSE	47
2022-09-13	12:53:34	2.63268	11.7107	1740.1	FALSE	47
2022-09-13	12:53:34	1.32408	5.88977	1717.79	FALSE	47
2022-09-13	12:53:34	0.672939	2.99337	1743.09	FALSE	47
2022-09-13	12:53:35	0.785	3.49184	1721.28	FALSE	47
2022-09-13	12:53:35	0.899148	3.99959	1747.09	FALSE	47
2022-09-13	12:53:35	1.23319	5.48548	1726.76	FALSE	47
2022-09-13	12:53:35	5.52647	24.5828	1771.68	1	48
2022-09-13	12:53:36	4.94139	21.9803	1748.74	1	49
2022-09-13	12:53:36	7.44973	33.1379	1804.81	1	50
2022-09-13	12:53:36	1.9051	8.47427	1757.22	FALSE	50
2022-09-13	12:53:36	2.72943	12.1411	1816.96	FALSE	50
2022-09-13	12:53:37	0.699147	3.10995	1760.33	FALSE	50
2022-09-13	12:53:37	0.795076	3.53666	1820.49	FALSE	50
2022-09-13	12:53:37	0.593601	2.64046	1762.97	FALSE	50
2022-09-13	12:53:38	0.553957	2.46411	1822.96	FALSE	50
2022-09-13	12:53:38	1.00378	4.46501	1767.43	FALSE	50
2022-09-13	12:53:38	1.30673	5.8126	1828.77	FALSE	50
2022-09-13	12:53:38	0.512888	2.28143	1769.72	FALSE	50
2022-09-13	12:53:39	0.565305	2.51459	1831.28	FALSE	50
2022-09-13	12:53:39	0.33187	1.47622	1771.19	FALSE	50
2022-09-13	12:53:39	0.629529	2.80027	1834.08	FALSE	50
2022-09-13	12:53:39	0.731158	3.25234	1774.44	FALSE	50
2022-09-13	12:53:40	0.738893	3.28674	1837.37	FALSE	50
2022-09-13	12:53:40	0.738537	3.28516	1777.73	FALSE	50
2022-09-13	12:53:40	0.737519	3.28063	1840.65	FALSE	50
2022-09-13	12:53:40	0.738486	3.28493	1781.01	FALSE	50
2022-09-13	12:53:41	0.740471	3.29376	1843.94	FALSE	50
2022-09-13	12:53:41	0.739809	3.29082	1784.31	FALSE	50
2022-09-13	12:53:41	0.739097	3.28765	1847.23	FALSE	50
2022-09-13	12:53:42	0.730242	3.24826	1787.55	FALSE	50
2022-09-13	12:53:42	0.728562	3.24079	1850.47	FALSE	50
2022-09-13	12:53:42	0.743423	3.30689	1790.86	FALSE	50
2022-09-13	12:53:42	0.736654	3.27678	1853.75	FALSE	50
2022-09-13	12:53:43	0.741081	3.29648	1794.16	FALSE	50
2022-09-13	12:53:43	0.729428	3.24464	1856.99	FALSE	50
2022-09-13	12:53:43	0.731616	3.25437	1797.41	FALSE	50
2022-09-13	12:53:43	0.73243	3.258	1860.25	FALSE	50
2022-09-13	12:53:44	0.741997	3.30055	1800.71	FALSE	50
2022-09-13	12:53:44	0.739147	3.28787	1863.54	FALSE	50
2022-09-13	12:53:44	0.734669	3.26795	1803.98	FALSE	50
2022-09-13	12:53:44	0.735483	3.27158	1866.81	FALSE	50
2022-09-13	12:53:45	0.731717	3.25482	1807.23	FALSE	50
2022-09-13	12:53:45	0.730496	3.24939	1870.06	FALSE	50
2022-09-13	12:53:45	0.734211	3.26592	1810.5	FALSE	50
2022-09-13	12:53:46	0.731107	3.25211	1873.31	FALSE	50
2022-09-13	12:53:46	0.728359	3.23989	1813.74	FALSE	50
2022-09-13	12:53:46	0.734771	3.26841	1876.58	FALSE	50
2022-09-13	12:53:46	0.731768	3.25505	1817	FALSE	50
2022-09-13	12:53:47	0.736959	3.27814	1879.86	FALSE	50
2022-09-13	12:53:47	0.73355	3.26298	1820.26	FALSE	50
2022-09-13	12:53:47	0.732837	3.25981	1883.12	FALSE	50
2022-09-13	12:53:47	0.732583	3.25868	1823.52	FALSE	50
2022-09-13	12:53:48	0.737824	3.28199	1886.4	FALSE	50
2022-09-13	12:53:48	0.741489	3.29829	1826.82	FALSE	50
2022-09-13	12:53:48	0.739809	3.29082	1889.69	FALSE	50
2022-09-13	12:53:48	0.733193	3.26139	1830.08	FALSE	50
2022-09-13	12:53:49	0.737519	3.28063	1892.97	FALSE	50
2022-09-13	12:53:49	0.732074	3.25641	1833.33	FALSE	50
2022-09-13	12:53:49	0.741997	3.30055	1896.27	FALSE	50
2022-09-13	12:53:49	0.736756	3.27724	1836.61	FALSE	50
2022-09-13	12:53:50	0.736196	3.27475	1899.55	FALSE	50
2022-09-13	12:53:50	0.731667	3.2546	1839.86	FALSE	50
2022-09-13	12:53:50	0.737163	3.27905	1902.83	FALSE	50
2022-09-13	12:53:51	0.738944	3.28697	1843.15	FALSE	50
2022-09-13	12:53:51	0.734262	3.26614	1906.09	FALSE	50
2022-09-13	12:53:51	0.741997	3.30055	1846.45	FALSE	50
2022-09-13	12:53:51	0.738231	3.2838	1909.38	FALSE	50
2022-09-13	12:53:52	0.729529	3.24509	1849.7	FALSE	50
2022-09-13	12:53:52	0.738384	3.28448	1912.66	FALSE	50
2022-09-13	12:53:52	0.729733	3.246	1852.94	FALSE	50
2022-09-13	12:53:52	0.734211	3.26592	1915.93	FALSE	50
2022-09-13	12:53:53	0.741234	3.29716	1856.24	FALSE	50
2022-09-13	12:53:53	0.737417	3.28018	1919.21	FALSE	50
2022-09-13	12:53:53	0.734873	3.26886	1859.51	FALSE	50
2022-09-13	12:53:53	0.728817	3.24192	1922.45	FALSE	50
2022-09-13	12:53:54	0.735941	3.27361	1862.78	FALSE	50
2022-09-13	12:53:54	0.730242	3.24826	1925.7	FALSE	50
2022-09-13	12:53:54	0.731056	3.25188	1866.03	FALSE	50
2022-09-13	12:53:55	0.73131	3.25301	1928.95	FALSE	50
2022-09-13	12:53:55	0.731005	3.25166	1869.29	FALSE	50
2022-09-13	12:53:55	0.73472	3.26818	1932.22	FALSE	50
2022-09-13	12:53:55	0.736857	3.27769	1872.56	FALSE	50
2022-09-13	12:53:56	0.736399	3.27565	1935.5	FALSE	50
2022-09-13	12:53:56	0.733855	3.26433	1875.83	FALSE	50
2022-09-13	12:53:56	0.73243	3.258	1938.75	FALSE	50
2022-09-13	12:53:56	0.738384	3.28448	1879.11	FALSE	50
2022-09-13	12:53:57	0.733346	3.26207	1942.02	FALSE	50
2022-09-13	12:53:57	0.733193	3.26139	1882.37	FALSE	50
2022-09-13	12:53:57	0.738079	3.28312	1945.3	FALSE	50
2022-09-13	12:53:57	0.747544	3.32523	1885.7	FALSE	50
2022-09-13	12:53:58	0.733397	3.2623	1948.56	FALSE	50
2022-09-13	12:53:58	0.737061	3.27859	1888.98	FALSE	50
2022-09-13	12:53:58	0.73187	3.2555	1951.82	FALSE	50
2022-09-13	12:53:59	0.729377	3.24441	1892.22	FALSE	50
2022-09-13	12:53:59	0.739555	3.28969	1955.11	FALSE	50
2022-09-13	12:53:59	0.739097	3.28765	1895.51	FALSE	50
2022-09-13	12:53:59	0.731005	3.25166	1958.36	FALSE	50
2022-09-13	12:54:00	0.744797	3.31301	1898.82	FALSE	50
2022-09-13	12:54:00	0.730801	3.25075	1961.61	FALSE	50
2022-09-13	12:54:00	0.736959	3.27814	1902.1	FALSE	50
2022-09-13	12:54:00	0.762252	3.39065	1965	FALSE	50
2022-09-13	12:54:01	0.733601	3.2632	1905.36	FALSE	50
2022-09-13	12:54:01	0.735534	3.2718	1968.27	FALSE	50
2022-09-13	12:54:01	0.734364	3.2666	1908.63	FALSE	50
2022-09-13	12:54:01	0.728919	3.24238	1971.51	FALSE	50
2022-09-13	12:54:02	0.733142	3.26116	1911.89	FALSE	50
2022-09-13	12:54:02	0.743778	3.30847	1974.82	FALSE	50
2022-09-13	12:54:02	0.737315	3.27972	1915.17	FALSE	50
2022-09-13	12:54:03	0.735891	3.27339	1978.1	FALSE	50
2022-09-13	12:54:03	0.734364	3.2666	1918.44	FALSE	50
2022-09-13	12:54:03	0.739606	3.28992	1981.39	FALSE	50
2022-09-13	12:54:03	0.732634	3.2589	1921.7	FALSE	50
2022-09-13	12:54:04	0.733448	3.26252	1984.65	FALSE	50
2022-09-13	12:54:04	0.737519	3.28063	1924.98	FALSE	50
2022-09-13	12:54:04	0.731768	3.25505	1987.9	FALSE	50
2022-09-13	12:54:04	0.732023	3.25618	1928.23	FALSE	50
2022-09-13	12:54:05	0.737621	3.28109	1991.18	FALSE	50
2022-09-13	12:54:05	0.733193	3.26139	1931.5	FALSE	50
2022-09-13	12:54:05	0.743982	3.30938	1994.49	FALSE	50
2022-09-13	12:54:05	0.736399	3.27565	1934.77	FALSE	50
2022-09-13	12:54:06	0.732379	3.25777	1997.75	FALSE	50
2022-09-13	12:54:06	0.739962	3.2915	1938.06	FALSE	50
2022-09-13	12:54:06	0.734466	3.26705	2001.02	FALSE	50
2022-09-13	12:54:07	0.736807	3.27746	1941.34	FALSE	50
2022-09-13	12:54:07	0.731819	3.25528	2004.27	FALSE	50
2022-09-13	12:54:07	0.738689	3.28584	1944.63	FALSE	50
2022-09-13	12:54:07	0.740267	3.29286	2007.57	FALSE	50
2022-09-13	12:54:08	0.738333	3.28425	1947.91	FALSE	50
2022-09-13	12:54:08	0.738079	3.28312	2010.85	FALSE	50
2022-09-13	12:54:08	0.730242	3.24826	1951.16	FALSE	50
2022-09-13	12:54:08	0.732481	3.25822	2014.11	FALSE	50
2022-09-13	12:54:09	0.733855	3.26433	1954.42	FALSE	50
2022-09-13	12:54:09	0.737468	3.28041	2017.39	FALSE	50
2022-09-13	12:54:09	0.736094	3.27429	1957.7	FALSE	50
2022-09-13	12:54:09	0.732634	3.2589	2020.65	FALSE	50
2022-09-13	12:54:10	0.72958	3.24532	1960.94	FALSE	50
2022-09-13	12:54:10	0.735585	3.27203	2023.92	FALSE	50
2022-09-13	12:54:10	0.736094	3.27429	1964.22	FALSE	50
2022-09-13	12:54:11	0.737621	3.28109	2027.2	FALSE	50
2022-09-13	12:54:11	0.739656	3.29014	1967.51	FALSE	50
2022-09-13	12:54:11	0.736654	3.27678	2030.48	FALSE	50
2022-09-13	12:54:11	0.741794	3.29965	1970.81	FALSE	50
2022-09-13	12:54:12	0.733397	3.2623	2033.74	FALSE	50
2022-09-13	12:54:12	0.738639	3.28561	1974.09	FALSE	50
2022-09-13	12:54:12	0.738791	3.28629	2037.03	FALSE	50
2022-09-13	12:54:12	0.736349	3.27543	1977.37	FALSE	50
2022-09-13	12:54:13	0.738486	3.28493	2040.31	FALSE	50
2022-09-13	12:54:13	0.743728	3.30825	1980.68	FALSE	50
2022-09-13	12:54:13	0.731921	3.25573	2043.57	FALSE	50
2022-09-13	12:54:13	0.733041	3.26071	1983.94	FALSE	50
2022-09-13	12:54:14	0.737315	3.27972	2046.85	FALSE	50
2022-09-13	12:54:14	0.727087	3.23423	1987.17	FALSE	50
2022-09-13	12:54:14	0.735941	3.27361	2050.12	FALSE	50
2022-09-13	12:54:14	0.730496	3.24939	1990.42	FALSE	50
2022-09-13	12:54:15	0.734975	3.26932	2053.39	FALSE	50
2022-09-13	12:54:15	0.734618	3.26773	1993.69	FALSE	50
2022-09-13	12:54:15	0.736654	3.27678	2056.67	FALSE	50
2022-09-13	12:54:16	0.740013	3.29173	1996.98	FALSE	50
2022-09-13	12:54:16	0.735534	3.2718	2059.94	FALSE	50
2022-09-13	12:54:16	0.735433	3.27135	2000.25	FALSE	50
2022-09-13	12:54:16	0.740267	3.29286	2063.23	FALSE	50
2022-09-13	12:54:17	0.72958	3.24532	2003.5	FALSE	50
2022-09-13	12:54:17	0.736959	3.27814	2066.51	FALSE	50
2022-09-13	12:54:17	0.737061	3.27859	2006.78	FALSE	50
2022-09-13	12:54:17	0.733957	3.26479	2069.77	FALSE	50
2022-09-13	12:54:18	0.73986	3.29105	2010.07	FALSE	50
2022-09-13	12:54:18	0.739249	3.28833	2073.06	FALSE	50
2022-09-13	12:54:18	0.711769	3.16609	2013.23	FALSE	50
2022-09-13	12:54:18	0.59701	2.65562	2075.72	FALSE	50
2022-09-13	12:54:19	0.528919	2.35274	2015.59	FALSE	50
2022-09-13	12:54:19	0.540725	2.40525	2078.12	FALSE	50
2022-09-13	12:54:19	0.340115	1.5129	2017.1	FALSE	50
2022-09-13	12:54:20	0.490802	2.18319	2080.31	FALSE	50
2022-09-13	12:54:20	0.645712	2.87226	2019.97	FALSE	50
2022-09-13	12:54:20	0.741489	3.29829	2083.6	FALSE	50
2022-09-13	12:54:20	0.738791	3.28629	2023.26	FALSE	50
2022-09-13	12:54:21	0.731463	3.25369	2086.86	FALSE	50
2022-09-13	12:54:21	0.731361	3.25324	2026.51	FALSE	50
2022-09-13	12:54:21	0.738588	3.28539	2090.14	FALSE	50
2022-09-13	12:54:21	0.735026	3.26954	2029.78	FALSE	50
2022-09-13	12:54:22	0.740573	3.29422	2093.44	FALSE	50
2022-09-13	12:54:22	0.733804	3.26411	2033.04	FALSE	50
2022-09-13	12:54:22	0.730394	3.24894	2096.69	FALSE	50
2022-09-13	12:54:22	0.735178	3.27022	2036.31	FALSE	50
2022-09-13	12:54:23	0.738028	3.2829	2099.97	FALSE	50
2022-09-13	12:54:23	0.736552	3.27633	2039.59	FALSE	50
2022-09-13	12:54:23	0.739555	3.28969	2103.26	FALSE	50
2022-09-13	12:54:24	0.737621	3.28109	2042.87	FALSE	50
2022-09-13	12:54:24	0.7307	3.2503	2106.51	FALSE	50
2022-09-13	12:54:24	0.733397	3.2623	2046.13	FALSE	50
2022-09-13	12:54:24	0.738282	3.28403	2109.79	FALSE	50
2022-09-13	12:54:25	0.741947	3.30033	2049.43	FALSE	50
2022-09-13	12:54:25	0.749987	3.33609	2113.13	FALSE	50
2022-09-13	12:54:25	0.869631	3.86829	2053.3	FALSE	50
2022-09-13	12:54:25	0.749631	3.33451	2116.46	FALSE	50
2022-09-13	12:54:26	0.73243	3.258	2056.56	FALSE	50
2022-09-13	12:54:26	0.727646	3.23671	2119.7	FALSE	50
2022-09-13	12:54:26	0.728257	3.23943	2059.8	FALSE	50
2022-09-13	12:54:26	0.726221	3.23038	2122.93	FALSE	50
2022-09-13	12:54:27	0.741641	3.29897	2063.1	FALSE	50
2022-09-13	12:54:27	0.741539	3.29851	2126.23	FALSE	50
2022-09-13	12:54:27	0.736908	3.27791	2066.38	FALSE	50
2022-09-13	12:54:28	0.732583	3.25868	2129.49	FALSE	50
2022-09-13	12:54:28	0.732735	3.25935	2069.64	FALSE	50
2022-09-13	12:54:28	0.770598	3.42777	2132.92	FALSE	50
2022-09-13	12:54:28	0.740064	3.29195	2072.93	FALSE	50
2022-09-13	12:54:29	2.23044	9.92144	2142.84	FALSE	50
2022-09-13	12:54:29	1.68169	7.48049	2080.41	FALSE	50
2022-09-13	12:54:29	2.35915	10.494	2153.33	FALSE	50
2022-09-13	12:54:29	3.53731	15.7347	2096.14	1	51
2022-09-13	12:54:30	0.893295	3.97355	2157.3	FALSE	51
2022-09-13	12:54:30	1.79162	7.96948	2104.11	FALSE	51
2022-09-13	12:54:30	1.79345	7.97762	2165.28	FALSE	51
2022-09-13	12:54:30	1.43762	6.39482	2110.51	FALSE	51
2022-09-13	12:54:31	2.40871	10.7144	2176	FALSE	51
2022-09-13	12:54:31	1.22159	5.43388	2115.94	FALSE	51
2022-09-13	12:54:31	2.20464	9.80668	2185.8	FALSE	51
2022-09-13	12:54:32	1.02251	4.54833	2120.49	FALSE	51
2022-09-13	12:54:32	1.00037	4.44985	2190.25	FALSE	51
2022-09-13	12:54:32	0.984847	4.3808	2124.87	FALSE	51
2022-09-13	12:54:32	0.935382	4.16077	2194.41	FALSE	51
2022-09-13	12:54:33	0.673601	2.99631	2127.87	FALSE	51
2022-09-13	12:54:33	0.296603	1.31935	2195.73	FALSE	51
2022-09-13	12:54:33	0.728054	3.23853	2131.1	FALSE	51
2022-09-13	12:54:33	0.733295	3.26184	2198.99	FALSE	51
2022-09-13	12:54:34	0.733753	3.26388	2134.37	FALSE	51
2022-09-13	12:54:34	0.739147	3.28787	2202.28	FALSE	51
2022-09-13	12:54:34	0.735483	3.27158	2137.64	FALSE	51
2022-09-13	12:54:34	0.746476	3.32047	2205.6	FALSE	51
2022-09-13	12:54:35	0.485763	2.16077	2139.8	FALSE	51
2022-09-13	12:54:35	0.739555	3.28969	2208.89	FALSE	51
2022-09-13	12:54:35	0.306425	1.36304	2141.16	FALSE	51
2022-09-13	12:54:36	0.301845	1.34267	2210.24	FALSE	51
2022-09-13	12:54:36	0.590954	2.62868	2143.79	FALSE	51
2022-09-13	12:54:36	0.668817	2.97503	2213.21	FALSE	51
2022-09-13	12:54:36	1.31752	5.86059	2149.65	FALSE	51
2022-09-13	12:54:37	2.59416	11.5393	2224.75	FALSE	51
2022-09-13	12:54:37	2.81177	12.5073	2162.16	FALSE	51
2022-09-13	12:54:37	1.83197	8.14897	2232.9	FALSE	51
2022-09-13	12:54:37	1.55411	6.91299	2169.07	FALSE	51
2022-09-13	12:54:38	1.77854	7.9113	2240.81	FALSE	51
2022-09-13	12:54:38	0.654516	2.91142	2171.99	FALSE	51
2022-09-13	12:54:38	0.856196	3.80853	2244.62	FALSE	51
2022-09-13	12:54:38	0.240776	1.07102	2173.06	FALSE	51
2022-09-13	12:54:39	0.804695	3.57944	2248.2	FALSE	51
2022-09-13	12:54:39	0.245255	1.09094	2174.15	FALSE	51
2022-09-13	12:54:39	0.5593	2.48788	2250.69	FALSE	51
2022-09-13	12:54:39	0.834669	3.71277	2177.86	FALSE	51
2022-09-13	12:54:40	0.937417	4.16982	2254.86	FALSE	51
2022-09-13	12:54:40	2.70841	12.0475	2189.91	FALSE	51
2022-09-13	12:54:40	1.93589	8.61123	2263.47	FALSE	51
2022-09-13	12:54:41	2.68281	11.9337	2201.84	FALSE	51
2022-09-13	12:54:41	2.07141	9.21405	2272.68	FALSE	51
2022-09-13	12:54:41	0.230598	1.02575	2202.87	FALSE	51
2022-09-13	12:54:41	0.113194	0.50351	2273.18	FALSE	51
2022-09-13	12:54:42	-0.00304046	-0.0135246	2202.87	FALSE	51
2022-09-13	12:54:42	-0.0510302	-0.226993	2273.18	FALSE	51
2022-09-13	12:54:42	0.022303	0.0992082	2202.97	FALSE	51
2022-09-13	12:54:42	-0.12014	-0.534407	2273.18	FALSE	51
2022-09-13	12:54:43	-0.0645671	-0.287207	2202.97	FALSE	51
2022-09-13	12:54:43	-0.305483	-1.35885	2273.18	FALSE	51
2022-09-13	12:54:43	-0.444618	-1.97775	2202.97	FALSE	51
2022-09-13	12:54:43	-0.511946	-2.27724	2273.18	FALSE	51
2022-09-13	12:54:44	1.0224	4.54784	2207.51	FALSE	51
2022-09-13	12:54:44	1.22597	5.45336	2278.64	FALSE	51
2022-09-13	12:54:44	5.33227	23.719	2231.23	1	52
2022-09-13	12:54:45	1.37055	6.09648	2284.73	FALSE	52
2022-09-13	12:54:45	2.47513	11.0099	2242.24	FALSE	52
2022-09-13	12:54:45	1.12892	5.02166	2289.76	FALSE	52
2022-09-13	12:54:45	3.89518	17.3265	2259.57	1	53
2022-09-13	12:54:46	4.24016	18.8611	2308.62	1	54
2022-09-13	12:54:46	5.43925	24.1949	2283.76	1	55
2022-09-13	12:54:46	3.20057	14.2368	2322.85	1	56
2022-09-13	12:54:46	2.65477	11.8089	2295.57	FALSE	56
2022-09-13	12:54:47	2.43426	10.8281	2333.68	FALSE	56
2022-09-13	12:54:47	1.62515	7.22899	2302.8	FALSE	56
2022-09-13	12:54:47	1.62515	7.22899	2340.91	FALSE	56
2022-09-13	12:54:47	0.801438	3.56496	2306.37	FALSE	56
2022-09-13	12:54:48	0.755891	3.36235	2344.27	FALSE	56
2022-09-13	12:54:48	0.549733	2.44532	2308.81	FALSE	56
2022-09-13	12:54:48	0.518079	2.30452	2346.58	FALSE	56
2022-09-13	12:54:49	0.528868	2.35251	2311.16	FALSE	56
2022-09-13	12:54:49	0.708613	3.15205	2349.73	FALSE	56
2022-09-13	12:54:49	1.11375	4.95418	2316.12	FALSE	56
2022-09-13	12:54:49	2.28296	10.1551	2359.89	FALSE	56
2022-09-13	12:54:50	10.4809	46.6211	2362.74	1	57
2022-09-13	12:54:50	7.95227	35.3733	2395.26	1	58
2022-09-13	12:54:50	0.87187	3.87825	2366.62	FALSE	58
2022-09-13	12:54:50	5.69858	25.3484	2420.61	1	59
2022-09-13	12:54:51	2.26678	10.0831	2376.7	FALSE	59
2022-09-13	12:54:51	0.898741	3.99778	2424.6	FALSE	59
2022-09-13	12:54:51	0.526425	2.34164	2379.04	FALSE	59
2022-09-13	12:54:51	0.449936	2.00141	2426.61	FALSE	59
2022-09-13	12:54:52	0.334364	1.48732	2380.53	FALSE	59
2022-09-13	12:54:52	0.405356	1.8031	2428.41	FALSE	59
2022-09-13	12:54:52	0.630903	2.80638	2383.34	FALSE	59
2022-09-13	12:54:53	0.477112	2.12229	2430.53	FALSE	59
2022-09-13	12:54:53	0.372685	1.65778	2384.99	FALSE	59
2022-09-13	12:54:53	0.337265	1.50022	2432.03	FALSE	59
2022-09-13	12:54:53	0.281692	1.25302	2386.25	FALSE	59
2022-09-13	12:54:54	0.245916	1.09388	2433.13	FALSE	59
2022-09-13	12:54:54	0.0859671	0.382399	2386.63	FALSE	59
2022-09-13	12:54:54	-0.0201906	-0.0898118	2433.13	FALSE	59
2022-09-13	12:54:54	-0.0203432	-0.0904906	2386.63	FALSE	59
2022-09-13	12:54:55	-0.166501	-0.74063	2433.13	FALSE	59
2022-09-13	12:54:55	-0.0544399	-0.24216	2386.63	FALSE	59
2022-09-13	12:54:55	0.236959	1.05404	2434.18	FALSE	59
2022-09-13	12:54:55	0.521539	2.31991	2388.95	FALSE	59
2022-09-13	12:54:56	0.901539	4.01023	2438.19	FALSE	59
2022-09-13	12:54:56	0.888715	3.95318	2392.9	FALSE	59
2022-09-13	12:54:56	2.38393	10.6042	2448.79	FALSE	59
2022-09-13	12:54:57	1.51457	6.73711	2399.64	FALSE	59
2022-09-13	12:54:57	0.700776	3.11719	2451.91	FALSE	59
2022-09-13	12:54:57	0.469224	2.0872	2401.73	FALSE	59
2022-09-13	12:54:57	0.69014	3.06988	2454.98	FALSE	59
2022-09-13	12:54:58	-1.33286	-5.92883	2401.73	FALSE	59
2022-09-13	12:54:58	0.738486	3.28493	2458.27	FALSE	59
2022-09-13	12:54:58	0.739147	3.28787	2405.02	FALSE	59
2022-09-13	12:54:58	0.736501	3.2761	2461.54	FALSE	59
2022-09-13	12:54:59	0.554669	2.46728	2407.48	FALSE	59
2022-09-13	12:54:59	0.741997	3.30055	2464.84	FALSE	59
2022-09-13	12:54:59	1.30286	5.79538	2413.28	FALSE	59
2022-09-13	12:54:59	2.80444	12.4747	2477.32	FALSE	59
2022-09-13	12:55:00	1.15045	5.11743	2418.4	FALSE	59
2022-09-13	12:55:00	0.89528	3.98238	2481.3	FALSE	59
2022-09-13	12:55:00	0.337926	1.50316	2419.9	FALSE	59
2022-09-13	12:55:01	0.624287	2.77695	2484.08	FALSE	59
2022-09-13	12:55:01	0.285051	1.26796	2421.17	FALSE	59
2022-09-13	12:55:01	0.565254	2.51436	2486.59	FALSE	59
2022-09-13	12:55:01	0.751209	3.34153	2424.51	FALSE	59
2022-09-13	12:55:02	0.778384	3.46241	2490.05	FALSE	59
2022-09-13	12:55:02	1.39757	6.21667	2430.72	FALSE	59
2022-09-13	12:55:02	1.87833	8.35519	2498.41	FALSE	59
2022-09-13	12:55:02	0.742608	3.30327	2434.03	FALSE	59
2022-09-13	12:55:03	0.738079	3.28312	2501.69	FALSE	59
2022-09-13	12:55:03	0.730547	3.24962	2437.28	FALSE	59
2022-09-13	12:55:03	0.726832	3.23309	2504.92	FALSE	59
2022-09-13	12:55:03	0.712379	3.1688	2440.45	FALSE	59
2022-09-13	12:55:04	0.738639	3.28561	2508.21	FALSE	59
2022-09-13	12:55:04	0.713244	3.17265	2443.62	FALSE	59
2022-09-13	12:55:04	0.845967	3.76303	2511.97	FALSE	59
2022-09-13	12:55:04	0.793041	3.5276	2447.15	FALSE	59
2022-09-13	12:55:05	0.735534	3.2718	2515.25	FALSE	59
2022-09-13	12:55:05	0.734313	3.26637	2450.41	FALSE	59
2022-09-13	12:55:05	0.733804	3.26411	2518.51	FALSE	59
2022-09-13	12:55:06	0.740776	3.29512	2453.71	FALSE	59
2022-09-13	12:55:06	0.738079	3.28312	2521.79	FALSE	59
2022-09-13	12:55:06	0.737265	3.2795	2456.99	FALSE	59
2022-09-13	12:55:06	0.730649	3.25007	2525.04	FALSE	59
2022-09-13	12:55:07	0.72958	3.24532	2460.23	FALSE	59
2022-09-13	12:55:07	0.732481	3.25822	2528.3	FALSE	59
2022-09-13	12:55:07	0.740165	3.2924	2463.53	FALSE	59
2022-09-13	12:55:07	0.734568	3.26751	2531.57	FALSE	59
2022-09-13	12:55:08	0.730954	3.25143	2466.78	FALSE	59
2022-09-13	12:55:08	0.737875	3.28222	2534.85	FALSE	59
2022-09-13	12:55:08	0.714109	3.1765	2469.95	FALSE	59
2022-09-13	12:55:08	0.744186	3.31029	2538.16	FALSE	59
2022-09-13	12:55:09	0.740623	3.29444	2473.25	FALSE	59
2022-09-13	12:55:09	0.732888	3.26003	2541.42	FALSE	59
2022-09-13	12:55:09	0.0989951	0.44035	2473.69	FALSE	59
2022-09-13	12:55:10	-2.21205	-9.83964	2541.42	FALSE	59
2022-09-13	12:55:10	0.386425	1.7189	2475.41	FALSE	59
2022-09-13	12:55:10	0.101285	0.450536	2541.87	FALSE	59
2022-09-13	12:55:10	-0.0928623	-0.41307	2475.41	FALSE	59
2022-09-13	12:55:11	0.196603	0.874529	2542.75	FALSE	59
2022-09-13	12:55:11	0.0734989	0.326938	2475.73	FALSE	59
2022-09-13	12:55:11	0.115077	0.511886	2543.26	FALSE	59
2022-09-13	12:55:11	0.0965523	0.429484	2476.16	FALSE	59
2022-09-13	12:55:12	0.102303	0.455064	2543.71	FALSE	59
2022-09-13	12:55:12	0.260318	1.15795	2477.32	FALSE	59
2022-09-13	12:55:12	-0.0181041	-0.0805307	2543.71	FALSE	59
2022-09-13	12:55:12	0.220166	0.979342	2478.3	FALSE	59
2022-09-13	12:55:13	0.218842	0.973453	2544.69	FALSE	59
2022-09-13	12:55:13	0.488054	2.17096	2480.47	FALSE	59
2022-09-13	12:55:13	0.154059	0.685285	2545.37	FALSE	59
2022-09-13	12:55:14	0.461896	2.05461	2482.53	FALSE	59
2022-09-13	12:55:14	0.343575	1.52829	2546.9	FALSE	59
2022-09-13	12:55:14	0.331819	1.476	2484	FALSE	59
2022-09-13	12:55:14	0.468206	2.08267	2548.98	FALSE	59
2022-09-13	12:55:15	0.513092	2.28234	2486.28	FALSE	59
2022-09-13	12:55:15	0.498232	2.21624	2551.2	FALSE	59
2022-09-13	12:55:15	0.419911	1.86785	2488.15	FALSE	59
2022-09-13	12:55:15	0.465153	2.06909	2553.27	FALSE	59
2022-09-13	12:55:16	0.197621	0.879058	2489.03	FALSE	59
2022-09-13	12:55:16	0.235534	1.0477	2554.32	FALSE	59
2022-09-13	12:55:16	0.181947	0.809337	2489.84	FALSE	59
2022-09-13	12:55:16	0.456756	2.03174	2556.35	FALSE	59
2022-09-13	12:55:17	0.705204	3.13689	2492.98	FALSE	59
2022-09-13	12:55:17	0.731361	3.25324	2559.6	FALSE	59
2022-09-13	12:55:17	0.346883	1.543	2494.52	FALSE	59
2022-09-13	12:55:18	0.429173	1.90905	2561.51	FALSE	59
2022-09-13	12:55:18	1.30587	5.80877	2500.33	FALSE	59
2022-09-13	12:55:18	2.50536	11.1443	2572.65	FALSE	59
2022-09-13	12:55:18	4.70424	20.9254	2521.26	1	60
2022-09-13	12:55:19	4.58266	20.3846	2593.04	1	61
2022-09-13	12:55:19	3.7537	16.6972	2537.95	1	62
2022-09-13	12:55:19	2.89731	12.8878	2605.93	FALSE	62
2022-09-13	12:55:19	3.02637	13.4619	2551.41	1	63
2022-09-13	12:55:20	0.952481	4.23683	2610.16	FALSE	63
2022-09-13	12:55:20	1.44424	6.42427	2557.84	FALSE	63
2022-09-13	12:55:20	1.05981	4.71425	2614.88	FALSE	63
2022-09-13	12:55:20	1.60276	7.1294	2564.97	FALSE	63
2022-09-13	12:55:21	1.52856	6.79934	2621.68	FALSE	63
2022-09-13	12:55:21	3.45945	15.3883	2580.36	1	64
2022-09-13	12:55:21	2.57976	11.4753	2633.15	FALSE	64
2022-09-13	12:55:22	0.877163	3.9018	2584.26	FALSE	64
2022-09-13	12:55:22	0.855127	3.80378	2636.96	FALSE	64
2022-09-13	12:55:22	0.760979	3.38499	2587.64	FALSE	64
2022-09-13	12:55:22	1.20047	5.33993	2642.3	FALSE	64
2022-09-13	12:55:23	0.49757	2.21329	2589.86	FALSE	64
2022-09-13	12:55:23	0.631921	2.81091	2645.11	FALSE	64
2022-09-13	12:55:23	0.790751	3.51742	2593.37	FALSE	64
2022-09-13	12:55:23	2.84388	12.6501	2657.76	FALSE	64
2022-09-13	12:55:24	5.48769	24.4103	2617.78	1	65
2022-09-13	12:55:24	7.5854	33.7414	2691.5	1	66
2022-09-13	12:55:24	3.47451	15.4553	2633.24	1	67
2022-09-13	12:55:24	6.0025	26.7003	2718.2	1	68
2022-09-13	12:55:25	2.63029	11.7001	2644.94	FALSE	68
2022-09-13	12:55:25	0.73757	3.28086	2721.48	FALSE	68
2022-09-13	12:55:25	0.767799	3.41532	2648.35	FALSE	68

## Sheet: Daisy_martin_2022913125011 (E)
Date	Time	Lbs	Total force x time			**GoPro Fitting: 1239
2022-09-13	12:50:25	0.37299	0.37299	FALSE	0			Total force x time	1207.19
2022-09-13	12:50:25	0.672277	1.04527	FALSE	0			Total Steps	68
2022-09-13	12:50:25	1.51869	2.56396	FALSE	0
2022-09-13	12:50:25	1.80668	4.37064	FALSE	0
2022-09-13	12:50:26	3.6594	8.03004	1	1
2022-09-13	12:50:26	1.79462	9.82466	FALSE	1
2022-09-13	12:50:26	1.28576	11.1104	FALSE	1
2022-09-13	12:50:26	0.671107	11.7815	FALSE	1
2022-09-13	12:50:27	0.2193	12.0008	FALSE	1
2022-09-13	12:50:27	0.392481	12.3933	FALSE	1
2022-09-13	12:50:27	0.478282	12.8716	FALSE	1
2022-09-13	12:50:27	0.424949	13.2965	FALSE	1
2022-09-13	12:50:28	0.36154	13.6581	FALSE	1
2022-09-13	12:50:28	0.359606	14.0177	FALSE	1
2022-09-13	12:50:28	0.340929	14.3586	FALSE	1
2022-09-13	12:50:29	0.32841	14.687	FALSE	1
2022-09-13	12:50:29	0.429478	15.1165	FALSE	1
2022-09-13	12:50:29	0.357723	15.4742	FALSE	1
2022-09-13	12:50:29	0.53416	16.0084	FALSE	1
2022-09-13	12:50:30	0.416247	16.4246	FALSE	1
2022-09-13	12:50:30	0.562862	16.9875	FALSE	1
2022-09-13	12:50:30	0.225509	17.213	FALSE	1
2022-09-13	12:50:30	0.44556	17.6586	FALSE	1
2022-09-13	12:50:31	0.127239	17.7858	FALSE	1
2022-09-13	12:50:31	0.303473	18.0893	FALSE	1
2022-09-13	12:50:31	0.23584	18.3251	FALSE	1
2022-09-13	12:50:31	0.522404	18.8475	FALSE	1
2022-09-13	12:50:32	0.337417	19.1849	FALSE	1
2022-09-13	12:50:32	0.420369	19.6053	FALSE	1
2022-09-13	12:50:32	0.393804	19.9991	FALSE	1
2022-09-13	12:50:33	0.517112	20.5162	FALSE	1
2022-09-13	12:50:33	1.55299	22.0692	FALSE	1
2022-09-13	12:50:33	2.62179	24.691	FALSE	1
2022-09-13	12:50:33	2.74821	27.4392	FALSE	1
2022-09-13	12:50:34	1.77747	29.2167	FALSE	1
2022-09-13	12:50:34	1.61548	30.8322	FALSE	1
2022-09-13	12:50:34	1.08846	31.9206	FALSE	1
2022-09-13	12:50:34	2.71971	34.6403	FALSE	1
2022-09-13	12:50:35	1.46846	36.1088	FALSE	1
2022-09-13	12:50:35	1.01019	37.119	FALSE	1
2022-09-13	12:50:35	0.336145	37.4551	FALSE	1
2022-09-13	12:50:35	0.416654	37.8718	FALSE	1
2022-09-13	12:50:36	0.480929	38.3527	FALSE	1
2022-09-13	12:50:36	0.846323	39.199	FALSE	1
2022-09-13	12:50:36	0.713804	39.9128	FALSE	1
2022-09-13	12:50:37	1.68322	41.5961	FALSE	1
2022-09-13	12:50:37	0.874873	42.4709	FALSE	1
2022-09-13	12:50:37	0.478028	42.949	FALSE	1
2022-09-13	12:50:37	-0.108435	42.949	FALSE	1
2022-09-13	12:50:38	0.179402	43.1284	FALSE	1
2022-09-13	12:50:38	0.333346	43.4617	FALSE	1
2022-09-13	12:50:38	0.589733	44.0514	FALSE	1
2022-09-13	12:50:38	0.587545	44.639	FALSE	1
2022-09-13	12:50:39	0.64042	45.2794	FALSE	1
2022-09-13	12:50:39	0.263372	45.5428	FALSE	1
2022-09-13	12:50:39	0.25126	45.794	FALSE	1
2022-09-13	12:50:39	0.350598	46.1446	FALSE	1
2022-09-13	12:50:40	0.459249	46.6039	FALSE	1
2022-09-13	12:50:40	0.47355	47.0774	FALSE	1
2022-09-13	12:50:40	0.727952	47.8054	FALSE	1
2022-09-13	12:50:41	0.365967	48.1713	FALSE	1
2022-09-13	12:50:41	0.392583	48.5639	FALSE	1
2022-09-13	12:50:41	0.315178	48.8791	FALSE	1
2022-09-13	12:50:41	0.344237	49.2233	FALSE	1
2022-09-13	12:50:42	0.402456	49.6258	FALSE	1
2022-09-13	12:50:42	0.494008	50.1198	FALSE	1
2022-09-13	12:50:42	0.434211	50.554	FALSE	1
2022-09-13	12:50:42	0.459962	51.014	FALSE	1
2022-09-13	12:50:43	0.701845	51.7158	FALSE	1
2022-09-13	12:50:43	2.75568	54.4715	FALSE	1
2022-09-13	12:50:43	0.576807	55.0483	FALSE	1
2022-09-13	12:50:43	0.541692	55.59	FALSE	1
2022-09-13	12:50:44	0.43986	56.0299	FALSE	1
2022-09-13	12:50:44	0.290038	56.3199	FALSE	1
2022-09-13	12:50:44	0.360623	56.6805	FALSE	1
2022-09-13	12:50:45	0.289631	56.9702	FALSE	1
2022-09-13	12:50:45	0.294924	57.2651	FALSE	1
2022-09-13	12:50:45	0.535178	57.8003	FALSE	1
2022-09-13	12:50:45	0.903728	58.704	FALSE	1
2022-09-13	12:50:46	1.07492	59.7789	FALSE	1
2022-09-13	12:50:46	2.26083	62.0397	FALSE	1
2022-09-13	12:50:46	2.67696	64.7167	FALSE	1
2022-09-13	12:50:46	0.50383	65.2205	FALSE	1
2022-09-13	12:50:47	0.348206	65.5687	FALSE	1
2022-09-13	12:50:47	0.313906	65.8826	FALSE	1
2022-09-13	12:50:47	0.293804	66.1764	FALSE	1
2022-09-13	12:50:47	0.280522	66.457	FALSE	1
2022-09-13	12:50:48	0.330649	66.7876	FALSE	1
2022-09-13	12:50:48	0.324797	67.1124	FALSE	1
2022-09-13	12:50:48	0.242456	67.3549	FALSE	1
2022-09-13	12:50:48	0.371361	67.7262	FALSE	1
2022-09-13	12:50:49	0.368206	68.0944	FALSE	1
2022-09-13	12:50:49	0.618893	68.7133	FALSE	1
2022-09-13	12:50:49	1.03121	69.7445	FALSE	1
2022-09-13	12:50:50	1.97045	71.715	FALSE	1
2022-09-13	12:50:50	1.44235	73.1573	FALSE	1
2022-09-13	12:50:50	1.93706	75.0944	FALSE	1
2022-09-13	12:50:50	1.57095	76.6653	FALSE	1
2022-09-13	12:50:51	2.65645	79.3218	FALSE	1
2022-09-13	12:50:51	1.82856	81.1504	FALSE	1
2022-09-13	12:50:51	1.66291	82.8133	FALSE	1
2022-09-13	12:50:51	2.37788	85.1911	FALSE	1
2022-09-13	12:50:52	1.62999	86.8211	FALSE	1
2022-09-13	12:50:52	0.991514	87.8127	FALSE	1
2022-09-13	12:50:52	0.763626	88.5763	FALSE	1
2022-09-13	12:50:52	0.742659	89.3189	FALSE	1
2022-09-13	12:50:53	1.32627	90.6452	FALSE	1
2022-09-13	12:50:53	0.849122	91.4943	FALSE	1
2022-09-13	12:50:53	1.05966	92.554	FALSE	1
2022-09-13	12:50:54	0.357875	92.9119	FALSE	1
2022-09-13	12:50:54	0.850292	93.7622	FALSE	1
2022-09-13	12:50:54	0.477214	94.2394	FALSE	1
2022-09-13	12:50:54	0.713143	94.9525	FALSE	1
2022-09-13	12:50:55	0.444389	95.3969	FALSE	1
2022-09-13	12:50:55	0.787799	96.1847	FALSE	1
2022-09-13	12:50:55	1.20581	97.3905	FALSE	1
2022-09-13	12:50:55	0.771107	98.1616	FALSE	1
2022-09-13	12:50:56	2.15039	100.312	FALSE	1
2022-09-13	12:50:56	1.54139	101.853	FALSE	1
2022-09-13	12:50:56	2.84724	104.701	FALSE	1
2022-09-13	12:50:56	1.11645	105.817	FALSE	1
2022-09-13	12:50:57	1.10088	106.918	FALSE	1
2022-09-13	12:50:57	0.570649	107.489	FALSE	1
2022-09-13	12:50:57	0.236705	107.725	FALSE	1
2022-09-13	12:50:58	0.615738	108.341	FALSE	1
2022-09-13	12:50:58	0.311209	108.652	FALSE	1
2022-09-13	12:50:58	0.728359	109.381	FALSE	1
2022-09-13	12:50:58	0.668613	110.049	FALSE	1
2022-09-13	12:50:59	1.10215	111.151	FALSE	1
2022-09-13	12:50:59	0.990242	112.142	FALSE	1
2022-09-13	12:50:59	1.38093	113.523	FALSE	1
2022-09-13	12:50:59	2.11609	115.639	FALSE	1
2022-09-13	12:51:00	2.19167	117.83	FALSE	1
2022-09-13	12:51:00	2.67065	120.501	FALSE	1
2022-09-13	12:51:00	1.98994	122.491	FALSE	1
2022-09-13	12:51:00	4.1425	126.633	1	2
2022-09-13	12:51:01	0.567544	127.201	FALSE	2
2022-09-13	12:51:01	3.76276	130.964	1	3
2022-09-13	12:51:01	0.941845	131.906	FALSE	3
2022-09-13	12:51:02	4.14525	136.051	1	4
2022-09-13	12:51:02	2.37508	138.426	FALSE	4
2022-09-13	12:51:02	4.05273	142.479	1	5
2022-09-13	12:51:02	2.5334	145.012	FALSE	5
2022-09-13	12:51:03	0.713448	145.725	FALSE	5
2022-09-13	12:51:03	2.03177	147.757	FALSE	5
2022-09-13	12:51:03	0.761946	148.519	FALSE	5
2022-09-13	12:51:03	1.19187	149.711	FALSE	5
2022-09-13	12:51:04	0.850394	150.561	FALSE	5
2022-09-13	12:51:04	0.546628	151.108	FALSE	5
2022-09-13	12:51:04	1.40851	152.517	FALSE	5
2022-09-13	12:51:04	0.968511	153.485	FALSE	5
2022-09-13	12:51:05	1.31385	154.799	FALSE	5
2022-09-13	12:51:05	1.01401	155.813	FALSE	5
2022-09-13	12:51:05	1.56322	157.376	FALSE	5
2022-09-13	12:51:05	2.45767	159.834	FALSE	5
2022-09-13	12:51:06	1.41864	161.252	FALSE	5
2022-09-13	12:51:06	2.60251	163.855	FALSE	5
2022-09-13	12:51:06	0.995992	164.851	FALSE	5
2022-09-13	12:51:07	1.79207	166.643	FALSE	5
2022-09-13	12:51:07	0.575942	167.219	FALSE	5
2022-09-13	12:51:07	2.64159	169.861	FALSE	5
2022-09-13	12:51:07	0.877621	170.738	FALSE	5
2022-09-13	12:51:08	1.54129	172.28	FALSE	5
2022-09-13	12:51:08	1.29009	173.57	FALSE	5
2022-09-13	12:51:08	0.413499	173.983	FALSE	5
2022-09-13	12:51:08	0.641489	174.625	FALSE	5
2022-09-13	12:51:09	0.294008	174.919	FALSE	5
2022-09-13	12:51:09	-0.0489437	174.919	FALSE	5
2022-09-13	12:51:09	-0.505839	174.919	FALSE	5
2022-09-13	12:51:09	-0.553117	174.919	FALSE	5
2022-09-13	12:51:10	0.00128524	174.92	FALSE	5
2022-09-13	12:51:10	0.240827	175.161	FALSE	5
2022-09-13	12:51:10	0.334873	175.496	FALSE	5
2022-09-13	12:51:11	0.562252	176.058	FALSE	5
2022-09-13	12:51:11	0.398283	176.456	FALSE	5
2022-09-13	12:51:11	0.475534	176.932	FALSE	5
2022-09-13	12:51:11	0.421132	177.353	FALSE	5
2022-09-13	12:51:12	0.441081	177.794	FALSE	5
2022-09-13	12:51:12	0.464746	178.259	FALSE	5
2022-09-13	12:51:12	0.425	178.684	FALSE	5
2022-09-13	12:51:12	0.430496	179.114	FALSE	5
2022-09-13	12:51:13	0.461082	179.575	FALSE	5
2022-09-13	12:51:13	0.54729	180.122	FALSE	5
2022-09-13	12:51:13	0.378944	180.501	FALSE	5
2022-09-13	12:51:13	0.647595	181.149	FALSE	5
2022-09-13	12:51:14	0.610852	181.76	FALSE	5
2022-09-13	12:51:14	0.590547	182.35	FALSE	5
2022-09-13	12:51:14	0.569173	182.92	FALSE	5
2022-09-13	12:51:15	0.682507	183.602	FALSE	5
2022-09-13	12:51:15	0.413804	184.016	FALSE	5
2022-09-13	12:51:15	0.479504	184.495	FALSE	5
2022-09-13	12:51:15	0.416094	184.911	FALSE	5
2022-09-13	12:51:16	0.268359	185.18	FALSE	5
2022-09-13	12:51:16	0.345967	185.526	FALSE	5
2022-09-13	12:51:16	0.440573	185.966	FALSE	5
2022-09-13	12:51:16	0.457875	186.424	FALSE	5
2022-09-13	12:51:17	0.500267	186.925	FALSE	5
2022-09-13	12:51:17	0.503066	187.428	FALSE	5
2022-09-13	12:51:17	0.52271	187.95	FALSE	5
2022-09-13	12:51:17	0.503219	188.454	FALSE	5
2022-09-13	12:51:18	0.532837	188.986	FALSE	5
2022-09-13	12:51:18	0.559504	189.546	FALSE	5
2022-09-13	12:51:18	0.594822	190.141	FALSE	5
2022-09-13	12:51:19	0.531718	190.672	FALSE	5
2022-09-13	12:51:19	0.584847	191.257	FALSE	5
2022-09-13	12:51:19	0.605712	191.863	FALSE	5
2022-09-13	12:51:19	0.584796	192.448	FALSE	5
2022-09-13	12:51:20	0.544796	192.993	FALSE	5
2022-09-13	12:51:20	0.460623	193.453	FALSE	5
2022-09-13	12:51:20	0.443422	193.897	FALSE	5
2022-09-13	12:51:20	0.475942	194.373	FALSE	5
2022-09-13	12:51:21	0.28159	194.654	FALSE	5
2022-09-13	12:51:21	0.367138	195.021	FALSE	5
2022-09-13	12:51:21	0.205356	195.227	FALSE	5
2022-09-13	12:51:21	0.153092	195.38	FALSE	5
2022-09-13	12:51:22	0.000572752	195.38	FALSE	5
2022-09-13	12:51:22	0.494873	195.875	FALSE	5
2022-09-13	12:51:22	0.484237	196.359	FALSE	5
2022-09-13	12:51:22	0.421336	196.781	FALSE	5
2022-09-13	12:51:23	0.428868	197.21	FALSE	5
2022-09-13	12:51:23	0.327443	197.537	FALSE	5
2022-09-13	12:51:23	0.570445	198.107	FALSE	5
2022-09-13	12:51:24	0.339809	198.447	FALSE	5
2022-09-13	12:51:24	0.54215	198.989	FALSE	5
2022-09-13	12:51:24	0.284084	199.274	FALSE	5
2022-09-13	12:51:24	0.553295	199.827	FALSE	5
2022-09-13	12:51:25	0.293397	200.12	FALSE	5
2022-09-13	12:51:25	0.483728	200.604	FALSE	5
2022-09-13	12:51:25	0.342914	200.947	FALSE	5
2022-09-13	12:51:25	0.466425	201.413	FALSE	5
2022-09-13	12:51:26	0.657163	202.07	FALSE	5
2022-09-13	12:51:26	0.734975	202.805	FALSE	5
2022-09-13	12:51:26	0.736959	203.542	FALSE	5
2022-09-13	12:51:26	0.735687	204.278	FALSE	5
2022-09-13	12:51:27	1.14805	205.426	FALSE	5
2022-09-13	12:51:27	1.32729	206.753	FALSE	5
2022-09-13	12:51:27	0.713651	207.467	FALSE	5
2022-09-13	12:51:28	0.713448	208.181	FALSE	5
2022-09-13	12:51:28	0.776756	208.957	FALSE	5
2022-09-13	12:51:28	1.0277	209.985	FALSE	5
2022-09-13	12:51:28	1.01436	210.999	FALSE	5
2022-09-13	12:51:29	0.749835	211.749	FALSE	5
2022-09-13	12:51:29	0.949173	212.698	FALSE	5
2022-09-13	12:51:29	0.776196	213.475	FALSE	5
2022-09-13	12:51:29	0.742608	214.217	FALSE	5
2022-09-13	12:51:30	0.979962	215.197	FALSE	5
2022-09-13	12:51:30	0.764288	215.961	FALSE	5
2022-09-13	12:51:30	0.753041	216.714	FALSE	5
2022-09-13	12:51:30	0.784491	217.499	FALSE	5
2022-09-13	12:51:31	0.811666	218.311	FALSE	5
2022-09-13	12:51:31	0.546679	218.857	FALSE	5
2022-09-13	12:51:31	0.566476	219.424	FALSE	5
2022-09-13	12:51:32	1.06709	220.491	FALSE	5
2022-09-13	12:51:32	0.977977	221.469	FALSE	5
2022-09-13	12:51:32	0.667239	222.136	FALSE	5
2022-09-13	12:51:32	0.653448	222.79	FALSE	5
2022-09-13	12:51:33	0.550547	223.34	FALSE	5
2022-09-13	12:51:33	0.237163	223.577	FALSE	5
2022-09-13	12:51:33	0.810445	224.388	FALSE	5
2022-09-13	12:51:33	0.755738	225.143	FALSE	5
2022-09-13	12:51:34	1.42052	226.564	FALSE	5
2022-09-13	12:51:34	0.780013	227.344	FALSE	5
2022-09-13	12:51:34	1.00922	228.353	FALSE	5
2022-09-13	12:51:34	0.476756	228.83	FALSE	5
2022-09-13	12:51:35	0.110038	228.94	FALSE	5
2022-09-13	12:51:35	0.69701	229.637	FALSE	5
2022-09-13	12:51:35	0.762099	230.399	FALSE	5
2022-09-13	12:51:36	0.726374	231.125	FALSE	5
2022-09-13	12:51:36	0.737875	231.863	FALSE	5
2022-09-13	12:51:36	0.735992	232.599	FALSE	5
2022-09-13	12:51:36	0.738231	233.338	FALSE	5
2022-09-13	12:51:37	0.737621	234.075	FALSE	5
2022-09-13	12:51:37	0.753142	234.828	FALSE	5
2022-09-13	12:51:37	1.17579	236.004	FALSE	5
2022-09-13	12:51:37	0.528359	236.532	FALSE	5
2022-09-13	12:51:38	0.661743	237.194	FALSE	5
2022-09-13	12:51:38	0.738333	237.933	FALSE	5
2022-09-13	12:51:38	0.736959	238.669	FALSE	5
2022-09-13	12:51:38	0.737926	239.407	FALSE	5
2022-09-13	12:51:39	0.73416	240.142	FALSE	5
2022-09-13	12:51:39	0.733193	240.875	FALSE	5
2022-09-13	12:51:39	0.73757	241.612	FALSE	5
2022-09-13	12:51:40	0.740827	242.353	FALSE	5
2022-09-13	12:51:40	0.734669	243.088	FALSE	5
2022-09-13	12:51:40	0.729784	243.818	FALSE	5
2022-09-13	12:51:40	0.738893	244.556	FALSE	5
2022-09-13	12:51:41	0.739656	245.296	FALSE	5
2022-09-13	12:51:41	0.739504	246.036	FALSE	5
2022-09-13	12:51:41	0.742201	246.778	FALSE	5
2022-09-13	12:51:41	0.736603	247.514	FALSE	5
2022-09-13	12:51:42	0.735891	248.25	FALSE	5
2022-09-13	12:51:42	0.738689	248.989	FALSE	5
2022-09-13	12:51:42	0.751616	249.741	FALSE	5
2022-09-13	12:51:42	0.807188	250.548	FALSE	5
2022-09-13	12:51:43	0.335942	250.884	FALSE	5
2022-09-13	12:51:43	0.542252	251.426	FALSE	5
2022-09-13	12:51:43	0.489173	251.915	FALSE	5
2022-09-13	12:51:43	0.57243	252.488	FALSE	5
2022-09-13	12:51:44	4.71874	257.206	1	6
2022-09-13	12:51:44	6.75177	263.958	1	7
2022-09-13	12:51:44	1.38658	265.345	FALSE	7
2022-09-13	12:51:45	1.50296	266.848	FALSE	7
2022-09-13	12:51:45	0.303677	267.151	FALSE	7
2022-09-13	12:51:45	0.569326	267.721	FALSE	7
2022-09-13	12:51:45	0.600623	268.321	FALSE	7
2022-09-13	12:51:46	0.649886	268.971	FALSE	7
2022-09-13	12:51:46	1.3048	270.276	FALSE	7
2022-09-13	12:51:46	1.17263	271.449	FALSE	7
2022-09-13	12:51:46	3.72856	275.177	1	8
2022-09-13	12:51:47	1.91406	277.091	FALSE	8
2022-09-13	12:51:47	3.69258	280.784	1	9
2022-09-13	12:51:47	1.97095	282.755	FALSE	9
2022-09-13	12:51:47	1.34922	284.104	FALSE	9
2022-09-13	12:51:48	2.25808	286.362	FALSE	9
2022-09-13	12:51:48	1.4221	287.784	FALSE	9
2022-09-13	12:51:48	1.35579	289.14	FALSE	9
2022-09-13	12:51:49	1.77497	290.915	FALSE	9
2022-09-13	12:51:49	1.08943	292.004	FALSE	9
2022-09-13	12:51:49	2.92439	294.929	FALSE	9
2022-09-13	12:51:49	0.305356	295.234	FALSE	9
2022-09-13	12:51:50	0.769377	296.003	FALSE	9
2022-09-13	12:51:50	1.04515	297.049	FALSE	9
2022-09-13	12:51:50	1.48123	298.53	FALSE	9
2022-09-13	12:51:50	1.93645	300.466	FALSE	9
2022-09-13	12:51:51	1.54276	302.009	FALSE	9
2022-09-13	12:51:51	4.62194	306.631	1	10
2022-09-13	12:51:51	2.19732	308.828	FALSE	10
2022-09-13	12:51:51	0.883371	309.712	FALSE	10
2022-09-13	12:51:52	0.764644	310.476	FALSE	10
2022-09-13	12:51:52	0.467443	310.944	FALSE	10
2022-09-13	12:51:52	0.26042	311.204	FALSE	10
2022-09-13	12:51:53	0.137112	311.341	FALSE	10
2022-09-13	12:51:53	0.0838806	311.425	FALSE	10
2022-09-13	12:51:53	0.728512	312.154	FALSE	10
2022-09-13	12:51:53	0.981896	313.136	FALSE	10
2022-09-13	12:51:54	1.60683	314.742	FALSE	10
2022-09-13	12:51:54	1.18927	315.932	FALSE	10
2022-09-13	12:51:54	0.602201	316.534	FALSE	10
2022-09-13	12:51:54	0.451361	316.985	FALSE	10
2022-09-13	12:51:55	0.209682	317.195	FALSE	10
2022-09-13	12:51:55	0.270038	317.465	FALSE	10
2022-09-13	12:51:55	0.162456	317.627	FALSE	10
2022-09-13	12:51:55	0.453906	318.081	FALSE	10
2022-09-13	12:51:56	0.719351	318.801	FALSE	10
2022-09-13	12:51:56	0.0337534	318.834	FALSE	10
2022-09-13	12:51:56	0.149937	318.984	FALSE	10
2022-09-13	12:51:57	0.330903	319.315	FALSE	10
2022-09-13	12:51:57	0.0213361	319.337	FALSE	10
2022-09-13	12:51:57	-0.0166283	319.337	FALSE	10
2022-09-13	12:51:57	-0.107722	319.337	FALSE	10
2022-09-13	12:51:58	-0.124923	319.337	FALSE	10
2022-09-13	12:51:58	-0.179783	319.337	FALSE	10
2022-09-13	12:51:58	-0.201615	319.337	FALSE	10
2022-09-13	12:51:58	-0.113473	319.337	FALSE	10
2022-09-13	12:51:59	-0.189045	319.337	FALSE	10
2022-09-13	12:51:59	-0.312302	319.337	FALSE	10
2022-09-13	12:51:59	0.042812	319.379	FALSE	10
2022-09-13	12:51:59	0.428206	319.808	FALSE	10
2022-09-13	12:52:00	0.790038	320.598	FALSE	10
2022-09-13	12:52:00	2.70556	323.303	FALSE	10
2022-09-13	12:52:00	2.31192	325.615	FALSE	10
2022-09-13	12:52:00	0.395026	326.01	FALSE	10
2022-09-13	12:52:01	0.174618	326.185	FALSE	10
2022-09-13	12:52:01	0.215178	326.4	FALSE	10
2022-09-13	12:52:01	-0.0319972	326.4	FALSE	10
2022-09-13	12:52:02	-0.318053	326.4	FALSE	10
2022-09-13	12:52:02	-0.430317	326.4	FALSE	10
2022-09-13	12:52:02	-0.352557	326.4	FALSE	10
2022-09-13	12:52:02	-0.443905	326.4	FALSE	10
2022-09-13	12:52:03	-0.304363	326.4	FALSE	10
2022-09-13	12:52:03	0.0575702	326.458	FALSE	10
2022-09-13	12:52:03	0.344847	326.802	FALSE	10
2022-09-13	12:52:03	0.384033	327.186	FALSE	10
2022-09-13	12:52:04	0.35757	327.544	FALSE	10
2022-09-13	12:52:04	0.337926	327.882	FALSE	10
2022-09-13	12:52:04	0.38327	328.265	FALSE	10
2022-09-13	12:52:04	0.383982	328.649	FALSE	10
2022-09-13	12:52:05	0.368919	329.018	FALSE	10
2022-09-13	12:52:05	0.36271	329.381	FALSE	10
2022-09-13	12:52:05	0.349936	329.731	FALSE	10
2022-09-13	12:52:06	0.341896	330.073	FALSE	10
2022-09-13	12:52:06	0.354975	330.428	FALSE	10
2022-09-13	12:52:06	0.32159	330.749	FALSE	10
2022-09-13	12:52:06	0.268155	331.017	FALSE	10
2022-09-13	12:52:07	0.122456	331.14	FALSE	10
2022-09-13	12:52:07	0.0926338	331.232	FALSE	10
2022-09-13	12:52:07	0.111005	331.343	FALSE	10
2022-09-13	12:52:07	0.659148	332.003	FALSE	10
2022-09-13	12:52:08	0.735941	332.739	FALSE	10
2022-09-13	12:52:08	0.741539	333.48	FALSE	10
2022-09-13	12:52:08	0.732684	334.213	FALSE	10
2022-09-13	12:52:08	0.730242	334.943	FALSE	10
2022-09-13	12:52:09	0.733092	335.676	FALSE	10
2022-09-13	12:52:09	0.733092	336.409	FALSE	10
2022-09-13	12:52:09	0.732583	337.142	FALSE	10
2022-09-13	12:52:10	0.738181	337.88	FALSE	10
2022-09-13	12:52:10	0.735127	338.615	FALSE	10
2022-09-13	12:52:10	0.738893	339.354	FALSE	10
2022-09-13	12:52:10	0.734211	340.088	FALSE	10
2022-09-13	12:52:11	0.730293	340.819	FALSE	10
2022-09-13	12:52:11	0.752176	341.571	FALSE	10
2022-09-13	12:52:11	0.587443	342.158	FALSE	10
2022-09-13	12:52:11	-0.295101	342.158	FALSE	10
2022-09-13	12:52:12	-0.572557	342.158	FALSE	10
2022-09-13	12:52:12	-0.740648	342.158	FALSE	10
2022-09-13	12:52:12	-0.840546	342.158	FALSE	10
2022-09-13	12:52:12	-0.666348	342.158	FALSE	10
2022-09-13	12:52:13	-0.524669	342.158	FALSE	10
2022-09-13	12:52:13	-0.229809	342.158	FALSE	10
2022-09-13	12:52:13	-0.100292	342.158	FALSE	10
2022-09-13	12:52:14	1.32785	343.486	FALSE	10
2022-09-13	12:52:14	0.189784	343.676	FALSE	10
2022-09-13	12:52:14	0.164746	343.841	FALSE	10
2022-09-13	12:52:14	-0.017188	343.841	FALSE	10
2022-09-13	12:52:15	-0.0764756	343.841	FALSE	10
2022-09-13	12:52:15	-0.220699	343.841	FALSE	10
2022-09-13	12:52:15	-0.215407	343.841	FALSE	10
2022-09-13	12:52:15	-0.28187	343.841	FALSE	10
2022-09-13	12:52:16	-0.417188	343.841	FALSE	10
2022-09-13	12:52:16	-0.50589	343.841	FALSE	10
2022-09-13	12:52:16	-0.525381	343.841	FALSE	10
2022-09-13	12:52:16	-0.405178	343.841	FALSE	10
2022-09-13	12:52:17	-0.136934	343.841	FALSE	10
2022-09-13	12:52:17	0.5764	344.417	FALSE	10
2022-09-13	12:52:17	2.39014	346.807	FALSE	10
2022-09-13	12:52:18	4.47614	351.283	1	11
2022-09-13	12:52:18	3.41604	354.699	1	12
2022-09-13	12:52:18	1.57737	356.277	FALSE	12
2022-09-13	12:52:18	0.35986	356.636	FALSE	12
2022-09-13	12:52:19	0.625916	357.262	FALSE	12
2022-09-13	12:52:19	0.460573	357.723	FALSE	12
2022-09-13	12:52:19	1.91915	359.642	FALSE	12
2022-09-13	12:52:19	2.03726	361.679	FALSE	12
2022-09-13	12:52:20	3.365	365.044	1	13
2022-09-13	12:52:20	4.47965	369.524	1	14
2022-09-13	12:52:20	2.63899	372.163	FALSE	14
2022-09-13	12:52:20	4.18917	376.352	1	15
2022-09-13	12:52:21	3.97299	380.325	1	16
2022-09-13	12:52:21	2.7196	383.045	FALSE	16
2022-09-13	12:52:21	4.55441	387.599	1	17
2022-09-13	12:52:21	3.21787	390.817	1	18
2022-09-13	12:52:22	1.9049	392.722	FALSE	18
2022-09-13	12:52:22	2.72627	395.448	FALSE	18
2022-09-13	12:52:22	0.477367	395.926	FALSE	18
2022-09-13	12:52:23	3.3052	399.231	1	19
2022-09-13	12:52:23	0.437163	399.668	FALSE	19
2022-09-13	12:52:23	2.29146	401.959	FALSE	19
2022-09-13	12:52:23	0.821946	402.781	FALSE	19
2022-09-13	12:52:24	1.09747	403.879	FALSE	19
2022-09-13	12:52:24	1.72337	405.602	FALSE	19
2022-09-13	12:52:24	2.95894	408.561	FALSE	19
2022-09-13	12:52:24	3.72154	412.283	1	20
2022-09-13	12:52:25	2.13803	414.421	FALSE	20
2022-09-13	12:52:25	0.63014	415.051	FALSE	20
2022-09-13	12:52:25	-4.07907	415.051	FALSE	20
2022-09-13	12:52:25	0.189275	415.24	FALSE	20
2022-09-13	12:52:26	-0.118053	415.24	FALSE	20
2022-09-13	12:52:26	-0.0216155	415.24	FALSE	20
2022-09-13	12:52:26	-0.0716918	415.24	FALSE	20
2022-09-13	12:52:27	-0.12757	415.24	FALSE	20
2022-09-13	12:52:27	-0.192811	415.24	FALSE	20
2022-09-13	12:52:27	-0.0262466	415.24	FALSE	20
2022-09-13	12:52:27	-0.0468572	415.24	FALSE	20
2022-09-13	12:52:28	1.2992	416.539	FALSE	20
2022-09-13	12:52:28	3.4137	419.953	1	21
2022-09-13	12:52:28	3.68383	423.637	1	22
2022-09-13	12:52:28	3.10586	426.743	1	23
2022-09-13	12:52:29	3.18215	429.925	1	24
2022-09-13	12:52:29	3.46948	433.394	1	25
2022-09-13	12:52:29	5.1021	438.496	1	26
2022-09-13	12:52:29	3.48072	441.977	1	27
2022-09-13	12:52:30	2.10927	444.086	FALSE	27
2022-09-13	12:52:30	1.54347	445.63	FALSE	27
2022-09-13	12:52:30	0.721336	446.351	FALSE	27
2022-09-13	12:52:31	0.693041	447.044	FALSE	27
2022-09-13	12:52:31	0.310293	447.355	FALSE	27
2022-09-13	12:52:31	0.324898	447.679	FALSE	27
2022-09-13	12:52:31	-1.28879	447.679	FALSE	27
2022-09-13	12:52:32	0.0748221	447.754	FALSE	27
2022-09-13	12:52:32	0.227545	447.982	FALSE	27
2022-09-13	12:52:32	0.28897	448.271	FALSE	27
2022-09-13	12:52:32	0.255484	448.526	FALSE	27
2022-09-13	12:52:33	0.407901	448.934	FALSE	27
2022-09-13	12:52:33	0.44388	449.378	FALSE	27
2022-09-13	12:52:33	1.05024	450.428	FALSE	27
2022-09-13	12:52:33	0.960166	451.388	FALSE	27
2022-09-13	12:52:34	0.963524	452.352	FALSE	27
2022-09-13	12:52:34	0.771209	453.123	FALSE	27
2022-09-13	12:52:34	0.406323	453.53	FALSE	27
2022-09-13	12:52:35	0.527901	454.057	FALSE	27
2022-09-13	12:52:35	0.427341	454.485	FALSE	27
2022-09-13	12:52:35	0.622099	455.107	FALSE	27
2022-09-13	12:52:35	0.599453	455.706	FALSE	27
2022-09-13	12:52:36	0.507392	456.214	FALSE	27
2022-09-13	12:52:36	0.642252	456.856	FALSE	27
2022-09-13	12:52:36	0.153143	457.009	FALSE	27
2022-09-13	12:52:36	0.210293	457.219	FALSE	27
2022-09-13	12:52:37	0.268512	457.488	FALSE	27
2022-09-13	12:52:37	0.0596567	457.548	FALSE	27
2022-09-13	12:52:37	-0.421056	457.548	FALSE	27
2022-09-13	12:52:37	-0.605127	457.548	FALSE	27
2022-09-13	12:52:38	-0.789351	457.548	FALSE	27
2022-09-13	12:52:38	-0.836017	457.548	FALSE	27
2022-09-13	12:52:38	-0.997391	457.548	FALSE	27
2022-09-13	12:52:39	-0.966959	457.548	FALSE	27
2022-09-13	12:52:39	-1.05759	457.548	FALSE	27
2022-09-13	12:52:39	-0.994745	457.548	FALSE	27
2022-09-13	12:52:39	-1.19597	457.548	FALSE	27
2022-09-13	12:52:40	-1.01067	457.548	FALSE	27
2022-09-13	12:52:40	-0.414643	457.548	FALSE	27
2022-09-13	12:52:40	-0.327417	457.548	FALSE	27
2022-09-13	12:52:40	-0.222837	457.548	FALSE	27
2022-09-13	12:52:41	0.0524302	457.6	FALSE	27
2022-09-13	12:52:41	0.176705	457.777	FALSE	27
2022-09-13	12:52:41	0.389224	458.166	FALSE	27
2022-09-13	12:52:41	0.330395	458.496	FALSE	27
2022-09-13	12:52:42	0.242761	458.739	FALSE	27
2022-09-13	12:52:42	0.66902	459.408	FALSE	27
2022-09-13	12:52:42	0.726527	460.135	FALSE	27
2022-09-13	12:52:42	0.732888	460.868	FALSE	27
2022-09-13	12:52:43	0.734415	461.602	FALSE	27
2022-09-13	12:52:43	0.739504	462.341	FALSE	27
2022-09-13	12:52:43	0.732328	463.074	FALSE	27
2022-09-13	12:52:44	0.623473	463.697	FALSE	27
2022-09-13	12:52:44	0.53874	464.236	FALSE	27
2022-09-13	12:52:44	0.534058	464.77	FALSE	27
2022-09-13	12:52:44	0.500318	465.27	FALSE	27
2022-09-13	12:52:45	0.468715	465.739	FALSE	27
2022-09-13	12:52:45	0.459351	466.198	FALSE	27
2022-09-13	12:52:45	0.447799	466.646	FALSE	27
2022-09-13	12:52:45	1.40281	468.049	FALSE	27
2022-09-13	12:52:46	0.884593	468.934	FALSE	27
2022-09-13	12:52:46	0.741997	469.676	FALSE	27
2022-09-13	12:52:46	0.73014	470.406	FALSE	27
2022-09-13	12:52:46	0.737468	471.143	FALSE	27
2022-09-13	12:52:47	0.746374	471.89	FALSE	27
2022-09-13	12:52:47	0.740674	472.63	FALSE	27
2022-09-13	12:52:47	0.737265	473.368	FALSE	27
2022-09-13	12:52:48	0.740318	474.108	FALSE	27
2022-09-13	12:52:48	0.742201	474.85	FALSE	27
2022-09-13	12:52:48	0.737214	475.587	FALSE	27
2022-09-13	12:52:48	0.733499	476.321	FALSE	27
2022-09-13	12:52:49	1.36973	477.69	FALSE	27
2022-09-13	12:52:49	1.95518	479.646	FALSE	27
2022-09-13	12:52:49	2.02032	481.666	FALSE	27
2022-09-13	12:52:49	1.57874	483.245	FALSE	27
2022-09-13	12:52:50	1.43309	484.678	FALSE	27
2022-09-13	12:52:50	1.35986	486.038	FALSE	27
2022-09-13	12:52:50	1.38505	487.423	FALSE	27
2022-09-13	12:52:50	1.54037	488.963	FALSE	27
2022-09-13	12:52:51	1.71604	490.679	FALSE	27
2022-09-13	12:52:51	2.08352	492.763	FALSE	27
2022-09-13	12:52:51	1.42815	494.191	FALSE	27
2022-09-13	12:52:52	0.31472	494.506	FALSE	27
2022-09-13	12:52:52	0.300522	494.806	FALSE	27
2022-09-13	12:52:52	0.195484	495.002	FALSE	27
2022-09-13	12:52:52	0.276196	495.278	FALSE	27
2022-09-13	12:52:53	0.34042	495.618	FALSE	27
2022-09-13	12:52:53	0.360522	495.979	FALSE	27
2022-09-13	12:52:53	0.348562	496.327	FALSE	27
2022-09-13	12:52:53	0.353957	496.681	FALSE	27
2022-09-13	12:52:54	0.366476	497.048	FALSE	27
2022-09-13	12:52:54	0.672125	497.72	FALSE	27
2022-09-13	12:52:54	0.518181	498.238	FALSE	27
2022-09-13	12:52:54	0.646272	498.884	FALSE	27
2022-09-13	12:52:55	0.331819	499.216	FALSE	27
2022-09-13	12:52:55	0.646323	499.862	FALSE	27
2022-09-13	12:52:55	0.731717	500.594	FALSE	27
2022-09-13	12:52:56	0.752786	501.347	FALSE	27
2022-09-13	12:52:56	0.735789	502.083	FALSE	27
2022-09-13	12:52:56	0.739147	502.822	FALSE	27
2022-09-13	12:52:56	0.734924	503.557	FALSE	27
2022-09-13	12:52:57	0.720471	504.277	FALSE	27
2022-09-13	12:52:57	0.893753	505.171	FALSE	27
2022-09-13	12:52:57	0.738791	505.91	FALSE	27
2022-09-13	12:52:57	1.72632	507.636	FALSE	27
2022-09-13	12:52:58	0.765509	508.402	FALSE	27
2022-09-13	12:52:58	2.70617	511.108	FALSE	27
2022-09-13	12:52:58	0.736196	511.844	FALSE	27
2022-09-13	12:52:58	0.731514	512.575	FALSE	27
2022-09-13	12:52:59	0.729224	513.305	FALSE	27
2022-09-13	12:52:59	0.729987	514.035	FALSE	27
2022-09-13	12:52:59	0.738791	514.773	FALSE	27
2022-09-13	12:53:00	0.728206	515.502	FALSE	27
2022-09-13	12:53:00	0.739402	516.241	FALSE	27
2022-09-13	12:53:00	0.738384	516.979	FALSE	27
2022-09-13	12:53:00	0.741947	517.721	FALSE	27
2022-09-13	12:53:01	0.736247	518.458	FALSE	27
2022-09-13	12:53:01	0.732074	519.19	FALSE	27
2022-09-13	12:53:01	0.735076	519.925	FALSE	27
2022-09-13	12:53:02	0.736705	520.662	FALSE	27
2022-09-13	12:53:02	0.736807	521.398	FALSE	27
2022-09-13	12:53:02	0.73472	522.133	FALSE	27
2022-09-13	12:53:02	0.734873	522.868	FALSE	27
2022-09-13	12:53:02	0.738588	523.607	FALSE	27
2022-09-13	12:53:03	0.731565	524.338	FALSE	27
2022-09-13	12:53:03	0.735687	525.074	FALSE	27
2022-09-13	12:53:03	0.73813	525.812	FALSE	27
2022-09-13	12:53:03	0.735687	526.548	FALSE	27
2022-09-13	12:53:04	0.735483	527.283	FALSE	27
2022-09-13	12:53:04	0.740064	528.023	FALSE	27
2022-09-13	12:53:04	0.734008	528.757	FALSE	27
2022-09-13	12:53:05	0.735687	529.493	FALSE	27
2022-09-13	12:53:05	0.729428	530.222	FALSE	27
2022-09-13	12:53:05	0.732786	530.955	FALSE	27
2022-09-13	12:53:05	0.731005	531.686	FALSE	27
2022-09-13	12:53:06	0.735483	532.422	FALSE	27
2022-09-13	12:53:06	0.74332	533.165	FALSE	27
2022-09-13	12:53:06	0.734975	533.9	FALSE	27
2022-09-13	12:53:06	0.741896	534.642	FALSE	27
2022-09-13	12:53:07	0.738282	535.38	FALSE	27
2022-09-13	12:53:07	0.7393	536.119	FALSE	27
2022-09-13	12:53:07	0.735891	536.855	FALSE	27
2022-09-13	12:53:07	0.740114	537.595	FALSE	27
2022-09-13	12:53:08	0.738486	538.334	FALSE	27
2022-09-13	12:53:08	0.735076	539.069	FALSE	27
2022-09-13	12:53:08	0.729886	539.799	FALSE	27
2022-09-13	12:53:09	0.736501	540.535	FALSE	27
2022-09-13	12:53:09	0.73528	541.271	FALSE	27
2022-09-13	12:53:09	0.734059	542.005	FALSE	27
2022-09-13	12:53:09	0.730852	542.735	FALSE	27
2022-09-13	12:53:10	0.739453	543.475	FALSE	27
2022-09-13	12:53:10	0.736298	544.211	FALSE	27
2022-09-13	12:53:10	0.734466	544.946	FALSE	27
2022-09-13	12:53:10	0.735178	545.681	FALSE	27
2022-09-13	12:53:11	0.734618	546.415	FALSE	27
2022-09-13	12:53:11	0.735483	547.151	FALSE	27
2022-09-13	12:53:11	0.735076	547.886	FALSE	27
2022-09-13	12:53:11	0.735433	548.621	FALSE	27
2022-09-13	12:53:12	0.736857	549.358	FALSE	27
2022-09-13	12:53:12	0.733651	550.092	FALSE	27
2022-09-13	12:53:12	0.735026	550.827	FALSE	27
2022-09-13	12:53:13	0.738588	551.566	FALSE	27
2022-09-13	12:53:13	0.733804	552.299	FALSE	27
2022-09-13	12:53:13	0.735382	553.035	FALSE	27
2022-09-13	12:53:13	0.737773	553.773	FALSE	27
2022-09-13	12:53:14	0.738791	554.511	FALSE	27
2022-09-13	12:53:14	0.738282	555.25	FALSE	27
2022-09-13	12:53:14	0.738333	555.988	FALSE	27
2022-09-13	12:53:14	0.741896	556.73	FALSE	27
2022-09-13	12:53:15	0.73243	557.462	FALSE	27
2022-09-13	12:53:15	0.738333	558.201	FALSE	27
2022-09-13	12:53:15	0.728206	558.929	FALSE	27
2022-09-13	12:53:15	0.741285	559.67	FALSE	27
2022-09-13	12:53:16	0.734568	560.405	FALSE	27
2022-09-13	12:53:16	0.738384	561.143	FALSE	27
2022-09-13	12:53:16	0.735382	561.878	FALSE	27
2022-09-13	12:53:17	0.741896	562.62	FALSE	27
2022-09-13	12:53:17	0.731972	563.352	FALSE	27
2022-09-13	12:53:17	0.728257	564.081	FALSE	27
2022-09-13	12:53:17	0.731259	564.812	FALSE	27
2022-09-13	12:53:18	0.730343	565.542	FALSE	27
2022-09-13	12:53:18	0.733855	566.276	FALSE	27
2022-09-13	12:53:18	0.734059	567.01	FALSE	27
2022-09-13	12:53:18	0.738435	567.748	FALSE	27
2022-09-13	12:53:19	0.728766	568.477	FALSE	27
2022-09-13	12:53:19	0.738231	569.215	FALSE	27
2022-09-13	12:53:19	0.74042	569.956	FALSE	27
2022-09-13	12:53:19	0.736501	570.692	FALSE	27
2022-09-13	12:53:20	0.735992	571.428	FALSE	27
2022-09-13	12:53:20	0.736807	572.165	FALSE	27
2022-09-13	12:53:20	0.737824	572.903	FALSE	27
2022-09-13	12:53:21	0.73416	573.637	FALSE	27
2022-09-13	12:53:21	0.738995	574.376	FALSE	27
2022-09-13	12:53:21	1.96994	576.346	FALSE	27
2022-09-13	12:53:21	5.93187	582.278	1	28
2022-09-13	12:53:22	9.03487	591.313	1	29
2022-09-13	12:53:22	5.85446	597.167	1	30
2022-09-13	12:53:22	8.76097	605.928	1	31
2022-09-13	12:53:22	5.56281	611.491	1	32
2022-09-13	12:53:23	6.15009	617.641	1	33
2022-09-13	12:53:23	6.46306	624.104	1	34
2022-09-13	12:53:23	8.70601	632.81	1	35
2022-09-13	12:53:23	9.13741	641.948	1	36
2022-09-13	12:53:24	4.34836	646.296	1	37
2022-09-13	12:53:24	1.74541	648.041	FALSE	37
2022-09-13	12:53:24	1.64067	649.682	FALSE	37
2022-09-13	12:53:24	0.96444	650.647	FALSE	37
2022-09-13	12:53:25	0.84388	651.49	FALSE	37
2022-09-13	12:53:25	1.09095	652.581	FALSE	37
2022-09-13	12:53:25	1.28322	653.865	FALSE	37
2022-09-13	12:53:26	4.02535	657.89	1	38
2022-09-13	12:53:26	8.09207	665.982	1	39
2022-09-13	12:53:26	15.0964	681.078	1	40
2022-09-13	12:53:26	12.1188	693.197	1	41
2022-09-13	12:53:27	14.4598	707.657	1	42
2022-09-13	12:53:27	25.7309	733.388	1	43
2022-09-13	12:53:27	11.9367	745.325	1	44
2022-09-13	12:53:27	4.77813	750.103	1	45
2022-09-13	12:53:28	2.62495	752.728	FALSE	45
2022-09-13	12:53:28	1.04816	753.776	FALSE	45
2022-09-13	12:53:28	1.04062	754.816	FALSE	45
2022-09-13	12:53:28	0.794618	755.611	FALSE	45
2022-09-13	12:53:29	1.4648	757.076	FALSE	45
2022-09-13	12:53:29	0.350496	757.426	FALSE	45
2022-09-13	12:53:29	0.314873	757.741	FALSE	45
2022-09-13	12:53:30	0.225865	757.967	FALSE	45
2022-09-13	12:53:30	0.121845	758.089	FALSE	45
2022-09-13	12:53:30	-0.247264	758.089	FALSE	45
2022-09-13	12:53:30	-0.2493	758.089	FALSE	45
2022-09-13	12:53:31	0.405204	758.494	FALSE	45
2022-09-13	12:53:31	0.0349239	758.529	FALSE	45
2022-09-13	12:53:31	0.408715	758.938	FALSE	45
2022-09-13	12:53:31	0.117265	759.055	FALSE	45
2022-09-13	12:53:32	0.476807	759.532	FALSE	45
2022-09-13	12:53:32	1.05279	760.585	FALSE	45
2022-09-13	12:53:32	0.235891	760.821	FALSE	45
2022-09-13	12:53:32	1.16363	761.984	FALSE	45
2022-09-13	12:53:33	0.985967	762.97	FALSE	45
2022-09-13	12:53:33	3.26968	766.24	1	46
2022-09-13	12:53:33	4.84179	771.082	1	47
2022-09-13	12:53:34	2.32943	773.411	FALSE	47
2022-09-13	12:53:34	2.63268	776.044	FALSE	47
2022-09-13	12:53:34	1.32408	777.368	FALSE	47
2022-09-13	12:53:34	0.672939	778.041	FALSE	47
2022-09-13	12:53:35	0.785	778.826	FALSE	47
2022-09-13	12:53:35	0.899148	779.725	FALSE	47
2022-09-13	12:53:35	1.23319	780.958	FALSE	47
2022-09-13	12:53:35	5.52647	786.485	1	48
2022-09-13	12:53:36	4.94139	791.426	1	49
2022-09-13	12:53:36	7.44973	798.876	1	50
2022-09-13	12:53:36	1.9051	800.781	FALSE	50
2022-09-13	12:53:36	2.72943	803.51	FALSE	50
2022-09-13	12:53:37	0.699147	804.209	FALSE	50
2022-09-13	12:53:37	0.795076	805.004	FALSE	50
2022-09-13	12:53:37	0.593601	805.598	FALSE	50
2022-09-13	12:53:38	0.553957	806.152	FALSE	50
2022-09-13	12:53:38	1.00378	807.156	FALSE	50
2022-09-13	12:53:38	1.30673	808.463	FALSE	50
2022-09-13	12:53:38	0.512888	808.975	FALSE	50
2022-09-13	12:53:39	0.565305	809.541	FALSE	50
2022-09-13	12:53:39	0.33187	809.873	FALSE	50
2022-09-13	12:53:39	0.629529	810.502	FALSE	50
2022-09-13	12:53:39	0.731158	811.233	FALSE	50
2022-09-13	12:53:40	0.738893	811.972	FALSE	50
2022-09-13	12:53:40	0.738537	812.711	FALSE	50
2022-09-13	12:53:40	0.737519	813.448	FALSE	50
2022-09-13	12:53:40	0.738486	814.187	FALSE	50
2022-09-13	12:53:41	0.740471	814.927	FALSE	50
2022-09-13	12:53:41	0.739809	815.667	FALSE	50
2022-09-13	12:53:41	0.739097	816.406	FALSE	50
2022-09-13	12:53:42	0.730242	817.136	FALSE	50
2022-09-13	12:53:42	0.728562	817.865	FALSE	50
2022-09-13	12:53:42	0.743423	818.608	FALSE	50
2022-09-13	12:53:42	0.736654	819.345	FALSE	50
2022-09-13	12:53:43	0.741081	820.086	FALSE	50
2022-09-13	12:53:43	0.729428	820.815	FALSE	50
2022-09-13	12:53:43	0.731616	821.547	FALSE	50
2022-09-13	12:53:43	0.73243	822.28	FALSE	50
2022-09-13	12:53:44	0.741997	823.022	FALSE	50
2022-09-13	12:53:44	0.739147	823.761	FALSE	50
2022-09-13	12:53:44	0.734669	824.495	FALSE	50
2022-09-13	12:53:44	0.735483	825.231	FALSE	50
2022-09-13	12:53:45	0.731717	825.963	FALSE	50
2022-09-13	12:53:45	0.730496	826.693	FALSE	50
2022-09-13	12:53:45	0.734211	827.427	FALSE	50
2022-09-13	12:53:46	0.731107	828.158	FALSE	50
2022-09-13	12:53:46	0.728359	828.887	FALSE	50
2022-09-13	12:53:46	0.734771	829.621	FALSE	50
2022-09-13	12:53:46	0.731768	830.353	FALSE	50
2022-09-13	12:53:47	0.736959	831.09	FALSE	50
2022-09-13	12:53:47	0.73355	831.824	FALSE	50
2022-09-13	12:53:47	0.732837	832.557	FALSE	50
2022-09-13	12:53:47	0.732583	833.289	FALSE	50
2022-09-13	12:53:48	0.737824	834.027	FALSE	50
2022-09-13	12:53:48	0.741489	834.768	FALSE	50
2022-09-13	12:53:48	0.739809	835.508	FALSE	50
2022-09-13	12:53:48	0.733193	836.241	FALSE	50
2022-09-13	12:53:49	0.737519	836.979	FALSE	50
2022-09-13	12:53:49	0.732074	837.711	FALSE	50
2022-09-13	12:53:49	0.741997	838.453	FALSE	50
2022-09-13	12:53:49	0.736756	839.19	FALSE	50
2022-09-13	12:53:50	0.736196	839.926	FALSE	50
2022-09-13	12:53:50	0.731667	840.658	FALSE	50
2022-09-13	12:53:50	0.737163	841.395	FALSE	50
2022-09-13	12:53:51	0.738944	842.134	FALSE	50
2022-09-13	12:53:51	0.734262	842.868	FALSE	50
2022-09-13	12:53:51	0.741997	843.61	FALSE	50
2022-09-13	12:53:51	0.738231	844.348	FALSE	50
2022-09-13	12:53:52	0.729529	845.078	FALSE	50
2022-09-13	12:53:52	0.738384	845.816	FALSE	50
2022-09-13	12:53:52	0.729733	846.546	FALSE	50
2022-09-13	12:53:52	0.734211	847.28	FALSE	50
2022-09-13	12:53:53	0.741234	848.021	FALSE	50
2022-09-13	12:53:53	0.737417	848.759	FALSE	50
2022-09-13	12:53:53	0.734873	849.494	FALSE	50
2022-09-13	12:53:53	0.728817	850.223	FALSE	50
2022-09-13	12:53:54	0.735941	850.958	FALSE	50
2022-09-13	12:53:54	0.730242	851.689	FALSE	50
2022-09-13	12:53:54	0.731056	852.42	FALSE	50
2022-09-13	12:53:55	0.73131	853.151	FALSE	50
2022-09-13	12:53:55	0.731005	853.882	FALSE	50
2022-09-13	12:53:55	0.73472	854.617	FALSE	50
2022-09-13	12:53:55	0.736857	855.354	FALSE	50
2022-09-13	12:53:56	0.736399	856.09	FALSE	50
2022-09-13	12:53:56	0.733855	856.824	FALSE	50
2022-09-13	12:53:56	0.73243	857.556	FALSE	50
2022-09-13	12:53:56	0.738384	858.295	FALSE	50
2022-09-13	12:53:57	0.733346	859.028	FALSE	50
2022-09-13	12:53:57	0.733193	859.761	FALSE	50
2022-09-13	12:53:57	0.738079	860.499	FALSE	50
2022-09-13	12:53:57	0.747544	861.247	FALSE	50
2022-09-13	12:53:58	0.733397	861.98	FALSE	50
2022-09-13	12:53:58	0.737061	862.717	FALSE	50
2022-09-13	12:53:58	0.73187	863.449	FALSE	50
2022-09-13	12:53:59	0.729377	864.179	FALSE	50
2022-09-13	12:53:59	0.739555	864.918	FALSE	50
2022-09-13	12:53:59	0.739097	865.657	FALSE	50
2022-09-13	12:53:59	0.731005	866.388	FALSE	50
2022-09-13	12:54:00	0.744797	867.133	FALSE	50
2022-09-13	12:54:00	0.730801	867.864	FALSE	50
2022-09-13	12:54:00	0.736959	868.601	FALSE	50
2022-09-13	12:54:00	0.762252	869.363	FALSE	50
2022-09-13	12:54:01	0.733601	870.097	FALSE	50
2022-09-13	12:54:01	0.735534	870.832	FALSE	50
2022-09-13	12:54:01	0.734364	871.567	FALSE	50
2022-09-13	12:54:01	0.728919	872.295	FALSE	50
2022-09-13	12:54:02	0.733142	873.029	FALSE	50
2022-09-13	12:54:02	0.743778	873.772	FALSE	50
2022-09-13	12:54:02	0.737315	874.51	FALSE	50
2022-09-13	12:54:03	0.735891	875.246	FALSE	50
2022-09-13	12:54:03	0.734364	875.98	FALSE	50
2022-09-13	12:54:03	0.739606	876.72	FALSE	50
2022-09-13	12:54:03	0.732634	877.452	FALSE	50
2022-09-13	12:54:04	0.733448	878.186	FALSE	50
2022-09-13	12:54:04	0.737519	878.923	FALSE	50
2022-09-13	12:54:04	0.731768	879.655	FALSE	50
2022-09-13	12:54:04	0.732023	880.387	FALSE	50
2022-09-13	12:54:05	0.737621	881.125	FALSE	50
2022-09-13	12:54:05	0.733193	881.858	FALSE	50
2022-09-13	12:54:05	0.743982	882.602	FALSE	50
2022-09-13	12:54:05	0.736399	883.338	FALSE	50
2022-09-13	12:54:06	0.732379	884.071	FALSE	50
2022-09-13	12:54:06	0.739962	884.81	FALSE	50
2022-09-13	12:54:06	0.734466	885.545	FALSE	50
2022-09-13	12:54:07	0.736807	886.282	FALSE	50
2022-09-13	12:54:07	0.731819	887.014	FALSE	50
2022-09-13	12:54:07	0.738689	887.752	FALSE	50
2022-09-13	12:54:07	0.740267	888.493	FALSE	50
2022-09-13	12:54:08	0.738333	889.231	FALSE	50
2022-09-13	12:54:08	0.738079	889.969	FALSE	50
2022-09-13	12:54:08	0.730242	890.699	FALSE	50
2022-09-13	12:54:08	0.732481	891.432	FALSE	50
2022-09-13	12:54:09	0.733855	892.166	FALSE	50
2022-09-13	12:54:09	0.737468	892.903	FALSE	50
2022-09-13	12:54:09	0.736094	893.639	FALSE	50
2022-09-13	12:54:09	0.732634	894.372	FALSE	50
2022-09-13	12:54:10	0.72958	895.101	FALSE	50
2022-09-13	12:54:10	0.735585	895.837	FALSE	50
2022-09-13	12:54:10	0.736094	896.573	FALSE	50
2022-09-13	12:54:11	0.737621	897.311	FALSE	50
2022-09-13	12:54:11	0.739656	898.05	FALSE	50
2022-09-13	12:54:11	0.736654	898.787	FALSE	50
2022-09-13	12:54:11	0.741794	899.529	FALSE	50
2022-09-13	12:54:12	0.733397	900.262	FALSE	50
2022-09-13	12:54:12	0.738639	901.001	FALSE	50
2022-09-13	12:54:12	0.738791	901.74	FALSE	50
2022-09-13	12:54:12	0.736349	902.476	FALSE	50
2022-09-13	12:54:13	0.738486	903.214	FALSE	50
2022-09-13	12:54:13	0.743728	903.958	FALSE	50
2022-09-13	12:54:13	0.731921	904.69	FALSE	50
2022-09-13	12:54:13	0.733041	905.423	FALSE	50
2022-09-13	12:54:14	0.737315	906.16	FALSE	50
2022-09-13	12:54:14	0.727087	906.887	FALSE	50
2022-09-13	12:54:14	0.735941	907.623	FALSE	50
2022-09-13	12:54:14	0.730496	908.354	FALSE	50
2022-09-13	12:54:15	0.734975	909.089	FALSE	50
2022-09-13	12:54:15	0.734618	909.823	FALSE	50
2022-09-13	12:54:15	0.736654	910.56	FALSE	50
2022-09-13	12:54:16	0.740013	911.3	FALSE	50
2022-09-13	12:54:16	0.735534	912.036	FALSE	50
2022-09-13	12:54:16	0.735433	912.771	FALSE	50
2022-09-13	12:54:16	0.740267	913.511	FALSE	50
2022-09-13	12:54:17	0.72958	914.241	FALSE	50
2022-09-13	12:54:17	0.736959	914.978	FALSE	50
2022-09-13	12:54:17	0.737061	915.715	FALSE	50
2022-09-13	12:54:17	0.733957	916.449	FALSE	50
2022-09-13	12:54:18	0.73986	917.189	FALSE	50
2022-09-13	12:54:18	0.739249	917.928	FALSE	50
2022-09-13	12:54:18	0.711769	918.64	FALSE	50
2022-09-13	12:54:18	0.59701	919.237	FALSE	50
2022-09-13	12:54:19	0.528919	919.766	FALSE	50
2022-09-13	12:54:19	0.540725	920.306	FALSE	50
2022-09-13	12:54:19	0.340115	920.647	FALSE	50
2022-09-13	12:54:20	0.490802	921.137	FALSE	50
2022-09-13	12:54:20	0.645712	921.783	FALSE	50
2022-09-13	12:54:20	0.741489	922.525	FALSE	50
2022-09-13	12:54:20	0.738791	923.263	FALSE	50
2022-09-13	12:54:21	0.731463	923.995	FALSE	50
2022-09-13	12:54:21	0.731361	924.726	FALSE	50
2022-09-13	12:54:21	0.738588	925.465	FALSE	50
2022-09-13	12:54:21	0.735026	926.2	FALSE	50
2022-09-13	12:54:22	0.740573	926.94	FALSE	50
2022-09-13	12:54:22	0.733804	927.674	FALSE	50
2022-09-13	12:54:22	0.730394	928.405	FALSE	50
2022-09-13	12:54:22	0.735178	929.14	FALSE	50
2022-09-13	12:54:23	0.738028	929.878	FALSE	50
2022-09-13	12:54:23	0.736552	930.614	FALSE	50
2022-09-13	12:54:23	0.739555	931.354	FALSE	50
2022-09-13	12:54:24	0.737621	932.092	FALSE	50
2022-09-13	12:54:24	0.7307	932.822	FALSE	50
2022-09-13	12:54:24	0.733397	933.556	FALSE	50
2022-09-13	12:54:24	0.738282	934.294	FALSE	50
2022-09-13	12:54:25	0.741947	935.036	FALSE	50
2022-09-13	12:54:25	0.749987	935.786	FALSE	50
2022-09-13	12:54:25	0.869631	936.655	FALSE	50
2022-09-13	12:54:25	0.749631	937.405	FALSE	50
2022-09-13	12:54:26	0.73243	938.138	FALSE	50
2022-09-13	12:54:26	0.727646	938.865	FALSE	50
2022-09-13	12:54:26	0.728257	939.593	FALSE	50
2022-09-13	12:54:26	0.726221	940.32	FALSE	50
2022-09-13	12:54:27	0.741641	941.061	FALSE	50
2022-09-13	12:54:27	0.741539	941.803	FALSE	50
2022-09-13	12:54:27	0.736908	942.54	FALSE	50
2022-09-13	12:54:28	0.732583	943.272	FALSE	50
2022-09-13	12:54:28	0.732735	944.005	FALSE	50
2022-09-13	12:54:28	0.770598	944.776	FALSE	50
2022-09-13	12:54:28	0.740064	945.516	FALSE	50
2022-09-13	12:54:29	2.23044	947.746	FALSE	50
2022-09-13	12:54:29	1.68169	949.428	FALSE	50
2022-09-13	12:54:29	2.35915	951.787	FALSE	50
2022-09-13	12:54:29	3.53731	955.324	1	51
2022-09-13	12:54:30	0.893295	956.218	FALSE	51
2022-09-13	12:54:30	1.79162	958.009	FALSE	51
2022-09-13	12:54:30	1.79345	959.803	FALSE	51
2022-09-13	12:54:30	1.43762	961.24	FALSE	51
2022-09-13	12:54:31	2.40871	963.649	FALSE	51
2022-09-13	12:54:31	1.22159	964.871	FALSE	51
2022-09-13	12:54:31	2.20464	967.075	FALSE	51
2022-09-13	12:54:32	1.02251	968.098	FALSE	51
2022-09-13	12:54:32	1.00037	969.098	FALSE	51
2022-09-13	12:54:32	0.984847	970.083	FALSE	51
2022-09-13	12:54:32	0.935382	971.018	FALSE	51
2022-09-13	12:54:33	0.673601	971.692	FALSE	51
2022-09-13	12:54:33	0.296603	971.989	FALSE	51
2022-09-13	12:54:33	0.728054	972.717	FALSE	51
2022-09-13	12:54:33	0.733295	973.45	FALSE	51
2022-09-13	12:54:34	0.733753	974.184	FALSE	51
2022-09-13	12:54:34	0.739147	974.923	FALSE	51
2022-09-13	12:54:34	0.735483	975.658	FALSE	51
2022-09-13	12:54:34	0.746476	976.405	FALSE	51
2022-09-13	12:54:35	0.485763	976.891	FALSE	51
2022-09-13	12:54:35	0.739555	977.63	FALSE	51
2022-09-13	12:54:35	0.306425	977.936	FALSE	51
2022-09-13	12:54:36	0.301845	978.238	FALSE	51
2022-09-13	12:54:36	0.590954	978.829	FALSE	51
2022-09-13	12:54:36	0.668817	979.498	FALSE	51
2022-09-13	12:54:36	1.31752	980.816	FALSE	51
2022-09-13	12:54:37	2.59416	983.41	FALSE	51
2022-09-13	12:54:37	2.81177	986.222	FALSE	51
2022-09-13	12:54:37	1.83197	988.054	FALSE	51
2022-09-13	12:54:37	1.55411	989.608	FALSE	51
2022-09-13	12:54:38	1.77854	991.386	FALSE	51
2022-09-13	12:54:38	0.654516	992.041	FALSE	51
2022-09-13	12:54:38	0.856196	992.897	FALSE	51
2022-09-13	12:54:38	0.240776	993.138	FALSE	51
2022-09-13	12:54:39	0.804695	993.942	FALSE	51
2022-09-13	12:54:39	0.245255	994.188	FALSE	51
2022-09-13	12:54:39	0.5593	994.747	FALSE	51
2022-09-13	12:54:39	0.834669	995.582	FALSE	51
2022-09-13	12:54:40	0.937417	996.519	FALSE	51
2022-09-13	12:54:40	2.70841	999.227	FALSE	51
2022-09-13	12:54:40	1.93589	1001.16	FALSE	51
2022-09-13	12:54:41	2.68281	1003.85	FALSE	51
2022-09-13	12:54:41	2.07141	1005.92	FALSE	51
2022-09-13	12:54:41	0.230598	1006.15	FALSE	51
2022-09-13	12:54:41	0.113194	1006.26	FALSE	51
2022-09-13	12:54:42	-0.00304046	1006.26	FALSE	51
2022-09-13	12:54:42	-0.0510302	1006.26	FALSE	51
2022-09-13	12:54:42	0.022303	1006.28	FALSE	51
2022-09-13	12:54:42	-0.12014	1006.28	FALSE	51
2022-09-13	12:54:43	-0.0645671	1006.28	FALSE	51
2022-09-13	12:54:43	-0.305483	1006.28	FALSE	51
2022-09-13	12:54:43	-0.444618	1006.28	FALSE	51
2022-09-13	12:54:43	-0.511946	1006.28	FALSE	51
2022-09-13	12:54:44	1.0224	1007.31	FALSE	51
2022-09-13	12:54:44	1.22597	1008.53	FALSE	51
2022-09-13	12:54:44	5.33227	1013.86	1	52
2022-09-13	12:54:45	1.37055	1015.23	FALSE	52
2022-09-13	12:54:45	2.47513	1017.71	FALSE	52
2022-09-13	12:54:45	1.12892	1018.84	FALSE	52
2022-09-13	12:54:45	3.89518	1022.73	1	53
2022-09-13	12:54:46	4.24016	1026.97	1	54
2022-09-13	12:54:46	5.43925	1032.41	1	55
2022-09-13	12:54:46	3.20057	1035.61	1	56
2022-09-13	12:54:46	2.65477	1038.27	FALSE	56
2022-09-13	12:54:47	2.43426	1040.7	FALSE	56
2022-09-13	12:54:47	1.62515	1042.33	FALSE	56
2022-09-13	12:54:47	1.62515	1043.95	FALSE	56
2022-09-13	12:54:47	0.801438	1044.75	FALSE	56
2022-09-13	12:54:48	0.755891	1045.51	FALSE	56
2022-09-13	12:54:48	0.549733	1046.06	FALSE	56
2022-09-13	12:54:48	0.518079	1046.58	FALSE	56
2022-09-13	12:54:49	0.528868	1047.11	FALSE	56
2022-09-13	12:54:49	0.708613	1047.82	FALSE	56
2022-09-13	12:54:49	1.11375	1048.93	FALSE	56
2022-09-13	12:54:49	2.28296	1051.21	FALSE	56
2022-09-13	12:54:50	10.4809	1061.69	1	57
2022-09-13	12:54:50	7.95227	1069.65	1	58
2022-09-13	12:54:50	0.87187	1070.52	FALSE	58
2022-09-13	12:54:50	5.69858	1076.22	1	59
2022-09-13	12:54:51	2.26678	1078.48	FALSE	59
2022-09-13	12:54:51	0.898741	1079.38	FALSE	59
2022-09-13	12:54:51	0.526425	1079.91	FALSE	59
2022-09-13	12:54:51	0.449936	1080.36	FALSE	59
2022-09-13	12:54:52	0.334364	1080.69	FALSE	59
2022-09-13	12:54:52	0.405356	1081.1	FALSE	59
2022-09-13	12:54:52	0.630903	1081.73	FALSE	59
2022-09-13	12:54:53	0.477112	1082.21	FALSE	59
2022-09-13	12:54:53	0.372685	1082.58	FALSE	59
2022-09-13	12:54:53	0.337265	1082.92	FALSE	59
2022-09-13	12:54:53	0.281692	1083.2	FALSE	59
2022-09-13	12:54:54	0.245916	1083.44	FALSE	59
2022-09-13	12:54:54	0.0859671	1083.53	FALSE	59
2022-09-13	12:54:54	-0.0201906	1083.53	FALSE	59
2022-09-13	12:54:54	-0.0203432	1083.53	FALSE	59
2022-09-13	12:54:55	-0.166501	1083.53	FALSE	59
2022-09-13	12:54:55	-0.0544399	1083.53	FALSE	59
2022-09-13	12:54:55	0.236959	1083.77	FALSE	59
2022-09-13	12:54:55	0.521539	1084.29	FALSE	59
2022-09-13	12:54:56	0.901539	1085.19	FALSE	59
2022-09-13	12:54:56	0.888715	1086.08	FALSE	59
2022-09-13	12:54:56	2.38393	1088.46	FALSE	59
2022-09-13	12:54:57	1.51457	1089.98	FALSE	59
2022-09-13	12:54:57	0.700776	1090.68	FALSE	59
2022-09-13	12:54:57	0.469224	1091.15	FALSE	59
2022-09-13	12:54:57	0.69014	1091.84	FALSE	59
2022-09-13	12:54:58	-1.33286	1091.84	FALSE	59
2022-09-13	12:54:58	0.738486	1092.58	FALSE	59
2022-09-13	12:54:58	0.739147	1093.31	FALSE	59
2022-09-13	12:54:58	0.736501	1094.05	FALSE	59
2022-09-13	12:54:59	0.554669	1094.61	FALSE	59
2022-09-13	12:54:59	0.741997	1095.35	FALSE	59
2022-09-13	12:54:59	1.30286	1096.65	FALSE	59
2022-09-13	12:54:59	2.80444	1099.45	FALSE	59
2022-09-13	12:55:00	1.15045	1100.61	FALSE	59
2022-09-13	12:55:00	0.89528	1101.5	FALSE	59
2022-09-13	12:55:00	0.337926	1101.84	FALSE	59
2022-09-13	12:55:01	0.624287	1102.46	FALSE	59
2022-09-13	12:55:01	0.285051	1102.75	FALSE	59
2022-09-13	12:55:01	0.565254	1103.31	FALSE	59
2022-09-13	12:55:01	0.751209	1104.06	FALSE	59
2022-09-13	12:55:02	0.778384	1104.84	FALSE	59
2022-09-13	12:55:02	1.39757	1106.24	FALSE	59
2022-09-13	12:55:02	1.87833	1108.12	FALSE	59
2022-09-13	12:55:02	0.742608	1108.86	FALSE	59
2022-09-13	12:55:03	0.738079	1109.6	FALSE	59
2022-09-13	12:55:03	0.730547	1110.33	FALSE	59
2022-09-13	12:55:03	0.726832	1111.06	FALSE	59
2022-09-13	12:55:03	0.712379	1111.77	FALSE	59
2022-09-13	12:55:04	0.738639	1112.51	FALSE	59
2022-09-13	12:55:04	0.713244	1113.22	FALSE	59
2022-09-13	12:55:04	0.845967	1114.07	FALSE	59
2022-09-13	12:55:04	0.793041	1114.86	FALSE	59
2022-09-13	12:55:05	0.735534	1115.6	FALSE	59
2022-09-13	12:55:05	0.734313	1116.33	FALSE	59
2022-09-13	12:55:05	0.733804	1117.06	FALSE	59
2022-09-13	12:55:06	0.740776	1117.8	FALSE	59
2022-09-13	12:55:06	0.738079	1118.54	FALSE	59
2022-09-13	12:55:06	0.737265	1119.28	FALSE	59
2022-09-13	12:55:06	0.730649	1120.01	FALSE	59
2022-09-13	12:55:07	0.72958	1120.74	FALSE	59
2022-09-13	12:55:07	0.732481	1121.47	FALSE	59
2022-09-13	12:55:07	0.740165	1122.21	FALSE	59
2022-09-13	12:55:07	0.734568	1122.95	FALSE	59
2022-09-13	12:55:08	0.730954	1123.68	FALSE	59
2022-09-13	12:55:08	0.737875	1124.42	FALSE	59
2022-09-13	12:55:08	0.714109	1125.13	FALSE	59
2022-09-13	12:55:08	0.744186	1125.87	FALSE	59
2022-09-13	12:55:09	0.740623	1126.61	FALSE	59
2022-09-13	12:55:09	0.732888	1127.35	FALSE	59
2022-09-13	12:55:09	0.0989951	1127.45	FALSE	59
2022-09-13	12:55:10	-2.21205	1127.45	FALSE	59
2022-09-13	12:55:10	0.386425	1127.83	FALSE	59
2022-09-13	12:55:10	0.101285	1127.93	FALSE	59
2022-09-13	12:55:10	-0.0928623	1127.93	FALSE	59
2022-09-13	12:55:11	0.196603	1128.13	FALSE	59
2022-09-13	12:55:11	0.0734989	1128.2	FALSE	59
2022-09-13	12:55:11	0.115077	1128.32	FALSE	59
2022-09-13	12:55:11	0.0965523	1128.42	FALSE	59
2022-09-13	12:55:12	0.102303	1128.52	FALSE	59
2022-09-13	12:55:12	0.260318	1128.78	FALSE	59
2022-09-13	12:55:12	-0.0181041	1128.78	FALSE	59
2022-09-13	12:55:12	0.220166	1129	FALSE	59
2022-09-13	12:55:13	0.218842	1129.22	FALSE	59
2022-09-13	12:55:13	0.488054	1129.71	FALSE	59
2022-09-13	12:55:13	0.154059	1129.86	FALSE	59
2022-09-13	12:55:14	0.461896	1130.32	FALSE	59
2022-09-13	12:55:14	0.343575	1130.67	FALSE	59
2022-09-13	12:55:14	0.331819	1131	FALSE	59
2022-09-13	12:55:14	0.468206	1131.47	FALSE	59
2022-09-13	12:55:15	0.513092	1131.98	FALSE	59
2022-09-13	12:55:15	0.498232	1132.48	FALSE	59
2022-09-13	12:55:15	0.419911	1132.9	FALSE	59
2022-09-13	12:55:15	0.465153	1133.36	FALSE	59
2022-09-13	12:55:16	0.197621	1133.56	FALSE	59
2022-09-13	12:55:16	0.235534	1133.8	FALSE	59
2022-09-13	12:55:16	0.181947	1133.98	FALSE	59
2022-09-13	12:55:16	0.456756	1134.43	FALSE	59
2022-09-13	12:55:17	0.705204	1135.14	FALSE	59
2022-09-13	12:55:17	0.731361	1135.87	FALSE	59
2022-09-13	12:55:17	0.346883	1136.22	FALSE	59
2022-09-13	12:55:18	0.429173	1136.65	FALSE	59
2022-09-13	12:55:18	1.30587	1137.95	FALSE	59
2022-09-13	12:55:18	2.50536	1140.46	FALSE	59
2022-09-13	12:55:18	4.70424	1145.16	1	60
2022-09-13	12:55:19	4.58266	1149.74	1	61
2022-09-13	12:55:19	3.7537	1153.5	1	62
2022-09-13	12:55:19	2.89731	1156.4	FALSE	62
2022-09-13	12:55:19	3.02637	1159.42	1	63
2022-09-13	12:55:20	0.952481	1160.37	FALSE	63
2022-09-13	12:55:20	1.44424	1161.82	FALSE	63
2022-09-13	12:55:20	1.05981	1162.88	FALSE	63
2022-09-13	12:55:20	1.60276	1164.48	FALSE	63
2022-09-13	12:55:21	1.52856	1166.01	FALSE	63
2022-09-13	12:55:21	3.45945	1169.47	1	64
2022-09-13	12:55:21	2.57976	1172.05	FALSE	64
2022-09-13	12:55:22	0.877163	1172.93	FALSE	64
2022-09-13	12:55:22	0.855127	1173.78	FALSE	64
2022-09-13	12:55:22	0.760979	1174.54	FALSE	64
2022-09-13	12:55:22	1.20047	1175.74	FALSE	64
2022-09-13	12:55:23	0.49757	1176.24	FALSE	64
2022-09-13	12:55:23	0.631921	1176.87	FALSE	64
2022-09-13	12:55:23	0.790751	1177.66	FALSE	64
2022-09-13	12:55:23	2.84388	1180.51	FALSE	64
2022-09-13	12:55:24	5.48769	1185.99	1	65
2022-09-13	12:55:24	7.5854	1193.58	1	66
2022-09-13	12:55:24	3.47451	1197.05	1	67
2022-09-13	12:55:24	6.0025	1203.06	1	68
2022-09-13	12:55:25	2.63029	1205.69	FALSE	68
2022-09-13	12:55:25	0.73757	1206.42	FALSE	68
2022-09-13	12:55:25	0.767799	1207.19	FALSE	68

## Sheet: Daisy_martin_2022913125011
						**GoPro Fitting: 1239
2022-09-13	12:50:12	0.266629
2022-09-13	12:50:12	0.264338
2022-09-13	12:50:12	0.207188
2022-09-13	12:50:12	0.285509
2022-09-13	12:50:12	0.483881
2022-09-13	12:50:13	1.60022
2022-09-13	12:50:13	0.846934
2022-09-13	12:50:13	0.471769
2022-09-13	12:50:13	0.441132
2022-09-13	12:50:14	0.865712
2022-09-13	12:50:14	0.891259
2022-09-13	12:50:14	2.04668
2022-09-13	12:50:14	3.87645
2022-09-13	12:50:15	1.86469
2022-09-13	12:50:15	0.766018
2022-09-13	12:50:15	0.244389
2022-09-13	12:50:16	0.28444
2022-09-13	12:50:16	0.339046
2022-09-13	12:50:16	0.418384
2022-09-13	12:50:16	1.61955
2022-09-13	12:50:17	1.18815
2022-09-13	12:50:17	0.816145
2022-09-13	12:50:17	0.988868
2022-09-13	12:50:17	0.625254
2022-09-13	12:50:18	0.345102
2022-09-13	12:50:18	0.458333
2022-09-13	12:50:18	1.08291
2022-09-13	12:50:18	1.03635
2022-09-13	12:50:19	0.410496
2022-09-13	12:50:19	0.410954
2022-09-13	12:50:19	0.350903
2022-09-13	12:50:20	0.399758
2022-09-13	12:50:20	0.392837
2022-09-13	12:50:20	0.446781
2022-09-13	12:50:20	0.575382
2022-09-13	12:50:21	0.307799
2022-09-13	12:50:21	0.35528
2022-09-13	12:50:21	0.26159
2022-09-13	12:50:21	0.359046
2022-09-13	12:50:22	0.369479
2022-09-13	12:50:22	0.280369
2022-09-13	12:50:22	0.556298
2022-09-13	12:50:22	0.136043
2022-09-13	12:50:23	0.347138
2022-09-13	12:50:23	0.513143
2022-09-13	12:50:23	0.376298
2022-09-13	12:50:24	0.255636
2022-09-13	12:50:24	0.168715
2022-09-13	12:50:24	0.310598
2022-09-13	12:50:24	0.190547
2022-09-13	12:50:25	0.37299
2022-09-13	12:50:25	0.672277
2022-09-13	12:50:25	1.51869
2022-09-13	12:50:25	1.80668
2022-09-13	12:50:26	3.6594
2022-09-13	12:50:26	1.79462
2022-09-13	12:50:26	1.28576
2022-09-13	12:50:26	0.671107
2022-09-13	12:50:27	0.2193
2022-09-13	12:50:27	0.392481
2022-09-13	12:50:27	0.478282
2022-09-13	12:50:27	0.424949
2022-09-13	12:50:28	0.36154
2022-09-13	12:50:28	0.359606
2022-09-13	12:50:28	0.340929
2022-09-13	12:50:29	0.32841
2022-09-13	12:50:29	0.429478
2022-09-13	12:50:29	0.357723
2022-09-13	12:50:29	0.53416
2022-09-13	12:50:30	0.416247
2022-09-13	12:50:30	0.562862
2022-09-13	12:50:30	0.225509
2022-09-13	12:50:30	0.44556
2022-09-13	12:50:31	0.127239
2022-09-13	12:50:31	0.303473
2022-09-13	12:50:31	0.23584
2022-09-13	12:50:31	0.522404
2022-09-13	12:50:32	0.337417
2022-09-13	12:50:32	0.420369
2022-09-13	12:50:32	0.393804
2022-09-13	12:50:33	0.517112
2022-09-13	12:50:33	1.55299
2022-09-13	12:50:33	2.62179
2022-09-13	12:50:33	2.74821
2022-09-13	12:50:34	1.77747
2022-09-13	12:50:34	1.61548
2022-09-13	12:50:34	1.08846
2022-09-13	12:50:34	2.71971
2022-09-13	12:50:35	1.46846
2022-09-13	12:50:35	1.01019
2022-09-13	12:50:35	0.336145
2022-09-13	12:50:35	0.416654
2022-09-13	12:50:36	0.480929
2022-09-13	12:50:36	0.846323
2022-09-13	12:50:36	0.713804
2022-09-13	12:50:37	1.68322
2022-09-13	12:50:37	0.874873
2022-09-13	12:50:37	0.478028
2022-09-13	12:50:37	-0.108435
2022-09-13	12:50:38	0.179402
2022-09-13	12:50:38	0.333346
2022-09-13	12:50:38	0.589733
2022-09-13	12:50:38	0.587545
2022-09-13	12:50:39	0.64042
2022-09-13	12:50:39	0.263372
2022-09-13	12:50:39	0.25126
2022-09-13	12:50:39	0.350598
2022-09-13	12:50:40	0.459249
2022-09-13	12:50:40	0.47355
2022-09-13	12:50:40	0.727952
2022-09-13	12:50:41	0.365967
2022-09-13	12:50:41	0.392583
2022-09-13	12:50:41	0.315178
2022-09-13	12:50:41	0.344237
2022-09-13	12:50:42	0.402456
2022-09-13	12:50:42	0.494008
2022-09-13	12:50:42	0.434211
2022-09-13	12:50:42	0.459962
2022-09-13	12:50:43	0.701845
2022-09-13	12:50:43	2.75568
2022-09-13	12:50:43	0.576807
2022-09-13	12:50:43	0.541692
2022-09-13	12:50:44	0.43986
2022-09-13	12:50:44	0.290038
2022-09-13	12:50:44	0.360623
2022-09-13	12:50:45	0.289631
2022-09-13	12:50:45	0.294924
2022-09-13	12:50:45	0.535178
2022-09-13	12:50:45	0.903728
2022-09-13	12:50:46	1.07492
2022-09-13	12:50:46	2.26083
2022-09-13	12:50:46	2.67696
2022-09-13	12:50:46	0.50383
2022-09-13	12:50:47	0.348206
2022-09-13	12:50:47	0.313906
2022-09-13	12:50:47	0.293804
2022-09-13	12:50:47	0.280522
2022-09-13	12:50:48	0.330649
2022-09-13	12:50:48	0.324797
2022-09-13	12:50:48	0.242456
2022-09-13	12:50:48	0.371361
2022-09-13	12:50:49	0.368206
2022-09-13	12:50:49	0.618893
2022-09-13	12:50:49	1.03121
2022-09-13	12:50:50	1.97045
2022-09-13	12:50:50	1.44235
2022-09-13	12:50:50	1.93706
2022-09-13	12:50:50	1.57095
2022-09-13	12:50:51	2.65645
2022-09-13	12:50:51	1.82856
2022-09-13	12:50:51	1.66291
2022-09-13	12:50:51	2.37788
2022-09-13	12:50:52	1.62999
2022-09-13	12:50:52	0.991514
2022-09-13	12:50:52	0.763626
2022-09-13	12:50:52	0.742659
2022-09-13	12:50:53	1.32627
2022-09-13	12:50:53	0.849122
2022-09-13	12:50:53	1.05966
2022-09-13	12:50:54	0.357875
2022-09-13	12:50:54	0.850292
2022-09-13	12:50:54	0.477214
2022-09-13	12:50:54	0.713143
2022-09-13	12:50:55	0.444389
2022-09-13	12:50:55	0.787799
2022-09-13	12:50:55	1.20581
2022-09-13	12:50:55	0.771107
2022-09-13	12:50:56	2.15039
2022-09-13	12:50:56	1.54139
2022-09-13	12:50:56	2.84724
2022-09-13	12:50:56	1.11645
2022-09-13	12:50:57	1.10088
2022-09-13	12:50:57	0.570649
2022-09-13	12:50:57	0.236705
2022-09-13	12:50:58	0.615738
2022-09-13	12:50:58	0.311209
2022-09-13	12:50:58	0.728359
2022-09-13	12:50:58	0.668613
2022-09-13	12:50:59	1.10215
2022-09-13	12:50:59	0.990242
2022-09-13	12:50:59	1.38093
2022-09-13	12:50:59	2.11609
2022-09-13	12:51:00	2.19167
2022-09-13	12:51:00	2.67065
2022-09-13	12:51:00	1.98994
2022-09-13	12:51:00	4.1425
2022-09-13	12:51:01	0.567544
2022-09-13	12:51:01	3.76276
2022-09-13	12:51:01	0.941845
2022-09-13	12:51:02	4.14525
2022-09-13	12:51:02	2.37508
2022-09-13	12:51:02	4.05273
2022-09-13	12:51:02	2.5334
2022-09-13	12:51:03	0.713448
2022-09-13	12:51:03	2.03177
2022-09-13	12:51:03	0.761946
2022-09-13	12:51:03	1.19187
2022-09-13	12:51:04	0.850394
2022-09-13	12:51:04	0.546628
2022-09-13	12:51:04	1.40851
2022-09-13	12:51:04	0.968511
2022-09-13	12:51:05	1.31385
2022-09-13	12:51:05	1.01401
2022-09-13	12:51:05	1.56322
2022-09-13	12:51:05	2.45767
2022-09-13	12:51:06	1.41864
2022-09-13	12:51:06	2.60251
2022-09-13	12:51:06	0.995992
2022-09-13	12:51:07	1.79207
2022-09-13	12:51:07	0.575942
2022-09-13	12:51:07	2.64159
2022-09-13	12:51:07	0.877621
2022-09-13	12:51:08	1.54129
2022-09-13	12:51:08	1.29009
2022-09-13	12:51:08	0.413499
2022-09-13	12:51:08	0.641489
2022-09-13	12:51:09	0.294008
2022-09-13	12:51:09	-0.0489437
2022-09-13	12:51:09	-0.505839
2022-09-13	12:51:09	-0.553117
2022-09-13	12:51:10	0.00128524
2022-09-13	12:51:10	0.240827
2022-09-13	12:51:10	0.334873
2022-09-13	12:51:11	0.562252
2022-09-13	12:51:11	0.398283
2022-09-13	12:51:11	0.475534
2022-09-13	12:51:11	0.421132
2022-09-13	12:51:12	0.441081
2022-09-13	12:51:12	0.464746
2022-09-13	12:51:12	0.425
2022-09-13	12:51:12	0.430496
2022-09-13	12:51:13	0.461082
2022-09-13	12:51:13	0.54729
2022-09-13	12:51:13	0.378944
2022-09-13	12:51:13	0.647595
2022-09-13	12:51:14	0.610852
2022-09-13	12:51:14	0.590547
2022-09-13	12:51:14	0.569173
2022-09-13	12:51:15	0.682507
2022-09-13	12:51:15	0.413804
2022-09-13	12:51:15	0.479504
2022-09-13	12:51:15	0.416094
2022-09-13	12:51:16	0.268359
2022-09-13	12:51:16	0.345967
2022-09-13	12:51:16	0.440573
2022-09-13	12:51:16	0.457875
2022-09-13	12:51:17	0.500267
2022-09-13	12:51:17	0.503066
2022-09-13	12:51:17	0.52271
2022-09-13	12:51:17	0.503219
2022-09-13	12:51:18	0.532837
2022-09-13	12:51:18	0.559504
2022-09-13	12:51:18	0.594822
2022-09-13	12:51:19	0.531718
2022-09-13	12:51:19	0.584847
2022-09-13	12:51:19	0.605712
2022-09-13	12:51:19	0.584796
2022-09-13	12:51:20	0.544796
2022-09-13	12:51:20	0.460623
2022-09-13	12:51:20	0.443422
2022-09-13	12:51:20	0.475942
2022-09-13	12:51:21	0.28159
2022-09-13	12:51:21	0.367138
2022-09-13	12:51:21	0.205356
2022-09-13	12:51:21	0.153092
2022-09-13	12:51:22	0.000572752
2022-09-13	12:51:22	0.494873
2022-09-13	12:51:22	0.484237
2022-09-13	12:51:22	0.421336
2022-09-13	12:51:23	0.428868
2022-09-13	12:51:23	0.327443
2022-09-13	12:51:23	0.570445
2022-09-13	12:51:24	0.339809
2022-09-13	12:51:24	0.54215
2022-09-13	12:51:24	0.284084
2022-09-13	12:51:24	0.553295
2022-09-13	12:51:25	0.293397
2022-09-13	12:51:25	0.483728
2022-09-13	12:51:25	0.342914
2022-09-13	12:51:25	0.466425
2022-09-13	12:51:26	0.657163
2022-09-13	12:51:26	0.734975
2022-09-13	12:51:26	0.736959
2022-09-13	12:51:26	0.735687
2022-09-13	12:51:27	1.14805
2022-09-13	12:51:27	1.32729
2022-09-13	12:51:27	0.713651
2022-09-13	12:51:28	0.713448
2022-09-13	12:51:28	0.776756
2022-09-13	12:51:28	1.0277
2022-09-13	12:51:28	1.01436
2022-09-13	12:51:29	0.749835
2022-09-13	12:51:29	0.949173
2022-09-13	12:51:29	0.776196
2022-09-13	12:51:29	0.742608
2022-09-13	12:51:30	0.979962
2022-09-13	12:51:30	0.764288
2022-09-13	12:51:30	0.753041
2022-09-13	12:51:30	0.784491
2022-09-13	12:51:31	0.811666
2022-09-13	12:51:31	0.546679
2022-09-13	12:51:31	0.566476
2022-09-13	12:51:32	1.06709
2022-09-13	12:51:32	0.977977
2022-09-13	12:51:32	0.667239
2022-09-13	12:51:32	0.653448
2022-09-13	12:51:33	0.550547
2022-09-13	12:51:33	0.237163
2022-09-13	12:51:33	0.810445
2022-09-13	12:51:33	0.755738
2022-09-13	12:51:34	1.42052
2022-09-13	12:51:34	0.780013
2022-09-13	12:51:34	1.00922
2022-09-13	12:51:34	0.476756
2022-09-13	12:51:35	0.110038
2022-09-13	12:51:35	0.69701
2022-09-13	12:51:35	0.762099
2022-09-13	12:51:36	0.726374
2022-09-13	12:51:36	0.737875
2022-09-13	12:51:36	0.735992
2022-09-13	12:51:36	0.738231
2022-09-13	12:51:37	0.737621
2022-09-13	12:51:37	0.753142
2022-09-13	12:51:37	1.17579
2022-09-13	12:51:37	0.528359
2022-09-13	12:51:38	0.661743
2022-09-13	12:51:38	0.738333
2022-09-13	12:51:38	0.736959
2022-09-13	12:51:38	0.737926
2022-09-13	12:51:39	0.73416
2022-09-13	12:51:39	0.733193
2022-09-13	12:51:39	0.73757
2022-09-13	12:51:40	0.740827
2022-09-13	12:51:40	0.734669
2022-09-13	12:51:40	0.729784
2022-09-13	12:51:40	0.738893
2022-09-13	12:51:41	0.739656
2022-09-13	12:51:41	0.739504
2022-09-13	12:51:41	0.742201
2022-09-13	12:51:41	0.736603
2022-09-13	12:51:42	0.735891
2022-09-13	12:51:42	0.738689
2022-09-13	12:51:42	0.751616
2022-09-13	12:51:42	0.807188
2022-09-13	12:51:43	0.335942
2022-09-13	12:51:43	0.542252
2022-09-13	12:51:43	0.489173
2022-09-13	12:51:43	0.57243
2022-09-13	12:51:44	4.71874
2022-09-13	12:51:44	6.75177
2022-09-13	12:51:44	1.38658
2022-09-13	12:51:45	1.50296
2022-09-13	12:51:45	0.303677
2022-09-13	12:51:45	0.569326
2022-09-13	12:51:45	0.600623
2022-09-13	12:51:46	0.649886
2022-09-13	12:51:46	1.3048
2022-09-13	12:51:46	1.17263
2022-09-13	12:51:46	3.72856
2022-09-13	12:51:47	1.91406
2022-09-13	12:51:47	3.69258
2022-09-13	12:51:47	1.97095
2022-09-13	12:51:47	1.34922
2022-09-13	12:51:48	2.25808
2022-09-13	12:51:48	1.4221
2022-09-13	12:51:48	1.35579
2022-09-13	12:51:49	1.77497
2022-09-13	12:51:49	1.08943
2022-09-13	12:51:49	2.92439
2022-09-13	12:51:49	0.305356
2022-09-13	12:51:50	0.769377
2022-09-13	12:51:50	1.04515
2022-09-13	12:51:50	1.48123
2022-09-13	12:51:50	1.93645
2022-09-13	12:51:51	1.54276
2022-09-13	12:51:51	4.62194
2022-09-13	12:51:51	2.19732
2022-09-13	12:51:51	0.883371
2022-09-13	12:51:52	0.764644
2022-09-13	12:51:52	0.467443
2022-09-13	12:51:52	0.26042
2022-09-13	12:51:53	0.137112
2022-09-13	12:51:53	0.0838806
2022-09-13	12:51:53	0.728512
2022-09-13	12:51:53	0.981896
2022-09-13	12:51:54	1.60683
2022-09-13	12:51:54	1.18927
2022-09-13	12:51:54	0.602201
2022-09-13	12:51:54	0.451361
2022-09-13	12:51:55	0.209682
2022-09-13	12:51:55	0.270038
2022-09-13	12:51:55	0.162456
2022-09-13	12:51:55	0.453906
2022-09-13	12:51:56	0.719351
2022-09-13	12:51:56	0.0337534
2022-09-13	12:51:56	0.149937
2022-09-13	12:51:57	0.330903
2022-09-13	12:51:57	0.0213361
2022-09-13	12:51:57	-0.0166283
2022-09-13	12:51:57	-0.107722
2022-09-13	12:51:58	-0.124923
2022-09-13	12:51:58	-0.179783
2022-09-13	12:51:58	-0.201615
2022-09-13	12:51:58	-0.113473
2022-09-13	12:51:59	-0.189045
2022-09-13	12:51:59	-0.312302
2022-09-13	12:51:59	0.042812
2022-09-13	12:51:59	0.428206
2022-09-13	12:52:00	0.790038
2022-09-13	12:52:00	2.70556
2022-09-13	12:52:00	2.31192
2022-09-13	12:52:00	0.395026
2022-09-13	12:52:01	0.174618
2022-09-13	12:52:01	0.215178
2022-09-13	12:52:01	-0.0319972
2022-09-13	12:52:02	-0.318053
2022-09-13	12:52:02	-0.430317
2022-09-13	12:52:02	-0.352557
2022-09-13	12:52:02	-0.443905
2022-09-13	12:52:03	-0.304363
2022-09-13	12:52:03	0.0575702
2022-09-13	12:52:03	0.344847
2022-09-13	12:52:03	0.384033
2022-09-13	12:52:04	0.35757
2022-09-13	12:52:04	0.337926
2022-09-13	12:52:04	0.38327
2022-09-13	12:52:04	0.383982
2022-09-13	12:52:05	0.368919
2022-09-13	12:52:05	0.36271
2022-09-13	12:52:05	0.349936
2022-09-13	12:52:06	0.341896
2022-09-13	12:52:06	0.354975
2022-09-13	12:52:06	0.32159
2022-09-13	12:52:06	0.268155
2022-09-13	12:52:07	0.122456
2022-09-13	12:52:07	0.0926338
2022-09-13	12:52:07	0.111005
2022-09-13	12:52:07	0.659148
2022-09-13	12:52:08	0.735941
2022-09-13	12:52:08	0.741539
2022-09-13	12:52:08	0.732684
2022-09-13	12:52:08	0.730242
2022-09-13	12:52:09	0.733092
2022-09-13	12:52:09	0.733092
2022-09-13	12:52:09	0.732583
2022-09-13	12:52:10	0.738181
2022-09-13	12:52:10	0.735127
2022-09-13	12:52:10	0.738893
2022-09-13	12:52:10	0.734211
2022-09-13	12:52:11	0.730293
2022-09-13	12:52:11	0.752176
2022-09-13	12:52:11	0.587443
2022-09-13	12:52:11	-0.295101
2022-09-13	12:52:12	-0.572557
2022-09-13	12:52:12	-0.740648
2022-09-13	12:52:12	-0.840546
2022-09-13	12:52:12	-0.666348
2022-09-13	12:52:13	-0.524669
2022-09-13	12:52:13	-0.229809
2022-09-13	12:52:13	-0.100292
2022-09-13	12:52:14	1.32785
2022-09-13	12:52:14	0.189784
2022-09-13	12:52:14	0.164746
2022-09-13	12:52:14	-0.017188
2022-09-13	12:52:15	-0.0764756
2022-09-13	12:52:15	-0.220699
2022-09-13	12:52:15	-0.215407
2022-09-13	12:52:15	-0.28187
2022-09-13	12:52:16	-0.417188
2022-09-13	12:52:16	-0.50589
2022-09-13	12:52:16	-0.525381
2022-09-13	12:52:16	-0.405178
2022-09-13	12:52:17	-0.136934
2022-09-13	12:52:17	0.5764
2022-09-13	12:52:17	2.39014
2022-09-13	12:52:18	4.47614
2022-09-13	12:52:18	3.41604
2022-09-13	12:52:18	1.57737
2022-09-13	12:52:18	0.35986
2022-09-13	12:52:19	0.625916
2022-09-13	12:52:19	0.460573
2022-09-13	12:52:19	1.91915
2022-09-13	12:52:19	2.03726
2022-09-13	12:52:20	3.365
2022-09-13	12:52:20	4.47965
2022-09-13	12:52:20	2.63899
2022-09-13	12:52:20	4.18917
2022-09-13	12:52:21	3.97299
2022-09-13	12:52:21	2.7196
2022-09-13	12:52:21	4.55441
2022-09-13	12:52:21	3.21787
2022-09-13	12:52:22	1.9049
2022-09-13	12:52:22	2.72627
2022-09-13	12:52:22	0.477367
2022-09-13	12:52:23	3.3052
2022-09-13	12:52:23	0.437163
2022-09-13	12:52:23	2.29146
2022-09-13	12:52:23	0.821946
2022-09-13	12:52:24	1.09747
2022-09-13	12:52:24	1.72337
2022-09-13	12:52:24	2.95894
2022-09-13	12:52:24	3.72154
2022-09-13	12:52:25	2.13803
2022-09-13	12:52:25	0.63014
2022-09-13	12:52:25	-4.07907
2022-09-13	12:52:25	0.189275
2022-09-13	12:52:26	-0.118053
2022-09-13	12:52:26	-0.0216155
2022-09-13	12:52:26	-0.0716918
2022-09-13	12:52:27	-0.12757
2022-09-13	12:52:27	-0.192811
2022-09-13	12:52:27	-0.0262466
2022-09-13	12:52:27	-0.0468572
2022-09-13	12:52:28	1.2992
2022-09-13	12:52:28	3.4137
2022-09-13	12:52:28	3.68383
2022-09-13	12:52:28	3.10586
2022-09-13	12:52:29	3.18215
2022-09-13	12:52:29	3.46948
2022-09-13	12:52:29	5.1021
2022-09-13	12:52:29	3.48072
2022-09-13	12:52:30	2.10927
2022-09-13	12:52:30	1.54347
2022-09-13	12:52:30	0.721336
2022-09-13	12:52:31	0.693041
2022-09-13	12:52:31	0.310293
2022-09-13	12:52:31	0.324898
2022-09-13	12:52:31	-1.28879
2022-09-13	12:52:32	0.0748221
2022-09-13	12:52:32	0.227545
2022-09-13	12:52:32	0.28897
2022-09-13	12:52:32	0.255484
2022-09-13	12:52:33	0.407901
2022-09-13	12:52:33	0.44388
2022-09-13	12:52:33	1.05024
2022-09-13	12:52:33	0.960166
2022-09-13	12:52:34	0.963524
2022-09-13	12:52:34	0.771209
2022-09-13	12:52:34	0.406323
2022-09-13	12:52:35	0.527901
2022-09-13	12:52:35	0.427341
2022-09-13	12:52:35	0.622099
2022-09-13	12:52:35	0.599453
2022-09-13	12:52:36	0.507392
2022-09-13	12:52:36	0.642252
2022-09-13	12:52:36	0.153143
2022-09-13	12:52:36	0.210293
2022-09-13	12:52:37	0.268512
2022-09-13	12:52:37	0.0596567
2022-09-13	12:52:37	-0.421056
2022-09-13	12:52:37	-0.605127
2022-09-13	12:52:38	-0.789351
2022-09-13	12:52:38	-0.836017
2022-09-13	12:52:38	-0.997391
2022-09-13	12:52:39	-0.966959
2022-09-13	12:52:39	-1.05759
2022-09-13	12:52:39	-0.994745
2022-09-13	12:52:39	-1.19597
2022-09-13	12:52:40	-1.01067
2022-09-13	12:52:40	-0.414643
2022-09-13	12:52:40	-0.327417
2022-09-13	12:52:40	-0.222837
2022-09-13	12:52:41	0.0524302
2022-09-13	12:52:41	0.176705
2022-09-13	12:52:41	0.389224
2022-09-13	12:52:41	0.330395
2022-09-13	12:52:42	0.242761
2022-09-13	12:52:42	0.66902
2022-09-13	12:52:42	0.726527
2022-09-13	12:52:42	0.732888
2022-09-13	12:52:43	0.734415
2022-09-13	12:52:43	0.739504
2022-09-13	12:52:43	0.732328
2022-09-13	12:52:44	0.623473
2022-09-13	12:52:44	0.53874
2022-09-13	12:52:44	0.534058
2022-09-13	12:52:44	0.500318
2022-09-13	12:52:45	0.468715
2022-09-13	12:52:45	0.459351
2022-09-13	12:52:45	0.447799
2022-09-13	12:52:45	1.40281
2022-09-13	12:52:46	0.884593
2022-09-13	12:52:46	0.741997
2022-09-13	12:52:46	0.73014
2022-09-13	12:52:46	0.737468
2022-09-13	12:52:47	0.746374
2022-09-13	12:52:47	0.740674
2022-09-13	12:52:47	0.737265
2022-09-13	12:52:48	0.740318
2022-09-13	12:52:48	0.742201
2022-09-13	12:52:48	0.737214
2022-09-13	12:52:48	0.733499
2022-09-13	12:52:49	1.36973
2022-09-13	12:52:49	1.95518
2022-09-13	12:52:49	2.02032
2022-09-13	12:52:49	1.57874
2022-09-13	12:52:50	1.43309
2022-09-13	12:52:50	1.35986
2022-09-13	12:52:50	1.38505
2022-09-13	12:52:50	1.54037
2022-09-13	12:52:51	1.71604
2022-09-13	12:52:51	2.08352
2022-09-13	12:52:51	1.42815
2022-09-13	12:52:52	0.31472
2022-09-13	12:52:52	0.300522
2022-09-13	12:52:52	0.195484
2022-09-13	12:52:52	0.276196
2022-09-13	12:52:53	0.34042
2022-09-13	12:52:53	0.360522
2022-09-13	12:52:53	0.348562
2022-09-13	12:52:53	0.353957
2022-09-13	12:52:54	0.366476
2022-09-13	12:52:54	0.672125
2022-09-13	12:52:54	0.518181
2022-09-13	12:52:54	0.646272
2022-09-13	12:52:55	0.331819
2022-09-13	12:52:55	0.646323
2022-09-13	12:52:55	0.731717
2022-09-13	12:52:56	0.752786
2022-09-13	12:52:56	0.735789
2022-09-13	12:52:56	0.739147
2022-09-13	12:52:56	0.734924
2022-09-13	12:52:57	0.720471
2022-09-13	12:52:57	0.893753
2022-09-13	12:52:57	0.738791
2022-09-13	12:52:57	1.72632
2022-09-13	12:52:58	0.765509
2022-09-13	12:52:58	2.70617
2022-09-13	12:52:58	0.736196
2022-09-13	12:52:58	0.731514
2022-09-13	12:52:59	0.729224
2022-09-13	12:52:59	0.729987
2022-09-13	12:52:59	0.738791
2022-09-13	12:53:00	0.728206
2022-09-13	12:53:00	0.739402
2022-09-13	12:53:00	0.738384
2022-09-13	12:53:00	0.741947
2022-09-13	12:53:01	0.736247
2022-09-13	12:53:01	0.732074
2022-09-13	12:53:01	0.735076
2022-09-13	12:53:02	0.736705
2022-09-13	12:53:02	0.736807
2022-09-13	12:53:02	0.73472
2022-09-13	12:53:02	0.734873
2022-09-13	12:53:02	0.738588
2022-09-13	12:53:03	0.731565
2022-09-13	12:53:03	0.735687
2022-09-13	12:53:03	0.73813
2022-09-13	12:53:03	0.735687
2022-09-13	12:53:04	0.735483
2022-09-13	12:53:04	0.740064
2022-09-13	12:53:04	0.734008
2022-09-13	12:53:05	0.735687
2022-09-13	12:53:05	0.729428
2022-09-13	12:53:05	0.732786
2022-09-13	12:53:05	0.731005
2022-09-13	12:53:06	0.735483
2022-09-13	12:53:06	0.74332
2022-09-13	12:53:06	0.734975
2022-09-13	12:53:06	0.741896
2022-09-13	12:53:07	0.738282
2022-09-13	12:53:07	0.7393
2022-09-13	12:53:07	0.735891
2022-09-13	12:53:07	0.740114
2022-09-13	12:53:08	0.738486
2022-09-13	12:53:08	0.735076
2022-09-13	12:53:08	0.729886
2022-09-13	12:53:09	0.736501
2022-09-13	12:53:09	0.73528
2022-09-13	12:53:09	0.734059
2022-09-13	12:53:09	0.730852
2022-09-13	12:53:10	0.739453
2022-09-13	12:53:10	0.736298
2022-09-13	12:53:10	0.734466
2022-09-13	12:53:10	0.735178
2022-09-13	12:53:11	0.734618
2022-09-13	12:53:11	0.735483
2022-09-13	12:53:11	0.735076
2022-09-13	12:53:11	0.735433
2022-09-13	12:53:12	0.736857
2022-09-13	12:53:12	0.733651
2022-09-13	12:53:12	0.735026
2022-09-13	12:53:13	0.738588
2022-09-13	12:53:13	0.733804
2022-09-13	12:53:13	0.735382
2022-09-13	12:53:13	0.737773
2022-09-13	12:53:14	0.738791
2022-09-13	12:53:14	0.738282
2022-09-13	12:53:14	0.738333
2022-09-13	12:53:14	0.741896
2022-09-13	12:53:15	0.73243
2022-09-13	12:53:15	0.738333
2022-09-13	12:53:15	0.728206
2022-09-13	12:53:15	0.741285
2022-09-13	12:53:16	0.734568
2022-09-13	12:53:16	0.738384
2022-09-13	12:53:16	0.735382
2022-09-13	12:53:17	0.741896
2022-09-13	12:53:17	0.731972
2022-09-13	12:53:17	0.728257
2022-09-13	12:53:17	0.731259
2022-09-13	12:53:18	0.730343
2022-09-13	12:53:18	0.733855
2022-09-13	12:53:18	0.734059
2022-09-13	12:53:18	0.738435
2022-09-13	12:53:19	0.728766
2022-09-13	12:53:19	0.738231
2022-09-13	12:53:19	0.74042
2022-09-13	12:53:19	0.736501
2022-09-13	12:53:20	0.735992
2022-09-13	12:53:20	0.736807
2022-09-13	12:53:20	0.737824
2022-09-13	12:53:21	0.73416
2022-09-13	12:53:21	0.738995
2022-09-13	12:53:21	1.96994
2022-09-13	12:53:21	5.93187
2022-09-13	12:53:22	9.03487
2022-09-13	12:53:22	5.85446
2022-09-13	12:53:22	8.76097
2022-09-13	12:53:22	5.56281
2022-09-13	12:53:23	6.15009
2022-09-13	12:53:23	6.46306
2022-09-13	12:53:23	8.70601
2022-09-13	12:53:23	9.13741
2022-09-13	12:53:24	4.34836
2022-09-13	12:53:24	1.74541
2022-09-13	12:53:24	1.64067
2022-09-13	12:53:24	0.96444
2022-09-13	12:53:25	0.84388
2022-09-13	12:53:25	1.09095
2022-09-13	12:53:25	1.28322
2022-09-13	12:53:26	4.02535
2022-09-13	12:53:26	8.09207
2022-09-13	12:53:26	15.0964
2022-09-13	12:53:26	12.1188
2022-09-13	12:53:27	14.4598
2022-09-13	12:53:27	25.7309
2022-09-13	12:53:27	11.9367
2022-09-13	12:53:27	4.77813
2022-09-13	12:53:28	2.62495
2022-09-13	12:53:28	1.04816
2022-09-13	12:53:28	1.04062
2022-09-13	12:53:28	0.794618
2022-09-13	12:53:29	1.4648
2022-09-13	12:53:29	0.350496
2022-09-13	12:53:29	0.314873
2022-09-13	12:53:30	0.225865
2022-09-13	12:53:30	0.121845
2022-09-13	12:53:30	-0.247264
2022-09-13	12:53:30	-0.2493
2022-09-13	12:53:31	0.405204
2022-09-13	12:53:31	0.0349239
2022-09-13	12:53:31	0.408715
2022-09-13	12:53:31	0.117265
2022-09-13	12:53:32	0.476807
2022-09-13	12:53:32	1.05279
2022-09-13	12:53:32	0.235891
2022-09-13	12:53:32	1.16363
2022-09-13	12:53:33	0.985967
2022-09-13	12:53:33	3.26968
2022-09-13	12:53:33	4.84179
2022-09-13	12:53:34	2.32943
2022-09-13	12:53:34	2.63268
2022-09-13	12:53:34	1.32408
2022-09-13	12:53:34	0.672939
2022-09-13	12:53:35	0.785
2022-09-13	12:53:35	0.899148
2022-09-13	12:53:35	1.23319
2022-09-13	12:53:35	5.52647
2022-09-13	12:53:36	4.94139
2022-09-13	12:53:36	7.44973
2022-09-13	12:53:36	1.9051
2022-09-13	12:53:36	2.72943
2022-09-13	12:53:37	0.699147
2022-09-13	12:53:37	0.795076
2022-09-13	12:53:37	0.593601
2022-09-13	12:53:38	0.553957
2022-09-13	12:53:38	1.00378
2022-09-13	12:53:38	1.30673
2022-09-13	12:53:38	0.512888
2022-09-13	12:53:39	0.565305
2022-09-13	12:53:39	0.33187
2022-09-13	12:53:39	0.629529
2022-09-13	12:53:39	0.731158
2022-09-13	12:53:40	0.738893
2022-09-13	12:53:40	0.738537
2022-09-13	12:53:40	0.737519
2022-09-13	12:53:40	0.738486
2022-09-13	12:53:41	0.740471
2022-09-13	12:53:41	0.739809
2022-09-13	12:53:41	0.739097
2022-09-13	12:53:42	0.730242
2022-09-13	12:53:42	0.728562
2022-09-13	12:53:42	0.743423
2022-09-13	12:53:42	0.736654
2022-09-13	12:53:43	0.741081
2022-09-13	12:53:43	0.729428
2022-09-13	12:53:43	0.731616
2022-09-13	12:53:43	0.73243
2022-09-13	12:53:44	0.741997
2022-09-13	12:53:44	0.739147
2022-09-13	12:53:44	0.734669
2022-09-13	12:53:44	0.735483
2022-09-13	12:53:45	0.731717
2022-09-13	12:53:45	0.730496
2022-09-13	12:53:45	0.734211
2022-09-13	12:53:46	0.731107
2022-09-13	12:53:46	0.728359
2022-09-13	12:53:46	0.734771
2022-09-13	12:53:46	0.731768
2022-09-13	12:53:47	0.736959
2022-09-13	12:53:47	0.73355
2022-09-13	12:53:47	0.732837
2022-09-13	12:53:47	0.732583
2022-09-13	12:53:48	0.737824
2022-09-13	12:53:48	0.741489
2022-09-13	12:53:48	0.739809
2022-09-13	12:53:48	0.733193
2022-09-13	12:53:49	0.737519
2022-09-13	12:53:49	0.732074
2022-09-13	12:53:49	0.741997
2022-09-13	12:53:49	0.736756
2022-09-13	12:53:50	0.736196
2022-09-13	12:53:50	0.731667
2022-09-13	12:53:50	0.737163
2022-09-13	12:53:51	0.738944
2022-09-13	12:53:51	0.734262
2022-09-13	12:53:51	0.741997
2022-09-13	12:53:51	0.738231
2022-09-13	12:53:52	0.729529
2022-09-13	12:53:52	0.738384
2022-09-13	12:53:52	0.729733
2022-09-13	12:53:52	0.734211
2022-09-13	12:53:53	0.741234
2022-09-13	12:53:53	0.737417
2022-09-13	12:53:53	0.734873
2022-09-13	12:53:53	0.728817
2022-09-13	12:53:54	0.735941
2022-09-13	12:53:54	0.730242
2022-09-13	12:53:54	0.731056
2022-09-13	12:53:55	0.73131
2022-09-13	12:53:55	0.731005
2022-09-13	12:53:55	0.73472
2022-09-13	12:53:55	0.736857
2022-09-13	12:53:56	0.736399
2022-09-13	12:53:56	0.733855
2022-09-13	12:53:56	0.73243
2022-09-13	12:53:56	0.738384
2022-09-13	12:53:57	0.733346
2022-09-13	12:53:57	0.733193
2022-09-13	12:53:57	0.738079
2022-09-13	12:53:57	0.747544
2022-09-13	12:53:58	0.733397
2022-09-13	12:53:58	0.737061
2022-09-13	12:53:58	0.73187
2022-09-13	12:53:59	0.729377
2022-09-13	12:53:59	0.739555
2022-09-13	12:53:59	0.739097
2022-09-13	12:53:59	0.731005
2022-09-13	12:54:00	0.744797
2022-09-13	12:54:00	0.730801
2022-09-13	12:54:00	0.736959
2022-09-13	12:54:00	0.762252
2022-09-13	12:54:01	0.733601
2022-09-13	12:54:01	0.735534
2022-09-13	12:54:01	0.734364
2022-09-13	12:54:01	0.728919
2022-09-13	12:54:02	0.733142
2022-09-13	12:54:02	0.743778
2022-09-13	12:54:02	0.737315
2022-09-13	12:54:03	0.735891
2022-09-13	12:54:03	0.734364
2022-09-13	12:54:03	0.739606
2022-09-13	12:54:03	0.732634
2022-09-13	12:54:04	0.733448
2022-09-13	12:54:04	0.737519
2022-09-13	12:54:04	0.731768
2022-09-13	12:54:04	0.732023
2022-09-13	12:54:05	0.737621
2022-09-13	12:54:05	0.733193
2022-09-13	12:54:05	0.743982
2022-09-13	12:54:05	0.736399
2022-09-13	12:54:06	0.732379
2022-09-13	12:54:06	0.739962
2022-09-13	12:54:06	0.734466
2022-09-13	12:54:07	0.736807
2022-09-13	12:54:07	0.731819
2022-09-13	12:54:07	0.738689
2022-09-13	12:54:07	0.740267
2022-09-13	12:54:08	0.738333
2022-09-13	12:54:08	0.738079
2022-09-13	12:54:08	0.730242
2022-09-13	12:54:08	0.732481
2022-09-13	12:54:09	0.733855
2022-09-13	12:54:09	0.737468
2022-09-13	12:54:09	0.736094
2022-09-13	12:54:09	0.732634
2022-09-13	12:54:10	0.72958
2022-09-13	12:54:10	0.735585
2022-09-13	12:54:10	0.736094
2022-09-13	12:54:11	0.737621
2022-09-13	12:54:11	0.739656
2022-09-13	12:54:11	0.736654
2022-09-13	12:54:11	0.741794
2022-09-13	12:54:12	0.733397
2022-09-13	12:54:12	0.738639
2022-09-13	12:54:12	0.738791
2022-09-13	12:54:12	0.736349
2022-09-13	12:54:13	0.738486
2022-09-13	12:54:13	0.743728
2022-09-13	12:54:13	0.731921
2022-09-13	12:54:13	0.733041
2022-09-13	12:54:14	0.737315
2022-09-13	12:54:14	0.727087
2022-09-13	12:54:14	0.735941
2022-09-13	12:54:14	0.730496
2022-09-13	12:54:15	0.734975
2022-09-13	12:54:15	0.734618
2022-09-13	12:54:15	0.736654
2022-09-13	12:54:16	0.740013
2022-09-13	12:54:16	0.735534
2022-09-13	12:54:16	0.735433
2022-09-13	12:54:16	0.740267
2022-09-13	12:54:17	0.72958
2022-09-13	12:54:17	0.736959
2022-09-13	12:54:17	0.737061
2022-09-13	12:54:17	0.733957
2022-09-13	12:54:18	0.73986
2022-09-13	12:54:18	0.739249
2022-09-13	12:54:18	0.711769
2022-09-13	12:54:18	0.59701
2022-09-13	12:54:19	0.528919
2022-09-13	12:54:19	0.540725
2022-09-13	12:54:19	0.340115
2022-09-13	12:54:20	0.490802
2022-09-13	12:54:20	0.645712
2022-09-13	12:54:20	0.741489
2022-09-13	12:54:20	0.738791
2022-09-13	12:54:21	0.731463
2022-09-13	12:54:21	0.731361
2022-09-13	12:54:21	0.738588
2022-09-13	12:54:21	0.735026
2022-09-13	12:54:22	0.740573
2022-09-13	12:54:22	0.733804
2022-09-13	12:54:22	0.730394
2022-09-13	12:54:22	0.735178
2022-09-13	12:54:23	0.738028
2022-09-13	12:54:23	0.736552
2022-09-13	12:54:23	0.739555
2022-09-13	12:54:24	0.737621
2022-09-13	12:54:24	0.7307
2022-09-13	12:54:24	0.733397
2022-09-13	12:54:24	0.738282
2022-09-13	12:54:25	0.741947
2022-09-13	12:54:25	0.749987
2022-09-13	12:54:25	0.869631
2022-09-13	12:54:25	0.749631
2022-09-13	12:54:26	0.73243
2022-09-13	12:54:26	0.727646
2022-09-13	12:54:26	0.728257
2022-09-13	12:54:26	0.726221
2022-09-13	12:54:27	0.741641
2022-09-13	12:54:27	0.741539
2022-09-13	12:54:27	0.736908
2022-09-13	12:54:28	0.732583
2022-09-13	12:54:28	0.732735
2022-09-13	12:54:28	0.770598
2022-09-13	12:54:28	0.740064
2022-09-13	12:54:29	2.23044
2022-09-13	12:54:29	1.68169
2022-09-13	12:54:29	2.35915
2022-09-13	12:54:29	3.53731
2022-09-13	12:54:30	0.893295
2022-09-13	12:54:30	1.79162
2022-09-13	12:54:30	1.79345
2022-09-13	12:54:30	1.43762
2022-09-13	12:54:31	2.40871
2022-09-13	12:54:31	1.22159
2022-09-13	12:54:31	2.20464
2022-09-13	12:54:32	1.02251
2022-09-13	12:54:32	1.00037
2022-09-13	12:54:32	0.984847
2022-09-13	12:54:32	0.935382
2022-09-13	12:54:33	0.673601
2022-09-13	12:54:33	0.296603
2022-09-13	12:54:33	0.728054
2022-09-13	12:54:33	0.733295
2022-09-13	12:54:34	0.733753
2022-09-13	12:54:34	0.739147
2022-09-13	12:54:34	0.735483
2022-09-13	12:54:34	0.746476
2022-09-13	12:54:35	0.485763
2022-09-13	12:54:35	0.739555
2022-09-13	12:54:35	0.306425
2022-09-13	12:54:36	0.301845
2022-09-13	12:54:36	0.590954
2022-09-13	12:54:36	0.668817
2022-09-13	12:54:36	1.31752
2022-09-13	12:54:37	2.59416
2022-09-13	12:54:37	2.81177
2022-09-13	12:54:37	1.83197
2022-09-13	12:54:37	1.55411
2022-09-13	12:54:38	1.77854
2022-09-13	12:54:38	0.654516
2022-09-13	12:54:38	0.856196
2022-09-13	12:54:38	0.240776
2022-09-13	12:54:39	0.804695
2022-09-13	12:54:39	0.245255
2022-09-13	12:54:39	0.5593
2022-09-13	12:54:39	0.834669
2022-09-13	12:54:40	0.937417
2022-09-13	12:54:40	2.70841
2022-09-13	12:54:40	1.93589
2022-09-13	12:54:41	2.68281
2022-09-13	12:54:41	2.07141
2022-09-13	12:54:41	0.230598
2022-09-13	12:54:41	0.113194
2022-09-13	12:54:42	-0.00304046
2022-09-13	12:54:42	-0.0510302
2022-09-13	12:54:42	0.022303
2022-09-13	12:54:42	-0.12014
2022-09-13	12:54:43	-0.0645671
2022-09-13	12:54:43	-0.305483
2022-09-13	12:54:43	-0.444618
2022-09-13	12:54:43	-0.511946
2022-09-13	12:54:44	1.0224
2022-09-13	12:54:44	1.22597
2022-09-13	12:54:44	5.33227
2022-09-13	12:54:45	1.37055
2022-09-13	12:54:45	2.47513
2022-09-13	12:54:45	1.12892
2022-09-13	12:54:45	3.89518
2022-09-13	12:54:46	4.24016
2022-09-13	12:54:46	5.43925
2022-09-13	12:54:46	3.20057
2022-09-13	12:54:46	2.65477
2022-09-13	12:54:47	2.43426
2022-09-13	12:54:47	1.62515
2022-09-13	12:54:47	1.62515
2022-09-13	12:54:47	0.801438
2022-09-13	12:54:48	0.755891
2022-09-13	12:54:48	0.549733
2022-09-13	12:54:48	0.518079
2022-09-13	12:54:49	0.528868
2022-09-13	12:54:49	0.708613
2022-09-13	12:54:49	1.11375
2022-09-13	12:54:49	2.28296
2022-09-13	12:54:50	10.4809
2022-09-13	12:54:50	7.95227
2022-09-13	12:54:50	0.87187
2022-09-13	12:54:50	5.69858
2022-09-13	12:54:51	2.26678
2022-09-13	12:54:51	0.898741
2022-09-13	12:54:51	0.526425
2022-09-13	12:54:51	0.449936
2022-09-13	12:54:52	0.334364
2022-09-13	12:54:52	0.405356
2022-09-13	12:54:52	0.630903
2022-09-13	12:54:53	0.477112
2022-09-13	12:54:53	0.372685
2022-09-13	12:54:53	0.337265
2022-09-13	12:54:53	0.281692
2022-09-13	12:54:54	0.245916
2022-09-13	12:54:54	0.0859671
2022-09-13	12:54:54	-0.0201906
2022-09-13	12:54:54	-0.0203432
2022-09-13	12:54:55	-0.166501
2022-09-13	12:54:55	-0.0544399
2022-09-13	12:54:55	0.236959
2022-09-13	12:54:55	0.521539
2022-09-13	12:54:56	0.901539
2022-09-13	12:54:56	0.888715
2022-09-13	12:54:56	2.38393
2022-09-13	12:54:57	1.51457
2022-09-13	12:54:57	0.700776
2022-09-13	12:54:57	0.469224
2022-09-13	12:54:57	0.69014
2022-09-13	12:54:58	-1.33286
2022-09-13	12:54:58	0.738486
2022-09-13	12:54:58	0.739147
2022-09-13	12:54:58	0.736501
2022-09-13	12:54:59	0.554669
2022-09-13	12:54:59	0.741997
2022-09-13	12:54:59	1.30286
2022-09-13	12:54:59	2.80444
2022-09-13	12:55:00	1.15045
2022-09-13	12:55:00	0.89528
2022-09-13	12:55:00	0.337926
2022-09-13	12:55:01	0.624287
2022-09-13	12:55:01	0.285051
2022-09-13	12:55:01	0.565254
2022-09-13	12:55:01	0.751209
2022-09-13	12:55:02	0.778384
2022-09-13	12:55:02	1.39757
2022-09-13	12:55:02	1.87833
2022-09-13	12:55:02	0.742608
2022-09-13	12:55:03	0.738079
2022-09-13	12:55:03	0.730547
2022-09-13	12:55:03	0.726832
2022-09-13	12:55:03	0.712379
2022-09-13	12:55:04	0.738639
2022-09-13	12:55:04	0.713244
2022-09-13	12:55:04	0.845967
2022-09-13	12:55:04	0.793041
2022-09-13	12:55:05	0.735534
2022-09-13	12:55:05	0.734313
2022-09-13	12:55:05	0.733804
2022-09-13	12:55:06	0.740776
2022-09-13	12:55:06	0.738079
2022-09-13	12:55:06	0.737265
2022-09-13	12:55:06	0.730649
2022-09-13	12:55:07	0.72958
2022-09-13	12:55:07	0.732481
2022-09-13	12:55:07	0.740165
2022-09-13	12:55:07	0.734568
2022-09-13	12:55:08	0.730954
2022-09-13	12:55:08	0.737875
2022-09-13	12:55:08	0.714109
2022-09-13	12:55:08	0.744186
2022-09-13	12:55:09	0.740623
2022-09-13	12:55:09	0.732888
2022-09-13	12:55:09	0.0989951
2022-09-13	12:55:10	-2.21205
2022-09-13	12:55:10	0.386425
2022-09-13	12:55:10	0.101285
2022-09-13	12:55:10	-0.0928623
2022-09-13	12:55:11	0.196603
2022-09-13	12:55:11	0.0734989
2022-09-13	12:55:11	0.115077
2022-09-13	12:55:11	0.0965523
2022-09-13	12:55:12	0.102303
2022-09-13	12:55:12	0.260318
2022-09-13	12:55:12	-0.0181041
2022-09-13	12:55:12	0.220166
2022-09-13	12:55:13	0.218842
2022-09-13	12:55:13	0.488054
2022-09-13	12:55:13	0.154059
2022-09-13	12:55:14	0.461896
2022-09-13	12:55:14	0.343575
2022-09-13	12:55:14	0.331819
2022-09-13	12:55:14	0.468206
2022-09-13	12:55:15	0.513092
2022-09-13	12:55:15	0.498232
2022-09-13	12:55:15	0.419911
2022-09-13	12:55:15	0.465153
2022-09-13	12:55:16	0.197621
2022-09-13	12:55:16	0.235534
2022-09-13	12:55:16	0.181947
2022-09-13	12:55:16	0.456756
2022-09-13	12:55:17	0.705204
2022-09-13	12:55:17	0.731361
2022-09-13	12:55:17	0.346883
2022-09-13	12:55:18	0.429173
2022-09-13	12:55:18	1.30587
2022-09-13	12:55:18	2.50536
2022-09-13	12:55:18	4.70424
2022-09-13	12:55:19	4.58266
2022-09-13	12:55:19	3.7537
2022-09-13	12:55:19	2.89731
2022-09-13	12:55:19	3.02637
2022-09-13	12:55:20	0.952481
2022-09-13	12:55:20	1.44424
2022-09-13	12:55:20	1.05981
2022-09-13	12:55:20	1.60276
2022-09-13	12:55:21	1.52856
2022-09-13	12:55:21	3.45945
2022-09-13	12:55:21	2.57976
2022-09-13	12:55:22	0.877163
2022-09-13	12:55:22	0.855127
2022-09-13	12:55:22	0.760979
2022-09-13	12:55:22	1.20047
2022-09-13	12:55:23	0.49757
2022-09-13	12:55:23	0.631921
2022-09-13	12:55:23	0.790751
2022-09-13	12:55:23	2.84388
2022-09-13	12:55:24	5.48769
2022-09-13	12:55:24	7.5854
2022-09-13	12:55:24	3.47451
2022-09-13	12:55:24	6.0025
2022-09-13	12:55:25	2.63029
2022-09-13	12:55:25	0.73757
2022-09-13	12:55:25	0.767799
2022-09-13	12:55:26	0.231819
2022-09-13	12:55:26	0.0501401
2022-09-13	12:55:26	0.0303946
2022-09-13	12:55:26	-0.111336
2022-09-13	12:55:27	-0.098562
2022-09-13	12:55:27	-0.474185
2022-09-13	12:55:27	-0.288842
2022-09-13	12:55:27	-0.244313
2022-09-13	12:55:28	-0.356374
2022-09-13	12:55:28	-0.243244
2022-09-13	12:55:28	0.0912597
2022-09-13	12:55:28	0.0228119
2022-09-13	12:55:29	0.185814
2022-09-13	12:55:29	-0.00700993
2022-09-13	12:55:29	1.22581
2022-09-13	12:55:29	4.45818
2022-09-13	12:55:30	8.445
2022-09-13	12:55:30	7.56846
2022-09-13	12:55:30	5.07528
2022-09-13	12:55:31	1.13299
2022-09-13	12:55:31	1.78617
2022-09-13	12:55:31	1.54536
2022-09-13	12:55:31	3.05004
2022-09-13	12:55:32	2.19192
2022-09-13	12:55:32	1.71365
2022-09-13	12:55:32	1.81274
2022-09-13	12:55:32	0.823015
2022-09-13	12:55:33	2.31421
2022-09-13	12:55:33	2.50698
2022-09-13	12:55:33	5.85843
2022-09-13	12:55:33	2.36866
2022-09-13	12:55:34	0.714873
2022-09-13	12:55:34	0.775687
2022-09-13	12:55:34	1.20566
2022-09-13	12:55:35	0.73757
2022-09-13	12:55:35	4.50571
2022-09-13	12:55:35	5.7225
2022-09-13	12:55:35	1.96042
