# Supplementary material for: Comparing efficacy in reducing pulling and welfare impacts of four types of leash walking equipment
Source: PeerJ journal article supplement (doi:10.7717/peerj.18131), 2024-10-24
Supplement: Shelter1_Tension_files.zip [file Daisy_prong_202291315844 copy.xlsx]

## Sheet: Averaged Newtons
Date	Time	Averaged Newtons	Impulse	Total steps
2022-09-13	15:08:58	3.16768	3.16768	0
2022-09-13	15:08:59	1.56728	4.73496	0		Impulse	1158.47
2022-09-13	15:09:00	-0.781885	4.73496	0		Total steps	11
2022-09-13	15:09:01	-0.657778	4.73496	0		# > 5sec	0
2022-09-13	15:09:02	3.0563	7.79126	0
2022-09-13	15:09:03	0.250312	8.04157	0
2022-09-13	15:09:04	-0.39332	8.04157	0
2022-09-13	15:09:05	1.26117	9.30274	0
2022-09-13	15:09:06	6.55588	15.8586	0
2022-09-13	15:09:07	9.18967	25.0483	0
2022-09-13	15:09:08	5.73881	30.7871	0
2022-09-13	15:09:09	1.49575	32.2829	0
2022-09-13	15:09:10	-1.28285	32.2829	0
2022-09-13	15:09:11	-0.0449335	32.2829	0
2022-09-13	15:09:12	1.88777	34.1706	0
2022-09-13	15:09:13	-0.275587	34.1706	0
2022-09-13	15:09:14	-1.56734	34.1706	0
2022-09-13	15:09:15	-1.56536	34.1706	0
2022-09-13	15:09:16	1.58585	35.7565	0
2022-09-13	15:09:17	13.1227	48.8792	1
2022-09-13	15:09:18	5.03756	53.9168	1
2022-09-13	15:09:19	6.459	60.3758	1
2022-09-13	15:09:20	1.6035	61.9793	1
2022-09-13	15:09:21	1.44559	63.4249	1
2022-09-13	15:09:22	1.21873	64.6436	1
2022-09-13	15:09:23	1.24748	65.8911	1
2022-09-13	15:09:24	3.94542	69.8365	1
2022-09-13	15:09:25	8.51689	78.3534	1
2022-09-13	15:09:26	3.01063	81.364	1
2022-09-13	15:09:27	2.42795	83.792	1
2022-09-13	15:09:28	6.37948	90.1714	1
2022-09-13	15:09:29	6.66865	96.8401	1
2022-09-13	15:09:30	7.86646	104.707	1
2022-09-13	15:09:31	7.83229	112.539	1
2022-09-13	15:09:32	4.17304	116.712	1
2022-09-13	15:09:33	5.17974	121.892	1
2022-09-13	15:09:34	8.76544	130.657	1
2022-09-13	15:09:35	8.93359	139.591	1
2022-09-13	15:09:36	7.85208	147.443	1
2022-09-13	15:09:37	7.14849	154.591	1
2022-09-13	15:09:38	10.0211	164.612	1
2022-09-13	15:09:39	7.14501	171.757	1
2022-09-13	15:09:40	8.46935	180.227	1
2022-09-13	15:09:41	9.68001	189.907	1
2022-09-13	15:09:42	9.4364	199.343	1
2022-09-13	15:09:43	5.6255	204.969	1
2022-09-13	15:09:44	4.83874	209.807	1
2022-09-13	15:09:45	8.22211	218.029	1
2022-09-13	15:09:46	7.35186	225.381	1
2022-09-13	15:09:47	4.88198	230.263	1
2022-09-13	15:09:48	10.9973	241.261	1
2022-09-13	15:09:49	8.16467	249.425	1
2022-09-13	15:09:50	1.80729	251.233	1
2022-09-13	15:09:51	8.05351	259.286	1
2022-09-13	15:09:52	7.60376	266.89	1
2022-09-13	15:09:53	9.25412	276.144	1
2022-09-13	15:09:54	9.05707	285.201	1
2022-09-13	15:09:55	6.29579	291.497	1
2022-09-13	15:09:56	5.15612	296.653	1
2022-09-13	15:09:57	6.41897	303.072	1
2022-09-13	15:09:58	3.82641	306.898	1
2022-09-13	15:09:59	2.08573	308.984	1
2022-09-13	15:10:00	6.95968	315.944	1
2022-09-13	15:10:01	28.98	344.924	2
2022-09-13	15:10:02	3.87066	348.794	2
2022-09-13	15:10:03	1.36038	350.155	2
2022-09-13	15:10:04	1.85461	352.009	2
2022-09-13	15:10:05	2.98348	354.993	2
2022-09-13	15:10:06	2.74662	357.739	2
2022-09-13	15:10:07	0.968249	358.708	2
2022-09-13	15:10:08	1.44736	360.155	2
2022-09-13	15:10:09	0.958288	361.113	2
2022-09-13	15:10:10	1.25065	362.364	2
2022-09-13	15:10:11	7.57291	369.937	2
2022-09-13	15:10:12	9.6781	379.615	2
2022-09-13	15:10:13	5.24591	384.861	2
2022-09-13	15:10:14	3.76128	388.622	2
2022-09-13	15:10:15	2.59976	391.222	2
2022-09-13	15:10:16	0.951895	392.174	2
2022-09-13	15:10:17	0.455744	392.63	2
2022-09-13	15:10:18	5.34661	397.976	2
2022-09-13	15:10:19	9.76425	407.74	2
2022-09-13	15:10:20	2.00967	409.75	2
2022-09-13	15:10:21	3.0437	412.794	2
2022-09-13	15:10:22	3.80994	416.604	2
2022-09-13	15:10:23	2.94328	419.547	2
2022-09-13	15:10:24	3.24685	422.794	2
2022-09-13	15:10:25	1.38922	424.183	2
2022-09-13	15:10:26	1.67487	425.858	2
2022-09-13	15:10:27	1.65211	427.51	2
2022-09-13	15:10:28	1.1249	428.635	2
2022-09-13	15:10:29	7.38204	436.017	2
2022-09-13	15:10:30	7.29933	443.316	2
2022-09-13	15:10:31	3.42302	446.739	2
2022-09-13	15:10:32	11.283	458.022	2
2022-09-13	15:10:33	11.986	470.008	2
2022-09-13	15:10:34	4.97079	474.979	2
2022-09-13	15:10:35	-0.14216	474.979	2
2022-09-13	15:10:36	-2.11527	474.979	2
2022-09-13	15:10:37	-1.20667	474.979	2
2022-09-13	15:10:38	1.70267	476.682	2
2022-09-13	15:10:39	3.89297	480.575	2
2022-09-13	15:10:40	1.47962	482.054	2
2022-09-13	15:10:41	1.59281	483.647	2
2022-09-13	15:10:42	6.29514	489.942	2
2022-09-13	15:10:43	9.32084	499.263	2
2022-09-13	15:10:44	1.40282	500.666	2
2022-09-13	15:10:45	1.86604	502.532	2
2022-09-13	15:10:46	1.5876	504.12	2
2022-09-13	15:10:47	1.64668	505.766	2
2022-09-13	15:10:48	1.32875	507.095	2
2022-09-13	15:10:49	1.33271	508.428	2
2022-09-13	15:10:50	0.310866	508.739	2
2022-09-13	15:10:51	-0.117486	508.739	2
2022-09-13	15:10:52	1.02105	509.76	2
2022-09-13	15:10:53	1.8305	511.59	2
2022-09-13	15:10:54	3.29202	514.882	2
2022-09-13	15:10:55	3.68	518.562	2
2022-09-13	15:10:56	3.71804	522.28	2
2022-09-13	15:10:57	1.72416	524.004	2
2022-09-13	15:10:58	1.34546	525.35	2
2022-09-13	15:10:59	1.68568	527.036	2
2022-09-13	15:11:00	4.95465	531.99	2
2022-09-13	15:11:01	16.8103	548.801	3
2022-09-13	15:11:02	17.1754	565.976	4
2022-09-13	15:11:03	7.53172	573.508	4
2022-09-13	15:11:04	1.69049	575.198	4
2022-09-13	15:11:05	2.04991	577.248	4
2022-09-13	15:11:06	2.01552	579.264	4
2022-09-13	15:11:07	2.22563	581.489	4
2022-09-13	15:11:08	2.00984	583.499	4
2022-09-13	15:11:09	1.81539	585.314	4
2022-09-13	15:11:10	0.760891	586.075	4
2022-09-13	15:11:11	1.34872	587.424	4
2022-09-13	15:11:12	0.564061	587.988	4
2022-09-13	15:11:13	-0.64448	587.988	4
2022-09-13	15:11:14	2.561	590.549	4
2022-09-13	15:11:15	13.0624	603.612	5
2022-09-13	15:11:16	18.2067	621.818	6
2022-09-13	15:11:17	1.26361	623.082	6
2022-09-13	15:11:18	1.09124	624.173	6
2022-09-13	15:11:19	-0.00169476	624.173	6
2022-09-13	15:11:20	4.72997	628.903	6
2022-09-13	15:11:21	6.48526	635.388	6
2022-09-13	15:11:22	4.8632	640.252	6
2022-09-13	15:11:23	5.02674	645.278	6
2022-09-13	15:11:24	5.78209	651.06	6
2022-09-13	15:11:25	6.34463	657.405	6
2022-09-13	15:11:26	3.23053	660.635	6
2022-09-13	15:11:27	1.74861	662.384	6
2022-09-13	15:11:28	0.147199	662.531	6
2022-09-13	15:11:29	0.0778723	662.609	6
2022-09-13	15:11:30	-1.70437	662.609	6
2022-09-13	15:11:31	-0.453646	662.609	6
2022-09-13	15:11:32	1.76915	664.378	6
2022-09-13	15:11:33	1.8975	666.276	6
2022-09-13	15:11:34	1.7939	668.07	6
2022-09-13	15:11:35	2.20922	670.279	6
2022-09-13	15:11:36	3.80808	674.087	6
2022-09-13	15:11:37	1.57079	675.658	6
2022-09-13	15:11:38	1.05389	676.712	6
2022-09-13	15:11:39	1.44623	678.158	6
2022-09-13	15:11:40	1.40571	679.564	6
2022-09-13	15:11:41	1.29326	680.857	6
2022-09-13	15:11:42	-0.563457	680.857	6
2022-09-13	15:11:43	-0.050706	680.857	6
2022-09-13	15:11:44	0.0930964	680.95	6
2022-09-13	15:11:45	1.75772	682.708	6
2022-09-13	15:11:46	1.77753	684.485	6
2022-09-13	15:11:47	0.853874	685.339	6
2022-09-13	15:11:48	-0.611597	685.339	6
2022-09-13	15:11:49	-0.553364	685.339	6
2022-09-13	15:11:50	0.216016	685.555	6
2022-09-13	15:11:51	1.63106	687.186	6
2022-09-13	15:11:52	2.45003	689.636	6
2022-09-13	15:11:53	1.78562	691.422	6
2022-09-13	15:11:54	1.77919	693.201	6
2022-09-13	15:11:55	1.97741	695.178	6
2022-09-13	15:11:56	1.91341	697.092	6
2022-09-13	15:11:57	2.00661	699.098	6
2022-09-13	15:11:58	1.95517	701.054	6
2022-09-13	15:11:59	1.95583	703.009	6
2022-09-13	15:12:00	1.75981	704.769	6
2022-09-13	15:12:01	2.06174	706.831	6
2022-09-13	15:12:02	2.11657	708.948	6
2022-09-13	15:12:03	2.00744	710.955	6
2022-09-13	15:12:04	1.97447	712.93	6
2022-09-13	15:12:05	1.96208	714.892	6
2022-09-13	15:12:06	2.1207	717.012	6
2022-09-13	15:12:07	2.0491	719.061	6
2022-09-13	15:12:08	2.04261	721.104	6
2022-09-13	15:12:09	2.02648	723.13	6
2022-09-13	15:12:10	2.02569	725.156	6
2022-09-13	15:12:11	2.02404	727.18	6
2022-09-13	15:12:12	2.02642	729.207	6
2022-09-13	15:12:13	1.99818	731.205	6
2022-09-13	15:12:14	1.96887	733.174	6
2022-09-13	15:12:15	2.78133	735.955	6
2022-09-13	15:12:16	8.09707	744.052	6
2022-09-13	15:12:17	1.27255	745.325	6
2022-09-13	15:12:18	0.652742	745.977	6
2022-09-13	15:12:19	0.382173	746.36	6
2022-09-13	15:12:20	0.981094	747.341	6
2022-09-13	15:12:21	1.91442	749.255	6
2022-09-13	15:12:22	2.09688	751.352	6
2022-09-13	15:12:23	2.09045	753.442	6
2022-09-13	15:12:24	2.03881	755.481	6
2022-09-13	15:12:25	2.03678	757.518	6
2022-09-13	15:12:26	2.04674	759.565	6
2022-09-13	15:12:27	2.02759	761.592	6
2022-09-13	15:12:28	2.00916	763.601	6
2022-09-13	15:12:29	1.6348	765.236	6
2022-09-13	15:12:30	1.89111	767.127	6
2022-09-13	15:12:31	2.18658	769.314	6
2022-09-13	15:12:32	2.3344	771.648	6
2022-09-13	15:12:33	4.17259	775.821	6
2022-09-13	15:12:34	6.77905	782.6	6
2022-09-13	15:12:35	2.62197	785.222	6
2022-09-13	15:12:36	2.6181	787.84	6
2022-09-13	15:12:37	3.43122	791.271	6
2022-09-13	15:12:38	5.27462	796.546	6
2022-09-13	15:12:39	4.37039	800.916	6
2022-09-13	15:12:40	3.31878	804.235	6
2022-09-13	15:12:41	9.20878	813.444	6
2022-09-13	15:12:42	8.53833	821.982	6
2022-09-13	15:12:43	3.16383	825.146	6
2022-09-13	15:12:44	3.34854	828.495	6
2022-09-13	15:12:45	11.7304	840.225	6
2022-09-13	15:12:46	3.97282	844.198	6
2022-09-13	15:12:47	1.01903	845.217	6
2022-09-13	15:12:48	-1.04934	845.217	6
2022-09-13	15:12:49	5.48476	850.702	6
2022-09-13	15:12:50	1.44301	852.145	6
2022-09-13	15:12:51	1.90082	854.045	6
2022-09-13	15:12:52	1.24555	855.291	6
2022-09-13	15:12:53	1.04663	856.338	6
2022-09-13	15:12:54	7.40349	863.741	6
2022-09-13	15:12:55	3.52504	867.266	6
2022-09-13	15:12:56	24.7114	891.978	7
2022-09-13	15:12:57	16.4784	908.456	8
2022-09-13	15:12:58	9.14284	917.599	8
2022-09-13	15:12:59	5.61535	923.214	8
2022-09-13	15:13:00	4.44311	927.657	8
2022-09-13	15:13:01	5.78487	933.442	8
2022-09-13	15:13:02	5.75409	939.196	8
2022-09-13	15:13:03	4.97245	944.169	8
2022-09-13	15:13:04	3.99659	948.165	8
2022-09-13	15:13:05	2.99178	951.157	8
2022-09-13	15:13:06	2.30984	953.467	8
2022-09-13	15:13:07	1.9799	955.447	8
2022-09-13	15:13:08	2.88228	958.329	8
2022-09-13	15:13:09	0.0835327	958.413	8
2022-09-13	15:13:10	1.30856	959.721	8
2022-09-13	15:13:11	0.948158	960.669	8
2022-09-13	15:13:12	1.64074	962.31	8
2022-09-13	15:13:13	1.74453	964.054	8
2022-09-13	15:13:14	1.40752	965.462	8
2022-09-13	15:13:15	2.8872	968.349	8
2022-09-13	15:13:16	1.79648	970.146	8
2022-09-13	15:13:17	1.75042	971.896	8
2022-09-13	15:13:18	2.24278	974.139	8
2022-09-13	15:13:19	5.02709	979.166	8
2022-09-13	15:13:20	3.7362	982.902	8
2022-09-13	15:13:21	4.58045	987.483	8
2022-09-13	15:13:22	8.46579	995.948	8
2022-09-13	15:13:23	2.52674	998.475	8
2022-09-13	15:13:24	1.27634	999.752	8
2022-09-13	15:13:25	0.973058	1000.72	8
2022-09-13	15:13:26	-0.138198	1000.72	8
2022-09-13	15:13:27	0.624315	1001.35	8
2022-09-13	15:13:28	2.00333	1003.35	8
2022-09-13	15:13:29	1.40656	1004.76	8
2022-09-13	15:13:30	1.2674	1006.03	8
2022-09-13	15:13:31	-0.466833	1006.03	8
2022-09-13	15:13:32	-1.90048	1006.03	8
2022-09-13	15:13:33	0.440972	1006.47	8
2022-09-13	15:13:34	8.8823	1015.35	8
2022-09-13	15:13:35	14.2292	1029.58	9
2022-09-13	15:13:36	2.71387	1032.29	9
2022-09-13	15:13:37	1.5627	1033.86	9
2022-09-13	15:13:38	-0.112957	1033.86	9
2022-09-13	15:13:39	1.09819	1034.95	9
2022-09-13	15:13:40	0.528635	1035.48	9
2022-09-13	15:13:41	0.0957001	1035.58	9
2022-09-13	15:13:42	1.18064	1036.76	9
2022-09-13	15:13:43	1.49462	1038.25	9
2022-09-13	15:13:44	0.446613	1038.7	9
2022-09-13	15:13:45	2.29863	1041	9
2022-09-13	15:13:46	2.64113	1043.64	9
2022-09-13	15:13:47	2.80157	1046.44	9
2022-09-13	15:13:48	5.11024	1051.55	9
2022-09-13	15:13:49	18.2242	1069.78	10
2022-09-13	15:13:50	11.4812	1081.26	10
2022-09-13	15:13:51	12.5007	1093.76	10
2022-09-13	15:13:52	7.07341	1100.83	10
2022-09-13	15:13:53	8.15209	1108.98	10
2022-09-13	15:13:54	5.28431	1114.27	10
2022-09-13	15:13:55	2.46173	1116.73	10
2022-09-13	15:13:56	2.79363	1119.52	10
2022-09-13	15:13:57	11.9408	1131.46	10
2022-09-13	15:13:58	27.0067	1158.47	11

## Sheet: Daisy_prong_202291315844 (4)
Date	Time	Lbs	Newtons	Averaged Newtons	Total force x time	total steps > 13.345		**GoPro Fitting: 1458
2022-09-13	15:08:58	0.625051	2.78035	3.16768	2.78035	FALSE	0
2022-09-13	15:08:58	1.05284	4.68324	3.16768	4.68324	FALSE	0
2022-09-13	15:08:58	0.799504	3.55635	3.16768	6.33671	FALSE	0
2022-09-13	15:08:58	0.371107	1.65076	3.16768	6.334	FALSE	0
2022-09-13	15:08:59	0.444135	1.9756	1.56728	8.31231	FALSE	0
2022-09-13	15:08:59	0.533702	2.37401	1.56728	8.70801	FALSE	0
2022-09-13	15:08:59	0.163168	0.725804	1.56728	9.03811	FALSE	0
2022-09-13	15:08:59	0.268359	1.19371	1.56728	9.90173	FALSE	0
2022-09-13	15:09:00	0.152685	0.679173	-0.781885	9.71728	FALSE	0
2022-09-13	15:09:00	0.0303946	0.135201	-0.781885	10.0369	FALSE	0
2022-09-13	15:09:00	-0.432302	-1.92297	-0.781885	9.71728	FALSE	0
2022-09-13	15:09:00	-0.45388	-2.01895	-0.781885	10.0369	FALSE	0
2022-09-13	15:09:01	-0.322888	-1.43627	-0.657778	9.71728	FALSE	0
2022-09-13	15:09:01	-0.276119	-1.22823	-0.657778	10.0369	FALSE	0
2022-09-13	15:09:01	0.155382	0.69117	-0.657778	10.4085	FALSE	0
2022-09-13	15:09:02	0.240725	1.07079	3.0563	11.1077	FALSE	0
2022-09-13	15:09:02	0.759504	3.37843	3.0563	13.7869	FALSE	0
2022-09-13	15:09:02	1.15426	5.13438	3.0563	16.2421	FALSE	0
2022-09-13	15:09:02	0.593855	2.64159	3.0563	16.4285	FALSE	0
2022-09-13	15:09:03	0.315891	1.40515	0.250312	17.6472	FALSE	0
2022-09-13	15:09:03	0.185713	0.826089	0.250312	17.2546	FALSE	0
2022-09-13	15:09:03	-0.0999361	-0.444536	0.250312	17.6472	FALSE	0
2022-09-13	15:09:03	-0.176577	-0.78545	0.250312	17.2546	FALSE	0
2022-09-13	15:09:04	-0.276832	-1.2314	-0.39332	17.6472	FALSE	0
2022-09-13	15:09:04	0.000929014	0.00413244	-0.39332	17.2587	FALSE	0
2022-09-13	15:09:04	-0.128893	-0.573342	-0.39332	17.6472	FALSE	0
2022-09-13	15:09:04	0.0511071	0.227335	-0.39332	17.486	FALSE	0
2022-09-13	15:09:05	0.127952	0.569156	1.26117	18.2164	FALSE	0
2022-09-13	15:09:05	0.389224	1.73135	1.26117	19.2174	FALSE	0
2022-09-13	15:09:05	0.333397	1.48302	1.26117	19.6994	FALSE	0
2022-09-13	15:09:06	0.72327	3.21725	6.55588	22.4346	FALSE	0
2022-09-13	15:09:06	1.50006	6.67257	6.55588	26.372	FALSE	0
2022-09-13	15:09:06	1.73487	7.71705	6.55588	30.1517	FALSE	0
2022-09-13	15:09:06	1.93711	8.61665	6.55588	34.9886	FALSE	0
2022-09-13	15:09:07	2.842	12.6418	9.18967	42.7935	FALSE	0
2022-09-13	15:09:07	1.86032	8.27508	9.18967	43.2637	FALSE	0
2022-09-13	15:09:07	2.21945	9.87256	9.18967	52.666	FALSE	0
2022-09-13	15:09:07	1.34195	5.96926	9.18967	49.233	FALSE	0
2022-09-13	15:09:08	2.03508	9.05244	5.73881	61.7185	FALSE	0
2022-09-13	15:09:08	1.04139	4.63231	5.73881	53.8653	FALSE	0
2022-09-13	15:09:08	0.793957	3.53168	5.73881	65.2501	FALSE	0
2022-09-13	15:09:09	0.738486	3.28493	1.49575	57.1502	FALSE	0
2022-09-13	15:09:09	0.536094	2.38465	1.49575	67.6348	FALSE	0
2022-09-13	15:09:09	0.0844404	0.375608	1.49575	57.5258	FALSE	0
2022-09-13	15:09:09	-0.0139819	-0.0621943	1.49575	67.6348	FALSE	0
2022-09-13	15:09:10	-0.0779005	-0.346517	-1.28285	57.5258	FALSE	0
2022-09-13	15:09:10	-0.330012	-1.46796	-1.28285	67.6348	FALSE	0
2022-09-13	15:09:10	-0.431183	-1.91799	-1.28285	57.5258	FALSE	0
2022-09-13	15:09:10	-0.314491	-1.39892	-1.28285	67.6348	FALSE	0
2022-09-13	15:09:11	-0.260496	-1.15874	-0.0449335	57.5258	FALSE	0
2022-09-13	15:09:11	-0.134847	-0.599826	-0.0449335	67.6348	FALSE	0
2022-09-13	15:09:11	-0.151692	-0.674756	-0.0449335	57.5258	FALSE	0
2022-09-13	15:09:11	0.506629	2.25359	-0.0449335	69.8884	FALSE	0
2022-09-13	15:09:12	0.662863	2.94855	1.88777	60.4744	FALSE	0
2022-09-13	15:09:12	0.314567	1.39926	1.88777	71.2876	FALSE	0
2022-09-13	15:09:12	0.455585	2.02653	1.88777	62.5009	FALSE	0
2022-09-13	15:09:12	0.264542	1.17674	1.88777	72.4644	FALSE	0
2022-09-13	15:09:13	0.194415	0.864797	-0.275587	63.3657	FALSE	0
2022-09-13	15:09:13	-0.12818	-0.57017	-0.275587	72.4644	FALSE	0
2022-09-13	15:09:13	-0.252099	-1.12139	-0.275587	63.3657	FALSE	0
2022-09-13	15:09:14	-0.387519	-1.72376	-1.56734	72.4644	FALSE	0
2022-09-13	15:09:14	-0.341972	-1.52116	-1.56734	63.3657	FALSE	0
2022-09-13	15:09:14	-0.409656	-1.82223	-1.56734	72.4644	FALSE	0
2022-09-13	15:09:14	-0.270267	-1.2022	-1.56734	63.3657	FALSE	0
2022-09-13	15:09:15	-0.187417	-0.833668	-1.56536	72.4644	FALSE	0
2022-09-13	15:09:15	-0.168842	-0.751043	-1.56536	63.3657	FALSE	0
2022-09-13	15:09:15	-0.628384	-2.79518	-1.56536	72.4644	FALSE	0
2022-09-13	15:09:15	-0.422989	-1.88154	-1.56536	63.3657	FALSE	0
2022-09-13	15:09:16	-0.311793	-1.38692	1.58585	72.4644	FALSE	0
2022-09-13	15:09:16	0.1307	0.58138	1.58585	63.9471	FALSE	0
2022-09-13	15:09:16	0.267494	1.18987	1.58585	73.6542	FALSE	0
2022-09-13	15:09:16	1.33966	5.95908	1.58585	69.9062	FALSE	0
2022-09-13	15:09:17	2.77284	12.3341	13.1227	85.9884	FALSE	0
2022-09-13	15:09:17	3.12408	13.8965	13.1227	83.8027	1	1
2022-09-13	15:09:17	2.95345	13.1375	13.1227	99.1259	FALSE	1
2022-09-13	15:09:18	0.75986	3.38001	5.03756	87.1827	FALSE	1
2022-09-13	15:09:18	1.59966	7.11561	5.03756	106.242	FALSE	1
2022-09-13	15:09:18	0.589936	2.62415	5.03756	89.8069	FALSE	1
2022-09-13	15:09:18	1.58052	7.03047	5.03756	113.272	FALSE	1
2022-09-13	15:09:19	0.563066	2.50463	6.459	92.3115	FALSE	1
2022-09-13	15:09:19	1.97991	8.80704	6.459	122.079	FALSE	1
2022-09-13	15:09:19	0.988817	4.39846	6.459	96.7099	FALSE	1
2022-09-13	15:09:19	2.2764	10.1259	6.459	132.205	FALSE	1
2022-09-13	15:09:20	0.548359	2.43921	1.6035	99.1492	FALSE	1
2022-09-13	15:09:20	0.278384	1.23831	1.6035	133.443	FALSE	1
2022-09-13	15:09:20	0.37472	1.66683	1.6035	100.816	FALSE	1
2022-09-13	15:09:20	0.240471	1.06966	1.6035	134.513	FALSE	1
2022-09-13	15:09:21	0.496909	2.21035	1.44559	103.026	FALSE	1
2022-09-13	15:09:21	0.196552	0.874303	1.44559	135.387	FALSE	1
2022-09-13	15:09:21	0.281489	1.25212	1.44559	104.278	FALSE	1
2022-09-13	15:09:22	0.164084	0.729878	1.21873	136.117	FALSE	1
2022-09-13	15:09:22	0.303982	1.35217	1.21873	105.631	FALSE	1
2022-09-13	15:09:22	0.2593	1.15342	1.21873	137.27	FALSE	1
2022-09-13	15:09:22	0.368562	1.63944	1.21873	107.27	FALSE	1
2022-09-13	15:09:23	0.424135	1.88664	1.24748	139.157	FALSE	1
2022-09-13	15:09:23	0.252379	1.12263	1.24748	108.393	FALSE	1
2022-09-13	15:09:23	0.26327	1.17108	1.24748	140.328	FALSE	1
2022-09-13	15:09:23	0.181998	0.809564	1.24748	109.202	FALSE	1
2022-09-13	15:09:24	0.307596	1.36825	3.94542	141.696	FALSE	1
2022-09-13	15:09:24	0.183117	0.814541	3.94542	110.017	FALSE	1
2022-09-13	15:09:24	2.05202	9.1278	3.94542	150.824	FALSE	1
2022-09-13	15:09:24	1.00515	4.47111	3.94542	114.488	FALSE	1
2022-09-13	15:09:25	1.80688	8.03736	8.51689	158.862	FALSE	1
2022-09-13	15:09:25	1.13584	5.05244	8.51689	119.54	FALSE	1
2022-09-13	15:09:25	2.80133	12.4609	8.51689	171.322	FALSE	1
2022-09-13	15:09:26	1.01233	4.50305	3.01063	124.043	FALSE	1
2022-09-13	15:09:26	1.13151	5.03318	3.01063	176.356	FALSE	1
2022-09-13	15:09:26	0.336654	1.4975	3.01063	125.541	FALSE	1
2022-09-13	15:09:26	0.226781	1.00877	3.01063	177.364	FALSE	1
2022-09-13	15:09:27	0.42159	1.87532	2.42795	127.416	FALSE	1
2022-09-13	15:09:27	0.222659	0.990432	2.42795	178.355	FALSE	1
2022-09-13	15:09:27	0.723015	3.21612	2.42795	130.632	FALSE	1
2022-09-13	15:09:27	0.816043	3.62992	2.42795	181.985	FALSE	1
2022-09-13	15:09:28	0.716807	3.1885	6.37948	133.821	FALSE	1
2022-09-13	15:09:28	1.60296	7.13029	6.37948	189.115	FALSE	1
2022-09-13	15:09:28	1.53004	6.80592	6.37948	140.627	FALSE	1
2022-09-13	15:09:28	1.88688	8.39322	6.37948	197.508	FALSE	1
2022-09-13	15:09:29	1.21197	5.39108	6.66865	146.018	FALSE	1
2022-09-13	15:09:29	2.06525	9.18665	6.66865	206.695	FALSE	1
2022-09-13	15:09:29	1.22032	5.42823	6.66865	151.446	FALSE	1
2022-09-13	15:09:30	2.5564	11.3714	7.86646	218.066	FALSE	1
2022-09-13	15:09:30	0.952328	4.23615	7.86646	155.682	FALSE	1
2022-09-13	15:09:30	2.51044	11.1669	7.86646	229.233	FALSE	1
2022-09-13	15:09:30	1.05467	4.69138	7.86646	160.374	FALSE	1
2022-09-13	15:09:31	3.64994	16.2357	7.83229	245.469	1	2
2022-09-13	15:09:31	1.54536	6.87407	7.83229	167.248	FALSE	2
2022-09-13	15:09:31	1.14093	5.07508	7.83229	250.544	FALSE	2
2022-09-13	15:09:31	0.706883	3.14436	7.83229	170.392	FALSE	2
2022-09-13	15:09:32	0.569224	2.53202	4.17304	253.076	FALSE	2
2022-09-13	15:09:32	1.17665	5.23397	4.17304	175.626	FALSE	2
2022-09-13	15:09:32	0.751311	3.34198	4.17304	256.418	FALSE	2
2022-09-13	15:09:32	1.25538	5.58418	4.17304	181.21	FALSE	2
2022-09-13	15:09:33	0.978028	4.35046	5.17974	260.768	FALSE	2
2022-09-13	15:09:33	0.728206	3.23921	5.17974	184.449	FALSE	2
2022-09-13	15:09:33	1.78714	7.94956	5.17974	268.718	FALSE	2
2022-09-13	15:09:34	0.99584	4.4297	8.76544	188.879	FALSE	2
2022-09-13	15:09:34	2.6251	11.677	8.76544	280.395	FALSE	2
2022-09-13	15:09:34	1.30419	5.8013	8.76544	194.68	FALSE	2
2022-09-13	15:09:34	2.95711	13.1538	8.76544	293.549	FALSE	2
2022-09-13	15:09:35	1.48403	6.60126	8.93359	201.282	FALSE	2
2022-09-13	15:09:35	2.53279	11.2664	8.93359	304.815	FALSE	2
2022-09-13	15:09:35	2.00536	8.92024	8.93359	210.202	FALSE	2
2022-09-13	15:09:35	2.01126	8.94649	8.93359	313.762	FALSE	2
2022-09-13	15:09:36	2.00556	8.92113	7.85208	219.123	FALSE	2
2022-09-13	15:09:36	1.91538	8.51999	7.85208	322.282	FALSE	2
2022-09-13	15:09:36	1.70815	7.59819	7.85208	226.721	FALSE	2
2022-09-13	15:09:36	1.43182	6.36902	7.85208	328.651	FALSE	2
2022-09-13	15:09:37	0.916094	4.07497	7.14849	230.796	FALSE	2
2022-09-13	15:09:37	2.30627	10.2588	7.14849	338.909	FALSE	2
2022-09-13	15:09:37	1.59879	7.11174	7.14849	237.908	FALSE	2
2022-09-13	15:09:38	3.16118	14.0616	10.0211	352.971	1	3
2022-09-13	15:09:38	1.83599	8.16685	10.0211	246.075	FALSE	3
2022-09-13	15:09:38	2.1737	9.66905	10.0211	362.64	FALSE	3
2022-09-13	15:09:38	1.84047	8.18678	10.0211	254.262	FALSE	3
2022-09-13	15:09:39	1.25212	5.56968	7.14501	368.21	FALSE	3
2022-09-13	15:09:39	2.2052	9.80917	7.14501	264.071	FALSE	3
2022-09-13	15:09:39	1.23034	5.4728	7.14501	373.683	FALSE	3
2022-09-13	15:09:39	1.73742	7.72839	7.14501	271.799	FALSE	3
2022-09-13	15:09:40	1.73533	7.71909	8.46935	381.402	FALSE	3
2022-09-13	15:09:40	2.74123	12.1935	8.46935	283.993	FALSE	3
2022-09-13	15:09:40	1.1819	5.25733	8.46935	386.659	FALSE	3
2022-09-13	15:09:40	1.95752	8.70744	8.46935	292.7	FALSE	3
2022-09-13	15:09:41	2.20454	9.80623	9.68001	396.465	FALSE	3
2022-09-13	15:09:41	2.20088	9.78995	9.68001	302.49	FALSE	3
2022-09-13	15:09:41	2.12307	9.44384	9.68001	405.909	FALSE	3
2022-09-13	15:09:42	2.64724	11.7755	9.4364	314.265	FALSE	3
2022-09-13	15:09:42	1.35375	6.02175	9.4364	411.931	FALSE	3
2022-09-13	15:09:42	3.35263	14.9132	9.4364	329.179	1	4
2022-09-13	15:09:42	1.13197	5.03523	9.4364	416.966	FALSE	4
2022-09-13	15:09:43	3.36235	14.9564	5.6255	344.135	1	5
2022-09-13	15:09:43	0.403015	1.79269	5.6255	418.759	FALSE	5
2022-09-13	15:09:43	0.808664	3.5971	5.6255	347.732	FALSE	5
2022-09-13	15:09:43	0.484644	2.15579	5.6255	420.914	FALSE	5
2022-09-13	15:09:44	1.05553	4.69521	4.83874	352.427	FALSE	5
2022-09-13	15:09:44	0.782455	3.48052	4.83874	424.395	FALSE	5
2022-09-13	15:09:44	1.25721	5.59232	4.83874	358.02	FALSE	5
2022-09-13	15:09:44	1.25599	5.58689	4.83874	429.982	FALSE	5
2022-09-13	15:09:45	1.68816	7.50927	8.22211	365.529	FALSE	5
2022-09-13	15:09:45	1.42541	6.34051	8.22211	436.322	FALSE	5
2022-09-13	15:09:45	2.43167	10.8166	8.22211	376.346	FALSE	5
2022-09-13	15:09:46	2.05238	9.1294	7.35186	445.452	FALSE	5
2022-09-13	15:09:46	2.1537	9.58009	7.35186	385.926	FALSE	5
2022-09-13	15:09:46	1.1109	4.94151	7.35186	450.393	FALSE	5
2022-09-13	15:09:46	1.29411	5.75646	7.35186	391.682	FALSE	5
2022-09-13	15:09:47	0.310751	1.38228	4.88198	451.776	FALSE	5
2022-09-13	15:09:47	0.705	3.13598	4.88198	394.818	FALSE	5
2022-09-13	15:09:47	0.658741	2.93021	4.88198	454.706	FALSE	5
2022-09-13	15:09:47	2.71558	12.0794	4.88198	406.898	FALSE	5
2022-09-13	15:09:48	1.37981	6.13767	10.9973	460.843	FALSE	5
2022-09-13	15:09:48	2.13915	9.51537	10.9973	416.413	FALSE	5
2022-09-13	15:09:48	2.69508	11.9883	10.9973	472.832	FALSE	5
2022-09-13	15:09:48	3.67518	16.3479	10.9973	432.761	1	6
2022-09-13	15:09:49	2.82154	12.5508	8.16467	485.382	FALSE	6
2022-09-13	15:09:49	1.44729	6.43784	8.16467	439.199	FALSE	6
2022-09-13	15:09:49	1.23767	5.5054	8.16467	490.888	FALSE	6
2022-09-13	15:09:50	0.578791	2.57458	1.80729	441.773	FALSE	6
2022-09-13	15:09:50	0.195687	0.870455	1.80729	491.758	FALSE	6
2022-09-13	15:09:50	0.575026	2.55783	1.80729	444.331	FALSE	6
2022-09-13	15:09:50	0.275687	1.22631	1.80729	492.985	FALSE	6
2022-09-13	15:09:51	1.04134	4.63209	8.05351	448.963	FALSE	6
2022-09-13	15:09:51	1.03747	4.61487	8.05351	497.6	FALSE	6
2022-09-13	15:09:51	2.85207	12.6866	8.05351	461.65	FALSE	6
2022-09-13	15:09:51	2.31116	10.2805	8.05351	507.88	FALSE	6
2022-09-13	15:09:52	2.41396	10.7378	7.60376	472.387	FALSE	6
2022-09-13	15:09:52	1.19314	5.30733	7.60376	513.187	FALSE	6
2022-09-13	15:09:52	1.68836	7.51016	7.60376	479.898	FALSE	6
2022-09-13	15:09:52	1.54215	6.85979	7.60376	520.047	FALSE	6
2022-09-13	15:09:53	1.69589	7.54366	9.25412	487.441	FALSE	6
2022-09-13	15:09:53	1.97752	8.7964	9.25412	528.844	FALSE	6
2022-09-13	15:09:53	2.56785	11.4223	9.25412	498.864	FALSE	6
2022-09-13	15:09:54	1.54653	6.87927	9.05707	535.723	FALSE	6
2022-09-13	15:09:54	2.72205	12.1082	9.05707	510.972	FALSE	6
2022-09-13	15:09:54	1.24917	5.55656	9.05707	541.279	FALSE	6
2022-09-13	15:09:54	2.62673	11.6842	9.05707	522.656	FALSE	6
2022-09-13	15:09:55	1.78261	7.92941	6.29579	549.209	FALSE	6
2022-09-13	15:09:55	1.96174	8.72621	6.29579	531.382	FALSE	6
2022-09-13	15:09:55	0.971616	4.32194	6.29579	553.531	FALSE	6
2022-09-13	15:09:55	0.945458	4.20559	6.29579	535.588	FALSE	6
2022-09-13	15:09:56	1.49243	6.63863	5.15612	560.169	FALSE	6
2022-09-13	15:09:56	0.774568	3.44543	5.15612	539.033	FALSE	6
2022-09-13	15:09:56	1.54907	6.89057	5.15612	567.06	FALSE	6
2022-09-13	15:09:56	0.820522	3.64985	5.15612	542.683	FALSE	6
2022-09-13	15:09:57	2.16556	9.63284	6.41897	576.693	FALSE	6
2022-09-13	15:09:57	0.647239	2.87905	6.41897	545.562	FALSE	6
2022-09-13	15:09:57	1.51635	6.74503	6.41897	583.438	FALSE	6
2022-09-13	15:09:58	1.15859	5.15364	3.82641	550.716	FALSE	6
2022-09-13	15:09:58	0.641132	2.85188	3.82641	586.29	FALSE	6
2022-09-13	15:09:58	1.00627	4.47609	3.82641	555.192	FALSE	6
2022-09-13	15:09:58	0.634873	2.82404	3.82641	589.114	FALSE	6
2022-09-13	15:09:59	0.468206	2.08267	2.08573	557.275	FALSE	6
2022-09-13	15:09:59	0.508613	2.26241	2.08573	591.376	FALSE	6
2022-09-13	15:09:59	0.252328	1.12241	2.08573	558.397	FALSE	6
2022-09-13	15:09:59	0.646425	2.87543	2.08573	594.252	FALSE	6
2022-09-13	15:10:00	0.572583	2.54696	6.95968	560.944	FALSE	6
2022-09-13	15:10:00	0.803779	3.57537	6.95968	597.827	FALSE	6
2022-09-13	15:10:00	1.27818	5.6856	6.95968	566.63	FALSE	6
2022-09-13	15:10:00	3.60388	16.0308	6.95968	613.858	1	7
2022-09-13	15:10:01	5.54454	24.6632	28.98	591.293	1	8
2022-09-13	15:10:01	9.70688	43.1781	28.98	657.036	1	9
2022-09-13	15:10:01	4.29355	19.0986	28.98	610.391	1	10
2022-09-13	15:10:02	2.07955	9.25025	3.87066	666.286	FALSE	10
2022-09-13	15:10:02	0.66388	2.95307	3.87066	613.344	FALSE	10
2022-09-13	15:10:02	0.397265	1.76711	3.87066	668.053	FALSE	10
2022-09-13	15:10:02	0.339962	1.51222	3.87066	614.857	FALSE	10
2022-09-13	15:10:03	0.297061	1.32139	1.36038	669.375	FALSE	10
2022-09-13	15:10:03	0.293753	1.30667	1.36038	616.163	FALSE	10
2022-09-13	15:10:03	0.487697	2.16937	1.36038	671.544	FALSE	10
2022-09-13	15:10:03	0.144797	0.644086	1.36038	616.807	FALSE	10
2022-09-13	15:10:04	0.511107	2.27351	1.85461	673.818	FALSE	10
2022-09-13	15:10:04	0.233753	1.03978	1.85461	617.847	FALSE	10
2022-09-13	15:10:04	0.488512	2.173	1.85461	675.99	FALSE	10
2022-09-13	15:10:04	0.434364	1.93214	1.85461	619.779	FALSE	10
2022-09-13	15:10:05	0.587494	2.61329	2.98348	678.604	FALSE	10
2022-09-13	15:10:05	0.579555	2.57798	2.98348	622.357	FALSE	10
2022-09-13	15:10:05	0.845102	3.75918	2.98348	682.363	FALSE	10
2022-09-13	15:10:06	1.10546	4.91731	2.74662	627.275	FALSE	10
2022-09-13	15:10:06	0.743728	3.30825	2.74662	685.671	FALSE	10
2022-09-13	15:10:06	0.518842	2.30791	2.74662	629.583	FALSE	10
2022-09-13	15:10:06	0.101845	0.453027	2.74662	686.124	FALSE	10
2022-09-13	15:10:07	0.277265	1.23333	0.968249	630.816	FALSE	10
2022-09-13	15:10:07	0.138588	0.616467	0.968249	686.741	FALSE	10
2022-09-13	15:10:07	0.286222	1.27317	0.968249	632.089	FALSE	10
2022-09-13	15:10:07	0.168613	0.750024	0.968249	687.491	FALSE	10
2022-09-13	15:10:08	0.346272	1.54029	1.44736	633.629	FALSE	10
2022-09-13	15:10:08	0.357977	1.59235	1.44736	689.083	FALSE	10
2022-09-13	15:10:08	0.18556	0.825408	1.44736	634.455	FALSE	10
2022-09-13	15:10:08	0.411718	1.8314	1.44736	690.914	FALSE	10
2022-09-13	15:10:09	0.14383	0.639785	0.958288	635.095	FALSE	10
2022-09-13	15:10:09	0.419555	1.86626	0.958288	692.781	FALSE	10
2022-09-13	15:10:09	0.0829136	0.368816	0.958288	635.463	FALSE	10
2022-09-13	15:10:10	0.346374	1.54074	1.25065	694.322	FALSE	10
2022-09-13	15:10:10	0.140929	0.62688	1.25065	636.09	FALSE	10
2022-09-13	15:10:10	0.315331	1.40266	1.25065	695.724	FALSE	10
2022-09-13	15:10:10	0.321998	1.43231	1.25065	637.523	FALSE	10
2022-09-13	15:10:11	0.447647	1.99122	7.57291	697.715	FALSE	10
2022-09-13	15:10:11	1.71243	7.61723	7.57291	645.14	FALSE	10
2022-09-13	15:10:11	1.72123	7.65638	7.57291	705.372	FALSE	10
2022-09-13	15:10:11	2.92856	13.0268	7.57291	658.167	FALSE	10
2022-09-13	15:10:12	1.6167	7.1914	9.6781	712.563	FALSE	10
2022-09-13	15:10:12	3.93716	17.5133	9.6781	675.68	1	11
2022-09-13	15:10:12	1.23462	5.49184	9.6781	718.055	FALSE	11
2022-09-13	15:10:12	1.91446	8.5159	9.6781	684.196	FALSE	11
2022-09-13	15:10:13	1.31711	5.85877	5.24591	723.914	FALSE	11
2022-09-13	15:10:13	0.704593	3.13417	5.24591	687.33	FALSE	11
2022-09-13	15:10:13	1.5163	6.74481	5.24591	730.659	FALSE	11
2022-09-13	15:10:14	0.3707	1.64895	3.76128	688.979	FALSE	11
2022-09-13	15:10:14	1.51508	6.73938	3.76128	737.398	FALSE	11
2022-09-13	15:10:14	0.941285	4.18702	3.76128	693.166	FALSE	11
2022-09-13	15:10:14	0.555229	2.46977	3.76128	739.868	FALSE	11
2022-09-13	15:10:15	1.04953	4.66852	2.59976	697.834	FALSE	11
2022-09-13	15:10:15	0.306476	1.36327	2.59976	741.231	FALSE	11
2022-09-13	15:10:15	0.722812	3.21521	2.59976	701.05	FALSE	11
2022-09-13	15:10:15	0.258995	1.15206	2.59976	742.383	FALSE	11
2022-09-13	15:10:16	0.233194	1.03729	0.951895	702.087	FALSE	11
2022-09-13	15:10:16	0.23925	1.06423	0.951895	743.447	FALSE	11
2022-09-13	15:10:16	0.229428	1.02054	0.951895	703.107	FALSE	11
2022-09-13	15:10:16	0.15411	0.685512	0.951895	744.133	FALSE	11
2022-09-13	15:10:17	0.234517	1.04318	0.455744	704.151	FALSE	11
2022-09-13	15:10:17	0.065102	0.289587	0.455744	744.422	FALSE	11
2022-09-13	15:10:17	0.00774832	0.0344661	0.455744	704.185	FALSE	11
2022-09-13	15:10:18	0.0270867	0.120487	5.34661	744.543	FALSE	11
2022-09-13	15:10:18	0.143117	0.636613	5.34661	704.822	FALSE	11
2022-09-13	15:10:18	1.78897	7.9577	5.34661	752.501	FALSE	11
2022-09-13	15:10:18	2.84871	12.6716	5.34661	717.493	FALSE	11
2022-09-13	15:10:19	1.57981	7.02731	9.76425	759.528	FALSE	11
2022-09-13	15:10:19	3.07019	13.6568	9.76425	731.15	1	12
2022-09-13	15:10:19	0.84841	3.7739	9.76425	763.302	FALSE	12
2022-09-13	15:10:19	3.282	14.599	9.76425	745.749	1	13
2022-09-13	15:10:20	0.396756	1.76485	2.00967	765.067	FALSE	13
2022-09-13	15:10:20	0.644542	2.86705	2.00967	748.616	FALSE	13
2022-09-13	15:10:20	0.342608	1.52399	2.00967	766.591	FALSE	13
2022-09-13	15:10:20	0.42327	1.88279	2.00967	750.499	FALSE	13
2022-09-13	15:10:21	0.585814	2.60582	3.0437	769.196	FALSE	13
2022-09-13	15:10:21	0.605662	2.69411	3.0437	753.193	FALSE	13
2022-09-13	15:10:21	0.861285	3.83117	3.0437	773.028	FALSE	13
2022-09-13	15:10:22	0.934974	4.15895	3.80994	757.352	FALSE	13
2022-09-13	15:10:22	0.984288	4.37831	3.80994	777.406	FALSE	13
2022-09-13	15:10:22	0.819707	3.64622	3.80994	760.998	FALSE	13
2022-09-13	15:10:22	0.687086	3.0563	3.80994	780.462	FALSE	13
2022-09-13	15:10:23	0.667087	2.96734	2.94328	763.966	FALSE	13
2022-09-13	15:10:23	0.560471	2.49309	2.94328	782.955	FALSE	13
2022-09-13	15:10:23	0.632786	2.81476	2.94328	766.78	FALSE	13
2022-09-13	15:10:23	0.786374	3.49795	2.94328	786.453	FALSE	13
2022-09-13	15:10:24	0.466374	2.07452	3.24685	768.855	FALSE	13
2022-09-13	15:10:24	1.33854	5.95409	3.24685	792.407	FALSE	13
2022-09-13	15:10:24	0.834109	3.71028	3.24685	772.565	FALSE	13
2022-09-13	15:10:24	0.280674	1.24849	3.24685	793.656	FALSE	13
2022-09-13	15:10:25	0.370954	1.65008	1.38922	774.215	FALSE	13
2022-09-13	15:10:25	0.19355	0.860949	1.38922	794.517	FALSE	13
2022-09-13	15:10:25	0.37243	1.65664	1.38922	775.872	FALSE	13
2022-09-13	15:10:26	0.538333	2.39461	1.67487	796.911	FALSE	13
2022-09-13	15:10:26	0.228155	1.01488	1.67487	776.887	FALSE	13
2022-09-13	15:10:26	0.364847	1.62291	1.67487	798.534	FALSE	13
2022-09-13	15:10:26	0.374771	1.66706	1.67487	778.554	FALSE	13
2022-09-13	15:10:27	0.371107	1.65076	1.65211	800.185	FALSE	13
2022-09-13	15:10:27	0.28215	1.25506	1.65211	779.809	FALSE	13
2022-09-13	15:10:27	0.407137	1.81103	1.65211	801.996	FALSE	13
2022-09-13	15:10:27	0.425254	1.89161	1.65211	781.701	FALSE	13
2022-09-13	15:10:28	0.270038	1.20118	1.1249	803.197	FALSE	13
2022-09-13	15:10:28	0.27925	1.24216	1.1249	782.943	FALSE	13
2022-09-13	15:10:28	0.167799	0.746404	1.1249	803.944	FALSE	13
2022-09-13	15:10:28	0.294466	1.30984	1.1249	784.253	FALSE	13
2022-09-13	15:10:29	0.815636	3.62811	7.38204	807.572	FALSE	13
2022-09-13	15:10:29	1.3619	6.058	7.38204	790.311	FALSE	13
2022-09-13	15:10:29	2.61304	11.6233	7.38204	819.195	FALSE	13
2022-09-13	15:10:29	1.84765	8.21872	7.38204	798.529	FALSE	13
2022-09-13	15:10:30	2.53177	11.2618	7.29933	830.457	FALSE	13
2022-09-13	15:10:30	1.33981	5.95974	7.29933	804.489	FALSE	13
2022-09-13	15:10:30	1.05131	4.67644	7.29933	835.133	FALSE	13
2022-09-13	15:10:31	0.875026	3.89229	3.42302	808.381	FALSE	13
2022-09-13	15:10:31	0.85986	3.82483	3.42302	838.958	FALSE	13
2022-09-13	15:10:31	0.581641	2.58726	3.42302	810.969	FALSE	13
2022-09-13	15:10:31	0.76159	3.3877	3.42302	842.346	FALSE	13
2022-09-13	15:10:32	0.805916	3.58488	11.283	814.553	FALSE	13
2022-09-13	15:10:32	1.51289	6.72964	11.283	849.076	FALSE	13
2022-09-13	15:10:32	2.61167	11.6172	11.283	826.171	FALSE	13
2022-09-13	15:10:32	5.21563	23.2002	11.283	872.276	1	14
2022-09-13	15:10:33	4.47513	19.9063	11.986	846.077	1	15
2022-09-13	15:10:33	4.288	19.0739	11.986	891.35	1	16
2022-09-13	15:10:33	0.822252	3.65754	11.986	849.734	FALSE	16
2022-09-13	15:10:33	1.19294	5.30644	11.986	896.656	FALSE	16
2022-09-13	15:10:34	1.10347	4.90846	4.97079	854.643	FALSE	16
2022-09-13	15:10:34	1.28632	5.72181	4.97079	902.378	FALSE	16
2022-09-13	15:10:34	0.962659	4.2821	4.97079	858.925	FALSE	16
2022-09-13	15:10:35	0.20612	0.916863	-0.14216	903.295	FALSE	16
2022-09-13	15:10:35	0.116247	0.51709	-0.14216	859.442	FALSE	16
2022-09-13	15:10:35	-0.138511	-0.616125	-0.14216	903.295	FALSE	16
2022-09-13	15:10:35	-0.311692	-1.38647	-0.14216	859.442	FALSE	16
2022-09-13	15:10:36	-0.528536	-2.35103	-2.11527	903.295	FALSE	16
2022-09-13	15:10:36	-0.526043	-2.33994	-2.11527	859.442	FALSE	16
2022-09-13	15:10:36	-0.37902	-1.68596	-2.11527	903.295	FALSE	16
2022-09-13	15:10:36	-0.468536	-2.08414	-2.11527	859.442	FALSE	16
2022-09-13	15:10:37	-0.228435	-1.01612	-1.20667	903.295	FALSE	16
2022-09-13	15:10:37	-0.326043	-1.4503	-1.20667	859.442	FALSE	16
2022-09-13	15:10:37	-0.162277	-0.721841	-1.20667	903.295	FALSE	16
2022-09-13	15:10:37	-0.368333	-1.63842	-1.20667	859.442	FALSE	16
2022-09-13	15:10:38	0.307799	1.36915	1.70267	904.664	FALSE	16
2022-09-13	15:10:38	0.30271	1.34651	1.70267	860.789	FALSE	16
2022-09-13	15:10:38	0.537824	2.39235	1.70267	907.056	FALSE	16
2022-09-13	15:10:39	1.01701	4.52386	3.89297	865.312	FALSE	16
2022-09-13	15:10:39	1.19681	5.32365	3.89297	912.38	FALSE	16
2022-09-13	15:10:39	0.788715	3.50836	3.89297	868.821	FALSE	16
2022-09-13	15:10:39	0.498181	2.21601	3.89297	914.596	FALSE	16
2022-09-13	15:10:40	0.26098	1.16089	1.47962	869.982	FALSE	16
2022-09-13	15:10:40	0.425204	1.89139	1.47962	916.487	FALSE	16
2022-09-13	15:10:40	0.328766	1.46242	1.47962	871.444	FALSE	16
2022-09-13	15:10:40	0.315585	1.40379	1.47962	917.891	FALSE	16
2022-09-13	15:10:41	0.267494	1.18987	1.59281	872.634	FALSE	16
2022-09-13	15:10:41	0.337061	1.49931	1.59281	919.39	FALSE	16
2022-09-13	15:10:41	0.393448	1.75014	1.59281	874.384	FALSE	16
2022-09-13	15:10:41	0.434313	1.93191	1.59281	921.322	FALSE	16
2022-09-13	15:10:42	0.446934	1.98805	6.29514	876.372	FALSE	16
2022-09-13	15:10:42	1.33726	5.9484	6.29514	927.271	FALSE	16
2022-09-13	15:10:42	2.46144	10.949	6.29514	887.321	FALSE	16
2022-09-13	15:10:43	3.50286	15.5814	9.32084	942.852	1	17
2022-09-13	15:10:43	2.33843	10.4018	9.32084	897.723	FALSE	17
2022-09-13	15:10:43	1.68592	7.49931	9.32084	950.351	FALSE	17
2022-09-13	15:10:43	0.854466	3.80084	9.32084	901.524	FALSE	17
2022-09-13	15:10:44	0.133194	0.592474	1.40282	950.944	FALSE	17
2022-09-13	15:10:44	0.460267	2.04736	1.40282	903.571	FALSE	17
2022-09-13	15:10:44	0.174822	0.777643	1.40282	951.722	FALSE	17
2022-09-13	15:10:44	0.493193	2.19382	1.40282	905.765	FALSE	17
2022-09-13	15:10:45	0.251819	1.12014	1.86604	952.842	FALSE	17
2022-09-13	15:10:45	0.521031	2.31765	1.86604	908.083	FALSE	17
2022-09-13	15:10:45	0.373041	1.65936	1.86604	954.501	FALSE	17
2022-09-13	15:10:45	0.532125	2.367	1.86604	910.45	FALSE	17
2022-09-13	15:10:46	0.353601	1.57289	1.5876	956.074	FALSE	17
2022-09-13	15:10:46	0.461285	2.05189	1.5876	912.502	FALSE	17
2022-09-13	15:10:46	0.25584	1.13803	1.5876	957.212	FALSE	17
2022-09-13	15:10:47	0.516247	2.29637	1.64668	914.798	FALSE	17
2022-09-13	15:10:47	0.212634	0.945839	1.64668	958.158	FALSE	17
2022-09-13	15:10:47	0.470191	2.0915	1.64668	916.889	FALSE	17
2022-09-13	15:10:47	0.281692	1.25302	1.64668	959.411	FALSE	17
2022-09-13	15:10:48	0.322354	1.4339	1.32875	918.323	FALSE	17
2022-09-13	15:10:48	0.373448	1.66117	1.32875	961.072	FALSE	17
2022-09-13	15:10:48	0.213448	0.949459	1.32875	919.273	FALSE	17
2022-09-13	15:10:48	0.285611	1.27045	1.32875	962.342	FALSE	17
2022-09-13	15:10:49	0.286272	1.2734	1.33271	920.546	FALSE	17
2022-09-13	15:10:49	0.210496	0.936328	1.33271	963.279	FALSE	17
2022-09-13	15:10:49	0.317468	1.41216	1.33271	921.958	FALSE	17
2022-09-13	15:10:49	0.384186	1.70894	1.33271	964.988	FALSE	17
2022-09-13	15:10:50	0.134313	0.597451	0.310866	922.556	FALSE	17
2022-09-13	15:10:50	0.110395	0.491059	0.310866	965.479	FALSE	17
2022-09-13	15:10:50	-0.0350506	-0.155912	0.310866	922.556	FALSE	17
2022-09-13	15:10:51	0.0227102	0.10102	-0.117486	965.58	FALSE	17
2022-09-13	15:10:51	0.0416415	0.18523	-0.117486	922.741	FALSE	17
2022-09-13	15:10:51	-0.161565	-0.718673	-0.117486	965.58	FALSE	17
2022-09-13	15:10:51	-0.00843487	-0.03752	-0.117486	922.741	FALSE	17
2022-09-13	15:10:52	0.112481	0.500338	1.02105	966.08	FALSE	17
2022-09-13	15:10:52	0.251514	1.11878	1.02105	923.86	FALSE	17
2022-09-13	15:10:52	0.220878	0.98251	1.02105	967.063	FALSE	17
2022-09-13	15:10:52	0.333295	1.48256	1.02105	925.342	FALSE	17
2022-09-13	15:10:53	0.43355	1.92852	1.8305	968.991	FALSE	17
2022-09-13	15:10:53	0.365967	1.62789	1.8305	926.97	FALSE	17
2022-09-13	15:10:53	0.442405	1.96791	1.8305	970.959	FALSE	17
2022-09-13	15:10:53	0.404135	1.79767	1.8305	928.768	FALSE	17
2022-09-13	15:10:54	0.481234	2.14063	3.29202	973.1	FALSE	17
2022-09-13	15:10:54	0.548206	2.43853	3.29202	931.206	FALSE	17
2022-09-13	15:10:54	1.1908	5.29692	3.29202	978.397	FALSE	17
2022-09-13	15:10:55	1.22586	5.45287	3.68	936.659	FALSE	17
2022-09-13	15:10:55	0.840725	3.73971	3.68	982.136	FALSE	17
2022-09-13	15:10:55	0.784287	3.48867	3.68	940.148	FALSE	17
2022-09-13	15:10:55	0.458333	2.03876	3.68	984.175	FALSE	17
2022-09-13	15:10:56	0.705255	3.13712	3.71804	943.285	FALSE	17
2022-09-13	15:10:56	0.73584	3.27316	3.71804	987.448	FALSE	17
2022-09-13	15:10:56	0.911412	4.05414	3.71804	947.339	FALSE	17
2022-09-13	15:10:56	0.990903	4.40773	3.71804	991.856	FALSE	17
2022-09-13	15:10:57	0.299249	1.33112	1.72416	948.67	FALSE	17
2022-09-13	15:10:57	0.487087	2.16666	1.72416	994.023	FALSE	17
2022-09-13	15:10:57	0.410954	1.82801	1.72416	950.498	FALSE	17
2022-09-13	15:10:57	0.353143	1.57085	1.72416	995.593	FALSE	17
2022-09-13	15:10:58	0.299199	1.3309	1.34546	951.829	FALSE	17
2022-09-13	15:10:58	0.249886	1.11154	1.34546	996.705	FALSE	17
2022-09-13	15:10:58	0.358333	1.59394	1.34546	953.423	FALSE	17
2022-09-13	15:10:59	0.367952	1.63672	1.68568	998.342	FALSE	17
2022-09-13	15:10:59	0.301947	1.34312	1.68568	954.766	FALSE	17
2022-09-13	15:10:59	0.465204	2.06932	1.68568	1000.41	FALSE	17
2022-09-13	15:10:59	0.380725	1.69354	1.68568	956.46	FALSE	17
2022-09-13	15:11:00	0.610242	2.71448	4.95465	1003.13	FALSE	17
2022-09-13	15:11:00	0.832176	3.70169	4.95465	960.162	FALSE	17
2022-09-13	15:11:00	0.780013	3.46965	4.95465	1006.6	FALSE	17
2022-09-13	15:11:00	2.23299	9.93279	4.95465	970.094	FALSE	17
2022-09-13	15:11:01	4.13675	18.4011	16.8103	1025	1	18
2022-09-13	15:11:01	3.71309	16.5166	16.8103	986.611	1	19
2022-09-13	15:11:01	4.18098	18.5978	16.8103	1043.59	1	20
2022-09-13	15:11:01	3.08566	13.7256	16.8103	1000.34	1	21
2022-09-13	15:11:02	2.07355	9.22357	17.1754	1052.82	FALSE	21
2022-09-13	15:11:02	4.2653	18.9729	17.1754	1019.31	1	22
2022-09-13	15:11:02	5.24474	23.3297	17.1754	1076.15	1	23
2022-09-13	15:11:03	4.28592	19.0646	7.53172	1038.37	1	24
2022-09-13	15:11:03	1.64393	7.31253	7.53172	1083.46	FALSE	24
2022-09-13	15:11:03	0.490649	2.1825	7.53172	1040.56	FALSE	24
2022-09-13	15:11:03	0.352328	1.56723	7.53172	1085.03	FALSE	24
2022-09-13	15:11:04	0.31416	1.39745	1.69049	1041.95	FALSE	24
2022-09-13	15:11:04	0.332736	1.48008	1.69049	1086.51	FALSE	24
2022-09-13	15:11:04	0.361794	1.60933	1.69049	1043.56	FALSE	24
2022-09-13	15:11:04	0.511463	2.27509	1.69049	1088.78	FALSE	24
2022-09-13	15:11:05	0.477214	2.12274	2.04991	1045.69	FALSE	24
2022-09-13	15:11:05	0.504288	2.24317	2.04991	1091.03	FALSE	24
2022-09-13	15:11:05	0.359148	1.59756	2.04991	1047.28	FALSE	24
2022-09-13	15:11:05	0.50271	2.23615	2.04991	1093.26	FALSE	24
2022-09-13	15:11:06	0.461336	2.05211	2.01552	1049.34	FALSE	24
2022-09-13	15:11:06	0.332125	1.47736	2.01552	1094.74	FALSE	24
2022-09-13	15:11:06	0.565865	2.51708	2.01552	1051.85	FALSE	24
2022-09-13	15:11:07	0.456094	2.0288	2.22563	1096.77	FALSE	24
2022-09-13	15:11:07	0.42841	1.90565	2.22563	1053.76	FALSE	24
2022-09-13	15:11:07	0.533142	2.37152	2.22563	1099.14	FALSE	24
2022-09-13	15:11:07	0.583728	2.59654	2.22563	1056.36	FALSE	24
2022-09-13	15:11:08	0.432023	1.92172	2.00984	1101.06	FALSE	24
2022-09-13	15:11:08	0.377367	1.6786	2.00984	1058.03	FALSE	24
2022-09-13	15:11:08	0.443066	1.97085	2.00984	1103.03	FALSE	24
2022-09-13	15:11:08	0.554873	2.46819	2.00984	1060.5	FALSE	24
2022-09-13	15:11:09	0.365255	1.62473	1.81539	1104.66	FALSE	24
2022-09-13	15:11:09	0.463422	2.06139	1.81539	1062.56	FALSE	24
2022-09-13	15:11:09	0.485305	2.15873	1.81539	1106.82	FALSE	24
2022-09-13	15:11:09	0.318486	1.41669	1.81539	1063.98	FALSE	24
2022-09-13	15:11:10	0.166883	0.742329	0.760891	1107.56	FALSE	24
2022-09-13	15:11:10	0.198995	0.88517	0.760891	1064.87	FALSE	24
2022-09-13	15:11:10	0.14729	0.655175	0.760891	1108.21	FALSE	24
2022-09-13	15:11:11	0.385254	1.71369	1.34872	1066.58	FALSE	24
2022-09-13	15:11:11	0.271921	1.20956	1.34872	1109.42	FALSE	24
2022-09-13	15:11:11	0.22612	1.00583	1.34872	1067.58	FALSE	24
2022-09-13	15:11:11	0.329529	1.46581	1.34872	1110.89	FALSE	24
2022-09-13	15:11:12	0.176094	0.783301	0.564061	1068.37	FALSE	24
2022-09-13	15:11:12	0.140318	0.624163	0.564061	1111.51	FALSE	24
2022-09-13	15:11:12	0.141641	0.630047	0.564061	1069	FALSE	24
2022-09-13	15:11:12	0.0491733	0.218733	0.564061	1111.73	FALSE	24
2022-09-13	15:11:13	0.126272	0.561683	-0.64448	1069.56	FALSE	24
2022-09-13	15:11:13	-0.11042	-0.49117	-0.64448	1111.73	FALSE	24
2022-09-13	15:11:13	-0.297697	-1.32422	-0.64448	1069.56	FALSE	24
2022-09-13	15:11:13	-0.297697	-1.32422	-0.64448	1111.73	FALSE	24
2022-09-13	15:11:14	-0.341717	-1.52003	2.561	1069.56	FALSE	24
2022-09-13	15:11:14	0.0484608	0.215563	2.561	1111.95	FALSE	24
2022-09-13	15:11:14	2.02047	8.98745	2.561	1078.55	FALSE	24
2022-09-13	15:11:15	1.33279	5.92852	13.0624	1117.88	FALSE	24
2022-09-13	15:11:15	2.06271	9.17535	13.0624	1087.72	FALSE	24
2022-09-13	15:11:15	2.68546	11.9455	13.0624	1129.82	FALSE	24
2022-09-13	15:11:15	5.6653	25.2004	13.0624	1112.92	1	25
2022-09-13	15:11:16	5.95859	26.505	18.2067	1156.33	1	26
2022-09-13	15:11:16	5.69482	25.3317	18.2067	1138.25	1	27
2022-09-13	15:11:16	3.38963	15.0778	18.2067	1171.4	1	28
2022-09-13	15:11:16	1.32917	5.91241	18.2067	1144.17	FALSE	28
2022-09-13	15:11:17	0.432735	1.92489	1.26361	1173.33	FALSE	28
2022-09-13	15:11:17	0.271616	1.2082	1.26361	1145.38	FALSE	28
2022-09-13	15:11:17	0.253499	1.12761	1.26361	1174.46	FALSE	28
2022-09-13	15:11:17	0.178435	0.793715	1.26361	1146.17	FALSE	28
2022-09-13	15:11:18	0.225306	1.00221	1.09124	1175.46	FALSE	28
2022-09-13	15:11:18	0.271514	1.20775	1.09124	1147.38	FALSE	28
2022-09-13	15:11:18	0.239148	1.06378	1.09124	1176.52	FALSE	28
2022-09-13	15:11:19	-1.17571	-5.22979	-0.00169476	1147.38	FALSE	28
2022-09-13	15:11:19	0.301896	1.34289	-0.00169476	1177.86	FALSE	28
2022-09-13	15:11:19	0.414822	1.84521	-0.00169476	1149.22	FALSE	28
2022-09-13	15:11:19	0.457468	2.03491	-0.00169476	1179.9	FALSE	28
2022-09-13	15:11:20	1.00907	4.48855	4.72997	1153.71	FALSE	28
2022-09-13	15:11:20	0.477824	2.12546	4.72997	1182.03	FALSE	28
2022-09-13	15:11:20	1.81085	8.05502	4.72997	1161.77	FALSE	28
2022-09-13	15:11:20	0.955636	4.25086	4.72997	1186.28	FALSE	28
2022-09-13	15:11:21	1.51955	6.75926	6.48526	1168.52	FALSE	28
2022-09-13	15:11:21	1.36134	6.05551	6.48526	1192.33	FALSE	28
2022-09-13	15:11:21	1.39111	6.18794	6.48526	1174.71	FALSE	28
2022-09-13	15:11:21	1.55981	6.93835	6.48526	1199.27	FALSE	28
2022-09-13	15:11:22	0.873906	3.88731	4.8632	1178.6	FALSE	28
2022-09-13	15:11:22	1.28897	5.7336	4.8632	1205	FALSE	28
2022-09-13	15:11:22	1.11701	4.96868	4.8632	1183.57	FALSE	28
2022-09-13	15:11:23	0.743728	3.30825	5.02674	1208.31	FALSE	28
2022-09-13	15:11:23	1.56169	6.94671	5.02674	1190.52	FALSE	28
2022-09-13	15:11:23	0.7193	3.19959	5.02674	1211.51	FALSE	28
2022-09-13	15:11:23	1.49553	6.65242	5.02674	1197.17	FALSE	28
2022-09-13	15:11:24	0.733092	3.26094	5.78209	1214.77	FALSE	28
2022-09-13	15:11:24	1.59889	7.11218	5.78209	1204.28	FALSE	28
2022-09-13	15:11:24	0.794669	3.53485	5.78209	1218.31	FALSE	28
2022-09-13	15:11:24	2.07284	9.22041	5.78209	1213.5	FALSE	28
2022-09-13	15:11:25	1.8594	8.27098	6.34463	1226.58	FALSE	28
2022-09-13	15:11:25	1.55696	6.92567	6.34463	1220.43	FALSE	28
2022-09-13	15:11:25	1.31874	5.86602	6.34463	1232.44	FALSE	28
2022-09-13	15:11:25	0.970242	4.31583	6.34463	1224.74	FALSE	28
2022-09-13	15:11:26	0.715738	3.18375	3.23053	1235.63	FALSE	28
2022-09-13	15:11:26	0.933855	4.15397	3.23053	1228.9	FALSE	28
2022-09-13	15:11:26	0.529173	2.35387	3.23053	1237.98	FALSE	28
2022-09-13	15:11:27	0.682048	3.03389	1.74861	1231.93	FALSE	28
2022-09-13	15:11:27	0.403728	1.79586	1.74861	1239.78	FALSE	28
2022-09-13	15:11:27	0.195331	0.868871	1.74861	1232.8	FALSE	28
2022-09-13	15:11:27	0.291311	1.29581	1.74861	1241.07	FALSE	28
2022-09-13	15:11:28	0.0363997	0.161913	0.147199	1232.96	FALSE	28
2022-09-13	15:11:28	0.155331	0.690943	0.147199	1241.76	FALSE	28
2022-09-13	15:11:28	-0.0322517	-0.143462	0.147199	1232.96	FALSE	28
2022-09-13	15:11:28	-0.0271117	-0.120598	0.147199	1241.76	FALSE	28
2022-09-13	15:11:29	-0.13042	-0.580134	0.0778723	1232.96	FALSE	28
2022-09-13	15:11:29	0.0503946	0.224165	0.0778723	1241.99	FALSE	28
2022-09-13	15:11:29	0.0699875	0.311318	0.0778723	1233.27	FALSE	28
2022-09-13	15:11:29	0.0800638	0.35614	0.0778723	1242.34	FALSE	28
2022-09-13	15:11:30	-0.298562	-1.32806	-1.70437	1233.27	FALSE	28
2022-09-13	15:11:30	-0.396425	-1.76338	-1.70437	1242.34	FALSE	28
2022-09-13	15:11:30	-0.454491	-2.02167	-1.70437	1233.27	FALSE	28
2022-09-13	15:11:31	-0.25103	-1.11663	-0.453646	1242.34	FALSE	28
2022-09-13	15:11:31	-0.159376	-0.708936	-0.453646	1233.27	FALSE	28
2022-09-13	15:11:31	-0.1093	-0.486188	-0.453646	1242.34	FALSE	28
2022-09-13	15:11:31	0.111769	0.497171	-0.453646	1233.77	FALSE	28
2022-09-13	15:11:32	0.146272	0.650647	1.76915	1243	FALSE	28
2022-09-13	15:11:32	0.439606	1.95546	1.76915	1235.72	FALSE	28
2022-09-13	15:11:32	0.421387	1.87441	1.76915	1244.87	FALSE	28
2022-09-13	15:11:32	0.583626	2.59609	1.76915	1238.32	FALSE	28
2022-09-13	15:11:33	0.39701	1.76598	1.8975	1246.64	FALSE	28
2022-09-13	15:11:33	0.577316	2.56802	1.8975	1240.89	FALSE	28
2022-09-13	15:11:33	0.241794	1.07555	1.8975	1247.71	FALSE	28
2022-09-13	15:11:33	0.490191	2.18047	1.8975	1243.07	FALSE	28
2022-09-13	15:11:34	0.322812	1.43593	1.7939	1249.15	FALSE	28
2022-09-13	15:11:34	0.627646	2.79189	1.7939	1245.86	FALSE	28
2022-09-13	15:11:34	0.259402	1.15387	1.7939	1250.3	FALSE	28
2022-09-13	15:11:35	0.609835	2.71267	2.20922	1248.57	FALSE	28
2022-09-13	15:11:35	0.369479	1.64352	2.20922	1251.94	FALSE	28
2022-09-13	15:11:35	0.394059	1.75285	2.20922	1250.33	FALSE	28
2022-09-13	15:11:35	0.613244	2.72783	2.20922	1254.67	FALSE	28
2022-09-13	15:11:36	0.972634	4.32647	3.80808	1254.65	FALSE	28
2022-09-13	15:11:36	0.50673	2.25404	3.80808	1256.93	FALSE	28
2022-09-13	15:11:36	1.46648	6.5232	3.80808	1261.18	FALSE	28
2022-09-13	15:11:36	0.478537	2.12863	3.80808	1259.05	FALSE	28
2022-09-13	15:11:37	0.616043	2.74028	1.57079	1263.92	FALSE	28
2022-09-13	15:11:37	0.288003	1.28109	1.57079	1260.34	FALSE	28
2022-09-13	15:11:37	0.295636	1.31505	1.57079	1265.23	FALSE	28
2022-09-13	15:11:37	0.212837	0.946742	1.57079	1261.28	FALSE	28
2022-09-13	15:11:38	0.290751	1.29332	1.05389	1266.52	FALSE	28
2022-09-13	15:11:38	0.25528	1.13554	1.05389	1262.42	FALSE	28
2022-09-13	15:11:38	0.164746	0.732823	1.05389	1267.26	FALSE	28
2022-09-13	15:11:39	-0.0570862	-0.253931	1.44623	1262.42	FALSE	28
2022-09-13	15:11:39	0.369936	1.64555	1.44623	1268.9	FALSE	28
2022-09-13	15:11:39	0.234975	1.04522	1.44623	1263.46	FALSE	28
2022-09-13	15:11:39	0.752684	3.34809	1.44623	1272.25	FALSE	28
2022-09-13	15:11:40	0.194975	0.867288	1.40571	1264.33	FALSE	28
2022-09-13	15:11:40	0.557824	2.48131	1.40571	1274.73	FALSE	28
2022-09-13	15:11:40	0.192634	0.856875	1.40571	1265.19	FALSE	28
2022-09-13	15:11:40	0.318639	1.41737	1.40571	1276.15	FALSE	28
2022-09-13	15:11:41	0.422761	1.88053	1.29326	1267.07	FALSE	28
2022-09-13	15:11:41	0.287443	1.2786	1.29326	1277.43	FALSE	28
2022-09-13	15:11:41	0.150293	0.668533	1.29326	1267.74	FALSE	28
2022-09-13	15:11:41	0.302456	1.34538	1.29326	1278.77	FALSE	28
2022-09-13	15:11:42	-0.0147962	-0.0658165	-0.563457	1267.74	FALSE	28
2022-09-13	15:11:42	-0.218257	-0.970851	-0.563457	1278.77	FALSE	28
2022-09-13	15:11:42	-0.146959	-0.653703	-0.563457	1267.74	FALSE	28
2022-09-13	15:11:43	-0.097646	-0.434349	-0.050706	1278.77	FALSE	28
2022-09-13	15:11:43	0.0507508	0.22575	-0.050706	1267.96	FALSE	28
2022-09-13	15:11:43	0.0152293	0.067743	-0.050706	1278.84	FALSE	28
2022-09-13	15:11:43	-0.013931	-0.0619679	-0.050706	1267.96	FALSE	28
2022-09-13	15:11:44	-0.0285875	-0.127163	0.0930964	1278.84	FALSE	28
2022-09-13	15:11:44	-0.0496562	-0.220881	0.0930964	1267.96	FALSE	28
2022-09-13	15:11:44	0.0662216	0.294567	0.0930964	1279.14	FALSE	28
2022-09-13	15:11:44	0.0957381	0.425862	0.0930964	1268.39	FALSE	28
2022-09-13	15:11:45	0.15416	0.685735	1.75772	1279.82	FALSE	28
2022-09-13	15:11:45	0.329275	1.46468	1.75772	1269.85	FALSE	28
2022-09-13	15:11:45	0.416349	1.852	1.75772	1281.67	FALSE	28
2022-09-13	15:11:45	0.680827	3.02845	1.75772	1272.88	FALSE	28
2022-09-13	15:11:46	0.414059	1.84182	1.77753	1283.52	FALSE	28
2022-09-13	15:11:46	0.346527	1.54142	1.77753	1274.42	FALSE	28
2022-09-13	15:11:46	0.438232	1.94934	1.77753	1285.47	FALSE	28
2022-09-13	15:11:47	0.333804	1.48483	0.853874	1275.91	FALSE	28
2022-09-13	15:11:47	0.255484	1.13644	0.853874	1286.6	FALSE	28
2022-09-13	15:11:47	0.145611	0.647707	0.853874	1276.56	FALSE	28
2022-09-13	15:11:47	0.0329391	0.14652	0.853874	1286.75	FALSE	28
2022-09-13	15:11:48	-0.126908	-0.564512	-0.611597	1276.56	FALSE	28
2022-09-13	15:11:48	-0.256017	-1.13881	-0.611597	1286.75	FALSE	28
2022-09-13	15:11:48	-0.105534	-0.469436	-0.611597	1276.56	FALSE	28
2022-09-13	15:11:48	-0.0615137	-0.273625	-0.611597	1286.75	FALSE	28
2022-09-13	15:11:49	-0.0123535	-0.0549508	-0.553364	1276.56	FALSE	28
2022-09-13	15:11:49	-0.258918	-1.15172	-0.553364	1286.75	FALSE	28
2022-09-13	15:11:49	-0.181768	-0.80854	-0.553364	1276.56	FALSE	28
2022-09-13	15:11:49	-0.0445672	-0.198244	-0.553364	1286.75	FALSE	28
2022-09-13	15:11:50	0.00265929	0.0118291	0.216016	1276.57	FALSE	28
2022-09-13	15:11:50	0.0347712	0.154669	0.216016	1286.9	FALSE	28
2022-09-13	15:11:50	0.0451529	0.200849	0.216016	1276.77	FALSE	28
2022-09-13	15:11:50	0.111667	0.496717	0.216016	1287.4	FALSE	28
2022-09-13	15:11:51	0.414008	1.84159	1.63106	1278.61	FALSE	28
2022-09-13	15:11:51	0.405458	1.80356	1.63106	1289.2	FALSE	28
2022-09-13	15:11:51	0.280573	1.24804	1.63106	1279.86	FALSE	28
2022-09-13	15:11:52	0.288512	1.28336	2.45003	1290.49	FALSE	28
2022-09-13	15:11:52	1.11274	4.94969	2.45003	1284.81	FALSE	28
2022-09-13	15:11:52	0.377672	1.67996	2.45003	1292.17	FALSE	28
2022-09-13	15:11:52	0.424237	1.88709	2.45003	1286.69	FALSE	28
2022-09-13	15:11:53	0.385916	1.71663	1.78562	1293.88	FALSE	28
2022-09-13	15:11:53	0.426832	1.89863	1.78562	1288.59	FALSE	28
2022-09-13	15:11:53	0.369428	1.64329	1.78562	1295.53	FALSE	28
2022-09-13	15:11:53	0.423524	1.88392	1.78562	1290.48	FALSE	28
2022-09-13	15:11:54	0.429631	1.91108	1.77919	1297.44	FALSE	28
2022-09-13	15:11:54	0.428461	1.90588	1.77919	1292.38	FALSE	28
2022-09-13	15:11:54	0.341845	1.52059	1.77919	1298.96	FALSE	28
2022-09-13	15:11:55	0.468003	2.08177	1.97741	1294.46	FALSE	28
2022-09-13	15:11:55	0.453652	2.01793	1.97741	1300.98	FALSE	28
2022-09-13	15:11:55	0.459911	2.04578	1.97741	1296.51	FALSE	28
2022-09-13	15:11:55	0.396603	1.76417	1.97741	1302.74	FALSE	28
2022-09-13	15:11:56	0.379351	1.68743	1.91341	1298.2	FALSE	28
2022-09-13	15:11:56	0.425407	1.8923	1.91341	1304.63	FALSE	28
2022-09-13	15:11:56	0.423219	1.88256	1.91341	1300.08	FALSE	28
2022-09-13	15:11:56	0.492634	2.19133	1.91341	1306.82	FALSE	28
2022-09-13	15:11:57	0.40327	1.79383	2.00661	1301.87	FALSE	28
2022-09-13	15:11:57	0.353957	1.57447	2.00661	1308.4	FALSE	28
2022-09-13	15:11:57	0.54785	2.43695	2.00661	1304.31	FALSE	28
2022-09-13	15:11:57	0.499351	2.22121	2.00661	1310.62	FALSE	28
2022-09-13	15:11:58	0.461183	2.05143	1.95517	1306.36	FALSE	28
2022-09-13	15:11:58	0.434262	1.93168	1.95517	1312.55	FALSE	28
2022-09-13	15:11:58	0.458232	2.03831	1.95517	1308.4	FALSE	28
2022-09-13	15:11:58	0.404491	1.79926	1.95517	1314.35	FALSE	28
2022-09-13	15:11:59	0.455789	2.02744	1.95583	1310.43	FALSE	28
2022-09-13	15:11:59	0.438842	1.95206	1.95583	1316.3	FALSE	28
2022-09-13	15:11:59	0.42444	1.88799	1.95583	1312.32	FALSE	28
2022-09-13	15:12:00	0.405967	1.80582	1.75981	1318.11	FALSE	28
2022-09-13	15:12:00	0.405102	1.80197	1.75981	1314.12	FALSE	28
2022-09-13	15:12:00	0.444084	1.97537	1.75981	1320.08	FALSE	28
2022-09-13	15:12:00	0.327341	1.45608	1.75981	1315.57	FALSE	28
2022-09-13	15:12:01	0.468308	2.08313	2.06174	1322.17	FALSE	28
2022-09-13	15:12:01	0.460776	2.04962	2.06174	1317.62	FALSE	28
2022-09-13	15:12:01	0.455534	2.02631	2.06174	1324.19	FALSE	28
2022-09-13	15:12:01	0.469377	2.08788	2.06174	1319.71	FALSE	28
2022-09-13	15:12:02	0.46215	2.05574	2.11657	1326.25	FALSE	28
2022-09-13	15:12:02	0.430395	1.91448	2.11657	1321.63	FALSE	28
2022-09-13	15:12:02	0.527239	2.34526	2.11657	1328.59	FALSE	28
2022-09-13	15:12:02	0.483524	2.15081	2.11657	1323.78	FALSE	28
2022-09-13	15:12:03	0.45014	2.00231	2.00744	1330.6	FALSE	28
2022-09-13	15:12:03	0.452277	2.01182	2.00744	1325.79	FALSE	28
2022-09-13	15:12:03	0.451463	2.0082	2.00744	1332.6	FALSE	28
2022-09-13	15:12:04	0.480522	2.13746	1.97447	1327.93	FALSE	28
2022-09-13	15:12:04	0.447036	1.98851	1.97447	1334.59	FALSE	28
2022-09-13	15:12:04	0.453753	2.01838	1.97447	1329.95	FALSE	28
2022-09-13	15:12:04	0.394211	1.75353	1.97447	1336.35	FALSE	28
2022-09-13	15:12:05	0.475992	2.11731	1.96208	1332.06	FALSE	28
2022-09-13	15:12:05	0.447901	1.99235	1.96208	1338.34	FALSE	28
2022-09-13	15:12:05	0.36897	1.64125	1.96208	1333.7	FALSE	28
2022-09-13	15:12:05	0.471514	2.09739	1.96208	1340.44	FALSE	28
2022-09-13	15:12:06	0.477926	2.12591	2.1207	1335.83	FALSE	28
2022-09-13	15:12:06	0.468257	2.0829	2.1207	1342.52	FALSE	28
2022-09-13	15:12:06	0.480115	2.13565	2.1207	1337.97	FALSE	28
2022-09-13	15:12:06	0.480725	2.13836	2.1207	1344.66	FALSE	28
2022-09-13	15:12:07	0.444186	1.97583	2.0491	1339.94	FALSE	28
2022-09-13	15:12:07	0.471972	2.09943	2.0491	1346.76	FALSE	28
2022-09-13	15:12:07	0.465814	2.07203	2.0491	1342.01	FALSE	28
2022-09-13	15:12:08	0.462456	2.0571	2.04261	1348.81	FALSE	28
2022-09-13	15:12:08	0.463626	2.0623	2.04261	1344.08	FALSE	28
2022-09-13	15:12:08	0.459402	2.04351	2.04261	1350.86	FALSE	28
2022-09-13	15:12:08	0.451311	2.00752	2.04261	1346.08	FALSE	28
2022-09-13	15:12:09	0.472634	2.10237	2.02648	1352.96	FALSE	28
2022-09-13	15:12:09	0.445102	1.9799	2.02648	1348.06	FALSE	28
2022-09-13	15:12:09	0.452227	2.0116	2.02648	1354.97	FALSE	28
2022-09-13	15:12:09	0.452328	2.01205	2.02648	1350.07	FALSE	28
2022-09-13	15:12:10	0.448155	1.99348	2.02569	1356.96	FALSE	28
2022-09-13	15:12:10	0.455382	2.02563	2.02569	1352.1	FALSE	28
2022-09-13	15:12:10	0.461285	2.05189	2.02569	1359.02	FALSE	28
2022-09-13	15:12:10	0.456756	2.03174	2.02569	1354.13	FALSE	28
2022-09-13	15:12:11	0.452786	2.01408	2.02404	1361.03	FALSE	28
2022-09-13	15:12:11	0.458944	2.04147	2.02404	1356.17	FALSE	28
2022-09-13	15:12:11	0.453346	2.01657	2.02404	1363.05	FALSE	28
2022-09-13	15:12:12	0.466018	2.07294	2.02642	1358.25	FALSE	28
2022-09-13	15:12:12	0.447392	1.99009	2.02642	1365.04	FALSE	28
2022-09-13	15:12:12	0.455636	2.02676	2.02642	1360.27	FALSE	28
2022-09-13	15:12:12	0.453193	2.01589	2.02642	1367.05	FALSE	28
2022-09-13	15:12:13	0.458333	2.03876	1.99818	1362.31	FALSE	28
2022-09-13	15:12:13	0.466221	2.07384	1.99818	1369.13	FALSE	28
2022-09-13	15:12:13	0.421336	1.87419	1.99818	1364.19	FALSE	28
2022-09-13	15:12:13	0.450954	2.00593	1.99818	1371.13	FALSE	28
2022-09-13	15:12:14	0.440166	1.95795	1.96887	1366.14	FALSE	28
2022-09-13	15:12:14	0.434313	1.93191	1.96887	1373.07	FALSE	28
2022-09-13	15:12:14	0.444186	1.97583	1.96887	1368.12	FALSE	28
2022-09-13	15:12:14	0.451819	2.00978	1.96887	1375.07	FALSE	28
2022-09-13	15:12:15	0.47014	2.09128	2.78133	1370.21	FALSE	28
2022-09-13	15:12:15	0.475738	2.11618	2.78133	1377.19	FALSE	28
2022-09-13	15:12:15	0.929936	4.13654	2.78133	1374.35	FALSE	28
2022-09-13	15:12:16	2.60306	11.5789	8.09707	1388.77	FALSE	28
2022-09-13	15:12:16	2.36581	10.5236	8.09707	1384.87	FALSE	28
2022-09-13	15:12:16	1.81701	8.08242	8.09707	1396.85	FALSE	28
2022-09-13	15:12:16	0.495331	2.20333	8.09707	1387.07	FALSE	28
2022-09-13	15:12:17	0.270954	1.20526	1.27255	1398.06	FALSE	28
2022-09-13	15:12:17	0.384949	1.71233	1.27255	1388.79	FALSE	28
2022-09-13	15:12:17	0.343372	1.52739	1.27255	1399.59	FALSE	28
2022-09-13	15:12:17	0.145051	0.645216	1.27255	1389.43	FALSE	28
2022-09-13	15:12:18	0.160929	0.715844	0.652742	1400.3	FALSE	28
2022-09-13	15:12:18	0.135127	0.601072	0.652742	1390.03	FALSE	28
2022-09-13	15:12:18	0.144949	0.644762	0.652742	1400.95	FALSE	28
2022-09-13	15:12:18	0.145967	0.64929	0.652742	1390.68	FALSE	28
2022-09-13	15:12:19	0.165153	0.734634	0.382173	1401.68	FALSE	28
2022-09-13	15:12:19	0.0812852	0.361573	0.382173	1391.04	FALSE	28
2022-09-13	15:12:19	0.0113107	0.0503123	0.382173	1401.73	FALSE	28
2022-09-13	15:12:20	0.0555855	0.247255	0.981094	1391.29	FALSE	28
2022-09-13	15:12:20	0.267494	1.18987	0.981094	1402.92	FALSE	28
2022-09-13	15:12:20	0.291361	1.29603	0.981094	1392.59	FALSE	28
2022-09-13	15:12:20	0.267799	1.19122	0.981094	1404.11	FALSE	28
2022-09-13	15:12:21	0.384797	1.71165	1.91442	1394.3	FALSE	28
2022-09-13	15:12:21	0.333448	1.48324	1.91442	1405.59	FALSE	28
2022-09-13	15:12:21	0.483066	2.14877	1.91442	1396.45	FALSE	28
2022-09-13	15:12:21	0.520216	2.31402	1.91442	1407.91	FALSE	28
2022-09-13	15:12:22	0.465814	2.07203	2.09688	1398.52	FALSE	28
2022-09-13	15:12:22	0.431412	1.91901	2.09688	1409.83	FALSE	28
2022-09-13	15:12:22	0.47243	2.10146	2.09688	1400.62	FALSE	28
2022-09-13	15:12:22	0.515941	2.29501	2.09688	1412.12	FALSE	28
2022-09-13	15:12:23	0.474313	2.10984	2.09045	1402.73	FALSE	28
2022-09-13	15:12:23	0.471769	2.09852	2.09045	1414.22	FALSE	28
2022-09-13	15:12:23	0.463779	2.06298	2.09045	1404.79	FALSE	28
2022-09-13	15:12:24	0.445865	1.9833	2.03881	1416.2	FALSE	28
2022-09-13	15:12:24	0.476756	2.12071	2.03881	1406.91	FALSE	28
2022-09-13	15:12:24	0.455229	2.02495	2.03881	1418.23	FALSE	28
2022-09-13	15:12:24	0.455534	2.02631	2.03881	1408.94	FALSE	28
2022-09-13	15:12:25	0.458232	2.03831	2.03678	1420.27	FALSE	28
2022-09-13	15:12:25	0.457468	2.03491	2.03678	1410.98	FALSE	28
2022-09-13	15:12:25	0.45584	2.02767	2.03678	1422.3	FALSE	28
2022-09-13	15:12:25	0.460013	2.04623	2.03678	1413.02	FALSE	28
2022-09-13	15:12:26	0.455789	2.02744	2.04674	1424.32	FALSE	28
2022-09-13	15:12:26	0.466069	2.07317	2.04674	1415.1	FALSE	28
2022-09-13	15:12:26	0.460623	2.04894	2.04674	1426.37	FALSE	28
2022-09-13	15:12:26	0.458028	2.0374	2.04674	1417.13	FALSE	28
2022-09-13	15:12:27	0.460623	2.04894	2.02759	1428.42	FALSE	28
2022-09-13	15:12:27	0.462965	2.05936	2.02759	1419.19	FALSE	28
2022-09-13	15:12:27	0.44388	1.97447	2.02759	1430.4	FALSE	28
2022-09-13	15:12:28	0.473092	2.10441	2.00916	1421.3	FALSE	28
2022-09-13	15:12:28	0.533448	2.37288	2.00916	1432.77	FALSE	28
2022-09-13	15:12:28	0.389428	1.73225	2.00916	1423.03	FALSE	28
2022-09-13	15:12:28	0.410751	1.8271	2.00916	1434.6	FALSE	28
2022-09-13	15:12:29	0.343524	1.52806	1.6348	1424.56	FALSE	28
2022-09-13	15:12:29	0.317214	1.41103	1.6348	1436.01	FALSE	28
2022-09-13	15:12:29	0.543982	2.41974	1.6348	1426.98	FALSE	28
2022-09-13	15:12:29	0.265356	1.18036	1.6348	1437.19	FALSE	28
2022-09-13	15:12:30	0.618893	2.75296	1.89111	1429.73	FALSE	28
2022-09-13	15:12:30	0.298334	1.32705	1.89111	1438.51	FALSE	28
2022-09-13	15:12:30	0.458333	2.03876	1.89111	1431.77	FALSE	28
2022-09-13	15:12:30	0.325	1.44566	1.89111	1439.96	FALSE	28
2022-09-13	15:12:31	0.606578	2.69818	2.18658	1434.47	FALSE	28
2022-09-13	15:12:31	0.363575	1.61725	2.18658	1441.58	FALSE	28
2022-09-13	15:12:31	0.504542	2.2443	2.18658	1436.71	FALSE	28
2022-09-13	15:12:32	0.541692	2.40955	2.3344	1443.99	FALSE	28
2022-09-13	15:12:32	0.544644	2.42269	2.3344	1439.13	FALSE	28
2022-09-13	15:12:32	0.45187	2.01001	2.3344	1446	FALSE	28
2022-09-13	15:12:32	0.56098	2.49535	2.3344	1441.63	FALSE	28
2022-09-13	15:12:33	0.497061	2.21103	4.17259	1448.21	FALSE	28
2022-09-13	15:12:33	0.754873	3.35783	4.17259	1444.99	FALSE	28
2022-09-13	15:12:33	1.28902	5.73382	4.17259	1453.94	FALSE	28
2022-09-13	15:12:33	1.21121	5.3877	4.17259	1450.37	FALSE	28
2022-09-13	15:12:34	1.27854	5.6872	6.77905	1459.63	FALSE	28
2022-09-13	15:12:34	1.73401	7.71322	6.77905	1458.09	FALSE	28
2022-09-13	15:12:34	1.68246	7.48392	6.77905	1467.11	FALSE	28
2022-09-13	15:12:34	1.40098	6.23184	6.77905	1464.32	FALSE	28
2022-09-13	15:12:35	1.0164	4.52115	2.62197	1471.63	FALSE	28
2022-09-13	15:12:35	0.466374	2.07452	2.62197	1466.39	FALSE	28
2022-09-13	15:12:35	0.28556	1.27023	2.62197	1472.9	FALSE	28
2022-09-13	15:12:36	0.607188	2.70089	2.6181	1469.1	FALSE	28
2022-09-13	15:12:36	0.23126	1.02869	2.6181	1473.93	FALSE	28
2022-09-13	15:12:36	0.675941	3.00672	2.6181	1472.1	FALSE	28
2022-09-13	15:12:36	0.839911	3.73609	2.6181	1477.67	FALSE	28
2022-09-13	15:12:37	1.03823	4.61825	3.43122	1476.72	FALSE	28
2022-09-13	15:12:37	0.778181	3.4615	3.43122	1481.13	FALSE	28
2022-09-13	15:12:37	0.554924	2.46841	3.43122	1479.19	FALSE	28
2022-09-13	15:12:37	0.71416	3.17673	3.43122	1484.31	FALSE	28
2022-09-13	15:12:38	0.383219	1.70463	5.27462	1480.89	FALSE	28
2022-09-13	15:12:38	0.914415	4.0675	5.27462	1488.37	FALSE	28
2022-09-13	15:12:38	1.12653	5.01103	5.27462	1485.9	FALSE	28
2022-09-13	15:12:38	2.31899	10.3153	5.27462	1498.69	FALSE	28
2022-09-13	15:12:39	1.31732	5.8597	4.37039	1491.76	FALSE	28
2022-09-13	15:12:39	0.752684	3.34809	4.37039	1502.04	FALSE	28
2022-09-13	15:12:39	0.877519	3.90338	4.37039	1495.67	FALSE	28
2022-09-13	15:12:40	0.282812	1.258	3.31878	1503.3	FALSE	28
2022-09-13	15:12:40	0.917061	4.07927	3.31878	1499.75	FALSE	28
2022-09-13	15:12:40	0.520878	2.31697	3.31878	1505.61	FALSE	28
2022-09-13	15:12:40	1.26363	5.62088	3.31878	1505.37	FALSE	28
2022-09-13	15:12:41	0.929427	4.13428	9.20878	1509.75	FALSE	28
2022-09-13	15:12:41	1.35645	6.03376	9.20878	1511.4	FALSE	28
2022-09-13	15:12:41	3.76637	16.7536	9.20878	1526.5	1	29
2022-09-13	15:12:41	2.22866	9.91353	9.20878	1521.31	FALSE	29
2022-09-13	15:12:42	2.78541	12.3901	8.53833	1538.89	FALSE	29
2022-09-13	15:12:42	1.48983	6.62706	8.53833	1527.94	FALSE	29
2022-09-13	15:12:42	2.40993	10.7199	8.53833	1549.61	FALSE	29
2022-09-13	15:12:42	0.992837	4.41634	8.53833	1532.36	FALSE	29
2022-09-13	15:12:43	0.867799	3.86014	3.16383	1553.47	FALSE	29
2022-09-13	15:12:43	0.853295	3.79563	3.16383	1536.15	FALSE	29
2022-09-13	15:12:43	0.412685	1.83571	3.16383	1555.31	FALSE	29
2022-09-13	15:12:44	0.463168	2.06026	3.34854	1538.21	FALSE	29
2022-09-13	15:12:44	0.636247	2.83015	3.34854	1558.14	FALSE	29
2022-09-13	15:12:44	0.940674	4.18431	3.34854	1542.4	FALSE	29
2022-09-13	15:12:44	0.971056	4.31945	3.34854	1562.46	FALSE	29
2022-09-13	15:12:45	1.33289	5.92896	11.7304	1548.33	FALSE	29
2022-09-13	15:12:45	3.55533	15.8148	11.7304	1578.27	1	30
2022-09-13	15:12:45	2.61228	11.6199	11.7304	1559.95	FALSE	30
2022-09-13	15:12:45	3.04795	13.5579	11.7304	1591.83	1	31
2022-09-13	15:12:46	1.68556	7.49771	3.97282	1567.44	FALSE	31
2022-09-13	15:12:46	1.29401	5.75602	3.97282	1597.58	FALSE	31
2022-09-13	15:12:46	0.356094	1.58398	3.97282	1569.03	FALSE	31
2022-09-13	15:12:46	0.236858	1.05359	3.97282	1598.64	FALSE	31
2022-09-13	15:12:47	0.450802	2.00526	1.01903	1571.03	FALSE	31
2022-09-13	15:12:47	0.0867305	0.385795	1.01903	1599.02	FALSE	31
2022-09-13	15:12:47	0.149733	0.666042	1.01903	1571.7	FALSE	31
2022-09-13	15:12:48	-0.119071	-0.529652	-1.04934	1599.02	FALSE	31
2022-09-13	15:12:48	-0.236017	-1.04985	-1.04934	1571.7	FALSE	31
2022-09-13	15:12:48	-0.358155	-1.59315	-1.04934	1599.02	FALSE	31
2022-09-13	15:12:48	-0.230369	-1.02473	-1.04934	1571.7	FALSE	31
2022-09-13	15:12:49	0.225356	1.00243	5.48476	1600.03	FALSE	31
2022-09-13	15:12:49	1.36892	6.08923	5.48476	1577.79	FALSE	31
2022-09-13	15:12:49	3.0879	13.7356	5.48476	1613.76	1	32
2022-09-13	15:12:49	0.249937	1.11177	5.48476	1578.9	FALSE	32
2022-09-13	15:12:50	0.248868	1.10701	1.44301	1614.87	FALSE	32
2022-09-13	15:12:50	0.515331	2.2923	1.44301	1581.19	FALSE	32
2022-09-13	15:12:50	0.162965	0.724901	1.44301	1615.59	FALSE	32
2022-09-13	15:12:50	0.370445	1.64781	1.44301	1582.84	FALSE	32
2022-09-13	15:12:51	0.664949	2.95783	1.90082	1618.55	FALSE	32
2022-09-13	15:12:51	0.250649	1.11494	1.90082	1583.96	FALSE	32
2022-09-13	15:12:51	0.366374	1.6297	1.90082	1620.18	FALSE	32
2022-09-13	15:12:52	0.508359	2.26128	1.24555	1586.22	FALSE	32
2022-09-13	15:12:52	0.161794	0.719692	1.24555	1620.9	FALSE	32
2022-09-13	15:12:52	0.290496	1.29218	1.24555	1587.51	FALSE	32
2022-09-13	15:12:52	0.159402	0.709052	1.24555	1621.61	FALSE	32
2022-09-13	15:12:53	0.182761	0.812957	1.04663	1588.32	FALSE	32
2022-09-13	15:12:53	0.0834734	0.371306	1.04663	1621.98	FALSE	32
2022-09-13	15:12:53	0.0905982	0.402999	1.04663	1588.73	FALSE	32
2022-09-13	15:12:53	0.584338	2.59925	1.04663	1624.58	FALSE	32
2022-09-13	15:12:54	0.720572	3.20525	7.40349	1591.93	FALSE	32
2022-09-13	15:12:54	1.28933	5.7352	7.40349	1630.32	FALSE	32
2022-09-13	15:12:54	2.23701	9.95067	7.40349	1601.88	FALSE	32
2022-09-13	15:12:54	2.4106	10.7228	7.40349	1641.04	FALSE	32
2022-09-13	15:12:55	1.60795	7.15248	3.52504	1609.03	FALSE	32
2022-09-13	15:12:55	0.383066	1.70395	3.52504	1642.74	FALSE	32
2022-09-13	15:12:55	0.386374	1.71867	3.52504	1610.75	FALSE	32
2022-09-13	15:12:56	1.09324	4.86295	24.7114	1647.61	FALSE	32
2022-09-13	15:12:56	2.13955	9.51715	24.7114	1620.27	FALSE	32
2022-09-13	15:12:56	7.57619	33.7004	24.7114	1681.31	1	33
2022-09-13	15:12:56	11.4125	50.7651	24.7114	1671.03	1	34
2022-09-13	15:12:57	7.49543	33.3412	16.4784	1714.65	1	35
2022-09-13	15:12:57	3.5593	15.8325	16.4784	1686.87	1	36
2022-09-13	15:12:57	2.24322	9.97829	16.4784	1724.63	FALSE	36
2022-09-13	15:12:57	1.52006	6.76153	16.4784	1693.63	FALSE	36
2022-09-13	15:12:58	1.15385	5.13256	9.14284	1729.76	FALSE	36
2022-09-13	15:12:58	2.02927	9.0266	9.14284	1702.66	FALSE	36
2022-09-13	15:12:58	3.10123	13.7949	9.14284	1743.55	1	37
2022-09-13	15:12:58	1.93726	8.61732	9.14284	1711.27	FALSE	37
2022-09-13	15:12:59	1.41329	6.2866	5.61535	1749.84	FALSE	37
2022-09-13	15:12:59	1.11192	4.94604	5.61535	1716.22	FALSE	37
2022-09-13	15:12:59	1.26195	5.61341	5.61535	1755.45	FALSE	37
2022-09-13	15:13:00	1.19121	5.29874	4.44311	1721.52	FALSE	37
2022-09-13	15:13:00	1.02434	4.55647	4.44311	1760.01	FALSE	37
2022-09-13	15:13:00	0.947341	4.21396	4.44311	1725.73	FALSE	37
2022-09-13	15:13:00	0.832532	3.70327	4.44311	1763.71	FALSE	37
2022-09-13	15:13:01	0.936298	4.16484	5.78487	1729.9	FALSE	37
2022-09-13	15:13:01	1.27548	5.67359	5.78487	1769.39	FALSE	37
2022-09-13	15:13:01	1.51345	6.73213	5.78487	1736.63	FALSE	37
2022-09-13	15:13:01	1.47676	6.56892	5.78487	1775.96	FALSE	37
2022-09-13	15:13:02	1.42246	6.32739	5.75409	1742.96	FALSE	37
2022-09-13	15:13:02	1.31971	5.87033	5.75409	1781.83	FALSE	37
2022-09-13	15:13:02	1.29411	5.75646	5.75409	1748.71	FALSE	37
2022-09-13	15:13:02	1.13803	5.06219	5.75409	1786.89	FALSE	37
2022-09-13	15:13:03	1.0338	4.59855	4.97245	1753.31	FALSE	37
2022-09-13	15:13:03	1.128	5.01757	4.97245	1791.91	FALSE	37
2022-09-13	15:13:03	1.19177	5.30123	4.97245	1758.61	FALSE	37
2022-09-13	15:13:04	1.07915	4.80028	3.99659	1796.71	FALSE	37
2022-09-13	15:13:04	1.01553	4.51728	3.99659	1763.13	FALSE	37
2022-09-13	15:13:04	0.86444	3.8452	3.99659	1800.55	FALSE	37
2022-09-13	15:13:04	0.634771	2.82359	3.99659	1765.95	FALSE	37
2022-09-13	15:13:05	0.522455	2.32398	2.99178	1802.87	FALSE	37
2022-09-13	15:13:05	0.607494	2.70225	2.99178	1768.66	FALSE	37
2022-09-13	15:13:05	0.6907	3.07237	2.99178	1805.95	FALSE	37
2022-09-13	15:13:05	0.869682	3.86852	2.99178	1772.52	FALSE	37
2022-09-13	15:13:06	0.703626	3.12987	2.30984	1809.08	FALSE	37
2022-09-13	15:13:06	0.508817	2.26332	2.30984	1774.79	FALSE	37
2022-09-13	15:13:06	0.429936	1.91244	2.30984	1810.99	FALSE	37
2022-09-13	15:13:06	0.43472	1.93372	2.30984	1776.72	FALSE	37
2022-09-13	15:13:07	0.452888	2.01454	1.9799	1813	FALSE	37
2022-09-13	15:13:07	0.459198	2.0426	1.9799	1778.76	FALSE	37
2022-09-13	15:13:07	0.423219	1.88256	1.9799	1814.89	FALSE	37
2022-09-13	15:13:08	0.481438	2.14153	2.88228	1780.9	FALSE	37
2022-09-13	15:13:08	0.701336	3.11968	2.88228	1818.01	FALSE	37
2022-09-13	15:13:08	0.844898	3.75828	2.88228	1784.66	FALSE	37
2022-09-13	15:13:08	0.564186	2.50961	2.88228	1820.52	FALSE	37
2022-09-13	15:13:09	0.297824	1.32478	0.0835327	1785.99	FALSE	37
2022-09-13	15:13:09	-0.255559	-1.13678	0.0835327	1820.52	FALSE	37
2022-09-13	15:13:09	-0.27047	-1.2031	0.0835327	1785.99	FALSE	37
2022-09-13	15:13:09	0.303321	1.34923	0.0835327	1821.87	FALSE	37
2022-09-13	15:13:10	0.244593	1.088	1.30856	1787.08	FALSE	37
2022-09-13	15:13:10	0.272634	1.21273	1.30856	1823.08	FALSE	37
2022-09-13	15:13:10	0.365305	1.62495	1.30856	1788.7	FALSE	37
2022-09-13	15:13:11	0.201794	0.89762	0.948158	1823.98	FALSE	37
2022-09-13	15:13:11	0.259911	1.15614	0.948158	1789.86	FALSE	37
2022-09-13	15:13:11	-0.00762061	-0.033898	0.948158	1823.98	FALSE	37
2022-09-13	15:13:11	0.398537	1.77277	0.948158	1791.63	FALSE	37
2022-09-13	15:13:12	0.324746	1.44454	1.64074	1825.42	FALSE	37
2022-09-13	15:13:12	0.559199	2.48743	1.64074	1794.12	FALSE	37
2022-09-13	15:13:12	0.253855	1.1292	1.64074	1826.55	FALSE	37
2022-09-13	15:13:12	0.337621	1.50181	1.64074	1795.62	FALSE	37
2022-09-13	15:13:13	0.439656	1.95568	1.74453	1828.5	FALSE	37
2022-09-13	15:13:13	0.541794	2.41001	1.74453	1798.03	FALSE	37
2022-09-13	15:13:13	0.118181	0.525693	1.74453	1829.03	FALSE	37
2022-09-13	15:13:13	0.469122	2.08675	1.74453	1800.12	FALSE	37
2022-09-13	15:13:14	0.174924	0.778097	1.40752	1829.81	FALSE	37
2022-09-13	15:13:14	0.303473	1.34991	1.40752	1801.47	FALSE	37
2022-09-13	15:13:14	0.16271	0.723767	1.40752	1830.53	FALSE	37
2022-09-13	15:13:14	0.624593	2.77831	1.40752	1804.24	FALSE	37
2022-09-13	15:13:15	0.479453	2.1327	2.8872	1832.67	FALSE	37
2022-09-13	15:13:15	0.848715	3.77525	2.8872	1808.02	FALSE	37
2022-09-13	15:13:15	0.619046	2.75364	2.8872	1835.42	FALSE	37
2022-09-13	15:13:16	0.619198	2.75432	1.79648	1810.77	FALSE	37
2022-09-13	15:13:16	0.369122	1.64193	1.79648	1837.06	FALSE	37
2022-09-13	15:13:16	0.371463	1.65234	1.79648	1812.43	FALSE	37
2022-09-13	15:13:16	0.255687	1.13735	1.79648	1838.2	FALSE	37
2022-09-13	15:13:17	0.563931	2.50848	1.75042	1814.93	FALSE	37
2022-09-13	15:13:17	0.244033	1.08551	1.75042	1839.28	FALSE	37
2022-09-13	15:13:17	0.603422	2.68414	1.75042	1817.62	FALSE	37
2022-09-13	15:13:17	0.162659	0.72354	1.75042	1840.01	FALSE	37
2022-09-13	15:13:18	0.0998094	0.443972	2.24278	1818.06	FALSE	37
2022-09-13	15:13:18	0.148512	0.660611	2.24278	1840.67	FALSE	37
2022-09-13	15:13:18	0.869326	3.86694	2.24278	1821.93	FALSE	37
2022-09-13	15:13:18	0.899148	3.99959	2.24278	1844.67	FALSE	37
2022-09-13	15:13:19	2.10683	9.3716	5.02709	1831.3	FALSE	37
2022-09-13	15:13:19	0.54215	2.41159	5.02709	1847.08	FALSE	37
2022-09-13	15:13:19	0.741438	3.29806	5.02709	1834.6	FALSE	37
2022-09-13	15:13:20	0.870802	3.8735	3.7362	1850.95	FALSE	37
2022-09-13	15:13:20	0.580114	2.58046	3.7362	1837.18	FALSE	37
2022-09-13	15:13:20	0.872786	3.88233	3.7362	1854.83	FALSE	37
2022-09-13	15:13:20	1.03604	4.60851	3.7362	1841.79	FALSE	37
2022-09-13	15:13:21	0.634313	2.82155	4.58045	1857.66	FALSE	37
2022-09-13	15:13:21	0.822354	3.658	4.58045	1845.45	FALSE	37
2022-09-13	15:13:21	0.929631	4.13518	4.58045	1861.79	FALSE	37
2022-09-13	15:13:21	1.73263	7.70708	4.58045	1853.15	FALSE	37
2022-09-13	15:13:22	1.83925	8.18135	8.46579	1869.97	FALSE	37
2022-09-13	15:13:22	1.80536	8.0306	8.46579	1861.18	FALSE	37
2022-09-13	15:13:22	2.30704	10.2622	8.46579	1880.24	FALSE	37
2022-09-13	15:13:22	1.66113	7.38904	8.46579	1868.57	FALSE	37
2022-09-13	15:13:23	0.66215	2.94538	2.52674	1883.18	FALSE	37
2022-09-13	15:13:23	0.505305	2.2477	2.52674	1870.82	FALSE	37
2022-09-13	15:13:23	0.536654	2.38714	2.52674	1885.57	FALSE	37
2022-09-13	15:13:24	0.328257	1.46015	1.27634	1872.28	FALSE	37
2022-09-13	15:13:24	0.224898	1.00039	1.27634	1886.57	FALSE	37
2022-09-13	15:13:24	0.268206	1.19303	1.27634	1873.47	FALSE	37
2022-09-13	15:13:24	0.326374	1.45178	1.27634	1888.02	FALSE	37
2022-09-13	15:13:25	0.395738	1.76032	0.973058	1875.23	FALSE	37
2022-09-13	15:13:25	0.220725	0.981829	0.973058	1889	FALSE	37
2022-09-13	15:13:25	0.0731936	0.32558	0.973058	1875.56	FALSE	37
2022-09-13	15:13:25	0.185356	0.824501	0.973058	1889.83	FALSE	37
2022-09-13	15:13:26	-0.0267046	-0.118787	-0.138198	1875.56	FALSE	37
2022-09-13	15:13:26	0.0537534	0.239106	-0.138198	1890.07	FALSE	37
2022-09-13	15:13:26	-0.138918	-0.617935	-0.138198	1875.56	FALSE	37
2022-09-13	15:13:26	-0.0124043	-0.0551768	-0.138198	1890.07	FALSE	37
2022-09-13	15:13:27	-0.310623	-1.38171	0.624315	1875.56	FALSE	37
2022-09-13	15:13:27	0.385051	1.71278	0.624315	1891.78	FALSE	37
2022-09-13	15:13:27	0.346629	1.54188	0.624315	1877.1	FALSE	37
2022-09-13	15:13:28	0.436501	1.94164	2.00333	1893.72	FALSE	37
2022-09-13	15:13:28	0.319758	1.42235	2.00333	1878.52	FALSE	37
2022-09-13	15:13:28	0.668562	2.9739	2.00333	1896.69	FALSE	37
2022-09-13	15:13:28	0.376654	1.67543	2.00333	1880.2	FALSE	37
2022-09-13	15:13:29	0.273906	1.21839	1.40656	1897.91	FALSE	37
2022-09-13	15:13:29	0.413143	1.83774	1.40656	1882.04	FALSE	37
2022-09-13	15:13:29	0.324186	1.44204	1.40656	1899.35	FALSE	37
2022-09-13	15:13:29	0.253601	1.12807	1.40656	1883.17	FALSE	37
2022-09-13	15:13:30	0.42785	1.90316	1.2674	1901.26	FALSE	37
2022-09-13	15:13:30	0.250394	1.1138	1.2674	1884.28	FALSE	37
2022-09-13	15:13:30	0.319911	1.42303	1.2674	1902.68	FALSE	37
2022-09-13	15:13:30	0.14154	0.629598	1.2674	1884.91	FALSE	37
2022-09-13	15:13:31	-0.0127606	-0.0567617	-0.466833	1902.68	FALSE	37
2022-09-13	15:13:31	-0.0704195	-0.31324	-0.466833	1884.91	FALSE	37
2022-09-13	15:13:31	-0.146399	-0.651212	-0.466833	1902.68	FALSE	37
2022-09-13	15:13:31	-0.190216	-0.846119	-0.466833	1884.91	FALSE	37
2022-09-13	15:13:32	-0.394033	-1.75274	-1.90048	1902.68	FALSE	37
2022-09-13	15:13:32	-0.399071	-1.77515	-1.90048	1884.91	FALSE	37
2022-09-13	15:13:32	-0.488638	-2.17356	-1.90048	1902.68	FALSE	37
2022-09-13	15:13:33	-0.404058	-1.79733	0.440972	1884.91	FALSE	37
2022-09-13	15:13:33	-0.39103	-1.73938	0.440972	1902.68	FALSE	37
2022-09-13	15:13:33	0.233753	1.03978	0.440972	1885.95	FALSE	37
2022-09-13	15:13:33	0.957875	4.26082	0.440972	1906.94	FALSE	37
2022-09-13	15:13:34	1.40856	6.26556	8.8823	1892.21	FALSE	37
2022-09-13	15:13:34	1.76994	7.87305	8.8823	1914.81	FALSE	37
2022-09-13	15:13:34	2.07614	9.23509	8.8823	1901.45	FALSE	37
2022-09-13	15:13:34	2.73268	12.1555	8.8823	1926.97	FALSE	37
2022-09-13	15:13:35	2.70515	12.033	14.2292	1913.48	FALSE	37
2022-09-13	15:13:35	4.01925	17.8784	14.2292	1944.85	1	38
2022-09-13	15:13:35	2.07889	9.24732	14.2292	1922.73	FALSE	38
2022-09-13	15:13:35	3.99222	17.7582	14.2292	1962.61	1	39
2022-09-13	15:13:36	0.459249	2.04283	2.71387	1924.77	FALSE	39
2022-09-13	15:13:36	0.96098	4.27463	2.71387	1966.88	FALSE	39
2022-09-13	15:13:36	0.410089	1.82416	2.71387	1926.6	FALSE	39
2022-09-13	15:13:37	0.262456	1.16746	1.5627	1968.05	FALSE	39
2022-09-13	15:13:37	0.362201	1.61114	1.5627	1928.21	FALSE	39
2022-09-13	15:13:37	0.199504	0.887434	1.5627	1968.94	FALSE	39
2022-09-13	15:13:37	0.581081	2.58476	1.5627	1930.79	FALSE	39
2022-09-13	15:13:38	0.141031	0.627334	-0.112957	1969.56	FALSE	39
2022-09-13	15:13:38	0.0533463	0.237295	-0.112957	1931.03	FALSE	39
2022-09-13	15:13:38	-0.155559	-0.691958	-0.112957	1969.56	FALSE	39
2022-09-13	15:13:38	-0.140394	-0.624501	-0.112957	1931.03	FALSE	39
2022-09-13	15:13:39	-0.00614479	-0.0273333	1.09819	1969.56	FALSE	39
2022-09-13	15:13:39	0.141998	0.631636	1.09819	1931.66	FALSE	39
2022-09-13	15:13:39	0.62617	2.78533	1.09819	1972.35	FALSE	39
2022-09-13	15:13:39	0.225509	1.00311	1.09819	1932.66	FALSE	39
2022-09-13	15:13:40	0.278079	1.23695	0.528635	1973.59	FALSE	39
2022-09-13	15:13:40	0.0406237	0.180702	0.528635	1932.85	FALSE	39
2022-09-13	15:13:40	0.0378247	0.168252	0.528635	1973.75	FALSE	39
2022-09-13	15:13:41	-0.00151375	-0.00673346	0.0957001	1932.85	FALSE	39
2022-09-13	15:13:41	-0.0645671	-0.287207	0.0957001	1973.75	FALSE	39
2022-09-13	15:13:41	0.0036262	0.0161301	0.0957001	1932.86	FALSE	39
2022-09-13	15:13:41	0.148512	0.660611	0.0957001	1974.41	FALSE	39
2022-09-13	15:13:42	0.115636	0.514372	1.18064	1933.38	FALSE	39
2022-09-13	15:13:42	0.195331	0.868871	1.18064	1975.28	FALSE	39
2022-09-13	15:13:42	0.362354	1.61182	1.18064	1934.99	FALSE	39
2022-09-13	15:13:42	0.388359	1.7275	1.18064	1977.01	FALSE	39
2022-09-13	15:13:43	0.37584	1.67181	1.49462	1936.66	FALSE	39
2022-09-13	15:13:43	0.311718	1.38658	1.49462	1978.4	FALSE	39
2022-09-13	15:13:43	0.333651	1.48415	1.49462	1938.14	FALSE	39
2022-09-13	15:13:43	0.322812	1.43593	1.49462	1979.83	FALSE	39
2022-09-13	15:13:44	0.237519	1.05653	0.446613	1939.2	FALSE	39
2022-09-13	15:13:44	0.0724811	0.32241	0.446613	1980.16	FALSE	39
2022-09-13	15:13:44	-0.00879109	-0.0391045	0.446613	1939.2	FALSE	39
2022-09-13	15:13:45	0.101082	0.449633	2.29863	1980.61	FALSE	39
2022-09-13	15:13:45	0.782812	3.4821	2.29863	1942.68	FALSE	39
2022-09-13	15:13:45	0.704949	3.13575	2.29863	1983.74	FALSE	39
2022-09-13	15:13:45	0.478181	2.12704	2.29863	1944.81	FALSE	39
2022-09-13	15:13:46	0.428613	1.90656	2.64113	1985.65	FALSE	39
2022-09-13	15:13:46	0.510445	2.27056	2.64113	1947.08	FALSE	39
2022-09-13	15:13:46	1.14235	5.0814	2.64113	1990.73	FALSE	39
2022-09-13	15:13:46	0.293601	1.306	2.64113	1948.39	FALSE	39
2022-09-13	15:13:47	1.02164	4.54446	2.80157	1995.27	FALSE	39
2022-09-13	15:13:47	0.894008	3.97673	2.80157	1952.36	FALSE	39
2022-09-13	15:13:47	0.326679	1.45313	2.80157	1996.73	FALSE	39
2022-09-13	15:13:47	0.276959	1.23197	2.80157	1953.59	FALSE	39
2022-09-13	15:13:48	0.362812	1.61386	5.11024	1998.34	FALSE	39
2022-09-13	15:13:48	0.297468	1.3232	5.11024	1954.92	FALSE	39
2022-09-13	15:13:48	2.78622	12.3937	5.11024	2010.73	FALSE	39
2022-09-13	15:13:49	2.871	12.7708	18.2242	1967.69	FALSE	39
2022-09-13	15:13:49	3.95645	17.5991	18.2242	2028.33	1	40
2022-09-13	15:13:49	3.91294	17.4055	18.2242	1985.09	1	41
2022-09-13	15:13:49	5.64754	25.1214	18.2242	2053.45	1	42
2022-09-13	15:13:50	2.43472	10.8301	11.4812	1995.92	FALSE	42
2022-09-13	15:13:50	3.08006	13.7007	11.4812	2067.16	1	43
2022-09-13	15:13:50	2.08016	9.25297	11.4812	2005.18	FALSE	43
2022-09-13	15:13:50	2.72943	12.1411	11.4812	2079.3	FALSE	43
2022-09-13	15:13:51	1.56291	6.95214	12.5007	2012.13	FALSE	43
2022-09-13	15:13:51	2.26001	10.053	12.5007	2089.35	FALSE	43
2022-09-13	15:13:51	4.02943	17.9237	12.5007	2030.05	1	44
2022-09-13	15:13:51	3.38882	15.0741	12.5007	2104.42	1	45
2022-09-13	15:13:52	2.16128	9.61381	7.07341	2039.67	FALSE	45
2022-09-13	15:13:52	1.58271	7.04021	7.07341	2111.46	FALSE	45
2022-09-13	15:13:52	1.02653	4.56621	7.07341	2044.23	FALSE	45
2022-09-13	15:13:53	1.40017	6.22824	8.15209	2117.69	FALSE	45
2022-09-13	15:13:53	2.39869	10.6699	8.15209	2054.9	FALSE	45
2022-09-13	15:13:53	1.91146	8.50256	8.15209	2126.19	FALSE	45
2022-09-13	15:13:53	1.62037	7.20773	8.15209	2062.11	FALSE	45
2022-09-13	15:13:54	2.21691	9.86126	5.28431	2136.06	FALSE	45
2022-09-13	15:13:54	1.48027	6.58454	5.28431	2068.69	FALSE	45
2022-09-13	15:13:54	0.572837	2.54809	5.28431	2138.6	FALSE	45
2022-09-13	15:13:54	0.481845	2.14334	5.28431	2070.84	FALSE	45
2022-09-13	15:13:55	0.434517	1.93282	2.46173	2140.54	FALSE	45
2022-09-13	15:13:55	0.556348	2.47475	2.46173	2073.31	FALSE	45
2022-09-13	15:13:55	0.634415	2.822	2.46173	2143.36	FALSE	45
2022-09-13	15:13:55	0.58841	2.61737	2.46173	2075.93	FALSE	45
2022-09-13	15:13:56	0.64383	2.86388	2.79363	2146.22	FALSE	45
2022-09-13	15:13:56	0.681794	3.03276	2.79363	2078.96	FALSE	45
2022-09-13	15:13:56	0.558486	2.48426	2.79363	2148.71	FALSE	45
2022-09-13	15:13:57	0.520522	2.31539	11.9408	2081.28	FALSE	45
2022-09-13	15:13:57	0.99472	4.42471	11.9408	2153.13	FALSE	45
2022-09-13	15:13:57	3.17055	14.1032	11.9408	2095.38	1	46
2022-09-13	15:13:57	6.05187	26.9199	11.9408	2180.05	1	47
2022-09-13	15:13:58	3.90235	17.3584	27.0067	2112.74	1	48
2022-09-13	15:13:58	5.05044	22.4654	27.0067	2202.52	1	49
2022-09-13	15:13:58	7.5452	33.5626	27.0067	2146.3	1	50
2022-09-13	15:13:58	7.78749	34.6403	27.0067	2237.16	1	51

## Sheet: Daisy_prong_202291315844 (3)
Date	Time	Lbs	Newtons	Total force x time	total steps > 13.345		**GoPro Fitting: 1458
2022-09-13	15:08:58	0.625051	2.78035	2.78035	FALSE	0
2022-09-13	15:08:58	1.05284	4.68324	4.68324	FALSE	0
2022-09-13	15:08:58	0.799504	3.55635	6.33671	FALSE	0
2022-09-13	15:08:58	0.371107	1.65076	6.334	FALSE	0
2022-09-13	15:08:59	0.444135	1.9756	8.31231	FALSE	0
2022-09-13	15:08:59	0.533702	2.37401	8.70801	FALSE	0
2022-09-13	15:08:59	0.163168	0.725804	9.03811	FALSE	0
2022-09-13	15:08:59	0.268359	1.19371	9.90173	FALSE	0
2022-09-13	15:09:00	0.152685	0.679173	9.71728	FALSE	0
2022-09-13	15:09:00	0.0303946	0.135201	10.0369	FALSE	0
2022-09-13	15:09:00	-0.432302	-1.92297	9.71728	FALSE	0
2022-09-13	15:09:00	-0.45388	-2.01895	10.0369	FALSE	0
2022-09-13	15:09:01	-0.322888	-1.43627	9.71728	FALSE	0
2022-09-13	15:09:01	-0.276119	-1.22823	10.0369	FALSE	0
2022-09-13	15:09:01	0.155382	0.69117	10.4085	FALSE	0
2022-09-13	15:09:02	0.240725	1.07079	11.1077	FALSE	0
2022-09-13	15:09:02	0.759504	3.37843	13.7869	FALSE	0
2022-09-13	15:09:02	1.15426	5.13438	16.2421	FALSE	0
2022-09-13	15:09:02	0.593855	2.64159	16.4285	FALSE	0
2022-09-13	15:09:03	0.315891	1.40515	17.6472	FALSE	0
2022-09-13	15:09:03	0.185713	0.826089	17.2546	FALSE	0
2022-09-13	15:09:03	-0.0999361	-0.444536	17.6472	FALSE	0
2022-09-13	15:09:03	-0.176577	-0.78545	17.2546	FALSE	0
2022-09-13	15:09:04	-0.276832	-1.2314	17.6472	FALSE	0
2022-09-13	15:09:04	0.000929014	0.00413244	17.2587	FALSE	0
2022-09-13	15:09:04	-0.128893	-0.573342	17.6472	FALSE	0
2022-09-13	15:09:04	0.0511071	0.227335	17.486	FALSE	0
2022-09-13	15:09:05	0.127952	0.569156	18.2164	FALSE	0
2022-09-13	15:09:05	0.389224	1.73135	19.2174	FALSE	0
2022-09-13	15:09:05	0.333397	1.48302	19.6994	FALSE	0
2022-09-13	15:09:06	0.72327	3.21725	22.4346	FALSE	0
2022-09-13	15:09:06	1.50006	6.67257	26.372	FALSE	0
2022-09-13	15:09:06	1.73487	7.71705	30.1517	FALSE	0
2022-09-13	15:09:06	1.93711	8.61665	34.9886	FALSE	0
2022-09-13	15:09:07	2.842	12.6418	42.7935	FALSE	0
2022-09-13	15:09:07	1.86032	8.27508	43.2637	FALSE	0
2022-09-13	15:09:07	2.21945	9.87256	52.666	FALSE	0
2022-09-13	15:09:07	1.34195	5.96926	49.233	FALSE	0
2022-09-13	15:09:08	2.03508	9.05244	61.7185	FALSE	0
2022-09-13	15:09:08	1.04139	4.63231	53.8653	FALSE	0
2022-09-13	15:09:08	0.793957	3.53168	65.2501	FALSE	0
2022-09-13	15:09:09	0.738486	3.28493	57.1502	FALSE	0
2022-09-13	15:09:09	0.536094	2.38465	67.6348	FALSE	0
2022-09-13	15:09:09	0.0844404	0.375608	57.5258	FALSE	0
2022-09-13	15:09:09	-0.0139819	-0.0621943	67.6348	FALSE	0
2022-09-13	15:09:10	-0.0779005	-0.346517	57.5258	FALSE	0
2022-09-13	15:09:10	-0.330012	-1.46796	67.6348	FALSE	0
2022-09-13	15:09:10	-0.431183	-1.91799	57.5258	FALSE	0
2022-09-13	15:09:10	-0.314491	-1.39892	67.6348	FALSE	0
2022-09-13	15:09:11	-0.260496	-1.15874	57.5258	FALSE	0
2022-09-13	15:09:11	-0.134847	-0.599826	67.6348	FALSE	0
2022-09-13	15:09:11	-0.151692	-0.674756	57.5258	FALSE	0
2022-09-13	15:09:11	0.506629	2.25359	69.8884	FALSE	0
2022-09-13	15:09:12	0.662863	2.94855	60.4744	FALSE	0
2022-09-13	15:09:12	0.314567	1.39926	71.2876	FALSE	0
2022-09-13	15:09:12	0.455585	2.02653	62.5009	FALSE	0
2022-09-13	15:09:12	0.264542	1.17674	72.4644	FALSE	0
2022-09-13	15:09:13	0.194415	0.864797	63.3657	FALSE	0
2022-09-13	15:09:13	-0.12818	-0.57017	72.4644	FALSE	0
2022-09-13	15:09:13	-0.252099	-1.12139	63.3657	FALSE	0
2022-09-13	15:09:14	-0.387519	-1.72376	72.4644	FALSE	0
2022-09-13	15:09:14	-0.341972	-1.52116	63.3657	FALSE	0
2022-09-13	15:09:14	-0.409656	-1.82223	72.4644	FALSE	0
2022-09-13	15:09:14	-0.270267	-1.2022	63.3657	FALSE	0
2022-09-13	15:09:15	-0.187417	-0.833668	72.4644	FALSE	0
2022-09-13	15:09:15	-0.168842	-0.751043	63.3657	FALSE	0
2022-09-13	15:09:15	-0.628384	-2.79518	72.4644	FALSE	0
2022-09-13	15:09:15	-0.422989	-1.88154	63.3657	FALSE	0
2022-09-13	15:09:16	-0.311793	-1.38692	72.4644	FALSE	0
2022-09-13	15:09:16	0.1307	0.58138	63.9471	FALSE	0
2022-09-13	15:09:16	0.267494	1.18987	73.6542	FALSE	0
2022-09-13	15:09:16	1.33966	5.95908	69.9062	FALSE	0
2022-09-13	15:09:17	2.77284	12.3341	85.9884	FALSE	0
2022-09-13	15:09:17	3.12408	13.8965	83.8027	1	1
2022-09-13	15:09:17	2.95345	13.1375	99.1259	FALSE	1
2022-09-13	15:09:18	0.75986	3.38001	87.1827	FALSE	1
2022-09-13	15:09:18	1.59966	7.11561	106.242	FALSE	1
2022-09-13	15:09:18	0.589936	2.62415	89.8069	FALSE	1
2022-09-13	15:09:18	1.58052	7.03047	113.272	FALSE	1
2022-09-13	15:09:19	0.563066	2.50463	92.3115	FALSE	1
2022-09-13	15:09:19	1.97991	8.80704	122.079	FALSE	1
2022-09-13	15:09:19	0.988817	4.39846	96.7099	FALSE	1
2022-09-13	15:09:19	2.2764	10.1259	132.205	FALSE	1
2022-09-13	15:09:20	0.548359	2.43921	99.1492	FALSE	1
2022-09-13	15:09:20	0.278384	1.23831	133.443	FALSE	1
2022-09-13	15:09:20	0.37472	1.66683	100.816	FALSE	1
2022-09-13	15:09:20	0.240471	1.06966	134.513	FALSE	1
2022-09-13	15:09:21	0.496909	2.21035	103.026	FALSE	1
2022-09-13	15:09:21	0.196552	0.874303	135.387	FALSE	1
2022-09-13	15:09:21	0.281489	1.25212	104.278	FALSE	1
2022-09-13	15:09:22	0.164084	0.729878	136.117	FALSE	1
2022-09-13	15:09:22	0.303982	1.35217	105.631	FALSE	1
2022-09-13	15:09:22	0.2593	1.15342	137.27	FALSE	1
2022-09-13	15:09:22	0.368562	1.63944	107.27	FALSE	1
2022-09-13	15:09:23	0.424135	1.88664	139.157	FALSE	1
2022-09-13	15:09:23	0.252379	1.12263	108.393	FALSE	1
2022-09-13	15:09:23	0.26327	1.17108	140.328	FALSE	1
2022-09-13	15:09:23	0.181998	0.809564	109.202	FALSE	1
2022-09-13	15:09:24	0.307596	1.36825	141.696	FALSE	1
2022-09-13	15:09:24	0.183117	0.814541	110.017	FALSE	1
2022-09-13	15:09:24	2.05202	9.1278	150.824	FALSE	1
2022-09-13	15:09:24	1.00515	4.47111	114.488	FALSE	1
2022-09-13	15:09:25	1.80688	8.03736	158.862	FALSE	1
2022-09-13	15:09:25	1.13584	5.05244	119.54	FALSE	1
2022-09-13	15:09:25	2.80133	12.4609	171.322	FALSE	1
2022-09-13	15:09:26	1.01233	4.50305	124.043	FALSE	1
2022-09-13	15:09:26	1.13151	5.03318	176.356	FALSE	1
2022-09-13	15:09:26	0.336654	1.4975	125.541	FALSE	1
2022-09-13	15:09:26	0.226781	1.00877	177.364	FALSE	1
2022-09-13	15:09:27	0.42159	1.87532	127.416	FALSE	1
2022-09-13	15:09:27	0.222659	0.990432	178.355	FALSE	1
2022-09-13	15:09:27	0.723015	3.21612	130.632	FALSE	1
2022-09-13	15:09:27	0.816043	3.62992	181.985	FALSE	1
2022-09-13	15:09:28	0.716807	3.1885	133.821	FALSE	1
2022-09-13	15:09:28	1.60296	7.13029	189.115	FALSE	1
2022-09-13	15:09:28	1.53004	6.80592	140.627	FALSE	1
2022-09-13	15:09:28	1.88688	8.39322	197.508	FALSE	1
2022-09-13	15:09:29	1.21197	5.39108	146.018	FALSE	1
2022-09-13	15:09:29	2.06525	9.18665	206.695	FALSE	1
2022-09-13	15:09:29	1.22032	5.42823	151.446	FALSE	1
2022-09-13	15:09:30	2.5564	11.3714	218.066	FALSE	1
2022-09-13	15:09:30	0.952328	4.23615	155.682	FALSE	1
2022-09-13	15:09:30	2.51044	11.1669	229.233	FALSE	1
2022-09-13	15:09:30	1.05467	4.69138	160.374	FALSE	1
2022-09-13	15:09:31	3.64994	16.2357	245.469	1	2
2022-09-13	15:09:31	1.54536	6.87407	167.248	FALSE	2
2022-09-13	15:09:31	1.14093	5.07508	250.544	FALSE	2
2022-09-13	15:09:31	0.706883	3.14436	170.392	FALSE	2
2022-09-13	15:09:32	0.569224	2.53202	253.076	FALSE	2
2022-09-13	15:09:32	1.17665	5.23397	175.626	FALSE	2
2022-09-13	15:09:32	0.751311	3.34198	256.418	FALSE	2
2022-09-13	15:09:32	1.25538	5.58418	181.21	FALSE	2
2022-09-13	15:09:33	0.978028	4.35046	260.768	FALSE	2
2022-09-13	15:09:33	0.728206	3.23921	184.449	FALSE	2
2022-09-13	15:09:33	1.78714	7.94956	268.718	FALSE	2
2022-09-13	15:09:34	0.99584	4.4297	188.879	FALSE	2
2022-09-13	15:09:34	2.6251	11.677	280.395	FALSE	2
2022-09-13	15:09:34	1.30419	5.8013	194.68	FALSE	2
2022-09-13	15:09:34	2.95711	13.1538	293.549	FALSE	2
2022-09-13	15:09:35	1.48403	6.60126	201.282	FALSE	2
2022-09-13	15:09:35	2.53279	11.2664	304.815	FALSE	2
2022-09-13	15:09:35	2.00536	8.92024	210.202	FALSE	2
2022-09-13	15:09:35	2.01126	8.94649	313.762	FALSE	2
2022-09-13	15:09:36	2.00556	8.92113	219.123	FALSE	2
2022-09-13	15:09:36	1.91538	8.51999	322.282	FALSE	2
2022-09-13	15:09:36	1.70815	7.59819	226.721	FALSE	2
2022-09-13	15:09:36	1.43182	6.36902	328.651	FALSE	2
2022-09-13	15:09:37	0.916094	4.07497	230.796	FALSE	2
2022-09-13	15:09:37	2.30627	10.2588	338.909	FALSE	2
2022-09-13	15:09:37	1.59879	7.11174	237.908	FALSE	2
2022-09-13	15:09:38	3.16118	14.0616	352.971	1	3
2022-09-13	15:09:38	1.83599	8.16685	246.075	FALSE	3
2022-09-13	15:09:38	2.1737	9.66905	362.64	FALSE	3
2022-09-13	15:09:38	1.84047	8.18678	254.262	FALSE	3
2022-09-13	15:09:39	1.25212	5.56968	368.21	FALSE	3
2022-09-13	15:09:39	2.2052	9.80917	264.071	FALSE	3
2022-09-13	15:09:39	1.23034	5.4728	373.683	FALSE	3
2022-09-13	15:09:39	1.73742	7.72839	271.799	FALSE	3
2022-09-13	15:09:40	1.73533	7.71909	381.402	FALSE	3
2022-09-13	15:09:40	2.74123	12.1935	283.993	FALSE	3
2022-09-13	15:09:40	1.1819	5.25733	386.659	FALSE	3
2022-09-13	15:09:40	1.95752	8.70744	292.7	FALSE	3
2022-09-13	15:09:41	2.20454	9.80623	396.465	FALSE	3
2022-09-13	15:09:41	2.20088	9.78995	302.49	FALSE	3
2022-09-13	15:09:41	2.12307	9.44384	405.909	FALSE	3
2022-09-13	15:09:42	2.64724	11.7755	314.265	FALSE	3
2022-09-13	15:09:42	1.35375	6.02175	411.931	FALSE	3
2022-09-13	15:09:42	3.35263	14.9132	329.179	1	4
2022-09-13	15:09:42	1.13197	5.03523	416.966	FALSE	4
2022-09-13	15:09:43	3.36235	14.9564	344.135	1	5
2022-09-13	15:09:43	0.403015	1.79269	418.759	FALSE	5
2022-09-13	15:09:43	0.808664	3.5971	347.732	FALSE	5
2022-09-13	15:09:43	0.484644	2.15579	420.914	FALSE	5
2022-09-13	15:09:44	1.05553	4.69521	352.427	FALSE	5
2022-09-13	15:09:44	0.782455	3.48052	424.395	FALSE	5
2022-09-13	15:09:44	1.25721	5.59232	358.02	FALSE	5
2022-09-13	15:09:44	1.25599	5.58689	429.982	FALSE	5
2022-09-13	15:09:45	1.68816	7.50927	365.529	FALSE	5
2022-09-13	15:09:45	1.42541	6.34051	436.322	FALSE	5
2022-09-13	15:09:45	2.43167	10.8166	376.346	FALSE	5
2022-09-13	15:09:46	2.05238	9.1294	445.452	FALSE	5
2022-09-13	15:09:46	2.1537	9.58009	385.926	FALSE	5
2022-09-13	15:09:46	1.1109	4.94151	450.393	FALSE	5
2022-09-13	15:09:46	1.29411	5.75646	391.682	FALSE	5
2022-09-13	15:09:47	0.310751	1.38228	451.776	FALSE	5
2022-09-13	15:09:47	0.705	3.13598	394.818	FALSE	5
2022-09-13	15:09:47	0.658741	2.93021	454.706	FALSE	5
2022-09-13	15:09:47	2.71558	12.0794	406.898	FALSE	5
2022-09-13	15:09:48	1.37981	6.13767	460.843	FALSE	5
2022-09-13	15:09:48	2.13915	9.51537	416.413	FALSE	5
2022-09-13	15:09:48	2.69508	11.9883	472.832	FALSE	5
2022-09-13	15:09:48	3.67518	16.3479	432.761	1	6
2022-09-13	15:09:49	2.82154	12.5508	485.382	FALSE	6
2022-09-13	15:09:49	1.44729	6.43784	439.199	FALSE	6
2022-09-13	15:09:49	1.23767	5.5054	490.888	FALSE	6
2022-09-13	15:09:50	0.578791	2.57458	441.773	FALSE	6
2022-09-13	15:09:50	0.195687	0.870455	491.758	FALSE	6
2022-09-13	15:09:50	0.575026	2.55783	444.331	FALSE	6
2022-09-13	15:09:50	0.275687	1.22631	492.985	FALSE	6
2022-09-13	15:09:51	1.04134	4.63209	448.963	FALSE	6
2022-09-13	15:09:51	1.03747	4.61487	497.6	FALSE	6
2022-09-13	15:09:51	2.85207	12.6866	461.65	FALSE	6
2022-09-13	15:09:51	2.31116	10.2805	507.88	FALSE	6
2022-09-13	15:09:52	2.41396	10.7378	472.387	FALSE	6
2022-09-13	15:09:52	1.19314	5.30733	513.187	FALSE	6
2022-09-13	15:09:52	1.68836	7.51016	479.898	FALSE	6
2022-09-13	15:09:52	1.54215	6.85979	520.047	FALSE	6
2022-09-13	15:09:53	1.69589	7.54366	487.441	FALSE	6
2022-09-13	15:09:53	1.97752	8.7964	528.844	FALSE	6
2022-09-13	15:09:53	2.56785	11.4223	498.864	FALSE	6
2022-09-13	15:09:54	1.54653	6.87927	535.723	FALSE	6
2022-09-13	15:09:54	2.72205	12.1082	510.972	FALSE	6
2022-09-13	15:09:54	1.24917	5.55656	541.279	FALSE	6
2022-09-13	15:09:54	2.62673	11.6842	522.656	FALSE	6
2022-09-13	15:09:55	1.78261	7.92941	549.209	FALSE	6
2022-09-13	15:09:55	1.96174	8.72621	531.382	FALSE	6
2022-09-13	15:09:55	0.971616	4.32194	553.531	FALSE	6
2022-09-13	15:09:55	0.945458	4.20559	535.588	FALSE	6
2022-09-13	15:09:56	1.49243	6.63863	560.169	FALSE	6
2022-09-13	15:09:56	0.774568	3.44543	539.033	FALSE	6
2022-09-13	15:09:56	1.54907	6.89057	567.06	FALSE	6
2022-09-13	15:09:56	0.820522	3.64985	542.683	FALSE	6
2022-09-13	15:09:57	2.16556	9.63284	576.693	FALSE	6
2022-09-13	15:09:57	0.647239	2.87905	545.562	FALSE	6
2022-09-13	15:09:57	1.51635	6.74503	583.438	FALSE	6
2022-09-13	15:09:58	1.15859	5.15364	550.716	FALSE	6
2022-09-13	15:09:58	0.641132	2.85188	586.29	FALSE	6
2022-09-13	15:09:58	1.00627	4.47609	555.192	FALSE	6
2022-09-13	15:09:58	0.634873	2.82404	589.114	FALSE	6
2022-09-13	15:09:59	0.468206	2.08267	557.275	FALSE	6
2022-09-13	15:09:59	0.508613	2.26241	591.376	FALSE	6
2022-09-13	15:09:59	0.252328	1.12241	558.397	FALSE	6
2022-09-13	15:09:59	0.646425	2.87543	594.252	FALSE	6
2022-09-13	15:10:00	0.572583	2.54696	560.944	FALSE	6
2022-09-13	15:10:00	0.803779	3.57537	597.827	FALSE	6
2022-09-13	15:10:00	1.27818	5.6856	566.63	FALSE	6
2022-09-13	15:10:00	3.60388	16.0308	613.858	1	7
2022-09-13	15:10:01	5.54454	24.6632	591.293	1	8
2022-09-13	15:10:01	9.70688	43.1781	657.036	1	9
2022-09-13	15:10:01	4.29355	19.0986	610.391	1	10
2022-09-13	15:10:02	2.07955	9.25025	666.286	FALSE	10
2022-09-13	15:10:02	0.66388	2.95307	613.344	FALSE	10
2022-09-13	15:10:02	0.397265	1.76711	668.053	FALSE	10
2022-09-13	15:10:02	0.339962	1.51222	614.857	FALSE	10
2022-09-13	15:10:03	0.297061	1.32139	669.375	FALSE	10
2022-09-13	15:10:03	0.293753	1.30667	616.163	FALSE	10
2022-09-13	15:10:03	0.487697	2.16937	671.544	FALSE	10
2022-09-13	15:10:03	0.144797	0.644086	616.807	FALSE	10
2022-09-13	15:10:04	0.511107	2.27351	673.818	FALSE	10
2022-09-13	15:10:04	0.233753	1.03978	617.847	FALSE	10
2022-09-13	15:10:04	0.488512	2.173	675.99	FALSE	10
2022-09-13	15:10:04	0.434364	1.93214	619.779	FALSE	10
2022-09-13	15:10:05	0.587494	2.61329	678.604	FALSE	10
2022-09-13	15:10:05	0.579555	2.57798	622.357	FALSE	10
2022-09-13	15:10:05	0.845102	3.75918	682.363	FALSE	10
2022-09-13	15:10:06	1.10546	4.91731	627.275	FALSE	10
2022-09-13	15:10:06	0.743728	3.30825	685.671	FALSE	10
2022-09-13	15:10:06	0.518842	2.30791	629.583	FALSE	10
2022-09-13	15:10:06	0.101845	0.453027	686.124	FALSE	10
2022-09-13	15:10:07	0.277265	1.23333	630.816	FALSE	10
2022-09-13	15:10:07	0.138588	0.616467	686.741	FALSE	10
2022-09-13	15:10:07	0.286222	1.27317	632.089	FALSE	10
2022-09-13	15:10:07	0.168613	0.750024	687.491	FALSE	10
2022-09-13	15:10:08	0.346272	1.54029	633.629	FALSE	10
2022-09-13	15:10:08	0.357977	1.59235	689.083	FALSE	10
2022-09-13	15:10:08	0.18556	0.825408	634.455	FALSE	10
2022-09-13	15:10:08	0.411718	1.8314	690.914	FALSE	10
2022-09-13	15:10:09	0.14383	0.639785	635.095	FALSE	10
2022-09-13	15:10:09	0.419555	1.86626	692.781	FALSE	10
2022-09-13	15:10:09	0.0829136	0.368816	635.463	FALSE	10
2022-09-13	15:10:10	0.346374	1.54074	694.322	FALSE	10
2022-09-13	15:10:10	0.140929	0.62688	636.09	FALSE	10
2022-09-13	15:10:10	0.315331	1.40266	695.724	FALSE	10
2022-09-13	15:10:10	0.321998	1.43231	637.523	FALSE	10
2022-09-13	15:10:11	0.447647	1.99122	697.715	FALSE	10
2022-09-13	15:10:11	1.71243	7.61723	645.14	FALSE	10
2022-09-13	15:10:11	1.72123	7.65638	705.372	FALSE	10
2022-09-13	15:10:11	2.92856	13.0268	658.167	FALSE	10
2022-09-13	15:10:12	1.6167	7.1914	712.563	FALSE	10
2022-09-13	15:10:12	3.93716	17.5133	675.68	1	11
2022-09-13	15:10:12	1.23462	5.49184	718.055	FALSE	11
2022-09-13	15:10:12	1.91446	8.5159	684.196	FALSE	11
2022-09-13	15:10:13	1.31711	5.85877	723.914	FALSE	11
2022-09-13	15:10:13	0.704593	3.13417	687.33	FALSE	11
2022-09-13	15:10:13	1.5163	6.74481	730.659	FALSE	11
2022-09-13	15:10:14	0.3707	1.64895	688.979	FALSE	11
2022-09-13	15:10:14	1.51508	6.73938	737.398	FALSE	11
2022-09-13	15:10:14	0.941285	4.18702	693.166	FALSE	11
2022-09-13	15:10:14	0.555229	2.46977	739.868	FALSE	11
2022-09-13	15:10:15	1.04953	4.66852	697.834	FALSE	11
2022-09-13	15:10:15	0.306476	1.36327	741.231	FALSE	11
2022-09-13	15:10:15	0.722812	3.21521	701.05	FALSE	11
2022-09-13	15:10:15	0.258995	1.15206	742.383	FALSE	11
2022-09-13	15:10:16	0.233194	1.03729	702.087	FALSE	11
2022-09-13	15:10:16	0.23925	1.06423	743.447	FALSE	11
2022-09-13	15:10:16	0.229428	1.02054	703.107	FALSE	11
2022-09-13	15:10:16	0.15411	0.685512	744.133	FALSE	11
2022-09-13	15:10:17	0.234517	1.04318	704.151	FALSE	11
2022-09-13	15:10:17	0.065102	0.289587	744.422	FALSE	11
2022-09-13	15:10:17	0.00774832	0.0344661	704.185	FALSE	11
2022-09-13	15:10:18	0.0270867	0.120487	744.543	FALSE	11
2022-09-13	15:10:18	0.143117	0.636613	704.822	FALSE	11
2022-09-13	15:10:18	1.78897	7.9577	752.501	FALSE	11
2022-09-13	15:10:18	2.84871	12.6716	717.493	FALSE	11
2022-09-13	15:10:19	1.57981	7.02731	759.528	FALSE	11
2022-09-13	15:10:19	3.07019	13.6568	731.15	1	12
2022-09-13	15:10:19	0.84841	3.7739	763.302	FALSE	12
2022-09-13	15:10:19	3.282	14.599	745.749	1	13
2022-09-13	15:10:20	0.396756	1.76485	765.067	FALSE	13
2022-09-13	15:10:20	0.644542	2.86705	748.616	FALSE	13
2022-09-13	15:10:20	0.342608	1.52399	766.591	FALSE	13
2022-09-13	15:10:20	0.42327	1.88279	750.499	FALSE	13
2022-09-13	15:10:21	0.585814	2.60582	769.196	FALSE	13
2022-09-13	15:10:21	0.605662	2.69411	753.193	FALSE	13
2022-09-13	15:10:21	0.861285	3.83117	773.028	FALSE	13
2022-09-13	15:10:22	0.934974	4.15895	757.352	FALSE	13
2022-09-13	15:10:22	0.984288	4.37831	777.406	FALSE	13
2022-09-13	15:10:22	0.819707	3.64622	760.998	FALSE	13
2022-09-13	15:10:22	0.687086	3.0563	780.462	FALSE	13
2022-09-13	15:10:23	0.667087	2.96734	763.966	FALSE	13
2022-09-13	15:10:23	0.560471	2.49309	782.955	FALSE	13
2022-09-13	15:10:23	0.632786	2.81476	766.78	FALSE	13
2022-09-13	15:10:23	0.786374	3.49795	786.453	FALSE	13
2022-09-13	15:10:24	0.466374	2.07452	768.855	FALSE	13
2022-09-13	15:10:24	1.33854	5.95409	792.407	FALSE	13
2022-09-13	15:10:24	0.834109	3.71028	772.565	FALSE	13
2022-09-13	15:10:24	0.280674	1.24849	793.656	FALSE	13
2022-09-13	15:10:25	0.370954	1.65008	774.215	FALSE	13
2022-09-13	15:10:25	0.19355	0.860949	794.517	FALSE	13
2022-09-13	15:10:25	0.37243	1.65664	775.872	FALSE	13
2022-09-13	15:10:26	0.538333	2.39461	796.911	FALSE	13
2022-09-13	15:10:26	0.228155	1.01488	776.887	FALSE	13
2022-09-13	15:10:26	0.364847	1.62291	798.534	FALSE	13
2022-09-13	15:10:26	0.374771	1.66706	778.554	FALSE	13
2022-09-13	15:10:27	0.371107	1.65076	800.185	FALSE	13
2022-09-13	15:10:27	0.28215	1.25506	779.809	FALSE	13
2022-09-13	15:10:27	0.407137	1.81103	801.996	FALSE	13
2022-09-13	15:10:27	0.425254	1.89161	781.701	FALSE	13
2022-09-13	15:10:28	0.270038	1.20118	803.197	FALSE	13
2022-09-13	15:10:28	0.27925	1.24216	782.943	FALSE	13
2022-09-13	15:10:28	0.167799	0.746404	803.944	FALSE	13
2022-09-13	15:10:28	0.294466	1.30984	784.253	FALSE	13
2022-09-13	15:10:29	0.815636	3.62811	807.572	FALSE	13
2022-09-13	15:10:29	1.3619	6.058	790.311	FALSE	13
2022-09-13	15:10:29	2.61304	11.6233	819.195	FALSE	13
2022-09-13	15:10:29	1.84765	8.21872	798.529	FALSE	13
2022-09-13	15:10:30	2.53177	11.2618	830.457	FALSE	13
2022-09-13	15:10:30	1.33981	5.95974	804.489	FALSE	13
2022-09-13	15:10:30	1.05131	4.67644	835.133	FALSE	13
2022-09-13	15:10:31	0.875026	3.89229	808.381	FALSE	13
2022-09-13	15:10:31	0.85986	3.82483	838.958	FALSE	13
2022-09-13	15:10:31	0.581641	2.58726	810.969	FALSE	13
2022-09-13	15:10:31	0.76159	3.3877	842.346	FALSE	13
2022-09-13	15:10:32	0.805916	3.58488	814.553	FALSE	13
2022-09-13	15:10:32	1.51289	6.72964	849.076	FALSE	13
2022-09-13	15:10:32	2.61167	11.6172	826.171	FALSE	13
2022-09-13	15:10:32	5.21563	23.2002	872.276	1	14
2022-09-13	15:10:33	4.47513	19.9063	846.077	1	15
2022-09-13	15:10:33	4.288	19.0739	891.35	1	16
2022-09-13	15:10:33	0.822252	3.65754	849.734	FALSE	16
2022-09-13	15:10:33	1.19294	5.30644	896.656	FALSE	16
2022-09-13	15:10:34	1.10347	4.90846	854.643	FALSE	16
2022-09-13	15:10:34	1.28632	5.72181	902.378	FALSE	16
2022-09-13	15:10:34	0.962659	4.2821	858.925	FALSE	16
2022-09-13	15:10:35	0.20612	0.916863	903.295	FALSE	16
2022-09-13	15:10:35	0.116247	0.51709	859.442	FALSE	16
2022-09-13	15:10:35	-0.138511	-0.616125	903.295	FALSE	16
2022-09-13	15:10:35	-0.311692	-1.38647	859.442	FALSE	16
2022-09-13	15:10:36	-0.528536	-2.35103	903.295	FALSE	16
2022-09-13	15:10:36	-0.526043	-2.33994	859.442	FALSE	16
2022-09-13	15:10:36	-0.37902	-1.68596	903.295	FALSE	16
2022-09-13	15:10:36	-0.468536	-2.08414	859.442	FALSE	16
2022-09-13	15:10:37	-0.228435	-1.01612	903.295	FALSE	16
2022-09-13	15:10:37	-0.326043	-1.4503	859.442	FALSE	16
2022-09-13	15:10:37	-0.162277	-0.721841	903.295	FALSE	16
2022-09-13	15:10:37	-0.368333	-1.63842	859.442	FALSE	16
2022-09-13	15:10:38	0.307799	1.36915	904.664	FALSE	16
2022-09-13	15:10:38	0.30271	1.34651	860.789	FALSE	16
2022-09-13	15:10:38	0.537824	2.39235	907.056	FALSE	16
2022-09-13	15:10:39	1.01701	4.52386	865.312	FALSE	16
2022-09-13	15:10:39	1.19681	5.32365	912.38	FALSE	16
2022-09-13	15:10:39	0.788715	3.50836	868.821	FALSE	16
2022-09-13	15:10:39	0.498181	2.21601	914.596	FALSE	16
2022-09-13	15:10:40	0.26098	1.16089	869.982	FALSE	16
2022-09-13	15:10:40	0.425204	1.89139	916.487	FALSE	16
2022-09-13	15:10:40	0.328766	1.46242	871.444	FALSE	16
2022-09-13	15:10:40	0.315585	1.40379	917.891	FALSE	16
2022-09-13	15:10:41	0.267494	1.18987	872.634	FALSE	16
2022-09-13	15:10:41	0.337061	1.49931	919.39	FALSE	16
2022-09-13	15:10:41	0.393448	1.75014	874.384	FALSE	16
2022-09-13	15:10:41	0.434313	1.93191	921.322	FALSE	16
2022-09-13	15:10:42	0.446934	1.98805	876.372	FALSE	16
2022-09-13	15:10:42	1.33726	5.9484	927.271	FALSE	16
2022-09-13	15:10:42	2.46144	10.949	887.321	FALSE	16
2022-09-13	15:10:43	3.50286	15.5814	942.852	1	17
2022-09-13	15:10:43	2.33843	10.4018	897.723	FALSE	17
2022-09-13	15:10:43	1.68592	7.49931	950.351	FALSE	17
2022-09-13	15:10:43	0.854466	3.80084	901.524	FALSE	17
2022-09-13	15:10:44	0.133194	0.592474	950.944	FALSE	17
2022-09-13	15:10:44	0.460267	2.04736	903.571	FALSE	17
2022-09-13	15:10:44	0.174822	0.777643	951.722	FALSE	17
2022-09-13	15:10:44	0.493193	2.19382	905.765	FALSE	17
2022-09-13	15:10:45	0.251819	1.12014	952.842	FALSE	17
2022-09-13	15:10:45	0.521031	2.31765	908.083	FALSE	17
2022-09-13	15:10:45	0.373041	1.65936	954.501	FALSE	17
2022-09-13	15:10:45	0.532125	2.367	910.45	FALSE	17
2022-09-13	15:10:46	0.353601	1.57289	956.074	FALSE	17
2022-09-13	15:10:46	0.461285	2.05189	912.502	FALSE	17
2022-09-13	15:10:46	0.25584	1.13803	957.212	FALSE	17
2022-09-13	15:10:47	0.516247	2.29637	914.798	FALSE	17
2022-09-13	15:10:47	0.212634	0.945839	958.158	FALSE	17
2022-09-13	15:10:47	0.470191	2.0915	916.889	FALSE	17
2022-09-13	15:10:47	0.281692	1.25302	959.411	FALSE	17
2022-09-13	15:10:48	0.322354	1.4339	918.323	FALSE	17
2022-09-13	15:10:48	0.373448	1.66117	961.072	FALSE	17
2022-09-13	15:10:48	0.213448	0.949459	919.273	FALSE	17
2022-09-13	15:10:48	0.285611	1.27045	962.342	FALSE	17
2022-09-13	15:10:49	0.286272	1.2734	920.546	FALSE	17
2022-09-13	15:10:49	0.210496	0.936328	963.279	FALSE	17
2022-09-13	15:10:49	0.317468	1.41216	921.958	FALSE	17
2022-09-13	15:10:49	0.384186	1.70894	964.988	FALSE	17
2022-09-13	15:10:50	0.134313	0.597451	922.556	FALSE	17
2022-09-13	15:10:50	0.110395	0.491059	965.479	FALSE	17
2022-09-13	15:10:50	-0.0350506	-0.155912	922.556	FALSE	17
2022-09-13	15:10:51	0.0227102	0.10102	965.58	FALSE	17
2022-09-13	15:10:51	0.0416415	0.18523	922.741	FALSE	17
2022-09-13	15:10:51	-0.161565	-0.718673	965.58	FALSE	17
2022-09-13	15:10:51	-0.00843487	-0.03752	922.741	FALSE	17
2022-09-13	15:10:52	0.112481	0.500338	966.08	FALSE	17
2022-09-13	15:10:52	0.251514	1.11878	923.86	FALSE	17
2022-09-13	15:10:52	0.220878	0.98251	967.063	FALSE	17
2022-09-13	15:10:52	0.333295	1.48256	925.342	FALSE	17
2022-09-13	15:10:53	0.43355	1.92852	968.991	FALSE	17
2022-09-13	15:10:53	0.365967	1.62789	926.97	FALSE	17
2022-09-13	15:10:53	0.442405	1.96791	970.959	FALSE	17
2022-09-13	15:10:53	0.404135	1.79767	928.768	FALSE	17
2022-09-13	15:10:54	0.481234	2.14063	973.1	FALSE	17
2022-09-13	15:10:54	0.548206	2.43853	931.206	FALSE	17
2022-09-13	15:10:54	1.1908	5.29692	978.397	FALSE	17
2022-09-13	15:10:55	1.22586	5.45287	936.659	FALSE	17
2022-09-13	15:10:55	0.840725	3.73971	982.136	FALSE	17
2022-09-13	15:10:55	0.784287	3.48867	940.148	FALSE	17
2022-09-13	15:10:55	0.458333	2.03876	984.175	FALSE	17
2022-09-13	15:10:56	0.705255	3.13712	943.285	FALSE	17
2022-09-13	15:10:56	0.73584	3.27316	987.448	FALSE	17
2022-09-13	15:10:56	0.911412	4.05414	947.339	FALSE	17
2022-09-13	15:10:56	0.990903	4.40773	991.856	FALSE	17
2022-09-13	15:10:57	0.299249	1.33112	948.67	FALSE	17
2022-09-13	15:10:57	0.487087	2.16666	994.023	FALSE	17
2022-09-13	15:10:57	0.410954	1.82801	950.498	FALSE	17
2022-09-13	15:10:57	0.353143	1.57085	995.593	FALSE	17
2022-09-13	15:10:58	0.299199	1.3309	951.829	FALSE	17
2022-09-13	15:10:58	0.249886	1.11154	996.705	FALSE	17
2022-09-13	15:10:58	0.358333	1.59394	953.423	FALSE	17
2022-09-13	15:10:59	0.367952	1.63672	998.342	FALSE	17
2022-09-13	15:10:59	0.301947	1.34312	954.766	FALSE	17
2022-09-13	15:10:59	0.465204	2.06932	1000.41	FALSE	17
2022-09-13	15:10:59	0.380725	1.69354	956.46	FALSE	17
2022-09-13	15:11:00	0.610242	2.71448	1003.13	FALSE	17
2022-09-13	15:11:00	0.832176	3.70169	960.162	FALSE	17
2022-09-13	15:11:00	0.780013	3.46965	1006.6	FALSE	17
2022-09-13	15:11:00	2.23299	9.93279	970.094	FALSE	17
2022-09-13	15:11:01	4.13675	18.4011	1025	1	18
2022-09-13	15:11:01	3.71309	16.5166	986.611	1	19
2022-09-13	15:11:01	4.18098	18.5978	1043.59	1	20
2022-09-13	15:11:01	3.08566	13.7256	1000.34	1	21
2022-09-13	15:11:02	2.07355	9.22357	1052.82	FALSE	21
2022-09-13	15:11:02	4.2653	18.9729	1019.31	1	22
2022-09-13	15:11:02	5.24474	23.3297	1076.15	1	23
2022-09-13	15:11:03	4.28592	19.0646	1038.37	1	24
2022-09-13	15:11:03	1.64393	7.31253	1083.46	FALSE	24
2022-09-13	15:11:03	0.490649	2.1825	1040.56	FALSE	24
2022-09-13	15:11:03	0.352328	1.56723	1085.03	FALSE	24
2022-09-13	15:11:04	0.31416	1.39745	1041.95	FALSE	24
2022-09-13	15:11:04	0.332736	1.48008	1086.51	FALSE	24
2022-09-13	15:11:04	0.361794	1.60933	1043.56	FALSE	24
2022-09-13	15:11:04	0.511463	2.27509	1088.78	FALSE	24
2022-09-13	15:11:05	0.477214	2.12274	1045.69	FALSE	24
2022-09-13	15:11:05	0.504288	2.24317	1091.03	FALSE	24
2022-09-13	15:11:05	0.359148	1.59756	1047.28	FALSE	24
2022-09-13	15:11:05	0.50271	2.23615	1093.26	FALSE	24
2022-09-13	15:11:06	0.461336	2.05211	1049.34	FALSE	24
2022-09-13	15:11:06	0.332125	1.47736	1094.74	FALSE	24
2022-09-13	15:11:06	0.565865	2.51708	1051.85	FALSE	24
2022-09-13	15:11:07	0.456094	2.0288	1096.77	FALSE	24
2022-09-13	15:11:07	0.42841	1.90565	1053.76	FALSE	24
2022-09-13	15:11:07	0.533142	2.37152	1099.14	FALSE	24
2022-09-13	15:11:07	0.583728	2.59654	1056.36	FALSE	24
2022-09-13	15:11:08	0.432023	1.92172	1101.06	FALSE	24
2022-09-13	15:11:08	0.377367	1.6786	1058.03	FALSE	24
2022-09-13	15:11:08	0.443066	1.97085	1103.03	FALSE	24
2022-09-13	15:11:08	0.554873	2.46819	1060.5	FALSE	24
2022-09-13	15:11:09	0.365255	1.62473	1104.66	FALSE	24
2022-09-13	15:11:09	0.463422	2.06139	1062.56	FALSE	24
2022-09-13	15:11:09	0.485305	2.15873	1106.82	FALSE	24
2022-09-13	15:11:09	0.318486	1.41669	1063.98	FALSE	24
2022-09-13	15:11:10	0.166883	0.742329	1107.56	FALSE	24
2022-09-13	15:11:10	0.198995	0.88517	1064.87	FALSE	24
2022-09-13	15:11:10	0.14729	0.655175	1108.21	FALSE	24
2022-09-13	15:11:11	0.385254	1.71369	1066.58	FALSE	24
2022-09-13	15:11:11	0.271921	1.20956	1109.42	FALSE	24
2022-09-13	15:11:11	0.22612	1.00583	1067.58	FALSE	24
2022-09-13	15:11:11	0.329529	1.46581	1110.89	FALSE	24
2022-09-13	15:11:12	0.176094	0.783301	1068.37	FALSE	24
2022-09-13	15:11:12	0.140318	0.624163	1111.51	FALSE	24
2022-09-13	15:11:12	0.141641	0.630047	1069	FALSE	24
2022-09-13	15:11:12	0.0491733	0.218733	1111.73	FALSE	24
2022-09-13	15:11:13	0.126272	0.561683	1069.56	FALSE	24
2022-09-13	15:11:13	-0.11042	-0.49117	1111.73	FALSE	24
2022-09-13	15:11:13	-0.297697	-1.32422	1069.56	FALSE	24
2022-09-13	15:11:13	-0.297697	-1.32422	1111.73	FALSE	24
2022-09-13	15:11:14	-0.341717	-1.52003	1069.56	FALSE	24
2022-09-13	15:11:14	0.0484608	0.215563	1111.95	FALSE	24
2022-09-13	15:11:14	2.02047	8.98745	1078.55	FALSE	24
2022-09-13	15:11:15	1.33279	5.92852	1117.88	FALSE	24
2022-09-13	15:11:15	2.06271	9.17535	1087.72	FALSE	24
2022-09-13	15:11:15	2.68546	11.9455	1129.82	FALSE	24
2022-09-13	15:11:15	5.6653	25.2004	1112.92	1	25
2022-09-13	15:11:16	5.95859	26.505	1156.33	1	26
2022-09-13	15:11:16	5.69482	25.3317	1138.25	1	27
2022-09-13	15:11:16	3.38963	15.0778	1171.4	1	28
2022-09-13	15:11:16	1.32917	5.91241	1144.17	FALSE	28
2022-09-13	15:11:17	0.432735	1.92489	1173.33	FALSE	28
2022-09-13	15:11:17	0.271616	1.2082	1145.38	FALSE	28
2022-09-13	15:11:17	0.253499	1.12761	1174.46	FALSE	28
2022-09-13	15:11:17	0.178435	0.793715	1146.17	FALSE	28
2022-09-13	15:11:18	0.225306	1.00221	1175.46	FALSE	28
2022-09-13	15:11:18	0.271514	1.20775	1147.38	FALSE	28
2022-09-13	15:11:18	0.239148	1.06378	1176.52	FALSE	28
2022-09-13	15:11:19	-1.17571	-5.22979	1147.38	FALSE	28
2022-09-13	15:11:19	0.301896	1.34289	1177.86	FALSE	28
2022-09-13	15:11:19	0.414822	1.84521	1149.22	FALSE	28
2022-09-13	15:11:19	0.457468	2.03491	1179.9	FALSE	28
2022-09-13	15:11:20	1.00907	4.48855	1153.71	FALSE	28
2022-09-13	15:11:20	0.477824	2.12546	1182.03	FALSE	28
2022-09-13	15:11:20	1.81085	8.05502	1161.77	FALSE	28
2022-09-13	15:11:20	0.955636	4.25086	1186.28	FALSE	28
2022-09-13	15:11:21	1.51955	6.75926	1168.52	FALSE	28
2022-09-13	15:11:21	1.36134	6.05551	1192.33	FALSE	28
2022-09-13	15:11:21	1.39111	6.18794	1174.71	FALSE	28
2022-09-13	15:11:21	1.55981	6.93835	1199.27	FALSE	28
2022-09-13	15:11:22	0.873906	3.88731	1178.6	FALSE	28
2022-09-13	15:11:22	1.28897	5.7336	1205	FALSE	28
2022-09-13	15:11:22	1.11701	4.96868	1183.57	FALSE	28
2022-09-13	15:11:23	0.743728	3.30825	1208.31	FALSE	28
2022-09-13	15:11:23	1.56169	6.94671	1190.52	FALSE	28
2022-09-13	15:11:23	0.7193	3.19959	1211.51	FALSE	28
2022-09-13	15:11:23	1.49553	6.65242	1197.17	FALSE	28
2022-09-13	15:11:24	0.733092	3.26094	1214.77	FALSE	28
2022-09-13	15:11:24	1.59889	7.11218	1204.28	FALSE	28
2022-09-13	15:11:24	0.794669	3.53485	1218.31	FALSE	28
2022-09-13	15:11:24	2.07284	9.22041	1213.5	FALSE	28
2022-09-13	15:11:25	1.8594	8.27098	1226.58	FALSE	28
2022-09-13	15:11:25	1.55696	6.92567	1220.43	FALSE	28
2022-09-13	15:11:25	1.31874	5.86602	1232.44	FALSE	28
2022-09-13	15:11:25	0.970242	4.31583	1224.74	FALSE	28
2022-09-13	15:11:26	0.715738	3.18375	1235.63	FALSE	28
2022-09-13	15:11:26	0.933855	4.15397	1228.9	FALSE	28
2022-09-13	15:11:26	0.529173	2.35387	1237.98	FALSE	28
2022-09-13	15:11:27	0.682048	3.03389	1231.93	FALSE	28
2022-09-13	15:11:27	0.403728	1.79586	1239.78	FALSE	28
2022-09-13	15:11:27	0.195331	0.868871	1232.8	FALSE	28
2022-09-13	15:11:27	0.291311	1.29581	1241.07	FALSE	28
2022-09-13	15:11:28	0.0363997	0.161913	1232.96	FALSE	28
2022-09-13	15:11:28	0.155331	0.690943	1241.76	FALSE	28
2022-09-13	15:11:28	-0.0322517	-0.143462	1232.96	FALSE	28
2022-09-13	15:11:28	-0.0271117	-0.120598	1241.76	FALSE	28
2022-09-13	15:11:29	-0.13042	-0.580134	1232.96	FALSE	28
2022-09-13	15:11:29	0.0503946	0.224165	1241.99	FALSE	28
2022-09-13	15:11:29	0.0699875	0.311318	1233.27	FALSE	28
2022-09-13	15:11:29	0.0800638	0.35614	1242.34	FALSE	28
2022-09-13	15:11:30	-0.298562	-1.32806	1233.27	FALSE	28
2022-09-13	15:11:30	-0.396425	-1.76338	1242.34	FALSE	28
2022-09-13	15:11:30	-0.454491	-2.02167	1233.27	FALSE	28
2022-09-13	15:11:31	-0.25103	-1.11663	1242.34	FALSE	28
2022-09-13	15:11:31	-0.159376	-0.708936	1233.27	FALSE	28
2022-09-13	15:11:31	-0.1093	-0.486188	1242.34	FALSE	28
2022-09-13	15:11:31	0.111769	0.497171	1233.77	FALSE	28
2022-09-13	15:11:32	0.146272	0.650647	1243	FALSE	28
2022-09-13	15:11:32	0.439606	1.95546	1235.72	FALSE	28
2022-09-13	15:11:32	0.421387	1.87441	1244.87	FALSE	28
2022-09-13	15:11:32	0.583626	2.59609	1238.32	FALSE	28
2022-09-13	15:11:33	0.39701	1.76598	1246.64	FALSE	28
2022-09-13	15:11:33	0.577316	2.56802	1240.89	FALSE	28
2022-09-13	15:11:33	0.241794	1.07555	1247.71	FALSE	28
2022-09-13	15:11:33	0.490191	2.18047	1243.07	FALSE	28
2022-09-13	15:11:34	0.322812	1.43593	1249.15	FALSE	28
2022-09-13	15:11:34	0.627646	2.79189	1245.86	FALSE	28
2022-09-13	15:11:34	0.259402	1.15387	1250.3	FALSE	28
2022-09-13	15:11:35	0.609835	2.71267	1248.57	FALSE	28
2022-09-13	15:11:35	0.369479	1.64352	1251.94	FALSE	28
2022-09-13	15:11:35	0.394059	1.75285	1250.33	FALSE	28
2022-09-13	15:11:35	0.613244	2.72783	1254.67	FALSE	28
2022-09-13	15:11:36	0.972634	4.32647	1254.65	FALSE	28
2022-09-13	15:11:36	0.50673	2.25404	1256.93	FALSE	28
2022-09-13	15:11:36	1.46648	6.5232	1261.18	FALSE	28
2022-09-13	15:11:36	0.478537	2.12863	1259.05	FALSE	28
2022-09-13	15:11:37	0.616043	2.74028	1263.92	FALSE	28
2022-09-13	15:11:37	0.288003	1.28109	1260.34	FALSE	28
2022-09-13	15:11:37	0.295636	1.31505	1265.23	FALSE	28
2022-09-13	15:11:37	0.212837	0.946742	1261.28	FALSE	28
2022-09-13	15:11:38	0.290751	1.29332	1266.52	FALSE	28
2022-09-13	15:11:38	0.25528	1.13554	1262.42	FALSE	28
2022-09-13	15:11:38	0.164746	0.732823	1267.26	FALSE	28
2022-09-13	15:11:39	-0.0570862	-0.253931	1262.42	FALSE	28
2022-09-13	15:11:39	0.369936	1.64555	1268.9	FALSE	28
2022-09-13	15:11:39	0.234975	1.04522	1263.46	FALSE	28
2022-09-13	15:11:39	0.752684	3.34809	1272.25	FALSE	28
2022-09-13	15:11:40	0.194975	0.867288	1264.33	FALSE	28
2022-09-13	15:11:40	0.557824	2.48131	1274.73	FALSE	28
2022-09-13	15:11:40	0.192634	0.856875	1265.19	FALSE	28
2022-09-13	15:11:40	0.318639	1.41737	1276.15	FALSE	28
2022-09-13	15:11:41	0.422761	1.88053	1267.07	FALSE	28
2022-09-13	15:11:41	0.287443	1.2786	1277.43	FALSE	28
2022-09-13	15:11:41	0.150293	0.668533	1267.74	FALSE	28
2022-09-13	15:11:41	0.302456	1.34538	1278.77	FALSE	28
2022-09-13	15:11:42	-0.0147962	-0.0658165	1267.74	FALSE	28
2022-09-13	15:11:42	-0.218257	-0.970851	1278.77	FALSE	28
2022-09-13	15:11:42	-0.146959	-0.653703	1267.74	FALSE	28
2022-09-13	15:11:43	-0.097646	-0.434349	1278.77	FALSE	28
2022-09-13	15:11:43	0.0507508	0.22575	1267.96	FALSE	28
2022-09-13	15:11:43	0.0152293	0.067743	1278.84	FALSE	28
2022-09-13	15:11:43	-0.013931	-0.0619679	1267.96	FALSE	28
2022-09-13	15:11:44	-0.0285875	-0.127163	1278.84	FALSE	28
2022-09-13	15:11:44	-0.0496562	-0.220881	1267.96	FALSE	28
2022-09-13	15:11:44	0.0662216	0.294567	1279.14	FALSE	28
2022-09-13	15:11:44	0.0957381	0.425862	1268.39	FALSE	28
2022-09-13	15:11:45	0.15416	0.685735	1279.82	FALSE	28
2022-09-13	15:11:45	0.329275	1.46468	1269.85	FALSE	28
2022-09-13	15:11:45	0.416349	1.852	1281.67	FALSE	28
2022-09-13	15:11:45	0.680827	3.02845	1272.88	FALSE	28
2022-09-13	15:11:46	0.414059	1.84182	1283.52	FALSE	28
2022-09-13	15:11:46	0.346527	1.54142	1274.42	FALSE	28
2022-09-13	15:11:46	0.438232	1.94934	1285.47	FALSE	28
2022-09-13	15:11:47	0.333804	1.48483	1275.91	FALSE	28
2022-09-13	15:11:47	0.255484	1.13644	1286.6	FALSE	28
2022-09-13	15:11:47	0.145611	0.647707	1276.56	FALSE	28
2022-09-13	15:11:47	0.0329391	0.14652	1286.75	FALSE	28
2022-09-13	15:11:48	-0.126908	-0.564512	1276.56	FALSE	28
2022-09-13	15:11:48	-0.256017	-1.13881	1286.75	FALSE	28
2022-09-13	15:11:48	-0.105534	-0.469436	1276.56	FALSE	28
2022-09-13	15:11:48	-0.0615137	-0.273625	1286.75	FALSE	28
2022-09-13	15:11:49	-0.0123535	-0.0549508	1276.56	FALSE	28
2022-09-13	15:11:49	-0.258918	-1.15172	1286.75	FALSE	28
2022-09-13	15:11:49	-0.181768	-0.80854	1276.56	FALSE	28
2022-09-13	15:11:49	-0.0445672	-0.198244	1286.75	FALSE	28
2022-09-13	15:11:50	0.00265929	0.0118291	1276.57	FALSE	28
2022-09-13	15:11:50	0.0347712	0.154669	1286.9	FALSE	28
2022-09-13	15:11:50	0.0451529	0.200849	1276.77	FALSE	28
2022-09-13	15:11:50	0.111667	0.496717	1287.4	FALSE	28
2022-09-13	15:11:51	0.414008	1.84159	1278.61	FALSE	28
2022-09-13	15:11:51	0.405458	1.80356	1289.2	FALSE	28
2022-09-13	15:11:51	0.280573	1.24804	1279.86	FALSE	28
2022-09-13	15:11:52	0.288512	1.28336	1290.49	FALSE	28
2022-09-13	15:11:52	1.11274	4.94969	1284.81	FALSE	28
2022-09-13	15:11:52	0.377672	1.67996	1292.17	FALSE	28
2022-09-13	15:11:52	0.424237	1.88709	1286.69	FALSE	28
2022-09-13	15:11:53	0.385916	1.71663	1293.88	FALSE	28
2022-09-13	15:11:53	0.426832	1.89863	1288.59	FALSE	28
2022-09-13	15:11:53	0.369428	1.64329	1295.53	FALSE	28
2022-09-13	15:11:53	0.423524	1.88392	1290.48	FALSE	28
2022-09-13	15:11:54	0.429631	1.91108	1297.44	FALSE	28
2022-09-13	15:11:54	0.428461	1.90588	1292.38	FALSE	28
2022-09-13	15:11:54	0.341845	1.52059	1298.96	FALSE	28
2022-09-13	15:11:55	0.468003	2.08177	1294.46	FALSE	28
2022-09-13	15:11:55	0.453652	2.01793	1300.98	FALSE	28
2022-09-13	15:11:55	0.459911	2.04578	1296.51	FALSE	28
2022-09-13	15:11:55	0.396603	1.76417	1302.74	FALSE	28
2022-09-13	15:11:56	0.379351	1.68743	1298.2	FALSE	28
2022-09-13	15:11:56	0.425407	1.8923	1304.63	FALSE	28
2022-09-13	15:11:56	0.423219	1.88256	1300.08	FALSE	28
2022-09-13	15:11:56	0.492634	2.19133	1306.82	FALSE	28
2022-09-13	15:11:57	0.40327	1.79383	1301.87	FALSE	28
2022-09-13	15:11:57	0.353957	1.57447	1308.4	FALSE	28
2022-09-13	15:11:57	0.54785	2.43695	1304.31	FALSE	28
2022-09-13	15:11:57	0.499351	2.22121	1310.62	FALSE	28
2022-09-13	15:11:58	0.461183	2.05143	1306.36	FALSE	28
2022-09-13	15:11:58	0.434262	1.93168	1312.55	FALSE	28
2022-09-13	15:11:58	0.458232	2.03831	1308.4	FALSE	28
2022-09-13	15:11:58	0.404491	1.79926	1314.35	FALSE	28
2022-09-13	15:11:59	0.455789	2.02744	1310.43	FALSE	28
2022-09-13	15:11:59	0.438842	1.95206	1316.3	FALSE	28
2022-09-13	15:11:59	0.42444	1.88799	1312.32	FALSE	28
2022-09-13	15:12:00	0.405967	1.80582	1318.11	FALSE	28
2022-09-13	15:12:00	0.405102	1.80197	1314.12	FALSE	28
2022-09-13	15:12:00	0.444084	1.97537	1320.08	FALSE	28
2022-09-13	15:12:00	0.327341	1.45608	1315.57	FALSE	28
2022-09-13	15:12:01	0.468308	2.08313	1322.17	FALSE	28
2022-09-13	15:12:01	0.460776	2.04962	1317.62	FALSE	28
2022-09-13	15:12:01	0.455534	2.02631	1324.19	FALSE	28
2022-09-13	15:12:01	0.469377	2.08788	1319.71	FALSE	28
2022-09-13	15:12:02	0.46215	2.05574	1326.25	FALSE	28
2022-09-13	15:12:02	0.430395	1.91448	1321.63	FALSE	28
2022-09-13	15:12:02	0.527239	2.34526	1328.59	FALSE	28
2022-09-13	15:12:02	0.483524	2.15081	1323.78	FALSE	28
2022-09-13	15:12:03	0.45014	2.00231	1330.6	FALSE	28
2022-09-13	15:12:03	0.452277	2.01182	1325.79	FALSE	28
2022-09-13	15:12:03	0.451463	2.0082	1332.6	FALSE	28
2022-09-13	15:12:04	0.480522	2.13746	1327.93	FALSE	28
2022-09-13	15:12:04	0.447036	1.98851	1334.59	FALSE	28
2022-09-13	15:12:04	0.453753	2.01838	1329.95	FALSE	28
2022-09-13	15:12:04	0.394211	1.75353	1336.35	FALSE	28
2022-09-13	15:12:05	0.475992	2.11731	1332.06	FALSE	28
2022-09-13	15:12:05	0.447901	1.99235	1338.34	FALSE	28
2022-09-13	15:12:05	0.36897	1.64125	1333.7	FALSE	28
2022-09-13	15:12:05	0.471514	2.09739	1340.44	FALSE	28
2022-09-13	15:12:06	0.477926	2.12591	1335.83	FALSE	28
2022-09-13	15:12:06	0.468257	2.0829	1342.52	FALSE	28
2022-09-13	15:12:06	0.480115	2.13565	1337.97	FALSE	28
2022-09-13	15:12:06	0.480725	2.13836	1344.66	FALSE	28
2022-09-13	15:12:07	0.444186	1.97583	1339.94	FALSE	28
2022-09-13	15:12:07	0.471972	2.09943	1346.76	FALSE	28
2022-09-13	15:12:07	0.465814	2.07203	1342.01	FALSE	28
2022-09-13	15:12:08	0.462456	2.0571	1348.81	FALSE	28
2022-09-13	15:12:08	0.463626	2.0623	1344.08	FALSE	28
2022-09-13	15:12:08	0.459402	2.04351	1350.86	FALSE	28
2022-09-13	15:12:08	0.451311	2.00752	1346.08	FALSE	28
2022-09-13	15:12:09	0.472634	2.10237	1352.96	FALSE	28
2022-09-13	15:12:09	0.445102	1.9799	1348.06	FALSE	28
2022-09-13	15:12:09	0.452227	2.0116	1354.97	FALSE	28
2022-09-13	15:12:09	0.452328	2.01205	1350.07	FALSE	28
2022-09-13	15:12:10	0.448155	1.99348	1356.96	FALSE	28
2022-09-13	15:12:10	0.455382	2.02563	1352.1	FALSE	28
2022-09-13	15:12:10	0.461285	2.05189	1359.02	FALSE	28
2022-09-13	15:12:10	0.456756	2.03174	1354.13	FALSE	28
2022-09-13	15:12:11	0.452786	2.01408	1361.03	FALSE	28
2022-09-13	15:12:11	0.458944	2.04147	1356.17	FALSE	28
2022-09-13	15:12:11	0.453346	2.01657	1363.05	FALSE	28
2022-09-13	15:12:12	0.466018	2.07294	1358.25	FALSE	28
2022-09-13	15:12:12	0.447392	1.99009	1365.04	FALSE	28
2022-09-13	15:12:12	0.455636	2.02676	1360.27	FALSE	28
2022-09-13	15:12:12	0.453193	2.01589	1367.05	FALSE	28
2022-09-13	15:12:13	0.458333	2.03876	1362.31	FALSE	28
2022-09-13	15:12:13	0.466221	2.07384	1369.13	FALSE	28
2022-09-13	15:12:13	0.421336	1.87419	1364.19	FALSE	28
2022-09-13	15:12:13	0.450954	2.00593	1371.13	FALSE	28
2022-09-13	15:12:14	0.440166	1.95795	1366.14	FALSE	28
2022-09-13	15:12:14	0.434313	1.93191	1373.07	FALSE	28
2022-09-13	15:12:14	0.444186	1.97583	1368.12	FALSE	28
2022-09-13	15:12:14	0.451819	2.00978	1375.07	FALSE	28
2022-09-13	15:12:15	0.47014	2.09128	1370.21	FALSE	28
2022-09-13	15:12:15	0.475738	2.11618	1377.19	FALSE	28
2022-09-13	15:12:15	0.929936	4.13654	1374.35	FALSE	28
2022-09-13	15:12:16	2.60306	11.5789	1388.77	FALSE	28
2022-09-13	15:12:16	2.36581	10.5236	1384.87	FALSE	28
2022-09-13	15:12:16	1.81701	8.08242	1396.85	FALSE	28
2022-09-13	15:12:16	0.495331	2.20333	1387.07	FALSE	28
2022-09-13	15:12:17	0.270954	1.20526	1398.06	FALSE	28
2022-09-13	15:12:17	0.384949	1.71233	1388.79	FALSE	28
2022-09-13	15:12:17	0.343372	1.52739	1399.59	FALSE	28
2022-09-13	15:12:17	0.145051	0.645216	1389.43	FALSE	28
2022-09-13	15:12:18	0.160929	0.715844	1400.3	FALSE	28
2022-09-13	15:12:18	0.135127	0.601072	1390.03	FALSE	28
2022-09-13	15:12:18	0.144949	0.644762	1400.95	FALSE	28
2022-09-13	15:12:18	0.145967	0.64929	1390.68	FALSE	28
2022-09-13	15:12:19	0.165153	0.734634	1401.68	FALSE	28
2022-09-13	15:12:19	0.0812852	0.361573	1391.04	FALSE	28
2022-09-13	15:12:19	0.0113107	0.0503123	1401.73	FALSE	28
2022-09-13	15:12:20	0.0555855	0.247255	1391.29	FALSE	28
2022-09-13	15:12:20	0.267494	1.18987	1402.92	FALSE	28
2022-09-13	15:12:20	0.291361	1.29603	1392.59	FALSE	28
2022-09-13	15:12:20	0.267799	1.19122	1404.11	FALSE	28
2022-09-13	15:12:21	0.384797	1.71165	1394.3	FALSE	28
2022-09-13	15:12:21	0.333448	1.48324	1405.59	FALSE	28
2022-09-13	15:12:21	0.483066	2.14877	1396.45	FALSE	28
2022-09-13	15:12:21	0.520216	2.31402	1407.91	FALSE	28
2022-09-13	15:12:22	0.465814	2.07203	1398.52	FALSE	28
2022-09-13	15:12:22	0.431412	1.91901	1409.83	FALSE	28
2022-09-13	15:12:22	0.47243	2.10146	1400.62	FALSE	28
2022-09-13	15:12:22	0.515941	2.29501	1412.12	FALSE	28
2022-09-13	15:12:23	0.474313	2.10984	1402.73	FALSE	28
2022-09-13	15:12:23	0.471769	2.09852	1414.22	FALSE	28
2022-09-13	15:12:23	0.463779	2.06298	1404.79	FALSE	28
2022-09-13	15:12:24	0.445865	1.9833	1416.2	FALSE	28
2022-09-13	15:12:24	0.476756	2.12071	1406.91	FALSE	28
2022-09-13	15:12:24	0.455229	2.02495	1418.23	FALSE	28
2022-09-13	15:12:24	0.455534	2.02631	1408.94	FALSE	28
2022-09-13	15:12:25	0.458232	2.03831	1420.27	FALSE	28
2022-09-13	15:12:25	0.457468	2.03491	1410.98	FALSE	28
2022-09-13	15:12:25	0.45584	2.02767	1422.3	FALSE	28
2022-09-13	15:12:25	0.460013	2.04623	1413.02	FALSE	28
2022-09-13	15:12:26	0.455789	2.02744	1424.32	FALSE	28
2022-09-13	15:12:26	0.466069	2.07317	1415.1	FALSE	28
2022-09-13	15:12:26	0.460623	2.04894	1426.37	FALSE	28
2022-09-13	15:12:26	0.458028	2.0374	1417.13	FALSE	28
2022-09-13	15:12:27	0.460623	2.04894	1428.42	FALSE	28
2022-09-13	15:12:27	0.462965	2.05936	1419.19	FALSE	28
2022-09-13	15:12:27	0.44388	1.97447	1430.4	FALSE	28
2022-09-13	15:12:28	0.473092	2.10441	1421.3	FALSE	28
2022-09-13	15:12:28	0.533448	2.37288	1432.77	FALSE	28
2022-09-13	15:12:28	0.389428	1.73225	1423.03	FALSE	28
2022-09-13	15:12:28	0.410751	1.8271	1434.6	FALSE	28
2022-09-13	15:12:29	0.343524	1.52806	1424.56	FALSE	28
2022-09-13	15:12:29	0.317214	1.41103	1436.01	FALSE	28
2022-09-13	15:12:29	0.543982	2.41974	1426.98	FALSE	28
2022-09-13	15:12:29	0.265356	1.18036	1437.19	FALSE	28
2022-09-13	15:12:30	0.618893	2.75296	1429.73	FALSE	28
2022-09-13	15:12:30	0.298334	1.32705	1438.51	FALSE	28
2022-09-13	15:12:30	0.458333	2.03876	1431.77	FALSE	28
2022-09-13	15:12:30	0.325	1.44566	1439.96	FALSE	28
2022-09-13	15:12:31	0.606578	2.69818	1434.47	FALSE	28
2022-09-13	15:12:31	0.363575	1.61725	1441.58	FALSE	28
2022-09-13	15:12:31	0.504542	2.2443	1436.71	FALSE	28
2022-09-13	15:12:32	0.541692	2.40955	1443.99	FALSE	28
2022-09-13	15:12:32	0.544644	2.42269	1439.13	FALSE	28
2022-09-13	15:12:32	0.45187	2.01001	1446	FALSE	28
2022-09-13	15:12:32	0.56098	2.49535	1441.63	FALSE	28
2022-09-13	15:12:33	0.497061	2.21103	1448.21	FALSE	28
2022-09-13	15:12:33	0.754873	3.35783	1444.99	FALSE	28
2022-09-13	15:12:33	1.28902	5.73382	1453.94	FALSE	28
2022-09-13	15:12:33	1.21121	5.3877	1450.37	FALSE	28
2022-09-13	15:12:34	1.27854	5.6872	1459.63	FALSE	28
2022-09-13	15:12:34	1.73401	7.71322	1458.09	FALSE	28
2022-09-13	15:12:34	1.68246	7.48392	1467.11	FALSE	28
2022-09-13	15:12:34	1.40098	6.23184	1464.32	FALSE	28
2022-09-13	15:12:35	1.0164	4.52115	1471.63	FALSE	28
2022-09-13	15:12:35	0.466374	2.07452	1466.39	FALSE	28
2022-09-13	15:12:35	0.28556	1.27023	1472.9	FALSE	28
2022-09-13	15:12:36	0.607188	2.70089	1469.1	FALSE	28
2022-09-13	15:12:36	0.23126	1.02869	1473.93	FALSE	28
2022-09-13	15:12:36	0.675941	3.00672	1472.1	FALSE	28
2022-09-13	15:12:36	0.839911	3.73609	1477.67	FALSE	28
2022-09-13	15:12:37	1.03823	4.61825	1476.72	FALSE	28
2022-09-13	15:12:37	0.778181	3.4615	1481.13	FALSE	28
2022-09-13	15:12:37	0.554924	2.46841	1479.19	FALSE	28
2022-09-13	15:12:37	0.71416	3.17673	1484.31	FALSE	28
2022-09-13	15:12:38	0.383219	1.70463	1480.89	FALSE	28
2022-09-13	15:12:38	0.914415	4.0675	1488.37	FALSE	28
2022-09-13	15:12:38	1.12653	5.01103	1485.9	FALSE	28
2022-09-13	15:12:38	2.31899	10.3153	1498.69	FALSE	28
2022-09-13	15:12:39	1.31732	5.8597	1491.76	FALSE	28
2022-09-13	15:12:39	0.752684	3.34809	1502.04	FALSE	28
2022-09-13	15:12:39	0.877519	3.90338	1495.67	FALSE	28
2022-09-13	15:12:40	0.282812	1.258	1503.3	FALSE	28
2022-09-13	15:12:40	0.917061	4.07927	1499.75	FALSE	28
2022-09-13	15:12:40	0.520878	2.31697	1505.61	FALSE	28
2022-09-13	15:12:40	1.26363	5.62088	1505.37	FALSE	28
2022-09-13	15:12:41	0.929427	4.13428	1509.75	FALSE	28
2022-09-13	15:12:41	1.35645	6.03376	1511.4	FALSE	28
2022-09-13	15:12:41	3.76637	16.7536	1526.5	1	29
2022-09-13	15:12:41	2.22866	9.91353	1521.31	FALSE	29
2022-09-13	15:12:42	2.78541	12.3901	1538.89	FALSE	29
2022-09-13	15:12:42	1.48983	6.62706	1527.94	FALSE	29
2022-09-13	15:12:42	2.40993	10.7199	1549.61	FALSE	29
2022-09-13	15:12:42	0.992837	4.41634	1532.36	FALSE	29
2022-09-13	15:12:43	0.867799	3.86014	1553.47	FALSE	29
2022-09-13	15:12:43	0.853295	3.79563	1536.15	FALSE	29
2022-09-13	15:12:43	0.412685	1.83571	1555.31	FALSE	29
2022-09-13	15:12:44	0.463168	2.06026	1538.21	FALSE	29
2022-09-13	15:12:44	0.636247	2.83015	1558.14	FALSE	29
2022-09-13	15:12:44	0.940674	4.18431	1542.4	FALSE	29
2022-09-13	15:12:44	0.971056	4.31945	1562.46	FALSE	29
2022-09-13	15:12:45	1.33289	5.92896	1548.33	FALSE	29
2022-09-13	15:12:45	3.55533	15.8148	1578.27	1	30
2022-09-13	15:12:45	2.61228	11.6199	1559.95	FALSE	30
2022-09-13	15:12:45	3.04795	13.5579	1591.83	1	31
2022-09-13	15:12:46	1.68556	7.49771	1567.44	FALSE	31
2022-09-13	15:12:46	1.29401	5.75602	1597.58	FALSE	31
2022-09-13	15:12:46	0.356094	1.58398	1569.03	FALSE	31
2022-09-13	15:12:46	0.236858	1.05359	1598.64	FALSE	31
2022-09-13	15:12:47	0.450802	2.00526	1571.03	FALSE	31
2022-09-13	15:12:47	0.0867305	0.385795	1599.02	FALSE	31
2022-09-13	15:12:47	0.149733	0.666042	1571.7	FALSE	31
2022-09-13	15:12:48	-0.119071	-0.529652	1599.02	FALSE	31
2022-09-13	15:12:48	-0.236017	-1.04985	1571.7	FALSE	31
2022-09-13	15:12:48	-0.358155	-1.59315	1599.02	FALSE	31
2022-09-13	15:12:48	-0.230369	-1.02473	1571.7	FALSE	31
2022-09-13	15:12:49	0.225356	1.00243	1600.03	FALSE	31
2022-09-13	15:12:49	1.36892	6.08923	1577.79	FALSE	31
2022-09-13	15:12:49	3.0879	13.7356	1613.76	1	32
2022-09-13	15:12:49	0.249937	1.11177	1578.9	FALSE	32
2022-09-13	15:12:50	0.248868	1.10701	1614.87	FALSE	32
2022-09-13	15:12:50	0.515331	2.2923	1581.19	FALSE	32
2022-09-13	15:12:50	0.162965	0.724901	1615.59	FALSE	32
2022-09-13	15:12:50	0.370445	1.64781	1582.84	FALSE	32
2022-09-13	15:12:51	0.664949	2.95783	1618.55	FALSE	32
2022-09-13	15:12:51	0.250649	1.11494	1583.96	FALSE	32
2022-09-13	15:12:51	0.366374	1.6297	1620.18	FALSE	32
2022-09-13	15:12:52	0.508359	2.26128	1586.22	FALSE	32
2022-09-13	15:12:52	0.161794	0.719692	1620.9	FALSE	32
2022-09-13	15:12:52	0.290496	1.29218	1587.51	FALSE	32
2022-09-13	15:12:52	0.159402	0.709052	1621.61	FALSE	32
2022-09-13	15:12:53	0.182761	0.812957	1588.32	FALSE	32
2022-09-13	15:12:53	0.0834734	0.371306	1621.98	FALSE	32
2022-09-13	15:12:53	0.0905982	0.402999	1588.73	FALSE	32
2022-09-13	15:12:53	0.584338	2.59925	1624.58	FALSE	32
2022-09-13	15:12:54	0.720572	3.20525	1591.93	FALSE	32
2022-09-13	15:12:54	1.28933	5.7352	1630.32	FALSE	32
2022-09-13	15:12:54	2.23701	9.95067	1601.88	FALSE	32
2022-09-13	15:12:54	2.4106	10.7228	1641.04	FALSE	32
2022-09-13	15:12:55	1.60795	7.15248	1609.03	FALSE	32
2022-09-13	15:12:55	0.383066	1.70395	1642.74	FALSE	32
2022-09-13	15:12:55	0.386374	1.71867	1610.75	FALSE	32
2022-09-13	15:12:56	1.09324	4.86295	1647.61	FALSE	32
2022-09-13	15:12:56	2.13955	9.51715	1620.27	FALSE	32
2022-09-13	15:12:56	7.57619	33.7004	1681.31	1	33
2022-09-13	15:12:56	11.4125	50.7651	1671.03	1	34
2022-09-13	15:12:57	7.49543	33.3412	1714.65	1	35
2022-09-13	15:12:57	3.5593	15.8325	1686.87	1	36
2022-09-13	15:12:57	2.24322	9.97829	1724.63	FALSE	36
2022-09-13	15:12:57	1.52006	6.76153	1693.63	FALSE	36
2022-09-13	15:12:58	1.15385	5.13256	1729.76	FALSE	36
2022-09-13	15:12:58	2.02927	9.0266	1702.66	FALSE	36
2022-09-13	15:12:58	3.10123	13.7949	1743.55	1	37
2022-09-13	15:12:58	1.93726	8.61732	1711.27	FALSE	37
2022-09-13	15:12:59	1.41329	6.2866	1749.84	FALSE	37
2022-09-13	15:12:59	1.11192	4.94604	1716.22	FALSE	37
2022-09-13	15:12:59	1.26195	5.61341	1755.45	FALSE	37
2022-09-13	15:13:00	1.19121	5.29874	1721.52	FALSE	37
2022-09-13	15:13:00	1.02434	4.55647	1760.01	FALSE	37
2022-09-13	15:13:00	0.947341	4.21396	1725.73	FALSE	37
2022-09-13	15:13:00	0.832532	3.70327	1763.71	FALSE	37
2022-09-13	15:13:01	0.936298	4.16484	1729.9	FALSE	37
2022-09-13	15:13:01	1.27548	5.67359	1769.39	FALSE	37
2022-09-13	15:13:01	1.51345	6.73213	1736.63	FALSE	37
2022-09-13	15:13:01	1.47676	6.56892	1775.96	FALSE	37
2022-09-13	15:13:02	1.42246	6.32739	1742.96	FALSE	37
2022-09-13	15:13:02	1.31971	5.87033	1781.83	FALSE	37
2022-09-13	15:13:02	1.29411	5.75646	1748.71	FALSE	37
2022-09-13	15:13:02	1.13803	5.06219	1786.89	FALSE	37
2022-09-13	15:13:03	1.0338	4.59855	1753.31	FALSE	37
2022-09-13	15:13:03	1.128	5.01757	1791.91	FALSE	37
2022-09-13	15:13:03	1.19177	5.30123	1758.61	FALSE	37
2022-09-13	15:13:04	1.07915	4.80028	1796.71	FALSE	37
2022-09-13	15:13:04	1.01553	4.51728	1763.13	FALSE	37
2022-09-13	15:13:04	0.86444	3.8452	1800.55	FALSE	37
2022-09-13	15:13:04	0.634771	2.82359	1765.95	FALSE	37
2022-09-13	15:13:05	0.522455	2.32398	1802.87	FALSE	37
2022-09-13	15:13:05	0.607494	2.70225	1768.66	FALSE	37
2022-09-13	15:13:05	0.6907	3.07237	1805.95	FALSE	37
2022-09-13	15:13:05	0.869682	3.86852	1772.52	FALSE	37
2022-09-13	15:13:06	0.703626	3.12987	1809.08	FALSE	37
2022-09-13	15:13:06	0.508817	2.26332	1774.79	FALSE	37
2022-09-13	15:13:06	0.429936	1.91244	1810.99	FALSE	37
2022-09-13	15:13:06	0.43472	1.93372	1776.72	FALSE	37
2022-09-13	15:13:07	0.452888	2.01454	1813	FALSE	37
2022-09-13	15:13:07	0.459198	2.0426	1778.76	FALSE	37
2022-09-13	15:13:07	0.423219	1.88256	1814.89	FALSE	37
2022-09-13	15:13:08	0.481438	2.14153	1780.9	FALSE	37
2022-09-13	15:13:08	0.701336	3.11968	1818.01	FALSE	37
2022-09-13	15:13:08	0.844898	3.75828	1784.66	FALSE	37
2022-09-13	15:13:08	0.564186	2.50961	1820.52	FALSE	37
2022-09-13	15:13:09	0.297824	1.32478	1785.99	FALSE	37
2022-09-13	15:13:09	-0.255559	-1.13678	1820.52	FALSE	37
2022-09-13	15:13:09	-0.27047	-1.2031	1785.99	FALSE	37
2022-09-13	15:13:09	0.303321	1.34923	1821.87	FALSE	37
2022-09-13	15:13:10	0.244593	1.088	1787.08	FALSE	37
2022-09-13	15:13:10	0.272634	1.21273	1823.08	FALSE	37
2022-09-13	15:13:10	0.365305	1.62495	1788.7	FALSE	37
2022-09-13	15:13:11	0.201794	0.89762	1823.98	FALSE	37
2022-09-13	15:13:11	0.259911	1.15614	1789.86	FALSE	37
2022-09-13	15:13:11	-0.00762061	-0.033898	1823.98	FALSE	37
2022-09-13	15:13:11	0.398537	1.77277	1791.63	FALSE	37
2022-09-13	15:13:12	0.324746	1.44454	1825.42	FALSE	37
2022-09-13	15:13:12	0.559199	2.48743	1794.12	FALSE	37
2022-09-13	15:13:12	0.253855	1.1292	1826.55	FALSE	37
2022-09-13	15:13:12	0.337621	1.50181	1795.62	FALSE	37
2022-09-13	15:13:13	0.439656	1.95568	1828.5	FALSE	37
2022-09-13	15:13:13	0.541794	2.41001	1798.03	FALSE	37
2022-09-13	15:13:13	0.118181	0.525693	1829.03	FALSE	37
2022-09-13	15:13:13	0.469122	2.08675	1800.12	FALSE	37
2022-09-13	15:13:14	0.174924	0.778097	1829.81	FALSE	37
2022-09-13	15:13:14	0.303473	1.34991	1801.47	FALSE	37
2022-09-13	15:13:14	0.16271	0.723767	1830.53	FALSE	37
2022-09-13	15:13:14	0.624593	2.77831	1804.24	FALSE	37
2022-09-13	15:13:15	0.479453	2.1327	1832.67	FALSE	37
2022-09-13	15:13:15	0.848715	3.77525	1808.02	FALSE	37
2022-09-13	15:13:15	0.619046	2.75364	1835.42	FALSE	37
2022-09-13	15:13:16	0.619198	2.75432	1810.77	FALSE	37
2022-09-13	15:13:16	0.369122	1.64193	1837.06	FALSE	37
2022-09-13	15:13:16	0.371463	1.65234	1812.43	FALSE	37
2022-09-13	15:13:16	0.255687	1.13735	1838.2	FALSE	37
2022-09-13	15:13:17	0.563931	2.50848	1814.93	FALSE	37
2022-09-13	15:13:17	0.244033	1.08551	1839.28	FALSE	37
2022-09-13	15:13:17	0.603422	2.68414	1817.62	FALSE	37
2022-09-13	15:13:17	0.162659	0.72354	1840.01	FALSE	37
2022-09-13	15:13:18	0.0998094	0.443972	1818.06	FALSE	37
2022-09-13	15:13:18	0.148512	0.660611	1840.67	FALSE	37
2022-09-13	15:13:18	0.869326	3.86694	1821.93	FALSE	37
2022-09-13	15:13:18	0.899148	3.99959	1844.67	FALSE	37
2022-09-13	15:13:19	2.10683	9.3716	1831.3	FALSE	37
2022-09-13	15:13:19	0.54215	2.41159	1847.08	FALSE	37
2022-09-13	15:13:19	0.741438	3.29806	1834.6	FALSE	37
2022-09-13	15:13:20	0.870802	3.8735	1850.95	FALSE	37
2022-09-13	15:13:20	0.580114	2.58046	1837.18	FALSE	37
2022-09-13	15:13:20	0.872786	3.88233	1854.83	FALSE	37
2022-09-13	15:13:20	1.03604	4.60851	1841.79	FALSE	37
2022-09-13	15:13:21	0.634313	2.82155	1857.66	FALSE	37
2022-09-13	15:13:21	0.822354	3.658	1845.45	FALSE	37
2022-09-13	15:13:21	0.929631	4.13518	1861.79	FALSE	37
2022-09-13	15:13:21	1.73263	7.70708	1853.15	FALSE	37
2022-09-13	15:13:22	1.83925	8.18135	1869.97	FALSE	37
2022-09-13	15:13:22	1.80536	8.0306	1861.18	FALSE	37
2022-09-13	15:13:22	2.30704	10.2622	1880.24	FALSE	37
2022-09-13	15:13:22	1.66113	7.38904	1868.57	FALSE	37
2022-09-13	15:13:23	0.66215	2.94538	1883.18	FALSE	37
2022-09-13	15:13:23	0.505305	2.2477	1870.82	FALSE	37
2022-09-13	15:13:23	0.536654	2.38714	1885.57	FALSE	37
2022-09-13	15:13:24	0.328257	1.46015	1872.28	FALSE	37
2022-09-13	15:13:24	0.224898	1.00039	1886.57	FALSE	37
2022-09-13	15:13:24	0.268206	1.19303	1873.47	FALSE	37
2022-09-13	15:13:24	0.326374	1.45178	1888.02	FALSE	37
2022-09-13	15:13:25	0.395738	1.76032	1875.23	FALSE	37
2022-09-13	15:13:25	0.220725	0.981829	1889	FALSE	37
2022-09-13	15:13:25	0.0731936	0.32558	1875.56	FALSE	37
2022-09-13	15:13:25	0.185356	0.824501	1889.83	FALSE	37
2022-09-13	15:13:26	-0.0267046	-0.118787	1875.56	FALSE	37
2022-09-13	15:13:26	0.0537534	0.239106	1890.07	FALSE	37
2022-09-13	15:13:26	-0.138918	-0.617935	1875.56	FALSE	37
2022-09-13	15:13:26	-0.0124043	-0.0551768	1890.07	FALSE	37
2022-09-13	15:13:27	-0.310623	-1.38171	1875.56	FALSE	37
2022-09-13	15:13:27	0.385051	1.71278	1891.78	FALSE	37
2022-09-13	15:13:27	0.346629	1.54188	1877.1	FALSE	37
2022-09-13	15:13:28	0.436501	1.94164	1893.72	FALSE	37
2022-09-13	15:13:28	0.319758	1.42235	1878.52	FALSE	37
2022-09-13	15:13:28	0.668562	2.9739	1896.69	FALSE	37
2022-09-13	15:13:28	0.376654	1.67543	1880.2	FALSE	37
2022-09-13	15:13:29	0.273906	1.21839	1897.91	FALSE	37
2022-09-13	15:13:29	0.413143	1.83774	1882.04	FALSE	37
2022-09-13	15:13:29	0.324186	1.44204	1899.35	FALSE	37
2022-09-13	15:13:29	0.253601	1.12807	1883.17	FALSE	37
2022-09-13	15:13:30	0.42785	1.90316	1901.26	FALSE	37
2022-09-13	15:13:30	0.250394	1.1138	1884.28	FALSE	37
2022-09-13	15:13:30	0.319911	1.42303	1902.68	FALSE	37
2022-09-13	15:13:30	0.14154	0.629598	1884.91	FALSE	37
2022-09-13	15:13:31	-0.0127606	-0.0567617	1902.68	FALSE	37
2022-09-13	15:13:31	-0.0704195	-0.31324	1884.91	FALSE	37
2022-09-13	15:13:31	-0.146399	-0.651212	1902.68	FALSE	37
2022-09-13	15:13:31	-0.190216	-0.846119	1884.91	FALSE	37
2022-09-13	15:13:32	-0.394033	-1.75274	1902.68	FALSE	37
2022-09-13	15:13:32	-0.399071	-1.77515	1884.91	FALSE	37
2022-09-13	15:13:32	-0.488638	-2.17356	1902.68	FALSE	37
2022-09-13	15:13:33	-0.404058	-1.79733	1884.91	FALSE	37
2022-09-13	15:13:33	-0.39103	-1.73938	1902.68	FALSE	37
2022-09-13	15:13:33	0.233753	1.03978	1885.95	FALSE	37
2022-09-13	15:13:33	0.957875	4.26082	1906.94	FALSE	37
2022-09-13	15:13:34	1.40856	6.26556	1892.21	FALSE	37
2022-09-13	15:13:34	1.76994	7.87305	1914.81	FALSE	37
2022-09-13	15:13:34	2.07614	9.23509	1901.45	FALSE	37
2022-09-13	15:13:34	2.73268	12.1555	1926.97	FALSE	37
2022-09-13	15:13:35	2.70515	12.033	1913.48	FALSE	37
2022-09-13	15:13:35	4.01925	17.8784	1944.85	1	38
2022-09-13	15:13:35	2.07889	9.24732	1922.73	FALSE	38
2022-09-13	15:13:35	3.99222	17.7582	1962.61	1	39
2022-09-13	15:13:36	0.459249	2.04283	1924.77	FALSE	39
2022-09-13	15:13:36	0.96098	4.27463	1966.88	FALSE	39
2022-09-13	15:13:36	0.410089	1.82416	1926.6	FALSE	39
2022-09-13	15:13:37	0.262456	1.16746	1968.05	FALSE	39
2022-09-13	15:13:37	0.362201	1.61114	1928.21	FALSE	39
2022-09-13	15:13:37	0.199504	0.887434	1968.94	FALSE	39
2022-09-13	15:13:37	0.581081	2.58476	1930.79	FALSE	39
2022-09-13	15:13:38	0.141031	0.627334	1969.56	FALSE	39
2022-09-13	15:13:38	0.0533463	0.237295	1931.03	FALSE	39
2022-09-13	15:13:38	-0.155559	-0.691958	1969.56	FALSE	39
2022-09-13	15:13:38	-0.140394	-0.624501	1931.03	FALSE	39
2022-09-13	15:13:39	-0.00614479	-0.0273333	1969.56	FALSE	39
2022-09-13	15:13:39	0.141998	0.631636	1931.66	FALSE	39
2022-09-13	15:13:39	0.62617	2.78533	1972.35	FALSE	39
2022-09-13	15:13:39	0.225509	1.00311	1932.66	FALSE	39
2022-09-13	15:13:40	0.278079	1.23695	1973.59	FALSE	39
2022-09-13	15:13:40	0.0406237	0.180702	1932.85	FALSE	39
2022-09-13	15:13:40	0.0378247	0.168252	1973.75	FALSE	39
2022-09-13	15:13:41	-0.00151375	-0.00673346	1932.85	FALSE	39
2022-09-13	15:13:41	-0.0645671	-0.287207	1973.75	FALSE	39
2022-09-13	15:13:41	0.0036262	0.0161301	1932.86	FALSE	39
2022-09-13	15:13:41	0.148512	0.660611	1974.41	FALSE	39
2022-09-13	15:13:42	0.115636	0.514372	1933.38	FALSE	39
2022-09-13	15:13:42	0.195331	0.868871	1975.28	FALSE	39
2022-09-13	15:13:42	0.362354	1.61182	1934.99	FALSE	39
2022-09-13	15:13:42	0.388359	1.7275	1977.01	FALSE	39
2022-09-13	15:13:43	0.37584	1.67181	1936.66	FALSE	39
2022-09-13	15:13:43	0.311718	1.38658	1978.4	FALSE	39
2022-09-13	15:13:43	0.333651	1.48415	1938.14	FALSE	39
2022-09-13	15:13:43	0.322812	1.43593	1979.83	FALSE	39
2022-09-13	15:13:44	0.237519	1.05653	1939.2	FALSE	39
2022-09-13	15:13:44	0.0724811	0.32241	1980.16	FALSE	39
2022-09-13	15:13:44	-0.00879109	-0.0391045	1939.2	FALSE	39
2022-09-13	15:13:45	0.101082	0.449633	1980.61	FALSE	39
2022-09-13	15:13:45	0.782812	3.4821	1942.68	FALSE	39
2022-09-13	15:13:45	0.704949	3.13575	1983.74	FALSE	39
2022-09-13	15:13:45	0.478181	2.12704	1944.81	FALSE	39
2022-09-13	15:13:46	0.428613	1.90656	1985.65	FALSE	39
2022-09-13	15:13:46	0.510445	2.27056	1947.08	FALSE	39
2022-09-13	15:13:46	1.14235	5.0814	1990.73	FALSE	39
2022-09-13	15:13:46	0.293601	1.306	1948.39	FALSE	39
2022-09-13	15:13:47	1.02164	4.54446	1995.27	FALSE	39
2022-09-13	15:13:47	0.894008	3.97673	1952.36	FALSE	39
2022-09-13	15:13:47	0.326679	1.45313	1996.73	FALSE	39
2022-09-13	15:13:47	0.276959	1.23197	1953.59	FALSE	39
2022-09-13	15:13:48	0.362812	1.61386	1998.34	FALSE	39
2022-09-13	15:13:48	0.297468	1.3232	1954.92	FALSE	39
2022-09-13	15:13:48	2.78622	12.3937	2010.73	FALSE	39
2022-09-13	15:13:49	2.871	12.7708	1967.69	FALSE	39
2022-09-13	15:13:49	3.95645	17.5991	2028.33	1	40
2022-09-13	15:13:49	3.91294	17.4055	1985.09	1	41
2022-09-13	15:13:49	5.64754	25.1214	2053.45	1	42
2022-09-13	15:13:50	2.43472	10.8301	1995.92	FALSE	42
2022-09-13	15:13:50	3.08006	13.7007	2067.16	1	43
2022-09-13	15:13:50	2.08016	9.25297	2005.18	FALSE	43
2022-09-13	15:13:50	2.72943	12.1411	2079.3	FALSE	43
2022-09-13	15:13:51	1.56291	6.95214	2012.13	FALSE	43
2022-09-13	15:13:51	2.26001	10.053	2089.35	FALSE	43
2022-09-13	15:13:51	4.02943	17.9237	2030.05	1	44
2022-09-13	15:13:51	3.38882	15.0741	2104.42	1	45
2022-09-13	15:13:52	2.16128	9.61381	2039.67	FALSE	45
2022-09-13	15:13:52	1.58271	7.04021	2111.46	FALSE	45
2022-09-13	15:13:52	1.02653	4.56621	2044.23	FALSE	45
2022-09-13	15:13:53	1.40017	6.22824	2117.69	FALSE	45
2022-09-13	15:13:53	2.39869	10.6699	2054.9	FALSE	45
2022-09-13	15:13:53	1.91146	8.50256	2126.19	FALSE	45
2022-09-13	15:13:53	1.62037	7.20773	2062.11	FALSE	45
2022-09-13	15:13:54	2.21691	9.86126	2136.06	FALSE	45
2022-09-13	15:13:54	1.48027	6.58454	2068.69	FALSE	45
2022-09-13	15:13:54	0.572837	2.54809	2138.6	FALSE	45
2022-09-13	15:13:54	0.481845	2.14334	2070.84	FALSE	45
2022-09-13	15:13:55	0.434517	1.93282	2140.54	FALSE	45
2022-09-13	15:13:55	0.556348	2.47475	2073.31	FALSE	45
2022-09-13	15:13:55	0.634415	2.822	2143.36	FALSE	45
2022-09-13	15:13:55	0.58841	2.61737	2075.93	FALSE	45
2022-09-13	15:13:56	0.64383	2.86388	2146.22	FALSE	45
2022-09-13	15:13:56	0.681794	3.03276	2078.96	FALSE	45
2022-09-13	15:13:56	0.558486	2.48426	2148.71	FALSE	45
2022-09-13	15:13:57	0.520522	2.31539	2081.28	FALSE	45
2022-09-13	15:13:57	0.99472	4.42471	2153.13	FALSE	45
2022-09-13	15:13:57	3.17055	14.1032	2095.38	1	46
2022-09-13	15:13:57	6.05187	26.9199	2180.05	1	47
2022-09-13	15:13:58	3.90235	17.3584	2112.74	1	48
2022-09-13	15:13:58	5.05044	22.4654	2202.52	1	49
2022-09-13	15:13:58	7.5452	33.5626	2146.3	1	50
2022-09-13	15:13:58	7.78749	34.6403	2237.16	1	51

## Sheet: Daisy_prong_202291315844 (2)
Date	Time	Lbs	Total force x time			**GoPro Fitting: 1458
2022-09-13	15:08:45	0.501488	0.501488	FALSE	0
2022-09-13	15:08:45	0.474975	0.976463	FALSE	0
2022-09-13	15:08:45	0.45874	1.4352	FALSE	0
2022-09-13	15:08:45	0.478791	1.91399	FALSE	0
2022-09-13	15:08:46	0.480165	2.39416	FALSE	0
2022-09-13	15:08:46	0.509936	2.90409	FALSE	0
2022-09-13	15:08:46	0.856196	3.76029	FALSE	0
2022-09-13	15:08:46	1.6996	5.45989	FALSE	0
2022-09-13	15:08:47	2.23162	7.69151	FALSE	0
2022-09-13	15:08:47	1.39207	9.08358	FALSE	0
2022-09-13	15:08:47	0.899402	9.98298	FALSE	0
2022-09-13	15:08:47	1.04729	11.0303	FALSE	0
2022-09-13	15:08:48	1.11441	12.1447	FALSE	0
2022-09-13	15:08:48	1.52286	13.6675	FALSE	0
2022-09-13	15:08:48	1.5967	15.2642	FALSE	0
2022-09-13	15:08:49	1.24337	16.5076	FALSE	0
2022-09-13	15:08:49	1.19538	17.703	FALSE	0
2022-09-13	15:08:49	1.13172	18.8347	FALSE	0
2022-09-13	15:08:49	1.13162	19.9663	FALSE	0
2022-09-13	15:08:50	1.04057	21.0069	FALSE	0
2022-09-13	15:08:50	0.949428	21.9563	FALSE	0
2022-09-13	15:08:50	0.766577	22.7229	FALSE	0
2022-09-13	15:08:50	0.839198	23.5621	FALSE	0
2022-09-13	15:08:51	0.63584	24.1979	FALSE	0
2022-09-13	15:08:51	0.688562	24.8865	FALSE	0
2022-09-13	15:08:51	0.461998	25.3485	FALSE	0
2022-09-13	15:08:51	0.484135	25.8326	FALSE	0
2022-09-13	15:08:52	0.341234	26.1739	FALSE	0
2022-09-13	15:08:52	0.577214	26.7511	FALSE	0
2022-09-13	15:08:52	0.742405	27.4935	FALSE	0
2022-09-13	15:08:53	0.554618	28.0481	FALSE	0
2022-09-13	15:08:53	0.412583	28.4607	FALSE	0
2022-09-13	15:08:53	0.321234	28.7819	FALSE	0
2022-09-13	15:08:53	0.370293	29.1522	FALSE	0
2022-09-13	15:08:54	0.334822	29.487	FALSE	0
2022-09-13	15:08:54	0.50958	29.9966	FALSE	0
2022-09-13	15:08:54	0.215891	30.2125	FALSE	0
2022-09-13	15:08:54	0.345153	30.5577	FALSE	0
2022-09-13	15:08:55	0.205	30.7627	FALSE	0
2022-09-13	15:08:55	0.379148	31.1418	FALSE	0
2022-09-13	15:08:55	0.472328	31.6141	FALSE	0
2022-09-13	15:08:55	0.356196	31.9703	FALSE	0
2022-09-13	15:08:56	0.518995	32.4893	FALSE	0
2022-09-13	15:08:56	0.495993	32.9853	FALSE	0
2022-09-13	15:08:56	0.432685	33.418	FALSE	0
2022-09-13	15:08:56	0.48902	33.907	FALSE	0
2022-09-13	15:08:57	0.455942	34.363	FALSE	0
2022-09-13	15:08:57	0.476552	34.8395	FALSE	0
2022-09-13	15:08:57	0.453193	35.2927	FALSE	0
2022-09-13	15:08:58	0.625051	35.9178	FALSE	0
2022-09-13	15:08:58	1.05284	36.9706	FALSE	0
2022-09-13	15:08:58	0.799504	37.7701	FALSE	0
2022-09-13	15:08:58	0.371107	38.1412	FALSE	0
2022-09-13	15:08:59	0.444135	38.5854	FALSE	0
2022-09-13	15:08:59	0.533702	39.1191	FALSE	0
2022-09-13	15:08:59	0.163168	39.2822	FALSE	0
2022-09-13	15:08:59	0.268359	39.5506	FALSE	0
2022-09-13	15:09:00	0.152685	39.7033	FALSE	0
2022-09-13	15:09:00	0.0303946	39.7337	FALSE	0
2022-09-13	15:09:00	-0.432302	39.7337	FALSE	0
2022-09-13	15:09:00	-0.45388	39.7337	FALSE	0
2022-09-13	15:09:01	-0.322888	39.7337	FALSE	0
2022-09-13	15:09:01	-0.276119	39.7337	FALSE	0
2022-09-13	15:09:01	0.155382	39.889	FALSE	0
2022-09-13	15:09:02	0.240725	40.1298	FALSE	0
2022-09-13	15:09:02	0.759504	40.8893	FALSE	0
2022-09-13	15:09:02	1.15426	42.0435	FALSE	0
2022-09-13	15:09:02	0.593855	42.6374	FALSE	0
2022-09-13	15:09:03	0.315891	42.9533	FALSE	0
2022-09-13	15:09:03	0.185713	43.139	FALSE	0
2022-09-13	15:09:03	-0.0999361	43.139	FALSE	0
2022-09-13	15:09:03	-0.176577	43.139	FALSE	0
2022-09-13	15:09:04	-0.276832	43.139	FALSE	0
2022-09-13	15:09:04	0.000929014	43.1399	FALSE	0
2022-09-13	15:09:04	-0.128893	43.1399	FALSE	0
2022-09-13	15:09:04	0.0511071	43.191	FALSE	0
2022-09-13	15:09:05	0.127952	43.319	FALSE	0
2022-09-13	15:09:05	0.389224	43.7082	FALSE	0
2022-09-13	15:09:05	0.333397	44.0416	FALSE	0
2022-09-13	15:09:06	0.72327	44.7649	FALSE	0
2022-09-13	15:09:06	1.50006	46.2649	FALSE	0
2022-09-13	15:09:06	1.73487	47.9998	FALSE	0
2022-09-13	15:09:06	1.93711	49.9369	FALSE	0
2022-09-13	15:09:07	2.842	52.7789	FALSE	0
2022-09-13	15:09:07	1.86032	54.6392	FALSE	0
2022-09-13	15:09:07	2.21945	56.8587	FALSE	0
2022-09-13	15:09:07	1.34195	58.2006	FALSE	0
2022-09-13	15:09:08	2.03508	60.2357	FALSE	0
2022-09-13	15:09:08	1.04139	61.2771	FALSE	0
2022-09-13	15:09:08	0.793957	62.0711	FALSE	0
2022-09-13	15:09:09	0.738486	62.8095	FALSE	0
2022-09-13	15:09:09	0.536094	63.3456	FALSE	0
2022-09-13	15:09:09	0.0844404	63.4301	FALSE	0
2022-09-13	15:09:09	-0.0139819	63.4301	FALSE	0
2022-09-13	15:09:10	-0.0779005	63.4301	FALSE	0
2022-09-13	15:09:10	-0.330012	63.4301	FALSE	0
2022-09-13	15:09:10	-0.431183	63.4301	FALSE	0
2022-09-13	15:09:10	-0.314491	63.4301	FALSE	0
2022-09-13	15:09:11	-0.260496	63.4301	FALSE	0
2022-09-13	15:09:11	-0.134847	63.4301	FALSE	0
2022-09-13	15:09:11	-0.151692	63.4301	FALSE	0
2022-09-13	15:09:11	0.506629	63.9367	FALSE	0
2022-09-13	15:09:12	0.662863	64.5996	FALSE	0
2022-09-13	15:09:12	0.314567	64.9141	FALSE	0
2022-09-13	15:09:12	0.455585	65.3697	FALSE	0
2022-09-13	15:09:12	0.264542	65.6343	FALSE	0
2022-09-13	15:09:13	0.194415	65.8287	FALSE	0
2022-09-13	15:09:13	-0.12818	65.8287	FALSE	0
2022-09-13	15:09:13	-0.252099	65.8287	FALSE	0
2022-09-13	15:09:14	-0.387519	65.8287	FALSE	0
2022-09-13	15:09:14	-0.341972	65.8287	FALSE	0
2022-09-13	15:09:14	-0.409656	65.8287	FALSE	0
2022-09-13	15:09:14	-0.270267	65.8287	FALSE	0
2022-09-13	15:09:15	-0.187417	65.8287	FALSE	0
2022-09-13	15:09:15	-0.168842	65.8287	FALSE	0
2022-09-13	15:09:15	-0.628384	65.8287	FALSE	0
2022-09-13	15:09:15	-0.422989	65.8287	FALSE	0
2022-09-13	15:09:16	-0.311793	65.8287	FALSE	0
2022-09-13	15:09:16	0.1307	65.9594	FALSE	0
2022-09-13	15:09:16	0.267494	66.2269	FALSE	0
2022-09-13	15:09:16	1.33966	67.5665	FALSE	0
2022-09-13	15:09:17	2.77284	70.3394	FALSE	0
2022-09-13	15:09:17	3.12408	73.4635	1	1
2022-09-13	15:09:17	2.95345	76.4169	FALSE	1
2022-09-13	15:09:18	0.75986	77.1768	FALSE	1
2022-09-13	15:09:18	1.59966	78.7764	FALSE	1
2022-09-13	15:09:18	0.589936	79.3664	FALSE	1
2022-09-13	15:09:18	1.58052	80.9469	FALSE	1
2022-09-13	15:09:19	0.563066	81.5099	FALSE	1
2022-09-13	15:09:19	1.97991	83.4899	FALSE	1
2022-09-13	15:09:19	0.988817	84.4787	FALSE	1
2022-09-13	15:09:19	2.2764	86.7551	FALSE	1
2022-09-13	15:09:20	0.548359	87.3034	FALSE	1
2022-09-13	15:09:20	0.278384	87.5818	FALSE	1
2022-09-13	15:09:20	0.37472	87.9565	FALSE	1
2022-09-13	15:09:20	0.240471	88.197	FALSE	1
2022-09-13	15:09:21	0.496909	88.6939	FALSE	1
2022-09-13	15:09:21	0.196552	88.8905	FALSE	1
2022-09-13	15:09:21	0.281489	89.172	FALSE	1
2022-09-13	15:09:22	0.164084	89.336	FALSE	1
2022-09-13	15:09:22	0.303982	89.64	FALSE	1
2022-09-13	15:09:22	0.2593	89.8993	FALSE	1
2022-09-13	15:09:22	0.368562	90.2679	FALSE	1
2022-09-13	15:09:23	0.424135	90.692	FALSE	1
2022-09-13	15:09:23	0.252379	90.9444	FALSE	1
2022-09-13	15:09:23	0.26327	91.2077	FALSE	1
2022-09-13	15:09:23	0.181998	91.3897	FALSE	1
2022-09-13	15:09:24	0.307596	91.6973	FALSE	1
2022-09-13	15:09:24	0.183117	91.8804	FALSE	1
2022-09-13	15:09:24	2.05202	93.9324	FALSE	1
2022-09-13	15:09:24	1.00515	94.9376	FALSE	1
2022-09-13	15:09:25	1.80688	96.7444	FALSE	1
2022-09-13	15:09:25	1.13584	97.8803	FALSE	1
2022-09-13	15:09:25	2.80133	100.682	FALSE	1
2022-09-13	15:09:26	1.01233	101.694	FALSE	1
2022-09-13	15:09:26	1.13151	102.825	FALSE	1
2022-09-13	15:09:26	0.336654	103.162	FALSE	1
2022-09-13	15:09:26	0.226781	103.389	FALSE	1
2022-09-13	15:09:27	0.42159	103.81	FALSE	1
2022-09-13	15:09:27	0.222659	104.033	FALSE	1
2022-09-13	15:09:27	0.723015	104.756	FALSE	1
2022-09-13	15:09:27	0.816043	105.572	FALSE	1
2022-09-13	15:09:28	0.716807	106.289	FALSE	1
2022-09-13	15:09:28	1.60296	107.892	FALSE	1
2022-09-13	15:09:28	1.53004	109.422	FALSE	1
2022-09-13	15:09:28	1.88688	111.309	FALSE	1
2022-09-13	15:09:29	1.21197	112.521	FALSE	1
2022-09-13	15:09:29	2.06525	114.586	FALSE	1
2022-09-13	15:09:29	1.22032	115.806	FALSE	1
2022-09-13	15:09:30	2.5564	118.363	FALSE	1
2022-09-13	15:09:30	0.952328	119.315	FALSE	1
2022-09-13	15:09:30	2.51044	121.826	FALSE	1
2022-09-13	15:09:30	1.05467	122.88	FALSE	1
2022-09-13	15:09:31	3.64994	126.53	1	2
2022-09-13	15:09:31	1.54536	128.076	FALSE	2
2022-09-13	15:09:31	1.14093	129.216	FALSE	2
2022-09-13	15:09:31	0.706883	129.923	FALSE	2
2022-09-13	15:09:32	0.569224	130.493	FALSE	2
2022-09-13	15:09:32	1.17665	131.669	FALSE	2
2022-09-13	15:09:32	0.751311	132.421	FALSE	2
2022-09-13	15:09:32	1.25538	133.676	FALSE	2
2022-09-13	15:09:33	0.978028	134.654	FALSE	2
2022-09-13	15:09:33	0.728206	135.382	FALSE	2
2022-09-13	15:09:33	1.78714	137.169	FALSE	2
2022-09-13	15:09:34	0.99584	138.165	FALSE	2
2022-09-13	15:09:34	2.6251	140.79	FALSE	2
2022-09-13	15:09:34	1.30419	142.094	FALSE	2
2022-09-13	15:09:34	2.95711	145.052	FALSE	2
2022-09-13	15:09:35	1.48403	146.536	FALSE	2
2022-09-13	15:09:35	2.53279	149.068	FALSE	2
2022-09-13	15:09:35	2.00536	151.074	FALSE	2
2022-09-13	15:09:35	2.01126	153.085	FALSE	2
2022-09-13	15:09:36	2.00556	155.091	FALSE	2
2022-09-13	15:09:36	1.91538	157.006	FALSE	2
2022-09-13	15:09:36	1.70815	158.714	FALSE	2
2022-09-13	15:09:36	1.43182	160.146	FALSE	2
2022-09-13	15:09:37	0.916094	161.062	FALSE	2
2022-09-13	15:09:37	2.30627	163.368	FALSE	2
2022-09-13	15:09:37	1.59879	164.967	FALSE	2
2022-09-13	15:09:38	3.16118	168.128	1	3
2022-09-13	15:09:38	1.83599	169.964	FALSE	3
2022-09-13	15:09:38	2.1737	172.138	FALSE	3
2022-09-13	15:09:38	1.84047	173.978	FALSE	3
2022-09-13	15:09:39	1.25212	175.231	FALSE	3
2022-09-13	15:09:39	2.2052	177.436	FALSE	3
2022-09-13	15:09:39	1.23034	178.666	FALSE	3
2022-09-13	15:09:39	1.73742	180.403	FALSE	3
2022-09-13	15:09:40	1.73533	182.139	FALSE	3
2022-09-13	15:09:40	2.74123	184.88	FALSE	3
2022-09-13	15:09:40	1.1819	186.062	FALSE	3
2022-09-13	15:09:40	1.95752	188.019	FALSE	3
2022-09-13	15:09:41	2.20454	190.224	FALSE	3
2022-09-13	15:09:41	2.20088	192.425	FALSE	3
2022-09-13	15:09:41	2.12307	194.548	FALSE	3
2022-09-13	15:09:42	2.64724	197.195	FALSE	3
2022-09-13	15:09:42	1.35375	198.549	FALSE	3
2022-09-13	15:09:42	3.35263	201.902	1	4
2022-09-13	15:09:42	1.13197	203.034	FALSE	4
2022-09-13	15:09:43	3.36235	206.396	1	5
2022-09-13	15:09:43	0.403015	206.799	FALSE	5
2022-09-13	15:09:43	0.808664	207.608	FALSE	5
2022-09-13	15:09:43	0.484644	208.092	FALSE	5
2022-09-13	15:09:44	1.05553	209.148	FALSE	5
2022-09-13	15:09:44	0.782455	209.93	FALSE	5
2022-09-13	15:09:44	1.25721	211.187	FALSE	5
2022-09-13	15:09:44	1.25599	212.443	FALSE	5
2022-09-13	15:09:45	1.68816	214.132	FALSE	5
2022-09-13	15:09:45	1.42541	215.557	FALSE	5
2022-09-13	15:09:45	2.43167	217.989	FALSE	5
2022-09-13	15:09:46	2.05238	220.041	FALSE	5
2022-09-13	15:09:46	2.1537	222.195	FALSE	5
2022-09-13	15:09:46	1.1109	223.306	FALSE	5
2022-09-13	15:09:46	1.29411	224.6	FALSE	5
2022-09-13	15:09:47	0.310751	224.91	FALSE	5
2022-09-13	15:09:47	0.705	225.615	FALSE	5
2022-09-13	15:09:47	0.658741	226.274	FALSE	5
2022-09-13	15:09:47	2.71558	228.99	FALSE	5
2022-09-13	15:09:48	1.37981	230.37	FALSE	5
2022-09-13	15:09:48	2.13915	232.509	FALSE	5
2022-09-13	15:09:48	2.69508	235.204	FALSE	5
2022-09-13	15:09:48	3.67518	238.879	1	6
2022-09-13	15:09:49	2.82154	241.701	FALSE	6
2022-09-13	15:09:49	1.44729	243.148	FALSE	6
2022-09-13	15:09:49	1.23767	244.386	FALSE	6
2022-09-13	15:09:50	0.578791	244.964	FALSE	6
2022-09-13	15:09:50	0.195687	245.16	FALSE	6
2022-09-13	15:09:50	0.575026	245.735	FALSE	6
2022-09-13	15:09:50	0.275687	246.011	FALSE	6
2022-09-13	15:09:51	1.04134	247.052	FALSE	6
2022-09-13	15:09:51	1.03747	248.09	FALSE	6
2022-09-13	15:09:51	2.85207	250.942	FALSE	6
2022-09-13	15:09:51	2.31116	253.253	FALSE	6
2022-09-13	15:09:52	2.41396	255.667	FALSE	6
2022-09-13	15:09:52	1.19314	256.86	FALSE	6
2022-09-13	15:09:52	1.68836	258.548	FALSE	6
2022-09-13	15:09:52	1.54215	260.09	FALSE	6
2022-09-13	15:09:53	1.69589	261.786	FALSE	6
2022-09-13	15:09:53	1.97752	263.764	FALSE	6
2022-09-13	15:09:53	2.56785	266.332	FALSE	6
2022-09-13	15:09:54	1.54653	267.878	FALSE	6
2022-09-13	15:09:54	2.72205	270.6	FALSE	6
2022-09-13	15:09:54	1.24917	271.849	FALSE	6
2022-09-13	15:09:54	2.62673	274.476	FALSE	6
2022-09-13	15:09:55	1.78261	276.259	FALSE	6
2022-09-13	15:09:55	1.96174	278.22	FALSE	6
2022-09-13	15:09:55	0.971616	279.192	FALSE	6
2022-09-13	15:09:55	0.945458	280.138	FALSE	6
2022-09-13	15:09:56	1.49243	281.63	FALSE	6
2022-09-13	15:09:56	0.774568	282.405	FALSE	6
2022-09-13	15:09:56	1.54907	283.954	FALSE	6
2022-09-13	15:09:56	0.820522	284.774	FALSE	6
2022-09-13	15:09:57	2.16556	286.94	FALSE	6
2022-09-13	15:09:57	0.647239	287.587	FALSE	6
2022-09-13	15:09:57	1.51635	289.103	FALSE	6
2022-09-13	15:09:58	1.15859	290.262	FALSE	6
2022-09-13	15:09:58	0.641132	290.903	FALSE	6
2022-09-13	15:09:58	1.00627	291.909	FALSE	6
2022-09-13	15:09:58	0.634873	292.544	FALSE	6
2022-09-13	15:09:59	0.468206	293.012	FALSE	6
2022-09-13	15:09:59	0.508613	293.521	FALSE	6
2022-09-13	15:09:59	0.252328	293.773	FALSE	6
2022-09-13	15:09:59	0.646425	294.42	FALSE	6
2022-09-13	15:10:00	0.572583	294.992	FALSE	6
2022-09-13	15:10:00	0.803779	295.796	FALSE	6
2022-09-13	15:10:00	1.27818	297.074	FALSE	6
2022-09-13	15:10:00	3.60388	300.678	1	7
2022-09-13	15:10:01	5.54454	306.223	1	8
2022-09-13	15:10:01	9.70688	315.93	1	9
2022-09-13	15:10:01	4.29355	320.223	1	10
2022-09-13	15:10:02	2.07955	322.303	FALSE	10
2022-09-13	15:10:02	0.66388	322.967	FALSE	10
2022-09-13	15:10:02	0.397265	323.364	FALSE	10
2022-09-13	15:10:02	0.339962	323.704	FALSE	10
2022-09-13	15:10:03	0.297061	324.001	FALSE	10
2022-09-13	15:10:03	0.293753	324.295	FALSE	10
2022-09-13	15:10:03	0.487697	324.782	FALSE	10
2022-09-13	15:10:03	0.144797	324.927	FALSE	10
2022-09-13	15:10:04	0.511107	325.438	FALSE	10
2022-09-13	15:10:04	0.233753	325.672	FALSE	10
2022-09-13	15:10:04	0.488512	326.16	FALSE	10
2022-09-13	15:10:04	0.434364	326.595	FALSE	10
2022-09-13	15:10:05	0.587494	327.182	FALSE	10
2022-09-13	15:10:05	0.579555	327.762	FALSE	10
2022-09-13	15:10:05	0.845102	328.607	FALSE	10
2022-09-13	15:10:06	1.10546	329.712	FALSE	10
2022-09-13	15:10:06	0.743728	330.456	FALSE	10
2022-09-13	15:10:06	0.518842	330.975	FALSE	10
2022-09-13	15:10:06	0.101845	331.077	FALSE	10
2022-09-13	15:10:07	0.277265	331.354	FALSE	10
2022-09-13	15:10:07	0.138588	331.493	FALSE	10
2022-09-13	15:10:07	0.286222	331.779	FALSE	10
2022-09-13	15:10:07	0.168613	331.947	FALSE	10
2022-09-13	15:10:08	0.346272	332.294	FALSE	10
2022-09-13	15:10:08	0.357977	332.652	FALSE	10
2022-09-13	15:10:08	0.18556	332.837	FALSE	10
2022-09-13	15:10:08	0.411718	333.249	FALSE	10
2022-09-13	15:10:09	0.14383	333.393	FALSE	10
2022-09-13	15:10:09	0.419555	333.812	FALSE	10
2022-09-13	15:10:09	0.0829136	333.895	FALSE	10
2022-09-13	15:10:10	0.346374	334.242	FALSE	10
2022-09-13	15:10:10	0.140929	334.383	FALSE	10
2022-09-13	15:10:10	0.315331	334.698	FALSE	10
2022-09-13	15:10:10	0.321998	335.02	FALSE	10
2022-09-13	15:10:11	0.447647	335.468	FALSE	10
2022-09-13	15:10:11	1.71243	337.18	FALSE	10
2022-09-13	15:10:11	1.72123	338.901	FALSE	10
2022-09-13	15:10:11	2.92856	341.83	FALSE	10
2022-09-13	15:10:12	1.6167	343.447	FALSE	10
2022-09-13	15:10:12	3.93716	347.384	1	11
2022-09-13	15:10:12	1.23462	348.618	FALSE	11
2022-09-13	15:10:12	1.91446	350.533	FALSE	11
2022-09-13	15:10:13	1.31711	351.85	FALSE	11
2022-09-13	15:10:13	0.704593	352.554	FALSE	11
2022-09-13	15:10:13	1.5163	354.071	FALSE	11
2022-09-13	15:10:14	0.3707	354.441	FALSE	11
2022-09-13	15:10:14	1.51508	355.957	FALSE	11
2022-09-13	15:10:14	0.941285	356.898	FALSE	11
2022-09-13	15:10:14	0.555229	357.453	FALSE	11
2022-09-13	15:10:15	1.04953	358.503	FALSE	11
2022-09-13	15:10:15	0.306476	358.809	FALSE	11
2022-09-13	15:10:15	0.722812	359.532	FALSE	11
2022-09-13	15:10:15	0.258995	359.791	FALSE	11
2022-09-13	15:10:16	0.233194	360.024	FALSE	11
2022-09-13	15:10:16	0.23925	360.263	FALSE	11
2022-09-13	15:10:16	0.229428	360.493	FALSE	11
2022-09-13	15:10:16	0.15411	360.647	FALSE	11
2022-09-13	15:10:17	0.234517	360.881	FALSE	11
2022-09-13	15:10:17	0.065102	360.946	FALSE	11
2022-09-13	15:10:17	0.00774832	360.954	FALSE	11
2022-09-13	15:10:18	0.0270867	360.981	FALSE	11
2022-09-13	15:10:18	0.143117	361.124	FALSE	11
2022-09-13	15:10:18	1.78897	362.913	FALSE	11
2022-09-13	15:10:18	2.84871	365.762	FALSE	11
2022-09-13	15:10:19	1.57981	367.342	FALSE	11
2022-09-13	15:10:19	3.07019	370.412	1	12
2022-09-13	15:10:19	0.84841	371.261	FALSE	12
2022-09-13	15:10:19	3.282	374.543	1	13
2022-09-13	15:10:20	0.396756	374.939	FALSE	13
2022-09-13	15:10:20	0.644542	375.584	FALSE	13
2022-09-13	15:10:20	0.342608	375.926	FALSE	13
2022-09-13	15:10:20	0.42327	376.35	FALSE	13
2022-09-13	15:10:21	0.585814	376.936	FALSE	13
2022-09-13	15:10:21	0.605662	377.541	FALSE	13
2022-09-13	15:10:21	0.861285	378.402	FALSE	13
2022-09-13	15:10:22	0.934974	379.337	FALSE	13
2022-09-13	15:10:22	0.984288	380.322	FALSE	13
2022-09-13	15:10:22	0.819707	381.141	FALSE	13
2022-09-13	15:10:22	0.687086	381.829	FALSE	13
2022-09-13	15:10:23	0.667087	382.496	FALSE	13
2022-09-13	15:10:23	0.560471	383.056	FALSE	13
2022-09-13	15:10:23	0.632786	383.689	FALSE	13
2022-09-13	15:10:23	0.786374	384.475	FALSE	13
2022-09-13	15:10:24	0.466374	384.942	FALSE	13
2022-09-13	15:10:24	1.33854	386.28	FALSE	13
2022-09-13	15:10:24	0.834109	387.114	FALSE	13
2022-09-13	15:10:24	0.280674	387.395	FALSE	13
2022-09-13	15:10:25	0.370954	387.766	FALSE	13
2022-09-13	15:10:25	0.19355	387.959	FALSE	13
2022-09-13	15:10:25	0.37243	388.332	FALSE	13
2022-09-13	15:10:26	0.538333	388.87	FALSE	13
2022-09-13	15:10:26	0.228155	389.098	FALSE	13
2022-09-13	15:10:26	0.364847	389.463	FALSE	13
2022-09-13	15:10:26	0.374771	389.838	FALSE	13
2022-09-13	15:10:27	0.371107	390.209	FALSE	13
2022-09-13	15:10:27	0.28215	390.491	FALSE	13
2022-09-13	15:10:27	0.407137	390.898	FALSE	13
2022-09-13	15:10:27	0.425254	391.324	FALSE	13
2022-09-13	15:10:28	0.270038	391.594	FALSE	13
2022-09-13	15:10:28	0.27925	391.873	FALSE	13
2022-09-13	15:10:28	0.167799	392.041	FALSE	13
2022-09-13	15:10:28	0.294466	392.335	FALSE	13
2022-09-13	15:10:29	0.815636	393.151	FALSE	13
2022-09-13	15:10:29	1.3619	394.513	FALSE	13
2022-09-13	15:10:29	2.61304	397.126	FALSE	13
2022-09-13	15:10:29	1.84765	398.973	FALSE	13
2022-09-13	15:10:30	2.53177	401.505	FALSE	13
2022-09-13	15:10:30	1.33981	402.845	FALSE	13
2022-09-13	15:10:30	1.05131	403.896	FALSE	13
2022-09-13	15:10:31	0.875026	404.771	FALSE	13
2022-09-13	15:10:31	0.85986	405.631	FALSE	13
2022-09-13	15:10:31	0.581641	406.213	FALSE	13
2022-09-13	15:10:31	0.76159	406.974	FALSE	13
2022-09-13	15:10:32	0.805916	407.78	FALSE	13
2022-09-13	15:10:32	1.51289	409.293	FALSE	13
2022-09-13	15:10:32	2.61167	411.905	FALSE	13
2022-09-13	15:10:32	5.21563	417.12	1	14
2022-09-13	15:10:33	4.47513	421.596	1	15
2022-09-13	15:10:33	4.288	425.884	1	16
2022-09-13	15:10:33	0.822252	426.706	FALSE	16
2022-09-13	15:10:33	1.19294	427.899	FALSE	16
2022-09-13	15:10:34	1.10347	429.002	FALSE	16
2022-09-13	15:10:34	1.28632	430.289	FALSE	16
2022-09-13	15:10:34	0.962659	431.251	FALSE	16
2022-09-13	15:10:35	0.20612	431.457	FALSE	16
2022-09-13	15:10:35	0.116247	431.574	FALSE	16
2022-09-13	15:10:35	-0.138511	431.574	FALSE	16
2022-09-13	15:10:35	-0.311692	431.574	FALSE	16
2022-09-13	15:10:36	-0.528536	431.574	FALSE	16
2022-09-13	15:10:36	-0.526043	431.574	FALSE	16
2022-09-13	15:10:36	-0.37902	431.574	FALSE	16
2022-09-13	15:10:36	-0.468536	431.574	FALSE	16
2022-09-13	15:10:37	-0.228435	431.574	FALSE	16
2022-09-13	15:10:37	-0.326043	431.574	FALSE	16
2022-09-13	15:10:37	-0.162277	431.574	FALSE	16
2022-09-13	15:10:37	-0.368333	431.574	FALSE	16
2022-09-13	15:10:38	0.307799	431.881	FALSE	16
2022-09-13	15:10:38	0.30271	432.184	FALSE	16
2022-09-13	15:10:38	0.537824	432.722	FALSE	16
2022-09-13	15:10:39	1.01701	433.739	FALSE	16
2022-09-13	15:10:39	1.19681	434.936	FALSE	16
2022-09-13	15:10:39	0.788715	435.725	FALSE	16
2022-09-13	15:10:39	0.498181	436.223	FALSE	16
2022-09-13	15:10:40	0.26098	436.484	FALSE	16
2022-09-13	15:10:40	0.425204	436.909	FALSE	16
2022-09-13	15:10:40	0.328766	437.238	FALSE	16
2022-09-13	15:10:40	0.315585	437.553	FALSE	16
2022-09-13	15:10:41	0.267494	437.821	FALSE	16
2022-09-13	15:10:41	0.337061	438.158	FALSE	16
2022-09-13	15:10:41	0.393448	438.551	FALSE	16
2022-09-13	15:10:41	0.434313	438.986	FALSE	16
2022-09-13	15:10:42	0.446934	439.432	FALSE	16
2022-09-13	15:10:42	1.33726	440.77	FALSE	16
2022-09-13	15:10:42	2.46144	443.231	FALSE	16
2022-09-13	15:10:43	3.50286	446.734	1	17
2022-09-13	15:10:43	2.33843	449.072	FALSE	17
2022-09-13	15:10:43	1.68592	450.758	FALSE	17
2022-09-13	15:10:43	0.854466	451.613	FALSE	17
2022-09-13	15:10:44	0.133194	451.746	FALSE	17
2022-09-13	15:10:44	0.460267	452.206	FALSE	17
2022-09-13	15:10:44	0.174822	452.381	FALSE	17
2022-09-13	15:10:44	0.493193	452.874	FALSE	17
2022-09-13	15:10:45	0.251819	453.126	FALSE	17
2022-09-13	15:10:45	0.521031	453.647	FALSE	17
2022-09-13	15:10:45	0.373041	454.02	FALSE	17
2022-09-13	15:10:45	0.532125	454.552	FALSE	17
2022-09-13	15:10:46	0.353601	454.906	FALSE	17
2022-09-13	15:10:46	0.461285	455.367	FALSE	17
2022-09-13	15:10:46	0.25584	455.623	FALSE	17
2022-09-13	15:10:47	0.516247	456.139	FALSE	17
2022-09-13	15:10:47	0.212634	456.352	FALSE	17
2022-09-13	15:10:47	0.470191	456.822	FALSE	17
2022-09-13	15:10:47	0.281692	457.104	FALSE	17
2022-09-13	15:10:48	0.322354	457.426	FALSE	17
2022-09-13	15:10:48	0.373448	457.8	FALSE	17
2022-09-13	15:10:48	0.213448	458.013	FALSE	17
2022-09-13	15:10:48	0.285611	458.299	FALSE	17
2022-09-13	15:10:49	0.286272	458.585	FALSE	17
2022-09-13	15:10:49	0.210496	458.795	FALSE	17
2022-09-13	15:10:49	0.317468	459.113	FALSE	17
2022-09-13	15:10:49	0.384186	459.497	FALSE	17
2022-09-13	15:10:50	0.134313	459.631	FALSE	17
2022-09-13	15:10:50	0.110395	459.742	FALSE	17
2022-09-13	15:10:50	-0.0350506	459.742	FALSE	17
2022-09-13	15:10:51	0.0227102	459.765	FALSE	17
2022-09-13	15:10:51	0.0416415	459.806	FALSE	17
2022-09-13	15:10:51	-0.161565	459.806	FALSE	17
2022-09-13	15:10:51	-0.00843487	459.806	FALSE	17
2022-09-13	15:10:52	0.112481	459.919	FALSE	17
2022-09-13	15:10:52	0.251514	460.17	FALSE	17
2022-09-13	15:10:52	0.220878	460.391	FALSE	17
2022-09-13	15:10:52	0.333295	460.724	FALSE	17
2022-09-13	15:10:53	0.43355	461.158	FALSE	17
2022-09-13	15:10:53	0.365967	461.524	FALSE	17
2022-09-13	15:10:53	0.442405	461.966	FALSE	17
2022-09-13	15:10:53	0.404135	462.37	FALSE	17
2022-09-13	15:10:54	0.481234	462.852	FALSE	17
2022-09-13	15:10:54	0.548206	463.4	FALSE	17
2022-09-13	15:10:54	1.1908	464.591	FALSE	17
2022-09-13	15:10:55	1.22586	465.816	FALSE	17
2022-09-13	15:10:55	0.840725	466.657	FALSE	17
2022-09-13	15:10:55	0.784287	467.442	FALSE	17
2022-09-13	15:10:55	0.458333	467.9	FALSE	17
2022-09-13	15:10:56	0.705255	468.605	FALSE	17
2022-09-13	15:10:56	0.73584	469.341	FALSE	17
2022-09-13	15:10:56	0.911412	470.252	FALSE	17
2022-09-13	15:10:56	0.990903	471.243	FALSE	17
2022-09-13	15:10:57	0.299249	471.543	FALSE	17
2022-09-13	15:10:57	0.487087	472.03	FALSE	17
2022-09-13	15:10:57	0.410954	472.441	FALSE	17
2022-09-13	15:10:57	0.353143	472.794	FALSE	17
2022-09-13	15:10:58	0.299199	473.093	FALSE	17
2022-09-13	15:10:58	0.249886	473.343	FALSE	17
2022-09-13	15:10:58	0.358333	473.701	FALSE	17
2022-09-13	15:10:59	0.367952	474.069	FALSE	17
2022-09-13	15:10:59	0.301947	474.371	FALSE	17
2022-09-13	15:10:59	0.465204	474.836	FALSE	17
2022-09-13	15:10:59	0.380725	475.217	FALSE	17
2022-09-13	15:11:00	0.610242	475.827	FALSE	17
2022-09-13	15:11:00	0.832176	476.659	FALSE	17
2022-09-13	15:11:00	0.780013	477.439	FALSE	17
2022-09-13	15:11:00	2.23299	479.672	FALSE	17
2022-09-13	15:11:01	4.13675	483.809	1	18
2022-09-13	15:11:01	3.71309	487.522	1	19
2022-09-13	15:11:01	4.18098	491.703	1	20
2022-09-13	15:11:01	3.08566	494.789	1	21
2022-09-13	15:11:02	2.07355	496.862	FALSE	21
2022-09-13	15:11:02	4.2653	501.128	1	22
2022-09-13	15:11:02	5.24474	506.372	1	23
2022-09-13	15:11:03	4.28592	510.658	1	24
2022-09-13	15:11:03	1.64393	512.302	FALSE	24
2022-09-13	15:11:03	0.490649	512.793	FALSE	24
2022-09-13	15:11:03	0.352328	513.145	FALSE	24
2022-09-13	15:11:04	0.31416	513.459	FALSE	24
2022-09-13	15:11:04	0.332736	513.792	FALSE	24
2022-09-13	15:11:04	0.361794	514.154	FALSE	24
2022-09-13	15:11:04	0.511463	514.665	FALSE	24
2022-09-13	15:11:05	0.477214	515.143	FALSE	24
2022-09-13	15:11:05	0.504288	515.647	FALSE	24
2022-09-13	15:11:05	0.359148	516.006	FALSE	24
2022-09-13	15:11:05	0.50271	516.509	FALSE	24
2022-09-13	15:11:06	0.461336	516.97	FALSE	24
2022-09-13	15:11:06	0.332125	517.302	FALSE	24
2022-09-13	15:11:06	0.565865	517.868	FALSE	24
2022-09-13	15:11:07	0.456094	518.324	FALSE	24
2022-09-13	15:11:07	0.42841	518.753	FALSE	24
2022-09-13	15:11:07	0.533142	519.286	FALSE	24
2022-09-13	15:11:07	0.583728	519.869	FALSE	24
2022-09-13	15:11:08	0.432023	520.301	FALSE	24
2022-09-13	15:11:08	0.377367	520.679	FALSE	24
2022-09-13	15:11:08	0.443066	521.122	FALSE	24
2022-09-13	15:11:08	0.554873	521.677	FALSE	24
2022-09-13	15:11:09	0.365255	522.042	FALSE	24
2022-09-13	15:11:09	0.463422	522.505	FALSE	24
2022-09-13	15:11:09	0.485305	522.991	FALSE	24
2022-09-13	15:11:09	0.318486	523.309	FALSE	24
2022-09-13	15:11:10	0.166883	523.476	FALSE	24
2022-09-13	15:11:10	0.198995	523.675	FALSE	24
2022-09-13	15:11:10	0.14729	523.822	FALSE	24
2022-09-13	15:11:11	0.385254	524.208	FALSE	24
2022-09-13	15:11:11	0.271921	524.48	FALSE	24
2022-09-13	15:11:11	0.22612	524.706	FALSE	24
2022-09-13	15:11:11	0.329529	525.035	FALSE	24
2022-09-13	15:11:12	0.176094	525.211	FALSE	24
2022-09-13	15:11:12	0.140318	525.352	FALSE	24
2022-09-13	15:11:12	0.141641	525.493	FALSE	24
2022-09-13	15:11:12	0.0491733	525.542	FALSE	24
2022-09-13	15:11:13	0.126272	525.669	FALSE	24
2022-09-13	15:11:13	-0.11042	525.669	FALSE	24
2022-09-13	15:11:13	-0.297697	525.669	FALSE	24
2022-09-13	15:11:13	-0.297697	525.669	FALSE	24
2022-09-13	15:11:14	-0.341717	525.669	FALSE	24
2022-09-13	15:11:14	0.0484608	525.717	FALSE	24
2022-09-13	15:11:14	2.02047	527.738	FALSE	24
2022-09-13	15:11:15	1.33279	529.07	FALSE	24
2022-09-13	15:11:15	2.06271	531.133	FALSE	24
2022-09-13	15:11:15	2.68546	533.819	FALSE	24
2022-09-13	15:11:15	5.6653	539.484	1	25
2022-09-13	15:11:16	5.95859	545.443	1	26
2022-09-13	15:11:16	5.69482	551.137	1	27
2022-09-13	15:11:16	3.38963	554.527	1	28
2022-09-13	15:11:16	1.32917	555.856	FALSE	28
2022-09-13	15:11:17	0.432735	556.289	FALSE	28
2022-09-13	15:11:17	0.271616	556.561	FALSE	28
2022-09-13	15:11:17	0.253499	556.814	FALSE	28
2022-09-13	15:11:17	0.178435	556.992	FALSE	28
2022-09-13	15:11:18	0.225306	557.218	FALSE	28
2022-09-13	15:11:18	0.271514	557.489	FALSE	28
2022-09-13	15:11:18	0.239148	557.728	FALSE	28
2022-09-13	15:11:19	-1.17571	557.728	FALSE	28
2022-09-13	15:11:19	0.301896	558.03	FALSE	28
2022-09-13	15:11:19	0.414822	558.445	FALSE	28
2022-09-13	15:11:19	0.457468	558.903	FALSE	28
2022-09-13	15:11:20	1.00907	559.912	FALSE	28
2022-09-13	15:11:20	0.477824	560.389	FALSE	28
2022-09-13	15:11:20	1.81085	562.2	FALSE	28
2022-09-13	15:11:20	0.955636	563.156	FALSE	28
2022-09-13	15:11:21	1.51955	564.676	FALSE	28
2022-09-13	15:11:21	1.36134	566.037	FALSE	28
2022-09-13	15:11:21	1.39111	567.428	FALSE	28
2022-09-13	15:11:21	1.55981	568.988	FALSE	28
2022-09-13	15:11:22	0.873906	569.862	FALSE	28
2022-09-13	15:11:22	1.28897	571.151	FALSE	28
2022-09-13	15:11:22	1.11701	572.268	FALSE	28
2022-09-13	15:11:23	0.743728	573.011	FALSE	28
2022-09-13	15:11:23	1.56169	574.573	FALSE	28
2022-09-13	15:11:23	0.7193	575.292	FALSE	28
2022-09-13	15:11:23	1.49553	576.788	FALSE	28
2022-09-13	15:11:24	0.733092	577.521	FALSE	28
2022-09-13	15:11:24	1.59889	579.12	FALSE	28
2022-09-13	15:11:24	0.794669	579.915	FALSE	28
2022-09-13	15:11:24	2.07284	581.987	FALSE	28
2022-09-13	15:11:25	1.8594	583.847	FALSE	28
2022-09-13	15:11:25	1.55696	585.404	FALSE	28
2022-09-13	15:11:25	1.31874	586.723	FALSE	28
2022-09-13	15:11:25	0.970242	587.693	FALSE	28
2022-09-13	15:11:26	0.715738	588.408	FALSE	28
2022-09-13	15:11:26	0.933855	589.342	FALSE	28
2022-09-13	15:11:26	0.529173	589.872	FALSE	28
2022-09-13	15:11:27	0.682048	590.554	FALSE	28
2022-09-13	15:11:27	0.403728	590.957	FALSE	28
2022-09-13	15:11:27	0.195331	591.153	FALSE	28
2022-09-13	15:11:27	0.291311	591.444	FALSE	28
2022-09-13	15:11:28	0.0363997	591.48	FALSE	28
2022-09-13	15:11:28	0.155331	591.636	FALSE	28
2022-09-13	15:11:28	-0.0322517	591.636	FALSE	28
2022-09-13	15:11:28	-0.0271117	591.636	FALSE	28
2022-09-13	15:11:29	-0.13042	591.636	FALSE	28
2022-09-13	15:11:29	0.0503946	591.686	FALSE	28
2022-09-13	15:11:29	0.0699875	591.756	FALSE	28
2022-09-13	15:11:29	0.0800638	591.836	FALSE	28
2022-09-13	15:11:30	-0.298562	591.836	FALSE	28
2022-09-13	15:11:30	-0.396425	591.836	FALSE	28
2022-09-13	15:11:30	-0.454491	591.836	FALSE	28
2022-09-13	15:11:31	-0.25103	591.836	FALSE	28
2022-09-13	15:11:31	-0.159376	591.836	FALSE	28
2022-09-13	15:11:31	-0.1093	591.836	FALSE	28
2022-09-13	15:11:31	0.111769	591.948	FALSE	28
2022-09-13	15:11:32	0.146272	592.094	FALSE	28
2022-09-13	15:11:32	0.439606	592.534	FALSE	28
2022-09-13	15:11:32	0.421387	592.955	FALSE	28
2022-09-13	15:11:32	0.583626	593.539	FALSE	28
2022-09-13	15:11:33	0.39701	593.936	FALSE	28
2022-09-13	15:11:33	0.577316	594.513	FALSE	28
2022-09-13	15:11:33	0.241794	594.755	FALSE	28
2022-09-13	15:11:33	0.490191	595.245	FALSE	28
2022-09-13	15:11:34	0.322812	595.568	FALSE	28
2022-09-13	15:11:34	0.627646	596.196	FALSE	28
2022-09-13	15:11:34	0.259402	596.455	FALSE	28
2022-09-13	15:11:35	0.609835	597.065	FALSE	28
2022-09-13	15:11:35	0.369479	597.434	FALSE	28
2022-09-13	15:11:35	0.394059	597.828	FALSE	28
2022-09-13	15:11:35	0.613244	598.442	FALSE	28
2022-09-13	15:11:36	0.972634	599.414	FALSE	28
2022-09-13	15:11:36	0.50673	599.921	FALSE	28
2022-09-13	15:11:36	1.46648	601.387	FALSE	28
2022-09-13	15:11:36	0.478537	601.866	FALSE	28
2022-09-13	15:11:37	0.616043	602.482	FALSE	28
2022-09-13	15:11:37	0.288003	602.77	FALSE	28
2022-09-13	15:11:37	0.295636	603.066	FALSE	28
2022-09-13	15:11:37	0.212837	603.278	FALSE	28
2022-09-13	15:11:38	0.290751	603.569	FALSE	28
2022-09-13	15:11:38	0.25528	603.824	FALSE	28
2022-09-13	15:11:38	0.164746	603.989	FALSE	28
2022-09-13	15:11:39	-0.0570862	603.989	FALSE	28
2022-09-13	15:11:39	0.369936	604.359	FALSE	28
2022-09-13	15:11:39	0.234975	604.594	FALSE	28
2022-09-13	15:11:39	0.752684	605.347	FALSE	28
2022-09-13	15:11:40	0.194975	605.542	FALSE	28
2022-09-13	15:11:40	0.557824	606.1	FALSE	28
2022-09-13	15:11:40	0.192634	606.292	FALSE	28
2022-09-13	15:11:40	0.318639	606.611	FALSE	28
2022-09-13	15:11:41	0.422761	607.034	FALSE	28
2022-09-13	15:11:41	0.287443	607.321	FALSE	28
2022-09-13	15:11:41	0.150293	607.471	FALSE	28
2022-09-13	15:11:41	0.302456	607.774	FALSE	28
2022-09-13	15:11:42	-0.0147962	607.774	FALSE	28
2022-09-13	15:11:42	-0.218257	607.774	FALSE	28
2022-09-13	15:11:42	-0.146959	607.774	FALSE	28
2022-09-13	15:11:43	-0.097646	607.774	FALSE	28
2022-09-13	15:11:43	0.0507508	607.825	FALSE	28
2022-09-13	15:11:43	0.0152293	607.84	FALSE	28
2022-09-13	15:11:43	-0.013931	607.84	FALSE	28
2022-09-13	15:11:44	-0.0285875	607.84	FALSE	28
2022-09-13	15:11:44	-0.0496562	607.84	FALSE	28
2022-09-13	15:11:44	0.0662216	607.906	FALSE	28
2022-09-13	15:11:44	0.0957381	608.002	FALSE	28
2022-09-13	15:11:45	0.15416	608.156	FALSE	28
2022-09-13	15:11:45	0.329275	608.485	FALSE	28
2022-09-13	15:11:45	0.416349	608.902	FALSE	28
2022-09-13	15:11:45	0.680827	609.582	FALSE	28
2022-09-13	15:11:46	0.414059	609.996	FALSE	28
2022-09-13	15:11:46	0.346527	610.343	FALSE	28
2022-09-13	15:11:46	0.438232	610.781	FALSE	28
2022-09-13	15:11:47	0.333804	611.115	FALSE	28
2022-09-13	15:11:47	0.255484	611.371	FALSE	28
2022-09-13	15:11:47	0.145611	611.516	FALSE	28
2022-09-13	15:11:47	0.0329391	611.549	FALSE	28
2022-09-13	15:11:48	-0.126908	611.549	FALSE	28
2022-09-13	15:11:48	-0.256017	611.549	FALSE	28
2022-09-13	15:11:48	-0.105534	611.549	FALSE	28
2022-09-13	15:11:48	-0.0615137	611.549	FALSE	28
2022-09-13	15:11:49	-0.0123535	611.549	FALSE	28
2022-09-13	15:11:49	-0.258918	611.549	FALSE	28
2022-09-13	15:11:49	-0.181768	611.549	FALSE	28
2022-09-13	15:11:49	-0.0445672	611.549	FALSE	28
2022-09-13	15:11:50	0.00265929	611.552	FALSE	28
2022-09-13	15:11:50	0.0347712	611.586	FALSE	28
2022-09-13	15:11:50	0.0451529	611.632	FALSE	28
2022-09-13	15:11:50	0.111667	611.743	FALSE	28
2022-09-13	15:11:51	0.414008	612.157	FALSE	28
2022-09-13	15:11:51	0.405458	612.563	FALSE	28
2022-09-13	15:11:51	0.280573	612.843	FALSE	28
2022-09-13	15:11:52	0.288512	613.132	FALSE	28
2022-09-13	15:11:52	1.11274	614.245	FALSE	28
2022-09-13	15:11:52	0.377672	614.622	FALSE	28
2022-09-13	15:11:52	0.424237	615.047	FALSE	28
2022-09-13	15:11:53	0.385916	615.432	FALSE	28
2022-09-13	15:11:53	0.426832	615.859	FALSE	28
2022-09-13	15:11:53	0.369428	616.229	FALSE	28
2022-09-13	15:11:53	0.423524	616.652	FALSE	28
2022-09-13	15:11:54	0.429631	617.082	FALSE	28
2022-09-13	15:11:54	0.428461	617.51	FALSE	28
2022-09-13	15:11:54	0.341845	617.852	FALSE	28
2022-09-13	15:11:55	0.468003	618.32	FALSE	28
2022-09-13	15:11:55	0.453652	618.774	FALSE	28
2022-09-13	15:11:55	0.459911	619.234	FALSE	28
2022-09-13	15:11:55	0.396603	619.63	FALSE	28
2022-09-13	15:11:56	0.379351	620.01	FALSE	28
2022-09-13	15:11:56	0.425407	620.435	FALSE	28
2022-09-13	15:11:56	0.423219	620.858	FALSE	28
2022-09-13	15:11:56	0.492634	621.351	FALSE	28
2022-09-13	15:11:57	0.40327	621.754	FALSE	28
2022-09-13	15:11:57	0.353957	622.108	FALSE	28
2022-09-13	15:11:57	0.54785	622.656	FALSE	28
2022-09-13	15:11:57	0.499351	623.155	FALSE	28
2022-09-13	15:11:58	0.461183	623.617	FALSE	28
2022-09-13	15:11:58	0.434262	624.051	FALSE	28
2022-09-13	15:11:58	0.458232	624.509	FALSE	28
2022-09-13	15:11:58	0.404491	624.914	FALSE	28
2022-09-13	15:11:59	0.455789	625.369	FALSE	28
2022-09-13	15:11:59	0.438842	625.808	FALSE	28
2022-09-13	15:11:59	0.42444	626.233	FALSE	28
2022-09-13	15:12:00	0.405967	626.639	FALSE	28
2022-09-13	15:12:00	0.405102	627.044	FALSE	28
2022-09-13	15:12:00	0.444084	627.488	FALSE	28
2022-09-13	15:12:00	0.327341	627.815	FALSE	28
2022-09-13	15:12:01	0.468308	628.283	FALSE	28
2022-09-13	15:12:01	0.460776	628.744	FALSE	28
2022-09-13	15:12:01	0.455534	629.2	FALSE	28
2022-09-13	15:12:01	0.469377	629.669	FALSE	28
2022-09-13	15:12:02	0.46215	630.131	FALSE	28
2022-09-13	15:12:02	0.430395	630.562	FALSE	28
2022-09-13	15:12:02	0.527239	631.089	FALSE	28
2022-09-13	15:12:02	0.483524	631.572	FALSE	28
2022-09-13	15:12:03	0.45014	632.023	FALSE	28
2022-09-13	15:12:03	0.452277	632.475	FALSE	28
2022-09-13	15:12:03	0.451463	632.926	FALSE	28
2022-09-13	15:12:04	0.480522	633.407	FALSE	28
2022-09-13	15:12:04	0.447036	633.854	FALSE	28
2022-09-13	15:12:04	0.453753	634.308	FALSE	28
2022-09-13	15:12:04	0.394211	634.702	FALSE	28
2022-09-13	15:12:05	0.475992	635.178	FALSE	28
2022-09-13	15:12:05	0.447901	635.626	FALSE	28
2022-09-13	15:12:05	0.36897	635.995	FALSE	28
2022-09-13	15:12:05	0.471514	636.466	FALSE	28
2022-09-13	15:12:06	0.477926	636.944	FALSE	28
2022-09-13	15:12:06	0.468257	637.412	FALSE	28
2022-09-13	15:12:06	0.480115	637.892	FALSE	28
2022-09-13	15:12:06	0.480725	638.373	FALSE	28
2022-09-13	15:12:07	0.444186	638.817	FALSE	28
2022-09-13	15:12:07	0.471972	639.289	FALSE	28
2022-09-13	15:12:07	0.465814	639.755	FALSE	28
2022-09-13	15:12:08	0.462456	640.218	FALSE	28
2022-09-13	15:12:08	0.463626	640.681	FALSE	28
2022-09-13	15:12:08	0.459402	641.141	FALSE	28
2022-09-13	15:12:08	0.451311	641.592	FALSE	28
2022-09-13	15:12:09	0.472634	642.065	FALSE	28
2022-09-13	15:12:09	0.445102	642.51	FALSE	28
2022-09-13	15:12:09	0.452227	642.962	FALSE	28
2022-09-13	15:12:09	0.452328	643.414	FALSE	28
2022-09-13	15:12:10	0.448155	643.862	FALSE	28
2022-09-13	15:12:10	0.455382	644.318	FALSE	28
2022-09-13	15:12:10	0.461285	644.779	FALSE	28
2022-09-13	15:12:10	0.456756	645.236	FALSE	28
2022-09-13	15:12:11	0.452786	645.689	FALSE	28
2022-09-13	15:12:11	0.458944	646.148	FALSE	28
2022-09-13	15:12:11	0.453346	646.601	FALSE	28
2022-09-13	15:12:12	0.466018	647.067	FALSE	28
2022-09-13	15:12:12	0.447392	647.514	FALSE	28
2022-09-13	15:12:12	0.455636	647.97	FALSE	28
2022-09-13	15:12:12	0.453193	648.423	FALSE	28
2022-09-13	15:12:13	0.458333	648.881	FALSE	28
2022-09-13	15:12:13	0.466221	649.348	FALSE	28
2022-09-13	15:12:13	0.421336	649.769	FALSE	28
2022-09-13	15:12:13	0.450954	650.22	FALSE	28
2022-09-13	15:12:14	0.440166	650.66	FALSE	28
2022-09-13	15:12:14	0.434313	651.094	FALSE	28
2022-09-13	15:12:14	0.444186	651.539	FALSE	28
2022-09-13	15:12:14	0.451819	651.99	FALSE	28
2022-09-13	15:12:15	0.47014	652.461	FALSE	28
2022-09-13	15:12:15	0.475738	652.936	FALSE	28
2022-09-13	15:12:15	0.929936	653.866	FALSE	28
2022-09-13	15:12:16	2.60306	656.469	FALSE	28
2022-09-13	15:12:16	2.36581	658.835	FALSE	28
2022-09-13	15:12:16	1.81701	660.652	FALSE	28
2022-09-13	15:12:16	0.495331	661.147	FALSE	28
2022-09-13	15:12:17	0.270954	661.418	FALSE	28
2022-09-13	15:12:17	0.384949	661.803	FALSE	28
2022-09-13	15:12:17	0.343372	662.147	FALSE	28
2022-09-13	15:12:17	0.145051	662.292	FALSE	28
2022-09-13	15:12:18	0.160929	662.453	FALSE	28
2022-09-13	15:12:18	0.135127	662.588	FALSE	28
2022-09-13	15:12:18	0.144949	662.733	FALSE	28
2022-09-13	15:12:18	0.145967	662.879	FALSE	28
2022-09-13	15:12:19	0.165153	663.044	FALSE	28
2022-09-13	15:12:19	0.0812852	663.125	FALSE	28
2022-09-13	15:12:19	0.0113107	663.137	FALSE	28
2022-09-13	15:12:20	0.0555855	663.192	FALSE	28
2022-09-13	15:12:20	0.267494	663.46	FALSE	28
2022-09-13	15:12:20	0.291361	663.751	FALSE	28
2022-09-13	15:12:20	0.267799	664.019	FALSE	28
2022-09-13	15:12:21	0.384797	664.404	FALSE	28
2022-09-13	15:12:21	0.333448	664.737	FALSE	28
2022-09-13	15:12:21	0.483066	665.22	FALSE	28
2022-09-13	15:12:21	0.520216	665.74	FALSE	28
2022-09-13	15:12:22	0.465814	666.206	FALSE	28
2022-09-13	15:12:22	0.431412	666.638	FALSE	28
2022-09-13	15:12:22	0.47243	667.11	FALSE	28
2022-09-13	15:12:22	0.515941	667.626	FALSE	28
2022-09-13	15:12:23	0.474313	668.1	FALSE	28
2022-09-13	15:12:23	0.471769	668.572	FALSE	28
2022-09-13	15:12:23	0.463779	669.036	FALSE	28
2022-09-13	15:12:24	0.445865	669.482	FALSE	28
2022-09-13	15:12:24	0.476756	669.958	FALSE	28
2022-09-13	15:12:24	0.455229	670.414	FALSE	28
2022-09-13	15:12:24	0.455534	670.869	FALSE	28
2022-09-13	15:12:25	0.458232	671.327	FALSE	28
2022-09-13	15:12:25	0.457468	671.785	FALSE	28
2022-09-13	15:12:25	0.45584	672.241	FALSE	28
2022-09-13	15:12:25	0.460013	672.701	FALSE	28
2022-09-13	15:12:26	0.455789	673.156	FALSE	28
2022-09-13	15:12:26	0.466069	673.623	FALSE	28
2022-09-13	15:12:26	0.460623	674.083	FALSE	28
2022-09-13	15:12:26	0.458028	674.541	FALSE	28
2022-09-13	15:12:27	0.460623	675.002	FALSE	28
2022-09-13	15:12:27	0.462965	675.465	FALSE	28
2022-09-13	15:12:27	0.44388	675.909	FALSE	28
2022-09-13	15:12:28	0.473092	676.382	FALSE	28
2022-09-13	15:12:28	0.533448	676.915	FALSE	28
2022-09-13	15:12:28	0.389428	677.305	FALSE	28
2022-09-13	15:12:28	0.410751	677.715	FALSE	28
2022-09-13	15:12:29	0.343524	678.059	FALSE	28
2022-09-13	15:12:29	0.317214	678.376	FALSE	28
2022-09-13	15:12:29	0.543982	678.92	FALSE	28
2022-09-13	15:12:29	0.265356	679.185	FALSE	28
2022-09-13	15:12:30	0.618893	679.804	FALSE	28
2022-09-13	15:12:30	0.298334	680.103	FALSE	28
2022-09-13	15:12:30	0.458333	680.561	FALSE	28
2022-09-13	15:12:30	0.325	680.886	FALSE	28
2022-09-13	15:12:31	0.606578	681.493	FALSE	28
2022-09-13	15:12:31	0.363575	681.856	FALSE	28
2022-09-13	15:12:31	0.504542	682.361	FALSE	28
2022-09-13	15:12:32	0.541692	682.902	FALSE	28
2022-09-13	15:12:32	0.544644	683.447	FALSE	28
2022-09-13	15:12:32	0.45187	683.899	FALSE	28
2022-09-13	15:12:32	0.56098	684.46	FALSE	28
2022-09-13	15:12:33	0.497061	684.957	FALSE	28
2022-09-13	15:12:33	0.754873	685.712	FALSE	28
2022-09-13	15:12:33	1.28902	687.001	FALSE	28
2022-09-13	15:12:33	1.21121	688.212	FALSE	28
2022-09-13	15:12:34	1.27854	689.491	FALSE	28
2022-09-13	15:12:34	1.73401	691.225	FALSE	28
2022-09-13	15:12:34	1.68246	692.907	FALSE	28
2022-09-13	15:12:34	1.40098	694.308	FALSE	28
2022-09-13	15:12:35	1.0164	695.324	FALSE	28
2022-09-13	15:12:35	0.466374	695.791	FALSE	28
2022-09-13	15:12:35	0.28556	696.076	FALSE	28
2022-09-13	15:12:36	0.607188	696.684	FALSE	28
2022-09-13	15:12:36	0.23126	696.915	FALSE	28
2022-09-13	15:12:36	0.675941	697.591	FALSE	28
2022-09-13	15:12:36	0.839911	698.431	FALSE	28
2022-09-13	15:12:37	1.03823	699.469	FALSE	28
2022-09-13	15:12:37	0.778181	700.247	FALSE	28
2022-09-13	15:12:37	0.554924	700.802	FALSE	28
2022-09-13	15:12:37	0.71416	701.516	FALSE	28
2022-09-13	15:12:38	0.383219	701.899	FALSE	28
2022-09-13	15:12:38	0.914415	702.814	FALSE	28
2022-09-13	15:12:38	1.12653	703.94	FALSE	28
2022-09-13	15:12:38	2.31899	706.259	FALSE	28
2022-09-13	15:12:39	1.31732	707.577	FALSE	28
2022-09-13	15:12:39	0.752684	708.329	FALSE	28
2022-09-13	15:12:39	0.877519	709.207	FALSE	28
2022-09-13	15:12:40	0.282812	709.49	FALSE	28
2022-09-13	15:12:40	0.917061	710.407	FALSE	28
2022-09-13	15:12:40	0.520878	710.928	FALSE	28
2022-09-13	15:12:40	1.26363	712.191	FALSE	28
2022-09-13	15:12:41	0.929427	713.121	FALSE	28
2022-09-13	15:12:41	1.35645	714.477	FALSE	28
2022-09-13	15:12:41	3.76637	718.244	1	29
2022-09-13	15:12:41	2.22866	720.472	FALSE	29
2022-09-13	15:12:42	2.78541	723.258	FALSE	29
2022-09-13	15:12:42	1.48983	724.747	FALSE	29
2022-09-13	15:12:42	2.40993	727.157	FALSE	29
2022-09-13	15:12:42	0.992837	728.15	FALSE	29
2022-09-13	15:12:43	0.867799	729.018	FALSE	29
2022-09-13	15:12:43	0.853295	729.871	FALSE	29
2022-09-13	15:12:43	0.412685	730.284	FALSE	29
2022-09-13	15:12:44	0.463168	730.747	FALSE	29
2022-09-13	15:12:44	0.636247	731.383	FALSE	29
2022-09-13	15:12:44	0.940674	732.324	FALSE	29
2022-09-13	15:12:44	0.971056	733.295	FALSE	29
2022-09-13	15:12:45	1.33289	734.628	FALSE	29
2022-09-13	15:12:45	3.55533	738.183	1	30
2022-09-13	15:12:45	2.61228	740.796	FALSE	30
2022-09-13	15:12:45	3.04795	743.844	1	31
2022-09-13	15:12:46	1.68556	745.529	FALSE	31
2022-09-13	15:12:46	1.29401	746.823	FALSE	31
2022-09-13	15:12:46	0.356094	747.179	FALSE	31
2022-09-13	15:12:46	0.236858	747.416	FALSE	31
2022-09-13	15:12:47	0.450802	747.867	FALSE	31
2022-09-13	15:12:47	0.0867305	747.954	FALSE	31
2022-09-13	15:12:47	0.149733	748.103	FALSE	31
2022-09-13	15:12:48	-0.119071	748.103	FALSE	31
2022-09-13	15:12:48	-0.236017	748.103	FALSE	31
2022-09-13	15:12:48	-0.358155	748.103	FALSE	31
2022-09-13	15:12:48	-0.230369	748.103	FALSE	31
2022-09-13	15:12:49	0.225356	748.329	FALSE	31
2022-09-13	15:12:49	1.36892	749.698	FALSE	31
2022-09-13	15:12:49	3.0879	752.786	1	32
2022-09-13	15:12:49	0.249937	753.035	FALSE	32
2022-09-13	15:12:50	0.248868	753.284	FALSE	32
2022-09-13	15:12:50	0.515331	753.8	FALSE	32
2022-09-13	15:12:50	0.162965	753.963	FALSE	32
2022-09-13	15:12:50	0.370445	754.333	FALSE	32
2022-09-13	15:12:51	0.664949	754.998	FALSE	32
2022-09-13	15:12:51	0.250649	755.249	FALSE	32
2022-09-13	15:12:51	0.366374	755.615	FALSE	32
2022-09-13	15:12:52	0.508359	756.123	FALSE	32
2022-09-13	15:12:52	0.161794	756.285	FALSE	32
2022-09-13	15:12:52	0.290496	756.576	FALSE	32
2022-09-13	15:12:52	0.159402	756.735	FALSE	32
2022-09-13	15:12:53	0.182761	756.918	FALSE	32
2022-09-13	15:12:53	0.0834734	757.001	FALSE	32
2022-09-13	15:12:53	0.0905982	757.092	FALSE	32
2022-09-13	15:12:53	0.584338	757.676	FALSE	32
2022-09-13	15:12:54	0.720572	758.397	FALSE	32
2022-09-13	15:12:54	1.28933	759.686	FALSE	32
2022-09-13	15:12:54	2.23701	761.923	FALSE	32
2022-09-13	15:12:54	2.4106	764.334	FALSE	32
2022-09-13	15:12:55	1.60795	765.942	FALSE	32
2022-09-13	15:12:55	0.383066	766.325	FALSE	32
2022-09-13	15:12:55	0.386374	766.711	FALSE	32
2022-09-13	15:12:56	1.09324	767.804	FALSE	32
2022-09-13	15:12:56	2.13955	769.944	FALSE	32
2022-09-13	15:12:56	7.57619	777.52	1	33
2022-09-13	15:12:56	11.4125	788.933	1	34
2022-09-13	15:12:57	7.49543	796.428	1	35
2022-09-13	15:12:57	3.5593	799.987	1	36
2022-09-13	15:12:57	2.24322	802.231	FALSE	36
2022-09-13	15:12:57	1.52006	803.751	FALSE	36
2022-09-13	15:12:58	1.15385	804.904	FALSE	36
2022-09-13	15:12:58	2.02927	806.934	FALSE	36
2022-09-13	15:12:58	3.10123	810.035	1	37
2022-09-13	15:12:58	1.93726	811.972	FALSE	37
2022-09-13	15:12:59	1.41329	813.386	FALSE	37
2022-09-13	15:12:59	1.11192	814.497	FALSE	37
2022-09-13	15:12:59	1.26195	815.759	FALSE	37
2022-09-13	15:13:00	1.19121	816.951	FALSE	37
2022-09-13	15:13:00	1.02434	817.975	FALSE	37
2022-09-13	15:13:00	0.947341	818.922	FALSE	37
2022-09-13	15:13:00	0.832532	819.755	FALSE	37
2022-09-13	15:13:01	0.936298	820.691	FALSE	37
2022-09-13	15:13:01	1.27548	821.967	FALSE	37
2022-09-13	15:13:01	1.51345	823.48	FALSE	37
2022-09-13	15:13:01	1.47676	824.957	FALSE	37
2022-09-13	15:13:02	1.42246	826.379	FALSE	37
2022-09-13	15:13:02	1.31971	827.699	FALSE	37
2022-09-13	15:13:02	1.29411	828.993	FALSE	37
2022-09-13	15:13:02	1.13803	830.131	FALSE	37
2022-09-13	15:13:03	1.0338	831.165	FALSE	37
2022-09-13	15:13:03	1.128	832.293	FALSE	37
2022-09-13	15:13:03	1.19177	833.485	FALSE	37
2022-09-13	15:13:04	1.07915	834.564	FALSE	37
2022-09-13	15:13:04	1.01553	835.579	FALSE	37
2022-09-13	15:13:04	0.86444	836.444	FALSE	37
2022-09-13	15:13:04	0.634771	837.079	FALSE	37
2022-09-13	15:13:05	0.522455	837.601	FALSE	37
2022-09-13	15:13:05	0.607494	838.209	FALSE	37
2022-09-13	15:13:05	0.6907	838.899	FALSE	37
2022-09-13	15:13:05	0.869682	839.769	FALSE	37
2022-09-13	15:13:06	0.703626	840.473	FALSE	37
2022-09-13	15:13:06	0.508817	840.981	FALSE	37
2022-09-13	15:13:06	0.429936	841.411	FALSE	37
2022-09-13	15:13:06	0.43472	841.846	FALSE	37
2022-09-13	15:13:07	0.452888	842.299	FALSE	37
2022-09-13	15:13:07	0.459198	842.758	FALSE	37
2022-09-13	15:13:07	0.423219	843.181	FALSE	37
2022-09-13	15:13:08	0.481438	843.663	FALSE	37
2022-09-13	15:13:08	0.701336	844.364	FALSE	37
2022-09-13	15:13:08	0.844898	845.209	FALSE	37
2022-09-13	15:13:08	0.564186	845.773	FALSE	37
2022-09-13	15:13:09	0.297824	846.071	FALSE	37
2022-09-13	15:13:09	-0.255559	846.071	FALSE	37
2022-09-13	15:13:09	-0.27047	846.071	FALSE	37
2022-09-13	15:13:09	0.303321	846.374	FALSE	37
2022-09-13	15:13:10	0.244593	846.619	FALSE	37
2022-09-13	15:13:10	0.272634	846.892	FALSE	37
2022-09-13	15:13:10	0.365305	847.257	FALSE	37
2022-09-13	15:13:11	0.201794	847.459	FALSE	37
2022-09-13	15:13:11	0.259911	847.719	FALSE	37
2022-09-13	15:13:11	-0.00762061	847.719	FALSE	37
2022-09-13	15:13:11	0.398537	848.117	FALSE	37
2022-09-13	15:13:12	0.324746	848.442	FALSE	37
2022-09-13	15:13:12	0.559199	849.001	FALSE	37
2022-09-13	15:13:12	0.253855	849.255	FALSE	37
2022-09-13	15:13:12	0.337621	849.593	FALSE	37
2022-09-13	15:13:13	0.439656	850.032	FALSE	37
2022-09-13	15:13:13	0.541794	850.574	FALSE	37
2022-09-13	15:13:13	0.118181	850.692	FALSE	37
2022-09-13	15:13:13	0.469122	851.161	FALSE	37
2022-09-13	15:13:14	0.174924	851.336	FALSE	37
2022-09-13	15:13:14	0.303473	851.64	FALSE	37
2022-09-13	15:13:14	0.16271	851.802	FALSE	37
2022-09-13	15:13:14	0.624593	852.427	FALSE	37
2022-09-13	15:13:15	0.479453	852.906	FALSE	37
2022-09-13	15:13:15	0.848715	853.755	FALSE	37
2022-09-13	15:13:15	0.619046	854.374	FALSE	37
2022-09-13	15:13:16	0.619198	854.993	FALSE	37
2022-09-13	15:13:16	0.369122	855.363	FALSE	37
2022-09-13	15:13:16	0.371463	855.734	FALSE	37
2022-09-13	15:13:16	0.255687	855.99	FALSE	37
2022-09-13	15:13:17	0.563931	856.554	FALSE	37
2022-09-13	15:13:17	0.244033	856.798	FALSE	37
2022-09-13	15:13:17	0.603422	857.401	FALSE	37
2022-09-13	15:13:17	0.162659	857.564	FALSE	37
2022-09-13	15:13:18	0.0998094	857.664	FALSE	37
2022-09-13	15:13:18	0.148512	857.812	FALSE	37
2022-09-13	15:13:18	0.869326	858.681	FALSE	37
2022-09-13	15:13:18	0.899148	859.581	FALSE	37
2022-09-13	15:13:19	2.10683	861.687	FALSE	37
2022-09-13	15:13:19	0.54215	862.229	FALSE	37
2022-09-13	15:13:19	0.741438	862.971	FALSE	37
2022-09-13	15:13:20	0.870802	863.842	FALSE	37
2022-09-13	15:13:20	0.580114	864.422	FALSE	37
2022-09-13	15:13:20	0.872786	865.295	FALSE	37
2022-09-13	15:13:20	1.03604	866.331	FALSE	37
2022-09-13	15:13:21	0.634313	866.965	FALSE	37
2022-09-13	15:13:21	0.822354	867.787	FALSE	37
2022-09-13	15:13:21	0.929631	868.717	FALSE	37
2022-09-13	15:13:21	1.73263	870.45	FALSE	37
2022-09-13	15:13:22	1.83925	872.289	FALSE	37
2022-09-13	15:13:22	1.80536	874.094	FALSE	37
2022-09-13	15:13:22	2.30704	876.401	FALSE	37
2022-09-13	15:13:22	1.66113	878.062	FALSE	37
2022-09-13	15:13:23	0.66215	878.725	FALSE	37
2022-09-13	15:13:23	0.505305	879.23	FALSE	37
2022-09-13	15:13:23	0.536654	879.766	FALSE	37
2022-09-13	15:13:24	0.328257	880.095	FALSE	37
2022-09-13	15:13:24	0.224898	880.32	FALSE	37
2022-09-13	15:13:24	0.268206	880.588	FALSE	37
2022-09-13	15:13:24	0.326374	880.914	FALSE	37
2022-09-13	15:13:25	0.395738	881.31	FALSE	37
2022-09-13	15:13:25	0.220725	881.531	FALSE	37
2022-09-13	15:13:25	0.0731936	881.604	FALSE	37
2022-09-13	15:13:25	0.185356	881.789	FALSE	37
2022-09-13	15:13:26	-0.0267046	881.789	FALSE	37
2022-09-13	15:13:26	0.0537534	881.843	FALSE	37
2022-09-13	15:13:26	-0.138918	881.843	FALSE	37
2022-09-13	15:13:26	-0.0124043	881.843	FALSE	37
2022-09-13	15:13:27	-0.310623	881.843	FALSE	37
2022-09-13	15:13:27	0.385051	882.228	FALSE	37
2022-09-13	15:13:27	0.346629	882.575	FALSE	37
2022-09-13	15:13:28	0.436501	883.011	FALSE	37
2022-09-13	15:13:28	0.319758	883.331	FALSE	37
2022-09-13	15:13:28	0.668562	883.999	FALSE	37
2022-09-13	15:13:28	0.376654	884.376	FALSE	37
2022-09-13	15:13:29	0.273906	884.65	FALSE	37
2022-09-13	15:13:29	0.413143	885.063	FALSE	37
2022-09-13	15:13:29	0.324186	885.387	FALSE	37
2022-09-13	15:13:29	0.253601	885.641	FALSE	37
2022-09-13	15:13:30	0.42785	886.069	FALSE	37
2022-09-13	15:13:30	0.250394	886.319	FALSE	37
2022-09-13	15:13:30	0.319911	886.639	FALSE	37
2022-09-13	15:13:30	0.14154	886.781	FALSE	37
2022-09-13	15:13:31	-0.0127606	886.781	FALSE	37
2022-09-13	15:13:31	-0.0704195	886.781	FALSE	37
2022-09-13	15:13:31	-0.146399	886.781	FALSE	37
2022-09-13	15:13:31	-0.190216	886.781	FALSE	37
2022-09-13	15:13:32	-0.394033	886.781	FALSE	37
2022-09-13	15:13:32	-0.399071	886.781	FALSE	37
2022-09-13	15:13:32	-0.488638	886.781	FALSE	37
2022-09-13	15:13:33	-0.404058	886.781	FALSE	37
2022-09-13	15:13:33	-0.39103	886.781	FALSE	37
2022-09-13	15:13:33	0.233753	887.014	FALSE	37
2022-09-13	15:13:33	0.957875	887.972	FALSE	37
2022-09-13	15:13:34	1.40856	889.381	FALSE	37
2022-09-13	15:13:34	1.76994	891.151	FALSE	37
2022-09-13	15:13:34	2.07614	893.227	FALSE	37
2022-09-13	15:13:34	2.73268	895.96	FALSE	37
2022-09-13	15:13:35	2.70515	898.665	FALSE	37
2022-09-13	15:13:35	4.01925	902.684	1	38
2022-09-13	15:13:35	2.07889	904.763	FALSE	38
2022-09-13	15:13:35	3.99222	908.755	1	39
2022-09-13	15:13:36	0.459249	909.214	FALSE	39
2022-09-13	15:13:36	0.96098	910.175	FALSE	39
2022-09-13	15:13:36	0.410089	910.585	FALSE	39
2022-09-13	15:13:37	0.262456	910.848	FALSE	39
2022-09-13	15:13:37	0.362201	911.21	FALSE	39
2022-09-13	15:13:37	0.199504	911.41	FALSE	39
2022-09-13	15:13:37	0.581081	911.991	FALSE	39
2022-09-13	15:13:38	0.141031	912.132	FALSE	39
2022-09-13	15:13:38	0.0533463	912.185	FALSE	39
2022-09-13	15:13:38	-0.155559	912.185	FALSE	39
2022-09-13	15:13:38	-0.140394	912.185	FALSE	39
2022-09-13	15:13:39	-0.00614479	912.185	FALSE	39
2022-09-13	15:13:39	0.141998	912.327	FALSE	39
2022-09-13	15:13:39	0.62617	912.953	FALSE	39
2022-09-13	15:13:39	0.225509	913.179	FALSE	39
2022-09-13	15:13:40	0.278079	913.457	FALSE	39
2022-09-13	15:13:40	0.0406237	913.497	FALSE	39
2022-09-13	15:13:40	0.0378247	913.535	FALSE	39
2022-09-13	15:13:41	-0.00151375	913.535	FALSE	39
2022-09-13	15:13:41	-0.0645671	913.535	FALSE	39
2022-09-13	15:13:41	0.0036262	913.539	FALSE	39
2022-09-13	15:13:41	0.148512	913.687	FALSE	39
2022-09-13	15:13:42	0.115636	913.803	FALSE	39
2022-09-13	15:13:42	0.195331	913.998	FALSE	39
2022-09-13	15:13:42	0.362354	914.361	FALSE	39
2022-09-13	15:13:42	0.388359	914.749	FALSE	39
2022-09-13	15:13:43	0.37584	915.125	FALSE	39
2022-09-13	15:13:43	0.311718	915.437	FALSE	39
2022-09-13	15:13:43	0.333651	915.77	FALSE	39
2022-09-13	15:13:43	0.322812	916.093	FALSE	39
2022-09-13	15:13:44	0.237519	916.331	FALSE	39
2022-09-13	15:13:44	0.0724811	916.403	FALSE	39
2022-09-13	15:13:44	-0.00879109	916.403	FALSE	39
2022-09-13	15:13:45	0.101082	916.504	FALSE	39
2022-09-13	15:13:45	0.782812	917.287	FALSE	39
2022-09-13	15:13:45	0.704949	917.992	FALSE	39
2022-09-13	15:13:45	0.478181	918.47	FALSE	39
2022-09-13	15:13:46	0.428613	918.899	FALSE	39
2022-09-13	15:13:46	0.510445	919.409	FALSE	39
2022-09-13	15:13:46	1.14235	920.552	FALSE	39
2022-09-13	15:13:46	0.293601	920.845	FALSE	39
2022-09-13	15:13:47	1.02164	921.867	FALSE	39
2022-09-13	15:13:47	0.894008	922.761	FALSE	39
2022-09-13	15:13:47	0.326679	923.087	FALSE	39
2022-09-13	15:13:47	0.276959	923.364	FALSE	39
2022-09-13	15:13:48	0.362812	923.727	FALSE	39
2022-09-13	15:13:48	0.297468	924.025	FALSE	39
2022-09-13	15:13:48	2.78622	926.811	FALSE	39
2022-09-13	15:13:49	2.871	929.682	FALSE	39
2022-09-13	15:13:49	3.95645	933.638	1	40
2022-09-13	15:13:49	3.91294	937.551	1	41
2022-09-13	15:13:49	5.64754	943.199	1	42
2022-09-13	15:13:50	2.43472	945.634	FALSE	42
2022-09-13	15:13:50	3.08006	948.714	1	43
2022-09-13	15:13:50	2.08016	950.794	FALSE	43
2022-09-13	15:13:50	2.72943	953.523	FALSE	43
2022-09-13	15:13:51	1.56291	955.086	FALSE	43
2022-09-13	15:13:51	2.26001	957.346	FALSE	43
2022-09-13	15:13:51	4.02943	961.376	1	44
2022-09-13	15:13:51	3.38882	964.764	1	45
2022-09-13	15:13:52	2.16128	966.926	FALSE	45
2022-09-13	15:13:52	1.58271	968.508	FALSE	45
2022-09-13	15:13:52	1.02653	969.535	FALSE	45
2022-09-13	15:13:53	1.40017	970.935	FALSE	45
2022-09-13	15:13:53	2.39869	973.334	FALSE	45
2022-09-13	15:13:53	1.91146	975.245	FALSE	45
2022-09-13	15:13:53	1.62037	976.866	FALSE	45
2022-09-13	15:13:54	2.21691	979.083	FALSE	45
2022-09-13	15:13:54	1.48027	980.563	FALSE	45
2022-09-13	15:13:54	0.572837	981.136	FALSE	45
2022-09-13	15:13:54	0.481845	981.617	FALSE	45
2022-09-13	15:13:55	0.434517	982.052	FALSE	45
2022-09-13	15:13:55	0.556348	982.608	FALSE	45
2022-09-13	15:13:55	0.634415	983.243	FALSE	45
2022-09-13	15:13:55	0.58841	983.831	FALSE	45
2022-09-13	15:13:56	0.64383	984.475	FALSE	45
2022-09-13	15:13:56	0.681794	985.157	FALSE	45
2022-09-13	15:13:56	0.558486	985.715	FALSE	45
2022-09-13	15:13:57	0.520522	986.236	FALSE	45
2022-09-13	15:13:57	0.99472	987.231	FALSE	45
2022-09-13	15:13:57	3.17055	990.401	1	46
2022-09-13	15:13:57	6.05187	996.453	1	47
2022-09-13	15:13:58	3.90235	1000.36	1	48
2022-09-13	15:13:58	5.05044	1005.41	1	49
2022-09-13	15:13:58	7.5452	1012.95	1	50
2022-09-13	15:13:58	7.78749	1020.74	1	51
2022-09-13	15:13:59	6.76047	1027.5	1	52
2022-09-13	15:13:59	7.86276	1035.36	1	53
2022-09-13	15:13:59	5.46154	1040.82	1	54
2022-09-13	15:13:59	8.24886	1049.07	1	55
2022-09-13	15:14:00	7.86545	1056.94	1	56
2022-09-13	15:14:00	10.2895	1067.23	1	57
2022-09-13	15:14:00	11.6815	1078.91	1	58
2022-09-13	15:14:01	6.55243	1085.46	1	59
2022-09-13	15:14:01	4.10306	1089.56	1	60
2022-09-13	15:14:01	3.68118	1093.25	1	61
2022-09-13	15:14:01	4.51273	1097.76	1	62
2022-09-13	15:14:02	3.92113	1101.68	1	63
2022-09-13	15:14:02	1.70821	1103.39	FALSE	63
2022-09-13	15:14:02	0.893499	1104.28	FALSE	63
2022-09-13	15:14:02	1.34602	1105.63	FALSE	63
2022-09-13	15:14:03	1.91324	1107.54	FALSE	63
2022-09-13	15:14:03	1.76495	1109.3	FALSE	63
2022-09-13	15:14:03	2.15207	1111.46	FALSE	63
2022-09-13	15:14:03	1.0138	1112.47	FALSE	63
2022-09-13	15:14:04	0.844084	1113.31	FALSE	63
2022-09-13	15:14:04	0.453804	1113.77	FALSE	63
2022-09-13	15:14:04	0.172278	1113.94	FALSE	63
2022-09-13	15:14:05	0.188003	1114.13	FALSE	63

## Sheet: Daisy_prong_202291315844
						**GoPro Fitting: 1458
2022-09-13	15:08:45	0.501488
2022-09-13	15:08:45	0.474975
2022-09-13	15:08:45	0.45874
2022-09-13	15:08:45	0.478791
2022-09-13	15:08:46	0.480165
2022-09-13	15:08:46	0.509936
2022-09-13	15:08:46	0.856196
2022-09-13	15:08:46	1.6996
2022-09-13	15:08:47	2.23162
2022-09-13	15:08:47	1.39207
2022-09-13	15:08:47	0.899402
2022-09-13	15:08:47	1.04729
2022-09-13	15:08:48	1.11441
2022-09-13	15:08:48	1.52286
2022-09-13	15:08:48	1.5967
2022-09-13	15:08:49	1.24337
2022-09-13	15:08:49	1.19538
2022-09-13	15:08:49	1.13172
2022-09-13	15:08:49	1.13162
2022-09-13	15:08:50	1.04057
2022-09-13	15:08:50	0.949428
2022-09-13	15:08:50	0.766577
2022-09-13	15:08:50	0.839198
2022-09-13	15:08:51	0.63584
2022-09-13	15:08:51	0.688562
2022-09-13	15:08:51	0.461998
2022-09-13	15:08:51	0.484135
2022-09-13	15:08:52	0.341234
2022-09-13	15:08:52	0.577214
2022-09-13	15:08:52	0.742405
2022-09-13	15:08:53	0.554618
2022-09-13	15:08:53	0.412583
2022-09-13	15:08:53	0.321234
2022-09-13	15:08:53	0.370293
2022-09-13	15:08:54	0.334822
2022-09-13	15:08:54	0.50958
2022-09-13	15:08:54	0.215891
2022-09-13	15:08:54	0.345153
2022-09-13	15:08:55	0.205
2022-09-13	15:08:55	0.379148
2022-09-13	15:08:55	0.472328
2022-09-13	15:08:55	0.356196
2022-09-13	15:08:56	0.518995
2022-09-13	15:08:56	0.495993
2022-09-13	15:08:56	0.432685
2022-09-13	15:08:56	0.48902
2022-09-13	15:08:57	0.455942
2022-09-13	15:08:57	0.476552
2022-09-13	15:08:57	0.453193
2022-09-13	15:08:58	0.625051
2022-09-13	15:08:58	1.05284
2022-09-13	15:08:58	0.799504
2022-09-13	15:08:58	0.371107
2022-09-13	15:08:59	0.444135
2022-09-13	15:08:59	0.533702
2022-09-13	15:08:59	0.163168
2022-09-13	15:08:59	0.268359
2022-09-13	15:09:00	0.152685
2022-09-13	15:09:00	0.0303946
2022-09-13	15:09:00	-0.432302
2022-09-13	15:09:00	-0.45388
2022-09-13	15:09:01	-0.322888
2022-09-13	15:09:01	-0.276119
2022-09-13	15:09:01	0.155382
2022-09-13	15:09:02	0.240725
2022-09-13	15:09:02	0.759504
2022-09-13	15:09:02	1.15426
2022-09-13	15:09:02	0.593855
2022-09-13	15:09:03	0.315891
2022-09-13	15:09:03	0.185713
2022-09-13	15:09:03	-0.0999361
2022-09-13	15:09:03	-0.176577
2022-09-13	15:09:04	-0.276832
2022-09-13	15:09:04	0.000929014
2022-09-13	15:09:04	-0.128893
2022-09-13	15:09:04	0.0511071
2022-09-13	15:09:05	0.127952
2022-09-13	15:09:05	0.389224
2022-09-13	15:09:05	0.333397
2022-09-13	15:09:06	0.72327
2022-09-13	15:09:06	1.50006
2022-09-13	15:09:06	1.73487
2022-09-13	15:09:06	1.93711
2022-09-13	15:09:07	2.842
2022-09-13	15:09:07	1.86032
2022-09-13	15:09:07	2.21945
2022-09-13	15:09:07	1.34195
2022-09-13	15:09:08	2.03508
2022-09-13	15:09:08	1.04139
2022-09-13	15:09:08	0.793957
2022-09-13	15:09:09	0.738486
2022-09-13	15:09:09	0.536094
2022-09-13	15:09:09	0.0844404
2022-09-13	15:09:09	-0.0139819
2022-09-13	15:09:10	-0.0779005
2022-09-13	15:09:10	-0.330012
2022-09-13	15:09:10	-0.431183
2022-09-13	15:09:10	-0.314491
2022-09-13	15:09:11	-0.260496
2022-09-13	15:09:11	-0.134847
2022-09-13	15:09:11	-0.151692
2022-09-13	15:09:11	0.506629
2022-09-13	15:09:12	0.662863
2022-09-13	15:09:12	0.314567
2022-09-13	15:09:12	0.455585
2022-09-13	15:09:12	0.264542
2022-09-13	15:09:13	0.194415
2022-09-13	15:09:13	-0.12818
2022-09-13	15:09:13	-0.252099
2022-09-13	15:09:14	-0.387519
2022-09-13	15:09:14	-0.341972
2022-09-13	15:09:14	-0.409656
2022-09-13	15:09:14	-0.270267
2022-09-13	15:09:15	-0.187417
2022-09-13	15:09:15	-0.168842
2022-09-13	15:09:15	-0.628384
2022-09-13	15:09:15	-0.422989
2022-09-13	15:09:16	-0.311793
2022-09-13	15:09:16	0.1307
2022-09-13	15:09:16	0.267494
2022-09-13	15:09:16	1.33966
2022-09-13	15:09:17	2.77284
2022-09-13	15:09:17	3.12408
2022-09-13	15:09:17	2.95345
2022-09-13	15:09:18	0.75986
2022-09-13	15:09:18	1.59966
2022-09-13	15:09:18	0.589936
2022-09-13	15:09:18	1.58052
2022-09-13	15:09:19	0.563066
2022-09-13	15:09:19	1.97991
2022-09-13	15:09:19	0.988817
2022-09-13	15:09:19	2.2764
2022-09-13	15:09:20	0.548359
2022-09-13	15:09:20	0.278384
2022-09-13	15:09:20	0.37472
2022-09-13	15:09:20	0.240471
2022-09-13	15:09:21	0.496909
2022-09-13	15:09:21	0.196552
2022-09-13	15:09:21	0.281489
2022-09-13	15:09:22	0.164084
2022-09-13	15:09:22	0.303982
2022-09-13	15:09:22	0.2593
2022-09-13	15:09:22	0.368562
2022-09-13	15:09:23	0.424135
2022-09-13	15:09:23	0.252379
2022-09-13	15:09:23	0.26327
2022-09-13	15:09:23	0.181998
2022-09-13	15:09:24	0.307596
2022-09-13	15:09:24	0.183117
2022-09-13	15:09:24	2.05202
2022-09-13	15:09:24	1.00515
2022-09-13	15:09:25	1.80688
2022-09-13	15:09:25	1.13584
2022-09-13	15:09:25	2.80133
2022-09-13	15:09:26	1.01233
2022-09-13	15:09:26	1.13151
2022-09-13	15:09:26	0.336654
2022-09-13	15:09:26	0.226781
2022-09-13	15:09:27	0.42159
2022-09-13	15:09:27	0.222659
2022-09-13	15:09:27	0.723015
2022-09-13	15:09:27	0.816043
2022-09-13	15:09:28	0.716807
2022-09-13	15:09:28	1.60296
2022-09-13	15:09:28	1.53004
2022-09-13	15:09:28	1.88688
2022-09-13	15:09:29	1.21197
2022-09-13	15:09:29	2.06525
2022-09-13	15:09:29	1.22032
2022-09-13	15:09:30	2.5564
2022-09-13	15:09:30	0.952328
2022-09-13	15:09:30	2.51044
2022-09-13	15:09:30	1.05467
2022-09-13	15:09:31	3.64994
2022-09-13	15:09:31	1.54536
2022-09-13	15:09:31	1.14093
2022-09-13	15:09:31	0.706883
2022-09-13	15:09:32	0.569224
2022-09-13	15:09:32	1.17665
2022-09-13	15:09:32	0.751311
2022-09-13	15:09:32	1.25538
2022-09-13	15:09:33	0.978028
2022-09-13	15:09:33	0.728206
2022-09-13	15:09:33	1.78714
2022-09-13	15:09:34	0.99584
2022-09-13	15:09:34	2.6251
2022-09-13	15:09:34	1.30419
2022-09-13	15:09:34	2.95711
2022-09-13	15:09:35	1.48403
2022-09-13	15:09:35	2.53279
2022-09-13	15:09:35	2.00536
2022-09-13	15:09:35	2.01126
2022-09-13	15:09:36	2.00556
2022-09-13	15:09:36	1.91538
2022-09-13	15:09:36	1.70815
2022-09-13	15:09:36	1.43182
2022-09-13	15:09:37	0.916094
2022-09-13	15:09:37	2.30627
2022-09-13	15:09:37	1.59879
2022-09-13	15:09:38	3.16118
2022-09-13	15:09:38	1.83599
2022-09-13	15:09:38	2.1737
2022-09-13	15:09:38	1.84047
2022-09-13	15:09:39	1.25212
2022-09-13	15:09:39	2.2052
2022-09-13	15:09:39	1.23034
2022-09-13	15:09:39	1.73742
2022-09-13	15:09:40	1.73533
2022-09-13	15:09:40	2.74123
2022-09-13	15:09:40	1.1819
2022-09-13	15:09:40	1.95752
2022-09-13	15:09:41	2.20454
2022-09-13	15:09:41	2.20088
2022-09-13	15:09:41	2.12307
2022-09-13	15:09:42	2.64724
2022-09-13	15:09:42	1.35375
2022-09-13	15:09:42	3.35263
2022-09-13	15:09:42	1.13197
2022-09-13	15:09:43	3.36235
2022-09-13	15:09:43	0.403015
2022-09-13	15:09:43	0.808664
2022-09-13	15:09:43	0.484644
2022-09-13	15:09:44	1.05553
2022-09-13	15:09:44	0.782455
2022-09-13	15:09:44	1.25721
2022-09-13	15:09:44	1.25599
2022-09-13	15:09:45	1.68816
2022-09-13	15:09:45	1.42541
2022-09-13	15:09:45	2.43167
2022-09-13	15:09:46	2.05238
2022-09-13	15:09:46	2.1537
2022-09-13	15:09:46	1.1109
2022-09-13	15:09:46	1.29411
2022-09-13	15:09:47	0.310751
2022-09-13	15:09:47	0.705
2022-09-13	15:09:47	0.658741
2022-09-13	15:09:47	2.71558
2022-09-13	15:09:48	1.37981
2022-09-13	15:09:48	2.13915
2022-09-13	15:09:48	2.69508
2022-09-13	15:09:48	3.67518
2022-09-13	15:09:49	2.82154
2022-09-13	15:09:49	1.44729
2022-09-13	15:09:49	1.23767
2022-09-13	15:09:50	0.578791
2022-09-13	15:09:50	0.195687
2022-09-13	15:09:50	0.575026
2022-09-13	15:09:50	0.275687
2022-09-13	15:09:51	1.04134
2022-09-13	15:09:51	1.03747
2022-09-13	15:09:51	2.85207
2022-09-13	15:09:51	2.31116
2022-09-13	15:09:52	2.41396
2022-09-13	15:09:52	1.19314
2022-09-13	15:09:52	1.68836
2022-09-13	15:09:52	1.54215
2022-09-13	15:09:53	1.69589
2022-09-13	15:09:53	1.97752
2022-09-13	15:09:53	2.56785
2022-09-13	15:09:54	1.54653
2022-09-13	15:09:54	2.72205
2022-09-13	15:09:54	1.24917
2022-09-13	15:09:54	2.62673
2022-09-13	15:09:55	1.78261
2022-09-13	15:09:55	1.96174
2022-09-13	15:09:55	0.971616
2022-09-13	15:09:55	0.945458
2022-09-13	15:09:56	1.49243
2022-09-13	15:09:56	0.774568
2022-09-13	15:09:56	1.54907
2022-09-13	15:09:56	0.820522
2022-09-13	15:09:57	2.16556
2022-09-13	15:09:57	0.647239
2022-09-13	15:09:57	1.51635
2022-09-13	15:09:58	1.15859
2022-09-13	15:09:58	0.641132
2022-09-13	15:09:58	1.00627
2022-09-13	15:09:58	0.634873
2022-09-13	15:09:59	0.468206
2022-09-13	15:09:59	0.508613
2022-09-13	15:09:59	0.252328
2022-09-13	15:09:59	0.646425
2022-09-13	15:10:00	0.572583
2022-09-13	15:10:00	0.803779
2022-09-13	15:10:00	1.27818
2022-09-13	15:10:00	3.60388
2022-09-13	15:10:01	5.54454
2022-09-13	15:10:01	9.70688
2022-09-13	15:10:01	4.29355
2022-09-13	15:10:02	2.07955
2022-09-13	15:10:02	0.66388
2022-09-13	15:10:02	0.397265
2022-09-13	15:10:02	0.339962
2022-09-13	15:10:03	0.297061
2022-09-13	15:10:03	0.293753
2022-09-13	15:10:03	0.487697
2022-09-13	15:10:03	0.144797
2022-09-13	15:10:04	0.511107
2022-09-13	15:10:04	0.233753
2022-09-13	15:10:04	0.488512
2022-09-13	15:10:04	0.434364
2022-09-13	15:10:05	0.587494
2022-09-13	15:10:05	0.579555
2022-09-13	15:10:05	0.845102
2022-09-13	15:10:06	1.10546
2022-09-13	15:10:06	0.743728
2022-09-13	15:10:06	0.518842
2022-09-13	15:10:06	0.101845
2022-09-13	15:10:07	0.277265
2022-09-13	15:10:07	0.138588
2022-09-13	15:10:07	0.286222
2022-09-13	15:10:07	0.168613
2022-09-13	15:10:08	0.346272
2022-09-13	15:10:08	0.357977
2022-09-13	15:10:08	0.18556
2022-09-13	15:10:08	0.411718
2022-09-13	15:10:09	0.14383
2022-09-13	15:10:09	0.419555
2022-09-13	15:10:09	0.0829136
2022-09-13	15:10:10	0.346374
2022-09-13	15:10:10	0.140929
2022-09-13	15:10:10	0.315331
2022-09-13	15:10:10	0.321998
2022-09-13	15:10:11	0.447647
2022-09-13	15:10:11	1.71243
2022-09-13	15:10:11	1.72123
2022-09-13	15:10:11	2.92856
2022-09-13	15:10:12	1.6167
2022-09-13	15:10:12	3.93716
2022-09-13	15:10:12	1.23462
2022-09-13	15:10:12	1.91446
2022-09-13	15:10:13	1.31711
2022-09-13	15:10:13	0.704593
2022-09-13	15:10:13	1.5163
2022-09-13	15:10:14	0.3707
2022-09-13	15:10:14	1.51508
2022-09-13	15:10:14	0.941285
2022-09-13	15:10:14	0.555229
2022-09-13	15:10:15	1.04953
2022-09-13	15:10:15	0.306476
2022-09-13	15:10:15	0.722812
2022-09-13	15:10:15	0.258995
2022-09-13	15:10:16	0.233194
2022-09-13	15:10:16	0.23925
2022-09-13	15:10:16	0.229428
2022-09-13	15:10:16	0.15411
2022-09-13	15:10:17	0.234517
2022-09-13	15:10:17	0.065102
2022-09-13	15:10:17	0.00774832
2022-09-13	15:10:18	0.0270867
2022-09-13	15:10:18	0.143117
2022-09-13	15:10:18	1.78897
2022-09-13	15:10:18	2.84871
2022-09-13	15:10:19	1.57981
2022-09-13	15:10:19	3.07019
2022-09-13	15:10:19	0.84841
2022-09-13	15:10:19	3.282
2022-09-13	15:10:20	0.396756
2022-09-13	15:10:20	0.644542
2022-09-13	15:10:20	0.342608
2022-09-13	15:10:20	0.42327
2022-09-13	15:10:21	0.585814
2022-09-13	15:10:21	0.605662
2022-09-13	15:10:21	0.861285
2022-09-13	15:10:22	0.934974
2022-09-13	15:10:22	0.984288
2022-09-13	15:10:22	0.819707
2022-09-13	15:10:22	0.687086
2022-09-13	15:10:23	0.667087
2022-09-13	15:10:23	0.560471
2022-09-13	15:10:23	0.632786
2022-09-13	15:10:23	0.786374
2022-09-13	15:10:24	0.466374
2022-09-13	15:10:24	1.33854
2022-09-13	15:10:24	0.834109
2022-09-13	15:10:24	0.280674
2022-09-13	15:10:25	0.370954
2022-09-13	15:10:25	0.19355
2022-09-13	15:10:25	0.37243
2022-09-13	15:10:26	0.538333
2022-09-13	15:10:26	0.228155
2022-09-13	15:10:26	0.364847
2022-09-13	15:10:26	0.374771
2022-09-13	15:10:27	0.371107
2022-09-13	15:10:27	0.28215
2022-09-13	15:10:27	0.407137
2022-09-13	15:10:27	0.425254
2022-09-13	15:10:28	0.270038
2022-09-13	15:10:28	0.27925
2022-09-13	15:10:28	0.167799
2022-09-13	15:10:28	0.294466
2022-09-13	15:10:29	0.815636
2022-09-13	15:10:29	1.3619
2022-09-13	15:10:29	2.61304
2022-09-13	15:10:29	1.84765
2022-09-13	15:10:30	2.53177
2022-09-13	15:10:30	1.33981
2022-09-13	15:10:30	1.05131
2022-09-13	15:10:31	0.875026
2022-09-13	15:10:31	0.85986
2022-09-13	15:10:31	0.581641
2022-09-13	15:10:31	0.76159
2022-09-13	15:10:32	0.805916
2022-09-13	15:10:32	1.51289
2022-09-13	15:10:32	2.61167
2022-09-13	15:10:32	5.21563
2022-09-13	15:10:33	4.47513
2022-09-13	15:10:33	4.288
2022-09-13	15:10:33	0.822252
2022-09-13	15:10:33	1.19294
2022-09-13	15:10:34	1.10347
2022-09-13	15:10:34	1.28632
2022-09-13	15:10:34	0.962659
2022-09-13	15:10:35	0.20612
2022-09-13	15:10:35	0.116247
2022-09-13	15:10:35	-0.138511
2022-09-13	15:10:35	-0.311692
2022-09-13	15:10:36	-0.528536
2022-09-13	15:10:36	-0.526043
2022-09-13	15:10:36	-0.37902
2022-09-13	15:10:36	-0.468536
2022-09-13	15:10:37	-0.228435
2022-09-13	15:10:37	-0.326043
2022-09-13	15:10:37	-0.162277
2022-09-13	15:10:37	-0.368333
2022-09-13	15:10:38	0.307799
2022-09-13	15:10:38	0.30271
2022-09-13	15:10:38	0.537824
2022-09-13	15:10:39	1.01701
2022-09-13	15:10:39	1.19681
2022-09-13	15:10:39	0.788715
2022-09-13	15:10:39	0.498181
2022-09-13	15:10:40	0.26098
2022-09-13	15:10:40	0.425204
2022-09-13	15:10:40	0.328766
2022-09-13	15:10:40	0.315585
2022-09-13	15:10:41	0.267494
2022-09-13	15:10:41	0.337061
2022-09-13	15:10:41	0.393448
2022-09-13	15:10:41	0.434313
2022-09-13	15:10:42	0.446934
2022-09-13	15:10:42	1.33726
2022-09-13	15:10:42	2.46144
2022-09-13	15:10:43	3.50286
2022-09-13	15:10:43	2.33843
2022-09-13	15:10:43	1.68592
2022-09-13	15:10:43	0.854466
2022-09-13	15:10:44	0.133194
2022-09-13	15:10:44	0.460267
2022-09-13	15:10:44	0.174822
2022-09-13	15:10:44	0.493193
2022-09-13	15:10:45	0.251819
2022-09-13	15:10:45	0.521031
2022-09-13	15:10:45	0.373041
2022-09-13	15:10:45	0.532125
2022-09-13	15:10:46	0.353601
2022-09-13	15:10:46	0.461285
2022-09-13	15:10:46	0.25584
2022-09-13	15:10:47	0.516247
2022-09-13	15:10:47	0.212634
2022-09-13	15:10:47	0.470191
2022-09-13	15:10:47	0.281692
2022-09-13	15:10:48	0.322354
2022-09-13	15:10:48	0.373448
2022-09-13	15:10:48	0.213448
2022-09-13	15:10:48	0.285611
2022-09-13	15:10:49	0.286272
2022-09-13	15:10:49	0.210496
2022-09-13	15:10:49	0.317468
2022-09-13	15:10:49	0.384186
2022-09-13	15:10:50	0.134313
2022-09-13	15:10:50	0.110395
2022-09-13	15:10:50	-0.0350506
2022-09-13	15:10:51	0.0227102
2022-09-13	15:10:51	0.0416415
2022-09-13	15:10:51	-0.161565
2022-09-13	15:10:51	-0.00843487
2022-09-13	15:10:52	0.112481
2022-09-13	15:10:52	0.251514
2022-09-13	15:10:52	0.220878
2022-09-13	15:10:52	0.333295
2022-09-13	15:10:53	0.43355
2022-09-13	15:10:53	0.365967
2022-09-13	15:10:53	0.442405
2022-09-13	15:10:53	0.404135
2022-09-13	15:10:54	0.481234
2022-09-13	15:10:54	0.548206
2022-09-13	15:10:54	1.1908
2022-09-13	15:10:55	1.22586
2022-09-13	15:10:55	0.840725
2022-09-13	15:10:55	0.784287
2022-09-13	15:10:55	0.458333
2022-09-13	15:10:56	0.705255
2022-09-13	15:10:56	0.73584
2022-09-13	15:10:56	0.911412
2022-09-13	15:10:56	0.990903
2022-09-13	15:10:57	0.299249
2022-09-13	15:10:57	0.487087
2022-09-13	15:10:57	0.410954
2022-09-13	15:10:57	0.353143
2022-09-13	15:10:58	0.299199
2022-09-13	15:10:58	0.249886
2022-09-13	15:10:58	0.358333
2022-09-13	15:10:59	0.367952
2022-09-13	15:10:59	0.301947
2022-09-13	15:10:59	0.465204
2022-09-13	15:10:59	0.380725
2022-09-13	15:11:00	0.610242
2022-09-13	15:11:00	0.832176
2022-09-13	15:11:00	0.780013
2022-09-13	15:11:00	2.23299
2022-09-13	15:11:01	4.13675
2022-09-13	15:11:01	3.71309
2022-09-13	15:11:01	4.18098
2022-09-13	15:11:01	3.08566
2022-09-13	15:11:02	2.07355
2022-09-13	15:11:02	4.2653
2022-09-13	15:11:02	5.24474
2022-09-13	15:11:03	4.28592
2022-09-13	15:11:03	1.64393
2022-09-13	15:11:03	0.490649
2022-09-13	15:11:03	0.352328
2022-09-13	15:11:04	0.31416
2022-09-13	15:11:04	0.332736
2022-09-13	15:11:04	0.361794
2022-09-13	15:11:04	0.511463
2022-09-13	15:11:05	0.477214
2022-09-13	15:11:05	0.504288
2022-09-13	15:11:05	0.359148
2022-09-13	15:11:05	0.50271
2022-09-13	15:11:06	0.461336
2022-09-13	15:11:06	0.332125
2022-09-13	15:11:06	0.565865
2022-09-13	15:11:07	0.456094
2022-09-13	15:11:07	0.42841
2022-09-13	15:11:07	0.533142
2022-09-13	15:11:07	0.583728
2022-09-13	15:11:08	0.432023
2022-09-13	15:11:08	0.377367
2022-09-13	15:11:08	0.443066
2022-09-13	15:11:08	0.554873
2022-09-13	15:11:09	0.365255
2022-09-13	15:11:09	0.463422
2022-09-13	15:11:09	0.485305
2022-09-13	15:11:09	0.318486
2022-09-13	15:11:10	0.166883
2022-09-13	15:11:10	0.198995
2022-09-13	15:11:10	0.14729
2022-09-13	15:11:11	0.385254
2022-09-13	15:11:11	0.271921
2022-09-13	15:11:11	0.22612
2022-09-13	15:11:11	0.329529
2022-09-13	15:11:12	0.176094
2022-09-13	15:11:12	0.140318
2022-09-13	15:11:12	0.141641
2022-09-13	15:11:12	0.0491733
2022-09-13	15:11:13	0.126272
2022-09-13	15:11:13	-0.11042
2022-09-13	15:11:13	-0.297697
2022-09-13	15:11:13	-0.297697
2022-09-13	15:11:14	-0.341717
2022-09-13	15:11:14	0.0484608
2022-09-13	15:11:14	2.02047
2022-09-13	15:11:15	1.33279
2022-09-13	15:11:15	2.06271
2022-09-13	15:11:15	2.68546
2022-09-13	15:11:15	5.6653
2022-09-13	15:11:16	5.95859
2022-09-13	15:11:16	5.69482
2022-09-13	15:11:16	3.38963
2022-09-13	15:11:16	1.32917
2022-09-13	15:11:17	0.432735
2022-09-13	15:11:17	0.271616
2022-09-13	15:11:17	0.253499
2022-09-13	15:11:17	0.178435
2022-09-13	15:11:18	0.225306
2022-09-13	15:11:18	0.271514
2022-09-13	15:11:18	0.239148
2022-09-13	15:11:19	-1.17571
2022-09-13	15:11:19	0.301896
2022-09-13	15:11:19	0.414822
2022-09-13	15:11:19	0.457468
2022-09-13	15:11:20	1.00907
2022-09-13	15:11:20	0.477824
2022-09-13	15:11:20	1.81085
2022-09-13	15:11:20	0.955636
2022-09-13	15:11:21	1.51955
2022-09-13	15:11:21	1.36134
2022-09-13	15:11:21	1.39111
2022-09-13	15:11:21	1.55981
2022-09-13	15:11:22	0.873906
2022-09-13	15:11:22	1.28897
2022-09-13	15:11:22	1.11701
2022-09-13	15:11:23	0.743728
2022-09-13	15:11:23	1.56169
2022-09-13	15:11:23	0.7193
2022-09-13	15:11:23	1.49553
2022-09-13	15:11:24	0.733092
2022-09-13	15:11:24	1.59889
2022-09-13	15:11:24	0.794669
2022-09-13	15:11:24	2.07284
2022-09-13	15:11:25	1.8594
2022-09-13	15:11:25	1.55696
2022-09-13	15:11:25	1.31874
2022-09-13	15:11:25	0.970242
2022-09-13	15:11:26	0.715738
2022-09-13	15:11:26	0.933855
2022-09-13	15:11:26	0.529173
2022-09-13	15:11:27	0.682048
2022-09-13	15:11:27	0.403728
2022-09-13	15:11:27	0.195331
2022-09-13	15:11:27	0.291311
2022-09-13	15:11:28	0.0363997
2022-09-13	15:11:28	0.155331
2022-09-13	15:11:28	-0.0322517
2022-09-13	15:11:28	-0.0271117
2022-09-13	15:11:29	-0.13042
2022-09-13	15:11:29	0.0503946
2022-09-13	15:11:29	0.0699875
2022-09-13	15:11:29	0.0800638
2022-09-13	15:11:30	-0.298562
2022-09-13	15:11:30	-0.396425
2022-09-13	15:11:30	-0.454491
2022-09-13	15:11:31	-0.25103
2022-09-13	15:11:31	-0.159376
2022-09-13	15:11:31	-0.1093
2022-09-13	15:11:31	0.111769
2022-09-13	15:11:32	0.146272
2022-09-13	15:11:32	0.439606
2022-09-13	15:11:32	0.421387
2022-09-13	15:11:32	0.583626
2022-09-13	15:11:33	0.39701
2022-09-13	15:11:33	0.577316
2022-09-13	15:11:33	0.241794
2022-09-13	15:11:33	0.490191
2022-09-13	15:11:34	0.322812
2022-09-13	15:11:34	0.627646
2022-09-13	15:11:34	0.259402
2022-09-13	15:11:35	0.609835
2022-09-13	15:11:35	0.369479
2022-09-13	15:11:35	0.394059
2022-09-13	15:11:35	0.613244
2022-09-13	15:11:36	0.972634
2022-09-13	15:11:36	0.50673
2022-09-13	15:11:36	1.46648
2022-09-13	15:11:36	0.478537
2022-09-13	15:11:37	0.616043
2022-09-13	15:11:37	0.288003
2022-09-13	15:11:37	0.295636
2022-09-13	15:11:37	0.212837
2022-09-13	15:11:38	0.290751
2022-09-13	15:11:38	0.25528
2022-09-13	15:11:38	0.164746
2022-09-13	15:11:39	-0.0570862
2022-09-13	15:11:39	0.369936
2022-09-13	15:11:39	0.234975
2022-09-13	15:11:39	0.752684
2022-09-13	15:11:40	0.194975
2022-09-13	15:11:40	0.557824
2022-09-13	15:11:40	0.192634
2022-09-13	15:11:40	0.318639
2022-09-13	15:11:41	0.422761
2022-09-13	15:11:41	0.287443
2022-09-13	15:11:41	0.150293
2022-09-13	15:11:41	0.302456
2022-09-13	15:11:42	-0.0147962
2022-09-13	15:11:42	-0.218257
2022-09-13	15:11:42	-0.146959
2022-09-13	15:11:43	-0.097646
2022-09-13	15:11:43	0.0507508
2022-09-13	15:11:43	0.0152293
2022-09-13	15:11:43	-0.013931
2022-09-13	15:11:44	-0.0285875
2022-09-13	15:11:44	-0.0496562
2022-09-13	15:11:44	0.0662216
2022-09-13	15:11:44	0.0957381
2022-09-13	15:11:45	0.15416
2022-09-13	15:11:45	0.329275
2022-09-13	15:11:45	0.416349
2022-09-13	15:11:45	0.680827
2022-09-13	15:11:46	0.414059
2022-09-13	15:11:46	0.346527
2022-09-13	15:11:46	0.438232
2022-09-13	15:11:47	0.333804
2022-09-13	15:11:47	0.255484
2022-09-13	15:11:47	0.145611
2022-09-13	15:11:47	0.0329391
2022-09-13	15:11:48	-0.126908
2022-09-13	15:11:48	-0.256017
2022-09-13	15:11:48	-0.105534
2022-09-13	15:11:48	-0.0615137
2022-09-13	15:11:49	-0.0123535
2022-09-13	15:11:49	-0.258918
2022-09-13	15:11:49	-0.181768
2022-09-13	15:11:49	-0.0445672
2022-09-13	15:11:50	0.00265929
2022-09-13	15:11:50	0.0347712
2022-09-13	15:11:50	0.0451529
2022-09-13	15:11:50	0.111667
2022-09-13	15:11:51	0.414008
2022-09-13	15:11:51	0.405458
2022-09-13	15:11:51	0.280573
2022-09-13	15:11:52	0.288512
2022-09-13	15:11:52	1.11274
2022-09-13	15:11:52	0.377672
2022-09-13	15:11:52	0.424237
2022-09-13	15:11:53	0.385916
2022-09-13	15:11:53	0.426832
2022-09-13	15:11:53	0.369428
2022-09-13	15:11:53	0.423524
2022-09-13	15:11:54	0.429631
2022-09-13	15:11:54	0.428461
2022-09-13	15:11:54	0.341845
2022-09-13	15:11:55	0.468003
2022-09-13	15:11:55	0.453652
2022-09-13	15:11:55	0.459911
2022-09-13	15:11:55	0.396603
2022-09-13	15:11:56	0.379351
2022-09-13	15:11:56	0.425407
2022-09-13	15:11:56	0.423219
2022-09-13	15:11:56	0.492634
2022-09-13	15:11:57	0.40327
2022-09-13	15:11:57	0.353957
2022-09-13	15:11:57	0.54785
2022-09-13	15:11:57	0.499351
2022-09-13	15:11:58	0.461183
2022-09-13	15:11:58	0.434262
2022-09-13	15:11:58	0.458232
2022-09-13	15:11:58	0.404491
2022-09-13	15:11:59	0.455789
2022-09-13	15:11:59	0.438842
2022-09-13	15:11:59	0.42444
2022-09-13	15:12:00	0.405967
2022-09-13	15:12:00	0.405102
2022-09-13	15:12:00	0.444084
2022-09-13	15:12:00	0.327341
2022-09-13	15:12:01	0.468308
2022-09-13	15:12:01	0.460776
2022-09-13	15:12:01	0.455534
2022-09-13	15:12:01	0.469377
2022-09-13	15:12:02	0.46215
2022-09-13	15:12:02	0.430395
2022-09-13	15:12:02	0.527239
2022-09-13	15:12:02	0.483524
2022-09-13	15:12:03	0.45014
2022-09-13	15:12:03	0.452277
2022-09-13	15:12:03	0.451463
2022-09-13	15:12:04	0.480522
2022-09-13	15:12:04	0.447036
2022-09-13	15:12:04	0.453753
2022-09-13	15:12:04	0.394211
2022-09-13	15:12:05	0.475992
2022-09-13	15:12:05	0.447901
2022-09-13	15:12:05	0.36897
2022-09-13	15:12:05	0.471514
2022-09-13	15:12:06	0.477926
2022-09-13	15:12:06	0.468257
2022-09-13	15:12:06	0.480115
2022-09-13	15:12:06	0.480725
2022-09-13	15:12:07	0.444186
2022-09-13	15:12:07	0.471972
2022-09-13	15:12:07	0.465814
2022-09-13	15:12:08	0.462456
2022-09-13	15:12:08	0.463626
2022-09-13	15:12:08	0.459402
2022-09-13	15:12:08	0.451311
2022-09-13	15:12:09	0.472634
2022-09-13	15:12:09	0.445102
2022-09-13	15:12:09	0.452227
2022-09-13	15:12:09	0.452328
2022-09-13	15:12:10	0.448155
2022-09-13	15:12:10	0.455382
2022-09-13	15:12:10	0.461285
2022-09-13	15:12:10	0.456756
2022-09-13	15:12:11	0.452786
2022-09-13	15:12:11	0.458944
2022-09-13	15:12:11	0.453346
2022-09-13	15:12:12	0.466018
2022-09-13	15:12:12	0.447392
2022-09-13	15:12:12	0.455636
2022-09-13	15:12:12	0.453193
2022-09-13	15:12:13	0.458333
2022-09-13	15:12:13	0.466221
2022-09-13	15:12:13	0.421336
2022-09-13	15:12:13	0.450954
2022-09-13	15:12:14	0.440166
2022-09-13	15:12:14	0.434313
2022-09-13	15:12:14	0.444186
2022-09-13	15:12:14	0.451819
2022-09-13	15:12:15	0.47014
2022-09-13	15:12:15	0.475738
2022-09-13	15:12:15	0.929936
2022-09-13	15:12:16	2.60306
2022-09-13	15:12:16	2.36581
2022-09-13	15:12:16	1.81701
2022-09-13	15:12:16	0.495331
2022-09-13	15:12:17	0.270954
2022-09-13	15:12:17	0.384949
2022-09-13	15:12:17	0.343372
2022-09-13	15:12:17	0.145051
2022-09-13	15:12:18	0.160929
2022-09-13	15:12:18	0.135127
2022-09-13	15:12:18	0.144949
2022-09-13	15:12:18	0.145967
2022-09-13	15:12:19	0.165153
2022-09-13	15:12:19	0.0812852
2022-09-13	15:12:19	0.0113107
2022-09-13	15:12:20	0.0555855
2022-09-13	15:12:20	0.267494
2022-09-13	15:12:20	0.291361
2022-09-13	15:12:20	0.267799
2022-09-13	15:12:21	0.384797
2022-09-13	15:12:21	0.333448
2022-09-13	15:12:21	0.483066
2022-09-13	15:12:21	0.520216
2022-09-13	15:12:22	0.465814
2022-09-13	15:12:22	0.431412
2022-09-13	15:12:22	0.47243
2022-09-13	15:12:22	0.515941
2022-09-13	15:12:23	0.474313
2022-09-13	15:12:23	0.471769
2022-09-13	15:12:23	0.463779
2022-09-13	15:12:24	0.445865
2022-09-13	15:12:24	0.476756
2022-09-13	15:12:24	0.455229
2022-09-13	15:12:24	0.455534
2022-09-13	15:12:25	0.458232
2022-09-13	15:12:25	0.457468
2022-09-13	15:12:25	0.45584
2022-09-13	15:12:25	0.460013
2022-09-13	15:12:26	0.455789
2022-09-13	15:12:26	0.466069
2022-09-13	15:12:26	0.460623
2022-09-13	15:12:26	0.458028
2022-09-13	15:12:27	0.460623
2022-09-13	15:12:27	0.462965
2022-09-13	15:12:27	0.44388
2022-09-13	15:12:28	0.473092
2022-09-13	15:12:28	0.533448
2022-09-13	15:12:28	0.389428
2022-09-13	15:12:28	0.410751
2022-09-13	15:12:29	0.343524
2022-09-13	15:12:29	0.317214
2022-09-13	15:12:29	0.543982
2022-09-13	15:12:29	0.265356
2022-09-13	15:12:30	0.618893
2022-09-13	15:12:30	0.298334
2022-09-13	15:12:30	0.458333
2022-09-13	15:12:30	0.325
2022-09-13	15:12:31	0.606578
2022-09-13	15:12:31	0.363575
2022-09-13	15:12:31	0.504542
2022-09-13	15:12:32	0.541692
2022-09-13	15:12:32	0.544644
2022-09-13	15:12:32	0.45187
2022-09-13	15:12:32	0.56098
2022-09-13	15:12:33	0.497061
2022-09-13	15:12:33	0.754873
2022-09-13	15:12:33	1.28902
2022-09-13	15:12:33	1.21121
2022-09-13	15:12:34	1.27854
2022-09-13	15:12:34	1.73401
2022-09-13	15:12:34	1.68246
2022-09-13	15:12:34	1.40098
2022-09-13	15:12:35	1.0164
2022-09-13	15:12:35	0.466374
2022-09-13	15:12:35	0.28556
2022-09-13	15:12:36	0.607188
2022-09-13	15:12:36	0.23126
2022-09-13	15:12:36	0.675941
2022-09-13	15:12:36	0.839911
2022-09-13	15:12:37	1.03823
2022-09-13	15:12:37	0.778181
2022-09-13	15:12:37	0.554924
2022-09-13	15:12:37	0.71416
2022-09-13	15:12:38	0.383219
2022-09-13	15:12:38	0.914415
2022-09-13	15:12:38	1.12653
2022-09-13	15:12:38	2.31899
2022-09-13	15:12:39	1.31732
2022-09-13	15:12:39	0.752684
2022-09-13	15:12:39	0.877519
2022-09-13	15:12:40	0.282812
2022-09-13	15:12:40	0.917061
2022-09-13	15:12:40	0.520878
2022-09-13	15:12:40	1.26363
2022-09-13	15:12:41	0.929427
2022-09-13	15:12:41	1.35645
2022-09-13	15:12:41	3.76637
2022-09-13	15:12:41	2.22866
2022-09-13	15:12:42	2.78541
2022-09-13	15:12:42	1.48983
2022-09-13	15:12:42	2.40993
2022-09-13	15:12:42	0.992837
2022-09-13	15:12:43	0.867799
2022-09-13	15:12:43	0.853295
2022-09-13	15:12:43	0.412685
2022-09-13	15:12:44	0.463168
2022-09-13	15:12:44	0.636247
2022-09-13	15:12:44	0.940674
2022-09-13	15:12:44	0.971056
2022-09-13	15:12:45	1.33289
2022-09-13	15:12:45	3.55533
2022-09-13	15:12:45	2.61228
2022-09-13	15:12:45	3.04795
2022-09-13	15:12:46	1.68556
2022-09-13	15:12:46	1.29401
2022-09-13	15:12:46	0.356094
2022-09-13	15:12:46	0.236858
2022-09-13	15:12:47	0.450802
2022-09-13	15:12:47	0.0867305
2022-09-13	15:12:47	0.149733
2022-09-13	15:12:48	-0.119071
2022-09-13	15:12:48	-0.236017
2022-09-13	15:12:48	-0.358155
2022-09-13	15:12:48	-0.230369
2022-09-13	15:12:49	0.225356
2022-09-13	15:12:49	1.36892
2022-09-13	15:12:49	3.0879
2022-09-13	15:12:49	0.249937
2022-09-13	15:12:50	0.248868
2022-09-13	15:12:50	0.515331
2022-09-13	15:12:50	0.162965
2022-09-13	15:12:50	0.370445
2022-09-13	15:12:51	0.664949
2022-09-13	15:12:51	0.250649
2022-09-13	15:12:51	0.366374
2022-09-13	15:12:52	0.508359
2022-09-13	15:12:52	0.161794
2022-09-13	15:12:52	0.290496
2022-09-13	15:12:52	0.159402
2022-09-13	15:12:53	0.182761
2022-09-13	15:12:53	0.0834734
2022-09-13	15:12:53	0.0905982
2022-09-13	15:12:53	0.584338
2022-09-13	15:12:54	0.720572
2022-09-13	15:12:54	1.28933
2022-09-13	15:12:54	2.23701
2022-09-13	15:12:54	2.4106
2022-09-13	15:12:55	1.60795
2022-09-13	15:12:55	0.383066
2022-09-13	15:12:55	0.386374
2022-09-13	15:12:56	1.09324
2022-09-13	15:12:56	2.13955
2022-09-13	15:12:56	7.57619
2022-09-13	15:12:56	11.4125
2022-09-13	15:12:57	7.49543
2022-09-13	15:12:57	3.5593
2022-09-13	15:12:57	2.24322
2022-09-13	15:12:57	1.52006
2022-09-13	15:12:58	1.15385
2022-09-13	15:12:58	2.02927
2022-09-13	15:12:58	3.10123
2022-09-13	15:12:58	1.93726
2022-09-13	15:12:59	1.41329
2022-09-13	15:12:59	1.11192
2022-09-13	15:12:59	1.26195
2022-09-13	15:13:00	1.19121
2022-09-13	15:13:00	1.02434
2022-09-13	15:13:00	0.947341
2022-09-13	15:13:00	0.832532
2022-09-13	15:13:01	0.936298
2022-09-13	15:13:01	1.27548
2022-09-13	15:13:01	1.51345
2022-09-13	15:13:01	1.47676
2022-09-13	15:13:02	1.42246
2022-09-13	15:13:02	1.31971
2022-09-13	15:13:02	1.29411
2022-09-13	15:13:02	1.13803
2022-09-13	15:13:03	1.0338
2022-09-13	15:13:03	1.128
2022-09-13	15:13:03	1.19177
2022-09-13	15:13:04	1.07915
2022-09-13	15:13:04	1.01553
2022-09-13	15:13:04	0.86444
2022-09-13	15:13:04	0.634771
2022-09-13	15:13:05	0.522455
2022-09-13	15:13:05	0.607494
2022-09-13	15:13:05	0.6907
2022-09-13	15:13:05	0.869682
2022-09-13	15:13:06	0.703626
2022-09-13	15:13:06	0.508817
2022-09-13	15:13:06	0.429936
2022-09-13	15:13:06	0.43472
2022-09-13	15:13:07	0.452888
2022-09-13	15:13:07	0.459198
2022-09-13	15:13:07	0.423219
2022-09-13	15:13:08	0.481438
2022-09-13	15:13:08	0.701336
2022-09-13	15:13:08	0.844898
2022-09-13	15:13:08	0.564186
2022-09-13	15:13:09	0.297824
2022-09-13	15:13:09	-0.255559
2022-09-13	15:13:09	-0.27047
2022-09-13	15:13:09	0.303321
2022-09-13	15:13:10	0.244593
2022-09-13	15:13:10	0.272634
2022-09-13	15:13:10	0.365305
2022-09-13	15:13:11	0.201794
2022-09-13	15:13:11	0.259911
2022-09-13	15:13:11	-0.00762061
2022-09-13	15:13:11	0.398537
2022-09-13	15:13:12	0.324746
2022-09-13	15:13:12	0.559199
2022-09-13	15:13:12	0.253855
2022-09-13	15:13:12	0.337621
2022-09-13	15:13:13	0.439656
2022-09-13	15:13:13	0.541794
2022-09-13	15:13:13	0.118181
2022-09-13	15:13:13	0.469122
2022-09-13	15:13:14	0.174924
2022-09-13	15:13:14	0.303473
2022-09-13	15:13:14	0.16271
2022-09-13	15:13:14	0.624593
2022-09-13	15:13:15	0.479453
2022-09-13	15:13:15	0.848715
2022-09-13	15:13:15	0.619046
2022-09-13	15:13:16	0.619198
2022-09-13	15:13:16	0.369122
2022-09-13	15:13:16	0.371463
2022-09-13	15:13:16	0.255687
2022-09-13	15:13:17	0.563931
2022-09-13	15:13:17	0.244033
2022-09-13	15:13:17	0.603422
2022-09-13	15:13:17	0.162659
2022-09-13	15:13:18	0.0998094
2022-09-13	15:13:18	0.148512
2022-09-13	15:13:18	0.869326
2022-09-13	15:13:18	0.899148
2022-09-13	15:13:19	2.10683
2022-09-13	15:13:19	0.54215
2022-09-13	15:13:19	0.741438
2022-09-13	15:13:20	0.870802
2022-09-13	15:13:20	0.580114
2022-09-13	15:13:20	0.872786
2022-09-13	15:13:20	1.03604
2022-09-13	15:13:21	0.634313
2022-09-13	15:13:21	0.822354
2022-09-13	15:13:21	0.929631
2022-09-13	15:13:21	1.73263
2022-09-13	15:13:22	1.83925
2022-09-13	15:13:22	1.80536
2022-09-13	15:13:22	2.30704
2022-09-13	15:13:22	1.66113
2022-09-13	15:13:23	0.66215
2022-09-13	15:13:23	0.505305
2022-09-13	15:13:23	0.536654
2022-09-13	15:13:24	0.328257
2022-09-13	15:13:24	0.224898
2022-09-13	15:13:24	0.268206
2022-09-13	15:13:24	0.326374
2022-09-13	15:13:25	0.395738
2022-09-13	15:13:25	0.220725
2022-09-13	15:13:25	0.0731936
2022-09-13	15:13:25	0.185356
2022-09-13	15:13:26	-0.0267046
2022-09-13	15:13:26	0.0537534
2022-09-13	15:13:26	-0.138918
2022-09-13	15:13:26	-0.0124043
2022-09-13	15:13:27	-0.310623
2022-09-13	15:13:27	0.385051
2022-09-13	15:13:27	0.346629
2022-09-13	15:13:28	0.436501
2022-09-13	15:13:28	0.319758
2022-09-13	15:13:28	0.668562
2022-09-13	15:13:28	0.376654
2022-09-13	15:13:29	0.273906
2022-09-13	15:13:29	0.413143
2022-09-13	15:13:29	0.324186
2022-09-13	15:13:29	0.253601
2022-09-13	15:13:30	0.42785
2022-09-13	15:13:30	0.250394
2022-09-13	15:13:30	0.319911
2022-09-13	15:13:30	0.14154
2022-09-13	15:13:31	-0.0127606
2022-09-13	15:13:31	-0.0704195
2022-09-13	15:13:31	-0.146399
2022-09-13	15:13:31	-0.190216
2022-09-13	15:13:32	-0.394033
2022-09-13	15:13:32	-0.399071
2022-09-13	15:13:32	-0.488638
2022-09-13	15:13:33	-0.404058
2022-09-13	15:13:33	-0.39103
2022-09-13	15:13:33	0.233753
2022-09-13	15:13:33	0.957875
2022-09-13	15:13:34	1.40856
2022-09-13	15:13:34	1.76994
2022-09-13	15:13:34	2.07614
2022-09-13	15:13:34	2.73268
2022-09-13	15:13:35	2.70515
2022-09-13	15:13:35	4.01925
2022-09-13	15:13:35	2.07889
2022-09-13	15:13:35	3.99222
2022-09-13	15:13:36	0.459249
2022-09-13	15:13:36	0.96098
2022-09-13	15:13:36	0.410089
2022-09-13	15:13:37	0.262456
2022-09-13	15:13:37	0.362201
2022-09-13	15:13:37	0.199504
2022-09-13	15:13:37	0.581081
2022-09-13	15:13:38	0.141031
2022-09-13	15:13:38	0.0533463
2022-09-13	15:13:38	-0.155559
2022-09-13	15:13:38	-0.140394
2022-09-13	15:13:39	-0.00614479
2022-09-13	15:13:39	0.141998
2022-09-13	15:13:39	0.62617
2022-09-13	15:13:39	0.225509
2022-09-13	15:13:40	0.278079
2022-09-13	15:13:40	0.0406237
2022-09-13	15:13:40	0.0378247
2022-09-13	15:13:41	-0.00151375
2022-09-13	15:13:41	-0.0645671
2022-09-13	15:13:41	0.0036262
2022-09-13	15:13:41	0.148512
2022-09-13	15:13:42	0.115636
2022-09-13	15:13:42	0.195331
2022-09-13	15:13:42	0.362354
2022-09-13	15:13:42	0.388359
2022-09-13	15:13:43	0.37584
2022-09-13	15:13:43	0.311718
2022-09-13	15:13:43	0.333651
2022-09-13	15:13:43	0.322812
2022-09-13	15:13:44	0.237519
2022-09-13	15:13:44	0.0724811
2022-09-13	15:13:44	-0.00879109
2022-09-13	15:13:45	0.101082
2022-09-13	15:13:45	0.782812
2022-09-13	15:13:45	0.704949
2022-09-13	15:13:45	0.478181
2022-09-13	15:13:46	0.428613
2022-09-13	15:13:46	0.510445
2022-09-13	15:13:46	1.14235
2022-09-13	15:13:46	0.293601
2022-09-13	15:13:47	1.02164
2022-09-13	15:13:47	0.894008
2022-09-13	15:13:47	0.326679
2022-09-13	15:13:47	0.276959
2022-09-13	15:13:48	0.362812
2022-09-13	15:13:48	0.297468
2022-09-13	15:13:48	2.78622
2022-09-13	15:13:49	2.871
2022-09-13	15:13:49	3.95645
2022-09-13	15:13:49	3.91294
2022-09-13	15:13:49	5.64754
2022-09-13	15:13:50	2.43472
2022-09-13	15:13:50	3.08006
2022-09-13	15:13:50	2.08016
2022-09-13	15:13:50	2.72943
2022-09-13	15:13:51	1.56291
2022-09-13	15:13:51	2.26001
2022-09-13	15:13:51	4.02943
2022-09-13	15:13:51	3.38882
2022-09-13	15:13:52	2.16128
2022-09-13	15:13:52	1.58271
2022-09-13	15:13:52	1.02653
2022-09-13	15:13:53	1.40017
2022-09-13	15:13:53	2.39869
2022-09-13	15:13:53	1.91146
2022-09-13	15:13:53	1.62037
2022-09-13	15:13:54	2.21691
2022-09-13	15:13:54	1.48027
2022-09-13	15:13:54	0.572837
2022-09-13	15:13:54	0.481845
2022-09-13	15:13:55	0.434517
2022-09-13	15:13:55	0.556348
2022-09-13	15:13:55	0.634415
2022-09-13	15:13:55	0.58841
2022-09-13	15:13:56	0.64383
2022-09-13	15:13:56	0.681794
2022-09-13	15:13:56	0.558486
2022-09-13	15:13:57	0.520522
2022-09-13	15:13:57	0.99472
2022-09-13	15:13:57	3.17055
2022-09-13	15:13:57	6.05187
2022-09-13	15:13:58	3.90235
2022-09-13	15:13:58	5.05044
2022-09-13	15:13:58	7.5452
2022-09-13	15:13:58	7.78749
2022-09-13	15:13:59	6.76047
2022-09-13	15:13:59	7.86276
2022-09-13	15:13:59	5.46154
2022-09-13	15:13:59	8.24886
2022-09-13	15:14:00	7.86545
2022-09-13	15:14:00	10.2895
2022-09-13	15:14:00	11.6815
2022-09-13	15:14:01	6.55243
2022-09-13	15:14:01	4.10306
2022-09-13	15:14:01	3.68118
2022-09-13	15:14:01	4.51273
2022-09-13	15:14:02	3.92113
2022-09-13	15:14:02	1.70821
2022-09-13	15:14:02	0.893499
2022-09-13	15:14:02	1.34602
2022-09-13	15:14:03	1.91324
2022-09-13	15:14:03	1.76495
2022-09-13	15:14:03	2.15207
2022-09-13	15:14:03	1.0138
2022-09-13	15:14:04	0.844084
2022-09-13	15:14:04	0.453804
2022-09-13	15:14:04	0.172278
2022-09-13	15:14:05	0.188003
