# Supplementary material for: Comparing efficacy in reducing pulling and welfare impacts of four types of leash walking equipment
Source: PeerJ journal article supplement (doi:10.7717/peerj.18131), 2024-10-24
Supplement: Shelter1_Tension_files.zip [file Daisy_star_2022913142214 copy.xlsx]

## Sheet: Averaged Newtons
Date	Time	Averaged Newtons
2022-09-13	14:22:30	2.01876	2.01876	0		Impulse	1643.24
2022-09-13	14:22:31	2.2408	4.25956	0		Total steps	25
2022-09-13	14:22:32	1.74798	6.00754	0		# > 5 sec	0
2022-09-13	14:22:33	1.33497	7.34251	0
2022-09-13	14:22:34	0.266196	7.60871	0
2022-09-13	14:22:35	0.885113	8.49382	0
2022-09-13	14:22:36	3.69438	12.1882	0
2022-09-13	14:22:37	3.77259	15.9608	0
2022-09-13	14:22:38	3.57061	19.5314	0
2022-09-13	14:22:39	6.16482	25.6962	0
2022-09-13	14:22:40	4.39506	30.0913	0
2022-09-13	14:22:41	3.75262	33.8439	0
2022-09-13	14:22:42	5.73059	39.5745	0
2022-09-13	14:22:43	6.04135	45.6158	0
2022-09-13	14:22:44	5.14496	50.7608	0
2022-09-13	14:22:45	2.30737	53.0682	0
2022-09-13	14:22:46	2.89807	55.9662	0
2022-09-13	14:22:47	5.37679	61.343	0
2022-09-13	14:22:48	3.33558	64.6786	0
2022-09-13	14:22:49	4.18448	68.8631	0
2022-09-13	14:22:50	5.01532	73.8784	0
2022-09-13	14:22:51	3.63564	77.514	0
2022-09-13	14:22:52	4.65793	82.172	0
2022-09-13	14:22:53	3.54758	85.7196	0
2022-09-13	14:22:54	2.28686	88.0064	0
2022-09-13	14:22:55	7.56216	95.5686	0
2022-09-13	14:22:56	8.07076	103.639	0
2022-09-13	14:22:57	6.76721	110.407	0
2022-09-13	14:22:58	3.61581	114.022	0
2022-09-13	14:22:59	1.79897	115.821	0
2022-09-13	14:23:00	2.55823	118.38	0
2022-09-13	14:23:01	5.48057	123.86	0
2022-09-13	14:23:02	5.32084	129.181	0
2022-09-13	14:23:03	5.76478	134.946	0
2022-09-13	14:23:04	3.58493	138.531	0
2022-09-13	14:23:05	0.918276	139.449	0
2022-09-13	14:23:06	0.820427	140.269	0
2022-09-13	14:23:07	0.65812	140.928	0
2022-09-13	14:23:08	-0.605769	140.928	0
2022-09-13	14:23:09	-2.33106	140.928	0
2022-09-13	14:23:10	-1.99843	140.928	0
2022-09-13	14:23:11	1.776	142.704	0
2022-09-13	14:23:12	8.84926	151.553	0
2022-09-13	14:23:13	1.78398	153.337	0
2022-09-13	14:23:14	1.17485	154.512	0
2022-09-13	14:23:15	1.24934	155.761	0
2022-09-13	14:23:16	0.38138	156.142	0
2022-09-13	14:23:17	1.64448	157.787	0
2022-09-13	14:23:18	1.83208	159.619	0
2022-09-13	14:23:19	0.825861	160.445	0
2022-09-13	14:23:20	1.13695	161.582	0
2022-09-13	14:23:21	1.53169	163.113	0
2022-09-13	14:23:22	1.35663	164.47	0
2022-09-13	14:23:23	0.979679	165.45	0
2022-09-13	14:23:24	1.29377	166.743	0
2022-09-13	14:23:25	6.34186	173.085	0
2022-09-13	14:23:26	1.99228	175.078	0
2022-09-13	14:23:27	1.6541	176.732	0
2022-09-13	14:23:28	1.50362	178.235	0
2022-09-13	14:23:29	8.33251	186.568	0
2022-09-13	14:23:30	3.13945	189.707	0
2022-09-13	14:23:31	2.47215	192.179	0
2022-09-13	14:23:32	2.63519	194.815	0
2022-09-13	14:23:33	3.18018	197.995	0
2022-09-13	14:23:34	4.61215	202.607	0
2022-09-13	14:23:35	5.35107	207.958	0
2022-09-13	14:23:36	4.98227	212.94	0
2022-09-13	14:23:37	7.24405	220.184	0
2022-09-13	14:23:38	8.25976	228.444	0
2022-09-13	14:23:39	7.00302	235.447	0
2022-09-13	14:23:40	7.28877	242.736	0
2022-09-13	14:23:41	5.71118	248.447	0
2022-09-13	14:23:42	5.49401	253.941	0
2022-09-13	14:23:43	3.08709	257.028	0
2022-09-13	14:23:44	2.60333	259.632	0
2022-09-13	14:23:45	13.2925	272.924	1
2022-09-13	14:23:46	9.37953	282.304	1
2022-09-13	14:23:47	9.72764	292.031	1
2022-09-13	14:23:48	6.54344	298.575	1
2022-09-13	14:23:49	4.52958	303.104	1
2022-09-13	14:23:50	25.4969	328.601	2
2022-09-13	14:23:51	12.1702	340.771	2
2022-09-13	14:23:52	4.13111	344.902	2
2022-09-13	14:23:53	2.31572	347.218	2
2022-09-13	14:23:54	6.27462	353.493	2
2022-09-13	14:23:55	17.5007	370.993	3
2022-09-13	14:23:56	11.9432	382.937	3
2022-09-13	14:23:57	10.3864	393.323	3
2022-09-13	14:23:58	10.8703	404.193	3
2022-09-13	14:23:59	3.02152	407.215	3
2022-09-13	14:24:00	0.853251	408.068	3
2022-09-13	14:24:01	-0.230615	408.068	3
2022-09-13	14:24:02	-1.22693	408.068	3
2022-09-13	14:24:03	-0.584208	408.068	3
2022-09-13	14:24:04	1.46485	409.533	3
2022-09-13	14:24:05	1.12145	410.654	3
2022-09-13	14:24:06	1.43667	412.091	3
2022-09-13	14:24:07	0.840197	412.931	3
2022-09-13	14:24:08	0.380758	413.312	3
2022-09-13	14:24:09	1.1554	414.467	3
2022-09-13	14:24:10	6.2924	420.76	3
2022-09-13	14:24:11	9.05106	429.811	3
2022-09-13	14:24:12	3.37065	433.182	3
2022-09-13	14:24:13	5.962	439.144	3
2022-09-13	14:24:14	4.84028	443.984	3
2022-09-13	14:24:15	5.8769	449.861	3
2022-09-13	14:24:16	3.66371	453.524	3
2022-09-13	14:24:17	1.72823	455.253	3
2022-09-13	14:24:18	0.998978	456.252	3
2022-09-13	14:24:19	1.00613	457.258	3
2022-09-13	14:24:20	1.63751	458.895	3
2022-09-13	14:24:21	1.27181	460.167	3
2022-09-13	14:24:22	0.949799	461.117	3
2022-09-13	14:24:23	0.707468	461.824	3
2022-09-13	14:24:24	9.28559	471.11	3
2022-09-13	14:24:25	2.09467	473.205	3
2022-09-13	14:24:26	1.10537	474.31	3
2022-09-13	14:24:27	1.17228	475.482	3
2022-09-13	14:24:28	0.972662	476.455	3
2022-09-13	14:24:29	3.32223	479.777	3
2022-09-13	14:24:30	1.16355	480.941	3
2022-09-13	14:24:31	1.14542	482.086	3
2022-09-13	14:24:32	1.15897	483.245	3
2022-09-13	14:24:33	1.74051	484.986	3
2022-09-13	14:24:34	0.742782	485.728	3
2022-09-13	14:24:35	1.05434	486.783	3
2022-09-13	14:24:36	3.0417	489.824	3
2022-09-13	14:24:37	11.753	501.578	3
2022-09-13	14:24:38	18.4348	520.012	4
2022-09-13	14:24:39	20.4457	540.458	5
2022-09-13	14:24:40	3.88018	544.338	5
2022-09-13	14:24:41	2.06309	546.401	5
2022-09-13	14:24:42	1.83667	548.238	5
2022-09-13	14:24:43	1.85027	550.088	5
2022-09-13	14:24:44	1.7923	551.881	5
2022-09-13	14:24:45	2.14017	554.021	5
2022-09-13	14:24:46	1.1554	555.176	5
2022-09-13	14:24:47	1.27906	556.455	5
2022-09-13	14:24:48	1.0245	557.48	5
2022-09-13	14:24:49	1.60888	559.089	5
2022-09-13	14:24:50	1.5464	560.635	5
2022-09-13	14:24:51	1.74138	562.376	5
2022-09-13	14:24:52	1.6181	563.994	5
2022-09-13	14:24:53	1.61301	565.607	5
2022-09-13	14:24:54	1.66604	567.274	5
2022-09-13	14:24:55	1.69724	568.971	5
2022-09-13	14:24:56	18.9192	587.89	6
2022-09-13	14:24:57	51.328	639.218	7
2022-09-13	14:24:58	26.0356	665.254	8
2022-09-13	14:24:59	8.55683	673.81	8
2022-09-13	14:25:00	3.71413	677.525	8
2022-09-13	14:25:01	6.96291	684.488	8
2022-09-13	14:25:02	17.0968	701.584	9
2022-09-13	14:25:03	14.7734	716.358	10
2022-09-13	14:25:04	2.07232	718.43	10
2022-09-13	14:25:05	1.73095	720.161	10
2022-09-13	14:25:06	9.44399	729.605	10
2022-09-13	14:25:07	25.8564	755.461	11
2022-09-13	14:25:08	16.1483	771.61	12
2022-09-13	14:25:09	3.19325	774.803	12
2022-09-13	14:25:10	1.31567	776.119	12
2022-09-13	14:25:11	2.91414	779.033	12
2022-09-13	14:25:12	6.71537	785.748	12
2022-09-13	14:25:13	1.60594	787.354	12
2022-09-13	14:25:14	0.0946245	787.449	12
2022-09-13	14:25:15	0.0537831	787.502	12
2022-09-13	14:25:16	2.77407	790.277	12
2022-09-13	14:25:17	6.9444	797.221	12
2022-09-13	14:25:18	7.23574	804.457	12
2022-09-13	14:25:19	3.23038	807.687	12
2022-09-13	14:25:20	2.71018	810.397	12
2022-09-13	14:25:21	1.85387	812.251	12
2022-09-13	14:25:22	1.9387	814.19	12
2022-09-13	14:25:23	1.95651	816.146	12
2022-09-13	14:25:24	2.07288	818.219	12
2022-09-13	14:25:25	1.84731	820.067	12
2022-09-13	14:25:26	2.10418	822.171	12
2022-09-13	14:25:27	1.91312	824.084	12
2022-09-13	14:25:28	1.10011	825.184	12
2022-09-13	14:25:29	0.958798	826.143	12
2022-09-13	14:25:30	0.616694	826.759	12
2022-09-13	14:25:31	0.615862	827.375	12
2022-09-13	14:25:32	-0.375492	827.375	12
2022-09-13	14:25:33	1.58239	828.958	12
2022-09-13	14:25:34	5.15861	834.116	12
2022-09-13	14:25:35	6.93895	841.055	12
2022-09-13	14:25:36	8.40993	849.465	12
2022-09-13	14:25:37	8.18192	857.647	12
2022-09-13	14:25:38	2.03168	859.679	12
2022-09-13	14:25:39	1.09071	860.769	12
2022-09-13	14:25:40	0.622636	861.392	12
2022-09-13	14:25:41	0.592189	861.984	12
2022-09-13	14:25:42	0.291907	862.276	12
2022-09-13	14:25:43	-1.97315	862.276	12
2022-09-13	14:25:44	-0.762191	862.276	12
2022-09-13	14:25:45	0.485455	862.762	12
2022-09-13	14:25:46	1.93593	864.698	12
2022-09-13	14:25:47	0.864872	865.562	12
2022-09-13	14:25:48	1.98607	867.549	12
2022-09-13	14:25:49	1.47198	869.021	12
2022-09-13	14:25:50	1.46989	870.49	12
2022-09-13	14:25:51	1.74184	872.232	12
2022-09-13	14:25:52	1.92982	874.162	12
2022-09-13	14:25:53	1.02473	875.187	12
2022-09-13	14:25:54	1.32184	876.509	12
2022-09-13	14:25:55	1.31075	877.819	12
2022-09-13	14:25:56	2.75952	880.579	12
2022-09-13	14:25:57	2.06106	882.64	12
2022-09-13	14:25:58	1.90124	884.541	12
2022-09-13	14:25:59	2.15074	886.692	12
2022-09-13	14:26:00	2.4164	889.108	12
2022-09-13	14:26:01	4.69291	893.801	12
2022-09-13	14:26:02	4.62007	898.421	12
2022-09-13	14:26:03	2.31599	900.737	12
2022-09-13	14:26:04	3.90717	904.644	12
2022-09-13	14:26:05	3.28126	907.926	12
2022-09-13	14:26:06	1.57277	909.499	12
2022-09-13	14:26:07	1.10641	910.605	12
2022-09-13	14:26:08	3.36632	913.971	12
2022-09-13	14:26:09	0.411544	914.383	12
2022-09-13	14:26:10	3.1726	917.555	12
2022-09-13	14:26:11	9.07143	926.627	12
2022-09-13	14:26:12	2.40759	929.034	12
2022-09-13	14:26:13	13.1383	942.173	13
2022-09-13	14:26:14	11.0707	953.243	13
2022-09-13	14:26:15	11.557	964.8	13
2022-09-13	14:26:16	3.85387	968.654	13
2022-09-13	14:26:17	1.14725	969.802	13
2022-09-13	14:26:18	2.23197	972.034	13
2022-09-13	14:26:19	14.4446	986.478	14
2022-09-13	14:26:20	18.3044	1004.78	15
2022-09-13	14:26:21	10.4659	1015.25	15
2022-09-13	14:26:22	5.10892	1020.36	15
2022-09-13	14:26:23	0.367572	1020.72	15
2022-09-13	14:26:24	0.228089	1020.95	15
2022-09-13	14:26:25	-0.51024	1020.95	15
2022-09-13	14:26:26	5.76008	1026.71	15
2022-09-13	14:26:27	9.0938	1035.81	15
2022-09-13	14:26:28	3.5894	1039.4	15
2022-09-13	14:26:29	8.37806	1047.77	15
2022-09-13	14:26:30	21.3076	1069.08	16
2022-09-13	14:26:31	9.00251	1078.08	16
2022-09-13	14:26:32	5.0855	1083.17	16
2022-09-13	14:26:33	5.79941	1088.97	16
2022-09-13	14:26:34	5.39959	1094.37	16
2022-09-13	14:26:35	1.49502	1095.86	16
2022-09-13	14:26:36	1.80756	1097.67	16
2022-09-13	14:26:37	1.85212	1099.52	16
2022-09-13	14:26:38	1.84272	1101.37	16
2022-09-13	14:26:39	1.66627	1103.03	16
2022-09-13	14:26:40	1.65076	1104.68	16
2022-09-13	14:26:41	2.47837	1107.16	16
2022-09-13	14:26:42	7.16907	1114.33	16
2022-09-13	14:26:43	0.711147	1115.04	16
2022-09-13	14:26:44	-1.35055	1115.04	16
2022-09-13	14:26:45	-0.794449	1115.04	16
2022-09-13	14:26:46	-1.5344	1115.04	16
2022-09-13	14:26:47	-2.33932	1115.04	16
2022-09-13	14:26:48	-1.25947	1115.04	16
2022-09-13	14:26:49	0.472947	1115.51	16
2022-09-13	14:26:50	2.14634	1117.66	16
2022-09-13	14:26:51	1.39864	1119.06	16
2022-09-13	14:26:52	-0.895091	1119.06	16
2022-09-13	14:26:53	12.9811	1132.04	16
2022-09-13	14:26:54	17.6523	1149.69	17
2022-09-13	14:26:55	8.68684	1158.38	17
2022-09-13	14:26:56	1.29483	1159.67	17
2022-09-13	14:26:57	8.7591	1168.43	17
2022-09-13	14:26:58	11.3077	1179.74	17
2022-09-13	14:26:59	4.78815	1184.53	17
2022-09-13	14:27:00	1.51727	1186.05	17
2022-09-13	14:27:01	1.01488	1187.06	17
2022-09-13	14:27:02	1.20735	1188.27	17
2022-09-13	14:27:03	1.39003	1189.66	17
2022-09-13	14:27:04	2.89391	1192.55	17
2022-09-13	14:27:05	3.57927	1196.13	17
2022-09-13	14:27:06	2.75222	1198.88	17
2022-09-13	14:27:07	3.10406	1201.99	17
2022-09-13	14:27:08	3.67248	1205.66	17
2022-09-13	14:27:09	4.768	1210.43	17
2022-09-13	14:27:10	8.08821	1218.52	17
2022-09-13	14:27:11	6.26273	1224.78	17
2022-09-13	14:27:12	20.0082	1244.79	18
2022-09-13	14:27:13	11.4187	1256.21	18
2022-09-13	14:27:14	10.943	1267.15	18
2022-09-13	14:27:15	31.7843	1298.93	19
2022-09-13	14:27:16	21.34	1320.27	20
2022-09-13	14:27:17	13.2794	1333.55	21
2022-09-13	14:27:18	65.5691	1399.12	22
2022-09-13	14:27:19	68.3823	1467.51	23
2022-09-13	14:27:20	84.46	1551.97	24
2022-09-13	14:27:21	61.8663	1613.83	25
2022-09-13	14:27:22	9.12752	1622.96	25
2022-09-13	14:27:23	1.99122	1624.95	25
2022-09-13	14:27:24	2.77152	1627.72	25
2022-09-13	14:27:25	2.19456	1629.92	25
2022-09-13	14:27:26	2.0593	1631.98	25
2022-09-13	14:27:27	2.12071	1634.1	25
2022-09-13	14:27:28	2.26234	1636.36	25
2022-09-13	14:27:29	3.23813	1639.6	25
2022-09-13	14:27:30	3.63853	1643.24	25

## Sheet: Daisy_star_2022913142214 (4)
Date	Time	Lbs	Newtons	Averaged Newtons	Total force x time	total steps > 13.345		**GoPro Fitting: 1411
2022-09-13	14:22:30	0.294924	1.31188	2.01876	1.31188	FALSE	0
2022-09-13	14:22:30	0.499555	2.22212	2.01876	2.22212	FALSE	0
2022-09-13	14:22:30	0.567036	2.52229	2.01876	3.83417	FALSE	0
2022-09-13	14:22:31	0.613346	2.72829	2.2408	4.95041	FALSE	0
2022-09-13	14:22:31	0.462049	2.05529	2.2408	5.88946	FALSE	0
2022-09-13	14:22:31	0.454771	2.02291	2.2408	6.97332	FALSE	0
2022-09-13	14:22:31	0.484847	2.1567	2.2408	8.04615	FALSE	0
2022-09-13	14:22:32	0.432328	1.92308	1.74798	8.8964	FALSE	0
2022-09-13	14:22:32	0.374924	1.66774	1.74798	9.71389	FALSE	0
2022-09-13	14:22:32	0.407036	1.81058	1.74798	10.707	FALSE	0
2022-09-13	14:22:32	0.35757	1.59054	1.74798	11.3044	FALSE	0
2022-09-13	14:22:33	0.372176	1.65551	1.33497	12.3625	FALSE	0
2022-09-13	14:22:33	0.48958	2.17775	1.33497	13.4822	FALSE	0
2022-09-13	14:22:33	0.236043	1.04997	1.33497	13.4125	FALSE	0
2022-09-13	14:22:33	0.102659	0.456648	1.33497	13.9388	FALSE	0
2022-09-13	14:22:34	0.115738	0.514826	0.266196	13.9273	FALSE	0
2022-09-13	14:22:34	0.100217	0.445785	0.266196	14.3846	FALSE	0
2022-09-13	14:22:34	-0.0364247	-0.162024	0.266196	13.9273	FALSE	0
2022-09-13	14:22:35	0.000929014	0.00413244	0.885113	14.3887	FALSE	0
2022-09-13	14:22:35	0.32159	1.4305	0.885113	15.3578	FALSE	0
2022-09-13	14:22:35	0.340929	1.51652	0.885113	15.9053	FALSE	0
2022-09-13	14:22:35	0.132481	0.589302	0.885113	15.9471	FALSE	0
2022-09-13	14:22:36	0.493804	2.19654	3.69438	18.1018	FALSE	0
2022-09-13	14:22:36	0.80902	3.59868	3.69438	19.5458	FALSE	0
2022-09-13	14:22:36	0.989275	4.40049	3.69438	22.5023	FALSE	0
2022-09-13	14:22:36	1.03004	4.58182	3.69438	24.1276	FALSE	0
2022-09-13	14:22:37	0.930801	4.14039	3.77259	26.6427	FALSE	0
2022-09-13	14:22:37	0.767596	3.41442	3.77259	27.542	FALSE	0
2022-09-13	14:22:37	0.8707	3.87305	3.77259	30.5157	FALSE	0
2022-09-13	14:22:37	0.823371	3.66252	3.77259	31.2045	FALSE	0
2022-09-13	14:22:38	0.742812	3.30418	3.57061	33.8199	FALSE	0
2022-09-13	14:22:38	0.748206	3.32817	3.57061	34.5327	FALSE	0
2022-09-13	14:22:38	0.917112	4.0795	3.57061	37.8994	FALSE	0
2022-09-13	14:22:39	0.992023	4.41272	6.16482	38.9454	FALSE	0
2022-09-13	14:22:39	1.27777	5.68378	6.16482	43.5832	FALSE	0
2022-09-13	14:22:39	1.63319	7.26476	6.16482	46.2102	FALSE	0
2022-09-13	14:22:39	1.64067	7.29803	6.16482	50.8812	FALSE	0
2022-09-13	14:22:40	1.16831	5.19688	4.39506	51.407	FALSE	0
2022-09-13	14:22:40	1.02866	4.57569	4.39506	55.4569	FALSE	0
2022-09-13	14:22:40	0.891616	3.96609	4.39506	55.3731	FALSE	0
2022-09-13	14:22:40	0.863626	3.84158	4.39506	59.2985	FALSE	0
2022-09-13	14:22:41	0.853651	3.79721	3.75262	59.1703	FALSE	0
2022-09-13	14:22:41	0.760318	3.38205	3.75262	62.6805	FALSE	0
2022-09-13	14:22:41	0.814567	3.62336	3.75262	62.7937	FALSE	0
2022-09-13	14:22:41	0.945967	4.20785	3.75262	66.8884	FALSE	0
2022-09-13	14:22:42	1.16276	5.17219	5.73059	67.9659	FALSE	0
2022-09-13	14:22:42	1.26709	5.63627	5.73059	72.5246	FALSE	0
2022-09-13	14:22:42	1.43503	6.3833	5.73059	74.3492	FALSE	0
2022-09-13	14:22:43	1.46536	6.51821	6.04135	79.0429	FALSE	0
2022-09-13	14:22:43	1.38072	6.14172	6.04135	80.4909	FALSE	0
2022-09-13	14:22:43	1.29981	5.78181	6.04135	84.8247	FALSE	0
2022-09-13	14:22:43	1.28673	5.72363	6.04135	86.2145	FALSE	0
2022-09-13	14:22:44	1.32948	5.91379	5.14496	90.7385	FALSE	0
2022-09-13	14:22:44	1.27223	5.65913	5.14496	91.8737	FALSE	0
2022-09-13	14:22:44	0.868206	3.86195	5.14496	94.6004	FALSE	0
2022-09-13	14:22:45	0.71472	3.17922	2.30737	95.0529	FALSE	0
2022-09-13	14:22:45	0.53701	2.38873	2.30737	96.9892	FALSE	0
2022-09-13	14:22:45	0.438079	1.94866	2.30737	97.0016	FALSE	0
2022-09-13	14:22:45	0.473194	2.10486	2.30737	99.094	FALSE	0
2022-09-13	14:22:45	0.430598	1.91539	2.30737	98.9169	FALSE	0
2022-09-13	14:22:46	0.271718	1.20866	2.89807	100.303	FALSE	0
2022-09-13	14:22:46	0.594567	2.64475	2.89807	101.562	FALSE	0
2022-09-13	14:22:46	1.08826	4.8408	2.89807	105.143	FALSE	0
2022-09-13	14:22:47	1.57742	7.01668	5.37679	108.578	FALSE	0
2022-09-13	14:22:47	1.17788	5.23945	5.37679	110.383	FALSE	0
2022-09-13	14:22:47	1.11335	4.9524	5.37679	113.531	FALSE	0
2022-09-13	14:22:47	0.966374	4.29862	5.37679	114.682	FALSE	0
2022-09-13	14:22:48	0.725204	3.22585	3.33558	116.757	FALSE	0
2022-09-13	14:22:48	0.787494	3.50293	3.33558	118.184	FALSE	0
2022-09-13	14:22:48	0.784796	3.49093	3.33558	120.248	FALSE	0
2022-09-13	14:22:48	0.701997	3.12262	3.33558	121.307	FALSE	0
2022-09-13	14:22:49	0.697417	3.10225	4.18448	123.35	FALSE	0
2022-09-13	14:22:49	0.546374	2.43038	4.18448	123.737	FALSE	0
2022-09-13	14:22:49	1.13182	5.03456	4.18448	128.384	FALSE	0
2022-09-13	14:22:49	1.38724	6.17072	4.18448	129.908	FALSE	0
2022-09-13	14:22:50	1.29569	5.76349	5.01532	134.148	FALSE	0
2022-09-13	14:22:50	1.06983	4.75882	5.01532	134.667	FALSE	0
2022-09-13	14:22:50	1.01696	4.52364	5.01532	138.672	FALSE	0
2022-09-13	14:22:51	0.987951	4.3946	3.63564	139.062	FALSE	0
2022-09-13	14:22:51	0.90902	4.0435	3.63564	142.715	FALSE	0
2022-09-13	14:22:51	0.813855	3.62019	3.63564	142.682	FALSE	0
2022-09-13	14:22:51	0.558486	2.48426	3.63564	145.199	FALSE	0
2022-09-13	14:22:52	0.709122	3.15432	4.65793	145.836	FALSE	0
2022-09-13	14:22:52	0.559199	2.48743	4.65793	147.687	FALSE	0
2022-09-13	14:22:52	1.0307	4.58476	4.65793	150.421	FALSE	0
2022-09-13	14:22:52	1.88958	8.40523	4.65793	156.092	FALSE	0
2022-09-13	14:22:53	0.980216	4.3602	3.54758	154.781	FALSE	0
2022-09-13	14:22:53	1.18897	5.28878	3.54758	161.381	FALSE	0
2022-09-13	14:22:53	0.619657	2.75636	3.54758	157.537	FALSE	0
2022-09-13	14:22:53	0.401285	1.785	3.54758	163.166	FALSE	0
2022-09-13	14:22:54	0.658741	2.93021	2.28686	160.468	FALSE	0
2022-09-13	14:22:54	0.483321	2.14991	2.28686	165.316	FALSE	0
2022-09-13	14:22:54	0.400267	1.78047	2.28686	162.248	FALSE	0
2022-09-13	14:22:55	0.94444	4.20106	7.56216	169.517	FALSE	0
2022-09-13	14:22:55	1.55874	6.93359	7.56216	169.182	FALSE	0
2022-09-13	14:22:55	2.35477	10.4745	7.56216	179.991	FALSE	0
2022-09-13	14:22:55	1.94225	8.63952	7.56216	177.821	FALSE	0
2022-09-13	14:22:56	2.19029	9.74285	8.07076	189.734	FALSE	0
2022-09-13	14:22:56	2.24276	9.97625	8.07076	187.797	FALSE	0
2022-09-13	14:22:56	1.49248	6.63885	8.07076	196.373	FALSE	0
2022-09-13	14:22:56	1.33202	5.92509	8.07076	193.723	FALSE	0
2022-09-13	14:22:57	1.20383	5.35488	6.76721	201.728	FALSE	0
2022-09-13	14:22:57	1.43808	6.39687	6.76721	200.119	FALSE	0
2022-09-13	14:22:57	1.75523	7.80761	6.76721	209.535	FALSE	0
2022-09-13	14:22:57	1.68821	7.5095	6.76721	207.629	FALSE	0
2022-09-13	14:22:58	1.13645	5.05516	3.61581	214.59	FALSE	0
2022-09-13	14:22:58	0.730903	3.2512	3.61581	210.88	FALSE	0
2022-09-13	14:22:58	0.571259	2.54107	3.61581	217.132	FALSE	0
2022-09-13	14:22:59	0.608868	2.70837	1.79897	213.588	FALSE	0
2022-09-13	14:22:59	0.406679	1.80899	1.79897	218.941	FALSE	0
2022-09-13	14:22:59	0.374517	1.66593	1.79897	215.254	FALSE	0
2022-09-13	14:22:59	0.227646	1.01261	1.79897	219.953	FALSE	0
2022-09-13	14:23:00	0.231412	1.02937	2.55823	216.284	FALSE	0
2022-09-13	14:23:00	1.06612	4.74231	2.55823	224.695	FALSE	0
2022-09-13	14:23:00	0.59584	2.65042	2.55823	218.934	FALSE	0
2022-09-13	14:23:00	0.407087	1.8108	2.55823	226.506	FALSE	0
2022-09-13	14:23:01	0.338028	1.50362	5.48057	220.438	FALSE	0
2022-09-13	14:23:01	0.563371	2.50599	5.48057	229.012	FALSE	0
2022-09-13	14:23:01	1.60541	7.14118	5.48057	227.579	FALSE	0
2022-09-13	14:23:01	2.42154	10.7715	5.48057	239.784	FALSE	0
2022-09-13	14:23:02	1.70276	7.57422	5.32084	235.153	FALSE	0
2022-09-13	14:23:02	0.976756	4.34481	5.32084	244.129	FALSE	0
2022-09-13	14:23:02	0.90902	4.0435	5.32084	239.197	FALSE	0
2022-09-13	14:23:03	1.68195	7.48165	5.76478	251.61	FALSE	0
2022-09-13	14:23:03	1.96877	8.75748	5.76478	247.954	FALSE	0
2022-09-13	14:23:03	0.599962	2.66875	5.76478	254.279	FALSE	0
2022-09-13	14:23:03	0.933244	4.15126	5.76478	252.105	FALSE	0
2022-09-13	14:23:04	1.47299	6.55215	3.58493	260.831	FALSE	0
2022-09-13	14:23:04	1.25126	5.56585	3.58493	257.671	FALSE	0
2022-09-13	14:23:04	0.250649	1.11494	3.58493	261.946	FALSE	0
2022-09-13	14:23:04	0.248817	1.10679	3.58493	258.778	FALSE	0
2022-09-13	14:23:05	0.229936	1.0228	0.918276	262.969	FALSE	0
2022-09-13	14:23:05	0.17584	0.782171	0.918276	259.56	FALSE	0
2022-09-13	14:23:05	0.202354	0.900111	0.918276	263.869	FALSE	0
2022-09-13	14:23:05	0.217621	0.968022	0.918276	260.528	FALSE	0
2022-09-13	14:23:06	0.172074	0.76542	0.820427	264.634	FALSE	0
2022-09-13	14:23:06	0.336603	1.49728	0.820427	262.026	FALSE	0
2022-09-13	14:23:06	0.044644	0.198585	0.820427	264.833	FALSE	0
2022-09-13	14:23:07	0.199555	0.887661	0.65812	262.913	FALSE	0
2022-09-13	14:23:07	0.040929	0.18206	0.65812	265.015	FALSE	0
2022-09-13	14:23:07	0.332532	1.47917	0.65812	264.392	FALSE	0
2022-09-13	14:23:07	0.0187916	0.0835888	0.65812	265.099	FALSE	0
2022-09-13	14:23:08	0.144491	0.642725	-0.605769	265.035	FALSE	0
2022-09-13	14:23:08	-0.00807864	-0.0359354	-0.605769	265.099	FALSE	0
2022-09-13	14:23:08	-0.218969	-0.974018	-0.605769	265.035	FALSE	0
2022-09-13	14:23:08	-0.462175	-2.05585	-0.605769	265.099	FALSE	0
2022-09-13	14:23:09	-0.458358	-2.03887	-2.33106	265.035	FALSE	0
2022-09-13	14:23:09	-0.604109	-2.6872	-2.33106	265.099	FALSE	0
2022-09-13	14:23:09	-0.54528	-2.42551	-2.33106	265.035	FALSE	0
2022-09-13	14:23:09	-0.488435	-2.17266	-2.33106	265.099	FALSE	0
2022-09-13	14:23:10	-0.261768	-1.1644	-1.99843	265.035	FALSE	0
2022-09-13	14:23:10	-0.495305	-2.20322	-1.99843	265.099	FALSE	0
2022-09-13	14:23:10	-0.590725	-2.62766	-1.99843	265.035	FALSE	0
2022-09-13	14:23:11	-0.456679	-2.0314	1.776	265.099	FALSE	0
2022-09-13	14:23:11	-0.0175443	-0.0780406	1.776	265.035	FALSE	0
2022-09-13	14:23:11	0.730242	3.24826	1.776	268.347	FALSE	0
2022-09-13	14:23:11	1.34103	5.96517	1.776	271	FALSE	0
2022-09-13	14:23:12	2.13859	9.51288	8.84926	277.86	FALSE	0
2022-09-13	14:23:12	2.17304	9.66612	8.84926	280.666	FALSE	0
2022-09-13	14:23:12	2.19584	9.76754	8.84926	287.627	FALSE	0
2022-09-13	14:23:12	1.45014	6.45051	8.84926	287.117	FALSE	0
2022-09-13	14:23:13	0.556094	2.47362	1.78398	290.101	FALSE	0
2022-09-13	14:23:13	0.521794	2.32104	1.78398	289.438	FALSE	0
2022-09-13	14:23:13	0.189784	0.844197	1.78398	290.945	FALSE	0
2022-09-13	14:23:13	0.336552	1.49705	1.78398	290.935	FALSE	0
2022-09-13	14:23:14	0.110751	0.492643	1.17485	291.438	FALSE	0
2022-09-13	14:23:14	0.515076	2.29116	1.17485	293.226	FALSE	0
2022-09-13	14:23:14	0.166527	0.740745	1.17485	292.179	FALSE	0
2022-09-13	14:23:15	0.310496	1.38115	1.24934	294.607	FALSE	0
2022-09-13	14:23:15	0.344898	1.53418	1.24934	293.713	FALSE	0
2022-09-13	14:23:15	0.323372	1.43842	1.24934	296.046	FALSE	0
2022-09-13	14:23:15	0.144695	0.643632	1.24934	294.356	FALSE	0
2022-09-13	14:23:16	0.0391478	0.174137	0.38138	296.22	FALSE	0
2022-09-13	14:23:16	0.124542	0.553988	0.38138	294.91	FALSE	0
2022-09-13	14:23:16	-0.0377987	-0.168136	0.38138	296.22	FALSE	0
2022-09-13	14:23:16	0.217061	0.965531	0.38138	295.876	FALSE	0
2022-09-13	14:23:17	0.253804	1.12897	1.64448	297.349	FALSE	0
2022-09-13	14:23:17	0.425713	1.89366	1.64448	297.769	FALSE	0
2022-09-13	14:23:17	0.36785	1.63627	1.64448	298.985	FALSE	0
2022-09-13	14:23:17	0.431412	1.91901	1.64448	299.689	FALSE	0
2022-09-13	14:23:18	0.533041	2.37107	1.83208	301.356	FALSE	0
2022-09-13	14:23:18	0.317519	1.41239	1.83208	301.101	FALSE	0
2022-09-13	14:23:18	0.385051	1.71278	1.83208	303.069	FALSE	0
2022-09-13	14:23:19	0.138537	0.61624	0.825861	301.717	FALSE	0
2022-09-13	14:23:19	0.194568	0.865477	0.825861	303.934	FALSE	0
2022-09-13	14:23:19	0.0890205	0.395981	0.825861	302.113	FALSE	0
2022-09-13	14:23:19	0.320522	1.42575	0.825861	305.36	FALSE	0
2022-09-13	14:23:20	0.317265	1.41126	1.13695	303.524	FALSE	0
2022-09-13	14:23:20	0.199046	0.885396	1.13695	306.246	FALSE	0
2022-09-13	14:23:20	0.353143	1.57085	1.13695	305.095	FALSE	0
2022-09-13	14:23:20	0.152939	0.680303	1.13695	306.926	FALSE	0
2022-09-13	14:23:21	0.520064	2.31335	1.53169	307.409	FALSE	0
2022-09-13	14:23:21	0.192583	0.856648	1.53169	307.783	FALSE	0
2022-09-13	14:23:21	0.397825	1.76961	1.53169	309.178	FALSE	0
2022-09-13	14:23:21	0.266883	1.18715	1.53169	308.97	FALSE	0
2022-09-13	14:23:22	0.361845	1.60956	1.35663	310.788	FALSE	0
2022-09-13	14:23:22	0.308613	1.37277	1.35663	310.342	FALSE	0
2022-09-13	14:23:22	0.244491	1.08754	1.35663	311.875	FALSE	0
2022-09-13	14:23:23	0.347443	1.5455	0.979679	311.888	FALSE	0
2022-09-13	14:23:23	0.12042	0.535652	0.979679	312.411	FALSE	0
2022-09-13	14:23:23	0.292888	1.30282	0.979679	313.191	FALSE	0
2022-09-13	14:23:23	0.120216	0.534745	0.979679	312.946	FALSE	0
2022-09-13	14:23:24	0.235178	1.04612	1.29377	314.237	FALSE	0
2022-09-13	14:23:24	0.0160435	0.0713647	1.29377	313.017	FALSE	0
2022-09-13	14:23:24	0.340064	1.51267	1.29377	315.75	FALSE	0
2022-09-13	14:23:24	0.572125	2.54493	1.29377	315.562	FALSE	0
2022-09-13	14:23:25	1.71793	7.6417	6.34186	323.391	FALSE	0
2022-09-13	14:23:25	2.01772	8.97522	6.34186	324.537	FALSE	0
2022-09-13	14:23:25	0.574466	2.55534	6.34186	325.947	FALSE	0
2022-09-13	14:23:25	1.39274	6.19519	6.34186	330.732	FALSE	0
2022-09-13	14:23:26	0.37126	1.65144	1.99228	327.598	FALSE	0
2022-09-13	14:23:26	0.437621	1.94663	1.99228	332.679	FALSE	0
2022-09-13	14:23:26	0.534771	2.37877	1.99228	329.977	FALSE	0
2022-09-13	14:23:27	0.312685	1.39089	1.6541	334.07	FALSE	0
2022-09-13	14:23:27	0.461336	2.05211	1.6541	332.029	FALSE	0
2022-09-13	14:23:27	0.248461	1.1052	1.6541	335.175	FALSE	0
2022-09-13	14:23:27	0.464949	2.06819	1.6541	334.097	FALSE	0
2022-09-13	14:23:28	0.151921	0.675775	1.50362	335.851	FALSE	0
2022-09-13	14:23:28	0.390242	1.73587	1.50362	335.833	FALSE	0
2022-09-13	14:23:28	0.186374	0.829029	1.50362	336.68	FALSE	0
2022-09-13	14:23:28	0.623575	2.77379	1.50362	338.607	FALSE	0
2022-09-13	14:23:29	0.507545	2.25766	8.33251	338.938	FALSE	0
2022-09-13	14:23:29	3.28525	14.6134	8.33251	353.22	1	1
2022-09-13	14:23:29	2.22785	9.90992	8.33251	348.847	FALSE	1
2022-09-13	14:23:29	1.47228	6.549	8.33251	359.769	FALSE	1
2022-09-13	14:23:30	0.738537	3.28516	3.13945	352.133	FALSE	1
2022-09-13	14:23:30	0.403168	1.79337	3.13945	361.563	FALSE	1
2022-09-13	14:23:30	0.975636	4.33982	3.13945	356.472	FALSE	1
2022-09-13	14:23:31	0.368715	1.64012	2.47215	363.203	FALSE	1
2022-09-13	14:23:31	0.737214	3.27928	2.47215	359.752	FALSE	1
2022-09-13	14:23:31	0.574517	2.55557	2.47215	365.758	FALSE	1
2022-09-13	14:23:31	0.542608	2.41363	2.47215	362.165	FALSE	1
2022-09-13	14:23:32	0.673804	2.99721	2.63519	368.756	FALSE	1
2022-09-13	14:23:32	0.41986	1.86762	2.63519	364.033	FALSE	1
2022-09-13	14:23:32	0.827443	3.68063	2.63519	372.436	FALSE	1
2022-09-13	14:23:32	0.448562	1.99529	2.63519	366.028	FALSE	1
2022-09-13	14:23:33	0.731361	3.25324	3.18018	375.689	FALSE	1
2022-09-13	14:23:33	0.571565	2.54244	3.18018	368.571	FALSE	1
2022-09-13	14:23:33	0.74902	3.33179	3.18018	379.021	FALSE	1
2022-09-13	14:23:33	0.807799	3.59325	3.18018	372.164	FALSE	1
2022-09-13	14:23:34	0.910903	4.05188	4.61215	383.073	FALSE	1
2022-09-13	14:23:34	1.23396	5.4889	4.61215	377.653	FALSE	1
2022-09-13	14:23:34	0.965713	4.29568	4.61215	387.369	FALSE	1
2022-09-13	14:23:35	1.21548	5.4067	5.35107	383.06	FALSE	1
2022-09-13	14:23:35	1.05477	4.69183	5.35107	392.061	FALSE	1
2022-09-13	14:23:35	1.34403	5.97851	5.35107	389.038	FALSE	1
2022-09-13	14:23:35	1.19762	5.32725	5.35107	397.388	FALSE	1
2022-09-13	14:23:36	1.18439	5.2684	4.98227	394.306	FALSE	1
2022-09-13	14:23:36	1.30342	5.79787	4.98227	403.186	FALSE	1
2022-09-13	14:23:36	0.718893	3.19778	4.98227	397.504	FALSE	1
2022-09-13	14:23:36	1.27355	5.66501	4.98227	408.851	FALSE	1
2022-09-13	14:23:37	0.90902	4.0435	7.24405	401.548	FALSE	1
2022-09-13	14:23:37	2.59009	11.5212	7.24405	420.372	FALSE	1
2022-09-13	14:23:37	1.33212	5.92554	7.24405	407.473	FALSE	1
2022-09-13	14:23:37	1.68291	7.48592	7.24405	427.858	FALSE	1
2022-09-13	14:23:38	2.00785	8.93132	8.25976	416.405	FALSE	1
2022-09-13	14:23:38	1.85732	8.26173	8.25976	436.12	FALSE	1
2022-09-13	14:23:38	1.70546	7.58623	8.25976	423.991	FALSE	1
2022-09-13	14:23:39	1.06195	4.72377	7.00302	440.843	FALSE	1
2022-09-13	14:23:39	1.85899	8.26916	7.00302	432.26	FALSE	1
2022-09-13	14:23:39	1.3537	6.02153	7.00302	446.865	FALSE	1
2022-09-13	14:23:39	2.02276	8.99764	7.00302	441.258	FALSE	1
2022-09-13	14:23:40	1.80663	8.03625	7.28877	454.901	FALSE	1
2022-09-13	14:23:40	1.84561	8.20964	7.28877	449.467	FALSE	1
2022-09-13	14:23:40	1.90302	8.46501	7.28877	463.366	FALSE	1
2022-09-13	14:23:40	0.999097	4.44418	7.28877	453.911	FALSE	1
2022-09-13	14:23:41	1.75126	7.78995	5.71118	471.156	FALSE	1
2022-09-13	14:23:41	0.737672	3.28131	5.71118	457.193	FALSE	1
2022-09-13	14:23:41	1.78159	7.92487	5.71118	479.081	FALSE	1
2022-09-13	14:23:41	0.865204	3.8486	5.71118	461.041	FALSE	1
2022-09-13	14:23:42	2.47436	11.0064	5.49401	490.087	FALSE	1
2022-09-13	14:23:42	0.721285	3.20842	5.49401	464.25	FALSE	1
2022-09-13	14:23:42	0.509682	2.26717	5.49401	492.355	FALSE	1
2022-09-13	14:23:43	1.02317	4.55126	3.08709	468.801	FALSE	1
2022-09-13	14:23:43	0.607494	2.70225	3.08709	495.057	FALSE	1
2022-09-13	14:23:43	0.859148	3.82166	3.08709	472.623	FALSE	1
2022-09-13	14:23:43	0.286222	1.27317	3.08709	496.33	FALSE	1
2022-09-13	14:23:44	0.888664	3.95296	2.60333	476.576	FALSE	1
2022-09-13	14:23:44	0.306832	1.36485	2.60333	497.695	FALSE	1
2022-09-13	14:23:44	0.588461	2.61759	2.60333	479.193	FALSE	1
2022-09-13	14:23:44	0.557061	2.47792	2.60333	500.173	FALSE	1
2022-09-13	14:23:45	1.24307	5.52942	13.2925	484.723	FALSE	1
2022-09-13	14:23:45	3.15828	14.0487	13.2925	514.221	1	2
2022-09-13	14:23:45	3.56602	15.8624	13.2925	500.585	1	3
2022-09-13	14:23:45	3.98576	17.7295	13.2925	531.951	1	4
2022-09-13	14:23:46	2.41487	10.7418	9.37953	511.327	FALSE	4
2022-09-13	14:23:46	2.23879	9.95859	9.37953	541.909	FALSE	4
2022-09-13	14:23:46	1.67218	7.43819	9.37953	518.765	FALSE	4
2022-09-13	14:23:47	1.52032	6.76269	9.72764	548.672	FALSE	4
2022-09-13	14:23:47	1.97279	8.77536	9.72764	527.54	FALSE	4
2022-09-13	14:23:47	2.15146	9.57012	9.72764	558.242	FALSE	4
2022-09-13	14:23:47	3.10291	13.8024	9.72764	541.343	1	5
2022-09-13	14:23:48	2.09014	9.29736	6.54344	567.54	FALSE	5
2022-09-13	14:23:48	2.57798	11.4674	6.54344	552.81	FALSE	5
2022-09-13	14:23:48	0.631158	2.80752	6.54344	570.347	FALSE	5
2022-09-13	14:23:48	0.584847	2.60152	6.54344	555.412	FALSE	5
2022-09-13	14:23:49	0.337061	1.49931	4.52958	571.846	FALSE	5
2022-09-13	14:23:49	0.573601	2.55149	4.52958	557.963	FALSE	5
2022-09-13	14:23:49	0.938639	4.17525	4.52958	576.022	FALSE	5
2022-09-13	14:23:49	2.22388	9.89226	4.52958	567.855	FALSE	5
2022-09-13	14:23:50	3.70836	16.4955	25.4969	592.517	1	6
2022-09-13	14:23:50	4.95044	22.0205	25.4969	589.876	1	7
2022-09-13	14:23:50	8.53711	37.9748	25.4969	630.492	1	8
2022-09-13	14:23:51	3.94342	17.5411	12.1702	607.417	1	9
2022-09-13	14:23:51	3.70759	16.4921	12.1702	646.984	1	10
2022-09-13	14:23:51	2.0165	8.9698	12.1702	616.387	FALSE	10
2022-09-13	14:23:51	1.2764	5.67768	12.1702	652.662	FALSE	10
2022-09-13	14:23:52	0.867392	3.85833	4.13111	620.245	FALSE	10
2022-09-13	14:23:52	0.811514	3.60978	4.13111	656.272	FALSE	10
2022-09-13	14:23:52	1.21548	5.4067	4.13111	625.652	FALSE	10
2022-09-13	14:23:52	0.820471	3.64962	4.13111	659.921	FALSE	10
2022-09-13	14:23:53	0.747494	3.325	2.31572	628.977	FALSE	10
2022-09-13	14:23:53	0.462354	2.05664	2.31572	661.978	FALSE	10
2022-09-13	14:23:53	0.436908	1.94345	2.31572	630.92	FALSE	10
2022-09-13	14:23:53	0.435636	1.9378	2.31572	663.916	FALSE	10
2022-09-13	14:23:54	0.32841	1.46083	6.27462	632.381	FALSE	10
2022-09-13	14:23:54	1.55609	6.9218	6.27462	670.837	FALSE	10
2022-09-13	14:23:54	2.34729	10.4412	6.27462	642.822	FALSE	10
2022-09-13	14:23:55	4.42983	19.7048	17.5007	690.542	1	11
2022-09-13	14:23:55	3.27111	14.5506	17.5007	657.373	1	12
2022-09-13	14:23:55	4.45355	19.8103	17.5007	710.353	1	13
2022-09-13	14:23:55	3.58286	15.9373	17.5007	673.31	1	14
2022-09-13	14:23:56	3.22622	14.3509	11.9432	724.703	1	15
2022-09-13	14:23:56	3.55223	15.801	11.9432	689.111	1	16
2022-09-13	14:23:56	1.80205	8.01588	11.9432	732.719	FALSE	16
2022-09-13	14:23:56	2.1593	9.605	11.9432	698.716	FALSE	16
2022-09-13	14:23:57	1.25095	5.56448	10.3864	738.284	FALSE	16
2022-09-13	14:23:57	2.43533	10.8328	10.3864	709.549	FALSE	16
2022-09-13	14:23:57	1.98989	8.85143	10.3864	747.135	FALSE	16
2022-09-13	14:23:57	3.66373	16.297	10.3864	725.846	1	17
2022-09-13	14:23:58	3.98744	17.7369	10.8703	764.872	1	18
2022-09-13	14:23:58	2.09335	9.31164	10.8703	735.158	FALSE	18
2022-09-13	14:23:58	2.73441	12.1632	10.8703	777.035	FALSE	18
2022-09-13	14:23:58	0.959809	4.26942	10.8703	739.427	FALSE	18
2022-09-13	14:23:59	1.3905	6.18522	3.02152	783.221	FALSE	18
2022-09-13	14:23:59	0.353092	1.57062	3.02152	740.998	FALSE	18
2022-09-13	14:23:59	0.294211	1.30871	3.02152	784.529	FALSE	18
2022-09-13	14:24:00	0.387697	1.72455	0.853251	742.722	FALSE	18
2022-09-13	14:24:00	0.0411326	0.182966	0.853251	784.712	FALSE	18
2022-09-13	14:24:00	0.251056	1.11675	0.853251	743.839	FALSE	18
2022-09-13	14:24:00	0.087392	0.388737	0.853251	785.101	FALSE	18
2022-09-13	14:24:01	0.0403183	0.179344	-0.230615	744.018	FALSE	18
2022-09-13	14:24:01	-0.157086	-0.69875	-0.230615	785.101	FALSE	18
2022-09-13	14:24:01	0.0146695	0.0652529	-0.230615	744.084	FALSE	18
2022-09-13	14:24:01	-0.10528	-0.468306	-0.230615	785.101	FALSE	18
2022-09-13	14:24:02	-0.264872	-1.1782	-1.22693	744.084	FALSE	18
2022-09-13	14:24:02	-0.335814	-1.49377	-1.22693	785.101	FALSE	18
2022-09-13	14:24:02	-0.252913	-1.12501	-1.22693	744.084	FALSE	18
2022-09-13	14:24:02	-0.249707	-1.11075	-1.22693	785.101	FALSE	18
2022-09-13	14:24:03	-0.200191	-0.89049	-0.584208	744.084	FALSE	18
2022-09-13	14:24:03	-0.284567	-1.26581	-0.584208	785.101	FALSE	18
2022-09-13	14:24:03	0.0907508	0.403678	-0.584208	744.487	FALSE	18
2022-09-13	14:24:04	0.184695	0.82156	1.46485	785.922	FALSE	18
2022-09-13	14:24:04	0.665967	2.96235	1.46485	747.45	FALSE	18
2022-09-13	14:24:04	0.265865	1.18262	1.46485	787.105	FALSE	18
2022-09-13	14:24:04	0.200725	0.892865	1.46485	748.343	FALSE	18
2022-09-13	14:24:05	0.309326	1.37594	1.12145	788.481	FALSE	18
2022-09-13	14:24:05	0.146832	0.653138	1.12145	748.996	FALSE	18
2022-09-13	14:24:05	0.380522	1.69264	1.12145	790.174	FALSE	18
2022-09-13	14:24:05	0.171769	0.764063	1.12145	749.76	FALSE	18
2022-09-13	14:24:06	0.478791	2.12976	1.43667	792.303	FALSE	18
2022-09-13	14:24:06	0.132583	0.589756	1.43667	750.35	FALSE	18
2022-09-13	14:24:06	0.429071	1.90859	1.43667	794.212	FALSE	18
2022-09-13	14:24:06	0.251463	1.11856	1.43667	751.468	FALSE	18
2022-09-13	14:24:07	0.375331	1.66955	0.840197	795.882	FALSE	18
2022-09-13	14:24:07	0.0454073	0.201981	0.840197	751.67	FALSE	18
2022-09-13	14:24:07	0.145916	0.649064	0.840197	796.531	FALSE	18
2022-09-13	14:24:08	0.168054	0.747538	0.380758	752.418	FALSE	18
2022-09-13	14:24:08	0.163015	0.725123	0.380758	797.256	FALSE	18
2022-09-13	14:24:08	-0.107926	-0.480076	0.380758	752.418	FALSE	18
2022-09-13	14:24:08	0.11925	0.530448	0.380758	797.786	FALSE	18
2022-09-13	14:24:09	-0.0663483	-0.295131	1.1554	752.418	FALSE	18
2022-09-13	14:24:09	0.193804	0.862079	1.1554	798.648	FALSE	18
2022-09-13	14:24:09	0.106069	0.471816	1.1554	752.889	FALSE	18
2022-09-13	14:24:09	0.805458	3.58284	1.1554	802.231	FALSE	18
2022-09-13	14:24:10	0.498995	2.21963	6.2924	755.109	FALSE	18
2022-09-13	14:24:10	1.56592	6.96553	6.2924	809.197	FALSE	18
2022-09-13	14:24:10	1.35401	6.02291	6.2924	761.132	FALSE	18
2022-09-13	14:24:10	2.23945	9.96152	6.2924	819.158	FALSE	18
2022-09-13	14:24:11	2.2448	9.98532	9.05106	771.117	FALSE	18
2022-09-13	14:24:11	1.9023	8.46181	9.05106	827.62	FALSE	18
2022-09-13	14:24:11	1.95721	8.70606	9.05106	779.823	FALSE	18
2022-09-13	14:24:12	0.535687	2.38284	3.37065	830.003	FALSE	18
2022-09-13	14:24:12	1.14561	5.0959	3.37065	784.919	FALSE	18
2022-09-13	14:24:12	0.591972	2.63321	3.37065	832.636	FALSE	18
2022-09-13	14:24:13	1.48108	6.58814	5.962	791.507	FALSE	18
2022-09-13	14:24:13	0.995534	4.42833	5.962	837.064	FALSE	18
2022-09-13	14:24:13	1.93487	8.60669	5.962	800.114	FALSE	18
2022-09-13	14:24:13	0.954924	4.24769	5.962	841.312	FALSE	18
2022-09-13	14:24:13	1.33518	5.93915	5.962	806.053	FALSE	18
2022-09-13	14:24:14	1.59126	7.07824	4.84028	848.39	FALSE	18
2022-09-13	14:24:14	0.618995	2.75341	4.84028	808.807	FALSE	18
2022-09-13	14:24:14	1.28368	5.71007	4.84028	854.1	FALSE	18
2022-09-13	14:24:14	0.858639	3.8194	4.84028	812.626	FALSE	18
2022-09-13	14:24:15	1.5533	6.90939	5.8769	861.01	FALSE	18
2022-09-13	14:24:15	0.972735	4.32692	5.8769	816.953	FALSE	18
2022-09-13	14:24:15	1.43752	6.39438	5.8769	867.404	FALSE	18
2022-09-13	14:24:16	1.3081	5.81869	3.66371	822.772	FALSE	18
2022-09-13	14:24:16	0.963219	4.28459	3.66371	871.689	FALSE	18
2022-09-13	14:24:16	0.59584	2.65042	3.66371	825.422	FALSE	18
2022-09-13	14:24:16	0.427392	1.90113	3.66371	873.59	FALSE	18
2022-09-13	14:24:17	0.270547	1.20345	1.72823	826.626	FALSE	18
2022-09-13	14:24:17	0.328054	1.45925	1.72823	875.049	FALSE	18
2022-09-13	14:24:17	0.555687	2.47181	1.72823	829.097	FALSE	18
2022-09-13	14:24:17	0.399809	1.77843	1.72823	876.828	FALSE	18
2022-09-13	14:24:18	0.182303	0.81092	0.998978	829.908	FALSE	18
2022-09-13	14:24:18	0.353957	1.57447	0.998978	878.402	FALSE	18
2022-09-13	14:24:18	0.1593	0.708598	0.998978	830.617	FALSE	18
2022-09-13	14:24:18	0.202761	0.901921	0.998978	879.304	FALSE	18
2022-09-13	14:24:19	0.163575	0.727614	1.00613	831.345	FALSE	18
2022-09-13	14:24:19	0.23014	1.02371	1.00613	880.328	FALSE	18
2022-09-13	14:24:19	0.284847	1.26706	1.00613	832.612	FALSE	18
2022-09-13	14:24:20	0.161082	0.716525	1.63751	881.044	FALSE	18
2022-09-13	14:24:20	0.524236	2.33191	1.63751	834.943	FALSE	18
2022-09-13	14:24:20	0.326374	1.45178	1.63751	882.496	FALSE	18
2022-09-13	14:24:20	0.460827	2.04985	1.63751	836.993	FALSE	18
2022-09-13	14:24:21	0.239199	1.064	1.27181	883.56	FALSE	18
2022-09-13	14:24:21	0.43701	1.94391	1.27181	838.937	FALSE	18
2022-09-13	14:24:21	0.177774	0.790774	1.27181	884.351	FALSE	18
2022-09-13	14:24:21	0.289682	1.28856	1.27181	840.226	FALSE	18
2022-09-13	14:24:22	0.161336	0.717655	0.949799	885.068	FALSE	18
2022-09-13	14:24:22	0.276043	1.22789	0.949799	841.454	FALSE	18
2022-09-13	14:24:22	0.259402	1.15387	0.949799	886.222	FALSE	18
2022-09-13	14:24:22	0.157316	0.699773	0.949799	842.153	FALSE	18
2022-09-13	14:24:23	0.195942	0.871589	0.707468	887.094	FALSE	18
2022-09-13	14:24:23	0.13355	0.594057	0.707468	842.748	FALSE	18
2022-09-13	14:24:23	0.147646	0.656759	0.707468	887.751	FALSE	18
2022-09-13	14:24:24	0.536043	2.38443	9.28559	845.132	FALSE	18
2022-09-13	14:24:24	1.93248	8.59606	9.28559	896.347	FALSE	18
2022-09-13	14:24:24	3.57207	15.8893	9.28559	861.021	1	19
2022-09-13	14:24:24	2.30938	10.2726	9.28559	906.619	FALSE	19
2022-09-13	14:24:25	0.841692	3.74401	2.09467	864.765	FALSE	19
2022-09-13	14:24:25	0.512379	2.27916	2.09467	908.898	FALSE	19
2022-09-13	14:24:25	0.131565	0.585227	2.09467	865.35	FALSE	19
2022-09-13	14:24:25	0.397977	1.77028	2.09467	910.669	FALSE	19
2022-09-13	14:24:26	0.137163	0.610128	1.10537	865.961	FALSE	19
2022-09-13	14:24:26	0.401845	1.78749	1.10537	912.456	FALSE	19
2022-09-13	14:24:26	0.262608	1.16813	1.10537	867.129	FALSE	19
2022-09-13	14:24:26	0.192379	0.85574	1.10537	913.312	FALSE	19
2022-09-13	14:24:27	0.258791	1.15115	1.17228	868.28	FALSE	19
2022-09-13	14:24:27	0.238893	1.06264	1.17228	914.375	FALSE	19
2022-09-13	14:24:27	0.292939	1.30305	1.17228	869.583	FALSE	19
2022-09-13	14:24:28	0.220674	0.981602	0.972662	915.356	FALSE	19
2022-09-13	14:24:28	0.181743	0.808429	0.972662	870.391	FALSE	19
2022-09-13	14:24:28	0.242456	1.07849	0.972662	916.435	FALSE	19
2022-09-13	14:24:28	0.229784	1.02213	0.972662	871.413	FALSE	19
2022-09-13	14:24:29	0.29472	1.31097	3.32223	917.746	FALSE	19
2022-09-13	14:24:29	1.40994	6.2717	3.32223	877.685	FALSE	19
2022-09-13	14:24:29	0.881692	3.92194	3.32223	921.668	FALSE	19
2022-09-13	14:24:29	0.401132	1.78432	3.32223	879.469	FALSE	19
2022-09-13	14:24:30	0.346527	1.54142	1.16355	923.209	FALSE	19
2022-09-13	14:24:30	0.168461	0.749348	1.16355	880.219	FALSE	19
2022-09-13	14:24:30	0.171819	0.764285	1.16355	923.973	FALSE	19
2022-09-13	14:24:30	0.359504	1.59915	1.16355	881.818	FALSE	19
2022-09-13	14:24:31	0.237672	1.05721	1.14542	925.031	FALSE	19
2022-09-13	14:24:31	0.289835	1.28924	1.14542	883.107	FALSE	19
2022-09-13	14:24:31	0.245	1.08981	1.14542	926.12	FALSE	19
2022-09-13	14:24:32	0.246476	1.09637	1.15897	884.204	FALSE	19
2022-09-13	14:24:32	0.269886	1.20051	1.15897	927.321	FALSE	19
2022-09-13	14:24:32	0.265356	1.18036	1.15897	885.384	FALSE	19
2022-09-13	14:24:32	0.260471	1.15863	1.15897	928.479	FALSE	19
2022-09-13	14:24:33	0.377112	1.67747	1.74051	887.061	FALSE	19
2022-09-13	14:24:33	0.447036	1.98851	1.74051	930.468	FALSE	19
2022-09-13	14:24:33	0.326323	1.45155	1.74051	888.513	FALSE	19
2022-09-13	14:24:33	0.414669	1.84453	1.74051	932.312	FALSE	19
2022-09-13	14:24:34	0.311056	1.38364	0.742782	889.897	FALSE	19
2022-09-13	14:24:34	0.286527	1.27453	0.742782	933.587	FALSE	19
2022-09-13	14:24:34	-0.119733	-0.532596	0.742782	889.897	FALSE	19
2022-09-13	14:24:34	0.190089	0.845554	0.742782	934.433	FALSE	19
2022-09-13	14:24:35	0.185	0.822917	1.05434	890.72	FALSE	19
2022-09-13	14:24:35	0.237875	1.05812	1.05434	935.491	FALSE	19
2022-09-13	14:24:35	0.288206	1.282	1.05434	892.002	FALSE	19
2022-09-13	14:24:36	0.25584	1.13803	3.0417	936.629	FALSE	19
2022-09-13	14:24:36	0.254669	1.13282	3.0417	893.134	FALSE	19
2022-09-13	14:24:36	0.149428	0.664686	3.0417	937.293	FALSE	19
2022-09-13	14:24:36	2.07528	9.23126	3.0417	902.366	FALSE	19
2022-09-13	14:24:37	2.18877	9.73609	11.753	947.029	FALSE	19
2022-09-13	14:24:37	2.31503	10.2977	11.753	912.663	FALSE	19
2022-09-13	14:24:37	2.88724	12.843	11.753	959.873	FALSE	19
2022-09-13	14:24:37	3.17777	14.1354	11.753	926.799	1	20
2022-09-13	14:24:38	2.98851	13.2935	18.4348	973.166	FALSE	20
2022-09-13	14:24:38	3.96729	17.6473	18.4348	944.446	1	21
2022-09-13	14:24:38	4.9652	22.0862	18.4348	995.252	1	22
2022-09-13	14:24:38	4.65635	20.7124	18.4348	965.158	1	23
2022-09-13	14:24:39	4.73228	21.0501	20.4457	1016.3	1	24
2022-09-13	14:24:39	5.20871	23.1694	20.4457	988.328	1	25
2022-09-13	14:24:39	3.84821	17.1176	20.4457	1033.42	1	26
2022-09-13	14:24:40	1.92826	8.57729	3.88018	996.905	FALSE	26
2022-09-13	14:24:40	0.60159	2.67599	3.88018	1036.1	FALSE	26
2022-09-13	14:24:40	0.461641	2.05347	3.88018	998.959	FALSE	26
2022-09-13	14:24:40	0.497723	2.21397	3.88018	1038.31	FALSE	26
2022-09-13	14:24:41	0.479402	2.13248	2.06309	1001.09	FALSE	26
2022-09-13	14:24:41	0.435178	1.93576	2.06309	1040.25	FALSE	26
2022-09-13	14:24:41	0.499911	2.2237	2.06309	1003.31	FALSE	26
2022-09-13	14:24:41	0.440725	1.96043	2.06309	1042.21	FALSE	26
2022-09-13	14:24:42	0.363168	1.61544	1.83667	1004.93	FALSE	26
2022-09-13	14:24:42	0.418537	1.86174	1.83667	1044.07	FALSE	26
2022-09-13	14:24:42	0.432328	1.92308	1.83667	1006.85	FALSE	26
2022-09-13	14:24:42	0.43757	1.9464	1.83667	1046.01	FALSE	26
2022-09-13	14:24:43	0.349224	1.55342	1.85027	1008.41	FALSE	26
2022-09-13	14:24:43	0.594059	2.64249	1.85027	1048.66	FALSE	26
2022-09-13	14:24:43	0.304593	1.35489	1.85027	1009.76	FALSE	26
2022-09-13	14:24:44	0.396043	1.76168	1.7923	1050.42	FALSE	26
2022-09-13	14:24:44	0.364746	1.62246	1.7923	1011.38	FALSE	26
2022-09-13	14:24:44	0.404491	1.79926	1.7923	1052.22	FALSE	26
2022-09-13	14:24:44	0.446425	1.98579	1.7923	1013.37	FALSE	26
2022-09-13	14:24:45	0.642608	2.85845	2.14017	1055.08	FALSE	26
2022-09-13	14:24:45	0.560165	2.49173	2.14017	1015.86	FALSE	26
2022-09-13	14:24:45	0.353346	1.57175	2.14017	1056.65	FALSE	26
2022-09-13	14:24:45	0.36841	1.63876	2.14017	1017.5	FALSE	26
2022-09-13	14:24:46	0.264695	1.17742	1.1554	1057.83	FALSE	26
2022-09-13	14:24:46	0.239758	1.06649	1.1554	1018.57	FALSE	26
2022-09-13	14:24:46	0.277926	1.23627	1.1554	1059.06	FALSE	26
2022-09-13	14:24:46	0.256603	1.14142	1.1554	1019.71	FALSE	26
2022-09-13	14:24:47	0.382964	1.7035	1.27906	1060.77	FALSE	26
2022-09-13	14:24:47	0.130293	0.579569	1.27906	1020.29	FALSE	26
2022-09-13	14:24:47	0.349377	1.5541	1.27906	1062.32	FALSE	26
2022-09-13	14:24:48	0.207545	0.923202	1.0245	1021.21	FALSE	26
2022-09-13	14:24:48	0.409173	1.82008	1.0245	1064.14	FALSE	26
2022-09-13	14:24:48	0.204135	0.908033	1.0245	1022.12	FALSE	26
2022-09-13	14:24:48	0.10042	0.446688	1.0245	1064.59	FALSE	26
2022-09-13	14:24:49	0.34668	1.5421	1.60888	1023.66	FALSE	26
2022-09-13	14:24:49	0.323473	1.43887	1.60888	1066.02	FALSE	26
2022-09-13	14:24:49	0.406985	1.81035	1.60888	1025.47	FALSE	26
2022-09-13	14:24:49	0.369631	1.64419	1.60888	1067.67	FALSE	26
2022-09-13	14:24:50	0.379351	1.68743	1.5464	1027.16	FALSE	26
2022-09-13	14:24:50	0.34668	1.5421	1.5464	1069.21	FALSE	26
2022-09-13	14:24:50	0.341794	1.52037	1.5464	1028.68	FALSE	26
2022-09-13	14:24:50	0.322761	1.43571	1.5464	1070.65	FALSE	26
2022-09-13	14:24:51	0.353295	1.57153	1.74138	1030.25	FALSE	26
2022-09-13	14:24:51	0.468766	2.08516	1.74138	1072.73	FALSE	26
2022-09-13	14:24:51	0.352379	1.56745	1.74138	1031.82	FALSE	26
2022-09-13	14:24:52	0.364033	1.61929	1.6181	1074.35	FALSE	26
2022-09-13	14:24:52	0.370344	1.64736	1.6181	1033.47	FALSE	26
2022-09-13	14:24:52	0.335127	1.49071	1.6181	1075.84	FALSE	26
2022-09-13	14:24:52	0.38556	1.71505	1.6181	1035.18	FALSE	26
2022-09-13	14:24:53	0.316705	1.40877	1.61301	1077.25	FALSE	26
2022-09-13	14:24:53	0.367697	1.63559	1.61301	1036.82	FALSE	26
2022-09-13	14:24:53	0.480674	2.13813	1.61301	1079.39	FALSE	26
2022-09-13	14:24:53	0.285407	1.26955	1.61301	1038.09	FALSE	26
2022-09-13	14:24:54	0.387341	1.72297	1.66604	1081.11	FALSE	26
2022-09-13	14:24:54	0.334109	1.48618	1.66604	1039.57	FALSE	26
2022-09-13	14:24:54	0.358486	1.59462	1.66604	1082.71	FALSE	26
2022-09-13	14:24:54	0.418232	1.86038	1.66604	1041.43	FALSE	26
2022-09-13	14:24:55	0.239148	1.06378	1.69724	1083.77	FALSE	26
2022-09-13	14:24:55	0.516501	2.2975	1.69724	1043.73	FALSE	26
2022-09-13	14:24:55	0.389021	1.73044	1.69724	1085.5	FALSE	26
2022-09-13	14:24:56	0.594364	2.64385	18.9192	1046.37	FALSE	26
2022-09-13	14:24:56	0.933499	4.15239	18.9192	1089.65	FALSE	26
2022-09-13	14:24:56	3.58027	15.9258	18.9192	1062.3	1	27
2022-09-13	14:24:56	11.9048	52.9549	18.9192	1142.61	1	28
2022-09-13	14:24:57	12.23	54.4015	51.328	1116.7	1	29
2022-09-13	14:24:57	17.3755	77.2897	51.328	1219.9	1	30
2022-09-13	14:24:57	8.52316	37.9127	51.328	1154.61	1	31
2022-09-13	14:24:57	8.02754	35.7081	51.328	1255.61	1	32
2022-09-13	14:24:58	8.00993	35.6298	26.0356	1190.24	1	33
2022-09-13	14:24:58	6.28642	27.9633	26.0356	1283.57	1	34
2022-09-13	14:24:58	5.14174	22.8715	26.0356	1213.11	1	35
2022-09-13	14:24:58	3.97421	17.6781	26.0356	1301.25	1	36
2022-09-13	14:24:59	2.92749	13.0221	8.55683	1226.14	FALSE	36
2022-09-13	14:24:59	1.98129	8.81317	8.55683	1310.06	FALSE	36
2022-09-13	14:24:59	0.862201	3.83524	8.55683	1229.97	FALSE	36
2022-09-13	14:25:00	0.516145	2.29592	3.71413	1312.36	FALSE	36
2022-09-13	14:25:00	0.453397	2.0168	3.71413	1231.99	FALSE	36
2022-09-13	14:25:00	0.619606	2.75613	3.71413	1315.11	FALSE	36
2022-09-13	14:25:00	1.75075	7.78769	3.71413	1239.78	FALSE	36
2022-09-13	14:25:01	2.39345	10.6465	6.96291	1325.76	FALSE	36
2022-09-13	14:25:01	1.4276	6.35025	6.96291	1246.13	FALSE	36
2022-09-13	14:25:01	0.93869	4.17548	6.96291	1329.93	FALSE	36
2022-09-13	14:25:01	1.50159	6.67937	6.96291	1252.81	FALSE	36
2022-09-13	14:25:02	3.44627	15.3297	17.0968	1345.26	1	37
2022-09-13	14:25:02	4.17273	18.5611	17.0968	1271.37	1	38
2022-09-13	14:25:02	3.7363	16.6198	17.0968	1361.88	1	39
2022-09-13	14:25:02	4.01884	17.8766	17.0968	1289.24	1	40
2022-09-13	14:25:03	3.86352	17.1857	14.7734	1379.07	1	41
2022-09-13	14:25:03	4.55849	20.2771	14.7734	1309.52	1	42
2022-09-13	14:25:03	1.54159	6.8573	14.7734	1385.93	FALSE	42
2022-09-13	14:25:04	0.577875	2.5705	2.07232	1312.09	FALSE	42
2022-09-13	14:25:04	0.455585	2.02653	2.07232	1387.95	FALSE	42
2022-09-13	14:25:04	0.445153	1.98013	2.07232	1314.07	FALSE	42
2022-09-13	14:25:04	0.384898	1.7121	2.07232	1389.67	FALSE	42
2022-09-13	14:25:05	0.363168	1.61544	1.73095	1315.69	FALSE	42
2022-09-13	14:25:05	0.364237	1.6202	1.73095	1391.29	FALSE	42
2022-09-13	14:25:05	0.353346	1.57175	1.73095	1317.26	FALSE	42
2022-09-13	14:25:05	0.475789	2.1164	1.73095	1393.4	FALSE	42
2022-09-13	14:25:06	0.54098	2.40639	9.44399	1319.67	FALSE	42
2022-09-13	14:25:06	0.652837	2.90395	9.44399	1396.31	FALSE	42
2022-09-13	14:25:06	1.61523	7.18487	9.44399	1326.85	FALSE	42
2022-09-13	14:25:06	5.68337	25.2808	9.44399	1421.59	1	43
2022-09-13	14:25:07	9.18754	40.868	25.8564	1367.72	1	44
2022-09-13	14:25:07	5.6109	24.9584	25.8564	1446.55	1	45
2022-09-13	14:25:07	2.63991	11.7428	25.8564	1379.46	FALSE	45
2022-09-13	14:25:08	6.05813	26.9478	16.1483	1473.49	1	46
2022-09-13	14:25:08	3.58042	15.9264	16.1483	1395.39	1	47
2022-09-13	14:25:08	3.07665	13.6856	16.1483	1487.18	1	48
2022-09-13	14:25:08	1.80602	8.03354	16.1483	1403.42	FALSE	48
2022-09-13	14:25:09	0.665713	2.96122	3.19325	1490.14	FALSE	48
2022-09-13	14:25:09	1.29838	5.77545	3.19325	1409.2	FALSE	48
2022-09-13	14:25:09	0.413906	1.84114	3.19325	1491.98	FALSE	48
2022-09-13	14:25:09	0.493499	2.19518	3.19325	1411.39	FALSE	48
2022-09-13	14:25:10	0.474466	2.11052	1.31567	1494.09	FALSE	48
2022-09-13	14:25:10	0.209835	0.933388	1.31567	1412.33	FALSE	48
2022-09-13	14:25:10	0.244237	1.08642	1.31567	1495.18	FALSE	48
2022-09-13	14:25:10	0.254568	1.13237	1.31567	1413.46	FALSE	48
2022-09-13	14:25:11	0.557417	2.4795	2.91414	1497.66	FALSE	48
2022-09-13	14:25:11	0.425	1.89048	2.91414	1415.35	FALSE	48
2022-09-13	14:25:11	0.982965	4.37242	2.91414	1502.03	FALSE	48
2022-09-13	14:25:12	1.18709	5.28041	6.71537	1420.63	FALSE	48
2022-09-13	14:25:12	2.60734	11.598	6.71537	1513.63	FALSE	48
2022-09-13	14:25:12	1.13691	5.0572	6.71537	1425.69	FALSE	48
2022-09-13	14:25:12	1.10739	4.92589	6.71537	1518.55	FALSE	48
2022-09-13	14:25:13	0.523371	2.32806	1.60594	1428.01	FALSE	48
2022-09-13	14:25:13	0.405509	1.80379	1.60594	1520.36	FALSE	48
2022-09-13	14:25:13	0.363931	1.61884	1.60594	1429.63	FALSE	48
2022-09-13	14:25:13	0.151311	0.673062	1.60594	1521.03	FALSE	48
2022-09-13	14:25:14	0.0664252	0.295473	0.0946245	1429.93	FALSE	48
2022-09-13	14:25:14	-0.053931	-0.239896	0.0946245	1521.03	FALSE	48
2022-09-13	14:25:14	0.00774832	0.0344661	0.0946245	1429.96	FALSE	48
2022-09-13	14:25:14	0.0648476	0.288455	0.0946245	1521.32	FALSE	48
2022-09-13	14:25:15	0.0166033	0.0738548	0.0537831	1430.04	FALSE	48
2022-09-13	14:25:15	-0.00543234	-0.0241641	0.0537831	1521.32	FALSE	48
2022-09-13	14:25:15	0.025102	0.111659	0.0537831	1430.15	FALSE	48
2022-09-13	14:25:16	0.16668	0.741426	2.77407	1522.06	FALSE	48
2022-09-13	14:25:16	0.158741	0.706112	2.77407	1430.85	FALSE	48
2022-09-13	14:25:16	0.465662	2.07136	2.77407	1524.13	FALSE	48
2022-09-13	14:25:16	1.70347	7.57738	2.77407	1438.43	FALSE	48
2022-09-13	14:25:17	0.920674	4.09534	6.9444	1528.23	FALSE	48
2022-09-13	14:25:17	1.1848	5.27023	6.9444	1443.7	FALSE	48
2022-09-13	14:25:17	1.80963	8.0496	6.9444	1536.28	FALSE	48
2022-09-13	14:25:17	2.32958	10.3624	6.9444	1454.06	FALSE	48
2022-09-13	14:25:18	1.94546	8.6538	7.23574	1544.93	FALSE	48
2022-09-13	14:25:18	2.00449	8.91637	7.23574	1462.98	FALSE	48
2022-09-13	14:25:18	1.24816	5.55207	7.23574	1550.48	FALSE	48
2022-09-13	14:25:18	1.30856	5.82074	7.23574	1468.8	FALSE	48
2022-09-13	14:25:19	1.05584	4.69659	3.23038	1555.18	FALSE	48
2022-09-13	14:25:19	0.68444	3.04453	3.23038	1471.85	FALSE	48
2022-09-13	14:25:19	0.438384	1.95002	3.23038	1557.13	FALSE	48
2022-09-13	14:25:20	0.861234	3.83094	2.71018	1475.68	FALSE	48
2022-09-13	14:25:20	0.604491	2.6889	2.71018	1559.82	FALSE	48
2022-09-13	14:25:20	0.553702	2.46298	2.71018	1478.14	FALSE	48
2022-09-13	14:25:20	0.417672	1.85789	2.71018	1561.68	FALSE	48
2022-09-13	14:25:21	0.370038	1.646	1.85387	1479.79	FALSE	48
2022-09-13	14:25:21	0.418028	1.85947	1.85387	1563.54	FALSE	48
2022-09-13	14:25:21	0.483982	2.15285	1.85387	1481.94	FALSE	48
2022-09-13	14:25:21	0.395026	1.75715	1.85387	1565.29	FALSE	48
2022-09-13	14:25:22	0.360064	1.60164	1.9387	1483.54	FALSE	48
2022-09-13	14:25:22	0.454211	2.02042	1.9387	1567.31	FALSE	48
2022-09-13	14:25:22	0.428766	1.90724	1.9387	1485.45	FALSE	48
2022-09-13	14:25:22	0.500318	2.22551	1.9387	1569.54	FALSE	48
2022-09-13	14:25:23	0.410293	1.82507	1.95651	1487.27	FALSE	48
2022-09-13	14:25:23	0.39528	1.75828	1.95651	1571.3	FALSE	48
2022-09-13	14:25:23	0.513957	2.28618	1.95651	1489.56	FALSE	48
2022-09-13	14:25:24	0.417163	1.85562	2.07288	1573.15	FALSE	48
2022-09-13	14:25:24	0.479758	2.13406	2.07288	1491.69	FALSE	48
2022-09-13	14:25:24	0.479046	2.13089	2.07288	1575.28	FALSE	48
2022-09-13	14:25:24	0.488054	2.17096	2.07288	1493.86	FALSE	48
2022-09-13	14:25:25	0.420166	1.86898	1.84731	1577.15	FALSE	48
2022-09-13	14:25:25	0.338893	1.50746	1.84731	1495.37	FALSE	48
2022-09-13	14:25:25	0.435585	1.93757	1.84731	1579.09	FALSE	48
2022-09-13	14:25:25	0.466527	2.07521	1.84731	1497.45	FALSE	48
2022-09-13	14:25:26	0.464644	2.06683	2.10418	1581.16	FALSE	48
2022-09-13	14:25:26	0.533753	2.37424	2.10418	1499.82	FALSE	48
2022-09-13	14:25:26	0.348206	1.54889	2.10418	1582.71	FALSE	48
2022-09-13	14:25:26	0.54556	2.42676	2.10418	1502.25	FALSE	48
2022-09-13	14:25:27	0.485356	2.15896	1.91312	1584.86	FALSE	48
2022-09-13	14:25:27	0.375585	1.67068	1.91312	1503.92	FALSE	48
2022-09-13	14:25:27	0.429326	1.90973	1.91312	1586.77	FALSE	48
2022-09-13	14:25:28	0.219402	0.975944	1.10011	1504.89	FALSE	48
2022-09-13	14:25:28	0.259453	1.1541	1.10011	1587.93	FALSE	48
2022-09-13	14:25:28	0.19014	0.845781	1.10011	1505.74	FALSE	48
2022-09-13	14:25:28	0.320267	1.42461	1.10011	1589.35	FALSE	48
2022-09-13	14:25:29	0.252074	1.12128	0.958798	1506.86	FALSE	48
2022-09-13	14:25:29	0.276451	1.22971	0.958798	1590.58	FALSE	48
2022-09-13	14:25:29	0.186527	0.829709	0.958798	1507.69	FALSE	48
2022-09-13	14:25:29	0.147138	0.654499	0.958798	1591.24	FALSE	48
2022-09-13	14:25:30	0.211514	0.940857	0.616694	1508.63	FALSE	48
2022-09-13	14:25:30	0.141591	0.629825	0.616694	1591.87	FALSE	48
2022-09-13	14:25:30	0.18729	0.833103	0.616694	1509.46	FALSE	48
2022-09-13	14:25:30	0.0141606	0.0629892	0.616694	1591.93	FALSE	48
2022-09-13	14:25:31	0.047443	0.211036	0.615862	1509.68	FALSE	48
2022-09-13	14:25:31	0.175127	0.779	0.615862	1592.71	FALSE	48
2022-09-13	14:25:31	0.192786	0.857551	0.615862	1510.53	FALSE	48
2022-09-13	14:25:32	0.218741	0.973004	-0.375492	1593.68	FALSE	48
2022-09-13	14:25:32	0.0758399	0.337351	-0.375492	1510.87	FALSE	48
2022-09-13	14:25:32	-0.426246	-1.89603	-0.375492	1593.68	FALSE	48
2022-09-13	14:25:32	-0.205992	-0.916294	-0.375492	1510.87	FALSE	48
2022-09-13	14:25:33	-0.119224	-0.530332	1.58239	1593.68	FALSE	48
2022-09-13	14:25:33	0.0419468	0.186588	1.58239	1511.06	FALSE	48
2022-09-13	14:25:33	0.512176	2.27826	1.58239	1595.96	FALSE	48
2022-09-13	14:25:33	0.988054	4.39506	1.58239	1515.45	FALSE	48
2022-09-13	14:25:34	0.826323	3.67565	5.15861	1599.64	FALSE	48
2022-09-13	14:25:34	1.92841	8.57795	5.15861	1524.03	FALSE	48
2022-09-13	14:25:34	0.534822	2.379	5.15861	1602.01	FALSE	48
2022-09-13	14:25:34	1.34927	6.00182	5.15861	1530.03	FALSE	48
2022-09-13	14:25:35	0.689275	3.06603	6.93895	1605.08	FALSE	48
2022-09-13	14:25:35	3.11106	13.8386	6.93895	1543.87	1	49
2022-09-13	14:25:35	0.879504	3.91221	6.93895	1608.99	FALSE	49
2022-09-13	14:25:36	2.89686	12.8858	8.40993	1556.76	FALSE	49
2022-09-13	14:25:36	1.56933	6.98069	8.40993	1615.97	FALSE	49
2022-09-13	14:25:36	1.96541	8.74254	8.40993	1565.5	FALSE	49
2022-09-13	14:25:36	1.13095	5.03069	8.40993	1621	FALSE	49
2022-09-13	14:25:37	2.36541	10.5218	8.18192	1576.02	FALSE	49
2022-09-13	14:25:37	1.99767	8.88604	8.18192	1629.89	FALSE	49
2022-09-13	14:25:37	1.89482	8.42854	8.18192	1584.45	FALSE	49
2022-09-13	14:25:37	1.09961	4.89129	8.18192	1634.78	FALSE	49
2022-09-13	14:25:38	0.594669	2.64521	2.03168	1587.09	FALSE	49
2022-09-13	14:25:38	0.361641	1.60865	2.03168	1636.39	FALSE	49
2022-09-13	14:25:38	0.535687	2.38284	2.03168	1589.48	FALSE	49
2022-09-13	14:25:38	0.334975	1.49004	2.03168	1637.88	FALSE	49
2022-09-13	14:25:39	0.203575	0.905542	1.09071	1590.38	FALSE	49
2022-09-13	14:25:39	0.168206	0.748214	1.09071	1638.63	FALSE	49
2022-09-13	14:25:39	0.36383	1.61839	1.09071	1592	FALSE	49
2022-09-13	14:25:40	0.149529	0.665135	0.622636	1639.29	FALSE	49
2022-09-13	14:25:40	0.0520232	0.23141	0.622636	1592.23	FALSE	49
2022-09-13	14:25:40	0.112176	0.498981	0.622636	1639.79	FALSE	49
2022-09-13	14:25:40	0.246171	1.09502	0.622636	1593.33	FALSE	49
2022-09-13	14:25:41	0.332023	1.4769	0.592189	1641.27	FALSE	49
2022-09-13	14:25:41	0.268512	1.1944	0.592189	1594.52	FALSE	49
2022-09-13	14:25:41	-0.0405468	-0.18036	0.592189	1641.27	FALSE	49
2022-09-13	14:25:41	-0.0274679	-0.122183	0.592189	1594.52	FALSE	49
2022-09-13	14:25:42	0.0635753	0.282796	0.291907	1641.55	FALSE	49
2022-09-13	14:25:42	0.212125	0.943574	0.291907	1595.47	FALSE	49
2022-09-13	14:25:42	0.123168	0.547876	0.291907	1642.1	FALSE	49
2022-09-13	14:25:42	-0.136374	-0.606619	0.291907	1595.47	FALSE	49
2022-09-13	14:25:43	-0.412557	-1.83514	-1.97315	1642.1	FALSE	49
2022-09-13	14:25:43	-0.476832	-2.12104	-1.97315	1595.47	FALSE	49
2022-09-13	14:25:43	-0.441361	-1.96326	-1.97315	1642.1	FALSE	49
2022-09-13	14:25:44	-0.342582	-1.52387	-0.762191	1595.47	FALSE	49
2022-09-13	14:25:44	-0.248689	-1.10622	-0.762191	1642.1	FALSE	49
2022-09-13	14:25:44	0.0615905	0.273967	-0.762191	1595.74	FALSE	49
2022-09-13	14:25:44	-0.155712	-0.692638	-0.762191	1642.1	FALSE	49
2022-09-13	14:25:45	-0.150623	-0.670001	0.485455	1595.74	FALSE	49
2022-09-13	14:25:45	0.0250003	0.111206	0.485455	1642.21	FALSE	49
2022-09-13	14:25:45	0.203931	0.907126	0.485455	1596.65	FALSE	49
2022-09-13	14:25:45	0.358232	1.59349	0.485455	1643.81	FALSE	49
2022-09-13	14:25:46	0.454364	2.0211	1.93593	1598.67	FALSE	49
2022-09-13	14:25:46	0.523015	2.32648	1.93593	1646.13	FALSE	49
2022-09-13	14:25:46	0.436349	1.94097	1.93593	1600.61	FALSE	49
2022-09-13	14:25:46	0.327138	1.45518	1.93593	1647.59	FALSE	49
2022-09-13	14:25:47	0.118232	0.52592	0.864872	1601.13	FALSE	49
2022-09-13	14:25:47	0.228257	1.01533	0.864872	1648.6	FALSE	49
2022-09-13	14:25:47	0.236807	1.05336	0.864872	1602.19	FALSE	49
2022-09-13	14:25:48	0.322405	1.43412	1.98607	1650.04	FALSE	49
2022-09-13	14:25:48	0.767443	3.41374	1.98607	1605.6	FALSE	49
2022-09-13	14:25:48	0.479148	2.13135	1.98607	1652.17	FALSE	49
2022-09-13	14:25:48	0.216959	0.965077	1.98607	1606.57	FALSE	49
2022-09-13	14:25:49	0.357672	1.591	1.47198	1653.76	FALSE	49
2022-09-13	14:25:49	0.336501	1.49682	1.47198	1608.06	FALSE	49
2022-09-13	14:25:49	0.307443	1.36757	1.47198	1655.13	FALSE	49
2022-09-13	14:25:49	0.322048	1.43253	1.47198	1609.5	FALSE	49
2022-09-13	14:25:50	0.336654	1.4975	1.46989	1656.62	FALSE	49
2022-09-13	14:25:50	0.355789	1.58262	1.46989	1611.08	FALSE	49
2022-09-13	14:25:50	0.280827	1.24917	1.46989	1657.87	FALSE	49
2022-09-13	14:25:50	0.348511	1.55025	1.46989	1612.63	FALSE	49
2022-09-13	14:25:51	0.360115	1.60186	1.74184	1659.47	FALSE	49
2022-09-13	14:25:51	0.429987	1.91267	1.74184	1614.54	FALSE	49
2022-09-13	14:25:51	0.384644	1.71097	1.74184	1661.19	FALSE	49
2022-09-13	14:25:52	0.447137	1.98895	1.92982	1616.53	FALSE	49
2022-09-13	14:25:52	0.421896	1.87668	1.92982	1663.06	FALSE	49
2022-09-13	14:25:52	0.443372	1.97221	1.92982	1618.5	FALSE	49
2022-09-13	14:25:52	0.422965	1.88143	1.92982	1664.94	FALSE	49
2022-09-13	14:25:53	0.230598	1.02575	1.02473	1619.53	FALSE	49
2022-09-13	14:25:53	0.296043	1.31686	1.02473	1666.26	FALSE	49
2022-09-13	14:25:53	0.277774	1.23559	1.02473	1620.76	FALSE	49
2022-09-13	14:25:53	0.117061	0.520711	1.02473	1666.78	FALSE	49
2022-09-13	14:25:54	0.251565	1.11901	1.32184	1621.88	FALSE	49
2022-09-13	14:25:54	0.223931	0.99609	1.32184	1667.78	FALSE	49
2022-09-13	14:25:54	0.373244	1.66026	1.32184	1623.54	FALSE	49
2022-09-13	14:25:54	0.339911	1.51199	1.32184	1669.29	FALSE	49
2022-09-13	14:25:55	0.269784	1.20005	1.31075	1624.74	FALSE	49
2022-09-13	14:25:55	0.296094	1.31709	1.31075	1670.61	FALSE	49
2022-09-13	14:25:55	0.369733	1.64465	1.31075	1626.39	FALSE	49
2022-09-13	14:25:55	0.243066	1.08121	1.31075	1671.69	FALSE	49
2022-09-13	14:25:56	0.462201	2.05596	2.75952	1628.44	FALSE	49
2022-09-13	14:25:56	0.881641	3.92172	2.75952	1675.61	FALSE	49
2022-09-13	14:25:56	0.517264	2.30089	2.75952	1630.75	FALSE	49
2022-09-13	14:25:57	0.373092	1.65959	2.06106	1677.27	FALSE	49
2022-09-13	14:25:57	0.47299	2.10395	2.06106	1632.85	FALSE	49
2022-09-13	14:25:57	0.626832	2.78827	2.06106	1680.06	FALSE	49
2022-09-13	14:25:57	0.380471	1.69241	2.06106	1634.54	FALSE	49
2022-09-13	14:25:58	0.377163	1.6777	1.90124	1681.74	FALSE	49
2022-09-13	14:25:58	0.435382	1.93667	1.90124	1636.48	FALSE	49
2022-09-13	14:25:58	0.427545	1.90181	1.90124	1683.64	FALSE	49
2022-09-13	14:25:58	0.46958	2.08879	1.90124	1638.57	FALSE	49
2022-09-13	14:25:59	0.509682	2.26717	2.15074	1685.9	FALSE	49
2022-09-13	14:25:59	0.445204	1.98036	2.15074	1640.55	FALSE	49
2022-09-13	14:25:59	0.495636	2.20469	2.15074	1688.11	FALSE	49
2022-09-13	14:26:00	0.484237	2.15398	2.4164	1642.7	FALSE	49
2022-09-13	14:26:00	0.402914	1.79224	2.4164	1689.9	FALSE	49
2022-09-13	14:26:00	0.48902	2.17526	2.4164	1644.88	FALSE	49
2022-09-13	14:26:00	0.796756	3.54413	2.4164	1693.45	FALSE	49
2022-09-13	14:26:01	0.7993	3.55545	4.69291	1648.43	FALSE	49
2022-09-13	14:26:01	0.776196	3.45268	4.69291	1696.9	FALSE	49
2022-09-13	14:26:01	1.25793	5.59552	4.69291	1654.03	FALSE	49
2022-09-13	14:26:01	1.38663	6.16801	4.69291	1703.07	FALSE	49
2022-09-13	14:26:02	0.784135	3.48799	4.62007	1657.52	FALSE	49
2022-09-13	14:26:02	1.36276	6.06183	4.62007	1709.13	FALSE	49
2022-09-13	14:26:02	0.907544	4.03694	4.62007	1661.55	FALSE	49
2022-09-13	14:26:02	1.10011	4.89351	4.62007	1714.02	FALSE	49
2022-09-13	14:26:03	0.428613	1.90656	2.31599	1663.46	FALSE	49
2022-09-13	14:26:03	0.615585	2.73825	2.31599	1716.76	FALSE	49
2022-09-13	14:26:03	0.517773	2.30316	2.31599	1665.76	FALSE	49
2022-09-13	14:26:04	0.450038	2.00186	3.90717	1718.76	FALSE	49
2022-09-13	14:26:04	0.555483	2.4709	3.90717	1668.23	FALSE	49
2022-09-13	14:26:04	0.816705	3.63287	3.90717	1722.39	FALSE	49
2022-09-13	14:26:04	1.69126	7.52306	3.90717	1675.76	FALSE	49
2022-09-13	14:26:05	0.691616	3.07645	3.28126	1725.47	FALSE	49
2022-09-13	14:26:05	1.19569	5.31867	3.28126	1681.07	FALSE	49
2022-09-13	14:26:05	0.557926	2.48177	3.28126	1727.95	FALSE	49
2022-09-13	14:26:05	0.505407	2.24815	3.28126	1683.32	FALSE	49
2022-09-13	14:26:06	0.427188	1.90022	1.57277	1729.85	FALSE	49
2022-09-13	14:26:06	0.357316	1.58941	1.57277	1684.91	FALSE	49
2022-09-13	14:26:06	0.344186	1.53101	1.57277	1731.38	FALSE	49
2022-09-13	14:26:06	0.285611	1.27045	1.57277	1686.18	FALSE	49
2022-09-13	14:26:07	0.377468	1.67905	1.10641	1733.06	FALSE	49
2022-09-13	14:26:07	0.256145	1.13938	1.10641	1687.32	FALSE	49
2022-09-13	14:26:07	0.112583	0.500792	1.10641	1733.56	FALSE	49
2022-09-13	14:26:08	0.930089	4.13722	3.36632	1691.46	FALSE	49
2022-09-13	14:26:08	1.06022	4.71607	3.36632	1738.28	FALSE	49
2022-09-13	14:26:08	0.627137	2.78963	3.36632	1694.25	FALSE	49
2022-09-13	14:26:08	0.409682	1.82235	3.36632	1740.1	FALSE	49
2022-09-13	14:26:09	0.223575	0.994506	0.411544	1695.24	FALSE	49
2022-09-13	14:26:09	0.0179264	0.0797402	0.411544	1740.18	FALSE	49
2022-09-13	14:26:09	0.0711071	0.316299	0.411544	1695.56	FALSE	49
2022-09-13	14:26:09	0.0574684	0.255631	0.411544	1740.44	FALSE	49
2022-09-13	14:26:10	0.553804	2.46343	3.1726	1698.02	FALSE	49
2022-09-13	14:26:10	0.746425	3.32025	3.1726	1743.76	FALSE	49
2022-09-13	14:26:10	0.685611	3.04973	3.1726	1701.07	FALSE	49
2022-09-13	14:26:10	0.867086	3.85697	3.1726	1747.61	FALSE	49
2022-09-13	14:26:11	1.73258	7.70686	9.07143	1708.78	FALSE	49
2022-09-13	14:26:11	2.62123	11.6598	9.07143	1759.27	FALSE	49
2022-09-13	14:26:11	1.85899	8.26916	9.07143	1717.05	FALSE	49
2022-09-13	14:26:11	1.94459	8.64993	9.07143	1767.92	FALSE	49
2022-09-13	14:26:12	0.813091	3.61679	2.40759	1720.67	FALSE	49
2022-09-13	14:26:12	0.427392	1.90113	2.40759	1769.83	FALSE	49
2022-09-13	14:26:12	0.38327	1.70486	2.40759	1722.37	FALSE	49
2022-09-13	14:26:13	1.4822	6.59312	13.1383	1776.42	FALSE	49
2022-09-13	14:26:13	2.45915	10.9388	13.1383	1733.31	FALSE	49
2022-09-13	14:26:13	4.80118	21.3566	13.1383	1797.77	1	50
2022-09-13	14:26:13	3.07197	13.6647	13.1383	1746.97	1	51
2022-09-13	14:26:14	3.95161	17.5776	11.0707	1815.35	1	52
2022-09-13	14:26:14	1.32536	5.89547	11.0707	1752.87	FALSE	52
2022-09-13	14:26:14	1.99431	8.87109	11.0707	1824.22	FALSE	52
2022-09-13	14:26:14	2.68398	11.9389	11.0707	1764.81	FALSE	52
2022-09-13	14:26:15	3.41029	15.1697	11.557	1839.39	1	53
2022-09-13	14:26:15	2.69487	11.9873	11.557	1776.8	FALSE	53
2022-09-13	14:26:15	1.72546	7.67519	11.557	1847.07	FALSE	53
2022-09-13	14:26:15	2.56189	11.3958	11.557	1788.19	FALSE	53
2022-09-13	14:26:16	1.29044	5.74014	3.85387	1852.81	FALSE	53
2022-09-13	14:26:16	0.842201	3.74628	3.85387	1791.94	FALSE	53
2022-09-13	14:26:16	0.466527	2.07521	3.85387	1854.88	FALSE	53
2022-09-13	14:26:17	0.437417	1.94572	1.14725	1793.88	FALSE	53
2022-09-13	14:26:17	0.329428	1.46536	1.14725	1856.35	FALSE	53
2022-09-13	14:26:17	0.135585	0.603109	1.14725	1794.49	FALSE	53
2022-09-13	14:26:17	0.129224	0.574814	1.14725	1856.92	FALSE	53
2022-09-13	14:26:18	0.0655091	0.291398	2.23197	1794.78	FALSE	53
2022-09-13	14:26:18	0.166883	0.742329	2.23197	1857.67	FALSE	53
2022-09-13	14:26:18	0.729936	3.2469	2.23197	1798.03	FALSE	53
2022-09-13	14:26:18	1.04475	4.64726	2.23197	1862.31	FALSE	53
2022-09-13	14:26:19	3.91981	17.4361	14.4446	1815.46	1	54
2022-09-13	14:26:19	1.96912	8.75904	14.4446	1871.07	FALSE	54
2022-09-13	14:26:19	3.85294	17.1386	14.4446	1832.6	1	55
2022-09-13	14:26:20	2.83228	12.5985	18.3044	1883.67	FALSE	55
2022-09-13	14:26:20	7.45334	33.1539	18.3044	1865.75	1	56
2022-09-13	14:26:20	3.67273	16.337	18.3044	1900.01	1	57
2022-09-13	14:26:20	2.50169	11.128	18.3044	1876.88	FALSE	57
2022-09-13	14:26:21	1.54434	6.86953	10.4659	1906.88	FALSE	57
2022-09-13	14:26:21	1.26057	5.60727	10.4659	1882.49	FALSE	57
2022-09-13	14:26:21	1.87431	8.33731	10.4659	1915.21	FALSE	57
2022-09-13	14:26:21	4.73212	21.0494	10.4659	1903.54	1	58
2022-09-13	14:26:22	2.40103	10.6803	5.10892	1925.9	FALSE	58
2022-09-13	14:26:22	1.43879	6.40003	5.10892	1909.94	FALSE	58
2022-09-13	14:26:22	0.440776	1.96066	5.10892	1927.86	FALSE	58
2022-09-13	14:26:22	0.31355	1.39473	5.10892	1911.33	FALSE	58
2022-09-13	14:26:23	0.242761	1.07985	0.367572	1928.94	FALSE	58
2022-09-13	14:26:23	0.0982317	0.436954	0.367572	1911.77	FALSE	58
2022-09-13	14:26:23	0.0946694	0.421108	0.367572	1929.36	FALSE	58
2022-09-13	14:26:23	-0.105127	-0.467626	0.367572	1911.77	FALSE	58
2022-09-13	14:26:24	0.0790969	0.351839	0.228089	1929.71	FALSE	58
2022-09-13	14:26:24	-0.045585	-0.202771	0.228089	1911.77	FALSE	58
2022-09-13	14:26:24	0.120318	0.535199	0.228089	1930.24	FALSE	58
2022-09-13	14:26:25	0.0307509	0.136786	-0.51024	1911.91	FALSE	58
2022-09-13	14:26:25	-0.0900124	-0.400393	-0.51024	1930.24	FALSE	58
2022-09-13	14:26:25	-0.285534	-1.27011	-0.51024	1911.91	FALSE	58
2022-09-13	14:26:25	-0.114033	-0.507242	-0.51024	1930.24	FALSE	58
2022-09-13	14:26:26	0.025102	0.111659	5.76008	1912.02	FALSE	58
2022-09-13	14:26:26	1.61645	7.19029	5.76008	1937.43	FALSE	58
2022-09-13	14:26:26	1.58383	7.04519	5.76008	1919.06	FALSE	58
2022-09-13	14:26:26	1.95431	8.69316	5.76008	1946.13	FALSE	58
2022-09-13	14:26:27	1.58363	7.0443	9.0938	1926.11	FALSE	58
2022-09-13	14:26:27	2.31258	10.2868	9.0938	1956.41	FALSE	58
2022-09-13	14:26:27	2.28678	10.1721	9.0938	1936.28	FALSE	58
2022-09-13	14:26:27	1.99452	8.87202	9.0938	1965.29	FALSE	58
2022-09-13	14:26:28	0.70042	3.11561	3.5894	1939.4	FALSE	58
2022-09-13	14:26:28	0.811463	3.60955	3.5894	1968.9	FALSE	58
2022-09-13	14:26:28	0.908919	4.04305	3.5894	1943.44	FALSE	58
2022-09-13	14:26:29	1.87996	8.36244	8.37806	1977.26	FALSE	58
2022-09-13	14:26:29	1.54785	6.88515	8.37806	1950.32	FALSE	58
2022-09-13	14:26:29	2.22948	9.91717	8.37806	1987.18	FALSE	58
2022-09-13	14:26:29	1.8766	8.34749	8.37806	1958.67	FALSE	58
2022-09-13	14:26:30	3.71813	16.539	21.3076	2003.71	1	59
2022-09-13	14:26:30	4.07131	18.11	21.3076	1976.78	1	60
2022-09-13	14:26:30	6.98184	31.0566	21.3076	2034.77	1	61
2022-09-13	14:26:30	4.38938	19.5248	21.3076	1996.31	1	62
2022-09-13	14:26:31	2.05401	9.13665	9.00251	2043.91	FALSE	62
2022-09-13	14:26:31	2.62332	11.6691	9.00251	2007.98	FALSE	62
2022-09-13	14:26:31	0.985458	4.38351	9.00251	2048.29	FALSE	62
2022-09-13	14:26:31	2.43263	10.8208	9.00251	2018.8	FALSE	62
2022-09-13	14:26:32	0.623524	2.77356	5.0855	2051.06	FALSE	62
2022-09-13	14:26:32	2.13457	9.49499	5.0855	2028.29	FALSE	62
2022-09-13	14:26:32	0.671718	2.98794	5.0855	2054.05	FALSE	62
2022-09-13	14:26:33	1.88948	8.40478	5.79941	2036.7	FALSE	62
2022-09-13	14:26:33	0.604186	2.68754	5.79941	2056.74	FALSE	62
2022-09-13	14:26:33	1.37742	6.12704	5.79941	2042.82	FALSE	62
2022-09-13	14:26:33	1.34398	5.97829	5.79941	2062.72	FALSE	62
2022-09-13	14:26:34	1.49457	6.64815	5.39959	2049.47	FALSE	62
2022-09-13	14:26:34	1.35696	6.03603	5.39959	2068.75	FALSE	62
2022-09-13	14:26:34	0.948664	4.21985	5.39959	2053.69	FALSE	62
2022-09-13	14:26:34	1.05533	4.69432	5.39959	2073.45	FALSE	62
2022-09-13	14:26:35	0.416909	1.85449	1.49502	2055.55	FALSE	62
2022-09-13	14:26:35	0.387952	1.72569	1.49502	2075.17	FALSE	62
2022-09-13	14:26:35	0.22098	0.982963	1.49502	2056.53	FALSE	62
2022-09-13	14:26:35	0.318537	1.41692	1.49502	2076.59	FALSE	62
2022-09-13	14:26:36	0.420674	1.87124	1.80756	2058.4	FALSE	62
2022-09-13	14:26:36	0.398486	1.77255	1.80756	2078.36	FALSE	62
2022-09-13	14:26:36	0.399911	1.77888	1.80756	2060.18	FALSE	62
2022-09-13	14:26:37	0.42327	1.88279	1.85212	2080.25	FALSE	62
2022-09-13	14:26:37	0.413906	1.84114	1.85212	2062.02	FALSE	62
2022-09-13	14:26:37	0.381489	1.69694	1.85212	2081.94	FALSE	62
2022-09-13	14:26:37	0.446832	1.9876	1.85212	2064.01	FALSE	62
2022-09-13	14:26:38	0.431565	1.91969	1.84272	2083.86	FALSE	62
2022-09-13	14:26:38	0.42327	1.88279	1.84272	2065.89	FALSE	62
2022-09-13	14:26:38	0.404542	1.79948	1.84272	2085.66	FALSE	62
2022-09-13	14:26:38	0.397672	1.76892	1.84272	2067.66	FALSE	62
2022-09-13	14:26:39	0.395026	1.75715	1.66627	2087.42	FALSE	62
2022-09-13	14:26:39	0.366425	1.62993	1.66627	2069.29	FALSE	62
2022-09-13	14:26:39	0.368003	1.63695	1.66627	2089.06	FALSE	62
2022-09-13	14:26:39	0.368919	1.64103	1.66627	2070.93	FALSE	62
2022-09-13	14:26:40	0.360725	1.60458	1.65076	2090.66	FALSE	62
2022-09-13	14:26:40	0.375534	1.67045	1.65076	2072.6	FALSE	62
2022-09-13	14:26:40	0.377061	1.67724	1.65076	2092.34	FALSE	62
2022-09-13	14:26:41	0.39243	1.74561	2.47837	2074.35	FALSE	62
2022-09-13	14:26:41	0.431769	1.92059	2.47837	2094.26	FALSE	62
2022-09-13	14:26:41	0.515127	2.29139	2.47837	2076.64	FALSE	62
2022-09-13	14:26:41	0.889326	3.9559	2.47837	2098.22	FALSE	62
2022-09-13	14:26:42	1.33711	5.94773	7.16907	2082.59	FALSE	62
2022-09-13	14:26:42	1.93655	8.61416	7.16907	2106.83	FALSE	62
2022-09-13	14:26:42	2.24368	9.98034	7.16907	2092.57	FALSE	62
2022-09-13	14:26:42	0.929376	4.13405	7.16907	2110.96	FALSE	62
2022-09-13	14:26:43	0.332023	1.4769	0.711147	2094.04	FALSE	62
2022-09-13	14:26:43	0.242252	1.07759	0.711147	2112.04	FALSE	62
2022-09-13	14:26:43	0.121082	0.538597	0.711147	2094.58	FALSE	62
2022-09-13	14:26:43	-0.0558649	-0.248498	0.711147	2112.04	FALSE	62
2022-09-13	14:26:44	-0.200445	-0.891619	-1.35055	2094.58	FALSE	62
2022-09-13	14:26:44	-0.286399	-1.27396	-1.35055	2112.04	FALSE	62
2022-09-13	14:26:44	-0.424007	-1.88607	-1.35055	2094.58	FALSE	62
2022-09-13	14:26:45	-0.289503	-1.28777	-0.794449	2112.04	FALSE	62
2022-09-13	14:26:45	-0.0532694	-0.236953	-0.794449	2094.58	FALSE	62
2022-09-13	14:26:45	-0.211794	-0.942102	-0.794449	2112.04	FALSE	62
2022-09-13	14:26:45	-0.159834	-0.710974	-0.794449	2094.58	FALSE	62
2022-09-13	14:26:46	-0.196323	-0.873284	-1.5344	2112.04	FALSE	62
2022-09-13	14:26:46	-0.241972	-1.07634	-1.5344	2094.58	FALSE	62
2022-09-13	14:26:46	-0.420394	-1.87	-1.5344	2112.04	FALSE	62
2022-09-13	14:26:46	-0.521106	-2.31798	-1.5344	2094.58	FALSE	62
2022-09-13	14:26:47	-0.626908	-2.78861	-2.33932	2112.04	FALSE	62
2022-09-13	14:26:47	-0.760953	-3.38487	-2.33932	2094.58	FALSE	62
2022-09-13	14:26:47	-0.328944	-1.46321	-2.33932	2112.04	FALSE	62
2022-09-13	14:26:47	-0.386806	-1.72059	-2.33932	2094.58	FALSE	62
2022-09-13	14:26:48	-0.305432	-1.35862	-1.25947	2112.04	FALSE	62
2022-09-13	14:26:48	-0.309656	-1.37741	-1.25947	2094.58	FALSE	62
2022-09-13	14:26:48	-0.234338	-1.04238	-1.25947	2112.04	FALSE	62
2022-09-13	14:26:49	-0.0212593	-0.0945656	0.472947	2094.58	FALSE	62
2022-09-13	14:26:49	0.147494	0.656083	0.472947	2112.7	FALSE	62
2022-09-13	14:26:49	0.108613	0.483132	0.472947	2095.06	FALSE	62
2022-09-13	14:26:49	0.190445	0.847137	0.472947	2113.54	FALSE	62
2022-09-13	14:26:50	0.393092	1.74855	2.14634	2096.81	FALSE	62
2022-09-13	14:26:50	0.621998	2.76677	2.14634	2116.31	FALSE	62
2022-09-13	14:26:50	0.436196	1.94029	2.14634	2098.75	FALSE	62
2022-09-13	14:26:50	0.478791	2.12976	2.14634	2118.44	FALSE	62
2022-09-13	14:26:51	0.466578	2.07543	1.39864	2100.83	FALSE	62
2022-09-13	14:26:51	0.332532	1.47917	1.39864	2119.92	FALSE	62
2022-09-13	14:26:51	0.325712	1.44883	1.39864	2102.28	FALSE	62
2022-09-13	14:26:51	0.132888	0.591112	1.39864	2120.51	FALSE	62
2022-09-13	14:26:52	-0.048842	-0.217259	-0.895091	2102.28	FALSE	62
2022-09-13	14:26:52	-0.226755	-1.00865	-0.895091	2120.51	FALSE	62
2022-09-13	14:26:52	-0.328079	-1.45936	-0.895091	2102.28	FALSE	62
2022-09-13	14:26:53	-0.382684	-1.70225	12.9811	2120.51	FALSE	62
2022-09-13	14:26:53	0.720827	3.20638	12.9811	2105.48	FALSE	62
2022-09-13	14:26:53	5.40184	24.0285	12.9811	2144.54	1	63
2022-09-13	14:26:53	5.93314	26.3918	12.9811	2131.88	1	64
2022-09-13	14:26:54	4.95762	22.0525	17.6523	2166.59	1	65
2022-09-13	14:26:54	3.46276	15.403	17.6523	2147.28	1	66
2022-09-13	14:26:54	4.5135	20.077	17.6523	2186.67	1	67
2022-09-13	14:26:54	2.93981	13.0769	17.6523	2160.36	FALSE	67
2022-09-13	14:26:55	4.40312	19.586	8.68684	2206.25	1	68
2022-09-13	14:26:55	2.09757	9.33041	8.68684	2169.69	FALSE	68
2022-09-13	14:26:55	1.12205	4.9911	8.68684	2211.25	FALSE	68
2022-09-13	14:26:55	0.188817	0.839896	8.68684	2170.53	FALSE	68
2022-09-13	14:26:56	0.510394	2.27033	1.29483	2213.52	FALSE	68
2022-09-13	14:26:56	0.226629	1.00809	1.29483	2171.53	FALSE	68
2022-09-13	14:26:56	0.136247	0.606054	1.29483	2214.12	FALSE	68
2022-09-13	14:26:57	0.226221	1.00628	8.7591	2172.54	FALSE	68
2022-09-13	14:26:57	0.25701	1.14323	8.7591	2215.27	FALSE	68
2022-09-13	14:26:57	2.16408	9.62626	8.7591	2182.17	FALSE	68
2022-09-13	14:26:57	5.22922	23.2606	8.7591	2238.53	1	69
2022-09-13	14:26:58	2.47925	11.0282	11.3077	2193.19	FALSE	69
2022-09-13	14:26:58	2.46754	10.9761	11.3077	2249.5	FALSE	69
2022-09-13	14:26:58	1.91726	8.52836	11.3077	2201.72	FALSE	69
2022-09-13	14:26:58	3.30429	14.6981	11.3077	2264.2	1	70
2022-09-13	14:26:59	1.80602	8.03354	4.78815	2209.76	FALSE	70
2022-09-13	14:26:59	1.0595	4.71287	4.78815	2268.91	FALSE	70
2022-09-13	14:26:59	1.03625	4.60945	4.78815	2214.37	FALSE	70
2022-09-13	14:26:59	0.403931	1.79677	4.78815	2270.71	FALSE	70
2022-09-13	14:27:00	0.698689	3.10791	1.51727	2217.47	FALSE	70
2022-09-13	14:27:00	0.178639	0.794622	1.51727	2271.5	FALSE	70
2022-09-13	14:27:00	0.145967	0.64929	1.51727	2218.12	FALSE	70
2022-09-13	14:27:01	0.0383845	0.170742	1.01488	2271.68	FALSE	70
2022-09-13	14:27:01	0.128054	0.56961	1.01488	2218.69	FALSE	70
2022-09-13	14:27:01	0.103117	0.458685	1.01488	2272.13	FALSE	70
2022-09-13	14:27:01	0.643066	2.86049	1.01488	2221.55	FALSE	70
2022-09-13	14:27:02	0.143423	0.637974	1.20735	2272.77	FALSE	70
2022-09-13	14:27:02	0.304746	1.35557	1.20735	2222.91	FALSE	70
2022-09-13	14:27:02	0.314567	1.39926	1.20735	2274.17	FALSE	70
2022-09-13	14:27:02	0.322964	1.43661	1.20735	2224.35	FALSE	70
2022-09-13	14:27:03	0.278435	1.23853	1.39003	2275.41	FALSE	70
2022-09-13	14:27:03	0.297977	1.32546	1.39003	2225.67	FALSE	70
2022-09-13	14:27:03	0.327952	1.4588	1.39003	2276.87	FALSE	70
2022-09-13	14:27:03	0.345611	1.53735	1.39003	2227.21	FALSE	70
2022-09-13	14:27:04	0.490445	2.1816	2.89391	2279.05	FALSE	70
2022-09-13	14:27:04	0.527443	2.34617	2.89391	2229.55	FALSE	70
2022-09-13	14:27:04	0.933855	4.15397	2.89391	2283.2	FALSE	70
2022-09-13	14:27:05	0.858283	3.81781	3.57927	2233.37	FALSE	70
2022-09-13	14:27:05	1.01996	4.53699	3.57927	2287.74	FALSE	70
2022-09-13	14:27:05	0.672074	2.98952	3.57927	2236.36	FALSE	70
2022-09-13	14:27:05	0.668308	2.97277	3.57927	2290.71	FALSE	70
2022-09-13	14:27:06	0.643677	2.8632	2.75222	2239.22	FALSE	70
2022-09-13	14:27:06	0.56215	2.50056	2.75222	2293.21	FALSE	70
2022-09-13	14:27:06	0.621845	2.76609	2.75222	2241.99	FALSE	70
2022-09-13	14:27:06	0.647239	2.87905	2.75222	2296.09	FALSE	70
2022-09-13	14:27:07	0.642405	2.85755	3.10406	2244.85	FALSE	70
2022-09-13	14:27:07	0.622964	2.77107	3.10406	2298.86	FALSE	70
2022-09-13	14:27:07	0.731565	3.25415	3.10406	2248.1	FALSE	70
2022-09-13	14:27:07	0.794364	3.53349	3.10406	2302.4	FALSE	70
2022-09-13	14:27:08	0.797875	3.54911	3.67248	2251.65	FALSE	70
2022-09-13	14:27:08	0.806781	3.58872	3.67248	2305.99	FALSE	70
2022-09-13	14:27:08	0.872176	3.87961	3.67248	2255.53	FALSE	70
2022-09-13	14:27:09	0.791616	3.52127	4.768	2309.51	FALSE	70
2022-09-13	14:27:09	0.870293	3.87124	4.768	2259.4	FALSE	70
2022-09-13	14:27:09	1.14449	5.09092	4.768	2314.6	FALSE	70
2022-09-13	14:27:09	1.48118	6.58858	4.768	2265.99	FALSE	70
2022-09-13	14:27:10	2.59401	11.5387	8.08821	2326.14	FALSE	70
2022-09-13	14:27:10	1.81421	8.06997	8.08821	2274.06	FALSE	70
2022-09-13	14:27:10	1.52256	6.77265	8.08821	2332.91	FALSE	70
2022-09-13	14:27:10	1.34246	5.97153	8.08821	2280.03	FALSE	70
2022-09-13	14:27:11	1.26637	5.63307	6.26273	2338.54	FALSE	70
2022-09-13	14:27:11	1.52378	6.77808	6.26273	2286.81	FALSE	70
2022-09-13	14:27:11	1.46668	6.52409	6.26273	2345.07	FALSE	70
2022-09-13	14:27:11	1.37487	6.1157	6.26273	2292.93	FALSE	70
2022-09-13	14:27:12	2.95095	13.1264	20.0082	2358.19	FALSE	70
2022-09-13	14:27:12	3.73528	16.6153	20.0082	2309.54	1	71
2022-09-13	14:27:12	6.8079	30.2829	20.0082	2388.48	1	72
2022-09-13	14:27:13	5.49787	24.4556	11.4187	2334	1	73
2022-09-13	14:27:13	2.28637	10.1702	11.4187	2398.65	FALSE	73
2022-09-13	14:27:13	1.19253	5.30461	11.4187	2339.3	FALSE	73
2022-09-13	14:27:13	1.29136	5.74423	11.4187	2404.39	FALSE	73
2022-09-13	14:27:14	1.2077	5.37209	10.943	2344.67	FALSE	73
2022-09-13	14:27:14	1.62006	7.20635	10.943	2411.6	FALSE	73
2022-09-13	14:27:14	1.95279	8.6864	10.943	2353.36	FALSE	73
2022-09-13	14:27:14	5.05986	22.5073	10.943	2434.1	1	74
2022-09-13	14:27:15	4.45487	19.8162	31.7843	2373.18	1	75
2022-09-13	14:27:15	5.60179	24.9179	31.7843	2459.02	1	76
2022-09-13	14:27:15	11.3796	50.6187	31.7843	2423.8	1	77
2022-09-13	14:27:16	8.05253	35.8193	21.34	2494.84	1	78
2022-09-13	14:27:16	2.82347	12.5594	21.34	2436.35	FALSE	78
2022-09-13	14:27:16	2.9421	13.087	21.34	2507.93	FALSE	78
2022-09-13	14:27:16	5.37171	23.8944	21.34	2460.25	1	79
2022-09-13	14:27:17	2.37833	10.5793	13.2794	2518.51	FALSE	79
2022-09-13	14:27:17	3.02871	13.4723	13.2794	2473.72	1	80
2022-09-13	14:27:17	3.06805	13.6473	13.2794	2532.16	1	81
2022-09-13	14:27:17	3.46627	15.4187	13.2794	2489.14	1	82
2022-09-13	14:27:18	12.3799	55.0683	65.5691	2587.22	1	83
2022-09-13	14:27:18	11.8203	52.5791	65.5691	2541.72	1	84
2022-09-13	14:27:18	11.53	51.2877	65.5691	2638.51	1	85
2022-09-13	14:27:18	23.2322	103.341	65.5691	2645.06	1	86
2022-09-13	14:27:19	22.4448	99.839	68.3823	2738.35	1	87
2022-09-13	14:27:19	13.7817	61.3038	68.3823	2706.36	1	88
2022-09-13	14:27:19	11.8165	52.5622	68.3823	2790.91	1	89
2022-09-13	14:27:19	13.4491	59.8243	68.3823	2766.19	1	90
2022-09-13	14:27:20	19.369	86.1572	84.46	2877.07	1	91
2022-09-13	14:27:20	16.7612	74.5572	84.46	2840.75	1	92
2022-09-13	14:27:20	20.8322	92.6658	84.46	2969.74	1	93
2022-09-13	14:27:21	24.56	109.248	61.8663	2949.99	1	94
2022-09-13	14:27:21	13.9493	62.0493	61.8663	3031.79	1	95
2022-09-13	14:27:21	10.3468	46.0246	61.8663	2996.02	1	96
2022-09-13	14:27:21	6.77655	30.1434	61.8663	3061.93	1	97
2022-09-13	14:27:22	4.58948	20.4149	9.12752	3016.43	1	98
2022-09-13	14:27:22	1.7165	7.63534	9.12752	3069.56	FALSE	98
2022-09-13	14:27:22	1.10688	4.92362	9.12752	3021.36	FALSE	98
2022-09-13	14:27:22	0.794975	3.53621	9.12752	3073.1	FALSE	98
2022-09-13	14:27:23	0.370852	1.64962	1.99122	3023.01	FALSE	98
2022-09-13	14:27:23	0.421031	1.87283	1.99122	3074.97	FALSE	98
2022-09-13	14:27:23	0.525611	2.33802	1.99122	3025.34	FALSE	98
2022-09-13	14:27:23	0.473092	2.10441	1.99122	3077.08	FALSE	98
2022-09-13	14:27:24	0.512481	2.27962	2.77152	3027.62	FALSE	98
2022-09-13	14:27:24	0.552074	2.45574	2.77152	3079.53	FALSE	98
2022-09-13	14:27:24	0.804644	3.57922	2.77152	3031.2	FALSE	98
2022-09-13	14:27:25	0.491107	2.18454	2.19456	3081.72	FALSE	98
2022-09-13	14:27:25	0.479148	2.13135	2.19456	3033.33	FALSE	98
2022-09-13	14:27:25	0.50271	2.23615	2.19456	3083.95	FALSE	98
2022-09-13	14:27:25	0.500471	2.2262	2.19456	3035.56	FALSE	98
2022-09-13	14:27:26	0.475891	2.11686	2.0593	3086.07	FALSE	98
2022-09-13	14:27:26	0.439606	1.95546	2.0593	3037.52	FALSE	98
2022-09-13	14:27:26	0.505356	2.24792	2.0593	3088.32	FALSE	98
2022-09-13	14:27:26	0.430954	1.91697	2.0593	3039.43	FALSE	98
2022-09-13	14:27:27	0.498995	2.21963	2.12071	3090.54	FALSE	98
2022-09-13	14:27:27	0.442812	1.96972	2.12071	3041.4	FALSE	98
2022-09-13	14:27:27	0.49126	2.18522	2.12071	3092.72	FALSE	98
2022-09-13	14:27:27	0.473957	2.10826	2.12071	3043.51	FALSE	98
2022-09-13	14:27:28	0.495026	2.20197	2.26234	3094.93	FALSE	98
2022-09-13	14:27:28	0.517875	2.30361	2.26234	3045.81	FALSE	98
2022-09-13	14:27:28	0.512888	2.28143	2.26234	3097.21	FALSE	98
2022-09-13	14:27:29	0.588715	2.61872	3.23813	3048.43	FALSE	98
2022-09-13	14:27:29	0.632379	2.81295	3.23813	3100.02	FALSE	98
2022-09-13	14:27:29	0.747595	3.32545	3.23813	3051.76	FALSE	98
2022-09-13	14:27:29	0.943168	4.1954	3.23813	3104.22	FALSE	98
2022-09-13	14:27:30	0.675738	3.00582	3.63853	3054.76	FALSE	98
2022-09-13	14:27:30	1.02327	4.55171	3.63853	3108.77	FALSE	98
2022-09-13	14:27:30	0.76444	3.40038	3.63853	3058.17	FALSE	98
2022-09-13	14:27:30	0.808461	3.5962	3.63853	3112.36	FALSE	98

## Sheet: Daisy_star_2022913142214 (3)
Date	Time	Lbs	Newtons	Total force x time	total steps > 13.345		**GoPro Fitting: 1411
2022-09-13	14:22:30	0.294924	1.31188	1.31188	FALSE	0
2022-09-13	14:22:30	0.499555	2.22212	2.22212	FALSE	0
2022-09-13	14:22:30	0.567036	2.52229	3.83417	FALSE	0
2022-09-13	14:22:31	0.613346	2.72829	4.95041	FALSE	0
2022-09-13	14:22:31	0.462049	2.05529	5.88946	FALSE	0
2022-09-13	14:22:31	0.454771	2.02291	6.97332	FALSE	0
2022-09-13	14:22:31	0.484847	2.1567	8.04615	FALSE	0
2022-09-13	14:22:32	0.432328	1.92308	8.8964	FALSE	0
2022-09-13	14:22:32	0.374924	1.66774	9.71389	FALSE	0
2022-09-13	14:22:32	0.407036	1.81058	10.707	FALSE	0
2022-09-13	14:22:32	0.35757	1.59054	11.3044	FALSE	0
2022-09-13	14:22:33	0.372176	1.65551	12.3625	FALSE	0
2022-09-13	14:22:33	0.48958	2.17775	13.4822	FALSE	0
2022-09-13	14:22:33	0.236043	1.04997	13.4125	FALSE	0
2022-09-13	14:22:33	0.102659	0.456648	13.9388	FALSE	0
2022-09-13	14:22:34	0.115738	0.514826	13.9273	FALSE	0
2022-09-13	14:22:34	0.100217	0.445785	14.3846	FALSE	0
2022-09-13	14:22:34	-0.0364247	-0.162024	13.9273	FALSE	0
2022-09-13	14:22:35	0.000929014	0.00413244	14.3887	FALSE	0
2022-09-13	14:22:35	0.32159	1.4305	15.3578	FALSE	0
2022-09-13	14:22:35	0.340929	1.51652	15.9053	FALSE	0
2022-09-13	14:22:35	0.132481	0.589302	15.9471	FALSE	0
2022-09-13	14:22:36	0.493804	2.19654	18.1018	FALSE	0
2022-09-13	14:22:36	0.80902	3.59868	19.5458	FALSE	0
2022-09-13	14:22:36	0.989275	4.40049	22.5023	FALSE	0
2022-09-13	14:22:36	1.03004	4.58182	24.1276	FALSE	0
2022-09-13	14:22:37	0.930801	4.14039	26.6427	FALSE	0
2022-09-13	14:22:37	0.767596	3.41442	27.542	FALSE	0
2022-09-13	14:22:37	0.8707	3.87305	30.5157	FALSE	0
2022-09-13	14:22:37	0.823371	3.66252	31.2045	FALSE	0
2022-09-13	14:22:38	0.742812	3.30418	33.8199	FALSE	0
2022-09-13	14:22:38	0.748206	3.32817	34.5327	FALSE	0
2022-09-13	14:22:38	0.917112	4.0795	37.8994	FALSE	0
2022-09-13	14:22:39	0.992023	4.41272	38.9454	FALSE	0
2022-09-13	14:22:39	1.27777	5.68378	43.5832	FALSE	0
2022-09-13	14:22:39	1.63319	7.26476	46.2102	FALSE	0
2022-09-13	14:22:39	1.64067	7.29803	50.8812	FALSE	0
2022-09-13	14:22:40	1.16831	5.19688	51.407	FALSE	0
2022-09-13	14:22:40	1.02866	4.57569	55.4569	FALSE	0
2022-09-13	14:22:40	0.891616	3.96609	55.3731	FALSE	0
2022-09-13	14:22:40	0.863626	3.84158	59.2985	FALSE	0
2022-09-13	14:22:41	0.853651	3.79721	59.1703	FALSE	0
2022-09-13	14:22:41	0.760318	3.38205	62.6805	FALSE	0
2022-09-13	14:22:41	0.814567	3.62336	62.7937	FALSE	0
2022-09-13	14:22:41	0.945967	4.20785	66.8884	FALSE	0
2022-09-13	14:22:42	1.16276	5.17219	67.9659	FALSE	0
2022-09-13	14:22:42	1.26709	5.63627	72.5246	FALSE	0
2022-09-13	14:22:42	1.43503	6.3833	74.3492	FALSE	0
2022-09-13	14:22:43	1.46536	6.51821	79.0429	FALSE	0
2022-09-13	14:22:43	1.38072	6.14172	80.4909	FALSE	0
2022-09-13	14:22:43	1.29981	5.78181	84.8247	FALSE	0
2022-09-13	14:22:43	1.28673	5.72363	86.2145	FALSE	0
2022-09-13	14:22:44	1.32948	5.91379	90.7385	FALSE	0
2022-09-13	14:22:44	1.27223	5.65913	91.8737	FALSE	0
2022-09-13	14:22:44	0.868206	3.86195	94.6004	FALSE	0
2022-09-13	14:22:45	0.71472	3.17922	95.0529	FALSE	0
2022-09-13	14:22:45	0.53701	2.38873	96.9892	FALSE	0
2022-09-13	14:22:45	0.438079	1.94866	97.0016	FALSE	0
2022-09-13	14:22:45	0.473194	2.10486	99.094	FALSE	0
2022-09-13	14:22:45	0.430598	1.91539	98.9169	FALSE	0
2022-09-13	14:22:46	0.271718	1.20866	100.303	FALSE	0
2022-09-13	14:22:46	0.594567	2.64475	101.562	FALSE	0
2022-09-13	14:22:46	1.08826	4.8408	105.143	FALSE	0
2022-09-13	14:22:47	1.57742	7.01668	108.578	FALSE	0
2022-09-13	14:22:47	1.17788	5.23945	110.383	FALSE	0
2022-09-13	14:22:47	1.11335	4.9524	113.531	FALSE	0
2022-09-13	14:22:47	0.966374	4.29862	114.682	FALSE	0
2022-09-13	14:22:48	0.725204	3.22585	116.757	FALSE	0
2022-09-13	14:22:48	0.787494	3.50293	118.184	FALSE	0
2022-09-13	14:22:48	0.784796	3.49093	120.248	FALSE	0
2022-09-13	14:22:48	0.701997	3.12262	121.307	FALSE	0
2022-09-13	14:22:49	0.697417	3.10225	123.35	FALSE	0
2022-09-13	14:22:49	0.546374	2.43038	123.737	FALSE	0
2022-09-13	14:22:49	1.13182	5.03456	128.384	FALSE	0
2022-09-13	14:22:49	1.38724	6.17072	129.908	FALSE	0
2022-09-13	14:22:50	1.29569	5.76349	134.148	FALSE	0
2022-09-13	14:22:50	1.06983	4.75882	134.667	FALSE	0
2022-09-13	14:22:50	1.01696	4.52364	138.672	FALSE	0
2022-09-13	14:22:51	0.987951	4.3946	139.062	FALSE	0
2022-09-13	14:22:51	0.90902	4.0435	142.715	FALSE	0
2022-09-13	14:22:51	0.813855	3.62019	142.682	FALSE	0
2022-09-13	14:22:51	0.558486	2.48426	145.199	FALSE	0
2022-09-13	14:22:52	0.709122	3.15432	145.836	FALSE	0
2022-09-13	14:22:52	0.559199	2.48743	147.687	FALSE	0
2022-09-13	14:22:52	1.0307	4.58476	150.421	FALSE	0
2022-09-13	14:22:52	1.88958	8.40523	156.092	FALSE	0
2022-09-13	14:22:53	0.980216	4.3602	154.781	FALSE	0
2022-09-13	14:22:53	1.18897	5.28878	161.381	FALSE	0
2022-09-13	14:22:53	0.619657	2.75636	157.537	FALSE	0
2022-09-13	14:22:53	0.401285	1.785	163.166	FALSE	0
2022-09-13	14:22:54	0.658741	2.93021	160.468	FALSE	0
2022-09-13	14:22:54	0.483321	2.14991	165.316	FALSE	0
2022-09-13	14:22:54	0.400267	1.78047	162.248	FALSE	0
2022-09-13	14:22:55	0.94444	4.20106	169.517	FALSE	0
2022-09-13	14:22:55	1.55874	6.93359	169.182	FALSE	0
2022-09-13	14:22:55	2.35477	10.4745	179.991	FALSE	0
2022-09-13	14:22:55	1.94225	8.63952	177.821	FALSE	0
2022-09-13	14:22:56	2.19029	9.74285	189.734	FALSE	0
2022-09-13	14:22:56	2.24276	9.97625	187.797	FALSE	0
2022-09-13	14:22:56	1.49248	6.63885	196.373	FALSE	0
2022-09-13	14:22:56	1.33202	5.92509	193.723	FALSE	0
2022-09-13	14:22:57	1.20383	5.35488	201.728	FALSE	0
2022-09-13	14:22:57	1.43808	6.39687	200.119	FALSE	0
2022-09-13	14:22:57	1.75523	7.80761	209.535	FALSE	0
2022-09-13	14:22:57	1.68821	7.5095	207.629	FALSE	0
2022-09-13	14:22:58	1.13645	5.05516	214.59	FALSE	0
2022-09-13	14:22:58	0.730903	3.2512	210.88	FALSE	0
2022-09-13	14:22:58	0.571259	2.54107	217.132	FALSE	0
2022-09-13	14:22:59	0.608868	2.70837	213.588	FALSE	0
2022-09-13	14:22:59	0.406679	1.80899	218.941	FALSE	0
2022-09-13	14:22:59	0.374517	1.66593	215.254	FALSE	0
2022-09-13	14:22:59	0.227646	1.01261	219.953	FALSE	0
2022-09-13	14:23:00	0.231412	1.02937	216.284	FALSE	0
2022-09-13	14:23:00	1.06612	4.74231	224.695	FALSE	0
2022-09-13	14:23:00	0.59584	2.65042	218.934	FALSE	0
2022-09-13	14:23:00	0.407087	1.8108	226.506	FALSE	0
2022-09-13	14:23:01	0.338028	1.50362	220.438	FALSE	0
2022-09-13	14:23:01	0.563371	2.50599	229.012	FALSE	0
2022-09-13	14:23:01	1.60541	7.14118	227.579	FALSE	0
2022-09-13	14:23:01	2.42154	10.7715	239.784	FALSE	0
2022-09-13	14:23:02	1.70276	7.57422	235.153	FALSE	0
2022-09-13	14:23:02	0.976756	4.34481	244.129	FALSE	0
2022-09-13	14:23:02	0.90902	4.0435	239.197	FALSE	0
2022-09-13	14:23:03	1.68195	7.48165	251.61	FALSE	0
2022-09-13	14:23:03	1.96877	8.75748	247.954	FALSE	0
2022-09-13	14:23:03	0.599962	2.66875	254.279	FALSE	0
2022-09-13	14:23:03	0.933244	4.15126	252.105	FALSE	0
2022-09-13	14:23:04	1.47299	6.55215	260.831	FALSE	0
2022-09-13	14:23:04	1.25126	5.56585	257.671	FALSE	0
2022-09-13	14:23:04	0.250649	1.11494	261.946	FALSE	0
2022-09-13	14:23:04	0.248817	1.10679	258.778	FALSE	0
2022-09-13	14:23:05	0.229936	1.0228	262.969	FALSE	0
2022-09-13	14:23:05	0.17584	0.782171	259.56	FALSE	0
2022-09-13	14:23:05	0.202354	0.900111	263.869	FALSE	0
2022-09-13	14:23:05	0.217621	0.968022	260.528	FALSE	0
2022-09-13	14:23:06	0.172074	0.76542	264.634	FALSE	0
2022-09-13	14:23:06	0.336603	1.49728	262.026	FALSE	0
2022-09-13	14:23:06	0.044644	0.198585	264.833	FALSE	0
2022-09-13	14:23:07	0.199555	0.887661	262.913	FALSE	0
2022-09-13	14:23:07	0.040929	0.18206	265.015	FALSE	0
2022-09-13	14:23:07	0.332532	1.47917	264.392	FALSE	0
2022-09-13	14:23:07	0.0187916	0.0835888	265.099	FALSE	0
2022-09-13	14:23:08	0.144491	0.642725	265.035	FALSE	0
2022-09-13	14:23:08	-0.00807864	-0.0359354	265.099	FALSE	0
2022-09-13	14:23:08	-0.218969	-0.974018	265.035	FALSE	0
2022-09-13	14:23:08	-0.462175	-2.05585	265.099	FALSE	0
2022-09-13	14:23:09	-0.458358	-2.03887	265.035	FALSE	0
2022-09-13	14:23:09	-0.604109	-2.6872	265.099	FALSE	0
2022-09-13	14:23:09	-0.54528	-2.42551	265.035	FALSE	0
2022-09-13	14:23:09	-0.488435	-2.17266	265.099	FALSE	0
2022-09-13	14:23:10	-0.261768	-1.1644	265.035	FALSE	0
2022-09-13	14:23:10	-0.495305	-2.20322	265.099	FALSE	0
2022-09-13	14:23:10	-0.590725	-2.62766	265.035	FALSE	0
2022-09-13	14:23:11	-0.456679	-2.0314	265.099	FALSE	0
2022-09-13	14:23:11	-0.0175443	-0.0780406	265.035	FALSE	0
2022-09-13	14:23:11	0.730242	3.24826	268.347	FALSE	0
2022-09-13	14:23:11	1.34103	5.96517	271	FALSE	0
2022-09-13	14:23:12	2.13859	9.51288	277.86	FALSE	0
2022-09-13	14:23:12	2.17304	9.66612	280.666	FALSE	0
2022-09-13	14:23:12	2.19584	9.76754	287.627	FALSE	0
2022-09-13	14:23:12	1.45014	6.45051	287.117	FALSE	0
2022-09-13	14:23:13	0.556094	2.47362	290.101	FALSE	0
2022-09-13	14:23:13	0.521794	2.32104	289.438	FALSE	0
2022-09-13	14:23:13	0.189784	0.844197	290.945	FALSE	0
2022-09-13	14:23:13	0.336552	1.49705	290.935	FALSE	0
2022-09-13	14:23:14	0.110751	0.492643	291.438	FALSE	0
2022-09-13	14:23:14	0.515076	2.29116	293.226	FALSE	0
2022-09-13	14:23:14	0.166527	0.740745	292.179	FALSE	0
2022-09-13	14:23:15	0.310496	1.38115	294.607	FALSE	0
2022-09-13	14:23:15	0.344898	1.53418	293.713	FALSE	0
2022-09-13	14:23:15	0.323372	1.43842	296.046	FALSE	0
2022-09-13	14:23:15	0.144695	0.643632	294.356	FALSE	0
2022-09-13	14:23:16	0.0391478	0.174137	296.22	FALSE	0
2022-09-13	14:23:16	0.124542	0.553988	294.91	FALSE	0
2022-09-13	14:23:16	-0.0377987	-0.168136	296.22	FALSE	0
2022-09-13	14:23:16	0.217061	0.965531	295.876	FALSE	0
2022-09-13	14:23:17	0.253804	1.12897	297.349	FALSE	0
2022-09-13	14:23:17	0.425713	1.89366	297.769	FALSE	0
2022-09-13	14:23:17	0.36785	1.63627	298.985	FALSE	0
2022-09-13	14:23:17	0.431412	1.91901	299.689	FALSE	0
2022-09-13	14:23:18	0.533041	2.37107	301.356	FALSE	0
2022-09-13	14:23:18	0.317519	1.41239	301.101	FALSE	0
2022-09-13	14:23:18	0.385051	1.71278	303.069	FALSE	0
2022-09-13	14:23:19	0.138537	0.61624	301.717	FALSE	0
2022-09-13	14:23:19	0.194568	0.865477	303.934	FALSE	0
2022-09-13	14:23:19	0.0890205	0.395981	302.113	FALSE	0
2022-09-13	14:23:19	0.320522	1.42575	305.36	FALSE	0
2022-09-13	14:23:20	0.317265	1.41126	303.524	FALSE	0
2022-09-13	14:23:20	0.199046	0.885396	306.246	FALSE	0
2022-09-13	14:23:20	0.353143	1.57085	305.095	FALSE	0
2022-09-13	14:23:20	0.152939	0.680303	306.926	FALSE	0
2022-09-13	14:23:21	0.520064	2.31335	307.409	FALSE	0
2022-09-13	14:23:21	0.192583	0.856648	307.783	FALSE	0
2022-09-13	14:23:21	0.397825	1.76961	309.178	FALSE	0
2022-09-13	14:23:21	0.266883	1.18715	308.97	FALSE	0
2022-09-13	14:23:22	0.361845	1.60956	310.788	FALSE	0
2022-09-13	14:23:22	0.308613	1.37277	310.342	FALSE	0
2022-09-13	14:23:22	0.244491	1.08754	311.875	FALSE	0
2022-09-13	14:23:23	0.347443	1.5455	311.888	FALSE	0
2022-09-13	14:23:23	0.12042	0.535652	312.411	FALSE	0
2022-09-13	14:23:23	0.292888	1.30282	313.191	FALSE	0
2022-09-13	14:23:23	0.120216	0.534745	312.946	FALSE	0
2022-09-13	14:23:24	0.235178	1.04612	314.237	FALSE	0
2022-09-13	14:23:24	0.0160435	0.0713647	313.017	FALSE	0
2022-09-13	14:23:24	0.340064	1.51267	315.75	FALSE	0
2022-09-13	14:23:24	0.572125	2.54493	315.562	FALSE	0
2022-09-13	14:23:25	1.71793	7.6417	323.391	FALSE	0
2022-09-13	14:23:25	2.01772	8.97522	324.537	FALSE	0
2022-09-13	14:23:25	0.574466	2.55534	325.947	FALSE	0
2022-09-13	14:23:25	1.39274	6.19519	330.732	FALSE	0
2022-09-13	14:23:26	0.37126	1.65144	327.598	FALSE	0
2022-09-13	14:23:26	0.437621	1.94663	332.679	FALSE	0
2022-09-13	14:23:26	0.534771	2.37877	329.977	FALSE	0
2022-09-13	14:23:27	0.312685	1.39089	334.07	FALSE	0
2022-09-13	14:23:27	0.461336	2.05211	332.029	FALSE	0
2022-09-13	14:23:27	0.248461	1.1052	335.175	FALSE	0
2022-09-13	14:23:27	0.464949	2.06819	334.097	FALSE	0
2022-09-13	14:23:28	0.151921	0.675775	335.851	FALSE	0
2022-09-13	14:23:28	0.390242	1.73587	335.833	FALSE	0
2022-09-13	14:23:28	0.186374	0.829029	336.68	FALSE	0
2022-09-13	14:23:28	0.623575	2.77379	338.607	FALSE	0
2022-09-13	14:23:29	0.507545	2.25766	338.938	FALSE	0
2022-09-13	14:23:29	3.28525	14.6134	353.22	1	1
2022-09-13	14:23:29	2.22785	9.90992	348.847	FALSE	1
2022-09-13	14:23:29	1.47228	6.549	359.769	FALSE	1
2022-09-13	14:23:30	0.738537	3.28516	352.133	FALSE	1
2022-09-13	14:23:30	0.403168	1.79337	361.563	FALSE	1
2022-09-13	14:23:30	0.975636	4.33982	356.472	FALSE	1
2022-09-13	14:23:31	0.368715	1.64012	363.203	FALSE	1
2022-09-13	14:23:31	0.737214	3.27928	359.752	FALSE	1
2022-09-13	14:23:31	0.574517	2.55557	365.758	FALSE	1
2022-09-13	14:23:31	0.542608	2.41363	362.165	FALSE	1
2022-09-13	14:23:32	0.673804	2.99721	368.756	FALSE	1
2022-09-13	14:23:32	0.41986	1.86762	364.033	FALSE	1
2022-09-13	14:23:32	0.827443	3.68063	372.436	FALSE	1
2022-09-13	14:23:32	0.448562	1.99529	366.028	FALSE	1
2022-09-13	14:23:33	0.731361	3.25324	375.689	FALSE	1
2022-09-13	14:23:33	0.571565	2.54244	368.571	FALSE	1
2022-09-13	14:23:33	0.74902	3.33179	379.021	FALSE	1
2022-09-13	14:23:33	0.807799	3.59325	372.164	FALSE	1
2022-09-13	14:23:34	0.910903	4.05188	383.073	FALSE	1
2022-09-13	14:23:34	1.23396	5.4889	377.653	FALSE	1
2022-09-13	14:23:34	0.965713	4.29568	387.369	FALSE	1
2022-09-13	14:23:35	1.21548	5.4067	383.06	FALSE	1
2022-09-13	14:23:35	1.05477	4.69183	392.061	FALSE	1
2022-09-13	14:23:35	1.34403	5.97851	389.038	FALSE	1
2022-09-13	14:23:35	1.19762	5.32725	397.388	FALSE	1
2022-09-13	14:23:36	1.18439	5.2684	394.306	FALSE	1
2022-09-13	14:23:36	1.30342	5.79787	403.186	FALSE	1
2022-09-13	14:23:36	0.718893	3.19778	397.504	FALSE	1
2022-09-13	14:23:36	1.27355	5.66501	408.851	FALSE	1
2022-09-13	14:23:37	0.90902	4.0435	401.548	FALSE	1
2022-09-13	14:23:37	2.59009	11.5212	420.372	FALSE	1
2022-09-13	14:23:37	1.33212	5.92554	407.473	FALSE	1
2022-09-13	14:23:37	1.68291	7.48592	427.858	FALSE	1
2022-09-13	14:23:38	2.00785	8.93132	416.405	FALSE	1
2022-09-13	14:23:38	1.85732	8.26173	436.12	FALSE	1
2022-09-13	14:23:38	1.70546	7.58623	423.991	FALSE	1
2022-09-13	14:23:39	1.06195	4.72377	440.843	FALSE	1
2022-09-13	14:23:39	1.85899	8.26916	432.26	FALSE	1
2022-09-13	14:23:39	1.3537	6.02153	446.865	FALSE	1
2022-09-13	14:23:39	2.02276	8.99764	441.258	FALSE	1
2022-09-13	14:23:40	1.80663	8.03625	454.901	FALSE	1
2022-09-13	14:23:40	1.84561	8.20964	449.467	FALSE	1
2022-09-13	14:23:40	1.90302	8.46501	463.366	FALSE	1
2022-09-13	14:23:40	0.999097	4.44418	453.911	FALSE	1
2022-09-13	14:23:41	1.75126	7.78995	471.156	FALSE	1
2022-09-13	14:23:41	0.737672	3.28131	457.193	FALSE	1
2022-09-13	14:23:41	1.78159	7.92487	479.081	FALSE	1
2022-09-13	14:23:41	0.865204	3.8486	461.041	FALSE	1
2022-09-13	14:23:42	2.47436	11.0064	490.087	FALSE	1
2022-09-13	14:23:42	0.721285	3.20842	464.25	FALSE	1
2022-09-13	14:23:42	0.509682	2.26717	492.355	FALSE	1
2022-09-13	14:23:43	1.02317	4.55126	468.801	FALSE	1
2022-09-13	14:23:43	0.607494	2.70225	495.057	FALSE	1
2022-09-13	14:23:43	0.859148	3.82166	472.623	FALSE	1
2022-09-13	14:23:43	0.286222	1.27317	496.33	FALSE	1
2022-09-13	14:23:44	0.888664	3.95296	476.576	FALSE	1
2022-09-13	14:23:44	0.306832	1.36485	497.695	FALSE	1
2022-09-13	14:23:44	0.588461	2.61759	479.193	FALSE	1
2022-09-13	14:23:44	0.557061	2.47792	500.173	FALSE	1
2022-09-13	14:23:45	1.24307	5.52942	484.723	FALSE	1
2022-09-13	14:23:45	3.15828	14.0487	514.221	1	2
2022-09-13	14:23:45	3.56602	15.8624	500.585	1	3
2022-09-13	14:23:45	3.98576	17.7295	531.951	1	4
2022-09-13	14:23:46	2.41487	10.7418	511.327	FALSE	4
2022-09-13	14:23:46	2.23879	9.95859	541.909	FALSE	4
2022-09-13	14:23:46	1.67218	7.43819	518.765	FALSE	4
2022-09-13	14:23:47	1.52032	6.76269	548.672	FALSE	4
2022-09-13	14:23:47	1.97279	8.77536	527.54	FALSE	4
2022-09-13	14:23:47	2.15146	9.57012	558.242	FALSE	4
2022-09-13	14:23:47	3.10291	13.8024	541.343	1	5
2022-09-13	14:23:48	2.09014	9.29736	567.54	FALSE	5
2022-09-13	14:23:48	2.57798	11.4674	552.81	FALSE	5
2022-09-13	14:23:48	0.631158	2.80752	570.347	FALSE	5
2022-09-13	14:23:48	0.584847	2.60152	555.412	FALSE	5
2022-09-13	14:23:49	0.337061	1.49931	571.846	FALSE	5
2022-09-13	14:23:49	0.573601	2.55149	557.963	FALSE	5
2022-09-13	14:23:49	0.938639	4.17525	576.022	FALSE	5
2022-09-13	14:23:49	2.22388	9.89226	567.855	FALSE	5
2022-09-13	14:23:50	3.70836	16.4955	592.517	1	6
2022-09-13	14:23:50	4.95044	22.0205	589.876	1	7
2022-09-13	14:23:50	8.53711	37.9748	630.492	1	8
2022-09-13	14:23:51	3.94342	17.5411	607.417	1	9
2022-09-13	14:23:51	3.70759	16.4921	646.984	1	10
2022-09-13	14:23:51	2.0165	8.9698	616.387	FALSE	10
2022-09-13	14:23:51	1.2764	5.67768	652.662	FALSE	10
2022-09-13	14:23:52	0.867392	3.85833	620.245	FALSE	10
2022-09-13	14:23:52	0.811514	3.60978	656.272	FALSE	10
2022-09-13	14:23:52	1.21548	5.4067	625.652	FALSE	10
2022-09-13	14:23:52	0.820471	3.64962	659.921	FALSE	10
2022-09-13	14:23:53	0.747494	3.325	628.977	FALSE	10
2022-09-13	14:23:53	0.462354	2.05664	661.978	FALSE	10
2022-09-13	14:23:53	0.436908	1.94345	630.92	FALSE	10
2022-09-13	14:23:53	0.435636	1.9378	663.916	FALSE	10
2022-09-13	14:23:54	0.32841	1.46083	632.381	FALSE	10
2022-09-13	14:23:54	1.55609	6.9218	670.837	FALSE	10
2022-09-13	14:23:54	2.34729	10.4412	642.822	FALSE	10
2022-09-13	14:23:55	4.42983	19.7048	690.542	1	11
2022-09-13	14:23:55	3.27111	14.5506	657.373	1	12
2022-09-13	14:23:55	4.45355	19.8103	710.353	1	13
2022-09-13	14:23:55	3.58286	15.9373	673.31	1	14
2022-09-13	14:23:56	3.22622	14.3509	724.703	1	15
2022-09-13	14:23:56	3.55223	15.801	689.111	1	16
2022-09-13	14:23:56	1.80205	8.01588	732.719	FALSE	16
2022-09-13	14:23:56	2.1593	9.605	698.716	FALSE	16
2022-09-13	14:23:57	1.25095	5.56448	738.284	FALSE	16
2022-09-13	14:23:57	2.43533	10.8328	709.549	FALSE	16
2022-09-13	14:23:57	1.98989	8.85143	747.135	FALSE	16
2022-09-13	14:23:57	3.66373	16.297	725.846	1	17
2022-09-13	14:23:58	3.98744	17.7369	764.872	1	18
2022-09-13	14:23:58	2.09335	9.31164	735.158	FALSE	18
2022-09-13	14:23:58	2.73441	12.1632	777.035	FALSE	18
2022-09-13	14:23:58	0.959809	4.26942	739.427	FALSE	18
2022-09-13	14:23:59	1.3905	6.18522	783.221	FALSE	18
2022-09-13	14:23:59	0.353092	1.57062	740.998	FALSE	18
2022-09-13	14:23:59	0.294211	1.30871	784.529	FALSE	18
2022-09-13	14:24:00	0.387697	1.72455	742.722	FALSE	18
2022-09-13	14:24:00	0.0411326	0.182966	784.712	FALSE	18
2022-09-13	14:24:00	0.251056	1.11675	743.839	FALSE	18
2022-09-13	14:24:00	0.087392	0.388737	785.101	FALSE	18
2022-09-13	14:24:01	0.0403183	0.179344	744.018	FALSE	18
2022-09-13	14:24:01	-0.157086	-0.69875	785.101	FALSE	18
2022-09-13	14:24:01	0.0146695	0.0652529	744.084	FALSE	18
2022-09-13	14:24:01	-0.10528	-0.468306	785.101	FALSE	18
2022-09-13	14:24:02	-0.264872	-1.1782	744.084	FALSE	18
2022-09-13	14:24:02	-0.335814	-1.49377	785.101	FALSE	18
2022-09-13	14:24:02	-0.252913	-1.12501	744.084	FALSE	18
2022-09-13	14:24:02	-0.249707	-1.11075	785.101	FALSE	18
2022-09-13	14:24:03	-0.200191	-0.89049	744.084	FALSE	18
2022-09-13	14:24:03	-0.284567	-1.26581	785.101	FALSE	18
2022-09-13	14:24:03	0.0907508	0.403678	744.487	FALSE	18
2022-09-13	14:24:04	0.184695	0.82156	785.922	FALSE	18
2022-09-13	14:24:04	0.665967	2.96235	747.45	FALSE	18
2022-09-13	14:24:04	0.265865	1.18262	787.105	FALSE	18
2022-09-13	14:24:04	0.200725	0.892865	748.343	FALSE	18
2022-09-13	14:24:05	0.309326	1.37594	788.481	FALSE	18
2022-09-13	14:24:05	0.146832	0.653138	748.996	FALSE	18
2022-09-13	14:24:05	0.380522	1.69264	790.174	FALSE	18
2022-09-13	14:24:05	0.171769	0.764063	749.76	FALSE	18
2022-09-13	14:24:06	0.478791	2.12976	792.303	FALSE	18
2022-09-13	14:24:06	0.132583	0.589756	750.35	FALSE	18
2022-09-13	14:24:06	0.429071	1.90859	794.212	FALSE	18
2022-09-13	14:24:06	0.251463	1.11856	751.468	FALSE	18
2022-09-13	14:24:07	0.375331	1.66955	795.882	FALSE	18
2022-09-13	14:24:07	0.0454073	0.201981	751.67	FALSE	18
2022-09-13	14:24:07	0.145916	0.649064	796.531	FALSE	18
2022-09-13	14:24:08	0.168054	0.747538	752.418	FALSE	18
2022-09-13	14:24:08	0.163015	0.725123	797.256	FALSE	18
2022-09-13	14:24:08	-0.107926	-0.480076	752.418	FALSE	18
2022-09-13	14:24:08	0.11925	0.530448	797.786	FALSE	18
2022-09-13	14:24:09	-0.0663483	-0.295131	752.418	FALSE	18
2022-09-13	14:24:09	0.193804	0.862079	798.648	FALSE	18
2022-09-13	14:24:09	0.106069	0.471816	752.889	FALSE	18
2022-09-13	14:24:09	0.805458	3.58284	802.231	FALSE	18
2022-09-13	14:24:10	0.498995	2.21963	755.109	FALSE	18
2022-09-13	14:24:10	1.56592	6.96553	809.197	FALSE	18
2022-09-13	14:24:10	1.35401	6.02291	761.132	FALSE	18
2022-09-13	14:24:10	2.23945	9.96152	819.158	FALSE	18
2022-09-13	14:24:11	2.2448	9.98532	771.117	FALSE	18
2022-09-13	14:24:11	1.9023	8.46181	827.62	FALSE	18
2022-09-13	14:24:11	1.95721	8.70606	779.823	FALSE	18
2022-09-13	14:24:12	0.535687	2.38284	830.003	FALSE	18
2022-09-13	14:24:12	1.14561	5.0959	784.919	FALSE	18
2022-09-13	14:24:12	0.591972	2.63321	832.636	FALSE	18
2022-09-13	14:24:13	1.48108	6.58814	791.507	FALSE	18
2022-09-13	14:24:13	0.995534	4.42833	837.064	FALSE	18
2022-09-13	14:24:13	1.93487	8.60669	800.114	FALSE	18
2022-09-13	14:24:13	0.954924	4.24769	841.312	FALSE	18
2022-09-13	14:24:13	1.33518	5.93915	806.053	FALSE	18
2022-09-13	14:24:14	1.59126	7.07824	848.39	FALSE	18
2022-09-13	14:24:14	0.618995	2.75341	808.807	FALSE	18
2022-09-13	14:24:14	1.28368	5.71007	854.1	FALSE	18
2022-09-13	14:24:14	0.858639	3.8194	812.626	FALSE	18
2022-09-13	14:24:15	1.5533	6.90939	861.01	FALSE	18
2022-09-13	14:24:15	0.972735	4.32692	816.953	FALSE	18
2022-09-13	14:24:15	1.43752	6.39438	867.404	FALSE	18
2022-09-13	14:24:16	1.3081	5.81869	822.772	FALSE	18
2022-09-13	14:24:16	0.963219	4.28459	871.689	FALSE	18
2022-09-13	14:24:16	0.59584	2.65042	825.422	FALSE	18
2022-09-13	14:24:16	0.427392	1.90113	873.59	FALSE	18
2022-09-13	14:24:17	0.270547	1.20345	826.626	FALSE	18
2022-09-13	14:24:17	0.328054	1.45925	875.049	FALSE	18
2022-09-13	14:24:17	0.555687	2.47181	829.097	FALSE	18
2022-09-13	14:24:17	0.399809	1.77843	876.828	FALSE	18
2022-09-13	14:24:18	0.182303	0.81092	829.908	FALSE	18
2022-09-13	14:24:18	0.353957	1.57447	878.402	FALSE	18
2022-09-13	14:24:18	0.1593	0.708598	830.617	FALSE	18
2022-09-13	14:24:18	0.202761	0.901921	879.304	FALSE	18
2022-09-13	14:24:19	0.163575	0.727614	831.345	FALSE	18
2022-09-13	14:24:19	0.23014	1.02371	880.328	FALSE	18
2022-09-13	14:24:19	0.284847	1.26706	832.612	FALSE	18
2022-09-13	14:24:20	0.161082	0.716525	881.044	FALSE	18
2022-09-13	14:24:20	0.524236	2.33191	834.943	FALSE	18
2022-09-13	14:24:20	0.326374	1.45178	882.496	FALSE	18
2022-09-13	14:24:20	0.460827	2.04985	836.993	FALSE	18
2022-09-13	14:24:21	0.239199	1.064	883.56	FALSE	18
2022-09-13	14:24:21	0.43701	1.94391	838.937	FALSE	18
2022-09-13	14:24:21	0.177774	0.790774	884.351	FALSE	18
2022-09-13	14:24:21	0.289682	1.28856	840.226	FALSE	18
2022-09-13	14:24:22	0.161336	0.717655	885.068	FALSE	18
2022-09-13	14:24:22	0.276043	1.22789	841.454	FALSE	18
2022-09-13	14:24:22	0.259402	1.15387	886.222	FALSE	18
2022-09-13	14:24:22	0.157316	0.699773	842.153	FALSE	18
2022-09-13	14:24:23	0.195942	0.871589	887.094	FALSE	18
2022-09-13	14:24:23	0.13355	0.594057	842.748	FALSE	18
2022-09-13	14:24:23	0.147646	0.656759	887.751	FALSE	18
2022-09-13	14:24:24	0.536043	2.38443	845.132	FALSE	18
2022-09-13	14:24:24	1.93248	8.59606	896.347	FALSE	18
2022-09-13	14:24:24	3.57207	15.8893	861.021	1	19
2022-09-13	14:24:24	2.30938	10.2726	906.619	FALSE	19
2022-09-13	14:24:25	0.841692	3.74401	864.765	FALSE	19
2022-09-13	14:24:25	0.512379	2.27916	908.898	FALSE	19
2022-09-13	14:24:25	0.131565	0.585227	865.35	FALSE	19
2022-09-13	14:24:25	0.397977	1.77028	910.669	FALSE	19
2022-09-13	14:24:26	0.137163	0.610128	865.961	FALSE	19
2022-09-13	14:24:26	0.401845	1.78749	912.456	FALSE	19
2022-09-13	14:24:26	0.262608	1.16813	867.129	FALSE	19
2022-09-13	14:24:26	0.192379	0.85574	913.312	FALSE	19
2022-09-13	14:24:27	0.258791	1.15115	868.28	FALSE	19
2022-09-13	14:24:27	0.238893	1.06264	914.375	FALSE	19
2022-09-13	14:24:27	0.292939	1.30305	869.583	FALSE	19
2022-09-13	14:24:28	0.220674	0.981602	915.356	FALSE	19
2022-09-13	14:24:28	0.181743	0.808429	870.391	FALSE	19
2022-09-13	14:24:28	0.242456	1.07849	916.435	FALSE	19
2022-09-13	14:24:28	0.229784	1.02213	871.413	FALSE	19
2022-09-13	14:24:29	0.29472	1.31097	917.746	FALSE	19
2022-09-13	14:24:29	1.40994	6.2717	877.685	FALSE	19
2022-09-13	14:24:29	0.881692	3.92194	921.668	FALSE	19
2022-09-13	14:24:29	0.401132	1.78432	879.469	FALSE	19
2022-09-13	14:24:30	0.346527	1.54142	923.209	FALSE	19
2022-09-13	14:24:30	0.168461	0.749348	880.219	FALSE	19
2022-09-13	14:24:30	0.171819	0.764285	923.973	FALSE	19
2022-09-13	14:24:30	0.359504	1.59915	881.818	FALSE	19
2022-09-13	14:24:31	0.237672	1.05721	925.031	FALSE	19
2022-09-13	14:24:31	0.289835	1.28924	883.107	FALSE	19
2022-09-13	14:24:31	0.245	1.08981	926.12	FALSE	19
2022-09-13	14:24:32	0.246476	1.09637	884.204	FALSE	19
2022-09-13	14:24:32	0.269886	1.20051	927.321	FALSE	19
2022-09-13	14:24:32	0.265356	1.18036	885.384	FALSE	19
2022-09-13	14:24:32	0.260471	1.15863	928.479	FALSE	19
2022-09-13	14:24:33	0.377112	1.67747	887.061	FALSE	19
2022-09-13	14:24:33	0.447036	1.98851	930.468	FALSE	19
2022-09-13	14:24:33	0.326323	1.45155	888.513	FALSE	19
2022-09-13	14:24:33	0.414669	1.84453	932.312	FALSE	19
2022-09-13	14:24:34	0.311056	1.38364	889.897	FALSE	19
2022-09-13	14:24:34	0.286527	1.27453	933.587	FALSE	19
2022-09-13	14:24:34	-0.119733	-0.532596	889.897	FALSE	19
2022-09-13	14:24:34	0.190089	0.845554	934.433	FALSE	19
2022-09-13	14:24:35	0.185	0.822917	890.72	FALSE	19
2022-09-13	14:24:35	0.237875	1.05812	935.491	FALSE	19
2022-09-13	14:24:35	0.288206	1.282	892.002	FALSE	19
2022-09-13	14:24:36	0.25584	1.13803	936.629	FALSE	19
2022-09-13	14:24:36	0.254669	1.13282	893.134	FALSE	19
2022-09-13	14:24:36	0.149428	0.664686	937.293	FALSE	19
2022-09-13	14:24:36	2.07528	9.23126	902.366	FALSE	19
2022-09-13	14:24:37	2.18877	9.73609	947.029	FALSE	19
2022-09-13	14:24:37	2.31503	10.2977	912.663	FALSE	19
2022-09-13	14:24:37	2.88724	12.843	959.873	FALSE	19
2022-09-13	14:24:37	3.17777	14.1354	926.799	1	20
2022-09-13	14:24:38	2.98851	13.2935	973.166	FALSE	20
2022-09-13	14:24:38	3.96729	17.6473	944.446	1	21
2022-09-13	14:24:38	4.9652	22.0862	995.252	1	22
2022-09-13	14:24:38	4.65635	20.7124	965.158	1	23
2022-09-13	14:24:39	4.73228	21.0501	1016.3	1	24
2022-09-13	14:24:39	5.20871	23.1694	988.328	1	25
2022-09-13	14:24:39	3.84821	17.1176	1033.42	1	26
2022-09-13	14:24:40	1.92826	8.57729	996.905	FALSE	26
2022-09-13	14:24:40	0.60159	2.67599	1036.1	FALSE	26
2022-09-13	14:24:40	0.461641	2.05347	998.959	FALSE	26
2022-09-13	14:24:40	0.497723	2.21397	1038.31	FALSE	26
2022-09-13	14:24:41	0.479402	2.13248	1001.09	FALSE	26
2022-09-13	14:24:41	0.435178	1.93576	1040.25	FALSE	26
2022-09-13	14:24:41	0.499911	2.2237	1003.31	FALSE	26
2022-09-13	14:24:41	0.440725	1.96043	1042.21	FALSE	26
2022-09-13	14:24:42	0.363168	1.61544	1004.93	FALSE	26
2022-09-13	14:24:42	0.418537	1.86174	1044.07	FALSE	26
2022-09-13	14:24:42	0.432328	1.92308	1006.85	FALSE	26
2022-09-13	14:24:42	0.43757	1.9464	1046.01	FALSE	26
2022-09-13	14:24:43	0.349224	1.55342	1008.41	FALSE	26
2022-09-13	14:24:43	0.594059	2.64249	1048.66	FALSE	26
2022-09-13	14:24:43	0.304593	1.35489	1009.76	FALSE	26
2022-09-13	14:24:44	0.396043	1.76168	1050.42	FALSE	26
2022-09-13	14:24:44	0.364746	1.62246	1011.38	FALSE	26
2022-09-13	14:24:44	0.404491	1.79926	1052.22	FALSE	26
2022-09-13	14:24:44	0.446425	1.98579	1013.37	FALSE	26
2022-09-13	14:24:45	0.642608	2.85845	1055.08	FALSE	26
2022-09-13	14:24:45	0.560165	2.49173	1015.86	FALSE	26
2022-09-13	14:24:45	0.353346	1.57175	1056.65	FALSE	26
2022-09-13	14:24:45	0.36841	1.63876	1017.5	FALSE	26
2022-09-13	14:24:46	0.264695	1.17742	1057.83	FALSE	26
2022-09-13	14:24:46	0.239758	1.06649	1018.57	FALSE	26
2022-09-13	14:24:46	0.277926	1.23627	1059.06	FALSE	26
2022-09-13	14:24:46	0.256603	1.14142	1019.71	FALSE	26
2022-09-13	14:24:47	0.382964	1.7035	1060.77	FALSE	26
2022-09-13	14:24:47	0.130293	0.579569	1020.29	FALSE	26
2022-09-13	14:24:47	0.349377	1.5541	1062.32	FALSE	26
2022-09-13	14:24:48	0.207545	0.923202	1021.21	FALSE	26
2022-09-13	14:24:48	0.409173	1.82008	1064.14	FALSE	26
2022-09-13	14:24:48	0.204135	0.908033	1022.12	FALSE	26
2022-09-13	14:24:48	0.10042	0.446688	1064.59	FALSE	26
2022-09-13	14:24:49	0.34668	1.5421	1023.66	FALSE	26
2022-09-13	14:24:49	0.323473	1.43887	1066.02	FALSE	26
2022-09-13	14:24:49	0.406985	1.81035	1025.47	FALSE	26
2022-09-13	14:24:49	0.369631	1.64419	1067.67	FALSE	26
2022-09-13	14:24:50	0.379351	1.68743	1027.16	FALSE	26
2022-09-13	14:24:50	0.34668	1.5421	1069.21	FALSE	26
2022-09-13	14:24:50	0.341794	1.52037	1028.68	FALSE	26
2022-09-13	14:24:50	0.322761	1.43571	1070.65	FALSE	26
2022-09-13	14:24:51	0.353295	1.57153	1030.25	FALSE	26
2022-09-13	14:24:51	0.468766	2.08516	1072.73	FALSE	26
2022-09-13	14:24:51	0.352379	1.56745	1031.82	FALSE	26
2022-09-13	14:24:52	0.364033	1.61929	1074.35	FALSE	26
2022-09-13	14:24:52	0.370344	1.64736	1033.47	FALSE	26
2022-09-13	14:24:52	0.335127	1.49071	1075.84	FALSE	26
2022-09-13	14:24:52	0.38556	1.71505	1035.18	FALSE	26
2022-09-13	14:24:53	0.316705	1.40877	1077.25	FALSE	26
2022-09-13	14:24:53	0.367697	1.63559	1036.82	FALSE	26
2022-09-13	14:24:53	0.480674	2.13813	1079.39	FALSE	26
2022-09-13	14:24:53	0.285407	1.26955	1038.09	FALSE	26
2022-09-13	14:24:54	0.387341	1.72297	1081.11	FALSE	26
2022-09-13	14:24:54	0.334109	1.48618	1039.57	FALSE	26
2022-09-13	14:24:54	0.358486	1.59462	1082.71	FALSE	26
2022-09-13	14:24:54	0.418232	1.86038	1041.43	FALSE	26
2022-09-13	14:24:55	0.239148	1.06378	1083.77	FALSE	26
2022-09-13	14:24:55	0.516501	2.2975	1043.73	FALSE	26
2022-09-13	14:24:55	0.389021	1.73044	1085.5	FALSE	26
2022-09-13	14:24:56	0.594364	2.64385	1046.37	FALSE	26
2022-09-13	14:24:56	0.933499	4.15239	1089.65	FALSE	26
2022-09-13	14:24:56	3.58027	15.9258	1062.3	1	27
2022-09-13	14:24:56	11.9048	52.9549	1142.61	1	28
2022-09-13	14:24:57	12.23	54.4015	1116.7	1	29
2022-09-13	14:24:57	17.3755	77.2897	1219.9	1	30
2022-09-13	14:24:57	8.52316	37.9127	1154.61	1	31
2022-09-13	14:24:57	8.02754	35.7081	1255.61	1	32
2022-09-13	14:24:58	8.00993	35.6298	1190.24	1	33
2022-09-13	14:24:58	6.28642	27.9633	1283.57	1	34
2022-09-13	14:24:58	5.14174	22.8715	1213.11	1	35
2022-09-13	14:24:58	3.97421	17.6781	1301.25	1	36
2022-09-13	14:24:59	2.92749	13.0221	1226.14	FALSE	36
2022-09-13	14:24:59	1.98129	8.81317	1310.06	FALSE	36
2022-09-13	14:24:59	0.862201	3.83524	1229.97	FALSE	36
2022-09-13	14:25:00	0.516145	2.29592	1312.36	FALSE	36
2022-09-13	14:25:00	0.453397	2.0168	1231.99	FALSE	36
2022-09-13	14:25:00	0.619606	2.75613	1315.11	FALSE	36
2022-09-13	14:25:00	1.75075	7.78769	1239.78	FALSE	36
2022-09-13	14:25:01	2.39345	10.6465	1325.76	FALSE	36
2022-09-13	14:25:01	1.4276	6.35025	1246.13	FALSE	36
2022-09-13	14:25:01	0.93869	4.17548	1329.93	FALSE	36
2022-09-13	14:25:01	1.50159	6.67937	1252.81	FALSE	36
2022-09-13	14:25:02	3.44627	15.3297	1345.26	1	37
2022-09-13	14:25:02	4.17273	18.5611	1271.37	1	38
2022-09-13	14:25:02	3.7363	16.6198	1361.88	1	39
2022-09-13	14:25:02	4.01884	17.8766	1289.24	1	40
2022-09-13	14:25:03	3.86352	17.1857	1379.07	1	41
2022-09-13	14:25:03	4.55849	20.2771	1309.52	1	42
2022-09-13	14:25:03	1.54159	6.8573	1385.93	FALSE	42
2022-09-13	14:25:04	0.577875	2.5705	1312.09	FALSE	42
2022-09-13	14:25:04	0.455585	2.02653	1387.95	FALSE	42
2022-09-13	14:25:04	0.445153	1.98013	1314.07	FALSE	42
2022-09-13	14:25:04	0.384898	1.7121	1389.67	FALSE	42
2022-09-13	14:25:05	0.363168	1.61544	1315.69	FALSE	42
2022-09-13	14:25:05	0.364237	1.6202	1391.29	FALSE	42
2022-09-13	14:25:05	0.353346	1.57175	1317.26	FALSE	42
2022-09-13	14:25:05	0.475789	2.1164	1393.4	FALSE	42
2022-09-13	14:25:06	0.54098	2.40639	1319.67	FALSE	42
2022-09-13	14:25:06	0.652837	2.90395	1396.31	FALSE	42
2022-09-13	14:25:06	1.61523	7.18487	1326.85	FALSE	42
2022-09-13	14:25:06	5.68337	25.2808	1421.59	1	43
2022-09-13	14:25:07	9.18754	40.868	1367.72	1	44
2022-09-13	14:25:07	5.6109	24.9584	1446.55	1	45
2022-09-13	14:25:07	2.63991	11.7428	1379.46	FALSE	45
2022-09-13	14:25:08	6.05813	26.9478	1473.49	1	46
2022-09-13	14:25:08	3.58042	15.9264	1395.39	1	47
2022-09-13	14:25:08	3.07665	13.6856	1487.18	1	48
2022-09-13	14:25:08	1.80602	8.03354	1403.42	FALSE	48
2022-09-13	14:25:09	0.665713	2.96122	1490.14	FALSE	48
2022-09-13	14:25:09	1.29838	5.77545	1409.2	FALSE	48
2022-09-13	14:25:09	0.413906	1.84114	1491.98	FALSE	48
2022-09-13	14:25:09	0.493499	2.19518	1411.39	FALSE	48
2022-09-13	14:25:10	0.474466	2.11052	1494.09	FALSE	48
2022-09-13	14:25:10	0.209835	0.933388	1412.33	FALSE	48
2022-09-13	14:25:10	0.244237	1.08642	1495.18	FALSE	48
2022-09-13	14:25:10	0.254568	1.13237	1413.46	FALSE	48
2022-09-13	14:25:11	0.557417	2.4795	1497.66	FALSE	48
2022-09-13	14:25:11	0.425	1.89048	1415.35	FALSE	48
2022-09-13	14:25:11	0.982965	4.37242	1502.03	FALSE	48
2022-09-13	14:25:12	1.18709	5.28041	1420.63	FALSE	48
2022-09-13	14:25:12	2.60734	11.598	1513.63	FALSE	48
2022-09-13	14:25:12	1.13691	5.0572	1425.69	FALSE	48
2022-09-13	14:25:12	1.10739	4.92589	1518.55	FALSE	48
2022-09-13	14:25:13	0.523371	2.32806	1428.01	FALSE	48
2022-09-13	14:25:13	0.405509	1.80379	1520.36	FALSE	48
2022-09-13	14:25:13	0.363931	1.61884	1429.63	FALSE	48
2022-09-13	14:25:13	0.151311	0.673062	1521.03	FALSE	48
2022-09-13	14:25:14	0.0664252	0.295473	1429.93	FALSE	48
2022-09-13	14:25:14	-0.053931	-0.239896	1521.03	FALSE	48
2022-09-13	14:25:14	0.00774832	0.0344661	1429.96	FALSE	48
2022-09-13	14:25:14	0.0648476	0.288455	1521.32	FALSE	48
2022-09-13	14:25:15	0.0166033	0.0738548	1430.04	FALSE	48
2022-09-13	14:25:15	-0.00543234	-0.0241641	1521.32	FALSE	48
2022-09-13	14:25:15	0.025102	0.111659	1430.15	FALSE	48
2022-09-13	14:25:16	0.16668	0.741426	1522.06	FALSE	48
2022-09-13	14:25:16	0.158741	0.706112	1430.85	FALSE	48
2022-09-13	14:25:16	0.465662	2.07136	1524.13	FALSE	48
2022-09-13	14:25:16	1.70347	7.57738	1438.43	FALSE	48
2022-09-13	14:25:17	0.920674	4.09534	1528.23	FALSE	48
2022-09-13	14:25:17	1.1848	5.27023	1443.7	FALSE	48
2022-09-13	14:25:17	1.80963	8.0496	1536.28	FALSE	48
2022-09-13	14:25:17	2.32958	10.3624	1454.06	FALSE	48
2022-09-13	14:25:18	1.94546	8.6538	1544.93	FALSE	48
2022-09-13	14:25:18	2.00449	8.91637	1462.98	FALSE	48
2022-09-13	14:25:18	1.24816	5.55207	1550.48	FALSE	48
2022-09-13	14:25:18	1.30856	5.82074	1468.8	FALSE	48
2022-09-13	14:25:19	1.05584	4.69659	1555.18	FALSE	48
2022-09-13	14:25:19	0.68444	3.04453	1471.85	FALSE	48
2022-09-13	14:25:19	0.438384	1.95002	1557.13	FALSE	48
2022-09-13	14:25:20	0.861234	3.83094	1475.68	FALSE	48
2022-09-13	14:25:20	0.604491	2.6889	1559.82	FALSE	48
2022-09-13	14:25:20	0.553702	2.46298	1478.14	FALSE	48
2022-09-13	14:25:20	0.417672	1.85789	1561.68	FALSE	48
2022-09-13	14:25:21	0.370038	1.646	1479.79	FALSE	48
2022-09-13	14:25:21	0.418028	1.85947	1563.54	FALSE	48
2022-09-13	14:25:21	0.483982	2.15285	1481.94	FALSE	48
2022-09-13	14:25:21	0.395026	1.75715	1565.29	FALSE	48
2022-09-13	14:25:22	0.360064	1.60164	1483.54	FALSE	48
2022-09-13	14:25:22	0.454211	2.02042	1567.31	FALSE	48
2022-09-13	14:25:22	0.428766	1.90724	1485.45	FALSE	48
2022-09-13	14:25:22	0.500318	2.22551	1569.54	FALSE	48
2022-09-13	14:25:23	0.410293	1.82507	1487.27	FALSE	48
2022-09-13	14:25:23	0.39528	1.75828	1571.3	FALSE	48
2022-09-13	14:25:23	0.513957	2.28618	1489.56	FALSE	48
2022-09-13	14:25:24	0.417163	1.85562	1573.15	FALSE	48
2022-09-13	14:25:24	0.479758	2.13406	1491.69	FALSE	48
2022-09-13	14:25:24	0.479046	2.13089	1575.28	FALSE	48
2022-09-13	14:25:24	0.488054	2.17096	1493.86	FALSE	48
2022-09-13	14:25:25	0.420166	1.86898	1577.15	FALSE	48
2022-09-13	14:25:25	0.338893	1.50746	1495.37	FALSE	48
2022-09-13	14:25:25	0.435585	1.93757	1579.09	FALSE	48
2022-09-13	14:25:25	0.466527	2.07521	1497.45	FALSE	48
2022-09-13	14:25:26	0.464644	2.06683	1581.16	FALSE	48
2022-09-13	14:25:26	0.533753	2.37424	1499.82	FALSE	48
2022-09-13	14:25:26	0.348206	1.54889	1582.71	FALSE	48
2022-09-13	14:25:26	0.54556	2.42676	1502.25	FALSE	48
2022-09-13	14:25:27	0.485356	2.15896	1584.86	FALSE	48
2022-09-13	14:25:27	0.375585	1.67068	1503.92	FALSE	48
2022-09-13	14:25:27	0.429326	1.90973	1586.77	FALSE	48
2022-09-13	14:25:28	0.219402	0.975944	1504.89	FALSE	48
2022-09-13	14:25:28	0.259453	1.1541	1587.93	FALSE	48
2022-09-13	14:25:28	0.19014	0.845781	1505.74	FALSE	48
2022-09-13	14:25:28	0.320267	1.42461	1589.35	FALSE	48
2022-09-13	14:25:29	0.252074	1.12128	1506.86	FALSE	48
2022-09-13	14:25:29	0.276451	1.22971	1590.58	FALSE	48
2022-09-13	14:25:29	0.186527	0.829709	1507.69	FALSE	48
2022-09-13	14:25:29	0.147138	0.654499	1591.24	FALSE	48
2022-09-13	14:25:30	0.211514	0.940857	1508.63	FALSE	48
2022-09-13	14:25:30	0.141591	0.629825	1591.87	FALSE	48
2022-09-13	14:25:30	0.18729	0.833103	1509.46	FALSE	48
2022-09-13	14:25:30	0.0141606	0.0629892	1591.93	FALSE	48
2022-09-13	14:25:31	0.047443	0.211036	1509.68	FALSE	48
2022-09-13	14:25:31	0.175127	0.779	1592.71	FALSE	48
2022-09-13	14:25:31	0.192786	0.857551	1510.53	FALSE	48
2022-09-13	14:25:32	0.218741	0.973004	1593.68	FALSE	48
2022-09-13	14:25:32	0.0758399	0.337351	1510.87	FALSE	48
2022-09-13	14:25:32	-0.426246	-1.89603	1593.68	FALSE	48
2022-09-13	14:25:32	-0.205992	-0.916294	1510.87	FALSE	48
2022-09-13	14:25:33	-0.119224	-0.530332	1593.68	FALSE	48
2022-09-13	14:25:33	0.0419468	0.186588	1511.06	FALSE	48
2022-09-13	14:25:33	0.512176	2.27826	1595.96	FALSE	48
2022-09-13	14:25:33	0.988054	4.39506	1515.45	FALSE	48
2022-09-13	14:25:34	0.826323	3.67565	1599.64	FALSE	48
2022-09-13	14:25:34	1.92841	8.57795	1524.03	FALSE	48
2022-09-13	14:25:34	0.534822	2.379	1602.01	FALSE	48
2022-09-13	14:25:34	1.34927	6.00182	1530.03	FALSE	48
2022-09-13	14:25:35	0.689275	3.06603	1605.08	FALSE	48
2022-09-13	14:25:35	3.11106	13.8386	1543.87	1	49
2022-09-13	14:25:35	0.879504	3.91221	1608.99	FALSE	49
2022-09-13	14:25:36	2.89686	12.8858	1556.76	FALSE	49
2022-09-13	14:25:36	1.56933	6.98069	1615.97	FALSE	49
2022-09-13	14:25:36	1.96541	8.74254	1565.5	FALSE	49
2022-09-13	14:25:36	1.13095	5.03069	1621	FALSE	49
2022-09-13	14:25:37	2.36541	10.5218	1576.02	FALSE	49
2022-09-13	14:25:37	1.99767	8.88604	1629.89	FALSE	49
2022-09-13	14:25:37	1.89482	8.42854	1584.45	FALSE	49
2022-09-13	14:25:37	1.09961	4.89129	1634.78	FALSE	49
2022-09-13	14:25:38	0.594669	2.64521	1587.09	FALSE	49
2022-09-13	14:25:38	0.361641	1.60865	1636.39	FALSE	49
2022-09-13	14:25:38	0.535687	2.38284	1589.48	FALSE	49
2022-09-13	14:25:38	0.334975	1.49004	1637.88	FALSE	49
2022-09-13	14:25:39	0.203575	0.905542	1590.38	FALSE	49
2022-09-13	14:25:39	0.168206	0.748214	1638.63	FALSE	49
2022-09-13	14:25:39	0.36383	1.61839	1592	FALSE	49
2022-09-13	14:25:40	0.149529	0.665135	1639.29	FALSE	49
2022-09-13	14:25:40	0.0520232	0.23141	1592.23	FALSE	49
2022-09-13	14:25:40	0.112176	0.498981	1639.79	FALSE	49
2022-09-13	14:25:40	0.246171	1.09502	1593.33	FALSE	49
2022-09-13	14:25:41	0.332023	1.4769	1641.27	FALSE	49
2022-09-13	14:25:41	0.268512	1.1944	1594.52	FALSE	49
2022-09-13	14:25:41	-0.0405468	-0.18036	1641.27	FALSE	49
2022-09-13	14:25:41	-0.0274679	-0.122183	1594.52	FALSE	49
2022-09-13	14:25:42	0.0635753	0.282796	1641.55	FALSE	49
2022-09-13	14:25:42	0.212125	0.943574	1595.47	FALSE	49
2022-09-13	14:25:42	0.123168	0.547876	1642.1	FALSE	49
2022-09-13	14:25:42	-0.136374	-0.606619	1595.47	FALSE	49
2022-09-13	14:25:43	-0.412557	-1.83514	1642.1	FALSE	49
2022-09-13	14:25:43	-0.476832	-2.12104	1595.47	FALSE	49
2022-09-13	14:25:43	-0.441361	-1.96326	1642.1	FALSE	49
2022-09-13	14:25:44	-0.342582	-1.52387	1595.47	FALSE	49
2022-09-13	14:25:44	-0.248689	-1.10622	1642.1	FALSE	49
2022-09-13	14:25:44	0.0615905	0.273967	1595.74	FALSE	49
2022-09-13	14:25:44	-0.155712	-0.692638	1642.1	FALSE	49
2022-09-13	14:25:45	-0.150623	-0.670001	1595.74	FALSE	49
2022-09-13	14:25:45	0.0250003	0.111206	1642.21	FALSE	49
2022-09-13	14:25:45	0.203931	0.907126	1596.65	FALSE	49
2022-09-13	14:25:45	0.358232	1.59349	1643.81	FALSE	49
2022-09-13	14:25:46	0.454364	2.0211	1598.67	FALSE	49
2022-09-13	14:25:46	0.523015	2.32648	1646.13	FALSE	49
2022-09-13	14:25:46	0.436349	1.94097	1600.61	FALSE	49
2022-09-13	14:25:46	0.327138	1.45518	1647.59	FALSE	49
2022-09-13	14:25:47	0.118232	0.52592	1601.13	FALSE	49
2022-09-13	14:25:47	0.228257	1.01533	1648.6	FALSE	49
2022-09-13	14:25:47	0.236807	1.05336	1602.19	FALSE	49
2022-09-13	14:25:48	0.322405	1.43412	1650.04	FALSE	49
2022-09-13	14:25:48	0.767443	3.41374	1605.6	FALSE	49
2022-09-13	14:25:48	0.479148	2.13135	1652.17	FALSE	49
2022-09-13	14:25:48	0.216959	0.965077	1606.57	FALSE	49
2022-09-13	14:25:49	0.357672	1.591	1653.76	FALSE	49
2022-09-13	14:25:49	0.336501	1.49682	1608.06	FALSE	49
2022-09-13	14:25:49	0.307443	1.36757	1655.13	FALSE	49
2022-09-13	14:25:49	0.322048	1.43253	1609.5	FALSE	49
2022-09-13	14:25:50	0.336654	1.4975	1656.62	FALSE	49
2022-09-13	14:25:50	0.355789	1.58262	1611.08	FALSE	49
2022-09-13	14:25:50	0.280827	1.24917	1657.87	FALSE	49
2022-09-13	14:25:50	0.348511	1.55025	1612.63	FALSE	49
2022-09-13	14:25:51	0.360115	1.60186	1659.47	FALSE	49
2022-09-13	14:25:51	0.429987	1.91267	1614.54	FALSE	49
2022-09-13	14:25:51	0.384644	1.71097	1661.19	FALSE	49
2022-09-13	14:25:52	0.447137	1.98895	1616.53	FALSE	49
2022-09-13	14:25:52	0.421896	1.87668	1663.06	FALSE	49
2022-09-13	14:25:52	0.443372	1.97221	1618.5	FALSE	49
2022-09-13	14:25:52	0.422965	1.88143	1664.94	FALSE	49
2022-09-13	14:25:53	0.230598	1.02575	1619.53	FALSE	49
2022-09-13	14:25:53	0.296043	1.31686	1666.26	FALSE	49
2022-09-13	14:25:53	0.277774	1.23559	1620.76	FALSE	49
2022-09-13	14:25:53	0.117061	0.520711	1666.78	FALSE	49
2022-09-13	14:25:54	0.251565	1.11901	1621.88	FALSE	49
2022-09-13	14:25:54	0.223931	0.99609	1667.78	FALSE	49
2022-09-13	14:25:54	0.373244	1.66026	1623.54	FALSE	49
2022-09-13	14:25:54	0.339911	1.51199	1669.29	FALSE	49
2022-09-13	14:25:55	0.269784	1.20005	1624.74	FALSE	49
2022-09-13	14:25:55	0.296094	1.31709	1670.61	FALSE	49
2022-09-13	14:25:55	0.369733	1.64465	1626.39	FALSE	49
2022-09-13	14:25:55	0.243066	1.08121	1671.69	FALSE	49
2022-09-13	14:25:56	0.462201	2.05596	1628.44	FALSE	49
2022-09-13	14:25:56	0.881641	3.92172	1675.61	FALSE	49
2022-09-13	14:25:56	0.517264	2.30089	1630.75	FALSE	49
2022-09-13	14:25:57	0.373092	1.65959	1677.27	FALSE	49
2022-09-13	14:25:57	0.47299	2.10395	1632.85	FALSE	49
2022-09-13	14:25:57	0.626832	2.78827	1680.06	FALSE	49
2022-09-13	14:25:57	0.380471	1.69241	1634.54	FALSE	49
2022-09-13	14:25:58	0.377163	1.6777	1681.74	FALSE	49
2022-09-13	14:25:58	0.435382	1.93667	1636.48	FALSE	49
2022-09-13	14:25:58	0.427545	1.90181	1683.64	FALSE	49
2022-09-13	14:25:58	0.46958	2.08879	1638.57	FALSE	49
2022-09-13	14:25:59	0.509682	2.26717	1685.9	FALSE	49
2022-09-13	14:25:59	0.445204	1.98036	1640.55	FALSE	49
2022-09-13	14:25:59	0.495636	2.20469	1688.11	FALSE	49
2022-09-13	14:26:00	0.484237	2.15398	1642.7	FALSE	49
2022-09-13	14:26:00	0.402914	1.79224	1689.9	FALSE	49
2022-09-13	14:26:00	0.48902	2.17526	1644.88	FALSE	49
2022-09-13	14:26:00	0.796756	3.54413	1693.45	FALSE	49
2022-09-13	14:26:01	0.7993	3.55545	1648.43	FALSE	49
2022-09-13	14:26:01	0.776196	3.45268	1696.9	FALSE	49
2022-09-13	14:26:01	1.25793	5.59552	1654.03	FALSE	49
2022-09-13	14:26:01	1.38663	6.16801	1703.07	FALSE	49
2022-09-13	14:26:02	0.784135	3.48799	1657.52	FALSE	49
2022-09-13	14:26:02	1.36276	6.06183	1709.13	FALSE	49
2022-09-13	14:26:02	0.907544	4.03694	1661.55	FALSE	49
2022-09-13	14:26:02	1.10011	4.89351	1714.02	FALSE	49
2022-09-13	14:26:03	0.428613	1.90656	1663.46	FALSE	49
2022-09-13	14:26:03	0.615585	2.73825	1716.76	FALSE	49
2022-09-13	14:26:03	0.517773	2.30316	1665.76	FALSE	49
2022-09-13	14:26:04	0.450038	2.00186	1718.76	FALSE	49
2022-09-13	14:26:04	0.555483	2.4709	1668.23	FALSE	49
2022-09-13	14:26:04	0.816705	3.63287	1722.39	FALSE	49
2022-09-13	14:26:04	1.69126	7.52306	1675.76	FALSE	49
2022-09-13	14:26:05	0.691616	3.07645	1725.47	FALSE	49
2022-09-13	14:26:05	1.19569	5.31867	1681.07	FALSE	49
2022-09-13	14:26:05	0.557926	2.48177	1727.95	FALSE	49
2022-09-13	14:26:05	0.505407	2.24815	1683.32	FALSE	49
2022-09-13	14:26:06	0.427188	1.90022	1729.85	FALSE	49
2022-09-13	14:26:06	0.357316	1.58941	1684.91	FALSE	49
2022-09-13	14:26:06	0.344186	1.53101	1731.38	FALSE	49
2022-09-13	14:26:06	0.285611	1.27045	1686.18	FALSE	49
2022-09-13	14:26:07	0.377468	1.67905	1733.06	FALSE	49
2022-09-13	14:26:07	0.256145	1.13938	1687.32	FALSE	49
2022-09-13	14:26:07	0.112583	0.500792	1733.56	FALSE	49
2022-09-13	14:26:08	0.930089	4.13722	1691.46	FALSE	49
2022-09-13	14:26:08	1.06022	4.71607	1738.28	FALSE	49
2022-09-13	14:26:08	0.627137	2.78963	1694.25	FALSE	49
2022-09-13	14:26:08	0.409682	1.82235	1740.1	FALSE	49
2022-09-13	14:26:09	0.223575	0.994506	1695.24	FALSE	49
2022-09-13	14:26:09	0.0179264	0.0797402	1740.18	FALSE	49
2022-09-13	14:26:09	0.0711071	0.316299	1695.56	FALSE	49
2022-09-13	14:26:09	0.0574684	0.255631	1740.44	FALSE	49
2022-09-13	14:26:10	0.553804	2.46343	1698.02	FALSE	49
2022-09-13	14:26:10	0.746425	3.32025	1743.76	FALSE	49
2022-09-13	14:26:10	0.685611	3.04973	1701.07	FALSE	49
2022-09-13	14:26:10	0.867086	3.85697	1747.61	FALSE	49
2022-09-13	14:26:11	1.73258	7.70686	1708.78	FALSE	49
2022-09-13	14:26:11	2.62123	11.6598	1759.27	FALSE	49
2022-09-13	14:26:11	1.85899	8.26916	1717.05	FALSE	49
2022-09-13	14:26:11	1.94459	8.64993	1767.92	FALSE	49
2022-09-13	14:26:12	0.813091	3.61679	1720.67	FALSE	49
2022-09-13	14:26:12	0.427392	1.90113	1769.83	FALSE	49
2022-09-13	14:26:12	0.38327	1.70486	1722.37	FALSE	49
2022-09-13	14:26:13	1.4822	6.59312	1776.42	FALSE	49
2022-09-13	14:26:13	2.45915	10.9388	1733.31	FALSE	49
2022-09-13	14:26:13	4.80118	21.3566	1797.77	1	50
2022-09-13	14:26:13	3.07197	13.6647	1746.97	1	51
2022-09-13	14:26:14	3.95161	17.5776	1815.35	1	52
2022-09-13	14:26:14	1.32536	5.89547	1752.87	FALSE	52
2022-09-13	14:26:14	1.99431	8.87109	1824.22	FALSE	52
2022-09-13	14:26:14	2.68398	11.9389	1764.81	FALSE	52
2022-09-13	14:26:15	3.41029	15.1697	1839.39	1	53
2022-09-13	14:26:15	2.69487	11.9873	1776.8	FALSE	53
2022-09-13	14:26:15	1.72546	7.67519	1847.07	FALSE	53
2022-09-13	14:26:15	2.56189	11.3958	1788.19	FALSE	53
2022-09-13	14:26:16	1.29044	5.74014	1852.81	FALSE	53
2022-09-13	14:26:16	0.842201	3.74628	1791.94	FALSE	53
2022-09-13	14:26:16	0.466527	2.07521	1854.88	FALSE	53
2022-09-13	14:26:17	0.437417	1.94572	1793.88	FALSE	53
2022-09-13	14:26:17	0.329428	1.46536	1856.35	FALSE	53
2022-09-13	14:26:17	0.135585	0.603109	1794.49	FALSE	53
2022-09-13	14:26:17	0.129224	0.574814	1856.92	FALSE	53
2022-09-13	14:26:18	0.0655091	0.291398	1794.78	FALSE	53
2022-09-13	14:26:18	0.166883	0.742329	1857.67	FALSE	53
2022-09-13	14:26:18	0.729936	3.2469	1798.03	FALSE	53
2022-09-13	14:26:18	1.04475	4.64726	1862.31	FALSE	53
2022-09-13	14:26:19	3.91981	17.4361	1815.46	1	54
2022-09-13	14:26:19	1.96912	8.75904	1871.07	FALSE	54
2022-09-13	14:26:19	3.85294	17.1386	1832.6	1	55
2022-09-13	14:26:20	2.83228	12.5985	1883.67	FALSE	55
2022-09-13	14:26:20	7.45334	33.1539	1865.75	1	56
2022-09-13	14:26:20	3.67273	16.337	1900.01	1	57
2022-09-13	14:26:20	2.50169	11.128	1876.88	FALSE	57
2022-09-13	14:26:21	1.54434	6.86953	1906.88	FALSE	57
2022-09-13	14:26:21	1.26057	5.60727	1882.49	FALSE	57
2022-09-13	14:26:21	1.87431	8.33731	1915.21	FALSE	57
2022-09-13	14:26:21	4.73212	21.0494	1903.54	1	58
2022-09-13	14:26:22	2.40103	10.6803	1925.9	FALSE	58
2022-09-13	14:26:22	1.43879	6.40003	1909.94	FALSE	58
2022-09-13	14:26:22	0.440776	1.96066	1927.86	FALSE	58
2022-09-13	14:26:22	0.31355	1.39473	1911.33	FALSE	58
2022-09-13	14:26:23	0.242761	1.07985	1928.94	FALSE	58
2022-09-13	14:26:23	0.0982317	0.436954	1911.77	FALSE	58
2022-09-13	14:26:23	0.0946694	0.421108	1929.36	FALSE	58
2022-09-13	14:26:23	-0.105127	-0.467626	1911.77	FALSE	58
2022-09-13	14:26:24	0.0790969	0.351839	1929.71	FALSE	58
2022-09-13	14:26:24	-0.045585	-0.202771	1911.77	FALSE	58
2022-09-13	14:26:24	0.120318	0.535199	1930.24	FALSE	58
2022-09-13	14:26:25	0.0307509	0.136786	1911.91	FALSE	58
2022-09-13	14:26:25	-0.0900124	-0.400393	1930.24	FALSE	58
2022-09-13	14:26:25	-0.285534	-1.27011	1911.91	FALSE	58
2022-09-13	14:26:25	-0.114033	-0.507242	1930.24	FALSE	58
2022-09-13	14:26:26	0.025102	0.111659	1912.02	FALSE	58
2022-09-13	14:26:26	1.61645	7.19029	1937.43	FALSE	58
2022-09-13	14:26:26	1.58383	7.04519	1919.06	FALSE	58
2022-09-13	14:26:26	1.95431	8.69316	1946.13	FALSE	58
2022-09-13	14:26:27	1.58363	7.0443	1926.11	FALSE	58
2022-09-13	14:26:27	2.31258	10.2868	1956.41	FALSE	58
2022-09-13	14:26:27	2.28678	10.1721	1936.28	FALSE	58
2022-09-13	14:26:27	1.99452	8.87202	1965.29	FALSE	58
2022-09-13	14:26:28	0.70042	3.11561	1939.4	FALSE	58
2022-09-13	14:26:28	0.811463	3.60955	1968.9	FALSE	58
2022-09-13	14:26:28	0.908919	4.04305	1943.44	FALSE	58
2022-09-13	14:26:29	1.87996	8.36244	1977.26	FALSE	58
2022-09-13	14:26:29	1.54785	6.88515	1950.32	FALSE	58
2022-09-13	14:26:29	2.22948	9.91717	1987.18	FALSE	58
2022-09-13	14:26:29	1.8766	8.34749	1958.67	FALSE	58
2022-09-13	14:26:30	3.71813	16.539	2003.71	1	59
2022-09-13	14:26:30	4.07131	18.11	1976.78	1	60
2022-09-13	14:26:30	6.98184	31.0566	2034.77	1	61
2022-09-13	14:26:30	4.38938	19.5248	1996.31	1	62
2022-09-13	14:26:31	2.05401	9.13665	2043.91	FALSE	62
2022-09-13	14:26:31	2.62332	11.6691	2007.98	FALSE	62
2022-09-13	14:26:31	0.985458	4.38351	2048.29	FALSE	62
2022-09-13	14:26:31	2.43263	10.8208	2018.8	FALSE	62
2022-09-13	14:26:32	0.623524	2.77356	2051.06	FALSE	62
2022-09-13	14:26:32	2.13457	9.49499	2028.29	FALSE	62
2022-09-13	14:26:32	0.671718	2.98794	2054.05	FALSE	62
2022-09-13	14:26:33	1.88948	8.40478	2036.7	FALSE	62
2022-09-13	14:26:33	0.604186	2.68754	2056.74	FALSE	62
2022-09-13	14:26:33	1.37742	6.12704	2042.82	FALSE	62
2022-09-13	14:26:33	1.34398	5.97829	2062.72	FALSE	62
2022-09-13	14:26:34	1.49457	6.64815	2049.47	FALSE	62
2022-09-13	14:26:34	1.35696	6.03603	2068.75	FALSE	62
2022-09-13	14:26:34	0.948664	4.21985	2053.69	FALSE	62
2022-09-13	14:26:34	1.05533	4.69432	2073.45	FALSE	62
2022-09-13	14:26:35	0.416909	1.85449	2055.55	FALSE	62
2022-09-13	14:26:35	0.387952	1.72569	2075.17	FALSE	62
2022-09-13	14:26:35	0.22098	0.982963	2056.53	FALSE	62
2022-09-13	14:26:35	0.318537	1.41692	2076.59	FALSE	62
2022-09-13	14:26:36	0.420674	1.87124	2058.4	FALSE	62
2022-09-13	14:26:36	0.398486	1.77255	2078.36	FALSE	62
2022-09-13	14:26:36	0.399911	1.77888	2060.18	FALSE	62
2022-09-13	14:26:37	0.42327	1.88279	2080.25	FALSE	62
2022-09-13	14:26:37	0.413906	1.84114	2062.02	FALSE	62
2022-09-13	14:26:37	0.381489	1.69694	2081.94	FALSE	62
2022-09-13	14:26:37	0.446832	1.9876	2064.01	FALSE	62
2022-09-13	14:26:38	0.431565	1.91969	2083.86	FALSE	62
2022-09-13	14:26:38	0.42327	1.88279	2065.89	FALSE	62
2022-09-13	14:26:38	0.404542	1.79948	2085.66	FALSE	62
2022-09-13	14:26:38	0.397672	1.76892	2067.66	FALSE	62
2022-09-13	14:26:39	0.395026	1.75715	2087.42	FALSE	62
2022-09-13	14:26:39	0.366425	1.62993	2069.29	FALSE	62
2022-09-13	14:26:39	0.368003	1.63695	2089.06	FALSE	62
2022-09-13	14:26:39	0.368919	1.64103	2070.93	FALSE	62
2022-09-13	14:26:40	0.360725	1.60458	2090.66	FALSE	62
2022-09-13	14:26:40	0.375534	1.67045	2072.6	FALSE	62
2022-09-13	14:26:40	0.377061	1.67724	2092.34	FALSE	62
2022-09-13	14:26:41	0.39243	1.74561	2074.35	FALSE	62
2022-09-13	14:26:41	0.431769	1.92059	2094.26	FALSE	62
2022-09-13	14:26:41	0.515127	2.29139	2076.64	FALSE	62
2022-09-13	14:26:41	0.889326	3.9559	2098.22	FALSE	62
2022-09-13	14:26:42	1.33711	5.94773	2082.59	FALSE	62
2022-09-13	14:26:42	1.93655	8.61416	2106.83	FALSE	62
2022-09-13	14:26:42	2.24368	9.98034	2092.57	FALSE	62
2022-09-13	14:26:42	0.929376	4.13405	2110.96	FALSE	62
2022-09-13	14:26:43	0.332023	1.4769	2094.04	FALSE	62
2022-09-13	14:26:43	0.242252	1.07759	2112.04	FALSE	62
2022-09-13	14:26:43	0.121082	0.538597	2094.58	FALSE	62
2022-09-13	14:26:43	-0.0558649	-0.248498	2112.04	FALSE	62
2022-09-13	14:26:44	-0.200445	-0.891619	2094.58	FALSE	62
2022-09-13	14:26:44	-0.286399	-1.27396	2112.04	FALSE	62
2022-09-13	14:26:44	-0.424007	-1.88607	2094.58	FALSE	62
2022-09-13	14:26:45	-0.289503	-1.28777	2112.04	FALSE	62
2022-09-13	14:26:45	-0.0532694	-0.236953	2094.58	FALSE	62
2022-09-13	14:26:45	-0.211794	-0.942102	2112.04	FALSE	62
2022-09-13	14:26:45	-0.159834	-0.710974	2094.58	FALSE	62
2022-09-13	14:26:46	-0.196323	-0.873284	2112.04	FALSE	62
2022-09-13	14:26:46	-0.241972	-1.07634	2094.58	FALSE	62
2022-09-13	14:26:46	-0.420394	-1.87	2112.04	FALSE	62
2022-09-13	14:26:46	-0.521106	-2.31798	2094.58	FALSE	62
2022-09-13	14:26:47	-0.626908	-2.78861	2112.04	FALSE	62
2022-09-13	14:26:47	-0.760953	-3.38487	2094.58	FALSE	62
2022-09-13	14:26:47	-0.328944	-1.46321	2112.04	FALSE	62
2022-09-13	14:26:47	-0.386806	-1.72059	2094.58	FALSE	62
2022-09-13	14:26:48	-0.305432	-1.35862	2112.04	FALSE	62
2022-09-13	14:26:48	-0.309656	-1.37741	2094.58	FALSE	62
2022-09-13	14:26:48	-0.234338	-1.04238	2112.04	FALSE	62
2022-09-13	14:26:49	-0.0212593	-0.0945656	2094.58	FALSE	62
2022-09-13	14:26:49	0.147494	0.656083	2112.7	FALSE	62
2022-09-13	14:26:49	0.108613	0.483132	2095.06	FALSE	62
2022-09-13	14:26:49	0.190445	0.847137	2113.54	FALSE	62
2022-09-13	14:26:50	0.393092	1.74855	2096.81	FALSE	62
2022-09-13	14:26:50	0.621998	2.76677	2116.31	FALSE	62
2022-09-13	14:26:50	0.436196	1.94029	2098.75	FALSE	62
2022-09-13	14:26:50	0.478791	2.12976	2118.44	FALSE	62
2022-09-13	14:26:51	0.466578	2.07543	2100.83	FALSE	62
2022-09-13	14:26:51	0.332532	1.47917	2119.92	FALSE	62
2022-09-13	14:26:51	0.325712	1.44883	2102.28	FALSE	62
2022-09-13	14:26:51	0.132888	0.591112	2120.51	FALSE	62
2022-09-13	14:26:52	-0.048842	-0.217259	2102.28	FALSE	62
2022-09-13	14:26:52	-0.226755	-1.00865	2120.51	FALSE	62
2022-09-13	14:26:52	-0.328079	-1.45936	2102.28	FALSE	62
2022-09-13	14:26:53	-0.382684	-1.70225	2120.51	FALSE	62
2022-09-13	14:26:53	0.720827	3.20638	2105.48	FALSE	62
2022-09-13	14:26:53	5.40184	24.0285	2144.54	1	63
2022-09-13	14:26:53	5.93314	26.3918	2131.88	1	64
2022-09-13	14:26:54	4.95762	22.0525	2166.59	1	65
2022-09-13	14:26:54	3.46276	15.403	2147.28	1	66
2022-09-13	14:26:54	4.5135	20.077	2186.67	1	67
2022-09-13	14:26:54	2.93981	13.0769	2160.36	FALSE	67
2022-09-13	14:26:55	4.40312	19.586	2206.25	1	68
2022-09-13	14:26:55	2.09757	9.33041	2169.69	FALSE	68
2022-09-13	14:26:55	1.12205	4.9911	2211.25	FALSE	68
2022-09-13	14:26:55	0.188817	0.839896	2170.53	FALSE	68
2022-09-13	14:26:56	0.510394	2.27033	2213.52	FALSE	68
2022-09-13	14:26:56	0.226629	1.00809	2171.53	FALSE	68
2022-09-13	14:26:56	0.136247	0.606054	2214.12	FALSE	68
2022-09-13	14:26:57	0.226221	1.00628	2172.54	FALSE	68
2022-09-13	14:26:57	0.25701	1.14323	2215.27	FALSE	68
2022-09-13	14:26:57	2.16408	9.62626	2182.17	FALSE	68
2022-09-13	14:26:57	5.22922	23.2606	2238.53	1	69
2022-09-13	14:26:58	2.47925	11.0282	2193.19	FALSE	69
2022-09-13	14:26:58	2.46754	10.9761	2249.5	FALSE	69
2022-09-13	14:26:58	1.91726	8.52836	2201.72	FALSE	69
2022-09-13	14:26:58	3.30429	14.6981	2264.2	1	70
2022-09-13	14:26:59	1.80602	8.03354	2209.76	FALSE	70
2022-09-13	14:26:59	1.0595	4.71287	2268.91	FALSE	70
2022-09-13	14:26:59	1.03625	4.60945	2214.37	FALSE	70
2022-09-13	14:26:59	0.403931	1.79677	2270.71	FALSE	70
2022-09-13	14:27:00	0.698689	3.10791	2217.47	FALSE	70
2022-09-13	14:27:00	0.178639	0.794622	2271.5	FALSE	70
2022-09-13	14:27:00	0.145967	0.64929	2218.12	FALSE	70
2022-09-13	14:27:01	0.0383845	0.170742	2271.68	FALSE	70
2022-09-13	14:27:01	0.128054	0.56961	2218.69	FALSE	70
2022-09-13	14:27:01	0.103117	0.458685	2272.13	FALSE	70
2022-09-13	14:27:01	0.643066	2.86049	2221.55	FALSE	70
2022-09-13	14:27:02	0.143423	0.637974	2272.77	FALSE	70
2022-09-13	14:27:02	0.304746	1.35557	2222.91	FALSE	70
2022-09-13	14:27:02	0.314567	1.39926	2274.17	FALSE	70
2022-09-13	14:27:02	0.322964	1.43661	2224.35	FALSE	70
2022-09-13	14:27:03	0.278435	1.23853	2275.41	FALSE	70
2022-09-13	14:27:03	0.297977	1.32546	2225.67	FALSE	70
2022-09-13	14:27:03	0.327952	1.4588	2276.87	FALSE	70
2022-09-13	14:27:03	0.345611	1.53735	2227.21	FALSE	70
2022-09-13	14:27:04	0.490445	2.1816	2279.05	FALSE	70
2022-09-13	14:27:04	0.527443	2.34617	2229.55	FALSE	70
2022-09-13	14:27:04	0.933855	4.15397	2283.2	FALSE	70
2022-09-13	14:27:05	0.858283	3.81781	2233.37	FALSE	70
2022-09-13	14:27:05	1.01996	4.53699	2287.74	FALSE	70
2022-09-13	14:27:05	0.672074	2.98952	2236.36	FALSE	70
2022-09-13	14:27:05	0.668308	2.97277	2290.71	FALSE	70
2022-09-13	14:27:06	0.643677	2.8632	2239.22	FALSE	70
2022-09-13	14:27:06	0.56215	2.50056	2293.21	FALSE	70
2022-09-13	14:27:06	0.621845	2.76609	2241.99	FALSE	70
2022-09-13	14:27:06	0.647239	2.87905	2296.09	FALSE	70
2022-09-13	14:27:07	0.642405	2.85755	2244.85	FALSE	70
2022-09-13	14:27:07	0.622964	2.77107	2298.86	FALSE	70
2022-09-13	14:27:07	0.731565	3.25415	2248.1	FALSE	70
2022-09-13	14:27:07	0.794364	3.53349	2302.4	FALSE	70
2022-09-13	14:27:08	0.797875	3.54911	2251.65	FALSE	70
2022-09-13	14:27:08	0.806781	3.58872	2305.99	FALSE	70
2022-09-13	14:27:08	0.872176	3.87961	2255.53	FALSE	70
2022-09-13	14:27:09	0.791616	3.52127	2309.51	FALSE	70
2022-09-13	14:27:09	0.870293	3.87124	2259.4	FALSE	70
2022-09-13	14:27:09	1.14449	5.09092	2314.6	FALSE	70
2022-09-13	14:27:09	1.48118	6.58858	2265.99	FALSE	70
2022-09-13	14:27:10	2.59401	11.5387	2326.14	FALSE	70
2022-09-13	14:27:10	1.81421	8.06997	2274.06	FALSE	70
2022-09-13	14:27:10	1.52256	6.77265	2332.91	FALSE	70
2022-09-13	14:27:10	1.34246	5.97153	2280.03	FALSE	70
2022-09-13	14:27:11	1.26637	5.63307	2338.54	FALSE	70
2022-09-13	14:27:11	1.52378	6.77808	2286.81	FALSE	70
2022-09-13	14:27:11	1.46668	6.52409	2345.07	FALSE	70
2022-09-13	14:27:11	1.37487	6.1157	2292.93	FALSE	70
2022-09-13	14:27:12	2.95095	13.1264	2358.19	FALSE	70
2022-09-13	14:27:12	3.73528	16.6153	2309.54	1	71
2022-09-13	14:27:12	6.8079	30.2829	2388.48	1	72
2022-09-13	14:27:13	5.49787	24.4556	2334	1	73
2022-09-13	14:27:13	2.28637	10.1702	2398.65	FALSE	73
2022-09-13	14:27:13	1.19253	5.30461	2339.3	FALSE	73
2022-09-13	14:27:13	1.29136	5.74423	2404.39	FALSE	73
2022-09-13	14:27:14	1.2077	5.37209	2344.67	FALSE	73
2022-09-13	14:27:14	1.62006	7.20635	2411.6	FALSE	73
2022-09-13	14:27:14	1.95279	8.6864	2353.36	FALSE	73
2022-09-13	14:27:14	5.05986	22.5073	2434.1	1	74
2022-09-13	14:27:15	4.45487	19.8162	2373.18	1	75
2022-09-13	14:27:15	5.60179	24.9179	2459.02	1	76
2022-09-13	14:27:15	11.3796	50.6187	2423.8	1	77
2022-09-13	14:27:16	8.05253	35.8193	2494.84	1	78
2022-09-13	14:27:16	2.82347	12.5594	2436.35	FALSE	78
2022-09-13	14:27:16	2.9421	13.087	2507.93	FALSE	78
2022-09-13	14:27:16	5.37171	23.8944	2460.25	1	79
2022-09-13	14:27:17	2.37833	10.5793	2518.51	FALSE	79
2022-09-13	14:27:17	3.02871	13.4723	2473.72	1	80
2022-09-13	14:27:17	3.06805	13.6473	2532.16	1	81
2022-09-13	14:27:17	3.46627	15.4187	2489.14	1	82
2022-09-13	14:27:18	12.3799	55.0683	2587.22	1	83
2022-09-13	14:27:18	11.8203	52.5791	2541.72	1	84
2022-09-13	14:27:18	11.53	51.2877	2638.51	1	85
2022-09-13	14:27:18	23.2322	103.341	2645.06	1	86
2022-09-13	14:27:19	22.4448	99.839	2738.35	1	87
2022-09-13	14:27:19	13.7817	61.3038	2706.36	1	88
2022-09-13	14:27:19	11.8165	52.5622	2790.91	1	89
2022-09-13	14:27:19	13.4491	59.8243	2766.19	1	90
2022-09-13	14:27:20	19.369	86.1572	2877.07	1	91
2022-09-13	14:27:20	16.7612	74.5572	2840.75	1	92
2022-09-13	14:27:20	20.8322	92.6658	2969.74	1	93
2022-09-13	14:27:21	24.56	109.248	2949.99	1	94
2022-09-13	14:27:21	13.9493	62.0493	3031.79	1	95
2022-09-13	14:27:21	10.3468	46.0246	2996.02	1	96
2022-09-13	14:27:21	6.77655	30.1434	3061.93	1	97
2022-09-13	14:27:22	4.58948	20.4149	3016.43	1	98
2022-09-13	14:27:22	1.7165	7.63534	3069.56	FALSE	98
2022-09-13	14:27:22	1.10688	4.92362	3021.36	FALSE	98
2022-09-13	14:27:22	0.794975	3.53621	3073.1	FALSE	98
2022-09-13	14:27:23	0.370852	1.64962	3023.01	FALSE	98
2022-09-13	14:27:23	0.421031	1.87283	3074.97	FALSE	98
2022-09-13	14:27:23	0.525611	2.33802	3025.34	FALSE	98
2022-09-13	14:27:23	0.473092	2.10441	3077.08	FALSE	98
2022-09-13	14:27:24	0.512481	2.27962	3027.62	FALSE	98
2022-09-13	14:27:24	0.552074	2.45574	3079.53	FALSE	98
2022-09-13	14:27:24	0.804644	3.57922	3031.2	FALSE	98
2022-09-13	14:27:25	0.491107	2.18454	3081.72	FALSE	98
2022-09-13	14:27:25	0.479148	2.13135	3033.33	FALSE	98
2022-09-13	14:27:25	0.50271	2.23615	3083.95	FALSE	98
2022-09-13	14:27:25	0.500471	2.2262	3035.56	FALSE	98
2022-09-13	14:27:26	0.475891	2.11686	3086.07	FALSE	98
2022-09-13	14:27:26	0.439606	1.95546	3037.52	FALSE	98
2022-09-13	14:27:26	0.505356	2.24792	3088.32	FALSE	98
2022-09-13	14:27:26	0.430954	1.91697	3039.43	FALSE	98
2022-09-13	14:27:27	0.498995	2.21963	3090.54	FALSE	98
2022-09-13	14:27:27	0.442812	1.96972	3041.4	FALSE	98
2022-09-13	14:27:27	0.49126	2.18522	3092.72	FALSE	98
2022-09-13	14:27:27	0.473957	2.10826	3043.51	FALSE	98
2022-09-13	14:27:28	0.495026	2.20197	3094.93	FALSE	98
2022-09-13	14:27:28	0.517875	2.30361	3045.81	FALSE	98
2022-09-13	14:27:28	0.512888	2.28143	3097.21	FALSE	98
2022-09-13	14:27:29	0.588715	2.61872	3048.43	FALSE	98
2022-09-13	14:27:29	0.632379	2.81295	3100.02	FALSE	98
2022-09-13	14:27:29	0.747595	3.32545	3051.76	FALSE	98
2022-09-13	14:27:29	0.943168	4.1954	3104.22	FALSE	98
2022-09-13	14:27:30	0.675738	3.00582	3054.76	FALSE	98
2022-09-13	14:27:30	1.02327	4.55171	3108.77	FALSE	98
2022-09-13	14:27:30	0.76444	3.40038	3058.17	FALSE	98
2022-09-13	14:27:30	0.808461	3.5962	3112.36	FALSE	98

## Sheet: Daisy_star_2022913142214 (2)
Date	Time	Lbs	Total force x time			**GoPro Fitting: 1411
2022-09-13	14:22:14	0.633702	0.633702	FALSE	0
2022-09-13	14:22:14	0.768817	1.40252	FALSE	0
2022-09-13	14:22:15	0.776603	2.17912	FALSE	0
2022-09-13	14:22:15	1.02927	3.20839	FALSE	0
2022-09-13	14:22:15	1.04291	4.2513	FALSE	0
2022-09-13	14:22:15	0.705305	4.95661	FALSE	0
2022-09-13	14:22:16	0.486934	5.44354	FALSE	0
2022-09-13	14:22:16	0.445051	5.88859	FALSE	0
2022-09-13	14:22:16	0.405967	6.29456	FALSE	0
2022-09-13	14:22:16	0.413346	6.70791	FALSE	0
2022-09-13	14:22:17	0.671819	7.37972	FALSE	0
2022-09-13	14:22:17	0.757214	8.13694	FALSE	0
2022-09-13	14:22:17	0.730649	8.86759	FALSE	0
2022-09-13	14:22:18	0.611667	9.47925	FALSE	0
2022-09-13	14:22:18	0.497723	9.97698	FALSE	0
2022-09-13	14:22:18	0.432074	10.4091	FALSE	0
2022-09-13	14:22:18	0.427239	10.8363	FALSE	0
2022-09-13	14:22:19	0.407494	11.2438	FALSE	0
2022-09-13	14:22:19	0.431158	11.6749	FALSE	0
2022-09-13	14:22:19	0.374568	12.0495	FALSE	0
2022-09-13	14:22:19	0.467799	12.5173	FALSE	0
2022-09-13	14:22:20	0.856043	13.3734	FALSE	0
2022-09-13	14:22:20	1.16546	14.5388	FALSE	0
2022-09-13	14:22:20	0.963371	15.5022	FALSE	0
2022-09-13	14:22:20	0.806985	16.3092	FALSE	0
2022-09-13	14:22:21	0.504084	16.8133	FALSE	0
2022-09-13	14:22:21	0.600369	17.4136	FALSE	0
2022-09-13	14:22:21	0.473499	17.8871	FALSE	0
2022-09-13	14:22:22	0.324898	18.212	FALSE	0
2022-09-13	14:22:22	0.272939	18.485	FALSE	0
2022-09-13	14:22:22	0.607392	19.0923	FALSE	0
2022-09-13	14:22:22	0.578282	19.6706	FALSE	0
2022-09-13	14:22:23	0.574568	20.2452	FALSE	0
2022-09-13	14:22:23	1.09045	21.3356	FALSE	0
2022-09-13	14:22:23	0.435178	21.7708	FALSE	0
2022-09-13	14:22:23	0.438384	22.2092	FALSE	0
2022-09-13	14:22:24	0.198181	22.4074	FALSE	0
2022-09-13	14:22:24	0.57187	22.9793	FALSE	0
2022-09-13	14:22:24	0.164389	23.1437	FALSE	0
2022-09-13	14:22:24	0.442812	23.5865	FALSE	0
2022-09-13	14:22:25	0.162354	23.7488	FALSE	0
2022-09-13	14:22:25	0.469173	24.218	FALSE	0
2022-09-13	14:22:25	0.404033	24.622	FALSE	0
2022-09-13	14:22:26	0.233346	24.8554	FALSE	0
2022-09-13	14:22:26	0.468868	25.3242	FALSE	0
2022-09-13	14:22:26	0.564898	25.8891	FALSE	0
2022-09-13	14:22:26	0.398333	26.2875	FALSE	0
2022-09-13	14:22:27	0.216807	26.5043	FALSE	0
2022-09-13	14:22:27	0.346272	26.8505	FALSE	0
2022-09-13	14:22:27	0.0808272	26.9314	FALSE	0
2022-09-13	14:22:27	0.203066	27.1344	FALSE	0
2022-09-13	14:22:28	0.20958	27.344	FALSE	0
2022-09-13	14:22:28	0.320827	27.6648	FALSE	0
2022-09-13	14:22:28	0.165458	27.8303	FALSE	0
2022-09-13	14:22:28	0.182099	28.0124	FALSE	0
2022-09-13	14:22:29	0.128003	28.1404	FALSE	0
2022-09-13	14:22:29	0.377468	28.5179	FALSE	0
2022-09-13	14:22:29	0.357519	28.8754	FALSE	0
2022-09-13	14:22:29	0.448613	29.324	FALSE	0
2022-09-13	14:22:30	0.294924	29.6189	FALSE	0
2022-09-13	14:22:30	0.499555	30.1185	FALSE	0
2022-09-13	14:22:30	0.567036	30.6855	FALSE	0
2022-09-13	14:22:31	0.613346	31.2989	FALSE	0
2022-09-13	14:22:31	0.462049	31.7609	FALSE	0
2022-09-13	14:22:31	0.454771	32.2157	FALSE	0
2022-09-13	14:22:31	0.484847	32.7005	FALSE	0
2022-09-13	14:22:32	0.432328	33.1329	FALSE	0
2022-09-13	14:22:32	0.374924	33.5078	FALSE	0
2022-09-13	14:22:32	0.407036	33.9148	FALSE	0
2022-09-13	14:22:32	0.35757	34.2724	FALSE	0
2022-09-13	14:22:33	0.372176	34.6446	FALSE	0
2022-09-13	14:22:33	0.48958	35.1341	FALSE	0
2022-09-13	14:22:33	0.236043	35.3702	FALSE	0
2022-09-13	14:22:33	0.102659	35.4729	FALSE	0
2022-09-13	14:22:34	0.115738	35.5886	FALSE	0
2022-09-13	14:22:34	0.100217	35.6888	FALSE	0
2022-09-13	14:22:34	-0.0364247	35.6888	FALSE	0
2022-09-13	14:22:35	0.000929014	35.6897	FALSE	0
2022-09-13	14:22:35	0.32159	36.0113	FALSE	0
2022-09-13	14:22:35	0.340929	36.3523	FALSE	0
2022-09-13	14:22:35	0.132481	36.4847	FALSE	0
2022-09-13	14:22:36	0.493804	36.9785	FALSE	0
2022-09-13	14:22:36	0.80902	37.7876	FALSE	0
2022-09-13	14:22:36	0.989275	38.7768	FALSE	0
2022-09-13	14:22:36	1.03004	39.8069	FALSE	0
2022-09-13	14:22:37	0.930801	40.7377	FALSE	0
2022-09-13	14:22:37	0.767596	41.5053	FALSE	0
2022-09-13	14:22:37	0.8707	42.376	FALSE	0
2022-09-13	14:22:37	0.823371	43.1993	FALSE	0
2022-09-13	14:22:38	0.742812	43.9422	FALSE	0
2022-09-13	14:22:38	0.748206	44.6904	FALSE	0
2022-09-13	14:22:38	0.917112	45.6075	FALSE	0
2022-09-13	14:22:39	0.992023	46.5995	FALSE	0
2022-09-13	14:22:39	1.27777	47.8773	FALSE	0
2022-09-13	14:22:39	1.63319	49.5105	FALSE	0
2022-09-13	14:22:39	1.64067	51.1511	FALSE	0
2022-09-13	14:22:40	1.16831	52.3194	FALSE	0
2022-09-13	14:22:40	1.02866	53.3481	FALSE	0
2022-09-13	14:22:40	0.891616	54.2397	FALSE	0
2022-09-13	14:22:40	0.863626	55.1033	FALSE	0
2022-09-13	14:22:41	0.853651	55.957	FALSE	0
2022-09-13	14:22:41	0.760318	56.7173	FALSE	0
2022-09-13	14:22:41	0.814567	57.5319	FALSE	0
2022-09-13	14:22:41	0.945967	58.4778	FALSE	0
2022-09-13	14:22:42	1.16276	59.6406	FALSE	0
2022-09-13	14:22:42	1.26709	60.9077	FALSE	0
2022-09-13	14:22:42	1.43503	62.3427	FALSE	0
2022-09-13	14:22:43	1.46536	63.8081	FALSE	0
2022-09-13	14:22:43	1.38072	65.1888	FALSE	0
2022-09-13	14:22:43	1.29981	66.4886	FALSE	0
2022-09-13	14:22:43	1.28673	67.7753	FALSE	0
2022-09-13	14:22:44	1.32948	69.1048	FALSE	0
2022-09-13	14:22:44	1.27223	70.3771	FALSE	0
2022-09-13	14:22:44	0.868206	71.2453	FALSE	0
2022-09-13	14:22:45	0.71472	71.96	FALSE	0
2022-09-13	14:22:45	0.53701	72.497	FALSE	0
2022-09-13	14:22:45	0.438079	72.9351	FALSE	0
2022-09-13	14:22:45	0.473194	73.4083	FALSE	0
2022-09-13	14:22:45	0.430598	73.8389	FALSE	0
2022-09-13	14:22:46	0.271718	74.1106	FALSE	0
2022-09-13	14:22:46	0.594567	74.7051	FALSE	0
2022-09-13	14:22:46	1.08826	75.7934	FALSE	0
2022-09-13	14:22:47	1.57742	77.3708	FALSE	0
2022-09-13	14:22:47	1.17788	78.5487	FALSE	0
2022-09-13	14:22:47	1.11335	79.6621	FALSE	0
2022-09-13	14:22:47	0.966374	80.6284	FALSE	0
2022-09-13	14:22:48	0.725204	81.3536	FALSE	0
2022-09-13	14:22:48	0.787494	82.1411	FALSE	0
2022-09-13	14:22:48	0.784796	82.9259	FALSE	0
2022-09-13	14:22:48	0.701997	83.6279	FALSE	0
2022-09-13	14:22:49	0.697417	84.3253	FALSE	0
2022-09-13	14:22:49	0.546374	84.8717	FALSE	0
2022-09-13	14:22:49	1.13182	86.0035	FALSE	0
2022-09-13	14:22:49	1.38724	87.3908	FALSE	0
2022-09-13	14:22:50	1.29569	88.6865	FALSE	0
2022-09-13	14:22:50	1.06983	89.7563	FALSE	0
2022-09-13	14:22:50	1.01696	90.7732	FALSE	0
2022-09-13	14:22:51	0.987951	91.7612	FALSE	0
2022-09-13	14:22:51	0.90902	92.6702	FALSE	0
2022-09-13	14:22:51	0.813855	93.4841	FALSE	0
2022-09-13	14:22:51	0.558486	94.0426	FALSE	0
2022-09-13	14:22:52	0.709122	94.7517	FALSE	0
2022-09-13	14:22:52	0.559199	95.3109	FALSE	0
2022-09-13	14:22:52	1.0307	96.3416	FALSE	0
2022-09-13	14:22:52	1.88958	98.2312	FALSE	0
2022-09-13	14:22:53	0.980216	99.2114	FALSE	0
2022-09-13	14:22:53	1.18897	100.4	FALSE	0
2022-09-13	14:22:53	0.619657	101.02	FALSE	0
2022-09-13	14:22:53	0.401285	101.421	FALSE	0
2022-09-13	14:22:54	0.658741	102.08	FALSE	0
2022-09-13	14:22:54	0.483321	102.563	FALSE	0
2022-09-13	14:22:54	0.400267	102.964	FALSE	0
2022-09-13	14:22:55	0.94444	103.908	FALSE	0
2022-09-13	14:22:55	1.55874	105.467	FALSE	0
2022-09-13	14:22:55	2.35477	107.822	FALSE	0
2022-09-13	14:22:55	1.94225	109.764	FALSE	0
2022-09-13	14:22:56	2.19029	111.954	FALSE	0
2022-09-13	14:22:56	2.24276	114.197	FALSE	0
2022-09-13	14:22:56	1.49248	115.689	FALSE	0
2022-09-13	14:22:56	1.33202	117.021	FALSE	0
2022-09-13	14:22:57	1.20383	118.225	FALSE	0
2022-09-13	14:22:57	1.43808	119.663	FALSE	0
2022-09-13	14:22:57	1.75523	121.419	FALSE	0
2022-09-13	14:22:57	1.68821	123.107	FALSE	0
2022-09-13	14:22:58	1.13645	124.243	FALSE	0
2022-09-13	14:22:58	0.730903	124.974	FALSE	0
2022-09-13	14:22:58	0.571259	125.545	FALSE	0
2022-09-13	14:22:59	0.608868	126.154	FALSE	0
2022-09-13	14:22:59	0.406679	126.561	FALSE	0
2022-09-13	14:22:59	0.374517	126.935	FALSE	0
2022-09-13	14:22:59	0.227646	127.163	FALSE	0
2022-09-13	14:23:00	0.231412	127.394	FALSE	0
2022-09-13	14:23:00	1.06612	128.461	FALSE	0
2022-09-13	14:23:00	0.59584	129.056	FALSE	0
2022-09-13	14:23:00	0.407087	129.463	FALSE	0
2022-09-13	14:23:01	0.338028	129.802	FALSE	0
2022-09-13	14:23:01	0.563371	130.365	FALSE	0
2022-09-13	14:23:01	1.60541	131.97	FALSE	0
2022-09-13	14:23:01	2.42154	134.392	FALSE	0
2022-09-13	14:23:02	1.70276	136.095	FALSE	0
2022-09-13	14:23:02	0.976756	137.071	FALSE	0
2022-09-13	14:23:02	0.90902	137.98	FALSE	0
2022-09-13	14:23:03	1.68195	139.662	FALSE	0
2022-09-13	14:23:03	1.96877	141.631	FALSE	0
2022-09-13	14:23:03	0.599962	142.231	FALSE	0
2022-09-13	14:23:03	0.933244	143.164	FALSE	0
2022-09-13	14:23:04	1.47299	144.637	FALSE	0
2022-09-13	14:23:04	1.25126	145.889	FALSE	0
2022-09-13	14:23:04	0.250649	146.139	FALSE	0
2022-09-13	14:23:04	0.248817	146.388	FALSE	0
2022-09-13	14:23:05	0.229936	146.618	FALSE	0
2022-09-13	14:23:05	0.17584	146.794	FALSE	0
2022-09-13	14:23:05	0.202354	146.996	FALSE	0
2022-09-13	14:23:05	0.217621	147.214	FALSE	0
2022-09-13	14:23:06	0.172074	147.386	FALSE	0
2022-09-13	14:23:06	0.336603	147.722	FALSE	0
2022-09-13	14:23:06	0.044644	147.767	FALSE	0
2022-09-13	14:23:07	0.199555	147.967	FALSE	0
2022-09-13	14:23:07	0.040929	148.008	FALSE	0
2022-09-13	14:23:07	0.332532	148.34	FALSE	0
2022-09-13	14:23:07	0.0187916	148.359	FALSE	0
2022-09-13	14:23:08	0.144491	148.503	FALSE	0
2022-09-13	14:23:08	-0.00807864	148.503	FALSE	0
2022-09-13	14:23:08	-0.218969	148.503	FALSE	0
2022-09-13	14:23:08	-0.462175	148.503	FALSE	0
2022-09-13	14:23:09	-0.458358	148.503	FALSE	0
2022-09-13	14:23:09	-0.604109	148.503	FALSE	0
2022-09-13	14:23:09	-0.54528	148.503	FALSE	0
2022-09-13	14:23:09	-0.488435	148.503	FALSE	0
2022-09-13	14:23:10	-0.261768	148.503	FALSE	0
2022-09-13	14:23:10	-0.495305	148.503	FALSE	0
2022-09-13	14:23:10	-0.590725	148.503	FALSE	0
2022-09-13	14:23:11	-0.456679	148.503	FALSE	0
2022-09-13	14:23:11	-0.0175443	148.503	FALSE	0
2022-09-13	14:23:11	0.730242	149.234	FALSE	0
2022-09-13	14:23:11	1.34103	150.575	FALSE	0
2022-09-13	14:23:12	2.13859	152.713	FALSE	0
2022-09-13	14:23:12	2.17304	154.886	FALSE	0
2022-09-13	14:23:12	2.19584	157.082	FALSE	0
2022-09-13	14:23:12	1.45014	158.532	FALSE	0
2022-09-13	14:23:13	0.556094	159.088	FALSE	0
2022-09-13	14:23:13	0.521794	159.61	FALSE	0
2022-09-13	14:23:13	0.189784	159.8	FALSE	0
2022-09-13	14:23:13	0.336552	160.137	FALSE	0
2022-09-13	14:23:14	0.110751	160.247	FALSE	0
2022-09-13	14:23:14	0.515076	160.762	FALSE	0
2022-09-13	14:23:14	0.166527	160.929	FALSE	0
2022-09-13	14:23:15	0.310496	161.239	FALSE	0
2022-09-13	14:23:15	0.344898	161.584	FALSE	0
2022-09-13	14:23:15	0.323372	161.908	FALSE	0
2022-09-13	14:23:15	0.144695	162.052	FALSE	0
2022-09-13	14:23:16	0.0391478	162.091	FALSE	0
2022-09-13	14:23:16	0.124542	162.216	FALSE	0
2022-09-13	14:23:16	-0.0377987	162.216	FALSE	0
2022-09-13	14:23:16	0.217061	162.433	FALSE	0
2022-09-13	14:23:17	0.253804	162.687	FALSE	0
2022-09-13	14:23:17	0.425713	163.113	FALSE	0
2022-09-13	14:23:17	0.36785	163.48	FALSE	0
2022-09-13	14:23:17	0.431412	163.912	FALSE	0
2022-09-13	14:23:18	0.533041	164.445	FALSE	0
2022-09-13	14:23:18	0.317519	164.762	FALSE	0
2022-09-13	14:23:18	0.385051	165.147	FALSE	0
2022-09-13	14:23:19	0.138537	165.286	FALSE	0
2022-09-13	14:23:19	0.194568	165.481	FALSE	0
2022-09-13	14:23:19	0.0890205	165.57	FALSE	0
2022-09-13	14:23:19	0.320522	165.89	FALSE	0
2022-09-13	14:23:20	0.317265	166.207	FALSE	0
2022-09-13	14:23:20	0.199046	166.406	FALSE	0
2022-09-13	14:23:20	0.353143	166.76	FALSE	0
2022-09-13	14:23:20	0.152939	166.912	FALSE	0
2022-09-13	14:23:21	0.520064	167.433	FALSE	0
2022-09-13	14:23:21	0.192583	167.625	FALSE	0
2022-09-13	14:23:21	0.397825	168.023	FALSE	0
2022-09-13	14:23:21	0.266883	168.29	FALSE	0
2022-09-13	14:23:22	0.361845	168.652	FALSE	0
2022-09-13	14:23:22	0.308613	168.96	FALSE	0
2022-09-13	14:23:22	0.244491	169.205	FALSE	0
2022-09-13	14:23:23	0.347443	169.552	FALSE	0
2022-09-13	14:23:23	0.12042	169.673	FALSE	0
2022-09-13	14:23:23	0.292888	169.966	FALSE	0
2022-09-13	14:23:23	0.120216	170.086	FALSE	0
2022-09-13	14:23:24	0.235178	170.321	FALSE	0
2022-09-13	14:23:24	0.0160435	170.337	FALSE	0
2022-09-13	14:23:24	0.340064	170.677	FALSE	0
2022-09-13	14:23:24	0.572125	171.249	FALSE	0
2022-09-13	14:23:25	1.71793	172.967	FALSE	0
2022-09-13	14:23:25	2.01772	174.985	FALSE	0
2022-09-13	14:23:25	0.574466	175.559	FALSE	0
2022-09-13	14:23:25	1.39274	176.952	FALSE	0
2022-09-13	14:23:26	0.37126	177.323	FALSE	0
2022-09-13	14:23:26	0.437621	177.761	FALSE	0
2022-09-13	14:23:26	0.534771	178.296	FALSE	0
2022-09-13	14:23:27	0.312685	178.608	FALSE	0
2022-09-13	14:23:27	0.461336	179.07	FALSE	0
2022-09-13	14:23:27	0.248461	179.318	FALSE	0
2022-09-13	14:23:27	0.464949	179.783	FALSE	0
2022-09-13	14:23:28	0.151921	179.935	FALSE	0
2022-09-13	14:23:28	0.390242	180.325	FALSE	0
2022-09-13	14:23:28	0.186374	180.512	FALSE	0
2022-09-13	14:23:28	0.623575	181.135	FALSE	0
2022-09-13	14:23:29	0.507545	181.643	FALSE	0
2022-09-13	14:23:29	3.28525	184.928	1	1
2022-09-13	14:23:29	2.22785	187.156	FALSE	1
2022-09-13	14:23:29	1.47228	188.628	FALSE	1
2022-09-13	14:23:30	0.738537	189.367	FALSE	1
2022-09-13	14:23:30	0.403168	189.77	FALSE	1
2022-09-13	14:23:30	0.975636	190.745	FALSE	1
2022-09-13	14:23:31	0.368715	191.114	FALSE	1
2022-09-13	14:23:31	0.737214	191.851	FALSE	1
2022-09-13	14:23:31	0.574517	192.426	FALSE	1
2022-09-13	14:23:31	0.542608	192.969	FALSE	1
2022-09-13	14:23:32	0.673804	193.642	FALSE	1
2022-09-13	14:23:32	0.41986	194.062	FALSE	1
2022-09-13	14:23:32	0.827443	194.89	FALSE	1
2022-09-13	14:23:32	0.448562	195.338	FALSE	1
2022-09-13	14:23:33	0.731361	196.07	FALSE	1
2022-09-13	14:23:33	0.571565	196.641	FALSE	1
2022-09-13	14:23:33	0.74902	197.39	FALSE	1
2022-09-13	14:23:33	0.807799	198.198	FALSE	1
2022-09-13	14:23:34	0.910903	199.109	FALSE	1
2022-09-13	14:23:34	1.23396	200.343	FALSE	1
2022-09-13	14:23:34	0.965713	201.309	FALSE	1
2022-09-13	14:23:35	1.21548	202.524	FALSE	1
2022-09-13	14:23:35	1.05477	203.579	FALSE	1
2022-09-13	14:23:35	1.34403	204.923	FALSE	1
2022-09-13	14:23:35	1.19762	206.12	FALSE	1
2022-09-13	14:23:36	1.18439	207.305	FALSE	1
2022-09-13	14:23:36	1.30342	208.608	FALSE	1
2022-09-13	14:23:36	0.718893	209.327	FALSE	1
2022-09-13	14:23:36	1.27355	210.601	FALSE	1
2022-09-13	14:23:37	0.90902	211.51	FALSE	1
2022-09-13	14:23:37	2.59009	214.1	FALSE	1
2022-09-13	14:23:37	1.33212	215.432	FALSE	1
2022-09-13	14:23:37	1.68291	217.115	FALSE	1
2022-09-13	14:23:38	2.00785	219.123	FALSE	1
2022-09-13	14:23:38	1.85732	220.98	FALSE	1
2022-09-13	14:23:38	1.70546	222.685	FALSE	1
2022-09-13	14:23:39	1.06195	223.747	FALSE	1
2022-09-13	14:23:39	1.85899	225.606	FALSE	1
2022-09-13	14:23:39	1.3537	226.96	FALSE	1
2022-09-13	14:23:39	2.02276	228.983	FALSE	1
2022-09-13	14:23:40	1.80663	230.789	FALSE	1
2022-09-13	14:23:40	1.84561	232.635	FALSE	1
2022-09-13	14:23:40	1.90302	234.538	FALSE	1
2022-09-13	14:23:40	0.999097	235.537	FALSE	1
2022-09-13	14:23:41	1.75126	237.288	FALSE	1
2022-09-13	14:23:41	0.737672	238.026	FALSE	1
2022-09-13	14:23:41	1.78159	239.808	FALSE	1
2022-09-13	14:23:41	0.865204	240.673	FALSE	1
2022-09-13	14:23:42	2.47436	243.147	FALSE	1
2022-09-13	14:23:42	0.721285	243.869	FALSE	1
2022-09-13	14:23:42	0.509682	244.378	FALSE	1
2022-09-13	14:23:43	1.02317	245.401	FALSE	1
2022-09-13	14:23:43	0.607494	246.009	FALSE	1
2022-09-13	14:23:43	0.859148	246.868	FALSE	1
2022-09-13	14:23:43	0.286222	247.154	FALSE	1
2022-09-13	14:23:44	0.888664	248.043	FALSE	1
2022-09-13	14:23:44	0.306832	248.35	FALSE	1
2022-09-13	14:23:44	0.588461	248.938	FALSE	1
2022-09-13	14:23:44	0.557061	249.495	FALSE	1
2022-09-13	14:23:45	1.24307	250.738	FALSE	1
2022-09-13	14:23:45	3.15828	253.897	1	2
2022-09-13	14:23:45	3.56602	257.463	1	3
2022-09-13	14:23:45	3.98576	261.448	1	4
2022-09-13	14:23:46	2.41487	263.863	FALSE	4
2022-09-13	14:23:46	2.23879	266.102	FALSE	4
2022-09-13	14:23:46	1.67218	267.774	FALSE	4
2022-09-13	14:23:47	1.52032	269.295	FALSE	4
2022-09-13	14:23:47	1.97279	271.267	FALSE	4
2022-09-13	14:23:47	2.15146	273.419	FALSE	4
2022-09-13	14:23:47	3.10291	276.522	1	5
2022-09-13	14:23:48	2.09014	278.612	FALSE	5
2022-09-13	14:23:48	2.57798	281.19	FALSE	5
2022-09-13	14:23:48	0.631158	281.821	FALSE	5
2022-09-13	14:23:48	0.584847	282.406	FALSE	5
2022-09-13	14:23:49	0.337061	282.743	FALSE	5
2022-09-13	14:23:49	0.573601	283.317	FALSE	5
2022-09-13	14:23:49	0.938639	284.255	FALSE	5
2022-09-13	14:23:49	2.22388	286.479	FALSE	5
2022-09-13	14:23:50	3.70836	290.187	1	6
2022-09-13	14:23:50	4.95044	295.138	1	7
2022-09-13	14:23:50	8.53711	303.675	1	8
2022-09-13	14:23:51	3.94342	307.618	1	9
2022-09-13	14:23:51	3.70759	311.326	1	10
2022-09-13	14:23:51	2.0165	313.343	FALSE	10
2022-09-13	14:23:51	1.2764	314.619	FALSE	10
2022-09-13	14:23:52	0.867392	315.486	FALSE	10
2022-09-13	14:23:52	0.811514	316.298	FALSE	10
2022-09-13	14:23:52	1.21548	317.513	FALSE	10
2022-09-13	14:23:52	0.820471	318.334	FALSE	10
2022-09-13	14:23:53	0.747494	319.081	FALSE	10
2022-09-13	14:23:53	0.462354	319.544	FALSE	10
2022-09-13	14:23:53	0.436908	319.981	FALSE	10
2022-09-13	14:23:53	0.435636	320.416	FALSE	10
2022-09-13	14:23:54	0.32841	320.745	FALSE	10
2022-09-13	14:23:54	1.55609	322.301	FALSE	10
2022-09-13	14:23:54	2.34729	324.648	FALSE	10
2022-09-13	14:23:55	4.42983	329.078	1	11
2022-09-13	14:23:55	3.27111	332.349	1	12
2022-09-13	14:23:55	4.45355	336.802	1	13
2022-09-13	14:23:55	3.58286	340.385	1	14
2022-09-13	14:23:56	3.22622	343.612	1	15
2022-09-13	14:23:56	3.55223	347.164	1	16
2022-09-13	14:23:56	1.80205	348.966	FALSE	16
2022-09-13	14:23:56	2.1593	351.125	FALSE	16
2022-09-13	14:23:57	1.25095	352.376	FALSE	16
2022-09-13	14:23:57	2.43533	354.811	FALSE	16
2022-09-13	14:23:57	1.98989	356.801	FALSE	16
2022-09-13	14:23:57	3.66373	360.465	1	17
2022-09-13	14:23:58	3.98744	364.452	1	18
2022-09-13	14:23:58	2.09335	366.546	FALSE	18
2022-09-13	14:23:58	2.73441	369.28	FALSE	18
2022-09-13	14:23:58	0.959809	370.24	FALSE	18
2022-09-13	14:23:59	1.3905	371.631	FALSE	18
2022-09-13	14:23:59	0.353092	371.984	FALSE	18
2022-09-13	14:23:59	0.294211	372.278	FALSE	18
2022-09-13	14:24:00	0.387697	372.666	FALSE	18
2022-09-13	14:24:00	0.0411326	372.707	FALSE	18
2022-09-13	14:24:00	0.251056	372.958	FALSE	18
2022-09-13	14:24:00	0.087392	373.045	FALSE	18
2022-09-13	14:24:01	0.0403183	373.085	FALSE	18
2022-09-13	14:24:01	-0.157086	373.085	FALSE	18
2022-09-13	14:24:01	0.0146695	373.1	FALSE	18
2022-09-13	14:24:01	-0.10528	373.1	FALSE	18
2022-09-13	14:24:02	-0.264872	373.1	FALSE	18
2022-09-13	14:24:02	-0.335814	373.1	FALSE	18
2022-09-13	14:24:02	-0.252913	373.1	FALSE	18
2022-09-13	14:24:02	-0.249707	373.1	FALSE	18
2022-09-13	14:24:03	-0.200191	373.1	FALSE	18
2022-09-13	14:24:03	-0.284567	373.1	FALSE	18
2022-09-13	14:24:03	0.0907508	373.191	FALSE	18
2022-09-13	14:24:04	0.184695	373.376	FALSE	18
2022-09-13	14:24:04	0.665967	374.041	FALSE	18
2022-09-13	14:24:04	0.265865	374.307	FALSE	18
2022-09-13	14:24:04	0.200725	374.508	FALSE	18
2022-09-13	14:24:05	0.309326	374.817	FALSE	18
2022-09-13	14:24:05	0.146832	374.964	FALSE	18
2022-09-13	14:24:05	0.380522	375.345	FALSE	18
2022-09-13	14:24:05	0.171769	375.517	FALSE	18
2022-09-13	14:24:06	0.478791	375.995	FALSE	18
2022-09-13	14:24:06	0.132583	376.128	FALSE	18
2022-09-13	14:24:06	0.429071	376.557	FALSE	18
2022-09-13	14:24:06	0.251463	376.808	FALSE	18
2022-09-13	14:24:07	0.375331	377.184	FALSE	18
2022-09-13	14:24:07	0.0454073	377.229	FALSE	18
2022-09-13	14:24:07	0.145916	377.375	FALSE	18
2022-09-13	14:24:08	0.168054	377.543	FALSE	18
2022-09-13	14:24:08	0.163015	377.706	FALSE	18
2022-09-13	14:24:08	-0.107926	377.706	FALSE	18
2022-09-13	14:24:08	0.11925	377.825	FALSE	18
2022-09-13	14:24:09	-0.0663483	377.825	FALSE	18
2022-09-13	14:24:09	0.193804	378.019	FALSE	18
2022-09-13	14:24:09	0.106069	378.125	FALSE	18
2022-09-13	14:24:09	0.805458	378.931	FALSE	18
2022-09-13	14:24:10	0.498995	379.43	FALSE	18
2022-09-13	14:24:10	1.56592	380.996	FALSE	18
2022-09-13	14:24:10	1.35401	382.35	FALSE	18
2022-09-13	14:24:10	2.23945	384.589	FALSE	18
2022-09-13	14:24:11	2.2448	386.834	FALSE	18
2022-09-13	14:24:11	1.9023	388.736	FALSE	18
2022-09-13	14:24:11	1.95721	390.693	FALSE	18
2022-09-13	14:24:12	0.535687	391.229	FALSE	18
2022-09-13	14:24:12	1.14561	392.375	FALSE	18
2022-09-13	14:24:12	0.591972	392.967	FALSE	18
2022-09-13	14:24:13	1.48108	394.448	FALSE	18
2022-09-13	14:24:13	0.995534	395.443	FALSE	18
2022-09-13	14:24:13	1.93487	397.378	FALSE	18
2022-09-13	14:24:13	0.954924	398.333	FALSE	18
2022-09-13	14:24:13	1.33518	399.668	FALSE	18
2022-09-13	14:24:14	1.59126	401.26	FALSE	18
2022-09-13	14:24:14	0.618995	401.879	FALSE	18
2022-09-13	14:24:14	1.28368	403.162	FALSE	18
2022-09-13	14:24:14	0.858639	404.021	FALSE	18
2022-09-13	14:24:15	1.5533	405.574	FALSE	18
2022-09-13	14:24:15	0.972735	406.547	FALSE	18
2022-09-13	14:24:15	1.43752	407.984	FALSE	18
2022-09-13	14:24:16	1.3081	409.293	FALSE	18
2022-09-13	14:24:16	0.963219	410.256	FALSE	18
2022-09-13	14:24:16	0.59584	410.852	FALSE	18
2022-09-13	14:24:16	0.427392	411.279	FALSE	18
2022-09-13	14:24:17	0.270547	411.55	FALSE	18
2022-09-13	14:24:17	0.328054	411.878	FALSE	18
2022-09-13	14:24:17	0.555687	412.433	FALSE	18
2022-09-13	14:24:17	0.399809	412.833	FALSE	18
2022-09-13	14:24:18	0.182303	413.015	FALSE	18
2022-09-13	14:24:18	0.353957	413.369	FALSE	18
2022-09-13	14:24:18	0.1593	413.529	FALSE	18
2022-09-13	14:24:18	0.202761	413.731	FALSE	18
2022-09-13	14:24:19	0.163575	413.895	FALSE	18
2022-09-13	14:24:19	0.23014	414.125	FALSE	18
2022-09-13	14:24:19	0.284847	414.41	FALSE	18
2022-09-13	14:24:20	0.161082	414.571	FALSE	18
2022-09-13	14:24:20	0.524236	415.095	FALSE	18
2022-09-13	14:24:20	0.326374	415.422	FALSE	18
2022-09-13	14:24:20	0.460827	415.882	FALSE	18
2022-09-13	14:24:21	0.239199	416.122	FALSE	18
2022-09-13	14:24:21	0.43701	416.559	FALSE	18
2022-09-13	14:24:21	0.177774	416.736	FALSE	18
2022-09-13	14:24:21	0.289682	417.026	FALSE	18
2022-09-13	14:24:22	0.161336	417.187	FALSE	18
2022-09-13	14:24:22	0.276043	417.463	FALSE	18
2022-09-13	14:24:22	0.259402	417.723	FALSE	18
2022-09-13	14:24:22	0.157316	417.88	FALSE	18
2022-09-13	14:24:23	0.195942	418.076	FALSE	18
2022-09-13	14:24:23	0.13355	418.21	FALSE	18
2022-09-13	14:24:23	0.147646	418.357	FALSE	18
2022-09-13	14:24:24	0.536043	418.893	FALSE	18
2022-09-13	14:24:24	1.93248	420.826	FALSE	18
2022-09-13	14:24:24	3.57207	424.398	1	19
2022-09-13	14:24:24	2.30938	426.707	FALSE	19
2022-09-13	14:24:25	0.841692	427.549	FALSE	19
2022-09-13	14:24:25	0.512379	428.061	FALSE	19
2022-09-13	14:24:25	0.131565	428.193	FALSE	19
2022-09-13	14:24:25	0.397977	428.591	FALSE	19
2022-09-13	14:24:26	0.137163	428.728	FALSE	19
2022-09-13	14:24:26	0.401845	429.13	FALSE	19
2022-09-13	14:24:26	0.262608	429.393	FALSE	19
2022-09-13	14:24:26	0.192379	429.585	FALSE	19
2022-09-13	14:24:27	0.258791	429.844	FALSE	19
2022-09-13	14:24:27	0.238893	430.083	FALSE	19
2022-09-13	14:24:27	0.292939	430.376	FALSE	19
2022-09-13	14:24:28	0.220674	430.596	FALSE	19
2022-09-13	14:24:28	0.181743	430.778	FALSE	19
2022-09-13	14:24:28	0.242456	431.02	FALSE	19
2022-09-13	14:24:28	0.229784	431.25	FALSE	19
2022-09-13	14:24:29	0.29472	431.545	FALSE	19
2022-09-13	14:24:29	1.40994	432.955	FALSE	19
2022-09-13	14:24:29	0.881692	433.837	FALSE	19
2022-09-13	14:24:29	0.401132	434.238	FALSE	19
2022-09-13	14:24:30	0.346527	434.584	FALSE	19
2022-09-13	14:24:30	0.168461	434.753	FALSE	19
2022-09-13	14:24:30	0.171819	434.925	FALSE	19
2022-09-13	14:24:30	0.359504	435.284	FALSE	19
2022-09-13	14:24:31	0.237672	435.522	FALSE	19
2022-09-13	14:24:31	0.289835	435.812	FALSE	19
2022-09-13	14:24:31	0.245	436.057	FALSE	19
2022-09-13	14:24:32	0.246476	436.303	FALSE	19
2022-09-13	14:24:32	0.269886	436.573	FALSE	19
2022-09-13	14:24:32	0.265356	436.838	FALSE	19
2022-09-13	14:24:32	0.260471	437.099	FALSE	19
2022-09-13	14:24:33	0.377112	437.476	FALSE	19
2022-09-13	14:24:33	0.447036	437.923	FALSE	19
2022-09-13	14:24:33	0.326323	438.249	FALSE	19
2022-09-13	14:24:33	0.414669	438.664	FALSE	19
2022-09-13	14:24:34	0.311056	438.975	FALSE	19
2022-09-13	14:24:34	0.286527	439.261	FALSE	19
2022-09-13	14:24:34	-0.119733	439.261	FALSE	19
2022-09-13	14:24:34	0.190089	439.452	FALSE	19
2022-09-13	14:24:35	0.185	439.637	FALSE	19
2022-09-13	14:24:35	0.237875	439.874	FALSE	19
2022-09-13	14:24:35	0.288206	440.163	FALSE	19
2022-09-13	14:24:36	0.25584	440.418	FALSE	19
2022-09-13	14:24:36	0.254669	440.673	FALSE	19
2022-09-13	14:24:36	0.149428	440.823	FALSE	19
2022-09-13	14:24:36	2.07528	442.898	FALSE	19
2022-09-13	14:24:37	2.18877	445.087	FALSE	19
2022-09-13	14:24:37	2.31503	447.402	FALSE	19
2022-09-13	14:24:37	2.88724	450.289	FALSE	19
2022-09-13	14:24:37	3.17777	453.467	1	20
2022-09-13	14:24:38	2.98851	456.455	FALSE	20
2022-09-13	14:24:38	3.96729	460.422	1	21
2022-09-13	14:24:38	4.9652	465.388	1	22
2022-09-13	14:24:38	4.65635	470.044	1	23
2022-09-13	14:24:39	4.73228	474.776	1	24
2022-09-13	14:24:39	5.20871	479.985	1	25
2022-09-13	14:24:39	3.84821	483.833	1	26
2022-09-13	14:24:40	1.92826	485.761	FALSE	26
2022-09-13	14:24:40	0.60159	486.363	FALSE	26
2022-09-13	14:24:40	0.461641	486.825	FALSE	26
2022-09-13	14:24:40	0.497723	487.322	FALSE	26
2022-09-13	14:24:41	0.479402	487.802	FALSE	26
2022-09-13	14:24:41	0.435178	488.237	FALSE	26
2022-09-13	14:24:41	0.499911	488.737	FALSE	26
2022-09-13	14:24:41	0.440725	489.178	FALSE	26
2022-09-13	14:24:42	0.363168	489.541	FALSE	26
2022-09-13	14:24:42	0.418537	489.959	FALSE	26
2022-09-13	14:24:42	0.432328	490.392	FALSE	26
2022-09-13	14:24:42	0.43757	490.829	FALSE	26
2022-09-13	14:24:43	0.349224	491.178	FALSE	26
2022-09-13	14:24:43	0.594059	491.772	FALSE	26
2022-09-13	14:24:43	0.304593	492.077	FALSE	26
2022-09-13	14:24:44	0.396043	492.473	FALSE	26
2022-09-13	14:24:44	0.364746	492.838	FALSE	26
2022-09-13	14:24:44	0.404491	493.242	FALSE	26
2022-09-13	14:24:44	0.446425	493.689	FALSE	26
2022-09-13	14:24:45	0.642608	494.331	FALSE	26
2022-09-13	14:24:45	0.560165	494.892	FALSE	26
2022-09-13	14:24:45	0.353346	495.245	FALSE	26
2022-09-13	14:24:45	0.36841	495.613	FALSE	26
2022-09-13	14:24:46	0.264695	495.878	FALSE	26
2022-09-13	14:24:46	0.239758	496.118	FALSE	26
2022-09-13	14:24:46	0.277926	496.396	FALSE	26
2022-09-13	14:24:46	0.256603	496.652	FALSE	26
2022-09-13	14:24:47	0.382964	497.035	FALSE	26
2022-09-13	14:24:47	0.130293	497.166	FALSE	26
2022-09-13	14:24:47	0.349377	497.515	FALSE	26
2022-09-13	14:24:48	0.207545	497.722	FALSE	26
2022-09-13	14:24:48	0.409173	498.132	FALSE	26
2022-09-13	14:24:48	0.204135	498.336	FALSE	26
2022-09-13	14:24:48	0.10042	498.436	FALSE	26
2022-09-13	14:24:49	0.34668	498.783	FALSE	26
2022-09-13	14:24:49	0.323473	499.106	FALSE	26
2022-09-13	14:24:49	0.406985	499.513	FALSE	26
2022-09-13	14:24:49	0.369631	499.883	FALSE	26
2022-09-13	14:24:50	0.379351	500.262	FALSE	26
2022-09-13	14:24:50	0.34668	500.609	FALSE	26
2022-09-13	14:24:50	0.341794	500.951	FALSE	26
2022-09-13	14:24:50	0.322761	501.274	FALSE	26
2022-09-13	14:24:51	0.353295	501.627	FALSE	26
2022-09-13	14:24:51	0.468766	502.096	FALSE	26
2022-09-13	14:24:51	0.352379	502.448	FALSE	26
2022-09-13	14:24:52	0.364033	502.812	FALSE	26
2022-09-13	14:24:52	0.370344	503.182	FALSE	26
2022-09-13	14:24:52	0.335127	503.518	FALSE	26
2022-09-13	14:24:52	0.38556	503.903	FALSE	26
2022-09-13	14:24:53	0.316705	504.22	FALSE	26
2022-09-13	14:24:53	0.367697	504.587	FALSE	26
2022-09-13	14:24:53	0.480674	505.068	FALSE	26
2022-09-13	14:24:53	0.285407	505.354	FALSE	26
2022-09-13	14:24:54	0.387341	505.741	FALSE	26
2022-09-13	14:24:54	0.334109	506.075	FALSE	26
2022-09-13	14:24:54	0.358486	506.433	FALSE	26
2022-09-13	14:24:54	0.418232	506.852	FALSE	26
2022-09-13	14:24:55	0.239148	507.091	FALSE	26
2022-09-13	14:24:55	0.516501	507.607	FALSE	26
2022-09-13	14:24:55	0.389021	507.996	FALSE	26
2022-09-13	14:24:56	0.594364	508.591	FALSE	26
2022-09-13	14:24:56	0.933499	509.524	FALSE	26
2022-09-13	14:24:56	3.58027	513.105	1	27
2022-09-13	14:24:56	11.9048	525.009	1	28
2022-09-13	14:24:57	12.23	537.239	1	29
2022-09-13	14:24:57	17.3755	554.615	1	30
2022-09-13	14:24:57	8.52316	563.138	1	31
2022-09-13	14:24:57	8.02754	571.166	1	32
2022-09-13	14:24:58	8.00993	579.175	1	33
2022-09-13	14:24:58	6.28642	585.462	1	34
2022-09-13	14:24:58	5.14174	590.604	1	35
2022-09-13	14:24:58	3.97421	594.578	1	36
2022-09-13	14:24:59	2.92749	597.505	FALSE	36
2022-09-13	14:24:59	1.98129	599.487	FALSE	36
2022-09-13	14:24:59	0.862201	600.349	FALSE	36
2022-09-13	14:25:00	0.516145	600.865	FALSE	36
2022-09-13	14:25:00	0.453397	601.318	FALSE	36
2022-09-13	14:25:00	0.619606	601.938	FALSE	36
2022-09-13	14:25:00	1.75075	603.689	FALSE	36
2022-09-13	14:25:01	2.39345	606.082	FALSE	36
2022-09-13	14:25:01	1.4276	607.51	FALSE	36
2022-09-13	14:25:01	0.93869	608.448	FALSE	36
2022-09-13	14:25:01	1.50159	609.95	FALSE	36
2022-09-13	14:25:02	3.44627	613.396	1	37
2022-09-13	14:25:02	4.17273	617.569	1	38
2022-09-13	14:25:02	3.7363	621.305	1	39
2022-09-13	14:25:02	4.01884	625.324	1	40
2022-09-13	14:25:03	3.86352	629.188	1	41
2022-09-13	14:25:03	4.55849	633.746	1	42
2022-09-13	14:25:03	1.54159	635.288	FALSE	42
2022-09-13	14:25:04	0.577875	635.866	FALSE	42
2022-09-13	14:25:04	0.455585	636.321	FALSE	42
2022-09-13	14:25:04	0.445153	636.766	FALSE	42
2022-09-13	14:25:04	0.384898	637.151	FALSE	42
2022-09-13	14:25:05	0.363168	637.514	FALSE	42
2022-09-13	14:25:05	0.364237	637.879	FALSE	42
2022-09-13	14:25:05	0.353346	638.232	FALSE	42
2022-09-13	14:25:05	0.475789	638.708	FALSE	42
2022-09-13	14:25:06	0.54098	639.249	FALSE	42
2022-09-13	14:25:06	0.652837	639.902	FALSE	42
2022-09-13	14:25:06	1.61523	641.517	FALSE	42
2022-09-13	14:25:06	5.68337	647.2	1	43
2022-09-13	14:25:07	9.18754	656.388	1	44
2022-09-13	14:25:07	5.6109	661.999	1	45
2022-09-13	14:25:07	2.63991	664.639	FALSE	45
2022-09-13	14:25:08	6.05813	670.697	1	46
2022-09-13	14:25:08	3.58042	674.277	1	47
2022-09-13	14:25:08	3.07665	677.354	1	48
2022-09-13	14:25:08	1.80602	679.16	FALSE	48
2022-09-13	14:25:09	0.665713	679.826	FALSE	48
2022-09-13	14:25:09	1.29838	681.124	FALSE	48
2022-09-13	14:25:09	0.413906	681.538	FALSE	48
2022-09-13	14:25:09	0.493499	682.031	FALSE	48
2022-09-13	14:25:10	0.474466	682.506	FALSE	48
2022-09-13	14:25:10	0.209835	682.716	FALSE	48
2022-09-13	14:25:10	0.244237	682.96	FALSE	48
2022-09-13	14:25:10	0.254568	683.214	FALSE	48
2022-09-13	14:25:11	0.557417	683.772	FALSE	48
2022-09-13	14:25:11	0.425	684.197	FALSE	48
2022-09-13	14:25:11	0.982965	685.18	FALSE	48
2022-09-13	14:25:12	1.18709	686.367	FALSE	48
2022-09-13	14:25:12	2.60734	688.974	FALSE	48
2022-09-13	14:25:12	1.13691	690.111	FALSE	48
2022-09-13	14:25:12	1.10739	691.219	FALSE	48
2022-09-13	14:25:13	0.523371	691.742	FALSE	48
2022-09-13	14:25:13	0.405509	692.147	FALSE	48
2022-09-13	14:25:13	0.363931	692.511	FALSE	48
2022-09-13	14:25:13	0.151311	692.663	FALSE	48
2022-09-13	14:25:14	0.0664252	692.729	FALSE	48
2022-09-13	14:25:14	-0.053931	692.729	FALSE	48
2022-09-13	14:25:14	0.00774832	692.737	FALSE	48
2022-09-13	14:25:14	0.0648476	692.802	FALSE	48
2022-09-13	14:25:15	0.0166033	692.818	FALSE	48
2022-09-13	14:25:15	-0.00543234	692.818	FALSE	48
2022-09-13	14:25:15	0.025102	692.843	FALSE	48
2022-09-13	14:25:16	0.16668	693.01	FALSE	48
2022-09-13	14:25:16	0.158741	693.169	FALSE	48
2022-09-13	14:25:16	0.465662	693.634	FALSE	48
2022-09-13	14:25:16	1.70347	695.338	FALSE	48
2022-09-13	14:25:17	0.920674	696.259	FALSE	48
2022-09-13	14:25:17	1.1848	697.443	FALSE	48
2022-09-13	14:25:17	1.80963	699.253	FALSE	48
2022-09-13	14:25:17	2.32958	701.583	FALSE	48
2022-09-13	14:25:18	1.94546	703.528	FALSE	48
2022-09-13	14:25:18	2.00449	705.533	FALSE	48
2022-09-13	14:25:18	1.24816	706.781	FALSE	48
2022-09-13	14:25:18	1.30856	708.089	FALSE	48
2022-09-13	14:25:19	1.05584	709.145	FALSE	48
2022-09-13	14:25:19	0.68444	709.83	FALSE	48
2022-09-13	14:25:19	0.438384	710.268	FALSE	48
2022-09-13	14:25:20	0.861234	711.129	FALSE	48
2022-09-13	14:25:20	0.604491	711.734	FALSE	48
2022-09-13	14:25:20	0.553702	712.287	FALSE	48
2022-09-13	14:25:20	0.417672	712.705	FALSE	48
2022-09-13	14:25:21	0.370038	713.075	FALSE	48
2022-09-13	14:25:21	0.418028	713.493	FALSE	48
2022-09-13	14:25:21	0.483982	713.977	FALSE	48
2022-09-13	14:25:21	0.395026	714.372	FALSE	48
2022-09-13	14:25:22	0.360064	714.732	FALSE	48
2022-09-13	14:25:22	0.454211	715.186	FALSE	48
2022-09-13	14:25:22	0.428766	715.615	FALSE	48
2022-09-13	14:25:22	0.500318	716.115	FALSE	48
2022-09-13	14:25:23	0.410293	716.526	FALSE	48
2022-09-13	14:25:23	0.39528	716.921	FALSE	48
2022-09-13	14:25:23	0.513957	717.435	FALSE	48
2022-09-13	14:25:24	0.417163	717.852	FALSE	48
2022-09-13	14:25:24	0.479758	718.332	FALSE	48
2022-09-13	14:25:24	0.479046	718.811	FALSE	48
2022-09-13	14:25:24	0.488054	719.299	FALSE	48
2022-09-13	14:25:25	0.420166	719.719	FALSE	48
2022-09-13	14:25:25	0.338893	720.058	FALSE	48
2022-09-13	14:25:25	0.435585	720.494	FALSE	48
2022-09-13	14:25:25	0.466527	720.96	FALSE	48
2022-09-13	14:25:26	0.464644	721.425	FALSE	48
2022-09-13	14:25:26	0.533753	721.959	FALSE	48
2022-09-13	14:25:26	0.348206	722.307	FALSE	48
2022-09-13	14:25:26	0.54556	722.852	FALSE	48
2022-09-13	14:25:27	0.485356	723.338	FALSE	48
2022-09-13	14:25:27	0.375585	723.713	FALSE	48
2022-09-13	14:25:27	0.429326	724.143	FALSE	48
2022-09-13	14:25:28	0.219402	724.362	FALSE	48
2022-09-13	14:25:28	0.259453	724.621	FALSE	48
2022-09-13	14:25:28	0.19014	724.812	FALSE	48
2022-09-13	14:25:28	0.320267	725.132	FALSE	48
2022-09-13	14:25:29	0.252074	725.384	FALSE	48
2022-09-13	14:25:29	0.276451	725.66	FALSE	48
2022-09-13	14:25:29	0.186527	725.847	FALSE	48
2022-09-13	14:25:29	0.147138	725.994	FALSE	48
2022-09-13	14:25:30	0.211514	726.206	FALSE	48
2022-09-13	14:25:30	0.141591	726.347	FALSE	48
2022-09-13	14:25:30	0.18729	726.534	FALSE	48
2022-09-13	14:25:30	0.0141606	726.549	FALSE	48
2022-09-13	14:25:31	0.047443	726.596	FALSE	48
2022-09-13	14:25:31	0.175127	726.771	FALSE	48
2022-09-13	14:25:31	0.192786	726.964	FALSE	48
2022-09-13	14:25:32	0.218741	727.183	FALSE	48
2022-09-13	14:25:32	0.0758399	727.259	FALSE	48
2022-09-13	14:25:32	-0.426246	727.259	FALSE	48
2022-09-13	14:25:32	-0.205992	727.259	FALSE	48
2022-09-13	14:25:33	-0.119224	727.259	FALSE	48
2022-09-13	14:25:33	0.0419468	727.301	FALSE	48
2022-09-13	14:25:33	0.512176	727.813	FALSE	48
2022-09-13	14:25:33	0.988054	728.801	FALSE	48
2022-09-13	14:25:34	0.826323	729.627	FALSE	48
2022-09-13	14:25:34	1.92841	731.555	FALSE	48
2022-09-13	14:25:34	0.534822	732.09	FALSE	48
2022-09-13	14:25:34	1.34927	733.44	FALSE	48
2022-09-13	14:25:35	0.689275	734.129	FALSE	48
2022-09-13	14:25:35	3.11106	737.24	1	49
2022-09-13	14:25:35	0.879504	738.119	FALSE	49
2022-09-13	14:25:36	2.89686	741.016	FALSE	49
2022-09-13	14:25:36	1.56933	742.586	FALSE	49
2022-09-13	14:25:36	1.96541	744.551	FALSE	49
2022-09-13	14:25:36	1.13095	745.682	FALSE	49
2022-09-13	14:25:37	2.36541	748.047	FALSE	49
2022-09-13	14:25:37	1.99767	750.045	FALSE	49
2022-09-13	14:25:37	1.89482	751.94	FALSE	49
2022-09-13	14:25:37	1.09961	753.039	FALSE	49
2022-09-13	14:25:38	0.594669	753.634	FALSE	49
2022-09-13	14:25:38	0.361641	753.996	FALSE	49
2022-09-13	14:25:38	0.535687	754.531	FALSE	49
2022-09-13	14:25:38	0.334975	754.866	FALSE	49
2022-09-13	14:25:39	0.203575	755.07	FALSE	49
2022-09-13	14:25:39	0.168206	755.238	FALSE	49
2022-09-13	14:25:39	0.36383	755.602	FALSE	49
2022-09-13	14:25:40	0.149529	755.752	FALSE	49
2022-09-13	14:25:40	0.0520232	755.804	FALSE	49
2022-09-13	14:25:40	0.112176	755.916	FALSE	49
2022-09-13	14:25:40	0.246171	756.162	FALSE	49
2022-09-13	14:25:41	0.332023	756.494	FALSE	49
2022-09-13	14:25:41	0.268512	756.762	FALSE	49
2022-09-13	14:25:41	-0.0405468	756.762	FALSE	49
2022-09-13	14:25:41	-0.0274679	756.762	FALSE	49
2022-09-13	14:25:42	0.0635753	756.826	FALSE	49
2022-09-13	14:25:42	0.212125	757.038	FALSE	49
2022-09-13	14:25:42	0.123168	757.161	FALSE	49
2022-09-13	14:25:42	-0.136374	757.161	FALSE	49
2022-09-13	14:25:43	-0.412557	757.161	FALSE	49
2022-09-13	14:25:43	-0.476832	757.161	FALSE	49
2022-09-13	14:25:43	-0.441361	757.161	FALSE	49
2022-09-13	14:25:44	-0.342582	757.161	FALSE	49
2022-09-13	14:25:44	-0.248689	757.161	FALSE	49
2022-09-13	14:25:44	0.0615905	757.223	FALSE	49
2022-09-13	14:25:44	-0.155712	757.223	FALSE	49
2022-09-13	14:25:45	-0.150623	757.223	FALSE	49
2022-09-13	14:25:45	0.0250003	757.248	FALSE	49
2022-09-13	14:25:45	0.203931	757.452	FALSE	49
2022-09-13	14:25:45	0.358232	757.81	FALSE	49
2022-09-13	14:25:46	0.454364	758.264	FALSE	49
2022-09-13	14:25:46	0.523015	758.787	FALSE	49
2022-09-13	14:25:46	0.436349	759.224	FALSE	49
2022-09-13	14:25:46	0.327138	759.551	FALSE	49
2022-09-13	14:25:47	0.118232	759.669	FALSE	49
2022-09-13	14:25:47	0.228257	759.897	FALSE	49
2022-09-13	14:25:47	0.236807	760.134	FALSE	49
2022-09-13	14:25:48	0.322405	760.457	FALSE	49
2022-09-13	14:25:48	0.767443	761.224	FALSE	49
2022-09-13	14:25:48	0.479148	761.703	FALSE	49
2022-09-13	14:25:48	0.216959	761.92	FALSE	49
2022-09-13	14:25:49	0.357672	762.278	FALSE	49
2022-09-13	14:25:49	0.336501	762.614	FALSE	49
2022-09-13	14:25:49	0.307443	762.922	FALSE	49
2022-09-13	14:25:49	0.322048	763.244	FALSE	49
2022-09-13	14:25:50	0.336654	763.581	FALSE	49
2022-09-13	14:25:50	0.355789	763.936	FALSE	49
2022-09-13	14:25:50	0.280827	764.217	FALSE	49
2022-09-13	14:25:50	0.348511	764.566	FALSE	49
2022-09-13	14:25:51	0.360115	764.926	FALSE	49
2022-09-13	14:25:51	0.429987	765.356	FALSE	49
2022-09-13	14:25:51	0.384644	765.74	FALSE	49
2022-09-13	14:25:52	0.447137	766.188	FALSE	49
2022-09-13	14:25:52	0.421896	766.609	FALSE	49
2022-09-13	14:25:52	0.443372	767.053	FALSE	49
2022-09-13	14:25:52	0.422965	767.476	FALSE	49
2022-09-13	14:25:53	0.230598	767.706	FALSE	49
2022-09-13	14:25:53	0.296043	768.002	FALSE	49
2022-09-13	14:25:53	0.277774	768.28	FALSE	49
2022-09-13	14:25:53	0.117061	768.397	FALSE	49
2022-09-13	14:25:54	0.251565	768.649	FALSE	49
2022-09-13	14:25:54	0.223931	768.873	FALSE	49
2022-09-13	14:25:54	0.373244	769.246	FALSE	49
2022-09-13	14:25:54	0.339911	769.586	FALSE	49
2022-09-13	14:25:55	0.269784	769.856	FALSE	49
2022-09-13	14:25:55	0.296094	770.152	FALSE	49
2022-09-13	14:25:55	0.369733	770.522	FALSE	49
2022-09-13	14:25:55	0.243066	770.765	FALSE	49
2022-09-13	14:25:56	0.462201	771.227	FALSE	49
2022-09-13	14:25:56	0.881641	772.108	FALSE	49
2022-09-13	14:25:56	0.517264	772.626	FALSE	49
2022-09-13	14:25:57	0.373092	772.999	FALSE	49
2022-09-13	14:25:57	0.47299	773.472	FALSE	49
2022-09-13	14:25:57	0.626832	774.099	FALSE	49
2022-09-13	14:25:57	0.380471	774.479	FALSE	49
2022-09-13	14:25:58	0.377163	774.856	FALSE	49
2022-09-13	14:25:58	0.435382	775.292	FALSE	49
2022-09-13	14:25:58	0.427545	775.719	FALSE	49
2022-09-13	14:25:58	0.46958	776.189	FALSE	49
2022-09-13	14:25:59	0.509682	776.698	FALSE	49
2022-09-13	14:25:59	0.445204	777.144	FALSE	49
2022-09-13	14:25:59	0.495636	777.639	FALSE	49
2022-09-13	14:26:00	0.484237	778.124	FALSE	49
2022-09-13	14:26:00	0.402914	778.526	FALSE	49
2022-09-13	14:26:00	0.48902	779.015	FALSE	49
2022-09-13	14:26:00	0.796756	779.812	FALSE	49
2022-09-13	14:26:01	0.7993	780.612	FALSE	49
2022-09-13	14:26:01	0.776196	781.388	FALSE	49
2022-09-13	14:26:01	1.25793	782.646	FALSE	49
2022-09-13	14:26:01	1.38663	784.032	FALSE	49
2022-09-13	14:26:02	0.784135	784.816	FALSE	49
2022-09-13	14:26:02	1.36276	786.179	FALSE	49
2022-09-13	14:26:02	0.907544	787.087	FALSE	49
2022-09-13	14:26:02	1.10011	788.187	FALSE	49
2022-09-13	14:26:03	0.428613	788.615	FALSE	49
2022-09-13	14:26:03	0.615585	789.231	FALSE	49
2022-09-13	14:26:03	0.517773	789.749	FALSE	49
2022-09-13	14:26:04	0.450038	790.199	FALSE	49
2022-09-13	14:26:04	0.555483	790.754	FALSE	49
2022-09-13	14:26:04	0.816705	791.571	FALSE	49
2022-09-13	14:26:04	1.69126	793.262	FALSE	49
2022-09-13	14:26:05	0.691616	793.954	FALSE	49
2022-09-13	14:26:05	1.19569	795.15	FALSE	49
2022-09-13	14:26:05	0.557926	795.707	FALSE	49
2022-09-13	14:26:05	0.505407	796.213	FALSE	49
2022-09-13	14:26:06	0.427188	796.64	FALSE	49
2022-09-13	14:26:06	0.357316	796.997	FALSE	49
2022-09-13	14:26:06	0.344186	797.342	FALSE	49
2022-09-13	14:26:06	0.285611	797.627	FALSE	49
2022-09-13	14:26:07	0.377468	798.005	FALSE	49
2022-09-13	14:26:07	0.256145	798.261	FALSE	49
2022-09-13	14:26:07	0.112583	798.373	FALSE	49
2022-09-13	14:26:08	0.930089	799.303	FALSE	49
2022-09-13	14:26:08	1.06022	800.364	FALSE	49
2022-09-13	14:26:08	0.627137	800.991	FALSE	49
2022-09-13	14:26:08	0.409682	801.401	FALSE	49
2022-09-13	14:26:09	0.223575	801.624	FALSE	49
2022-09-13	14:26:09	0.0179264	801.642	FALSE	49
2022-09-13	14:26:09	0.0711071	801.713	FALSE	49
2022-09-13	14:26:09	0.0574684	801.771	FALSE	49
2022-09-13	14:26:10	0.553804	802.324	FALSE	49
2022-09-13	14:26:10	0.746425	803.071	FALSE	49
2022-09-13	14:26:10	0.685611	803.756	FALSE	49
2022-09-13	14:26:10	0.867086	804.624	FALSE	49
2022-09-13	14:26:11	1.73258	806.356	FALSE	49
2022-09-13	14:26:11	2.62123	808.977	FALSE	49
2022-09-13	14:26:11	1.85899	810.836	FALSE	49
2022-09-13	14:26:11	1.94459	812.781	FALSE	49
2022-09-13	14:26:12	0.813091	813.594	FALSE	49
2022-09-13	14:26:12	0.427392	814.021	FALSE	49
2022-09-13	14:26:12	0.38327	814.405	FALSE	49
2022-09-13	14:26:13	1.4822	815.887	FALSE	49
2022-09-13	14:26:13	2.45915	818.346	FALSE	49
2022-09-13	14:26:13	4.80118	823.147	1	50
2022-09-13	14:26:13	3.07197	826.219	1	51
2022-09-13	14:26:14	3.95161	830.171	1	52
2022-09-13	14:26:14	1.32536	831.496	FALSE	52
2022-09-13	14:26:14	1.99431	833.49	FALSE	52
2022-09-13	14:26:14	2.68398	836.174	FALSE	52
2022-09-13	14:26:15	3.41029	839.585	1	53
2022-09-13	14:26:15	2.69487	842.28	FALSE	53
2022-09-13	14:26:15	1.72546	844.005	FALSE	53
2022-09-13	14:26:15	2.56189	846.567	FALSE	53
2022-09-13	14:26:16	1.29044	847.857	FALSE	53
2022-09-13	14:26:16	0.842201	848.7	FALSE	53
2022-09-13	14:26:16	0.466527	849.166	FALSE	53
2022-09-13	14:26:17	0.437417	849.604	FALSE	53
2022-09-13	14:26:17	0.329428	849.933	FALSE	53
2022-09-13	14:26:17	0.135585	850.069	FALSE	53
2022-09-13	14:26:17	0.129224	850.198	FALSE	53
2022-09-13	14:26:18	0.0655091	850.263	FALSE	53
2022-09-13	14:26:18	0.166883	850.43	FALSE	53
2022-09-13	14:26:18	0.729936	851.16	FALSE	53
2022-09-13	14:26:18	1.04475	852.205	FALSE	53
2022-09-13	14:26:19	3.91981	856.125	1	54
2022-09-13	14:26:19	1.96912	858.094	FALSE	54
2022-09-13	14:26:19	3.85294	861.947	1	55
2022-09-13	14:26:20	2.83228	864.779	FALSE	55
2022-09-13	14:26:20	7.45334	872.232	1	56
2022-09-13	14:26:20	3.67273	875.905	1	57
2022-09-13	14:26:20	2.50169	878.407	FALSE	57
2022-09-13	14:26:21	1.54434	879.951	FALSE	57
2022-09-13	14:26:21	1.26057	881.212	FALSE	57
2022-09-13	14:26:21	1.87431	883.086	FALSE	57
2022-09-13	14:26:21	4.73212	887.818	1	58
2022-09-13	14:26:22	2.40103	890.219	FALSE	58
2022-09-13	14:26:22	1.43879	891.658	FALSE	58
2022-09-13	14:26:22	0.440776	892.099	FALSE	58
2022-09-13	14:26:22	0.31355	892.412	FALSE	58
2022-09-13	14:26:23	0.242761	892.655	FALSE	58
2022-09-13	14:26:23	0.0982317	892.753	FALSE	58
2022-09-13	14:26:23	0.0946694	892.848	FALSE	58
2022-09-13	14:26:23	-0.105127	892.848	FALSE	58
2022-09-13	14:26:24	0.0790969	892.927	FALSE	58
2022-09-13	14:26:24	-0.045585	892.927	FALSE	58
2022-09-13	14:26:24	0.120318	893.047	FALSE	58
2022-09-13	14:26:25	0.0307509	893.078	FALSE	58
2022-09-13	14:26:25	-0.0900124	893.078	FALSE	58
2022-09-13	14:26:25	-0.285534	893.078	FALSE	58
2022-09-13	14:26:25	-0.114033	893.078	FALSE	58
2022-09-13	14:26:26	0.025102	893.103	FALSE	58
2022-09-13	14:26:26	1.61645	894.72	FALSE	58
2022-09-13	14:26:26	1.58383	896.303	FALSE	58
2022-09-13	14:26:26	1.95431	898.258	FALSE	58
2022-09-13	14:26:27	1.58363	899.841	FALSE	58
2022-09-13	14:26:27	2.31258	902.154	FALSE	58
2022-09-13	14:26:27	2.28678	904.441	FALSE	58
2022-09-13	14:26:27	1.99452	906.435	FALSE	58
2022-09-13	14:26:28	0.70042	907.136	FALSE	58
2022-09-13	14:26:28	0.811463	907.947	FALSE	58
2022-09-13	14:26:28	0.908919	908.856	FALSE	58
2022-09-13	14:26:29	1.87996	910.736	FALSE	58
2022-09-13	14:26:29	1.54785	912.284	FALSE	58
2022-09-13	14:26:29	2.22948	914.513	FALSE	58
2022-09-13	14:26:29	1.8766	916.39	FALSE	58
2022-09-13	14:26:30	3.71813	920.108	1	59
2022-09-13	14:26:30	4.07131	924.179	1	60
2022-09-13	14:26:30	6.98184	931.161	1	61
2022-09-13	14:26:30	4.38938	935.551	1	62
2022-09-13	14:26:31	2.05401	937.605	FALSE	62
2022-09-13	14:26:31	2.62332	940.228	FALSE	62
2022-09-13	14:26:31	0.985458	941.213	FALSE	62
2022-09-13	14:26:31	2.43263	943.646	FALSE	62
2022-09-13	14:26:32	0.623524	944.27	FALSE	62
2022-09-13	14:26:32	2.13457	946.404	FALSE	62
2022-09-13	14:26:32	0.671718	947.076	FALSE	62
2022-09-13	14:26:33	1.88948	948.965	FALSE	62
2022-09-13	14:26:33	0.604186	949.57	FALSE	62
2022-09-13	14:26:33	1.37742	950.947	FALSE	62
2022-09-13	14:26:33	1.34398	952.291	FALSE	62
2022-09-13	14:26:34	1.49457	953.785	FALSE	62
2022-09-13	14:26:34	1.35696	955.142	FALSE	62
2022-09-13	14:26:34	0.948664	956.091	FALSE	62
2022-09-13	14:26:34	1.05533	957.146	FALSE	62
2022-09-13	14:26:35	0.416909	957.563	FALSE	62
2022-09-13	14:26:35	0.387952	957.951	FALSE	62
2022-09-13	14:26:35	0.22098	958.172	FALSE	62
2022-09-13	14:26:35	0.318537	958.491	FALSE	62
2022-09-13	14:26:36	0.420674	958.911	FALSE	62
2022-09-13	14:26:36	0.398486	959.31	FALSE	62
2022-09-13	14:26:36	0.399911	959.71	FALSE	62
2022-09-13	14:26:37	0.42327	960.133	FALSE	62
2022-09-13	14:26:37	0.413906	960.547	FALSE	62
2022-09-13	14:26:37	0.381489	960.929	FALSE	62
2022-09-13	14:26:37	0.446832	961.375	FALSE	62
2022-09-13	14:26:38	0.431565	961.807	FALSE	62
2022-09-13	14:26:38	0.42327	962.23	FALSE	62
2022-09-13	14:26:38	0.404542	962.635	FALSE	62
2022-09-13	14:26:38	0.397672	963.032	FALSE	62
2022-09-13	14:26:39	0.395026	963.427	FALSE	62
2022-09-13	14:26:39	0.366425	963.794	FALSE	62
2022-09-13	14:26:39	0.368003	964.162	FALSE	62
2022-09-13	14:26:39	0.368919	964.531	FALSE	62
2022-09-13	14:26:40	0.360725	964.892	FALSE	62
2022-09-13	14:26:40	0.375534	965.267	FALSE	62
2022-09-13	14:26:40	0.377061	965.644	FALSE	62
2022-09-13	14:26:41	0.39243	966.037	FALSE	62
2022-09-13	14:26:41	0.431769	966.468	FALSE	62
2022-09-13	14:26:41	0.515127	966.983	FALSE	62
2022-09-13	14:26:41	0.889326	967.873	FALSE	62
2022-09-13	14:26:42	1.33711	969.21	FALSE	62
2022-09-13	14:26:42	1.93655	971.146	FALSE	62
2022-09-13	14:26:42	2.24368	973.39	FALSE	62
2022-09-13	14:26:42	0.929376	974.32	FALSE	62
2022-09-13	14:26:43	0.332023	974.652	FALSE	62
2022-09-13	14:26:43	0.242252	974.894	FALSE	62
2022-09-13	14:26:43	0.121082	975.015	FALSE	62
2022-09-13	14:26:43	-0.0558649	975.015	FALSE	62
2022-09-13	14:26:44	-0.200445	975.015	FALSE	62
2022-09-13	14:26:44	-0.286399	975.015	FALSE	62
2022-09-13	14:26:44	-0.424007	975.015	FALSE	62
2022-09-13	14:26:45	-0.289503	975.015	FALSE	62
2022-09-13	14:26:45	-0.0532694	975.015	FALSE	62
2022-09-13	14:26:45	-0.211794	975.015	FALSE	62
2022-09-13	14:26:45	-0.159834	975.015	FALSE	62
2022-09-13	14:26:46	-0.196323	975.015	FALSE	62
2022-09-13	14:26:46	-0.241972	975.015	FALSE	62
2022-09-13	14:26:46	-0.420394	975.015	FALSE	62
2022-09-13	14:26:46	-0.521106	975.015	FALSE	62
2022-09-13	14:26:47	-0.626908	975.015	FALSE	62
2022-09-13	14:26:47	-0.760953	975.015	FALSE	62
2022-09-13	14:26:47	-0.328944	975.015	FALSE	62
2022-09-13	14:26:47	-0.386806	975.015	FALSE	62
2022-09-13	14:26:48	-0.305432	975.015	FALSE	62
2022-09-13	14:26:48	-0.309656	975.015	FALSE	62
2022-09-13	14:26:48	-0.234338	975.015	FALSE	62
2022-09-13	14:26:49	-0.0212593	975.015	FALSE	62
2022-09-13	14:26:49	0.147494	975.162	FALSE	62
2022-09-13	14:26:49	0.108613	975.271	FALSE	62
2022-09-13	14:26:49	0.190445	975.461	FALSE	62
2022-09-13	14:26:50	0.393092	975.855	FALSE	62
2022-09-13	14:26:50	0.621998	976.476	FALSE	62
2022-09-13	14:26:50	0.436196	976.913	FALSE	62
2022-09-13	14:26:50	0.478791	977.391	FALSE	62
2022-09-13	14:26:51	0.466578	977.858	FALSE	62
2022-09-13	14:26:51	0.332532	978.191	FALSE	62
2022-09-13	14:26:51	0.325712	978.516	FALSE	62
2022-09-13	14:26:51	0.132888	978.649	FALSE	62
2022-09-13	14:26:52	-0.048842	978.649	FALSE	62
2022-09-13	14:26:52	-0.226755	978.649	FALSE	62
2022-09-13	14:26:52	-0.328079	978.649	FALSE	62
2022-09-13	14:26:53	-0.382684	978.649	FALSE	62
2022-09-13	14:26:53	0.720827	979.37	FALSE	62
2022-09-13	14:26:53	5.40184	984.772	1	63
2022-09-13	14:26:53	5.93314	990.705	1	64
2022-09-13	14:26:54	4.95762	995.663	1	65
2022-09-13	14:26:54	3.46276	999.125	1	66
2022-09-13	14:26:54	4.5135	1003.64	1	67
2022-09-13	14:26:54	2.93981	1006.58	FALSE	67
2022-09-13	14:26:55	4.40312	1010.98	1	68
2022-09-13	14:26:55	2.09757	1013.08	FALSE	68
2022-09-13	14:26:55	1.12205	1014.2	FALSE	68
2022-09-13	14:26:55	0.188817	1014.39	FALSE	68
2022-09-13	14:26:56	0.510394	1014.9	FALSE	68
2022-09-13	14:26:56	0.226629	1015.13	FALSE	68
2022-09-13	14:26:56	0.136247	1015.26	FALSE	68
2022-09-13	14:26:57	0.226221	1015.49	FALSE	68
2022-09-13	14:26:57	0.25701	1015.75	FALSE	68
2022-09-13	14:26:57	2.16408	1017.91	FALSE	68
2022-09-13	14:26:57	5.22922	1023.14	1	69
2022-09-13	14:26:58	2.47925	1025.62	FALSE	69
2022-09-13	14:26:58	2.46754	1028.09	FALSE	69
2022-09-13	14:26:58	1.91726	1030	FALSE	69
2022-09-13	14:26:58	3.30429	1033.31	1	70
2022-09-13	14:26:59	1.80602	1035.11	FALSE	70
2022-09-13	14:26:59	1.0595	1036.17	FALSE	70
2022-09-13	14:26:59	1.03625	1037.21	FALSE	70
2022-09-13	14:26:59	0.403931	1037.61	FALSE	70
2022-09-13	14:27:00	0.698689	1038.31	FALSE	70
2022-09-13	14:27:00	0.178639	1038.49	FALSE	70
2022-09-13	14:27:00	0.145967	1038.64	FALSE	70
2022-09-13	14:27:01	0.0383845	1038.68	FALSE	70
2022-09-13	14:27:01	0.128054	1038.8	FALSE	70
2022-09-13	14:27:01	0.103117	1038.91	FALSE	70
2022-09-13	14:27:01	0.643066	1039.55	FALSE	70
2022-09-13	14:27:02	0.143423	1039.69	FALSE	70
2022-09-13	14:27:02	0.304746	1040	FALSE	70
2022-09-13	14:27:02	0.314567	1040.31	FALSE	70
2022-09-13	14:27:02	0.322964	1040.64	FALSE	70
2022-09-13	14:27:03	0.278435	1040.91	FALSE	70
2022-09-13	14:27:03	0.297977	1041.21	FALSE	70
2022-09-13	14:27:03	0.327952	1041.54	FALSE	70
2022-09-13	14:27:03	0.345611	1041.89	FALSE	70
2022-09-13	14:27:04	0.490445	1042.38	FALSE	70
2022-09-13	14:27:04	0.527443	1042.9	FALSE	70
2022-09-13	14:27:04	0.933855	1043.84	FALSE	70
2022-09-13	14:27:05	0.858283	1044.7	FALSE	70
2022-09-13	14:27:05	1.01996	1045.72	FALSE	70
2022-09-13	14:27:05	0.672074	1046.39	FALSE	70
2022-09-13	14:27:05	0.668308	1047.06	FALSE	70
2022-09-13	14:27:06	0.643677	1047.7	FALSE	70
2022-09-13	14:27:06	0.56215	1048.26	FALSE	70
2022-09-13	14:27:06	0.621845	1048.88	FALSE	70
2022-09-13	14:27:06	0.647239	1049.53	FALSE	70
2022-09-13	14:27:07	0.642405	1050.17	FALSE	70
2022-09-13	14:27:07	0.622964	1050.8	FALSE	70
2022-09-13	14:27:07	0.731565	1051.53	FALSE	70
2022-09-13	14:27:07	0.794364	1052.32	FALSE	70
2022-09-13	14:27:08	0.797875	1053.12	FALSE	70
2022-09-13	14:27:08	0.806781	1053.93	FALSE	70
2022-09-13	14:27:08	0.872176	1054.8	FALSE	70
2022-09-13	14:27:09	0.791616	1055.59	FALSE	70
2022-09-13	14:27:09	0.870293	1056.46	FALSE	70
2022-09-13	14:27:09	1.14449	1057.61	FALSE	70
2022-09-13	14:27:09	1.48118	1059.09	FALSE	70
2022-09-13	14:27:10	2.59401	1061.68	FALSE	70
2022-09-13	14:27:10	1.81421	1063.49	FALSE	70
2022-09-13	14:27:10	1.52256	1065.02	FALSE	70
2022-09-13	14:27:10	1.34246	1066.36	FALSE	70
2022-09-13	14:27:11	1.26637	1067.63	FALSE	70
2022-09-13	14:27:11	1.52378	1069.15	FALSE	70
2022-09-13	14:27:11	1.46668	1070.62	FALSE	70
2022-09-13	14:27:11	1.37487	1071.99	FALSE	70
2022-09-13	14:27:12	2.95095	1074.94	FALSE	70
2022-09-13	14:27:12	3.73528	1078.68	1	71
2022-09-13	14:27:12	6.8079	1085.49	1	72
2022-09-13	14:27:13	5.49787	1090.98	1	73
2022-09-13	14:27:13	2.28637	1093.27	FALSE	73
2022-09-13	14:27:13	1.19253	1094.46	FALSE	73
2022-09-13	14:27:13	1.29136	1095.75	FALSE	73
2022-09-13	14:27:14	1.2077	1096.96	FALSE	73
2022-09-13	14:27:14	1.62006	1098.58	FALSE	73
2022-09-13	14:27:14	1.95279	1100.53	FALSE	73
2022-09-13	14:27:14	5.05986	1105.59	1	74
2022-09-13	14:27:15	4.45487	1110.05	1	75
2022-09-13	14:27:15	5.60179	1115.65	1	76
2022-09-13	14:27:15	11.3796	1127.03	1	77
2022-09-13	14:27:16	8.05253	1135.08	1	78
2022-09-13	14:27:16	2.82347	1137.91	FALSE	78
2022-09-13	14:27:16	2.9421	1140.85	FALSE	78
2022-09-13	14:27:16	5.37171	1146.22	1	79
2022-09-13	14:27:17	2.37833	1148.6	FALSE	79
2022-09-13	14:27:17	3.02871	1151.63	1	80
2022-09-13	14:27:17	3.06805	1154.7	1	81
2022-09-13	14:27:17	3.46627	1158.16	1	82
2022-09-13	14:27:18	12.3799	1170.54	1	83
2022-09-13	14:27:18	11.8203	1182.36	1	84
2022-09-13	14:27:18	11.53	1193.89	1	85
2022-09-13	14:27:18	23.2322	1217.12	1	86
2022-09-13	14:27:19	22.4448	1239.57	1	87
2022-09-13	14:27:19	13.7817	1253.35	1	88
2022-09-13	14:27:19	11.8165	1265.17	1	89
2022-09-13	14:27:19	13.4491	1278.62	1	90
2022-09-13	14:27:20	19.369	1297.99	1	91
2022-09-13	14:27:20	16.7612	1314.75	1	92
2022-09-13	14:27:20	20.8322	1335.58	1	93
2022-09-13	14:27:21	24.56	1360.14	1	94
2022-09-13	14:27:21	13.9493	1374.09	1	95
2022-09-13	14:27:21	10.3468	1384.43	1	96
2022-09-13	14:27:21	6.77655	1391.21	1	97
2022-09-13	14:27:22	4.58948	1395.8	1	98
2022-09-13	14:27:22	1.7165	1397.52	FALSE	98
2022-09-13	14:27:22	1.10688	1398.62	FALSE	98
2022-09-13	14:27:22	0.794975	1399.42	FALSE	98
2022-09-13	14:27:23	0.370852	1399.79	FALSE	98
2022-09-13	14:27:23	0.421031	1400.21	FALSE	98
2022-09-13	14:27:23	0.525611	1400.74	FALSE	98
2022-09-13	14:27:23	0.473092	1401.21	FALSE	98
2022-09-13	14:27:24	0.512481	1401.72	FALSE	98
2022-09-13	14:27:24	0.552074	1402.27	FALSE	98
2022-09-13	14:27:24	0.804644	1403.08	FALSE	98
2022-09-13	14:27:25	0.491107	1403.57	FALSE	98
2022-09-13	14:27:25	0.479148	1404.05	FALSE	98
2022-09-13	14:27:25	0.50271	1404.55	FALSE	98
2022-09-13	14:27:25	0.500471	1405.05	FALSE	98
2022-09-13	14:27:26	0.475891	1405.53	FALSE	98
2022-09-13	14:27:26	0.439606	1405.97	FALSE	98
2022-09-13	14:27:26	0.505356	1406.47	FALSE	98
2022-09-13	14:27:26	0.430954	1406.9	FALSE	98
2022-09-13	14:27:27	0.498995	1407.4	FALSE	98
2022-09-13	14:27:27	0.442812	1407.85	FALSE	98
2022-09-13	14:27:27	0.49126	1408.34	FALSE	98
2022-09-13	14:27:27	0.473957	1408.81	FALSE	98
2022-09-13	14:27:28	0.495026	1409.31	FALSE	98
2022-09-13	14:27:28	0.517875	1409.82	FALSE	98
2022-09-13	14:27:28	0.512888	1410.34	FALSE	98
2022-09-13	14:27:29	0.588715	1410.93	FALSE	98
2022-09-13	14:27:29	0.632379	1411.56	FALSE	98
2022-09-13	14:27:29	0.747595	1412.31	FALSE	98
2022-09-13	14:27:29	0.943168	1413.25	FALSE	98
2022-09-13	14:27:30	0.675738	1413.92	FALSE	98
2022-09-13	14:27:30	1.02327	1414.95	FALSE	98
2022-09-13	14:27:30	0.76444	1415.71	FALSE	98
2022-09-13	14:27:30	0.808461	1416.52	FALSE	98
2022-09-13	14:27:31	0.580827	1417.1	FALSE	98
2022-09-13	14:27:31	0.534109	1417.64	FALSE	98
2022-09-13	14:27:31	0.452583	1418.09	FALSE	98
2022-09-13	14:27:31	0.592379	1418.68	FALSE	98
2022-09-13	14:27:32	0.43416	1419.11	FALSE	98
2022-09-13	14:27:32	0.53187	1419.65	FALSE	98
2022-09-13	14:27:32	0.564389	1420.21	FALSE	98
2022-09-13	14:27:33	0.709987	1420.92	FALSE	98
2022-09-13	14:27:33	0.962659	1421.88	FALSE	98
2022-09-13	14:27:33	0.795076	1422.68	FALSE	98
2022-09-13	14:27:33	0.513041	1423.19	FALSE	98
2022-09-13	14:27:34	0.458995	1423.65	FALSE	98
2022-09-13	14:27:34	0.527494	1424.18	FALSE	98
2022-09-13	14:27:34	0.645204	1424.82	FALSE	98
2022-09-13	14:27:34	1.05553	1425.88	FALSE	98
2022-09-13	14:27:35	4.12118	1430	1	99
2022-09-13	14:27:35	5.57538	1435.58	1	100
2022-09-13	14:27:35	1.94938	1437.52	FALSE	100
2022-09-13	14:27:35	0.939809	1438.46	FALSE	100
2022-09-13	14:27:36	0.579046	1439.04	FALSE	100
2022-09-13	14:27:36	0.592583	1439.64	FALSE	100
2022-09-13	14:27:36	0.375789	1440.01	FALSE	100
2022-09-13	14:27:37	0.491361	1440.5	FALSE	100
2022-09-13	14:27:37	0.43355	1440.94	FALSE	100

## Sheet: Daisy_star_2022913142214
						**GoPro Fitting: 1411
2022-09-13	14:22:14	0.633702
2022-09-13	14:22:14	0.768817
2022-09-13	14:22:15	0.776603
2022-09-13	14:22:15	1.02927
2022-09-13	14:22:15	1.04291
2022-09-13	14:22:15	0.705305
2022-09-13	14:22:16	0.486934
2022-09-13	14:22:16	0.445051
2022-09-13	14:22:16	0.405967
2022-09-13	14:22:16	0.413346
2022-09-13	14:22:17	0.671819
2022-09-13	14:22:17	0.757214
2022-09-13	14:22:17	0.730649
2022-09-13	14:22:18	0.611667
2022-09-13	14:22:18	0.497723
2022-09-13	14:22:18	0.432074
2022-09-13	14:22:18	0.427239
2022-09-13	14:22:19	0.407494
2022-09-13	14:22:19	0.431158
2022-09-13	14:22:19	0.374568
2022-09-13	14:22:19	0.467799
2022-09-13	14:22:20	0.856043
2022-09-13	14:22:20	1.16546
2022-09-13	14:22:20	0.963371
2022-09-13	14:22:20	0.806985
2022-09-13	14:22:21	0.504084
2022-09-13	14:22:21	0.600369
2022-09-13	14:22:21	0.473499
2022-09-13	14:22:22	0.324898
2022-09-13	14:22:22	0.272939
2022-09-13	14:22:22	0.607392
2022-09-13	14:22:22	0.578282
2022-09-13	14:22:23	0.574568
2022-09-13	14:22:23	1.09045
2022-09-13	14:22:23	0.435178
2022-09-13	14:22:23	0.438384
2022-09-13	14:22:24	0.198181
2022-09-13	14:22:24	0.57187
2022-09-13	14:22:24	0.164389
2022-09-13	14:22:24	0.442812
2022-09-13	14:22:25	0.162354
2022-09-13	14:22:25	0.469173
2022-09-13	14:22:25	0.404033
2022-09-13	14:22:26	0.233346
2022-09-13	14:22:26	0.468868
2022-09-13	14:22:26	0.564898
2022-09-13	14:22:26	0.398333
2022-09-13	14:22:27	0.216807
2022-09-13	14:22:27	0.346272
2022-09-13	14:22:27	0.0808272
2022-09-13	14:22:27	0.203066
2022-09-13	14:22:28	0.20958
2022-09-13	14:22:28	0.320827
2022-09-13	14:22:28	0.165458
2022-09-13	14:22:28	0.182099
2022-09-13	14:22:29	0.128003
2022-09-13	14:22:29	0.377468
2022-09-13	14:22:29	0.357519
2022-09-13	14:22:29	0.448613
2022-09-13	14:22:30	0.294924
2022-09-13	14:22:30	0.499555
2022-09-13	14:22:30	0.567036
2022-09-13	14:22:31	0.613346
2022-09-13	14:22:31	0.462049
2022-09-13	14:22:31	0.454771
2022-09-13	14:22:31	0.484847
2022-09-13	14:22:32	0.432328
2022-09-13	14:22:32	0.374924
2022-09-13	14:22:32	0.407036
2022-09-13	14:22:32	0.35757
2022-09-13	14:22:33	0.372176
2022-09-13	14:22:33	0.48958
2022-09-13	14:22:33	0.236043
2022-09-13	14:22:33	0.102659
2022-09-13	14:22:34	0.115738
2022-09-13	14:22:34	0.100217
2022-09-13	14:22:34	-0.0364247
2022-09-13	14:22:35	0.000929014
2022-09-13	14:22:35	0.32159
2022-09-13	14:22:35	0.340929
2022-09-13	14:22:35	0.132481
2022-09-13	14:22:36	0.493804
2022-09-13	14:22:36	0.80902
2022-09-13	14:22:36	0.989275
2022-09-13	14:22:36	1.03004
2022-09-13	14:22:37	0.930801
2022-09-13	14:22:37	0.767596
2022-09-13	14:22:37	0.8707
2022-09-13	14:22:37	0.823371
2022-09-13	14:22:38	0.742812
2022-09-13	14:22:38	0.748206
2022-09-13	14:22:38	0.917112
2022-09-13	14:22:39	0.992023
2022-09-13	14:22:39	1.27777
2022-09-13	14:22:39	1.63319
2022-09-13	14:22:39	1.64067
2022-09-13	14:22:40	1.16831
2022-09-13	14:22:40	1.02866
2022-09-13	14:22:40	0.891616
2022-09-13	14:22:40	0.863626
2022-09-13	14:22:41	0.853651
2022-09-13	14:22:41	0.760318
2022-09-13	14:22:41	0.814567
2022-09-13	14:22:41	0.945967
2022-09-13	14:22:42	1.16276
2022-09-13	14:22:42	1.26709
2022-09-13	14:22:42	1.43503
2022-09-13	14:22:43	1.46536
2022-09-13	14:22:43	1.38072
2022-09-13	14:22:43	1.29981
2022-09-13	14:22:43	1.28673
2022-09-13	14:22:44	1.32948
2022-09-13	14:22:44	1.27223
2022-09-13	14:22:44	0.868206
2022-09-13	14:22:45	0.71472
2022-09-13	14:22:45	0.53701
2022-09-13	14:22:45	0.438079
2022-09-13	14:22:45	0.473194
2022-09-13	14:22:45	0.430598
2022-09-13	14:22:46	0.271718
2022-09-13	14:22:46	0.594567
2022-09-13	14:22:46	1.08826
2022-09-13	14:22:47	1.57742
2022-09-13	14:22:47	1.17788
2022-09-13	14:22:47	1.11335
2022-09-13	14:22:47	0.966374
2022-09-13	14:22:48	0.725204
2022-09-13	14:22:48	0.787494
2022-09-13	14:22:48	0.784796
2022-09-13	14:22:48	0.701997
2022-09-13	14:22:49	0.697417
2022-09-13	14:22:49	0.546374
2022-09-13	14:22:49	1.13182
2022-09-13	14:22:49	1.38724
2022-09-13	14:22:50	1.29569
2022-09-13	14:22:50	1.06983
2022-09-13	14:22:50	1.01696
2022-09-13	14:22:51	0.987951
2022-09-13	14:22:51	0.90902
2022-09-13	14:22:51	0.813855
2022-09-13	14:22:51	0.558486
2022-09-13	14:22:52	0.709122
2022-09-13	14:22:52	0.559199
2022-09-13	14:22:52	1.0307
2022-09-13	14:22:52	1.88958
2022-09-13	14:22:53	0.980216
2022-09-13	14:22:53	1.18897
2022-09-13	14:22:53	0.619657
2022-09-13	14:22:53	0.401285
2022-09-13	14:22:54	0.658741
2022-09-13	14:22:54	0.483321
2022-09-13	14:22:54	0.400267
2022-09-13	14:22:55	0.94444
2022-09-13	14:22:55	1.55874
2022-09-13	14:22:55	2.35477
2022-09-13	14:22:55	1.94225
2022-09-13	14:22:56	2.19029
2022-09-13	14:22:56	2.24276
2022-09-13	14:22:56	1.49248
2022-09-13	14:22:56	1.33202
2022-09-13	14:22:57	1.20383
2022-09-13	14:22:57	1.43808
2022-09-13	14:22:57	1.75523
2022-09-13	14:22:57	1.68821
2022-09-13	14:22:58	1.13645
2022-09-13	14:22:58	0.730903
2022-09-13	14:22:58	0.571259
2022-09-13	14:22:59	0.608868
2022-09-13	14:22:59	0.406679
2022-09-13	14:22:59	0.374517
2022-09-13	14:22:59	0.227646
2022-09-13	14:23:00	0.231412
2022-09-13	14:23:00	1.06612
2022-09-13	14:23:00	0.59584
2022-09-13	14:23:00	0.407087
2022-09-13	14:23:01	0.338028
2022-09-13	14:23:01	0.563371
2022-09-13	14:23:01	1.60541
2022-09-13	14:23:01	2.42154
2022-09-13	14:23:02	1.70276
2022-09-13	14:23:02	0.976756
2022-09-13	14:23:02	0.90902
2022-09-13	14:23:03	1.68195
2022-09-13	14:23:03	1.96877
2022-09-13	14:23:03	0.599962
2022-09-13	14:23:03	0.933244
2022-09-13	14:23:04	1.47299
2022-09-13	14:23:04	1.25126
2022-09-13	14:23:04	0.250649
2022-09-13	14:23:04	0.248817
2022-09-13	14:23:05	0.229936
2022-09-13	14:23:05	0.17584
2022-09-13	14:23:05	0.202354
2022-09-13	14:23:05	0.217621
2022-09-13	14:23:06	0.172074
2022-09-13	14:23:06	0.336603
2022-09-13	14:23:06	0.044644
2022-09-13	14:23:07	0.199555
2022-09-13	14:23:07	0.040929
2022-09-13	14:23:07	0.332532
2022-09-13	14:23:07	0.0187916
2022-09-13	14:23:08	0.144491
2022-09-13	14:23:08	-0.00807864
2022-09-13	14:23:08	-0.218969
2022-09-13	14:23:08	-0.462175
2022-09-13	14:23:09	-0.458358
2022-09-13	14:23:09	-0.604109
2022-09-13	14:23:09	-0.54528
2022-09-13	14:23:09	-0.488435
2022-09-13	14:23:10	-0.261768
2022-09-13	14:23:10	-0.495305
2022-09-13	14:23:10	-0.590725
2022-09-13	14:23:11	-0.456679
2022-09-13	14:23:11	-0.0175443
2022-09-13	14:23:11	0.730242
2022-09-13	14:23:11	1.34103
2022-09-13	14:23:12	2.13859
2022-09-13	14:23:12	2.17304
2022-09-13	14:23:12	2.19584
2022-09-13	14:23:12	1.45014
2022-09-13	14:23:13	0.556094
2022-09-13	14:23:13	0.521794
2022-09-13	14:23:13	0.189784
2022-09-13	14:23:13	0.336552
2022-09-13	14:23:14	0.110751
2022-09-13	14:23:14	0.515076
2022-09-13	14:23:14	0.166527
2022-09-13	14:23:15	0.310496
2022-09-13	14:23:15	0.344898
2022-09-13	14:23:15	0.323372
2022-09-13	14:23:15	0.144695
2022-09-13	14:23:16	0.0391478
2022-09-13	14:23:16	0.124542
2022-09-13	14:23:16	-0.0377987
2022-09-13	14:23:16	0.217061
2022-09-13	14:23:17	0.253804
2022-09-13	14:23:17	0.425713
2022-09-13	14:23:17	0.36785
2022-09-13	14:23:17	0.431412
2022-09-13	14:23:18	0.533041
2022-09-13	14:23:18	0.317519
2022-09-13	14:23:18	0.385051
2022-09-13	14:23:19	0.138537
2022-09-13	14:23:19	0.194568
2022-09-13	14:23:19	0.0890205
2022-09-13	14:23:19	0.320522
2022-09-13	14:23:20	0.317265
2022-09-13	14:23:20	0.199046
2022-09-13	14:23:20	0.353143
2022-09-13	14:23:20	0.152939
2022-09-13	14:23:21	0.520064
2022-09-13	14:23:21	0.192583
2022-09-13	14:23:21	0.397825
2022-09-13	14:23:21	0.266883
2022-09-13	14:23:22	0.361845
2022-09-13	14:23:22	0.308613
2022-09-13	14:23:22	0.244491
2022-09-13	14:23:23	0.347443
2022-09-13	14:23:23	0.12042
2022-09-13	14:23:23	0.292888
2022-09-13	14:23:23	0.120216
2022-09-13	14:23:24	0.235178
2022-09-13	14:23:24	0.0160435
2022-09-13	14:23:24	0.340064
2022-09-13	14:23:24	0.572125
2022-09-13	14:23:25	1.71793
2022-09-13	14:23:25	2.01772
2022-09-13	14:23:25	0.574466
2022-09-13	14:23:25	1.39274
2022-09-13	14:23:26	0.37126
2022-09-13	14:23:26	0.437621
2022-09-13	14:23:26	0.534771
2022-09-13	14:23:27	0.312685
2022-09-13	14:23:27	0.461336
2022-09-13	14:23:27	0.248461
2022-09-13	14:23:27	0.464949
2022-09-13	14:23:28	0.151921
2022-09-13	14:23:28	0.390242
2022-09-13	14:23:28	0.186374
2022-09-13	14:23:28	0.623575
2022-09-13	14:23:29	0.507545
2022-09-13	14:23:29	3.28525
2022-09-13	14:23:29	2.22785
2022-09-13	14:23:29	1.47228
2022-09-13	14:23:30	0.738537
2022-09-13	14:23:30	0.403168
2022-09-13	14:23:30	0.975636
2022-09-13	14:23:31	0.368715
2022-09-13	14:23:31	0.737214
2022-09-13	14:23:31	0.574517
2022-09-13	14:23:31	0.542608
2022-09-13	14:23:32	0.673804
2022-09-13	14:23:32	0.41986
2022-09-13	14:23:32	0.827443
2022-09-13	14:23:32	0.448562
2022-09-13	14:23:33	0.731361
2022-09-13	14:23:33	0.571565
2022-09-13	14:23:33	0.74902
2022-09-13	14:23:33	0.807799
2022-09-13	14:23:34	0.910903
2022-09-13	14:23:34	1.23396
2022-09-13	14:23:34	0.965713
2022-09-13	14:23:35	1.21548
2022-09-13	14:23:35	1.05477
2022-09-13	14:23:35	1.34403
2022-09-13	14:23:35	1.19762
2022-09-13	14:23:36	1.18439
2022-09-13	14:23:36	1.30342
2022-09-13	14:23:36	0.718893
2022-09-13	14:23:36	1.27355
2022-09-13	14:23:37	0.90902
2022-09-13	14:23:37	2.59009
2022-09-13	14:23:37	1.33212
2022-09-13	14:23:37	1.68291
2022-09-13	14:23:38	2.00785
2022-09-13	14:23:38	1.85732
2022-09-13	14:23:38	1.70546
2022-09-13	14:23:39	1.06195
2022-09-13	14:23:39	1.85899
2022-09-13	14:23:39	1.3537
2022-09-13	14:23:39	2.02276
2022-09-13	14:23:40	1.80663
2022-09-13	14:23:40	1.84561
2022-09-13	14:23:40	1.90302
2022-09-13	14:23:40	0.999097
2022-09-13	14:23:41	1.75126
2022-09-13	14:23:41	0.737672
2022-09-13	14:23:41	1.78159
2022-09-13	14:23:41	0.865204
2022-09-13	14:23:42	2.47436
2022-09-13	14:23:42	0.721285
2022-09-13	14:23:42	0.509682
2022-09-13	14:23:43	1.02317
2022-09-13	14:23:43	0.607494
2022-09-13	14:23:43	0.859148
2022-09-13	14:23:43	0.286222
2022-09-13	14:23:44	0.888664
2022-09-13	14:23:44	0.306832
2022-09-13	14:23:44	0.588461
2022-09-13	14:23:44	0.557061
2022-09-13	14:23:45	1.24307
2022-09-13	14:23:45	3.15828
2022-09-13	14:23:45	3.56602
2022-09-13	14:23:45	3.98576
2022-09-13	14:23:46	2.41487
2022-09-13	14:23:46	2.23879
2022-09-13	14:23:46	1.67218
2022-09-13	14:23:47	1.52032
2022-09-13	14:23:47	1.97279
2022-09-13	14:23:47	2.15146
2022-09-13	14:23:47	3.10291
2022-09-13	14:23:48	2.09014
2022-09-13	14:23:48	2.57798
2022-09-13	14:23:48	0.631158
2022-09-13	14:23:48	0.584847
2022-09-13	14:23:49	0.337061
2022-09-13	14:23:49	0.573601
2022-09-13	14:23:49	0.938639
2022-09-13	14:23:49	2.22388
2022-09-13	14:23:50	3.70836
2022-09-13	14:23:50	4.95044
2022-09-13	14:23:50	8.53711
2022-09-13	14:23:51	3.94342
2022-09-13	14:23:51	3.70759
2022-09-13	14:23:51	2.0165
2022-09-13	14:23:51	1.2764
2022-09-13	14:23:52	0.867392
2022-09-13	14:23:52	0.811514
2022-09-13	14:23:52	1.21548
2022-09-13	14:23:52	0.820471
2022-09-13	14:23:53	0.747494
2022-09-13	14:23:53	0.462354
2022-09-13	14:23:53	0.436908
2022-09-13	14:23:53	0.435636
2022-09-13	14:23:54	0.32841
2022-09-13	14:23:54	1.55609
2022-09-13	14:23:54	2.34729
2022-09-13	14:23:55	4.42983
2022-09-13	14:23:55	3.27111
2022-09-13	14:23:55	4.45355
2022-09-13	14:23:55	3.58286
2022-09-13	14:23:56	3.22622
2022-09-13	14:23:56	3.55223
2022-09-13	14:23:56	1.80205
2022-09-13	14:23:56	2.1593
2022-09-13	14:23:57	1.25095
2022-09-13	14:23:57	2.43533
2022-09-13	14:23:57	1.98989
2022-09-13	14:23:57	3.66373
2022-09-13	14:23:58	3.98744
2022-09-13	14:23:58	2.09335
2022-09-13	14:23:58	2.73441
2022-09-13	14:23:58	0.959809
2022-09-13	14:23:59	1.3905
2022-09-13	14:23:59	0.353092
2022-09-13	14:23:59	0.294211
2022-09-13	14:24:00	0.387697
2022-09-13	14:24:00	0.0411326
2022-09-13	14:24:00	0.251056
2022-09-13	14:24:00	0.087392
2022-09-13	14:24:01	0.0403183
2022-09-13	14:24:01	-0.157086
2022-09-13	14:24:01	0.0146695
2022-09-13	14:24:01	-0.10528
2022-09-13	14:24:02	-0.264872
2022-09-13	14:24:02	-0.335814
2022-09-13	14:24:02	-0.252913
2022-09-13	14:24:02	-0.249707
2022-09-13	14:24:03	-0.200191
2022-09-13	14:24:03	-0.284567
2022-09-13	14:24:03	0.0907508
2022-09-13	14:24:04	0.184695
2022-09-13	14:24:04	0.665967
2022-09-13	14:24:04	0.265865
2022-09-13	14:24:04	0.200725
2022-09-13	14:24:05	0.309326
2022-09-13	14:24:05	0.146832
2022-09-13	14:24:05	0.380522
2022-09-13	14:24:05	0.171769
2022-09-13	14:24:06	0.478791
2022-09-13	14:24:06	0.132583
2022-09-13	14:24:06	0.429071
2022-09-13	14:24:06	0.251463
2022-09-13	14:24:07	0.375331
2022-09-13	14:24:07	0.0454073
2022-09-13	14:24:07	0.145916
2022-09-13	14:24:08	0.168054
2022-09-13	14:24:08	0.163015
2022-09-13	14:24:08	-0.107926
2022-09-13	14:24:08	0.11925
2022-09-13	14:24:09	-0.0663483
2022-09-13	14:24:09	0.193804
2022-09-13	14:24:09	0.106069
2022-09-13	14:24:09	0.805458
2022-09-13	14:24:10	0.498995
2022-09-13	14:24:10	1.56592
2022-09-13	14:24:10	1.35401
2022-09-13	14:24:10	2.23945
2022-09-13	14:24:11	2.2448
2022-09-13	14:24:11	1.9023
2022-09-13	14:24:11	1.95721
2022-09-13	14:24:12	0.535687
2022-09-13	14:24:12	1.14561
2022-09-13	14:24:12	0.591972
2022-09-13	14:24:13	1.48108
2022-09-13	14:24:13	0.995534
2022-09-13	14:24:13	1.93487
2022-09-13	14:24:13	0.954924
2022-09-13	14:24:13	1.33518
2022-09-13	14:24:14	1.59126
2022-09-13	14:24:14	0.618995
2022-09-13	14:24:14	1.28368
2022-09-13	14:24:14	0.858639
2022-09-13	14:24:15	1.5533
2022-09-13	14:24:15	0.972735
2022-09-13	14:24:15	1.43752
2022-09-13	14:24:16	1.3081
2022-09-13	14:24:16	0.963219
2022-09-13	14:24:16	0.59584
2022-09-13	14:24:16	0.427392
2022-09-13	14:24:17	0.270547
2022-09-13	14:24:17	0.328054
2022-09-13	14:24:17	0.555687
2022-09-13	14:24:17	0.399809
2022-09-13	14:24:18	0.182303
2022-09-13	14:24:18	0.353957
2022-09-13	14:24:18	0.1593
2022-09-13	14:24:18	0.202761
2022-09-13	14:24:19	0.163575
2022-09-13	14:24:19	0.23014
2022-09-13	14:24:19	0.284847
2022-09-13	14:24:20	0.161082
2022-09-13	14:24:20	0.524236
2022-09-13	14:24:20	0.326374
2022-09-13	14:24:20	0.460827
2022-09-13	14:24:21	0.239199
2022-09-13	14:24:21	0.43701
2022-09-13	14:24:21	0.177774
2022-09-13	14:24:21	0.289682
2022-09-13	14:24:22	0.161336
2022-09-13	14:24:22	0.276043
2022-09-13	14:24:22	0.259402
2022-09-13	14:24:22	0.157316
2022-09-13	14:24:23	0.195942
2022-09-13	14:24:23	0.13355
2022-09-13	14:24:23	0.147646
2022-09-13	14:24:24	0.536043
2022-09-13	14:24:24	1.93248
2022-09-13	14:24:24	3.57207
2022-09-13	14:24:24	2.30938
2022-09-13	14:24:25	0.841692
2022-09-13	14:24:25	0.512379
2022-09-13	14:24:25	0.131565
2022-09-13	14:24:25	0.397977
2022-09-13	14:24:26	0.137163
2022-09-13	14:24:26	0.401845
2022-09-13	14:24:26	0.262608
2022-09-13	14:24:26	0.192379
2022-09-13	14:24:27	0.258791
2022-09-13	14:24:27	0.238893
2022-09-13	14:24:27	0.292939
2022-09-13	14:24:28	0.220674
2022-09-13	14:24:28	0.181743
2022-09-13	14:24:28	0.242456
2022-09-13	14:24:28	0.229784
2022-09-13	14:24:29	0.29472
2022-09-13	14:24:29	1.40994
2022-09-13	14:24:29	0.881692
2022-09-13	14:24:29	0.401132
2022-09-13	14:24:30	0.346527
2022-09-13	14:24:30	0.168461
2022-09-13	14:24:30	0.171819
2022-09-13	14:24:30	0.359504
2022-09-13	14:24:31	0.237672
2022-09-13	14:24:31	0.289835
2022-09-13	14:24:31	0.245
2022-09-13	14:24:32	0.246476
2022-09-13	14:24:32	0.269886
2022-09-13	14:24:32	0.265356
2022-09-13	14:24:32	0.260471
2022-09-13	14:24:33	0.377112
2022-09-13	14:24:33	0.447036
2022-09-13	14:24:33	0.326323
2022-09-13	14:24:33	0.414669
2022-09-13	14:24:34	0.311056
2022-09-13	14:24:34	0.286527
2022-09-13	14:24:34	-0.119733
2022-09-13	14:24:34	0.190089
2022-09-13	14:24:35	0.185
2022-09-13	14:24:35	0.237875
2022-09-13	14:24:35	0.288206
2022-09-13	14:24:36	0.25584
2022-09-13	14:24:36	0.254669
2022-09-13	14:24:36	0.149428
2022-09-13	14:24:36	2.07528
2022-09-13	14:24:37	2.18877
2022-09-13	14:24:37	2.31503
2022-09-13	14:24:37	2.88724
2022-09-13	14:24:37	3.17777
2022-09-13	14:24:38	2.98851
2022-09-13	14:24:38	3.96729
2022-09-13	14:24:38	4.9652
2022-09-13	14:24:38	4.65635
2022-09-13	14:24:39	4.73228
2022-09-13	14:24:39	5.20871
2022-09-13	14:24:39	3.84821
2022-09-13	14:24:40	1.92826
2022-09-13	14:24:40	0.60159
2022-09-13	14:24:40	0.461641
2022-09-13	14:24:40	0.497723
2022-09-13	14:24:41	0.479402
2022-09-13	14:24:41	0.435178
2022-09-13	14:24:41	0.499911
2022-09-13	14:24:41	0.440725
2022-09-13	14:24:42	0.363168
2022-09-13	14:24:42	0.418537
2022-09-13	14:24:42	0.432328
2022-09-13	14:24:42	0.43757
2022-09-13	14:24:43	0.349224
2022-09-13	14:24:43	0.594059
2022-09-13	14:24:43	0.304593
2022-09-13	14:24:44	0.396043
2022-09-13	14:24:44	0.364746
2022-09-13	14:24:44	0.404491
2022-09-13	14:24:44	0.446425
2022-09-13	14:24:45	0.642608
2022-09-13	14:24:45	0.560165
2022-09-13	14:24:45	0.353346
2022-09-13	14:24:45	0.36841
2022-09-13	14:24:46	0.264695
2022-09-13	14:24:46	0.239758
2022-09-13	14:24:46	0.277926
2022-09-13	14:24:46	0.256603
2022-09-13	14:24:47	0.382964
2022-09-13	14:24:47	0.130293
2022-09-13	14:24:47	0.349377
2022-09-13	14:24:48	0.207545
2022-09-13	14:24:48	0.409173
2022-09-13	14:24:48	0.204135
2022-09-13	14:24:48	0.10042
2022-09-13	14:24:49	0.34668
2022-09-13	14:24:49	0.323473
2022-09-13	14:24:49	0.406985
2022-09-13	14:24:49	0.369631
2022-09-13	14:24:50	0.379351
2022-09-13	14:24:50	0.34668
2022-09-13	14:24:50	0.341794
2022-09-13	14:24:50	0.322761
2022-09-13	14:24:51	0.353295
2022-09-13	14:24:51	0.468766
2022-09-13	14:24:51	0.352379
2022-09-13	14:24:52	0.364033
2022-09-13	14:24:52	0.370344
2022-09-13	14:24:52	0.335127
2022-09-13	14:24:52	0.38556
2022-09-13	14:24:53	0.316705
2022-09-13	14:24:53	0.367697
2022-09-13	14:24:53	0.480674
2022-09-13	14:24:53	0.285407
2022-09-13	14:24:54	0.387341
2022-09-13	14:24:54	0.334109
2022-09-13	14:24:54	0.358486
2022-09-13	14:24:54	0.418232
2022-09-13	14:24:55	0.239148
2022-09-13	14:24:55	0.516501
2022-09-13	14:24:55	0.389021
2022-09-13	14:24:56	0.594364
2022-09-13	14:24:56	0.933499
2022-09-13	14:24:56	3.58027
2022-09-13	14:24:56	11.9048
2022-09-13	14:24:57	12.23
2022-09-13	14:24:57	17.3755
2022-09-13	14:24:57	8.52316
2022-09-13	14:24:57	8.02754
2022-09-13	14:24:58	8.00993
2022-09-13	14:24:58	6.28642
2022-09-13	14:24:58	5.14174
2022-09-13	14:24:58	3.97421
2022-09-13	14:24:59	2.92749
2022-09-13	14:24:59	1.98129
2022-09-13	14:24:59	0.862201
2022-09-13	14:25:00	0.516145
2022-09-13	14:25:00	0.453397
2022-09-13	14:25:00	0.619606
2022-09-13	14:25:00	1.75075
2022-09-13	14:25:01	2.39345
2022-09-13	14:25:01	1.4276
2022-09-13	14:25:01	0.93869
2022-09-13	14:25:01	1.50159
2022-09-13	14:25:02	3.44627
2022-09-13	14:25:02	4.17273
2022-09-13	14:25:02	3.7363
2022-09-13	14:25:02	4.01884
2022-09-13	14:25:03	3.86352
2022-09-13	14:25:03	4.55849
2022-09-13	14:25:03	1.54159
2022-09-13	14:25:04	0.577875
2022-09-13	14:25:04	0.455585
2022-09-13	14:25:04	0.445153
2022-09-13	14:25:04	0.384898
2022-09-13	14:25:05	0.363168
2022-09-13	14:25:05	0.364237
2022-09-13	14:25:05	0.353346
2022-09-13	14:25:05	0.475789
2022-09-13	14:25:06	0.54098
2022-09-13	14:25:06	0.652837
2022-09-13	14:25:06	1.61523
2022-09-13	14:25:06	5.68337
2022-09-13	14:25:07	9.18754
2022-09-13	14:25:07	5.6109
2022-09-13	14:25:07	2.63991
2022-09-13	14:25:08	6.05813
2022-09-13	14:25:08	3.58042
2022-09-13	14:25:08	3.07665
2022-09-13	14:25:08	1.80602
2022-09-13	14:25:09	0.665713
2022-09-13	14:25:09	1.29838
2022-09-13	14:25:09	0.413906
2022-09-13	14:25:09	0.493499
2022-09-13	14:25:10	0.474466
2022-09-13	14:25:10	0.209835
2022-09-13	14:25:10	0.244237
2022-09-13	14:25:10	0.254568
2022-09-13	14:25:11	0.557417
2022-09-13	14:25:11	0.425
2022-09-13	14:25:11	0.982965
2022-09-13	14:25:12	1.18709
2022-09-13	14:25:12	2.60734
2022-09-13	14:25:12	1.13691
2022-09-13	14:25:12	1.10739
2022-09-13	14:25:13	0.523371
2022-09-13	14:25:13	0.405509
2022-09-13	14:25:13	0.363931
2022-09-13	14:25:13	0.151311
2022-09-13	14:25:14	0.0664252
2022-09-13	14:25:14	-0.053931
2022-09-13	14:25:14	0.00774832
2022-09-13	14:25:14	0.0648476
2022-09-13	14:25:15	0.0166033
2022-09-13	14:25:15	-0.00543234
2022-09-13	14:25:15	0.025102
2022-09-13	14:25:16	0.16668
2022-09-13	14:25:16	0.158741
2022-09-13	14:25:16	0.465662
2022-09-13	14:25:16	1.70347
2022-09-13	14:25:17	0.920674
2022-09-13	14:25:17	1.1848
2022-09-13	14:25:17	1.80963
2022-09-13	14:25:17	2.32958
2022-09-13	14:25:18	1.94546
2022-09-13	14:25:18	2.00449
2022-09-13	14:25:18	1.24816
2022-09-13	14:25:18	1.30856
2022-09-13	14:25:19	1.05584
2022-09-13	14:25:19	0.68444
2022-09-13	14:25:19	0.438384
2022-09-13	14:25:20	0.861234
2022-09-13	14:25:20	0.604491
2022-09-13	14:25:20	0.553702
2022-09-13	14:25:20	0.417672
2022-09-13	14:25:21	0.370038
2022-09-13	14:25:21	0.418028
2022-09-13	14:25:21	0.483982
2022-09-13	14:25:21	0.395026
2022-09-13	14:25:22	0.360064
2022-09-13	14:25:22	0.454211
2022-09-13	14:25:22	0.428766
2022-09-13	14:25:22	0.500318
2022-09-13	14:25:23	0.410293
2022-09-13	14:25:23	0.39528
2022-09-13	14:25:23	0.513957
2022-09-13	14:25:24	0.417163
2022-09-13	14:25:24	0.479758
2022-09-13	14:25:24	0.479046
2022-09-13	14:25:24	0.488054
2022-09-13	14:25:25	0.420166
2022-09-13	14:25:25	0.338893
2022-09-13	14:25:25	0.435585
2022-09-13	14:25:25	0.466527
2022-09-13	14:25:26	0.464644
2022-09-13	14:25:26	0.533753
2022-09-13	14:25:26	0.348206
2022-09-13	14:25:26	0.54556
2022-09-13	14:25:27	0.485356
2022-09-13	14:25:27	0.375585
2022-09-13	14:25:27	0.429326
2022-09-13	14:25:28	0.219402
2022-09-13	14:25:28	0.259453
2022-09-13	14:25:28	0.19014
2022-09-13	14:25:28	0.320267
2022-09-13	14:25:29	0.252074
2022-09-13	14:25:29	0.276451
2022-09-13	14:25:29	0.186527
2022-09-13	14:25:29	0.147138
2022-09-13	14:25:30	0.211514
2022-09-13	14:25:30	0.141591
2022-09-13	14:25:30	0.18729
2022-09-13	14:25:30	0.0141606
2022-09-13	14:25:31	0.047443
2022-09-13	14:25:31	0.175127
2022-09-13	14:25:31	0.192786
2022-09-13	14:25:32	0.218741
2022-09-13	14:25:32	0.0758399
2022-09-13	14:25:32	-0.426246
2022-09-13	14:25:32	-0.205992
2022-09-13	14:25:33	-0.119224
2022-09-13	14:25:33	0.0419468
2022-09-13	14:25:33	0.512176
2022-09-13	14:25:33	0.988054
2022-09-13	14:25:34	0.826323
2022-09-13	14:25:34	1.92841
2022-09-13	14:25:34	0.534822
2022-09-13	14:25:34	1.34927
2022-09-13	14:25:35	0.689275
2022-09-13	14:25:35	3.11106
2022-09-13	14:25:35	0.879504
2022-09-13	14:25:36	2.89686
2022-09-13	14:25:36	1.56933
2022-09-13	14:25:36	1.96541
2022-09-13	14:25:36	1.13095
2022-09-13	14:25:37	2.36541
2022-09-13	14:25:37	1.99767
2022-09-13	14:25:37	1.89482
2022-09-13	14:25:37	1.09961
2022-09-13	14:25:38	0.594669
2022-09-13	14:25:38	0.361641
2022-09-13	14:25:38	0.535687
2022-09-13	14:25:38	0.334975
2022-09-13	14:25:39	0.203575
2022-09-13	14:25:39	0.168206
2022-09-13	14:25:39	0.36383
2022-09-13	14:25:40	0.149529
2022-09-13	14:25:40	0.0520232
2022-09-13	14:25:40	0.112176
2022-09-13	14:25:40	0.246171
2022-09-13	14:25:41	0.332023
2022-09-13	14:25:41	0.268512
2022-09-13	14:25:41	-0.0405468
2022-09-13	14:25:41	-0.0274679
2022-09-13	14:25:42	0.0635753
2022-09-13	14:25:42	0.212125
2022-09-13	14:25:42	0.123168
2022-09-13	14:25:42	-0.136374
2022-09-13	14:25:43	-0.412557
2022-09-13	14:25:43	-0.476832
2022-09-13	14:25:43	-0.441361
2022-09-13	14:25:44	-0.342582
2022-09-13	14:25:44	-0.248689
2022-09-13	14:25:44	0.0615905
2022-09-13	14:25:44	-0.155712
2022-09-13	14:25:45	-0.150623
2022-09-13	14:25:45	0.0250003
2022-09-13	14:25:45	0.203931
2022-09-13	14:25:45	0.358232
2022-09-13	14:25:46	0.454364
2022-09-13	14:25:46	0.523015
2022-09-13	14:25:46	0.436349
2022-09-13	14:25:46	0.327138
2022-09-13	14:25:47	0.118232
2022-09-13	14:25:47	0.228257
2022-09-13	14:25:47	0.236807
2022-09-13	14:25:48	0.322405
2022-09-13	14:25:48	0.767443
2022-09-13	14:25:48	0.479148
2022-09-13	14:25:48	0.216959
2022-09-13	14:25:49	0.357672
2022-09-13	14:25:49	0.336501
2022-09-13	14:25:49	0.307443
2022-09-13	14:25:49	0.322048
2022-09-13	14:25:50	0.336654
2022-09-13	14:25:50	0.355789
2022-09-13	14:25:50	0.280827
2022-09-13	14:25:50	0.348511
2022-09-13	14:25:51	0.360115
2022-09-13	14:25:51	0.429987
2022-09-13	14:25:51	0.384644
2022-09-13	14:25:52	0.447137
2022-09-13	14:25:52	0.421896
2022-09-13	14:25:52	0.443372
2022-09-13	14:25:52	0.422965
2022-09-13	14:25:53	0.230598
2022-09-13	14:25:53	0.296043
2022-09-13	14:25:53	0.277774
2022-09-13	14:25:53	0.117061
2022-09-13	14:25:54	0.251565
2022-09-13	14:25:54	0.223931
2022-09-13	14:25:54	0.373244
2022-09-13	14:25:54	0.339911
2022-09-13	14:25:55	0.269784
2022-09-13	14:25:55	0.296094
2022-09-13	14:25:55	0.369733
2022-09-13	14:25:55	0.243066
2022-09-13	14:25:56	0.462201
2022-09-13	14:25:56	0.881641
2022-09-13	14:25:56	0.517264
2022-09-13	14:25:57	0.373092
2022-09-13	14:25:57	0.47299
2022-09-13	14:25:57	0.626832
2022-09-13	14:25:57	0.380471
2022-09-13	14:25:58	0.377163
2022-09-13	14:25:58	0.435382
2022-09-13	14:25:58	0.427545
2022-09-13	14:25:58	0.46958
2022-09-13	14:25:59	0.509682
2022-09-13	14:25:59	0.445204
2022-09-13	14:25:59	0.495636
2022-09-13	14:26:00	0.484237
2022-09-13	14:26:00	0.402914
2022-09-13	14:26:00	0.48902
2022-09-13	14:26:00	0.796756
2022-09-13	14:26:01	0.7993
2022-09-13	14:26:01	0.776196
2022-09-13	14:26:01	1.25793
2022-09-13	14:26:01	1.38663
2022-09-13	14:26:02	0.784135
2022-09-13	14:26:02	1.36276
2022-09-13	14:26:02	0.907544
2022-09-13	14:26:02	1.10011
2022-09-13	14:26:03	0.428613
2022-09-13	14:26:03	0.615585
2022-09-13	14:26:03	0.517773
2022-09-13	14:26:04	0.450038
2022-09-13	14:26:04	0.555483
2022-09-13	14:26:04	0.816705
2022-09-13	14:26:04	1.69126
2022-09-13	14:26:05	0.691616
2022-09-13	14:26:05	1.19569
2022-09-13	14:26:05	0.557926
2022-09-13	14:26:05	0.505407
2022-09-13	14:26:06	0.427188
2022-09-13	14:26:06	0.357316
2022-09-13	14:26:06	0.344186
2022-09-13	14:26:06	0.285611
2022-09-13	14:26:07	0.377468
2022-09-13	14:26:07	0.256145
2022-09-13	14:26:07	0.112583
2022-09-13	14:26:08	0.930089
2022-09-13	14:26:08	1.06022
2022-09-13	14:26:08	0.627137
2022-09-13	14:26:08	0.409682
2022-09-13	14:26:09	0.223575
2022-09-13	14:26:09	0.0179264
2022-09-13	14:26:09	0.0711071
2022-09-13	14:26:09	0.0574684
2022-09-13	14:26:10	0.553804
2022-09-13	14:26:10	0.746425
2022-09-13	14:26:10	0.685611
2022-09-13	14:26:10	0.867086
2022-09-13	14:26:11	1.73258
2022-09-13	14:26:11	2.62123
2022-09-13	14:26:11	1.85899
2022-09-13	14:26:11	1.94459
2022-09-13	14:26:12	0.813091
2022-09-13	14:26:12	0.427392
2022-09-13	14:26:12	0.38327
2022-09-13	14:26:13	1.4822
2022-09-13	14:26:13	2.45915
2022-09-13	14:26:13	4.80118
2022-09-13	14:26:13	3.07197
2022-09-13	14:26:14	3.95161
2022-09-13	14:26:14	1.32536
2022-09-13	14:26:14	1.99431
2022-09-13	14:26:14	2.68398
2022-09-13	14:26:15	3.41029
2022-09-13	14:26:15	2.69487
2022-09-13	14:26:15	1.72546
2022-09-13	14:26:15	2.56189
2022-09-13	14:26:16	1.29044
2022-09-13	14:26:16	0.842201
2022-09-13	14:26:16	0.466527
2022-09-13	14:26:17	0.437417
2022-09-13	14:26:17	0.329428
2022-09-13	14:26:17	0.135585
2022-09-13	14:26:17	0.129224
2022-09-13	14:26:18	0.0655091
2022-09-13	14:26:18	0.166883
2022-09-13	14:26:18	0.729936
2022-09-13	14:26:18	1.04475
2022-09-13	14:26:19	3.91981
2022-09-13	14:26:19	1.96912
2022-09-13	14:26:19	3.85294
2022-09-13	14:26:20	2.83228
2022-09-13	14:26:20	7.45334
2022-09-13	14:26:20	3.67273
2022-09-13	14:26:20	2.50169
2022-09-13	14:26:21	1.54434
2022-09-13	14:26:21	1.26057
2022-09-13	14:26:21	1.87431
2022-09-13	14:26:21	4.73212
2022-09-13	14:26:22	2.40103
2022-09-13	14:26:22	1.43879
2022-09-13	14:26:22	0.440776
2022-09-13	14:26:22	0.31355
2022-09-13	14:26:23	0.242761
2022-09-13	14:26:23	0.0982317
2022-09-13	14:26:23	0.0946694
2022-09-13	14:26:23	-0.105127
2022-09-13	14:26:24	0.0790969
2022-09-13	14:26:24	-0.045585
2022-09-13	14:26:24	0.120318
2022-09-13	14:26:25	0.0307509
2022-09-13	14:26:25	-0.0900124
2022-09-13	14:26:25	-0.285534
2022-09-13	14:26:25	-0.114033
2022-09-13	14:26:26	0.025102
2022-09-13	14:26:26	1.61645
2022-09-13	14:26:26	1.58383
2022-09-13	14:26:26	1.95431
2022-09-13	14:26:27	1.58363
2022-09-13	14:26:27	2.31258
2022-09-13	14:26:27	2.28678
2022-09-13	14:26:27	1.99452
2022-09-13	14:26:28	0.70042
2022-09-13	14:26:28	0.811463
2022-09-13	14:26:28	0.908919
2022-09-13	14:26:29	1.87996
2022-09-13	14:26:29	1.54785
2022-09-13	14:26:29	2.22948
2022-09-13	14:26:29	1.8766
2022-09-13	14:26:30	3.71813
2022-09-13	14:26:30	4.07131
2022-09-13	14:26:30	6.98184
2022-09-13	14:26:30	4.38938
2022-09-13	14:26:31	2.05401
2022-09-13	14:26:31	2.62332
2022-09-13	14:26:31	0.985458
2022-09-13	14:26:31	2.43263
2022-09-13	14:26:32	0.623524
2022-09-13	14:26:32	2.13457
2022-09-13	14:26:32	0.671718
2022-09-13	14:26:33	1.88948
2022-09-13	14:26:33	0.604186
2022-09-13	14:26:33	1.37742
2022-09-13	14:26:33	1.34398
2022-09-13	14:26:34	1.49457
2022-09-13	14:26:34	1.35696
2022-09-13	14:26:34	0.948664
2022-09-13	14:26:34	1.05533
2022-09-13	14:26:35	0.416909
2022-09-13	14:26:35	0.387952
2022-09-13	14:26:35	0.22098
2022-09-13	14:26:35	0.318537
2022-09-13	14:26:36	0.420674
2022-09-13	14:26:36	0.398486
2022-09-13	14:26:36	0.399911
2022-09-13	14:26:37	0.42327
2022-09-13	14:26:37	0.413906
2022-09-13	14:26:37	0.381489
2022-09-13	14:26:37	0.446832
2022-09-13	14:26:38	0.431565
2022-09-13	14:26:38	0.42327
2022-09-13	14:26:38	0.404542
2022-09-13	14:26:38	0.397672
2022-09-13	14:26:39	0.395026
2022-09-13	14:26:39	0.366425
2022-09-13	14:26:39	0.368003
2022-09-13	14:26:39	0.368919
2022-09-13	14:26:40	0.360725
2022-09-13	14:26:40	0.375534
2022-09-13	14:26:40	0.377061
2022-09-13	14:26:41	0.39243
2022-09-13	14:26:41	0.431769
2022-09-13	14:26:41	0.515127
2022-09-13	14:26:41	0.889326
2022-09-13	14:26:42	1.33711
2022-09-13	14:26:42	1.93655
2022-09-13	14:26:42	2.24368
2022-09-13	14:26:42	0.929376
2022-09-13	14:26:43	0.332023
2022-09-13	14:26:43	0.242252
2022-09-13	14:26:43	0.121082
2022-09-13	14:26:43	-0.0558649
2022-09-13	14:26:44	-0.200445
2022-09-13	14:26:44	-0.286399
2022-09-13	14:26:44	-0.424007
2022-09-13	14:26:45	-0.289503
2022-09-13	14:26:45	-0.0532694
2022-09-13	14:26:45	-0.211794
2022-09-13	14:26:45	-0.159834
2022-09-13	14:26:46	-0.196323
2022-09-13	14:26:46	-0.241972
2022-09-13	14:26:46	-0.420394
2022-09-13	14:26:46	-0.521106
2022-09-13	14:26:47	-0.626908
2022-09-13	14:26:47	-0.760953
2022-09-13	14:26:47	-0.328944
2022-09-13	14:26:47	-0.386806
2022-09-13	14:26:48	-0.305432
2022-09-13	14:26:48	-0.309656
2022-09-13	14:26:48	-0.234338
2022-09-13	14:26:49	-0.0212593
2022-09-13	14:26:49	0.147494
2022-09-13	14:26:49	0.108613
2022-09-13	14:26:49	0.190445
2022-09-13	14:26:50	0.393092
2022-09-13	14:26:50	0.621998
2022-09-13	14:26:50	0.436196
2022-09-13	14:26:50	0.478791
2022-09-13	14:26:51	0.466578
2022-09-13	14:26:51	0.332532
2022-09-13	14:26:51	0.325712
2022-09-13	14:26:51	0.132888
2022-09-13	14:26:52	-0.048842
2022-09-13	14:26:52	-0.226755
2022-09-13	14:26:52	-0.328079
2022-09-13	14:26:53	-0.382684
2022-09-13	14:26:53	0.720827
2022-09-13	14:26:53	5.40184
2022-09-13	14:26:53	5.93314
2022-09-13	14:26:54	4.95762
2022-09-13	14:26:54	3.46276
2022-09-13	14:26:54	4.5135
2022-09-13	14:26:54	2.93981
2022-09-13	14:26:55	4.40312
2022-09-13	14:26:55	2.09757
2022-09-13	14:26:55	1.12205
2022-09-13	14:26:55	0.188817
2022-09-13	14:26:56	0.510394
2022-09-13	14:26:56	0.226629
2022-09-13	14:26:56	0.136247
2022-09-13	14:26:57	0.226221
2022-09-13	14:26:57	0.25701
2022-09-13	14:26:57	2.16408
2022-09-13	14:26:57	5.22922
2022-09-13	14:26:58	2.47925
2022-09-13	14:26:58	2.46754
2022-09-13	14:26:58	1.91726
2022-09-13	14:26:58	3.30429
2022-09-13	14:26:59	1.80602
2022-09-13	14:26:59	1.0595
2022-09-13	14:26:59	1.03625
2022-09-13	14:26:59	0.403931
2022-09-13	14:27:00	0.698689
2022-09-13	14:27:00	0.178639
2022-09-13	14:27:00	0.145967
2022-09-13	14:27:01	0.0383845
2022-09-13	14:27:01	0.128054
2022-09-13	14:27:01	0.103117
2022-09-13	14:27:01	0.643066
2022-09-13	14:27:02	0.143423
2022-09-13	14:27:02	0.304746
2022-09-13	14:27:02	0.314567
2022-09-13	14:27:02	0.322964
2022-09-13	14:27:03	0.278435
2022-09-13	14:27:03	0.297977
2022-09-13	14:27:03	0.327952
2022-09-13	14:27:03	0.345611
2022-09-13	14:27:04	0.490445
2022-09-13	14:27:04	0.527443
2022-09-13	14:27:04	0.933855
2022-09-13	14:27:05	0.858283
2022-09-13	14:27:05	1.01996
2022-09-13	14:27:05	0.672074
2022-09-13	14:27:05	0.668308
2022-09-13	14:27:06	0.643677
2022-09-13	14:27:06	0.56215
2022-09-13	14:27:06	0.621845
2022-09-13	14:27:06	0.647239
2022-09-13	14:27:07	0.642405
2022-09-13	14:27:07	0.622964
2022-09-13	14:27:07	0.731565
2022-09-13	14:27:07	0.794364
2022-09-13	14:27:08	0.797875
2022-09-13	14:27:08	0.806781
2022-09-13	14:27:08	0.872176
2022-09-13	14:27:09	0.791616
2022-09-13	14:27:09	0.870293
2022-09-13	14:27:09	1.14449
2022-09-13	14:27:09	1.48118
2022-09-13	14:27:10	2.59401
2022-09-13	14:27:10	1.81421
2022-09-13	14:27:10	1.52256
2022-09-13	14:27:10	1.34246
2022-09-13	14:27:11	1.26637
2022-09-13	14:27:11	1.52378
2022-09-13	14:27:11	1.46668
2022-09-13	14:27:11	1.37487
2022-09-13	14:27:12	2.95095
2022-09-13	14:27:12	3.73528
2022-09-13	14:27:12	6.8079
2022-09-13	14:27:13	5.49787
2022-09-13	14:27:13	2.28637
2022-09-13	14:27:13	1.19253
2022-09-13	14:27:13	1.29136
2022-09-13	14:27:14	1.2077
2022-09-13	14:27:14	1.62006
2022-09-13	14:27:14	1.95279
2022-09-13	14:27:14	5.05986
2022-09-13	14:27:15	4.45487
2022-09-13	14:27:15	5.60179
2022-09-13	14:27:15	11.3796
2022-09-13	14:27:16	8.05253
2022-09-13	14:27:16	2.82347
2022-09-13	14:27:16	2.9421
2022-09-13	14:27:16	5.37171
2022-09-13	14:27:17	2.37833
2022-09-13	14:27:17	3.02871
2022-09-13	14:27:17	3.06805
2022-09-13	14:27:17	3.46627
2022-09-13	14:27:18	12.3799
2022-09-13	14:27:18	11.8203
2022-09-13	14:27:18	11.53
2022-09-13	14:27:18	23.2322
2022-09-13	14:27:19	22.4448
2022-09-13	14:27:19	13.7817
2022-09-13	14:27:19	11.8165
2022-09-13	14:27:19	13.4491
2022-09-13	14:27:20	19.369
2022-09-13	14:27:20	16.7612
2022-09-13	14:27:20	20.8322
2022-09-13	14:27:21	24.56
2022-09-13	14:27:21	13.9493
2022-09-13	14:27:21	10.3468
2022-09-13	14:27:21	6.77655
2022-09-13	14:27:22	4.58948
2022-09-13	14:27:22	1.7165
2022-09-13	14:27:22	1.10688
2022-09-13	14:27:22	0.794975
2022-09-13	14:27:23	0.370852
2022-09-13	14:27:23	0.421031
2022-09-13	14:27:23	0.525611
2022-09-13	14:27:23	0.473092
2022-09-13	14:27:24	0.512481
2022-09-13	14:27:24	0.552074
2022-09-13	14:27:24	0.804644
2022-09-13	14:27:25	0.491107
2022-09-13	14:27:25	0.479148
2022-09-13	14:27:25	0.50271
2022-09-13	14:27:25	0.500471
2022-09-13	14:27:26	0.475891
2022-09-13	14:27:26	0.439606
2022-09-13	14:27:26	0.505356
2022-09-13	14:27:26	0.430954
2022-09-13	14:27:27	0.498995
2022-09-13	14:27:27	0.442812
2022-09-13	14:27:27	0.49126
2022-09-13	14:27:27	0.473957
2022-09-13	14:27:28	0.495026
2022-09-13	14:27:28	0.517875
2022-09-13	14:27:28	0.512888
2022-09-13	14:27:29	0.588715
2022-09-13	14:27:29	0.632379
2022-09-13	14:27:29	0.747595
2022-09-13	14:27:29	0.943168
2022-09-13	14:27:30	0.675738
2022-09-13	14:27:30	1.02327
2022-09-13	14:27:30	0.76444
2022-09-13	14:27:30	0.808461
2022-09-13	14:27:31	0.580827
2022-09-13	14:27:31	0.534109
2022-09-13	14:27:31	0.452583
2022-09-13	14:27:31	0.592379
2022-09-13	14:27:32	0.43416
2022-09-13	14:27:32	0.53187
2022-09-13	14:27:32	0.564389
2022-09-13	14:27:33	0.709987
2022-09-13	14:27:33	0.962659
2022-09-13	14:27:33	0.795076
2022-09-13	14:27:33	0.513041
2022-09-13	14:27:34	0.458995
2022-09-13	14:27:34	0.527494
2022-09-13	14:27:34	0.645204
2022-09-13	14:27:34	1.05553
2022-09-13	14:27:35	4.12118
2022-09-13	14:27:35	5.57538
2022-09-13	14:27:35	1.94938
2022-09-13	14:27:35	0.939809
2022-09-13	14:27:36	0.579046
2022-09-13	14:27:36	0.592583
2022-09-13	14:27:36	0.375789
2022-09-13	14:27:37	0.491361
2022-09-13	14:27:37	0.43355
