# Supplementary material for: Comparing efficacy in reducing pulling and welfare impacts of four types of leash walking equipment
Source: PeerJ journal article supplement (doi:10.7717/peerj.18131), 2024-10-24
Supplement: Shelter1_Tension_files.zip [file Dominic_harness_2022912102110 copy.xlsx]

## Sheet: Sheet3
Date	Time	Averaged	Impulse	Total steps
2022-09-12	10:21:41	1.5099	1.5099	0			Newton impulse	537.305
2022-09-12	10:21:42	1.3401	2.85	0			Total steps	0
2022-09-12	10:21:43	2.89026	5.74026	0			# times pull > 13N, >5secs	0
2022-09-12	10:21:44	4.17361	9.91387	0
2022-09-12	10:21:45	4.40457	14.3184	0
2022-09-12	10:21:46	7.51852	21.837	0
2022-09-12	10:21:47	1.05976	22.8967	0
2022-09-12	10:21:48	-0.0952449	22.8967	0
2022-09-12	10:21:49	-0.280473	22.8967	0
2022-09-12	10:21:50	-0.0512154	22.8967	0
2022-09-12	10:21:51	0.418166	23.3149	0
2022-09-12	10:21:52	0.677022	23.9919	0
2022-09-12	10:21:53	0.803563	24.7955	0
2022-09-12	10:21:54	1.2099	26.0054	0
2022-09-12	10:21:55	1.15553	27.1609	0
2022-09-12	10:21:56	0.790207	27.9511	0
2022-09-12	10:21:57	0.732426	28.6835	0
2022-09-12	10:21:58	0.610242	29.2938	0
2022-09-12	10:21:59	1.16927	30.463	0
2022-09-12	10:22:00	0.589698	31.0527	0
2022-09-12	10:22:01	0.0723267	31.1251	0
2022-09-12	10:22:02	0.391624	31.5167	0
2022-09-12	10:22:03	0.848667	32.3654	0
2022-09-12	10:22:04	1.44151	33.8069	0
2022-09-12	10:22:05	1.47764	35.2845	0
2022-09-12	10:22:06	7.81162	43.0961	0
2022-09-12	10:22:07	3.58125	46.6774	0
2022-09-12	10:22:08	1.28577	47.9632	0
2022-09-12	10:22:09	1.21697	49.1801	0
2022-09-12	10:22:10	1.25376	50.4339	0
2022-09-12	10:22:11	1.46774	51.9016	0
2022-09-12	10:22:12	1.64321	53.5448	0
2022-09-12	10:22:13	1.94787	55.4927	0
2022-09-12	10:22:14	4.29262	59.7853	0
2022-09-12	10:22:15	3.07922	62.8645	0
2022-09-12	10:22:16	3.97277	66.8373	0
2022-09-12	10:22:17	2.07656	68.9139	0
2022-09-12	10:22:18	3.97078	72.8847	0
2022-09-12	10:22:19	3.20152	76.0862	0
2022-09-12	10:22:20	3.44271	79.5289	0
2022-09-12	10:22:21	4.34721	83.8761	0
2022-09-12	10:22:22	1.80894	85.685	0
2022-09-12	10:22:23	4.7221	90.4071	0
2022-09-12	10:22:24	2.3417	92.7488	0
2022-09-12	10:22:25	1.82831	94.5772	0
2022-09-12	10:22:26	3.37526	97.9524	0
2022-09-12	10:22:27	2.23938	100.192	0
2022-09-12	10:22:28	3.04311	103.235	0
2022-09-12	10:22:29	3.46082	106.696	0
2022-09-12	10:22:30	2.23216	108.928	0
2022-09-12	10:22:31	4.43275	113.361	0
2022-09-12	10:22:32	7.08639	120.447	0
2022-09-12	10:22:33	10.3551	130.802	0
2022-09-12	10:22:34	6.66406	137.466	0
2022-09-12	10:22:35	4.01119	141.477	0
2022-09-12	10:22:36	1.65981	143.137	0
2022-09-12	10:22:37	1.38081	144.518	0
2022-09-12	10:22:38	1.46649	145.984	0
2022-09-12	10:22:39	1.45234	147.437	0
2022-09-12	10:22:40	5.74124	153.178	0
2022-09-12	10:22:41	9.53777	162.716	0
2022-09-12	10:22:42	3.922	166.638	0
2022-09-12	10:22:43	8.88634	175.524	0
2022-09-12	10:22:44	2.92053	178.445	0
2022-09-12	10:22:45	1.17232	179.617	0
2022-09-12	10:22:46	1.8468	181.464	0
2022-09-12	10:22:47	1.23657	182.7	0
2022-09-12	10:22:48	0.853987	183.554	0
2022-09-12	10:22:49	-0.298243	183.554	0
2022-09-12	10:22:50	-0.274814	183.554	0
2022-09-12	10:22:51	1.33942	184.894	0
2022-09-12	10:22:52	2.97101	187.865	0
2022-09-12	10:22:53	3.39025	191.255	0
2022-09-12	10:22:54	3.06677	194.322	0
2022-09-12	10:22:55	1.50101	195.823	0
2022-09-12	10:22:56	1.41458	197.237	0
2022-09-12	10:22:57	1.48709	198.724	0
2022-09-12	10:22:58	1.53672	200.261	0
2022-09-12	10:22:59	1.50192	201.763	0
2022-09-12	10:23:00	0.970888	202.734	0
2022-09-12	10:23:01	0.244482	202.979	0
2022-09-12	10:23:02	1.40362	204.382	0
2022-09-12	10:23:03	2.1417	206.524	0
2022-09-12	10:23:04	3.20517	209.729	0
2022-09-12	10:23:05	3.76128	213.49	0
2022-09-12	10:23:06	3.1804	216.671	0
2022-09-12	10:23:07	1.39473	218.065	0
2022-09-12	10:23:08	1.09275	219.158	0
2022-09-12	10:23:09	1.282	220.44	0
2022-09-12	10:23:10	1.47147	221.912	0
2022-09-12	10:23:11	4.02986	225.941	0
2022-09-12	10:23:12	0.202943	226.144	0
2022-09-12	10:23:13	0.239709	226.384	0
2022-09-12	10:23:14	1.10549	227.49	0
2022-09-12	10:23:15	3.55307	231.043	0
2022-09-12	10:23:16	0.950422	231.993	0
2022-09-12	10:23:17	-1.42555	231.993	0
2022-09-12	10:23:18	-2.36728	231.993	0
2022-09-12	10:23:19	-2.00729	231.993	0
2022-09-12	10:23:20	-1.49422	231.993	0
2022-09-12	10:23:21	-0.405146	231.993	0
2022-09-12	10:23:22	-0.53582	231.993	0
2022-09-12	10:23:23	-0.333953	231.993	0
2022-09-12	10:23:24	0.199547	232.193	0
2022-09-12	10:23:25	0.218393	232.411	0
2022-09-12	10:23:26	0.241822	232.653	0
2022-09-12	10:23:27	-0.415447	232.653	0
2022-09-12	10:23:28	0.0222421	232.675	0
2022-09-12	10:23:29	0.00458499	232.68	0
2022-09-12	10:23:30	0.0355226	232.715	0
2022-09-12	10:23:31	0.286926	233.002	0
2022-09-12	10:23:32	-0.0893024	233.002	0
2022-09-12	10:23:33	-0.0624207	233.002	0
2022-09-12	10:23:34	0.245595	233.248	0
2022-09-12	10:23:35	0.352801	233.601	0
2022-09-12	10:23:36	0.559138	234.16	0
2022-09-12	10:23:37	2.13104	236.291	0
2022-09-12	10:23:38	3.75176	240.042	0
2022-09-12	10:23:39	0.715015	240.758	0
2022-09-12	10:23:40	1.13186	241.889	0
2022-09-12	10:23:41	1.42812	243.317	0
2022-09-12	10:23:42	1.30741	244.625	0
2022-09-12	10:23:43	2.1616	246.787	0
2022-09-12	10:23:44	2.53389	249.32	0
2022-09-12	10:23:45	3.25319	252.574	0
2022-09-12	10:23:46	1.70163	254.275	0
2022-09-12	10:23:47	1.16368	255.439	0
2022-09-12	10:23:48	1.14731	256.586	0
2022-09-12	10:23:49	1.48579	258.072	0
2022-09-12	10:23:50	1.07453	259.147	0
2022-09-12	10:23:51	1.31805	260.465	0
2022-09-12	10:23:52	2.67108	263.136	0
2022-09-12	10:23:53	1.66055	264.796	0
2022-09-12	10:23:54	1.42541	266.222	0
2022-09-12	10:23:55	2.00842	268.23	0
2022-09-12	10:23:56	-0.0464988	268.23	0
2022-09-12	10:23:57	-0.156818	268.23	0
2022-09-12	10:23:58	0.447424	268.677	0
2022-09-12	10:23:59	-0.361175	268.677	0
2022-09-12	10:24:00	-0.336028	268.677	0
2022-09-12	10:24:01	-0.292527	268.677	0
2022-09-12	10:24:02	-0.245216	268.677	0
2022-09-12	10:24:03	0.272665	268.95	0
2022-09-12	10:24:04	1.52201	270.472	0
2022-09-12	10:24:05	0.706639	271.179	0
2022-09-12	10:24:06	0.142049	271.321	0
2022-09-12	10:24:07	0.466043	271.787	0
2022-09-12	10:24:08	1.55891	273.346	0
2022-09-12	10:24:09	1.46528	274.811	0
2022-09-12	10:24:10	1.25449	276.066	0
2022-09-12	10:24:11	1.36655	277.432	0
2022-09-12	10:24:12	1.72897	279.161	0
2022-09-12	10:24:13	1.41926	280.58	0
2022-09-12	10:24:14	0.940858	281.521	0
2022-09-12	10:24:15	-1.82019	281.521	0
2022-09-12	10:24:16	-1.68386	281.521	0
2022-09-12	10:24:17	-1.29758	281.521	0
2022-09-12	10:24:18	-1.67186	281.521	0
2022-09-12	10:24:19	-1.13276	281.521	0
2022-09-12	10:24:20	-0.86734	281.521	0
2022-09-12	10:24:21	-0.808484	281.521	0
2022-09-12	10:24:22	-0.842496	281.521	0
2022-09-12	10:24:23	-0.0253531	281.521	0
2022-09-12	10:24:24	2.52138	284.043	0
2022-09-12	10:24:25	1.49598	285.539	0
2022-09-12	10:24:26	2.94039	288.479	0
2022-09-12	10:24:27	1.64663	290.126	0
2022-09-12	10:24:28	2.50157	292.627	0
2022-09-12	10:24:29	2.54747	295.175	0
2022-09-12	10:24:30	2.45408	297.629	0
2022-09-12	10:24:31	1.35449	298.983	0
2022-09-12	10:24:32	1.40764	300.391	0
2022-09-12	10:24:33	1.44482	301.836	0
2022-09-12	10:24:34	1.47747	303.313	0
2022-09-12	10:24:35	1.85238	305.165	0
2022-09-12	10:24:36	1.47713	306.643	0
2022-09-12	10:24:37	0.960608	307.603	0
2022-09-12	10:24:38	0.302206	307.905	0
2022-09-12	10:24:39	-0.764474	307.905	0
2022-09-12	10:24:40	0.21262	308.118	0
2022-09-12	10:24:41	0.51477	308.633	0
2022-09-12	10:24:42	-0.189245	308.633	0
2022-09-12	10:24:43	0.163271	308.796	0
2022-09-12	10:24:44	0.014828	308.811	0
2022-09-12	10:24:45	0.649234	309.46	0
2022-09-12	10:24:46	1.20843	310.669	0
2022-09-12	10:24:47	1.1621	311.831	0
2022-09-12	10:24:48	1.69518	313.526	0
2022-09-12	10:24:49	2.41199	315.938	0
2022-09-12	10:24:50	1.86881	317.807	0
2022-09-12	10:24:51	1.87775	319.684	0
2022-09-12	10:24:52	1.42152	321.106	0
2022-09-12	10:24:53	1.40305	322.509	0
2022-09-12	10:24:54	1.54487	324.054	0
2022-09-12	10:24:55	1.48664	325.54	0
2022-09-12	10:24:56	1.74093	327.281	0
2022-09-12	10:24:57	1.42682	328.708	0
2022-09-12	10:24:58	1.32461	330.033	0
2022-09-12	10:24:59	1.28381	331.317	0
2022-09-12	10:25:00	1.29905	332.616	0
2022-09-12	10:25:01	0.882454	333.498	0
2022-09-12	10:25:02	0.757836	334.256	0
2022-09-12	10:25:03	0.997788	335.254	0
2022-09-12	10:25:04	1.24963	336.503	0
2022-09-12	10:25:05	1.42122	337.925	0
2022-09-12	10:25:06	1.75715	339.682	0
2022-09-12	10:25:07	1.13129	340.813	0
2022-09-12	10:25:08	1.3005	342.114	0
2022-09-12	10:25:09	1.57477	343.688	0
2022-09-12	10:25:10	1.3846	345.073	0
2022-09-12	10:25:11	1.67277	346.746	0
2022-09-12	10:25:12	1.71799	348.464	0
2022-09-12	10:25:13	1.63529	350.099	0
2022-09-12	10:25:14	1.51873	351.618	0
2022-09-12	10:25:15	1.69366	353.311	0
2022-09-12	10:25:16	1.79564	355.107	0
2022-09-12	10:25:17	1.47796	356.585	0
2022-09-12	10:25:18	1.32173	357.907	0
2022-09-12	10:25:19	1.55138	359.458	0
2022-09-12	10:25:20	1.54289	361.001	0
2022-09-12	10:25:21	0.030222	361.031	0
2022-09-12	10:25:22	-0.1292	361.031	0
2022-09-12	10:25:23	0.623825	361.655	0
2022-09-12	10:25:24	0.812109	362.467	0
2022-09-12	10:25:25	0.312507	362.78	0
2022-09-12	10:25:26	0.865928	363.646	0
2022-09-12	10:25:27	0.537577	364.183	0
2022-09-12	10:25:28	1.03718	365.22	0
2022-09-12	10:25:29	1.82659	367.047	0
2022-09-12	10:25:30	1.69754	368.744	0
2022-09-12	10:25:31	1.65364	370.398	0
2022-09-12	10:25:32	4.69268	375.091	0
2022-09-12	10:25:33	3.28754	378.378	0
2022-09-12	10:25:34	6.72087	385.099	0
2022-09-12	10:25:35	5.71305	390.812	0
2022-09-12	10:25:36	6.64123	397.453	0
2022-09-12	10:25:37	3.88114	401.335	0
2022-09-12	10:25:38	0.439049	401.774	0
2022-09-12	10:25:39	0.263252	402.037	0
2022-09-12	10:25:40	0.548669	402.586	0
2022-09-12	10:25:41	1.00582	403.591	0
2022-09-12	10:25:42	1.3215	404.913	0
2022-09-12	10:25:43	1.37209	406.285	0
2022-09-12	10:25:44	1.9511	408.236	0
2022-09-12	10:25:45	6.14666	414.383	0
2022-09-12	10:25:46	6.07723	420.46	0
2022-09-12	10:25:47	4.22573	424.686	0
2022-09-12	10:25:48	2.44974	427.135	0
2022-09-12	10:25:49	1.70758	428.843	0
2022-09-12	10:25:50	1.55212	430.395	0
2022-09-12	10:25:51	1.58511	431.98	0
2022-09-12	10:25:52	1.88284	433.863	0
2022-09-12	10:25:53	2.46502	436.328	0
2022-09-12	10:25:54	1.87509	438.203	0
2022-09-12	10:25:55	1.84408	440.047	0
2022-09-12	10:25:56	1.70931	441.757	0
2022-09-12	10:25:57	1.92931	443.686	0
2022-09-12	10:25:58	5.76422	449.45	0
2022-09-12	10:25:59	4.5448	453.995	0
2022-09-12	10:26:00	2.19797	456.193	0
2022-09-12	10:26:01	1.89892	458.092	0
2022-09-12	10:26:02	1.84363	459.935	0
2022-09-12	10:26:03	1.66796	461.603	0
2022-09-12	10:26:04	1.4837	463.087	0
2022-09-12	10:26:05	1.661	464.748	0
2022-09-12	10:26:06	1.59722	466.345	0
2022-09-12	10:26:07	1.22716	467.572	0
2022-09-12	10:26:08	0.531125	468.104	0
2022-09-12	10:26:09	2.06056	470.164	0
2022-09-12	10:26:10	1.5657	471.73	0
2022-09-12	10:26:11	1.80361	473.534	0
2022-09-12	10:26:12	1.7361	475.27	0
2022-09-12	10:26:13	2.03197	477.302	0
2022-09-12	10:26:14	1.99716	479.299	0
2022-09-12	10:26:15	2.19756	481.496	0
2022-09-12	10:26:16	0.766721	482.263	0
2022-09-12	10:26:17	0.154972	482.418	0
2022-09-12	10:26:18	0.705997	483.124	0
2022-09-12	10:26:19	1.26785	484.392	0
2022-09-12	10:26:20	1.37419	485.766	0
2022-09-12	10:26:21	1.72463	487.491	0
2022-09-12	10:26:22	3.22761	490.718	0
2022-09-12	10:26:23	3.68612	494.404	0
2022-09-12	10:26:24	1.94527	496.35	0
2022-09-12	10:26:25	1.04895	497.399	0
2022-09-12	10:26:26	1.58926	498.988	0
2022-09-12	10:26:27	0.655855	499.644	0
2022-09-12	10:26:28	0.842521	500.486	0
2022-09-12	10:26:29	1.38415	501.87	0
2022-09-12	10:26:30	3.05253	504.923	0
2022-09-12	10:26:31	9.86612	514.789	0
2022-09-12	10:26:32	4.3353	519.124	0
2022-09-12	10:26:33	2.71634	521.841	0
2022-09-12	10:26:34	6.56113	528.402	0
2022-09-12	10:26:35	1.87017	530.272	0
2022-09-12	10:26:36	1.29632	531.568	0
2022-09-12	10:26:37	1.17317	532.741	0
2022-09-12	10:26:38	1.17666	533.918	0
2022-09-12	10:26:39	1.26038	535.178	0
2022-09-12	10:26:40	1.05704	536.236	0
2022-09-12	10:26:41	1.06966	537.305	0

## Sheet: Dominic_harness_20229121021 (3)
Date	Time	Lbs	Newtons	averaged newtons	Total Force x Time	total time steps force > 13.345		**GoPro Fitting: 1010
2022-09-12	10:21:41	0.201031	0.894226	1.5099	0.894226	FALSE	0			Total Force x time	1033.15
2022-09-12	10:21:41	0.427188	1.90022	1.5099	1.90022	FALSE	0			Total Time Steps Force >13.345	7
2022-09-12	10:21:41	0.180725	0.803901	1.5099	1.69813	FALSE	0
2022-09-12	10:21:41	0.548817	2.44125	1.5099	4.34147	FALSE	0
2022-09-12	10:21:42	0.192939	0.858231	1.3401	2.55636	FALSE	0
2022-09-12	10:21:42	0.40098	1.78364	1.3401	6.1251	FALSE	0
2022-09-12	10:21:42	0.309886	1.37843	1.3401	3.93479	FALSE	0
2022-09-12	10:21:43	0.369479	1.64352	2.89026	7.76862	FALSE	0
2022-09-12	10:21:43	1.34729	5.99302	2.89026	9.92781	FALSE	0
2022-09-12	10:21:43	0.234415	1.04272	2.89026	8.81135	FALSE	0
2022-09-12	10:21:43	0.64785	2.88177	2.89026	12.8096	FALSE	0
2022-09-12	10:21:44	1.82037	8.09737	4.17361	16.9087	FALSE	0
2022-09-12	10:21:44	0.753651	3.35239	4.17361	16.162	FALSE	0
2022-09-12	10:21:44	0.690751	3.0726	4.17361	19.9813	FALSE	0
2022-09-12	10:21:44	0.488308	2.17209	4.17361	18.3341	FALSE	0
2022-09-12	10:21:45	0.247036	1.09887	4.40457	21.0802	FALSE	0
2022-09-12	10:21:45	0.784593	3.49003	4.40457	21.8241	FALSE	0
2022-09-12	10:21:45	2.22683	9.90539	4.40457	30.9856	FALSE	0
2022-09-12	10:21:45	0.702303	3.12398	4.40457	24.9481	FALSE	0
2022-09-12	10:21:46	1.89894	8.44686	7.51852	39.4324	FALSE	0
2022-09-12	10:21:46	2.59604	11.5477	7.51852	36.4958	FALSE	0
2022-09-12	10:21:46	0.575738	2.561	7.51852	41.9934	FALSE	0
2022-09-12	10:21:47	0.389479	1.73248	1.05976	38.2283	FALSE	0
2022-09-12	10:21:47	0.349478	1.55455	1.05976	43.548	FALSE	0
2022-09-12	10:21:47	0.190242	0.846234	1.05976	39.0745	FALSE	0
2022-09-12	10:21:47	0.0237788	0.105773	1.05976	43.6537	FALSE	0
2022-09-12	10:21:48	0.174975	0.778324	-0.0952449	39.8528	FALSE	0
2022-09-12	10:21:48	0.126272	0.561683	-0.0952449	44.2154	FALSE	0
2022-09-12	10:21:48	-0.215	-0.956363	-0.0952449	39.8528	FALSE	0
2022-09-12	10:21:48	-0.171895	-0.764623	-0.0952449	44.2154	FALSE	0
2022-09-12	10:21:49	-0.120547	-0.536217	-0.280473	39.8528	FALSE	0
2022-09-12	10:21:49	-0.0593763	-0.264118	-0.280473	44.2154	FALSE	0
2022-09-12	10:21:49	-0.0390201	-0.173569	-0.280473	39.8528	FALSE	0
2022-09-12	10:21:49	-0.0332695	-0.147989	-0.280473	44.2154	FALSE	0
2022-09-12	10:21:50	-0.0261448	-0.116297	-0.0512154	39.8528	FALSE	0
2022-09-12	10:21:50	-0.0270608	-0.120372	-0.0512154	44.2154	FALSE	0
2022-09-12	10:21:50	-0.00899467	-0.0400101	-0.0512154	39.8528	FALSE	0
2022-09-12	10:21:50	0.0161453	0.0718175	-0.0512154	44.2872	FALSE	0
2022-09-12	10:21:51	0.0464252	0.206509	0.418166	40.0593	FALSE	0
2022-09-12	10:21:51	0.0819468	0.364516	0.418166	44.6518	FALSE	0
2022-09-12	10:21:51	0.153652	0.683475	0.418166	40.7428	FALSE	0
2022-09-12	10:21:52	0.160216	0.712673	0.677022	45.3644	FALSE	0
2022-09-12	10:21:52	0.147545	0.65631	0.677022	41.3991	FALSE	0
2022-09-12	10:21:52	0.161998	0.7206	0.677022	46.085	FALSE	0
2022-09-12	10:21:52	0.139046	0.618504	0.677022	42.0176	FALSE	0
2022-09-12	10:21:53	0.15813	0.703394	0.803563	46.7884	FALSE	0
2022-09-12	10:21:53	0.161082	0.716525	0.803563	42.7341	FALSE	0
2022-09-12	10:21:53	0.172837	0.768814	0.803563	47.5572	FALSE	0
2022-09-12	10:21:53	0.230547	1.02552	0.803563	43.7597	FALSE	0
2022-09-12	10:21:54	0.393041	1.74832	1.2099	49.3056	FALSE	0
2022-09-12	10:21:54	0.215229	0.957382	1.2099	44.717	FALSE	0
2022-09-12	10:21:54	0.227087	1.01013	1.2099	50.3157	FALSE	0
2022-09-12	10:21:54	0.252634	1.12377	1.2099	45.8408	FALSE	0
2022-09-12	10:21:55	0.310853	1.38274	1.15553	51.6984	FALSE	0
2022-09-12	10:21:55	0.266883	1.18715	1.15553	47.028	FALSE	0
2022-09-12	10:21:55	0.20159	0.896713	1.15553	52.5951	FALSE	0
2022-09-12	10:21:56	0.173448	0.771531	0.790207	47.7995	FALSE	0
2022-09-12	10:21:56	0.201336	0.895583	0.790207	53.4907	FALSE	0
2022-09-12	10:21:56	0.158435	0.704751	0.790207	48.5042	FALSE	0
2022-09-12	10:21:56	0.177367	0.788964	0.790207	54.2797	FALSE	0
2022-09-12	10:21:57	0.166018	0.738481	0.732426	49.2427	FALSE	0
2022-09-12	10:21:57	0.149886	0.666723	0.732426	54.9464	FALSE	0
2022-09-12	10:21:57	0.172125	0.765646	0.732426	50.0084	FALSE	0
2022-09-12	10:21:57	0.170598	0.758854	0.732426	55.7053	FALSE	0
2022-09-12	10:21:58	0.143575	0.63865	0.610242	50.647	FALSE	0
2022-09-12	10:21:58	0.150191	0.66808	0.610242	56.3734	FALSE	0
2022-09-12	10:21:58	0.155026	0.689587	0.610242	51.3366	FALSE	0
2022-09-12	10:21:58	0.099962	0.444651	0.610242	56.818	FALSE	0
2022-09-12	10:21:59	0.0603692	0.268534	1.16927	51.6051	FALSE	0
2022-09-12	10:21:59	0.144898	0.644535	1.16927	57.4625	FALSE	0
2022-09-12	10:21:59	0.583321	2.59473	1.16927	54.1999	FALSE	0
2022-09-12	10:22:00	0.125916	0.5601	0.589698	58.0226	FALSE	0
2022-09-12	10:22:00	0.0830155	0.36927	0.589698	54.5691	FALSE	0
2022-09-12	10:22:00	0.184491	0.820653	0.589698	58.8433	FALSE	0
2022-09-12	10:22:00	0.136858	0.608772	0.589698	55.1779	FALSE	0
2022-09-12	10:22:01	0.0662724	0.294793	0.0723267	59.1381	FALSE	0
2022-09-12	10:22:01	0.000674557	0.00300056	0.0723267	55.1809	FALSE	0
2022-09-12	10:22:01	0.0630155	0.280306	0.0723267	59.4184	FALSE	0
2022-09-12	10:22:01	-0.0649234	-0.288792	0.0723267	55.1809	FALSE	0
2022-09-12	10:22:02	0.000114759	0.000510471	0.391624	59.4189	FALSE	0
2022-09-12	10:22:02	0.13299	0.591566	0.391624	55.7725	FALSE	0
2022-09-12	10:22:02	0.139606	0.620995	0.391624	60.0399	FALSE	0
2022-09-12	10:22:02	0.0794531	0.353423	0.391624	56.1259	FALSE	0
2022-09-12	10:22:03	0.0510053	0.226882	0.848667	60.2668	FALSE	0
2022-09-12	10:22:03	0.0920231	0.409337	0.848667	56.5352	FALSE	0
2022-09-12	10:22:03	0.286425	1.27408	0.848667	61.5409	FALSE	0
2022-09-12	10:22:03	0.333702	1.48437	0.848667	58.0196	FALSE	0
2022-09-12	10:22:04	0.332074	1.47713	1.44151	63.018	FALSE	0
2022-09-12	10:22:04	0.304542	1.35466	1.44151	59.3743	FALSE	0
2022-09-12	10:22:04	0.335585	1.49275	1.44151	64.5107	FALSE	0
2022-09-12	10:22:05	0.279148	1.24171	1.47764	60.616	FALSE	0
2022-09-12	10:22:05	0.30098	1.33882	1.47764	65.8496	FALSE	0
2022-09-12	10:22:05	0.398639	1.77323	1.47764	62.3892	FALSE	0
2022-09-12	10:22:05	0.349987	1.55681	1.47764	67.4064	FALSE	0
2022-09-12	10:22:06	0.405764	1.80492	7.81162	64.1941	FALSE	0
2022-09-12	10:22:06	3.02871	13.4723	7.81162	80.8787	1	1
2022-09-12	10:22:06	0.729529	3.24509	7.81162	67.4392	FALSE	1
2022-09-12	10:22:06	2.86052	12.7242	7.81162	93.6028	FALSE	1
2022-09-12	10:22:07	2.22586	9.90107	3.58125	77.3403	FALSE	1
2022-09-12	10:22:07	0.451616	2.00888	3.58125	95.6117	FALSE	1
2022-09-12	10:22:07	0.319504	1.42122	3.58125	78.7615	FALSE	1
2022-09-12	10:22:07	0.223422	0.993826	3.58125	96.6055	FALSE	1
2022-09-12	10:22:08	0.323575	1.43933	1.28577	80.2008	FALSE	1
2022-09-12	10:22:08	0.331056	1.4726	1.28577	98.0781	FALSE	1
2022-09-12	10:22:08	0.212532	0.945385	1.28577	81.1462	FALSE	1
2022-09-12	10:22:09	0.353397	1.57198	1.21697	99.6501	FALSE	1
2022-09-12	10:22:09	0.257977	1.14753	1.21697	82.2937	FALSE	1
2022-09-12	10:22:09	0.309529	1.37685	1.21697	101.027	FALSE	1
2022-09-12	10:22:09	0.173448	0.771531	1.21697	83.0653	FALSE	1
2022-09-12	10:22:10	0.309122	1.37504	1.25376	102.402	FALSE	1
2022-09-12	10:22:10	0.259962	1.15636	1.25376	84.2216	FALSE	1
2022-09-12	10:22:10	0.261438	1.16293	1.25376	103.565	FALSE	1
2022-09-12	10:22:10	0.296908	1.32071	1.25376	85.5423	FALSE	1
2022-09-12	10:22:11	0.282608	1.2571	1.46774	104.822	FALSE	1
2022-09-12	10:22:11	0.529428	2.355	1.46774	87.8973	FALSE	1
2022-09-12	10:22:11	0.212125	0.943574	1.46774	105.766	FALSE	1
2022-09-12	10:22:11	0.295687	1.31527	1.46774	89.2126	FALSE	1
2022-09-12	10:22:12	0.2964	1.31845	1.64321	107.084	FALSE	1
2022-09-12	10:22:12	0.324237	1.44227	1.64321	90.6549	FALSE	1
2022-09-12	10:22:12	0.487596	2.16892	1.64321	109.253	FALSE	1
2022-09-12	10:22:13	0.256654	1.14165	1.94787	91.7965	FALSE	1
2022-09-12	10:22:13	0.300115	1.33497	1.94787	110.588	FALSE	1
2022-09-12	10:22:13	0.699708	3.11244	1.94787	94.909	FALSE	1
2022-09-12	10:22:13	0.495127	2.20242	1.94787	112.79	FALSE	1
2022-09-12	10:22:14	0.412023	1.83276	4.29262	96.7417	FALSE	1
2022-09-12	10:22:14	0.512939	2.28166	4.29262	115.072	FALSE	1
2022-09-12	10:22:14	0.617468	2.74662	4.29262	99.4884	FALSE	1
2022-09-12	10:22:14	2.31767	10.3095	4.29262	125.381	FALSE	1
2022-09-12	10:22:15	0.321438	1.42982	3.07922	100.918	FALSE	1
2022-09-12	10:22:15	1.11777	4.97206	3.07922	130.354	FALSE	1
2022-09-12	10:22:15	0.607239	2.70112	3.07922	103.619	FALSE	1
2022-09-12	10:22:15	0.722507	3.21386	3.07922	133.567	FALSE	1
2022-09-12	10:22:16	1.44877	6.44442	3.97277	110.064	FALSE	1
2022-09-12	10:22:16	0.404491	1.79926	3.97277	135.367	FALSE	1
2022-09-12	10:22:16	0.315534	1.40356	3.97277	111.467	FALSE	1
2022-09-12	10:22:16	1.40368	6.24385	3.97277	141.611	FALSE	1
2022-09-12	10:22:17	0.340471	1.51448	2.07656	112.982	FALSE	1
2022-09-12	10:22:17	0.577061	2.56688	2.07656	144.177	FALSE	1
2022-09-12	10:22:17	0.482964	2.14832	2.07656	115.13	FALSE	1
2022-09-12	10:22:18	0.441489	1.96383	3.97078	146.141	FALSE	1
2022-09-12	10:22:18	1.90851	8.48943	3.97078	123.62	FALSE	1
2022-09-12	10:22:18	0.264644	1.17719	3.97078	147.318	FALSE	1
2022-09-12	10:22:18	0.956043	4.25267	3.97078	127.872	FALSE	1
2022-09-12	10:22:19	0.568613	2.5293	3.20152	149.848	FALSE	1
2022-09-12	10:22:19	0.511972	2.27735	3.20152	130.15	FALSE	1
2022-09-12	10:22:19	1.33976	5.95952	3.20152	155.807	FALSE	1
2022-09-12	10:22:19	0.458588	2.03989	3.20152	132.189	FALSE	1
2022-09-12	10:22:20	0.395636	1.75987	3.44271	157.567	FALSE	1
2022-09-12	10:22:20	1.1134	4.95263	3.44271	137.142	FALSE	1
2022-09-12	10:22:20	0.439809	1.95636	3.44271	159.523	FALSE	1
2022-09-12	10:22:20	1.14698	5.102	3.44271	142.244	FALSE	1
2022-09-12	10:22:21	0.515433	2.29275	4.34721	161.816	FALSE	1
2022-09-12	10:22:21	0.778079	3.46105	4.34721	145.705	FALSE	1
2022-09-12	10:22:21	1.63838	7.28784	4.34721	169.104	FALSE	1
2022-09-12	10:22:22	0.242405	1.07827	1.80894	146.783	FALSE	1
2022-09-12	10:22:22	0.412583	1.83525	1.80894	170.939	FALSE	1
2022-09-12	10:22:22	0.445407	1.98126	1.80894	148.765	FALSE	1
2022-09-12	10:22:22	0.526272	2.34096	1.80894	173.28	FALSE	1
2022-09-12	10:22:23	1.48286	6.59606	4.7221	155.361	FALSE	1
2022-09-12	10:22:23	0.505254	2.24747	4.7221	175.528	FALSE	1
2022-09-12	10:22:23	0.909631	4.04622	4.7221	159.407	FALSE	1
2022-09-12	10:22:23	1.34856	5.99866	4.7221	181.526	FALSE	1
2022-09-12	10:22:24	0.639351	2.84396	2.3417	162.251	FALSE	1
2022-09-12	10:22:24	0.935331	4.16054	2.3417	185.687	FALSE	1
2022-09-12	10:22:24	0.380216	1.69128	2.3417	163.942	FALSE	1
2022-09-12	10:22:24	0.150853	0.671024	2.3417	186.358	FALSE	1
2022-09-12	10:22:25	0.553244	2.46094	1.82831	166.403	FALSE	1
2022-09-12	10:22:25	0.178181	0.792585	1.82831	187.151	FALSE	1
2022-09-12	10:22:25	0.501641	2.2314	1.82831	168.634	FALSE	1
2022-09-12	10:22:26	0.144695	0.643632	3.37526	187.794	FALSE	1
2022-09-12	10:22:26	0.58215	2.58952	3.37526	171.224	FALSE	1
2022-09-12	10:22:26	1.69355	7.53325	3.37526	195.327	FALSE	1
2022-09-12	10:22:26	0.614771	2.73462	3.37526	173.959	FALSE	1
2022-09-12	10:22:27	0.407036	1.81058	2.23938	197.138	FALSE	1
2022-09-12	10:22:27	0.422812	1.88075	2.23938	175.839	FALSE	1
2022-09-12	10:22:27	0.252735	1.12422	2.23938	198.262	FALSE	1
2022-09-12	10:22:27	0.931158	4.14198	2.23938	179.981	FALSE	1
2022-09-12	10:22:28	0.242557	1.07894	3.04311	199.341	FALSE	1
2022-09-12	10:22:28	0.441336	1.96315	3.04311	181.945	FALSE	1
2022-09-12	10:22:28	1.51029	6.71807	3.04311	206.059	FALSE	1
2022-09-12	10:22:28	0.542303	2.41227	3.04311	184.357	FALSE	1
2022-09-12	10:22:29	1.04861	4.66443	3.46082	210.724	FALSE	1
2022-09-12	10:22:29	0.568409	2.5284	3.46082	186.885	FALSE	1
2022-09-12	10:22:29	0.552685	2.45845	3.46082	213.182	FALSE	1
2022-09-12	10:22:29	0.942405	4.19201	3.46082	191.077	FALSE	1
2022-09-12	10:22:30	0.312786	1.39133	2.23216	214.573	FALSE	1
2022-09-12	10:22:30	0.395942	1.76123	2.23216	192.838	FALSE	1
2022-09-12	10:22:30	0.796705	3.5439	2.23216	218.117	FALSE	1
2022-09-12	10:22:31	0.5364	2.38601	4.43275	195.224	FALSE	1
2022-09-12	10:22:31	0.63014	2.80299	4.43275	220.92	FALSE	1
2022-09-12	10:22:31	2.2621	10.0623	4.43275	205.287	FALSE	1
2022-09-12	10:22:31	0.557468	2.47973	4.43275	223.4	FALSE	1
2022-09-12	10:22:32	1.6051	7.13981	7.08639	212.427	FALSE	1
2022-09-12	10:22:32	3.09187	13.7533	7.08639	237.153	1	2
2022-09-12	10:22:32	0.460929	2.0503	7.08639	214.477	FALSE	2
2022-09-12	10:22:32	1.21447	5.40221	7.08639	242.556	FALSE	2
2022-09-12	10:22:33	3.20902	14.2744	10.3551	228.751	1	3
2022-09-12	10:22:33	1.13732	5.05903	10.3551	247.615	FALSE	3
2022-09-12	10:22:33	1.54067	6.85321	10.3551	235.604	FALSE	3
2022-09-12	10:22:33	3.42469	15.2337	10.3551	262.848	1	4
2022-09-12	10:22:34	0.919911	4.09195	6.66406	239.696	FALSE	4
2022-09-12	10:22:34	1.60108	7.12192	6.66406	269.97	FALSE	4
2022-09-12	10:22:34	1.97345	8.7783	6.66406	248.475	FALSE	4
2022-09-12	10:22:35	1.1594	5.15724	4.01119	275.127	FALSE	4
2022-09-12	10:22:35	1.3792	6.13496	4.01119	254.61	FALSE	4
2022-09-12	10:22:35	0.580471	2.58205	4.01119	277.709	FALSE	4
2022-09-12	10:22:35	0.487952	2.17051	4.01119	256.78	FALSE	4
2022-09-12	10:22:36	0.343728	1.52897	1.65981	279.238	FALSE	4
2022-09-12	10:22:36	0.383117	1.70418	1.65981	258.484	FALSE	4
2022-09-12	10:22:36	0.24958	1.11018	1.65981	280.349	FALSE	4
2022-09-12	10:22:36	0.516145	2.29592	1.65981	260.78	FALSE	4
2022-09-12	10:22:37	0.111769	0.497171	1.38081	280.846	FALSE	4
2022-09-12	10:22:37	0.449886	2.00118	1.38081	262.781	FALSE	4
2022-09-12	10:22:37	0.325916	1.44974	1.38081	282.296	FALSE	4
2022-09-12	10:22:37	0.35411	1.57515	1.38081	264.357	FALSE	4
2022-09-12	10:22:38	0.305916	1.36078	1.46649	283.656	FALSE	4
2022-09-12	10:22:38	0.305814	1.36032	1.46649	265.717	FALSE	4
2022-09-12	10:22:38	0.377316	1.67838	1.46649	285.335	FALSE	4
2022-09-12	10:22:39	0.232583	1.03458	1.45234	266.751	FALSE	4
2022-09-12	10:22:39	0.242405	1.07827	1.45234	286.413	FALSE	4
2022-09-12	10:22:39	0.294415	1.30962	1.45234	268.061	FALSE	4
2022-09-12	10:22:39	0.536603	2.38692	1.45234	288.8	FALSE	4
2022-09-12	10:22:40	0.572481	2.54651	5.74124	270.608	FALSE	4
2022-09-12	10:22:40	1.56022	6.94017	5.74124	295.74	FALSE	4
2022-09-12	10:22:40	0.566883	2.52161	5.74124	273.129	FALSE	4
2022-09-12	10:22:40	2.46317	10.9567	5.74124	306.697	FALSE	4
2022-09-12	10:22:41	1.67635	7.45674	9.53777	280.586	FALSE	4
2022-09-12	10:22:41	2.28312	10.1558	9.53777	316.853	FALSE	4
2022-09-12	10:22:41	3.90093	17.3521	9.53777	297.938	1	5
2022-09-12	10:22:41	0.716349	3.18646	9.53777	320.039	FALSE	5
2022-09-12	10:22:42	0.759249	3.37729	3.922	301.315	FALSE	5
2022-09-12	10:22:42	1.69991	7.56154	3.922	327.601	FALSE	5
2022-09-12	10:22:42	0.179606	0.798923	3.922	302.114	FALSE	5
2022-09-12	10:22:42	0.888053	3.95024	3.922	331.551	FALSE	5
2022-09-12	10:22:43	1.57874	7.02255	8.88634	309.137	FALSE	5
2022-09-12	10:22:43	3.51156	15.6201	8.88634	347.171	1	6
2022-09-12	10:22:43	0.902914	4.01634	8.88634	313.153	FALSE	6
2022-09-12	10:22:44	0.846578	3.76575	2.92053	350.937	FALSE	6
2022-09-12	10:22:44	1.11436	4.9569	2.92053	318.11	FALSE	6
2022-09-12	10:22:44	0.26042	1.1584	2.92053	352.095	FALSE	6
2022-09-12	10:22:44	0.404898	1.80107	2.92053	319.911	FALSE	6
2022-09-12	10:22:45	0.214364	0.953534	1.17232	353.049	FALSE	6
2022-09-12	10:22:45	0.261489	1.16316	1.17232	321.074	FALSE	6
2022-09-12	10:22:45	0.285102	1.26819	1.17232	354.317	FALSE	6
2022-09-12	10:22:45	0.293244	1.30441	1.17232	322.379	FALSE	6
2022-09-12	10:22:46	0.272176	1.21069	1.8468	355.527	FALSE	6
2022-09-12	10:22:46	0.282354	1.25597	1.8468	323.635	FALSE	6
2022-09-12	10:22:46	0.578995	2.57549	1.8468	358.103	FALSE	6
2022-09-12	10:22:46	0.527188	2.34504	1.8468	325.98	FALSE	6
2022-09-12	10:22:47	0.348868	1.55183	1.23657	359.655	FALSE	6
2022-09-12	10:22:47	0.247748	1.10203	1.23657	327.082	FALSE	6
2022-09-12	10:22:47	0.237367	1.05586	1.23657	360.711	FALSE	6
2022-09-12	10:22:48	0.245305	1.09117	0.853987	328.173	FALSE	6
2022-09-12	10:22:48	0.214517	0.954215	0.853987	361.665	FALSE	6
2022-09-12	10:22:48	0.223626	0.994733	0.853987	329.168	FALSE	6
2022-09-12	10:22:48	0.0844913	0.375834	0.853987	362.041	FALSE	6
2022-09-12	10:22:49	0.0723794	0.321958	-0.298243	329.49	FALSE	6
2022-09-12	10:22:49	-0.0977478	-0.434802	-0.298243	362.041	FALSE	6
2022-09-12	10:22:49	-0.0885366	-0.393829	-0.298243	329.49	FALSE	6
2022-09-12	10:22:49	-0.154287	-0.686299	-0.298243	362.041	FALSE	6
2022-09-12	10:22:50	-0.161768	-0.719576	-0.274814	329.49	FALSE	6
2022-09-12	10:22:50	-0.143295	-0.637405	-0.274814	362.041	FALSE	6
2022-09-12	10:22:50	0.01584	0.0704595	-0.274814	329.56	FALSE	6
2022-09-12	10:22:50	0.0420994	0.187267	-0.274814	362.228	FALSE	6
2022-09-12	10:22:51	0.374924	1.66774	1.33942	331.228	FALSE	6
2022-09-12	10:22:51	0.252583	1.12354	1.33942	363.351	FALSE	6
2022-09-12	10:22:51	0.27584	1.22699	1.33942	332.455	FALSE	6
2022-09-12	10:22:52	0.250954	1.11629	2.97101	364.468	FALSE	6
2022-09-12	10:22:52	0.589529	2.62234	2.97101	335.077	FALSE	6
2022-09-12	10:22:52	0.819758	3.64645	2.97101	368.114	FALSE	6
2022-09-12	10:22:52	1.01141	4.49895	2.97101	339.576	FALSE	6
2022-09-12	10:22:53	0.730547	3.24962	3.39025	371.364	FALSE	6
2022-09-12	10:22:53	0.736349	3.27543	3.39025	342.851	FALSE	6
2022-09-12	10:22:53	0.714466	3.17809	3.39025	374.542	FALSE	6
2022-09-12	10:22:53	0.86729	3.85788	3.39025	346.709	FALSE	6
2022-09-12	10:22:54	0.921641	4.09964	3.06677	378.642	FALSE	6
2022-09-12	10:22:54	0.458435	2.03921	3.06677	348.749	FALSE	6
2022-09-12	10:22:54	0.857672	3.8151	3.06677	382.457	FALSE	6
2022-09-12	10:22:54	0.520013	2.31312	3.06677	351.062	FALSE	6
2022-09-12	10:22:55	0.361336	1.60729	1.50101	384.064	FALSE	6
2022-09-12	10:22:55	0.343423	1.52761	1.50101	352.589	FALSE	6
2022-09-12	10:22:55	0.305814	1.36032	1.50101	385.424	FALSE	6
2022-09-12	10:22:55	0.339199	1.50882	1.50101	354.098	FALSE	6
2022-09-12	10:22:56	0.35355	1.57266	1.41458	386.997	FALSE	6
2022-09-12	10:22:56	0.334211	1.48664	1.41458	355.585	FALSE	6
2022-09-12	10:22:56	0.266272	1.18443	1.41458	388.181	FALSE	6
2022-09-12	10:22:57	0.315382	1.40288	1.48709	356.988	FALSE	6
2022-09-12	10:22:57	0.26897	1.19643	1.48709	389.378	FALSE	6
2022-09-12	10:22:57	0.407494	1.81261	1.48709	358.8	FALSE	6
2022-09-12	10:22:57	0.345407	1.53644	1.48709	390.914	FALSE	6
2022-09-12	10:22:58	0.357519	1.59032	1.53672	360.391	FALSE	6
2022-09-12	10:22:58	0.348715	1.55115	1.53672	392.465	FALSE	6
2022-09-12	10:22:58	0.345458	1.53667	1.53672	361.927	FALSE	6
2022-09-12	10:22:58	0.330191	1.46876	1.53672	393.934	FALSE	6
2022-09-12	10:22:59	0.338283	1.50475	1.50192	363.432	FALSE	6
2022-09-12	10:22:59	0.336196	1.49547	1.50192	395.43	FALSE	6
2022-09-12	10:22:59	0.31813	1.41511	1.50192	364.847	FALSE	6
2022-09-12	10:22:59	0.357977	1.59235	1.50192	397.022	FALSE	6
2022-09-12	10:23:00	0.232328	1.03344	0.970888	365.881	FALSE	6
2022-09-12	10:23:00	0.189682	0.843743	0.970888	397.866	FALSE	6
2022-09-12	10:23:00	0.232786	1.03548	0.970888	366.916	FALSE	6
2022-09-12	10:23:01	0.294567	1.31029	0.244482	399.176	FALSE	6
2022-09-12	10:23:01	0.0919213	0.408884	0.244482	367.325	FALSE	6
2022-09-12	10:23:01	-0.0733712	-0.32637	0.244482	399.176	FALSE	6
2022-09-12	10:23:01	-0.0932694	-0.414881	0.244482	367.325	FALSE	6
2022-09-12	10:23:02	0.114415	0.508941	1.40362	399.685	FALSE	6
2022-09-12	10:23:02	0.506629	2.25359	1.40362	369.578	FALSE	6
2022-09-12	10:23:02	0.177265	0.78851	1.40362	400.473	FALSE	6
2022-09-12	10:23:02	0.46388	2.06343	1.40362	371.642	FALSE	6
2022-09-12	10:23:03	0.571768	2.54334	2.1417	403.017	FALSE	6
2022-09-12	10:23:03	0.201336	0.895583	2.1417	372.537	FALSE	6
2022-09-12	10:23:03	0.74902	3.33179	2.1417	406.349	FALSE	6
2022-09-12	10:23:03	0.403779	1.79609	2.1417	374.334	FALSE	6
2022-09-12	10:23:04	0.601488	2.67554	3.20517	409.024	FALSE	6
2022-09-12	10:23:04	0.796705	3.5439	3.20517	377.877	FALSE	6
2022-09-12	10:23:04	0.763473	3.39608	3.20517	412.42	FALSE	6
2022-09-12	10:23:05	0.59416	2.64294	3.76128	380.52	FALSE	6
2022-09-12	10:23:05	0.951768	4.23365	3.76128	416.654	FALSE	6
2022-09-12	10:23:05	1.51798	6.75228	3.76128	387.273	FALSE	6
2022-09-12	10:23:05	0.318384	1.41624	3.76128	418.07	FALSE	6
2022-09-12	10:23:06	0.540827	2.40571	3.1804	389.678	FALSE	6
2022-09-12	10:23:06	1.74296	7.75303	3.1804	425.823	FALSE	6
2022-09-12	10:23:06	0.390802	1.73837	3.1804	391.417	FALSE	6
2022-09-12	10:23:06	0.185356	0.824501	3.1804	426.648	FALSE	6
2022-09-12	10:23:07	0.434415	1.93236	1.39473	393.349	FALSE	6
2022-09-12	10:23:07	0.156349	0.695472	1.39473	427.343	FALSE	6
2022-09-12	10:23:07	0.433346	1.92761	1.39473	395.277	FALSE	6
2022-09-12	10:23:07	0.230089	1.02348	1.39473	428.367	FALSE	6
2022-09-12	10:23:08	0.233906	1.04046	1.09275	396.317	FALSE	6
2022-09-12	10:23:08	0.262303	1.16678	1.09275	429.533	FALSE	6
2022-09-12	10:23:08	0.323473	1.43887	1.09275	397.756	FALSE	6
2022-09-12	10:23:08	0.162965	0.724901	1.09275	430.258	FALSE	6
2022-09-12	10:23:09	0.343677	1.52874	1.282	399.285	FALSE	6
2022-09-12	10:23:09	0.0939061	0.417713	1.282	430.676	FALSE	6
2022-09-12	10:23:09	0.427036	1.89954	1.282	401.184	FALSE	6
2022-09-12	10:23:10	0.295025	1.31233	1.47147	431.988	FALSE	6
2022-09-12	10:23:10	0.346985	1.54346	1.47147	402.728	FALSE	6
2022-09-12	10:23:10	0.253702	1.12852	1.47147	433.117	FALSE	6
2022-09-12	10:23:10	0.427494	1.90158	1.47147	404.629	FALSE	6
2022-09-12	10:23:11	0.37701	1.67702	4.02986	434.794	FALSE	6
2022-09-12	10:23:11	2.76413	12.2954	4.02986	416.925	FALSE	6
2022-09-12	10:23:11	0.171107	0.761118	4.02986	435.555	FALSE	6
2022-09-12	10:23:11	0.311565	1.3859	4.02986	418.311	FALSE	6
2022-09-12	10:23:12	0.46098	2.05053	0.202943	437.605	FALSE	6
2022-09-12	10:23:12	0.104339	0.464121	0.202943	418.775	FALSE	6
2022-09-12	10:23:12	-0.0901142	-0.400846	0.202943	437.605	FALSE	6
2022-09-12	10:23:12	-0.29271	-1.30203	0.202943	418.775	FALSE	6
2022-09-12	10:23:13	-0.370979	-1.65019	0.239709	437.605	FALSE	6
2022-09-12	10:23:13	0.173855	0.773342	0.239709	419.548	FALSE	6
2022-09-12	10:23:13	0.358791	1.59597	0.239709	439.201	FALSE	6
2022-09-12	10:23:14	0.299758	1.33338	1.10549	420.882	FALSE	6
2022-09-12	10:23:14	-0.0871117	-0.38749	1.10549	439.201	FALSE	6
2022-09-12	10:23:14	0.159657	0.710186	1.10549	421.592	FALSE	6
2022-09-12	10:23:14	0.621794	2.76586	1.10549	441.967	FALSE	6
2022-09-12	10:23:15	1.22459	5.44722	3.55307	427.039	FALSE	6
2022-09-12	10:23:15	0.366374	1.6297	3.55307	443.597	FALSE	6
2022-09-12	10:23:15	0.605305	2.69252	3.55307	429.731	FALSE	6
2022-09-12	10:23:15	0.998792	4.44283	3.55307	448.04	FALSE	6
2022-09-12	10:23:16	0.483168	2.14923	0.950422	431.881	FALSE	6
2022-09-12	10:23:16	0.131769	0.586135	0.950422	448.626	FALSE	6
2022-09-12	10:23:16	0.315738	1.40447	0.950422	433.285	FALSE	6
2022-09-12	10:23:16	-0.0760175	-0.338141	0.950422	448.626	FALSE	6
2022-09-12	10:23:17	-0.190419	-0.847022	-1.42555	433.285	FALSE	6
2022-09-12	10:23:17	-0.299834	-1.33372	-1.42555	448.626	FALSE	6
2022-09-12	10:23:17	-0.471183	-2.09592	-1.42555	433.285	FALSE	6
2022-09-12	10:23:18	-0.450979	-2.00604	-2.36728	448.626	FALSE	6
2022-09-12	10:23:18	-0.561615	-2.49818	-2.36728	433.285	FALSE	6
2022-09-12	10:23:18	-0.527926	-2.34832	-2.36728	448.626	FALSE	6
2022-09-12	10:23:18	-0.588231	-2.61657	-2.36728	433.285	FALSE	6
2022-09-12	10:23:19	-0.476526	-2.11968	-2.00729	448.626	FALSE	6
2022-09-12	10:23:19	-0.431437	-1.91912	-2.00729	433.285	FALSE	6
2022-09-12	10:23:19	-0.449758	-2.00061	-2.00729	448.626	FALSE	6
2022-09-12	10:23:19	-0.447315	-1.98975	-2.00729	433.285	FALSE	6
2022-09-12	10:23:20	-0.402938	-1.79235	-1.49422	448.626	FALSE	6
2022-09-12	10:23:20	-0.3836	-1.70633	-1.49422	433.285	FALSE	6
2022-09-12	10:23:20	-0.318867	-1.41838	-1.49422	448.626	FALSE	6
2022-09-12	10:23:20	-0.238257	-1.05981	-1.49422	433.285	FALSE	6
2022-09-12	10:23:21	-0.117035	-0.520595	-0.405146	448.626	FALSE	6
2022-09-12	10:23:21	-0.0465519	-0.207072	-0.405146	433.285	FALSE	6
2022-09-12	10:23:21	-0.109656	-0.487772	-0.405146	448.626	FALSE	6
2022-09-12	10:23:22	-0.116883	-0.519919	-0.53582	433.285	FALSE	6
2022-09-12	10:23:22	-0.0975443	-0.433897	-0.53582	448.626	FALSE	6
2022-09-12	10:23:22	-0.128893	-0.573342	-0.53582	433.285	FALSE	6
2022-09-12	10:23:22	-0.138511	-0.616125	-0.53582	448.626	FALSE	6
2022-09-12	10:23:23	-0.092506	-0.411485	-0.333953	433.285	FALSE	6
2022-09-12	10:23:23	-0.16645	-0.740403	-0.333953	448.626	FALSE	6
2022-09-12	10:23:23	0.0674939	0.300226	-0.333953	433.585	FALSE	6
2022-09-12	10:23:23	-0.108842	-0.484151	-0.333953	448.626	FALSE	6
2022-09-12	10:23:24	-0.0405977	-0.180587	0.199547	433.585	FALSE	6
2022-09-12	10:23:24	0.0156872	0.0697798	0.199547	448.696	FALSE	6
2022-09-12	10:23:24	0.0458145	0.203792	0.199547	433.789	FALSE	6
2022-09-12	10:23:24	0.158537	0.705204	0.199547	449.401	FALSE	6
2022-09-12	10:23:25	0.0756873	0.336672	0.218393	434.126	FALSE	6
2022-09-12	10:23:25	0.10271	0.456875	0.218393	449.858	FALSE	6
2022-09-12	10:23:25	0.00657784	0.0292595	0.218393	434.155	FALSE	6
2022-09-12	10:23:25	0.0114125	0.0507651	0.218393	449.909	FALSE	6
2022-09-12	10:23:26	0.0642369	0.285739	0.241822	434.441	FALSE	6
2022-09-12	10:23:26	0.0500893	0.222807	0.241822	450.131	FALSE	6
2022-09-12	10:23:26	0.0487661	0.216921	0.241822	434.658	FALSE	6
2022-09-12	10:23:27	-0.166399	-0.740176	-0.415447	450.131	FALSE	6
2022-09-12	10:23:27	-0.142939	-0.635821	-0.415447	434.658	FALSE	6
2022-09-12	10:23:27	-0.0104705	-0.0465749	-0.415447	450.131	FALSE	6
2022-09-12	10:23:27	-0.0537784	-0.239217	-0.415447	434.658	FALSE	6
2022-09-12	10:23:28	0.0282572	0.125694	0.0222421	450.257	FALSE	6
2022-09-12	10:23:28	-0.0964755	-0.429142	0.0222421	434.658	FALSE	6
2022-09-12	10:23:28	0.0485626	0.216016	0.0222421	450.473	FALSE	6
2022-09-12	10:23:28	0.0396567	0.176401	0.0222421	434.834	FALSE	6
2022-09-12	10:23:29	-0.00879109	-0.0391045	0.00458499	450.473	FALSE	6
2022-09-12	10:23:29	-0.0417682	-0.185793	0.00458499	434.834	FALSE	6
2022-09-12	10:23:29	-0.0471117	-0.209562	0.00458499	450.473	FALSE	6
2022-09-12	10:23:29	0.101794	0.4528	0.00458499	435.287	FALSE	6
2022-09-12	10:23:30	-0.0135748	-0.0603834	0.0355226	450.473	FALSE	6
2022-09-12	10:23:30	0.0770613	0.342784	0.0355226	435.63	FALSE	6
2022-09-12	10:23:30	-0.039529	-0.175833	0.0355226	450.473	FALSE	6
2022-09-12	10:23:31	0.186679	0.830386	0.286926	436.46	FALSE	6
2022-09-12	10:23:31	0.0120231	0.0534812	0.286926	450.527	FALSE	6
2022-09-12	10:23:31	0.0899875	0.400282	0.286926	436.86	FALSE	6
2022-09-12	10:23:31	-0.030674	-0.136444	0.286926	450.527	FALSE	6
2022-09-12	10:23:32	0.0690206	0.307017	-0.0893024	437.167	FALSE	6
2022-09-12	10:23:32	-0.0172389	-0.0766821	-0.0893024	450.527	FALSE	6
2022-09-12	10:23:32	-0.032557	-0.14482	-0.0893024	437.167	FALSE	6
2022-09-12	10:23:32	-0.099529	-0.442725	-0.0893024	450.527	FALSE	6
2022-09-12	10:23:33	0.032074	0.142672	-0.0624207	437.31	FALSE	6
2022-09-12	10:23:33	-0.00370202	-0.0164673	-0.0624207	450.527	FALSE	6
2022-09-12	10:23:33	-0.0297071	-0.132143	-0.0624207	437.31	FALSE	6
2022-09-12	10:23:33	-0.0547961	-0.243744	-0.0624207	450.527	FALSE	6
2022-09-12	10:23:34	0.0615905	0.273967	0.245595	437.584	FALSE	6
2022-09-12	10:23:34	0.049275	0.219185	0.245595	450.746	FALSE	6
2022-09-12	10:23:34	0.0547712	0.243633	0.245595	437.828	FALSE	6
2022-09-12	10:23:35	0.0470358	0.209225	0.352801	450.955	FALSE	6
2022-09-12	10:23:35	0.140827	0.626427	0.352801	438.454	FALSE	6
2022-09-12	10:23:35	0.100217	0.445785	0.352801	451.401	FALSE	6
2022-09-12	10:23:35	0.0291733	0.129769	0.352801	438.584	FALSE	6
2022-09-12	10:23:36	0.154415	0.686869	0.559138	452.088	FALSE	6
2022-09-12	10:23:36	0.0740587	0.329428	0.559138	438.913	FALSE	6
2022-09-12	10:23:36	0.138995	0.618278	0.559138	452.706	FALSE	6
2022-09-12	10:23:36	0.135331	0.601979	0.559138	439.515	FALSE	6
2022-09-12	10:23:37	0.452583	2.01318	2.13104	454.719	FALSE	6
2022-09-12	10:23:37	0.416552	1.85291	2.13104	441.368	FALSE	6
2022-09-12	10:23:37	0.568104	2.52704	2.13104	457.246	FALSE	6
2022-09-12	10:23:38	0.502964	2.23728	3.75176	443.606	FALSE	6
2022-09-12	10:23:38	0.335127	1.49071	3.75176	458.737	FALSE	6
2022-09-12	10:23:38	0.265713	1.18194	3.75176	444.787	FALSE	6
2022-09-12	10:23:38	0.345662	1.53757	3.75176	460.274	FALSE	6
2022-09-12	10:23:38	2.7677	12.3113	3.75176	457.099	FALSE	6
2022-09-12	10:23:39	0.141489	0.629371	0.715015	460.904	FALSE	6
2022-09-12	10:23:39	0.0703438	0.312903	0.715015	457.412	FALSE	6
2022-09-12	10:23:39	0.270395	1.20277	0.715015	462.107	FALSE	6
2022-09-12	10:23:40	0.192583	0.856648	1.13186	458.268	FALSE	6
2022-09-12	10:23:40	0.292074	1.2992	1.13186	463.406	FALSE	6
2022-09-12	10:23:40	0.24215	1.07713	1.13186	459.345	FALSE	6
2022-09-12	10:23:40	0.291005	1.29445	1.13186	464.7	FALSE	6
2022-09-12	10:23:41	0.297061	1.32139	1.42812	460.667	FALSE	6
2022-09-12	10:23:41	0.371107	1.65076	1.42812	466.351	FALSE	6
2022-09-12	10:23:41	0.327952	1.4588	1.42812	462.126	FALSE	6
2022-09-12	10:23:41	0.288104	1.28154	1.42812	467.633	FALSE	6
2022-09-12	10:23:42	0.274008	1.21884	1.30741	463.344	FALSE	6
2022-09-12	10:23:42	0.29355	1.30577	1.30741	468.938	FALSE	6
2022-09-12	10:23:42	0.293244	1.30441	1.30741	464.649	FALSE	6
2022-09-12	10:23:42	0.314873	1.40062	1.30741	470.339	FALSE	6
2022-09-12	10:23:43	0.322506	1.43457	2.1616	466.083	FALSE	6
2022-09-12	10:23:43	0.425254	1.89161	2.1616	472.231	FALSE	6
2022-09-12	10:23:43	0.710089	3.15862	2.1616	469.242	FALSE	6
2022-09-12	10:23:44	0.625051	2.78035	2.53389	475.011	FALSE	6
2022-09-12	10:23:44	0.597977	2.65992	2.53389	471.902	FALSE	6
2022-09-12	10:23:44	0.490547	2.18205	2.53389	477.193	FALSE	6
2022-09-12	10:23:44	0.565	2.51323	2.53389	474.415	FALSE	6
2022-09-12	10:23:45	0.637214	2.83446	3.25319	480.027	FALSE	6
2022-09-12	10:23:45	0.706985	3.14481	3.25319	477.56	FALSE	6
2022-09-12	10:23:45	0.820522	3.64985	3.25319	483.677	FALSE	6
2022-09-12	10:23:45	0.760674	3.38363	3.25319	480.944	FALSE	6
2022-09-12	10:23:46	0.559402	2.48833	1.70163	486.166	FALSE	6
2022-09-12	10:23:46	0.375789	1.67158	1.70163	482.615	FALSE	6
2022-09-12	10:23:46	0.334822	1.48936	1.70163	487.655	FALSE	6
2022-09-12	10:23:46	0.260165	1.15727	1.70163	483.773	FALSE	6
2022-09-12	10:23:47	0.289987	1.28992	1.16368	488.945	FALSE	6
2022-09-12	10:23:47	0.24902	1.10769	1.16368	484.88	FALSE	6
2022-09-12	10:23:47	0.245814	1.09343	1.16368	490.038	FALSE	6
2022-09-12	10:23:48	0.249886	1.11154	1.14731	485.992	FALSE	6
2022-09-12	10:23:48	0.284491	1.26547	1.14731	491.304	FALSE	6
2022-09-12	10:23:48	0.248664	1.10611	1.14731	487.098	FALSE	6
2022-09-12	10:23:48	0.248664	1.10611	1.14731	492.41	FALSE	6
2022-09-12	10:23:49	0.267087	1.18806	1.48579	488.286	FALSE	6
2022-09-12	10:23:49	0.285102	1.26819	1.48579	493.678	FALSE	6
2022-09-12	10:23:49	0.378384	1.68313	1.48579	489.969	FALSE	6
2022-09-12	10:23:49	0.405509	1.80379	1.48579	495.482	FALSE	6
2022-09-12	10:23:50	0.279148	1.24171	1.07453	491.211	FALSE	6
2022-09-12	10:23:50	0.225611	1.00356	1.07453	496.485	FALSE	6
2022-09-12	10:23:50	0.338435	1.50543	1.07453	492.716	FALSE	6
2022-09-12	10:23:50	0.123066	0.547422	1.07453	497.033	FALSE	6
2022-09-12	10:23:51	0.341489	1.51901	1.31805	494.235	FALSE	6
2022-09-12	10:23:51	0.240115	1.06808	1.31805	498.101	FALSE	6
2022-09-12	10:23:51	0.253957	1.12965	1.31805	495.365	FALSE	6
2022-09-12	10:23:51	0.349682	1.55546	1.31805	499.656	FALSE	6
2022-09-12	10:23:52	0.504847	2.24566	2.67108	497.61	FALSE	6
2022-09-12	10:23:52	1.06291	4.72804	2.67108	504.384	FALSE	6
2022-09-12	10:23:52	0.233702	1.03955	2.67108	498.65	FALSE	6
2022-09-12	10:23:53	0.295127	1.31278	1.66055	505.697	FALSE	6
2022-09-12	10:23:53	0.51701	2.29976	1.66055	500.95	FALSE	6
2022-09-12	10:23:53	0.328257	1.46015	1.66055	507.157	FALSE	6
2022-09-12	10:23:53	0.352837	1.56949	1.66055	502.519	FALSE	6
2022-09-12	10:23:54	0.279199	1.24193	1.42541	508.399	FALSE	6
2022-09-12	10:23:54	0.259606	1.15478	1.42541	503.674	FALSE	6
2022-09-12	10:23:54	0.324898	1.44521	1.42541	509.844	FALSE	6
2022-09-12	10:23:54	0.418079	1.8597	1.42541	505.534	FALSE	6
2022-09-12	10:23:55	0.667494	2.96915	2.00842	512.814	FALSE	6
2022-09-12	10:23:55	0.399249	1.77594	2.00842	507.31	FALSE	6
2022-09-12	10:23:55	0.496756	2.20967	2.00842	515.023	FALSE	6
2022-09-12	10:23:55	0.242557	1.07894	2.00842	508.389	FALSE	6
2022-09-12	10:23:56	0.128105	0.569837	-0.0464988	515.593	FALSE	6
2022-09-12	10:23:56	-0.0422262	-0.187831	-0.0464988	508.389	FALSE	6
2022-09-12	10:23:56	-0.117239	-0.521503	-0.0464988	515.593	FALSE	6
2022-09-12	10:23:57	-0.0966791	-0.430048	-0.156818	508.389	FALSE	6
2022-09-12	10:23:57	-0.0695035	-0.309165	-0.156818	515.593	FALSE	6
2022-09-12	10:23:57	-0.0226333	-0.100677	-0.156818	508.389	FALSE	6
2022-09-12	10:23:57	0.0477992	0.21262	-0.156818	515.806	FALSE	6
2022-09-12	10:23:58	-0.034389	-0.152969	0.447424	508.389	FALSE	6
2022-09-12	10:23:58	-0.00578856	-0.0257487	0.447424	515.806	FALSE	6
2022-09-12	10:23:58	0.470649	2.09354	0.447424	510.482	FALSE	6
2022-09-12	10:23:58	-0.0281295	-0.125126	0.447424	515.806	FALSE	6
2022-09-12	10:23:59	-0.0431422	-0.191905	-0.361175	510.482	FALSE	6
2022-09-12	10:23:59	-0.139173	-0.619069	-0.361175	515.806	FALSE	6
2022-09-12	10:23:59	-0.0771371	-0.343121	-0.361175	510.482	FALSE	6
2022-09-12	10:23:59	-0.0653305	-0.290603	-0.361175	515.806	FALSE	6
2022-09-12	10:24:00	-0.0753559	-0.335198	-0.336028	510.482	FALSE	6
2022-09-12	10:24:00	-0.0833967	-0.370965	-0.336028	515.806	FALSE	6
2022-09-12	10:24:00	-0.067875	-0.301922	-0.336028	510.482	FALSE	6
2022-09-12	10:24:01	-0.0637529	-0.283586	-0.292527	515.806	FALSE	6
2022-09-12	10:24:01	-0.0760684	-0.338367	-0.292527	510.482	FALSE	6
2022-09-12	10:24:01	-0.0622262	-0.276795	-0.292527	515.806	FALSE	6
2022-09-12	10:24:01	-0.0610048	-0.271362	-0.292527	510.482	FALSE	6
2022-09-12	10:24:02	-0.0605977	-0.269551	-0.245216	515.806	FALSE	6
2022-09-12	10:24:02	-0.0596308	-0.26525	-0.245216	510.482	FALSE	6
2022-09-12	10:24:02	-0.0541855	-0.241028	-0.245216	515.806	FALSE	6
2022-09-12	10:24:02	-0.0460939	-0.205035	-0.245216	510.482	FALSE	6
2022-09-12	10:24:03	-0.0366282	-0.16293	0.272665	515.806	FALSE	6
2022-09-12	10:24:03	-0.0347962	-0.15478	0.272665	510.482	FALSE	6
2022-09-12	10:24:03	0.194415	0.864797	0.272665	516.671	FALSE	6
2022-09-12	10:24:03	0.122201	0.543574	0.272665	511.026	FALSE	6
2022-09-12	10:24:04	0.12958	0.576398	1.52201	517.247	FALSE	6
2022-09-12	10:24:04	0.407341	1.81193	1.52201	512.838	FALSE	6
2022-09-12	10:24:04	0.396858	1.7653	1.52201	519.012	FALSE	6
2022-09-12	10:24:04	0.434873	1.9344	1.52201	514.772	FALSE	6
2022-09-12	10:24:05	-0.0351015	-0.156138	0.706639	519.012	FALSE	6
2022-09-12	10:24:05	0.493448	2.19496	0.706639	516.967	FALSE	6
2022-09-12	10:24:05	0.0182318	0.0810987	0.706639	519.093	FALSE	6
2022-09-12	10:24:06	0.023219	0.103283	0.142049	517.07	FALSE	6
2022-09-12	10:24:06	-0.0175443	-0.0780406	0.142049	519.093	FALSE	6
2022-09-12	10:24:06	0.120318	0.535199	0.142049	517.606	FALSE	6
2022-09-12	10:24:06	0.00174323	0.00775424	0.142049	519.101	FALSE	6
2022-09-12	10:24:07	-0.111997	-0.498185	0.466043	517.606	FALSE	6
2022-09-12	10:24:07	0.0689188	0.306565	0.466043	519.408	FALSE	6
2022-09-12	10:24:07	0.128868	0.573231	0.466043	518.179	FALSE	6
2022-09-12	10:24:07	0.333295	1.48256	0.466043	520.89	FALSE	6
2022-09-12	10:24:08	0.306781	1.36462	1.55891	519.543	FALSE	6
2022-09-12	10:24:08	0.333906	1.48528	1.55891	522.376	FALSE	6
2022-09-12	10:24:08	0.433601	1.92874	1.55891	521.472	FALSE	6
2022-09-12	10:24:08	0.327545	1.45699	1.55891	523.833	FALSE	6
2022-09-12	10:24:09	0.353499	1.57243	1.46528	523.045	FALSE	6
2022-09-12	10:24:09	0.321743	1.43118	1.46528	525.264	FALSE	6
2022-09-12	10:24:09	0.31299	1.39224	1.46528	524.437	FALSE	6
2022-09-12	10:24:10	0.270954	1.20526	1.25449	526.469	FALSE	6
2022-09-12	10:24:10	0.264338	1.17583	1.25449	525.613	FALSE	6
2022-09-12	10:24:10	0.329987	1.46785	1.25449	527.937	FALSE	6
2022-09-12	10:24:10	0.262812	1.16904	1.25449	526.782	FALSE	6
2022-09-12	10:24:11	0.236807	1.05336	1.36655	528.99	FALSE	6
2022-09-12	10:24:11	0.313295	1.3936	1.36655	528.175	FALSE	6
2022-09-12	10:24:11	0.289326	1.28698	1.36655	530.277	FALSE	6
2022-09-12	10:24:11	0.389428	1.73225	1.36655	529.908	FALSE	6
2022-09-12	10:24:12	0.40215	1.78884	1.72897	532.066	FALSE	6
2022-09-12	10:24:12	0.402405	1.78998	1.72897	531.698	FALSE	6
2022-09-12	10:24:12	0.392786	1.74719	1.72897	533.813	FALSE	6
2022-09-12	10:24:12	0.357417	1.58986	1.72897	533.287	FALSE	6
2022-09-12	10:24:13	0.3307	1.47102	1.41926	535.284	FALSE	6
2022-09-12	10:24:13	0.314364	1.39835	1.41926	534.686	FALSE	6
2022-09-12	10:24:13	0.312125	1.38839	1.41926	536.673	FALSE	6
2022-09-12	10:24:14	0.295789	1.31573	0.940858	536.001	FALSE	6
2022-09-12	10:24:14	0.255331	1.13576	0.940858	537.808	FALSE	6
2022-09-12	10:24:14	0.181387	0.806846	0.940858	536.808	FALSE	6
2022-09-12	10:24:14	0.11355	0.505093	0.940858	538.313	FALSE	6
2022-09-12	10:24:15	-0.244618	-1.08811	-1.82019	536.808	FALSE	6
2022-09-12	10:24:15	-0.366959	-1.63231	-1.82019	538.313	FALSE	6
2022-09-12	10:24:15	-0.466043	-2.07305	-1.82019	536.808	FALSE	6
2022-09-12	10:24:15	-0.559172	-2.48731	-1.82019	538.313	FALSE	6
2022-09-12	10:24:16	-0.48248	-2.14617	-1.68386	536.808	FALSE	6
2022-09-12	10:24:16	-0.432913	-1.92568	-1.68386	538.313	FALSE	6
2022-09-12	10:24:16	-0.338766	-1.5069	-1.68386	536.808	FALSE	6
2022-09-12	10:24:16	-0.260038	-1.1567	-1.68386	538.313	FALSE	6
2022-09-12	10:24:17	-0.250318	-1.11346	-1.29758	536.808	FALSE	6
2022-09-12	10:24:17	-0.240394	-1.06932	-1.29758	538.313	FALSE	6
2022-09-12	10:24:17	-0.384414	-1.70995	-1.29758	536.808	FALSE	6
2022-09-12	10:24:18	-0.421056	-1.87294	-1.67186	538.313	FALSE	6
2022-09-12	10:24:18	-0.443854	-1.97435	-1.67186	536.808	FALSE	6
2022-09-12	10:24:18	-0.372201	-1.65562	-1.67186	538.313	FALSE	6
2022-09-12	10:24:18	-0.266297	-1.18454	-1.67186	536.808	FALSE	6
2022-09-12	10:24:19	-0.338104	-1.50395	-1.13276	538.313	FALSE	6
2022-09-12	10:24:19	-0.263091	-1.17028	-1.13276	536.808	FALSE	6
2022-09-12	10:24:19	-0.222023	-0.987603	-1.13276	538.313	FALSE	6
2022-09-12	10:24:19	-0.195407	-0.869209	-1.13276	536.808	FALSE	6
2022-09-12	10:24:20	-0.141768	-0.630612	-0.86734	538.313	FALSE	6
2022-09-12	10:24:20	-0.239427	-1.06502	-0.86734	536.808	FALSE	6
2022-09-12	10:24:20	-0.222073	-0.987825	-0.86734	538.313	FALSE	6
2022-09-12	10:24:20	-0.176679	-0.785904	-0.86734	536.808	FALSE	6
2022-09-12	10:24:21	-0.189554	-0.843174	-0.808484	538.313	FALSE	6
2022-09-12	10:24:21	-0.167519	-0.745158	-0.808484	536.808	FALSE	6
2022-09-12	10:24:21	-0.178409	-0.793599	-0.808484	538.313	FALSE	6
2022-09-12	10:24:21	-0.191539	-0.852004	-0.808484	536.808	FALSE	6
2022-09-12	10:24:22	-0.196832	-0.875548	-0.842496	538.313	FALSE	6
2022-09-12	10:24:22	-0.190623	-0.847929	-0.842496	536.808	FALSE	6
2022-09-12	10:24:22	-0.18075	-0.804012	-0.842496	538.313	FALSE	6
2022-09-12	10:24:23	-0.155865	-0.693319	-0.0253531	536.808	FALSE	6
2022-09-12	10:24:23	-0.126552	-0.562929	-0.0253531	538.313	FALSE	6
2022-09-12	10:24:23	-0.000699497	-0.0031115	-0.0253531	536.808	FALSE	6
2022-09-12	10:24:23	0.260318	1.15795	-0.0253531	539.471	FALSE	6
2022-09-12	10:24:24	0.356145	1.5842	2.52138	538.393	FALSE	6
2022-09-12	10:24:24	1.37991	6.13812	2.52138	545.61	FALSE	6
2022-09-12	10:24:24	0.279453	1.24306	2.52138	539.636	FALSE	6
2022-09-12	10:24:24	0.251819	1.12014	2.52138	546.73	FALSE	6
2022-09-12	10:24:25	0.419606	1.86649	1.49598	541.502	FALSE	6
2022-09-12	10:24:25	0.414415	1.8434	1.49598	548.573	FALSE	6
2022-09-12	10:24:25	0.22841	1.01601	1.49598	542.518	FALSE	6
2022-09-12	10:24:25	0.282812	1.258	1.49598	549.831	FALSE	6
2022-09-12	10:24:26	1.47156	6.54579	2.94039	549.064	FALSE	6
2022-09-12	10:24:26	0.23528	1.04657	2.94039	550.878	FALSE	6
2022-09-12	10:24:26	0.276247	1.2288	2.94039	550.293	FALSE	6
2022-09-12	10:24:27	0.387952	1.72569	1.64663	552.603	FALSE	6
2022-09-12	10:24:27	0.285102	1.26819	1.64663	551.561	FALSE	6
2022-09-12	10:24:27	0.280369	1.24714	1.64663	553.85	FALSE	6
2022-09-12	10:24:27	0.52729	2.34549	1.64663	553.906	FALSE	6
2022-09-12	10:24:28	0.364288	1.62043	2.50157	555.471	FALSE	6
2022-09-12	10:24:28	0.3107	1.38206	2.50157	555.288	FALSE	6
2022-09-12	10:24:28	1.3394	5.95792	2.50157	561.429	FALSE	6
2022-09-12	10:24:28	0.235127	1.04589	2.50157	556.334	FALSE	6
2022-09-12	10:24:29	0.486476	2.16394	2.54747	563.593	FALSE	6
2022-09-12	10:24:29	1.09843	4.88604	2.54747	561.22	FALSE	6
2022-09-12	10:24:29	0.423117	1.88211	2.54747	565.475	FALSE	6
2022-09-12	10:24:29	0.282761	1.25778	2.54747	562.478	FALSE	6
2022-09-12	10:24:30	1.01284	4.50531	2.45408	569.98	FALSE	6
2022-09-12	10:24:30	0.237061	1.05449	2.45408	563.533	FALSE	6
2022-09-12	10:24:30	0.405204	1.80243	2.45408	571.783	FALSE	6
2022-09-12	10:24:31	0.26958	1.19915	1.35449	564.732	FALSE	6
2022-09-12	10:24:31	0.431972	1.9215	1.35449	573.704	FALSE	6
2022-09-12	10:24:31	0.1764	0.784662	1.35449	565.516	FALSE	6
2022-09-12	10:24:31	0.340064	1.51267	1.35449	575.217	FALSE	6
2022-09-12	10:24:32	0.2364	1.05155	1.40764	566.568	FALSE	6
2022-09-12	10:24:32	0.435891	1.93893	1.40764	577.156	FALSE	6
2022-09-12	10:24:32	0.153804	0.684151	1.40764	567.252	FALSE	6
2022-09-12	10:24:32	0.439708	1.95591	1.40764	579.112	FALSE	6
2022-09-12	10:24:33	0.316298	1.40696	1.44482	568.659	FALSE	6
2022-09-12	10:24:33	0.308206	1.37096	1.44482	580.483	FALSE	6
2022-09-12	10:24:33	0.275687	1.22631	1.44482	569.885	FALSE	6
2022-09-12	10:24:33	0.399046	1.77504	1.44482	582.258	FALSE	6
2022-09-12	10:24:34	0.310547	1.38138	1.47747	571.267	FALSE	6
2022-09-12	10:24:34	0.309987	1.37888	1.47747	583.636	FALSE	6
2022-09-12	10:24:34	0.338741	1.50679	1.47747	572.774	FALSE	6
2022-09-12	10:24:34	0.369326	1.64284	1.47747	585.279	FALSE	6
2022-09-12	10:24:35	0.384644	1.71097	1.85238	574.485	FALSE	6
2022-09-12	10:24:35	0.454822	2.02314	1.85238	587.302	FALSE	6
2022-09-12	10:24:35	0.409835	1.82303	1.85238	576.308	FALSE	6
2022-09-12	10:24:36	0.428868	1.90769	1.47713	589.21	FALSE	6
2022-09-12	10:24:36	0.462405	2.05687	1.47713	578.364	FALSE	6
2022-09-12	10:24:36	0.325916	1.44974	1.47713	590.66	FALSE	6
2022-09-12	10:24:36	0.111107	0.494226	1.47713	578.859	FALSE	6
2022-09-12	10:24:37	0.165509	0.736217	0.960608	591.396	FALSE	6
2022-09-12	10:24:37	-0.00538142	-0.0239376	0.960608	578.859	FALSE	6
2022-09-12	10:24:37	0.320471	1.42552	0.960608	592.822	FALSE	6
2022-09-12	10:24:37	0.383219	1.70463	0.960608	580.563	FALSE	6
2022-09-12	10:24:38	0.285356	1.26932	0.302206	594.091	FALSE	6
2022-09-12	10:24:38	0.280165	1.24623	0.302206	581.81	FALSE	6
2022-09-12	10:24:38	-0.060903	-0.270909	0.302206	594.091	FALSE	6
2022-09-12	10:24:38	-0.232862	-1.03582	0.302206	581.81	FALSE	6
2022-09-12	10:24:39	-0.275356	-1.22484	-0.764474	594.091	FALSE	6
2022-09-12	10:24:39	-0.0626842	-0.278832	-0.764474	581.81	FALSE	6
2022-09-12	10:24:39	-0.177544	-0.789751	-0.764474	594.091	FALSE	6
2022-09-12	10:24:40	0.0191478	0.0851732	0.21262	581.895	FALSE	6
2022-09-12	10:24:40	0.149987	0.667172	0.21262	594.758	FALSE	6
2022-09-12	10:24:40	-0.0585112	-0.26027	0.21262	581.895	FALSE	6
2022-09-12	10:24:40	0.0805727	0.358403	0.21262	595.117	FALSE	6
2022-09-12	10:24:41	0.168155	0.747987	0.51477	582.643	FALSE	6
2022-09-12	10:24:41	0.182456	0.811601	0.51477	595.928	FALSE	6
2022-09-12	10:24:41	0.0473412	0.210583	0.51477	582.853	FALSE	6
2022-09-12	10:24:41	0.0649493	0.288907	0.51477	596.217	FALSE	6
2022-09-12	10:24:42	-0.0916409	-0.407637	-0.189245	582.853	FALSE	6
2022-09-12	10:24:42	-0.0315392	-0.140293	-0.189245	596.217	FALSE	6
2022-09-12	10:24:42	-0.0335748	-0.149347	-0.189245	582.853	FALSE	6
2022-09-12	10:24:42	-0.0134221	-0.0597042	-0.189245	596.217	FALSE	6
2022-09-12	10:24:43	-0.0421244	-0.187378	0.163271	582.853	FALSE	6
2022-09-12	10:24:43	0.105967	0.471362	0.163271	596.688	FALSE	6
2022-09-12	10:24:43	0.0462725	0.205829	0.163271	583.059	FALSE	6
2022-09-12	10:24:44	0.004186	0.0186202	0.014828	596.707	FALSE	6
2022-09-12	10:24:44	-0.117392	-0.522183	0.014828	583.059	FALSE	6
2022-09-12	10:24:44	0.0825066	0.367006	0.014828	597.074	FALSE	6
2022-09-12	10:24:44	0.0440333	0.195869	0.014828	583.255	FALSE	6
2022-09-12	10:24:45	0.220623	0.981375	0.649234	598.055	FALSE	6
2022-09-12	10:24:45	0.0296313	0.131806	0.649234	583.387	FALSE	6
2022-09-12	10:24:45	0.206374	0.917993	0.649234	598.973	FALSE	6
2022-09-12	10:24:45	0.127189	0.565762	0.649234	583.953	FALSE	6
2022-09-12	10:24:46	0.671565	2.98726	1.20843	601.961	FALSE	6
2022-09-12	10:24:46	0.0504455	0.224392	1.20843	584.177	FALSE	6
2022-09-12	10:24:46	0.121998	0.542672	1.20843	602.503	FALSE	6
2022-09-12	10:24:46	0.242659	1.0794	1.20843	585.256	FALSE	6
2022-09-12	10:24:47	0.222303	0.988848	1.1621	603.492	FALSE	6
2022-09-12	10:24:47	0.0917687	0.408206	1.1621	585.665	FALSE	6
2022-09-12	10:24:47	0.469682	2.08924	1.1621	605.581	FALSE	6
2022-09-12	10:24:48	0.136196	0.605827	1.69518	586.27	FALSE	6
2022-09-12	10:24:48	0.380827	1.69399	1.69518	607.275	FALSE	6
2022-09-12	10:24:48	0.605712	2.69433	1.69518	588.965	FALSE	6
2022-09-12	10:24:48	0.401641	1.78658	1.69518	609.062	FALSE	6
2022-09-12	10:24:49	0.716298	3.18624	2.41199	592.151	FALSE	6
2022-09-12	10:24:49	0.59355	2.64023	2.41199	611.702	FALSE	6
2022-09-12	10:24:49	0.305967	1.361	2.41199	593.512	FALSE	6
2022-09-12	10:24:49	0.553143	2.46049	2.41199	614.163	FALSE	6
2022-09-12	10:24:50	0.216043	0.961002	1.86881	594.473	FALSE	6
2022-09-12	10:24:50	0.466832	2.07656	1.86881	616.239	FALSE	6
2022-09-12	10:24:50	0.370191	1.64668	1.86881	596.12	FALSE	6
2022-09-12	10:24:50	0.627443	2.79099	1.86881	619.03	FALSE	6
2022-09-12	10:24:51	0.307087	1.36598	1.87775	597.486	FALSE	6
2022-09-12	10:24:51	0.557723	2.48086	1.87775	621.511	FALSE	6
2022-09-12	10:24:51	0.266069	1.18353	1.87775	598.669	FALSE	6
2022-09-12	10:24:51	0.557672	2.48064	1.87775	623.992	FALSE	6
2022-09-12	10:24:52	0.264644	1.17719	1.42152	599.846	FALSE	6
2022-09-12	10:24:52	0.49243	2.19043	1.42152	626.182	FALSE	6
2022-09-12	10:24:52	0.201641	0.896939	1.42152	600.743	FALSE	6
2022-09-12	10:24:53	0.450293	2.00299	1.40305	628.185	FALSE	6
2022-09-12	10:24:53	0.185255	0.824051	1.40305	601.567	FALSE	6
2022-09-12	10:24:53	0.44154	1.96406	1.40305	630.149	FALSE	6
2022-09-12	10:24:53	0.184593	0.821107	1.40305	602.388	FALSE	6
2022-09-12	10:24:54	0.443575	1.97311	1.54487	632.122	FALSE	6
2022-09-12	10:24:54	0.201998	0.898528	1.54487	603.287	FALSE	6
2022-09-12	10:24:54	0.485814	2.161	1.54487	634.283	FALSE	6
2022-09-12	10:24:54	0.257824	1.14685	1.54487	604.434	FALSE	6
2022-09-12	10:24:55	0.339555	1.51041	1.48664	635.794	FALSE	6
2022-09-12	10:24:55	0.34841	1.5498	1.48664	605.984	FALSE	6
2022-09-12	10:24:55	0.41126	1.82937	1.48664	637.623	FALSE	6
2022-09-12	10:24:55	0.237621	1.05699	1.48664	607.041	FALSE	6
2022-09-12	10:24:56	0.462354	2.05664	1.74093	639.68	FALSE	6
2022-09-12	10:24:56	0.341794	1.52037	1.74093	608.561	FALSE	6
2022-09-12	10:24:56	0.369987	1.64578	1.74093	641.326	FALSE	6
2022-09-12	10:24:57	0.237163	1.05495	1.42682	609.616	FALSE	6
2022-09-12	10:24:57	0.313702	1.39541	1.42682	642.721	FALSE	6
2022-09-12	10:24:57	0.346018	1.53916	1.42682	611.155	FALSE	6
2022-09-12	10:24:57	0.386171	1.71777	1.42682	644.439	FALSE	6
2022-09-12	10:24:58	0.209326	0.931124	1.32461	612.086	FALSE	6
2022-09-12	10:24:58	0.349173	1.55319	1.32461	645.992	FALSE	6
2022-09-12	10:24:58	0.349886	1.55636	1.32461	613.643	FALSE	6
2022-09-12	10:24:58	0.282761	1.25778	1.32461	647.25	FALSE	6
2022-09-12	10:24:59	0.219657	0.977078	1.28381	614.62	FALSE	6
2022-09-12	10:24:59	0.312634	1.39066	1.28381	648.64	FALSE	6
2022-09-12	10:24:59	0.335687	1.4932	1.28381	616.113	FALSE	6
2022-09-12	10:24:59	0.286476	1.2743	1.28381	649.915	FALSE	6
2022-09-12	10:25:00	0.269428	1.19847	1.29905	617.311	FALSE	6
2022-09-12	10:25:00	0.328359	1.46061	1.29905	651.375	FALSE	6
2022-09-12	10:25:00	0.278333	1.23808	1.29905	618.549	FALSE	6
2022-09-12	10:25:01	0.212685	0.946065	0.882454	652.321	FALSE	6
2022-09-12	10:25:01	0.124237	0.552631	0.882454	619.102	FALSE	6
2022-09-12	10:25:01	0.282659	1.25732	0.882454	653.579	FALSE	6
2022-09-12	10:25:01	0.173957	0.773796	0.882454	619.876	FALSE	6
2022-09-12	10:25:02	0.152125	0.676682	0.757836	654.255	FALSE	6
2022-09-12	10:25:02	0.111921	0.497847	0.757836	620.374	FALSE	6
2022-09-12	10:25:02	0.21925	0.975268	0.757836	655.231	FALSE	6
2022-09-12	10:25:02	0.198181	0.881549	0.757836	621.255	FALSE	6
2022-09-12	10:25:03	0.216145	0.961456	0.997788	656.192	FALSE	6
2022-09-12	10:25:03	0.159758	0.710636	0.997788	621.966	FALSE	6
2022-09-12	10:25:03	0.316959	1.4099	0.997788	657.602	FALSE	6
2022-09-12	10:25:03	0.204389	0.909163	0.997788	622.875	FALSE	6
2022-09-12	10:25:04	0.341336	1.51833	1.24963	659.12	FALSE	6
2022-09-12	10:25:04	0.147545	0.65631	1.24963	623.531	FALSE	6
2022-09-12	10:25:04	0.353906	1.57424	1.24963	660.695	FALSE	6
2022-09-12	10:25:05	0.242608	1.07917	1.42122	624.61	FALSE	6
2022-09-12	10:25:05	0.271921	1.20956	1.42122	661.904	FALSE	6
2022-09-12	10:25:05	0.246323	1.09569	1.42122	625.706	FALSE	6
2022-09-12	10:25:05	0.517163	2.30044	1.42122	664.205	FALSE	6
2022-09-12	10:25:06	0.212074	0.943348	1.75715	626.649	FALSE	6
2022-09-12	10:25:06	0.3993	1.77617	1.75715	665.981	FALSE	6
2022-09-12	10:25:06	0.649631	2.88969	1.75715	629.539	FALSE	6
2022-09-12	10:25:06	0.319097	1.41941	1.75715	667.4	FALSE	6
2022-09-12	10:25:07	0.205356	0.913465	1.13129	630.453	FALSE	6
2022-09-12	10:25:07	0.331616	1.47509	1.13129	668.875	FALSE	6
2022-09-12	10:25:07	0.138537	0.61624	1.13129	631.069	FALSE	6
2022-09-12	10:25:07	0.341794	1.52037	1.13129	670.396	FALSE	6
2022-09-12	10:25:08	0.239453	1.06513	1.3005	632.134	FALSE	6
2022-09-12	10:25:08	0.304186	1.35308	1.3005	671.749	FALSE	6
2022-09-12	10:25:08	0.198384	0.882452	1.3005	633.016	FALSE	6
2022-09-12	10:25:08	0.427443	1.90135	1.3005	673.65	FALSE	6
2022-09-12	10:25:09	0.276196	1.22858	1.57477	634.245	FALSE	6
2022-09-12	10:25:09	0.352379	1.56745	1.57477	675.217	FALSE	6
2022-09-12	10:25:09	0.433499	1.92829	1.57477	636.173	FALSE	6
2022-09-12	10:25:10	0.176043	0.783074	1.3846	676.001	FALSE	6
2022-09-12	10:25:10	0.32729	1.45585	1.3846	637.629	FALSE	6
2022-09-12	10:25:10	0.328359	1.46061	1.3846	677.461	FALSE	6
2022-09-12	10:25:10	0.413397	1.83887	1.3846	639.468	FALSE	6
2022-09-12	10:25:11	0.282812	1.258	1.67277	678.719	FALSE	6
2022-09-12	10:25:11	0.632735	2.81453	1.67277	642.283	FALSE	6
2022-09-12	10:25:11	0.308562	1.37255	1.67277	680.092	FALSE	6
2022-09-12	10:25:11	0.280115	1.24601	1.67277	643.529	FALSE	6
2022-09-12	10:25:12	0.443677	1.97356	1.71799	682.065	FALSE	6
2022-09-12	10:25:12	0.311158	1.38409	1.71799	644.913	FALSE	6
2022-09-12	10:25:12	0.419962	1.86807	1.71799	683.933	FALSE	6
2022-09-12	10:25:12	0.370089	1.64623	1.71799	646.559	FALSE	6
2022-09-12	10:25:13	0.338893	1.50746	1.63529	685.441	FALSE	6
2022-09-12	10:25:13	0.344491	1.53236	1.63529	648.091	FALSE	6
2022-09-12	10:25:13	0.419504	1.86604	1.63529	687.307	FALSE	6
2022-09-12	10:25:14	0.242201	1.07736	1.51873	649.169	FALSE	6
2022-09-12	10:25:14	0.46556	2.0709	1.51873	689.378	FALSE	6
2022-09-12	10:25:14	0.291056	1.29468	1.51873	650.463	FALSE	6
2022-09-12	10:25:14	0.366883	1.63197	1.51873	691.01	FALSE	6
2022-09-12	10:25:15	0.296756	1.32003	1.69366	651.783	FALSE	6
2022-09-12	10:25:15	0.411667	1.83118	1.69366	692.841	FALSE	6
2022-09-12	10:25:15	0.384746	1.71143	1.69366	653.495	FALSE	6
2022-09-12	10:25:15	0.429835	1.91199	1.69366	694.753	FALSE	6
2022-09-12	10:25:16	0.359351	1.59847	1.79564	655.093	FALSE	6
2022-09-12	10:25:16	0.406985	1.81035	1.79564	696.563	FALSE	6
2022-09-12	10:25:16	0.398181	1.77119	1.79564	656.864	FALSE	6
2022-09-12	10:25:16	0.450191	2.00254	1.79564	698.566	FALSE	6
2022-09-12	10:25:17	0.339504	1.51018	1.47796	658.375	FALSE	6
2022-09-12	10:25:17	0.272328	1.21137	1.47796	699.777	FALSE	6
2022-09-12	10:25:17	0.384949	1.71233	1.47796	660.087	FALSE	6
2022-09-12	10:25:18	0.305204	1.35761	1.32173	701.135	FALSE	6
2022-09-12	10:25:18	0.320624	1.4262	1.32173	661.513	FALSE	6
2022-09-12	10:25:18	0.358384	1.59416	1.32173	702.729	FALSE	6
2022-09-12	10:25:18	0.204339	0.908941	1.32173	662.422	FALSE	6
2022-09-12	10:25:19	0.410242	1.82484	1.55138	704.554	FALSE	6
2022-09-12	10:25:19	0.341438	1.51878	1.55138	663.941	FALSE	6
2022-09-12	10:25:19	0.390751	1.73814	1.55138	706.292	FALSE	6
2022-09-12	10:25:19	0.252634	1.12377	1.55138	665.065	FALSE	6
2022-09-12	10:25:20	0.552888	2.45936	1.54289	708.751	FALSE	6
2022-09-12	10:25:20	0.211412	0.940403	1.54289	666.005	FALSE	6
2022-09-12	10:25:20	0.448104	1.99326	1.54289	710.744	FALSE	6
2022-09-12	10:25:20	0.175026	0.778551	1.54289	666.784	FALSE	6
2022-09-12	10:25:21	0.0653056	0.290492	0.030222	711.035	FALSE	6
2022-09-12	10:25:21	0.044644	0.198585	0.030222	666.982	FALSE	6
2022-09-12	10:25:21	0.0277992	0.123656	0.030222	711.159	FALSE	6
2022-09-12	10:25:21	-0.110572	-0.491846	0.030222	666.982	FALSE	6
2022-09-12	10:25:22	-0.143956	-0.640345	-0.1292	711.159	FALSE	6
2022-09-12	10:25:22	-0.0341346	-0.151838	-0.1292	666.982	FALSE	6
2022-09-12	10:25:22	0.0909544	0.404583	-0.1292	711.563	FALSE	6
2022-09-12	10:25:23	0.0119214	0.0530288	0.623825	667.035	FALSE	6
2022-09-12	10:25:23	0.109937	0.489022	0.623825	712.052	FALSE	6
2022-09-12	10:25:23	0.208461	0.927276	0.623825	667.962	FALSE	6
2022-09-12	10:25:23	0.230649	1.02597	0.623825	713.078	FALSE	6
2022-09-12	10:25:24	0.147545	0.65631	0.812109	668.619	FALSE	6
2022-09-12	10:25:24	0.275738	1.22654	0.812109	714.305	FALSE	6
2022-09-12	10:25:24	0.103626	0.460949	0.812109	669.08	FALSE	6
2022-09-12	10:25:24	0.203372	0.904639	0.812109	715.209	FALSE	6
2022-09-12	10:25:25	0.0921249	0.40979	0.312507	669.49	FALSE	6
2022-09-12	10:25:25	0.00576363	0.0256378	0.312507	715.235	FALSE	6
2022-09-12	10:25:25	0.123881	0.551047	0.312507	670.041	FALSE	6
2022-09-12	10:25:25	0.0592496	0.263554	0.312507	715.499	FALSE	6
2022-09-12	10:25:26	0.149326	0.664232	0.865928	670.705	FALSE	6
2022-09-12	10:25:26	0.0906999	0.403451	0.865928	715.902	FALSE	6
2022-09-12	10:25:26	0.343982	1.5301	0.865928	672.235	FALSE	6
2022-09-12	10:25:27	0.139453	0.620315	0.537577	716.522	FALSE	6
2022-09-12	10:25:27	0.188766	0.839669	0.537577	673.075	FALSE	6
2022-09-12	10:25:27	0.142863	0.635483	0.537577	717.158	FALSE	6
2022-09-12	10:25:27	0.0123285	0.0548396	0.537577	673.129	FALSE	6
2022-09-12	10:25:28	0.164237	0.730559	1.03718	717.888	FALSE	6
2022-09-12	10:25:28	0.169631	0.754553	1.03718	673.884	FALSE	6
2022-09-12	10:25:28	0.301132	1.3395	1.03718	719.228	FALSE	6
2022-09-12	10:25:28	0.297672	1.3241	1.03718	675.208	FALSE	6
2022-09-12	10:25:29	0.269631	1.19937	1.82659	720.427	FALSE	6
2022-09-12	10:25:29	0.234262	1.04204	1.82659	676.25	FALSE	6
2022-09-12	10:25:29	0.310395	1.3807	1.82659	721.808	FALSE	6
2022-09-12	10:25:29	0.828257	3.68425	1.82659	679.934	FALSE	6
2022-09-12	10:25:30	0.410344	1.82529	1.69754	723.633	FALSE	6
2022-09-12	10:25:30	0.36612	1.62857	1.69754	681.563	FALSE	6
2022-09-12	10:25:30	0.36841	1.63876	1.69754	725.272	FALSE	6
2022-09-12	10:25:31	0.369682	1.64442	1.65364	683.207	FALSE	6
2022-09-12	10:25:31	0.316807	1.40922	1.65364	726.681	FALSE	6
2022-09-12	10:25:31	0.315178	1.40197	1.65364	684.609	FALSE	6
2022-09-12	10:25:31	0.485356	2.15896	1.65364	728.84	FALSE	6
2022-09-12	10:25:32	0.51813	2.30475	4.69268	686.914	FALSE	6
2022-09-12	10:25:32	0.83701	3.72319	4.69268	732.563	FALSE	6
2022-09-12	10:25:32	1.37396	6.11165	4.69268	693.026	FALSE	6
2022-09-12	10:25:32	1.49075	6.63115	4.69268	739.195	FALSE	6
2022-09-12	10:25:33	0.857926	3.81623	3.28754	696.842	FALSE	6
2022-09-12	10:25:33	0.944644	4.20197	3.28754	743.396	FALSE	6
2022-09-12	10:25:33	0.343779	1.5292	3.28754	698.371	FALSE	6
2022-09-12	10:25:33	0.809936	3.60276	3.28754	746.999	FALSE	6
2022-09-12	10:25:34	1.3877	6.17277	6.72087	704.544	FALSE	6
2022-09-12	10:25:34	1.60678	7.14728	6.72087	754.147	FALSE	6
2022-09-12	10:25:34	1.53828	6.84258	6.72087	711.387	FALSE	6
2022-09-12	10:25:35	2.00637	8.92474	5.71305	763.071	FALSE	6
2022-09-12	10:25:35	0.566781	2.52116	5.71305	713.908	FALSE	6
2022-09-12	10:25:35	0.815992	3.6297	5.71305	766.701	FALSE	6
2022-09-12	10:25:35	1.74826	7.77661	5.71305	721.684	FALSE	6
2022-09-12	10:25:36	3.05935	13.6086	6.64123	780.31	1	7
2022-09-12	10:25:36	1.58286	7.04088	6.64123	728.725	FALSE	7
2022-09-12	10:25:36	0.742506	3.30282	6.64123	783.612	FALSE	7
2022-09-12	10:25:36	0.587341	2.61261	6.64123	731.338	FALSE	7
2022-09-12	10:25:37	1.77309	7.88706	3.88114	791.499	FALSE	7
2022-09-12	10:25:37	0.251311	1.11788	3.88114	732.456	FALSE	7
2022-09-12	10:25:37	0.316959	1.4099	3.88114	792.909	FALSE	7
2022-09-12	10:25:37	1.14872	5.10974	3.88114	737.565	FALSE	7
2022-09-12	10:25:38	0.111005	0.493772	0.439049	793.403	FALSE	7
2022-09-12	10:25:38	0.133906	0.595641	0.439049	738.161	FALSE	7
2022-09-12	10:25:38	0.131362	0.584324	0.439049	793.987	FALSE	7
2022-09-12	10:25:38	0.0185371	0.0824567	0.439049	738.243	FALSE	7
2022-09-12	10:25:39	0.103677	0.461176	0.263252	794.449	FALSE	7
2022-09-12	10:25:39	0.000725441	0.00322691	0.263252	738.247	FALSE	7
2022-09-12	10:25:39	0.0731427	0.325353	0.263252	794.774	FALSE	7
2022-09-12	10:25:40	0.0436262	0.194058	0.548669	738.441	FALSE	7
2022-09-12	10:25:40	0.0251529	0.111885	0.548669	794.886	FALSE	7
2022-09-12	10:25:40	0.181285	0.806392	0.548669	739.247	FALSE	7
2022-09-12	10:25:40	0.243321	1.08234	0.548669	795.968	FALSE	7
2022-09-12	10:25:41	0.104491	0.464797	1.00582	739.712	FALSE	7
2022-09-12	10:25:41	0.286527	1.27453	1.00582	797.243	FALSE	7
2022-09-12	10:25:41	0.126272	0.561683	1.00582	740.274	FALSE	7
2022-09-12	10:25:41	0.387188	1.72229	1.00582	798.965	FALSE	7
2022-09-12	10:25:42	0.22327	0.99315	1.3215	741.267	FALSE	7
2022-09-12	10:25:42	0.328003	1.45902	1.3215	800.424	FALSE	7
2022-09-12	10:25:42	0.158435	0.704751	1.3215	741.972	FALSE	7
2022-09-12	10:25:42	0.478639	2.12908	1.3215	802.553	FALSE	7
2022-09-12	10:25:43	0.151209	0.672608	1.37209	742.644	FALSE	7
2022-09-12	10:25:43	0.498842	2.21895	1.37209	804.772	FALSE	7
2022-09-12	10:25:43	0.275331	1.22473	1.37209	743.869	FALSE	7
2022-09-12	10:25:44	0.432328	1.92308	1.9511	806.695	FALSE	7
2022-09-12	10:25:44	0.28042	1.24736	1.9511	745.116	FALSE	7
2022-09-12	10:25:44	0.795636	3.53915	1.9511	810.234	FALSE	7
2022-09-12	10:25:44	0.24612	1.09479	1.9511	746.211	FALSE	7
2022-09-12	10:25:45	0.882761	3.9267	6.14666	814.161	FALSE	7
2022-09-12	10:25:45	2.27843	10.1349	6.14666	756.346	FALSE	7
2022-09-12	10:25:45	0.62617	2.78533	6.14666	816.946	FALSE	7
2022-09-12	10:25:45	1.73996	7.73969	6.14666	764.086	FALSE	7
2022-09-12	10:25:46	2.2048	9.80739	6.07723	826.754	FALSE	7
2022-09-12	10:25:46	0.338232	1.50452	6.07723	765.59	FALSE	7
2022-09-12	10:25:46	0.885356	3.93824	6.07723	830.692	FALSE	7
2022-09-12	10:25:46	2.0365	9.05876	6.07723	774.649	FALSE	7
2022-09-12	10:25:47	0.543779	2.41884	4.22573	833.111	FALSE	7
2022-09-12	10:25:47	1.14042	5.07282	4.22573	779.722	FALSE	7
2022-09-12	10:25:47	1.16576	5.18553	4.22573	838.296	FALSE	7
2022-09-12	10:25:48	0.215942	0.960553	2.44974	780.682	FALSE	7
2022-09-12	10:25:48	0.816247	3.63083	2.44974	841.927	FALSE	7
2022-09-12	10:25:48	0.481285	2.14085	2.44974	782.823	FALSE	7
2022-09-12	10:25:48	0.689428	3.06671	2.44974	844.994	FALSE	7
2022-09-12	10:25:49	0.29243	1.30079	1.70758	784.124	FALSE	7
2022-09-12	10:25:49	0.465305	2.06977	1.70758	847.064	FALSE	7
2022-09-12	10:25:49	0.274669	1.22178	1.70758	785.346	FALSE	7
2022-09-12	10:25:49	0.503117	2.23797	1.70758	849.302	FALSE	7
2022-09-12	10:25:50	0.317723	1.4133	1.55212	786.759	FALSE	7
2022-09-12	10:25:50	0.398842	1.77413	1.55212	851.076	FALSE	7
2022-09-12	10:25:50	0.272277	1.21114	1.55212	787.97	FALSE	7
2022-09-12	10:25:50	0.406883	1.8099	1.55212	852.886	FALSE	7
2022-09-12	10:25:51	0.277825	1.23582	1.58511	789.206	FALSE	7
2022-09-12	10:25:51	0.427545	1.90181	1.58511	854.787	FALSE	7
2022-09-12	10:25:51	0.363677	1.61771	1.58511	790.824	FALSE	7
2022-09-12	10:25:52	0.287697	1.27973	1.88284	856.067	FALSE	7
2022-09-12	10:25:52	0.459707	2.04487	1.88284	792.869	FALSE	7
2022-09-12	10:25:52	0.345305	1.53599	1.88284	857.603	FALSE	7
2022-09-12	10:25:52	0.60042	2.67079	1.88284	795.539	FALSE	7
2022-09-12	10:25:53	0.34159	1.51946	2.46502	859.123	FALSE	7
2022-09-12	10:25:53	1.10592	4.91935	2.46502	800.459	FALSE	7
2022-09-12	10:25:53	0.245153	1.09049	2.46502	860.213	FALSE	7
2022-09-12	10:25:53	0.523982	2.33078	2.46502	802.789	FALSE	7
2022-09-12	10:25:54	0.36327	1.6159	1.87509	861.829	FALSE	7
2022-09-12	10:25:54	0.486221	2.16281	1.87509	804.952	FALSE	7
2022-09-12	10:25:54	0.309937	1.37866	1.87509	863.208	FALSE	7
2022-09-12	10:25:54	0.52673	2.343	1.87509	807.295	FALSE	7
2022-09-12	10:25:55	0.231565	1.03005	1.84408	864.238	FALSE	7
2022-09-12	10:25:55	0.620318	2.7593	1.84408	810.055	FALSE	7
2022-09-12	10:25:55	0.268868	1.19598	1.84408	865.434	FALSE	7
2022-09-12	10:25:55	0.537519	2.39099	1.84408	812.446	FALSE	7
2022-09-12	10:25:56	0.309479	1.37662	1.70931	866.81	FALSE	7
2022-09-12	10:25:56	0.518486	2.30633	1.70931	814.752	FALSE	7
2022-09-12	10:25:56	0.324847	1.44498	1.70931	868.255	FALSE	7
2022-09-12	10:25:57	0.48383	2.15217	1.92931	816.904	FALSE	7
2022-09-12	10:25:57	0.318181	1.41533	1.92931	869.671	FALSE	7
2022-09-12	10:25:57	0.550496	2.44872	1.92931	819.353	FALSE	7
2022-09-12	10:25:57	0.382405	1.70101	1.92931	871.372	FALSE	7
2022-09-12	10:25:58	0.974669	4.33552	5.76422	823.688	FALSE	7
2022-09-12	10:25:58	1.6707	7.43161	5.76422	878.803	FALSE	7
2022-09-12	10:25:58	0.695585	3.0941	5.76422	826.782	FALSE	7
2022-09-12	10:25:58	1.84246	8.19563	5.76422	886.999	FALSE	7
2022-09-12	10:25:59	1.86744	8.30675	4.5448	835.089	FALSE	7
2022-09-12	10:25:59	0.915585	4.07271	4.5448	891.072	FALSE	7
2022-09-12	10:25:59	0.794109	3.53236	4.5448	838.621	FALSE	7
2022-09-12	10:25:59	0.509733	2.26739	4.5448	893.339	FALSE	7
2022-09-12	10:26:00	0.687086	3.0563	2.19797	841.678	FALSE	7
2022-09-12	10:26:00	0.271819	1.20911	2.19797	894.548	FALSE	7
2022-09-12	10:26:00	0.523473	2.32851	2.19797	844.006	FALSE	7
2022-09-12	10:26:01	0.351565	1.56383	1.89892	896.112	FALSE	7
2022-09-12	10:26:01	0.408257	1.81601	1.89892	845.822	FALSE	7
2022-09-12	10:26:01	0.321031	1.42801	1.89892	897.54	FALSE	7
2022-09-12	10:26:01	0.62673	2.78782	1.89892	848.61	FALSE	7
2022-09-12	10:26:02	0.199402	0.88698	1.84363	898.427	FALSE	7
2022-09-12	10:26:02	0.483931	2.15262	1.84363	850.763	FALSE	7
2022-09-12	10:26:02	0.534822	2.379	1.84363	900.806	FALSE	7
2022-09-12	10:26:02	0.439708	1.95591	1.84363	852.719	FALSE	7
2022-09-12	10:26:03	0.232583	1.03458	1.66796	901.84	FALSE	7
2022-09-12	10:26:03	0.590242	2.62551	1.66796	855.344	FALSE	7
2022-09-12	10:26:03	0.165713	0.737125	1.66796	902.578	FALSE	7
2022-09-12	10:26:03	0.511361	2.27464	1.66796	857.619	FALSE	7
2022-09-12	10:26:04	0.320216	1.42438	1.4837	904.002	FALSE	7
2022-09-12	10:26:04	0.411209	1.82914	1.4837	859.448	FALSE	7
2022-09-12	10:26:04	0.269224	1.19756	1.4837	905.2	FALSE	7
2022-09-12	10:26:05	0.530293	2.35885	1.661	861.807	FALSE	7
2022-09-12	10:26:05	0.240878	1.07147	1.661	906.271	FALSE	7
2022-09-12	10:26:05	0.45411	2.01997	1.661	863.827	FALSE	7
2022-09-12	10:26:05	0.268359	1.19371	1.661	907.465	FALSE	7
2022-09-12	10:26:06	0.48729	2.16756	1.59722	865.994	FALSE	7
2022-09-12	10:26:06	0.273499	1.21658	1.59722	908.681	FALSE	7
2022-09-12	10:26:06	0.479707	2.13383	1.59722	868.128	FALSE	7
2022-09-12	10:26:06	0.195789	0.870909	1.59722	909.552	FALSE	7
2022-09-12	10:26:07	0.42897	1.90814	1.22716	870.036	FALSE	7
2022-09-12	10:26:07	0.206018	0.916409	1.22716	910.469	FALSE	7
2022-09-12	10:26:07	0.296908	1.32071	1.22716	871.357	FALSE	7
2022-09-12	10:26:07	0.171616	0.763382	1.22716	911.232	FALSE	7
2022-09-12	10:26:08	0.217621	0.968022	0.531125	872.325	FALSE	7
2022-09-12	10:26:08	0.152888	0.680076	0.531125	911.912	FALSE	7
2022-09-12	10:26:08	-0.0170354	-0.0757769	0.531125	872.325	FALSE	7
2022-09-12	10:26:08	0.124135	0.552177	0.531125	912.464	FALSE	7
2022-09-12	10:26:09	0.0665269	0.295925	2.06056	872.621	FALSE	7
2022-09-12	10:26:09	0.676806	3.01057	2.06056	915.475	FALSE	7
2022-09-12	10:26:09	0.646374	2.8752	2.06056	875.496	FALSE	7
2022-09-12	10:26:10	0.37584	1.67181	1.5657	917.147	FALSE	7
2022-09-12	10:26:10	0.245509	1.09207	1.5657	876.588	FALSE	7
2022-09-12	10:26:10	0.386781	1.72048	1.5657	918.867	FALSE	7
2022-09-12	10:26:10	0.399809	1.77843	1.5657	878.367	FALSE	7
2022-09-12	10:26:11	0.376552	1.67498	1.80361	920.542	FALSE	7
2022-09-12	10:26:11	0.399453	1.77685	1.80361	880.144	FALSE	7
2022-09-12	10:26:11	0.426374	1.8966	1.80361	922.439	FALSE	7
2022-09-12	10:26:11	0.419504	1.86604	1.80361	882.01	FALSE	7
2022-09-12	10:26:12	0.37701	1.67702	1.7361	924.116	FALSE	7
2022-09-12	10:26:12	0.383728	1.7069	1.7361	883.716	FALSE	7
2022-09-12	10:26:12	0.398588	1.773	1.7361	925.889	FALSE	7
2022-09-12	10:26:12	0.401845	1.78749	1.7361	885.504	FALSE	7
2022-09-12	10:26:13	0.404949	1.80129	2.03197	927.69	FALSE	7
2022-09-12	10:26:13	0.459707	2.04487	2.03197	887.549	FALSE	7
2022-09-12	10:26:13	0.505763	2.24973	2.03197	929.94	FALSE	7
2022-09-12	10:26:14	0.427341	1.9009	1.99716	889.45	FALSE	7
2022-09-12	10:26:14	0.404898	1.80107	1.99716	931.741	FALSE	7
2022-09-12	10:26:14	0.412379	1.83434	1.99716	891.284	FALSE	7
2022-09-12	10:26:14	0.55131	2.45234	1.99716	934.193	FALSE	7
2022-09-12	10:26:15	1.61019	7.16245	2.19756	898.447	FALSE	7
2022-09-12	10:26:15	0.186832	0.831066	2.19756	935.024	FALSE	7
2022-09-12	10:26:15	-0.0337784	-0.150253	2.19756	898.447	FALSE	7
2022-09-12	10:26:15	0.212888	0.946968	2.19756	935.971	FALSE	7
2022-09-12	10:26:16	0.631107	2.80729	0.766721	901.254	FALSE	7
2022-09-12	10:26:16	0.00281194	0.0125081	0.766721	935.984	FALSE	7
2022-09-12	10:26:16	-0.038613	-0.171758	0.766721	901.254	FALSE	7
2022-09-12	10:26:16	0.0941605	0.418845	0.766721	936.403	FALSE	7
2022-09-12	10:26:17	0.0128883	0.0573297	0.154972	901.311	FALSE	7
2022-09-12	10:26:17	0.105204	0.467968	0.154972	936.87	FALSE	7
2022-09-12	10:26:17	-0.0135748	-0.0603834	0.154972	901.311	FALSE	7
2022-09-12	10:26:18	0.126731	0.563725	0.705997	937.434	FALSE	7
2022-09-12	10:26:18	0.160878	0.715618	0.705997	902.027	FALSE	7
2022-09-12	10:26:18	0.16902	0.751835	0.705997	938.186	FALSE	7
2022-09-12	10:26:18	0.178232	0.792812	0.705997	902.82	FALSE	7
2022-09-12	10:26:19	0.187239	0.832877	1.26785	939.019	FALSE	7
2022-09-12	10:26:19	0.363117	1.61522	1.26785	904.435	FALSE	7
2022-09-12	10:26:19	0.202659	0.901468	1.26785	939.92	FALSE	7
2022-09-12	10:26:19	0.387087	1.72184	1.26785	906.157	FALSE	7
2022-09-12	10:26:20	0.224695	0.999488	1.37419	940.92	FALSE	7
2022-09-12	10:26:20	0.380115	1.69083	1.37419	907.847	FALSE	7
2022-09-12	10:26:20	0.245255	1.09094	1.37419	942.011	FALSE	7
2022-09-12	10:26:20	0.385662	1.7155	1.37419	909.563	FALSE	7
2022-09-12	10:26:21	0.266934	1.18738	1.72463	943.198	FALSE	7
2022-09-12	10:26:21	0.532176	2.36723	1.72463	911.93	FALSE	7
2022-09-12	10:26:21	0.364033	1.61929	1.72463	944.817	FALSE	7
2022-09-12	10:26:22	0.460267	2.04736	3.22761	913.978	FALSE	7
2022-09-12	10:26:22	0.466069	2.07317	3.22761	946.891	FALSE	7
2022-09-12	10:26:22	0.750598	3.33881	3.22761	917.316	FALSE	7
2022-09-12	10:26:22	1.22546	5.45109	3.22761	952.342	FALSE	7
2022-09-12	10:26:23	1.06505	4.73756	3.68612	922.054	FALSE	7
2022-09-12	10:26:23	0.71243	3.16903	3.68612	955.511	FALSE	7
2022-09-12	10:26:23	0.938028	4.17254	3.68612	926.226	FALSE	7
2022-09-12	10:26:23	0.599199	2.66536	3.68612	958.176	FALSE	7
2022-09-12	10:26:24	0.360674	1.60435	1.94527	927.831	FALSE	7
2022-09-12	10:26:24	0.671361	2.98635	1.94527	961.162	FALSE	7
2022-09-12	10:26:24	0.384949	1.71233	1.94527	929.543	FALSE	7
2022-09-12	10:26:24	0.332278	1.47804	1.94527	962.641	FALSE	7
2022-09-12	10:26:25	0.24098	1.07193	1.04895	930.615	FALSE	7
2022-09-12	10:26:25	0.266985	1.1876	1.04895	963.828	FALSE	7
2022-09-12	10:26:25	0.188817	0.839896	1.04895	931.455	FALSE	7
2022-09-12	10:26:25	0.246476	1.09637	1.04895	964.925	FALSE	7
2022-09-12	10:26:26	0.221336	0.984547	1.58926	932.439	FALSE	7
2022-09-12	10:26:26	0.286578	1.27476	1.58926	966.199	FALSE	7
2022-09-12	10:26:26	0.563931	2.50848	1.58926	934.948	FALSE	7
2022-09-12	10:26:27	0.114822	0.510751	0.655855	966.71	FALSE	7
2022-09-12	10:26:27	0.0662724	0.294793	0.655855	935.243	FALSE	7
2022-09-12	10:26:27	0.261234	1.16202	0.655855	967.872	FALSE	7
2022-09-12	10:26:28	0.0862215	0.38353	0.842521	935.626	FALSE	7
2022-09-12	10:26:28	0.171921	0.764739	0.842521	968.637	FALSE	7
2022-09-12	10:26:28	0.25472	1.13305	0.842521	936.759	FALSE	7
2022-09-12	10:26:28	0.146985	0.653819	0.842521	969.291	FALSE	7
2022-09-12	10:26:28	0.287188	1.27747	0.842521	938.037	FALSE	7
2022-09-12	10:26:29	0.189224	0.841706	1.38415	970.132	FALSE	7
2022-09-12	10:26:29	0.281234	1.25099	1.38415	939.288	FALSE	7
2022-09-12	10:26:29	0.330547	1.47034	1.38415	971.603	FALSE	7
2022-09-12	10:26:29	0.443677	1.97356	1.38415	941.261	FALSE	7
2022-09-12	10:26:30	0.508715	2.26287	3.05253	973.866	FALSE	7
2022-09-12	10:26:30	0.681234	3.03027	3.05253	944.292	FALSE	7
2022-09-12	10:26:30	0.868766	3.86444	3.05253	977.73	FALSE	7
2022-09-12	10:26:31	2.54948	11.3406	9.86612	955.632	FALSE	7
2022-09-12	10:26:31	1.49345	6.64316	9.86612	984.373	FALSE	7
2022-09-12	10:26:31	2.81533	12.5232	9.86612	968.155	FALSE	7
2022-09-12	10:26:31	2.01375	8.95756	9.86612	993.331	FALSE	7
2022-09-12	10:26:32	0.572277	2.5456	4.3353	970.701	FALSE	7
2022-09-12	10:26:32	0.816654	3.63264	4.3353	996.963	FALSE	7
2022-09-12	10:26:32	2.0649	9.18509	4.3353	979.886	FALSE	7
2022-09-12	10:26:32	0.444644	1.97787	4.3353	998.941	FALSE	7
2022-09-12	10:26:33	0.977519	4.3482	2.71634	984.234	FALSE	7
2022-09-12	10:26:33	0.732023	3.25618	2.71634	1002.2	FALSE	7
2022-09-12	10:26:33	0.382201	1.70011	2.71634	985.934	FALSE	7
2022-09-12	10:26:33	0.350903	1.56089	2.71634	1003.76	FALSE	7
2022-09-12	10:26:34	1.02261	4.54877	6.56113	990.483	FALSE	7
2022-09-12	10:26:34	2.70505	12.0326	6.56113	1015.79	FALSE	7
2022-09-12	10:26:34	0.697366	3.10202	6.56113	993.585	FALSE	7
2022-09-12	10:26:35	0.702201	3.12353	1.87017	1018.91	FALSE	7
2022-09-12	10:26:35	0.344695	1.53327	1.87017	995.118	FALSE	7
2022-09-12	10:26:35	0.263677	1.17289	1.87017	1020.09	FALSE	7
2022-09-12	10:26:35	0.371158	1.65099	1.87017	996.769	FALSE	7
2022-09-12	10:26:36	0.279402	1.24284	1.29632	1021.33	FALSE	7
2022-09-12	10:26:36	0.313957	1.39654	1.29632	998.166	FALSE	7
2022-09-12	10:26:36	0.306781	1.36462	1.29632	1022.69	FALSE	7
2022-09-12	10:26:36	0.26556	1.18126	1.29632	999.347	FALSE	7
2022-09-12	10:26:37	0.248257	1.1043	1.17317	1023.8	FALSE	7
2022-09-12	10:26:37	0.220471	0.980699	1.17317	1000.33	FALSE	7
2022-09-12	10:26:37	0.331616	1.47509	1.17317	1025.27	FALSE	7
2022-09-12	10:26:37	0.254618	1.13259	1.17317	1001.46	FALSE	7
2022-09-12	10:26:38	0.298842	1.32931	1.17666	1026.6	FALSE	7
2022-09-12	10:26:38	0.237875	1.05812	1.17666	1002.52	FALSE	7
2022-09-12	10:26:38	0.256858	1.14256	1.17666	1027.75	FALSE	7
2022-09-12	10:26:39	0.3107	1.38206	1.26038	1003.9	FALSE	7
2022-09-12	10:26:39	0.207952	0.925012	1.26038	1028.67	FALSE	7
2022-09-12	10:26:39	0.393295	1.74945	1.26038	1005.65	FALSE	7
2022-09-12	10:26:39	0.221438	0.985001	1.26038	1029.66	FALSE	7
2022-09-12	10:26:40	0.229275	1.01986	1.05704	1006.67	FALSE	7
2022-09-12	10:26:40	0.259402	1.15387	1.05704	1030.81	FALSE	7
2022-09-12	10:26:40	0.20785	0.924558	1.05704	1007.59	FALSE	7
2022-09-12	10:26:40	0.254008	1.12988	1.05704	1031.94	FALSE	7
2022-09-12	10:26:41	0.209122	0.930216	1.06966	1008.52	FALSE	7
2022-09-12	10:26:41	0.271819	1.20911	1.06966	1033.15	FALSE	7

## Sheet: Dominic_harness_20229121021 (2)
Date	Time	Lbs	Newtons	Total Force x Time	total time steps force > 13.345		**GoPro Fitting: 1010
2022-09-12	10:21:41	0.201031	0.894226	0.894226	FALSE	0			Total Force x Force	1033.15
2022-09-12	10:21:41	0.427188	1.90022	1.90022	FALSE	0			Total Time Steps Force >13.345	7
2022-09-12	10:21:41	0.180725	0.803901	1.69813	FALSE	0
2022-09-12	10:21:41	0.548817	2.44125	4.34147	FALSE	0
2022-09-12	10:21:42	0.192939	0.858231	2.55636	FALSE	0
2022-09-12	10:21:42	0.40098	1.78364	6.1251	FALSE	0
2022-09-12	10:21:42	0.309886	1.37843	3.93479	FALSE	0
2022-09-12	10:21:43	0.369479	1.64352	7.76862	FALSE	0
2022-09-12	10:21:43	1.34729	5.99302	9.92781	FALSE	0
2022-09-12	10:21:43	0.234415	1.04272	8.81135	FALSE	0
2022-09-12	10:21:43	0.64785	2.88177	12.8096	FALSE	0
2022-09-12	10:21:44	1.82037	8.09737	16.9087	FALSE	0
2022-09-12	10:21:44	0.753651	3.35239	16.162	FALSE	0
2022-09-12	10:21:44	0.690751	3.0726	19.9813	FALSE	0
2022-09-12	10:21:44	0.488308	2.17209	18.3341	FALSE	0
2022-09-12	10:21:45	0.247036	1.09887	21.0802	FALSE	0
2022-09-12	10:21:45	0.784593	3.49003	21.8241	FALSE	0
2022-09-12	10:21:45	2.22683	9.90539	30.9856	FALSE	0
2022-09-12	10:21:45	0.702303	3.12398	24.9481	FALSE	0
2022-09-12	10:21:46	1.89894	8.44686	39.4324	FALSE	0
2022-09-12	10:21:46	2.59604	11.5477	36.4958	FALSE	0
2022-09-12	10:21:46	0.575738	2.561	41.9934	FALSE	0
2022-09-12	10:21:47	0.389479	1.73248	38.2283	FALSE	0
2022-09-12	10:21:47	0.349478	1.55455	43.548	FALSE	0
2022-09-12	10:21:47	0.190242	0.846234	39.0745	FALSE	0
2022-09-12	10:21:47	0.0237788	0.105773	43.6537	FALSE	0
2022-09-12	10:21:48	0.174975	0.778324	39.8528	FALSE	0
2022-09-12	10:21:48	0.126272	0.561683	44.2154	FALSE	0
2022-09-12	10:21:48	-0.215	-0.956363	39.8528	FALSE	0
2022-09-12	10:21:48	-0.171895	-0.764623	44.2154	FALSE	0
2022-09-12	10:21:49	-0.120547	-0.536217	39.8528	FALSE	0
2022-09-12	10:21:49	-0.0593763	-0.264118	44.2154	FALSE	0
2022-09-12	10:21:49	-0.0390201	-0.173569	39.8528	FALSE	0
2022-09-12	10:21:49	-0.0332695	-0.147989	44.2154	FALSE	0
2022-09-12	10:21:50	-0.0261448	-0.116297	39.8528	FALSE	0
2022-09-12	10:21:50	-0.0270608	-0.120372	44.2154	FALSE	0
2022-09-12	10:21:50	-0.00899467	-0.0400101	39.8528	FALSE	0
2022-09-12	10:21:50	0.0161453	0.0718175	44.2872	FALSE	0
2022-09-12	10:21:51	0.0464252	0.206509	40.0593	FALSE	0
2022-09-12	10:21:51	0.0819468	0.364516	44.6518	FALSE	0
2022-09-12	10:21:51	0.153652	0.683475	40.7428	FALSE	0
2022-09-12	10:21:52	0.160216	0.712673	45.3644	FALSE	0
2022-09-12	10:21:52	0.147545	0.65631	41.3991	FALSE	0
2022-09-12	10:21:52	0.161998	0.7206	46.085	FALSE	0
2022-09-12	10:21:52	0.139046	0.618504	42.0176	FALSE	0
2022-09-12	10:21:53	0.15813	0.703394	46.7884	FALSE	0
2022-09-12	10:21:53	0.161082	0.716525	42.7341	FALSE	0
2022-09-12	10:21:53	0.172837	0.768814	47.5572	FALSE	0
2022-09-12	10:21:53	0.230547	1.02552	43.7597	FALSE	0
2022-09-12	10:21:54	0.393041	1.74832	49.3056	FALSE	0
2022-09-12	10:21:54	0.215229	0.957382	44.717	FALSE	0
2022-09-12	10:21:54	0.227087	1.01013	50.3157	FALSE	0
2022-09-12	10:21:54	0.252634	1.12377	45.8408	FALSE	0
2022-09-12	10:21:55	0.310853	1.38274	51.6984	FALSE	0
2022-09-12	10:21:55	0.266883	1.18715	47.028	FALSE	0
2022-09-12	10:21:55	0.20159	0.896713	52.5951	FALSE	0
2022-09-12	10:21:56	0.173448	0.771531	47.7995	FALSE	0
2022-09-12	10:21:56	0.201336	0.895583	53.4907	FALSE	0
2022-09-12	10:21:56	0.158435	0.704751	48.5042	FALSE	0
2022-09-12	10:21:56	0.177367	0.788964	54.2797	FALSE	0
2022-09-12	10:21:57	0.166018	0.738481	49.2427	FALSE	0
2022-09-12	10:21:57	0.149886	0.666723	54.9464	FALSE	0
2022-09-12	10:21:57	0.172125	0.765646	50.0084	FALSE	0
2022-09-12	10:21:57	0.170598	0.758854	55.7053	FALSE	0
2022-09-12	10:21:58	0.143575	0.63865	50.647	FALSE	0
2022-09-12	10:21:58	0.150191	0.66808	56.3734	FALSE	0
2022-09-12	10:21:58	0.155026	0.689587	51.3366	FALSE	0
2022-09-12	10:21:58	0.099962	0.444651	56.818	FALSE	0
2022-09-12	10:21:59	0.0603692	0.268534	51.6051	FALSE	0
2022-09-12	10:21:59	0.144898	0.644535	57.4625	FALSE	0
2022-09-12	10:21:59	0.583321	2.59473	54.1999	FALSE	0
2022-09-12	10:22:00	0.125916	0.5601	58.0226	FALSE	0
2022-09-12	10:22:00	0.0830155	0.36927	54.5691	FALSE	0
2022-09-12	10:22:00	0.184491	0.820653	58.8433	FALSE	0
2022-09-12	10:22:00	0.136858	0.608772	55.1779	FALSE	0
2022-09-12	10:22:01	0.0662724	0.294793	59.1381	FALSE	0
2022-09-12	10:22:01	0.000674557	0.00300056	55.1809	FALSE	0
2022-09-12	10:22:01	0.0630155	0.280306	59.4184	FALSE	0
2022-09-12	10:22:01	-0.0649234	-0.288792	55.1809	FALSE	0
2022-09-12	10:22:02	0.000114759	0.000510471	59.4189	FALSE	0
2022-09-12	10:22:02	0.13299	0.591566	55.7725	FALSE	0
2022-09-12	10:22:02	0.139606	0.620995	60.0399	FALSE	0
2022-09-12	10:22:02	0.0794531	0.353423	56.1259	FALSE	0
2022-09-12	10:22:03	0.0510053	0.226882	60.2668	FALSE	0
2022-09-12	10:22:03	0.0920231	0.409337	56.5352	FALSE	0
2022-09-12	10:22:03	0.286425	1.27408	61.5409	FALSE	0
2022-09-12	10:22:03	0.333702	1.48437	58.0196	FALSE	0
2022-09-12	10:22:04	0.332074	1.47713	63.018	FALSE	0
2022-09-12	10:22:04	0.304542	1.35466	59.3743	FALSE	0
2022-09-12	10:22:04	0.335585	1.49275	64.5107	FALSE	0
2022-09-12	10:22:05	0.279148	1.24171	60.616	FALSE	0
2022-09-12	10:22:05	0.30098	1.33882	65.8496	FALSE	0
2022-09-12	10:22:05	0.398639	1.77323	62.3892	FALSE	0
2022-09-12	10:22:05	0.349987	1.55681	67.4064	FALSE	0
2022-09-12	10:22:06	0.405764	1.80492	64.1941	FALSE	0
2022-09-12	10:22:06	3.02871	13.4723	80.8787	1	1
2022-09-12	10:22:06	0.729529	3.24509	67.4392	FALSE	1
2022-09-12	10:22:06	2.86052	12.7242	93.6028	FALSE	1
2022-09-12	10:22:07	2.22586	9.90107	77.3403	FALSE	1
2022-09-12	10:22:07	0.451616	2.00888	95.6117	FALSE	1
2022-09-12	10:22:07	0.319504	1.42122	78.7615	FALSE	1
2022-09-12	10:22:07	0.223422	0.993826	96.6055	FALSE	1
2022-09-12	10:22:08	0.323575	1.43933	80.2008	FALSE	1
2022-09-12	10:22:08	0.331056	1.4726	98.0781	FALSE	1
2022-09-12	10:22:08	0.212532	0.945385	81.1462	FALSE	1
2022-09-12	10:22:09	0.353397	1.57198	99.6501	FALSE	1
2022-09-12	10:22:09	0.257977	1.14753	82.2937	FALSE	1
2022-09-12	10:22:09	0.309529	1.37685	101.027	FALSE	1
2022-09-12	10:22:09	0.173448	0.771531	83.0653	FALSE	1
2022-09-12	10:22:10	0.309122	1.37504	102.402	FALSE	1
2022-09-12	10:22:10	0.259962	1.15636	84.2216	FALSE	1
2022-09-12	10:22:10	0.261438	1.16293	103.565	FALSE	1
2022-09-12	10:22:10	0.296908	1.32071	85.5423	FALSE	1
2022-09-12	10:22:11	0.282608	1.2571	104.822	FALSE	1
2022-09-12	10:22:11	0.529428	2.355	87.8973	FALSE	1
2022-09-12	10:22:11	0.212125	0.943574	105.766	FALSE	1
2022-09-12	10:22:11	0.295687	1.31527	89.2126	FALSE	1
2022-09-12	10:22:12	0.2964	1.31845	107.084	FALSE	1
2022-09-12	10:22:12	0.324237	1.44227	90.6549	FALSE	1
2022-09-12	10:22:12	0.487596	2.16892	109.253	FALSE	1
2022-09-12	10:22:13	0.256654	1.14165	91.7965	FALSE	1
2022-09-12	10:22:13	0.300115	1.33497	110.588	FALSE	1
2022-09-12	10:22:13	0.699708	3.11244	94.909	FALSE	1
2022-09-12	10:22:13	0.495127	2.20242	112.79	FALSE	1
2022-09-12	10:22:14	0.412023	1.83276	96.7417	FALSE	1
2022-09-12	10:22:14	0.512939	2.28166	115.072	FALSE	1
2022-09-12	10:22:14	0.617468	2.74662	99.4884	FALSE	1
2022-09-12	10:22:14	2.31767	10.3095	125.381	FALSE	1
2022-09-12	10:22:15	0.321438	1.42982	100.918	FALSE	1
2022-09-12	10:22:15	1.11777	4.97206	130.354	FALSE	1
2022-09-12	10:22:15	0.607239	2.70112	103.619	FALSE	1
2022-09-12	10:22:15	0.722507	3.21386	133.567	FALSE	1
2022-09-12	10:22:16	1.44877	6.44442	110.064	FALSE	1
2022-09-12	10:22:16	0.404491	1.79926	135.367	FALSE	1
2022-09-12	10:22:16	0.315534	1.40356	111.467	FALSE	1
2022-09-12	10:22:16	1.40368	6.24385	141.611	FALSE	1
2022-09-12	10:22:17	0.340471	1.51448	112.982	FALSE	1
2022-09-12	10:22:17	0.577061	2.56688	144.177	FALSE	1
2022-09-12	10:22:17	0.482964	2.14832	115.13	FALSE	1
2022-09-12	10:22:18	0.441489	1.96383	146.141	FALSE	1
2022-09-12	10:22:18	1.90851	8.48943	123.62	FALSE	1
2022-09-12	10:22:18	0.264644	1.17719	147.318	FALSE	1
2022-09-12	10:22:18	0.956043	4.25267	127.872	FALSE	1
2022-09-12	10:22:19	0.568613	2.5293	149.848	FALSE	1
2022-09-12	10:22:19	0.511972	2.27735	130.15	FALSE	1
2022-09-12	10:22:19	1.33976	5.95952	155.807	FALSE	1
2022-09-12	10:22:19	0.458588	2.03989	132.189	FALSE	1
2022-09-12	10:22:20	0.395636	1.75987	157.567	FALSE	1
2022-09-12	10:22:20	1.1134	4.95263	137.142	FALSE	1
2022-09-12	10:22:20	0.439809	1.95636	159.523	FALSE	1
2022-09-12	10:22:20	1.14698	5.102	142.244	FALSE	1
2022-09-12	10:22:21	0.515433	2.29275	161.816	FALSE	1
2022-09-12	10:22:21	0.778079	3.46105	145.705	FALSE	1
2022-09-12	10:22:21	1.63838	7.28784	169.104	FALSE	1
2022-09-12	10:22:22	0.242405	1.07827	146.783	FALSE	1
2022-09-12	10:22:22	0.412583	1.83525	170.939	FALSE	1
2022-09-12	10:22:22	0.445407	1.98126	148.765	FALSE	1
2022-09-12	10:22:22	0.526272	2.34096	173.28	FALSE	1
2022-09-12	10:22:23	1.48286	6.59606	155.361	FALSE	1
2022-09-12	10:22:23	0.505254	2.24747	175.528	FALSE	1
2022-09-12	10:22:23	0.909631	4.04622	159.407	FALSE	1
2022-09-12	10:22:23	1.34856	5.99866	181.526	FALSE	1
2022-09-12	10:22:24	0.639351	2.84396	162.251	FALSE	1
2022-09-12	10:22:24	0.935331	4.16054	185.687	FALSE	1
2022-09-12	10:22:24	0.380216	1.69128	163.942	FALSE	1
2022-09-12	10:22:24	0.150853	0.671024	186.358	FALSE	1
2022-09-12	10:22:25	0.553244	2.46094	166.403	FALSE	1
2022-09-12	10:22:25	0.178181	0.792585	187.151	FALSE	1
2022-09-12	10:22:25	0.501641	2.2314	168.634	FALSE	1
2022-09-12	10:22:26	0.144695	0.643632	187.794	FALSE	1
2022-09-12	10:22:26	0.58215	2.58952	171.224	FALSE	1
2022-09-12	10:22:26	1.69355	7.53325	195.327	FALSE	1
2022-09-12	10:22:26	0.614771	2.73462	173.959	FALSE	1
2022-09-12	10:22:27	0.407036	1.81058	197.138	FALSE	1
2022-09-12	10:22:27	0.422812	1.88075	175.839	FALSE	1
2022-09-12	10:22:27	0.252735	1.12422	198.262	FALSE	1
2022-09-12	10:22:27	0.931158	4.14198	179.981	FALSE	1
2022-09-12	10:22:28	0.242557	1.07894	199.341	FALSE	1
2022-09-12	10:22:28	0.441336	1.96315	181.945	FALSE	1
2022-09-12	10:22:28	1.51029	6.71807	206.059	FALSE	1
2022-09-12	10:22:28	0.542303	2.41227	184.357	FALSE	1
2022-09-12	10:22:29	1.04861	4.66443	210.724	FALSE	1
2022-09-12	10:22:29	0.568409	2.5284	186.885	FALSE	1
2022-09-12	10:22:29	0.552685	2.45845	213.182	FALSE	1
2022-09-12	10:22:29	0.942405	4.19201	191.077	FALSE	1
2022-09-12	10:22:30	0.312786	1.39133	214.573	FALSE	1
2022-09-12	10:22:30	0.395942	1.76123	192.838	FALSE	1
2022-09-12	10:22:30	0.796705	3.5439	218.117	FALSE	1
2022-09-12	10:22:31	0.5364	2.38601	195.224	FALSE	1
2022-09-12	10:22:31	0.63014	2.80299	220.92	FALSE	1
2022-09-12	10:22:31	2.2621	10.0623	205.287	FALSE	1
2022-09-12	10:22:31	0.557468	2.47973	223.4	FALSE	1
2022-09-12	10:22:32	1.6051	7.13981	212.427	FALSE	1
2022-09-12	10:22:32	3.09187	13.7533	237.153	1	2
2022-09-12	10:22:32	0.460929	2.0503	214.477	FALSE	2
2022-09-12	10:22:32	1.21447	5.40221	242.556	FALSE	2
2022-09-12	10:22:33	3.20902	14.2744	228.751	1	3
2022-09-12	10:22:33	1.13732	5.05903	247.615	FALSE	3
2022-09-12	10:22:33	1.54067	6.85321	235.604	FALSE	3
2022-09-12	10:22:33	3.42469	15.2337	262.848	1	4
2022-09-12	10:22:34	0.919911	4.09195	239.696	FALSE	4
2022-09-12	10:22:34	1.60108	7.12192	269.97	FALSE	4
2022-09-12	10:22:34	1.97345	8.7783	248.475	FALSE	4
2022-09-12	10:22:35	1.1594	5.15724	275.127	FALSE	4
2022-09-12	10:22:35	1.3792	6.13496	254.61	FALSE	4
2022-09-12	10:22:35	0.580471	2.58205	277.709	FALSE	4
2022-09-12	10:22:35	0.487952	2.17051	256.78	FALSE	4
2022-09-12	10:22:36	0.343728	1.52897	279.238	FALSE	4
2022-09-12	10:22:36	0.383117	1.70418	258.484	FALSE	4
2022-09-12	10:22:36	0.24958	1.11018	280.349	FALSE	4
2022-09-12	10:22:36	0.516145	2.29592	260.78	FALSE	4
2022-09-12	10:22:37	0.111769	0.497171	280.846	FALSE	4
2022-09-12	10:22:37	0.449886	2.00118	262.781	FALSE	4
2022-09-12	10:22:37	0.325916	1.44974	282.296	FALSE	4
2022-09-12	10:22:37	0.35411	1.57515	264.357	FALSE	4
2022-09-12	10:22:38	0.305916	1.36078	283.656	FALSE	4
2022-09-12	10:22:38	0.305814	1.36032	265.717	FALSE	4
2022-09-12	10:22:38	0.377316	1.67838	285.335	FALSE	4
2022-09-12	10:22:39	0.232583	1.03458	266.751	FALSE	4
2022-09-12	10:22:39	0.242405	1.07827	286.413	FALSE	4
2022-09-12	10:22:39	0.294415	1.30962	268.061	FALSE	4
2022-09-12	10:22:39	0.536603	2.38692	288.8	FALSE	4
2022-09-12	10:22:40	0.572481	2.54651	270.608	FALSE	4
2022-09-12	10:22:40	1.56022	6.94017	295.74	FALSE	4
2022-09-12	10:22:40	0.566883	2.52161	273.129	FALSE	4
2022-09-12	10:22:40	2.46317	10.9567	306.697	FALSE	4
2022-09-12	10:22:41	1.67635	7.45674	280.586	FALSE	4
2022-09-12	10:22:41	2.28312	10.1558	316.853	FALSE	4
2022-09-12	10:22:41	3.90093	17.3521	297.938	1	5
2022-09-12	10:22:41	0.716349	3.18646	320.039	FALSE	5
2022-09-12	10:22:42	0.759249	3.37729	301.315	FALSE	5
2022-09-12	10:22:42	1.69991	7.56154	327.601	FALSE	5
2022-09-12	10:22:42	0.179606	0.798923	302.114	FALSE	5
2022-09-12	10:22:42	0.888053	3.95024	331.551	FALSE	5
2022-09-12	10:22:43	1.57874	7.02255	309.137	FALSE	5
2022-09-12	10:22:43	3.51156	15.6201	347.171	1	6
2022-09-12	10:22:43	0.902914	4.01634	313.153	FALSE	6
2022-09-12	10:22:44	0.846578	3.76575	350.937	FALSE	6
2022-09-12	10:22:44	1.11436	4.9569	318.11	FALSE	6
2022-09-12	10:22:44	0.26042	1.1584	352.095	FALSE	6
2022-09-12	10:22:44	0.404898	1.80107	319.911	FALSE	6
2022-09-12	10:22:45	0.214364	0.953534	353.049	FALSE	6
2022-09-12	10:22:45	0.261489	1.16316	321.074	FALSE	6
2022-09-12	10:22:45	0.285102	1.26819	354.317	FALSE	6
2022-09-12	10:22:45	0.293244	1.30441	322.379	FALSE	6
2022-09-12	10:22:46	0.272176	1.21069	355.527	FALSE	6
2022-09-12	10:22:46	0.282354	1.25597	323.635	FALSE	6
2022-09-12	10:22:46	0.578995	2.57549	358.103	FALSE	6
2022-09-12	10:22:46	0.527188	2.34504	325.98	FALSE	6
2022-09-12	10:22:47	0.348868	1.55183	359.655	FALSE	6
2022-09-12	10:22:47	0.247748	1.10203	327.082	FALSE	6
2022-09-12	10:22:47	0.237367	1.05586	360.711	FALSE	6
2022-09-12	10:22:48	0.245305	1.09117	328.173	FALSE	6
2022-09-12	10:22:48	0.214517	0.954215	361.665	FALSE	6
2022-09-12	10:22:48	0.223626	0.994733	329.168	FALSE	6
2022-09-12	10:22:48	0.0844913	0.375834	362.041	FALSE	6
2022-09-12	10:22:49	0.0723794	0.321958	329.49	FALSE	6
2022-09-12	10:22:49	-0.0977478	-0.434802	362.041	FALSE	6
2022-09-12	10:22:49	-0.0885366	-0.393829	329.49	FALSE	6
2022-09-12	10:22:49	-0.154287	-0.686299	362.041	FALSE	6
2022-09-12	10:22:50	-0.161768	-0.719576	329.49	FALSE	6
2022-09-12	10:22:50	-0.143295	-0.637405	362.041	FALSE	6
2022-09-12	10:22:50	0.01584	0.0704595	329.56	FALSE	6
2022-09-12	10:22:50	0.0420994	0.187267	362.228	FALSE	6
2022-09-12	10:22:51	0.374924	1.66774	331.228	FALSE	6
2022-09-12	10:22:51	0.252583	1.12354	363.351	FALSE	6
2022-09-12	10:22:51	0.27584	1.22699	332.455	FALSE	6
2022-09-12	10:22:52	0.250954	1.11629	364.468	FALSE	6
2022-09-12	10:22:52	0.589529	2.62234	335.077	FALSE	6
2022-09-12	10:22:52	0.819758	3.64645	368.114	FALSE	6
2022-09-12	10:22:52	1.01141	4.49895	339.576	FALSE	6
2022-09-12	10:22:53	0.730547	3.24962	371.364	FALSE	6
2022-09-12	10:22:53	0.736349	3.27543	342.851	FALSE	6
2022-09-12	10:22:53	0.714466	3.17809	374.542	FALSE	6
2022-09-12	10:22:53	0.86729	3.85788	346.709	FALSE	6
2022-09-12	10:22:54	0.921641	4.09964	378.642	FALSE	6
2022-09-12	10:22:54	0.458435	2.03921	348.749	FALSE	6
2022-09-12	10:22:54	0.857672	3.8151	382.457	FALSE	6
2022-09-12	10:22:54	0.520013	2.31312	351.062	FALSE	6
2022-09-12	10:22:55	0.361336	1.60729	384.064	FALSE	6
2022-09-12	10:22:55	0.343423	1.52761	352.589	FALSE	6
2022-09-12	10:22:55	0.305814	1.36032	385.424	FALSE	6
2022-09-12	10:22:55	0.339199	1.50882	354.098	FALSE	6
2022-09-12	10:22:56	0.35355	1.57266	386.997	FALSE	6
2022-09-12	10:22:56	0.334211	1.48664	355.585	FALSE	6
2022-09-12	10:22:56	0.266272	1.18443	388.181	FALSE	6
2022-09-12	10:22:57	0.315382	1.40288	356.988	FALSE	6
2022-09-12	10:22:57	0.26897	1.19643	389.378	FALSE	6
2022-09-12	10:22:57	0.407494	1.81261	358.8	FALSE	6
2022-09-12	10:22:57	0.345407	1.53644	390.914	FALSE	6
2022-09-12	10:22:58	0.357519	1.59032	360.391	FALSE	6
2022-09-12	10:22:58	0.348715	1.55115	392.465	FALSE	6
2022-09-12	10:22:58	0.345458	1.53667	361.927	FALSE	6
2022-09-12	10:22:58	0.330191	1.46876	393.934	FALSE	6
2022-09-12	10:22:59	0.338283	1.50475	363.432	FALSE	6
2022-09-12	10:22:59	0.336196	1.49547	395.43	FALSE	6
2022-09-12	10:22:59	0.31813	1.41511	364.847	FALSE	6
2022-09-12	10:22:59	0.357977	1.59235	397.022	FALSE	6
2022-09-12	10:23:00	0.232328	1.03344	365.881	FALSE	6
2022-09-12	10:23:00	0.189682	0.843743	397.866	FALSE	6
2022-09-12	10:23:00	0.232786	1.03548	366.916	FALSE	6
2022-09-12	10:23:01	0.294567	1.31029	399.176	FALSE	6
2022-09-12	10:23:01	0.0919213	0.408884	367.325	FALSE	6
2022-09-12	10:23:01	-0.0733712	-0.32637	399.176	FALSE	6
2022-09-12	10:23:01	-0.0932694	-0.414881	367.325	FALSE	6
2022-09-12	10:23:02	0.114415	0.508941	399.685	FALSE	6
2022-09-12	10:23:02	0.506629	2.25359	369.578	FALSE	6
2022-09-12	10:23:02	0.177265	0.78851	400.473	FALSE	6
2022-09-12	10:23:02	0.46388	2.06343	371.642	FALSE	6
2022-09-12	10:23:03	0.571768	2.54334	403.017	FALSE	6
2022-09-12	10:23:03	0.201336	0.895583	372.537	FALSE	6
2022-09-12	10:23:03	0.74902	3.33179	406.349	FALSE	6
2022-09-12	10:23:03	0.403779	1.79609	374.334	FALSE	6
2022-09-12	10:23:04	0.601488	2.67554	409.024	FALSE	6
2022-09-12	10:23:04	0.796705	3.5439	377.877	FALSE	6
2022-09-12	10:23:04	0.763473	3.39608	412.42	FALSE	6
2022-09-12	10:23:05	0.59416	2.64294	380.52	FALSE	6
2022-09-12	10:23:05	0.951768	4.23365	416.654	FALSE	6
2022-09-12	10:23:05	1.51798	6.75228	387.273	FALSE	6
2022-09-12	10:23:05	0.318384	1.41624	418.07	FALSE	6
2022-09-12	10:23:06	0.540827	2.40571	389.678	FALSE	6
2022-09-12	10:23:06	1.74296	7.75303	425.823	FALSE	6
2022-09-12	10:23:06	0.390802	1.73837	391.417	FALSE	6
2022-09-12	10:23:06	0.185356	0.824501	426.648	FALSE	6
2022-09-12	10:23:07	0.434415	1.93236	393.349	FALSE	6
2022-09-12	10:23:07	0.156349	0.695472	427.343	FALSE	6
2022-09-12	10:23:07	0.433346	1.92761	395.277	FALSE	6
2022-09-12	10:23:07	0.230089	1.02348	428.367	FALSE	6
2022-09-12	10:23:08	0.233906	1.04046	396.317	FALSE	6
2022-09-12	10:23:08	0.262303	1.16678	429.533	FALSE	6
2022-09-12	10:23:08	0.323473	1.43887	397.756	FALSE	6
2022-09-12	10:23:08	0.162965	0.724901	430.258	FALSE	6
2022-09-12	10:23:09	0.343677	1.52874	399.285	FALSE	6
2022-09-12	10:23:09	0.0939061	0.417713	430.676	FALSE	6
2022-09-12	10:23:09	0.427036	1.89954	401.184	FALSE	6
2022-09-12	10:23:10	0.295025	1.31233	431.988	FALSE	6
2022-09-12	10:23:10	0.346985	1.54346	402.728	FALSE	6
2022-09-12	10:23:10	0.253702	1.12852	433.117	FALSE	6
2022-09-12	10:23:10	0.427494	1.90158	404.629	FALSE	6
2022-09-12	10:23:11	0.37701	1.67702	434.794	FALSE	6
2022-09-12	10:23:11	2.76413	12.2954	416.925	FALSE	6
2022-09-12	10:23:11	0.171107	0.761118	435.555	FALSE	6
2022-09-12	10:23:11	0.311565	1.3859	418.311	FALSE	6
2022-09-12	10:23:12	0.46098	2.05053	437.605	FALSE	6
2022-09-12	10:23:12	0.104339	0.464121	418.775	FALSE	6
2022-09-12	10:23:12	-0.0901142	-0.400846	437.605	FALSE	6
2022-09-12	10:23:12	-0.29271	-1.30203	418.775	FALSE	6
2022-09-12	10:23:13	-0.370979	-1.65019	437.605	FALSE	6
2022-09-12	10:23:13	0.173855	0.773342	419.548	FALSE	6
2022-09-12	10:23:13	0.358791	1.59597	439.201	FALSE	6
2022-09-12	10:23:14	0.299758	1.33338	420.882	FALSE	6
2022-09-12	10:23:14	-0.0871117	-0.38749	439.201	FALSE	6
2022-09-12	10:23:14	0.159657	0.710186	421.592	FALSE	6
2022-09-12	10:23:14	0.621794	2.76586	441.967	FALSE	6
2022-09-12	10:23:15	1.22459	5.44722	427.039	FALSE	6
2022-09-12	10:23:15	0.366374	1.6297	443.597	FALSE	6
2022-09-12	10:23:15	0.605305	2.69252	429.731	FALSE	6
2022-09-12	10:23:15	0.998792	4.44283	448.04	FALSE	6
2022-09-12	10:23:16	0.483168	2.14923	431.881	FALSE	6
2022-09-12	10:23:16	0.131769	0.586135	448.626	FALSE	6
2022-09-12	10:23:16	0.315738	1.40447	433.285	FALSE	6
2022-09-12	10:23:16	-0.0760175	-0.338141	448.626	FALSE	6
2022-09-12	10:23:17	-0.190419	-0.847022	433.285	FALSE	6
2022-09-12	10:23:17	-0.299834	-1.33372	448.626	FALSE	6
2022-09-12	10:23:17	-0.471183	-2.09592	433.285	FALSE	6
2022-09-12	10:23:18	-0.450979	-2.00604	448.626	FALSE	6
2022-09-12	10:23:18	-0.561615	-2.49818	433.285	FALSE	6
2022-09-12	10:23:18	-0.527926	-2.34832	448.626	FALSE	6
2022-09-12	10:23:18	-0.588231	-2.61657	433.285	FALSE	6
2022-09-12	10:23:19	-0.476526	-2.11968	448.626	FALSE	6
2022-09-12	10:23:19	-0.431437	-1.91912	433.285	FALSE	6
2022-09-12	10:23:19	-0.449758	-2.00061	448.626	FALSE	6
2022-09-12	10:23:19	-0.447315	-1.98975	433.285	FALSE	6
2022-09-12	10:23:20	-0.402938	-1.79235	448.626	FALSE	6
2022-09-12	10:23:20	-0.3836	-1.70633	433.285	FALSE	6
2022-09-12	10:23:20	-0.318867	-1.41838	448.626	FALSE	6
2022-09-12	10:23:20	-0.238257	-1.05981	433.285	FALSE	6
2022-09-12	10:23:21	-0.117035	-0.520595	448.626	FALSE	6
2022-09-12	10:23:21	-0.0465519	-0.207072	433.285	FALSE	6
2022-09-12	10:23:21	-0.109656	-0.487772	448.626	FALSE	6
2022-09-12	10:23:22	-0.116883	-0.519919	433.285	FALSE	6
2022-09-12	10:23:22	-0.0975443	-0.433897	448.626	FALSE	6
2022-09-12	10:23:22	-0.128893	-0.573342	433.285	FALSE	6
2022-09-12	10:23:22	-0.138511	-0.616125	448.626	FALSE	6
2022-09-12	10:23:23	-0.092506	-0.411485	433.285	FALSE	6
2022-09-12	10:23:23	-0.16645	-0.740403	448.626	FALSE	6
2022-09-12	10:23:23	0.0674939	0.300226	433.585	FALSE	6
2022-09-12	10:23:23	-0.108842	-0.484151	448.626	FALSE	6
2022-09-12	10:23:24	-0.0405977	-0.180587	433.585	FALSE	6
2022-09-12	10:23:24	0.0156872	0.0697798	448.696	FALSE	6
2022-09-12	10:23:24	0.0458145	0.203792	433.789	FALSE	6
2022-09-12	10:23:24	0.158537	0.705204	449.401	FALSE	6
2022-09-12	10:23:25	0.0756873	0.336672	434.126	FALSE	6
2022-09-12	10:23:25	0.10271	0.456875	449.858	FALSE	6
2022-09-12	10:23:25	0.00657784	0.0292595	434.155	FALSE	6
2022-09-12	10:23:25	0.0114125	0.0507651	449.909	FALSE	6
2022-09-12	10:23:26	0.0642369	0.285739	434.441	FALSE	6
2022-09-12	10:23:26	0.0500893	0.222807	450.131	FALSE	6
2022-09-12	10:23:26	0.0487661	0.216921	434.658	FALSE	6
2022-09-12	10:23:27	-0.166399	-0.740176	450.131	FALSE	6
2022-09-12	10:23:27	-0.142939	-0.635821	434.658	FALSE	6
2022-09-12	10:23:27	-0.0104705	-0.0465749	450.131	FALSE	6
2022-09-12	10:23:27	-0.0537784	-0.239217	434.658	FALSE	6
2022-09-12	10:23:28	0.0282572	0.125694	450.257	FALSE	6
2022-09-12	10:23:28	-0.0964755	-0.429142	434.658	FALSE	6
2022-09-12	10:23:28	0.0485626	0.216016	450.473	FALSE	6
2022-09-12	10:23:28	0.0396567	0.176401	434.834	FALSE	6
2022-09-12	10:23:29	-0.00879109	-0.0391045	450.473	FALSE	6
2022-09-12	10:23:29	-0.0417682	-0.185793	434.834	FALSE	6
2022-09-12	10:23:29	-0.0471117	-0.209562	450.473	FALSE	6
2022-09-12	10:23:29	0.101794	0.4528	435.287	FALSE	6
2022-09-12	10:23:30	-0.0135748	-0.0603834	450.473	FALSE	6
2022-09-12	10:23:30	0.0770613	0.342784	435.63	FALSE	6
2022-09-12	10:23:30	-0.039529	-0.175833	450.473	FALSE	6
2022-09-12	10:23:31	0.186679	0.830386	436.46	FALSE	6
2022-09-12	10:23:31	0.0120231	0.0534812	450.527	FALSE	6
2022-09-12	10:23:31	0.0899875	0.400282	436.86	FALSE	6
2022-09-12	10:23:31	-0.030674	-0.136444	450.527	FALSE	6
2022-09-12	10:23:32	0.0690206	0.307017	437.167	FALSE	6
2022-09-12	10:23:32	-0.0172389	-0.0766821	450.527	FALSE	6
2022-09-12	10:23:32	-0.032557	-0.14482	437.167	FALSE	6
2022-09-12	10:23:32	-0.099529	-0.442725	450.527	FALSE	6
2022-09-12	10:23:33	0.032074	0.142672	437.31	FALSE	6
2022-09-12	10:23:33	-0.00370202	-0.0164673	450.527	FALSE	6
2022-09-12	10:23:33	-0.0297071	-0.132143	437.31	FALSE	6
2022-09-12	10:23:33	-0.0547961	-0.243744	450.527	FALSE	6
2022-09-12	10:23:34	0.0615905	0.273967	437.584	FALSE	6
2022-09-12	10:23:34	0.049275	0.219185	450.746	FALSE	6
2022-09-12	10:23:34	0.0547712	0.243633	437.828	FALSE	6
2022-09-12	10:23:35	0.0470358	0.209225	450.955	FALSE	6
2022-09-12	10:23:35	0.140827	0.626427	438.454	FALSE	6
2022-09-12	10:23:35	0.100217	0.445785	451.401	FALSE	6
2022-09-12	10:23:35	0.0291733	0.129769	438.584	FALSE	6
2022-09-12	10:23:36	0.154415	0.686869	452.088	FALSE	6
2022-09-12	10:23:36	0.0740587	0.329428	438.913	FALSE	6
2022-09-12	10:23:36	0.138995	0.618278	452.706	FALSE	6
2022-09-12	10:23:36	0.135331	0.601979	439.515	FALSE	6
2022-09-12	10:23:37	0.452583	2.01318	454.719	FALSE	6
2022-09-12	10:23:37	0.416552	1.85291	441.368	FALSE	6
2022-09-12	10:23:37	0.568104	2.52704	457.246	FALSE	6
2022-09-12	10:23:38	0.502964	2.23728	443.606	FALSE	6
2022-09-12	10:23:38	0.335127	1.49071	458.737	FALSE	6
2022-09-12	10:23:38	0.265713	1.18194	444.787	FALSE	6
2022-09-12	10:23:38	0.345662	1.53757	460.274	FALSE	6
2022-09-12	10:23:38	2.7677	12.3113	457.099	FALSE	6
2022-09-12	10:23:39	0.141489	0.629371	460.904	FALSE	6
2022-09-12	10:23:39	0.0703438	0.312903	457.412	FALSE	6
2022-09-12	10:23:39	0.270395	1.20277	462.107	FALSE	6
2022-09-12	10:23:40	0.192583	0.856648	458.268	FALSE	6
2022-09-12	10:23:40	0.292074	1.2992	463.406	FALSE	6
2022-09-12	10:23:40	0.24215	1.07713	459.345	FALSE	6
2022-09-12	10:23:40	0.291005	1.29445	464.7	FALSE	6
2022-09-12	10:23:41	0.297061	1.32139	460.667	FALSE	6
2022-09-12	10:23:41	0.371107	1.65076	466.351	FALSE	6
2022-09-12	10:23:41	0.327952	1.4588	462.126	FALSE	6
2022-09-12	10:23:41	0.288104	1.28154	467.633	FALSE	6
2022-09-12	10:23:42	0.274008	1.21884	463.344	FALSE	6
2022-09-12	10:23:42	0.29355	1.30577	468.938	FALSE	6
2022-09-12	10:23:42	0.293244	1.30441	464.649	FALSE	6
2022-09-12	10:23:42	0.314873	1.40062	470.339	FALSE	6
2022-09-12	10:23:43	0.322506	1.43457	466.083	FALSE	6
2022-09-12	10:23:43	0.425254	1.89161	472.231	FALSE	6
2022-09-12	10:23:43	0.710089	3.15862	469.242	FALSE	6
2022-09-12	10:23:44	0.625051	2.78035	475.011	FALSE	6
2022-09-12	10:23:44	0.597977	2.65992	471.902	FALSE	6
2022-09-12	10:23:44	0.490547	2.18205	477.193	FALSE	6
2022-09-12	10:23:44	0.565	2.51323	474.415	FALSE	6
2022-09-12	10:23:45	0.637214	2.83446	480.027	FALSE	6
2022-09-12	10:23:45	0.706985	3.14481	477.56	FALSE	6
2022-09-12	10:23:45	0.820522	3.64985	483.677	FALSE	6
2022-09-12	10:23:45	0.760674	3.38363	480.944	FALSE	6
2022-09-12	10:23:46	0.559402	2.48833	486.166	FALSE	6
2022-09-12	10:23:46	0.375789	1.67158	482.615	FALSE	6
2022-09-12	10:23:46	0.334822	1.48936	487.655	FALSE	6
2022-09-12	10:23:46	0.260165	1.15727	483.773	FALSE	6
2022-09-12	10:23:47	0.289987	1.28992	488.945	FALSE	6
2022-09-12	10:23:47	0.24902	1.10769	484.88	FALSE	6
2022-09-12	10:23:47	0.245814	1.09343	490.038	FALSE	6
2022-09-12	10:23:48	0.249886	1.11154	485.992	FALSE	6
2022-09-12	10:23:48	0.284491	1.26547	491.304	FALSE	6
2022-09-12	10:23:48	0.248664	1.10611	487.098	FALSE	6
2022-09-12	10:23:48	0.248664	1.10611	492.41	FALSE	6
2022-09-12	10:23:49	0.267087	1.18806	488.286	FALSE	6
2022-09-12	10:23:49	0.285102	1.26819	493.678	FALSE	6
2022-09-12	10:23:49	0.378384	1.68313	489.969	FALSE	6
2022-09-12	10:23:49	0.405509	1.80379	495.482	FALSE	6
2022-09-12	10:23:50	0.279148	1.24171	491.211	FALSE	6
2022-09-12	10:23:50	0.225611	1.00356	496.485	FALSE	6
2022-09-12	10:23:50	0.338435	1.50543	492.716	FALSE	6
2022-09-12	10:23:50	0.123066	0.547422	497.033	FALSE	6
2022-09-12	10:23:51	0.341489	1.51901	494.235	FALSE	6
2022-09-12	10:23:51	0.240115	1.06808	498.101	FALSE	6
2022-09-12	10:23:51	0.253957	1.12965	495.365	FALSE	6
2022-09-12	10:23:51	0.349682	1.55546	499.656	FALSE	6
2022-09-12	10:23:52	0.504847	2.24566	497.61	FALSE	6
2022-09-12	10:23:52	1.06291	4.72804	504.384	FALSE	6
2022-09-12	10:23:52	0.233702	1.03955	498.65	FALSE	6
2022-09-12	10:23:53	0.295127	1.31278	505.697	FALSE	6
2022-09-12	10:23:53	0.51701	2.29976	500.95	FALSE	6
2022-09-12	10:23:53	0.328257	1.46015	507.157	FALSE	6
2022-09-12	10:23:53	0.352837	1.56949	502.519	FALSE	6
2022-09-12	10:23:54	0.279199	1.24193	508.399	FALSE	6
2022-09-12	10:23:54	0.259606	1.15478	503.674	FALSE	6
2022-09-12	10:23:54	0.324898	1.44521	509.844	FALSE	6
2022-09-12	10:23:54	0.418079	1.8597	505.534	FALSE	6
2022-09-12	10:23:55	0.667494	2.96915	512.814	FALSE	6
2022-09-12	10:23:55	0.399249	1.77594	507.31	FALSE	6
2022-09-12	10:23:55	0.496756	2.20967	515.023	FALSE	6
2022-09-12	10:23:55	0.242557	1.07894	508.389	FALSE	6
2022-09-12	10:23:56	0.128105	0.569837	515.593	FALSE	6
2022-09-12	10:23:56	-0.0422262	-0.187831	508.389	FALSE	6
2022-09-12	10:23:56	-0.117239	-0.521503	515.593	FALSE	6
2022-09-12	10:23:57	-0.0966791	-0.430048	508.389	FALSE	6
2022-09-12	10:23:57	-0.0695035	-0.309165	515.593	FALSE	6
2022-09-12	10:23:57	-0.0226333	-0.100677	508.389	FALSE	6
2022-09-12	10:23:57	0.0477992	0.21262	515.806	FALSE	6
2022-09-12	10:23:58	-0.034389	-0.152969	508.389	FALSE	6
2022-09-12	10:23:58	-0.00578856	-0.0257487	515.806	FALSE	6
2022-09-12	10:23:58	0.470649	2.09354	510.482	FALSE	6
2022-09-12	10:23:58	-0.0281295	-0.125126	515.806	FALSE	6
2022-09-12	10:23:59	-0.0431422	-0.191905	510.482	FALSE	6
2022-09-12	10:23:59	-0.139173	-0.619069	515.806	FALSE	6
2022-09-12	10:23:59	-0.0771371	-0.343121	510.482	FALSE	6
2022-09-12	10:23:59	-0.0653305	-0.290603	515.806	FALSE	6
2022-09-12	10:24:00	-0.0753559	-0.335198	510.482	FALSE	6
2022-09-12	10:24:00	-0.0833967	-0.370965	515.806	FALSE	6
2022-09-12	10:24:00	-0.067875	-0.301922	510.482	FALSE	6
2022-09-12	10:24:01	-0.0637529	-0.283586	515.806	FALSE	6
2022-09-12	10:24:01	-0.0760684	-0.338367	510.482	FALSE	6
2022-09-12	10:24:01	-0.0622262	-0.276795	515.806	FALSE	6
2022-09-12	10:24:01	-0.0610048	-0.271362	510.482	FALSE	6
2022-09-12	10:24:02	-0.0605977	-0.269551	515.806	FALSE	6
2022-09-12	10:24:02	-0.0596308	-0.26525	510.482	FALSE	6
2022-09-12	10:24:02	-0.0541855	-0.241028	515.806	FALSE	6
2022-09-12	10:24:02	-0.0460939	-0.205035	510.482	FALSE	6
2022-09-12	10:24:03	-0.0366282	-0.16293	515.806	FALSE	6
2022-09-12	10:24:03	-0.0347962	-0.15478	510.482	FALSE	6
2022-09-12	10:24:03	0.194415	0.864797	516.671	FALSE	6
2022-09-12	10:24:03	0.122201	0.543574	511.026	FALSE	6
2022-09-12	10:24:04	0.12958	0.576398	517.247	FALSE	6
2022-09-12	10:24:04	0.407341	1.81193	512.838	FALSE	6
2022-09-12	10:24:04	0.396858	1.7653	519.012	FALSE	6
2022-09-12	10:24:04	0.434873	1.9344	514.772	FALSE	6
2022-09-12	10:24:05	-0.0351015	-0.156138	519.012	FALSE	6
2022-09-12	10:24:05	0.493448	2.19496	516.967	FALSE	6
2022-09-12	10:24:05	0.0182318	0.0810987	519.093	FALSE	6
2022-09-12	10:24:06	0.023219	0.103283	517.07	FALSE	6
2022-09-12	10:24:06	-0.0175443	-0.0780406	519.093	FALSE	6
2022-09-12	10:24:06	0.120318	0.535199	517.606	FALSE	6
2022-09-12	10:24:06	0.00174323	0.00775424	519.101	FALSE	6
2022-09-12	10:24:07	-0.111997	-0.498185	517.606	FALSE	6
2022-09-12	10:24:07	0.0689188	0.306565	519.408	FALSE	6
2022-09-12	10:24:07	0.128868	0.573231	518.179	FALSE	6
2022-09-12	10:24:07	0.333295	1.48256	520.89	FALSE	6
2022-09-12	10:24:08	0.306781	1.36462	519.543	FALSE	6
2022-09-12	10:24:08	0.333906	1.48528	522.376	FALSE	6
2022-09-12	10:24:08	0.433601	1.92874	521.472	FALSE	6
2022-09-12	10:24:08	0.327545	1.45699	523.833	FALSE	6
2022-09-12	10:24:09	0.353499	1.57243	523.045	FALSE	6
2022-09-12	10:24:09	0.321743	1.43118	525.264	FALSE	6
2022-09-12	10:24:09	0.31299	1.39224	524.437	FALSE	6
2022-09-12	10:24:10	0.270954	1.20526	526.469	FALSE	6
2022-09-12	10:24:10	0.264338	1.17583	525.613	FALSE	6
2022-09-12	10:24:10	0.329987	1.46785	527.937	FALSE	6
2022-09-12	10:24:10	0.262812	1.16904	526.782	FALSE	6
2022-09-12	10:24:11	0.236807	1.05336	528.99	FALSE	6
2022-09-12	10:24:11	0.313295	1.3936	528.175	FALSE	6
2022-09-12	10:24:11	0.289326	1.28698	530.277	FALSE	6
2022-09-12	10:24:11	0.389428	1.73225	529.908	FALSE	6
2022-09-12	10:24:12	0.40215	1.78884	532.066	FALSE	6
2022-09-12	10:24:12	0.402405	1.78998	531.698	FALSE	6
2022-09-12	10:24:12	0.392786	1.74719	533.813	FALSE	6
2022-09-12	10:24:12	0.357417	1.58986	533.287	FALSE	6
2022-09-12	10:24:13	0.3307	1.47102	535.284	FALSE	6
2022-09-12	10:24:13	0.314364	1.39835	534.686	FALSE	6
2022-09-12	10:24:13	0.312125	1.38839	536.673	FALSE	6
2022-09-12	10:24:14	0.295789	1.31573	536.001	FALSE	6
2022-09-12	10:24:14	0.255331	1.13576	537.808	FALSE	6
2022-09-12	10:24:14	0.181387	0.806846	536.808	FALSE	6
2022-09-12	10:24:14	0.11355	0.505093	538.313	FALSE	6
2022-09-12	10:24:15	-0.244618	-1.08811	536.808	FALSE	6
2022-09-12	10:24:15	-0.366959	-1.63231	538.313	FALSE	6
2022-09-12	10:24:15	-0.466043	-2.07305	536.808	FALSE	6
2022-09-12	10:24:15	-0.559172	-2.48731	538.313	FALSE	6
2022-09-12	10:24:16	-0.48248	-2.14617	536.808	FALSE	6
2022-09-12	10:24:16	-0.432913	-1.92568	538.313	FALSE	6
2022-09-12	10:24:16	-0.338766	-1.5069	536.808	FALSE	6
2022-09-12	10:24:16	-0.260038	-1.1567	538.313	FALSE	6
2022-09-12	10:24:17	-0.250318	-1.11346	536.808	FALSE	6
2022-09-12	10:24:17	-0.240394	-1.06932	538.313	FALSE	6
2022-09-12	10:24:17	-0.384414	-1.70995	536.808	FALSE	6
2022-09-12	10:24:18	-0.421056	-1.87294	538.313	FALSE	6
2022-09-12	10:24:18	-0.443854	-1.97435	536.808	FALSE	6
2022-09-12	10:24:18	-0.372201	-1.65562	538.313	FALSE	6
2022-09-12	10:24:18	-0.266297	-1.18454	536.808	FALSE	6
2022-09-12	10:24:19	-0.338104	-1.50395	538.313	FALSE	6
2022-09-12	10:24:19	-0.263091	-1.17028	536.808	FALSE	6
2022-09-12	10:24:19	-0.222023	-0.987603	538.313	FALSE	6
2022-09-12	10:24:19	-0.195407	-0.869209	536.808	FALSE	6
2022-09-12	10:24:20	-0.141768	-0.630612	538.313	FALSE	6
2022-09-12	10:24:20	-0.239427	-1.06502	536.808	FALSE	6
2022-09-12	10:24:20	-0.222073	-0.987825	538.313	FALSE	6
2022-09-12	10:24:20	-0.176679	-0.785904	536.808	FALSE	6
2022-09-12	10:24:21	-0.189554	-0.843174	538.313	FALSE	6
2022-09-12	10:24:21	-0.167519	-0.745158	536.808	FALSE	6
2022-09-12	10:24:21	-0.178409	-0.793599	538.313	FALSE	6
2022-09-12	10:24:21	-0.191539	-0.852004	536.808	FALSE	6
2022-09-12	10:24:22	-0.196832	-0.875548	538.313	FALSE	6
2022-09-12	10:24:22	-0.190623	-0.847929	536.808	FALSE	6
2022-09-12	10:24:22	-0.18075	-0.804012	538.313	FALSE	6
2022-09-12	10:24:23	-0.155865	-0.693319	536.808	FALSE	6
2022-09-12	10:24:23	-0.126552	-0.562929	538.313	FALSE	6
2022-09-12	10:24:23	-0.000699497	-0.0031115	536.808	FALSE	6
2022-09-12	10:24:23	0.260318	1.15795	539.471	FALSE	6
2022-09-12	10:24:24	0.356145	1.5842	538.393	FALSE	6
2022-09-12	10:24:24	1.37991	6.13812	545.61	FALSE	6
2022-09-12	10:24:24	0.279453	1.24306	539.636	FALSE	6
2022-09-12	10:24:24	0.251819	1.12014	546.73	FALSE	6
2022-09-12	10:24:25	0.419606	1.86649	541.502	FALSE	6
2022-09-12	10:24:25	0.414415	1.8434	548.573	FALSE	6
2022-09-12	10:24:25	0.22841	1.01601	542.518	FALSE	6
2022-09-12	10:24:25	0.282812	1.258	549.831	FALSE	6
2022-09-12	10:24:26	1.47156	6.54579	549.064	FALSE	6
2022-09-12	10:24:26	0.23528	1.04657	550.878	FALSE	6
2022-09-12	10:24:26	0.276247	1.2288	550.293	FALSE	6
2022-09-12	10:24:27	0.387952	1.72569	552.603	FALSE	6
2022-09-12	10:24:27	0.285102	1.26819	551.561	FALSE	6
2022-09-12	10:24:27	0.280369	1.24714	553.85	FALSE	6
2022-09-12	10:24:27	0.52729	2.34549	553.906	FALSE	6
2022-09-12	10:24:28	0.364288	1.62043	555.471	FALSE	6
2022-09-12	10:24:28	0.3107	1.38206	555.288	FALSE	6
2022-09-12	10:24:28	1.3394	5.95792	561.429	FALSE	6
2022-09-12	10:24:28	0.235127	1.04589	556.334	FALSE	6
2022-09-12	10:24:29	0.486476	2.16394	563.593	FALSE	6
2022-09-12	10:24:29	1.09843	4.88604	561.22	FALSE	6
2022-09-12	10:24:29	0.423117	1.88211	565.475	FALSE	6
2022-09-12	10:24:29	0.282761	1.25778	562.478	FALSE	6
2022-09-12	10:24:30	1.01284	4.50531	569.98	FALSE	6
2022-09-12	10:24:30	0.237061	1.05449	563.533	FALSE	6
2022-09-12	10:24:30	0.405204	1.80243	571.783	FALSE	6
2022-09-12	10:24:31	0.26958	1.19915	564.732	FALSE	6
2022-09-12	10:24:31	0.431972	1.9215	573.704	FALSE	6
2022-09-12	10:24:31	0.1764	0.784662	565.516	FALSE	6
2022-09-12	10:24:31	0.340064	1.51267	575.217	FALSE	6
2022-09-12	10:24:32	0.2364	1.05155	566.568	FALSE	6
2022-09-12	10:24:32	0.435891	1.93893	577.156	FALSE	6
2022-09-12	10:24:32	0.153804	0.684151	567.252	FALSE	6
2022-09-12	10:24:32	0.439708	1.95591	579.112	FALSE	6
2022-09-12	10:24:33	0.316298	1.40696	568.659	FALSE	6
2022-09-12	10:24:33	0.308206	1.37096	580.483	FALSE	6
2022-09-12	10:24:33	0.275687	1.22631	569.885	FALSE	6
2022-09-12	10:24:33	0.399046	1.77504	582.258	FALSE	6
2022-09-12	10:24:34	0.310547	1.38138	571.267	FALSE	6
2022-09-12	10:24:34	0.309987	1.37888	583.636	FALSE	6
2022-09-12	10:24:34	0.338741	1.50679	572.774	FALSE	6
2022-09-12	10:24:34	0.369326	1.64284	585.279	FALSE	6
2022-09-12	10:24:35	0.384644	1.71097	574.485	FALSE	6
2022-09-12	10:24:35	0.454822	2.02314	587.302	FALSE	6
2022-09-12	10:24:35	0.409835	1.82303	576.308	FALSE	6
2022-09-12	10:24:36	0.428868	1.90769	589.21	FALSE	6
2022-09-12	10:24:36	0.462405	2.05687	578.364	FALSE	6
2022-09-12	10:24:36	0.325916	1.44974	590.66	FALSE	6
2022-09-12	10:24:36	0.111107	0.494226	578.859	FALSE	6
2022-09-12	10:24:37	0.165509	0.736217	591.396	FALSE	6
2022-09-12	10:24:37	-0.00538142	-0.0239376	578.859	FALSE	6
2022-09-12	10:24:37	0.320471	1.42552	592.822	FALSE	6
2022-09-12	10:24:37	0.383219	1.70463	580.563	FALSE	6
2022-09-12	10:24:38	0.285356	1.26932	594.091	FALSE	6
2022-09-12	10:24:38	0.280165	1.24623	581.81	FALSE	6
2022-09-12	10:24:38	-0.060903	-0.270909	594.091	FALSE	6
2022-09-12	10:24:38	-0.232862	-1.03582	581.81	FALSE	6
2022-09-12	10:24:39	-0.275356	-1.22484	594.091	FALSE	6
2022-09-12	10:24:39	-0.0626842	-0.278832	581.81	FALSE	6
2022-09-12	10:24:39	-0.177544	-0.789751	594.091	FALSE	6
2022-09-12	10:24:40	0.0191478	0.0851732	581.895	FALSE	6
2022-09-12	10:24:40	0.149987	0.667172	594.758	FALSE	6
2022-09-12	10:24:40	-0.0585112	-0.26027	581.895	FALSE	6
2022-09-12	10:24:40	0.0805727	0.358403	595.117	FALSE	6
2022-09-12	10:24:41	0.168155	0.747987	582.643	FALSE	6
2022-09-12	10:24:41	0.182456	0.811601	595.928	FALSE	6
2022-09-12	10:24:41	0.0473412	0.210583	582.853	FALSE	6
2022-09-12	10:24:41	0.0649493	0.288907	596.217	FALSE	6
2022-09-12	10:24:42	-0.0916409	-0.407637	582.853	FALSE	6
2022-09-12	10:24:42	-0.0315392	-0.140293	596.217	FALSE	6
2022-09-12	10:24:42	-0.0335748	-0.149347	582.853	FALSE	6
2022-09-12	10:24:42	-0.0134221	-0.0597042	596.217	FALSE	6
2022-09-12	10:24:43	-0.0421244	-0.187378	582.853	FALSE	6
2022-09-12	10:24:43	0.105967	0.471362	596.688	FALSE	6
2022-09-12	10:24:43	0.0462725	0.205829	583.059	FALSE	6
2022-09-12	10:24:44	0.004186	0.0186202	596.707	FALSE	6
2022-09-12	10:24:44	-0.117392	-0.522183	583.059	FALSE	6
2022-09-12	10:24:44	0.0825066	0.367006	597.074	FALSE	6
2022-09-12	10:24:44	0.0440333	0.195869	583.255	FALSE	6
2022-09-12	10:24:45	0.220623	0.981375	598.055	FALSE	6
2022-09-12	10:24:45	0.0296313	0.131806	583.387	FALSE	6
2022-09-12	10:24:45	0.206374	0.917993	598.973	FALSE	6
2022-09-12	10:24:45	0.127189	0.565762	583.953	FALSE	6
2022-09-12	10:24:46	0.671565	2.98726	601.961	FALSE	6
2022-09-12	10:24:46	0.0504455	0.224392	584.177	FALSE	6
2022-09-12	10:24:46	0.121998	0.542672	602.503	FALSE	6
2022-09-12	10:24:46	0.242659	1.0794	585.256	FALSE	6
2022-09-12	10:24:47	0.222303	0.988848	603.492	FALSE	6
2022-09-12	10:24:47	0.0917687	0.408206	585.665	FALSE	6
2022-09-12	10:24:47	0.469682	2.08924	605.581	FALSE	6
2022-09-12	10:24:48	0.136196	0.605827	586.27	FALSE	6
2022-09-12	10:24:48	0.380827	1.69399	607.275	FALSE	6
2022-09-12	10:24:48	0.605712	2.69433	588.965	FALSE	6
2022-09-12	10:24:48	0.401641	1.78658	609.062	FALSE	6
2022-09-12	10:24:49	0.716298	3.18624	592.151	FALSE	6
2022-09-12	10:24:49	0.59355	2.64023	611.702	FALSE	6
2022-09-12	10:24:49	0.305967	1.361	593.512	FALSE	6
2022-09-12	10:24:49	0.553143	2.46049	614.163	FALSE	6
2022-09-12	10:24:50	0.216043	0.961002	594.473	FALSE	6
2022-09-12	10:24:50	0.466832	2.07656	616.239	FALSE	6
2022-09-12	10:24:50	0.370191	1.64668	596.12	FALSE	6
2022-09-12	10:24:50	0.627443	2.79099	619.03	FALSE	6
2022-09-12	10:24:51	0.307087	1.36598	597.486	FALSE	6
2022-09-12	10:24:51	0.557723	2.48086	621.511	FALSE	6
2022-09-12	10:24:51	0.266069	1.18353	598.669	FALSE	6
2022-09-12	10:24:51	0.557672	2.48064	623.992	FALSE	6
2022-09-12	10:24:52	0.264644	1.17719	599.846	FALSE	6
2022-09-12	10:24:52	0.49243	2.19043	626.182	FALSE	6
2022-09-12	10:24:52	0.201641	0.896939	600.743	FALSE	6
2022-09-12	10:24:53	0.450293	2.00299	628.185	FALSE	6
2022-09-12	10:24:53	0.185255	0.824051	601.567	FALSE	6
2022-09-12	10:24:53	0.44154	1.96406	630.149	FALSE	6
2022-09-12	10:24:53	0.184593	0.821107	602.388	FALSE	6
2022-09-12	10:24:54	0.443575	1.97311	632.122	FALSE	6
2022-09-12	10:24:54	0.201998	0.898528	603.287	FALSE	6
2022-09-12	10:24:54	0.485814	2.161	634.283	FALSE	6
2022-09-12	10:24:54	0.257824	1.14685	604.434	FALSE	6
2022-09-12	10:24:55	0.339555	1.51041	635.794	FALSE	6
2022-09-12	10:24:55	0.34841	1.5498	605.984	FALSE	6
2022-09-12	10:24:55	0.41126	1.82937	637.623	FALSE	6
2022-09-12	10:24:55	0.237621	1.05699	607.041	FALSE	6
2022-09-12	10:24:56	0.462354	2.05664	639.68	FALSE	6
2022-09-12	10:24:56	0.341794	1.52037	608.561	FALSE	6
2022-09-12	10:24:56	0.369987	1.64578	641.326	FALSE	6
2022-09-12	10:24:57	0.237163	1.05495	609.616	FALSE	6
2022-09-12	10:24:57	0.313702	1.39541	642.721	FALSE	6
2022-09-12	10:24:57	0.346018	1.53916	611.155	FALSE	6
2022-09-12	10:24:57	0.386171	1.71777	644.439	FALSE	6
2022-09-12	10:24:58	0.209326	0.931124	612.086	FALSE	6
2022-09-12	10:24:58	0.349173	1.55319	645.992	FALSE	6
2022-09-12	10:24:58	0.349886	1.55636	613.643	FALSE	6
2022-09-12	10:24:58	0.282761	1.25778	647.25	FALSE	6
2022-09-12	10:24:59	0.219657	0.977078	614.62	FALSE	6
2022-09-12	10:24:59	0.312634	1.39066	648.64	FALSE	6
2022-09-12	10:24:59	0.335687	1.4932	616.113	FALSE	6
2022-09-12	10:24:59	0.286476	1.2743	649.915	FALSE	6
2022-09-12	10:25:00	0.269428	1.19847	617.311	FALSE	6
2022-09-12	10:25:00	0.328359	1.46061	651.375	FALSE	6
2022-09-12	10:25:00	0.278333	1.23808	618.549	FALSE	6
2022-09-12	10:25:01	0.212685	0.946065	652.321	FALSE	6
2022-09-12	10:25:01	0.124237	0.552631	619.102	FALSE	6
2022-09-12	10:25:01	0.282659	1.25732	653.579	FALSE	6
2022-09-12	10:25:01	0.173957	0.773796	619.876	FALSE	6
2022-09-12	10:25:02	0.152125	0.676682	654.255	FALSE	6
2022-09-12	10:25:02	0.111921	0.497847	620.374	FALSE	6
2022-09-12	10:25:02	0.21925	0.975268	655.231	FALSE	6
2022-09-12	10:25:02	0.198181	0.881549	621.255	FALSE	6
2022-09-12	10:25:03	0.216145	0.961456	656.192	FALSE	6
2022-09-12	10:25:03	0.159758	0.710636	621.966	FALSE	6
2022-09-12	10:25:03	0.316959	1.4099	657.602	FALSE	6
2022-09-12	10:25:03	0.204389	0.909163	622.875	FALSE	6
2022-09-12	10:25:04	0.341336	1.51833	659.12	FALSE	6
2022-09-12	10:25:04	0.147545	0.65631	623.531	FALSE	6
2022-09-12	10:25:04	0.353906	1.57424	660.695	FALSE	6
2022-09-12	10:25:05	0.242608	1.07917	624.61	FALSE	6
2022-09-12	10:25:05	0.271921	1.20956	661.904	FALSE	6
2022-09-12	10:25:05	0.246323	1.09569	625.706	FALSE	6
2022-09-12	10:25:05	0.517163	2.30044	664.205	FALSE	6
2022-09-12	10:25:06	0.212074	0.943348	626.649	FALSE	6
2022-09-12	10:25:06	0.3993	1.77617	665.981	FALSE	6
2022-09-12	10:25:06	0.649631	2.88969	629.539	FALSE	6
2022-09-12	10:25:06	0.319097	1.41941	667.4	FALSE	6
2022-09-12	10:25:07	0.205356	0.913465	630.453	FALSE	6
2022-09-12	10:25:07	0.331616	1.47509	668.875	FALSE	6
2022-09-12	10:25:07	0.138537	0.61624	631.069	FALSE	6
2022-09-12	10:25:07	0.341794	1.52037	670.396	FALSE	6
2022-09-12	10:25:08	0.239453	1.06513	632.134	FALSE	6
2022-09-12	10:25:08	0.304186	1.35308	671.749	FALSE	6
2022-09-12	10:25:08	0.198384	0.882452	633.016	FALSE	6
2022-09-12	10:25:08	0.427443	1.90135	673.65	FALSE	6
2022-09-12	10:25:09	0.276196	1.22858	634.245	FALSE	6
2022-09-12	10:25:09	0.352379	1.56745	675.217	FALSE	6
2022-09-12	10:25:09	0.433499	1.92829	636.173	FALSE	6
2022-09-12	10:25:10	0.176043	0.783074	676.001	FALSE	6
2022-09-12	10:25:10	0.32729	1.45585	637.629	FALSE	6
2022-09-12	10:25:10	0.328359	1.46061	677.461	FALSE	6
2022-09-12	10:25:10	0.413397	1.83887	639.468	FALSE	6
2022-09-12	10:25:11	0.282812	1.258	678.719	FALSE	6
2022-09-12	10:25:11	0.632735	2.81453	642.283	FALSE	6
2022-09-12	10:25:11	0.308562	1.37255	680.092	FALSE	6
2022-09-12	10:25:11	0.280115	1.24601	643.529	FALSE	6
2022-09-12	10:25:12	0.443677	1.97356	682.065	FALSE	6
2022-09-12	10:25:12	0.311158	1.38409	644.913	FALSE	6
2022-09-12	10:25:12	0.419962	1.86807	683.933	FALSE	6
2022-09-12	10:25:12	0.370089	1.64623	646.559	FALSE	6
2022-09-12	10:25:13	0.338893	1.50746	685.441	FALSE	6
2022-09-12	10:25:13	0.344491	1.53236	648.091	FALSE	6
2022-09-12	10:25:13	0.419504	1.86604	687.307	FALSE	6
2022-09-12	10:25:14	0.242201	1.07736	649.169	FALSE	6
2022-09-12	10:25:14	0.46556	2.0709	689.378	FALSE	6
2022-09-12	10:25:14	0.291056	1.29468	650.463	FALSE	6
2022-09-12	10:25:14	0.366883	1.63197	691.01	FALSE	6
2022-09-12	10:25:15	0.296756	1.32003	651.783	FALSE	6
2022-09-12	10:25:15	0.411667	1.83118	692.841	FALSE	6
2022-09-12	10:25:15	0.384746	1.71143	653.495	FALSE	6
2022-09-12	10:25:15	0.429835	1.91199	694.753	FALSE	6
2022-09-12	10:25:16	0.359351	1.59847	655.093	FALSE	6
2022-09-12	10:25:16	0.406985	1.81035	696.563	FALSE	6
2022-09-12	10:25:16	0.398181	1.77119	656.864	FALSE	6
2022-09-12	10:25:16	0.450191	2.00254	698.566	FALSE	6
2022-09-12	10:25:17	0.339504	1.51018	658.375	FALSE	6
2022-09-12	10:25:17	0.272328	1.21137	699.777	FALSE	6
2022-09-12	10:25:17	0.384949	1.71233	660.087	FALSE	6
2022-09-12	10:25:18	0.305204	1.35761	701.135	FALSE	6
2022-09-12	10:25:18	0.320624	1.4262	661.513	FALSE	6
2022-09-12	10:25:18	0.358384	1.59416	702.729	FALSE	6
2022-09-12	10:25:18	0.204339	0.908941	662.422	FALSE	6
2022-09-12	10:25:19	0.410242	1.82484	704.554	FALSE	6
2022-09-12	10:25:19	0.341438	1.51878	663.941	FALSE	6
2022-09-12	10:25:19	0.390751	1.73814	706.292	FALSE	6
2022-09-12	10:25:19	0.252634	1.12377	665.065	FALSE	6
2022-09-12	10:25:20	0.552888	2.45936	708.751	FALSE	6
2022-09-12	10:25:20	0.211412	0.940403	666.005	FALSE	6
2022-09-12	10:25:20	0.448104	1.99326	710.744	FALSE	6
2022-09-12	10:25:20	0.175026	0.778551	666.784	FALSE	6
2022-09-12	10:25:21	0.0653056	0.290492	711.035	FALSE	6
2022-09-12	10:25:21	0.044644	0.198585	666.982	FALSE	6
2022-09-12	10:25:21	0.0277992	0.123656	711.159	FALSE	6
2022-09-12	10:25:21	-0.110572	-0.491846	666.982	FALSE	6
2022-09-12	10:25:22	-0.143956	-0.640345	711.159	FALSE	6
2022-09-12	10:25:22	-0.0341346	-0.151838	666.982	FALSE	6
2022-09-12	10:25:22	0.0909544	0.404583	711.563	FALSE	6
2022-09-12	10:25:23	0.0119214	0.0530288	667.035	FALSE	6
2022-09-12	10:25:23	0.109937	0.489022	712.052	FALSE	6
2022-09-12	10:25:23	0.208461	0.927276	667.962	FALSE	6
2022-09-12	10:25:23	0.230649	1.02597	713.078	FALSE	6
2022-09-12	10:25:24	0.147545	0.65631	668.619	FALSE	6
2022-09-12	10:25:24	0.275738	1.22654	714.305	FALSE	6
2022-09-12	10:25:24	0.103626	0.460949	669.08	FALSE	6
2022-09-12	10:25:24	0.203372	0.904639	715.209	FALSE	6
2022-09-12	10:25:25	0.0921249	0.40979	669.49	FALSE	6
2022-09-12	10:25:25	0.00576363	0.0256378	715.235	FALSE	6
2022-09-12	10:25:25	0.123881	0.551047	670.041	FALSE	6
2022-09-12	10:25:25	0.0592496	0.263554	715.499	FALSE	6
2022-09-12	10:25:26	0.149326	0.664232	670.705	FALSE	6
2022-09-12	10:25:26	0.0906999	0.403451	715.902	FALSE	6
2022-09-12	10:25:26	0.343982	1.5301	672.235	FALSE	6
2022-09-12	10:25:27	0.139453	0.620315	716.522	FALSE	6
2022-09-12	10:25:27	0.188766	0.839669	673.075	FALSE	6
2022-09-12	10:25:27	0.142863	0.635483	717.158	FALSE	6
2022-09-12	10:25:27	0.0123285	0.0548396	673.129	FALSE	6
2022-09-12	10:25:28	0.164237	0.730559	717.888	FALSE	6
2022-09-12	10:25:28	0.169631	0.754553	673.884	FALSE	6
2022-09-12	10:25:28	0.301132	1.3395	719.228	FALSE	6
2022-09-12	10:25:28	0.297672	1.3241	675.208	FALSE	6
2022-09-12	10:25:29	0.269631	1.19937	720.427	FALSE	6
2022-09-12	10:25:29	0.234262	1.04204	676.25	FALSE	6
2022-09-12	10:25:29	0.310395	1.3807	721.808	FALSE	6
2022-09-12	10:25:29	0.828257	3.68425	679.934	FALSE	6
2022-09-12	10:25:30	0.410344	1.82529	723.633	FALSE	6
2022-09-12	10:25:30	0.36612	1.62857	681.563	FALSE	6
2022-09-12	10:25:30	0.36841	1.63876	725.272	FALSE	6
2022-09-12	10:25:31	0.369682	1.64442	683.207	FALSE	6
2022-09-12	10:25:31	0.316807	1.40922	726.681	FALSE	6
2022-09-12	10:25:31	0.315178	1.40197	684.609	FALSE	6
2022-09-12	10:25:31	0.485356	2.15896	728.84	FALSE	6
2022-09-12	10:25:32	0.51813	2.30475	686.914	FALSE	6
2022-09-12	10:25:32	0.83701	3.72319	732.563	FALSE	6
2022-09-12	10:25:32	1.37396	6.11165	693.026	FALSE	6
2022-09-12	10:25:32	1.49075	6.63115	739.195	FALSE	6
2022-09-12	10:25:33	0.857926	3.81623	696.842	FALSE	6
2022-09-12	10:25:33	0.944644	4.20197	743.396	FALSE	6
2022-09-12	10:25:33	0.343779	1.5292	698.371	FALSE	6
2022-09-12	10:25:33	0.809936	3.60276	746.999	FALSE	6
2022-09-12	10:25:34	1.3877	6.17277	704.544	FALSE	6
2022-09-12	10:25:34	1.60678	7.14728	754.147	FALSE	6
2022-09-12	10:25:34	1.53828	6.84258	711.387	FALSE	6
2022-09-12	10:25:35	2.00637	8.92474	763.071	FALSE	6
2022-09-12	10:25:35	0.566781	2.52116	713.908	FALSE	6
2022-09-12	10:25:35	0.815992	3.6297	766.701	FALSE	6
2022-09-12	10:25:35	1.74826	7.77661	721.684	FALSE	6
2022-09-12	10:25:36	3.05935	13.6086	780.31	1	7
2022-09-12	10:25:36	1.58286	7.04088	728.725	FALSE	7
2022-09-12	10:25:36	0.742506	3.30282	783.612	FALSE	7
2022-09-12	10:25:36	0.587341	2.61261	731.338	FALSE	7
2022-09-12	10:25:37	1.77309	7.88706	791.499	FALSE	7
2022-09-12	10:25:37	0.251311	1.11788	732.456	FALSE	7
2022-09-12	10:25:37	0.316959	1.4099	792.909	FALSE	7
2022-09-12	10:25:37	1.14872	5.10974	737.565	FALSE	7
2022-09-12	10:25:38	0.111005	0.493772	793.403	FALSE	7
2022-09-12	10:25:38	0.133906	0.595641	738.161	FALSE	7
2022-09-12	10:25:38	0.131362	0.584324	793.987	FALSE	7
2022-09-12	10:25:38	0.0185371	0.0824567	738.243	FALSE	7
2022-09-12	10:25:39	0.103677	0.461176	794.449	FALSE	7
2022-09-12	10:25:39	0.000725441	0.00322691	738.247	FALSE	7
2022-09-12	10:25:39	0.0731427	0.325353	794.774	FALSE	7
2022-09-12	10:25:40	0.0436262	0.194058	738.441	FALSE	7
2022-09-12	10:25:40	0.0251529	0.111885	794.886	FALSE	7
2022-09-12	10:25:40	0.181285	0.806392	739.247	FALSE	7
2022-09-12	10:25:40	0.243321	1.08234	795.968	FALSE	7
2022-09-12	10:25:41	0.104491	0.464797	739.712	FALSE	7
2022-09-12	10:25:41	0.286527	1.27453	797.243	FALSE	7
2022-09-12	10:25:41	0.126272	0.561683	740.274	FALSE	7
2022-09-12	10:25:41	0.387188	1.72229	798.965	FALSE	7
2022-09-12	10:25:42	0.22327	0.99315	741.267	FALSE	7
2022-09-12	10:25:42	0.328003	1.45902	800.424	FALSE	7
2022-09-12	10:25:42	0.158435	0.704751	741.972	FALSE	7
2022-09-12	10:25:42	0.478639	2.12908	802.553	FALSE	7
2022-09-12	10:25:43	0.151209	0.672608	742.644	FALSE	7
2022-09-12	10:25:43	0.498842	2.21895	804.772	FALSE	7
2022-09-12	10:25:43	0.275331	1.22473	743.869	FALSE	7
2022-09-12	10:25:44	0.432328	1.92308	806.695	FALSE	7
2022-09-12	10:25:44	0.28042	1.24736	745.116	FALSE	7
2022-09-12	10:25:44	0.795636	3.53915	810.234	FALSE	7
2022-09-12	10:25:44	0.24612	1.09479	746.211	FALSE	7
2022-09-12	10:25:45	0.882761	3.9267	814.161	FALSE	7
2022-09-12	10:25:45	2.27843	10.1349	756.346	FALSE	7
2022-09-12	10:25:45	0.62617	2.78533	816.946	FALSE	7
2022-09-12	10:25:45	1.73996	7.73969	764.086	FALSE	7
2022-09-12	10:25:46	2.2048	9.80739	826.754	FALSE	7
2022-09-12	10:25:46	0.338232	1.50452	765.59	FALSE	7
2022-09-12	10:25:46	0.885356	3.93824	830.692	FALSE	7
2022-09-12	10:25:46	2.0365	9.05876	774.649	FALSE	7
2022-09-12	10:25:47	0.543779	2.41884	833.111	FALSE	7
2022-09-12	10:25:47	1.14042	5.07282	779.722	FALSE	7
2022-09-12	10:25:47	1.16576	5.18553	838.296	FALSE	7
2022-09-12	10:25:48	0.215942	0.960553	780.682	FALSE	7
2022-09-12	10:25:48	0.816247	3.63083	841.927	FALSE	7
2022-09-12	10:25:48	0.481285	2.14085	782.823	FALSE	7
2022-09-12	10:25:48	0.689428	3.06671	844.994	FALSE	7
2022-09-12	10:25:49	0.29243	1.30079	784.124	FALSE	7
2022-09-12	10:25:49	0.465305	2.06977	847.064	FALSE	7
2022-09-12	10:25:49	0.274669	1.22178	785.346	FALSE	7
2022-09-12	10:25:49	0.503117	2.23797	849.302	FALSE	7
2022-09-12	10:25:50	0.317723	1.4133	786.759	FALSE	7
2022-09-12	10:25:50	0.398842	1.77413	851.076	FALSE	7
2022-09-12	10:25:50	0.272277	1.21114	787.97	FALSE	7
2022-09-12	10:25:50	0.406883	1.8099	852.886	FALSE	7
2022-09-12	10:25:51	0.277825	1.23582	789.206	FALSE	7
2022-09-12	10:25:51	0.427545	1.90181	854.787	FALSE	7
2022-09-12	10:25:51	0.363677	1.61771	790.824	FALSE	7
2022-09-12	10:25:52	0.287697	1.27973	856.067	FALSE	7
2022-09-12	10:25:52	0.459707	2.04487	792.869	FALSE	7
2022-09-12	10:25:52	0.345305	1.53599	857.603	FALSE	7
2022-09-12	10:25:52	0.60042	2.67079	795.539	FALSE	7
2022-09-12	10:25:53	0.34159	1.51946	859.123	FALSE	7
2022-09-12	10:25:53	1.10592	4.91935	800.459	FALSE	7
2022-09-12	10:25:53	0.245153	1.09049	860.213	FALSE	7
2022-09-12	10:25:53	0.523982	2.33078	802.789	FALSE	7
2022-09-12	10:25:54	0.36327	1.6159	861.829	FALSE	7
2022-09-12	10:25:54	0.486221	2.16281	804.952	FALSE	7
2022-09-12	10:25:54	0.309937	1.37866	863.208	FALSE	7
2022-09-12	10:25:54	0.52673	2.343	807.295	FALSE	7
2022-09-12	10:25:55	0.231565	1.03005	864.238	FALSE	7
2022-09-12	10:25:55	0.620318	2.7593	810.055	FALSE	7
2022-09-12	10:25:55	0.268868	1.19598	865.434	FALSE	7
2022-09-12	10:25:55	0.537519	2.39099	812.446	FALSE	7
2022-09-12	10:25:56	0.309479	1.37662	866.81	FALSE	7
2022-09-12	10:25:56	0.518486	2.30633	814.752	FALSE	7
2022-09-12	10:25:56	0.324847	1.44498	868.255	FALSE	7
2022-09-12	10:25:57	0.48383	2.15217	816.904	FALSE	7
2022-09-12	10:25:57	0.318181	1.41533	869.671	FALSE	7
2022-09-12	10:25:57	0.550496	2.44872	819.353	FALSE	7
2022-09-12	10:25:57	0.382405	1.70101	871.372	FALSE	7
2022-09-12	10:25:58	0.974669	4.33552	823.688	FALSE	7
2022-09-12	10:25:58	1.6707	7.43161	878.803	FALSE	7
2022-09-12	10:25:58	0.695585	3.0941	826.782	FALSE	7
2022-09-12	10:25:58	1.84246	8.19563	886.999	FALSE	7
2022-09-12	10:25:59	1.86744	8.30675	835.089	FALSE	7
2022-09-12	10:25:59	0.915585	4.07271	891.072	FALSE	7
2022-09-12	10:25:59	0.794109	3.53236	838.621	FALSE	7
2022-09-12	10:25:59	0.509733	2.26739	893.339	FALSE	7
2022-09-12	10:26:00	0.687086	3.0563	841.678	FALSE	7
2022-09-12	10:26:00	0.271819	1.20911	894.548	FALSE	7
2022-09-12	10:26:00	0.523473	2.32851	844.006	FALSE	7
2022-09-12	10:26:01	0.351565	1.56383	896.112	FALSE	7
2022-09-12	10:26:01	0.408257	1.81601	845.822	FALSE	7
2022-09-12	10:26:01	0.321031	1.42801	897.54	FALSE	7
2022-09-12	10:26:01	0.62673	2.78782	848.61	FALSE	7
2022-09-12	10:26:02	0.199402	0.88698	898.427	FALSE	7
2022-09-12	10:26:02	0.483931	2.15262	850.763	FALSE	7
2022-09-12	10:26:02	0.534822	2.379	900.806	FALSE	7
2022-09-12	10:26:02	0.439708	1.95591	852.719	FALSE	7
2022-09-12	10:26:03	0.232583	1.03458	901.84	FALSE	7
2022-09-12	10:26:03	0.590242	2.62551	855.344	FALSE	7
2022-09-12	10:26:03	0.165713	0.737125	902.578	FALSE	7
2022-09-12	10:26:03	0.511361	2.27464	857.619	FALSE	7
2022-09-12	10:26:04	0.320216	1.42438	904.002	FALSE	7
2022-09-12	10:26:04	0.411209	1.82914	859.448	FALSE	7
2022-09-12	10:26:04	0.269224	1.19756	905.2	FALSE	7
2022-09-12	10:26:05	0.530293	2.35885	861.807	FALSE	7
2022-09-12	10:26:05	0.240878	1.07147	906.271	FALSE	7
2022-09-12	10:26:05	0.45411	2.01997	863.827	FALSE	7
2022-09-12	10:26:05	0.268359	1.19371	907.465	FALSE	7
2022-09-12	10:26:06	0.48729	2.16756	865.994	FALSE	7
2022-09-12	10:26:06	0.273499	1.21658	908.681	FALSE	7
2022-09-12	10:26:06	0.479707	2.13383	868.128	FALSE	7
2022-09-12	10:26:06	0.195789	0.870909	909.552	FALSE	7
2022-09-12	10:26:07	0.42897	1.90814	870.036	FALSE	7
2022-09-12	10:26:07	0.206018	0.916409	910.469	FALSE	7
2022-09-12	10:26:07	0.296908	1.32071	871.357	FALSE	7
2022-09-12	10:26:07	0.171616	0.763382	911.232	FALSE	7
2022-09-12	10:26:08	0.217621	0.968022	872.325	FALSE	7
2022-09-12	10:26:08	0.152888	0.680076	911.912	FALSE	7
2022-09-12	10:26:08	-0.0170354	-0.0757769	872.325	FALSE	7
2022-09-12	10:26:08	0.124135	0.552177	912.464	FALSE	7
2022-09-12	10:26:09	0.0665269	0.295925	872.621	FALSE	7
2022-09-12	10:26:09	0.676806	3.01057	915.475	FALSE	7
2022-09-12	10:26:09	0.646374	2.8752	875.496	FALSE	7
2022-09-12	10:26:10	0.37584	1.67181	917.147	FALSE	7
2022-09-12	10:26:10	0.245509	1.09207	876.588	FALSE	7
2022-09-12	10:26:10	0.386781	1.72048	918.867	FALSE	7
2022-09-12	10:26:10	0.399809	1.77843	878.367	FALSE	7
2022-09-12	10:26:11	0.376552	1.67498	920.542	FALSE	7
2022-09-12	10:26:11	0.399453	1.77685	880.144	FALSE	7
2022-09-12	10:26:11	0.426374	1.8966	922.439	FALSE	7
2022-09-12	10:26:11	0.419504	1.86604	882.01	FALSE	7
2022-09-12	10:26:12	0.37701	1.67702	924.116	FALSE	7
2022-09-12	10:26:12	0.383728	1.7069	883.716	FALSE	7
2022-09-12	10:26:12	0.398588	1.773	925.889	FALSE	7
2022-09-12	10:26:12	0.401845	1.78749	885.504	FALSE	7
2022-09-12	10:26:13	0.404949	1.80129	927.69	FALSE	7
2022-09-12	10:26:13	0.459707	2.04487	887.549	FALSE	7
2022-09-12	10:26:13	0.505763	2.24973	929.94	FALSE	7
2022-09-12	10:26:14	0.427341	1.9009	889.45	FALSE	7
2022-09-12	10:26:14	0.404898	1.80107	931.741	FALSE	7
2022-09-12	10:26:14	0.412379	1.83434	891.284	FALSE	7
2022-09-12	10:26:14	0.55131	2.45234	934.193	FALSE	7
2022-09-12	10:26:15	1.61019	7.16245	898.447	FALSE	7
2022-09-12	10:26:15	0.186832	0.831066	935.024	FALSE	7
2022-09-12	10:26:15	-0.0337784	-0.150253	898.447	FALSE	7
2022-09-12	10:26:15	0.212888	0.946968	935.971	FALSE	7
2022-09-12	10:26:16	0.631107	2.80729	901.254	FALSE	7
2022-09-12	10:26:16	0.00281194	0.0125081	935.984	FALSE	7
2022-09-12	10:26:16	-0.038613	-0.171758	901.254	FALSE	7
2022-09-12	10:26:16	0.0941605	0.418845	936.403	FALSE	7
2022-09-12	10:26:17	0.0128883	0.0573297	901.311	FALSE	7
2022-09-12	10:26:17	0.105204	0.467968	936.87	FALSE	7
2022-09-12	10:26:17	-0.0135748	-0.0603834	901.311	FALSE	7
2022-09-12	10:26:18	0.126731	0.563725	937.434	FALSE	7
2022-09-12	10:26:18	0.160878	0.715618	902.027	FALSE	7
2022-09-12	10:26:18	0.16902	0.751835	938.186	FALSE	7
2022-09-12	10:26:18	0.178232	0.792812	902.82	FALSE	7
2022-09-12	10:26:19	0.187239	0.832877	939.019	FALSE	7
2022-09-12	10:26:19	0.363117	1.61522	904.435	FALSE	7
2022-09-12	10:26:19	0.202659	0.901468	939.92	FALSE	7
2022-09-12	10:26:19	0.387087	1.72184	906.157	FALSE	7
2022-09-12	10:26:20	0.224695	0.999488	940.92	FALSE	7
2022-09-12	10:26:20	0.380115	1.69083	907.847	FALSE	7
2022-09-12	10:26:20	0.245255	1.09094	942.011	FALSE	7
2022-09-12	10:26:20	0.385662	1.7155	909.563	FALSE	7
2022-09-12	10:26:21	0.266934	1.18738	943.198	FALSE	7
2022-09-12	10:26:21	0.532176	2.36723	911.93	FALSE	7
2022-09-12	10:26:21	0.364033	1.61929	944.817	FALSE	7
2022-09-12	10:26:22	0.460267	2.04736	913.978	FALSE	7
2022-09-12	10:26:22	0.466069	2.07317	946.891	FALSE	7
2022-09-12	10:26:22	0.750598	3.33881	917.316	FALSE	7
2022-09-12	10:26:22	1.22546	5.45109	952.342	FALSE	7
2022-09-12	10:26:23	1.06505	4.73756	922.054	FALSE	7
2022-09-12	10:26:23	0.71243	3.16903	955.511	FALSE	7
2022-09-12	10:26:23	0.938028	4.17254	926.226	FALSE	7
2022-09-12	10:26:23	0.599199	2.66536	958.176	FALSE	7
2022-09-12	10:26:24	0.360674	1.60435	927.831	FALSE	7
2022-09-12	10:26:24	0.671361	2.98635	961.162	FALSE	7
2022-09-12	10:26:24	0.384949	1.71233	929.543	FALSE	7
2022-09-12	10:26:24	0.332278	1.47804	962.641	FALSE	7
2022-09-12	10:26:25	0.24098	1.07193	930.615	FALSE	7
2022-09-12	10:26:25	0.266985	1.1876	963.828	FALSE	7
2022-09-12	10:26:25	0.188817	0.839896	931.455	FALSE	7
2022-09-12	10:26:25	0.246476	1.09637	964.925	FALSE	7
2022-09-12	10:26:26	0.221336	0.984547	932.439	FALSE	7
2022-09-12	10:26:26	0.286578	1.27476	966.199	FALSE	7
2022-09-12	10:26:26	0.563931	2.50848	934.948	FALSE	7
2022-09-12	10:26:27	0.114822	0.510751	966.71	FALSE	7
2022-09-12	10:26:27	0.0662724	0.294793	935.243	FALSE	7
2022-09-12	10:26:27	0.261234	1.16202	967.872	FALSE	7
2022-09-12	10:26:28	0.0862215	0.38353	935.626	FALSE	7
2022-09-12	10:26:28	0.171921	0.764739	968.637	FALSE	7
2022-09-12	10:26:28	0.25472	1.13305	936.759	FALSE	7
2022-09-12	10:26:28	0.146985	0.653819	969.291	FALSE	7
2022-09-12	10:26:28	0.287188	1.27747	938.037	FALSE	7
2022-09-12	10:26:29	0.189224	0.841706	970.132	FALSE	7
2022-09-12	10:26:29	0.281234	1.25099	939.288	FALSE	7
2022-09-12	10:26:29	0.330547	1.47034	971.603	FALSE	7
2022-09-12	10:26:29	0.443677	1.97356	941.261	FALSE	7
2022-09-12	10:26:30	0.508715	2.26287	973.866	FALSE	7
2022-09-12	10:26:30	0.681234	3.03027	944.292	FALSE	7
2022-09-12	10:26:30	0.868766	3.86444	977.73	FALSE	7
2022-09-12	10:26:31	2.54948	11.3406	955.632	FALSE	7
2022-09-12	10:26:31	1.49345	6.64316	984.373	FALSE	7
2022-09-12	10:26:31	2.81533	12.5232	968.155	FALSE	7
2022-09-12	10:26:31	2.01375	8.95756	993.331	FALSE	7
2022-09-12	10:26:32	0.572277	2.5456	970.701	FALSE	7
2022-09-12	10:26:32	0.816654	3.63264	996.963	FALSE	7
2022-09-12	10:26:32	2.0649	9.18509	979.886	FALSE	7
2022-09-12	10:26:32	0.444644	1.97787	998.941	FALSE	7
2022-09-12	10:26:33	0.977519	4.3482	984.234	FALSE	7
2022-09-12	10:26:33	0.732023	3.25618	1002.2	FALSE	7
2022-09-12	10:26:33	0.382201	1.70011	985.934	FALSE	7
2022-09-12	10:26:33	0.350903	1.56089	1003.76	FALSE	7
2022-09-12	10:26:34	1.02261	4.54877	990.483	FALSE	7
2022-09-12	10:26:34	2.70505	12.0326	1015.79	FALSE	7
2022-09-12	10:26:34	0.697366	3.10202	993.585	FALSE	7
2022-09-12	10:26:35	0.702201	3.12353	1018.91	FALSE	7
2022-09-12	10:26:35	0.344695	1.53327	995.118	FALSE	7
2022-09-12	10:26:35	0.263677	1.17289	1020.09	FALSE	7
2022-09-12	10:26:35	0.371158	1.65099	996.769	FALSE	7
2022-09-12	10:26:36	0.279402	1.24284	1021.33	FALSE	7
2022-09-12	10:26:36	0.313957	1.39654	998.166	FALSE	7
2022-09-12	10:26:36	0.306781	1.36462	1022.69	FALSE	7
2022-09-12	10:26:36	0.26556	1.18126	999.347	FALSE	7
2022-09-12	10:26:37	0.248257	1.1043	1023.8	FALSE	7
2022-09-12	10:26:37	0.220471	0.980699	1000.33	FALSE	7
2022-09-12	10:26:37	0.331616	1.47509	1025.27	FALSE	7
2022-09-12	10:26:37	0.254618	1.13259	1001.46	FALSE	7
2022-09-12	10:26:38	0.298842	1.32931	1026.6	FALSE	7
2022-09-12	10:26:38	0.237875	1.05812	1002.52	FALSE	7
2022-09-12	10:26:38	0.256858	1.14256	1027.75	FALSE	7
2022-09-12	10:26:39	0.3107	1.38206	1003.9	FALSE	7
2022-09-12	10:26:39	0.207952	0.925012	1028.67	FALSE	7
2022-09-12	10:26:39	0.393295	1.74945	1005.65	FALSE	7
2022-09-12	10:26:39	0.221438	0.985001	1029.66	FALSE	7
2022-09-12	10:26:40	0.229275	1.01986	1006.67	FALSE	7
2022-09-12	10:26:40	0.259402	1.15387	1030.81	FALSE	7
2022-09-12	10:26:40	0.20785	0.924558	1007.59	FALSE	7
2022-09-12	10:26:40	0.254008	1.12988	1031.94	FALSE	7
2022-09-12	10:26:41	0.209122	0.930216	1008.52	FALSE	7
2022-09-12	10:26:41	0.271819	1.20911	1033.15	FALSE	7

## Sheet: Dominic_harness_20229121021 (E)
Date	Time	Lbs	Total Force x Time	total time steps force > 3		**GoPro Fitting: 1010
2022-09-12	10:21:41	0.201031	0.201031	FALSE	0			Total Force x Force	458.989
2022-09-12	10:21:41	0.427188	0.628219	FALSE	0			Total Time Steps Force >3	7
2022-09-12	10:21:41	0.180725	0.808944	FALSE	0
2022-09-12	10:21:41	0.548817	1.35776	FALSE	0
2022-09-12	10:21:42	0.192939	1.5507	FALSE	0
2022-09-12	10:21:42	0.40098	1.95168	FALSE	0
2022-09-12	10:21:42	0.309886	2.26157	FALSE	0
2022-09-12	10:21:43	0.369479	2.63105	FALSE	0
2022-09-12	10:21:43	1.34729	3.97834	FALSE	0
2022-09-12	10:21:43	0.234415	4.21275	FALSE	0
2022-09-12	10:21:43	0.64785	4.8606	FALSE	0
2022-09-12	10:21:44	1.82037	6.68097	FALSE	0
2022-09-12	10:21:44	0.753651	7.43462	FALSE	0
2022-09-12	10:21:44	0.690751	8.12537	FALSE	0
2022-09-12	10:21:44	0.488308	8.61368	FALSE	0
2022-09-12	10:21:45	0.247036	8.86072	FALSE	0
2022-09-12	10:21:45	0.784593	9.64531	FALSE	0
2022-09-12	10:21:45	2.22683	11.8721	FALSE	0
2022-09-12	10:21:45	0.702303	12.5744	FALSE	0
2022-09-12	10:21:46	1.89894	14.4734	FALSE	0
2022-09-12	10:21:46	2.59604	17.0694	FALSE	0
2022-09-12	10:21:46	0.575738	17.6452	FALSE	0
2022-09-12	10:21:47	0.389479	18.0346	FALSE	0
2022-09-12	10:21:47	0.349478	18.3841	FALSE	0
2022-09-12	10:21:47	0.190242	18.5744	FALSE	0
2022-09-12	10:21:47	0.0237788	18.5981	FALSE	0
2022-09-12	10:21:48	0.174975	18.7731	FALSE	0
2022-09-12	10:21:48	0.126272	18.8994	FALSE	0
2022-09-12	10:21:48	-0.215	18.8994	FALSE	0
2022-09-12	10:21:48	-0.171895	18.8994	FALSE	0
2022-09-12	10:21:49	-0.120547	18.8994	FALSE	0
2022-09-12	10:21:49	-0.0593763	18.8994	FALSE	0
2022-09-12	10:21:49	-0.0390201	18.8994	FALSE	0
2022-09-12	10:21:49	-0.0332695	18.8994	FALSE	0
2022-09-12	10:21:50	-0.0261448	18.8994	FALSE	0
2022-09-12	10:21:50	-0.0270608	18.8994	FALSE	0
2022-09-12	10:21:50	-0.00899467	18.8994	FALSE	0
2022-09-12	10:21:50	0.0161453	18.9155	FALSE	0
2022-09-12	10:21:51	0.0464252	18.962	FALSE	0
2022-09-12	10:21:51	0.0819468	19.0439	FALSE	0
2022-09-12	10:21:51	0.153652	19.1976	FALSE	0
2022-09-12	10:21:52	0.160216	19.3578	FALSE	0
2022-09-12	10:21:52	0.147545	19.5053	FALSE	0
2022-09-12	10:21:52	0.161998	19.6673	FALSE	0
2022-09-12	10:21:52	0.139046	19.8064	FALSE	0
2022-09-12	10:21:53	0.15813	19.9645	FALSE	0
2022-09-12	10:21:53	0.161082	20.1256	FALSE	0
2022-09-12	10:21:53	0.172837	20.2984	FALSE	0
2022-09-12	10:21:53	0.230547	20.529	FALSE	0
2022-09-12	10:21:54	0.393041	20.922	FALSE	0
2022-09-12	10:21:54	0.215229	21.1372	FALSE	0
2022-09-12	10:21:54	0.227087	21.3643	FALSE	0
2022-09-12	10:21:54	0.252634	21.6169	FALSE	0
2022-09-12	10:21:55	0.310853	21.9278	FALSE	0
2022-09-12	10:21:55	0.266883	22.1947	FALSE	0
2022-09-12	10:21:55	0.20159	22.3963	FALSE	0
2022-09-12	10:21:56	0.173448	22.5697	FALSE	0
2022-09-12	10:21:56	0.201336	22.7711	FALSE	0
2022-09-12	10:21:56	0.158435	22.9295	FALSE	0
2022-09-12	10:21:56	0.177367	23.1069	FALSE	0
2022-09-12	10:21:57	0.166018	23.2729	FALSE	0
2022-09-12	10:21:57	0.149886	23.4228	FALSE	0
2022-09-12	10:21:57	0.172125	23.5949	FALSE	0
2022-09-12	10:21:57	0.170598	23.7655	FALSE	0
2022-09-12	10:21:58	0.143575	23.9091	FALSE	0
2022-09-12	10:21:58	0.150191	24.0593	FALSE	0
2022-09-12	10:21:58	0.155026	24.2143	FALSE	0
2022-09-12	10:21:58	0.099962	24.3142	FALSE	0
2022-09-12	10:21:59	0.0603692	24.3746	FALSE	0
2022-09-12	10:21:59	0.144898	24.5195	FALSE	0
2022-09-12	10:21:59	0.583321	25.1028	FALSE	0
2022-09-12	10:22:00	0.125916	25.2287	FALSE	0
2022-09-12	10:22:00	0.0830155	25.3118	FALSE	0
2022-09-12	10:22:00	0.184491	25.4962	FALSE	0
2022-09-12	10:22:00	0.136858	25.6331	FALSE	0
2022-09-12	10:22:01	0.0662724	25.6994	FALSE	0
2022-09-12	10:22:01	0.000674557	25.7001	FALSE	0
2022-09-12	10:22:01	0.0630155	25.7631	FALSE	0
2022-09-12	10:22:01	-0.0649234	25.7631	FALSE	0
2022-09-12	10:22:02	0.000114759	25.7632	FALSE	0
2022-09-12	10:22:02	0.13299	25.8962	FALSE	0
2022-09-12	10:22:02	0.139606	26.0358	FALSE	0
2022-09-12	10:22:02	0.0794531	26.1152	FALSE	0
2022-09-12	10:22:03	0.0510053	26.1662	FALSE	0
2022-09-12	10:22:03	0.0920231	26.2583	FALSE	0
2022-09-12	10:22:03	0.286425	26.5447	FALSE	0
2022-09-12	10:22:03	0.333702	26.8784	FALSE	0
2022-09-12	10:22:04	0.332074	27.2105	FALSE	0
2022-09-12	10:22:04	0.304542	27.515	FALSE	0
2022-09-12	10:22:04	0.335585	27.8506	FALSE	0
2022-09-12	10:22:05	0.279148	28.1297	FALSE	0
2022-09-12	10:22:05	0.30098	28.4307	FALSE	0
2022-09-12	10:22:05	0.398639	28.8294	FALSE	0
2022-09-12	10:22:05	0.349987	29.1793	FALSE	0
2022-09-12	10:22:06	0.405764	29.5851	FALSE	0
2022-09-12	10:22:06	3.02871	32.6138	1	1
2022-09-12	10:22:06	0.729529	33.3433	FALSE	1
2022-09-12	10:22:06	2.86052	36.2039	FALSE	1
2022-09-12	10:22:07	2.22586	38.4297	FALSE	1
2022-09-12	10:22:07	0.451616	38.8813	FALSE	1
2022-09-12	10:22:07	0.319504	39.2008	FALSE	1
2022-09-12	10:22:07	0.223422	39.4243	FALSE	1
2022-09-12	10:22:08	0.323575	39.7478	FALSE	1
2022-09-12	10:22:08	0.331056	40.0789	FALSE	1
2022-09-12	10:22:08	0.212532	40.2914	FALSE	1
2022-09-12	10:22:09	0.353397	40.6448	FALSE	1
2022-09-12	10:22:09	0.257977	40.9028	FALSE	1
2022-09-12	10:22:09	0.309529	41.2123	FALSE	1
2022-09-12	10:22:09	0.173448	41.3858	FALSE	1
2022-09-12	10:22:10	0.309122	41.6949	FALSE	1
2022-09-12	10:22:10	0.259962	41.9549	FALSE	1
2022-09-12	10:22:10	0.261438	42.2163	FALSE	1
2022-09-12	10:22:10	0.296908	42.5132	FALSE	1
2022-09-12	10:22:11	0.282608	42.7958	FALSE	1
2022-09-12	10:22:11	0.529428	43.3252	FALSE	1
2022-09-12	10:22:11	0.212125	43.5374	FALSE	1
2022-09-12	10:22:11	0.295687	43.8331	FALSE	1
2022-09-12	10:22:12	0.2964	44.1295	FALSE	1
2022-09-12	10:22:12	0.324237	44.4537	FALSE	1
2022-09-12	10:22:12	0.487596	44.9413	FALSE	1
2022-09-12	10:22:13	0.256654	45.1979	FALSE	1
2022-09-12	10:22:13	0.300115	45.4981	FALSE	1
2022-09-12	10:22:13	0.699708	46.1978	FALSE	1
2022-09-12	10:22:13	0.495127	46.6929	FALSE	1
2022-09-12	10:22:14	0.412023	47.1049	FALSE	1
2022-09-12	10:22:14	0.512939	47.6179	FALSE	1
2022-09-12	10:22:14	0.617468	48.2353	FALSE	1
2022-09-12	10:22:14	2.31767	50.553	FALSE	1
2022-09-12	10:22:15	0.321438	50.8744	FALSE	1
2022-09-12	10:22:15	1.11777	51.9922	FALSE	1
2022-09-12	10:22:15	0.607239	52.5994	FALSE	1
2022-09-12	10:22:15	0.722507	53.322	FALSE	1
2022-09-12	10:22:16	1.44877	54.7707	FALSE	1
2022-09-12	10:22:16	0.404491	55.1752	FALSE	1
2022-09-12	10:22:16	0.315534	55.4907	FALSE	1
2022-09-12	10:22:16	1.40368	56.8944	FALSE	1
2022-09-12	10:22:17	0.340471	57.2349	FALSE	1
2022-09-12	10:22:17	0.577061	57.812	FALSE	1
2022-09-12	10:22:17	0.482964	58.2949	FALSE	1
2022-09-12	10:22:18	0.441489	58.7364	FALSE	1
2022-09-12	10:22:18	1.90851	60.6449	FALSE	1
2022-09-12	10:22:18	0.264644	60.9096	FALSE	1
2022-09-12	10:22:18	0.956043	61.8656	FALSE	1
2022-09-12	10:22:19	0.568613	62.4342	FALSE	1
2022-09-12	10:22:19	0.511972	62.9462	FALSE	1
2022-09-12	10:22:19	1.33976	64.286	FALSE	1
2022-09-12	10:22:19	0.458588	64.7445	FALSE	1
2022-09-12	10:22:20	0.395636	65.1402	FALSE	1
2022-09-12	10:22:20	1.1134	66.2536	FALSE	1
2022-09-12	10:22:20	0.439809	66.6934	FALSE	1
2022-09-12	10:22:20	1.14698	67.8404	FALSE	1
2022-09-12	10:22:21	0.515433	68.3558	FALSE	1
2022-09-12	10:22:21	0.778079	69.1339	FALSE	1
2022-09-12	10:22:21	1.63838	70.7723	FALSE	1
2022-09-12	10:22:22	0.242405	71.0147	FALSE	1
2022-09-12	10:22:22	0.412583	71.4272	FALSE	1
2022-09-12	10:22:22	0.445407	71.8727	FALSE	1
2022-09-12	10:22:22	0.526272	72.3989	FALSE	1
2022-09-12	10:22:23	1.48286	73.8818	FALSE	1
2022-09-12	10:22:23	0.505254	74.387	FALSE	1
2022-09-12	10:22:23	0.909631	75.2967	FALSE	1
2022-09-12	10:22:23	1.34856	76.6452	FALSE	1
2022-09-12	10:22:24	0.639351	77.2846	FALSE	1
2022-09-12	10:22:24	0.935331	78.2199	FALSE	1
2022-09-12	10:22:24	0.380216	78.6001	FALSE	1
2022-09-12	10:22:24	0.150853	78.751	FALSE	1
2022-09-12	10:22:25	0.553244	79.3042	FALSE	1
2022-09-12	10:22:25	0.178181	79.4824	FALSE	1
2022-09-12	10:22:25	0.501641	79.984	FALSE	1
2022-09-12	10:22:26	0.144695	80.1287	FALSE	1
2022-09-12	10:22:26	0.58215	80.7109	FALSE	1
2022-09-12	10:22:26	1.69355	82.4044	FALSE	1
2022-09-12	10:22:26	0.614771	83.0192	FALSE	1
2022-09-12	10:22:27	0.407036	83.4263	FALSE	1
2022-09-12	10:22:27	0.422812	83.8491	FALSE	1
2022-09-12	10:22:27	0.252735	84.1018	FALSE	1
2022-09-12	10:22:27	0.931158	85.033	FALSE	1
2022-09-12	10:22:28	0.242557	85.2755	FALSE	1
2022-09-12	10:22:28	0.441336	85.7168	FALSE	1
2022-09-12	10:22:28	1.51029	87.2271	FALSE	1
2022-09-12	10:22:28	0.542303	87.7694	FALSE	1
2022-09-12	10:22:29	1.04861	88.8181	FALSE	1
2022-09-12	10:22:29	0.568409	89.3865	FALSE	1
2022-09-12	10:22:29	0.552685	89.9391	FALSE	1
2022-09-12	10:22:29	0.942405	90.8816	FALSE	1
2022-09-12	10:22:30	0.312786	91.1943	FALSE	1
2022-09-12	10:22:30	0.395942	91.5903	FALSE	1
2022-09-12	10:22:30	0.796705	92.387	FALSE	1
2022-09-12	10:22:31	0.5364	92.9234	FALSE	1
2022-09-12	10:22:31	0.63014	93.5535	FALSE	1
2022-09-12	10:22:31	2.2621	95.8156	FALSE	1
2022-09-12	10:22:31	0.557468	96.3731	FALSE	1
2022-09-12	10:22:32	1.6051	97.9782	FALSE	1
2022-09-12	10:22:32	3.09187	101.07	1	2
2022-09-12	10:22:32	0.460929	101.531	FALSE	2
2022-09-12	10:22:32	1.21447	102.745	FALSE	2
2022-09-12	10:22:33	3.20902	105.954	1	3
2022-09-12	10:22:33	1.13732	107.092	FALSE	3
2022-09-12	10:22:33	1.54067	108.632	FALSE	3
2022-09-12	10:22:33	3.42469	112.057	1	4
2022-09-12	10:22:34	0.919911	112.977	FALSE	4
2022-09-12	10:22:34	1.60108	114.578	FALSE	4
2022-09-12	10:22:34	1.97345	116.552	FALSE	4
2022-09-12	10:22:35	1.1594	117.711	FALSE	4
2022-09-12	10:22:35	1.3792	119.09	FALSE	4
2022-09-12	10:22:35	0.580471	119.671	FALSE	4
2022-09-12	10:22:35	0.487952	120.159	FALSE	4
2022-09-12	10:22:36	0.343728	120.502	FALSE	4
2022-09-12	10:22:36	0.383117	120.885	FALSE	4
2022-09-12	10:22:36	0.24958	121.135	FALSE	4
2022-09-12	10:22:36	0.516145	121.651	FALSE	4
2022-09-12	10:22:37	0.111769	121.763	FALSE	4
2022-09-12	10:22:37	0.449886	122.213	FALSE	4
2022-09-12	10:22:37	0.325916	122.539	FALSE	4
2022-09-12	10:22:37	0.35411	122.893	FALSE	4
2022-09-12	10:22:38	0.305916	123.199	FALSE	4
2022-09-12	10:22:38	0.305814	123.505	FALSE	4
2022-09-12	10:22:38	0.377316	123.882	FALSE	4
2022-09-12	10:22:39	0.232583	124.115	FALSE	4
2022-09-12	10:22:39	0.242405	124.357	FALSE	4
2022-09-12	10:22:39	0.294415	124.651	FALSE	4
2022-09-12	10:22:39	0.536603	125.188	FALSE	4
2022-09-12	10:22:40	0.572481	125.76	FALSE	4
2022-09-12	10:22:40	1.56022	127.321	FALSE	4
2022-09-12	10:22:40	0.566883	127.888	FALSE	4
2022-09-12	10:22:40	2.46317	130.351	FALSE	4
2022-09-12	10:22:41	1.67635	132.027	FALSE	4
2022-09-12	10:22:41	2.28312	134.31	FALSE	4
2022-09-12	10:22:41	3.90093	138.211	1	5
2022-09-12	10:22:41	0.716349	138.927	FALSE	5
2022-09-12	10:22:42	0.759249	139.687	FALSE	5
2022-09-12	10:22:42	1.69991	141.387	FALSE	5
2022-09-12	10:22:42	0.179606	141.566	FALSE	5
2022-09-12	10:22:42	0.888053	142.454	FALSE	5
2022-09-12	10:22:43	1.57874	144.033	FALSE	5
2022-09-12	10:22:43	3.51156	147.545	1	6
2022-09-12	10:22:43	0.902914	148.447	FALSE	6
2022-09-12	10:22:44	0.846578	149.294	FALSE	6
2022-09-12	10:22:44	1.11436	150.408	FALSE	6
2022-09-12	10:22:44	0.26042	150.669	FALSE	6
2022-09-12	10:22:44	0.404898	151.074	FALSE	6
2022-09-12	10:22:45	0.214364	151.288	FALSE	6
2022-09-12	10:22:45	0.261489	151.55	FALSE	6
2022-09-12	10:22:45	0.285102	151.835	FALSE	6
2022-09-12	10:22:45	0.293244	152.128	FALSE	6
2022-09-12	10:22:46	0.272176	152.4	FALSE	6
2022-09-12	10:22:46	0.282354	152.682	FALSE	6
2022-09-12	10:22:46	0.578995	153.261	FALSE	6
2022-09-12	10:22:46	0.527188	153.789	FALSE	6
2022-09-12	10:22:47	0.348868	154.137	FALSE	6
2022-09-12	10:22:47	0.247748	154.385	FALSE	6
2022-09-12	10:22:47	0.237367	154.623	FALSE	6
2022-09-12	10:22:48	0.245305	154.868	FALSE	6
2022-09-12	10:22:48	0.214517	155.082	FALSE	6
2022-09-12	10:22:48	0.223626	155.306	FALSE	6
2022-09-12	10:22:48	0.0844913	155.391	FALSE	6
2022-09-12	10:22:49	0.0723794	155.463	FALSE	6
2022-09-12	10:22:49	-0.0977478	155.463	FALSE	6
2022-09-12	10:22:49	-0.0885366	155.463	FALSE	6
2022-09-12	10:22:49	-0.154287	155.463	FALSE	6
2022-09-12	10:22:50	-0.161768	155.463	FALSE	6
2022-09-12	10:22:50	-0.143295	155.463	FALSE	6
2022-09-12	10:22:50	0.01584	155.479	FALSE	6
2022-09-12	10:22:50	0.0420994	155.521	FALSE	6
2022-09-12	10:22:51	0.374924	155.896	FALSE	6
2022-09-12	10:22:51	0.252583	156.148	FALSE	6
2022-09-12	10:22:51	0.27584	156.424	FALSE	6
2022-09-12	10:22:52	0.250954	156.675	FALSE	6
2022-09-12	10:22:52	0.589529	157.265	FALSE	6
2022-09-12	10:22:52	0.819758	158.084	FALSE	6
2022-09-12	10:22:52	1.01141	159.096	FALSE	6
2022-09-12	10:22:53	0.730547	159.826	FALSE	6
2022-09-12	10:22:53	0.736349	160.563	FALSE	6
2022-09-12	10:22:53	0.714466	161.277	FALSE	6
2022-09-12	10:22:53	0.86729	162.145	FALSE	6
2022-09-12	10:22:54	0.921641	163.066	FALSE	6
2022-09-12	10:22:54	0.458435	163.525	FALSE	6
2022-09-12	10:22:54	0.857672	164.382	FALSE	6
2022-09-12	10:22:54	0.520013	164.902	FALSE	6
2022-09-12	10:22:55	0.361336	165.264	FALSE	6
2022-09-12	10:22:55	0.343423	165.607	FALSE	6
2022-09-12	10:22:55	0.305814	165.913	FALSE	6
2022-09-12	10:22:55	0.339199	166.252	FALSE	6
2022-09-12	10:22:56	0.35355	166.606	FALSE	6
2022-09-12	10:22:56	0.334211	166.94	FALSE	6
2022-09-12	10:22:56	0.266272	167.206	FALSE	6
2022-09-12	10:22:57	0.315382	167.521	FALSE	6
2022-09-12	10:22:57	0.26897	167.79	FALSE	6
2022-09-12	10:22:57	0.407494	168.198	FALSE	6
2022-09-12	10:22:57	0.345407	168.543	FALSE	6
2022-09-12	10:22:58	0.357519	168.901	FALSE	6
2022-09-12	10:22:58	0.348715	169.25	FALSE	6
2022-09-12	10:22:58	0.345458	169.595	FALSE	6
2022-09-12	10:22:58	0.330191	169.925	FALSE	6
2022-09-12	10:22:59	0.338283	170.264	FALSE	6
2022-09-12	10:22:59	0.336196	170.6	FALSE	6
2022-09-12	10:22:59	0.31813	170.918	FALSE	6
2022-09-12	10:22:59	0.357977	171.276	FALSE	6
2022-09-12	10:23:00	0.232328	171.508	FALSE	6
2022-09-12	10:23:00	0.189682	171.698	FALSE	6
2022-09-12	10:23:00	0.232786	171.931	FALSE	6
2022-09-12	10:23:01	0.294567	172.225	FALSE	6
2022-09-12	10:23:01	0.0919213	172.317	FALSE	6
2022-09-12	10:23:01	-0.0733712	172.317	FALSE	6
2022-09-12	10:23:01	-0.0932694	172.317	FALSE	6
2022-09-12	10:23:02	0.114415	172.432	FALSE	6
2022-09-12	10:23:02	0.506629	172.938	FALSE	6
2022-09-12	10:23:02	0.177265	173.115	FALSE	6
2022-09-12	10:23:02	0.46388	173.579	FALSE	6
2022-09-12	10:23:03	0.571768	174.151	FALSE	6
2022-09-12	10:23:03	0.201336	174.352	FALSE	6
2022-09-12	10:23:03	0.74902	175.101	FALSE	6
2022-09-12	10:23:03	0.403779	175.505	FALSE	6
2022-09-12	10:23:04	0.601488	176.107	FALSE	6
2022-09-12	10:23:04	0.796705	176.903	FALSE	6
2022-09-12	10:23:04	0.763473	177.667	FALSE	6
2022-09-12	10:23:05	0.59416	178.261	FALSE	6
2022-09-12	10:23:05	0.951768	179.213	FALSE	6
2022-09-12	10:23:05	1.51798	180.731	FALSE	6
2022-09-12	10:23:05	0.318384	181.049	FALSE	6
2022-09-12	10:23:06	0.540827	181.59	FALSE	6
2022-09-12	10:23:06	1.74296	183.333	FALSE	6
2022-09-12	10:23:06	0.390802	183.724	FALSE	6
2022-09-12	10:23:06	0.185356	183.909	FALSE	6
2022-09-12	10:23:07	0.434415	184.344	FALSE	6
2022-09-12	10:23:07	0.156349	184.5	FALSE	6
2022-09-12	10:23:07	0.433346	184.933	FALSE	6
2022-09-12	10:23:07	0.230089	185.163	FALSE	6
2022-09-12	10:23:08	0.233906	185.397	FALSE	6
2022-09-12	10:23:08	0.262303	185.659	FALSE	6
2022-09-12	10:23:08	0.323473	185.983	FALSE	6
2022-09-12	10:23:08	0.162965	186.146	FALSE	6
2022-09-12	10:23:09	0.343677	186.49	FALSE	6
2022-09-12	10:23:09	0.0939061	186.584	FALSE	6
2022-09-12	10:23:09	0.427036	187.011	FALSE	6
2022-09-12	10:23:10	0.295025	187.306	FALSE	6
2022-09-12	10:23:10	0.346985	187.653	FALSE	6
2022-09-12	10:23:10	0.253702	187.906	FALSE	6
2022-09-12	10:23:10	0.427494	188.334	FALSE	6
2022-09-12	10:23:11	0.37701	188.711	FALSE	6
2022-09-12	10:23:11	2.76413	191.475	FALSE	6
2022-09-12	10:23:11	0.171107	191.646	FALSE	6
2022-09-12	10:23:11	0.311565	191.958	FALSE	6
2022-09-12	10:23:12	0.46098	192.419	FALSE	6
2022-09-12	10:23:12	0.104339	192.523	FALSE	6
2022-09-12	10:23:12	-0.0901142	192.523	FALSE	6
2022-09-12	10:23:12	-0.29271	192.523	FALSE	6
2022-09-12	10:23:13	-0.370979	192.523	FALSE	6
2022-09-12	10:23:13	0.173855	192.697	FALSE	6
2022-09-12	10:23:13	0.358791	193.056	FALSE	6
2022-09-12	10:23:14	0.299758	193.355	FALSE	6
2022-09-12	10:23:14	-0.0871117	193.355	FALSE	6
2022-09-12	10:23:14	0.159657	193.515	FALSE	6
2022-09-12	10:23:14	0.621794	194.137	FALSE	6
2022-09-12	10:23:15	1.22459	195.361	FALSE	6
2022-09-12	10:23:15	0.366374	195.728	FALSE	6
2022-09-12	10:23:15	0.605305	196.333	FALSE	6
2022-09-12	10:23:15	0.998792	197.332	FALSE	6
2022-09-12	10:23:16	0.483168	197.815	FALSE	6
2022-09-12	10:23:16	0.131769	197.947	FALSE	6
2022-09-12	10:23:16	0.315738	198.262	FALSE	6
2022-09-12	10:23:16	-0.0760175	198.262	FALSE	6
2022-09-12	10:23:17	-0.190419	198.262	FALSE	6
2022-09-12	10:23:17	-0.299834	198.262	FALSE	6
2022-09-12	10:23:17	-0.471183	198.262	FALSE	6
2022-09-12	10:23:18	-0.450979	198.262	FALSE	6
2022-09-12	10:23:18	-0.561615	198.262	FALSE	6
2022-09-12	10:23:18	-0.527926	198.262	FALSE	6
2022-09-12	10:23:18	-0.588231	198.262	FALSE	6
2022-09-12	10:23:19	-0.476526	198.262	FALSE	6
2022-09-12	10:23:19	-0.431437	198.262	FALSE	6
2022-09-12	10:23:19	-0.449758	198.262	FALSE	6
2022-09-12	10:23:19	-0.447315	198.262	FALSE	6
2022-09-12	10:23:20	-0.402938	198.262	FALSE	6
2022-09-12	10:23:20	-0.3836	198.262	FALSE	6
2022-09-12	10:23:20	-0.318867	198.262	FALSE	6
2022-09-12	10:23:20	-0.238257	198.262	FALSE	6
2022-09-12	10:23:21	-0.117035	198.262	FALSE	6
2022-09-12	10:23:21	-0.0465519	198.262	FALSE	6
2022-09-12	10:23:21	-0.109656	198.262	FALSE	6
2022-09-12	10:23:22	-0.116883	198.262	FALSE	6
2022-09-12	10:23:22	-0.0975443	198.262	FALSE	6
2022-09-12	10:23:22	-0.128893	198.262	FALSE	6
2022-09-12	10:23:22	-0.138511	198.262	FALSE	6
2022-09-12	10:23:23	-0.092506	198.262	FALSE	6
2022-09-12	10:23:23	-0.16645	198.262	FALSE	6
2022-09-12	10:23:23	0.0674939	198.33	FALSE	6
2022-09-12	10:23:23	-0.108842	198.33	FALSE	6
2022-09-12	10:23:24	-0.0405977	198.33	FALSE	6
2022-09-12	10:23:24	0.0156872	198.346	FALSE	6
2022-09-12	10:23:24	0.0458145	198.391	FALSE	6
2022-09-12	10:23:24	0.158537	198.55	FALSE	6
2022-09-12	10:23:25	0.0756873	198.626	FALSE	6
2022-09-12	10:23:25	0.10271	198.728	FALSE	6
2022-09-12	10:23:25	0.00657784	198.735	FALSE	6
2022-09-12	10:23:25	0.0114125	198.746	FALSE	6
2022-09-12	10:23:26	0.0642369	198.811	FALSE	6
2022-09-12	10:23:26	0.0500893	198.861	FALSE	6
2022-09-12	10:23:26	0.0487661	198.909	FALSE	6
2022-09-12	10:23:27	-0.166399	198.909	FALSE	6
2022-09-12	10:23:27	-0.142939	198.909	FALSE	6
2022-09-12	10:23:27	-0.0104705	198.909	FALSE	6
2022-09-12	10:23:27	-0.0537784	198.909	FALSE	6
2022-09-12	10:23:28	0.0282572	198.938	FALSE	6
2022-09-12	10:23:28	-0.0964755	198.938	FALSE	6
2022-09-12	10:23:28	0.0485626	198.986	FALSE	6
2022-09-12	10:23:28	0.0396567	199.026	FALSE	6
2022-09-12	10:23:29	-0.00879109	199.026	FALSE	6
2022-09-12	10:23:29	-0.0417682	199.026	FALSE	6
2022-09-12	10:23:29	-0.0471117	199.026	FALSE	6
2022-09-12	10:23:29	0.101794	199.128	FALSE	6
2022-09-12	10:23:30	-0.0135748	199.128	FALSE	6
2022-09-12	10:23:30	0.0770613	199.205	FALSE	6
2022-09-12	10:23:30	-0.039529	199.205	FALSE	6
2022-09-12	10:23:31	0.186679	199.392	FALSE	6
2022-09-12	10:23:31	0.0120231	199.404	FALSE	6
2022-09-12	10:23:31	0.0899875	199.494	FALSE	6
2022-09-12	10:23:31	-0.030674	199.494	FALSE	6
2022-09-12	10:23:32	0.0690206	199.563	FALSE	6
2022-09-12	10:23:32	-0.0172389	199.563	FALSE	6
2022-09-12	10:23:32	-0.032557	199.563	FALSE	6
2022-09-12	10:23:32	-0.099529	199.563	FALSE	6
2022-09-12	10:23:33	0.032074	199.595	FALSE	6
2022-09-12	10:23:33	-0.00370202	199.595	FALSE	6
2022-09-12	10:23:33	-0.0297071	199.595	FALSE	6
2022-09-12	10:23:33	-0.0547961	199.595	FALSE	6
2022-09-12	10:23:34	0.0615905	199.656	FALSE	6
2022-09-12	10:23:34	0.049275	199.705	FALSE	6
2022-09-12	10:23:34	0.0547712	199.76	FALSE	6
2022-09-12	10:23:35	0.0470358	199.807	FALSE	6
2022-09-12	10:23:35	0.140827	199.948	FALSE	6
2022-09-12	10:23:35	0.100217	200.048	FALSE	6
2022-09-12	10:23:35	0.0291733	200.078	FALSE	6
2022-09-12	10:23:36	0.154415	200.232	FALSE	6
2022-09-12	10:23:36	0.0740587	200.306	FALSE	6
2022-09-12	10:23:36	0.138995	200.445	FALSE	6
2022-09-12	10:23:36	0.135331	200.58	FALSE	6
2022-09-12	10:23:37	0.452583	201.033	FALSE	6
2022-09-12	10:23:37	0.416552	201.449	FALSE	6
2022-09-12	10:23:37	0.568104	202.018	FALSE	6
2022-09-12	10:23:38	0.502964	202.521	FALSE	6
2022-09-12	10:23:38	0.335127	202.856	FALSE	6
2022-09-12	10:23:38	0.265713	203.121	FALSE	6
2022-09-12	10:23:38	0.345662	203.467	FALSE	6
2022-09-12	10:23:38	2.7677	206.235	FALSE	6
2022-09-12	10:23:39	0.141489	206.376	FALSE	6
2022-09-12	10:23:39	0.0703438	206.447	FALSE	6
2022-09-12	10:23:39	0.270395	206.717	FALSE	6
2022-09-12	10:23:40	0.192583	206.91	FALSE	6
2022-09-12	10:23:40	0.292074	207.202	FALSE	6
2022-09-12	10:23:40	0.24215	207.444	FALSE	6
2022-09-12	10:23:40	0.291005	207.735	FALSE	6
2022-09-12	10:23:41	0.297061	208.032	FALSE	6
2022-09-12	10:23:41	0.371107	208.403	FALSE	6
2022-09-12	10:23:41	0.327952	208.731	FALSE	6
2022-09-12	10:23:41	0.288104	209.019	FALSE	6
2022-09-12	10:23:42	0.274008	209.293	FALSE	6
2022-09-12	10:23:42	0.29355	209.587	FALSE	6
2022-09-12	10:23:42	0.293244	209.88	FALSE	6
2022-09-12	10:23:42	0.314873	210.195	FALSE	6
2022-09-12	10:23:43	0.322506	210.517	FALSE	6
2022-09-12	10:23:43	0.425254	210.942	FALSE	6
2022-09-12	10:23:43	0.710089	211.652	FALSE	6
2022-09-12	10:23:44	0.625051	212.278	FALSE	6
2022-09-12	10:23:44	0.597977	212.876	FALSE	6
2022-09-12	10:23:44	0.490547	213.366	FALSE	6
2022-09-12	10:23:44	0.565	213.931	FALSE	6
2022-09-12	10:23:45	0.637214	214.568	FALSE	6
2022-09-12	10:23:45	0.706985	215.275	FALSE	6
2022-09-12	10:23:45	0.820522	216.096	FALSE	6
2022-09-12	10:23:45	0.760674	216.856	FALSE	6
2022-09-12	10:23:46	0.559402	217.416	FALSE	6
2022-09-12	10:23:46	0.375789	217.792	FALSE	6
2022-09-12	10:23:46	0.334822	218.126	FALSE	6
2022-09-12	10:23:46	0.260165	218.387	FALSE	6
2022-09-12	10:23:47	0.289987	218.677	FALSE	6
2022-09-12	10:23:47	0.24902	218.926	FALSE	6
2022-09-12	10:23:47	0.245814	219.171	FALSE	6
2022-09-12	10:23:48	0.249886	219.421	FALSE	6
2022-09-12	10:23:48	0.284491	219.706	FALSE	6
2022-09-12	10:23:48	0.248664	219.955	FALSE	6
2022-09-12	10:23:48	0.248664	220.203	FALSE	6
2022-09-12	10:23:49	0.267087	220.47	FALSE	6
2022-09-12	10:23:49	0.285102	220.755	FALSE	6
2022-09-12	10:23:49	0.378384	221.134	FALSE	6
2022-09-12	10:23:49	0.405509	221.539	FALSE	6
2022-09-12	10:23:50	0.279148	221.818	FALSE	6
2022-09-12	10:23:50	0.225611	222.044	FALSE	6
2022-09-12	10:23:50	0.338435	222.382	FALSE	6
2022-09-12	10:23:50	0.123066	222.506	FALSE	6
2022-09-12	10:23:51	0.341489	222.847	FALSE	6
2022-09-12	10:23:51	0.240115	223.087	FALSE	6
2022-09-12	10:23:51	0.253957	223.341	FALSE	6
2022-09-12	10:23:51	0.349682	223.691	FALSE	6
2022-09-12	10:23:52	0.504847	224.196	FALSE	6
2022-09-12	10:23:52	1.06291	225.259	FALSE	6
2022-09-12	10:23:52	0.233702	225.492	FALSE	6
2022-09-12	10:23:53	0.295127	225.787	FALSE	6
2022-09-12	10:23:53	0.51701	226.304	FALSE	6
2022-09-12	10:23:53	0.328257	226.633	FALSE	6
2022-09-12	10:23:53	0.352837	226.985	FALSE	6
2022-09-12	10:23:54	0.279199	227.265	FALSE	6
2022-09-12	10:23:54	0.259606	227.524	FALSE	6
2022-09-12	10:23:54	0.324898	227.849	FALSE	6
2022-09-12	10:23:54	0.418079	228.267	FALSE	6
2022-09-12	10:23:55	0.667494	228.935	FALSE	6
2022-09-12	10:23:55	0.399249	229.334	FALSE	6
2022-09-12	10:23:55	0.496756	229.831	FALSE	6
2022-09-12	10:23:55	0.242557	230.073	FALSE	6
2022-09-12	10:23:56	0.128105	230.201	FALSE	6
2022-09-12	10:23:56	-0.0422262	230.201	FALSE	6
2022-09-12	10:23:56	-0.117239	230.201	FALSE	6
2022-09-12	10:23:57	-0.0966791	230.201	FALSE	6
2022-09-12	10:23:57	-0.0695035	230.201	FALSE	6
2022-09-12	10:23:57	-0.0226333	230.201	FALSE	6
2022-09-12	10:23:57	0.0477992	230.249	FALSE	6
2022-09-12	10:23:58	-0.034389	230.249	FALSE	6
2022-09-12	10:23:58	-0.00578856	230.249	FALSE	6
2022-09-12	10:23:58	0.470649	230.72	FALSE	6
2022-09-12	10:23:58	-0.0281295	230.72	FALSE	6
2022-09-12	10:23:59	-0.0431422	230.72	FALSE	6
2022-09-12	10:23:59	-0.139173	230.72	FALSE	6
2022-09-12	10:23:59	-0.0771371	230.72	FALSE	6
2022-09-12	10:23:59	-0.0653305	230.72	FALSE	6
2022-09-12	10:24:00	-0.0753559	230.72	FALSE	6
2022-09-12	10:24:00	-0.0833967	230.72	FALSE	6
2022-09-12	10:24:00	-0.067875	230.72	FALSE	6
2022-09-12	10:24:01	-0.0637529	230.72	FALSE	6
2022-09-12	10:24:01	-0.0760684	230.72	FALSE	6
2022-09-12	10:24:01	-0.0622262	230.72	FALSE	6
2022-09-12	10:24:01	-0.0610048	230.72	FALSE	6
2022-09-12	10:24:02	-0.0605977	230.72	FALSE	6
2022-09-12	10:24:02	-0.0596308	230.72	FALSE	6
2022-09-12	10:24:02	-0.0541855	230.72	FALSE	6
2022-09-12	10:24:02	-0.0460939	230.72	FALSE	6
2022-09-12	10:24:03	-0.0366282	230.72	FALSE	6
2022-09-12	10:24:03	-0.0347962	230.72	FALSE	6
2022-09-12	10:24:03	0.194415	230.914	FALSE	6
2022-09-12	10:24:03	0.122201	231.036	FALSE	6
2022-09-12	10:24:04	0.12958	231.166	FALSE	6
2022-09-12	10:24:04	0.407341	231.573	FALSE	6
2022-09-12	10:24:04	0.396858	231.97	FALSE	6
2022-09-12	10:24:04	0.434873	232.405	FALSE	6
2022-09-12	10:24:05	-0.0351015	232.405	FALSE	6
2022-09-12	10:24:05	0.493448	232.899	FALSE	6
2022-09-12	10:24:05	0.0182318	232.917	FALSE	6
2022-09-12	10:24:06	0.023219	232.94	FALSE	6
2022-09-12	10:24:06	-0.0175443	232.94	FALSE	6
2022-09-12	10:24:06	0.120318	233.06	FALSE	6
2022-09-12	10:24:06	0.00174323	233.062	FALSE	6
2022-09-12	10:24:07	-0.111997	233.062	FALSE	6
2022-09-12	10:24:07	0.0689188	233.131	FALSE	6
2022-09-12	10:24:07	0.128868	233.26	FALSE	6
2022-09-12	10:24:07	0.333295	233.593	FALSE	6
2022-09-12	10:24:08	0.306781	233.9	FALSE	6
2022-09-12	10:24:08	0.333906	234.234	FALSE	6
2022-09-12	10:24:08	0.433601	234.667	FALSE	6
2022-09-12	10:24:08	0.327545	234.995	FALSE	6
2022-09-12	10:24:09	0.353499	235.348	FALSE	6
2022-09-12	10:24:09	0.321743	235.67	FALSE	6
2022-09-12	10:24:09	0.31299	235.983	FALSE	6
2022-09-12	10:24:10	0.270954	236.254	FALSE	6
2022-09-12	10:24:10	0.264338	236.518	FALSE	6
2022-09-12	10:24:10	0.329987	236.848	FALSE	6
2022-09-12	10:24:10	0.262812	237.111	FALSE	6
2022-09-12	10:24:11	0.236807	237.348	FALSE	6
2022-09-12	10:24:11	0.313295	237.661	FALSE	6
2022-09-12	10:24:11	0.289326	237.951	FALSE	6
2022-09-12	10:24:11	0.389428	238.34	FALSE	6
2022-09-12	10:24:12	0.40215	238.742	FALSE	6
2022-09-12	10:24:12	0.402405	239.145	FALSE	6
2022-09-12	10:24:12	0.392786	239.537	FALSE	6
2022-09-12	10:24:12	0.357417	239.895	FALSE	6
2022-09-12	10:24:13	0.3307	240.226	FALSE	6
2022-09-12	10:24:13	0.314364	240.54	FALSE	6
2022-09-12	10:24:13	0.312125	240.852	FALSE	6
2022-09-12	10:24:14	0.295789	241.148	FALSE	6
2022-09-12	10:24:14	0.255331	241.403	FALSE	6
2022-09-12	10:24:14	0.181387	241.585	FALSE	6
2022-09-12	10:24:14	0.11355	241.698	FALSE	6
2022-09-12	10:24:15	-0.244618	241.698	FALSE	6
2022-09-12	10:24:15	-0.366959	241.698	FALSE	6
2022-09-12	10:24:15	-0.466043	241.698	FALSE	6
2022-09-12	10:24:15	-0.559172	241.698	FALSE	6
2022-09-12	10:24:16	-0.48248	241.698	FALSE	6
2022-09-12	10:24:16	-0.432913	241.698	FALSE	6
2022-09-12	10:24:16	-0.338766	241.698	FALSE	6
2022-09-12	10:24:16	-0.260038	241.698	FALSE	6
2022-09-12	10:24:17	-0.250318	241.698	FALSE	6
2022-09-12	10:24:17	-0.240394	241.698	FALSE	6
2022-09-12	10:24:17	-0.384414	241.698	FALSE	6
2022-09-12	10:24:18	-0.421056	241.698	FALSE	6
2022-09-12	10:24:18	-0.443854	241.698	FALSE	6
2022-09-12	10:24:18	-0.372201	241.698	FALSE	6
2022-09-12	10:24:18	-0.266297	241.698	FALSE	6
2022-09-12	10:24:19	-0.338104	241.698	FALSE	6
2022-09-12	10:24:19	-0.263091	241.698	FALSE	6
2022-09-12	10:24:19	-0.222023	241.698	FALSE	6
2022-09-12	10:24:19	-0.195407	241.698	FALSE	6
2022-09-12	10:24:20	-0.141768	241.698	FALSE	6
2022-09-12	10:24:20	-0.239427	241.698	FALSE	6
2022-09-12	10:24:20	-0.222073	241.698	FALSE	6
2022-09-12	10:24:20	-0.176679	241.698	FALSE	6
2022-09-12	10:24:21	-0.189554	241.698	FALSE	6
2022-09-12	10:24:21	-0.167519	241.698	FALSE	6
2022-09-12	10:24:21	-0.178409	241.698	FALSE	6
2022-09-12	10:24:21	-0.191539	241.698	FALSE	6
2022-09-12	10:24:22	-0.196832	241.698	FALSE	6
2022-09-12	10:24:22	-0.190623	241.698	FALSE	6
2022-09-12	10:24:22	-0.18075	241.698	FALSE	6
2022-09-12	10:24:23	-0.155865	241.698	FALSE	6
2022-09-12	10:24:23	-0.126552	241.698	FALSE	6
2022-09-12	10:24:23	-0.000699497	241.698	FALSE	6
2022-09-12	10:24:23	0.260318	241.958	FALSE	6
2022-09-12	10:24:24	0.356145	242.315	FALSE	6
2022-09-12	10:24:24	1.37991	243.695	FALSE	6
2022-09-12	10:24:24	0.279453	243.974	FALSE	6
2022-09-12	10:24:24	0.251819	244.226	FALSE	6
2022-09-12	10:24:25	0.419606	244.645	FALSE	6
2022-09-12	10:24:25	0.414415	245.06	FALSE	6
2022-09-12	10:24:25	0.22841	245.288	FALSE	6
2022-09-12	10:24:25	0.282812	245.571	FALSE	6
2022-09-12	10:24:26	1.47156	247.043	FALSE	6
2022-09-12	10:24:26	0.23528	247.278	FALSE	6
2022-09-12	10:24:26	0.276247	247.554	FALSE	6
2022-09-12	10:24:27	0.387952	247.942	FALSE	6
2022-09-12	10:24:27	0.285102	248.227	FALSE	6
2022-09-12	10:24:27	0.280369	248.508	FALSE	6
2022-09-12	10:24:27	0.52729	249.035	FALSE	6
2022-09-12	10:24:28	0.364288	249.399	FALSE	6
2022-09-12	10:24:28	0.3107	249.71	FALSE	6
2022-09-12	10:24:28	1.3394	251.049	FALSE	6
2022-09-12	10:24:28	0.235127	251.284	FALSE	6
2022-09-12	10:24:29	0.486476	251.771	FALSE	6
2022-09-12	10:24:29	1.09843	252.869	FALSE	6
2022-09-12	10:24:29	0.423117	253.292	FALSE	6
2022-09-12	10:24:29	0.282761	253.575	FALSE	6
2022-09-12	10:24:30	1.01284	254.588	FALSE	6
2022-09-12	10:24:30	0.237061	254.825	FALSE	6
2022-09-12	10:24:30	0.405204	255.23	FALSE	6
2022-09-12	10:24:31	0.26958	255.5	FALSE	6
2022-09-12	10:24:31	0.431972	255.932	FALSE	6
2022-09-12	10:24:31	0.1764	256.108	FALSE	6
2022-09-12	10:24:31	0.340064	256.448	FALSE	6
2022-09-12	10:24:32	0.2364	256.685	FALSE	6
2022-09-12	10:24:32	0.435891	257.121	FALSE	6
2022-09-12	10:24:32	0.153804	257.274	FALSE	6
2022-09-12	10:24:32	0.439708	257.714	FALSE	6
2022-09-12	10:24:33	0.316298	258.03	FALSE	6
2022-09-12	10:24:33	0.308206	258.339	FALSE	6
2022-09-12	10:24:33	0.275687	258.614	FALSE	6
2022-09-12	10:24:33	0.399046	259.013	FALSE	6
2022-09-12	10:24:34	0.310547	259.324	FALSE	6
2022-09-12	10:24:34	0.309987	259.634	FALSE	6
2022-09-12	10:24:34	0.338741	259.973	FALSE	6
2022-09-12	10:24:34	0.369326	260.342	FALSE	6
2022-09-12	10:24:35	0.384644	260.727	FALSE	6
2022-09-12	10:24:35	0.454822	261.181	FALSE	6
2022-09-12	10:24:35	0.409835	261.591	FALSE	6
2022-09-12	10:24:36	0.428868	262.02	FALSE	6
2022-09-12	10:24:36	0.462405	262.482	FALSE	6
2022-09-12	10:24:36	0.325916	262.808	FALSE	6
2022-09-12	10:24:36	0.111107	262.92	FALSE	6
2022-09-12	10:24:37	0.165509	263.085	FALSE	6
2022-09-12	10:24:37	-0.00538142	263.085	FALSE	6
2022-09-12	10:24:37	0.320471	263.405	FALSE	6
2022-09-12	10:24:37	0.383219	263.789	FALSE	6
2022-09-12	10:24:38	0.285356	264.074	FALSE	6
2022-09-12	10:24:38	0.280165	264.354	FALSE	6
2022-09-12	10:24:38	-0.060903	264.354	FALSE	6
2022-09-12	10:24:38	-0.232862	264.354	FALSE	6
2022-09-12	10:24:39	-0.275356	264.354	FALSE	6
2022-09-12	10:24:39	-0.0626842	264.354	FALSE	6
2022-09-12	10:24:39	-0.177544	264.354	FALSE	6
2022-09-12	10:24:40	0.0191478	264.373	FALSE	6
2022-09-12	10:24:40	0.149987	264.523	FALSE	6
2022-09-12	10:24:40	-0.0585112	264.523	FALSE	6
2022-09-12	10:24:40	0.0805727	264.604	FALSE	6
2022-09-12	10:24:41	0.168155	264.772	FALSE	6
2022-09-12	10:24:41	0.182456	264.955	FALSE	6
2022-09-12	10:24:41	0.0473412	265.002	FALSE	6
2022-09-12	10:24:41	0.0649493	265.067	FALSE	6
2022-09-12	10:24:42	-0.0916409	265.067	FALSE	6
2022-09-12	10:24:42	-0.0315392	265.067	FALSE	6
2022-09-12	10:24:42	-0.0335748	265.067	FALSE	6
2022-09-12	10:24:42	-0.0134221	265.067	FALSE	6
2022-09-12	10:24:43	-0.0421244	265.067	FALSE	6
2022-09-12	10:24:43	0.105967	265.173	FALSE	6
2022-09-12	10:24:43	0.0462725	265.219	FALSE	6
2022-09-12	10:24:44	0.004186	265.223	FALSE	6
2022-09-12	10:24:44	-0.117392	265.223	FALSE	6
2022-09-12	10:24:44	0.0825066	265.306	FALSE	6
2022-09-12	10:24:44	0.0440333	265.35	FALSE	6
2022-09-12	10:24:45	0.220623	265.57	FALSE	6
2022-09-12	10:24:45	0.0296313	265.6	FALSE	6
2022-09-12	10:24:45	0.206374	265.806	FALSE	6
2022-09-12	10:24:45	0.127189	265.934	FALSE	6
2022-09-12	10:24:46	0.671565	266.605	FALSE	6
2022-09-12	10:24:46	0.0504455	266.656	FALSE	6
2022-09-12	10:24:46	0.121998	266.778	FALSE	6
2022-09-12	10:24:46	0.242659	267.02	FALSE	6
2022-09-12	10:24:47	0.222303	267.243	FALSE	6
2022-09-12	10:24:47	0.0917687	267.334	FALSE	6
2022-09-12	10:24:47	0.469682	267.804	FALSE	6
2022-09-12	10:24:48	0.136196	267.94	FALSE	6
2022-09-12	10:24:48	0.380827	268.321	FALSE	6
2022-09-12	10:24:48	0.605712	268.927	FALSE	6
2022-09-12	10:24:48	0.401641	269.328	FALSE	6
2022-09-12	10:24:49	0.716298	270.045	FALSE	6
2022-09-12	10:24:49	0.59355	270.638	FALSE	6
2022-09-12	10:24:49	0.305967	270.944	FALSE	6
2022-09-12	10:24:49	0.553143	271.497	FALSE	6
2022-09-12	10:24:50	0.216043	271.713	FALSE	6
2022-09-12	10:24:50	0.466832	272.18	FALSE	6
2022-09-12	10:24:50	0.370191	272.55	FALSE	6
2022-09-12	10:24:50	0.627443	273.178	FALSE	6
2022-09-12	10:24:51	0.307087	273.485	FALSE	6
2022-09-12	10:24:51	0.557723	274.043	FALSE	6
2022-09-12	10:24:51	0.266069	274.309	FALSE	6
2022-09-12	10:24:51	0.557672	274.866	FALSE	6
2022-09-12	10:24:52	0.264644	275.131	FALSE	6
2022-09-12	10:24:52	0.49243	275.624	FALSE	6
2022-09-12	10:24:52	0.201641	275.825	FALSE	6
2022-09-12	10:24:53	0.450293	276.275	FALSE	6
2022-09-12	10:24:53	0.185255	276.461	FALSE	6
2022-09-12	10:24:53	0.44154	276.902	FALSE	6
2022-09-12	10:24:53	0.184593	277.087	FALSE	6
2022-09-12	10:24:54	0.443575	277.53	FALSE	6
2022-09-12	10:24:54	0.201998	277.732	FALSE	6
2022-09-12	10:24:54	0.485814	278.218	FALSE	6
2022-09-12	10:24:54	0.257824	278.476	FALSE	6
2022-09-12	10:24:55	0.339555	278.816	FALSE	6
2022-09-12	10:24:55	0.34841	279.164	FALSE	6
2022-09-12	10:24:55	0.41126	279.575	FALSE	6
2022-09-12	10:24:55	0.237621	279.813	FALSE	6
2022-09-12	10:24:56	0.462354	280.275	FALSE	6
2022-09-12	10:24:56	0.341794	280.617	FALSE	6
2022-09-12	10:24:56	0.369987	280.987	FALSE	6
2022-09-12	10:24:57	0.237163	281.224	FALSE	6
2022-09-12	10:24:57	0.313702	281.538	FALSE	6
2022-09-12	10:24:57	0.346018	281.884	FALSE	6
2022-09-12	10:24:57	0.386171	282.27	FALSE	6
2022-09-12	10:24:58	0.209326	282.479	FALSE	6
2022-09-12	10:24:58	0.349173	282.829	FALSE	6
2022-09-12	10:24:58	0.349886	283.178	FALSE	6
2022-09-12	10:24:58	0.282761	283.461	FALSE	6
2022-09-12	10:24:59	0.219657	283.681	FALSE	6
2022-09-12	10:24:59	0.312634	283.994	FALSE	6
2022-09-12	10:24:59	0.335687	284.329	FALSE	6
2022-09-12	10:24:59	0.286476	284.616	FALSE	6
2022-09-12	10:25:00	0.269428	284.885	FALSE	6
2022-09-12	10:25:00	0.328359	285.213	FALSE	6
2022-09-12	10:25:00	0.278333	285.492	FALSE	6
2022-09-12	10:25:01	0.212685	285.704	FALSE	6
2022-09-12	10:25:01	0.124237	285.829	FALSE	6
2022-09-12	10:25:01	0.282659	286.111	FALSE	6
2022-09-12	10:25:01	0.173957	286.285	FALSE	6
2022-09-12	10:25:02	0.152125	286.437	FALSE	6
2022-09-12	10:25:02	0.111921	286.549	FALSE	6
2022-09-12	10:25:02	0.21925	286.769	FALSE	6
2022-09-12	10:25:02	0.198181	286.967	FALSE	6
2022-09-12	10:25:03	0.216145	287.183	FALSE	6
2022-09-12	10:25:03	0.159758	287.343	FALSE	6
2022-09-12	10:25:03	0.316959	287.66	FALSE	6
2022-09-12	10:25:03	0.204389	287.864	FALSE	6
2022-09-12	10:25:04	0.341336	288.205	FALSE	6
2022-09-12	10:25:04	0.147545	288.353	FALSE	6
2022-09-12	10:25:04	0.353906	288.707	FALSE	6
2022-09-12	10:25:05	0.242608	288.949	FALSE	6
2022-09-12	10:25:05	0.271921	289.221	FALSE	6
2022-09-12	10:25:05	0.246323	289.468	FALSE	6
2022-09-12	10:25:05	0.517163	289.985	FALSE	6
2022-09-12	10:25:06	0.212074	290.197	FALSE	6
2022-09-12	10:25:06	0.3993	290.596	FALSE	6
2022-09-12	10:25:06	0.649631	291.246	FALSE	6
2022-09-12	10:25:06	0.319097	291.565	FALSE	6
2022-09-12	10:25:07	0.205356	291.77	FALSE	6
2022-09-12	10:25:07	0.331616	292.102	FALSE	6
2022-09-12	10:25:07	0.138537	292.24	FALSE	6
2022-09-12	10:25:07	0.341794	292.582	FALSE	6
2022-09-12	10:25:08	0.239453	292.822	FALSE	6
2022-09-12	10:25:08	0.304186	293.126	FALSE	6
2022-09-12	10:25:08	0.198384	293.324	FALSE	6
2022-09-12	10:25:08	0.427443	293.752	FALSE	6
2022-09-12	10:25:09	0.276196	294.028	FALSE	6
2022-09-12	10:25:09	0.352379	294.38	FALSE	6
2022-09-12	10:25:09	0.433499	294.814	FALSE	6
2022-09-12	10:25:10	0.176043	294.99	FALSE	6
2022-09-12	10:25:10	0.32729	295.317	FALSE	6
2022-09-12	10:25:10	0.328359	295.645	FALSE	6
2022-09-12	10:25:10	0.413397	296.059	FALSE	6
2022-09-12	10:25:11	0.282812	296.342	FALSE	6
2022-09-12	10:25:11	0.632735	296.974	FALSE	6
2022-09-12	10:25:11	0.308562	297.283	FALSE	6
2022-09-12	10:25:11	0.280115	297.563	FALSE	6
2022-09-12	10:25:12	0.443677	298.007	FALSE	6
2022-09-12	10:25:12	0.311158	298.318	FALSE	6
2022-09-12	10:25:12	0.419962	298.738	FALSE	6
2022-09-12	10:25:12	0.370089	299.108	FALSE	6
2022-09-12	10:25:13	0.338893	299.447	FALSE	6
2022-09-12	10:25:13	0.344491	299.791	FALSE	6
2022-09-12	10:25:13	0.419504	300.211	FALSE	6
2022-09-12	10:25:14	0.242201	300.453	FALSE	6
2022-09-12	10:25:14	0.46556	300.919	FALSE	6
2022-09-12	10:25:14	0.291056	301.21	FALSE	6
2022-09-12	10:25:14	0.366883	301.577	FALSE	6
2022-09-12	10:25:15	0.296756	301.873	FALSE	6
2022-09-12	10:25:15	0.411667	302.285	FALSE	6
2022-09-12	10:25:15	0.384746	302.67	FALSE	6
2022-09-12	10:25:15	0.429835	303.1	FALSE	6
2022-09-12	10:25:16	0.359351	303.459	FALSE	6
2022-09-12	10:25:16	0.406985	303.866	FALSE	6
2022-09-12	10:25:16	0.398181	304.264	FALSE	6
2022-09-12	10:25:16	0.450191	304.714	FALSE	6
2022-09-12	10:25:17	0.339504	305.054	FALSE	6
2022-09-12	10:25:17	0.272328	305.326	FALSE	6
2022-09-12	10:25:17	0.384949	305.711	FALSE	6
2022-09-12	10:25:18	0.305204	306.016	FALSE	6
2022-09-12	10:25:18	0.320624	306.337	FALSE	6
2022-09-12	10:25:18	0.358384	306.695	FALSE	6
2022-09-12	10:25:18	0.204339	306.9	FALSE	6
2022-09-12	10:25:19	0.410242	307.31	FALSE	6
2022-09-12	10:25:19	0.341438	307.651	FALSE	6
2022-09-12	10:25:19	0.390751	308.042	FALSE	6
2022-09-12	10:25:19	0.252634	308.295	FALSE	6
2022-09-12	10:25:20	0.552888	308.848	FALSE	6
2022-09-12	10:25:20	0.211412	309.059	FALSE	6
2022-09-12	10:25:20	0.448104	309.507	FALSE	6
2022-09-12	10:25:20	0.175026	309.682	FALSE	6
2022-09-12	10:25:21	0.0653056	309.747	FALSE	6
2022-09-12	10:25:21	0.044644	309.792	FALSE	6
2022-09-12	10:25:21	0.0277992	309.82	FALSE	6
2022-09-12	10:25:21	-0.110572	309.82	FALSE	6
2022-09-12	10:25:22	-0.143956	309.82	FALSE	6
2022-09-12	10:25:22	-0.0341346	309.82	FALSE	6
2022-09-12	10:25:22	0.0909544	309.911	FALSE	6
2022-09-12	10:25:23	0.0119214	309.923	FALSE	6
2022-09-12	10:25:23	0.109937	310.033	FALSE	6
2022-09-12	10:25:23	0.208461	310.241	FALSE	6
2022-09-12	10:25:23	0.230649	310.472	FALSE	6
2022-09-12	10:25:24	0.147545	310.619	FALSE	6
2022-09-12	10:25:24	0.275738	310.895	FALSE	6
2022-09-12	10:25:24	0.103626	310.999	FALSE	6
2022-09-12	10:25:24	0.203372	311.202	FALSE	6
2022-09-12	10:25:25	0.0921249	311.294	FALSE	6
2022-09-12	10:25:25	0.00576363	311.3	FALSE	6
2022-09-12	10:25:25	0.123881	311.424	FALSE	6
2022-09-12	10:25:25	0.0592496	311.483	FALSE	6
2022-09-12	10:25:26	0.149326	311.632	FALSE	6
2022-09-12	10:25:26	0.0906999	311.723	FALSE	6
2022-09-12	10:25:26	0.343982	312.067	FALSE	6
2022-09-12	10:25:27	0.139453	312.207	FALSE	6
2022-09-12	10:25:27	0.188766	312.395	FALSE	6
2022-09-12	10:25:27	0.142863	312.538	FALSE	6
2022-09-12	10:25:27	0.0123285	312.551	FALSE	6
2022-09-12	10:25:28	0.164237	312.715	FALSE	6
2022-09-12	10:25:28	0.169631	312.884	FALSE	6
2022-09-12	10:25:28	0.301132	313.186	FALSE	6
2022-09-12	10:25:28	0.297672	313.483	FALSE	6
2022-09-12	10:25:29	0.269631	313.753	FALSE	6
2022-09-12	10:25:29	0.234262	313.987	FALSE	6
2022-09-12	10:25:29	0.310395	314.297	FALSE	6
2022-09-12	10:25:29	0.828257	315.126	FALSE	6
2022-09-12	10:25:30	0.410344	315.536	FALSE	6
2022-09-12	10:25:30	0.36612	315.902	FALSE	6
2022-09-12	10:25:30	0.36841	316.271	FALSE	6
2022-09-12	10:25:31	0.369682	316.64	FALSE	6
2022-09-12	10:25:31	0.316807	316.957	FALSE	6
2022-09-12	10:25:31	0.315178	317.272	FALSE	6
2022-09-12	10:25:31	0.485356	317.758	FALSE	6
2022-09-12	10:25:32	0.51813	318.276	FALSE	6
2022-09-12	10:25:32	0.83701	319.113	FALSE	6
2022-09-12	10:25:32	1.37396	320.487	FALSE	6
2022-09-12	10:25:32	1.49075	321.977	FALSE	6
2022-09-12	10:25:33	0.857926	322.835	FALSE	6
2022-09-12	10:25:33	0.944644	323.78	FALSE	6
2022-09-12	10:25:33	0.343779	324.124	FALSE	6
2022-09-12	10:25:33	0.809936	324.934	FALSE	6
2022-09-12	10:25:34	1.3877	326.321	FALSE	6
2022-09-12	10:25:34	1.60678	327.928	FALSE	6
2022-09-12	10:25:34	1.53828	329.467	FALSE	6
2022-09-12	10:25:35	2.00637	331.473	FALSE	6
2022-09-12	10:25:35	0.566781	332.04	FALSE	6
2022-09-12	10:25:35	0.815992	332.856	FALSE	6
2022-09-12	10:25:35	1.74826	334.604	FALSE	6
2022-09-12	10:25:36	3.05935	337.663	1	7
2022-09-12	10:25:36	1.58286	339.246	FALSE	7
2022-09-12	10:25:36	0.742506	339.989	FALSE	7
2022-09-12	10:25:36	0.587341	340.576	FALSE	7
2022-09-12	10:25:37	1.77309	342.349	FALSE	7
2022-09-12	10:25:37	0.251311	342.6	FALSE	7
2022-09-12	10:25:37	0.316959	342.917	FALSE	7
2022-09-12	10:25:37	1.14872	344.066	FALSE	7
2022-09-12	10:25:38	0.111005	344.177	FALSE	7
2022-09-12	10:25:38	0.133906	344.311	FALSE	7
2022-09-12	10:25:38	0.131362	344.442	FALSE	7
2022-09-12	10:25:38	0.0185371	344.461	FALSE	7
2022-09-12	10:25:39	0.103677	344.565	FALSE	7
2022-09-12	10:25:39	0.000725441	344.565	FALSE	7
2022-09-12	10:25:39	0.0731427	344.638	FALSE	7
2022-09-12	10:25:40	0.0436262	344.682	FALSE	7
2022-09-12	10:25:40	0.0251529	344.707	FALSE	7
2022-09-12	10:25:40	0.181285	344.888	FALSE	7
2022-09-12	10:25:40	0.243321	345.132	FALSE	7
2022-09-12	10:25:41	0.104491	345.236	FALSE	7
2022-09-12	10:25:41	0.286527	345.523	FALSE	7
2022-09-12	10:25:41	0.126272	345.649	FALSE	7
2022-09-12	10:25:41	0.387188	346.036	FALSE	7
2022-09-12	10:25:42	0.22327	346.26	FALSE	7
2022-09-12	10:25:42	0.328003	346.588	FALSE	7
2022-09-12	10:25:42	0.158435	346.746	FALSE	7
2022-09-12	10:25:42	0.478639	347.225	FALSE	7
2022-09-12	10:25:43	0.151209	347.376	FALSE	7
2022-09-12	10:25:43	0.498842	347.875	FALSE	7
2022-09-12	10:25:43	0.275331	348.15	FALSE	7
2022-09-12	10:25:44	0.432328	348.582	FALSE	7
2022-09-12	10:25:44	0.28042	348.863	FALSE	7
2022-09-12	10:25:44	0.795636	349.658	FALSE	7
2022-09-12	10:25:44	0.24612	349.905	FALSE	7
2022-09-12	10:25:45	0.882761	350.787	FALSE	7
2022-09-12	10:25:45	2.27843	353.066	FALSE	7
2022-09-12	10:25:45	0.62617	353.692	FALSE	7
2022-09-12	10:25:45	1.73996	355.432	FALSE	7
2022-09-12	10:25:46	2.2048	357.637	FALSE	7
2022-09-12	10:25:46	0.338232	357.975	FALSE	7
2022-09-12	10:25:46	0.885356	358.86	FALSE	7
2022-09-12	10:25:46	2.0365	360.897	FALSE	7
2022-09-12	10:25:47	0.543779	361.441	FALSE	7
2022-09-12	10:25:47	1.14042	362.581	FALSE	7
2022-09-12	10:25:47	1.16576	363.747	FALSE	7
2022-09-12	10:25:48	0.215942	363.963	FALSE	7
2022-09-12	10:25:48	0.816247	364.779	FALSE	7
2022-09-12	10:25:48	0.481285	365.26	FALSE	7
2022-09-12	10:25:48	0.689428	365.95	FALSE	7
2022-09-12	10:25:49	0.29243	366.242	FALSE	7
2022-09-12	10:25:49	0.465305	366.707	FALSE	7
2022-09-12	10:25:49	0.274669	366.982	FALSE	7
2022-09-12	10:25:49	0.503117	367.485	FALSE	7
2022-09-12	10:25:50	0.317723	367.803	FALSE	7
2022-09-12	10:25:50	0.398842	368.202	FALSE	7
2022-09-12	10:25:50	0.272277	368.474	FALSE	7
2022-09-12	10:25:50	0.406883	368.881	FALSE	7
2022-09-12	10:25:51	0.277825	369.159	FALSE	7
2022-09-12	10:25:51	0.427545	369.586	FALSE	7
2022-09-12	10:25:51	0.363677	369.95	FALSE	7
2022-09-12	10:25:52	0.287697	370.238	FALSE	7
2022-09-12	10:25:52	0.459707	370.697	FALSE	7
2022-09-12	10:25:52	0.345305	371.043	FALSE	7
2022-09-12	10:25:52	0.60042	371.643	FALSE	7
2022-09-12	10:25:53	0.34159	371.985	FALSE	7
2022-09-12	10:25:53	1.10592	373.091	FALSE	7
2022-09-12	10:25:53	0.245153	373.336	FALSE	7
2022-09-12	10:25:53	0.523982	373.86	FALSE	7
2022-09-12	10:25:54	0.36327	374.223	FALSE	7
2022-09-12	10:25:54	0.486221	374.709	FALSE	7
2022-09-12	10:25:54	0.309937	375.019	FALSE	7
2022-09-12	10:25:54	0.52673	375.546	FALSE	7
2022-09-12	10:25:55	0.231565	375.777	FALSE	7
2022-09-12	10:25:55	0.620318	376.398	FALSE	7
2022-09-12	10:25:55	0.268868	376.667	FALSE	7
2022-09-12	10:25:55	0.537519	377.204	FALSE	7
2022-09-12	10:25:56	0.309479	377.514	FALSE	7
2022-09-12	10:25:56	0.518486	378.032	FALSE	7
2022-09-12	10:25:56	0.324847	378.357	FALSE	7
2022-09-12	10:25:57	0.48383	378.841	FALSE	7
2022-09-12	10:25:57	0.318181	379.159	FALSE	7
2022-09-12	10:25:57	0.550496	379.709	FALSE	7
2022-09-12	10:25:57	0.382405	380.092	FALSE	7
2022-09-12	10:25:58	0.974669	381.066	FALSE	7
2022-09-12	10:25:58	1.6707	382.737	FALSE	7
2022-09-12	10:25:58	0.695585	383.433	FALSE	7
2022-09-12	10:25:58	1.84246	385.275	FALSE	7
2022-09-12	10:25:59	1.86744	387.143	FALSE	7
2022-09-12	10:25:59	0.915585	388.058	FALSE	7
2022-09-12	10:25:59	0.794109	388.852	FALSE	7
2022-09-12	10:25:59	0.509733	389.362	FALSE	7
2022-09-12	10:26:00	0.687086	390.049	FALSE	7
2022-09-12	10:26:00	0.271819	390.321	FALSE	7
2022-09-12	10:26:00	0.523473	390.844	FALSE	7
2022-09-12	10:26:01	0.351565	391.196	FALSE	7
2022-09-12	10:26:01	0.408257	391.604	FALSE	7
2022-09-12	10:26:01	0.321031	391.925	FALSE	7
2022-09-12	10:26:01	0.62673	392.552	FALSE	7
2022-09-12	10:26:02	0.199402	392.751	FALSE	7
2022-09-12	10:26:02	0.483931	393.235	FALSE	7
2022-09-12	10:26:02	0.534822	393.77	FALSE	7
2022-09-12	10:26:02	0.439708	394.21	FALSE	7
2022-09-12	10:26:03	0.232583	394.443	FALSE	7
2022-09-12	10:26:03	0.590242	395.033	FALSE	7
2022-09-12	10:26:03	0.165713	395.198	FALSE	7
2022-09-12	10:26:03	0.511361	395.71	FALSE	7
2022-09-12	10:26:04	0.320216	396.03	FALSE	7
2022-09-12	10:26:04	0.411209	396.441	FALSE	7
2022-09-12	10:26:04	0.269224	396.71	FALSE	7
2022-09-12	10:26:05	0.530293	397.241	FALSE	7
2022-09-12	10:26:05	0.240878	397.482	FALSE	7
2022-09-12	10:26:05	0.45411	397.936	FALSE	7
2022-09-12	10:26:05	0.268359	398.204	FALSE	7
2022-09-12	10:26:06	0.48729	398.691	FALSE	7
2022-09-12	10:26:06	0.273499	398.965	FALSE	7
2022-09-12	10:26:06	0.479707	399.445	FALSE	7
2022-09-12	10:26:06	0.195789	399.64	FALSE	7
2022-09-12	10:26:07	0.42897	400.069	FALSE	7
2022-09-12	10:26:07	0.206018	400.275	FALSE	7
2022-09-12	10:26:07	0.296908	400.572	FALSE	7
2022-09-12	10:26:07	0.171616	400.744	FALSE	7
2022-09-12	10:26:08	0.217621	400.962	FALSE	7
2022-09-12	10:26:08	0.152888	401.114	FALSE	7
2022-09-12	10:26:08	-0.0170354	401.114	FALSE	7
2022-09-12	10:26:08	0.124135	401.239	FALSE	7
2022-09-12	10:26:09	0.0665269	401.305	FALSE	7
2022-09-12	10:26:09	0.676806	401.982	FALSE	7
2022-09-12	10:26:09	0.646374	402.628	FALSE	7
2022-09-12	10:26:10	0.37584	403.004	FALSE	7
2022-09-12	10:26:10	0.245509	403.25	FALSE	7
2022-09-12	10:26:10	0.386781	403.636	FALSE	7
2022-09-12	10:26:10	0.399809	404.036	FALSE	7
2022-09-12	10:26:11	0.376552	404.413	FALSE	7
2022-09-12	10:26:11	0.399453	404.812	FALSE	7
2022-09-12	10:26:11	0.426374	405.239	FALSE	7
2022-09-12	10:26:11	0.419504	405.658	FALSE	7
2022-09-12	10:26:12	0.37701	406.035	FALSE	7
2022-09-12	10:26:12	0.383728	406.419	FALSE	7
2022-09-12	10:26:12	0.398588	406.817	FALSE	7
2022-09-12	10:26:12	0.401845	407.219	FALSE	7
2022-09-12	10:26:13	0.404949	407.624	FALSE	7
2022-09-12	10:26:13	0.459707	408.084	FALSE	7
2022-09-12	10:26:13	0.505763	408.59	FALSE	7
2022-09-12	10:26:14	0.427341	409.017	FALSE	7
2022-09-12	10:26:14	0.404898	409.422	FALSE	7
2022-09-12	10:26:14	0.412379	409.834	FALSE	7
2022-09-12	10:26:14	0.55131	410.386	FALSE	7
2022-09-12	10:26:15	1.61019	411.996	FALSE	7
2022-09-12	10:26:15	0.186832	412.183	FALSE	7
2022-09-12	10:26:15	-0.0337784	412.183	FALSE	7
2022-09-12	10:26:15	0.212888	412.396	FALSE	7
2022-09-12	10:26:16	0.631107	413.027	FALSE	7
2022-09-12	10:26:16	0.00281194	413.029	FALSE	7
2022-09-12	10:26:16	-0.038613	413.029	FALSE	7
2022-09-12	10:26:16	0.0941605	413.124	FALSE	7
2022-09-12	10:26:17	0.0128883	413.136	FALSE	7
2022-09-12	10:26:17	0.105204	413.242	FALSE	7
2022-09-12	10:26:17	-0.0135748	413.242	FALSE	7
2022-09-12	10:26:18	0.126731	413.368	FALSE	7
2022-09-12	10:26:18	0.160878	413.529	FALSE	7
2022-09-12	10:26:18	0.16902	413.698	FALSE	7
2022-09-12	10:26:18	0.178232	413.877	FALSE	7
2022-09-12	10:26:19	0.187239	414.064	FALSE	7
2022-09-12	10:26:19	0.363117	414.427	FALSE	7
2022-09-12	10:26:19	0.202659	414.63	FALSE	7
2022-09-12	10:26:19	0.387087	415.017	FALSE	7
2022-09-12	10:26:20	0.224695	415.241	FALSE	7
2022-09-12	10:26:20	0.380115	415.621	FALSE	7
2022-09-12	10:26:20	0.245255	415.867	FALSE	7
2022-09-12	10:26:20	0.385662	416.252	FALSE	7
2022-09-12	10:26:21	0.266934	416.519	FALSE	7
2022-09-12	10:26:21	0.532176	417.051	FALSE	7
2022-09-12	10:26:21	0.364033	417.416	FALSE	7
2022-09-12	10:26:22	0.460267	417.876	FALSE	7
2022-09-12	10:26:22	0.466069	418.342	FALSE	7
2022-09-12	10:26:22	0.750598	419.092	FALSE	7
2022-09-12	10:26:22	1.22546	420.318	FALSE	7
2022-09-12	10:26:23	1.06505	421.383	FALSE	7
2022-09-12	10:26:23	0.71243	422.095	FALSE	7
2022-09-12	10:26:23	0.938028	423.033	FALSE	7
2022-09-12	10:26:23	0.599199	423.633	FALSE	7
2022-09-12	10:26:24	0.360674	423.993	FALSE	7
2022-09-12	10:26:24	0.671361	424.665	FALSE	7
2022-09-12	10:26:24	0.384949	425.05	FALSE	7
2022-09-12	10:26:24	0.332278	425.382	FALSE	7
2022-09-12	10:26:25	0.24098	425.623	FALSE	7
2022-09-12	10:26:25	0.266985	425.89	FALSE	7
2022-09-12	10:26:25	0.188817	426.079	FALSE	7
2022-09-12	10:26:25	0.246476	426.325	FALSE	7
2022-09-12	10:26:26	0.221336	426.546	FALSE	7
2022-09-12	10:26:26	0.286578	426.833	FALSE	7
2022-09-12	10:26:26	0.563931	427.397	FALSE	7
2022-09-12	10:26:27	0.114822	427.512	FALSE	7
2022-09-12	10:26:27	0.0662724	427.578	FALSE	7
2022-09-12	10:26:27	0.261234	427.839	FALSE	7
2022-09-12	10:26:28	0.0862215	427.926	FALSE	7
2022-09-12	10:26:28	0.171921	428.097	FALSE	7
2022-09-12	10:26:28	0.25472	428.352	FALSE	7
2022-09-12	10:26:28	0.146985	428.499	FALSE	7
2022-09-12	10:26:28	0.287188	428.786	FALSE	7
2022-09-12	10:26:29	0.189224	428.976	FALSE	7
2022-09-12	10:26:29	0.281234	429.257	FALSE	7
2022-09-12	10:26:29	0.330547	429.587	FALSE	7
2022-09-12	10:26:29	0.443677	430.031	FALSE	7
2022-09-12	10:26:30	0.508715	430.54	FALSE	7
2022-09-12	10:26:30	0.681234	431.221	FALSE	7
2022-09-12	10:26:30	0.868766	432.09	FALSE	7
2022-09-12	10:26:31	2.54948	434.639	FALSE	7
2022-09-12	10:26:31	1.49345	436.133	FALSE	7
2022-09-12	10:26:31	2.81533	438.948	FALSE	7
2022-09-12	10:26:31	2.01375	440.962	FALSE	7
2022-09-12	10:26:32	0.572277	441.534	FALSE	7
2022-09-12	10:26:32	0.816654	442.351	FALSE	7
2022-09-12	10:26:32	2.0649	444.416	FALSE	7
2022-09-12	10:26:32	0.444644	444.86	FALSE	7
2022-09-12	10:26:33	0.977519	445.838	FALSE	7
2022-09-12	10:26:33	0.732023	446.57	FALSE	7
2022-09-12	10:26:33	0.382201	446.952	FALSE	7
2022-09-12	10:26:33	0.350903	447.303	FALSE	7
2022-09-12	10:26:34	1.02261	448.325	FALSE	7
2022-09-12	10:26:34	2.70505	451.031	FALSE	7
2022-09-12	10:26:34	0.697366	451.728	FALSE	7
2022-09-12	10:26:35	0.702201	452.43	FALSE	7
2022-09-12	10:26:35	0.344695	452.775	FALSE	7
2022-09-12	10:26:35	0.263677	453.038	FALSE	7
2022-09-12	10:26:35	0.371158	453.41	FALSE	7
2022-09-12	10:26:36	0.279402	453.689	FALSE	7
2022-09-12	10:26:36	0.313957	454.003	FALSE	7
2022-09-12	10:26:36	0.306781	454.31	FALSE	7
2022-09-12	10:26:36	0.26556	454.575	FALSE	7
2022-09-12	10:26:37	0.248257	454.824	FALSE	7
2022-09-12	10:26:37	0.220471	455.044	FALSE	7
2022-09-12	10:26:37	0.331616	455.376	FALSE	7
2022-09-12	10:26:37	0.254618	455.63	FALSE	7
2022-09-12	10:26:38	0.298842	455.929	FALSE	7
2022-09-12	10:26:38	0.237875	456.167	FALSE	7
2022-09-12	10:26:38	0.256858	456.424	FALSE	7
2022-09-12	10:26:39	0.3107	456.735	FALSE	7
2022-09-12	10:26:39	0.207952	456.943	FALSE	7
2022-09-12	10:26:39	0.393295	457.336	FALSE	7
2022-09-12	10:26:39	0.221438	457.557	FALSE	7
2022-09-12	10:26:40	0.229275	457.787	FALSE	7
2022-09-12	10:26:40	0.259402	458.046	FALSE	7
2022-09-12	10:26:40	0.20785	458.254	FALSE	7
2022-09-12	10:26:40	0.254008	458.508	FALSE	7
2022-09-12	10:26:41	0.209122	458.717	FALSE	7
2022-09-12	10:26:41	0.271819	458.989	FALSE	7

## Sheet: Dominic_harness_2022912102110
						**GoPro Fitting: 1010
2022-09-12	10:21:10	0.399758
2022-09-12	10:21:10	0.404746
2022-09-12	10:21:11	0.403168
2022-09-12	10:21:11	0.389987
2022-09-12	10:21:11	0.449631
2022-09-12	10:21:11	0.468003
2022-09-12	10:21:12	0.45528
2022-09-12	10:21:12	0.451056
2022-09-12	10:21:12	0.445407
2022-09-12	10:21:13	0.326374
2022-09-12	10:21:13	0.630242
2022-09-12	10:21:13	0.395484
2022-09-12	10:21:13	0.426272
2022-09-12	10:21:14	0.477265
2022-09-12	10:21:14	0.450445
2022-09-12	10:21:14	0.445102
2022-09-12	10:21:14	0.421489
2022-09-12	10:21:15	0.454466
2022-09-12	10:21:15	0.471769
2022-09-12	10:21:15	0.465509
2022-09-12	10:21:15	0.416094
2022-09-12	10:21:16	0.456858
2022-09-12	10:21:16	0.456756
2022-09-12	10:21:16	0.468155
2022-09-12	10:21:17	0.458842
2022-09-12	10:21:17	0.464746
2022-09-12	10:21:17	0.463473
2022-09-12	10:21:17	0.462405
2022-09-12	10:21:18	0.463117
2022-09-12	10:21:18	0.446578
2022-09-12	10:21:18	0.458842
2022-09-12	10:21:18	0.461743
2022-09-12	10:21:19	0.415331
2022-09-12	10:21:19	0.577112
2022-09-12	10:21:19	0.405865
2022-09-12	10:21:19	0.521336
2022-09-12	10:21:20	0.406374
2022-09-12	10:21:20	0.433855
2022-09-12	10:21:20	0.449377
2022-09-12	10:21:21	0.586985
2022-09-12	10:21:21	0.446476
2022-09-12	10:21:21	0.35355
2022-09-12	10:21:21	0.14154
2022-09-12	10:21:22	-0.0724043
2022-09-12	10:21:22	-0.0264501
2022-09-12	10:21:22	0.0522267
2022-09-12	10:21:22	0.124339
2022-09-12	10:21:23	0.225255
2022-09-12	10:21:23	0.033957
2022-09-12	10:21:23	0.278486
2022-09-12	10:21:23	0.511514
2022-09-12	10:21:24	0.557672
2022-09-12	10:21:24	1.07706
2022-09-12	10:21:24	1.64047
2022-09-12	10:21:24	0.353448
2022-09-12	10:21:25	0.513041
2022-09-12	10:21:25	0.255687
2022-09-12	10:21:25	0.219504
2022-09-12	10:21:26	-0.152557
2022-09-12	10:21:26	1.15737
2022-09-12	10:21:26	1.22963
2022-09-12	10:21:26	1.27981
2022-09-12	10:21:27	0.885102
2022-09-12	10:21:27	-0.00650102
2022-09-12	10:21:27	-0.050674
2022-09-12	10:21:27	-0.018613
2022-09-12	10:21:28	-0.00812953
2022-09-12	10:21:28	-0.0691982
2022-09-12	10:21:28	0.0886643
2022-09-12	10:21:28	0.125458
2022-09-12	10:21:29	0.0259162
2022-09-12	10:21:29	-0.0352033
2022-09-12	10:21:29	0.0768577
2022-09-12	10:21:30	0.135229
2022-09-12	10:21:30	0.239809
2022-09-12	10:21:30	0.468359
2022-09-12	10:21:30	0.245407
2022-09-12	10:21:31	0.342354
2022-09-12	10:21:31	0.342201
2022-09-12	10:21:31	0.329479
2022-09-12	10:21:31	0.235942
2022-09-12	10:21:32	0.347901
2022-09-12	10:21:32	-0.00354937
2022-09-12	10:21:32	-0.156883
2022-09-12	10:21:33	-0.0572898
2022-09-12	10:21:33	-0.26528
2022-09-12	10:21:33	-0.0658394
2022-09-12	10:21:33	-0.0985112
2022-09-12	10:21:34	0.194822
2022-09-12	10:21:34	0.0988424
2022-09-12	10:21:34	-0.0332695
2022-09-12	10:21:34	0.0212343
2022-09-12	10:21:35	0.386985
2022-09-12	10:21:35	0.233448
2022-09-12	10:21:35	0.22388
2022-09-12	10:21:35	0.141234
2022-09-12	10:21:36	0.276654
2022-09-12	10:21:36	0.260115
2022-09-12	10:21:36	0.327392
2022-09-12	10:21:36	0.156094
2022-09-12	10:21:37	0.282201
2022-09-12	10:21:37	0.199657
2022-09-12	10:21:37	0.327392
2022-09-12	10:21:37	0.175585
2022-09-12	10:21:38	0.347138
2022-09-12	10:21:38	0.234568
2022-09-12	10:21:38	0.414517
2022-09-12	10:21:39	0.188257
2022-09-12	10:21:39	0.452227
2022-09-12	10:21:39	0.270598
2022-09-12	10:21:39	0.372023
2022-09-12	10:21:40	0.182201
2022-09-12	10:21:40	0.377672
2022-09-12	10:21:40	0.253601
2022-09-12	10:21:40	0.402761
2022-09-12	10:21:41	0.201031
2022-09-12	10:21:41	0.427188
2022-09-12	10:21:41	0.180725
2022-09-12	10:21:41	0.548817
2022-09-12	10:21:42	0.192939
2022-09-12	10:21:42	0.40098
2022-09-12	10:21:42	0.309886
2022-09-12	10:21:43	0.369479
2022-09-12	10:21:43	1.34729
2022-09-12	10:21:43	0.234415
2022-09-12	10:21:43	0.64785
2022-09-12	10:21:44	1.82037
2022-09-12	10:21:44	0.753651
2022-09-12	10:21:44	0.690751
2022-09-12	10:21:44	0.488308
2022-09-12	10:21:45	0.247036
2022-09-12	10:21:45	0.784593
2022-09-12	10:21:45	2.22683
2022-09-12	10:21:45	0.702303
2022-09-12	10:21:46	1.89894
2022-09-12	10:21:46	2.59604
2022-09-12	10:21:46	0.575738
2022-09-12	10:21:47	0.389479
2022-09-12	10:21:47	0.349478
2022-09-12	10:21:47	0.190242
2022-09-12	10:21:47	0.0237788
2022-09-12	10:21:48	0.174975
2022-09-12	10:21:48	0.126272
2022-09-12	10:21:48	-0.215
2022-09-12	10:21:48	-0.171895
2022-09-12	10:21:49	-0.120547
2022-09-12	10:21:49	-0.0593763
2022-09-12	10:21:49	-0.0390201
2022-09-12	10:21:49	-0.0332695
2022-09-12	10:21:50	-0.0261448
2022-09-12	10:21:50	-0.0270608
2022-09-12	10:21:50	-0.00899467
2022-09-12	10:21:50	0.0161453
2022-09-12	10:21:51	0.0464252
2022-09-12	10:21:51	0.0819468
2022-09-12	10:21:51	0.153652
2022-09-12	10:21:52	0.160216
2022-09-12	10:21:52	0.147545
2022-09-12	10:21:52	0.161998
2022-09-12	10:21:52	0.139046
2022-09-12	10:21:53	0.15813
2022-09-12	10:21:53	0.161082
2022-09-12	10:21:53	0.172837
2022-09-12	10:21:53	0.230547
2022-09-12	10:21:54	0.393041
2022-09-12	10:21:54	0.215229
2022-09-12	10:21:54	0.227087
2022-09-12	10:21:54	0.252634
2022-09-12	10:21:55	0.310853
2022-09-12	10:21:55	0.266883
2022-09-12	10:21:55	0.20159
2022-09-12	10:21:56	0.173448
2022-09-12	10:21:56	0.201336
2022-09-12	10:21:56	0.158435
2022-09-12	10:21:56	0.177367
2022-09-12	10:21:57	0.166018
2022-09-12	10:21:57	0.149886
2022-09-12	10:21:57	0.172125
2022-09-12	10:21:57	0.170598
2022-09-12	10:21:58	0.143575
2022-09-12	10:21:58	0.150191
2022-09-12	10:21:58	0.155026
2022-09-12	10:21:58	0.099962
2022-09-12	10:21:59	0.0603692
2022-09-12	10:21:59	0.144898
2022-09-12	10:21:59	0.583321
2022-09-12	10:22:00	0.125916
2022-09-12	10:22:00	0.0830155
2022-09-12	10:22:00	0.184491
2022-09-12	10:22:00	0.136858
2022-09-12	10:22:01	0.0662724
2022-09-12	10:22:01	0.000674557
2022-09-12	10:22:01	0.0630155
2022-09-12	10:22:01	-0.0649234
2022-09-12	10:22:02	0.000114759
2022-09-12	10:22:02	0.13299
2022-09-12	10:22:02	0.139606
2022-09-12	10:22:02	0.0794531
2022-09-12	10:22:03	0.0510053
2022-09-12	10:22:03	0.0920231
2022-09-12	10:22:03	0.286425
2022-09-12	10:22:03	0.333702
2022-09-12	10:22:04	0.332074
2022-09-12	10:22:04	0.304542
2022-09-12	10:22:04	0.335585
2022-09-12	10:22:05	0.279148
2022-09-12	10:22:05	0.30098
2022-09-12	10:22:05	0.398639
2022-09-12	10:22:05	0.349987
2022-09-12	10:22:06	0.405764
2022-09-12	10:22:06	3.02871
2022-09-12	10:22:06	0.729529
2022-09-12	10:22:06	2.86052
2022-09-12	10:22:07	2.22586
2022-09-12	10:22:07	0.451616
2022-09-12	10:22:07	0.319504
2022-09-12	10:22:07	0.223422
2022-09-12	10:22:08	0.323575
2022-09-12	10:22:08	0.331056
2022-09-12	10:22:08	0.212532
2022-09-12	10:22:09	0.353397
2022-09-12	10:22:09	0.257977
2022-09-12	10:22:09	0.309529
2022-09-12	10:22:09	0.173448
2022-09-12	10:22:10	0.309122
2022-09-12	10:22:10	0.259962
2022-09-12	10:22:10	0.261438
2022-09-12	10:22:10	0.296908
2022-09-12	10:22:11	0.282608
2022-09-12	10:22:11	0.529428
2022-09-12	10:22:11	0.212125
2022-09-12	10:22:11	0.295687
2022-09-12	10:22:12	0.2964
2022-09-12	10:22:12	0.324237
2022-09-12	10:22:12	0.487596
2022-09-12	10:22:13	0.256654
2022-09-12	10:22:13	0.300115
2022-09-12	10:22:13	0.699708
2022-09-12	10:22:13	0.495127
2022-09-12	10:22:14	0.412023
2022-09-12	10:22:14	0.512939
2022-09-12	10:22:14	0.617468
2022-09-12	10:22:14	2.31767
2022-09-12	10:22:15	0.321438
2022-09-12	10:22:15	1.11777
2022-09-12	10:22:15	0.607239
2022-09-12	10:22:15	0.722507
2022-09-12	10:22:16	1.44877
2022-09-12	10:22:16	0.404491
2022-09-12	10:22:16	0.315534
2022-09-12	10:22:16	1.40368
2022-09-12	10:22:17	0.340471
2022-09-12	10:22:17	0.577061
2022-09-12	10:22:17	0.482964
2022-09-12	10:22:18	0.441489
2022-09-12	10:22:18	1.90851
2022-09-12	10:22:18	0.264644
2022-09-12	10:22:18	0.956043
2022-09-12	10:22:19	0.568613
2022-09-12	10:22:19	0.511972
2022-09-12	10:22:19	1.33976
2022-09-12	10:22:19	0.458588
2022-09-12	10:22:20	0.395636
2022-09-12	10:22:20	1.1134
2022-09-12	10:22:20	0.439809
2022-09-12	10:22:20	1.14698
2022-09-12	10:22:21	0.515433
2022-09-12	10:22:21	0.778079
2022-09-12	10:22:21	1.63838
2022-09-12	10:22:22	0.242405
2022-09-12	10:22:22	0.412583
2022-09-12	10:22:22	0.445407
2022-09-12	10:22:22	0.526272
2022-09-12	10:22:23	1.48286
2022-09-12	10:22:23	0.505254
2022-09-12	10:22:23	0.909631
2022-09-12	10:22:23	1.34856
2022-09-12	10:22:24	0.639351
2022-09-12	10:22:24	0.935331
2022-09-12	10:22:24	0.380216
2022-09-12	10:22:24	0.150853
2022-09-12	10:22:25	0.553244
2022-09-12	10:22:25	0.178181
2022-09-12	10:22:25	0.501641
2022-09-12	10:22:26	0.144695
2022-09-12	10:22:26	0.58215
2022-09-12	10:22:26	1.69355
2022-09-12	10:22:26	0.614771
2022-09-12	10:22:27	0.407036
2022-09-12	10:22:27	0.422812
2022-09-12	10:22:27	0.252735
2022-09-12	10:22:27	0.931158
2022-09-12	10:22:28	0.242557
2022-09-12	10:22:28	0.441336
2022-09-12	10:22:28	1.51029
2022-09-12	10:22:28	0.542303
2022-09-12	10:22:29	1.04861
2022-09-12	10:22:29	0.568409
2022-09-12	10:22:29	0.552685
2022-09-12	10:22:29	0.942405
2022-09-12	10:22:30	0.312786
2022-09-12	10:22:30	0.395942
2022-09-12	10:22:30	0.796705
2022-09-12	10:22:31	0.5364
2022-09-12	10:22:31	0.63014
2022-09-12	10:22:31	2.2621
2022-09-12	10:22:31	0.557468
2022-09-12	10:22:32	1.6051
2022-09-12	10:22:32	3.09187
2022-09-12	10:22:32	0.460929
2022-09-12	10:22:32	1.21447
2022-09-12	10:22:33	3.20902
2022-09-12	10:22:33	1.13732
2022-09-12	10:22:33	1.54067
2022-09-12	10:22:33	3.42469
2022-09-12	10:22:34	0.919911
2022-09-12	10:22:34	1.60108
2022-09-12	10:22:34	1.97345
2022-09-12	10:22:35	1.1594
2022-09-12	10:22:35	1.3792
2022-09-12	10:22:35	0.580471
2022-09-12	10:22:35	0.487952
2022-09-12	10:22:36	0.343728
2022-09-12	10:22:36	0.383117
2022-09-12	10:22:36	0.24958
2022-09-12	10:22:36	0.516145
2022-09-12	10:22:37	0.111769
2022-09-12	10:22:37	0.449886
2022-09-12	10:22:37	0.325916
2022-09-12	10:22:37	0.35411
2022-09-12	10:22:38	0.305916
2022-09-12	10:22:38	0.305814
2022-09-12	10:22:38	0.377316
2022-09-12	10:22:39	0.232583
2022-09-12	10:22:39	0.242405
2022-09-12	10:22:39	0.294415
2022-09-12	10:22:39	0.536603
2022-09-12	10:22:40	0.572481
2022-09-12	10:22:40	1.56022
2022-09-12	10:22:40	0.566883
2022-09-12	10:22:40	2.46317
2022-09-12	10:22:41	1.67635
2022-09-12	10:22:41	2.28312
2022-09-12	10:22:41	3.90093
2022-09-12	10:22:41	0.716349
2022-09-12	10:22:42	0.759249
2022-09-12	10:22:42	1.69991
2022-09-12	10:22:42	0.179606
2022-09-12	10:22:42	0.888053
2022-09-12	10:22:43	1.57874
2022-09-12	10:22:43	3.51156
2022-09-12	10:22:43	0.902914
2022-09-12	10:22:44	0.846578
2022-09-12	10:22:44	1.11436
2022-09-12	10:22:44	0.26042
2022-09-12	10:22:44	0.404898
2022-09-12	10:22:45	0.214364
2022-09-12	10:22:45	0.261489
2022-09-12	10:22:45	0.285102
2022-09-12	10:22:45	0.293244
2022-09-12	10:22:46	0.272176
2022-09-12	10:22:46	0.282354
2022-09-12	10:22:46	0.578995
2022-09-12	10:22:46	0.527188
2022-09-12	10:22:47	0.348868
2022-09-12	10:22:47	0.247748
2022-09-12	10:22:47	0.237367
2022-09-12	10:22:48	0.245305
2022-09-12	10:22:48	0.214517
2022-09-12	10:22:48	0.223626
2022-09-12	10:22:48	0.0844913
2022-09-12	10:22:49	0.0723794
2022-09-12	10:22:49	-0.0977478
2022-09-12	10:22:49	-0.0885366
2022-09-12	10:22:49	-0.154287
2022-09-12	10:22:50	-0.161768
2022-09-12	10:22:50	-0.143295
2022-09-12	10:22:50	0.01584
2022-09-12	10:22:50	0.0420994
2022-09-12	10:22:51	0.374924
2022-09-12	10:22:51	0.252583
2022-09-12	10:22:51	0.27584
2022-09-12	10:22:52	0.250954
2022-09-12	10:22:52	0.589529
2022-09-12	10:22:52	0.819758
2022-09-12	10:22:52	1.01141
2022-09-12	10:22:53	0.730547
2022-09-12	10:22:53	0.736349
2022-09-12	10:22:53	0.714466
2022-09-12	10:22:53	0.86729
2022-09-12	10:22:54	0.921641
2022-09-12	10:22:54	0.458435
2022-09-12	10:22:54	0.857672
2022-09-12	10:22:54	0.520013
2022-09-12	10:22:55	0.361336
2022-09-12	10:22:55	0.343423
2022-09-12	10:22:55	0.305814
2022-09-12	10:22:55	0.339199
2022-09-12	10:22:56	0.35355
2022-09-12	10:22:56	0.334211
2022-09-12	10:22:56	0.266272
2022-09-12	10:22:57	0.315382
2022-09-12	10:22:57	0.26897
2022-09-12	10:22:57	0.407494
2022-09-12	10:22:57	0.345407
2022-09-12	10:22:58	0.357519
2022-09-12	10:22:58	0.348715
2022-09-12	10:22:58	0.345458
2022-09-12	10:22:58	0.330191
2022-09-12	10:22:59	0.338283
2022-09-12	10:22:59	0.336196
2022-09-12	10:22:59	0.31813
2022-09-12	10:22:59	0.357977
2022-09-12	10:23:00	0.232328
2022-09-12	10:23:00	0.189682
2022-09-12	10:23:00	0.232786
2022-09-12	10:23:01	0.294567
2022-09-12	10:23:01	0.0919213
2022-09-12	10:23:01	-0.0733712
2022-09-12	10:23:01	-0.0932694
2022-09-12	10:23:02	0.114415
2022-09-12	10:23:02	0.506629
2022-09-12	10:23:02	0.177265
2022-09-12	10:23:02	0.46388
2022-09-12	10:23:03	0.571768
2022-09-12	10:23:03	0.201336
2022-09-12	10:23:03	0.74902
2022-09-12	10:23:03	0.403779
2022-09-12	10:23:04	0.601488
2022-09-12	10:23:04	0.796705
2022-09-12	10:23:04	0.763473
2022-09-12	10:23:05	0.59416
2022-09-12	10:23:05	0.951768
2022-09-12	10:23:05	1.51798
2022-09-12	10:23:05	0.318384
2022-09-12	10:23:06	0.540827
2022-09-12	10:23:06	1.74296
2022-09-12	10:23:06	0.390802
2022-09-12	10:23:06	0.185356
2022-09-12	10:23:07	0.434415
2022-09-12	10:23:07	0.156349
2022-09-12	10:23:07	0.433346
2022-09-12	10:23:07	0.230089
2022-09-12	10:23:08	0.233906
2022-09-12	10:23:08	0.262303
2022-09-12	10:23:08	0.323473
2022-09-12	10:23:08	0.162965
2022-09-12	10:23:09	0.343677
2022-09-12	10:23:09	0.0939061
2022-09-12	10:23:09	0.427036
2022-09-12	10:23:10	0.295025
2022-09-12	10:23:10	0.346985
2022-09-12	10:23:10	0.253702
2022-09-12	10:23:10	0.427494
2022-09-12	10:23:11	0.37701
2022-09-12	10:23:11	2.76413
2022-09-12	10:23:11	0.171107
2022-09-12	10:23:11	0.311565
2022-09-12	10:23:12	0.46098
2022-09-12	10:23:12	0.104339
2022-09-12	10:23:12	-0.0901142
2022-09-12	10:23:12	-0.29271
2022-09-12	10:23:13	-0.370979
2022-09-12	10:23:13	0.173855
2022-09-12	10:23:13	0.358791
2022-09-12	10:23:14	0.299758
2022-09-12	10:23:14	-0.0871117
2022-09-12	10:23:14	0.159657
2022-09-12	10:23:14	0.621794
2022-09-12	10:23:15	1.22459
2022-09-12	10:23:15	0.366374
2022-09-12	10:23:15	0.605305
2022-09-12	10:23:15	0.998792
2022-09-12	10:23:16	0.483168
2022-09-12	10:23:16	0.131769
2022-09-12	10:23:16	0.315738
2022-09-12	10:23:16	-0.0760175
2022-09-12	10:23:17	-0.190419
2022-09-12	10:23:17	-0.299834
2022-09-12	10:23:17	-0.471183
2022-09-12	10:23:18	-0.450979
2022-09-12	10:23:18	-0.561615
2022-09-12	10:23:18	-0.527926
2022-09-12	10:23:18	-0.588231
2022-09-12	10:23:19	-0.476526
2022-09-12	10:23:19	-0.431437
2022-09-12	10:23:19	-0.449758
2022-09-12	10:23:19	-0.447315
2022-09-12	10:23:20	-0.402938
2022-09-12	10:23:20	-0.3836
2022-09-12	10:23:20	-0.318867
2022-09-12	10:23:20	-0.238257
2022-09-12	10:23:21	-0.117035
2022-09-12	10:23:21	-0.0465519
2022-09-12	10:23:21	-0.109656
2022-09-12	10:23:22	-0.116883
2022-09-12	10:23:22	-0.0975443
2022-09-12	10:23:22	-0.128893
2022-09-12	10:23:22	-0.138511
2022-09-12	10:23:23	-0.092506
2022-09-12	10:23:23	-0.16645
2022-09-12	10:23:23	0.0674939
2022-09-12	10:23:23	-0.108842
2022-09-12	10:23:24	-0.0405977
2022-09-12	10:23:24	0.0156872
2022-09-12	10:23:24	0.0458145
2022-09-12	10:23:24	0.158537
2022-09-12	10:23:25	0.0756873
2022-09-12	10:23:25	0.10271
2022-09-12	10:23:25	0.00657784
2022-09-12	10:23:25	0.0114125
2022-09-12	10:23:26	0.0642369
2022-09-12	10:23:26	0.0500893
2022-09-12	10:23:26	0.0487661
2022-09-12	10:23:27	-0.166399
2022-09-12	10:23:27	-0.142939
2022-09-12	10:23:27	-0.0104705
2022-09-12	10:23:27	-0.0537784
2022-09-12	10:23:28	0.0282572
2022-09-12	10:23:28	-0.0964755
2022-09-12	10:23:28	0.0485626
2022-09-12	10:23:28	0.0396567
2022-09-12	10:23:29	-0.00879109
2022-09-12	10:23:29	-0.0417682
2022-09-12	10:23:29	-0.0471117
2022-09-12	10:23:29	0.101794
2022-09-12	10:23:30	-0.0135748
2022-09-12	10:23:30	0.0770613
2022-09-12	10:23:30	-0.039529
2022-09-12	10:23:31	0.186679
2022-09-12	10:23:31	0.0120231
2022-09-12	10:23:31	0.0899875
2022-09-12	10:23:31	-0.030674
2022-09-12	10:23:32	0.0690206
2022-09-12	10:23:32	-0.0172389
2022-09-12	10:23:32	-0.032557
2022-09-12	10:23:32	-0.099529
2022-09-12	10:23:33	0.032074
2022-09-12	10:23:33	-0.00370202
2022-09-12	10:23:33	-0.0297071
2022-09-12	10:23:33	-0.0547961
2022-09-12	10:23:34	0.0615905
2022-09-12	10:23:34	0.049275
2022-09-12	10:23:34	0.0547712
2022-09-12	10:23:35	0.0470358
2022-09-12	10:23:35	0.140827
2022-09-12	10:23:35	0.100217
2022-09-12	10:23:35	0.0291733
2022-09-12	10:23:36	0.154415
2022-09-12	10:23:36	0.0740587
2022-09-12	10:23:36	0.138995
2022-09-12	10:23:36	0.135331
2022-09-12	10:23:37	0.452583
2022-09-12	10:23:37	0.416552
2022-09-12	10:23:37	0.568104
2022-09-12	10:23:38	0.502964
2022-09-12	10:23:38	0.335127
2022-09-12	10:23:38	0.265713
2022-09-12	10:23:38	0.345662
2022-09-12	10:23:38	2.7677
2022-09-12	10:23:39	0.141489
2022-09-12	10:23:39	0.0703438
2022-09-12	10:23:39	0.270395
2022-09-12	10:23:40	0.192583
2022-09-12	10:23:40	0.292074
2022-09-12	10:23:40	0.24215
2022-09-12	10:23:40	0.291005
2022-09-12	10:23:41	0.297061
2022-09-12	10:23:41	0.371107
2022-09-12	10:23:41	0.327952
2022-09-12	10:23:41	0.288104
2022-09-12	10:23:42	0.274008
2022-09-12	10:23:42	0.29355
2022-09-12	10:23:42	0.293244
2022-09-12	10:23:42	0.314873
2022-09-12	10:23:43	0.322506
2022-09-12	10:23:43	0.425254
2022-09-12	10:23:43	0.710089
2022-09-12	10:23:44	0.625051
2022-09-12	10:23:44	0.597977
2022-09-12	10:23:44	0.490547
2022-09-12	10:23:44	0.565
2022-09-12	10:23:45	0.637214
2022-09-12	10:23:45	0.706985
2022-09-12	10:23:45	0.820522
2022-09-12	10:23:45	0.760674
2022-09-12	10:23:46	0.559402
2022-09-12	10:23:46	0.375789
2022-09-12	10:23:46	0.334822
2022-09-12	10:23:46	0.260165
2022-09-12	10:23:47	0.289987
2022-09-12	10:23:47	0.24902
2022-09-12	10:23:47	0.245814
2022-09-12	10:23:48	0.249886
2022-09-12	10:23:48	0.284491
2022-09-12	10:23:48	0.248664
2022-09-12	10:23:48	0.248664
2022-09-12	10:23:49	0.267087
2022-09-12	10:23:49	0.285102
2022-09-12	10:23:49	0.378384
2022-09-12	10:23:49	0.405509
2022-09-12	10:23:50	0.279148
2022-09-12	10:23:50	0.225611
2022-09-12	10:23:50	0.338435
2022-09-12	10:23:50	0.123066
2022-09-12	10:23:51	0.341489
2022-09-12	10:23:51	0.240115
2022-09-12	10:23:51	0.253957
2022-09-12	10:23:51	0.349682
2022-09-12	10:23:52	0.504847
2022-09-12	10:23:52	1.06291
2022-09-12	10:23:52	0.233702
2022-09-12	10:23:53	0.295127
2022-09-12	10:23:53	0.51701
2022-09-12	10:23:53	0.328257
2022-09-12	10:23:53	0.352837
2022-09-12	10:23:54	0.279199
2022-09-12	10:23:54	0.259606
2022-09-12	10:23:54	0.324898
2022-09-12	10:23:54	0.418079
2022-09-12	10:23:55	0.667494
2022-09-12	10:23:55	0.399249
2022-09-12	10:23:55	0.496756
2022-09-12	10:23:55	0.242557
2022-09-12	10:23:56	0.128105
2022-09-12	10:23:56	-0.0422262
2022-09-12	10:23:56	-0.117239
2022-09-12	10:23:57	-0.0966791
2022-09-12	10:23:57	-0.0695035
2022-09-12	10:23:57	-0.0226333
2022-09-12	10:23:57	0.0477992
2022-09-12	10:23:58	-0.034389
2022-09-12	10:23:58	-0.00578856
2022-09-12	10:23:58	0.470649
2022-09-12	10:23:58	-0.0281295
2022-09-12	10:23:59	-0.0431422
2022-09-12	10:23:59	-0.139173
2022-09-12	10:23:59	-0.0771371
2022-09-12	10:23:59	-0.0653305
2022-09-12	10:24:00	-0.0753559
2022-09-12	10:24:00	-0.0833967
2022-09-12	10:24:00	-0.067875
2022-09-12	10:24:01	-0.0637529
2022-09-12	10:24:01	-0.0760684
2022-09-12	10:24:01	-0.0622262
2022-09-12	10:24:01	-0.0610048
2022-09-12	10:24:02	-0.0605977
2022-09-12	10:24:02	-0.0596308
2022-09-12	10:24:02	-0.0541855
2022-09-12	10:24:02	-0.0460939
2022-09-12	10:24:03	-0.0366282
2022-09-12	10:24:03	-0.0347962
2022-09-12	10:24:03	0.194415
2022-09-12	10:24:03	0.122201
2022-09-12	10:24:04	0.12958
2022-09-12	10:24:04	0.407341
2022-09-12	10:24:04	0.396858
2022-09-12	10:24:04	0.434873
2022-09-12	10:24:05	-0.0351015
2022-09-12	10:24:05	0.493448
2022-09-12	10:24:05	0.0182318
2022-09-12	10:24:06	0.023219
2022-09-12	10:24:06	-0.0175443
2022-09-12	10:24:06	0.120318
2022-09-12	10:24:06	0.00174323
2022-09-12	10:24:07	-0.111997
2022-09-12	10:24:07	0.0689188
2022-09-12	10:24:07	0.128868
2022-09-12	10:24:07	0.333295
2022-09-12	10:24:08	0.306781
2022-09-12	10:24:08	0.333906
2022-09-12	10:24:08	0.433601
2022-09-12	10:24:08	0.327545
2022-09-12	10:24:09	0.353499
2022-09-12	10:24:09	0.321743
2022-09-12	10:24:09	0.31299
2022-09-12	10:24:10	0.270954
2022-09-12	10:24:10	0.264338
2022-09-12	10:24:10	0.329987
2022-09-12	10:24:10	0.262812
2022-09-12	10:24:11	0.236807
2022-09-12	10:24:11	0.313295
2022-09-12	10:24:11	0.289326
2022-09-12	10:24:11	0.389428
2022-09-12	10:24:12	0.40215
2022-09-12	10:24:12	0.402405
2022-09-12	10:24:12	0.392786
2022-09-12	10:24:12	0.357417
2022-09-12	10:24:13	0.3307
2022-09-12	10:24:13	0.314364
2022-09-12	10:24:13	0.312125
2022-09-12	10:24:14	0.295789
2022-09-12	10:24:14	0.255331
2022-09-12	10:24:14	0.181387
2022-09-12	10:24:14	0.11355
2022-09-12	10:24:15	-0.244618
2022-09-12	10:24:15	-0.366959
2022-09-12	10:24:15	-0.466043
2022-09-12	10:24:15	-0.559172
2022-09-12	10:24:16	-0.48248
2022-09-12	10:24:16	-0.432913
2022-09-12	10:24:16	-0.338766
2022-09-12	10:24:16	-0.260038
2022-09-12	10:24:17	-0.250318
2022-09-12	10:24:17	-0.240394
2022-09-12	10:24:17	-0.384414
2022-09-12	10:24:18	-0.421056
2022-09-12	10:24:18	-0.443854
2022-09-12	10:24:18	-0.372201
2022-09-12	10:24:18	-0.266297
2022-09-12	10:24:19	-0.338104
2022-09-12	10:24:19	-0.263091
2022-09-12	10:24:19	-0.222023
2022-09-12	10:24:19	-0.195407
2022-09-12	10:24:20	-0.141768
2022-09-12	10:24:20	-0.239427
2022-09-12	10:24:20	-0.222073
2022-09-12	10:24:20	-0.176679
2022-09-12	10:24:21	-0.189554
2022-09-12	10:24:21	-0.167519
2022-09-12	10:24:21	-0.178409
2022-09-12	10:24:21	-0.191539
2022-09-12	10:24:22	-0.196832
2022-09-12	10:24:22	-0.190623
2022-09-12	10:24:22	-0.18075
2022-09-12	10:24:23	-0.155865
2022-09-12	10:24:23	-0.126552
2022-09-12	10:24:23	-0.000699497
2022-09-12	10:24:23	0.260318
2022-09-12	10:24:24	0.356145
2022-09-12	10:24:24	1.37991
2022-09-12	10:24:24	0.279453
2022-09-12	10:24:24	0.251819
2022-09-12	10:24:25	0.419606
2022-09-12	10:24:25	0.414415
2022-09-12	10:24:25	0.22841
2022-09-12	10:24:25	0.282812
2022-09-12	10:24:26	1.47156
2022-09-12	10:24:26	0.23528
2022-09-12	10:24:26	0.276247
2022-09-12	10:24:27	0.387952
2022-09-12	10:24:27	0.285102
2022-09-12	10:24:27	0.280369
2022-09-12	10:24:27	0.52729
2022-09-12	10:24:28	0.364288
2022-09-12	10:24:28	0.3107
2022-09-12	10:24:28	1.3394
2022-09-12	10:24:28	0.235127
2022-09-12	10:24:29	0.486476
2022-09-12	10:24:29	1.09843
2022-09-12	10:24:29	0.423117
2022-09-12	10:24:29	0.282761
2022-09-12	10:24:30	1.01284
2022-09-12	10:24:30	0.237061
2022-09-12	10:24:30	0.405204
2022-09-12	10:24:31	0.26958
2022-09-12	10:24:31	0.431972
2022-09-12	10:24:31	0.1764
2022-09-12	10:24:31	0.340064
2022-09-12	10:24:32	0.2364
2022-09-12	10:24:32	0.435891
2022-09-12	10:24:32	0.153804
2022-09-12	10:24:32	0.439708
2022-09-12	10:24:33	0.316298
2022-09-12	10:24:33	0.308206
2022-09-12	10:24:33	0.275687
2022-09-12	10:24:33	0.399046
2022-09-12	10:24:34	0.310547
2022-09-12	10:24:34	0.309987
2022-09-12	10:24:34	0.338741
2022-09-12	10:24:34	0.369326
2022-09-12	10:24:35	0.384644
2022-09-12	10:24:35	0.454822
2022-09-12	10:24:35	0.409835
2022-09-12	10:24:36	0.428868
2022-09-12	10:24:36	0.462405
2022-09-12	10:24:36	0.325916
2022-09-12	10:24:36	0.111107
2022-09-12	10:24:37	0.165509
2022-09-12	10:24:37	-0.00538142
2022-09-12	10:24:37	0.320471
2022-09-12	10:24:37	0.383219
2022-09-12	10:24:38	0.285356
2022-09-12	10:24:38	0.280165
2022-09-12	10:24:38	-0.060903
2022-09-12	10:24:38	-0.232862
2022-09-12	10:24:39	-0.275356
2022-09-12	10:24:39	-0.0626842
2022-09-12	10:24:39	-0.177544
2022-09-12	10:24:40	0.0191478
2022-09-12	10:24:40	0.149987
2022-09-12	10:24:40	-0.0585112
2022-09-12	10:24:40	0.0805727
2022-09-12	10:24:41	0.168155
2022-09-12	10:24:41	0.182456
2022-09-12	10:24:41	0.0473412
2022-09-12	10:24:41	0.0649493
2022-09-12	10:24:42	-0.0916409
2022-09-12	10:24:42	-0.0315392
2022-09-12	10:24:42	-0.0335748
2022-09-12	10:24:42	-0.0134221
2022-09-12	10:24:43	-0.0421244
2022-09-12	10:24:43	0.105967
2022-09-12	10:24:43	0.0462725
2022-09-12	10:24:44	0.004186
2022-09-12	10:24:44	-0.117392
2022-09-12	10:24:44	0.0825066
2022-09-12	10:24:44	0.0440333
2022-09-12	10:24:45	0.220623
2022-09-12	10:24:45	0.0296313
2022-09-12	10:24:45	0.206374
2022-09-12	10:24:45	0.127189
2022-09-12	10:24:46	0.671565
2022-09-12	10:24:46	0.0504455
2022-09-12	10:24:46	0.121998
2022-09-12	10:24:46	0.242659
2022-09-12	10:24:47	0.222303
2022-09-12	10:24:47	0.0917687
2022-09-12	10:24:47	0.469682
2022-09-12	10:24:48	0.136196
2022-09-12	10:24:48	0.380827
2022-09-12	10:24:48	0.605712
2022-09-12	10:24:48	0.401641
2022-09-12	10:24:49	0.716298
2022-09-12	10:24:49	0.59355
2022-09-12	10:24:49	0.305967
2022-09-12	10:24:49	0.553143
2022-09-12	10:24:50	0.216043
2022-09-12	10:24:50	0.466832
2022-09-12	10:24:50	0.370191
2022-09-12	10:24:50	0.627443
2022-09-12	10:24:51	0.307087
2022-09-12	10:24:51	0.557723
2022-09-12	10:24:51	0.266069
2022-09-12	10:24:51	0.557672
2022-09-12	10:24:52	0.264644
2022-09-12	10:24:52	0.49243
2022-09-12	10:24:52	0.201641
2022-09-12	10:24:53	0.450293
2022-09-12	10:24:53	0.185255
2022-09-12	10:24:53	0.44154
2022-09-12	10:24:53	0.184593
2022-09-12	10:24:54	0.443575
2022-09-12	10:24:54	0.201998
2022-09-12	10:24:54	0.485814
2022-09-12	10:24:54	0.257824
2022-09-12	10:24:55	0.339555
2022-09-12	10:24:55	0.34841
2022-09-12	10:24:55	0.41126
2022-09-12	10:24:55	0.237621
2022-09-12	10:24:56	0.462354
2022-09-12	10:24:56	0.341794
2022-09-12	10:24:56	0.369987
2022-09-12	10:24:57	0.237163
2022-09-12	10:24:57	0.313702
2022-09-12	10:24:57	0.346018
2022-09-12	10:24:57	0.386171
2022-09-12	10:24:58	0.209326
2022-09-12	10:24:58	0.349173
2022-09-12	10:24:58	0.349886
2022-09-12	10:24:58	0.282761
2022-09-12	10:24:59	0.219657
2022-09-12	10:24:59	0.312634
2022-09-12	10:24:59	0.335687
2022-09-12	10:24:59	0.286476
2022-09-12	10:25:00	0.269428
2022-09-12	10:25:00	0.328359
2022-09-12	10:25:00	0.278333
2022-09-12	10:25:01	0.212685
2022-09-12	10:25:01	0.124237
2022-09-12	10:25:01	0.282659
2022-09-12	10:25:01	0.173957
2022-09-12	10:25:02	0.152125
2022-09-12	10:25:02	0.111921
2022-09-12	10:25:02	0.21925
2022-09-12	10:25:02	0.198181
2022-09-12	10:25:03	0.216145
2022-09-12	10:25:03	0.159758
2022-09-12	10:25:03	0.316959
2022-09-12	10:25:03	0.204389
2022-09-12	10:25:04	0.341336
2022-09-12	10:25:04	0.147545
2022-09-12	10:25:04	0.353906
2022-09-12	10:25:05	0.242608
2022-09-12	10:25:05	0.271921
2022-09-12	10:25:05	0.246323
2022-09-12	10:25:05	0.517163
2022-09-12	10:25:06	0.212074
2022-09-12	10:25:06	0.3993
2022-09-12	10:25:06	0.649631
2022-09-12	10:25:06	0.319097
2022-09-12	10:25:07	0.205356
2022-09-12	10:25:07	0.331616
2022-09-12	10:25:07	0.138537
2022-09-12	10:25:07	0.341794
2022-09-12	10:25:08	0.239453
2022-09-12	10:25:08	0.304186
2022-09-12	10:25:08	0.198384
2022-09-12	10:25:08	0.427443
2022-09-12	10:25:09	0.276196
2022-09-12	10:25:09	0.352379
2022-09-12	10:25:09	0.433499
2022-09-12	10:25:10	0.176043
2022-09-12	10:25:10	0.32729
2022-09-12	10:25:10	0.328359
2022-09-12	10:25:10	0.413397
2022-09-12	10:25:11	0.282812
2022-09-12	10:25:11	0.632735
2022-09-12	10:25:11	0.308562
2022-09-12	10:25:11	0.280115
2022-09-12	10:25:12	0.443677
2022-09-12	10:25:12	0.311158
2022-09-12	10:25:12	0.419962
2022-09-12	10:25:12	0.370089
2022-09-12	10:25:13	0.338893
2022-09-12	10:25:13	0.344491
2022-09-12	10:25:13	0.419504
2022-09-12	10:25:14	0.242201
2022-09-12	10:25:14	0.46556
2022-09-12	10:25:14	0.291056
2022-09-12	10:25:14	0.366883
2022-09-12	10:25:15	0.296756
2022-09-12	10:25:15	0.411667
2022-09-12	10:25:15	0.384746
2022-09-12	10:25:15	0.429835
2022-09-12	10:25:16	0.359351
2022-09-12	10:25:16	0.406985
2022-09-12	10:25:16	0.398181
2022-09-12	10:25:16	0.450191
2022-09-12	10:25:17	0.339504
2022-09-12	10:25:17	0.272328
2022-09-12	10:25:17	0.384949
2022-09-12	10:25:18	0.305204
2022-09-12	10:25:18	0.320624
2022-09-12	10:25:18	0.358384
2022-09-12	10:25:18	0.204339
2022-09-12	10:25:19	0.410242
2022-09-12	10:25:19	0.341438
2022-09-12	10:25:19	0.390751
2022-09-12	10:25:19	0.252634
2022-09-12	10:25:20	0.552888
2022-09-12	10:25:20	0.211412
2022-09-12	10:25:20	0.448104
2022-09-12	10:25:20	0.175026
2022-09-12	10:25:21	0.0653056
2022-09-12	10:25:21	0.044644
2022-09-12	10:25:21	0.0277992
2022-09-12	10:25:21	-0.110572
2022-09-12	10:25:22	-0.143956
2022-09-12	10:25:22	-0.0341346
2022-09-12	10:25:22	0.0909544
2022-09-12	10:25:23	0.0119214
2022-09-12	10:25:23	0.109937
2022-09-12	10:25:23	0.208461
2022-09-12	10:25:23	0.230649
2022-09-12	10:25:24	0.147545
2022-09-12	10:25:24	0.275738
2022-09-12	10:25:24	0.103626
2022-09-12	10:25:24	0.203372
2022-09-12	10:25:25	0.0921249
2022-09-12	10:25:25	0.00576363
2022-09-12	10:25:25	0.123881
2022-09-12	10:25:25	0.0592496
2022-09-12	10:25:26	0.149326
2022-09-12	10:25:26	0.0906999
2022-09-12	10:25:26	0.343982
2022-09-12	10:25:27	0.139453
2022-09-12	10:25:27	0.188766
2022-09-12	10:25:27	0.142863
2022-09-12	10:25:27	0.0123285
2022-09-12	10:25:28	0.164237
2022-09-12	10:25:28	0.169631
2022-09-12	10:25:28	0.301132
2022-09-12	10:25:28	0.297672
2022-09-12	10:25:29	0.269631
2022-09-12	10:25:29	0.234262
2022-09-12	10:25:29	0.310395
2022-09-12	10:25:29	0.828257
2022-09-12	10:25:30	0.410344
2022-09-12	10:25:30	0.36612
2022-09-12	10:25:30	0.36841
2022-09-12	10:25:31	0.369682
2022-09-12	10:25:31	0.316807
2022-09-12	10:25:31	0.315178
2022-09-12	10:25:31	0.485356
2022-09-12	10:25:32	0.51813
2022-09-12	10:25:32	0.83701
2022-09-12	10:25:32	1.37396
2022-09-12	10:25:32	1.49075
2022-09-12	10:25:33	0.857926
2022-09-12	10:25:33	0.944644
2022-09-12	10:25:33	0.343779
2022-09-12	10:25:33	0.809936
2022-09-12	10:25:34	1.3877
2022-09-12	10:25:34	1.60678
2022-09-12	10:25:34	1.53828
2022-09-12	10:25:35	2.00637
2022-09-12	10:25:35	0.566781
2022-09-12	10:25:35	0.815992
2022-09-12	10:25:35	1.74826
2022-09-12	10:25:36	3.05935
2022-09-12	10:25:36	1.58286
2022-09-12	10:25:36	0.742506
2022-09-12	10:25:36	0.587341
2022-09-12	10:25:37	1.77309
2022-09-12	10:25:37	0.251311
2022-09-12	10:25:37	0.316959
2022-09-12	10:25:37	1.14872
2022-09-12	10:25:38	0.111005
2022-09-12	10:25:38	0.133906
2022-09-12	10:25:38	0.131362
2022-09-12	10:25:38	0.0185371
2022-09-12	10:25:39	0.103677
2022-09-12	10:25:39	0.000725441
2022-09-12	10:25:39	0.0731427
2022-09-12	10:25:40	0.0436262
2022-09-12	10:25:40	0.0251529
2022-09-12	10:25:40	0.181285
2022-09-12	10:25:40	0.243321
2022-09-12	10:25:41	0.104491
2022-09-12	10:25:41	0.286527
2022-09-12	10:25:41	0.126272
2022-09-12	10:25:41	0.387188
2022-09-12	10:25:42	0.22327
2022-09-12	10:25:42	0.328003
2022-09-12	10:25:42	0.158435
2022-09-12	10:25:42	0.478639
2022-09-12	10:25:43	0.151209
2022-09-12	10:25:43	0.498842
2022-09-12	10:25:43	0.275331
2022-09-12	10:25:44	0.432328
2022-09-12	10:25:44	0.28042
2022-09-12	10:25:44	0.795636
2022-09-12	10:25:44	0.24612
2022-09-12	10:25:45	0.882761
2022-09-12	10:25:45	2.27843
2022-09-12	10:25:45	0.62617
2022-09-12	10:25:45	1.73996
2022-09-12	10:25:46	2.2048
2022-09-12	10:25:46	0.338232
2022-09-12	10:25:46	0.885356
2022-09-12	10:25:46	2.0365
2022-09-12	10:25:47	0.543779
2022-09-12	10:25:47	1.14042
2022-09-12	10:25:47	1.16576
2022-09-12	10:25:48	0.215942
2022-09-12	10:25:48	0.816247
2022-09-12	10:25:48	0.481285
2022-09-12	10:25:48	0.689428
2022-09-12	10:25:49	0.29243
2022-09-12	10:25:49	0.465305
2022-09-12	10:25:49	0.274669
2022-09-12	10:25:49	0.503117
2022-09-12	10:25:50	0.317723
2022-09-12	10:25:50	0.398842
2022-09-12	10:25:50	0.272277
2022-09-12	10:25:50	0.406883
2022-09-12	10:25:51	0.277825
2022-09-12	10:25:51	0.427545
2022-09-12	10:25:51	0.363677
2022-09-12	10:25:52	0.287697
2022-09-12	10:25:52	0.459707
2022-09-12	10:25:52	0.345305
2022-09-12	10:25:52	0.60042
2022-09-12	10:25:53	0.34159
2022-09-12	10:25:53	1.10592
2022-09-12	10:25:53	0.245153
2022-09-12	10:25:53	0.523982
2022-09-12	10:25:54	0.36327
2022-09-12	10:25:54	0.486221
2022-09-12	10:25:54	0.309937
2022-09-12	10:25:54	0.52673
2022-09-12	10:25:55	0.231565
2022-09-12	10:25:55	0.620318
2022-09-12	10:25:55	0.268868
2022-09-12	10:25:55	0.537519
2022-09-12	10:25:56	0.309479
2022-09-12	10:25:56	0.518486
2022-09-12	10:25:56	0.324847
2022-09-12	10:25:57	0.48383
2022-09-12	10:25:57	0.318181
2022-09-12	10:25:57	0.550496
2022-09-12	10:25:57	0.382405
2022-09-12	10:25:58	0.974669
2022-09-12	10:25:58	1.6707
2022-09-12	10:25:58	0.695585
2022-09-12	10:25:58	1.84246
2022-09-12	10:25:59	1.86744
2022-09-12	10:25:59	0.915585
2022-09-12	10:25:59	0.794109
2022-09-12	10:25:59	0.509733
2022-09-12	10:26:00	0.687086
2022-09-12	10:26:00	0.271819
2022-09-12	10:26:00	0.523473
2022-09-12	10:26:01	0.351565
2022-09-12	10:26:01	0.408257
2022-09-12	10:26:01	0.321031
2022-09-12	10:26:01	0.62673
2022-09-12	10:26:02	0.199402
2022-09-12	10:26:02	0.483931
2022-09-12	10:26:02	0.534822
2022-09-12	10:26:02	0.439708
2022-09-12	10:26:03	0.232583
2022-09-12	10:26:03	0.590242
2022-09-12	10:26:03	0.165713
2022-09-12	10:26:03	0.511361
2022-09-12	10:26:04	0.320216
2022-09-12	10:26:04	0.411209
2022-09-12	10:26:04	0.269224
2022-09-12	10:26:05	0.530293
2022-09-12	10:26:05	0.240878
2022-09-12	10:26:05	0.45411
2022-09-12	10:26:05	0.268359
2022-09-12	10:26:06	0.48729
2022-09-12	10:26:06	0.273499
2022-09-12	10:26:06	0.479707
2022-09-12	10:26:06	0.195789
2022-09-12	10:26:07	0.42897
2022-09-12	10:26:07	0.206018
2022-09-12	10:26:07	0.296908
2022-09-12	10:26:07	0.171616
2022-09-12	10:26:08	0.217621
2022-09-12	10:26:08	0.152888
2022-09-12	10:26:08	-0.0170354
2022-09-12	10:26:08	0.124135
2022-09-12	10:26:09	0.0665269
2022-09-12	10:26:09	0.676806
2022-09-12	10:26:09	0.646374
2022-09-12	10:26:10	0.37584
2022-09-12	10:26:10	0.245509
2022-09-12	10:26:10	0.386781
2022-09-12	10:26:10	0.399809
2022-09-12	10:26:11	0.376552
2022-09-12	10:26:11	0.399453
2022-09-12	10:26:11	0.426374
2022-09-12	10:26:11	0.419504
2022-09-12	10:26:12	0.37701
2022-09-12	10:26:12	0.383728
2022-09-12	10:26:12	0.398588
2022-09-12	10:26:12	0.401845
2022-09-12	10:26:13	0.404949
2022-09-12	10:26:13	0.459707
2022-09-12	10:26:13	0.505763
2022-09-12	10:26:14	0.427341
2022-09-12	10:26:14	0.404898
2022-09-12	10:26:14	0.412379
2022-09-12	10:26:14	0.55131
2022-09-12	10:26:15	1.61019
2022-09-12	10:26:15	0.186832
2022-09-12	10:26:15	-0.0337784
2022-09-12	10:26:15	0.212888
2022-09-12	10:26:16	0.631107
2022-09-12	10:26:16	0.00281194
2022-09-12	10:26:16	-0.038613
2022-09-12	10:26:16	0.0941605
2022-09-12	10:26:17	0.0128883
2022-09-12	10:26:17	0.105204
2022-09-12	10:26:17	-0.0135748
2022-09-12	10:26:18	0.126731
2022-09-12	10:26:18	0.160878
2022-09-12	10:26:18	0.16902
2022-09-12	10:26:18	0.178232
2022-09-12	10:26:19	0.187239
2022-09-12	10:26:19	0.363117
2022-09-12	10:26:19	0.202659
2022-09-12	10:26:19	0.387087
2022-09-12	10:26:20	0.224695
2022-09-12	10:26:20	0.380115
2022-09-12	10:26:20	0.245255
2022-09-12	10:26:20	0.385662
2022-09-12	10:26:21	0.266934
2022-09-12	10:26:21	0.532176
2022-09-12	10:26:21	0.364033
2022-09-12	10:26:22	0.460267
2022-09-12	10:26:22	0.466069
2022-09-12	10:26:22	0.750598
2022-09-12	10:26:22	1.22546
2022-09-12	10:26:23	1.06505
2022-09-12	10:26:23	0.71243
2022-09-12	10:26:23	0.938028
2022-09-12	10:26:23	0.599199
2022-09-12	10:26:24	0.360674
2022-09-12	10:26:24	0.671361
2022-09-12	10:26:24	0.384949
2022-09-12	10:26:24	0.332278
2022-09-12	10:26:25	0.24098
2022-09-12	10:26:25	0.266985
2022-09-12	10:26:25	0.188817
2022-09-12	10:26:25	0.246476
2022-09-12	10:26:26	0.221336
2022-09-12	10:26:26	0.286578
2022-09-12	10:26:26	0.563931
2022-09-12	10:26:27	0.114822
2022-09-12	10:26:27	0.0662724
2022-09-12	10:26:27	0.261234
2022-09-12	10:26:28	0.0862215
2022-09-12	10:26:28	0.171921
2022-09-12	10:26:28	0.25472
2022-09-12	10:26:28	0.146985
2022-09-12	10:26:28	0.287188
2022-09-12	10:26:29	0.189224
2022-09-12	10:26:29	0.281234
2022-09-12	10:26:29	0.330547
2022-09-12	10:26:29	0.443677
2022-09-12	10:26:30	0.508715
2022-09-12	10:26:30	0.681234
2022-09-12	10:26:30	0.868766
2022-09-12	10:26:31	2.54948
2022-09-12	10:26:31	1.49345
2022-09-12	10:26:31	2.81533
2022-09-12	10:26:31	2.01375
2022-09-12	10:26:32	0.572277
2022-09-12	10:26:32	0.816654
2022-09-12	10:26:32	2.0649
2022-09-12	10:26:32	0.444644
2022-09-12	10:26:33	0.977519
2022-09-12	10:26:33	0.732023
2022-09-12	10:26:33	0.382201
2022-09-12	10:26:33	0.350903
2022-09-12	10:26:34	1.02261
2022-09-12	10:26:34	2.70505
2022-09-12	10:26:34	0.697366
2022-09-12	10:26:35	0.702201
2022-09-12	10:26:35	0.344695
2022-09-12	10:26:35	0.263677
2022-09-12	10:26:35	0.371158
2022-09-12	10:26:36	0.279402
2022-09-12	10:26:36	0.313957
2022-09-12	10:26:36	0.306781
2022-09-12	10:26:36	0.26556
2022-09-12	10:26:37	0.248257
2022-09-12	10:26:37	0.220471
2022-09-12	10:26:37	0.331616
2022-09-12	10:26:37	0.254618
2022-09-12	10:26:38	0.298842
2022-09-12	10:26:38	0.237875
2022-09-12	10:26:38	0.256858
2022-09-12	10:26:39	0.3107
2022-09-12	10:26:39	0.207952
2022-09-12	10:26:39	0.393295
2022-09-12	10:26:39	0.221438
2022-09-12	10:26:40	0.229275
2022-09-12	10:26:40	0.259402
2022-09-12	10:26:40	0.20785
2022-09-12	10:26:40	0.254008
2022-09-12	10:26:41	0.209122
2022-09-12	10:26:41	0.271819
