# Supplementary material for: Comparing efficacy in reducing pulling and welfare impacts of four types of leash walking equipment
Source: PeerJ journal article supplement (doi:10.7717/peerj.18131), 2024-10-24
Supplement: Shelter1_Tension_files.zip [file Dominic_martin_202291293152 copy.xlsx]

## Sheet: averaged newtons
Date	Time	averaged newtons	Impulse newtons
2022-09-12	09:32:09	13.2889	13.2889	1			Impulse Newtons	1385.37
2022-09-12	09:32:10	1.68516	14.9741	1			Total Steps	11
2022-09-12	09:32:11	2.21097	17.185	1			# > 5sec	0
2022-09-12	09:32:12	3.21538	20.4004	1
2022-09-12	09:32:13	4.83784	25.2383	1
2022-09-12	09:32:14	4.18306	29.4213	1
2022-09-12	09:32:15	3.76801	33.1893	1
2022-09-12	09:32:16	3.722	36.9113	1
2022-09-12	09:32:17	5.51305	42.4244	1
2022-09-12	09:32:18	4.18425	46.6086	1
2022-09-12	09:32:19	3.75239	50.361	1
2022-09-12	09:32:20	5.48062	55.8417	1
2022-09-12	09:32:21	6.68561	62.5273	1
2022-09-12	09:32:22	12.3309	74.8581	1
2022-09-12	09:32:23	7.7111	82.5692	1
2022-09-12	09:32:24	12.1211	94.6903	1
2022-09-12	09:32:25	3.83676	98.5271	1
2022-09-12	09:32:26	1.1228	99.6499	1
2022-09-12	09:32:27	1.08607	100.736	1
2022-09-12	09:32:28	1.95764	102.694	1
2022-09-12	09:32:29	1.95268	104.646	1
2022-09-12	09:32:30	3.33773	107.984	1
2022-09-12	09:32:31	5.56058	113.545	1
2022-09-12	09:32:32	5.46475	119.009	1
2022-09-12	09:32:33	4.27288	123.282	1
2022-09-12	09:32:34	1.98596	125.268	1
2022-09-12	09:32:35	1.80978	127.078	1
2022-09-12	09:32:36	1.15698	128.235	1
2022-09-12	09:32:37	0.61345	128.848	1
2022-09-12	09:32:38	0.44018	129.289	1
2022-09-12	09:32:39	0.542896	129.832	1
2022-09-12	09:32:40	1.88514	131.717	1
2022-09-12	09:32:41	2.74919	134.466	1
2022-09-12	09:32:42	2.62467	137.09	1
2022-09-12	09:32:43	0.975152	138.066	1
2022-09-12	09:32:44	1.77175	139.837	1
2022-09-12	09:32:45	3.57141	143.409	1
2022-09-12	09:32:46	6.39619	149.805	1
2022-09-12	09:32:47	4.37406	154.179	1
2022-09-12	09:32:48	4.74775	158.927	1
2022-09-12	09:32:49	6.57722	165.504	1
2022-09-12	09:32:50	4.75839	170.262	1
2022-09-12	09:32:51	5.84213	176.105	1
2022-09-12	09:32:52	3.46751	179.572	1
2022-09-12	09:32:53	3.92534	183.497	1
2022-09-12	09:32:54	10.2474	193.745	1
2022-09-12	09:32:55	8.83466	202.579	1
2022-09-12	09:32:56	9.20963	211.789	1
2022-09-12	09:32:57	9.2114	221.001	1
2022-09-12	09:32:58	10.4096	231.41	1
2022-09-12	09:32:59	10.2542	241.664	1
2022-09-12	09:33:00	11.1646	252.829	1
2022-09-12	09:33:01	17.1717	270.001	2
2022-09-12	09:33:02	24.3864	294.387	3
2022-09-12	09:33:03	22.1599	316.547	4
2022-09-12	09:33:04	10.5114	327.058	4
2022-09-12	09:33:05	8.63171	335.69	4
2022-09-12	09:33:06	8.25305	343.943	4
2022-09-12	09:33:07	7.24185	351.185	4
2022-09-12	09:33:08	8.1858	359.371	4
2022-09-12	09:33:09	3.89173	363.262	4
2022-09-12	09:33:10	6.99617	370.259	4
2022-09-12	09:33:11	1.69677	371.955	4
2022-09-12	09:33:12	0.306112	372.262	4
2022-09-12	09:33:13	0.635822	372.897	4
2022-09-12	09:33:14	0.597056	373.494	4
2022-09-12	09:33:15	0.695471	374.19	4
2022-09-12	09:33:16	0.781946	374.972	4
2022-09-12	09:33:17	0.750781	375.723	4
2022-09-12	09:33:18	0.717258	376.44	4
2022-09-12	09:33:19	0.705658	377.146	4
2022-09-12	09:33:20	0.762816	377.908	4
2022-09-12	09:33:21	0.767909	378.676	4
2022-09-12	09:33:22	0.770569	379.447	4
2022-09-12	09:33:23	0.756251	380.203	4
2022-09-12	09:33:24	1.86796	382.071	4
2022-09-12	09:33:25	5.73654	387.808	4
2022-09-12	09:33:26	5.85017	393.658	4
2022-09-12	09:33:27	1.23333	394.891	4
2022-09-12	09:33:28	1.13067	396.022	4
2022-09-12	09:33:29	1.10271	397.124	4
2022-09-12	09:33:30	1.02778	398.152	4
2022-09-12	09:33:31	1.15625	399.308	4
2022-09-12	09:33:32	1.52433	400.833	4
2022-09-12	09:33:33	1.77147	402.604	4
2022-09-12	09:33:34	2.91521	405.519	4
2022-09-12	09:33:35	3.11953	408.639	4
2022-09-12	09:33:36	1.04437	409.683	4
2022-09-12	09:33:37	1.06955	410.753	4
2022-09-12	09:33:38	4.60762	415.361	4
2022-09-12	09:33:39	8.70562	424.066	4
2022-09-12	09:33:40	6.37989	430.446	4
2022-09-12	09:33:41	6.88877	437.335	4
2022-09-12	09:33:42	8.77268	446.108	4
2022-09-12	09:33:43	9.83618	455.944	4
2022-09-12	09:33:44	7.93112	463.875	4
2022-09-12	09:33:45	8.83805	472.713	4
2022-09-12	09:33:46	8.31519	481.028	4
2022-09-12	09:33:47	13.0665	494.095	5
2022-09-12	09:33:48	26.883	520.978	6
2022-09-12	09:33:49	39.7387	560.716	7
2022-09-12	09:33:50	14.932	575.648	8
2022-09-12	09:33:51	3.41504	579.063	8
2022-09-12	09:33:52	2.07702	581.14	8
2022-09-12	09:33:53	0.942141	582.082	8
2022-09-12	09:33:54	0.906505	582.989	8
2022-09-12	09:33:55	1.08268	584.072	8
2022-09-12	09:33:56	2.53285	586.604	8
2022-09-12	09:33:57	6.56721	593.172	8
2022-09-12	09:33:58	4.54825	597.72	8
2022-09-12	09:33:59	5.71666	603.437	8
2022-09-12	09:34:00	6.52198	609.959	8
2022-09-12	09:34:01	7.08391	617.043	8
2022-09-12	09:34:02	8.32339	625.366	8
2022-09-12	09:34:03	8.28901	633.655	8
2022-09-12	09:34:04	7.28555	640.94	8
2022-09-12	09:34:05	8.22616	649.167	8
2022-09-12	09:34:06	5.5955	654.762	8
2022-09-12	09:34:07	9.55321	664.315	8
2022-09-12	09:34:08	9.41627	673.732	8
2022-09-12	09:34:09	4.91855	678.65	8
2022-09-12	09:34:10	2.58748	681.238	8
2022-09-12	09:34:11	0.92286	682.16	8
2022-09-12	09:34:12	0.174024	682.335	8
2022-09-12	09:34:13	4.468	686.803	8
2022-09-12	09:34:14	4.77932	691.582	8
2022-09-12	09:34:15	8.8124	700.394	8
2022-09-12	09:34:16	7.79985	708.194	8
2022-09-12	09:34:17	8.00478	716.199	8
2022-09-12	09:34:18	5.05391	721.253	8
2022-09-12	09:34:19	11.2515	732.504	8
2022-09-12	09:34:20	2.05364	734.558	8
2022-09-12	09:34:21	-0.416693	734.558	8
2022-09-12	09:34:22	0.156367	734.714	8
2022-09-12	09:34:23	1.93644	736.651	8
2022-09-12	09:34:24	2.5896	739.24	8
2022-09-12	09:34:25	3.04255	742.283	8
2022-09-12	09:34:26	1.19241	743.475	8
2022-09-12	09:34:27	1.12891	744.604	8
2022-09-12	09:34:28	1.21167	745.816	8
2022-09-12	09:34:29	2.64187	748.458	8
2022-09-12	09:34:30	0.79264	749.25	8
2022-09-12	09:34:31	-0.0438015	749.25	8
2022-09-12	09:34:32	0.857157	750.108	8
2022-09-12	09:34:33	1.50075	751.608	8
2022-09-12	09:34:34	1.30803	752.916	8
2022-09-12	09:34:35	0.834407	753.751	8
2022-09-12	09:34:36	1.03718	754.788	8
2022-09-12	09:34:37	1.0468	755.835	8
2022-09-12	09:34:38	1.14057	756.975	8
2022-09-12	09:34:39	3.62817	760.603	8
2022-09-12	09:34:40	7.25735	767.861	8
2022-09-12	09:34:41	8.0373	775.898	8
2022-09-12	09:34:42	4.4903	780.388	8
2022-09-12	09:34:43	1.81867	782.207	8
2022-09-12	09:34:44	1.08545	783.292	8
2022-09-12	09:34:45	2.05461	785.347	8
2022-09-12	09:34:46	2.45256	787.8	8
2022-09-12	09:34:47	2.11312	789.913	8
2022-09-12	09:34:48	1.55483	791.468	8
2022-09-12	09:34:49	1.60463	793.072	8
2022-09-12	09:34:50	1.49939	794.572	8
2022-09-12	09:34:51	1.15738	795.729	8
2022-09-12	09:34:52	0.793376	796.522	8
2022-09-12	09:34:53	0.847875	797.37	8
2022-09-12	09:34:54	0.725521	798.096	8
2022-09-12	09:34:55	0.45016	798.546	8
2022-09-12	09:34:56	0.921842	799.468	8
2022-09-12	09:34:57	0.850593	800.318	8
2022-09-12	09:34:58	0.848838	801.167	8
2022-09-12	09:34:59	0.83333	802.001	8
2022-09-12	09:35:00	0.862872	802.863	8
2022-09-12	09:35:01	1.32393	804.187	8
2022-09-12	09:35:02	1.23588	805.423	8
2022-09-12	09:35:03	0.953364	806.377	8
2022-09-12	09:35:04	1.04408	807.421	8
2022-09-12	09:35:05	1.34782	808.769	8
2022-09-12	09:35:06	1.87413	810.643	8
2022-09-12	09:35:07	1.18019	811.823	8
2022-09-12	09:35:08	1.05661	812.879	8
2022-09-12	09:35:09	1.21793	814.097	8
2022-09-12	09:35:10	1.38766	815.485	8
2022-09-12	09:35:11	1.48947	816.974	8
2022-09-12	09:35:12	1.2651	818.24	8
2022-09-12	09:35:13	1.1129	819.352	8
2022-09-12	09:35:14	2.78884	822.141	8
2022-09-12	09:35:15	1.08036	823.222	8
2022-09-12	09:35:16	1.40984	824.632	8
2022-09-12	09:35:17	1.45072	826.082	8
2022-09-12	09:35:18	1.46361	827.546	8
2022-09-12	09:35:19	1.14918	828.695	8
2022-09-12	09:35:20	2.14617	830.841	8
2022-09-12	09:35:21	3.04619	833.887	8
2022-09-12	09:35:22	6.67281	840.56	8
2022-09-12	09:35:23	4.02523	844.585	8
2022-09-12	09:35:24	1.667	846.252	8
2022-09-12	09:35:25	1.54085	847.793	8
2022-09-12	09:35:26	1.47917	849.272	8
2022-09-12	09:35:27	1.14635	850.419	8
2022-09-12	09:35:28	3.03977	853.459	8
2022-09-12	09:35:29	5.88141	859.34	8
2022-09-12	09:35:30	5.44806	864.788	8
2022-09-12	09:35:31	5.7019	870.49	8
2022-09-12	09:35:32	4.98629	875.476	8
2022-09-12	09:35:33	4.87106	880.347	8
2022-09-12	09:35:34	5.91753	886.265	8
2022-09-12	09:35:35	8.94361	895.208	8
2022-09-12	09:35:36	7.31899	902.527	8
2022-09-12	09:35:37	7.13755	909.665	8
2022-09-12	09:35:38	7.34541	917.01	8
2022-09-12	09:35:39	9.31275	926.323	8
2022-09-12	09:35:40	6.99312	933.316	8
2022-09-12	09:35:41	4.62369	937.94	8
2022-09-12	09:35:42	6.8586	944.799	8
2022-09-12	09:35:43	6.97426	951.773	8
2022-09-12	09:35:44	8.03784	959.811	8
2022-09-12	09:35:45	11.7896	971.6	8
2022-09-12	09:35:46	8.85253	980.453	8
2022-09-12	09:35:47	4.48142	984.934	8
2022-09-12	09:35:48	10.3213	995.256	8
2022-09-12	09:35:49	5.10728	1000.36	8
2022-09-12	09:35:50	3.37961	1003.74	8
2022-09-12	09:35:51	4.08992	1007.83	8
2022-09-12	09:35:52	3.82302	1011.66	8
2022-09-12	09:35:53	2.75789	1014.41	8
2022-09-12	09:35:54	3.06892	1017.48	8
2022-09-12	09:35:55	1.15138	1018.63	8
2022-09-12	09:35:56	0.389246	1019.02	8
2022-09-12	09:35:57	-0.139236	1019.02	8
2022-09-12	09:35:58	2.04142	1021.06	8
2022-09-12	09:35:59	4.26087	1025.33	8
2022-09-12	09:36:00	3.8482	1029.17	8
2022-09-12	09:36:01	6.37285	1035.55	8
2022-09-12	09:36:02	7.56465	1043.11	8
2022-09-12	09:36:03	6.62753	1049.74	8
2022-09-12	09:36:04	10.6	1060.34	8
2022-09-12	09:36:05	2.01324	1062.35	8
2022-09-12	09:36:06	0.941009	1063.29	8
2022-09-12	09:36:07	0.840519	1064.13	8
2022-09-12	09:36:08	1.24685	1065.38	8
2022-09-12	09:36:09	1.43667	1066.82	8
2022-09-12	09:36:10	1.89999	1068.72	8
2022-09-12	09:36:11	4.94769	1073.66	8
2022-09-12	09:36:12	1.45947	1075.12	8
2022-09-12	09:36:13	4.95006	1080.07	8
2022-09-12	09:36:14	8.37136	1088.45	8
2022-09-12	09:36:15	3.23796	1091.68	8
2022-09-12	09:36:16	1.72439	1093.41	8
2022-09-12	09:36:17	1.29507	1094.7	8
2022-09-12	09:36:18	1.19258	1095.9	8
2022-09-12	09:36:19	1.08943	1096.98	8
2022-09-12	09:36:20	0.931916	1097.92	8
2022-09-12	09:36:21	0.935255	1098.85	8
2022-09-12	09:36:22	-0.720031	1098.85	8
2022-09-12	09:36:23	-0.63016	1098.85	8
2022-09-12	09:36:24	9.9025	1108.75	8
2022-09-12	09:36:25	12.8576	1121.61	8
2022-09-12	09:36:26	10.6092	1132.22	8
2022-09-12	09:36:27	8.55243	1140.77	8
2022-09-12	09:36:28	7.67661	1148.45	8
2022-09-12	09:36:29	8.54551	1157	8
2022-09-12	09:36:30	8.04025	1165.04	8
2022-09-12	09:36:31	3.87497	1168.91	8
2022-09-12	09:36:32	5.61112	1174.52	8
2022-09-12	09:36:33	5.75001	1180.27	8
2022-09-12	09:36:34	6.36534	1186.64	8
2022-09-12	09:36:35	4.82919	1191.47	8
2022-09-12	09:36:36	7.154	1198.62	8
2022-09-12	09:36:37	5.88809	1204.51	8
2022-09-12	09:36:38	7.60722	1212.12	8
2022-09-12	09:36:39	3.10508	1215.22	8
2022-09-12	09:36:40	5.84039	1221.06	8
2022-09-12	09:36:41	8.46596	1229.53	8
2022-09-12	09:36:42	11.0996	1240.63	8
2022-09-12	09:36:43	6.20173	1246.83	8
2022-09-12	09:36:44	9.27822	1256.11	8
2022-09-12	09:36:45	13.133	1269.24	9
2022-09-12	09:36:46	8.82334	1278.06	9
2022-09-12	09:36:47	5.8383	1283.9	9
2022-09-12	09:36:48	2.40916	1286.31	9
2022-09-12	09:36:49	0.878888	1287.19	9
2022-09-12	09:36:50	1.6085	1288.8	9
2022-09-12	09:36:51	0.660892	1289.46	9
2022-09-12	09:36:52	0.672324	1290.13	9
2022-09-12	09:36:53	0.698527	1290.83	9
2022-09-12	09:36:54	2.97232	1293.8	9
2022-09-12	09:36:55	3.1417	1296.94	9
2022-09-12	09:36:56	1.53293	1298.48	9
2022-09-12	09:36:57	7.10404	1305.58	9
2022-09-12	09:36:58	10.0232	1315.6	9
2022-09-12	09:36:59	10.668	1326.27	9
2022-09-12	09:37:00	14.191	1340.46	10
2022-09-12	09:37:01	24.3153	1364.78	11
2022-09-12	09:37:02	8.41146	1373.19	11
2022-09-12	09:37:03	2.042	1375.23	11
2022-09-12	09:37:04	1.82393	1377.06	11
2022-09-12	09:37:05	1.51205	1378.57	11
2022-09-12	09:37:06	0.470006	1379.04	11
2022-09-12	09:37:07	1.48098	1380.52	11
2022-09-12	09:37:08	2.27362	1382.79	11
2022-09-12	09:37:09	2.58046	1385.37	11

## Sheet: Dominic_martin_202291293152 (3)
Date	Time	Lbs	Newtons	averaged newtons	Total Force x Time
								**GoPro Fitting: 920
2022-09-12	09:32:09	2.15095	9.56786	13.2889	9.56786	FALSE	0			Total Force x Time	2630.92
2022-09-12	09:32:09	3.89416	17.322	13.2889	17.322	1	1			Total Time Steps Force >3	54
2022-09-12	09:32:09	4.09141	18.1994	13.2889	27.7673	1	2
2022-09-12	09:32:09	1.8134	8.06637	13.2889	25.3884	FALSE	2
2022-09-12	09:32:10	0.524287	2.33213	1.68516	30.0994	FALSE	2
2022-09-12	09:32:10	0.273448	1.21635	1.68516	26.6047	FALSE	2
2022-09-12	09:32:10	0.338791	1.50701	1.68516	31.6064	FALSE	2
2022-09-12	09:32:11	0.345153	1.53531	2.21097	28.14	FALSE	2
2022-09-12	09:32:11	0.544389	2.42155	2.21097	34.028	FALSE	2
2022-09-12	09:32:11	0.514975	2.29071	2.21097	30.4307	FALSE	2
2022-09-12	09:32:11	0.583677	2.59631	2.21097	36.6243	FALSE	2
2022-09-12	09:32:12	0.41126	1.82937	3.21538	32.2601	FALSE	2
2022-09-12	09:32:12	0.699198	3.11017	3.21538	39.7344	FALSE	2
2022-09-12	09:32:12	1.10968	4.93608	3.21538	37.1962	FALSE	2
2022-09-12	09:32:12	0.671259	2.98589	3.21538	42.7203	FALSE	2
2022-09-12	09:32:13	0.799758	3.55748	4.83784	40.7537	FALSE	2
2022-09-12	09:32:13	1.37039	6.09577	4.83784	48.8161	FALSE	2
2022-09-12	09:32:13	1.08632	4.83217	4.83784	45.5858	FALSE	2
2022-09-12	09:32:13	1.09391	4.86593	4.83784	53.682	FALSE	2
2022-09-12	09:32:14	0.977621	4.34865	4.18306	49.9345	FALSE	2
2022-09-12	09:32:14	0.948155	4.21758	4.18306	57.8996	FALSE	2
2022-09-12	09:32:14	0.939198	4.17774	4.18306	54.1122	FALSE	2
2022-09-12	09:32:14	0.896603	3.98827	4.18306	61.8879	FALSE	2
2022-09-12	09:32:15	0.909835	4.04713	3.76801	58.1594	FALSE	2
2022-09-12	09:32:15	0.891972	3.96767	3.76801	65.8556	FALSE	2
2022-09-12	09:32:15	0.739453	3.28923	3.76801	61.4486	FALSE	2
2022-09-12	09:32:16	0.769987	3.42506	3.722	69.2806	FALSE	2
2022-09-12	09:32:16	0.968155	4.30655	3.722	65.7551	FALSE	2
2022-09-12	09:32:16	0.643779	2.86366	3.722	72.1443	FALSE	2
2022-09-12	09:32:16	0.965051	4.29274	3.722	70.0479	FALSE	2
2022-09-12	09:32:17	0.76103	3.38521	5.51305	75.5295	FALSE	2
2022-09-12	09:32:17	1.93737	8.61781	5.51305	78.6657	FALSE	2
2022-09-12	09:32:17	1.05548	4.69499	5.51305	80.2245	FALSE	2
2022-09-12	09:32:17	1.20368	5.35421	5.51305	84.0199	FALSE	2
2022-09-12	09:32:18	1.07141	4.76585	4.18425	84.9903	FALSE	2
2022-09-12	09:32:18	1.20765	5.37187	4.18425	89.3918	FALSE	2
2022-09-12	09:32:18	1.13233	5.03683	4.18425	90.0272	FALSE	2
2022-09-12	09:32:18	0.35126	1.56247	4.18425	90.9542	FALSE	2
2022-09-12	09:32:19	0.935534	4.16144	3.75239	94.1886	FALSE	2
2022-09-12	09:32:19	0.902659	4.01521	3.75239	94.9695	FALSE	2
2022-09-12	09:32:19	0.692532	3.08052	3.75239	97.2691	FALSE	2
2022-09-12	09:32:20	1.51905	6.75704	5.48062	101.726	FALSE	2
2022-09-12	09:32:20	1.45645	6.47858	5.48062	103.748	FALSE	2
2022-09-12	09:32:20	1.20342	5.35305	5.48062	107.08	FALSE	2
2022-09-12	09:32:20	0.749478	3.33383	5.48062	107.082	FALSE	2
2022-09-12	09:32:21	1.19075	5.29669	6.68561	112.376	FALSE	2
2022-09-12	09:32:21	0.809936	3.60276	6.68561	110.684	FALSE	2
2022-09-12	09:32:21	1.60251	7.12828	6.68561	119.505	FALSE	2
2022-09-12	09:32:21	2.40877	10.7147	6.68561	121.399	FALSE	2
2022-09-12	09:32:22	3.48709	15.5113	12.3309	135.016	1	3
2022-09-12	09:32:22	3.4363	15.2853	12.3309	136.684	1	4
2022-09-12	09:32:22	2.8079	12.4901	12.3309	147.506	FALSE	4
2022-09-12	09:32:22	1.35711	6.0367	12.3309	142.721	FALSE	4
2022-09-12	09:32:23	1.45849	6.48766	7.7111	153.994	FALSE	4
2022-09-12	09:32:23	2.05177	9.12668	7.7111	151.848	FALSE	4
2022-09-12	09:32:23	1.69034	7.51897	7.7111	161.513	FALSE	4
2022-09-12	09:32:24	2.59304	11.5344	12.1211	163.382	FALSE	4
2022-09-12	09:32:24	4.13864	18.4095	12.1211	179.922	1	5
2022-09-12	09:32:24	2.21289	9.84338	12.1211	173.225	FALSE	5
2022-09-12	09:32:24	1.95523	8.69725	12.1211	188.619	FALSE	5
2022-09-12	09:32:25	1.90525	8.47493	3.83676	181.7	FALSE	5
2022-09-12	09:32:25	0.729529	3.24509	3.83676	191.864	FALSE	5
2022-09-12	09:32:25	0.419758	1.86717	3.83676	183.568	FALSE	5
2022-09-12	09:32:25	0.395636	1.75987	3.83676	193.624	FALSE	5
2022-09-12	09:32:26	0.180471	0.802771	1.1228	184.37	FALSE	5
2022-09-12	09:32:26	0.15472	0.688226	1.1228	194.312	FALSE	5
2022-09-12	09:32:26	0.480165	2.13587	1.1228	186.506	FALSE	5
2022-09-12	09:32:26	0.194313	0.864343	1.1228	195.177	FALSE	5
2022-09-12	09:32:27	0.32673	1.45336	1.08607	187.96	FALSE	5
2022-09-12	09:32:27	0.196756	0.87521	1.08607	196.052	FALSE	5
2022-09-12	09:32:27	0.245916	1.09388	1.08607	189.053	FALSE	5
2022-09-12	09:32:27	0.207239	0.921841	1.08607	196.974	FALSE	5
2022-09-12	09:32:28	0.160674	0.71471	1.95764	189.768	FALSE	5
2022-09-12	09:32:28	0.46388	2.06343	1.95764	199.037	FALSE	5
2022-09-12	09:32:28	0.695738	3.09478	1.95764	192.863	FALSE	5
2022-09-12	09:32:29	0.493804	2.19654	1.95268	201.234	FALSE	5
2022-09-12	09:32:29	0.287596	1.27928	1.95268	194.142	FALSE	5
2022-09-12	09:32:29	0.484949	2.15715	1.95268	203.391	FALSE	5
2022-09-12	09:32:29	0.48958	2.17775	1.95268	196.32	FALSE	5
2022-09-12	09:32:30	0.547748	2.43649	3.33773	205.827	FALSE	5
2022-09-12	09:32:30	0.598232	2.66106	3.33773	198.981	FALSE	5
2022-09-12	09:32:30	0.830343	3.69353	3.33773	209.521	FALSE	5
2022-09-12	09:32:30	1.0251	4.55985	3.33773	203.541	FALSE	5
2022-09-12	09:32:31	1.13126	5.03207	5.56058	214.553	FALSE	5
2022-09-12	09:32:31	1.26281	5.61723	5.56058	209.158	FALSE	5
2022-09-12	09:32:31	1.26795	5.6401	5.56058	220.193	FALSE	5
2022-09-12	09:32:31	1.33828	5.95294	5.56058	215.111	FALSE	5
2022-09-12	09:32:32	1.0848	4.82541	5.46475	225.019	FALSE	5
2022-09-12	09:32:32	1.24342	5.53098	5.46475	220.642	FALSE	5
2022-09-12	09:32:32	1.35737	6.03785	5.46475	231.056	FALSE	5
2022-09-12	09:32:33	1.16597	5.18647	4.27288	225.828	FALSE	5
2022-09-12	09:32:33	1.19345	5.3087	4.27288	236.365	FALSE	5
2022-09-12	09:32:33	1.04927	4.66736	4.27288	230.496	FALSE	5
2022-09-12	09:32:33	0.433651	1.92897	4.27288	238.294	FALSE	5
2022-09-12	09:32:34	0.445865	1.9833	1.98596	232.479	FALSE	5
2022-09-12	09:32:34	0.572176	2.54515	1.98596	240.839	FALSE	5
2022-09-12	09:32:34	0.436196	1.94029	1.98596	234.419	FALSE	5
2022-09-12	09:32:34	0.331616	1.47509	1.98596	242.314	FALSE	5
2022-09-12	09:32:35	0.531514	2.36428	1.80978	236.784	FALSE	5
2022-09-12	09:32:35	0.602303	2.67916	1.80978	244.994	FALSE	5
2022-09-12	09:32:35	0.22327	0.99315	1.80978	237.777	FALSE	5
2022-09-12	09:32:35	0.270344	1.20254	1.80978	246.196	FALSE	5
2022-09-12	09:32:36	0.344898	1.53418	1.15698	239.311	FALSE	5
2022-09-12	09:32:36	0.272023	1.21001	1.15698	247.406	FALSE	5
2022-09-12	09:32:36	0.277875	1.23604	1.15698	240.547	FALSE	5
2022-09-12	09:32:36	0.145611	0.647707	1.15698	248.054	FALSE	5
2022-09-12	09:32:37	0.1764	0.784662	0.61345	241.332	FALSE	5
2022-09-12	09:32:37	0.0827101	0.367911	0.61345	248.422	FALSE	5
2022-09-12	09:32:37	0.154619	0.687776	0.61345	242.02	FALSE	5
2022-09-12	09:32:38	0.156959	0.698185	0.44018	249.12	FALSE	5
2022-09-12	09:32:38	0.14154	0.629598	0.44018	242.649	FALSE	5
2022-09-12	09:32:38	0.0210817	0.0937756	0.44018	249.214	FALSE	5
2022-09-12	09:32:38	0.076247	0.339162	0.44018	242.988	FALSE	5
2022-09-12	09:32:39	0.112583	0.500792	0.542896	249.714	FALSE	5
2022-09-12	09:32:39	0.0254073	0.113017	0.542896	243.101	FALSE	5
2022-09-12	09:32:39	0.228155	1.01488	0.542896	250.729	FALSE	5
2022-09-12	09:32:40	-0.0146944	-0.0653636	1.88514	243.101	FALSE	5
2022-09-12	09:32:40	0.229275	1.01986	1.88514	251.749	FALSE	5
2022-09-12	09:32:40	0.445458	1.98149	1.88514	245.083	FALSE	5
2022-09-12	09:32:40	0.686476	3.05358	1.88514	254.803	FALSE	5
2022-09-12	09:32:40	0.772481	3.43615	1.88514	248.519	FALSE	5
2022-09-12	09:32:41	0.533092	2.3713	2.74919	257.174	FALSE	5
2022-09-12	09:32:41	0.550954	2.45075	2.74919	250.97	FALSE	5
2022-09-12	09:32:41	0.770089	3.42551	2.74919	260.6	FALSE	5
2022-09-12	09:32:42	0.395687	1.76009	2.62467	252.73	FALSE	5
2022-09-12	09:32:42	1.09803	4.88426	2.62467	265.484	FALSE	5
2022-09-12	09:32:42	0.507443	2.25721	2.62467	254.987	FALSE	5
2022-09-12	09:32:42	0.359046	1.59711	2.62467	267.081	FALSE	5
2022-09-12	09:32:43	0.317926	1.4142	0.975152	256.401	FALSE	5
2022-09-12	09:32:43	0.104237	0.463667	0.975152	267.545	FALSE	5
2022-09-12	09:32:43	0.339249	1.50905	0.975152	257.91	FALSE	5
2022-09-12	09:32:43	0.115484	0.513696	0.975152	268.058	FALSE	5
2022-09-12	09:32:44	0.331718	1.47555	1.77175	259.386	FALSE	5
2022-09-12	09:32:44	0.378232	1.68245	1.77175	269.741	FALSE	5
2022-09-12	09:32:44	0.333295	1.48256	1.77175	260.868	FALSE	5
2022-09-12	09:32:44	0.549987	2.44645	1.77175	272.187	FALSE	5
2022-09-12	09:32:45	0.494924	2.20152	3.57141	263.07	FALSE	5
2022-09-12	09:32:45	0.916654	4.07746	3.57141	276.265	FALSE	5
2022-09-12	09:32:45	0.726629	3.23219	3.57141	266.302	FALSE	5
2022-09-12	09:32:45	1.07335	4.77448	3.57141	281.039	FALSE	5
2022-09-12	09:32:46	1.51106	6.7215	6.39619	273.024	FALSE	5
2022-09-12	09:32:46	1.63441	7.27018	6.39619	288.309	FALSE	5
2022-09-12	09:32:46	1.16831	5.19688	6.39619	278.22	FALSE	5
2022-09-12	09:32:47	0.986781	4.3894	4.37406	292.699	FALSE	5
2022-09-12	09:32:47	1.10841	4.93043	4.37406	283.151	FALSE	5
2022-09-12	09:32:47	1.05889	4.71015	4.37406	297.409	FALSE	5
2022-09-12	09:32:47	0.779249	3.46626	4.37406	286.617	FALSE	5
2022-09-12	09:32:48	0.735483	3.27158	4.74775	300.68	FALSE	5
2022-09-12	09:32:48	1.58551	7.05267	4.74775	293.67	FALSE	5
2022-09-12	09:32:48	0.736654	3.27678	4.74775	303.957	FALSE	5
2022-09-12	09:32:48	1.21172	5.38997	4.74775	299.06	FALSE	5
2022-09-12	09:32:49	1.33324	5.93052	6.57722	309.888	FALSE	5
2022-09-12	09:32:49	1.66266	7.39584	6.57722	306.456	FALSE	5
2022-09-12	09:32:49	1.61716	7.19345	6.57722	317.081	FALSE	5
2022-09-12	09:32:49	1.30144	5.78907	6.57722	312.245	FALSE	5
2022-09-12	09:32:50	1.30648	5.81148	4.75839	322.893	FALSE	5
2022-09-12	09:32:50	0.97645	4.34344	4.75839	316.588	FALSE	5
2022-09-12	09:32:50	0.926272	4.12024	4.75839	327.013	FALSE	5
2022-09-12	09:32:51	1.10195	4.90169	5.84213	321.49	FALSE	5
2022-09-12	09:32:51	1.57838	7.02095	5.84213	334.034	FALSE	5
2022-09-12	09:32:51	1.10632	4.92113	5.84213	326.411	FALSE	5
2022-09-12	09:32:51	1.46683	6.52475	5.84213	340.559	FALSE	5
2022-09-12	09:32:52	1.1105	4.93973	3.46751	331.351	FALSE	5
2022-09-12	09:32:52	0.965458	4.29455	3.46751	344.853	FALSE	5
2022-09-12	09:32:52	0.451667	2.00911	3.46751	333.36	FALSE	5
2022-09-12	09:32:52	0.590496	2.62664	3.46751	347.48	FALSE	5
2022-09-12	09:32:53	0.772939	3.43819	3.92534	336.798	FALSE	5
2022-09-12	09:32:53	0.355992	1.58352	3.92534	349.063	FALSE	5
2022-09-12	09:32:53	0.798842	3.55341	3.92534	340.351	FALSE	5
2022-09-12	09:32:53	1.60205	7.12624	3.92534	356.19	FALSE	5
2022-09-12	09:32:54	2.91116	12.9494	10.2474	353.301	FALSE	5
2022-09-12	09:32:54	1.80469	8.02762	10.2474	364.217	FALSE	5
2022-09-12	09:32:54	3.01609	13.4162	10.2474	366.717	1	6
2022-09-12	09:32:54	1.48296	6.5965	10.2474	370.814	FALSE	6
2022-09-12	09:32:55	2.15355	9.57942	8.83466	376.296	FALSE	6
2022-09-12	09:32:55	1.48439	6.60286	8.83466	377.417	FALSE	6
2022-09-12	09:32:55	2.32042	10.3217	8.83466	386.618	FALSE	6
2022-09-12	09:32:56	2.47731	11.0196	9.20963	388.436	FALSE	6
2022-09-12	09:32:56	1.30459	5.80308	9.20963	392.421	FALSE	6
2022-09-12	09:32:56	2.4277	10.7989	9.20963	399.235	FALSE	6
2022-09-12	09:32:56	2.07207	9.21698	9.20963	401.638	FALSE	6
2022-09-12	09:32:57	2.77981	12.3652	9.2114	411.6	FALSE	6
2022-09-12	09:32:57	1.12352	4.99764	9.2114	406.636	FALSE	6
2022-09-12	09:32:57	1.68363	7.48912	9.2114	419.089	FALSE	6
2022-09-12	09:32:57	2.6963	11.9937	9.2114	418.629	FALSE	6
2022-09-12	09:32:58	2.21721	9.86259	10.4096	428.952	FALSE	6
2022-09-12	09:32:58	2.13721	9.50674	10.4096	428.136	FALSE	6
2022-09-12	09:32:58	1.62688	7.23669	10.4096	436.189	FALSE	6
2022-09-12	09:32:58	3.37945	15.0325	10.4096	443.169	1	7
2022-09-12	09:32:59	1.84892	8.22437	10.2542	444.413	FALSE	7
2022-09-12	09:32:59	3.37441	15.0101	10.2542	458.179	1	8
2022-09-12	09:32:59	1.69238	7.52804	10.2542	451.941	FALSE	8
2022-09-12	09:33:00	3.45579	15.372	11.1646	473.551	1	9
2022-09-12	09:33:00	1.11065	4.94039	11.1646	456.881	FALSE	9
2022-09-12	09:33:00	2.77146	12.328	11.1646	485.879	FALSE	9
2022-09-12	09:33:00	2.70179	12.0181	11.1646	468.9	FALSE	9
2022-09-12	09:33:01	3.34653	14.886	17.1717	500.765	1	10
2022-09-12	09:33:01	3.2564	14.4851	17.1717	483.385	1	11
2022-09-12	09:33:01	2.51472	11.186	17.1717	511.951	FALSE	11
2022-09-12	09:33:01	6.32383	28.1297	17.1717	511.514	1	12
2022-09-12	09:33:02	2.9508	13.1257	24.3864	525.077	FALSE	12
2022-09-12	09:33:02	6.83121	30.3866	24.3864	541.901	1	13
2022-09-12	09:33:02	4.13523	18.3943	24.3864	543.471	1	14
2022-09-12	09:33:02	8.01197	35.6388	24.3864	577.54	1	15
2022-09-12	09:33:03	4.09909	18.2336	22.1599	561.704	1	16
2022-09-12	09:33:03	7.00525	31.1608	22.1599	608.7	1	17
2022-09-12	09:33:03	4.71665	20.9806	22.1599	582.685	1	18
2022-09-12	09:33:03	4.10612	18.2648	22.1599	626.965	1	19
2022-09-12	09:33:04	1.96352	8.73413	10.5114	591.419	FALSE	19
2022-09-12	09:33:04	2.53772	11.2883	10.5114	638.254	FALSE	19
2022-09-12	09:33:04	2.58795	11.5117	10.5114	602.931	FALSE	19
2022-09-12	09:33:05	1.57085	6.98745	8.63171	645.241	FALSE	19
2022-09-12	09:33:05	2.01253	8.95214	8.63171	611.883	FALSE	19
2022-09-12	09:33:05	1.62795	7.24145	8.63171	652.482	FALSE	19
2022-09-12	09:33:05	2.55065	11.3458	8.63171	623.229	FALSE	19
2022-09-12	09:33:06	2.37681	10.5725	8.25305	663.055	FALSE	19
2022-09-12	09:33:06	1.97706	8.79436	8.25305	632.023	FALSE	19
2022-09-12	09:33:06	1.92581	8.56639	8.25305	671.621	FALSE	19
2022-09-12	09:33:06	1.14179	5.07891	8.25305	637.102	FALSE	19
2022-09-12	09:33:07	1.25558	5.58507	7.24185	677.206	FALSE	19
2022-09-12	09:33:07	1.05284	4.68324	7.24185	641.785	FALSE	19
2022-09-12	09:33:07	1.73355	7.71118	7.24185	684.918	FALSE	19
2022-09-12	09:33:07	2.47019	10.9879	7.24185	652.773	FALSE	19
2022-09-12	09:33:08	1.30139	5.78884	8.1858	690.707	FALSE	19
2022-09-12	09:33:08	2.04383	9.09136	8.1858	661.865	FALSE	19
2022-09-12	09:33:08	2.17553	9.67719	8.1858	700.384	FALSE	19
2022-09-12	09:33:09	1.96251	8.72964	3.89173	670.594	FALSE	19
2022-09-12	09:33:09	1.18332	5.26364	3.89173	705.647	FALSE	19
2022-09-12	09:33:09	0.197316	0.877701	3.89173	671.472	FALSE	19
2022-09-12	09:33:09	0.156451	0.695925	3.89173	706.343	FALSE	19
2022-09-12	09:33:10	0.66729	2.96824	6.99617	674.44	FALSE	19
2022-09-12	09:33:10	2.78235	12.3764	6.99617	718.72	FALSE	19
2022-09-12	09:33:10	1.39146	6.18949	6.99617	680.63	FALSE	19
2022-09-12	09:33:10	1.45014	6.45051	6.99617	725.17	FALSE	19
2022-09-12	09:33:11	0.84098	3.74085	1.69677	684.37	FALSE	19
2022-09-12	09:33:11	0.364542	1.62156	1.69677	726.792	FALSE	19
2022-09-12	09:33:11	0.236858	1.05359	1.69677	685.424	FALSE	19
2022-09-12	09:33:11	0.0834226	0.37108	1.69677	727.163	FALSE	19
2022-09-12	09:33:12	-0.0103687	-0.0461221	0.306112	685.424	FALSE	19
2022-09-12	09:33:12	0.0540587	0.240464	0.306112	727.403	FALSE	19
2022-09-12	09:33:12	0.162761	0.723993	0.306112	686.148	FALSE	19
2022-09-12	09:33:13	0.209377	0.931351	0.635822	728.335	FALSE	19
2022-09-12	09:33:13	0.0941096	0.418618	0.635822	686.567	FALSE	19
2022-09-12	09:33:13	0.143982	0.640461	0.635822	728.975	FALSE	19
2022-09-12	09:33:13	0.124288	0.552858	0.635822	687.12	FALSE	19
2022-09-12	09:33:14	0.109479	0.486984	0.597056	729.462	FALSE	19
2022-09-12	09:33:14	0.135738	0.60379	0.597056	687.723	FALSE	19
2022-09-12	09:33:14	0.148003	0.658347	0.597056	730.12	FALSE	19
2022-09-12	09:33:14	0.143677	0.639104	0.597056	688.362	FALSE	19
2022-09-12	09:33:15	0.14668	0.652462	0.695471	730.773	FALSE	19
2022-09-12	09:33:15	0.154873	0.688906	0.695471	689.051	FALSE	19
2022-09-12	09:33:15	0.163575	0.727614	0.695471	731.501	FALSE	19
2022-09-12	09:33:15	0.160267	0.7129	0.695471	689.764	FALSE	19
2022-09-12	09:33:16	0.171616	0.763382	0.781946	732.264	FALSE	19
2022-09-12	09:33:16	0.177825	0.791001	0.781946	690.555	FALSE	19
2022-09-12	09:33:16	0.1764	0.784662	0.781946	733.049	FALSE	19
2022-09-12	09:33:16	0.177316	0.788737	0.781946	691.344	FALSE	19
2022-09-12	09:33:17	0.177112	0.78783	0.750781	733.836	FALSE	19
2022-09-12	09:33:17	0.165713	0.737125	0.750781	692.081	FALSE	19
2022-09-12	09:33:17	0.163524	0.727387	0.750781	734.564	FALSE	19
2022-09-12	09:33:18	0.161336	0.717655	0.717258	692.799	FALSE	19
2022-09-12	09:33:18	0.160827	0.715391	0.717258	735.279	FALSE	19
2022-09-12	09:33:18	0.162048	0.720822	0.717258	693.52	FALSE	19
2022-09-12	09:33:18	0.160776	0.715164	0.717258	735.994	FALSE	19
2022-09-12	09:33:19	0.157316	0.699773	0.705658	694.219	FALSE	19
2022-09-12	09:33:19	0.155636	0.6923	0.705658	736.687	FALSE	19
2022-09-12	09:33:19	0.156807	0.697509	0.705658	694.917	FALSE	19
2022-09-12	09:33:19	0.164797	0.73305	0.705658	737.42	FALSE	19
2022-09-12	09:33:20	0.163372	0.726711	0.762816	695.644	FALSE	19
2022-09-12	09:33:20	0.174313	0.775379	0.762816	738.195	FALSE	19
2022-09-12	09:33:20	0.172532	0.767457	0.762816	696.411	FALSE	19
2022-09-12	09:33:20	0.175738	0.781718	0.762816	738.977	FALSE	19
2022-09-12	09:33:21	0.174771	0.777416	0.767909	697.188	FALSE	19
2022-09-12	09:33:21	0.171972	0.764966	0.767909	739.742	FALSE	19
2022-09-12	09:33:21	0.171158	0.761345	0.767909	697.95	FALSE	19
2022-09-12	09:33:22	0.180624	0.803452	0.770569	740.545	FALSE	19
2022-09-12	09:33:22	0.177112	0.78783	0.770569	698.738	FALSE	19
2022-09-12	09:33:22	0.170242	0.75727	0.770569	741.302	FALSE	19
2022-09-12	09:33:22	0.164949	0.733726	0.770569	699.471	FALSE	19
2022-09-12	09:33:23	0.163779	0.728522	0.756251	742.031	FALSE	19
2022-09-12	09:33:23	0.173804	0.773115	0.756251	700.244	FALSE	19
2022-09-12	09:33:23	0.186272	0.828575	0.756251	742.86	FALSE	19
2022-09-12	09:33:23	0.156196	0.694791	0.756251	700.939	FALSE	19
2022-09-12	09:33:24	0.119453	0.531351	1.86796	743.391	FALSE	19
2022-09-12	09:33:24	0.156349	0.695472	1.86796	701.635	FALSE	19
2022-09-12	09:33:24	0.64556	2.87158	1.86796	746.263	FALSE	19
2022-09-12	09:33:24	0.758384	3.37344	1.86796	705.008	FALSE	19
2022-09-12	09:33:25	1.06103	4.71967	5.73654	750.982	FALSE	19
2022-09-12	09:33:25	1.33625	5.94391	5.73654	710.952	FALSE	19
2022-09-12	09:33:25	1.30714	5.81442	5.73654	756.797	FALSE	19
2022-09-12	09:33:25	1.45411	6.46817	5.73654	717.42	FALSE	19
2022-09-12	09:33:26	1.83029	8.1415	5.85017	764.938	FALSE	19
2022-09-12	09:33:26	1.18215	5.25844	5.85017	722.679	FALSE	19
2022-09-12	09:33:26	0.933092	4.15058	5.85017	769.089	FALSE	19
2022-09-12	09:33:27	0.468206	2.08267	1.23333	724.761	FALSE	19
2022-09-12	09:33:27	0.26556	1.18126	1.23333	770.27	FALSE	19
2022-09-12	09:33:27	0.124797	0.555122	1.23333	725.316	FALSE	19
2022-09-12	09:33:27	0.250496	1.11426	1.23333	771.384	FALSE	19
2022-09-12	09:33:28	0.183473	0.816125	1.13067	726.133	FALSE	19
2022-09-12	09:33:28	0.242659	1.0794	1.13067	772.464	FALSE	19
2022-09-12	09:33:28	0.287697	1.27973	1.13067	727.412	FALSE	19
2022-09-12	09:33:28	0.302914	1.34742	1.13067	773.811	FALSE	19
2022-09-12	09:33:29	0.323117	1.43729	1.10271	728.85	FALSE	19
2022-09-12	09:33:29	0.209275	0.930897	1.10271	774.742	FALSE	19
2022-09-12	09:33:29	0.150751	0.670571	1.10271	729.52	FALSE	19
2022-09-12	09:33:29	0.308461	1.3721	1.10271	776.114	FALSE	19
2022-09-12	09:33:30	0.183372	0.815675	1.02778	730.336	FALSE	19
2022-09-12	09:33:30	0.257468	1.14527	1.02778	777.259	FALSE	19
2022-09-12	09:33:30	0.252328	1.12241	1.02778	731.458	FALSE	19
2022-09-12	09:33:31	0.323015	1.43684	1.15625	778.696	FALSE	19
2022-09-12	09:33:31	0.225916	1.00492	1.15625	732.463	FALSE	19
2022-09-12	09:33:31	0.221387	0.984774	1.15625	779.681	FALSE	19
2022-09-12	09:33:31	0.269428	1.19847	1.15625	733.662	FALSE	19
2022-09-12	09:33:32	0.304237	1.35331	1.52433	781.034	FALSE	19
2022-09-12	09:33:32	0.318791	1.41805	1.52433	735.08	FALSE	19
2022-09-12	09:33:32	0.354568	1.57719	1.52433	782.611	FALSE	19
2022-09-12	09:33:32	0.393143	1.74878	1.52433	736.829	FALSE	19
2022-09-12	09:33:33	0.383524	1.70599	1.77147	784.317	FALSE	19
2022-09-12	09:33:33	0.377316	1.67838	1.77147	738.507	FALSE	19
2022-09-12	09:33:33	0.397214	1.76689	1.77147	786.084	FALSE	19
2022-09-12	09:33:33	0.434924	1.93463	1.77147	740.442	FALSE	19
2022-09-12	09:33:34	0.444542	1.97741	2.91521	788.062	FALSE	19
2022-09-12	09:33:34	0.475076	2.11323	2.91521	742.555	FALSE	19
2022-09-12	09:33:34	0.637468	2.83559	2.91521	790.897	FALSE	19
2022-09-12	09:33:34	1.06439	4.73462	2.91521	747.289	FALSE	19
2022-09-12	09:33:35	0.764186	3.39925	3.11953	794.297	FALSE	19
2022-09-12	09:33:35	0.805661	3.58374	3.11953	750.873	FALSE	19
2022-09-12	09:33:35	0.534058	2.3756	3.11953	796.672	FALSE	19
2022-09-12	09:33:36	0.279453	1.24306	1.04437	752.116	FALSE	19
2022-09-12	09:33:36	0.252023	1.12105	1.04437	797.793	FALSE	19
2022-09-12	09:33:36	0.162965	0.724901	1.04437	752.841	FALSE	19
2022-09-12	09:33:36	0.244695	1.08845	1.04437	798.882	FALSE	19
2022-09-12	09:33:37	0.149071	0.663098	1.06955	753.504	FALSE	19
2022-09-12	09:33:37	0.150751	0.670571	1.06955	799.552	FALSE	19
2022-09-12	09:33:37	0.208206	0.926142	1.06955	754.43	FALSE	19
2022-09-12	09:33:37	0.453753	2.01838	1.06955	801.571	FALSE	19
2022-09-12	09:33:38	0.651056	2.89603	4.60762	757.326	FALSE	19
2022-09-12	09:33:38	0.724084	3.22087	4.60762	804.791	FALSE	19
2022-09-12	09:33:38	0.916807	4.07814	4.60762	761.404	FALSE	19
2022-09-12	09:33:38	1.85141	8.23544	4.60762	813.027	FALSE	19
2022-09-12	09:33:39	1.65075	7.34287	8.70562	768.747	FALSE	19
2022-09-12	09:33:39	1.5024	6.68298	8.70562	819.71	FALSE	19
2022-09-12	09:33:39	2.71818	12.091	8.70562	780.838	FALSE	19
2022-09-12	09:33:40	1.24037	5.51741	6.37989	825.227	FALSE	19
2022-09-12	09:33:40	1.89289	8.41995	6.37989	789.258	FALSE	19
2022-09-12	09:33:40	1.89004	8.40728	6.37989	833.635	FALSE	19
2022-09-12	09:33:40	0.713753	3.17492	6.37989	792.433	FALSE	19
2022-09-12	09:33:41	1.44632	6.43352	6.88877	840.068	FALSE	19
2022-09-12	09:33:41	2.22159	9.88208	6.88877	802.315	FALSE	19
2022-09-12	09:33:41	0.935127	4.15963	6.88877	844.228	FALSE	19
2022-09-12	09:33:41	1.59162	7.07984	6.88877	809.395	FALSE	19
2022-09-12	09:33:42	2.16027	9.60931	8.77268	853.837	FALSE	19
2022-09-12	09:33:42	1.20897	5.37774	8.77268	814.773	FALSE	19
2022-09-12	09:33:42	1.97146	8.76945	8.77268	862.606	FALSE	19
2022-09-12	09:33:42	2.54805	11.3342	8.77268	826.107	FALSE	19
2022-09-12	09:33:43	2.0106	8.94355	9.83618	871.55	FALSE	19
2022-09-12	09:33:43	3.01589	13.4153	9.83618	839.522	1	20
2022-09-12	09:33:43	2.16698	9.63916	9.83618	881.189	FALSE	20
2022-09-12	09:33:43	1.65162	7.34674	9.83618	846.869	FALSE	20
2022-09-12	09:33:44	1.12011	4.98247	7.93112	886.172	FALSE	20
2022-09-12	09:33:44	3.39197	15.0882	7.93112	861.957	1	21
2022-09-12	09:33:44	0.836908	3.72273	7.93112	889.894	FALSE	21
2022-09-12	09:33:45	2.25192	10.017	8.83805	871.974	FALSE	21
2022-09-12	09:33:45	1.80627	8.03465	8.83805	897.929	FALSE	21
2022-09-12	09:33:45	2.56057	11.3899	8.83805	883.364	FALSE	21
2022-09-12	09:33:45	1.32877	5.91063	8.83805	903.84	FALSE	21
2022-09-12	09:33:46	1.4537	6.46635	8.31519	889.831	FALSE	21
2022-09-12	09:33:46	1.69065	7.52035	8.31519	911.36	FALSE	21
2022-09-12	09:33:46	3.16123	14.0618	8.31519	903.892	1	22
2022-09-12	09:33:46	1.17177	5.21227	8.31519	916.572	FALSE	22
2022-09-12	09:33:47	1.77655	7.90245	13.0665	911.795	FALSE	22
2022-09-12	09:33:47	2.9194	12.9861	13.0665	929.558	FALSE	22
2022-09-12	09:33:47	2.18877	9.73609	13.0665	921.531	FALSE	22
2022-09-12	09:33:47	4.8652	21.6414	13.0665	951.2	1	23
2022-09-12	09:33:48	5.98322	26.6146	26.883	948.145	1	24
2022-09-12	09:33:48	5.65136	25.1384	26.883	976.338	1	25
2022-09-12	09:33:48	6.49614	28.8961	26.883	977.042	1	26
2022-09-12	09:33:49	7.80388	34.7132	39.7387	1011.05	1	27
2022-09-12	09:33:49	8.79945	39.1417	39.7387	1016.18	1	28
2022-09-12	09:33:49	11.6742	51.9292	39.7387	1062.98	1	29
2022-09-12	09:33:49	7.45706	33.1705	39.7387	1049.35	1	30
2022-09-12	09:33:50	4.45625	19.8223	14.932	1082.8	1	31
2022-09-12	09:33:50	2.97854	13.2491	14.932	1062.6	FALSE	31
2022-09-12	09:33:50	3.82215	17.0017	14.932	1099.8	1	32
2022-09-12	09:33:50	2.17055	9.65504	14.932	1072.26	FALSE	32
2022-09-12	09:33:51	1.0109	4.49669	3.41504	1104.3	FALSE	32
2022-09-12	09:33:51	0.687086	3.0563	3.41504	1075.31	FALSE	32
2022-09-12	09:33:51	0.757417	3.36914	3.41504	1107.67	FALSE	32
2022-09-12	09:33:51	0.615535	2.73802	3.41504	1078.05	FALSE	32
2022-09-12	09:33:52	0.621794	2.76586	2.07702	1110.44	FALSE	32
2022-09-12	09:33:52	0.404797	1.80062	2.07702	1079.85	FALSE	32
2022-09-12	09:33:52	0.47528	2.11414	2.07702	1112.55	FALSE	32
2022-09-12	09:33:52	0.365865	1.62744	2.07702	1081.48	FALSE	32
2022-09-12	09:33:53	0.295484	1.31437	0.942141	1113.86	FALSE	32
2022-09-12	09:33:53	0.190954	0.849402	0.942141	1082.33	FALSE	32
2022-09-12	09:33:53	0.14897	0.662648	0.942141	1114.53	FALSE	32
2022-09-12	09:33:54	0.243117	1.08143	0.906505	1083.41	FALSE	32
2022-09-12	09:33:54	0.201234	0.895129	0.906505	1115.42	FALSE	32
2022-09-12	09:33:54	0.262252	1.16655	0.906505	1084.58	FALSE	32
2022-09-12	09:33:54	0.108563	0.48291	0.906505	1115.91	FALSE	32
2022-09-12	09:33:55	0.279809	1.24465	1.08268	1085.82	FALSE	32
2022-09-12	09:33:55	0.238588	1.06129	1.08268	1116.97	FALSE	32
2022-09-12	09:33:55	0.281641	1.2528	1.08268	1087.08	FALSE	32
2022-09-12	09:33:55	0.17355	0.771985	1.08268	1117.74	FALSE	32
2022-09-12	09:33:56	0.349987	1.55681	2.53285	1088.63	FALSE	32
2022-09-12	09:33:56	0.362913	1.61431	2.53285	1119.35	FALSE	32
2022-09-12	09:33:56	0.995331	4.42743	2.53285	1093.06	FALSE	32
2022-09-12	09:33:57	0.923422	4.10757	6.56721	1123.46	FALSE	32
2022-09-12	09:33:57	1.69696	7.54842	6.56721	1100.61	FALSE	32
2022-09-12	09:33:57	2.29579	10.2121	6.56721	1133.67	FALSE	32
2022-09-12	09:33:57	0.989326	4.40072	6.56721	1105.01	FALSE	32
2022-09-12	09:33:58	1.31177	5.83502	4.54825	1139.51	FALSE	32
2022-09-12	09:33:58	0.590903	2.62845	4.54825	1107.64	FALSE	32
2022-09-12	09:33:58	1.21314	5.39629	4.54825	1144.9	FALSE	32
2022-09-12	09:33:58	0.97416	4.33326	4.54825	1111.97	FALSE	32
2022-09-12	09:33:59	1.13726	5.05876	5.71666	1149.96	FALSE	32
2022-09-12	09:33:59	1.36754	6.08309	5.71666	1118.05	FALSE	32
2022-09-12	09:33:59	1.64948	7.33722	5.71666	1157.3	FALSE	32
2022-09-12	09:33:59	0.986374	4.38759	5.71666	1122.44	FALSE	32
2022-09-12	09:34:00	1.97594	8.78938	6.52198	1166.09	FALSE	32
2022-09-12	09:34:00	1.46459	6.51479	6.52198	1128.96	FALSE	32
2022-09-12	09:34:00	1.28795	5.72906	6.52198	1171.82	FALSE	32
2022-09-12	09:34:00	1.13635	5.05471	6.52198	1134.01	FALSE	32
2022-09-12	09:34:01	1.14678	5.10111	7.08391	1176.92	FALSE	32
2022-09-12	09:34:01	2.5677	11.4216	7.08391	1145.43	FALSE	32
2022-09-12	09:34:01	1.06312	4.72897	7.08391	1181.65	FALSE	32
2022-09-12	09:34:02	2.13319	9.48886	8.32339	1154.92	FALSE	32
2022-09-12	09:34:02	1.12541	5.00605	8.32339	1186.65	FALSE	32
2022-09-12	09:34:02	2.07182	9.21587	8.32339	1164.14	FALSE	32
2022-09-12	09:34:02	2.15431	9.5828	8.32339	1196.24	FALSE	32
2022-09-12	09:34:03	1.67894	7.46826	8.28901	1171.61	FALSE	32
2022-09-12	09:34:03	1.40724	6.25968	8.28901	1202.5	FALSE	32
2022-09-12	09:34:03	2.50418	11.1391	8.28901	1182.74	FALSE	32
2022-09-12	09:34:04	1.11085	4.94128	7.28555	1207.44	FALSE	32
2022-09-12	09:34:04	2.20062	9.7888	7.28555	1192.53	FALSE	32
2022-09-12	09:34:04	1.62617	7.23353	7.28555	1214.67	FALSE	32
2022-09-12	09:34:04	1.5105	6.71901	7.28555	1199.25	FALSE	32
2022-09-12	09:34:04	1.74118	7.74512	7.28555	1222.42	FALSE	32
2022-09-12	09:34:05	1.08632	4.83217	8.22616	1204.08	FALSE	32
2022-09-12	09:34:05	1.39548	6.20737	8.22616	1228.62	FALSE	32
2022-09-12	09:34:05	2.90993	12.944	8.22616	1217.03	FALSE	32
2022-09-12	09:34:05	2.00556	8.92113	8.22616	1237.55	FALSE	32
2022-09-12	09:34:06	0.934974	4.15895	5.5955	1221.19	FALSE	32
2022-09-12	09:34:06	1.45304	6.46341	5.5955	1244.01	FALSE	32
2022-09-12	09:34:06	1.38576	6.16414	5.5955	1227.35	FALSE	32
2022-09-12	09:34:07	1.26174	5.61247	9.55321	1249.62	FALSE	32
2022-09-12	09:34:07	1.97391	8.78035	9.55321	1236.13	FALSE	32
2022-09-12	09:34:07	2.98174	13.2634	9.55321	1262.88	FALSE	32
2022-09-12	09:34:07	2.37324	10.5566	9.55321	1246.69	FALSE	32
2022-09-12	09:34:08	2.8363	12.6164	9.41627	1275.5	FALSE	32
2022-09-12	09:34:08	1.7763	7.90134	9.41627	1254.59	FALSE	32
2022-09-12	09:34:08	3.0164	13.4176	9.41627	1288.92	1	33
2022-09-12	09:34:08	0.838486	3.72975	9.41627	1258.32	FALSE	33
2022-09-12	09:34:09	1.30816	5.81896	4.91855	1294.74	FALSE	33
2022-09-12	09:34:09	1.2709	5.65322	4.91855	1263.97	FALSE	33
2022-09-12	09:34:09	1.47915	6.57956	4.91855	1301.32	FALSE	33
2022-09-12	09:34:09	0.364746	1.62246	4.91855	1265.59	FALSE	33
2022-09-12	09:34:10	0.726578	3.23196	2.58748	1304.55	FALSE	33
2022-09-12	09:34:10	0.570395	2.53723	2.58748	1268.13	FALSE	33
2022-09-12	09:34:10	0.448104	1.99326	2.58748	1306.54	FALSE	33
2022-09-12	09:34:11	0.197977	0.880641	0.92286	1269.01	FALSE	33
2022-09-12	09:34:11	0.224593	0.999035	0.92286	1307.54	FALSE	33
2022-09-12	09:34:11	0.194924	0.867061	0.92286	1269.88	FALSE	33
2022-09-12	09:34:11	0.212379	0.944704	0.92286	1308.49	FALSE	33
2022-09-12	09:34:12	-0.00838398	-0.0372936	0.174024	1269.88	FALSE	33
2022-09-12	09:34:12	0.0769595	0.342331	0.174024	1308.83	FALSE	33
2022-09-12	09:34:12	-0.0103178	-0.0458956	0.174024	1269.88	FALSE	33
2022-09-12	09:34:12	0.0982317	0.436954	0.174024	1309.27	FALSE	33
2022-09-12	09:34:13	1.45533	6.4736	4.468	1276.35	FALSE	33
2022-09-12	09:34:13	1.17599	5.23104	4.468	1314.5	FALSE	33
2022-09-12	09:34:13	0.454008	2.01952	4.468	1278.37	FALSE	33
2022-09-12	09:34:13	0.932481	4.14786	4.468	1318.64	FALSE	33
2022-09-12	09:34:14	0.584542	2.60016	4.77932	1280.97	FALSE	33
2022-09-12	09:34:14	1.15421	5.13416	4.77932	1323.78	FALSE	33
2022-09-12	09:34:14	0.785254	3.49297	4.77932	1284.47	FALSE	33
2022-09-12	09:34:14	1.77375	7.88999	4.77932	1331.67	FALSE	33
2022-09-12	09:34:15	1.80821	8.04328	8.8124	1292.51	FALSE	33
2022-09-12	09:34:15	2.34525	10.4321	8.8124	1342.1	FALSE	33
2022-09-12	09:34:15	1.78989	7.96179	8.8124	1300.47	FALSE	33
2022-09-12	09:34:16	2.36098	10.5021	7.79985	1352.6	FALSE	33
2022-09-12	09:34:16	1.15971	5.15862	7.79985	1305.63	FALSE	33
2022-09-12	09:34:16	1.92683	8.57093	7.79985	1361.17	FALSE	33
2022-09-12	09:34:16	1.56642	6.96775	7.79985	1312.6	FALSE	33
2022-09-12	09:34:17	1.82358	8.11165	8.00478	1369.29	FALSE	33
2022-09-12	09:34:17	1.60958	7.15973	8.00478	1319.76	FALSE	33
2022-09-12	09:34:17	2.4309	10.8131	8.00478	1380.1	FALSE	33
2022-09-12	09:34:17	1.33416	5.93461	8.00478	1325.69	FALSE	33
2022-09-12	09:34:18	1.74581	7.76571	5.05391	1387.86	FALSE	33
2022-09-12	09:34:18	0.720674	3.2057	5.05391	1328.9	FALSE	33
2022-09-12	09:34:18	1.45396	6.4675	5.05391	1394.33	FALSE	33
2022-09-12	09:34:18	0.624237	2.77673	5.05391	1331.67	FALSE	33
2022-09-12	09:34:19	1.41803	6.30768	11.2515	1400.64	FALSE	33
2022-09-12	09:34:19	2.43594	10.8355	11.2515	1342.51	FALSE	33
2022-09-12	09:34:19	3.73436	16.6112	11.2515	1417.25	1	34
2022-09-12	09:34:20	0.5336	2.37356	2.05364	1344.88	FALSE	34
2022-09-12	09:34:20	0.413346	1.83865	2.05364	1419.09	FALSE	34
2022-09-12	09:34:20	0.174364	0.775606	2.05364	1345.66	FALSE	34
2022-09-12	09:34:20	0.725407	3.22676	2.05364	1422.32	FALSE	34
2022-09-12	09:34:21	-0.105229	-0.46808	-0.416693	1345.66	FALSE	34
2022-09-12	09:34:21	-0.130725	-0.581491	-0.416693	1422.32	FALSE	34
2022-09-12	09:34:21	-0.0898598	-0.399714	-0.416693	1345.66	FALSE	34
2022-09-12	09:34:21	-0.0488929	-0.217485	-0.416693	1422.32	FALSE	34
2022-09-12	09:34:22	-0.130674	-0.581264	0.156367	1345.66	FALSE	34
2022-09-12	09:34:22	0.0395041	0.175722	0.156367	1422.49	FALSE	34
2022-09-12	09:34:22	0.0874938	0.38919	0.156367	1346.05	FALSE	34
2022-09-12	09:34:22	0.144288	0.641822	0.156367	1423.13	FALSE	34
2022-09-12	09:34:23	0.16897	0.751612	1.93644	1346.8	FALSE	34
2022-09-12	09:34:23	0.405305	1.80288	1.93644	1424.94	FALSE	34
2022-09-12	09:34:23	0.678842	3.01962	1.93644	1349.82	FALSE	34
2022-09-12	09:34:23	0.488206	2.17164	1.93644	1427.11	FALSE	34
2022-09-12	09:34:24	0.694211	3.08799	2.5896	1352.91	FALSE	34
2022-09-12	09:34:24	0.357214	1.58896	2.5896	1428.7	FALSE	34
2022-09-12	09:34:24	0.695076	3.09184	2.5896	1356	FALSE	34
2022-09-12	09:34:25	0.606628	2.6984	3.04255	1431.4	FALSE	34
2022-09-12	09:34:25	0.617112	2.74504	3.04255	1358.74	FALSE	34
2022-09-12	09:34:25	1.025	4.5594	3.04255	1435.95	FALSE	34
2022-09-12	09:34:25	0.487239	2.16734	3.04255	1360.91	FALSE	34
2022-09-12	09:34:26	0.419097	1.86423	1.19241	1437.82	FALSE	34
2022-09-12	09:34:26	0.295738	1.3155	1.19241	1362.23	FALSE	34
2022-09-12	09:34:26	0.205458	0.913918	1.19241	1438.73	FALSE	34
2022-09-12	09:34:26	0.151972	0.676002	1.19241	1362.9	FALSE	34
2022-09-12	09:34:27	0.168868	0.751159	1.12891	1439.48	FALSE	34
2022-09-12	09:34:27	0.2793	1.24238	1.12891	1364.15	FALSE	34
2022-09-12	09:34:27	0.28729	1.27792	1.12891	1440.76	FALSE	34
2022-09-12	09:34:27	0.279707	1.24419	1.12891	1365.39	FALSE	34
2022-09-12	09:34:28	0.274517	1.22111	1.21167	1441.98	FALSE	34
2022-09-12	09:34:28	0.267901	1.19168	1.21167	1366.58	FALSE	34
2022-09-12	09:34:28	0.274771	1.22224	1.21167	1443.21	FALSE	34
2022-09-12	09:34:29	0.306629	1.36395	2.64187	1367.95	FALSE	34
2022-09-12	09:34:29	0.101133	0.44986	2.64187	1443.66	FALSE	34
2022-09-12	09:34:29	0.203168	0.903732	2.64187	1368.85	FALSE	34
2022-09-12	09:34:29	1.76475	7.84996	2.64187	1451.51	FALSE	34
2022-09-12	09:34:30	0.962048	4.27938	0.79264	1373.13	FALSE	34
2022-09-12	09:34:30	0.00881704	0.03922	0.79264	1451.54	FALSE	34
2022-09-12	09:34:30	-0.157341	-0.699884	0.79264	1373.13	FALSE	34
2022-09-12	09:34:30	-0.10075	-0.448156	0.79264	1451.54	FALSE	34
2022-09-12	09:34:31	-0.10589	-0.47102	-0.0438015	1373.13	FALSE	34
2022-09-12	09:34:31	-0.177442	-0.789298	-0.0438015	1451.54	FALSE	34
2022-09-12	09:34:31	0.0362979	0.16146	-0.0438015	1373.29	FALSE	34
2022-09-12	09:34:31	0.207646	0.923651	-0.0438015	1452.47	FALSE	34
2022-09-12	09:34:32	0.135942	0.604697	0.857157	1373.89	FALSE	34
2022-09-12	09:34:32	0.251361	1.1181	0.857157	1453.59	FALSE	34
2022-09-12	09:34:32	0.189377	0.842387	0.857157	1374.74	FALSE	34
2022-09-12	09:34:32	0.19411	0.86344	0.857157	1454.45	FALSE	34
2022-09-12	09:34:33	0.272888	1.21386	1.50075	1375.95	FALSE	34
2022-09-12	09:34:33	0.291463	1.29649	1.50075	1455.75	FALSE	34
2022-09-12	09:34:33	0.447799	1.9919	1.50075	1377.94	FALSE	34
2022-09-12	09:34:34	0.394364	1.75421	1.30803	1457.5	FALSE	34
2022-09-12	09:34:34	0.280929	1.24963	1.30803	1379.19	FALSE	34
2022-09-12	09:34:34	0.287341	1.27815	1.30803	1458.78	FALSE	34
2022-09-12	09:34:34	0.213601	0.95014	1.30803	1380.14	FALSE	34
2022-09-12	09:34:35	0.246018	1.09434	0.834407	1459.87	FALSE	34
2022-09-12	09:34:35	0.187443	0.833784	0.834407	1380.98	FALSE	34
2022-09-12	09:34:35	0.132074	0.587492	0.834407	1460.46	FALSE	34
2022-09-12	09:34:35	0.184797	0.822014	0.834407	1381.8	FALSE	34
2022-09-12	09:34:36	0.208766	0.928633	1.03718	1461.39	FALSE	34
2022-09-12	09:34:36	0.2164	0.96259	1.03718	1382.76	FALSE	34
2022-09-12	09:34:36	0.250802	1.11562	1.03718	1462.5	FALSE	34
2022-09-12	09:34:36	0.256705	1.14188	1.03718	1383.9	FALSE	34
2022-09-12	09:34:37	0.158384	0.704524	1.0468	1463.21	FALSE	34
2022-09-12	09:34:37	0.289275	1.28675	1.0468	1385.19	FALSE	34
2022-09-12	09:34:37	0.258333	1.14912	1.0468	1464.36	FALSE	34
2022-09-12	09:34:38	0.234669	1.04385	1.14057	1386.23	FALSE	34
2022-09-12	09:34:38	0.272837	1.21363	1.14057	1465.57	FALSE	34
2022-09-12	09:34:38	0.268715	1.1953	1.14057	1387.43	FALSE	34
2022-09-12	09:34:38	0.249428	1.10951	1.14057	1466.68	FALSE	34
2022-09-12	09:34:39	0.597214	2.65653	3.62817	1390.09	FALSE	34
2022-09-12	09:34:39	0.646425	2.87543	3.62817	1469.56	FALSE	34
2022-09-12	09:34:39	1.24118	5.52102	3.62817	1395.61	FALSE	34
2022-09-12	09:34:39	0.777773	3.45969	3.62817	1473.02	FALSE	34
2022-09-12	09:34:40	0.654313	2.91052	7.25735	1398.52	FALSE	34
2022-09-12	09:34:40	2.22785	9.90992	7.25735	1482.93	FALSE	34
2022-09-12	09:34:40	1.15319	5.12962	7.25735	1403.65	FALSE	34
2022-09-12	09:34:40	2.49075	11.0794	7.25735	1494.01	FALSE	34
2022-09-12	09:34:41	0.960318	4.27169	8.0373	1407.92	FALSE	34
2022-09-12	09:34:41	1.05228	4.68075	8.0373	1498.69	FALSE	34
2022-09-12	09:34:41	3.408	15.1595	8.0373	1423.08	1	35
2022-09-12	09:34:42	2.80001	12.455	4.4903	1511.14	FALSE	35
2022-09-12	09:34:42	0.57757	2.56915	4.4903	1425.65	FALSE	35
2022-09-12	09:34:42	0.173092	0.769948	4.4903	1511.91	FALSE	35
2022-09-12	09:34:42	0.487188	2.16711	4.4903	1427.81	FALSE	35
2022-09-12	09:34:43	0.424491	1.88822	1.81867	1513.8	FALSE	35
2022-09-12	09:34:43	0.357112	1.58851	1.81867	1429.4	FALSE	35
2022-09-12	09:34:43	0.500776	2.22755	1.81867	1516.03	FALSE	35
2022-09-12	09:34:43	0.353041	1.5704	1.81867	1430.97	FALSE	35
2022-09-12	09:34:44	0.303473	1.34991	1.08545	1517.38	FALSE	35
2022-09-12	09:34:44	0.300013	1.33452	1.08545	1432.31	FALSE	35
2022-09-12	09:34:44	0.125458	0.558062	1.08545	1517.94	FALSE	35
2022-09-12	09:34:44	0.247137	1.09931	1.08545	1433.41	FALSE	35
2022-09-12	09:34:45	0.259708	1.15523	2.05461	1519.09	FALSE	35
2022-09-12	09:34:45	0.297214	1.32207	2.05461	1434.73	FALSE	35
2022-09-12	09:34:45	0.532074	2.36677	2.05461	1521.46	FALSE	35
2022-09-12	09:34:45	0.758588	3.37435	2.05461	1438.1	FALSE	35
2022-09-12	09:34:46	0.653091	2.90508	2.45256	1524.36	FALSE	35
2022-09-12	09:34:46	0.534211	2.37628	2.45256	1440.48	FALSE	35
2022-09-12	09:34:46	0.466781	2.07634	2.45256	1526.44	FALSE	35
2022-09-12	09:34:47	0.670293	2.9816	2.11312	1443.46	FALSE	35
2022-09-12	09:34:47	0.514975	2.29071	2.11312	1528.73	FALSE	35
2022-09-12	09:34:47	0.322506	1.43457	2.11312	1444.9	FALSE	35
2022-09-12	09:34:47	0.39243	1.74561	2.11312	1530.47	FALSE	35
2022-09-12	09:34:48	0.182201	0.810466	1.55483	1445.71	FALSE	35
2022-09-12	09:34:48	0.412888	1.83661	1.55483	1532.31	FALSE	35
2022-09-12	09:34:48	0.331718	1.47555	1.55483	1447.18	FALSE	35
2022-09-12	09:34:48	0.471361	2.09671	1.55483	1534.41	FALSE	35
2022-09-12	09:34:49	0.284847	1.26706	1.60463	1448.45	FALSE	35
2022-09-12	09:34:49	0.359046	1.59711	1.60463	1536.01	FALSE	35
2022-09-12	09:34:49	0.328257	1.46015	1.60463	1449.91	FALSE	35
2022-09-12	09:34:49	0.470802	2.09422	1.60463	1538.1	FALSE	35
2022-09-12	09:34:50	0.400827	1.78296	1.49939	1451.69	FALSE	35
2022-09-12	09:34:50	0.231667	1.0305	1.49939	1539.13	FALSE	35
2022-09-12	09:34:50	0.378741	1.68472	1.49939	1453.38	FALSE	35
2022-09-12	09:34:51	0.603168	2.68301	1.15738	1541.81	FALSE	35
2022-09-12	09:34:51	0.253702	1.12852	1.15738	1454.5	FALSE	35
2022-09-12	09:34:51	0.0622521	0.27691	1.15738	1542.09	FALSE	35
2022-09-12	09:34:51	0.121641	0.541083	1.15738	1455.05	FALSE	35
2022-09-12	09:34:52	0.317977	1.41443	0.793376	1543.5	FALSE	35
2022-09-12	09:34:52	0.0802674	0.357045	0.793376	1455.4	FALSE	35
2022-09-12	09:34:52	0.0419468	0.186588	0.793376	1543.69	FALSE	35
2022-09-12	09:34:52	0.273244	1.21544	0.793376	1456.62	FALSE	35
2022-09-12	09:34:53	0.131056	0.582963	0.847875	1544.27	FALSE	35
2022-09-12	09:34:53	0.308359	1.37164	0.847875	1457.99	FALSE	35
2022-09-12	09:34:53	0.212074	0.943348	0.847875	1545.22	FALSE	35
2022-09-12	09:34:53	0.110954	0.493546	0.847875	1458.48	FALSE	35
2022-09-12	09:34:54	0.169835	0.75546	0.725521	1545.97	FALSE	35
2022-09-12	09:34:54	0.114771	0.510524	0.725521	1458.99	FALSE	35
2022-09-12	09:34:54	0.211921	0.942667	0.725521	1546.92	FALSE	35
2022-09-12	09:34:54	0.155891	0.693434	0.725521	1459.69	FALSE	35
2022-09-12	09:34:55	0.132125	0.587718	0.45016	1547.5	FALSE	35
2022-09-12	09:34:55	0.0503946	0.224165	0.45016	1459.91	FALSE	35
2022-09-12	09:34:55	0.121082	0.538597	0.45016	1548.04	FALSE	35
2022-09-12	09:34:56	0.177367	0.788964	0.921842	1460.7	FALSE	35
2022-09-12	09:34:56	0.209936	0.933837	0.921842	1548.98	FALSE	35
2022-09-12	09:34:56	0.209173	0.930443	0.921842	1461.63	FALSE	35
2022-09-12	09:34:56	0.232481	1.03412	0.921842	1550.01	FALSE	35
2022-09-12	09:34:57	0.202405	0.900338	0.850593	1462.53	FALSE	35
2022-09-12	09:34:57	0.173601	0.772212	0.850593	1550.78	FALSE	35
2022-09-12	09:34:57	0.195738	0.870682	0.850593	1463.4	FALSE	35
2022-09-12	09:34:57	0.193143	0.859139	0.850593	1551.64	FALSE	35
2022-09-12	09:34:58	0.183168	0.814768	0.848838	1464.22	FALSE	35
2022-09-12	09:34:58	0.189784	0.844197	0.848838	1552.49	FALSE	35
2022-09-12	09:34:58	0.199708	0.888341	0.848838	1465.11	FALSE	35
2022-09-12	09:34:58	0.190649	0.848045	0.848838	1553.33	FALSE	35
2022-09-12	09:34:59	0.188155	0.836951	0.83333	1465.94	FALSE	35
2022-09-12	09:34:59	0.18729	0.833103	0.83333	1554.17	FALSE	35
2022-09-12	09:34:59	0.186578	0.829936	0.83333	1466.77	FALSE	35
2022-09-12	09:35:00	0.191972	0.85393	0.862872	1555.02	FALSE	35
2022-09-12	09:35:00	0.19528	0.868644	0.862872	1467.64	FALSE	35
2022-09-12	09:35:00	0.193346	0.860042	0.862872	1555.88	FALSE	35
2022-09-12	09:35:00	0.195331	0.868871	0.862872	1468.51	FALSE	35
2022-09-12	09:35:01	0.235636	1.04816	1.32393	1556.93	FALSE	35
2022-09-12	09:35:01	0.334415	1.48754	1.32393	1470	FALSE	35
2022-09-12	09:35:01	0.289529	1.28788	1.32393	1558.22	FALSE	35
2022-09-12	09:35:01	0.330954	1.47215	1.32393	1471.47	FALSE	35
2022-09-12	09:35:02	0.432328	1.92308	1.23588	1560.14	FALSE	35
2022-09-12	09:35:02	0.227087	1.01013	1.23588	1472.48	FALSE	35
2022-09-12	09:35:02	0.28388	1.26276	1.23588	1561.4	FALSE	35
2022-09-12	09:35:02	0.168054	0.747538	1.23588	1473.23	FALSE	35
2022-09-12	09:35:03	0.175076	0.778773	0.953364	1562.18	FALSE	35
2022-09-12	09:35:03	0.251514	1.11878	0.953364	1474.35	FALSE	35
2022-09-12	09:35:03	0.217621	0.968022	0.953364	1563.15	FALSE	35
2022-09-12	09:35:03	0.213092	0.947876	0.953364	1475.29	FALSE	35
2022-09-12	09:35:04	0.228206	1.01511	1.04408	1564.16	FALSE	35
2022-09-12	09:35:04	0.233295	1.03774	1.04408	1476.33	FALSE	35
2022-09-12	09:35:04	0.242659	1.0794	1.04408	1565.24	FALSE	35
2022-09-12	09:35:05	0.25299	1.12535	1.34782	1477.46	FALSE	35
2022-09-12	09:35:05	0.286832	1.27589	1.34782	1566.52	FALSE	35
2022-09-12	09:35:05	0.328104	1.45947	1.34782	1478.92	FALSE	35
2022-09-12	09:35:05	0.344084	1.53055	1.34782	1568.05	FALSE	35
2022-09-12	09:35:06	0.38383	1.70735	1.87413	1480.62	FALSE	35
2022-09-12	09:35:06	0.424135	1.88664	1.87413	1569.94	FALSE	35
2022-09-12	09:35:06	0.407748	1.81374	1.87413	1482.44	FALSE	35
2022-09-12	09:35:06	0.46958	2.08879	1.87413	1572.03	FALSE	35
2022-09-12	09:35:07	0.303575	1.35036	1.18019	1483.79	FALSE	35
2022-09-12	09:35:07	0.257316	1.14459	1.18019	1573.17	FALSE	35
2022-09-12	09:35:07	0.245662	1.09275	1.18019	1484.88	FALSE	35
2022-09-12	09:35:07	0.25472	1.13305	1.18019	1574.3	FALSE	35
2022-09-12	09:35:08	0.232379	1.03367	1.05661	1485.91	FALSE	35
2022-09-12	09:35:08	0.235076	1.04567	1.05661	1575.35	FALSE	35
2022-09-12	09:35:08	0.245153	1.09049	1.05661	1487	FALSE	35
2022-09-12	09:35:09	0.254364	1.13146	1.21793	1576.48	FALSE	35
2022-09-12	09:35:09	0.264796	1.17787	1.21793	1488.18	FALSE	35
2022-09-12	09:35:09	0.283066	1.25913	1.21793	1577.74	FALSE	35
2022-09-12	09:35:09	0.29299	1.30328	1.21793	1489.49	FALSE	35
2022-09-12	09:35:10	0.289529	1.28788	1.38766	1579.03	FALSE	35
2022-09-12	09:35:10	0.304797	1.3558	1.38766	1490.84	FALSE	35
2022-09-12	09:35:10	0.314211	1.39767	1.38766	1580.42	FALSE	35
2022-09-12	09:35:10	0.3393	1.50927	1.38766	1492.35	FALSE	35
2022-09-12	09:35:11	0.3593	1.59824	1.48947	1582.02	FALSE	35
2022-09-12	09:35:11	0.34958	1.555	1.48947	1493.91	FALSE	35
2022-09-12	09:35:11	0.32042	1.42529	1.48947	1583.45	FALSE	35
2022-09-12	09:35:11	0.310089	1.37934	1.48947	1495.29	FALSE	35
2022-09-12	09:35:12	0.301132	1.3395	1.2651	1584.79	FALSE	35
2022-09-12	09:35:12	0.287494	1.27883	1.2651	1496.56	FALSE	35
2022-09-12	09:35:12	0.264593	1.17696	1.2651	1585.96	FALSE	35
2022-09-12	09:35:13	0.257061	1.14346	1.1129	1497.71	FALSE	35
2022-09-12	09:35:13	0.250598	1.11471	1.1129	1587.08	FALSE	35
2022-09-12	09:35:13	0.249886	1.11154	1.1129	1498.82	FALSE	35
2022-09-12	09:35:13	0.243219	1.08189	1.1129	1588.16	FALSE	35
2022-09-12	09:35:14	0.33813	1.50407	2.78884	1500.32	FALSE	35
2022-09-12	09:35:14	0.81757	3.63671	2.78884	1591.8	FALSE	35
2022-09-12	09:35:14	1.11106	4.94222	2.78884	1505.27	FALSE	35
2022-09-12	09:35:14	0.241081	1.07238	2.78884	1592.87	FALSE	35
2022-09-12	09:35:15	0.171361	0.762248	1.08036	1506.03	FALSE	35
2022-09-12	09:35:15	0.250802	1.11562	1.08036	1593.99	FALSE	35
2022-09-12	09:35:15	0.267545	1.19009	1.08036	1507.22	FALSE	35
2022-09-12	09:35:15	0.281794	1.25348	1.08036	1595.24	FALSE	35
2022-09-12	09:35:16	0.258181	1.14844	1.40984	1508.37	FALSE	35
2022-09-12	09:35:16	0.358435	1.59439	1.40984	1596.83	FALSE	35
2022-09-12	09:35:16	0.266934	1.18738	1.40984	1509.55	FALSE	35
2022-09-12	09:35:16	0.384237	1.70916	1.40984	1598.54	FALSE	35
2022-09-12	09:35:17	0.283728	1.26208	1.45072	1510.82	FALSE	35
2022-09-12	09:35:17	0.407443	1.81239	1.45072	1600.36	FALSE	35
2022-09-12	09:35:17	0.287239	1.2777	1.45072	1512.09	FALSE	35
2022-09-12	09:35:18	0.280674	1.24849	1.46361	1601.6	FALSE	35
2022-09-12	09:35:18	0.392634	1.74651	1.46361	1513.84	FALSE	35
2022-09-12	09:35:18	0.260929	1.16066	1.46361	1602.76	FALSE	35
2022-09-12	09:35:18	0.381896	1.69875	1.46361	1515.54	FALSE	35
2022-09-12	09:35:19	0.168257	0.748441	1.14918	1603.51	FALSE	35
2022-09-12	09:35:19	0.199148	0.88585	1.14918	1516.42	FALSE	35
2022-09-12	09:35:19	0.366832	1.63174	1.14918	1605.14	FALSE	35
2022-09-12	09:35:19	0.299148	1.33067	1.14918	1517.76	FALSE	35
2022-09-12	09:35:20	0.479707	2.13383	2.14617	1607.28	FALSE	35
2022-09-12	09:35:20	0.299453	1.33203	2.14617	1519.09	FALSE	35
2022-09-12	09:35:20	0.588868	2.6194	2.14617	1609.9	FALSE	35
2022-09-12	09:35:20	0.561896	2.49943	2.14617	1521.59	FALSE	35
2022-09-12	09:35:21	0.781285	3.47531	3.04619	1613.37	FALSE	35
2022-09-12	09:35:21	0.435382	1.93667	3.04619	1523.52	FALSE	35
2022-09-12	09:35:21	0.837774	3.72659	3.04619	1617.1	FALSE	35
2022-09-12	09:35:22	0.609631	2.71176	6.67281	1526.23	FALSE	35
2022-09-12	09:35:22	1.05106	4.67533	6.67281	1621.78	FALSE	35
2022-09-12	09:35:22	1.61187	7.16992	6.67281	1533.4	FALSE	35
2022-09-12	09:35:22	2.7279	12.1342	6.67281	1633.91	FALSE	35
2022-09-12	09:35:23	1.39375	6.19968	4.02523	1539.6	FALSE	35
2022-09-12	09:35:23	1.26022	5.60571	4.02523	1639.52	FALSE	35
2022-09-12	09:35:23	0.415992	1.85042	4.02523	1541.45	FALSE	35
2022-09-12	09:35:23	0.549682	2.4451	4.02523	1641.96	FALSE	35
2022-09-12	09:35:24	0.40612	1.8065	1.667	1543.26	FALSE	35
2022-09-12	09:35:24	0.406527	1.80831	1.667	1643.77	FALSE	35
2022-09-12	09:35:24	0.342506	1.52354	1.667	1544.78	FALSE	35
2022-09-12	09:35:24	0.343881	1.52965	1.667	1645.3	FALSE	35
2022-09-12	09:35:25	0.47874	2.12953	1.54085	1546.91	FALSE	35
2022-09-12	09:35:25	0.235534	1.0477	1.54085	1646.35	FALSE	35
2022-09-12	09:35:25	0.471209	2.09603	1.54085	1549.01	FALSE	35
2022-09-12	09:35:25	0.200115	0.890152	1.54085	1647.24	FALSE	35
2022-09-12	09:35:26	0.421183	1.87351	1.47917	1550.88	FALSE	35
2022-09-12	09:35:26	0.164797	0.73305	1.47917	1647.97	FALSE	35
2022-09-12	09:35:26	0.411616	1.83095	1.47917	1552.71	FALSE	35
2022-09-12	09:35:27	0.23584	1.04906	1.14635	1649.02	FALSE	35
2022-09-12	09:35:27	0.486883	2.16575	1.14635	1554.88	FALSE	35
2022-09-12	09:35:27	0.313346	1.39383	1.14635	1650.41	FALSE	35
2022-09-12	09:35:27	-0.00522877	-0.0232586	1.14635	1554.88	FALSE	35
2022-09-12	09:35:28	-0.0403432	-0.179455	3.03977	1650.41	FALSE	35
2022-09-12	09:35:28	0.216807	0.964401	3.03977	1555.85	FALSE	35
2022-09-12	09:35:28	0.735229	3.27045	3.03977	1653.68	FALSE	35
2022-09-12	09:35:28	1.82179	8.10369	3.03977	1563.95	FALSE	35
2022-09-12	09:35:29	3.53029	15.7034	5.88141	1669.39	1	36
2022-09-12	09:35:29	0.68729	3.0572	5.88141	1567.01	FALSE	36
2022-09-12	09:35:29	0.589835	2.6237	5.88141	1672.01	FALSE	36
2022-09-12	09:35:29	0.481387	2.14131	5.88141	1569.15	FALSE	36
2022-09-12	09:35:30	0.658384	2.92862	5.44806	1674.94	FALSE	36
2022-09-12	09:35:30	1.40576	6.2531	5.44806	1575.4	FALSE	36
2022-09-12	09:35:30	1.61019	7.16245	5.44806	1682.1	FALSE	36
2022-09-12	09:35:31	1.13187	5.03478	5.7019	1580.44	FALSE	36
2022-09-12	09:35:31	1.30322	5.79698	5.7019	1687.9	FALSE	36
2022-09-12	09:35:31	2.0651	9.18598	5.7019	1589.62	FALSE	36
2022-09-12	09:35:31	0.627188	2.78986	5.7019	1690.69	FALSE	36
2022-09-12	09:35:32	1.40546	6.25177	4.98629	1595.87	FALSE	36
2022-09-12	09:35:32	1.60541	7.14118	4.98629	1697.83	FALSE	36
2022-09-12	09:35:32	0.595585	2.64928	4.98629	1598.52	FALSE	36
2022-09-12	09:35:32	0.877417	3.90293	4.98629	1701.73	FALSE	36
2022-09-12	09:35:33	1.12968	5.02504	4.87106	1603.55	FALSE	36
2022-09-12	09:35:33	1.19665	5.32294	4.87106	1707.05	FALSE	36
2022-09-12	09:35:33	1.21162	5.38953	4.87106	1608.94	FALSE	36
2022-09-12	09:35:33	0.842303	3.74673	4.87106	1710.8	FALSE	36
2022-09-12	09:35:34	1.38531	6.16214	5.91753	1615.1	FALSE	36
2022-09-12	09:35:34	1.75401	7.80219	5.91753	1718.6	FALSE	36
2022-09-12	09:35:34	0.46388	2.06343	5.91753	1617.16	FALSE	36
2022-09-12	09:35:34	1.71808	7.64236	5.91753	1726.25	FALSE	36
2022-09-12	09:35:35	1.27263	5.66091	8.94361	1622.82	FALSE	36
2022-09-12	09:35:35	3.07167	13.6634	8.94361	1739.91	1	37
2022-09-12	09:35:35	1.68754	7.50652	8.94361	1630.33	FALSE	37
2022-09-12	09:35:36	1.46296	6.50754	7.31899	1746.42	FALSE	37
2022-09-12	09:35:36	1.65345	7.35488	7.31899	1637.68	FALSE	37
2022-09-12	09:35:36	2.11742	9.41871	7.31899	1755.84	FALSE	37
2022-09-12	09:35:36	1.3477	5.99484	7.31899	1643.68	FALSE	37
2022-09-12	09:35:37	0.845	3.75873	7.13755	1759.59	FALSE	37
2022-09-12	09:35:37	2.00678	8.92656	7.13755	1652.61	FALSE	37
2022-09-12	09:35:37	1.96261	8.73008	7.13755	1768.32	FALSE	37
2022-09-12	09:35:37	1.60398	7.13482	7.13755	1659.74	FALSE	37
2022-09-12	09:35:38	0.719758	3.20163	7.34541	1771.53	FALSE	37
2022-09-12	09:35:38	2.78938	12.4077	7.34541	1672.15	FALSE	37
2022-09-12	09:35:38	1.86235	8.28411	7.34541	1779.81	FALSE	37
2022-09-12	09:35:38	1.2338	5.48819	7.34541	1677.64	FALSE	37
2022-09-12	09:35:39	1.95971	8.71718	9.31275	1788.53	FALSE	37
2022-09-12	09:35:39	2.93324	13.0476	9.31275	1690.68	FALSE	37
2022-09-12	09:35:39	1.38785	6.17343	9.31275	1794.7	FALSE	37
2022-09-12	09:35:40	1.79782	7.99706	6.99312	1698.68	FALSE	37
2022-09-12	09:35:40	1.41329	6.2866	6.99312	1800.99	FALSE	37
2022-09-12	09:35:40	1.42159	6.32352	6.99312	1705.01	FALSE	37
2022-09-12	09:35:40	1.65579	7.36529	6.99312	1808.35	FALSE	37
2022-09-12	09:35:41	0.440725	1.96043	4.62369	1706.97	FALSE	37
2022-09-12	09:35:41	1.51075	6.72012	4.62369	1815.07	FALSE	37
2022-09-12	09:35:41	1.07039	4.76131	4.62369	1711.73	FALSE	37
2022-09-12	09:35:41	1.13594	5.05289	4.62369	1820.13	FALSE	37
2022-09-12	09:35:42	1.09146	4.85503	6.8586	1716.58	FALSE	37
2022-09-12	09:35:42	1.67024	7.42956	6.8586	1827.56	FALSE	37
2022-09-12	09:35:42	1.78154	7.92465	6.8586	1724.51	FALSE	37
2022-09-12	09:35:42	1.62429	7.22517	6.8586	1834.78	FALSE	37
2022-09-12	09:35:43	0.845153	3.75941	6.97426	1728.27	FALSE	37
2022-09-12	09:35:43	1.79248	7.97331	6.97426	1842.75	FALSE	37
2022-09-12	09:35:43	2.06602	9.19007	6.97426	1737.46	FALSE	37
2022-09-12	09:35:44	0.90271	4.01543	8.03784	1846.77	FALSE	37
2022-09-12	09:35:44	2.4505	10.9003	8.03784	1748.36	FALSE	37
2022-09-12	09:35:44	1.8276	8.12953	8.03784	1854.9	FALSE	37
2022-09-12	09:35:44	2.04714	9.10609	8.03784	1757.46	FALSE	37
2022-09-12	09:35:45	1.37335	6.10894	11.7896	1861.01	FALSE	37
2022-09-12	09:35:45	2.10373	9.35781	11.7896	1766.82	FALSE	37
2022-09-12	09:35:45	2.7536	12.2486	11.7896	1873.26	FALSE	37
2022-09-12	09:35:45	4.371	19.4431	11.7896	1786.26	1	38
2022-09-12	09:35:46	2.94927	13.1189	8.85253	1886.38	FALSE	38
2022-09-12	09:35:46	2.47172	10.9947	8.85253	1797.26	FALSE	38
2022-09-12	09:35:46	1.87777	8.3527	8.85253	1894.73	FALSE	38
2022-09-12	09:35:46	0.661794	2.94379	8.85253	1800.2	FALSE	38
2022-09-12	09:35:47	1.25441	5.57987	4.48142	1900.31	FALSE	38
2022-09-12	09:35:47	0.475382	2.11459	4.48142	1802.32	FALSE	38
2022-09-12	09:35:47	0.977621	4.34865	4.48142	1904.66	FALSE	38
2022-09-12	09:35:47	1.32246	5.88257	4.48142	1808.2	FALSE	38
2022-09-12	09:35:48	1.93625	8.61283	10.3213	1913.27	FALSE	38
2022-09-12	09:35:48	2.04907	9.11467	10.3213	1817.31	FALSE	38
2022-09-12	09:35:48	2.97569	13.2365	10.3213	1926.51	FALSE	38
2022-09-12	09:35:49	1.46062	6.49713	5.10728	1823.81	FALSE	38
2022-09-12	09:35:49	1.96093	8.72261	5.10728	1935.23	FALSE	38
2022-09-12	09:35:49	0.846832	3.76688	5.10728	1827.58	FALSE	38
2022-09-12	09:35:49	0.324288	1.4425	5.10728	1936.67	FALSE	38
2022-09-12	09:35:50	0.825865	3.67361	3.37961	1831.25	FALSE	38
2022-09-12	09:35:50	1.1367	5.05627	3.37961	1941.73	FALSE	38
2022-09-12	09:35:50	0.36902	1.64147	3.37961	1832.89	FALSE	38
2022-09-12	09:35:50	0.707494	3.14707	3.37961	1944.87	FALSE	38
2022-09-12	09:35:51	1.34536	5.98443	4.08992	1838.88	FALSE	38
2022-09-12	09:35:51	0.235433	1.04725	4.08992	1945.92	FALSE	38
2022-09-12	09:35:51	0.976094	4.34186	4.08992	1843.22	FALSE	38
2022-09-12	09:35:51	1.12093	4.98612	4.08992	1950.91	FALSE	38
2022-09-12	09:35:52	0.848155	3.77276	3.82302	1846.99	FALSE	38
2022-09-12	09:35:52	0.886374	3.94277	3.82302	1954.85	FALSE	38
2022-09-12	09:35:52	0.843829	3.75352	3.82302	1850.75	FALSE	38
2022-09-12	09:35:53	0.300929	1.33859	2.75789	1956.19	FALSE	38
2022-09-12	09:35:53	0.764593	3.40106	2.75789	1854.15	FALSE	38
2022-09-12	09:35:53	0.938079	4.17276	2.75789	1960.36	FALSE	38
2022-09-12	09:35:53	0.4764	2.11912	2.75789	1856.27	FALSE	38
2022-09-12	09:35:54	0.618384	2.7507	3.06892	1963.11	FALSE	38
2022-09-12	09:35:54	1.75202	7.79334	3.06892	1864.06	FALSE	38
2022-09-12	09:35:54	0.220471	0.980699	3.06892	1964.09	FALSE	38
2022-09-12	09:35:54	0.168817	0.750932	3.06892	1864.81	FALSE	38
2022-09-12	09:35:55	0.194618	0.8657	1.15138	1964.96	FALSE	38
2022-09-12	09:35:55	0.278792	1.24012	1.15138	1866.05	FALSE	38
2022-09-12	09:35:55	0.269326	1.19802	1.15138	1966.16	FALSE	38
2022-09-12	09:35:55	0.292634	1.30169	1.15138	1867.35	FALSE	38
2022-09-12	09:35:56	0.287748	1.27996	0.389246	1967.44	FALSE	38
2022-09-12	09:35:56	0.136145	0.6056	0.389246	1867.96	FALSE	38
2022-09-12	09:35:56	-0.00924912	-0.0411419	0.389246	1967.44	FALSE	38
2022-09-12	09:35:56	-0.0646181	-0.287434	0.389246	1867.96	FALSE	38
2022-09-12	09:35:57	-0.0935748	-0.416239	-0.139236	1967.44	FALSE	38
2022-09-12	09:35:57	-0.0480277	-0.213637	-0.139236	1867.96	FALSE	38
2022-09-12	09:35:57	0.0476974	0.212168	-0.139236	1967.65	FALSE	38
2022-09-12	09:35:58	0.19813	0.881322	2.04142	1868.84	FALSE	38
2022-09-12	09:35:58	0.415789	1.84951	2.04142	1969.5	FALSE	38
2022-09-12	09:35:58	0.674822	3.00174	2.04142	1871.84	FALSE	38
2022-09-12	09:35:58	0.546985	2.4331	2.04142	1971.93	FALSE	38
2022-09-12	09:35:59	1.62744	7.23918	4.26087	1879.08	FALSE	38
2022-09-12	09:35:59	1.09996	4.89284	4.26087	1976.82	FALSE	38
2022-09-12	09:35:59	0.445763	1.98284	4.26087	1881.06	FALSE	38
2022-09-12	09:35:59	0.658384	2.92862	4.26087	1979.75	FALSE	38
2022-09-12	09:36:00	0.819148	3.64373	3.8482	1884.71	FALSE	38
2022-09-12	09:36:00	0.643982	2.86456	3.8482	1982.62	FALSE	38
2022-09-12	09:36:00	1.03747	4.61487	3.8482	1889.32	FALSE	38
2022-09-12	09:36:00	0.95986	4.26965	3.8482	1986.89	FALSE	38
2022-09-12	09:36:01	0.488715	2.1739	6.37285	1891.49	FALSE	38
2022-09-12	09:36:01	1.27609	5.6763	6.37285	1992.56	FALSE	38
2022-09-12	09:36:01	2.53324	11.2684	6.37285	1902.76	FALSE	38
2022-09-12	09:36:02	2.36556	10.5225	7.56465	2003.09	FALSE	38
2022-09-12	09:36:02	1.29335	5.75308	7.56465	1908.52	FALSE	38
2022-09-12	09:36:02	1.49263	6.63952	7.56465	2009.73	FALSE	38
2022-09-12	09:36:02	1.6509	7.34353	7.56465	1915.86	FALSE	38
2022-09-12	09:36:03	1.87497	8.34024	6.62753	2018.07	FALSE	38
2022-09-12	09:36:03	0.763982	3.39834	6.62753	1919.26	FALSE	38
2022-09-12	09:36:03	0.645509	2.87135	6.62753	2020.94	FALSE	38
2022-09-12	09:36:03	2.67528	11.9002	6.62753	1931.16	FALSE	38
2022-09-12	09:36:04	2.70378	12.027	10.6	2032.96	FALSE	38
2022-09-12	09:36:04	3.29843	14.6721	10.6	1945.83	1	39
2022-09-12	09:36:04	2.01085	8.94466	10.6	2041.91	FALSE	39
2022-09-12	09:36:04	1.51889	6.75633	10.6	1952.59	FALSE	39
2022-09-12	09:36:05	0.752583	3.34764	2.01324	2045.26	FALSE	39
2022-09-12	09:36:05	0.472176	2.10033	2.01324	1954.69	FALSE	39
2022-09-12	09:36:05	0.326323	1.45155	2.01324	2046.71	FALSE	39
2022-09-12	09:36:05	0.2593	1.15342	2.01324	1955.84	FALSE	39
2022-09-12	09:36:06	0.187494	0.834011	0.941009	2047.54	FALSE	39
2022-09-12	09:36:06	0.25355	1.12784	0.941009	1956.97	FALSE	39
2022-09-12	09:36:06	0.193601	0.861176	0.941009	2048.4	FALSE	39
2022-09-12	09:36:07	0.155535	0.691851	0.840519	1957.66	FALSE	39
2022-09-12	09:36:07	0.135942	0.604697	0.840519	2049.01	FALSE	39
2022-09-12	09:36:07	0.230547	1.02552	0.840519	1958.69	FALSE	39
2022-09-12	09:36:07	0.233804	1.04001	0.840519	2050.05	FALSE	39
2022-09-12	09:36:08	0.248868	1.10701	1.24685	1959.79	FALSE	39
2022-09-12	09:36:08	0.296247	1.31777	1.24685	2051.37	FALSE	39
2022-09-12	09:36:08	0.275636	1.22608	1.24685	1961.02	FALSE	39
2022-09-12	09:36:08	0.300471	1.33656	1.24685	2052.7	FALSE	39
2022-09-12	09:36:09	0.336145	1.49524	1.43667	1962.51	FALSE	39
2022-09-12	09:36:09	0.331616	1.47509	1.43667	2054.18	FALSE	39
2022-09-12	09:36:09	0.317316	1.41149	1.43667	1963.93	FALSE	39
2022-09-12	09:36:09	0.306832	1.36485	1.43667	2055.54	FALSE	39
2022-09-12	09:36:10	0.334873	1.48958	1.89999	1965.41	FALSE	39
2022-09-12	09:36:10	0.447647	1.99122	1.89999	2057.53	FALSE	39
2022-09-12	09:36:10	0.498893	2.21918	1.89999	1967.63	FALSE	39
2022-09-12	09:36:11	0.597468	2.65766	4.94769	2060.19	FALSE	39
2022-09-12	09:36:11	1.54261	6.86184	4.94769	1974.5	FALSE	39
2022-09-12	09:36:11	1.6138	7.17851	4.94769	2067.37	FALSE	39
2022-09-12	09:36:11	0.69528	3.09274	4.94769	1977.59	FALSE	39
2022-09-12	09:36:12	0.489733	2.17843	1.45947	2069.55	FALSE	39
2022-09-12	09:36:12	0.271158	1.20617	1.45947	1978.79	FALSE	39
2022-09-12	09:36:12	0.260064	1.15682	1.45947	2070.7	FALSE	39
2022-09-12	09:36:12	0.291463	1.29649	1.45947	1980.09	FALSE	39
2022-09-12	09:36:13	0.249071	1.10792	4.95006	2071.81	FALSE	39
2022-09-12	09:36:13	0.316501	1.40786	4.95006	1981.5	FALSE	39
2022-09-12	09:36:13	1.70566	7.58712	4.95006	2079.4	FALSE	39
2022-09-12	09:36:13	2.18006	9.69734	4.95006	1991.2	FALSE	39
2022-09-12	09:36:14	2.44648	10.8824	8.37136	2090.28	FALSE	39
2022-09-12	09:36:14	1.92948	8.58271	8.37136	1999.78	FALSE	39
2022-09-12	09:36:14	1.26994	5.64895	8.37136	2095.93	FALSE	39
2022-09-12	09:36:15	0.751616	3.34334	3.23796	2003.12	FALSE	39
2022-09-12	09:36:15	0.973193	4.32896	3.23796	2100.26	FALSE	39
2022-09-12	09:36:15	0.732277	3.25731	3.23796	2006.38	FALSE	39
2022-09-12	09:36:15	0.454618	2.02223	3.23796	2102.28	FALSE	39
2022-09-12	09:36:16	0.41584	1.84974	1.72439	2008.23	FALSE	39
2022-09-12	09:36:16	0.398944	1.77458	1.72439	2104.06	FALSE	39
2022-09-12	09:36:16	0.389428	1.73225	1.72439	2009.96	FALSE	39
2022-09-12	09:36:16	0.346425	1.54097	1.72439	2105.6	FALSE	39
2022-09-12	09:36:17	0.332227	1.47781	1.29507	2011.44	FALSE	39
2022-09-12	09:36:17	0.298334	1.32705	1.29507	2106.92	FALSE	39
2022-09-12	09:36:17	0.287188	1.27747	1.29507	2012.72	FALSE	39
2022-09-12	09:36:17	0.246832	1.09796	1.29507	2108.02	FALSE	39
2022-09-12	09:36:18	0.233499	1.03865	1.19258	2013.76	FALSE	39
2022-09-12	09:36:18	0.272176	1.21069	1.19258	2109.23	FALSE	39
2022-09-12	09:36:18	0.307646	1.36847	1.19258	2015.12	FALSE	39
2022-09-12	09:36:18	0.259097	1.15252	1.19258	2110.39	FALSE	39
2022-09-12	09:36:19	0.234415	1.04272	1.08943	2016.17	FALSE	39
2022-09-12	09:36:19	0.254211	1.13078	1.08943	2111.52	FALSE	39
2022-09-12	09:36:19	0.24612	1.09479	1.08943	2017.26	FALSE	39
2022-09-12	09:36:20	0.187036	0.831974	0.931916	2112.35	FALSE	39
2022-09-12	09:36:20	0.147646	0.656759	0.931916	2017.92	FALSE	39
2022-09-12	09:36:20	0.203728	0.906223	0.931916	2113.25	FALSE	39
2022-09-12	09:36:20	0.299606	1.33271	0.931916	2019.25	FALSE	39
2022-09-12	09:36:21	0.270802	1.20458	0.935255	2114.46	FALSE	39
2022-09-12	09:36:21	0.212023	0.943121	0.935255	2020.19	FALSE	39
2022-09-12	09:36:21	0.212227	0.944028	0.935255	2115.4	FALSE	39
2022-09-12	09:36:21	0.145967	0.64929	0.935255	2020.84	FALSE	39
2022-09-12	09:36:22	-0.00802776	-0.0357091	-0.720031	2115.4	FALSE	39
2022-09-12	09:36:22	-0.134593	-0.598697	-0.720031	2020.84	FALSE	39
2022-09-12	09:36:22	-0.197392	-0.878039	-0.720031	2115.4	FALSE	39
2022-09-12	09:36:22	-0.307468	-1.36768	-0.720031	2020.84	FALSE	39
2022-09-12	09:36:23	-0.314338	-1.39824	-0.63016	2115.4	FALSE	39
2022-09-12	09:36:23	-0.364872	-1.62302	-0.63016	2020.84	FALSE	39
2022-09-12	09:36:23	0.254211	1.13078	-0.63016	2116.53	FALSE	39
2022-09-12	09:36:24	1.70709	7.59348	9.9025	2028.44	FALSE	39
2022-09-12	09:36:24	2.81543	12.5236	9.9025	2129.06	FALSE	39
2022-09-12	09:36:24	2.65772	11.8221	9.9025	2040.26	FALSE	39
2022-09-12	09:36:24	1.72449	7.67088	9.9025	2136.73	FALSE	39
2022-09-12	09:36:25	3.55553	15.8157	12.8576	2056.07	1	40
2022-09-12	09:36:25	3.10653	13.8185	12.8576	2150.55	1	41
2022-09-12	09:36:25	1.59497	7.09475	12.8576	2063.17	FALSE	41
2022-09-12	09:36:25	3.30505	14.7015	12.8576	2165.25	1	42
2022-09-12	09:36:26	2.2905	10.1886	10.6092	2073.36	FALSE	42
2022-09-12	09:36:26	2.07172	9.21542	10.6092	2174.46	FALSE	42
2022-09-12	09:36:26	1.78836	7.95498	10.6092	2081.31	FALSE	42
2022-09-12	09:36:26	3.38963	15.0778	10.6092	2189.54	1	43
2022-09-12	09:36:27	1.46022	6.49535	8.55243	2087.81	FALSE	43
2022-09-12	09:36:27	2.48037	11.0332	8.55243	2200.58	FALSE	43
2022-09-12	09:36:27	1.70352	7.5776	8.55243	2095.39	FALSE	43
2022-09-12	09:36:27	2.04658	9.1036	8.55243	2209.68	FALSE	43
2022-09-12	09:36:28	2.12123	9.43566	7.67661	2104.82	FALSE	43
2022-09-12	09:36:28	0.87813	3.9061	7.67661	2213.58	FALSE	43
2022-09-12	09:36:28	2.17798	9.68809	7.67661	2114.51	FALSE	43
2022-09-12	09:36:29	1.17024	5.20546	8.54551	2218.79	FALSE	43
2022-09-12	09:36:29	1.70622	7.58961	8.54551	2122.1	FALSE	43
2022-09-12	09:36:29	2.57436	11.4513	8.54551	2230.24	FALSE	43
2022-09-12	09:36:29	2.23365	9.93572	8.54551	2132.04	FALSE	43
2022-09-12	09:36:30	2.06088	9.16721	8.04025	2239.41	FALSE	43
2022-09-12	09:36:30	2.48281	11.044	8.04025	2143.08	FALSE	43
2022-09-12	09:36:30	1.20698	5.36889	8.04025	2244.78	FALSE	43
2022-09-12	09:36:30	1.47945	6.58089	8.04025	2149.66	FALSE	43
2022-09-12	09:36:31	1.02439	4.55669	3.87497	2249.33	FALSE	43
2022-09-12	09:36:31	0.854975	3.8031	3.87497	2153.46	FALSE	43
2022-09-12	09:36:31	0.776145	3.45245	3.87497	2252.79	FALSE	43
2022-09-12	09:36:31	0.829021	3.68765	3.87497	2157.15	FALSE	43
2022-09-12	09:36:32	1.47828	6.57569	5.61112	2259.36	FALSE	43
2022-09-12	09:36:32	0.807697	3.5928	5.61112	2160.74	FALSE	43
2022-09-12	09:36:32	1.49833	6.66487	5.61112	2266.03	FALSE	43
2022-09-12	09:36:33	1.59665	7.10222	5.75001	2167.85	FALSE	43
2022-09-12	09:36:33	0.809377	3.60027	5.75001	2269.63	FALSE	43
2022-09-12	09:36:33	1.43513	6.38375	5.75001	2174.23	FALSE	43
2022-09-12	09:36:33	1.32948	5.91379	5.75001	2275.54	FALSE	43
2022-09-12	09:36:34	1.24719	5.54775	6.36534	2179.78	FALSE	43
2022-09-12	09:36:34	1.74062	7.74263	6.36534	2283.28	FALSE	43
2022-09-12	09:36:34	1.88612	8.38984	6.36534	2188.17	FALSE	43
2022-09-12	09:36:34	0.850038	3.78114	6.36534	2287.07	FALSE	43
2022-09-12	09:36:35	0.408817	1.8185	4.82919	2189.99	FALSE	43
2022-09-12	09:36:35	0.553041	2.46004	4.82919	2289.53	FALSE	43
2022-09-12	09:36:35	1.10093	4.89716	4.82919	2194.88	FALSE	43
2022-09-12	09:36:35	2.27981	10.1411	4.82919	2299.67	FALSE	43
2022-09-12	09:36:36	2.98724	13.2878	7.154	2208.17	FALSE	43
2022-09-12	09:36:36	1.01976	4.5361	7.154	2304.2	FALSE	43
2022-09-12	09:36:36	0.817875	3.63807	7.154	2211.81	FALSE	43
2022-09-12	09:36:37	0.548664	2.44057	5.88809	2306.64	FALSE	43
2022-09-12	09:36:37	1.25833	5.5973	5.88809	2217.41	FALSE	43
2022-09-12	09:36:37	1.33981	5.95974	5.88809	2312.6	FALSE	43
2022-09-12	09:36:37	2.148	9.55473	5.88809	2226.96	FALSE	43
2022-09-12	09:36:38	1.67355	7.44429	7.60722	2320.05	FALSE	43
2022-09-12	09:36:38	1.30709	5.8142	7.60722	2232.78	FALSE	43
2022-09-12	09:36:38	1.75055	7.7868	7.60722	2327.83	FALSE	43
2022-09-12	09:36:38	2.10953	9.38361	7.60722	2242.16	FALSE	43
2022-09-12	09:36:39	0.629885	2.80185	3.10508	2330.64	FALSE	43
2022-09-12	09:36:39	1.18093	5.25301	3.10508	2247.41	FALSE	43
2022-09-12	09:36:39	0.496349	2.20786	3.10508	2332.84	FALSE	43
2022-09-12	09:36:39	0.485051	2.1576	3.10508	2249.57	FALSE	43
2022-09-12	09:36:40	0.615992	2.74006	5.84039	2335.58	FALSE	43
2022-09-12	09:36:40	1.58602	7.05493	5.84039	2256.62	FALSE	43
2022-09-12	09:36:40	0.60902	2.70904	5.84039	2338.29	FALSE	43
2022-09-12	09:36:40	2.44088	10.8575	5.84039	2267.48	FALSE	43
2022-09-12	09:36:41	1.72123	7.65638	8.46596	2345.95	FALSE	43
2022-09-12	09:36:41	1.44459	6.42583	8.46596	2273.91	FALSE	43
2022-09-12	09:36:41	2.54388	11.3157	8.46596	2357.26	FALSE	43
2022-09-12	09:36:42	3.71187	16.5111	11.0996	2290.42	1	44
2022-09-12	09:36:42	0.765254	3.404	11.0996	2360.67	FALSE	44
2022-09-12	09:36:42	3.10128	13.7951	11.0996	2304.21	1	45
2022-09-12	09:36:42	2.40281	10.6882	11.0996	2371.36	FALSE	45
2022-09-12	09:36:43	0.966679	4.29998	6.20173	2308.51	FALSE	45
2022-09-12	09:36:43	1.88602	8.38939	6.20173	2379.75	FALSE	45
2022-09-12	09:36:43	1.99385	8.86904	6.20173	2317.38	FALSE	45
2022-09-12	09:36:43	0.730293	3.24849	6.20173	2382.99	FALSE	45
2022-09-12	09:36:44	2.19136	9.74761	9.27822	2327.13	FALSE	45
2022-09-12	09:36:44	1.52698	6.79231	9.27822	2389.79	FALSE	45
2022-09-12	09:36:44	2.12515	9.45309	9.27822	2336.58	FALSE	45
2022-09-12	09:36:44	2.49986	11.1199	9.27822	2400.91	FALSE	45
2022-09-12	09:36:45	3.47207	15.4445	13.133	2352.03	1	46
2022-09-12	09:36:45	1.61391	7.17899	13.133	2408.09	FALSE	46
2022-09-12	09:36:45	3.77131	16.7755	13.133	2368.8	1	47
2022-09-12	09:36:46	2.81039	12.5012	8.82334	2420.59	FALSE	47
2022-09-12	09:36:46	1.26882	5.64397	8.82334	2374.45	FALSE	47
2022-09-12	09:36:46	1.47248	6.54989	8.82334	2427.14	FALSE	47
2022-09-12	09:36:46	2.38261	10.5983	8.82334	2385.05	FALSE	47
2022-09-12	09:36:47	0.568715	2.52976	5.8383	2429.67	FALSE	47
2022-09-12	09:36:47	1.84327	8.19923	5.8383	2393.25	FALSE	47
2022-09-12	09:36:47	1.81218	8.06094	5.8383	2437.73	FALSE	47
2022-09-12	09:36:47	1.02587	4.56327	5.8383	2397.81	FALSE	47
2022-09-12	09:36:48	0.822913	3.66048	2.40916	2441.39	FALSE	47
2022-09-12	09:36:48	0.451005	2.00616	2.40916	2399.81	FALSE	47
2022-09-12	09:36:48	0.504135	2.24249	2.40916	2443.63	FALSE	47
2022-09-12	09:36:48	0.388359	1.7275	2.40916	2401.54	FALSE	47
2022-09-12	09:36:49	0.220115	0.979116	0.878888	2444.61	FALSE	47
2022-09-12	09:36:49	0.173397	0.771305	0.878888	2402.31	FALSE	47
2022-09-12	09:36:49	0.169122	0.752288	0.878888	2445.36	FALSE	47
2022-09-12	09:36:49	0.227697	1.01284	0.878888	2403.33	FALSE	47
2022-09-12	09:36:50	0.239606	1.06582	1.6085	2446.43	FALSE	47
2022-09-12	09:36:50	0.333193	1.48211	1.6085	2404.81	FALSE	47
2022-09-12	09:36:50	0.512023	2.27758	1.6085	2448.71	FALSE	47
2022-09-12	09:36:51	0.179046	0.796432	0.660892	2405.6	FALSE	47
2022-09-12	09:36:51	0.125102	0.556479	0.660892	2449.26	FALSE	47
2022-09-12	09:36:51	0.181743	0.808429	0.660892	2406.41	FALSE	47
2022-09-12	09:36:51	0.10841	0.482229	0.660892	2449.74	FALSE	47
2022-09-12	09:36:52	0.112685	0.501245	0.672324	2406.91	FALSE	47
2022-09-12	09:36:52	0.152125	0.676682	0.672324	2450.42	FALSE	47
2022-09-12	09:36:52	0.192888	0.858004	0.672324	2407.77	FALSE	47
2022-09-12	09:36:52	0.146883	0.653365	0.672324	2451.07	FALSE	47
2022-09-12	09:36:53	0.0977737	0.434917	0.698527	2408.21	FALSE	47
2022-09-12	09:36:53	0.140929	0.62688	0.698527	2451.7	FALSE	47
2022-09-12	09:36:53	0.106222	0.472497	0.698527	2408.68	FALSE	47
2022-09-12	09:36:53	0.283219	1.25981	0.698527	2452.96	FALSE	47
2022-09-12	09:36:54	0.337926	1.50316	2.97232	2410.18	FALSE	47
2022-09-12	09:36:54	0.293906	1.30735	2.97232	2454.27	FALSE	47
2022-09-12	09:36:54	1.37279	6.10644	2.97232	2416.29	FALSE	47
2022-09-12	09:36:55	0.846679	3.7662	3.1417	2458.03	FALSE	47
2022-09-12	09:36:55	0.859046	3.82121	3.1417	2420.11	FALSE	47
2022-09-12	09:36:55	0.801081	3.56337	3.1417	2461.6	FALSE	47
2022-09-12	09:36:55	0.318334	1.41601	3.1417	2421.53	FALSE	47
2022-09-12	09:36:56	0.589478	2.62212	1.53293	2464.22	FALSE	47
2022-09-12	09:36:56	0.291667	1.29739	1.53293	2422.82	FALSE	47
2022-09-12	09:36:56	0.266323	1.18466	1.53293	2465.4	FALSE	47
2022-09-12	09:36:56	0.231005	1.02756	1.53293	2423.85	FALSE	47
2022-09-12	09:36:57	0.602252	2.67894	7.10404	2468.08	FALSE	47
2022-09-12	09:36:57	0.777824	3.45992	7.10404	2427.31	FALSE	47
2022-09-12	09:36:57	2.33039	10.366	7.10404	2478.45	FALSE	47
2022-09-12	09:36:57	2.67777	11.9113	7.10404	2439.22	FALSE	47
2022-09-12	09:36:58	2.67014	11.8773	10.0232	2490.33	FALSE	47
2022-09-12	09:36:58	2.43452	10.8292	10.0232	2450.05	FALSE	47
2022-09-12	09:36:58	1.35961	6.04782	10.0232	2496.37	FALSE	47
2022-09-12	09:36:58	2.54902	11.3386	10.0232	2461.39	FALSE	47
2022-09-12	09:36:59	3.1821	14.1546	10.668	2510.53	1	48
2022-09-12	09:36:59	1.7394	7.7372	10.668	2469.13	FALSE	48
2022-09-12	09:36:59	2.27335	10.1123	10.668	2520.64	FALSE	48
2022-09-12	09:37:00	3.47818	15.4716	14.191	2484.6	1	49
2022-09-12	09:37:00	1.91391	8.51345	14.191	2529.16	FALSE	49
2022-09-12	09:37:00	2.90291	12.9127	14.191	2497.51	FALSE	49
2022-09-12	09:37:00	4.46612	19.8662	14.191	2549.02	1	50
2022-09-12	09:37:01	3.57655	15.9092	24.3153	2513.42	1	51
2022-09-12	09:37:01	7.12841	31.7086	24.3153	2580.73	1	52
2022-09-12	09:37:01	8.38169	37.2834	24.3153	2550.7	1	53
2022-09-12	09:37:01	2.77864	12.3599	24.3153	2593.09	FALSE	53
2022-09-12	09:37:02	2.37808	10.5782	8.41146	2561.28	FALSE	53
2022-09-12	09:37:02	3.06541	13.6356	8.41146	2606.73	1	54
2022-09-12	09:37:02	1.38612	6.16574	8.41146	2567.45	FALSE	54
2022-09-12	09:37:02	0.734313	3.26637	8.41146	2609.99	FALSE	54
2022-09-12	09:37:03	0.46729	2.0786	2.042	2569.53	FALSE	54
2022-09-12	09:37:03	0.740674	3.29467	2.042	2613.29	FALSE	54
2022-09-12	09:37:03	0.169224	0.752742	2.042	2570.28	FALSE	54
2022-09-12	09:37:04	0.175789	0.781945	1.82393	2614.07	FALSE	54
2022-09-12	09:37:04	0.545611	2.42699	1.82393	2572.71	FALSE	54
2022-09-12	09:37:04	0.349682	1.55546	1.82393	2615.62	FALSE	54
2022-09-12	09:37:04	0.569071	2.53134	1.82393	2575.24	FALSE	54
2022-09-12	09:37:05	1.12785	5.0169	1.51205	2620.64	FALSE	54
2022-09-12	09:37:05	0.105611	0.469779	1.51205	2575.71	FALSE	54
2022-09-12	09:37:05	0.0519213	0.230956	1.51205	2620.87	FALSE	54
2022-09-12	09:37:05	0.0743132	0.33056	1.51205	2576.04	FALSE	54
2022-09-12	09:37:06	0.123932	0.551274	0.470006	2621.42	FALSE	54
2022-09-12	09:37:06	0.103321	0.459592	0.470006	2576.5	FALSE	54
2022-09-12	09:37:06	0.068359	0.304075	0.470006	2621.73	FALSE	54
2022-09-12	09:37:06	0.127036	0.565082	0.470006	2577.06	FALSE	54
2022-09-12	09:37:07	0.219758	0.977528	1.48098	2622.7	FALSE	54
2022-09-12	09:37:07	0.384237	1.70916	1.48098	2578.77	FALSE	54
2022-09-12	09:37:07	0.394822	1.75625	1.48098	2624.46	FALSE	54
2022-09-12	09:37:08	0.486221	2.16281	2.27362	2580.94	FALSE	54
2022-09-12	09:37:08	0.460929	2.0503	2.27362	2626.51	FALSE	54
2022-09-12	09:37:08	0.631514	2.8091	2.27362	2583.74	FALSE	54
2022-09-12	09:37:08	0.465865	2.07226	2.27362	2628.58	FALSE	54
2022-09-12	09:37:09	0.635025	2.82472	2.58046	2586.57	FALSE	54
2022-09-12	09:37:09	0.525203	2.33621	2.58046	2630.92	FALSE	54

## Sheet: Dominic_martin_202291293152 (2)
Date	Time	Lbs	Newtons	Total Force x Time
							**GoPro Fitting: 920
2022-09-12	09:32:09	2.15095	9.56786	9.56786	FALSE	0			Total Force x Time	2630.92
2022-09-12	09:32:09	3.89416	17.322	17.322	1	1			Total Time Steps Force >3	54
2022-09-12	09:32:09	4.09141	18.1994	27.7673	1	2
2022-09-12	09:32:09	1.8134	8.06637	25.3884	FALSE	2
2022-09-12	09:32:10	0.524287	2.33213	30.0994	FALSE	2
2022-09-12	09:32:10	0.273448	1.21635	26.6047	FALSE	2
2022-09-12	09:32:10	0.338791	1.50701	31.6064	FALSE	2
2022-09-12	09:32:11	0.345153	1.53531	28.14	FALSE	2
2022-09-12	09:32:11	0.544389	2.42155	34.028	FALSE	2
2022-09-12	09:32:11	0.514975	2.29071	30.4307	FALSE	2
2022-09-12	09:32:11	0.583677	2.59631	36.6243	FALSE	2
2022-09-12	09:32:12	0.41126	1.82937	32.2601	FALSE	2
2022-09-12	09:32:12	0.699198	3.11017	39.7344	FALSE	2
2022-09-12	09:32:12	1.10968	4.93608	37.1962	FALSE	2
2022-09-12	09:32:12	0.671259	2.98589	42.7203	FALSE	2
2022-09-12	09:32:13	0.799758	3.55748	40.7537	FALSE	2
2022-09-12	09:32:13	1.37039	6.09577	48.8161	FALSE	2
2022-09-12	09:32:13	1.08632	4.83217	45.5858	FALSE	2
2022-09-12	09:32:13	1.09391	4.86593	53.682	FALSE	2
2022-09-12	09:32:14	0.977621	4.34865	49.9345	FALSE	2
2022-09-12	09:32:14	0.948155	4.21758	57.8996	FALSE	2
2022-09-12	09:32:14	0.939198	4.17774	54.1122	FALSE	2
2022-09-12	09:32:14	0.896603	3.98827	61.8879	FALSE	2
2022-09-12	09:32:15	0.909835	4.04713	58.1594	FALSE	2
2022-09-12	09:32:15	0.891972	3.96767	65.8556	FALSE	2
2022-09-12	09:32:15	0.739453	3.28923	61.4486	FALSE	2
2022-09-12	09:32:16	0.769987	3.42506	69.2806	FALSE	2
2022-09-12	09:32:16	0.968155	4.30655	65.7551	FALSE	2
2022-09-12	09:32:16	0.643779	2.86366	72.1443	FALSE	2
2022-09-12	09:32:16	0.965051	4.29274	70.0479	FALSE	2
2022-09-12	09:32:17	0.76103	3.38521	75.5295	FALSE	2
2022-09-12	09:32:17	1.93737	8.61781	78.6657	FALSE	2
2022-09-12	09:32:17	1.05548	4.69499	80.2245	FALSE	2
2022-09-12	09:32:17	1.20368	5.35421	84.0199	FALSE	2
2022-09-12	09:32:18	1.07141	4.76585	84.9903	FALSE	2
2022-09-12	09:32:18	1.20765	5.37187	89.3918	FALSE	2
2022-09-12	09:32:18	1.13233	5.03683	90.0272	FALSE	2
2022-09-12	09:32:18	0.35126	1.56247	90.9542	FALSE	2
2022-09-12	09:32:19	0.935534	4.16144	94.1886	FALSE	2
2022-09-12	09:32:19	0.902659	4.01521	94.9695	FALSE	2
2022-09-12	09:32:19	0.692532	3.08052	97.2691	FALSE	2
2022-09-12	09:32:20	1.51905	6.75704	101.726	FALSE	2
2022-09-12	09:32:20	1.45645	6.47858	103.748	FALSE	2
2022-09-12	09:32:20	1.20342	5.35305	107.08	FALSE	2
2022-09-12	09:32:20	0.749478	3.33383	107.082	FALSE	2
2022-09-12	09:32:21	1.19075	5.29669	112.376	FALSE	2
2022-09-12	09:32:21	0.809936	3.60276	110.684	FALSE	2
2022-09-12	09:32:21	1.60251	7.12828	119.505	FALSE	2
2022-09-12	09:32:21	2.40877	10.7147	121.399	FALSE	2
2022-09-12	09:32:22	3.48709	15.5113	135.016	1	3
2022-09-12	09:32:22	3.4363	15.2853	136.684	1	4
2022-09-12	09:32:22	2.8079	12.4901	147.506	FALSE	4
2022-09-12	09:32:22	1.35711	6.0367	142.721	FALSE	4
2022-09-12	09:32:23	1.45849	6.48766	153.994	FALSE	4
2022-09-12	09:32:23	2.05177	9.12668	151.848	FALSE	4
2022-09-12	09:32:23	1.69034	7.51897	161.513	FALSE	4
2022-09-12	09:32:24	2.59304	11.5344	163.382	FALSE	4
2022-09-12	09:32:24	4.13864	18.4095	179.922	1	5
2022-09-12	09:32:24	2.21289	9.84338	173.225	FALSE	5
2022-09-12	09:32:24	1.95523	8.69725	188.619	FALSE	5
2022-09-12	09:32:25	1.90525	8.47493	181.7	FALSE	5
2022-09-12	09:32:25	0.729529	3.24509	191.864	FALSE	5
2022-09-12	09:32:25	0.419758	1.86717	183.568	FALSE	5
2022-09-12	09:32:25	0.395636	1.75987	193.624	FALSE	5
2022-09-12	09:32:26	0.180471	0.802771	184.37	FALSE	5
2022-09-12	09:32:26	0.15472	0.688226	194.312	FALSE	5
2022-09-12	09:32:26	0.480165	2.13587	186.506	FALSE	5
2022-09-12	09:32:26	0.194313	0.864343	195.177	FALSE	5
2022-09-12	09:32:27	0.32673	1.45336	187.96	FALSE	5
2022-09-12	09:32:27	0.196756	0.87521	196.052	FALSE	5
2022-09-12	09:32:27	0.245916	1.09388	189.053	FALSE	5
2022-09-12	09:32:27	0.207239	0.921841	196.974	FALSE	5
2022-09-12	09:32:28	0.160674	0.71471	189.768	FALSE	5
2022-09-12	09:32:28	0.46388	2.06343	199.037	FALSE	5
2022-09-12	09:32:28	0.695738	3.09478	192.863	FALSE	5
2022-09-12	09:32:29	0.493804	2.19654	201.234	FALSE	5
2022-09-12	09:32:29	0.287596	1.27928	194.142	FALSE	5
2022-09-12	09:32:29	0.484949	2.15715	203.391	FALSE	5
2022-09-12	09:32:29	0.48958	2.17775	196.32	FALSE	5
2022-09-12	09:32:30	0.547748	2.43649	205.827	FALSE	5
2022-09-12	09:32:30	0.598232	2.66106	198.981	FALSE	5
2022-09-12	09:32:30	0.830343	3.69353	209.521	FALSE	5
2022-09-12	09:32:30	1.0251	4.55985	203.541	FALSE	5
2022-09-12	09:32:31	1.13126	5.03207	214.553	FALSE	5
2022-09-12	09:32:31	1.26281	5.61723	209.158	FALSE	5
2022-09-12	09:32:31	1.26795	5.6401	220.193	FALSE	5
2022-09-12	09:32:31	1.33828	5.95294	215.111	FALSE	5
2022-09-12	09:32:32	1.0848	4.82541	225.019	FALSE	5
2022-09-12	09:32:32	1.24342	5.53098	220.642	FALSE	5
2022-09-12	09:32:32	1.35737	6.03785	231.056	FALSE	5
2022-09-12	09:32:33	1.16597	5.18647	225.828	FALSE	5
2022-09-12	09:32:33	1.19345	5.3087	236.365	FALSE	5
2022-09-12	09:32:33	1.04927	4.66736	230.496	FALSE	5
2022-09-12	09:32:33	0.433651	1.92897	238.294	FALSE	5
2022-09-12	09:32:34	0.445865	1.9833	232.479	FALSE	5
2022-09-12	09:32:34	0.572176	2.54515	240.839	FALSE	5
2022-09-12	09:32:34	0.436196	1.94029	234.419	FALSE	5
2022-09-12	09:32:34	0.331616	1.47509	242.314	FALSE	5
2022-09-12	09:32:35	0.531514	2.36428	236.784	FALSE	5
2022-09-12	09:32:35	0.602303	2.67916	244.994	FALSE	5
2022-09-12	09:32:35	0.22327	0.99315	237.777	FALSE	5
2022-09-12	09:32:35	0.270344	1.20254	246.196	FALSE	5
2022-09-12	09:32:36	0.344898	1.53418	239.311	FALSE	5
2022-09-12	09:32:36	0.272023	1.21001	247.406	FALSE	5
2022-09-12	09:32:36	0.277875	1.23604	240.547	FALSE	5
2022-09-12	09:32:36	0.145611	0.647707	248.054	FALSE	5
2022-09-12	09:32:37	0.1764	0.784662	241.332	FALSE	5
2022-09-12	09:32:37	0.0827101	0.367911	248.422	FALSE	5
2022-09-12	09:32:37	0.154619	0.687776	242.02	FALSE	5
2022-09-12	09:32:38	0.156959	0.698185	249.12	FALSE	5
2022-09-12	09:32:38	0.14154	0.629598	242.649	FALSE	5
2022-09-12	09:32:38	0.0210817	0.0937756	249.214	FALSE	5
2022-09-12	09:32:38	0.076247	0.339162	242.988	FALSE	5
2022-09-12	09:32:39	0.112583	0.500792	249.714	FALSE	5
2022-09-12	09:32:39	0.0254073	0.113017	243.101	FALSE	5
2022-09-12	09:32:39	0.228155	1.01488	250.729	FALSE	5
2022-09-12	09:32:40	-0.0146944	-0.0653636	243.101	FALSE	5
2022-09-12	09:32:40	0.229275	1.01986	251.749	FALSE	5
2022-09-12	09:32:40	0.445458	1.98149	245.083	FALSE	5
2022-09-12	09:32:40	0.686476	3.05358	254.803	FALSE	5
2022-09-12	09:32:40	0.772481	3.43615	248.519	FALSE	5
2022-09-12	09:32:41	0.533092	2.3713	257.174	FALSE	5
2022-09-12	09:32:41	0.550954	2.45075	250.97	FALSE	5
2022-09-12	09:32:41	0.770089	3.42551	260.6	FALSE	5
2022-09-12	09:32:42	0.395687	1.76009	252.73	FALSE	5
2022-09-12	09:32:42	1.09803	4.88426	265.484	FALSE	5
2022-09-12	09:32:42	0.507443	2.25721	254.987	FALSE	5
2022-09-12	09:32:42	0.359046	1.59711	267.081	FALSE	5
2022-09-12	09:32:43	0.317926	1.4142	256.401	FALSE	5
2022-09-12	09:32:43	0.104237	0.463667	267.545	FALSE	5
2022-09-12	09:32:43	0.339249	1.50905	257.91	FALSE	5
2022-09-12	09:32:43	0.115484	0.513696	268.058	FALSE	5
2022-09-12	09:32:44	0.331718	1.47555	259.386	FALSE	5
2022-09-12	09:32:44	0.378232	1.68245	269.741	FALSE	5
2022-09-12	09:32:44	0.333295	1.48256	260.868	FALSE	5
2022-09-12	09:32:44	0.549987	2.44645	272.187	FALSE	5
2022-09-12	09:32:45	0.494924	2.20152	263.07	FALSE	5
2022-09-12	09:32:45	0.916654	4.07746	276.265	FALSE	5
2022-09-12	09:32:45	0.726629	3.23219	266.302	FALSE	5
2022-09-12	09:32:45	1.07335	4.77448	281.039	FALSE	5
2022-09-12	09:32:46	1.51106	6.7215	273.024	FALSE	5
2022-09-12	09:32:46	1.63441	7.27018	288.309	FALSE	5
2022-09-12	09:32:46	1.16831	5.19688	278.22	FALSE	5
2022-09-12	09:32:47	0.986781	4.3894	292.699	FALSE	5
2022-09-12	09:32:47	1.10841	4.93043	283.151	FALSE	5
2022-09-12	09:32:47	1.05889	4.71015	297.409	FALSE	5
2022-09-12	09:32:47	0.779249	3.46626	286.617	FALSE	5
2022-09-12	09:32:48	0.735483	3.27158	300.68	FALSE	5
2022-09-12	09:32:48	1.58551	7.05267	293.67	FALSE	5
2022-09-12	09:32:48	0.736654	3.27678	303.957	FALSE	5
2022-09-12	09:32:48	1.21172	5.38997	299.06	FALSE	5
2022-09-12	09:32:49	1.33324	5.93052	309.888	FALSE	5
2022-09-12	09:32:49	1.66266	7.39584	306.456	FALSE	5
2022-09-12	09:32:49	1.61716	7.19345	317.081	FALSE	5
2022-09-12	09:32:49	1.30144	5.78907	312.245	FALSE	5
2022-09-12	09:32:50	1.30648	5.81148	322.893	FALSE	5
2022-09-12	09:32:50	0.97645	4.34344	316.588	FALSE	5
2022-09-12	09:32:50	0.926272	4.12024	327.013	FALSE	5
2022-09-12	09:32:51	1.10195	4.90169	321.49	FALSE	5
2022-09-12	09:32:51	1.57838	7.02095	334.034	FALSE	5
2022-09-12	09:32:51	1.10632	4.92113	326.411	FALSE	5
2022-09-12	09:32:51	1.46683	6.52475	340.559	FALSE	5
2022-09-12	09:32:52	1.1105	4.93973	331.351	FALSE	5
2022-09-12	09:32:52	0.965458	4.29455	344.853	FALSE	5
2022-09-12	09:32:52	0.451667	2.00911	333.36	FALSE	5
2022-09-12	09:32:52	0.590496	2.62664	347.48	FALSE	5
2022-09-12	09:32:53	0.772939	3.43819	336.798	FALSE	5
2022-09-12	09:32:53	0.355992	1.58352	349.063	FALSE	5
2022-09-12	09:32:53	0.798842	3.55341	340.351	FALSE	5
2022-09-12	09:32:53	1.60205	7.12624	356.19	FALSE	5
2022-09-12	09:32:54	2.91116	12.9494	353.301	FALSE	5
2022-09-12	09:32:54	1.80469	8.02762	364.217	FALSE	5
2022-09-12	09:32:54	3.01609	13.4162	366.717	1	6
2022-09-12	09:32:54	1.48296	6.5965	370.814	FALSE	6
2022-09-12	09:32:55	2.15355	9.57942	376.296	FALSE	6
2022-09-12	09:32:55	1.48439	6.60286	377.417	FALSE	6
2022-09-12	09:32:55	2.32042	10.3217	386.618	FALSE	6
2022-09-12	09:32:56	2.47731	11.0196	388.436	FALSE	6
2022-09-12	09:32:56	1.30459	5.80308	392.421	FALSE	6
2022-09-12	09:32:56	2.4277	10.7989	399.235	FALSE	6
2022-09-12	09:32:56	2.07207	9.21698	401.638	FALSE	6
2022-09-12	09:32:57	2.77981	12.3652	411.6	FALSE	6
2022-09-12	09:32:57	1.12352	4.99764	406.636	FALSE	6
2022-09-12	09:32:57	1.68363	7.48912	419.089	FALSE	6
2022-09-12	09:32:57	2.6963	11.9937	418.629	FALSE	6
2022-09-12	09:32:58	2.21721	9.86259	428.952	FALSE	6
2022-09-12	09:32:58	2.13721	9.50674	428.136	FALSE	6
2022-09-12	09:32:58	1.62688	7.23669	436.189	FALSE	6
2022-09-12	09:32:58	3.37945	15.0325	443.169	1	7
2022-09-12	09:32:59	1.84892	8.22437	444.413	FALSE	7
2022-09-12	09:32:59	3.37441	15.0101	458.179	1	8
2022-09-12	09:32:59	1.69238	7.52804	451.941	FALSE	8
2022-09-12	09:33:00	3.45579	15.372	473.551	1	9
2022-09-12	09:33:00	1.11065	4.94039	456.881	FALSE	9
2022-09-12	09:33:00	2.77146	12.328	485.879	FALSE	9
2022-09-12	09:33:00	2.70179	12.0181	468.9	FALSE	9
2022-09-12	09:33:01	3.34653	14.886	500.765	1	10
2022-09-12	09:33:01	3.2564	14.4851	483.385	1	11
2022-09-12	09:33:01	2.51472	11.186	511.951	FALSE	11
2022-09-12	09:33:01	6.32383	28.1297	511.514	1	12
2022-09-12	09:33:02	2.9508	13.1257	525.077	FALSE	12
2022-09-12	09:33:02	6.83121	30.3866	541.901	1	13
2022-09-12	09:33:02	4.13523	18.3943	543.471	1	14
2022-09-12	09:33:02	8.01197	35.6388	577.54	1	15
2022-09-12	09:33:03	4.09909	18.2336	561.704	1	16
2022-09-12	09:33:03	7.00525	31.1608	608.7	1	17
2022-09-12	09:33:03	4.71665	20.9806	582.685	1	18
2022-09-12	09:33:03	4.10612	18.2648	626.965	1	19
2022-09-12	09:33:04	1.96352	8.73413	591.419	FALSE	19
2022-09-12	09:33:04	2.53772	11.2883	638.254	FALSE	19
2022-09-12	09:33:04	2.58795	11.5117	602.931	FALSE	19
2022-09-12	09:33:05	1.57085	6.98745	645.241	FALSE	19
2022-09-12	09:33:05	2.01253	8.95214	611.883	FALSE	19
2022-09-12	09:33:05	1.62795	7.24145	652.482	FALSE	19
2022-09-12	09:33:05	2.55065	11.3458	623.229	FALSE	19
2022-09-12	09:33:06	2.37681	10.5725	663.055	FALSE	19
2022-09-12	09:33:06	1.97706	8.79436	632.023	FALSE	19
2022-09-12	09:33:06	1.92581	8.56639	671.621	FALSE	19
2022-09-12	09:33:06	1.14179	5.07891	637.102	FALSE	19
2022-09-12	09:33:07	1.25558	5.58507	677.206	FALSE	19
2022-09-12	09:33:07	1.05284	4.68324	641.785	FALSE	19
2022-09-12	09:33:07	1.73355	7.71118	684.918	FALSE	19
2022-09-12	09:33:07	2.47019	10.9879	652.773	FALSE	19
2022-09-12	09:33:08	1.30139	5.78884	690.707	FALSE	19
2022-09-12	09:33:08	2.04383	9.09136	661.865	FALSE	19
2022-09-12	09:33:08	2.17553	9.67719	700.384	FALSE	19
2022-09-12	09:33:09	1.96251	8.72964	670.594	FALSE	19
2022-09-12	09:33:09	1.18332	5.26364	705.647	FALSE	19
2022-09-12	09:33:09	0.197316	0.877701	671.472	FALSE	19
2022-09-12	09:33:09	0.156451	0.695925	706.343	FALSE	19
2022-09-12	09:33:10	0.66729	2.96824	674.44	FALSE	19
2022-09-12	09:33:10	2.78235	12.3764	718.72	FALSE	19
2022-09-12	09:33:10	1.39146	6.18949	680.63	FALSE	19
2022-09-12	09:33:10	1.45014	6.45051	725.17	FALSE	19
2022-09-12	09:33:11	0.84098	3.74085	684.37	FALSE	19
2022-09-12	09:33:11	0.364542	1.62156	726.792	FALSE	19
2022-09-12	09:33:11	0.236858	1.05359	685.424	FALSE	19
2022-09-12	09:33:11	0.0834226	0.37108	727.163	FALSE	19
2022-09-12	09:33:12	-0.0103687	-0.0461221	685.424	FALSE	19
2022-09-12	09:33:12	0.0540587	0.240464	727.403	FALSE	19
2022-09-12	09:33:12	0.162761	0.723993	686.148	FALSE	19
2022-09-12	09:33:13	0.209377	0.931351	728.335	FALSE	19
2022-09-12	09:33:13	0.0941096	0.418618	686.567	FALSE	19
2022-09-12	09:33:13	0.143982	0.640461	728.975	FALSE	19
2022-09-12	09:33:13	0.124288	0.552858	687.12	FALSE	19
2022-09-12	09:33:14	0.109479	0.486984	729.462	FALSE	19
2022-09-12	09:33:14	0.135738	0.60379	687.723	FALSE	19
2022-09-12	09:33:14	0.148003	0.658347	730.12	FALSE	19
2022-09-12	09:33:14	0.143677	0.639104	688.362	FALSE	19
2022-09-12	09:33:15	0.14668	0.652462	730.773	FALSE	19
2022-09-12	09:33:15	0.154873	0.688906	689.051	FALSE	19
2022-09-12	09:33:15	0.163575	0.727614	731.501	FALSE	19
2022-09-12	09:33:15	0.160267	0.7129	689.764	FALSE	19
2022-09-12	09:33:16	0.171616	0.763382	732.264	FALSE	19
2022-09-12	09:33:16	0.177825	0.791001	690.555	FALSE	19
2022-09-12	09:33:16	0.1764	0.784662	733.049	FALSE	19
2022-09-12	09:33:16	0.177316	0.788737	691.344	FALSE	19
2022-09-12	09:33:17	0.177112	0.78783	733.836	FALSE	19
2022-09-12	09:33:17	0.165713	0.737125	692.081	FALSE	19
2022-09-12	09:33:17	0.163524	0.727387	734.564	FALSE	19
2022-09-12	09:33:18	0.161336	0.717655	692.799	FALSE	19
2022-09-12	09:33:18	0.160827	0.715391	735.279	FALSE	19
2022-09-12	09:33:18	0.162048	0.720822	693.52	FALSE	19
2022-09-12	09:33:18	0.160776	0.715164	735.994	FALSE	19
2022-09-12	09:33:19	0.157316	0.699773	694.219	FALSE	19
2022-09-12	09:33:19	0.155636	0.6923	736.687	FALSE	19
2022-09-12	09:33:19	0.156807	0.697509	694.917	FALSE	19
2022-09-12	09:33:19	0.164797	0.73305	737.42	FALSE	19
2022-09-12	09:33:20	0.163372	0.726711	695.644	FALSE	19
2022-09-12	09:33:20	0.174313	0.775379	738.195	FALSE	19
2022-09-12	09:33:20	0.172532	0.767457	696.411	FALSE	19
2022-09-12	09:33:20	0.175738	0.781718	738.977	FALSE	19
2022-09-12	09:33:21	0.174771	0.777416	697.188	FALSE	19
2022-09-12	09:33:21	0.171972	0.764966	739.742	FALSE	19
2022-09-12	09:33:21	0.171158	0.761345	697.95	FALSE	19
2022-09-12	09:33:22	0.180624	0.803452	740.545	FALSE	19
2022-09-12	09:33:22	0.177112	0.78783	698.738	FALSE	19
2022-09-12	09:33:22	0.170242	0.75727	741.302	FALSE	19
2022-09-12	09:33:22	0.164949	0.733726	699.471	FALSE	19
2022-09-12	09:33:23	0.163779	0.728522	742.031	FALSE	19
2022-09-12	09:33:23	0.173804	0.773115	700.244	FALSE	19
2022-09-12	09:33:23	0.186272	0.828575	742.86	FALSE	19
2022-09-12	09:33:23	0.156196	0.694791	700.939	FALSE	19
2022-09-12	09:33:24	0.119453	0.531351	743.391	FALSE	19
2022-09-12	09:33:24	0.156349	0.695472	701.635	FALSE	19
2022-09-12	09:33:24	0.64556	2.87158	746.263	FALSE	19
2022-09-12	09:33:24	0.758384	3.37344	705.008	FALSE	19
2022-09-12	09:33:25	1.06103	4.71967	750.982	FALSE	19
2022-09-12	09:33:25	1.33625	5.94391	710.952	FALSE	19
2022-09-12	09:33:25	1.30714	5.81442	756.797	FALSE	19
2022-09-12	09:33:25	1.45411	6.46817	717.42	FALSE	19
2022-09-12	09:33:26	1.83029	8.1415	764.938	FALSE	19
2022-09-12	09:33:26	1.18215	5.25844	722.679	FALSE	19
2022-09-12	09:33:26	0.933092	4.15058	769.089	FALSE	19
2022-09-12	09:33:27	0.468206	2.08267	724.761	FALSE	19
2022-09-12	09:33:27	0.26556	1.18126	770.27	FALSE	19
2022-09-12	09:33:27	0.124797	0.555122	725.316	FALSE	19
2022-09-12	09:33:27	0.250496	1.11426	771.384	FALSE	19
2022-09-12	09:33:28	0.183473	0.816125	726.133	FALSE	19
2022-09-12	09:33:28	0.242659	1.0794	772.464	FALSE	19
2022-09-12	09:33:28	0.287697	1.27973	727.412	FALSE	19
2022-09-12	09:33:28	0.302914	1.34742	773.811	FALSE	19
2022-09-12	09:33:29	0.323117	1.43729	728.85	FALSE	19
2022-09-12	09:33:29	0.209275	0.930897	774.742	FALSE	19
2022-09-12	09:33:29	0.150751	0.670571	729.52	FALSE	19
2022-09-12	09:33:29	0.308461	1.3721	776.114	FALSE	19
2022-09-12	09:33:30	0.183372	0.815675	730.336	FALSE	19
2022-09-12	09:33:30	0.257468	1.14527	777.259	FALSE	19
2022-09-12	09:33:30	0.252328	1.12241	731.458	FALSE	19
2022-09-12	09:33:31	0.323015	1.43684	778.696	FALSE	19
2022-09-12	09:33:31	0.225916	1.00492	732.463	FALSE	19
2022-09-12	09:33:31	0.221387	0.984774	779.681	FALSE	19
2022-09-12	09:33:31	0.269428	1.19847	733.662	FALSE	19
2022-09-12	09:33:32	0.304237	1.35331	781.034	FALSE	19
2022-09-12	09:33:32	0.318791	1.41805	735.08	FALSE	19
2022-09-12	09:33:32	0.354568	1.57719	782.611	FALSE	19
2022-09-12	09:33:32	0.393143	1.74878	736.829	FALSE	19
2022-09-12	09:33:33	0.383524	1.70599	784.317	FALSE	19
2022-09-12	09:33:33	0.377316	1.67838	738.507	FALSE	19
2022-09-12	09:33:33	0.397214	1.76689	786.084	FALSE	19
2022-09-12	09:33:33	0.434924	1.93463	740.442	FALSE	19
2022-09-12	09:33:34	0.444542	1.97741	788.062	FALSE	19
2022-09-12	09:33:34	0.475076	2.11323	742.555	FALSE	19
2022-09-12	09:33:34	0.637468	2.83559	790.897	FALSE	19
2022-09-12	09:33:34	1.06439	4.73462	747.289	FALSE	19
2022-09-12	09:33:35	0.764186	3.39925	794.297	FALSE	19
2022-09-12	09:33:35	0.805661	3.58374	750.873	FALSE	19
2022-09-12	09:33:35	0.534058	2.3756	796.672	FALSE	19
2022-09-12	09:33:36	0.279453	1.24306	752.116	FALSE	19
2022-09-12	09:33:36	0.252023	1.12105	797.793	FALSE	19
2022-09-12	09:33:36	0.162965	0.724901	752.841	FALSE	19
2022-09-12	09:33:36	0.244695	1.08845	798.882	FALSE	19
2022-09-12	09:33:37	0.149071	0.663098	753.504	FALSE	19
2022-09-12	09:33:37	0.150751	0.670571	799.552	FALSE	19
2022-09-12	09:33:37	0.208206	0.926142	754.43	FALSE	19
2022-09-12	09:33:37	0.453753	2.01838	801.571	FALSE	19
2022-09-12	09:33:38	0.651056	2.89603	757.326	FALSE	19
2022-09-12	09:33:38	0.724084	3.22087	804.791	FALSE	19
2022-09-12	09:33:38	0.916807	4.07814	761.404	FALSE	19
2022-09-12	09:33:38	1.85141	8.23544	813.027	FALSE	19
2022-09-12	09:33:39	1.65075	7.34287	768.747	FALSE	19
2022-09-12	09:33:39	1.5024	6.68298	819.71	FALSE	19
2022-09-12	09:33:39	2.71818	12.091	780.838	FALSE	19
2022-09-12	09:33:40	1.24037	5.51741	825.227	FALSE	19
2022-09-12	09:33:40	1.89289	8.41995	789.258	FALSE	19
2022-09-12	09:33:40	1.89004	8.40728	833.635	FALSE	19
2022-09-12	09:33:40	0.713753	3.17492	792.433	FALSE	19
2022-09-12	09:33:41	1.44632	6.43352	840.068	FALSE	19
2022-09-12	09:33:41	2.22159	9.88208	802.315	FALSE	19
2022-09-12	09:33:41	0.935127	4.15963	844.228	FALSE	19
2022-09-12	09:33:41	1.59162	7.07984	809.395	FALSE	19
2022-09-12	09:33:42	2.16027	9.60931	853.837	FALSE	19
2022-09-12	09:33:42	1.20897	5.37774	814.773	FALSE	19
2022-09-12	09:33:42	1.97146	8.76945	862.606	FALSE	19
2022-09-12	09:33:42	2.54805	11.3342	826.107	FALSE	19
2022-09-12	09:33:43	2.0106	8.94355	871.55	FALSE	19
2022-09-12	09:33:43	3.01589	13.4153	839.522	1	20
2022-09-12	09:33:43	2.16698	9.63916	881.189	FALSE	20
2022-09-12	09:33:43	1.65162	7.34674	846.869	FALSE	20
2022-09-12	09:33:44	1.12011	4.98247	886.172	FALSE	20
2022-09-12	09:33:44	3.39197	15.0882	861.957	1	21
2022-09-12	09:33:44	0.836908	3.72273	889.894	FALSE	21
2022-09-12	09:33:45	2.25192	10.017	871.974	FALSE	21
2022-09-12	09:33:45	1.80627	8.03465	897.929	FALSE	21
2022-09-12	09:33:45	2.56057	11.3899	883.364	FALSE	21
2022-09-12	09:33:45	1.32877	5.91063	903.84	FALSE	21
2022-09-12	09:33:46	1.4537	6.46635	889.831	FALSE	21
2022-09-12	09:33:46	1.69065	7.52035	911.36	FALSE	21
2022-09-12	09:33:46	3.16123	14.0618	903.892	1	22
2022-09-12	09:33:46	1.17177	5.21227	916.572	FALSE	22
2022-09-12	09:33:47	1.77655	7.90245	911.795	FALSE	22
2022-09-12	09:33:47	2.9194	12.9861	929.558	FALSE	22
2022-09-12	09:33:47	2.18877	9.73609	921.531	FALSE	22
2022-09-12	09:33:47	4.8652	21.6414	951.2	1	23
2022-09-12	09:33:48	5.98322	26.6146	948.145	1	24
2022-09-12	09:33:48	5.65136	25.1384	976.338	1	25
2022-09-12	09:33:48	6.49614	28.8961	977.042	1	26
2022-09-12	09:33:49	7.80388	34.7132	1011.05	1	27
2022-09-12	09:33:49	8.79945	39.1417	1016.18	1	28
2022-09-12	09:33:49	11.6742	51.9292	1062.98	1	29
2022-09-12	09:33:49	7.45706	33.1705	1049.35	1	30
2022-09-12	09:33:50	4.45625	19.8223	1082.8	1	31
2022-09-12	09:33:50	2.97854	13.2491	1062.6	FALSE	31
2022-09-12	09:33:50	3.82215	17.0017	1099.8	1	32
2022-09-12	09:33:50	2.17055	9.65504	1072.26	FALSE	32
2022-09-12	09:33:51	1.0109	4.49669	1104.3	FALSE	32
2022-09-12	09:33:51	0.687086	3.0563	1075.31	FALSE	32
2022-09-12	09:33:51	0.757417	3.36914	1107.67	FALSE	32
2022-09-12	09:33:51	0.615535	2.73802	1078.05	FALSE	32
2022-09-12	09:33:52	0.621794	2.76586	1110.44	FALSE	32
2022-09-12	09:33:52	0.404797	1.80062	1079.85	FALSE	32
2022-09-12	09:33:52	0.47528	2.11414	1112.55	FALSE	32
2022-09-12	09:33:52	0.365865	1.62744	1081.48	FALSE	32
2022-09-12	09:33:53	0.295484	1.31437	1113.86	FALSE	32
2022-09-12	09:33:53	0.190954	0.849402	1082.33	FALSE	32
2022-09-12	09:33:53	0.14897	0.662648	1114.53	FALSE	32
2022-09-12	09:33:54	0.243117	1.08143	1083.41	FALSE	32
2022-09-12	09:33:54	0.201234	0.895129	1115.42	FALSE	32
2022-09-12	09:33:54	0.262252	1.16655	1084.58	FALSE	32
2022-09-12	09:33:54	0.108563	0.48291	1115.91	FALSE	32
2022-09-12	09:33:55	0.279809	1.24465	1085.82	FALSE	32
2022-09-12	09:33:55	0.238588	1.06129	1116.97	FALSE	32
2022-09-12	09:33:55	0.281641	1.2528	1087.08	FALSE	32
2022-09-12	09:33:55	0.17355	0.771985	1117.74	FALSE	32
2022-09-12	09:33:56	0.349987	1.55681	1088.63	FALSE	32
2022-09-12	09:33:56	0.362913	1.61431	1119.35	FALSE	32
2022-09-12	09:33:56	0.995331	4.42743	1093.06	FALSE	32
2022-09-12	09:33:57	0.923422	4.10757	1123.46	FALSE	32
2022-09-12	09:33:57	1.69696	7.54842	1100.61	FALSE	32
2022-09-12	09:33:57	2.29579	10.2121	1133.67	FALSE	32
2022-09-12	09:33:57	0.989326	4.40072	1105.01	FALSE	32
2022-09-12	09:33:58	1.31177	5.83502	1139.51	FALSE	32
2022-09-12	09:33:58	0.590903	2.62845	1107.64	FALSE	32
2022-09-12	09:33:58	1.21314	5.39629	1144.9	FALSE	32
2022-09-12	09:33:58	0.97416	4.33326	1111.97	FALSE	32
2022-09-12	09:33:59	1.13726	5.05876	1149.96	FALSE	32
2022-09-12	09:33:59	1.36754	6.08309	1118.05	FALSE	32
2022-09-12	09:33:59	1.64948	7.33722	1157.3	FALSE	32
2022-09-12	09:33:59	0.986374	4.38759	1122.44	FALSE	32
2022-09-12	09:34:00	1.97594	8.78938	1166.09	FALSE	32
2022-09-12	09:34:00	1.46459	6.51479	1128.96	FALSE	32
2022-09-12	09:34:00	1.28795	5.72906	1171.82	FALSE	32
2022-09-12	09:34:00	1.13635	5.05471	1134.01	FALSE	32
2022-09-12	09:34:01	1.14678	5.10111	1176.92	FALSE	32
2022-09-12	09:34:01	2.5677	11.4216	1145.43	FALSE	32
2022-09-12	09:34:01	1.06312	4.72897	1181.65	FALSE	32
2022-09-12	09:34:02	2.13319	9.48886	1154.92	FALSE	32
2022-09-12	09:34:02	1.12541	5.00605	1186.65	FALSE	32
2022-09-12	09:34:02	2.07182	9.21587	1164.14	FALSE	32
2022-09-12	09:34:02	2.15431	9.5828	1196.24	FALSE	32
2022-09-12	09:34:03	1.67894	7.46826	1171.61	FALSE	32
2022-09-12	09:34:03	1.40724	6.25968	1202.5	FALSE	32
2022-09-12	09:34:03	2.50418	11.1391	1182.74	FALSE	32
2022-09-12	09:34:04	1.11085	4.94128	1207.44	FALSE	32
2022-09-12	09:34:04	2.20062	9.7888	1192.53	FALSE	32
2022-09-12	09:34:04	1.62617	7.23353	1214.67	FALSE	32
2022-09-12	09:34:04	1.5105	6.71901	1199.25	FALSE	32
2022-09-12	09:34:04	1.74118	7.74512	1222.42	FALSE	32
2022-09-12	09:34:05	1.08632	4.83217	1204.08	FALSE	32
2022-09-12	09:34:05	1.39548	6.20737	1228.62	FALSE	32
2022-09-12	09:34:05	2.90993	12.944	1217.03	FALSE	32
2022-09-12	09:34:05	2.00556	8.92113	1237.55	FALSE	32
2022-09-12	09:34:06	0.934974	4.15895	1221.19	FALSE	32
2022-09-12	09:34:06	1.45304	6.46341	1244.01	FALSE	32
2022-09-12	09:34:06	1.38576	6.16414	1227.35	FALSE	32
2022-09-12	09:34:07	1.26174	5.61247	1249.62	FALSE	32
2022-09-12	09:34:07	1.97391	8.78035	1236.13	FALSE	32
2022-09-12	09:34:07	2.98174	13.2634	1262.88	FALSE	32
2022-09-12	09:34:07	2.37324	10.5566	1246.69	FALSE	32
2022-09-12	09:34:08	2.8363	12.6164	1275.5	FALSE	32
2022-09-12	09:34:08	1.7763	7.90134	1254.59	FALSE	32
2022-09-12	09:34:08	3.0164	13.4176	1288.92	1	33
2022-09-12	09:34:08	0.838486	3.72975	1258.32	FALSE	33
2022-09-12	09:34:09	1.30816	5.81896	1294.74	FALSE	33
2022-09-12	09:34:09	1.2709	5.65322	1263.97	FALSE	33
2022-09-12	09:34:09	1.47915	6.57956	1301.32	FALSE	33
2022-09-12	09:34:09	0.364746	1.62246	1265.59	FALSE	33
2022-09-12	09:34:10	0.726578	3.23196	1304.55	FALSE	33
2022-09-12	09:34:10	0.570395	2.53723	1268.13	FALSE	33
2022-09-12	09:34:10	0.448104	1.99326	1306.54	FALSE	33
2022-09-12	09:34:11	0.197977	0.880641	1269.01	FALSE	33
2022-09-12	09:34:11	0.224593	0.999035	1307.54	FALSE	33
2022-09-12	09:34:11	0.194924	0.867061	1269.88	FALSE	33
2022-09-12	09:34:11	0.212379	0.944704	1308.49	FALSE	33
2022-09-12	09:34:12	-0.00838398	-0.0372936	1269.88	FALSE	33
2022-09-12	09:34:12	0.0769595	0.342331	1308.83	FALSE	33
2022-09-12	09:34:12	-0.0103178	-0.0458956	1269.88	FALSE	33
2022-09-12	09:34:12	0.0982317	0.436954	1309.27	FALSE	33
2022-09-12	09:34:13	1.45533	6.4736	1276.35	FALSE	33
2022-09-12	09:34:13	1.17599	5.23104	1314.5	FALSE	33
2022-09-12	09:34:13	0.454008	2.01952	1278.37	FALSE	33
2022-09-12	09:34:13	0.932481	4.14786	1318.64	FALSE	33
2022-09-12	09:34:14	0.584542	2.60016	1280.97	FALSE	33
2022-09-12	09:34:14	1.15421	5.13416	1323.78	FALSE	33
2022-09-12	09:34:14	0.785254	3.49297	1284.47	FALSE	33
2022-09-12	09:34:14	1.77375	7.88999	1331.67	FALSE	33
2022-09-12	09:34:15	1.80821	8.04328	1292.51	FALSE	33
2022-09-12	09:34:15	2.34525	10.4321	1342.1	FALSE	33
2022-09-12	09:34:15	1.78989	7.96179	1300.47	FALSE	33
2022-09-12	09:34:16	2.36098	10.5021	1352.6	FALSE	33
2022-09-12	09:34:16	1.15971	5.15862	1305.63	FALSE	33
2022-09-12	09:34:16	1.92683	8.57093	1361.17	FALSE	33
2022-09-12	09:34:16	1.56642	6.96775	1312.6	FALSE	33
2022-09-12	09:34:17	1.82358	8.11165	1369.29	FALSE	33
2022-09-12	09:34:17	1.60958	7.15973	1319.76	FALSE	33
2022-09-12	09:34:17	2.4309	10.8131	1380.1	FALSE	33
2022-09-12	09:34:17	1.33416	5.93461	1325.69	FALSE	33
2022-09-12	09:34:18	1.74581	7.76571	1387.86	FALSE	33
2022-09-12	09:34:18	0.720674	3.2057	1328.9	FALSE	33
2022-09-12	09:34:18	1.45396	6.4675	1394.33	FALSE	33
2022-09-12	09:34:18	0.624237	2.77673	1331.67	FALSE	33
2022-09-12	09:34:19	1.41803	6.30768	1400.64	FALSE	33
2022-09-12	09:34:19	2.43594	10.8355	1342.51	FALSE	33
2022-09-12	09:34:19	3.73436	16.6112	1417.25	1	34
2022-09-12	09:34:20	0.5336	2.37356	1344.88	FALSE	34
2022-09-12	09:34:20	0.413346	1.83865	1419.09	FALSE	34
2022-09-12	09:34:20	0.174364	0.775606	1345.66	FALSE	34
2022-09-12	09:34:20	0.725407	3.22676	1422.32	FALSE	34
2022-09-12	09:34:21	-0.105229	-0.46808	1345.66	FALSE	34
2022-09-12	09:34:21	-0.130725	-0.581491	1422.32	FALSE	34
2022-09-12	09:34:21	-0.0898598	-0.399714	1345.66	FALSE	34
2022-09-12	09:34:21	-0.0488929	-0.217485	1422.32	FALSE	34
2022-09-12	09:34:22	-0.130674	-0.581264	1345.66	FALSE	34
2022-09-12	09:34:22	0.0395041	0.175722	1422.49	FALSE	34
2022-09-12	09:34:22	0.0874938	0.38919	1346.05	FALSE	34
2022-09-12	09:34:22	0.144288	0.641822	1423.13	FALSE	34
2022-09-12	09:34:23	0.16897	0.751612	1346.8	FALSE	34
2022-09-12	09:34:23	0.405305	1.80288	1424.94	FALSE	34
2022-09-12	09:34:23	0.678842	3.01962	1349.82	FALSE	34
2022-09-12	09:34:23	0.488206	2.17164	1427.11	FALSE	34
2022-09-12	09:34:24	0.694211	3.08799	1352.91	FALSE	34
2022-09-12	09:34:24	0.357214	1.58896	1428.7	FALSE	34
2022-09-12	09:34:24	0.695076	3.09184	1356	FALSE	34
2022-09-12	09:34:25	0.606628	2.6984	1431.4	FALSE	34
2022-09-12	09:34:25	0.617112	2.74504	1358.74	FALSE	34
2022-09-12	09:34:25	1.025	4.5594	1435.95	FALSE	34
2022-09-12	09:34:25	0.487239	2.16734	1360.91	FALSE	34
2022-09-12	09:34:26	0.419097	1.86423	1437.82	FALSE	34
2022-09-12	09:34:26	0.295738	1.3155	1362.23	FALSE	34
2022-09-12	09:34:26	0.205458	0.913918	1438.73	FALSE	34
2022-09-12	09:34:26	0.151972	0.676002	1362.9	FALSE	34
2022-09-12	09:34:27	0.168868	0.751159	1439.48	FALSE	34
2022-09-12	09:34:27	0.2793	1.24238	1364.15	FALSE	34
2022-09-12	09:34:27	0.28729	1.27792	1440.76	FALSE	34
2022-09-12	09:34:27	0.279707	1.24419	1365.39	FALSE	34
2022-09-12	09:34:28	0.274517	1.22111	1441.98	FALSE	34
2022-09-12	09:34:28	0.267901	1.19168	1366.58	FALSE	34
2022-09-12	09:34:28	0.274771	1.22224	1443.21	FALSE	34
2022-09-12	09:34:29	0.306629	1.36395	1367.95	FALSE	34
2022-09-12	09:34:29	0.101133	0.44986	1443.66	FALSE	34
2022-09-12	09:34:29	0.203168	0.903732	1368.85	FALSE	34
2022-09-12	09:34:29	1.76475	7.84996	1451.51	FALSE	34
2022-09-12	09:34:30	0.962048	4.27938	1373.13	FALSE	34
2022-09-12	09:34:30	0.00881704	0.03922	1451.54	FALSE	34
2022-09-12	09:34:30	-0.157341	-0.699884	1373.13	FALSE	34
2022-09-12	09:34:30	-0.10075	-0.448156	1451.54	FALSE	34
2022-09-12	09:34:31	-0.10589	-0.47102	1373.13	FALSE	34
2022-09-12	09:34:31	-0.177442	-0.789298	1451.54	FALSE	34
2022-09-12	09:34:31	0.0362979	0.16146	1373.29	FALSE	34
2022-09-12	09:34:31	0.207646	0.923651	1452.47	FALSE	34
2022-09-12	09:34:32	0.135942	0.604697	1373.89	FALSE	34
2022-09-12	09:34:32	0.251361	1.1181	1453.59	FALSE	34
2022-09-12	09:34:32	0.189377	0.842387	1374.74	FALSE	34
2022-09-12	09:34:32	0.19411	0.86344	1454.45	FALSE	34
2022-09-12	09:34:33	0.272888	1.21386	1375.95	FALSE	34
2022-09-12	09:34:33	0.291463	1.29649	1455.75	FALSE	34
2022-09-12	09:34:33	0.447799	1.9919	1377.94	FALSE	34
2022-09-12	09:34:34	0.394364	1.75421	1457.5	FALSE	34
2022-09-12	09:34:34	0.280929	1.24963	1379.19	FALSE	34
2022-09-12	09:34:34	0.287341	1.27815	1458.78	FALSE	34
2022-09-12	09:34:34	0.213601	0.95014	1380.14	FALSE	34
2022-09-12	09:34:35	0.246018	1.09434	1459.87	FALSE	34
2022-09-12	09:34:35	0.187443	0.833784	1380.98	FALSE	34
2022-09-12	09:34:35	0.132074	0.587492	1460.46	FALSE	34
2022-09-12	09:34:35	0.184797	0.822014	1381.8	FALSE	34
2022-09-12	09:34:36	0.208766	0.928633	1461.39	FALSE	34
2022-09-12	09:34:36	0.2164	0.96259	1382.76	FALSE	34
2022-09-12	09:34:36	0.250802	1.11562	1462.5	FALSE	34
2022-09-12	09:34:36	0.256705	1.14188	1383.9	FALSE	34
2022-09-12	09:34:37	0.158384	0.704524	1463.21	FALSE	34
2022-09-12	09:34:37	0.289275	1.28675	1385.19	FALSE	34
2022-09-12	09:34:37	0.258333	1.14912	1464.36	FALSE	34
2022-09-12	09:34:38	0.234669	1.04385	1386.23	FALSE	34
2022-09-12	09:34:38	0.272837	1.21363	1465.57	FALSE	34
2022-09-12	09:34:38	0.268715	1.1953	1387.43	FALSE	34
2022-09-12	09:34:38	0.249428	1.10951	1466.68	FALSE	34
2022-09-12	09:34:39	0.597214	2.65653	1390.09	FALSE	34
2022-09-12	09:34:39	0.646425	2.87543	1469.56	FALSE	34
2022-09-12	09:34:39	1.24118	5.52102	1395.61	FALSE	34
2022-09-12	09:34:39	0.777773	3.45969	1473.02	FALSE	34
2022-09-12	09:34:40	0.654313	2.91052	1398.52	FALSE	34
2022-09-12	09:34:40	2.22785	9.90992	1482.93	FALSE	34
2022-09-12	09:34:40	1.15319	5.12962	1403.65	FALSE	34
2022-09-12	09:34:40	2.49075	11.0794	1494.01	FALSE	34
2022-09-12	09:34:41	0.960318	4.27169	1407.92	FALSE	34
2022-09-12	09:34:41	1.05228	4.68075	1498.69	FALSE	34
2022-09-12	09:34:41	3.408	15.1595	1423.08	1	35
2022-09-12	09:34:42	2.80001	12.455	1511.14	FALSE	35
2022-09-12	09:34:42	0.57757	2.56915	1425.65	FALSE	35
2022-09-12	09:34:42	0.173092	0.769948	1511.91	FALSE	35
2022-09-12	09:34:42	0.487188	2.16711	1427.81	FALSE	35
2022-09-12	09:34:43	0.424491	1.88822	1513.8	FALSE	35
2022-09-12	09:34:43	0.357112	1.58851	1429.4	FALSE	35
2022-09-12	09:34:43	0.500776	2.22755	1516.03	FALSE	35
2022-09-12	09:34:43	0.353041	1.5704	1430.97	FALSE	35
2022-09-12	09:34:44	0.303473	1.34991	1517.38	FALSE	35
2022-09-12	09:34:44	0.300013	1.33452	1432.31	FALSE	35
2022-09-12	09:34:44	0.125458	0.558062	1517.94	FALSE	35
2022-09-12	09:34:44	0.247137	1.09931	1433.41	FALSE	35
2022-09-12	09:34:45	0.259708	1.15523	1519.09	FALSE	35
2022-09-12	09:34:45	0.297214	1.32207	1434.73	FALSE	35
2022-09-12	09:34:45	0.532074	2.36677	1521.46	FALSE	35
2022-09-12	09:34:45	0.758588	3.37435	1438.1	FALSE	35
2022-09-12	09:34:46	0.653091	2.90508	1524.36	FALSE	35
2022-09-12	09:34:46	0.534211	2.37628	1440.48	FALSE	35
2022-09-12	09:34:46	0.466781	2.07634	1526.44	FALSE	35
2022-09-12	09:34:47	0.670293	2.9816	1443.46	FALSE	35
2022-09-12	09:34:47	0.514975	2.29071	1528.73	FALSE	35
2022-09-12	09:34:47	0.322506	1.43457	1444.9	FALSE	35
2022-09-12	09:34:47	0.39243	1.74561	1530.47	FALSE	35
2022-09-12	09:34:48	0.182201	0.810466	1445.71	FALSE	35
2022-09-12	09:34:48	0.412888	1.83661	1532.31	FALSE	35
2022-09-12	09:34:48	0.331718	1.47555	1447.18	FALSE	35
2022-09-12	09:34:48	0.471361	2.09671	1534.41	FALSE	35
2022-09-12	09:34:49	0.284847	1.26706	1448.45	FALSE	35
2022-09-12	09:34:49	0.359046	1.59711	1536.01	FALSE	35
2022-09-12	09:34:49	0.328257	1.46015	1449.91	FALSE	35
2022-09-12	09:34:49	0.470802	2.09422	1538.1	FALSE	35
2022-09-12	09:34:50	0.400827	1.78296	1451.69	FALSE	35
2022-09-12	09:34:50	0.231667	1.0305	1539.13	FALSE	35
2022-09-12	09:34:50	0.378741	1.68472	1453.38	FALSE	35
2022-09-12	09:34:51	0.603168	2.68301	1541.81	FALSE	35
2022-09-12	09:34:51	0.253702	1.12852	1454.5	FALSE	35
2022-09-12	09:34:51	0.0622521	0.27691	1542.09	FALSE	35
2022-09-12	09:34:51	0.121641	0.541083	1455.05	FALSE	35
2022-09-12	09:34:52	0.317977	1.41443	1543.5	FALSE	35
2022-09-12	09:34:52	0.0802674	0.357045	1455.4	FALSE	35
2022-09-12	09:34:52	0.0419468	0.186588	1543.69	FALSE	35
2022-09-12	09:34:52	0.273244	1.21544	1456.62	FALSE	35
2022-09-12	09:34:53	0.131056	0.582963	1544.27	FALSE	35
2022-09-12	09:34:53	0.308359	1.37164	1457.99	FALSE	35
2022-09-12	09:34:53	0.212074	0.943348	1545.22	FALSE	35
2022-09-12	09:34:53	0.110954	0.493546	1458.48	FALSE	35
2022-09-12	09:34:54	0.169835	0.75546	1545.97	FALSE	35
2022-09-12	09:34:54	0.114771	0.510524	1458.99	FALSE	35
2022-09-12	09:34:54	0.211921	0.942667	1546.92	FALSE	35
2022-09-12	09:34:54	0.155891	0.693434	1459.69	FALSE	35
2022-09-12	09:34:55	0.132125	0.587718	1547.5	FALSE	35
2022-09-12	09:34:55	0.0503946	0.224165	1459.91	FALSE	35
2022-09-12	09:34:55	0.121082	0.538597	1548.04	FALSE	35
2022-09-12	09:34:56	0.177367	0.788964	1460.7	FALSE	35
2022-09-12	09:34:56	0.209936	0.933837	1548.98	FALSE	35
2022-09-12	09:34:56	0.209173	0.930443	1461.63	FALSE	35
2022-09-12	09:34:56	0.232481	1.03412	1550.01	FALSE	35
2022-09-12	09:34:57	0.202405	0.900338	1462.53	FALSE	35
2022-09-12	09:34:57	0.173601	0.772212	1550.78	FALSE	35
2022-09-12	09:34:57	0.195738	0.870682	1463.4	FALSE	35
2022-09-12	09:34:57	0.193143	0.859139	1551.64	FALSE	35
2022-09-12	09:34:58	0.183168	0.814768	1464.22	FALSE	35
2022-09-12	09:34:58	0.189784	0.844197	1552.49	FALSE	35
2022-09-12	09:34:58	0.199708	0.888341	1465.11	FALSE	35
2022-09-12	09:34:58	0.190649	0.848045	1553.33	FALSE	35
2022-09-12	09:34:59	0.188155	0.836951	1465.94	FALSE	35
2022-09-12	09:34:59	0.18729	0.833103	1554.17	FALSE	35
2022-09-12	09:34:59	0.186578	0.829936	1466.77	FALSE	35
2022-09-12	09:35:00	0.191972	0.85393	1555.02	FALSE	35
2022-09-12	09:35:00	0.19528	0.868644	1467.64	FALSE	35
2022-09-12	09:35:00	0.193346	0.860042	1555.88	FALSE	35
2022-09-12	09:35:00	0.195331	0.868871	1468.51	FALSE	35
2022-09-12	09:35:01	0.235636	1.04816	1556.93	FALSE	35
2022-09-12	09:35:01	0.334415	1.48754	1470	FALSE	35
2022-09-12	09:35:01	0.289529	1.28788	1558.22	FALSE	35
2022-09-12	09:35:01	0.330954	1.47215	1471.47	FALSE	35
2022-09-12	09:35:02	0.432328	1.92308	1560.14	FALSE	35
2022-09-12	09:35:02	0.227087	1.01013	1472.48	FALSE	35
2022-09-12	09:35:02	0.28388	1.26276	1561.4	FALSE	35
2022-09-12	09:35:02	0.168054	0.747538	1473.23	FALSE	35
2022-09-12	09:35:03	0.175076	0.778773	1562.18	FALSE	35
2022-09-12	09:35:03	0.251514	1.11878	1474.35	FALSE	35
2022-09-12	09:35:03	0.217621	0.968022	1563.15	FALSE	35
2022-09-12	09:35:03	0.213092	0.947876	1475.29	FALSE	35
2022-09-12	09:35:04	0.228206	1.01511	1564.16	FALSE	35
2022-09-12	09:35:04	0.233295	1.03774	1476.33	FALSE	35
2022-09-12	09:35:04	0.242659	1.0794	1565.24	FALSE	35
2022-09-12	09:35:05	0.25299	1.12535	1477.46	FALSE	35
2022-09-12	09:35:05	0.286832	1.27589	1566.52	FALSE	35
2022-09-12	09:35:05	0.328104	1.45947	1478.92	FALSE	35
2022-09-12	09:35:05	0.344084	1.53055	1568.05	FALSE	35
2022-09-12	09:35:06	0.38383	1.70735	1480.62	FALSE	35
2022-09-12	09:35:06	0.424135	1.88664	1569.94	FALSE	35
2022-09-12	09:35:06	0.407748	1.81374	1482.44	FALSE	35
2022-09-12	09:35:06	0.46958	2.08879	1572.03	FALSE	35
2022-09-12	09:35:07	0.303575	1.35036	1483.79	FALSE	35
2022-09-12	09:35:07	0.257316	1.14459	1573.17	FALSE	35
2022-09-12	09:35:07	0.245662	1.09275	1484.88	FALSE	35
2022-09-12	09:35:07	0.25472	1.13305	1574.3	FALSE	35
2022-09-12	09:35:08	0.232379	1.03367	1485.91	FALSE	35
2022-09-12	09:35:08	0.235076	1.04567	1575.35	FALSE	35
2022-09-12	09:35:08	0.245153	1.09049	1487	FALSE	35
2022-09-12	09:35:09	0.254364	1.13146	1576.48	FALSE	35
2022-09-12	09:35:09	0.264796	1.17787	1488.18	FALSE	35
2022-09-12	09:35:09	0.283066	1.25913	1577.74	FALSE	35
2022-09-12	09:35:09	0.29299	1.30328	1489.49	FALSE	35
2022-09-12	09:35:10	0.289529	1.28788	1579.03	FALSE	35
2022-09-12	09:35:10	0.304797	1.3558	1490.84	FALSE	35
2022-09-12	09:35:10	0.314211	1.39767	1580.42	FALSE	35
2022-09-12	09:35:10	0.3393	1.50927	1492.35	FALSE	35
2022-09-12	09:35:11	0.3593	1.59824	1582.02	FALSE	35
2022-09-12	09:35:11	0.34958	1.555	1493.91	FALSE	35
2022-09-12	09:35:11	0.32042	1.42529	1583.45	FALSE	35
2022-09-12	09:35:11	0.310089	1.37934	1495.29	FALSE	35
2022-09-12	09:35:12	0.301132	1.3395	1584.79	FALSE	35
2022-09-12	09:35:12	0.287494	1.27883	1496.56	FALSE	35
2022-09-12	09:35:12	0.264593	1.17696	1585.96	FALSE	35
2022-09-12	09:35:13	0.257061	1.14346	1497.71	FALSE	35
2022-09-12	09:35:13	0.250598	1.11471	1587.08	FALSE	35
2022-09-12	09:35:13	0.249886	1.11154	1498.82	FALSE	35
2022-09-12	09:35:13	0.243219	1.08189	1588.16	FALSE	35
2022-09-12	09:35:14	0.33813	1.50407	1500.32	FALSE	35
2022-09-12	09:35:14	0.81757	3.63671	1591.8	FALSE	35
2022-09-12	09:35:14	1.11106	4.94222	1505.27	FALSE	35
2022-09-12	09:35:14	0.241081	1.07238	1592.87	FALSE	35
2022-09-12	09:35:15	0.171361	0.762248	1506.03	FALSE	35
2022-09-12	09:35:15	0.250802	1.11562	1593.99	FALSE	35
2022-09-12	09:35:15	0.267545	1.19009	1507.22	FALSE	35
2022-09-12	09:35:15	0.281794	1.25348	1595.24	FALSE	35
2022-09-12	09:35:16	0.258181	1.14844	1508.37	FALSE	35
2022-09-12	09:35:16	0.358435	1.59439	1596.83	FALSE	35
2022-09-12	09:35:16	0.266934	1.18738	1509.55	FALSE	35
2022-09-12	09:35:16	0.384237	1.70916	1598.54	FALSE	35
2022-09-12	09:35:17	0.283728	1.26208	1510.82	FALSE	35
2022-09-12	09:35:17	0.407443	1.81239	1600.36	FALSE	35
2022-09-12	09:35:17	0.287239	1.2777	1512.09	FALSE	35
2022-09-12	09:35:18	0.280674	1.24849	1601.6	FALSE	35
2022-09-12	09:35:18	0.392634	1.74651	1513.84	FALSE	35
2022-09-12	09:35:18	0.260929	1.16066	1602.76	FALSE	35
2022-09-12	09:35:18	0.381896	1.69875	1515.54	FALSE	35
2022-09-12	09:35:19	0.168257	0.748441	1603.51	FALSE	35
2022-09-12	09:35:19	0.199148	0.88585	1516.42	FALSE	35
2022-09-12	09:35:19	0.366832	1.63174	1605.14	FALSE	35
2022-09-12	09:35:19	0.299148	1.33067	1517.76	FALSE	35
2022-09-12	09:35:20	0.479707	2.13383	1607.28	FALSE	35
2022-09-12	09:35:20	0.299453	1.33203	1519.09	FALSE	35
2022-09-12	09:35:20	0.588868	2.6194	1609.9	FALSE	35
2022-09-12	09:35:20	0.561896	2.49943	1521.59	FALSE	35
2022-09-12	09:35:21	0.781285	3.47531	1613.37	FALSE	35
2022-09-12	09:35:21	0.435382	1.93667	1523.52	FALSE	35
2022-09-12	09:35:21	0.837774	3.72659	1617.1	FALSE	35
2022-09-12	09:35:22	0.609631	2.71176	1526.23	FALSE	35
2022-09-12	09:35:22	1.05106	4.67533	1621.78	FALSE	35
2022-09-12	09:35:22	1.61187	7.16992	1533.4	FALSE	35
2022-09-12	09:35:22	2.7279	12.1342	1633.91	FALSE	35
2022-09-12	09:35:23	1.39375	6.19968	1539.6	FALSE	35
2022-09-12	09:35:23	1.26022	5.60571	1639.52	FALSE	35
2022-09-12	09:35:23	0.415992	1.85042	1541.45	FALSE	35
2022-09-12	09:35:23	0.549682	2.4451	1641.96	FALSE	35
2022-09-12	09:35:24	0.40612	1.8065	1543.26	FALSE	35
2022-09-12	09:35:24	0.406527	1.80831	1643.77	FALSE	35
2022-09-12	09:35:24	0.342506	1.52354	1544.78	FALSE	35
2022-09-12	09:35:24	0.343881	1.52965	1645.3	FALSE	35
2022-09-12	09:35:25	0.47874	2.12953	1546.91	FALSE	35
2022-09-12	09:35:25	0.235534	1.0477	1646.35	FALSE	35
2022-09-12	09:35:25	0.471209	2.09603	1549.01	FALSE	35
2022-09-12	09:35:25	0.200115	0.890152	1647.24	FALSE	35
2022-09-12	09:35:26	0.421183	1.87351	1550.88	FALSE	35
2022-09-12	09:35:26	0.164797	0.73305	1647.97	FALSE	35
2022-09-12	09:35:26	0.411616	1.83095	1552.71	FALSE	35
2022-09-12	09:35:27	0.23584	1.04906	1649.02	FALSE	35
2022-09-12	09:35:27	0.486883	2.16575	1554.88	FALSE	35
2022-09-12	09:35:27	0.313346	1.39383	1650.41	FALSE	35
2022-09-12	09:35:27	-0.00522877	-0.0232586	1554.88	FALSE	35
2022-09-12	09:35:28	-0.0403432	-0.179455	1650.41	FALSE	35
2022-09-12	09:35:28	0.216807	0.964401	1555.85	FALSE	35
2022-09-12	09:35:28	0.735229	3.27045	1653.68	FALSE	35
2022-09-12	09:35:28	1.82179	8.10369	1563.95	FALSE	35
2022-09-12	09:35:29	3.53029	15.7034	1669.39	1	36
2022-09-12	09:35:29	0.68729	3.0572	1567.01	FALSE	36
2022-09-12	09:35:29	0.589835	2.6237	1672.01	FALSE	36
2022-09-12	09:35:29	0.481387	2.14131	1569.15	FALSE	36
2022-09-12	09:35:30	0.658384	2.92862	1674.94	FALSE	36
2022-09-12	09:35:30	1.40576	6.2531	1575.4	FALSE	36
2022-09-12	09:35:30	1.61019	7.16245	1682.1	FALSE	36
2022-09-12	09:35:31	1.13187	5.03478	1580.44	FALSE	36
2022-09-12	09:35:31	1.30322	5.79698	1687.9	FALSE	36
2022-09-12	09:35:31	2.0651	9.18598	1589.62	FALSE	36
2022-09-12	09:35:31	0.627188	2.78986	1690.69	FALSE	36
2022-09-12	09:35:32	1.40546	6.25177	1595.87	FALSE	36
2022-09-12	09:35:32	1.60541	7.14118	1697.83	FALSE	36
2022-09-12	09:35:32	0.595585	2.64928	1598.52	FALSE	36
2022-09-12	09:35:32	0.877417	3.90293	1701.73	FALSE	36
2022-09-12	09:35:33	1.12968	5.02504	1603.55	FALSE	36
2022-09-12	09:35:33	1.19665	5.32294	1707.05	FALSE	36
2022-09-12	09:35:33	1.21162	5.38953	1608.94	FALSE	36
2022-09-12	09:35:33	0.842303	3.74673	1710.8	FALSE	36
2022-09-12	09:35:34	1.38531	6.16214	1615.1	FALSE	36
2022-09-12	09:35:34	1.75401	7.80219	1718.6	FALSE	36
2022-09-12	09:35:34	0.46388	2.06343	1617.16	FALSE	36
2022-09-12	09:35:34	1.71808	7.64236	1726.25	FALSE	36
2022-09-12	09:35:35	1.27263	5.66091	1622.82	FALSE	36
2022-09-12	09:35:35	3.07167	13.6634	1739.91	1	37
2022-09-12	09:35:35	1.68754	7.50652	1630.33	FALSE	37
2022-09-12	09:35:36	1.46296	6.50754	1746.42	FALSE	37
2022-09-12	09:35:36	1.65345	7.35488	1637.68	FALSE	37
2022-09-12	09:35:36	2.11742	9.41871	1755.84	FALSE	37
2022-09-12	09:35:36	1.3477	5.99484	1643.68	FALSE	37
2022-09-12	09:35:37	0.845	3.75873	1759.59	FALSE	37
2022-09-12	09:35:37	2.00678	8.92656	1652.61	FALSE	37
2022-09-12	09:35:37	1.96261	8.73008	1768.32	FALSE	37
2022-09-12	09:35:37	1.60398	7.13482	1659.74	FALSE	37
2022-09-12	09:35:38	0.719758	3.20163	1771.53	FALSE	37
2022-09-12	09:35:38	2.78938	12.4077	1672.15	FALSE	37
2022-09-12	09:35:38	1.86235	8.28411	1779.81	FALSE	37
2022-09-12	09:35:38	1.2338	5.48819	1677.64	FALSE	37
2022-09-12	09:35:39	1.95971	8.71718	1788.53	FALSE	37
2022-09-12	09:35:39	2.93324	13.0476	1690.68	FALSE	37
2022-09-12	09:35:39	1.38785	6.17343	1794.7	FALSE	37
2022-09-12	09:35:40	1.79782	7.99706	1698.68	FALSE	37
2022-09-12	09:35:40	1.41329	6.2866	1800.99	FALSE	37
2022-09-12	09:35:40	1.42159	6.32352	1705.01	FALSE	37
2022-09-12	09:35:40	1.65579	7.36529	1808.35	FALSE	37
2022-09-12	09:35:41	0.440725	1.96043	1706.97	FALSE	37
2022-09-12	09:35:41	1.51075	6.72012	1815.07	FALSE	37
2022-09-12	09:35:41	1.07039	4.76131	1711.73	FALSE	37
2022-09-12	09:35:41	1.13594	5.05289	1820.13	FALSE	37
2022-09-12	09:35:42	1.09146	4.85503	1716.58	FALSE	37
2022-09-12	09:35:42	1.67024	7.42956	1827.56	FALSE	37
2022-09-12	09:35:42	1.78154	7.92465	1724.51	FALSE	37
2022-09-12	09:35:42	1.62429	7.22517	1834.78	FALSE	37
2022-09-12	09:35:43	0.845153	3.75941	1728.27	FALSE	37
2022-09-12	09:35:43	1.79248	7.97331	1842.75	FALSE	37
2022-09-12	09:35:43	2.06602	9.19007	1737.46	FALSE	37
2022-09-12	09:35:44	0.90271	4.01543	1846.77	FALSE	37
2022-09-12	09:35:44	2.4505	10.9003	1748.36	FALSE	37
2022-09-12	09:35:44	1.8276	8.12953	1854.9	FALSE	37
2022-09-12	09:35:44	2.04714	9.10609	1757.46	FALSE	37
2022-09-12	09:35:45	1.37335	6.10894	1861.01	FALSE	37
2022-09-12	09:35:45	2.10373	9.35781	1766.82	FALSE	37
2022-09-12	09:35:45	2.7536	12.2486	1873.26	FALSE	37
2022-09-12	09:35:45	4.371	19.4431	1786.26	1	38
2022-09-12	09:35:46	2.94927	13.1189	1886.38	FALSE	38
2022-09-12	09:35:46	2.47172	10.9947	1797.26	FALSE	38
2022-09-12	09:35:46	1.87777	8.3527	1894.73	FALSE	38
2022-09-12	09:35:46	0.661794	2.94379	1800.2	FALSE	38
2022-09-12	09:35:47	1.25441	5.57987	1900.31	FALSE	38
2022-09-12	09:35:47	0.475382	2.11459	1802.32	FALSE	38
2022-09-12	09:35:47	0.977621	4.34865	1904.66	FALSE	38
2022-09-12	09:35:47	1.32246	5.88257	1808.2	FALSE	38
2022-09-12	09:35:48	1.93625	8.61283	1913.27	FALSE	38
2022-09-12	09:35:48	2.04907	9.11467	1817.31	FALSE	38
2022-09-12	09:35:48	2.97569	13.2365	1926.51	FALSE	38
2022-09-12	09:35:49	1.46062	6.49713	1823.81	FALSE	38
2022-09-12	09:35:49	1.96093	8.72261	1935.23	FALSE	38
2022-09-12	09:35:49	0.846832	3.76688	1827.58	FALSE	38
2022-09-12	09:35:49	0.324288	1.4425	1936.67	FALSE	38
2022-09-12	09:35:50	0.825865	3.67361	1831.25	FALSE	38
2022-09-12	09:35:50	1.1367	5.05627	1941.73	FALSE	38
2022-09-12	09:35:50	0.36902	1.64147	1832.89	FALSE	38
2022-09-12	09:35:50	0.707494	3.14707	1944.87	FALSE	38
2022-09-12	09:35:51	1.34536	5.98443	1838.88	FALSE	38
2022-09-12	09:35:51	0.235433	1.04725	1945.92	FALSE	38
2022-09-12	09:35:51	0.976094	4.34186	1843.22	FALSE	38
2022-09-12	09:35:51	1.12093	4.98612	1950.91	FALSE	38
2022-09-12	09:35:52	0.848155	3.77276	1846.99	FALSE	38
2022-09-12	09:35:52	0.886374	3.94277	1954.85	FALSE	38
2022-09-12	09:35:52	0.843829	3.75352	1850.75	FALSE	38
2022-09-12	09:35:53	0.300929	1.33859	1956.19	FALSE	38
2022-09-12	09:35:53	0.764593	3.40106	1854.15	FALSE	38
2022-09-12	09:35:53	0.938079	4.17276	1960.36	FALSE	38
2022-09-12	09:35:53	0.4764	2.11912	1856.27	FALSE	38
2022-09-12	09:35:54	0.618384	2.7507	1963.11	FALSE	38
2022-09-12	09:35:54	1.75202	7.79334	1864.06	FALSE	38
2022-09-12	09:35:54	0.220471	0.980699	1964.09	FALSE	38
2022-09-12	09:35:54	0.168817	0.750932	1864.81	FALSE	38
2022-09-12	09:35:55	0.194618	0.8657	1964.96	FALSE	38
2022-09-12	09:35:55	0.278792	1.24012	1866.05	FALSE	38
2022-09-12	09:35:55	0.269326	1.19802	1966.16	FALSE	38
2022-09-12	09:35:55	0.292634	1.30169	1867.35	FALSE	38
2022-09-12	09:35:56	0.287748	1.27996	1967.44	FALSE	38
2022-09-12	09:35:56	0.136145	0.6056	1867.96	FALSE	38
2022-09-12	09:35:56	-0.00924912	-0.0411419	1967.44	FALSE	38
2022-09-12	09:35:56	-0.0646181	-0.287434	1867.96	FALSE	38
2022-09-12	09:35:57	-0.0935748	-0.416239	1967.44	FALSE	38
2022-09-12	09:35:57	-0.0480277	-0.213637	1867.96	FALSE	38
2022-09-12	09:35:57	0.0476974	0.212168	1967.65	FALSE	38
2022-09-12	09:35:58	0.19813	0.881322	1868.84	FALSE	38
2022-09-12	09:35:58	0.415789	1.84951	1969.5	FALSE	38
2022-09-12	09:35:58	0.674822	3.00174	1871.84	FALSE	38
2022-09-12	09:35:58	0.546985	2.4331	1971.93	FALSE	38
2022-09-12	09:35:59	1.62744	7.23918	1879.08	FALSE	38
2022-09-12	09:35:59	1.09996	4.89284	1976.82	FALSE	38
2022-09-12	09:35:59	0.445763	1.98284	1881.06	FALSE	38
2022-09-12	09:35:59	0.658384	2.92862	1979.75	FALSE	38
2022-09-12	09:36:00	0.819148	3.64373	1884.71	FALSE	38
2022-09-12	09:36:00	0.643982	2.86456	1982.62	FALSE	38
2022-09-12	09:36:00	1.03747	4.61487	1889.32	FALSE	38
2022-09-12	09:36:00	0.95986	4.26965	1986.89	FALSE	38
2022-09-12	09:36:01	0.488715	2.1739	1891.49	FALSE	38
2022-09-12	09:36:01	1.27609	5.6763	1992.56	FALSE	38
2022-09-12	09:36:01	2.53324	11.2684	1902.76	FALSE	38
2022-09-12	09:36:02	2.36556	10.5225	2003.09	FALSE	38
2022-09-12	09:36:02	1.29335	5.75308	1908.52	FALSE	38
2022-09-12	09:36:02	1.49263	6.63952	2009.73	FALSE	38
2022-09-12	09:36:02	1.6509	7.34353	1915.86	FALSE	38
2022-09-12	09:36:03	1.87497	8.34024	2018.07	FALSE	38
2022-09-12	09:36:03	0.763982	3.39834	1919.26	FALSE	38
2022-09-12	09:36:03	0.645509	2.87135	2020.94	FALSE	38
2022-09-12	09:36:03	2.67528	11.9002	1931.16	FALSE	38
2022-09-12	09:36:04	2.70378	12.027	2032.96	FALSE	38
2022-09-12	09:36:04	3.29843	14.6721	1945.83	1	39
2022-09-12	09:36:04	2.01085	8.94466	2041.91	FALSE	39
2022-09-12	09:36:04	1.51889	6.75633	1952.59	FALSE	39
2022-09-12	09:36:05	0.752583	3.34764	2045.26	FALSE	39
2022-09-12	09:36:05	0.472176	2.10033	1954.69	FALSE	39
2022-09-12	09:36:05	0.326323	1.45155	2046.71	FALSE	39
2022-09-12	09:36:05	0.2593	1.15342	1955.84	FALSE	39
2022-09-12	09:36:06	0.187494	0.834011	2047.54	FALSE	39
2022-09-12	09:36:06	0.25355	1.12784	1956.97	FALSE	39
2022-09-12	09:36:06	0.193601	0.861176	2048.4	FALSE	39
2022-09-12	09:36:07	0.155535	0.691851	1957.66	FALSE	39
2022-09-12	09:36:07	0.135942	0.604697	2049.01	FALSE	39
2022-09-12	09:36:07	0.230547	1.02552	1958.69	FALSE	39
2022-09-12	09:36:07	0.233804	1.04001	2050.05	FALSE	39
2022-09-12	09:36:08	0.248868	1.10701	1959.79	FALSE	39
2022-09-12	09:36:08	0.296247	1.31777	2051.37	FALSE	39
2022-09-12	09:36:08	0.275636	1.22608	1961.02	FALSE	39
2022-09-12	09:36:08	0.300471	1.33656	2052.7	FALSE	39
2022-09-12	09:36:09	0.336145	1.49524	1962.51	FALSE	39
2022-09-12	09:36:09	0.331616	1.47509	2054.18	FALSE	39
2022-09-12	09:36:09	0.317316	1.41149	1963.93	FALSE	39
2022-09-12	09:36:09	0.306832	1.36485	2055.54	FALSE	39
2022-09-12	09:36:10	0.334873	1.48958	1965.41	FALSE	39
2022-09-12	09:36:10	0.447647	1.99122	2057.53	FALSE	39
2022-09-12	09:36:10	0.498893	2.21918	1967.63	FALSE	39
2022-09-12	09:36:11	0.597468	2.65766	2060.19	FALSE	39
2022-09-12	09:36:11	1.54261	6.86184	1974.5	FALSE	39
2022-09-12	09:36:11	1.6138	7.17851	2067.37	FALSE	39
2022-09-12	09:36:11	0.69528	3.09274	1977.59	FALSE	39
2022-09-12	09:36:12	0.489733	2.17843	2069.55	FALSE	39
2022-09-12	09:36:12	0.271158	1.20617	1978.79	FALSE	39
2022-09-12	09:36:12	0.260064	1.15682	2070.7	FALSE	39
2022-09-12	09:36:12	0.291463	1.29649	1980.09	FALSE	39
2022-09-12	09:36:13	0.249071	1.10792	2071.81	FALSE	39
2022-09-12	09:36:13	0.316501	1.40786	1981.5	FALSE	39
2022-09-12	09:36:13	1.70566	7.58712	2079.4	FALSE	39
2022-09-12	09:36:13	2.18006	9.69734	1991.2	FALSE	39
2022-09-12	09:36:14	2.44648	10.8824	2090.28	FALSE	39
2022-09-12	09:36:14	1.92948	8.58271	1999.78	FALSE	39
2022-09-12	09:36:14	1.26994	5.64895	2095.93	FALSE	39
2022-09-12	09:36:15	0.751616	3.34334	2003.12	FALSE	39
2022-09-12	09:36:15	0.973193	4.32896	2100.26	FALSE	39
2022-09-12	09:36:15	0.732277	3.25731	2006.38	FALSE	39
2022-09-12	09:36:15	0.454618	2.02223	2102.28	FALSE	39
2022-09-12	09:36:16	0.41584	1.84974	2008.23	FALSE	39
2022-09-12	09:36:16	0.398944	1.77458	2104.06	FALSE	39
2022-09-12	09:36:16	0.389428	1.73225	2009.96	FALSE	39
2022-09-12	09:36:16	0.346425	1.54097	2105.6	FALSE	39
2022-09-12	09:36:17	0.332227	1.47781	2011.44	FALSE	39
2022-09-12	09:36:17	0.298334	1.32705	2106.92	FALSE	39
2022-09-12	09:36:17	0.287188	1.27747	2012.72	FALSE	39
2022-09-12	09:36:17	0.246832	1.09796	2108.02	FALSE	39
2022-09-12	09:36:18	0.233499	1.03865	2013.76	FALSE	39
2022-09-12	09:36:18	0.272176	1.21069	2109.23	FALSE	39
2022-09-12	09:36:18	0.307646	1.36847	2015.12	FALSE	39
2022-09-12	09:36:18	0.259097	1.15252	2110.39	FALSE	39
2022-09-12	09:36:19	0.234415	1.04272	2016.17	FALSE	39
2022-09-12	09:36:19	0.254211	1.13078	2111.52	FALSE	39
2022-09-12	09:36:19	0.24612	1.09479	2017.26	FALSE	39
2022-09-12	09:36:20	0.187036	0.831974	2112.35	FALSE	39
2022-09-12	09:36:20	0.147646	0.656759	2017.92	FALSE	39
2022-09-12	09:36:20	0.203728	0.906223	2113.25	FALSE	39
2022-09-12	09:36:20	0.299606	1.33271	2019.25	FALSE	39
2022-09-12	09:36:21	0.270802	1.20458	2114.46	FALSE	39
2022-09-12	09:36:21	0.212023	0.943121	2020.19	FALSE	39
2022-09-12	09:36:21	0.212227	0.944028	2115.4	FALSE	39
2022-09-12	09:36:21	0.145967	0.64929	2020.84	FALSE	39
2022-09-12	09:36:22	-0.00802776	-0.0357091	2115.4	FALSE	39
2022-09-12	09:36:22	-0.134593	-0.598697	2020.84	FALSE	39
2022-09-12	09:36:22	-0.197392	-0.878039	2115.4	FALSE	39
2022-09-12	09:36:22	-0.307468	-1.36768	2020.84	FALSE	39
2022-09-12	09:36:23	-0.314338	-1.39824	2115.4	FALSE	39
2022-09-12	09:36:23	-0.364872	-1.62302	2020.84	FALSE	39
2022-09-12	09:36:23	0.254211	1.13078	2116.53	FALSE	39
2022-09-12	09:36:24	1.70709	7.59348	2028.44	FALSE	39
2022-09-12	09:36:24	2.81543	12.5236	2129.06	FALSE	39
2022-09-12	09:36:24	2.65772	11.8221	2040.26	FALSE	39
2022-09-12	09:36:24	1.72449	7.67088	2136.73	FALSE	39
2022-09-12	09:36:25	3.55553	15.8157	2056.07	1	40
2022-09-12	09:36:25	3.10653	13.8185	2150.55	1	41
2022-09-12	09:36:25	1.59497	7.09475	2063.17	FALSE	41
2022-09-12	09:36:25	3.30505	14.7015	2165.25	1	42
2022-09-12	09:36:26	2.2905	10.1886	2073.36	FALSE	42
2022-09-12	09:36:26	2.07172	9.21542	2174.46	FALSE	42
2022-09-12	09:36:26	1.78836	7.95498	2081.31	FALSE	42
2022-09-12	09:36:26	3.38963	15.0778	2189.54	1	43
2022-09-12	09:36:27	1.46022	6.49535	2087.81	FALSE	43
2022-09-12	09:36:27	2.48037	11.0332	2200.58	FALSE	43
2022-09-12	09:36:27	1.70352	7.5776	2095.39	FALSE	43
2022-09-12	09:36:27	2.04658	9.1036	2209.68	FALSE	43
2022-09-12	09:36:28	2.12123	9.43566	2104.82	FALSE	43
2022-09-12	09:36:28	0.87813	3.9061	2213.58	FALSE	43
2022-09-12	09:36:28	2.17798	9.68809	2114.51	FALSE	43
2022-09-12	09:36:29	1.17024	5.20546	2218.79	FALSE	43
2022-09-12	09:36:29	1.70622	7.58961	2122.1	FALSE	43
2022-09-12	09:36:29	2.57436	11.4513	2230.24	FALSE	43
2022-09-12	09:36:29	2.23365	9.93572	2132.04	FALSE	43
2022-09-12	09:36:30	2.06088	9.16721	2239.41	FALSE	43
2022-09-12	09:36:30	2.48281	11.044	2143.08	FALSE	43
2022-09-12	09:36:30	1.20698	5.36889	2244.78	FALSE	43
2022-09-12	09:36:30	1.47945	6.58089	2149.66	FALSE	43
2022-09-12	09:36:31	1.02439	4.55669	2249.33	FALSE	43
2022-09-12	09:36:31	0.854975	3.8031	2153.46	FALSE	43
2022-09-12	09:36:31	0.776145	3.45245	2252.79	FALSE	43
2022-09-12	09:36:31	0.829021	3.68765	2157.15	FALSE	43
2022-09-12	09:36:32	1.47828	6.57569	2259.36	FALSE	43
2022-09-12	09:36:32	0.807697	3.5928	2160.74	FALSE	43
2022-09-12	09:36:32	1.49833	6.66487	2266.03	FALSE	43
2022-09-12	09:36:33	1.59665	7.10222	2167.85	FALSE	43
2022-09-12	09:36:33	0.809377	3.60027	2269.63	FALSE	43
2022-09-12	09:36:33	1.43513	6.38375	2174.23	FALSE	43
2022-09-12	09:36:33	1.32948	5.91379	2275.54	FALSE	43
2022-09-12	09:36:34	1.24719	5.54775	2179.78	FALSE	43
2022-09-12	09:36:34	1.74062	7.74263	2283.28	FALSE	43
2022-09-12	09:36:34	1.88612	8.38984	2188.17	FALSE	43
2022-09-12	09:36:34	0.850038	3.78114	2287.07	FALSE	43
2022-09-12	09:36:35	0.408817	1.8185	2189.99	FALSE	43
2022-09-12	09:36:35	0.553041	2.46004	2289.53	FALSE	43
2022-09-12	09:36:35	1.10093	4.89716	2194.88	FALSE	43
2022-09-12	09:36:35	2.27981	10.1411	2299.67	FALSE	43
2022-09-12	09:36:36	2.98724	13.2878	2208.17	FALSE	43
2022-09-12	09:36:36	1.01976	4.5361	2304.2	FALSE	43
2022-09-12	09:36:36	0.817875	3.63807	2211.81	FALSE	43
2022-09-12	09:36:37	0.548664	2.44057	2306.64	FALSE	43
2022-09-12	09:36:37	1.25833	5.5973	2217.41	FALSE	43
2022-09-12	09:36:37	1.33981	5.95974	2312.6	FALSE	43
2022-09-12	09:36:37	2.148	9.55473	2226.96	FALSE	43
2022-09-12	09:36:38	1.67355	7.44429	2320.05	FALSE	43
2022-09-12	09:36:38	1.30709	5.8142	2232.78	FALSE	43
2022-09-12	09:36:38	1.75055	7.7868	2327.83	FALSE	43
2022-09-12	09:36:38	2.10953	9.38361	2242.16	FALSE	43
2022-09-12	09:36:39	0.629885	2.80185	2330.64	FALSE	43
2022-09-12	09:36:39	1.18093	5.25301	2247.41	FALSE	43
2022-09-12	09:36:39	0.496349	2.20786	2332.84	FALSE	43
2022-09-12	09:36:39	0.485051	2.1576	2249.57	FALSE	43
2022-09-12	09:36:40	0.615992	2.74006	2335.58	FALSE	43
2022-09-12	09:36:40	1.58602	7.05493	2256.62	FALSE	43
2022-09-12	09:36:40	0.60902	2.70904	2338.29	FALSE	43
2022-09-12	09:36:40	2.44088	10.8575	2267.48	FALSE	43
2022-09-12	09:36:41	1.72123	7.65638	2345.95	FALSE	43
2022-09-12	09:36:41	1.44459	6.42583	2273.91	FALSE	43
2022-09-12	09:36:41	2.54388	11.3157	2357.26	FALSE	43
2022-09-12	09:36:42	3.71187	16.5111	2290.42	1	44
2022-09-12	09:36:42	0.765254	3.404	2360.67	FALSE	44
2022-09-12	09:36:42	3.10128	13.7951	2304.21	1	45
2022-09-12	09:36:42	2.40281	10.6882	2371.36	FALSE	45
2022-09-12	09:36:43	0.966679	4.29998	2308.51	FALSE	45
2022-09-12	09:36:43	1.88602	8.38939	2379.75	FALSE	45
2022-09-12	09:36:43	1.99385	8.86904	2317.38	FALSE	45
2022-09-12	09:36:43	0.730293	3.24849	2382.99	FALSE	45
2022-09-12	09:36:44	2.19136	9.74761	2327.13	FALSE	45
2022-09-12	09:36:44	1.52698	6.79231	2389.79	FALSE	45
2022-09-12	09:36:44	2.12515	9.45309	2336.58	FALSE	45
2022-09-12	09:36:44	2.49986	11.1199	2400.91	FALSE	45
2022-09-12	09:36:45	3.47207	15.4445	2352.03	1	46
2022-09-12	09:36:45	1.61391	7.17899	2408.09	FALSE	46
2022-09-12	09:36:45	3.77131	16.7755	2368.8	1	47
2022-09-12	09:36:46	2.81039	12.5012	2420.59	FALSE	47
2022-09-12	09:36:46	1.26882	5.64397	2374.45	FALSE	47
2022-09-12	09:36:46	1.47248	6.54989	2427.14	FALSE	47
2022-09-12	09:36:46	2.38261	10.5983	2385.05	FALSE	47
2022-09-12	09:36:47	0.568715	2.52976	2429.67	FALSE	47
2022-09-12	09:36:47	1.84327	8.19923	2393.25	FALSE	47
2022-09-12	09:36:47	1.81218	8.06094	2437.73	FALSE	47
2022-09-12	09:36:47	1.02587	4.56327	2397.81	FALSE	47
2022-09-12	09:36:48	0.822913	3.66048	2441.39	FALSE	47
2022-09-12	09:36:48	0.451005	2.00616	2399.81	FALSE	47
2022-09-12	09:36:48	0.504135	2.24249	2443.63	FALSE	47
2022-09-12	09:36:48	0.388359	1.7275	2401.54	FALSE	47
2022-09-12	09:36:49	0.220115	0.979116	2444.61	FALSE	47
2022-09-12	09:36:49	0.173397	0.771305	2402.31	FALSE	47
2022-09-12	09:36:49	0.169122	0.752288	2445.36	FALSE	47
2022-09-12	09:36:49	0.227697	1.01284	2403.33	FALSE	47
2022-09-12	09:36:50	0.239606	1.06582	2446.43	FALSE	47
2022-09-12	09:36:50	0.333193	1.48211	2404.81	FALSE	47
2022-09-12	09:36:50	0.512023	2.27758	2448.71	FALSE	47
2022-09-12	09:36:51	0.179046	0.796432	2405.6	FALSE	47
2022-09-12	09:36:51	0.125102	0.556479	2449.26	FALSE	47
2022-09-12	09:36:51	0.181743	0.808429	2406.41	FALSE	47
2022-09-12	09:36:51	0.10841	0.482229	2449.74	FALSE	47
2022-09-12	09:36:52	0.112685	0.501245	2406.91	FALSE	47
2022-09-12	09:36:52	0.152125	0.676682	2450.42	FALSE	47
2022-09-12	09:36:52	0.192888	0.858004	2407.77	FALSE	47
2022-09-12	09:36:52	0.146883	0.653365	2451.07	FALSE	47
2022-09-12	09:36:53	0.0977737	0.434917	2408.21	FALSE	47
2022-09-12	09:36:53	0.140929	0.62688	2451.7	FALSE	47
2022-09-12	09:36:53	0.106222	0.472497	2408.68	FALSE	47
2022-09-12	09:36:53	0.283219	1.25981	2452.96	FALSE	47
2022-09-12	09:36:54	0.337926	1.50316	2410.18	FALSE	47
2022-09-12	09:36:54	0.293906	1.30735	2454.27	FALSE	47
2022-09-12	09:36:54	1.37279	6.10644	2416.29	FALSE	47
2022-09-12	09:36:55	0.846679	3.7662	2458.03	FALSE	47
2022-09-12	09:36:55	0.859046	3.82121	2420.11	FALSE	47
2022-09-12	09:36:55	0.801081	3.56337	2461.6	FALSE	47
2022-09-12	09:36:55	0.318334	1.41601	2421.53	FALSE	47
2022-09-12	09:36:56	0.589478	2.62212	2464.22	FALSE	47
2022-09-12	09:36:56	0.291667	1.29739	2422.82	FALSE	47
2022-09-12	09:36:56	0.266323	1.18466	2465.4	FALSE	47
2022-09-12	09:36:56	0.231005	1.02756	2423.85	FALSE	47
2022-09-12	09:36:57	0.602252	2.67894	2468.08	FALSE	47
2022-09-12	09:36:57	0.777824	3.45992	2427.31	FALSE	47
2022-09-12	09:36:57	2.33039	10.366	2478.45	FALSE	47
2022-09-12	09:36:57	2.67777	11.9113	2439.22	FALSE	47
2022-09-12	09:36:58	2.67014	11.8773	2490.33	FALSE	47
2022-09-12	09:36:58	2.43452	10.8292	2450.05	FALSE	47
2022-09-12	09:36:58	1.35961	6.04782	2496.37	FALSE	47
2022-09-12	09:36:58	2.54902	11.3386	2461.39	FALSE	47
2022-09-12	09:36:59	3.1821	14.1546	2510.53	1	48
2022-09-12	09:36:59	1.7394	7.7372	2469.13	FALSE	48
2022-09-12	09:36:59	2.27335	10.1123	2520.64	FALSE	48
2022-09-12	09:37:00	3.47818	15.4716	2484.6	1	49
2022-09-12	09:37:00	1.91391	8.51345	2529.16	FALSE	49
2022-09-12	09:37:00	2.90291	12.9127	2497.51	FALSE	49
2022-09-12	09:37:00	4.46612	19.8662	2549.02	1	50
2022-09-12	09:37:01	3.57655	15.9092	2513.42	1	51
2022-09-12	09:37:01	7.12841	31.7086	2580.73	1	52
2022-09-12	09:37:01	8.38169	37.2834	2550.7	1	53
2022-09-12	09:37:01	2.77864	12.3599	2593.09	FALSE	53
2022-09-12	09:37:02	2.37808	10.5782	2561.28	FALSE	53
2022-09-12	09:37:02	3.06541	13.6356	2606.73	1	54
2022-09-12	09:37:02	1.38612	6.16574	2567.45	FALSE	54
2022-09-12	09:37:02	0.734313	3.26637	2609.99	FALSE	54
2022-09-12	09:37:03	0.46729	2.0786	2569.53	FALSE	54
2022-09-12	09:37:03	0.740674	3.29467	2613.29	FALSE	54
2022-09-12	09:37:03	0.169224	0.752742	2570.28	FALSE	54
2022-09-12	09:37:04	0.175789	0.781945	2614.07	FALSE	54
2022-09-12	09:37:04	0.545611	2.42699	2572.71	FALSE	54
2022-09-12	09:37:04	0.349682	1.55546	2615.62	FALSE	54
2022-09-12	09:37:04	0.569071	2.53134	2575.24	FALSE	54
2022-09-12	09:37:05	1.12785	5.0169	2620.64	FALSE	54
2022-09-12	09:37:05	0.105611	0.469779	2575.71	FALSE	54
2022-09-12	09:37:05	0.0519213	0.230956	2620.87	FALSE	54
2022-09-12	09:37:05	0.0743132	0.33056	2576.04	FALSE	54
2022-09-12	09:37:06	0.123932	0.551274	2621.42	FALSE	54
2022-09-12	09:37:06	0.103321	0.459592	2576.5	FALSE	54
2022-09-12	09:37:06	0.068359	0.304075	2621.73	FALSE	54
2022-09-12	09:37:06	0.127036	0.565082	2577.06	FALSE	54
2022-09-12	09:37:07	0.219758	0.977528	2622.7	FALSE	54
2022-09-12	09:37:07	0.384237	1.70916	2578.77	FALSE	54
2022-09-12	09:37:07	0.394822	1.75625	2624.46	FALSE	54
2022-09-12	09:37:08	0.486221	2.16281	2580.94	FALSE	54
2022-09-12	09:37:08	0.460929	2.0503	2626.51	FALSE	54
2022-09-12	09:37:08	0.631514	2.8091	2583.74	FALSE	54
2022-09-12	09:37:08	0.465865	2.07226	2628.58	FALSE	54
2022-09-12	09:37:09	0.635025	2.82472	2586.57	FALSE	54
2022-09-12	09:37:09	0.525203	2.33621	2630.92	FALSE	54

## Sheet: Dominic_martin_202291293152 (E)
Date	Time	Lbs	Total Force x Time
						**GoPro Fitting: 920
2022-09-12	09:32:09	2.15095	2.15095	FALSE	0
2022-09-12	09:32:09	3.89416	6.04511	1	1
2022-09-12	09:32:09	4.09141	10.1365	1	2
2022-09-12	09:32:09	1.8134	11.9499	FALSE	2
2022-09-12	09:32:10	0.524287	12.4742	FALSE	2
2022-09-12	09:32:10	0.273448	12.7477	FALSE	2
2022-09-12	09:32:10	0.338791	13.0864	FALSE	2
2022-09-12	09:32:11	0.345153	13.4316	FALSE	2
2022-09-12	09:32:11	0.544389	13.976	FALSE	2
2022-09-12	09:32:11	0.514975	14.491	FALSE	2
2022-09-12	09:32:11	0.583677	15.0746	FALSE	2
2022-09-12	09:32:12	0.41126	15.4859	FALSE	2
2022-09-12	09:32:12	0.699198	16.1851	FALSE	2
2022-09-12	09:32:12	1.10968	17.2948	FALSE	2
2022-09-12	09:32:12	0.671259	17.966	FALSE	2
2022-09-12	09:32:13	0.799758	18.7658	FALSE	2
2022-09-12	09:32:13	1.37039	20.1362	FALSE	2
2022-09-12	09:32:13	1.08632	21.2225	FALSE	2
2022-09-12	09:32:13	1.09391	22.3164	FALSE	2
2022-09-12	09:32:14	0.977621	23.294	FALSE	2
2022-09-12	09:32:14	0.948155	24.2422	FALSE	2
2022-09-12	09:32:14	0.939198	25.1814	FALSE	2
2022-09-12	09:32:14	0.896603	26.078	FALSE	2
2022-09-12	09:32:15	0.909835	26.9878	FALSE	2
2022-09-12	09:32:15	0.891972	27.8798	FALSE	2
2022-09-12	09:32:15	0.739453	28.6193	FALSE	2
2022-09-12	09:32:16	0.769987	29.3892	FALSE	2			Total Force x Time	1172.94
2022-09-12	09:32:16	0.968155	30.3574	FALSE	2			Total Time Steps Force >3	52
2022-09-12	09:32:16	0.643779	31.0012	FALSE	2
2022-09-12	09:32:16	0.965051	31.9662	FALSE	2
2022-09-12	09:32:17	0.76103	32.7273	FALSE	2
2022-09-12	09:32:17	1.93737	34.6646	FALSE	2
2022-09-12	09:32:17	1.05548	35.7201	FALSE	2
2022-09-12	09:32:17	1.20368	36.9238	FALSE	2
2022-09-12	09:32:18	1.07141	37.9952	FALSE	2
2022-09-12	09:32:18	1.20765	39.2028	FALSE	2
2022-09-12	09:32:18	1.13233	40.3352	FALSE	2
2022-09-12	09:32:18	0.35126	40.6864	FALSE	2
2022-09-12	09:32:19	0.935534	41.622	FALSE	2
2022-09-12	09:32:19	0.902659	42.5246	FALSE	2
2022-09-12	09:32:19	0.692532	43.2172	FALSE	2
2022-09-12	09:32:20	1.51905	44.7362	FALSE	2
2022-09-12	09:32:20	1.45645	46.1927	FALSE	2
2022-09-12	09:32:20	1.20342	47.3961	FALSE	2
2022-09-12	09:32:20	0.749478	48.1456	FALSE	2
2022-09-12	09:32:21	1.19075	49.3363	FALSE	2
2022-09-12	09:32:21	0.809936	50.1462	FALSE	2
2022-09-12	09:32:21	1.60251	51.7488	FALSE	2
2022-09-12	09:32:21	2.40877	54.1575	FALSE	2
2022-09-12	09:32:22	3.48709	57.6446	1	3
2022-09-12	09:32:22	3.4363	61.0809	1	4
2022-09-12	09:32:22	2.8079	63.8888	FALSE	4
2022-09-12	09:32:22	1.35711	65.2459	FALSE	4
2022-09-12	09:32:23	1.45849	66.7044	FALSE	4
2022-09-12	09:32:23	2.05177	68.7562	FALSE	4
2022-09-12	09:32:23	1.69034	70.4465	FALSE	4
2022-09-12	09:32:24	2.59304	73.0396	FALSE	4
2022-09-12	09:32:24	4.13864	77.1782	1	5
2022-09-12	09:32:24	2.21289	79.3911	FALSE	5
2022-09-12	09:32:24	1.95523	81.3463	FALSE	5
2022-09-12	09:32:25	1.90525	83.2516	FALSE	5
2022-09-12	09:32:25	0.729529	83.9811	FALSE	5
2022-09-12	09:32:25	0.419758	84.4009	FALSE	5
2022-09-12	09:32:25	0.395636	84.7965	FALSE	5
2022-09-12	09:32:26	0.180471	84.977	FALSE	5
2022-09-12	09:32:26	0.15472	85.1317	FALSE	5
2022-09-12	09:32:26	0.480165	85.6119	FALSE	5
2022-09-12	09:32:26	0.194313	85.8062	FALSE	5
2022-09-12	09:32:27	0.32673	86.1329	FALSE	5
2022-09-12	09:32:27	0.196756	86.3297	FALSE	5
2022-09-12	09:32:27	0.245916	86.5756	FALSE	5
2022-09-12	09:32:27	0.207239	86.7828	FALSE	5
2022-09-12	09:32:28	0.160674	86.9435	FALSE	5
2022-09-12	09:32:28	0.46388	87.4074	FALSE	5
2022-09-12	09:32:28	0.695738	88.1031	FALSE	5
2022-09-12	09:32:29	0.493804	88.5969	FALSE	5
2022-09-12	09:32:29	0.287596	88.8845	FALSE	5
2022-09-12	09:32:29	0.484949	89.3694	FALSE	5
2022-09-12	09:32:29	0.48958	89.859	FALSE	5
2022-09-12	09:32:30	0.547748	90.4068	FALSE	5
2022-09-12	09:32:30	0.598232	91.005	FALSE	5
2022-09-12	09:32:30	0.830343	91.8353	FALSE	5
2022-09-12	09:32:30	1.0251	92.8604	FALSE	5
2022-09-12	09:32:31	1.13126	93.9917	FALSE	5
2022-09-12	09:32:31	1.26281	95.2545	FALSE	5
2022-09-12	09:32:31	1.26795	96.5225	FALSE	5
2022-09-12	09:32:31	1.33828	97.8607	FALSE	5
2022-09-12	09:32:32	1.0848	98.9455	FALSE	5
2022-09-12	09:32:32	1.24342	100.189	FALSE	5
2022-09-12	09:32:32	1.35737	101.546	FALSE	5
2022-09-12	09:32:33	1.16597	102.712	FALSE	5
2022-09-12	09:32:33	1.19345	103.906	FALSE	5
2022-09-12	09:32:33	1.04927	104.955	FALSE	5
2022-09-12	09:32:33	0.433651	105.389	FALSE	5
2022-09-12	09:32:34	0.445865	105.835	FALSE	5
2022-09-12	09:32:34	0.572176	106.407	FALSE	5
2022-09-12	09:32:34	0.436196	106.843	FALSE	5
2022-09-12	09:32:34	0.331616	107.175	FALSE	5
2022-09-12	09:32:35	0.531514	107.706	FALSE	5
2022-09-12	09:32:35	0.602303	108.308	FALSE	5
2022-09-12	09:32:35	0.22327	108.532	FALSE	5
2022-09-12	09:32:35	0.270344	108.802	FALSE	5
2022-09-12	09:32:36	0.344898	109.147	FALSE	5
2022-09-12	09:32:36	0.272023	109.419	FALSE	5
2022-09-12	09:32:36	0.277875	109.697	FALSE	5
2022-09-12	09:32:36	0.145611	109.842	FALSE	5
2022-09-12	09:32:37	0.1764	110.019	FALSE	5
2022-09-12	09:32:37	0.0827101	110.101	FALSE	5
2022-09-12	09:32:37	0.154619	110.256	FALSE	5
2022-09-12	09:32:38	0.156959	110.413	FALSE	5
2022-09-12	09:32:38	0.14154	110.555	FALSE	5
2022-09-12	09:32:38	0.0210817	110.576	FALSE	5
2022-09-12	09:32:38	0.076247	110.652	FALSE	5
2022-09-12	09:32:39	0.112583	110.765	FALSE	5
2022-09-12	09:32:39	0.0254073	110.79	FALSE	5
2022-09-12	09:32:39	0.228155	111.018	FALSE	5
2022-09-12	09:32:40	-0.0146944	111.018	FALSE	5
2022-09-12	09:32:40	0.229275	111.247	FALSE	5
2022-09-12	09:32:40	0.445458	111.693	FALSE	5
2022-09-12	09:32:40	0.686476	112.379	FALSE	5
2022-09-12	09:32:40	0.772481	113.152	FALSE	5
2022-09-12	09:32:41	0.533092	113.685	FALSE	5
2022-09-12	09:32:41	0.550954	114.236	FALSE	5
2022-09-12	09:32:41	0.770089	115.006	FALSE	5
2022-09-12	09:32:42	0.395687	115.402	FALSE	5
2022-09-12	09:32:42	1.09803	116.5	FALSE	5
2022-09-12	09:32:42	0.507443	117.007	FALSE	5
2022-09-12	09:32:42	0.359046	117.366	FALSE	5
2022-09-12	09:32:43	0.317926	117.684	FALSE	5
2022-09-12	09:32:43	0.104237	117.788	FALSE	5
2022-09-12	09:32:43	0.339249	118.128	FALSE	5
2022-09-12	09:32:43	0.115484	118.243	FALSE	5
2022-09-12	09:32:44	0.331718	118.575	FALSE	5
2022-09-12	09:32:44	0.378232	118.953	FALSE	5
2022-09-12	09:32:44	0.333295	119.286	FALSE	5
2022-09-12	09:32:44	0.549987	119.836	FALSE	5
2022-09-12	09:32:45	0.494924	120.331	FALSE	5
2022-09-12	09:32:45	0.916654	121.248	FALSE	5
2022-09-12	09:32:45	0.726629	121.974	FALSE	5
2022-09-12	09:32:45	1.07335	123.048	FALSE	5
2022-09-12	09:32:46	1.51106	124.559	FALSE	5
2022-09-12	09:32:46	1.63441	126.193	FALSE	5
2022-09-12	09:32:46	1.16831	127.362	FALSE	5
2022-09-12	09:32:47	0.986781	128.348	FALSE	5
2022-09-12	09:32:47	1.10841	129.457	FALSE	5
2022-09-12	09:32:47	1.05889	130.516	FALSE	5
2022-09-12	09:32:47	0.779249	131.295	FALSE	5
2022-09-12	09:32:48	0.735483	132.03	FALSE	5
2022-09-12	09:32:48	1.58551	133.616	FALSE	5
2022-09-12	09:32:48	0.736654	134.353	FALSE	5
2022-09-12	09:32:48	1.21172	135.564	FALSE	5
2022-09-12	09:32:49	1.33324	136.898	FALSE	5
2022-09-12	09:32:49	1.66266	138.56	FALSE	5
2022-09-12	09:32:49	1.61716	140.177	FALSE	5
2022-09-12	09:32:49	1.30144	141.479	FALSE	5
2022-09-12	09:32:50	1.30648	142.785	FALSE	5
2022-09-12	09:32:50	0.97645	143.762	FALSE	5
2022-09-12	09:32:50	0.926272	144.688	FALSE	5
2022-09-12	09:32:51	1.10195	145.79	FALSE	5
2022-09-12	09:32:51	1.57838	147.368	FALSE	5
2022-09-12	09:32:51	1.10632	148.475	FALSE	5
2022-09-12	09:32:51	1.46683	149.941	FALSE	5
2022-09-12	09:32:52	1.1105	151.052	FALSE	5
2022-09-12	09:32:52	0.965458	152.017	FALSE	5
2022-09-12	09:32:52	0.451667	152.469	FALSE	5
2022-09-12	09:32:52	0.590496	153.06	FALSE	5
2022-09-12	09:32:53	0.772939	153.833	FALSE	5
2022-09-12	09:32:53	0.355992	154.189	FALSE	5
2022-09-12	09:32:53	0.798842	154.987	FALSE	5
2022-09-12	09:32:53	1.60205	156.589	FALSE	5
2022-09-12	09:32:54	2.91116	159.501	FALSE	5
2022-09-12	09:32:54	1.80469	161.305	FALSE	5
2022-09-12	09:32:54	3.01609	164.321	1	6
2022-09-12	09:32:54	1.48296	165.804	FALSE	6
2022-09-12	09:32:55	2.15355	167.958	FALSE	6
2022-09-12	09:32:55	1.48439	169.442	FALSE	6
2022-09-12	09:32:55	2.32042	171.763	FALSE	6
2022-09-12	09:32:56	2.47731	174.24	FALSE	6
2022-09-12	09:32:56	1.30459	175.545	FALSE	6
2022-09-12	09:32:56	2.4277	177.972	FALSE	6
2022-09-12	09:32:56	2.07207	180.044	FALSE	6
2022-09-12	09:32:57	2.77981	182.824	FALSE	6
2022-09-12	09:32:57	1.12352	183.948	FALSE	6
2022-09-12	09:32:57	1.68363	185.631	FALSE	6
2022-09-12	09:32:57	2.6963	188.328	FALSE	6
2022-09-12	09:32:58	2.21721	190.545	FALSE	6
2022-09-12	09:32:58	2.13721	192.682	FALSE	6
2022-09-12	09:32:58	1.62688	194.309	FALSE	6
2022-09-12	09:32:58	3.37945	197.688	1	7
2022-09-12	09:32:59	1.84892	199.537	FALSE	7
2022-09-12	09:32:59	3.37441	202.912	1	8
2022-09-12	09:32:59	1.69238	204.604	FALSE	8
2022-09-12	09:33:00	3.45579	208.06	1	9
2022-09-12	09:33:00	1.11065	209.17	FALSE	9
2022-09-12	09:33:00	2.77146	211.942	FALSE	9
2022-09-12	09:33:00	2.70179	214.644	FALSE	9
2022-09-12	09:33:01	3.34653	217.99	1	10
2022-09-12	09:33:01	3.2564	221.247	1	11
2022-09-12	09:33:01	2.51472	223.761	FALSE	11
2022-09-12	09:33:01	6.32383	230.085	1	12
2022-09-12	09:33:02	2.9508	233.036	FALSE	12
2022-09-12	09:33:02	6.83121	239.867	1	13
2022-09-12	09:33:02	4.13523	244.002	1	14
2022-09-12	09:33:02	8.01197	252.014	1	15
2022-09-12	09:33:03	4.09909	256.114	1	16
2022-09-12	09:33:03	7.00525	263.119	1	17
2022-09-12	09:33:03	4.71665	267.835	1	18
2022-09-12	09:33:03	4.10612	271.942	1	19
2022-09-12	09:33:04	1.96352	273.905	FALSE	19
2022-09-12	09:33:04	2.53772	276.443	FALSE	19
2022-09-12	09:33:04	2.58795	279.031	FALSE	19
2022-09-12	09:33:05	1.57085	280.602	FALSE	19
2022-09-12	09:33:05	2.01253	282.614	FALSE	19
2022-09-12	09:33:05	1.62795	284.242	FALSE	19
2022-09-12	09:33:05	2.55065	286.793	FALSE	19
2022-09-12	09:33:06	2.37681	289.17	FALSE	19
2022-09-12	09:33:06	1.97706	291.147	FALSE	19
2022-09-12	09:33:06	1.92581	293.072	FALSE	19
2022-09-12	09:33:06	1.14179	294.214	FALSE	19
2022-09-12	09:33:07	1.25558	295.47	FALSE	19
2022-09-12	09:33:07	1.05284	296.523	FALSE	19
2022-09-12	09:33:07	1.73355	298.256	FALSE	19
2022-09-12	09:33:07	2.47019	300.726	FALSE	19
2022-09-12	09:33:08	1.30139	302.028	FALSE	19
2022-09-12	09:33:08	2.04383	304.072	FALSE	19
2022-09-12	09:33:08	2.17553	306.247	FALSE	19
2022-09-12	09:33:09	1.96251	308.21	FALSE	19
2022-09-12	09:33:09	1.18332	309.393	FALSE	19
2022-09-12	09:33:09	0.197316	309.59	FALSE	19
2022-09-12	09:33:09	0.156451	309.747	FALSE	19
2022-09-12	09:33:10	0.66729	310.414	FALSE	19
2022-09-12	09:33:10	2.78235	313.196	FALSE	19
2022-09-12	09:33:10	1.39146	314.588	FALSE	19
2022-09-12	09:33:10	1.45014	316.038	FALSE	19
2022-09-12	09:33:11	0.84098	316.879	FALSE	19
2022-09-12	09:33:11	0.364542	317.243	FALSE	19
2022-09-12	09:33:11	0.236858	317.48	FALSE	19
2022-09-12	09:33:11	0.0834226	317.564	FALSE	19
2022-09-12	09:33:12	-0.0103687	317.564	FALSE	19
2022-09-12	09:33:12	0.0540587	317.618	FALSE	19
2022-09-12	09:33:12	0.162761	317.781	FALSE	19
2022-09-12	09:33:13	0.209377	317.99	FALSE	19
2022-09-12	09:33:13	0.0941096	318.084	FALSE	19
2022-09-12	09:33:13	0.143982	318.228	FALSE	19
2022-09-12	09:33:13	0.124288	318.352	FALSE	19
2022-09-12	09:33:14	0.109479	318.462	FALSE	19
2022-09-12	09:33:14	0.135738	318.598	FALSE	19
2022-09-12	09:33:14	0.148003	318.746	FALSE	19
2022-09-12	09:33:14	0.143677	318.889	FALSE	19
2022-09-12	09:33:15	0.14668	319.036	FALSE	19
2022-09-12	09:33:15	0.154873	319.191	FALSE	19
2022-09-12	09:33:15	0.163575	319.354	FALSE	19
2022-09-12	09:33:15	0.160267	319.515	FALSE	19
2022-09-12	09:33:16	0.171616	319.686	FALSE	19
2022-09-12	09:33:16	0.177825	319.864	FALSE	19
2022-09-12	09:33:16	0.1764	320.04	FALSE	19
2022-09-12	09:33:16	0.177316	320.218	FALSE	19
2022-09-12	09:33:17	0.177112	320.395	FALSE	19
2022-09-12	09:33:17	0.165713	320.561	FALSE	19
2022-09-12	09:33:17	0.163524	320.724	FALSE	19
2022-09-12	09:33:18	0.161336	320.885	FALSE	19
2022-09-12	09:33:18	0.160827	321.046	FALSE	19
2022-09-12	09:33:18	0.162048	321.208	FALSE	19
2022-09-12	09:33:18	0.160776	321.369	FALSE	19
2022-09-12	09:33:19	0.157316	321.526	FALSE	19
2022-09-12	09:33:19	0.155636	321.682	FALSE	19
2022-09-12	09:33:19	0.156807	321.839	FALSE	19
2022-09-12	09:33:19	0.164797	322.004	FALSE	19
2022-09-12	09:33:20	0.163372	322.167	FALSE	19
2022-09-12	09:33:20	0.174313	322.341	FALSE	19
2022-09-12	09:33:20	0.172532	322.514	FALSE	19
2022-09-12	09:33:20	0.175738	322.69	FALSE	19
2022-09-12	09:33:21	0.174771	322.864	FALSE	19
2022-09-12	09:33:21	0.171972	323.036	FALSE	19
2022-09-12	09:33:21	0.171158	323.207	FALSE	19
2022-09-12	09:33:22	0.180624	323.388	FALSE	19
2022-09-12	09:33:22	0.177112	323.565	FALSE	19
2022-09-12	09:33:22	0.170242	323.735	FALSE	19
2022-09-12	09:33:22	0.164949	323.9	FALSE	19
2022-09-12	09:33:23	0.163779	324.064	FALSE	19
2022-09-12	09:33:23	0.173804	324.238	FALSE	19
2022-09-12	09:33:23	0.186272	324.424	FALSE	19
2022-09-12	09:33:23	0.156196	324.58	FALSE	19
2022-09-12	09:33:24	0.119453	324.7	FALSE	19
2022-09-12	09:33:24	0.156349	324.856	FALSE	19
2022-09-12	09:33:24	0.64556	325.502	FALSE	19
2022-09-12	09:33:24	0.758384	326.26	FALSE	19
2022-09-12	09:33:25	1.06103	327.321	FALSE	19
2022-09-12	09:33:25	1.33625	328.657	FALSE	19
2022-09-12	09:33:25	1.30714	329.965	FALSE	19
2022-09-12	09:33:25	1.45411	331.419	FALSE	19
2022-09-12	09:33:26	1.83029	333.249	FALSE	19
2022-09-12	09:33:26	1.18215	334.431	FALSE	19
2022-09-12	09:33:26	0.933092	335.364	FALSE	19
2022-09-12	09:33:27	0.468206	335.832	FALSE	19
2022-09-12	09:33:27	0.26556	336.098	FALSE	19
2022-09-12	09:33:27	0.124797	336.223	FALSE	19
2022-09-12	09:33:27	0.250496	336.473	FALSE	19
2022-09-12	09:33:28	0.183473	336.657	FALSE	19
2022-09-12	09:33:28	0.242659	336.899	FALSE	19
2022-09-12	09:33:28	0.287697	337.187	FALSE	19
2022-09-12	09:33:28	0.302914	337.49	FALSE	19
2022-09-12	09:33:29	0.323117	337.813	FALSE	19
2022-09-12	09:33:29	0.209275	338.022	FALSE	19
2022-09-12	09:33:29	0.150751	338.173	FALSE	19
2022-09-12	09:33:29	0.308461	338.482	FALSE	19
2022-09-12	09:33:30	0.183372	338.665	FALSE	19
2022-09-12	09:33:30	0.257468	338.923	FALSE	19
2022-09-12	09:33:30	0.252328	339.175	FALSE	19
2022-09-12	09:33:31	0.323015	339.498	FALSE	19
2022-09-12	09:33:31	0.225916	339.724	FALSE	19
2022-09-12	09:33:31	0.221387	339.945	FALSE	19
2022-09-12	09:33:31	0.269428	340.215	FALSE	19
2022-09-12	09:33:32	0.304237	340.519	FALSE	19
2022-09-12	09:33:32	0.318791	340.838	FALSE	19
2022-09-12	09:33:32	0.354568	341.192	FALSE	19
2022-09-12	09:33:32	0.393143	341.585	FALSE	19
2022-09-12	09:33:33	0.383524	341.969	FALSE	19
2022-09-12	09:33:33	0.377316	342.346	FALSE	19
2022-09-12	09:33:33	0.397214	342.743	FALSE	19
2022-09-12	09:33:33	0.434924	343.178	FALSE	19
2022-09-12	09:33:34	0.444542	343.623	FALSE	19
2022-09-12	09:33:34	0.475076	344.098	FALSE	19
2022-09-12	09:33:34	0.637468	344.735	FALSE	19
2022-09-12	09:33:34	1.06439	345.8	FALSE	19
2022-09-12	09:33:35	0.764186	346.564	FALSE	19
2022-09-12	09:33:35	0.805661	347.37	FALSE	19
2022-09-12	09:33:35	0.534058	347.904	FALSE	19
2022-09-12	09:33:36	0.279453	348.183	FALSE	19
2022-09-12	09:33:36	0.252023	348.435	FALSE	19
2022-09-12	09:33:36	0.162965	348.598	FALSE	19
2022-09-12	09:33:36	0.244695	348.843	FALSE	19
2022-09-12	09:33:37	0.149071	348.992	FALSE	19
2022-09-12	09:33:37	0.150751	349.143	FALSE	19
2022-09-12	09:33:37	0.208206	349.351	FALSE	19
2022-09-12	09:33:37	0.453753	349.805	FALSE	19
2022-09-12	09:33:38	0.651056	350.456	FALSE	19
2022-09-12	09:33:38	0.724084	351.18	FALSE	19
2022-09-12	09:33:38	0.916807	352.097	FALSE	19
2022-09-12	09:33:38	1.85141	353.948	FALSE	19
2022-09-12	09:33:39	1.65075	355.599	FALSE	19
2022-09-12	09:33:39	1.5024	357.101	FALSE	19
2022-09-12	09:33:39	2.71818	359.819	FALSE	19
2022-09-12	09:33:40	1.24037	361.06	FALSE	19
2022-09-12	09:33:40	1.89289	362.953	FALSE	19
2022-09-12	09:33:40	1.89004	364.843	FALSE	19
2022-09-12	09:33:40	0.713753	365.556	FALSE	19
2022-09-12	09:33:41	1.44632	367.003	FALSE	19
2022-09-12	09:33:41	2.22159	369.224	FALSE	19
2022-09-12	09:33:41	0.935127	370.159	FALSE	19
2022-09-12	09:33:41	1.59162	371.751	FALSE	19
2022-09-12	09:33:42	2.16027	373.911	FALSE	19
2022-09-12	09:33:42	1.20897	375.12	FALSE	19
2022-09-12	09:33:42	1.97146	377.092	FALSE	19
2022-09-12	09:33:42	2.54805	379.64	FALSE	19
2022-09-12	09:33:43	2.0106	381.65	FALSE	19
2022-09-12	09:33:43	3.01589	384.666	1	20
2022-09-12	09:33:43	2.16698	386.833	FALSE	20
2022-09-12	09:33:43	1.65162	388.485	FALSE	20
2022-09-12	09:33:44	1.12011	389.605	FALSE	20
2022-09-12	09:33:44	3.39197	392.997	1	21
2022-09-12	09:33:44	0.836908	393.834	FALSE	21
2022-09-12	09:33:45	2.25192	396.086	FALSE	21
2022-09-12	09:33:45	1.80627	397.892	FALSE	21
2022-09-12	09:33:45	2.56057	400.453	FALSE	21
2022-09-12	09:33:45	1.32877	401.781	FALSE	21
2022-09-12	09:33:46	1.4537	403.235	FALSE	21
2022-09-12	09:33:46	1.69065	404.926	FALSE	21
2022-09-12	09:33:46	3.16123	408.087	1	22
2022-09-12	09:33:46	1.17177	409.259	FALSE	22
2022-09-12	09:33:47	1.77655	411.035	FALSE	22
2022-09-12	09:33:47	2.9194	413.955	FALSE	22
2022-09-12	09:33:47	2.18877	416.143	FALSE	22
2022-09-12	09:33:47	4.8652	421.009	1	23
2022-09-12	09:33:48	5.98322	426.992	1	24
2022-09-12	09:33:48	5.65136	432.643	1	25
2022-09-12	09:33:48	6.49614	439.139	1	26
2022-09-12	09:33:49	7.80388	446.943	1	27
2022-09-12	09:33:49	8.79945	455.743	1	28
2022-09-12	09:33:49	11.6742	467.417	1	29
2022-09-12	09:33:49	7.45706	474.874	1	30
2022-09-12	09:33:50	4.45625	479.33	1	31
2022-09-12	09:33:50	2.97854	482.309	FALSE	31
2022-09-12	09:33:50	3.82215	486.131	1	32
2022-09-12	09:33:50	2.17055	488.301	FALSE	32
2022-09-12	09:33:51	1.0109	489.312	FALSE	32
2022-09-12	09:33:51	0.687086	489.999	FALSE	32
2022-09-12	09:33:51	0.757417	490.757	FALSE	32
2022-09-12	09:33:51	0.615535	491.372	FALSE	32
2022-09-12	09:33:52	0.621794	491.994	FALSE	32
2022-09-12	09:33:52	0.404797	492.399	FALSE	32
2022-09-12	09:33:52	0.47528	492.874	FALSE	32
2022-09-12	09:33:52	0.365865	493.24	FALSE	32
2022-09-12	09:33:53	0.295484	493.536	FALSE	32
2022-09-12	09:33:53	0.190954	493.727	FALSE	32
2022-09-12	09:33:53	0.14897	493.876	FALSE	32
2022-09-12	09:33:54	0.243117	494.119	FALSE	32
2022-09-12	09:33:54	0.201234	494.32	FALSE	32
2022-09-12	09:33:54	0.262252	494.582	FALSE	32
2022-09-12	09:33:54	0.108563	494.691	FALSE	32
2022-09-12	09:33:55	0.279809	494.97	FALSE	32
2022-09-12	09:33:55	0.238588	495.209	FALSE	32
2022-09-12	09:33:55	0.281641	495.491	FALSE	32
2022-09-12	09:33:55	0.17355	495.664	FALSE	32
2022-09-12	09:33:56	0.349987	496.014	FALSE	32
2022-09-12	09:33:56	0.362913	496.377	FALSE	32
2022-09-12	09:33:56	0.995331	497.373	FALSE	32
2022-09-12	09:33:57	0.923422	498.296	FALSE	32
2022-09-12	09:33:57	1.69696	499.993	FALSE	32
2022-09-12	09:33:57	2.29579	502.289	FALSE	32
2022-09-12	09:33:57	0.989326	503.278	FALSE	32
2022-09-12	09:33:58	1.31177	504.59	FALSE	32
2022-09-12	09:33:58	0.590903	505.181	FALSE	32
2022-09-12	09:33:58	1.21314	506.394	FALSE	32
2022-09-12	09:33:58	0.97416	507.368	FALSE	32
2022-09-12	09:33:59	1.13726	508.505	FALSE	32
2022-09-12	09:33:59	1.36754	509.873	FALSE	32
2022-09-12	09:33:59	1.64948	511.522	FALSE	32
2022-09-12	09:33:59	0.986374	512.509	FALSE	32
2022-09-12	09:34:00	1.97594	514.485	FALSE	32
2022-09-12	09:34:00	1.46459	515.949	FALSE	32
2022-09-12	09:34:00	1.28795	517.237	FALSE	32
2022-09-12	09:34:00	1.13635	518.373	FALSE	32
2022-09-12	09:34:01	1.14678	519.52	FALSE	32
2022-09-12	09:34:01	2.5677	522.088	FALSE	32
2022-09-12	09:34:01	1.06312	523.151	FALSE	32
2022-09-12	09:34:02	2.13319	525.284	FALSE	32
2022-09-12	09:34:02	1.12541	526.41	FALSE	32
2022-09-12	09:34:02	2.07182	528.481	FALSE	32
2022-09-12	09:34:02	2.15431	530.636	FALSE	32
2022-09-12	09:34:03	1.67894	532.315	FALSE	32
2022-09-12	09:34:03	1.40724	533.722	FALSE	32
2022-09-12	09:34:03	2.50418	536.226	FALSE	32
2022-09-12	09:34:04	1.11085	537.337	FALSE	32
2022-09-12	09:34:04	2.20062	539.538	FALSE	32
2022-09-12	09:34:04	1.62617	541.164	FALSE	32
2022-09-12	09:34:04	1.5105	542.674	FALSE	32
2022-09-12	09:34:04	1.74118	544.415	FALSE	32
2022-09-12	09:34:05	1.08632	545.502	FALSE	32
2022-09-12	09:34:05	1.39548	546.897	FALSE	32
2022-09-12	09:34:05	2.90993	549.807	FALSE	32
2022-09-12	09:34:05	2.00556	551.813	FALSE	32
2022-09-12	09:34:06	0.934974	552.748	FALSE	32
2022-09-12	09:34:06	1.45304	554.201	FALSE	32
2022-09-12	09:34:06	1.38576	555.587	FALSE	32
2022-09-12	09:34:07	1.26174	556.848	FALSE	32
2022-09-12	09:34:07	1.97391	558.822	FALSE	32
2022-09-12	09:34:07	2.98174	561.804	FALSE	32
2022-09-12	09:34:07	2.37324	564.177	FALSE	32
2022-09-12	09:34:08	2.8363	567.013	FALSE	32
2022-09-12	09:34:08	1.7763	568.79	FALSE	32
2022-09-12	09:34:08	3.0164	571.806	1	33
2022-09-12	09:34:08	0.838486	572.645	FALSE	33
2022-09-12	09:34:09	1.30816	573.953	FALSE	33
2022-09-12	09:34:09	1.2709	575.224	FALSE	33
2022-09-12	09:34:09	1.47915	576.703	FALSE	33
2022-09-12	09:34:09	0.364746	577.068	FALSE	33
2022-09-12	09:34:10	0.726578	577.794	FALSE	33
2022-09-12	09:34:10	0.570395	578.365	FALSE	33
2022-09-12	09:34:10	0.448104	578.813	FALSE	33
2022-09-12	09:34:11	0.197977	579.011	FALSE	33
2022-09-12	09:34:11	0.224593	579.235	FALSE	33
2022-09-12	09:34:11	0.194924	579.43	FALSE	33
2022-09-12	09:34:11	0.212379	579.643	FALSE	33
2022-09-12	09:34:12	-0.00838398	579.643	FALSE	33
2022-09-12	09:34:12	0.0769595	579.72	FALSE	33
2022-09-12	09:34:12	-0.0103178	579.72	FALSE	33
2022-09-12	09:34:12	0.0982317	579.818	FALSE	33
2022-09-12	09:34:13	1.45533	581.273	FALSE	33
2022-09-12	09:34:13	1.17599	582.449	FALSE	33
2022-09-12	09:34:13	0.454008	582.903	FALSE	33
2022-09-12	09:34:13	0.932481	583.836	FALSE	33
2022-09-12	09:34:14	0.584542	584.42	FALSE	33
2022-09-12	09:34:14	1.15421	585.574	FALSE	33
2022-09-12	09:34:14	0.785254	586.36	FALSE	33
2022-09-12	09:34:14	1.77375	588.133	FALSE	33
2022-09-12	09:34:15	1.80821	589.942	FALSE	33
2022-09-12	09:34:15	2.34525	592.287	FALSE	33
2022-09-12	09:34:15	1.78989	594.077	FALSE	33
2022-09-12	09:34:16	2.36098	596.438	FALSE	33
2022-09-12	09:34:16	1.15971	597.597	FALSE	33
2022-09-12	09:34:16	1.92683	599.524	FALSE	33
2022-09-12	09:34:16	1.56642	601.091	FALSE	33
2022-09-12	09:34:17	1.82358	602.914	FALSE	33
2022-09-12	09:34:17	1.60958	604.524	FALSE	33
2022-09-12	09:34:17	2.4309	606.955	FALSE	33
2022-09-12	09:34:17	1.33416	608.289	FALSE	33
2022-09-12	09:34:18	1.74581	610.035	FALSE	33
2022-09-12	09:34:18	0.720674	610.755	FALSE	33
2022-09-12	09:34:18	1.45396	612.209	FALSE	33
2022-09-12	09:34:18	0.624237	612.834	FALSE	33
2022-09-12	09:34:19	1.41803	614.252	FALSE	33
2022-09-12	09:34:19	2.43594	616.687	FALSE	33
2022-09-12	09:34:19	3.73436	620.422	1	34
2022-09-12	09:34:20	0.5336	620.955	FALSE	34
2022-09-12	09:34:20	0.413346	621.369	FALSE	34
2022-09-12	09:34:20	0.174364	621.543	FALSE	34
2022-09-12	09:34:20	0.725407	622.269	FALSE	34
2022-09-12	09:34:21	-0.105229	622.269	FALSE	34
2022-09-12	09:34:21	-0.130725	622.269	FALSE	34
2022-09-12	09:34:21	-0.0898598	622.269	FALSE	34
2022-09-12	09:34:21	-0.0488929	622.269	FALSE	34
2022-09-12	09:34:22	-0.130674	622.269	FALSE	34
2022-09-12	09:34:22	0.0395041	622.308	FALSE	34
2022-09-12	09:34:22	0.0874938	622.396	FALSE	34
2022-09-12	09:34:22	0.144288	622.54	FALSE	34
2022-09-12	09:34:23	0.16897	622.709	FALSE	34
2022-09-12	09:34:23	0.405305	623.114	FALSE	34
2022-09-12	09:34:23	0.678842	623.793	FALSE	34
2022-09-12	09:34:23	0.488206	624.281	FALSE	34
2022-09-12	09:34:24	0.694211	624.975	FALSE	34
2022-09-12	09:34:24	0.357214	625.333	FALSE	34
2022-09-12	09:34:24	0.695076	626.028	FALSE	34
2022-09-12	09:34:25	0.606628	626.634	FALSE	34
2022-09-12	09:34:25	0.617112	627.251	FALSE	34
2022-09-12	09:34:25	1.025	628.276	FALSE	34
2022-09-12	09:34:25	0.487239	628.764	FALSE	34
2022-09-12	09:34:26	0.419097	629.183	FALSE	34
2022-09-12	09:34:26	0.295738	629.478	FALSE	34
2022-09-12	09:34:26	0.205458	629.684	FALSE	34
2022-09-12	09:34:26	0.151972	629.836	FALSE	34
2022-09-12	09:34:27	0.168868	630.005	FALSE	34
2022-09-12	09:34:27	0.2793	630.284	FALSE	34
2022-09-12	09:34:27	0.28729	630.571	FALSE	34
2022-09-12	09:34:27	0.279707	630.851	FALSE	34
2022-09-12	09:34:28	0.274517	631.126	FALSE	34
2022-09-12	09:34:28	0.267901	631.393	FALSE	34
2022-09-12	09:34:28	0.274771	631.668	FALSE	34
2022-09-12	09:34:29	0.306629	631.975	FALSE	34
2022-09-12	09:34:29	0.101133	632.076	FALSE	34
2022-09-12	09:34:29	0.203168	632.279	FALSE	34
2022-09-12	09:34:29	1.76475	634.044	FALSE	34
2022-09-12	09:34:30	0.962048	635.006	FALSE	34
2022-09-12	09:34:30	0.00881704	635.015	FALSE	34
2022-09-12	09:34:30	-0.157341	635.015	FALSE	34
2022-09-12	09:34:30	-0.10075	635.015	FALSE	34
2022-09-12	09:34:31	-0.10589	635.015	FALSE	34
2022-09-12	09:34:31	-0.177442	635.015	FALSE	34
2022-09-12	09:34:31	0.0362979	635.051	FALSE	34
2022-09-12	09:34:31	0.207646	635.259	FALSE	34
2022-09-12	09:34:32	0.135942	635.395	FALSE	34
2022-09-12	09:34:32	0.251361	635.646	FALSE	34
2022-09-12	09:34:32	0.189377	635.835	FALSE	34
2022-09-12	09:34:32	0.19411	636.03	FALSE	34
2022-09-12	09:34:33	0.272888	636.302	FALSE	34
2022-09-12	09:34:33	0.291463	636.594	FALSE	34
2022-09-12	09:34:33	0.447799	637.042	FALSE	34
2022-09-12	09:34:34	0.394364	637.436	FALSE	34
2022-09-12	09:34:34	0.280929	637.717	FALSE	34
2022-09-12	09:34:34	0.287341	638.004	FALSE	34
2022-09-12	09:34:34	0.213601	638.218	FALSE	34
2022-09-12	09:34:35	0.246018	638.464	FALSE	34
2022-09-12	09:34:35	0.187443	638.651	FALSE	34
2022-09-12	09:34:35	0.132074	638.783	FALSE	34
2022-09-12	09:34:35	0.184797	638.968	FALSE	34
2022-09-12	09:34:36	0.208766	639.177	FALSE	34
2022-09-12	09:34:36	0.2164	639.393	FALSE	34
2022-09-12	09:34:36	0.250802	639.644	FALSE	34
2022-09-12	09:34:36	0.256705	639.901	FALSE	34
2022-09-12	09:34:37	0.158384	640.059	FALSE	34
2022-09-12	09:34:37	0.289275	640.349	FALSE	34
2022-09-12	09:34:37	0.258333	640.607	FALSE	34
2022-09-12	09:34:38	0.234669	640.842	FALSE	34
2022-09-12	09:34:38	0.272837	641.114	FALSE	34
2022-09-12	09:34:38	0.268715	641.383	FALSE	34
2022-09-12	09:34:38	0.249428	641.633	FALSE	34
2022-09-12	09:34:39	0.597214	642.23	FALSE	34
2022-09-12	09:34:39	0.646425	642.876	FALSE	34
2022-09-12	09:34:39	1.24118	644.117	FALSE	34
2022-09-12	09:34:39	0.777773	644.895	FALSE	34
2022-09-12	09:34:40	0.654313	645.549	FALSE	34
2022-09-12	09:34:40	2.22785	647.777	FALSE	34
2022-09-12	09:34:40	1.15319	648.931	FALSE	34
2022-09-12	09:34:40	2.49075	651.421	FALSE	34
2022-09-12	09:34:41	0.960318	652.382	FALSE	34
2022-09-12	09:34:41	1.05228	653.434	FALSE	34
2022-09-12	09:34:41	3.408	656.842	1	35
2022-09-12	09:34:42	2.80001	659.642	FALSE	35
2022-09-12	09:34:42	0.57757	660.219	FALSE	35
2022-09-12	09:34:42	0.173092	660.393	FALSE	35
2022-09-12	09:34:42	0.487188	660.88	FALSE	35
2022-09-12	09:34:43	0.424491	661.304	FALSE	35
2022-09-12	09:34:43	0.357112	661.661	FALSE	35
2022-09-12	09:34:43	0.500776	662.162	FALSE	35
2022-09-12	09:34:43	0.353041	662.515	FALSE	35
2022-09-12	09:34:44	0.303473	662.819	FALSE	35
2022-09-12	09:34:44	0.300013	663.119	FALSE	35
2022-09-12	09:34:44	0.125458	663.244	FALSE	35
2022-09-12	09:34:44	0.247137	663.491	FALSE	35
2022-09-12	09:34:45	0.259708	663.751	FALSE	35
2022-09-12	09:34:45	0.297214	664.048	FALSE	35
2022-09-12	09:34:45	0.532074	664.58	FALSE	35
2022-09-12	09:34:45	0.758588	665.339	FALSE	35
2022-09-12	09:34:46	0.653091	665.992	FALSE	35
2022-09-12	09:34:46	0.534211	666.526	FALSE	35
2022-09-12	09:34:46	0.466781	666.993	FALSE	35
2022-09-12	09:34:47	0.670293	667.663	FALSE	35
2022-09-12	09:34:47	0.514975	668.178	FALSE	35
2022-09-12	09:34:47	0.322506	668.501	FALSE	35
2022-09-12	09:34:47	0.39243	668.893	FALSE	35
2022-09-12	09:34:48	0.182201	669.075	FALSE	35
2022-09-12	09:34:48	0.412888	669.488	FALSE	35
2022-09-12	09:34:48	0.331718	669.82	FALSE	35
2022-09-12	09:34:48	0.471361	670.291	FALSE	35
2022-09-12	09:34:49	0.284847	670.576	FALSE	35
2022-09-12	09:34:49	0.359046	670.935	FALSE	35
2022-09-12	09:34:49	0.328257	671.263	FALSE	35
2022-09-12	09:34:49	0.470802	671.734	FALSE	35
2022-09-12	09:34:50	0.400827	672.135	FALSE	35
2022-09-12	09:34:50	0.231667	672.367	FALSE	35
2022-09-12	09:34:50	0.378741	672.745	FALSE	35
2022-09-12	09:34:51	0.603168	673.349	FALSE	35
2022-09-12	09:34:51	0.253702	673.602	FALSE	35
2022-09-12	09:34:51	0.0622521	673.665	FALSE	35
2022-09-12	09:34:51	0.121641	673.786	FALSE	35
2022-09-12	09:34:52	0.317977	674.104	FALSE	35
2022-09-12	09:34:52	0.0802674	674.184	FALSE	35
2022-09-12	09:34:52	0.0419468	674.226	FALSE	35
2022-09-12	09:34:52	0.273244	674.5	FALSE	35
2022-09-12	09:34:53	0.131056	674.631	FALSE	35
2022-09-12	09:34:53	0.308359	674.939	FALSE	35
2022-09-12	09:34:53	0.212074	675.151	FALSE	35
2022-09-12	09:34:53	0.110954	675.262	FALSE	35
2022-09-12	09:34:54	0.169835	675.432	FALSE	35
2022-09-12	09:34:54	0.114771	675.547	FALSE	35
2022-09-12	09:34:54	0.211921	675.759	FALSE	35
2022-09-12	09:34:54	0.155891	675.915	FALSE	35
2022-09-12	09:34:55	0.132125	676.047	FALSE	35
2022-09-12	09:34:55	0.0503946	676.097	FALSE	35
2022-09-12	09:34:55	0.121082	676.218	FALSE	35
2022-09-12	09:34:56	0.177367	676.395	FALSE	35
2022-09-12	09:34:56	0.209936	676.605	FALSE	35
2022-09-12	09:34:56	0.209173	676.815	FALSE	35
2022-09-12	09:34:56	0.232481	677.047	FALSE	35
2022-09-12	09:34:57	0.202405	677.249	FALSE	35
2022-09-12	09:34:57	0.173601	677.423	FALSE	35
2022-09-12	09:34:57	0.195738	677.619	FALSE	35
2022-09-12	09:34:57	0.193143	677.812	FALSE	35
2022-09-12	09:34:58	0.183168	677.995	FALSE	35
2022-09-12	09:34:58	0.189784	678.185	FALSE	35
2022-09-12	09:34:58	0.199708	678.385	FALSE	35
2022-09-12	09:34:58	0.190649	678.575	FALSE	35
2022-09-12	09:34:59	0.188155	678.763	FALSE	35
2022-09-12	09:34:59	0.18729	678.951	FALSE	35
2022-09-12	09:34:59	0.186578	679.137	FALSE	35
2022-09-12	09:35:00	0.191972	679.329	FALSE	35
2022-09-12	09:35:00	0.19528	679.525	FALSE	35
2022-09-12	09:35:00	0.193346	679.718	FALSE	35
2022-09-12	09:35:00	0.195331	679.913	FALSE	35
2022-09-12	09:35:01	0.235636	680.149	FALSE	35
2022-09-12	09:35:01	0.334415	680.483	FALSE	35
2022-09-12	09:35:01	0.289529	680.773	FALSE	35
2022-09-12	09:35:01	0.330954	681.104	FALSE	35
2022-09-12	09:35:02	0.432328	681.536	FALSE	35
2022-09-12	09:35:02	0.227087	681.763	FALSE	35
2022-09-12	09:35:02	0.28388	682.047	FALSE	35
2022-09-12	09:35:02	0.168054	682.215	FALSE	35
2022-09-12	09:35:03	0.175076	682.39	FALSE	35
2022-09-12	09:35:03	0.251514	682.642	FALSE	35
2022-09-12	09:35:03	0.217621	682.859	FALSE	35
2022-09-12	09:35:03	0.213092	683.072	FALSE	35
2022-09-12	09:35:04	0.228206	683.301	FALSE	35
2022-09-12	09:35:04	0.233295	683.534	FALSE	35
2022-09-12	09:35:04	0.242659	683.777	FALSE	35
2022-09-12	09:35:05	0.25299	684.03	FALSE	35
2022-09-12	09:35:05	0.286832	684.316	FALSE	35
2022-09-12	09:35:05	0.328104	684.644	FALSE	35
2022-09-12	09:35:05	0.344084	684.989	FALSE	35
2022-09-12	09:35:06	0.38383	685.372	FALSE	35
2022-09-12	09:35:06	0.424135	685.797	FALSE	35
2022-09-12	09:35:06	0.407748	686.204	FALSE	35
2022-09-12	09:35:06	0.46958	686.674	FALSE	35
2022-09-12	09:35:07	0.303575	686.977	FALSE	35
2022-09-12	09:35:07	0.257316	687.235	FALSE	35
2022-09-12	09:35:07	0.245662	687.48	FALSE	35
2022-09-12	09:35:07	0.25472	687.735	FALSE	35
2022-09-12	09:35:08	0.232379	687.968	FALSE	35
2022-09-12	09:35:08	0.235076	688.203	FALSE	35
2022-09-12	09:35:08	0.245153	688.448	FALSE	35
2022-09-12	09:35:09	0.254364	688.702	FALSE	35
2022-09-12	09:35:09	0.264796	688.967	FALSE	35
2022-09-12	09:35:09	0.283066	689.25	FALSE	35
2022-09-12	09:35:09	0.29299	689.543	FALSE	35
2022-09-12	09:35:10	0.289529	689.832	FALSE	35
2022-09-12	09:35:10	0.304797	690.137	FALSE	35
2022-09-12	09:35:10	0.314211	690.452	FALSE	35
2022-09-12	09:35:10	0.3393	690.791	FALSE	35
2022-09-12	09:35:11	0.3593	691.15	FALSE	35
2022-09-12	09:35:11	0.34958	691.5	FALSE	35
2022-09-12	09:35:11	0.32042	691.82	FALSE	35
2022-09-12	09:35:11	0.310089	692.13	FALSE	35
2022-09-12	09:35:12	0.301132	692.431	FALSE	35
2022-09-12	09:35:12	0.287494	692.719	FALSE	35
2022-09-12	09:35:12	0.264593	692.983	FALSE	35
2022-09-12	09:35:13	0.257061	693.24	FALSE	35
2022-09-12	09:35:13	0.250598	693.491	FALSE	35
2022-09-12	09:35:13	0.249886	693.741	FALSE	35
2022-09-12	09:35:13	0.243219	693.984	FALSE	35
2022-09-12	09:35:14	0.33813	694.322	FALSE	35
2022-09-12	09:35:14	0.81757	695.14	FALSE	35
2022-09-12	09:35:14	1.11106	696.251	FALSE	35
2022-09-12	09:35:14	0.241081	696.492	FALSE	35
2022-09-12	09:35:15	0.171361	696.663	FALSE	35
2022-09-12	09:35:15	0.250802	696.914	FALSE	35
2022-09-12	09:35:15	0.267545	697.182	FALSE	35
2022-09-12	09:35:15	0.281794	697.464	FALSE	35
2022-09-12	09:35:16	0.258181	697.722	FALSE	35
2022-09-12	09:35:16	0.358435	698.08	FALSE	35
2022-09-12	09:35:16	0.266934	698.347	FALSE	35
2022-09-12	09:35:16	0.384237	698.731	FALSE	35
2022-09-12	09:35:17	0.283728	699.015	FALSE	35
2022-09-12	09:35:17	0.407443	699.422	FALSE	35
2022-09-12	09:35:17	0.287239	699.71	FALSE	35
2022-09-12	09:35:18	0.280674	699.99	FALSE	35
2022-09-12	09:35:18	0.392634	700.383	FALSE	35
2022-09-12	09:35:18	0.260929	700.644	FALSE	35
2022-09-12	09:35:18	0.381896	701.026	FALSE	35
2022-09-12	09:35:19	0.168257	701.194	FALSE	35
2022-09-12	09:35:19	0.199148	701.393	FALSE	35
2022-09-12	09:35:19	0.366832	701.76	FALSE	35
2022-09-12	09:35:19	0.299148	702.059	FALSE	35
2022-09-12	09:35:20	0.479707	702.539	FALSE	35
2022-09-12	09:35:20	0.299453	702.838	FALSE	35
2022-09-12	09:35:20	0.588868	703.427	FALSE	35
2022-09-12	09:35:20	0.561896	703.989	FALSE	35
2022-09-12	09:35:21	0.781285	704.77	FALSE	35
2022-09-12	09:35:21	0.435382	705.206	FALSE	35
2022-09-12	09:35:21	0.837774	706.044	FALSE	35
2022-09-12	09:35:22	0.609631	706.653	FALSE	35
2022-09-12	09:35:22	1.05106	707.704	FALSE	35
2022-09-12	09:35:22	1.61187	709.316	FALSE	35
2022-09-12	09:35:22	2.7279	712.044	FALSE	35
2022-09-12	09:35:23	1.39375	713.438	FALSE	35
2022-09-12	09:35:23	1.26022	714.698	FALSE	35
2022-09-12	09:35:23	0.415992	715.114	FALSE	35
2022-09-12	09:35:23	0.549682	715.664	FALSE	35
2022-09-12	09:35:24	0.40612	716.07	FALSE	35
2022-09-12	09:35:24	0.406527	716.476	FALSE	35
2022-09-12	09:35:24	0.342506	716.819	FALSE	35
2022-09-12	09:35:24	0.343881	717.163	FALSE	35
2022-09-12	09:35:25	0.47874	717.641	FALSE	35
2022-09-12	09:35:25	0.235534	717.877	FALSE	35
2022-09-12	09:35:25	0.471209	718.348	FALSE	35
2022-09-12	09:35:25	0.200115	718.548	FALSE	35
2022-09-12	09:35:26	0.421183	718.97	FALSE	35
2022-09-12	09:35:26	0.164797	719.134	FALSE	35
2022-09-12	09:35:26	0.411616	719.546	FALSE	35
2022-09-12	09:35:27	0.23584	719.782	FALSE	35
2022-09-12	09:35:27	0.486883	720.269	FALSE	35
2022-09-12	09:35:27	0.313346	720.582	FALSE	35
2022-09-12	09:35:27	-0.00522877	720.582	FALSE	35
2022-09-12	09:35:28	-0.0403432	720.582	FALSE	35
2022-09-12	09:35:28	0.216807	720.799	FALSE	35
2022-09-12	09:35:28	0.735229	721.534	FALSE	35
2022-09-12	09:35:28	1.82179	723.356	FALSE	35
2022-09-12	09:35:29	3.53029	726.886	1	36
2022-09-12	09:35:29	0.68729	727.573	FALSE	36
2022-09-12	09:35:29	0.589835	728.163	FALSE	36
2022-09-12	09:35:29	0.481387	728.645	FALSE	36
2022-09-12	09:35:30	0.658384	729.303	FALSE	36
2022-09-12	09:35:30	1.40576	730.709	FALSE	36
2022-09-12	09:35:30	1.61019	732.319	FALSE	36
2022-09-12	09:35:31	1.13187	733.451	FALSE	36
2022-09-12	09:35:31	1.30322	734.754	FALSE	36
2022-09-12	09:35:31	2.0651	736.819	FALSE	36
2022-09-12	09:35:31	0.627188	737.446	FALSE	36
2022-09-12	09:35:32	1.40546	738.852	FALSE	36
2022-09-12	09:35:32	1.60541	740.457	FALSE	36
2022-09-12	09:35:32	0.595585	741.053	FALSE	36
2022-09-12	09:35:32	0.877417	741.93	FALSE	36
2022-09-12	09:35:33	1.12968	743.06	FALSE	36
2022-09-12	09:35:33	1.19665	744.257	FALSE	36
2022-09-12	09:35:33	1.21162	745.468	FALSE	36
2022-09-12	09:35:33	0.842303	746.31	FALSE	36
2022-09-12	09:35:34	1.38531	747.696	FALSE	36
2022-09-12	09:35:34	1.75401	749.45	FALSE	36
2022-09-12	09:35:34	0.46388	749.914	FALSE	36
2022-09-12	09:35:34	1.71808	751.632	FALSE	36
2022-09-12	09:35:35	1.27263	752.904	FALSE	36
2022-09-12	09:35:35	3.07167	755.976	1	37
2022-09-12	09:35:35	1.68754	757.664	FALSE	37
2022-09-12	09:35:36	1.46296	759.127	FALSE	37
2022-09-12	09:35:36	1.65345	760.78	FALSE	37
2022-09-12	09:35:36	2.11742	762.897	FALSE	37
2022-09-12	09:35:36	1.3477	764.245	FALSE	37
2022-09-12	09:35:37	0.845	765.09	FALSE	37
2022-09-12	09:35:37	2.00678	767.097	FALSE	37
2022-09-12	09:35:37	1.96261	769.06	FALSE	37
2022-09-12	09:35:37	1.60398	770.663	FALSE	37
2022-09-12	09:35:38	0.719758	771.383	FALSE	37
2022-09-12	09:35:38	2.78938	774.173	FALSE	37
2022-09-12	09:35:38	1.86235	776.035	FALSE	37
2022-09-12	09:35:38	1.2338	777.269	FALSE	37
2022-09-12	09:35:39	1.95971	779.228	FALSE	37
2022-09-12	09:35:39	2.93324	782.162	FALSE	37
2022-09-12	09:35:39	1.38785	783.55	FALSE	37
2022-09-12	09:35:40	1.79782	785.347	FALSE	37
2022-09-12	09:35:40	1.41329	786.761	FALSE	37
2022-09-12	09:35:40	1.42159	788.182	FALSE	37
2022-09-12	09:35:40	1.65579	789.838	FALSE	37
2022-09-12	09:35:41	0.440725	790.279	FALSE	37
2022-09-12	09:35:41	1.51075	791.79	FALSE	37
2022-09-12	09:35:41	1.07039	792.86	FALSE	37
2022-09-12	09:35:41	1.13594	793.996	FALSE	37
2022-09-12	09:35:42	1.09146	795.087	FALSE	37
2022-09-12	09:35:42	1.67024	796.758	FALSE	37
2022-09-12	09:35:42	1.78154	798.539	FALSE	37
2022-09-12	09:35:42	1.62429	800.163	FALSE	37
2022-09-12	09:35:43	0.845153	801.009	FALSE	37
2022-09-12	09:35:43	1.79248	802.801	FALSE	37
2022-09-12	09:35:43	2.06602	804.867	FALSE	37
2022-09-12	09:35:44	0.90271	805.77	FALSE	37
2022-09-12	09:35:44	2.4505	808.22	FALSE	37
2022-09-12	09:35:44	1.8276	810.048	FALSE	37
2022-09-12	09:35:44	2.04714	812.095	FALSE	37
2022-09-12	09:35:45	1.37335	813.468	FALSE	37
2022-09-12	09:35:45	2.10373	815.572	FALSE	37
2022-09-12	09:35:45	2.7536	818.326	FALSE	37
2022-09-12	09:35:45	4.371	822.697	1	38
2022-09-12	09:35:46	2.94927	825.646	FALSE	38
2022-09-12	09:35:46	2.47172	828.118	FALSE	38
2022-09-12	09:35:46	1.87777	829.995	FALSE	38
2022-09-12	09:35:46	0.661794	830.657	FALSE	38
2022-09-12	09:35:47	1.25441	831.912	FALSE	38
2022-09-12	09:35:47	0.475382	832.387	FALSE	38
2022-09-12	09:35:47	0.977621	833.365	FALSE	38
2022-09-12	09:35:47	1.32246	834.687	FALSE	38
2022-09-12	09:35:48	1.93625	836.623	FALSE	38
2022-09-12	09:35:48	2.04907	838.672	FALSE	38
2022-09-12	09:35:48	2.97569	841.648	FALSE	38
2022-09-12	09:35:49	1.46062	843.109	FALSE	38
2022-09-12	09:35:49	1.96093	845.07	FALSE	38
2022-09-12	09:35:49	0.846832	845.916	FALSE	38
2022-09-12	09:35:49	0.324288	846.241	FALSE	38
2022-09-12	09:35:50	0.825865	847.067	FALSE	38
2022-09-12	09:35:50	1.1367	848.203	FALSE	38
2022-09-12	09:35:50	0.36902	848.572	FALSE	38
2022-09-12	09:35:50	0.707494	849.28	FALSE	38
2022-09-12	09:35:51	1.34536	850.625	FALSE	38
2022-09-12	09:35:51	0.235433	850.861	FALSE	38
2022-09-12	09:35:51	0.976094	851.837	FALSE	38
2022-09-12	09:35:51	1.12093	852.958	FALSE	38
2022-09-12	09:35:52	0.848155	853.806	FALSE	38
2022-09-12	09:35:52	0.886374	854.692	FALSE	38
2022-09-12	09:35:52	0.843829	855.536	FALSE	38
2022-09-12	09:35:53	0.300929	855.837	FALSE	38
2022-09-12	09:35:53	0.764593	856.602	FALSE	38
2022-09-12	09:35:53	0.938079	857.54	FALSE	38
2022-09-12	09:35:53	0.4764	858.016	FALSE	38
2022-09-12	09:35:54	0.618384	858.634	FALSE	38
2022-09-12	09:35:54	1.75202	860.386	FALSE	38
2022-09-12	09:35:54	0.220471	860.607	FALSE	38
2022-09-12	09:35:54	0.168817	860.776	FALSE	38
2022-09-12	09:35:55	0.194618	860.97	FALSE	38
2022-09-12	09:35:55	0.278792	861.249	FALSE	38
2022-09-12	09:35:55	0.269326	861.518	FALSE	38
2022-09-12	09:35:55	0.292634	861.811	FALSE	38
2022-09-12	09:35:56	0.287748	862.099	FALSE	38
2022-09-12	09:35:56	0.136145	862.235	FALSE	38
2022-09-12	09:35:56	-0.00924912	862.235	FALSE	38
2022-09-12	09:35:56	-0.0646181	862.235	FALSE	38
2022-09-12	09:35:57	-0.0935748	862.235	FALSE	38
2022-09-12	09:35:57	-0.0480277	862.235	FALSE	38
2022-09-12	09:35:57	0.0476974	862.283	FALSE	38
2022-09-12	09:35:58	0.19813	862.481	FALSE	38
2022-09-12	09:35:58	0.415789	862.897	FALSE	38
2022-09-12	09:35:58	0.674822	863.571	FALSE	38
2022-09-12	09:35:58	0.546985	864.118	FALSE	38
2022-09-12	09:35:59	1.62744	865.746	FALSE	38
2022-09-12	09:35:59	1.09996	866.846	FALSE	38
2022-09-12	09:35:59	0.445763	867.292	FALSE	38
2022-09-12	09:35:59	0.658384	867.95	FALSE	38
2022-09-12	09:36:00	0.819148	868.769	FALSE	38
2022-09-12	09:36:00	0.643982	869.413	FALSE	38
2022-09-12	09:36:00	1.03747	870.451	FALSE	38
2022-09-12	09:36:00	0.95986	871.41	FALSE	38
2022-09-12	09:36:01	0.488715	871.899	FALSE	38
2022-09-12	09:36:01	1.27609	873.175	FALSE	38
2022-09-12	09:36:01	2.53324	875.708	FALSE	38
2022-09-12	09:36:02	2.36556	878.074	FALSE	38
2022-09-12	09:36:02	1.29335	879.367	FALSE	38
2022-09-12	09:36:02	1.49263	880.86	FALSE	38
2022-09-12	09:36:02	1.6509	882.511	FALSE	38
2022-09-12	09:36:03	1.87497	884.386	FALSE	38
2022-09-12	09:36:03	0.763982	885.15	FALSE	38
2022-09-12	09:36:03	0.645509	885.795	FALSE	38
2022-09-12	09:36:03	2.67528	888.471	FALSE	38
2022-09-12	09:36:04	2.70378	891.174	FALSE	38
2022-09-12	09:36:04	3.29843	894.473	1	39
2022-09-12	09:36:04	2.01085	896.484	FALSE	39
2022-09-12	09:36:04	1.51889	898.003	FALSE	39
2022-09-12	09:36:05	0.752583	898.755	FALSE	39
2022-09-12	09:36:05	0.472176	899.227	FALSE	39
2022-09-12	09:36:05	0.326323	899.554	FALSE	39
2022-09-12	09:36:05	0.2593	899.813	FALSE	39
2022-09-12	09:36:06	0.187494	900	FALSE	39
2022-09-12	09:36:06	0.25355	900.254	FALSE	39
2022-09-12	09:36:06	0.193601	900.448	FALSE	39
2022-09-12	09:36:07	0.155535	900.603	FALSE	39
2022-09-12	09:36:07	0.135942	900.739	FALSE	39
2022-09-12	09:36:07	0.230547	900.97	FALSE	39
2022-09-12	09:36:07	0.233804	901.203	FALSE	39
2022-09-12	09:36:08	0.248868	901.452	FALSE	39
2022-09-12	09:36:08	0.296247	901.749	FALSE	39
2022-09-12	09:36:08	0.275636	902.024	FALSE	39
2022-09-12	09:36:08	0.300471	902.325	FALSE	39
2022-09-12	09:36:09	0.336145	902.661	FALSE	39
2022-09-12	09:36:09	0.331616	902.992	FALSE	39
2022-09-12	09:36:09	0.317316	903.31	FALSE	39
2022-09-12	09:36:09	0.306832	903.617	FALSE	39
2022-09-12	09:36:10	0.334873	903.951	FALSE	39
2022-09-12	09:36:10	0.447647	904.399	FALSE	39
2022-09-12	09:36:10	0.498893	904.898	FALSE	39
2022-09-12	09:36:11	0.597468	905.495	FALSE	39
2022-09-12	09:36:11	1.54261	907.038	FALSE	39
2022-09-12	09:36:11	1.6138	908.652	FALSE	39
2022-09-12	09:36:11	0.69528	909.347	FALSE	39
2022-09-12	09:36:12	0.489733	909.837	FALSE	39
2022-09-12	09:36:12	0.271158	910.108	FALSE	39
2022-09-12	09:36:12	0.260064	910.368	FALSE	39
2022-09-12	09:36:12	0.291463	910.66	FALSE	39
2022-09-12	09:36:13	0.249071	910.909	FALSE	39
2022-09-12	09:36:13	0.316501	911.225	FALSE	39
2022-09-12	09:36:13	1.70566	912.931	FALSE	39
2022-09-12	09:36:13	2.18006	915.111	FALSE	39
2022-09-12	09:36:14	2.44648	917.557	FALSE	39
2022-09-12	09:36:14	1.92948	919.487	FALSE	39
2022-09-12	09:36:14	1.26994	920.757	FALSE	39
2022-09-12	09:36:15	0.751616	921.508	FALSE	39
2022-09-12	09:36:15	0.973193	922.482	FALSE	39
2022-09-12	09:36:15	0.732277	923.214	FALSE	39
2022-09-12	09:36:15	0.454618	923.668	FALSE	39
2022-09-12	09:36:16	0.41584	924.084	FALSE	39
2022-09-12	09:36:16	0.398944	924.483	FALSE	39
2022-09-12	09:36:16	0.389428	924.873	FALSE	39
2022-09-12	09:36:16	0.346425	925.219	FALSE	39
2022-09-12	09:36:17	0.332227	925.551	FALSE	39
2022-09-12	09:36:17	0.298334	925.85	FALSE	39
2022-09-12	09:36:17	0.287188	926.137	FALSE	39
2022-09-12	09:36:17	0.246832	926.384	FALSE	39
2022-09-12	09:36:18	0.233499	926.617	FALSE	39
2022-09-12	09:36:18	0.272176	926.889	FALSE	39
2022-09-12	09:36:18	0.307646	927.197	FALSE	39
2022-09-12	09:36:18	0.259097	927.456	FALSE	39
2022-09-12	09:36:19	0.234415	927.691	FALSE	39
2022-09-12	09:36:19	0.254211	927.945	FALSE	39
2022-09-12	09:36:19	0.24612	928.191	FALSE	39
2022-09-12	09:36:20	0.187036	928.378	FALSE	39
2022-09-12	09:36:20	0.147646	928.526	FALSE	39
2022-09-12	09:36:20	0.203728	928.729	FALSE	39
2022-09-12	09:36:20	0.299606	929.029	FALSE	39
2022-09-12	09:36:21	0.270802	929.3	FALSE	39
2022-09-12	09:36:21	0.212023	929.512	FALSE	39
2022-09-12	09:36:21	0.212227	929.724	FALSE	39
2022-09-12	09:36:21	0.145967	929.87	FALSE	39
2022-09-12	09:36:22	-0.00802776	929.87	FALSE	39
2022-09-12	09:36:22	-0.134593	929.87	FALSE	39
2022-09-12	09:36:22	-0.197392	929.87	FALSE	39
2022-09-12	09:36:22	-0.307468	929.87	FALSE	39
2022-09-12	09:36:23	-0.314338	929.87	FALSE	39
2022-09-12	09:36:23	-0.364872	929.87	FALSE	39
2022-09-12	09:36:23	0.254211	930.124	FALSE	39
2022-09-12	09:36:24	1.70709	931.831	FALSE	39
2022-09-12	09:36:24	2.81543	934.647	FALSE	39
2022-09-12	09:36:24	2.65772	937.304	FALSE	39
2022-09-12	09:36:24	1.72449	939.029	FALSE	39
2022-09-12	09:36:25	3.55553	942.584	1	40
2022-09-12	09:36:25	3.10653	945.691	1	41
2022-09-12	09:36:25	1.59497	947.286	FALSE	41
2022-09-12	09:36:25	3.30505	950.591	1	42
2022-09-12	09:36:26	2.2905	952.881	FALSE	42
2022-09-12	09:36:26	2.07172	954.953	FALSE	42
2022-09-12	09:36:26	1.78836	956.741	FALSE	42
2022-09-12	09:36:26	3.38963	960.131	1	43
2022-09-12	09:36:27	1.46022	961.591	FALSE	43
2022-09-12	09:36:27	2.48037	964.072	FALSE	43
2022-09-12	09:36:27	1.70352	965.775	FALSE	43
2022-09-12	09:36:27	2.04658	967.822	FALSE	43
2022-09-12	09:36:28	2.12123	969.943	FALSE	43
2022-09-12	09:36:28	0.87813	970.821	FALSE	43
2022-09-12	09:36:28	2.17798	972.999	FALSE	43
2022-09-12	09:36:29	1.17024	974.169	FALSE	43
2022-09-12	09:36:29	1.70622	975.876	FALSE	43
2022-09-12	09:36:29	2.57436	978.45	FALSE	43
2022-09-12	09:36:29	2.23365	980.684	FALSE	43
2022-09-12	09:36:30	2.06088	982.745	FALSE	43
2022-09-12	09:36:30	2.48281	985.227	FALSE	43
2022-09-12	09:36:30	1.20698	986.434	FALSE	43
2022-09-12	09:36:30	1.47945	987.914	FALSE	43
2022-09-12	09:36:31	1.02439	988.938	FALSE	43
2022-09-12	09:36:31	0.854975	989.793	FALSE	43
2022-09-12	09:36:31	0.776145	990.569	FALSE	43
2022-09-12	09:36:31	0.829021	991.398	FALSE	43
2022-09-12	09:36:32	1.47828	992.877	FALSE	43
2022-09-12	09:36:32	0.807697	993.684	FALSE	43
2022-09-12	09:36:32	1.49833	995.183	FALSE	43
2022-09-12	09:36:33	1.59665	996.779	FALSE	43
2022-09-12	09:36:33	0.809377	997.589	FALSE	43
2022-09-12	09:36:33	1.43513	999.024	FALSE	43
2022-09-12	09:36:33	1.32948	1000.35	FALSE	43
2022-09-12	09:36:34	1.24719	1001.6	FALSE	43
2022-09-12	09:36:34	1.74062	1003.34	FALSE	43
2022-09-12	09:36:34	1.88612	1005.23	FALSE	43
2022-09-12	09:36:34	0.850038	1006.08	FALSE	43
2022-09-12	09:36:35	0.408817	1006.49	FALSE	43
2022-09-12	09:36:35	0.553041	1007.04	FALSE	43
2022-09-12	09:36:35	1.10093	1008.14	FALSE	43
2022-09-12	09:36:35	2.27981	1010.42	FALSE	43
2022-09-12	09:36:36	2.98724	1013.41	FALSE	43
2022-09-12	09:36:36	1.01976	1014.43	FALSE	43
2022-09-12	09:36:36	0.817875	1015.24	FALSE	43
2022-09-12	09:36:37	0.548664	1015.79	FALSE	43
2022-09-12	09:36:37	1.25833	1017.05	FALSE	43
2022-09-12	09:36:37	1.33981	1018.39	FALSE	43
2022-09-12	09:36:37	2.148	1020.54	FALSE	43
2022-09-12	09:36:38	1.67355	1022.21	FALSE	43
2022-09-12	09:36:38	1.30709	1023.52	FALSE	43
2022-09-12	09:36:38	1.75055	1025.27	FALSE	43
2022-09-12	09:36:38	2.10953	1027.38	FALSE	43
2022-09-12	09:36:39	0.629885	1028.01	FALSE	43
2022-09-12	09:36:39	1.18093	1029.19	FALSE	43
2022-09-12	09:36:39	0.496349	1029.69	FALSE	43
2022-09-12	09:36:39	0.485051	1030.17	FALSE	43
2022-09-12	09:36:40	0.615992	1030.79	FALSE	43
2022-09-12	09:36:40	1.58602	1032.37	FALSE	43
2022-09-12	09:36:40	0.60902	1032.98	FALSE	43
2022-09-12	09:36:40	2.44088	1035.42	FALSE	43
2022-09-12	09:36:41	1.72123	1037.15	FALSE	43
2022-09-12	09:36:41	1.44459	1038.59	FALSE	43
2022-09-12	09:36:41	2.54388	1041.13	FALSE	43
2022-09-12	09:36:42	3.71187	1044.85	1	44
2022-09-12	09:36:42	0.765254	1045.61	FALSE	44
2022-09-12	09:36:42	3.10128	1048.71	1	45
2022-09-12	09:36:42	2.40281	1051.12	FALSE	45
2022-09-12	09:36:43	0.966679	1052.08	FALSE	45
2022-09-12	09:36:43	1.88602	1053.97	FALSE	45
2022-09-12	09:36:43	1.99385	1055.96	FALSE	45
2022-09-12	09:36:43	0.730293	1056.69	FALSE	45
2022-09-12	09:36:44	2.19136	1058.88	FALSE	45
2022-09-12	09:36:44	1.52698	1060.41	FALSE	45
2022-09-12	09:36:44	2.12515	1062.54	FALSE	45
2022-09-12	09:36:44	2.49986	1065.04	FALSE	45
2022-09-12	09:36:45	3.47207	1068.51	1	46
2022-09-12	09:36:45	1.61391	1070.12	FALSE	46
2022-09-12	09:36:45	3.77131	1073.89	1	47
2022-09-12	09:36:46	2.81039	1076.7	FALSE	47
2022-09-12	09:36:46	1.26882	1077.97	FALSE	47
2022-09-12	09:36:46	1.47248	1079.44	FALSE	47
2022-09-12	09:36:46	2.38261	1081.83	FALSE	47
2022-09-12	09:36:47	0.568715	1082.4	FALSE	47
2022-09-12	09:36:47	1.84327	1084.24	FALSE	47
2022-09-12	09:36:47	1.81218	1086.05	FALSE	47
2022-09-12	09:36:47	1.02587	1087.08	FALSE	47
2022-09-12	09:36:48	0.822913	1087.9	FALSE	47
2022-09-12	09:36:48	0.451005	1088.35	FALSE	47
2022-09-12	09:36:48	0.504135	1088.86	FALSE	47
2022-09-12	09:36:48	0.388359	1089.24	FALSE	47
2022-09-12	09:36:49	0.220115	1089.46	FALSE	47
2022-09-12	09:36:49	0.173397	1089.64	FALSE	47
2022-09-12	09:36:49	0.169122	1089.81	FALSE	47
2022-09-12	09:36:49	0.227697	1090.03	FALSE	47
2022-09-12	09:36:50	0.239606	1090.27	FALSE	47
2022-09-12	09:36:50	0.333193	1090.61	FALSE	47
2022-09-12	09:36:50	0.512023	1091.12	FALSE	47
2022-09-12	09:36:51	0.179046	1091.3	FALSE	47
2022-09-12	09:36:51	0.125102	1091.42	FALSE	47
2022-09-12	09:36:51	0.181743	1091.6	FALSE	47
2022-09-12	09:36:51	0.10841	1091.71	FALSE	47
2022-09-12	09:36:52	0.112685	1091.83	FALSE	47
2022-09-12	09:36:52	0.152125	1091.98	FALSE	47
2022-09-12	09:36:52	0.192888	1092.17	FALSE	47
2022-09-12	09:36:52	0.146883	1092.32	FALSE	47
2022-09-12	09:36:53	0.0977737	1092.42	FALSE	47
2022-09-12	09:36:53	0.140929	1092.56	FALSE	47
2022-09-12	09:36:53	0.106222	1092.66	FALSE	47
2022-09-12	09:36:53	0.283219	1092.95	FALSE	47
2022-09-12	09:36:54	0.337926	1093.28	FALSE	47
2022-09-12	09:36:54	0.293906	1093.58	FALSE	47
2022-09-12	09:36:54	1.37279	1094.95	FALSE	47
2022-09-12	09:36:55	0.846679	1095.8	FALSE	47
2022-09-12	09:36:55	0.859046	1096.66	FALSE	47
2022-09-12	09:36:55	0.801081	1097.46	FALSE	47
2022-09-12	09:36:55	0.318334	1097.78	FALSE	47
2022-09-12	09:36:56	0.589478	1098.36	FALSE	47
2022-09-12	09:36:56	0.291667	1098.66	FALSE	47
2022-09-12	09:36:56	0.266323	1098.92	FALSE	47
2022-09-12	09:36:56	0.231005	1099.15	FALSE	47
2022-09-12	09:36:57	0.602252	1099.76	FALSE	47
2022-09-12	09:36:57	0.777824	1100.53	FALSE	47
2022-09-12	09:36:57	2.33039	1102.86	FALSE	47
2022-09-12	09:36:57	2.67777	1105.54	FALSE	47
2022-09-12	09:36:58	2.67014	1108.21	FALSE	47
2022-09-12	09:36:58	2.43452	1110.65	FALSE	47
2022-09-12	09:36:58	1.35961	1112.01	FALSE	47
2022-09-12	09:36:58	2.54902	1114.56	FALSE	47
2022-09-12	09:36:59	3.1821	1117.74	1	48
2022-09-12	09:36:59	1.7394	1119.48	FALSE	48
2022-09-12	09:36:59	2.27335	1121.75	FALSE	48
2022-09-12	09:37:00	3.47818	1125.23	1	49
2022-09-12	09:37:00	1.91391	1127.14	FALSE	49
2022-09-12	09:37:00	2.90291	1130.05	FALSE	49
2022-09-12	09:37:00	4.46612	1134.51	1	50
2022-09-12	09:37:01	3.57655	1138.09	1	51
2022-09-12	09:37:01	7.12841	1145.22	1	52
2022-09-12	09:37:01	8.38169	1153.6	1	53
2022-09-12	09:37:01	2.77864	1156.38	FALSE	53
2022-09-12	09:37:02	2.37808	1158.75	FALSE	53
2022-09-12	09:37:02	3.06541	1161.82	1	54
2022-09-12	09:37:02	1.38612	1163.21	FALSE	54
2022-09-12	09:37:02	0.734313	1163.94	FALSE	54
2022-09-12	09:37:03	0.46729	1164.41	FALSE	54
2022-09-12	09:37:03	0.740674	1165.15	FALSE	54
2022-09-12	09:37:03	0.169224	1165.32	FALSE	54
2022-09-12	09:37:04	0.175789	1165.49	FALSE	54
2022-09-12	09:37:04	0.545611	1166.04	FALSE	54
2022-09-12	09:37:04	0.349682	1166.39	FALSE	54
2022-09-12	09:37:04	0.569071	1166.96	FALSE	54
2022-09-12	09:37:05	1.12785	1168.09	FALSE	54
2022-09-12	09:37:05	0.105611	1168.19	FALSE	54
2022-09-12	09:37:05	0.0519213	1168.24	FALSE	54
2022-09-12	09:37:05	0.0743132	1168.32	FALSE	54
2022-09-12	09:37:06	0.123932	1168.44	FALSE	54
2022-09-12	09:37:06	0.103321	1168.54	FALSE	54
2022-09-12	09:37:06	0.068359	1168.61	FALSE	54
2022-09-12	09:37:06	0.127036	1168.74	FALSE	54
2022-09-12	09:37:07	0.219758	1168.96	FALSE	54
2022-09-12	09:37:07	0.384237	1169.34	FALSE	54
2022-09-12	09:37:07	0.394822	1169.74	FALSE	54
2022-09-12	09:37:08	0.486221	1170.23	FALSE	54
2022-09-12	09:37:08	0.460929	1170.69	FALSE	54
2022-09-12	09:37:08	0.631514	1171.32	FALSE	54
2022-09-12	09:37:08	0.465865	1171.78	FALSE	54
2022-09-12	09:37:09	0.635025	1172.42	FALSE	54
2022-09-12	09:37:09	0.525203	1172.94	FALSE	54

## Sheet: Dominic_martin_202291293152
						**GoPro Fitting: 920
2022-09-12	09:31:53	0.265458
2022-09-12	09:31:53	0.216349
2022-09-12	09:31:53	0.258435
2022-09-12	09:31:53	0.262303
2022-09-12	09:31:54	0.289224
2022-09-12	09:31:54	0.254364
2022-09-12	09:31:54	0.253702
2022-09-12	09:31:54	0.310089
2022-09-12	09:31:55	0.266069
2022-09-12	09:31:55	0.24098
2022-09-12	09:31:55	0.430242
2022-09-12	09:31:55	0.926934
2022-09-12	09:31:56	1.38668
2022-09-12	09:31:56	2.11981
2022-09-12	09:31:56	0.95299
2022-09-12	09:31:56	0.321489
2022-09-12	09:31:57	0.309275
2022-09-12	09:31:57	0.226527
2022-09-12	09:31:57	0.371361
2022-09-12	09:31:58	0.27014
2022-09-12	09:31:58	0.482812
2022-09-12	09:31:58	0.361896
2022-09-12	09:31:58	0.363881
2022-09-12	09:31:59	0.387494
2022-09-12	09:31:59	0.311209
2022-09-12	09:31:59	0.276451
2022-09-12	09:31:59	0.387799
2022-09-12	09:32:00	0.931667
2022-09-12	09:32:00	0.857774
2022-09-12	09:32:00	0.335382
2022-09-12	09:32:00	0.363372
2022-09-12	09:32:01	-0.0672643
2022-09-12	09:32:01	0.111362
2022-09-12	09:32:01	-0.0585621
2022-09-12	09:32:02	0.0128374
2022-09-12	09:32:02	0.0742623
2022-09-12	09:32:02	0.517417
2022-09-12	09:32:02	1.19599
2022-09-12	09:32:03	1.0963
2022-09-12	09:32:03	0.410547
2022-09-12	09:32:03	0.8564
2022-09-12	09:32:03	1.60195
2022-09-12	09:32:04	1.91813
2022-09-12	09:32:04	2.52469
2022-09-12	09:32:04	2.79375
2022-09-12	09:32:04	3.41075
2022-09-12	09:32:05	3.03838
2022-09-12	09:32:05	3.45706
2022-09-12	09:32:05	6.7025
2022-09-12	09:32:05	5.37339
2022-09-12	09:32:06	5.84067
2022-09-12	09:32:06	4.55105
2022-09-12	09:32:06	5.72963
2022-09-12	09:32:07	3.04729
2022-09-12	09:32:07	5.72362
2022-09-12	09:32:07	4.35467
2022-09-12	09:32:07	2.2823
2022-09-12	09:32:08	0.485967
2022-09-12	09:32:08	0.296196
2022-09-12	09:32:08	0.669326
2022-09-12	09:32:08	0.597214
2022-09-12	09:32:09	2.15095
2022-09-12	09:32:09	3.89416
2022-09-12	09:32:09	4.09141
2022-09-12	09:32:09	1.8134
2022-09-12	09:32:10	0.524287
2022-09-12	09:32:10	0.273448
2022-09-12	09:32:10	0.338791
2022-09-12	09:32:11	0.345153
2022-09-12	09:32:11	0.544389
2022-09-12	09:32:11	0.514975
2022-09-12	09:32:11	0.583677
2022-09-12	09:32:12	0.41126
2022-09-12	09:32:12	0.699198
2022-09-12	09:32:12	1.10968
2022-09-12	09:32:12	0.671259
2022-09-12	09:32:13	0.799758
2022-09-12	09:32:13	1.37039
2022-09-12	09:32:13	1.08632
2022-09-12	09:32:13	1.09391
2022-09-12	09:32:14	0.977621
2022-09-12	09:32:14	0.948155
2022-09-12	09:32:14	0.939198
2022-09-12	09:32:14	0.896603
2022-09-12	09:32:15	0.909835
2022-09-12	09:32:15	0.891972
2022-09-12	09:32:15	0.739453
2022-09-12	09:32:16	0.769987
2022-09-12	09:32:16	0.968155
2022-09-12	09:32:16	0.643779
2022-09-12	09:32:16	0.965051
2022-09-12	09:32:17	0.76103
2022-09-12	09:32:17	1.93737
2022-09-12	09:32:17	1.05548
2022-09-12	09:32:17	1.20368
2022-09-12	09:32:18	1.07141
2022-09-12	09:32:18	1.20765
2022-09-12	09:32:18	1.13233
2022-09-12	09:32:18	0.35126
2022-09-12	09:32:19	0.935534
2022-09-12	09:32:19	0.902659
2022-09-12	09:32:19	0.692532
2022-09-12	09:32:20	1.51905
2022-09-12	09:32:20	1.45645
2022-09-12	09:32:20	1.20342
2022-09-12	09:32:20	0.749478
2022-09-12	09:32:21	1.19075
2022-09-12	09:32:21	0.809936
2022-09-12	09:32:21	1.60251
2022-09-12	09:32:21	2.40877
2022-09-12	09:32:22	3.48709
2022-09-12	09:32:22	3.4363
2022-09-12	09:32:22	2.8079
2022-09-12	09:32:22	1.35711
2022-09-12	09:32:23	1.45849
2022-09-12	09:32:23	2.05177
2022-09-12	09:32:23	1.69034
2022-09-12	09:32:24	2.59304
2022-09-12	09:32:24	4.13864
2022-09-12	09:32:24	2.21289
2022-09-12	09:32:24	1.95523
2022-09-12	09:32:25	1.90525
2022-09-12	09:32:25	0.729529
2022-09-12	09:32:25	0.419758
2022-09-12	09:32:25	0.395636
2022-09-12	09:32:26	0.180471
2022-09-12	09:32:26	0.15472
2022-09-12	09:32:26	0.480165
2022-09-12	09:32:26	0.194313
2022-09-12	09:32:27	0.32673
2022-09-12	09:32:27	0.196756
2022-09-12	09:32:27	0.245916
2022-09-12	09:32:27	0.207239
2022-09-12	09:32:28	0.160674
2022-09-12	09:32:28	0.46388
2022-09-12	09:32:28	0.695738
2022-09-12	09:32:29	0.493804
2022-09-12	09:32:29	0.287596
2022-09-12	09:32:29	0.484949
2022-09-12	09:32:29	0.48958
2022-09-12	09:32:30	0.547748
2022-09-12	09:32:30	0.598232
2022-09-12	09:32:30	0.830343
2022-09-12	09:32:30	1.0251
2022-09-12	09:32:31	1.13126
2022-09-12	09:32:31	1.26281
2022-09-12	09:32:31	1.26795
2022-09-12	09:32:31	1.33828
2022-09-12	09:32:32	1.0848
2022-09-12	09:32:32	1.24342
2022-09-12	09:32:32	1.35737
2022-09-12	09:32:33	1.16597
2022-09-12	09:32:33	1.19345
2022-09-12	09:32:33	1.04927
2022-09-12	09:32:33	0.433651
2022-09-12	09:32:34	0.445865
2022-09-12	09:32:34	0.572176
2022-09-12	09:32:34	0.436196
2022-09-12	09:32:34	0.331616
2022-09-12	09:32:35	0.531514
2022-09-12	09:32:35	0.602303
2022-09-12	09:32:35	0.22327
2022-09-12	09:32:35	0.270344
2022-09-12	09:32:36	0.344898
2022-09-12	09:32:36	0.272023
2022-09-12	09:32:36	0.277875
2022-09-12	09:32:36	0.145611
2022-09-12	09:32:37	0.1764
2022-09-12	09:32:37	0.0827101
2022-09-12	09:32:37	0.154619
2022-09-12	09:32:38	0.156959
2022-09-12	09:32:38	0.14154
2022-09-12	09:32:38	0.0210817
2022-09-12	09:32:38	0.076247
2022-09-12	09:32:39	0.112583
2022-09-12	09:32:39	0.0254073
2022-09-12	09:32:39	0.228155
2022-09-12	09:32:40	-0.0146944
2022-09-12	09:32:40	0.229275
2022-09-12	09:32:40	0.445458
2022-09-12	09:32:40	0.686476
2022-09-12	09:32:40	0.772481
2022-09-12	09:32:41	0.533092
2022-09-12	09:32:41	0.550954
2022-09-12	09:32:41	0.770089
2022-09-12	09:32:42	0.395687
2022-09-12	09:32:42	1.09803
2022-09-12	09:32:42	0.507443
2022-09-12	09:32:42	0.359046
2022-09-12	09:32:43	0.317926
2022-09-12	09:32:43	0.104237
2022-09-12	09:32:43	0.339249
2022-09-12	09:32:43	0.115484
2022-09-12	09:32:44	0.331718
2022-09-12	09:32:44	0.378232
2022-09-12	09:32:44	0.333295
2022-09-12	09:32:44	0.549987
2022-09-12	09:32:45	0.494924
2022-09-12	09:32:45	0.916654
2022-09-12	09:32:45	0.726629
2022-09-12	09:32:45	1.07335
2022-09-12	09:32:46	1.51106
2022-09-12	09:32:46	1.63441
2022-09-12	09:32:46	1.16831
2022-09-12	09:32:47	0.986781
2022-09-12	09:32:47	1.10841
2022-09-12	09:32:47	1.05889
2022-09-12	09:32:47	0.779249
2022-09-12	09:32:48	0.735483
2022-09-12	09:32:48	1.58551
2022-09-12	09:32:48	0.736654
2022-09-12	09:32:48	1.21172
2022-09-12	09:32:49	1.33324
2022-09-12	09:32:49	1.66266
2022-09-12	09:32:49	1.61716
2022-09-12	09:32:49	1.30144
2022-09-12	09:32:50	1.30648
2022-09-12	09:32:50	0.97645
2022-09-12	09:32:50	0.926272
2022-09-12	09:32:51	1.10195
2022-09-12	09:32:51	1.57838
2022-09-12	09:32:51	1.10632
2022-09-12	09:32:51	1.46683
2022-09-12	09:32:52	1.1105
2022-09-12	09:32:52	0.965458
2022-09-12	09:32:52	0.451667
2022-09-12	09:32:52	0.590496
2022-09-12	09:32:53	0.772939
2022-09-12	09:32:53	0.355992
2022-09-12	09:32:53	0.798842
2022-09-12	09:32:53	1.60205
2022-09-12	09:32:54	2.91116
2022-09-12	09:32:54	1.80469
2022-09-12	09:32:54	3.01609
2022-09-12	09:32:54	1.48296
2022-09-12	09:32:55	2.15355
2022-09-12	09:32:55	1.48439
2022-09-12	09:32:55	2.32042
2022-09-12	09:32:56	2.47731
2022-09-12	09:32:56	1.30459
2022-09-12	09:32:56	2.4277
2022-09-12	09:32:56	2.07207
2022-09-12	09:32:57	2.77981
2022-09-12	09:32:57	1.12352
2022-09-12	09:32:57	1.68363
2022-09-12	09:32:57	2.6963
2022-09-12	09:32:58	2.21721
2022-09-12	09:32:58	2.13721
2022-09-12	09:32:58	1.62688
2022-09-12	09:32:58	3.37945
2022-09-12	09:32:59	1.84892
2022-09-12	09:32:59	3.37441
2022-09-12	09:32:59	1.69238
2022-09-12	09:33:00	3.45579
2022-09-12	09:33:00	1.11065
2022-09-12	09:33:00	2.77146
2022-09-12	09:33:00	2.70179
2022-09-12	09:33:01	3.34653
2022-09-12	09:33:01	3.2564
2022-09-12	09:33:01	2.51472
2022-09-12	09:33:01	6.32383
2022-09-12	09:33:02	2.9508
2022-09-12	09:33:02	6.83121
2022-09-12	09:33:02	4.13523
2022-09-12	09:33:02	8.01197
2022-09-12	09:33:03	4.09909
2022-09-12	09:33:03	7.00525
2022-09-12	09:33:03	4.71665
2022-09-12	09:33:03	4.10612
2022-09-12	09:33:04	1.96352
2022-09-12	09:33:04	2.53772
2022-09-12	09:33:04	2.58795
2022-09-12	09:33:05	1.57085
2022-09-12	09:33:05	2.01253
2022-09-12	09:33:05	1.62795
2022-09-12	09:33:05	2.55065
2022-09-12	09:33:06	2.37681
2022-09-12	09:33:06	1.97706
2022-09-12	09:33:06	1.92581
2022-09-12	09:33:06	1.14179
2022-09-12	09:33:07	1.25558
2022-09-12	09:33:07	1.05284
2022-09-12	09:33:07	1.73355
2022-09-12	09:33:07	2.47019
2022-09-12	09:33:08	1.30139
2022-09-12	09:33:08	2.04383
2022-09-12	09:33:08	2.17553
2022-09-12	09:33:09	1.96251
2022-09-12	09:33:09	1.18332
2022-09-12	09:33:09	0.197316
2022-09-12	09:33:09	0.156451
2022-09-12	09:33:10	0.66729
2022-09-12	09:33:10	2.78235
2022-09-12	09:33:10	1.39146
2022-09-12	09:33:10	1.45014
2022-09-12	09:33:11	0.84098
2022-09-12	09:33:11	0.364542
2022-09-12	09:33:11	0.236858
2022-09-12	09:33:11	0.0834226
2022-09-12	09:33:12	-0.0103687
2022-09-12	09:33:12	0.0540587
2022-09-12	09:33:12	0.162761
2022-09-12	09:33:13	0.209377
2022-09-12	09:33:13	0.0941096
2022-09-12	09:33:13	0.143982
2022-09-12	09:33:13	0.124288
2022-09-12	09:33:14	0.109479
2022-09-12	09:33:14	0.135738
2022-09-12	09:33:14	0.148003
2022-09-12	09:33:14	0.143677
2022-09-12	09:33:15	0.14668
2022-09-12	09:33:15	0.154873
2022-09-12	09:33:15	0.163575
2022-09-12	09:33:15	0.160267
2022-09-12	09:33:16	0.171616
2022-09-12	09:33:16	0.177825
2022-09-12	09:33:16	0.1764
2022-09-12	09:33:16	0.177316
2022-09-12	09:33:17	0.177112
2022-09-12	09:33:17	0.165713
2022-09-12	09:33:17	0.163524
2022-09-12	09:33:18	0.161336
2022-09-12	09:33:18	0.160827
2022-09-12	09:33:18	0.162048
2022-09-12	09:33:18	0.160776
2022-09-12	09:33:19	0.157316
2022-09-12	09:33:19	0.155636
2022-09-12	09:33:19	0.156807
2022-09-12	09:33:19	0.164797
2022-09-12	09:33:20	0.163372
2022-09-12	09:33:20	0.174313
2022-09-12	09:33:20	0.172532
2022-09-12	09:33:20	0.175738
2022-09-12	09:33:21	0.174771
2022-09-12	09:33:21	0.171972
2022-09-12	09:33:21	0.171158
2022-09-12	09:33:22	0.180624
2022-09-12	09:33:22	0.177112
2022-09-12	09:33:22	0.170242
2022-09-12	09:33:22	0.164949
2022-09-12	09:33:23	0.163779
2022-09-12	09:33:23	0.173804
2022-09-12	09:33:23	0.186272
2022-09-12	09:33:23	0.156196
2022-09-12	09:33:24	0.119453
2022-09-12	09:33:24	0.156349
2022-09-12	09:33:24	0.64556
2022-09-12	09:33:24	0.758384
2022-09-12	09:33:25	1.06103
2022-09-12	09:33:25	1.33625
2022-09-12	09:33:25	1.30714
2022-09-12	09:33:25	1.45411
2022-09-12	09:33:26	1.83029
2022-09-12	09:33:26	1.18215
2022-09-12	09:33:26	0.933092
2022-09-12	09:33:27	0.468206
2022-09-12	09:33:27	0.26556
2022-09-12	09:33:27	0.124797
2022-09-12	09:33:27	0.250496
2022-09-12	09:33:28	0.183473
2022-09-12	09:33:28	0.242659
2022-09-12	09:33:28	0.287697
2022-09-12	09:33:28	0.302914
2022-09-12	09:33:29	0.323117
2022-09-12	09:33:29	0.209275
2022-09-12	09:33:29	0.150751
2022-09-12	09:33:29	0.308461
2022-09-12	09:33:30	0.183372
2022-09-12	09:33:30	0.257468
2022-09-12	09:33:30	0.252328
2022-09-12	09:33:31	0.323015
2022-09-12	09:33:31	0.225916
2022-09-12	09:33:31	0.221387
2022-09-12	09:33:31	0.269428
2022-09-12	09:33:32	0.304237
2022-09-12	09:33:32	0.318791
2022-09-12	09:33:32	0.354568
2022-09-12	09:33:32	0.393143
2022-09-12	09:33:33	0.383524
2022-09-12	09:33:33	0.377316
2022-09-12	09:33:33	0.397214
2022-09-12	09:33:33	0.434924
2022-09-12	09:33:34	0.444542
2022-09-12	09:33:34	0.475076
2022-09-12	09:33:34	0.637468
2022-09-12	09:33:34	1.06439
2022-09-12	09:33:35	0.764186
2022-09-12	09:33:35	0.805661
2022-09-12	09:33:35	0.534058
2022-09-12	09:33:36	0.279453
2022-09-12	09:33:36	0.252023
2022-09-12	09:33:36	0.162965
2022-09-12	09:33:36	0.244695
2022-09-12	09:33:37	0.149071
2022-09-12	09:33:37	0.150751
2022-09-12	09:33:37	0.208206
2022-09-12	09:33:37	0.453753
2022-09-12	09:33:38	0.651056
2022-09-12	09:33:38	0.724084
2022-09-12	09:33:38	0.916807
2022-09-12	09:33:38	1.85141
2022-09-12	09:33:39	1.65075
2022-09-12	09:33:39	1.5024
2022-09-12	09:33:39	2.71818
2022-09-12	09:33:40	1.24037
2022-09-12	09:33:40	1.89289
2022-09-12	09:33:40	1.89004
2022-09-12	09:33:40	0.713753
2022-09-12	09:33:41	1.44632
2022-09-12	09:33:41	2.22159
2022-09-12	09:33:41	0.935127
2022-09-12	09:33:41	1.59162
2022-09-12	09:33:42	2.16027
2022-09-12	09:33:42	1.20897
2022-09-12	09:33:42	1.97146
2022-09-12	09:33:42	2.54805
2022-09-12	09:33:43	2.0106
2022-09-12	09:33:43	3.01589
2022-09-12	09:33:43	2.16698
2022-09-12	09:33:43	1.65162
2022-09-12	09:33:44	1.12011
2022-09-12	09:33:44	3.39197
2022-09-12	09:33:44	0.836908
2022-09-12	09:33:45	2.25192
2022-09-12	09:33:45	1.80627
2022-09-12	09:33:45	2.56057
2022-09-12	09:33:45	1.32877
2022-09-12	09:33:46	1.4537
2022-09-12	09:33:46	1.69065
2022-09-12	09:33:46	3.16123
2022-09-12	09:33:46	1.17177
2022-09-12	09:33:47	1.77655
2022-09-12	09:33:47	2.9194
2022-09-12	09:33:47	2.18877
2022-09-12	09:33:47	4.8652
2022-09-12	09:33:48	5.98322
2022-09-12	09:33:48	5.65136
2022-09-12	09:33:48	6.49614
2022-09-12	09:33:49	7.80388
2022-09-12	09:33:49	8.79945
2022-09-12	09:33:49	11.6742
2022-09-12	09:33:49	7.45706
2022-09-12	09:33:50	4.45625
2022-09-12	09:33:50	2.97854
2022-09-12	09:33:50	3.82215
2022-09-12	09:33:50	2.17055
2022-09-12	09:33:51	1.0109
2022-09-12	09:33:51	0.687086
2022-09-12	09:33:51	0.757417
2022-09-12	09:33:51	0.615535
2022-09-12	09:33:52	0.621794
2022-09-12	09:33:52	0.404797
2022-09-12	09:33:52	0.47528
2022-09-12	09:33:52	0.365865
2022-09-12	09:33:53	0.295484
2022-09-12	09:33:53	0.190954
2022-09-12	09:33:53	0.14897
2022-09-12	09:33:54	0.243117
2022-09-12	09:33:54	0.201234
2022-09-12	09:33:54	0.262252
2022-09-12	09:33:54	0.108563
2022-09-12	09:33:55	0.279809
2022-09-12	09:33:55	0.238588
2022-09-12	09:33:55	0.281641
2022-09-12	09:33:55	0.17355
2022-09-12	09:33:56	0.349987
2022-09-12	09:33:56	0.362913
2022-09-12	09:33:56	0.995331
2022-09-12	09:33:57	0.923422
2022-09-12	09:33:57	1.69696
2022-09-12	09:33:57	2.29579
2022-09-12	09:33:57	0.989326
2022-09-12	09:33:58	1.31177
2022-09-12	09:33:58	0.590903
2022-09-12	09:33:58	1.21314
2022-09-12	09:33:58	0.97416
2022-09-12	09:33:59	1.13726
2022-09-12	09:33:59	1.36754
2022-09-12	09:33:59	1.64948
2022-09-12	09:33:59	0.986374
2022-09-12	09:34:00	1.97594
2022-09-12	09:34:00	1.46459
2022-09-12	09:34:00	1.28795
2022-09-12	09:34:00	1.13635
2022-09-12	09:34:01	1.14678
2022-09-12	09:34:01	2.5677
2022-09-12	09:34:01	1.06312
2022-09-12	09:34:02	2.13319
2022-09-12	09:34:02	1.12541
2022-09-12	09:34:02	2.07182
2022-09-12	09:34:02	2.15431
2022-09-12	09:34:03	1.67894
2022-09-12	09:34:03	1.40724
2022-09-12	09:34:03	2.50418
2022-09-12	09:34:04	1.11085
2022-09-12	09:34:04	2.20062
2022-09-12	09:34:04	1.62617
2022-09-12	09:34:04	1.5105
2022-09-12	09:34:04	1.74118
2022-09-12	09:34:05	1.08632
2022-09-12	09:34:05	1.39548
2022-09-12	09:34:05	2.90993
2022-09-12	09:34:05	2.00556
2022-09-12	09:34:06	0.934974
2022-09-12	09:34:06	1.45304
2022-09-12	09:34:06	1.38576
2022-09-12	09:34:07	1.26174
2022-09-12	09:34:07	1.97391
2022-09-12	09:34:07	2.98174
2022-09-12	09:34:07	2.37324
2022-09-12	09:34:08	2.8363
2022-09-12	09:34:08	1.7763
2022-09-12	09:34:08	3.0164
2022-09-12	09:34:08	0.838486
2022-09-12	09:34:09	1.30816
2022-09-12	09:34:09	1.2709
2022-09-12	09:34:09	1.47915
2022-09-12	09:34:09	0.364746
2022-09-12	09:34:10	0.726578
2022-09-12	09:34:10	0.570395
2022-09-12	09:34:10	0.448104
2022-09-12	09:34:11	0.197977
2022-09-12	09:34:11	0.224593
2022-09-12	09:34:11	0.194924
2022-09-12	09:34:11	0.212379
2022-09-12	09:34:12	-0.00838398
2022-09-12	09:34:12	0.0769595
2022-09-12	09:34:12	-0.0103178
2022-09-12	09:34:12	0.0982317
2022-09-12	09:34:13	1.45533
2022-09-12	09:34:13	1.17599
2022-09-12	09:34:13	0.454008
2022-09-12	09:34:13	0.932481
2022-09-12	09:34:14	0.584542
2022-09-12	09:34:14	1.15421
2022-09-12	09:34:14	0.785254
2022-09-12	09:34:14	1.77375
2022-09-12	09:34:15	1.80821
2022-09-12	09:34:15	2.34525
2022-09-12	09:34:15	1.78989
2022-09-12	09:34:16	2.36098
2022-09-12	09:34:16	1.15971
2022-09-12	09:34:16	1.92683
2022-09-12	09:34:16	1.56642
2022-09-12	09:34:17	1.82358
2022-09-12	09:34:17	1.60958
2022-09-12	09:34:17	2.4309
2022-09-12	09:34:17	1.33416
2022-09-12	09:34:18	1.74581
2022-09-12	09:34:18	0.720674
2022-09-12	09:34:18	1.45396
2022-09-12	09:34:18	0.624237
2022-09-12	09:34:19	1.41803
2022-09-12	09:34:19	2.43594
2022-09-12	09:34:19	3.73436
2022-09-12	09:34:20	0.5336
2022-09-12	09:34:20	0.413346
2022-09-12	09:34:20	0.174364
2022-09-12	09:34:20	0.725407
2022-09-12	09:34:21	-0.105229
2022-09-12	09:34:21	-0.130725
2022-09-12	09:34:21	-0.0898598
2022-09-12	09:34:21	-0.0488929
2022-09-12	09:34:22	-0.130674
2022-09-12	09:34:22	0.0395041
2022-09-12	09:34:22	0.0874938
2022-09-12	09:34:22	0.144288
2022-09-12	09:34:23	0.16897
2022-09-12	09:34:23	0.405305
2022-09-12	09:34:23	0.678842
2022-09-12	09:34:23	0.488206
2022-09-12	09:34:24	0.694211
2022-09-12	09:34:24	0.357214
2022-09-12	09:34:24	0.695076
2022-09-12	09:34:25	0.606628
2022-09-12	09:34:25	0.617112
2022-09-12	09:34:25	1.025
2022-09-12	09:34:25	0.487239
2022-09-12	09:34:26	0.419097
2022-09-12	09:34:26	0.295738
2022-09-12	09:34:26	0.205458
2022-09-12	09:34:26	0.151972
2022-09-12	09:34:27	0.168868
2022-09-12	09:34:27	0.2793
2022-09-12	09:34:27	0.28729
2022-09-12	09:34:27	0.279707
2022-09-12	09:34:28	0.274517
2022-09-12	09:34:28	0.267901
2022-09-12	09:34:28	0.274771
2022-09-12	09:34:29	0.306629
2022-09-12	09:34:29	0.101133
2022-09-12	09:34:29	0.203168
2022-09-12	09:34:29	1.76475
2022-09-12	09:34:30	0.962048
2022-09-12	09:34:30	0.00881704
2022-09-12	09:34:30	-0.157341
2022-09-12	09:34:30	-0.10075
2022-09-12	09:34:31	-0.10589
2022-09-12	09:34:31	-0.177442
2022-09-12	09:34:31	0.0362979
2022-09-12	09:34:31	0.207646
2022-09-12	09:34:32	0.135942
2022-09-12	09:34:32	0.251361
2022-09-12	09:34:32	0.189377
2022-09-12	09:34:32	0.19411
2022-09-12	09:34:33	0.272888
2022-09-12	09:34:33	0.291463
2022-09-12	09:34:33	0.447799
2022-09-12	09:34:34	0.394364
2022-09-12	09:34:34	0.280929
2022-09-12	09:34:34	0.287341
2022-09-12	09:34:34	0.213601
2022-09-12	09:34:35	0.246018
2022-09-12	09:34:35	0.187443
2022-09-12	09:34:35	0.132074
2022-09-12	09:34:35	0.184797
2022-09-12	09:34:36	0.208766
2022-09-12	09:34:36	0.2164
2022-09-12	09:34:36	0.250802
2022-09-12	09:34:36	0.256705
2022-09-12	09:34:37	0.158384
2022-09-12	09:34:37	0.289275
2022-09-12	09:34:37	0.258333
2022-09-12	09:34:38	0.234669
2022-09-12	09:34:38	0.272837
2022-09-12	09:34:38	0.268715
2022-09-12	09:34:38	0.249428
2022-09-12	09:34:39	0.597214
2022-09-12	09:34:39	0.646425
2022-09-12	09:34:39	1.24118
2022-09-12	09:34:39	0.777773
2022-09-12	09:34:40	0.654313
2022-09-12	09:34:40	2.22785
2022-09-12	09:34:40	1.15319
2022-09-12	09:34:40	2.49075
2022-09-12	09:34:41	0.960318
2022-09-12	09:34:41	1.05228
2022-09-12	09:34:41	3.408
2022-09-12	09:34:42	2.80001
2022-09-12	09:34:42	0.57757
2022-09-12	09:34:42	0.173092
2022-09-12	09:34:42	0.487188
2022-09-12	09:34:43	0.424491
2022-09-12	09:34:43	0.357112
2022-09-12	09:34:43	0.500776
2022-09-12	09:34:43	0.353041
2022-09-12	09:34:44	0.303473
2022-09-12	09:34:44	0.300013
2022-09-12	09:34:44	0.125458
2022-09-12	09:34:44	0.247137
2022-09-12	09:34:45	0.259708
2022-09-12	09:34:45	0.297214
2022-09-12	09:34:45	0.532074
2022-09-12	09:34:45	0.758588
2022-09-12	09:34:46	0.653091
2022-09-12	09:34:46	0.534211
2022-09-12	09:34:46	0.466781
2022-09-12	09:34:47	0.670293
2022-09-12	09:34:47	0.514975
2022-09-12	09:34:47	0.322506
2022-09-12	09:34:47	0.39243
2022-09-12	09:34:48	0.182201
2022-09-12	09:34:48	0.412888
2022-09-12	09:34:48	0.331718
2022-09-12	09:34:48	0.471361
2022-09-12	09:34:49	0.284847
2022-09-12	09:34:49	0.359046
2022-09-12	09:34:49	0.328257
2022-09-12	09:34:49	0.470802
2022-09-12	09:34:50	0.400827
2022-09-12	09:34:50	0.231667
2022-09-12	09:34:50	0.378741
2022-09-12	09:34:51	0.603168
2022-09-12	09:34:51	0.253702
2022-09-12	09:34:51	0.0622521
2022-09-12	09:34:51	0.121641
2022-09-12	09:34:52	0.317977
2022-09-12	09:34:52	0.0802674
2022-09-12	09:34:52	0.0419468
2022-09-12	09:34:52	0.273244
2022-09-12	09:34:53	0.131056
2022-09-12	09:34:53	0.308359
2022-09-12	09:34:53	0.212074
2022-09-12	09:34:53	0.110954
2022-09-12	09:34:54	0.169835
2022-09-12	09:34:54	0.114771
2022-09-12	09:34:54	0.211921
2022-09-12	09:34:54	0.155891
2022-09-12	09:34:55	0.132125
2022-09-12	09:34:55	0.0503946
2022-09-12	09:34:55	0.121082
2022-09-12	09:34:56	0.177367
2022-09-12	09:34:56	0.209936
2022-09-12	09:34:56	0.209173
2022-09-12	09:34:56	0.232481
2022-09-12	09:34:57	0.202405
2022-09-12	09:34:57	0.173601
2022-09-12	09:34:57	0.195738
2022-09-12	09:34:57	0.193143
2022-09-12	09:34:58	0.183168
2022-09-12	09:34:58	0.189784
2022-09-12	09:34:58	0.199708
2022-09-12	09:34:58	0.190649
2022-09-12	09:34:59	0.188155
2022-09-12	09:34:59	0.18729
2022-09-12	09:34:59	0.186578
2022-09-12	09:35:00	0.191972
2022-09-12	09:35:00	0.19528
2022-09-12	09:35:00	0.193346
2022-09-12	09:35:00	0.195331
2022-09-12	09:35:01	0.235636
2022-09-12	09:35:01	0.334415
2022-09-12	09:35:01	0.289529
2022-09-12	09:35:01	0.330954
2022-09-12	09:35:02	0.432328
2022-09-12	09:35:02	0.227087
2022-09-12	09:35:02	0.28388
2022-09-12	09:35:02	0.168054
2022-09-12	09:35:03	0.175076
2022-09-12	09:35:03	0.251514
2022-09-12	09:35:03	0.217621
2022-09-12	09:35:03	0.213092
2022-09-12	09:35:04	0.228206
2022-09-12	09:35:04	0.233295
2022-09-12	09:35:04	0.242659
2022-09-12	09:35:05	0.25299
2022-09-12	09:35:05	0.286832
2022-09-12	09:35:05	0.328104
2022-09-12	09:35:05	0.344084
2022-09-12	09:35:06	0.38383
2022-09-12	09:35:06	0.424135
2022-09-12	09:35:06	0.407748
2022-09-12	09:35:06	0.46958
2022-09-12	09:35:07	0.303575
2022-09-12	09:35:07	0.257316
2022-09-12	09:35:07	0.245662
2022-09-12	09:35:07	0.25472
2022-09-12	09:35:08	0.232379
2022-09-12	09:35:08	0.235076
2022-09-12	09:35:08	0.245153
2022-09-12	09:35:09	0.254364
2022-09-12	09:35:09	0.264796
2022-09-12	09:35:09	0.283066
2022-09-12	09:35:09	0.29299
2022-09-12	09:35:10	0.289529
2022-09-12	09:35:10	0.304797
2022-09-12	09:35:10	0.314211
2022-09-12	09:35:10	0.3393
2022-09-12	09:35:11	0.3593
2022-09-12	09:35:11	0.34958
2022-09-12	09:35:11	0.32042
2022-09-12	09:35:11	0.310089
2022-09-12	09:35:12	0.301132
2022-09-12	09:35:12	0.287494
2022-09-12	09:35:12	0.264593
2022-09-12	09:35:13	0.257061
2022-09-12	09:35:13	0.250598
2022-09-12	09:35:13	0.249886
2022-09-12	09:35:13	0.243219
2022-09-12	09:35:14	0.33813
2022-09-12	09:35:14	0.81757
2022-09-12	09:35:14	1.11106
2022-09-12	09:35:14	0.241081
2022-09-12	09:35:15	0.171361
2022-09-12	09:35:15	0.250802
2022-09-12	09:35:15	0.267545
2022-09-12	09:35:15	0.281794
2022-09-12	09:35:16	0.258181
2022-09-12	09:35:16	0.358435
2022-09-12	09:35:16	0.266934
2022-09-12	09:35:16	0.384237
2022-09-12	09:35:17	0.283728
2022-09-12	09:35:17	0.407443
2022-09-12	09:35:17	0.287239
2022-09-12	09:35:18	0.280674
2022-09-12	09:35:18	0.392634
2022-09-12	09:35:18	0.260929
2022-09-12	09:35:18	0.381896
2022-09-12	09:35:19	0.168257
2022-09-12	09:35:19	0.199148
2022-09-12	09:35:19	0.366832
2022-09-12	09:35:19	0.299148
2022-09-12	09:35:20	0.479707
2022-09-12	09:35:20	0.299453
2022-09-12	09:35:20	0.588868
2022-09-12	09:35:20	0.561896
2022-09-12	09:35:21	0.781285
2022-09-12	09:35:21	0.435382
2022-09-12	09:35:21	0.837774
2022-09-12	09:35:22	0.609631
2022-09-12	09:35:22	1.05106
2022-09-12	09:35:22	1.61187
2022-09-12	09:35:22	2.7279
2022-09-12	09:35:23	1.39375
2022-09-12	09:35:23	1.26022
2022-09-12	09:35:23	0.415992
2022-09-12	09:35:23	0.549682
2022-09-12	09:35:24	0.40612
2022-09-12	09:35:24	0.406527
2022-09-12	09:35:24	0.342506
2022-09-12	09:35:24	0.343881
2022-09-12	09:35:25	0.47874
2022-09-12	09:35:25	0.235534
2022-09-12	09:35:25	0.471209
2022-09-12	09:35:25	0.200115
2022-09-12	09:35:26	0.421183
2022-09-12	09:35:26	0.164797
2022-09-12	09:35:26	0.411616
2022-09-12	09:35:27	0.23584
2022-09-12	09:35:27	0.486883
2022-09-12	09:35:27	0.313346
2022-09-12	09:35:27	-0.00522877
2022-09-12	09:35:28	-0.0403432
2022-09-12	09:35:28	0.216807
2022-09-12	09:35:28	0.735229
2022-09-12	09:35:28	1.82179
2022-09-12	09:35:29	3.53029
2022-09-12	09:35:29	0.68729
2022-09-12	09:35:29	0.589835
2022-09-12	09:35:29	0.481387
2022-09-12	09:35:30	0.658384
2022-09-12	09:35:30	1.40576
2022-09-12	09:35:30	1.61019
2022-09-12	09:35:31	1.13187
2022-09-12	09:35:31	1.30322
2022-09-12	09:35:31	2.0651
2022-09-12	09:35:31	0.627188
2022-09-12	09:35:32	1.40546
2022-09-12	09:35:32	1.60541
2022-09-12	09:35:32	0.595585
2022-09-12	09:35:32	0.877417
2022-09-12	09:35:33	1.12968
2022-09-12	09:35:33	1.19665
2022-09-12	09:35:33	1.21162
2022-09-12	09:35:33	0.842303
2022-09-12	09:35:34	1.38531
2022-09-12	09:35:34	1.75401
2022-09-12	09:35:34	0.46388
2022-09-12	09:35:34	1.71808
2022-09-12	09:35:35	1.27263
2022-09-12	09:35:35	3.07167
2022-09-12	09:35:35	1.68754
2022-09-12	09:35:36	1.46296
2022-09-12	09:35:36	1.65345
2022-09-12	09:35:36	2.11742
2022-09-12	09:35:36	1.3477
2022-09-12	09:35:37	0.845
2022-09-12	09:35:37	2.00678
2022-09-12	09:35:37	1.96261
2022-09-12	09:35:37	1.60398
2022-09-12	09:35:38	0.719758
2022-09-12	09:35:38	2.78938
2022-09-12	09:35:38	1.86235
2022-09-12	09:35:38	1.2338
2022-09-12	09:35:39	1.95971
2022-09-12	09:35:39	2.93324
2022-09-12	09:35:39	1.38785
2022-09-12	09:35:40	1.79782
2022-09-12	09:35:40	1.41329
2022-09-12	09:35:40	1.42159
2022-09-12	09:35:40	1.65579
2022-09-12	09:35:41	0.440725
2022-09-12	09:35:41	1.51075
2022-09-12	09:35:41	1.07039
2022-09-12	09:35:41	1.13594
2022-09-12	09:35:42	1.09146
2022-09-12	09:35:42	1.67024
2022-09-12	09:35:42	1.78154
2022-09-12	09:35:42	1.62429
2022-09-12	09:35:43	0.845153
2022-09-12	09:35:43	1.79248
2022-09-12	09:35:43	2.06602
2022-09-12	09:35:44	0.90271
2022-09-12	09:35:44	2.4505
2022-09-12	09:35:44	1.8276
2022-09-12	09:35:44	2.04714
2022-09-12	09:35:45	1.37335
2022-09-12	09:35:45	2.10373
2022-09-12	09:35:45	2.7536
2022-09-12	09:35:45	4.371
2022-09-12	09:35:46	2.94927
2022-09-12	09:35:46	2.47172
2022-09-12	09:35:46	1.87777
2022-09-12	09:35:46	0.661794
2022-09-12	09:35:47	1.25441
2022-09-12	09:35:47	0.475382
2022-09-12	09:35:47	0.977621
2022-09-12	09:35:47	1.32246
2022-09-12	09:35:48	1.93625
2022-09-12	09:35:48	2.04907
2022-09-12	09:35:48	2.97569
2022-09-12	09:35:49	1.46062
2022-09-12	09:35:49	1.96093
2022-09-12	09:35:49	0.846832
2022-09-12	09:35:49	0.324288
2022-09-12	09:35:50	0.825865
2022-09-12	09:35:50	1.1367
2022-09-12	09:35:50	0.36902
2022-09-12	09:35:50	0.707494
2022-09-12	09:35:51	1.34536
2022-09-12	09:35:51	0.235433
2022-09-12	09:35:51	0.976094
2022-09-12	09:35:51	1.12093
2022-09-12	09:35:52	0.848155
2022-09-12	09:35:52	0.886374
2022-09-12	09:35:52	0.843829
2022-09-12	09:35:53	0.300929
2022-09-12	09:35:53	0.764593
2022-09-12	09:35:53	0.938079
2022-09-12	09:35:53	0.4764
2022-09-12	09:35:54	0.618384
2022-09-12	09:35:54	1.75202
2022-09-12	09:35:54	0.220471
2022-09-12	09:35:54	0.168817
2022-09-12	09:35:55	0.194618
2022-09-12	09:35:55	0.278792
2022-09-12	09:35:55	0.269326
2022-09-12	09:35:55	0.292634
2022-09-12	09:35:56	0.287748
2022-09-12	09:35:56	0.136145
2022-09-12	09:35:56	-0.00924912
2022-09-12	09:35:56	-0.0646181
2022-09-12	09:35:57	-0.0935748
2022-09-12	09:35:57	-0.0480277
2022-09-12	09:35:57	0.0476974
2022-09-12	09:35:58	0.19813
2022-09-12	09:35:58	0.415789
2022-09-12	09:35:58	0.674822
2022-09-12	09:35:58	0.546985
2022-09-12	09:35:59	1.62744
2022-09-12	09:35:59	1.09996
2022-09-12	09:35:59	0.445763
2022-09-12	09:35:59	0.658384
2022-09-12	09:36:00	0.819148
2022-09-12	09:36:00	0.643982
2022-09-12	09:36:00	1.03747
2022-09-12	09:36:00	0.95986
2022-09-12	09:36:01	0.488715
2022-09-12	09:36:01	1.27609
2022-09-12	09:36:01	2.53324
2022-09-12	09:36:02	2.36556
2022-09-12	09:36:02	1.29335
2022-09-12	09:36:02	1.49263
2022-09-12	09:36:02	1.6509
2022-09-12	09:36:03	1.87497
2022-09-12	09:36:03	0.763982
2022-09-12	09:36:03	0.645509
2022-09-12	09:36:03	2.67528
2022-09-12	09:36:04	2.70378
2022-09-12	09:36:04	3.29843
2022-09-12	09:36:04	2.01085
2022-09-12	09:36:04	1.51889
2022-09-12	09:36:05	0.752583
2022-09-12	09:36:05	0.472176
2022-09-12	09:36:05	0.326323
2022-09-12	09:36:05	0.2593
2022-09-12	09:36:06	0.187494
2022-09-12	09:36:06	0.25355
2022-09-12	09:36:06	0.193601
2022-09-12	09:36:07	0.155535
2022-09-12	09:36:07	0.135942
2022-09-12	09:36:07	0.230547
2022-09-12	09:36:07	0.233804
2022-09-12	09:36:08	0.248868
2022-09-12	09:36:08	0.296247
2022-09-12	09:36:08	0.275636
2022-09-12	09:36:08	0.300471
2022-09-12	09:36:09	0.336145
2022-09-12	09:36:09	0.331616
2022-09-12	09:36:09	0.317316
2022-09-12	09:36:09	0.306832
2022-09-12	09:36:10	0.334873
2022-09-12	09:36:10	0.447647
2022-09-12	09:36:10	0.498893
2022-09-12	09:36:11	0.597468
2022-09-12	09:36:11	1.54261
2022-09-12	09:36:11	1.6138
2022-09-12	09:36:11	0.69528
2022-09-12	09:36:12	0.489733
2022-09-12	09:36:12	0.271158
2022-09-12	09:36:12	0.260064
2022-09-12	09:36:12	0.291463
2022-09-12	09:36:13	0.249071
2022-09-12	09:36:13	0.316501
2022-09-12	09:36:13	1.70566
2022-09-12	09:36:13	2.18006
2022-09-12	09:36:14	2.44648
2022-09-12	09:36:14	1.92948
2022-09-12	09:36:14	1.26994
2022-09-12	09:36:15	0.751616
2022-09-12	09:36:15	0.973193
2022-09-12	09:36:15	0.732277
2022-09-12	09:36:15	0.454618
2022-09-12	09:36:16	0.41584
2022-09-12	09:36:16	0.398944
2022-09-12	09:36:16	0.389428
2022-09-12	09:36:16	0.346425
2022-09-12	09:36:17	0.332227
2022-09-12	09:36:17	0.298334
2022-09-12	09:36:17	0.287188
2022-09-12	09:36:17	0.246832
2022-09-12	09:36:18	0.233499
2022-09-12	09:36:18	0.272176
2022-09-12	09:36:18	0.307646
2022-09-12	09:36:18	0.259097
2022-09-12	09:36:19	0.234415
2022-09-12	09:36:19	0.254211
2022-09-12	09:36:19	0.24612
2022-09-12	09:36:20	0.187036
2022-09-12	09:36:20	0.147646
2022-09-12	09:36:20	0.203728
2022-09-12	09:36:20	0.299606
2022-09-12	09:36:21	0.270802
2022-09-12	09:36:21	0.212023
2022-09-12	09:36:21	0.212227
2022-09-12	09:36:21	0.145967
2022-09-12	09:36:22	-0.00802776
2022-09-12	09:36:22	-0.134593
2022-09-12	09:36:22	-0.197392
2022-09-12	09:36:22	-0.307468
2022-09-12	09:36:23	-0.314338
2022-09-12	09:36:23	-0.364872
2022-09-12	09:36:23	0.254211
2022-09-12	09:36:24	1.70709
2022-09-12	09:36:24	2.81543
2022-09-12	09:36:24	2.65772
2022-09-12	09:36:24	1.72449
2022-09-12	09:36:25	3.55553
2022-09-12	09:36:25	3.10653
2022-09-12	09:36:25	1.59497
2022-09-12	09:36:25	3.30505
2022-09-12	09:36:26	2.2905
2022-09-12	09:36:26	2.07172
2022-09-12	09:36:26	1.78836
2022-09-12	09:36:26	3.38963
2022-09-12	09:36:27	1.46022
2022-09-12	09:36:27	2.48037
2022-09-12	09:36:27	1.70352
2022-09-12	09:36:27	2.04658
2022-09-12	09:36:28	2.12123
2022-09-12	09:36:28	0.87813
2022-09-12	09:36:28	2.17798
2022-09-12	09:36:29	1.17024
2022-09-12	09:36:29	1.70622
2022-09-12	09:36:29	2.57436
2022-09-12	09:36:29	2.23365
2022-09-12	09:36:30	2.06088
2022-09-12	09:36:30	2.48281
2022-09-12	09:36:30	1.20698
2022-09-12	09:36:30	1.47945
2022-09-12	09:36:31	1.02439
2022-09-12	09:36:31	0.854975
2022-09-12	09:36:31	0.776145
2022-09-12	09:36:31	0.829021
2022-09-12	09:36:32	1.47828
2022-09-12	09:36:32	0.807697
2022-09-12	09:36:32	1.49833
2022-09-12	09:36:33	1.59665
2022-09-12	09:36:33	0.809377
2022-09-12	09:36:33	1.43513
2022-09-12	09:36:33	1.32948
2022-09-12	09:36:34	1.24719
2022-09-12	09:36:34	1.74062
2022-09-12	09:36:34	1.88612
2022-09-12	09:36:34	0.850038
2022-09-12	09:36:35	0.408817
2022-09-12	09:36:35	0.553041
2022-09-12	09:36:35	1.10093
2022-09-12	09:36:35	2.27981
2022-09-12	09:36:36	2.98724
2022-09-12	09:36:36	1.01976
2022-09-12	09:36:36	0.817875
2022-09-12	09:36:37	0.548664
2022-09-12	09:36:37	1.25833
2022-09-12	09:36:37	1.33981
2022-09-12	09:36:37	2.148
2022-09-12	09:36:38	1.67355
2022-09-12	09:36:38	1.30709
2022-09-12	09:36:38	1.75055
2022-09-12	09:36:38	2.10953
2022-09-12	09:36:39	0.629885
2022-09-12	09:36:39	1.18093
2022-09-12	09:36:39	0.496349
2022-09-12	09:36:39	0.485051
2022-09-12	09:36:40	0.615992
2022-09-12	09:36:40	1.58602
2022-09-12	09:36:40	0.60902
2022-09-12	09:36:40	2.44088
2022-09-12	09:36:41	1.72123
2022-09-12	09:36:41	1.44459
2022-09-12	09:36:41	2.54388
2022-09-12	09:36:42	3.71187
2022-09-12	09:36:42	0.765254
2022-09-12	09:36:42	3.10128
2022-09-12	09:36:42	2.40281
2022-09-12	09:36:43	0.966679
2022-09-12	09:36:43	1.88602
2022-09-12	09:36:43	1.99385
2022-09-12	09:36:43	0.730293
2022-09-12	09:36:44	2.19136
2022-09-12	09:36:44	1.52698
2022-09-12	09:36:44	2.12515
2022-09-12	09:36:44	2.49986
2022-09-12	09:36:45	3.47207
2022-09-12	09:36:45	1.61391
2022-09-12	09:36:45	3.77131
2022-09-12	09:36:46	2.81039
2022-09-12	09:36:46	1.26882
2022-09-12	09:36:46	1.47248
2022-09-12	09:36:46	2.38261
2022-09-12	09:36:47	0.568715
2022-09-12	09:36:47	1.84327
2022-09-12	09:36:47	1.81218
2022-09-12	09:36:47	1.02587
2022-09-12	09:36:48	0.822913
2022-09-12	09:36:48	0.451005
2022-09-12	09:36:48	0.504135
2022-09-12	09:36:48	0.388359
2022-09-12	09:36:49	0.220115
2022-09-12	09:36:49	0.173397
2022-09-12	09:36:49	0.169122
2022-09-12	09:36:49	0.227697
2022-09-12	09:36:50	0.239606
2022-09-12	09:36:50	0.333193
2022-09-12	09:36:50	0.512023
2022-09-12	09:36:51	0.179046
2022-09-12	09:36:51	0.125102
2022-09-12	09:36:51	0.181743
2022-09-12	09:36:51	0.10841
2022-09-12	09:36:52	0.112685
2022-09-12	09:36:52	0.152125
2022-09-12	09:36:52	0.192888
2022-09-12	09:36:52	0.146883
2022-09-12	09:36:53	0.0977737
2022-09-12	09:36:53	0.140929
2022-09-12	09:36:53	0.106222
2022-09-12	09:36:53	0.283219
2022-09-12	09:36:54	0.337926
2022-09-12	09:36:54	0.293906
2022-09-12	09:36:54	1.37279
2022-09-12	09:36:55	0.846679
2022-09-12	09:36:55	0.859046
2022-09-12	09:36:55	0.801081
2022-09-12	09:36:55	0.318334
2022-09-12	09:36:56	0.589478
2022-09-12	09:36:56	0.291667
2022-09-12	09:36:56	0.266323
2022-09-12	09:36:56	0.231005
2022-09-12	09:36:57	0.602252
2022-09-12	09:36:57	0.777824
2022-09-12	09:36:57	2.33039
2022-09-12	09:36:57	2.67777
2022-09-12	09:36:58	2.67014
2022-09-12	09:36:58	2.43452
2022-09-12	09:36:58	1.35961
2022-09-12	09:36:58	2.54902
2022-09-12	09:36:59	3.1821
2022-09-12	09:36:59	1.7394
2022-09-12	09:36:59	2.27335
2022-09-12	09:37:00	3.47818
2022-09-12	09:37:00	1.91391
2022-09-12	09:37:00	2.90291
2022-09-12	09:37:00	4.46612
2022-09-12	09:37:01	3.57655
2022-09-12	09:37:01	7.12841
2022-09-12	09:37:01	8.38169
2022-09-12	09:37:01	2.77864
2022-09-12	09:37:02	2.37808
2022-09-12	09:37:02	3.06541
2022-09-12	09:37:02	1.38612
2022-09-12	09:37:02	0.734313
2022-09-12	09:37:03	0.46729
2022-09-12	09:37:03	0.740674
2022-09-12	09:37:03	0.169224
2022-09-12	09:37:04	0.175789
2022-09-12	09:37:04	0.545611
2022-09-12	09:37:04	0.349682
2022-09-12	09:37:04	0.569071
2022-09-12	09:37:05	1.12785
2022-09-12	09:37:05	0.105611
2022-09-12	09:37:05	0.0519213
2022-09-12	09:37:05	0.0743132
2022-09-12	09:37:06	0.123932
2022-09-12	09:37:06	0.103321
2022-09-12	09:37:06	0.068359
2022-09-12	09:37:06	0.127036
2022-09-12	09:37:07	0.219758
2022-09-12	09:37:07	0.384237
2022-09-12	09:37:07	0.394822
2022-09-12	09:37:08	0.486221
2022-09-12	09:37:08	0.460929
2022-09-12	09:37:08	0.631514
2022-09-12	09:37:08	0.465865
2022-09-12	09:37:09	0.635025
2022-09-12	09:37:09	0.525203
