# Supplementary material for: Comparing efficacy in reducing pulling and welfare impacts of four types of leash walking equipment
Source: PeerJ journal article supplement (doi:10.7717/peerj.18131), 2024-10-24
Supplement: Shelter1_Tension_files.zip [file Dominic_prong_2022912123959 copy.xlsx]

## Sheet: Averaged Newtons
Date	Time	averaged newtons	Newton Impulse
2022-09-12	12:40:07	9.96108	9.96108	0			Impulse Newton	555.023
2022-09-12	12:40:08	2.8396	12.8007	0			Total steps	1
2022-09-12	12:40:09	0.449632	13.2503	0
2022-09-12	12:40:10	2.56817	15.8185	0
2022-09-12	12:40:11	-0.691394	15.8185	0
2022-09-12	12:40:12	-0.805486	15.8185	0
2022-09-12	12:40:13	-1.15172	15.8185	0
2022-09-12	12:40:14	-0.737761	15.8185	0
2022-09-12	12:40:15	1.40045	17.2189	0
2022-09-12	12:40:16	1.98652	19.2054	0
2022-09-12	12:40:17	1.40147	20.6069	0
2022-09-12	12:40:18	0.966136	21.573	0
2022-09-12	12:40:19	1.49983	23.0729	0
2022-09-12	12:40:20	1.49558	24.5685	0
2022-09-12	12:40:21	1.3013	25.8698	0
2022-09-12	12:40:22	1.48943	27.3592	0
2022-09-12	12:40:23	1.21426	28.5734	0
2022-09-12	12:40:24	-1.10769	28.5734	0
2022-09-12	12:40:25	4.0786	32.652	0
2022-09-12	12:40:26	4.65349	37.3055	0
2022-09-12	12:40:27	1.70413	39.0097	0
2022-09-12	12:40:28	1.96717	40.9768	0
2022-09-12	12:40:29	1.56072	42.5375	0
2022-09-12	12:40:30	1.13938	43.6769	0
2022-09-12	12:40:31	1.17832	44.8552	0
2022-09-12	12:40:32	1.24719	46.1024	0
2022-09-12	12:40:33	1.47792	47.5804	0
2022-09-12	12:40:34	1.40952	48.9899	0
2022-09-12	12:40:35	1.15053	50.1404	0
2022-09-12	12:40:36	1.12733	51.2678	0
2022-09-12	12:40:37	1.22116	52.4889	0
2022-09-12	12:40:38	1.35602	53.8449	0
2022-09-12	12:40:39	1.38517	55.2301	0
2022-09-12	12:40:40	1.18364	56.4137	0
2022-09-12	12:40:41	0.428918	56.8427	0
2022-09-12	12:40:42	0.682001	57.5247	0
2022-09-12	12:40:43	1.00228	58.5269	0
2022-09-12	12:40:44	1.22201	59.749	0
2022-09-12	12:40:45	1.19417	60.9431	0
2022-09-12	12:40:46	2.0228	62.9659	0
2022-09-12	12:40:47	1.67355	64.6395	0
2022-09-12	12:40:48	1.34855	65.988	0
2022-09-12	12:40:49	1.48262	67.4706	0
2022-09-12	12:40:50	1.30288	68.7735	0
2022-09-12	12:40:51	1.159	69.9325	0
2022-09-12	12:40:52	2.29292	72.2254	0
2022-09-12	12:40:53	1.55715	73.7826	0
2022-09-12	12:40:54	1.87317	75.6558	0
2022-09-12	12:40:55	1.85585	77.5116	0
2022-09-12	12:40:56	1.46394	78.9756	0
2022-09-12	12:40:57	1.71941	80.695	0
2022-09-12	12:40:58	1.57724	82.2722	0
2022-09-12	12:40:59	1.9507	84.2229	0
2022-09-12	12:41:00	2.29637	86.5193	0
2022-09-12	12:41:01	1.72376	88.243	0
2022-09-12	12:41:02	1.31307	89.5561	0
2022-09-12	12:41:03	1.6079	91.164	0
2022-09-12	12:41:04	1.39451	92.5585	0
2022-09-12	12:41:05	0.520146	93.0787	0
2022-09-12	12:41:06	-0.673623	93.0787	0
2022-09-12	12:41:07	-0.218165	93.0787	0
2022-09-12	12:41:08	0.533105	93.6118	0
2022-09-12	12:41:09	1.66949	95.2813	0
2022-09-12	12:41:10	0.765816	96.0471	0
2022-09-12	12:41:11	0.68581	96.7329	0
2022-09-12	12:41:12	0.5013	97.2342	0
2022-09-12	12:41:13	0.626993	97.8612	0
2022-09-12	12:41:14	0.804412	98.6656	0
2022-09-12	12:41:15	1.04046	99.7061	0
2022-09-12	12:41:16	1.42427	101.13	0
2022-09-12	12:41:17	1.44063	102.571	0
2022-09-12	12:41:18	1.51177	104.083	0
2022-09-12	12:41:19	1.4517	105.534	0
2022-09-12	12:41:20	1.52093	107.055	0
2022-09-12	12:41:21	1.76078	108.816	0
2022-09-12	12:41:22	3.31566	112.132	0
2022-09-12	12:41:23	1.73406	113.866	0
2022-09-12	12:41:24	1.66343	115.529	0
2022-09-12	12:41:25	2.50039	118.03	0
2022-09-12	12:41:26	4.59789	122.628	0
2022-09-12	12:41:27	14.8145	137.442	1
2022-09-12	12:41:28	12.6337	150.076	1
2022-09-12	12:41:29	3.70763	153.783	1
2022-09-12	12:41:30	7.33013	161.114	1
2022-09-12	12:41:31	2.02548	163.139	1
2022-09-12	12:41:32	2.0357	165.175	1
2022-09-12	12:41:33	2.59292	167.768	1
2022-09-12	12:41:34	3.0482	170.816	1
2022-09-12	12:41:35	2.55609	173.372	1
2022-09-12	12:41:36	3.18742	176.559	1
2022-09-12	12:41:37	1.90814	178.467	1
2022-09-12	12:41:38	1.3683	179.836	1
2022-09-12	12:41:39	1.23635	181.072	1
2022-09-12	12:41:40	1.30039	182.373	1
2022-09-12	12:41:41	1.29983	183.672	1
2022-09-12	12:41:42	1.29784	184.97	1
2022-09-12	12:41:43	1.15727	186.127	1
2022-09-12	12:41:44	1.17351	187.301	1
2022-09-12	12:41:45	1.45217	188.753	1
2022-09-12	12:41:46	1.4936	190.247	1
2022-09-12	12:41:47	1.17055	191.417	1
2022-09-12	12:41:48	1.84363	193.261	1
2022-09-12	12:41:49	0.570174	193.831	1
2022-09-12	12:41:50	0.737235	194.568	1
2022-09-12	12:41:51	1.50965	196.078	1
2022-09-12	12:41:52	1.39128	197.469	1
2022-09-12	12:41:53	1.64244	199.112	1
2022-09-12	12:41:54	1.34453	200.456	1
2022-09-12	12:41:55	1.3623	201.819	1
2022-09-12	12:41:56	1.33874	203.157	1
2022-09-12	12:41:57	1.31584	204.473	1
2022-09-12	12:41:58	1.0601	205.533	1
2022-09-12	12:41:59	0.353499	205.887	1
2022-09-12	12:42:00	0.520372	206.407	1
2022-09-12	12:42:01	1.07278	207.48	1
2022-09-12	12:42:02	1.09852	208.578	1
2022-09-12	12:42:03	0.117035	208.695	1
2022-09-12	12:42:04	0.628464	209.324	1
2022-09-12	12:42:05	2.26253	211.586	1
2022-09-12	12:42:06	3.20774	214.794	1
2022-09-12	12:42:07	2.09065	216.885	1
2022-09-12	12:42:08	2.06864	218.953	1
2022-09-12	12:42:09	7.44852	226.402	1
2022-09-12	12:42:10	5.27197	231.674	1
2022-09-12	12:42:11	2.26553	233.939	1
2022-09-12	12:42:12	2.4205	236.36	1
2022-09-12	12:42:13	1.75415	238.114	1
2022-09-12	12:42:14	1.39983	239.514	1
2022-09-12	12:42:15	1.11397	240.628	1
2022-09-12	12:42:16	1.3598	241.988	1
2022-09-12	12:42:17	0.908317	242.896	1
2022-09-12	12:42:18	0.935084	243.831	1
2022-09-12	12:42:19	0.694734	244.526	1
2022-09-12	12:42:20	0.175043	244.701	1
2022-09-12	12:42:21	0.634747	245.336	1
2022-09-12	12:42:22	1.36281	246.698	1
2022-09-12	12:42:23	2.15415	248.853	1
2022-09-12	12:42:24	2.80337	251.656	1
2022-09-12	12:42:25	3.17746	254.833	1
2022-09-12	12:42:26	3.2628	258.096	1
2022-09-12	12:42:27	3.1997	261.296	1
2022-09-12	12:42:28	3.27248	264.568	1
2022-09-12	12:42:29	2.48963	267.058	1
2022-09-12	12:42:30	2.29886	269.357	1
2022-09-12	12:42:31	3.75165	273.109	1
2022-09-12	12:42:32	4.14295	277.252	1
2022-09-12	12:42:33	1.81171	279.063	1
2022-09-12	12:42:34	1.49117	280.554	1
2022-09-12	12:42:35	2.57283	283.127	1
2022-09-12	12:42:36	3.09615	286.223	1
2022-09-12	12:42:37	1.80113	288.024	1
2022-09-12	12:42:38	1.07164	289.096	1
2022-09-12	12:42:39	0.890036	289.986	1
2022-09-12	12:42:40	0.928406	290.915	1
2022-09-12	12:42:41	0.443237	291.358	1
2022-09-12	12:42:42	0.352801	291.711	1
2022-09-12	12:42:43	0.583021	292.294	1
2022-09-12	12:42:44	2.58719	294.881	1
2022-09-12	12:42:45	3.58986	298.471	1
2022-09-12	12:42:46	2.07385	300.545	1
2022-09-12	12:42:47	1.29349	301.838	1
2022-09-12	12:42:48	0.855441	302.693	1
2022-09-12	12:42:49	1.37832	304.072	1
2022-09-12	12:42:50	1.85942	305.931	1
2022-09-12	12:42:51	2.40418	308.335	1
2022-09-12	12:42:52	2.80389	311.139	1
2022-09-12	12:42:53	2.43825	313.578	1
2022-09-12	12:42:54	2.02229	315.6	1
2022-09-12	12:42:55	2.08024	317.68	1
2022-09-12	12:42:56	1.88656	319.567	1
2022-09-12	12:42:57	2.03446	321.601	1
2022-09-12	12:42:58	8.85253	330.454	1
2022-09-12	12:42:59	5.8453	336.299	1
2022-09-12	12:43:00	8.50076	344.8	1
2022-09-12	12:43:01	2.23508	347.035	1
2022-09-12	12:43:02	0.141879	347.177	1
2022-09-12	12:43:03	2.48986	349.666	1
2022-09-12	12:43:04	4.5121	354.179	1
2022-09-12	12:43:05	2.23949	356.418	1
2022-09-12	12:43:06	0.856986	357.275	1
2022-09-12	12:43:07	-1.01986	357.275	1
2022-09-12	12:43:08	0.805034	358.08	1
2022-09-12	12:43:09	1.63763	359.718	1
2022-09-12	12:43:10	1.84397	361.562	1
2022-09-12	12:43:11	1.66825	363.23	1
2022-09-12	12:43:12	1.86913	365.099	1
2022-09-12	12:43:13	2.10186	367.201	1
2022-09-12	12:43:14	1.47894	368.68	1
2022-09-12	12:43:15	1.42224	370.102	1
2022-09-12	12:43:16	1.44906	371.551	1
2022-09-12	12:43:17	1.61035	373.162	1
2022-09-12	12:43:18	2.40044	375.562	1
2022-09-12	12:43:19	2.45539	378.017	1
2022-09-12	12:43:20	1.99605	380.013	1
2022-09-12	12:43:21	1.89235	381.906	1
2022-09-12	12:43:22	1.79348	383.699	1
2022-09-12	12:43:23	1.86932	385.569	1
2022-09-12	12:43:24	1.88792	387.456	1
2022-09-12	12:43:25	1.86281	389.319	1
2022-09-12	12:43:26	1.76445	391.084	1
2022-09-12	12:43:27	2.03027	393.114	1
2022-09-12	12:43:28	0.454838	393.569	1
2022-09-12	12:43:29	0.62473	394.194	1
2022-09-12	12:43:30	1.1099	395.303	1
2022-09-12	12:43:31	1.41895	396.722	1
2022-09-12	12:43:32	1.42824	398.151	1
2022-09-12	12:43:33	1.28098	399.432	1
2022-09-12	12:43:34	1.50956	400.941	1
2022-09-12	12:43:35	0.850196	401.791	1
2022-09-12	12:43:36	0.696452	402.488	1
2022-09-12	12:43:37	0.742159	403.23	1
2022-09-12	12:43:38	0.742217	403.972	1
2022-09-12	12:43:39	1.44363	405.416	1
2022-09-12	12:43:40	2.22046	407.636	1
2022-09-12	12:43:41	1.28987	408.926	1
2022-09-12	12:43:42	0.448953	409.375	1
2022-09-12	12:43:43	1.29903	410.674	1
2022-09-12	12:43:44	1.73195	412.406	1
2022-09-12	12:43:45	2.34068	414.747	1
2022-09-12	12:43:46	2.37877	417.126	1
2022-09-12	12:43:47	1.89173	419.017	1
2022-09-12	12:43:48	1.56977	420.587	1
2022-09-12	12:43:49	1.1218	421.709	1
2022-09-12	12:43:50	0.823201	422.532	1
2022-09-12	12:43:51	1.07283	423.605	1
2022-09-12	12:43:52	0.844423	424.449	1
2022-09-12	12:43:53	0.97134	425.421	1
2022-09-12	12:43:54	1.27781	426.698	1
2022-09-12	12:43:55	1.18121	427.88	1
2022-09-12	12:43:56	1.28396	429.164	1
2022-09-12	12:43:57	1.09994	430.264	1
2022-09-12	12:43:58	1.11137	431.375	1
2022-09-12	12:43:59	1.76955	433.144	1
2022-09-12	12:44:00	2.7928	435.937	1
2022-09-12	12:44:01	2.7756	438.713	1
2022-09-12	12:44:02	1.50707	440.22	1
2022-09-12	12:44:03	1.05308	441.273	1
2022-09-12	12:44:04	0.953422	442.226	1
2022-09-12	12:44:05	1.0425	443.269	1
2022-09-12	12:44:06	1.10741	444.376	1
2022-09-12	12:44:07	1.27017	445.647	1
2022-09-12	12:44:08	1.35942	447.006	1
2022-09-12	12:44:09	1.63197	448.638	1
2022-09-12	12:44:10	1.51629	450.154	1
2022-09-12	12:44:11	1.51675	451.671	1
2022-09-12	12:44:12	1.48353	453.154	1
2022-09-12	12:44:13	1.96753	455.122	1
2022-09-12	12:44:14	2.10435	457.226	1
2022-09-12	12:44:15	2.44464	459.671	1
2022-09-12	12:44:16	2.03587	461.707	1
2022-09-12	12:44:17	1.99643	463.703	1
2022-09-12	12:44:18	2.0979	465.801	1
2022-09-12	12:44:19	2.19535	467.997	1
2022-09-12	12:44:20	2.25053	470.247	1
2022-09-12	12:44:21	1.73746	471.985	1
2022-09-12	12:44:22	1.95766	473.942	1
2022-09-12	12:44:23	2.07283	476.015	1
2022-09-12	12:44:24	2.15483	478.17	1
2022-09-12	12:44:25	1.63167	479.802	1
2022-09-12	12:44:26	1.50588	481.307	1
2022-09-12	12:44:27	1.82404	483.131	1
2022-09-12	12:44:28	1.53355	484.665	1
2022-09-12	12:44:29	1.90927	486.574	1
2022-09-12	12:44:30	1.68409	488.258	1
2022-09-12	12:44:31	1.58194	489.84	1
2022-09-12	12:44:32	1.91305	491.753	1
2022-09-12	12:44:33	1.53706	493.29	1
2022-09-12	12:44:34	1.29977	494.59	1
2022-09-12	12:44:35	1.51335	496.104	1
2022-09-12	12:44:36	1.50565	497.609	1
2022-09-12	12:44:37	1.5415	499.151	1
2022-09-12	12:44:38	1.66825	500.819	1
2022-09-12	12:44:39	1.80209	502.621	1
2022-09-12	12:44:40	1.93893	504.56	1
2022-09-12	12:44:41	1.47804	506.038	1
2022-09-12	12:44:42	1.38064	507.419	1
2022-09-12	12:44:43	1.24855	508.667	1
2022-09-12	12:44:44	1.92172	510.589	1
2022-09-12	12:44:45	5.24136	515.83	1
2022-09-12	12:44:46	2.33089	518.161	1
2022-09-12	12:44:47	2.31986	520.481	1
2022-09-12	12:44:48	2.02727	522.508	1
2022-09-12	12:44:49	1.51682	524.025	1
2022-09-12	12:44:50	1.67543	525.701	1
2022-09-12	12:44:51	1.52603	527.227	1
2022-09-12	12:44:52	0.836443	528.063	1
2022-09-12	12:44:53	1.23008	529.293	1
2022-09-12	12:44:54	1.93649	531.23	1
2022-09-12	12:44:55	1.96728	533.197	1
2022-09-12	12:44:56	1.82037	535.017	1
2022-09-12	12:44:57	1.79571	536.813	1
2022-09-12	12:44:58	1.74459	538.558	1
2022-09-12	12:44:59	1.88686	540.444	1
2022-09-12	12:45:00	2.0902	542.535	1
2022-09-12	12:45:01	1.99869	544.533	1
2022-09-12	12:45:02	1.96496	546.498	1
2022-09-12	12:45:03	1.95285	548.451	1
2022-09-12	12:45:04	1.89937	550.35	1
2022-09-12	12:45:05	2.03717	552.388	1
2022-09-12	12:45:06	1.50894	553.897	1
2022-09-12	12:45:07	1.12637	555.023	1

## Sheet: Dominic_prong_2022912123959 (4)
Date	Time	Lbs	Newtons	averaged newtons	Total Force x Time	total time steps force > 3		**GoPro Fitting: 1229
2022-09-12	12:40:07	0.66556	2.96054	9.96108	2.96054	FALSE	0			Total Force x Time	1052.05
2022-09-12	12:40:07	0.902812	4.01589	9.96108	4.01589	FALSE	0			total time steps force > 3	6
2022-09-12	12:40:07	2.04368	9.0907	9.96108	12.0512	FALSE	0
2022-09-12	12:40:07	5.34535	23.7772	9.96108	27.7931	1	1
2022-09-12	12:40:08	1.61039	7.16334	2.8396	19.2146	FALSE	1
2022-09-12	12:40:08	0.123015	0.547195	2.8396	28.3403	FALSE	1
2022-09-12	12:40:08	0.253143	1.12603	2.8396	20.3406	FALSE	1
2022-09-12	12:40:08	0.566934	2.52184	2.8396	30.8621	FALSE	1
2022-09-12	12:40:09	0.0446949	0.198812	0.449632	20.5394	FALSE	1
2022-09-12	12:40:09	0.124797	0.555122	0.449632	31.4172	FALSE	1
2022-09-12	12:40:09	0.143168	0.63684	0.449632	21.1763	FALSE	1
2022-09-12	12:40:09	0.0916669	0.407753	0.449632	31.825	FALSE	1
2022-09-12	12:40:10	0.36897	1.64125	2.56817	22.8175	FALSE	1
2022-09-12	12:40:10	0.975025	4.33711	2.56817	36.1621	FALSE	1
2022-09-12	12:40:10	0.388054	1.72614	2.56817	24.5437	FALSE	1
2022-09-12	12:40:11	-0.0907758	-0.403789	-0.691394	36.1621	FALSE	1
2022-09-12	12:40:11	-0.317035	-1.41024	-0.691394	24.5437	FALSE	1
2022-09-12	12:40:11	-0.101463	-0.451328	-0.691394	36.1621	FALSE	1
2022-09-12	12:40:11	-0.112455	-0.500222	-0.691394	24.5437	FALSE	1
2022-09-12	12:40:12	-0.201921	-0.898185	-0.805486	36.1621	FALSE	1
2022-09-12	12:40:12	-0.245076	-1.09015	-0.805486	24.5437	FALSE	1
2022-09-12	12:40:12	-0.176221	-0.783866	-0.805486	36.1621	FALSE	1
2022-09-12	12:40:12	-0.101107	-0.449744	-0.805486	24.5437	FALSE	1
2022-09-12	12:40:13	-0.0857376	-0.381378	-1.15172	36.1621	FALSE	1
2022-09-12	12:40:13	-0.339885	-1.51188	-1.15172	24.5437	FALSE	1
2022-09-12	12:40:13	-0.350216	-1.55783	-1.15172	36.1621	FALSE	1
2022-09-12	12:40:13	-0.259834	-1.15579	-1.15172	24.5437	FALSE	1
2022-09-12	12:40:14	-0.159376	-0.708936	-0.737761	36.1621	FALSE	1
2022-09-12	12:40:14	-0.164872	-0.733384	-0.737761	24.5437	FALSE	1
2022-09-12	12:40:14	-0.17332	-0.770962	-0.737761	36.1621	FALSE	1
2022-09-12	12:40:15	0.441387	1.96338	1.40045	26.507	FALSE	1
2022-09-12	12:40:15	0.314873	1.40062	1.40045	37.5627	FALSE	1
2022-09-12	12:40:15	0.225865	1.00469	1.40045	27.5117	FALSE	1
2022-09-12	12:40:15	0.277214	1.2331	1.40045	38.7958	FALSE	1
2022-09-12	12:40:16	0.574822	2.55692	1.98652	30.0686	FALSE	1
2022-09-12	12:40:16	0.300013	1.33452	1.98652	40.1303	FALSE	1
2022-09-12	12:40:16	0.477468	2.12387	1.98652	32.1925	FALSE	1
2022-09-12	12:40:16	0.434059	1.93078	1.98652	42.0611	FALSE	1
2022-09-12	12:40:17	0.14444	0.642498	1.40147	32.835	FALSE	1
2022-09-12	12:40:17	0.334109	1.48618	1.40147	43.5473	FALSE	1
2022-09-12	12:40:17	0.371209	1.65121	1.40147	34.4862	FALSE	1
2022-09-12	12:40:17	0.410496	1.82597	1.40147	45.3733	FALSE	1
2022-09-12	12:40:18	0.231412	1.02937	0.966136	35.5156	FALSE	1
2022-09-12	12:40:18	0.155535	0.691851	0.966136	46.0651	FALSE	1
2022-09-12	12:40:18	0.264644	1.17719	0.966136	36.6928	FALSE	1
2022-09-12	12:40:19	0.124237	0.552631	1.49983	46.6177	FALSE	1
2022-09-12	12:40:19	0.299555	1.33248	1.49983	38.0253	FALSE	1
2022-09-12	12:40:19	0.283779	1.26231	1.49983	47.88	FALSE	1
2022-09-12	12:40:19	0.641132	2.85188	1.49983	40.8772	FALSE	1
2022-09-12	12:40:20	0.508562	2.26219	1.49558	50.1422	FALSE	1
2022-09-12	12:40:20	0.234975	1.04522	1.49558	41.9224	FALSE	1
2022-09-12	12:40:20	0.301489	1.34108	1.49558	51.4833	FALSE	1
2022-09-12	12:40:20	0.29986	1.33384	1.49558	43.2562	FALSE	1
2022-09-12	12:40:21	0.332176	1.47759	1.3013	52.9609	FALSE	1
2022-09-12	12:40:21	0.143423	0.637974	1.3013	43.8942	FALSE	1
2022-09-12	12:40:21	0.366272	1.62925	1.3013	54.5902	FALSE	1
2022-09-12	12:40:21	0.328308	1.46038	1.3013	45.3546	FALSE	1
2022-09-12	12:40:22	0.38556	1.71505	1.48943	56.3052	FALSE	1
2022-09-12	12:40:22	0.263626	1.17266	1.48943	46.5272	FALSE	1
2022-09-12	12:40:22	0.355331	1.58058	1.48943	57.8858	FALSE	1
2022-09-12	12:40:23	0.281743	1.25325	1.21426	47.7805	FALSE	1
2022-09-12	12:40:23	0.330598	1.47057	1.21426	59.3563	FALSE	1
2022-09-12	12:40:23	0.24612	1.09479	1.21426	48.8753	FALSE	1
2022-09-12	12:40:23	0.233448	1.03842	1.21426	60.3948	FALSE	1
2022-09-12	12:40:24	-0.0784094	-0.348781	-1.10769	48.8753	FALSE	1
2022-09-12	12:40:24	-0.0927096	-0.412391	-1.10769	60.3948	FALSE	1
2022-09-12	12:40:24	-0.318358	-1.41612	-1.10769	48.8753	FALSE	1
2022-09-12	12:40:24	-0.506603	-2.25347	-1.10769	60.3948	FALSE	1
2022-09-12	12:40:25	-0.575915	-2.56179	4.0786	48.8753	FALSE	1
2022-09-12	12:40:25	-0.0370863	-0.164967	4.0786	60.3948	FALSE	1
2022-09-12	12:40:25	1.8619	8.2821	4.0786	57.1574	FALSE	1
2022-09-12	12:40:25	2.41874	10.759	4.0786	71.1538	FALSE	1
2022-09-12	12:40:26	0.895432	3.98306	4.65349	61.1404	FALSE	1
2022-09-12	12:40:26	1.49039	6.62955	4.65349	77.7834	FALSE	1
2022-09-12	12:40:26	0.752634	3.34787	4.65349	64.4883	FALSE	1
2022-09-12	12:40:27	0.563677	2.50735	1.70413	80.2907	FALSE	1
2022-09-12	12:40:27	0.23126	1.02869	1.70413	65.517	FALSE	1
2022-09-12	12:40:27	0.362048	1.61046	1.70413	81.9012	FALSE	1
2022-09-12	12:40:27	0.375433	1.67	1.70413	67.187	FALSE	1
2022-09-12	12:40:28	0.350191	1.55772	1.96717	83.4589	FALSE	1
2022-09-12	12:40:28	0.397417	1.76779	1.96717	68.9548	FALSE	1
2022-09-12	12:40:28	0.562812	2.5035	1.96717	85.9624	FALSE	1
2022-09-12	12:40:28	0.458537	2.03966	1.96717	70.9944	FALSE	1
2022-09-12	12:40:29	0.343219	1.52671	1.56072	87.4891	FALSE	1
2022-09-12	12:40:29	0.328817	1.46264	1.56072	72.4571	FALSE	1
2022-09-12	12:40:29	0.50444	2.24385	1.56072	89.733	FALSE	1
2022-09-12	12:40:29	0.226985	1.00967	1.56072	73.4668	FALSE	1
2022-09-12	12:40:30	0.237723	1.05744	1.13938	90.7904	FALSE	1
2022-09-12	12:40:30	0.258842	1.15138	1.13938	74.6181	FALSE	1
2022-09-12	12:40:30	0.27187	1.20933	1.13938	91.9997	FALSE	1
2022-09-12	12:40:31	0.255178	1.13508	1.17832	75.7532	FALSE	1
2022-09-12	12:40:31	0.246832	1.09796	1.17832	93.0977	FALSE	1
2022-09-12	12:40:31	0.289886	1.28947	1.17832	77.0427	FALSE	1
2022-09-12	12:40:31	0.267697	1.19077	1.17832	94.2885	FALSE	1
2022-09-12	12:40:32	0.316145	1.40628	1.24719	78.449	FALSE	1
2022-09-12	12:40:32	0.234822	1.04454	1.24719	95.333	FALSE	1
2022-09-12	12:40:32	0.252328	1.12241	1.24719	79.5714	FALSE	1
2022-09-12	12:40:32	0.318232	1.41556	1.24719	96.7485	FALSE	1
2022-09-12	12:40:33	0.286883	1.27611	1.47792	80.8475	FALSE	1
2022-09-12	12:40:33	0.341438	1.51878	1.47792	98.2673	FALSE	1
2022-09-12	12:40:33	0.368257	1.63808	1.47792	82.4856	FALSE	1
2022-09-12	12:40:33	0.33243	1.47872	1.47792	99.746	FALSE	1
2022-09-12	12:40:34	0.348257	1.54912	1.40952	84.0347	FALSE	1
2022-09-12	12:40:34	0.219504	0.976398	1.40952	100.722	FALSE	1
2022-09-12	12:40:34	0.382863	1.70305	1.40952	85.7377	FALSE	1
2022-09-12	12:40:35	0.135484	0.60266	1.15053	101.325	FALSE	1
2022-09-12	12:40:35	0.364797	1.62269	1.15053	87.3604	FALSE	1
2022-09-12	12:40:35	0.158842	0.706561	1.15053	102.032	FALSE	1
2022-09-12	12:40:35	0.375484	1.67023	1.15053	89.0307	FALSE	1
2022-09-12	12:40:36	0.134568	0.598585	1.12733	102.63	FALSE	1
2022-09-12	12:40:36	0.361031	1.60594	1.12733	90.6366	FALSE	1
2022-09-12	12:40:36	0.149682	0.665815	1.12733	103.296	FALSE	1
2022-09-12	12:40:36	0.368461	1.63899	1.12733	92.2756	FALSE	1
2022-09-12	12:40:37	0.207799	0.924332	1.22116	104.22	FALSE	1
2022-09-12	12:40:37	0.351463	1.56338	1.22116	93.839	FALSE	1
2022-09-12	12:40:37	0.220471	0.980699	1.22116	105.201	FALSE	1
2022-09-12	12:40:37	0.318384	1.41624	1.22116	95.2552	FALSE	1
2022-09-12	12:40:38	0.297265	1.32229	1.35602	106.523	FALSE	1
2022-09-12	12:40:38	0.307087	1.36598	1.35602	96.6212	FALSE	1
2022-09-12	12:40:38	0.310191	1.37979	1.35602	107.903	FALSE	1
2022-09-12	12:40:39	0.333804	1.48483	1.38517	98.106	FALSE	1
2022-09-12	12:40:39	0.267545	1.19009	1.38517	109.093	FALSE	1
2022-09-12	12:40:39	0.372837	1.65845	1.38517	99.7645	FALSE	1
2022-09-12	12:40:39	0.271412	1.20729	1.38517	110.301	FALSE	1
2022-09-12	12:40:40	0.302456	1.34538	1.18364	101.11	FALSE	1
2022-09-12	12:40:40	0.163473	0.727161	1.18364	111.028	FALSE	1
2022-09-12	12:40:40	0.322914	1.43639	1.18364	102.546	FALSE	1
2022-09-12	12:40:40	0.275535	1.22563	1.18364	112.253	FALSE	1
2022-09-12	12:40:41	-0.0193254	-0.0859632	0.428918	102.546	FALSE	1
2022-09-12	12:40:41	0.0731427	0.325353	0.428918	112.579	FALSE	1
2022-09-12	12:40:41	0.157112	0.698866	0.428918	103.245	FALSE	1
2022-09-12	12:40:41	0.174771	0.777416	0.428918	113.356	FALSE	1
2022-09-12	12:40:42	0.0852037	0.379003	0.682001	103.624	FALSE	1
2022-09-12	12:40:42	0.158893	0.706788	0.682001	114.063	FALSE	1
2022-09-12	12:40:42	0.15187	0.675548	0.682001	104.3	FALSE	1
2022-09-12	12:40:42	0.217316	0.966665	0.682001	115.03	FALSE	1
2022-09-12	12:40:43	0.127901	0.568929	1.00228	104.869	FALSE	1
2022-09-12	12:40:43	0.393397	1.74991	1.00228	116.779	FALSE	1
2022-09-12	12:40:43	0.154669	0.687999	1.00228	105.557	FALSE	1
2022-09-12	12:40:44	0.390598	1.73746	1.22201	118.517	FALSE	1
2022-09-12	12:40:44	0.120064	0.534069	1.22201	106.091	FALSE	1
2022-09-12	12:40:44	0.416298	1.85178	1.22201	120.369	FALSE	1
2022-09-12	12:40:44	0.171921	0.764739	1.22201	106.855	FALSE	1
2022-09-12	12:40:45	0.303219	1.34878	1.19417	121.718	FALSE	1
2022-09-12	12:40:45	0.165153	0.734634	1.19417	107.59	FALSE	1
2022-09-12	12:40:45	0.348257	1.54912	1.19417	123.267	FALSE	1
2022-09-12	12:40:45	0.257214	1.14414	1.19417	108.734	FALSE	1
2022-09-12	12:40:46	0.384644	1.71097	2.0228	124.978	FALSE	1
2022-09-12	12:40:46	0.334568	1.48823	2.0228	110.222	FALSE	1
2022-09-12	12:40:46	0.389631	1.73316	2.0228	126.711	FALSE	1
2022-09-12	12:40:46	0.71014	3.15884	2.0228	113.381	FALSE	1
2022-09-12	12:40:47	0.45869	2.04034	1.67355	128.751	FALSE	1
2022-09-12	12:40:47	0.460115	2.04668	1.67355	115.428	FALSE	1
2022-09-12	12:40:47	0.209886	0.933615	1.67355	129.685	FALSE	1
2022-09-12	12:40:48	0.377163	1.6777	1.34855	117.106	FALSE	1
2022-09-12	12:40:48	0.204033	0.90758	1.34855	130.592	FALSE	1
2022-09-12	12:40:48	0.453193	2.01589	1.34855	119.121	FALSE	1
2022-09-12	12:40:48	0.178283	0.793038	1.34855	131.385	FALSE	1
2022-09-12	12:40:49	0.513397	2.28369	1.48262	121.405	FALSE	1
2022-09-12	12:40:49	0.184135	0.819069	1.48262	132.204	FALSE	1
2022-09-12	12:40:49	0.416043	1.85064	1.48262	123.256	FALSE	1
2022-09-12	12:40:49	0.219657	0.977078	1.48262	133.181	FALSE	1
2022-09-12	12:40:50	0.260776	1.15998	1.30288	124.416	FALSE	1
2022-09-12	12:40:50	0.255484	1.13644	1.30288	134.318	FALSE	1
2022-09-12	12:40:50	0.333143	1.48189	1.30288	125.898	FALSE	1
2022-09-12	12:40:50	0.322201	1.43321	1.30288	135.751	FALSE	1
2022-09-12	12:40:51	0.251412	1.11833	1.159	127.016	FALSE	1
2022-09-12	12:40:51	0.312227	1.38885	1.159	137.14	FALSE	1
2022-09-12	12:40:51	0.218028	0.969832	1.159	127.986	FALSE	1
2022-09-12	12:40:52	0.479046	2.13089	2.29292	139.271	FALSE	1
2022-09-12	12:40:52	0.36271	1.61341	2.29292	129.599	FALSE	1
2022-09-12	12:40:52	0.716145	3.18556	2.29292	142.456	FALSE	1
2022-09-12	12:40:52	0.503982	2.24181	2.29292	131.841	FALSE	1
2022-09-12	12:40:53	0.489784	2.17866	1.55715	144.635	FALSE	1
2022-09-12	12:40:53	0.174822	0.777643	1.55715	132.619	FALSE	1
2022-09-12	12:40:53	0.512481	2.27962	1.55715	146.915	FALSE	1
2022-09-12	12:40:53	0.223168	0.992696	1.55715	133.611	FALSE	1
2022-09-12	12:40:54	0.441692	1.96473	1.87317	148.879	FALSE	1
2022-09-12	12:40:54	0.449377	1.99892	1.87317	135.61	FALSE	1
2022-09-12	12:40:54	0.340318	1.5138	1.87317	150.393	FALSE	1
2022-09-12	12:40:54	0.453041	2.01522	1.87317	137.626	FALSE	1
2022-09-12	12:40:55	0.329275	1.46468	1.85585	151.858	FALSE	1
2022-09-12	12:40:55	0.660166	2.93655	1.85585	140.562	FALSE	1
2022-09-12	12:40:55	0.262201	1.16632	1.85585	153.024	FALSE	1
2022-09-12	12:40:56	0.471005	2.09512	1.46394	142.657	FALSE	1
2022-09-12	12:40:56	0.186883	0.831293	1.46394	153.856	FALSE	1
2022-09-12	12:40:56	0.477214	2.12274	1.46394	144.78	FALSE	1
2022-09-12	12:40:56	0.181336	0.806619	1.46394	154.662	FALSE	1
2022-09-12	12:40:57	0.512685	2.28053	1.71941	147.061	FALSE	1
2022-09-12	12:40:57	0.232481	1.03412	1.71941	155.696	FALSE	1
2022-09-12	12:40:57	0.492939	2.19269	1.71941	149.253	FALSE	1
2022-09-12	12:40:57	0.308054	1.37029	1.71941	157.067	FALSE	1
2022-09-12	12:40:58	0.433906	1.9301	1.57724	151.183	FALSE	1
2022-09-12	12:40:58	0.323931	1.44091	1.57724	158.507	FALSE	1
2022-09-12	12:40:58	0.31416	1.39745	1.57724	152.581	FALSE	1
2022-09-12	12:40:58	0.346323	1.54051	1.57724	160.048	FALSE	1
2022-09-12	12:40:59	0.374415	1.66547	1.9507	154.246	FALSE	1
2022-09-12	12:40:59	0.640013	2.84691	1.9507	162.895	FALSE	1
2022-09-12	12:40:59	0.301183	1.33972	1.9507	155.586	FALSE	1
2022-09-12	12:41:00	0.708206	3.15024	2.29637	166.045	FALSE	1
2022-09-12	12:41:00	0.444796	1.97854	2.29637	157.564	FALSE	1
2022-09-12	12:41:00	0.724796	3.22404	2.29637	169.269	FALSE	1
2022-09-12	12:41:00	0.187188	0.83265	2.29637	158.397	FALSE	1
2022-09-12	12:41:01	0.469224	2.0872	1.72376	171.356	FALSE	1
2022-09-12	12:41:01	0.264847	1.17809	1.72376	159.575	FALSE	1
2022-09-12	12:41:01	0.708664	3.15228	1.72376	174.509	FALSE	1
2022-09-12	12:41:01	0.107341	0.477474	1.72376	160.053	FALSE	1
2022-09-12	12:41:02	0.459453	2.04374	1.31307	176.552	FALSE	1
2022-09-12	12:41:02	0.143728	0.639331	1.31307	160.692	FALSE	1
2022-09-12	12:41:02	0.420115	1.86876	1.31307	178.421	FALSE	1
2022-09-12	12:41:02	0.157468	0.700449	1.31307	161.392	FALSE	1
2022-09-12	12:41:03	0.484186	2.15376	1.6079	180.575	FALSE	1
2022-09-12	12:41:03	0.152583	0.67872	1.6079	162.071	FALSE	1
2022-09-12	12:41:03	0.447647	1.99122	1.6079	182.566	FALSE	1
2022-09-12	12:41:04	0.161133	0.716752	1.39451	162.788	FALSE	1
2022-09-12	12:41:04	0.469326	2.08766	1.39451	184.654	FALSE	1
2022-09-12	12:41:04	0.145662	0.647934	1.39451	163.436	FALSE	1
2022-09-12	12:41:04	0.477875	2.12568	1.39451	186.779	FALSE	1
2022-09-12	12:41:05	0.217723	0.968475	0.520146	164.404	FALSE	1
2022-09-12	12:41:05	0.306425	1.36304	0.520146	188.143	FALSE	1
2022-09-12	12:41:05	0.0218959	0.0973973	0.520146	164.502	FALSE	1
2022-09-12	12:41:05	-0.0783076	-0.348328	0.520146	188.143	FALSE	1
2022-09-12	12:41:06	-0.198969	-0.885054	-0.673623	164.502	FALSE	1
2022-09-12	12:41:06	-0.240699	-1.07068	-0.673623	188.143	FALSE	1
2022-09-12	12:41:06	-0.1836	-0.81669	-0.673623	164.502	FALSE	1
2022-09-12	12:41:06	0.0175193	0.0779294	-0.673623	188.22	FALSE	1
2022-09-12	12:41:07	-0.0817682	-0.363721	-0.218165	164.502	FALSE	1
2022-09-12	12:41:07	0.0417941	0.185909	-0.218165	188.406	FALSE	1
2022-09-12	12:41:07	-0.107163	-0.476682	-0.218165	164.502	FALSE	1
2022-09-12	12:41:08	0.0792496	0.352518	0.533105	188.759	FALSE	1
2022-09-12	12:41:08	-0.0298089	-0.132596	0.533105	164.502	FALSE	1
2022-09-12	12:41:08	0.220013	0.978662	0.533105	189.738	FALSE	1
2022-09-12	12:41:08	0.209936	0.933837	0.533105	165.436	FALSE	1
2022-09-12	12:41:09	0.380725	1.69354	1.66949	191.431	FALSE	1
2022-09-12	12:41:09	0.226476	1.00741	1.66949	166.443	FALSE	1
2022-09-12	12:41:09	0.710954	3.16247	1.66949	194.594	FALSE	1
2022-09-12	12:41:09	0.183117	0.814541	1.66949	167.258	FALSE	1
2022-09-12	12:41:10	0.192227	0.855064	0.765816	195.449	FALSE	1
2022-09-12	12:41:10	0.224593	0.999035	0.765816	168.257	FALSE	1
2022-09-12	12:41:10	0.177825	0.791001	0.765816	196.24	FALSE	1
2022-09-12	12:41:10	0.0940079	0.418166	0.765816	168.675	FALSE	1
2022-09-12	12:41:11	0.157468	0.700449	0.68581	196.94	FALSE	1
2022-09-12	12:41:11	0.191819	0.853249	0.68581	169.528	FALSE	1
2022-09-12	12:41:11	0.113244	0.503732	0.68581	197.444	FALSE	1
2022-09-12	12:41:12	0.10958	0.487434	0.5013	170.015	FALSE	1
2022-09-12	12:41:12	0.0935498	0.416128	0.5013	197.86	FALSE	1
2022-09-12	12:41:12	0.194924	0.867061	0.5013	170.882	FALSE	1
2022-09-12	12:41:12	0.0527356	0.234578	0.5013	198.094	FALSE	1
2022-09-12	12:41:13	0.146069	0.649744	0.626993	171.532	FALSE	1
2022-09-12	12:41:13	0.100624	0.447596	0.626993	198.542	FALSE	1
2022-09-12	12:41:13	0.22444	0.998354	0.626993	172.531	FALSE	1
2022-09-12	12:41:13	0.0926846	0.41228	0.626993	198.954	FALSE	1
2022-09-12	12:41:14	0.214364	0.953534	0.804412	173.484	FALSE	1
2022-09-12	12:41:14	0.144848	0.644313	0.804412	199.599	FALSE	1
2022-09-12	12:41:14	0.227138	1.01036	0.804412	174.494	FALSE	1
2022-09-12	12:41:14	0.13701	0.609448	0.804412	200.208	FALSE	1
2022-09-12	12:41:15	0.231514	1.02982	1.04046	175.524	FALSE	1
2022-09-12	12:41:15	0.188359	0.837859	1.04046	201.046	FALSE	1
2022-09-12	12:41:15	0.281845	1.2537	1.04046	176.778	FALSE	1
2022-09-12	12:41:16	0.251107	1.11697	1.42427	202.163	FALSE	1
2022-09-12	12:41:16	0.355331	1.58058	1.42427	178.359	FALSE	1
2022-09-12	12:41:16	0.252125	1.1215	1.42427	203.284	FALSE	1
2022-09-12	12:41:16	0.422201	1.87803	1.42427	180.237	FALSE	1
2022-09-12	12:41:17	0.44902	1.99733	1.44063	205.282	FALSE	1
2022-09-12	12:41:17	0.249478	1.10973	1.44063	181.346	FALSE	1
2022-09-12	12:41:17	0.288308	1.28245	1.44063	206.564	FALSE	1
2022-09-12	12:41:17	0.308664	1.373	1.44063	182.719	FALSE	1
2022-09-12	12:41:18	0.350547	1.5593	1.51177	208.124	FALSE	1
2022-09-12	12:41:18	0.371412	1.65211	1.51177	184.371	FALSE	1
2022-09-12	12:41:18	0.362965	1.61454	1.51177	209.738	FALSE	1
2022-09-12	12:41:18	0.274517	1.22111	1.51177	185.593	FALSE	1
2022-09-12	12:41:19	0.318181	1.41533	1.4517	211.153	FALSE	1
2022-09-12	12:41:19	0.237621	1.05699	1.4517	186.65	FALSE	1
2022-09-12	12:41:19	0.42327	1.88279	1.4517	213.036	FALSE	1
2022-09-12	12:41:20	0.315484	1.40334	1.52093	188.053	FALSE	1
2022-09-12	12:41:20	0.419555	1.86626	1.52093	214.902	FALSE	1
2022-09-12	12:41:20	0.300827	1.33814	1.52093	189.391	FALSE	1
2022-09-12	12:41:20	0.331819	1.476	1.52093	216.378	FALSE	1
2022-09-12	12:41:21	0.404797	1.80062	1.76078	191.192	FALSE	1
2022-09-12	12:41:21	0.37355	1.66163	1.76078	218.04	FALSE	1
2022-09-12	12:41:21	0.364542	1.62156	1.76078	192.813	FALSE	1
2022-09-12	12:41:21	0.440471	1.9593	1.76078	219.999	FALSE	1
2022-09-12	12:41:22	1.1449	5.09274	3.31566	197.906	FALSE	1
2022-09-12	12:41:22	1.2367	5.50109	3.31566	225.5	FALSE	1
2022-09-12	12:41:22	0.257723	1.1464	3.31566	199.052	FALSE	1
2022-09-12	12:41:22	0.342252	1.52241	3.31566	227.023	FALSE	1
2022-09-12	12:41:23	0.356247	1.58466	1.73406	200.637	FALSE	1
2022-09-12	12:41:23	0.410293	1.82507	1.73406	228.848	FALSE	1
2022-09-12	12:41:23	0.402964	1.79246	1.73406	202.429	FALSE	1
2022-09-12	12:41:24	0.413753	1.84046	1.66343	230.688	FALSE	1
2022-09-12	12:41:24	0.408664	1.81782	1.66343	204.247	FALSE	1
2022-09-12	12:41:24	0.347392	1.54527	1.66343	232.234	FALSE	1
2022-09-12	12:41:24	0.326018	1.45019	1.66343	205.697	FALSE	1
2022-09-12	12:41:25	0.437367	1.9455	2.50039	234.179	FALSE	1
2022-09-12	12:41:25	0.416145	1.8511	2.50039	207.549	FALSE	1
2022-09-12	12:41:25	0.77243	3.43592	2.50039	237.615	FALSE	1
2022-09-12	12:41:25	0.622506	2.76903	2.50039	210.318	FALSE	1
2022-09-12	12:41:26	0.555483	2.4709	4.59789	240.086	FALSE	1
2022-09-12	12:41:26	0.997672	4.43784	4.59789	214.755	FALSE	1
2022-09-12	12:41:26	0.974618	4.3353	4.59789	244.421	FALSE	1
2022-09-12	12:41:26	1.60683	7.1475	4.59789	221.903	FALSE	1
2022-09-12	12:41:27	3.0052	13.3677	14.8145	257.789	1	2
2022-09-12	12:41:27	4.08515	18.1716	14.8145	240.075	1	3
2022-09-12	12:41:27	2.90098	12.9041	14.8145	270.693	FALSE	3
2022-09-12	12:41:28	2.86332	12.7366	12.6337	252.811	FALSE	3
2022-09-12	12:41:28	3.21655	14.3079	12.6337	285.001	1	4
2022-09-12	12:41:28	3.42943	15.2548	12.6337	268.066	1	5
2022-09-12	12:41:28	1.85146	8.23566	12.6337	293.237	FALSE	5
2022-09-12	12:41:29	0.59701	2.65562	3.70763	270.722	FALSE	5
2022-09-12	12:41:29	0.85645	3.80966	3.70763	297.046	FALSE	5
2022-09-12	12:41:29	0.835839	3.71798	3.70763	274.44	FALSE	5
2022-09-12	12:41:29	1.04475	4.64726	3.70763	301.694	FALSE	5
2022-09-12	12:41:30	0.918435	4.08538	7.33013	278.525	FALSE	5
2022-09-12	12:41:30	2.47472	11.008	7.33013	312.702	FALSE	5
2022-09-12	12:41:30	2.39436	10.6506	7.33013	289.175	FALSE	5
2022-09-12	12:41:30	0.804033	3.5765	7.33013	316.278	FALSE	5
2022-09-12	12:41:31	0.78042	3.47146	2.02548	292.647	FALSE	5
2022-09-12	12:41:31	0.220878	0.98251	2.02548	317.261	FALSE	5
2022-09-12	12:41:31	0.364746	1.62246	2.02548	294.269	FALSE	5
2022-09-12	12:41:32	0.287901	1.28064	2.0357	318.541	FALSE	5
2022-09-12	12:41:32	0.605051	2.69139	2.0357	296.961	FALSE	5
2022-09-12	12:41:32	0.64042	2.84872	2.0357	321.39	FALSE	5
2022-09-12	12:41:32	0.297214	1.32207	2.0357	298.283	FALSE	5
2022-09-12	12:41:33	0.765611	3.40559	2.59292	324.796	FALSE	5
2022-09-12	12:41:33	0.450903	2.00571	2.59292	300.289	FALSE	5
2022-09-12	12:41:33	0.409733	1.82257	2.59292	326.618	FALSE	5
2022-09-12	12:41:33	0.705407	3.13779	2.59292	303.426	FALSE	5
2022-09-12	12:41:34	0.637672	2.83649	3.0482	329.455	FALSE	5
2022-09-12	12:41:34	0.424338	1.88754	3.0482	305.314	FALSE	5
2022-09-12	12:41:34	1.2681	5.64076	3.0482	335.095	FALSE	5
2022-09-12	12:41:34	0.410954	1.82801	3.0482	307.142	FALSE	5
2022-09-12	12:41:35	0.421539	1.87509	2.55609	336.971	FALSE	5
2022-09-12	12:41:35	0.644288	2.86592	2.55609	310.008	FALSE	5
2022-09-12	12:41:35	0.658079	2.92727	2.55609	339.898	FALSE	5
2022-09-12	12:41:36	0.405102	1.80197	3.18742	311.81	FALSE	5
2022-09-12	12:41:36	0.757061	3.36756	3.18742	343.265	FALSE	5
2022-09-12	12:41:36	0.725967	3.22925	3.18742	315.039	FALSE	5
2022-09-12	12:41:36	0.97813	4.35092	3.18742	347.616	FALSE	5
2022-09-12	12:41:37	0.443728	1.97379	1.90814	317.013	FALSE	5
2022-09-12	12:41:37	0.597417	2.65743	1.90814	350.274	FALSE	5
2022-09-12	12:41:37	0.298995	1.32999	1.90814	318.343	FALSE	5
2022-09-12	12:41:37	0.375738	1.67136	1.90814	351.945	FALSE	5
2022-09-12	12:41:38	0.244542	1.08777	1.3683	319.431	FALSE	5
2022-09-12	12:41:38	0.348155	1.54866	1.3683	353.494	FALSE	5
2022-09-12	12:41:38	0.310598	1.3816	1.3683	320.812	FALSE	5
2022-09-12	12:41:38	0.327138	1.45518	1.3683	354.949	FALSE	5
2022-09-12	12:41:39	0.272226	1.21092	1.23635	322.023	FALSE	5
2022-09-12	12:41:39	0.268868	1.19598	1.23635	356.145	FALSE	5
2022-09-12	12:41:39	0.292735	1.30214	1.23635	323.325	FALSE	5
2022-09-12	12:41:40	0.185458	0.824954	1.30039	356.97	FALSE	5
2022-09-12	12:41:40	0.296705	1.3198	1.30039	324.645	FALSE	5
2022-09-12	12:41:40	0.244288	1.08664	1.30039	358.056	FALSE	5
2022-09-12	12:41:40	0.442914	1.97017	1.30039	326.615	FALSE	5
2022-09-12	12:41:41	0.286934	1.27634	1.29983	359.333	FALSE	5
2022-09-12	12:41:41	0.336654	1.4975	1.29983	328.113	FALSE	5
2022-09-12	12:41:41	0.263982	1.17424	1.29983	360.507	FALSE	5
2022-09-12	12:41:41	0.281285	1.25121	1.29983	329.364	FALSE	5
2022-09-12	12:41:42	0.3307	1.47102	1.29784	361.978	FALSE	5
2022-09-12	12:41:42	0.287443	1.2786	1.29784	330.643	FALSE	5
2022-09-12	12:41:42	0.271514	1.20775	1.29784	363.186	FALSE	5
2022-09-12	12:41:42	0.277417	1.23401	1.29784	331.877	FALSE	5
2022-09-12	12:41:43	0.269122	1.19711	1.15727	364.383	FALSE	5
2022-09-12	12:41:43	0.264644	1.17719	1.15727	333.054	FALSE	5
2022-09-12	12:41:43	0.24673	1.0975	1.15727	365.48	FALSE	5
2022-09-12	12:41:44	0.241081	1.07238	1.17351	334.126	FALSE	5
2022-09-12	12:41:44	0.202354	0.900111	1.17351	366.381	FALSE	5
2022-09-12	12:41:44	0.373397	1.66094	1.17351	335.787	FALSE	5
2022-09-12	12:41:44	0.238435	1.06061	1.17351	367.441	FALSE	5
2022-09-12	12:41:45	0.271972	1.20979	1.45217	336.997	FALSE	5
2022-09-12	12:41:45	0.349275	1.55365	1.45217	368.995	FALSE	5
2022-09-12	12:41:45	0.357774	1.59145	1.45217	338.588	FALSE	5
2022-09-12	12:41:45	0.326832	1.45381	1.45217	370.449	FALSE	5
2022-09-12	12:41:46	0.377417	1.67883	1.4936	340.267	FALSE	5
2022-09-12	12:41:46	0.390649	1.73768	1.4936	372.186	FALSE	5
2022-09-12	12:41:46	0.298537	1.32795	1.4936	341.595	FALSE	5
2022-09-12	12:41:46	0.276501	1.22993	1.4936	373.416	FALSE	5
2022-09-12	12:41:47	0.24785	1.10249	1.17055	342.698	FALSE	5
2022-09-12	12:41:47	0.265763	1.18217	1.17055	374.598	FALSE	5
2022-09-12	12:41:47	0.27584	1.22699	1.17055	343.925	FALSE	5
2022-09-12	12:41:48	0.253041	1.12558	1.84363	375.724	FALSE	5
2022-09-12	12:41:48	0.289835	1.28924	1.84363	345.214	FALSE	5
2022-09-12	12:41:48	0.435433	1.93689	1.84363	377.661	FALSE	5
2022-09-12	12:41:48	0.679555	3.0228	1.84363	348.237	FALSE	5
2022-09-12	12:41:49	0.572939	2.54855	0.570174	380.209	FALSE	5
2022-09-12	12:41:49	0.147748	0.657213	0.570174	348.894	FALSE	5
2022-09-12	12:41:49	-0.104771	-0.466042	0.570174	380.209	FALSE	5
2022-09-12	12:41:49	-0.103193	-0.459023	0.570174	348.894	FALSE	5
2022-09-12	12:41:50	-0.00115753	-0.00514892	0.737235	380.209	FALSE	5
2022-09-12	12:41:50	0.215127	0.956928	0.737235	349.851	FALSE	5
2022-09-12	12:41:50	0.218893	0.97368	0.737235	381.183	FALSE	5
2022-09-12	12:41:50	0.230089	1.02348	0.737235	350.874	FALSE	5
2022-09-12	12:41:51	0.305356	1.35828	1.50965	382.541	FALSE	5
2022-09-12	12:41:51	0.330802	1.47147	1.50965	352.346	FALSE	5
2022-09-12	12:41:51	0.381998	1.6992	1.50965	384.241	FALSE	5
2022-09-12	12:41:52	0.300369	1.3361	1.39128	353.682	FALSE	5
2022-09-12	12:41:52	0.249631	1.11041	1.39128	385.351	FALSE	5
2022-09-12	12:41:52	0.349784	1.55591	1.39128	355.238	FALSE	5
2022-09-12	12:41:52	0.35131	1.5627	1.39128	386.914	FALSE	5
2022-09-12	12:41:53	0.436603	1.9421	1.64244	357.18	FALSE	5
2022-09-12	12:41:53	0.376196	1.6734	1.64244	388.587	FALSE	5
2022-09-12	12:41:53	0.338181	1.5043	1.64244	358.684	FALSE	5
2022-09-12	12:41:53	0.325967	1.44997	1.64244	390.037	FALSE	5
2022-09-12	12:41:54	0.29299	1.30328	1.34453	359.987	FALSE	5
2022-09-12	12:41:54	0.313753	1.39564	1.34453	391.433	FALSE	5
2022-09-12	12:41:54	0.296349	1.31822	1.34453	361.306	FALSE	5
2022-09-12	12:41:54	0.305967	1.361	1.34453	392.794	FALSE	5
2022-09-12	12:41:55	0.305051	1.35693	1.3623	362.663	FALSE	5
2022-09-12	12:41:55	0.310395	1.3807	1.3623	394.174	FALSE	5
2022-09-12	12:41:55	0.303779	1.35127	1.3623	364.014	FALSE	5
2022-09-12	12:41:55	0.305814	1.36032	1.3623	395.535	FALSE	5
2022-09-12	12:41:56	0.297417	1.32297	1.33874	365.337	FALSE	5
2022-09-12	12:41:56	0.300573	1.33701	1.33874	396.872	FALSE	5
2022-09-12	12:41:56	0.304898	1.35625	1.33874	366.693	FALSE	5
2022-09-12	12:41:57	0.315178	1.40197	1.31584	398.274	FALSE	5
2022-09-12	12:41:57	0.285662	1.27068	1.31584	367.964	FALSE	5
2022-09-12	12:41:57	0.300725	1.33768	1.31584	399.611	FALSE	5
2022-09-12	12:41:57	0.281692	1.25302	1.31584	369.217	FALSE	5
2022-09-12	12:41:58	0.28383	1.26253	1.0601	400.874	FALSE	5
2022-09-12	12:41:58	0.251311	1.11788	1.0601	370.335	FALSE	5
2022-09-12	12:41:58	0.19355	0.860949	1.0601	401.735	FALSE	5
2022-09-12	12:41:58	0.224593	0.999035	1.0601	371.334	FALSE	5
2022-09-12	12:41:59	0.086985	0.386927	0.353499	402.122	FALSE	5
2022-09-12	12:41:59	0.0587407	0.26129	0.353499	371.595	FALSE	5
2022-09-12	12:41:59	0.0926846	0.41228	0.353499	402.534	FALSE	5
2022-09-12	12:42:00	0.0249493	0.110979	0.520372	371.706	FALSE	5
2022-09-12	12:42:00	0.116756	0.519354	0.520372	403.053	FALSE	5
2022-09-12	12:42:00	0.222252	0.988621	0.520372	372.695	FALSE	5
2022-09-12	12:42:00	0.103982	0.462533	0.520372	403.516	FALSE	5
2022-09-12	12:42:01	0.277316	1.23356	1.07278	373.928	FALSE	5
2022-09-12	12:42:01	0.205407	0.913691	1.07278	404.43	FALSE	5
2022-09-12	12:42:01	0.239504	1.06536	1.07278	374.993	FALSE	5
2022-09-12	12:42:01	0.242456	1.07849	1.07278	405.508	FALSE	5
2022-09-12	12:42:02	0.246934	1.09841	1.09852	376.092	FALSE	5
2022-09-12	12:42:02	0.313244	1.39337	1.09852	406.902	FALSE	5
2022-09-12	12:42:02	0.145356	0.646573	1.09852	376.738	FALSE	5
2022-09-12	12:42:02	0.282303	1.25574	1.09852	408.157	FALSE	5
2022-09-12	12:42:03	0.112786	0.501695	0.117035	377.24	FALSE	5
2022-09-12	12:42:03	-0.126806	-0.564058	0.117035	408.157	FALSE	5
2022-09-12	12:42:03	0.0585371	0.260385	0.117035	377.501	FALSE	5
2022-09-12	12:42:03	0.0607254	0.270119	0.117035	408.427	FALSE	5
2022-09-12	12:42:04	0.181539	0.807522	0.628464	378.308	FALSE	5
2022-09-12	12:42:04	0.0503438	0.223939	0.628464	408.651	FALSE	5
2022-09-12	12:42:04	0.191972	0.85393	0.628464	379.162	FALSE	5
2022-09-12	12:42:05	0.0924811	0.411374	2.26253	409.063	FALSE	5
2022-09-12	12:42:05	0.144593	0.643179	2.26253	379.805	FALSE	5
2022-09-12	12:42:05	0.308461	1.3721	2.26253	410.435	FALSE	5
2022-09-12	12:42:05	1.48902	6.62346	2.26253	386.429	FALSE	5
2022-09-12	12:42:06	0.838486	3.72975	3.20774	414.165	FALSE	5
2022-09-12	12:42:06	0.861845	3.83366	3.20774	390.262	FALSE	5
2022-09-12	12:42:06	0.80668	3.58827	3.20774	417.753	FALSE	5
2022-09-12	12:42:06	0.377519	1.67928	3.20774	391.942	FALSE	5
2022-09-12	12:42:07	0.55813	2.48267	2.09065	420.235	FALSE	5
2022-09-12	12:42:07	0.420674	1.87124	2.09065	393.813	FALSE	5
2022-09-12	12:42:07	0.486323	2.16326	2.09065	422.399	FALSE	5
2022-09-12	12:42:07	0.414873	1.84544	2.09065	395.658	FALSE	5
2022-09-12	12:42:08	0.444338	1.9765	2.06864	424.375	FALSE	5
2022-09-12	12:42:08	0.413244	1.83819	2.06864	397.496	FALSE	5
2022-09-12	12:42:08	0.53757	2.39122	2.06864	426.766	FALSE	5
2022-09-12	12:42:09	0.942201	4.1911	7.44852	401.688	FALSE	5
2022-09-12	12:42:09	1.47609	6.56594	7.44852	433.332	FALSE	5
2022-09-12	12:42:09	2.06144	9.1697	7.44852	410.857	FALSE	5
2022-09-12	12:42:09	2.21828	9.86735	7.44852	443.2	FALSE	5
2022-09-12	12:42:10	1.93742	8.61803	5.27197	419.475	FALSE	5
2022-09-12	12:42:10	1.5136	6.7328	5.27197	449.933	FALSE	5
2022-09-12	12:42:10	0.618384	2.7507	5.27197	422.226	FALSE	5
2022-09-12	12:42:10	0.671361	2.98635	5.27197	452.919	FALSE	5
2022-09-12	12:42:11	0.592481	2.63547	2.26553	424.861	FALSE	5
2022-09-12	12:42:11	0.566374	2.51934	2.26553	455.438	FALSE	5
2022-09-12	12:42:11	0.469784	2.08969	2.26553	426.951	FALSE	5
2022-09-12	12:42:11	0.408613	1.81759	2.26553	457.256	FALSE	5
2022-09-12	12:42:12	0.693499	3.08482	2.4205	430.036	FALSE	5
2022-09-12	12:42:12	0.402099	1.78862	2.4205	459.044	FALSE	5
2022-09-12	12:42:12	0.536858	2.38805	2.4205	432.424	FALSE	5
2022-09-12	12:42:13	0.517417	2.30157	1.75415	461.346	FALSE	5
2022-09-12	12:42:13	0.311819	1.38703	1.75415	433.811	FALSE	5
2022-09-12	12:42:13	0.430598	1.91539	1.75415	463.261	FALSE	5
2022-09-12	12:42:13	0.31757	1.41261	1.75415	435.224	FALSE	5
2022-09-12	12:42:14	0.348511	1.55025	1.39983	464.812	FALSE	5
2022-09-12	12:42:14	0.343423	1.52761	1.39983	436.751	FALSE	5
2022-09-12	12:42:14	0.199911	0.889244	1.39983	465.701	FALSE	5
2022-09-12	12:42:14	0.366934	1.6322	1.39983	438.383	FALSE	5
2022-09-12	12:42:15	0.292125	1.29943	1.11397	467	FALSE	5
2022-09-12	12:42:15	0.205204	0.912788	1.11397	439.296	FALSE	5
2022-09-12	12:42:15	0.34785	1.54731	1.11397	468.548	FALSE	5
2022-09-12	12:42:15	0.156552	0.696375	1.11397	439.993	FALSE	5
2022-09-12	12:42:16	0.391158	1.73995	1.3598	470.288	FALSE	5
2022-09-12	12:42:16	0.195331	0.868871	1.3598	440.861	FALSE	5
2022-09-12	12:42:16	0.330598	1.47057	1.3598	471.758	FALSE	5
2022-09-12	12:42:17	0.235433	1.04725	0.908317	441.909	FALSE	5
2022-09-12	12:42:17	0.185509	0.825181	0.908317	472.583	FALSE	5
2022-09-12	12:42:17	0.219097	0.974587	0.908317	442.883	FALSE	5
2022-09-12	12:42:17	0.176756	0.786246	0.908317	473.37	FALSE	5
2022-09-12	12:42:18	0.26042	1.1584	0.935084	444.042	FALSE	5
2022-09-12	12:42:18	0.161641	0.719011	0.935084	474.089	FALSE	5
2022-09-12	12:42:18	0.341183	1.51765	0.935084	445.559	FALSE	5
2022-09-12	12:42:18	0.0776211	0.345274	0.935084	474.434	FALSE	5
2022-09-12	12:42:19	0.211158	0.939273	0.694734	446.499	FALSE	5
2022-09-12	12:42:19	0.115382	0.513242	0.694734	474.947	FALSE	5
2022-09-12	12:42:19	0.126323	0.56191	0.694734	447.061	FALSE	5
2022-09-12	12:42:19	0.17187	0.764512	0.694734	475.712	FALSE	5
2022-09-12	12:42:20	-0.0303178	-0.13486	0.175043	447.061	FALSE	5
2022-09-12	12:42:20	0.144695	0.643632	0.175043	476.355	FALSE	5
2022-09-12	12:42:20	0.00367708	0.0163564	0.175043	447.077	FALSE	5
2022-09-12	12:42:21	0.0799111	0.355461	0.634747	476.711	FALSE	5
2022-09-12	12:42:21	0.171718	0.763836	0.634747	447.841	FALSE	5
2022-09-12	12:42:21	0.0874429	0.388964	0.634747	477.1	FALSE	5
2022-09-12	12:42:21	0.231718	1.03073	0.634747	448.871	FALSE	5
2022-09-12	12:42:22	0.14327	0.637294	1.36281	477.737	FALSE	5
2022-09-12	12:42:22	0.375178	1.66887	1.36281	450.54	FALSE	5
2022-09-12	12:42:22	0.254873	1.13373	1.36281	478.871	FALSE	5
2022-09-12	12:42:22	0.452176	2.01137	1.36281	452.552	FALSE	5
2022-09-12	12:42:23	0.345916	1.5387	2.15415	480.409	FALSE	5
2022-09-12	12:42:23	0.562862	2.50372	2.15415	455.055	FALSE	5
2022-09-12	12:42:23	0.294669	1.31075	2.15415	481.72	FALSE	5
2022-09-12	12:42:23	0.733651	3.26343	2.15415	458.319	FALSE	5
2022-09-12	12:42:24	0.710344	3.15975	2.80337	484.88	FALSE	5
2022-09-12	12:42:24	0.594364	2.64385	2.80337	460.963	FALSE	5
2022-09-12	12:42:24	0.585967	2.6065	2.80337	487.486	FALSE	5
2022-09-12	12:42:25	0.542506	2.41318	3.17746	463.376	FALSE	5
2022-09-12	12:42:25	0.870445	3.87191	3.17746	491.358	FALSE	5
2022-09-12	12:42:25	0.572226	2.54538	3.17746	465.921	FALSE	5
2022-09-12	12:42:25	0.872125	3.87939	3.17746	495.238	FALSE	5
2022-09-12	12:42:26	0.878791	3.90904	3.2628	469.83	FALSE	5
2022-09-12	12:42:26	0.785814	3.49546	3.2628	498.733	FALSE	5
2022-09-12	12:42:26	0.79416	3.53258	3.2628	473.363	FALSE	5
2022-09-12	12:42:26	0.47528	2.11414	3.2628	500.847	FALSE	5
2022-09-12	12:42:27	0.861743	3.83321	3.1997	477.196	FALSE	5
2022-09-12	12:42:27	0.613499	2.72897	3.1997	503.576	FALSE	5
2022-09-12	12:42:27	0.853244	3.7954	3.1997	480.991	FALSE	5
2022-09-12	12:42:27	0.548817	2.44125	3.1997	506.018	FALSE	5
2022-09-12	12:42:28	0.956603	4.25516	3.27248	485.247	FALSE	5
2022-09-12	12:42:28	0.947697	4.21555	3.27248	510.233	FALSE	5
2022-09-12	12:42:28	0.302761	1.34674	3.27248	486.593	FALSE	5
2022-09-12	12:42:29	1.3424	5.97126	2.48963	516.204	FALSE	5
2022-09-12	12:42:29	0.314618	1.39948	2.48963	487.993	FALSE	5
2022-09-12	12:42:29	0.267443	1.18964	2.48963	517.394	FALSE	5
2022-09-12	12:42:29	0.314313	1.39813	2.48963	489.391	FALSE	5
2022-09-12	12:42:30	0.80042	3.56043	2.29886	520.954	FALSE	5
2022-09-12	12:42:30	0.472074	2.09988	2.29886	491.491	FALSE	5
2022-09-12	12:42:30	0.124033	0.551724	2.29886	521.506	FALSE	5
2022-09-12	12:42:30	0.6707	2.98341	2.29886	494.474	FALSE	5
2022-09-12	12:42:31	0.665254	2.95918	3.75165	524.465	FALSE	5
2022-09-12	12:42:31	0.773041	3.43864	3.75165	497.913	FALSE	5
2022-09-12	12:42:31	0.807799	3.59325	3.75165	528.059	FALSE	5
2022-09-12	12:42:31	1.12754	5.01552	3.75165	502.928	FALSE	5
2022-09-12	12:42:32	0.717163	3.19008	4.14295	531.249	FALSE	5
2022-09-12	12:42:32	0.939249	4.17797	4.14295	507.106	FALSE	5
2022-09-12	12:42:32	1.13772	5.06081	4.14295	536.309	FALSE	5
2022-09-12	12:42:33	0.51243	2.27939	1.81171	509.386	FALSE	5
2022-09-12	12:42:33	0.354517	1.57696	1.81171	537.886	FALSE	5
2022-09-12	12:42:33	0.485204	2.15828	1.81171	511.544	FALSE	5
2022-09-12	12:42:33	0.27701	1.2322	1.81171	539.119	FALSE	5
2022-09-12	12:42:34	0.308003	1.37006	1.49117	512.914	FALSE	5
2022-09-12	12:42:34	0.274618	1.22156	1.49117	540.34	FALSE	5
2022-09-12	12:42:34	0.356247	1.58466	1.49117	514.499	FALSE	5
2022-09-12	12:42:34	0.402048	1.78839	1.49117	542.129	FALSE	5
2022-09-12	12:42:35	0.368817	1.64057	2.57283	516.139	FALSE	5
2022-09-12	12:42:35	0.837163	3.72387	2.57283	545.852	FALSE	5
2022-09-12	12:42:35	0.463015	2.05958	2.57283	518.199	FALSE	5
2022-09-12	12:42:35	0.644593	2.86728	2.57283	548.72	FALSE	5
2022-09-12	12:42:36	1.27335	5.66412	3.09615	523.863	FALSE	5
2022-09-12	12:42:36	0.454669	2.02246	3.09615	550.742	FALSE	5
2022-09-12	12:42:36	0.360115	1.60186	3.09615	525.465	FALSE	5
2022-09-12	12:42:37	0.531361	2.3636	1.80113	553.106	FALSE	5
2022-09-12	12:42:37	0.473194	2.10486	1.80113	527.57	FALSE	5
2022-09-12	12:42:37	0.22556	1.00334	1.80113	554.109	FALSE	5
2022-09-12	12:42:37	0.389529	1.7327	1.80113	529.303	FALSE	5
2022-09-12	12:42:38	0.338588	1.50611	1.07164	555.615	FALSE	5
2022-09-12	12:42:38	0.292837	1.3026	1.07164	530.605	FALSE	5
2022-09-12	12:42:38	0.173244	0.770624	1.07164	556.386	FALSE	5
2022-09-12	12:42:38	0.158995	0.707242	1.07164	531.312	FALSE	5
2022-09-12	12:42:39	0.211056	0.938819	0.890036	557.325	FALSE	5
2022-09-12	12:42:39	0.192023	0.854157	0.890036	532.167	FALSE	5
2022-09-12	12:42:39	0.272379	1.2116	0.890036	558.536	FALSE	5
2022-09-12	12:42:39	0.124898	0.555571	0.890036	532.722	FALSE	5
2022-09-12	12:42:40	0.105305	0.468418	0.928406	559.005	FALSE	5
2022-09-12	12:42:40	0.315026	1.4013	0.928406	534.123	FALSE	5
2022-09-12	12:42:40	0.205814	0.915502	0.928406	559.92	FALSE	5
2022-09-12	12:42:41	0.244848	1.08913	0.443237	535.213	FALSE	5
2022-09-12	12:42:41	0.112176	0.498981	0.443237	560.419	FALSE	5
2022-09-12	12:42:41	-0.0393763	-0.175154	0.443237	535.213	FALSE	5
2022-09-12	12:42:41	0.080929	0.359988	0.443237	560.779	FALSE	5
2022-09-12	12:42:42	0.0699875	0.311318	0.352801	535.524	FALSE	5
2022-09-12	12:42:42	0.0372649	0.165762	0.352801	560.945	FALSE	5
2022-09-12	12:42:42	0.203575	0.905542	0.352801	536.429	FALSE	5
2022-09-12	12:42:42	0.00642519	0.0285805	0.352801	560.973	FALSE	5
2022-09-12	12:42:43	0.173601	0.772212	0.583021	537.202	FALSE	5
2022-09-12	12:42:43	0.0867305	0.385795	0.583021	561.359	FALSE	5
2022-09-12	12:42:43	0.112328	0.499657	0.583021	537.701	FALSE	5
2022-09-12	12:42:43	0.151616	0.674418	0.583021	562.034	FALSE	5
2022-09-12	12:42:44	0.0799111	0.355461	2.58719	538.057	FALSE	5
2022-09-12	12:42:44	0.651056	2.89603	2.58719	564.93	FALSE	5
2022-09-12	12:42:44	1.01391	4.51007	2.58719	542.567	FALSE	5
2022-09-12	12:42:45	0.937774	4.17141	3.58986	569.101	FALSE	5
2022-09-12	12:42:45	0.78042	3.47146	3.58986	546.038	FALSE	5
2022-09-12	12:42:45	1.045	4.64837	3.58986	573.749	FALSE	5
2022-09-12	12:42:45	0.464949	2.06819	3.58986	548.106	FALSE	5
2022-09-12	12:42:46	0.561845	2.4992	2.07385	576.249	FALSE	5
2022-09-12	12:42:46	0.343881	1.52965	2.07385	549.636	FALSE	5
2022-09-12	12:42:46	0.388206	1.72682	2.07385	577.976	FALSE	5
2022-09-12	12:42:46	0.570954	2.53972	2.07385	552.176	FALSE	5
2022-09-12	12:42:47	0.375687	1.67113	1.29349	579.647	FALSE	5
2022-09-12	12:42:47	0.264542	1.17674	1.29349	553.353	FALSE	5
2022-09-12	12:42:47	0.197977	0.880641	1.29349	580.527	FALSE	5
2022-09-12	12:42:47	0.324949	1.44544	1.29349	554.798	FALSE	5
2022-09-12	12:42:48	0.16327	0.726258	0.855441	581.254	FALSE	5
2022-09-12	12:42:48	0.252125	1.1215	0.855441	555.919	FALSE	5
2022-09-12	12:42:48	0.16154	0.718562	0.855441	581.972	FALSE	5
2022-09-12	12:42:49	0.30154	1.34131	1.37832	557.261	FALSE	5
2022-09-12	12:42:49	0.227748	1.01307	1.37832	582.985	FALSE	5
2022-09-12	12:42:49	0.277417	1.23401	1.37832	558.495	FALSE	5
2022-09-12	12:42:49	0.432735	1.92489	1.37832	584.91	FALSE	5
2022-09-12	12:42:50	0.217977	0.969605	1.85942	559.464	FALSE	5
2022-09-12	12:42:50	0.514975	2.29071	1.85942	587.201	FALSE	5
2022-09-12	12:42:50	0.3707	1.64895	1.85942	561.113	FALSE	5
2022-09-12	12:42:50	0.568409	2.5284	1.85942	589.729	FALSE	5
2022-09-12	12:42:51	0.537163	2.38941	2.40418	563.503	FALSE	5
2022-09-12	12:42:51	0.451056	2.00639	2.40418	591.736	FALSE	5
2022-09-12	12:42:51	0.426018	1.89501	2.40418	565.398	FALSE	5
2022-09-12	12:42:51	0.747697	3.32591	2.40418	595.061	FALSE	5
2022-09-12	12:42:52	0.70103	3.11832	2.80389	568.516	FALSE	5
2022-09-12	12:42:52	0.401285	1.785	2.80389	596.846	FALSE	5
2022-09-12	12:42:52	0.788715	3.50836	2.80389	572.024	FALSE	5
2022-09-12	12:42:53	0.428664	1.90678	2.43825	598.753	FALSE	5
2022-09-12	12:42:53	0.647239	2.87905	2.43825	574.904	FALSE	5
2022-09-12	12:42:53	0.522913	2.32602	2.43825	601.079	FALSE	5
2022-09-12	12:42:53	0.593753	2.64113	2.43825	577.545	FALSE	5
2022-09-12	12:42:54	0.406832	1.80967	2.02229	602.889	FALSE	5
2022-09-12	12:42:54	0.582252	2.58997	2.02229	580.135	FALSE	5
2022-09-12	12:42:54	0.405204	1.80243	2.02229	604.691	FALSE	5
2022-09-12	12:42:54	0.424237	1.88709	2.02229	582.022	FALSE	5
2022-09-12	12:42:55	0.448817	1.99643	2.08024	606.688	FALSE	5
2022-09-12	12:42:55	0.408003	1.81488	2.08024	583.837	FALSE	5
2022-09-12	12:42:55	0.61126	2.71901	2.08024	609.407	FALSE	5
2022-09-12	12:42:55	0.402557	1.79065	2.08024	585.627	FALSE	5
2022-09-12	12:42:56	0.499707	2.2228	1.88656	611.63	FALSE	5
2022-09-12	12:42:56	0.316501	1.40786	1.88656	587.035	FALSE	5
2022-09-12	12:42:56	0.456145	2.02902	1.88656	613.659	FALSE	5
2022-09-12	12:42:57	0.444237	1.97606	2.03446	589.011	FALSE	5
2022-09-12	12:42:57	0.366374	1.6297	2.03446	615.288	FALSE	5
2022-09-12	12:42:57	0.629326	2.79937	2.03446	591.811	FALSE	5
2022-09-12	12:42:57	0.389529	1.7327	2.03446	617.021	FALSE	5
2022-09-12	12:42:58	0.580929	2.58409	8.85253	594.395	FALSE	5
2022-09-12	12:42:58	1.69721	7.54953	8.85253	624.571	FALSE	5
2022-09-12	12:42:58	2.3995	10.6735	8.85253	605.068	FALSE	5
2022-09-12	12:42:58	3.28291	14.603	8.85253	639.174	1	6
2022-09-12	12:42:59	1.60276	7.1294	5.8453	612.197	FALSE	6
2022-09-12	12:42:59	0.973651	4.33099	5.8453	643.505	FALSE	6
2022-09-12	12:42:59	1.27589	5.67541	5.8453	617.873	FALSE	6
2022-09-12	12:42:59	1.40403	6.24541	5.8453	649.75	FALSE	6
2022-09-12	12:43:00	1.54154	6.85708	8.50076	624.73	FALSE	6
2022-09-12	12:43:00	2.40195	10.6844	8.50076	660.434	FALSE	6
2022-09-12	12:43:00	1.78968	7.96085	8.50076	632.691	FALSE	6
2022-09-12	12:43:01	1.02047	4.53925	2.23508	664.974	FALSE	6
2022-09-12	12:43:01	0.656349	2.91957	2.23508	635.61	FALSE	6
2022-09-12	12:43:01	0.0596058	0.265139	2.23508	665.239	FALSE	6
2022-09-12	12:43:01	0.273448	1.21635	2.23508	636.827	FALSE	6
2022-09-12	12:43:02	0.082303	0.3661	0.141879	665.605	FALSE	6
2022-09-12	12:43:02	-0.0515901	-0.229483	0.141879	636.827	FALSE	6
2022-09-12	12:43:02	0.0993513	0.441934	0.141879	666.047	FALSE	6
2022-09-12	12:43:02	-0.00248066	-0.0110345	0.141879	636.827	FALSE	6
2022-09-12	12:43:03	-0.0112847	-0.0501966	2.48986	666.047	FALSE	6
2022-09-12	12:43:03	0.538282	2.39439	2.48986	639.221	FALSE	6
2022-09-12	12:43:03	0.761539	3.38748	2.48986	669.434	FALSE	6
2022-09-12	12:43:03	0.950445	4.22777	2.48986	643.449	FALSE	6
2022-09-12	12:43:04	1.06785	4.75001	4.5121	674.184	FALSE	6
2022-09-12	12:43:04	1.13238	5.03705	4.5121	648.486	FALSE	6
2022-09-12	12:43:04	0.842863	3.74922	4.5121	677.933	FALSE	6
2022-09-12	12:43:05	0.683117	3.03864	2.23949	651.525	FALSE	6
2022-09-12	12:43:05	0.466323	2.0743	2.23949	680.008	FALSE	6
2022-09-12	12:43:05	0.428766	1.90724	2.23949	653.432	FALSE	6
2022-09-12	12:43:05	0.435636	1.9378	2.23949	681.946	FALSE	6
2022-09-12	12:43:06	0.556399	2.47497	0.856986	655.907	FALSE	6
2022-09-12	12:43:06	0.34383	1.52942	0.856986	683.475	FALSE	6
2022-09-12	12:43:06	-0.0881804	-0.392244	0.856986	655.907	FALSE	6
2022-09-12	12:43:06	-0.041412	-0.184209	0.856986	683.475	FALSE	6
2022-09-12	12:43:07	-0.173727	-0.772772	-1.01986	655.907	FALSE	6
2022-09-12	12:43:07	-0.416374	-1.85211	-1.01986	683.475	FALSE	6
2022-09-12	12:43:07	-0.258766	-1.15104	-1.01986	655.907	FALSE	6
2022-09-12	12:43:07	-0.0682313	-0.303506	-1.01986	683.475	FALSE	6
2022-09-12	12:43:08	0.0751275	0.334182	0.805034	656.241	FALSE	6
2022-09-12	12:43:08	0.205814	0.915502	0.805034	684.391	FALSE	6
2022-09-12	12:43:08	0.261998	1.16542	0.805034	657.406	FALSE	6
2022-09-12	12:43:09	0.33126	1.47351	1.63763	685.864	FALSE	6
2022-09-12	12:43:09	0.407443	1.81239	1.63763	659.219	FALSE	6
2022-09-12	12:43:09	0.366323	1.62948	1.63763	687.494	FALSE	6
2022-09-12	12:43:09	0.367595	1.63514	1.63763	660.854	FALSE	6
2022-09-12	12:43:10	0.313143	1.39292	1.84397	688.886	FALSE	6
2022-09-12	12:43:10	0.416858	1.85427	1.84397	662.708	FALSE	6
2022-09-12	12:43:10	0.527188	2.34504	1.84397	691.231	FALSE	6
2022-09-12	12:43:10	0.40098	1.78364	1.84397	664.492	FALSE	6
2022-09-12	12:43:11	0.258232	1.14867	1.66825	692.38	FALSE	6
2022-09-12	12:43:11	0.402812	1.79179	1.66825	666.284	FALSE	6
2022-09-12	12:43:11	0.42556	1.89298	1.66825	694.273	FALSE	6
2022-09-12	12:43:11	0.41355	1.83955	1.66825	668.123	FALSE	6
2022-09-12	12:43:12	0.428512	1.90611	1.86913	696.179	FALSE	6
2022-09-12	12:43:12	0.399707	1.77798	1.86913	669.901	FALSE	6
2022-09-12	12:43:12	0.432379	1.92331	1.86913	698.103	FALSE	6
2022-09-12	12:43:13	0.47014	2.09128	2.10186	671.992	FALSE	6
2022-09-12	12:43:13	0.568053	2.52681	2.10186	700.629	FALSE	6
2022-09-12	12:43:13	0.42444	1.88799	2.10186	673.88	FALSE	6
2022-09-12	12:43:13	0.427443	1.90135	2.10186	702.531	FALSE	6
2022-09-12	12:43:14	0.418181	1.86015	1.47894	675.741	FALSE	6
2022-09-12	12:43:14	0.303168	1.34855	1.47894	703.879	FALSE	6
2022-09-12	12:43:14	0.456858	2.0322	1.47894	677.773	FALSE	6
2022-09-12	12:43:14	0.151718	0.674872	1.47894	704.554	FALSE	6
2022-09-12	12:43:15	0.275331	1.22473	1.42224	678.997	FALSE	6
2022-09-12	12:43:15	0.42729	1.90067	1.42224	706.455	FALSE	6
2022-09-12	12:43:15	0.21757	0.967795	1.42224	679.965	FALSE	6
2022-09-12	12:43:15	0.358741	1.59575	1.42224	708.051	FALSE	6
2022-09-12	12:43:16	0.250089	1.11245	1.44906	681.078	FALSE	6
2022-09-12	12:43:16	0.330445	1.46989	1.44906	709.52	FALSE	6
2022-09-12	12:43:16	0.396756	1.76485	1.44906	682.843	FALSE	6
2022-09-12	12:43:17	0.314567	1.39926	1.61035	710.92	FALSE	6
2022-09-12	12:43:17	0.506934	2.25494	1.61035	685.098	FALSE	6
2022-09-12	12:43:17	0.213601	0.95014	1.61035	711.87	FALSE	6
2022-09-12	12:43:17	0.41299	1.83706	1.61035	686.935	FALSE	6
2022-09-12	12:43:18	0.347545	1.54595	2.40044	713.416	FALSE	6
2022-09-12	12:43:18	0.635585	2.82721	2.40044	689.762	FALSE	6
2022-09-12	12:43:18	0.795534	3.53869	2.40044	716.954	FALSE	6
2022-09-12	12:43:18	0.379911	1.68992	2.40044	691.452	FALSE	6
2022-09-12	12:43:19	0.564287	2.51006	2.45539	719.465	FALSE	6
2022-09-12	12:43:19	0.477265	2.12297	2.45539	693.575	FALSE	6
2022-09-12	12:43:19	0.715432	3.18238	2.45539	722.647	FALSE	6
2022-09-12	12:43:19	0.451005	2.00616	2.45539	695.581	FALSE	6
2022-09-12	12:43:20	0.394873	1.75647	1.99605	724.403	FALSE	6
2022-09-12	12:43:20	0.490242	2.18069	1.99605	697.762	FALSE	6
2022-09-12	12:43:20	0.461082	2.05098	1.99605	726.454	FALSE	6
2022-09-12	12:43:21	0.479453	2.1327	1.89235	699.894	FALSE	6
2022-09-12	12:43:21	0.415331	1.84748	1.89235	728.302	FALSE	6
2022-09-12	12:43:21	0.38159	1.69739	1.89235	701.592	FALSE	6
2022-09-12	12:43:21	0.425305	1.89184	1.89235	730.194	FALSE	6
2022-09-12	12:43:22	0.357875	1.5919	1.79348	703.184	FALSE	6
2022-09-12	12:43:22	0.354975	1.579	1.79348	731.773	FALSE	6
2022-09-12	12:43:22	0.53645	2.38624	1.79348	705.57	FALSE	6
2022-09-12	12:43:22	0.363473	1.6168	1.79348	733.389	FALSE	6
2022-09-12	12:43:23	0.431769	1.92059	1.86932	707.49	FALSE	6
2022-09-12	12:43:23	0.334873	1.48958	1.86932	734.879	FALSE	6
2022-09-12	12:43:23	0.400827	1.78296	1.86932	709.273	FALSE	6
2022-09-12	12:43:23	0.513499	2.28415	1.86932	737.163	FALSE	6
2022-09-12	12:43:24	0.301896	1.34289	1.88792	710.616	FALSE	6
2022-09-12	12:43:24	0.601387	2.67509	1.88792	739.838	FALSE	6
2022-09-12	12:43:24	0.369987	1.64578	1.88792	712.262	FALSE	6
2022-09-12	12:43:25	0.440013	1.95727	1.86281	741.796	FALSE	6
2022-09-12	12:43:25	0.377163	1.6777	1.86281	713.94	FALSE	6
2022-09-12	12:43:25	0.318181	1.41533	1.86281	743.211	FALSE	6
2022-09-12	12:43:25	0.539758	2.40095	1.86281	716.341	FALSE	6
2022-09-12	12:43:26	0.360267	1.60254	1.76445	744.813	FALSE	6
2022-09-12	12:43:26	0.490547	2.18205	1.76445	718.523	FALSE	6
2022-09-12	12:43:26	0.357265	1.58919	1.76445	746.403	FALSE	6
2022-09-12	12:43:26	0.378588	1.68404	1.76445	720.207	FALSE	6
2022-09-12	12:43:27	0.398842	1.77413	2.03027	748.177	FALSE	6
2022-09-12	12:43:27	0.252328	1.12241	2.03027	721.329	FALSE	6
2022-09-12	12:43:27	0.487697	2.16937	2.03027	750.346	FALSE	6
2022-09-12	12:43:27	0.686832	3.05517	2.03027	724.384	FALSE	6
2022-09-12	12:43:28	0.111667	0.496717	0.454838	750.843	FALSE	6
2022-09-12	12:43:28	0.129275	0.575041	0.454838	724.959	FALSE	6
2022-09-12	12:43:28	0.0658145	0.292756	0.454838	751.136	FALSE	6
2022-09-12	12:43:29	0.13355	0.594057	0.62473	725.553	FALSE	6
2022-09-12	12:43:29	0.132277	0.588395	0.62473	751.724	FALSE	6
2022-09-12	12:43:29	0.139504	0.620542	0.62473	726.174	FALSE	6
2022-09-12	12:43:29	0.156451	0.695925	0.62473	752.42	FALSE	6
2022-09-12	12:43:30	0.265865	1.18262	1.1099	727.357	FALSE	6
2022-09-12	12:43:30	0.253193	1.12625	1.1099	753.546	FALSE	6
2022-09-12	12:43:30	0.237163	1.05495	1.1099	728.412	FALSE	6
2022-09-12	12:43:30	0.241845	1.07577	1.1099	754.622	FALSE	6
2022-09-12	12:43:31	0.173601	0.772212	1.41895	729.184	FALSE	6
2022-09-12	12:43:31	0.378791	1.68494	1.41895	756.307	FALSE	6
2022-09-12	12:43:31	0.444898	1.979	1.41895	731.163	FALSE	6
2022-09-12	12:43:31	0.27869	1.23967	1.41895	757.547	FALSE	6
2022-09-12	12:43:32	0.389021	1.73044	1.42824	732.893	FALSE	6
2022-09-12	12:43:32	0.310089	1.37934	1.42824	758.926	FALSE	6
2022-09-12	12:43:32	0.264135	1.17493	1.42824	734.068	FALSE	6
2022-09-12	12:43:33	0.251921	1.12059	1.28098	760.046	FALSE	6
2022-09-12	12:43:33	0.214517	0.954215	1.28098	735.022	FALSE	6
2022-09-12	12:43:33	0.427596	1.90203	1.28098	761.949	FALSE	6
2022-09-12	12:43:33	0.257875	1.14708	1.28098	736.169	FALSE	6
2022-09-12	12:43:34	0.295789	1.31573	1.50956	763.264	FALSE	6
2022-09-12	12:43:34	0.420674	1.87124	1.50956	738.041	FALSE	6
2022-09-12	12:43:34	0.396603	1.76417	1.50956	765.028	FALSE	6
2022-09-12	12:43:34	0.244389	1.08709	1.50956	739.128	FALSE	6
2022-09-12	12:43:35	0.148512	0.660611	0.850196	765.689	FALSE	6
2022-09-12	12:43:35	0.25126	1.11765	0.850196	740.245	FALSE	6
2022-09-12	12:43:35	0.167239	0.743913	0.850196	766.433	FALSE	6
2022-09-12	12:43:35	0.197519	0.878604	0.850196	741.124	FALSE	6
2022-09-12	12:43:36	0.169987	0.756136	0.696452	767.189	FALSE	6
2022-09-12	12:43:36	0.1507	0.670344	0.696452	741.794	FALSE	6
2022-09-12	12:43:36	0.149021	0.662875	0.696452	767.852	FALSE	6
2022-09-12	12:43:37	0.127443	0.566892	0.742159	742.361	FALSE	6
2022-09-12	12:43:37	0.221539	0.98545	0.742159	768.837	FALSE	6
2022-09-12	12:43:37	0.0951274	0.423146	0.742159	742.784	FALSE	6
2022-09-12	12:43:37	0.22327	0.99315	0.742159	769.831	FALSE	6
2022-09-12	12:43:38	0.140624	0.625524	0.742217	743.41	FALSE	6
2022-09-12	12:43:38	0.185407	0.824727	0.742217	770.655	FALSE	6
2022-09-12	12:43:38	0.178435	0.793715	0.742217	744.204	FALSE	6
2022-09-12	12:43:38	0.162965	0.724901	0.742217	771.38	FALSE	6
2022-09-12	12:43:39	0.294618	1.31052	1.44363	745.514	FALSE	6
2022-09-12	12:43:39	0.363626	1.61748	1.44363	772.998	FALSE	6
2022-09-12	12:43:39	0.317926	1.4142	1.44363	746.928	FALSE	6
2022-09-12	12:43:39	0.321998	1.43231	1.44363	774.43	FALSE	6
2022-09-12	12:43:40	0.312837	1.39156	2.22046	748.32	FALSE	6
2022-09-12	12:43:40	0.415585	1.84861	2.22046	776.279	FALSE	6
2022-09-12	12:43:40	0.769122	3.42121	2.22046	751.741	FALSE	6
2022-09-12	12:43:41	0.808562	3.59665	1.28987	779.875	FALSE	6
2022-09-12	12:43:41	0.201438	0.896037	1.28987	752.637	FALSE	6
2022-09-12	12:43:41	0.128563	0.571874	1.28987	780.447	FALSE	6
2022-09-12	12:43:41	0.0213361	0.0949072	1.28987	752.732	FALSE	6
2022-09-12	12:43:42	0.0187407	0.0833624	0.448953	780.53	FALSE	6
2022-09-12	12:43:42	-0.0565264	-0.251441	0.448953	752.732	FALSE	6
2022-09-12	12:43:42	0.0678501	0.301811	0.448953	780.832	FALSE	6
2022-09-12	12:43:42	0.373652	1.66208	0.448953	754.394	FALSE	6
2022-09-12	12:43:43	0.268919	1.19621	1.29903	782.028	FALSE	6
2022-09-12	12:43:43	0.231616	1.03027	1.29903	755.424	FALSE	6
2022-09-12	12:43:43	0.303626	1.35059	1.29903	783.379	FALSE	6
2022-09-12	12:43:43	0.363982	1.61906	1.29903	757.043	FALSE	6
2022-09-12	12:43:44	0.346629	1.54188	1.73195	784.921	FALSE	6
2022-09-12	12:43:44	0.43986	1.95659	1.73195	759	FALSE	6
2022-09-12	12:43:44	0.38159	1.69739	1.73195	786.618	FALSE	6
2022-09-12	12:43:45	0.493499	2.19518	2.34068	761.195	FALSE	6
2022-09-12	12:43:45	0.509275	2.26536	2.34068	788.884	FALSE	6
2022-09-12	12:43:45	0.577926	2.57073	2.34068	763.766	FALSE	6
2022-09-12	12:43:45	0.524135	2.33146	2.34068	791.215	FALSE	6
2022-09-12	12:43:46	0.559148	2.4872	2.37877	766.253	FALSE	6
2022-09-12	12:43:46	0.499148	2.22031	2.37877	793.435	FALSE	6
2022-09-12	12:43:46	0.528664	2.3516	2.37877	768.605	FALSE	6
2022-09-12	12:43:46	0.552125	2.45596	2.37877	795.891	FALSE	6
2022-09-12	12:43:47	0.519046	2.30882	1.89173	770.914	FALSE	6
2022-09-12	12:43:47	0.462354	2.05664	1.89173	797.948	FALSE	6
2022-09-12	12:43:47	0.348053	1.54821	1.89173	772.462	FALSE	6
2022-09-12	12:43:47	0.371667	1.65325	1.89173	799.601	FALSE	6
2022-09-12	12:43:48	0.375585	1.67068	1.56977	774.132	FALSE	6
2022-09-12	12:43:48	0.359707	1.60005	1.56977	801.201	FALSE	6
2022-09-12	12:43:48	0.470191	2.0915	1.56977	776.224	FALSE	6
2022-09-12	12:43:48	0.20612	0.916863	1.56977	802.118	FALSE	6
2022-09-12	12:43:49	0.267087	1.18806	1.1218	777.412	FALSE	6
2022-09-12	12:43:49	0.218079	0.970059	1.1218	803.088	FALSE	6
2022-09-12	12:43:49	0.271412	1.20729	1.1218	778.619	FALSE	6
2022-09-12	12:43:50	0.0805218	0.358177	0.823201	803.446	FALSE	6
2022-09-12	12:43:50	0.235331	1.0468	0.823201	779.666	FALSE	6
2022-09-12	12:43:50	0.0705473	0.313808	0.823201	803.76	FALSE	6
2022-09-12	12:43:50	0.353855	1.57402	0.823201	781.24	FALSE	6
2022-09-12	12:43:51	0.128054	0.56961	1.07283	804.33	FALSE	6
2022-09-12	12:43:51	0.361794	1.60933	1.07283	782.849	FALSE	6
2022-09-12	12:43:51	0.153804	0.684151	1.07283	805.014	FALSE	6
2022-09-12	12:43:51	0.321082	1.42824	1.07283	784.278	FALSE	6
2022-09-12	12:43:52	0.0986389	0.438766	0.844423	805.453	FALSE	6
2022-09-12	12:43:52	0.272379	1.2116	0.844423	785.489	FALSE	6
2022-09-12	12:43:52	0.149224	0.663778	0.844423	806.117	FALSE	6
2022-09-12	12:43:52	0.239097	1.06355	0.844423	786.553	FALSE	6
2022-09-12	12:43:53	0.225356	1.00243	0.97134	807.119	FALSE	6
2022-09-12	12:43:53	0.192735	0.857324	0.97134	787.41	FALSE	6
2022-09-12	12:43:53	0.23701	1.05427	0.97134	808.173	FALSE	6
2022-09-12	12:43:54	0.24327	1.08211	1.27781	788.492	FALSE	6
2022-09-12	12:43:54	0.348003	1.54799	1.27781	809.721	FALSE	6
2022-09-12	12:43:54	0.171311	0.762026	1.27781	789.254	FALSE	6
2022-09-12	12:43:54	0.386476	1.71912	1.27781	811.44	FALSE	6
2022-09-12	12:43:55	0.205458	0.913918	1.18121	790.168	FALSE	6
2022-09-12	12:43:55	0.378893	1.68539	1.18121	813.126	FALSE	6
2022-09-12	12:43:55	0.215891	0.960326	1.18121	791.129	FALSE	6
2022-09-12	12:43:55	0.261947	1.16519	1.18121	814.291	FALSE	6
2022-09-12	12:43:56	0.257875	1.14708	1.28396	792.276	FALSE	6
2022-09-12	12:43:56	0.21925	0.975268	1.28396	815.266	FALSE	6
2022-09-12	12:43:56	0.388817	1.72954	1.28396	794.005	FALSE	6
2022-09-12	12:43:57	0.161183	0.716974	1.09994	815.983	FALSE	6
2022-09-12	12:43:57	0.373244	1.66026	1.09994	795.665	FALSE	6
2022-09-12	12:43:57	0.177417	0.789186	1.09994	816.772	FALSE	6
2022-09-12	12:43:57	0.277265	1.23333	1.09994	796.899	FALSE	6
2022-09-12	12:43:58	0.233855	1.04023	1.11137	817.813	FALSE	6
2022-09-12	12:43:58	0.218995	0.974134	1.11137	797.873	FALSE	6
2022-09-12	12:43:58	0.31187	1.38726	1.11137	819.2	FALSE	6
2022-09-12	12:43:58	0.234669	1.04385	1.11137	798.917	FALSE	6
2022-09-12	12:43:59	0.465	2.06841	1.76955	821.268	FALSE	6
2022-09-12	12:43:59	0.180471	0.802771	1.76955	799.72	FALSE	6
2022-09-12	12:43:59	0.556043	2.47339	1.76955	823.742	FALSE	6
2022-09-12	12:43:59	0.389733	1.73361	1.76955	801.453	FALSE	6
2022-09-12	12:44:00	0.493957	2.19722	2.7928	825.939	FALSE	6
2022-09-12	12:44:00	0.774975	3.44724	2.7928	804.9	FALSE	6
2022-09-12	12:44:00	0.683728	3.04136	2.7928	828.98	FALSE	6
2022-09-12	12:44:00	0.558741	2.48539	2.7928	807.386	FALSE	6
2022-09-12	12:44:01	0.475382	2.11459	2.7756	831.095	FALSE	6
2022-09-12	12:44:01	0.782913	3.48255	2.7756	810.868	FALSE	6
2022-09-12	12:44:01	0.613652	2.72965	2.7756	833.825	FALSE	6
2022-09-12	12:44:02	0.372125	1.65529	1.50707	812.524	FALSE	6
2022-09-12	12:44:02	0.329428	1.46536	1.50707	835.29	FALSE	6
2022-09-12	12:44:02	0.333092	1.48166	1.50707	814.005	FALSE	6
2022-09-12	12:44:02	0.320573	1.42597	1.50707	836.716	FALSE	6
2022-09-12	12:44:03	0.269987	1.20096	1.05308	815.206	FALSE	6
2022-09-12	12:44:03	0.253906	1.12942	1.05308	837.845	FALSE	6
2022-09-12	12:44:03	0.276705	1.23084	1.05308	816.437	FALSE	6
2022-09-12	12:44:03	0.146374	0.651101	1.05308	838.496	FALSE	6
2022-09-12	12:44:04	0.317163	1.4108	0.953422	817.848	FALSE	6
2022-09-12	12:44:04	0.100064	0.445105	0.953422	838.941	FALSE	6
2022-09-12	12:44:04	0.287952	1.28087	0.953422	819.129	FALSE	6
2022-09-12	12:44:04	0.152176	0.676909	0.953422	839.618	FALSE	6
2022-09-12	12:44:05	0.279199	1.24193	1.0425	820.371	FALSE	6
2022-09-12	12:44:05	0.20215	0.899204	1.0425	840.518	FALSE	6
2022-09-12	12:44:05	0.221743	0.986357	1.0425	821.357	FALSE	6
2022-09-12	12:44:06	0.222456	0.989529	1.10741	841.507	FALSE	6
2022-09-12	12:44:06	0.25126	1.11765	1.10741	822.475	FALSE	6
2022-09-12	12:44:06	0.296654	1.31958	1.10741	842.827	FALSE	6
2022-09-12	12:44:06	0.225458	1.00288	1.10741	823.478	FALSE	6
2022-09-12	12:44:07	0.319249	1.42008	1.27017	844.247	FALSE	6
2022-09-12	12:44:07	0.255229	1.13531	1.27017	824.613	FALSE	6
2022-09-12	12:44:07	0.443422	1.97243	1.27017	846.219	FALSE	6
2022-09-12	12:44:07	0.124288	0.552858	1.27017	825.166	FALSE	6
2022-09-12	12:44:08	0.43472	1.93372	1.35942	848.153	FALSE	6
2022-09-12	12:44:08	0.206934	0.920484	1.35942	826.086	FALSE	6
2022-09-12	12:44:08	0.436756	1.94278	1.35942	850.096	FALSE	6
2022-09-12	12:44:08	0.144033	0.640688	1.35942	826.727	FALSE	6
2022-09-12	12:44:09	0.437672	1.94685	1.63197	852.043	FALSE	6
2022-09-12	12:44:09	0.211819	0.942213	1.63197	827.669	FALSE	6
2022-09-12	12:44:09	0.451158	2.00684	1.63197	854.049	FALSE	6
2022-09-12	12:44:10	0.232685	1.03503	1.51629	828.704	FALSE	6
2022-09-12	12:44:10	0.379606	1.68856	1.51629	855.738	FALSE	6
2022-09-12	12:44:10	0.227748	1.01307	1.51629	829.717	FALSE	6
2022-09-12	12:44:10	0.523473	2.32851	1.51629	858.066	FALSE	6
2022-09-12	12:44:11	0.32612	1.45065	1.51675	831.168	FALSE	6
2022-09-12	12:44:11	0.291819	1.29807	1.51675	859.365	FALSE	6
2022-09-12	12:44:11	0.40271	1.79133	1.51675	832.959	FALSE	6
2022-09-12	12:44:11	0.34327	1.52693	1.51675	860.891	FALSE	6
2022-09-12	12:44:12	0.391005	1.73927	1.48353	834.698	FALSE	6
2022-09-12	12:44:12	0.227138	1.01036	1.48353	861.902	FALSE	6
2022-09-12	12:44:12	0.504542	2.2443	1.48353	836.943	FALSE	6
2022-09-12	12:44:12	0.211361	0.940176	1.48353	862.842	FALSE	6
2022-09-12	12:44:13	0.481794	2.14312	1.96753	839.086	FALSE	6
2022-09-12	12:44:13	0.387137	1.72206	1.96753	864.564	FALSE	6
2022-09-12	12:44:13	0.458028	2.0374	1.96753	841.123	FALSE	6
2022-09-12	12:44:14	0.340267	1.51358	2.10435	866.078	FALSE	6
2022-09-12	12:44:14	0.626272	2.78578	2.10435	843.909	FALSE	6
2022-09-12	12:44:14	0.381998	1.6992	2.10435	867.777	FALSE	6
2022-09-12	12:44:14	0.543779	2.41884	2.10435	846.328	FALSE	6
2022-09-12	12:44:15	0.468512	2.08404	2.44464	869.861	FALSE	6
2022-09-12	12:44:15	0.628868	2.79733	2.44464	849.125	FALSE	6
2022-09-12	12:44:15	0.455483	2.02608	2.44464	871.887	FALSE	6
2022-09-12	12:44:15	0.645458	2.87113	2.44464	851.996	FALSE	6
2022-09-12	12:44:16	0.35645	1.58556	2.03587	873.473	FALSE	6
2022-09-12	12:44:16	0.466629	2.07566	2.03587	854.072	FALSE	6
2022-09-12	12:44:16	0.574517	2.55557	2.03587	876.028	FALSE	6
2022-09-12	12:44:16	0.433143	1.92671	2.03587	855.999	FALSE	6
2022-09-12	12:44:17	0.353143	1.57085	1.99643	877.599	FALSE	6
2022-09-12	12:44:17	0.502659	2.23593	1.99643	858.235	FALSE	6
2022-09-12	12:44:17	0.490649	2.1825	1.99643	879.781	FALSE	6
2022-09-12	12:44:18	0.354669	1.57764	2.0979	859.812	FALSE	6
2022-09-12	12:44:18	0.523422	2.32829	2.0979	882.11	FALSE	6
2022-09-12	12:44:18	0.454415	2.02133	2.0979	861.834	FALSE	6
2022-09-12	12:44:18	0.554008	2.46434	2.0979	884.574	FALSE	6
2022-09-12	12:44:19	0.321692	1.43095	2.19535	863.265	FALSE	6
2022-09-12	12:44:19	0.641794	2.85483	2.19535	887.429	FALSE	6
2022-09-12	12:44:19	0.411565	1.83072	2.19535	865.095	FALSE	6
2022-09-12	12:44:19	0.599097	2.6649	2.19535	890.094	FALSE	6
2022-09-12	12:44:20	0.325458	1.4477	2.25053	866.543	FALSE	6
2022-09-12	12:44:20	0.708308	3.1507	2.25053	893.244	FALSE	6
2022-09-12	12:44:20	0.387697	1.72455	2.25053	868.268	FALSE	6
2022-09-12	12:44:20	0.602303	2.67916	2.25053	895.924	FALSE	6
2022-09-12	12:44:21	0.38383	1.70735	1.73746	869.975	FALSE	6
2022-09-12	12:44:21	0.475687	2.11595	1.73746	898.04	FALSE	6
2022-09-12	12:44:21	0.312277	1.38907	1.73746	871.364	FALSE	6
2022-09-12	12:44:22	0.489428	2.17707	1.95766	900.217	FALSE	6
2022-09-12	12:44:22	0.445305	1.98081	1.95766	873.345	FALSE	6
2022-09-12	12:44:22	0.39355	1.75059	1.95766	901.967	FALSE	6
2022-09-12	12:44:22	0.432125	1.92218	1.95766	875.267	FALSE	6
2022-09-12	12:44:23	0.458232	2.03831	2.07283	904.006	FALSE	6
2022-09-12	12:44:23	0.523575	2.32897	2.07283	877.596	FALSE	6
2022-09-12	12:44:23	0.295942	1.31641	2.07283	905.322	FALSE	6
2022-09-12	12:44:23	0.586221	2.60763	2.07283	880.204	FALSE	6
2022-09-12	12:44:24	0.354008	1.5747	2.15483	906.897	FALSE	6
2022-09-12	12:44:24	0.700674	3.11674	2.15483	883.32	FALSE	6
2022-09-12	12:44:24	0.295025	1.31233	2.15483	908.209	FALSE	6
2022-09-12	12:44:24	0.588003	2.61555	2.15483	885.936	FALSE	6
2022-09-12	12:44:25	0.457112	2.03333	1.63167	910.242	FALSE	6
2022-09-12	12:44:25	0.424237	1.88709	1.63167	887.823	FALSE	6
2022-09-12	12:44:25	0.219097	0.974587	1.63167	911.217	FALSE	6
2022-09-12	12:44:26	0.265305	1.18013	1.50588	889.003	FALSE	6
2022-09-12	12:44:26	0.317519	1.41239	1.50588	912.629	FALSE	6
2022-09-12	12:44:26	0.262812	1.16904	1.50588	890.172	FALSE	6
2022-09-12	12:44:26	0.508512	2.26196	1.50588	914.891	FALSE	6
2022-09-12	12:44:27	0.19986	0.889017	1.82404	891.061	FALSE	6
2022-09-12	12:44:27	0.614974	2.73553	1.82404	917.627	FALSE	6
2022-09-12	12:44:27	0.367646	1.63536	1.82404	892.696	FALSE	6
2022-09-12	12:44:27	0.457774	2.03627	1.82404	919.663	FALSE	6
2022-09-12	12:44:28	0.24785	1.10249	1.53355	893.799	FALSE	6
2022-09-12	12:44:28	0.405305	1.80288	1.53355	921.466	FALSE	6
2022-09-12	12:44:28	0.319097	1.41941	1.53355	895.218	FALSE	6
2022-09-12	12:44:28	0.406781	1.80944	1.53355	923.275	FALSE	6
2022-09-12	12:44:29	0.461387	2.05234	1.90927	897.271	FALSE	6
2022-09-12	12:44:29	0.343321	1.52716	1.90927	924.803	FALSE	6
2022-09-12	12:44:29	0.482964	2.14832	1.90927	899.419	FALSE	6
2022-09-12	12:44:30	0.251107	1.11697	1.68409	925.92	FALSE	6
2022-09-12	12:44:30	0.559199	2.48743	1.68409	901.906	FALSE	6
2022-09-12	12:44:30	0.208054	0.925466	1.68409	926.845	FALSE	6
2022-09-12	12:44:30	0.496043	2.2065	1.68409	904.113	FALSE	6
2022-09-12	12:44:31	0.285407	1.26955	1.58194	928.115	FALSE	6
2022-09-12	12:44:31	0.449224	1.99824	1.58194	906.111	FALSE	6
2022-09-12	12:44:31	0.356959	1.58783	1.58194	929.702	FALSE	6
2022-09-12	12:44:31	0.330954	1.47215	1.58194	907.583	FALSE	6
2022-09-12	12:44:32	0.483982	2.15285	1.91305	931.855	FALSE	6
2022-09-12	12:44:32	0.252277	1.12218	1.91305	908.706	FALSE	6
2022-09-12	12:44:32	0.553957	2.46411	1.91305	934.319	FALSE	6
2022-09-12	12:44:33	0.204848	0.911205	1.53706	909.617	FALSE	6
2022-09-12	12:44:33	0.552227	2.45642	1.53706	936.776	FALSE	6
2022-09-12	12:44:33	0.235127	1.04589	1.53706	910.663	FALSE	6
2022-09-12	12:44:33	0.389987	1.73474	1.53706	938.51	FALSE	6
2022-09-12	12:44:34	0.184491	0.820653	1.29977	911.483	FALSE	6
2022-09-12	12:44:34	0.35411	1.57515	1.29977	940.086	FALSE	6
2022-09-12	12:44:34	0.241387	1.07374	1.29977	912.557	FALSE	6
2022-09-12	12:44:34	0.388817	1.72954	1.29977	941.815	FALSE	6
2022-09-12	12:44:35	0.419402	1.86558	1.51335	914.423	FALSE	6
2022-09-12	12:44:35	0.243931	1.08505	1.51335	942.9	FALSE	6
2022-09-12	12:44:35	0.458893	2.04125	1.51335	916.464	FALSE	6
2022-09-12	12:44:35	0.238639	1.06151	1.51335	943.962	FALSE	6
2022-09-12	12:44:36	0.448155	1.99348	1.50565	918.457	FALSE	6
2022-09-12	12:44:36	0.216603	0.963493	1.50565	944.925	FALSE	6
2022-09-12	12:44:36	0.386832	1.72071	1.50565	920.178	FALSE	6
2022-09-12	12:44:36	0.302354	1.34493	1.50565	946.27	FALSE	6
2022-09-12	12:44:37	0.297926	1.32523	1.5415	921.503	FALSE	6
2022-09-12	12:44:37	0.469428	2.08811	1.5415	948.358	FALSE	6
2022-09-12	12:44:37	0.272277	1.21114	1.5415	922.714	FALSE	6
2022-09-12	12:44:38	0.527595	2.34685	1.66825	950.705	FALSE	6
2022-09-12	12:44:38	0.309173	1.37526	1.66825	924.09	FALSE	6
2022-09-12	12:44:38	0.381845	1.69852	1.66825	952.404	FALSE	6
2022-09-12	12:44:38	0.28154	1.25235	1.66825	925.342	FALSE	6
2022-09-12	12:44:39	0.403575	1.79518	1.80209	954.199	FALSE	6
2022-09-12	12:44:39	0.431209	1.9181	1.80209	927.26	FALSE	6
2022-09-12	12:44:39	0.282303	1.25574	1.80209	955.455	FALSE	6
2022-09-12	12:44:39	0.503422	2.23932	1.80209	929.499	FALSE	6
2022-09-12	12:44:40	0.354364	1.57628	1.93893	957.031	FALSE	6
2022-09-12	12:44:40	0.539605	2.40027	1.93893	931.9	FALSE	6
2022-09-12	12:44:40	0.336298	1.49592	1.93893	958.527	FALSE	6
2022-09-12	12:44:40	0.513295	2.28324	1.93893	934.183	FALSE	6
2022-09-12	12:44:41	0.242659	1.0794	1.47804	959.606	FALSE	6
2022-09-12	12:44:41	0.508155	2.26038	1.47804	936.443	FALSE	6
2022-09-12	12:44:41	0.246018	1.09434	1.47804	960.701	FALSE	6
2022-09-12	12:44:42	0.29299	1.30328	1.38064	937.747	FALSE	6
2022-09-12	12:44:42	0.266629	1.18602	1.38064	961.887	FALSE	6
2022-09-12	12:44:42	0.286781	1.27566	1.38064	939.022	FALSE	6
2022-09-12	12:44:42	0.395127	1.7576	1.38064	963.644	FALSE	6
2022-09-12	12:44:43	0.202557	0.901014	1.24855	939.923	FALSE	6
2022-09-12	12:44:43	0.177316	0.788737	1.24855	964.433	FALSE	6
2022-09-12	12:44:43	0.337519	1.50135	1.24855	941.425	FALSE	6
2022-09-12	12:44:43	0.405356	1.8031	1.24855	966.236	FALSE	6
2022-09-12	12:44:44	0.390191	1.73565	1.92172	943.16	FALSE	6
2022-09-12	12:44:44	0.424338	1.88754	1.92172	968.124	FALSE	6
2022-09-12	12:44:44	0.481539	2.14198	1.92172	945.302	FALSE	6
2022-09-12	12:44:45	1.19747	5.32659	5.24136	973.45	FALSE	6
2022-09-12	12:44:45	1.29559	5.76304	5.24136	951.065	FALSE	6
2022-09-12	12:44:45	0.901438	4.00978	5.24136	977.46	FALSE	6
2022-09-12	12:44:45	1.31874	5.86602	5.24136	956.931	FALSE	6
2022-09-12	12:44:46	0.606425	2.6975	2.33089	980.157	FALSE	6
2022-09-12	12:44:46	0.474822	2.1121	2.33089	959.043	FALSE	6
2022-09-12	12:44:46	0.454059	2.01975	2.33089	982.177	FALSE	6
2022-09-12	12:44:46	0.560725	2.49422	2.33089	961.538	FALSE	6
2022-09-12	12:44:47	0.543982	2.41974	2.31986	984.597	FALSE	6
2022-09-12	12:44:47	0.603015	2.68233	2.31986	964.22	FALSE	6
2022-09-12	12:44:47	0.353499	1.57243	2.31986	986.169	FALSE	6
2022-09-12	12:44:47	0.585611	2.60491	2.31986	966.825	FALSE	6
2022-09-12	12:44:48	0.351565	1.56383	2.02727	987.733	FALSE	6
2022-09-12	12:44:48	0.601539	2.67577	2.02727	969.501	FALSE	6
2022-09-12	12:44:48	0.299555	1.33248	2.02727	989.066	FALSE	6
2022-09-12	12:44:48	0.570343	2.537	2.02727	972.038	FALSE	6
2022-09-12	12:44:49	0.295738	1.3155	1.51682	990.381	FALSE	6
2022-09-12	12:44:49	0.405254	1.80265	1.51682	973.84	FALSE	6
2022-09-12	12:44:49	0.321998	1.43231	1.51682	991.813	FALSE	6
2022-09-12	12:44:50	0.327392	1.45631	1.67543	975.297	FALSE	6
2022-09-12	12:44:50	0.464186	2.06479	1.67543	993.878	FALSE	6
2022-09-12	12:44:50	0.260725	1.15976	1.67543	976.456	FALSE	6
2022-09-12	12:44:50	0.454313	2.02088	1.67543	995.899	FALSE	6
2022-09-12	12:44:51	0.205102	0.912335	1.52603	977.369	FALSE	6
2022-09-12	12:44:51	0.439962	1.95704	1.52603	997.856	FALSE	6
2022-09-12	12:44:51	0.208054	0.925466	1.52603	978.294	FALSE	6
2022-09-12	12:44:51	0.519148	2.30927	1.52603	1000.17	FALSE	6
2022-09-12	12:44:52	0.37299	1.65913	0.836443	979.953	FALSE	6
2022-09-12	12:44:52	0.203931	0.907126	0.836443	1001.07	FALSE	6
2022-09-12	12:44:52	0.0436262	0.194058	0.836443	980.147	FALSE	6
2022-09-12	12:44:52	0.131616	0.585454	0.836443	1001.66	FALSE	6
2022-09-12	12:44:53	0.0827101	0.367911	1.23008	980.515	FALSE	6
2022-09-12	12:44:53	0.391565	1.74176	1.23008	1003.4	FALSE	6
2022-09-12	12:44:53	0.355331	1.58058	1.23008	982.096	FALSE	6
2022-09-12	12:44:54	0.282761	1.25778	1.93649	1004.66	FALSE	6
2022-09-12	12:44:54	0.636043	2.82925	1.93649	984.925	FALSE	6
2022-09-12	12:44:54	0.430751	1.91607	1.93649	1006.57	FALSE	6
2022-09-12	12:44:54	0.391819	1.74289	1.93649	986.668	FALSE	6
2022-09-12	12:44:55	0.588206	2.61646	1.96728	1009.19	FALSE	6
2022-09-12	12:44:55	0.393346	1.74968	1.96728	988.418	FALSE	6
2022-09-12	12:44:55	0.408155	1.81556	1.96728	1011.01	FALSE	6
2022-09-12	12:44:55	0.379351	1.68743	1.96728	990.105	FALSE	6
2022-09-12	12:44:56	0.450344	2.00322	1.82037	1013.01	FALSE	6
2022-09-12	12:44:56	0.396858	1.7653	1.82037	991.87	FALSE	6
2022-09-12	12:44:56	0.313092	1.3927	1.82037	1014.4	FALSE	6
2022-09-12	12:44:56	0.476654	2.12025	1.82037	993.991	FALSE	6
2022-09-12	12:44:57	0.425713	1.89366	1.79571	1016.3	FALSE	6
2022-09-12	12:44:57	0.442099	1.96654	1.79571	995.957	FALSE	6
2022-09-12	12:44:57	0.34327	1.52693	1.79571	1017.82	FALSE	6
2022-09-12	12:44:58	0.386171	1.71777	1.74459	997.675	FALSE	6
2022-09-12	12:44:58	0.368003	1.63695	1.74459	1019.46	FALSE	6
2022-09-12	12:44:58	0.398842	1.77413	1.74459	999.449	FALSE	6
2022-09-12	12:44:58	0.415789	1.84951	1.74459	1021.31	FALSE	6
2022-09-12	12:44:59	0.401183	1.78454	1.88686	1001.23	FALSE	6
2022-09-12	12:44:59	0.376654	1.67543	1.88686	1022.98	FALSE	6
2022-09-12	12:44:59	0.462812	2.05868	1.88686	1003.29	FALSE	6
2022-09-12	12:44:59	0.456094	2.0288	1.88686	1025.01	FALSE	6
2022-09-12	12:45:00	0.560115	2.4915	2.0902	1005.78	FALSE	6
2022-09-12	12:45:00	0.390038	1.73497	2.0902	1026.75	FALSE	6
2022-09-12	12:45:00	0.424491	1.88822	2.0902	1007.67	FALSE	6
2022-09-12	12:45:00	0.504949	2.24611	2.0902	1028.99	FALSE	6
2022-09-12	12:45:01	0.428766	1.90724	1.99869	1009.58	FALSE	6
2022-09-12	12:45:01	0.468054	2.082	1.99869	1031.08	FALSE	6
2022-09-12	12:45:01	0.451158	2.00684	1.99869	1011.59	FALSE	6
2022-09-12	12:45:02	0.458842	2.04102	1.96496	1033.12	FALSE	6
2022-09-12	12:45:02	0.432888	1.92557	1.96496	1013.51	FALSE	6
2022-09-12	12:45:02	0.434517	1.93282	1.96496	1035.05	FALSE	6
2022-09-12	12:45:02	0.440725	1.96043	1.96496	1015.47	FALSE	6
2022-09-12	12:45:03	0.459198	2.0426	1.95285	1037.09	FALSE	6
2022-09-12	12:45:03	0.419606	1.86649	1.95285	1017.34	FALSE	6
2022-09-12	12:45:03	0.438842	1.95206	1.95285	1039.04	FALSE	6
2022-09-12	12:45:03	0.438435	1.95025	1.95285	1019.29	FALSE	6
2022-09-12	12:45:04	0.444949	1.97922	1.89937	1041.02	FALSE	6
2022-09-12	12:45:04	0.442456	1.96813	1.89937	1021.26	FALSE	6
2022-09-12	12:45:04	0.407748	1.81374	1.89937	1042.84	FALSE	6
2022-09-12	12:45:04	0.412837	1.83638	1.89937	1023.09	FALSE	6
2022-09-12	12:45:05	0.462201	2.05596	2.03717	1044.89	FALSE	6
2022-09-12	12:45:05	0.41757	1.85743	2.03717	1024.95	FALSE	6
2022-09-12	12:45:05	0.49416	2.19812	2.03717	1047.09	FALSE	6
2022-09-12	12:45:06	0.367036	1.63265	1.50894	1026.58	FALSE	6
2022-09-12	12:45:06	0.293143	1.30396	1.50894	1048.4	FALSE	6
2022-09-12	12:45:06	0.37014	1.64646	1.50894	1028.23	FALSE	6
2022-09-12	12:45:06	0.326578	1.45268	1.50894	1049.85	FALSE	6
2022-09-12	12:45:07	0.290954	1.29422	1.12637	1029.52	FALSE	6
2022-09-12	12:45:07	0.280522	1.24782	1.12637	1051.1	FALSE	6
2022-09-12	12:45:07	0.227087	1.01013	1.12637	1030.53	FALSE	6
2022-09-12	12:45:07	0.214313	0.953307	1.12637	1052.05	FALSE	6

## Sheet: Dominic_prong_2022912123959 (3)
Date	Time	Lbs	Newtons	Total Force x Time	total time steps force > 3		**GoPro Fitting: 1229
2022-09-12	12:40:07	0.66556	2.96054	2.96054	FALSE	0			Total Force x Time	1052.05
2022-09-12	12:40:07	0.902812	4.01589	4.01589	FALSE	0			total time steps force > 3	6
2022-09-12	12:40:07	2.04368	9.0907	12.0512	FALSE	0
2022-09-12	12:40:07	5.34535	23.7772	27.7931	1	1
2022-09-12	12:40:08	1.61039	7.16334	19.2146	FALSE	1
2022-09-12	12:40:08	0.123015	0.547195	28.3403	FALSE	1
2022-09-12	12:40:08	0.253143	1.12603	20.3406	FALSE	1
2022-09-12	12:40:08	0.566934	2.52184	30.8621	FALSE	1
2022-09-12	12:40:09	0.0446949	0.198812	20.5394	FALSE	1
2022-09-12	12:40:09	0.124797	0.555122	31.4172	FALSE	1
2022-09-12	12:40:09	0.143168	0.63684	21.1763	FALSE	1
2022-09-12	12:40:09	0.0916669	0.407753	31.825	FALSE	1
2022-09-12	12:40:10	0.36897	1.64125	22.8175	FALSE	1
2022-09-12	12:40:10	0.975025	4.33711	36.1621	FALSE	1
2022-09-12	12:40:10	0.388054	1.72614	24.5437	FALSE	1
2022-09-12	12:40:11	-0.0907758	-0.403789	36.1621	FALSE	1
2022-09-12	12:40:11	-0.317035	-1.41024	24.5437	FALSE	1
2022-09-12	12:40:11	-0.101463	-0.451328	36.1621	FALSE	1
2022-09-12	12:40:11	-0.112455	-0.500222	24.5437	FALSE	1
2022-09-12	12:40:12	-0.201921	-0.898185	36.1621	FALSE	1
2022-09-12	12:40:12	-0.245076	-1.09015	24.5437	FALSE	1
2022-09-12	12:40:12	-0.176221	-0.783866	36.1621	FALSE	1
2022-09-12	12:40:12	-0.101107	-0.449744	24.5437	FALSE	1
2022-09-12	12:40:13	-0.0857376	-0.381378	36.1621	FALSE	1
2022-09-12	12:40:13	-0.339885	-1.51188	24.5437	FALSE	1
2022-09-12	12:40:13	-0.350216	-1.55783	36.1621	FALSE	1
2022-09-12	12:40:13	-0.259834	-1.15579	24.5437	FALSE	1
2022-09-12	12:40:14	-0.159376	-0.708936	36.1621	FALSE	1
2022-09-12	12:40:14	-0.164872	-0.733384	24.5437	FALSE	1
2022-09-12	12:40:14	-0.17332	-0.770962	36.1621	FALSE	1
2022-09-12	12:40:15	0.441387	1.96338	26.507	FALSE	1
2022-09-12	12:40:15	0.314873	1.40062	37.5627	FALSE	1
2022-09-12	12:40:15	0.225865	1.00469	27.5117	FALSE	1
2022-09-12	12:40:15	0.277214	1.2331	38.7958	FALSE	1
2022-09-12	12:40:16	0.574822	2.55692	30.0686	FALSE	1
2022-09-12	12:40:16	0.300013	1.33452	40.1303	FALSE	1
2022-09-12	12:40:16	0.477468	2.12387	32.1925	FALSE	1
2022-09-12	12:40:16	0.434059	1.93078	42.0611	FALSE	1
2022-09-12	12:40:17	0.14444	0.642498	32.835	FALSE	1
2022-09-12	12:40:17	0.334109	1.48618	43.5473	FALSE	1
2022-09-12	12:40:17	0.371209	1.65121	34.4862	FALSE	1
2022-09-12	12:40:17	0.410496	1.82597	45.3733	FALSE	1
2022-09-12	12:40:18	0.231412	1.02937	35.5156	FALSE	1
2022-09-12	12:40:18	0.155535	0.691851	46.0651	FALSE	1
2022-09-12	12:40:18	0.264644	1.17719	36.6928	FALSE	1
2022-09-12	12:40:19	0.124237	0.552631	46.6177	FALSE	1
2022-09-12	12:40:19	0.299555	1.33248	38.0253	FALSE	1
2022-09-12	12:40:19	0.283779	1.26231	47.88	FALSE	1
2022-09-12	12:40:19	0.641132	2.85188	40.8772	FALSE	1
2022-09-12	12:40:20	0.508562	2.26219	50.1422	FALSE	1
2022-09-12	12:40:20	0.234975	1.04522	41.9224	FALSE	1
2022-09-12	12:40:20	0.301489	1.34108	51.4833	FALSE	1
2022-09-12	12:40:20	0.29986	1.33384	43.2562	FALSE	1
2022-09-12	12:40:21	0.332176	1.47759	52.9609	FALSE	1
2022-09-12	12:40:21	0.143423	0.637974	43.8942	FALSE	1
2022-09-12	12:40:21	0.366272	1.62925	54.5902	FALSE	1
2022-09-12	12:40:21	0.328308	1.46038	45.3546	FALSE	1
2022-09-12	12:40:22	0.38556	1.71505	56.3052	FALSE	1
2022-09-12	12:40:22	0.263626	1.17266	46.5272	FALSE	1
2022-09-12	12:40:22	0.355331	1.58058	57.8858	FALSE	1
2022-09-12	12:40:23	0.281743	1.25325	47.7805	FALSE	1
2022-09-12	12:40:23	0.330598	1.47057	59.3563	FALSE	1
2022-09-12	12:40:23	0.24612	1.09479	48.8753	FALSE	1
2022-09-12	12:40:23	0.233448	1.03842	60.3948	FALSE	1
2022-09-12	12:40:24	-0.0784094	-0.348781	48.8753	FALSE	1
2022-09-12	12:40:24	-0.0927096	-0.412391	60.3948	FALSE	1
2022-09-12	12:40:24	-0.318358	-1.41612	48.8753	FALSE	1
2022-09-12	12:40:24	-0.506603	-2.25347	60.3948	FALSE	1
2022-09-12	12:40:25	-0.575915	-2.56179	48.8753	FALSE	1
2022-09-12	12:40:25	-0.0370863	-0.164967	60.3948	FALSE	1
2022-09-12	12:40:25	1.8619	8.2821	57.1574	FALSE	1
2022-09-12	12:40:25	2.41874	10.759	71.1538	FALSE	1
2022-09-12	12:40:26	0.895432	3.98306	61.1404	FALSE	1
2022-09-12	12:40:26	1.49039	6.62955	77.7834	FALSE	1
2022-09-12	12:40:26	0.752634	3.34787	64.4883	FALSE	1
2022-09-12	12:40:27	0.563677	2.50735	80.2907	FALSE	1
2022-09-12	12:40:27	0.23126	1.02869	65.517	FALSE	1
2022-09-12	12:40:27	0.362048	1.61046	81.9012	FALSE	1
2022-09-12	12:40:27	0.375433	1.67	67.187	FALSE	1
2022-09-12	12:40:28	0.350191	1.55772	83.4589	FALSE	1
2022-09-12	12:40:28	0.397417	1.76779	68.9548	FALSE	1
2022-09-12	12:40:28	0.562812	2.5035	85.9624	FALSE	1
2022-09-12	12:40:28	0.458537	2.03966	70.9944	FALSE	1
2022-09-12	12:40:29	0.343219	1.52671	87.4891	FALSE	1
2022-09-12	12:40:29	0.328817	1.46264	72.4571	FALSE	1
2022-09-12	12:40:29	0.50444	2.24385	89.733	FALSE	1
2022-09-12	12:40:29	0.226985	1.00967	73.4668	FALSE	1
2022-09-12	12:40:30	0.237723	1.05744	90.7904	FALSE	1
2022-09-12	12:40:30	0.258842	1.15138	74.6181	FALSE	1
2022-09-12	12:40:30	0.27187	1.20933	91.9997	FALSE	1
2022-09-12	12:40:31	0.255178	1.13508	75.7532	FALSE	1
2022-09-12	12:40:31	0.246832	1.09796	93.0977	FALSE	1
2022-09-12	12:40:31	0.289886	1.28947	77.0427	FALSE	1
2022-09-12	12:40:31	0.267697	1.19077	94.2885	FALSE	1
2022-09-12	12:40:32	0.316145	1.40628	78.449	FALSE	1
2022-09-12	12:40:32	0.234822	1.04454	95.333	FALSE	1
2022-09-12	12:40:32	0.252328	1.12241	79.5714	FALSE	1
2022-09-12	12:40:32	0.318232	1.41556	96.7485	FALSE	1
2022-09-12	12:40:33	0.286883	1.27611	80.8475	FALSE	1
2022-09-12	12:40:33	0.341438	1.51878	98.2673	FALSE	1
2022-09-12	12:40:33	0.368257	1.63808	82.4856	FALSE	1
2022-09-12	12:40:33	0.33243	1.47872	99.746	FALSE	1
2022-09-12	12:40:34	0.348257	1.54912	84.0347	FALSE	1
2022-09-12	12:40:34	0.219504	0.976398	100.722	FALSE	1
2022-09-12	12:40:34	0.382863	1.70305	85.7377	FALSE	1
2022-09-12	12:40:35	0.135484	0.60266	101.325	FALSE	1
2022-09-12	12:40:35	0.364797	1.62269	87.3604	FALSE	1
2022-09-12	12:40:35	0.158842	0.706561	102.032	FALSE	1
2022-09-12	12:40:35	0.375484	1.67023	89.0307	FALSE	1
2022-09-12	12:40:36	0.134568	0.598585	102.63	FALSE	1
2022-09-12	12:40:36	0.361031	1.60594	90.6366	FALSE	1
2022-09-12	12:40:36	0.149682	0.665815	103.296	FALSE	1
2022-09-12	12:40:36	0.368461	1.63899	92.2756	FALSE	1
2022-09-12	12:40:37	0.207799	0.924332	104.22	FALSE	1
2022-09-12	12:40:37	0.351463	1.56338	93.839	FALSE	1
2022-09-12	12:40:37	0.220471	0.980699	105.201	FALSE	1
2022-09-12	12:40:37	0.318384	1.41624	95.2552	FALSE	1
2022-09-12	12:40:38	0.297265	1.32229	106.523	FALSE	1
2022-09-12	12:40:38	0.307087	1.36598	96.6212	FALSE	1
2022-09-12	12:40:38	0.310191	1.37979	107.903	FALSE	1
2022-09-12	12:40:39	0.333804	1.48483	98.106	FALSE	1
2022-09-12	12:40:39	0.267545	1.19009	109.093	FALSE	1
2022-09-12	12:40:39	0.372837	1.65845	99.7645	FALSE	1
2022-09-12	12:40:39	0.271412	1.20729	110.301	FALSE	1
2022-09-12	12:40:40	0.302456	1.34538	101.11	FALSE	1
2022-09-12	12:40:40	0.163473	0.727161	111.028	FALSE	1
2022-09-12	12:40:40	0.322914	1.43639	102.546	FALSE	1
2022-09-12	12:40:40	0.275535	1.22563	112.253	FALSE	1
2022-09-12	12:40:41	-0.0193254	-0.0859632	102.546	FALSE	1
2022-09-12	12:40:41	0.0731427	0.325353	112.579	FALSE	1
2022-09-12	12:40:41	0.157112	0.698866	103.245	FALSE	1
2022-09-12	12:40:41	0.174771	0.777416	113.356	FALSE	1
2022-09-12	12:40:42	0.0852037	0.379003	103.624	FALSE	1
2022-09-12	12:40:42	0.158893	0.706788	114.063	FALSE	1
2022-09-12	12:40:42	0.15187	0.675548	104.3	FALSE	1
2022-09-12	12:40:42	0.217316	0.966665	115.03	FALSE	1
2022-09-12	12:40:43	0.127901	0.568929	104.869	FALSE	1
2022-09-12	12:40:43	0.393397	1.74991	116.779	FALSE	1
2022-09-12	12:40:43	0.154669	0.687999	105.557	FALSE	1
2022-09-12	12:40:44	0.390598	1.73746	118.517	FALSE	1
2022-09-12	12:40:44	0.120064	0.534069	106.091	FALSE	1
2022-09-12	12:40:44	0.416298	1.85178	120.369	FALSE	1
2022-09-12	12:40:44	0.171921	0.764739	106.855	FALSE	1
2022-09-12	12:40:45	0.303219	1.34878	121.718	FALSE	1
2022-09-12	12:40:45	0.165153	0.734634	107.59	FALSE	1
2022-09-12	12:40:45	0.348257	1.54912	123.267	FALSE	1
2022-09-12	12:40:45	0.257214	1.14414	108.734	FALSE	1
2022-09-12	12:40:46	0.384644	1.71097	124.978	FALSE	1
2022-09-12	12:40:46	0.334568	1.48823	110.222	FALSE	1
2022-09-12	12:40:46	0.389631	1.73316	126.711	FALSE	1
2022-09-12	12:40:46	0.71014	3.15884	113.381	FALSE	1
2022-09-12	12:40:47	0.45869	2.04034	128.751	FALSE	1
2022-09-12	12:40:47	0.460115	2.04668	115.428	FALSE	1
2022-09-12	12:40:47	0.209886	0.933615	129.685	FALSE	1
2022-09-12	12:40:48	0.377163	1.6777	117.106	FALSE	1
2022-09-12	12:40:48	0.204033	0.90758	130.592	FALSE	1
2022-09-12	12:40:48	0.453193	2.01589	119.121	FALSE	1
2022-09-12	12:40:48	0.178283	0.793038	131.385	FALSE	1
2022-09-12	12:40:49	0.513397	2.28369	121.405	FALSE	1
2022-09-12	12:40:49	0.184135	0.819069	132.204	FALSE	1
2022-09-12	12:40:49	0.416043	1.85064	123.256	FALSE	1
2022-09-12	12:40:49	0.219657	0.977078	133.181	FALSE	1
2022-09-12	12:40:50	0.260776	1.15998	124.416	FALSE	1
2022-09-12	12:40:50	0.255484	1.13644	134.318	FALSE	1
2022-09-12	12:40:50	0.333143	1.48189	125.898	FALSE	1
2022-09-12	12:40:50	0.322201	1.43321	135.751	FALSE	1
2022-09-12	12:40:51	0.251412	1.11833	127.016	FALSE	1
2022-09-12	12:40:51	0.312227	1.38885	137.14	FALSE	1
2022-09-12	12:40:51	0.218028	0.969832	127.986	FALSE	1
2022-09-12	12:40:52	0.479046	2.13089	139.271	FALSE	1
2022-09-12	12:40:52	0.36271	1.61341	129.599	FALSE	1
2022-09-12	12:40:52	0.716145	3.18556	142.456	FALSE	1
2022-09-12	12:40:52	0.503982	2.24181	131.841	FALSE	1
2022-09-12	12:40:53	0.489784	2.17866	144.635	FALSE	1
2022-09-12	12:40:53	0.174822	0.777643	132.619	FALSE	1
2022-09-12	12:40:53	0.512481	2.27962	146.915	FALSE	1
2022-09-12	12:40:53	0.223168	0.992696	133.611	FALSE	1
2022-09-12	12:40:54	0.441692	1.96473	148.879	FALSE	1
2022-09-12	12:40:54	0.449377	1.99892	135.61	FALSE	1
2022-09-12	12:40:54	0.340318	1.5138	150.393	FALSE	1
2022-09-12	12:40:54	0.453041	2.01522	137.626	FALSE	1
2022-09-12	12:40:55	0.329275	1.46468	151.858	FALSE	1
2022-09-12	12:40:55	0.660166	2.93655	140.562	FALSE	1
2022-09-12	12:40:55	0.262201	1.16632	153.024	FALSE	1
2022-09-12	12:40:56	0.471005	2.09512	142.657	FALSE	1
2022-09-12	12:40:56	0.186883	0.831293	153.856	FALSE	1
2022-09-12	12:40:56	0.477214	2.12274	144.78	FALSE	1
2022-09-12	12:40:56	0.181336	0.806619	154.662	FALSE	1
2022-09-12	12:40:57	0.512685	2.28053	147.061	FALSE	1
2022-09-12	12:40:57	0.232481	1.03412	155.696	FALSE	1
2022-09-12	12:40:57	0.492939	2.19269	149.253	FALSE	1
2022-09-12	12:40:57	0.308054	1.37029	157.067	FALSE	1
2022-09-12	12:40:58	0.433906	1.9301	151.183	FALSE	1
2022-09-12	12:40:58	0.323931	1.44091	158.507	FALSE	1
2022-09-12	12:40:58	0.31416	1.39745	152.581	FALSE	1
2022-09-12	12:40:58	0.346323	1.54051	160.048	FALSE	1
2022-09-12	12:40:59	0.374415	1.66547	154.246	FALSE	1
2022-09-12	12:40:59	0.640013	2.84691	162.895	FALSE	1
2022-09-12	12:40:59	0.301183	1.33972	155.586	FALSE	1
2022-09-12	12:41:00	0.708206	3.15024	166.045	FALSE	1
2022-09-12	12:41:00	0.444796	1.97854	157.564	FALSE	1
2022-09-12	12:41:00	0.724796	3.22404	169.269	FALSE	1
2022-09-12	12:41:00	0.187188	0.83265	158.397	FALSE	1
2022-09-12	12:41:01	0.469224	2.0872	171.356	FALSE	1
2022-09-12	12:41:01	0.264847	1.17809	159.575	FALSE	1
2022-09-12	12:41:01	0.708664	3.15228	174.509	FALSE	1
2022-09-12	12:41:01	0.107341	0.477474	160.053	FALSE	1
2022-09-12	12:41:02	0.459453	2.04374	176.552	FALSE	1
2022-09-12	12:41:02	0.143728	0.639331	160.692	FALSE	1
2022-09-12	12:41:02	0.420115	1.86876	178.421	FALSE	1
2022-09-12	12:41:02	0.157468	0.700449	161.392	FALSE	1
2022-09-12	12:41:03	0.484186	2.15376	180.575	FALSE	1
2022-09-12	12:41:03	0.152583	0.67872	162.071	FALSE	1
2022-09-12	12:41:03	0.447647	1.99122	182.566	FALSE	1
2022-09-12	12:41:04	0.161133	0.716752	162.788	FALSE	1
2022-09-12	12:41:04	0.469326	2.08766	184.654	FALSE	1
2022-09-12	12:41:04	0.145662	0.647934	163.436	FALSE	1
2022-09-12	12:41:04	0.477875	2.12568	186.779	FALSE	1
2022-09-12	12:41:05	0.217723	0.968475	164.404	FALSE	1
2022-09-12	12:41:05	0.306425	1.36304	188.143	FALSE	1
2022-09-12	12:41:05	0.0218959	0.0973973	164.502	FALSE	1
2022-09-12	12:41:05	-0.0783076	-0.348328	188.143	FALSE	1
2022-09-12	12:41:06	-0.198969	-0.885054	164.502	FALSE	1
2022-09-12	12:41:06	-0.240699	-1.07068	188.143	FALSE	1
2022-09-12	12:41:06	-0.1836	-0.81669	164.502	FALSE	1
2022-09-12	12:41:06	0.0175193	0.0779294	188.22	FALSE	1
2022-09-12	12:41:07	-0.0817682	-0.363721	164.502	FALSE	1
2022-09-12	12:41:07	0.0417941	0.185909	188.406	FALSE	1
2022-09-12	12:41:07	-0.107163	-0.476682	164.502	FALSE	1
2022-09-12	12:41:08	0.0792496	0.352518	188.759	FALSE	1
2022-09-12	12:41:08	-0.0298089	-0.132596	164.502	FALSE	1
2022-09-12	12:41:08	0.220013	0.978662	189.738	FALSE	1
2022-09-12	12:41:08	0.209936	0.933837	165.436	FALSE	1
2022-09-12	12:41:09	0.380725	1.69354	191.431	FALSE	1
2022-09-12	12:41:09	0.226476	1.00741	166.443	FALSE	1
2022-09-12	12:41:09	0.710954	3.16247	194.594	FALSE	1
2022-09-12	12:41:09	0.183117	0.814541	167.258	FALSE	1
2022-09-12	12:41:10	0.192227	0.855064	195.449	FALSE	1
2022-09-12	12:41:10	0.224593	0.999035	168.257	FALSE	1
2022-09-12	12:41:10	0.177825	0.791001	196.24	FALSE	1
2022-09-12	12:41:10	0.0940079	0.418166	168.675	FALSE	1
2022-09-12	12:41:11	0.157468	0.700449	196.94	FALSE	1
2022-09-12	12:41:11	0.191819	0.853249	169.528	FALSE	1
2022-09-12	12:41:11	0.113244	0.503732	197.444	FALSE	1
2022-09-12	12:41:12	0.10958	0.487434	170.015	FALSE	1
2022-09-12	12:41:12	0.0935498	0.416128	197.86	FALSE	1
2022-09-12	12:41:12	0.194924	0.867061	170.882	FALSE	1
2022-09-12	12:41:12	0.0527356	0.234578	198.094	FALSE	1
2022-09-12	12:41:13	0.146069	0.649744	171.532	FALSE	1
2022-09-12	12:41:13	0.100624	0.447596	198.542	FALSE	1
2022-09-12	12:41:13	0.22444	0.998354	172.531	FALSE	1
2022-09-12	12:41:13	0.0926846	0.41228	198.954	FALSE	1
2022-09-12	12:41:14	0.214364	0.953534	173.484	FALSE	1
2022-09-12	12:41:14	0.144848	0.644313	199.599	FALSE	1
2022-09-12	12:41:14	0.227138	1.01036	174.494	FALSE	1
2022-09-12	12:41:14	0.13701	0.609448	200.208	FALSE	1
2022-09-12	12:41:15	0.231514	1.02982	175.524	FALSE	1
2022-09-12	12:41:15	0.188359	0.837859	201.046	FALSE	1
2022-09-12	12:41:15	0.281845	1.2537	176.778	FALSE	1
2022-09-12	12:41:16	0.251107	1.11697	202.163	FALSE	1
2022-09-12	12:41:16	0.355331	1.58058	178.359	FALSE	1
2022-09-12	12:41:16	0.252125	1.1215	203.284	FALSE	1
2022-09-12	12:41:16	0.422201	1.87803	180.237	FALSE	1
2022-09-12	12:41:17	0.44902	1.99733	205.282	FALSE	1
2022-09-12	12:41:17	0.249478	1.10973	181.346	FALSE	1
2022-09-12	12:41:17	0.288308	1.28245	206.564	FALSE	1
2022-09-12	12:41:17	0.308664	1.373	182.719	FALSE	1
2022-09-12	12:41:18	0.350547	1.5593	208.124	FALSE	1
2022-09-12	12:41:18	0.371412	1.65211	184.371	FALSE	1
2022-09-12	12:41:18	0.362965	1.61454	209.738	FALSE	1
2022-09-12	12:41:18	0.274517	1.22111	185.593	FALSE	1
2022-09-12	12:41:19	0.318181	1.41533	211.153	FALSE	1
2022-09-12	12:41:19	0.237621	1.05699	186.65	FALSE	1
2022-09-12	12:41:19	0.42327	1.88279	213.036	FALSE	1
2022-09-12	12:41:20	0.315484	1.40334	188.053	FALSE	1
2022-09-12	12:41:20	0.419555	1.86626	214.902	FALSE	1
2022-09-12	12:41:20	0.300827	1.33814	189.391	FALSE	1
2022-09-12	12:41:20	0.331819	1.476	216.378	FALSE	1
2022-09-12	12:41:21	0.404797	1.80062	191.192	FALSE	1
2022-09-12	12:41:21	0.37355	1.66163	218.04	FALSE	1
2022-09-12	12:41:21	0.364542	1.62156	192.813	FALSE	1
2022-09-12	12:41:21	0.440471	1.9593	219.999	FALSE	1
2022-09-12	12:41:22	1.1449	5.09274	197.906	FALSE	1
2022-09-12	12:41:22	1.2367	5.50109	225.5	FALSE	1
2022-09-12	12:41:22	0.257723	1.1464	199.052	FALSE	1
2022-09-12	12:41:22	0.342252	1.52241	227.023	FALSE	1
2022-09-12	12:41:23	0.356247	1.58466	200.637	FALSE	1
2022-09-12	12:41:23	0.410293	1.82507	228.848	FALSE	1
2022-09-12	12:41:23	0.402964	1.79246	202.429	FALSE	1
2022-09-12	12:41:24	0.413753	1.84046	230.688	FALSE	1
2022-09-12	12:41:24	0.408664	1.81782	204.247	FALSE	1
2022-09-12	12:41:24	0.347392	1.54527	232.234	FALSE	1
2022-09-12	12:41:24	0.326018	1.45019	205.697	FALSE	1
2022-09-12	12:41:25	0.437367	1.9455	234.179	FALSE	1
2022-09-12	12:41:25	0.416145	1.8511	207.549	FALSE	1
2022-09-12	12:41:25	0.77243	3.43592	237.615	FALSE	1
2022-09-12	12:41:25	0.622506	2.76903	210.318	FALSE	1
2022-09-12	12:41:26	0.555483	2.4709	240.086	FALSE	1
2022-09-12	12:41:26	0.997672	4.43784	214.755	FALSE	1
2022-09-12	12:41:26	0.974618	4.3353	244.421	FALSE	1
2022-09-12	12:41:26	1.60683	7.1475	221.903	FALSE	1
2022-09-12	12:41:27	3.0052	13.3677	257.789	1	2
2022-09-12	12:41:27	4.08515	18.1716	240.075	1	3
2022-09-12	12:41:27	2.90098	12.9041	270.693	FALSE	3
2022-09-12	12:41:28	2.86332	12.7366	252.811	FALSE	3
2022-09-12	12:41:28	3.21655	14.3079	285.001	1	4
2022-09-12	12:41:28	3.42943	15.2548	268.066	1	5
2022-09-12	12:41:28	1.85146	8.23566	293.237	FALSE	5
2022-09-12	12:41:29	0.59701	2.65562	270.722	FALSE	5
2022-09-12	12:41:29	0.85645	3.80966	297.046	FALSE	5
2022-09-12	12:41:29	0.835839	3.71798	274.44	FALSE	5
2022-09-12	12:41:29	1.04475	4.64726	301.694	FALSE	5
2022-09-12	12:41:30	0.918435	4.08538	278.525	FALSE	5
2022-09-12	12:41:30	2.47472	11.008	312.702	FALSE	5
2022-09-12	12:41:30	2.39436	10.6506	289.175	FALSE	5
2022-09-12	12:41:30	0.804033	3.5765	316.278	FALSE	5
2022-09-12	12:41:31	0.78042	3.47146	292.647	FALSE	5
2022-09-12	12:41:31	0.220878	0.98251	317.261	FALSE	5
2022-09-12	12:41:31	0.364746	1.62246	294.269	FALSE	5
2022-09-12	12:41:32	0.287901	1.28064	318.541	FALSE	5
2022-09-12	12:41:32	0.605051	2.69139	296.961	FALSE	5
2022-09-12	12:41:32	0.64042	2.84872	321.39	FALSE	5
2022-09-12	12:41:32	0.297214	1.32207	298.283	FALSE	5
2022-09-12	12:41:33	0.765611	3.40559	324.796	FALSE	5
2022-09-12	12:41:33	0.450903	2.00571	300.289	FALSE	5
2022-09-12	12:41:33	0.409733	1.82257	326.618	FALSE	5
2022-09-12	12:41:33	0.705407	3.13779	303.426	FALSE	5
2022-09-12	12:41:34	0.637672	2.83649	329.455	FALSE	5
2022-09-12	12:41:34	0.424338	1.88754	305.314	FALSE	5
2022-09-12	12:41:34	1.2681	5.64076	335.095	FALSE	5
2022-09-12	12:41:34	0.410954	1.82801	307.142	FALSE	5
2022-09-12	12:41:35	0.421539	1.87509	336.971	FALSE	5
2022-09-12	12:41:35	0.644288	2.86592	310.008	FALSE	5
2022-09-12	12:41:35	0.658079	2.92727	339.898	FALSE	5
2022-09-12	12:41:36	0.405102	1.80197	311.81	FALSE	5
2022-09-12	12:41:36	0.757061	3.36756	343.265	FALSE	5
2022-09-12	12:41:36	0.725967	3.22925	315.039	FALSE	5
2022-09-12	12:41:36	0.97813	4.35092	347.616	FALSE	5
2022-09-12	12:41:37	0.443728	1.97379	317.013	FALSE	5
2022-09-12	12:41:37	0.597417	2.65743	350.274	FALSE	5
2022-09-12	12:41:37	0.298995	1.32999	318.343	FALSE	5
2022-09-12	12:41:37	0.375738	1.67136	351.945	FALSE	5
2022-09-12	12:41:38	0.244542	1.08777	319.431	FALSE	5
2022-09-12	12:41:38	0.348155	1.54866	353.494	FALSE	5
2022-09-12	12:41:38	0.310598	1.3816	320.812	FALSE	5
2022-09-12	12:41:38	0.327138	1.45518	354.949	FALSE	5
2022-09-12	12:41:39	0.272226	1.21092	322.023	FALSE	5
2022-09-12	12:41:39	0.268868	1.19598	356.145	FALSE	5
2022-09-12	12:41:39	0.292735	1.30214	323.325	FALSE	5
2022-09-12	12:41:40	0.185458	0.824954	356.97	FALSE	5
2022-09-12	12:41:40	0.296705	1.3198	324.645	FALSE	5
2022-09-12	12:41:40	0.244288	1.08664	358.056	FALSE	5
2022-09-12	12:41:40	0.442914	1.97017	326.615	FALSE	5
2022-09-12	12:41:41	0.286934	1.27634	359.333	FALSE	5
2022-09-12	12:41:41	0.336654	1.4975	328.113	FALSE	5
2022-09-12	12:41:41	0.263982	1.17424	360.507	FALSE	5
2022-09-12	12:41:41	0.281285	1.25121	329.364	FALSE	5
2022-09-12	12:41:42	0.3307	1.47102	361.978	FALSE	5
2022-09-12	12:41:42	0.287443	1.2786	330.643	FALSE	5
2022-09-12	12:41:42	0.271514	1.20775	363.186	FALSE	5
2022-09-12	12:41:42	0.277417	1.23401	331.877	FALSE	5
2022-09-12	12:41:43	0.269122	1.19711	364.383	FALSE	5
2022-09-12	12:41:43	0.264644	1.17719	333.054	FALSE	5
2022-09-12	12:41:43	0.24673	1.0975	365.48	FALSE	5
2022-09-12	12:41:44	0.241081	1.07238	334.126	FALSE	5
2022-09-12	12:41:44	0.202354	0.900111	366.381	FALSE	5
2022-09-12	12:41:44	0.373397	1.66094	335.787	FALSE	5
2022-09-12	12:41:44	0.238435	1.06061	367.441	FALSE	5
2022-09-12	12:41:45	0.271972	1.20979	336.997	FALSE	5
2022-09-12	12:41:45	0.349275	1.55365	368.995	FALSE	5
2022-09-12	12:41:45	0.357774	1.59145	338.588	FALSE	5
2022-09-12	12:41:45	0.326832	1.45381	370.449	FALSE	5
2022-09-12	12:41:46	0.377417	1.67883	340.267	FALSE	5
2022-09-12	12:41:46	0.390649	1.73768	372.186	FALSE	5
2022-09-12	12:41:46	0.298537	1.32795	341.595	FALSE	5
2022-09-12	12:41:46	0.276501	1.22993	373.416	FALSE	5
2022-09-12	12:41:47	0.24785	1.10249	342.698	FALSE	5
2022-09-12	12:41:47	0.265763	1.18217	374.598	FALSE	5
2022-09-12	12:41:47	0.27584	1.22699	343.925	FALSE	5
2022-09-12	12:41:48	0.253041	1.12558	375.724	FALSE	5
2022-09-12	12:41:48	0.289835	1.28924	345.214	FALSE	5
2022-09-12	12:41:48	0.435433	1.93689	377.661	FALSE	5
2022-09-12	12:41:48	0.679555	3.0228	348.237	FALSE	5
2022-09-12	12:41:49	0.572939	2.54855	380.209	FALSE	5
2022-09-12	12:41:49	0.147748	0.657213	348.894	FALSE	5
2022-09-12	12:41:49	-0.104771	-0.466042	380.209	FALSE	5
2022-09-12	12:41:49	-0.103193	-0.459023	348.894	FALSE	5
2022-09-12	12:41:50	-0.00115753	-0.00514892	380.209	FALSE	5
2022-09-12	12:41:50	0.215127	0.956928	349.851	FALSE	5
2022-09-12	12:41:50	0.218893	0.97368	381.183	FALSE	5
2022-09-12	12:41:50	0.230089	1.02348	350.874	FALSE	5
2022-09-12	12:41:51	0.305356	1.35828	382.541	FALSE	5
2022-09-12	12:41:51	0.330802	1.47147	352.346	FALSE	5
2022-09-12	12:41:51	0.381998	1.6992	384.241	FALSE	5
2022-09-12	12:41:52	0.300369	1.3361	353.682	FALSE	5
2022-09-12	12:41:52	0.249631	1.11041	385.351	FALSE	5
2022-09-12	12:41:52	0.349784	1.55591	355.238	FALSE	5
2022-09-12	12:41:52	0.35131	1.5627	386.914	FALSE	5
2022-09-12	12:41:53	0.436603	1.9421	357.18	FALSE	5
2022-09-12	12:41:53	0.376196	1.6734	388.587	FALSE	5
2022-09-12	12:41:53	0.338181	1.5043	358.684	FALSE	5
2022-09-12	12:41:53	0.325967	1.44997	390.037	FALSE	5
2022-09-12	12:41:54	0.29299	1.30328	359.987	FALSE	5
2022-09-12	12:41:54	0.313753	1.39564	391.433	FALSE	5
2022-09-12	12:41:54	0.296349	1.31822	361.306	FALSE	5
2022-09-12	12:41:54	0.305967	1.361	392.794	FALSE	5
2022-09-12	12:41:55	0.305051	1.35693	362.663	FALSE	5
2022-09-12	12:41:55	0.310395	1.3807	394.174	FALSE	5
2022-09-12	12:41:55	0.303779	1.35127	364.014	FALSE	5
2022-09-12	12:41:55	0.305814	1.36032	395.535	FALSE	5
2022-09-12	12:41:56	0.297417	1.32297	365.337	FALSE	5
2022-09-12	12:41:56	0.300573	1.33701	396.872	FALSE	5
2022-09-12	12:41:56	0.304898	1.35625	366.693	FALSE	5
2022-09-12	12:41:57	0.315178	1.40197	398.274	FALSE	5
2022-09-12	12:41:57	0.285662	1.27068	367.964	FALSE	5
2022-09-12	12:41:57	0.300725	1.33768	399.611	FALSE	5
2022-09-12	12:41:57	0.281692	1.25302	369.217	FALSE	5
2022-09-12	12:41:58	0.28383	1.26253	400.874	FALSE	5
2022-09-12	12:41:58	0.251311	1.11788	370.335	FALSE	5
2022-09-12	12:41:58	0.19355	0.860949	401.735	FALSE	5
2022-09-12	12:41:58	0.224593	0.999035	371.334	FALSE	5
2022-09-12	12:41:59	0.086985	0.386927	402.122	FALSE	5
2022-09-12	12:41:59	0.0587407	0.26129	371.595	FALSE	5
2022-09-12	12:41:59	0.0926846	0.41228	402.534	FALSE	5
2022-09-12	12:42:00	0.0249493	0.110979	371.706	FALSE	5
2022-09-12	12:42:00	0.116756	0.519354	403.053	FALSE	5
2022-09-12	12:42:00	0.222252	0.988621	372.695	FALSE	5
2022-09-12	12:42:00	0.103982	0.462533	403.516	FALSE	5
2022-09-12	12:42:01	0.277316	1.23356	373.928	FALSE	5
2022-09-12	12:42:01	0.205407	0.913691	404.43	FALSE	5
2022-09-12	12:42:01	0.239504	1.06536	374.993	FALSE	5
2022-09-12	12:42:01	0.242456	1.07849	405.508	FALSE	5
2022-09-12	12:42:02	0.246934	1.09841	376.092	FALSE	5
2022-09-12	12:42:02	0.313244	1.39337	406.902	FALSE	5
2022-09-12	12:42:02	0.145356	0.646573	376.738	FALSE	5
2022-09-12	12:42:02	0.282303	1.25574	408.157	FALSE	5
2022-09-12	12:42:03	0.112786	0.501695	377.24	FALSE	5
2022-09-12	12:42:03	-0.126806	-0.564058	408.157	FALSE	5
2022-09-12	12:42:03	0.0585371	0.260385	377.501	FALSE	5
2022-09-12	12:42:03	0.0607254	0.270119	408.427	FALSE	5
2022-09-12	12:42:04	0.181539	0.807522	378.308	FALSE	5
2022-09-12	12:42:04	0.0503438	0.223939	408.651	FALSE	5
2022-09-12	12:42:04	0.191972	0.85393	379.162	FALSE	5
2022-09-12	12:42:05	0.0924811	0.411374	409.063	FALSE	5
2022-09-12	12:42:05	0.144593	0.643179	379.805	FALSE	5
2022-09-12	12:42:05	0.308461	1.3721	410.435	FALSE	5
2022-09-12	12:42:05	1.48902	6.62346	386.429	FALSE	5
2022-09-12	12:42:06	0.838486	3.72975	414.165	FALSE	5
2022-09-12	12:42:06	0.861845	3.83366	390.262	FALSE	5
2022-09-12	12:42:06	0.80668	3.58827	417.753	FALSE	5
2022-09-12	12:42:06	0.377519	1.67928	391.942	FALSE	5
2022-09-12	12:42:07	0.55813	2.48267	420.235	FALSE	5
2022-09-12	12:42:07	0.420674	1.87124	393.813	FALSE	5
2022-09-12	12:42:07	0.486323	2.16326	422.399	FALSE	5
2022-09-12	12:42:07	0.414873	1.84544	395.658	FALSE	5
2022-09-12	12:42:08	0.444338	1.9765	424.375	FALSE	5
2022-09-12	12:42:08	0.413244	1.83819	397.496	FALSE	5
2022-09-12	12:42:08	0.53757	2.39122	426.766	FALSE	5
2022-09-12	12:42:09	0.942201	4.1911	401.688	FALSE	5
2022-09-12	12:42:09	1.47609	6.56594	433.332	FALSE	5
2022-09-12	12:42:09	2.06144	9.1697	410.857	FALSE	5
2022-09-12	12:42:09	2.21828	9.86735	443.2	FALSE	5
2022-09-12	12:42:10	1.93742	8.61803	419.475	FALSE	5
2022-09-12	12:42:10	1.5136	6.7328	449.933	FALSE	5
2022-09-12	12:42:10	0.618384	2.7507	422.226	FALSE	5
2022-09-12	12:42:10	0.671361	2.98635	452.919	FALSE	5
2022-09-12	12:42:11	0.592481	2.63547	424.861	FALSE	5
2022-09-12	12:42:11	0.566374	2.51934	455.438	FALSE	5
2022-09-12	12:42:11	0.469784	2.08969	426.951	FALSE	5
2022-09-12	12:42:11	0.408613	1.81759	457.256	FALSE	5
2022-09-12	12:42:12	0.693499	3.08482	430.036	FALSE	5
2022-09-12	12:42:12	0.402099	1.78862	459.044	FALSE	5
2022-09-12	12:42:12	0.536858	2.38805	432.424	FALSE	5
2022-09-12	12:42:13	0.517417	2.30157	461.346	FALSE	5
2022-09-12	12:42:13	0.311819	1.38703	433.811	FALSE	5
2022-09-12	12:42:13	0.430598	1.91539	463.261	FALSE	5
2022-09-12	12:42:13	0.31757	1.41261	435.224	FALSE	5
2022-09-12	12:42:14	0.348511	1.55025	464.812	FALSE	5
2022-09-12	12:42:14	0.343423	1.52761	436.751	FALSE	5
2022-09-12	12:42:14	0.199911	0.889244	465.701	FALSE	5
2022-09-12	12:42:14	0.366934	1.6322	438.383	FALSE	5
2022-09-12	12:42:15	0.292125	1.29943	467	FALSE	5
2022-09-12	12:42:15	0.205204	0.912788	439.296	FALSE	5
2022-09-12	12:42:15	0.34785	1.54731	468.548	FALSE	5
2022-09-12	12:42:15	0.156552	0.696375	439.993	FALSE	5
2022-09-12	12:42:16	0.391158	1.73995	470.288	FALSE	5
2022-09-12	12:42:16	0.195331	0.868871	440.861	FALSE	5
2022-09-12	12:42:16	0.330598	1.47057	471.758	FALSE	5
2022-09-12	12:42:17	0.235433	1.04725	441.909	FALSE	5
2022-09-12	12:42:17	0.185509	0.825181	472.583	FALSE	5
2022-09-12	12:42:17	0.219097	0.974587	442.883	FALSE	5
2022-09-12	12:42:17	0.176756	0.786246	473.37	FALSE	5
2022-09-12	12:42:18	0.26042	1.1584	444.042	FALSE	5
2022-09-12	12:42:18	0.161641	0.719011	474.089	FALSE	5
2022-09-12	12:42:18	0.341183	1.51765	445.559	FALSE	5
2022-09-12	12:42:18	0.0776211	0.345274	474.434	FALSE	5
2022-09-12	12:42:19	0.211158	0.939273	446.499	FALSE	5
2022-09-12	12:42:19	0.115382	0.513242	474.947	FALSE	5
2022-09-12	12:42:19	0.126323	0.56191	447.061	FALSE	5
2022-09-12	12:42:19	0.17187	0.764512	475.712	FALSE	5
2022-09-12	12:42:20	-0.0303178	-0.13486	447.061	FALSE	5
2022-09-12	12:42:20	0.144695	0.643632	476.355	FALSE	5
2022-09-12	12:42:20	0.00367708	0.0163564	447.077	FALSE	5
2022-09-12	12:42:21	0.0799111	0.355461	476.711	FALSE	5
2022-09-12	12:42:21	0.171718	0.763836	447.841	FALSE	5
2022-09-12	12:42:21	0.0874429	0.388964	477.1	FALSE	5
2022-09-12	12:42:21	0.231718	1.03073	448.871	FALSE	5
2022-09-12	12:42:22	0.14327	0.637294	477.737	FALSE	5
2022-09-12	12:42:22	0.375178	1.66887	450.54	FALSE	5
2022-09-12	12:42:22	0.254873	1.13373	478.871	FALSE	5
2022-09-12	12:42:22	0.452176	2.01137	452.552	FALSE	5
2022-09-12	12:42:23	0.345916	1.5387	480.409	FALSE	5
2022-09-12	12:42:23	0.562862	2.50372	455.055	FALSE	5
2022-09-12	12:42:23	0.294669	1.31075	481.72	FALSE	5
2022-09-12	12:42:23	0.733651	3.26343	458.319	FALSE	5
2022-09-12	12:42:24	0.710344	3.15975	484.88	FALSE	5
2022-09-12	12:42:24	0.594364	2.64385	460.963	FALSE	5
2022-09-12	12:42:24	0.585967	2.6065	487.486	FALSE	5
2022-09-12	12:42:25	0.542506	2.41318	463.376	FALSE	5
2022-09-12	12:42:25	0.870445	3.87191	491.358	FALSE	5
2022-09-12	12:42:25	0.572226	2.54538	465.921	FALSE	5
2022-09-12	12:42:25	0.872125	3.87939	495.238	FALSE	5
2022-09-12	12:42:26	0.878791	3.90904	469.83	FALSE	5
2022-09-12	12:42:26	0.785814	3.49546	498.733	FALSE	5
2022-09-12	12:42:26	0.79416	3.53258	473.363	FALSE	5
2022-09-12	12:42:26	0.47528	2.11414	500.847	FALSE	5
2022-09-12	12:42:27	0.861743	3.83321	477.196	FALSE	5
2022-09-12	12:42:27	0.613499	2.72897	503.576	FALSE	5
2022-09-12	12:42:27	0.853244	3.7954	480.991	FALSE	5
2022-09-12	12:42:27	0.548817	2.44125	506.018	FALSE	5
2022-09-12	12:42:28	0.956603	4.25516	485.247	FALSE	5
2022-09-12	12:42:28	0.947697	4.21555	510.233	FALSE	5
2022-09-12	12:42:28	0.302761	1.34674	486.593	FALSE	5
2022-09-12	12:42:29	1.3424	5.97126	516.204	FALSE	5
2022-09-12	12:42:29	0.314618	1.39948	487.993	FALSE	5
2022-09-12	12:42:29	0.267443	1.18964	517.394	FALSE	5
2022-09-12	12:42:29	0.314313	1.39813	489.391	FALSE	5
2022-09-12	12:42:30	0.80042	3.56043	520.954	FALSE	5
2022-09-12	12:42:30	0.472074	2.09988	491.491	FALSE	5
2022-09-12	12:42:30	0.124033	0.551724	521.506	FALSE	5
2022-09-12	12:42:30	0.6707	2.98341	494.474	FALSE	5
2022-09-12	12:42:31	0.665254	2.95918	524.465	FALSE	5
2022-09-12	12:42:31	0.773041	3.43864	497.913	FALSE	5
2022-09-12	12:42:31	0.807799	3.59325	528.059	FALSE	5
2022-09-12	12:42:31	1.12754	5.01552	502.928	FALSE	5
2022-09-12	12:42:32	0.717163	3.19008	531.249	FALSE	5
2022-09-12	12:42:32	0.939249	4.17797	507.106	FALSE	5
2022-09-12	12:42:32	1.13772	5.06081	536.309	FALSE	5
2022-09-12	12:42:33	0.51243	2.27939	509.386	FALSE	5
2022-09-12	12:42:33	0.354517	1.57696	537.886	FALSE	5
2022-09-12	12:42:33	0.485204	2.15828	511.544	FALSE	5
2022-09-12	12:42:33	0.27701	1.2322	539.119	FALSE	5
2022-09-12	12:42:34	0.308003	1.37006	512.914	FALSE	5
2022-09-12	12:42:34	0.274618	1.22156	540.34	FALSE	5
2022-09-12	12:42:34	0.356247	1.58466	514.499	FALSE	5
2022-09-12	12:42:34	0.402048	1.78839	542.129	FALSE	5
2022-09-12	12:42:35	0.368817	1.64057	516.139	FALSE	5
2022-09-12	12:42:35	0.837163	3.72387	545.852	FALSE	5
2022-09-12	12:42:35	0.463015	2.05958	518.199	FALSE	5
2022-09-12	12:42:35	0.644593	2.86728	548.72	FALSE	5
2022-09-12	12:42:36	1.27335	5.66412	523.863	FALSE	5
2022-09-12	12:42:36	0.454669	2.02246	550.742	FALSE	5
2022-09-12	12:42:36	0.360115	1.60186	525.465	FALSE	5
2022-09-12	12:42:37	0.531361	2.3636	553.106	FALSE	5
2022-09-12	12:42:37	0.473194	2.10486	527.57	FALSE	5
2022-09-12	12:42:37	0.22556	1.00334	554.109	FALSE	5
2022-09-12	12:42:37	0.389529	1.7327	529.303	FALSE	5
2022-09-12	12:42:38	0.338588	1.50611	555.615	FALSE	5
2022-09-12	12:42:38	0.292837	1.3026	530.605	FALSE	5
2022-09-12	12:42:38	0.173244	0.770624	556.386	FALSE	5
2022-09-12	12:42:38	0.158995	0.707242	531.312	FALSE	5
2022-09-12	12:42:39	0.211056	0.938819	557.325	FALSE	5
2022-09-12	12:42:39	0.192023	0.854157	532.167	FALSE	5
2022-09-12	12:42:39	0.272379	1.2116	558.536	FALSE	5
2022-09-12	12:42:39	0.124898	0.555571	532.722	FALSE	5
2022-09-12	12:42:40	0.105305	0.468418	559.005	FALSE	5
2022-09-12	12:42:40	0.315026	1.4013	534.123	FALSE	5
2022-09-12	12:42:40	0.205814	0.915502	559.92	FALSE	5
2022-09-12	12:42:41	0.244848	1.08913	535.213	FALSE	5
2022-09-12	12:42:41	0.112176	0.498981	560.419	FALSE	5
2022-09-12	12:42:41	-0.0393763	-0.175154	535.213	FALSE	5
2022-09-12	12:42:41	0.080929	0.359988	560.779	FALSE	5
2022-09-12	12:42:42	0.0699875	0.311318	535.524	FALSE	5
2022-09-12	12:42:42	0.0372649	0.165762	560.945	FALSE	5
2022-09-12	12:42:42	0.203575	0.905542	536.429	FALSE	5
2022-09-12	12:42:42	0.00642519	0.0285805	560.973	FALSE	5
2022-09-12	12:42:43	0.173601	0.772212	537.202	FALSE	5
2022-09-12	12:42:43	0.0867305	0.385795	561.359	FALSE	5
2022-09-12	12:42:43	0.112328	0.499657	537.701	FALSE	5
2022-09-12	12:42:43	0.151616	0.674418	562.034	FALSE	5
2022-09-12	12:42:44	0.0799111	0.355461	538.057	FALSE	5
2022-09-12	12:42:44	0.651056	2.89603	564.93	FALSE	5
2022-09-12	12:42:44	1.01391	4.51007	542.567	FALSE	5
2022-09-12	12:42:45	0.937774	4.17141	569.101	FALSE	5
2022-09-12	12:42:45	0.78042	3.47146	546.038	FALSE	5
2022-09-12	12:42:45	1.045	4.64837	573.749	FALSE	5
2022-09-12	12:42:45	0.464949	2.06819	548.106	FALSE	5
2022-09-12	12:42:46	0.561845	2.4992	576.249	FALSE	5
2022-09-12	12:42:46	0.343881	1.52965	549.636	FALSE	5
2022-09-12	12:42:46	0.388206	1.72682	577.976	FALSE	5
2022-09-12	12:42:46	0.570954	2.53972	552.176	FALSE	5
2022-09-12	12:42:47	0.375687	1.67113	579.647	FALSE	5
2022-09-12	12:42:47	0.264542	1.17674	553.353	FALSE	5
2022-09-12	12:42:47	0.197977	0.880641	580.527	FALSE	5
2022-09-12	12:42:47	0.324949	1.44544	554.798	FALSE	5
2022-09-12	12:42:48	0.16327	0.726258	581.254	FALSE	5
2022-09-12	12:42:48	0.252125	1.1215	555.919	FALSE	5
2022-09-12	12:42:48	0.16154	0.718562	581.972	FALSE	5
2022-09-12	12:42:49	0.30154	1.34131	557.261	FALSE	5
2022-09-12	12:42:49	0.227748	1.01307	582.985	FALSE	5
2022-09-12	12:42:49	0.277417	1.23401	558.495	FALSE	5
2022-09-12	12:42:49	0.432735	1.92489	584.91	FALSE	5
2022-09-12	12:42:50	0.217977	0.969605	559.464	FALSE	5
2022-09-12	12:42:50	0.514975	2.29071	587.201	FALSE	5
2022-09-12	12:42:50	0.3707	1.64895	561.113	FALSE	5
2022-09-12	12:42:50	0.568409	2.5284	589.729	FALSE	5
2022-09-12	12:42:51	0.537163	2.38941	563.503	FALSE	5
2022-09-12	12:42:51	0.451056	2.00639	591.736	FALSE	5
2022-09-12	12:42:51	0.426018	1.89501	565.398	FALSE	5
2022-09-12	12:42:51	0.747697	3.32591	595.061	FALSE	5
2022-09-12	12:42:52	0.70103	3.11832	568.516	FALSE	5
2022-09-12	12:42:52	0.401285	1.785	596.846	FALSE	5
2022-09-12	12:42:52	0.788715	3.50836	572.024	FALSE	5
2022-09-12	12:42:53	0.428664	1.90678	598.753	FALSE	5
2022-09-12	12:42:53	0.647239	2.87905	574.904	FALSE	5
2022-09-12	12:42:53	0.522913	2.32602	601.079	FALSE	5
2022-09-12	12:42:53	0.593753	2.64113	577.545	FALSE	5
2022-09-12	12:42:54	0.406832	1.80967	602.889	FALSE	5
2022-09-12	12:42:54	0.582252	2.58997	580.135	FALSE	5
2022-09-12	12:42:54	0.405204	1.80243	604.691	FALSE	5
2022-09-12	12:42:54	0.424237	1.88709	582.022	FALSE	5
2022-09-12	12:42:55	0.448817	1.99643	606.688	FALSE	5
2022-09-12	12:42:55	0.408003	1.81488	583.837	FALSE	5
2022-09-12	12:42:55	0.61126	2.71901	609.407	FALSE	5
2022-09-12	12:42:55	0.402557	1.79065	585.627	FALSE	5
2022-09-12	12:42:56	0.499707	2.2228	611.63	FALSE	5
2022-09-12	12:42:56	0.316501	1.40786	587.035	FALSE	5
2022-09-12	12:42:56	0.456145	2.02902	613.659	FALSE	5
2022-09-12	12:42:57	0.444237	1.97606	589.011	FALSE	5
2022-09-12	12:42:57	0.366374	1.6297	615.288	FALSE	5
2022-09-12	12:42:57	0.629326	2.79937	591.811	FALSE	5
2022-09-12	12:42:57	0.389529	1.7327	617.021	FALSE	5
2022-09-12	12:42:58	0.580929	2.58409	594.395	FALSE	5
2022-09-12	12:42:58	1.69721	7.54953	624.571	FALSE	5
2022-09-12	12:42:58	2.3995	10.6735	605.068	FALSE	5
2022-09-12	12:42:58	3.28291	14.603	639.174	1	6
2022-09-12	12:42:59	1.60276	7.1294	612.197	FALSE	6
2022-09-12	12:42:59	0.973651	4.33099	643.505	FALSE	6
2022-09-12	12:42:59	1.27589	5.67541	617.873	FALSE	6
2022-09-12	12:42:59	1.40403	6.24541	649.75	FALSE	6
2022-09-12	12:43:00	1.54154	6.85708	624.73	FALSE	6
2022-09-12	12:43:00	2.40195	10.6844	660.434	FALSE	6
2022-09-12	12:43:00	1.78968	7.96085	632.691	FALSE	6
2022-09-12	12:43:01	1.02047	4.53925	664.974	FALSE	6
2022-09-12	12:43:01	0.656349	2.91957	635.61	FALSE	6
2022-09-12	12:43:01	0.0596058	0.265139	665.239	FALSE	6
2022-09-12	12:43:01	0.273448	1.21635	636.827	FALSE	6
2022-09-12	12:43:02	0.082303	0.3661	665.605	FALSE	6
2022-09-12	12:43:02	-0.0515901	-0.229483	636.827	FALSE	6
2022-09-12	12:43:02	0.0993513	0.441934	666.047	FALSE	6
2022-09-12	12:43:02	-0.00248066	-0.0110345	636.827	FALSE	6
2022-09-12	12:43:03	-0.0112847	-0.0501966	666.047	FALSE	6
2022-09-12	12:43:03	0.538282	2.39439	639.221	FALSE	6
2022-09-12	12:43:03	0.761539	3.38748	669.434	FALSE	6
2022-09-12	12:43:03	0.950445	4.22777	643.449	FALSE	6
2022-09-12	12:43:04	1.06785	4.75001	674.184	FALSE	6
2022-09-12	12:43:04	1.13238	5.03705	648.486	FALSE	6
2022-09-12	12:43:04	0.842863	3.74922	677.933	FALSE	6
2022-09-12	12:43:05	0.683117	3.03864	651.525	FALSE	6
2022-09-12	12:43:05	0.466323	2.0743	680.008	FALSE	6
2022-09-12	12:43:05	0.428766	1.90724	653.432	FALSE	6
2022-09-12	12:43:05	0.435636	1.9378	681.946	FALSE	6
2022-09-12	12:43:06	0.556399	2.47497	655.907	FALSE	6
2022-09-12	12:43:06	0.34383	1.52942	683.475	FALSE	6
2022-09-12	12:43:06	-0.0881804	-0.392244	655.907	FALSE	6
2022-09-12	12:43:06	-0.041412	-0.184209	683.475	FALSE	6
2022-09-12	12:43:07	-0.173727	-0.772772	655.907	FALSE	6
2022-09-12	12:43:07	-0.416374	-1.85211	683.475	FALSE	6
2022-09-12	12:43:07	-0.258766	-1.15104	655.907	FALSE	6
2022-09-12	12:43:07	-0.0682313	-0.303506	683.475	FALSE	6
2022-09-12	12:43:08	0.0751275	0.334182	656.241	FALSE	6
2022-09-12	12:43:08	0.205814	0.915502	684.391	FALSE	6
2022-09-12	12:43:08	0.261998	1.16542	657.406	FALSE	6
2022-09-12	12:43:09	0.33126	1.47351	685.864	FALSE	6
2022-09-12	12:43:09	0.407443	1.81239	659.219	FALSE	6
2022-09-12	12:43:09	0.366323	1.62948	687.494	FALSE	6
2022-09-12	12:43:09	0.367595	1.63514	660.854	FALSE	6
2022-09-12	12:43:10	0.313143	1.39292	688.886	FALSE	6
2022-09-12	12:43:10	0.416858	1.85427	662.708	FALSE	6
2022-09-12	12:43:10	0.527188	2.34504	691.231	FALSE	6
2022-09-12	12:43:10	0.40098	1.78364	664.492	FALSE	6
2022-09-12	12:43:11	0.258232	1.14867	692.38	FALSE	6
2022-09-12	12:43:11	0.402812	1.79179	666.284	FALSE	6
2022-09-12	12:43:11	0.42556	1.89298	694.273	FALSE	6
2022-09-12	12:43:11	0.41355	1.83955	668.123	FALSE	6
2022-09-12	12:43:12	0.428512	1.90611	696.179	FALSE	6
2022-09-12	12:43:12	0.399707	1.77798	669.901	FALSE	6
2022-09-12	12:43:12	0.432379	1.92331	698.103	FALSE	6
2022-09-12	12:43:13	0.47014	2.09128	671.992	FALSE	6
2022-09-12	12:43:13	0.568053	2.52681	700.629	FALSE	6
2022-09-12	12:43:13	0.42444	1.88799	673.88	FALSE	6
2022-09-12	12:43:13	0.427443	1.90135	702.531	FALSE	6
2022-09-12	12:43:14	0.418181	1.86015	675.741	FALSE	6
2022-09-12	12:43:14	0.303168	1.34855	703.879	FALSE	6
2022-09-12	12:43:14	0.456858	2.0322	677.773	FALSE	6
2022-09-12	12:43:14	0.151718	0.674872	704.554	FALSE	6
2022-09-12	12:43:15	0.275331	1.22473	678.997	FALSE	6
2022-09-12	12:43:15	0.42729	1.90067	706.455	FALSE	6
2022-09-12	12:43:15	0.21757	0.967795	679.965	FALSE	6
2022-09-12	12:43:15	0.358741	1.59575	708.051	FALSE	6
2022-09-12	12:43:16	0.250089	1.11245	681.078	FALSE	6
2022-09-12	12:43:16	0.330445	1.46989	709.52	FALSE	6
2022-09-12	12:43:16	0.396756	1.76485	682.843	FALSE	6
2022-09-12	12:43:17	0.314567	1.39926	710.92	FALSE	6
2022-09-12	12:43:17	0.506934	2.25494	685.098	FALSE	6
2022-09-12	12:43:17	0.213601	0.95014	711.87	FALSE	6
2022-09-12	12:43:17	0.41299	1.83706	686.935	FALSE	6
2022-09-12	12:43:18	0.347545	1.54595	713.416	FALSE	6
2022-09-12	12:43:18	0.635585	2.82721	689.762	FALSE	6
2022-09-12	12:43:18	0.795534	3.53869	716.954	FALSE	6
2022-09-12	12:43:18	0.379911	1.68992	691.452	FALSE	6
2022-09-12	12:43:19	0.564287	2.51006	719.465	FALSE	6
2022-09-12	12:43:19	0.477265	2.12297	693.575	FALSE	6
2022-09-12	12:43:19	0.715432	3.18238	722.647	FALSE	6
2022-09-12	12:43:19	0.451005	2.00616	695.581	FALSE	6
2022-09-12	12:43:20	0.394873	1.75647	724.403	FALSE	6
2022-09-12	12:43:20	0.490242	2.18069	697.762	FALSE	6
2022-09-12	12:43:20	0.461082	2.05098	726.454	FALSE	6
2022-09-12	12:43:21	0.479453	2.1327	699.894	FALSE	6
2022-09-12	12:43:21	0.415331	1.84748	728.302	FALSE	6
2022-09-12	12:43:21	0.38159	1.69739	701.592	FALSE	6
2022-09-12	12:43:21	0.425305	1.89184	730.194	FALSE	6
2022-09-12	12:43:22	0.357875	1.5919	703.184	FALSE	6
2022-09-12	12:43:22	0.354975	1.579	731.773	FALSE	6
2022-09-12	12:43:22	0.53645	2.38624	705.57	FALSE	6
2022-09-12	12:43:22	0.363473	1.6168	733.389	FALSE	6
2022-09-12	12:43:23	0.431769	1.92059	707.49	FALSE	6
2022-09-12	12:43:23	0.334873	1.48958	734.879	FALSE	6
2022-09-12	12:43:23	0.400827	1.78296	709.273	FALSE	6
2022-09-12	12:43:23	0.513499	2.28415	737.163	FALSE	6
2022-09-12	12:43:24	0.301896	1.34289	710.616	FALSE	6
2022-09-12	12:43:24	0.601387	2.67509	739.838	FALSE	6
2022-09-12	12:43:24	0.369987	1.64578	712.262	FALSE	6
2022-09-12	12:43:25	0.440013	1.95727	741.796	FALSE	6
2022-09-12	12:43:25	0.377163	1.6777	713.94	FALSE	6
2022-09-12	12:43:25	0.318181	1.41533	743.211	FALSE	6
2022-09-12	12:43:25	0.539758	2.40095	716.341	FALSE	6
2022-09-12	12:43:26	0.360267	1.60254	744.813	FALSE	6
2022-09-12	12:43:26	0.490547	2.18205	718.523	FALSE	6
2022-09-12	12:43:26	0.357265	1.58919	746.403	FALSE	6
2022-09-12	12:43:26	0.378588	1.68404	720.207	FALSE	6
2022-09-12	12:43:27	0.398842	1.77413	748.177	FALSE	6
2022-09-12	12:43:27	0.252328	1.12241	721.329	FALSE	6
2022-09-12	12:43:27	0.487697	2.16937	750.346	FALSE	6
2022-09-12	12:43:27	0.686832	3.05517	724.384	FALSE	6
2022-09-12	12:43:28	0.111667	0.496717	750.843	FALSE	6
2022-09-12	12:43:28	0.129275	0.575041	724.959	FALSE	6
2022-09-12	12:43:28	0.0658145	0.292756	751.136	FALSE	6
2022-09-12	12:43:29	0.13355	0.594057	725.553	FALSE	6
2022-09-12	12:43:29	0.132277	0.588395	751.724	FALSE	6
2022-09-12	12:43:29	0.139504	0.620542	726.174	FALSE	6
2022-09-12	12:43:29	0.156451	0.695925	752.42	FALSE	6
2022-09-12	12:43:30	0.265865	1.18262	727.357	FALSE	6
2022-09-12	12:43:30	0.253193	1.12625	753.546	FALSE	6
2022-09-12	12:43:30	0.237163	1.05495	728.412	FALSE	6
2022-09-12	12:43:30	0.241845	1.07577	754.622	FALSE	6
2022-09-12	12:43:31	0.173601	0.772212	729.184	FALSE	6
2022-09-12	12:43:31	0.378791	1.68494	756.307	FALSE	6
2022-09-12	12:43:31	0.444898	1.979	731.163	FALSE	6
2022-09-12	12:43:31	0.27869	1.23967	757.547	FALSE	6
2022-09-12	12:43:32	0.389021	1.73044	732.893	FALSE	6
2022-09-12	12:43:32	0.310089	1.37934	758.926	FALSE	6
2022-09-12	12:43:32	0.264135	1.17493	734.068	FALSE	6
2022-09-12	12:43:33	0.251921	1.12059	760.046	FALSE	6
2022-09-12	12:43:33	0.214517	0.954215	735.022	FALSE	6
2022-09-12	12:43:33	0.427596	1.90203	761.949	FALSE	6
2022-09-12	12:43:33	0.257875	1.14708	736.169	FALSE	6
2022-09-12	12:43:34	0.295789	1.31573	763.264	FALSE	6
2022-09-12	12:43:34	0.420674	1.87124	738.041	FALSE	6
2022-09-12	12:43:34	0.396603	1.76417	765.028	FALSE	6
2022-09-12	12:43:34	0.244389	1.08709	739.128	FALSE	6
2022-09-12	12:43:35	0.148512	0.660611	765.689	FALSE	6
2022-09-12	12:43:35	0.25126	1.11765	740.245	FALSE	6
2022-09-12	12:43:35	0.167239	0.743913	766.433	FALSE	6
2022-09-12	12:43:35	0.197519	0.878604	741.124	FALSE	6
2022-09-12	12:43:36	0.169987	0.756136	767.189	FALSE	6
2022-09-12	12:43:36	0.1507	0.670344	741.794	FALSE	6
2022-09-12	12:43:36	0.149021	0.662875	767.852	FALSE	6
2022-09-12	12:43:37	0.127443	0.566892	742.361	FALSE	6
2022-09-12	12:43:37	0.221539	0.98545	768.837	FALSE	6
2022-09-12	12:43:37	0.0951274	0.423146	742.784	FALSE	6
2022-09-12	12:43:37	0.22327	0.99315	769.831	FALSE	6
2022-09-12	12:43:38	0.140624	0.625524	743.41	FALSE	6
2022-09-12	12:43:38	0.185407	0.824727	770.655	FALSE	6
2022-09-12	12:43:38	0.178435	0.793715	744.204	FALSE	6
2022-09-12	12:43:38	0.162965	0.724901	771.38	FALSE	6
2022-09-12	12:43:39	0.294618	1.31052	745.514	FALSE	6
2022-09-12	12:43:39	0.363626	1.61748	772.998	FALSE	6
2022-09-12	12:43:39	0.317926	1.4142	746.928	FALSE	6
2022-09-12	12:43:39	0.321998	1.43231	774.43	FALSE	6
2022-09-12	12:43:40	0.312837	1.39156	748.32	FALSE	6
2022-09-12	12:43:40	0.415585	1.84861	776.279	FALSE	6
2022-09-12	12:43:40	0.769122	3.42121	751.741	FALSE	6
2022-09-12	12:43:41	0.808562	3.59665	779.875	FALSE	6
2022-09-12	12:43:41	0.201438	0.896037	752.637	FALSE	6
2022-09-12	12:43:41	0.128563	0.571874	780.447	FALSE	6
2022-09-12	12:43:41	0.0213361	0.0949072	752.732	FALSE	6
2022-09-12	12:43:42	0.0187407	0.0833624	780.53	FALSE	6
2022-09-12	12:43:42	-0.0565264	-0.251441	752.732	FALSE	6
2022-09-12	12:43:42	0.0678501	0.301811	780.832	FALSE	6
2022-09-12	12:43:42	0.373652	1.66208	754.394	FALSE	6
2022-09-12	12:43:43	0.268919	1.19621	782.028	FALSE	6
2022-09-12	12:43:43	0.231616	1.03027	755.424	FALSE	6
2022-09-12	12:43:43	0.303626	1.35059	783.379	FALSE	6
2022-09-12	12:43:43	0.363982	1.61906	757.043	FALSE	6
2022-09-12	12:43:44	0.346629	1.54188	784.921	FALSE	6
2022-09-12	12:43:44	0.43986	1.95659	759	FALSE	6
2022-09-12	12:43:44	0.38159	1.69739	786.618	FALSE	6
2022-09-12	12:43:45	0.493499	2.19518	761.195	FALSE	6
2022-09-12	12:43:45	0.509275	2.26536	788.884	FALSE	6
2022-09-12	12:43:45	0.577926	2.57073	763.766	FALSE	6
2022-09-12	12:43:45	0.524135	2.33146	791.215	FALSE	6
2022-09-12	12:43:46	0.559148	2.4872	766.253	FALSE	6
2022-09-12	12:43:46	0.499148	2.22031	793.435	FALSE	6
2022-09-12	12:43:46	0.528664	2.3516	768.605	FALSE	6
2022-09-12	12:43:46	0.552125	2.45596	795.891	FALSE	6
2022-09-12	12:43:47	0.519046	2.30882	770.914	FALSE	6
2022-09-12	12:43:47	0.462354	2.05664	797.948	FALSE	6
2022-09-12	12:43:47	0.348053	1.54821	772.462	FALSE	6
2022-09-12	12:43:47	0.371667	1.65325	799.601	FALSE	6
2022-09-12	12:43:48	0.375585	1.67068	774.132	FALSE	6
2022-09-12	12:43:48	0.359707	1.60005	801.201	FALSE	6
2022-09-12	12:43:48	0.470191	2.0915	776.224	FALSE	6
2022-09-12	12:43:48	0.20612	0.916863	802.118	FALSE	6
2022-09-12	12:43:49	0.267087	1.18806	777.412	FALSE	6
2022-09-12	12:43:49	0.218079	0.970059	803.088	FALSE	6
2022-09-12	12:43:49	0.271412	1.20729	778.619	FALSE	6
2022-09-12	12:43:50	0.0805218	0.358177	803.446	FALSE	6
2022-09-12	12:43:50	0.235331	1.0468	779.666	FALSE	6
2022-09-12	12:43:50	0.0705473	0.313808	803.76	FALSE	6
2022-09-12	12:43:50	0.353855	1.57402	781.24	FALSE	6
2022-09-12	12:43:51	0.128054	0.56961	804.33	FALSE	6
2022-09-12	12:43:51	0.361794	1.60933	782.849	FALSE	6
2022-09-12	12:43:51	0.153804	0.684151	805.014	FALSE	6
2022-09-12	12:43:51	0.321082	1.42824	784.278	FALSE	6
2022-09-12	12:43:52	0.0986389	0.438766	805.453	FALSE	6
2022-09-12	12:43:52	0.272379	1.2116	785.489	FALSE	6
2022-09-12	12:43:52	0.149224	0.663778	806.117	FALSE	6
2022-09-12	12:43:52	0.239097	1.06355	786.553	FALSE	6
2022-09-12	12:43:53	0.225356	1.00243	807.119	FALSE	6
2022-09-12	12:43:53	0.192735	0.857324	787.41	FALSE	6
2022-09-12	12:43:53	0.23701	1.05427	808.173	FALSE	6
2022-09-12	12:43:54	0.24327	1.08211	788.492	FALSE	6
2022-09-12	12:43:54	0.348003	1.54799	809.721	FALSE	6
2022-09-12	12:43:54	0.171311	0.762026	789.254	FALSE	6
2022-09-12	12:43:54	0.386476	1.71912	811.44	FALSE	6
2022-09-12	12:43:55	0.205458	0.913918	790.168	FALSE	6
2022-09-12	12:43:55	0.378893	1.68539	813.126	FALSE	6
2022-09-12	12:43:55	0.215891	0.960326	791.129	FALSE	6
2022-09-12	12:43:55	0.261947	1.16519	814.291	FALSE	6
2022-09-12	12:43:56	0.257875	1.14708	792.276	FALSE	6
2022-09-12	12:43:56	0.21925	0.975268	815.266	FALSE	6
2022-09-12	12:43:56	0.388817	1.72954	794.005	FALSE	6
2022-09-12	12:43:57	0.161183	0.716974	815.983	FALSE	6
2022-09-12	12:43:57	0.373244	1.66026	795.665	FALSE	6
2022-09-12	12:43:57	0.177417	0.789186	816.772	FALSE	6
2022-09-12	12:43:57	0.277265	1.23333	796.899	FALSE	6
2022-09-12	12:43:58	0.233855	1.04023	817.813	FALSE	6
2022-09-12	12:43:58	0.218995	0.974134	797.873	FALSE	6
2022-09-12	12:43:58	0.31187	1.38726	819.2	FALSE	6
2022-09-12	12:43:58	0.234669	1.04385	798.917	FALSE	6
2022-09-12	12:43:59	0.465	2.06841	821.268	FALSE	6
2022-09-12	12:43:59	0.180471	0.802771	799.72	FALSE	6
2022-09-12	12:43:59	0.556043	2.47339	823.742	FALSE	6
2022-09-12	12:43:59	0.389733	1.73361	801.453	FALSE	6
2022-09-12	12:44:00	0.493957	2.19722	825.939	FALSE	6
2022-09-12	12:44:00	0.774975	3.44724	804.9	FALSE	6
2022-09-12	12:44:00	0.683728	3.04136	828.98	FALSE	6
2022-09-12	12:44:00	0.558741	2.48539	807.386	FALSE	6
2022-09-12	12:44:01	0.475382	2.11459	831.095	FALSE	6
2022-09-12	12:44:01	0.782913	3.48255	810.868	FALSE	6
2022-09-12	12:44:01	0.613652	2.72965	833.825	FALSE	6
2022-09-12	12:44:02	0.372125	1.65529	812.524	FALSE	6
2022-09-12	12:44:02	0.329428	1.46536	835.29	FALSE	6
2022-09-12	12:44:02	0.333092	1.48166	814.005	FALSE	6
2022-09-12	12:44:02	0.320573	1.42597	836.716	FALSE	6
2022-09-12	12:44:03	0.269987	1.20096	815.206	FALSE	6
2022-09-12	12:44:03	0.253906	1.12942	837.845	FALSE	6
2022-09-12	12:44:03	0.276705	1.23084	816.437	FALSE	6
2022-09-12	12:44:03	0.146374	0.651101	838.496	FALSE	6
2022-09-12	12:44:04	0.317163	1.4108	817.848	FALSE	6
2022-09-12	12:44:04	0.100064	0.445105	838.941	FALSE	6
2022-09-12	12:44:04	0.287952	1.28087	819.129	FALSE	6
2022-09-12	12:44:04	0.152176	0.676909	839.618	FALSE	6
2022-09-12	12:44:05	0.279199	1.24193	820.371	FALSE	6
2022-09-12	12:44:05	0.20215	0.899204	840.518	FALSE	6
2022-09-12	12:44:05	0.221743	0.986357	821.357	FALSE	6
2022-09-12	12:44:06	0.222456	0.989529	841.507	FALSE	6
2022-09-12	12:44:06	0.25126	1.11765	822.475	FALSE	6
2022-09-12	12:44:06	0.296654	1.31958	842.827	FALSE	6
2022-09-12	12:44:06	0.225458	1.00288	823.478	FALSE	6
2022-09-12	12:44:07	0.319249	1.42008	844.247	FALSE	6
2022-09-12	12:44:07	0.255229	1.13531	824.613	FALSE	6
2022-09-12	12:44:07	0.443422	1.97243	846.219	FALSE	6
2022-09-12	12:44:07	0.124288	0.552858	825.166	FALSE	6
2022-09-12	12:44:08	0.43472	1.93372	848.153	FALSE	6
2022-09-12	12:44:08	0.206934	0.920484	826.086	FALSE	6
2022-09-12	12:44:08	0.436756	1.94278	850.096	FALSE	6
2022-09-12	12:44:08	0.144033	0.640688	826.727	FALSE	6
2022-09-12	12:44:09	0.437672	1.94685	852.043	FALSE	6
2022-09-12	12:44:09	0.211819	0.942213	827.669	FALSE	6
2022-09-12	12:44:09	0.451158	2.00684	854.049	FALSE	6
2022-09-12	12:44:10	0.232685	1.03503	828.704	FALSE	6
2022-09-12	12:44:10	0.379606	1.68856	855.738	FALSE	6
2022-09-12	12:44:10	0.227748	1.01307	829.717	FALSE	6
2022-09-12	12:44:10	0.523473	2.32851	858.066	FALSE	6
2022-09-12	12:44:11	0.32612	1.45065	831.168	FALSE	6
2022-09-12	12:44:11	0.291819	1.29807	859.365	FALSE	6
2022-09-12	12:44:11	0.40271	1.79133	832.959	FALSE	6
2022-09-12	12:44:11	0.34327	1.52693	860.891	FALSE	6
2022-09-12	12:44:12	0.391005	1.73927	834.698	FALSE	6
2022-09-12	12:44:12	0.227138	1.01036	861.902	FALSE	6
2022-09-12	12:44:12	0.504542	2.2443	836.943	FALSE	6
2022-09-12	12:44:12	0.211361	0.940176	862.842	FALSE	6
2022-09-12	12:44:13	0.481794	2.14312	839.086	FALSE	6
2022-09-12	12:44:13	0.387137	1.72206	864.564	FALSE	6
2022-09-12	12:44:13	0.458028	2.0374	841.123	FALSE	6
2022-09-12	12:44:14	0.340267	1.51358	866.078	FALSE	6
2022-09-12	12:44:14	0.626272	2.78578	843.909	FALSE	6
2022-09-12	12:44:14	0.381998	1.6992	867.777	FALSE	6
2022-09-12	12:44:14	0.543779	2.41884	846.328	FALSE	6
2022-09-12	12:44:15	0.468512	2.08404	869.861	FALSE	6
2022-09-12	12:44:15	0.628868	2.79733	849.125	FALSE	6
2022-09-12	12:44:15	0.455483	2.02608	871.887	FALSE	6
2022-09-12	12:44:15	0.645458	2.87113	851.996	FALSE	6
2022-09-12	12:44:16	0.35645	1.58556	873.473	FALSE	6
2022-09-12	12:44:16	0.466629	2.07566	854.072	FALSE	6
2022-09-12	12:44:16	0.574517	2.55557	876.028	FALSE	6
2022-09-12	12:44:16	0.433143	1.92671	855.999	FALSE	6
2022-09-12	12:44:17	0.353143	1.57085	877.599	FALSE	6
2022-09-12	12:44:17	0.502659	2.23593	858.235	FALSE	6
2022-09-12	12:44:17	0.490649	2.1825	879.781	FALSE	6
2022-09-12	12:44:18	0.354669	1.57764	859.812	FALSE	6
2022-09-12	12:44:18	0.523422	2.32829	882.11	FALSE	6
2022-09-12	12:44:18	0.454415	2.02133	861.834	FALSE	6
2022-09-12	12:44:18	0.554008	2.46434	884.574	FALSE	6
2022-09-12	12:44:19	0.321692	1.43095	863.265	FALSE	6
2022-09-12	12:44:19	0.641794	2.85483	887.429	FALSE	6
2022-09-12	12:44:19	0.411565	1.83072	865.095	FALSE	6
2022-09-12	12:44:19	0.599097	2.6649	890.094	FALSE	6
2022-09-12	12:44:20	0.325458	1.4477	866.543	FALSE	6
2022-09-12	12:44:20	0.708308	3.1507	893.244	FALSE	6
2022-09-12	12:44:20	0.387697	1.72455	868.268	FALSE	6
2022-09-12	12:44:20	0.602303	2.67916	895.924	FALSE	6
2022-09-12	12:44:21	0.38383	1.70735	869.975	FALSE	6
2022-09-12	12:44:21	0.475687	2.11595	898.04	FALSE	6
2022-09-12	12:44:21	0.312277	1.38907	871.364	FALSE	6
2022-09-12	12:44:22	0.489428	2.17707	900.217	FALSE	6
2022-09-12	12:44:22	0.445305	1.98081	873.345	FALSE	6
2022-09-12	12:44:22	0.39355	1.75059	901.967	FALSE	6
2022-09-12	12:44:22	0.432125	1.92218	875.267	FALSE	6
2022-09-12	12:44:23	0.458232	2.03831	904.006	FALSE	6
2022-09-12	12:44:23	0.523575	2.32897	877.596	FALSE	6
2022-09-12	12:44:23	0.295942	1.31641	905.322	FALSE	6
2022-09-12	12:44:23	0.586221	2.60763	880.204	FALSE	6
2022-09-12	12:44:24	0.354008	1.5747	906.897	FALSE	6
2022-09-12	12:44:24	0.700674	3.11674	883.32	FALSE	6
2022-09-12	12:44:24	0.295025	1.31233	908.209	FALSE	6
2022-09-12	12:44:24	0.588003	2.61555	885.936	FALSE	6
2022-09-12	12:44:25	0.457112	2.03333	910.242	FALSE	6
2022-09-12	12:44:25	0.424237	1.88709	887.823	FALSE	6
2022-09-12	12:44:25	0.219097	0.974587	911.217	FALSE	6
2022-09-12	12:44:26	0.265305	1.18013	889.003	FALSE	6
2022-09-12	12:44:26	0.317519	1.41239	912.629	FALSE	6
2022-09-12	12:44:26	0.262812	1.16904	890.172	FALSE	6
2022-09-12	12:44:26	0.508512	2.26196	914.891	FALSE	6
2022-09-12	12:44:27	0.19986	0.889017	891.061	FALSE	6
2022-09-12	12:44:27	0.614974	2.73553	917.627	FALSE	6
2022-09-12	12:44:27	0.367646	1.63536	892.696	FALSE	6
2022-09-12	12:44:27	0.457774	2.03627	919.663	FALSE	6
2022-09-12	12:44:28	0.24785	1.10249	893.799	FALSE	6
2022-09-12	12:44:28	0.405305	1.80288	921.466	FALSE	6
2022-09-12	12:44:28	0.319097	1.41941	895.218	FALSE	6
2022-09-12	12:44:28	0.406781	1.80944	923.275	FALSE	6
2022-09-12	12:44:29	0.461387	2.05234	897.271	FALSE	6
2022-09-12	12:44:29	0.343321	1.52716	924.803	FALSE	6
2022-09-12	12:44:29	0.482964	2.14832	899.419	FALSE	6
2022-09-12	12:44:30	0.251107	1.11697	925.92	FALSE	6
2022-09-12	12:44:30	0.559199	2.48743	901.906	FALSE	6
2022-09-12	12:44:30	0.208054	0.925466	926.845	FALSE	6
2022-09-12	12:44:30	0.496043	2.2065	904.113	FALSE	6
2022-09-12	12:44:31	0.285407	1.26955	928.115	FALSE	6
2022-09-12	12:44:31	0.449224	1.99824	906.111	FALSE	6
2022-09-12	12:44:31	0.356959	1.58783	929.702	FALSE	6
2022-09-12	12:44:31	0.330954	1.47215	907.583	FALSE	6
2022-09-12	12:44:32	0.483982	2.15285	931.855	FALSE	6
2022-09-12	12:44:32	0.252277	1.12218	908.706	FALSE	6
2022-09-12	12:44:32	0.553957	2.46411	934.319	FALSE	6
2022-09-12	12:44:33	0.204848	0.911205	909.617	FALSE	6
2022-09-12	12:44:33	0.552227	2.45642	936.776	FALSE	6
2022-09-12	12:44:33	0.235127	1.04589	910.663	FALSE	6
2022-09-12	12:44:33	0.389987	1.73474	938.51	FALSE	6
2022-09-12	12:44:34	0.184491	0.820653	911.483	FALSE	6
2022-09-12	12:44:34	0.35411	1.57515	940.086	FALSE	6
2022-09-12	12:44:34	0.241387	1.07374	912.557	FALSE	6
2022-09-12	12:44:34	0.388817	1.72954	941.815	FALSE	6
2022-09-12	12:44:35	0.419402	1.86558	914.423	FALSE	6
2022-09-12	12:44:35	0.243931	1.08505	942.9	FALSE	6
2022-09-12	12:44:35	0.458893	2.04125	916.464	FALSE	6
2022-09-12	12:44:35	0.238639	1.06151	943.962	FALSE	6
2022-09-12	12:44:36	0.448155	1.99348	918.457	FALSE	6
2022-09-12	12:44:36	0.216603	0.963493	944.925	FALSE	6
2022-09-12	12:44:36	0.386832	1.72071	920.178	FALSE	6
2022-09-12	12:44:36	0.302354	1.34493	946.27	FALSE	6
2022-09-12	12:44:37	0.297926	1.32523	921.503	FALSE	6
2022-09-12	12:44:37	0.469428	2.08811	948.358	FALSE	6
2022-09-12	12:44:37	0.272277	1.21114	922.714	FALSE	6
2022-09-12	12:44:38	0.527595	2.34685	950.705	FALSE	6
2022-09-12	12:44:38	0.309173	1.37526	924.09	FALSE	6
2022-09-12	12:44:38	0.381845	1.69852	952.404	FALSE	6
2022-09-12	12:44:38	0.28154	1.25235	925.342	FALSE	6
2022-09-12	12:44:39	0.403575	1.79518	954.199	FALSE	6
2022-09-12	12:44:39	0.431209	1.9181	927.26	FALSE	6
2022-09-12	12:44:39	0.282303	1.25574	955.455	FALSE	6
2022-09-12	12:44:39	0.503422	2.23932	929.499	FALSE	6
2022-09-12	12:44:40	0.354364	1.57628	957.031	FALSE	6
2022-09-12	12:44:40	0.539605	2.40027	931.9	FALSE	6
2022-09-12	12:44:40	0.336298	1.49592	958.527	FALSE	6
2022-09-12	12:44:40	0.513295	2.28324	934.183	FALSE	6
2022-09-12	12:44:41	0.242659	1.0794	959.606	FALSE	6
2022-09-12	12:44:41	0.508155	2.26038	936.443	FALSE	6
2022-09-12	12:44:41	0.246018	1.09434	960.701	FALSE	6
2022-09-12	12:44:42	0.29299	1.30328	937.747	FALSE	6
2022-09-12	12:44:42	0.266629	1.18602	961.887	FALSE	6
2022-09-12	12:44:42	0.286781	1.27566	939.022	FALSE	6
2022-09-12	12:44:42	0.395127	1.7576	963.644	FALSE	6
2022-09-12	12:44:43	0.202557	0.901014	939.923	FALSE	6
2022-09-12	12:44:43	0.177316	0.788737	964.433	FALSE	6
2022-09-12	12:44:43	0.337519	1.50135	941.425	FALSE	6
2022-09-12	12:44:43	0.405356	1.8031	966.236	FALSE	6
2022-09-12	12:44:44	0.390191	1.73565	943.16	FALSE	6
2022-09-12	12:44:44	0.424338	1.88754	968.124	FALSE	6
2022-09-12	12:44:44	0.481539	2.14198	945.302	FALSE	6
2022-09-12	12:44:45	1.19747	5.32659	973.45	FALSE	6
2022-09-12	12:44:45	1.29559	5.76304	951.065	FALSE	6
2022-09-12	12:44:45	0.901438	4.00978	977.46	FALSE	6
2022-09-12	12:44:45	1.31874	5.86602	956.931	FALSE	6
2022-09-12	12:44:46	0.606425	2.6975	980.157	FALSE	6
2022-09-12	12:44:46	0.474822	2.1121	959.043	FALSE	6
2022-09-12	12:44:46	0.454059	2.01975	982.177	FALSE	6
2022-09-12	12:44:46	0.560725	2.49422	961.538	FALSE	6
2022-09-12	12:44:47	0.543982	2.41974	984.597	FALSE	6
2022-09-12	12:44:47	0.603015	2.68233	964.22	FALSE	6
2022-09-12	12:44:47	0.353499	1.57243	986.169	FALSE	6
2022-09-12	12:44:47	0.585611	2.60491	966.825	FALSE	6
2022-09-12	12:44:48	0.351565	1.56383	987.733	FALSE	6
2022-09-12	12:44:48	0.601539	2.67577	969.501	FALSE	6
2022-09-12	12:44:48	0.299555	1.33248	989.066	FALSE	6
2022-09-12	12:44:48	0.570343	2.537	972.038	FALSE	6
2022-09-12	12:44:49	0.295738	1.3155	990.381	FALSE	6
2022-09-12	12:44:49	0.405254	1.80265	973.84	FALSE	6
2022-09-12	12:44:49	0.321998	1.43231	991.813	FALSE	6
2022-09-12	12:44:50	0.327392	1.45631	975.297	FALSE	6
2022-09-12	12:44:50	0.464186	2.06479	993.878	FALSE	6
2022-09-12	12:44:50	0.260725	1.15976	976.456	FALSE	6
2022-09-12	12:44:50	0.454313	2.02088	995.899	FALSE	6
2022-09-12	12:44:51	0.205102	0.912335	977.369	FALSE	6
2022-09-12	12:44:51	0.439962	1.95704	997.856	FALSE	6
2022-09-12	12:44:51	0.208054	0.925466	978.294	FALSE	6
2022-09-12	12:44:51	0.519148	2.30927	1000.17	FALSE	6
2022-09-12	12:44:52	0.37299	1.65913	979.953	FALSE	6
2022-09-12	12:44:52	0.203931	0.907126	1001.07	FALSE	6
2022-09-12	12:44:52	0.0436262	0.194058	980.147	FALSE	6
2022-09-12	12:44:52	0.131616	0.585454	1001.66	FALSE	6
2022-09-12	12:44:53	0.0827101	0.367911	980.515	FALSE	6
2022-09-12	12:44:53	0.391565	1.74176	1003.4	FALSE	6
2022-09-12	12:44:53	0.355331	1.58058	982.096	FALSE	6
2022-09-12	12:44:54	0.282761	1.25778	1004.66	FALSE	6
2022-09-12	12:44:54	0.636043	2.82925	984.925	FALSE	6
2022-09-12	12:44:54	0.430751	1.91607	1006.57	FALSE	6
2022-09-12	12:44:54	0.391819	1.74289	986.668	FALSE	6
2022-09-12	12:44:55	0.588206	2.61646	1009.19	FALSE	6
2022-09-12	12:44:55	0.393346	1.74968	988.418	FALSE	6
2022-09-12	12:44:55	0.408155	1.81556	1011.01	FALSE	6
2022-09-12	12:44:55	0.379351	1.68743	990.105	FALSE	6
2022-09-12	12:44:56	0.450344	2.00322	1013.01	FALSE	6
2022-09-12	12:44:56	0.396858	1.7653	991.87	FALSE	6
2022-09-12	12:44:56	0.313092	1.3927	1014.4	FALSE	6
2022-09-12	12:44:56	0.476654	2.12025	993.991	FALSE	6
2022-09-12	12:44:57	0.425713	1.89366	1016.3	FALSE	6
2022-09-12	12:44:57	0.442099	1.96654	995.957	FALSE	6
2022-09-12	12:44:57	0.34327	1.52693	1017.82	FALSE	6
2022-09-12	12:44:58	0.386171	1.71777	997.675	FALSE	6
2022-09-12	12:44:58	0.368003	1.63695	1019.46	FALSE	6
2022-09-12	12:44:58	0.398842	1.77413	999.449	FALSE	6
2022-09-12	12:44:58	0.415789	1.84951	1021.31	FALSE	6
2022-09-12	12:44:59	0.401183	1.78454	1001.23	FALSE	6
2022-09-12	12:44:59	0.376654	1.67543	1022.98	FALSE	6
2022-09-12	12:44:59	0.462812	2.05868	1003.29	FALSE	6
2022-09-12	12:44:59	0.456094	2.0288	1025.01	FALSE	6
2022-09-12	12:45:00	0.560115	2.4915	1005.78	FALSE	6
2022-09-12	12:45:00	0.390038	1.73497	1026.75	FALSE	6
2022-09-12	12:45:00	0.424491	1.88822	1007.67	FALSE	6
2022-09-12	12:45:00	0.504949	2.24611	1028.99	FALSE	6
2022-09-12	12:45:01	0.428766	1.90724	1009.58	FALSE	6
2022-09-12	12:45:01	0.468054	2.082	1031.08	FALSE	6
2022-09-12	12:45:01	0.451158	2.00684	1011.59	FALSE	6
2022-09-12	12:45:02	0.458842	2.04102	1033.12	FALSE	6
2022-09-12	12:45:02	0.432888	1.92557	1013.51	FALSE	6
2022-09-12	12:45:02	0.434517	1.93282	1035.05	FALSE	6
2022-09-12	12:45:02	0.440725	1.96043	1015.47	FALSE	6
2022-09-12	12:45:03	0.459198	2.0426	1037.09	FALSE	6
2022-09-12	12:45:03	0.419606	1.86649	1017.34	FALSE	6
2022-09-12	12:45:03	0.438842	1.95206	1039.04	FALSE	6
2022-09-12	12:45:03	0.438435	1.95025	1019.29	FALSE	6
2022-09-12	12:45:04	0.444949	1.97922	1041.02	FALSE	6
2022-09-12	12:45:04	0.442456	1.96813	1021.26	FALSE	6
2022-09-12	12:45:04	0.407748	1.81374	1042.84	FALSE	6
2022-09-12	12:45:04	0.412837	1.83638	1023.09	FALSE	6
2022-09-12	12:45:05	0.462201	2.05596	1044.89	FALSE	6
2022-09-12	12:45:05	0.41757	1.85743	1024.95	FALSE	6
2022-09-12	12:45:05	0.49416	2.19812	1047.09	FALSE	6
2022-09-12	12:45:06	0.367036	1.63265	1026.58	FALSE	6
2022-09-12	12:45:06	0.293143	1.30396	1048.4	FALSE	6
2022-09-12	12:45:06	0.37014	1.64646	1028.23	FALSE	6
2022-09-12	12:45:06	0.326578	1.45268	1049.85	FALSE	6
2022-09-12	12:45:07	0.290954	1.29422	1029.52	FALSE	6
2022-09-12	12:45:07	0.280522	1.24782	1051.1	FALSE	6
2022-09-12	12:45:07	0.227087	1.01013	1030.53	FALSE	6
2022-09-12	12:45:07	0.214313	0.953307	1052.05	FALSE	6

## Sheet: Dominic_prong_2022912123959 (2)
Date	Time	Lbs	Total Force x Time	total time steps force > 3		**GoPro Fitting: 1229
2022-09-12	12:40:07	0.66556	0.66556	FALSE	0			Total Force x Time	468.186
2022-09-12	12:40:07	0.902812	1.56837	FALSE	0			total time steps force > 3	6
2022-09-12	12:40:07	2.04368	3.61205	1	0
2022-09-12	12:40:07	5.34535	8.9574	FALSE	1
2022-09-12	12:40:08	1.61039	10.5678	FALSE	1
2022-09-12	12:40:08	0.123015	10.6908	FALSE	1
2022-09-12	12:40:08	0.253143	10.944	FALSE	1
2022-09-12	12:40:08	0.566934	11.5109	FALSE	1
2022-09-12	12:40:09	0.0446949	11.5556	FALSE	1
2022-09-12	12:40:09	0.124797	11.6804	FALSE	1
2022-09-12	12:40:09	0.143168	11.8235	FALSE	1
2022-09-12	12:40:09	0.0916669	11.9152	FALSE	1
2022-09-12	12:40:10	0.36897	12.2842	FALSE	1
2022-09-12	12:40:10	0.975025	13.2592	FALSE	1
2022-09-12	12:40:10	0.388054	13.6473	FALSE	1
2022-09-12	12:40:11	-0.0907758	13.6473	FALSE	1
2022-09-12	12:40:11	-0.317035	13.6473	FALSE	1
2022-09-12	12:40:11	-0.101463	13.6473	FALSE	1
2022-09-12	12:40:11	-0.112455	13.6473	FALSE	1
2022-09-12	12:40:12	-0.201921	13.6473	FALSE	1
2022-09-12	12:40:12	-0.245076	13.6473	FALSE	1
2022-09-12	12:40:12	-0.176221	13.6473	FALSE	1
2022-09-12	12:40:12	-0.101107	13.6473	FALSE	1
2022-09-12	12:40:13	-0.0857376	13.6473	FALSE	1
2022-09-12	12:40:13	-0.339885	13.6473	FALSE	1
2022-09-12	12:40:13	-0.350216	13.6473	FALSE	1
2022-09-12	12:40:13	-0.259834	13.6473	FALSE	1
2022-09-12	12:40:14	-0.159376	13.6473	FALSE	1
2022-09-12	12:40:14	-0.164872	13.6473	FALSE	1
2022-09-12	12:40:14	-0.17332	13.6473	FALSE	1
2022-09-12	12:40:15	0.441387	14.0886	FALSE	1
2022-09-12	12:40:15	0.314873	14.4035	FALSE	1
2022-09-12	12:40:15	0.225865	14.6294	FALSE	1
2022-09-12	12:40:15	0.277214	14.9066	FALSE	1
2022-09-12	12:40:16	0.574822	15.4814	FALSE	1
2022-09-12	12:40:16	0.300013	15.7814	FALSE	1
2022-09-12	12:40:16	0.477468	16.2589	FALSE	1
2022-09-12	12:40:16	0.434059	16.693	FALSE	1
2022-09-12	12:40:17	0.14444	16.8374	FALSE	1
2022-09-12	12:40:17	0.334109	17.1715	FALSE	1
2022-09-12	12:40:17	0.371209	17.5427	FALSE	1
2022-09-12	12:40:17	0.410496	17.9532	FALSE	1
2022-09-12	12:40:18	0.231412	18.1846	FALSE	1
2022-09-12	12:40:18	0.155535	18.3402	FALSE	1
2022-09-12	12:40:18	0.264644	18.6048	FALSE	1
2022-09-12	12:40:19	0.124237	18.729	FALSE	1
2022-09-12	12:40:19	0.299555	19.0286	FALSE	1
2022-09-12	12:40:19	0.283779	19.3124	FALSE	1
2022-09-12	12:40:19	0.641132	19.9535	FALSE	1
2022-09-12	12:40:20	0.508562	20.4621	FALSE	1
2022-09-12	12:40:20	0.234975	20.697	FALSE	1
2022-09-12	12:40:20	0.301489	20.9985	FALSE	1
2022-09-12	12:40:20	0.29986	21.2984	FALSE	1
2022-09-12	12:40:21	0.332176	21.6306	FALSE	1
2022-09-12	12:40:21	0.143423	21.774	FALSE	1
2022-09-12	12:40:21	0.366272	22.1403	FALSE	1
2022-09-12	12:40:21	0.328308	22.4686	FALSE	1
2022-09-12	12:40:22	0.38556	22.8541	FALSE	1
2022-09-12	12:40:22	0.263626	23.1178	FALSE	1
2022-09-12	12:40:22	0.355331	23.4731	FALSE	1
2022-09-12	12:40:23	0.281743	23.7548	FALSE	1
2022-09-12	12:40:23	0.330598	24.0854	FALSE	1
2022-09-12	12:40:23	0.24612	24.3316	FALSE	1
2022-09-12	12:40:23	0.233448	24.565	FALSE	1
2022-09-12	12:40:24	-0.0784094	24.565	FALSE	1
2022-09-12	12:40:24	-0.0927096	24.565	FALSE	1
2022-09-12	12:40:24	-0.318358	24.565	FALSE	1
2022-09-12	12:40:24	-0.506603	24.565	FALSE	1
2022-09-12	12:40:25	-0.575915	24.565	FALSE	1
2022-09-12	12:40:25	-0.0370863	24.565	FALSE	1
2022-09-12	12:40:25	1.8619	26.4269	FALSE	1
2022-09-12	12:40:25	2.41874	28.8456	FALSE	1
2022-09-12	12:40:26	0.895432	29.7411	FALSE	1
2022-09-12	12:40:26	1.49039	31.2315	FALSE	1
2022-09-12	12:40:26	0.752634	31.9841	FALSE	1
2022-09-12	12:40:27	0.563677	32.5478	FALSE	1
2022-09-12	12:40:27	0.23126	32.779	FALSE	1
2022-09-12	12:40:27	0.362048	33.1411	FALSE	1
2022-09-12	12:40:27	0.375433	33.5165	FALSE	1
2022-09-12	12:40:28	0.350191	33.8667	FALSE	1
2022-09-12	12:40:28	0.397417	34.2641	FALSE	1
2022-09-12	12:40:28	0.562812	34.8269	FALSE	1
2022-09-12	12:40:28	0.458537	35.2855	FALSE	1
2022-09-12	12:40:29	0.343219	35.6287	FALSE	1
2022-09-12	12:40:29	0.328817	35.9575	FALSE	1
2022-09-12	12:40:29	0.50444	36.4619	FALSE	1
2022-09-12	12:40:29	0.226985	36.6889	FALSE	1
2022-09-12	12:40:30	0.237723	36.9267	FALSE	1
2022-09-12	12:40:30	0.258842	37.1855	FALSE	1
2022-09-12	12:40:30	0.27187	37.4574	FALSE	1
2022-09-12	12:40:31	0.255178	37.7125	FALSE	1
2022-09-12	12:40:31	0.246832	37.9594	FALSE	1
2022-09-12	12:40:31	0.289886	38.2493	FALSE	1
2022-09-12	12:40:31	0.267697	38.517	FALSE	1
2022-09-12	12:40:32	0.316145	38.8331	FALSE	1
2022-09-12	12:40:32	0.234822	39.0679	FALSE	1
2022-09-12	12:40:32	0.252328	39.3203	FALSE	1
2022-09-12	12:40:32	0.318232	39.6385	FALSE	1
2022-09-12	12:40:33	0.286883	39.9254	FALSE	1
2022-09-12	12:40:33	0.341438	40.2668	FALSE	1
2022-09-12	12:40:33	0.368257	40.6351	FALSE	1
2022-09-12	12:40:33	0.33243	40.9675	FALSE	1
2022-09-12	12:40:34	0.348257	41.3158	FALSE	1
2022-09-12	12:40:34	0.219504	41.5353	FALSE	1
2022-09-12	12:40:34	0.382863	41.9181	FALSE	1
2022-09-12	12:40:35	0.135484	42.0536	FALSE	1
2022-09-12	12:40:35	0.364797	42.4184	FALSE	1
2022-09-12	12:40:35	0.158842	42.5772	FALSE	1
2022-09-12	12:40:35	0.375484	42.9527	FALSE	1
2022-09-12	12:40:36	0.134568	43.0873	FALSE	1
2022-09-12	12:40:36	0.361031	43.4483	FALSE	1
2022-09-12	12:40:36	0.149682	43.598	FALSE	1
2022-09-12	12:40:36	0.368461	43.9665	FALSE	1
2022-09-12	12:40:37	0.207799	44.1743	FALSE	1
2022-09-12	12:40:37	0.351463	44.5257	FALSE	1
2022-09-12	12:40:37	0.220471	44.7462	FALSE	1
2022-09-12	12:40:37	0.318384	45.0646	FALSE	1
2022-09-12	12:40:38	0.297265	45.3618	FALSE	1
2022-09-12	12:40:38	0.307087	45.6689	FALSE	1
2022-09-12	12:40:38	0.310191	45.9791	FALSE	1
2022-09-12	12:40:39	0.333804	46.3129	FALSE	1
2022-09-12	12:40:39	0.267545	46.5805	FALSE	1
2022-09-12	12:40:39	0.372837	46.9533	FALSE	1
2022-09-12	12:40:39	0.271412	47.2247	FALSE	1
2022-09-12	12:40:40	0.302456	47.5272	FALSE	1
2022-09-12	12:40:40	0.163473	47.6907	FALSE	1
2022-09-12	12:40:40	0.322914	48.0136	FALSE	1
2022-09-12	12:40:40	0.275535	48.2891	FALSE	1
2022-09-12	12:40:41	-0.0193254	48.2891	FALSE	1
2022-09-12	12:40:41	0.0731427	48.3622	FALSE	1
2022-09-12	12:40:41	0.157112	48.5194	FALSE	1
2022-09-12	12:40:41	0.174771	48.6941	FALSE	1
2022-09-12	12:40:42	0.0852037	48.7793	FALSE	1
2022-09-12	12:40:42	0.158893	48.9382	FALSE	1
2022-09-12	12:40:42	0.15187	49.0901	FALSE	1
2022-09-12	12:40:42	0.217316	49.3074	FALSE	1
2022-09-12	12:40:43	0.127901	49.4353	FALSE	1
2022-09-12	12:40:43	0.393397	49.8287	FALSE	1
2022-09-12	12:40:43	0.154669	49.9834	FALSE	1
2022-09-12	12:40:44	0.390598	50.374	FALSE	1
2022-09-12	12:40:44	0.120064	50.494	FALSE	1
2022-09-12	12:40:44	0.416298	50.9103	FALSE	1
2022-09-12	12:40:44	0.171921	51.0823	FALSE	1
2022-09-12	12:40:45	0.303219	51.3855	FALSE	1
2022-09-12	12:40:45	0.165153	51.5506	FALSE	1
2022-09-12	12:40:45	0.348257	51.8989	FALSE	1
2022-09-12	12:40:45	0.257214	52.1561	FALSE	1
2022-09-12	12:40:46	0.384644	52.5407	FALSE	1
2022-09-12	12:40:46	0.334568	52.8753	FALSE	1
2022-09-12	12:40:46	0.389631	53.2649	FALSE	1
2022-09-12	12:40:46	0.71014	53.9751	FALSE	1
2022-09-12	12:40:47	0.45869	54.4338	FALSE	1
2022-09-12	12:40:47	0.460115	54.8939	FALSE	1
2022-09-12	12:40:47	0.209886	55.1038	FALSE	1
2022-09-12	12:40:48	0.377163	55.4809	FALSE	1
2022-09-12	12:40:48	0.204033	55.685	FALSE	1
2022-09-12	12:40:48	0.453193	56.1382	FALSE	1
2022-09-12	12:40:48	0.178283	56.3164	FALSE	1
2022-09-12	12:40:49	0.513397	56.8298	FALSE	1
2022-09-12	12:40:49	0.184135	57.014	FALSE	1
2022-09-12	12:40:49	0.416043	57.43	FALSE	1
2022-09-12	12:40:49	0.219657	57.6497	FALSE	1
2022-09-12	12:40:50	0.260776	57.9105	FALSE	1
2022-09-12	12:40:50	0.255484	58.1659	FALSE	1
2022-09-12	12:40:50	0.333143	58.4991	FALSE	1
2022-09-12	12:40:50	0.322201	58.8213	FALSE	1
2022-09-12	12:40:51	0.251412	59.0727	FALSE	1
2022-09-12	12:40:51	0.312227	59.3849	FALSE	1
2022-09-12	12:40:51	0.218028	59.603	FALSE	1
2022-09-12	12:40:52	0.479046	60.082	FALSE	1
2022-09-12	12:40:52	0.36271	60.4447	FALSE	1
2022-09-12	12:40:52	0.716145	61.1609	FALSE	1
2022-09-12	12:40:52	0.503982	61.6648	FALSE	1
2022-09-12	12:40:53	0.489784	62.1546	FALSE	1
2022-09-12	12:40:53	0.174822	62.3294	FALSE	1
2022-09-12	12:40:53	0.512481	62.8419	FALSE	1
2022-09-12	12:40:53	0.223168	63.0651	FALSE	1
2022-09-12	12:40:54	0.441692	63.5068	FALSE	1
2022-09-12	12:40:54	0.449377	63.9562	FALSE	1
2022-09-12	12:40:54	0.340318	64.2965	FALSE	1
2022-09-12	12:40:54	0.453041	64.7495	FALSE	1
2022-09-12	12:40:55	0.329275	65.0788	FALSE	1
2022-09-12	12:40:55	0.660166	65.739	FALSE	1
2022-09-12	12:40:55	0.262201	66.0012	FALSE	1
2022-09-12	12:40:56	0.471005	66.4722	FALSE	1
2022-09-12	12:40:56	0.186883	66.659	FALSE	1
2022-09-12	12:40:56	0.477214	67.1363	FALSE	1
2022-09-12	12:40:56	0.181336	67.3176	FALSE	1
2022-09-12	12:40:57	0.512685	67.8303	FALSE	1
2022-09-12	12:40:57	0.232481	68.0628	FALSE	1
2022-09-12	12:40:57	0.492939	68.5557	FALSE	1
2022-09-12	12:40:57	0.308054	68.8638	FALSE	1
2022-09-12	12:40:58	0.433906	69.2977	FALSE	1
2022-09-12	12:40:58	0.323931	69.6216	FALSE	1
2022-09-12	12:40:58	0.31416	69.9358	FALSE	1
2022-09-12	12:40:58	0.346323	70.2821	FALSE	1
2022-09-12	12:40:59	0.374415	70.6565	FALSE	1
2022-09-12	12:40:59	0.640013	71.2965	FALSE	1
2022-09-12	12:40:59	0.301183	71.5977	FALSE	1
2022-09-12	12:41:00	0.708206	72.3059	FALSE	1
2022-09-12	12:41:00	0.444796	72.7507	FALSE	1
2022-09-12	12:41:00	0.724796	73.4755	FALSE	1
2022-09-12	12:41:00	0.187188	73.6627	FALSE	1
2022-09-12	12:41:01	0.469224	74.1319	FALSE	1
2022-09-12	12:41:01	0.264847	74.3967	FALSE	1
2022-09-12	12:41:01	0.708664	75.1054	FALSE	1
2022-09-12	12:41:01	0.107341	75.2128	FALSE	1
2022-09-12	12:41:02	0.459453	75.6722	FALSE	1
2022-09-12	12:41:02	0.143728	75.8159	FALSE	1
2022-09-12	12:41:02	0.420115	76.236	FALSE	1
2022-09-12	12:41:02	0.157468	76.3935	FALSE	1
2022-09-12	12:41:03	0.484186	76.8777	FALSE	1
2022-09-12	12:41:03	0.152583	77.0303	FALSE	1
2022-09-12	12:41:03	0.447647	77.4779	FALSE	1
2022-09-12	12:41:04	0.161133	77.6391	FALSE	1
2022-09-12	12:41:04	0.469326	78.1084	FALSE	1
2022-09-12	12:41:04	0.145662	78.2541	FALSE	1
2022-09-12	12:41:04	0.477875	78.7319	FALSE	1
2022-09-12	12:41:05	0.217723	78.9496	FALSE	1
2022-09-12	12:41:05	0.306425	79.2561	FALSE	1
2022-09-12	12:41:05	0.0218959	79.278	FALSE	1
2022-09-12	12:41:05	-0.0783076	79.278	FALSE	1
2022-09-12	12:41:06	-0.198969	79.278	FALSE	1
2022-09-12	12:41:06	-0.240699	79.278	FALSE	1
2022-09-12	12:41:06	-0.1836	79.278	FALSE	1
2022-09-12	12:41:06	0.0175193	79.2955	FALSE	1
2022-09-12	12:41:07	-0.0817682	79.2955	FALSE	1
2022-09-12	12:41:07	0.0417941	79.3373	FALSE	1
2022-09-12	12:41:07	-0.107163	79.3373	FALSE	1
2022-09-12	12:41:08	0.0792496	79.4165	FALSE	1
2022-09-12	12:41:08	-0.0298089	79.4165	FALSE	1
2022-09-12	12:41:08	0.220013	79.6365	FALSE	1
2022-09-12	12:41:08	0.209936	79.8465	FALSE	1
2022-09-12	12:41:09	0.380725	80.2272	FALSE	1
2022-09-12	12:41:09	0.226476	80.4537	FALSE	1
2022-09-12	12:41:09	0.710954	81.1646	FALSE	1
2022-09-12	12:41:09	0.183117	81.3478	FALSE	1
2022-09-12	12:41:10	0.192227	81.54	FALSE	1
2022-09-12	12:41:10	0.224593	81.7646	FALSE	1
2022-09-12	12:41:10	0.177825	81.9424	FALSE	1
2022-09-12	12:41:10	0.0940079	82.0364	FALSE	1
2022-09-12	12:41:11	0.157468	82.1939	FALSE	1
2022-09-12	12:41:11	0.191819	82.3857	FALSE	1
2022-09-12	12:41:11	0.113244	82.4989	FALSE	1
2022-09-12	12:41:12	0.10958	82.6085	FALSE	1
2022-09-12	12:41:12	0.0935498	82.7021	FALSE	1
2022-09-12	12:41:12	0.194924	82.897	FALSE	1
2022-09-12	12:41:12	0.0527356	82.9497	FALSE	1
2022-09-12	12:41:13	0.146069	83.0958	FALSE	1
2022-09-12	12:41:13	0.100624	83.1964	FALSE	1
2022-09-12	12:41:13	0.22444	83.4209	FALSE	1
2022-09-12	12:41:13	0.0926846	83.5135	FALSE	1
2022-09-12	12:41:14	0.214364	83.7279	FALSE	1
2022-09-12	12:41:14	0.144848	83.8728	FALSE	1
2022-09-12	12:41:14	0.227138	84.0999	FALSE	1
2022-09-12	12:41:14	0.13701	84.2369	FALSE	1
2022-09-12	12:41:15	0.231514	84.4684	FALSE	1
2022-09-12	12:41:15	0.188359	84.6568	FALSE	1
2022-09-12	12:41:15	0.281845	84.9386	FALSE	1
2022-09-12	12:41:16	0.251107	85.1897	FALSE	1
2022-09-12	12:41:16	0.355331	85.5451	FALSE	1
2022-09-12	12:41:16	0.252125	85.7972	FALSE	1
2022-09-12	12:41:16	0.422201	86.2194	FALSE	1
2022-09-12	12:41:17	0.44902	86.6684	FALSE	1
2022-09-12	12:41:17	0.249478	86.9179	FALSE	1
2022-09-12	12:41:17	0.288308	87.2062	FALSE	1
2022-09-12	12:41:17	0.308664	87.5149	FALSE	1
2022-09-12	12:41:18	0.350547	87.8654	FALSE	1
2022-09-12	12:41:18	0.371412	88.2368	FALSE	1
2022-09-12	12:41:18	0.362965	88.5998	FALSE	1
2022-09-12	12:41:18	0.274517	88.8743	FALSE	1
2022-09-12	12:41:19	0.318181	89.1925	FALSE	1
2022-09-12	12:41:19	0.237621	89.4301	FALSE	1
2022-09-12	12:41:19	0.42327	89.8534	FALSE	1
2022-09-12	12:41:20	0.315484	90.1689	FALSE	1
2022-09-12	12:41:20	0.419555	90.5884	FALSE	1
2022-09-12	12:41:20	0.300827	90.8892	FALSE	1
2022-09-12	12:41:20	0.331819	91.2211	FALSE	1
2022-09-12	12:41:21	0.404797	91.6259	FALSE	1
2022-09-12	12:41:21	0.37355	91.9994	FALSE	1
2022-09-12	12:41:21	0.364542	92.3639	FALSE	1
2022-09-12	12:41:21	0.440471	92.8044	FALSE	1
2022-09-12	12:41:22	1.1449	93.9493	FALSE	1
2022-09-12	12:41:22	1.2367	95.186	FALSE	1
2022-09-12	12:41:22	0.257723	95.4437	FALSE	1
2022-09-12	12:41:22	0.342252	95.786	FALSE	1
2022-09-12	12:41:23	0.356247	96.1422	FALSE	1
2022-09-12	12:41:23	0.410293	96.5525	FALSE	1
2022-09-12	12:41:23	0.402964	96.9555	FALSE	1
2022-09-12	12:41:24	0.413753	97.3692	FALSE	1
2022-09-12	12:41:24	0.408664	97.7779	FALSE	1
2022-09-12	12:41:24	0.347392	98.1253	FALSE	1
2022-09-12	12:41:24	0.326018	98.4513	FALSE	1
2022-09-12	12:41:25	0.437367	98.8887	FALSE	1
2022-09-12	12:41:25	0.416145	99.3048	FALSE	1
2022-09-12	12:41:25	0.77243	100.077	FALSE	1
2022-09-12	12:41:25	0.622506	100.7	FALSE	1
2022-09-12	12:41:26	0.555483	101.255	FALSE	1
2022-09-12	12:41:26	0.997672	102.253	FALSE	1
2022-09-12	12:41:26	0.974618	103.228	FALSE	1
2022-09-12	12:41:26	1.60683	104.834	1	1
2022-09-12	12:41:27	3.0052	107.84	1	2
2022-09-12	12:41:27	4.08515	111.925	FALSE	3
2022-09-12	12:41:27	2.90098	114.826	FALSE	3
2022-09-12	12:41:28	2.86332	117.689	1	3
2022-09-12	12:41:28	3.21655	120.906	1	4
2022-09-12	12:41:28	3.42943	124.335	FALSE	5
2022-09-12	12:41:28	1.85146	126.186	FALSE	5
2022-09-12	12:41:29	0.59701	126.783	FALSE	5
2022-09-12	12:41:29	0.85645	127.64	FALSE	5
2022-09-12	12:41:29	0.835839	128.476	FALSE	5
2022-09-12	12:41:29	1.04475	129.521	FALSE	5
2022-09-12	12:41:30	0.918435	130.439	FALSE	5
2022-09-12	12:41:30	2.47472	132.914	FALSE	5
2022-09-12	12:41:30	2.39436	135.308	FALSE	5
2022-09-12	12:41:30	0.804033	136.112	FALSE	5
2022-09-12	12:41:31	0.78042	136.892	FALSE	5
2022-09-12	12:41:31	0.220878	137.113	FALSE	5
2022-09-12	12:41:31	0.364746	137.478	FALSE	5
2022-09-12	12:41:32	0.287901	137.766	FALSE	5
2022-09-12	12:41:32	0.605051	138.371	FALSE	5
2022-09-12	12:41:32	0.64042	139.011	FALSE	5
2022-09-12	12:41:32	0.297214	139.309	FALSE	5
2022-09-12	12:41:33	0.765611	140.074	FALSE	5
2022-09-12	12:41:33	0.450903	140.525	FALSE	5
2022-09-12	12:41:33	0.409733	140.935	FALSE	5
2022-09-12	12:41:33	0.705407	141.64	FALSE	5
2022-09-12	12:41:34	0.637672	142.278	FALSE	5
2022-09-12	12:41:34	0.424338	142.702	FALSE	5
2022-09-12	12:41:34	1.2681	143.97	FALSE	5
2022-09-12	12:41:34	0.410954	144.381	FALSE	5
2022-09-12	12:41:35	0.421539	144.803	FALSE	5
2022-09-12	12:41:35	0.644288	145.447	FALSE	5
2022-09-12	12:41:35	0.658079	146.105	FALSE	5
2022-09-12	12:41:36	0.405102	146.51	FALSE	5
2022-09-12	12:41:36	0.757061	147.267	FALSE	5
2022-09-12	12:41:36	0.725967	147.993	FALSE	5
2022-09-12	12:41:36	0.97813	148.972	FALSE	5
2022-09-12	12:41:37	0.443728	149.415	FALSE	5
2022-09-12	12:41:37	0.597417	150.013	FALSE	5
2022-09-12	12:41:37	0.298995	150.312	FALSE	5
2022-09-12	12:41:37	0.375738	150.687	FALSE	5
2022-09-12	12:41:38	0.244542	150.932	FALSE	5
2022-09-12	12:41:38	0.348155	151.28	FALSE	5
2022-09-12	12:41:38	0.310598	151.591	FALSE	5
2022-09-12	12:41:38	0.327138	151.918	FALSE	5
2022-09-12	12:41:39	0.272226	152.19	FALSE	5
2022-09-12	12:41:39	0.268868	152.459	FALSE	5
2022-09-12	12:41:39	0.292735	152.752	FALSE	5
2022-09-12	12:41:40	0.185458	152.937	FALSE	5
2022-09-12	12:41:40	0.296705	153.234	FALSE	5
2022-09-12	12:41:40	0.244288	153.478	FALSE	5
2022-09-12	12:41:40	0.442914	153.921	FALSE	5
2022-09-12	12:41:41	0.286934	154.208	FALSE	5
2022-09-12	12:41:41	0.336654	154.545	FALSE	5
2022-09-12	12:41:41	0.263982	154.809	FALSE	5
2022-09-12	12:41:41	0.281285	155.09	FALSE	5
2022-09-12	12:41:42	0.3307	155.421	FALSE	5
2022-09-12	12:41:42	0.287443	155.708	FALSE	5
2022-09-12	12:41:42	0.271514	155.98	FALSE	5
2022-09-12	12:41:42	0.277417	156.257	FALSE	5
2022-09-12	12:41:43	0.269122	156.526	FALSE	5
2022-09-12	12:41:43	0.264644	156.791	FALSE	5
2022-09-12	12:41:43	0.24673	157.038	FALSE	5
2022-09-12	12:41:44	0.241081	157.279	FALSE	5
2022-09-12	12:41:44	0.202354	157.481	FALSE	5
2022-09-12	12:41:44	0.373397	157.854	FALSE	5
2022-09-12	12:41:44	0.238435	158.093	FALSE	5
2022-09-12	12:41:45	0.271972	158.365	FALSE	5
2022-09-12	12:41:45	0.349275	158.714	FALSE	5
2022-09-12	12:41:45	0.357774	159.072	FALSE	5
2022-09-12	12:41:45	0.326832	159.399	FALSE	5
2022-09-12	12:41:46	0.377417	159.776	FALSE	5
2022-09-12	12:41:46	0.390649	160.167	FALSE	5
2022-09-12	12:41:46	0.298537	160.465	FALSE	5
2022-09-12	12:41:46	0.276501	160.742	FALSE	5
2022-09-12	12:41:47	0.24785	160.99	FALSE	5
2022-09-12	12:41:47	0.265763	161.255	FALSE	5
2022-09-12	12:41:47	0.27584	161.531	FALSE	5
2022-09-12	12:41:48	0.253041	161.784	FALSE	5
2022-09-12	12:41:48	0.289835	162.074	FALSE	5
2022-09-12	12:41:48	0.435433	162.509	FALSE	5
2022-09-12	12:41:48	0.679555	163.189	FALSE	5
2022-09-12	12:41:49	0.572939	163.762	FALSE	5
2022-09-12	12:41:49	0.147748	163.91	FALSE	5
2022-09-12	12:41:49	-0.104771	163.91	FALSE	5
2022-09-12	12:41:49	-0.103193	163.91	FALSE	5
2022-09-12	12:41:50	-0.00115753	163.91	FALSE	5
2022-09-12	12:41:50	0.215127	164.125	FALSE	5
2022-09-12	12:41:50	0.218893	164.344	FALSE	5
2022-09-12	12:41:50	0.230089	164.574	FALSE	5
2022-09-12	12:41:51	0.305356	164.879	FALSE	5
2022-09-12	12:41:51	0.330802	165.21	FALSE	5
2022-09-12	12:41:51	0.381998	165.592	FALSE	5
2022-09-12	12:41:52	0.300369	165.892	FALSE	5
2022-09-12	12:41:52	0.249631	166.142	FALSE	5
2022-09-12	12:41:52	0.349784	166.492	FALSE	5
2022-09-12	12:41:52	0.35131	166.843	FALSE	5
2022-09-12	12:41:53	0.436603	167.28	FALSE	5
2022-09-12	12:41:53	0.376196	167.656	FALSE	5
2022-09-12	12:41:53	0.338181	167.994	FALSE	5
2022-09-12	12:41:53	0.325967	168.32	FALSE	5
2022-09-12	12:41:54	0.29299	168.613	FALSE	5
2022-09-12	12:41:54	0.313753	168.927	FALSE	5
2022-09-12	12:41:54	0.296349	169.223	FALSE	5
2022-09-12	12:41:54	0.305967	169.529	FALSE	5
2022-09-12	12:41:55	0.305051	169.834	FALSE	5
2022-09-12	12:41:55	0.310395	170.145	FALSE	5
2022-09-12	12:41:55	0.303779	170.448	FALSE	5
2022-09-12	12:41:55	0.305814	170.754	FALSE	5
2022-09-12	12:41:56	0.297417	171.052	FALSE	5
2022-09-12	12:41:56	0.300573	171.352	FALSE	5
2022-09-12	12:41:56	0.304898	171.657	FALSE	5
2022-09-12	12:41:57	0.315178	171.972	FALSE	5
2022-09-12	12:41:57	0.285662	172.258	FALSE	5
2022-09-12	12:41:57	0.300725	172.559	FALSE	5
2022-09-12	12:41:57	0.281692	172.84	FALSE	5
2022-09-12	12:41:58	0.28383	173.124	FALSE	5
2022-09-12	12:41:58	0.251311	173.375	FALSE	5
2022-09-12	12:41:58	0.19355	173.569	FALSE	5
2022-09-12	12:41:58	0.224593	173.794	FALSE	5
2022-09-12	12:41:59	0.086985	173.881	FALSE	5
2022-09-12	12:41:59	0.0587407	173.939	FALSE	5
2022-09-12	12:41:59	0.0926846	174.032	FALSE	5
2022-09-12	12:42:00	0.0249493	174.057	FALSE	5
2022-09-12	12:42:00	0.116756	174.174	FALSE	5
2022-09-12	12:42:00	0.222252	174.396	FALSE	5
2022-09-12	12:42:00	0.103982	174.5	FALSE	5
2022-09-12	12:42:01	0.277316	174.777	FALSE	5
2022-09-12	12:42:01	0.205407	174.983	FALSE	5
2022-09-12	12:42:01	0.239504	175.222	FALSE	5
2022-09-12	12:42:01	0.242456	175.465	FALSE	5
2022-09-12	12:42:02	0.246934	175.712	FALSE	5
2022-09-12	12:42:02	0.313244	176.025	FALSE	5
2022-09-12	12:42:02	0.145356	176.17	FALSE	5
2022-09-12	12:42:02	0.282303	176.452	FALSE	5
2022-09-12	12:42:03	0.112786	176.565	FALSE	5
2022-09-12	12:42:03	-0.126806	176.565	FALSE	5
2022-09-12	12:42:03	0.0585371	176.624	FALSE	5
2022-09-12	12:42:03	0.0607254	176.684	FALSE	5
2022-09-12	12:42:04	0.181539	176.866	FALSE	5
2022-09-12	12:42:04	0.0503438	176.916	FALSE	5
2022-09-12	12:42:04	0.191972	177.108	FALSE	5
2022-09-12	12:42:05	0.0924811	177.201	FALSE	5
2022-09-12	12:42:05	0.144593	177.345	FALSE	5
2022-09-12	12:42:05	0.308461	177.654	FALSE	5
2022-09-12	12:42:05	1.48902	179.143	FALSE	5
2022-09-12	12:42:06	0.838486	179.981	FALSE	5
2022-09-12	12:42:06	0.861845	180.843	FALSE	5
2022-09-12	12:42:06	0.80668	181.65	FALSE	5
2022-09-12	12:42:06	0.377519	182.027	FALSE	5
2022-09-12	12:42:07	0.55813	182.586	FALSE	5
2022-09-12	12:42:07	0.420674	183.006	FALSE	5
2022-09-12	12:42:07	0.486323	183.493	FALSE	5
2022-09-12	12:42:07	0.414873	183.907	FALSE	5
2022-09-12	12:42:08	0.444338	184.352	FALSE	5
2022-09-12	12:42:08	0.413244	184.765	FALSE	5
2022-09-12	12:42:08	0.53757	185.303	FALSE	5
2022-09-12	12:42:09	0.942201	186.245	FALSE	5
2022-09-12	12:42:09	1.47609	187.721	FALSE	5
2022-09-12	12:42:09	2.06144	189.782	FALSE	5
2022-09-12	12:42:09	2.21828	192.001	FALSE	5
2022-09-12	12:42:10	1.93742	193.938	FALSE	5
2022-09-12	12:42:10	1.5136	195.452	FALSE	5
2022-09-12	12:42:10	0.618384	196.07	FALSE	5
2022-09-12	12:42:10	0.671361	196.741	FALSE	5
2022-09-12	12:42:11	0.592481	197.334	FALSE	5
2022-09-12	12:42:11	0.566374	197.9	FALSE	5
2022-09-12	12:42:11	0.469784	198.37	FALSE	5
2022-09-12	12:42:11	0.408613	198.779	FALSE	5
2022-09-12	12:42:12	0.693499	199.472	FALSE	5
2022-09-12	12:42:12	0.402099	199.874	FALSE	5
2022-09-12	12:42:12	0.536858	200.411	FALSE	5
2022-09-12	12:42:13	0.517417	200.928	FALSE	5
2022-09-12	12:42:13	0.311819	201.24	FALSE	5
2022-09-12	12:42:13	0.430598	201.671	FALSE	5
2022-09-12	12:42:13	0.31757	201.988	FALSE	5
2022-09-12	12:42:14	0.348511	202.337	FALSE	5
2022-09-12	12:42:14	0.343423	202.68	FALSE	5
2022-09-12	12:42:14	0.199911	202.88	FALSE	5
2022-09-12	12:42:14	0.366934	203.247	FALSE	5
2022-09-12	12:42:15	0.292125	203.539	FALSE	5
2022-09-12	12:42:15	0.205204	203.745	FALSE	5
2022-09-12	12:42:15	0.34785	204.092	FALSE	5
2022-09-12	12:42:15	0.156552	204.249	FALSE	5
2022-09-12	12:42:16	0.391158	204.64	FALSE	5
2022-09-12	12:42:16	0.195331	204.835	FALSE	5
2022-09-12	12:42:16	0.330598	205.166	FALSE	5
2022-09-12	12:42:17	0.235433	205.401	FALSE	5
2022-09-12	12:42:17	0.185509	205.587	FALSE	5
2022-09-12	12:42:17	0.219097	205.806	FALSE	5
2022-09-12	12:42:17	0.176756	205.983	FALSE	5
2022-09-12	12:42:18	0.26042	206.243	FALSE	5
2022-09-12	12:42:18	0.161641	206.405	FALSE	5
2022-09-12	12:42:18	0.341183	206.746	FALSE	5
2022-09-12	12:42:18	0.0776211	206.824	FALSE	5
2022-09-12	12:42:19	0.211158	207.035	FALSE	5
2022-09-12	12:42:19	0.115382	207.15	FALSE	5
2022-09-12	12:42:19	0.126323	207.277	FALSE	5
2022-09-12	12:42:19	0.17187	207.448	FALSE	5
2022-09-12	12:42:20	-0.0303178	207.448	FALSE	5
2022-09-12	12:42:20	0.144695	207.593	FALSE	5
2022-09-12	12:42:20	0.00367708	207.597	FALSE	5
2022-09-12	12:42:21	0.0799111	207.677	FALSE	5
2022-09-12	12:42:21	0.171718	207.848	FALSE	5
2022-09-12	12:42:21	0.0874429	207.936	FALSE	5
2022-09-12	12:42:21	0.231718	208.168	FALSE	5
2022-09-12	12:42:22	0.14327	208.311	FALSE	5
2022-09-12	12:42:22	0.375178	208.686	FALSE	5
2022-09-12	12:42:22	0.254873	208.941	FALSE	5
2022-09-12	12:42:22	0.452176	209.393	FALSE	5
2022-09-12	12:42:23	0.345916	209.739	FALSE	5
2022-09-12	12:42:23	0.562862	210.302	FALSE	5
2022-09-12	12:42:23	0.294669	210.597	FALSE	5
2022-09-12	12:42:23	0.733651	211.33	FALSE	5
2022-09-12	12:42:24	0.710344	212.041	FALSE	5
2022-09-12	12:42:24	0.594364	212.635	FALSE	5
2022-09-12	12:42:24	0.585967	213.221	FALSE	5
2022-09-12	12:42:25	0.542506	213.763	FALSE	5
2022-09-12	12:42:25	0.870445	214.634	FALSE	5
2022-09-12	12:42:25	0.572226	215.206	FALSE	5
2022-09-12	12:42:25	0.872125	216.078	FALSE	5
2022-09-12	12:42:26	0.878791	216.957	FALSE	5
2022-09-12	12:42:26	0.785814	217.743	FALSE	5
2022-09-12	12:42:26	0.79416	218.537	FALSE	5
2022-09-12	12:42:26	0.47528	219.012	FALSE	5
2022-09-12	12:42:27	0.861743	219.874	FALSE	5
2022-09-12	12:42:27	0.613499	220.487	FALSE	5
2022-09-12	12:42:27	0.853244	221.341	FALSE	5
2022-09-12	12:42:27	0.548817	221.89	FALSE	5
2022-09-12	12:42:28	0.956603	222.846	FALSE	5
2022-09-12	12:42:28	0.947697	223.794	FALSE	5
2022-09-12	12:42:28	0.302761	224.097	FALSE	5
2022-09-12	12:42:29	1.3424	225.439	FALSE	5
2022-09-12	12:42:29	0.314618	225.754	FALSE	5
2022-09-12	12:42:29	0.267443	226.021	FALSE	5
2022-09-12	12:42:29	0.314313	226.335	FALSE	5
2022-09-12	12:42:30	0.80042	227.136	FALSE	5
2022-09-12	12:42:30	0.472074	227.608	FALSE	5
2022-09-12	12:42:30	0.124033	227.732	FALSE	5
2022-09-12	12:42:30	0.6707	228.403	FALSE	5
2022-09-12	12:42:31	0.665254	229.068	FALSE	5
2022-09-12	12:42:31	0.773041	229.841	FALSE	5
2022-09-12	12:42:31	0.807799	230.649	FALSE	5
2022-09-12	12:42:31	1.12754	231.776	FALSE	5
2022-09-12	12:42:32	0.717163	232.493	FALSE	5
2022-09-12	12:42:32	0.939249	233.433	FALSE	5
2022-09-12	12:42:32	1.13772	234.57	FALSE	5
2022-09-12	12:42:33	0.51243	235.083	FALSE	5
2022-09-12	12:42:33	0.354517	235.437	FALSE	5
2022-09-12	12:42:33	0.485204	235.923	FALSE	5
2022-09-12	12:42:33	0.27701	236.2	FALSE	5
2022-09-12	12:42:34	0.308003	236.508	FALSE	5
2022-09-12	12:42:34	0.274618	236.782	FALSE	5
2022-09-12	12:42:34	0.356247	237.138	FALSE	5
2022-09-12	12:42:34	0.402048	237.54	FALSE	5
2022-09-12	12:42:35	0.368817	237.909	FALSE	5
2022-09-12	12:42:35	0.837163	238.746	FALSE	5
2022-09-12	12:42:35	0.463015	239.209	FALSE	5
2022-09-12	12:42:35	0.644593	239.854	FALSE	5
2022-09-12	12:42:36	1.27335	241.127	FALSE	5
2022-09-12	12:42:36	0.454669	241.582	FALSE	5
2022-09-12	12:42:36	0.360115	241.942	FALSE	5
2022-09-12	12:42:37	0.531361	242.474	FALSE	5
2022-09-12	12:42:37	0.473194	242.947	FALSE	5
2022-09-12	12:42:37	0.22556	243.172	FALSE	5
2022-09-12	12:42:37	0.389529	243.562	FALSE	5
2022-09-12	12:42:38	0.338588	243.9	FALSE	5
2022-09-12	12:42:38	0.292837	244.193	FALSE	5
2022-09-12	12:42:38	0.173244	244.366	FALSE	5
2022-09-12	12:42:38	0.158995	244.525	FALSE	5
2022-09-12	12:42:39	0.211056	244.737	FALSE	5
2022-09-12	12:42:39	0.192023	244.929	FALSE	5
2022-09-12	12:42:39	0.272379	245.201	FALSE	5
2022-09-12	12:42:39	0.124898	245.326	FALSE	5
2022-09-12	12:42:40	0.105305	245.431	FALSE	5
2022-09-12	12:42:40	0.315026	245.746	FALSE	5
2022-09-12	12:42:40	0.205814	245.952	FALSE	5
2022-09-12	12:42:41	0.244848	246.197	FALSE	5
2022-09-12	12:42:41	0.112176	246.309	FALSE	5
2022-09-12	12:42:41	-0.0393763	246.309	FALSE	5
2022-09-12	12:42:41	0.080929	246.39	FALSE	5
2022-09-12	12:42:42	0.0699875	246.46	FALSE	5
2022-09-12	12:42:42	0.0372649	246.497	FALSE	5
2022-09-12	12:42:42	0.203575	246.701	FALSE	5
2022-09-12	12:42:42	0.00642519	246.707	FALSE	5
2022-09-12	12:42:43	0.173601	246.881	FALSE	5
2022-09-12	12:42:43	0.0867305	246.968	FALSE	5
2022-09-12	12:42:43	0.112328	247.08	FALSE	5
2022-09-12	12:42:43	0.151616	247.231	FALSE	5
2022-09-12	12:42:44	0.0799111	247.311	FALSE	5
2022-09-12	12:42:44	0.651056	247.962	FALSE	5
2022-09-12	12:42:44	1.01391	248.976	FALSE	5
2022-09-12	12:42:45	0.937774	249.914	FALSE	5
2022-09-12	12:42:45	0.78042	250.695	FALSE	5
2022-09-12	12:42:45	1.045	251.74	FALSE	5
2022-09-12	12:42:45	0.464949	252.204	FALSE	5
2022-09-12	12:42:46	0.561845	252.766	FALSE	5
2022-09-12	12:42:46	0.343881	253.11	FALSE	5
2022-09-12	12:42:46	0.388206	253.498	FALSE	5
2022-09-12	12:42:46	0.570954	254.069	FALSE	5
2022-09-12	12:42:47	0.375687	254.445	FALSE	5
2022-09-12	12:42:47	0.264542	254.71	FALSE	5
2022-09-12	12:42:47	0.197977	254.908	FALSE	5
2022-09-12	12:42:47	0.324949	255.233	FALSE	5
2022-09-12	12:42:48	0.16327	255.396	FALSE	5
2022-09-12	12:42:48	0.252125	255.648	FALSE	5
2022-09-12	12:42:48	0.16154	255.809	FALSE	5
2022-09-12	12:42:49	0.30154	256.111	FALSE	5
2022-09-12	12:42:49	0.227748	256.339	FALSE	5
2022-09-12	12:42:49	0.277417	256.616	FALSE	5
2022-09-12	12:42:49	0.432735	257.049	FALSE	5
2022-09-12	12:42:50	0.217977	257.267	FALSE	5
2022-09-12	12:42:50	0.514975	257.782	FALSE	5
2022-09-12	12:42:50	0.3707	258.153	FALSE	5
2022-09-12	12:42:50	0.568409	258.721	FALSE	5
2022-09-12	12:42:51	0.537163	259.258	FALSE	5
2022-09-12	12:42:51	0.451056	259.709	FALSE	5
2022-09-12	12:42:51	0.426018	260.135	FALSE	5
2022-09-12	12:42:51	0.747697	260.883	FALSE	5
2022-09-12	12:42:52	0.70103	261.584	FALSE	5
2022-09-12	12:42:52	0.401285	261.985	FALSE	5
2022-09-12	12:42:52	0.788715	262.774	FALSE	5
2022-09-12	12:42:53	0.428664	263.203	FALSE	5
2022-09-12	12:42:53	0.647239	263.85	FALSE	5
2022-09-12	12:42:53	0.522913	264.373	FALSE	5
2022-09-12	12:42:53	0.593753	264.966	FALSE	5
2022-09-12	12:42:54	0.406832	265.373	FALSE	5
2022-09-12	12:42:54	0.582252	265.956	FALSE	5
2022-09-12	12:42:54	0.405204	266.361	FALSE	5
2022-09-12	12:42:54	0.424237	266.785	FALSE	5
2022-09-12	12:42:55	0.448817	267.234	FALSE	5
2022-09-12	12:42:55	0.408003	267.642	FALSE	5
2022-09-12	12:42:55	0.61126	268.253	FALSE	5
2022-09-12	12:42:55	0.402557	268.656	FALSE	5
2022-09-12	12:42:56	0.499707	269.155	FALSE	5
2022-09-12	12:42:56	0.316501	269.472	FALSE	5
2022-09-12	12:42:56	0.456145	269.928	FALSE	5
2022-09-12	12:42:57	0.444237	270.372	FALSE	5
2022-09-12	12:42:57	0.366374	270.739	FALSE	5
2022-09-12	12:42:57	0.629326	271.368	FALSE	5
2022-09-12	12:42:57	0.389529	271.757	FALSE	5
2022-09-12	12:42:58	0.580929	272.338	FALSE	5
2022-09-12	12:42:58	1.69721	274.036	FALSE	5
2022-09-12	12:42:58	2.3995	276.435	1	5
2022-09-12	12:42:58	3.28291	279.718	FALSE	6
2022-09-12	12:42:59	1.60276	281.321	FALSE	6
2022-09-12	12:42:59	0.973651	282.294	FALSE	6
2022-09-12	12:42:59	1.27589	283.57	FALSE	6
2022-09-12	12:42:59	1.40403	284.974	FALSE	6
2022-09-12	12:43:00	1.54154	286.516	FALSE	6
2022-09-12	12:43:00	2.40195	288.918	FALSE	6
2022-09-12	12:43:00	1.78968	290.708	FALSE	6
2022-09-12	12:43:01	1.02047	291.728	FALSE	6
2022-09-12	12:43:01	0.656349	292.384	FALSE	6
2022-09-12	12:43:01	0.0596058	292.444	FALSE	6
2022-09-12	12:43:01	0.273448	292.717	FALSE	6
2022-09-12	12:43:02	0.082303	292.8	FALSE	6
2022-09-12	12:43:02	-0.0515901	292.8	FALSE	6
2022-09-12	12:43:02	0.0993513	292.899	FALSE	6
2022-09-12	12:43:02	-0.00248066	292.899	FALSE	6
2022-09-12	12:43:03	-0.0112847	292.899	FALSE	6
2022-09-12	12:43:03	0.538282	293.437	FALSE	6
2022-09-12	12:43:03	0.761539	294.199	FALSE	6
2022-09-12	12:43:03	0.950445	295.149	FALSE	6
2022-09-12	12:43:04	1.06785	296.217	FALSE	6
2022-09-12	12:43:04	1.13238	297.35	FALSE	6
2022-09-12	12:43:04	0.842863	298.192	FALSE	6
2022-09-12	12:43:05	0.683117	298.876	FALSE	6
2022-09-12	12:43:05	0.466323	299.342	FALSE	6
2022-09-12	12:43:05	0.428766	299.771	FALSE	6
2022-09-12	12:43:05	0.435636	300.206	FALSE	6
2022-09-12	12:43:06	0.556399	300.763	FALSE	6
2022-09-12	12:43:06	0.34383	301.106	FALSE	6
2022-09-12	12:43:06	-0.0881804	301.106	FALSE	6
2022-09-12	12:43:06	-0.041412	301.106	FALSE	6
2022-09-12	12:43:07	-0.173727	301.106	FALSE	6
2022-09-12	12:43:07	-0.416374	301.106	FALSE	6
2022-09-12	12:43:07	-0.258766	301.106	FALSE	6
2022-09-12	12:43:07	-0.0682313	301.106	FALSE	6
2022-09-12	12:43:08	0.0751275	301.182	FALSE	6
2022-09-12	12:43:08	0.205814	301.387	FALSE	6
2022-09-12	12:43:08	0.261998	301.649	FALSE	6
2022-09-12	12:43:09	0.33126	301.981	FALSE	6
2022-09-12	12:43:09	0.407443	302.388	FALSE	6
2022-09-12	12:43:09	0.366323	302.754	FALSE	6
2022-09-12	12:43:09	0.367595	303.122	FALSE	6
2022-09-12	12:43:10	0.313143	303.435	FALSE	6
2022-09-12	12:43:10	0.416858	303.852	FALSE	6
2022-09-12	12:43:10	0.527188	304.379	FALSE	6
2022-09-12	12:43:10	0.40098	304.78	FALSE	6
2022-09-12	12:43:11	0.258232	305.038	FALSE	6
2022-09-12	12:43:11	0.402812	305.441	FALSE	6
2022-09-12	12:43:11	0.42556	305.867	FALSE	6
2022-09-12	12:43:11	0.41355	306.28	FALSE	6
2022-09-12	12:43:12	0.428512	306.709	FALSE	6
2022-09-12	12:43:12	0.399707	307.109	FALSE	6
2022-09-12	12:43:12	0.432379	307.541	FALSE	6
2022-09-12	12:43:13	0.47014	308.011	FALSE	6
2022-09-12	12:43:13	0.568053	308.579	FALSE	6
2022-09-12	12:43:13	0.42444	309.004	FALSE	6
2022-09-12	12:43:13	0.427443	309.431	FALSE	6
2022-09-12	12:43:14	0.418181	309.849	FALSE	6
2022-09-12	12:43:14	0.303168	310.152	FALSE	6
2022-09-12	12:43:14	0.456858	310.609	FALSE	6
2022-09-12	12:43:14	0.151718	310.761	FALSE	6
2022-09-12	12:43:15	0.275331	311.036	FALSE	6
2022-09-12	12:43:15	0.42729	311.464	FALSE	6
2022-09-12	12:43:15	0.21757	311.681	FALSE	6
2022-09-12	12:43:15	0.358741	312.04	FALSE	6
2022-09-12	12:43:16	0.250089	312.29	FALSE	6
2022-09-12	12:43:16	0.330445	312.62	FALSE	6
2022-09-12	12:43:16	0.396756	313.017	FALSE	6
2022-09-12	12:43:17	0.314567	313.332	FALSE	6
2022-09-12	12:43:17	0.506934	313.839	FALSE	6
2022-09-12	12:43:17	0.213601	314.052	FALSE	6
2022-09-12	12:43:17	0.41299	314.465	FALSE	6
2022-09-12	12:43:18	0.347545	314.813	FALSE	6
2022-09-12	12:43:18	0.635585	315.448	FALSE	6
2022-09-12	12:43:18	0.795534	316.244	FALSE	6
2022-09-12	12:43:18	0.379911	316.624	FALSE	6
2022-09-12	12:43:19	0.564287	317.188	FALSE	6
2022-09-12	12:43:19	0.477265	317.665	FALSE	6
2022-09-12	12:43:19	0.715432	318.381	FALSE	6
2022-09-12	12:43:19	0.451005	318.832	FALSE	6
2022-09-12	12:43:20	0.394873	319.227	FALSE	6
2022-09-12	12:43:20	0.490242	319.717	FALSE	6
2022-09-12	12:43:20	0.461082	320.178	FALSE	6
2022-09-12	12:43:21	0.479453	320.657	FALSE	6
2022-09-12	12:43:21	0.415331	321.073	FALSE	6
2022-09-12	12:43:21	0.38159	321.454	FALSE	6
2022-09-12	12:43:21	0.425305	321.88	FALSE	6
2022-09-12	12:43:22	0.357875	322.238	FALSE	6
2022-09-12	12:43:22	0.354975	322.593	FALSE	6
2022-09-12	12:43:22	0.53645	323.129	FALSE	6
2022-09-12	12:43:22	0.363473	323.492	FALSE	6
2022-09-12	12:43:23	0.431769	323.924	FALSE	6
2022-09-12	12:43:23	0.334873	324.259	FALSE	6
2022-09-12	12:43:23	0.400827	324.66	FALSE	6
2022-09-12	12:43:23	0.513499	325.173	FALSE	6
2022-09-12	12:43:24	0.301896	325.475	FALSE	6
2022-09-12	12:43:24	0.601387	326.077	FALSE	6
2022-09-12	12:43:24	0.369987	326.447	FALSE	6
2022-09-12	12:43:25	0.440013	326.887	FALSE	6
2022-09-12	12:43:25	0.377163	327.264	FALSE	6
2022-09-12	12:43:25	0.318181	327.582	FALSE	6
2022-09-12	12:43:25	0.539758	328.122	FALSE	6
2022-09-12	12:43:26	0.360267	328.482	FALSE	6
2022-09-12	12:43:26	0.490547	328.973	FALSE	6
2022-09-12	12:43:26	0.357265	329.33	FALSE	6
2022-09-12	12:43:26	0.378588	329.708	FALSE	6
2022-09-12	12:43:27	0.398842	330.107	FALSE	6
2022-09-12	12:43:27	0.252328	330.36	FALSE	6
2022-09-12	12:43:27	0.487697	330.847	FALSE	6
2022-09-12	12:43:27	0.686832	331.534	FALSE	6
2022-09-12	12:43:28	0.111667	331.646	FALSE	6
2022-09-12	12:43:28	0.129275	331.775	FALSE	6
2022-09-12	12:43:28	0.0658145	331.841	FALSE	6
2022-09-12	12:43:29	0.13355	331.975	FALSE	6
2022-09-12	12:43:29	0.132277	332.107	FALSE	6
2022-09-12	12:43:29	0.139504	332.246	FALSE	6
2022-09-12	12:43:29	0.156451	332.403	FALSE	6
2022-09-12	12:43:30	0.265865	332.669	FALSE	6
2022-09-12	12:43:30	0.253193	332.922	FALSE	6
2022-09-12	12:43:30	0.237163	333.159	FALSE	6
2022-09-12	12:43:30	0.241845	333.401	FALSE	6
2022-09-12	12:43:31	0.173601	333.574	FALSE	6
2022-09-12	12:43:31	0.378791	333.953	FALSE	6
2022-09-12	12:43:31	0.444898	334.398	FALSE	6
2022-09-12	12:43:31	0.27869	334.677	FALSE	6
2022-09-12	12:43:32	0.389021	335.066	FALSE	6
2022-09-12	12:43:32	0.310089	335.376	FALSE	6
2022-09-12	12:43:32	0.264135	335.64	FALSE	6
2022-09-12	12:43:33	0.251921	335.892	FALSE	6
2022-09-12	12:43:33	0.214517	336.106	FALSE	6
2022-09-12	12:43:33	0.427596	336.534	FALSE	6
2022-09-12	12:43:33	0.257875	336.792	FALSE	6
2022-09-12	12:43:34	0.295789	337.088	FALSE	6
2022-09-12	12:43:34	0.420674	337.508	FALSE	6
2022-09-12	12:43:34	0.396603	337.905	FALSE	6
2022-09-12	12:43:34	0.244389	338.149	FALSE	6
2022-09-12	12:43:35	0.148512	338.298	FALSE	6
2022-09-12	12:43:35	0.25126	338.549	FALSE	6
2022-09-12	12:43:35	0.167239	338.716	FALSE	6
2022-09-12	12:43:35	0.197519	338.914	FALSE	6
2022-09-12	12:43:36	0.169987	339.084	FALSE	6
2022-09-12	12:43:36	0.1507	339.235	FALSE	6
2022-09-12	12:43:36	0.149021	339.384	FALSE	6
2022-09-12	12:43:37	0.127443	339.511	FALSE	6
2022-09-12	12:43:37	0.221539	339.733	FALSE	6
2022-09-12	12:43:37	0.0951274	339.828	FALSE	6
2022-09-12	12:43:37	0.22327	340.051	FALSE	6
2022-09-12	12:43:38	0.140624	340.192	FALSE	6
2022-09-12	12:43:38	0.185407	340.377	FALSE	6
2022-09-12	12:43:38	0.178435	340.555	FALSE	6
2022-09-12	12:43:38	0.162965	340.718	FALSE	6
2022-09-12	12:43:39	0.294618	341.013	FALSE	6
2022-09-12	12:43:39	0.363626	341.377	FALSE	6
2022-09-12	12:43:39	0.317926	341.695	FALSE	6
2022-09-12	12:43:39	0.321998	342.017	FALSE	6
2022-09-12	12:43:40	0.312837	342.329	FALSE	6
2022-09-12	12:43:40	0.415585	342.745	FALSE	6
2022-09-12	12:43:40	0.769122	343.514	FALSE	6
2022-09-12	12:43:41	0.808562	344.323	FALSE	6
2022-09-12	12:43:41	0.201438	344.524	FALSE	6
2022-09-12	12:43:41	0.128563	344.653	FALSE	6
2022-09-12	12:43:41	0.0213361	344.674	FALSE	6
2022-09-12	12:43:42	0.0187407	344.693	FALSE	6
2022-09-12	12:43:42	-0.0565264	344.693	FALSE	6
2022-09-12	12:43:42	0.0678501	344.761	FALSE	6
2022-09-12	12:43:42	0.373652	345.134	FALSE	6
2022-09-12	12:43:43	0.268919	345.403	FALSE	6
2022-09-12	12:43:43	0.231616	345.635	FALSE	6
2022-09-12	12:43:43	0.303626	345.938	FALSE	6
2022-09-12	12:43:43	0.363982	346.302	FALSE	6
2022-09-12	12:43:44	0.346629	346.649	FALSE	6
2022-09-12	12:43:44	0.43986	347.089	FALSE	6
2022-09-12	12:43:44	0.38159	347.471	FALSE	6
2022-09-12	12:43:45	0.493499	347.964	FALSE	6
2022-09-12	12:43:45	0.509275	348.473	FALSE	6
2022-09-12	12:43:45	0.577926	349.051	FALSE	6
2022-09-12	12:43:45	0.524135	349.575	FALSE	6
2022-09-12	12:43:46	0.559148	350.134	FALSE	6
2022-09-12	12:43:46	0.499148	350.634	FALSE	6
2022-09-12	12:43:46	0.528664	351.162	FALSE	6
2022-09-12	12:43:46	0.552125	351.714	FALSE	6
2022-09-12	12:43:47	0.519046	352.233	FALSE	6
2022-09-12	12:43:47	0.462354	352.696	FALSE	6
2022-09-12	12:43:47	0.348053	353.044	FALSE	6
2022-09-12	12:43:47	0.371667	353.416	FALSE	6
2022-09-12	12:43:48	0.375585	353.791	FALSE	6
2022-09-12	12:43:48	0.359707	354.151	FALSE	6
2022-09-12	12:43:48	0.470191	354.621	FALSE	6
2022-09-12	12:43:48	0.20612	354.827	FALSE	6
2022-09-12	12:43:49	0.267087	355.094	FALSE	6
2022-09-12	12:43:49	0.218079	355.312	FALSE	6
2022-09-12	12:43:49	0.271412	355.584	FALSE	6
2022-09-12	12:43:50	0.0805218	355.664	FALSE	6
2022-09-12	12:43:50	0.235331	355.9	FALSE	6
2022-09-12	12:43:50	0.0705473	355.97	FALSE	6
2022-09-12	12:43:50	0.353855	356.324	FALSE	6
2022-09-12	12:43:51	0.128054	356.452	FALSE	6
2022-09-12	12:43:51	0.361794	356.814	FALSE	6
2022-09-12	12:43:51	0.153804	356.968	FALSE	6
2022-09-12	12:43:51	0.321082	357.289	FALSE	6
2022-09-12	12:43:52	0.0986389	357.387	FALSE	6
2022-09-12	12:43:52	0.272379	357.66	FALSE	6
2022-09-12	12:43:52	0.149224	357.809	FALSE	6
2022-09-12	12:43:52	0.239097	358.048	FALSE	6
2022-09-12	12:43:53	0.225356	358.273	FALSE	6
2022-09-12	12:43:53	0.192735	358.466	FALSE	6
2022-09-12	12:43:53	0.23701	358.703	FALSE	6
2022-09-12	12:43:54	0.24327	358.946	FALSE	6
2022-09-12	12:43:54	0.348003	359.294	FALSE	6
2022-09-12	12:43:54	0.171311	359.466	FALSE	6
2022-09-12	12:43:54	0.386476	359.852	FALSE	6
2022-09-12	12:43:55	0.205458	360.058	FALSE	6
2022-09-12	12:43:55	0.378893	360.437	FALSE	6
2022-09-12	12:43:55	0.215891	360.652	FALSE	6
2022-09-12	12:43:55	0.261947	360.914	FALSE	6
2022-09-12	12:43:56	0.257875	361.172	FALSE	6
2022-09-12	12:43:56	0.21925	361.392	FALSE	6
2022-09-12	12:43:56	0.388817	361.78	FALSE	6
2022-09-12	12:43:57	0.161183	361.942	FALSE	6
2022-09-12	12:43:57	0.373244	362.315	FALSE	6
2022-09-12	12:43:57	0.177417	362.492	FALSE	6
2022-09-12	12:43:57	0.277265	362.769	FALSE	6
2022-09-12	12:43:58	0.233855	363.003	FALSE	6
2022-09-12	12:43:58	0.218995	363.222	FALSE	6
2022-09-12	12:43:58	0.31187	363.534	FALSE	6
2022-09-12	12:43:58	0.234669	363.769	FALSE	6
2022-09-12	12:43:59	0.465	364.234	FALSE	6
2022-09-12	12:43:59	0.180471	364.414	FALSE	6
2022-09-12	12:43:59	0.556043	364.97	FALSE	6
2022-09-12	12:43:59	0.389733	365.36	FALSE	6
2022-09-12	12:44:00	0.493957	365.854	FALSE	6
2022-09-12	12:44:00	0.774975	366.629	FALSE	6
2022-09-12	12:44:00	0.683728	367.313	FALSE	6
2022-09-12	12:44:00	0.558741	367.872	FALSE	6
2022-09-12	12:44:01	0.475382	368.347	FALSE	6
2022-09-12	12:44:01	0.782913	369.13	FALSE	6
2022-09-12	12:44:01	0.613652	369.743	FALSE	6
2022-09-12	12:44:02	0.372125	370.116	FALSE	6
2022-09-12	12:44:02	0.329428	370.445	FALSE	6
2022-09-12	12:44:02	0.333092	370.778	FALSE	6
2022-09-12	12:44:02	0.320573	371.099	FALSE	6
2022-09-12	12:44:03	0.269987	371.369	FALSE	6
2022-09-12	12:44:03	0.253906	371.623	FALSE	6
2022-09-12	12:44:03	0.276705	371.899	FALSE	6
2022-09-12	12:44:03	0.146374	372.046	FALSE	6
2022-09-12	12:44:04	0.317163	372.363	FALSE	6
2022-09-12	12:44:04	0.100064	372.463	FALSE	6
2022-09-12	12:44:04	0.287952	372.751	FALSE	6
2022-09-12	12:44:04	0.152176	372.903	FALSE	6
2022-09-12	12:44:05	0.279199	373.182	FALSE	6
2022-09-12	12:44:05	0.20215	373.384	FALSE	6
2022-09-12	12:44:05	0.221743	373.606	FALSE	6
2022-09-12	12:44:06	0.222456	373.829	FALSE	6
2022-09-12	12:44:06	0.25126	374.08	FALSE	6
2022-09-12	12:44:06	0.296654	374.376	FALSE	6
2022-09-12	12:44:06	0.225458	374.602	FALSE	6
2022-09-12	12:44:07	0.319249	374.921	FALSE	6
2022-09-12	12:44:07	0.255229	375.176	FALSE	6
2022-09-12	12:44:07	0.443422	375.62	FALSE	6
2022-09-12	12:44:07	0.124288	375.744	FALSE	6
2022-09-12	12:44:08	0.43472	376.179	FALSE	6
2022-09-12	12:44:08	0.206934	376.386	FALSE	6
2022-09-12	12:44:08	0.436756	376.823	FALSE	6
2022-09-12	12:44:08	0.144033	376.967	FALSE	6
2022-09-12	12:44:09	0.437672	377.404	FALSE	6
2022-09-12	12:44:09	0.211819	377.616	FALSE	6
2022-09-12	12:44:09	0.451158	378.067	FALSE	6
2022-09-12	12:44:10	0.232685	378.3	FALSE	6
2022-09-12	12:44:10	0.379606	378.679	FALSE	6
2022-09-12	12:44:10	0.227748	378.907	FALSE	6
2022-09-12	12:44:10	0.523473	379.431	FALSE	6
2022-09-12	12:44:11	0.32612	379.757	FALSE	6
2022-09-12	12:44:11	0.291819	380.049	FALSE	6
2022-09-12	12:44:11	0.40271	380.451	FALSE	6
2022-09-12	12:44:11	0.34327	380.795	FALSE	6
2022-09-12	12:44:12	0.391005	381.186	FALSE	6
2022-09-12	12:44:12	0.227138	381.413	FALSE	6
2022-09-12	12:44:12	0.504542	381.917	FALSE	6
2022-09-12	12:44:12	0.211361	382.129	FALSE	6
2022-09-12	12:44:13	0.481794	382.61	FALSE	6
2022-09-12	12:44:13	0.387137	382.998	FALSE	6
2022-09-12	12:44:13	0.458028	383.456	FALSE	6
2022-09-12	12:44:14	0.340267	383.796	FALSE	6
2022-09-12	12:44:14	0.626272	384.422	FALSE	6
2022-09-12	12:44:14	0.381998	384.804	FALSE	6
2022-09-12	12:44:14	0.543779	385.348	FALSE	6
2022-09-12	12:44:15	0.468512	385.816	FALSE	6
2022-09-12	12:44:15	0.628868	386.445	FALSE	6
2022-09-12	12:44:15	0.455483	386.901	FALSE	6
2022-09-12	12:44:15	0.645458	387.546	FALSE	6
2022-09-12	12:44:16	0.35645	387.903	FALSE	6
2022-09-12	12:44:16	0.466629	388.369	FALSE	6
2022-09-12	12:44:16	0.574517	388.944	FALSE	6
2022-09-12	12:44:16	0.433143	389.377	FALSE	6
2022-09-12	12:44:17	0.353143	389.73	FALSE	6
2022-09-12	12:44:17	0.502659	390.233	FALSE	6
2022-09-12	12:44:17	0.490649	390.723	FALSE	6
2022-09-12	12:44:18	0.354669	391.078	FALSE	6
2022-09-12	12:44:18	0.523422	391.602	FALSE	6
2022-09-12	12:44:18	0.454415	392.056	FALSE	6
2022-09-12	12:44:18	0.554008	392.61	FALSE	6
2022-09-12	12:44:19	0.321692	392.932	FALSE	6
2022-09-12	12:44:19	0.641794	393.573	FALSE	6
2022-09-12	12:44:19	0.411565	393.985	FALSE	6
2022-09-12	12:44:19	0.599097	394.584	FALSE	6
2022-09-12	12:44:20	0.325458	394.91	FALSE	6
2022-09-12	12:44:20	0.708308	395.618	FALSE	6
2022-09-12	12:44:20	0.387697	396.006	FALSE	6
2022-09-12	12:44:20	0.602303	396.608	FALSE	6
2022-09-12	12:44:21	0.38383	396.992	FALSE	6
2022-09-12	12:44:21	0.475687	397.467	FALSE	6
2022-09-12	12:44:21	0.312277	397.78	FALSE	6
2022-09-12	12:44:22	0.489428	398.269	FALSE	6
2022-09-12	12:44:22	0.445305	398.714	FALSE	6
2022-09-12	12:44:22	0.39355	399.108	FALSE	6
2022-09-12	12:44:22	0.432125	399.54	FALSE	6
2022-09-12	12:44:23	0.458232	399.998	FALSE	6
2022-09-12	12:44:23	0.523575	400.522	FALSE	6
2022-09-12	12:44:23	0.295942	400.818	FALSE	6
2022-09-12	12:44:23	0.586221	401.404	FALSE	6
2022-09-12	12:44:24	0.354008	401.758	FALSE	6
2022-09-12	12:44:24	0.700674	402.459	FALSE	6
2022-09-12	12:44:24	0.295025	402.754	FALSE	6
2022-09-12	12:44:24	0.588003	403.342	FALSE	6
2022-09-12	12:44:25	0.457112	403.799	FALSE	6
2022-09-12	12:44:25	0.424237	404.223	FALSE	6
2022-09-12	12:44:25	0.219097	404.442	FALSE	6
2022-09-12	12:44:26	0.265305	404.708	FALSE	6
2022-09-12	12:44:26	0.317519	405.025	FALSE	6
2022-09-12	12:44:26	0.262812	405.288	FALSE	6
2022-09-12	12:44:26	0.508512	405.796	FALSE	6
2022-09-12	12:44:27	0.19986	405.996	FALSE	6
2022-09-12	12:44:27	0.614974	406.611	FALSE	6
2022-09-12	12:44:27	0.367646	406.979	FALSE	6
2022-09-12	12:44:27	0.457774	407.437	FALSE	6
2022-09-12	12:44:28	0.24785	407.684	FALSE	6
2022-09-12	12:44:28	0.405305	408.09	FALSE	6
2022-09-12	12:44:28	0.319097	408.409	FALSE	6
2022-09-12	12:44:28	0.406781	408.816	FALSE	6
2022-09-12	12:44:29	0.461387	409.277	FALSE	6
2022-09-12	12:44:29	0.343321	409.62	FALSE	6
2022-09-12	12:44:29	0.482964	410.103	FALSE	6
2022-09-12	12:44:30	0.251107	410.354	FALSE	6
2022-09-12	12:44:30	0.559199	410.914	FALSE	6
2022-09-12	12:44:30	0.208054	411.122	FALSE	6
2022-09-12	12:44:30	0.496043	411.618	FALSE	6
2022-09-12	12:44:31	0.285407	411.903	FALSE	6
2022-09-12	12:44:31	0.449224	412.352	FALSE	6
2022-09-12	12:44:31	0.356959	412.709	FALSE	6
2022-09-12	12:44:31	0.330954	413.04	FALSE	6
2022-09-12	12:44:32	0.483982	413.524	FALSE	6
2022-09-12	12:44:32	0.252277	413.777	FALSE	6
2022-09-12	12:44:32	0.553957	414.33	FALSE	6
2022-09-12	12:44:33	0.204848	414.535	FALSE	6
2022-09-12	12:44:33	0.552227	415.088	FALSE	6
2022-09-12	12:44:33	0.235127	415.323	FALSE	6
2022-09-12	12:44:33	0.389987	415.713	FALSE	6
2022-09-12	12:44:34	0.184491	415.897	FALSE	6
2022-09-12	12:44:34	0.35411	416.251	FALSE	6
2022-09-12	12:44:34	0.241387	416.493	FALSE	6
2022-09-12	12:44:34	0.388817	416.881	FALSE	6
2022-09-12	12:44:35	0.419402	417.301	FALSE	6
2022-09-12	12:44:35	0.243931	417.545	FALSE	6
2022-09-12	12:44:35	0.458893	418.004	FALSE	6
2022-09-12	12:44:35	0.238639	418.242	FALSE	6
2022-09-12	12:44:36	0.448155	418.69	FALSE	6
2022-09-12	12:44:36	0.216603	418.907	FALSE	6
2022-09-12	12:44:36	0.386832	419.294	FALSE	6
2022-09-12	12:44:36	0.302354	419.596	FALSE	6
2022-09-12	12:44:37	0.297926	419.894	FALSE	6
2022-09-12	12:44:37	0.469428	420.364	FALSE	6
2022-09-12	12:44:37	0.272277	420.636	FALSE	6
2022-09-12	12:44:38	0.527595	421.164	FALSE	6
2022-09-12	12:44:38	0.309173	421.473	FALSE	6
2022-09-12	12:44:38	0.381845	421.855	FALSE	6
2022-09-12	12:44:38	0.28154	422.136	FALSE	6
2022-09-12	12:44:39	0.403575	422.54	FALSE	6
2022-09-12	12:44:39	0.431209	422.971	FALSE	6
2022-09-12	12:44:39	0.282303	423.253	FALSE	6
2022-09-12	12:44:39	0.503422	423.757	FALSE	6
2022-09-12	12:44:40	0.354364	424.111	FALSE	6
2022-09-12	12:44:40	0.539605	424.651	FALSE	6
2022-09-12	12:44:40	0.336298	424.987	FALSE	6
2022-09-12	12:44:40	0.513295	425.5	FALSE	6
2022-09-12	12:44:41	0.242659	425.743	FALSE	6
2022-09-12	12:44:41	0.508155	426.251	FALSE	6
2022-09-12	12:44:41	0.246018	426.497	FALSE	6
2022-09-12	12:44:42	0.29299	426.79	FALSE	6
2022-09-12	12:44:42	0.266629	427.057	FALSE	6
2022-09-12	12:44:42	0.286781	427.343	FALSE	6
2022-09-12	12:44:42	0.395127	427.739	FALSE	6
2022-09-12	12:44:43	0.202557	427.941	FALSE	6
2022-09-12	12:44:43	0.177316	428.118	FALSE	6
2022-09-12	12:44:43	0.337519	428.456	FALSE	6
2022-09-12	12:44:43	0.405356	428.861	FALSE	6
2022-09-12	12:44:44	0.390191	429.251	FALSE	6
2022-09-12	12:44:44	0.424338	429.676	FALSE	6
2022-09-12	12:44:44	0.481539	430.157	FALSE	6
2022-09-12	12:44:45	1.19747	431.355	FALSE	6
2022-09-12	12:44:45	1.29559	432.65	FALSE	6
2022-09-12	12:44:45	0.901438	433.552	FALSE	6
2022-09-12	12:44:45	1.31874	434.871	FALSE	6
2022-09-12	12:44:46	0.606425	435.477	FALSE	6
2022-09-12	12:44:46	0.474822	435.952	FALSE	6
2022-09-12	12:44:46	0.454059	436.406	FALSE	6
2022-09-12	12:44:46	0.560725	436.967	FALSE	6
2022-09-12	12:44:47	0.543982	437.511	FALSE	6
2022-09-12	12:44:47	0.603015	438.114	FALSE	6
2022-09-12	12:44:47	0.353499	438.467	FALSE	6
2022-09-12	12:44:47	0.585611	439.053	FALSE	6
2022-09-12	12:44:48	0.351565	439.404	FALSE	6
2022-09-12	12:44:48	0.601539	440.006	FALSE	6
2022-09-12	12:44:48	0.299555	440.305	FALSE	6
2022-09-12	12:44:48	0.570343	440.876	FALSE	6
2022-09-12	12:44:49	0.295738	441.171	FALSE	6
2022-09-12	12:44:49	0.405254	441.577	FALSE	6
2022-09-12	12:44:49	0.321998	441.899	FALSE	6
2022-09-12	12:44:50	0.327392	442.226	FALSE	6
2022-09-12	12:44:50	0.464186	442.69	FALSE	6
2022-09-12	12:44:50	0.260725	442.951	FALSE	6
2022-09-12	12:44:50	0.454313	443.405	FALSE	6
2022-09-12	12:44:51	0.205102	443.61	FALSE	6
2022-09-12	12:44:51	0.439962	444.05	FALSE	6
2022-09-12	12:44:51	0.208054	444.258	FALSE	6
2022-09-12	12:44:51	0.519148	444.778	FALSE	6
2022-09-12	12:44:52	0.37299	445.151	FALSE	6
2022-09-12	12:44:52	0.203931	445.354	FALSE	6
2022-09-12	12:44:52	0.0436262	445.398	FALSE	6
2022-09-12	12:44:52	0.131616	445.53	FALSE	6
2022-09-12	12:44:53	0.0827101	445.612	FALSE	6
2022-09-12	12:44:53	0.391565	446.004	FALSE	6
2022-09-12	12:44:53	0.355331	446.359	FALSE	6
2022-09-12	12:44:54	0.282761	446.642	FALSE	6
2022-09-12	12:44:54	0.636043	447.278	FALSE	6
2022-09-12	12:44:54	0.430751	447.709	FALSE	6
2022-09-12	12:44:54	0.391819	448.101	FALSE	6
2022-09-12	12:44:55	0.588206	448.689	FALSE	6
2022-09-12	12:44:55	0.393346	449.082	FALSE	6
2022-09-12	12:44:55	0.408155	449.49	FALSE	6
2022-09-12	12:44:55	0.379351	449.87	FALSE	6
2022-09-12	12:44:56	0.450344	450.32	FALSE	6
2022-09-12	12:44:56	0.396858	450.717	FALSE	6
2022-09-12	12:44:56	0.313092	451.03	FALSE	6
2022-09-12	12:44:56	0.476654	451.507	FALSE	6
2022-09-12	12:44:57	0.425713	451.932	FALSE	6
2022-09-12	12:44:57	0.442099	452.375	FALSE	6
2022-09-12	12:44:57	0.34327	452.718	FALSE	6
2022-09-12	12:44:58	0.386171	453.104	FALSE	6
2022-09-12	12:44:58	0.368003	453.472	FALSE	6
2022-09-12	12:44:58	0.398842	453.871	FALSE	6
2022-09-12	12:44:58	0.415789	454.287	FALSE	6
2022-09-12	12:44:59	0.401183	454.688	FALSE	6
2022-09-12	12:44:59	0.376654	455.064	FALSE	6
2022-09-12	12:44:59	0.462812	455.527	FALSE	6
2022-09-12	12:44:59	0.456094	455.983	FALSE	6
2022-09-12	12:45:00	0.560115	456.543	FALSE	6
2022-09-12	12:45:00	0.390038	456.933	FALSE	6
2022-09-12	12:45:00	0.424491	457.358	FALSE	6
2022-09-12	12:45:00	0.504949	457.863	FALSE	6
2022-09-12	12:45:01	0.428766	458.292	FALSE	6
2022-09-12	12:45:01	0.468054	458.76	FALSE	6
2022-09-12	12:45:01	0.451158	459.211	FALSE	6
2022-09-12	12:45:02	0.458842	459.67	FALSE	6
2022-09-12	12:45:02	0.432888	460.103	FALSE	6
2022-09-12	12:45:02	0.434517	460.537	FALSE	6
2022-09-12	12:45:02	0.440725	460.978	FALSE	6
2022-09-12	12:45:03	0.459198	461.437	FALSE	6
2022-09-12	12:45:03	0.419606	461.857	FALSE	6
2022-09-12	12:45:03	0.438842	462.296	FALSE	6
2022-09-12	12:45:03	0.438435	462.734	FALSE	6
2022-09-12	12:45:04	0.444949	463.179	FALSE	6
2022-09-12	12:45:04	0.442456	463.621	FALSE	6
2022-09-12	12:45:04	0.407748	464.029	FALSE	6
2022-09-12	12:45:04	0.412837	464.442	FALSE	6
2022-09-12	12:45:05	0.462201	464.904	FALSE	6
2022-09-12	12:45:05	0.41757	465.322	FALSE	6
2022-09-12	12:45:05	0.49416	465.816	FALSE	6
2022-09-12	12:45:06	0.367036	466.183	FALSE	6
2022-09-12	12:45:06	0.293143	466.476	FALSE	6
2022-09-12	12:45:06	0.37014	466.846	FALSE	6
2022-09-12	12:45:06	0.326578	467.173	FALSE	6
2022-09-12	12:45:07	0.290954	467.464	FALSE	6
2022-09-12	12:45:07	0.280522	467.744	FALSE	6
2022-09-12	12:45:07	0.227087	467.971	FALSE	6
2022-09-12	12:45:07	0.214313	468.186	FALSE	6

## Sheet: Dominic_prong_2022912123959
						**GoPro Fitting: 1229
2022-09-12	12:40:00	0.352481
2022-09-12	12:40:00	0.341743
2022-09-12	12:40:00	0.351361
2022-09-12	12:40:00	0.351412
2022-09-12	12:40:01	0.403066
2022-09-12	12:40:01	0.38159
2022-09-12	12:40:01	0.393957
2022-09-12	12:40:01	0.402303
2022-09-12	12:40:02	0.41243
2022-09-12	12:40:02	0.439758
2022-09-12	12:40:02	0.492532
2022-09-12	12:40:03	0.393804
2022-09-12	12:40:03	0.466883
2022-09-12	12:40:03	0.405662
2022-09-12	12:40:03	0.424135
2022-09-12	12:40:04	0.467901
2022-09-12	12:40:04	0.395229
2022-09-12	12:40:04	0.333855
2022-09-12	12:40:04	0.717061
2022-09-12	12:40:05	1.11452
2022-09-12	12:40:05	1.27899
2022-09-12	12:40:05	0.875229
2022-09-12	12:40:05	0.660115
2022-09-12	12:40:06	0.123677
2022-09-12	12:40:06	0.225509
2022-09-12	12:40:06	0.329529
2022-09-12	12:40:07	0.66556
2022-09-12	12:40:07	0.902812
2022-09-12	12:40:07	2.04368
2022-09-12	12:40:07	5.34535
2022-09-12	12:40:08	1.61039
2022-09-12	12:40:08	0.123015
2022-09-12	12:40:08	0.253143
2022-09-12	12:40:08	0.566934
2022-09-12	12:40:09	0.0446949
2022-09-12	12:40:09	0.124797
2022-09-12	12:40:09	0.143168
2022-09-12	12:40:09	0.0916669
2022-09-12	12:40:10	0.36897
2022-09-12	12:40:10	0.975025
2022-09-12	12:40:10	0.388054
2022-09-12	12:40:11	-0.0907758
2022-09-12	12:40:11	-0.317035
2022-09-12	12:40:11	-0.101463
2022-09-12	12:40:11	-0.112455
2022-09-12	12:40:12	-0.201921
2022-09-12	12:40:12	-0.245076
2022-09-12	12:40:12	-0.176221
2022-09-12	12:40:12	-0.101107
2022-09-12	12:40:13	-0.0857376
2022-09-12	12:40:13	-0.339885
2022-09-12	12:40:13	-0.350216
2022-09-12	12:40:13	-0.259834
2022-09-12	12:40:14	-0.159376
2022-09-12	12:40:14	-0.164872
2022-09-12	12:40:14	-0.17332
2022-09-12	12:40:15	0.441387
2022-09-12	12:40:15	0.314873
2022-09-12	12:40:15	0.225865
2022-09-12	12:40:15	0.277214
2022-09-12	12:40:16	0.574822
2022-09-12	12:40:16	0.300013
2022-09-12	12:40:16	0.477468
2022-09-12	12:40:16	0.434059
2022-09-12	12:40:17	0.14444
2022-09-12	12:40:17	0.334109
2022-09-12	12:40:17	0.371209
2022-09-12	12:40:17	0.410496
2022-09-12	12:40:18	0.231412
2022-09-12	12:40:18	0.155535
2022-09-12	12:40:18	0.264644
2022-09-12	12:40:19	0.124237
2022-09-12	12:40:19	0.299555
2022-09-12	12:40:19	0.283779
2022-09-12	12:40:19	0.641132
2022-09-12	12:40:20	0.508562
2022-09-12	12:40:20	0.234975
2022-09-12	12:40:20	0.301489
2022-09-12	12:40:20	0.29986
2022-09-12	12:40:21	0.332176
2022-09-12	12:40:21	0.143423
2022-09-12	12:40:21	0.366272
2022-09-12	12:40:21	0.328308
2022-09-12	12:40:22	0.38556
2022-09-12	12:40:22	0.263626
2022-09-12	12:40:22	0.355331
2022-09-12	12:40:23	0.281743
2022-09-12	12:40:23	0.330598
2022-09-12	12:40:23	0.24612
2022-09-12	12:40:23	0.233448
2022-09-12	12:40:24	-0.0784094
2022-09-12	12:40:24	-0.0927096
2022-09-12	12:40:24	-0.318358
2022-09-12	12:40:24	-0.506603
2022-09-12	12:40:25	-0.575915
2022-09-12	12:40:25	-0.0370863
2022-09-12	12:40:25	1.8619
2022-09-12	12:40:25	2.41874
2022-09-12	12:40:26	0.895432
2022-09-12	12:40:26	1.49039
2022-09-12	12:40:26	0.752634
2022-09-12	12:40:27	0.563677
2022-09-12	12:40:27	0.23126
2022-09-12	12:40:27	0.362048
2022-09-12	12:40:27	0.375433
2022-09-12	12:40:28	0.350191
2022-09-12	12:40:28	0.397417
2022-09-12	12:40:28	0.562812
2022-09-12	12:40:28	0.458537
2022-09-12	12:40:29	0.343219
2022-09-12	12:40:29	0.328817
2022-09-12	12:40:29	0.50444
2022-09-12	12:40:29	0.226985
2022-09-12	12:40:30	0.237723
2022-09-12	12:40:30	0.258842
2022-09-12	12:40:30	0.27187
2022-09-12	12:40:31	0.255178
2022-09-12	12:40:31	0.246832
2022-09-12	12:40:31	0.289886
2022-09-12	12:40:31	0.267697
2022-09-12	12:40:32	0.316145
2022-09-12	12:40:32	0.234822
2022-09-12	12:40:32	0.252328
2022-09-12	12:40:32	0.318232
2022-09-12	12:40:33	0.286883
2022-09-12	12:40:33	0.341438
2022-09-12	12:40:33	0.368257
2022-09-12	12:40:33	0.33243
2022-09-12	12:40:34	0.348257
2022-09-12	12:40:34	0.219504
2022-09-12	12:40:34	0.382863
2022-09-12	12:40:35	0.135484
2022-09-12	12:40:35	0.364797
2022-09-12	12:40:35	0.158842
2022-09-12	12:40:35	0.375484
2022-09-12	12:40:36	0.134568
2022-09-12	12:40:36	0.361031
2022-09-12	12:40:36	0.149682
2022-09-12	12:40:36	0.368461
2022-09-12	12:40:37	0.207799
2022-09-12	12:40:37	0.351463
2022-09-12	12:40:37	0.220471
2022-09-12	12:40:37	0.318384
2022-09-12	12:40:38	0.297265
2022-09-12	12:40:38	0.307087
2022-09-12	12:40:38	0.310191
2022-09-12	12:40:39	0.333804
2022-09-12	12:40:39	0.267545
2022-09-12	12:40:39	0.372837
2022-09-12	12:40:39	0.271412
2022-09-12	12:40:40	0.302456
2022-09-12	12:40:40	0.163473
2022-09-12	12:40:40	0.322914
2022-09-12	12:40:40	0.275535
2022-09-12	12:40:41	-0.0193254
2022-09-12	12:40:41	0.0731427
2022-09-12	12:40:41	0.157112
2022-09-12	12:40:41	0.174771
2022-09-12	12:40:42	0.0852037
2022-09-12	12:40:42	0.158893
2022-09-12	12:40:42	0.15187
2022-09-12	12:40:42	0.217316
2022-09-12	12:40:43	0.127901
2022-09-12	12:40:43	0.393397
2022-09-12	12:40:43	0.154669
2022-09-12	12:40:44	0.390598
2022-09-12	12:40:44	0.120064
2022-09-12	12:40:44	0.416298
2022-09-12	12:40:44	0.171921
2022-09-12	12:40:45	0.303219
2022-09-12	12:40:45	0.165153
2022-09-12	12:40:45	0.348257
2022-09-12	12:40:45	0.257214
2022-09-12	12:40:46	0.384644
2022-09-12	12:40:46	0.334568
2022-09-12	12:40:46	0.389631
2022-09-12	12:40:46	0.71014
2022-09-12	12:40:47	0.45869
2022-09-12	12:40:47	0.460115
2022-09-12	12:40:47	0.209886
2022-09-12	12:40:48	0.377163
2022-09-12	12:40:48	0.204033
2022-09-12	12:40:48	0.453193
2022-09-12	12:40:48	0.178283
2022-09-12	12:40:49	0.513397
2022-09-12	12:40:49	0.184135
2022-09-12	12:40:49	0.416043
2022-09-12	12:40:49	0.219657
2022-09-12	12:40:50	0.260776
2022-09-12	12:40:50	0.255484
2022-09-12	12:40:50	0.333143
2022-09-12	12:40:50	0.322201
2022-09-12	12:40:51	0.251412
2022-09-12	12:40:51	0.312227
2022-09-12	12:40:51	0.218028
2022-09-12	12:40:52	0.479046
2022-09-12	12:40:52	0.36271
2022-09-12	12:40:52	0.716145
2022-09-12	12:40:52	0.503982
2022-09-12	12:40:53	0.489784
2022-09-12	12:40:53	0.174822
2022-09-12	12:40:53	0.512481
2022-09-12	12:40:53	0.223168
2022-09-12	12:40:54	0.441692
2022-09-12	12:40:54	0.449377
2022-09-12	12:40:54	0.340318
2022-09-12	12:40:54	0.453041
2022-09-12	12:40:55	0.329275
2022-09-12	12:40:55	0.660166
2022-09-12	12:40:55	0.262201
2022-09-12	12:40:56	0.471005
2022-09-12	12:40:56	0.186883
2022-09-12	12:40:56	0.477214
2022-09-12	12:40:56	0.181336
2022-09-12	12:40:57	0.512685
2022-09-12	12:40:57	0.232481
2022-09-12	12:40:57	0.492939
2022-09-12	12:40:57	0.308054
2022-09-12	12:40:58	0.433906
2022-09-12	12:40:58	0.323931
2022-09-12	12:40:58	0.31416
2022-09-12	12:40:58	0.346323
2022-09-12	12:40:59	0.374415
2022-09-12	12:40:59	0.640013
2022-09-12	12:40:59	0.301183
2022-09-12	12:41:00	0.708206
2022-09-12	12:41:00	0.444796
2022-09-12	12:41:00	0.724796
2022-09-12	12:41:00	0.187188
2022-09-12	12:41:01	0.469224
2022-09-12	12:41:01	0.264847
2022-09-12	12:41:01	0.708664
2022-09-12	12:41:01	0.107341
2022-09-12	12:41:02	0.459453
2022-09-12	12:41:02	0.143728
2022-09-12	12:41:02	0.420115
2022-09-12	12:41:02	0.157468
2022-09-12	12:41:03	0.484186
2022-09-12	12:41:03	0.152583
2022-09-12	12:41:03	0.447647
2022-09-12	12:41:04	0.161133
2022-09-12	12:41:04	0.469326
2022-09-12	12:41:04	0.145662
2022-09-12	12:41:04	0.477875
2022-09-12	12:41:05	0.217723
2022-09-12	12:41:05	0.306425
2022-09-12	12:41:05	0.0218959
2022-09-12	12:41:05	-0.0783076
2022-09-12	12:41:06	-0.198969
2022-09-12	12:41:06	-0.240699
2022-09-12	12:41:06	-0.1836
2022-09-12	12:41:06	0.0175193
2022-09-12	12:41:07	-0.0817682
2022-09-12	12:41:07	0.0417941
2022-09-12	12:41:07	-0.107163
2022-09-12	12:41:08	0.0792496
2022-09-12	12:41:08	-0.0298089
2022-09-12	12:41:08	0.220013
2022-09-12	12:41:08	0.209936
2022-09-12	12:41:09	0.380725
2022-09-12	12:41:09	0.226476
2022-09-12	12:41:09	0.710954
2022-09-12	12:41:09	0.183117
2022-09-12	12:41:10	0.192227
2022-09-12	12:41:10	0.224593
2022-09-12	12:41:10	0.177825
2022-09-12	12:41:10	0.0940079
2022-09-12	12:41:11	0.157468
2022-09-12	12:41:11	0.191819
2022-09-12	12:41:11	0.113244
2022-09-12	12:41:12	0.10958
2022-09-12	12:41:12	0.0935498
2022-09-12	12:41:12	0.194924
2022-09-12	12:41:12	0.0527356
2022-09-12	12:41:13	0.146069
2022-09-12	12:41:13	0.100624
2022-09-12	12:41:13	0.22444
2022-09-12	12:41:13	0.0926846
2022-09-12	12:41:14	0.214364
2022-09-12	12:41:14	0.144848
2022-09-12	12:41:14	0.227138
2022-09-12	12:41:14	0.13701
2022-09-12	12:41:15	0.231514
2022-09-12	12:41:15	0.188359
2022-09-12	12:41:15	0.281845
2022-09-12	12:41:16	0.251107
2022-09-12	12:41:16	0.355331
2022-09-12	12:41:16	0.252125
2022-09-12	12:41:16	0.422201
2022-09-12	12:41:17	0.44902
2022-09-12	12:41:17	0.249478
2022-09-12	12:41:17	0.288308
2022-09-12	12:41:17	0.308664
2022-09-12	12:41:18	0.350547
2022-09-12	12:41:18	0.371412
2022-09-12	12:41:18	0.362965
2022-09-12	12:41:18	0.274517
2022-09-12	12:41:19	0.318181
2022-09-12	12:41:19	0.237621
2022-09-12	12:41:19	0.42327
2022-09-12	12:41:20	0.315484
2022-09-12	12:41:20	0.419555
2022-09-12	12:41:20	0.300827
2022-09-12	12:41:20	0.331819
2022-09-12	12:41:21	0.404797
2022-09-12	12:41:21	0.37355
2022-09-12	12:41:21	0.364542
2022-09-12	12:41:21	0.440471
2022-09-12	12:41:22	1.1449
2022-09-12	12:41:22	1.2367
2022-09-12	12:41:22	0.257723
2022-09-12	12:41:22	0.342252
2022-09-12	12:41:23	0.356247
2022-09-12	12:41:23	0.410293
2022-09-12	12:41:23	0.402964
2022-09-12	12:41:24	0.413753
2022-09-12	12:41:24	0.408664
2022-09-12	12:41:24	0.347392
2022-09-12	12:41:24	0.326018
2022-09-12	12:41:25	0.437367
2022-09-12	12:41:25	0.416145
2022-09-12	12:41:25	0.77243
2022-09-12	12:41:25	0.622506
2022-09-12	12:41:26	0.555483
2022-09-12	12:41:26	0.997672
2022-09-12	12:41:26	0.974618
2022-09-12	12:41:26	1.60683
2022-09-12	12:41:27	3.0052
2022-09-12	12:41:27	4.08515
2022-09-12	12:41:27	2.90098
2022-09-12	12:41:28	2.86332
2022-09-12	12:41:28	3.21655
2022-09-12	12:41:28	3.42943
2022-09-12	12:41:28	1.85146
2022-09-12	12:41:29	0.59701
2022-09-12	12:41:29	0.85645
2022-09-12	12:41:29	0.835839
2022-09-12	12:41:29	1.04475
2022-09-12	12:41:30	0.918435
2022-09-12	12:41:30	2.47472
2022-09-12	12:41:30	2.39436
2022-09-12	12:41:30	0.804033
2022-09-12	12:41:31	0.78042
2022-09-12	12:41:31	0.220878
2022-09-12	12:41:31	0.364746
2022-09-12	12:41:32	0.287901
2022-09-12	12:41:32	0.605051
2022-09-12	12:41:32	0.64042
2022-09-12	12:41:32	0.297214
2022-09-12	12:41:33	0.765611
2022-09-12	12:41:33	0.450903
2022-09-12	12:41:33	0.409733
2022-09-12	12:41:33	0.705407
2022-09-12	12:41:34	0.637672
2022-09-12	12:41:34	0.424338
2022-09-12	12:41:34	1.2681
2022-09-12	12:41:34	0.410954
2022-09-12	12:41:35	0.421539
2022-09-12	12:41:35	0.644288
2022-09-12	12:41:35	0.658079
2022-09-12	12:41:36	0.405102
2022-09-12	12:41:36	0.757061
2022-09-12	12:41:36	0.725967
2022-09-12	12:41:36	0.97813
2022-09-12	12:41:37	0.443728
2022-09-12	12:41:37	0.597417
2022-09-12	12:41:37	0.298995
2022-09-12	12:41:37	0.375738
2022-09-12	12:41:38	0.244542
2022-09-12	12:41:38	0.348155
2022-09-12	12:41:38	0.310598
2022-09-12	12:41:38	0.327138
2022-09-12	12:41:39	0.272226
2022-09-12	12:41:39	0.268868
2022-09-12	12:41:39	0.292735
2022-09-12	12:41:40	0.185458
2022-09-12	12:41:40	0.296705
2022-09-12	12:41:40	0.244288
2022-09-12	12:41:40	0.442914
2022-09-12	12:41:41	0.286934
2022-09-12	12:41:41	0.336654
2022-09-12	12:41:41	0.263982
2022-09-12	12:41:41	0.281285
2022-09-12	12:41:42	0.3307
2022-09-12	12:41:42	0.287443
2022-09-12	12:41:42	0.271514
2022-09-12	12:41:42	0.277417
2022-09-12	12:41:43	0.269122
2022-09-12	12:41:43	0.264644
2022-09-12	12:41:43	0.24673
2022-09-12	12:41:44	0.241081
2022-09-12	12:41:44	0.202354
2022-09-12	12:41:44	0.373397
2022-09-12	12:41:44	0.238435
2022-09-12	12:41:45	0.271972
2022-09-12	12:41:45	0.349275
2022-09-12	12:41:45	0.357774
2022-09-12	12:41:45	0.326832
2022-09-12	12:41:46	0.377417
2022-09-12	12:41:46	0.390649
2022-09-12	12:41:46	0.298537
2022-09-12	12:41:46	0.276501
2022-09-12	12:41:47	0.24785
2022-09-12	12:41:47	0.265763
2022-09-12	12:41:47	0.27584
2022-09-12	12:41:48	0.253041
2022-09-12	12:41:48	0.289835
2022-09-12	12:41:48	0.435433
2022-09-12	12:41:48	0.679555
2022-09-12	12:41:49	0.572939
2022-09-12	12:41:49	0.147748
2022-09-12	12:41:49	-0.104771
2022-09-12	12:41:49	-0.103193
2022-09-12	12:41:50	-0.00115753
2022-09-12	12:41:50	0.215127
2022-09-12	12:41:50	0.218893
2022-09-12	12:41:50	0.230089
2022-09-12	12:41:51	0.305356
2022-09-12	12:41:51	0.330802
2022-09-12	12:41:51	0.381998
2022-09-12	12:41:52	0.300369
2022-09-12	12:41:52	0.249631
2022-09-12	12:41:52	0.349784
2022-09-12	12:41:52	0.35131
2022-09-12	12:41:53	0.436603
2022-09-12	12:41:53	0.376196
2022-09-12	12:41:53	0.338181
2022-09-12	12:41:53	0.325967
2022-09-12	12:41:54	0.29299
2022-09-12	12:41:54	0.313753
2022-09-12	12:41:54	0.296349
2022-09-12	12:41:54	0.305967
2022-09-12	12:41:55	0.305051
2022-09-12	12:41:55	0.310395
2022-09-12	12:41:55	0.303779
2022-09-12	12:41:55	0.305814
2022-09-12	12:41:56	0.297417
2022-09-12	12:41:56	0.300573
2022-09-12	12:41:56	0.304898
2022-09-12	12:41:57	0.315178
2022-09-12	12:41:57	0.285662
2022-09-12	12:41:57	0.300725
2022-09-12	12:41:57	0.281692
2022-09-12	12:41:58	0.28383
2022-09-12	12:41:58	0.251311
2022-09-12	12:41:58	0.19355
2022-09-12	12:41:58	0.224593
2022-09-12	12:41:59	0.086985
2022-09-12	12:41:59	0.0587407
2022-09-12	12:41:59	0.0926846
2022-09-12	12:42:00	0.0249493
2022-09-12	12:42:00	0.116756
2022-09-12	12:42:00	0.222252
2022-09-12	12:42:00	0.103982
2022-09-12	12:42:01	0.277316
2022-09-12	12:42:01	0.205407
2022-09-12	12:42:01	0.239504
2022-09-12	12:42:01	0.242456
2022-09-12	12:42:02	0.246934
2022-09-12	12:42:02	0.313244
2022-09-12	12:42:02	0.145356
2022-09-12	12:42:02	0.282303
2022-09-12	12:42:03	0.112786
2022-09-12	12:42:03	-0.126806
2022-09-12	12:42:03	0.0585371
2022-09-12	12:42:03	0.0607254
2022-09-12	12:42:04	0.181539
2022-09-12	12:42:04	0.0503438
2022-09-12	12:42:04	0.191972
2022-09-12	12:42:05	0.0924811
2022-09-12	12:42:05	0.144593
2022-09-12	12:42:05	0.308461
2022-09-12	12:42:05	1.48902
2022-09-12	12:42:06	0.838486
2022-09-12	12:42:06	0.861845
2022-09-12	12:42:06	0.80668
2022-09-12	12:42:06	0.377519
2022-09-12	12:42:07	0.55813
2022-09-12	12:42:07	0.420674
2022-09-12	12:42:07	0.486323
2022-09-12	12:42:07	0.414873
2022-09-12	12:42:08	0.444338
2022-09-12	12:42:08	0.413244
2022-09-12	12:42:08	0.53757
2022-09-12	12:42:09	0.942201
2022-09-12	12:42:09	1.47609
2022-09-12	12:42:09	2.06144
2022-09-12	12:42:09	2.21828
2022-09-12	12:42:10	1.93742
2022-09-12	12:42:10	1.5136
2022-09-12	12:42:10	0.618384
2022-09-12	12:42:10	0.671361
2022-09-12	12:42:11	0.592481
2022-09-12	12:42:11	0.566374
2022-09-12	12:42:11	0.469784
2022-09-12	12:42:11	0.408613
2022-09-12	12:42:12	0.693499
2022-09-12	12:42:12	0.402099
2022-09-12	12:42:12	0.536858
2022-09-12	12:42:13	0.517417
2022-09-12	12:42:13	0.311819
2022-09-12	12:42:13	0.430598
2022-09-12	12:42:13	0.31757
2022-09-12	12:42:14	0.348511
2022-09-12	12:42:14	0.343423
2022-09-12	12:42:14	0.199911
2022-09-12	12:42:14	0.366934
2022-09-12	12:42:15	0.292125
2022-09-12	12:42:15	0.205204
2022-09-12	12:42:15	0.34785
2022-09-12	12:42:15	0.156552
2022-09-12	12:42:16	0.391158
2022-09-12	12:42:16	0.195331
2022-09-12	12:42:16	0.330598
2022-09-12	12:42:17	0.235433
2022-09-12	12:42:17	0.185509
2022-09-12	12:42:17	0.219097
2022-09-12	12:42:17	0.176756
2022-09-12	12:42:18	0.26042
2022-09-12	12:42:18	0.161641
2022-09-12	12:42:18	0.341183
2022-09-12	12:42:18	0.0776211
2022-09-12	12:42:19	0.211158
2022-09-12	12:42:19	0.115382
2022-09-12	12:42:19	0.126323
2022-09-12	12:42:19	0.17187
2022-09-12	12:42:20	-0.0303178
2022-09-12	12:42:20	0.144695
2022-09-12	12:42:20	0.00367708
2022-09-12	12:42:21	0.0799111
2022-09-12	12:42:21	0.171718
2022-09-12	12:42:21	0.0874429
2022-09-12	12:42:21	0.231718
2022-09-12	12:42:22	0.14327
2022-09-12	12:42:22	0.375178
2022-09-12	12:42:22	0.254873
2022-09-12	12:42:22	0.452176
2022-09-12	12:42:23	0.345916
2022-09-12	12:42:23	0.562862
2022-09-12	12:42:23	0.294669
2022-09-12	12:42:23	0.733651
2022-09-12	12:42:24	0.710344
2022-09-12	12:42:24	0.594364
2022-09-12	12:42:24	0.585967
2022-09-12	12:42:25	0.542506
2022-09-12	12:42:25	0.870445
2022-09-12	12:42:25	0.572226
2022-09-12	12:42:25	0.872125
2022-09-12	12:42:26	0.878791
2022-09-12	12:42:26	0.785814
2022-09-12	12:42:26	0.79416
2022-09-12	12:42:26	0.47528
2022-09-12	12:42:27	0.861743
2022-09-12	12:42:27	0.613499
2022-09-12	12:42:27	0.853244
2022-09-12	12:42:27	0.548817
2022-09-12	12:42:28	0.956603
2022-09-12	12:42:28	0.947697
2022-09-12	12:42:28	0.302761
2022-09-12	12:42:29	1.3424
2022-09-12	12:42:29	0.314618
2022-09-12	12:42:29	0.267443
2022-09-12	12:42:29	0.314313
2022-09-12	12:42:30	0.80042
2022-09-12	12:42:30	0.472074
2022-09-12	12:42:30	0.124033
2022-09-12	12:42:30	0.6707
2022-09-12	12:42:31	0.665254
2022-09-12	12:42:31	0.773041
2022-09-12	12:42:31	0.807799
2022-09-12	12:42:31	1.12754
2022-09-12	12:42:32	0.717163
2022-09-12	12:42:32	0.939249
2022-09-12	12:42:32	1.13772
2022-09-12	12:42:33	0.51243
2022-09-12	12:42:33	0.354517
2022-09-12	12:42:33	0.485204
2022-09-12	12:42:33	0.27701
2022-09-12	12:42:34	0.308003
2022-09-12	12:42:34	0.274618
2022-09-12	12:42:34	0.356247
2022-09-12	12:42:34	0.402048
2022-09-12	12:42:35	0.368817
2022-09-12	12:42:35	0.837163
2022-09-12	12:42:35	0.463015
2022-09-12	12:42:35	0.644593
2022-09-12	12:42:36	1.27335
2022-09-12	12:42:36	0.454669
2022-09-12	12:42:36	0.360115
2022-09-12	12:42:37	0.531361
2022-09-12	12:42:37	0.473194
2022-09-12	12:42:37	0.22556
2022-09-12	12:42:37	0.389529
2022-09-12	12:42:38	0.338588
2022-09-12	12:42:38	0.292837
2022-09-12	12:42:38	0.173244
2022-09-12	12:42:38	0.158995
2022-09-12	12:42:39	0.211056
2022-09-12	12:42:39	0.192023
2022-09-12	12:42:39	0.272379
2022-09-12	12:42:39	0.124898
2022-09-12	12:42:40	0.105305
2022-09-12	12:42:40	0.315026
2022-09-12	12:42:40	0.205814
2022-09-12	12:42:41	0.244848
2022-09-12	12:42:41	0.112176
2022-09-12	12:42:41	-0.0393763
2022-09-12	12:42:41	0.080929
2022-09-12	12:42:42	0.0699875
2022-09-12	12:42:42	0.0372649
2022-09-12	12:42:42	0.203575
2022-09-12	12:42:42	0.00642519
2022-09-12	12:42:43	0.173601
2022-09-12	12:42:43	0.0867305
2022-09-12	12:42:43	0.112328
2022-09-12	12:42:43	0.151616
2022-09-12	12:42:44	0.0799111
2022-09-12	12:42:44	0.651056
2022-09-12	12:42:44	1.01391
2022-09-12	12:42:45	0.937774
2022-09-12	12:42:45	0.78042
2022-09-12	12:42:45	1.045
2022-09-12	12:42:45	0.464949
2022-09-12	12:42:46	0.561845
2022-09-12	12:42:46	0.343881
2022-09-12	12:42:46	0.388206
2022-09-12	12:42:46	0.570954
2022-09-12	12:42:47	0.375687
2022-09-12	12:42:47	0.264542
2022-09-12	12:42:47	0.197977
2022-09-12	12:42:47	0.324949
2022-09-12	12:42:48	0.16327
2022-09-12	12:42:48	0.252125
2022-09-12	12:42:48	0.16154
2022-09-12	12:42:49	0.30154
2022-09-12	12:42:49	0.227748
2022-09-12	12:42:49	0.277417
2022-09-12	12:42:49	0.432735
2022-09-12	12:42:50	0.217977
2022-09-12	12:42:50	0.514975
2022-09-12	12:42:50	0.3707
2022-09-12	12:42:50	0.568409
2022-09-12	12:42:51	0.537163
2022-09-12	12:42:51	0.451056
2022-09-12	12:42:51	0.426018
2022-09-12	12:42:51	0.747697
2022-09-12	12:42:52	0.70103
2022-09-12	12:42:52	0.401285
2022-09-12	12:42:52	0.788715
2022-09-12	12:42:53	0.428664
2022-09-12	12:42:53	0.647239
2022-09-12	12:42:53	0.522913
2022-09-12	12:42:53	0.593753
2022-09-12	12:42:54	0.406832
2022-09-12	12:42:54	0.582252
2022-09-12	12:42:54	0.405204
2022-09-12	12:42:54	0.424237
2022-09-12	12:42:55	0.448817
2022-09-12	12:42:55	0.408003
2022-09-12	12:42:55	0.61126
2022-09-12	12:42:55	0.402557
2022-09-12	12:42:56	0.499707
2022-09-12	12:42:56	0.316501
2022-09-12	12:42:56	0.456145
2022-09-12	12:42:57	0.444237
2022-09-12	12:42:57	0.366374
2022-09-12	12:42:57	0.629326
2022-09-12	12:42:57	0.389529
2022-09-12	12:42:58	0.580929
2022-09-12	12:42:58	1.69721
2022-09-12	12:42:58	2.3995
2022-09-12	12:42:58	3.28291
2022-09-12	12:42:59	1.60276
2022-09-12	12:42:59	0.973651
2022-09-12	12:42:59	1.27589
2022-09-12	12:42:59	1.40403
2022-09-12	12:43:00	1.54154
2022-09-12	12:43:00	2.40195
2022-09-12	12:43:00	1.78968
2022-09-12	12:43:01	1.02047
2022-09-12	12:43:01	0.656349
2022-09-12	12:43:01	0.0596058
2022-09-12	12:43:01	0.273448
2022-09-12	12:43:02	0.082303
2022-09-12	12:43:02	-0.0515901
2022-09-12	12:43:02	0.0993513
2022-09-12	12:43:02	-0.00248066
2022-09-12	12:43:03	-0.0112847
2022-09-12	12:43:03	0.538282
2022-09-12	12:43:03	0.761539
2022-09-12	12:43:03	0.950445
2022-09-12	12:43:04	1.06785
2022-09-12	12:43:04	1.13238
2022-09-12	12:43:04	0.842863
2022-09-12	12:43:05	0.683117
2022-09-12	12:43:05	0.466323
2022-09-12	12:43:05	0.428766
2022-09-12	12:43:05	0.435636
2022-09-12	12:43:06	0.556399
2022-09-12	12:43:06	0.34383
2022-09-12	12:43:06	-0.0881804
2022-09-12	12:43:06	-0.041412
2022-09-12	12:43:07	-0.173727
2022-09-12	12:43:07	-0.416374
2022-09-12	12:43:07	-0.258766
2022-09-12	12:43:07	-0.0682313
2022-09-12	12:43:08	0.0751275
2022-09-12	12:43:08	0.205814
2022-09-12	12:43:08	0.261998
2022-09-12	12:43:09	0.33126
2022-09-12	12:43:09	0.407443
2022-09-12	12:43:09	0.366323
2022-09-12	12:43:09	0.367595
2022-09-12	12:43:10	0.313143
2022-09-12	12:43:10	0.416858
2022-09-12	12:43:10	0.527188
2022-09-12	12:43:10	0.40098
2022-09-12	12:43:11	0.258232
2022-09-12	12:43:11	0.402812
2022-09-12	12:43:11	0.42556
2022-09-12	12:43:11	0.41355
2022-09-12	12:43:12	0.428512
2022-09-12	12:43:12	0.399707
2022-09-12	12:43:12	0.432379
2022-09-12	12:43:13	0.47014
2022-09-12	12:43:13	0.568053
2022-09-12	12:43:13	0.42444
2022-09-12	12:43:13	0.427443
2022-09-12	12:43:14	0.418181
2022-09-12	12:43:14	0.303168
2022-09-12	12:43:14	0.456858
2022-09-12	12:43:14	0.151718
2022-09-12	12:43:15	0.275331
2022-09-12	12:43:15	0.42729
2022-09-12	12:43:15	0.21757
2022-09-12	12:43:15	0.358741
2022-09-12	12:43:16	0.250089
2022-09-12	12:43:16	0.330445
2022-09-12	12:43:16	0.396756
2022-09-12	12:43:17	0.314567
2022-09-12	12:43:17	0.506934
2022-09-12	12:43:17	0.213601
2022-09-12	12:43:17	0.41299
2022-09-12	12:43:18	0.347545
2022-09-12	12:43:18	0.635585
2022-09-12	12:43:18	0.795534
2022-09-12	12:43:18	0.379911
2022-09-12	12:43:19	0.564287
2022-09-12	12:43:19	0.477265
2022-09-12	12:43:19	0.715432
2022-09-12	12:43:19	0.451005
2022-09-12	12:43:20	0.394873
2022-09-12	12:43:20	0.490242
2022-09-12	12:43:20	0.461082
2022-09-12	12:43:21	0.479453
2022-09-12	12:43:21	0.415331
2022-09-12	12:43:21	0.38159
2022-09-12	12:43:21	0.425305
2022-09-12	12:43:22	0.357875
2022-09-12	12:43:22	0.354975
2022-09-12	12:43:22	0.53645
2022-09-12	12:43:22	0.363473
2022-09-12	12:43:23	0.431769
2022-09-12	12:43:23	0.334873
2022-09-12	12:43:23	0.400827
2022-09-12	12:43:23	0.513499
2022-09-12	12:43:24	0.301896
2022-09-12	12:43:24	0.601387
2022-09-12	12:43:24	0.369987
2022-09-12	12:43:25	0.440013
2022-09-12	12:43:25	0.377163
2022-09-12	12:43:25	0.318181
2022-09-12	12:43:25	0.539758
2022-09-12	12:43:26	0.360267
2022-09-12	12:43:26	0.490547
2022-09-12	12:43:26	0.357265
2022-09-12	12:43:26	0.378588
2022-09-12	12:43:27	0.398842
2022-09-12	12:43:27	0.252328
2022-09-12	12:43:27	0.487697
2022-09-12	12:43:27	0.686832
2022-09-12	12:43:28	0.111667
2022-09-12	12:43:28	0.129275
2022-09-12	12:43:28	0.0658145
2022-09-12	12:43:29	0.13355
2022-09-12	12:43:29	0.132277
2022-09-12	12:43:29	0.139504
2022-09-12	12:43:29	0.156451
2022-09-12	12:43:30	0.265865
2022-09-12	12:43:30	0.253193
2022-09-12	12:43:30	0.237163
2022-09-12	12:43:30	0.241845
2022-09-12	12:43:31	0.173601
2022-09-12	12:43:31	0.378791
2022-09-12	12:43:31	0.444898
2022-09-12	12:43:31	0.27869
2022-09-12	12:43:32	0.389021
2022-09-12	12:43:32	0.310089
2022-09-12	12:43:32	0.264135
2022-09-12	12:43:33	0.251921
2022-09-12	12:43:33	0.214517
2022-09-12	12:43:33	0.427596
2022-09-12	12:43:33	0.257875
2022-09-12	12:43:34	0.295789
2022-09-12	12:43:34	0.420674
2022-09-12	12:43:34	0.396603
2022-09-12	12:43:34	0.244389
2022-09-12	12:43:35	0.148512
2022-09-12	12:43:35	0.25126
2022-09-12	12:43:35	0.167239
2022-09-12	12:43:35	0.197519
2022-09-12	12:43:36	0.169987
2022-09-12	12:43:36	0.1507
2022-09-12	12:43:36	0.149021
2022-09-12	12:43:37	0.127443
2022-09-12	12:43:37	0.221539
2022-09-12	12:43:37	0.0951274
2022-09-12	12:43:37	0.22327
2022-09-12	12:43:38	0.140624
2022-09-12	12:43:38	0.185407
2022-09-12	12:43:38	0.178435
2022-09-12	12:43:38	0.162965
2022-09-12	12:43:39	0.294618
2022-09-12	12:43:39	0.363626
2022-09-12	12:43:39	0.317926
2022-09-12	12:43:39	0.321998
2022-09-12	12:43:40	0.312837
2022-09-12	12:43:40	0.415585
2022-09-12	12:43:40	0.769122
2022-09-12	12:43:41	0.808562
2022-09-12	12:43:41	0.201438
2022-09-12	12:43:41	0.128563
2022-09-12	12:43:41	0.0213361
2022-09-12	12:43:42	0.0187407
2022-09-12	12:43:42	-0.0565264
2022-09-12	12:43:42	0.0678501
2022-09-12	12:43:42	0.373652
2022-09-12	12:43:43	0.268919
2022-09-12	12:43:43	0.231616
2022-09-12	12:43:43	0.303626
2022-09-12	12:43:43	0.363982
2022-09-12	12:43:44	0.346629
2022-09-12	12:43:44	0.43986
2022-09-12	12:43:44	0.38159
2022-09-12	12:43:45	0.493499
2022-09-12	12:43:45	0.509275
2022-09-12	12:43:45	0.577926
2022-09-12	12:43:45	0.524135
2022-09-12	12:43:46	0.559148
2022-09-12	12:43:46	0.499148
2022-09-12	12:43:46	0.528664
2022-09-12	12:43:46	0.552125
2022-09-12	12:43:47	0.519046
2022-09-12	12:43:47	0.462354
2022-09-12	12:43:47	0.348053
2022-09-12	12:43:47	0.371667
2022-09-12	12:43:48	0.375585
2022-09-12	12:43:48	0.359707
2022-09-12	12:43:48	0.470191
2022-09-12	12:43:48	0.20612
2022-09-12	12:43:49	0.267087
2022-09-12	12:43:49	0.218079
2022-09-12	12:43:49	0.271412
2022-09-12	12:43:50	0.0805218
2022-09-12	12:43:50	0.235331
2022-09-12	12:43:50	0.0705473
2022-09-12	12:43:50	0.353855
2022-09-12	12:43:51	0.128054
2022-09-12	12:43:51	0.361794
2022-09-12	12:43:51	0.153804
2022-09-12	12:43:51	0.321082
2022-09-12	12:43:52	0.0986389
2022-09-12	12:43:52	0.272379
2022-09-12	12:43:52	0.149224
2022-09-12	12:43:52	0.239097
2022-09-12	12:43:53	0.225356
2022-09-12	12:43:53	0.192735
2022-09-12	12:43:53	0.23701
2022-09-12	12:43:54	0.24327
2022-09-12	12:43:54	0.348003
2022-09-12	12:43:54	0.171311
2022-09-12	12:43:54	0.386476
2022-09-12	12:43:55	0.205458
2022-09-12	12:43:55	0.378893
2022-09-12	12:43:55	0.215891
2022-09-12	12:43:55	0.261947
2022-09-12	12:43:56	0.257875
2022-09-12	12:43:56	0.21925
2022-09-12	12:43:56	0.388817
2022-09-12	12:43:57	0.161183
2022-09-12	12:43:57	0.373244
2022-09-12	12:43:57	0.177417
2022-09-12	12:43:57	0.277265
2022-09-12	12:43:58	0.233855
2022-09-12	12:43:58	0.218995
2022-09-12	12:43:58	0.31187
2022-09-12	12:43:58	0.234669
2022-09-12	12:43:59	0.465
2022-09-12	12:43:59	0.180471
2022-09-12	12:43:59	0.556043
2022-09-12	12:43:59	0.389733
2022-09-12	12:44:00	0.493957
2022-09-12	12:44:00	0.774975
2022-09-12	12:44:00	0.683728
2022-09-12	12:44:00	0.558741
2022-09-12	12:44:01	0.475382
2022-09-12	12:44:01	0.782913
2022-09-12	12:44:01	0.613652
2022-09-12	12:44:02	0.372125
2022-09-12	12:44:02	0.329428
2022-09-12	12:44:02	0.333092
2022-09-12	12:44:02	0.320573
2022-09-12	12:44:03	0.269987
2022-09-12	12:44:03	0.253906
2022-09-12	12:44:03	0.276705
2022-09-12	12:44:03	0.146374
2022-09-12	12:44:04	0.317163
2022-09-12	12:44:04	0.100064
2022-09-12	12:44:04	0.287952
2022-09-12	12:44:04	0.152176
2022-09-12	12:44:05	0.279199
2022-09-12	12:44:05	0.20215
2022-09-12	12:44:05	0.221743
2022-09-12	12:44:06	0.222456
2022-09-12	12:44:06	0.25126
2022-09-12	12:44:06	0.296654
2022-09-12	12:44:06	0.225458
2022-09-12	12:44:07	0.319249
2022-09-12	12:44:07	0.255229
2022-09-12	12:44:07	0.443422
2022-09-12	12:44:07	0.124288
2022-09-12	12:44:08	0.43472
2022-09-12	12:44:08	0.206934
2022-09-12	12:44:08	0.436756
2022-09-12	12:44:08	0.144033
2022-09-12	12:44:09	0.437672
2022-09-12	12:44:09	0.211819
2022-09-12	12:44:09	0.451158
2022-09-12	12:44:10	0.232685
2022-09-12	12:44:10	0.379606
2022-09-12	12:44:10	0.227748
2022-09-12	12:44:10	0.523473
2022-09-12	12:44:11	0.32612
2022-09-12	12:44:11	0.291819
2022-09-12	12:44:11	0.40271
2022-09-12	12:44:11	0.34327
2022-09-12	12:44:12	0.391005
2022-09-12	12:44:12	0.227138
2022-09-12	12:44:12	0.504542
2022-09-12	12:44:12	0.211361
2022-09-12	12:44:13	0.481794
2022-09-12	12:44:13	0.387137
2022-09-12	12:44:13	0.458028
2022-09-12	12:44:14	0.340267
2022-09-12	12:44:14	0.626272
2022-09-12	12:44:14	0.381998
2022-09-12	12:44:14	0.543779
2022-09-12	12:44:15	0.468512
2022-09-12	12:44:15	0.628868
2022-09-12	12:44:15	0.455483
2022-09-12	12:44:15	0.645458
2022-09-12	12:44:16	0.35645
2022-09-12	12:44:16	0.466629
2022-09-12	12:44:16	0.574517
2022-09-12	12:44:16	0.433143
2022-09-12	12:44:17	0.353143
2022-09-12	12:44:17	0.502659
2022-09-12	12:44:17	0.490649
2022-09-12	12:44:18	0.354669
2022-09-12	12:44:18	0.523422
2022-09-12	12:44:18	0.454415
2022-09-12	12:44:18	0.554008
2022-09-12	12:44:19	0.321692
2022-09-12	12:44:19	0.641794
2022-09-12	12:44:19	0.411565
2022-09-12	12:44:19	0.599097
2022-09-12	12:44:20	0.325458
2022-09-12	12:44:20	0.708308
2022-09-12	12:44:20	0.387697
2022-09-12	12:44:20	0.602303
2022-09-12	12:44:21	0.38383
2022-09-12	12:44:21	0.475687
2022-09-12	12:44:21	0.312277
2022-09-12	12:44:22	0.489428
2022-09-12	12:44:22	0.445305
2022-09-12	12:44:22	0.39355
2022-09-12	12:44:22	0.432125
2022-09-12	12:44:23	0.458232
2022-09-12	12:44:23	0.523575
2022-09-12	12:44:23	0.295942
2022-09-12	12:44:23	0.586221
2022-09-12	12:44:24	0.354008
2022-09-12	12:44:24	0.700674
2022-09-12	12:44:24	0.295025
2022-09-12	12:44:24	0.588003
2022-09-12	12:44:25	0.457112
2022-09-12	12:44:25	0.424237
2022-09-12	12:44:25	0.219097
2022-09-12	12:44:26	0.265305
2022-09-12	12:44:26	0.317519
2022-09-12	12:44:26	0.262812
2022-09-12	12:44:26	0.508512
2022-09-12	12:44:27	0.19986
2022-09-12	12:44:27	0.614974
2022-09-12	12:44:27	0.367646
2022-09-12	12:44:27	0.457774
2022-09-12	12:44:28	0.24785
2022-09-12	12:44:28	0.405305
2022-09-12	12:44:28	0.319097
2022-09-12	12:44:28	0.406781
2022-09-12	12:44:29	0.461387
2022-09-12	12:44:29	0.343321
2022-09-12	12:44:29	0.482964
2022-09-12	12:44:30	0.251107
2022-09-12	12:44:30	0.559199
2022-09-12	12:44:30	0.208054
2022-09-12	12:44:30	0.496043
2022-09-12	12:44:31	0.285407
2022-09-12	12:44:31	0.449224
2022-09-12	12:44:31	0.356959
2022-09-12	12:44:31	0.330954
2022-09-12	12:44:32	0.483982
2022-09-12	12:44:32	0.252277
2022-09-12	12:44:32	0.553957
2022-09-12	12:44:33	0.204848
2022-09-12	12:44:33	0.552227
2022-09-12	12:44:33	0.235127
2022-09-12	12:44:33	0.389987
2022-09-12	12:44:34	0.184491
2022-09-12	12:44:34	0.35411
2022-09-12	12:44:34	0.241387
2022-09-12	12:44:34	0.388817
2022-09-12	12:44:35	0.419402
2022-09-12	12:44:35	0.243931
2022-09-12	12:44:35	0.458893
2022-09-12	12:44:35	0.238639
2022-09-12	12:44:36	0.448155
2022-09-12	12:44:36	0.216603
2022-09-12	12:44:36	0.386832
2022-09-12	12:44:36	0.302354
2022-09-12	12:44:37	0.297926
2022-09-12	12:44:37	0.469428
2022-09-12	12:44:37	0.272277
2022-09-12	12:44:38	0.527595
2022-09-12	12:44:38	0.309173
2022-09-12	12:44:38	0.381845
2022-09-12	12:44:38	0.28154
2022-09-12	12:44:39	0.403575
2022-09-12	12:44:39	0.431209
2022-09-12	12:44:39	0.282303
2022-09-12	12:44:39	0.503422
2022-09-12	12:44:40	0.354364
2022-09-12	12:44:40	0.539605
2022-09-12	12:44:40	0.336298
2022-09-12	12:44:40	0.513295
2022-09-12	12:44:41	0.242659
2022-09-12	12:44:41	0.508155
2022-09-12	12:44:41	0.246018
2022-09-12	12:44:42	0.29299
2022-09-12	12:44:42	0.266629
2022-09-12	12:44:42	0.286781
2022-09-12	12:44:42	0.395127
2022-09-12	12:44:43	0.202557
2022-09-12	12:44:43	0.177316
2022-09-12	12:44:43	0.337519
2022-09-12	12:44:43	0.405356
2022-09-12	12:44:44	0.390191
2022-09-12	12:44:44	0.424338
2022-09-12	12:44:44	0.481539
2022-09-12	12:44:45	1.19747
2022-09-12	12:44:45	1.29559
2022-09-12	12:44:45	0.901438
2022-09-12	12:44:45	1.31874
2022-09-12	12:44:46	0.606425
2022-09-12	12:44:46	0.474822
2022-09-12	12:44:46	0.454059
2022-09-12	12:44:46	0.560725
2022-09-12	12:44:47	0.543982
2022-09-12	12:44:47	0.603015
2022-09-12	12:44:47	0.353499
2022-09-12	12:44:47	0.585611
2022-09-12	12:44:48	0.351565
2022-09-12	12:44:48	0.601539
2022-09-12	12:44:48	0.299555
2022-09-12	12:44:48	0.570343
2022-09-12	12:44:49	0.295738
2022-09-12	12:44:49	0.405254
2022-09-12	12:44:49	0.321998
2022-09-12	12:44:50	0.327392
2022-09-12	12:44:50	0.464186
2022-09-12	12:44:50	0.260725
2022-09-12	12:44:50	0.454313
2022-09-12	12:44:51	0.205102
2022-09-12	12:44:51	0.439962
2022-09-12	12:44:51	0.208054
2022-09-12	12:44:51	0.519148
2022-09-12	12:44:52	0.37299
2022-09-12	12:44:52	0.203931
2022-09-12	12:44:52	0.0436262
2022-09-12	12:44:52	0.131616
2022-09-12	12:44:53	0.0827101
2022-09-12	12:44:53	0.391565
2022-09-12	12:44:53	0.355331
2022-09-12	12:44:54	0.282761
2022-09-12	12:44:54	0.636043
2022-09-12	12:44:54	0.430751
2022-09-12	12:44:54	0.391819
2022-09-12	12:44:55	0.588206
2022-09-12	12:44:55	0.393346
2022-09-12	12:44:55	0.408155
2022-09-12	12:44:55	0.379351
2022-09-12	12:44:56	0.450344
2022-09-12	12:44:56	0.396858
2022-09-12	12:44:56	0.313092
2022-09-12	12:44:56	0.476654
2022-09-12	12:44:57	0.425713
2022-09-12	12:44:57	0.442099
2022-09-12	12:44:57	0.34327
2022-09-12	12:44:58	0.386171
2022-09-12	12:44:58	0.368003
2022-09-12	12:44:58	0.398842
2022-09-12	12:44:58	0.415789
2022-09-12	12:44:59	0.401183
2022-09-12	12:44:59	0.376654
2022-09-12	12:44:59	0.462812
2022-09-12	12:44:59	0.456094
2022-09-12	12:45:00	0.560115
2022-09-12	12:45:00	0.390038
2022-09-12	12:45:00	0.424491
2022-09-12	12:45:00	0.504949
2022-09-12	12:45:01	0.428766
2022-09-12	12:45:01	0.468054
2022-09-12	12:45:01	0.451158
2022-09-12	12:45:02	0.458842
2022-09-12	12:45:02	0.432888
2022-09-12	12:45:02	0.434517
2022-09-12	12:45:02	0.440725
2022-09-12	12:45:03	0.459198
2022-09-12	12:45:03	0.419606
2022-09-12	12:45:03	0.438842
2022-09-12	12:45:03	0.438435
2022-09-12	12:45:04	0.444949
2022-09-12	12:45:04	0.442456
2022-09-12	12:45:04	0.407748
2022-09-12	12:45:04	0.412837
2022-09-12	12:45:05	0.462201
2022-09-12	12:45:05	0.41757
2022-09-12	12:45:05	0.49416
2022-09-12	12:45:06	0.367036
2022-09-12	12:45:06	0.293143
2022-09-12	12:45:06	0.37014
2022-09-12	12:45:06	0.326578
2022-09-12	12:45:07	0.290954
2022-09-12	12:45:07	0.280522
2022-09-12	12:45:07	0.227087
2022-09-12	12:45:07	0.214313
2022-09-12	12:45:08	0.208613
2022-09-12	12:45:08	0.24673
2022-09-12	12:45:08	0.21869
2022-09-12	12:45:08	0.219708
2022-09-12	12:45:09	0.227952
2022-09-12	12:45:09	0.232786
2022-09-12	12:45:09	0.257316
2022-09-12	12:45:10	0.293143
2022-09-12	12:45:10	0.412023
2022-09-12	12:45:10	0.431005
2022-09-12	12:45:10	0.333957
2022-09-12	12:45:11	0.318334
2022-09-12	12:45:11	0.298334
2022-09-12	12:45:11	0.288054
2022-09-12	12:45:11	0.277672
2022-09-12	12:45:12	0.269122
2022-09-12	12:45:12	0.277621
2022-09-12	12:45:12	0.262659
2022-09-12	12:45:12	0.260064
2022-09-12	12:45:13	0.262608
2022-09-12	12:45:13	0.244237
2022-09-12	12:45:13	0.258181
2022-09-12	12:45:14	0.233092
2022-09-12	12:45:14	0.283524
2022-09-12	12:45:14	0.157977
2022-09-12	12:45:14	0.240471
2022-09-12	12:45:15	0.233143
2022-09-12	12:45:15	0.247901
2022-09-12	12:45:15	0.258893
2022-09-12	12:45:15	0.263321
2022-09-12	12:45:16	0.269733
