# Supplementary material for: Comparing efficacy in reducing pulling and welfare impacts of four types of leash walking equipment
Source: PeerJ journal article supplement (doi:10.7717/peerj.18131), 2024-10-24
Supplement: Shelter1_Tension_files.zip [file Dominic_star_2022912111922 copy.xlsx]

## Sheet: Sheet2
Date	Time	averaged newtons
2022-09-12	11:19:46	1.95064	1.95064	0			newton impulse	633.967
2022-09-12	11:19:47	1.81669	3.76733	0			Total steps	0
2022-09-12	11:19:48	1.83446	5.60179	0
2022-09-12	11:19:49	1.10209	6.70388	0
2022-09-12	11:19:50	0.536332	7.24021	0
2022-09-12	11:19:51	0.671193	7.91141	0
2022-09-12	11:19:52	0.683585	8.59499	0
2022-09-12	11:19:53	0.974246	9.56924	0
2022-09-12	11:19:54	1.05797	10.6272	0
2022-09-12	11:19:55	2.85206	13.4793	0
2022-09-12	11:19:56	2.03649	15.5158	0
2022-09-12	11:19:57	3.46082	18.9766	0
2022-09-12	11:19:58	1.99213	20.9687	0
2022-09-12	11:19:59	2.30259	23.2713	0
2022-09-12	11:20:00	2.18771	25.459	0
2022-09-12	11:20:01	1.53882	26.9978	0
2022-09-12	11:20:02	1.46566	28.4635	0
2022-09-12	11:20:03	1.88177	30.3453	0
2022-09-12	11:20:04	2.25302	32.5983	0
2022-09-12	11:20:05	2.54866	35.1469	0
2022-09-12	11:20:06	3.30463	38.4516	0
2022-09-12	11:20:07	2.1842	40.6358	0
2022-09-12	11:20:08	1.89026	42.526	0
2022-09-12	11:20:09	3.90982	46.4359	0
2022-09-12	11:20:10	2.13598	48.5718	0
2022-09-12	11:20:11	3.53153	52.1034	0
2022-09-12	11:20:12	3.21509	55.3185	0
2022-09-12	11:20:13	1.33401	56.6525	0
2022-09-12	11:20:14	1.22277	57.8752	0
2022-09-12	11:20:15	1.12507	59.0003	0
2022-09-12	11:20:16	1.07527	60.0756	0
2022-09-12	11:20:17	1.39281	61.4684	0
2022-09-12	11:20:18	0.994658	62.463	0
2022-09-12	11:20:19	0.197963	62.661	0
2022-09-12	11:20:20	0.239106	62.9001	0
2022-09-12	11:20:21	1.52399	64.4241	0
2022-09-12	11:20:22	3.96948	68.3936	0
2022-09-12	11:20:23	2.65343	71.047	0
2022-09-12	11:20:24	1.30141	72.3484	0
2022-09-12	11:20:25	1.11024	73.4587	0
2022-09-12	11:20:26	1.71227	75.1709	0
2022-09-12	11:20:27	1.96609	77.137	0
2022-09-12	11:20:28	1.1056	78.2426	0
2022-09-12	11:20:29	5.03722	83.2798	0
2022-09-12	11:20:30	5.48804	88.7679	0
2022-09-12	11:20:31	1.98224	90.7501	0
2022-09-12	11:20:32	2.58935	93.3395	0
2022-09-12	11:20:33	1.32778	94.6673	0
2022-09-12	11:20:34	2.94447	97.6117	0
2022-09-12	11:20:35	1.41765	99.0294	0
2022-09-12	11:20:36	1.78243	100.812	0
2022-09-12	11:20:37	2.42857	103.24	0
2022-09-12	11:20:38	4.21731	107.458	0
2022-09-12	11:20:39	1.43463	108.892	0
2022-09-12	11:20:40	1.69558	110.588	0
2022-09-12	11:20:41	1.40147	111.989	0
2022-09-12	11:20:42	1.27855	113.268	0
2022-09-12	11:20:43	1.22965	114.498	0
2022-09-12	11:20:44	1.4726	115.97	0
2022-09-12	11:20:45	0.239671	116.21	0
2022-09-12	11:20:46	2.12546	118.335	0
2022-09-12	11:20:47	1.7988	120.134	0
2022-09-12	11:20:48	1.88347	122.018	0
2022-09-12	11:20:49	2.26292	124.28	0
2022-09-12	11:20:50	1.64425	125.925	0
2022-09-12	11:20:51	1.77605	127.701	0
2022-09-12	11:20:52	1.70909	129.41	0
2022-09-12	11:20:53	1.79162	131.201	0
2022-09-12	11:20:54	1.43112	132.633	0
2022-09-12	11:20:55	0.560101	133.193	0
2022-09-12	11:20:56	1.43689	134.63	0
2022-09-12	11:20:57	1.93131	136.561	0
2022-09-12	11:20:58	1.81437	138.375	0
2022-09-12	11:20:59	1.68681	140.062	0
2022-09-12	11:21:00	1.66027	141.722	0
2022-09-12	11:21:01	1.64397	143.366	0
2022-09-12	11:21:02	1.48924	144.856	0
2022-09-12	11:21:03	2.14504	147.001	0
2022-09-12	11:21:04	1.73072	148.731	0
2022-09-12	11:21:05	1.60118	150.333	0
2022-09-12	11:21:06	1.5631	151.896	0
2022-09-12	11:21:07	1.49405	153.39	0
2022-09-12	11:21:08	1.50384	154.894	0
2022-09-12	11:21:09	1.89607	156.79	0
2022-09-12	11:21:10	1.60011	158.39	0
2022-09-12	11:21:11	1.42365	159.813	0
2022-09-12	11:21:12	1.58398	161.397	0
2022-09-12	11:21:13	1.54466	162.942	0
2022-09-12	11:21:14	2.23683	165.179	0
2022-09-12	11:21:15	0.583247	165.762	0
2022-09-12	11:21:16	1.25732	167.019	0
2022-09-12	11:21:17	1.26842	168.288	0
2022-09-12	11:21:18	0.79598	169.084	0
2022-09-12	11:21:19	0.832991	169.917	0
2022-09-12	11:21:20	1.01697	170.934	0
2022-09-12	11:21:21	1.00826	171.942	0
2022-09-12	11:21:22	0.202509	172.145	0
2022-09-12	11:21:23	-0.611768	172.145	0
2022-09-12	11:21:24	-1.11567	172.145	0
2022-09-12	11:21:25	1.71295	173.857	0
2022-09-12	11:21:26	1.9504	175.808	0
2022-09-12	11:21:27	1.61069	177.419	0
2022-09-12	11:21:28	1.70231	179.121	0
2022-09-12	11:21:29	1.98867	181.11	0
2022-09-12	11:21:30	1.82363	182.933	0
2022-09-12	11:21:31	1.69315	184.626	0
2022-09-12	11:21:32	1.72105	186.347	0
2022-09-12	11:21:33	1.77549	188.123	0
2022-09-12	11:21:34	1.59122	189.714	0
2022-09-12	11:21:35	1.41731	191.131	0
2022-09-12	11:21:36	1.41069	192.542	0
2022-09-12	11:21:37	1.53157	194.074	0
2022-09-12	11:21:38	1.77752	195.851	0
2022-09-12	11:21:39	1.73616	197.587	0
2022-09-12	11:21:40	1.68132	199.269	0
2022-09-12	11:21:41	1.72371	200.992	0
2022-09-12	11:21:42	1.70313	202.695	0
2022-09-12	11:21:43	1.58171	204.277	0
2022-09-12	11:21:44	1.57872	205.856	0
2022-09-12	11:21:45	1.79603	207.652	0
2022-09-12	11:21:46	1.21733	208.869	0
2022-09-12	11:21:47	1.31041	210.18	0
2022-09-12	11:21:48	1.62965	211.809	0
2022-09-12	11:21:49	1.78647	213.596	0
2022-09-12	11:21:50	1.51618	215.112	0
2022-09-12	11:21:51	1.57326	216.685	0
2022-09-12	11:21:52	1.76915	218.454	0
2022-09-12	11:21:53	1.7112	220.166	0
2022-09-12	11:21:54	1.6408	221.806	0
2022-09-12	11:21:55	1.53576	223.342	0
2022-09-12	11:21:56	1.61437	224.957	0
2022-09-12	11:21:57	1.6799	226.636	0
2022-09-12	11:21:58	1.95562	228.592	0
2022-09-12	11:21:59	1.98662	230.579	0
2022-09-12	11:22:00	1.89479	232.473	0
2022-09-12	11:22:01	1.90627	234.38	0
2022-09-12	11:22:02	1.79281	236.173	0
2022-09-12	11:22:03	1.82846	238.001	0
2022-09-12	11:22:04	1.84504	239.846	0
2022-09-12	11:22:05	1.65959	241.506	0
2022-09-12	11:22:06	1.67351	243.179	0
2022-09-12	11:22:07	1.92203	245.101	0
2022-09-12	11:22:08	1.82133	246.922	0
2022-09-12	11:22:09	1.68868	248.611	0
2022-09-12	11:22:10	1.63163	250.243	0
2022-09-12	11:22:11	1.69316	251.936	0
2022-09-12	11:22:12	3.20101	255.137	0
2022-09-12	11:22:13	2.249	257.386	0
2022-09-12	11:22:14	1.67758	259.064	0
2022-09-12	11:22:15	1.75183	260.815	0
2022-09-12	11:22:16	1.89132	262.707	0
2022-09-12	11:22:17	1.91471	264.621	0
2022-09-12	11:22:18	1.99977	266.621	0
2022-09-12	11:22:19	4.14011	270.761	0
2022-09-12	11:22:20	1.98028	272.742	0
2022-09-12	11:22:21	2.32834	275.07	0
2022-09-12	11:22:22	2.36422	277.434	0
2022-09-12	11:22:23	2.64843	280.083	0
2022-09-12	11:22:24	3.50927	283.592	0
2022-09-12	11:22:25	3.41442	287.006	0
2022-09-12	11:22:26	2.17396	289.18	0
2022-09-12	11:22:27	2.5554	291.736	0
2022-09-12	11:22:28	4.18084	295.916	0
2022-09-12	11:22:29	3.69415	299.611	0
2022-09-12	11:22:30	2.9426	302.553	0
2022-09-12	11:22:31	6.80082	309.354	0
2022-09-12	11:22:32	4.25614	313.61	0
2022-09-12	11:22:33	1.3833	314.993	0
2022-09-12	11:22:34	0.337464	315.331	0
2022-09-12	11:22:35	-1.17209	315.331	0
2022-09-12	11:22:36	2.97074	318.302	0
2022-09-12	11:22:37	2.94057	321.242	0
2022-09-12	11:22:38	2.24962	323.492	0
2022-09-12	11:22:39	5.16993	328.662	0
2022-09-12	11:22:40	3.60155	332.263	0
2022-09-12	11:22:41	1.49094	333.754	0
2022-09-12	11:22:42	6.81514	340.569	0
2022-09-12	11:22:43	4.53756	345.107	0
2022-09-12	11:22:44	1.6043	346.711	0
2022-09-12	11:22:45	1.10716	347.818	0
2022-09-12	11:22:46	1.41607	349.234	0
2022-09-12	11:22:47	1.4073	350.642	0
2022-09-12	11:22:48	1.461	352.103	0
2022-09-12	11:22:49	1.20345	353.306	0
2022-09-12	11:22:50	1.32331	354.63	0
2022-09-12	11:22:51	0.952121	355.582	0
2022-09-12	11:22:52	2.04527	357.627	0
2022-09-12	11:22:53	1.82144	359.448	0
2022-09-12	11:22:54	1.94646	361.395	0
2022-09-12	11:22:55	1.8202	363.215	0
2022-09-12	11:22:56	1.59473	364.81	0
2022-09-12	11:22:57	0.931273	365.741	0
2022-09-12	11:22:58	1.34357	367.085	0
2022-09-12	11:22:59	1.54199	368.627	0
2022-09-12	11:23:00	2.11674	370.743	0
2022-09-12	11:23:01	2.53459	373.278	0
2022-09-12	11:23:02	2.07554	375.353	0
2022-09-12	11:23:03	2.17741	377.531	0
2022-09-12	11:23:04	2.01063	379.542	0
2022-09-12	11:23:05	3.15749	382.699	0
2022-09-12	11:23:06	1.85727	384.556	0
2022-09-12	11:23:07	1.63774	386.194	0
2022-09-12	11:23:08	1.49343	387.687	0
2022-09-12	11:23:09	1.41686	389.104	0
2022-09-12	11:23:10	1.44521	390.55	0
2022-09-12	11:23:11	1.52009	392.07	0
2022-09-12	11:23:12	1.49207	393.562	0
2022-09-12	11:23:13	1.40628	394.968	0
2022-09-12	11:23:14	1.24902	396.217	0
2022-09-12	11:23:15	1.64153	397.858	0
2022-09-12	11:23:16	2.05958	399.918	0
2022-09-12	11:23:17	1.38025	401.298	0
2022-09-12	11:23:18	1.5624	402.861	0
2022-09-12	11:23:19	4.12528	406.986	0
2022-09-12	11:23:20	4.05126	411.037	0
2022-09-12	11:23:21	1.67968	412.717	0
2022-09-12	11:23:22	6.39075	419.108	0
2022-09-12	11:23:23	2.82065	421.928	0
2022-09-12	11:23:24	0.763213	422.692	0
2022-09-12	11:23:25	0.550423	423.242	0
2022-09-12	11:23:26	0.688604	423.931	0
2022-09-12	11:23:27	0.487209	424.418	0
2022-09-12	11:23:28	1.69733	426.115	0
2022-09-12	11:23:29	6.15018	432.265	0
2022-09-12	11:23:30	3.98427	436.25	0
2022-09-12	11:23:31	1.39485	437.644	0
2022-09-12	11:23:32	1.71374	439.358	0
2022-09-12	11:23:33	4.32505	443.683	0
2022-09-12	11:23:34	1.47594	445.159	0
2022-09-12	11:23:35	1.32992	446.489	0
2022-09-12	11:23:36	1.73169	448.221	0
2022-09-12	11:23:37	1.48573	449.706	0
2022-09-12	11:23:38	1.33837	451.045	0
2022-09-12	11:23:39	1.33339	452.378	0
2022-09-12	11:23:40	2.22642	454.605	0
2022-09-12	11:23:41	3.72981	458.334	0
2022-09-12	11:23:42	2.90701	461.241	0
2022-09-12	11:23:43	2.88614	464.128	0
2022-09-12	11:23:44	3.15041	467.278	0
2022-09-12	11:23:45	1.86185	469.14	0
2022-09-12	11:23:46	3.33966	472.48	0
2022-09-12	11:23:47	5.00288	477.482	0
2022-09-12	11:23:48	1.76768	479.25	0
2022-09-12	11:23:49	1.37504	480.625	0
2022-09-12	11:23:50	1.64357	482.269	0
2022-09-12	11:23:51	1.82982	484.099	0
2022-09-12	11:23:52	1.44029	485.539	0
2022-09-12	11:23:53	1.13003	486.669	0
2022-09-12	11:23:54	2.22828	488.897	0
2022-09-12	11:23:55	2.42985	491.327	0
2022-09-12	11:23:56	2.2391	493.566	0
2022-09-12	11:23:57	2.85273	496.419	0
2022-09-12	11:23:58	1.85936	498.278	0
2022-09-12	11:23:59	3.0267	501.305	0
2022-09-12	11:24:00	3.90209	505.207	0
2022-09-12	11:24:01	4.67197	509.879	0
2022-09-12	11:24:02	4.95058	514.829	0
2022-09-12	11:24:03	2.61125	517.441	0
2022-09-12	11:24:04	2.01869	519.459	0
2022-09-12	11:24:05	1.68981	521.149	0
2022-09-12	11:24:06	2.51872	523.668	0
2022-09-12	11:24:07	2.48612	526.154	0
2022-09-12	11:24:08	1.51358	527.668	0
2022-09-12	11:24:09	1.39824	529.066	0
2022-09-12	11:24:10	3.39885	532.465	0
2022-09-12	11:24:11	3.4486	535.913	0
2022-09-12	11:24:12	1.6411	537.554	0
2022-09-12	11:24:13	4.3979	541.952	0
2022-09-12	11:24:14	1.63452	543.587	0
2022-09-12	11:24:15	1.71573	545.303	0
2022-09-12	11:24:16	1.97922	547.282	0
2022-09-12	11:24:17	1.4726	548.754	0
2022-09-12	11:24:18	1.2279	549.982	0
2022-09-12	11:24:19	0.856818	550.839	0
2022-09-12	11:24:20	1.90082	552.74	0
2022-09-12	11:24:21	2.42416	555.164	0
2022-09-12	11:24:22	2.81872	557.983	0
2022-09-12	11:24:23	2.43678	560.42	0
2022-09-12	11:24:24	2.36971	562.789	0
2022-09-12	11:24:25	2.35743	565.147	0
2022-09-12	11:24:26	2.10316	567.25	0
2022-09-12	11:24:27	1.5777	568.828	0
2022-09-12	11:24:28	1.45766	570.285	0
2022-09-12	11:24:29	1.30962	571.595	0
2022-09-12	11:24:30	1.28398	572.879	0
2022-09-12	11:24:31	1.95879	574.838	0
2022-09-12	11:24:32	6.79431	581.632	0
2022-09-12	11:24:33	8.66435	590.296	0
2022-09-12	11:24:34	9.55275	599.849	0
2022-09-12	11:24:35	6.24694	606.096	0
2022-09-12	11:24:36	9.73996	615.836	0
2022-09-12	11:24:37	3.59808	619.434	0
2022-09-12	11:24:38	3.4752	622.909	0
2022-09-12	11:24:39	1.98036	624.89	0
2022-09-12	11:24:40	1.86321	626.753	0
2022-09-12	11:24:41	0.913619	627.666	0
2022-09-12	11:24:42	1.38302	629.049	0
2022-09-12	11:24:43	0.825011	629.874	0
2022-09-12	11:24:44	1.461	631.335	0
2022-09-12	11:24:45	1.53222	632.868	0
2022-09-12	11:24:46	1.09892	633.967	0

## Sheet: Dominic_star_2022912111922  (3)
Date	Time	Lbs	Newtons	averaged newtons	Total Force x Time	Total Time Steps Force >13.345		**GoPro Fitting: 1108
2022-09-12	11:19:46	0.412532	1.83502	1.95064	1.83502	FALSE	0			Total Force x Time	1196.08
2022-09-12	11:19:46	0.446578	1.98647	1.95064	1.98647	FALSE	0			Total Time Steps Force >3	2
2022-09-12	11:19:46	0.397417	1.76779	1.95064	3.60282	FALSE	0
2022-09-12	11:19:46	0.49757	2.21329	1.95064	4.19976	FALSE	0
2022-09-12	11:19:47	0.479148	2.13135	1.81669	5.73416	FALSE	0
2022-09-12	11:19:47	0.327443	1.45653	1.81669	5.65629	FALSE	0
2022-09-12	11:19:47	0.482557	2.14651	1.81669	7.88067	FALSE	0
2022-09-12	11:19:47	0.344491	1.53236	1.81669	7.18866	FALSE	0
2022-09-12	11:19:48	0.55126	2.45211	1.83446	10.3328	FALSE	0
2022-09-12	11:19:48	0.307137	1.36621	1.83446	8.55486	FALSE	0
2022-09-12	11:19:48	0.471769	2.09852	1.83446	12.4313	FALSE	0
2022-09-12	11:19:48	0.319453	1.42099	1.83446	9.97585	FALSE	0
2022-09-12	11:19:49	0.503982	2.24181	1.10209	14.6731	FALSE	0
2022-09-12	11:19:49	0.116145	0.516636	1.10209	10.4925	FALSE	0
2022-09-12	11:19:49	0.314466	1.39881	1.10209	16.0719	FALSE	0
2022-09-12	11:19:49	0.0564506	0.251104	1.10209	10.7436	FALSE	0
2022-09-12	11:19:50	0.0947203	0.421335	0.536332	16.4933	FALSE	0
2022-09-12	11:19:50	0.12042	0.535652	0.536332	11.2792	FALSE	0
2022-09-12	11:19:50	0.146578	0.652008	0.536332	17.1453	FALSE	0
2022-09-12	11:19:51	0.042812	0.190436	0.671193	11.4697	FALSE	0
2022-09-12	11:19:51	0.194059	0.863213	0.671193	18.0085	FALSE	0
2022-09-12	11:19:51	0.217316	0.966665	0.671193	12.4363	FALSE	0
2022-09-12	11:19:51	0.149377	0.664459	0.671193	18.6729	FALSE	0
2022-09-12	11:19:52	0.131005	0.582736	0.683585	13.0191	FALSE	0
2022-09-12	11:19:52	0.0956364	0.42541	0.683585	19.0984	FALSE	0
2022-09-12	11:19:52	0.284135	1.26389	0.683585	14.283	FALSE	0
2022-09-12	11:19:52	0.103931	0.462306	0.683585	19.5607	FALSE	0
2022-09-12	11:19:53	0.310089	1.37934	0.974246	15.6623	FALSE	0
2022-09-12	11:19:53	0.217468	0.967341	0.974246	20.528	FALSE	0
2022-09-12	11:19:53	0.262557	1.16791	0.974246	16.8302	FALSE	0
2022-09-12	11:19:53	0.0859671	0.382399	0.974246	20.9104	FALSE	0
2022-09-12	11:19:54	0.194415	0.864797	1.05797	17.695	FALSE	0
2022-09-12	11:19:54	0.317316	1.41149	1.05797	22.3219	FALSE	0
2022-09-12	11:19:54	0.201794	0.89762	1.05797	18.5926	FALSE	0
2022-09-12	11:19:55	0.466476	2.07498	2.85206	24.3969	FALSE	0
2022-09-12	11:19:55	0.496858	2.21012	2.85206	20.8028	FALSE	0
2022-09-12	11:19:55	1.12648	5.01081	2.85206	29.4077	FALSE	0
2022-09-12	11:19:55	0.474873	2.11233	2.85206	22.9151	FALSE	0
2022-09-12	11:19:56	0.566628	2.52047	2.03649	31.9281	FALSE	0
2022-09-12	11:19:56	0.298893	1.32954	2.03649	24.2446	FALSE	0
2022-09-12	11:19:56	0.466069	2.07317	2.03649	34.0013	FALSE	0
2022-09-12	11:19:56	0.499707	2.2228	2.03649	26.4674	FALSE	0
2022-09-12	11:19:57	0.553346	2.46139	3.46082	36.4627	FALSE	0
2022-09-12	11:19:57	0.764898	3.40242	3.46082	29.8698	FALSE	0
2022-09-12	11:19:57	0.951667	4.23321	3.46082	40.6959	FALSE	0
2022-09-12	11:19:57	0.842201	3.74628	3.46082	33.6161	FALSE	0
2022-09-12	11:19:58	0.309682	1.37753	1.99213	42.0734	FALSE	0
2022-09-12	11:19:58	0.522303	2.32331	1.99213	35.9394	FALSE	0
2022-09-12	11:19:58	0.511565	2.27554	1.99213	44.349	FALSE	0
2022-09-12	11:19:59	0.8993	4.00027	2.30259	39.9397	FALSE	0
2022-09-12	11:19:59	0.216603	0.963493	2.30259	45.3125	FALSE	0
2022-09-12	11:19:59	0.491565	2.18658	2.30259	42.1263	FALSE	0
2022-09-12	11:19:59	0.463117	2.06004	2.30259	47.3725	FALSE	0
2022-09-12	11:20:00	0.414618	1.8443	2.18771	43.9706	FALSE	0
2022-09-12	11:20:00	0.428664	1.90678	2.18771	49.2793	FALSE	0
2022-09-12	11:20:00	0.582252	2.58997	2.18771	46.5605	FALSE	0
2022-09-12	11:20:00	0.541743	2.40978	2.18771	51.6891	FALSE	0
2022-09-12	11:20:01	0.250038	1.11222	1.53882	47.6728	FALSE	0
2022-09-12	11:20:01	0.530191	2.3584	1.53882	54.0475	FALSE	0
2022-09-12	11:20:01	0.174364	0.775606	1.53882	48.4484	FALSE	0
2022-09-12	11:20:01	0.429173	1.90905	1.53882	55.9565	FALSE	0
2022-09-12	11:20:02	0.245611	1.09253	1.46566	49.5409	FALSE	0
2022-09-12	11:20:02	0.384797	1.71165	1.46566	57.6682	FALSE	0
2022-09-12	11:20:02	0.358079	1.59281	1.46566	51.1337	FALSE	0
2022-09-12	11:20:03	0.22958	1.02122	1.88177	58.6894	FALSE	0
2022-09-12	11:20:03	0.504898	2.24589	1.88177	53.3796	FALSE	0
2022-09-12	11:20:03	0.177672	0.790321	1.88177	59.4797	FALSE	0
2022-09-12	11:20:03	0.780013	3.46965	1.88177	56.8492	FALSE	0
2022-09-12	11:20:04	0.276908	1.23174	2.25302	60.7115	FALSE	0
2022-09-12	11:20:04	0.661183	2.94107	2.25302	59.7903	FALSE	0
2022-09-12	11:20:04	0.464898	2.06796	2.25302	62.7794	FALSE	0
2022-09-12	11:20:04	0.623015	2.7713	2.25302	62.5616	FALSE	0
2022-09-12	11:20:05	0.742303	3.30191	2.54866	66.0813	FALSE	0
2022-09-12	11:20:05	0.370547	1.64827	2.54866	64.2099	FALSE	0
2022-09-12	11:20:05	0.775483	3.4495	2.54866	69.5308	FALSE	0
2022-09-12	11:20:05	0.403524	1.79496	2.54866	66.0048	FALSE	0
2022-09-12	11:20:06	0.936043	4.16371	3.30463	73.6945	FALSE	0
2022-09-12	11:20:06	0.534466	2.37741	3.30463	68.3823	FALSE	0
2022-09-12	11:20:06	0.758232	3.37277	3.30463	77.0673	FALSE	0
2022-09-12	11:20:07	0.508512	2.26196	2.1842	70.6442	FALSE	0
2022-09-12	11:20:07	0.482659	2.14696	2.1842	79.2143	FALSE	0
2022-09-12	11:20:07	0.542659	2.41386	2.1842	73.0581	FALSE	0
2022-09-12	11:20:07	0.430293	1.91403	2.1842	81.1283	FALSE	0
2022-09-12	11:20:08	0.593957	2.64204	1.89026	75.7001	FALSE	0
2022-09-12	11:20:08	0.235891	1.04929	1.89026	82.1776	FALSE	0
2022-09-12	11:20:08	0.583168	2.59405	1.89026	78.2942	FALSE	0
2022-09-12	11:20:08	0.286781	1.27566	1.89026	83.4532	FALSE	0
2022-09-12	11:20:09	1.07197	4.76834	3.90982	83.0625	FALSE	0
2022-09-12	11:20:09	0.631208	2.80774	3.90982	86.261	FALSE	0
2022-09-12	11:20:09	1.12184	4.99017	3.90982	88.0527	FALSE	0
2022-09-12	11:20:09	0.690852	3.07305	3.90982	89.334	FALSE	0
2022-09-12	11:20:10	0.774313	3.4443	2.13598	91.497	FALSE	0
2022-09-12	11:20:10	0.416501	1.85268	2.13598	91.1867	FALSE	0
2022-09-12	11:20:10	0.181641	0.807975	2.13598	92.3049	FALSE	0
2022-09-12	11:20:10	0.548308	2.43898	2.13598	93.6257	FALSE	0
2022-09-12	11:20:11	0.87869	3.90859	3.53153	96.2135	FALSE	0
2022-09-12	11:20:11	0.805254	3.58193	3.53153	97.2076	FALSE	0
2022-09-12	11:20:11	0.697824	3.10406	3.53153	99.3176	FALSE	0
2022-09-12	11:20:12	1.17156	5.21133	3.21509	102.419	FALSE	0
2022-09-12	11:20:12	0.574262	2.55443	3.21509	101.872	FALSE	0
2022-09-12	11:20:12	0.550903	2.45053	3.21509	104.869	FALSE	0
2022-09-12	11:20:12	0.594415	2.64408	3.21509	104.516	FALSE	0
2022-09-12	11:20:13	0.246527	1.0966	1.33401	105.966	FALSE	0
2022-09-12	11:20:13	0.409886	1.82325	1.33401	106.339	FALSE	0
2022-09-12	11:20:13	0.154924	0.689133	1.33401	106.655	FALSE	0
2022-09-12	11:20:13	0.388257	1.72704	1.33401	108.066	FALSE	0
2022-09-12	11:20:14	0.208155	0.925915	1.22277	107.581	FALSE	0
2022-09-12	11:20:14	0.345255	1.53576	1.22277	109.602	FALSE	0
2022-09-12	11:20:14	0.27126	1.20662	1.22277	108.788	FALSE	0
2022-09-12	11:20:15	0.206374	0.917993	1.12507	110.52	FALSE	0
2022-09-12	11:20:15	0.297774	1.32456	1.12507	110.112	FALSE	0
2022-09-12	11:20:15	0.140624	0.625524	1.12507	111.146	FALSE	0
2022-09-12	11:20:15	0.366934	1.6322	1.12507	111.745	FALSE	0
2022-09-12	11:20:16	0.0987407	0.439218	1.07527	111.585	FALSE	0
2022-09-12	11:20:16	0.390649	1.73768	1.07527	113.482	FALSE	0
2022-09-12	11:20:16	0.139351	0.619861	1.07527	112.205	FALSE	0
2022-09-12	11:20:16	0.338181	1.5043	1.07527	114.986	FALSE	0
2022-09-12	11:20:17	0.148563	0.660838	1.39281	112.866	FALSE	0
2022-09-12	11:20:17	0.594415	2.64408	1.39281	117.631	FALSE	0
2022-09-12	11:20:17	0.189784	0.844197	1.39281	113.71	FALSE	0
2022-09-12	11:20:17	0.319707	1.42212	1.39281	119.053	FALSE	0
2022-09-12	11:20:18	0.270242	1.20209	0.994658	114.912	FALSE	0
2022-09-12	11:20:18	0.179402	0.798016	0.994658	119.851	FALSE	0
2022-09-12	11:20:18	0.221183	0.983866	0.994658	115.896	FALSE	0
2022-09-12	11:20:19	0.0593005	0.26378	0.197963	120.114	FALSE	0
2022-09-12	11:20:19	0.00174323	0.00775424	0.197963	115.904	FALSE	0
2022-09-12	11:20:19	0.0887153	0.394623	0.197963	120.509	FALSE	0
2022-09-12	11:20:19	0.0282572	0.125694	0.197963	116.029	FALSE	0
2022-09-12	11:20:20	-0.000241466	-0.00107409	0.239106	120.509	FALSE	0
2022-09-12	11:20:20	-0.0202924	-0.0902647	0.239106	116.029	FALSE	0
2022-09-12	11:20:20	0.077214	0.343463	0.239106	120.853	FALSE	0
2022-09-12	11:20:20	0.158334	0.704301	0.239106	116.733	FALSE	0
2022-09-12	11:20:21	0.235229	1.04635	1.52399	121.899	FALSE	0
2022-09-12	11:20:21	0.277621	1.23491	1.52399	117.968	FALSE	0
2022-09-12	11:20:21	0.181183	0.805938	1.52399	122.705	FALSE	0
2022-09-12	11:20:21	0.676399	3.00876	1.52399	120.977	FALSE	0
2022-09-12	11:20:22	0.403015	1.79269	3.96948	124.498	FALSE	0
2022-09-12	11:20:22	0.8993	4.00027	3.96948	124.977	FALSE	0
2022-09-12	11:20:22	1.36938	6.09128	3.96948	130.589	FALSE	0
2022-09-12	11:20:22	0.897824	3.9937	3.96948	128.971	FALSE	0
2022-09-12	11:20:23	0.57813	2.57164	2.65343	133.16	FALSE	0
2022-09-12	11:20:23	1.12973	5.02526	2.65343	133.996	FALSE	0
2022-09-12	11:20:23	0.0816923	0.363384	2.65343	133.524	FALSE	0
2022-09-12	11:20:24	0.349173	1.55319	1.30141	135.55	FALSE	0
2022-09-12	11:20:24	0.205662	0.914826	1.30141	134.439	FALSE	0
2022-09-12	11:20:24	0.34327	1.52693	1.30141	137.077	FALSE	0
2022-09-12	11:20:24	0.272176	1.21069	1.30141	135.649	FALSE	0
2022-09-12	11:20:25	0.303575	1.35036	1.11024	138.427	FALSE	0
2022-09-12	11:20:25	0.222049	0.987718	1.11024	136.637	FALSE	0
2022-09-12	11:20:25	0.265611	1.18149	1.11024	139.608	FALSE	0
2022-09-12	11:20:25	0.207137	0.921387	1.11024	137.558	FALSE	0
2022-09-12	11:20:26	0.333295	1.48256	1.71227	141.091	FALSE	0
2022-09-12	11:20:26	0.298639	1.32841	1.71227	138.887	FALSE	0
2022-09-12	11:20:26	0.440471	1.9593	1.71227	143.05	FALSE	0
2022-09-12	11:20:26	0.467341	2.07883	1.71227	140.966	FALSE	0
2022-09-12	11:20:27	0.755229	3.35941	1.96609	146.41	FALSE	0
2022-09-12	11:20:27	0.47187	2.09897	1.96609	143.065	FALSE	0
2022-09-12	11:20:27	0.0988933	0.439897	1.96609	146.85	FALSE	0
2022-09-12	11:20:28	0.427188	1.90022	1.1056	144.965	FALSE	0
2022-09-12	11:20:28	0.105662	0.470006	1.1056	147.32	FALSE	0
2022-09-12	11:20:28	0.360471	1.60345	1.1056	146.568	FALSE	0
2022-09-12	11:20:28	0.100878	0.448726	1.1056	147.768	FALSE	0
2022-09-12	11:20:29	0.31584	1.40492	5.03722	147.973	FALSE	0
2022-09-12	11:20:29	0.361285	1.60707	5.03722	149.375	FALSE	0
2022-09-12	11:20:29	0.910445	4.04984	5.03722	152.023	FALSE	0
2022-09-12	11:20:29	2.9421	13.087	5.03722	162.462	FALSE	0
2022-09-12	11:20:30	2.12887	9.46964	5.48804	161.493	FALSE	0
2022-09-12	11:20:30	1.06795	4.75046	5.48804	167.213	FALSE	0
2022-09-12	11:20:30	1.16968	5.20297	5.48804	166.696	FALSE	0
2022-09-12	11:20:30	0.568563	2.52908	5.48804	169.742	FALSE	0
2022-09-12	11:20:31	0.217468	0.967341	1.98224	167.663	FALSE	0
2022-09-12	11:20:31	0.574262	2.55443	1.98224	172.296	FALSE	0
2022-09-12	11:20:31	0.545153	2.42495	1.98224	170.088	FALSE	0
2022-09-12	11:20:32	0.443728	1.97379	2.58935	174.27	FALSE	0
2022-09-12	11:20:32	1.06424	4.73395	2.58935	174.822	FALSE	0
2022-09-12	11:20:32	0.522099	2.3224	2.58935	176.593	FALSE	0
2022-09-12	11:20:32	0.298384	1.32727	2.58935	176.149	FALSE	0
2022-09-12	11:20:33	0.212685	0.946065	1.32778	177.539	FALSE	0
2022-09-12	11:20:33	0.353346	1.57175	1.32778	177.721	FALSE	0
2022-09-12	11:20:33	0.236145	1.05042	1.32778	178.589	FALSE	0
2022-09-12	11:20:33	0.391819	1.74289	1.32778	179.464	FALSE	0
2022-09-12	11:20:34	0.649478	2.88901	2.94447	181.478	FALSE	0
2022-09-12	11:20:34	0.879504	3.91221	2.94447	183.376	FALSE	0
2022-09-12	11:20:34	0.777723	3.45947	2.94447	184.938	FALSE	0
2022-09-12	11:20:34	0.341082	1.5172	2.94447	184.893	FALSE	0
2022-09-12	11:20:35	0.163117	0.725577	1.41765	185.663	FALSE	0
2022-09-12	11:20:35	0.361489	1.60798	1.41765	186.501	FALSE	0
2022-09-12	11:20:35	0.271819	1.20911	1.41765	186.872	FALSE	0
2022-09-12	11:20:35	0.478384	2.12795	1.41765	188.629	FALSE	0
2022-09-12	11:20:36	0.310903	1.38296	1.78243	188.255	FALSE	0
2022-09-12	11:20:36	0.51299	2.28188	1.78243	190.911	FALSE	0
2022-09-12	11:20:36	0.378232	1.68245	1.78243	189.938	FALSE	0
2022-09-12	11:20:37	0.371718	1.65348	2.42857	192.565	FALSE	0
2022-09-12	11:20:37	0.487443	2.16824	2.42857	192.106	FALSE	0
2022-09-12	11:20:37	0.327392	1.45631	2.42857	194.021	FALSE	0
2022-09-12	11:20:37	0.997315	4.43626	2.42857	196.542	FALSE	0
2022-09-12	11:20:38	1.13279	5.03888	4.21731	199.06	FALSE	0
2022-09-12	11:20:38	1.86032	8.27508	4.21731	204.817	FALSE	0
2022-09-12	11:20:38	0.314364	1.39835	4.21731	200.458	FALSE	0
2022-09-12	11:20:38	0.484898	2.15692	4.21731	206.974	FALSE	0
2022-09-12	11:20:39	0.406832	1.80967	1.43463	202.268	FALSE	0
2022-09-12	11:20:39	0.281336	1.25144	1.43463	208.226	FALSE	0
2022-09-12	11:20:39	0.37986	1.68969	1.43463	203.957	FALSE	0
2022-09-12	11:20:39	0.222049	0.987718	1.43463	209.213	FALSE	0
2022-09-12	11:20:40	0.449936	2.00141	1.69558	205.959	FALSE	0
2022-09-12	11:20:40	0.182914	0.813638	1.69558	210.027	FALSE	0
2022-09-12	11:20:40	0.5107	2.2717	1.69558	208.231	FALSE	0
2022-09-12	11:20:41	0.236247	1.05087	1.40147	211.078	FALSE	0
2022-09-12	11:20:41	0.429428	1.91018	1.40147	210.141	FALSE	0
2022-09-12	11:20:41	0.21925	0.975268	1.40147	212.053	FALSE	0
2022-09-12	11:20:41	0.375331	1.66955	1.40147	211.81	FALSE	0
2022-09-12	11:20:42	0.355585	1.58171	1.27855	213.635	FALSE	0
2022-09-12	11:20:42	0.276501	1.22993	1.27855	213.04	FALSE	0
2022-09-12	11:20:42	0.312227	1.38885	1.27855	215.024	FALSE	0
2022-09-12	11:20:42	0.205407	0.913691	1.27855	213.954	FALSE	0
2022-09-12	11:20:43	0.39131	1.74063	1.22965	216.764	FALSE	0
2022-09-12	11:20:43	0.169682	0.754779	1.22965	214.709	FALSE	0
2022-09-12	11:20:43	0.41355	1.83955	1.22965	218.604	FALSE	0
2022-09-12	11:20:43	0.131209	0.583644	1.22965	215.292	FALSE	0
2022-09-12	11:20:44	0.393957	1.7524	1.4726	220.356	FALSE	0
2022-09-12	11:20:44	0.20444	0.90939	1.4726	216.202	FALSE	0
2022-09-12	11:20:44	0.394771	1.75602	1.4726	222.112	FALSE	0
2022-09-12	11:20:45	0.0201656	0.0897006	0.239671	216.291	FALSE	0
2022-09-12	11:20:45	-0.107468	-0.478039	0.239671	222.112	FALSE	0
2022-09-12	11:20:45	-0.199631	-0.887999	0.239671	216.291	FALSE	0
2022-09-12	11:20:45	0.502455	2.23502	0.239671	224.347	FALSE	0
2022-09-12	11:20:46	0.804186	3.57718	2.12546	219.869	FALSE	0
2022-09-12	11:20:46	0.436196	1.94029	2.12546	226.288	FALSE	0
2022-09-12	11:20:46	0.263066	1.17017	2.12546	221.039	FALSE	0
2022-09-12	11:20:46	0.40785	1.8142	2.12546	228.102	FALSE	0
2022-09-12	11:20:47	0.370903	1.64985	1.7988	222.689	FALSE	0
2022-09-12	11:20:47	0.434466	1.93259	1.7988	230.034	FALSE	0
2022-09-12	11:20:47	0.452735	2.01386	1.7988	224.702	FALSE	0
2022-09-12	11:20:47	0.359453	1.59892	1.7988	231.633	FALSE	0
2022-09-12	11:20:48	0.395534	1.75941	1.88347	226.462	FALSE	0
2022-09-12	11:20:48	0.321489	1.43005	1.88347	233.063	FALSE	0
2022-09-12	11:20:48	0.553244	2.46094	1.88347	228.923	FALSE	0
2022-09-12	11:20:49	0.457468	2.03491	2.26292	235.098	FALSE	0
2022-09-12	11:20:49	0.588919	2.61963	2.26292	231.542	FALSE	0
2022-09-12	11:20:49	0.400624	1.78206	2.26292	236.88	FALSE	0
2022-09-12	11:20:49	0.587901	2.6151	2.26292	234.158	FALSE	0
2022-09-12	11:20:50	0.287036	1.27679	1.64425	238.157	FALSE	0
2022-09-12	11:20:50	0.419708	1.86695	1.64425	236.025	FALSE	0
2022-09-12	11:20:50	0.293346	1.30486	1.64425	239.462	FALSE	0
2022-09-12	11:20:50	0.478486	2.1284	1.64425	238.153	FALSE	0
2022-09-12	11:20:51	0.305763	1.36009	1.77605	240.822	FALSE	0
2022-09-12	11:20:51	0.376756	1.67589	1.77605	239.829	FALSE	0
2022-09-12	11:20:51	0.428155	1.90452	1.77605	242.727	FALSE	0
2022-09-12	11:20:51	0.486425	2.16372	1.77605	241.993	FALSE	0
2022-09-12	11:20:52	0.332786	1.4803	1.70909	244.207	FALSE	0
2022-09-12	11:20:52	0.362507	1.6125	1.70909	243.605	FALSE	0
2022-09-12	11:20:52	0.457367	2.03446	1.70909	246.241	FALSE	0
2022-09-12	11:20:53	0.435941	1.93915	1.79162	245.544	FALSE	0
2022-09-12	11:20:53	0.415789	1.84951	1.79162	248.091	FALSE	0
2022-09-12	11:20:53	0.408868	1.81873	1.79162	247.363	FALSE	0
2022-09-12	11:20:53	0.350496	1.55908	1.79162	249.65	FALSE	0
2022-09-12	11:20:54	0.258384	1.14934	1.43112	248.512	FALSE	0
2022-09-12	11:20:54	0.321438	1.42982	1.43112	251.08	FALSE	0
2022-09-12	11:20:54	0.36042	1.60322	1.43112	250.115	FALSE	0
2022-09-12	11:20:54	0.34668	1.5421	1.43112	252.622	FALSE	0
2022-09-12	11:20:55	0.218741	0.973004	0.560101	251.088	FALSE	0
2022-09-12	11:20:55	0.0838297	0.372891	0.560101	252.995	FALSE	0
2022-09-12	11:20:55	0.132227	0.588172	0.560101	251.677	FALSE	0
2022-09-12	11:20:55	0.0688679	0.306338	0.560101	253.301	FALSE	0
2022-09-12	11:20:56	0.0843895	0.375381	1.43689	252.052	FALSE	0
2022-09-12	11:20:56	0.3593	1.59824	1.43689	254.899	FALSE	0
2022-09-12	11:20:56	0.408817	1.8185	1.43689	253.871	FALSE	0
2022-09-12	11:20:56	0.439606	1.95546	1.43689	256.855	FALSE	0
2022-09-12	11:20:57	0.340522	1.51471	1.93131	255.385	FALSE	0
2022-09-12	11:20:57	0.487392	2.16802	1.93131	259.023	FALSE	0
2022-09-12	11:20:57	0.474618	2.1112	1.93131	257.496	FALSE	0
2022-09-12	11:20:58	0.533499	2.37311	1.81437	261.396	FALSE	0
2022-09-12	11:20:58	0.392176	1.74448	1.81437	259.241	FALSE	0
2022-09-12	11:20:58	0.368359	1.63853	1.81437	263.034	FALSE	0
2022-09-12	11:20:58	0.337519	1.50135	1.81437	260.742	FALSE	0
2022-09-12	11:20:59	0.428919	1.90792	1.68681	264.942	FALSE	0
2022-09-12	11:20:59	0.349784	1.55591	1.68681	262.298	FALSE	0
2022-09-12	11:20:59	0.392685	1.74674	1.68681	266.689	FALSE	0
2022-09-12	11:20:59	0.345458	1.53667	1.68681	263.835	FALSE	0
2022-09-12	11:21:00	0.379707	1.68901	1.66027	268.378	FALSE	0
2022-09-12	11:21:00	0.376247	1.67362	1.66027	265.508	FALSE	0
2022-09-12	11:21:00	0.36841	1.63876	1.66027	270.017	FALSE	0
2022-09-12	11:21:00	0.368613	1.63966	1.66027	267.148	FALSE	0
2022-09-12	11:21:01	0.374364	1.66525	1.64397	271.682	FALSE	0
2022-09-12	11:21:01	0.366934	1.6322	1.64397	268.78	FALSE	0
2022-09-12	11:21:01	0.367443	1.63446	1.64397	273.317	FALSE	0
2022-09-12	11:21:02	0.362303	1.6116	1.48924	270.392	FALSE	0
2022-09-12	11:21:02	0.3593	1.59824	1.48924	274.915	FALSE	0
2022-09-12	11:21:02	0.307137	1.36621	1.48924	271.758	FALSE	0
2022-09-12	11:21:02	0.310445	1.38092	1.48924	276.296	FALSE	0
2022-09-12	11:21:03	0.417316	1.85631	2.14504	273.614	FALSE	0
2022-09-12	11:21:03	0.52215	2.32263	2.14504	278.618	FALSE	0
2022-09-12	11:21:03	0.406985	1.81035	2.14504	275.425	FALSE	0
2022-09-12	11:21:03	0.582456	2.59088	2.14504	281.209	FALSE	0
2022-09-12	11:21:04	0.396349	1.76304	1.73072	277.188	FALSE	0
2022-09-12	11:21:04	0.464542	2.06638	1.73072	283.276	FALSE	0
2022-09-12	11:21:04	0.361031	1.60594	1.73072	278.794	FALSE	0
2022-09-12	11:21:04	0.334415	1.48754	1.73072	284.763	FALSE	0
2022-09-12	11:21:05	0.406425	1.80786	1.60118	280.602	FALSE	0
2022-09-12	11:21:05	0.299453	1.33203	1.60118	286.095	FALSE	0
2022-09-12	11:21:05	0.374008	1.66366	1.60118	282.265	FALSE	0
2022-09-12	11:21:06	0.263321	1.1713	1.5631	287.266	FALSE	0
2022-09-12	11:21:06	0.388257	1.72704	1.5631	283.992	FALSE	0
2022-09-12	11:21:06	0.374313	1.66502	1.5631	288.931	FALSE	0
2022-09-12	11:21:06	0.379707	1.68901	1.5631	285.681	FALSE	0
2022-09-12	11:21:07	0.324542	1.44363	1.49405	290.375	FALSE	0
2022-09-12	11:21:07	0.398741	1.77368	1.49405	287.455	FALSE	0
2022-09-12	11:21:07	0.217316	0.966665	1.49405	291.342	FALSE	0
2022-09-12	11:21:07	0.402914	1.79224	1.49405	289.247	FALSE	0
2022-09-12	11:21:08	0.351768	1.56473	1.50384	292.906	FALSE	0
2022-09-12	11:21:08	0.27869	1.23967	1.50384	290.487	FALSE	0
2022-09-12	11:21:08	0.366476	1.63016	1.50384	294.537	FALSE	0
2022-09-12	11:21:08	0.355382	1.58081	1.50384	292.068	FALSE	0
2022-09-12	11:21:09	0.372125	1.65529	1.89607	296.192	FALSE	0
2022-09-12	11:21:09	0.329886	1.4674	1.89607	293.535	FALSE	0
2022-09-12	11:21:09	0.576756	2.56553	1.89607	298.757	FALSE	0
2022-09-12	11:21:10	0.36841	1.63876	1.60011	295.174	FALSE	0
2022-09-12	11:21:10	0.446221	1.98488	1.60011	300.742	FALSE	0
2022-09-12	11:21:10	0.22612	1.00583	1.60011	296.18	FALSE	0
2022-09-12	11:21:10	0.39813	1.77096	1.60011	302.513	FALSE	0
2022-09-12	11:21:11	0.312685	1.39089	1.42365	297.571	FALSE	0
2022-09-12	11:21:11	0.38897	1.73022	1.42365	304.243	FALSE	0
2022-09-12	11:21:11	0.314567	1.39926	1.42365	298.97	FALSE	0
2022-09-12	11:21:11	0.263982	1.17424	1.42365	305.418	FALSE	0
2022-09-12	11:21:12	0.325712	1.44883	1.58398	300.419	FALSE	0
2022-09-12	11:21:12	0.324949	1.44544	1.58398	306.863	FALSE	0
2022-09-12	11:21:12	0.394669	1.75557	1.58398	302.174	FALSE	0
2022-09-12	11:21:12	0.379046	1.68607	1.58398	308.549	FALSE	0
2022-09-12	11:21:13	0.400674	1.78228	1.54466	303.957	FALSE	0
2022-09-12	11:21:13	0.360318	1.60277	1.54466	310.152	FALSE	0
2022-09-12	11:21:13	0.280776	1.24895	1.54466	305.205	FALSE	0
2022-09-12	11:21:14	0.280267	1.24668	2.23683	311.399	FALSE	0
2022-09-12	11:21:14	0.468868	2.08562	2.23683	307.291	FALSE	0
2022-09-12	11:21:14	0.92841	4.12975	2.23683	315.528	FALSE	0
2022-09-12	11:21:14	0.333906	1.48528	2.23683	308.776	FALSE	0
2022-09-12	11:21:15	0.188563	0.838766	0.583247	316.367	FALSE	0
2022-09-12	11:21:15	0.140318	0.624163	0.583247	309.401	FALSE	0
2022-09-12	11:21:15	0.108308	0.481776	0.583247	316.849	FALSE	0
2022-09-12	11:21:15	0.0872903	0.388285	0.583247	309.789	FALSE	0
2022-09-12	11:21:16	0.207188	0.921614	1.25732	317.771	FALSE	0
2022-09-12	11:21:16	0.377214	1.67792	1.25732	311.467	FALSE	0
2022-09-12	11:21:16	0.375178	1.66887	1.25732	319.439	FALSE	0
2022-09-12	11:21:16	0.171056	0.760891	1.25732	312.228	FALSE	0
2022-09-12	11:21:17	0.380216	1.69128	1.26842	321.131	FALSE	0
2022-09-12	11:21:17	0.23813	1.05925	1.26842	313.287	FALSE	0
2022-09-12	11:21:17	0.237112	1.05472	1.26842	322.185	FALSE	0
2022-09-12	11:21:18	0.142303	0.632992	0.79598	313.92	FALSE	0
2022-09-12	11:21:18	0.188512	0.838539	0.79598	323.024	FALSE	0
2022-09-12	11:21:18	0.0977228	0.434691	0.79598	314.355	FALSE	0
2022-09-12	11:21:18	0.287239	1.2777	0.79598	324.302	FALSE	0
2022-09-12	11:21:19	0.0674939	0.300226	0.832991	314.655	FALSE	0
2022-09-12	11:21:19	0.187595	0.83446	0.832991	325.136	FALSE	0
2022-09-12	11:21:19	0.155535	0.691851	0.832991	315.347	FALSE	0
2022-09-12	11:21:19	0.338435	1.50543	0.832991	326.642	FALSE	0
2022-09-12	11:21:20	0.117316	0.521845	1.01697	315.869	FALSE	0
2022-09-12	11:21:20	0.318842	1.41827	1.01697	328.06	FALSE	0
2022-09-12	11:21:20	0.16673	0.741648	1.01697	316.61	FALSE	0
2022-09-12	11:21:20	0.311616	1.38613	1.01697	329.446	FALSE	0
2022-09-12	11:21:21	0.19126	0.850763	1.00826	317.461	FALSE	0
2022-09-12	11:21:21	0.272634	1.21273	1.00826	330.659	FALSE	0
2022-09-12	11:21:21	0.188054	0.836502	1.00826	318.297	FALSE	0
2022-09-12	11:21:21	0.25472	1.13305	1.00826	331.792	FALSE	0
2022-09-12	11:21:22	0.142252	0.632765	0.202509	318.93	FALSE	0
2022-09-12	11:21:22	-0.01444	-0.064232	0.202509	331.792	FALSE	0
2022-09-12	11:21:22	0.00876615	0.0389936	0.202509	318.969	FALSE	0
2022-09-12	11:21:23	-0.0121499	-0.0540452	-0.611768	331.792	FALSE	0
2022-09-12	11:21:23	-0.14874	-0.661625	-0.611768	318.969	FALSE	0
2022-09-12	11:21:23	-0.217137	-0.965869	-0.611768	331.792	FALSE	0
2022-09-12	11:21:23	-0.172099	-0.765531	-0.611768	318.969	FALSE	0
2022-09-12	11:21:24	-0.324567	-1.44374	-1.11567	331.792	FALSE	0
2022-09-12	11:21:24	-0.371183	-1.6511	-1.11567	318.969	FALSE	0
2022-09-12	11:21:24	-0.373473	-1.66128	-1.11567	331.792	FALSE	0
2022-09-12	11:21:24	0.0659671	0.293435	-1.11567	319.263	FALSE	0
2022-09-12	11:21:25	0.350649	1.55976	1.71295	333.352	FALSE	0
2022-09-12	11:21:25	0.290954	1.29422	1.71295	320.557	FALSE	0
2022-09-12	11:21:25	0.534058	2.3756	1.71295	335.727	FALSE	0
2022-09-12	11:21:25	0.364695	1.62224	1.71295	322.179	FALSE	0
2022-09-12	11:21:26	0.542354	2.4125	1.9504	338.14	FALSE	0
2022-09-12	11:21:26	0.307697	1.3687	1.9504	323.548	FALSE	0
2022-09-12	11:21:26	0.465356	2.07	1.9504	340.21	FALSE	0
2022-09-12	11:21:27	0.28841	1.28291	1.61069	324.831	FALSE	0
2022-09-12	11:21:27	0.406171	1.80673	1.61069	342.016	FALSE	0
2022-09-12	11:21:27	0.35869	1.59552	1.61069	326.426	FALSE	0
2022-09-12	11:21:27	0.395127	1.7576	1.61069	343.774	FALSE	0
2022-09-12	11:21:28	0.409428	1.82122	1.70231	328.247	FALSE	0
2022-09-12	11:21:28	0.409071	1.81963	1.70231	345.594	FALSE	0
2022-09-12	11:21:28	0.347697	1.54663	1.70231	329.794	FALSE	0
2022-09-12	11:21:28	0.364593	1.62178	1.70231	347.215	FALSE	0
2022-09-12	11:21:29	0.641539	2.85369	1.98867	332.648	FALSE	0
2022-09-12	11:21:29	0.339402	1.50973	1.98867	348.725	FALSE	0
2022-09-12	11:21:29	0.406527	1.80831	1.98867	334.456	FALSE	0
2022-09-12	11:21:29	0.400827	1.78296	1.98867	350.508	FALSE	0
2022-09-12	11:21:30	0.422048	1.87735	1.82363	336.333	FALSE	0
2022-09-12	11:21:30	0.375127	1.66864	1.82363	352.177	FALSE	0
2022-09-12	11:21:30	0.432735	1.92489	1.82363	338.258	FALSE	0
2022-09-12	11:21:31	0.315229	1.4022	1.69315	353.579	FALSE	0
2022-09-12	11:21:31	0.360827	1.60503	1.69315	339.863	FALSE	0
2022-09-12	11:21:31	0.427697	1.90248	1.69315	355.481	FALSE	0
2022-09-12	11:21:31	0.418791	1.86287	1.69315	341.726	FALSE	0
2022-09-12	11:21:32	0.462557	2.05755	1.72105	357.539	FALSE	0
2022-09-12	11:21:32	0.365662	1.62654	1.72105	343.353	FALSE	0
2022-09-12	11:21:32	0.395891	1.761	1.72105	359.3	FALSE	0
2022-09-12	11:21:32	0.323524	1.4391	1.72105	344.792	FALSE	0
2022-09-12	11:21:33	0.420115	1.86876	1.77549	361.169	FALSE	0
2022-09-12	11:21:33	0.34154	1.51924	1.77549	346.311	FALSE	0
2022-09-12	11:21:33	0.414109	1.84204	1.77549	363.011	FALSE	0
2022-09-12	11:21:33	0.420827	1.87192	1.77549	348.183	FALSE	0
2022-09-12	11:21:34	0.613193	2.72761	1.59122	365.738	FALSE	0
2022-09-12	11:21:34	0.320776	1.42688	1.59122	349.61	FALSE	0
2022-09-12	11:21:34	0.139199	0.619185	1.59122	366.358	FALSE	0
2022-09-12	11:21:35	0.120267	0.534972	1.41731	350.145	FALSE	0
2022-09-12	11:21:35	0.267494	1.18987	1.41731	367.547	FALSE	0
2022-09-12	11:21:35	0.396451	1.76349	1.41731	351.908	FALSE	0
2022-09-12	11:21:35	0.490293	2.18092	1.41731	369.728	FALSE	0
2022-09-12	11:21:36	0.317824	1.41374	1.41069	353.322	FALSE	0
2022-09-12	11:21:36	0.255942	1.13848	1.41069	370.867	FALSE	0
2022-09-12	11:21:36	0.392176	1.74448	1.41069	355.067	FALSE	0
2022-09-12	11:21:36	0.302608	1.34606	1.41069	372.213	FALSE	0
2022-09-12	11:21:37	0.390191	1.73565	1.53157	356.802	FALSE	0
2022-09-12	11:21:37	0.329428	1.46536	1.53157	373.678	FALSE	0
2022-09-12	11:21:37	0.396298	1.76281	1.53157	358.565	FALSE	0
2022-09-12	11:21:37	0.261336	1.16247	1.53157	374.841	FALSE	0
2022-09-12	11:21:38	0.410445	1.82574	1.77752	360.391	FALSE	0
2022-09-12	11:21:38	0.268104	1.19258	1.77752	376.033	FALSE	0
2022-09-12	11:21:38	0.520267	2.31425	1.77752	362.705	FALSE	0
2022-09-12	11:21:39	0.298893	1.32954	1.73616	377.363	FALSE	0
2022-09-12	11:21:39	0.473448	2.10599	1.73616	364.811	FALSE	0
2022-09-12	11:21:39	0.366374	1.6297	1.73616	378.993	FALSE	0
2022-09-12	11:21:39	0.422506	1.87939	1.73616	366.69	FALSE	0
2022-09-12	11:21:40	0.334415	1.48754	1.68132	380.48	FALSE	0
2022-09-12	11:21:40	0.418181	1.86015	1.68132	368.551	FALSE	0
2022-09-12	11:21:40	0.352634	1.56859	1.68132	382.049	FALSE	0
2022-09-12	11:21:40	0.406679	1.80899	1.68132	370.36	FALSE	0
2022-09-12	11:21:41	0.386222	1.71799	1.72371	383.767	FALSE	0
2022-09-12	11:21:41	0.369479	1.64352	1.72371	372.003	FALSE	0
2022-09-12	11:21:41	0.402201	1.78907	1.72371	385.556	FALSE	0
2022-09-12	11:21:41	0.392125	1.74425	1.72371	373.747	FALSE	0
2022-09-12	11:21:42	0.41014	1.82438	1.70313	387.38	FALSE	0
2022-09-12	11:21:42	0.356298	1.58488	1.70313	375.332	FALSE	0
2022-09-12	11:21:42	0.382201	1.70011	1.70313	389.08	FALSE	0
2022-09-12	11:21:43	0.333346	1.48279	1.58171	376.815	FALSE	0
2022-09-12	11:21:43	0.399809	1.77843	1.58171	390.859	FALSE	0
2022-09-12	11:21:43	0.331819	1.476	1.58171	378.291	FALSE	0
2022-09-12	11:21:43	0.357366	1.58964	1.58171	392.448	FALSE	0
2022-09-12	11:21:44	0.301641	1.34176	1.57872	379.633	FALSE	0
2022-09-12	11:21:44	0.409936	1.82348	1.57872	394.272	FALSE	0
2022-09-12	11:21:44	0.354924	1.57877	1.57872	381.211	FALSE	0
2022-09-12	11:21:44	0.353143	1.57085	1.57872	395.843	FALSE	0
2022-09-12	11:21:45	0.483881	2.1524	1.79603	383.364	FALSE	0
2022-09-12	11:21:45	0.304898	1.35625	1.79603	397.199	FALSE	0
2022-09-12	11:21:45	0.380674	1.69331	1.79603	385.057	FALSE	0
2022-09-12	11:21:45	0.445611	1.98217	1.79603	399.181	FALSE	0
2022-09-12	11:21:46	0.225713	1.00402	1.21733	386.061	FALSE	0
2022-09-12	11:21:46	0.256705	1.14188	1.21733	400.323	FALSE	0
2022-09-12	11:21:46	0.338588	1.50611	1.21733	387.567	FALSE	0
2022-09-12	11:21:47	0.25472	1.13305	1.31041	401.456	FALSE	0
2022-09-12	11:21:47	0.347799	1.54708	1.31041	389.114	FALSE	0
2022-09-12	11:21:47	0.277417	1.23401	1.31041	402.69	FALSE	0
2022-09-12	11:21:47	0.298435	1.3275	1.31041	390.442	FALSE	0
2022-09-12	11:21:48	0.394262	1.75376	1.62965	404.444	FALSE	0
2022-09-12	11:21:48	0.347036	1.54369	1.62965	391.986	FALSE	0
2022-09-12	11:21:48	0.341641	1.51969	1.62965	405.963	FALSE	0
2022-09-12	11:21:48	0.382506	1.70146	1.62965	393.687	FALSE	0
2022-09-12	11:21:49	0.376705	1.67566	1.78647	407.639	FALSE	0
2022-09-12	11:21:49	0.394669	1.75557	1.78647	395.443	FALSE	0
2022-09-12	11:21:49	0.393092	1.74855	1.78647	409.388	FALSE	0
2022-09-12	11:21:49	0.441998	1.9661	1.78647	397.409	FALSE	0
2022-09-12	11:21:50	0.352074	1.5661	1.51618	410.954	FALSE	0
2022-09-12	11:21:50	0.361896	1.60979	1.51618	399.019	FALSE	0
2022-09-12	11:21:50	0.321285	1.42914	1.51618	412.383	FALSE	0
2022-09-12	11:21:50	0.328155	1.4597	1.51618	400.478	FALSE	0
2022-09-12	11:21:51	0.320013	1.42348	1.57326	413.806	FALSE	0
2022-09-12	11:21:51	0.38098	1.69468	1.57326	402.173	FALSE	0
2022-09-12	11:21:51	0.360064	1.60164	1.57326	415.408	FALSE	0
2022-09-12	11:21:52	0.363779	1.61816	1.76915	403.791	FALSE	0
2022-09-12	11:21:52	0.428206	1.90475	1.76915	417.313	FALSE	0
2022-09-12	11:21:52	0.419809	1.86739	1.76915	405.658	FALSE	0
2022-09-12	11:21:52	0.379097	1.6863	1.76915	418.999	FALSE	0
2022-09-12	11:21:53	0.391565	1.74176	1.7112	407.4	FALSE	0
2022-09-12	11:21:53	0.349071	1.55274	1.7112	420.552	FALSE	0
2022-09-12	11:21:53	0.424033	1.88618	1.7112	409.286	FALSE	0
2022-09-12	11:21:53	0.37411	1.66412	1.7112	422.216	FALSE	0
2022-09-12	11:21:54	0.357825	1.59168	1.6408	410.878	FALSE	0
2022-09-12	11:21:54	0.392379	1.74538	1.6408	423.961	FALSE	0
2022-09-12	11:21:54	0.379351	1.68743	1.6408	412.565	FALSE	0
2022-09-12	11:21:54	0.345916	1.5387	1.6408	425.5	FALSE	0
2022-09-12	11:21:55	0.39299	1.7481	1.53576	414.314	FALSE	0
2022-09-12	11:21:55	0.294618	1.31052	1.53576	426.81	FALSE	0
2022-09-12	11:21:55	0.348155	1.54866	1.53576	415.862	FALSE	0
2022-09-12	11:21:56	0.35645	1.58556	1.61437	428.396	FALSE	0
2022-09-12	11:21:56	0.365865	1.62744	1.61437	417.49	FALSE	0
2022-09-12	11:21:56	0.397468	1.76802	1.61437	430.164	FALSE	0
2022-09-12	11:21:56	0.331921	1.47645	1.61437	418.966	FALSE	0
2022-09-12	11:21:57	0.340827	1.51607	1.6799	431.68	FALSE	0
2022-09-12	11:21:57	0.393041	1.74832	1.6799	420.714	FALSE	0
2022-09-12	11:21:57	0.356654	1.58647	1.6799	433.267	FALSE	0
2022-09-12	11:21:57	0.420115	1.86876	1.6799	422.583	FALSE	0
2022-09-12	11:21:58	0.469987	2.0906	1.95562	435.357	FALSE	0
2022-09-12	11:21:58	0.444898	1.979	1.95562	424.562	FALSE	0
2022-09-12	11:21:58	0.421031	1.87283	1.95562	437.23	FALSE	0
2022-09-12	11:21:58	0.422659	1.88007	1.95562	426.442	FALSE	0
2022-09-12	11:21:59	0.425611	1.8932	1.98662	439.123	FALSE	0
2022-09-12	11:21:59	0.460267	2.04736	1.98662	428.49	FALSE	0
2022-09-12	11:21:59	0.453957	2.01929	1.98662	441.142	FALSE	0
2022-09-12	11:22:00	0.425153	1.89117	1.89479	430.381	FALSE	0
2022-09-12	11:22:00	0.423473	1.88369	1.89479	443.026	FALSE	0
2022-09-12	11:22:00	0.430038	1.9129	1.89479	432.294	FALSE	0
2022-09-12	11:22:00	0.425204	1.89139	1.89479	444.918	FALSE	0
2022-09-12	11:22:01	0.41472	1.84476	1.90627	434.138	FALSE	0
2022-09-12	11:22:01	0.430344	1.91426	1.90627	446.832	FALSE	0
2022-09-12	11:22:01	0.429275	1.9095	1.90627	436.048	FALSE	0
2022-09-12	11:22:01	0.43986	1.95659	1.90627	448.788	FALSE	0
2022-09-12	11:22:02	0.430191	1.91358	1.79281	437.962	FALSE	0
2022-09-12	11:22:02	0.444949	1.97922	1.79281	450.768	FALSE	0
2022-09-12	11:22:02	0.401743	1.78703	1.79281	439.749	FALSE	0
2022-09-12	11:22:02	0.33528	1.49139	1.79281	452.259	FALSE	0
2022-09-12	11:22:03	0.373448	1.66117	1.82846	441.41	FALSE	0
2022-09-12	11:22:03	0.478486	2.1284	1.82846	454.387	FALSE	0
2022-09-12	11:22:03	0.381234	1.69581	1.82846	443.106	FALSE	0
2022-09-12	11:22:04	0.401489	1.7859	1.84504	456.173	FALSE	0
2022-09-12	11:22:04	0.41243	1.83457	1.84504	444.94	FALSE	0
2022-09-12	11:22:04	0.399453	1.77685	1.84504	457.95	FALSE	0
2022-09-12	11:22:04	0.445763	1.98284	1.84504	446.923	FALSE	0
2022-09-12	11:22:05	0.358181	1.59326	1.65959	459.543	FALSE	0
2022-09-12	11:22:05	0.403015	1.79269	1.65959	448.716	FALSE	0
2022-09-12	11:22:05	0.381641	1.69762	1.65959	461.241	FALSE	0
2022-09-12	11:22:05	0.349529	1.55477	1.65959	450.27	FALSE	0
2022-09-12	11:22:06	0.393397	1.74991	1.67351	462.991	FALSE	0
2022-09-12	11:22:06	0.363931	1.61884	1.67351	451.889	FALSE	0
2022-09-12	11:22:06	0.423677	1.8846	1.67351	464.876	FALSE	0
2022-09-12	11:22:06	0.323881	1.44069	1.67351	453.33	FALSE	0
2022-09-12	11:22:07	0.477875	2.12568	1.92203	467.001	FALSE	0
2022-09-12	11:22:07	0.299809	1.33361	1.92203	454.664	FALSE	0
2022-09-12	11:22:07	0.518588	2.30678	1.92203	469.308	FALSE	0
2022-09-12	11:22:08	0.326221	1.4511	1.82133	456.115	FALSE	0
2022-09-12	11:22:08	0.536247	2.38533	1.82133	471.693	FALSE	0
2022-09-12	11:22:08	0.290242	1.29105	1.82133	457.406	FALSE	0
2022-09-12	11:22:08	0.485102	2.15783	1.82133	473.851	FALSE	0
2022-09-12	11:22:09	0.329631	1.46626	1.68868	458.872	FALSE	0
2022-09-12	11:22:09	0.452583	2.01318	1.68868	475.864	FALSE	0
2022-09-12	11:22:09	0.296705	1.3198	1.68868	460.192	FALSE	0
2022-09-12	11:22:09	0.439606	1.95546	1.68868	477.82	FALSE	0
2022-09-12	11:22:10	0.34271	1.52444	1.63163	461.716	FALSE	0
2022-09-12	11:22:10	0.446985	1.98828	1.63163	479.808	FALSE	0
2022-09-12	11:22:10	0.27355	1.21681	1.63163	462.933	FALSE	0
2022-09-12	11:22:10	0.403982	1.79699	1.63163	481.605	FALSE	0
2022-09-12	11:22:11	0.303524	1.35014	1.69316	464.283	FALSE	0
2022-09-12	11:22:11	0.491616	2.18681	1.69316	483.792	FALSE	0
2022-09-12	11:22:11	0.346781	1.54255	1.69316	465.826	FALSE	0
2022-09-12	11:22:12	0.759962	3.38046	3.20101	487.172	FALSE	0
2022-09-12	11:22:12	0.532939	2.37062	3.20101	468.196	FALSE	0
2022-09-12	11:22:12	1.08704	4.83537	3.20101	492.008	FALSE	0
2022-09-12	11:22:12	0.498537	2.21759	3.20101	470.414	FALSE	0
2022-09-12	11:22:13	0.74042	3.29354	2.249	495.301	FALSE	0
2022-09-12	11:22:13	0.409122	1.81986	2.249	472.234	FALSE	0
2022-09-12	11:22:13	0.596908	2.65517	2.249	497.956	FALSE	0
2022-09-12	11:22:13	0.275941	1.22744	2.249	473.461	FALSE	0
2022-09-12	11:22:14	0.471361	2.09671	1.67758	500.053	FALSE	0
2022-09-12	11:22:14	0.280165	1.24623	1.67758	474.707	FALSE	0
2022-09-12	11:22:14	0.501845	2.23231	1.67758	502.285	FALSE	0
2022-09-12	11:22:14	0.255178	1.13508	1.67758	475.843	FALSE	0
2022-09-12	11:22:15	0.471565	2.09762	1.75183	504.383	FALSE	0
2022-09-12	11:22:15	0.274415	1.22065	1.75183	477.063	FALSE	0
2022-09-12	11:22:15	0.54159	2.4091	1.75183	506.792	FALSE	0
2022-09-12	11:22:15	0.287748	1.27996	1.75183	478.343	FALSE	0
2022-09-12	11:22:16	0.451514	2.00842	1.89132	508.801	FALSE	0
2022-09-12	11:22:16	0.417061	1.85517	1.89132	480.198	FALSE	0
2022-09-12	11:22:16	0.406985	1.81035	1.89132	510.611	FALSE	0
2022-09-12	11:22:17	0.56444	2.51074	1.91471	482.709	FALSE	0
2022-09-12	11:22:17	0.349071	1.55274	1.91471	512.164	FALSE	0
2022-09-12	11:22:17	0.536145	2.38488	1.91471	485.094	FALSE	0
2022-09-12	11:22:17	0.272125	1.21047	1.91471	513.374	FALSE	0
2022-09-12	11:22:18	0.53584	2.38352	1.99977	487.477	FALSE	0
2022-09-12	11:22:18	0.255229	1.13531	1.99977	514.509	FALSE	0
2022-09-12	11:22:18	0.526374	2.34142	1.99977	489.819	FALSE	0
2022-09-12	11:22:18	0.480827	2.13881	1.99977	516.648	FALSE	0
2022-09-12	11:22:19	1.04851	4.66398	4.14011	494.483	FALSE	0
2022-09-12	11:22:19	1.04902	4.66625	4.14011	521.315	FALSE	0
2022-09-12	11:22:19	1.12312	4.99586	4.14011	499.479	FALSE	0
2022-09-12	11:22:19	0.502303	2.23434	4.14011	523.549	FALSE	0
2022-09-12	11:22:20	0.501641	2.2314	1.98028	501.71	FALSE	0
2022-09-12	11:22:20	0.352939	1.56994	1.98028	525.119	FALSE	0
2022-09-12	11:22:20	0.48098	2.1395	1.98028	503.85	FALSE	0
2022-09-12	11:22:21	0.351158	1.56202	2.32834	526.681	FALSE	0
2022-09-12	11:22:21	0.813295	3.6177	2.32834	507.467	FALSE	0
2022-09-12	11:22:21	0.408563	1.81737	2.32834	528.498	FALSE	0
2022-09-12	11:22:21	0.520725	2.31629	2.32834	509.784	FALSE	0
2022-09-12	11:22:22	0.410598	1.82642	2.36422	530.325	FALSE	0
2022-09-12	11:22:22	0.522099	2.3224	2.36422	512.106	FALSE	0
2022-09-12	11:22:22	0.460522	2.04849	2.36422	532.373	FALSE	0
2022-09-12	11:22:22	0.732786	3.25958	2.36422	515.366	FALSE	0
2022-09-12	11:22:23	0.518995	2.30859	2.64843	534.682	FALSE	0
2022-09-12	11:22:23	0.572888	2.54832	2.64843	517.914	FALSE	0
2022-09-12	11:22:23	0.725967	3.22925	2.64843	537.911	FALSE	0
2022-09-12	11:22:23	0.563728	2.50757	2.64843	520.421	FALSE	0
2022-09-12	11:22:24	0.513295	2.28324	3.50927	540.194	FALSE	0
2022-09-12	11:22:24	0.801183	3.56382	3.50927	523.985	FALSE	0
2022-09-12	11:22:24	1.05228	4.68075	3.50927	544.875	FALSE	0
2022-09-12	11:22:25	0.728359	3.23989	3.41442	527.225	FALSE	0
2022-09-12	11:22:25	0.75014	3.33677	3.41442	548.212	FALSE	0
2022-09-12	11:22:25	0.959249	4.26693	3.41442	531.492	FALSE	0
2022-09-12	11:22:25	0.632634	2.81408	3.41442	551.026	FALSE	0
2022-09-12	11:22:26	0.433143	1.92671	2.17396	533.419	FALSE	0
2022-09-12	11:22:26	0.542863	2.41476	2.17396	553.441	FALSE	0
2022-09-12	11:22:26	0.480623	2.13791	2.17396	535.557	FALSE	0
2022-09-12	11:22:26	0.498282	2.21646	2.17396	555.657	FALSE	0
2022-09-12	11:22:27	0.728613	3.24102	2.5554	538.798	FALSE	0
2022-09-12	11:22:27	0.53014	2.35817	2.5554	558.015	FALSE	0
2022-09-12	11:22:27	0.445611	1.98217	2.5554	540.78	FALSE	0
2022-09-12	11:22:27	0.59355	2.64023	2.5554	560.655	FALSE	0
2022-09-12	11:22:28	0.688664	3.06332	4.18084	543.843	FALSE	0
2022-09-12	11:22:28	0.756959	3.36711	4.18084	564.023	FALSE	0
2022-09-12	11:22:28	1.37406	6.11209	4.18084	549.955	FALSE	0
2022-09-12	11:22:29	1.42413	6.33482	3.69415	570.357	FALSE	0
2022-09-12	11:22:29	0.650242	2.89241	3.69415	552.848	FALSE	0
2022-09-12	11:22:29	0.553855	2.46366	3.69415	572.821	FALSE	0
2022-09-12	11:22:29	0.693702	3.08573	3.69415	555.933	FALSE	0
2022-09-12	11:22:30	0.508461	2.26174	2.9426	575.083	FALSE	0
2022-09-12	11:22:30	0.655433	2.9155	2.9426	558.849	FALSE	0
2022-09-12	11:22:30	0.693855	3.08641	2.9426	578.169	FALSE	0
2022-09-12	11:22:30	0.788359	3.50678	2.9426	562.356	FALSE	0
2022-09-12	11:22:31	1.17391	5.22179	6.80082	583.391	FALSE	0
2022-09-12	11:22:31	1.32581	5.89747	6.80082	568.253	FALSE	0
2022-09-12	11:22:31	2.07004	9.20795	6.80082	592.599	FALSE	0
2022-09-12	11:22:31	1.54581	6.87607	6.80082	575.129	FALSE	0
2022-09-12	11:22:32	1.27599	5.67586	4.25614	598.275	FALSE	0
2022-09-12	11:22:32	0.823371	3.66252	4.25614	578.792	FALSE	0
2022-09-12	11:22:32	0.771107	3.43004	4.25614	601.705	FALSE	0
2022-09-12	11:22:33	0.515178	2.29161	1.3833	581.083	FALSE	0
2022-09-12	11:22:33	0.337723	1.50226	1.3833	603.207	FALSE	0
2022-09-12	11:22:33	0.133499	0.59383	1.3833	581.677	FALSE	0
2022-09-12	11:22:33	0.257519	1.1455	1.3833	604.353	FALSE	0
2022-09-12	11:22:34	0.215178	0.957155	0.337464	582.634	FALSE	0
2022-09-12	11:22:34	0.302099	1.3438	0.337464	605.696	FALSE	0
2022-09-12	11:22:34	0.0790969	0.351839	0.337464	582.986	FALSE	0
2022-09-12	11:22:34	-0.292913	-1.30294	0.337464	605.696	FALSE	0
2022-09-12	11:22:35	-0.451386	-2.00786	-1.17209	582.986	FALSE	0
2022-09-12	11:22:35	-0.338155	-1.50418	-1.17209	605.696	FALSE	0
2022-09-12	11:22:35	-0.239224	-1.06412	-1.17209	582.986	FALSE	0
2022-09-12	11:22:35	-0.0252287	-0.112222	-1.17209	605.696	FALSE	0
2022-09-12	11:22:36	0.0942114	0.419071	2.97074	583.405	FALSE	0
2022-09-12	11:22:36	0.903982	4.02109	2.97074	609.717	FALSE	0
2022-09-12	11:22:36	1.00536	4.47204	2.97074	587.877	FALSE	0
2022-09-12	11:22:37	1.14958	5.11356	2.94057	614.831	FALSE	0
2022-09-12	11:22:37	0.647341	2.8795	2.94057	590.757	FALSE	0
2022-09-12	11:22:37	0.463117	2.06004	2.94057	616.891	FALSE	0
2022-09-12	11:22:37	0.384237	1.70916	2.94057	592.466	FALSE	0
2022-09-12	11:22:38	0.616959	2.74436	2.24962	619.635	FALSE	0
2022-09-12	11:22:38	0.552532	2.45777	2.24962	594.924	FALSE	0
2022-09-12	11:22:38	0.47874	2.12953	2.24962	621.765	FALSE	0
2022-09-12	11:22:38	0.37472	1.66683	2.24962	596.591	FALSE	0
2022-09-12	11:22:39	0.408969	1.81918	5.16993	623.584	FALSE	0
2022-09-12	11:22:39	1.11528	4.96099	5.16993	601.552	FALSE	0
2022-09-12	11:22:39	1.29518	5.76122	5.16993	629.345	FALSE	0
2022-09-12	11:22:39	1.82958	8.13834	5.16993	609.69	FALSE	0
2022-09-12	11:22:40	1.35523	6.02833	3.60155	635.374	FALSE	0
2022-09-12	11:22:40	0.645051	2.86932	3.60155	612.559	FALSE	0
2022-09-12	11:22:40	0.428715	1.90701	3.60155	637.281	FALSE	0
2022-09-12	11:22:41	0.342863	1.52512	1.49094	614.084	FALSE	0
2022-09-12	11:22:41	0.333295	1.48256	1.49094	638.763	FALSE	0
2022-09-12	11:22:41	0.291616	1.29717	1.49094	615.382	FALSE	0
2022-09-12	11:22:41	0.372939	1.65891	1.49094	640.422	FALSE	0
2022-09-12	11:22:42	0.771768	3.43298	6.81514	618.815	FALSE	0
2022-09-12	11:22:42	0.77757	3.45879	6.81514	643.881	FALSE	0
2022-09-12	11:22:42	1.40943	6.26943	6.81514	625.084	FALSE	0
2022-09-12	11:22:42	3.16968	14.0994	6.81514	657.98	1	1
2022-09-12	11:22:43	2.19111	9.7465	4.53756	634.83	FALSE	1
2022-09-12	11:22:43	1.08047	4.80615	4.53756	662.786	FALSE	1
2022-09-12	11:22:43	0.391667	1.74221	4.53756	636.573	FALSE	1
2022-09-12	11:22:43	0.417112	1.8554	4.53756	664.642	FALSE	1
2022-09-12	11:22:44	0.361336	1.60729	1.6043	638.18	FALSE	1
2022-09-12	11:22:44	0.345102	1.53508	1.6043	666.177	FALSE	1
2022-09-12	11:22:44	0.365916	1.62767	1.6043	639.808	FALSE	1
2022-09-12	11:22:44	0.370293	1.64714	1.6043	667.824	FALSE	1
2022-09-12	11:22:45	0.17187	0.764512	1.10716	640.572	FALSE	1
2022-09-12	11:22:45	0.326425	1.452	1.10716	669.276	FALSE	1
2022-09-12	11:22:45	0.24841	1.10498	1.10716	641.677	FALSE	1
2022-09-12	11:22:46	0.397214	1.76689	1.41607	671.043	FALSE	1
2022-09-12	11:22:46	0.292888	1.30282	1.41607	642.98	FALSE	1
2022-09-12	11:22:46	0.271361	1.20707	1.41607	672.25	FALSE	1
2022-09-12	11:22:46	0.311921	1.38749	1.41607	644.367	FALSE	1
2022-09-12	11:22:47	0.285814	1.27136	1.4073	673.521	FALSE	1
2022-09-12	11:22:47	0.366476	1.63016	1.4073	645.998	FALSE	1
2022-09-12	11:22:47	0.266171	1.18398	1.4073	674.705	FALSE	1
2022-09-12	11:22:47	0.347036	1.54369	1.4073	647.541	FALSE	1
2022-09-12	11:22:48	0.278842	1.24034	1.461	675.946	FALSE	1
2022-09-12	11:22:48	0.403066	1.79292	1.461	649.334	FALSE	1
2022-09-12	11:22:48	0.190496	0.847364	1.461	676.793	FALSE	1
2022-09-12	11:22:48	0.441387	1.96338	1.461	651.298	FALSE	1
2022-09-12	11:22:49	0.244593	1.088	1.20345	677.881	FALSE	1
2022-09-12	11:22:49	0.336807	1.49818	1.20345	652.796	FALSE	1
2022-09-12	11:22:49	0.230242	1.02416	1.20345	678.905	FALSE	1
2022-09-12	11:22:50	0.284084	1.26366	1.32331	654.059	FALSE	1
2022-09-12	11:22:50	0.316501	1.40786	1.32331	680.313	FALSE	1
2022-09-12	11:22:50	0.312888	1.39179	1.32331	655.451	FALSE	1
2022-09-12	11:22:50	0.276501	1.22993	1.32331	681.543	FALSE	1
2022-09-12	11:22:51	0.126934	0.564628	0.952121	656.016	FALSE	1
2022-09-12	11:22:51	0.11925	0.530448	0.952121	682.073	FALSE	1
2022-09-12	11:22:51	0.127596	0.567573	0.952121	656.583	FALSE	1
2022-09-12	11:22:51	0.482405	2.14583	0.952121	684.219	FALSE	1
2022-09-12	11:22:52	0.365356	1.62518	2.04527	658.209	FALSE	1
2022-09-12	11:22:52	0.222812	0.991112	2.04527	685.21	FALSE	1
2022-09-12	11:22:52	0.539758	2.40095	2.04527	660.61	FALSE	1
2022-09-12	11:22:52	0.71126	3.16383	2.04527	688.374	FALSE	1
2022-09-12	11:22:53	0.330598	1.47057	1.82144	662.08	FALSE	1
2022-09-12	11:22:53	0.435891	1.93893	1.82144	690.313	FALSE	1
2022-09-12	11:22:53	0.461947	2.05483	1.82144	664.135	FALSE	1
2022-09-12	11:22:54	0.325204	1.44657	1.94646	691.76	FALSE	1
2022-09-12	11:22:54	0.619504	2.75568	1.94646	666.891	FALSE	1
2022-09-12	11:22:54	0.297519	1.32342	1.94646	693.083	FALSE	1
2022-09-12	11:22:54	0.508104	2.26015	1.94646	669.151	FALSE	1
2022-09-12	11:22:55	0.341489	1.51901	1.8202	694.602	FALSE	1
2022-09-12	11:22:55	0.368613	1.63966	1.8202	670.79	FALSE	1
2022-09-12	11:22:55	0.298639	1.32841	1.8202	695.931	FALSE	1
2022-09-12	11:22:55	0.628053	2.79371	1.8202	673.584	FALSE	1
2022-09-12	11:22:56	0.301183	1.33972	1.59473	697.27	FALSE	1
2022-09-12	11:22:56	0.701896	3.12217	1.59473	676.706	FALSE	1
2022-09-12	11:22:56	0.216909	0.964855	1.59473	698.235	FALSE	1
2022-09-12	11:22:56	0.214059	0.952177	1.59473	677.658	FALSE	1
2022-09-12	11:22:57	0.0862215	0.38353	0.931273	698.619	FALSE	1
2022-09-12	11:22:57	0.30617	1.36191	0.931273	679.02	FALSE	1
2022-09-12	11:22:57	0.235687	1.04838	0.931273	699.667	FALSE	1
2022-09-12	11:22:58	0.357366	1.58964	1.34357	680.61	FALSE	1
2022-09-12	11:22:58	0.230038	1.02326	1.34357	700.69	FALSE	1
2022-09-12	11:22:58	0.356705	1.5867	1.34357	682.197	FALSE	1
2022-09-12	11:22:58	0.264084	1.1747	1.34357	701.865	FALSE	1
2022-09-12	11:22:59	0.381336	1.69626	1.54199	683.893	FALSE	1
2022-09-12	11:22:59	0.229122	1.01918	1.54199	702.884	FALSE	1
2022-09-12	11:22:59	0.442812	1.96972	1.54199	685.863	FALSE	1
2022-09-12	11:22:59	0.333346	1.48279	1.54199	704.367	FALSE	1
2022-09-12	11:23:00	0.527901	2.34821	2.11674	688.211	FALSE	1
2022-09-12	11:23:00	0.32042	1.42529	2.11674	705.792	FALSE	1
2022-09-12	11:23:00	0.532684	2.36948	2.11674	690.58	FALSE	1
2022-09-12	11:23:00	0.522455	2.32398	2.11674	708.116	FALSE	1
2022-09-12	11:23:01	0.637112	2.834	2.53459	693.414	FALSE	1
2022-09-12	11:23:01	0.444338	1.9765	2.53459	710.093	FALSE	1
2022-09-12	11:23:01	0.627952	2.79326	2.53459	696.208	FALSE	1
2022-09-12	11:23:02	0.461489	2.0528	2.07554	712.146	FALSE	1
2022-09-12	11:23:02	0.439097	1.95319	2.07554	698.161	FALSE	1
2022-09-12	11:23:02	0.470547	2.09309	2.07554	714.239	FALSE	1
2022-09-12	11:23:02	0.49528	2.2031	2.07554	700.364	FALSE	1
2022-09-12	11:23:03	0.476298	2.11867	2.17741	716.357	FALSE	1
2022-09-12	11:23:03	0.657468	2.92455	2.17741	703.288	FALSE	1
2022-09-12	11:23:03	0.401183	1.78454	2.17741	718.142	FALSE	1
2022-09-12	11:23:03	0.423066	1.88188	2.17741	705.17	FALSE	1
2022-09-12	11:23:04	0.464491	2.06615	2.01063	720.208	FALSE	1
2022-09-12	11:23:04	0.519198	2.3095	2.01063	707.48	FALSE	1
2022-09-12	11:23:04	0.414211	1.84249	2.01063	722.05	FALSE	1
2022-09-12	11:23:04	0.41014	1.82438	2.01063	709.304	FALSE	1
2022-09-12	11:23:05	0.685662	3.04996	3.15749	725.1	FALSE	1
2022-09-12	11:23:05	0.618333	2.75047	3.15749	712.055	FALSE	1
2022-09-12	11:23:05	0.825509	3.67203	3.15749	728.772	FALSE	1
2022-09-12	11:23:06	0.388155	1.72659	1.85727	713.781	FALSE	1
2022-09-12	11:23:06	0.478181	2.12704	1.85727	730.9	FALSE	1
2022-09-12	11:23:06	0.401031	1.78387	1.85727	715.565	FALSE	1
2022-09-12	11:23:06	0.402761	1.79156	1.85727	732.691	FALSE	1
2022-09-12	11:23:07	0.263728	1.17311	1.63774	716.738	FALSE	1
2022-09-12	11:23:07	0.528053	2.34889	1.63774	735.04	FALSE	1
2022-09-12	11:23:07	0.256705	1.14188	1.63774	717.88	FALSE	1
2022-09-12	11:23:07	0.424237	1.88709	1.63774	736.927	FALSE	1
2022-09-12	11:23:08	0.265356	1.18036	1.49343	719.061	FALSE	1
2022-09-12	11:23:08	0.428053	1.90407	1.49343	738.831	FALSE	1
2022-09-12	11:23:08	0.211107	0.939046	1.49343	720	FALSE	1
2022-09-12	11:23:08	0.438435	1.95025	1.49343	740.781	FALSE	1
2022-09-12	11:23:09	0.244033	1.08551	1.41686	721.085	FALSE	1
2022-09-12	11:23:09	0.42729	1.90067	1.41686	742.682	FALSE	1
2022-09-12	11:23:09	0.23986	1.06695	1.41686	722.152	FALSE	1
2022-09-12	11:23:09	0.362913	1.61431	1.41686	744.296	FALSE	1
2022-09-12	11:23:10	0.304084	1.35263	1.44521	723.505	FALSE	1
2022-09-12	11:23:10	0.391463	1.74131	1.44521	746.038	FALSE	1
2022-09-12	11:23:10	0.279148	1.24171	1.44521	724.746	FALSE	1
2022-09-12	11:23:11	0.348206	1.54889	1.52009	747.587	FALSE	1
2022-09-12	11:23:11	0.30958	1.37707	1.52009	726.123	FALSE	1
2022-09-12	11:23:11	0.374619	1.66638	1.52009	749.253	FALSE	1
2022-09-12	11:23:11	0.334517	1.488	1.52009	727.611	FALSE	1
2022-09-12	11:23:12	0.303931	1.35195	1.49207	750.605	FALSE	1
2022-09-12	11:23:12	0.313194	1.39315	1.49207	729.005	FALSE	1
2022-09-12	11:23:12	0.388054	1.72614	1.49207	752.331	FALSE	1
2022-09-12	11:23:12	0.336552	1.49705	1.49207	730.502	FALSE	1
2022-09-12	11:23:13	0.242201	1.07736	1.40628	753.408	FALSE	1
2022-09-12	11:23:13	0.357977	1.59235	1.40628	732.094	FALSE	1
2022-09-12	11:23:13	0.262506	1.16768	1.40628	754.576	FALSE	1
2022-09-12	11:23:13	0.401896	1.78771	1.40628	733.882	FALSE	1
2022-09-12	11:23:14	0.169937	0.755914	1.24902	755.332	FALSE	1
2022-09-12	11:23:14	0.434313	1.93191	1.24902	735.814	FALSE	1
2022-09-12	11:23:14	0.23813	1.05925	1.24902	756.391	FALSE	1
2022-09-12	11:23:15	0.412481	1.8348	1.64153	737.648	FALSE	1
2022-09-12	11:23:15	0.296807	1.32026	1.64153	757.711	FALSE	1
2022-09-12	11:23:15	0.379809	1.68947	1.64153	739.338	FALSE	1
2022-09-12	11:23:15	0.387036	1.72161	1.64153	759.433	FALSE	1
2022-09-12	11:23:16	0.530598	2.36021	2.05958	741.698	FALSE	1
2022-09-12	11:23:16	0.47701	2.12184	2.05958	761.555	FALSE	1
2022-09-12	11:23:16	0.434771	1.93395	2.05958	743.632	FALSE	1
2022-09-12	11:23:16	0.409682	1.82235	2.05958	763.377	FALSE	1
2022-09-12	11:23:17	0.353092	1.57062	1.38025	745.203	FALSE	1
2022-09-12	11:23:17	0.289937	1.2897	1.38025	764.667	FALSE	1
2022-09-12	11:23:17	0.296756	1.32003	1.38025	746.523	FALSE	1
2022-09-12	11:23:17	0.301387	1.34063	1.38025	766.008	FALSE	1
2022-09-12	11:23:18	0.244898	1.08936	1.5624	747.612	FALSE	1
2022-09-12	11:23:18	0.378791	1.68494	1.5624	767.693	FALSE	1
2022-09-12	11:23:18	0.430038	1.9129	1.5624	749.525	FALSE	1
2022-09-12	11:23:19	0.47874	2.12953	4.12528	769.822	FALSE	1
2022-09-12	11:23:19	0.471005	2.09512	4.12528	751.62	FALSE	1
2022-09-12	11:23:19	0.771412	3.43139	4.12528	773.253	FALSE	1
2022-09-12	11:23:19	1.98846	8.84507	4.12528	760.465	FALSE	1
2022-09-12	11:23:20	1.91579	8.52182	4.05126	781.775	FALSE	1
2022-09-12	11:23:20	0.827443	3.68063	4.05126	764.146	FALSE	1
2022-09-12	11:23:20	0.513601	2.2846	4.05126	784.06	FALSE	1
2022-09-12	11:23:20	0.386222	1.71799	4.05126	765.864	FALSE	1
2022-09-12	11:23:21	0.443982	1.97492	1.67968	786.035	FALSE	1
2022-09-12	11:23:21	0.352379	1.56745	1.67968	767.431	FALSE	1
2022-09-12	11:23:21	0.290344	1.29151	1.67968	787.326	FALSE	1
2022-09-12	11:23:21	0.423728	1.88483	1.67968	769.316	FALSE	1
2022-09-12	11:23:22	0.604084	2.68709	6.39075	790.013	FALSE	1
2022-09-12	11:23:22	1.16312	5.17379	6.39075	774.49	FALSE	1
2022-09-12	11:23:22	2.54291	11.3114	6.39075	801.325	FALSE	1
2022-09-12	11:23:23	0.999148	4.44441	2.82065	778.934	FALSE	1
2022-09-12	11:23:23	0.85589	3.80717	2.82065	805.132	FALSE	1
2022-09-12	11:23:23	0.38612	1.71754	2.82065	780.652	FALSE	1
2022-09-12	11:23:23	0.29528	1.31346	2.82065	806.445	FALSE	1
2022-09-12	11:23:24	0.199606	0.887887	0.763213	781.54	FALSE	1
2022-09-12	11:23:24	0.205306	0.913242	0.763213	807.359	FALSE	1
2022-09-12	11:23:24	0.0822521	0.365874	0.763213	781.906	FALSE	1
2022-09-12	11:23:24	0.199148	0.88585	0.763213	808.244	FALSE	1
2022-09-12	11:23:25	0.0874938	0.38919	0.550423	782.295	FALSE	1
2022-09-12	11:23:25	0.177163	0.788056	0.550423	809.033	FALSE	1
2022-09-12	11:23:25	0.151158	0.672381	0.550423	782.967	FALSE	1
2022-09-12	11:23:25	0.0791478	0.352065	0.550423	809.385	FALSE	1
2022-09-12	11:23:26	0.138232	0.614884	0.688604	783.582	FALSE	1
2022-09-12	11:23:26	0.103117	0.458685	0.688604	809.843	FALSE	1
2022-09-12	11:23:26	0.223066	0.992242	0.688604	784.574	FALSE	1
2022-09-12	11:23:27	0.0227102	0.10102	0.487209	809.944	FALSE	1
2022-09-12	11:23:27	0.194822	0.866607	0.487209	785.441	FALSE	1
2022-09-12	11:23:27	0.0651529	0.289813	0.487209	810.234	FALSE	1
2022-09-12	11:23:27	0.155433	0.691397	0.487209	786.132	FALSE	1
2022-09-12	11:23:28	0.3393	1.50927	1.69733	811.743	FALSE	1
2022-09-12	11:23:28	0.358435	1.59439	1.69733	787.727	FALSE	1
2022-09-12	11:23:28	0.58785	2.61487	1.69733	814.358	FALSE	1
2022-09-12	11:23:28	0.240725	1.07079	1.69733	788.797	FALSE	1
2022-09-12	11:23:29	0.321692	1.43095	6.15018	815.789	FALSE	1
2022-09-12	11:23:29	0.867443	3.85856	6.15018	792.656	FALSE	1
2022-09-12	11:23:29	1.55009	6.89511	6.15018	822.684	FALSE	1
2022-09-12	11:23:29	2.79126	12.4161	6.15018	805.072	FALSE	1
2022-09-12	11:23:30	1.30378	5.79947	3.98427	828.484	FALSE	1
2022-09-12	11:23:30	0.94673	4.21124	3.98427	809.283	FALSE	1
2022-09-12	11:23:30	0.436603	1.9421	3.98427	830.426	FALSE	1
2022-09-12	11:23:31	0.573702	2.55194	1.39485	811.835	FALSE	1
2022-09-12	11:23:31	0.350293	1.55817	1.39485	831.984	FALSE	1
2022-09-12	11:23:31	0.240115	1.06808	1.39485	812.903	FALSE	1
2022-09-12	11:23:31	0.090191	0.401188	1.39485	832.385	FALSE	1
2022-09-12	11:23:32	0.287188	1.27747	1.71374	814.181	FALSE	1
2022-09-12	11:23:32	0.203524	0.905315	1.71374	833.291	FALSE	1
2022-09-12	11:23:32	0.251565	1.11901	1.71374	815.3	FALSE	1
2022-09-12	11:23:32	0.798791	3.55318	1.71374	836.844	FALSE	1
2022-09-12	11:23:33	1.82739	8.1286	4.32505	823.428	FALSE	1
2022-09-12	11:23:33	1.29197	5.74694	4.32505	842.591	FALSE	1
2022-09-12	11:23:33	0.306985	1.36553	4.32505	824.794	FALSE	1
2022-09-12	11:23:33	0.462914	2.05913	4.32505	844.65	FALSE	1
2022-09-12	11:23:34	0.348461	1.55002	1.47594	826.344	FALSE	1
2022-09-12	11:23:34	0.311056	1.38364	1.47594	846.033	FALSE	1
2022-09-12	11:23:34	0.30042	1.33633	1.47594	827.68	FALSE	1
2022-09-12	11:23:34	0.36729	1.63378	1.47594	847.667	FALSE	1
2022-09-12	11:23:35	0.323881	1.44069	1.32992	829.121	FALSE	1
2022-09-12	11:23:35	0.283219	1.25981	1.32992	848.927	FALSE	1
2022-09-12	11:23:35	0.289835	1.28924	1.32992	830.41	FALSE	1
2022-09-12	11:23:36	0.276043	1.22789	1.73169	850.155	FALSE	1
2022-09-12	11:23:36	0.358333	1.59394	1.73169	832.004	FALSE	1
2022-09-12	11:23:36	0.339097	1.50837	1.73169	851.663	FALSE	1
2022-09-12	11:23:36	0.583728	2.59654	1.73169	834.601	FALSE	1
2022-09-12	11:23:37	0.173753	0.772888	1.48573	852.436	FALSE	1
2022-09-12	11:23:37	0.598181	2.66083	1.48573	837.262	FALSE	1
2022-09-12	11:23:37	0.206629	0.919127	1.48573	853.355	FALSE	1
2022-09-12	11:23:37	0.357468	1.59009	1.48573	838.852	FALSE	1
2022-09-12	11:23:38	0.132736	0.590436	1.33837	853.946	FALSE	1
2022-09-12	11:23:38	0.473397	2.10576	1.33837	840.957	FALSE	1
2022-09-12	11:23:38	0.156501	0.696148	1.33837	854.642	FALSE	1
2022-09-12	11:23:38	0.440878	1.96111	1.33837	842.918	FALSE	1
2022-09-12	11:23:39	0.152685	0.679173	1.33339	855.321	FALSE	1
2022-09-12	11:23:39	0.489173	2.17594	1.33339	845.094	FALSE	1
2022-09-12	11:23:39	0.257417	1.14504	1.33339	856.466	FALSE	1
2022-09-12	11:23:40	0.567697	2.52523	2.22642	847.62	FALSE	1
2022-09-12	11:23:40	0.289122	1.28607	2.22642	857.752	FALSE	1
2022-09-12	11:23:40	0.644033	2.86479	2.22642	850.484	FALSE	1
2022-09-12	11:23:40	0.501234	2.22959	2.22642	859.982	FALSE	1
2022-09-12	11:23:41	0.757824	3.37095	3.72981	853.855	FALSE	1
2022-09-12	11:23:41	0.825102	3.67022	3.72981	863.652	FALSE	1
2022-09-12	11:23:41	1.16429	5.17899	3.72981	859.034	FALSE	1
2022-09-12	11:23:41	0.606781	2.69908	3.72981	866.351	FALSE	1
2022-09-12	11:23:42	0.987086	4.39076	2.90701	863.425	FALSE	1
2022-09-12	11:23:42	0.491005	2.18409	2.90701	868.535	FALSE	1
2022-09-12	11:23:42	0.601743	2.67667	2.90701	866.102	FALSE	1
2022-09-12	11:23:42	0.534262	2.3765	2.90701	870.912	FALSE	1
2022-09-12	11:23:43	0.397672	1.76892	2.88614	867.871	FALSE	1
2022-09-12	11:23:43	0.684593	3.04521	2.88614	873.957	FALSE	1
2022-09-12	11:23:43	0.864237	3.8443	2.88614	871.715	FALSE	1
2022-09-12	11:23:44	0.506018	2.25087	3.15041	876.208	FALSE	1
2022-09-12	11:23:44	0.440929	1.96134	3.15041	873.676	FALSE	1
2022-09-12	11:23:44	1.07477	4.78079	3.15041	880.989	FALSE	1
2022-09-12	11:23:44	0.811259	3.60864	3.15041	877.285	FALSE	1
2022-09-12	11:23:45	0.449071	1.99756	1.86185	882.986	FALSE	1
2022-09-12	11:23:45	0.441743	1.96496	1.86185	879.25	FALSE	1
2022-09-12	11:23:45	0.481438	2.14153	1.86185	885.128	FALSE	1
2022-09-12	11:23:45	0.301998	1.34335	1.86185	880.593	FALSE	1
2022-09-12	11:23:46	0.409682	1.82235	3.33966	886.95	FALSE	1
2022-09-12	11:23:46	0.471463	2.09716	3.33966	882.69	FALSE	1
2022-09-12	11:23:46	0.70098	3.1181	3.33966	890.068	FALSE	1
2022-09-12	11:23:46	1.42103	6.32103	3.33966	889.012	FALSE	1
2022-09-12	11:23:47	1.25396	5.57786	5.00288	895.646	FALSE	1
2022-09-12	11:23:47	1.11335	4.9524	5.00288	893.964	FALSE	1
2022-09-12	11:23:47	1.00678	4.47836	5.00288	900.124	FALSE	1
2022-09-12	11:23:48	0.543779	2.41884	1.76768	896.383	FALSE	1
2022-09-12	11:23:48	0.364033	1.61929	1.76768	901.744	FALSE	1
2022-09-12	11:23:48	0.265916	1.18285	1.76768	897.566	FALSE	1
2022-09-12	11:23:48	0.41584	1.84974	1.76768	903.593	FALSE	1
2022-09-12	11:23:49	0.15869	0.705885	1.37504	898.271	FALSE	1
2022-09-12	11:23:49	0.454822	2.02314	1.37504	905.617	FALSE	1
2022-09-12	11:23:49	0.175585	0.781037	1.37504	899.053	FALSE	1
2022-09-12	11:23:49	0.447392	1.99009	1.37504	907.607	FALSE	1
2022-09-12	11:23:50	0.251565	1.11901	1.64357	900.172	FALSE	1
2022-09-12	11:23:50	0.535178	2.38058	1.64357	909.987	FALSE	1
2022-09-12	11:23:50	0.208461	0.927276	1.64357	901.099	FALSE	1
2022-09-12	11:23:50	0.482761	2.14742	1.64357	912.135	FALSE	1
2022-09-12	11:23:51	0.343473	1.52784	1.82982	902.627	FALSE	1
2022-09-12	11:23:51	0.561234	2.49648	1.82982	914.631	FALSE	1
2022-09-12	11:23:51	0.329377	1.46513	1.82982	904.092	FALSE	1
2022-09-12	11:23:52	0.322964	1.43661	1.44029	916.068	FALSE	1
2022-09-12	11:23:52	0.341743	1.52014	1.44029	905.612	FALSE	1
2022-09-12	11:23:52	0.291514	1.29671	1.44029	917.364	FALSE	1
2022-09-12	11:23:52	0.338944	1.50769	1.44029	907.12	FALSE	1
2022-09-12	11:23:53	0.173092	0.769948	1.13003	918.134	FALSE	1
2022-09-12	11:23:53	0.335382	1.49185	1.13003	908.611	FALSE	1
2022-09-12	11:23:53	0.253651	1.12829	1.13003	919.263	FALSE	1
2022-09-12	11:23:54	0.365	1.62359	2.22828	910.235	FALSE	1
2022-09-12	11:23:54	0.240573	1.07012	2.22828	920.333	FALSE	1
2022-09-12	11:23:54	0.458079	2.03763	2.22828	912.273	FALSE	1
2022-09-12	11:23:54	0.567952	2.52636	2.22828	922.859	FALSE	1
2022-09-12	11:23:54	0.873092	3.88369	2.22828	916.156	FALSE	1
2022-09-12	11:23:55	0.703219	3.12806	2.42985	925.987	FALSE	1
2022-09-12	11:23:55	0.600725	2.67214	2.42985	918.829	FALSE	1
2022-09-12	11:23:55	0.334822	1.48936	2.42985	927.477	FALSE	1
2022-09-12	11:23:56	0.48612	2.16236	2.2391	920.991	FALSE	1
2022-09-12	11:23:56	0.24897	1.10747	2.2391	928.584	FALSE	1
2022-09-12	11:23:56	0.639453	2.84441	2.2391	923.835	FALSE	1
2022-09-12	11:23:56	0.638944	2.84215	2.2391	931.426	FALSE	1
2022-09-12	11:23:57	1.11248	4.94853	2.85273	928.784	FALSE	1
2022-09-12	11:23:57	0.786578	3.49886	2.85273	934.925	FALSE	1
2022-09-12	11:23:57	0.510242	2.26966	2.85273	931.053	FALSE	1
2022-09-12	11:23:57	0.155993	0.693888	2.85273	935.619	FALSE	1
2022-09-12	11:23:58	0.464339	2.06547	1.85936	933.119	FALSE	1
2022-09-12	11:23:58	0.286323	1.27362	1.85936	936.893	FALSE	1
2022-09-12	11:23:58	0.42897	1.90814	1.85936	935.027	FALSE	1
2022-09-12	11:23:58	0.492379	2.1902	1.85936	939.083	FALSE	1
2022-09-12	11:23:59	0.670496	2.9825	3.0267	938.01	FALSE	1
2022-09-12	11:23:59	0.554822	2.46796	3.0267	941.551	FALSE	1
2022-09-12	11:23:59	0.660267	2.937	3.0267	940.947	FALSE	1
2022-09-12	11:23:59	0.836145	3.71934	3.0267	945.27	FALSE	1
2022-09-12	11:24:00	0.696552	3.0984	3.90209	944.045	FALSE	1
2022-09-12	11:24:00	1.02469	4.55803	3.90209	949.828	FALSE	1
2022-09-12	11:24:00	0.910445	4.04984	3.90209	948.095	FALSE	1
2022-09-12	11:24:01	0.570801	2.53904	4.67197	952.367	FALSE	1
2022-09-12	11:24:01	1.1764	5.23286	4.67197	953.328	FALSE	1
2022-09-12	11:24:01	1.10205	4.90214	4.67197	957.269	FALSE	1
2022-09-12	11:24:01	1.35197	6.01383	4.67197	959.342	FALSE	1
2022-09-12	11:24:02	1.41202	6.28095	4.95058	963.55	FALSE	1
2022-09-12	11:24:02	1.17503	5.22677	4.95058	964.568	FALSE	1
2022-09-12	11:24:02	1.00541	4.47226	4.95058	968.022	FALSE	1
2022-09-12	11:24:02	0.8593	3.82234	4.95058	968.391	FALSE	1
2022-09-12	11:24:03	0.994262	4.42268	2.61125	972.445	FALSE	1
2022-09-12	11:24:03	0.584237	2.5988	2.61125	970.989	FALSE	1
2022-09-12	11:24:03	0.423677	1.8846	2.61125	974.33	FALSE	1
2022-09-12	11:24:03	0.345967	1.53893	2.61125	972.528	FALSE	1
2022-09-12	11:24:04	0.458079	2.03763	2.01869	976.367	FALSE	1
2022-09-12	11:24:04	0.46098	2.05053	2.01869	974.579	FALSE	1
2022-09-12	11:24:04	0.442405	1.96791	2.01869	978.335	FALSE	1
2022-09-12	11:24:05	0.222608	0.990205	1.68981	975.569	FALSE	1
2022-09-12	11:24:05	0.446323	1.98533	1.68981	980.321	FALSE	1
2022-09-12	11:24:05	0.361234	1.60684	1.68981	977.176	FALSE	1
2022-09-12	11:24:05	0.489377	2.17685	1.68981	982.497	FALSE	1
2022-09-12	11:24:06	0.441336	1.96315	2.51872	979.139	FALSE	1
2022-09-12	11:24:06	0.709682	3.15681	2.51872	985.654	FALSE	1
2022-09-12	11:24:06	0.623371	2.77288	2.51872	981.912	FALSE	1
2022-09-12	11:24:06	0.490547	2.18205	2.51872	987.836	FALSE	1
2022-09-12	11:24:07	0.300522	1.33678	2.48612	983.249	FALSE	1
2022-09-12	11:24:07	0.762048	3.38974	2.48612	991.226	FALSE	1
2022-09-12	11:24:07	0.591921	2.63298	2.48612	985.882	FALSE	1
2022-09-12	11:24:07	0.581132	2.58499	2.48612	993.811	FALSE	1
2022-09-12	11:24:08	0.466171	2.07362	1.51358	987.955	FALSE	1
2022-09-12	11:24:08	0.43472	1.93372	1.51358	995.745	FALSE	1
2022-09-12	11:24:08	0.119911	0.533388	1.51358	988.489	FALSE	1
2022-09-12	11:24:09	0.430649	1.91561	1.39824	997.66	FALSE	1
2022-09-12	11:24:09	0.113244	0.503732	1.39824	988.992	FALSE	1
2022-09-12	11:24:09	0.415026	1.84612	1.39824	999.506	FALSE	1
2022-09-12	11:24:09	0.298435	1.3275	1.39824	990.32	FALSE	1
2022-09-12	11:24:10	0.609071	2.70927	3.39885	1002.22	FALSE	1
2022-09-12	11:24:10	0.518842	2.30791	3.39885	992.628	FALSE	1
2022-09-12	11:24:10	0.939249	4.17797	3.39885	1006.39	FALSE	1
2022-09-12	11:24:10	0.989224	4.40027	3.39885	997.028	FALSE	1
2022-09-12	11:24:11	0.867799	3.86014	3.4486	1010.25	FALSE	1
2022-09-12	11:24:11	0.740878	3.29557	3.4486	1000.32	FALSE	1
2022-09-12	11:24:11	1.06424	4.73395	3.4486	1014.99	FALSE	1
2022-09-12	11:24:11	0.428206	1.90475	3.4486	1002.23	FALSE	1
2022-09-12	11:24:12	0.425611	1.8932	1.6411	1016.88	FALSE	1
2022-09-12	11:24:12	0.265967	1.18307	1.6411	1003.41	FALSE	1
2022-09-12	11:24:12	0.415229	1.84702	1.6411	1018.73	FALSE	1
2022-09-12	11:24:13	0.392532	1.74606	4.3979	1005.16	FALSE	1
2022-09-12	11:24:13	0.789275	3.51085	4.3979	1022.24	FALSE	1
2022-09-12	11:24:13	1.3276	5.90543	4.3979	1011.06	FALSE	1
2022-09-12	11:24:13	1.44536	6.42925	4.3979	1028.67	FALSE	1
2022-09-12	11:24:14	0.61645	2.74209	1.63452	1013.81	FALSE	1
2022-09-12	11:24:14	0.358333	1.59394	1.63452	1030.26	FALSE	1
2022-09-12	11:24:14	0.162863	0.724447	1.63452	1014.53	FALSE	1
2022-09-12	11:24:14	0.332176	1.47759	1.63452	1031.74	FALSE	1
2022-09-12	11:24:15	0.544186	2.42065	1.71573	1016.95	FALSE	1
2022-09-12	11:24:15	0.16668	0.741426	1.71573	1032.48	FALSE	1
2022-09-12	11:24:15	0.315026	1.4013	1.71573	1018.35	FALSE	1
2022-09-12	11:24:15	0.516959	2.29954	1.71573	1034.78	FALSE	1
2022-09-12	11:24:16	0.722862	3.21543	1.97922	1021.57	FALSE	1
2022-09-12	11:24:16	0.328257	1.46015	1.97922	1036.24	FALSE	1
2022-09-12	11:24:16	0.283728	1.26208	1.97922	1022.83	FALSE	1
2022-09-12	11:24:17	0.254873	1.13373	1.4726	1037.37	FALSE	1
2022-09-12	11:24:17	0.42673	1.89818	1.4726	1024.73	FALSE	1
2022-09-12	11:24:17	0.264186	1.17515	1.4726	1038.55	FALSE	1
2022-09-12	11:24:17	0.378435	1.68335	1.4726	1026.41	FALSE	1
2022-09-12	11:24:18	0.343372	1.52739	1.2279	1040.08	FALSE	1
2022-09-12	11:24:18	0.274313	1.2202	1.2279	1027.63	FALSE	1
2022-09-12	11:24:18	0.375433	1.67	1.2279	1041.75	FALSE	1
2022-09-12	11:24:18	0.111056	0.493999	1.2279	1028.12	FALSE	1
2022-09-12	11:24:19	0.122049	0.542898	0.856818	1042.29	FALSE	1
2022-09-12	11:24:19	0.178435	0.793715	0.856818	1028.92	FALSE	1
2022-09-12	11:24:19	0.237265	1.0554	0.856818	1043.35	FALSE	1
2022-09-12	11:24:19	0.232736	1.03526	0.856818	1029.95	FALSE	1
2022-09-12	11:24:20	0.344593	1.53282	1.90082	1044.88	FALSE	1
2022-09-12	11:24:20	0.465153	2.06909	1.90082	1032.02	FALSE	1
2022-09-12	11:24:20	0.472227	2.10056	1.90082	1046.98	FALSE	1
2022-09-12	11:24:21	0.638079	2.8383	2.42416	1034.86	FALSE	1
2022-09-12	11:24:21	0.397723	1.76915	2.42416	1048.75	FALSE	1
2022-09-12	11:24:21	0.466425	2.07475	2.42416	1036.94	FALSE	1
2022-09-12	11:24:21	0.677672	3.01442	2.42416	1051.76	FALSE	1
2022-09-12	11:24:22	0.767392	3.41351	2.81872	1040.35	FALSE	1
2022-09-12	11:24:22	0.661285	2.94153	2.81872	1054.7	FALSE	1
2022-09-12	11:24:22	0.530241	2.35862	2.81872	1042.71	FALSE	1
2022-09-12	11:24:22	0.575789	2.56122	2.81872	1057.27	FALSE	1
2022-09-12	11:24:23	0.546221	2.4297	2.43678	1045.14	FALSE	1
2022-09-12	11:24:23	0.535534	2.38216	2.43678	1059.65	FALSE	1
2022-09-12	11:24:23	0.555127	2.46932	2.43678	1047.61	FALSE	1
2022-09-12	11:24:23	0.554364	2.46592	2.43678	1062.11	FALSE	1
2022-09-12	11:24:24	0.555331	2.47022	2.36971	1050.08	FALSE	1
2022-09-12	11:24:24	0.506883	2.25472	2.36971	1064.37	FALSE	1
2022-09-12	11:24:24	0.535992	2.3842	2.36971	1052.46	FALSE	1
2022-09-12	11:24:25	0.510394	2.27033	2.35743	1066.64	FALSE	1
2022-09-12	11:24:25	0.496909	2.21035	2.35743	1054.67	FALSE	1
2022-09-12	11:24:25	0.509987	2.26852	2.35743	1068.91	FALSE	1
2022-09-12	11:24:25	0.602608	2.68052	2.35743	1057.35	FALSE	1
2022-09-12	11:24:26	0.570191	2.53632	2.10316	1071.44	FALSE	1
2022-09-12	11:24:26	0.66042	2.93768	2.10316	1060.29	FALSE	1
2022-09-12	11:24:26	0.351158	1.56202	2.10316	1073.01	FALSE	1
2022-09-12	11:24:26	0.309479	1.37662	2.10316	1061.67	FALSE	1
2022-09-12	11:24:27	0.434313	1.93191	1.5777	1074.94	FALSE	1
2022-09-12	11:24:27	0.35126	1.56247	1.5777	1063.23	FALSE	1
2022-09-12	11:24:27	0.375178	1.66887	1.5777	1076.61	FALSE	1
2022-09-12	11:24:27	0.257977	1.14753	1.5777	1064.38	FALSE	1
2022-09-12	11:24:28	0.321947	1.43208	1.45766	1078.04	FALSE	1
2022-09-12	11:24:28	0.335535	1.49253	1.45766	1065.87	FALSE	1
2022-09-12	11:24:28	0.317977	1.41443	1.45766	1079.45	FALSE	1
2022-09-12	11:24:28	0.335331	1.49162	1.45766	1067.36	FALSE	1
2022-09-12	11:24:29	0.301082	1.33927	1.30962	1080.79	FALSE	1
2022-09-12	11:24:29	0.286069	1.27249	1.30962	1068.63	FALSE	1
2022-09-12	11:24:29	0.296094	1.31709	1.30962	1082.11	FALSE	1
2022-09-12	11:24:30	0.284389	1.26502	1.28398	1069.9	FALSE	1
2022-09-12	11:24:30	0.288868	1.28494	1.28398	1083.39	FALSE	1
2022-09-12	11:24:30	0.286374	1.27385	1.28398	1071.17	FALSE	1
2022-09-12	11:24:30	0.294975	1.31211	1.28398	1084.71	FALSE	1
2022-09-12	11:24:31	0.302303	1.3447	1.95879	1072.52	FALSE	1
2022-09-12	11:24:31	0.290853	1.29377	1.95879	1086	FALSE	1
2022-09-12	11:24:31	0.353244	1.5713	1.95879	1074.09	FALSE	1
2022-09-12	11:24:31	0.815025	3.62539	1.95879	1089.62	FALSE	1
2022-09-12	11:24:32	3.01925	13.4302	6.79431	1087.52	1	2
2022-09-12	11:24:32	1.24347	5.5312	6.79431	1095.16	FALSE	2
2022-09-12	11:24:32	0.79874	3.55296	6.79431	1091.07	FALSE	2
2022-09-12	11:24:32	1.04826	4.66287	6.79431	1099.82	FALSE	2
2022-09-12	11:24:33	2.28541	10.166	8.66435	1101.24	FALSE	2
2022-09-12	11:24:33	1.91024	8.49713	8.66435	1108.32	FALSE	2
2022-09-12	11:24:33	1.64785	7.32997	8.66435	1108.57	FALSE	2
2022-09-12	11:24:34	2.1424	9.52982	9.55275	1117.85	FALSE	2
2022-09-12	11:24:34	1.36281	6.06205	9.55275	1114.63	FALSE	2
2022-09-12	11:24:34	2.13874	9.51354	9.55275	1127.36	FALSE	2
2022-09-12	11:24:34	2.94627	13.1056	9.55275	1127.73	FALSE	2
2022-09-12	11:24:35	1.86347	8.28909	6.24694	1135.65	FALSE	2
2022-09-12	11:24:35	1.14047	5.07304	6.24694	1132.81	FALSE	2
2022-09-12	11:24:35	1.17538	5.22833	6.24694	1140.88	FALSE	2
2022-09-12	11:24:35	1.43818	6.39731	6.24694	1139.21	FALSE	2
2022-09-12	11:24:36	2.94973	13.121	9.73996	1154	FALSE	2
2022-09-12	11:24:36	2.70016	12.0109	9.73996	1151.22	FALSE	2
2022-09-12	11:24:36	1.89655	8.43623	9.73996	1162.43	FALSE	2
2022-09-12	11:24:36	1.21212	5.39175	9.73996	1156.61	FALSE	2
2022-09-12	11:24:37	1.16968	5.20297	3.59808	1167.64	FALSE	2
2022-09-12	11:24:37	0.571819	2.54357	3.59808	1159.15	FALSE	2
2022-09-12	11:24:37	0.685153	3.0477	3.59808	1170.68	FALSE	2
2022-09-12	11:24:38	1.00088	4.45211	3.4752	1163.6	FALSE	2
2022-09-12	11:24:38	0.843626	3.75262	3.4752	1174.44	FALSE	2
2022-09-12	11:24:38	0.763524	3.39631	3.4752	1167	FALSE	2
2022-09-12	11:24:38	0.51701	2.29976	3.4752	1176.74	FALSE	2
2022-09-12	11:24:39	0.616349	2.74164	1.98036	1169.74	FALSE	2
2022-09-12	11:24:39	0.396501	1.76372	1.98036	1178.5	FALSE	2
2022-09-12	11:24:39	0.451107	2.00661	1.98036	1171.75	FALSE	2
2022-09-12	11:24:39	0.316858	1.40945	1.98036	1179.91	FALSE	2
2022-09-12	11:24:40	0.891056	3.9636	1.86321	1175.71	FALSE	2
2022-09-12	11:24:40	0.290242	1.29105	1.86321	1181.2	FALSE	2
2022-09-12	11:24:40	0.332939	1.48098	1.86321	1177.19	FALSE	2
2022-09-12	11:24:40	0.161234	0.717201	1.86321	1181.92	FALSE	2
2022-09-12	11:24:41	0.274975	1.22314	0.913619	1178.42	FALSE	2
2022-09-12	11:24:41	0.104339	0.464121	0.913619	1182.38	FALSE	2
2022-09-12	11:24:41	0.236858	1.05359	0.913619	1179.47	FALSE	2
2022-09-12	11:24:42	0.226374	1.00696	1.38302	1183.39	FALSE	2
2022-09-12	11:24:42	0.383066	1.70395	1.38302	1181.17	FALSE	2
2022-09-12	11:24:42	0.26215	1.1661	1.38302	1184.56	FALSE	2
2022-09-12	11:24:42	0.372074	1.65506	1.38302	1182.83	FALSE	2
2022-09-12	11:24:43	0.220929	0.982736	0.825011	1185.54	FALSE	2
2022-09-12	11:24:43	0.165356	0.735537	0.825011	1183.56	FALSE	2
2022-09-12	11:24:43	0.173804	0.773115	0.825011	1186.31	FALSE	2
2022-09-12	11:24:43	0.181794	0.808656	0.825011	1184.37	FALSE	2
2022-09-12	11:24:44	0.16668	0.741426	1.461	1187.05	FALSE	2
2022-09-12	11:24:44	0.188257	0.837405	1.461	1185.21	FALSE	2
2022-09-12	11:24:44	0.627799	2.79258	1.461	1189.85	FALSE	2
2022-09-12	11:24:44	0.331056	1.4726	1.461	1186.68	FALSE	2
2022-09-12	11:24:45	0.416145	1.8511	1.53222	1191.7	FALSE	2
2022-09-12	11:24:45	0.26897	1.19643	1.53222	1187.88	FALSE	2
2022-09-12	11:24:45	0.348257	1.54912	1.53222	1193.25	FALSE	2
2022-09-12	11:24:46	0.19813	0.881322	1.09892	1188.76	FALSE	2
2022-09-12	11:24:46	0.358283	1.59371	1.09892	1194.84	FALSE	2
2022-09-12	11:24:46	0.153143	0.681211	1.09892	1189.44	FALSE	2
2022-09-12	11:24:46	0.278639	1.23944	1.09892	1196.08	FALSE	2

## Sheet: Dominic_star_2022912111922  (2)
Date	Time	Lbs	Newtons	Total Force x Time	Total Time Steps Force >13.345		**GoPro Fitting: 1108
2022-09-12	11:19:46	0.412532	1.83502	1.83502	FALSE	0			Total Force x Time	1196.08
2022-09-12	11:19:46	0.446578	1.98647	1.98647	FALSE	0			Total Time Steps Force >3	2
2022-09-12	11:19:46	0.397417	1.76779	3.60282	FALSE	0
2022-09-12	11:19:46	0.49757	2.21329	4.19976	FALSE	0
2022-09-12	11:19:47	0.479148	2.13135	5.73416	FALSE	0
2022-09-12	11:19:47	0.327443	1.45653	5.65629	FALSE	0
2022-09-12	11:19:47	0.482557	2.14651	7.88067	FALSE	0
2022-09-12	11:19:47	0.344491	1.53236	7.18866	FALSE	0
2022-09-12	11:19:48	0.55126	2.45211	10.3328	FALSE	0
2022-09-12	11:19:48	0.307137	1.36621	8.55486	FALSE	0
2022-09-12	11:19:48	0.471769	2.09852	12.4313	FALSE	0
2022-09-12	11:19:48	0.319453	1.42099	9.97585	FALSE	0
2022-09-12	11:19:49	0.503982	2.24181	14.6731	FALSE	0
2022-09-12	11:19:49	0.116145	0.516636	10.4925	FALSE	0
2022-09-12	11:19:49	0.314466	1.39881	16.0719	FALSE	0
2022-09-12	11:19:49	0.0564506	0.251104	10.7436	FALSE	0
2022-09-12	11:19:50	0.0947203	0.421335	16.4933	FALSE	0
2022-09-12	11:19:50	0.12042	0.535652	11.2792	FALSE	0
2022-09-12	11:19:50	0.146578	0.652008	17.1453	FALSE	0
2022-09-12	11:19:51	0.042812	0.190436	11.4697	FALSE	0
2022-09-12	11:19:51	0.194059	0.863213	18.0085	FALSE	0
2022-09-12	11:19:51	0.217316	0.966665	12.4363	FALSE	0
2022-09-12	11:19:51	0.149377	0.664459	18.6729	FALSE	0
2022-09-12	11:19:52	0.131005	0.582736	13.0191	FALSE	0
2022-09-12	11:19:52	0.0956364	0.42541	19.0984	FALSE	0
2022-09-12	11:19:52	0.284135	1.26389	14.283	FALSE	0
2022-09-12	11:19:52	0.103931	0.462306	19.5607	FALSE	0
2022-09-12	11:19:53	0.310089	1.37934	15.6623	FALSE	0
2022-09-12	11:19:53	0.217468	0.967341	20.528	FALSE	0
2022-09-12	11:19:53	0.262557	1.16791	16.8302	FALSE	0
2022-09-12	11:19:53	0.0859671	0.382399	20.9104	FALSE	0
2022-09-12	11:19:54	0.194415	0.864797	17.695	FALSE	0
2022-09-12	11:19:54	0.317316	1.41149	22.3219	FALSE	0
2022-09-12	11:19:54	0.201794	0.89762	18.5926	FALSE	0
2022-09-12	11:19:55	0.466476	2.07498	24.3969	FALSE	0
2022-09-12	11:19:55	0.496858	2.21012	20.8028	FALSE	0
2022-09-12	11:19:55	1.12648	5.01081	29.4077	FALSE	0
2022-09-12	11:19:55	0.474873	2.11233	22.9151	FALSE	0
2022-09-12	11:19:56	0.566628	2.52047	31.9281	FALSE	0
2022-09-12	11:19:56	0.298893	1.32954	24.2446	FALSE	0
2022-09-12	11:19:56	0.466069	2.07317	34.0013	FALSE	0
2022-09-12	11:19:56	0.499707	2.2228	26.4674	FALSE	0
2022-09-12	11:19:57	0.553346	2.46139	36.4627	FALSE	0
2022-09-12	11:19:57	0.764898	3.40242	29.8698	FALSE	0
2022-09-12	11:19:57	0.951667	4.23321	40.6959	FALSE	0
2022-09-12	11:19:57	0.842201	3.74628	33.6161	FALSE	0
2022-09-12	11:19:58	0.309682	1.37753	42.0734	FALSE	0
2022-09-12	11:19:58	0.522303	2.32331	35.9394	FALSE	0
2022-09-12	11:19:58	0.511565	2.27554	44.349	FALSE	0
2022-09-12	11:19:59	0.8993	4.00027	39.9397	FALSE	0
2022-09-12	11:19:59	0.216603	0.963493	45.3125	FALSE	0
2022-09-12	11:19:59	0.491565	2.18658	42.1263	FALSE	0
2022-09-12	11:19:59	0.463117	2.06004	47.3725	FALSE	0
2022-09-12	11:20:00	0.414618	1.8443	43.9706	FALSE	0
2022-09-12	11:20:00	0.428664	1.90678	49.2793	FALSE	0
2022-09-12	11:20:00	0.582252	2.58997	46.5605	FALSE	0
2022-09-12	11:20:00	0.541743	2.40978	51.6891	FALSE	0
2022-09-12	11:20:01	0.250038	1.11222	47.6728	FALSE	0
2022-09-12	11:20:01	0.530191	2.3584	54.0475	FALSE	0
2022-09-12	11:20:01	0.174364	0.775606	48.4484	FALSE	0
2022-09-12	11:20:01	0.429173	1.90905	55.9565	FALSE	0
2022-09-12	11:20:02	0.245611	1.09253	49.5409	FALSE	0
2022-09-12	11:20:02	0.384797	1.71165	57.6682	FALSE	0
2022-09-12	11:20:02	0.358079	1.59281	51.1337	FALSE	0
2022-09-12	11:20:03	0.22958	1.02122	58.6894	FALSE	0
2022-09-12	11:20:03	0.504898	2.24589	53.3796	FALSE	0
2022-09-12	11:20:03	0.177672	0.790321	59.4797	FALSE	0
2022-09-12	11:20:03	0.780013	3.46965	56.8492	FALSE	0
2022-09-12	11:20:04	0.276908	1.23174	60.7115	FALSE	0
2022-09-12	11:20:04	0.661183	2.94107	59.7903	FALSE	0
2022-09-12	11:20:04	0.464898	2.06796	62.7794	FALSE	0
2022-09-12	11:20:04	0.623015	2.7713	62.5616	FALSE	0
2022-09-12	11:20:05	0.742303	3.30191	66.0813	FALSE	0
2022-09-12	11:20:05	0.370547	1.64827	64.2099	FALSE	0
2022-09-12	11:20:05	0.775483	3.4495	69.5308	FALSE	0
2022-09-12	11:20:05	0.403524	1.79496	66.0048	FALSE	0
2022-09-12	11:20:06	0.936043	4.16371	73.6945	FALSE	0
2022-09-12	11:20:06	0.534466	2.37741	68.3823	FALSE	0
2022-09-12	11:20:06	0.758232	3.37277	77.0673	FALSE	0
2022-09-12	11:20:07	0.508512	2.26196	70.6442	FALSE	0
2022-09-12	11:20:07	0.482659	2.14696	79.2143	FALSE	0
2022-09-12	11:20:07	0.542659	2.41386	73.0581	FALSE	0
2022-09-12	11:20:07	0.430293	1.91403	81.1283	FALSE	0
2022-09-12	11:20:08	0.593957	2.64204	75.7001	FALSE	0
2022-09-12	11:20:08	0.235891	1.04929	82.1776	FALSE	0
2022-09-12	11:20:08	0.583168	2.59405	78.2942	FALSE	0
2022-09-12	11:20:08	0.286781	1.27566	83.4532	FALSE	0
2022-09-12	11:20:09	1.07197	4.76834	83.0625	FALSE	0
2022-09-12	11:20:09	0.631208	2.80774	86.261	FALSE	0
2022-09-12	11:20:09	1.12184	4.99017	88.0527	FALSE	0
2022-09-12	11:20:09	0.690852	3.07305	89.334	FALSE	0
2022-09-12	11:20:10	0.774313	3.4443	91.497	FALSE	0
2022-09-12	11:20:10	0.416501	1.85268	91.1867	FALSE	0
2022-09-12	11:20:10	0.181641	0.807975	92.3049	FALSE	0
2022-09-12	11:20:10	0.548308	2.43898	93.6257	FALSE	0
2022-09-12	11:20:11	0.87869	3.90859	96.2135	FALSE	0
2022-09-12	11:20:11	0.805254	3.58193	97.2076	FALSE	0
2022-09-12	11:20:11	0.697824	3.10406	99.3176	FALSE	0
2022-09-12	11:20:12	1.17156	5.21133	102.419	FALSE	0
2022-09-12	11:20:12	0.574262	2.55443	101.872	FALSE	0
2022-09-12	11:20:12	0.550903	2.45053	104.869	FALSE	0
2022-09-12	11:20:12	0.594415	2.64408	104.516	FALSE	0
2022-09-12	11:20:13	0.246527	1.0966	105.966	FALSE	0
2022-09-12	11:20:13	0.409886	1.82325	106.339	FALSE	0
2022-09-12	11:20:13	0.154924	0.689133	106.655	FALSE	0
2022-09-12	11:20:13	0.388257	1.72704	108.066	FALSE	0
2022-09-12	11:20:14	0.208155	0.925915	107.581	FALSE	0
2022-09-12	11:20:14	0.345255	1.53576	109.602	FALSE	0
2022-09-12	11:20:14	0.27126	1.20662	108.788	FALSE	0
2022-09-12	11:20:15	0.206374	0.917993	110.52	FALSE	0
2022-09-12	11:20:15	0.297774	1.32456	110.112	FALSE	0
2022-09-12	11:20:15	0.140624	0.625524	111.146	FALSE	0
2022-09-12	11:20:15	0.366934	1.6322	111.745	FALSE	0
2022-09-12	11:20:16	0.0987407	0.439218	111.585	FALSE	0
2022-09-12	11:20:16	0.390649	1.73768	113.482	FALSE	0
2022-09-12	11:20:16	0.139351	0.619861	112.205	FALSE	0
2022-09-12	11:20:16	0.338181	1.5043	114.986	FALSE	0
2022-09-12	11:20:17	0.148563	0.660838	112.866	FALSE	0
2022-09-12	11:20:17	0.594415	2.64408	117.631	FALSE	0
2022-09-12	11:20:17	0.189784	0.844197	113.71	FALSE	0
2022-09-12	11:20:17	0.319707	1.42212	119.053	FALSE	0
2022-09-12	11:20:18	0.270242	1.20209	114.912	FALSE	0
2022-09-12	11:20:18	0.179402	0.798016	119.851	FALSE	0
2022-09-12	11:20:18	0.221183	0.983866	115.896	FALSE	0
2022-09-12	11:20:19	0.0593005	0.26378	120.114	FALSE	0
2022-09-12	11:20:19	0.00174323	0.00775424	115.904	FALSE	0
2022-09-12	11:20:19	0.0887153	0.394623	120.509	FALSE	0
2022-09-12	11:20:19	0.0282572	0.125694	116.029	FALSE	0
2022-09-12	11:20:20	-0.000241466	-0.00107409	120.509	FALSE	0
2022-09-12	11:20:20	-0.0202924	-0.0902647	116.029	FALSE	0
2022-09-12	11:20:20	0.077214	0.343463	120.853	FALSE	0
2022-09-12	11:20:20	0.158334	0.704301	116.733	FALSE	0
2022-09-12	11:20:21	0.235229	1.04635	121.899	FALSE	0
2022-09-12	11:20:21	0.277621	1.23491	117.968	FALSE	0
2022-09-12	11:20:21	0.181183	0.805938	122.705	FALSE	0
2022-09-12	11:20:21	0.676399	3.00876	120.977	FALSE	0
2022-09-12	11:20:22	0.403015	1.79269	124.498	FALSE	0
2022-09-12	11:20:22	0.8993	4.00027	124.977	FALSE	0
2022-09-12	11:20:22	1.36938	6.09128	130.589	FALSE	0
2022-09-12	11:20:22	0.897824	3.9937	128.971	FALSE	0
2022-09-12	11:20:23	0.57813	2.57164	133.16	FALSE	0
2022-09-12	11:20:23	1.12973	5.02526	133.996	FALSE	0
2022-09-12	11:20:23	0.0816923	0.363384	133.524	FALSE	0
2022-09-12	11:20:24	0.349173	1.55319	135.55	FALSE	0
2022-09-12	11:20:24	0.205662	0.914826	134.439	FALSE	0
2022-09-12	11:20:24	0.34327	1.52693	137.077	FALSE	0
2022-09-12	11:20:24	0.272176	1.21069	135.649	FALSE	0
2022-09-12	11:20:25	0.303575	1.35036	138.427	FALSE	0
2022-09-12	11:20:25	0.222049	0.987718	136.637	FALSE	0
2022-09-12	11:20:25	0.265611	1.18149	139.608	FALSE	0
2022-09-12	11:20:25	0.207137	0.921387	137.558	FALSE	0
2022-09-12	11:20:26	0.333295	1.48256	141.091	FALSE	0
2022-09-12	11:20:26	0.298639	1.32841	138.887	FALSE	0
2022-09-12	11:20:26	0.440471	1.9593	143.05	FALSE	0
2022-09-12	11:20:26	0.467341	2.07883	140.966	FALSE	0
2022-09-12	11:20:27	0.755229	3.35941	146.41	FALSE	0
2022-09-12	11:20:27	0.47187	2.09897	143.065	FALSE	0
2022-09-12	11:20:27	0.0988933	0.439897	146.85	FALSE	0
2022-09-12	11:20:28	0.427188	1.90022	144.965	FALSE	0
2022-09-12	11:20:28	0.105662	0.470006	147.32	FALSE	0
2022-09-12	11:20:28	0.360471	1.60345	146.568	FALSE	0
2022-09-12	11:20:28	0.100878	0.448726	147.768	FALSE	0
2022-09-12	11:20:29	0.31584	1.40492	147.973	FALSE	0
2022-09-12	11:20:29	0.361285	1.60707	149.375	FALSE	0
2022-09-12	11:20:29	0.910445	4.04984	152.023	FALSE	0
2022-09-12	11:20:29	2.9421	13.087	162.462	FALSE	0
2022-09-12	11:20:30	2.12887	9.46964	161.493	FALSE	0
2022-09-12	11:20:30	1.06795	4.75046	167.213	FALSE	0
2022-09-12	11:20:30	1.16968	5.20297	166.696	FALSE	0
2022-09-12	11:20:30	0.568563	2.52908	169.742	FALSE	0
2022-09-12	11:20:31	0.217468	0.967341	167.663	FALSE	0
2022-09-12	11:20:31	0.574262	2.55443	172.296	FALSE	0
2022-09-12	11:20:31	0.545153	2.42495	170.088	FALSE	0
2022-09-12	11:20:32	0.443728	1.97379	174.27	FALSE	0
2022-09-12	11:20:32	1.06424	4.73395	174.822	FALSE	0
2022-09-12	11:20:32	0.522099	2.3224	176.593	FALSE	0
2022-09-12	11:20:32	0.298384	1.32727	176.149	FALSE	0
2022-09-12	11:20:33	0.212685	0.946065	177.539	FALSE	0
2022-09-12	11:20:33	0.353346	1.57175	177.721	FALSE	0
2022-09-12	11:20:33	0.236145	1.05042	178.589	FALSE	0
2022-09-12	11:20:33	0.391819	1.74289	179.464	FALSE	0
2022-09-12	11:20:34	0.649478	2.88901	181.478	FALSE	0
2022-09-12	11:20:34	0.879504	3.91221	183.376	FALSE	0
2022-09-12	11:20:34	0.777723	3.45947	184.938	FALSE	0
2022-09-12	11:20:34	0.341082	1.5172	184.893	FALSE	0
2022-09-12	11:20:35	0.163117	0.725577	185.663	FALSE	0
2022-09-12	11:20:35	0.361489	1.60798	186.501	FALSE	0
2022-09-12	11:20:35	0.271819	1.20911	186.872	FALSE	0
2022-09-12	11:20:35	0.478384	2.12795	188.629	FALSE	0
2022-09-12	11:20:36	0.310903	1.38296	188.255	FALSE	0
2022-09-12	11:20:36	0.51299	2.28188	190.911	FALSE	0
2022-09-12	11:20:36	0.378232	1.68245	189.938	FALSE	0
2022-09-12	11:20:37	0.371718	1.65348	192.565	FALSE	0
2022-09-12	11:20:37	0.487443	2.16824	192.106	FALSE	0
2022-09-12	11:20:37	0.327392	1.45631	194.021	FALSE	0
2022-09-12	11:20:37	0.997315	4.43626	196.542	FALSE	0
2022-09-12	11:20:38	1.13279	5.03888	199.06	FALSE	0
2022-09-12	11:20:38	1.86032	8.27508	204.817	FALSE	0
2022-09-12	11:20:38	0.314364	1.39835	200.458	FALSE	0
2022-09-12	11:20:38	0.484898	2.15692	206.974	FALSE	0
2022-09-12	11:20:39	0.406832	1.80967	202.268	FALSE	0
2022-09-12	11:20:39	0.281336	1.25144	208.226	FALSE	0
2022-09-12	11:20:39	0.37986	1.68969	203.957	FALSE	0
2022-09-12	11:20:39	0.222049	0.987718	209.213	FALSE	0
2022-09-12	11:20:40	0.449936	2.00141	205.959	FALSE	0
2022-09-12	11:20:40	0.182914	0.813638	210.027	FALSE	0
2022-09-12	11:20:40	0.5107	2.2717	208.231	FALSE	0
2022-09-12	11:20:41	0.236247	1.05087	211.078	FALSE	0
2022-09-12	11:20:41	0.429428	1.91018	210.141	FALSE	0
2022-09-12	11:20:41	0.21925	0.975268	212.053	FALSE	0
2022-09-12	11:20:41	0.375331	1.66955	211.81	FALSE	0
2022-09-12	11:20:42	0.355585	1.58171	213.635	FALSE	0
2022-09-12	11:20:42	0.276501	1.22993	213.04	FALSE	0
2022-09-12	11:20:42	0.312227	1.38885	215.024	FALSE	0
2022-09-12	11:20:42	0.205407	0.913691	213.954	FALSE	0
2022-09-12	11:20:43	0.39131	1.74063	216.764	FALSE	0
2022-09-12	11:20:43	0.169682	0.754779	214.709	FALSE	0
2022-09-12	11:20:43	0.41355	1.83955	218.604	FALSE	0
2022-09-12	11:20:43	0.131209	0.583644	215.292	FALSE	0
2022-09-12	11:20:44	0.393957	1.7524	220.356	FALSE	0
2022-09-12	11:20:44	0.20444	0.90939	216.202	FALSE	0
2022-09-12	11:20:44	0.394771	1.75602	222.112	FALSE	0
2022-09-12	11:20:45	0.0201656	0.0897006	216.291	FALSE	0
2022-09-12	11:20:45	-0.107468	-0.478039	222.112	FALSE	0
2022-09-12	11:20:45	-0.199631	-0.887999	216.291	FALSE	0
2022-09-12	11:20:45	0.502455	2.23502	224.347	FALSE	0
2022-09-12	11:20:46	0.804186	3.57718	219.869	FALSE	0
2022-09-12	11:20:46	0.436196	1.94029	226.288	FALSE	0
2022-09-12	11:20:46	0.263066	1.17017	221.039	FALSE	0
2022-09-12	11:20:46	0.40785	1.8142	228.102	FALSE	0
2022-09-12	11:20:47	0.370903	1.64985	222.689	FALSE	0
2022-09-12	11:20:47	0.434466	1.93259	230.034	FALSE	0
2022-09-12	11:20:47	0.452735	2.01386	224.702	FALSE	0
2022-09-12	11:20:47	0.359453	1.59892	231.633	FALSE	0
2022-09-12	11:20:48	0.395534	1.75941	226.462	FALSE	0
2022-09-12	11:20:48	0.321489	1.43005	233.063	FALSE	0
2022-09-12	11:20:48	0.553244	2.46094	228.923	FALSE	0
2022-09-12	11:20:49	0.457468	2.03491	235.098	FALSE	0
2022-09-12	11:20:49	0.588919	2.61963	231.542	FALSE	0
2022-09-12	11:20:49	0.400624	1.78206	236.88	FALSE	0
2022-09-12	11:20:49	0.587901	2.6151	234.158	FALSE	0
2022-09-12	11:20:50	0.287036	1.27679	238.157	FALSE	0
2022-09-12	11:20:50	0.419708	1.86695	236.025	FALSE	0
2022-09-12	11:20:50	0.293346	1.30486	239.462	FALSE	0
2022-09-12	11:20:50	0.478486	2.1284	238.153	FALSE	0
2022-09-12	11:20:51	0.305763	1.36009	240.822	FALSE	0
2022-09-12	11:20:51	0.376756	1.67589	239.829	FALSE	0
2022-09-12	11:20:51	0.428155	1.90452	242.727	FALSE	0
2022-09-12	11:20:51	0.486425	2.16372	241.993	FALSE	0
2022-09-12	11:20:52	0.332786	1.4803	244.207	FALSE	0
2022-09-12	11:20:52	0.362507	1.6125	243.605	FALSE	0
2022-09-12	11:20:52	0.457367	2.03446	246.241	FALSE	0
2022-09-12	11:20:53	0.435941	1.93915	245.544	FALSE	0
2022-09-12	11:20:53	0.415789	1.84951	248.091	FALSE	0
2022-09-12	11:20:53	0.408868	1.81873	247.363	FALSE	0
2022-09-12	11:20:53	0.350496	1.55908	249.65	FALSE	0
2022-09-12	11:20:54	0.258384	1.14934	248.512	FALSE	0
2022-09-12	11:20:54	0.321438	1.42982	251.08	FALSE	0
2022-09-12	11:20:54	0.36042	1.60322	250.115	FALSE	0
2022-09-12	11:20:54	0.34668	1.5421	252.622	FALSE	0
2022-09-12	11:20:55	0.218741	0.973004	251.088	FALSE	0
2022-09-12	11:20:55	0.0838297	0.372891	252.995	FALSE	0
2022-09-12	11:20:55	0.132227	0.588172	251.677	FALSE	0
2022-09-12	11:20:55	0.0688679	0.306338	253.301	FALSE	0
2022-09-12	11:20:56	0.0843895	0.375381	252.052	FALSE	0
2022-09-12	11:20:56	0.3593	1.59824	254.899	FALSE	0
2022-09-12	11:20:56	0.408817	1.8185	253.871	FALSE	0
2022-09-12	11:20:56	0.439606	1.95546	256.855	FALSE	0
2022-09-12	11:20:57	0.340522	1.51471	255.385	FALSE	0
2022-09-12	11:20:57	0.487392	2.16802	259.023	FALSE	0
2022-09-12	11:20:57	0.474618	2.1112	257.496	FALSE	0
2022-09-12	11:20:58	0.533499	2.37311	261.396	FALSE	0
2022-09-12	11:20:58	0.392176	1.74448	259.241	FALSE	0
2022-09-12	11:20:58	0.368359	1.63853	263.034	FALSE	0
2022-09-12	11:20:58	0.337519	1.50135	260.742	FALSE	0
2022-09-12	11:20:59	0.428919	1.90792	264.942	FALSE	0
2022-09-12	11:20:59	0.349784	1.55591	262.298	FALSE	0
2022-09-12	11:20:59	0.392685	1.74674	266.689	FALSE	0
2022-09-12	11:20:59	0.345458	1.53667	263.835	FALSE	0
2022-09-12	11:21:00	0.379707	1.68901	268.378	FALSE	0
2022-09-12	11:21:00	0.376247	1.67362	265.508	FALSE	0
2022-09-12	11:21:00	0.36841	1.63876	270.017	FALSE	0
2022-09-12	11:21:00	0.368613	1.63966	267.148	FALSE	0
2022-09-12	11:21:01	0.374364	1.66525	271.682	FALSE	0
2022-09-12	11:21:01	0.366934	1.6322	268.78	FALSE	0
2022-09-12	11:21:01	0.367443	1.63446	273.317	FALSE	0
2022-09-12	11:21:02	0.362303	1.6116	270.392	FALSE	0
2022-09-12	11:21:02	0.3593	1.59824	274.915	FALSE	0
2022-09-12	11:21:02	0.307137	1.36621	271.758	FALSE	0
2022-09-12	11:21:02	0.310445	1.38092	276.296	FALSE	0
2022-09-12	11:21:03	0.417316	1.85631	273.614	FALSE	0
2022-09-12	11:21:03	0.52215	2.32263	278.618	FALSE	0
2022-09-12	11:21:03	0.406985	1.81035	275.425	FALSE	0
2022-09-12	11:21:03	0.582456	2.59088	281.209	FALSE	0
2022-09-12	11:21:04	0.396349	1.76304	277.188	FALSE	0
2022-09-12	11:21:04	0.464542	2.06638	283.276	FALSE	0
2022-09-12	11:21:04	0.361031	1.60594	278.794	FALSE	0
2022-09-12	11:21:04	0.334415	1.48754	284.763	FALSE	0
2022-09-12	11:21:05	0.406425	1.80786	280.602	FALSE	0
2022-09-12	11:21:05	0.299453	1.33203	286.095	FALSE	0
2022-09-12	11:21:05	0.374008	1.66366	282.265	FALSE	0
2022-09-12	11:21:06	0.263321	1.1713	287.266	FALSE	0
2022-09-12	11:21:06	0.388257	1.72704	283.992	FALSE	0
2022-09-12	11:21:06	0.374313	1.66502	288.931	FALSE	0
2022-09-12	11:21:06	0.379707	1.68901	285.681	FALSE	0
2022-09-12	11:21:07	0.324542	1.44363	290.375	FALSE	0
2022-09-12	11:21:07	0.398741	1.77368	287.455	FALSE	0
2022-09-12	11:21:07	0.217316	0.966665	291.342	FALSE	0
2022-09-12	11:21:07	0.402914	1.79224	289.247	FALSE	0
2022-09-12	11:21:08	0.351768	1.56473	292.906	FALSE	0
2022-09-12	11:21:08	0.27869	1.23967	290.487	FALSE	0
2022-09-12	11:21:08	0.366476	1.63016	294.537	FALSE	0
2022-09-12	11:21:08	0.355382	1.58081	292.068	FALSE	0
2022-09-12	11:21:09	0.372125	1.65529	296.192	FALSE	0
2022-09-12	11:21:09	0.329886	1.4674	293.535	FALSE	0
2022-09-12	11:21:09	0.576756	2.56553	298.757	FALSE	0
2022-09-12	11:21:10	0.36841	1.63876	295.174	FALSE	0
2022-09-12	11:21:10	0.446221	1.98488	300.742	FALSE	0
2022-09-12	11:21:10	0.22612	1.00583	296.18	FALSE	0
2022-09-12	11:21:10	0.39813	1.77096	302.513	FALSE	0
2022-09-12	11:21:11	0.312685	1.39089	297.571	FALSE	0
2022-09-12	11:21:11	0.38897	1.73022	304.243	FALSE	0
2022-09-12	11:21:11	0.314567	1.39926	298.97	FALSE	0
2022-09-12	11:21:11	0.263982	1.17424	305.418	FALSE	0
2022-09-12	11:21:12	0.325712	1.44883	300.419	FALSE	0
2022-09-12	11:21:12	0.324949	1.44544	306.863	FALSE	0
2022-09-12	11:21:12	0.394669	1.75557	302.174	FALSE	0
2022-09-12	11:21:12	0.379046	1.68607	308.549	FALSE	0
2022-09-12	11:21:13	0.400674	1.78228	303.957	FALSE	0
2022-09-12	11:21:13	0.360318	1.60277	310.152	FALSE	0
2022-09-12	11:21:13	0.280776	1.24895	305.205	FALSE	0
2022-09-12	11:21:14	0.280267	1.24668	311.399	FALSE	0
2022-09-12	11:21:14	0.468868	2.08562	307.291	FALSE	0
2022-09-12	11:21:14	0.92841	4.12975	315.528	FALSE	0
2022-09-12	11:21:14	0.333906	1.48528	308.776	FALSE	0
2022-09-12	11:21:15	0.188563	0.838766	316.367	FALSE	0
2022-09-12	11:21:15	0.140318	0.624163	309.401	FALSE	0
2022-09-12	11:21:15	0.108308	0.481776	316.849	FALSE	0
2022-09-12	11:21:15	0.0872903	0.388285	309.789	FALSE	0
2022-09-12	11:21:16	0.207188	0.921614	317.771	FALSE	0
2022-09-12	11:21:16	0.377214	1.67792	311.467	FALSE	0
2022-09-12	11:21:16	0.375178	1.66887	319.439	FALSE	0
2022-09-12	11:21:16	0.171056	0.760891	312.228	FALSE	0
2022-09-12	11:21:17	0.380216	1.69128	321.131	FALSE	0
2022-09-12	11:21:17	0.23813	1.05925	313.287	FALSE	0
2022-09-12	11:21:17	0.237112	1.05472	322.185	FALSE	0
2022-09-12	11:21:18	0.142303	0.632992	313.92	FALSE	0
2022-09-12	11:21:18	0.188512	0.838539	323.024	FALSE	0
2022-09-12	11:21:18	0.0977228	0.434691	314.355	FALSE	0
2022-09-12	11:21:18	0.287239	1.2777	324.302	FALSE	0
2022-09-12	11:21:19	0.0674939	0.300226	314.655	FALSE	0
2022-09-12	11:21:19	0.187595	0.83446	325.136	FALSE	0
2022-09-12	11:21:19	0.155535	0.691851	315.347	FALSE	0
2022-09-12	11:21:19	0.338435	1.50543	326.642	FALSE	0
2022-09-12	11:21:20	0.117316	0.521845	315.869	FALSE	0
2022-09-12	11:21:20	0.318842	1.41827	328.06	FALSE	0
2022-09-12	11:21:20	0.16673	0.741648	316.61	FALSE	0
2022-09-12	11:21:20	0.311616	1.38613	329.446	FALSE	0
2022-09-12	11:21:21	0.19126	0.850763	317.461	FALSE	0
2022-09-12	11:21:21	0.272634	1.21273	330.659	FALSE	0
2022-09-12	11:21:21	0.188054	0.836502	318.297	FALSE	0
2022-09-12	11:21:21	0.25472	1.13305	331.792	FALSE	0
2022-09-12	11:21:22	0.142252	0.632765	318.93	FALSE	0
2022-09-12	11:21:22	-0.01444	-0.064232	331.792	FALSE	0
2022-09-12	11:21:22	0.00876615	0.0389936	318.969	FALSE	0
2022-09-12	11:21:23	-0.0121499	-0.0540452	331.792	FALSE	0
2022-09-12	11:21:23	-0.14874	-0.661625	318.969	FALSE	0
2022-09-12	11:21:23	-0.217137	-0.965869	331.792	FALSE	0
2022-09-12	11:21:23	-0.172099	-0.765531	318.969	FALSE	0
2022-09-12	11:21:24	-0.324567	-1.44374	331.792	FALSE	0
2022-09-12	11:21:24	-0.371183	-1.6511	318.969	FALSE	0
2022-09-12	11:21:24	-0.373473	-1.66128	331.792	FALSE	0
2022-09-12	11:21:24	0.0659671	0.293435	319.263	FALSE	0
2022-09-12	11:21:25	0.350649	1.55976	333.352	FALSE	0
2022-09-12	11:21:25	0.290954	1.29422	320.557	FALSE	0
2022-09-12	11:21:25	0.534058	2.3756	335.727	FALSE	0
2022-09-12	11:21:25	0.364695	1.62224	322.179	FALSE	0
2022-09-12	11:21:26	0.542354	2.4125	338.14	FALSE	0
2022-09-12	11:21:26	0.307697	1.3687	323.548	FALSE	0
2022-09-12	11:21:26	0.465356	2.07	340.21	FALSE	0
2022-09-12	11:21:27	0.28841	1.28291	324.831	FALSE	0
2022-09-12	11:21:27	0.406171	1.80673	342.016	FALSE	0
2022-09-12	11:21:27	0.35869	1.59552	326.426	FALSE	0
2022-09-12	11:21:27	0.395127	1.7576	343.774	FALSE	0
2022-09-12	11:21:28	0.409428	1.82122	328.247	FALSE	0
2022-09-12	11:21:28	0.409071	1.81963	345.594	FALSE	0
2022-09-12	11:21:28	0.347697	1.54663	329.794	FALSE	0
2022-09-12	11:21:28	0.364593	1.62178	347.215	FALSE	0
2022-09-12	11:21:29	0.641539	2.85369	332.648	FALSE	0
2022-09-12	11:21:29	0.339402	1.50973	348.725	FALSE	0
2022-09-12	11:21:29	0.406527	1.80831	334.456	FALSE	0
2022-09-12	11:21:29	0.400827	1.78296	350.508	FALSE	0
2022-09-12	11:21:30	0.422048	1.87735	336.333	FALSE	0
2022-09-12	11:21:30	0.375127	1.66864	352.177	FALSE	0
2022-09-12	11:21:30	0.432735	1.92489	338.258	FALSE	0
2022-09-12	11:21:31	0.315229	1.4022	353.579	FALSE	0
2022-09-12	11:21:31	0.360827	1.60503	339.863	FALSE	0
2022-09-12	11:21:31	0.427697	1.90248	355.481	FALSE	0
2022-09-12	11:21:31	0.418791	1.86287	341.726	FALSE	0
2022-09-12	11:21:32	0.462557	2.05755	357.539	FALSE	0
2022-09-12	11:21:32	0.365662	1.62654	343.353	FALSE	0
2022-09-12	11:21:32	0.395891	1.761	359.3	FALSE	0
2022-09-12	11:21:32	0.323524	1.4391	344.792	FALSE	0
2022-09-12	11:21:33	0.420115	1.86876	361.169	FALSE	0
2022-09-12	11:21:33	0.34154	1.51924	346.311	FALSE	0
2022-09-12	11:21:33	0.414109	1.84204	363.011	FALSE	0
2022-09-12	11:21:33	0.420827	1.87192	348.183	FALSE	0
2022-09-12	11:21:34	0.613193	2.72761	365.738	FALSE	0
2022-09-12	11:21:34	0.320776	1.42688	349.61	FALSE	0
2022-09-12	11:21:34	0.139199	0.619185	366.358	FALSE	0
2022-09-12	11:21:35	0.120267	0.534972	350.145	FALSE	0
2022-09-12	11:21:35	0.267494	1.18987	367.547	FALSE	0
2022-09-12	11:21:35	0.396451	1.76349	351.908	FALSE	0
2022-09-12	11:21:35	0.490293	2.18092	369.728	FALSE	0
2022-09-12	11:21:36	0.317824	1.41374	353.322	FALSE	0
2022-09-12	11:21:36	0.255942	1.13848	370.867	FALSE	0
2022-09-12	11:21:36	0.392176	1.74448	355.067	FALSE	0
2022-09-12	11:21:36	0.302608	1.34606	372.213	FALSE	0
2022-09-12	11:21:37	0.390191	1.73565	356.802	FALSE	0
2022-09-12	11:21:37	0.329428	1.46536	373.678	FALSE	0
2022-09-12	11:21:37	0.396298	1.76281	358.565	FALSE	0
2022-09-12	11:21:37	0.261336	1.16247	374.841	FALSE	0
2022-09-12	11:21:38	0.410445	1.82574	360.391	FALSE	0
2022-09-12	11:21:38	0.268104	1.19258	376.033	FALSE	0
2022-09-12	11:21:38	0.520267	2.31425	362.705	FALSE	0
2022-09-12	11:21:39	0.298893	1.32954	377.363	FALSE	0
2022-09-12	11:21:39	0.473448	2.10599	364.811	FALSE	0
2022-09-12	11:21:39	0.366374	1.6297	378.993	FALSE	0
2022-09-12	11:21:39	0.422506	1.87939	366.69	FALSE	0
2022-09-12	11:21:40	0.334415	1.48754	380.48	FALSE	0
2022-09-12	11:21:40	0.418181	1.86015	368.551	FALSE	0
2022-09-12	11:21:40	0.352634	1.56859	382.049	FALSE	0
2022-09-12	11:21:40	0.406679	1.80899	370.36	FALSE	0
2022-09-12	11:21:41	0.386222	1.71799	383.767	FALSE	0
2022-09-12	11:21:41	0.369479	1.64352	372.003	FALSE	0
2022-09-12	11:21:41	0.402201	1.78907	385.556	FALSE	0
2022-09-12	11:21:41	0.392125	1.74425	373.747	FALSE	0
2022-09-12	11:21:42	0.41014	1.82438	387.38	FALSE	0
2022-09-12	11:21:42	0.356298	1.58488	375.332	FALSE	0
2022-09-12	11:21:42	0.382201	1.70011	389.08	FALSE	0
2022-09-12	11:21:43	0.333346	1.48279	376.815	FALSE	0
2022-09-12	11:21:43	0.399809	1.77843	390.859	FALSE	0
2022-09-12	11:21:43	0.331819	1.476	378.291	FALSE	0
2022-09-12	11:21:43	0.357366	1.58964	392.448	FALSE	0
2022-09-12	11:21:44	0.301641	1.34176	379.633	FALSE	0
2022-09-12	11:21:44	0.409936	1.82348	394.272	FALSE	0
2022-09-12	11:21:44	0.354924	1.57877	381.211	FALSE	0
2022-09-12	11:21:44	0.353143	1.57085	395.843	FALSE	0
2022-09-12	11:21:45	0.483881	2.1524	383.364	FALSE	0
2022-09-12	11:21:45	0.304898	1.35625	397.199	FALSE	0
2022-09-12	11:21:45	0.380674	1.69331	385.057	FALSE	0
2022-09-12	11:21:45	0.445611	1.98217	399.181	FALSE	0
2022-09-12	11:21:46	0.225713	1.00402	386.061	FALSE	0
2022-09-12	11:21:46	0.256705	1.14188	400.323	FALSE	0
2022-09-12	11:21:46	0.338588	1.50611	387.567	FALSE	0
2022-09-12	11:21:47	0.25472	1.13305	401.456	FALSE	0
2022-09-12	11:21:47	0.347799	1.54708	389.114	FALSE	0
2022-09-12	11:21:47	0.277417	1.23401	402.69	FALSE	0
2022-09-12	11:21:47	0.298435	1.3275	390.442	FALSE	0
2022-09-12	11:21:48	0.394262	1.75376	404.444	FALSE	0
2022-09-12	11:21:48	0.347036	1.54369	391.986	FALSE	0
2022-09-12	11:21:48	0.341641	1.51969	405.963	FALSE	0
2022-09-12	11:21:48	0.382506	1.70146	393.687	FALSE	0
2022-09-12	11:21:49	0.376705	1.67566	407.639	FALSE	0
2022-09-12	11:21:49	0.394669	1.75557	395.443	FALSE	0
2022-09-12	11:21:49	0.393092	1.74855	409.388	FALSE	0
2022-09-12	11:21:49	0.441998	1.9661	397.409	FALSE	0
2022-09-12	11:21:50	0.352074	1.5661	410.954	FALSE	0
2022-09-12	11:21:50	0.361896	1.60979	399.019	FALSE	0
2022-09-12	11:21:50	0.321285	1.42914	412.383	FALSE	0
2022-09-12	11:21:50	0.328155	1.4597	400.478	FALSE	0
2022-09-12	11:21:51	0.320013	1.42348	413.806	FALSE	0
2022-09-12	11:21:51	0.38098	1.69468	402.173	FALSE	0
2022-09-12	11:21:51	0.360064	1.60164	415.408	FALSE	0
2022-09-12	11:21:52	0.363779	1.61816	403.791	FALSE	0
2022-09-12	11:21:52	0.428206	1.90475	417.313	FALSE	0
2022-09-12	11:21:52	0.419809	1.86739	405.658	FALSE	0
2022-09-12	11:21:52	0.379097	1.6863	418.999	FALSE	0
2022-09-12	11:21:53	0.391565	1.74176	407.4	FALSE	0
2022-09-12	11:21:53	0.349071	1.55274	420.552	FALSE	0
2022-09-12	11:21:53	0.424033	1.88618	409.286	FALSE	0
2022-09-12	11:21:53	0.37411	1.66412	422.216	FALSE	0
2022-09-12	11:21:54	0.357825	1.59168	410.878	FALSE	0
2022-09-12	11:21:54	0.392379	1.74538	423.961	FALSE	0
2022-09-12	11:21:54	0.379351	1.68743	412.565	FALSE	0
2022-09-12	11:21:54	0.345916	1.5387	425.5	FALSE	0
2022-09-12	11:21:55	0.39299	1.7481	414.314	FALSE	0
2022-09-12	11:21:55	0.294618	1.31052	426.81	FALSE	0
2022-09-12	11:21:55	0.348155	1.54866	415.862	FALSE	0
2022-09-12	11:21:56	0.35645	1.58556	428.396	FALSE	0
2022-09-12	11:21:56	0.365865	1.62744	417.49	FALSE	0
2022-09-12	11:21:56	0.397468	1.76802	430.164	FALSE	0
2022-09-12	11:21:56	0.331921	1.47645	418.966	FALSE	0
2022-09-12	11:21:57	0.340827	1.51607	431.68	FALSE	0
2022-09-12	11:21:57	0.393041	1.74832	420.714	FALSE	0
2022-09-12	11:21:57	0.356654	1.58647	433.267	FALSE	0
2022-09-12	11:21:57	0.420115	1.86876	422.583	FALSE	0
2022-09-12	11:21:58	0.469987	2.0906	435.357	FALSE	0
2022-09-12	11:21:58	0.444898	1.979	424.562	FALSE	0
2022-09-12	11:21:58	0.421031	1.87283	437.23	FALSE	0
2022-09-12	11:21:58	0.422659	1.88007	426.442	FALSE	0
2022-09-12	11:21:59	0.425611	1.8932	439.123	FALSE	0
2022-09-12	11:21:59	0.460267	2.04736	428.49	FALSE	0
2022-09-12	11:21:59	0.453957	2.01929	441.142	FALSE	0
2022-09-12	11:22:00	0.425153	1.89117	430.381	FALSE	0
2022-09-12	11:22:00	0.423473	1.88369	443.026	FALSE	0
2022-09-12	11:22:00	0.430038	1.9129	432.294	FALSE	0
2022-09-12	11:22:00	0.425204	1.89139	444.918	FALSE	0
2022-09-12	11:22:01	0.41472	1.84476	434.138	FALSE	0
2022-09-12	11:22:01	0.430344	1.91426	446.832	FALSE	0
2022-09-12	11:22:01	0.429275	1.9095	436.048	FALSE	0
2022-09-12	11:22:01	0.43986	1.95659	448.788	FALSE	0
2022-09-12	11:22:02	0.430191	1.91358	437.962	FALSE	0
2022-09-12	11:22:02	0.444949	1.97922	450.768	FALSE	0
2022-09-12	11:22:02	0.401743	1.78703	439.749	FALSE	0
2022-09-12	11:22:02	0.33528	1.49139	452.259	FALSE	0
2022-09-12	11:22:03	0.373448	1.66117	441.41	FALSE	0
2022-09-12	11:22:03	0.478486	2.1284	454.387	FALSE	0
2022-09-12	11:22:03	0.381234	1.69581	443.106	FALSE	0
2022-09-12	11:22:04	0.401489	1.7859	456.173	FALSE	0
2022-09-12	11:22:04	0.41243	1.83457	444.94	FALSE	0
2022-09-12	11:22:04	0.399453	1.77685	457.95	FALSE	0
2022-09-12	11:22:04	0.445763	1.98284	446.923	FALSE	0
2022-09-12	11:22:05	0.358181	1.59326	459.543	FALSE	0
2022-09-12	11:22:05	0.403015	1.79269	448.716	FALSE	0
2022-09-12	11:22:05	0.381641	1.69762	461.241	FALSE	0
2022-09-12	11:22:05	0.349529	1.55477	450.27	FALSE	0
2022-09-12	11:22:06	0.393397	1.74991	462.991	FALSE	0
2022-09-12	11:22:06	0.363931	1.61884	451.889	FALSE	0
2022-09-12	11:22:06	0.423677	1.8846	464.876	FALSE	0
2022-09-12	11:22:06	0.323881	1.44069	453.33	FALSE	0
2022-09-12	11:22:07	0.477875	2.12568	467.001	FALSE	0
2022-09-12	11:22:07	0.299809	1.33361	454.664	FALSE	0
2022-09-12	11:22:07	0.518588	2.30678	469.308	FALSE	0
2022-09-12	11:22:08	0.326221	1.4511	456.115	FALSE	0
2022-09-12	11:22:08	0.536247	2.38533	471.693	FALSE	0
2022-09-12	11:22:08	0.290242	1.29105	457.406	FALSE	0
2022-09-12	11:22:08	0.485102	2.15783	473.851	FALSE	0
2022-09-12	11:22:09	0.329631	1.46626	458.872	FALSE	0
2022-09-12	11:22:09	0.452583	2.01318	475.864	FALSE	0
2022-09-12	11:22:09	0.296705	1.3198	460.192	FALSE	0
2022-09-12	11:22:09	0.439606	1.95546	477.82	FALSE	0
2022-09-12	11:22:10	0.34271	1.52444	461.716	FALSE	0
2022-09-12	11:22:10	0.446985	1.98828	479.808	FALSE	0
2022-09-12	11:22:10	0.27355	1.21681	462.933	FALSE	0
2022-09-12	11:22:10	0.403982	1.79699	481.605	FALSE	0
2022-09-12	11:22:11	0.303524	1.35014	464.283	FALSE	0
2022-09-12	11:22:11	0.491616	2.18681	483.792	FALSE	0
2022-09-12	11:22:11	0.346781	1.54255	465.826	FALSE	0
2022-09-12	11:22:12	0.759962	3.38046	487.172	FALSE	0
2022-09-12	11:22:12	0.532939	2.37062	468.196	FALSE	0
2022-09-12	11:22:12	1.08704	4.83537	492.008	FALSE	0
2022-09-12	11:22:12	0.498537	2.21759	470.414	FALSE	0
2022-09-12	11:22:13	0.74042	3.29354	495.301	FALSE	0
2022-09-12	11:22:13	0.409122	1.81986	472.234	FALSE	0
2022-09-12	11:22:13	0.596908	2.65517	497.956	FALSE	0
2022-09-12	11:22:13	0.275941	1.22744	473.461	FALSE	0
2022-09-12	11:22:14	0.471361	2.09671	500.053	FALSE	0
2022-09-12	11:22:14	0.280165	1.24623	474.707	FALSE	0
2022-09-12	11:22:14	0.501845	2.23231	502.285	FALSE	0
2022-09-12	11:22:14	0.255178	1.13508	475.843	FALSE	0
2022-09-12	11:22:15	0.471565	2.09762	504.383	FALSE	0
2022-09-12	11:22:15	0.274415	1.22065	477.063	FALSE	0
2022-09-12	11:22:15	0.54159	2.4091	506.792	FALSE	0
2022-09-12	11:22:15	0.287748	1.27996	478.343	FALSE	0
2022-09-12	11:22:16	0.451514	2.00842	508.801	FALSE	0
2022-09-12	11:22:16	0.417061	1.85517	480.198	FALSE	0
2022-09-12	11:22:16	0.406985	1.81035	510.611	FALSE	0
2022-09-12	11:22:17	0.56444	2.51074	482.709	FALSE	0
2022-09-12	11:22:17	0.349071	1.55274	512.164	FALSE	0
2022-09-12	11:22:17	0.536145	2.38488	485.094	FALSE	0
2022-09-12	11:22:17	0.272125	1.21047	513.374	FALSE	0
2022-09-12	11:22:18	0.53584	2.38352	487.477	FALSE	0
2022-09-12	11:22:18	0.255229	1.13531	514.509	FALSE	0
2022-09-12	11:22:18	0.526374	2.34142	489.819	FALSE	0
2022-09-12	11:22:18	0.480827	2.13881	516.648	FALSE	0
2022-09-12	11:22:19	1.04851	4.66398	494.483	FALSE	0
2022-09-12	11:22:19	1.04902	4.66625	521.315	FALSE	0
2022-09-12	11:22:19	1.12312	4.99586	499.479	FALSE	0
2022-09-12	11:22:19	0.502303	2.23434	523.549	FALSE	0
2022-09-12	11:22:20	0.501641	2.2314	501.71	FALSE	0
2022-09-12	11:22:20	0.352939	1.56994	525.119	FALSE	0
2022-09-12	11:22:20	0.48098	2.1395	503.85	FALSE	0
2022-09-12	11:22:21	0.351158	1.56202	526.681	FALSE	0
2022-09-12	11:22:21	0.813295	3.6177	507.467	FALSE	0
2022-09-12	11:22:21	0.408563	1.81737	528.498	FALSE	0
2022-09-12	11:22:21	0.520725	2.31629	509.784	FALSE	0
2022-09-12	11:22:22	0.410598	1.82642	530.325	FALSE	0
2022-09-12	11:22:22	0.522099	2.3224	512.106	FALSE	0
2022-09-12	11:22:22	0.460522	2.04849	532.373	FALSE	0
2022-09-12	11:22:22	0.732786	3.25958	515.366	FALSE	0
2022-09-12	11:22:23	0.518995	2.30859	534.682	FALSE	0
2022-09-12	11:22:23	0.572888	2.54832	517.914	FALSE	0
2022-09-12	11:22:23	0.725967	3.22925	537.911	FALSE	0
2022-09-12	11:22:23	0.563728	2.50757	520.421	FALSE	0
2022-09-12	11:22:24	0.513295	2.28324	540.194	FALSE	0
2022-09-12	11:22:24	0.801183	3.56382	523.985	FALSE	0
2022-09-12	11:22:24	1.05228	4.68075	544.875	FALSE	0
2022-09-12	11:22:25	0.728359	3.23989	527.225	FALSE	0
2022-09-12	11:22:25	0.75014	3.33677	548.212	FALSE	0
2022-09-12	11:22:25	0.959249	4.26693	531.492	FALSE	0
2022-09-12	11:22:25	0.632634	2.81408	551.026	FALSE	0
2022-09-12	11:22:26	0.433143	1.92671	533.419	FALSE	0
2022-09-12	11:22:26	0.542863	2.41476	553.441	FALSE	0
2022-09-12	11:22:26	0.480623	2.13791	535.557	FALSE	0
2022-09-12	11:22:26	0.498282	2.21646	555.657	FALSE	0
2022-09-12	11:22:27	0.728613	3.24102	538.798	FALSE	0
2022-09-12	11:22:27	0.53014	2.35817	558.015	FALSE	0
2022-09-12	11:22:27	0.445611	1.98217	540.78	FALSE	0
2022-09-12	11:22:27	0.59355	2.64023	560.655	FALSE	0
2022-09-12	11:22:28	0.688664	3.06332	543.843	FALSE	0
2022-09-12	11:22:28	0.756959	3.36711	564.023	FALSE	0
2022-09-12	11:22:28	1.37406	6.11209	549.955	FALSE	0
2022-09-12	11:22:29	1.42413	6.33482	570.357	FALSE	0
2022-09-12	11:22:29	0.650242	2.89241	552.848	FALSE	0
2022-09-12	11:22:29	0.553855	2.46366	572.821	FALSE	0
2022-09-12	11:22:29	0.693702	3.08573	555.933	FALSE	0
2022-09-12	11:22:30	0.508461	2.26174	575.083	FALSE	0
2022-09-12	11:22:30	0.655433	2.9155	558.849	FALSE	0
2022-09-12	11:22:30	0.693855	3.08641	578.169	FALSE	0
2022-09-12	11:22:30	0.788359	3.50678	562.356	FALSE	0
2022-09-12	11:22:31	1.17391	5.22179	583.391	FALSE	0
2022-09-12	11:22:31	1.32581	5.89747	568.253	FALSE	0
2022-09-12	11:22:31	2.07004	9.20795	592.599	FALSE	0
2022-09-12	11:22:31	1.54581	6.87607	575.129	FALSE	0
2022-09-12	11:22:32	1.27599	5.67586	598.275	FALSE	0
2022-09-12	11:22:32	0.823371	3.66252	578.792	FALSE	0
2022-09-12	11:22:32	0.771107	3.43004	601.705	FALSE	0
2022-09-12	11:22:33	0.515178	2.29161	581.083	FALSE	0
2022-09-12	11:22:33	0.337723	1.50226	603.207	FALSE	0
2022-09-12	11:22:33	0.133499	0.59383	581.677	FALSE	0
2022-09-12	11:22:33	0.257519	1.1455	604.353	FALSE	0
2022-09-12	11:22:34	0.215178	0.957155	582.634	FALSE	0
2022-09-12	11:22:34	0.302099	1.3438	605.696	FALSE	0
2022-09-12	11:22:34	0.0790969	0.351839	582.986	FALSE	0
2022-09-12	11:22:34	-0.292913	-1.30294	605.696	FALSE	0
2022-09-12	11:22:35	-0.451386	-2.00786	582.986	FALSE	0
2022-09-12	11:22:35	-0.338155	-1.50418	605.696	FALSE	0
2022-09-12	11:22:35	-0.239224	-1.06412	582.986	FALSE	0
2022-09-12	11:22:35	-0.0252287	-0.112222	605.696	FALSE	0
2022-09-12	11:22:36	0.0942114	0.419071	583.405	FALSE	0
2022-09-12	11:22:36	0.903982	4.02109	609.717	FALSE	0
2022-09-12	11:22:36	1.00536	4.47204	587.877	FALSE	0
2022-09-12	11:22:37	1.14958	5.11356	614.831	FALSE	0
2022-09-12	11:22:37	0.647341	2.8795	590.757	FALSE	0
2022-09-12	11:22:37	0.463117	2.06004	616.891	FALSE	0
2022-09-12	11:22:37	0.384237	1.70916	592.466	FALSE	0
2022-09-12	11:22:38	0.616959	2.74436	619.635	FALSE	0
2022-09-12	11:22:38	0.552532	2.45777	594.924	FALSE	0
2022-09-12	11:22:38	0.47874	2.12953	621.765	FALSE	0
2022-09-12	11:22:38	0.37472	1.66683	596.591	FALSE	0
2022-09-12	11:22:39	0.408969	1.81918	623.584	FALSE	0
2022-09-12	11:22:39	1.11528	4.96099	601.552	FALSE	0
2022-09-12	11:22:39	1.29518	5.76122	629.345	FALSE	0
2022-09-12	11:22:39	1.82958	8.13834	609.69	FALSE	0
2022-09-12	11:22:40	1.35523	6.02833	635.374	FALSE	0
2022-09-12	11:22:40	0.645051	2.86932	612.559	FALSE	0
2022-09-12	11:22:40	0.428715	1.90701	637.281	FALSE	0
2022-09-12	11:22:41	0.342863	1.52512	614.084	FALSE	0
2022-09-12	11:22:41	0.333295	1.48256	638.763	FALSE	0
2022-09-12	11:22:41	0.291616	1.29717	615.382	FALSE	0
2022-09-12	11:22:41	0.372939	1.65891	640.422	FALSE	0
2022-09-12	11:22:42	0.771768	3.43298	618.815	FALSE	0
2022-09-12	11:22:42	0.77757	3.45879	643.881	FALSE	0
2022-09-12	11:22:42	1.40943	6.26943	625.084	FALSE	0
2022-09-12	11:22:42	3.16968	14.0994	657.98	1	1
2022-09-12	11:22:43	2.19111	9.7465	634.83	FALSE	1
2022-09-12	11:22:43	1.08047	4.80615	662.786	FALSE	1
2022-09-12	11:22:43	0.391667	1.74221	636.573	FALSE	1
2022-09-12	11:22:43	0.417112	1.8554	664.642	FALSE	1
2022-09-12	11:22:44	0.361336	1.60729	638.18	FALSE	1
2022-09-12	11:22:44	0.345102	1.53508	666.177	FALSE	1
2022-09-12	11:22:44	0.365916	1.62767	639.808	FALSE	1
2022-09-12	11:22:44	0.370293	1.64714	667.824	FALSE	1
2022-09-12	11:22:45	0.17187	0.764512	640.572	FALSE	1
2022-09-12	11:22:45	0.326425	1.452	669.276	FALSE	1
2022-09-12	11:22:45	0.24841	1.10498	641.677	FALSE	1
2022-09-12	11:22:46	0.397214	1.76689	671.043	FALSE	1
2022-09-12	11:22:46	0.292888	1.30282	642.98	FALSE	1
2022-09-12	11:22:46	0.271361	1.20707	672.25	FALSE	1
2022-09-12	11:22:46	0.311921	1.38749	644.367	FALSE	1
2022-09-12	11:22:47	0.285814	1.27136	673.521	FALSE	1
2022-09-12	11:22:47	0.366476	1.63016	645.998	FALSE	1
2022-09-12	11:22:47	0.266171	1.18398	674.705	FALSE	1
2022-09-12	11:22:47	0.347036	1.54369	647.541	FALSE	1
2022-09-12	11:22:48	0.278842	1.24034	675.946	FALSE	1
2022-09-12	11:22:48	0.403066	1.79292	649.334	FALSE	1
2022-09-12	11:22:48	0.190496	0.847364	676.793	FALSE	1
2022-09-12	11:22:48	0.441387	1.96338	651.298	FALSE	1
2022-09-12	11:22:49	0.244593	1.088	677.881	FALSE	1
2022-09-12	11:22:49	0.336807	1.49818	652.796	FALSE	1
2022-09-12	11:22:49	0.230242	1.02416	678.905	FALSE	1
2022-09-12	11:22:50	0.284084	1.26366	654.059	FALSE	1
2022-09-12	11:22:50	0.316501	1.40786	680.313	FALSE	1
2022-09-12	11:22:50	0.312888	1.39179	655.451	FALSE	1
2022-09-12	11:22:50	0.276501	1.22993	681.543	FALSE	1
2022-09-12	11:22:51	0.126934	0.564628	656.016	FALSE	1
2022-09-12	11:22:51	0.11925	0.530448	682.073	FALSE	1
2022-09-12	11:22:51	0.127596	0.567573	656.583	FALSE	1
2022-09-12	11:22:51	0.482405	2.14583	684.219	FALSE	1
2022-09-12	11:22:52	0.365356	1.62518	658.209	FALSE	1
2022-09-12	11:22:52	0.222812	0.991112	685.21	FALSE	1
2022-09-12	11:22:52	0.539758	2.40095	660.61	FALSE	1
2022-09-12	11:22:52	0.71126	3.16383	688.374	FALSE	1
2022-09-12	11:22:53	0.330598	1.47057	662.08	FALSE	1
2022-09-12	11:22:53	0.435891	1.93893	690.313	FALSE	1
2022-09-12	11:22:53	0.461947	2.05483	664.135	FALSE	1
2022-09-12	11:22:54	0.325204	1.44657	691.76	FALSE	1
2022-09-12	11:22:54	0.619504	2.75568	666.891	FALSE	1
2022-09-12	11:22:54	0.297519	1.32342	693.083	FALSE	1
2022-09-12	11:22:54	0.508104	2.26015	669.151	FALSE	1
2022-09-12	11:22:55	0.341489	1.51901	694.602	FALSE	1
2022-09-12	11:22:55	0.368613	1.63966	670.79	FALSE	1
2022-09-12	11:22:55	0.298639	1.32841	695.931	FALSE	1
2022-09-12	11:22:55	0.628053	2.79371	673.584	FALSE	1
2022-09-12	11:22:56	0.301183	1.33972	697.27	FALSE	1
2022-09-12	11:22:56	0.701896	3.12217	676.706	FALSE	1
2022-09-12	11:22:56	0.216909	0.964855	698.235	FALSE	1
2022-09-12	11:22:56	0.214059	0.952177	677.658	FALSE	1
2022-09-12	11:22:57	0.0862215	0.38353	698.619	FALSE	1
2022-09-12	11:22:57	0.30617	1.36191	679.02	FALSE	1
2022-09-12	11:22:57	0.235687	1.04838	699.667	FALSE	1
2022-09-12	11:22:58	0.357366	1.58964	680.61	FALSE	1
2022-09-12	11:22:58	0.230038	1.02326	700.69	FALSE	1
2022-09-12	11:22:58	0.356705	1.5867	682.197	FALSE	1
2022-09-12	11:22:58	0.264084	1.1747	701.865	FALSE	1
2022-09-12	11:22:59	0.381336	1.69626	683.893	FALSE	1
2022-09-12	11:22:59	0.229122	1.01918	702.884	FALSE	1
2022-09-12	11:22:59	0.442812	1.96972	685.863	FALSE	1
2022-09-12	11:22:59	0.333346	1.48279	704.367	FALSE	1
2022-09-12	11:23:00	0.527901	2.34821	688.211	FALSE	1
2022-09-12	11:23:00	0.32042	1.42529	705.792	FALSE	1
2022-09-12	11:23:00	0.532684	2.36948	690.58	FALSE	1
2022-09-12	11:23:00	0.522455	2.32398	708.116	FALSE	1
2022-09-12	11:23:01	0.637112	2.834	693.414	FALSE	1
2022-09-12	11:23:01	0.444338	1.9765	710.093	FALSE	1
2022-09-12	11:23:01	0.627952	2.79326	696.208	FALSE	1
2022-09-12	11:23:02	0.461489	2.0528	712.146	FALSE	1
2022-09-12	11:23:02	0.439097	1.95319	698.161	FALSE	1
2022-09-12	11:23:02	0.470547	2.09309	714.239	FALSE	1
2022-09-12	11:23:02	0.49528	2.2031	700.364	FALSE	1
2022-09-12	11:23:03	0.476298	2.11867	716.357	FALSE	1
2022-09-12	11:23:03	0.657468	2.92455	703.288	FALSE	1
2022-09-12	11:23:03	0.401183	1.78454	718.142	FALSE	1
2022-09-12	11:23:03	0.423066	1.88188	705.17	FALSE	1
2022-09-12	11:23:04	0.464491	2.06615	720.208	FALSE	1
2022-09-12	11:23:04	0.519198	2.3095	707.48	FALSE	1
2022-09-12	11:23:04	0.414211	1.84249	722.05	FALSE	1
2022-09-12	11:23:04	0.41014	1.82438	709.304	FALSE	1
2022-09-12	11:23:05	0.685662	3.04996	725.1	FALSE	1
2022-09-12	11:23:05	0.618333	2.75047	712.055	FALSE	1
2022-09-12	11:23:05	0.825509	3.67203	728.772	FALSE	1
2022-09-12	11:23:06	0.388155	1.72659	713.781	FALSE	1
2022-09-12	11:23:06	0.478181	2.12704	730.9	FALSE	1
2022-09-12	11:23:06	0.401031	1.78387	715.565	FALSE	1
2022-09-12	11:23:06	0.402761	1.79156	732.691	FALSE	1
2022-09-12	11:23:07	0.263728	1.17311	716.738	FALSE	1
2022-09-12	11:23:07	0.528053	2.34889	735.04	FALSE	1
2022-09-12	11:23:07	0.256705	1.14188	717.88	FALSE	1
2022-09-12	11:23:07	0.424237	1.88709	736.927	FALSE	1
2022-09-12	11:23:08	0.265356	1.18036	719.061	FALSE	1
2022-09-12	11:23:08	0.428053	1.90407	738.831	FALSE	1
2022-09-12	11:23:08	0.211107	0.939046	720	FALSE	1
2022-09-12	11:23:08	0.438435	1.95025	740.781	FALSE	1
2022-09-12	11:23:09	0.244033	1.08551	721.085	FALSE	1
2022-09-12	11:23:09	0.42729	1.90067	742.682	FALSE	1
2022-09-12	11:23:09	0.23986	1.06695	722.152	FALSE	1
2022-09-12	11:23:09	0.362913	1.61431	744.296	FALSE	1
2022-09-12	11:23:10	0.304084	1.35263	723.505	FALSE	1
2022-09-12	11:23:10	0.391463	1.74131	746.038	FALSE	1
2022-09-12	11:23:10	0.279148	1.24171	724.746	FALSE	1
2022-09-12	11:23:11	0.348206	1.54889	747.587	FALSE	1
2022-09-12	11:23:11	0.30958	1.37707	726.123	FALSE	1
2022-09-12	11:23:11	0.374619	1.66638	749.253	FALSE	1
2022-09-12	11:23:11	0.334517	1.488	727.611	FALSE	1
2022-09-12	11:23:12	0.303931	1.35195	750.605	FALSE	1
2022-09-12	11:23:12	0.313194	1.39315	729.005	FALSE	1
2022-09-12	11:23:12	0.388054	1.72614	752.331	FALSE	1
2022-09-12	11:23:12	0.336552	1.49705	730.502	FALSE	1
2022-09-12	11:23:13	0.242201	1.07736	753.408	FALSE	1
2022-09-12	11:23:13	0.357977	1.59235	732.094	FALSE	1
2022-09-12	11:23:13	0.262506	1.16768	754.576	FALSE	1
2022-09-12	11:23:13	0.401896	1.78771	733.882	FALSE	1
2022-09-12	11:23:14	0.169937	0.755914	755.332	FALSE	1
2022-09-12	11:23:14	0.434313	1.93191	735.814	FALSE	1
2022-09-12	11:23:14	0.23813	1.05925	756.391	FALSE	1
2022-09-12	11:23:15	0.412481	1.8348	737.648	FALSE	1
2022-09-12	11:23:15	0.296807	1.32026	757.711	FALSE	1
2022-09-12	11:23:15	0.379809	1.68947	739.338	FALSE	1
2022-09-12	11:23:15	0.387036	1.72161	759.433	FALSE	1
2022-09-12	11:23:16	0.530598	2.36021	741.698	FALSE	1
2022-09-12	11:23:16	0.47701	2.12184	761.555	FALSE	1
2022-09-12	11:23:16	0.434771	1.93395	743.632	FALSE	1
2022-09-12	11:23:16	0.409682	1.82235	763.377	FALSE	1
2022-09-12	11:23:17	0.353092	1.57062	745.203	FALSE	1
2022-09-12	11:23:17	0.289937	1.2897	764.667	FALSE	1
2022-09-12	11:23:17	0.296756	1.32003	746.523	FALSE	1
2022-09-12	11:23:17	0.301387	1.34063	766.008	FALSE	1
2022-09-12	11:23:18	0.244898	1.08936	747.612	FALSE	1
2022-09-12	11:23:18	0.378791	1.68494	767.693	FALSE	1
2022-09-12	11:23:18	0.430038	1.9129	749.525	FALSE	1
2022-09-12	11:23:19	0.47874	2.12953	769.822	FALSE	1
2022-09-12	11:23:19	0.471005	2.09512	751.62	FALSE	1
2022-09-12	11:23:19	0.771412	3.43139	773.253	FALSE	1
2022-09-12	11:23:19	1.98846	8.84507	760.465	FALSE	1
2022-09-12	11:23:20	1.91579	8.52182	781.775	FALSE	1
2022-09-12	11:23:20	0.827443	3.68063	764.146	FALSE	1
2022-09-12	11:23:20	0.513601	2.2846	784.06	FALSE	1
2022-09-12	11:23:20	0.386222	1.71799	765.864	FALSE	1
2022-09-12	11:23:21	0.443982	1.97492	786.035	FALSE	1
2022-09-12	11:23:21	0.352379	1.56745	767.431	FALSE	1
2022-09-12	11:23:21	0.290344	1.29151	787.326	FALSE	1
2022-09-12	11:23:21	0.423728	1.88483	769.316	FALSE	1
2022-09-12	11:23:22	0.604084	2.68709	790.013	FALSE	1
2022-09-12	11:23:22	1.16312	5.17379	774.49	FALSE	1
2022-09-12	11:23:22	2.54291	11.3114	801.325	FALSE	1
2022-09-12	11:23:23	0.999148	4.44441	778.934	FALSE	1
2022-09-12	11:23:23	0.85589	3.80717	805.132	FALSE	1
2022-09-12	11:23:23	0.38612	1.71754	780.652	FALSE	1
2022-09-12	11:23:23	0.29528	1.31346	806.445	FALSE	1
2022-09-12	11:23:24	0.199606	0.887887	781.54	FALSE	1
2022-09-12	11:23:24	0.205306	0.913242	807.359	FALSE	1
2022-09-12	11:23:24	0.0822521	0.365874	781.906	FALSE	1
2022-09-12	11:23:24	0.199148	0.88585	808.244	FALSE	1
2022-09-12	11:23:25	0.0874938	0.38919	782.295	FALSE	1
2022-09-12	11:23:25	0.177163	0.788056	809.033	FALSE	1
2022-09-12	11:23:25	0.151158	0.672381	782.967	FALSE	1
2022-09-12	11:23:25	0.0791478	0.352065	809.385	FALSE	1
2022-09-12	11:23:26	0.138232	0.614884	783.582	FALSE	1
2022-09-12	11:23:26	0.103117	0.458685	809.843	FALSE	1
2022-09-12	11:23:26	0.223066	0.992242	784.574	FALSE	1
2022-09-12	11:23:27	0.0227102	0.10102	809.944	FALSE	1
2022-09-12	11:23:27	0.194822	0.866607	785.441	FALSE	1
2022-09-12	11:23:27	0.0651529	0.289813	810.234	FALSE	1
2022-09-12	11:23:27	0.155433	0.691397	786.132	FALSE	1
2022-09-12	11:23:28	0.3393	1.50927	811.743	FALSE	1
2022-09-12	11:23:28	0.358435	1.59439	787.727	FALSE	1
2022-09-12	11:23:28	0.58785	2.61487	814.358	FALSE	1
2022-09-12	11:23:28	0.240725	1.07079	788.797	FALSE	1
2022-09-12	11:23:29	0.321692	1.43095	815.789	FALSE	1
2022-09-12	11:23:29	0.867443	3.85856	792.656	FALSE	1
2022-09-12	11:23:29	1.55009	6.89511	822.684	FALSE	1
2022-09-12	11:23:29	2.79126	12.4161	805.072	FALSE	1
2022-09-12	11:23:30	1.30378	5.79947	828.484	FALSE	1
2022-09-12	11:23:30	0.94673	4.21124	809.283	FALSE	1
2022-09-12	11:23:30	0.436603	1.9421	830.426	FALSE	1
2022-09-12	11:23:31	0.573702	2.55194	811.835	FALSE	1
2022-09-12	11:23:31	0.350293	1.55817	831.984	FALSE	1
2022-09-12	11:23:31	0.240115	1.06808	812.903	FALSE	1
2022-09-12	11:23:31	0.090191	0.401188	832.385	FALSE	1
2022-09-12	11:23:32	0.287188	1.27747	814.181	FALSE	1
2022-09-12	11:23:32	0.203524	0.905315	833.291	FALSE	1
2022-09-12	11:23:32	0.251565	1.11901	815.3	FALSE	1
2022-09-12	11:23:32	0.798791	3.55318	836.844	FALSE	1
2022-09-12	11:23:33	1.82739	8.1286	823.428	FALSE	1
2022-09-12	11:23:33	1.29197	5.74694	842.591	FALSE	1
2022-09-12	11:23:33	0.306985	1.36553	824.794	FALSE	1
2022-09-12	11:23:33	0.462914	2.05913	844.65	FALSE	1
2022-09-12	11:23:34	0.348461	1.55002	826.344	FALSE	1
2022-09-12	11:23:34	0.311056	1.38364	846.033	FALSE	1
2022-09-12	11:23:34	0.30042	1.33633	827.68	FALSE	1
2022-09-12	11:23:34	0.36729	1.63378	847.667	FALSE	1
2022-09-12	11:23:35	0.323881	1.44069	829.121	FALSE	1
2022-09-12	11:23:35	0.283219	1.25981	848.927	FALSE	1
2022-09-12	11:23:35	0.289835	1.28924	830.41	FALSE	1
2022-09-12	11:23:36	0.276043	1.22789	850.155	FALSE	1
2022-09-12	11:23:36	0.358333	1.59394	832.004	FALSE	1
2022-09-12	11:23:36	0.339097	1.50837	851.663	FALSE	1
2022-09-12	11:23:36	0.583728	2.59654	834.601	FALSE	1
2022-09-12	11:23:37	0.173753	0.772888	852.436	FALSE	1
2022-09-12	11:23:37	0.598181	2.66083	837.262	FALSE	1
2022-09-12	11:23:37	0.206629	0.919127	853.355	FALSE	1
2022-09-12	11:23:37	0.357468	1.59009	838.852	FALSE	1
2022-09-12	11:23:38	0.132736	0.590436	853.946	FALSE	1
2022-09-12	11:23:38	0.473397	2.10576	840.957	FALSE	1
2022-09-12	11:23:38	0.156501	0.696148	854.642	FALSE	1
2022-09-12	11:23:38	0.440878	1.96111	842.918	FALSE	1
2022-09-12	11:23:39	0.152685	0.679173	855.321	FALSE	1
2022-09-12	11:23:39	0.489173	2.17594	845.094	FALSE	1
2022-09-12	11:23:39	0.257417	1.14504	856.466	FALSE	1
2022-09-12	11:23:40	0.567697	2.52523	847.62	FALSE	1
2022-09-12	11:23:40	0.289122	1.28607	857.752	FALSE	1
2022-09-12	11:23:40	0.644033	2.86479	850.484	FALSE	1
2022-09-12	11:23:40	0.501234	2.22959	859.982	FALSE	1
2022-09-12	11:23:41	0.757824	3.37095	853.855	FALSE	1
2022-09-12	11:23:41	0.825102	3.67022	863.652	FALSE	1
2022-09-12	11:23:41	1.16429	5.17899	859.034	FALSE	1
2022-09-12	11:23:41	0.606781	2.69908	866.351	FALSE	1
2022-09-12	11:23:42	0.987086	4.39076	863.425	FALSE	1
2022-09-12	11:23:42	0.491005	2.18409	868.535	FALSE	1
2022-09-12	11:23:42	0.601743	2.67667	866.102	FALSE	1
2022-09-12	11:23:42	0.534262	2.3765	870.912	FALSE	1
2022-09-12	11:23:43	0.397672	1.76892	867.871	FALSE	1
2022-09-12	11:23:43	0.684593	3.04521	873.957	FALSE	1
2022-09-12	11:23:43	0.864237	3.8443	871.715	FALSE	1
2022-09-12	11:23:44	0.506018	2.25087	876.208	FALSE	1
2022-09-12	11:23:44	0.440929	1.96134	873.676	FALSE	1
2022-09-12	11:23:44	1.07477	4.78079	880.989	FALSE	1
2022-09-12	11:23:44	0.811259	3.60864	877.285	FALSE	1
2022-09-12	11:23:45	0.449071	1.99756	882.986	FALSE	1
2022-09-12	11:23:45	0.441743	1.96496	879.25	FALSE	1
2022-09-12	11:23:45	0.481438	2.14153	885.128	FALSE	1
2022-09-12	11:23:45	0.301998	1.34335	880.593	FALSE	1
2022-09-12	11:23:46	0.409682	1.82235	886.95	FALSE	1
2022-09-12	11:23:46	0.471463	2.09716	882.69	FALSE	1
2022-09-12	11:23:46	0.70098	3.1181	890.068	FALSE	1
2022-09-12	11:23:46	1.42103	6.32103	889.012	FALSE	1
2022-09-12	11:23:47	1.25396	5.57786	895.646	FALSE	1
2022-09-12	11:23:47	1.11335	4.9524	893.964	FALSE	1
2022-09-12	11:23:47	1.00678	4.47836	900.124	FALSE	1
2022-09-12	11:23:48	0.543779	2.41884	896.383	FALSE	1
2022-09-12	11:23:48	0.364033	1.61929	901.744	FALSE	1
2022-09-12	11:23:48	0.265916	1.18285	897.566	FALSE	1
2022-09-12	11:23:48	0.41584	1.84974	903.593	FALSE	1
2022-09-12	11:23:49	0.15869	0.705885	898.271	FALSE	1
2022-09-12	11:23:49	0.454822	2.02314	905.617	FALSE	1
2022-09-12	11:23:49	0.175585	0.781037	899.053	FALSE	1
2022-09-12	11:23:49	0.447392	1.99009	907.607	FALSE	1
2022-09-12	11:23:50	0.251565	1.11901	900.172	FALSE	1
2022-09-12	11:23:50	0.535178	2.38058	909.987	FALSE	1
2022-09-12	11:23:50	0.208461	0.927276	901.099	FALSE	1
2022-09-12	11:23:50	0.482761	2.14742	912.135	FALSE	1
2022-09-12	11:23:51	0.343473	1.52784	902.627	FALSE	1
2022-09-12	11:23:51	0.561234	2.49648	914.631	FALSE	1
2022-09-12	11:23:51	0.329377	1.46513	904.092	FALSE	1
2022-09-12	11:23:52	0.322964	1.43661	916.068	FALSE	1
2022-09-12	11:23:52	0.341743	1.52014	905.612	FALSE	1
2022-09-12	11:23:52	0.291514	1.29671	917.364	FALSE	1
2022-09-12	11:23:52	0.338944	1.50769	907.12	FALSE	1
2022-09-12	11:23:53	0.173092	0.769948	918.134	FALSE	1
2022-09-12	11:23:53	0.335382	1.49185	908.611	FALSE	1
2022-09-12	11:23:53	0.253651	1.12829	919.263	FALSE	1
2022-09-12	11:23:54	0.365	1.62359	910.235	FALSE	1
2022-09-12	11:23:54	0.240573	1.07012	920.333	FALSE	1
2022-09-12	11:23:54	0.458079	2.03763	912.273	FALSE	1
2022-09-12	11:23:54	0.567952	2.52636	922.859	FALSE	1
2022-09-12	11:23:54	0.873092	3.88369	916.156	FALSE	1
2022-09-12	11:23:55	0.703219	3.12806	925.987	FALSE	1
2022-09-12	11:23:55	0.600725	2.67214	918.829	FALSE	1
2022-09-12	11:23:55	0.334822	1.48936	927.477	FALSE	1
2022-09-12	11:23:56	0.48612	2.16236	920.991	FALSE	1
2022-09-12	11:23:56	0.24897	1.10747	928.584	FALSE	1
2022-09-12	11:23:56	0.639453	2.84441	923.835	FALSE	1
2022-09-12	11:23:56	0.638944	2.84215	931.426	FALSE	1
2022-09-12	11:23:57	1.11248	4.94853	928.784	FALSE	1
2022-09-12	11:23:57	0.786578	3.49886	934.925	FALSE	1
2022-09-12	11:23:57	0.510242	2.26966	931.053	FALSE	1
2022-09-12	11:23:57	0.155993	0.693888	935.619	FALSE	1
2022-09-12	11:23:58	0.464339	2.06547	933.119	FALSE	1
2022-09-12	11:23:58	0.286323	1.27362	936.893	FALSE	1
2022-09-12	11:23:58	0.42897	1.90814	935.027	FALSE	1
2022-09-12	11:23:58	0.492379	2.1902	939.083	FALSE	1
2022-09-12	11:23:59	0.670496	2.9825	938.01	FALSE	1
2022-09-12	11:23:59	0.554822	2.46796	941.551	FALSE	1
2022-09-12	11:23:59	0.660267	2.937	940.947	FALSE	1
2022-09-12	11:23:59	0.836145	3.71934	945.27	FALSE	1
2022-09-12	11:24:00	0.696552	3.0984	944.045	FALSE	1
2022-09-12	11:24:00	1.02469	4.55803	949.828	FALSE	1
2022-09-12	11:24:00	0.910445	4.04984	948.095	FALSE	1
2022-09-12	11:24:01	0.570801	2.53904	952.367	FALSE	1
2022-09-12	11:24:01	1.1764	5.23286	953.328	FALSE	1
2022-09-12	11:24:01	1.10205	4.90214	957.269	FALSE	1
2022-09-12	11:24:01	1.35197	6.01383	959.342	FALSE	1
2022-09-12	11:24:02	1.41202	6.28095	963.55	FALSE	1
2022-09-12	11:24:02	1.17503	5.22677	964.568	FALSE	1
2022-09-12	11:24:02	1.00541	4.47226	968.022	FALSE	1
2022-09-12	11:24:02	0.8593	3.82234	968.391	FALSE	1
2022-09-12	11:24:03	0.994262	4.42268	972.445	FALSE	1
2022-09-12	11:24:03	0.584237	2.5988	970.989	FALSE	1
2022-09-12	11:24:03	0.423677	1.8846	974.33	FALSE	1
2022-09-12	11:24:03	0.345967	1.53893	972.528	FALSE	1
2022-09-12	11:24:04	0.458079	2.03763	976.367	FALSE	1
2022-09-12	11:24:04	0.46098	2.05053	974.579	FALSE	1
2022-09-12	11:24:04	0.442405	1.96791	978.335	FALSE	1
2022-09-12	11:24:05	0.222608	0.990205	975.569	FALSE	1
2022-09-12	11:24:05	0.446323	1.98533	980.321	FALSE	1
2022-09-12	11:24:05	0.361234	1.60684	977.176	FALSE	1
2022-09-12	11:24:05	0.489377	2.17685	982.497	FALSE	1
2022-09-12	11:24:06	0.441336	1.96315	979.139	FALSE	1
2022-09-12	11:24:06	0.709682	3.15681	985.654	FALSE	1
2022-09-12	11:24:06	0.623371	2.77288	981.912	FALSE	1
2022-09-12	11:24:06	0.490547	2.18205	987.836	FALSE	1
2022-09-12	11:24:07	0.300522	1.33678	983.249	FALSE	1
2022-09-12	11:24:07	0.762048	3.38974	991.226	FALSE	1
2022-09-12	11:24:07	0.591921	2.63298	985.882	FALSE	1
2022-09-12	11:24:07	0.581132	2.58499	993.811	FALSE	1
2022-09-12	11:24:08	0.466171	2.07362	987.955	FALSE	1
2022-09-12	11:24:08	0.43472	1.93372	995.745	FALSE	1
2022-09-12	11:24:08	0.119911	0.533388	988.489	FALSE	1
2022-09-12	11:24:09	0.430649	1.91561	997.66	FALSE	1
2022-09-12	11:24:09	0.113244	0.503732	988.992	FALSE	1
2022-09-12	11:24:09	0.415026	1.84612	999.506	FALSE	1
2022-09-12	11:24:09	0.298435	1.3275	990.32	FALSE	1
2022-09-12	11:24:10	0.609071	2.70927	1002.22	FALSE	1
2022-09-12	11:24:10	0.518842	2.30791	992.628	FALSE	1
2022-09-12	11:24:10	0.939249	4.17797	1006.39	FALSE	1
2022-09-12	11:24:10	0.989224	4.40027	997.028	FALSE	1
2022-09-12	11:24:11	0.867799	3.86014	1010.25	FALSE	1
2022-09-12	11:24:11	0.740878	3.29557	1000.32	FALSE	1
2022-09-12	11:24:11	1.06424	4.73395	1014.99	FALSE	1
2022-09-12	11:24:11	0.428206	1.90475	1002.23	FALSE	1
2022-09-12	11:24:12	0.425611	1.8932	1016.88	FALSE	1
2022-09-12	11:24:12	0.265967	1.18307	1003.41	FALSE	1
2022-09-12	11:24:12	0.415229	1.84702	1018.73	FALSE	1
2022-09-12	11:24:13	0.392532	1.74606	1005.16	FALSE	1
2022-09-12	11:24:13	0.789275	3.51085	1022.24	FALSE	1
2022-09-12	11:24:13	1.3276	5.90543	1011.06	FALSE	1
2022-09-12	11:24:13	1.44536	6.42925	1028.67	FALSE	1
2022-09-12	11:24:14	0.61645	2.74209	1013.81	FALSE	1
2022-09-12	11:24:14	0.358333	1.59394	1030.26	FALSE	1
2022-09-12	11:24:14	0.162863	0.724447	1014.53	FALSE	1
2022-09-12	11:24:14	0.332176	1.47759	1031.74	FALSE	1
2022-09-12	11:24:15	0.544186	2.42065	1016.95	FALSE	1
2022-09-12	11:24:15	0.16668	0.741426	1032.48	FALSE	1
2022-09-12	11:24:15	0.315026	1.4013	1018.35	FALSE	1
2022-09-12	11:24:15	0.516959	2.29954	1034.78	FALSE	1
2022-09-12	11:24:16	0.722862	3.21543	1021.57	FALSE	1
2022-09-12	11:24:16	0.328257	1.46015	1036.24	FALSE	1
2022-09-12	11:24:16	0.283728	1.26208	1022.83	FALSE	1
2022-09-12	11:24:17	0.254873	1.13373	1037.37	FALSE	1
2022-09-12	11:24:17	0.42673	1.89818	1024.73	FALSE	1
2022-09-12	11:24:17	0.264186	1.17515	1038.55	FALSE	1
2022-09-12	11:24:17	0.378435	1.68335	1026.41	FALSE	1
2022-09-12	11:24:18	0.343372	1.52739	1040.08	FALSE	1
2022-09-12	11:24:18	0.274313	1.2202	1027.63	FALSE	1
2022-09-12	11:24:18	0.375433	1.67	1041.75	FALSE	1
2022-09-12	11:24:18	0.111056	0.493999	1028.12	FALSE	1
2022-09-12	11:24:19	0.122049	0.542898	1042.29	FALSE	1
2022-09-12	11:24:19	0.178435	0.793715	1028.92	FALSE	1
2022-09-12	11:24:19	0.237265	1.0554	1043.35	FALSE	1
2022-09-12	11:24:19	0.232736	1.03526	1029.95	FALSE	1
2022-09-12	11:24:20	0.344593	1.53282	1044.88	FALSE	1
2022-09-12	11:24:20	0.465153	2.06909	1032.02	FALSE	1
2022-09-12	11:24:20	0.472227	2.10056	1046.98	FALSE	1
2022-09-12	11:24:21	0.638079	2.8383	1034.86	FALSE	1
2022-09-12	11:24:21	0.397723	1.76915	1048.75	FALSE	1
2022-09-12	11:24:21	0.466425	2.07475	1036.94	FALSE	1
2022-09-12	11:24:21	0.677672	3.01442	1051.76	FALSE	1
2022-09-12	11:24:22	0.767392	3.41351	1040.35	FALSE	1
2022-09-12	11:24:22	0.661285	2.94153	1054.7	FALSE	1
2022-09-12	11:24:22	0.530241	2.35862	1042.71	FALSE	1
2022-09-12	11:24:22	0.575789	2.56122	1057.27	FALSE	1
2022-09-12	11:24:23	0.546221	2.4297	1045.14	FALSE	1
2022-09-12	11:24:23	0.535534	2.38216	1059.65	FALSE	1
2022-09-12	11:24:23	0.555127	2.46932	1047.61	FALSE	1
2022-09-12	11:24:23	0.554364	2.46592	1062.11	FALSE	1
2022-09-12	11:24:24	0.555331	2.47022	1050.08	FALSE	1
2022-09-12	11:24:24	0.506883	2.25472	1064.37	FALSE	1
2022-09-12	11:24:24	0.535992	2.3842	1052.46	FALSE	1
2022-09-12	11:24:25	0.510394	2.27033	1066.64	FALSE	1
2022-09-12	11:24:25	0.496909	2.21035	1054.67	FALSE	1
2022-09-12	11:24:25	0.509987	2.26852	1068.91	FALSE	1
2022-09-12	11:24:25	0.602608	2.68052	1057.35	FALSE	1
2022-09-12	11:24:26	0.570191	2.53632	1071.44	FALSE	1
2022-09-12	11:24:26	0.66042	2.93768	1060.29	FALSE	1
2022-09-12	11:24:26	0.351158	1.56202	1073.01	FALSE	1
2022-09-12	11:24:26	0.309479	1.37662	1061.67	FALSE	1
2022-09-12	11:24:27	0.434313	1.93191	1074.94	FALSE	1
2022-09-12	11:24:27	0.35126	1.56247	1063.23	FALSE	1
2022-09-12	11:24:27	0.375178	1.66887	1076.61	FALSE	1
2022-09-12	11:24:27	0.257977	1.14753	1064.38	FALSE	1
2022-09-12	11:24:28	0.321947	1.43208	1078.04	FALSE	1
2022-09-12	11:24:28	0.335535	1.49253	1065.87	FALSE	1
2022-09-12	11:24:28	0.317977	1.41443	1079.45	FALSE	1
2022-09-12	11:24:28	0.335331	1.49162	1067.36	FALSE	1
2022-09-12	11:24:29	0.301082	1.33927	1080.79	FALSE	1
2022-09-12	11:24:29	0.286069	1.27249	1068.63	FALSE	1
2022-09-12	11:24:29	0.296094	1.31709	1082.11	FALSE	1
2022-09-12	11:24:30	0.284389	1.26502	1069.9	FALSE	1
2022-09-12	11:24:30	0.288868	1.28494	1083.39	FALSE	1
2022-09-12	11:24:30	0.286374	1.27385	1071.17	FALSE	1
2022-09-12	11:24:30	0.294975	1.31211	1084.71	FALSE	1
2022-09-12	11:24:31	0.302303	1.3447	1072.52	FALSE	1
2022-09-12	11:24:31	0.290853	1.29377	1086	FALSE	1
2022-09-12	11:24:31	0.353244	1.5713	1074.09	FALSE	1
2022-09-12	11:24:31	0.815025	3.62539	1089.62	FALSE	1
2022-09-12	11:24:32	3.01925	13.4302	1087.52	1	2
2022-09-12	11:24:32	1.24347	5.5312	1095.16	FALSE	2
2022-09-12	11:24:32	0.79874	3.55296	1091.07	FALSE	2
2022-09-12	11:24:32	1.04826	4.66287	1099.82	FALSE	2
2022-09-12	11:24:33	2.28541	10.166	1101.24	FALSE	2
2022-09-12	11:24:33	1.91024	8.49713	1108.32	FALSE	2
2022-09-12	11:24:33	1.64785	7.32997	1108.57	FALSE	2
2022-09-12	11:24:34	2.1424	9.52982	1117.85	FALSE	2
2022-09-12	11:24:34	1.36281	6.06205	1114.63	FALSE	2
2022-09-12	11:24:34	2.13874	9.51354	1127.36	FALSE	2
2022-09-12	11:24:34	2.94627	13.1056	1127.73	FALSE	2
2022-09-12	11:24:35	1.86347	8.28909	1135.65	FALSE	2
2022-09-12	11:24:35	1.14047	5.07304	1132.81	FALSE	2
2022-09-12	11:24:35	1.17538	5.22833	1140.88	FALSE	2
2022-09-12	11:24:35	1.43818	6.39731	1139.21	FALSE	2
2022-09-12	11:24:36	2.94973	13.121	1154	FALSE	2
2022-09-12	11:24:36	2.70016	12.0109	1151.22	FALSE	2
2022-09-12	11:24:36	1.89655	8.43623	1162.43	FALSE	2
2022-09-12	11:24:36	1.21212	5.39175	1156.61	FALSE	2
2022-09-12	11:24:37	1.16968	5.20297	1167.64	FALSE	2
2022-09-12	11:24:37	0.571819	2.54357	1159.15	FALSE	2
2022-09-12	11:24:37	0.685153	3.0477	1170.68	FALSE	2
2022-09-12	11:24:38	1.00088	4.45211	1163.6	FALSE	2
2022-09-12	11:24:38	0.843626	3.75262	1174.44	FALSE	2
2022-09-12	11:24:38	0.763524	3.39631	1167	FALSE	2
2022-09-12	11:24:38	0.51701	2.29976	1176.74	FALSE	2
2022-09-12	11:24:39	0.616349	2.74164	1169.74	FALSE	2
2022-09-12	11:24:39	0.396501	1.76372	1178.5	FALSE	2
2022-09-12	11:24:39	0.451107	2.00661	1171.75	FALSE	2
2022-09-12	11:24:39	0.316858	1.40945	1179.91	FALSE	2
2022-09-12	11:24:40	0.891056	3.9636	1175.71	FALSE	2
2022-09-12	11:24:40	0.290242	1.29105	1181.2	FALSE	2
2022-09-12	11:24:40	0.332939	1.48098	1177.19	FALSE	2
2022-09-12	11:24:40	0.161234	0.717201	1181.92	FALSE	2
2022-09-12	11:24:41	0.274975	1.22314	1178.42	FALSE	2
2022-09-12	11:24:41	0.104339	0.464121	1182.38	FALSE	2
2022-09-12	11:24:41	0.236858	1.05359	1179.47	FALSE	2
2022-09-12	11:24:42	0.226374	1.00696	1183.39	FALSE	2
2022-09-12	11:24:42	0.383066	1.70395	1181.17	FALSE	2
2022-09-12	11:24:42	0.26215	1.1661	1184.56	FALSE	2
2022-09-12	11:24:42	0.372074	1.65506	1182.83	FALSE	2
2022-09-12	11:24:43	0.220929	0.982736	1185.54	FALSE	2
2022-09-12	11:24:43	0.165356	0.735537	1183.56	FALSE	2
2022-09-12	11:24:43	0.173804	0.773115	1186.31	FALSE	2
2022-09-12	11:24:43	0.181794	0.808656	1184.37	FALSE	2
2022-09-12	11:24:44	0.16668	0.741426	1187.05	FALSE	2
2022-09-12	11:24:44	0.188257	0.837405	1185.21	FALSE	2
2022-09-12	11:24:44	0.627799	2.79258	1189.85	FALSE	2
2022-09-12	11:24:44	0.331056	1.4726	1186.68	FALSE	2
2022-09-12	11:24:45	0.416145	1.8511	1191.7	FALSE	2
2022-09-12	11:24:45	0.26897	1.19643	1187.88	FALSE	2
2022-09-12	11:24:45	0.348257	1.54912	1193.25	FALSE	2
2022-09-12	11:24:46	0.19813	0.881322	1188.76	FALSE	2
2022-09-12	11:24:46	0.358283	1.59371	1194.84	FALSE	2
2022-09-12	11:24:46	0.153143	0.681211	1189.44	FALSE	2
2022-09-12	11:24:46	0.278639	1.23944	1196.08	FALSE	2

## Sheet: Dominic_star_2022912111922 (E)
Date	Time	Lbs	Total Force x Time	Total Time Steps Force >3		**GoPro Fitting: 1108
2022-09-12	11:19:46	0.412532	0.412532	FALSE	0			Total Force x Time	536.289
2022-09-12	11:19:46	0.446578	0.85911	FALSE	0			Total Time Steps Force >3	2
2022-09-12	11:19:46	0.397417	1.25653	FALSE	0
2022-09-12	11:19:46	0.49757	1.7541	FALSE	0
2022-09-12	11:19:47	0.479148	2.23325	FALSE	0
2022-09-12	11:19:47	0.327443	2.56069	FALSE	0
2022-09-12	11:19:47	0.482557	3.04325	FALSE	0
2022-09-12	11:19:47	0.344491	3.38774	FALSE	0
2022-09-12	11:19:48	0.55126	3.939	FALSE	0
2022-09-12	11:19:48	0.307137	4.24613	FALSE	0
2022-09-12	11:19:48	0.471769	4.7179	FALSE	0
2022-09-12	11:19:48	0.319453	5.03736	FALSE	0
2022-09-12	11:19:49	0.503982	5.54134	FALSE	0
2022-09-12	11:19:49	0.116145	5.65748	FALSE	0
2022-09-12	11:19:49	0.314466	5.97195	FALSE	0
2022-09-12	11:19:49	0.0564506	6.0284	FALSE	0
2022-09-12	11:19:50	0.0947203	6.12312	FALSE	0
2022-09-12	11:19:50	0.12042	6.24354	FALSE	0
2022-09-12	11:19:50	0.146578	6.39012	FALSE	0
2022-09-12	11:19:51	0.042812	6.43293	FALSE	0
2022-09-12	11:19:51	0.194059	6.62699	FALSE	0
2022-09-12	11:19:51	0.217316	6.8443	FALSE	0
2022-09-12	11:19:51	0.149377	6.99368	FALSE	0
2022-09-12	11:19:52	0.131005	7.12469	FALSE	0
2022-09-12	11:19:52	0.0956364	7.22032	FALSE	0
2022-09-12	11:19:52	0.284135	7.50446	FALSE	0
2022-09-12	11:19:52	0.103931	7.60839	FALSE	0
2022-09-12	11:19:53	0.310089	7.91848	FALSE	0
2022-09-12	11:19:53	0.217468	8.13595	FALSE	0
2022-09-12	11:19:53	0.262557	8.3985	FALSE	0
2022-09-12	11:19:53	0.0859671	8.48447	FALSE	0
2022-09-12	11:19:54	0.194415	8.67888	FALSE	0
2022-09-12	11:19:54	0.317316	8.9962	FALSE	0
2022-09-12	11:19:54	0.201794	9.19799	FALSE	0
2022-09-12	11:19:55	0.466476	9.66447	FALSE	0
2022-09-12	11:19:55	0.496858	10.1613	FALSE	0
2022-09-12	11:19:55	1.12648	11.2878	FALSE	0
2022-09-12	11:19:55	0.474873	11.7627	FALSE	0
2022-09-12	11:19:56	0.566628	12.3293	FALSE	0
2022-09-12	11:19:56	0.298893	12.6282	FALSE	0
2022-09-12	11:19:56	0.466069	13.0943	FALSE	0
2022-09-12	11:19:56	0.499707	13.594	FALSE	0
2022-09-12	11:19:57	0.553346	14.1473	FALSE	0
2022-09-12	11:19:57	0.764898	14.9122	FALSE	0
2022-09-12	11:19:57	0.951667	15.8639	FALSE	0
2022-09-12	11:19:57	0.842201	16.7061	FALSE	0
2022-09-12	11:19:58	0.309682	17.0158	FALSE	0
2022-09-12	11:19:58	0.522303	17.5381	FALSE	0
2022-09-12	11:19:58	0.511565	18.0496	FALSE	0
2022-09-12	11:19:59	0.8993	18.9489	FALSE	0
2022-09-12	11:19:59	0.216603	19.1655	FALSE	0
2022-09-12	11:19:59	0.491565	19.6571	FALSE	0
2022-09-12	11:19:59	0.463117	20.1202	FALSE	0
2022-09-12	11:20:00	0.414618	20.5348	FALSE	0
2022-09-12	11:20:00	0.428664	20.9635	FALSE	0
2022-09-12	11:20:00	0.582252	21.5458	FALSE	0
2022-09-12	11:20:00	0.541743	22.0875	FALSE	0
2022-09-12	11:20:01	0.250038	22.3375	FALSE	0
2022-09-12	11:20:01	0.530191	22.8677	FALSE	0
2022-09-12	11:20:01	0.174364	23.0421	FALSE	0
2022-09-12	11:20:01	0.429173	23.4713	FALSE	0
2022-09-12	11:20:02	0.245611	23.7169	FALSE	0
2022-09-12	11:20:02	0.384797	24.1017	FALSE	0
2022-09-12	11:20:02	0.358079	24.4598	FALSE	0
2022-09-12	11:20:03	0.22958	24.6893	FALSE	0
2022-09-12	11:20:03	0.504898	25.1942	FALSE	0
2022-09-12	11:20:03	0.177672	25.3719	FALSE	0
2022-09-12	11:20:03	0.780013	26.1519	FALSE	0
2022-09-12	11:20:04	0.276908	26.4288	FALSE	0
2022-09-12	11:20:04	0.661183	27.09	FALSE	0
2022-09-12	11:20:04	0.464898	27.5549	FALSE	0
2022-09-12	11:20:04	0.623015	28.1779	FALSE	0
2022-09-12	11:20:05	0.742303	28.9202	FALSE	0
2022-09-12	11:20:05	0.370547	29.2908	FALSE	0
2022-09-12	11:20:05	0.775483	30.0663	FALSE	0
2022-09-12	11:20:05	0.403524	30.4698	FALSE	0
2022-09-12	11:20:06	0.936043	31.4058	FALSE	0
2022-09-12	11:20:06	0.534466	31.9403	FALSE	0
2022-09-12	11:20:06	0.758232	32.6985	FALSE	0
2022-09-12	11:20:07	0.508512	33.207	FALSE	0
2022-09-12	11:20:07	0.482659	33.6897	FALSE	0
2022-09-12	11:20:07	0.542659	34.2324	FALSE	0
2022-09-12	11:20:07	0.430293	34.6626	FALSE	0
2022-09-12	11:20:08	0.593957	35.2566	FALSE	0
2022-09-12	11:20:08	0.235891	35.4925	FALSE	0
2022-09-12	11:20:08	0.583168	36.0757	FALSE	0
2022-09-12	11:20:08	0.286781	36.3624	FALSE	0
2022-09-12	11:20:09	1.07197	37.4344	FALSE	0
2022-09-12	11:20:09	0.631208	38.0656	FALSE	0
2022-09-12	11:20:09	1.12184	39.1875	FALSE	0
2022-09-12	11:20:09	0.690852	39.8783	FALSE	0
2022-09-12	11:20:10	0.774313	40.6526	FALSE	0
2022-09-12	11:20:10	0.416501	41.0691	FALSE	0
2022-09-12	11:20:10	0.181641	41.2508	FALSE	0
2022-09-12	11:20:10	0.548308	41.7991	FALSE	0
2022-09-12	11:20:11	0.87869	42.6778	FALSE	0
2022-09-12	11:20:11	0.805254	43.483	FALSE	0
2022-09-12	11:20:11	0.697824	44.1808	FALSE	0
2022-09-12	11:20:12	1.17156	45.3524	FALSE	0
2022-09-12	11:20:12	0.574262	45.9267	FALSE	0
2022-09-12	11:20:12	0.550903	46.4776	FALSE	0
2022-09-12	11:20:12	0.594415	47.072	FALSE	0
2022-09-12	11:20:13	0.246527	47.3185	FALSE	0
2022-09-12	11:20:13	0.409886	47.7284	FALSE	0
2022-09-12	11:20:13	0.154924	47.8833	FALSE	0
2022-09-12	11:20:13	0.388257	48.2716	FALSE	0
2022-09-12	11:20:14	0.208155	48.4797	FALSE	0
2022-09-12	11:20:14	0.345255	48.825	FALSE	0
2022-09-12	11:20:14	0.27126	49.0962	FALSE	0
2022-09-12	11:20:15	0.206374	49.3026	FALSE	0
2022-09-12	11:20:15	0.297774	49.6004	FALSE	0
2022-09-12	11:20:15	0.140624	49.741	FALSE	0
2022-09-12	11:20:15	0.366934	50.108	FALSE	0
2022-09-12	11:20:16	0.0987407	50.2067	FALSE	0
2022-09-12	11:20:16	0.390649	50.5973	FALSE	0
2022-09-12	11:20:16	0.139351	50.7367	FALSE	0
2022-09-12	11:20:16	0.338181	51.0749	FALSE	0
2022-09-12	11:20:17	0.148563	51.2234	FALSE	0
2022-09-12	11:20:17	0.594415	51.8179	FALSE	0
2022-09-12	11:20:17	0.189784	52.0076	FALSE	0
2022-09-12	11:20:17	0.319707	52.3273	FALSE	0
2022-09-12	11:20:18	0.270242	52.5976	FALSE	0
2022-09-12	11:20:18	0.179402	52.777	FALSE	0
2022-09-12	11:20:18	0.221183	52.9982	FALSE	0
2022-09-12	11:20:19	0.0593005	53.0575	FALSE	0
2022-09-12	11:20:19	0.00174323	53.0592	FALSE	0
2022-09-12	11:20:19	0.0887153	53.1479	FALSE	0
2022-09-12	11:20:19	0.0282572	53.1762	FALSE	0
2022-09-12	11:20:20	-0.000241466	53.1762	FALSE	0
2022-09-12	11:20:20	-0.0202924	53.1762	FALSE	0
2022-09-12	11:20:20	0.077214	53.2534	FALSE	0
2022-09-12	11:20:20	0.158334	53.4117	FALSE	0
2022-09-12	11:20:21	0.235229	53.647	FALSE	0
2022-09-12	11:20:21	0.277621	53.9246	FALSE	0
2022-09-12	11:20:21	0.181183	54.1058	FALSE	0
2022-09-12	11:20:21	0.676399	54.7822	FALSE	0
2022-09-12	11:20:22	0.403015	55.1852	FALSE	0
2022-09-12	11:20:22	0.8993	56.0845	FALSE	0
2022-09-12	11:20:22	1.36938	57.4539	FALSE	0
2022-09-12	11:20:22	0.897824	58.3517	FALSE	0
2022-09-12	11:20:23	0.57813	58.9298	FALSE	0
2022-09-12	11:20:23	1.12973	60.0595	FALSE	0
2022-09-12	11:20:23	0.0816923	60.1412	FALSE	0
2022-09-12	11:20:24	0.349173	60.4904	FALSE	0
2022-09-12	11:20:24	0.205662	60.6961	FALSE	0
2022-09-12	11:20:24	0.34327	61.0393	FALSE	0
2022-09-12	11:20:24	0.272176	61.3115	FALSE	0
2022-09-12	11:20:25	0.303575	61.6151	FALSE	0
2022-09-12	11:20:25	0.222049	61.8371	FALSE	0
2022-09-12	11:20:25	0.265611	62.1028	FALSE	0
2022-09-12	11:20:25	0.207137	62.3099	FALSE	0
2022-09-12	11:20:26	0.333295	62.6432	FALSE	0
2022-09-12	11:20:26	0.298639	62.9418	FALSE	0
2022-09-12	11:20:26	0.440471	63.3823	FALSE	0
2022-09-12	11:20:26	0.467341	63.8496	FALSE	0
2022-09-12	11:20:27	0.755229	64.6049	FALSE	0
2022-09-12	11:20:27	0.47187	65.0767	FALSE	0
2022-09-12	11:20:27	0.0988933	65.1756	FALSE	0
2022-09-12	11:20:28	0.427188	65.6028	FALSE	0
2022-09-12	11:20:28	0.105662	65.7085	FALSE	0
2022-09-12	11:20:28	0.360471	66.0689	FALSE	0
2022-09-12	11:20:28	0.100878	66.1698	FALSE	0
2022-09-12	11:20:29	0.31584	66.4857	FALSE	0
2022-09-12	11:20:29	0.361285	66.847	FALSE	0
2022-09-12	11:20:29	0.910445	67.7574	FALSE	0
2022-09-12	11:20:29	2.9421	70.6995	FALSE	0
2022-09-12	11:20:30	2.12887	72.8284	FALSE	0
2022-09-12	11:20:30	1.06795	73.8963	FALSE	0
2022-09-12	11:20:30	1.16968	75.066	FALSE	0
2022-09-12	11:20:30	0.568563	75.6346	FALSE	0
2022-09-12	11:20:31	0.217468	75.852	FALSE	0
2022-09-12	11:20:31	0.574262	76.4263	FALSE	0
2022-09-12	11:20:31	0.545153	76.9714	FALSE	0
2022-09-12	11:20:32	0.443728	77.4152	FALSE	0
2022-09-12	11:20:32	1.06424	78.4794	FALSE	0
2022-09-12	11:20:32	0.522099	79.0015	FALSE	0
2022-09-12	11:20:32	0.298384	79.2999	FALSE	0
2022-09-12	11:20:33	0.212685	79.5126	FALSE	0
2022-09-12	11:20:33	0.353346	79.8659	FALSE	0
2022-09-12	11:20:33	0.236145	80.1021	FALSE	0
2022-09-12	11:20:33	0.391819	80.4939	FALSE	0
2022-09-12	11:20:34	0.649478	81.1434	FALSE	0
2022-09-12	11:20:34	0.879504	82.0229	FALSE	0
2022-09-12	11:20:34	0.777723	82.8006	FALSE	0
2022-09-12	11:20:34	0.341082	83.1417	FALSE	0
2022-09-12	11:20:35	0.163117	83.3048	FALSE	0
2022-09-12	11:20:35	0.361489	83.6663	FALSE	0
2022-09-12	11:20:35	0.271819	83.9381	FALSE	0
2022-09-12	11:20:35	0.478384	84.4165	FALSE	0
2022-09-12	11:20:36	0.310903	84.7274	FALSE	0
2022-09-12	11:20:36	0.51299	85.2404	FALSE	0
2022-09-12	11:20:36	0.378232	85.6186	FALSE	0
2022-09-12	11:20:37	0.371718	85.9903	FALSE	0
2022-09-12	11:20:37	0.487443	86.4778	FALSE	0
2022-09-12	11:20:37	0.327392	86.8052	FALSE	0
2022-09-12	11:20:37	0.997315	87.8025	FALSE	0
2022-09-12	11:20:38	1.13279	88.9353	FALSE	0
2022-09-12	11:20:38	1.86032	90.7956	FALSE	0
2022-09-12	11:20:38	0.314364	91.11	FALSE	0
2022-09-12	11:20:38	0.484898	91.5948	FALSE	0
2022-09-12	11:20:39	0.406832	92.0017	FALSE	0
2022-09-12	11:20:39	0.281336	92.283	FALSE	0
2022-09-12	11:20:39	0.37986	92.6629	FALSE	0
2022-09-12	11:20:39	0.222049	92.8849	FALSE	0
2022-09-12	11:20:40	0.449936	93.3349	FALSE	0
2022-09-12	11:20:40	0.182914	93.5178	FALSE	0
2022-09-12	11:20:40	0.5107	94.0285	FALSE	0
2022-09-12	11:20:41	0.236247	94.2647	FALSE	0
2022-09-12	11:20:41	0.429428	94.6942	FALSE	0
2022-09-12	11:20:41	0.21925	94.9134	FALSE	0
2022-09-12	11:20:41	0.375331	95.2887	FALSE	0
2022-09-12	11:20:42	0.355585	95.6443	FALSE	0
2022-09-12	11:20:42	0.276501	95.9208	FALSE	0
2022-09-12	11:20:42	0.312227	96.233	FALSE	0
2022-09-12	11:20:42	0.205407	96.4385	FALSE	0
2022-09-12	11:20:43	0.39131	96.8298	FALSE	0
2022-09-12	11:20:43	0.169682	96.9994	FALSE	0
2022-09-12	11:20:43	0.41355	97.413	FALSE	0
2022-09-12	11:20:43	0.131209	97.5442	FALSE	0
2022-09-12	11:20:44	0.393957	97.9382	FALSE	0
2022-09-12	11:20:44	0.20444	98.1426	FALSE	0
2022-09-12	11:20:44	0.394771	98.5374	FALSE	0
2022-09-12	11:20:45	0.0201656	98.5575	FALSE	0
2022-09-12	11:20:45	-0.107468	98.5575	FALSE	0
2022-09-12	11:20:45	-0.199631	98.5575	FALSE	0
2022-09-12	11:20:45	0.502455	99.06	FALSE	0
2022-09-12	11:20:46	0.804186	99.8642	FALSE	0
2022-09-12	11:20:46	0.436196	100.3	FALSE	0
2022-09-12	11:20:46	0.263066	100.563	FALSE	0
2022-09-12	11:20:46	0.40785	100.971	FALSE	0
2022-09-12	11:20:47	0.370903	101.342	FALSE	0
2022-09-12	11:20:47	0.434466	101.777	FALSE	0
2022-09-12	11:20:47	0.452735	102.229	FALSE	0
2022-09-12	11:20:47	0.359453	102.589	FALSE	0
2022-09-12	11:20:48	0.395534	102.984	FALSE	0
2022-09-12	11:20:48	0.321489	103.306	FALSE	0
2022-09-12	11:20:48	0.553244	103.859	FALSE	0
2022-09-12	11:20:49	0.457468	104.317	FALSE	0
2022-09-12	11:20:49	0.588919	104.906	FALSE	0
2022-09-12	11:20:49	0.400624	105.306	FALSE	0
2022-09-12	11:20:49	0.587901	105.894	FALSE	0
2022-09-12	11:20:50	0.287036	106.181	FALSE	0
2022-09-12	11:20:50	0.419708	106.601	FALSE	0
2022-09-12	11:20:50	0.293346	106.894	FALSE	0
2022-09-12	11:20:50	0.478486	107.373	FALSE	0
2022-09-12	11:20:51	0.305763	107.678	FALSE	0
2022-09-12	11:20:51	0.376756	108.055	FALSE	0
2022-09-12	11:20:51	0.428155	108.483	FALSE	0
2022-09-12	11:20:51	0.486425	108.97	FALSE	0
2022-09-12	11:20:52	0.332786	109.302	FALSE	0
2022-09-12	11:20:52	0.362507	109.665	FALSE	0
2022-09-12	11:20:52	0.457367	110.122	FALSE	0
2022-09-12	11:20:53	0.435941	110.558	FALSE	0
2022-09-12	11:20:53	0.415789	110.974	FALSE	0
2022-09-12	11:20:53	0.408868	111.383	FALSE	0
2022-09-12	11:20:53	0.350496	111.733	FALSE	0
2022-09-12	11:20:54	0.258384	111.992	FALSE	0
2022-09-12	11:20:54	0.321438	112.313	FALSE	0
2022-09-12	11:20:54	0.36042	112.674	FALSE	0
2022-09-12	11:20:54	0.34668	113.02	FALSE	0
2022-09-12	11:20:55	0.218741	113.239	FALSE	0
2022-09-12	11:20:55	0.0838297	113.323	FALSE	0
2022-09-12	11:20:55	0.132227	113.455	FALSE	0
2022-09-12	11:20:55	0.0688679	113.524	FALSE	0
2022-09-12	11:20:56	0.0843895	113.608	FALSE	0
2022-09-12	11:20:56	0.3593	113.968	FALSE	0
2022-09-12	11:20:56	0.408817	114.377	FALSE	0
2022-09-12	11:20:56	0.439606	114.816	FALSE	0
2022-09-12	11:20:57	0.340522	115.157	FALSE	0
2022-09-12	11:20:57	0.487392	115.644	FALSE	0
2022-09-12	11:20:57	0.474618	116.119	FALSE	0
2022-09-12	11:20:58	0.533499	116.652	FALSE	0
2022-09-12	11:20:58	0.392176	117.044	FALSE	0
2022-09-12	11:20:58	0.368359	117.413	FALSE	0
2022-09-12	11:20:58	0.337519	117.75	FALSE	0
2022-09-12	11:20:59	0.428919	118.179	FALSE	0
2022-09-12	11:20:59	0.349784	118.529	FALSE	0
2022-09-12	11:20:59	0.392685	118.922	FALSE	0
2022-09-12	11:20:59	0.345458	119.267	FALSE	0
2022-09-12	11:21:00	0.379707	119.647	FALSE	0
2022-09-12	11:21:00	0.376247	120.023	FALSE	0
2022-09-12	11:21:00	0.36841	120.391	FALSE	0
2022-09-12	11:21:00	0.368613	120.76	FALSE	0
2022-09-12	11:21:01	0.374364	121.134	FALSE	0
2022-09-12	11:21:01	0.366934	121.501	FALSE	0
2022-09-12	11:21:01	0.367443	121.869	FALSE	0
2022-09-12	11:21:02	0.362303	122.231	FALSE	0
2022-09-12	11:21:02	0.3593	122.59	FALSE	0
2022-09-12	11:21:02	0.307137	122.898	FALSE	0
2022-09-12	11:21:02	0.310445	123.208	FALSE	0
2022-09-12	11:21:03	0.417316	123.625	FALSE	0
2022-09-12	11:21:03	0.52215	124.147	FALSE	0
2022-09-12	11:21:03	0.406985	124.554	FALSE	0
2022-09-12	11:21:03	0.582456	125.137	FALSE	0
2022-09-12	11:21:04	0.396349	125.533	FALSE	0
2022-09-12	11:21:04	0.464542	125.998	FALSE	0
2022-09-12	11:21:04	0.361031	126.359	FALSE	0
2022-09-12	11:21:04	0.334415	126.693	FALSE	0
2022-09-12	11:21:05	0.406425	127.1	FALSE	0
2022-09-12	11:21:05	0.299453	127.399	FALSE	0
2022-09-12	11:21:05	0.374008	127.773	FALSE	0
2022-09-12	11:21:06	0.263321	128.036	FALSE	0
2022-09-12	11:21:06	0.388257	128.425	FALSE	0
2022-09-12	11:21:06	0.374313	128.799	FALSE	0
2022-09-12	11:21:06	0.379707	129.179	FALSE	0
2022-09-12	11:21:07	0.324542	129.503	FALSE	0
2022-09-12	11:21:07	0.398741	129.902	FALSE	0
2022-09-12	11:21:07	0.217316	130.119	FALSE	0
2022-09-12	11:21:07	0.402914	130.522	FALSE	0
2022-09-12	11:21:08	0.351768	130.874	FALSE	0
2022-09-12	11:21:08	0.27869	131.153	FALSE	0
2022-09-12	11:21:08	0.366476	131.519	FALSE	0
2022-09-12	11:21:08	0.355382	131.875	FALSE	0
2022-09-12	11:21:09	0.372125	132.247	FALSE	0
2022-09-12	11:21:09	0.329886	132.577	FALSE	0
2022-09-12	11:21:09	0.576756	133.153	FALSE	0
2022-09-12	11:21:10	0.36841	133.522	FALSE	0
2022-09-12	11:21:10	0.446221	133.968	FALSE	0
2022-09-12	11:21:10	0.22612	134.194	FALSE	0
2022-09-12	11:21:10	0.39813	134.592	FALSE	0
2022-09-12	11:21:11	0.312685	134.905	FALSE	0
2022-09-12	11:21:11	0.38897	135.294	FALSE	0
2022-09-12	11:21:11	0.314567	135.608	FALSE	0
2022-09-12	11:21:11	0.263982	135.872	FALSE	0
2022-09-12	11:21:12	0.325712	136.198	FALSE	0
2022-09-12	11:21:12	0.324949	136.523	FALSE	0
2022-09-12	11:21:12	0.394669	136.918	FALSE	0
2022-09-12	11:21:12	0.379046	137.297	FALSE	0
2022-09-12	11:21:13	0.400674	137.697	FALSE	0
2022-09-12	11:21:13	0.360318	138.058	FALSE	0
2022-09-12	11:21:13	0.280776	138.339	FALSE	0
2022-09-12	11:21:14	0.280267	138.619	FALSE	0
2022-09-12	11:21:14	0.468868	139.088	FALSE	0
2022-09-12	11:21:14	0.92841	140.016	FALSE	0
2022-09-12	11:21:14	0.333906	140.35	FALSE	0
2022-09-12	11:21:15	0.188563	140.539	FALSE	0
2022-09-12	11:21:15	0.140318	140.679	FALSE	0
2022-09-12	11:21:15	0.108308	140.787	FALSE	0
2022-09-12	11:21:15	0.0872903	140.874	FALSE	0
2022-09-12	11:21:16	0.207188	141.082	FALSE	0
2022-09-12	11:21:16	0.377214	141.459	FALSE	0
2022-09-12	11:21:16	0.375178	141.834	FALSE	0
2022-09-12	11:21:16	0.171056	142.005	FALSE	0
2022-09-12	11:21:17	0.380216	142.385	FALSE	0
2022-09-12	11:21:17	0.23813	142.623	FALSE	0
2022-09-12	11:21:17	0.237112	142.861	FALSE	0
2022-09-12	11:21:18	0.142303	143.003	FALSE	0
2022-09-12	11:21:18	0.188512	143.191	FALSE	0
2022-09-12	11:21:18	0.0977228	143.289	FALSE	0
2022-09-12	11:21:18	0.287239	143.576	FALSE	0
2022-09-12	11:21:19	0.0674939	143.644	FALSE	0
2022-09-12	11:21:19	0.187595	143.831	FALSE	0
2022-09-12	11:21:19	0.155535	143.987	FALSE	0
2022-09-12	11:21:19	0.338435	144.325	FALSE	0
2022-09-12	11:21:20	0.117316	144.443	FALSE	0
2022-09-12	11:21:20	0.318842	144.762	FALSE	0
2022-09-12	11:21:20	0.16673	144.928	FALSE	0
2022-09-12	11:21:20	0.311616	145.24	FALSE	0
2022-09-12	11:21:21	0.19126	145.431	FALSE	0
2022-09-12	11:21:21	0.272634	145.704	FALSE	0
2022-09-12	11:21:21	0.188054	145.892	FALSE	0
2022-09-12	11:21:21	0.25472	146.147	FALSE	0
2022-09-12	11:21:22	0.142252	146.289	FALSE	0
2022-09-12	11:21:22	-0.01444	146.289	FALSE	0
2022-09-12	11:21:22	0.00876615	146.298	FALSE	0
2022-09-12	11:21:23	-0.0121499	146.298	FALSE	0
2022-09-12	11:21:23	-0.14874	146.298	FALSE	0
2022-09-12	11:21:23	-0.217137	146.298	FALSE	0
2022-09-12	11:21:23	-0.172099	146.298	FALSE	0
2022-09-12	11:21:24	-0.324567	146.298	FALSE	0
2022-09-12	11:21:24	-0.371183	146.298	FALSE	0
2022-09-12	11:21:24	-0.373473	146.298	FALSE	0
2022-09-12	11:21:24	0.0659671	146.364	FALSE	0
2022-09-12	11:21:25	0.350649	146.714	FALSE	0
2022-09-12	11:21:25	0.290954	147.005	FALSE	0
2022-09-12	11:21:25	0.534058	147.539	FALSE	0
2022-09-12	11:21:25	0.364695	147.904	FALSE	0
2022-09-12	11:21:26	0.542354	148.446	FALSE	0
2022-09-12	11:21:26	0.307697	148.754	FALSE	0
2022-09-12	11:21:26	0.465356	149.219	FALSE	0
2022-09-12	11:21:27	0.28841	149.508	FALSE	0
2022-09-12	11:21:27	0.406171	149.914	FALSE	0
2022-09-12	11:21:27	0.35869	150.273	FALSE	0
2022-09-12	11:21:27	0.395127	150.668	FALSE	0
2022-09-12	11:21:28	0.409428	151.077	FALSE	0
2022-09-12	11:21:28	0.409071	151.486	FALSE	0
2022-09-12	11:21:28	0.347697	151.834	FALSE	0
2022-09-12	11:21:28	0.364593	152.199	FALSE	0
2022-09-12	11:21:29	0.641539	152.84	FALSE	0
2022-09-12	11:21:29	0.339402	153.179	FALSE	0
2022-09-12	11:21:29	0.406527	153.586	FALSE	0
2022-09-12	11:21:29	0.400827	153.987	FALSE	0
2022-09-12	11:21:30	0.422048	154.409	FALSE	0
2022-09-12	11:21:30	0.375127	154.784	FALSE	0
2022-09-12	11:21:30	0.432735	155.217	FALSE	0
2022-09-12	11:21:31	0.315229	155.532	FALSE	0
2022-09-12	11:21:31	0.360827	155.893	FALSE	0
2022-09-12	11:21:31	0.427697	156.32	FALSE	0
2022-09-12	11:21:31	0.418791	156.739	FALSE	0
2022-09-12	11:21:32	0.462557	157.202	FALSE	0
2022-09-12	11:21:32	0.365662	157.567	FALSE	0
2022-09-12	11:21:32	0.395891	157.963	FALSE	0
2022-09-12	11:21:32	0.323524	158.287	FALSE	0
2022-09-12	11:21:33	0.420115	158.707	FALSE	0
2022-09-12	11:21:33	0.34154	159.049	FALSE	0
2022-09-12	11:21:33	0.414109	159.463	FALSE	0
2022-09-12	11:21:33	0.420827	159.883	FALSE	0
2022-09-12	11:21:34	0.613193	160.497	FALSE	0
2022-09-12	11:21:34	0.320776	160.817	FALSE	0
2022-09-12	11:21:34	0.139199	160.957	FALSE	0
2022-09-12	11:21:35	0.120267	161.077	FALSE	0
2022-09-12	11:21:35	0.267494	161.344	FALSE	0
2022-09-12	11:21:35	0.396451	161.741	FALSE	0
2022-09-12	11:21:35	0.490293	162.231	FALSE	0
2022-09-12	11:21:36	0.317824	162.549	FALSE	0
2022-09-12	11:21:36	0.255942	162.805	FALSE	0
2022-09-12	11:21:36	0.392176	163.197	FALSE	0
2022-09-12	11:21:36	0.302608	163.5	FALSE	0
2022-09-12	11:21:37	0.390191	163.89	FALSE	0
2022-09-12	11:21:37	0.329428	164.219	FALSE	0
2022-09-12	11:21:37	0.396298	164.616	FALSE	0
2022-09-12	11:21:37	0.261336	164.877	FALSE	0
2022-09-12	11:21:38	0.410445	165.287	FALSE	0
2022-09-12	11:21:38	0.268104	165.556	FALSE	0
2022-09-12	11:21:38	0.520267	166.076	FALSE	0
2022-09-12	11:21:39	0.298893	166.375	FALSE	0
2022-09-12	11:21:39	0.473448	166.848	FALSE	0
2022-09-12	11:21:39	0.366374	167.214	FALSE	0
2022-09-12	11:21:39	0.422506	167.637	FALSE	0
2022-09-12	11:21:40	0.334415	167.971	FALSE	0
2022-09-12	11:21:40	0.418181	168.39	FALSE	0
2022-09-12	11:21:40	0.352634	168.742	FALSE	0
2022-09-12	11:21:40	0.406679	169.149	FALSE	0
2022-09-12	11:21:41	0.386222	169.535	FALSE	0
2022-09-12	11:21:41	0.369479	169.905	FALSE	0
2022-09-12	11:21:41	0.402201	170.307	FALSE	0
2022-09-12	11:21:41	0.392125	170.699	FALSE	0
2022-09-12	11:21:42	0.41014	171.109	FALSE	0
2022-09-12	11:21:42	0.356298	171.465	FALSE	0
2022-09-12	11:21:42	0.382201	171.848	FALSE	0
2022-09-12	11:21:43	0.333346	172.181	FALSE	0
2022-09-12	11:21:43	0.399809	172.581	FALSE	0
2022-09-12	11:21:43	0.331819	172.913	FALSE	0
2022-09-12	11:21:43	0.357366	173.27	FALSE	0
2022-09-12	11:21:44	0.301641	173.572	FALSE	0
2022-09-12	11:21:44	0.409936	173.981	FALSE	0
2022-09-12	11:21:44	0.354924	174.336	FALSE	0
2022-09-12	11:21:44	0.353143	174.69	FALSE	0
2022-09-12	11:21:45	0.483881	175.173	FALSE	0
2022-09-12	11:21:45	0.304898	175.478	FALSE	0
2022-09-12	11:21:45	0.380674	175.859	FALSE	0
2022-09-12	11:21:45	0.445611	176.305	FALSE	0
2022-09-12	11:21:46	0.225713	176.53	FALSE	0
2022-09-12	11:21:46	0.256705	176.787	FALSE	0
2022-09-12	11:21:46	0.338588	177.126	FALSE	0
2022-09-12	11:21:47	0.25472	177.38	FALSE	0
2022-09-12	11:21:47	0.347799	177.728	FALSE	0
2022-09-12	11:21:47	0.277417	178.006	FALSE	0
2022-09-12	11:21:47	0.298435	178.304	FALSE	0
2022-09-12	11:21:48	0.394262	178.698	FALSE	0
2022-09-12	11:21:48	0.347036	179.045	FALSE	0
2022-09-12	11:21:48	0.341641	179.387	FALSE	0
2022-09-12	11:21:48	0.382506	179.769	FALSE	0
2022-09-12	11:21:49	0.376705	180.146	FALSE	0
2022-09-12	11:21:49	0.394669	180.541	FALSE	0
2022-09-12	11:21:49	0.393092	180.934	FALSE	0
2022-09-12	11:21:49	0.441998	181.376	FALSE	0
2022-09-12	11:21:50	0.352074	181.728	FALSE	0
2022-09-12	11:21:50	0.361896	182.09	FALSE	0
2022-09-12	11:21:50	0.321285	182.411	FALSE	0
2022-09-12	11:21:50	0.328155	182.739	FALSE	0
2022-09-12	11:21:51	0.320013	183.059	FALSE	0
2022-09-12	11:21:51	0.38098	183.44	FALSE	0
2022-09-12	11:21:51	0.360064	183.8	FALSE	0
2022-09-12	11:21:52	0.363779	184.164	FALSE	0
2022-09-12	11:21:52	0.428206	184.592	FALSE	0
2022-09-12	11:21:52	0.419809	185.012	FALSE	0
2022-09-12	11:21:52	0.379097	185.391	FALSE	0
2022-09-12	11:21:53	0.391565	185.783	FALSE	0
2022-09-12	11:21:53	0.349071	186.132	FALSE	0
2022-09-12	11:21:53	0.424033	186.556	FALSE	0
2022-09-12	11:21:53	0.37411	186.93	FALSE	0
2022-09-12	11:21:54	0.357825	187.288	FALSE	0
2022-09-12	11:21:54	0.392379	187.68	FALSE	0
2022-09-12	11:21:54	0.379351	188.06	FALSE	0
2022-09-12	11:21:54	0.345916	188.406	FALSE	0
2022-09-12	11:21:55	0.39299	188.799	FALSE	0
2022-09-12	11:21:55	0.294618	189.093	FALSE	0
2022-09-12	11:21:55	0.348155	189.441	FALSE	0
2022-09-12	11:21:56	0.35645	189.798	FALSE	0
2022-09-12	11:21:56	0.365865	190.164	FALSE	0
2022-09-12	11:21:56	0.397468	190.561	FALSE	0
2022-09-12	11:21:56	0.331921	190.893	FALSE	0
2022-09-12	11:21:57	0.340827	191.234	FALSE	0
2022-09-12	11:21:57	0.393041	191.627	FALSE	0
2022-09-12	11:21:57	0.356654	191.984	FALSE	0
2022-09-12	11:21:57	0.420115	192.404	FALSE	0
2022-09-12	11:21:58	0.469987	192.874	FALSE	0
2022-09-12	11:21:58	0.444898	193.319	FALSE	0
2022-09-12	11:21:58	0.421031	193.74	FALSE	0
2022-09-12	11:21:58	0.422659	194.162	FALSE	0
2022-09-12	11:21:59	0.425611	194.588	FALSE	0
2022-09-12	11:21:59	0.460267	195.048	FALSE	0
2022-09-12	11:21:59	0.453957	195.502	FALSE	0
2022-09-12	11:22:00	0.425153	195.927	FALSE	0
2022-09-12	11:22:00	0.423473	196.351	FALSE	0
2022-09-12	11:22:00	0.430038	196.781	FALSE	0
2022-09-12	11:22:00	0.425204	197.206	FALSE	0
2022-09-12	11:22:01	0.41472	197.621	FALSE	0
2022-09-12	11:22:01	0.430344	198.051	FALSE	0
2022-09-12	11:22:01	0.429275	198.48	FALSE	0
2022-09-12	11:22:01	0.43986	198.92	FALSE	0
2022-09-12	11:22:02	0.430191	199.35	FALSE	0
2022-09-12	11:22:02	0.444949	199.795	FALSE	0
2022-09-12	11:22:02	0.401743	200.197	FALSE	0
2022-09-12	11:22:02	0.33528	200.532	FALSE	0
2022-09-12	11:22:03	0.373448	200.906	FALSE	0
2022-09-12	11:22:03	0.478486	201.384	FALSE	0
2022-09-12	11:22:03	0.381234	201.765	FALSE	0
2022-09-12	11:22:04	0.401489	202.167	FALSE	0
2022-09-12	11:22:04	0.41243	202.579	FALSE	0
2022-09-12	11:22:04	0.399453	202.979	FALSE	0
2022-09-12	11:22:04	0.445763	203.425	FALSE	0
2022-09-12	11:22:05	0.358181	203.783	FALSE	0
2022-09-12	11:22:05	0.403015	204.186	FALSE	0
2022-09-12	11:22:05	0.381641	204.567	FALSE	0
2022-09-12	11:22:05	0.349529	204.917	FALSE	0
2022-09-12	11:22:06	0.393397	205.31	FALSE	0
2022-09-12	11:22:06	0.363931	205.674	FALSE	0
2022-09-12	11:22:06	0.423677	206.098	FALSE	0
2022-09-12	11:22:06	0.323881	206.422	FALSE	0
2022-09-12	11:22:07	0.477875	206.9	FALSE	0
2022-09-12	11:22:07	0.299809	207.199	FALSE	0
2022-09-12	11:22:07	0.518588	207.718	FALSE	0
2022-09-12	11:22:08	0.326221	208.044	FALSE	0
2022-09-12	11:22:08	0.536247	208.581	FALSE	0
2022-09-12	11:22:08	0.290242	208.871	FALSE	0
2022-09-12	11:22:08	0.485102	209.356	FALSE	0
2022-09-12	11:22:09	0.329631	209.686	FALSE	0
2022-09-12	11:22:09	0.452583	210.138	FALSE	0
2022-09-12	11:22:09	0.296705	210.435	FALSE	0
2022-09-12	11:22:09	0.439606	210.874	FALSE	0
2022-09-12	11:22:10	0.34271	211.217	FALSE	0
2022-09-12	11:22:10	0.446985	211.664	FALSE	0
2022-09-12	11:22:10	0.27355	211.938	FALSE	0
2022-09-12	11:22:10	0.403982	212.342	FALSE	0
2022-09-12	11:22:11	0.303524	212.645	FALSE	0
2022-09-12	11:22:11	0.491616	213.137	FALSE	0
2022-09-12	11:22:11	0.346781	213.484	FALSE	0
2022-09-12	11:22:12	0.759962	214.244	FALSE	0
2022-09-12	11:22:12	0.532939	214.776	FALSE	0
2022-09-12	11:22:12	1.08704	215.864	FALSE	0
2022-09-12	11:22:12	0.498537	216.362	FALSE	0
2022-09-12	11:22:13	0.74042	217.102	FALSE	0
2022-09-12	11:22:13	0.409122	217.512	FALSE	0
2022-09-12	11:22:13	0.596908	218.108	FALSE	0
2022-09-12	11:22:13	0.275941	218.384	FALSE	0
2022-09-12	11:22:14	0.471361	218.856	FALSE	0
2022-09-12	11:22:14	0.280165	219.136	FALSE	0
2022-09-12	11:22:14	0.501845	219.638	FALSE	0
2022-09-12	11:22:14	0.255178	219.893	FALSE	0
2022-09-12	11:22:15	0.471565	220.365	FALSE	0
2022-09-12	11:22:15	0.274415	220.639	FALSE	0
2022-09-12	11:22:15	0.54159	221.181	FALSE	0
2022-09-12	11:22:15	0.287748	221.468	FALSE	0
2022-09-12	11:22:16	0.451514	221.92	FALSE	0
2022-09-12	11:22:16	0.417061	222.337	FALSE	0
2022-09-12	11:22:16	0.406985	222.744	FALSE	0
2022-09-12	11:22:17	0.56444	223.308	FALSE	0
2022-09-12	11:22:17	0.349071	223.657	FALSE	0
2022-09-12	11:22:17	0.536145	224.194	FALSE	0
2022-09-12	11:22:17	0.272125	224.466	FALSE	0
2022-09-12	11:22:18	0.53584	225.001	FALSE	0
2022-09-12	11:22:18	0.255229	225.257	FALSE	0
2022-09-12	11:22:18	0.526374	225.783	FALSE	0
2022-09-12	11:22:18	0.480827	226.264	FALSE	0
2022-09-12	11:22:19	1.04851	227.312	FALSE	0
2022-09-12	11:22:19	1.04902	228.361	FALSE	0
2022-09-12	11:22:19	1.12312	229.485	FALSE	0
2022-09-12	11:22:19	0.502303	229.987	FALSE	0
2022-09-12	11:22:20	0.501641	230.489	FALSE	0
2022-09-12	11:22:20	0.352939	230.841	FALSE	0
2022-09-12	11:22:20	0.48098	231.322	FALSE	0
2022-09-12	11:22:21	0.351158	231.674	FALSE	0
2022-09-12	11:22:21	0.813295	232.487	FALSE	0
2022-09-12	11:22:21	0.408563	232.895	FALSE	0
2022-09-12	11:22:21	0.520725	233.416	FALSE	0
2022-09-12	11:22:22	0.410598	233.827	FALSE	0
2022-09-12	11:22:22	0.522099	234.349	FALSE	0
2022-09-12	11:22:22	0.460522	234.809	FALSE	0
2022-09-12	11:22:22	0.732786	235.542	FALSE	0
2022-09-12	11:22:23	0.518995	236.061	FALSE	0
2022-09-12	11:22:23	0.572888	236.634	FALSE	0
2022-09-12	11:22:23	0.725967	237.36	FALSE	0
2022-09-12	11:22:23	0.563728	237.924	FALSE	0
2022-09-12	11:22:24	0.513295	238.437	FALSE	0
2022-09-12	11:22:24	0.801183	239.238	FALSE	0
2022-09-12	11:22:24	1.05228	240.291	FALSE	0
2022-09-12	11:22:25	0.728359	241.019	FALSE	0
2022-09-12	11:22:25	0.75014	241.769	FALSE	0
2022-09-12	11:22:25	0.959249	242.728	FALSE	0
2022-09-12	11:22:25	0.632634	243.361	FALSE	0
2022-09-12	11:22:26	0.433143	243.794	FALSE	0
2022-09-12	11:22:26	0.542863	244.337	FALSE	0
2022-09-12	11:22:26	0.480623	244.818	FALSE	0
2022-09-12	11:22:26	0.498282	245.316	FALSE	0
2022-09-12	11:22:27	0.728613	246.044	FALSE	0
2022-09-12	11:22:27	0.53014	246.575	FALSE	0
2022-09-12	11:22:27	0.445611	247.02	FALSE	0
2022-09-12	11:22:27	0.59355	247.614	FALSE	0
2022-09-12	11:22:28	0.688664	248.302	FALSE	0
2022-09-12	11:22:28	0.756959	249.059	FALSE	0
2022-09-12	11:22:28	1.37406	250.433	FALSE	0
2022-09-12	11:22:29	1.42413	251.858	FALSE	0
2022-09-12	11:22:29	0.650242	252.508	FALSE	0
2022-09-12	11:22:29	0.553855	253.062	FALSE	0
2022-09-12	11:22:29	0.693702	253.755	FALSE	0
2022-09-12	11:22:30	0.508461	254.264	FALSE	0
2022-09-12	11:22:30	0.655433	254.919	FALSE	0
2022-09-12	11:22:30	0.693855	255.613	FALSE	0
2022-09-12	11:22:30	0.788359	256.401	FALSE	0
2022-09-12	11:22:31	1.17391	257.575	FALSE	0
2022-09-12	11:22:31	1.32581	258.901	FALSE	0
2022-09-12	11:22:31	2.07004	260.971	FALSE	0
2022-09-12	11:22:31	1.54581	262.517	FALSE	0
2022-09-12	11:22:32	1.27599	263.793	FALSE	0
2022-09-12	11:22:32	0.823371	264.616	FALSE	0
2022-09-12	11:22:32	0.771107	265.387	FALSE	0
2022-09-12	11:22:33	0.515178	265.903	FALSE	0
2022-09-12	11:22:33	0.337723	266.24	FALSE	0
2022-09-12	11:22:33	0.133499	266.374	FALSE	0
2022-09-12	11:22:33	0.257519	266.631	FALSE	0
2022-09-12	11:22:34	0.215178	266.847	FALSE	0
2022-09-12	11:22:34	0.302099	267.149	FALSE	0
2022-09-12	11:22:34	0.0790969	267.228	FALSE	0
2022-09-12	11:22:34	-0.292913	267.228	FALSE	0
2022-09-12	11:22:35	-0.451386	267.228	FALSE	0
2022-09-12	11:22:35	-0.338155	267.228	FALSE	0
2022-09-12	11:22:35	-0.239224	267.228	FALSE	0
2022-09-12	11:22:35	-0.0252287	267.228	FALSE	0
2022-09-12	11:22:36	0.0942114	267.322	FALSE	0
2022-09-12	11:22:36	0.903982	268.226	FALSE	0
2022-09-12	11:22:36	1.00536	269.231	FALSE	0
2022-09-12	11:22:37	1.14958	270.381	FALSE	0
2022-09-12	11:22:37	0.647341	271.028	FALSE	0
2022-09-12	11:22:37	0.463117	271.491	FALSE	0
2022-09-12	11:22:37	0.384237	271.876	FALSE	0
2022-09-12	11:22:38	0.616959	272.493	FALSE	0
2022-09-12	11:22:38	0.552532	273.045	FALSE	0
2022-09-12	11:22:38	0.47874	273.524	FALSE	0
2022-09-12	11:22:38	0.37472	273.899	FALSE	0
2022-09-12	11:22:39	0.408969	274.308	FALSE	0
2022-09-12	11:22:39	1.11528	275.423	FALSE	0
2022-09-12	11:22:39	1.29518	276.718	FALSE	0
2022-09-12	11:22:39	1.82958	278.548	FALSE	0
2022-09-12	11:22:40	1.35523	279.903	FALSE	0
2022-09-12	11:22:40	0.645051	280.548	FALSE	0
2022-09-12	11:22:40	0.428715	280.977	FALSE	0
2022-09-12	11:22:41	0.342863	281.319	FALSE	0
2022-09-12	11:22:41	0.333295	281.653	FALSE	0
2022-09-12	11:22:41	0.291616	281.944	FALSE	0
2022-09-12	11:22:41	0.372939	282.317	FALSE	0
2022-09-12	11:22:42	0.771768	283.089	FALSE	0
2022-09-12	11:22:42	0.77757	283.867	FALSE	0
2022-09-12	11:22:42	1.40943	285.276	FALSE	0
2022-09-12	11:22:42	3.16968	288.446	1	1
2022-09-12	11:22:43	2.19111	290.637	FALSE	1
2022-09-12	11:22:43	1.08047	291.717	FALSE	1
2022-09-12	11:22:43	0.391667	292.109	FALSE	1
2022-09-12	11:22:43	0.417112	292.526	FALSE	1
2022-09-12	11:22:44	0.361336	292.887	FALSE	1
2022-09-12	11:22:44	0.345102	293.233	FALSE	1
2022-09-12	11:22:44	0.365916	293.598	FALSE	1
2022-09-12	11:22:44	0.370293	293.969	FALSE	1
2022-09-12	11:22:45	0.17187	294.141	FALSE	1
2022-09-12	11:22:45	0.326425	294.467	FALSE	1
2022-09-12	11:22:45	0.24841	294.715	FALSE	1
2022-09-12	11:22:46	0.397214	295.113	FALSE	1
2022-09-12	11:22:46	0.292888	295.406	FALSE	1
2022-09-12	11:22:46	0.271361	295.677	FALSE	1
2022-09-12	11:22:46	0.311921	295.989	FALSE	1
2022-09-12	11:22:47	0.285814	296.275	FALSE	1
2022-09-12	11:22:47	0.366476	296.641	FALSE	1
2022-09-12	11:22:47	0.266171	296.907	FALSE	1
2022-09-12	11:22:47	0.347036	297.254	FALSE	1
2022-09-12	11:22:48	0.278842	297.533	FALSE	1
2022-09-12	11:22:48	0.403066	297.936	FALSE	1
2022-09-12	11:22:48	0.190496	298.127	FALSE	1
2022-09-12	11:22:48	0.441387	298.568	FALSE	1
2022-09-12	11:22:49	0.244593	298.813	FALSE	1
2022-09-12	11:22:49	0.336807	299.149	FALSE	1
2022-09-12	11:22:49	0.230242	299.38	FALSE	1
2022-09-12	11:22:50	0.284084	299.664	FALSE	1
2022-09-12	11:22:50	0.316501	299.98	FALSE	1
2022-09-12	11:22:50	0.312888	300.293	FALSE	1
2022-09-12	11:22:50	0.276501	300.57	FALSE	1
2022-09-12	11:22:51	0.126934	300.697	FALSE	1
2022-09-12	11:22:51	0.11925	300.816	FALSE	1
2022-09-12	11:22:51	0.127596	300.943	FALSE	1
2022-09-12	11:22:51	0.482405	301.426	FALSE	1
2022-09-12	11:22:52	0.365356	301.791	FALSE	1
2022-09-12	11:22:52	0.222812	302.014	FALSE	1
2022-09-12	11:22:52	0.539758	302.554	FALSE	1
2022-09-12	11:22:52	0.71126	303.265	FALSE	1
2022-09-12	11:22:53	0.330598	303.596	FALSE	1
2022-09-12	11:22:53	0.435891	304.032	FALSE	1
2022-09-12	11:22:53	0.461947	304.494	FALSE	1
2022-09-12	11:22:54	0.325204	304.819	FALSE	1
2022-09-12	11:22:54	0.619504	305.438	FALSE	1
2022-09-12	11:22:54	0.297519	305.736	FALSE	1
2022-09-12	11:22:54	0.508104	306.244	FALSE	1
2022-09-12	11:22:55	0.341489	306.585	FALSE	1
2022-09-12	11:22:55	0.368613	306.954	FALSE	1
2022-09-12	11:22:55	0.298639	307.253	FALSE	1
2022-09-12	11:22:55	0.628053	307.881	FALSE	1
2022-09-12	11:22:56	0.301183	308.182	FALSE	1
2022-09-12	11:22:56	0.701896	308.884	FALSE	1
2022-09-12	11:22:56	0.216909	309.101	FALSE	1
2022-09-12	11:22:56	0.214059	309.315	FALSE	1
2022-09-12	11:22:57	0.0862215	309.401	FALSE	1
2022-09-12	11:22:57	0.30617	309.707	FALSE	1
2022-09-12	11:22:57	0.235687	309.943	FALSE	1
2022-09-12	11:22:58	0.357366	310.3	FALSE	1
2022-09-12	11:22:58	0.230038	310.53	FALSE	1
2022-09-12	11:22:58	0.356705	310.887	FALSE	1
2022-09-12	11:22:58	0.264084	311.151	FALSE	1
2022-09-12	11:22:59	0.381336	311.532	FALSE	1
2022-09-12	11:22:59	0.229122	311.761	FALSE	1
2022-09-12	11:22:59	0.442812	312.204	FALSE	1
2022-09-12	11:22:59	0.333346	312.538	FALSE	1
2022-09-12	11:23:00	0.527901	313.065	FALSE	1
2022-09-12	11:23:00	0.32042	313.386	FALSE	1
2022-09-12	11:23:00	0.532684	313.919	FALSE	1
2022-09-12	11:23:00	0.522455	314.441	FALSE	1
2022-09-12	11:23:01	0.637112	315.078	FALSE	1
2022-09-12	11:23:01	0.444338	315.522	FALSE	1
2022-09-12	11:23:01	0.627952	316.15	FALSE	1
2022-09-12	11:23:02	0.461489	316.612	FALSE	1
2022-09-12	11:23:02	0.439097	317.051	FALSE	1
2022-09-12	11:23:02	0.470547	317.522	FALSE	1
2022-09-12	11:23:02	0.49528	318.017	FALSE	1
2022-09-12	11:23:03	0.476298	318.493	FALSE	1
2022-09-12	11:23:03	0.657468	319.151	FALSE	1
2022-09-12	11:23:03	0.401183	319.552	FALSE	1
2022-09-12	11:23:03	0.423066	319.975	FALSE	1
2022-09-12	11:23:04	0.464491	320.439	FALSE	1
2022-09-12	11:23:04	0.519198	320.959	FALSE	1
2022-09-12	11:23:04	0.414211	321.373	FALSE	1
2022-09-12	11:23:04	0.41014	321.783	FALSE	1
2022-09-12	11:23:05	0.685662	322.469	FALSE	1
2022-09-12	11:23:05	0.618333	323.087	FALSE	1
2022-09-12	11:23:05	0.825509	323.912	FALSE	1
2022-09-12	11:23:06	0.388155	324.301	FALSE	1
2022-09-12	11:23:06	0.478181	324.779	FALSE	1
2022-09-12	11:23:06	0.401031	325.18	FALSE	1
2022-09-12	11:23:06	0.402761	325.583	FALSE	1
2022-09-12	11:23:07	0.263728	325.846	FALSE	1
2022-09-12	11:23:07	0.528053	326.374	FALSE	1
2022-09-12	11:23:07	0.256705	326.631	FALSE	1
2022-09-12	11:23:07	0.424237	327.055	FALSE	1
2022-09-12	11:23:08	0.265356	327.321	FALSE	1
2022-09-12	11:23:08	0.428053	327.749	FALSE	1
2022-09-12	11:23:08	0.211107	327.96	FALSE	1
2022-09-12	11:23:08	0.438435	328.398	FALSE	1
2022-09-12	11:23:09	0.244033	328.642	FALSE	1
2022-09-12	11:23:09	0.42729	329.07	FALSE	1
2022-09-12	11:23:09	0.23986	329.309	FALSE	1
2022-09-12	11:23:09	0.362913	329.672	FALSE	1
2022-09-12	11:23:10	0.304084	329.976	FALSE	1
2022-09-12	11:23:10	0.391463	330.368	FALSE	1
2022-09-12	11:23:10	0.279148	330.647	FALSE	1
2022-09-12	11:23:11	0.348206	330.995	FALSE	1
2022-09-12	11:23:11	0.30958	331.305	FALSE	1
2022-09-12	11:23:11	0.374619	331.679	FALSE	1
2022-09-12	11:23:11	0.334517	332.014	FALSE	1
2022-09-12	11:23:12	0.303931	332.318	FALSE	1
2022-09-12	11:23:12	0.313194	332.631	FALSE	1
2022-09-12	11:23:12	0.388054	333.019	FALSE	1
2022-09-12	11:23:12	0.336552	333.356	FALSE	1
2022-09-12	11:23:13	0.242201	333.598	FALSE	1
2022-09-12	11:23:13	0.357977	333.956	FALSE	1
2022-09-12	11:23:13	0.262506	334.218	FALSE	1
2022-09-12	11:23:13	0.401896	334.62	FALSE	1
2022-09-12	11:23:14	0.169937	334.79	FALSE	1
2022-09-12	11:23:14	0.434313	335.224	FALSE	1
2022-09-12	11:23:14	0.23813	335.463	FALSE	1
2022-09-12	11:23:15	0.412481	335.875	FALSE	1
2022-09-12	11:23:15	0.296807	336.172	FALSE	1
2022-09-12	11:23:15	0.379809	336.552	FALSE	1
2022-09-12	11:23:15	0.387036	336.939	FALSE	1
2022-09-12	11:23:16	0.530598	337.469	FALSE	1
2022-09-12	11:23:16	0.47701	337.946	FALSE	1
2022-09-12	11:23:16	0.434771	338.381	FALSE	1
2022-09-12	11:23:16	0.409682	338.791	FALSE	1
2022-09-12	11:23:17	0.353092	339.144	FALSE	1
2022-09-12	11:23:17	0.289937	339.434	FALSE	1
2022-09-12	11:23:17	0.296756	339.731	FALSE	1
2022-09-12	11:23:17	0.301387	340.032	FALSE	1
2022-09-12	11:23:18	0.244898	340.277	FALSE	1
2022-09-12	11:23:18	0.378791	340.656	FALSE	1
2022-09-12	11:23:18	0.430038	341.086	FALSE	1
2022-09-12	11:23:19	0.47874	341.564	FALSE	1
2022-09-12	11:23:19	0.471005	342.035	FALSE	1
2022-09-12	11:23:19	0.771412	342.807	FALSE	1
2022-09-12	11:23:19	1.98846	344.795	FALSE	1
2022-09-12	11:23:20	1.91579	346.711	FALSE	1
2022-09-12	11:23:20	0.827443	347.539	FALSE	1
2022-09-12	11:23:20	0.513601	348.052	FALSE	1
2022-09-12	11:23:20	0.386222	348.438	FALSE	1
2022-09-12	11:23:21	0.443982	348.882	FALSE	1
2022-09-12	11:23:21	0.352379	349.235	FALSE	1
2022-09-12	11:23:21	0.290344	349.525	FALSE	1
2022-09-12	11:23:21	0.423728	349.949	FALSE	1
2022-09-12	11:23:22	0.604084	350.553	FALSE	1
2022-09-12	11:23:22	1.16312	351.716	FALSE	1
2022-09-12	11:23:22	2.54291	354.259	FALSE	1
2022-09-12	11:23:23	0.999148	355.258	FALSE	1
2022-09-12	11:23:23	0.85589	356.114	FALSE	1
2022-09-12	11:23:23	0.38612	356.5	FALSE	1
2022-09-12	11:23:23	0.29528	356.795	FALSE	1
2022-09-12	11:23:24	0.199606	356.995	FALSE	1
2022-09-12	11:23:24	0.205306	357.2	FALSE	1
2022-09-12	11:23:24	0.0822521	357.283	FALSE	1
2022-09-12	11:23:24	0.199148	357.482	FALSE	1
2022-09-12	11:23:25	0.0874938	357.569	FALSE	1
2022-09-12	11:23:25	0.177163	357.746	FALSE	1
2022-09-12	11:23:25	0.151158	357.897	FALSE	1
2022-09-12	11:23:25	0.0791478	357.977	FALSE	1
2022-09-12	11:23:26	0.138232	358.115	FALSE	1
2022-09-12	11:23:26	0.103117	358.218	FALSE	1
2022-09-12	11:23:26	0.223066	358.441	FALSE	1
2022-09-12	11:23:27	0.0227102	358.464	FALSE	1
2022-09-12	11:23:27	0.194822	358.659	FALSE	1
2022-09-12	11:23:27	0.0651529	358.724	FALSE	1
2022-09-12	11:23:27	0.155433	358.879	FALSE	1
2022-09-12	11:23:28	0.3393	359.218	FALSE	1
2022-09-12	11:23:28	0.358435	359.577	FALSE	1
2022-09-12	11:23:28	0.58785	360.165	FALSE	1
2022-09-12	11:23:28	0.240725	360.405	FALSE	1
2022-09-12	11:23:29	0.321692	360.727	FALSE	1
2022-09-12	11:23:29	0.867443	361.595	FALSE	1
2022-09-12	11:23:29	1.55009	363.145	FALSE	1
2022-09-12	11:23:29	2.79126	365.936	FALSE	1
2022-09-12	11:23:30	1.30378	367.24	FALSE	1
2022-09-12	11:23:30	0.94673	368.186	FALSE	1
2022-09-12	11:23:30	0.436603	368.623	FALSE	1
2022-09-12	11:23:31	0.573702	369.197	FALSE	1
2022-09-12	11:23:31	0.350293	369.547	FALSE	1
2022-09-12	11:23:31	0.240115	369.787	FALSE	1
2022-09-12	11:23:31	0.090191	369.877	FALSE	1
2022-09-12	11:23:32	0.287188	370.165	FALSE	1
2022-09-12	11:23:32	0.203524	370.368	FALSE	1
2022-09-12	11:23:32	0.251565	370.62	FALSE	1
2022-09-12	11:23:32	0.798791	371.418	FALSE	1
2022-09-12	11:23:33	1.82739	373.246	FALSE	1
2022-09-12	11:23:33	1.29197	374.538	FALSE	1
2022-09-12	11:23:33	0.306985	374.845	FALSE	1
2022-09-12	11:23:33	0.462914	375.308	FALSE	1
2022-09-12	11:23:34	0.348461	375.656	FALSE	1
2022-09-12	11:23:34	0.311056	375.967	FALSE	1
2022-09-12	11:23:34	0.30042	376.268	FALSE	1
2022-09-12	11:23:34	0.36729	376.635	FALSE	1
2022-09-12	11:23:35	0.323881	376.959	FALSE	1
2022-09-12	11:23:35	0.283219	377.242	FALSE	1
2022-09-12	11:23:35	0.289835	377.532	FALSE	1
2022-09-12	11:23:36	0.276043	377.808	FALSE	1
2022-09-12	11:23:36	0.358333	378.166	FALSE	1
2022-09-12	11:23:36	0.339097	378.505	FALSE	1
2022-09-12	11:23:36	0.583728	379.089	FALSE	1
2022-09-12	11:23:37	0.173753	379.263	FALSE	1
2022-09-12	11:23:37	0.598181	379.861	FALSE	1
2022-09-12	11:23:37	0.206629	380.068	FALSE	1
2022-09-12	11:23:37	0.357468	380.425	FALSE	1
2022-09-12	11:23:38	0.132736	380.558	FALSE	1
2022-09-12	11:23:38	0.473397	381.031	FALSE	1
2022-09-12	11:23:38	0.156501	381.188	FALSE	1
2022-09-12	11:23:38	0.440878	381.629	FALSE	1
2022-09-12	11:23:39	0.152685	381.781	FALSE	1
2022-09-12	11:23:39	0.489173	382.27	FALSE	1
2022-09-12	11:23:39	0.257417	382.528	FALSE	1
2022-09-12	11:23:40	0.567697	383.096	FALSE	1
2022-09-12	11:23:40	0.289122	383.385	FALSE	1
2022-09-12	11:23:40	0.644033	384.029	FALSE	1
2022-09-12	11:23:40	0.501234	384.53	FALSE	1
2022-09-12	11:23:41	0.757824	385.288	FALSE	1
2022-09-12	11:23:41	0.825102	386.113	FALSE	1
2022-09-12	11:23:41	1.16429	387.277	FALSE	1
2022-09-12	11:23:41	0.606781	387.884	FALSE	1
2022-09-12	11:23:42	0.987086	388.871	FALSE	1
2022-09-12	11:23:42	0.491005	389.362	FALSE	1
2022-09-12	11:23:42	0.601743	389.964	FALSE	1
2022-09-12	11:23:42	0.534262	390.498	FALSE	1
2022-09-12	11:23:43	0.397672	390.896	FALSE	1
2022-09-12	11:23:43	0.684593	391.58	FALSE	1
2022-09-12	11:23:43	0.864237	392.445	FALSE	1
2022-09-12	11:23:44	0.506018	392.951	FALSE	1
2022-09-12	11:23:44	0.440929	393.392	FALSE	1
2022-09-12	11:23:44	1.07477	394.466	FALSE	1
2022-09-12	11:23:44	0.811259	395.278	FALSE	1
2022-09-12	11:23:45	0.449071	395.727	FALSE	1
2022-09-12	11:23:45	0.441743	396.168	FALSE	1
2022-09-12	11:23:45	0.481438	396.65	FALSE	1
2022-09-12	11:23:45	0.301998	396.952	FALSE	1
2022-09-12	11:23:46	0.409682	397.361	FALSE	1
2022-09-12	11:23:46	0.471463	397.833	FALSE	1
2022-09-12	11:23:46	0.70098	398.534	FALSE	1
2022-09-12	11:23:46	1.42103	399.955	FALSE	1
2022-09-12	11:23:47	1.25396	401.209	FALSE	1
2022-09-12	11:23:47	1.11335	402.322	FALSE	1
2022-09-12	11:23:47	1.00678	403.329	FALSE	1
2022-09-12	11:23:48	0.543779	403.873	FALSE	1
2022-09-12	11:23:48	0.364033	404.237	FALSE	1
2022-09-12	11:23:48	0.265916	404.503	FALSE	1
2022-09-12	11:23:48	0.41584	404.919	FALSE	1
2022-09-12	11:23:49	0.15869	405.077	FALSE	1
2022-09-12	11:23:49	0.454822	405.532	FALSE	1
2022-09-12	11:23:49	0.175585	405.708	FALSE	1
2022-09-12	11:23:49	0.447392	406.155	FALSE	1
2022-09-12	11:23:50	0.251565	406.407	FALSE	1
2022-09-12	11:23:50	0.535178	406.942	FALSE	1
2022-09-12	11:23:50	0.208461	407.15	FALSE	1
2022-09-12	11:23:50	0.482761	407.633	FALSE	1
2022-09-12	11:23:51	0.343473	407.977	FALSE	1
2022-09-12	11:23:51	0.561234	408.538	FALSE	1
2022-09-12	11:23:51	0.329377	408.867	FALSE	1
2022-09-12	11:23:52	0.322964	409.19	FALSE	1
2022-09-12	11:23:52	0.341743	409.532	FALSE	1
2022-09-12	11:23:52	0.291514	409.823	FALSE	1
2022-09-12	11:23:52	0.338944	410.162	FALSE	1
2022-09-12	11:23:53	0.173092	410.335	FALSE	1
2022-09-12	11:23:53	0.335382	410.671	FALSE	1
2022-09-12	11:23:53	0.253651	410.924	FALSE	1
2022-09-12	11:23:54	0.365	411.289	FALSE	1
2022-09-12	11:23:54	0.240573	411.53	FALSE	1
2022-09-12	11:23:54	0.458079	411.988	FALSE	1
2022-09-12	11:23:54	0.567952	412.556	FALSE	1
2022-09-12	11:23:54	0.873092	413.429	FALSE	1
2022-09-12	11:23:55	0.703219	414.132	FALSE	1
2022-09-12	11:23:55	0.600725	414.733	FALSE	1
2022-09-12	11:23:55	0.334822	415.068	FALSE	1
2022-09-12	11:23:56	0.48612	415.554	FALSE	1
2022-09-12	11:23:56	0.24897	415.803	FALSE	1
2022-09-12	11:23:56	0.639453	416.442	FALSE	1
2022-09-12	11:23:56	0.638944	417.081	FALSE	1
2022-09-12	11:23:57	1.11248	418.194	FALSE	1
2022-09-12	11:23:57	0.786578	418.98	FALSE	1
2022-09-12	11:23:57	0.510242	419.491	FALSE	1
2022-09-12	11:23:57	0.155993	419.647	FALSE	1
2022-09-12	11:23:58	0.464339	420.111	FALSE	1
2022-09-12	11:23:58	0.286323	420.397	FALSE	1
2022-09-12	11:23:58	0.42897	420.826	FALSE	1
2022-09-12	11:23:58	0.492379	421.319	FALSE	1
2022-09-12	11:23:59	0.670496	421.989	FALSE	1
2022-09-12	11:23:59	0.554822	422.544	FALSE	1
2022-09-12	11:23:59	0.660267	423.204	FALSE	1
2022-09-12	11:23:59	0.836145	424.04	FALSE	1
2022-09-12	11:24:00	0.696552	424.737	FALSE	1
2022-09-12	11:24:00	1.02469	425.762	FALSE	1
2022-09-12	11:24:00	0.910445	426.672	FALSE	1
2022-09-12	11:24:01	0.570801	427.243	FALSE	1
2022-09-12	11:24:01	1.1764	428.419	FALSE	1
2022-09-12	11:24:01	1.10205	429.521	FALSE	1
2022-09-12	11:24:01	1.35197	430.873	FALSE	1
2022-09-12	11:24:02	1.41202	432.285	FALSE	1
2022-09-12	11:24:02	1.17503	433.46	FALSE	1
2022-09-12	11:24:02	1.00541	434.466	FALSE	1
2022-09-12	11:24:02	0.8593	435.325	FALSE	1
2022-09-12	11:24:03	0.994262	436.319	FALSE	1
2022-09-12	11:24:03	0.584237	436.904	FALSE	1
2022-09-12	11:24:03	0.423677	437.327	FALSE	1
2022-09-12	11:24:03	0.345967	437.673	FALSE	1
2022-09-12	11:24:04	0.458079	438.131	FALSE	1
2022-09-12	11:24:04	0.46098	438.592	FALSE	1
2022-09-12	11:24:04	0.442405	439.035	FALSE	1
2022-09-12	11:24:05	0.222608	439.257	FALSE	1
2022-09-12	11:24:05	0.446323	439.704	FALSE	1
2022-09-12	11:24:05	0.361234	440.065	FALSE	1
2022-09-12	11:24:05	0.489377	440.554	FALSE	1
2022-09-12	11:24:06	0.441336	440.996	FALSE	1
2022-09-12	11:24:06	0.709682	441.705	FALSE	1
2022-09-12	11:24:06	0.623371	442.329	FALSE	1
2022-09-12	11:24:06	0.490547	442.819	FALSE	1
2022-09-12	11:24:07	0.300522	443.12	FALSE	1
2022-09-12	11:24:07	0.762048	443.882	FALSE	1
2022-09-12	11:24:07	0.591921	444.474	FALSE	1
2022-09-12	11:24:07	0.581132	445.055	FALSE	1
2022-09-12	11:24:08	0.466171	445.521	FALSE	1
2022-09-12	11:24:08	0.43472	445.956	FALSE	1
2022-09-12	11:24:08	0.119911	446.076	FALSE	1
2022-09-12	11:24:09	0.430649	446.506	FALSE	1
2022-09-12	11:24:09	0.113244	446.619	FALSE	1
2022-09-12	11:24:09	0.415026	447.035	FALSE	1
2022-09-12	11:24:09	0.298435	447.333	FALSE	1
2022-09-12	11:24:10	0.609071	447.942	FALSE	1
2022-09-12	11:24:10	0.518842	448.461	FALSE	1
2022-09-12	11:24:10	0.939249	449.4	FALSE	1
2022-09-12	11:24:10	0.989224	450.389	FALSE	1
2022-09-12	11:24:11	0.867799	451.257	FALSE	1
2022-09-12	11:24:11	0.740878	451.998	FALSE	1
2022-09-12	11:24:11	1.06424	453.062	FALSE	1
2022-09-12	11:24:11	0.428206	453.49	FALSE	1
2022-09-12	11:24:12	0.425611	453.916	FALSE	1
2022-09-12	11:24:12	0.265967	454.182	FALSE	1
2022-09-12	11:24:12	0.415229	454.597	FALSE	1
2022-09-12	11:24:13	0.392532	454.99	FALSE	1
2022-09-12	11:24:13	0.789275	455.779	FALSE	1
2022-09-12	11:24:13	1.3276	457.107	FALSE	1
2022-09-12	11:24:13	1.44536	458.552	FALSE	1
2022-09-12	11:24:14	0.61645	459.168	FALSE	1
2022-09-12	11:24:14	0.358333	459.527	FALSE	1
2022-09-12	11:24:14	0.162863	459.69	FALSE	1
2022-09-12	11:24:14	0.332176	460.022	FALSE	1
2022-09-12	11:24:15	0.544186	460.566	FALSE	1
2022-09-12	11:24:15	0.16668	460.733	FALSE	1
2022-09-12	11:24:15	0.315026	461.048	FALSE	1
2022-09-12	11:24:15	0.516959	461.565	FALSE	1
2022-09-12	11:24:16	0.722862	462.288	FALSE	1
2022-09-12	11:24:16	0.328257	462.616	FALSE	1
2022-09-12	11:24:16	0.283728	462.9	FALSE	1
2022-09-12	11:24:17	0.254873	463.154	FALSE	1
2022-09-12	11:24:17	0.42673	463.581	FALSE	1
2022-09-12	11:24:17	0.264186	463.845	FALSE	1
2022-09-12	11:24:17	0.378435	464.224	FALSE	1
2022-09-12	11:24:18	0.343372	464.567	FALSE	1
2022-09-12	11:24:18	0.274313	464.841	FALSE	1
2022-09-12	11:24:18	0.375433	465.217	FALSE	1
2022-09-12	11:24:18	0.111056	465.328	FALSE	1
2022-09-12	11:24:19	0.122049	465.45	FALSE	1
2022-09-12	11:24:19	0.178435	465.628	FALSE	1
2022-09-12	11:24:19	0.237265	465.866	FALSE	1
2022-09-12	11:24:19	0.232736	466.098	FALSE	1
2022-09-12	11:24:20	0.344593	466.443	FALSE	1
2022-09-12	11:24:20	0.465153	466.908	FALSE	1
2022-09-12	11:24:20	0.472227	467.38	FALSE	1
2022-09-12	11:24:21	0.638079	468.018	FALSE	1
2022-09-12	11:24:21	0.397723	468.416	FALSE	1
2022-09-12	11:24:21	0.466425	468.883	FALSE	1
2022-09-12	11:24:21	0.677672	469.56	FALSE	1
2022-09-12	11:24:22	0.767392	470.328	FALSE	1
2022-09-12	11:24:22	0.661285	470.989	FALSE	1
2022-09-12	11:24:22	0.530241	471.519	FALSE	1
2022-09-12	11:24:22	0.575789	472.095	FALSE	1
2022-09-12	11:24:23	0.546221	472.641	FALSE	1
2022-09-12	11:24:23	0.535534	473.177	FALSE	1
2022-09-12	11:24:23	0.555127	473.732	FALSE	1
2022-09-12	11:24:23	0.554364	474.286	FALSE	1
2022-09-12	11:24:24	0.555331	474.842	FALSE	1
2022-09-12	11:24:24	0.506883	475.348	FALSE	1
2022-09-12	11:24:24	0.535992	475.884	FALSE	1
2022-09-12	11:24:25	0.510394	476.395	FALSE	1
2022-09-12	11:24:25	0.496909	476.892	FALSE	1
2022-09-12	11:24:25	0.509987	477.402	FALSE	1
2022-09-12	11:24:25	0.602608	478.004	FALSE	1
2022-09-12	11:24:26	0.570191	478.575	FALSE	1
2022-09-12	11:24:26	0.66042	479.235	FALSE	1
2022-09-12	11:24:26	0.351158	479.586	FALSE	1
2022-09-12	11:24:26	0.309479	479.896	FALSE	1
2022-09-12	11:24:27	0.434313	480.33	FALSE	1
2022-09-12	11:24:27	0.35126	480.681	FALSE	1
2022-09-12	11:24:27	0.375178	481.056	FALSE	1
2022-09-12	11:24:27	0.257977	481.314	FALSE	1
2022-09-12	11:24:28	0.321947	481.636	FALSE	1
2022-09-12	11:24:28	0.335535	481.972	FALSE	1
2022-09-12	11:24:28	0.317977	482.29	FALSE	1
2022-09-12	11:24:28	0.335331	482.625	FALSE	1
2022-09-12	11:24:29	0.301082	482.926	FALSE	1
2022-09-12	11:24:29	0.286069	483.212	FALSE	1
2022-09-12	11:24:29	0.296094	483.508	FALSE	1
2022-09-12	11:24:30	0.284389	483.793	FALSE	1
2022-09-12	11:24:30	0.288868	484.082	FALSE	1
2022-09-12	11:24:30	0.286374	484.368	FALSE	1
2022-09-12	11:24:30	0.294975	484.663	FALSE	1
2022-09-12	11:24:31	0.302303	484.965	FALSE	1
2022-09-12	11:24:31	0.290853	485.256	FALSE	1
2022-09-12	11:24:31	0.353244	485.609	FALSE	1
2022-09-12	11:24:31	0.815025	486.424	FALSE	1
2022-09-12	11:24:32	3.01925	489.444	1	2
2022-09-12	11:24:32	1.24347	490.687	FALSE	2
2022-09-12	11:24:32	0.79874	491.486	FALSE	2
2022-09-12	11:24:32	1.04826	492.534	FALSE	2
2022-09-12	11:24:33	2.28541	494.82	FALSE	2
2022-09-12	11:24:33	1.91024	496.73	FALSE	2
2022-09-12	11:24:33	1.64785	498.378	FALSE	2
2022-09-12	11:24:34	2.1424	500.52	FALSE	2
2022-09-12	11:24:34	1.36281	501.883	FALSE	2
2022-09-12	11:24:34	2.13874	504.022	FALSE	2
2022-09-12	11:24:34	2.94627	506.968	FALSE	2
2022-09-12	11:24:35	1.86347	508.831	FALSE	2
2022-09-12	11:24:35	1.14047	509.972	FALSE	2
2022-09-12	11:24:35	1.17538	511.147	FALSE	2
2022-09-12	11:24:35	1.43818	512.585	FALSE	2
2022-09-12	11:24:36	2.94973	515.535	FALSE	2
2022-09-12	11:24:36	2.70016	518.235	FALSE	2
2022-09-12	11:24:36	1.89655	520.132	FALSE	2
2022-09-12	11:24:36	1.21212	521.344	FALSE	2
2022-09-12	11:24:37	1.16968	522.514	FALSE	2
2022-09-12	11:24:37	0.571819	523.085	FALSE	2
2022-09-12	11:24:37	0.685153	523.771	FALSE	2
2022-09-12	11:24:38	1.00088	524.771	FALSE	2
2022-09-12	11:24:38	0.843626	525.615	FALSE	2
2022-09-12	11:24:38	0.763524	526.379	FALSE	2
2022-09-12	11:24:38	0.51701	526.896	FALSE	2
2022-09-12	11:24:39	0.616349	527.512	FALSE	2
2022-09-12	11:24:39	0.396501	527.908	FALSE	2
2022-09-12	11:24:39	0.451107	528.36	FALSE	2
2022-09-12	11:24:39	0.316858	528.676	FALSE	2
2022-09-12	11:24:40	0.891056	529.567	FALSE	2
2022-09-12	11:24:40	0.290242	529.858	FALSE	2
2022-09-12	11:24:40	0.332939	530.191	FALSE	2
2022-09-12	11:24:40	0.161234	530.352	FALSE	2
2022-09-12	11:24:41	0.274975	530.627	FALSE	2
2022-09-12	11:24:41	0.104339	530.731	FALSE	2
2022-09-12	11:24:41	0.236858	530.968	FALSE	2
2022-09-12	11:24:42	0.226374	531.194	FALSE	2
2022-09-12	11:24:42	0.383066	531.578	FALSE	2
2022-09-12	11:24:42	0.26215	531.84	FALSE	2
2022-09-12	11:24:42	0.372074	532.212	FALSE	2
2022-09-12	11:24:43	0.220929	532.433	FALSE	2
2022-09-12	11:24:43	0.165356	532.598	FALSE	2
2022-09-12	11:24:43	0.173804	532.772	FALSE	2
2022-09-12	11:24:43	0.181794	532.954	FALSE	2
2022-09-12	11:24:44	0.16668	533.12	FALSE	2
2022-09-12	11:24:44	0.188257	533.309	FALSE	2
2022-09-12	11:24:44	0.627799	533.936	FALSE	2
2022-09-12	11:24:44	0.331056	534.267	FALSE	2
2022-09-12	11:24:45	0.416145	534.684	FALSE	2
2022-09-12	11:24:45	0.26897	534.953	FALSE	2
2022-09-12	11:24:45	0.348257	535.301	FALSE	2
2022-09-12	11:24:46	0.19813	535.499	FALSE	2
2022-09-12	11:24:46	0.358283	535.857	FALSE	2
2022-09-12	11:24:46	0.153143	536.01	FALSE	2
2022-09-12	11:24:46	0.278639	536.289	FALSE	2

## Sheet: Dominic_star_2022912111922
						**GoPro Fitting: 1108
2022-09-12	11:19:23	0.376094
2022-09-12	11:19:23	0.387188
2022-09-12	11:19:23	0.386629
2022-09-12	11:19:23	0.396552
2022-09-12	11:19:24	0.384593
2022-09-12	11:19:24	0.359097
2022-09-12	11:19:24	0.510598
2022-09-12	11:19:24	0.316043
2022-09-12	11:19:25	0.500827
2022-09-12	11:19:25	0.334059
2022-09-12	11:19:25	0.4193
2022-09-12	11:19:26	0.295229
2022-09-12	11:19:26	0.508257
2022-09-12	11:19:26	0.408817
2022-09-12	11:19:26	0.460267
2022-09-12	11:19:27	0.404898
2022-09-12	11:19:27	0.481845
2022-09-12	11:19:27	0.439962
2022-09-12	11:19:27	0.460623
2022-09-12	11:19:28	0.474975
2022-09-12	11:19:28	0.497112
2022-09-12	11:19:28	0.408613
2022-09-12	11:19:28	0.414313
2022-09-12	11:19:29	0.359199
2022-09-12	11:19:29	0.585153
2022-09-12	11:19:29	0.317519
2022-09-12	11:19:30	0.215636
2022-09-12	11:19:30	0.420674
2022-09-12	11:19:30	0.161998
2022-09-12	11:19:30	0.185306
2022-09-12	11:19:31	0.0280537
2022-09-12	11:19:31	0.118537
2022-09-12	11:19:31	0.193499
2022-09-12	11:19:31	0.224797
2022-09-12	11:19:32	0.452532
2022-09-12	11:19:32	0.285051
2022-09-12	11:19:32	0.418944
2022-09-12	11:19:32	0.037214
2022-09-12	11:19:33	-0.0916919
2022-09-12	11:19:33	-0.378053
2022-09-12	11:19:33	-0.322939
2022-09-12	11:19:34	-0.167722
2022-09-12	11:19:34	0.283677
2022-09-12	11:19:34	0.264237
2022-09-12	11:19:34	0.734211
2022-09-12	11:19:35	0.246934
2022-09-12	11:19:35	0.621489
2022-09-12	11:19:35	0.461998
2022-09-12	11:19:35	0.577977
2022-09-12	11:19:36	0.218232
2022-09-12	11:19:36	0.213855
2022-09-12	11:19:36	0.24897
2022-09-12	11:19:36	0.153397
2022-09-12	11:19:37	0.122049
2022-09-12	11:19:37	0.21986
2022-09-12	11:19:37	-0.0552542
2022-09-12	11:19:38	0.00973306
2022-09-12	11:19:38	-0.0284858
2022-09-12	11:19:38	0.321641
2022-09-12	11:19:38	0.281998
2022-09-12	11:19:39	0.315534
2022-09-12	11:19:39	0.160929
2022-09-12	11:19:39	0.459809
2022-09-12	11:19:39	0.230293
2022-09-12	11:19:40	0.405713
2022-09-12	11:19:40	0.3164
2022-09-12	11:19:40	0.415789
2022-09-12	11:19:40	0.413499
2022-09-12	11:19:41	0.409835
2022-09-12	11:19:41	0.315789
2022-09-12	11:19:41	0.418232
2022-09-12	11:19:42	0.28042
2022-09-12	11:19:42	0.354517
2022-09-12	11:19:42	1.29686
2022-09-12	11:19:42	2.59543
2022-09-12	11:19:43	2.31365
2022-09-12	11:19:43	0.552532
2022-09-12	11:19:43	0.487646
2022-09-12	11:19:43	0.437265
2022-09-12	11:19:44	0.412837
2022-09-12	11:19:44	0.340776
2022-09-12	11:19:44	0.39243
2022-09-12	11:19:45	0.348613
2022-09-12	11:19:45	0.455178
2022-09-12	11:19:45	0.351361
2022-09-12	11:19:45	0.453397
2022-09-12	11:19:46	0.412532
2022-09-12	11:19:46	0.446578
2022-09-12	11:19:46	0.397417
2022-09-12	11:19:46	0.49757
2022-09-12	11:19:47	0.479148
2022-09-12	11:19:47	0.327443
2022-09-12	11:19:47	0.482557
2022-09-12	11:19:47	0.344491
2022-09-12	11:19:48	0.55126
2022-09-12	11:19:48	0.307137
2022-09-12	11:19:48	0.471769
2022-09-12	11:19:48	0.319453
2022-09-12	11:19:49	0.503982
2022-09-12	11:19:49	0.116145
2022-09-12	11:19:49	0.314466
2022-09-12	11:19:49	0.0564506
2022-09-12	11:19:50	0.0947203
2022-09-12	11:19:50	0.12042
2022-09-12	11:19:50	0.146578
2022-09-12	11:19:51	0.042812
2022-09-12	11:19:51	0.194059
2022-09-12	11:19:51	0.217316
2022-09-12	11:19:51	0.149377
2022-09-12	11:19:52	0.131005
2022-09-12	11:19:52	0.0956364
2022-09-12	11:19:52	0.284135
2022-09-12	11:19:52	0.103931
2022-09-12	11:19:53	0.310089
2022-09-12	11:19:53	0.217468
2022-09-12	11:19:53	0.262557
2022-09-12	11:19:53	0.0859671
2022-09-12	11:19:54	0.194415
2022-09-12	11:19:54	0.317316
2022-09-12	11:19:54	0.201794
2022-09-12	11:19:55	0.466476
2022-09-12	11:19:55	0.496858
2022-09-12	11:19:55	1.12648
2022-09-12	11:19:55	0.474873
2022-09-12	11:19:56	0.566628
2022-09-12	11:19:56	0.298893
2022-09-12	11:19:56	0.466069
2022-09-12	11:19:56	0.499707
2022-09-12	11:19:57	0.553346
2022-09-12	11:19:57	0.764898
2022-09-12	11:19:57	0.951667
2022-09-12	11:19:57	0.842201
2022-09-12	11:19:58	0.309682
2022-09-12	11:19:58	0.522303
2022-09-12	11:19:58	0.511565
2022-09-12	11:19:59	0.8993
2022-09-12	11:19:59	0.216603
2022-09-12	11:19:59	0.491565
2022-09-12	11:19:59	0.463117
2022-09-12	11:20:00	0.414618
2022-09-12	11:20:00	0.428664
2022-09-12	11:20:00	0.582252
2022-09-12	11:20:00	0.541743
2022-09-12	11:20:01	0.250038
2022-09-12	11:20:01	0.530191
2022-09-12	11:20:01	0.174364
2022-09-12	11:20:01	0.429173
2022-09-12	11:20:02	0.245611
2022-09-12	11:20:02	0.384797
2022-09-12	11:20:02	0.358079
2022-09-12	11:20:03	0.22958
2022-09-12	11:20:03	0.504898
2022-09-12	11:20:03	0.177672
2022-09-12	11:20:03	0.780013
2022-09-12	11:20:04	0.276908
2022-09-12	11:20:04	0.661183
2022-09-12	11:20:04	0.464898
2022-09-12	11:20:04	0.623015
2022-09-12	11:20:05	0.742303
2022-09-12	11:20:05	0.370547
2022-09-12	11:20:05	0.775483
2022-09-12	11:20:05	0.403524
2022-09-12	11:20:06	0.936043
2022-09-12	11:20:06	0.534466
2022-09-12	11:20:06	0.758232
2022-09-12	11:20:07	0.508512
2022-09-12	11:20:07	0.482659
2022-09-12	11:20:07	0.542659
2022-09-12	11:20:07	0.430293
2022-09-12	11:20:08	0.593957
2022-09-12	11:20:08	0.235891
2022-09-12	11:20:08	0.583168
2022-09-12	11:20:08	0.286781
2022-09-12	11:20:09	1.07197
2022-09-12	11:20:09	0.631208
2022-09-12	11:20:09	1.12184
2022-09-12	11:20:09	0.690852
2022-09-12	11:20:10	0.774313
2022-09-12	11:20:10	0.416501
2022-09-12	11:20:10	0.181641
2022-09-12	11:20:10	0.548308
2022-09-12	11:20:11	0.87869
2022-09-12	11:20:11	0.805254
2022-09-12	11:20:11	0.697824
2022-09-12	11:20:12	1.17156
2022-09-12	11:20:12	0.574262
2022-09-12	11:20:12	0.550903
2022-09-12	11:20:12	0.594415
2022-09-12	11:20:13	0.246527
2022-09-12	11:20:13	0.409886
2022-09-12	11:20:13	0.154924
2022-09-12	11:20:13	0.388257
2022-09-12	11:20:14	0.208155
2022-09-12	11:20:14	0.345255
2022-09-12	11:20:14	0.27126
2022-09-12	11:20:15	0.206374
2022-09-12	11:20:15	0.297774
2022-09-12	11:20:15	0.140624
2022-09-12	11:20:15	0.366934
2022-09-12	11:20:16	0.0987407
2022-09-12	11:20:16	0.390649
2022-09-12	11:20:16	0.139351
2022-09-12	11:20:16	0.338181
2022-09-12	11:20:17	0.148563
2022-09-12	11:20:17	0.594415
2022-09-12	11:20:17	0.189784
2022-09-12	11:20:17	0.319707
2022-09-12	11:20:18	0.270242
2022-09-12	11:20:18	0.179402
2022-09-12	11:20:18	0.221183
2022-09-12	11:20:19	0.0593005
2022-09-12	11:20:19	0.00174323
2022-09-12	11:20:19	0.0887153
2022-09-12	11:20:19	0.0282572
2022-09-12	11:20:20	-0.000241466
2022-09-12	11:20:20	-0.0202924
2022-09-12	11:20:20	0.077214
2022-09-12	11:20:20	0.158334
2022-09-12	11:20:21	0.235229
2022-09-12	11:20:21	0.277621
2022-09-12	11:20:21	0.181183
2022-09-12	11:20:21	0.676399
2022-09-12	11:20:22	0.403015
2022-09-12	11:20:22	0.8993
2022-09-12	11:20:22	1.36938
2022-09-12	11:20:22	0.897824
2022-09-12	11:20:23	0.57813
2022-09-12	11:20:23	1.12973
2022-09-12	11:20:23	0.0816923
2022-09-12	11:20:24	0.349173
2022-09-12	11:20:24	0.205662
2022-09-12	11:20:24	0.34327
2022-09-12	11:20:24	0.272176
2022-09-12	11:20:25	0.303575
2022-09-12	11:20:25	0.222049
2022-09-12	11:20:25	0.265611
2022-09-12	11:20:25	0.207137
2022-09-12	11:20:26	0.333295
2022-09-12	11:20:26	0.298639
2022-09-12	11:20:26	0.440471
2022-09-12	11:20:26	0.467341
2022-09-12	11:20:27	0.755229
2022-09-12	11:20:27	0.47187
2022-09-12	11:20:27	0.0988933
2022-09-12	11:20:28	0.427188
2022-09-12	11:20:28	0.105662
2022-09-12	11:20:28	0.360471
2022-09-12	11:20:28	0.100878
2022-09-12	11:20:29	0.31584
2022-09-12	11:20:29	0.361285
2022-09-12	11:20:29	0.910445
2022-09-12	11:20:29	2.9421
2022-09-12	11:20:30	2.12887
2022-09-12	11:20:30	1.06795
2022-09-12	11:20:30	1.16968
2022-09-12	11:20:30	0.568563
2022-09-12	11:20:31	0.217468
2022-09-12	11:20:31	0.574262
2022-09-12	11:20:31	0.545153
2022-09-12	11:20:32	0.443728
2022-09-12	11:20:32	1.06424
2022-09-12	11:20:32	0.522099
2022-09-12	11:20:32	0.298384
2022-09-12	11:20:33	0.212685
2022-09-12	11:20:33	0.353346
2022-09-12	11:20:33	0.236145
2022-09-12	11:20:33	0.391819
2022-09-12	11:20:34	0.649478
2022-09-12	11:20:34	0.879504
2022-09-12	11:20:34	0.777723
2022-09-12	11:20:34	0.341082
2022-09-12	11:20:35	0.163117
2022-09-12	11:20:35	0.361489
2022-09-12	11:20:35	0.271819
2022-09-12	11:20:35	0.478384
2022-09-12	11:20:36	0.310903
2022-09-12	11:20:36	0.51299
2022-09-12	11:20:36	0.378232
2022-09-12	11:20:37	0.371718
2022-09-12	11:20:37	0.487443
2022-09-12	11:20:37	0.327392
2022-09-12	11:20:37	0.997315
2022-09-12	11:20:38	1.13279
2022-09-12	11:20:38	1.86032
2022-09-12	11:20:38	0.314364
2022-09-12	11:20:38	0.484898
2022-09-12	11:20:39	0.406832
2022-09-12	11:20:39	0.281336
2022-09-12	11:20:39	0.37986
2022-09-12	11:20:39	0.222049
2022-09-12	11:20:40	0.449936
2022-09-12	11:20:40	0.182914
2022-09-12	11:20:40	0.5107
2022-09-12	11:20:41	0.236247
2022-09-12	11:20:41	0.429428
2022-09-12	11:20:41	0.21925
2022-09-12	11:20:41	0.375331
2022-09-12	11:20:42	0.355585
2022-09-12	11:20:42	0.276501
2022-09-12	11:20:42	0.312227
2022-09-12	11:20:42	0.205407
2022-09-12	11:20:43	0.39131
2022-09-12	11:20:43	0.169682
2022-09-12	11:20:43	0.41355
2022-09-12	11:20:43	0.131209
2022-09-12	11:20:44	0.393957
2022-09-12	11:20:44	0.20444
2022-09-12	11:20:44	0.394771
2022-09-12	11:20:45	0.0201656
2022-09-12	11:20:45	-0.107468
2022-09-12	11:20:45	-0.199631
2022-09-12	11:20:45	0.502455
2022-09-12	11:20:46	0.804186
2022-09-12	11:20:46	0.436196
2022-09-12	11:20:46	0.263066
2022-09-12	11:20:46	0.40785
2022-09-12	11:20:47	0.370903
2022-09-12	11:20:47	0.434466
2022-09-12	11:20:47	0.452735
2022-09-12	11:20:47	0.359453
2022-09-12	11:20:48	0.395534
2022-09-12	11:20:48	0.321489
2022-09-12	11:20:48	0.553244
2022-09-12	11:20:49	0.457468
2022-09-12	11:20:49	0.588919
2022-09-12	11:20:49	0.400624
2022-09-12	11:20:49	0.587901
2022-09-12	11:20:50	0.287036
2022-09-12	11:20:50	0.419708
2022-09-12	11:20:50	0.293346
2022-09-12	11:20:50	0.478486
2022-09-12	11:20:51	0.305763
2022-09-12	11:20:51	0.376756
2022-09-12	11:20:51	0.428155
2022-09-12	11:20:51	0.486425
2022-09-12	11:20:52	0.332786
2022-09-12	11:20:52	0.362507
2022-09-12	11:20:52	0.457367
2022-09-12	11:20:53	0.435941
2022-09-12	11:20:53	0.415789
2022-09-12	11:20:53	0.408868
2022-09-12	11:20:53	0.350496
2022-09-12	11:20:54	0.258384
2022-09-12	11:20:54	0.321438
2022-09-12	11:20:54	0.36042
2022-09-12	11:20:54	0.34668
2022-09-12	11:20:55	0.218741
2022-09-12	11:20:55	0.0838297
2022-09-12	11:20:55	0.132227
2022-09-12	11:20:55	0.0688679
2022-09-12	11:20:56	0.0843895
2022-09-12	11:20:56	0.3593
2022-09-12	11:20:56	0.408817
2022-09-12	11:20:56	0.439606
2022-09-12	11:20:57	0.340522
2022-09-12	11:20:57	0.487392
2022-09-12	11:20:57	0.474618
2022-09-12	11:20:58	0.533499
2022-09-12	11:20:58	0.392176
2022-09-12	11:20:58	0.368359
2022-09-12	11:20:58	0.337519
2022-09-12	11:20:59	0.428919
2022-09-12	11:20:59	0.349784
2022-09-12	11:20:59	0.392685
2022-09-12	11:20:59	0.345458
2022-09-12	11:21:00	0.379707
2022-09-12	11:21:00	0.376247
2022-09-12	11:21:00	0.36841
2022-09-12	11:21:00	0.368613
2022-09-12	11:21:01	0.374364
2022-09-12	11:21:01	0.366934
2022-09-12	11:21:01	0.367443
2022-09-12	11:21:02	0.362303
2022-09-12	11:21:02	0.3593
2022-09-12	11:21:02	0.307137
2022-09-12	11:21:02	0.310445
2022-09-12	11:21:03	0.417316
2022-09-12	11:21:03	0.52215
2022-09-12	11:21:03	0.406985
2022-09-12	11:21:03	0.582456
2022-09-12	11:21:04	0.396349
2022-09-12	11:21:04	0.464542
2022-09-12	11:21:04	0.361031
2022-09-12	11:21:04	0.334415
2022-09-12	11:21:05	0.406425
2022-09-12	11:21:05	0.299453
2022-09-12	11:21:05	0.374008
2022-09-12	11:21:06	0.263321
2022-09-12	11:21:06	0.388257
2022-09-12	11:21:06	0.374313
2022-09-12	11:21:06	0.379707
2022-09-12	11:21:07	0.324542
2022-09-12	11:21:07	0.398741
2022-09-12	11:21:07	0.217316
2022-09-12	11:21:07	0.402914
2022-09-12	11:21:08	0.351768
2022-09-12	11:21:08	0.27869
2022-09-12	11:21:08	0.366476
2022-09-12	11:21:08	0.355382
2022-09-12	11:21:09	0.372125
2022-09-12	11:21:09	0.329886
2022-09-12	11:21:09	0.576756
2022-09-12	11:21:10	0.36841
2022-09-12	11:21:10	0.446221
2022-09-12	11:21:10	0.22612
2022-09-12	11:21:10	0.39813
2022-09-12	11:21:11	0.312685
2022-09-12	11:21:11	0.38897
2022-09-12	11:21:11	0.314567
2022-09-12	11:21:11	0.263982
2022-09-12	11:21:12	0.325712
2022-09-12	11:21:12	0.324949
2022-09-12	11:21:12	0.394669
2022-09-12	11:21:12	0.379046
2022-09-12	11:21:13	0.400674
2022-09-12	11:21:13	0.360318
2022-09-12	11:21:13	0.280776
2022-09-12	11:21:14	0.280267
2022-09-12	11:21:14	0.468868
2022-09-12	11:21:14	0.92841
2022-09-12	11:21:14	0.333906
2022-09-12	11:21:15	0.188563
2022-09-12	11:21:15	0.140318
2022-09-12	11:21:15	0.108308
2022-09-12	11:21:15	0.0872903
2022-09-12	11:21:16	0.207188
2022-09-12	11:21:16	0.377214
2022-09-12	11:21:16	0.375178
2022-09-12	11:21:16	0.171056
2022-09-12	11:21:17	0.380216
2022-09-12	11:21:17	0.23813
2022-09-12	11:21:17	0.237112
2022-09-12	11:21:18	0.142303
2022-09-12	11:21:18	0.188512
2022-09-12	11:21:18	0.0977228
2022-09-12	11:21:18	0.287239
2022-09-12	11:21:19	0.0674939
2022-09-12	11:21:19	0.187595
2022-09-12	11:21:19	0.155535
2022-09-12	11:21:19	0.338435
2022-09-12	11:21:20	0.117316
2022-09-12	11:21:20	0.318842
2022-09-12	11:21:20	0.16673
2022-09-12	11:21:20	0.311616
2022-09-12	11:21:21	0.19126
2022-09-12	11:21:21	0.272634
2022-09-12	11:21:21	0.188054
2022-09-12	11:21:21	0.25472
2022-09-12	11:21:22	0.142252
2022-09-12	11:21:22	-0.01444
2022-09-12	11:21:22	0.00876615
2022-09-12	11:21:23	-0.0121499
2022-09-12	11:21:23	-0.14874
2022-09-12	11:21:23	-0.217137
2022-09-12	11:21:23	-0.172099
2022-09-12	11:21:24	-0.324567
2022-09-12	11:21:24	-0.371183
2022-09-12	11:21:24	-0.373473
2022-09-12	11:21:24	0.0659671
2022-09-12	11:21:25	0.350649
2022-09-12	11:21:25	0.290954
2022-09-12	11:21:25	0.534058
2022-09-12	11:21:25	0.364695
2022-09-12	11:21:26	0.542354
2022-09-12	11:21:26	0.307697
2022-09-12	11:21:26	0.465356
2022-09-12	11:21:27	0.28841
2022-09-12	11:21:27	0.406171
2022-09-12	11:21:27	0.35869
2022-09-12	11:21:27	0.395127
2022-09-12	11:21:28	0.409428
2022-09-12	11:21:28	0.409071
2022-09-12	11:21:28	0.347697
2022-09-12	11:21:28	0.364593
2022-09-12	11:21:29	0.641539
2022-09-12	11:21:29	0.339402
2022-09-12	11:21:29	0.406527
2022-09-12	11:21:29	0.400827
2022-09-12	11:21:30	0.422048
2022-09-12	11:21:30	0.375127
2022-09-12	11:21:30	0.432735
2022-09-12	11:21:31	0.315229
2022-09-12	11:21:31	0.360827
2022-09-12	11:21:31	0.427697
2022-09-12	11:21:31	0.418791
2022-09-12	11:21:32	0.462557
2022-09-12	11:21:32	0.365662
2022-09-12	11:21:32	0.395891
2022-09-12	11:21:32	0.323524
2022-09-12	11:21:33	0.420115
2022-09-12	11:21:33	0.34154
2022-09-12	11:21:33	0.414109
2022-09-12	11:21:33	0.420827
2022-09-12	11:21:34	0.613193
2022-09-12	11:21:34	0.320776
2022-09-12	11:21:34	0.139199
2022-09-12	11:21:35	0.120267
2022-09-12	11:21:35	0.267494
2022-09-12	11:21:35	0.396451
2022-09-12	11:21:35	0.490293
2022-09-12	11:21:36	0.317824
2022-09-12	11:21:36	0.255942
2022-09-12	11:21:36	0.392176
2022-09-12	11:21:36	0.302608
2022-09-12	11:21:37	0.390191
2022-09-12	11:21:37	0.329428
2022-09-12	11:21:37	0.396298
2022-09-12	11:21:37	0.261336
2022-09-12	11:21:38	0.410445
2022-09-12	11:21:38	0.268104
2022-09-12	11:21:38	0.520267
2022-09-12	11:21:39	0.298893
2022-09-12	11:21:39	0.473448
2022-09-12	11:21:39	0.366374
2022-09-12	11:21:39	0.422506
2022-09-12	11:21:40	0.334415
2022-09-12	11:21:40	0.418181
2022-09-12	11:21:40	0.352634
2022-09-12	11:21:40	0.406679
2022-09-12	11:21:41	0.386222
2022-09-12	11:21:41	0.369479
2022-09-12	11:21:41	0.402201
2022-09-12	11:21:41	0.392125
2022-09-12	11:21:42	0.41014
2022-09-12	11:21:42	0.356298
2022-09-12	11:21:42	0.382201
2022-09-12	11:21:43	0.333346
2022-09-12	11:21:43	0.399809
2022-09-12	11:21:43	0.331819
2022-09-12	11:21:43	0.357366
2022-09-12	11:21:44	0.301641
2022-09-12	11:21:44	0.409936
2022-09-12	11:21:44	0.354924
2022-09-12	11:21:44	0.353143
2022-09-12	11:21:45	0.483881
2022-09-12	11:21:45	0.304898
2022-09-12	11:21:45	0.380674
2022-09-12	11:21:45	0.445611
2022-09-12	11:21:46	0.225713
2022-09-12	11:21:46	0.256705
2022-09-12	11:21:46	0.338588
2022-09-12	11:21:47	0.25472
2022-09-12	11:21:47	0.347799
2022-09-12	11:21:47	0.277417
2022-09-12	11:21:47	0.298435
2022-09-12	11:21:48	0.394262
2022-09-12	11:21:48	0.347036
2022-09-12	11:21:48	0.341641
2022-09-12	11:21:48	0.382506
2022-09-12	11:21:49	0.376705
2022-09-12	11:21:49	0.394669
2022-09-12	11:21:49	0.393092
2022-09-12	11:21:49	0.441998
2022-09-12	11:21:50	0.352074
2022-09-12	11:21:50	0.361896
2022-09-12	11:21:50	0.321285
2022-09-12	11:21:50	0.328155
2022-09-12	11:21:51	0.320013
2022-09-12	11:21:51	0.38098
2022-09-12	11:21:51	0.360064
2022-09-12	11:21:52	0.363779
2022-09-12	11:21:52	0.428206
2022-09-12	11:21:52	0.419809
2022-09-12	11:21:52	0.379097
2022-09-12	11:21:53	0.391565
2022-09-12	11:21:53	0.349071
2022-09-12	11:21:53	0.424033
2022-09-12	11:21:53	0.37411
2022-09-12	11:21:54	0.357825
2022-09-12	11:21:54	0.392379
2022-09-12	11:21:54	0.379351
2022-09-12	11:21:54	0.345916
2022-09-12	11:21:55	0.39299
2022-09-12	11:21:55	0.294618
2022-09-12	11:21:55	0.348155
2022-09-12	11:21:56	0.35645
2022-09-12	11:21:56	0.365865
2022-09-12	11:21:56	0.397468
2022-09-12	11:21:56	0.331921
2022-09-12	11:21:57	0.340827
2022-09-12	11:21:57	0.393041
2022-09-12	11:21:57	0.356654
2022-09-12	11:21:57	0.420115
2022-09-12	11:21:58	0.469987
2022-09-12	11:21:58	0.444898
2022-09-12	11:21:58	0.421031
2022-09-12	11:21:58	0.422659
2022-09-12	11:21:59	0.425611
2022-09-12	11:21:59	0.460267
2022-09-12	11:21:59	0.453957
2022-09-12	11:22:00	0.425153
2022-09-12	11:22:00	0.423473
2022-09-12	11:22:00	0.430038
2022-09-12	11:22:00	0.425204
2022-09-12	11:22:01	0.41472
2022-09-12	11:22:01	0.430344
2022-09-12	11:22:01	0.429275
2022-09-12	11:22:01	0.43986
2022-09-12	11:22:02	0.430191
2022-09-12	11:22:02	0.444949
2022-09-12	11:22:02	0.401743
2022-09-12	11:22:02	0.33528
2022-09-12	11:22:03	0.373448
2022-09-12	11:22:03	0.478486
2022-09-12	11:22:03	0.381234
2022-09-12	11:22:04	0.401489
2022-09-12	11:22:04	0.41243
2022-09-12	11:22:04	0.399453
2022-09-12	11:22:04	0.445763
2022-09-12	11:22:05	0.358181
2022-09-12	11:22:05	0.403015
2022-09-12	11:22:05	0.381641
2022-09-12	11:22:05	0.349529
2022-09-12	11:22:06	0.393397
2022-09-12	11:22:06	0.363931
2022-09-12	11:22:06	0.423677
2022-09-12	11:22:06	0.323881
2022-09-12	11:22:07	0.477875
2022-09-12	11:22:07	0.299809
2022-09-12	11:22:07	0.518588
2022-09-12	11:22:08	0.326221
2022-09-12	11:22:08	0.536247
2022-09-12	11:22:08	0.290242
2022-09-12	11:22:08	0.485102
2022-09-12	11:22:09	0.329631
2022-09-12	11:22:09	0.452583
2022-09-12	11:22:09	0.296705
2022-09-12	11:22:09	0.439606
2022-09-12	11:22:10	0.34271
2022-09-12	11:22:10	0.446985
2022-09-12	11:22:10	0.27355
2022-09-12	11:22:10	0.403982
2022-09-12	11:22:11	0.303524
2022-09-12	11:22:11	0.491616
2022-09-12	11:22:11	0.346781
2022-09-12	11:22:12	0.759962
2022-09-12	11:22:12	0.532939
2022-09-12	11:22:12	1.08704
2022-09-12	11:22:12	0.498537
2022-09-12	11:22:13	0.74042
2022-09-12	11:22:13	0.409122
2022-09-12	11:22:13	0.596908
2022-09-12	11:22:13	0.275941
2022-09-12	11:22:14	0.471361
2022-09-12	11:22:14	0.280165
2022-09-12	11:22:14	0.501845
2022-09-12	11:22:14	0.255178
2022-09-12	11:22:15	0.471565
2022-09-12	11:22:15	0.274415
2022-09-12	11:22:15	0.54159
2022-09-12	11:22:15	0.287748
2022-09-12	11:22:16	0.451514
2022-09-12	11:22:16	0.417061
2022-09-12	11:22:16	0.406985
2022-09-12	11:22:17	0.56444
2022-09-12	11:22:17	0.349071
2022-09-12	11:22:17	0.536145
2022-09-12	11:22:17	0.272125
2022-09-12	11:22:18	0.53584
2022-09-12	11:22:18	0.255229
2022-09-12	11:22:18	0.526374
2022-09-12	11:22:18	0.480827
2022-09-12	11:22:19	1.04851
2022-09-12	11:22:19	1.04902
2022-09-12	11:22:19	1.12312
2022-09-12	11:22:19	0.502303
2022-09-12	11:22:20	0.501641
2022-09-12	11:22:20	0.352939
2022-09-12	11:22:20	0.48098
2022-09-12	11:22:21	0.351158
2022-09-12	11:22:21	0.813295
2022-09-12	11:22:21	0.408563
2022-09-12	11:22:21	0.520725
2022-09-12	11:22:22	0.410598
2022-09-12	11:22:22	0.522099
2022-09-12	11:22:22	0.460522
2022-09-12	11:22:22	0.732786
2022-09-12	11:22:23	0.518995
2022-09-12	11:22:23	0.572888
2022-09-12	11:22:23	0.725967
2022-09-12	11:22:23	0.563728
2022-09-12	11:22:24	0.513295
2022-09-12	11:22:24	0.801183
2022-09-12	11:22:24	1.05228
2022-09-12	11:22:25	0.728359
2022-09-12	11:22:25	0.75014
2022-09-12	11:22:25	0.959249
2022-09-12	11:22:25	0.632634
2022-09-12	11:22:26	0.433143
2022-09-12	11:22:26	0.542863
2022-09-12	11:22:26	0.480623
2022-09-12	11:22:26	0.498282
2022-09-12	11:22:27	0.728613
2022-09-12	11:22:27	0.53014
2022-09-12	11:22:27	0.445611
2022-09-12	11:22:27	0.59355
2022-09-12	11:22:28	0.688664
2022-09-12	11:22:28	0.756959
2022-09-12	11:22:28	1.37406
2022-09-12	11:22:29	1.42413
2022-09-12	11:22:29	0.650242
2022-09-12	11:22:29	0.553855
2022-09-12	11:22:29	0.693702
2022-09-12	11:22:30	0.508461
2022-09-12	11:22:30	0.655433
2022-09-12	11:22:30	0.693855
2022-09-12	11:22:30	0.788359
2022-09-12	11:22:31	1.17391
2022-09-12	11:22:31	1.32581
2022-09-12	11:22:31	2.07004
2022-09-12	11:22:31	1.54581
2022-09-12	11:22:32	1.27599
2022-09-12	11:22:32	0.823371
2022-09-12	11:22:32	0.771107
2022-09-12	11:22:33	0.515178
2022-09-12	11:22:33	0.337723
2022-09-12	11:22:33	0.133499
2022-09-12	11:22:33	0.257519
2022-09-12	11:22:34	0.215178
2022-09-12	11:22:34	0.302099
2022-09-12	11:22:34	0.0790969
2022-09-12	11:22:34	-0.292913
2022-09-12	11:22:35	-0.451386
2022-09-12	11:22:35	-0.338155
2022-09-12	11:22:35	-0.239224
2022-09-12	11:22:35	-0.0252287
2022-09-12	11:22:36	0.0942114
2022-09-12	11:22:36	0.903982
2022-09-12	11:22:36	1.00536
2022-09-12	11:22:37	1.14958
2022-09-12	11:22:37	0.647341
2022-09-12	11:22:37	0.463117
2022-09-12	11:22:37	0.384237
2022-09-12	11:22:38	0.616959
2022-09-12	11:22:38	0.552532
2022-09-12	11:22:38	0.47874
2022-09-12	11:22:38	0.37472
2022-09-12	11:22:39	0.408969
2022-09-12	11:22:39	1.11528
2022-09-12	11:22:39	1.29518
2022-09-12	11:22:39	1.82958
2022-09-12	11:22:40	1.35523
2022-09-12	11:22:40	0.645051
2022-09-12	11:22:40	0.428715
2022-09-12	11:22:41	0.342863
2022-09-12	11:22:41	0.333295
2022-09-12	11:22:41	0.291616
2022-09-12	11:22:41	0.372939
2022-09-12	11:22:42	0.771768
2022-09-12	11:22:42	0.77757
2022-09-12	11:22:42	1.40943
2022-09-12	11:22:42	3.16968
2022-09-12	11:22:43	2.19111
2022-09-12	11:22:43	1.08047
2022-09-12	11:22:43	0.391667
2022-09-12	11:22:43	0.417112
2022-09-12	11:22:44	0.361336
2022-09-12	11:22:44	0.345102
2022-09-12	11:22:44	0.365916
2022-09-12	11:22:44	0.370293
2022-09-12	11:22:45	0.17187
2022-09-12	11:22:45	0.326425
2022-09-12	11:22:45	0.24841
2022-09-12	11:22:46	0.397214
2022-09-12	11:22:46	0.292888
2022-09-12	11:22:46	0.271361
2022-09-12	11:22:46	0.311921
2022-09-12	11:22:47	0.285814
2022-09-12	11:22:47	0.366476
2022-09-12	11:22:47	0.266171
2022-09-12	11:22:47	0.347036
2022-09-12	11:22:48	0.278842
2022-09-12	11:22:48	0.403066
2022-09-12	11:22:48	0.190496
2022-09-12	11:22:48	0.441387
2022-09-12	11:22:49	0.244593
2022-09-12	11:22:49	0.336807
2022-09-12	11:22:49	0.230242
2022-09-12	11:22:50	0.284084
2022-09-12	11:22:50	0.316501
2022-09-12	11:22:50	0.312888
2022-09-12	11:22:50	0.276501
2022-09-12	11:22:51	0.126934
2022-09-12	11:22:51	0.11925
2022-09-12	11:22:51	0.127596
2022-09-12	11:22:51	0.482405
2022-09-12	11:22:52	0.365356
2022-09-12	11:22:52	0.222812
2022-09-12	11:22:52	0.539758
2022-09-12	11:22:52	0.71126
2022-09-12	11:22:53	0.330598
2022-09-12	11:22:53	0.435891
2022-09-12	11:22:53	0.461947
2022-09-12	11:22:54	0.325204
2022-09-12	11:22:54	0.619504
2022-09-12	11:22:54	0.297519
2022-09-12	11:22:54	0.508104
2022-09-12	11:22:55	0.341489
2022-09-12	11:22:55	0.368613
2022-09-12	11:22:55	0.298639
2022-09-12	11:22:55	0.628053
2022-09-12	11:22:56	0.301183
2022-09-12	11:22:56	0.701896
2022-09-12	11:22:56	0.216909
2022-09-12	11:22:56	0.214059
2022-09-12	11:22:57	0.0862215
2022-09-12	11:22:57	0.30617
2022-09-12	11:22:57	0.235687
2022-09-12	11:22:58	0.357366
2022-09-12	11:22:58	0.230038
2022-09-12	11:22:58	0.356705
2022-09-12	11:22:58	0.264084
2022-09-12	11:22:59	0.381336
2022-09-12	11:22:59	0.229122
2022-09-12	11:22:59	0.442812
2022-09-12	11:22:59	0.333346
2022-09-12	11:23:00	0.527901
2022-09-12	11:23:00	0.32042
2022-09-12	11:23:00	0.532684
2022-09-12	11:23:00	0.522455
2022-09-12	11:23:01	0.637112
2022-09-12	11:23:01	0.444338
2022-09-12	11:23:01	0.627952
2022-09-12	11:23:02	0.461489
2022-09-12	11:23:02	0.439097
2022-09-12	11:23:02	0.470547
2022-09-12	11:23:02	0.49528
2022-09-12	11:23:03	0.476298
2022-09-12	11:23:03	0.657468
2022-09-12	11:23:03	0.401183
2022-09-12	11:23:03	0.423066
2022-09-12	11:23:04	0.464491
2022-09-12	11:23:04	0.519198
2022-09-12	11:23:04	0.414211
2022-09-12	11:23:04	0.41014
2022-09-12	11:23:05	0.685662
2022-09-12	11:23:05	0.618333
2022-09-12	11:23:05	0.825509
2022-09-12	11:23:06	0.388155
2022-09-12	11:23:06	0.478181
2022-09-12	11:23:06	0.401031
2022-09-12	11:23:06	0.402761
2022-09-12	11:23:07	0.263728
2022-09-12	11:23:07	0.528053
2022-09-12	11:23:07	0.256705
2022-09-12	11:23:07	0.424237
2022-09-12	11:23:08	0.265356
2022-09-12	11:23:08	0.428053
2022-09-12	11:23:08	0.211107
2022-09-12	11:23:08	0.438435
2022-09-12	11:23:09	0.244033
2022-09-12	11:23:09	0.42729
2022-09-12	11:23:09	0.23986
2022-09-12	11:23:09	0.362913
2022-09-12	11:23:10	0.304084
2022-09-12	11:23:10	0.391463
2022-09-12	11:23:10	0.279148
2022-09-12	11:23:11	0.348206
2022-09-12	11:23:11	0.30958
2022-09-12	11:23:11	0.374619
2022-09-12	11:23:11	0.334517
2022-09-12	11:23:12	0.303931
2022-09-12	11:23:12	0.313194
2022-09-12	11:23:12	0.388054
2022-09-12	11:23:12	0.336552
2022-09-12	11:23:13	0.242201
2022-09-12	11:23:13	0.357977
2022-09-12	11:23:13	0.262506
2022-09-12	11:23:13	0.401896
2022-09-12	11:23:14	0.169937
2022-09-12	11:23:14	0.434313
2022-09-12	11:23:14	0.23813
2022-09-12	11:23:15	0.412481
2022-09-12	11:23:15	0.296807
2022-09-12	11:23:15	0.379809
2022-09-12	11:23:15	0.387036
2022-09-12	11:23:16	0.530598
2022-09-12	11:23:16	0.47701
2022-09-12	11:23:16	0.434771
2022-09-12	11:23:16	0.409682
2022-09-12	11:23:17	0.353092
2022-09-12	11:23:17	0.289937
2022-09-12	11:23:17	0.296756
2022-09-12	11:23:17	0.301387
2022-09-12	11:23:18	0.244898
2022-09-12	11:23:18	0.378791
2022-09-12	11:23:18	0.430038
2022-09-12	11:23:19	0.47874
2022-09-12	11:23:19	0.471005
2022-09-12	11:23:19	0.771412
2022-09-12	11:23:19	1.98846
2022-09-12	11:23:20	1.91579
2022-09-12	11:23:20	0.827443
2022-09-12	11:23:20	0.513601
2022-09-12	11:23:20	0.386222
2022-09-12	11:23:21	0.443982
2022-09-12	11:23:21	0.352379
2022-09-12	11:23:21	0.290344
2022-09-12	11:23:21	0.423728
2022-09-12	11:23:22	0.604084
2022-09-12	11:23:22	1.16312
2022-09-12	11:23:22	2.54291
2022-09-12	11:23:23	0.999148
2022-09-12	11:23:23	0.85589
2022-09-12	11:23:23	0.38612
2022-09-12	11:23:23	0.29528
2022-09-12	11:23:24	0.199606
2022-09-12	11:23:24	0.205306
2022-09-12	11:23:24	0.0822521
2022-09-12	11:23:24	0.199148
2022-09-12	11:23:25	0.0874938
2022-09-12	11:23:25	0.177163
2022-09-12	11:23:25	0.151158
2022-09-12	11:23:25	0.0791478
2022-09-12	11:23:26	0.138232
2022-09-12	11:23:26	0.103117
2022-09-12	11:23:26	0.223066
2022-09-12	11:23:27	0.0227102
2022-09-12	11:23:27	0.194822
2022-09-12	11:23:27	0.0651529
2022-09-12	11:23:27	0.155433
2022-09-12	11:23:28	0.3393
2022-09-12	11:23:28	0.358435
2022-09-12	11:23:28	0.58785
2022-09-12	11:23:28	0.240725
2022-09-12	11:23:29	0.321692
2022-09-12	11:23:29	0.867443
2022-09-12	11:23:29	1.55009
2022-09-12	11:23:29	2.79126
2022-09-12	11:23:30	1.30378
2022-09-12	11:23:30	0.94673
2022-09-12	11:23:30	0.436603
2022-09-12	11:23:31	0.573702
2022-09-12	11:23:31	0.350293
2022-09-12	11:23:31	0.240115
2022-09-12	11:23:31	0.090191
2022-09-12	11:23:32	0.287188
2022-09-12	11:23:32	0.203524
2022-09-12	11:23:32	0.251565
2022-09-12	11:23:32	0.798791
2022-09-12	11:23:33	1.82739
2022-09-12	11:23:33	1.29197
2022-09-12	11:23:33	0.306985
2022-09-12	11:23:33	0.462914
2022-09-12	11:23:34	0.348461
2022-09-12	11:23:34	0.311056
2022-09-12	11:23:34	0.30042
2022-09-12	11:23:34	0.36729
2022-09-12	11:23:35	0.323881
2022-09-12	11:23:35	0.283219
2022-09-12	11:23:35	0.289835
2022-09-12	11:23:36	0.276043
2022-09-12	11:23:36	0.358333
2022-09-12	11:23:36	0.339097
2022-09-12	11:23:36	0.583728
2022-09-12	11:23:37	0.173753
2022-09-12	11:23:37	0.598181
2022-09-12	11:23:37	0.206629
2022-09-12	11:23:37	0.357468
2022-09-12	11:23:38	0.132736
2022-09-12	11:23:38	0.473397
2022-09-12	11:23:38	0.156501
2022-09-12	11:23:38	0.440878
2022-09-12	11:23:39	0.152685
2022-09-12	11:23:39	0.489173
2022-09-12	11:23:39	0.257417
2022-09-12	11:23:40	0.567697
2022-09-12	11:23:40	0.289122
2022-09-12	11:23:40	0.644033
2022-09-12	11:23:40	0.501234
2022-09-12	11:23:41	0.757824
2022-09-12	11:23:41	0.825102
2022-09-12	11:23:41	1.16429
2022-09-12	11:23:41	0.606781
2022-09-12	11:23:42	0.987086
2022-09-12	11:23:42	0.491005
2022-09-12	11:23:42	0.601743
2022-09-12	11:23:42	0.534262
2022-09-12	11:23:43	0.397672
2022-09-12	11:23:43	0.684593
2022-09-12	11:23:43	0.864237
2022-09-12	11:23:44	0.506018
2022-09-12	11:23:44	0.440929
2022-09-12	11:23:44	1.07477
2022-09-12	11:23:44	0.811259
2022-09-12	11:23:45	0.449071
2022-09-12	11:23:45	0.441743
2022-09-12	11:23:45	0.481438
2022-09-12	11:23:45	0.301998
2022-09-12	11:23:46	0.409682
2022-09-12	11:23:46	0.471463
2022-09-12	11:23:46	0.70098
2022-09-12	11:23:46	1.42103
2022-09-12	11:23:47	1.25396
2022-09-12	11:23:47	1.11335
2022-09-12	11:23:47	1.00678
2022-09-12	11:23:48	0.543779
2022-09-12	11:23:48	0.364033
2022-09-12	11:23:48	0.265916
2022-09-12	11:23:48	0.41584
2022-09-12	11:23:49	0.15869
2022-09-12	11:23:49	0.454822
2022-09-12	11:23:49	0.175585
2022-09-12	11:23:49	0.447392
2022-09-12	11:23:50	0.251565
2022-09-12	11:23:50	0.535178
2022-09-12	11:23:50	0.208461
2022-09-12	11:23:50	0.482761
2022-09-12	11:23:51	0.343473
2022-09-12	11:23:51	0.561234
2022-09-12	11:23:51	0.329377
2022-09-12	11:23:52	0.322964
2022-09-12	11:23:52	0.341743
2022-09-12	11:23:52	0.291514
2022-09-12	11:23:52	0.338944
2022-09-12	11:23:53	0.173092
2022-09-12	11:23:53	0.335382
2022-09-12	11:23:53	0.253651
2022-09-12	11:23:54	0.365
2022-09-12	11:23:54	0.240573
2022-09-12	11:23:54	0.458079
2022-09-12	11:23:54	0.567952
2022-09-12	11:23:54	0.873092
2022-09-12	11:23:55	0.703219
2022-09-12	11:23:55	0.600725
2022-09-12	11:23:55	0.334822
2022-09-12	11:23:56	0.48612
2022-09-12	11:23:56	0.24897
2022-09-12	11:23:56	0.639453
2022-09-12	11:23:56	0.638944
2022-09-12	11:23:57	1.11248
2022-09-12	11:23:57	0.786578
2022-09-12	11:23:57	0.510242
2022-09-12	11:23:57	0.155993
2022-09-12	11:23:58	0.464339
2022-09-12	11:23:58	0.286323
2022-09-12	11:23:58	0.42897
2022-09-12	11:23:58	0.492379
2022-09-12	11:23:59	0.670496
2022-09-12	11:23:59	0.554822
2022-09-12	11:23:59	0.660267
2022-09-12	11:23:59	0.836145
2022-09-12	11:24:00	0.696552
2022-09-12	11:24:00	1.02469
2022-09-12	11:24:00	0.910445
2022-09-12	11:24:01	0.570801
2022-09-12	11:24:01	1.1764
2022-09-12	11:24:01	1.10205
2022-09-12	11:24:01	1.35197
2022-09-12	11:24:02	1.41202
2022-09-12	11:24:02	1.17503
2022-09-12	11:24:02	1.00541
2022-09-12	11:24:02	0.8593
2022-09-12	11:24:03	0.994262
2022-09-12	11:24:03	0.584237
2022-09-12	11:24:03	0.423677
2022-09-12	11:24:03	0.345967
2022-09-12	11:24:04	0.458079
2022-09-12	11:24:04	0.46098
2022-09-12	11:24:04	0.442405
2022-09-12	11:24:05	0.222608
2022-09-12	11:24:05	0.446323
2022-09-12	11:24:05	0.361234
2022-09-12	11:24:05	0.489377
2022-09-12	11:24:06	0.441336
2022-09-12	11:24:06	0.709682
2022-09-12	11:24:06	0.623371
2022-09-12	11:24:06	0.490547
2022-09-12	11:24:07	0.300522
2022-09-12	11:24:07	0.762048
2022-09-12	11:24:07	0.591921
2022-09-12	11:24:07	0.581132
2022-09-12	11:24:08	0.466171
2022-09-12	11:24:08	0.43472
2022-09-12	11:24:08	0.119911
2022-09-12	11:24:09	0.430649
2022-09-12	11:24:09	0.113244
2022-09-12	11:24:09	0.415026
2022-09-12	11:24:09	0.298435
2022-09-12	11:24:10	0.609071
2022-09-12	11:24:10	0.518842
2022-09-12	11:24:10	0.939249
2022-09-12	11:24:10	0.989224
2022-09-12	11:24:11	0.867799
2022-09-12	11:24:11	0.740878
2022-09-12	11:24:11	1.06424
2022-09-12	11:24:11	0.428206
2022-09-12	11:24:12	0.425611
2022-09-12	11:24:12	0.265967
2022-09-12	11:24:12	0.415229
2022-09-12	11:24:13	0.392532
2022-09-12	11:24:13	0.789275
2022-09-12	11:24:13	1.3276
2022-09-12	11:24:13	1.44536
2022-09-12	11:24:14	0.61645
2022-09-12	11:24:14	0.358333
2022-09-12	11:24:14	0.162863
2022-09-12	11:24:14	0.332176
2022-09-12	11:24:15	0.544186
2022-09-12	11:24:15	0.16668
2022-09-12	11:24:15	0.315026
2022-09-12	11:24:15	0.516959
2022-09-12	11:24:16	0.722862
2022-09-12	11:24:16	0.328257
2022-09-12	11:24:16	0.283728
2022-09-12	11:24:17	0.254873
2022-09-12	11:24:17	0.42673
2022-09-12	11:24:17	0.264186
2022-09-12	11:24:17	0.378435
2022-09-12	11:24:18	0.343372
2022-09-12	11:24:18	0.274313
2022-09-12	11:24:18	0.375433
2022-09-12	11:24:18	0.111056
2022-09-12	11:24:19	0.122049
2022-09-12	11:24:19	0.178435
2022-09-12	11:24:19	0.237265
2022-09-12	11:24:19	0.232736
2022-09-12	11:24:20	0.344593
2022-09-12	11:24:20	0.465153
2022-09-12	11:24:20	0.472227
2022-09-12	11:24:21	0.638079
2022-09-12	11:24:21	0.397723
2022-09-12	11:24:21	0.466425
2022-09-12	11:24:21	0.677672
2022-09-12	11:24:22	0.767392
2022-09-12	11:24:22	0.661285
2022-09-12	11:24:22	0.530241
2022-09-12	11:24:22	0.575789
2022-09-12	11:24:23	0.546221
2022-09-12	11:24:23	0.535534
2022-09-12	11:24:23	0.555127
2022-09-12	11:24:23	0.554364
2022-09-12	11:24:24	0.555331
2022-09-12	11:24:24	0.506883
2022-09-12	11:24:24	0.535992
2022-09-12	11:24:25	0.510394
2022-09-12	11:24:25	0.496909
2022-09-12	11:24:25	0.509987
2022-09-12	11:24:25	0.602608
2022-09-12	11:24:26	0.570191
2022-09-12	11:24:26	0.66042
2022-09-12	11:24:26	0.351158
2022-09-12	11:24:26	0.309479
2022-09-12	11:24:27	0.434313
2022-09-12	11:24:27	0.35126
2022-09-12	11:24:27	0.375178
2022-09-12	11:24:27	0.257977
2022-09-12	11:24:28	0.321947
2022-09-12	11:24:28	0.335535
2022-09-12	11:24:28	0.317977
2022-09-12	11:24:28	0.335331
2022-09-12	11:24:29	0.301082
2022-09-12	11:24:29	0.286069
2022-09-12	11:24:29	0.296094
2022-09-12	11:24:30	0.284389
2022-09-12	11:24:30	0.288868
2022-09-12	11:24:30	0.286374
2022-09-12	11:24:30	0.294975
2022-09-12	11:24:31	0.302303
2022-09-12	11:24:31	0.290853
2022-09-12	11:24:31	0.353244
2022-09-12	11:24:31	0.815025
2022-09-12	11:24:32	3.01925
2022-09-12	11:24:32	1.24347
2022-09-12	11:24:32	0.79874
2022-09-12	11:24:32	1.04826
2022-09-12	11:24:33	2.28541
2022-09-12	11:24:33	1.91024
2022-09-12	11:24:33	1.64785
2022-09-12	11:24:34	2.1424
2022-09-12	11:24:34	1.36281
2022-09-12	11:24:34	2.13874
2022-09-12	11:24:34	2.94627
2022-09-12	11:24:35	1.86347
2022-09-12	11:24:35	1.14047
2022-09-12	11:24:35	1.17538
2022-09-12	11:24:35	1.43818
2022-09-12	11:24:36	2.94973
2022-09-12	11:24:36	2.70016
2022-09-12	11:24:36	1.89655
2022-09-12	11:24:36	1.21212
2022-09-12	11:24:37	1.16968
2022-09-12	11:24:37	0.571819
2022-09-12	11:24:37	0.685153
2022-09-12	11:24:38	1.00088
2022-09-12	11:24:38	0.843626
2022-09-12	11:24:38	0.763524
2022-09-12	11:24:38	0.51701
2022-09-12	11:24:39	0.616349
2022-09-12	11:24:39	0.396501
2022-09-12	11:24:39	0.451107
2022-09-12	11:24:39	0.316858
2022-09-12	11:24:40	0.891056
2022-09-12	11:24:40	0.290242
2022-09-12	11:24:40	0.332939
2022-09-12	11:24:40	0.161234
2022-09-12	11:24:41	0.274975
2022-09-12	11:24:41	0.104339
2022-09-12	11:24:41	0.236858
2022-09-12	11:24:42	0.226374
2022-09-12	11:24:42	0.383066
2022-09-12	11:24:42	0.26215
2022-09-12	11:24:42	0.372074
2022-09-12	11:24:43	0.220929
2022-09-12	11:24:43	0.165356
2022-09-12	11:24:43	0.173804
2022-09-12	11:24:43	0.181794
2022-09-12	11:24:44	0.16668
2022-09-12	11:24:44	0.188257
2022-09-12	11:24:44	0.627799
2022-09-12	11:24:44	0.331056
2022-09-12	11:24:45	0.416145
2022-09-12	11:24:45	0.26897
2022-09-12	11:24:45	0.348257
2022-09-12	11:24:46	0.19813
2022-09-12	11:24:46	0.358283
2022-09-12	11:24:46	0.153143
2022-09-12	11:24:46	0.278639
