# Supplementary material for: Comparing efficacy in reducing pulling and welfare impacts of four types of leash walking equipment
Source: PeerJ journal article supplement (doi:10.7717/peerj.18131), 2024-10-24
Supplement: Shelter1_Tension_files.zip [file Duke_harness_2022912121531 copy.xlsx]

## Sheet: Averaged newtons
Date	Time	averaged newtons	impulse	total steps
2022-09-12	12:15:32	0.868702	0.868702	0		Total impulse	1587.37
2022-09-12	12:15:33	1.0219	1.8906	0		total steps	23
2022-09-12	12:15:34	1.16938	3.05998	0		# > 5sec	1
2022-09-12	12:15:35	1.59303	4.65301	0
2022-09-12	12:15:36	1.90407	6.55708	0
2022-09-12	12:15:37	1.75976	8.31684	0
2022-09-12	12:15:38	1.85291	10.1697	0
2022-09-12	12:15:39	1.73355	11.9033	0
2022-09-12	12:15:40	1.90648	13.8098	0
2022-09-12	12:15:41	1.80412	15.6139	0
2022-09-12	12:15:42	2.53106	18.145	0
2022-09-12	12:15:43	1.6116	19.7566	0
2022-09-12	12:15:44	5.11174	24.8683	0
2022-09-12	12:15:45	22.8908	47.7591	1
2022-09-12	12:15:46	8.9788	56.7379	1
2022-09-12	12:15:47	4.99199	61.7299	1
2022-09-12	12:15:48	0.812655	62.5425	1
2022-09-12	12:15:49	1.69518	64.2377	1
2022-09-12	12:15:50	1.80475	66.0425	1
2022-09-12	12:15:51	2.12093	68.1634	1
2022-09-12	12:15:52	-0.617861	68.1634	1
2022-09-12	12:15:53	0.998242	69.1616	1
2022-09-12	12:15:54	1.52903	70.6907	1
2022-09-12	12:15:55	0.951949	71.6426	1
2022-09-12	12:15:56	0.239256	71.8819	1
2022-09-12	12:15:57	0.428919	72.3108	1
2022-09-12	12:15:58	0.607979	72.9188	1
2022-09-12	12:15:59	1.44352	74.3623	1
2022-09-12	12:16:00	11.4179	85.7801	1
2022-09-12	12:16:01	12.0314	97.8115	1
2022-09-12	12:16:02	11.1429	108.954	1
2022-09-12	12:16:03	7.18955	116.144	1
2022-09-12	12:16:04	4.1182	120.262	1
2022-09-12	12:16:05	11.3328	131.595	1
2022-09-12	12:16:06	11.9612	143.556	1
2022-09-12	12:16:07	8.46109	152.017	1
2022-09-12	12:16:08	4.23955	156.257	1
2022-09-12	12:16:09	6.67807	162.935	1
2022-09-12	12:16:10	7.3247	170.259	1
2022-09-12	12:16:11	8.89362	179.153	1
2022-09-12	12:16:12	8.29793	187.451	1
2022-09-12	12:16:13	7.30003	194.751	1
2022-09-12	12:16:14	8.20625	202.957	1
2022-09-12	12:16:15	12.3242	215.282	1
2022-09-12	12:16:16	10.322	225.604	1
2022-09-12	12:16:17	8.64133	234.245	1
2022-09-12	12:16:18	8.18492	242.43	1
2022-09-12	12:16:19	11.8032	254.233	1
2022-09-12	12:16:20	8.23256	262.466	1
2022-09-12	12:16:21	15.5678	278.033	2
2022-09-12	12:16:22	9.56333	287.597	2
2022-09-12	12:16:23	6.0387	293.635	2
2022-09-12	12:16:24	8.96082	302.596	2
2022-09-12	12:16:25	9.5917	312.188	2
2022-09-12	12:16:26	11.0217	323.21	2
2022-09-12	12:16:27	10.4383	333.648	2
2022-09-12	12:16:28	9.85956	343.507	2
2022-09-12	12:16:29	11.4545	354.962	2
2022-09-12	12:16:30	10.8238	365.786	2
2022-09-12	12:16:31	12.1001	377.886	2
2022-09-12	12:16:32	8.58627	386.472	2
2022-09-12	12:16:33	1.09826	387.57	2
2022-09-12	12:16:34	-0.890318	387.57	2
2022-09-12	12:16:35	-1.58143	387.57	2
2022-09-12	12:16:36	-0.62286	387.57	2
2022-09-12	12:16:37	0.982208	388.553	2
2022-09-12	12:16:38	3.21504	391.768	2
2022-09-12	12:16:39	5.45742	397.225	2
2022-09-12	12:16:40	9.2432	406.468	2
2022-09-12	12:16:41	2.20582	408.674	2
2022-09-12	12:16:42	2.84945	411.524	2
2022-09-12	12:16:43	9.45276	420.976	2
2022-09-12	12:16:44	13.3675	434.344	3
2022-09-12	12:16:45	4.96642	439.31	3
2022-09-12	12:16:46	12.2199	451.53	3
2022-09-12	12:16:47	13.8984	465.428	4
2022-09-12	12:16:48	6.96386	472.392	4
2022-09-12	12:16:49	5.52352	477.916	4
2022-09-12	12:16:50	5.05262	482.968	4
2022-09-12	12:16:51	1.72755	484.696	4
2022-09-12	12:16:52	0.81709	485.513	4
2022-09-12	12:16:53	1.20805	486.721	4
2022-09-12	12:16:54	2.62257	489.344	4
2022-09-12	12:16:55	5.04826	494.392	4
2022-09-12	12:16:56	1.84436	496.236	4
2022-09-12	12:16:57	1.12784	497.364	4
2022-09-12	12:16:58	0.956987	498.321	4
2022-09-12	12:16:59	1.1387	499.46	4
2022-09-12	12:17:00	4.33002	503.79	4
2022-09-12	12:17:01	7.88276	511.673	4
2022-09-12	12:17:02	1.86909	513.542	4
2022-09-12	12:17:03	9.3445	522.886	4
2022-09-12	12:17:04	12.638	535.524	4
2022-09-12	12:17:05	4.70859	540.233	4
2022-09-12	12:17:06	11.1173	551.35	4
2022-09-12	12:17:07	13.0542	564.404	5
2022-09-12	12:17:08	5.6478	570.052	5
2022-09-12	12:17:09	1.83585	571.888	5
2022-09-12	12:17:10	2.19626	574.084	5
2022-09-12	12:17:11	9.87959	583.964	5
2022-09-12	12:17:12	2.561	586.525	5
2022-09-12	12:17:13	2.5167	589.042	5
2022-09-12	12:17:14	5.63841	594.68	5
2022-09-12	12:17:15	3.90281	598.583	5
2022-09-12	12:17:16	2.02892	600.612	5
2022-09-12	12:17:17	0.410017	601.022	5
2022-09-12	12:17:18	0.618957	601.641	5
2022-09-12	12:17:19	1.55653	603.197	5
2022-09-12	12:17:20	1.36106	604.558	5
2022-09-12	12:17:21	1.62691	606.185	5
2022-09-12	12:17:22	2.70299	608.888	5
2022-09-12	12:17:23	3.50412	612.392	5
2022-09-12	12:17:24	10.1515	622.544	5
2022-09-12	12:17:25	8.3389	630.883	5
2022-09-12	12:17:26	6.58232	637.465	5
2022-09-12	12:17:27	4.4288	641.894	5
2022-09-12	12:17:28	1.3618	643.256	5
2022-09-12	12:17:29	0.645443	643.901	5
2022-09-12	12:17:30	-1.39711	643.901	5
2022-09-12	12:17:31	-0.91901	643.901	5
2022-09-12	12:17:32	0.930727	644.832	5
2022-09-12	12:17:33	0.718183	645.55	5
2022-09-12	12:17:34	1.61544	647.165	5
2022-09-12	12:17:35	2.4713	649.637	5
2022-09-12	12:17:36	2.23864	651.875	5
2022-09-12	12:17:37	6.73823	658.614	5
2022-09-12	12:17:38	12.8153	671.429	5
2022-09-12	12:17:39	5.33217	676.761	5
2022-09-12	12:17:40	2.50559	679.267	5
2022-09-12	12:17:41	5.93446	685.201	5
2022-09-12	12:17:42	2.45409	687.655	5
2022-09-12	12:17:43	0.751894	688.407	5
2022-09-12	12:17:44	-1.62218	688.407	5
2022-09-12	12:17:45	-0.50309	688.407	5
2022-09-12	12:17:46	1.28873	689.696	5
2022-09-12	12:17:47	1.62557	691.321	5
2022-09-12	12:17:48	1.61228	692.934	5
2022-09-12	12:17:49	1.37074	694.304	5
2022-09-12	12:17:50	1.03407	695.338	5
2022-09-12	12:17:51	-1.01137	695.338	5
2022-09-12	12:17:52	0.246973	695.585	5
2022-09-12	12:17:53	0.842216	696.428	5
2022-09-12	12:17:54	1.11645	697.544	5
2022-09-12	12:17:55	1.18766	698.732	5
2022-09-12	12:17:56	1.0494	699.781	5
2022-09-12	12:17:57	0.934292	700.715	5
2022-09-12	12:17:58	0.564703	701.28	5
2022-09-12	12:17:59	0.992978	702.273	5
2022-09-12	12:18:00	1.38007	703.653	5
2022-09-12	12:18:01	1.96451	705.618	5
2022-09-12	12:18:02	3.32047	708.938	5
2022-09-12	12:18:03	1.83938	710.778	5
2022-09-12	12:18:04	2.40616	713.184	5
2022-09-12	12:18:05	11.1711	724.355	5
2022-09-12	12:18:06	4.13103	728.486	5
2022-09-12	12:18:07	1.2773	729.763	5
2022-09-12	12:18:08	1.36921	731.132	5
2022-09-12	12:18:09	1.41165	732.544	5
2022-09-12	12:18:10	2.8918	735.436	5
2022-09-12	12:18:11	3.96575	739.402	5
2022-09-12	12:18:12	2.69976	742.101	5
2022-09-12	12:18:13	1.77973	743.881	5
2022-09-12	12:18:14	10.2802	754.161	5
2022-09-12	12:18:15	2.02099	756.182	5
2022-09-12	12:18:16	10.0044	766.187	5
2022-09-12	12:18:17	24.8829	791.069	6
2022-09-12	12:18:18	1.97326	793.043	6
2022-09-12	12:18:19	10.2245	803.267	6
2022-09-12	12:18:20	10.5028	813.77	6
2022-09-12	12:18:21	4.01407	817.784	6
2022-09-12	12:18:22	1.72908	819.513	6
2022-09-12	12:18:23	1.57707	821.09	6
2022-09-12	12:18:24	3.80768	824.898	6
2022-09-12	12:18:25	6.83981	831.738	6
2022-09-12	12:18:26	7.58433	839.322	6
2022-09-12	12:18:27	4.80179	844.124	6
2022-09-12	12:18:28	1.57323	845.697	6
2022-09-12	12:18:29	1.24397	846.941	6
2022-09-12	12:18:30	1.00711	847.948	6
2022-09-12	12:18:31	0.462817	848.411	6
2022-09-12	12:18:32	0.633275	849.044	6
2022-09-12	12:18:33	0.89411	849.938	6
2022-09-12	12:18:34	1.00696	850.945	6
2022-09-12	12:18:35	0.618956	851.564	6
2022-09-12	12:18:36	0.605601	852.17	6
2022-09-12	12:18:37	-0.0725508	852.17	6
2022-09-12	12:18:38	-0.670379	852.17	6
2022-09-12	12:18:39	-0.170568	852.17	6
2022-09-12	12:18:40	2.44374	854.614	6
2022-09-12	12:18:41	1.83808	856.452	6
2022-09-12	12:18:42	2.61427	859.066	6
2022-09-12	12:18:43	5.2877	864.354	6
2022-09-12	12:18:44	3.87152	868.225	6
2022-09-12	12:18:45	3.54956	871.775	6
2022-09-12	12:18:46	6.13585	877.911	6
2022-09-12	12:18:47	1.54566	879.456	6
2022-09-12	12:18:48	2.33649	881.793	6
2022-09-12	12:18:49	14.5786	896.371	7
2022-09-12	12:18:50	12.6191	908.99	7
2022-09-12	12:18:51	3.37741	912.368	7
2022-09-12	12:18:52	1.12116	913.489	7
2022-09-12	12:18:53	0.810071	914.299	7
2022-09-12	12:18:54	0.34218	914.641	7
2022-09-12	12:18:55	1.45868	916.1	7
2022-09-12	12:18:56	1.36423	917.464	7
2022-09-12	12:18:57	1.60345	919.068	7
2022-09-12	12:18:58	2.23412	921.302	7
2022-09-12	12:18:59	3.70366	925.005	7
2022-09-12	12:19:00	1.82857	926.834	7
2022-09-12	12:19:01	0.733841	927.568	7
2022-09-12	12:19:02	1.13788	928.706	7
2022-09-12	12:19:03	0.931746	929.637	7
2022-09-12	12:19:04	0.612336	930.25	7
2022-09-12	12:19:05	1.14674	931.396	7
2022-09-12	12:19:06	1.43721	932.834	7
2022-09-12	12:19:07	1.61228	934.446	7
2022-09-12	12:19:08	1.43548	935.881	7
2022-09-12	12:19:09	1.15834	937.04	7
2022-09-12	12:19:10	1.39156	938.431	7
2022-09-12	12:19:11	1.13633	939.568	7
2022-09-12	12:19:12	1.19615	940.764	7
2022-09-12	12:19:13	0.773399	941.537	7
2022-09-12	12:19:14	1.07064	942.608	7
2022-09-12	12:19:15	1.22258	943.83	7
2022-09-12	12:19:16	1.13237	944.963	7
2022-09-12	12:19:17	1.33989	946.303	7
2022-09-12	12:19:18	1.68207	947.985	7
2022-09-12	12:19:19	2.56722	950.552	7
2022-09-12	12:19:20	8.11802	958.67	7
2022-09-12	12:19:21	4.9105	963.58	7
2022-09-12	12:19:22	2.3055	965.886	7
2022-09-12	12:19:23	2.63655	968.523	7
2022-09-12	12:19:24	8.18588	976.708	7
2022-09-12	12:19:25	6.00252	982.711	7
2022-09-12	12:19:26	7.67783	990.389	7
2022-09-12	12:19:27	10.3964	1000.79	7
2022-09-12	12:19:28	8.75622	1009.54	7
2022-09-12	12:19:29	5.93636	1015.48	7
2022-09-12	12:19:30	3.50332	1018.98	7
2022-09-12	12:19:31	5.91763	1024.9	7
2022-09-12	12:19:32	4.97961	1029.88	7
2022-09-12	12:19:33	4.14231	1034.02	7
2022-09-12	12:19:34	5.14264	1039.16	7
2022-09-12	12:19:35	9.22032	1048.38	7
2022-09-12	12:19:36	10.8869	1059.27	7
2022-09-12	12:19:37	15.0604	1074.33	8
2022-09-12	12:19:38	3.7576	1078.09	8
2022-09-12	12:19:39	7.69668	1085.79	8
2022-09-12	12:19:40	20.6574	1106.44	9
2022-09-12	12:19:41	18.7787	1125.22	10
2022-09-12	12:19:42	25.4763	1150.7	11
2022-09-12	12:19:43	21.8774	1172.57	12
2022-09-12	12:19:44	26.4177	1198.99	13
2022-09-12	12:19:45	18.4194	1217.41	14
2022-09-12	12:19:46	12.8327	1230.24	14
2022-09-12	12:19:47	20.5691	1250.81	15
2022-09-12	12:19:48	12.6829	1263.5	15
2022-09-12	12:19:49	16.1361	1279.63	16
2022-09-12	12:19:50	14.5629	1294.2	17
2022-09-12	12:19:51	6.2289	1300.42	17
2022-09-12	12:19:52	2.62851	1303.05	17
2022-09-12	12:19:53	1.67973	1304.73	17
2022-09-12	12:19:54	0.974756	1305.71	17
2022-09-12	12:19:55	2.38632	1308.09	17
2022-09-12	12:19:56	3.49976	1311.59	17
2022-09-12	12:19:57	8.54773	1320.14	17
2022-09-12	12:19:58	11.777	1331.92	17
2022-09-12	12:19:59	11.4852	1343.4	17
2022-09-12	12:20:00	14.1967	1357.6	18
2022-09-12	12:20:01	9.58455	1367.18	18
2022-09-12	12:20:02	6.13138	1373.32	18
2022-09-12	12:20:03	4.96385	1378.28	18
2022-09-12	12:20:04	5.66534	1383.95	18
2022-09-12	12:20:05	7.38396	1391.33	18
2022-09-12	12:20:06	13.0598	1404.39	19
2022-09-12	12:20:07	10.2799	1414.67	19
2022-09-12	12:20:08	11.8575	1426.53	19
2022-09-12	12:20:09	10.6116	1437.14	19
2022-09-12	12:20:10	13.9831	1451.12	20
2022-09-12	12:20:11	14.344	1465.47	21
2022-09-12	12:20:12	20.767	1486.23	22
2022-09-12	12:20:13	11.4491	1497.68	22
2022-09-12	12:20:14	5.88697	1503.57	22
2022-09-12	12:20:15	2.00405	1505.57	22
2022-09-12	12:20:16	2.15665	1507.73	22
2022-09-12	12:20:17	0.988734	1508.72	22
2022-09-12	12:20:18	1.88392	1510.6	22
2022-09-12	12:20:19	2.27139	1512.87	22
2022-09-12	12:20:20	0.860382	1513.73	22
2022-09-12	12:20:21	2.28754	1516.02	22
2022-09-12	12:20:22	1.63321	1517.65	22
2022-09-12	12:20:23	0.926369	1518.58	22
2022-09-12	12:20:24	2.83043	1521.41	22
2022-09-12	12:20:25	6.15452	1527.57	22
2022-09-12	12:20:26	3.37786	1530.94	22
2022-09-12	12:20:27	9.72701	1540.67	22
2022-09-12	12:20:28	17.7004	1558.37	23
2022-09-12	12:20:29	12.8301	1571.2	23
2022-09-12	12:20:30	11.1067	1582.31	23
2022-09-12	12:20:31	4.3759	1586.68	23
2022-09-12	12:20:32	0.684832	1587.37	23

## Sheet: Duke_harness_2022912121531  (3)
Date	Time	Lbs	Newtons	averaged newtons	Total Force x Time	Total Time Steps Force >13.345		**GoPro Fitting: 1205
2022-09-12	12:15:32	0.199708	0.888341	0.868702	0.888341	FALSE	0			Total Force x Time	3006
2022-09-12	12:15:32	0.171107	0.761118	0.868702	0.761118	FALSE	0			Total Time Steps Force >3	140
2022-09-12	12:15:32	0.211616	0.94131	0.868702	1.82965	FALSE	0
2022-09-12	12:15:32	0.198741	0.88404	0.868702	1.64516	FALSE	0
2022-09-12	12:15:33	0.207494	0.922975	1.0219	2.75263	FALSE	0
2022-09-12	12:15:33	0.22327	0.99315	1.0219	2.63831	FALSE	0
2022-09-12	12:15:33	0.260064	1.15682	1.0219	3.90944	FALSE	0
2022-09-12	12:15:33	0.228104	1.01465	1.0219	3.65296	FALSE	0
2022-09-12	12:15:34	0.220674	0.981602	1.16938	4.89104	FALSE	0
2022-09-12	12:15:34	0.202303	0.899884	1.16938	4.55284	FALSE	0
2022-09-12	12:15:34	0.27014	1.20164	1.16938	6.09268	FALSE	0
2022-09-12	12:15:34	0.358435	1.59439	1.16938	6.14723	FALSE	0
2022-09-12	12:15:35	0.345356	1.53621	1.59303	7.62889	FALSE	0
2022-09-12	12:15:35	0.34785	1.54731	1.59303	7.69454	FALSE	0
2022-09-12	12:15:35	0.362201	1.61114	1.59303	9.24004	FALSE	0
2022-09-12	12:15:35	0.377112	1.67747	1.59303	9.37201	FALSE	0
2022-09-12	12:15:36	0.426629	1.89773	1.90407	11.1378	FALSE	0
2022-09-12	12:15:36	0.471209	2.09603	1.90407	11.468	FALSE	0
2022-09-12	12:15:36	0.386323	1.71844	1.90407	12.8562	FALSE	0
2022-09-12	12:15:37	0.451056	2.00639	1.75976	13.4744	FALSE	0
2022-09-12	12:15:37	0.427901	1.90339	1.75976	14.7596	FALSE	0
2022-09-12	12:15:37	0.333906	1.48528	1.75976	14.9597	FALSE	0
2022-09-12	12:15:37	0.36958	1.64397	1.75976	16.4036	FALSE	0
2022-09-12	12:15:38	0.449733	2.0005	1.85291	16.9602	FALSE	0
2022-09-12	12:15:38	0.43813	1.94889	1.85291	18.3525	FALSE	0
2022-09-12	12:15:38	0.421692	1.87577	1.85291	18.836	FALSE	0
2022-09-12	12:15:38	0.356654	1.58647	1.85291	19.9389	FALSE	0
2022-09-12	12:15:39	0.389428	1.73225	1.73355	20.5682	FALSE	0
2022-09-12	12:15:39	0.473346	2.10554	1.73355	22.0445	FALSE	0
2022-09-12	12:15:39	0.223219	0.992923	1.73355	21.5612	FALSE	0
2022-09-12	12:15:39	0.472888	2.1035	1.73355	24.148	FALSE	0
2022-09-12	12:15:40	0.46159	2.05324	1.90648	23.6144	FALSE	0
2022-09-12	12:15:40	0.320166	1.42416	1.90648	25.5721	FALSE	0
2022-09-12	12:15:40	0.504033	2.24204	1.90648	25.8564	FALSE	0
2022-09-12	12:15:41	0.395178	1.75783	1.80412	27.33	FALSE	0
2022-09-12	12:15:41	0.425967	1.89479	1.80412	27.7512	FALSE	0
2022-09-12	12:15:41	0.418588	1.86196	1.80412	29.1919	FALSE	0
2022-09-12	12:15:41	0.382608	1.70192	1.80412	29.4531	FALSE	0
2022-09-12	12:15:42	1.22103	5.43139	2.53106	34.6233	FALSE	0
2022-09-12	12:15:42	0.492125	2.18907	2.53106	31.6422	FALSE	0
2022-09-12	12:15:42	0.409835	1.82303	2.53106	36.4463	FALSE	0
2022-09-12	12:15:42	0.153041	0.680757	2.53106	32.323	FALSE	0
2022-09-12	12:15:43	0.280776	1.24895	1.6116	37.6953	FALSE	0
2022-09-12	12:15:43	0.60617	2.69637	1.6116	35.0193	FALSE	0
2022-09-12	12:15:43	0.418028	1.85947	1.6116	39.5548	FALSE	0
2022-09-12	12:15:43	0.144237	0.641595	1.6116	35.6609	FALSE	0
2022-09-12	12:15:44	0.123015	0.547195	5.11174	40.1019	FALSE	0
2022-09-12	12:15:44	0.199758	0.888564	5.11174	36.5495	FALSE	0
2022-09-12	12:15:44	3.12474	13.8995	5.11174	54.0014	1	1
2022-09-12	12:15:45	6.43782	28.6367	22.8908	65.1862	1	2
2022-09-12	12:15:45	6.13339	27.2825	22.8908	81.284	1	3
2022-09-12	12:15:45	7.23329	32.1751	22.8908	97.3613	1	4
2022-09-12	12:15:45	0.779809	3.46875	22.8908	84.7527	FALSE	4
2022-09-12	12:15:46	0.935025	4.15918	8.9788	101.521	FALSE	4
2022-09-12	12:15:46	2.54454	11.3186	8.9788	96.0713	FALSE	4
2022-09-12	12:15:46	2.30052	10.2332	8.9788	111.754	FALSE	4
2022-09-12	12:15:46	2.29401	10.2042	8.9788	106.276	FALSE	4
2022-09-12	12:15:47	1.40632	6.25559	4.99199	118.009	FALSE	4
2022-09-12	12:15:47	0.828867	3.68697	4.99199	109.963	FALSE	4
2022-09-12	12:15:47	1.97258	8.77443	4.99199	126.784	FALSE	4
2022-09-12	12:15:47	0.281234	1.25099	4.99199	111.213	FALSE	4
2022-09-12	12:15:48	0.140624	0.625524	0.812655	127.409	FALSE	4
2022-09-12	12:15:48	0.292735	1.30214	0.812655	112.516	FALSE	4
2022-09-12	12:15:48	0.11472	0.510298	0.812655	127.92	FALSE	4
2022-09-12	12:15:49	0.268766	1.19552	1.69518	113.711	FALSE	4
2022-09-12	12:15:49	0.304695	1.35534	1.69518	129.275	FALSE	4
2022-09-12	12:15:49	0.459504	2.04397	1.69518	115.755	FALSE	4
2022-09-12	12:15:49	0.491412	2.1859	1.69518	131.461	FALSE	4
2022-09-12	12:15:50	0.512023	2.27758	1.80475	118.033	FALSE	4
2022-09-12	12:15:50	0.3593	1.59824	1.80475	133.059	FALSE	4
2022-09-12	12:15:50	0.49986	2.22348	1.80475	120.256	FALSE	4
2022-09-12	12:15:50	0.251718	1.11969	1.80475	134.179	FALSE	4
2022-09-12	12:15:51	0.578333	2.57254	2.12093	122.829	FALSE	4
2022-09-12	12:15:51	0.535484	2.38194	2.12093	136.561	FALSE	4
2022-09-12	12:15:51	0.398079	1.77074	2.12093	124.599	FALSE	4
2022-09-12	12:15:51	0.395331	1.75851	2.12093	138.319	FALSE	4
2022-09-12	12:15:52	0.0778247	0.34618	-0.617861	124.946	FALSE	4
2022-09-12	12:15:52	-0.308333	-1.37153	-0.617861	138.319	FALSE	4
2022-09-12	12:15:52	-0.186196	-0.828237	-0.617861	124.946	FALSE	4
2022-09-12	12:15:53	0.194771	0.86638	0.998242	139.186	FALSE	4
2022-09-12	12:15:53	0.207087	0.921164	0.998242	125.867	FALSE	4
2022-09-12	12:15:53	0.243117	1.08143	0.998242	140.267	FALSE	4
2022-09-12	12:15:53	0.252684	1.12399	0.998242	126.991	FALSE	4
2022-09-12	12:15:54	0.313957	1.39654	1.52903	141.664	FALSE	4
2022-09-12	12:15:54	0.427596	1.90203	1.52903	128.893	FALSE	4
2022-09-12	12:15:54	0.332125	1.47736	1.52903	143.141	FALSE	4
2022-09-12	12:15:54	0.301285	1.34018	1.52903	130.233	FALSE	4
2022-09-12	12:15:55	0.311616	1.38613	0.951949	144.527	FALSE	4
2022-09-12	12:15:55	0.239962	1.0674	0.951949	131.3	FALSE	4
2022-09-12	12:15:55	0.165356	0.735537	0.951949	145.263	FALSE	4
2022-09-12	12:15:55	0.139097	0.618731	0.951949	131.919	FALSE	4
2022-09-12	12:15:56	0.157519	0.700676	0.239256	145.963	FALSE	4
2022-09-12	12:15:56	0.0484099	0.215337	0.239256	132.134	FALSE	4
2022-09-12	12:15:56	-0.0445672	-0.198244	0.239256	145.963	FALSE	4
2022-09-12	12:15:57	-0.0168827	-0.0750976	0.428919	132.134	FALSE	4
2022-09-12	12:15:57	0.019046	0.0847204	0.428919	146.048	FALSE	4
2022-09-12	12:15:57	0.165255	0.735087	0.428919	132.87	FALSE	4
2022-09-12	12:15:57	0.218283	0.970966	0.428919	147.019	FALSE	4
2022-09-12	12:15:58	0.0864252	0.384437	0.607979	133.254	FALSE	4
2022-09-12	12:15:58	0.0169086	0.0752128	0.607979	147.094	FALSE	4
2022-09-12	12:15:58	0.141082	0.627561	0.607979	133.882	FALSE	4
2022-09-12	12:15:58	0.302303	1.3447	0.607979	148.439	FALSE	4
2022-09-12	12:15:59	0.18841	0.838085	1.44352	134.72	FALSE	4
2022-09-12	12:15:59	0.348461	1.55002	1.44352	149.989	FALSE	4
2022-09-12	12:15:59	0.287596	1.27928	1.44352	135.999	FALSE	4
2022-09-12	12:15:59	0.4736	2.10667	1.44352	152.096	FALSE	4
2022-09-12	12:16:00	2.32139	10.326	11.4179	146.325	FALSE	4
2022-09-12	12:16:00	1.05202	4.6796	11.4179	156.775	FALSE	4
2022-09-12	12:16:00	4.32714	19.248	11.4179	165.573	1	5
2022-09-12	12:16:01	1.31625	5.85494	12.0314	162.63	FALSE	5
2022-09-12	12:16:01	3.85034	17.1271	12.0314	182.7	1	6
2022-09-12	12:16:01	0.741336	3.29761	12.0314	165.928	FALSE	6
2022-09-12	12:16:01	4.91116	21.8458	12.0314	204.546	1	7
2022-09-12	12:16:02	0.811514	3.60978	11.1429	169.537	FALSE	7
2022-09-12	12:16:02	4.39126	19.5332	11.1429	224.079	1	8
2022-09-12	12:16:02	1.89401	8.42494	11.1429	177.962	FALSE	8
2022-09-12	12:16:02	2.92332	13.0035	11.1429	237.083	FALSE	8
2022-09-12	12:16:03	1.1908	5.29692	7.18955	183.259	FALSE	8
2022-09-12	12:16:03	2.55273	11.3551	7.18955	248.438	FALSE	8
2022-09-12	12:16:03	0.780369	3.47124	7.18955	186.731	FALSE	8
2022-09-12	12:16:03	1.94123	8.63498	7.18955	257.073	FALSE	8
2022-09-12	12:16:04	0.335382	1.49185	4.1182	188.222	FALSE	8
2022-09-12	12:16:04	1.88912	8.40318	4.1182	265.476	FALSE	8
2022-09-12	12:16:04	0.552939	2.45958	4.1182	190.682	FALSE	8
2022-09-12	12:16:05	3.86459	17.1905	11.3328	282.666	1	9
2022-09-12	12:16:05	1.87289	8.33099	11.3328	199.013	FALSE	9
2022-09-12	12:16:05	3.02383	13.4506	11.3328	296.117	1	10
2022-09-12	12:16:05	1.42958	6.35906	11.3328	205.372	FALSE	10
2022-09-12	12:16:06	1.67742	7.4615	11.9612	303.578	FALSE	10
2022-09-12	12:16:06	3.24205	14.4213	11.9612	219.793	1	11
2022-09-12	12:16:06	2.13106	9.47938	11.9612	313.058	FALSE	11
2022-09-12	12:16:06	3.70546	16.4826	11.9612	236.276	1	12
2022-09-12	12:16:07	2.20475	9.80717	8.46109	322.865	FALSE	12
2022-09-12	12:16:07	2.12266	9.44202	8.46109	245.718	FALSE	12
2022-09-12	12:16:07	0.549885	2.446	8.46109	325.311	FALSE	12
2022-09-12	12:16:07	2.73126	12.1492	8.46109	257.867	FALSE	12
2022-09-12	12:16:08	0.196756	0.87521	4.23955	326.186	FALSE	12
2022-09-12	12:16:08	2.40999	10.7201	4.23955	268.587	FALSE	12
2022-09-12	12:16:08	0.252532	1.12331	4.23955	327.309	FALSE	12
2022-09-12	12:16:09	2.41014	10.7208	6.67807	279.308	FALSE	12
2022-09-12	12:16:09	0.381896	1.69875	6.67807	329.008	FALSE	12
2022-09-12	12:16:09	1.89609	8.43419	6.67807	287.742	FALSE	12
2022-09-12	12:16:09	1.31706	5.85855	6.67807	334.867	FALSE	12
2022-09-12	12:16:10	2.10678	9.37138	7.3247	297.114	FALSE	12
2022-09-12	12:16:10	1.47014	6.53948	7.3247	341.406	FALSE	12
2022-09-12	12:16:10	0.940522	4.18363	7.3247	301.297	FALSE	12
2022-09-12	12:16:10	2.06922	9.2043	7.3247	350.61	FALSE	12
2022-09-12	12:16:11	0.318232	1.41556	8.89362	302.713	FALSE	12
2022-09-12	12:16:11	2.56179	11.3954	8.89362	362.006	FALSE	12
2022-09-12	12:16:11	1.18439	5.2684	8.89362	307.981	FALSE	12
2022-09-12	12:16:11	3.93309	17.4952	8.89362	379.501	1	13
2022-09-12	12:16:12	1.4338	6.37783	8.29793	314.359	FALSE	13
2022-09-12	12:16:12	3.76485	16.7468	8.29793	396.248	1	14
2022-09-12	12:16:12	0.397723	1.76915	8.29793	316.128	FALSE	14
2022-09-12	12:16:13	2.34724	10.441	7.30003	406.689	FALSE	14
2022-09-12	12:16:13	0.930801	4.14039	7.30003	320.269	FALSE	14
2022-09-12	12:16:13	2.482	11.0404	7.30003	417.729	FALSE	14
2022-09-12	12:16:13	0.80444	3.57831	7.30003	323.847	FALSE	14
2022-09-12	12:16:14	1.16846	5.19754	8.20625	422.927	FALSE	14
2022-09-12	12:16:14	2.04729	9.10676	8.20625	332.954	FALSE	14
2022-09-12	12:16:14	0.69416	3.08776	8.20625	426.015	FALSE	14
2022-09-12	12:16:14	3.46948	15.4329	8.20625	348.387	1	15
2022-09-12	12:16:15	1.5849	7.04995	12.3242	433.064	FALSE	15
2022-09-12	12:16:15	4.09263	18.2048	12.3242	366.591	1	16
2022-09-12	12:16:15	1.35014	6.00569	12.3242	439.07	FALSE	16
2022-09-12	12:16:15	4.05472	18.0362	12.3242	384.628	1	17
2022-09-12	12:16:16	2.54693	11.3293	10.322	450.399	FALSE	17
2022-09-12	12:16:16	1.53787	6.84075	10.322	391.468	FALSE	17
2022-09-12	12:16:16	2.8767	12.7961	10.322	463.196	FALSE	17
2022-09-12	12:16:17	1.52775	6.79574	8.64133	398.264	FALSE	17
2022-09-12	12:16:17	3.16011	14.0568	8.64133	477.252	1	18
2022-09-12	12:16:17	0.909173	4.04418	8.64133	402.308	FALSE	18
2022-09-12	12:16:17	2.1736	9.66861	8.64133	486.921	FALSE	18
2022-09-12	12:16:18	0.597825	2.65925	8.18492	404.968	FALSE	18
2022-09-12	12:16:18	2.01696	8.97184	8.18492	495.893	FALSE	18
2022-09-12	12:16:18	0.670751	2.98363	8.18492	407.951	FALSE	18
2022-09-12	12:16:18	4.07467	18.1249	8.18492	514.018	1	19
2022-09-12	12:16:19	0.80841	3.59597	11.8032	411.547	FALSE	19
2022-09-12	12:16:19	5.24199	23.3174	11.8032	537.335	1	20
2022-09-12	12:16:19	0.852125	3.79042	11.8032	415.338	FALSE	20
2022-09-12	12:16:19	3.71141	16.5091	11.8032	553.844	1	21
2022-09-12	12:16:20	0.860522	3.82777	8.23256	419.165	FALSE	21
2022-09-12	12:16:20	1.69823	7.55407	8.23256	561.398	FALSE	21
2022-09-12	12:16:20	2.34159	10.4159	8.23256	429.581	FALSE	21
2022-09-12	12:16:20	2.50271	11.1326	8.23256	572.531	FALSE	21
2022-09-12	12:16:21	3.50698	15.5997	15.5678	445.181	1	22
2022-09-12	12:16:21	3.12296	13.8916	15.5678	586.422	1	23
2022-09-12	12:16:21	3.86943	17.212	15.5678	462.393	1	24
2022-09-12	12:16:22	1.25309	5.57399	9.56333	591.996	FALSE	24
2022-09-12	12:16:22	3.48352	15.4954	9.56333	477.888	1	25
2022-09-12	12:16:22	0.642964	2.86003	9.56333	594.856	FALSE	25
2022-09-12	12:16:22	3.22016	14.3239	9.56333	492.212	1	26
2022-09-12	12:16:23	0.499453	2.22167	6.0387	597.078	FALSE	26
2022-09-12	12:16:23	2.08414	9.27067	6.0387	501.483	FALSE	26
2022-09-12	12:16:23	0.541285	2.40774	6.0387	599.486	FALSE	26
2022-09-12	12:16:23	2.30536	10.2547	6.0387	511.738	FALSE	26
2022-09-12	12:16:24	1.07788	4.79463	8.96082	604.281	FALSE	26
2022-09-12	12:16:24	2.93813	13.0694	8.96082	524.807	FALSE	26
2022-09-12	12:16:24	2.02744	9.01846	8.96082	613.299	FALSE	26
2022-09-12	12:16:25	1.33172	5.92376	9.5917	530.731	FALSE	26
2022-09-12	12:16:25	2.79716	12.4423	9.5917	625.741	FALSE	26
2022-09-12	12:16:25	1.2567	5.59005	9.5917	536.321	FALSE	26
2022-09-12	12:16:25	3.23966	14.4107	9.5917	640.152	1	27
2022-09-12	12:16:26	0.791667	3.52149	11.0217	539.842	FALSE	27
2022-09-12	12:16:26	6.18535	27.5137	11.0217	667.666	1	28
2022-09-12	12:16:26	0.400929	1.78341	11.0217	541.626	FALSE	28
2022-09-12	12:16:26	2.53319	11.2681	11.0217	678.934	FALSE	28
2022-09-12	12:16:27	1.60933	7.15862	10.4383	548.784	FALSE	28
2022-09-12	12:16:27	3.42795	15.2482	10.4383	694.182	1	29
2022-09-12	12:16:27	2.82159	12.551	10.4383	561.335	FALSE	29
2022-09-12	12:16:27	1.52765	6.79529	10.4383	700.977	FALSE	29
2022-09-12	12:16:28	3.76429	16.7443	9.85956	578.08	1	30
2022-09-12	12:16:28	0.583931	2.59744	9.85956	703.575	FALSE	30
2022-09-12	12:16:28	3.77589	16.7959	9.85956	594.876	1	31
2022-09-12	12:16:28	0.741997	3.30055	9.85956	706.875	FALSE	31
2022-09-12	12:16:29	3.78332	16.829	11.4545	611.705	1	32
2022-09-12	12:16:29	0.8793	3.9113	11.4545	710.787	FALSE	32
2022-09-12	12:16:29	3.06266	13.6233	11.4545	625.328	1	33
2022-09-12	12:16:30	1.77034	7.87483	10.8238	718.661	FALSE	33
2022-09-12	12:16:30	2.84347	12.6483	10.8238	637.976	FALSE	33
2022-09-12	12:16:30	1.40704	6.2588	10.8238	724.92	FALSE	33
2022-09-12	12:16:30	3.71238	16.5134	10.8238	654.49	1	34
2022-09-12	12:16:31	0.557774	2.48109	12.1001	727.401	FALSE	34
2022-09-12	12:16:31	3.83258	17.0481	12.1001	671.538	1	35
2022-09-12	12:16:31	0.574364	2.55489	12.1001	729.956	FALSE	35
2022-09-12	12:16:31	5.91619	26.3164	12.1001	697.854	1	36
2022-09-12	12:16:32	0.456959	2.03265	8.58627	731.989	FALSE	36
2022-09-12	12:16:32	4.70266	20.9184	8.58627	718.772	1	37
2022-09-12	12:16:32	0.838842	3.73134	8.58627	735.72	FALSE	37
2022-09-12	12:16:32	1.72266	7.66274	8.58627	726.435	FALSE	37
2022-09-12	12:16:33	0.260216	1.15749	1.09826	736.878	FALSE	37
2022-09-12	12:16:33	0.360165	1.60209	1.09826	728.037	FALSE	37
2022-09-12	12:16:33	0.120318	0.535199	1.09826	737.413	FALSE	37
2022-09-12	12:16:34	0.0827101	0.367911	-0.890318	728.405	FALSE	37
2022-09-12	12:16:34	-0.166196	-0.739273	-0.890318	737.413	FALSE	37
2022-09-12	12:16:34	-0.296476	-1.31878	-0.890318	728.405	FALSE	37
2022-09-12	12:16:34	-0.420648	-1.87113	-0.890318	737.413	FALSE	37
2022-09-12	12:16:35	-0.421259	-1.87384	-1.58143	728.405	FALSE	37
2022-09-12	12:16:35	-0.340496	-1.51459	-1.58143	737.413	FALSE	37
2022-09-12	12:16:35	-0.294389	-1.3095	-1.58143	728.405	FALSE	37
2022-09-12	12:16:35	-0.365941	-1.62778	-1.58143	737.413	FALSE	37
2022-09-12	12:16:36	-0.22304	-0.992127	-0.62286	728.405	FALSE	37
2022-09-12	12:16:36	-0.178766	-0.795187	-0.62286	737.413	FALSE	37
2022-09-12	12:16:36	-0.15846	-0.704862	-0.62286	728.405	FALSE	37
2022-09-12	12:16:36	0.000165643	0.000736813	-0.62286	737.414	FALSE	37
2022-09-12	12:16:37	0.0546694	0.24318	0.982208	728.648	FALSE	37
2022-09-12	12:16:37	0.354517	1.57696	0.982208	738.991	FALSE	37
2022-09-12	12:16:37	0.253244	1.12648	0.982208	729.775	FALSE	37
2022-09-12	12:16:38	1.44927	6.44664	3.21504	745.437	FALSE	37
2022-09-12	12:16:38	0.287494	1.27883	3.21504	731.054	FALSE	37
2022-09-12	12:16:38	0.773804	3.44203	3.21504	748.879	FALSE	37
2022-09-12	12:16:38	0.380522	1.69264	3.21504	732.746	FALSE	37
2022-09-12	12:16:39	0.26673	1.18647	5.45742	750.066	FALSE	37
2022-09-12	12:16:39	0.374313	1.66502	5.45742	734.411	FALSE	37
2022-09-12	12:16:39	2.27314	10.1114	5.45742	760.177	FALSE	37
2022-09-12	12:16:39	1.99335	8.86682	5.45742	743.278	FALSE	37
2022-09-12	12:16:40	4.06683	18.0901	9.2432	778.267	1	38
2022-09-12	12:16:40	1.41467	6.29274	9.2432	749.571	FALSE	38
2022-09-12	12:16:40	2.53625	11.2817	9.2432	789.549	FALSE	38
2022-09-12	12:16:40	0.294109	1.30826	9.2432	750.879	FALSE	38
2022-09-12	12:16:41	0.911209	4.05324	2.20582	793.602	FALSE	38
2022-09-12	12:16:41	0.177621	0.790094	2.20582	751.669	FALSE	38
2022-09-12	12:16:41	0.398842	1.77413	2.20582	795.376	FALSE	38
2022-09-12	12:16:42	0.204186	0.90826	2.84945	752.577	FALSE	38
2022-09-12	12:16:42	0.301794	1.34244	2.84945	796.719	FALSE	38
2022-09-12	12:16:42	0.449071	1.99756	2.84945	754.575	FALSE	38
2022-09-12	12:16:42	1.60729	7.14955	2.84945	803.868	FALSE	38
2022-09-12	12:16:43	0.916705	4.07769	9.45276	758.653	FALSE	38
2022-09-12	12:16:43	3.0053	13.3682	9.45276	817.236	1	39
2022-09-12	12:16:43	1.28149	5.70032	9.45276	764.353	FALSE	39
2022-09-12	12:16:43	3.29681	14.6649	9.45276	831.901	1	40
2022-09-12	12:16:44	2.35034	10.4548	13.3675	774.808	FALSE	40
2022-09-12	12:16:44	3.26077	14.5046	13.3675	846.406	1	41
2022-09-12	12:16:44	2.80098	12.4593	13.3675	787.267	FALSE	41
2022-09-12	12:16:44	3.60846	16.0512	13.3675	862.457	1	42
2022-09-12	12:16:45	1.56083	6.94288	4.96642	794.21	FALSE	42
2022-09-12	12:16:45	0.435026	1.93508	4.96642	864.392	FALSE	42
2022-09-12	12:16:45	1.35365	6.02131	4.96642	800.231	FALSE	42
2022-09-12	12:16:46	0.343728	1.52897	12.2199	865.921	FALSE	42
2022-09-12	12:16:46	3.79558	16.8835	12.2199	817.115	1	43
2022-09-12	12:16:46	1.70871	7.60068	12.2199	873.522	FALSE	43
2022-09-12	12:16:46	5.14057	22.8663	12.2199	839.981	1	44
2022-09-12	12:16:47	1.93284	8.59766	13.8984	882.119	FALSE	44
2022-09-12	12:16:47	5.73283	25.5008	13.8984	865.482	1	45
2022-09-12	12:16:47	0.783626	3.48573	13.8984	885.605	FALSE	45
2022-09-12	12:16:47	4.04871	18.0095	13.8984	883.491	1	46
2022-09-12	12:16:48	0.577163	2.56734	6.96386	888.172	FALSE	46
2022-09-12	12:16:48	2.89762	12.8892	6.96386	896.381	FALSE	46
2022-09-12	12:16:48	0.770852	3.4289	6.96386	891.601	FALSE	46
2022-09-12	12:16:48	2.01655	8.97002	6.96386	905.351	FALSE	46
2022-09-12	12:16:49	1.0622	4.72488	5.52352	896.326	FALSE	46
2022-09-12	12:16:49	0.8393	3.73337	5.52352	909.084	FALSE	46
2022-09-12	12:16:49	1.82373	8.11232	5.52352	904.439	FALSE	46
2022-09-12	12:16:50	0.489631	2.17798	5.05262	911.262	FALSE	46
2022-09-12	12:16:50	2.14673	9.54908	5.05262	913.988	FALSE	46
2022-09-12	12:16:50	0.628104	2.79393	5.05262	914.056	FALSE	46
2022-09-12	12:16:50	1.27905	5.68947	5.05262	919.677	FALSE	46
2022-09-12	12:16:51	0.537265	2.38986	1.72755	916.446	FALSE	46
2022-09-12	12:16:51	0.373702	1.6623	1.72755	921.339	FALSE	46
2022-09-12	12:16:51	0.361285	1.60707	1.72755	918.053	FALSE	46
2022-09-12	12:16:51	0.281234	1.25099	1.72755	922.59	FALSE	46
2022-09-12	12:16:52	0.102507	0.455972	0.81709	918.509	FALSE	46
2022-09-12	12:16:52	0.3164	1.40741	0.81709	923.998	FALSE	46
2022-09-12	12:16:52	0.154924	0.689133	0.81709	919.198	FALSE	46
2022-09-12	12:16:52	0.160929	0.715844	0.81709	924.714	FALSE	46
2022-09-12	12:16:53	0.266171	1.18398	1.20805	920.382	FALSE	46
2022-09-12	12:16:53	0.182557	0.81205	1.20805	925.526	FALSE	46
2022-09-12	12:16:53	0.366018	1.62812	1.20805	922.01	FALSE	46
2022-09-12	12:16:54	0.28785	1.28041	2.62257	926.806	FALSE	46
2022-09-12	12:16:54	0.616807	2.74368	2.62257	924.754	FALSE	46
2022-09-12	12:16:54	0.730903	3.2512	2.62257	930.057	FALSE	46
2022-09-12	12:16:54	0.722761	3.21499	2.62257	927.969	FALSE	46
2022-09-12	12:16:55	1.98602	8.83421	5.04826	938.892	FALSE	46
2022-09-12	12:16:55	0.877875	3.90496	5.04826	931.874	FALSE	46
2022-09-12	12:16:55	1.18027	5.25008	5.04826	944.142	FALSE	46
2022-09-12	12:16:55	0.495432	2.20378	5.04826	934.077	FALSE	46
2022-09-12	12:16:56	0.698282	3.1061	1.84436	947.248	FALSE	46
2022-09-12	12:16:56	0.376908	1.67656	1.84436	935.754	FALSE	46
2022-09-12	12:16:56	0.410903	1.82778	1.84436	949.075	FALSE	46
2022-09-12	12:16:56	0.17243	0.767003	1.84436	936.521	FALSE	46
2022-09-12	12:16:57	0.408664	1.81782	1.12784	950.893	FALSE	46
2022-09-12	12:16:57	0.0502929	0.223713	1.12784	936.745	FALSE	46
2022-09-12	12:16:57	0.301692	1.34199	1.12784	952.235	FALSE	46
2022-09-12	12:16:58	0.131362	0.584324	0.956987	937.329	FALSE	46
2022-09-12	12:16:58	0.337774	1.50249	0.956987	953.738	FALSE	46
2022-09-12	12:16:58	0.128868	0.573231	0.956987	937.902	FALSE	46
2022-09-12	12:16:58	0.262557	1.16791	0.956987	954.906	FALSE	46
2022-09-12	12:16:59	0.210496	0.936328	1.1387	938.839	FALSE	46
2022-09-12	12:16:59	0.288664	1.28404	1.1387	956.19	FALSE	46
2022-09-12	12:16:59	0.271616	1.2082	1.1387	940.047	FALSE	46
2022-09-12	12:16:59	0.253193	1.12625	1.1387	957.316	FALSE	46
2022-09-12	12:17:00	0.432176	1.92241	4.33002	941.969	FALSE	46
2022-09-12	12:17:00	1.75055	7.7868	4.33002	965.103	FALSE	46
2022-09-12	12:17:00	0.73757	3.28086	4.33002	945.25	FALSE	46
2022-09-12	12:17:01	3.76373	16.7418	7.88276	981.845	1	47
2022-09-12	12:17:01	1.26215	5.6143	7.88276	950.864	FALSE	47
2022-09-12	12:17:01	1.28576	5.71932	7.88276	987.564	FALSE	47
2022-09-12	12:17:01	0.776857	3.45562	7.88276	954.32	FALSE	47
2022-09-12	12:17:02	0.312939	1.39202	1.86909	988.956	FALSE	47
2022-09-12	12:17:02	0.33355	1.4837	1.86909	955.804	FALSE	47
2022-09-12	12:17:02	0.575331	2.55919	1.86909	991.515	FALSE	47
2022-09-12	12:17:02	0.458944	2.04147	1.86909	957.845	FALSE	47
2022-09-12	12:17:03	1.01996	4.53699	9.3445	996.052	FALSE	47
2022-09-12	12:17:03	1.48902	6.62346	9.3445	964.469	FALSE	47
2022-09-12	12:17:03	3.74785	16.6712	9.3445	1012.72	1	48
2022-09-12	12:17:03	2.14612	9.54637	9.3445	974.015	FALSE	48
2022-09-12	12:17:04	3.67441	16.3445	12.638	1029.07	1	49
2022-09-12	12:17:04	2.81095	12.5037	12.638	986.519	FALSE	49
2022-09-12	12:17:04	2.5282	11.2459	12.638	1040.31	FALSE	49
2022-09-12	12:17:04	2.35106	10.458	12.638	996.977	FALSE	49
2022-09-12	12:17:05	0.716756	3.18827	4.70859	1043.5	FALSE	49
2022-09-12	12:17:05	1.82714	8.12748	4.70859	1005.1	FALSE	49
2022-09-12	12:17:05	0.631717	2.81	4.70859	1046.31	FALSE	49
2022-09-12	12:17:06	3.83737	17.0694	11.1173	1022.17	1	50
2022-09-12	12:17:06	0.410903	1.82778	11.1173	1048.14	FALSE	50
2022-09-12	12:17:06	3.36775	14.9804	11.1173	1037.15	1	51
2022-09-12	12:17:06	2.38108	10.5915	11.1173	1058.73	FALSE	51
2022-09-12	12:17:07	3.8938	17.3204	13.0542	1054.47	1	52
2022-09-12	12:17:07	2.96535	13.1905	13.0542	1071.92	FALSE	52
2022-09-12	12:17:07	3.22001	14.3232	13.0542	1068.8	1	53
2022-09-12	12:17:07	1.65966	7.3825	13.0542	1079.3	FALSE	53
2022-09-12	12:17:08	3.23655	14.3968	5.6478	1083.19	1	54
2022-09-12	12:17:08	0.377774	1.68041	5.6478	1080.98	FALSE	54
2022-09-12	12:17:08	0.585916	2.60627	5.6478	1085.8	FALSE	54
2022-09-12	12:17:08	0.878486	3.90768	5.6478	1084.89	FALSE	54
2022-09-12	12:17:09	0.367392	1.63423	1.83585	1087.43	FALSE	54
2022-09-12	12:17:09	0.299249	1.33112	1.83585	1086.22	FALSE	54
2022-09-12	12:17:09	0.571514	2.54221	1.83585	1089.98	FALSE	54
2022-09-12	12:17:10	0.372125	1.65529	2.19626	1087.88	FALSE	54
2022-09-12	12:17:10	0.471412	2.09693	2.19626	1092.07	FALSE	54
2022-09-12	12:17:10	0.659758	2.93474	2.19626	1090.81	FALSE	54
2022-09-12	12:17:10	0.471667	2.09807	2.19626	1094.17	FALSE	54
2022-09-12	12:17:11	0.725153	3.22563	9.87959	1094.04	FALSE	54
2022-09-12	12:17:11	1.5277	6.79552	9.87959	1100.97	FALSE	54
2022-09-12	12:17:11	2.60128	11.571	9.87959	1105.61	FALSE	54
2022-09-12	12:17:11	4.02999	17.9262	9.87959	1118.89	1	55
2022-09-12	12:17:12	0.557265	2.47883	2.561	1108.09	FALSE	55
2022-09-12	12:17:12	0.774262	3.44407	2.561	1122.34	FALSE	55
2022-09-12	12:17:12	0.187087	0.8322	2.561	1108.92	FALSE	55
2022-09-12	12:17:12	0.784338	3.48889	2.561	1125.83	FALSE	55
2022-09-12	12:17:13	0.191921	0.853703	2.5167	1109.77	FALSE	55
2022-09-12	12:17:13	1.28744	5.72679	2.5167	1131.55	FALSE	55
2022-09-12	12:17:13	0.217977	0.969605	2.5167	1110.74	FALSE	55
2022-09-12	12:17:14	1.02317	4.55126	5.63841	1136.1	FALSE	55
2022-09-12	12:17:14	0.791667	3.52149	5.63841	1114.27	FALSE	55
2022-09-12	12:17:14	1.21798	5.41782	5.63841	1141.52	FALSE	55
2022-09-12	12:17:14	2.03747	9.06307	5.63841	1123.33	FALSE	55
2022-09-12	12:17:15	1.11431	4.95667	3.90281	1146.48	FALSE	55
2022-09-12	12:17:15	1.70754	7.59548	3.90281	1130.92	FALSE	55
2022-09-12	12:17:15	0.182201	0.810466	3.90281	1147.29	FALSE	55
2022-09-12	12:17:15	0.505509	2.24861	3.90281	1133.17	FALSE	55
2022-09-12	12:17:16	1.01732	4.52524	2.02892	1151.82	FALSE	55
2022-09-12	12:17:16	0.355585	1.58171	2.02892	1134.75	FALSE	55
2022-09-12	12:17:16	0.304746	1.35557	2.02892	1153.17	FALSE	55
2022-09-12	12:17:16	0.146832	0.653138	2.02892	1135.41	FALSE	55
2022-09-12	12:17:17	-0.172964	-0.769378	0.410017	1153.17	FALSE	55
2022-09-12	12:17:17	-0.21561	-0.959076	0.410017	1135.41	FALSE	55
2022-09-12	12:17:17	0.665102	2.95851	0.410017	1156.13	FALSE	55
2022-09-12	12:17:18	0.074873	0.33305	0.618957	1135.74	FALSE	55
2022-09-12	12:17:18	0.204949	0.911654	0.618957	1157.04	FALSE	55
2022-09-12	12:17:18	0.251158	1.1172	0.618957	1136.86	FALSE	55
2022-09-12	12:17:18	0.0256109	0.113922	0.618957	1157.15	FALSE	55
2022-09-12	12:17:19	0.560471	2.49309	1.55653	1139.35	FALSE	55
2022-09-12	12:17:19	0.0563997	0.250877	1.55653	1157.41	FALSE	55
2022-09-12	12:17:19	0.548613	2.44034	1.55653	1141.79	FALSE	55
2022-09-12	12:17:19	0.234211	1.04182	1.55653	1158.45	FALSE	55
2022-09-12	12:17:20	0.451514	2.00842	1.36106	1143.8	FALSE	55
2022-09-12	12:17:20	0.180013	0.800734	1.36106	1159.25	FALSE	55
2022-09-12	12:17:20	0.253092	1.1258	1.36106	1144.93	FALSE	55
2022-09-12	12:17:20	0.3393	1.50927	1.36106	1160.76	FALSE	55
2022-09-12	12:17:21	0.18271	0.812731	1.62691	1145.74	FALSE	55
2022-09-12	12:17:21	0.656196	2.91889	1.62691	1163.68	FALSE	55
2022-09-12	12:17:21	0.258333	1.14912	1.62691	1146.89	FALSE	55
2022-09-12	12:17:22	1.14994	5.11516	2.70299	1168.79	FALSE	55
2022-09-12	12:17:22	0.222965	0.991793	2.70299	1147.88	FALSE	55
2022-09-12	12:17:22	0.702455	3.12466	2.70299	1171.92	FALSE	55
2022-09-12	12:17:22	0.35528	1.58036	2.70299	1149.46	FALSE	55
2022-09-12	12:17:23	0.737315	3.27972	3.50412	1175.2	FALSE	55
2022-09-12	12:17:23	0.738384	3.28448	3.50412	1152.74	FALSE	55
2022-09-12	12:17:23	0.230344	1.02462	3.50412	1176.22	FALSE	55
2022-09-12	12:17:23	1.445	6.42765	3.50412	1159.17	FALSE	55
2022-09-12	12:17:24	1.24388	5.53303	10.1515	1181.75	FALSE	55
2022-09-12	12:17:24	2.42866	10.8032	10.1515	1169.98	FALSE	55
2022-09-12	12:17:24	2.56571	11.4128	10.1515	1193.17	FALSE	55
2022-09-12	12:17:24	2.89039	12.857	10.1515	1182.83	FALSE	55
2022-09-12	12:17:25	1.3822	6.1483	8.3389	1199.31	FALSE	55
2022-09-12	12:17:25	3.45146	15.3528	8.3389	1198.19	1	56
2022-09-12	12:17:25	0.790344	3.51561	8.3389	1202.83	FALSE	56
2022-09-12	12:17:26	3.22093	14.3273	6.58232	1212.51	1	57
2022-09-12	12:17:26	0.436705	1.94255	6.58232	1204.77	FALSE	57
2022-09-12	12:17:26	1.75828	7.82118	6.58232	1220.33	FALSE	57
2022-09-12	12:17:26	0.503168	2.23819	6.58232	1207.01	FALSE	57
2022-09-12	12:17:27	1.18363	5.26502	4.4288	1225.6	FALSE	57
2022-09-12	12:17:27	0.953346	4.24067	4.4288	1211.25	FALSE	57
2022-09-12	12:17:27	0.446476	1.98601	4.4288	1227.58	FALSE	57
2022-09-12	12:17:27	1.3991	6.22348	4.4288	1217.48	FALSE	57
2022-09-12	12:17:28	0.283219	1.25981	1.3618	1228.84	FALSE	57
2022-09-12	12:17:28	0.13925	0.619412	1.3618	1218.09	FALSE	57
2022-09-12	12:17:28	0.696501	3.09818	1.3618	1231.94	FALSE	57
2022-09-12	12:17:28	0.105611	0.469779	1.3618	1218.56	FALSE	57
2022-09-12	12:17:29	0.232023	1.03208	0.645443	1232.97	FALSE	57
2022-09-12	12:17:29	0.107189	0.476798	0.645443	1219.04	FALSE	57
2022-09-12	12:17:29	0.0960943	0.427447	0.645443	1233.4	FALSE	57
2022-09-12	12:17:30	-0.114847	-0.510862	-1.39711	1219.04	FALSE	57
2022-09-12	12:17:30	-0.160852	-0.715502	-1.39711	1233.4	FALSE	57
2022-09-12	12:17:30	-0.424923	-1.89014	-1.39711	1219.04	FALSE	57
2022-09-12	12:17:30	-0.555712	-2.47192	-1.39711	1233.4	FALSE	57
2022-09-12	12:17:31	-0.522531	-2.32432	-0.91901	1219.04	FALSE	57
2022-09-12	12:17:31	-0.241208	-1.07294	-0.91901	1233.4	FALSE	57
2022-09-12	12:17:31	-0.170776	-0.759646	-0.91901	1219.04	FALSE	57
2022-09-12	12:17:31	0.108104	0.480868	-0.91901	1233.88	FALSE	57
2022-09-12	12:17:32	0.144746	0.643859	0.930727	1219.68	FALSE	57
2022-09-12	12:17:32	0.0982317	0.436954	0.930727	1234.32	FALSE	57
2022-09-12	12:17:32	-0.0352542	-0.156818	0.930727	1219.68	FALSE	57
2022-09-12	12:17:32	0.629224	2.79891	0.930727	1237.12	FALSE	57
2022-09-12	12:17:33	0.114669	0.510071	0.718183	1220.19	FALSE	57
2022-09-12	12:17:33	0.128206	0.570286	0.718183	1237.69	FALSE	57
2022-09-12	12:17:33	0.241489	1.07419	0.718183	1221.27	FALSE	57
2022-09-12	12:17:34	0.723473	3.21815	1.61544	1240.91	FALSE	57
2022-09-12	12:17:34	0.318384	1.41624	1.61544	1222.69	FALSE	57
2022-09-12	12:17:34	0.208868	0.929087	1.61544	1241.84	FALSE	57
2022-09-12	12:17:34	0.201947	0.898301	1.61544	1223.58	FALSE	57
2022-09-12	12:17:35	0.235433	1.04725	2.4713	1242.88	FALSE	57
2022-09-12	12:17:35	1.15426	5.13438	2.4713	1228.72	FALSE	57
2022-09-12	12:17:35	0.267952	1.1919	2.4713	1244.08	FALSE	57
2022-09-12	12:17:35	0.564644	2.51165	2.4713	1231.23	FALSE	57
2022-09-12	12:17:36	1.505	6.69454	2.23864	1250.77	FALSE	57
2022-09-12	12:17:36	0.068359	0.304075	2.23864	1231.53	FALSE	57
2022-09-12	12:17:36	0.302608	1.34606	2.23864	1252.12	FALSE	57
2022-09-12	12:17:36	0.137112	0.609902	2.23864	1232.14	FALSE	57
2022-09-12	12:17:37	0.483321	2.14991	6.73823	1254.27	FALSE	57
2022-09-12	12:17:37	3.50495	15.5907	6.73823	1247.73	1	58
2022-09-12	12:17:37	0.556196	2.47407	6.73823	1256.74	FALSE	58
2022-09-12	12:17:38	3.07955	13.6985	12.8153	1261.43	1	59
2022-09-12	12:17:38	4.71894	20.9908	12.8153	1277.73	1	60
2022-09-12	12:17:38	1.03752	4.6151	12.8153	1266.05	FALSE	60
2022-09-12	12:17:38	2.688	11.9568	12.8153	1289.69	FALSE	60
2022-09-12	12:17:39	2.91604	12.9711	5.33217	1279.02	FALSE	60
2022-09-12	12:17:39	0.37416	1.66434	5.33217	1291.35	FALSE	60
2022-09-12	12:17:39	1.22912	5.46737	5.33217	1284.49	FALSE	60
2022-09-12	12:17:39	0.275585	1.22586	5.33217	1292.58	FALSE	60
2022-09-12	12:17:40	0.044186	0.196548	2.50559	1284.68	FALSE	60
2022-09-12	12:17:40	0.480522	2.13746	2.50559	1294.72	FALSE	60
2022-09-12	12:17:40	0.165763	0.737347	2.50559	1285.42	FALSE	60
2022-09-12	12:17:40	1.56266	6.95102	2.50559	1301.67	FALSE	60
2022-09-12	12:17:41	1.53503	6.82812	5.93446	1292.25	FALSE	60
2022-09-12	12:17:41	0.547239	2.43423	5.93446	1304.1	FALSE	60
2022-09-12	12:17:41	1.92011	8.54103	5.93446	1300.79	FALSE	60
2022-09-12	12:17:42	0.229478	1.02076	2.45409	1305.12	FALSE	60
2022-09-12	12:17:42	0.357112	1.58851	2.45409	1302.38	FALSE	60
2022-09-12	12:17:42	1.39584	6.20898	2.45409	1311.33	FALSE	60
2022-09-12	12:17:42	0.22439	0.998132	2.45409	1303.38	FALSE	60
2022-09-12	12:17:43	0.182914	0.813638	0.751894	1312.14	FALSE	60
2022-09-12	12:17:43	0.488868	2.17458	0.751894	1305.55	FALSE	60
2022-09-12	12:17:43	-0.0137784	-0.0612891	0.751894	1312.14	FALSE	60
2022-09-12	12:17:43	0.01813	0.0806459	0.751894	1305.63	FALSE	60
2022-09-12	12:17:44	-0.067417	-0.299884	-1.62218	1312.14	FALSE	60
2022-09-12	12:17:44	-0.423905	-1.88561	-1.62218	1305.63	FALSE	60
2022-09-12	12:17:44	-0.516526	-2.29761	-1.62218	1312.14	FALSE	60
2022-09-12	12:17:44	-0.450877	-2.00559	-1.62218	1305.63	FALSE	60
2022-09-12	12:17:45	-0.391946	-1.74345	-0.50309	1312.14	FALSE	60
2022-09-12	12:17:45	-0.0464501	-0.206619	-0.50309	1305.63	FALSE	60
2022-09-12	12:17:45	0.0990969	0.440803	-0.50309	1312.58	FALSE	60
2022-09-12	12:17:46	0.167952	0.747084	1.28873	1306.38	FALSE	60
2022-09-12	12:17:46	0.262252	1.16655	1.28873	1313.75	FALSE	60
2022-09-12	12:17:46	0.276908	1.23174	1.28873	1307.61	FALSE	60
2022-09-12	12:17:46	0.451768	2.00955	1.28873	1315.76	FALSE	60
2022-09-12	12:17:47	0.33416	1.48641	1.62557	1309.1	FALSE	60
2022-09-12	12:17:47	0.429682	1.91131	1.62557	1317.67	FALSE	60
2022-09-12	12:17:47	0.402608	1.79088	1.62557	1310.89	FALSE	60
2022-09-12	12:17:47	0.295331	1.31369	1.62557	1318.99	FALSE	60
2022-09-12	12:17:48	0.39299	1.7481	1.61228	1312.64	FALSE	60
2022-09-12	12:17:48	0.34383	1.52942	1.61228	1320.52	FALSE	60
2022-09-12	12:17:48	0.360064	1.60164	1.61228	1314.24	FALSE	60
2022-09-12	12:17:48	0.352939	1.56994	1.61228	1322.09	FALSE	60
2022-09-12	12:17:49	0.359402	1.59869	1.37074	1315.84	FALSE	60
2022-09-12	12:17:49	0.30841	1.37187	1.37074	1323.46	FALSE	60
2022-09-12	12:17:49	0.256654	1.14165	1.37074	1316.98	FALSE	60
2022-09-12	12:17:50	0.238537	1.06106	1.03407	1324.52	FALSE	60
2022-09-12	12:17:50	0.309631	1.3773	1.03407	1318.35	FALSE	60
2022-09-12	12:17:50	0.200267	0.890828	1.03407	1325.41	FALSE	60
2022-09-12	12:17:50	0.181438	0.807073	1.03407	1319.16	FALSE	60
2022-09-12	12:17:51	-0.153575	-0.683132	-1.01137	1325.41	FALSE	60
2022-09-12	12:17:51	-0.405127	-1.80209	-1.01137	1319.16	FALSE	60
2022-09-12	12:17:51	-0.261564	-1.16349	-1.01137	1325.41	FALSE	60
2022-09-12	12:17:51	-0.0891982	-0.396771	-1.01137	1319.16	FALSE	60
2022-09-12	12:17:52	-0.0454323	-0.202092	0.246973	1325.41	FALSE	60
2022-09-12	12:17:52	0.0118705	0.0528024	0.246973	1319.21	FALSE	60
2022-09-12	12:17:52	0.106222	0.472497	0.246973	1325.88	FALSE	60
2022-09-12	12:17:52	0.149428	0.664686	0.246973	1319.88	FALSE	60
2022-09-12	12:17:53	0.115738	0.514826	0.842216	1326.4	FALSE	60
2022-09-12	12:17:53	0.16897	0.751612	0.842216	1320.63	FALSE	60
2022-09-12	12:17:53	0.217875	0.969152	0.842216	1327.37	FALSE	60
2022-09-12	12:17:53	0.254771	1.13327	0.842216	1321.76	FALSE	60
2022-09-12	12:17:54	0.248766	1.10656	1.11645	1328.47	FALSE	60
2022-09-12	12:17:54	0.247799	1.10226	1.11645	1322.87	FALSE	60
2022-09-12	12:17:54	0.2564	1.14052	1.11645	1329.61	FALSE	60
2022-09-12	12:17:55	0.271412	1.20729	1.18766	1324.07	FALSE	60
2022-09-12	12:17:55	0.315331	1.40266	1.18766	1331.02	FALSE	60
2022-09-12	12:17:55	0.275178	1.22405	1.18766	1325.3	FALSE	60
2022-09-12	12:17:55	0.206069	0.916636	1.18766	1331.93	FALSE	60
2022-09-12	12:17:56	0.30785	1.36938	1.0494	1326.67	FALSE	60
2022-09-12	12:17:56	0.148206	0.65925	1.0494	1332.59	FALSE	60
2022-09-12	12:17:56	0.282863	1.25823	1.0494	1327.93	FALSE	60
2022-09-12	12:17:56	0.204746	0.910751	1.0494	1333.5	FALSE	60
2022-09-12	12:17:57	0.220929	0.982736	0.934292	1328.91	FALSE	60
2022-09-12	12:17:57	0.220369	0.980245	0.934292	1334.48	FALSE	60
2022-09-12	12:17:57	0.177214	0.788283	0.934292	1329.7	FALSE	60
2022-09-12	12:17:57	0.221641	0.985903	0.934292	1335.47	FALSE	60
2022-09-12	12:17:58	0.159555	0.709733	0.564703	1330.41	FALSE	60
2022-09-12	12:17:58	0.180725	0.803901	0.564703	1336.27	FALSE	60
2022-09-12	12:17:58	0.0405728	0.180476	0.564703	1330.59	FALSE	60
2022-09-12	12:17:59	0.168003	0.747311	0.992978	1337.02	FALSE	60
2022-09-12	12:17:59	0.233753	1.03978	0.992978	1331.63	FALSE	60
2022-09-12	12:17:59	0.271819	1.20911	0.992978	1338.23	FALSE	60
2022-09-12	12:17:59	0.219351	0.975717	0.992978	1332.6	FALSE	60
2022-09-12	12:18:00	0.383473	1.70576	1.38007	1339.93	FALSE	60
2022-09-12	12:18:00	0.258181	1.14844	1.38007	1333.75	FALSE	60
2022-09-12	12:18:00	0.359148	1.59756	1.38007	1341.53	FALSE	60
2022-09-12	12:18:00	0.240216	1.06853	1.38007	1334.82	FALSE	60
2022-09-12	12:18:01	0.475127	2.11346	1.96451	1343.65	FALSE	60
2022-09-12	12:18:01	0.374924	1.66774	1.96451	1336.49	FALSE	60
2022-09-12	12:18:01	0.328257	1.46015	1.96451	1345.11	FALSE	60
2022-09-12	12:18:01	0.588257	2.61668	1.96451	1339.1	FALSE	60
2022-09-12	12:18:02	0.480929	2.13927	3.32047	1347.24	FALSE	60
2022-09-12	12:18:02	1.20291	5.35078	3.32047	1344.45	FALSE	60
2022-09-12	12:18:02	0.555585	2.47135	3.32047	1349.72	FALSE	60
2022-09-12	12:18:03	0.472125	2.10011	1.83938	1346.55	FALSE	60
2022-09-12	12:18:03	0.500063	2.22438	1.83938	1351.94	FALSE	60
2022-09-12	12:18:03	0.249987	1.11199	1.83938	1347.67	FALSE	60
2022-09-12	12:18:03	0.43187	1.92104	1.83938	1353.86	FALSE	60
2022-09-12	12:18:04	0.341387	1.51856	2.40616	1349.19	FALSE	60
2022-09-12	12:18:04	0.436858	1.94323	2.40616	1355.8	FALSE	60
2022-09-12	12:18:04	0.790802	3.51765	2.40616	1352.7	FALSE	60
2022-09-12	12:18:04	0.594669	2.64521	2.40616	1358.45	FALSE	60
2022-09-12	12:18:05	1.74413	7.75824	11.1711	1360.46	FALSE	60
2022-09-12	12:18:05	4.06983	18.1034	11.1711	1376.55	1	61
2022-09-12	12:18:05	1.72775	7.68538	11.1711	1368.15	FALSE	61
2022-09-12	12:18:05	2.50383	11.1375	11.1711	1387.69	FALSE	61
2022-09-12	12:18:06	0.555025	2.46886	4.13103	1370.62	FALSE	61
2022-09-12	12:18:06	0.931819	4.14492	4.13103	1391.84	FALSE	61
2022-09-12	12:18:06	1.29925	5.77932	4.13103	1376.39	FALSE	61
2022-09-12	12:18:07	0.35869	1.59552	1.2773	1393.43	FALSE	61
2022-09-12	12:18:07	0.171158	0.761345	1.2773	1377.16	FALSE	61
2022-09-12	12:18:07	0.367138	1.6331	1.2773	1395.06	FALSE	61
2022-09-12	12:18:07	0.251616	1.11924	1.2773	1378.28	FALSE	61
2022-09-12	12:18:08	0.405865	1.80537	1.36921	1396.87	FALSE	61
2022-09-12	12:18:08	0.367443	1.63446	1.36921	1379.91	FALSE	61
2022-09-12	12:18:08	0.340064	1.51267	1.36921	1398.38	FALSE	61
2022-09-12	12:18:08	0.117875	0.524332	1.36921	1380.43	FALSE	61
2022-09-12	12:18:09	0.346934	1.54323	1.41165	1399.93	FALSE	61
2022-09-12	12:18:09	0.1993	0.886526	1.41165	1381.32	FALSE	61
2022-09-12	12:18:09	0.449886	2.00118	1.41165	1401.93	FALSE	61
2022-09-12	12:18:09	0.273295	1.21567	1.41165	1382.54	FALSE	61
2022-09-12	12:18:10	0.73701	3.27837	2.8918	1405.21	FALSE	61
2022-09-12	12:18:10	0.768003	3.41623	2.8918	1385.95	FALSE	61
2022-09-12	12:18:10	0.445305	1.98081	2.8918	1407.19	FALSE	61
2022-09-12	12:18:11	0.220929	0.982736	3.96575	1386.94	FALSE	61
2022-09-12	12:18:11	0.527799	2.34776	3.96575	1409.53	FALSE	61
2022-09-12	12:18:11	0.947952	4.21668	3.96575	1391.15	FALSE	61
2022-09-12	12:18:11	1.86948	8.31582	3.96575	1417.85	FALSE	61
2022-09-12	12:18:12	0.764847	3.40219	2.69976	1394.55	FALSE	61
2022-09-12	12:18:12	1.02688	4.56777	2.69976	1422.42	FALSE	61
2022-09-12	12:18:12	0.288104	1.28154	2.69976	1395.84	FALSE	61
2022-09-12	12:18:12	0.347901	1.54753	2.69976	1423.96	FALSE	61
2022-09-12	12:18:13	0.383015	1.70373	1.77973	1397.54	FALSE	61
2022-09-12	12:18:13	0.309682	1.37753	1.77973	1425.34	FALSE	61
2022-09-12	12:18:13	0.441183	1.96247	1.77973	1399.5	FALSE	61
2022-09-12	12:18:13	0.466527	2.07521	1.77973	1427.42	FALSE	61
2022-09-12	12:18:14	2.01935	8.98247	10.2802	1408.48	FALSE	61
2022-09-12	12:18:14	1.9877	8.84169	10.2802	1436.26	FALSE	61
2022-09-12	12:18:14	2.92622	13.0164	10.2802	1421.5	FALSE	61
2022-09-12	12:18:15	0.33869	1.50656	2.02099	1437.77	FALSE	61
2022-09-12	12:18:15	0.591463	2.63095	2.02099	1424.13	FALSE	61
2022-09-12	12:18:15	0.417061	1.85517	2.02099	1439.62	FALSE	61
2022-09-12	12:18:15	0.47014	2.09128	2.02099	1426.22	FALSE	61
2022-09-12	12:18:16	0.272125	1.21047	10.0044	1440.83	FALSE	61
2022-09-12	12:18:16	0.230496	1.02529	10.0044	1427.25	FALSE	61
2022-09-12	12:18:16	0.467137	2.07792	10.0044	1442.91	FALSE	61
2022-09-12	12:18:16	8.02657	35.7038	10.0044	1462.95	1	62
2022-09-12	12:18:17	5.31192	23.6285	24.8829	1466.54	1	63
2022-09-12	12:18:17	5.47238	24.3422	24.8829	1487.29	1	64
2022-09-12	12:18:17	7.7798	34.6061	24.8829	1501.14	1	65
2022-09-12	12:18:17	3.81156	16.9546	24.8829	1504.25	1	66
2022-09-12	12:18:18	0.662812	2.94832	1.97326	1504.09	FALSE	66
2022-09-12	12:18:18	0.340013	1.51245	1.97326	1505.76	FALSE	66
2022-09-12	12:18:18	0.328003	1.45902	1.97326	1505.55	FALSE	66
2022-09-12	12:18:19	0.474211	2.10939	10.2245	1507.87	FALSE	66
2022-09-12	12:18:19	0.813855	3.62019	10.2245	1509.17	FALSE	66
2022-09-12	12:18:19	1.94892	8.66919	10.2245	1516.54	FALSE	66
2022-09-12	12:18:19	5.95726	26.4991	10.2245	1535.67	1	67
2022-09-12	12:18:20	1.48546	6.60762	10.5028	1523.15	FALSE	67
2022-09-12	12:18:20	2.37436	10.5616	10.5028	1546.23	FALSE	67
2022-09-12	12:18:20	4.3025	19.1384	10.5028	1542.29	1	68
2022-09-12	12:18:20	1.2822	5.70348	10.5028	1551.94	FALSE	68
2022-09-12	12:18:21	1.8595	8.27143	4.01407	1550.56	FALSE	68
2022-09-12	12:18:21	0.563066	2.50463	4.01407	1554.44	FALSE	68
2022-09-12	12:18:21	0.795992	3.54073	4.01407	1554.1	FALSE	68
2022-09-12	12:18:21	0.391056	1.7395	4.01407	1556.18	FALSE	68
2022-09-12	12:18:22	0.471718	2.0983	1.72908	1556.2	FALSE	68
2022-09-12	12:18:22	0.236043	1.04997	1.72908	1557.23	FALSE	68
2022-09-12	12:18:22	0.458384	2.03898	1.72908	1558.24	FALSE	68
2022-09-12	12:18:23	0.242761	1.07985	1.57707	1558.31	FALSE	68
2022-09-12	12:18:23	0.457163	2.03355	1.57707	1560.27	FALSE	68
2022-09-12	12:18:23	0.260929	1.16066	1.57707	1559.47	FALSE	68
2022-09-12	12:18:23	0.457316	2.03423	1.57707	1562.3	FALSE	68
2022-09-12	12:18:24	0.725356	3.22653	3.80768	1562.7	FALSE	68
2022-09-12	12:18:24	0.681387	3.03095	3.80768	1565.33	FALSE	68
2022-09-12	12:18:24	1.38892	6.17819	3.80768	1568.87	FALSE	68
2022-09-12	12:18:24	0.628359	2.79507	3.80768	1568.13	FALSE	68
2022-09-12	12:18:25	0.55187	2.45483	6.83981	1571.33	FALSE	68
2022-09-12	12:18:25	1.61314	7.17557	6.83981	1575.3	FALSE	68
2022-09-12	12:18:25	3.07345	13.6713	6.83981	1585	1	69
2022-09-12	12:18:25	0.912175	4.05754	6.83981	1579.36	FALSE	69
2022-09-12	12:18:26	1.96373	8.73506	7.58433	1593.74	FALSE	69
2022-09-12	12:18:26	1.81782	8.08603	7.58433	1587.45	FALSE	69
2022-09-12	12:18:26	1.33355	5.9319	7.58433	1599.67	FALSE	69
2022-09-12	12:18:27	1.60734	7.14977	4.80179	1594.6	FALSE	69
2022-09-12	12:18:27	1.23884	5.51061	4.80179	1605.18	FALSE	69
2022-09-12	12:18:27	0.806628	3.58804	4.80179	1598.19	FALSE	69
2022-09-12	12:18:27	0.665153	2.95873	4.80179	1608.14	FALSE	69
2022-09-12	12:18:28	0.366578	1.63061	1.57323	1599.82	FALSE	69
2022-09-12	12:18:28	0.357265	1.58919	1.57323	1609.73	FALSE	69
2022-09-12	12:18:28	0.329224	1.46445	1.57323	1601.28	FALSE	69
2022-09-12	12:18:28	0.361641	1.60865	1.57323	1611.34	FALSE	69
2022-09-12	12:18:29	0.342863	1.52512	1.24397	1602.81	FALSE	69
2022-09-12	12:18:29	0.278232	1.23763	1.24397	1612.57	FALSE	69
2022-09-12	12:18:29	0.365407	1.6254	1.24397	1604.43	FALSE	69
2022-09-12	12:18:29	0.132125	0.587718	1.24397	1613.16	FALSE	69
2022-09-12	12:18:30	0.25299	1.12535	1.00711	1605.56	FALSE	69
2022-09-12	12:18:30	0.202354	0.900111	1.00711	1614.06	FALSE	69
2022-09-12	12:18:30	0.22388	0.995863	1.00711	1606.55	FALSE	69
2022-09-12	12:18:31	0.215789	0.959873	0.462817	1615.02	FALSE	69
2022-09-12	12:18:31	0.0605218	0.269213	0.462817	1606.82	FALSE	69
2022-09-12	12:18:31	0.0476974	0.212168	0.462817	1615.23	FALSE	69
2022-09-12	12:18:31	0.0921758	0.410016	0.462817	1607.23	FALSE	69
2022-09-12	12:18:32	0.131921	0.586811	0.633275	1615.82	FALSE	69
2022-09-12	12:18:32	0.148461	0.660384	0.633275	1607.89	FALSE	69
2022-09-12	12:18:32	0.151616	0.674418	0.633275	1616.49	FALSE	69
2022-09-12	12:18:32	0.137468	0.611485	0.633275	1608.5	FALSE	69
2022-09-12	12:18:33	0.199809	0.88879	0.89411	1617.38	FALSE	69
2022-09-12	12:18:33	0.240216	1.06853	0.89411	1609.57	FALSE	69
2022-09-12	12:18:33	0.10271	0.456875	0.89411	1617.84	FALSE	69
2022-09-12	12:18:33	0.261285	1.16225	0.89411	1610.73	FALSE	69
2022-09-12	12:18:34	0.125051	0.556252	1.00696	1618.4	FALSE	69
2022-09-12	12:18:34	0.319606	1.42167	1.00696	1612.16	FALSE	69
2022-09-12	12:18:34	0.234466	1.04295	1.00696	1619.44	FALSE	69
2022-09-12	12:18:35	0.31187	1.38726	0.618956	1613.54	FALSE	69
2022-09-12	12:18:35	0.0303946	0.135201	0.618956	1619.57	FALSE	69
2022-09-12	12:18:35	0.0897839	0.399377	0.618956	1613.94	FALSE	69
2022-09-12	12:18:35	0.124542	0.553988	0.618956	1620.13	FALSE	69
2022-09-12	12:18:36	0.168104	0.74776	0.605601	1614.69	FALSE	69
2022-09-12	12:18:36	0.145764	0.648387	0.605601	1620.78	FALSE	69
2022-09-12	12:18:36	0.068817	0.306112	0.605601	1615	FALSE	69
2022-09-12	12:18:36	0.161896	0.720146	0.605601	1621.5	FALSE	69
2022-09-12	12:18:37	0.0830664	0.369496	-0.0725508	1615.37	FALSE	69
2022-09-12	12:18:37	0.147392	0.655629	-0.0725508	1622.15	FALSE	69
2022-09-12	12:18:37	-0.140445	-0.624727	-0.0725508	1615.37	FALSE	69
2022-09-12	12:18:37	-0.155254	-0.690601	-0.0725508	1622.15	FALSE	69
2022-09-12	12:18:38	-0.11271	-0.501357	-0.670379	1615.37	FALSE	69
2022-09-12	12:18:38	-0.207264	-0.921952	-0.670379	1622.15	FALSE	69
2022-09-12	12:18:38	-0.13215	-0.58783	-0.670379	1615.37	FALSE	69
2022-09-12	12:18:39	-0.267773	-1.19111	-0.170568	1622.15	FALSE	69
2022-09-12	12:18:39	-0.132455	-0.589186	-0.170568	1615.37	FALSE	69
2022-09-12	12:18:39	-0.139376	-0.619972	-0.170568	1622.15	FALSE	69
2022-09-12	12:18:39	0.386222	1.71799	-0.170568	1617.08	FALSE	69
2022-09-12	12:18:40	0.778232	3.46173	2.44374	1625.61	FALSE	69
2022-09-12	12:18:40	0.417367	1.85653	2.44374	1618.94	FALSE	69
2022-09-12	12:18:40	0.331005	1.47238	2.44374	1627.09	FALSE	69
2022-09-12	12:18:40	0.670903	2.98431	2.44374	1621.93	FALSE	69
2022-09-12	12:18:41	0.372837	1.65845	1.83808	1628.74	FALSE	69
2022-09-12	12:18:41	0.602252	2.67894	1.83808	1624.6	FALSE	69
2022-09-12	12:18:41	0.248715	1.10633	1.83808	1629.85	FALSE	69
2022-09-12	12:18:41	0.429071	1.90859	1.83808	1626.51	FALSE	69
2022-09-12	12:18:42	0.26673	1.18647	2.61427	1631.04	FALSE	69
2022-09-12	12:18:42	0.724949	3.22472	2.61427	1629.74	FALSE	69
2022-09-12	12:18:42	0.771463	3.43162	2.61427	1634.47	FALSE	69
2022-09-12	12:18:43	1.08108	4.80886	5.2877	1634.55	FALSE	69
2022-09-12	12:18:43	1.50327	6.68685	5.2877	1641.16	FALSE	69
2022-09-12	12:18:43	0.43411	1.93101	5.2877	1636.48	FALSE	69
2022-09-12	12:18:43	1.73645	7.72408	5.2877	1648.88	FALSE	69
2022-09-12	12:18:44	0.501183	2.22936	3.87152	1638.71	FALSE	69
2022-09-12	12:18:44	1.43696	6.39189	3.87152	1655.27	FALSE	69
2022-09-12	12:18:44	1.17248	5.21543	3.87152	1643.92	FALSE	69
2022-09-12	12:18:44	0.370802	1.6494	3.87152	1656.92	FALSE	69
2022-09-12	12:18:45	0.488359	2.17232	3.54956	1646.09	FALSE	69
2022-09-12	12:18:45	0.773397	3.44022	3.54956	1660.36	FALSE	69
2022-09-12	12:18:45	0.457672	2.03582	3.54956	1648.13	FALSE	69
2022-09-12	12:18:45	1.47248	6.54989	3.54956	1666.91	FALSE	69
2022-09-12	12:18:46	0.657163	2.92319	6.13585	1651.05	FALSE	69
2022-09-12	12:18:46	1.39126	6.1886	6.13585	1673.1	FALSE	69
2022-09-12	12:18:46	2.08978	9.29576	6.13585	1660.35	FALSE	69
2022-09-12	12:18:47	0.286069	1.27249	1.54566	1674.37	FALSE	69
2022-09-12	12:18:47	0.404644	1.79994	1.54566	1662.15	FALSE	69
2022-09-12	12:18:47	0.346425	1.54097	1.54566	1675.91	FALSE	69
2022-09-12	12:18:47	0.352786	1.56926	1.54566	1663.72	FALSE	69
2022-09-12	12:18:48	0.261743	1.16429	2.33649	1677.08	FALSE	69
2022-09-12	12:18:48	0.449835	2.00096	2.33649	1665.72	FALSE	69
2022-09-12	12:18:48	0.27411	1.2193	2.33649	1678.3	FALSE	69
2022-09-12	12:18:48	1.11538	4.96143	2.33649	1670.68	FALSE	69
2022-09-12	12:18:49	3.09818	13.7813	14.5786	1692.08	1	70
2022-09-12	12:18:49	2.0791	9.24825	14.5786	1679.93	FALSE	70
2022-09-12	12:18:49	4.09859	18.2313	14.5786	1710.31	1	71
2022-09-12	12:18:49	3.83375	17.0533	14.5786	1696.98	1	72
2022-09-12	12:18:50	3.51767	15.6473	12.6191	1725.96	1	73
2022-09-12	12:18:50	4.34922	19.3462	12.6191	1716.33	1	74
2022-09-12	12:18:50	0.64383	2.86388	12.6191	1728.82	FALSE	74
2022-09-12	12:18:51	1.04592	4.65246	3.37741	1720.98	FALSE	74
2022-09-12	12:18:51	1.41884	6.31128	3.37741	1735.13	FALSE	74
2022-09-12	12:18:51	0.161845	0.719919	3.37741	1721.7	FALSE	74
2022-09-12	12:18:51	0.410496	1.82597	3.37741	1736.96	FALSE	74
2022-09-12	12:18:52	0.193957	0.86276	1.12116	1722.56	FALSE	74
2022-09-12	12:18:52	0.340013	1.51245	1.12116	1738.47	FALSE	74
2022-09-12	12:18:52	0.140216	0.623709	1.12116	1723.19	FALSE	74
2022-09-12	12:18:52	0.334008	1.48573	1.12116	1739.96	FALSE	74
2022-09-12	12:18:53	0.2764	1.22948	0.810071	1724.42	FALSE	74
2022-09-12	12:18:53	0.331107	1.47283	0.810071	1741.43	FALSE	74
2022-09-12	12:18:53	0.17472	0.77719	0.810071	1725.19	FALSE	74
2022-09-12	12:18:53	-0.0537784	-0.239217	0.810071	1741.43	FALSE	74
2022-09-12	12:18:54	-0.023244	-0.103394	0.34218	1725.19	FALSE	74
2022-09-12	12:18:54	0.0570104	0.253594	0.34218	1741.68	FALSE	74
2022-09-12	12:18:54	0.19701	0.87634	0.34218	1726.07	FALSE	74
2022-09-12	12:18:55	0.25869	1.1507	1.45868	1742.83	FALSE	74
2022-09-12	12:18:55	0.277774	1.23559	1.45868	1727.31	FALSE	74
2022-09-12	12:18:55	0.425153	1.89117	1.45868	1744.72	FALSE	74
2022-09-12	12:18:55	0.350089	1.55727	1.45868	1728.86	FALSE	74
2022-09-12	12:18:56	0.275483	1.2254	1.36423	1745.95	FALSE	74
2022-09-12	12:18:56	0.415992	1.85042	1.36423	1730.71	FALSE	74
2022-09-12	12:18:56	0.165458	0.73599	1.36423	1746.69	FALSE	74
2022-09-12	12:18:56	0.369835	1.6451	1.36423	1732.36	FALSE	74
2022-09-12	12:18:57	0.355484	1.58126	1.60345	1748.27	FALSE	74
2022-09-12	12:18:57	0.356349	1.58511	1.60345	1733.94	FALSE	74
2022-09-12	12:18:57	0.36958	1.64397	1.60345	1749.91	FALSE	74
2022-09-12	12:18:58	0.454873	2.02337	2.23412	1735.97	FALSE	74
2022-09-12	12:18:58	0.401794	1.78726	2.23412	1751.7	FALSE	74
2022-09-12	12:18:58	0.444288	1.97628	2.23412	1737.94	FALSE	74
2022-09-12	12:18:58	0.708053	3.14956	2.23412	1754.85	FALSE	74
2022-09-12	12:18:59	1.52286	6.77399	3.70366	1744.72	FALSE	74
2022-09-12	12:18:59	0.307443	1.36757	3.70366	1756.22	FALSE	74
2022-09-12	12:18:59	0.983829	4.37627	3.70366	1749.09	FALSE	74
2022-09-12	12:18:59	0.516349	2.29682	3.70366	1758.51	FALSE	74
2022-09-12	12:19:00	0.748053	3.32749	1.82857	1752.42	FALSE	74
2022-09-12	12:19:00	0.212379	0.944704	1.82857	1759.46	FALSE	74
2022-09-12	12:19:00	0.352736	1.56904	1.82857	1753.99	FALSE	74
2022-09-12	12:19:00	0.331158	1.47306	1.82857	1760.93	FALSE	74
2022-09-12	12:19:01	0.154619	0.687776	0.733841	1754.68	FALSE	74
2022-09-12	12:19:01	0.183779	0.817486	0.733841	1761.75	FALSE	74
2022-09-12	12:19:01	0.153702	0.683697	0.733841	1755.36	FALSE	74
2022-09-12	12:19:01	0.167799	0.746404	0.733841	1762.49	FALSE	74
2022-09-12	12:19:02	0.293499	1.30554	1.13788	1756.67	FALSE	74
2022-09-12	12:19:02	0.225865	1.00469	1.13788	1763.5	FALSE	74
2022-09-12	12:19:02	0.248054	1.10339	1.13788	1757.77	FALSE	74
2022-09-12	12:19:03	0.265509	1.18104	0.931746	1764.68	FALSE	74
2022-09-12	12:19:03	0.126069	0.56078	0.931746	1758.33	FALSE	74
2022-09-12	12:19:03	0.210547	0.936555	0.931746	1765.62	FALSE	74
2022-09-12	12:19:03	0.235738	1.04861	0.931746	1759.38	FALSE	74
2022-09-12	12:19:04	0.174364	0.775606	0.612336	1766.39	FALSE	74
2022-09-12	12:19:04	0.154008	0.685058	0.612336	1760.07	FALSE	74
2022-09-12	12:19:04	0.109631	0.487661	0.612336	1766.88	FALSE	74
2022-09-12	12:19:04	0.112634	0.501019	0.612336	1760.57	FALSE	74
2022-09-12	12:19:05	0.165153	0.734634	1.14674	1767.61	FALSE	74
2022-09-12	12:19:05	0.315738	1.40447	1.14674	1761.97	FALSE	74
2022-09-12	12:19:05	0.28673	1.27543	1.14674	1768.89	FALSE	74
2022-09-12	12:19:05	0.263575	1.17243	1.14674	1763.14	FALSE	74
2022-09-12	12:19:06	0.281082	1.25031	1.43721	1770.14	FALSE	74
2022-09-12	12:19:06	0.358588	1.59507	1.43721	1764.74	FALSE	74
2022-09-12	12:19:06	0.329631	1.46626	1.43721	1771.61	FALSE	74
2022-09-12	12:19:07	0.298639	1.32841	1.61228	1766.07	FALSE	74
2022-09-12	12:19:07	0.318995	1.41895	1.61228	1773.03	FALSE	74
2022-09-12	12:19:07	0.414415	1.8434	1.61228	1767.91	FALSE	74
2022-09-12	12:19:07	0.417774	1.85834	1.61228	1774.88	FALSE	74
2022-09-12	12:19:08	0.349478	1.55455	1.43548	1769.46	FALSE	74
2022-09-12	12:19:08	0.325763	1.44906	1.43548	1776.33	FALSE	74
2022-09-12	12:19:08	0.309682	1.37753	1.43548	1770.84	FALSE	74
2022-09-12	12:19:08	0.305916	1.36078	1.43548	1777.69	FALSE	74
2022-09-12	12:19:09	0.295382	1.31392	1.15834	1772.16	FALSE	74
2022-09-12	12:19:09	0.225458	1.00288	1.15834	1778.7	FALSE	74
2022-09-12	12:19:09	0.194822	0.866607	1.15834	1773.02	FALSE	74
2022-09-12	12:19:09	0.325967	1.44997	1.15834	1780.15	FALSE	74
2022-09-12	12:19:10	0.287341	1.27815	1.39156	1774.3	FALSE	74
2022-09-12	12:19:10	0.324797	1.44476	1.39156	1781.59	FALSE	74
2022-09-12	12:19:10	0.326374	1.45178	1.39156	1775.75	FALSE	74
2022-09-12	12:19:11	0.292277	1.30011	1.13633	1782.89	FALSE	74
2022-09-12	12:19:11	0.277774	1.23559	1.13633	1776.99	FALSE	74
2022-09-12	12:19:11	0.286883	1.27611	1.13633	1784.17	FALSE	74
2022-09-12	12:19:11	0.164898	0.733499	1.13633	1777.72	FALSE	74
2022-09-12	12:19:12	0.291565	1.29694	1.19615	1785.46	FALSE	74
2022-09-12	12:19:12	0.230191	1.02394	1.19615	1778.75	FALSE	74
2022-09-12	12:19:12	0.209071	0.92999	1.19615	1786.39	FALSE	74
2022-09-12	12:19:12	0.344797	1.53373	1.19615	1780.28	FALSE	74
2022-09-12	12:19:13	0.150395	0.668987	0.773399	1787.06	FALSE	74
2022-09-12	12:19:13	0.27813	1.23718	0.773399	1781.52	FALSE	74
2022-09-12	12:19:13	0.185814	0.826538	0.773399	1787.89	FALSE	74
2022-09-12	12:19:13	0.0811325	0.360894	0.773399	1781.88	FALSE	74
2022-09-12	12:19:14	0.271209	1.20639	1.07064	1789.1	FALSE	74
2022-09-12	12:19:14	0.054873	0.244086	1.07064	1782.12	FALSE	74
2022-09-12	12:19:14	0.395992	1.76145	1.07064	1790.86	FALSE	74
2022-09-12	12:19:15	0.181692	0.808202	1.22258	1782.93	FALSE	74
2022-09-12	12:19:15	0.381896	1.69875	1.22258	1792.56	FALSE	74
2022-09-12	12:19:15	0.118232	0.52592	1.22258	1783.46	FALSE	74
2022-09-12	12:19:15	0.41757	1.85743	1.22258	1794.41	FALSE	74
2022-09-12	12:19:16	0.216451	0.962817	1.13237	1784.42	FALSE	74
2022-09-12	12:19:16	0.304644	1.35512	1.13237	1795.77	FALSE	74
2022-09-12	12:19:16	0.19813	0.881322	1.13237	1785.3	FALSE	74
2022-09-12	12:19:16	0.299046	1.33022	1.13237	1797.1	FALSE	74
2022-09-12	12:19:17	0.345713	1.5378	1.33989	1786.84	FALSE	74
2022-09-12	12:19:17	0.335636	1.49298	1.33989	1798.59	FALSE	74
2022-09-12	12:19:17	0.328511	1.46128	1.33989	1788.3	FALSE	74
2022-09-12	12:19:17	0.195026	0.867515	1.33989	1799.46	FALSE	74
2022-09-12	12:19:18	0.413601	1.83978	1.68207	1790.14	FALSE	74
2022-09-12	12:19:18	0.239606	1.06582	1.68207	1800.53	FALSE	74
2022-09-12	12:19:18	0.481234	2.14063	1.68207	1792.28	FALSE	74
2022-09-12	12:19:19	0.284644	1.26615	2.56722	1801.79	FALSE	74
2022-09-12	12:19:19	0.634618	2.82291	2.56722	1795.1	FALSE	74
2022-09-12	12:19:19	0.877366	3.9027	2.56722	1805.69	FALSE	74
2022-09-12	12:19:19	0.511921	2.27713	2.56722	1797.38	FALSE	74
2022-09-12	12:19:20	1.43218	6.37062	8.11802	1812.06	FALSE	74
2022-09-12	12:19:20	2.77375	12.3382	8.11802	1809.72	FALSE	74
2022-09-12	12:19:20	1.10093	4.89716	8.11802	1816.96	FALSE	74
2022-09-12	12:19:20	1.99319	8.86611	8.11802	1818.58	FALSE	74
2022-09-12	12:19:21	1.27329	5.66385	4.9105	1822.63	FALSE	74
2022-09-12	12:19:21	0.91131	4.05369	4.9105	1822.64	FALSE	74
2022-09-12	12:19:21	1.76566	7.85401	4.9105	1830.48	FALSE	74
2022-09-12	12:19:21	0.465458	2.07045	4.9105	1824.71	FALSE	74
2022-09-12	12:19:22	0.631412	2.80865	2.3055	1833.29	FALSE	74
2022-09-12	12:19:22	0.522506	2.32421	2.3055	1827.03	FALSE	74
2022-09-12	12:19:22	0.40098	1.78364	2.3055	1835.07	FALSE	74
2022-09-12	12:19:23	0.662659	2.94764	2.63655	1829.98	FALSE	74
2022-09-12	12:19:23	0.488919	2.17481	2.63655	1837.25	FALSE	74
2022-09-12	12:19:23	0.688359	3.06196	2.63655	1833.04	FALSE	74
2022-09-12	12:19:23	0.530954	2.36179	2.63655	1839.61	FALSE	74
2022-09-12	12:19:24	1.24739	5.54864	8.18588	1838.59	FALSE	74
2022-09-12	12:19:24	1.70017	7.5627	8.18588	1847.17	FALSE	74
2022-09-12	12:19:24	1.17752	5.23784	8.18588	1843.83	FALSE	74
2022-09-12	12:19:24	3.23599	14.3943	8.18588	1861.57	1	75
2022-09-12	12:19:25	0.33416	1.48641	6.00252	1845.31	FALSE	75
2022-09-12	12:19:25	1.6108	7.16516	6.00252	1868.73	FALSE	75
2022-09-12	12:19:25	1.94688	8.66011	6.00252	1853.97	FALSE	75
2022-09-12	12:19:25	1.50587	6.69841	6.00252	1875.43	FALSE	75
2022-09-12	12:19:26	1.98169	8.81495	7.67783	1862.79	FALSE	75
2022-09-12	12:19:26	0.677061	3.0117	7.67783	1878.44	FALSE	75
2022-09-12	12:19:26	2.61731	11.6423	7.67783	1874.43	FALSE	75
2022-09-12	12:19:26	1.62815	7.24234	7.67783	1885.68	FALSE	75
2022-09-12	12:19:27	2.34444	10.4285	10.3964	1884.86	FALSE	75
2022-09-12	12:19:27	2.42556	10.7894	10.3964	1896.47	FALSE	75
2022-09-12	12:19:27	2.24164	9.97126	10.3964	1894.83	FALSE	75
2022-09-12	12:19:28	3.92861	17.4752	8.75622	1913.95	1	76
2022-09-12	12:19:28	1.11528	4.96099	8.75622	1899.79	FALSE	76
2022-09-12	12:19:28	2.49294	11.0891	8.75622	1925.04	FALSE	76
2022-09-12	12:19:28	0.337112	1.49954	8.75622	1901.29	FALSE	76
2022-09-12	12:19:29	1.0335	4.59721	5.93636	1929.63	FALSE	76
2022-09-12	12:19:29	1.73767	7.7295	5.93636	1909.02	FALSE	76
2022-09-12	12:19:29	0.390344	1.73633	5.93636	1931.37	FALSE	76
2022-09-12	12:19:29	2.1767	9.6824	5.93636	1918.7	FALSE	76
2022-09-12	12:19:30	0.239097	1.06355	3.50332	1932.43	FALSE	76
2022-09-12	12:19:30	1.04688	4.65673	3.50332	1923.36	FALSE	76
2022-09-12	12:19:30	0.850598	3.78363	3.50332	1936.22	FALSE	76
2022-09-12	12:19:30	1.01375	4.50936	3.50332	1927.87	FALSE	76
2022-09-12	12:19:31	1.91492	8.51795	5.91763	1944.74	FALSE	76
2022-09-12	12:19:31	0.483728	2.15172	5.91763	1930.02	FALSE	76
2022-09-12	12:19:31	1.59238	7.08322	5.91763	1951.82	FALSE	76
2022-09-12	12:19:32	0.234059	1.04114	4.97961	1931.06	FALSE	76
2022-09-12	12:19:32	1.74637	7.7682	4.97961	1959.59	FALSE	76
2022-09-12	12:19:32	0.472074	2.09988	4.97961	1933.16	FALSE	76
2022-09-12	12:19:32	2.02536	9.00921	4.97961	1968.6	FALSE	76
2022-09-12	12:19:33	1.08174	4.8118	4.14231	1937.97	FALSE	76
2022-09-12	12:19:33	0.935331	4.16054	4.14231	1972.76	FALSE	76
2022-09-12	12:19:33	1.17976	5.24781	4.14231	1943.22	FALSE	76
2022-09-12	12:19:33	0.528104	2.34911	4.14231	1975.11	FALSE	76
2022-09-12	12:19:34	1.08128	4.80975	5.14264	1948.03	FALSE	76
2022-09-12	12:19:34	0.44673	1.98714	5.14264	1977.09	FALSE	76
2022-09-12	12:19:34	1.36072	6.05275	5.14264	1954.08	FALSE	76
2022-09-12	12:19:34	1.73574	7.72092	5.14264	1984.81	FALSE	76
2022-09-12	12:19:35	1.5362	6.83332	9.22032	1960.92	FALSE	76
2022-09-12	12:19:35	3.67029	16.3262	9.22032	2001.14	1	77
2022-09-12	12:19:35	1.01197	4.50144	9.22032	1965.42	FALSE	77
2022-09-12	12:19:36	3.82469	17.013	10.8869	2018.15	1	78
2022-09-12	12:19:36	0.921082	4.09716	10.8869	1969.52	FALSE	78
2022-09-12	12:19:36	2.54195	11.3071	10.8869	2029.46	FALSE	78
2022-09-12	12:19:36	2.5022	11.1303	10.8869	1980.65	FALSE	78
2022-09-12	12:19:37	3.35792	14.9367	15.0604	2044.4	1	79
2022-09-12	12:19:37	4.09411	18.2114	15.0604	1998.86	1	80
2022-09-12	12:19:37	2.3505	10.4555	15.0604	2054.85	FALSE	80
2022-09-12	12:19:37	3.74037	16.6379	15.0604	2015.5	1	81
2022-09-12	12:19:38	0.652074	2.90056	3.7576	2057.75	FALSE	81
2022-09-12	12:19:38	1.37793	6.12931	3.7576	2021.63	FALSE	81
2022-09-12	12:19:38	0.580725	2.58318	3.7576	2060.34	FALSE	81
2022-09-12	12:19:38	0.768257	3.41736	3.7576	2025.04	FALSE	81
2022-09-12	12:19:39	0.641845	2.85505	7.69668	2063.19	FALSE	81
2022-09-12	12:19:39	2.11355	9.40149	7.69668	2034.44	FALSE	81
2022-09-12	12:19:39	2.43548	10.8335	7.69668	2074.02	FALSE	81
2022-09-12	12:19:40	2.8625	12.733	20.6574	2047.18	FALSE	81
2022-09-12	12:19:40	4.2649	18.9711	20.6574	2093	1	82
2022-09-12	12:19:40	3.68948	16.4115	20.6574	2063.59	1	83
2022-09-12	12:19:40	7.75904	34.5138	20.6574	2127.51	1	84
2022-09-12	12:19:41	3.28016	14.5908	18.7787	2078.18	1	85
2022-09-12	12:19:41	4.7794	21.2597	18.7787	2148.77	1	86
2022-09-12	12:19:41	3.92444	17.4567	18.7787	2095.64	1	87
2022-09-12	12:19:41	4.90256	21.8076	18.7787	2170.58	1	88
2022-09-12	12:19:42	6.66031	29.6264	25.4763	2125.26	1	89
2022-09-12	12:19:42	3.88856	17.2971	25.4763	2187.87	1	90
2022-09-12	12:19:42	8.48952	37.7631	25.4763	2163.03	1	91
2022-09-12	12:19:42	3.87095	17.2188	25.4763	2205.09	1	92
2022-09-12	12:19:43	7.16271	31.8612	21.8774	2194.89	1	93
2022-09-12	12:19:43	2.86261	12.7335	21.8774	2217.83	FALSE	93
2022-09-12	12:19:43	4.72943	21.0375	21.8774	2215.92	1	94
2022-09-12	12:19:44	2.54724	11.3306	26.4177	2229.16	FALSE	94
2022-09-12	12:19:44	9.44724	42.0232	26.4177	2257.95	1	95
2022-09-12	12:19:44	3.82464	17.0128	26.4177	2246.17	1	96
2022-09-12	12:19:44	7.93675	35.3043	26.4177	2293.25	1	97
2022-09-12	12:19:45	6.90958	30.7352	18.4194	2276.91	1	98
2022-09-12	12:19:45	4.711	20.9555	18.4194	2314.21	1	99
2022-09-12	12:19:45	1.18622	5.27654	18.4194	2282.18	FALSE	99
2022-09-12	12:19:45	3.75665	16.7103	18.4194	2330.92	1	100
2022-09-12	12:19:46	1.75711	7.81598	12.8327	2290	FALSE	100
2022-09-12	12:19:46	3.15212	14.0213	12.8327	2344.94	1	101
2022-09-12	12:19:46	3.56938	15.8773	12.8327	2305.87	1	102
2022-09-12	12:19:46	3.06108	13.6163	12.8327	2358.56	1	103
2022-09-12	12:19:47	5.73578	25.5139	20.5691	2331.39	1	104
2022-09-12	12:19:47	2.85782	12.7122	20.5691	2371.27	FALSE	104
2022-09-12	12:19:47	5.27884	23.4813	20.5691	2354.87	1	105
2022-09-12	12:19:48	2.08195	9.26093	12.6829	2380.53	FALSE	105
2022-09-12	12:19:48	3.53625	15.7299	12.6829	2370.6	1	106
2022-09-12	12:19:48	2.67589	11.9029	12.6829	2392.43	FALSE	106
2022-09-12	12:19:48	3.11085	13.8377	12.6829	2384.44	1	107
2022-09-12	12:19:49	3.32846	14.8057	16.1361	2407.24	1	108
2022-09-12	12:19:49	3.42714	15.2446	16.1361	2399.68	1	109
2022-09-12	12:19:49	5.83421	25.9517	16.1361	2433.19	1	110
2022-09-12	12:19:49	1.92042	8.54241	16.1361	2408.22	FALSE	110
2022-09-12	12:19:50	5.47446	24.3515	14.5629	2457.54	1	111
2022-09-12	12:19:50	2.29172	10.194	14.5629	2418.42	FALSE	111
2022-09-12	12:19:50	4.52027	20.1071	14.5629	2477.65	1	112
2022-09-12	12:19:50	0.809122	3.59914	14.5629	2422.02	FALSE	112
2022-09-12	12:19:51	1.94383	8.64654	6.2289	2486.29	FALSE	112
2022-09-12	12:19:51	1.77126	7.87892	6.2289	2429.9	FALSE	112
2022-09-12	12:19:51	0.485865	2.16122	6.2289	2488.46	FALSE	112
2022-09-12	12:19:52	0.453041	2.01522	2.62851	2431.91	FALSE	112
2022-09-12	12:19:52	0.426679	1.89795	2.62851	2490.35	FALSE	112
2022-09-12	12:19:52	0.868104	3.8615	2.62851	2435.77	FALSE	112
2022-09-12	12:19:52	0.61584	2.73938	2.62851	2493.09	FALSE	112
2022-09-12	12:19:53	0.659657	2.93429	1.67973	2438.71	FALSE	112
2022-09-12	12:19:53	0.252786	1.12444	1.67973	2494.22	FALSE	112
2022-09-12	12:19:53	0.256247	1.13984	1.67973	2439.85	FALSE	112
2022-09-12	12:19:53	0.341794	1.52037	1.67973	2495.74	FALSE	112
2022-09-12	12:19:54	0.138232	0.614884	0.974756	2440.46	FALSE	112
2022-09-12	12:19:54	0.236705	1.05291	0.974756	2496.79	FALSE	112
2022-09-12	12:19:54	0.282099	1.25483	0.974756	2441.72	FALSE	112
2022-09-12	12:19:54	0.219504	0.976398	0.974756	2497.77	FALSE	112
2022-09-12	12:19:55	0.324491	1.4434	2.38632	2443.16	FALSE	112
2022-09-12	12:19:55	1.10495	4.91504	2.38632	2502.68	FALSE	112
2022-09-12	12:19:55	0.179962	0.800507	2.38632	2443.96	FALSE	112
2022-09-12	12:19:56	0.329122	1.464	3.49976	2504.15	FALSE	112
2022-09-12	12:19:56	0.335738	1.49343	3.49976	2445.45	FALSE	112
2022-09-12	12:19:56	0.549275	2.44329	3.49976	2506.59	FALSE	112
2022-09-12	12:19:56	1.93299	8.59833	3.49976	2454.05	FALSE	112
2022-09-12	12:19:57	0.891259	3.9645	8.54773	2510.55	FALSE	112
2022-09-12	12:19:57	2.34988	10.4527	8.54773	2464.51	FALSE	112
2022-09-12	12:19:57	3.26485	14.5227	8.54773	2525.08	1	113
2022-09-12	12:19:57	1.18047	5.25097	8.54773	2469.76	FALSE	113
2022-09-12	12:19:58	2.15253	9.57488	11.777	2534.65	FALSE	113
2022-09-12	12:19:58	2.72312	12.113	11.777	2481.87	FALSE	113
2022-09-12	12:19:58	2.19467	9.76233	11.777	2544.41	FALSE	113
2022-09-12	12:19:58	3.52001	15.6577	11.777	2497.53	1	114
2022-09-12	12:19:59	0.728562	3.24079	11.4852	2547.65	FALSE	114
2022-09-12	12:19:59	3.69614	16.4412	11.4852	2513.97	1	115
2022-09-12	12:19:59	3.32128	14.7737	11.4852	2562.43	1	116
2022-09-12	12:20:00	4.9482	22.0106	14.1967	2535.98	1	117
2022-09-12	12:20:00	2.9249	13.0105	14.1967	2575.44	FALSE	117
2022-09-12	12:20:00	2.46271	10.9546	14.1967	2546.93	FALSE	117
2022-09-12	12:20:00	2.43044	10.8111	14.1967	2586.25	FALSE	117
2022-09-12	12:20:01	2.27029	10.0987	9.58455	2557.03	FALSE	117
2022-09-12	12:20:01	1.62083	7.20978	9.58455	2593.46	FALSE	117
2022-09-12	12:20:01	2.57299	11.4452	9.58455	2568.48	FALSE	117
2022-09-12	12:20:02	0.711209	3.1636	6.13138	2596.62	FALSE	117
2022-09-12	12:20:02	1.84785	8.21961	6.13138	2576.7	FALSE	117
2022-09-12	12:20:02	0.495687	2.20491	6.13138	2598.83	FALSE	117
2022-09-12	12:20:02	1.43233	6.37129	6.13138	2583.07	FALSE	117
2022-09-12	12:20:02	2.4049	10.6975	6.13138	2609.53	FALSE	117
2022-09-12	12:20:03	1.31884	5.86646	4.96385	2588.94	FALSE	117
2022-09-12	12:20:03	1.45462	6.47044	4.96385	2616	FALSE	117
2022-09-12	12:20:03	0.574313	2.55466	4.96385	2591.49	FALSE	117
2022-09-12	12:20:04	1.3506	6.00774	5.66534	2622	FALSE	117
2022-09-12	12:20:04	2.0252	9.00849	5.66534	2600.5	FALSE	117
2022-09-12	12:20:04	0.403779	1.79609	5.66534	2623.8	FALSE	117
2022-09-12	12:20:04	1.31492	5.84903	5.66534	2606.35	FALSE	117
2022-09-12	12:20:05	0.666832	2.9662	7.38396	2626.77	FALSE	117
2022-09-12	12:20:05	1.92943	8.58249	7.38396	2614.93	FALSE	117
2022-09-12	12:20:05	2.4334	10.8242	7.38396	2637.59	FALSE	117
2022-09-12	12:20:05	1.61029	7.16289	7.38396	2622.09	FALSE	117
2022-09-12	12:20:06	2.65843	11.8252	13.0598	2649.42	FALSE	117
2022-09-12	12:20:06	1.40271	6.23953	13.0598	2628.33	FALSE	117
2022-09-12	12:20:06	3.24022	14.4131	13.0598	2663.83	1	118
2022-09-12	12:20:06	4.4425	19.7611	13.0598	2648.09	1	119
2022-09-12	12:20:07	1.10943	4.93497	10.2799	2668.76	FALSE	119
2022-09-12	12:20:07	5.25105	23.3577	10.2799	2671.45	1	120
2022-09-12	12:20:07	0.572583	2.54696	10.2799	2671.31	FALSE	120
2022-09-12	12:20:08	3.88281	17.2715	11.8575	2688.72	1	121
2022-09-12	12:20:08	2.57396	11.4495	11.8575	2682.76	FALSE	121
2022-09-12	12:20:08	2.23523	9.94275	11.8575	2698.67	FALSE	121
2022-09-12	12:20:08	1.9707	8.76607	11.8575	2691.53	FALSE	121
2022-09-12	12:20:09	1.67594	7.45492	10.6116	2706.12	FALSE	121
2022-09-12	12:20:09	2.51304	11.1785	10.6116	2702.7	FALSE	121
2022-09-12	12:20:09	5.0624	22.5186	10.6116	2728.64	1	122
2022-09-12	12:20:09	0.291005	1.29445	10.6116	2704	FALSE	122
2022-09-12	12:20:10	4.1279	18.3617	13.9831	2747	1	123
2022-09-12	12:20:10	3.22988	14.3672	13.9831	2718.37	1	124
2022-09-12	12:20:10	3.44754	15.3353	13.9831	2762.34	1	125
2022-09-12	12:20:10	1.76887	7.86829	13.9831	2726.23	FALSE	125
2022-09-12	12:20:11	2.93324	13.0476	14.344	2775.38	FALSE	125
2022-09-12	12:20:11	2.40805	10.7115	14.344	2736.95	FALSE	125
2022-09-12	12:20:11	4.33273	19.2728	14.344	2794.66	1	126
2022-09-12	12:20:12	4.4908	19.976	20.767	2756.92	1	127
2022-09-12	12:20:12	6.20988	27.6228	20.767	2822.28	1	128
2022-09-12	12:20:12	3.55492	15.813	20.767	2772.73	1	129
2022-09-12	12:20:12	4.41889	19.6561	20.767	2841.94	1	130
2022-09-12	12:20:13	3.61849	16.0958	11.4491	2788.83	1	131
2022-09-12	12:20:13	2.42128	10.7703	11.4491	2852.71	FALSE	131
2022-09-12	12:20:13	1.90622	8.47925	11.4491	2797.31	FALSE	131
2022-09-12	12:20:13	2.34953	10.4512	11.4491	2863.16	FALSE	131
2022-09-12	12:20:14	0.112939	0.502375	5.88697	2797.81	FALSE	131
2022-09-12	12:20:14	1.32134	5.87758	5.88697	2869.03	FALSE	131
2022-09-12	12:20:14	3.0821	13.7098	5.88697	2811.52	1	132
2022-09-12	12:20:14	0.777417	3.45811	5.88697	2872.49	FALSE	132
2022-09-12	12:20:15	0.579707	2.57865	2.00405	2814.1	FALSE	132
2022-09-12	12:20:15	0.432227	1.92263	2.00405	2874.42	FALSE	132
2022-09-12	12:20:15	0.339657	1.51086	2.00405	2815.61	FALSE	132
2022-09-12	12:20:16	1.10312	4.9069	2.15665	2879.32	FALSE	132
2022-09-12	12:20:16	0.240573	1.07012	2.15665	2816.68	FALSE	132
2022-09-12	12:20:16	0.407952	1.81465	2.15665	2881.14	FALSE	132
2022-09-12	12:20:16	0.187697	0.834914	2.15665	2817.52	FALSE	132
2022-09-12	12:20:17	0.237519	1.05653	0.988734	2882.19	FALSE	132
2022-09-12	12:20:17	0.0815396	0.362704	0.988734	2817.88	FALSE	132
2022-09-12	12:20:17	0.292634	1.30169	0.988734	2883.49	FALSE	132
2022-09-12	12:20:17	0.277417	1.23401	0.988734	2819.11	FALSE	132
2022-09-12	12:20:18	0.904542	4.02358	1.88392	2887.52	FALSE	132
2022-09-12	12:20:18	0.245204	1.09072	1.88392	2820.2	FALSE	132
2022-09-12	12:20:18	0.18897	0.840576	1.88392	2888.36	FALSE	132
2022-09-12	12:20:18	0.355382	1.58081	1.88392	2821.78	FALSE	132
2022-09-12	12:20:19	0.719962	3.20253	2.27139	2891.56	FALSE	132
2022-09-12	12:20:19	0.195331	0.868871	2.27139	2822.65	FALSE	132
2022-09-12	12:20:19	0.616603	2.74277	2.27139	2894.3	FALSE	132
2022-09-12	12:20:20	0.259708	1.15523	0.860382	2823.81	FALSE	132
2022-09-12	12:20:20	0.130496	0.580472	0.860382	2894.88	FALSE	132
2022-09-12	12:20:20	0.268664	1.19507	0.860382	2825	FALSE	132
2022-09-12	12:20:20	0.114822	0.510751	0.860382	2895.4	FALSE	132
2022-09-12	12:20:21	0.234618	1.04363	2.28754	2826.05	FALSE	132
2022-09-12	12:20:21	0.247087	1.09909	2.28754	2896.49	FALSE	132
2022-09-12	12:20:21	1.46693	6.5252	2.28754	2832.57	FALSE	132
2022-09-12	12:20:21	0.10841	0.482229	2.28754	2896.98	FALSE	132
2022-09-12	12:20:22	0.290903	1.29399	1.63321	2833.87	FALSE	132
2022-09-12	12:20:22	0.240573	1.07012	1.63321	2898.05	FALSE	132
2022-09-12	12:20:22	0.613855	2.73055	1.63321	2836.6	FALSE	132
2022-09-12	12:20:22	0.323321	1.4382	1.63321	2899.49	FALSE	132
2022-09-12	12:20:23	0.206171	0.91709	0.926369	2837.51	FALSE	132
2022-09-12	12:20:23	0.227239	1.0108	0.926369	2900.5	FALSE	132
2022-09-12	12:20:23	0.191361	0.851212	0.926369	2838.37	FALSE	132
2022-09-12	12:20:24	0.279046	1.24125	2.83043	2901.74	FALSE	132
2022-09-12	12:20:24	0.504288	2.24317	2.83043	2840.61	FALSE	132
2022-09-12	12:20:24	0.608104	2.70497	2.83043	2904.44	FALSE	132
2022-09-12	12:20:24	1.1538	5.13233	2.83043	2845.74	FALSE	132
2022-09-12	12:20:25	2.1138	9.40261	6.15452	2913.84	FALSE	132
2022-09-12	12:20:25	0.676908	3.01102	6.15452	2848.75	FALSE	132
2022-09-12	12:20:25	2.60479	11.5866	6.15452	2925.43	FALSE	132
2022-09-12	12:20:25	0.138893	0.617824	6.15452	2849.37	FALSE	132
2022-09-12	12:20:26	0.209326	0.931124	3.37786	2926.36	FALSE	132
2022-09-12	12:20:26	0.467341	2.07883	3.37786	2851.45	FALSE	132
2022-09-12	12:20:26	0.411667	1.83118	3.37786	2928.19	FALSE	132
2022-09-12	12:20:26	1.94917	8.6703	3.37786	2860.12	FALSE	132
2022-09-12	12:20:27	1.47966	6.58182	9.72701	2934.78	FALSE	132
2022-09-12	12:20:27	3.33701	14.8437	9.72701	2874.96	1	133
2022-09-12	12:20:27	1.74352	7.75553	9.72701	2942.53	FALSE	133
2022-09-12	12:20:28	5.31518	23.643	17.7004	2898.61	1	134
2022-09-12	12:20:28	1.96164	8.72577	17.7004	2951.26	FALSE	134
2022-09-12	12:20:28	4.57436	20.3477	17.7004	2918.95	1	135
2022-09-12	12:20:28	4.06576	18.0853	17.7004	2969.34	1	136
2022-09-12	12:20:29	3.58948	15.9667	12.8301	2934.92	1	137
2022-09-12	12:20:29	3.63513	16.1698	12.8301	2985.51	1	138
2022-09-12	12:20:29	1.24413	5.53414	12.8301	2940.45	FALSE	138
2022-09-12	12:20:29	3.06856	13.6496	12.8301	2999.16	1	139
2022-09-12	12:20:30	5.91304	26.3024	11.1067	2966.76	1	140
2022-09-12	12:20:30	0.867137	3.8572	11.1067	3003.02	FALSE	140
2022-09-12	12:20:30	2.97976	13.2546	11.1067	2980.01	FALSE	140
2022-09-12	12:20:30	0.227697	1.01284	11.1067	3004.03	FALSE	140
2022-09-12	12:20:31	0.364797	1.62269	4.3759	2981.63	FALSE	140
2022-09-12	12:20:31	0.287952	1.28087	4.3759	3005.31	FALSE	140
2022-09-12	12:20:31	2.29849	10.2241	4.3759	2991.86	FALSE	140
2022-09-12	12:20:32	0.153957	0.684832	0.684832	3006	FALSE	140

## Sheet: Duke_harness_2022912121531  (2)
Date	Time	Lbs	Newtons	Total Force x Time	Total Time Steps Force >13.345		**GoPro Fitting: 1205
2022-09-12	12:15:32	0.199708	0.888341	0.888341	FALSE	0			Total Force x Time	3006
2022-09-12	12:15:32	0.171107	0.761118	0.761118	FALSE	0			Total Time Steps Force >3	140
2022-09-12	12:15:32	0.211616	0.94131	1.82965	FALSE	0
2022-09-12	12:15:32	0.198741	0.88404	1.64516	FALSE	0
2022-09-12	12:15:33	0.207494	0.922975	2.75263	FALSE	0
2022-09-12	12:15:33	0.22327	0.99315	2.63831	FALSE	0
2022-09-12	12:15:33	0.260064	1.15682	3.90944	FALSE	0
2022-09-12	12:15:33	0.228104	1.01465	3.65296	FALSE	0
2022-09-12	12:15:34	0.220674	0.981602	4.89104	FALSE	0
2022-09-12	12:15:34	0.202303	0.899884	4.55284	FALSE	0
2022-09-12	12:15:34	0.27014	1.20164	6.09268	FALSE	0
2022-09-12	12:15:34	0.358435	1.59439	6.14723	FALSE	0
2022-09-12	12:15:35	0.345356	1.53621	7.62889	FALSE	0
2022-09-12	12:15:35	0.34785	1.54731	7.69454	FALSE	0
2022-09-12	12:15:35	0.362201	1.61114	9.24004	FALSE	0
2022-09-12	12:15:35	0.377112	1.67747	9.37201	FALSE	0
2022-09-12	12:15:36	0.426629	1.89773	11.1378	FALSE	0
2022-09-12	12:15:36	0.471209	2.09603	11.468	FALSE	0
2022-09-12	12:15:36	0.386323	1.71844	12.8562	FALSE	0
2022-09-12	12:15:37	0.451056	2.00639	13.4744	FALSE	0
2022-09-12	12:15:37	0.427901	1.90339	14.7596	FALSE	0
2022-09-12	12:15:37	0.333906	1.48528	14.9597	FALSE	0
2022-09-12	12:15:37	0.36958	1.64397	16.4036	FALSE	0
2022-09-12	12:15:38	0.449733	2.0005	16.9602	FALSE	0
2022-09-12	12:15:38	0.43813	1.94889	18.3525	FALSE	0
2022-09-12	12:15:38	0.421692	1.87577	18.836	FALSE	0
2022-09-12	12:15:38	0.356654	1.58647	19.9389	FALSE	0
2022-09-12	12:15:39	0.389428	1.73225	20.5682	FALSE	0
2022-09-12	12:15:39	0.473346	2.10554	22.0445	FALSE	0
2022-09-12	12:15:39	0.223219	0.992923	21.5612	FALSE	0
2022-09-12	12:15:39	0.472888	2.1035	24.148	FALSE	0
2022-09-12	12:15:40	0.46159	2.05324	23.6144	FALSE	0
2022-09-12	12:15:40	0.320166	1.42416	25.5721	FALSE	0
2022-09-12	12:15:40	0.504033	2.24204	25.8564	FALSE	0
2022-09-12	12:15:41	0.395178	1.75783	27.33	FALSE	0
2022-09-12	12:15:41	0.425967	1.89479	27.7512	FALSE	0
2022-09-12	12:15:41	0.418588	1.86196	29.1919	FALSE	0
2022-09-12	12:15:41	0.382608	1.70192	29.4531	FALSE	0
2022-09-12	12:15:42	1.22103	5.43139	34.6233	FALSE	0
2022-09-12	12:15:42	0.492125	2.18907	31.6422	FALSE	0
2022-09-12	12:15:42	0.409835	1.82303	36.4463	FALSE	0
2022-09-12	12:15:42	0.153041	0.680757	32.323	FALSE	0
2022-09-12	12:15:43	0.280776	1.24895	37.6953	FALSE	0
2022-09-12	12:15:43	0.60617	2.69637	35.0193	FALSE	0
2022-09-12	12:15:43	0.418028	1.85947	39.5548	FALSE	0
2022-09-12	12:15:43	0.144237	0.641595	35.6609	FALSE	0
2022-09-12	12:15:44	0.123015	0.547195	40.1019	FALSE	0
2022-09-12	12:15:44	0.199758	0.888564	36.5495	FALSE	0
2022-09-12	12:15:44	3.12474	13.8995	54.0014	1	1
2022-09-12	12:15:45	6.43782	28.6367	65.1862	1	2
2022-09-12	12:15:45	6.13339	27.2825	81.284	1	3
2022-09-12	12:15:45	7.23329	32.1751	97.3613	1	4
2022-09-12	12:15:45	0.779809	3.46875	84.7527	FALSE	4
2022-09-12	12:15:46	0.935025	4.15918	101.521	FALSE	4
2022-09-12	12:15:46	2.54454	11.3186	96.0713	FALSE	4
2022-09-12	12:15:46	2.30052	10.2332	111.754	FALSE	4
2022-09-12	12:15:46	2.29401	10.2042	106.276	FALSE	4
2022-09-12	12:15:47	1.40632	6.25559	118.009	FALSE	4
2022-09-12	12:15:47	0.828867	3.68697	109.963	FALSE	4
2022-09-12	12:15:47	1.97258	8.77443	126.784	FALSE	4
2022-09-12	12:15:47	0.281234	1.25099	111.213	FALSE	4
2022-09-12	12:15:48	0.140624	0.625524	127.409	FALSE	4
2022-09-12	12:15:48	0.292735	1.30214	112.516	FALSE	4
2022-09-12	12:15:48	0.11472	0.510298	127.92	FALSE	4
2022-09-12	12:15:49	0.268766	1.19552	113.711	FALSE	4
2022-09-12	12:15:49	0.304695	1.35534	129.275	FALSE	4
2022-09-12	12:15:49	0.459504	2.04397	115.755	FALSE	4
2022-09-12	12:15:49	0.491412	2.1859	131.461	FALSE	4
2022-09-12	12:15:50	0.512023	2.27758	118.033	FALSE	4
2022-09-12	12:15:50	0.3593	1.59824	133.059	FALSE	4
2022-09-12	12:15:50	0.49986	2.22348	120.256	FALSE	4
2022-09-12	12:15:50	0.251718	1.11969	134.179	FALSE	4
2022-09-12	12:15:51	0.578333	2.57254	122.829	FALSE	4
2022-09-12	12:15:51	0.535484	2.38194	136.561	FALSE	4
2022-09-12	12:15:51	0.398079	1.77074	124.599	FALSE	4
2022-09-12	12:15:51	0.395331	1.75851	138.319	FALSE	4
2022-09-12	12:15:52	0.0778247	0.34618	124.946	FALSE	4
2022-09-12	12:15:52	-0.308333	-1.37153	138.319	FALSE	4
2022-09-12	12:15:52	-0.186196	-0.828237	124.946	FALSE	4
2022-09-12	12:15:53	0.194771	0.86638	139.186	FALSE	4
2022-09-12	12:15:53	0.207087	0.921164	125.867	FALSE	4
2022-09-12	12:15:53	0.243117	1.08143	140.267	FALSE	4
2022-09-12	12:15:53	0.252684	1.12399	126.991	FALSE	4
2022-09-12	12:15:54	0.313957	1.39654	141.664	FALSE	4
2022-09-12	12:15:54	0.427596	1.90203	128.893	FALSE	4
2022-09-12	12:15:54	0.332125	1.47736	143.141	FALSE	4
2022-09-12	12:15:54	0.301285	1.34018	130.233	FALSE	4
2022-09-12	12:15:55	0.311616	1.38613	144.527	FALSE	4
2022-09-12	12:15:55	0.239962	1.0674	131.3	FALSE	4
2022-09-12	12:15:55	0.165356	0.735537	145.263	FALSE	4
2022-09-12	12:15:55	0.139097	0.618731	131.919	FALSE	4
2022-09-12	12:15:56	0.157519	0.700676	145.963	FALSE	4
2022-09-12	12:15:56	0.0484099	0.215337	132.134	FALSE	4
2022-09-12	12:15:56	-0.0445672	-0.198244	145.963	FALSE	4
2022-09-12	12:15:57	-0.0168827	-0.0750976	132.134	FALSE	4
2022-09-12	12:15:57	0.019046	0.0847204	146.048	FALSE	4
2022-09-12	12:15:57	0.165255	0.735087	132.87	FALSE	4
2022-09-12	12:15:57	0.218283	0.970966	147.019	FALSE	4
2022-09-12	12:15:58	0.0864252	0.384437	133.254	FALSE	4
2022-09-12	12:15:58	0.0169086	0.0752128	147.094	FALSE	4
2022-09-12	12:15:58	0.141082	0.627561	133.882	FALSE	4
2022-09-12	12:15:58	0.302303	1.3447	148.439	FALSE	4
2022-09-12	12:15:59	0.18841	0.838085	134.72	FALSE	4
2022-09-12	12:15:59	0.348461	1.55002	149.989	FALSE	4
2022-09-12	12:15:59	0.287596	1.27928	135.999	FALSE	4
2022-09-12	12:15:59	0.4736	2.10667	152.096	FALSE	4
2022-09-12	12:16:00	2.32139	10.326	146.325	FALSE	4
2022-09-12	12:16:00	1.05202	4.6796	156.775	FALSE	4
2022-09-12	12:16:00	4.32714	19.248	165.573	1	5
2022-09-12	12:16:01	1.31625	5.85494	162.63	FALSE	5
2022-09-12	12:16:01	3.85034	17.1271	182.7	1	6
2022-09-12	12:16:01	0.741336	3.29761	165.928	FALSE	6
2022-09-12	12:16:01	4.91116	21.8458	204.546	1	7
2022-09-12	12:16:02	0.811514	3.60978	169.537	FALSE	7
2022-09-12	12:16:02	4.39126	19.5332	224.079	1	8
2022-09-12	12:16:02	1.89401	8.42494	177.962	FALSE	8
2022-09-12	12:16:02	2.92332	13.0035	237.083	FALSE	8
2022-09-12	12:16:03	1.1908	5.29692	183.259	FALSE	8
2022-09-12	12:16:03	2.55273	11.3551	248.438	FALSE	8
2022-09-12	12:16:03	0.780369	3.47124	186.731	FALSE	8
2022-09-12	12:16:03	1.94123	8.63498	257.073	FALSE	8
2022-09-12	12:16:04	0.335382	1.49185	188.222	FALSE	8
2022-09-12	12:16:04	1.88912	8.40318	265.476	FALSE	8
2022-09-12	12:16:04	0.552939	2.45958	190.682	FALSE	8
2022-09-12	12:16:05	3.86459	17.1905	282.666	1	9
2022-09-12	12:16:05	1.87289	8.33099	199.013	FALSE	9
2022-09-12	12:16:05	3.02383	13.4506	296.117	1	10
2022-09-12	12:16:05	1.42958	6.35906	205.372	FALSE	10
2022-09-12	12:16:06	1.67742	7.4615	303.578	FALSE	10
2022-09-12	12:16:06	3.24205	14.4213	219.793	1	11
2022-09-12	12:16:06	2.13106	9.47938	313.058	FALSE	11
2022-09-12	12:16:06	3.70546	16.4826	236.276	1	12
2022-09-12	12:16:07	2.20475	9.80717	322.865	FALSE	12
2022-09-12	12:16:07	2.12266	9.44202	245.718	FALSE	12
2022-09-12	12:16:07	0.549885	2.446	325.311	FALSE	12
2022-09-12	12:16:07	2.73126	12.1492	257.867	FALSE	12
2022-09-12	12:16:08	0.196756	0.87521	326.186	FALSE	12
2022-09-12	12:16:08	2.40999	10.7201	268.587	FALSE	12
2022-09-12	12:16:08	0.252532	1.12331	327.309	FALSE	12
2022-09-12	12:16:09	2.41014	10.7208	279.308	FALSE	12
2022-09-12	12:16:09	0.381896	1.69875	329.008	FALSE	12
2022-09-12	12:16:09	1.89609	8.43419	287.742	FALSE	12
2022-09-12	12:16:09	1.31706	5.85855	334.867	FALSE	12
2022-09-12	12:16:10	2.10678	9.37138	297.114	FALSE	12
2022-09-12	12:16:10	1.47014	6.53948	341.406	FALSE	12
2022-09-12	12:16:10	0.940522	4.18363	301.297	FALSE	12
2022-09-12	12:16:10	2.06922	9.2043	350.61	FALSE	12
2022-09-12	12:16:11	0.318232	1.41556	302.713	FALSE	12
2022-09-12	12:16:11	2.56179	11.3954	362.006	FALSE	12
2022-09-12	12:16:11	1.18439	5.2684	307.981	FALSE	12
2022-09-12	12:16:11	3.93309	17.4952	379.501	1	13
2022-09-12	12:16:12	1.4338	6.37783	314.359	FALSE	13
2022-09-12	12:16:12	3.76485	16.7468	396.248	1	14
2022-09-12	12:16:12	0.397723	1.76915	316.128	FALSE	14
2022-09-12	12:16:13	2.34724	10.441	406.689	FALSE	14
2022-09-12	12:16:13	0.930801	4.14039	320.269	FALSE	14
2022-09-12	12:16:13	2.482	11.0404	417.729	FALSE	14
2022-09-12	12:16:13	0.80444	3.57831	323.847	FALSE	14
2022-09-12	12:16:14	1.16846	5.19754	422.927	FALSE	14
2022-09-12	12:16:14	2.04729	9.10676	332.954	FALSE	14
2022-09-12	12:16:14	0.69416	3.08776	426.015	FALSE	14
2022-09-12	12:16:14	3.46948	15.4329	348.387	1	15
2022-09-12	12:16:15	1.5849	7.04995	433.064	FALSE	15
2022-09-12	12:16:15	4.09263	18.2048	366.591	1	16
2022-09-12	12:16:15	1.35014	6.00569	439.07	FALSE	16
2022-09-12	12:16:15	4.05472	18.0362	384.628	1	17
2022-09-12	12:16:16	2.54693	11.3293	450.399	FALSE	17
2022-09-12	12:16:16	1.53787	6.84075	391.468	FALSE	17
2022-09-12	12:16:16	2.8767	12.7961	463.196	FALSE	17
2022-09-12	12:16:17	1.52775	6.79574	398.264	FALSE	17
2022-09-12	12:16:17	3.16011	14.0568	477.252	1	18
2022-09-12	12:16:17	0.909173	4.04418	402.308	FALSE	18
2022-09-12	12:16:17	2.1736	9.66861	486.921	FALSE	18
2022-09-12	12:16:18	0.597825	2.65925	404.968	FALSE	18
2022-09-12	12:16:18	2.01696	8.97184	495.893	FALSE	18
2022-09-12	12:16:18	0.670751	2.98363	407.951	FALSE	18
2022-09-12	12:16:18	4.07467	18.1249	514.018	1	19
2022-09-12	12:16:19	0.80841	3.59597	411.547	FALSE	19
2022-09-12	12:16:19	5.24199	23.3174	537.335	1	20
2022-09-12	12:16:19	0.852125	3.79042	415.338	FALSE	20
2022-09-12	12:16:19	3.71141	16.5091	553.844	1	21
2022-09-12	12:16:20	0.860522	3.82777	419.165	FALSE	21
2022-09-12	12:16:20	1.69823	7.55407	561.398	FALSE	21
2022-09-12	12:16:20	2.34159	10.4159	429.581	FALSE	21
2022-09-12	12:16:20	2.50271	11.1326	572.531	FALSE	21
2022-09-12	12:16:21	3.50698	15.5997	445.181	1	22
2022-09-12	12:16:21	3.12296	13.8916	586.422	1	23
2022-09-12	12:16:21	3.86943	17.212	462.393	1	24
2022-09-12	12:16:22	1.25309	5.57399	591.996	FALSE	24
2022-09-12	12:16:22	3.48352	15.4954	477.888	1	25
2022-09-12	12:16:22	0.642964	2.86003	594.856	FALSE	25
2022-09-12	12:16:22	3.22016	14.3239	492.212	1	26
2022-09-12	12:16:23	0.499453	2.22167	597.078	FALSE	26
2022-09-12	12:16:23	2.08414	9.27067	501.483	FALSE	26
2022-09-12	12:16:23	0.541285	2.40774	599.486	FALSE	26
2022-09-12	12:16:23	2.30536	10.2547	511.738	FALSE	26
2022-09-12	12:16:24	1.07788	4.79463	604.281	FALSE	26
2022-09-12	12:16:24	2.93813	13.0694	524.807	FALSE	26
2022-09-12	12:16:24	2.02744	9.01846	613.299	FALSE	26
2022-09-12	12:16:25	1.33172	5.92376	530.731	FALSE	26
2022-09-12	12:16:25	2.79716	12.4423	625.741	FALSE	26
2022-09-12	12:16:25	1.2567	5.59005	536.321	FALSE	26
2022-09-12	12:16:25	3.23966	14.4107	640.152	1	27
2022-09-12	12:16:26	0.791667	3.52149	539.842	FALSE	27
2022-09-12	12:16:26	6.18535	27.5137	667.666	1	28
2022-09-12	12:16:26	0.400929	1.78341	541.626	FALSE	28
2022-09-12	12:16:26	2.53319	11.2681	678.934	FALSE	28
2022-09-12	12:16:27	1.60933	7.15862	548.784	FALSE	28
2022-09-12	12:16:27	3.42795	15.2482	694.182	1	29
2022-09-12	12:16:27	2.82159	12.551	561.335	FALSE	29
2022-09-12	12:16:27	1.52765	6.79529	700.977	FALSE	29
2022-09-12	12:16:28	3.76429	16.7443	578.08	1	30
2022-09-12	12:16:28	0.583931	2.59744	703.575	FALSE	30
2022-09-12	12:16:28	3.77589	16.7959	594.876	1	31
2022-09-12	12:16:28	0.741997	3.30055	706.875	FALSE	31
2022-09-12	12:16:29	3.78332	16.829	611.705	1	32
2022-09-12	12:16:29	0.8793	3.9113	710.787	FALSE	32
2022-09-12	12:16:29	3.06266	13.6233	625.328	1	33
2022-09-12	12:16:30	1.77034	7.87483	718.661	FALSE	33
2022-09-12	12:16:30	2.84347	12.6483	637.976	FALSE	33
2022-09-12	12:16:30	1.40704	6.2588	724.92	FALSE	33
2022-09-12	12:16:30	3.71238	16.5134	654.49	1	34
2022-09-12	12:16:31	0.557774	2.48109	727.401	FALSE	34
2022-09-12	12:16:31	3.83258	17.0481	671.538	1	35
2022-09-12	12:16:31	0.574364	2.55489	729.956	FALSE	35
2022-09-12	12:16:31	5.91619	26.3164	697.854	1	36
2022-09-12	12:16:32	0.456959	2.03265	731.989	FALSE	36
2022-09-12	12:16:32	4.70266	20.9184	718.772	1	37
2022-09-12	12:16:32	0.838842	3.73134	735.72	FALSE	37
2022-09-12	12:16:32	1.72266	7.66274	726.435	FALSE	37
2022-09-12	12:16:33	0.260216	1.15749	736.878	FALSE	37
2022-09-12	12:16:33	0.360165	1.60209	728.037	FALSE	37
2022-09-12	12:16:33	0.120318	0.535199	737.413	FALSE	37
2022-09-12	12:16:34	0.0827101	0.367911	728.405	FALSE	37
2022-09-12	12:16:34	-0.166196	-0.739273	737.413	FALSE	37
2022-09-12	12:16:34	-0.296476	-1.31878	728.405	FALSE	37
2022-09-12	12:16:34	-0.420648	-1.87113	737.413	FALSE	37
2022-09-12	12:16:35	-0.421259	-1.87384	728.405	FALSE	37
2022-09-12	12:16:35	-0.340496	-1.51459	737.413	FALSE	37
2022-09-12	12:16:35	-0.294389	-1.3095	728.405	FALSE	37
2022-09-12	12:16:35	-0.365941	-1.62778	737.413	FALSE	37
2022-09-12	12:16:36	-0.22304	-0.992127	728.405	FALSE	37
2022-09-12	12:16:36	-0.178766	-0.795187	737.413	FALSE	37
2022-09-12	12:16:36	-0.15846	-0.704862	728.405	FALSE	37
2022-09-12	12:16:36	0.000165643	0.000736813	737.414	FALSE	37
2022-09-12	12:16:37	0.0546694	0.24318	728.648	FALSE	37
2022-09-12	12:16:37	0.354517	1.57696	738.991	FALSE	37
2022-09-12	12:16:37	0.253244	1.12648	729.775	FALSE	37
2022-09-12	12:16:38	1.44927	6.44664	745.437	FALSE	37
2022-09-12	12:16:38	0.287494	1.27883	731.054	FALSE	37
2022-09-12	12:16:38	0.773804	3.44203	748.879	FALSE	37
2022-09-12	12:16:38	0.380522	1.69264	732.746	FALSE	37
2022-09-12	12:16:39	0.26673	1.18647	750.066	FALSE	37
2022-09-12	12:16:39	0.374313	1.66502	734.411	FALSE	37
2022-09-12	12:16:39	2.27314	10.1114	760.177	FALSE	37
2022-09-12	12:16:39	1.99335	8.86682	743.278	FALSE	37
2022-09-12	12:16:40	4.06683	18.0901	778.267	1	38
2022-09-12	12:16:40	1.41467	6.29274	749.571	FALSE	38
2022-09-12	12:16:40	2.53625	11.2817	789.549	FALSE	38
2022-09-12	12:16:40	0.294109	1.30826	750.879	FALSE	38
2022-09-12	12:16:41	0.911209	4.05324	793.602	FALSE	38
2022-09-12	12:16:41	0.177621	0.790094	751.669	FALSE	38
2022-09-12	12:16:41	0.398842	1.77413	795.376	FALSE	38
2022-09-12	12:16:42	0.204186	0.90826	752.577	FALSE	38
2022-09-12	12:16:42	0.301794	1.34244	796.719	FALSE	38
2022-09-12	12:16:42	0.449071	1.99756	754.575	FALSE	38
2022-09-12	12:16:42	1.60729	7.14955	803.868	FALSE	38
2022-09-12	12:16:43	0.916705	4.07769	758.653	FALSE	38
2022-09-12	12:16:43	3.0053	13.3682	817.236	1	39
2022-09-12	12:16:43	1.28149	5.70032	764.353	FALSE	39
2022-09-12	12:16:43	3.29681	14.6649	831.901	1	40
2022-09-12	12:16:44	2.35034	10.4548	774.808	FALSE	40
2022-09-12	12:16:44	3.26077	14.5046	846.406	1	41
2022-09-12	12:16:44	2.80098	12.4593	787.267	FALSE	41
2022-09-12	12:16:44	3.60846	16.0512	862.457	1	42
2022-09-12	12:16:45	1.56083	6.94288	794.21	FALSE	42
2022-09-12	12:16:45	0.435026	1.93508	864.392	FALSE	42
2022-09-12	12:16:45	1.35365	6.02131	800.231	FALSE	42
2022-09-12	12:16:46	0.343728	1.52897	865.921	FALSE	42
2022-09-12	12:16:46	3.79558	16.8835	817.115	1	43
2022-09-12	12:16:46	1.70871	7.60068	873.522	FALSE	43
2022-09-12	12:16:46	5.14057	22.8663	839.981	1	44
2022-09-12	12:16:47	1.93284	8.59766	882.119	FALSE	44
2022-09-12	12:16:47	5.73283	25.5008	865.482	1	45
2022-09-12	12:16:47	0.783626	3.48573	885.605	FALSE	45
2022-09-12	12:16:47	4.04871	18.0095	883.491	1	46
2022-09-12	12:16:48	0.577163	2.56734	888.172	FALSE	46
2022-09-12	12:16:48	2.89762	12.8892	896.381	FALSE	46
2022-09-12	12:16:48	0.770852	3.4289	891.601	FALSE	46
2022-09-12	12:16:48	2.01655	8.97002	905.351	FALSE	46
2022-09-12	12:16:49	1.0622	4.72488	896.326	FALSE	46
2022-09-12	12:16:49	0.8393	3.73337	909.084	FALSE	46
2022-09-12	12:16:49	1.82373	8.11232	904.439	FALSE	46
2022-09-12	12:16:50	0.489631	2.17798	911.262	FALSE	46
2022-09-12	12:16:50	2.14673	9.54908	913.988	FALSE	46
2022-09-12	12:16:50	0.628104	2.79393	914.056	FALSE	46
2022-09-12	12:16:50	1.27905	5.68947	919.677	FALSE	46
2022-09-12	12:16:51	0.537265	2.38986	916.446	FALSE	46
2022-09-12	12:16:51	0.373702	1.6623	921.339	FALSE	46
2022-09-12	12:16:51	0.361285	1.60707	918.053	FALSE	46
2022-09-12	12:16:51	0.281234	1.25099	922.59	FALSE	46
2022-09-12	12:16:52	0.102507	0.455972	918.509	FALSE	46
2022-09-12	12:16:52	0.3164	1.40741	923.998	FALSE	46
2022-09-12	12:16:52	0.154924	0.689133	919.198	FALSE	46
2022-09-12	12:16:52	0.160929	0.715844	924.714	FALSE	46
2022-09-12	12:16:53	0.266171	1.18398	920.382	FALSE	46
2022-09-12	12:16:53	0.182557	0.81205	925.526	FALSE	46
2022-09-12	12:16:53	0.366018	1.62812	922.01	FALSE	46
2022-09-12	12:16:54	0.28785	1.28041	926.806	FALSE	46
2022-09-12	12:16:54	0.616807	2.74368	924.754	FALSE	46
2022-09-12	12:16:54	0.730903	3.2512	930.057	FALSE	46
2022-09-12	12:16:54	0.722761	3.21499	927.969	FALSE	46
2022-09-12	12:16:55	1.98602	8.83421	938.892	FALSE	46
2022-09-12	12:16:55	0.877875	3.90496	931.874	FALSE	46
2022-09-12	12:16:55	1.18027	5.25008	944.142	FALSE	46
2022-09-12	12:16:55	0.495432	2.20378	934.077	FALSE	46
2022-09-12	12:16:56	0.698282	3.1061	947.248	FALSE	46
2022-09-12	12:16:56	0.376908	1.67656	935.754	FALSE	46
2022-09-12	12:16:56	0.410903	1.82778	949.075	FALSE	46
2022-09-12	12:16:56	0.17243	0.767003	936.521	FALSE	46
2022-09-12	12:16:57	0.408664	1.81782	950.893	FALSE	46
2022-09-12	12:16:57	0.0502929	0.223713	936.745	FALSE	46
2022-09-12	12:16:57	0.301692	1.34199	952.235	FALSE	46
2022-09-12	12:16:58	0.131362	0.584324	937.329	FALSE	46
2022-09-12	12:16:58	0.337774	1.50249	953.738	FALSE	46
2022-09-12	12:16:58	0.128868	0.573231	937.902	FALSE	46
2022-09-12	12:16:58	0.262557	1.16791	954.906	FALSE	46
2022-09-12	12:16:59	0.210496	0.936328	938.839	FALSE	46
2022-09-12	12:16:59	0.288664	1.28404	956.19	FALSE	46
2022-09-12	12:16:59	0.271616	1.2082	940.047	FALSE	46
2022-09-12	12:16:59	0.253193	1.12625	957.316	FALSE	46
2022-09-12	12:17:00	0.432176	1.92241	941.969	FALSE	46
2022-09-12	12:17:00	1.75055	7.7868	965.103	FALSE	46
2022-09-12	12:17:00	0.73757	3.28086	945.25	FALSE	46
2022-09-12	12:17:01	3.76373	16.7418	981.845	1	47
2022-09-12	12:17:01	1.26215	5.6143	950.864	FALSE	47
2022-09-12	12:17:01	1.28576	5.71932	987.564	FALSE	47
2022-09-12	12:17:01	0.776857	3.45562	954.32	FALSE	47
2022-09-12	12:17:02	0.312939	1.39202	988.956	FALSE	47
2022-09-12	12:17:02	0.33355	1.4837	955.804	FALSE	47
2022-09-12	12:17:02	0.575331	2.55919	991.515	FALSE	47
2022-09-12	12:17:02	0.458944	2.04147	957.845	FALSE	47
2022-09-12	12:17:03	1.01996	4.53699	996.052	FALSE	47
2022-09-12	12:17:03	1.48902	6.62346	964.469	FALSE	47
2022-09-12	12:17:03	3.74785	16.6712	1012.72	1	48
2022-09-12	12:17:03	2.14612	9.54637	974.015	FALSE	48
2022-09-12	12:17:04	3.67441	16.3445	1029.07	1	49
2022-09-12	12:17:04	2.81095	12.5037	986.519	FALSE	49
2022-09-12	12:17:04	2.5282	11.2459	1040.31	FALSE	49
2022-09-12	12:17:04	2.35106	10.458	996.977	FALSE	49
2022-09-12	12:17:05	0.716756	3.18827	1043.5	FALSE	49
2022-09-12	12:17:05	1.82714	8.12748	1005.1	FALSE	49
2022-09-12	12:17:05	0.631717	2.81	1046.31	FALSE	49
2022-09-12	12:17:06	3.83737	17.0694	1022.17	1	50
2022-09-12	12:17:06	0.410903	1.82778	1048.14	FALSE	50
2022-09-12	12:17:06	3.36775	14.9804	1037.15	1	51
2022-09-12	12:17:06	2.38108	10.5915	1058.73	FALSE	51
2022-09-12	12:17:07	3.8938	17.3204	1054.47	1	52
2022-09-12	12:17:07	2.96535	13.1905	1071.92	FALSE	52
2022-09-12	12:17:07	3.22001	14.3232	1068.8	1	53
2022-09-12	12:17:07	1.65966	7.3825	1079.3	FALSE	53
2022-09-12	12:17:08	3.23655	14.3968	1083.19	1	54
2022-09-12	12:17:08	0.377774	1.68041	1080.98	FALSE	54
2022-09-12	12:17:08	0.585916	2.60627	1085.8	FALSE	54
2022-09-12	12:17:08	0.878486	3.90768	1084.89	FALSE	54
2022-09-12	12:17:09	0.367392	1.63423	1087.43	FALSE	54
2022-09-12	12:17:09	0.299249	1.33112	1086.22	FALSE	54
2022-09-12	12:17:09	0.571514	2.54221	1089.98	FALSE	54
2022-09-12	12:17:10	0.372125	1.65529	1087.88	FALSE	54
2022-09-12	12:17:10	0.471412	2.09693	1092.07	FALSE	54
2022-09-12	12:17:10	0.659758	2.93474	1090.81	FALSE	54
2022-09-12	12:17:10	0.471667	2.09807	1094.17	FALSE	54
2022-09-12	12:17:11	0.725153	3.22563	1094.04	FALSE	54
2022-09-12	12:17:11	1.5277	6.79552	1100.97	FALSE	54
2022-09-12	12:17:11	2.60128	11.571	1105.61	FALSE	54
2022-09-12	12:17:11	4.02999	17.9262	1118.89	1	55
2022-09-12	12:17:12	0.557265	2.47883	1108.09	FALSE	55
2022-09-12	12:17:12	0.774262	3.44407	1122.34	FALSE	55
2022-09-12	12:17:12	0.187087	0.8322	1108.92	FALSE	55
2022-09-12	12:17:12	0.784338	3.48889	1125.83	FALSE	55
2022-09-12	12:17:13	0.191921	0.853703	1109.77	FALSE	55
2022-09-12	12:17:13	1.28744	5.72679	1131.55	FALSE	55
2022-09-12	12:17:13	0.217977	0.969605	1110.74	FALSE	55
2022-09-12	12:17:14	1.02317	4.55126	1136.1	FALSE	55
2022-09-12	12:17:14	0.791667	3.52149	1114.27	FALSE	55
2022-09-12	12:17:14	1.21798	5.41782	1141.52	FALSE	55
2022-09-12	12:17:14	2.03747	9.06307	1123.33	FALSE	55
2022-09-12	12:17:15	1.11431	4.95667	1146.48	FALSE	55
2022-09-12	12:17:15	1.70754	7.59548	1130.92	FALSE	55
2022-09-12	12:17:15	0.182201	0.810466	1147.29	FALSE	55
2022-09-12	12:17:15	0.505509	2.24861	1133.17	FALSE	55
2022-09-12	12:17:16	1.01732	4.52524	1151.82	FALSE	55
2022-09-12	12:17:16	0.355585	1.58171	1134.75	FALSE	55
2022-09-12	12:17:16	0.304746	1.35557	1153.17	FALSE	55
2022-09-12	12:17:16	0.146832	0.653138	1135.41	FALSE	55
2022-09-12	12:17:17	-0.172964	-0.769378	1153.17	FALSE	55
2022-09-12	12:17:17	-0.21561	-0.959076	1135.41	FALSE	55
2022-09-12	12:17:17	0.665102	2.95851	1156.13	FALSE	55
2022-09-12	12:17:18	0.074873	0.33305	1135.74	FALSE	55
2022-09-12	12:17:18	0.204949	0.911654	1157.04	FALSE	55
2022-09-12	12:17:18	0.251158	1.1172	1136.86	FALSE	55
2022-09-12	12:17:18	0.0256109	0.113922	1157.15	FALSE	55
2022-09-12	12:17:19	0.560471	2.49309	1139.35	FALSE	55
2022-09-12	12:17:19	0.0563997	0.250877	1157.41	FALSE	55
2022-09-12	12:17:19	0.548613	2.44034	1141.79	FALSE	55
2022-09-12	12:17:19	0.234211	1.04182	1158.45	FALSE	55
2022-09-12	12:17:20	0.451514	2.00842	1143.8	FALSE	55
2022-09-12	12:17:20	0.180013	0.800734	1159.25	FALSE	55
2022-09-12	12:17:20	0.253092	1.1258	1144.93	FALSE	55
2022-09-12	12:17:20	0.3393	1.50927	1160.76	FALSE	55
2022-09-12	12:17:21	0.18271	0.812731	1145.74	FALSE	55
2022-09-12	12:17:21	0.656196	2.91889	1163.68	FALSE	55
2022-09-12	12:17:21	0.258333	1.14912	1146.89	FALSE	55
2022-09-12	12:17:22	1.14994	5.11516	1168.79	FALSE	55
2022-09-12	12:17:22	0.222965	0.991793	1147.88	FALSE	55
2022-09-12	12:17:22	0.702455	3.12466	1171.92	FALSE	55
2022-09-12	12:17:22	0.35528	1.58036	1149.46	FALSE	55
2022-09-12	12:17:23	0.737315	3.27972	1175.2	FALSE	55
2022-09-12	12:17:23	0.738384	3.28448	1152.74	FALSE	55
2022-09-12	12:17:23	0.230344	1.02462	1176.22	FALSE	55
2022-09-12	12:17:23	1.445	6.42765	1159.17	FALSE	55
2022-09-12	12:17:24	1.24388	5.53303	1181.75	FALSE	55
2022-09-12	12:17:24	2.42866	10.8032	1169.98	FALSE	55
2022-09-12	12:17:24	2.56571	11.4128	1193.17	FALSE	55
2022-09-12	12:17:24	2.89039	12.857	1182.83	FALSE	55
2022-09-12	12:17:25	1.3822	6.1483	1199.31	FALSE	55
2022-09-12	12:17:25	3.45146	15.3528	1198.19	1	56
2022-09-12	12:17:25	0.790344	3.51561	1202.83	FALSE	56
2022-09-12	12:17:26	3.22093	14.3273	1212.51	1	57
2022-09-12	12:17:26	0.436705	1.94255	1204.77	FALSE	57
2022-09-12	12:17:26	1.75828	7.82118	1220.33	FALSE	57
2022-09-12	12:17:26	0.503168	2.23819	1207.01	FALSE	57
2022-09-12	12:17:27	1.18363	5.26502	1225.6	FALSE	57
2022-09-12	12:17:27	0.953346	4.24067	1211.25	FALSE	57
2022-09-12	12:17:27	0.446476	1.98601	1227.58	FALSE	57
2022-09-12	12:17:27	1.3991	6.22348	1217.48	FALSE	57
2022-09-12	12:17:28	0.283219	1.25981	1228.84	FALSE	57
2022-09-12	12:17:28	0.13925	0.619412	1218.09	FALSE	57
2022-09-12	12:17:28	0.696501	3.09818	1231.94	FALSE	57
2022-09-12	12:17:28	0.105611	0.469779	1218.56	FALSE	57
2022-09-12	12:17:29	0.232023	1.03208	1232.97	FALSE	57
2022-09-12	12:17:29	0.107189	0.476798	1219.04	FALSE	57
2022-09-12	12:17:29	0.0960943	0.427447	1233.4	FALSE	57
2022-09-12	12:17:30	-0.114847	-0.510862	1219.04	FALSE	57
2022-09-12	12:17:30	-0.160852	-0.715502	1233.4	FALSE	57
2022-09-12	12:17:30	-0.424923	-1.89014	1219.04	FALSE	57
2022-09-12	12:17:30	-0.555712	-2.47192	1233.4	FALSE	57
2022-09-12	12:17:31	-0.522531	-2.32432	1219.04	FALSE	57
2022-09-12	12:17:31	-0.241208	-1.07294	1233.4	FALSE	57
2022-09-12	12:17:31	-0.170776	-0.759646	1219.04	FALSE	57
2022-09-12	12:17:31	0.108104	0.480868	1233.88	FALSE	57
2022-09-12	12:17:32	0.144746	0.643859	1219.68	FALSE	57
2022-09-12	12:17:32	0.0982317	0.436954	1234.32	FALSE	57
2022-09-12	12:17:32	-0.0352542	-0.156818	1219.68	FALSE	57
2022-09-12	12:17:32	0.629224	2.79891	1237.12	FALSE	57
2022-09-12	12:17:33	0.114669	0.510071	1220.19	FALSE	57
2022-09-12	12:17:33	0.128206	0.570286	1237.69	FALSE	57
2022-09-12	12:17:33	0.241489	1.07419	1221.27	FALSE	57
2022-09-12	12:17:34	0.723473	3.21815	1240.91	FALSE	57
2022-09-12	12:17:34	0.318384	1.41624	1222.69	FALSE	57
2022-09-12	12:17:34	0.208868	0.929087	1241.84	FALSE	57
2022-09-12	12:17:34	0.201947	0.898301	1223.58	FALSE	57
2022-09-12	12:17:35	0.235433	1.04725	1242.88	FALSE	57
2022-09-12	12:17:35	1.15426	5.13438	1228.72	FALSE	57
2022-09-12	12:17:35	0.267952	1.1919	1244.08	FALSE	57
2022-09-12	12:17:35	0.564644	2.51165	1231.23	FALSE	57
2022-09-12	12:17:36	1.505	6.69454	1250.77	FALSE	57
2022-09-12	12:17:36	0.068359	0.304075	1231.53	FALSE	57
2022-09-12	12:17:36	0.302608	1.34606	1252.12	FALSE	57
2022-09-12	12:17:36	0.137112	0.609902	1232.14	FALSE	57
2022-09-12	12:17:37	0.483321	2.14991	1254.27	FALSE	57
2022-09-12	12:17:37	3.50495	15.5907	1247.73	1	58
2022-09-12	12:17:37	0.556196	2.47407	1256.74	FALSE	58
2022-09-12	12:17:38	3.07955	13.6985	1261.43	1	59
2022-09-12	12:17:38	4.71894	20.9908	1277.73	1	60
2022-09-12	12:17:38	1.03752	4.6151	1266.05	FALSE	60
2022-09-12	12:17:38	2.688	11.9568	1289.69	FALSE	60
2022-09-12	12:17:39	2.91604	12.9711	1279.02	FALSE	60
2022-09-12	12:17:39	0.37416	1.66434	1291.35	FALSE	60
2022-09-12	12:17:39	1.22912	5.46737	1284.49	FALSE	60
2022-09-12	12:17:39	0.275585	1.22586	1292.58	FALSE	60
2022-09-12	12:17:40	0.044186	0.196548	1284.68	FALSE	60
2022-09-12	12:17:40	0.480522	2.13746	1294.72	FALSE	60
2022-09-12	12:17:40	0.165763	0.737347	1285.42	FALSE	60
2022-09-12	12:17:40	1.56266	6.95102	1301.67	FALSE	60
2022-09-12	12:17:41	1.53503	6.82812	1292.25	FALSE	60
2022-09-12	12:17:41	0.547239	2.43423	1304.1	FALSE	60
2022-09-12	12:17:41	1.92011	8.54103	1300.79	FALSE	60
2022-09-12	12:17:42	0.229478	1.02076	1305.12	FALSE	60
2022-09-12	12:17:42	0.357112	1.58851	1302.38	FALSE	60
2022-09-12	12:17:42	1.39584	6.20898	1311.33	FALSE	60
2022-09-12	12:17:42	0.22439	0.998132	1303.38	FALSE	60
2022-09-12	12:17:43	0.182914	0.813638	1312.14	FALSE	60
2022-09-12	12:17:43	0.488868	2.17458	1305.55	FALSE	60
2022-09-12	12:17:43	-0.0137784	-0.0612891	1312.14	FALSE	60
2022-09-12	12:17:43	0.01813	0.0806459	1305.63	FALSE	60
2022-09-12	12:17:44	-0.067417	-0.299884	1312.14	FALSE	60
2022-09-12	12:17:44	-0.423905	-1.88561	1305.63	FALSE	60
2022-09-12	12:17:44	-0.516526	-2.29761	1312.14	FALSE	60
2022-09-12	12:17:44	-0.450877	-2.00559	1305.63	FALSE	60
2022-09-12	12:17:45	-0.391946	-1.74345	1312.14	FALSE	60
2022-09-12	12:17:45	-0.0464501	-0.206619	1305.63	FALSE	60
2022-09-12	12:17:45	0.0990969	0.440803	1312.58	FALSE	60
2022-09-12	12:17:46	0.167952	0.747084	1306.38	FALSE	60
2022-09-12	12:17:46	0.262252	1.16655	1313.75	FALSE	60
2022-09-12	12:17:46	0.276908	1.23174	1307.61	FALSE	60
2022-09-12	12:17:46	0.451768	2.00955	1315.76	FALSE	60
2022-09-12	12:17:47	0.33416	1.48641	1309.1	FALSE	60
2022-09-12	12:17:47	0.429682	1.91131	1317.67	FALSE	60
2022-09-12	12:17:47	0.402608	1.79088	1310.89	FALSE	60
2022-09-12	12:17:47	0.295331	1.31369	1318.99	FALSE	60
2022-09-12	12:17:48	0.39299	1.7481	1312.64	FALSE	60
2022-09-12	12:17:48	0.34383	1.52942	1320.52	FALSE	60
2022-09-12	12:17:48	0.360064	1.60164	1314.24	FALSE	60
2022-09-12	12:17:48	0.352939	1.56994	1322.09	FALSE	60
2022-09-12	12:17:49	0.359402	1.59869	1315.84	FALSE	60
2022-09-12	12:17:49	0.30841	1.37187	1323.46	FALSE	60
2022-09-12	12:17:49	0.256654	1.14165	1316.98	FALSE	60
2022-09-12	12:17:50	0.238537	1.06106	1324.52	FALSE	60
2022-09-12	12:17:50	0.309631	1.3773	1318.35	FALSE	60
2022-09-12	12:17:50	0.200267	0.890828	1325.41	FALSE	60
2022-09-12	12:17:50	0.181438	0.807073	1319.16	FALSE	60
2022-09-12	12:17:51	-0.153575	-0.683132	1325.41	FALSE	60
2022-09-12	12:17:51	-0.405127	-1.80209	1319.16	FALSE	60
2022-09-12	12:17:51	-0.261564	-1.16349	1325.41	FALSE	60
2022-09-12	12:17:51	-0.0891982	-0.396771	1319.16	FALSE	60
2022-09-12	12:17:52	-0.0454323	-0.202092	1325.41	FALSE	60
2022-09-12	12:17:52	0.0118705	0.0528024	1319.21	FALSE	60
2022-09-12	12:17:52	0.106222	0.472497	1325.88	FALSE	60
2022-09-12	12:17:52	0.149428	0.664686	1319.88	FALSE	60
2022-09-12	12:17:53	0.115738	0.514826	1326.4	FALSE	60
2022-09-12	12:17:53	0.16897	0.751612	1320.63	FALSE	60
2022-09-12	12:17:53	0.217875	0.969152	1327.37	FALSE	60
2022-09-12	12:17:53	0.254771	1.13327	1321.76	FALSE	60
2022-09-12	12:17:54	0.248766	1.10656	1328.47	FALSE	60
2022-09-12	12:17:54	0.247799	1.10226	1322.87	FALSE	60
2022-09-12	12:17:54	0.2564	1.14052	1329.61	FALSE	60
2022-09-12	12:17:55	0.271412	1.20729	1324.07	FALSE	60
2022-09-12	12:17:55	0.315331	1.40266	1331.02	FALSE	60
2022-09-12	12:17:55	0.275178	1.22405	1325.3	FALSE	60
2022-09-12	12:17:55	0.206069	0.916636	1331.93	FALSE	60
2022-09-12	12:17:56	0.30785	1.36938	1326.67	FALSE	60
2022-09-12	12:17:56	0.148206	0.65925	1332.59	FALSE	60
2022-09-12	12:17:56	0.282863	1.25823	1327.93	FALSE	60
2022-09-12	12:17:56	0.204746	0.910751	1333.5	FALSE	60
2022-09-12	12:17:57	0.220929	0.982736	1328.91	FALSE	60
2022-09-12	12:17:57	0.220369	0.980245	1334.48	FALSE	60
2022-09-12	12:17:57	0.177214	0.788283	1329.7	FALSE	60
2022-09-12	12:17:57	0.221641	0.985903	1335.47	FALSE	60
2022-09-12	12:17:58	0.159555	0.709733	1330.41	FALSE	60
2022-09-12	12:17:58	0.180725	0.803901	1336.27	FALSE	60
2022-09-12	12:17:58	0.0405728	0.180476	1330.59	FALSE	60
2022-09-12	12:17:59	0.168003	0.747311	1337.02	FALSE	60
2022-09-12	12:17:59	0.233753	1.03978	1331.63	FALSE	60
2022-09-12	12:17:59	0.271819	1.20911	1338.23	FALSE	60
2022-09-12	12:17:59	0.219351	0.975717	1332.6	FALSE	60
2022-09-12	12:18:00	0.383473	1.70576	1339.93	FALSE	60
2022-09-12	12:18:00	0.258181	1.14844	1333.75	FALSE	60
2022-09-12	12:18:00	0.359148	1.59756	1341.53	FALSE	60
2022-09-12	12:18:00	0.240216	1.06853	1334.82	FALSE	60
2022-09-12	12:18:01	0.475127	2.11346	1343.65	FALSE	60
2022-09-12	12:18:01	0.374924	1.66774	1336.49	FALSE	60
2022-09-12	12:18:01	0.328257	1.46015	1345.11	FALSE	60
2022-09-12	12:18:01	0.588257	2.61668	1339.1	FALSE	60
2022-09-12	12:18:02	0.480929	2.13927	1347.24	FALSE	60
2022-09-12	12:18:02	1.20291	5.35078	1344.45	FALSE	60
2022-09-12	12:18:02	0.555585	2.47135	1349.72	FALSE	60
2022-09-12	12:18:03	0.472125	2.10011	1346.55	FALSE	60
2022-09-12	12:18:03	0.500063	2.22438	1351.94	FALSE	60
2022-09-12	12:18:03	0.249987	1.11199	1347.67	FALSE	60
2022-09-12	12:18:03	0.43187	1.92104	1353.86	FALSE	60
2022-09-12	12:18:04	0.341387	1.51856	1349.19	FALSE	60
2022-09-12	12:18:04	0.436858	1.94323	1355.8	FALSE	60
2022-09-12	12:18:04	0.790802	3.51765	1352.7	FALSE	60
2022-09-12	12:18:04	0.594669	2.64521	1358.45	FALSE	60
2022-09-12	12:18:05	1.74413	7.75824	1360.46	FALSE	60
2022-09-12	12:18:05	4.06983	18.1034	1376.55	1	61
2022-09-12	12:18:05	1.72775	7.68538	1368.15	FALSE	61
2022-09-12	12:18:05	2.50383	11.1375	1387.69	FALSE	61
2022-09-12	12:18:06	0.555025	2.46886	1370.62	FALSE	61
2022-09-12	12:18:06	0.931819	4.14492	1391.84	FALSE	61
2022-09-12	12:18:06	1.29925	5.77932	1376.39	FALSE	61
2022-09-12	12:18:07	0.35869	1.59552	1393.43	FALSE	61
2022-09-12	12:18:07	0.171158	0.761345	1377.16	FALSE	61
2022-09-12	12:18:07	0.367138	1.6331	1395.06	FALSE	61
2022-09-12	12:18:07	0.251616	1.11924	1378.28	FALSE	61
2022-09-12	12:18:08	0.405865	1.80537	1396.87	FALSE	61
2022-09-12	12:18:08	0.367443	1.63446	1379.91	FALSE	61
2022-09-12	12:18:08	0.340064	1.51267	1398.38	FALSE	61
2022-09-12	12:18:08	0.117875	0.524332	1380.43	FALSE	61
2022-09-12	12:18:09	0.346934	1.54323	1399.93	FALSE	61
2022-09-12	12:18:09	0.1993	0.886526	1381.32	FALSE	61
2022-09-12	12:18:09	0.449886	2.00118	1401.93	FALSE	61
2022-09-12	12:18:09	0.273295	1.21567	1382.54	FALSE	61
2022-09-12	12:18:10	0.73701	3.27837	1405.21	FALSE	61
2022-09-12	12:18:10	0.768003	3.41623	1385.95	FALSE	61
2022-09-12	12:18:10	0.445305	1.98081	1407.19	FALSE	61
2022-09-12	12:18:11	0.220929	0.982736	1386.94	FALSE	61
2022-09-12	12:18:11	0.527799	2.34776	1409.53	FALSE	61
2022-09-12	12:18:11	0.947952	4.21668	1391.15	FALSE	61
2022-09-12	12:18:11	1.86948	8.31582	1417.85	FALSE	61
2022-09-12	12:18:12	0.764847	3.40219	1394.55	FALSE	61
2022-09-12	12:18:12	1.02688	4.56777	1422.42	FALSE	61
2022-09-12	12:18:12	0.288104	1.28154	1395.84	FALSE	61
2022-09-12	12:18:12	0.347901	1.54753	1423.96	FALSE	61
2022-09-12	12:18:13	0.383015	1.70373	1397.54	FALSE	61
2022-09-12	12:18:13	0.309682	1.37753	1425.34	FALSE	61
2022-09-12	12:18:13	0.441183	1.96247	1399.5	FALSE	61
2022-09-12	12:18:13	0.466527	2.07521	1427.42	FALSE	61
2022-09-12	12:18:14	2.01935	8.98247	1408.48	FALSE	61
2022-09-12	12:18:14	1.9877	8.84169	1436.26	FALSE	61
2022-09-12	12:18:14	2.92622	13.0164	1421.5	FALSE	61
2022-09-12	12:18:15	0.33869	1.50656	1437.77	FALSE	61
2022-09-12	12:18:15	0.591463	2.63095	1424.13	FALSE	61
2022-09-12	12:18:15	0.417061	1.85517	1439.62	FALSE	61
2022-09-12	12:18:15	0.47014	2.09128	1426.22	FALSE	61
2022-09-12	12:18:16	0.272125	1.21047	1440.83	FALSE	61
2022-09-12	12:18:16	0.230496	1.02529	1427.25	FALSE	61
2022-09-12	12:18:16	0.467137	2.07792	1442.91	FALSE	61
2022-09-12	12:18:16	8.02657	35.7038	1462.95	1	62
2022-09-12	12:18:17	5.31192	23.6285	1466.54	1	63
2022-09-12	12:18:17	5.47238	24.3422	1487.29	1	64
2022-09-12	12:18:17	7.7798	34.6061	1501.14	1	65
2022-09-12	12:18:17	3.81156	16.9546	1504.25	1	66
2022-09-12	12:18:18	0.662812	2.94832	1504.09	FALSE	66
2022-09-12	12:18:18	0.340013	1.51245	1505.76	FALSE	66
2022-09-12	12:18:18	0.328003	1.45902	1505.55	FALSE	66
2022-09-12	12:18:19	0.474211	2.10939	1507.87	FALSE	66
2022-09-12	12:18:19	0.813855	3.62019	1509.17	FALSE	66
2022-09-12	12:18:19	1.94892	8.66919	1516.54	FALSE	66
2022-09-12	12:18:19	5.95726	26.4991	1535.67	1	67
2022-09-12	12:18:20	1.48546	6.60762	1523.15	FALSE	67
2022-09-12	12:18:20	2.37436	10.5616	1546.23	FALSE	67
2022-09-12	12:18:20	4.3025	19.1384	1542.29	1	68
2022-09-12	12:18:20	1.2822	5.70348	1551.94	FALSE	68
2022-09-12	12:18:21	1.8595	8.27143	1550.56	FALSE	68
2022-09-12	12:18:21	0.563066	2.50463	1554.44	FALSE	68
2022-09-12	12:18:21	0.795992	3.54073	1554.1	FALSE	68
2022-09-12	12:18:21	0.391056	1.7395	1556.18	FALSE	68
2022-09-12	12:18:22	0.471718	2.0983	1556.2	FALSE	68
2022-09-12	12:18:22	0.236043	1.04997	1557.23	FALSE	68
2022-09-12	12:18:22	0.458384	2.03898	1558.24	FALSE	68
2022-09-12	12:18:23	0.242761	1.07985	1558.31	FALSE	68
2022-09-12	12:18:23	0.457163	2.03355	1560.27	FALSE	68
2022-09-12	12:18:23	0.260929	1.16066	1559.47	FALSE	68
2022-09-12	12:18:23	0.457316	2.03423	1562.3	FALSE	68
2022-09-12	12:18:24	0.725356	3.22653	1562.7	FALSE	68
2022-09-12	12:18:24	0.681387	3.03095	1565.33	FALSE	68
2022-09-12	12:18:24	1.38892	6.17819	1568.87	FALSE	68
2022-09-12	12:18:24	0.628359	2.79507	1568.13	FALSE	68
2022-09-12	12:18:25	0.55187	2.45483	1571.33	FALSE	68
2022-09-12	12:18:25	1.61314	7.17557	1575.3	FALSE	68
2022-09-12	12:18:25	3.07345	13.6713	1585	1	69
2022-09-12	12:18:25	0.912175	4.05754	1579.36	FALSE	69
2022-09-12	12:18:26	1.96373	8.73506	1593.74	FALSE	69
2022-09-12	12:18:26	1.81782	8.08603	1587.45	FALSE	69
2022-09-12	12:18:26	1.33355	5.9319	1599.67	FALSE	69
2022-09-12	12:18:27	1.60734	7.14977	1594.6	FALSE	69
2022-09-12	12:18:27	1.23884	5.51061	1605.18	FALSE	69
2022-09-12	12:18:27	0.806628	3.58804	1598.19	FALSE	69
2022-09-12	12:18:27	0.665153	2.95873	1608.14	FALSE	69
2022-09-12	12:18:28	0.366578	1.63061	1599.82	FALSE	69
2022-09-12	12:18:28	0.357265	1.58919	1609.73	FALSE	69
2022-09-12	12:18:28	0.329224	1.46445	1601.28	FALSE	69
2022-09-12	12:18:28	0.361641	1.60865	1611.34	FALSE	69
2022-09-12	12:18:29	0.342863	1.52512	1602.81	FALSE	69
2022-09-12	12:18:29	0.278232	1.23763	1612.57	FALSE	69
2022-09-12	12:18:29	0.365407	1.6254	1604.43	FALSE	69
2022-09-12	12:18:29	0.132125	0.587718	1613.16	FALSE	69
2022-09-12	12:18:30	0.25299	1.12535	1605.56	FALSE	69
2022-09-12	12:18:30	0.202354	0.900111	1614.06	FALSE	69
2022-09-12	12:18:30	0.22388	0.995863	1606.55	FALSE	69
2022-09-12	12:18:31	0.215789	0.959873	1615.02	FALSE	69
2022-09-12	12:18:31	0.0605218	0.269213	1606.82	FALSE	69
2022-09-12	12:18:31	0.0476974	0.212168	1615.23	FALSE	69
2022-09-12	12:18:31	0.0921758	0.410016	1607.23	FALSE	69
2022-09-12	12:18:32	0.131921	0.586811	1615.82	FALSE	69
2022-09-12	12:18:32	0.148461	0.660384	1607.89	FALSE	69
2022-09-12	12:18:32	0.151616	0.674418	1616.49	FALSE	69
2022-09-12	12:18:32	0.137468	0.611485	1608.5	FALSE	69
2022-09-12	12:18:33	0.199809	0.88879	1617.38	FALSE	69
2022-09-12	12:18:33	0.240216	1.06853	1609.57	FALSE	69
2022-09-12	12:18:33	0.10271	0.456875	1617.84	FALSE	69
2022-09-12	12:18:33	0.261285	1.16225	1610.73	FALSE	69
2022-09-12	12:18:34	0.125051	0.556252	1618.4	FALSE	69
2022-09-12	12:18:34	0.319606	1.42167	1612.16	FALSE	69
2022-09-12	12:18:34	0.234466	1.04295	1619.44	FALSE	69
2022-09-12	12:18:35	0.31187	1.38726	1613.54	FALSE	69
2022-09-12	12:18:35	0.0303946	0.135201	1619.57	FALSE	69
2022-09-12	12:18:35	0.0897839	0.399377	1613.94	FALSE	69
2022-09-12	12:18:35	0.124542	0.553988	1620.13	FALSE	69
2022-09-12	12:18:36	0.168104	0.74776	1614.69	FALSE	69
2022-09-12	12:18:36	0.145764	0.648387	1620.78	FALSE	69
2022-09-12	12:18:36	0.068817	0.306112	1615	FALSE	69
2022-09-12	12:18:36	0.161896	0.720146	1621.5	FALSE	69
2022-09-12	12:18:37	0.0830664	0.369496	1615.37	FALSE	69
2022-09-12	12:18:37	0.147392	0.655629	1622.15	FALSE	69
2022-09-12	12:18:37	-0.140445	-0.624727	1615.37	FALSE	69
2022-09-12	12:18:37	-0.155254	-0.690601	1622.15	FALSE	69
2022-09-12	12:18:38	-0.11271	-0.501357	1615.37	FALSE	69
2022-09-12	12:18:38	-0.207264	-0.921952	1622.15	FALSE	69
2022-09-12	12:18:38	-0.13215	-0.58783	1615.37	FALSE	69
2022-09-12	12:18:39	-0.267773	-1.19111	1622.15	FALSE	69
2022-09-12	12:18:39	-0.132455	-0.589186	1615.37	FALSE	69
2022-09-12	12:18:39	-0.139376	-0.619972	1622.15	FALSE	69
2022-09-12	12:18:39	0.386222	1.71799	1617.08	FALSE	69
2022-09-12	12:18:40	0.778232	3.46173	1625.61	FALSE	69
2022-09-12	12:18:40	0.417367	1.85653	1618.94	FALSE	69
2022-09-12	12:18:40	0.331005	1.47238	1627.09	FALSE	69
2022-09-12	12:18:40	0.670903	2.98431	1621.93	FALSE	69
2022-09-12	12:18:41	0.372837	1.65845	1628.74	FALSE	69
2022-09-12	12:18:41	0.602252	2.67894	1624.6	FALSE	69
2022-09-12	12:18:41	0.248715	1.10633	1629.85	FALSE	69
2022-09-12	12:18:41	0.429071	1.90859	1626.51	FALSE	69
2022-09-12	12:18:42	0.26673	1.18647	1631.04	FALSE	69
2022-09-12	12:18:42	0.724949	3.22472	1629.74	FALSE	69
2022-09-12	12:18:42	0.771463	3.43162	1634.47	FALSE	69
2022-09-12	12:18:43	1.08108	4.80886	1634.55	FALSE	69
2022-09-12	12:18:43	1.50327	6.68685	1641.16	FALSE	69
2022-09-12	12:18:43	0.43411	1.93101	1636.48	FALSE	69
2022-09-12	12:18:43	1.73645	7.72408	1648.88	FALSE	69
2022-09-12	12:18:44	0.501183	2.22936	1638.71	FALSE	69
2022-09-12	12:18:44	1.43696	6.39189	1655.27	FALSE	69
2022-09-12	12:18:44	1.17248	5.21543	1643.92	FALSE	69
2022-09-12	12:18:44	0.370802	1.6494	1656.92	FALSE	69
2022-09-12	12:18:45	0.488359	2.17232	1646.09	FALSE	69
2022-09-12	12:18:45	0.773397	3.44022	1660.36	FALSE	69
2022-09-12	12:18:45	0.457672	2.03582	1648.13	FALSE	69
2022-09-12	12:18:45	1.47248	6.54989	1666.91	FALSE	69
2022-09-12	12:18:46	0.657163	2.92319	1651.05	FALSE	69
2022-09-12	12:18:46	1.39126	6.1886	1673.1	FALSE	69
2022-09-12	12:18:46	2.08978	9.29576	1660.35	FALSE	69
2022-09-12	12:18:47	0.286069	1.27249	1674.37	FALSE	69
2022-09-12	12:18:47	0.404644	1.79994	1662.15	FALSE	69
2022-09-12	12:18:47	0.346425	1.54097	1675.91	FALSE	69
2022-09-12	12:18:47	0.352786	1.56926	1663.72	FALSE	69
2022-09-12	12:18:48	0.261743	1.16429	1677.08	FALSE	69
2022-09-12	12:18:48	0.449835	2.00096	1665.72	FALSE	69
2022-09-12	12:18:48	0.27411	1.2193	1678.3	FALSE	69
2022-09-12	12:18:48	1.11538	4.96143	1670.68	FALSE	69
2022-09-12	12:18:49	3.09818	13.7813	1692.08	1	70
2022-09-12	12:18:49	2.0791	9.24825	1679.93	FALSE	70
2022-09-12	12:18:49	4.09859	18.2313	1710.31	1	71
2022-09-12	12:18:49	3.83375	17.0533	1696.98	1	72
2022-09-12	12:18:50	3.51767	15.6473	1725.96	1	73
2022-09-12	12:18:50	4.34922	19.3462	1716.33	1	74
2022-09-12	12:18:50	0.64383	2.86388	1728.82	FALSE	74
2022-09-12	12:18:51	1.04592	4.65246	1720.98	FALSE	74
2022-09-12	12:18:51	1.41884	6.31128	1735.13	FALSE	74
2022-09-12	12:18:51	0.161845	0.719919	1721.7	FALSE	74
2022-09-12	12:18:51	0.410496	1.82597	1736.96	FALSE	74
2022-09-12	12:18:52	0.193957	0.86276	1722.56	FALSE	74
2022-09-12	12:18:52	0.340013	1.51245	1738.47	FALSE	74
2022-09-12	12:18:52	0.140216	0.623709	1723.19	FALSE	74
2022-09-12	12:18:52	0.334008	1.48573	1739.96	FALSE	74
2022-09-12	12:18:53	0.2764	1.22948	1724.42	FALSE	74
2022-09-12	12:18:53	0.331107	1.47283	1741.43	FALSE	74
2022-09-12	12:18:53	0.17472	0.77719	1725.19	FALSE	74
2022-09-12	12:18:53	-0.0537784	-0.239217	1741.43	FALSE	74
2022-09-12	12:18:54	-0.023244	-0.103394	1725.19	FALSE	74
2022-09-12	12:18:54	0.0570104	0.253594	1741.68	FALSE	74
2022-09-12	12:18:54	0.19701	0.87634	1726.07	FALSE	74
2022-09-12	12:18:55	0.25869	1.1507	1742.83	FALSE	74
2022-09-12	12:18:55	0.277774	1.23559	1727.31	FALSE	74
2022-09-12	12:18:55	0.425153	1.89117	1744.72	FALSE	74
2022-09-12	12:18:55	0.350089	1.55727	1728.86	FALSE	74
2022-09-12	12:18:56	0.275483	1.2254	1745.95	FALSE	74
2022-09-12	12:18:56	0.415992	1.85042	1730.71	FALSE	74
2022-09-12	12:18:56	0.165458	0.73599	1746.69	FALSE	74
2022-09-12	12:18:56	0.369835	1.6451	1732.36	FALSE	74
2022-09-12	12:18:57	0.355484	1.58126	1748.27	FALSE	74
2022-09-12	12:18:57	0.356349	1.58511	1733.94	FALSE	74
2022-09-12	12:18:57	0.36958	1.64397	1749.91	FALSE	74
2022-09-12	12:18:58	0.454873	2.02337	1735.97	FALSE	74
2022-09-12	12:18:58	0.401794	1.78726	1751.7	FALSE	74
2022-09-12	12:18:58	0.444288	1.97628	1737.94	FALSE	74
2022-09-12	12:18:58	0.708053	3.14956	1754.85	FALSE	74
2022-09-12	12:18:59	1.52286	6.77399	1744.72	FALSE	74
2022-09-12	12:18:59	0.307443	1.36757	1756.22	FALSE	74
2022-09-12	12:18:59	0.983829	4.37627	1749.09	FALSE	74
2022-09-12	12:18:59	0.516349	2.29682	1758.51	FALSE	74
2022-09-12	12:19:00	0.748053	3.32749	1752.42	FALSE	74
2022-09-12	12:19:00	0.212379	0.944704	1759.46	FALSE	74
2022-09-12	12:19:00	0.352736	1.56904	1753.99	FALSE	74
2022-09-12	12:19:00	0.331158	1.47306	1760.93	FALSE	74
2022-09-12	12:19:01	0.154619	0.687776	1754.68	FALSE	74
2022-09-12	12:19:01	0.183779	0.817486	1761.75	FALSE	74
2022-09-12	12:19:01	0.153702	0.683697	1755.36	FALSE	74
2022-09-12	12:19:01	0.167799	0.746404	1762.49	FALSE	74
2022-09-12	12:19:02	0.293499	1.30554	1756.67	FALSE	74
2022-09-12	12:19:02	0.225865	1.00469	1763.5	FALSE	74
2022-09-12	12:19:02	0.248054	1.10339	1757.77	FALSE	74
2022-09-12	12:19:03	0.265509	1.18104	1764.68	FALSE	74
2022-09-12	12:19:03	0.126069	0.56078	1758.33	FALSE	74
2022-09-12	12:19:03	0.210547	0.936555	1765.62	FALSE	74
2022-09-12	12:19:03	0.235738	1.04861	1759.38	FALSE	74
2022-09-12	12:19:04	0.174364	0.775606	1766.39	FALSE	74
2022-09-12	12:19:04	0.154008	0.685058	1760.07	FALSE	74
2022-09-12	12:19:04	0.109631	0.487661	1766.88	FALSE	74
2022-09-12	12:19:04	0.112634	0.501019	1760.57	FALSE	74
2022-09-12	12:19:05	0.165153	0.734634	1767.61	FALSE	74
2022-09-12	12:19:05	0.315738	1.40447	1761.97	FALSE	74
2022-09-12	12:19:05	0.28673	1.27543	1768.89	FALSE	74
2022-09-12	12:19:05	0.263575	1.17243	1763.14	FALSE	74
2022-09-12	12:19:06	0.281082	1.25031	1770.14	FALSE	74
2022-09-12	12:19:06	0.358588	1.59507	1764.74	FALSE	74
2022-09-12	12:19:06	0.329631	1.46626	1771.61	FALSE	74
2022-09-12	12:19:07	0.298639	1.32841	1766.07	FALSE	74
2022-09-12	12:19:07	0.318995	1.41895	1773.03	FALSE	74
2022-09-12	12:19:07	0.414415	1.8434	1767.91	FALSE	74
2022-09-12	12:19:07	0.417774	1.85834	1774.88	FALSE	74
2022-09-12	12:19:08	0.349478	1.55455	1769.46	FALSE	74
2022-09-12	12:19:08	0.325763	1.44906	1776.33	FALSE	74
2022-09-12	12:19:08	0.309682	1.37753	1770.84	FALSE	74
2022-09-12	12:19:08	0.305916	1.36078	1777.69	FALSE	74
2022-09-12	12:19:09	0.295382	1.31392	1772.16	FALSE	74
2022-09-12	12:19:09	0.225458	1.00288	1778.7	FALSE	74
2022-09-12	12:19:09	0.194822	0.866607	1773.02	FALSE	74
2022-09-12	12:19:09	0.325967	1.44997	1780.15	FALSE	74
2022-09-12	12:19:10	0.287341	1.27815	1774.3	FALSE	74
2022-09-12	12:19:10	0.324797	1.44476	1781.59	FALSE	74
2022-09-12	12:19:10	0.326374	1.45178	1775.75	FALSE	74
2022-09-12	12:19:11	0.292277	1.30011	1782.89	FALSE	74
2022-09-12	12:19:11	0.277774	1.23559	1776.99	FALSE	74
2022-09-12	12:19:11	0.286883	1.27611	1784.17	FALSE	74
2022-09-12	12:19:11	0.164898	0.733499	1777.72	FALSE	74
2022-09-12	12:19:12	0.291565	1.29694	1785.46	FALSE	74
2022-09-12	12:19:12	0.230191	1.02394	1778.75	FALSE	74
2022-09-12	12:19:12	0.209071	0.92999	1786.39	FALSE	74
2022-09-12	12:19:12	0.344797	1.53373	1780.28	FALSE	74
2022-09-12	12:19:13	0.150395	0.668987	1787.06	FALSE	74
2022-09-12	12:19:13	0.27813	1.23718	1781.52	FALSE	74
2022-09-12	12:19:13	0.185814	0.826538	1787.89	FALSE	74
2022-09-12	12:19:13	0.0811325	0.360894	1781.88	FALSE	74
2022-09-12	12:19:14	0.271209	1.20639	1789.1	FALSE	74
2022-09-12	12:19:14	0.054873	0.244086	1782.12	FALSE	74
2022-09-12	12:19:14	0.395992	1.76145	1790.86	FALSE	74
2022-09-12	12:19:15	0.181692	0.808202	1782.93	FALSE	74
2022-09-12	12:19:15	0.381896	1.69875	1792.56	FALSE	74
2022-09-12	12:19:15	0.118232	0.52592	1783.46	FALSE	74
2022-09-12	12:19:15	0.41757	1.85743	1794.41	FALSE	74
2022-09-12	12:19:16	0.216451	0.962817	1784.42	FALSE	74
2022-09-12	12:19:16	0.304644	1.35512	1795.77	FALSE	74
2022-09-12	12:19:16	0.19813	0.881322	1785.3	FALSE	74
2022-09-12	12:19:16	0.299046	1.33022	1797.1	FALSE	74
2022-09-12	12:19:17	0.345713	1.5378	1786.84	FALSE	74
2022-09-12	12:19:17	0.335636	1.49298	1798.59	FALSE	74
2022-09-12	12:19:17	0.328511	1.46128	1788.3	FALSE	74
2022-09-12	12:19:17	0.195026	0.867515	1799.46	FALSE	74
2022-09-12	12:19:18	0.413601	1.83978	1790.14	FALSE	74
2022-09-12	12:19:18	0.239606	1.06582	1800.53	FALSE	74
2022-09-12	12:19:18	0.481234	2.14063	1792.28	FALSE	74
2022-09-12	12:19:19	0.284644	1.26615	1801.79	FALSE	74
2022-09-12	12:19:19	0.634618	2.82291	1795.1	FALSE	74
2022-09-12	12:19:19	0.877366	3.9027	1805.69	FALSE	74
2022-09-12	12:19:19	0.511921	2.27713	1797.38	FALSE	74
2022-09-12	12:19:20	1.43218	6.37062	1812.06	FALSE	74
2022-09-12	12:19:20	2.77375	12.3382	1809.72	FALSE	74
2022-09-12	12:19:20	1.10093	4.89716	1816.96	FALSE	74
2022-09-12	12:19:20	1.99319	8.86611	1818.58	FALSE	74
2022-09-12	12:19:21	1.27329	5.66385	1822.63	FALSE	74
2022-09-12	12:19:21	0.91131	4.05369	1822.64	FALSE	74
2022-09-12	12:19:21	1.76566	7.85401	1830.48	FALSE	74
2022-09-12	12:19:21	0.465458	2.07045	1824.71	FALSE	74
2022-09-12	12:19:22	0.631412	2.80865	1833.29	FALSE	74
2022-09-12	12:19:22	0.522506	2.32421	1827.03	FALSE	74
2022-09-12	12:19:22	0.40098	1.78364	1835.07	FALSE	74
2022-09-12	12:19:23	0.662659	2.94764	1829.98	FALSE	74
2022-09-12	12:19:23	0.488919	2.17481	1837.25	FALSE	74
2022-09-12	12:19:23	0.688359	3.06196	1833.04	FALSE	74
2022-09-12	12:19:23	0.530954	2.36179	1839.61	FALSE	74
2022-09-12	12:19:24	1.24739	5.54864	1838.59	FALSE	74
2022-09-12	12:19:24	1.70017	7.5627	1847.17	FALSE	74
2022-09-12	12:19:24	1.17752	5.23784	1843.83	FALSE	74
2022-09-12	12:19:24	3.23599	14.3943	1861.57	1	75
2022-09-12	12:19:25	0.33416	1.48641	1845.31	FALSE	75
2022-09-12	12:19:25	1.6108	7.16516	1868.73	FALSE	75
2022-09-12	12:19:25	1.94688	8.66011	1853.97	FALSE	75
2022-09-12	12:19:25	1.50587	6.69841	1875.43	FALSE	75
2022-09-12	12:19:26	1.98169	8.81495	1862.79	FALSE	75
2022-09-12	12:19:26	0.677061	3.0117	1878.44	FALSE	75
2022-09-12	12:19:26	2.61731	11.6423	1874.43	FALSE	75
2022-09-12	12:19:26	1.62815	7.24234	1885.68	FALSE	75
2022-09-12	12:19:27	2.34444	10.4285	1884.86	FALSE	75
2022-09-12	12:19:27	2.42556	10.7894	1896.47	FALSE	75
2022-09-12	12:19:27	2.24164	9.97126	1894.83	FALSE	75
2022-09-12	12:19:28	3.92861	17.4752	1913.95	1	76
2022-09-12	12:19:28	1.11528	4.96099	1899.79	FALSE	76
2022-09-12	12:19:28	2.49294	11.0891	1925.04	FALSE	76
2022-09-12	12:19:28	0.337112	1.49954	1901.29	FALSE	76
2022-09-12	12:19:29	1.0335	4.59721	1929.63	FALSE	76
2022-09-12	12:19:29	1.73767	7.7295	1909.02	FALSE	76
2022-09-12	12:19:29	0.390344	1.73633	1931.37	FALSE	76
2022-09-12	12:19:29	2.1767	9.6824	1918.7	FALSE	76
2022-09-12	12:19:30	0.239097	1.06355	1932.43	FALSE	76
2022-09-12	12:19:30	1.04688	4.65673	1923.36	FALSE	76
2022-09-12	12:19:30	0.850598	3.78363	1936.22	FALSE	76
2022-09-12	12:19:30	1.01375	4.50936	1927.87	FALSE	76
2022-09-12	12:19:31	1.91492	8.51795	1944.74	FALSE	76
2022-09-12	12:19:31	0.483728	2.15172	1930.02	FALSE	76
2022-09-12	12:19:31	1.59238	7.08322	1951.82	FALSE	76
2022-09-12	12:19:32	0.234059	1.04114	1931.06	FALSE	76
2022-09-12	12:19:32	1.74637	7.7682	1959.59	FALSE	76
2022-09-12	12:19:32	0.472074	2.09988	1933.16	FALSE	76
2022-09-12	12:19:32	2.02536	9.00921	1968.6	FALSE	76
2022-09-12	12:19:33	1.08174	4.8118	1937.97	FALSE	76
2022-09-12	12:19:33	0.935331	4.16054	1972.76	FALSE	76
2022-09-12	12:19:33	1.17976	5.24781	1943.22	FALSE	76
2022-09-12	12:19:33	0.528104	2.34911	1975.11	FALSE	76
2022-09-12	12:19:34	1.08128	4.80975	1948.03	FALSE	76
2022-09-12	12:19:34	0.44673	1.98714	1977.09	FALSE	76
2022-09-12	12:19:34	1.36072	6.05275	1954.08	FALSE	76
2022-09-12	12:19:34	1.73574	7.72092	1984.81	FALSE	76
2022-09-12	12:19:35	1.5362	6.83332	1960.92	FALSE	76
2022-09-12	12:19:35	3.67029	16.3262	2001.14	1	77
2022-09-12	12:19:35	1.01197	4.50144	1965.42	FALSE	77
2022-09-12	12:19:36	3.82469	17.013	2018.15	1	78
2022-09-12	12:19:36	0.921082	4.09716	1969.52	FALSE	78
2022-09-12	12:19:36	2.54195	11.3071	2029.46	FALSE	78
2022-09-12	12:19:36	2.5022	11.1303	1980.65	FALSE	78
2022-09-12	12:19:37	3.35792	14.9367	2044.4	1	79
2022-09-12	12:19:37	4.09411	18.2114	1998.86	1	80
2022-09-12	12:19:37	2.3505	10.4555	2054.85	FALSE	80
2022-09-12	12:19:37	3.74037	16.6379	2015.5	1	81
2022-09-12	12:19:38	0.652074	2.90056	2057.75	FALSE	81
2022-09-12	12:19:38	1.37793	6.12931	2021.63	FALSE	81
2022-09-12	12:19:38	0.580725	2.58318	2060.34	FALSE	81
2022-09-12	12:19:38	0.768257	3.41736	2025.04	FALSE	81
2022-09-12	12:19:39	0.641845	2.85505	2063.19	FALSE	81
2022-09-12	12:19:39	2.11355	9.40149	2034.44	FALSE	81
2022-09-12	12:19:39	2.43548	10.8335	2074.02	FALSE	81
2022-09-12	12:19:40	2.8625	12.733	2047.18	FALSE	81
2022-09-12	12:19:40	4.2649	18.9711	2093	1	82
2022-09-12	12:19:40	3.68948	16.4115	2063.59	1	83
2022-09-12	12:19:40	7.75904	34.5138	2127.51	1	84
2022-09-12	12:19:41	3.28016	14.5908	2078.18	1	85
2022-09-12	12:19:41	4.7794	21.2597	2148.77	1	86
2022-09-12	12:19:41	3.92444	17.4567	2095.64	1	87
2022-09-12	12:19:41	4.90256	21.8076	2170.58	1	88
2022-09-12	12:19:42	6.66031	29.6264	2125.26	1	89
2022-09-12	12:19:42	3.88856	17.2971	2187.87	1	90
2022-09-12	12:19:42	8.48952	37.7631	2163.03	1	91
2022-09-12	12:19:42	3.87095	17.2188	2205.09	1	92
2022-09-12	12:19:43	7.16271	31.8612	2194.89	1	93
2022-09-12	12:19:43	2.86261	12.7335	2217.83	FALSE	93
2022-09-12	12:19:43	4.72943	21.0375	2215.92	1	94
2022-09-12	12:19:44	2.54724	11.3306	2229.16	FALSE	94
2022-09-12	12:19:44	9.44724	42.0232	2257.95	1	95
2022-09-12	12:19:44	3.82464	17.0128	2246.17	1	96
2022-09-12	12:19:44	7.93675	35.3043	2293.25	1	97
2022-09-12	12:19:45	6.90958	30.7352	2276.91	1	98
2022-09-12	12:19:45	4.711	20.9555	2314.21	1	99
2022-09-12	12:19:45	1.18622	5.27654	2282.18	FALSE	99
2022-09-12	12:19:45	3.75665	16.7103	2330.92	1	100
2022-09-12	12:19:46	1.75711	7.81598	2290	FALSE	100
2022-09-12	12:19:46	3.15212	14.0213	2344.94	1	101
2022-09-12	12:19:46	3.56938	15.8773	2305.87	1	102
2022-09-12	12:19:46	3.06108	13.6163	2358.56	1	103
2022-09-12	12:19:47	5.73578	25.5139	2331.39	1	104
2022-09-12	12:19:47	2.85782	12.7122	2371.27	FALSE	104
2022-09-12	12:19:47	5.27884	23.4813	2354.87	1	105
2022-09-12	12:19:48	2.08195	9.26093	2380.53	FALSE	105
2022-09-12	12:19:48	3.53625	15.7299	2370.6	1	106
2022-09-12	12:19:48	2.67589	11.9029	2392.43	FALSE	106
2022-09-12	12:19:48	3.11085	13.8377	2384.44	1	107
2022-09-12	12:19:49	3.32846	14.8057	2407.24	1	108
2022-09-12	12:19:49	3.42714	15.2446	2399.68	1	109
2022-09-12	12:19:49	5.83421	25.9517	2433.19	1	110
2022-09-12	12:19:49	1.92042	8.54241	2408.22	FALSE	110
2022-09-12	12:19:50	5.47446	24.3515	2457.54	1	111
2022-09-12	12:19:50	2.29172	10.194	2418.42	FALSE	111
2022-09-12	12:19:50	4.52027	20.1071	2477.65	1	112
2022-09-12	12:19:50	0.809122	3.59914	2422.02	FALSE	112
2022-09-12	12:19:51	1.94383	8.64654	2486.29	FALSE	112
2022-09-12	12:19:51	1.77126	7.87892	2429.9	FALSE	112
2022-09-12	12:19:51	0.485865	2.16122	2488.46	FALSE	112
2022-09-12	12:19:52	0.453041	2.01522	2431.91	FALSE	112
2022-09-12	12:19:52	0.426679	1.89795	2490.35	FALSE	112
2022-09-12	12:19:52	0.868104	3.8615	2435.77	FALSE	112
2022-09-12	12:19:52	0.61584	2.73938	2493.09	FALSE	112
2022-09-12	12:19:53	0.659657	2.93429	2438.71	FALSE	112
2022-09-12	12:19:53	0.252786	1.12444	2494.22	FALSE	112
2022-09-12	12:19:53	0.256247	1.13984	2439.85	FALSE	112
2022-09-12	12:19:53	0.341794	1.52037	2495.74	FALSE	112
2022-09-12	12:19:54	0.138232	0.614884	2440.46	FALSE	112
2022-09-12	12:19:54	0.236705	1.05291	2496.79	FALSE	112
2022-09-12	12:19:54	0.282099	1.25483	2441.72	FALSE	112
2022-09-12	12:19:54	0.219504	0.976398	2497.77	FALSE	112
2022-09-12	12:19:55	0.324491	1.4434	2443.16	FALSE	112
2022-09-12	12:19:55	1.10495	4.91504	2502.68	FALSE	112
2022-09-12	12:19:55	0.179962	0.800507	2443.96	FALSE	112
2022-09-12	12:19:56	0.329122	1.464	2504.15	FALSE	112
2022-09-12	12:19:56	0.335738	1.49343	2445.45	FALSE	112
2022-09-12	12:19:56	0.549275	2.44329	2506.59	FALSE	112
2022-09-12	12:19:56	1.93299	8.59833	2454.05	FALSE	112
2022-09-12	12:19:57	0.891259	3.9645	2510.55	FALSE	112
2022-09-12	12:19:57	2.34988	10.4527	2464.51	FALSE	112
2022-09-12	12:19:57	3.26485	14.5227	2525.08	1	113
2022-09-12	12:19:57	1.18047	5.25097	2469.76	FALSE	113
2022-09-12	12:19:58	2.15253	9.57488	2534.65	FALSE	113
2022-09-12	12:19:58	2.72312	12.113	2481.87	FALSE	113
2022-09-12	12:19:58	2.19467	9.76233	2544.41	FALSE	113
2022-09-12	12:19:58	3.52001	15.6577	2497.53	1	114
2022-09-12	12:19:59	0.728562	3.24079	2547.65	FALSE	114
2022-09-12	12:19:59	3.69614	16.4412	2513.97	1	115
2022-09-12	12:19:59	3.32128	14.7737	2562.43	1	116
2022-09-12	12:20:00	4.9482	22.0106	2535.98	1	117
2022-09-12	12:20:00	2.9249	13.0105	2575.44	FALSE	117
2022-09-12	12:20:00	2.46271	10.9546	2546.93	FALSE	117
2022-09-12	12:20:00	2.43044	10.8111	2586.25	FALSE	117
2022-09-12	12:20:01	2.27029	10.0987	2557.03	FALSE	117
2022-09-12	12:20:01	1.62083	7.20978	2593.46	FALSE	117
2022-09-12	12:20:01	2.57299	11.4452	2568.48	FALSE	117
2022-09-12	12:20:02	0.711209	3.1636	2596.62	FALSE	117
2022-09-12	12:20:02	1.84785	8.21961	2576.7	FALSE	117
2022-09-12	12:20:02	0.495687	2.20491	2598.83	FALSE	117
2022-09-12	12:20:02	1.43233	6.37129	2583.07	FALSE	117
2022-09-12	12:20:02	2.4049	10.6975	2609.53	FALSE	117
2022-09-12	12:20:03	1.31884	5.86646	2588.94	FALSE	117
2022-09-12	12:20:03	1.45462	6.47044	2616	FALSE	117
2022-09-12	12:20:03	0.574313	2.55466	2591.49	FALSE	117
2022-09-12	12:20:04	1.3506	6.00774	2622	FALSE	117
2022-09-12	12:20:04	2.0252	9.00849	2600.5	FALSE	117
2022-09-12	12:20:04	0.403779	1.79609	2623.8	FALSE	117
2022-09-12	12:20:04	1.31492	5.84903	2606.35	FALSE	117
2022-09-12	12:20:05	0.666832	2.9662	2626.77	FALSE	117
2022-09-12	12:20:05	1.92943	8.58249	2614.93	FALSE	117
2022-09-12	12:20:05	2.4334	10.8242	2637.59	FALSE	117
2022-09-12	12:20:05	1.61029	7.16289	2622.09	FALSE	117
2022-09-12	12:20:06	2.65843	11.8252	2649.42	FALSE	117
2022-09-12	12:20:06	1.40271	6.23953	2628.33	FALSE	117
2022-09-12	12:20:06	3.24022	14.4131	2663.83	1	118
2022-09-12	12:20:06	4.4425	19.7611	2648.09	1	119
2022-09-12	12:20:07	1.10943	4.93497	2668.76	FALSE	119
2022-09-12	12:20:07	5.25105	23.3577	2671.45	1	120
2022-09-12	12:20:07	0.572583	2.54696	2671.31	FALSE	120
2022-09-12	12:20:08	3.88281	17.2715	2688.72	1	121
2022-09-12	12:20:08	2.57396	11.4495	2682.76	FALSE	121
2022-09-12	12:20:08	2.23523	9.94275	2698.67	FALSE	121
2022-09-12	12:20:08	1.9707	8.76607	2691.53	FALSE	121
2022-09-12	12:20:09	1.67594	7.45492	2706.12	FALSE	121
2022-09-12	12:20:09	2.51304	11.1785	2702.7	FALSE	121
2022-09-12	12:20:09	5.0624	22.5186	2728.64	1	122
2022-09-12	12:20:09	0.291005	1.29445	2704	FALSE	122
2022-09-12	12:20:10	4.1279	18.3617	2747	1	123
2022-09-12	12:20:10	3.22988	14.3672	2718.37	1	124
2022-09-12	12:20:10	3.44754	15.3353	2762.34	1	125
2022-09-12	12:20:10	1.76887	7.86829	2726.23	FALSE	125
2022-09-12	12:20:11	2.93324	13.0476	2775.38	FALSE	125
2022-09-12	12:20:11	2.40805	10.7115	2736.95	FALSE	125
2022-09-12	12:20:11	4.33273	19.2728	2794.66	1	126
2022-09-12	12:20:12	4.4908	19.976	2756.92	1	127
2022-09-12	12:20:12	6.20988	27.6228	2822.28	1	128
2022-09-12	12:20:12	3.55492	15.813	2772.73	1	129
2022-09-12	12:20:12	4.41889	19.6561	2841.94	1	130
2022-09-12	12:20:13	3.61849	16.0958	2788.83	1	131
2022-09-12	12:20:13	2.42128	10.7703	2852.71	FALSE	131
2022-09-12	12:20:13	1.90622	8.47925	2797.31	FALSE	131
2022-09-12	12:20:13	2.34953	10.4512	2863.16	FALSE	131
2022-09-12	12:20:14	0.112939	0.502375	2797.81	FALSE	131
2022-09-12	12:20:14	1.32134	5.87758	2869.03	FALSE	131
2022-09-12	12:20:14	3.0821	13.7098	2811.52	1	132
2022-09-12	12:20:14	0.777417	3.45811	2872.49	FALSE	132
2022-09-12	12:20:15	0.579707	2.57865	2814.1	FALSE	132
2022-09-12	12:20:15	0.432227	1.92263	2874.42	FALSE	132
2022-09-12	12:20:15	0.339657	1.51086	2815.61	FALSE	132
2022-09-12	12:20:16	1.10312	4.9069	2879.32	FALSE	132
2022-09-12	12:20:16	0.240573	1.07012	2816.68	FALSE	132
2022-09-12	12:20:16	0.407952	1.81465	2881.14	FALSE	132
2022-09-12	12:20:16	0.187697	0.834914	2817.52	FALSE	132
2022-09-12	12:20:17	0.237519	1.05653	2882.19	FALSE	132
2022-09-12	12:20:17	0.0815396	0.362704	2817.88	FALSE	132
2022-09-12	12:20:17	0.292634	1.30169	2883.49	FALSE	132
2022-09-12	12:20:17	0.277417	1.23401	2819.11	FALSE	132
2022-09-12	12:20:18	0.904542	4.02358	2887.52	FALSE	132
2022-09-12	12:20:18	0.245204	1.09072	2820.2	FALSE	132
2022-09-12	12:20:18	0.18897	0.840576	2888.36	FALSE	132
2022-09-12	12:20:18	0.355382	1.58081	2821.78	FALSE	132
2022-09-12	12:20:19	0.719962	3.20253	2891.56	FALSE	132
2022-09-12	12:20:19	0.195331	0.868871	2822.65	FALSE	132
2022-09-12	12:20:19	0.616603	2.74277	2894.3	FALSE	132
2022-09-12	12:20:20	0.259708	1.15523	2823.81	FALSE	132
2022-09-12	12:20:20	0.130496	0.580472	2894.88	FALSE	132
2022-09-12	12:20:20	0.268664	1.19507	2825	FALSE	132
2022-09-12	12:20:20	0.114822	0.510751	2895.4	FALSE	132
2022-09-12	12:20:21	0.234618	1.04363	2826.05	FALSE	132
2022-09-12	12:20:21	0.247087	1.09909	2896.49	FALSE	132
2022-09-12	12:20:21	1.46693	6.5252	2832.57	FALSE	132
2022-09-12	12:20:21	0.10841	0.482229	2896.98	FALSE	132
2022-09-12	12:20:22	0.290903	1.29399	2833.87	FALSE	132
2022-09-12	12:20:22	0.240573	1.07012	2898.05	FALSE	132
2022-09-12	12:20:22	0.613855	2.73055	2836.6	FALSE	132
2022-09-12	12:20:22	0.323321	1.4382	2899.49	FALSE	132
2022-09-12	12:20:23	0.206171	0.91709	2837.51	FALSE	132
2022-09-12	12:20:23	0.227239	1.0108	2900.5	FALSE	132
2022-09-12	12:20:23	0.191361	0.851212	2838.37	FALSE	132
2022-09-12	12:20:24	0.279046	1.24125	2901.74	FALSE	132
2022-09-12	12:20:24	0.504288	2.24317	2840.61	FALSE	132
2022-09-12	12:20:24	0.608104	2.70497	2904.44	FALSE	132
2022-09-12	12:20:24	1.1538	5.13233	2845.74	FALSE	132
2022-09-12	12:20:25	2.1138	9.40261	2913.84	FALSE	132
2022-09-12	12:20:25	0.676908	3.01102	2848.75	FALSE	132
2022-09-12	12:20:25	2.60479	11.5866	2925.43	FALSE	132
2022-09-12	12:20:25	0.138893	0.617824	2849.37	FALSE	132
2022-09-12	12:20:26	0.209326	0.931124	2926.36	FALSE	132
2022-09-12	12:20:26	0.467341	2.07883	2851.45	FALSE	132
2022-09-12	12:20:26	0.411667	1.83118	2928.19	FALSE	132
2022-09-12	12:20:26	1.94917	8.6703	2860.12	FALSE	132
2022-09-12	12:20:27	1.47966	6.58182	2934.78	FALSE	132
2022-09-12	12:20:27	3.33701	14.8437	2874.96	1	133
2022-09-12	12:20:27	1.74352	7.75553	2942.53	FALSE	133
2022-09-12	12:20:28	5.31518	23.643	2898.61	1	134
2022-09-12	12:20:28	1.96164	8.72577	2951.26	FALSE	134
2022-09-12	12:20:28	4.57436	20.3477	2918.95	1	135
2022-09-12	12:20:28	4.06576	18.0853	2969.34	1	136
2022-09-12	12:20:29	3.58948	15.9667	2934.92	1	137
2022-09-12	12:20:29	3.63513	16.1698	2985.51	1	138
2022-09-12	12:20:29	1.24413	5.53414	2940.45	FALSE	138
2022-09-12	12:20:29	3.06856	13.6496	2999.16	1	139
2022-09-12	12:20:30	5.91304	26.3024	2966.76	1	140
2022-09-12	12:20:30	0.867137	3.8572	3003.02	FALSE	140
2022-09-12	12:20:30	2.97976	13.2546	2980.01	FALSE	140
2022-09-12	12:20:30	0.227697	1.01284	3004.03	FALSE	140
2022-09-12	12:20:31	0.364797	1.62269	2981.63	FALSE	140
2022-09-12	12:20:31	0.287952	1.28087	3005.31	FALSE	140
2022-09-12	12:20:31	2.29849	10.2241	2991.86	FALSE	140
2022-09-12	12:20:32	0.153957	0.684832	3006	FALSE	140

## Sheet: Duke_harness_2022912121531 (E)
Date	Time	Lbs	Total Force x Time	Total Time Steps Force >3		**GoPro Fitting: 1205
2022-09-12	12:15:32	0.199708	0.199708	FALSE	0			Total Force x Time	1348.38
2022-09-12	12:15:32	0.171107	0.370815	FALSE	0			Total Time Steps Force >3	140
2022-09-12	12:15:32	0.211616	0.582431	FALSE	0
2022-09-12	12:15:32	0.198741	0.781172	FALSE	0
2022-09-12	12:15:33	0.207494	0.988666	FALSE	0
2022-09-12	12:15:33	0.22327	1.21194	FALSE	0
2022-09-12	12:15:33	0.260064	1.472	FALSE	0
2022-09-12	12:15:33	0.228104	1.7001	FALSE	0
2022-09-12	12:15:34	0.220674	1.92078	FALSE	0
2022-09-12	12:15:34	0.202303	2.12308	FALSE	0
2022-09-12	12:15:34	0.27014	2.39322	FALSE	0
2022-09-12	12:15:34	0.358435	2.75166	FALSE	0
2022-09-12	12:15:35	0.345356	3.09701	FALSE	0
2022-09-12	12:15:35	0.34785	3.44486	FALSE	0
2022-09-12	12:15:35	0.362201	3.80706	FALSE	0
2022-09-12	12:15:35	0.377112	4.18418	FALSE	0
2022-09-12	12:15:36	0.426629	4.6108	FALSE	0
2022-09-12	12:15:36	0.471209	5.08201	FALSE	0
2022-09-12	12:15:36	0.386323	5.46834	FALSE	0
2022-09-12	12:15:37	0.451056	5.91939	FALSE	0
2022-09-12	12:15:37	0.427901	6.34729	FALSE	0
2022-09-12	12:15:37	0.333906	6.6812	FALSE	0
2022-09-12	12:15:37	0.36958	7.05078	FALSE	0
2022-09-12	12:15:38	0.449733	7.50051	FALSE	0
2022-09-12	12:15:38	0.43813	7.93864	FALSE	0
2022-09-12	12:15:38	0.421692	8.36033	FALSE	0
2022-09-12	12:15:38	0.356654	8.71699	FALSE	0
2022-09-12	12:15:39	0.389428	9.10642	FALSE	0
2022-09-12	12:15:39	0.473346	9.57976	FALSE	0
2022-09-12	12:15:39	0.223219	9.80298	FALSE	0
2022-09-12	12:15:39	0.472888	10.2759	FALSE	0
2022-09-12	12:15:40	0.46159	10.7375	FALSE	0
2022-09-12	12:15:40	0.320166	11.0576	FALSE	0
2022-09-12	12:15:40	0.504033	11.5617	FALSE	0
2022-09-12	12:15:41	0.395178	11.9568	FALSE	0
2022-09-12	12:15:41	0.425967	12.3828	FALSE	0
2022-09-12	12:15:41	0.418588	12.8014	FALSE	0
2022-09-12	12:15:41	0.382608	13.184	FALSE	0
2022-09-12	12:15:42	1.22103	14.405	FALSE	0
2022-09-12	12:15:42	0.492125	14.8972	FALSE	0
2022-09-12	12:15:42	0.409835	15.307	FALSE	0
2022-09-12	12:15:42	0.153041	15.46	FALSE	0
2022-09-12	12:15:43	0.280776	15.7408	FALSE	0
2022-09-12	12:15:43	0.60617	16.347	FALSE	0
2022-09-12	12:15:43	0.418028	16.765	FALSE	0
2022-09-12	12:15:43	0.144237	16.9092	FALSE	0
2022-09-12	12:15:44	0.123015	17.0323	FALSE	0
2022-09-12	12:15:44	0.199758	17.232	FALSE	0
2022-09-12	12:15:44	3.12474	20.3568	1	1
2022-09-12	12:15:45	6.43782	26.7946	1	2
2022-09-12	12:15:45	6.13339	32.928	1	3
2022-09-12	12:15:45	7.23329	40.1613	1	4
2022-09-12	12:15:45	0.779809	40.9411	FALSE	4
2022-09-12	12:15:46	0.935025	41.8761	FALSE	4
2022-09-12	12:15:46	2.54454	44.4206	FALSE	4
2022-09-12	12:15:46	2.30052	46.7211	FALSE	4
2022-09-12	12:15:46	2.29401	49.0152	FALSE	4
2022-09-12	12:15:47	1.40632	50.4215	FALSE	4
2022-09-12	12:15:47	0.828867	51.2503	FALSE	4
2022-09-12	12:15:47	1.97258	53.2229	FALSE	4
2022-09-12	12:15:47	0.281234	53.5042	FALSE	4
2022-09-12	12:15:48	0.140624	53.6448	FALSE	4
2022-09-12	12:15:48	0.292735	53.9375	FALSE	4
2022-09-12	12:15:48	0.11472	54.0522	FALSE	4
2022-09-12	12:15:49	0.268766	54.321	FALSE	4
2022-09-12	12:15:49	0.304695	54.6257	FALSE	4
2022-09-12	12:15:49	0.459504	55.0852	FALSE	4
2022-09-12	12:15:49	0.491412	55.5766	FALSE	4
2022-09-12	12:15:50	0.512023	56.0886	FALSE	4
2022-09-12	12:15:50	0.3593	56.4479	FALSE	4
2022-09-12	12:15:50	0.49986	56.9478	FALSE	4
2022-09-12	12:15:50	0.251718	57.1995	FALSE	4
2022-09-12	12:15:51	0.578333	57.7778	FALSE	4
2022-09-12	12:15:51	0.535484	58.3133	FALSE	4
2022-09-12	12:15:51	0.398079	58.7114	FALSE	4
2022-09-12	12:15:51	0.395331	59.1067	FALSE	4
2022-09-12	12:15:52	0.0778247	59.1846	FALSE	4
2022-09-12	12:15:52	-0.308333	59.1846	FALSE	4
2022-09-12	12:15:52	-0.186196	59.1846	FALSE	4
2022-09-12	12:15:53	0.194771	59.3793	FALSE	4
2022-09-12	12:15:53	0.207087	59.5864	FALSE	4
2022-09-12	12:15:53	0.243117	59.8295	FALSE	4
2022-09-12	12:15:53	0.252684	60.0822	FALSE	4
2022-09-12	12:15:54	0.313957	60.3962	FALSE	4
2022-09-12	12:15:54	0.427596	60.8238	FALSE	4
2022-09-12	12:15:54	0.332125	61.1559	FALSE	4
2022-09-12	12:15:54	0.301285	61.4572	FALSE	4
2022-09-12	12:15:55	0.311616	61.7688	FALSE	4
2022-09-12	12:15:55	0.239962	62.0088	FALSE	4
2022-09-12	12:15:55	0.165356	62.1741	FALSE	4
2022-09-12	12:15:55	0.139097	62.3132	FALSE	4
2022-09-12	12:15:56	0.157519	62.4707	FALSE	4
2022-09-12	12:15:56	0.0484099	62.5191	FALSE	4
2022-09-12	12:15:56	-0.0445672	62.5191	FALSE	4
2022-09-12	12:15:57	-0.0168827	62.5191	FALSE	4
2022-09-12	12:15:57	0.019046	62.5382	FALSE	4
2022-09-12	12:15:57	0.165255	62.7035	FALSE	4
2022-09-12	12:15:57	0.218283	62.9217	FALSE	4
2022-09-12	12:15:58	0.0864252	63.0082	FALSE	4
2022-09-12	12:15:58	0.0169086	63.0251	FALSE	4
2022-09-12	12:15:58	0.141082	63.1661	FALSE	4
2022-09-12	12:15:58	0.302303	63.4685	FALSE	4
2022-09-12	12:15:59	0.18841	63.6569	FALSE	4
2022-09-12	12:15:59	0.348461	64.0053	FALSE	4
2022-09-12	12:15:59	0.287596	64.2929	FALSE	4
2022-09-12	12:15:59	0.4736	64.7665	FALSE	4
2022-09-12	12:16:00	2.32139	67.0879	FALSE	4
2022-09-12	12:16:00	1.05202	68.1399	FALSE	4
2022-09-12	12:16:00	4.32714	72.4671	1	5
2022-09-12	12:16:01	1.31625	73.7833	FALSE	5
2022-09-12	12:16:01	3.85034	77.6337	1	6
2022-09-12	12:16:01	0.741336	78.375	FALSE	6
2022-09-12	12:16:01	4.91116	83.2862	1	7
2022-09-12	12:16:02	0.811514	84.0977	FALSE	7
2022-09-12	12:16:02	4.39126	88.4889	1	8
2022-09-12	12:16:02	1.89401	90.3829	FALSE	8
2022-09-12	12:16:02	2.92332	93.3063	FALSE	8
2022-09-12	12:16:03	1.1908	94.4971	FALSE	8
2022-09-12	12:16:03	2.55273	97.0498	FALSE	8
2022-09-12	12:16:03	0.780369	97.8302	FALSE	8
2022-09-12	12:16:03	1.94123	99.7714	FALSE	8
2022-09-12	12:16:04	0.335382	100.107	FALSE	8
2022-09-12	12:16:04	1.88912	101.996	FALSE	8
2022-09-12	12:16:04	0.552939	102.549	FALSE	8
2022-09-12	12:16:05	3.86459	106.413	1	9
2022-09-12	12:16:05	1.87289	108.286	FALSE	9
2022-09-12	12:16:05	3.02383	111.31	1	10
2022-09-12	12:16:05	1.42958	112.74	FALSE	10
2022-09-12	12:16:06	1.67742	114.417	FALSE	10
2022-09-12	12:16:06	3.24205	117.659	1	11
2022-09-12	12:16:06	2.13106	119.79	FALSE	11
2022-09-12	12:16:06	3.70546	123.496	1	12
2022-09-12	12:16:07	2.20475	125.7	FALSE	12
2022-09-12	12:16:07	2.12266	127.823	FALSE	12
2022-09-12	12:16:07	0.549885	128.373	FALSE	12
2022-09-12	12:16:07	2.73126	131.104	FALSE	12
2022-09-12	12:16:08	0.196756	131.301	FALSE	12
2022-09-12	12:16:08	2.40999	133.711	FALSE	12
2022-09-12	12:16:08	0.252532	133.964	FALSE	12
2022-09-12	12:16:09	2.41014	136.374	FALSE	12
2022-09-12	12:16:09	0.381896	136.756	FALSE	12
2022-09-12	12:16:09	1.89609	138.652	FALSE	12
2022-09-12	12:16:09	1.31706	139.969	FALSE	12
2022-09-12	12:16:10	2.10678	142.076	FALSE	12
2022-09-12	12:16:10	1.47014	143.546	FALSE	12
2022-09-12	12:16:10	0.940522	144.486	FALSE	12
2022-09-12	12:16:10	2.06922	146.555	FALSE	12
2022-09-12	12:16:11	0.318232	146.874	FALSE	12
2022-09-12	12:16:11	2.56179	149.435	FALSE	12
2022-09-12	12:16:11	1.18439	150.62	FALSE	12
2022-09-12	12:16:11	3.93309	154.553	1	13
2022-09-12	12:16:12	1.4338	155.987	FALSE	13
2022-09-12	12:16:12	3.76485	159.752	1	14
2022-09-12	12:16:12	0.397723	160.149	FALSE	14
2022-09-12	12:16:13	2.34724	162.497	FALSE	14
2022-09-12	12:16:13	0.930801	163.427	FALSE	14
2022-09-12	12:16:13	2.482	165.909	FALSE	14
2022-09-12	12:16:13	0.80444	166.714	FALSE	14
2022-09-12	12:16:14	1.16846	167.882	FALSE	14
2022-09-12	12:16:14	2.04729	169.929	FALSE	14
2022-09-12	12:16:14	0.69416	170.624	FALSE	14
2022-09-12	12:16:14	3.46948	174.093	1	15
2022-09-12	12:16:15	1.5849	175.678	FALSE	15
2022-09-12	12:16:15	4.09263	179.771	1	16
2022-09-12	12:16:15	1.35014	181.121	FALSE	16
2022-09-12	12:16:15	4.05472	185.176	1	17
2022-09-12	12:16:16	2.54693	187.722	FALSE	17
2022-09-12	12:16:16	1.53787	189.26	FALSE	17
2022-09-12	12:16:16	2.8767	192.137	FALSE	17
2022-09-12	12:16:17	1.52775	193.665	FALSE	17
2022-09-12	12:16:17	3.16011	196.825	1	18
2022-09-12	12:16:17	0.909173	197.734	FALSE	18
2022-09-12	12:16:17	2.1736	199.908	FALSE	18
2022-09-12	12:16:18	0.597825	200.505	FALSE	18
2022-09-12	12:16:18	2.01696	202.522	FALSE	18
2022-09-12	12:16:18	0.670751	203.193	FALSE	18
2022-09-12	12:16:18	4.07467	207.268	1	19
2022-09-12	12:16:19	0.80841	208.076	FALSE	19
2022-09-12	12:16:19	5.24199	213.318	1	20
2022-09-12	12:16:19	0.852125	214.17	FALSE	20
2022-09-12	12:16:19	3.71141	217.882	1	21
2022-09-12	12:16:20	0.860522	218.742	FALSE	21
2022-09-12	12:16:20	1.69823	220.441	FALSE	21
2022-09-12	12:16:20	2.34159	222.782	FALSE	21
2022-09-12	12:16:20	2.50271	225.285	FALSE	21
2022-09-12	12:16:21	3.50698	228.792	1	22
2022-09-12	12:16:21	3.12296	231.915	1	23
2022-09-12	12:16:21	3.86943	235.784	1	24
2022-09-12	12:16:22	1.25309	237.037	FALSE	24
2022-09-12	12:16:22	3.48352	240.521	1	25
2022-09-12	12:16:22	0.642964	241.164	FALSE	25
2022-09-12	12:16:22	3.22016	244.384	1	26
2022-09-12	12:16:23	0.499453	244.883	FALSE	26
2022-09-12	12:16:23	2.08414	246.968	FALSE	26
2022-09-12	12:16:23	0.541285	247.509	FALSE	26
2022-09-12	12:16:23	2.30536	249.814	FALSE	26
2022-09-12	12:16:24	1.07788	250.892	FALSE	26
2022-09-12	12:16:24	2.93813	253.83	FALSE	26
2022-09-12	12:16:24	2.02744	255.858	FALSE	26
2022-09-12	12:16:25	1.33172	257.189	FALSE	26
2022-09-12	12:16:25	2.79716	259.987	FALSE	26
2022-09-12	12:16:25	1.2567	261.243	FALSE	26
2022-09-12	12:16:25	3.23966	264.483	1	27
2022-09-12	12:16:26	0.791667	265.275	FALSE	27
2022-09-12	12:16:26	6.18535	271.46	1	28
2022-09-12	12:16:26	0.400929	271.861	FALSE	28
2022-09-12	12:16:26	2.53319	274.394	FALSE	28
2022-09-12	12:16:27	1.60933	276.003	FALSE	28
2022-09-12	12:16:27	3.42795	279.431	1	29
2022-09-12	12:16:27	2.82159	282.253	FALSE	29
2022-09-12	12:16:27	1.52765	283.781	FALSE	29
2022-09-12	12:16:28	3.76429	287.545	1	30
2022-09-12	12:16:28	0.583931	288.129	FALSE	30
2022-09-12	12:16:28	3.77589	291.905	1	31
2022-09-12	12:16:28	0.741997	292.647	FALSE	31
2022-09-12	12:16:29	3.78332	296.43	1	32
2022-09-12	12:16:29	0.8793	297.309	FALSE	32
2022-09-12	12:16:29	3.06266	300.372	1	33
2022-09-12	12:16:30	1.77034	302.142	FALSE	33
2022-09-12	12:16:30	2.84347	304.986	FALSE	33
2022-09-12	12:16:30	1.40704	306.393	FALSE	33
2022-09-12	12:16:30	3.71238	310.105	1	34
2022-09-12	12:16:31	0.557774	310.663	FALSE	34
2022-09-12	12:16:31	3.83258	314.496	1	35
2022-09-12	12:16:31	0.574364	315.07	FALSE	35
2022-09-12	12:16:31	5.91619	320.986	1	36
2022-09-12	12:16:32	0.456959	321.443	FALSE	36
2022-09-12	12:16:32	4.70266	326.146	1	37
2022-09-12	12:16:32	0.838842	326.985	FALSE	37
2022-09-12	12:16:32	1.72266	328.707	FALSE	37
2022-09-12	12:16:33	0.260216	328.967	FALSE	37
2022-09-12	12:16:33	0.360165	329.328	FALSE	37
2022-09-12	12:16:33	0.120318	329.448	FALSE	37
2022-09-12	12:16:34	0.0827101	329.531	FALSE	37
2022-09-12	12:16:34	-0.166196	329.531	FALSE	37
2022-09-12	12:16:34	-0.296476	329.531	FALSE	37
2022-09-12	12:16:34	-0.420648	329.531	FALSE	37
2022-09-12	12:16:35	-0.421259	329.531	FALSE	37
2022-09-12	12:16:35	-0.340496	329.531	FALSE	37
2022-09-12	12:16:35	-0.294389	329.531	FALSE	37
2022-09-12	12:16:35	-0.365941	329.531	FALSE	37
2022-09-12	12:16:36	-0.22304	329.531	FALSE	37
2022-09-12	12:16:36	-0.178766	329.531	FALSE	37
2022-09-12	12:16:36	-0.15846	329.531	FALSE	37
2022-09-12	12:16:36	0.000165643	329.531	FALSE	37
2022-09-12	12:16:37	0.0546694	329.585	FALSE	37
2022-09-12	12:16:37	0.354517	329.94	FALSE	37
2022-09-12	12:16:37	0.253244	330.193	FALSE	37
2022-09-12	12:16:38	1.44927	331.642	FALSE	37
2022-09-12	12:16:38	0.287494	331.93	FALSE	37
2022-09-12	12:16:38	0.773804	332.704	FALSE	37
2022-09-12	12:16:38	0.380522	333.084	FALSE	37
2022-09-12	12:16:39	0.26673	333.351	FALSE	37
2022-09-12	12:16:39	0.374313	333.725	FALSE	37
2022-09-12	12:16:39	2.27314	335.998	FALSE	37
2022-09-12	12:16:39	1.99335	337.992	FALSE	37
2022-09-12	12:16:40	4.06683	342.059	1	38
2022-09-12	12:16:40	1.41467	343.473	FALSE	38
2022-09-12	12:16:40	2.53625	346.01	FALSE	38
2022-09-12	12:16:40	0.294109	346.304	FALSE	38
2022-09-12	12:16:41	0.911209	347.215	FALSE	38
2022-09-12	12:16:41	0.177621	347.393	FALSE	38
2022-09-12	12:16:41	0.398842	347.791	FALSE	38
2022-09-12	12:16:42	0.204186	347.996	FALSE	38
2022-09-12	12:16:42	0.301794	348.297	FALSE	38
2022-09-12	12:16:42	0.449071	348.746	FALSE	38
2022-09-12	12:16:42	1.60729	350.354	FALSE	38
2022-09-12	12:16:43	0.916705	351.27	FALSE	38
2022-09-12	12:16:43	3.0053	354.276	1	39
2022-09-12	12:16:43	1.28149	355.557	FALSE	39
2022-09-12	12:16:43	3.29681	358.854	1	40
2022-09-12	12:16:44	2.35034	361.204	FALSE	40
2022-09-12	12:16:44	3.26077	364.465	1	41
2022-09-12	12:16:44	2.80098	367.266	FALSE	41
2022-09-12	12:16:44	3.60846	370.875	1	42
2022-09-12	12:16:45	1.56083	372.435	FALSE	42
2022-09-12	12:16:45	0.435026	372.87	FALSE	42
2022-09-12	12:16:45	1.35365	374.224	FALSE	42
2022-09-12	12:16:46	0.343728	374.568	FALSE	42
2022-09-12	12:16:46	3.79558	378.363	1	43
2022-09-12	12:16:46	1.70871	380.072	FALSE	43
2022-09-12	12:16:46	5.14057	385.213	1	44
2022-09-12	12:16:47	1.93284	387.145	FALSE	44
2022-09-12	12:16:47	5.73283	392.878	1	45
2022-09-12	12:16:47	0.783626	393.662	FALSE	45
2022-09-12	12:16:47	4.04871	397.711	1	46
2022-09-12	12:16:48	0.577163	398.288	FALSE	46
2022-09-12	12:16:48	2.89762	401.185	FALSE	46
2022-09-12	12:16:48	0.770852	401.956	FALSE	46
2022-09-12	12:16:48	2.01655	403.973	FALSE	46
2022-09-12	12:16:49	1.0622	405.035	FALSE	46
2022-09-12	12:16:49	0.8393	405.874	FALSE	46
2022-09-12	12:16:49	1.82373	407.698	FALSE	46
2022-09-12	12:16:50	0.489631	408.188	FALSE	46
2022-09-12	12:16:50	2.14673	410.334	FALSE	46
2022-09-12	12:16:50	0.628104	410.963	FALSE	46
2022-09-12	12:16:50	1.27905	412.242	FALSE	46
2022-09-12	12:16:51	0.537265	412.779	FALSE	46
2022-09-12	12:16:51	0.373702	413.153	FALSE	46
2022-09-12	12:16:51	0.361285	413.514	FALSE	46
2022-09-12	12:16:51	0.281234	413.795	FALSE	46
2022-09-12	12:16:52	0.102507	413.898	FALSE	46
2022-09-12	12:16:52	0.3164	414.214	FALSE	46
2022-09-12	12:16:52	0.154924	414.369	FALSE	46
2022-09-12	12:16:52	0.160929	414.53	FALSE	46
2022-09-12	12:16:53	0.266171	414.796	FALSE	46
2022-09-12	12:16:53	0.182557	414.979	FALSE	46
2022-09-12	12:16:53	0.366018	415.345	FALSE	46
2022-09-12	12:16:54	0.28785	415.632	FALSE	46
2022-09-12	12:16:54	0.616807	416.249	FALSE	46
2022-09-12	12:16:54	0.730903	416.98	FALSE	46
2022-09-12	12:16:54	0.722761	417.703	FALSE	46
2022-09-12	12:16:55	1.98602	419.689	FALSE	46
2022-09-12	12:16:55	0.877875	420.567	FALSE	46
2022-09-12	12:16:55	1.18027	421.747	FALSE	46
2022-09-12	12:16:55	0.495432	422.242	FALSE	46
2022-09-12	12:16:56	0.698282	422.941	FALSE	46
2022-09-12	12:16:56	0.376908	423.318	FALSE	46
2022-09-12	12:16:56	0.410903	423.729	FALSE	46
2022-09-12	12:16:56	0.17243	423.901	FALSE	46
2022-09-12	12:16:57	0.408664	424.31	FALSE	46
2022-09-12	12:16:57	0.0502929	424.36	FALSE	46
2022-09-12	12:16:57	0.301692	424.662	FALSE	46
2022-09-12	12:16:58	0.131362	424.793	FALSE	46
2022-09-12	12:16:58	0.337774	425.131	FALSE	46
2022-09-12	12:16:58	0.128868	425.26	FALSE	46
2022-09-12	12:16:58	0.262557	425.522	FALSE	46
2022-09-12	12:16:59	0.210496	425.733	FALSE	46
2022-09-12	12:16:59	0.288664	426.021	FALSE	46
2022-09-12	12:16:59	0.271616	426.293	FALSE	46
2022-09-12	12:16:59	0.253193	426.546	FALSE	46
2022-09-12	12:17:00	0.432176	426.978	FALSE	46
2022-09-12	12:17:00	1.75055	428.729	FALSE	46
2022-09-12	12:17:00	0.73757	429.466	FALSE	46
2022-09-12	12:17:01	3.76373	433.23	1	47
2022-09-12	12:17:01	1.26215	434.492	FALSE	47
2022-09-12	12:17:01	1.28576	435.778	FALSE	47
2022-09-12	12:17:01	0.776857	436.555	FALSE	47
2022-09-12	12:17:02	0.312939	436.868	FALSE	47
2022-09-12	12:17:02	0.33355	437.201	FALSE	47
2022-09-12	12:17:02	0.575331	437.777	FALSE	47
2022-09-12	12:17:02	0.458944	438.236	FALSE	47
2022-09-12	12:17:03	1.01996	439.256	FALSE	47
2022-09-12	12:17:03	1.48902	440.745	FALSE	47
2022-09-12	12:17:03	3.74785	444.493	1	48
2022-09-12	12:17:03	2.14612	446.639	FALSE	48
2022-09-12	12:17:04	3.67441	450.313	1	49
2022-09-12	12:17:04	2.81095	453.124	FALSE	49
2022-09-12	12:17:04	2.5282	455.652	FALSE	49
2022-09-12	12:17:04	2.35106	458.003	FALSE	49
2022-09-12	12:17:05	0.716756	458.72	FALSE	49
2022-09-12	12:17:05	1.82714	460.547	FALSE	49
2022-09-12	12:17:05	0.631717	461.179	FALSE	49
2022-09-12	12:17:06	3.83737	465.016	1	50
2022-09-12	12:17:06	0.410903	465.427	FALSE	50
2022-09-12	12:17:06	3.36775	468.795	1	51
2022-09-12	12:17:06	2.38108	471.176	FALSE	51
2022-09-12	12:17:07	3.8938	475.07	1	52
2022-09-12	12:17:07	2.96535	478.035	FALSE	52
2022-09-12	12:17:07	3.22001	481.255	1	53
2022-09-12	12:17:07	1.65966	482.915	FALSE	53
2022-09-12	12:17:08	3.23655	486.151	1	54
2022-09-12	12:17:08	0.377774	486.529	FALSE	54
2022-09-12	12:17:08	0.585916	487.115	FALSE	54
2022-09-12	12:17:08	0.878486	487.994	FALSE	54
2022-09-12	12:17:09	0.367392	488.361	FALSE	54
2022-09-12	12:17:09	0.299249	488.66	FALSE	54
2022-09-12	12:17:09	0.571514	489.232	FALSE	54
2022-09-12	12:17:10	0.372125	489.604	FALSE	54
2022-09-12	12:17:10	0.471412	490.075	FALSE	54
2022-09-12	12:17:10	0.659758	490.735	FALSE	54
2022-09-12	12:17:10	0.471667	491.207	FALSE	54
2022-09-12	12:17:11	0.725153	491.932	FALSE	54
2022-09-12	12:17:11	1.5277	493.46	FALSE	54
2022-09-12	12:17:11	2.60128	496.061	FALSE	54
2022-09-12	12:17:11	4.02999	500.091	1	55
2022-09-12	12:17:12	0.557265	500.648	FALSE	55
2022-09-12	12:17:12	0.774262	501.422	FALSE	55
2022-09-12	12:17:12	0.187087	501.609	FALSE	55
2022-09-12	12:17:12	0.784338	502.394	FALSE	55
2022-09-12	12:17:13	0.191921	502.586	FALSE	55
2022-09-12	12:17:13	1.28744	503.873	FALSE	55
2022-09-12	12:17:13	0.217977	504.091	FALSE	55
2022-09-12	12:17:14	1.02317	505.114	FALSE	55
2022-09-12	12:17:14	0.791667	505.906	FALSE	55
2022-09-12	12:17:14	1.21798	507.124	FALSE	55
2022-09-12	12:17:14	2.03747	509.161	FALSE	55
2022-09-12	12:17:15	1.11431	510.276	FALSE	55
2022-09-12	12:17:15	1.70754	511.983	FALSE	55
2022-09-12	12:17:15	0.182201	512.165	FALSE	55
2022-09-12	12:17:15	0.505509	512.671	FALSE	55
2022-09-12	12:17:16	1.01732	513.688	FALSE	55
2022-09-12	12:17:16	0.355585	514.044	FALSE	55
2022-09-12	12:17:16	0.304746	514.349	FALSE	55
2022-09-12	12:17:16	0.146832	514.495	FALSE	55
2022-09-12	12:17:17	-0.172964	514.495	FALSE	55
2022-09-12	12:17:17	-0.21561	514.495	FALSE	55
2022-09-12	12:17:17	0.665102	515.161	FALSE	55
2022-09-12	12:17:18	0.074873	515.235	FALSE	55
2022-09-12	12:17:18	0.204949	515.44	FALSE	55
2022-09-12	12:17:18	0.251158	515.692	FALSE	55
2022-09-12	12:17:18	0.0256109	515.717	FALSE	55
2022-09-12	12:17:19	0.560471	516.278	FALSE	55
2022-09-12	12:17:19	0.0563997	516.334	FALSE	55
2022-09-12	12:17:19	0.548613	516.883	FALSE	55
2022-09-12	12:17:19	0.234211	517.117	FALSE	55
2022-09-12	12:17:20	0.451514	517.568	FALSE	55
2022-09-12	12:17:20	0.180013	517.748	FALSE	55
2022-09-12	12:17:20	0.253092	518.001	FALSE	55
2022-09-12	12:17:20	0.3393	518.341	FALSE	55
2022-09-12	12:17:21	0.18271	518.523	FALSE	55
2022-09-12	12:17:21	0.656196	519.18	FALSE	55
2022-09-12	12:17:21	0.258333	519.438	FALSE	55
2022-09-12	12:17:22	1.14994	520.588	FALSE	55
2022-09-12	12:17:22	0.222965	520.811	FALSE	55
2022-09-12	12:17:22	0.702455	521.513	FALSE	55
2022-09-12	12:17:22	0.35528	521.869	FALSE	55
2022-09-12	12:17:23	0.737315	522.606	FALSE	55
2022-09-12	12:17:23	0.738384	523.344	FALSE	55
2022-09-12	12:17:23	0.230344	523.575	FALSE	55
2022-09-12	12:17:23	1.445	525.02	FALSE	55
2022-09-12	12:17:24	1.24388	526.264	FALSE	55
2022-09-12	12:17:24	2.42866	528.692	FALSE	55
2022-09-12	12:17:24	2.56571	531.258	FALSE	55
2022-09-12	12:17:24	2.89039	534.148	FALSE	55
2022-09-12	12:17:25	1.3822	535.531	FALSE	55
2022-09-12	12:17:25	3.45146	538.982	1	56
2022-09-12	12:17:25	0.790344	539.772	FALSE	56
2022-09-12	12:17:26	3.22093	542.993	1	57
2022-09-12	12:17:26	0.436705	543.43	FALSE	57
2022-09-12	12:17:26	1.75828	545.188	FALSE	57
2022-09-12	12:17:26	0.503168	545.691	FALSE	57
2022-09-12	12:17:27	1.18363	546.875	FALSE	57
2022-09-12	12:17:27	0.953346	547.828	FALSE	57
2022-09-12	12:17:27	0.446476	548.275	FALSE	57
2022-09-12	12:17:27	1.3991	549.674	FALSE	57
2022-09-12	12:17:28	0.283219	549.957	FALSE	57
2022-09-12	12:17:28	0.13925	550.096	FALSE	57
2022-09-12	12:17:28	0.696501	550.793	FALSE	57
2022-09-12	12:17:28	0.105611	550.899	FALSE	57
2022-09-12	12:17:29	0.232023	551.131	FALSE	57
2022-09-12	12:17:29	0.107189	551.238	FALSE	57
2022-09-12	12:17:29	0.0960943	551.334	FALSE	57
2022-09-12	12:17:30	-0.114847	551.334	FALSE	57
2022-09-12	12:17:30	-0.160852	551.334	FALSE	57
2022-09-12	12:17:30	-0.424923	551.334	FALSE	57
2022-09-12	12:17:30	-0.555712	551.334	FALSE	57
2022-09-12	12:17:31	-0.522531	551.334	FALSE	57
2022-09-12	12:17:31	-0.241208	551.334	FALSE	57
2022-09-12	12:17:31	-0.170776	551.334	FALSE	57
2022-09-12	12:17:31	0.108104	551.442	FALSE	57
2022-09-12	12:17:32	0.144746	551.587	FALSE	57
2022-09-12	12:17:32	0.0982317	551.685	FALSE	57
2022-09-12	12:17:32	-0.0352542	551.685	FALSE	57
2022-09-12	12:17:32	0.629224	552.314	FALSE	57
2022-09-12	12:17:33	0.114669	552.429	FALSE	57
2022-09-12	12:17:33	0.128206	552.557	FALSE	57
2022-09-12	12:17:33	0.241489	552.798	FALSE	57
2022-09-12	12:17:34	0.723473	553.522	FALSE	57
2022-09-12	12:17:34	0.318384	553.84	FALSE	57
2022-09-12	12:17:34	0.208868	554.049	FALSE	57
2022-09-12	12:17:34	0.201947	554.251	FALSE	57
2022-09-12	12:17:35	0.235433	554.487	FALSE	57
2022-09-12	12:17:35	1.15426	555.641	FALSE	57
2022-09-12	12:17:35	0.267952	555.909	FALSE	57
2022-09-12	12:17:35	0.564644	556.473	FALSE	57
2022-09-12	12:17:36	1.505	557.978	FALSE	57
2022-09-12	12:17:36	0.068359	558.047	FALSE	57
2022-09-12	12:17:36	0.302608	558.349	FALSE	57
2022-09-12	12:17:36	0.137112	558.487	FALSE	57
2022-09-12	12:17:37	0.483321	558.97	FALSE	57
2022-09-12	12:17:37	3.50495	562.475	1	58
2022-09-12	12:17:37	0.556196	563.031	FALSE	58
2022-09-12	12:17:38	3.07955	566.111	1	59
2022-09-12	12:17:38	4.71894	570.829	1	60
2022-09-12	12:17:38	1.03752	571.867	FALSE	60
2022-09-12	12:17:38	2.688	574.555	FALSE	60
2022-09-12	12:17:39	2.91604	577.471	FALSE	60
2022-09-12	12:17:39	0.37416	577.845	FALSE	60
2022-09-12	12:17:39	1.22912	579.074	FALSE	60
2022-09-12	12:17:39	0.275585	579.35	FALSE	60
2022-09-12	12:17:40	0.044186	579.394	FALSE	60
2022-09-12	12:17:40	0.480522	579.875	FALSE	60
2022-09-12	12:17:40	0.165763	580.04	FALSE	60
2022-09-12	12:17:40	1.56266	581.603	FALSE	60
2022-09-12	12:17:41	1.53503	583.138	FALSE	60
2022-09-12	12:17:41	0.547239	583.685	FALSE	60
2022-09-12	12:17:41	1.92011	585.605	FALSE	60
2022-09-12	12:17:42	0.229478	585.835	FALSE	60
2022-09-12	12:17:42	0.357112	586.192	FALSE	60
2022-09-12	12:17:42	1.39584	587.588	FALSE	60
2022-09-12	12:17:42	0.22439	587.812	FALSE	60
2022-09-12	12:17:43	0.182914	587.995	FALSE	60
2022-09-12	12:17:43	0.488868	588.484	FALSE	60
2022-09-12	12:17:43	-0.0137784	588.484	FALSE	60
2022-09-12	12:17:43	0.01813	588.502	FALSE	60
2022-09-12	12:17:44	-0.067417	588.502	FALSE	60
2022-09-12	12:17:44	-0.423905	588.502	FALSE	60
2022-09-12	12:17:44	-0.516526	588.502	FALSE	60
2022-09-12	12:17:44	-0.450877	588.502	FALSE	60
2022-09-12	12:17:45	-0.391946	588.502	FALSE	60
2022-09-12	12:17:45	-0.0464501	588.502	FALSE	60
2022-09-12	12:17:45	0.0990969	588.601	FALSE	60
2022-09-12	12:17:46	0.167952	588.769	FALSE	60
2022-09-12	12:17:46	0.262252	589.031	FALSE	60
2022-09-12	12:17:46	0.276908	589.308	FALSE	60
2022-09-12	12:17:46	0.451768	589.76	FALSE	60
2022-09-12	12:17:47	0.33416	590.094	FALSE	60
2022-09-12	12:17:47	0.429682	590.524	FALSE	60
2022-09-12	12:17:47	0.402608	590.927	FALSE	60
2022-09-12	12:17:47	0.295331	591.222	FALSE	60
2022-09-12	12:17:48	0.39299	591.615	FALSE	60
2022-09-12	12:17:48	0.34383	591.959	FALSE	60
2022-09-12	12:17:48	0.360064	592.319	FALSE	60
2022-09-12	12:17:48	0.352939	592.672	FALSE	60
2022-09-12	12:17:49	0.359402	593.031	FALSE	60
2022-09-12	12:17:49	0.30841	593.34	FALSE	60
2022-09-12	12:17:49	0.256654	593.596	FALSE	60
2022-09-12	12:17:50	0.238537	593.835	FALSE	60
2022-09-12	12:17:50	0.309631	594.144	FALSE	60
2022-09-12	12:17:50	0.200267	594.345	FALSE	60
2022-09-12	12:17:50	0.181438	594.526	FALSE	60
2022-09-12	12:17:51	-0.153575	594.526	FALSE	60
2022-09-12	12:17:51	-0.405127	594.526	FALSE	60
2022-09-12	12:17:51	-0.261564	594.526	FALSE	60
2022-09-12	12:17:51	-0.0891982	594.526	FALSE	60
2022-09-12	12:17:52	-0.0454323	594.526	FALSE	60
2022-09-12	12:17:52	0.0118705	594.538	FALSE	60
2022-09-12	12:17:52	0.106222	594.644	FALSE	60
2022-09-12	12:17:52	0.149428	594.794	FALSE	60
2022-09-12	12:17:53	0.115738	594.909	FALSE	60
2022-09-12	12:17:53	0.16897	595.078	FALSE	60
2022-09-12	12:17:53	0.217875	595.296	FALSE	60
2022-09-12	12:17:53	0.254771	595.551	FALSE	60
2022-09-12	12:17:54	0.248766	595.8	FALSE	60
2022-09-12	12:17:54	0.247799	596.048	FALSE	60
2022-09-12	12:17:54	0.2564	596.304	FALSE	60
2022-09-12	12:17:55	0.271412	596.575	FALSE	60
2022-09-12	12:17:55	0.315331	596.891	FALSE	60
2022-09-12	12:17:55	0.275178	597.166	FALSE	60
2022-09-12	12:17:55	0.206069	597.372	FALSE	60
2022-09-12	12:17:56	0.30785	597.68	FALSE	60
2022-09-12	12:17:56	0.148206	597.828	FALSE	60
2022-09-12	12:17:56	0.282863	598.111	FALSE	60
2022-09-12	12:17:56	0.204746	598.316	FALSE	60
2022-09-12	12:17:57	0.220929	598.537	FALSE	60
2022-09-12	12:17:57	0.220369	598.757	FALSE	60
2022-09-12	12:17:57	0.177214	598.934	FALSE	60
2022-09-12	12:17:57	0.221641	599.156	FALSE	60
2022-09-12	12:17:58	0.159555	599.315	FALSE	60
2022-09-12	12:17:58	0.180725	599.496	FALSE	60
2022-09-12	12:17:58	0.0405728	599.537	FALSE	60
2022-09-12	12:17:59	0.168003	599.705	FALSE	60
2022-09-12	12:17:59	0.233753	599.938	FALSE	60
2022-09-12	12:17:59	0.271819	600.21	FALSE	60
2022-09-12	12:17:59	0.219351	600.43	FALSE	60
2022-09-12	12:18:00	0.383473	600.813	FALSE	60
2022-09-12	12:18:00	0.258181	601.071	FALSE	60
2022-09-12	12:18:00	0.359148	601.43	FALSE	60
2022-09-12	12:18:00	0.240216	601.671	FALSE	60
2022-09-12	12:18:01	0.475127	602.146	FALSE	60
2022-09-12	12:18:01	0.374924	602.521	FALSE	60
2022-09-12	12:18:01	0.328257	602.849	FALSE	60
2022-09-12	12:18:01	0.588257	603.437	FALSE	60
2022-09-12	12:18:02	0.480929	603.918	FALSE	60
2022-09-12	12:18:02	1.20291	605.121	FALSE	60
2022-09-12	12:18:02	0.555585	605.677	FALSE	60
2022-09-12	12:18:03	0.472125	606.149	FALSE	60
2022-09-12	12:18:03	0.500063	606.649	FALSE	60
2022-09-12	12:18:03	0.249987	606.899	FALSE	60
2022-09-12	12:18:03	0.43187	607.331	FALSE	60
2022-09-12	12:18:04	0.341387	607.672	FALSE	60
2022-09-12	12:18:04	0.436858	608.109	FALSE	60
2022-09-12	12:18:04	0.790802	608.9	FALSE	60
2022-09-12	12:18:04	0.594669	609.494	FALSE	60
2022-09-12	12:18:05	1.74413	611.238	FALSE	60
2022-09-12	12:18:05	4.06983	615.308	1	61
2022-09-12	12:18:05	1.72775	617.036	FALSE	61
2022-09-12	12:18:05	2.50383	619.54	FALSE	61
2022-09-12	12:18:06	0.555025	620.095	FALSE	61
2022-09-12	12:18:06	0.931819	621.027	FALSE	61
2022-09-12	12:18:06	1.29925	622.326	FALSE	61
2022-09-12	12:18:07	0.35869	622.685	FALSE	61
2022-09-12	12:18:07	0.171158	622.856	FALSE	61
2022-09-12	12:18:07	0.367138	623.223	FALSE	61
2022-09-12	12:18:07	0.251616	623.475	FALSE	61
2022-09-12	12:18:08	0.405865	623.88	FALSE	61
2022-09-12	12:18:08	0.367443	624.248	FALSE	61
2022-09-12	12:18:08	0.340064	624.588	FALSE	61
2022-09-12	12:18:08	0.117875	624.706	FALSE	61
2022-09-12	12:18:09	0.346934	625.053	FALSE	61
2022-09-12	12:18:09	0.1993	625.252	FALSE	61
2022-09-12	12:18:09	0.449886	625.702	FALSE	61
2022-09-12	12:18:09	0.273295	625.975	FALSE	61
2022-09-12	12:18:10	0.73701	626.712	FALSE	61
2022-09-12	12:18:10	0.768003	627.48	FALSE	61
2022-09-12	12:18:10	0.445305	627.925	FALSE	61
2022-09-12	12:18:11	0.220929	628.146	FALSE	61
2022-09-12	12:18:11	0.527799	628.674	FALSE	61
2022-09-12	12:18:11	0.947952	629.622	FALSE	61
2022-09-12	12:18:11	1.86948	631.492	FALSE	61
2022-09-12	12:18:12	0.764847	632.256	FALSE	61
2022-09-12	12:18:12	1.02688	633.283	FALSE	61
2022-09-12	12:18:12	0.288104	633.571	FALSE	61
2022-09-12	12:18:12	0.347901	633.919	FALSE	61
2022-09-12	12:18:13	0.383015	634.302	FALSE	61
2022-09-12	12:18:13	0.309682	634.612	FALSE	61
2022-09-12	12:18:13	0.441183	635.053	FALSE	61
2022-09-12	12:18:13	0.466527	635.52	FALSE	61
2022-09-12	12:18:14	2.01935	637.539	FALSE	61
2022-09-12	12:18:14	1.9877	639.527	FALSE	61
2022-09-12	12:18:14	2.92622	642.453	FALSE	61
2022-09-12	12:18:15	0.33869	642.792	FALSE	61
2022-09-12	12:18:15	0.591463	643.383	FALSE	61
2022-09-12	12:18:15	0.417061	643.8	FALSE	61
2022-09-12	12:18:15	0.47014	644.27	FALSE	61
2022-09-12	12:18:16	0.272125	644.543	FALSE	61
2022-09-12	12:18:16	0.230496	644.773	FALSE	61
2022-09-12	12:18:16	0.467137	645.24	FALSE	61
2022-09-12	12:18:16	8.02657	653.267	1	62
2022-09-12	12:18:17	5.31192	658.579	1	63
2022-09-12	12:18:17	5.47238	664.051	1	64
2022-09-12	12:18:17	7.7798	671.831	1	65
2022-09-12	12:18:17	3.81156	675.642	1	66
2022-09-12	12:18:18	0.662812	676.305	FALSE	66
2022-09-12	12:18:18	0.340013	676.645	FALSE	66
2022-09-12	12:18:18	0.328003	676.973	FALSE	66
2022-09-12	12:18:19	0.474211	677.447	FALSE	66
2022-09-12	12:18:19	0.813855	678.261	FALSE	66
2022-09-12	12:18:19	1.94892	680.21	FALSE	66
2022-09-12	12:18:19	5.95726	686.167	1	67
2022-09-12	12:18:20	1.48546	687.653	FALSE	67
2022-09-12	12:18:20	2.37436	690.027	FALSE	67
2022-09-12	12:18:20	4.3025	694.33	1	68
2022-09-12	12:18:20	1.2822	695.612	FALSE	68
2022-09-12	12:18:21	1.8595	697.471	FALSE	68
2022-09-12	12:18:21	0.563066	698.035	FALSE	68
2022-09-12	12:18:21	0.795992	698.831	FALSE	68
2022-09-12	12:18:21	0.391056	699.222	FALSE	68
2022-09-12	12:18:22	0.471718	699.693	FALSE	68
2022-09-12	12:18:22	0.236043	699.929	FALSE	68
2022-09-12	12:18:22	0.458384	700.388	FALSE	68
2022-09-12	12:18:23	0.242761	700.631	FALSE	68
2022-09-12	12:18:23	0.457163	701.088	FALSE	68
2022-09-12	12:18:23	0.260929	701.349	FALSE	68
2022-09-12	12:18:23	0.457316	701.806	FALSE	68
2022-09-12	12:18:24	0.725356	702.531	FALSE	68
2022-09-12	12:18:24	0.681387	703.213	FALSE	68
2022-09-12	12:18:24	1.38892	704.602	FALSE	68
2022-09-12	12:18:24	0.628359	705.23	FALSE	68
2022-09-12	12:18:25	0.55187	705.782	FALSE	68
2022-09-12	12:18:25	1.61314	707.395	FALSE	68
2022-09-12	12:18:25	3.07345	710.468	1	69
2022-09-12	12:18:25	0.912175	711.381	FALSE	69
2022-09-12	12:18:26	1.96373	713.344	FALSE	69
2022-09-12	12:18:26	1.81782	715.162	FALSE	69
2022-09-12	12:18:26	1.33355	716.496	FALSE	69
2022-09-12	12:18:27	1.60734	718.103	FALSE	69
2022-09-12	12:18:27	1.23884	719.342	FALSE	69
2022-09-12	12:18:27	0.806628	720.148	FALSE	69
2022-09-12	12:18:27	0.665153	720.814	FALSE	69
2022-09-12	12:18:28	0.366578	721.18	FALSE	69
2022-09-12	12:18:28	0.357265	721.537	FALSE	69
2022-09-12	12:18:28	0.329224	721.867	FALSE	69
2022-09-12	12:18:28	0.361641	722.228	FALSE	69
2022-09-12	12:18:29	0.342863	722.571	FALSE	69
2022-09-12	12:18:29	0.278232	722.849	FALSE	69
2022-09-12	12:18:29	0.365407	723.215	FALSE	69
2022-09-12	12:18:29	0.132125	723.347	FALSE	69
2022-09-12	12:18:30	0.25299	723.6	FALSE	69
2022-09-12	12:18:30	0.202354	723.802	FALSE	69
2022-09-12	12:18:30	0.22388	724.026	FALSE	69
2022-09-12	12:18:31	0.215789	724.242	FALSE	69
2022-09-12	12:18:31	0.0605218	724.303	FALSE	69
2022-09-12	12:18:31	0.0476974	724.35	FALSE	69
2022-09-12	12:18:31	0.0921758	724.442	FALSE	69
2022-09-12	12:18:32	0.131921	724.574	FALSE	69
2022-09-12	12:18:32	0.148461	724.723	FALSE	69
2022-09-12	12:18:32	0.151616	724.874	FALSE	69
2022-09-12	12:18:32	0.137468	725.012	FALSE	69
2022-09-12	12:18:33	0.199809	725.212	FALSE	69
2022-09-12	12:18:33	0.240216	725.452	FALSE	69
2022-09-12	12:18:33	0.10271	725.555	FALSE	69
2022-09-12	12:18:33	0.261285	725.816	FALSE	69
2022-09-12	12:18:34	0.125051	725.941	FALSE	69
2022-09-12	12:18:34	0.319606	726.261	FALSE	69
2022-09-12	12:18:34	0.234466	726.495	FALSE	69
2022-09-12	12:18:35	0.31187	726.807	FALSE	69
2022-09-12	12:18:35	0.0303946	726.837	FALSE	69
2022-09-12	12:18:35	0.0897839	726.927	FALSE	69
2022-09-12	12:18:35	0.124542	727.052	FALSE	69
2022-09-12	12:18:36	0.168104	727.22	FALSE	69
2022-09-12	12:18:36	0.145764	727.365	FALSE	69
2022-09-12	12:18:36	0.068817	727.434	FALSE	69
2022-09-12	12:18:36	0.161896	727.596	FALSE	69
2022-09-12	12:18:37	0.0830664	727.679	FALSE	69
2022-09-12	12:18:37	0.147392	727.827	FALSE	69
2022-09-12	12:18:37	-0.140445	727.827	FALSE	69
2022-09-12	12:18:37	-0.155254	727.827	FALSE	69
2022-09-12	12:18:38	-0.11271	727.827	FALSE	69
2022-09-12	12:18:38	-0.207264	727.827	FALSE	69
2022-09-12	12:18:38	-0.13215	727.827	FALSE	69
2022-09-12	12:18:39	-0.267773	727.827	FALSE	69
2022-09-12	12:18:39	-0.132455	727.827	FALSE	69
2022-09-12	12:18:39	-0.139376	727.827	FALSE	69
2022-09-12	12:18:39	0.386222	728.213	FALSE	69
2022-09-12	12:18:40	0.778232	728.991	FALSE	69
2022-09-12	12:18:40	0.417367	729.408	FALSE	69
2022-09-12	12:18:40	0.331005	729.739	FALSE	69
2022-09-12	12:18:40	0.670903	730.41	FALSE	69
2022-09-12	12:18:41	0.372837	730.783	FALSE	69
2022-09-12	12:18:41	0.602252	731.385	FALSE	69
2022-09-12	12:18:41	0.248715	731.634	FALSE	69
2022-09-12	12:18:41	0.429071	732.063	FALSE	69
2022-09-12	12:18:42	0.26673	732.33	FALSE	69
2022-09-12	12:18:42	0.724949	733.055	FALSE	69
2022-09-12	12:18:42	0.771463	733.826	FALSE	69
2022-09-12	12:18:43	1.08108	734.907	FALSE	69
2022-09-12	12:18:43	1.50327	736.411	FALSE	69
2022-09-12	12:18:43	0.43411	736.845	FALSE	69
2022-09-12	12:18:43	1.73645	738.581	FALSE	69
2022-09-12	12:18:44	0.501183	739.082	FALSE	69
2022-09-12	12:18:44	1.43696	740.519	FALSE	69
2022-09-12	12:18:44	1.17248	741.692	FALSE	69
2022-09-12	12:18:44	0.370802	742.063	FALSE	69
2022-09-12	12:18:45	0.488359	742.551	FALSE	69
2022-09-12	12:18:45	0.773397	743.324	FALSE	69
2022-09-12	12:18:45	0.457672	743.782	FALSE	69
2022-09-12	12:18:45	1.47248	745.255	FALSE	69
2022-09-12	12:18:46	0.657163	745.912	FALSE	69
2022-09-12	12:18:46	1.39126	747.303	FALSE	69
2022-09-12	12:18:46	2.08978	749.393	FALSE	69
2022-09-12	12:18:47	0.286069	749.679	FALSE	69
2022-09-12	12:18:47	0.404644	750.084	FALSE	69
2022-09-12	12:18:47	0.346425	750.43	FALSE	69
2022-09-12	12:18:47	0.352786	750.783	FALSE	69
2022-09-12	12:18:48	0.261743	751.044	FALSE	69
2022-09-12	12:18:48	0.449835	751.494	FALSE	69
2022-09-12	12:18:48	0.27411	751.768	FALSE	69
2022-09-12	12:18:48	1.11538	752.884	FALSE	69
2022-09-12	12:18:49	3.09818	755.982	1	70
2022-09-12	12:18:49	2.0791	758.061	FALSE	70
2022-09-12	12:18:49	4.09859	762.16	1	71
2022-09-12	12:18:49	3.83375	765.993	1	72
2022-09-12	12:18:50	3.51767	769.511	1	73
2022-09-12	12:18:50	4.34922	773.86	1	74
2022-09-12	12:18:50	0.64383	774.504	FALSE	74
2022-09-12	12:18:51	1.04592	775.55	FALSE	74
2022-09-12	12:18:51	1.41884	776.969	FALSE	74
2022-09-12	12:18:51	0.161845	777.131	FALSE	74
2022-09-12	12:18:51	0.410496	777.541	FALSE	74
2022-09-12	12:18:52	0.193957	777.735	FALSE	74
2022-09-12	12:18:52	0.340013	778.075	FALSE	74
2022-09-12	12:18:52	0.140216	778.215	FALSE	74
2022-09-12	12:18:52	0.334008	778.549	FALSE	74
2022-09-12	12:18:53	0.2764	778.826	FALSE	74
2022-09-12	12:18:53	0.331107	779.157	FALSE	74
2022-09-12	12:18:53	0.17472	779.332	FALSE	74
2022-09-12	12:18:53	-0.0537784	779.332	FALSE	74
2022-09-12	12:18:54	-0.023244	779.332	FALSE	74
2022-09-12	12:18:54	0.0570104	779.389	FALSE	74
2022-09-12	12:18:54	0.19701	779.586	FALSE	74
2022-09-12	12:18:55	0.25869	779.844	FALSE	74
2022-09-12	12:18:55	0.277774	780.122	FALSE	74
2022-09-12	12:18:55	0.425153	780.547	FALSE	74
2022-09-12	12:18:55	0.350089	780.897	FALSE	74
2022-09-12	12:18:56	0.275483	781.173	FALSE	74
2022-09-12	12:18:56	0.415992	781.589	FALSE	74
2022-09-12	12:18:56	0.165458	781.754	FALSE	74
2022-09-12	12:18:56	0.369835	782.124	FALSE	74
2022-09-12	12:18:57	0.355484	782.48	FALSE	74
2022-09-12	12:18:57	0.356349	782.836	FALSE	74
2022-09-12	12:18:57	0.36958	783.206	FALSE	74
2022-09-12	12:18:58	0.454873	783.66	FALSE	74
2022-09-12	12:18:58	0.401794	784.062	FALSE	74
2022-09-12	12:18:58	0.444288	784.507	FALSE	74
2022-09-12	12:18:58	0.708053	785.215	FALSE	74
2022-09-12	12:18:59	1.52286	786.737	FALSE	74
2022-09-12	12:18:59	0.307443	787.045	FALSE	74
2022-09-12	12:18:59	0.983829	788.029	FALSE	74
2022-09-12	12:18:59	0.516349	788.545	FALSE	74
2022-09-12	12:19:00	0.748053	789.293	FALSE	74
2022-09-12	12:19:00	0.212379	789.505	FALSE	74
2022-09-12	12:19:00	0.352736	789.858	FALSE	74
2022-09-12	12:19:00	0.331158	790.189	FALSE	74
2022-09-12	12:19:01	0.154619	790.344	FALSE	74
2022-09-12	12:19:01	0.183779	790.528	FALSE	74
2022-09-12	12:19:01	0.153702	790.681	FALSE	74
2022-09-12	12:19:01	0.167799	790.849	FALSE	74
2022-09-12	12:19:02	0.293499	791.143	FALSE	74
2022-09-12	12:19:02	0.225865	791.369	FALSE	74
2022-09-12	12:19:02	0.248054	791.617	FALSE	74
2022-09-12	12:19:03	0.265509	791.882	FALSE	74
2022-09-12	12:19:03	0.126069	792.008	FALSE	74
2022-09-12	12:19:03	0.210547	792.219	FALSE	74
2022-09-12	12:19:03	0.235738	792.455	FALSE	74
2022-09-12	12:19:04	0.174364	792.629	FALSE	74
2022-09-12	12:19:04	0.154008	792.783	FALSE	74
2022-09-12	12:19:04	0.109631	792.893	FALSE	74
2022-09-12	12:19:04	0.112634	793.005	FALSE	74
2022-09-12	12:19:05	0.165153	793.17	FALSE	74
2022-09-12	12:19:05	0.315738	793.486	FALSE	74
2022-09-12	12:19:05	0.28673	793.773	FALSE	74
2022-09-12	12:19:05	0.263575	794.036	FALSE	74
2022-09-12	12:19:06	0.281082	794.317	FALSE	74
2022-09-12	12:19:06	0.358588	794.676	FALSE	74
2022-09-12	12:19:06	0.329631	795.006	FALSE	74
2022-09-12	12:19:07	0.298639	795.304	FALSE	74
2022-09-12	12:19:07	0.318995	795.623	FALSE	74
2022-09-12	12:19:07	0.414415	796.038	FALSE	74
2022-09-12	12:19:07	0.417774	796.456	FALSE	74
2022-09-12	12:19:08	0.349478	796.805	FALSE	74
2022-09-12	12:19:08	0.325763	797.131	FALSE	74
2022-09-12	12:19:08	0.309682	797.44	FALSE	74
2022-09-12	12:19:08	0.305916	797.746	FALSE	74
2022-09-12	12:19:09	0.295382	798.042	FALSE	74
2022-09-12	12:19:09	0.225458	798.267	FALSE	74
2022-09-12	12:19:09	0.194822	798.462	FALSE	74
2022-09-12	12:19:09	0.325967	798.788	FALSE	74
2022-09-12	12:19:10	0.287341	799.075	FALSE	74
2022-09-12	12:19:10	0.324797	799.4	FALSE	74
2022-09-12	12:19:10	0.326374	799.727	FALSE	74
2022-09-12	12:19:11	0.292277	800.019	FALSE	74
2022-09-12	12:19:11	0.277774	800.297	FALSE	74
2022-09-12	12:19:11	0.286883	800.583	FALSE	74
2022-09-12	12:19:11	0.164898	800.748	FALSE	74
2022-09-12	12:19:12	0.291565	801.04	FALSE	74
2022-09-12	12:19:12	0.230191	801.27	FALSE	74
2022-09-12	12:19:12	0.209071	801.479	FALSE	74
2022-09-12	12:19:12	0.344797	801.824	FALSE	74
2022-09-12	12:19:13	0.150395	801.974	FALSE	74
2022-09-12	12:19:13	0.27813	802.252	FALSE	74
2022-09-12	12:19:13	0.185814	802.438	FALSE	74
2022-09-12	12:19:13	0.0811325	802.519	FALSE	74
2022-09-12	12:19:14	0.271209	802.791	FALSE	74
2022-09-12	12:19:14	0.054873	802.846	FALSE	74
2022-09-12	12:19:14	0.395992	803.242	FALSE	74
2022-09-12	12:19:15	0.181692	803.423	FALSE	74
2022-09-12	12:19:15	0.381896	803.805	FALSE	74
2022-09-12	12:19:15	0.118232	803.923	FALSE	74
2022-09-12	12:19:15	0.41757	804.341	FALSE	74
2022-09-12	12:19:16	0.216451	804.557	FALSE	74
2022-09-12	12:19:16	0.304644	804.862	FALSE	74
2022-09-12	12:19:16	0.19813	805.06	FALSE	74
2022-09-12	12:19:16	0.299046	805.359	FALSE	74
2022-09-12	12:19:17	0.345713	805.705	FALSE	74
2022-09-12	12:19:17	0.335636	806.041	FALSE	74
2022-09-12	12:19:17	0.328511	806.369	FALSE	74
2022-09-12	12:19:17	0.195026	806.564	FALSE	74
2022-09-12	12:19:18	0.413601	806.978	FALSE	74
2022-09-12	12:19:18	0.239606	807.217	FALSE	74
2022-09-12	12:19:18	0.481234	807.699	FALSE	74
2022-09-12	12:19:19	0.284644	807.983	FALSE	74
2022-09-12	12:19:19	0.634618	808.618	FALSE	74
2022-09-12	12:19:19	0.877366	809.495	FALSE	74
2022-09-12	12:19:19	0.511921	810.007	FALSE	74
2022-09-12	12:19:20	1.43218	811.439	FALSE	74
2022-09-12	12:19:20	2.77375	814.213	FALSE	74
2022-09-12	12:19:20	1.10093	815.314	FALSE	74
2022-09-12	12:19:20	1.99319	817.307	FALSE	74
2022-09-12	12:19:21	1.27329	818.58	FALSE	74
2022-09-12	12:19:21	0.91131	819.492	FALSE	74
2022-09-12	12:19:21	1.76566	821.257	FALSE	74
2022-09-12	12:19:21	0.465458	821.723	FALSE	74
2022-09-12	12:19:22	0.631412	822.354	FALSE	74
2022-09-12	12:19:22	0.522506	822.877	FALSE	74
2022-09-12	12:19:22	0.40098	823.278	FALSE	74
2022-09-12	12:19:23	0.662659	823.94	FALSE	74
2022-09-12	12:19:23	0.488919	824.429	FALSE	74
2022-09-12	12:19:23	0.688359	825.118	FALSE	74
2022-09-12	12:19:23	0.530954	825.649	FALSE	74
2022-09-12	12:19:24	1.24739	826.896	FALSE	74
2022-09-12	12:19:24	1.70017	828.596	FALSE	74
2022-09-12	12:19:24	1.17752	829.774	FALSE	74
2022-09-12	12:19:24	3.23599	833.01	1	75
2022-09-12	12:19:25	0.33416	833.344	FALSE	75
2022-09-12	12:19:25	1.6108	834.955	FALSE	75
2022-09-12	12:19:25	1.94688	836.902	FALSE	75
2022-09-12	12:19:25	1.50587	838.407	FALSE	75
2022-09-12	12:19:26	1.98169	840.389	FALSE	75
2022-09-12	12:19:26	0.677061	841.066	FALSE	75
2022-09-12	12:19:26	2.61731	843.683	FALSE	75
2022-09-12	12:19:26	1.62815	845.312	FALSE	75
2022-09-12	12:19:27	2.34444	847.656	FALSE	75
2022-09-12	12:19:27	2.42556	850.082	FALSE	75
2022-09-12	12:19:27	2.24164	852.323	FALSE	75
2022-09-12	12:19:28	3.92861	856.252	1	76
2022-09-12	12:19:28	1.11528	857.367	FALSE	76
2022-09-12	12:19:28	2.49294	859.86	FALSE	76
2022-09-12	12:19:28	0.337112	860.197	FALSE	76
2022-09-12	12:19:29	1.0335	861.231	FALSE	76
2022-09-12	12:19:29	1.73767	862.968	FALSE	76
2022-09-12	12:19:29	0.390344	863.359	FALSE	76
2022-09-12	12:19:29	2.1767	865.535	FALSE	76
2022-09-12	12:19:30	0.239097	865.774	FALSE	76
2022-09-12	12:19:30	1.04688	866.821	FALSE	76
2022-09-12	12:19:30	0.850598	867.672	FALSE	76
2022-09-12	12:19:30	1.01375	868.686	FALSE	76
2022-09-12	12:19:31	1.91492	870.601	FALSE	76
2022-09-12	12:19:31	0.483728	871.084	FALSE	76
2022-09-12	12:19:31	1.59238	872.677	FALSE	76
2022-09-12	12:19:32	0.234059	872.911	FALSE	76
2022-09-12	12:19:32	1.74637	874.657	FALSE	76
2022-09-12	12:19:32	0.472074	875.129	FALSE	76
2022-09-12	12:19:32	2.02536	877.155	FALSE	76
2022-09-12	12:19:33	1.08174	878.236	FALSE	76
2022-09-12	12:19:33	0.935331	879.172	FALSE	76
2022-09-12	12:19:33	1.17976	880.351	FALSE	76
2022-09-12	12:19:33	0.528104	880.88	FALSE	76
2022-09-12	12:19:34	1.08128	881.961	FALSE	76
2022-09-12	12:19:34	0.44673	882.408	FALSE	76
2022-09-12	12:19:34	1.36072	883.768	FALSE	76
2022-09-12	12:19:34	1.73574	885.504	FALSE	76
2022-09-12	12:19:35	1.5362	887.04	FALSE	76
2022-09-12	12:19:35	3.67029	890.711	1	77
2022-09-12	12:19:35	1.01197	891.722	FALSE	77
2022-09-12	12:19:36	3.82469	895.547	1	78
2022-09-12	12:19:36	0.921082	896.468	FALSE	78
2022-09-12	12:19:36	2.54195	899.01	FALSE	78
2022-09-12	12:19:36	2.5022	901.512	FALSE	78
2022-09-12	12:19:37	3.35792	904.87	1	79
2022-09-12	12:19:37	4.09411	908.964	1	80
2022-09-12	12:19:37	2.3505	911.315	FALSE	80
2022-09-12	12:19:37	3.74037	915.055	1	81
2022-09-12	12:19:38	0.652074	915.707	FALSE	81
2022-09-12	12:19:38	1.37793	917.085	FALSE	81
2022-09-12	12:19:38	0.580725	917.666	FALSE	81
2022-09-12	12:19:38	0.768257	918.434	FALSE	81
2022-09-12	12:19:39	0.641845	919.076	FALSE	81
2022-09-12	12:19:39	2.11355	921.19	FALSE	81
2022-09-12	12:19:39	2.43548	923.625	FALSE	81
2022-09-12	12:19:40	2.8625	926.488	FALSE	81
2022-09-12	12:19:40	4.2649	930.753	1	82
2022-09-12	12:19:40	3.68948	934.442	1	83
2022-09-12	12:19:40	7.75904	942.201	1	84
2022-09-12	12:19:41	3.28016	945.481	1	85
2022-09-12	12:19:41	4.7794	950.261	1	86
2022-09-12	12:19:41	3.92444	954.185	1	87
2022-09-12	12:19:41	4.90256	959.088	1	88
2022-09-12	12:19:42	6.66031	965.748	1	89
2022-09-12	12:19:42	3.88856	969.637	1	90
2022-09-12	12:19:42	8.48952	978.126	1	91
2022-09-12	12:19:42	3.87095	981.997	1	92
2022-09-12	12:19:43	7.16271	989.16	1	93
2022-09-12	12:19:43	2.86261	992.022	FALSE	93
2022-09-12	12:19:43	4.72943	996.752	1	94
2022-09-12	12:19:44	2.54724	999.299	FALSE	94
2022-09-12	12:19:44	9.44724	1008.75	1	95
2022-09-12	12:19:44	3.82464	1012.57	1	96
2022-09-12	12:19:44	7.93675	1020.51	1	97
2022-09-12	12:19:45	6.90958	1027.42	1	98
2022-09-12	12:19:45	4.711	1032.13	1	99
2022-09-12	12:19:45	1.18622	1033.31	FALSE	99
2022-09-12	12:19:45	3.75665	1037.07	1	100
2022-09-12	12:19:46	1.75711	1038.83	FALSE	100
2022-09-12	12:19:46	3.15212	1041.98	1	101
2022-09-12	12:19:46	3.56938	1045.55	1	102
2022-09-12	12:19:46	3.06108	1048.61	1	103
2022-09-12	12:19:47	5.73578	1054.35	1	104
2022-09-12	12:19:47	2.85782	1057.2	FALSE	104
2022-09-12	12:19:47	5.27884	1062.48	1	105
2022-09-12	12:19:48	2.08195	1064.57	FALSE	105
2022-09-12	12:19:48	3.53625	1068.1	1	106
2022-09-12	12:19:48	2.67589	1070.78	FALSE	106
2022-09-12	12:19:48	3.11085	1073.89	1	107
2022-09-12	12:19:49	3.32846	1077.22	1	108
2022-09-12	12:19:49	3.42714	1080.64	1	109
2022-09-12	12:19:49	5.83421	1086.48	1	110
2022-09-12	12:19:49	1.92042	1088.4	FALSE	110
2022-09-12	12:19:50	5.47446	1093.87	1	111
2022-09-12	12:19:50	2.29172	1096.16	FALSE	111
2022-09-12	12:19:50	4.52027	1100.68	1	112
2022-09-12	12:19:50	0.809122	1101.49	FALSE	112
2022-09-12	12:19:51	1.94383	1103.44	FALSE	112
2022-09-12	12:19:51	1.77126	1105.21	FALSE	112
2022-09-12	12:19:51	0.485865	1105.69	FALSE	112
2022-09-12	12:19:52	0.453041	1106.15	FALSE	112
2022-09-12	12:19:52	0.426679	1106.57	FALSE	112
2022-09-12	12:19:52	0.868104	1107.44	FALSE	112
2022-09-12	12:19:52	0.61584	1108.06	FALSE	112
2022-09-12	12:19:53	0.659657	1108.72	FALSE	112
2022-09-12	12:19:53	0.252786	1108.97	FALSE	112
2022-09-12	12:19:53	0.256247	1109.23	FALSE	112
2022-09-12	12:19:53	0.341794	1109.57	FALSE	112
2022-09-12	12:19:54	0.138232	1109.71	FALSE	112
2022-09-12	12:19:54	0.236705	1109.94	FALSE	112
2022-09-12	12:19:54	0.282099	1110.23	FALSE	112
2022-09-12	12:19:54	0.219504	1110.45	FALSE	112
2022-09-12	12:19:55	0.324491	1110.77	FALSE	112
2022-09-12	12:19:55	1.10495	1111.88	FALSE	112
2022-09-12	12:19:55	0.179962	1112.05	FALSE	112
2022-09-12	12:19:56	0.329122	1112.38	FALSE	112
2022-09-12	12:19:56	0.335738	1112.72	FALSE	112
2022-09-12	12:19:56	0.549275	1113.27	FALSE	112
2022-09-12	12:19:56	1.93299	1115.2	FALSE	112
2022-09-12	12:19:57	0.891259	1116.09	FALSE	112
2022-09-12	12:19:57	2.34988	1118.44	FALSE	112
2022-09-12	12:19:57	3.26485	1121.71	1	113
2022-09-12	12:19:57	1.18047	1122.89	FALSE	113
2022-09-12	12:19:58	2.15253	1125.04	FALSE	113
2022-09-12	12:19:58	2.72312	1127.76	FALSE	113
2022-09-12	12:19:58	2.19467	1129.96	FALSE	113
2022-09-12	12:19:58	3.52001	1133.48	1	114
2022-09-12	12:19:59	0.728562	1134.21	FALSE	114
2022-09-12	12:19:59	3.69614	1137.9	1	115
2022-09-12	12:19:59	3.32128	1141.22	1	116
2022-09-12	12:20:00	4.9482	1146.17	1	117
2022-09-12	12:20:00	2.9249	1149.1	FALSE	117
2022-09-12	12:20:00	2.46271	1151.56	FALSE	117
2022-09-12	12:20:00	2.43044	1153.99	FALSE	117
2022-09-12	12:20:01	2.27029	1156.26	FALSE	117
2022-09-12	12:20:01	1.62083	1157.88	FALSE	117
2022-09-12	12:20:01	2.57299	1160.46	FALSE	117
2022-09-12	12:20:02	0.711209	1161.17	FALSE	117
2022-09-12	12:20:02	1.84785	1163.01	FALSE	117
2022-09-12	12:20:02	0.495687	1163.51	FALSE	117
2022-09-12	12:20:02	1.43233	1164.94	FALSE	117
2022-09-12	12:20:02	2.4049	1167.35	FALSE	117
2022-09-12	12:20:03	1.31884	1168.67	FALSE	117
2022-09-12	12:20:03	1.45462	1170.12	FALSE	117
2022-09-12	12:20:03	0.574313	1170.69	FALSE	117
2022-09-12	12:20:04	1.3506	1172.05	FALSE	117
2022-09-12	12:20:04	2.0252	1174.07	FALSE	117
2022-09-12	12:20:04	0.403779	1174.47	FALSE	117
2022-09-12	12:20:04	1.31492	1175.79	FALSE	117
2022-09-12	12:20:05	0.666832	1176.46	FALSE	117
2022-09-12	12:20:05	1.92943	1178.39	FALSE	117
2022-09-12	12:20:05	2.4334	1180.82	FALSE	117
2022-09-12	12:20:05	1.61029	1182.43	FALSE	117
2022-09-12	12:20:06	2.65843	1185.09	FALSE	117
2022-09-12	12:20:06	1.40271	1186.49	FALSE	117
2022-09-12	12:20:06	3.24022	1189.73	1	118
2022-09-12	12:20:06	4.4425	1194.17	1	119
2022-09-12	12:20:07	1.10943	1195.28	FALSE	119
2022-09-12	12:20:07	5.25105	1200.53	1	120
2022-09-12	12:20:07	0.572583	1201.11	FALSE	120
2022-09-12	12:20:08	3.88281	1204.99	1	121
2022-09-12	12:20:08	2.57396	1207.56	FALSE	121
2022-09-12	12:20:08	2.23523	1209.8	FALSE	121
2022-09-12	12:20:08	1.9707	1211.77	FALSE	121
2022-09-12	12:20:09	1.67594	1213.44	FALSE	121
2022-09-12	12:20:09	2.51304	1215.96	FALSE	121
2022-09-12	12:20:09	5.0624	1221.02	1	122
2022-09-12	12:20:09	0.291005	1221.31	FALSE	122
2022-09-12	12:20:10	4.1279	1225.44	1	123
2022-09-12	12:20:10	3.22988	1228.67	1	124
2022-09-12	12:20:10	3.44754	1232.12	1	125
2022-09-12	12:20:10	1.76887	1233.89	FALSE	125
2022-09-12	12:20:11	2.93324	1236.82	FALSE	125
2022-09-12	12:20:11	2.40805	1239.23	FALSE	125
2022-09-12	12:20:11	4.33273	1243.56	1	126
2022-09-12	12:20:12	4.4908	1248.05	1	127
2022-09-12	12:20:12	6.20988	1254.26	1	128
2022-09-12	12:20:12	3.55492	1257.82	1	129
2022-09-12	12:20:12	4.41889	1262.23	1	130
2022-09-12	12:20:13	3.61849	1265.85	1	131
2022-09-12	12:20:13	2.42128	1268.27	FALSE	131
2022-09-12	12:20:13	1.90622	1270.18	FALSE	131
2022-09-12	12:20:13	2.34953	1272.53	FALSE	131
2022-09-12	12:20:14	0.112939	1272.64	FALSE	131
2022-09-12	12:20:14	1.32134	1273.96	FALSE	131
2022-09-12	12:20:14	3.0821	1277.05	1	132
2022-09-12	12:20:14	0.777417	1277.82	FALSE	132
2022-09-12	12:20:15	0.579707	1278.4	FALSE	132
2022-09-12	12:20:15	0.432227	1278.84	FALSE	132
2022-09-12	12:20:15	0.339657	1279.18	FALSE	132
2022-09-12	12:20:16	1.10312	1280.28	FALSE	132
2022-09-12	12:20:16	0.240573	1280.52	FALSE	132
2022-09-12	12:20:16	0.407952	1280.93	FALSE	132
2022-09-12	12:20:16	0.187697	1281.11	FALSE	132
2022-09-12	12:20:17	0.237519	1281.35	FALSE	132
2022-09-12	12:20:17	0.0815396	1281.43	FALSE	132
2022-09-12	12:20:17	0.292634	1281.73	FALSE	132
2022-09-12	12:20:17	0.277417	1282	FALSE	132
2022-09-12	12:20:18	0.904542	1282.91	FALSE	132
2022-09-12	12:20:18	0.245204	1283.15	FALSE	132
2022-09-12	12:20:18	0.18897	1283.34	FALSE	132
2022-09-12	12:20:18	0.355382	1283.7	FALSE	132
2022-09-12	12:20:19	0.719962	1284.42	FALSE	132
2022-09-12	12:20:19	0.195331	1284.61	FALSE	132
2022-09-12	12:20:19	0.616603	1285.23	FALSE	132
2022-09-12	12:20:20	0.259708	1285.49	FALSE	132
2022-09-12	12:20:20	0.130496	1285.62	FALSE	132
2022-09-12	12:20:20	0.268664	1285.89	FALSE	132
2022-09-12	12:20:20	0.114822	1286	FALSE	132
2022-09-12	12:20:21	0.234618	1286.24	FALSE	132
2022-09-12	12:20:21	0.247087	1286.48	FALSE	132
2022-09-12	12:20:21	1.46693	1287.95	FALSE	132
2022-09-12	12:20:21	0.10841	1288.06	FALSE	132
2022-09-12	12:20:22	0.290903	1288.35	FALSE	132
2022-09-12	12:20:22	0.240573	1288.59	FALSE	132
2022-09-12	12:20:22	0.613855	1289.21	FALSE	132
2022-09-12	12:20:22	0.323321	1289.53	FALSE	132
2022-09-12	12:20:23	0.206171	1289.74	FALSE	132
2022-09-12	12:20:23	0.227239	1289.96	FALSE	132
2022-09-12	12:20:23	0.191361	1290.15	FALSE	132
2022-09-12	12:20:24	0.279046	1290.43	FALSE	132
2022-09-12	12:20:24	0.504288	1290.94	FALSE	132
2022-09-12	12:20:24	0.608104	1291.55	FALSE	132
2022-09-12	12:20:24	1.1538	1292.7	FALSE	132
2022-09-12	12:20:25	2.1138	1294.81	FALSE	132
2022-09-12	12:20:25	0.676908	1295.49	FALSE	132
2022-09-12	12:20:25	2.60479	1298.09	FALSE	132
2022-09-12	12:20:25	0.138893	1298.23	FALSE	132
2022-09-12	12:20:26	0.209326	1298.44	FALSE	132
2022-09-12	12:20:26	0.467341	1298.91	FALSE	132
2022-09-12	12:20:26	0.411667	1299.32	FALSE	132
2022-09-12	12:20:26	1.94917	1301.27	FALSE	132
2022-09-12	12:20:27	1.47966	1302.75	FALSE	132
2022-09-12	12:20:27	3.33701	1306.09	1	133
2022-09-12	12:20:27	1.74352	1307.83	FALSE	133
2022-09-12	12:20:28	5.31518	1313.15	1	134
2022-09-12	12:20:28	1.96164	1315.11	FALSE	134
2022-09-12	12:20:28	4.57436	1319.68	1	135
2022-09-12	12:20:28	4.06576	1323.75	1	136
2022-09-12	12:20:29	3.58948	1327.34	1	137
2022-09-12	12:20:29	3.63513	1330.97	1	138
2022-09-12	12:20:29	1.24413	1332.22	FALSE	138
2022-09-12	12:20:29	3.06856	1335.29	1	139
2022-09-12	12:20:30	5.91304	1341.2	1	140
2022-09-12	12:20:30	0.867137	1342.07	FALSE	140
2022-09-12	12:20:30	2.97976	1345.05	FALSE	140
2022-09-12	12:20:30	0.227697	1345.27	FALSE	140
2022-09-12	12:20:31	0.364797	1345.64	FALSE	140
2022-09-12	12:20:31	0.287952	1345.93	FALSE	140
2022-09-12	12:20:31	2.29849	1348.22	FALSE	140
2022-09-12	12:20:32	0.153957	1348.38	FALSE	140

## Sheet: Duke_harness_2022912121531
						**GoPro Fitting: 1205
2022-09-12	12:15:32	0.199708
2022-09-12	12:15:32	0.171107
2022-09-12	12:15:32	0.211616
2022-09-12	12:15:32	0.198741
2022-09-12	12:15:33	0.207494
2022-09-12	12:15:33	0.22327
2022-09-12	12:15:33	0.260064
2022-09-12	12:15:33	0.228104
2022-09-12	12:15:34	0.220674
2022-09-12	12:15:34	0.202303
2022-09-12	12:15:34	0.27014
2022-09-12	12:15:34	0.358435
2022-09-12	12:15:35	0.345356
2022-09-12	12:15:35	0.34785
2022-09-12	12:15:35	0.362201
2022-09-12	12:15:35	0.377112
2022-09-12	12:15:36	0.426629
2022-09-12	12:15:36	0.471209
2022-09-12	12:15:36	0.386323
2022-09-12	12:15:37	0.451056
2022-09-12	12:15:37	0.427901
2022-09-12	12:15:37	0.333906
2022-09-12	12:15:37	0.36958
2022-09-12	12:15:38	0.449733
2022-09-12	12:15:38	0.43813
2022-09-12	12:15:38	0.421692
2022-09-12	12:15:38	0.356654
2022-09-12	12:15:39	0.389428
2022-09-12	12:15:39	0.473346
2022-09-12	12:15:39	0.223219
2022-09-12	12:15:39	0.472888
2022-09-12	12:15:40	0.46159
2022-09-12	12:15:40	0.320166
2022-09-12	12:15:40	0.504033
2022-09-12	12:15:41	0.395178
2022-09-12	12:15:41	0.425967
2022-09-12	12:15:41	0.418588
2022-09-12	12:15:41	0.382608
2022-09-12	12:15:42	1.22103
2022-09-12	12:15:42	0.492125
2022-09-12	12:15:42	0.409835
2022-09-12	12:15:42	0.153041
2022-09-12	12:15:43	0.280776
2022-09-12	12:15:43	0.60617
2022-09-12	12:15:43	0.418028
2022-09-12	12:15:43	0.144237
2022-09-12	12:15:44	0.123015
2022-09-12	12:15:44	0.199758
2022-09-12	12:15:44	3.12474
2022-09-12	12:15:45	6.43782
2022-09-12	12:15:45	6.13339
2022-09-12	12:15:45	7.23329
2022-09-12	12:15:45	0.779809
2022-09-12	12:15:46	0.935025
2022-09-12	12:15:46	2.54454
2022-09-12	12:15:46	2.30052
2022-09-12	12:15:46	2.29401
2022-09-12	12:15:47	1.40632
2022-09-12	12:15:47	0.828867
2022-09-12	12:15:47	1.97258
2022-09-12	12:15:47	0.281234
2022-09-12	12:15:48	0.140624
2022-09-12	12:15:48	0.292735
2022-09-12	12:15:48	0.11472
2022-09-12	12:15:49	0.268766
2022-09-12	12:15:49	0.304695
2022-09-12	12:15:49	0.459504
2022-09-12	12:15:49	0.491412
2022-09-12	12:15:50	0.512023
2022-09-12	12:15:50	0.3593
2022-09-12	12:15:50	0.49986
2022-09-12	12:15:50	0.251718
2022-09-12	12:15:51	0.578333
2022-09-12	12:15:51	0.535484
2022-09-12	12:15:51	0.398079
2022-09-12	12:15:51	0.395331
2022-09-12	12:15:52	0.0778247
2022-09-12	12:15:52	-0.308333
2022-09-12	12:15:52	-0.186196
2022-09-12	12:15:53	0.194771
2022-09-12	12:15:53	0.207087
2022-09-12	12:15:53	0.243117
2022-09-12	12:15:53	0.252684
2022-09-12	12:15:54	0.313957
2022-09-12	12:15:54	0.427596
2022-09-12	12:15:54	0.332125
2022-09-12	12:15:54	0.301285
2022-09-12	12:15:55	0.311616
2022-09-12	12:15:55	0.239962
2022-09-12	12:15:55	0.165356
2022-09-12	12:15:55	0.139097
2022-09-12	12:15:56	0.157519
2022-09-12	12:15:56	0.0484099
2022-09-12	12:15:56	-0.0445672
2022-09-12	12:15:57	-0.0168827
2022-09-12	12:15:57	0.019046
2022-09-12	12:15:57	0.165255
2022-09-12	12:15:57	0.218283
2022-09-12	12:15:58	0.0864252
2022-09-12	12:15:58	0.0169086
2022-09-12	12:15:58	0.141082
2022-09-12	12:15:58	0.302303
2022-09-12	12:15:59	0.18841
2022-09-12	12:15:59	0.348461
2022-09-12	12:15:59	0.287596
2022-09-12	12:15:59	0.4736
2022-09-12	12:16:00	2.32139
2022-09-12	12:16:00	1.05202
2022-09-12	12:16:00	4.32714
2022-09-12	12:16:01	1.31625
2022-09-12	12:16:01	3.85034
2022-09-12	12:16:01	0.741336
2022-09-12	12:16:01	4.91116
2022-09-12	12:16:02	0.811514
2022-09-12	12:16:02	4.39126
2022-09-12	12:16:02	1.89401
2022-09-12	12:16:02	2.92332
2022-09-12	12:16:03	1.1908
2022-09-12	12:16:03	2.55273
2022-09-12	12:16:03	0.780369
2022-09-12	12:16:03	1.94123
2022-09-12	12:16:04	0.335382
2022-09-12	12:16:04	1.88912
2022-09-12	12:16:04	0.552939
2022-09-12	12:16:05	3.86459
2022-09-12	12:16:05	1.87289
2022-09-12	12:16:05	3.02383
2022-09-12	12:16:05	1.42958
2022-09-12	12:16:06	1.67742
2022-09-12	12:16:06	3.24205
2022-09-12	12:16:06	2.13106
2022-09-12	12:16:06	3.70546
2022-09-12	12:16:07	2.20475
2022-09-12	12:16:07	2.12266
2022-09-12	12:16:07	0.549885
2022-09-12	12:16:07	2.73126
2022-09-12	12:16:08	0.196756
2022-09-12	12:16:08	2.40999
2022-09-12	12:16:08	0.252532
2022-09-12	12:16:09	2.41014
2022-09-12	12:16:09	0.381896
2022-09-12	12:16:09	1.89609
2022-09-12	12:16:09	1.31706
2022-09-12	12:16:10	2.10678
2022-09-12	12:16:10	1.47014
2022-09-12	12:16:10	0.940522
2022-09-12	12:16:10	2.06922
2022-09-12	12:16:11	0.318232
2022-09-12	12:16:11	2.56179
2022-09-12	12:16:11	1.18439
2022-09-12	12:16:11	3.93309
2022-09-12	12:16:12	1.4338
2022-09-12	12:16:12	3.76485
2022-09-12	12:16:12	0.397723
2022-09-12	12:16:13	2.34724
2022-09-12	12:16:13	0.930801
2022-09-12	12:16:13	2.482
2022-09-12	12:16:13	0.80444
2022-09-12	12:16:14	1.16846
2022-09-12	12:16:14	2.04729
2022-09-12	12:16:14	0.69416
2022-09-12	12:16:14	3.46948
2022-09-12	12:16:15	1.5849
2022-09-12	12:16:15	4.09263
2022-09-12	12:16:15	1.35014
2022-09-12	12:16:15	4.05472
2022-09-12	12:16:16	2.54693
2022-09-12	12:16:16	1.53787
2022-09-12	12:16:16	2.8767
2022-09-12	12:16:17	1.52775
2022-09-12	12:16:17	3.16011
2022-09-12	12:16:17	0.909173
2022-09-12	12:16:17	2.1736
2022-09-12	12:16:18	0.597825
2022-09-12	12:16:18	2.01696
2022-09-12	12:16:18	0.670751
2022-09-12	12:16:18	4.07467
2022-09-12	12:16:19	0.80841
2022-09-12	12:16:19	5.24199
2022-09-12	12:16:19	0.852125
2022-09-12	12:16:19	3.71141
2022-09-12	12:16:20	0.860522
2022-09-12	12:16:20	1.69823
2022-09-12	12:16:20	2.34159
2022-09-12	12:16:20	2.50271
2022-09-12	12:16:21	3.50698
2022-09-12	12:16:21	3.12296
2022-09-12	12:16:21	3.86943
2022-09-12	12:16:22	1.25309
2022-09-12	12:16:22	3.48352
2022-09-12	12:16:22	0.642964
2022-09-12	12:16:22	3.22016
2022-09-12	12:16:23	0.499453
2022-09-12	12:16:23	2.08414
2022-09-12	12:16:23	0.541285
2022-09-12	12:16:23	2.30536
2022-09-12	12:16:24	1.07788
2022-09-12	12:16:24	2.93813
2022-09-12	12:16:24	2.02744
2022-09-12	12:16:25	1.33172
2022-09-12	12:16:25	2.79716
2022-09-12	12:16:25	1.2567
2022-09-12	12:16:25	3.23966
2022-09-12	12:16:26	0.791667
2022-09-12	12:16:26	6.18535
2022-09-12	12:16:26	0.400929
2022-09-12	12:16:26	2.53319
2022-09-12	12:16:27	1.60933
2022-09-12	12:16:27	3.42795
2022-09-12	12:16:27	2.82159
2022-09-12	12:16:27	1.52765
2022-09-12	12:16:28	3.76429
2022-09-12	12:16:28	0.583931
2022-09-12	12:16:28	3.77589
2022-09-12	12:16:28	0.741997
2022-09-12	12:16:29	3.78332
2022-09-12	12:16:29	0.8793
2022-09-12	12:16:29	3.06266
2022-09-12	12:16:30	1.77034
2022-09-12	12:16:30	2.84347
2022-09-12	12:16:30	1.40704
2022-09-12	12:16:30	3.71238
2022-09-12	12:16:31	0.557774
2022-09-12	12:16:31	3.83258
2022-09-12	12:16:31	0.574364
2022-09-12	12:16:31	5.91619
2022-09-12	12:16:32	0.456959
2022-09-12	12:16:32	4.70266
2022-09-12	12:16:32	0.838842
2022-09-12	12:16:32	1.72266
2022-09-12	12:16:33	0.260216
2022-09-12	12:16:33	0.360165
2022-09-12	12:16:33	0.120318
2022-09-12	12:16:34	0.0827101
2022-09-12	12:16:34	-0.166196
2022-09-12	12:16:34	-0.296476
2022-09-12	12:16:34	-0.420648
2022-09-12	12:16:35	-0.421259
2022-09-12	12:16:35	-0.340496
2022-09-12	12:16:35	-0.294389
2022-09-12	12:16:35	-0.365941
2022-09-12	12:16:36	-0.22304
2022-09-12	12:16:36	-0.178766
2022-09-12	12:16:36	-0.15846
2022-09-12	12:16:36	0.000165643
2022-09-12	12:16:37	0.0546694
2022-09-12	12:16:37	0.354517
2022-09-12	12:16:37	0.253244
2022-09-12	12:16:38	1.44927
2022-09-12	12:16:38	0.287494
2022-09-12	12:16:38	0.773804
2022-09-12	12:16:38	0.380522
2022-09-12	12:16:39	0.26673
2022-09-12	12:16:39	0.374313
2022-09-12	12:16:39	2.27314
2022-09-12	12:16:39	1.99335
2022-09-12	12:16:40	4.06683
2022-09-12	12:16:40	1.41467
2022-09-12	12:16:40	2.53625
2022-09-12	12:16:40	0.294109
2022-09-12	12:16:41	0.911209
2022-09-12	12:16:41	0.177621
2022-09-12	12:16:41	0.398842
2022-09-12	12:16:42	0.204186
2022-09-12	12:16:42	0.301794
2022-09-12	12:16:42	0.449071
2022-09-12	12:16:42	1.60729
2022-09-12	12:16:43	0.916705
2022-09-12	12:16:43	3.0053
2022-09-12	12:16:43	1.28149
2022-09-12	12:16:43	3.29681
2022-09-12	12:16:44	2.35034
2022-09-12	12:16:44	3.26077
2022-09-12	12:16:44	2.80098
2022-09-12	12:16:44	3.60846
2022-09-12	12:16:45	1.56083
2022-09-12	12:16:45	0.435026
2022-09-12	12:16:45	1.35365
2022-09-12	12:16:46	0.343728
2022-09-12	12:16:46	3.79558
2022-09-12	12:16:46	1.70871
2022-09-12	12:16:46	5.14057
2022-09-12	12:16:47	1.93284
2022-09-12	12:16:47	5.73283
2022-09-12	12:16:47	0.783626
2022-09-12	12:16:47	4.04871
2022-09-12	12:16:48	0.577163
2022-09-12	12:16:48	2.89762
2022-09-12	12:16:48	0.770852
2022-09-12	12:16:48	2.01655
2022-09-12	12:16:49	1.0622
2022-09-12	12:16:49	0.8393
2022-09-12	12:16:49	1.82373
2022-09-12	12:16:50	0.489631
2022-09-12	12:16:50	2.14673
2022-09-12	12:16:50	0.628104
2022-09-12	12:16:50	1.27905
2022-09-12	12:16:51	0.537265
2022-09-12	12:16:51	0.373702
2022-09-12	12:16:51	0.361285
2022-09-12	12:16:51	0.281234
2022-09-12	12:16:52	0.102507
2022-09-12	12:16:52	0.3164
2022-09-12	12:16:52	0.154924
2022-09-12	12:16:52	0.160929
2022-09-12	12:16:53	0.266171
2022-09-12	12:16:53	0.182557
2022-09-12	12:16:53	0.366018
2022-09-12	12:16:54	0.28785
2022-09-12	12:16:54	0.616807
2022-09-12	12:16:54	0.730903
2022-09-12	12:16:54	0.722761
2022-09-12	12:16:55	1.98602
2022-09-12	12:16:55	0.877875
2022-09-12	12:16:55	1.18027
2022-09-12	12:16:55	0.495432
2022-09-12	12:16:56	0.698282
2022-09-12	12:16:56	0.376908
2022-09-12	12:16:56	0.410903
2022-09-12	12:16:56	0.17243
2022-09-12	12:16:57	0.408664
2022-09-12	12:16:57	0.0502929
2022-09-12	12:16:57	0.301692
2022-09-12	12:16:58	0.131362
2022-09-12	12:16:58	0.337774
2022-09-12	12:16:58	0.128868
2022-09-12	12:16:58	0.262557
2022-09-12	12:16:59	0.210496
2022-09-12	12:16:59	0.288664
2022-09-12	12:16:59	0.271616
2022-09-12	12:16:59	0.253193
2022-09-12	12:17:00	0.432176
2022-09-12	12:17:00	1.75055
2022-09-12	12:17:00	0.73757
2022-09-12	12:17:01	3.76373
2022-09-12	12:17:01	1.26215
2022-09-12	12:17:01	1.28576
2022-09-12	12:17:01	0.776857
2022-09-12	12:17:02	0.312939
2022-09-12	12:17:02	0.33355
2022-09-12	12:17:02	0.575331
2022-09-12	12:17:02	0.458944
2022-09-12	12:17:03	1.01996
2022-09-12	12:17:03	1.48902
2022-09-12	12:17:03	3.74785
2022-09-12	12:17:03	2.14612
2022-09-12	12:17:04	3.67441
2022-09-12	12:17:04	2.81095
2022-09-12	12:17:04	2.5282
2022-09-12	12:17:04	2.35106
2022-09-12	12:17:05	0.716756
2022-09-12	12:17:05	1.82714
2022-09-12	12:17:05	0.631717
2022-09-12	12:17:06	3.83737
2022-09-12	12:17:06	0.410903
2022-09-12	12:17:06	3.36775
2022-09-12	12:17:06	2.38108
2022-09-12	12:17:07	3.8938
2022-09-12	12:17:07	2.96535
2022-09-12	12:17:07	3.22001
2022-09-12	12:17:07	1.65966
2022-09-12	12:17:08	3.23655
2022-09-12	12:17:08	0.377774
2022-09-12	12:17:08	0.585916
2022-09-12	12:17:08	0.878486
2022-09-12	12:17:09	0.367392
2022-09-12	12:17:09	0.299249
2022-09-12	12:17:09	0.571514
2022-09-12	12:17:10	0.372125
2022-09-12	12:17:10	0.471412
2022-09-12	12:17:10	0.659758
2022-09-12	12:17:10	0.471667
2022-09-12	12:17:11	0.725153
2022-09-12	12:17:11	1.5277
2022-09-12	12:17:11	2.60128
2022-09-12	12:17:11	4.02999
2022-09-12	12:17:12	0.557265
2022-09-12	12:17:12	0.774262
2022-09-12	12:17:12	0.187087
2022-09-12	12:17:12	0.784338
2022-09-12	12:17:13	0.191921
2022-09-12	12:17:13	1.28744
2022-09-12	12:17:13	0.217977
2022-09-12	12:17:14	1.02317
2022-09-12	12:17:14	0.791667
2022-09-12	12:17:14	1.21798
2022-09-12	12:17:14	2.03747
2022-09-12	12:17:15	1.11431
2022-09-12	12:17:15	1.70754
2022-09-12	12:17:15	0.182201
2022-09-12	12:17:15	0.505509
2022-09-12	12:17:16	1.01732
2022-09-12	12:17:16	0.355585
2022-09-12	12:17:16	0.304746
2022-09-12	12:17:16	0.146832
2022-09-12	12:17:17	-0.172964
2022-09-12	12:17:17	-0.21561
2022-09-12	12:17:17	0.665102
2022-09-12	12:17:18	0.074873
2022-09-12	12:17:18	0.204949
2022-09-12	12:17:18	0.251158
2022-09-12	12:17:18	0.0256109
2022-09-12	12:17:19	0.560471
2022-09-12	12:17:19	0.0563997
2022-09-12	12:17:19	0.548613
2022-09-12	12:17:19	0.234211
2022-09-12	12:17:20	0.451514
2022-09-12	12:17:20	0.180013
2022-09-12	12:17:20	0.253092
2022-09-12	12:17:20	0.3393
2022-09-12	12:17:21	0.18271
2022-09-12	12:17:21	0.656196
2022-09-12	12:17:21	0.258333
2022-09-12	12:17:22	1.14994
2022-09-12	12:17:22	0.222965
2022-09-12	12:17:22	0.702455
2022-09-12	12:17:22	0.35528
2022-09-12	12:17:23	0.737315
2022-09-12	12:17:23	0.738384
2022-09-12	12:17:23	0.230344
2022-09-12	12:17:23	1.445
2022-09-12	12:17:24	1.24388
2022-09-12	12:17:24	2.42866
2022-09-12	12:17:24	2.56571
2022-09-12	12:17:24	2.89039
2022-09-12	12:17:25	1.3822
2022-09-12	12:17:25	3.45146
2022-09-12	12:17:25	0.790344
2022-09-12	12:17:26	3.22093
2022-09-12	12:17:26	0.436705
2022-09-12	12:17:26	1.75828
2022-09-12	12:17:26	0.503168
2022-09-12	12:17:27	1.18363
2022-09-12	12:17:27	0.953346
2022-09-12	12:17:27	0.446476
2022-09-12	12:17:27	1.3991
2022-09-12	12:17:28	0.283219
2022-09-12	12:17:28	0.13925
2022-09-12	12:17:28	0.696501
2022-09-12	12:17:28	0.105611
2022-09-12	12:17:29	0.232023
2022-09-12	12:17:29	0.107189
2022-09-12	12:17:29	0.0960943
2022-09-12	12:17:30	-0.114847
2022-09-12	12:17:30	-0.160852
2022-09-12	12:17:30	-0.424923
2022-09-12	12:17:30	-0.555712
2022-09-12	12:17:31	-0.522531
2022-09-12	12:17:31	-0.241208
2022-09-12	12:17:31	-0.170776
2022-09-12	12:17:31	0.108104
2022-09-12	12:17:32	0.144746
2022-09-12	12:17:32	0.0982317
2022-09-12	12:17:32	-0.0352542
2022-09-12	12:17:32	0.629224
2022-09-12	12:17:33	0.114669
2022-09-12	12:17:33	0.128206
2022-09-12	12:17:33	0.241489
2022-09-12	12:17:34	0.723473
2022-09-12	12:17:34	0.318384
2022-09-12	12:17:34	0.208868
2022-09-12	12:17:34	0.201947
2022-09-12	12:17:35	0.235433
2022-09-12	12:17:35	1.15426
2022-09-12	12:17:35	0.267952
2022-09-12	12:17:35	0.564644
2022-09-12	12:17:36	1.505
2022-09-12	12:17:36	0.068359
2022-09-12	12:17:36	0.302608
2022-09-12	12:17:36	0.137112
2022-09-12	12:17:37	0.483321
2022-09-12	12:17:37	3.50495
2022-09-12	12:17:37	0.556196
2022-09-12	12:17:38	3.07955
2022-09-12	12:17:38	4.71894
2022-09-12	12:17:38	1.03752
2022-09-12	12:17:38	2.688
2022-09-12	12:17:39	2.91604
2022-09-12	12:17:39	0.37416
2022-09-12	12:17:39	1.22912
2022-09-12	12:17:39	0.275585
2022-09-12	12:17:40	0.044186
2022-09-12	12:17:40	0.480522
2022-09-12	12:17:40	0.165763
2022-09-12	12:17:40	1.56266
2022-09-12	12:17:41	1.53503
2022-09-12	12:17:41	0.547239
2022-09-12	12:17:41	1.92011
2022-09-12	12:17:42	0.229478
2022-09-12	12:17:42	0.357112
2022-09-12	12:17:42	1.39584
2022-09-12	12:17:42	0.22439
2022-09-12	12:17:43	0.182914
2022-09-12	12:17:43	0.488868
2022-09-12	12:17:43	-0.0137784
2022-09-12	12:17:43	0.01813
2022-09-12	12:17:44	-0.067417
2022-09-12	12:17:44	-0.423905
2022-09-12	12:17:44	-0.516526
2022-09-12	12:17:44	-0.450877
2022-09-12	12:17:45	-0.391946
2022-09-12	12:17:45	-0.0464501
2022-09-12	12:17:45	0.0990969
2022-09-12	12:17:46	0.167952
2022-09-12	12:17:46	0.262252
2022-09-12	12:17:46	0.276908
2022-09-12	12:17:46	0.451768
2022-09-12	12:17:47	0.33416
2022-09-12	12:17:47	0.429682
2022-09-12	12:17:47	0.402608
2022-09-12	12:17:47	0.295331
2022-09-12	12:17:48	0.39299
2022-09-12	12:17:48	0.34383
2022-09-12	12:17:48	0.360064
2022-09-12	12:17:48	0.352939
2022-09-12	12:17:49	0.359402
2022-09-12	12:17:49	0.30841
2022-09-12	12:17:49	0.256654
2022-09-12	12:17:50	0.238537
2022-09-12	12:17:50	0.309631
2022-09-12	12:17:50	0.200267
2022-09-12	12:17:50	0.181438
2022-09-12	12:17:51	-0.153575
2022-09-12	12:17:51	-0.405127
2022-09-12	12:17:51	-0.261564
2022-09-12	12:17:51	-0.0891982
2022-09-12	12:17:52	-0.0454323
2022-09-12	12:17:52	0.0118705
2022-09-12	12:17:52	0.106222
2022-09-12	12:17:52	0.149428
2022-09-12	12:17:53	0.115738
2022-09-12	12:17:53	0.16897
2022-09-12	12:17:53	0.217875
2022-09-12	12:17:53	0.254771
2022-09-12	12:17:54	0.248766
2022-09-12	12:17:54	0.247799
2022-09-12	12:17:54	0.2564
2022-09-12	12:17:55	0.271412
2022-09-12	12:17:55	0.315331
2022-09-12	12:17:55	0.275178
2022-09-12	12:17:55	0.206069
2022-09-12	12:17:56	0.30785
2022-09-12	12:17:56	0.148206
2022-09-12	12:17:56	0.282863
2022-09-12	12:17:56	0.204746
2022-09-12	12:17:57	0.220929
2022-09-12	12:17:57	0.220369
2022-09-12	12:17:57	0.177214
2022-09-12	12:17:57	0.221641
2022-09-12	12:17:58	0.159555
2022-09-12	12:17:58	0.180725
2022-09-12	12:17:58	0.0405728
2022-09-12	12:17:59	0.168003
2022-09-12	12:17:59	0.233753
2022-09-12	12:17:59	0.271819
2022-09-12	12:17:59	0.219351
2022-09-12	12:18:00	0.383473
2022-09-12	12:18:00	0.258181
2022-09-12	12:18:00	0.359148
2022-09-12	12:18:00	0.240216
2022-09-12	12:18:01	0.475127
2022-09-12	12:18:01	0.374924
2022-09-12	12:18:01	0.328257
2022-09-12	12:18:01	0.588257
2022-09-12	12:18:02	0.480929
2022-09-12	12:18:02	1.20291
2022-09-12	12:18:02	0.555585
2022-09-12	12:18:03	0.472125
2022-09-12	12:18:03	0.500063
2022-09-12	12:18:03	0.249987
2022-09-12	12:18:03	0.43187
2022-09-12	12:18:04	0.341387
2022-09-12	12:18:04	0.436858
2022-09-12	12:18:04	0.790802
2022-09-12	12:18:04	0.594669
2022-09-12	12:18:05	1.74413
2022-09-12	12:18:05	4.06983
2022-09-12	12:18:05	1.72775
2022-09-12	12:18:05	2.50383
2022-09-12	12:18:06	0.555025
2022-09-12	12:18:06	0.931819
2022-09-12	12:18:06	1.29925
2022-09-12	12:18:07	0.35869
2022-09-12	12:18:07	0.171158
2022-09-12	12:18:07	0.367138
2022-09-12	12:18:07	0.251616
2022-09-12	12:18:08	0.405865
2022-09-12	12:18:08	0.367443
2022-09-12	12:18:08	0.340064
2022-09-12	12:18:08	0.117875
2022-09-12	12:18:09	0.346934
2022-09-12	12:18:09	0.1993
2022-09-12	12:18:09	0.449886
2022-09-12	12:18:09	0.273295
2022-09-12	12:18:10	0.73701
2022-09-12	12:18:10	0.768003
2022-09-12	12:18:10	0.445305
2022-09-12	12:18:11	0.220929
2022-09-12	12:18:11	0.527799
2022-09-12	12:18:11	0.947952
2022-09-12	12:18:11	1.86948
2022-09-12	12:18:12	0.764847
2022-09-12	12:18:12	1.02688
2022-09-12	12:18:12	0.288104
2022-09-12	12:18:12	0.347901
2022-09-12	12:18:13	0.383015
2022-09-12	12:18:13	0.309682
2022-09-12	12:18:13	0.441183
2022-09-12	12:18:13	0.466527
2022-09-12	12:18:14	2.01935
2022-09-12	12:18:14	1.9877
2022-09-12	12:18:14	2.92622
2022-09-12	12:18:15	0.33869
2022-09-12	12:18:15	0.591463
2022-09-12	12:18:15	0.417061
2022-09-12	12:18:15	0.47014
2022-09-12	12:18:16	0.272125
2022-09-12	12:18:16	0.230496
2022-09-12	12:18:16	0.467137
2022-09-12	12:18:16	8.02657
2022-09-12	12:18:17	5.31192
2022-09-12	12:18:17	5.47238
2022-09-12	12:18:17	7.7798
2022-09-12	12:18:17	3.81156
2022-09-12	12:18:18	0.662812
2022-09-12	12:18:18	0.340013
2022-09-12	12:18:18	0.328003
2022-09-12	12:18:19	0.474211
2022-09-12	12:18:19	0.813855
2022-09-12	12:18:19	1.94892
2022-09-12	12:18:19	5.95726
2022-09-12	12:18:20	1.48546
2022-09-12	12:18:20	2.37436
2022-09-12	12:18:20	4.3025
2022-09-12	12:18:20	1.2822
2022-09-12	12:18:21	1.8595
2022-09-12	12:18:21	0.563066
2022-09-12	12:18:21	0.795992
2022-09-12	12:18:21	0.391056
2022-09-12	12:18:22	0.471718
2022-09-12	12:18:22	0.236043
2022-09-12	12:18:22	0.458384
2022-09-12	12:18:23	0.242761
2022-09-12	12:18:23	0.457163
2022-09-12	12:18:23	0.260929
2022-09-12	12:18:23	0.457316
2022-09-12	12:18:24	0.725356
2022-09-12	12:18:24	0.681387
2022-09-12	12:18:24	1.38892
2022-09-12	12:18:24	0.628359
2022-09-12	12:18:25	0.55187
2022-09-12	12:18:25	1.61314
2022-09-12	12:18:25	3.07345
2022-09-12	12:18:25	0.912175
2022-09-12	12:18:26	1.96373
2022-09-12	12:18:26	1.81782
2022-09-12	12:18:26	1.33355
2022-09-12	12:18:27	1.60734
2022-09-12	12:18:27	1.23884
2022-09-12	12:18:27	0.806628
2022-09-12	12:18:27	0.665153
2022-09-12	12:18:28	0.366578
2022-09-12	12:18:28	0.357265
2022-09-12	12:18:28	0.329224
2022-09-12	12:18:28	0.361641
2022-09-12	12:18:29	0.342863
2022-09-12	12:18:29	0.278232
2022-09-12	12:18:29	0.365407
2022-09-12	12:18:29	0.132125
2022-09-12	12:18:30	0.25299
2022-09-12	12:18:30	0.202354
2022-09-12	12:18:30	0.22388
2022-09-12	12:18:31	0.215789
2022-09-12	12:18:31	0.0605218
2022-09-12	12:18:31	0.0476974
2022-09-12	12:18:31	0.0921758
2022-09-12	12:18:32	0.131921
2022-09-12	12:18:32	0.148461
2022-09-12	12:18:32	0.151616
2022-09-12	12:18:32	0.137468
2022-09-12	12:18:33	0.199809
2022-09-12	12:18:33	0.240216
2022-09-12	12:18:33	0.10271
2022-09-12	12:18:33	0.261285
2022-09-12	12:18:34	0.125051
2022-09-12	12:18:34	0.319606
2022-09-12	12:18:34	0.234466
2022-09-12	12:18:35	0.31187
2022-09-12	12:18:35	0.0303946
2022-09-12	12:18:35	0.0897839
2022-09-12	12:18:35	0.124542
2022-09-12	12:18:36	0.168104
2022-09-12	12:18:36	0.145764
2022-09-12	12:18:36	0.068817
2022-09-12	12:18:36	0.161896
2022-09-12	12:18:37	0.0830664
2022-09-12	12:18:37	0.147392
2022-09-12	12:18:37	-0.140445
2022-09-12	12:18:37	-0.155254
2022-09-12	12:18:38	-0.11271
2022-09-12	12:18:38	-0.207264
2022-09-12	12:18:38	-0.13215
2022-09-12	12:18:39	-0.267773
2022-09-12	12:18:39	-0.132455
2022-09-12	12:18:39	-0.139376
2022-09-12	12:18:39	0.386222
2022-09-12	12:18:40	0.778232
2022-09-12	12:18:40	0.417367
2022-09-12	12:18:40	0.331005
2022-09-12	12:18:40	0.670903
2022-09-12	12:18:41	0.372837
2022-09-12	12:18:41	0.602252
2022-09-12	12:18:41	0.248715
2022-09-12	12:18:41	0.429071
2022-09-12	12:18:42	0.26673
2022-09-12	12:18:42	0.724949
2022-09-12	12:18:42	0.771463
2022-09-12	12:18:43	1.08108
2022-09-12	12:18:43	1.50327
2022-09-12	12:18:43	0.43411
2022-09-12	12:18:43	1.73645
2022-09-12	12:18:44	0.501183
2022-09-12	12:18:44	1.43696
2022-09-12	12:18:44	1.17248
2022-09-12	12:18:44	0.370802
2022-09-12	12:18:45	0.488359
2022-09-12	12:18:45	0.773397
2022-09-12	12:18:45	0.457672
2022-09-12	12:18:45	1.47248
2022-09-12	12:18:46	0.657163
2022-09-12	12:18:46	1.39126
2022-09-12	12:18:46	2.08978
2022-09-12	12:18:47	0.286069
2022-09-12	12:18:47	0.404644
2022-09-12	12:18:47	0.346425
2022-09-12	12:18:47	0.352786
2022-09-12	12:18:48	0.261743
2022-09-12	12:18:48	0.449835
2022-09-12	12:18:48	0.27411
2022-09-12	12:18:48	1.11538
2022-09-12	12:18:49	3.09818
2022-09-12	12:18:49	2.0791
2022-09-12	12:18:49	4.09859
2022-09-12	12:18:49	3.83375
2022-09-12	12:18:50	3.51767
2022-09-12	12:18:50	4.34922
2022-09-12	12:18:50	0.64383
2022-09-12	12:18:51	1.04592
2022-09-12	12:18:51	1.41884
2022-09-12	12:18:51	0.161845
2022-09-12	12:18:51	0.410496
2022-09-12	12:18:52	0.193957
2022-09-12	12:18:52	0.340013
2022-09-12	12:18:52	0.140216
2022-09-12	12:18:52	0.334008
2022-09-12	12:18:53	0.2764
2022-09-12	12:18:53	0.331107
2022-09-12	12:18:53	0.17472
2022-09-12	12:18:53	-0.0537784
2022-09-12	12:18:54	-0.023244
2022-09-12	12:18:54	0.0570104
2022-09-12	12:18:54	0.19701
2022-09-12	12:18:55	0.25869
2022-09-12	12:18:55	0.277774
2022-09-12	12:18:55	0.425153
2022-09-12	12:18:55	0.350089
2022-09-12	12:18:56	0.275483
2022-09-12	12:18:56	0.415992
2022-09-12	12:18:56	0.165458
2022-09-12	12:18:56	0.369835
2022-09-12	12:18:57	0.355484
2022-09-12	12:18:57	0.356349
2022-09-12	12:18:57	0.36958
2022-09-12	12:18:58	0.454873
2022-09-12	12:18:58	0.401794
2022-09-12	12:18:58	0.444288
2022-09-12	12:18:58	0.708053
2022-09-12	12:18:59	1.52286
2022-09-12	12:18:59	0.307443
2022-09-12	12:18:59	0.983829
2022-09-12	12:18:59	0.516349
2022-09-12	12:19:00	0.748053
2022-09-12	12:19:00	0.212379
2022-09-12	12:19:00	0.352736
2022-09-12	12:19:00	0.331158
2022-09-12	12:19:01	0.154619
2022-09-12	12:19:01	0.183779
2022-09-12	12:19:01	0.153702
2022-09-12	12:19:01	0.167799
2022-09-12	12:19:02	0.293499
2022-09-12	12:19:02	0.225865
2022-09-12	12:19:02	0.248054
2022-09-12	12:19:03	0.265509
2022-09-12	12:19:03	0.126069
2022-09-12	12:19:03	0.210547
2022-09-12	12:19:03	0.235738
2022-09-12	12:19:04	0.174364
2022-09-12	12:19:04	0.154008
2022-09-12	12:19:04	0.109631
2022-09-12	12:19:04	0.112634
2022-09-12	12:19:05	0.165153
2022-09-12	12:19:05	0.315738
2022-09-12	12:19:05	0.28673
2022-09-12	12:19:05	0.263575
2022-09-12	12:19:06	0.281082
2022-09-12	12:19:06	0.358588
2022-09-12	12:19:06	0.329631
2022-09-12	12:19:07	0.298639
2022-09-12	12:19:07	0.318995
2022-09-12	12:19:07	0.414415
2022-09-12	12:19:07	0.417774
2022-09-12	12:19:08	0.349478
2022-09-12	12:19:08	0.325763
2022-09-12	12:19:08	0.309682
2022-09-12	12:19:08	0.305916
2022-09-12	12:19:09	0.295382
2022-09-12	12:19:09	0.225458
2022-09-12	12:19:09	0.194822
2022-09-12	12:19:09	0.325967
2022-09-12	12:19:10	0.287341
2022-09-12	12:19:10	0.324797
2022-09-12	12:19:10	0.326374
2022-09-12	12:19:11	0.292277
2022-09-12	12:19:11	0.277774
2022-09-12	12:19:11	0.286883
2022-09-12	12:19:11	0.164898
2022-09-12	12:19:12	0.291565
2022-09-12	12:19:12	0.230191
2022-09-12	12:19:12	0.209071
2022-09-12	12:19:12	0.344797
2022-09-12	12:19:13	0.150395
2022-09-12	12:19:13	0.27813
2022-09-12	12:19:13	0.185814
2022-09-12	12:19:13	0.0811325
2022-09-12	12:19:14	0.271209
2022-09-12	12:19:14	0.054873
2022-09-12	12:19:14	0.395992
2022-09-12	12:19:15	0.181692
2022-09-12	12:19:15	0.381896
2022-09-12	12:19:15	0.118232
2022-09-12	12:19:15	0.41757
2022-09-12	12:19:16	0.216451
2022-09-12	12:19:16	0.304644
2022-09-12	12:19:16	0.19813
2022-09-12	12:19:16	0.299046
2022-09-12	12:19:17	0.345713
2022-09-12	12:19:17	0.335636
2022-09-12	12:19:17	0.328511
2022-09-12	12:19:17	0.195026
2022-09-12	12:19:18	0.413601
2022-09-12	12:19:18	0.239606
2022-09-12	12:19:18	0.481234
2022-09-12	12:19:19	0.284644
2022-09-12	12:19:19	0.634618
2022-09-12	12:19:19	0.877366
2022-09-12	12:19:19	0.511921
2022-09-12	12:19:20	1.43218
2022-09-12	12:19:20	2.77375
2022-09-12	12:19:20	1.10093
2022-09-12	12:19:20	1.99319
2022-09-12	12:19:21	1.27329
2022-09-12	12:19:21	0.91131
2022-09-12	12:19:21	1.76566
2022-09-12	12:19:21	0.465458
2022-09-12	12:19:22	0.631412
2022-09-12	12:19:22	0.522506
2022-09-12	12:19:22	0.40098
2022-09-12	12:19:23	0.662659
2022-09-12	12:19:23	0.488919
2022-09-12	12:19:23	0.688359
2022-09-12	12:19:23	0.530954
2022-09-12	12:19:24	1.24739
2022-09-12	12:19:24	1.70017
2022-09-12	12:19:24	1.17752
2022-09-12	12:19:24	3.23599
2022-09-12	12:19:25	0.33416
2022-09-12	12:19:25	1.6108
2022-09-12	12:19:25	1.94688
2022-09-12	12:19:25	1.50587
2022-09-12	12:19:26	1.98169
2022-09-12	12:19:26	0.677061
2022-09-12	12:19:26	2.61731
2022-09-12	12:19:26	1.62815
2022-09-12	12:19:27	2.34444
2022-09-12	12:19:27	2.42556
2022-09-12	12:19:27	2.24164
2022-09-12	12:19:28	3.92861
2022-09-12	12:19:28	1.11528
2022-09-12	12:19:28	2.49294
2022-09-12	12:19:28	0.337112
2022-09-12	12:19:29	1.0335
2022-09-12	12:19:29	1.73767
2022-09-12	12:19:29	0.390344
2022-09-12	12:19:29	2.1767
2022-09-12	12:19:30	0.239097
2022-09-12	12:19:30	1.04688
2022-09-12	12:19:30	0.850598
2022-09-12	12:19:30	1.01375
2022-09-12	12:19:31	1.91492
2022-09-12	12:19:31	0.483728
2022-09-12	12:19:31	1.59238
2022-09-12	12:19:32	0.234059
2022-09-12	12:19:32	1.74637
2022-09-12	12:19:32	0.472074
2022-09-12	12:19:32	2.02536
2022-09-12	12:19:33	1.08174
2022-09-12	12:19:33	0.935331
2022-09-12	12:19:33	1.17976
2022-09-12	12:19:33	0.528104
2022-09-12	12:19:34	1.08128
2022-09-12	12:19:34	0.44673
2022-09-12	12:19:34	1.36072
2022-09-12	12:19:34	1.73574
2022-09-12	12:19:35	1.5362
2022-09-12	12:19:35	3.67029
2022-09-12	12:19:35	1.01197
2022-09-12	12:19:36	3.82469
2022-09-12	12:19:36	0.921082
2022-09-12	12:19:36	2.54195
2022-09-12	12:19:36	2.5022
2022-09-12	12:19:37	3.35792
2022-09-12	12:19:37	4.09411
2022-09-12	12:19:37	2.3505
2022-09-12	12:19:37	3.74037
2022-09-12	12:19:38	0.652074
2022-09-12	12:19:38	1.37793
2022-09-12	12:19:38	0.580725
2022-09-12	12:19:38	0.768257
2022-09-12	12:19:39	0.641845
2022-09-12	12:19:39	2.11355
2022-09-12	12:19:39	2.43548
2022-09-12	12:19:40	2.8625
2022-09-12	12:19:40	4.2649
2022-09-12	12:19:40	3.68948
2022-09-12	12:19:40	7.75904
2022-09-12	12:19:41	3.28016
2022-09-12	12:19:41	4.7794
2022-09-12	12:19:41	3.92444
2022-09-12	12:19:41	4.90256
2022-09-12	12:19:42	6.66031
2022-09-12	12:19:42	3.88856
2022-09-12	12:19:42	8.48952
2022-09-12	12:19:42	3.87095
2022-09-12	12:19:43	7.16271
2022-09-12	12:19:43	2.86261
2022-09-12	12:19:43	4.72943
2022-09-12	12:19:44	2.54724
2022-09-12	12:19:44	9.44724
2022-09-12	12:19:44	3.82464
2022-09-12	12:19:44	7.93675
2022-09-12	12:19:45	6.90958
2022-09-12	12:19:45	4.711
2022-09-12	12:19:45	1.18622
2022-09-12	12:19:45	3.75665
2022-09-12	12:19:46	1.75711
2022-09-12	12:19:46	3.15212
2022-09-12	12:19:46	3.56938
2022-09-12	12:19:46	3.06108
2022-09-12	12:19:47	5.73578
2022-09-12	12:19:47	2.85782
2022-09-12	12:19:47	5.27884
2022-09-12	12:19:48	2.08195
2022-09-12	12:19:48	3.53625
2022-09-12	12:19:48	2.67589
2022-09-12	12:19:48	3.11085
2022-09-12	12:19:49	3.32846
2022-09-12	12:19:49	3.42714
2022-09-12	12:19:49	5.83421
2022-09-12	12:19:49	1.92042
2022-09-12	12:19:50	5.47446
2022-09-12	12:19:50	2.29172
2022-09-12	12:19:50	4.52027
2022-09-12	12:19:50	0.809122
2022-09-12	12:19:51	1.94383
2022-09-12	12:19:51	1.77126
2022-09-12	12:19:51	0.485865
2022-09-12	12:19:52	0.453041
2022-09-12	12:19:52	0.426679
2022-09-12	12:19:52	0.868104
2022-09-12	12:19:52	0.61584
2022-09-12	12:19:53	0.659657
2022-09-12	12:19:53	0.252786
2022-09-12	12:19:53	0.256247
2022-09-12	12:19:53	0.341794
2022-09-12	12:19:54	0.138232
2022-09-12	12:19:54	0.236705
2022-09-12	12:19:54	0.282099
2022-09-12	12:19:54	0.219504
2022-09-12	12:19:55	0.324491
2022-09-12	12:19:55	1.10495
2022-09-12	12:19:55	0.179962
2022-09-12	12:19:56	0.329122
2022-09-12	12:19:56	0.335738
2022-09-12	12:19:56	0.549275
2022-09-12	12:19:56	1.93299
2022-09-12	12:19:57	0.891259
2022-09-12	12:19:57	2.34988
2022-09-12	12:19:57	3.26485
2022-09-12	12:19:57	1.18047
2022-09-12	12:19:58	2.15253
2022-09-12	12:19:58	2.72312
2022-09-12	12:19:58	2.19467
2022-09-12	12:19:58	3.52001
2022-09-12	12:19:59	0.728562
2022-09-12	12:19:59	3.69614
2022-09-12	12:19:59	3.32128
2022-09-12	12:20:00	4.9482
2022-09-12	12:20:00	2.9249
2022-09-12	12:20:00	2.46271
2022-09-12	12:20:00	2.43044
2022-09-12	12:20:01	2.27029
2022-09-12	12:20:01	1.62083
2022-09-12	12:20:01	2.57299
2022-09-12	12:20:02	0.711209
2022-09-12	12:20:02	1.84785
2022-09-12	12:20:02	0.495687
2022-09-12	12:20:02	1.43233
2022-09-12	12:20:02	2.4049
2022-09-12	12:20:03	1.31884
2022-09-12	12:20:03	1.45462
2022-09-12	12:20:03	0.574313
2022-09-12	12:20:04	1.3506
2022-09-12	12:20:04	2.0252
2022-09-12	12:20:04	0.403779
2022-09-12	12:20:04	1.31492
2022-09-12	12:20:05	0.666832
2022-09-12	12:20:05	1.92943
2022-09-12	12:20:05	2.4334
2022-09-12	12:20:05	1.61029
2022-09-12	12:20:06	2.65843
2022-09-12	12:20:06	1.40271
2022-09-12	12:20:06	3.24022
2022-09-12	12:20:06	4.4425
2022-09-12	12:20:07	1.10943
2022-09-12	12:20:07	5.25105
2022-09-12	12:20:07	0.572583
2022-09-12	12:20:08	3.88281
2022-09-12	12:20:08	2.57396
2022-09-12	12:20:08	2.23523
2022-09-12	12:20:08	1.9707
2022-09-12	12:20:09	1.67594
2022-09-12	12:20:09	2.51304
2022-09-12	12:20:09	5.0624
2022-09-12	12:20:09	0.291005
2022-09-12	12:20:10	4.1279
2022-09-12	12:20:10	3.22988
2022-09-12	12:20:10	3.44754
2022-09-12	12:20:10	1.76887
2022-09-12	12:20:11	2.93324
2022-09-12	12:20:11	2.40805
2022-09-12	12:20:11	4.33273
2022-09-12	12:20:12	4.4908
2022-09-12	12:20:12	6.20988
2022-09-12	12:20:12	3.55492
2022-09-12	12:20:12	4.41889
2022-09-12	12:20:13	3.61849
2022-09-12	12:20:13	2.42128
2022-09-12	12:20:13	1.90622
2022-09-12	12:20:13	2.34953
2022-09-12	12:20:14	0.112939
2022-09-12	12:20:14	1.32134
2022-09-12	12:20:14	3.0821
2022-09-12	12:20:14	0.777417
2022-09-12	12:20:15	0.579707
2022-09-12	12:20:15	0.432227
2022-09-12	12:20:15	0.339657
2022-09-12	12:20:16	1.10312
2022-09-12	12:20:16	0.240573
2022-09-12	12:20:16	0.407952
2022-09-12	12:20:16	0.187697
2022-09-12	12:20:17	0.237519
2022-09-12	12:20:17	0.0815396
2022-09-12	12:20:17	0.292634
2022-09-12	12:20:17	0.277417
2022-09-12	12:20:18	0.904542
2022-09-12	12:20:18	0.245204
2022-09-12	12:20:18	0.18897
2022-09-12	12:20:18	0.355382
2022-09-12	12:20:19	0.719962
2022-09-12	12:20:19	0.195331
2022-09-12	12:20:19	0.616603
2022-09-12	12:20:20	0.259708
2022-09-12	12:20:20	0.130496
2022-09-12	12:20:20	0.268664
2022-09-12	12:20:20	0.114822
2022-09-12	12:20:21	0.234618
2022-09-12	12:20:21	0.247087
2022-09-12	12:20:21	1.46693
2022-09-12	12:20:21	0.10841
2022-09-12	12:20:22	0.290903
2022-09-12	12:20:22	0.240573
2022-09-12	12:20:22	0.613855
2022-09-12	12:20:22	0.323321
2022-09-12	12:20:23	0.206171
2022-09-12	12:20:23	0.227239
2022-09-12	12:20:23	0.191361
2022-09-12	12:20:24	0.279046
2022-09-12	12:20:24	0.504288
2022-09-12	12:20:24	0.608104
2022-09-12	12:20:24	1.1538
2022-09-12	12:20:25	2.1138
2022-09-12	12:20:25	0.676908
2022-09-12	12:20:25	2.60479
2022-09-12	12:20:25	0.138893
2022-09-12	12:20:26	0.209326
2022-09-12	12:20:26	0.467341
2022-09-12	12:20:26	0.411667
2022-09-12	12:20:26	1.94917
2022-09-12	12:20:27	1.47966
2022-09-12	12:20:27	3.33701
2022-09-12	12:20:27	1.74352
2022-09-12	12:20:28	5.31518
2022-09-12	12:20:28	1.96164
2022-09-12	12:20:28	4.57436
2022-09-12	12:20:28	4.06576
2022-09-12	12:20:29	3.58948
2022-09-12	12:20:29	3.63513
2022-09-12	12:20:29	1.24413
2022-09-12	12:20:29	3.06856
2022-09-12	12:20:30	5.91304
2022-09-12	12:20:30	0.867137
2022-09-12	12:20:30	2.97976
2022-09-12	12:20:30	0.227697
2022-09-12	12:20:31	0.364797
2022-09-12	12:20:31	0.287952
2022-09-12	12:20:31	2.29849
2022-09-12	12:20:32	0.153957
2022-09-12	12:20:32	0.173753
2022-09-12	12:20:32	0.370496
2022-09-12	12:20:32	0.434873
2022-09-12	12:20:33	0.801997
2022-09-12	12:20:33	2.25558
2022-09-12	12:20:33	1.28704
2022-09-12	12:20:33	1.3163
2022-09-12	12:20:34	2.23884
2022-09-12	12:20:34	1.35406
2022-09-12	12:20:34	2.86978
2022-09-12	12:20:34	2.57044
2022-09-12	12:20:35	1.63823
2022-09-12	12:20:35	4.11263
2022-09-12	12:20:35	0.9536
2022-09-12	12:20:36	1.74429
2022-09-12	12:20:36	1.6133
2022-09-12	12:20:36	1.94006
2022-09-12	12:20:36	2.77772
2022-09-12	12:20:37	0.951259
2022-09-12	12:20:37	2.1879
2022-09-12	12:20:37	2.24083
2022-09-12	12:20:37	2.71065
2022-09-12	12:20:38	5.1678
2022-09-12	12:20:38	1.6449
2022-09-12	12:20:38	3.37604
2022-09-12	12:20:38	4.97833
2022-09-12	12:20:39	3.47411
2022-09-12	12:20:39	4.30337
2022-09-12	12:20:39	1.34179
2022-09-12	12:20:40	2.73782
2022-09-12	12:20:40	6.27731
2022-09-12	12:20:40	6.14301
2022-09-12	12:20:40	7.63863
2022-09-12	12:20:41	6.81207
2022-09-12	12:20:41	6.54082
2022-09-12	12:20:41	1.42958
2022-09-12	12:20:41	0.592532
2022-09-12	12:20:42	0.201031
2022-09-12	12:20:42	0.151565
2022-09-12	12:20:42	0.0625575
2022-09-12	12:20:42	0.0777228
2022-09-12	12:20:43	0.268512
2022-09-12	12:20:43	0.244135
2022-09-12	12:20:43	0.490649
2022-09-12	12:20:44	0.125611
2022-09-12	12:20:44	0.100369
2022-09-12	12:20:44	0.0980791
2022-09-12	12:20:44	-0.0931168
2022-09-12	12:20:45	0.0109035
2022-09-12	12:20:45	-0.0798852
2022-09-12	12:20:45	-0.116425
2022-09-12	12:20:45	-0.188129
2022-09-12	12:20:46	-0.281056
2022-09-12	12:20:46	-0.250063
2022-09-12	12:20:46	-0.286196
2022-09-12	12:20:46	-0.306399
2022-09-12	12:20:47	-0.447875
2022-09-12	12:20:47	-0.244516
2022-09-12	12:20:47	-0.234033
2022-09-12	12:20:48	-0.040445
2022-09-12	12:20:48	0.0442877
2022-09-12	12:20:48	0.654924
2022-09-12	12:20:48	0.136756
2022-09-12	12:20:49	1.13615
