# Supplementary material for: Comparing efficacy in reducing pulling and welfare impacts of four types of leash walking equipment
Source: PeerJ journal article supplement (doi:10.7717/peerj.18131), 2024-10-24
Supplement: Shelter1_Tension_files.zip [file Duke_martin_2022912104916 copy.xlsx]

## Sheet: Averaged Newtons
Date	Time	averaged newtons
2022-09-12	10:49:17	2.02433	2.02433	0			Impulse Newton	976.583
2022-09-12	10:49:18	3.28402	5.30835	0			Total steps	14
2022-09-12	10:49:19	12.0536	17.3619	0			# > 5sec	1
2022-09-12	10:49:20	29.2733	46.6352	1
2022-09-12	10:49:21	25.8933	72.5285	2
2022-09-12	10:49:22	1.20554	73.7341	2
2022-09-12	10:49:23	1.71273	75.4468	2
2022-09-12	10:49:24	1.74931	77.1961	2
2022-09-12	10:49:25	1.67747	78.8736	2
2022-09-12	10:49:26	-0.0471405	78.8736	2
2022-09-12	10:49:27	2.11595	80.9895	2
2022-09-12	10:49:28	1.09222	82.0817	2
2022-09-12	10:49:29	0.931463	83.0132	2
2022-09-12	10:49:30	5.51096	88.5242	2
2022-09-12	10:49:31	11.7625	100.287	2
2022-09-12	10:49:32	5.20013	105.487	2
2022-09-12	10:49:33	5.07185	110.559	2
2022-09-12	10:49:34	9.88195	120.441	2
2022-09-12	10:49:35	13.5304	133.971	3
2022-09-12	10:49:36	20.1304	154.101	4
2022-09-12	10:49:37	10.1134	164.215	4
2022-09-12	10:49:38	7.08203	171.297	4
2022-09-12	10:49:39	13.1462	184.443	5
2022-09-12	10:49:40	20.6226	205.066	6
2022-09-12	10:49:41	29.0124	234.078	7
2022-09-12	10:49:42	57.9626	292.041	8
2022-09-12	10:49:43	32.4445	324.485	9
2022-09-12	10:49:44	6.91293	331.398	9
2022-09-12	10:49:45	2.71432	334.112	9
2022-09-12	10:49:46	6.47094	340.583	9
2022-09-12	10:49:47	5.43342	346.017	9
2022-09-12	10:49:48	2.81204	348.829	9
2022-09-12	10:49:49	1.59409	350.423	9
2022-09-12	10:49:50	2.03814	352.461	9
2022-09-12	10:49:51	3.21221	355.673	9
2022-09-12	10:49:52	1.81199	357.485	9
2022-09-12	10:49:53	1.5344	359.02	9
2022-09-12	10:49:54	1.32914	360.349	9
2022-09-12	10:49:55	1.79637	362.145	9
2022-09-12	10:49:56	1.51958	363.665	9
2022-09-12	10:49:57	1.40413	365.069	9
2022-09-12	10:49:58	1.44355	366.512	9
2022-09-12	10:49:59	1.56479	368.077	9
2022-09-12	10:50:00	1.62705	369.704	9
2022-09-12	10:50:01	1.63712	371.341	9
2022-09-12	10:50:02	1.76591	373.107	9
2022-09-12	10:50:03	1.72071	374.828	9
2022-09-12	10:50:04	1.99597	376.824	9
2022-09-12	10:50:05	1.59807	378.422	9
2022-09-12	10:50:06	1.56579	379.988	9
2022-09-12	10:50:07	1.5344	381.522	9
2022-09-12	10:50:08	1.77453	383.297	9
2022-09-12	10:50:09	1.40073	384.698	9
2022-09-12	10:50:10	1.43789	386.135	9
2022-09-12	10:50:11	1.36751	387.503	9
2022-09-12	10:50:12	1.31477	388.818	9
2022-09-12	10:50:13	1.44595	390.264	9
2022-09-12	10:50:14	0.892244	391.156	9
2022-09-12	10:50:15	1.04959	392.206	9
2022-09-12	10:50:16	1.08325	393.289	9
2022-09-12	10:50:17	1.21443	394.503	9
2022-09-12	10:50:18	1.25002	395.753	9
2022-09-12	10:50:19	1.18496	396.938	9
2022-09-12	10:50:20	1.24759	398.186	9
2022-09-12	10:50:21	1.2932	399.479	9
2022-09-12	10:50:22	1.2168	400.696	9
2022-09-12	10:50:23	1.12173	401.817	9
2022-09-12	10:50:24	1.19032	403.008	9
2022-09-12	10:50:25	1.46412	404.472	9
2022-09-12	10:50:26	1.43899	405.911	9
2022-09-12	10:50:27	1.49954	407.41	9
2022-09-12	10:50:28	1.45444	408.865	9
2022-09-12	10:50:29	1.38042	410.245	9
2022-09-12	10:50:30	1.45381	411.699	9
2022-09-12	10:50:31	1.46757	413.167	9
2022-09-12	10:50:32	1.36968	414.536	9
2022-09-12	10:50:33	1.58681	416.123	9
2022-09-12	10:50:34	1.79711	417.92	9
2022-09-12	10:50:35	1.84481	419.765	9
2022-09-12	10:50:36	1.81284	421.578	9
2022-09-12	10:50:37	1.81097	423.389	9
2022-09-12	10:50:38	1.66106	425.05	9
2022-09-12	10:50:39	1.5962	426.646	9
2022-09-12	10:50:40	1.52452	428.171	9
2022-09-12	10:50:41	1.53118	429.702	9
2022-09-12	10:50:42	1.62773	431.33	9
2022-09-12	10:50:43	1.82993	433.16	9
2022-09-12	10:50:44	2.13444	435.294	9
2022-09-12	10:50:45	2.72557	438.02	9
2022-09-12	10:50:46	1.8275	439.847	9
2022-09-12	10:50:47	1.87464	441.722	9
2022-09-12	10:50:48	1.92942	443.651	9
2022-09-12	10:50:49	1.85941	445.511	9
2022-09-12	10:50:50	1.83757	447.348	9
2022-09-12	10:50:51	1.84459	449.193	9
2022-09-12	10:50:52	1.8322	451.025	9
2022-09-12	10:50:53	1.86325	452.888	9
2022-09-12	10:50:54	1.88686	454.775	9
2022-09-12	10:50:55	1.94368	456.719	9
2022-09-12	10:50:56	1.87085	458.589	9
2022-09-12	10:50:57	1.77519	460.365	9
2022-09-12	10:50:58	1.76061	462.125	9
2022-09-12	10:50:59	2.45687	464.582	9
2022-09-12	10:51:00	2.32393	466.906	9
2022-09-12	10:51:01	2.08019	468.986	9
2022-09-12	10:51:02	2.02144	471.008	9
2022-09-12	10:51:03	1.97368	472.981	9
2022-09-12	10:51:04	1.9533	474.935	9
2022-09-12	10:51:05	1.94942	476.884	9
2022-09-12	10:51:06	1.94713	478.831	9
2022-09-12	10:51:07	1.93576	480.767	9
2022-09-12	10:51:08	1.90633	482.673	9
2022-09-12	10:51:09	1.96202	484.635	9
2022-09-12	10:51:10	2.22016	486.856	9
2022-09-12	10:51:11	2.17724	489.033	9
2022-09-12	10:51:12	1.93706	490.97	9
2022-09-12	10:51:13	1.84159	492.811	9
2022-09-12	10:51:14	1.92754	494.739	9
2022-09-12	10:51:15	2.13202	496.871	9
2022-09-12	10:51:16	1.90135	498.772	9
2022-09-12	10:51:17	1.8464	500.619	9
2022-09-12	10:51:18	2.08735	502.706	9
2022-09-12	10:51:19	1.9696	504.676	9
2022-09-12	10:51:20	1.94629	506.622	9
2022-09-12	10:51:21	1.93021	508.552	9
2022-09-12	10:51:22	1.93553	510.488	9
2022-09-12	10:51:23	1.92942	512.417	9
2022-09-12	10:51:24	1.92535	514.342	9
2022-09-12	10:51:25	1.91793	516.26	9
2022-09-12	10:51:26	1.92122	518.182	9
2022-09-12	10:51:27	1.89962	520.081	9
2022-09-12	10:51:28	1.94544	522.027	9
2022-09-12	10:51:29	1.82671	523.853	9
2022-09-12	10:51:30	1.90814	525.762	9
2022-09-12	10:51:31	1.93719	527.699	9
2022-09-12	10:51:32	1.57634	529.275	9
2022-09-12	10:51:33	0.20515	529.48	9
2022-09-12	10:51:34	-1.11355	529.48	9
2022-09-12	10:51:35	1.26894	530.749	9
2022-09-12	10:51:36	1.50837	532.258	9
2022-09-12	10:51:37	1.3657	533.623	9
2022-09-12	10:51:38	10.4663	544.089	9
2022-09-12	10:51:39	6.3648	550.454	9
2022-09-12	10:51:40	1.99122	552.446	9
2022-09-12	10:51:41	2.47633	554.922	9
2022-09-12	10:51:42	2.02093	556.943	9
2022-09-12	10:51:43	3.70417	560.647	9
2022-09-12	10:51:44	5.58634	566.233	9
2022-09-12	10:51:45	2.20826	568.442	9
2022-09-12	10:51:46	1.87526	570.317	9
2022-09-12	10:51:47	3.42432	573.741	9
2022-09-12	10:51:48	3.04528	576.786	9
2022-09-12	10:51:49	1.66253	578.449	9
2022-09-12	10:51:50	1.5494	579.998	9
2022-09-12	10:51:51	1.45365	581.452	9
2022-09-12	10:51:52	3.81019	585.262	9
2022-09-12	10:51:53	3.87463	589.137	9
2022-09-12	10:51:54	2.24527	591.382	9
2022-09-12	10:51:55	1.82682	593.209	9
2022-09-12	10:51:56	1.64351	594.852	9
2022-09-12	10:51:57	2.07113	596.924	9
2022-09-12	10:51:58	2.04923	598.973	9
2022-09-12	10:51:59	3.87237	602.845	9
2022-09-12	10:52:00	6.71748	609.563	9
2022-09-12	10:52:01	4.83003	614.393	9
2022-09-12	10:52:02	3.99008	618.383	9
2022-09-12	10:52:03	1.5507	619.933	9
2022-09-12	10:52:04	0.745783	620.679	9
2022-09-12	10:52:05	0.594585	621.274	9
2022-09-12	10:52:06	-1.4507	621.274	9
2022-09-12	10:52:07	-1.83497	621.274	9
2022-09-12	10:52:08	-1.18387	621.274	9
2022-09-12	10:52:09	-0.649099	621.274	9
2022-09-12	10:52:10	-0.602203	621.274	9
2022-09-12	10:52:11	-0.889809	621.274	9
2022-09-12	10:52:12	-0.728858	621.274	9
2022-09-12	10:52:13	0.11513	621.389	9
2022-09-12	10:52:14	1.72654	623.115	9
2022-09-12	10:52:15	1.63672	624.752	9
2022-09-12	10:52:16	1.68568	626.438	9
2022-09-12	10:52:17	1.31346	627.751	9
2022-09-12	10:52:18	1.77634	629.528	9
2022-09-12	10:52:19	16.192	645.72	10
2022-09-12	10:52:20	18.0391	663.759	11
2022-09-12	10:52:21	3.34455	667.103	11
2022-09-12	10:52:22	1.75687	668.86	11
2022-09-12	10:52:23	1.6258	670.486	11
2022-09-12	10:52:24	1.67306	672.159	11
2022-09-12	10:52:25	1.6666	673.826	11
2022-09-12	10:52:26	1.45449	675.28	11
2022-09-12	10:52:27	1.56423	676.844	11
2022-09-12	10:52:28	1.80395	678.648	11
2022-09-12	10:52:29	2.00984	680.658	11
2022-09-12	10:52:30	2.78299	683.441	11
2022-09-12	10:52:31	1.89269	685.334	11
2022-09-12	10:52:32	1.58285	686.917	11
2022-09-12	10:52:33	1.48319	688.4	11
2022-09-12	10:52:34	1.96692	690.367	11
2022-09-12	10:52:35	2.09473	692.462	11
2022-09-12	10:52:36	2.34249	694.804	11
2022-09-12	10:52:37	3.50004	698.304	11
2022-09-12	10:52:38	6.63848	704.943	11
2022-09-12	10:52:39	8.21021	713.153	11
2022-09-12	10:52:40	7.19126	720.344	11
2022-09-12	10:52:41	1.93106	722.275	11
2022-09-12	10:52:42	1.62512	723.9	11
2022-09-12	10:52:43	0.435823	724.336	11
2022-09-12	10:52:44	-0.382454	724.336	11
2022-09-12	10:52:45	-0.168023	724.336	11
2022-09-12	10:52:46	0.967398	725.303	11
2022-09-12	10:52:47	1.89464	727.198	11
2022-09-12	10:52:48	1.5361	728.734	11
2022-09-12	10:52:49	1.62484	730.359	11
2022-09-12	10:52:50	1.60016	731.959	11
2022-09-12	10:52:51	0.213375	732.173	11
2022-09-12	10:52:52	-1.2829	732.173	11
2022-09-12	10:52:53	-1.50735	732.173	11
2022-09-12	10:52:54	0.783813	732.956	11
2022-09-12	10:52:55	2.47633	735.433	11
2022-09-12	10:52:56	2.83559	738.268	11
2022-09-12	10:52:57	2.17277	740.441	11
2022-09-12	10:52:58	1.87724	742.318	11
2022-09-12	10:52:59	1.01443	743.333	11
2022-09-12	10:53:00	-0.498526	743.333	11
2022-09-12	10:53:01	-0.643855	743.333	11
2022-09-12	10:53:02	-2.00627	743.333	11
2022-09-12	10:53:03	-1.75902	743.333	11
2022-09-12	10:53:04	-1.04578	743.333	11
2022-09-12	10:53:05	-0.141368	743.333	11
2022-09-12	10:53:06	0.176288	743.509	11
2022-09-12	10:53:07	0.467457	743.976	11
2022-09-12	10:53:08	0.306112	744.283	11
2022-09-12	10:53:09	0.726371	745.009	11
2022-09-12	10:53:10	0.69015	745.699	11
2022-09-12	10:53:11	1.07294	746.772	11
2022-09-12	10:53:12	1.16655	747.939	11
2022-09-12	10:53:13	1.28732	749.226	11
2022-09-12	10:53:14	1.03316	750.259	11
2022-09-12	10:53:15	1.48353	751.743	11
2022-09-12	10:53:16	1.59107	753.334	11
2022-09-12	10:53:17	2.70706	756.041	11
2022-09-12	10:53:18	2.73128	758.772	11
2022-09-12	10:53:19	2.42082	761.193	11
2022-09-12	10:53:20	9.64198	770.835	11
2022-09-12	10:53:21	22.0481	792.883	12
2022-09-12	10:53:22	5.90224	798.785	12
2022-09-12	10:53:23	3.04509	801.83	12
2022-09-12	10:53:24	1.93848	803.769	12
2022-09-12	10:53:25	1.62631	805.395	12
2022-09-12	10:53:26	1.69088	807.086	12
2022-09-12	10:53:27	2.03893	809.125	12
2022-09-12	10:53:28	2.02806	811.153	12
2022-09-12	10:53:29	2.02691	813.18	12
2022-09-12	10:53:30	2.15172	815.332	12
2022-09-12	10:53:31	2.51821	817.85	12
2022-09-12	10:53:32	2.54357	820.393	12
2022-09-12	10:53:33	2.39333	822.787	12
2022-09-12	10:53:34	2.27724	825.064	12
2022-09-12	10:53:35	2.23174	827.296	12
2022-09-12	10:53:36	2.34419	829.64	12
2022-09-12	10:53:37	2.44947	832.089	12
2022-09-12	10:53:38	2.57543	834.665	12
2022-09-12	10:53:39	2.03649	836.701	12
2022-09-12	10:53:40	2.01652	838.718	12
2022-09-12	10:53:41	2.01884	840.737	12
2022-09-12	10:53:42	1.95427	842.691	12
2022-09-12	10:53:43	1.87068	844.561	12
2022-09-12	10:53:44	1.9563	846.518	12
2022-09-12	10:53:45	1.75121	848.269	12
2022-09-12	10:53:46	1.78439	850.053	12
2022-09-12	10:53:47	2.31278	852.366	12
2022-09-12	10:53:48	1.98296	854.349	12
2022-09-12	10:53:49	1.99416	856.343	12
2022-09-12	10:53:50	2.0583	858.402	12
2022-09-12	10:53:51	2.22404	860.626	12
2022-09-12	10:53:52	2.82664	863.452	12
2022-09-12	10:53:53	2.36366	865.816	12
2022-09-12	10:53:54	1.8597	867.676	12
2022-09-12	10:53:55	1.63101	869.307	12
2022-09-12	10:53:56	1.72331	871.03	12
2022-09-12	10:53:57	1.76519	872.795	12
2022-09-12	10:53:58	1.73059	874.526	12
2022-09-12	10:53:59	3.3066	877.832	12
2022-09-12	10:54:00	9.93098	887.763	12
2022-09-12	10:54:01	22.708	910.471	13
2022-09-12	10:54:02	9.15815	919.629	13
2022-09-12	10:54:03	2.84634	922.476	13
2022-09-12	10:54:04	13.0951	935.571	14
2022-09-12	10:54:05	5.19511	940.766	14
2022-09-12	10:54:06	2.00718	942.773	14
2022-09-12	10:54:07	5.66456	948.438	14
2022-09-12	10:54:08	3.69931	952.137	14
2022-09-12	10:54:09	1.77272	953.91	14
2022-09-12	10:54:10	2.01776	955.928	14
2022-09-12	10:54:11	4.02939	959.957	14
2022-09-12	10:54:12	2.36524	962.322	14
2022-09-12	10:54:13	1.73316	964.055	14
2022-09-12	10:54:14	1.76276	965.818	14
2022-09-12	10:54:15	4.16143	969.98	14
2022-09-12	10:54:16	4.4049	974.384	14
2022-09-12	10:54:17	2.19858	976.583	14

## Sheet: Duke_martin_2022912104916 ( (3)
Date	Time	Lbs	Newtons	averaged newtons	Total Force x Time	Total Time Steps Force >3		**GoPro Fitting: 1038
2022-09-12	10:49:17	0.395636	1.75987	2.02433	1.75987	FALSE	0			Total Force x Time	1847.85
2022-09-12	10:49:17	0.422557	1.87962	2.02433	1.87962	FALSE	0			Total Time Steps Force >3	46
2022-09-12	10:49:17	0.506629	2.25359	2.02433	4.01346	FALSE	0
2022-09-12	10:49:17	0.495534	2.20423	2.02433	4.08385	FALSE	0
2022-09-12	10:49:18	0.677824	3.0151	3.28402	7.02855	FALSE	0
2022-09-12	10:49:18	1.17324	5.21881	3.28402	9.30266	FALSE	0
2022-09-12	10:49:18	0.691768	3.07712	3.28402	10.1057	FALSE	0
2022-09-12	10:49:18	0.410293	1.82507	3.28402	11.1277	FALSE	0
2022-09-12	10:49:19	0.584287	2.59903	12.0536	12.7047	FALSE	0
2022-09-12	10:49:19	0.744033	3.30961	12.0536	14.4373	FALSE	0
2022-09-12	10:49:19	6.80098	30.2521	12.0536	42.9568	1	1
2022-09-12	10:49:20	8.99395	40.0069	29.2733	54.4442	1	2
2022-09-12	10:49:20	5.60016	24.9106	29.2733	67.8675	1	3
2022-09-12	10:49:20	4.40652	19.6011	29.2733	74.0453	1	4
2022-09-12	10:49:20	7.32306	32.5744	29.2733	100.442	1	5
2022-09-12	10:49:21	11.9481	53.1475	25.8933	127.193	1	6
2022-09-12	10:49:21	8.67889	38.6054	25.8933	139.047	1	7
2022-09-12	10:49:21	2.13177	9.48254	25.8933	136.675	FALSE	7
2022-09-12	10:49:21	0.52556	2.3378	25.8933	141.385	FALSE	7
2022-09-12	10:49:22	0.333957	1.48551	1.20554	138.161	FALSE	7
2022-09-12	10:49:22	0.215942	0.960553	1.20554	142.346	FALSE	7
2022-09-12	10:49:22	0.211311	0.939954	1.20554	139.101	FALSE	7
2022-09-12	10:49:22	0.322863	1.43616	1.20554	143.782	FALSE	7
2022-09-12	10:49:23	0.335331	1.49162	1.71273	140.592	FALSE	7
2022-09-12	10:49:23	0.36271	1.61341	1.71273	145.395	FALSE	7
2022-09-12	10:49:23	0.409835	1.82303	1.71273	142.415	FALSE	7
2022-09-12	10:49:23	0.432277	1.92285	1.71273	147.318	FALSE	7
2022-09-12	10:49:24	0.365356	1.62518	1.74931	144.041	FALSE	7
2022-09-12	10:49:24	0.39584	1.76078	1.74931	149.079	FALSE	7
2022-09-12	10:49:24	0.418588	1.86196	1.74931	145.903	FALSE	7
2022-09-12	10:49:25	0.384033	1.70826	1.67747	150.787	FALSE	7
2022-09-12	10:49:25	0.287646	1.27951	1.67747	147.182	FALSE	7
2022-09-12	10:49:25	0.452227	2.0116	1.67747	152.799	FALSE	7
2022-09-12	10:49:25	0.384542	1.71052	1.67747	148.893	FALSE	7
2022-09-12	10:49:26	0.288868	1.28494	-0.0471405	154.084	FALSE	7
2022-09-12	10:49:26	-0.0814628	-0.362363	-0.0471405	148.893	FALSE	7
2022-09-12	10:49:26	-0.23388	-1.04035	-0.0471405	154.084	FALSE	7
2022-09-12	10:49:26	-0.0159158	-0.0707967	-0.0471405	148.893	FALSE	7
2022-09-12	10:49:27	0.0642878	0.285965	2.11595	154.37	FALSE	7
2022-09-12	10:49:27	0.939911	4.18091	2.11595	153.074	FALSE	7
2022-09-12	10:49:27	0.462608	2.05777	2.11595	156.427	FALSE	7
2022-09-12	10:49:27	0.435941	1.93915	2.11595	155.013	FALSE	7
2022-09-12	10:49:28	0.253041	1.12558	1.09222	157.553	FALSE	7
2022-09-12	10:49:28	0.301794	1.34244	1.09222	156.355	FALSE	7
2022-09-12	10:49:28	0.181794	0.808656	1.09222	158.362	FALSE	7
2022-09-12	10:49:29	0.293601	1.306	0.931463	157.661	FALSE	7
2022-09-12	10:49:29	0.163626	0.727841	0.931463	159.089	FALSE	7
2022-09-12	10:49:29	0.249173	1.10837	0.931463	158.77	FALSE	7
2022-09-12	10:49:29	0.131209	0.583644	0.931463	159.673	FALSE	7
2022-09-12	10:49:30	0.380115	1.69083	5.51096	160.46	FALSE	7
2022-09-12	10:49:30	0.412227	1.83367	5.51096	161.507	FALSE	7
2022-09-12	10:49:30	2.3166	10.3047	5.51096	170.765	FALSE	7
2022-09-12	10:49:30	1.84673	8.21462	5.51096	169.721	FALSE	7
2022-09-12	10:49:31	2.99273	13.3123	11.7625	184.077	FALSE	7
2022-09-12	10:49:31	3.74418	16.6549	11.7625	186.376	1	8
2022-09-12	10:49:31	1.38902	6.17864	11.7625	190.256	FALSE	8
2022-09-12	10:49:31	2.45141	10.9044	11.7625	197.281	FALSE	8
2022-09-12	10:49:32	1.55106	6.89943	5.20013	197.155	FALSE	8
2022-09-12	10:49:32	1.27101	5.65371	5.20013	202.934	FALSE	8
2022-09-12	10:49:32	0.685051	3.04724	5.20013	200.203	FALSE	8
2022-09-12	10:49:33	0.725814	3.22857	5.07185	206.163	FALSE	8
2022-09-12	10:49:33	2.04525	9.09768	5.07185	209.3	FALSE	8
2022-09-12	10:49:33	0.226374	1.00696	5.07185	207.17	FALSE	8
2022-09-12	10:49:33	1.56337	6.95418	5.07185	216.254	FALSE	8
2022-09-12	10:49:34	1.10989	4.93701	9.88195	212.107	FALSE	8
2022-09-12	10:49:34	2.44128	10.8593	9.88195	227.114	FALSE	8
2022-09-12	10:49:34	1.8081	8.04279	9.88195	220.15	FALSE	8
2022-09-12	10:49:34	3.52698	15.6887	9.88195	242.803	1	9
2022-09-12	10:49:35	3.87212	17.224	13.5304	237.374	1	10
2022-09-12	10:49:35	1.89258	8.41857	13.5304	251.221	FALSE	10
2022-09-12	10:49:35	2.73523	12.1669	13.5304	249.54	FALSE	10
2022-09-12	10:49:35	3.66714	16.3122	13.5304	267.533	1	11
2022-09-12	10:49:36	5.7995	25.7973	20.1304	275.338	1	12
2022-09-12	10:49:36	4.05467	18.036	20.1304	285.569	1	13
2022-09-12	10:49:36	3.7224	16.558	20.1304	291.896	1	14
2022-09-12	10:49:37	3.57355	15.8959	10.1134	301.465	1	15
2022-09-12	10:49:37	1.9193	8.53743	10.1134	300.433	FALSE	15
2022-09-12	10:49:37	1.34927	6.00182	10.1134	307.467	FALSE	15
2022-09-12	10:49:37	2.25228	10.0186	10.1134	310.452	FALSE	15
2022-09-12	10:49:38	0.844949	3.7585	7.08203	311.225	FALSE	15
2022-09-12	10:49:38	2.11981	9.42934	7.08203	319.881	FALSE	15
2022-09-12	10:49:38	1.33777	5.95067	7.08203	317.176	FALSE	15
2022-09-12	10:49:38	2.06592	9.18963	7.08203	329.071	FALSE	15
2022-09-12	10:49:39	1.85243	8.23998	13.1462	325.416	FALSE	15
2022-09-12	10:49:39	2.08459	9.27267	13.1462	338.343	FALSE	15
2022-09-12	10:49:39	4.45894	19.8343	13.1462	345.25	1	16
2022-09-12	10:49:39	3.42561	15.2378	13.1462	353.581	1	17
2022-09-12	10:49:40	3.97467	17.6801	20.6226	362.93	1	18
2022-09-12	10:49:40	4.54765	20.2289	20.6226	373.81	1	19
2022-09-12	10:49:40	5.72199	25.4526	20.6226	388.383	1	20
2022-09-12	10:49:40	4.30037	19.1289	20.6226	392.939	1	21
2022-09-12	10:49:41	4.81691	21.4266	29.0124	409.81	1	22
2022-09-12	10:49:41	9.07344	40.3605	29.0124	433.299	1	23
2022-09-12	10:49:41	5.6765	25.2502	29.0124	435.06	1	24
2022-09-12	10:49:42	7.56723	33.6606	57.9626	466.96	1	25
2022-09-12	10:49:42	7.72479	34.3614	57.9626	469.421	1	26
2022-09-12	10:49:42	13.3358	59.3203	57.9626	526.28	1	27
2022-09-12	10:49:42	23.4945	104.508	57.9626	573.929	1	28
2022-09-12	10:49:43	16.2267	72.1796	32.4445	598.46	1	29
2022-09-12	10:49:43	8.14688	36.239	32.4445	610.168	1	30
2022-09-12	10:49:43	2.81416	12.5179	32.4445	610.978	FALSE	30
2022-09-12	10:49:43	1.98765	8.84146	32.4445	619.01	FALSE	30
2022-09-12	10:49:44	1.77976	7.91673	6.91293	618.895	FALSE	30
2022-09-12	10:49:44	1.59808	7.10858	6.91293	626.118	FALSE	30
2022-09-12	10:49:44	2.12866	9.46871	6.91293	628.363	FALSE	30
2022-09-12	10:49:44	0.709885	3.15771	6.91293	629.276	FALSE	30
2022-09-12	10:49:45	0.502964	2.23728	2.71432	630.601	FALSE	30
2022-09-12	10:49:45	0.788053	3.50542	2.71432	632.782	FALSE	30
2022-09-12	10:49:45	0.539605	2.40027	2.71432	633.001	FALSE	30
2022-09-12	10:49:46	1.39146	6.18949	6.47094	638.971	FALSE	30
2022-09-12	10:49:46	2.00938	8.93812	6.47094	641.939	FALSE	30
2022-09-12	10:49:46	1.25355	5.57604	6.47094	644.547	FALSE	30
2022-09-12	10:49:46	1.16454	5.18011	6.47094	647.119	FALSE	30
2022-09-12	10:49:47	1.42968	6.3595	5.43342	650.907	FALSE	30
2022-09-12	10:49:47	0.629173	2.79869	5.43342	649.918	FALSE	30
2022-09-12	10:49:47	1.24363	5.53191	5.43342	656.439	FALSE	30
2022-09-12	10:49:47	1.58347	7.04359	5.43342	656.961	FALSE	30
2022-09-12	10:49:48	0.523982	2.33078	2.81204	658.769	FALSE	30
2022-09-12	10:49:48	0.395891	1.761	2.81204	658.722	FALSE	30
2022-09-12	10:49:48	1.20617	5.36529	2.81204	664.135	FALSE	30
2022-09-12	10:49:48	0.402659	1.79111	2.81204	660.514	FALSE	30
2022-09-12	10:49:49	0.307087	1.36598	1.59409	665.501	FALSE	30
2022-09-12	10:49:49	0.670852	2.98408	1.59409	663.498	FALSE	30
2022-09-12	10:49:49	0.097163	0.4322	1.59409	665.933	FALSE	30
2022-09-12	10:49:50	0.433448	1.92806	2.03814	665.426	FALSE	30
2022-09-12	10:49:50	0.560064	2.49128	2.03814	668.424	FALSE	30
2022-09-12	10:49:50	0.469835	2.08992	2.03814	667.516	FALSE	30
2022-09-12	10:49:50	0.369428	1.64329	2.03814	670.067	FALSE	30
2022-09-12	10:49:51	0.917621	4.08176	3.21221	671.597	FALSE	30
2022-09-12	10:49:51	0.772277	3.43524	3.21221	673.503	FALSE	30
2022-09-12	10:49:51	0.70444	3.13349	3.21221	674.731	FALSE	30
2022-09-12	10:49:51	0.494211	2.19835	3.21221	675.701	FALSE	30
2022-09-12	10:49:52	0.226578	1.00786	1.81199	675.739	FALSE	30
2022-09-12	10:49:52	0.322354	1.4339	1.81199	677.135	FALSE	30
2022-09-12	10:49:52	0.346476	1.54119	1.81199	677.28	FALSE	30
2022-09-12	10:49:52	0.734008	3.26501	1.81199	680.4	FALSE	30
2022-09-12	10:49:53	0.555229	2.46977	1.5344	679.75	FALSE	30
2022-09-12	10:49:53	0.328613	1.46174	1.5344	681.862	FALSE	30
2022-09-12	10:49:53	0.151005	0.6717	1.5344	680.421	FALSE	30
2022-09-12	10:49:54	0.353041	1.5704	1.32914	683.432	FALSE	30
2022-09-12	10:49:54	0.176909	0.786927	1.32914	681.208	FALSE	30
2022-09-12	10:49:54	0.0912088	0.405715	1.32914	683.838	FALSE	30
2022-09-12	10:49:54	0.574059	2.55353	1.32914	683.762	FALSE	30
2022-09-12	10:49:55	0.386985	1.72139	1.79637	685.559	FALSE	30
2022-09-12	10:49:55	0.257774	1.14663	1.79637	684.908	FALSE	30
2022-09-12	10:49:55	0.397926	1.77005	1.79637	687.329	FALSE	30
2022-09-12	10:49:55	0.572684	2.54741	1.79637	687.456	FALSE	30
2022-09-12	10:49:56	0.404898	1.80107	1.51958	689.13	FALSE	30
2022-09-12	10:49:56	0.389021	1.73044	1.51958	689.186	FALSE	30
2022-09-12	10:49:56	0.280165	1.24623	1.51958	690.376	FALSE	30
2022-09-12	10:49:56	0.292379	1.30056	1.51958	690.487	FALSE	30
2022-09-12	10:49:57	0.339809	1.51154	1.40413	691.888	FALSE	30
2022-09-12	10:49:57	0.307036	1.36576	1.40413	691.853	FALSE	30
2022-09-12	10:49:57	0.30673	1.3644	1.40413	693.252	FALSE	30
2022-09-12	10:49:57	0.309071	1.37481	1.40413	693.227	FALSE	30
2022-09-12	10:49:58	0.310344	1.38047	1.44355	694.633	FALSE	30
2022-09-12	10:49:58	0.328969	1.46332	1.44355	694.691	FALSE	30
2022-09-12	10:49:58	0.334262	1.48686	1.44355	696.12	FALSE	30
2022-09-12	10:49:59	0.381896	1.69875	1.56479	696.39	FALSE	30
2022-09-12	10:49:59	0.356196	1.58443	1.56479	697.704	FALSE	30
2022-09-12	10:49:59	0.339809	1.51154	1.56479	697.901	FALSE	30
2022-09-12	10:49:59	0.329224	1.46445	1.56479	699.169	FALSE	30
2022-09-12	10:50:00	0.354618	1.57741	1.62705	699.478	FALSE	30
2022-09-12	10:50:00	0.364644	1.62201	1.62705	700.791	FALSE	30
2022-09-12	10:50:00	0.34327	1.52693	1.62705	701.005	FALSE	30
2022-09-12	10:50:00	0.400573	1.78183	1.62705	702.572	FALSE	30
2022-09-12	10:50:01	0.267494	1.18987	1.63712	702.195	FALSE	30
2022-09-12	10:50:01	0.353143	1.57085	1.63712	704.143	FALSE	30
2022-09-12	10:50:01	0.415789	1.84951	1.63712	704.045	FALSE	30
2022-09-12	10:50:01	0.435738	1.93825	1.63712	706.082	FALSE	30
2022-09-12	10:50:02	0.355433	1.58104	1.76591	705.626	FALSE	30
2022-09-12	10:50:02	0.371921	1.65438	1.76591	707.736	FALSE	30
2022-09-12	10:50:02	0.463626	2.0623	1.76591	707.688	FALSE	30
2022-09-12	10:50:03	0.377977	1.68132	1.72071	709.417	FALSE	30
2022-09-12	10:50:03	0.416552	1.85291	1.72071	709.541	FALSE	30
2022-09-12	10:50:03	0.388257	1.72704	1.72071	711.144	FALSE	30
2022-09-12	10:50:03	0.364542	1.62156	1.72071	711.163	FALSE	30
2022-09-12	10:50:04	0.456043	2.02857	1.99597	713.173	FALSE	30
2022-09-12	10:50:04	0.461794	2.05415	1.99597	713.217	FALSE	30
2022-09-12	10:50:04	0.465204	2.06932	1.99597	715.242	FALSE	30
2022-09-12	10:50:04	0.411819	1.83185	1.99597	715.049	FALSE	30
2022-09-12	10:50:05	0.396247	1.76259	1.59807	717.005	FALSE	30
2022-09-12	10:50:05	0.349886	1.55636	1.59807	716.605	FALSE	30
2022-09-12	10:50:05	0.350802	1.56044	1.59807	718.565	FALSE	30
2022-09-12	10:50:05	0.340115	1.5129	1.59807	718.118	FALSE	30
2022-09-12	10:50:06	0.345	1.53463	1.56579	720.1	FALSE	30
2022-09-12	10:50:06	0.361336	1.60729	1.56579	719.725	FALSE	30
2022-09-12	10:50:06	0.349682	1.55546	1.56579	721.655	FALSE	30
2022-09-12	10:50:07	0.346985	1.54346	1.5344	721.269	FALSE	30
2022-09-12	10:50:07	0.326629	1.45291	1.5344	723.108	FALSE	30
2022-09-12	10:50:07	0.338181	1.5043	1.5344	722.773	FALSE	30
2022-09-12	10:50:07	0.368003	1.63695	1.5344	724.745	FALSE	30
2022-09-12	10:50:08	0.41472	1.84476	1.77453	724.618	FALSE	30
2022-09-12	10:50:08	0.425814	1.89411	1.77453	726.639	FALSE	30
2022-09-12	10:50:08	0.398232	1.77142	1.77453	726.389	FALSE	30
2022-09-12	10:50:08	0.356959	1.58783	1.77453	728.227	FALSE	30
2022-09-12	10:50:09	0.329122	1.464	1.40073	727.853	FALSE	30
2022-09-12	10:50:09	0.300522	1.33678	1.40073	729.564	FALSE	30
2022-09-12	10:50:09	0.316043	1.40582	1.40073	729.259	FALSE	30
2022-09-12	10:50:09	0.313906	1.39632	1.40073	730.96	FALSE	30
2022-09-12	10:50:10	0.334873	1.48958	1.43789	730.748	FALSE	30
2022-09-12	10:50:10	0.322252	1.43344	1.43789	732.394	FALSE	30
2022-09-12	10:50:10	0.312634	1.39066	1.43789	732.139	FALSE	30
2022-09-12	10:50:11	0.31243	1.38975	1.36751	733.783	FALSE	30
2022-09-12	10:50:11	0.311616	1.38613	1.36751	733.525	FALSE	30
2022-09-12	10:50:11	0.306629	1.36395	1.36751	735.147	FALSE	30
2022-09-12	10:50:11	0.299046	1.33022	1.36751	734.855	FALSE	30
2022-09-12	10:50:12	0.29472	1.31097	1.31477	736.458	FALSE	30
2022-09-12	10:50:12	0.30154	1.34131	1.31477	736.197	FALSE	30
2022-09-12	10:50:12	0.291361	1.29603	1.31477	737.754	FALSE	30
2022-09-12	10:50:12	0.294669	1.31075	1.31477	737.508	FALSE	30
2022-09-12	10:50:13	0.298792	1.32909	1.44595	739.083	FALSE	30
2022-09-12	10:50:13	0.355585	1.58171	1.44595	739.089	FALSE	30
2022-09-12	10:50:13	0.267138	1.18828	1.44595	740.272	FALSE	30
2022-09-12	10:50:13	0.378741	1.68472	1.44595	740.774	FALSE	30
2022-09-12	10:50:14	0.141591	0.629825	0.892244	740.901	FALSE	30
2022-09-12	10:50:14	0.120878	0.53769	0.892244	741.312	FALSE	30
2022-09-12	10:50:14	0.217875	0.969152	0.892244	741.871	FALSE	30
2022-09-12	10:50:14	0.321998	1.43231	0.892244	742.744	FALSE	30
2022-09-12	10:50:15	0.278283	1.23786	1.04959	743.108	FALSE	30
2022-09-12	10:50:15	0.245458	1.09185	1.04959	743.836	FALSE	30
2022-09-12	10:50:15	0.184135	0.819069	1.04959	743.928	FALSE	30
2022-09-12	10:50:16	0.256858	1.14256	1.08325	744.978	FALSE	30
2022-09-12	10:50:16	0.228054	1.01443	1.08325	744.942	FALSE	30
2022-09-12	10:50:16	0.249478	1.10973	1.08325	746.088	FALSE	30
2022-09-12	10:50:16	0.239708	1.06627	1.08325	746.008	FALSE	30
2022-09-12	10:50:17	0.290802	1.29355	1.21443	747.382	FALSE	30
2022-09-12	10:50:17	0.257926	1.14731	1.21443	747.156	FALSE	30
2022-09-12	10:50:17	0.257977	1.14753	1.21443	748.529	FALSE	30
2022-09-12	10:50:17	0.285356	1.26932	1.21443	748.425	FALSE	30
2022-09-12	10:50:18	0.277061	1.23242	1.25002	749.762	FALSE	30
2022-09-12	10:50:18	0.27472	1.22201	1.25002	749.647	FALSE	30
2022-09-12	10:50:18	0.276451	1.22971	1.25002	750.991	FALSE	30
2022-09-12	10:50:18	0.29584	1.31596	1.25002	750.963	FALSE	30
2022-09-12	10:50:19	0.27243	1.21182	1.18496	752.203	FALSE	30
2022-09-12	10:50:19	0.26271	1.16859	1.18496	752.131	FALSE	30
2022-09-12	10:50:19	0.264033	1.17447	1.18496	753.378	FALSE	30
2022-09-12	10:50:20	0.271565	1.20798	1.24759	753.339	FALSE	30
2022-09-12	10:50:20	0.284288	1.26457	1.24759	754.642	FALSE	30
2022-09-12	10:50:20	0.294211	1.30871	1.24759	754.648	FALSE	30
2022-09-12	10:50:20	0.271819	1.20911	1.24759	755.851	FALSE	30
2022-09-12	10:50:21	0.304237	1.35331	1.2932	756.001	FALSE	30
2022-09-12	10:50:21	0.294822	1.31143	1.2932	757.163	FALSE	30
2022-09-12	10:50:21	0.286883	1.27611	1.2932	757.278	FALSE	30
2022-09-12	10:50:21	0.276959	1.23197	1.2932	758.395	FALSE	30
2022-09-12	10:50:22	0.277621	1.23491	1.2168	758.512	FALSE	30
2022-09-12	10:50:22	0.275433	1.22518	1.2168	759.62	FALSE	30
2022-09-12	10:50:22	0.260318	1.15795	1.2168	759.67	FALSE	30
2022-09-12	10:50:22	0.280827	1.24917	1.2168	760.869	FALSE	30
2022-09-12	10:50:23	0.305255	1.35784	1.12173	761.028	FALSE	30
2022-09-12	10:50:23	0.193855	0.862306	1.12173	761.731	FALSE	30
2022-09-12	10:50:23	0.257417	1.14504	1.12173	762.173	FALSE	30
2022-09-12	10:50:24	0.279555	1.24352	1.19032	762.975	FALSE	30
2022-09-12	10:50:24	0.232379	1.03367	1.19032	763.207	FALSE	30
2022-09-12	10:50:24	0.263321	1.1713	1.19032	764.146	FALSE	30
2022-09-12	10:50:24	0.295127	1.31278	1.19032	764.52	FALSE	30
2022-09-12	10:50:25	0.31869	1.4176	1.46412	765.564	FALSE	30
2022-09-12	10:50:25	0.3507	1.55998	1.46412	766.08	FALSE	30
2022-09-12	10:50:25	0.329784	1.46695	1.46412	767.031	FALSE	30
2022-09-12	10:50:25	0.317417	1.41193	1.46412	767.492	FALSE	30
2022-09-12	10:50:26	0.309886	1.37843	1.43899	768.409	FALSE	30
2022-09-12	10:50:26	0.325458	1.4477	1.43899	768.939	FALSE	30
2022-09-12	10:50:26	0.326323	1.45155	1.43899	769.861	FALSE	30
2022-09-12	10:50:26	0.332328	1.47826	1.43899	770.418	FALSE	30
2022-09-12	10:50:27	0.342863	1.52512	1.49954	771.386	FALSE	30
2022-09-12	10:50:27	0.329122	1.464	1.49954	771.882	FALSE	30
2022-09-12	10:50:27	0.339351	1.5095	1.49954	772.895	FALSE	30
2022-09-12	10:50:28	0.33126	1.47351	1.45444	773.355	FALSE	30
2022-09-12	10:50:28	0.322964	1.43661	1.45444	774.332	FALSE	30
2022-09-12	10:50:28	0.330903	1.47192	1.45444	774.827	FALSE	30
2022-09-12	10:50:28	0.322761	1.43571	1.45444	775.768	FALSE	30
2022-09-12	10:50:29	0.311209	1.38432	1.38042	776.211	FALSE	30
2022-09-12	10:50:29	0.3164	1.40741	1.38042	777.175	FALSE	30
2022-09-12	10:50:29	0.309886	1.37843	1.38042	777.59	FALSE	30
2022-09-12	10:50:29	0.30383	1.3515	1.38042	778.527	FALSE	30
2022-09-12	10:50:30	0.305967	1.361	1.45381	778.951	FALSE	30
2022-09-12	10:50:30	0.309122	1.37504	1.45381	779.902	FALSE	30
2022-09-12	10:50:30	0.342964	1.52557	1.45381	780.476	FALSE	30
2022-09-12	10:50:30	0.349275	1.55365	1.45381	781.455	FALSE	30
2022-09-12	10:50:31	0.318384	1.41624	1.46757	781.893	FALSE	30
2022-09-12	10:50:31	0.293295	1.30463	1.46757	782.76	FALSE	30
2022-09-12	10:50:31	0.355127	1.57968	1.46757	783.472	FALSE	30
2022-09-12	10:50:31	0.352888	1.56972	1.46757	784.33	FALSE	30
2022-09-12	10:50:32	0.277774	1.23559	1.36968	784.708	FALSE	30
2022-09-12	10:50:32	0.317876	1.41398	1.36968	785.744	FALSE	30
2022-09-12	10:50:32	0.328104	1.45947	1.36968	786.167	FALSE	30
2022-09-12	10:50:33	0.288308	1.28245	1.58681	787.026	FALSE	30
2022-09-12	10:50:33	0.360369	1.60299	1.58681	787.77	FALSE	30
2022-09-12	10:50:33	0.356756	1.58692	1.58681	788.613	FALSE	30
2022-09-12	10:50:33	0.421489	1.87487	1.58681	789.645	FALSE	30
2022-09-12	10:50:34	0.376654	1.67543	1.79711	790.288	FALSE	30
2022-09-12	10:50:34	0.384288	1.70939	1.79711	791.355	FALSE	30
2022-09-12	10:50:34	0.454364	2.0211	1.79711	792.309	FALSE	30
2022-09-12	10:50:34	0.400725	1.7825	1.79711	793.137	FALSE	30
2022-09-12	10:50:35	0.385967	1.71686	1.84481	794.026	FALSE	30
2022-09-12	10:50:35	0.411565	1.83072	1.84481	794.968	FALSE	30
2022-09-12	10:50:35	0.458893	2.04125	1.84481	796.068	FALSE	30
2022-09-12	10:50:35	0.402506	1.79043	1.84481	796.758	FALSE	30
2022-09-12	10:50:36	0.38271	1.70237	1.81284	797.77	FALSE	30
2022-09-12	10:50:36	0.428359	1.90543	1.81284	798.664	FALSE	30
2022-09-12	10:50:36	0.411565	1.83072	1.81284	799.601	FALSE	30
2022-09-12	10:50:37	0.401489	1.7859	1.81097	800.45	FALSE	30
2022-09-12	10:50:37	0.406272	1.80718	1.81097	801.408	FALSE	30
2022-09-12	10:50:37	0.408359	1.81646	1.81097	802.266	FALSE	30
2022-09-12	10:50:37	0.412379	1.83434	1.81097	803.242	FALSE	30
2022-09-12	10:50:38	0.406578	1.80854	1.66106	804.075	FALSE	30
2022-09-12	10:50:38	0.394211	1.75353	1.66106	804.996	FALSE	30
2022-09-12	10:50:38	0.34673	1.54232	1.66106	805.617	FALSE	30
2022-09-12	10:50:38	0.346171	1.53984	1.66106	806.536	FALSE	30
2022-09-12	10:50:39	0.371209	1.65121	1.5962	807.268	FALSE	30
2022-09-12	10:50:39	0.359249	1.59801	1.5962	808.134	FALSE	30
2022-09-12	10:50:39	0.35182	1.56497	1.5962	808.833	FALSE	30
2022-09-12	10:50:39	0.353092	1.57062	1.5962	809.704	FALSE	30
2022-09-12	10:50:40	0.343473	1.52784	1.52452	810.361	FALSE	30
2022-09-12	10:50:40	0.338283	1.50475	1.52452	811.209	FALSE	30
2022-09-12	10:50:40	0.346425	1.54097	1.52452	811.902	FALSE	30
2022-09-12	10:50:41	0.342048	1.5215	1.53118	812.73	FALSE	30
2022-09-12	10:50:41	0.33813	1.50407	1.53118	813.406	FALSE	30
2022-09-12	10:50:41	0.341947	1.52105	1.53118	814.251	FALSE	30
2022-09-12	10:50:41	0.354771	1.57809	1.53118	814.984	FALSE	30
2022-09-12	10:50:42	0.340878	1.51629	1.62773	815.768	FALSE	30
2022-09-12	10:50:42	0.369835	1.6451	1.62773	816.629	FALSE	30
2022-09-12	10:50:42	0.361489	1.60798	1.62773	817.376	FALSE	30
2022-09-12	10:50:42	0.391514	1.74153	1.62773	818.371	FALSE	30
2022-09-12	10:50:43	0.412125	1.83321	1.82993	819.209	FALSE	30
2022-09-12	10:50:43	0.408969	1.81918	1.82993	820.19	FALSE	30
2022-09-12	10:50:43	0.407443	1.81239	1.82993	821.021	FALSE	30
2022-09-12	10:50:43	0.41701	1.85494	1.82993	822.045	FALSE	30
2022-09-12	10:50:44	0.443066	1.97085	2.13444	822.992	FALSE	30
2022-09-12	10:50:44	0.478791	2.12976	2.13444	824.175	FALSE	30
2022-09-12	10:50:44	0.517672	2.30271	2.13444	825.295	FALSE	30
2022-09-12	10:50:45	0.58215	2.58952	2.72557	826.764	FALSE	30
2022-09-12	10:50:45	0.643626	2.86298	2.72557	828.158	FALSE	30
2022-09-12	10:50:45	0.644542	2.86705	2.72557	829.631	FALSE	30
2022-09-12	10:50:45	0.580623	2.58273	2.72557	830.741	FALSE	30
2022-09-12	10:50:46	0.458537	2.03966	1.8275	831.671	FALSE	30
2022-09-12	10:50:46	0.413651	1.84	1.8275	832.581	FALSE	30
2022-09-12	10:50:46	0.387697	1.72455	1.8275	833.395	FALSE	30
2022-09-12	10:50:46	0.383473	1.70576	1.8275	834.286	FALSE	30
2022-09-12	10:50:47	0.386629	1.7198	1.87464	835.115	FALSE	30
2022-09-12	10:50:47	0.438079	1.94866	1.87464	836.235	FALSE	30
2022-09-12	10:50:47	0.432074	1.92195	1.87464	837.037	FALSE	30
2022-09-12	10:50:47	0.42897	1.90814	1.87464	838.143	FALSE	30
2022-09-12	10:50:48	0.426221	1.89592	1.92942	838.933	FALSE	30
2022-09-12	10:50:48	0.432277	1.92285	1.92942	840.066	FALSE	30
2022-09-12	10:50:48	0.442761	1.96949	1.92942	840.903	FALSE	30
2022-09-12	10:50:49	0.436959	1.94368	1.85941	842.01	FALSE	30
2022-09-12	10:50:49	0.467188	2.07815	1.85941	842.981	FALSE	30
2022-09-12	10:50:49	0.348511	1.55025	1.85941	843.56	FALSE	30
2022-09-12	10:50:49	0.419402	1.86558	1.85941	844.846	FALSE	30
2022-09-12	10:50:50	0.413092	1.83752	1.83757	845.397	FALSE	30
2022-09-12	10:50:50	0.405814	1.80514	1.83757	846.651	FALSE	30
2022-09-12	10:50:50	0.417519	1.85721	1.83757	847.255	FALSE	30
2022-09-12	10:50:50	0.415992	1.85042	1.83757	848.502	FALSE	30
2022-09-12	10:50:51	0.414109	1.84204	1.84459	849.097	FALSE	30
2022-09-12	10:50:51	0.413855	1.84091	1.84459	850.343	FALSE	30
2022-09-12	10:50:51	0.417417	1.85675	1.84459	850.953	FALSE	30
2022-09-12	10:50:51	0.413346	1.83865	1.84459	852.181	FALSE	30
2022-09-12	10:50:52	0.409886	1.82325	1.8322	852.777	FALSE	30
2022-09-12	10:50:52	0.414059	1.84182	1.8322	854.023	FALSE	30
2022-09-12	10:50:52	0.412532	1.83502	1.8322	854.612	FALSE	30
2022-09-12	10:50:52	0.411107	1.82869	1.8322	855.852	FALSE	30
2022-09-12	10:50:53	0.413143	1.83774	1.86325	856.449	FALSE	30
2022-09-12	10:50:53	0.422099	1.87758	1.86325	857.729	FALSE	30
2022-09-12	10:50:53	0.421387	1.87441	1.86325	858.324	FALSE	30
2022-09-12	10:50:54	0.422099	1.87758	1.88686	859.607	FALSE	30
2022-09-12	10:50:54	0.421641	1.87554	1.88686	860.199	FALSE	30
2022-09-12	10:50:54	0.422965	1.88143	1.88686	861.488	FALSE	30
2022-09-12	10:50:54	0.430038	1.9129	1.88686	862.112	FALSE	30
2022-09-12	10:50:55	0.43986	1.95659	1.94368	863.445	FALSE	30
2022-09-12	10:50:55	0.441641	1.96451	1.94368	864.077	FALSE	30
2022-09-12	10:50:55	0.437519	1.94617	1.94368	865.391	FALSE	30
2022-09-12	10:50:55	0.428817	1.90746	1.94368	865.984	FALSE	30
2022-09-12	10:50:56	0.423321	1.88302	1.87085	867.274	FALSE	30
2022-09-12	10:50:56	0.418639	1.86219	1.87085	867.846	FALSE	30
2022-09-12	10:50:56	0.420624	1.87102	1.87085	869.145	FALSE	30
2022-09-12	10:50:56	0.419758	1.86717	1.87085	869.714	FALSE	30
2022-09-12	10:50:57	0.425865	1.89433	1.77519	871.04	FALSE	30
2022-09-12	10:50:57	0.392888	1.74764	1.77519	871.461	FALSE	30
2022-09-12	10:50:57	0.378486	1.68358	1.77519	872.723	FALSE	30
2022-09-12	10:50:58	0.369835	1.6451	1.76061	873.106	FALSE	30
2022-09-12	10:50:58	0.358944	1.59665	1.76061	874.32	FALSE	30
2022-09-12	10:50:58	0.439148	1.95342	1.76061	875.06	FALSE	30
2022-09-12	10:50:58	0.41528	1.84725	1.76061	876.167	FALSE	30
2022-09-12	10:50:59	0.491769	2.18749	2.45687	877.247	FALSE	30
2022-09-12	10:50:59	0.536196	2.38511	2.45687	878.552	FALSE	30
2022-09-12	10:50:59	0.659554	2.93383	2.45687	880.181	FALSE	30
2022-09-12	10:50:59	0.521794	2.32104	2.45687	880.873	FALSE	30
2022-09-12	10:51:00	0.552328	2.45687	2.32393	882.638	FALSE	30
2022-09-12	10:51:00	0.436654	1.94232	2.32393	882.816	FALSE	30
2022-09-12	10:51:00	0.519046	2.30882	2.32393	884.947	FALSE	30
2022-09-12	10:51:00	0.581743	2.58771	2.32393	885.403	FALSE	30
2022-09-12	10:51:01	0.470751	2.09399	2.08019	887.041	FALSE	30
2022-09-12	10:51:01	0.481387	2.14131	2.08019	887.545	FALSE	30
2022-09-12	10:51:01	0.450802	2.00526	2.08019	889.046	FALSE	30
2022-09-12	10:51:02	0.513601	2.2846	2.02144	889.829	FALSE	30
2022-09-12	10:51:02	0.408868	1.81873	2.02144	890.865	FALSE	30
2022-09-12	10:51:02	0.435178	1.93576	2.02144	891.765	FALSE	30
2022-09-12	10:51:02	0.460115	2.04668	2.02144	892.911	FALSE	30
2022-09-12	10:51:03	0.475636	2.11572	1.97368	893.881	FALSE	30
2022-09-12	10:51:03	0.424746	1.88936	1.97368	894.801	FALSE	30
2022-09-12	10:51:03	0.435127	1.93553	1.97368	895.816	FALSE	30
2022-09-12	10:51:03	0.4393	1.95409	1.97368	896.755	FALSE	30
2022-09-12	10:51:04	0.431921	1.92127	1.9533	897.737	FALSE	30
2022-09-12	10:51:04	0.43701	1.94391	1.9533	898.699	FALSE	30
2022-09-12	10:51:04	0.440471	1.9593	1.9533	899.697	FALSE	30
2022-09-12	10:51:04	0.447087	1.98873	1.9533	900.688	FALSE	30
2022-09-12	10:51:05	0.436043	1.93961	1.94942	901.636	FALSE	30
2022-09-12	10:51:05	0.440827	1.96089	1.94942	902.648	FALSE	30
2022-09-12	10:51:05	0.437875	1.94776	1.94942	903.584	FALSE	30
2022-09-12	10:51:06	0.438435	1.95025	1.94713	904.599	FALSE	30
2022-09-12	10:51:06	0.435331	1.93644	1.94713	905.521	FALSE	30
2022-09-12	10:51:06	0.437417	1.94572	1.94713	906.544	FALSE	30
2022-09-12	10:51:06	0.439758	1.95613	1.94713	907.477	FALSE	30
2022-09-12	10:51:07	0.438333	1.94979	1.93576	908.494	FALSE	30
2022-09-12	10:51:07	0.437265	1.94504	1.93576	909.422	FALSE	30
2022-09-12	10:51:07	0.431718	1.92037	1.93576	910.415	FALSE	30
2022-09-12	10:51:07	0.433397	1.92784	1.93576	911.35	FALSE	30
2022-09-12	10:51:08	0.425356	1.89207	1.90633	912.307	FALSE	30
2022-09-12	10:51:08	0.430445	1.91471	1.90633	913.264	FALSE	30
2022-09-12	10:51:08	0.432227	1.92263	1.90633	914.229	FALSE	30
2022-09-12	10:51:08	0.426221	1.89592	1.90633	915.16	FALSE	30
2022-09-12	10:51:09	0.431107	1.91765	1.96202	916.147	FALSE	30
2022-09-12	10:51:09	0.429478	1.9104	1.96202	917.071	FALSE	30
2022-09-12	10:51:09	0.440624	1.95998	1.96202	918.107	FALSE	30
2022-09-12	10:51:09	0.463117	2.06004	1.96202	919.131	FALSE	30
2022-09-12	10:51:10	0.505356	2.24792	2.22016	920.355	FALSE	30
2022-09-12	10:51:10	0.510801	2.27215	2.22016	921.403	FALSE	30
2022-09-12	10:51:10	0.481183	2.1404	2.22016	922.495	FALSE	30
2022-09-12	10:51:11	0.532074	2.36677	2.17724	923.77	FALSE	30
2022-09-12	10:51:11	0.553194	2.46072	2.17724	924.956	FALSE	30
2022-09-12	10:51:11	0.479199	2.13157	2.17724	925.901	FALSE	30
2022-09-12	10:51:11	0.393397	1.74991	2.17724	926.706	FALSE	30
2022-09-12	10:51:12	0.482049	2.14425	1.93706	928.045	FALSE	30
2022-09-12	10:51:12	0.412939	1.83684	1.93706	928.543	FALSE	30
2022-09-12	10:51:12	0.419606	1.86649	1.93706	929.912	FALSE	30
2022-09-12	10:51:12	0.42729	1.90067	1.93706	930.443	FALSE	30
2022-09-12	10:51:13	0.407901	1.81443	1.84159	931.726	FALSE	30
2022-09-12	10:51:13	0.401489	1.7859	1.84159	932.229	FALSE	30
2022-09-12	10:51:13	0.401336	1.78522	1.84159	933.512	FALSE	30
2022-09-12	10:51:13	0.445305	1.98081	1.84159	934.21	FALSE	30
2022-09-12	10:51:14	0.421947	1.8769	1.92754	935.388	FALSE	30
2022-09-12	10:51:14	0.442608	1.96881	1.92754	936.179	FALSE	30
2022-09-12	10:51:14	0.435433	1.93689	1.92754	937.325	FALSE	30
2022-09-12	10:51:15	0.458995	2.0417	2.13202	938.221	FALSE	30
2022-09-12	10:51:15	0.485458	2.15941	2.13202	939.485	FALSE	30
2022-09-12	10:51:15	0.474975	2.11278	2.13202	940.333	FALSE	30
2022-09-12	10:51:15	0.497774	2.2142	2.13202	941.699	FALSE	30
2022-09-12	10:51:16	0.440776	1.96066	1.90135	942.294	FALSE	30
2022-09-12	10:51:16	0.457672	2.03582	1.90135	943.735	FALSE	30
2022-09-12	10:51:16	0.410089	1.82416	1.90135	944.118	FALSE	30
2022-09-12	10:51:16	0.401234	1.78477	1.90135	945.52	FALSE	30
2022-09-12	10:51:17	0.434262	1.93168	1.8464	946.05	FALSE	30
2022-09-12	10:51:17	0.387341	1.72297	1.8464	947.242	FALSE	30
2022-09-12	10:51:17	0.425153	1.89117	1.8464	947.941	FALSE	30
2022-09-12	10:51:17	0.413601	1.83978	1.8464	949.082	FALSE	30
2022-09-12	10:51:18	0.500267	2.22529	2.08735	950.166	FALSE	30
2022-09-12	10:51:18	0.45813	2.03785	2.08735	951.12	FALSE	30
2022-09-12	10:51:18	0.449377	1.99892	2.08735	952.165	FALSE	30
2022-09-12	10:51:19	0.443575	1.97311	1.9696	953.093	FALSE	30
2022-09-12	10:51:19	0.435636	1.9378	1.9696	954.103	FALSE	30
2022-09-12	10:51:19	0.447137	1.98895	1.9696	955.082	FALSE	30
2022-09-12	10:51:19	0.444796	1.97854	1.9696	956.082	FALSE	30
2022-09-12	10:51:20	0.436756	1.94278	1.94629	957.025	FALSE	30
2022-09-12	10:51:20	0.435178	1.93576	1.94629	958.017	FALSE	30
2022-09-12	10:51:20	0.44042	1.95908	1.94629	958.984	FALSE	30
2022-09-12	10:51:20	0.437825	1.94753	1.94629	959.965	FALSE	30
2022-09-12	10:51:21	0.435891	1.93893	1.93021	960.923	FALSE	30
2022-09-12	10:51:21	0.435585	1.93757	1.93021	961.902	FALSE	30
2022-09-12	10:51:21	0.434873	1.9344	1.93021	962.857	FALSE	30
2022-09-12	10:51:21	0.429377	1.90995	1.93021	963.812	FALSE	30
2022-09-12	10:51:22	0.434364	1.93214	1.93553	964.79	FALSE	30
2022-09-12	10:51:22	0.435076	1.93531	1.93553	965.748	FALSE	30
2022-09-12	10:51:22	0.435941	1.93915	1.93553	966.729	FALSE	30
2022-09-12	10:51:23	0.434873	1.9344	1.92942	967.682	FALSE	30
2022-09-12	10:51:23	0.433193	1.92693	1.92942	968.656	FALSE	30
2022-09-12	10:51:23	0.433855	1.92987	1.92942	969.612	FALSE	30
2022-09-12	10:51:23	0.433092	1.92648	1.92942	970.582	FALSE	30
2022-09-12	10:51:24	0.435331	1.93644	1.92535	971.548	FALSE	30
2022-09-12	10:51:24	0.43299	1.92603	1.92535	972.508	FALSE	30
2022-09-12	10:51:24	0.431514	1.91946	1.92535	973.468	FALSE	30
2022-09-12	10:51:24	0.431514	1.91946	1.92535	974.428	FALSE	30
2022-09-12	10:51:25	0.430598	1.91539	1.91793	975.383	FALSE	30
2022-09-12	10:51:25	0.432125	1.92218	1.91793	976.35	FALSE	30
2022-09-12	10:51:25	0.433041	1.92625	1.91793	977.31	FALSE	30
2022-09-12	10:51:25	0.428919	1.90792	1.91793	978.258	FALSE	30
2022-09-12	10:51:26	0.436145	1.94006	1.92122	979.25	FALSE	30
2022-09-12	10:51:26	0.429071	1.90859	1.92122	980.166	FALSE	30
2022-09-12	10:51:26	0.431718	1.92037	1.92122	981.17	FALSE	30
2022-09-12	10:51:26	0.4307	1.91584	1.92122	982.082	FALSE	30
2022-09-12	10:51:27	0.424746	1.88936	1.89962	983.059	FALSE	30
2022-09-12	10:51:27	0.429224	1.90927	1.89962	983.991	FALSE	30
2022-09-12	10:51:27	0.427188	1.90022	1.89962	984.96	FALSE	30
2022-09-12	10:51:28	0.432125	1.92218	1.94544	985.914	FALSE	30
2022-09-12	10:51:28	0.449733	2.0005	1.94544	986.96	FALSE	30
2022-09-12	10:51:28	0.419402	1.86558	1.94544	987.779	FALSE	30
2022-09-12	10:51:28	0.448155	1.99348	1.94544	988.954	FALSE	30
2022-09-12	10:51:29	0.313448	1.39428	1.82671	989.173	FALSE	30
2022-09-12	10:51:29	0.513092	2.28234	1.82671	991.236	FALSE	30
2022-09-12	10:51:29	0.386527	1.71935	1.82671	990.893	FALSE	30
2022-09-12	10:51:29	0.42958	1.91086	1.82671	993.147	FALSE	30
2022-09-12	10:51:30	0.393346	1.74968	1.90814	992.642	FALSE	30
2022-09-12	10:51:30	0.463677	2.06253	1.90814	995.209	FALSE	30
2022-09-12	10:51:30	0.420522	1.87057	1.90814	994.513	FALSE	30
2022-09-12	10:51:30	0.438333	1.94979	1.90814	997.159	FALSE	30
2022-09-12	10:51:31	0.434415	1.93236	1.93719	996.445	FALSE	30
2022-09-12	10:51:31	0.452125	2.01114	1.93719	999.17	FALSE	30
2022-09-12	10:51:31	0.419962	1.86807	1.93719	998.313	FALSE	30
2022-09-12	10:51:32	0.462456	2.0571	1.57634	1001.23	FALSE	30
2022-09-12	10:51:32	0.378435	1.68335	1.57634	999.997	FALSE	30
2022-09-12	10:51:32	0.312837	1.39156	1.57634	1002.62	FALSE	30
2022-09-12	10:51:32	0.263779	1.17334	1.57634	1001.17	FALSE	30
2022-09-12	10:51:33	0.107748	0.479285	0.20515	1003.1	FALSE	30
2022-09-12	10:51:33	-0.0448725	-0.199602	0.20515	1001.17	FALSE	30
2022-09-12	10:51:33	0.0754837	0.335767	0.20515	1003.43	FALSE	30
2022-09-12	10:51:34	0.0796567	0.354329	-1.11355	1001.52	FALSE	30
2022-09-12	10:51:34	-0.0964755	-0.429142	-1.11355	1003.43	FALSE	30
2022-09-12	10:51:34	-0.370165	-1.64657	-1.11355	1001.52	FALSE	30
2022-09-12	10:51:34	-0.589503	-2.62223	-1.11355	1003.43	FALSE	30
2022-09-12	10:51:34	-0.275203	-1.22416	-1.11355	1001.52	FALSE	30
2022-09-12	10:51:35	0.202608	0.901241	1.26894	1004.34	FALSE	30
2022-09-12	10:51:35	0.321641	1.43072	1.26894	1002.96	FALSE	30
2022-09-12	10:51:35	0.331565	1.47487	1.26894	1005.81	FALSE	30
2022-09-12	10:51:36	0.397825	1.76961	1.50837	1004.72	FALSE	30
2022-09-12	10:51:36	0.294618	1.31052	1.50837	1007.12	FALSE	30
2022-09-12	10:51:36	0.397723	1.76915	1.50837	1006.49	FALSE	30
2022-09-12	10:51:36	0.266221	1.1842	1.50837	1008.3	FALSE	30
2022-09-12	10:51:37	0.316756	1.40899	1.3657	1007.9	FALSE	30
2022-09-12	10:51:37	0.367595	1.63514	1.3657	1009.94	FALSE	30
2022-09-12	10:51:37	0.344033	1.53033	1.3657	1009.43	FALSE	30
2022-09-12	10:51:37	0.199708	0.888341	1.3657	1010.83	FALSE	30
2022-09-12	10:51:38	0.548919	2.4417	10.4663	1011.87	FALSE	30
2022-09-12	10:51:38	1.96383	8.73551	10.4663	1019.56	FALSE	30
2022-09-12	10:51:38	3.79441	16.8783	10.4663	1028.75	1	31
2022-09-12	10:51:38	3.10454	13.8096	10.4663	1033.37	1	32
2022-09-12	10:51:39	1.80958	8.04937	6.3648	1036.8	FALSE	32
2022-09-12	10:51:39	1.64821	7.33157	6.3648	1040.7	FALSE	32
2022-09-12	10:51:39	0.834822	3.71346	6.3648	1040.52	FALSE	32
2022-09-12	10:51:40	0.475636	2.11572	1.99122	1042.82	FALSE	32
2022-09-12	10:51:40	0.395127	1.7576	1.99122	1042.27	FALSE	32
2022-09-12	10:51:40	0.526476	2.34187	1.99122	1045.16	FALSE	32
2022-09-12	10:51:40	0.393346	1.74968	1.99122	1044.02	FALSE	32
2022-09-12	10:51:41	0.432481	1.92376	2.47633	1047.09	FALSE	32
2022-09-12	10:51:41	0.447443	1.99032	2.47633	1046.01	FALSE	32
2022-09-12	10:51:41	0.791819	3.52217	2.47633	1050.61	FALSE	32
2022-09-12	10:51:41	0.555076	2.46909	2.47633	1048.48	FALSE	32
2022-09-12	10:51:42	0.505713	2.24951	2.02093	1052.86	FALSE	32
2022-09-12	10:51:42	0.452125	2.01114	2.02093	1050.49	FALSE	32
2022-09-12	10:51:42	0.461998	2.05506	2.02093	1054.91	FALSE	32
2022-09-12	10:51:42	0.397468	1.76802	2.02093	1052.26	FALSE	32
2022-09-12	10:51:43	0.455483	2.02608	3.70417	1056.94	FALSE	32
2022-09-12	10:51:43	0.692532	3.08052	3.70417	1055.34	FALSE	32
2022-09-12	10:51:43	1.35019	6.00592	3.70417	1062.94	FALSE	32
2022-09-12	10:51:44	1.84709	8.21623	5.58634	1063.56	FALSE	32
2022-09-12	10:51:44	1.95324	8.6884	5.58634	1071.63	FALSE	32
2022-09-12	10:51:44	0.766629	3.41012	5.58634	1066.97	FALSE	32
2022-09-12	10:51:44	0.456501	2.03061	5.58634	1073.66	FALSE	32
2022-09-12	10:51:45	0.568563	2.52908	2.20826	1069.5	FALSE	32
2022-09-12	10:51:45	0.424288	1.88732	2.20826	1075.55	FALSE	32
2022-09-12	10:51:45	0.505	2.24634	2.20826	1071.74	FALSE	32
2022-09-12	10:51:45	0.487901	2.17028	2.20826	1077.72	FALSE	32
2022-09-12	10:51:46	0.522252	2.32308	1.87526	1074.07	FALSE	32
2022-09-12	10:51:46	0.377061	1.67724	1.87526	1079.4	FALSE	32
2022-09-12	10:51:46	0.429071	1.90859	1.87526	1075.98	FALSE	32
2022-09-12	10:51:46	0.357926	1.59213	1.87526	1080.99	FALSE	32
2022-09-12	10:51:47	0.488308	2.17209	3.42432	1078.15	FALSE	32
2022-09-12	10:51:47	0.497926	2.21487	3.42432	1083.21	FALSE	32
2022-09-12	10:51:47	0.964542	4.29048	3.42432	1082.44	FALSE	32
2022-09-12	10:51:47	1.12851	5.01984	3.42432	1088.23	FALSE	32
2022-09-12	10:51:48	0.912735	4.06003	3.04528	1086.5	FALSE	32
2022-09-12	10:51:48	0.54841	2.43944	3.04528	1090.67	FALSE	32
2022-09-12	10:51:48	0.592685	2.63638	3.04528	1089.13	FALSE	32
2022-09-12	10:51:49	0.338181	1.5043	1.66253	1092.17	FALSE	32
2022-09-12	10:51:49	0.459453	2.04374	1.66253	1091.18	FALSE	32
2022-09-12	10:51:49	0.221998	0.987492	1.66253	1093.16	FALSE	32
2022-09-12	10:51:49	0.475382	2.11459	1.66253	1093.29	FALSE	32
2022-09-12	10:51:50	0.184644	0.821333	1.5494	1093.98	FALSE	32
2022-09-12	10:51:50	0.480827	2.13881	1.5494	1095.43	FALSE	32
2022-09-12	10:51:50	0.214822	0.955571	1.5494	1094.93	FALSE	32
2022-09-12	10:51:50	0.51299	2.28188	1.5494	1097.71	FALSE	32
2022-09-12	10:51:51	0.171311	0.762026	1.45365	1095.7	FALSE	32
2022-09-12	10:51:51	0.462252	2.05619	1.45365	1099.77	FALSE	32
2022-09-12	10:51:51	0.191514	0.851893	1.45365	1096.55	FALSE	32
2022-09-12	10:51:51	0.482099	2.14447	1.45365	1101.91	FALSE	32
2022-09-12	10:51:52	0.54042	2.4039	3.81019	1098.95	FALSE	32
2022-09-12	10:51:52	0.861336	3.83139	3.81019	1105.75	FALSE	32
2022-09-12	10:51:52	1.16795	5.19528	3.81019	1104.15	FALSE	32
2022-09-12	10:51:53	1.41452	6.29207	3.87463	1112.04	FALSE	32
2022-09-12	10:51:53	0.800878	3.56247	3.87463	1107.71	FALSE	32
2022-09-12	10:51:53	0.688155	3.06105	3.87463	1115.1	FALSE	32
2022-09-12	10:51:53	0.580674	2.58295	3.87463	1110.29	FALSE	32
2022-09-12	10:51:54	0.682659	3.0366	2.24527	1118.14	FALSE	32
2022-09-12	10:51:54	0.52042	2.31493	2.24527	1112.61	FALSE	32
2022-09-12	10:51:54	0.296349	1.31822	2.24527	1119.45	FALSE	32
2022-09-12	10:51:54	0.519606	2.31131	2.24527	1114.92	FALSE	32
2022-09-12	10:51:55	0.287494	1.27883	1.82682	1120.73	FALSE	32
2022-09-12	10:51:55	0.543473	2.41748	1.82682	1117.34	FALSE	32
2022-09-12	10:51:55	0.329428	1.46536	1.82682	1122.2	FALSE	32
2022-09-12	10:51:55	0.482354	2.14561	1.82682	1119.48	FALSE	32
2022-09-12	10:51:56	0.375534	1.67045	1.64351	1123.87	FALSE	32
2022-09-12	10:51:56	0.373855	1.66298	1.64351	1121.14	FALSE	32
2022-09-12	10:51:56	0.359046	1.59711	1.64351	1125.47	FALSE	32
2022-09-12	10:51:57	0.326985	1.45449	2.07113	1122.6	FALSE	32
2022-09-12	10:51:57	0.533295	2.3722	2.07113	1127.84	FALSE	32
2022-09-12	10:51:57	0.473448	2.10599	2.07113	1124.71	FALSE	32
2022-09-12	10:51:57	0.528715	2.35183	2.07113	1130.19	FALSE	32
2022-09-12	10:51:58	0.569376	2.5327	2.04923	1127.24	FALSE	32
2022-09-12	10:51:58	0.195229	0.868418	2.04923	1131.06	FALSE	32
2022-09-12	10:51:58	0.716807	3.1885	2.04923	1130.43	FALSE	32
2022-09-12	10:51:58	0.361336	1.60729	2.04923	1132.67	FALSE	32
2022-09-12	10:51:59	0.641743	2.8546	3.87237	1133.28	FALSE	32
2022-09-12	10:51:59	0.836349	3.72025	3.87237	1136.39	FALSE	32
2022-09-12	10:51:59	0.572888	2.54832	3.87237	1135.83	FALSE	32
2022-09-12	10:51:59	1.43121	6.36631	3.87237	1142.75	FALSE	32
2022-09-12	10:52:00	1.02342	4.55238	6.71748	1140.38	FALSE	32
2022-09-12	10:52:00	1.94317	8.64361	6.71748	1151.4	FALSE	32
2022-09-12	10:52:00	1.56388	6.95645	6.71748	1147.34	FALSE	32
2022-09-12	10:52:01	0.993041	4.41724	4.83003	1155.81	FALSE	32
2022-09-12	10:52:01	1.33584	5.94208	4.83003	1153.28	FALSE	32
2022-09-12	10:52:01	1.20205	5.34696	4.83003	1161.16	FALSE	32
2022-09-12	10:52:01	0.81243	3.61385	4.83003	1156.89	FALSE	32
2022-09-12	10:52:02	1.15141	5.1217	3.99008	1166.28	FALSE	32
2022-09-12	10:52:02	0.584186	2.59858	3.99008	1159.49	FALSE	32
2022-09-12	10:52:02	0.640471	2.84894	3.99008	1169.13	FALSE	32
2022-09-12	10:52:02	1.21197	5.39108	3.99008	1164.88	FALSE	32
2022-09-12	10:52:03	0.211005	0.938592	1.5507	1170.07	FALSE	32
2022-09-12	10:52:03	0.52042	2.31493	1.5507	1167.2	FALSE	32
2022-09-12	10:52:03	0.348104	1.54844	1.5507	1171.62	FALSE	32
2022-09-12	10:52:03	0.314924	1.40084	1.5507	1168.6	FALSE	32
2022-09-12	10:52:04	0.339657	1.51086	0.745783	1173.13	FALSE	32
2022-09-12	10:52:04	0.0344659	0.153311	0.745783	1168.75	FALSE	32
2022-09-12	10:52:04	0.160166	0.71245	0.745783	1173.84	FALSE	32
2022-09-12	10:52:04	0.136349	0.606508	0.745783	1169.36	FALSE	32
2022-09-12	10:52:05	0.143372	0.637747	0.594585	1174.48	FALSE	32
2022-09-12	10:52:05	0.0796058	0.354103	0.594585	1169.71	FALSE	32
2022-09-12	10:52:05	0.178028	0.791904	0.594585	1175.27	FALSE	32
2022-09-12	10:52:06	-0.157544	-0.700787	-1.4507	1169.71	FALSE	32
2022-09-12	10:52:06	-0.314287	-1.39801	-1.4507	1175.27	FALSE	32
2022-09-12	10:52:06	-0.301056	-1.33916	-1.4507	1169.71	FALSE	32
2022-09-12	10:52:06	-0.531641	-2.36485	-1.4507	1175.27	FALSE	32
2022-09-12	10:52:07	-0.461768	-2.05404	-1.83497	1169.71	FALSE	32
2022-09-12	10:52:07	-0.455814	-2.02755	-1.83497	1175.27	FALSE	32
2022-09-12	10:52:07	-0.282786	-1.25789	-1.83497	1169.71	FALSE	32
2022-09-12	10:52:07	-0.449707	-2.00039	-1.83497	1175.27	FALSE	32
2022-09-12	10:52:08	-0.29902	-1.3301	-1.18387	1169.71	FALSE	32
2022-09-12	10:52:08	-0.335254	-1.49128	-1.18387	1175.27	FALSE	32
2022-09-12	10:52:08	-0.17902	-0.796317	-1.18387	1169.71	FALSE	32
2022-09-12	10:52:08	-0.251285	-1.11777	-1.18387	1175.27	FALSE	32
2022-09-12	10:52:09	-0.184872	-0.822348	-0.649099	1169.71	FALSE	32
2022-09-12	10:52:09	-0.0948979	-0.422125	-0.649099	1175.27	FALSE	32
2022-09-12	10:52:09	-0.158002	-0.702824	-0.649099	1169.71	FALSE	32
2022-09-12	10:52:10	-0.148638	-0.661172	-0.602203	1175.27	FALSE	32
2022-09-12	10:52:10	-0.110928	-0.49343	-0.602203	1169.71	FALSE	32
2022-09-12	10:52:10	-0.114084	-0.507468	-0.602203	1175.27	FALSE	32
2022-09-12	10:52:10	-0.167875	-0.746742	-0.602203	1169.71	FALSE	32
2022-09-12	10:52:11	-0.193626	-0.861287	-0.889809	1175.27	FALSE	32
2022-09-12	10:52:11	-0.245636	-1.09264	-0.889809	1169.71	FALSE	32
2022-09-12	10:52:11	-0.199122	-0.885734	-0.889809	1175.27	FALSE	32
2022-09-12	10:52:11	-0.161768	-0.719576	-0.889809	1169.71	FALSE	32
2022-09-12	10:52:12	-0.185534	-0.825292	-0.728858	1175.27	FALSE	32
2022-09-12	10:52:12	-0.197544	-0.878715	-0.728858	1169.71	FALSE	32
2022-09-12	10:52:12	-0.191488	-0.851777	-0.728858	1175.27	FALSE	32
2022-09-12	10:52:12	-0.0808521	-0.359646	-0.728858	1169.71	FALSE	32
2022-09-12	10:52:13	-0.0406995	-0.18104	0.11513	1175.27	FALSE	32
2022-09-12	10:52:13	-0.0077733	-0.0345772	0.11513	1169.71	FALSE	32
2022-09-12	10:52:13	0.12612	0.561007	0.11513	1175.83	FALSE	32
2022-09-12	10:52:14	0.0994022	0.442161	1.72654	1170.16	FALSE	32
2022-09-12	10:52:14	0.557163	2.47837	1.72654	1178.31	FALSE	32
2022-09-12	10:52:14	0.301031	1.33905	1.72654	1171.49	FALSE	32
2022-09-12	10:52:14	0.594975	2.64657	1.72654	1180.96	FALSE	32
2022-09-12	10:52:15	0.474415	2.11029	1.63672	1173.6	FALSE	32
2022-09-12	10:52:15	0.360064	1.60164	1.63672	1182.56	FALSE	32
2022-09-12	10:52:15	0.146527	0.651781	1.63672	1174.26	FALSE	32
2022-09-12	10:52:15	0.490802	2.18319	1.63672	1184.74	FALSE	32
2022-09-12	10:52:16	0.306781	1.36462	1.68568	1175.62	FALSE	32
2022-09-12	10:52:16	0.388359	1.7275	1.68568	1186.47	FALSE	32
2022-09-12	10:52:16	0.288715	1.28426	1.68568	1176.91	FALSE	32
2022-09-12	10:52:16	0.531972	2.36632	1.68568	1188.83	FALSE	32
2022-09-12	10:52:17	0.260471	1.15863	1.31346	1178.06	FALSE	32
2022-09-12	10:52:17	0.419046	1.864	1.31346	1190.7	FALSE	32
2022-09-12	10:52:17	0.206323	0.917766	1.31346	1178.98	FALSE	32
2022-09-12	10:52:18	0.506119	2.25132	1.77634	1192.95	FALSE	32
2022-09-12	10:52:18	0.280267	1.24668	1.77634	1180.23	FALSE	32
2022-09-12	10:52:18	0.472176	2.10033	1.77634	1195.05	FALSE	32
2022-09-12	10:52:18	0.338791	1.50701	1.77634	1181.74	FALSE	32
2022-09-12	10:52:19	1.60113	7.12215	16.192	1202.17	FALSE	32
2022-09-12	10:52:19	2.22103	9.87959	16.192	1191.62	FALSE	32
2022-09-12	10:52:19	4.64149	20.6463	16.192	1222.82	1	33
2022-09-12	10:52:19	6.09685	27.12	16.192	1218.74	1	34
2022-09-12	10:52:20	7.53171	33.5026	18.0391	1256.32	1	35
2022-09-12	10:52:20	4.84281	21.5418	18.0391	1240.28	1	36
2022-09-12	10:52:20	2.74307	12.2017	18.0391	1268.52	FALSE	36
2022-09-12	10:52:20	1.10388	4.91028	18.0391	1245.19	FALSE	36
2022-09-12	10:52:21	0.759351	3.37775	3.34455	1271.9	FALSE	36
2022-09-12	10:52:21	0.763779	3.39744	3.34455	1248.58	FALSE	36
2022-09-12	10:52:21	0.732532	3.25845	3.34455	1275.16	FALSE	36
2022-09-12	10:52:22	0.539351	2.39914	1.75687	1250.98	FALSE	36
2022-09-12	10:52:22	0.362812	1.61386	1.75687	1276.77	FALSE	36
2022-09-12	10:52:22	0.35131	1.5627	1.75687	1252.55	FALSE	36
2022-09-12	10:52:22	0.326374	1.45178	1.75687	1278.23	FALSE	36
2022-09-12	10:52:23	0.355229	1.58013	1.6258	1254.13	FALSE	36
2022-09-12	10:52:23	0.333753	1.4846	1.6258	1279.71	FALSE	36
2022-09-12	10:52:23	0.400674	1.78228	1.6258	1255.91	FALSE	36
2022-09-12	10:52:23	0.372328	1.65619	1.6258	1281.37	FALSE	36
2022-09-12	10:52:24	0.336094	1.49501	1.67306	1257.4	FALSE	36
2022-09-12	10:52:24	0.295484	1.31437	1.67306	1282.68	FALSE	36
2022-09-12	10:52:24	0.599606	2.66717	1.67306	1260.07	FALSE	36
2022-09-12	10:52:24	0.273295	1.21567	1.67306	1283.9	FALSE	36
2022-09-12	10:52:25	0.432227	1.92263	1.6666	1261.99	FALSE	36
2022-09-12	10:52:25	0.300929	1.33859	1.6666	1285.23	FALSE	36
2022-09-12	10:52:25	0.366883	1.63197	1.6666	1263.63	FALSE	36
2022-09-12	10:52:25	0.398639	1.77323	1.6666	1287.01	FALSE	36
2022-09-12	10:52:26	0.290293	1.29128	1.45449	1264.92	FALSE	36
2022-09-12	10:52:26	0.341183	1.51765	1.45449	1288.53	FALSE	36
2022-09-12	10:52:26	0.349478	1.55455	1.45449	1266.47	FALSE	36
2022-09-12	10:52:27	0.303015	1.34787	1.56423	1289.87	FALSE	36
2022-09-12	10:52:27	0.37243	1.65664	1.56423	1268.13	FALSE	36
2022-09-12	10:52:27	0.36902	1.64147	1.56423	1291.51	FALSE	36
2022-09-12	10:52:27	0.36215	1.61092	1.56423	1269.74	FALSE	36
2022-09-12	10:52:28	0.470903	2.09467	1.80395	1293.61	FALSE	36
2022-09-12	10:52:28	0.396094	1.76191	1.80395	1271.5	FALSE	36
2022-09-12	10:52:28	0.45126	2.00729	1.80395	1295.62	FALSE	36
2022-09-12	10:52:28	0.303931	1.35195	1.80395	1272.85	FALSE	36
2022-09-12	10:52:29	0.480573	2.13768	2.00984	1297.75	FALSE	36
2022-09-12	10:52:29	0.348359	1.54957	2.00984	1274.4	FALSE	36
2022-09-12	10:52:29	0.633041	2.81589	2.00984	1300.57	FALSE	36
2022-09-12	10:52:29	0.345356	1.53621	2.00984	1275.94	FALSE	36
2022-09-12	10:52:30	0.655941	2.91776	2.78299	1303.49	FALSE	36
2022-09-12	10:52:30	0.495687	2.20491	2.78299	1278.14	FALSE	36
2022-09-12	10:52:30	0.725305	3.2263	2.78299	1306.71	FALSE	36
2022-09-12	10:52:31	0.403677	1.79564	1.89269	1279.94	FALSE	36
2022-09-12	10:52:31	0.541438	2.40842	1.89269	1309.12	FALSE	36
2022-09-12	10:52:31	0.271921	1.20956	1.89269	1281.15	FALSE	36
2022-09-12	10:52:31	0.484949	2.15715	1.89269	1311.28	FALSE	36
2022-09-12	10:52:32	0.257163	1.14391	1.58285	1282.29	FALSE	36
2022-09-12	10:52:32	0.461692	2.0537	1.58285	1313.33	FALSE	36
2022-09-12	10:52:32	0.291768	1.29784	1.58285	1283.59	FALSE	36
2022-09-12	10:52:32	0.412735	1.83593	1.58285	1315.17	FALSE	36
2022-09-12	10:52:33	0.35472	1.57787	1.48319	1285.17	FALSE	36
2022-09-12	10:52:33	0.354517	1.57696	1.48319	1316.75	FALSE	36
2022-09-12	10:52:33	0.38729	1.72274	1.48319	1286.89	FALSE	36
2022-09-12	10:52:33	0.237214	1.05518	1.48319	1317.8	FALSE	36
2022-09-12	10:52:34	0.486527	2.16417	1.96692	1289.06	FALSE	36
2022-09-12	10:52:34	0.319249	1.42008	1.96692	1319.22	FALSE	36
2022-09-12	10:52:34	0.520776	2.31652	1.96692	1291.37	FALSE	36
2022-09-12	10:52:35	0.390903	1.73881	2.09473	1320.96	FALSE	36
2022-09-12	10:52:35	0.58159	2.58703	2.09473	1293.96	FALSE	36
2022-09-12	10:52:35	0.372939	1.65891	2.09473	1322.62	FALSE	36
2022-09-12	10:52:35	0.538232	2.39416	2.09473	1296.35	FALSE	36
2022-09-12	10:52:36	0.231565	1.03005	2.34249	1323.65	FALSE	36
2022-09-12	10:52:36	0.593194	2.63865	2.34249	1298.99	FALSE	36
2022-09-12	10:52:36	0.481234	2.14063	2.34249	1325.79	FALSE	36
2022-09-12	10:52:36	0.800471	3.56066	2.34249	1302.55	FALSE	36
2022-09-12	10:52:37	0.620624	2.76066	3.50004	1328.55	FALSE	36
2022-09-12	10:52:37	0.763931	3.39812	3.50004	1305.95	FALSE	36
2022-09-12	10:52:37	0.739402	3.28901	3.50004	1331.84	FALSE	36
2022-09-12	10:52:37	1.02342	4.55238	3.50004	1310.5	FALSE	36
2022-09-12	10:52:38	1.29447	5.75806	6.63848	1337.6	FALSE	36
2022-09-12	10:52:38	1.80062	8.00952	6.63848	1318.51	FALSE	36
2022-09-12	10:52:38	1.3821	6.14786	6.63848	1343.75	FALSE	36
2022-09-12	10:52:39	1.55762	6.92861	8.21021	1325.44	FALSE	36
2022-09-12	10:52:39	1.48668	6.61305	8.21021	1350.36	FALSE	36
2022-09-12	10:52:39	1.89889	8.44664	8.21021	1333.89	FALSE	36
2022-09-12	10:52:39	2.43976	10.8525	8.21021	1361.21	FALSE	36
2022-09-12	10:52:40	1.17289	5.21725	7.19126	1339.1	FALSE	36
2022-09-12	10:52:40	2.45752	10.9315	7.19126	1372.14	FALSE	36
2022-09-12	10:52:40	1.77966	7.91628	7.19126	1347.02	FALSE	36
2022-09-12	10:52:40	1.0566	4.69997	7.19126	1376.84	FALSE	36
2022-09-12	10:52:41	0.59182	2.63253	1.93106	1349.65	FALSE	36
2022-09-12	10:52:41	0.396043	1.76168	1.93106	1378.6	FALSE	36
2022-09-12	10:52:41	0.471514	2.09739	1.93106	1351.75	FALSE	36
2022-09-12	10:52:41	0.277112	1.23265	1.93106	1379.84	FALSE	36
2022-09-12	10:52:42	0.453448	2.01703	1.62512	1353.77	FALSE	36
2022-09-12	10:52:42	0.361896	1.60979	1.62512	1381.45	FALSE	36
2022-09-12	10:52:42	0.409275	1.82054	1.62512	1355.59	FALSE	36
2022-09-12	10:52:42	0.236756	1.05314	1.62512	1382.5	FALSE	36
2022-09-12	10:52:43	0.235229	1.04635	0.435823	1356.64	FALSE	36
2022-09-12	10:52:43	0.127596	0.567573	0.435823	1383.07	FALSE	36
2022-09-12	10:52:43	-0.0688928	-0.306449	0.435823	1356.64	FALSE	36
2022-09-12	10:52:44	-0.159834	-0.710974	-0.382454	1383.07	FALSE	36
2022-09-12	10:52:44	-0.149911	-0.666834	-0.382454	1356.64	FALSE	36
2022-09-12	10:52:44	-0.169402	-0.753534	-0.382454	1383.07	FALSE	36
2022-09-12	10:52:44	0.135229	0.601526	-0.382454	1357.24	FALSE	36
2022-09-12	10:52:45	0.0643895	0.286417	-0.168023	1383.35	FALSE	36
2022-09-12	10:52:45	-0.0431422	-0.191905	-0.168023	1357.24	FALSE	36
2022-09-12	10:52:45	-0.127722	-0.568133	-0.168023	1383.35	FALSE	36
2022-09-12	10:52:45	-0.0446181	-0.19847	-0.168023	1357.24	FALSE	36
2022-09-12	10:52:46	0.0170104	0.0756657	0.967398	1383.43	FALSE	36
2022-09-12	10:52:46	0.175178	0.779227	0.967398	1358.02	FALSE	36
2022-09-12	10:52:46	0.17243	0.767003	0.967398	1384.2	FALSE	36
2022-09-12	10:52:46	0.505305	2.2477	0.967398	1360.26	FALSE	36
2022-09-12	10:52:47	0.501896	2.23253	1.89464	1386.43	FALSE	36
2022-09-12	10:52:47	0.395229	1.75806	1.89464	1362.02	FALSE	36
2022-09-12	10:52:47	0.380674	1.69331	1.89464	1388.12	FALSE	36
2022-09-12	10:52:48	0.357366	1.58964	1.5361	1363.61	FALSE	36
2022-09-12	10:52:48	0.279453	1.24306	1.5361	1389.37	FALSE	36
2022-09-12	10:52:48	0.373753	1.66253	1.5361	1365.27	FALSE	36
2022-09-12	10:52:48	0.370751	1.64917	1.5361	1391.01	FALSE	36
2022-09-12	10:52:49	0.360674	1.60435	1.62484	1366.88	FALSE	36
2022-09-12	10:52:49	0.351718	1.56451	1.62484	1392.58	FALSE	36
2022-09-12	10:52:49	0.370802	1.6494	1.62484	1368.53	FALSE	36
2022-09-12	10:52:49	0.377926	1.68109	1.62484	1394.26	FALSE	36
2022-09-12	10:52:50	0.379402	1.68766	1.60016	1370.22	FALSE	36
2022-09-12	10:52:50	0.361794	1.60933	1.60016	1395.87	FALSE	36
2022-09-12	10:52:50	0.363473	1.6168	1.60016	1371.83	FALSE	36
2022-09-12	10:52:50	0.334262	1.48686	1.60016	1397.36	FALSE	36
2022-09-12	10:52:51	0.320166	1.42416	0.213375	1373.26	FALSE	36
2022-09-12	10:52:51	0.0709036	0.315393	0.213375	1397.67	FALSE	36
2022-09-12	10:52:51	-0.247163	-1.09943	0.213375	1373.26	FALSE	36
2022-09-12	10:52:52	-0.414999	-1.846	-1.2829	1397.67	FALSE	36
2022-09-12	10:52:52	-0.247722	-1.10192	-1.2829	1373.26	FALSE	36
2022-09-12	10:52:52	-0.240343	-1.06909	-1.2829	1397.67	FALSE	36
2022-09-12	10:52:52	-0.250572	-1.11459	-1.2829	1373.26	FALSE	36
2022-09-12	10:52:53	-0.443091	-1.97096	-1.50735	1397.67	FALSE	36
2022-09-12	10:52:53	-0.339936	-1.5121	-1.50735	1373.26	FALSE	36
2022-09-12	10:52:53	-0.298715	-1.32874	-1.50735	1397.67	FALSE	36
2022-09-12	10:52:53	-0.273727	-1.21759	-1.50735	1373.26	FALSE	36
2022-09-12	10:52:54	-0.158969	-0.707126	0.783813	1397.67	FALSE	36
2022-09-12	10:52:54	0.0512597	0.228013	0.783813	1373.48	FALSE	36
2022-09-12	10:52:54	0.448715	1.99597	0.783813	1399.67	FALSE	36
2022-09-12	10:52:54	0.36383	1.61839	0.783813	1375.1	FALSE	36
2022-09-12	10:52:55	0.578791	2.57458	2.47633	1402.24	FALSE	36
2022-09-12	10:52:55	0.790954	3.51832	2.47633	1378.62	FALSE	36
2022-09-12	10:52:55	0.300369	1.3361	2.47633	1403.58	FALSE	36
2022-09-12	10:52:56	0.867137	3.8572	2.83559	1382.48	FALSE	36
2022-09-12	10:52:56	0.40785	1.8142	2.83559	1405.39	FALSE	36
2022-09-12	10:52:56	0.598435	2.66196	2.83559	1385.14	FALSE	36
2022-09-12	10:52:56	0.67645	3.00898	2.83559	1408.4	FALSE	36
2022-09-12	10:52:57	0.42556	1.89298	2.17277	1387.03	FALSE	36
2022-09-12	10:52:57	0.516298	2.2966	2.17277	1410.7	FALSE	36
2022-09-12	10:52:57	0.508562	2.26219	2.17277	1389.3	FALSE	36
2022-09-12	10:52:57	0.503422	2.23932	2.17277	1412.94	FALSE	36
2022-09-12	10:52:58	0.575738	2.561	1.87724	1391.86	FALSE	36
2022-09-12	10:52:58	0.396451	1.76349	1.87724	1414.7	FALSE	36
2022-09-12	10:52:58	0.273804	1.21793	1.87724	1393.07	FALSE	36
2022-09-12	10:52:58	0.442099	1.96654	1.87724	1416.67	FALSE	36
2022-09-12	10:52:59	0.19528	0.868644	1.01443	1393.94	FALSE	36
2022-09-12	10:52:59	0.387443	1.72342	1.01443	1418.39	FALSE	36
2022-09-12	10:52:59	0.101438	0.451217	1.01443	1394.39	FALSE	36
2022-09-12	10:53:00	-0.0313356	-0.139387	-0.498526	1418.39	FALSE	36
2022-09-12	10:53:00	-0.161361	-0.717766	-0.498526	1394.39	FALSE	36
2022-09-12	10:53:00	-0.168944	-0.751497	-0.498526	1418.39	FALSE	36
2022-09-12	10:53:00	-0.0866537	-0.385453	-0.498526	1394.39	FALSE	36
2022-09-12	10:53:01	-0.0313356	-0.139387	-0.643855	1418.39	FALSE	36
2022-09-12	10:53:01	-0.171437	-0.762586	-0.643855	1394.39	FALSE	36
2022-09-12	10:53:01	-0.109453	-0.486869	-0.643855	1418.39	FALSE	36
2022-09-12	10:53:01	-0.266755	-1.18658	-0.643855	1394.39	FALSE	36
2022-09-12	10:53:02	-0.400089	-1.77968	-2.00627	1418.39	FALSE	36
2022-09-12	10:53:02	-0.547366	-2.43479	-2.00627	1394.39	FALSE	36
2022-09-12	10:53:02	-0.43958	-1.95534	-2.00627	1418.39	FALSE	36
2022-09-12	10:53:02	-0.417086	-1.85528	-2.00627	1394.39	FALSE	36
2022-09-12	10:53:03	-0.281819	-1.25359	-1.75902	1418.39	FALSE	36
2022-09-12	10:53:03	-0.356017	-1.58363	-1.75902	1394.39	FALSE	36
2022-09-12	10:53:03	-0.41388	-1.84102	-1.75902	1418.39	FALSE	36
2022-09-12	10:53:03	-0.530063	-2.35783	-1.75902	1394.39	FALSE	36
2022-09-12	10:53:04	-0.284669	-1.26626	-1.04578	1418.39	FALSE	36
2022-09-12	10:53:04	-0.321412	-1.4297	-1.04578	1394.39	FALSE	36
2022-09-12	10:53:04	-0.0992236	-0.441366	-1.04578	1418.39	FALSE	36
2022-09-12	10:53:05	-0.0691982	-0.307807	-0.141368	1394.39	FALSE	36
2022-09-12	10:53:05	-0.0436002	-0.193942	-0.141368	1418.39	FALSE	36
2022-09-12	10:53:05	-0.0140837	-0.0626471	-0.141368	1394.39	FALSE	36
2022-09-12	10:53:05	-0.000241466	-0.00107409	-0.141368	1418.39	FALSE	36
2022-09-12	10:53:06	-0.0170354	-0.0757769	0.176288	1394.39	FALSE	36
2022-09-12	10:53:06	0.045102	0.200623	0.176288	1418.59	FALSE	36
2022-09-12	10:53:06	0.103372	0.459819	0.176288	1394.85	FALSE	36
2022-09-12	10:53:06	0.0270867	0.120487	0.176288	1418.71	FALSE	36
2022-09-12	10:53:07	0.0207254	0.0921907	0.467457	1394.95	FALSE	36
2022-09-12	10:53:07	0.229478	1.02076	0.467457	1419.73	FALSE	36
2022-09-12	10:53:07	0.074415	0.331013	0.467457	1395.28	FALSE	36
2022-09-12	10:53:07	0.0957381	0.425862	0.467457	1420.16	FALSE	36
2022-09-12	10:53:08	0.0924811	0.411374	0.306112	1395.69	FALSE	36
2022-09-12	10:53:08	0.0629137	0.279853	0.306112	1420.44	FALSE	36
2022-09-12	10:53:08	0.0510562	0.227108	0.306112	1395.92	FALSE	36
2022-09-12	10:53:09	0.25869	1.1507	0.726371	1421.59	FALSE	36
2022-09-12	10:53:09	0.0686644	0.305433	0.726371	1396.22	FALSE	36
2022-09-12	10:53:09	0.218232	0.97074	0.726371	1422.56	FALSE	36
2022-09-12	10:53:09	0.107596	0.478609	0.726371	1396.7	FALSE	36
2022-09-12	10:53:10	0.1364	0.606734	0.69015	1423.17	FALSE	36
2022-09-12	10:53:10	0.102557	0.456194	0.69015	1397.16	FALSE	36
2022-09-12	10:53:10	0.104084	0.462986	0.69015	1423.63	FALSE	36
2022-09-12	10:53:10	0.27757	1.23469	0.69015	1398.39	FALSE	36
2022-09-12	10:53:11	0.130242	0.579342	1.07294	1424.21	FALSE	36
2022-09-12	10:53:11	0.284542	1.2657	1.07294	1399.66	FALSE	36
2022-09-12	10:53:11	0.191565	0.852119	1.07294	1425.06	FALSE	36
2022-09-12	10:53:11	0.358486	1.59462	1.07294	1401.25	FALSE	36
2022-09-12	10:53:12	0.153906	0.684605	1.16655	1425.75	FALSE	36
2022-09-12	10:53:12	0.392786	1.74719	1.16655	1403	FALSE	36
2022-09-12	10:53:12	0.240064	1.06785	1.16655	1426.81	FALSE	36
2022-09-12	10:53:13	0.367494	1.63469	1.28732	1404.63	FALSE	36
2022-09-12	10:53:13	0.16902	0.751835	1.28732	1427.57	FALSE	36
2022-09-12	10:53:13	0.409377	1.82099	1.28732	1406.45	FALSE	36
2022-09-12	10:53:13	0.211718	0.941764	1.28732	1428.51	FALSE	36
2022-09-12	10:53:14	0.194466	0.865024	1.03316	1407.32	FALSE	36
2022-09-12	10:53:14	0.12383	0.550821	1.03316	1429.06	FALSE	36
2022-09-12	10:53:14	0.329224	1.46445	1.03316	1408.78	FALSE	36
2022-09-12	10:53:14	0.28154	1.25235	1.03316	1430.31	FALSE	36
2022-09-12	10:53:15	0.320624	1.4262	1.48353	1410.21	FALSE	36
2022-09-12	10:53:15	0.323677	1.43978	1.48353	1431.75	FALSE	36
2022-09-12	10:53:15	0.32556	1.44816	1.48353	1411.66	FALSE	36
2022-09-12	10:53:15	0.364186	1.61997	1.48353	1433.37	FALSE	36
2022-09-12	10:53:16	0.296603	1.31935	1.59107	1412.98	FALSE	36
2022-09-12	10:53:16	0.370802	1.6494	1.59107	1435.02	FALSE	36
2022-09-12	10:53:16	0.405662	1.80447	1.59107	1414.78	FALSE	36
2022-09-12	10:53:17	0.440674	1.96021	2.70706	1436.98	FALSE	36
2022-09-12	10:53:17	0.448003	1.99281	2.70706	1416.77	FALSE	36
2022-09-12	10:53:17	0.539504	2.39982	2.70706	1439.38	FALSE	36
2022-09-12	10:53:17	1.00612	4.47542	2.70706	1421.25	FALSE	36
2022-09-12	10:53:18	0.860725	3.82868	2.73128	1443.21	FALSE	36
2022-09-12	10:53:18	0.690394	3.07101	2.73128	1424.32	FALSE	36
2022-09-12	10:53:18	0.52215	2.32263	2.73128	1445.53	FALSE	36
2022-09-12	10:53:18	0.382812	1.70282	2.73128	1426.02	FALSE	36
2022-09-12	10:53:19	0.561234	2.49648	2.42082	1448.03	FALSE	36
2022-09-12	10:53:19	0.63075	2.8057	2.42082	1428.83	FALSE	36
2022-09-12	10:53:19	0.400115	1.77979	2.42082	1449.81	FALSE	36
2022-09-12	10:53:19	0.584796	2.60129	2.42082	1431.43	FALSE	36
2022-09-12	10:53:20	1.74022	7.74085	9.64198	1457.55	FALSE	36
2022-09-12	10:53:20	1.87589	8.34433	9.64198	1439.77	FALSE	36
2022-09-12	10:53:20	2.88673	12.8408	9.64198	1470.39	FALSE	36
2022-09-12	10:53:21	5.82525	25.9119	22.0481	1465.69	1	37
2022-09-12	10:53:21	4.98948	22.1942	22.0481	1492.58	1	38
2022-09-12	10:53:21	4.10083	18.2413	22.0481	1483.93	1	39
2022-09-12	10:53:21	4.911	21.8451	22.0481	1514.43	1	40
2022-09-12	10:53:22	2.90912	12.9403	5.90224	1496.87	FALSE	40
2022-09-12	10:53:22	0.900623	4.00615	5.90224	1518.43	FALSE	40
2022-09-12	10:53:22	0.618537	2.75138	5.90224	1499.62	FALSE	40
2022-09-12	10:53:22	0.879249	3.91108	5.90224	1522.35	FALSE	40
2022-09-12	10:53:23	0.942863	4.19404	3.04509	1503.81	FALSE	40
2022-09-12	10:53:23	0.590445	2.62642	3.04509	1524.97	FALSE	40
2022-09-12	10:53:23	0.662608	2.94741	3.04509	1506.76	FALSE	40
2022-09-12	10:53:23	0.542354	2.4125	3.04509	1527.38	FALSE	40
2022-09-12	10:53:24	0.633142	2.81634	1.93848	1509.58	FALSE	40
2022-09-12	10:53:24	0.434517	1.93282	1.93848	1529.32	FALSE	40
2022-09-12	10:53:24	0.329987	1.46785	1.93848	1511.05	FALSE	40
2022-09-12	10:53:24	0.345509	1.53689	1.93848	1530.85	FALSE	40
2022-09-12	10:53:25	0.445305	1.98081	1.62631	1513.03	FALSE	40
2022-09-12	10:53:25	0.344135	1.53078	1.62631	1532.39	FALSE	40
2022-09-12	10:53:25	0.307392	1.36734	1.62631	1514.39	FALSE	40
2022-09-12	10:53:26	0.376094	1.67294	1.69088	1534.06	FALSE	40
2022-09-12	10:53:26	0.347952	1.54776	1.69088	1515.94	FALSE	40
2022-09-12	10:53:26	0.443473	1.97266	1.69088	1536.03	FALSE	40
2022-09-12	10:53:26	0.35299	1.57017	1.69088	1517.51	FALSE	40
2022-09-12	10:53:27	0.379911	1.68992	2.03893	1537.72	FALSE	40
2022-09-12	10:53:27	0.492583	2.19111	2.03893	1519.7	FALSE	40
2022-09-12	10:53:27	0.477519	2.1241	2.03893	1539.84	FALSE	40
2022-09-12	10:53:27	0.483473	2.15058	2.03893	1521.85	FALSE	40
2022-09-12	10:53:28	0.456349	2.02993	2.02806	1541.87	FALSE	40
2022-09-12	10:53:28	0.438486	1.95047	2.02806	1523.8	FALSE	40
2022-09-12	10:53:28	0.472176	2.10033	2.02806	1543.97	FALSE	40
2022-09-12	10:53:28	0.456705	2.03152	2.02806	1525.83	FALSE	40
2022-09-12	10:53:29	0.412634	1.83548	2.02691	1545.81	FALSE	40
2022-09-12	10:53:29	0.468766	2.08516	2.02691	1527.92	FALSE	40
2022-09-12	10:53:29	0.485611	2.16009	2.02691	1547.97	FALSE	40
2022-09-12	10:53:30	0.338232	1.50452	2.15172	1529.42	FALSE	40
2022-09-12	10:53:30	0.55416	2.46501	2.15172	1550.44	FALSE	40
2022-09-12	10:53:30	0.501845	2.23231	2.15172	1531.66	FALSE	40
2022-09-12	10:53:30	0.540674	2.40503	2.15172	1552.84	FALSE	40
2022-09-12	10:53:31	0.554669	2.46728	2.51821	1534.12	FALSE	40
2022-09-12	10:53:31	0.586679	2.60967	2.51821	1555.45	FALSE	40
2022-09-12	10:53:31	0.558944	2.48629	2.51821	1536.61	FALSE	40
2022-09-12	10:53:31	0.564186	2.50961	2.51821	1557.96	FALSE	40
2022-09-12	10:53:32	0.503321	2.23887	2.54357	1538.85	FALSE	40
2022-09-12	10:53:32	0.592481	2.63547	2.54357	1560.6	FALSE	40
2022-09-12	10:53:32	0.579504	2.57775	2.54357	1541.43	FALSE	40
2022-09-12	10:53:32	0.611972	2.72217	2.54357	1563.32	FALSE	40
2022-09-12	10:53:33	0.552379	2.45709	2.39333	1543.88	FALSE	40
2022-09-12	10:53:33	0.538893	2.3971	2.39333	1565.71	FALSE	40
2022-09-12	10:53:33	0.522862	2.32579	2.39333	1546.21	FALSE	40
2022-09-12	10:53:34	0.534873	2.37922	2.27724	1568.09	FALSE	40
2022-09-12	10:53:34	0.518486	2.30633	2.27724	1548.52	FALSE	40
2022-09-12	10:53:34	0.495789	2.20537	2.27724	1570.3	FALSE	40
2022-09-12	10:53:34	0.498639	2.21805	2.27724	1550.73	FALSE	40
2022-09-12	10:53:35	0.493855	2.19677	2.23174	1572.5	FALSE	40
2022-09-12	10:53:35	0.500827	2.22778	2.23174	1552.96	FALSE	40
2022-09-12	10:53:35	0.505967	2.25064	2.23174	1574.75	FALSE	40
2022-09-12	10:53:35	0.506221	2.25177	2.23174	1555.21	FALSE	40
2022-09-12	10:53:36	0.507901	2.25925	2.34419	1577.01	FALSE	40
2022-09-12	10:53:36	0.531616	2.36473	2.34419	1557.58	FALSE	40
2022-09-12	10:53:36	0.530496	2.35975	2.34419	1579.37	FALSE	40
2022-09-12	10:53:36	0.537977	2.39303	2.34419	1559.97	FALSE	40
2022-09-12	10:53:37	0.555433	2.47068	2.44947	1581.84	FALSE	40
2022-09-12	10:53:37	0.55299	2.45981	2.44947	1562.43	FALSE	40
2022-09-12	10:53:37	0.543575	2.41793	2.44947	1584.25	FALSE	40
2022-09-12	10:53:38	0.528817	2.35228	2.57543	1564.78	FALSE	40
2022-09-12	10:53:38	0.539707	2.40072	2.57543	1586.65	FALSE	40
2022-09-12	10:53:38	0.588562	2.61804	2.57543	1567.4	FALSE	40
2022-09-12	10:53:38	0.658842	2.93066	2.57543	1589.59	FALSE	40
2022-09-12	10:53:39	0.473702	2.10712	2.03649	1569.51	FALSE	40
2022-09-12	10:53:39	0.458486	2.03944	2.03649	1591.63	FALSE	40
2022-09-12	10:53:39	0.447494	1.99054	2.03649	1571.5	FALSE	40
2022-09-12	10:53:39	0.451616	2.00888	2.03649	1593.63	FALSE	40
2022-09-12	10:53:40	0.451768	2.00955	2.01652	1573.51	FALSE	40
2022-09-12	10:53:40	0.459402	2.04351	2.01652	1595.68	FALSE	40
2022-09-12	10:53:40	0.456043	2.02857	2.01652	1575.54	FALSE	40
2022-09-12	10:53:40	0.44612	1.98443	2.01652	1597.66	FALSE	40
2022-09-12	10:53:41	0.449835	2.00096	2.01884	1577.54	FALSE	40
2022-09-12	10:53:41	0.457163	2.03355	2.01884	1599.7	FALSE	40
2022-09-12	10:53:41	0.454568	2.02201	2.01884	1579.56	FALSE	40
2022-09-12	10:53:42	0.482863	2.14787	1.95427	1601.84	FALSE	40
2022-09-12	10:53:42	0.461794	2.05415	1.95427	1581.61	FALSE	40
2022-09-12	10:53:42	0.424593	1.88867	1.95427	1603.73	FALSE	40
2022-09-12	10:53:42	0.388104	1.72636	1.95427	1583.34	FALSE	40
2022-09-12	10:53:43	0.470191	2.0915	1.87068	1605.82	FALSE	40
2022-09-12	10:53:43	0.424644	1.8889	1.87068	1585.23	FALSE	40
2022-09-12	10:53:43	0.394567	1.75511	1.87068	1607.58	FALSE	40
2022-09-12	10:53:43	0.392786	1.74719	1.87068	1586.98	FALSE	40
2022-09-12	10:53:44	0.492634	2.19133	1.9563	1609.77	FALSE	40
2022-09-12	10:53:44	0.487596	2.16892	1.9563	1589.15	FALSE	40
2022-09-12	10:53:44	0.360573	1.6039	1.9563	1611.37	FALSE	40
2022-09-12	10:53:44	0.418384	1.86106	1.9563	1591.01	FALSE	40
2022-09-12	10:53:45	0.409682	1.82235	1.75121	1613.2	FALSE	40
2022-09-12	10:53:45	0.409377	1.82099	1.75121	1592.83	FALSE	40
2022-09-12	10:53:45	0.373143	1.65981	1.75121	1614.86	FALSE	40
2022-09-12	10:53:45	0.382557	1.70169	1.75121	1594.53	FALSE	40
2022-09-12	10:53:46	0.348461	1.55002	1.78439	1616.41	FALSE	40
2022-09-12	10:53:46	0.325153	1.44635	1.78439	1595.98	FALSE	40
2022-09-12	10:53:46	0.529835	2.35681	1.78439	1618.76	FALSE	40
2022-09-12	10:53:47	0.500572	2.22664	2.31278	1598.2	FALSE	40
2022-09-12	10:53:47	0.583066	2.59359	2.31278	1621.36	FALSE	40
2022-09-12	10:53:47	0.443117	1.97107	2.31278	1600.17	FALSE	40
2022-09-12	10:53:47	0.55299	2.45981	2.31278	1623.82	FALSE	40
2022-09-12	10:53:48	0.506119	2.25132	1.98296	1602.43	FALSE	40
2022-09-12	10:53:48	0.45701	2.03287	1.98296	1625.85	FALSE	40
2022-09-12	10:53:48	0.446578	1.98647	1.98296	1604.41	FALSE	40
2022-09-12	10:53:48	0.373448	1.66117	1.98296	1627.51	FALSE	40
2022-09-12	10:53:49	0.52897	2.35296	1.99416	1606.76	FALSE	40
2022-09-12	10:53:49	0.350242	1.55795	1.99416	1629.07	FALSE	40
2022-09-12	10:53:49	0.47813	2.12682	1.99416	1608.89	FALSE	40
2022-09-12	10:53:49	0.435891	1.93893	1.99416	1631.01	FALSE	40
2022-09-12	10:53:50	0.371107	1.65076	2.0583	1610.54	FALSE	40
2022-09-12	10:53:50	0.451768	2.00955	2.0583	1633.02	FALSE	40
2022-09-12	10:53:50	0.565305	2.51459	2.0583	1613.06	FALSE	40
2022-09-12	10:53:51	0.518588	2.30678	2.22404	1635.32	FALSE	40
2022-09-12	10:53:51	0.493092	2.19337	2.22404	1615.25	FALSE	40
2022-09-12	10:53:51	0.464033	2.06411	2.22404	1637.39	FALSE	40
2022-09-12	10:53:51	0.524236	2.33191	2.22404	1617.58	FALSE	40
2022-09-12	10:53:52	0.471667	2.09807	2.82664	1639.49	FALSE	40
2022-09-12	10:53:52	0.669326	2.9773	2.82664	1620.56	FALSE	40
2022-09-12	10:53:52	0.607239	2.70112	2.82664	1642.19	FALSE	40
2022-09-12	10:53:52	0.7936	3.53009	2.82664	1624.09	FALSE	40
2022-09-12	10:53:53	0.733957	3.26479	2.36366	1645.45	FALSE	40
2022-09-12	10:53:53	0.546374	2.43038	2.36366	1626.52	FALSE	40
2022-09-12	10:53:53	0.430496	1.91493	2.36366	1647.37	FALSE	40
2022-09-12	10:53:53	0.414669	1.84453	2.36366	1628.36	FALSE	40
2022-09-12	10:53:54	0.417316	1.85631	1.8597	1649.22	FALSE	40
2022-09-12	10:53:54	0.408563	1.81737	1.8597	1630.18	FALSE	40
2022-09-12	10:53:54	0.428359	1.90543	1.8597	1651.13	FALSE	40
2022-09-12	10:53:55	0.3193	1.42031	1.63101	1631.6	FALSE	40
2022-09-12	10:53:55	0.452277	2.01182	1.63101	1653.14	FALSE	40
2022-09-12	10:53:55	0.359555	1.59937	1.63101	1633.2	FALSE	40
2022-09-12	10:53:55	0.335535	1.49253	1.63101	1654.63	FALSE	40
2022-09-12	10:53:56	0.411209	1.82914	1.72331	1635.03	FALSE	40
2022-09-12	10:53:56	0.397723	1.76915	1.72331	1656.4	FALSE	40
2022-09-12	10:53:56	0.374364	1.66525	1.72331	1636.7	FALSE	40
2022-09-12	10:53:56	0.366374	1.6297	1.72331	1658.03	FALSE	40
2022-09-12	10:53:57	0.398435	1.77232	1.76519	1638.47	FALSE	40
2022-09-12	10:53:57	0.37355	1.66163	1.76519	1659.69	FALSE	40
2022-09-12	10:53:57	0.307443	1.36757	1.76519	1639.84	FALSE	40
2022-09-12	10:53:57	0.507901	2.25925	1.76519	1661.95	FALSE	40
2022-09-12	10:53:58	0.31014	1.37956	1.73059	1641.22	FALSE	40
2022-09-12	10:53:58	0.394771	1.75602	1.73059	1663.71	FALSE	40
2022-09-12	10:53:58	0.462252	2.05619	1.73059	1643.27	FALSE	40
2022-09-12	10:53:59	0.281743	1.25325	3.3066	1664.96	FALSE	40
2022-09-12	10:53:59	0.432939	1.9258	3.3066	1645.2	FALSE	40
2022-09-12	10:53:59	0.341489	1.51901	3.3066	1666.48	FALSE	40
2022-09-12	10:53:59	1.91726	8.52836	3.3066	1653.73	FALSE	40
2022-09-12	10:54:00	1.50902	6.71242	9.93098	1673.19	FALSE	40
2022-09-12	10:54:00	2.09447	9.31662	9.93098	1663.04	FALSE	40
2022-09-12	10:54:00	1.80877	8.04577	9.93098	1681.24	FALSE	40
2022-09-12	10:54:00	3.51808	15.6491	9.93098	1678.69	1	41
2022-09-12	10:54:01	6.18428	27.5089	22.708	1708.75	1	42
2022-09-12	10:54:01	8.09675	36.016	22.708	1714.71	1	43
2022-09-12	10:54:01	3.11477	13.8551	22.708	1722.6	1	44
2022-09-12	10:54:01	3.02413	13.4519	22.708	1728.16	1	45
2022-09-12	10:54:02	1.99737	8.8847	9.15815	1731.49	FALSE	45
2022-09-12	10:54:02	2.63156	11.7057	9.15815	1739.86	FALSE	45
2022-09-12	10:54:02	1.5476	6.88403	9.15815	1738.37	FALSE	45
2022-09-12	10:54:03	0.653295	2.90599	2.84634	1742.77	FALSE	45
2022-09-12	10:54:03	0.701641	3.12104	2.84634	1741.49	FALSE	45
2022-09-12	10:54:03	0.417265	1.85608	2.84634	1744.63	FALSE	45
2022-09-12	10:54:03	0.787341	3.50225	2.84634	1744.99	FALSE	45
2022-09-12	10:54:04	1.07365	4.77581	13.0951	1749.4	FALSE	45
2022-09-12	10:54:04	2.54968	11.3415	13.0951	1756.34	FALSE	45
2022-09-12	10:54:04	2.83406	12.6065	13.0951	1762.01	FALSE	45
2022-09-12	10:54:04	5.31823	23.6566	13.0951	1779.99	1	46
2022-09-12	10:54:05	2.09197	9.3055	5.19511	1771.31	FALSE	46
2022-09-12	10:54:05	1.57304	6.9972	5.19511	1786.99	FALSE	46
2022-09-12	10:54:05	0.672837	2.99291	5.19511	1774.31	FALSE	46
2022-09-12	10:54:05	0.333804	1.48483	5.19511	1788.47	FALSE	46
2022-09-12	10:54:06	0.618435	2.75092	2.00718	1777.06	FALSE	46
2022-09-12	10:54:06	0.293194	1.30419	2.00718	1789.78	FALSE	46
2022-09-12	10:54:06	0.516043	2.29546	2.00718	1779.35	FALSE	46
2022-09-12	10:54:06	0.377265	1.67815	2.00718	1791.46	FALSE	46
2022-09-12	10:54:07	0.977265	4.34707	5.66456	1783.7	FALSE	46
2022-09-12	10:54:07	0.813652	3.61929	5.66456	1795.08	FALSE	46
2022-09-12	10:54:07	2.02943	9.02731	5.66456	1792.73	FALSE	46
2022-09-12	10:54:08	1.21625	5.41012	3.69931	1800.49	FALSE	46
2022-09-12	10:54:08	1.21431	5.40149	3.69931	1798.13	FALSE	46
2022-09-12	10:54:08	0.570751	2.53881	3.69931	1803.03	FALSE	46
2022-09-12	10:54:08	0.325255	1.4468	3.69931	1799.58	FALSE	46
2022-09-12	10:54:09	0.537417	2.39054	1.77272	1805.42	FALSE	46
2022-09-12	10:54:09	0.314415	1.39858	1.77272	1800.98	FALSE	46
2022-09-12	10:54:09	0.454364	2.0211	1.77272	1807.44	FALSE	46
2022-09-12	10:54:09	0.287901	1.28064	1.77272	1802.26	FALSE	46
2022-09-12	10:54:10	0.379453	1.68788	2.01776	1809.12	FALSE	46
2022-09-12	10:54:10	0.290649	1.29286	2.01776	1803.55	FALSE	46
2022-09-12	10:54:10	0.474059	2.10871	2.01776	1811.23	FALSE	46
2022-09-12	10:54:10	0.670293	2.9816	2.01776	1806.53	FALSE	46
2022-09-12	10:54:11	0.992939	4.41679	4.02939	1815.65	FALSE	46
2022-09-12	10:54:11	1.10693	4.92385	4.02939	1811.45	FALSE	46
2022-09-12	10:54:11	0.617672	2.74753	4.02939	1818.4	FALSE	46
2022-09-12	10:54:12	0.563219	2.50531	2.36524	1813.96	FALSE	46
2022-09-12	10:54:12	0.322812	1.43593	2.36524	1819.83	FALSE	46
2022-09-12	10:54:12	0.834618	3.71255	2.36524	1817.67	FALSE	46
2022-09-12	10:54:12	0.406272	1.80718	2.36524	1821.64	FALSE	46
2022-09-12	10:54:13	0.454568	2.02201	1.73316	1819.69	FALSE	46
2022-09-12	10:54:13	0.361845	1.60956	1.73316	1823.25	FALSE	46
2022-09-12	10:54:13	0.389428	1.73225	1.73316	1821.43	FALSE	46
2022-09-12	10:54:13	0.352685	1.56881	1.73316	1824.82	FALSE	46
2022-09-12	10:54:14	0.452176	2.01137	1.76276	1823.44	FALSE	46
2022-09-12	10:54:14	0.329937	1.46763	1.76276	1826.29	FALSE	46
2022-09-12	10:54:14	0.445204	1.98036	1.76276	1825.42	FALSE	46
2022-09-12	10:54:14	0.357825	1.59168	1.76276	1827.88	FALSE	46
2022-09-12	10:54:15	0.594618	2.64498	4.16143	1828.06	FALSE	46
2022-09-12	10:54:15	0.817519	3.63649	4.16143	1831.52	FALSE	46
2022-09-12	10:54:15	1.39446	6.20284	4.16143	1834.27	FALSE	46
2022-09-12	10:54:16	1.18454	5.26907	4.4049	1836.78	FALSE	46
2022-09-12	10:54:16	0.975178	4.33779	4.4049	1838.6	FALSE	46
2022-09-12	10:54:16	0.626069	2.78488	4.4049	1839.57	FALSE	46
2022-09-12	10:54:16	1.17528	5.22788	4.4049	1843.83	FALSE	46
2022-09-12	10:54:17	0.653651	2.90757	2.19858	1842.48	FALSE	46
2022-09-12	10:54:17	0.443117	1.97107	2.19858	1845.8	FALSE	46
2022-09-12	10:54:17	0.419046	1.864	2.19858	1844.34	FALSE	46
2022-09-12	10:54:17	0.461234	2.05166	2.19858	1847.85	FALSE	46

## Sheet: Duke_martin_2022912104916 ( (2)
Date	Time	Lbs	Newtons	Total Force x Time	Total Time Steps Force >3		**GoPro Fitting: 1038
2022-09-12	10:49:17	0.395636	1.75987	1.75987	FALSE	0			Total Force x Time	1847.85
2022-09-12	10:49:17	0.422557	1.87962	1.87962	FALSE	0			Total Time Steps Force >3	46
2022-09-12	10:49:17	0.506629	2.25359	4.01346	FALSE	0
2022-09-12	10:49:17	0.495534	2.20423	4.08385	FALSE	0
2022-09-12	10:49:18	0.677824	3.0151	7.02855	FALSE	0
2022-09-12	10:49:18	1.17324	5.21881	9.30266	FALSE	0
2022-09-12	10:49:18	0.691768	3.07712	10.1057	FALSE	0
2022-09-12	10:49:18	0.410293	1.82507	11.1277	FALSE	0
2022-09-12	10:49:19	0.584287	2.59903	12.7047	FALSE	0
2022-09-12	10:49:19	0.744033	3.30961	14.4373	FALSE	0
2022-09-12	10:49:19	6.80098	30.2521	42.9568	1	1
2022-09-12	10:49:20	8.99395	40.0069	54.4442	1	2
2022-09-12	10:49:20	5.60016	24.9106	67.8675	1	3
2022-09-12	10:49:20	4.40652	19.6011	74.0453	1	4
2022-09-12	10:49:20	7.32306	32.5744	100.442	1	5
2022-09-12	10:49:21	11.9481	53.1475	127.193	1	6
2022-09-12	10:49:21	8.67889	38.6054	139.047	1	7
2022-09-12	10:49:21	2.13177	9.48254	136.675	FALSE	7
2022-09-12	10:49:21	0.52556	2.3378	141.385	FALSE	7
2022-09-12	10:49:22	0.333957	1.48551	138.161	FALSE	7
2022-09-12	10:49:22	0.215942	0.960553	142.346	FALSE	7
2022-09-12	10:49:22	0.211311	0.939954	139.101	FALSE	7
2022-09-12	10:49:22	0.322863	1.43616	143.782	FALSE	7
2022-09-12	10:49:23	0.335331	1.49162	140.592	FALSE	7
2022-09-12	10:49:23	0.36271	1.61341	145.395	FALSE	7
2022-09-12	10:49:23	0.409835	1.82303	142.415	FALSE	7
2022-09-12	10:49:23	0.432277	1.92285	147.318	FALSE	7
2022-09-12	10:49:24	0.365356	1.62518	144.041	FALSE	7
2022-09-12	10:49:24	0.39584	1.76078	149.079	FALSE	7
2022-09-12	10:49:24	0.418588	1.86196	145.903	FALSE	7
2022-09-12	10:49:25	0.384033	1.70826	150.787	FALSE	7
2022-09-12	10:49:25	0.287646	1.27951	147.182	FALSE	7
2022-09-12	10:49:25	0.452227	2.0116	152.799	FALSE	7
2022-09-12	10:49:25	0.384542	1.71052	148.893	FALSE	7
2022-09-12	10:49:26	0.288868	1.28494	154.084	FALSE	7
2022-09-12	10:49:26	-0.0814628	-0.362363	148.893	FALSE	7
2022-09-12	10:49:26	-0.23388	-1.04035	154.084	FALSE	7
2022-09-12	10:49:26	-0.0159158	-0.0707967	148.893	FALSE	7
2022-09-12	10:49:27	0.0642878	0.285965	154.37	FALSE	7
2022-09-12	10:49:27	0.939911	4.18091	153.074	FALSE	7
2022-09-12	10:49:27	0.462608	2.05777	156.427	FALSE	7
2022-09-12	10:49:27	0.435941	1.93915	155.013	FALSE	7
2022-09-12	10:49:28	0.253041	1.12558	157.553	FALSE	7
2022-09-12	10:49:28	0.301794	1.34244	156.355	FALSE	7
2022-09-12	10:49:28	0.181794	0.808656	158.362	FALSE	7
2022-09-12	10:49:29	0.293601	1.306	157.661	FALSE	7
2022-09-12	10:49:29	0.163626	0.727841	159.089	FALSE	7
2022-09-12	10:49:29	0.249173	1.10837	158.77	FALSE	7
2022-09-12	10:49:29	0.131209	0.583644	159.673	FALSE	7
2022-09-12	10:49:30	0.380115	1.69083	160.46	FALSE	7
2022-09-12	10:49:30	0.412227	1.83367	161.507	FALSE	7
2022-09-12	10:49:30	2.3166	10.3047	170.765	FALSE	7
2022-09-12	10:49:30	1.84673	8.21462	169.721	FALSE	7
2022-09-12	10:49:31	2.99273	13.3123	184.077	FALSE	7
2022-09-12	10:49:31	3.74418	16.6549	186.376	1	8
2022-09-12	10:49:31	1.38902	6.17864	190.256	FALSE	8
2022-09-12	10:49:31	2.45141	10.9044	197.281	FALSE	8
2022-09-12	10:49:32	1.55106	6.89943	197.155	FALSE	8
2022-09-12	10:49:32	1.27101	5.65371	202.934	FALSE	8
2022-09-12	10:49:32	0.685051	3.04724	200.203	FALSE	8
2022-09-12	10:49:33	0.725814	3.22857	206.163	FALSE	8
2022-09-12	10:49:33	2.04525	9.09768	209.3	FALSE	8
2022-09-12	10:49:33	0.226374	1.00696	207.17	FALSE	8
2022-09-12	10:49:33	1.56337	6.95418	216.254	FALSE	8
2022-09-12	10:49:34	1.10989	4.93701	212.107	FALSE	8
2022-09-12	10:49:34	2.44128	10.8593	227.114	FALSE	8
2022-09-12	10:49:34	1.8081	8.04279	220.15	FALSE	8
2022-09-12	10:49:34	3.52698	15.6887	242.803	1	9
2022-09-12	10:49:35	3.87212	17.224	237.374	1	10
2022-09-12	10:49:35	1.89258	8.41857	251.221	FALSE	10
2022-09-12	10:49:35	2.73523	12.1669	249.54	FALSE	10
2022-09-12	10:49:35	3.66714	16.3122	267.533	1	11
2022-09-12	10:49:36	5.7995	25.7973	275.338	1	12
2022-09-12	10:49:36	4.05467	18.036	285.569	1	13
2022-09-12	10:49:36	3.7224	16.558	291.896	1	14
2022-09-12	10:49:37	3.57355	15.8959	301.465	1	15
2022-09-12	10:49:37	1.9193	8.53743	300.433	FALSE	15
2022-09-12	10:49:37	1.34927	6.00182	307.467	FALSE	15
2022-09-12	10:49:37	2.25228	10.0186	310.452	FALSE	15
2022-09-12	10:49:38	0.844949	3.7585	311.225	FALSE	15
2022-09-12	10:49:38	2.11981	9.42934	319.881	FALSE	15
2022-09-12	10:49:38	1.33777	5.95067	317.176	FALSE	15
2022-09-12	10:49:38	2.06592	9.18963	329.071	FALSE	15
2022-09-12	10:49:39	1.85243	8.23998	325.416	FALSE	15
2022-09-12	10:49:39	2.08459	9.27267	338.343	FALSE	15
2022-09-12	10:49:39	4.45894	19.8343	345.25	1	16
2022-09-12	10:49:39	3.42561	15.2378	353.581	1	17
2022-09-12	10:49:40	3.97467	17.6801	362.93	1	18
2022-09-12	10:49:40	4.54765	20.2289	373.81	1	19
2022-09-12	10:49:40	5.72199	25.4526	388.383	1	20
2022-09-12	10:49:40	4.30037	19.1289	392.939	1	21
2022-09-12	10:49:41	4.81691	21.4266	409.81	1	22
2022-09-12	10:49:41	9.07344	40.3605	433.299	1	23
2022-09-12	10:49:41	5.6765	25.2502	435.06	1	24
2022-09-12	10:49:42	7.56723	33.6606	466.96	1	25
2022-09-12	10:49:42	7.72479	34.3614	469.421	1	26
2022-09-12	10:49:42	13.3358	59.3203	526.28	1	27
2022-09-12	10:49:42	23.4945	104.508	573.929	1	28
2022-09-12	10:49:43	16.2267	72.1796	598.46	1	29
2022-09-12	10:49:43	8.14688	36.239	610.168	1	30
2022-09-12	10:49:43	2.81416	12.5179	610.978	FALSE	30
2022-09-12	10:49:43	1.98765	8.84146	619.01	FALSE	30
2022-09-12	10:49:44	1.77976	7.91673	618.895	FALSE	30
2022-09-12	10:49:44	1.59808	7.10858	626.118	FALSE	30
2022-09-12	10:49:44	2.12866	9.46871	628.363	FALSE	30
2022-09-12	10:49:44	0.709885	3.15771	629.276	FALSE	30
2022-09-12	10:49:45	0.502964	2.23728	630.601	FALSE	30
2022-09-12	10:49:45	0.788053	3.50542	632.782	FALSE	30
2022-09-12	10:49:45	0.539605	2.40027	633.001	FALSE	30
2022-09-12	10:49:46	1.39146	6.18949	638.971	FALSE	30
2022-09-12	10:49:46	2.00938	8.93812	641.939	FALSE	30
2022-09-12	10:49:46	1.25355	5.57604	644.547	FALSE	30
2022-09-12	10:49:46	1.16454	5.18011	647.119	FALSE	30
2022-09-12	10:49:47	1.42968	6.3595	650.907	FALSE	30
2022-09-12	10:49:47	0.629173	2.79869	649.918	FALSE	30
2022-09-12	10:49:47	1.24363	5.53191	656.439	FALSE	30
2022-09-12	10:49:47	1.58347	7.04359	656.961	FALSE	30
2022-09-12	10:49:48	0.523982	2.33078	658.769	FALSE	30
2022-09-12	10:49:48	0.395891	1.761	658.722	FALSE	30
2022-09-12	10:49:48	1.20617	5.36529	664.135	FALSE	30
2022-09-12	10:49:48	0.402659	1.79111	660.514	FALSE	30
2022-09-12	10:49:49	0.307087	1.36598	665.501	FALSE	30
2022-09-12	10:49:49	0.670852	2.98408	663.498	FALSE	30
2022-09-12	10:49:49	0.097163	0.4322	665.933	FALSE	30
2022-09-12	10:49:50	0.433448	1.92806	665.426	FALSE	30
2022-09-12	10:49:50	0.560064	2.49128	668.424	FALSE	30
2022-09-12	10:49:50	0.469835	2.08992	667.516	FALSE	30
2022-09-12	10:49:50	0.369428	1.64329	670.067	FALSE	30
2022-09-12	10:49:51	0.917621	4.08176	671.597	FALSE	30
2022-09-12	10:49:51	0.772277	3.43524	673.503	FALSE	30
2022-09-12	10:49:51	0.70444	3.13349	674.731	FALSE	30
2022-09-12	10:49:51	0.494211	2.19835	675.701	FALSE	30
2022-09-12	10:49:52	0.226578	1.00786	675.739	FALSE	30
2022-09-12	10:49:52	0.322354	1.4339	677.135	FALSE	30
2022-09-12	10:49:52	0.346476	1.54119	677.28	FALSE	30
2022-09-12	10:49:52	0.734008	3.26501	680.4	FALSE	30
2022-09-12	10:49:53	0.555229	2.46977	679.75	FALSE	30
2022-09-12	10:49:53	0.328613	1.46174	681.862	FALSE	30
2022-09-12	10:49:53	0.151005	0.6717	680.421	FALSE	30
2022-09-12	10:49:54	0.353041	1.5704	683.432	FALSE	30
2022-09-12	10:49:54	0.176909	0.786927	681.208	FALSE	30
2022-09-12	10:49:54	0.0912088	0.405715	683.838	FALSE	30
2022-09-12	10:49:54	0.574059	2.55353	683.762	FALSE	30
2022-09-12	10:49:55	0.386985	1.72139	685.559	FALSE	30
2022-09-12	10:49:55	0.257774	1.14663	684.908	FALSE	30
2022-09-12	10:49:55	0.397926	1.77005	687.329	FALSE	30
2022-09-12	10:49:55	0.572684	2.54741	687.456	FALSE	30
2022-09-12	10:49:56	0.404898	1.80107	689.13	FALSE	30
2022-09-12	10:49:56	0.389021	1.73044	689.186	FALSE	30
2022-09-12	10:49:56	0.280165	1.24623	690.376	FALSE	30
2022-09-12	10:49:56	0.292379	1.30056	690.487	FALSE	30
2022-09-12	10:49:57	0.339809	1.51154	691.888	FALSE	30
2022-09-12	10:49:57	0.307036	1.36576	691.853	FALSE	30
2022-09-12	10:49:57	0.30673	1.3644	693.252	FALSE	30
2022-09-12	10:49:57	0.309071	1.37481	693.227	FALSE	30
2022-09-12	10:49:58	0.310344	1.38047	694.633	FALSE	30
2022-09-12	10:49:58	0.328969	1.46332	694.691	FALSE	30
2022-09-12	10:49:58	0.334262	1.48686	696.12	FALSE	30
2022-09-12	10:49:59	0.381896	1.69875	696.39	FALSE	30
2022-09-12	10:49:59	0.356196	1.58443	697.704	FALSE	30
2022-09-12	10:49:59	0.339809	1.51154	697.901	FALSE	30
2022-09-12	10:49:59	0.329224	1.46445	699.169	FALSE	30
2022-09-12	10:50:00	0.354618	1.57741	699.478	FALSE	30
2022-09-12	10:50:00	0.364644	1.62201	700.791	FALSE	30
2022-09-12	10:50:00	0.34327	1.52693	701.005	FALSE	30
2022-09-12	10:50:00	0.400573	1.78183	702.572	FALSE	30
2022-09-12	10:50:01	0.267494	1.18987	702.195	FALSE	30
2022-09-12	10:50:01	0.353143	1.57085	704.143	FALSE	30
2022-09-12	10:50:01	0.415789	1.84951	704.045	FALSE	30
2022-09-12	10:50:01	0.435738	1.93825	706.082	FALSE	30
2022-09-12	10:50:02	0.355433	1.58104	705.626	FALSE	30
2022-09-12	10:50:02	0.371921	1.65438	707.736	FALSE	30
2022-09-12	10:50:02	0.463626	2.0623	707.688	FALSE	30
2022-09-12	10:50:03	0.377977	1.68132	709.417	FALSE	30
2022-09-12	10:50:03	0.416552	1.85291	709.541	FALSE	30
2022-09-12	10:50:03	0.388257	1.72704	711.144	FALSE	30
2022-09-12	10:50:03	0.364542	1.62156	711.163	FALSE	30
2022-09-12	10:50:04	0.456043	2.02857	713.173	FALSE	30
2022-09-12	10:50:04	0.461794	2.05415	713.217	FALSE	30
2022-09-12	10:50:04	0.465204	2.06932	715.242	FALSE	30
2022-09-12	10:50:04	0.411819	1.83185	715.049	FALSE	30
2022-09-12	10:50:05	0.396247	1.76259	717.005	FALSE	30
2022-09-12	10:50:05	0.349886	1.55636	716.605	FALSE	30
2022-09-12	10:50:05	0.350802	1.56044	718.565	FALSE	30
2022-09-12	10:50:05	0.340115	1.5129	718.118	FALSE	30
2022-09-12	10:50:06	0.345	1.53463	720.1	FALSE	30
2022-09-12	10:50:06	0.361336	1.60729	719.725	FALSE	30
2022-09-12	10:50:06	0.349682	1.55546	721.655	FALSE	30
2022-09-12	10:50:07	0.346985	1.54346	721.269	FALSE	30
2022-09-12	10:50:07	0.326629	1.45291	723.108	FALSE	30
2022-09-12	10:50:07	0.338181	1.5043	722.773	FALSE	30
2022-09-12	10:50:07	0.368003	1.63695	724.745	FALSE	30
2022-09-12	10:50:08	0.41472	1.84476	724.618	FALSE	30
2022-09-12	10:50:08	0.425814	1.89411	726.639	FALSE	30
2022-09-12	10:50:08	0.398232	1.77142	726.389	FALSE	30
2022-09-12	10:50:08	0.356959	1.58783	728.227	FALSE	30
2022-09-12	10:50:09	0.329122	1.464	727.853	FALSE	30
2022-09-12	10:50:09	0.300522	1.33678	729.564	FALSE	30
2022-09-12	10:50:09	0.316043	1.40582	729.259	FALSE	30
2022-09-12	10:50:09	0.313906	1.39632	730.96	FALSE	30
2022-09-12	10:50:10	0.334873	1.48958	730.748	FALSE	30
2022-09-12	10:50:10	0.322252	1.43344	732.394	FALSE	30
2022-09-12	10:50:10	0.312634	1.39066	732.139	FALSE	30
2022-09-12	10:50:11	0.31243	1.38975	733.783	FALSE	30
2022-09-12	10:50:11	0.311616	1.38613	733.525	FALSE	30
2022-09-12	10:50:11	0.306629	1.36395	735.147	FALSE	30
2022-09-12	10:50:11	0.299046	1.33022	734.855	FALSE	30
2022-09-12	10:50:12	0.29472	1.31097	736.458	FALSE	30
2022-09-12	10:50:12	0.30154	1.34131	736.197	FALSE	30
2022-09-12	10:50:12	0.291361	1.29603	737.754	FALSE	30
2022-09-12	10:50:12	0.294669	1.31075	737.508	FALSE	30
2022-09-12	10:50:13	0.298792	1.32909	739.083	FALSE	30
2022-09-12	10:50:13	0.355585	1.58171	739.089	FALSE	30
2022-09-12	10:50:13	0.267138	1.18828	740.272	FALSE	30
2022-09-12	10:50:13	0.378741	1.68472	740.774	FALSE	30
2022-09-12	10:50:14	0.141591	0.629825	740.901	FALSE	30
2022-09-12	10:50:14	0.120878	0.53769	741.312	FALSE	30
2022-09-12	10:50:14	0.217875	0.969152	741.871	FALSE	30
2022-09-12	10:50:14	0.321998	1.43231	742.744	FALSE	30
2022-09-12	10:50:15	0.278283	1.23786	743.108	FALSE	30
2022-09-12	10:50:15	0.245458	1.09185	743.836	FALSE	30
2022-09-12	10:50:15	0.184135	0.819069	743.928	FALSE	30
2022-09-12	10:50:16	0.256858	1.14256	744.978	FALSE	30
2022-09-12	10:50:16	0.228054	1.01443	744.942	FALSE	30
2022-09-12	10:50:16	0.249478	1.10973	746.088	FALSE	30
2022-09-12	10:50:16	0.239708	1.06627	746.008	FALSE	30
2022-09-12	10:50:17	0.290802	1.29355	747.382	FALSE	30
2022-09-12	10:50:17	0.257926	1.14731	747.156	FALSE	30
2022-09-12	10:50:17	0.257977	1.14753	748.529	FALSE	30
2022-09-12	10:50:17	0.285356	1.26932	748.425	FALSE	30
2022-09-12	10:50:18	0.277061	1.23242	749.762	FALSE	30
2022-09-12	10:50:18	0.27472	1.22201	749.647	FALSE	30
2022-09-12	10:50:18	0.276451	1.22971	750.991	FALSE	30
2022-09-12	10:50:18	0.29584	1.31596	750.963	FALSE	30
2022-09-12	10:50:19	0.27243	1.21182	752.203	FALSE	30
2022-09-12	10:50:19	0.26271	1.16859	752.131	FALSE	30
2022-09-12	10:50:19	0.264033	1.17447	753.378	FALSE	30
2022-09-12	10:50:20	0.271565	1.20798	753.339	FALSE	30
2022-09-12	10:50:20	0.284288	1.26457	754.642	FALSE	30
2022-09-12	10:50:20	0.294211	1.30871	754.648	FALSE	30
2022-09-12	10:50:20	0.271819	1.20911	755.851	FALSE	30
2022-09-12	10:50:21	0.304237	1.35331	756.001	FALSE	30
2022-09-12	10:50:21	0.294822	1.31143	757.163	FALSE	30
2022-09-12	10:50:21	0.286883	1.27611	757.278	FALSE	30
2022-09-12	10:50:21	0.276959	1.23197	758.395	FALSE	30
2022-09-12	10:50:22	0.277621	1.23491	758.512	FALSE	30
2022-09-12	10:50:22	0.275433	1.22518	759.62	FALSE	30
2022-09-12	10:50:22	0.260318	1.15795	759.67	FALSE	30
2022-09-12	10:50:22	0.280827	1.24917	760.869	FALSE	30
2022-09-12	10:50:23	0.305255	1.35784	761.028	FALSE	30
2022-09-12	10:50:23	0.193855	0.862306	761.731	FALSE	30
2022-09-12	10:50:23	0.257417	1.14504	762.173	FALSE	30
2022-09-12	10:50:24	0.279555	1.24352	762.975	FALSE	30
2022-09-12	10:50:24	0.232379	1.03367	763.207	FALSE	30
2022-09-12	10:50:24	0.263321	1.1713	764.146	FALSE	30
2022-09-12	10:50:24	0.295127	1.31278	764.52	FALSE	30
2022-09-12	10:50:25	0.31869	1.4176	765.564	FALSE	30
2022-09-12	10:50:25	0.3507	1.55998	766.08	FALSE	30
2022-09-12	10:50:25	0.329784	1.46695	767.031	FALSE	30
2022-09-12	10:50:25	0.317417	1.41193	767.492	FALSE	30
2022-09-12	10:50:26	0.309886	1.37843	768.409	FALSE	30
2022-09-12	10:50:26	0.325458	1.4477	768.939	FALSE	30
2022-09-12	10:50:26	0.326323	1.45155	769.861	FALSE	30
2022-09-12	10:50:26	0.332328	1.47826	770.418	FALSE	30
2022-09-12	10:50:27	0.342863	1.52512	771.386	FALSE	30
2022-09-12	10:50:27	0.329122	1.464	771.882	FALSE	30
2022-09-12	10:50:27	0.339351	1.5095	772.895	FALSE	30
2022-09-12	10:50:28	0.33126	1.47351	773.355	FALSE	30
2022-09-12	10:50:28	0.322964	1.43661	774.332	FALSE	30
2022-09-12	10:50:28	0.330903	1.47192	774.827	FALSE	30
2022-09-12	10:50:28	0.322761	1.43571	775.768	FALSE	30
2022-09-12	10:50:29	0.311209	1.38432	776.211	FALSE	30
2022-09-12	10:50:29	0.3164	1.40741	777.175	FALSE	30
2022-09-12	10:50:29	0.309886	1.37843	777.59	FALSE	30
2022-09-12	10:50:29	0.30383	1.3515	778.527	FALSE	30
2022-09-12	10:50:30	0.305967	1.361	778.951	FALSE	30
2022-09-12	10:50:30	0.309122	1.37504	779.902	FALSE	30
2022-09-12	10:50:30	0.342964	1.52557	780.476	FALSE	30
2022-09-12	10:50:30	0.349275	1.55365	781.455	FALSE	30
2022-09-12	10:50:31	0.318384	1.41624	781.893	FALSE	30
2022-09-12	10:50:31	0.293295	1.30463	782.76	FALSE	30
2022-09-12	10:50:31	0.355127	1.57968	783.472	FALSE	30
2022-09-12	10:50:31	0.352888	1.56972	784.33	FALSE	30
2022-09-12	10:50:32	0.277774	1.23559	784.708	FALSE	30
2022-09-12	10:50:32	0.317876	1.41398	785.744	FALSE	30
2022-09-12	10:50:32	0.328104	1.45947	786.167	FALSE	30
2022-09-12	10:50:33	0.288308	1.28245	787.026	FALSE	30
2022-09-12	10:50:33	0.360369	1.60299	787.77	FALSE	30
2022-09-12	10:50:33	0.356756	1.58692	788.613	FALSE	30
2022-09-12	10:50:33	0.421489	1.87487	789.645	FALSE	30
2022-09-12	10:50:34	0.376654	1.67543	790.288	FALSE	30
2022-09-12	10:50:34	0.384288	1.70939	791.355	FALSE	30
2022-09-12	10:50:34	0.454364	2.0211	792.309	FALSE	30
2022-09-12	10:50:34	0.400725	1.7825	793.137	FALSE	30
2022-09-12	10:50:35	0.385967	1.71686	794.026	FALSE	30
2022-09-12	10:50:35	0.411565	1.83072	794.968	FALSE	30
2022-09-12	10:50:35	0.458893	2.04125	796.068	FALSE	30
2022-09-12	10:50:35	0.402506	1.79043	796.758	FALSE	30
2022-09-12	10:50:36	0.38271	1.70237	797.77	FALSE	30
2022-09-12	10:50:36	0.428359	1.90543	798.664	FALSE	30
2022-09-12	10:50:36	0.411565	1.83072	799.601	FALSE	30
2022-09-12	10:50:37	0.401489	1.7859	800.45	FALSE	30
2022-09-12	10:50:37	0.406272	1.80718	801.408	FALSE	30
2022-09-12	10:50:37	0.408359	1.81646	802.266	FALSE	30
2022-09-12	10:50:37	0.412379	1.83434	803.242	FALSE	30
2022-09-12	10:50:38	0.406578	1.80854	804.075	FALSE	30
2022-09-12	10:50:38	0.394211	1.75353	804.996	FALSE	30
2022-09-12	10:50:38	0.34673	1.54232	805.617	FALSE	30
2022-09-12	10:50:38	0.346171	1.53984	806.536	FALSE	30
2022-09-12	10:50:39	0.371209	1.65121	807.268	FALSE	30
2022-09-12	10:50:39	0.359249	1.59801	808.134	FALSE	30
2022-09-12	10:50:39	0.35182	1.56497	808.833	FALSE	30
2022-09-12	10:50:39	0.353092	1.57062	809.704	FALSE	30
2022-09-12	10:50:40	0.343473	1.52784	810.361	FALSE	30
2022-09-12	10:50:40	0.338283	1.50475	811.209	FALSE	30
2022-09-12	10:50:40	0.346425	1.54097	811.902	FALSE	30
2022-09-12	10:50:41	0.342048	1.5215	812.73	FALSE	30
2022-09-12	10:50:41	0.33813	1.50407	813.406	FALSE	30
2022-09-12	10:50:41	0.341947	1.52105	814.251	FALSE	30
2022-09-12	10:50:41	0.354771	1.57809	814.984	FALSE	30
2022-09-12	10:50:42	0.340878	1.51629	815.768	FALSE	30
2022-09-12	10:50:42	0.369835	1.6451	816.629	FALSE	30
2022-09-12	10:50:42	0.361489	1.60798	817.376	FALSE	30
2022-09-12	10:50:42	0.391514	1.74153	818.371	FALSE	30
2022-09-12	10:50:43	0.412125	1.83321	819.209	FALSE	30
2022-09-12	10:50:43	0.408969	1.81918	820.19	FALSE	30
2022-09-12	10:50:43	0.407443	1.81239	821.021	FALSE	30
2022-09-12	10:50:43	0.41701	1.85494	822.045	FALSE	30
2022-09-12	10:50:44	0.443066	1.97085	822.992	FALSE	30
2022-09-12	10:50:44	0.478791	2.12976	824.175	FALSE	30
2022-09-12	10:50:44	0.517672	2.30271	825.295	FALSE	30
2022-09-12	10:50:45	0.58215	2.58952	826.764	FALSE	30
2022-09-12	10:50:45	0.643626	2.86298	828.158	FALSE	30
2022-09-12	10:50:45	0.644542	2.86705	829.631	FALSE	30
2022-09-12	10:50:45	0.580623	2.58273	830.741	FALSE	30
2022-09-12	10:50:46	0.458537	2.03966	831.671	FALSE	30
2022-09-12	10:50:46	0.413651	1.84	832.581	FALSE	30
2022-09-12	10:50:46	0.387697	1.72455	833.395	FALSE	30
2022-09-12	10:50:46	0.383473	1.70576	834.286	FALSE	30
2022-09-12	10:50:47	0.386629	1.7198	835.115	FALSE	30
2022-09-12	10:50:47	0.438079	1.94866	836.235	FALSE	30
2022-09-12	10:50:47	0.432074	1.92195	837.037	FALSE	30
2022-09-12	10:50:47	0.42897	1.90814	838.143	FALSE	30
2022-09-12	10:50:48	0.426221	1.89592	838.933	FALSE	30
2022-09-12	10:50:48	0.432277	1.92285	840.066	FALSE	30
2022-09-12	10:50:48	0.442761	1.96949	840.903	FALSE	30
2022-09-12	10:50:49	0.436959	1.94368	842.01	FALSE	30
2022-09-12	10:50:49	0.467188	2.07815	842.981	FALSE	30
2022-09-12	10:50:49	0.348511	1.55025	843.56	FALSE	30
2022-09-12	10:50:49	0.419402	1.86558	844.846	FALSE	30
2022-09-12	10:50:50	0.413092	1.83752	845.397	FALSE	30
2022-09-12	10:50:50	0.405814	1.80514	846.651	FALSE	30
2022-09-12	10:50:50	0.417519	1.85721	847.255	FALSE	30
2022-09-12	10:50:50	0.415992	1.85042	848.502	FALSE	30
2022-09-12	10:50:51	0.414109	1.84204	849.097	FALSE	30
2022-09-12	10:50:51	0.413855	1.84091	850.343	FALSE	30
2022-09-12	10:50:51	0.417417	1.85675	850.953	FALSE	30
2022-09-12	10:50:51	0.413346	1.83865	852.181	FALSE	30
2022-09-12	10:50:52	0.409886	1.82325	852.777	FALSE	30
2022-09-12	10:50:52	0.414059	1.84182	854.023	FALSE	30
2022-09-12	10:50:52	0.412532	1.83502	854.612	FALSE	30
2022-09-12	10:50:52	0.411107	1.82869	855.852	FALSE	30
2022-09-12	10:50:53	0.413143	1.83774	856.449	FALSE	30
2022-09-12	10:50:53	0.422099	1.87758	857.729	FALSE	30
2022-09-12	10:50:53	0.421387	1.87441	858.324	FALSE	30
2022-09-12	10:50:54	0.422099	1.87758	859.607	FALSE	30
2022-09-12	10:50:54	0.421641	1.87554	860.199	FALSE	30
2022-09-12	10:50:54	0.422965	1.88143	861.488	FALSE	30
2022-09-12	10:50:54	0.430038	1.9129	862.112	FALSE	30
2022-09-12	10:50:55	0.43986	1.95659	863.445	FALSE	30
2022-09-12	10:50:55	0.441641	1.96451	864.077	FALSE	30
2022-09-12	10:50:55	0.437519	1.94617	865.391	FALSE	30
2022-09-12	10:50:55	0.428817	1.90746	865.984	FALSE	30
2022-09-12	10:50:56	0.423321	1.88302	867.274	FALSE	30
2022-09-12	10:50:56	0.418639	1.86219	867.846	FALSE	30
2022-09-12	10:50:56	0.420624	1.87102	869.145	FALSE	30
2022-09-12	10:50:56	0.419758	1.86717	869.714	FALSE	30
2022-09-12	10:50:57	0.425865	1.89433	871.04	FALSE	30
2022-09-12	10:50:57	0.392888	1.74764	871.461	FALSE	30
2022-09-12	10:50:57	0.378486	1.68358	872.723	FALSE	30
2022-09-12	10:50:58	0.369835	1.6451	873.106	FALSE	30
2022-09-12	10:50:58	0.358944	1.59665	874.32	FALSE	30
2022-09-12	10:50:58	0.439148	1.95342	875.06	FALSE	30
2022-09-12	10:50:58	0.41528	1.84725	876.167	FALSE	30
2022-09-12	10:50:59	0.491769	2.18749	877.247	FALSE	30
2022-09-12	10:50:59	0.536196	2.38511	878.552	FALSE	30
2022-09-12	10:50:59	0.659554	2.93383	880.181	FALSE	30
2022-09-12	10:50:59	0.521794	2.32104	880.873	FALSE	30
2022-09-12	10:51:00	0.552328	2.45687	882.638	FALSE	30
2022-09-12	10:51:00	0.436654	1.94232	882.816	FALSE	30
2022-09-12	10:51:00	0.519046	2.30882	884.947	FALSE	30
2022-09-12	10:51:00	0.581743	2.58771	885.403	FALSE	30
2022-09-12	10:51:01	0.470751	2.09399	887.041	FALSE	30
2022-09-12	10:51:01	0.481387	2.14131	887.545	FALSE	30
2022-09-12	10:51:01	0.450802	2.00526	889.046	FALSE	30
2022-09-12	10:51:02	0.513601	2.2846	889.829	FALSE	30
2022-09-12	10:51:02	0.408868	1.81873	890.865	FALSE	30
2022-09-12	10:51:02	0.435178	1.93576	891.765	FALSE	30
2022-09-12	10:51:02	0.460115	2.04668	892.911	FALSE	30
2022-09-12	10:51:03	0.475636	2.11572	893.881	FALSE	30
2022-09-12	10:51:03	0.424746	1.88936	894.801	FALSE	30
2022-09-12	10:51:03	0.435127	1.93553	895.816	FALSE	30
2022-09-12	10:51:03	0.4393	1.95409	896.755	FALSE	30
2022-09-12	10:51:04	0.431921	1.92127	897.737	FALSE	30
2022-09-12	10:51:04	0.43701	1.94391	898.699	FALSE	30
2022-09-12	10:51:04	0.440471	1.9593	899.697	FALSE	30
2022-09-12	10:51:04	0.447087	1.98873	900.688	FALSE	30
2022-09-12	10:51:05	0.436043	1.93961	901.636	FALSE	30
2022-09-12	10:51:05	0.440827	1.96089	902.648	FALSE	30
2022-09-12	10:51:05	0.437875	1.94776	903.584	FALSE	30
2022-09-12	10:51:06	0.438435	1.95025	904.599	FALSE	30
2022-09-12	10:51:06	0.435331	1.93644	905.521	FALSE	30
2022-09-12	10:51:06	0.437417	1.94572	906.544	FALSE	30
2022-09-12	10:51:06	0.439758	1.95613	907.477	FALSE	30
2022-09-12	10:51:07	0.438333	1.94979	908.494	FALSE	30
2022-09-12	10:51:07	0.437265	1.94504	909.422	FALSE	30
2022-09-12	10:51:07	0.431718	1.92037	910.415	FALSE	30
2022-09-12	10:51:07	0.433397	1.92784	911.35	FALSE	30
2022-09-12	10:51:08	0.425356	1.89207	912.307	FALSE	30
2022-09-12	10:51:08	0.430445	1.91471	913.264	FALSE	30
2022-09-12	10:51:08	0.432227	1.92263	914.229	FALSE	30
2022-09-12	10:51:08	0.426221	1.89592	915.16	FALSE	30
2022-09-12	10:51:09	0.431107	1.91765	916.147	FALSE	30
2022-09-12	10:51:09	0.429478	1.9104	917.071	FALSE	30
2022-09-12	10:51:09	0.440624	1.95998	918.107	FALSE	30
2022-09-12	10:51:09	0.463117	2.06004	919.131	FALSE	30
2022-09-12	10:51:10	0.505356	2.24792	920.355	FALSE	30
2022-09-12	10:51:10	0.510801	2.27215	921.403	FALSE	30
2022-09-12	10:51:10	0.481183	2.1404	922.495	FALSE	30
2022-09-12	10:51:11	0.532074	2.36677	923.77	FALSE	30
2022-09-12	10:51:11	0.553194	2.46072	924.956	FALSE	30
2022-09-12	10:51:11	0.479199	2.13157	925.901	FALSE	30
2022-09-12	10:51:11	0.393397	1.74991	926.706	FALSE	30
2022-09-12	10:51:12	0.482049	2.14425	928.045	FALSE	30
2022-09-12	10:51:12	0.412939	1.83684	928.543	FALSE	30
2022-09-12	10:51:12	0.419606	1.86649	929.912	FALSE	30
2022-09-12	10:51:12	0.42729	1.90067	930.443	FALSE	30
2022-09-12	10:51:13	0.407901	1.81443	931.726	FALSE	30
2022-09-12	10:51:13	0.401489	1.7859	932.229	FALSE	30
2022-09-12	10:51:13	0.401336	1.78522	933.512	FALSE	30
2022-09-12	10:51:13	0.445305	1.98081	934.21	FALSE	30
2022-09-12	10:51:14	0.421947	1.8769	935.388	FALSE	30
2022-09-12	10:51:14	0.442608	1.96881	936.179	FALSE	30
2022-09-12	10:51:14	0.435433	1.93689	937.325	FALSE	30
2022-09-12	10:51:15	0.458995	2.0417	938.221	FALSE	30
2022-09-12	10:51:15	0.485458	2.15941	939.485	FALSE	30
2022-09-12	10:51:15	0.474975	2.11278	940.333	FALSE	30
2022-09-12	10:51:15	0.497774	2.2142	941.699	FALSE	30
2022-09-12	10:51:16	0.440776	1.96066	942.294	FALSE	30
2022-09-12	10:51:16	0.457672	2.03582	943.735	FALSE	30
2022-09-12	10:51:16	0.410089	1.82416	944.118	FALSE	30
2022-09-12	10:51:16	0.401234	1.78477	945.52	FALSE	30
2022-09-12	10:51:17	0.434262	1.93168	946.05	FALSE	30
2022-09-12	10:51:17	0.387341	1.72297	947.242	FALSE	30
2022-09-12	10:51:17	0.425153	1.89117	947.941	FALSE	30
2022-09-12	10:51:17	0.413601	1.83978	949.082	FALSE	30
2022-09-12	10:51:18	0.500267	2.22529	950.166	FALSE	30
2022-09-12	10:51:18	0.45813	2.03785	951.12	FALSE	30
2022-09-12	10:51:18	0.449377	1.99892	952.165	FALSE	30
2022-09-12	10:51:19	0.443575	1.97311	953.093	FALSE	30
2022-09-12	10:51:19	0.435636	1.9378	954.103	FALSE	30
2022-09-12	10:51:19	0.447137	1.98895	955.082	FALSE	30
2022-09-12	10:51:19	0.444796	1.97854	956.082	FALSE	30
2022-09-12	10:51:20	0.436756	1.94278	957.025	FALSE	30
2022-09-12	10:51:20	0.435178	1.93576	958.017	FALSE	30
2022-09-12	10:51:20	0.44042	1.95908	958.984	FALSE	30
2022-09-12	10:51:20	0.437825	1.94753	959.965	FALSE	30
2022-09-12	10:51:21	0.435891	1.93893	960.923	FALSE	30
2022-09-12	10:51:21	0.435585	1.93757	961.902	FALSE	30
2022-09-12	10:51:21	0.434873	1.9344	962.857	FALSE	30
2022-09-12	10:51:21	0.429377	1.90995	963.812	FALSE	30
2022-09-12	10:51:22	0.434364	1.93214	964.79	FALSE	30
2022-09-12	10:51:22	0.435076	1.93531	965.748	FALSE	30
2022-09-12	10:51:22	0.435941	1.93915	966.729	FALSE	30
2022-09-12	10:51:23	0.434873	1.9344	967.682	FALSE	30
2022-09-12	10:51:23	0.433193	1.92693	968.656	FALSE	30
2022-09-12	10:51:23	0.433855	1.92987	969.612	FALSE	30
2022-09-12	10:51:23	0.433092	1.92648	970.582	FALSE	30
2022-09-12	10:51:24	0.435331	1.93644	971.548	FALSE	30
2022-09-12	10:51:24	0.43299	1.92603	972.508	FALSE	30
2022-09-12	10:51:24	0.431514	1.91946	973.468	FALSE	30
2022-09-12	10:51:24	0.431514	1.91946	974.428	FALSE	30
2022-09-12	10:51:25	0.430598	1.91539	975.383	FALSE	30
2022-09-12	10:51:25	0.432125	1.92218	976.35	FALSE	30
2022-09-12	10:51:25	0.433041	1.92625	977.31	FALSE	30
2022-09-12	10:51:25	0.428919	1.90792	978.258	FALSE	30
2022-09-12	10:51:26	0.436145	1.94006	979.25	FALSE	30
2022-09-12	10:51:26	0.429071	1.90859	980.166	FALSE	30
2022-09-12	10:51:26	0.431718	1.92037	981.17	FALSE	30
2022-09-12	10:51:26	0.4307	1.91584	982.082	FALSE	30
2022-09-12	10:51:27	0.424746	1.88936	983.059	FALSE	30
2022-09-12	10:51:27	0.429224	1.90927	983.991	FALSE	30
2022-09-12	10:51:27	0.427188	1.90022	984.96	FALSE	30
2022-09-12	10:51:28	0.432125	1.92218	985.914	FALSE	30
2022-09-12	10:51:28	0.449733	2.0005	986.96	FALSE	30
2022-09-12	10:51:28	0.419402	1.86558	987.779	FALSE	30
2022-09-12	10:51:28	0.448155	1.99348	988.954	FALSE	30
2022-09-12	10:51:29	0.313448	1.39428	989.173	FALSE	30
2022-09-12	10:51:29	0.513092	2.28234	991.236	FALSE	30
2022-09-12	10:51:29	0.386527	1.71935	990.893	FALSE	30
2022-09-12	10:51:29	0.42958	1.91086	993.147	FALSE	30
2022-09-12	10:51:30	0.393346	1.74968	992.642	FALSE	30
2022-09-12	10:51:30	0.463677	2.06253	995.209	FALSE	30
2022-09-12	10:51:30	0.420522	1.87057	994.513	FALSE	30
2022-09-12	10:51:30	0.438333	1.94979	997.159	FALSE	30
2022-09-12	10:51:31	0.434415	1.93236	996.445	FALSE	30
2022-09-12	10:51:31	0.452125	2.01114	999.17	FALSE	30
2022-09-12	10:51:31	0.419962	1.86807	998.313	FALSE	30
2022-09-12	10:51:32	0.462456	2.0571	1001.23	FALSE	30
2022-09-12	10:51:32	0.378435	1.68335	999.997	FALSE	30
2022-09-12	10:51:32	0.312837	1.39156	1002.62	FALSE	30
2022-09-12	10:51:32	0.263779	1.17334	1001.17	FALSE	30
2022-09-12	10:51:33	0.107748	0.479285	1003.1	FALSE	30
2022-09-12	10:51:33	-0.0448725	-0.199602	1001.17	FALSE	30
2022-09-12	10:51:33	0.0754837	0.335767	1003.43	FALSE	30
2022-09-12	10:51:34	0.0796567	0.354329	1001.52	FALSE	30
2022-09-12	10:51:34	-0.0964755	-0.429142	1003.43	FALSE	30
2022-09-12	10:51:34	-0.370165	-1.64657	1001.52	FALSE	30
2022-09-12	10:51:34	-0.589503	-2.62223	1003.43	FALSE	30
2022-09-12	10:51:34	-0.275203	-1.22416	1001.52	FALSE	30
2022-09-12	10:51:35	0.202608	0.901241	1004.34	FALSE	30
2022-09-12	10:51:35	0.321641	1.43072	1002.96	FALSE	30
2022-09-12	10:51:35	0.331565	1.47487	1005.81	FALSE	30
2022-09-12	10:51:36	0.397825	1.76961	1004.72	FALSE	30
2022-09-12	10:51:36	0.294618	1.31052	1007.12	FALSE	30
2022-09-12	10:51:36	0.397723	1.76915	1006.49	FALSE	30
2022-09-12	10:51:36	0.266221	1.1842	1008.3	FALSE	30
2022-09-12	10:51:37	0.316756	1.40899	1007.9	FALSE	30
2022-09-12	10:51:37	0.367595	1.63514	1009.94	FALSE	30
2022-09-12	10:51:37	0.344033	1.53033	1009.43	FALSE	30
2022-09-12	10:51:37	0.199708	0.888341	1010.83	FALSE	30
2022-09-12	10:51:38	0.548919	2.4417	1011.87	FALSE	30
2022-09-12	10:51:38	1.96383	8.73551	1019.56	FALSE	30
2022-09-12	10:51:38	3.79441	16.8783	1028.75	1	31
2022-09-12	10:51:38	3.10454	13.8096	1033.37	1	32
2022-09-12	10:51:39	1.80958	8.04937	1036.8	FALSE	32
2022-09-12	10:51:39	1.64821	7.33157	1040.7	FALSE	32
2022-09-12	10:51:39	0.834822	3.71346	1040.52	FALSE	32
2022-09-12	10:51:40	0.475636	2.11572	1042.82	FALSE	32
2022-09-12	10:51:40	0.395127	1.7576	1042.27	FALSE	32
2022-09-12	10:51:40	0.526476	2.34187	1045.16	FALSE	32
2022-09-12	10:51:40	0.393346	1.74968	1044.02	FALSE	32
2022-09-12	10:51:41	0.432481	1.92376	1047.09	FALSE	32
2022-09-12	10:51:41	0.447443	1.99032	1046.01	FALSE	32
2022-09-12	10:51:41	0.791819	3.52217	1050.61	FALSE	32
2022-09-12	10:51:41	0.555076	2.46909	1048.48	FALSE	32
2022-09-12	10:51:42	0.505713	2.24951	1052.86	FALSE	32
2022-09-12	10:51:42	0.452125	2.01114	1050.49	FALSE	32
2022-09-12	10:51:42	0.461998	2.05506	1054.91	FALSE	32
2022-09-12	10:51:42	0.397468	1.76802	1052.26	FALSE	32
2022-09-12	10:51:43	0.455483	2.02608	1056.94	FALSE	32
2022-09-12	10:51:43	0.692532	3.08052	1055.34	FALSE	32
2022-09-12	10:51:43	1.35019	6.00592	1062.94	FALSE	32
2022-09-12	10:51:44	1.84709	8.21623	1063.56	FALSE	32
2022-09-12	10:51:44	1.95324	8.6884	1071.63	FALSE	32
2022-09-12	10:51:44	0.766629	3.41012	1066.97	FALSE	32
2022-09-12	10:51:44	0.456501	2.03061	1073.66	FALSE	32
2022-09-12	10:51:45	0.568563	2.52908	1069.5	FALSE	32
2022-09-12	10:51:45	0.424288	1.88732	1075.55	FALSE	32
2022-09-12	10:51:45	0.505	2.24634	1071.74	FALSE	32
2022-09-12	10:51:45	0.487901	2.17028	1077.72	FALSE	32
2022-09-12	10:51:46	0.522252	2.32308	1074.07	FALSE	32
2022-09-12	10:51:46	0.377061	1.67724	1079.4	FALSE	32
2022-09-12	10:51:46	0.429071	1.90859	1075.98	FALSE	32
2022-09-12	10:51:46	0.357926	1.59213	1080.99	FALSE	32
2022-09-12	10:51:47	0.488308	2.17209	1078.15	FALSE	32
2022-09-12	10:51:47	0.497926	2.21487	1083.21	FALSE	32
2022-09-12	10:51:47	0.964542	4.29048	1082.44	FALSE	32
2022-09-12	10:51:47	1.12851	5.01984	1088.23	FALSE	32
2022-09-12	10:51:48	0.912735	4.06003	1086.5	FALSE	32
2022-09-12	10:51:48	0.54841	2.43944	1090.67	FALSE	32
2022-09-12	10:51:48	0.592685	2.63638	1089.13	FALSE	32
2022-09-12	10:51:49	0.338181	1.5043	1092.17	FALSE	32
2022-09-12	10:51:49	0.459453	2.04374	1091.18	FALSE	32
2022-09-12	10:51:49	0.221998	0.987492	1093.16	FALSE	32
2022-09-12	10:51:49	0.475382	2.11459	1093.29	FALSE	32
2022-09-12	10:51:50	0.184644	0.821333	1093.98	FALSE	32
2022-09-12	10:51:50	0.480827	2.13881	1095.43	FALSE	32
2022-09-12	10:51:50	0.214822	0.955571	1094.93	FALSE	32
2022-09-12	10:51:50	0.51299	2.28188	1097.71	FALSE	32
2022-09-12	10:51:51	0.171311	0.762026	1095.7	FALSE	32
2022-09-12	10:51:51	0.462252	2.05619	1099.77	FALSE	32
2022-09-12	10:51:51	0.191514	0.851893	1096.55	FALSE	32
2022-09-12	10:51:51	0.482099	2.14447	1101.91	FALSE	32
2022-09-12	10:51:52	0.54042	2.4039	1098.95	FALSE	32
2022-09-12	10:51:52	0.861336	3.83139	1105.75	FALSE	32
2022-09-12	10:51:52	1.16795	5.19528	1104.15	FALSE	32
2022-09-12	10:51:53	1.41452	6.29207	1112.04	FALSE	32
2022-09-12	10:51:53	0.800878	3.56247	1107.71	FALSE	32
2022-09-12	10:51:53	0.688155	3.06105	1115.1	FALSE	32
2022-09-12	10:51:53	0.580674	2.58295	1110.29	FALSE	32
2022-09-12	10:51:54	0.682659	3.0366	1118.14	FALSE	32
2022-09-12	10:51:54	0.52042	2.31493	1112.61	FALSE	32
2022-09-12	10:51:54	0.296349	1.31822	1119.45	FALSE	32
2022-09-12	10:51:54	0.519606	2.31131	1114.92	FALSE	32
2022-09-12	10:51:55	0.287494	1.27883	1120.73	FALSE	32
2022-09-12	10:51:55	0.543473	2.41748	1117.34	FALSE	32
2022-09-12	10:51:55	0.329428	1.46536	1122.2	FALSE	32
2022-09-12	10:51:55	0.482354	2.14561	1119.48	FALSE	32
2022-09-12	10:51:56	0.375534	1.67045	1123.87	FALSE	32
2022-09-12	10:51:56	0.373855	1.66298	1121.14	FALSE	32
2022-09-12	10:51:56	0.359046	1.59711	1125.47	FALSE	32
2022-09-12	10:51:57	0.326985	1.45449	1122.6	FALSE	32
2022-09-12	10:51:57	0.533295	2.3722	1127.84	FALSE	32
2022-09-12	10:51:57	0.473448	2.10599	1124.71	FALSE	32
2022-09-12	10:51:57	0.528715	2.35183	1130.19	FALSE	32
2022-09-12	10:51:58	0.569376	2.5327	1127.24	FALSE	32
2022-09-12	10:51:58	0.195229	0.868418	1131.06	FALSE	32
2022-09-12	10:51:58	0.716807	3.1885	1130.43	FALSE	32
2022-09-12	10:51:58	0.361336	1.60729	1132.67	FALSE	32
2022-09-12	10:51:59	0.641743	2.8546	1133.28	FALSE	32
2022-09-12	10:51:59	0.836349	3.72025	1136.39	FALSE	32
2022-09-12	10:51:59	0.572888	2.54832	1135.83	FALSE	32
2022-09-12	10:51:59	1.43121	6.36631	1142.75	FALSE	32
2022-09-12	10:52:00	1.02342	4.55238	1140.38	FALSE	32
2022-09-12	10:52:00	1.94317	8.64361	1151.4	FALSE	32
2022-09-12	10:52:00	1.56388	6.95645	1147.34	FALSE	32
2022-09-12	10:52:01	0.993041	4.41724	1155.81	FALSE	32
2022-09-12	10:52:01	1.33584	5.94208	1153.28	FALSE	32
2022-09-12	10:52:01	1.20205	5.34696	1161.16	FALSE	32
2022-09-12	10:52:01	0.81243	3.61385	1156.89	FALSE	32
2022-09-12	10:52:02	1.15141	5.1217	1166.28	FALSE	32
2022-09-12	10:52:02	0.584186	2.59858	1159.49	FALSE	32
2022-09-12	10:52:02	0.640471	2.84894	1169.13	FALSE	32
2022-09-12	10:52:02	1.21197	5.39108	1164.88	FALSE	32
2022-09-12	10:52:03	0.211005	0.938592	1170.07	FALSE	32
2022-09-12	10:52:03	0.52042	2.31493	1167.2	FALSE	32
2022-09-12	10:52:03	0.348104	1.54844	1171.62	FALSE	32
2022-09-12	10:52:03	0.314924	1.40084	1168.6	FALSE	32
2022-09-12	10:52:04	0.339657	1.51086	1173.13	FALSE	32
2022-09-12	10:52:04	0.0344659	0.153311	1168.75	FALSE	32
2022-09-12	10:52:04	0.160166	0.71245	1173.84	FALSE	32
2022-09-12	10:52:04	0.136349	0.606508	1169.36	FALSE	32
2022-09-12	10:52:05	0.143372	0.637747	1174.48	FALSE	32
2022-09-12	10:52:05	0.0796058	0.354103	1169.71	FALSE	32
2022-09-12	10:52:05	0.178028	0.791904	1175.27	FALSE	32
2022-09-12	10:52:06	-0.157544	-0.700787	1169.71	FALSE	32
2022-09-12	10:52:06	-0.314287	-1.39801	1175.27	FALSE	32
2022-09-12	10:52:06	-0.301056	-1.33916	1169.71	FALSE	32
2022-09-12	10:52:06	-0.531641	-2.36485	1175.27	FALSE	32
2022-09-12	10:52:07	-0.461768	-2.05404	1169.71	FALSE	32
2022-09-12	10:52:07	-0.455814	-2.02755	1175.27	FALSE	32
2022-09-12	10:52:07	-0.282786	-1.25789	1169.71	FALSE	32
2022-09-12	10:52:07	-0.449707	-2.00039	1175.27	FALSE	32
2022-09-12	10:52:08	-0.29902	-1.3301	1169.71	FALSE	32
2022-09-12	10:52:08	-0.335254	-1.49128	1175.27	FALSE	32
2022-09-12	10:52:08	-0.17902	-0.796317	1169.71	FALSE	32
2022-09-12	10:52:08	-0.251285	-1.11777	1175.27	FALSE	32
2022-09-12	10:52:09	-0.184872	-0.822348	1169.71	FALSE	32
2022-09-12	10:52:09	-0.0948979	-0.422125	1175.27	FALSE	32
2022-09-12	10:52:09	-0.158002	-0.702824	1169.71	FALSE	32
2022-09-12	10:52:10	-0.148638	-0.661172	1175.27	FALSE	32
2022-09-12	10:52:10	-0.110928	-0.49343	1169.71	FALSE	32
2022-09-12	10:52:10	-0.114084	-0.507468	1175.27	FALSE	32
2022-09-12	10:52:10	-0.167875	-0.746742	1169.71	FALSE	32
2022-09-12	10:52:11	-0.193626	-0.861287	1175.27	FALSE	32
2022-09-12	10:52:11	-0.245636	-1.09264	1169.71	FALSE	32
2022-09-12	10:52:11	-0.199122	-0.885734	1175.27	FALSE	32
2022-09-12	10:52:11	-0.161768	-0.719576	1169.71	FALSE	32
2022-09-12	10:52:12	-0.185534	-0.825292	1175.27	FALSE	32
2022-09-12	10:52:12	-0.197544	-0.878715	1169.71	FALSE	32
2022-09-12	10:52:12	-0.191488	-0.851777	1175.27	FALSE	32
2022-09-12	10:52:12	-0.0808521	-0.359646	1169.71	FALSE	32
2022-09-12	10:52:13	-0.0406995	-0.18104	1175.27	FALSE	32
2022-09-12	10:52:13	-0.0077733	-0.0345772	1169.71	FALSE	32
2022-09-12	10:52:13	0.12612	0.561007	1175.83	FALSE	32
2022-09-12	10:52:14	0.0994022	0.442161	1170.16	FALSE	32
2022-09-12	10:52:14	0.557163	2.47837	1178.31	FALSE	32
2022-09-12	10:52:14	0.301031	1.33905	1171.49	FALSE	32
2022-09-12	10:52:14	0.594975	2.64657	1180.96	FALSE	32
2022-09-12	10:52:15	0.474415	2.11029	1173.6	FALSE	32
2022-09-12	10:52:15	0.360064	1.60164	1182.56	FALSE	32
2022-09-12	10:52:15	0.146527	0.651781	1174.26	FALSE	32
2022-09-12	10:52:15	0.490802	2.18319	1184.74	FALSE	32
2022-09-12	10:52:16	0.306781	1.36462	1175.62	FALSE	32
2022-09-12	10:52:16	0.388359	1.7275	1186.47	FALSE	32
2022-09-12	10:52:16	0.288715	1.28426	1176.91	FALSE	32
2022-09-12	10:52:16	0.531972	2.36632	1188.83	FALSE	32
2022-09-12	10:52:17	0.260471	1.15863	1178.06	FALSE	32
2022-09-12	10:52:17	0.419046	1.864	1190.7	FALSE	32
2022-09-12	10:52:17	0.206323	0.917766	1178.98	FALSE	32
2022-09-12	10:52:18	0.506119	2.25132	1192.95	FALSE	32
2022-09-12	10:52:18	0.280267	1.24668	1180.23	FALSE	32
2022-09-12	10:52:18	0.472176	2.10033	1195.05	FALSE	32
2022-09-12	10:52:18	0.338791	1.50701	1181.74	FALSE	32
2022-09-12	10:52:19	1.60113	7.12215	1202.17	FALSE	32
2022-09-12	10:52:19	2.22103	9.87959	1191.62	FALSE	32
2022-09-12	10:52:19	4.64149	20.6463	1222.82	1	33
2022-09-12	10:52:19	6.09685	27.12	1218.74	1	34
2022-09-12	10:52:20	7.53171	33.5026	1256.32	1	35
2022-09-12	10:52:20	4.84281	21.5418	1240.28	1	36
2022-09-12	10:52:20	2.74307	12.2017	1268.52	FALSE	36
2022-09-12	10:52:20	1.10388	4.91028	1245.19	FALSE	36
2022-09-12	10:52:21	0.759351	3.37775	1271.9	FALSE	36
2022-09-12	10:52:21	0.763779	3.39744	1248.58	FALSE	36
2022-09-12	10:52:21	0.732532	3.25845	1275.16	FALSE	36
2022-09-12	10:52:22	0.539351	2.39914	1250.98	FALSE	36
2022-09-12	10:52:22	0.362812	1.61386	1276.77	FALSE	36
2022-09-12	10:52:22	0.35131	1.5627	1252.55	FALSE	36
2022-09-12	10:52:22	0.326374	1.45178	1278.23	FALSE	36
2022-09-12	10:52:23	0.355229	1.58013	1254.13	FALSE	36
2022-09-12	10:52:23	0.333753	1.4846	1279.71	FALSE	36
2022-09-12	10:52:23	0.400674	1.78228	1255.91	FALSE	36
2022-09-12	10:52:23	0.372328	1.65619	1281.37	FALSE	36
2022-09-12	10:52:24	0.336094	1.49501	1257.4	FALSE	36
2022-09-12	10:52:24	0.295484	1.31437	1282.68	FALSE	36
2022-09-12	10:52:24	0.599606	2.66717	1260.07	FALSE	36
2022-09-12	10:52:24	0.273295	1.21567	1283.9	FALSE	36
2022-09-12	10:52:25	0.432227	1.92263	1261.99	FALSE	36
2022-09-12	10:52:25	0.300929	1.33859	1285.23	FALSE	36
2022-09-12	10:52:25	0.366883	1.63197	1263.63	FALSE	36
2022-09-12	10:52:25	0.398639	1.77323	1287.01	FALSE	36
2022-09-12	10:52:26	0.290293	1.29128	1264.92	FALSE	36
2022-09-12	10:52:26	0.341183	1.51765	1288.53	FALSE	36
2022-09-12	10:52:26	0.349478	1.55455	1266.47	FALSE	36
2022-09-12	10:52:27	0.303015	1.34787	1289.87	FALSE	36
2022-09-12	10:52:27	0.37243	1.65664	1268.13	FALSE	36
2022-09-12	10:52:27	0.36902	1.64147	1291.51	FALSE	36
2022-09-12	10:52:27	0.36215	1.61092	1269.74	FALSE	36
2022-09-12	10:52:28	0.470903	2.09467	1293.61	FALSE	36
2022-09-12	10:52:28	0.396094	1.76191	1271.5	FALSE	36
2022-09-12	10:52:28	0.45126	2.00729	1295.62	FALSE	36
2022-09-12	10:52:28	0.303931	1.35195	1272.85	FALSE	36
2022-09-12	10:52:29	0.480573	2.13768	1297.75	FALSE	36
2022-09-12	10:52:29	0.348359	1.54957	1274.4	FALSE	36
2022-09-12	10:52:29	0.633041	2.81589	1300.57	FALSE	36
2022-09-12	10:52:29	0.345356	1.53621	1275.94	FALSE	36
2022-09-12	10:52:30	0.655941	2.91776	1303.49	FALSE	36
2022-09-12	10:52:30	0.495687	2.20491	1278.14	FALSE	36
2022-09-12	10:52:30	0.725305	3.2263	1306.71	FALSE	36
2022-09-12	10:52:31	0.403677	1.79564	1279.94	FALSE	36
2022-09-12	10:52:31	0.541438	2.40842	1309.12	FALSE	36
2022-09-12	10:52:31	0.271921	1.20956	1281.15	FALSE	36
2022-09-12	10:52:31	0.484949	2.15715	1311.28	FALSE	36
2022-09-12	10:52:32	0.257163	1.14391	1282.29	FALSE	36
2022-09-12	10:52:32	0.461692	2.0537	1313.33	FALSE	36
2022-09-12	10:52:32	0.291768	1.29784	1283.59	FALSE	36
2022-09-12	10:52:32	0.412735	1.83593	1315.17	FALSE	36
2022-09-12	10:52:33	0.35472	1.57787	1285.17	FALSE	36
2022-09-12	10:52:33	0.354517	1.57696	1316.75	FALSE	36
2022-09-12	10:52:33	0.38729	1.72274	1286.89	FALSE	36
2022-09-12	10:52:33	0.237214	1.05518	1317.8	FALSE	36
2022-09-12	10:52:34	0.486527	2.16417	1289.06	FALSE	36
2022-09-12	10:52:34	0.319249	1.42008	1319.22	FALSE	36
2022-09-12	10:52:34	0.520776	2.31652	1291.37	FALSE	36
2022-09-12	10:52:35	0.390903	1.73881	1320.96	FALSE	36
2022-09-12	10:52:35	0.58159	2.58703	1293.96	FALSE	36
2022-09-12	10:52:35	0.372939	1.65891	1322.62	FALSE	36
2022-09-12	10:52:35	0.538232	2.39416	1296.35	FALSE	36
2022-09-12	10:52:36	0.231565	1.03005	1323.65	FALSE	36
2022-09-12	10:52:36	0.593194	2.63865	1298.99	FALSE	36
2022-09-12	10:52:36	0.481234	2.14063	1325.79	FALSE	36
2022-09-12	10:52:36	0.800471	3.56066	1302.55	FALSE	36
2022-09-12	10:52:37	0.620624	2.76066	1328.55	FALSE	36
2022-09-12	10:52:37	0.763931	3.39812	1305.95	FALSE	36
2022-09-12	10:52:37	0.739402	3.28901	1331.84	FALSE	36
2022-09-12	10:52:37	1.02342	4.55238	1310.5	FALSE	36
2022-09-12	10:52:38	1.29447	5.75806	1337.6	FALSE	36
2022-09-12	10:52:38	1.80062	8.00952	1318.51	FALSE	36
2022-09-12	10:52:38	1.3821	6.14786	1343.75	FALSE	36
2022-09-12	10:52:39	1.55762	6.92861	1325.44	FALSE	36
2022-09-12	10:52:39	1.48668	6.61305	1350.36	FALSE	36
2022-09-12	10:52:39	1.89889	8.44664	1333.89	FALSE	36
2022-09-12	10:52:39	2.43976	10.8525	1361.21	FALSE	36
2022-09-12	10:52:40	1.17289	5.21725	1339.1	FALSE	36
2022-09-12	10:52:40	2.45752	10.9315	1372.14	FALSE	36
2022-09-12	10:52:40	1.77966	7.91628	1347.02	FALSE	36
2022-09-12	10:52:40	1.0566	4.69997	1376.84	FALSE	36
2022-09-12	10:52:41	0.59182	2.63253	1349.65	FALSE	36
2022-09-12	10:52:41	0.396043	1.76168	1378.6	FALSE	36
2022-09-12	10:52:41	0.471514	2.09739	1351.75	FALSE	36
2022-09-12	10:52:41	0.277112	1.23265	1379.84	FALSE	36
2022-09-12	10:52:42	0.453448	2.01703	1353.77	FALSE	36
2022-09-12	10:52:42	0.361896	1.60979	1381.45	FALSE	36
2022-09-12	10:52:42	0.409275	1.82054	1355.59	FALSE	36
2022-09-12	10:52:42	0.236756	1.05314	1382.5	FALSE	36
2022-09-12	10:52:43	0.235229	1.04635	1356.64	FALSE	36
2022-09-12	10:52:43	0.127596	0.567573	1383.07	FALSE	36
2022-09-12	10:52:43	-0.0688928	-0.306449	1356.64	FALSE	36
2022-09-12	10:52:44	-0.159834	-0.710974	1383.07	FALSE	36
2022-09-12	10:52:44	-0.149911	-0.666834	1356.64	FALSE	36
2022-09-12	10:52:44	-0.169402	-0.753534	1383.07	FALSE	36
2022-09-12	10:52:44	0.135229	0.601526	1357.24	FALSE	36
2022-09-12	10:52:45	0.0643895	0.286417	1383.35	FALSE	36
2022-09-12	10:52:45	-0.0431422	-0.191905	1357.24	FALSE	36
2022-09-12	10:52:45	-0.127722	-0.568133	1383.35	FALSE	36
2022-09-12	10:52:45	-0.0446181	-0.19847	1357.24	FALSE	36
2022-09-12	10:52:46	0.0170104	0.0756657	1383.43	FALSE	36
2022-09-12	10:52:46	0.175178	0.779227	1358.02	FALSE	36
2022-09-12	10:52:46	0.17243	0.767003	1384.2	FALSE	36
2022-09-12	10:52:46	0.505305	2.2477	1360.26	FALSE	36
2022-09-12	10:52:47	0.501896	2.23253	1386.43	FALSE	36
2022-09-12	10:52:47	0.395229	1.75806	1362.02	FALSE	36
2022-09-12	10:52:47	0.380674	1.69331	1388.12	FALSE	36
2022-09-12	10:52:48	0.357366	1.58964	1363.61	FALSE	36
2022-09-12	10:52:48	0.279453	1.24306	1389.37	FALSE	36
2022-09-12	10:52:48	0.373753	1.66253	1365.27	FALSE	36
2022-09-12	10:52:48	0.370751	1.64917	1391.01	FALSE	36
2022-09-12	10:52:49	0.360674	1.60435	1366.88	FALSE	36
2022-09-12	10:52:49	0.351718	1.56451	1392.58	FALSE	36
2022-09-12	10:52:49	0.370802	1.6494	1368.53	FALSE	36
2022-09-12	10:52:49	0.377926	1.68109	1394.26	FALSE	36
2022-09-12	10:52:50	0.379402	1.68766	1370.22	FALSE	36
2022-09-12	10:52:50	0.361794	1.60933	1395.87	FALSE	36
2022-09-12	10:52:50	0.363473	1.6168	1371.83	FALSE	36
2022-09-12	10:52:50	0.334262	1.48686	1397.36	FALSE	36
2022-09-12	10:52:51	0.320166	1.42416	1373.26	FALSE	36
2022-09-12	10:52:51	0.0709036	0.315393	1397.67	FALSE	36
2022-09-12	10:52:51	-0.247163	-1.09943	1373.26	FALSE	36
2022-09-12	10:52:52	-0.414999	-1.846	1397.67	FALSE	36
2022-09-12	10:52:52	-0.247722	-1.10192	1373.26	FALSE	36
2022-09-12	10:52:52	-0.240343	-1.06909	1397.67	FALSE	36
2022-09-12	10:52:52	-0.250572	-1.11459	1373.26	FALSE	36
2022-09-12	10:52:53	-0.443091	-1.97096	1397.67	FALSE	36
2022-09-12	10:52:53	-0.339936	-1.5121	1373.26	FALSE	36
2022-09-12	10:52:53	-0.298715	-1.32874	1397.67	FALSE	36
2022-09-12	10:52:53	-0.273727	-1.21759	1373.26	FALSE	36
2022-09-12	10:52:54	-0.158969	-0.707126	1397.67	FALSE	36
2022-09-12	10:52:54	0.0512597	0.228013	1373.48	FALSE	36
2022-09-12	10:52:54	0.448715	1.99597	1399.67	FALSE	36
2022-09-12	10:52:54	0.36383	1.61839	1375.1	FALSE	36
2022-09-12	10:52:55	0.578791	2.57458	1402.24	FALSE	36
2022-09-12	10:52:55	0.790954	3.51832	1378.62	FALSE	36
2022-09-12	10:52:55	0.300369	1.3361	1403.58	FALSE	36
2022-09-12	10:52:56	0.867137	3.8572	1382.48	FALSE	36
2022-09-12	10:52:56	0.40785	1.8142	1405.39	FALSE	36
2022-09-12	10:52:56	0.598435	2.66196	1385.14	FALSE	36
2022-09-12	10:52:56	0.67645	3.00898	1408.4	FALSE	36
2022-09-12	10:52:57	0.42556	1.89298	1387.03	FALSE	36
2022-09-12	10:52:57	0.516298	2.2966	1410.7	FALSE	36
2022-09-12	10:52:57	0.508562	2.26219	1389.3	FALSE	36
2022-09-12	10:52:57	0.503422	2.23932	1412.94	FALSE	36
2022-09-12	10:52:58	0.575738	2.561	1391.86	FALSE	36
2022-09-12	10:52:58	0.396451	1.76349	1414.7	FALSE	36
2022-09-12	10:52:58	0.273804	1.21793	1393.07	FALSE	36
2022-09-12	10:52:58	0.442099	1.96654	1416.67	FALSE	36
2022-09-12	10:52:59	0.19528	0.868644	1393.94	FALSE	36
2022-09-12	10:52:59	0.387443	1.72342	1418.39	FALSE	36
2022-09-12	10:52:59	0.101438	0.451217	1394.39	FALSE	36
2022-09-12	10:53:00	-0.0313356	-0.139387	1418.39	FALSE	36
2022-09-12	10:53:00	-0.161361	-0.717766	1394.39	FALSE	36
2022-09-12	10:53:00	-0.168944	-0.751497	1418.39	FALSE	36
2022-09-12	10:53:00	-0.0866537	-0.385453	1394.39	FALSE	36
2022-09-12	10:53:01	-0.0313356	-0.139387	1418.39	FALSE	36
2022-09-12	10:53:01	-0.171437	-0.762586	1394.39	FALSE	36
2022-09-12	10:53:01	-0.109453	-0.486869	1418.39	FALSE	36
2022-09-12	10:53:01	-0.266755	-1.18658	1394.39	FALSE	36
2022-09-12	10:53:02	-0.400089	-1.77968	1418.39	FALSE	36
2022-09-12	10:53:02	-0.547366	-2.43479	1394.39	FALSE	36
2022-09-12	10:53:02	-0.43958	-1.95534	1418.39	FALSE	36
2022-09-12	10:53:02	-0.417086	-1.85528	1394.39	FALSE	36
2022-09-12	10:53:03	-0.281819	-1.25359	1418.39	FALSE	36
2022-09-12	10:53:03	-0.356017	-1.58363	1394.39	FALSE	36
2022-09-12	10:53:03	-0.41388	-1.84102	1418.39	FALSE	36
2022-09-12	10:53:03	-0.530063	-2.35783	1394.39	FALSE	36
2022-09-12	10:53:04	-0.284669	-1.26626	1418.39	FALSE	36
2022-09-12	10:53:04	-0.321412	-1.4297	1394.39	FALSE	36
2022-09-12	10:53:04	-0.0992236	-0.441366	1418.39	FALSE	36
2022-09-12	10:53:05	-0.0691982	-0.307807	1394.39	FALSE	36
2022-09-12	10:53:05	-0.0436002	-0.193942	1418.39	FALSE	36
2022-09-12	10:53:05	-0.0140837	-0.0626471	1394.39	FALSE	36
2022-09-12	10:53:05	-0.000241466	-0.00107409	1418.39	FALSE	36
2022-09-12	10:53:06	-0.0170354	-0.0757769	1394.39	FALSE	36
2022-09-12	10:53:06	0.045102	0.200623	1418.59	FALSE	36
2022-09-12	10:53:06	0.103372	0.459819	1394.85	FALSE	36
2022-09-12	10:53:06	0.0270867	0.120487	1418.71	FALSE	36
2022-09-12	10:53:07	0.0207254	0.0921907	1394.95	FALSE	36
2022-09-12	10:53:07	0.229478	1.02076	1419.73	FALSE	36
2022-09-12	10:53:07	0.074415	0.331013	1395.28	FALSE	36
2022-09-12	10:53:07	0.0957381	0.425862	1420.16	FALSE	36
2022-09-12	10:53:08	0.0924811	0.411374	1395.69	FALSE	36
2022-09-12	10:53:08	0.0629137	0.279853	1420.44	FALSE	36
2022-09-12	10:53:08	0.0510562	0.227108	1395.92	FALSE	36
2022-09-12	10:53:09	0.25869	1.1507	1421.59	FALSE	36
2022-09-12	10:53:09	0.0686644	0.305433	1396.22	FALSE	36
2022-09-12	10:53:09	0.218232	0.97074	1422.56	FALSE	36
2022-09-12	10:53:09	0.107596	0.478609	1396.7	FALSE	36
2022-09-12	10:53:10	0.1364	0.606734	1423.17	FALSE	36
2022-09-12	10:53:10	0.102557	0.456194	1397.16	FALSE	36
2022-09-12	10:53:10	0.104084	0.462986	1423.63	FALSE	36
2022-09-12	10:53:10	0.27757	1.23469	1398.39	FALSE	36
2022-09-12	10:53:11	0.130242	0.579342	1424.21	FALSE	36
2022-09-12	10:53:11	0.284542	1.2657	1399.66	FALSE	36
2022-09-12	10:53:11	0.191565	0.852119	1425.06	FALSE	36
2022-09-12	10:53:11	0.358486	1.59462	1401.25	FALSE	36
2022-09-12	10:53:12	0.153906	0.684605	1425.75	FALSE	36
2022-09-12	10:53:12	0.392786	1.74719	1403	FALSE	36
2022-09-12	10:53:12	0.240064	1.06785	1426.81	FALSE	36
2022-09-12	10:53:13	0.367494	1.63469	1404.63	FALSE	36
2022-09-12	10:53:13	0.16902	0.751835	1427.57	FALSE	36
2022-09-12	10:53:13	0.409377	1.82099	1406.45	FALSE	36
2022-09-12	10:53:13	0.211718	0.941764	1428.51	FALSE	36
2022-09-12	10:53:14	0.194466	0.865024	1407.32	FALSE	36
2022-09-12	10:53:14	0.12383	0.550821	1429.06	FALSE	36
2022-09-12	10:53:14	0.329224	1.46445	1408.78	FALSE	36
2022-09-12	10:53:14	0.28154	1.25235	1430.31	FALSE	36
2022-09-12	10:53:15	0.320624	1.4262	1410.21	FALSE	36
2022-09-12	10:53:15	0.323677	1.43978	1431.75	FALSE	36
2022-09-12	10:53:15	0.32556	1.44816	1411.66	FALSE	36
2022-09-12	10:53:15	0.364186	1.61997	1433.37	FALSE	36
2022-09-12	10:53:16	0.296603	1.31935	1412.98	FALSE	36
2022-09-12	10:53:16	0.370802	1.6494	1435.02	FALSE	36
2022-09-12	10:53:16	0.405662	1.80447	1414.78	FALSE	36
2022-09-12	10:53:17	0.440674	1.96021	1436.98	FALSE	36
2022-09-12	10:53:17	0.448003	1.99281	1416.77	FALSE	36
2022-09-12	10:53:17	0.539504	2.39982	1439.38	FALSE	36
2022-09-12	10:53:17	1.00612	4.47542	1421.25	FALSE	36
2022-09-12	10:53:18	0.860725	3.82868	1443.21	FALSE	36
2022-09-12	10:53:18	0.690394	3.07101	1424.32	FALSE	36
2022-09-12	10:53:18	0.52215	2.32263	1445.53	FALSE	36
2022-09-12	10:53:18	0.382812	1.70282	1426.02	FALSE	36
2022-09-12	10:53:19	0.561234	2.49648	1448.03	FALSE	36
2022-09-12	10:53:19	0.63075	2.8057	1428.83	FALSE	36
2022-09-12	10:53:19	0.400115	1.77979	1449.81	FALSE	36
2022-09-12	10:53:19	0.584796	2.60129	1431.43	FALSE	36
2022-09-12	10:53:20	1.74022	7.74085	1457.55	FALSE	36
2022-09-12	10:53:20	1.87589	8.34433	1439.77	FALSE	36
2022-09-12	10:53:20	2.88673	12.8408	1470.39	FALSE	36
2022-09-12	10:53:21	5.82525	25.9119	1465.69	1	37
2022-09-12	10:53:21	4.98948	22.1942	1492.58	1	38
2022-09-12	10:53:21	4.10083	18.2413	1483.93	1	39
2022-09-12	10:53:21	4.911	21.8451	1514.43	1	40
2022-09-12	10:53:22	2.90912	12.9403	1496.87	FALSE	40
2022-09-12	10:53:22	0.900623	4.00615	1518.43	FALSE	40
2022-09-12	10:53:22	0.618537	2.75138	1499.62	FALSE	40
2022-09-12	10:53:22	0.879249	3.91108	1522.35	FALSE	40
2022-09-12	10:53:23	0.942863	4.19404	1503.81	FALSE	40
2022-09-12	10:53:23	0.590445	2.62642	1524.97	FALSE	40
2022-09-12	10:53:23	0.662608	2.94741	1506.76	FALSE	40
2022-09-12	10:53:23	0.542354	2.4125	1527.38	FALSE	40
2022-09-12	10:53:24	0.633142	2.81634	1509.58	FALSE	40
2022-09-12	10:53:24	0.434517	1.93282	1529.32	FALSE	40
2022-09-12	10:53:24	0.329987	1.46785	1511.05	FALSE	40
2022-09-12	10:53:24	0.345509	1.53689	1530.85	FALSE	40
2022-09-12	10:53:25	0.445305	1.98081	1513.03	FALSE	40
2022-09-12	10:53:25	0.344135	1.53078	1532.39	FALSE	40
2022-09-12	10:53:25	0.307392	1.36734	1514.39	FALSE	40
2022-09-12	10:53:26	0.376094	1.67294	1534.06	FALSE	40
2022-09-12	10:53:26	0.347952	1.54776	1515.94	FALSE	40
2022-09-12	10:53:26	0.443473	1.97266	1536.03	FALSE	40
2022-09-12	10:53:26	0.35299	1.57017	1517.51	FALSE	40
2022-09-12	10:53:27	0.379911	1.68992	1537.72	FALSE	40
2022-09-12	10:53:27	0.492583	2.19111	1519.7	FALSE	40
2022-09-12	10:53:27	0.477519	2.1241	1539.84	FALSE	40
2022-09-12	10:53:27	0.483473	2.15058	1521.85	FALSE	40
2022-09-12	10:53:28	0.456349	2.02993	1541.87	FALSE	40
2022-09-12	10:53:28	0.438486	1.95047	1523.8	FALSE	40
2022-09-12	10:53:28	0.472176	2.10033	1543.97	FALSE	40
2022-09-12	10:53:28	0.456705	2.03152	1525.83	FALSE	40
2022-09-12	10:53:29	0.412634	1.83548	1545.81	FALSE	40
2022-09-12	10:53:29	0.468766	2.08516	1527.92	FALSE	40
2022-09-12	10:53:29	0.485611	2.16009	1547.97	FALSE	40
2022-09-12	10:53:30	0.338232	1.50452	1529.42	FALSE	40
2022-09-12	10:53:30	0.55416	2.46501	1550.44	FALSE	40
2022-09-12	10:53:30	0.501845	2.23231	1531.66	FALSE	40
2022-09-12	10:53:30	0.540674	2.40503	1552.84	FALSE	40
2022-09-12	10:53:31	0.554669	2.46728	1534.12	FALSE	40
2022-09-12	10:53:31	0.586679	2.60967	1555.45	FALSE	40
2022-09-12	10:53:31	0.558944	2.48629	1536.61	FALSE	40
2022-09-12	10:53:31	0.564186	2.50961	1557.96	FALSE	40
2022-09-12	10:53:32	0.503321	2.23887	1538.85	FALSE	40
2022-09-12	10:53:32	0.592481	2.63547	1560.6	FALSE	40
2022-09-12	10:53:32	0.579504	2.57775	1541.43	FALSE	40
2022-09-12	10:53:32	0.611972	2.72217	1563.32	FALSE	40
2022-09-12	10:53:33	0.552379	2.45709	1543.88	FALSE	40
2022-09-12	10:53:33	0.538893	2.3971	1565.71	FALSE	40
2022-09-12	10:53:33	0.522862	2.32579	1546.21	FALSE	40
2022-09-12	10:53:34	0.534873	2.37922	1568.09	FALSE	40
2022-09-12	10:53:34	0.518486	2.30633	1548.52	FALSE	40
2022-09-12	10:53:34	0.495789	2.20537	1570.3	FALSE	40
2022-09-12	10:53:34	0.498639	2.21805	1550.73	FALSE	40
2022-09-12	10:53:35	0.493855	2.19677	1572.5	FALSE	40
2022-09-12	10:53:35	0.500827	2.22778	1552.96	FALSE	40
2022-09-12	10:53:35	0.505967	2.25064	1574.75	FALSE	40
2022-09-12	10:53:35	0.506221	2.25177	1555.21	FALSE	40
2022-09-12	10:53:36	0.507901	2.25925	1577.01	FALSE	40
2022-09-12	10:53:36	0.531616	2.36473	1557.58	FALSE	40
2022-09-12	10:53:36	0.530496	2.35975	1579.37	FALSE	40
2022-09-12	10:53:36	0.537977	2.39303	1559.97	FALSE	40
2022-09-12	10:53:37	0.555433	2.47068	1581.84	FALSE	40
2022-09-12	10:53:37	0.55299	2.45981	1562.43	FALSE	40
2022-09-12	10:53:37	0.543575	2.41793	1584.25	FALSE	40
2022-09-12	10:53:38	0.528817	2.35228	1564.78	FALSE	40
2022-09-12	10:53:38	0.539707	2.40072	1586.65	FALSE	40
2022-09-12	10:53:38	0.588562	2.61804	1567.4	FALSE	40
2022-09-12	10:53:38	0.658842	2.93066	1589.59	FALSE	40
2022-09-12	10:53:39	0.473702	2.10712	1569.51	FALSE	40
2022-09-12	10:53:39	0.458486	2.03944	1591.63	FALSE	40
2022-09-12	10:53:39	0.447494	1.99054	1571.5	FALSE	40
2022-09-12	10:53:39	0.451616	2.00888	1593.63	FALSE	40
2022-09-12	10:53:40	0.451768	2.00955	1573.51	FALSE	40
2022-09-12	10:53:40	0.459402	2.04351	1595.68	FALSE	40
2022-09-12	10:53:40	0.456043	2.02857	1575.54	FALSE	40
2022-09-12	10:53:40	0.44612	1.98443	1597.66	FALSE	40
2022-09-12	10:53:41	0.449835	2.00096	1577.54	FALSE	40
2022-09-12	10:53:41	0.457163	2.03355	1599.7	FALSE	40
2022-09-12	10:53:41	0.454568	2.02201	1579.56	FALSE	40
2022-09-12	10:53:42	0.482863	2.14787	1601.84	FALSE	40
2022-09-12	10:53:42	0.461794	2.05415	1581.61	FALSE	40
2022-09-12	10:53:42	0.424593	1.88867	1603.73	FALSE	40
2022-09-12	10:53:42	0.388104	1.72636	1583.34	FALSE	40
2022-09-12	10:53:43	0.470191	2.0915	1605.82	FALSE	40
2022-09-12	10:53:43	0.424644	1.8889	1585.23	FALSE	40
2022-09-12	10:53:43	0.394567	1.75511	1607.58	FALSE	40
2022-09-12	10:53:43	0.392786	1.74719	1586.98	FALSE	40
2022-09-12	10:53:44	0.492634	2.19133	1609.77	FALSE	40
2022-09-12	10:53:44	0.487596	2.16892	1589.15	FALSE	40
2022-09-12	10:53:44	0.360573	1.6039	1611.37	FALSE	40
2022-09-12	10:53:44	0.418384	1.86106	1591.01	FALSE	40
2022-09-12	10:53:45	0.409682	1.82235	1613.2	FALSE	40
2022-09-12	10:53:45	0.409377	1.82099	1592.83	FALSE	40
2022-09-12	10:53:45	0.373143	1.65981	1614.86	FALSE	40
2022-09-12	10:53:45	0.382557	1.70169	1594.53	FALSE	40
2022-09-12	10:53:46	0.348461	1.55002	1616.41	FALSE	40
2022-09-12	10:53:46	0.325153	1.44635	1595.98	FALSE	40
2022-09-12	10:53:46	0.529835	2.35681	1618.76	FALSE	40
2022-09-12	10:53:47	0.500572	2.22664	1598.2	FALSE	40
2022-09-12	10:53:47	0.583066	2.59359	1621.36	FALSE	40
2022-09-12	10:53:47	0.443117	1.97107	1600.17	FALSE	40
2022-09-12	10:53:47	0.55299	2.45981	1623.82	FALSE	40
2022-09-12	10:53:48	0.506119	2.25132	1602.43	FALSE	40
2022-09-12	10:53:48	0.45701	2.03287	1625.85	FALSE	40
2022-09-12	10:53:48	0.446578	1.98647	1604.41	FALSE	40
2022-09-12	10:53:48	0.373448	1.66117	1627.51	FALSE	40
2022-09-12	10:53:49	0.52897	2.35296	1606.76	FALSE	40
2022-09-12	10:53:49	0.350242	1.55795	1629.07	FALSE	40
2022-09-12	10:53:49	0.47813	2.12682	1608.89	FALSE	40
2022-09-12	10:53:49	0.435891	1.93893	1631.01	FALSE	40
2022-09-12	10:53:50	0.371107	1.65076	1610.54	FALSE	40
2022-09-12	10:53:50	0.451768	2.00955	1633.02	FALSE	40
2022-09-12	10:53:50	0.565305	2.51459	1613.06	FALSE	40
2022-09-12	10:53:51	0.518588	2.30678	1635.32	FALSE	40
2022-09-12	10:53:51	0.493092	2.19337	1615.25	FALSE	40
2022-09-12	10:53:51	0.464033	2.06411	1637.39	FALSE	40
2022-09-12	10:53:51	0.524236	2.33191	1617.58	FALSE	40
2022-09-12	10:53:52	0.471667	2.09807	1639.49	FALSE	40
2022-09-12	10:53:52	0.669326	2.9773	1620.56	FALSE	40
2022-09-12	10:53:52	0.607239	2.70112	1642.19	FALSE	40
2022-09-12	10:53:52	0.7936	3.53009	1624.09	FALSE	40
2022-09-12	10:53:53	0.733957	3.26479	1645.45	FALSE	40
2022-09-12	10:53:53	0.546374	2.43038	1626.52	FALSE	40
2022-09-12	10:53:53	0.430496	1.91493	1647.37	FALSE	40
2022-09-12	10:53:53	0.414669	1.84453	1628.36	FALSE	40
2022-09-12	10:53:54	0.417316	1.85631	1649.22	FALSE	40
2022-09-12	10:53:54	0.408563	1.81737	1630.18	FALSE	40
2022-09-12	10:53:54	0.428359	1.90543	1651.13	FALSE	40
2022-09-12	10:53:55	0.3193	1.42031	1631.6	FALSE	40
2022-09-12	10:53:55	0.452277	2.01182	1653.14	FALSE	40
2022-09-12	10:53:55	0.359555	1.59937	1633.2	FALSE	40
2022-09-12	10:53:55	0.335535	1.49253	1654.63	FALSE	40
2022-09-12	10:53:56	0.411209	1.82914	1635.03	FALSE	40
2022-09-12	10:53:56	0.397723	1.76915	1656.4	FALSE	40
2022-09-12	10:53:56	0.374364	1.66525	1636.7	FALSE	40
2022-09-12	10:53:56	0.366374	1.6297	1658.03	FALSE	40
2022-09-12	10:53:57	0.398435	1.77232	1638.47	FALSE	40
2022-09-12	10:53:57	0.37355	1.66163	1659.69	FALSE	40
2022-09-12	10:53:57	0.307443	1.36757	1639.84	FALSE	40
2022-09-12	10:53:57	0.507901	2.25925	1661.95	FALSE	40
2022-09-12	10:53:58	0.31014	1.37956	1641.22	FALSE	40
2022-09-12	10:53:58	0.394771	1.75602	1663.71	FALSE	40
2022-09-12	10:53:58	0.462252	2.05619	1643.27	FALSE	40
2022-09-12	10:53:59	0.281743	1.25325	1664.96	FALSE	40
2022-09-12	10:53:59	0.432939	1.9258	1645.2	FALSE	40
2022-09-12	10:53:59	0.341489	1.51901	1666.48	FALSE	40
2022-09-12	10:53:59	1.91726	8.52836	1653.73	FALSE	40
2022-09-12	10:54:00	1.50902	6.71242	1673.19	FALSE	40
2022-09-12	10:54:00	2.09447	9.31662	1663.04	FALSE	40
2022-09-12	10:54:00	1.80877	8.04577	1681.24	FALSE	40
2022-09-12	10:54:00	3.51808	15.6491	1678.69	1	41
2022-09-12	10:54:01	6.18428	27.5089	1708.75	1	42
2022-09-12	10:54:01	8.09675	36.016	1714.71	1	43
2022-09-12	10:54:01	3.11477	13.8551	1722.6	1	44
2022-09-12	10:54:01	3.02413	13.4519	1728.16	1	45
2022-09-12	10:54:02	1.99737	8.8847	1731.49	FALSE	45
2022-09-12	10:54:02	2.63156	11.7057	1739.86	FALSE	45
2022-09-12	10:54:02	1.5476	6.88403	1738.37	FALSE	45
2022-09-12	10:54:03	0.653295	2.90599	1742.77	FALSE	45
2022-09-12	10:54:03	0.701641	3.12104	1741.49	FALSE	45
2022-09-12	10:54:03	0.417265	1.85608	1744.63	FALSE	45
2022-09-12	10:54:03	0.787341	3.50225	1744.99	FALSE	45
2022-09-12	10:54:04	1.07365	4.77581	1749.4	FALSE	45
2022-09-12	10:54:04	2.54968	11.3415	1756.34	FALSE	45
2022-09-12	10:54:04	2.83406	12.6065	1762.01	FALSE	45
2022-09-12	10:54:04	5.31823	23.6566	1779.99	1	46
2022-09-12	10:54:05	2.09197	9.3055	1771.31	FALSE	46
2022-09-12	10:54:05	1.57304	6.9972	1786.99	FALSE	46
2022-09-12	10:54:05	0.672837	2.99291	1774.31	FALSE	46
2022-09-12	10:54:05	0.333804	1.48483	1788.47	FALSE	46
2022-09-12	10:54:06	0.618435	2.75092	1777.06	FALSE	46
2022-09-12	10:54:06	0.293194	1.30419	1789.78	FALSE	46
2022-09-12	10:54:06	0.516043	2.29546	1779.35	FALSE	46
2022-09-12	10:54:06	0.377265	1.67815	1791.46	FALSE	46
2022-09-12	10:54:07	0.977265	4.34707	1783.7	FALSE	46
2022-09-12	10:54:07	0.813652	3.61929	1795.08	FALSE	46
2022-09-12	10:54:07	2.02943	9.02731	1792.73	FALSE	46
2022-09-12	10:54:08	1.21625	5.41012	1800.49	FALSE	46
2022-09-12	10:54:08	1.21431	5.40149	1798.13	FALSE	46
2022-09-12	10:54:08	0.570751	2.53881	1803.03	FALSE	46
2022-09-12	10:54:08	0.325255	1.4468	1799.58	FALSE	46
2022-09-12	10:54:09	0.537417	2.39054	1805.42	FALSE	46
2022-09-12	10:54:09	0.314415	1.39858	1800.98	FALSE	46
2022-09-12	10:54:09	0.454364	2.0211	1807.44	FALSE	46
2022-09-12	10:54:09	0.287901	1.28064	1802.26	FALSE	46
2022-09-12	10:54:10	0.379453	1.68788	1809.12	FALSE	46
2022-09-12	10:54:10	0.290649	1.29286	1803.55	FALSE	46
2022-09-12	10:54:10	0.474059	2.10871	1811.23	FALSE	46
2022-09-12	10:54:10	0.670293	2.9816	1806.53	FALSE	46
2022-09-12	10:54:11	0.992939	4.41679	1815.65	FALSE	46
2022-09-12	10:54:11	1.10693	4.92385	1811.45	FALSE	46
2022-09-12	10:54:11	0.617672	2.74753	1818.4	FALSE	46
2022-09-12	10:54:12	0.563219	2.50531	1813.96	FALSE	46
2022-09-12	10:54:12	0.322812	1.43593	1819.83	FALSE	46
2022-09-12	10:54:12	0.834618	3.71255	1817.67	FALSE	46
2022-09-12	10:54:12	0.406272	1.80718	1821.64	FALSE	46
2022-09-12	10:54:13	0.454568	2.02201	1819.69	FALSE	46
2022-09-12	10:54:13	0.361845	1.60956	1823.25	FALSE	46
2022-09-12	10:54:13	0.389428	1.73225	1821.43	FALSE	46
2022-09-12	10:54:13	0.352685	1.56881	1824.82	FALSE	46
2022-09-12	10:54:14	0.452176	2.01137	1823.44	FALSE	46
2022-09-12	10:54:14	0.329937	1.46763	1826.29	FALSE	46
2022-09-12	10:54:14	0.445204	1.98036	1825.42	FALSE	46
2022-09-12	10:54:14	0.357825	1.59168	1827.88	FALSE	46
2022-09-12	10:54:15	0.594618	2.64498	1828.06	FALSE	46
2022-09-12	10:54:15	0.817519	3.63649	1831.52	FALSE	46
2022-09-12	10:54:15	1.39446	6.20284	1834.27	FALSE	46
2022-09-12	10:54:16	1.18454	5.26907	1836.78	FALSE	46
2022-09-12	10:54:16	0.975178	4.33779	1838.6	FALSE	46
2022-09-12	10:54:16	0.626069	2.78488	1839.57	FALSE	46
2022-09-12	10:54:16	1.17528	5.22788	1843.83	FALSE	46
2022-09-12	10:54:17	0.653651	2.90757	1842.48	FALSE	46
2022-09-12	10:54:17	0.443117	1.97107	1845.8	FALSE	46
2022-09-12	10:54:17	0.419046	1.864	1844.34	FALSE	46
2022-09-12	10:54:17	0.461234	2.05166	1847.85	FALSE	46

## Sheet: Duke_martin_2022912104916 (E)
Date	Time	Lbs	Total Force x Time	Total Time Steps Force >3		**GoPro Fitting: 1038
2022-09-12	10:49:17	0.395636	0.395636	FALSE	0			Total Force x Time	830.043
2022-09-12	10:49:17	0.422557	0.818193	FALSE	0			Total Time Steps Force >3	46
2022-09-12	10:49:17	0.506629	1.32482	FALSE	0
2022-09-12	10:49:17	0.495534	1.82036	FALSE	0
2022-09-12	10:49:18	0.677824	2.49818	FALSE	0
2022-09-12	10:49:18	1.17324	3.67142	FALSE	0
2022-09-12	10:49:18	0.691768	4.36319	FALSE	0
2022-09-12	10:49:18	0.410293	4.77348	FALSE	0
2022-09-12	10:49:19	0.584287	5.35777	FALSE	0
2022-09-12	10:49:19	0.744033	6.1018	FALSE	0
2022-09-12	10:49:19	6.80098	12.9028	1	1
2022-09-12	10:49:20	8.99395	21.8967	1	2
2022-09-12	10:49:20	5.60016	27.4969	1	3
2022-09-12	10:49:20	4.40652	31.9034	1	4
2022-09-12	10:49:20	7.32306	39.2265	1	5
2022-09-12	10:49:21	11.9481	51.1746	1	6
2022-09-12	10:49:21	8.67889	59.8535	1	7
2022-09-12	10:49:21	2.13177	61.9852	FALSE	7
2022-09-12	10:49:21	0.52556	62.5108	FALSE	7
2022-09-12	10:49:22	0.333957	62.8447	FALSE	7
2022-09-12	10:49:22	0.215942	63.0607	FALSE	7
2022-09-12	10:49:22	0.211311	63.272	FALSE	7
2022-09-12	10:49:22	0.322863	63.5949	FALSE	7
2022-09-12	10:49:23	0.335331	63.9302	FALSE	7
2022-09-12	10:49:23	0.36271	64.2929	FALSE	7
2022-09-12	10:49:23	0.409835	64.7027	FALSE	7
2022-09-12	10:49:23	0.432277	65.135	FALSE	7
2022-09-12	10:49:24	0.365356	65.5004	FALSE	7
2022-09-12	10:49:24	0.39584	65.8962	FALSE	7
2022-09-12	10:49:24	0.418588	66.3148	FALSE	7
2022-09-12	10:49:25	0.384033	66.6988	FALSE	7
2022-09-12	10:49:25	0.287646	66.9865	FALSE	7
2022-09-12	10:49:25	0.452227	67.4387	FALSE	7
2022-09-12	10:49:25	0.384542	67.8232	FALSE	7
2022-09-12	10:49:26	0.288868	68.1121	FALSE	7
2022-09-12	10:49:26	-0.0814628	68.1121	FALSE	7
2022-09-12	10:49:26	-0.23388	68.1121	FALSE	7
2022-09-12	10:49:26	-0.0159158	68.1121	FALSE	7
2022-09-12	10:49:27	0.0642878	68.1764	FALSE	7
2022-09-12	10:49:27	0.939911	69.1163	FALSE	7
2022-09-12	10:49:27	0.462608	69.5789	FALSE	7
2022-09-12	10:49:27	0.435941	70.0149	FALSE	7
2022-09-12	10:49:28	0.253041	70.2679	FALSE	7
2022-09-12	10:49:28	0.301794	70.5697	FALSE	7
2022-09-12	10:49:28	0.181794	70.7515	FALSE	7
2022-09-12	10:49:29	0.293601	71.0451	FALSE	7
2022-09-12	10:49:29	0.163626	71.2087	FALSE	7
2022-09-12	10:49:29	0.249173	71.4579	FALSE	7
2022-09-12	10:49:29	0.131209	71.5891	FALSE	7
2022-09-12	10:49:30	0.380115	71.9692	FALSE	7
2022-09-12	10:49:30	0.412227	72.3814	FALSE	7
2022-09-12	10:49:30	2.3166	74.698	FALSE	7
2022-09-12	10:49:30	1.84673	76.5448	FALSE	7
2022-09-12	10:49:31	2.99273	79.5375	FALSE	7
2022-09-12	10:49:31	3.74418	83.2817	1	8
2022-09-12	10:49:31	1.38902	84.6707	FALSE	8
2022-09-12	10:49:31	2.45141	87.1221	FALSE	8
2022-09-12	10:49:32	1.55106	88.6732	FALSE	8
2022-09-12	10:49:32	1.27101	89.9442	FALSE	8
2022-09-12	10:49:32	0.685051	90.6292	FALSE	8
2022-09-12	10:49:33	0.725814	91.355	FALSE	8
2022-09-12	10:49:33	2.04525	93.4003	FALSE	8
2022-09-12	10:49:33	0.226374	93.6267	FALSE	8
2022-09-12	10:49:33	1.56337	95.19	FALSE	8
2022-09-12	10:49:34	1.10989	96.2999	FALSE	8
2022-09-12	10:49:34	2.44128	98.7412	FALSE	8
2022-09-12	10:49:34	1.8081	100.549	FALSE	8
2022-09-12	10:49:34	3.52698	104.076	1	9
2022-09-12	10:49:35	3.87212	107.948	1	10
2022-09-12	10:49:35	1.89258	109.841	FALSE	10
2022-09-12	10:49:35	2.73523	112.576	FALSE	10
2022-09-12	10:49:35	3.66714	116.243	1	11
2022-09-12	10:49:36	5.7995	122.043	1	12
2022-09-12	10:49:36	4.05467	126.098	1	13
2022-09-12	10:49:36	3.7224	129.82	1	14
2022-09-12	10:49:37	3.57355	133.393	1	15
2022-09-12	10:49:37	1.9193	135.313	FALSE	15
2022-09-12	10:49:37	1.34927	136.662	FALSE	15
2022-09-12	10:49:37	2.25228	138.914	FALSE	15
2022-09-12	10:49:38	0.844949	139.759	FALSE	15
2022-09-12	10:49:38	2.11981	141.879	FALSE	15
2022-09-12	10:49:38	1.33777	143.217	FALSE	15
2022-09-12	10:49:38	2.06592	145.283	FALSE	15
2022-09-12	10:49:39	1.85243	147.135	FALSE	15
2022-09-12	10:49:39	2.08459	149.22	FALSE	15
2022-09-12	10:49:39	4.45894	153.679	1	16
2022-09-12	10:49:39	3.42561	157.104	1	17
2022-09-12	10:49:40	3.97467	161.079	1	18
2022-09-12	10:49:40	4.54765	165.627	1	19
2022-09-12	10:49:40	5.72199	171.349	1	20
2022-09-12	10:49:40	4.30037	175.649	1	21
2022-09-12	10:49:41	4.81691	180.466	1	22
2022-09-12	10:49:41	9.07344	189.539	1	23
2022-09-12	10:49:41	5.6765	195.216	1	24
2022-09-12	10:49:42	7.56723	202.783	1	25
2022-09-12	10:49:42	7.72479	210.508	1	26
2022-09-12	10:49:42	13.3358	223.844	1	27
2022-09-12	10:49:42	23.4945	247.338	1	28
2022-09-12	10:49:43	16.2267	263.565	1	29
2022-09-12	10:49:43	8.14688	271.712	1	30
2022-09-12	10:49:43	2.81416	274.526	FALSE	30
2022-09-12	10:49:43	1.98765	276.514	FALSE	30
2022-09-12	10:49:44	1.77976	278.293	FALSE	30
2022-09-12	10:49:44	1.59808	279.891	FALSE	30
2022-09-12	10:49:44	2.12866	282.02	FALSE	30
2022-09-12	10:49:44	0.709885	282.73	FALSE	30
2022-09-12	10:49:45	0.502964	283.233	FALSE	30
2022-09-12	10:49:45	0.788053	284.021	FALSE	30
2022-09-12	10:49:45	0.539605	284.561	FALSE	30
2022-09-12	10:49:46	1.39146	285.952	FALSE	30
2022-09-12	10:49:46	2.00938	287.961	FALSE	30
2022-09-12	10:49:46	1.25355	289.215	FALSE	30
2022-09-12	10:49:46	1.16454	290.38	FALSE	30
2022-09-12	10:49:47	1.42968	291.809	FALSE	30
2022-09-12	10:49:47	0.629173	292.438	FALSE	30
2022-09-12	10:49:47	1.24363	293.682	FALSE	30
2022-09-12	10:49:47	1.58347	295.265	FALSE	30
2022-09-12	10:49:48	0.523982	295.789	FALSE	30
2022-09-12	10:49:48	0.395891	296.185	FALSE	30
2022-09-12	10:49:48	1.20617	297.392	FALSE	30
2022-09-12	10:49:48	0.402659	297.794	FALSE	30
2022-09-12	10:49:49	0.307087	298.101	FALSE	30
2022-09-12	10:49:49	0.670852	298.772	FALSE	30
2022-09-12	10:49:49	0.097163	298.869	FALSE	30
2022-09-12	10:49:50	0.433448	299.303	FALSE	30
2022-09-12	10:49:50	0.560064	299.863	FALSE	30
2022-09-12	10:49:50	0.469835	300.333	FALSE	30
2022-09-12	10:49:50	0.369428	300.702	FALSE	30
2022-09-12	10:49:51	0.917621	301.62	FALSE	30
2022-09-12	10:49:51	0.772277	302.392	FALSE	30
2022-09-12	10:49:51	0.70444	303.096	FALSE	30
2022-09-12	10:49:51	0.494211	303.591	FALSE	30
2022-09-12	10:49:52	0.226578	303.817	FALSE	30
2022-09-12	10:49:52	0.322354	304.14	FALSE	30
2022-09-12	10:49:52	0.346476	304.486	FALSE	30
2022-09-12	10:49:52	0.734008	305.22	FALSE	30
2022-09-12	10:49:53	0.555229	305.775	FALSE	30
2022-09-12	10:49:53	0.328613	306.104	FALSE	30
2022-09-12	10:49:53	0.151005	306.255	FALSE	30
2022-09-12	10:49:54	0.353041	306.608	FALSE	30
2022-09-12	10:49:54	0.176909	306.785	FALSE	30
2022-09-12	10:49:54	0.0912088	306.876	FALSE	30
2022-09-12	10:49:54	0.574059	307.45	FALSE	30
2022-09-12	10:49:55	0.386985	307.837	FALSE	30
2022-09-12	10:49:55	0.257774	308.095	FALSE	30
2022-09-12	10:49:55	0.397926	308.493	FALSE	30
2022-09-12	10:49:55	0.572684	309.065	FALSE	30
2022-09-12	10:49:56	0.404898	309.47	FALSE	30
2022-09-12	10:49:56	0.389021	309.859	FALSE	30
2022-09-12	10:49:56	0.280165	310.14	FALSE	30
2022-09-12	10:49:56	0.292379	310.432	FALSE	30
2022-09-12	10:49:57	0.339809	310.772	FALSE	30
2022-09-12	10:49:57	0.307036	311.079	FALSE	30
2022-09-12	10:49:57	0.30673	311.385	FALSE	30
2022-09-12	10:49:57	0.309071	311.695	FALSE	30
2022-09-12	10:49:58	0.310344	312.005	FALSE	30
2022-09-12	10:49:58	0.328969	312.334	FALSE	30
2022-09-12	10:49:58	0.334262	312.668	FALSE	30
2022-09-12	10:49:59	0.381896	313.05	FALSE	30
2022-09-12	10:49:59	0.356196	313.406	FALSE	30
2022-09-12	10:49:59	0.339809	313.746	FALSE	30
2022-09-12	10:49:59	0.329224	314.075	FALSE	30
2022-09-12	10:50:00	0.354618	314.43	FALSE	30
2022-09-12	10:50:00	0.364644	314.795	FALSE	30
2022-09-12	10:50:00	0.34327	315.138	FALSE	30
2022-09-12	10:50:00	0.400573	315.538	FALSE	30
2022-09-12	10:50:01	0.267494	315.806	FALSE	30
2022-09-12	10:50:01	0.353143	316.159	FALSE	30
2022-09-12	10:50:01	0.415789	316.575	FALSE	30
2022-09-12	10:50:01	0.435738	317.011	FALSE	30
2022-09-12	10:50:02	0.355433	317.366	FALSE	30
2022-09-12	10:50:02	0.371921	317.738	FALSE	30
2022-09-12	10:50:02	0.463626	318.202	FALSE	30
2022-09-12	10:50:03	0.377977	318.579	FALSE	30
2022-09-12	10:50:03	0.416552	318.996	FALSE	30
2022-09-12	10:50:03	0.388257	319.384	FALSE	30
2022-09-12	10:50:03	0.364542	319.749	FALSE	30
2022-09-12	10:50:04	0.456043	320.205	FALSE	30
2022-09-12	10:50:04	0.461794	320.667	FALSE	30
2022-09-12	10:50:04	0.465204	321.132	FALSE	30
2022-09-12	10:50:04	0.411819	321.544	FALSE	30
2022-09-12	10:50:05	0.396247	321.94	FALSE	30
2022-09-12	10:50:05	0.349886	322.29	FALSE	30
2022-09-12	10:50:05	0.350802	322.641	FALSE	30
2022-09-12	10:50:05	0.340115	322.981	FALSE	30
2022-09-12	10:50:06	0.345	323.326	FALSE	30
2022-09-12	10:50:06	0.361336	323.687	FALSE	30
2022-09-12	10:50:06	0.349682	324.037	FALSE	30
2022-09-12	10:50:07	0.346985	324.384	FALSE	30
2022-09-12	10:50:07	0.326629	324.71	FALSE	30
2022-09-12	10:50:07	0.338181	325.049	FALSE	30
2022-09-12	10:50:07	0.368003	325.417	FALSE	30
2022-09-12	10:50:08	0.41472	325.831	FALSE	30
2022-09-12	10:50:08	0.425814	326.257	FALSE	30
2022-09-12	10:50:08	0.398232	326.655	FALSE	30
2022-09-12	10:50:08	0.356959	327.012	FALSE	30
2022-09-12	10:50:09	0.329122	327.341	FALSE	30
2022-09-12	10:50:09	0.300522	327.642	FALSE	30
2022-09-12	10:50:09	0.316043	327.958	FALSE	30
2022-09-12	10:50:09	0.313906	328.272	FALSE	30
2022-09-12	10:50:10	0.334873	328.607	FALSE	30
2022-09-12	10:50:10	0.322252	328.929	FALSE	30
2022-09-12	10:50:10	0.312634	329.242	FALSE	30
2022-09-12	10:50:11	0.31243	329.554	FALSE	30
2022-09-12	10:50:11	0.311616	329.866	FALSE	30
2022-09-12	10:50:11	0.306629	330.172	FALSE	30
2022-09-12	10:50:11	0.299046	330.471	FALSE	30
2022-09-12	10:50:12	0.29472	330.766	FALSE	30
2022-09-12	10:50:12	0.30154	331.068	FALSE	30
2022-09-12	10:50:12	0.291361	331.359	FALSE	30
2022-09-12	10:50:12	0.294669	331.654	FALSE	30
2022-09-12	10:50:13	0.298792	331.952	FALSE	30
2022-09-12	10:50:13	0.355585	332.308	FALSE	30
2022-09-12	10:50:13	0.267138	332.575	FALSE	30
2022-09-12	10:50:13	0.378741	332.954	FALSE	30
2022-09-12	10:50:14	0.141591	333.096	FALSE	30
2022-09-12	10:50:14	0.120878	333.216	FALSE	30
2022-09-12	10:50:14	0.217875	333.434	FALSE	30
2022-09-12	10:50:14	0.321998	333.756	FALSE	30
2022-09-12	10:50:15	0.278283	334.035	FALSE	30
2022-09-12	10:50:15	0.245458	334.28	FALSE	30
2022-09-12	10:50:15	0.184135	334.464	FALSE	30
2022-09-12	10:50:16	0.256858	334.721	FALSE	30
2022-09-12	10:50:16	0.228054	334.949	FALSE	30
2022-09-12	10:50:16	0.249478	335.199	FALSE	30
2022-09-12	10:50:16	0.239708	335.438	FALSE	30
2022-09-12	10:50:17	0.290802	335.729	FALSE	30
2022-09-12	10:50:17	0.257926	335.987	FALSE	30
2022-09-12	10:50:17	0.257977	336.245	FALSE	30
2022-09-12	10:50:17	0.285356	336.53	FALSE	30
2022-09-12	10:50:18	0.277061	336.807	FALSE	30
2022-09-12	10:50:18	0.27472	337.082	FALSE	30
2022-09-12	10:50:18	0.276451	337.359	FALSE	30
2022-09-12	10:50:18	0.29584	337.654	FALSE	30
2022-09-12	10:50:19	0.27243	337.927	FALSE	30
2022-09-12	10:50:19	0.26271	338.19	FALSE	30
2022-09-12	10:50:19	0.264033	338.454	FALSE	30
2022-09-12	10:50:20	0.271565	338.725	FALSE	30
2022-09-12	10:50:20	0.284288	339.009	FALSE	30
2022-09-12	10:50:20	0.294211	339.304	FALSE	30
2022-09-12	10:50:20	0.271819	339.575	FALSE	30
2022-09-12	10:50:21	0.304237	339.88	FALSE	30
2022-09-12	10:50:21	0.294822	340.174	FALSE	30
2022-09-12	10:50:21	0.286883	340.461	FALSE	30
2022-09-12	10:50:21	0.276959	340.738	FALSE	30
2022-09-12	10:50:22	0.277621	341.016	FALSE	30
2022-09-12	10:50:22	0.275433	341.291	FALSE	30
2022-09-12	10:50:22	0.260318	341.552	FALSE	30
2022-09-12	10:50:22	0.280827	341.833	FALSE	30
2022-09-12	10:50:23	0.305255	342.138	FALSE	30
2022-09-12	10:50:23	0.193855	342.332	FALSE	30
2022-09-12	10:50:23	0.257417	342.589	FALSE	30
2022-09-12	10:50:24	0.279555	342.869	FALSE	30
2022-09-12	10:50:24	0.232379	343.101	FALSE	30
2022-09-12	10:50:24	0.263321	343.364	FALSE	30
2022-09-12	10:50:24	0.295127	343.659	FALSE	30
2022-09-12	10:50:25	0.31869	343.978	FALSE	30
2022-09-12	10:50:25	0.3507	344.329	FALSE	30
2022-09-12	10:50:25	0.329784	344.659	FALSE	30
2022-09-12	10:50:25	0.317417	344.976	FALSE	30
2022-09-12	10:50:26	0.309886	345.286	FALSE	30
2022-09-12	10:50:26	0.325458	345.611	FALSE	30
2022-09-12	10:50:26	0.326323	345.938	FALSE	30
2022-09-12	10:50:26	0.332328	346.27	FALSE	30
2022-09-12	10:50:27	0.342863	346.613	FALSE	30
2022-09-12	10:50:27	0.329122	346.942	FALSE	30
2022-09-12	10:50:27	0.339351	347.281	FALSE	30
2022-09-12	10:50:28	0.33126	347.613	FALSE	30
2022-09-12	10:50:28	0.322964	347.936	FALSE	30
2022-09-12	10:50:28	0.330903	348.266	FALSE	30
2022-09-12	10:50:28	0.322761	348.589	FALSE	30
2022-09-12	10:50:29	0.311209	348.9	FALSE	30
2022-09-12	10:50:29	0.3164	349.217	FALSE	30
2022-09-12	10:50:29	0.309886	349.527	FALSE	30
2022-09-12	10:50:29	0.30383	349.831	FALSE	30
2022-09-12	10:50:30	0.305967	350.137	FALSE	30
2022-09-12	10:50:30	0.309122	350.446	FALSE	30
2022-09-12	10:50:30	0.342964	350.789	FALSE	30
2022-09-12	10:50:30	0.349275	351.138	FALSE	30
2022-09-12	10:50:31	0.318384	351.456	FALSE	30
2022-09-12	10:50:31	0.293295	351.75	FALSE	30
2022-09-12	10:50:31	0.355127	352.105	FALSE	30
2022-09-12	10:50:31	0.352888	352.458	FALSE	30
2022-09-12	10:50:32	0.277774	352.735	FALSE	30
2022-09-12	10:50:32	0.317876	353.053	FALSE	30
2022-09-12	10:50:32	0.328104	353.381	FALSE	30
2022-09-12	10:50:33	0.288308	353.67	FALSE	30
2022-09-12	10:50:33	0.360369	354.03	FALSE	30
2022-09-12	10:50:33	0.356756	354.387	FALSE	30
2022-09-12	10:50:33	0.421489	354.808	FALSE	30
2022-09-12	10:50:34	0.376654	355.185	FALSE	30
2022-09-12	10:50:34	0.384288	355.569	FALSE	30
2022-09-12	10:50:34	0.454364	356.024	FALSE	30
2022-09-12	10:50:34	0.400725	356.424	FALSE	30
2022-09-12	10:50:35	0.385967	356.81	FALSE	30
2022-09-12	10:50:35	0.411565	357.222	FALSE	30
2022-09-12	10:50:35	0.458893	357.681	FALSE	30
2022-09-12	10:50:35	0.402506	358.083	FALSE	30
2022-09-12	10:50:36	0.38271	358.466	FALSE	30
2022-09-12	10:50:36	0.428359	358.894	FALSE	30
2022-09-12	10:50:36	0.411565	359.306	FALSE	30
2022-09-12	10:50:37	0.401489	359.707	FALSE	30
2022-09-12	10:50:37	0.406272	360.114	FALSE	30
2022-09-12	10:50:37	0.408359	360.522	FALSE	30
2022-09-12	10:50:37	0.412379	360.934	FALSE	30
2022-09-12	10:50:38	0.406578	361.341	FALSE	30
2022-09-12	10:50:38	0.394211	361.735	FALSE	30
2022-09-12	10:50:38	0.34673	362.082	FALSE	30
2022-09-12	10:50:38	0.346171	362.428	FALSE	30
2022-09-12	10:50:39	0.371209	362.799	FALSE	30
2022-09-12	10:50:39	0.359249	363.159	FALSE	30
2022-09-12	10:50:39	0.35182	363.51	FALSE	30
2022-09-12	10:50:39	0.353092	363.863	FALSE	30
2022-09-12	10:50:40	0.343473	364.207	FALSE	30
2022-09-12	10:50:40	0.338283	364.545	FALSE	30
2022-09-12	10:50:40	0.346425	364.892	FALSE	30
2022-09-12	10:50:41	0.342048	365.234	FALSE	30
2022-09-12	10:50:41	0.33813	365.572	FALSE	30
2022-09-12	10:50:41	0.341947	365.914	FALSE	30
2022-09-12	10:50:41	0.354771	366.268	FALSE	30
2022-09-12	10:50:42	0.340878	366.609	FALSE	30
2022-09-12	10:50:42	0.369835	366.979	FALSE	30
2022-09-12	10:50:42	0.361489	367.341	FALSE	30
2022-09-12	10:50:42	0.391514	367.732	FALSE	30
2022-09-12	10:50:43	0.412125	368.144	FALSE	30
2022-09-12	10:50:43	0.408969	368.553	FALSE	30
2022-09-12	10:50:43	0.407443	368.961	FALSE	30
2022-09-12	10:50:43	0.41701	369.378	FALSE	30
2022-09-12	10:50:44	0.443066	369.821	FALSE	30
2022-09-12	10:50:44	0.478791	370.3	FALSE	30
2022-09-12	10:50:44	0.517672	370.817	FALSE	30
2022-09-12	10:50:45	0.58215	371.399	FALSE	30
2022-09-12	10:50:45	0.643626	372.043	FALSE	30
2022-09-12	10:50:45	0.644542	372.688	FALSE	30
2022-09-12	10:50:45	0.580623	373.268	FALSE	30
2022-09-12	10:50:46	0.458537	373.727	FALSE	30
2022-09-12	10:50:46	0.413651	374.14	FALSE	30
2022-09-12	10:50:46	0.387697	374.528	FALSE	30
2022-09-12	10:50:46	0.383473	374.912	FALSE	30
2022-09-12	10:50:47	0.386629	375.298	FALSE	30
2022-09-12	10:50:47	0.438079	375.736	FALSE	30
2022-09-12	10:50:47	0.432074	376.168	FALSE	30
2022-09-12	10:50:47	0.42897	376.597	FALSE	30
2022-09-12	10:50:48	0.426221	377.024	FALSE	30
2022-09-12	10:50:48	0.432277	377.456	FALSE	30
2022-09-12	10:50:48	0.442761	377.899	FALSE	30
2022-09-12	10:50:49	0.436959	378.336	FALSE	30
2022-09-12	10:50:49	0.467188	378.803	FALSE	30
2022-09-12	10:50:49	0.348511	379.151	FALSE	30
2022-09-12	10:50:49	0.419402	379.571	FALSE	30
2022-09-12	10:50:50	0.413092	379.984	FALSE	30
2022-09-12	10:50:50	0.405814	380.39	FALSE	30
2022-09-12	10:50:50	0.417519	380.807	FALSE	30
2022-09-12	10:50:50	0.415992	381.223	FALSE	30
2022-09-12	10:50:51	0.414109	381.637	FALSE	30
2022-09-12	10:50:51	0.413855	382.051	FALSE	30
2022-09-12	10:50:51	0.417417	382.468	FALSE	30
2022-09-12	10:50:51	0.413346	382.882	FALSE	30
2022-09-12	10:50:52	0.409886	383.292	FALSE	30
2022-09-12	10:50:52	0.414059	383.706	FALSE	30
2022-09-12	10:50:52	0.412532	384.118	FALSE	30
2022-09-12	10:50:52	0.411107	384.529	FALSE	30
2022-09-12	10:50:53	0.413143	384.943	FALSE	30
2022-09-12	10:50:53	0.422099	385.365	FALSE	30
2022-09-12	10:50:53	0.421387	385.786	FALSE	30
2022-09-12	10:50:54	0.422099	386.208	FALSE	30
2022-09-12	10:50:54	0.421641	386.63	FALSE	30
2022-09-12	10:50:54	0.422965	387.053	FALSE	30
2022-09-12	10:50:54	0.430038	387.483	FALSE	30
2022-09-12	10:50:55	0.43986	387.923	FALSE	30
2022-09-12	10:50:55	0.441641	388.364	FALSE	30
2022-09-12	10:50:55	0.437519	388.802	FALSE	30
2022-09-12	10:50:55	0.428817	389.231	FALSE	30
2022-09-12	10:50:56	0.423321	389.654	FALSE	30
2022-09-12	10:50:56	0.418639	390.073	FALSE	30
2022-09-12	10:50:56	0.420624	390.493	FALSE	30
2022-09-12	10:50:56	0.419758	390.913	FALSE	30
2022-09-12	10:50:57	0.425865	391.339	FALSE	30
2022-09-12	10:50:57	0.392888	391.732	FALSE	30
2022-09-12	10:50:57	0.378486	392.11	FALSE	30
2022-09-12	10:50:58	0.369835	392.48	FALSE	30
2022-09-12	10:50:58	0.358944	392.839	FALSE	30
2022-09-12	10:50:58	0.439148	393.278	FALSE	30
2022-09-12	10:50:58	0.41528	393.693	FALSE	30
2022-09-12	10:50:59	0.491769	394.185	FALSE	30
2022-09-12	10:50:59	0.536196	394.721	FALSE	30
2022-09-12	10:50:59	0.659554	395.381	FALSE	30
2022-09-12	10:50:59	0.521794	395.903	FALSE	30
2022-09-12	10:51:00	0.552328	396.455	FALSE	30
2022-09-12	10:51:00	0.436654	396.892	FALSE	30
2022-09-12	10:51:00	0.519046	397.411	FALSE	30
2022-09-12	10:51:00	0.581743	397.992	FALSE	30
2022-09-12	10:51:01	0.470751	398.463	FALSE	30
2022-09-12	10:51:01	0.481387	398.945	FALSE	30
2022-09-12	10:51:01	0.450802	399.395	FALSE	30
2022-09-12	10:51:02	0.513601	399.909	FALSE	30
2022-09-12	10:51:02	0.408868	400.318	FALSE	30
2022-09-12	10:51:02	0.435178	400.753	FALSE	30
2022-09-12	10:51:02	0.460115	401.213	FALSE	30
2022-09-12	10:51:03	0.475636	401.689	FALSE	30
2022-09-12	10:51:03	0.424746	402.114	FALSE	30
2022-09-12	10:51:03	0.435127	402.549	FALSE	30
2022-09-12	10:51:03	0.4393	402.988	FALSE	30
2022-09-12	10:51:04	0.431921	403.42	FALSE	30
2022-09-12	10:51:04	0.43701	403.857	FALSE	30
2022-09-12	10:51:04	0.440471	404.297	FALSE	30
2022-09-12	10:51:04	0.447087	404.744	FALSE	30
2022-09-12	10:51:05	0.436043	405.181	FALSE	30
2022-09-12	10:51:05	0.440827	405.621	FALSE	30
2022-09-12	10:51:05	0.437875	406.059	FALSE	30
2022-09-12	10:51:06	0.438435	406.498	FALSE	30
2022-09-12	10:51:06	0.435331	406.933	FALSE	30
2022-09-12	10:51:06	0.437417	407.37	FALSE	30
2022-09-12	10:51:06	0.439758	407.81	FALSE	30
2022-09-12	10:51:07	0.438333	408.248	FALSE	30
2022-09-12	10:51:07	0.437265	408.686	FALSE	30
2022-09-12	10:51:07	0.431718	409.117	FALSE	30
2022-09-12	10:51:07	0.433397	409.551	FALSE	30
2022-09-12	10:51:08	0.425356	409.976	FALSE	30
2022-09-12	10:51:08	0.430445	410.407	FALSE	30
2022-09-12	10:51:08	0.432227	410.839	FALSE	30
2022-09-12	10:51:08	0.426221	411.265	FALSE	30
2022-09-12	10:51:09	0.431107	411.696	FALSE	30
2022-09-12	10:51:09	0.429478	412.126	FALSE	30
2022-09-12	10:51:09	0.440624	412.566	FALSE	30
2022-09-12	10:51:09	0.463117	413.029	FALSE	30
2022-09-12	10:51:10	0.505356	413.535	FALSE	30
2022-09-12	10:51:10	0.510801	414.046	FALSE	30
2022-09-12	10:51:10	0.481183	414.527	FALSE	30
2022-09-12	10:51:11	0.532074	415.059	FALSE	30
2022-09-12	10:51:11	0.553194	415.612	FALSE	30
2022-09-12	10:51:11	0.479199	416.091	FALSE	30
2022-09-12	10:51:11	0.393397	416.485	FALSE	30
2022-09-12	10:51:12	0.482049	416.967	FALSE	30
2022-09-12	10:51:12	0.412939	417.38	FALSE	30
2022-09-12	10:51:12	0.419606	417.799	FALSE	30
2022-09-12	10:51:12	0.42729	418.227	FALSE	30
2022-09-12	10:51:13	0.407901	418.634	FALSE	30
2022-09-12	10:51:13	0.401489	419.036	FALSE	30
2022-09-12	10:51:13	0.401336	419.437	FALSE	30
2022-09-12	10:51:13	0.445305	419.883	FALSE	30
2022-09-12	10:51:14	0.421947	420.305	FALSE	30
2022-09-12	10:51:14	0.442608	420.747	FALSE	30
2022-09-12	10:51:14	0.435433	421.183	FALSE	30
2022-09-12	10:51:15	0.458995	421.642	FALSE	30
2022-09-12	10:51:15	0.485458	422.127	FALSE	30
2022-09-12	10:51:15	0.474975	422.602	FALSE	30
2022-09-12	10:51:15	0.497774	423.1	FALSE	30
2022-09-12	10:51:16	0.440776	423.541	FALSE	30
2022-09-12	10:51:16	0.457672	423.998	FALSE	30
2022-09-12	10:51:16	0.410089	424.408	FALSE	30
2022-09-12	10:51:16	0.401234	424.81	FALSE	30
2022-09-12	10:51:17	0.434262	425.244	FALSE	30
2022-09-12	10:51:17	0.387341	425.631	FALSE	30
2022-09-12	10:51:17	0.425153	426.056	FALSE	30
2022-09-12	10:51:17	0.413601	426.47	FALSE	30
2022-09-12	10:51:18	0.500267	426.97	FALSE	30
2022-09-12	10:51:18	0.45813	427.428	FALSE	30
2022-09-12	10:51:18	0.449377	427.878	FALSE	30
2022-09-12	10:51:19	0.443575	428.321	FALSE	30
2022-09-12	10:51:19	0.435636	428.757	FALSE	30
2022-09-12	10:51:19	0.447137	429.204	FALSE	30
2022-09-12	10:51:19	0.444796	429.649	FALSE	30
2022-09-12	10:51:20	0.436756	430.086	FALSE	30
2022-09-12	10:51:20	0.435178	430.521	FALSE	30
2022-09-12	10:51:20	0.44042	430.961	FALSE	30
2022-09-12	10:51:20	0.437825	431.399	FALSE	30
2022-09-12	10:51:21	0.435891	431.835	FALSE	30
2022-09-12	10:51:21	0.435585	432.27	FALSE	30
2022-09-12	10:51:21	0.434873	432.705	FALSE	30
2022-09-12	10:51:21	0.429377	433.135	FALSE	30
2022-09-12	10:51:22	0.434364	433.569	FALSE	30
2022-09-12	10:51:22	0.435076	434.004	FALSE	30
2022-09-12	10:51:22	0.435941	434.44	FALSE	30
2022-09-12	10:51:23	0.434873	434.875	FALSE	30
2022-09-12	10:51:23	0.433193	435.308	FALSE	30
2022-09-12	10:51:23	0.433855	435.742	FALSE	30
2022-09-12	10:51:23	0.433092	436.175	FALSE	30
2022-09-12	10:51:24	0.435331	436.61	FALSE	30
2022-09-12	10:51:24	0.43299	437.043	FALSE	30
2022-09-12	10:51:24	0.431514	437.475	FALSE	30
2022-09-12	10:51:24	0.431514	437.906	FALSE	30
2022-09-12	10:51:25	0.430598	438.337	FALSE	30
2022-09-12	10:51:25	0.432125	438.769	FALSE	30
2022-09-12	10:51:25	0.433041	439.202	FALSE	30
2022-09-12	10:51:25	0.428919	439.631	FALSE	30
2022-09-12	10:51:26	0.436145	440.067	FALSE	30
2022-09-12	10:51:26	0.429071	440.496	FALSE	30
2022-09-12	10:51:26	0.431718	440.928	FALSE	30
2022-09-12	10:51:26	0.4307	441.359	FALSE	30
2022-09-12	10:51:27	0.424746	441.784	FALSE	30
2022-09-12	10:51:27	0.429224	442.213	FALSE	30
2022-09-12	10:51:27	0.427188	442.64	FALSE	30
2022-09-12	10:51:28	0.432125	443.072	FALSE	30
2022-09-12	10:51:28	0.449733	443.522	FALSE	30
2022-09-12	10:51:28	0.419402	443.941	FALSE	30
2022-09-12	10:51:28	0.448155	444.389	FALSE	30
2022-09-12	10:51:29	0.313448	444.703	FALSE	30
2022-09-12	10:51:29	0.513092	445.216	FALSE	30
2022-09-12	10:51:29	0.386527	445.602	FALSE	30
2022-09-12	10:51:29	0.42958	446.032	FALSE	30
2022-09-12	10:51:30	0.393346	446.425	FALSE	30
2022-09-12	10:51:30	0.463677	446.889	FALSE	30
2022-09-12	10:51:30	0.420522	447.31	FALSE	30
2022-09-12	10:51:30	0.438333	447.748	FALSE	30
2022-09-12	10:51:31	0.434415	448.182	FALSE	30
2022-09-12	10:51:31	0.452125	448.634	FALSE	30
2022-09-12	10:51:31	0.419962	449.054	FALSE	30
2022-09-12	10:51:32	0.462456	449.517	FALSE	30
2022-09-12	10:51:32	0.378435	449.895	FALSE	30
2022-09-12	10:51:32	0.312837	450.208	FALSE	30
2022-09-12	10:51:32	0.263779	450.472	FALSE	30
2022-09-12	10:51:33	0.107748	450.58	FALSE	30
2022-09-12	10:51:33	-0.0448725	450.58	FALSE	30
2022-09-12	10:51:33	0.0754837	450.655	FALSE	30
2022-09-12	10:51:34	0.0796567	450.735	FALSE	30
2022-09-12	10:51:34	-0.0964755	450.735	FALSE	30
2022-09-12	10:51:34	-0.370165	450.735	FALSE	30
2022-09-12	10:51:34	-0.589503	450.735	FALSE	30
2022-09-12	10:51:34	-0.275203	450.735	FALSE	30
2022-09-12	10:51:35	0.202608	450.937	FALSE	30
2022-09-12	10:51:35	0.321641	451.259	FALSE	30
2022-09-12	10:51:35	0.331565	451.591	FALSE	30
2022-09-12	10:51:36	0.397825	451.988	FALSE	30
2022-09-12	10:51:36	0.294618	452.283	FALSE	30
2022-09-12	10:51:36	0.397723	452.681	FALSE	30
2022-09-12	10:51:36	0.266221	452.947	FALSE	30
2022-09-12	10:51:37	0.316756	453.264	FALSE	30
2022-09-12	10:51:37	0.367595	453.631	FALSE	30
2022-09-12	10:51:37	0.344033	453.975	FALSE	30
2022-09-12	10:51:37	0.199708	454.175	FALSE	30
2022-09-12	10:51:38	0.548919	454.724	FALSE	30
2022-09-12	10:51:38	1.96383	456.688	FALSE	30
2022-09-12	10:51:38	3.79441	460.482	1	31
2022-09-12	10:51:38	3.10454	463.587	1	32
2022-09-12	10:51:39	1.80958	465.396	FALSE	32
2022-09-12	10:51:39	1.64821	467.045	FALSE	32
2022-09-12	10:51:39	0.834822	467.879	FALSE	32
2022-09-12	10:51:40	0.475636	468.355	FALSE	32
2022-09-12	10:51:40	0.395127	468.75	FALSE	32
2022-09-12	10:51:40	0.526476	469.277	FALSE	32
2022-09-12	10:51:40	0.393346	469.67	FALSE	32
2022-09-12	10:51:41	0.432481	470.102	FALSE	32
2022-09-12	10:51:41	0.447443	470.55	FALSE	32
2022-09-12	10:51:41	0.791819	471.342	FALSE	32
2022-09-12	10:51:41	0.555076	471.897	FALSE	32
2022-09-12	10:51:42	0.505713	472.402	FALSE	32
2022-09-12	10:51:42	0.452125	472.855	FALSE	32
2022-09-12	10:51:42	0.461998	473.317	FALSE	32
2022-09-12	10:51:42	0.397468	473.714	FALSE	32
2022-09-12	10:51:43	0.455483	474.17	FALSE	32
2022-09-12	10:51:43	0.692532	474.862	FALSE	32
2022-09-12	10:51:43	1.35019	476.212	FALSE	32
2022-09-12	10:51:44	1.84709	478.059	FALSE	32
2022-09-12	10:51:44	1.95324	480.013	FALSE	32
2022-09-12	10:51:44	0.766629	480.779	FALSE	32
2022-09-12	10:51:44	0.456501	481.236	FALSE	32
2022-09-12	10:51:45	0.568563	481.804	FALSE	32
2022-09-12	10:51:45	0.424288	482.229	FALSE	32
2022-09-12	10:51:45	0.505	482.734	FALSE	32
2022-09-12	10:51:45	0.487901	483.221	FALSE	32
2022-09-12	10:51:46	0.522252	483.744	FALSE	32
2022-09-12	10:51:46	0.377061	484.121	FALSE	32
2022-09-12	10:51:46	0.429071	484.55	FALSE	32
2022-09-12	10:51:46	0.357926	484.908	FALSE	32
2022-09-12	10:51:47	0.488308	485.396	FALSE	32
2022-09-12	10:51:47	0.497926	485.894	FALSE	32
2022-09-12	10:51:47	0.964542	486.859	FALSE	32
2022-09-12	10:51:47	1.12851	487.987	FALSE	32
2022-09-12	10:51:48	0.912735	488.9	FALSE	32
2022-09-12	10:51:48	0.54841	489.448	FALSE	32
2022-09-12	10:51:48	0.592685	490.041	FALSE	32
2022-09-12	10:51:49	0.338181	490.379	FALSE	32
2022-09-12	10:51:49	0.459453	490.839	FALSE	32
2022-09-12	10:51:49	0.221998	491.061	FALSE	32
2022-09-12	10:51:49	0.475382	491.536	FALSE	32
2022-09-12	10:51:50	0.184644	491.721	FALSE	32
2022-09-12	10:51:50	0.480827	492.201	FALSE	32
2022-09-12	10:51:50	0.214822	492.416	FALSE	32
2022-09-12	10:51:50	0.51299	492.929	FALSE	32
2022-09-12	10:51:51	0.171311	493.101	FALSE	32
2022-09-12	10:51:51	0.462252	493.563	FALSE	32
2022-09-12	10:51:51	0.191514	493.754	FALSE	32
2022-09-12	10:51:51	0.482099	494.236	FALSE	32
2022-09-12	10:51:52	0.54042	494.777	FALSE	32
2022-09-12	10:51:52	0.861336	495.638	FALSE	32
2022-09-12	10:51:52	1.16795	496.806	FALSE	32
2022-09-12	10:51:53	1.41452	498.221	FALSE	32
2022-09-12	10:51:53	0.800878	499.021	FALSE	32
2022-09-12	10:51:53	0.688155	499.71	FALSE	32
2022-09-12	10:51:53	0.580674	500.29	FALSE	32
2022-09-12	10:51:54	0.682659	500.973	FALSE	32
2022-09-12	10:51:54	0.52042	501.493	FALSE	32
2022-09-12	10:51:54	0.296349	501.79	FALSE	32
2022-09-12	10:51:54	0.519606	502.309	FALSE	32
2022-09-12	10:51:55	0.287494	502.597	FALSE	32
2022-09-12	10:51:55	0.543473	503.14	FALSE	32
2022-09-12	10:51:55	0.329428	503.47	FALSE	32
2022-09-12	10:51:55	0.482354	503.952	FALSE	32
2022-09-12	10:51:56	0.375534	504.328	FALSE	32
2022-09-12	10:51:56	0.373855	504.701	FALSE	32
2022-09-12	10:51:56	0.359046	505.061	FALSE	32
2022-09-12	10:51:57	0.326985	505.388	FALSE	32
2022-09-12	10:51:57	0.533295	505.921	FALSE	32
2022-09-12	10:51:57	0.473448	506.394	FALSE	32
2022-09-12	10:51:57	0.528715	506.923	FALSE	32
2022-09-12	10:51:58	0.569376	507.492	FALSE	32
2022-09-12	10:51:58	0.195229	507.688	FALSE	32
2022-09-12	10:51:58	0.716807	508.404	FALSE	32
2022-09-12	10:51:58	0.361336	508.766	FALSE	32
2022-09-12	10:51:59	0.641743	509.407	FALSE	32
2022-09-12	10:51:59	0.836349	510.244	FALSE	32
2022-09-12	10:51:59	0.572888	510.817	FALSE	32
2022-09-12	10:51:59	1.43121	512.248	FALSE	32
2022-09-12	10:52:00	1.02342	513.271	FALSE	32
2022-09-12	10:52:00	1.94317	515.215	FALSE	32
2022-09-12	10:52:00	1.56388	516.778	FALSE	32
2022-09-12	10:52:01	0.993041	517.771	FALSE	32
2022-09-12	10:52:01	1.33584	519.107	FALSE	32
2022-09-12	10:52:01	1.20205	520.309	FALSE	32
2022-09-12	10:52:01	0.81243	521.122	FALSE	32
2022-09-12	10:52:02	1.15141	522.273	FALSE	32
2022-09-12	10:52:02	0.584186	522.857	FALSE	32
2022-09-12	10:52:02	0.640471	523.498	FALSE	32
2022-09-12	10:52:02	1.21197	524.71	FALSE	32
2022-09-12	10:52:03	0.211005	524.921	FALSE	32
2022-09-12	10:52:03	0.52042	525.441	FALSE	32
2022-09-12	10:52:03	0.348104	525.789	FALSE	32
2022-09-12	10:52:03	0.314924	526.104	FALSE	32
2022-09-12	10:52:04	0.339657	526.444	FALSE	32
2022-09-12	10:52:04	0.0344659	526.478	FALSE	32
2022-09-12	10:52:04	0.160166	526.639	FALSE	32
2022-09-12	10:52:04	0.136349	526.775	FALSE	32
2022-09-12	10:52:05	0.143372	526.918	FALSE	32
2022-09-12	10:52:05	0.0796058	526.998	FALSE	32
2022-09-12	10:52:05	0.178028	527.176	FALSE	32
2022-09-12	10:52:06	-0.157544	527.176	FALSE	32
2022-09-12	10:52:06	-0.314287	527.176	FALSE	32
2022-09-12	10:52:06	-0.301056	527.176	FALSE	32
2022-09-12	10:52:06	-0.531641	527.176	FALSE	32
2022-09-12	10:52:07	-0.461768	527.176	FALSE	32
2022-09-12	10:52:07	-0.455814	527.176	FALSE	32
2022-09-12	10:52:07	-0.282786	527.176	FALSE	32
2022-09-12	10:52:07	-0.449707	527.176	FALSE	32
2022-09-12	10:52:08	-0.29902	527.176	FALSE	32
2022-09-12	10:52:08	-0.335254	527.176	FALSE	32
2022-09-12	10:52:08	-0.17902	527.176	FALSE	32
2022-09-12	10:52:08	-0.251285	527.176	FALSE	32
2022-09-12	10:52:09	-0.184872	527.176	FALSE	32
2022-09-12	10:52:09	-0.0948979	527.176	FALSE	32
2022-09-12	10:52:09	-0.158002	527.176	FALSE	32
2022-09-12	10:52:10	-0.148638	527.176	FALSE	32
2022-09-12	10:52:10	-0.110928	527.176	FALSE	32
2022-09-12	10:52:10	-0.114084	527.176	FALSE	32
2022-09-12	10:52:10	-0.167875	527.176	FALSE	32
2022-09-12	10:52:11	-0.193626	527.176	FALSE	32
2022-09-12	10:52:11	-0.245636	527.176	FALSE	32
2022-09-12	10:52:11	-0.199122	527.176	FALSE	32
2022-09-12	10:52:11	-0.161768	527.176	FALSE	32
2022-09-12	10:52:12	-0.185534	527.176	FALSE	32
2022-09-12	10:52:12	-0.197544	527.176	FALSE	32
2022-09-12	10:52:12	-0.191488	527.176	FALSE	32
2022-09-12	10:52:12	-0.0808521	527.176	FALSE	32
2022-09-12	10:52:13	-0.0406995	527.176	FALSE	32
2022-09-12	10:52:13	-0.0077733	527.176	FALSE	32
2022-09-12	10:52:13	0.12612	527.302	FALSE	32
2022-09-12	10:52:14	0.0994022	527.401	FALSE	32
2022-09-12	10:52:14	0.557163	527.959	FALSE	32
2022-09-12	10:52:14	0.301031	528.26	FALSE	32
2022-09-12	10:52:14	0.594975	528.855	FALSE	32
2022-09-12	10:52:15	0.474415	529.329	FALSE	32
2022-09-12	10:52:15	0.360064	529.689	FALSE	32
2022-09-12	10:52:15	0.146527	529.836	FALSE	32
2022-09-12	10:52:15	0.490802	530.326	FALSE	32
2022-09-12	10:52:16	0.306781	530.633	FALSE	32
2022-09-12	10:52:16	0.388359	531.022	FALSE	32
2022-09-12	10:52:16	0.288715	531.31	FALSE	32
2022-09-12	10:52:16	0.531972	531.842	FALSE	32
2022-09-12	10:52:17	0.260471	532.103	FALSE	32
2022-09-12	10:52:17	0.419046	532.522	FALSE	32
2022-09-12	10:52:17	0.206323	532.728	FALSE	32
2022-09-12	10:52:18	0.506119	533.234	FALSE	32
2022-09-12	10:52:18	0.280267	533.514	FALSE	32
2022-09-12	10:52:18	0.472176	533.987	FALSE	32
2022-09-12	10:52:18	0.338791	534.325	FALSE	32
2022-09-12	10:52:19	1.60113	535.927	FALSE	32
2022-09-12	10:52:19	2.22103	538.148	FALSE	32
2022-09-12	10:52:19	4.64149	542.789	1	33
2022-09-12	10:52:19	6.09685	548.886	1	34
2022-09-12	10:52:20	7.53171	556.418	1	35
2022-09-12	10:52:20	4.84281	561.26	1	36
2022-09-12	10:52:20	2.74307	564.003	FALSE	36
2022-09-12	10:52:20	1.10388	565.107	FALSE	36
2022-09-12	10:52:21	0.759351	565.867	FALSE	36
2022-09-12	10:52:21	0.763779	566.63	FALSE	36
2022-09-12	10:52:21	0.732532	567.363	FALSE	36
2022-09-12	10:52:22	0.539351	567.902	FALSE	36
2022-09-12	10:52:22	0.362812	568.265	FALSE	36
2022-09-12	10:52:22	0.35131	568.617	FALSE	36
2022-09-12	10:52:22	0.326374	568.943	FALSE	36
2022-09-12	10:52:23	0.355229	569.298	FALSE	36
2022-09-12	10:52:23	0.333753	569.632	FALSE	36
2022-09-12	10:52:23	0.400674	570.033	FALSE	36
2022-09-12	10:52:23	0.372328	570.405	FALSE	36
2022-09-12	10:52:24	0.336094	570.741	FALSE	36
2022-09-12	10:52:24	0.295484	571.036	FALSE	36
2022-09-12	10:52:24	0.599606	571.636	FALSE	36
2022-09-12	10:52:24	0.273295	571.909	FALSE	36
2022-09-12	10:52:25	0.432227	572.342	FALSE	36
2022-09-12	10:52:25	0.300929	572.642	FALSE	36
2022-09-12	10:52:25	0.366883	573.009	FALSE	36
2022-09-12	10:52:25	0.398639	573.408	FALSE	36
2022-09-12	10:52:26	0.290293	573.698	FALSE	36
2022-09-12	10:52:26	0.341183	574.039	FALSE	36
2022-09-12	10:52:26	0.349478	574.389	FALSE	36
2022-09-12	10:52:27	0.303015	574.692	FALSE	36
2022-09-12	10:52:27	0.37243	575.064	FALSE	36
2022-09-12	10:52:27	0.36902	575.433	FALSE	36
2022-09-12	10:52:27	0.36215	575.796	FALSE	36
2022-09-12	10:52:28	0.470903	576.266	FALSE	36
2022-09-12	10:52:28	0.396094	576.663	FALSE	36
2022-09-12	10:52:28	0.45126	577.114	FALSE	36
2022-09-12	10:52:28	0.303931	577.418	FALSE	36
2022-09-12	10:52:29	0.480573	577.898	FALSE	36
2022-09-12	10:52:29	0.348359	578.247	FALSE	36
2022-09-12	10:52:29	0.633041	578.88	FALSE	36
2022-09-12	10:52:29	0.345356	579.225	FALSE	36
2022-09-12	10:52:30	0.655941	579.881	FALSE	36
2022-09-12	10:52:30	0.495687	580.377	FALSE	36
2022-09-12	10:52:30	0.725305	581.102	FALSE	36
2022-09-12	10:52:31	0.403677	581.506	FALSE	36
2022-09-12	10:52:31	0.541438	582.047	FALSE	36
2022-09-12	10:52:31	0.271921	582.319	FALSE	36
2022-09-12	10:52:31	0.484949	582.804	FALSE	36
2022-09-12	10:52:32	0.257163	583.061	FALSE	36
2022-09-12	10:52:32	0.461692	583.523	FALSE	36
2022-09-12	10:52:32	0.291768	583.815	FALSE	36
2022-09-12	10:52:32	0.412735	584.227	FALSE	36
2022-09-12	10:52:33	0.35472	584.582	FALSE	36
2022-09-12	10:52:33	0.354517	584.937	FALSE	36
2022-09-12	10:52:33	0.38729	585.324	FALSE	36
2022-09-12	10:52:33	0.237214	585.561	FALSE	36
2022-09-12	10:52:34	0.486527	586.048	FALSE	36
2022-09-12	10:52:34	0.319249	586.367	FALSE	36
2022-09-12	10:52:34	0.520776	586.888	FALSE	36
2022-09-12	10:52:35	0.390903	587.279	FALSE	36
2022-09-12	10:52:35	0.58159	587.86	FALSE	36
2022-09-12	10:52:35	0.372939	588.233	FALSE	36
2022-09-12	10:52:35	0.538232	588.771	FALSE	36
2022-09-12	10:52:36	0.231565	589.003	FALSE	36
2022-09-12	10:52:36	0.593194	589.596	FALSE	36
2022-09-12	10:52:36	0.481234	590.077	FALSE	36
2022-09-12	10:52:36	0.800471	590.878	FALSE	36
2022-09-12	10:52:37	0.620624	591.498	FALSE	36
2022-09-12	10:52:37	0.763931	592.262	FALSE	36
2022-09-12	10:52:37	0.739402	593.002	FALSE	36
2022-09-12	10:52:37	1.02342	594.025	FALSE	36
2022-09-12	10:52:38	1.29447	595.32	FALSE	36
2022-09-12	10:52:38	1.80062	597.12	FALSE	36
2022-09-12	10:52:38	1.3821	598.502	FALSE	36
2022-09-12	10:52:39	1.55762	600.06	FALSE	36
2022-09-12	10:52:39	1.48668	601.547	FALSE	36
2022-09-12	10:52:39	1.89889	603.446	FALSE	36
2022-09-12	10:52:39	2.43976	605.885	FALSE	36
2022-09-12	10:52:40	1.17289	607.058	FALSE	36
2022-09-12	10:52:40	2.45752	609.516	FALSE	36
2022-09-12	10:52:40	1.77966	611.295	FALSE	36
2022-09-12	10:52:40	1.0566	612.352	FALSE	36
2022-09-12	10:52:41	0.59182	612.944	FALSE	36
2022-09-12	10:52:41	0.396043	613.34	FALSE	36
2022-09-12	10:52:41	0.471514	613.811	FALSE	36
2022-09-12	10:52:41	0.277112	614.088	FALSE	36
2022-09-12	10:52:42	0.453448	614.542	FALSE	36
2022-09-12	10:52:42	0.361896	614.904	FALSE	36
2022-09-12	10:52:42	0.409275	615.313	FALSE	36
2022-09-12	10:52:42	0.236756	615.55	FALSE	36
2022-09-12	10:52:43	0.235229	615.785	FALSE	36
2022-09-12	10:52:43	0.127596	615.913	FALSE	36
2022-09-12	10:52:43	-0.0688928	615.913	FALSE	36
2022-09-12	10:52:44	-0.159834	615.913	FALSE	36
2022-09-12	10:52:44	-0.149911	615.913	FALSE	36
2022-09-12	10:52:44	-0.169402	615.913	FALSE	36
2022-09-12	10:52:44	0.135229	616.048	FALSE	36
2022-09-12	10:52:45	0.0643895	616.112	FALSE	36
2022-09-12	10:52:45	-0.0431422	616.112	FALSE	36
2022-09-12	10:52:45	-0.127722	616.112	FALSE	36
2022-09-12	10:52:45	-0.0446181	616.112	FALSE	36
2022-09-12	10:52:46	0.0170104	616.129	FALSE	36
2022-09-12	10:52:46	0.175178	616.304	FALSE	36
2022-09-12	10:52:46	0.17243	616.477	FALSE	36
2022-09-12	10:52:46	0.505305	616.982	FALSE	36
2022-09-12	10:52:47	0.501896	617.484	FALSE	36
2022-09-12	10:52:47	0.395229	617.879	FALSE	36
2022-09-12	10:52:47	0.380674	618.26	FALSE	36
2022-09-12	10:52:48	0.357366	618.617	FALSE	36
2022-09-12	10:52:48	0.279453	618.897	FALSE	36
2022-09-12	10:52:48	0.373753	619.271	FALSE	36
2022-09-12	10:52:48	0.370751	619.641	FALSE	36
2022-09-12	10:52:49	0.360674	620.002	FALSE	36
2022-09-12	10:52:49	0.351718	620.354	FALSE	36
2022-09-12	10:52:49	0.370802	620.725	FALSE	36
2022-09-12	10:52:49	0.377926	621.102	FALSE	36
2022-09-12	10:52:50	0.379402	621.482	FALSE	36
2022-09-12	10:52:50	0.361794	621.844	FALSE	36
2022-09-12	10:52:50	0.363473	622.207	FALSE	36
2022-09-12	10:52:50	0.334262	622.541	FALSE	36
2022-09-12	10:52:51	0.320166	622.862	FALSE	36
2022-09-12	10:52:51	0.0709036	622.932	FALSE	36
2022-09-12	10:52:51	-0.247163	622.932	FALSE	36
2022-09-12	10:52:52	-0.414999	622.932	FALSE	36
2022-09-12	10:52:52	-0.247722	622.932	FALSE	36
2022-09-12	10:52:52	-0.240343	622.932	FALSE	36
2022-09-12	10:52:52	-0.250572	622.932	FALSE	36
2022-09-12	10:52:53	-0.443091	622.932	FALSE	36
2022-09-12	10:52:53	-0.339936	622.932	FALSE	36
2022-09-12	10:52:53	-0.298715	622.932	FALSE	36
2022-09-12	10:52:53	-0.273727	622.932	FALSE	36
2022-09-12	10:52:54	-0.158969	622.932	FALSE	36
2022-09-12	10:52:54	0.0512597	622.984	FALSE	36
2022-09-12	10:52:54	0.448715	623.432	FALSE	36
2022-09-12	10:52:54	0.36383	623.796	FALSE	36
2022-09-12	10:52:55	0.578791	624.375	FALSE	36
2022-09-12	10:52:55	0.790954	625.166	FALSE	36
2022-09-12	10:52:55	0.300369	625.466	FALSE	36
2022-09-12	10:52:56	0.867137	626.334	FALSE	36
2022-09-12	10:52:56	0.40785	626.741	FALSE	36
2022-09-12	10:52:56	0.598435	627.34	FALSE	36
2022-09-12	10:52:56	0.67645	628.016	FALSE	36
2022-09-12	10:52:57	0.42556	628.442	FALSE	36
2022-09-12	10:52:57	0.516298	628.958	FALSE	36
2022-09-12	10:52:57	0.508562	629.467	FALSE	36
2022-09-12	10:52:57	0.503422	629.97	FALSE	36
2022-09-12	10:52:58	0.575738	630.546	FALSE	36
2022-09-12	10:52:58	0.396451	630.942	FALSE	36
2022-09-12	10:52:58	0.273804	631.216	FALSE	36
2022-09-12	10:52:58	0.442099	631.658	FALSE	36
2022-09-12	10:52:59	0.19528	631.853	FALSE	36
2022-09-12	10:52:59	0.387443	632.241	FALSE	36
2022-09-12	10:52:59	0.101438	632.342	FALSE	36
2022-09-12	10:53:00	-0.0313356	632.342	FALSE	36
2022-09-12	10:53:00	-0.161361	632.342	FALSE	36
2022-09-12	10:53:00	-0.168944	632.342	FALSE	36
2022-09-12	10:53:00	-0.0866537	632.342	FALSE	36
2022-09-12	10:53:01	-0.0313356	632.342	FALSE	36
2022-09-12	10:53:01	-0.171437	632.342	FALSE	36
2022-09-12	10:53:01	-0.109453	632.342	FALSE	36
2022-09-12	10:53:01	-0.266755	632.342	FALSE	36
2022-09-12	10:53:02	-0.400089	632.342	FALSE	36
2022-09-12	10:53:02	-0.547366	632.342	FALSE	36
2022-09-12	10:53:02	-0.43958	632.342	FALSE	36
2022-09-12	10:53:02	-0.417086	632.342	FALSE	36
2022-09-12	10:53:03	-0.281819	632.342	FALSE	36
2022-09-12	10:53:03	-0.356017	632.342	FALSE	36
2022-09-12	10:53:03	-0.41388	632.342	FALSE	36
2022-09-12	10:53:03	-0.530063	632.342	FALSE	36
2022-09-12	10:53:04	-0.284669	632.342	FALSE	36
2022-09-12	10:53:04	-0.321412	632.342	FALSE	36
2022-09-12	10:53:04	-0.0992236	632.342	FALSE	36
2022-09-12	10:53:05	-0.0691982	632.342	FALSE	36
2022-09-12	10:53:05	-0.0436002	632.342	FALSE	36
2022-09-12	10:53:05	-0.0140837	632.342	FALSE	36
2022-09-12	10:53:05	-0.000241466	632.342	FALSE	36
2022-09-12	10:53:06	-0.0170354	632.342	FALSE	36
2022-09-12	10:53:06	0.045102	632.387	FALSE	36
2022-09-12	10:53:06	0.103372	632.491	FALSE	36
2022-09-12	10:53:06	0.0270867	632.518	FALSE	36
2022-09-12	10:53:07	0.0207254	632.539	FALSE	36
2022-09-12	10:53:07	0.229478	632.768	FALSE	36
2022-09-12	10:53:07	0.074415	632.843	FALSE	36
2022-09-12	10:53:07	0.0957381	632.938	FALSE	36
2022-09-12	10:53:08	0.0924811	633.031	FALSE	36
2022-09-12	10:53:08	0.0629137	633.094	FALSE	36
2022-09-12	10:53:08	0.0510562	633.145	FALSE	36
2022-09-12	10:53:09	0.25869	633.403	FALSE	36
2022-09-12	10:53:09	0.0686644	633.472	FALSE	36
2022-09-12	10:53:09	0.218232	633.69	FALSE	36
2022-09-12	10:53:09	0.107596	633.798	FALSE	36
2022-09-12	10:53:10	0.1364	633.934	FALSE	36
2022-09-12	10:53:10	0.102557	634.037	FALSE	36
2022-09-12	10:53:10	0.104084	634.141	FALSE	36
2022-09-12	10:53:10	0.27757	634.419	FALSE	36
2022-09-12	10:53:11	0.130242	634.549	FALSE	36
2022-09-12	10:53:11	0.284542	634.833	FALSE	36
2022-09-12	10:53:11	0.191565	635.025	FALSE	36
2022-09-12	10:53:11	0.358486	635.383	FALSE	36
2022-09-12	10:53:12	0.153906	635.537	FALSE	36
2022-09-12	10:53:12	0.392786	635.93	FALSE	36
2022-09-12	10:53:12	0.240064	636.17	FALSE	36
2022-09-12	10:53:13	0.367494	636.538	FALSE	36
2022-09-12	10:53:13	0.16902	636.707	FALSE	36
2022-09-12	10:53:13	0.409377	637.116	FALSE	36
2022-09-12	10:53:13	0.211718	637.328	FALSE	36
2022-09-12	10:53:14	0.194466	637.522	FALSE	36
2022-09-12	10:53:14	0.12383	637.646	FALSE	36
2022-09-12	10:53:14	0.329224	637.975	FALSE	36
2022-09-12	10:53:14	0.28154	638.257	FALSE	36
2022-09-12	10:53:15	0.320624	638.577	FALSE	36
2022-09-12	10:53:15	0.323677	638.901	FALSE	36
2022-09-12	10:53:15	0.32556	639.227	FALSE	36
2022-09-12	10:53:15	0.364186	639.591	FALSE	36
2022-09-12	10:53:16	0.296603	639.887	FALSE	36
2022-09-12	10:53:16	0.370802	640.258	FALSE	36
2022-09-12	10:53:16	0.405662	640.664	FALSE	36
2022-09-12	10:53:17	0.440674	641.105	FALSE	36
2022-09-12	10:53:17	0.448003	641.553	FALSE	36
2022-09-12	10:53:17	0.539504	642.092	FALSE	36
2022-09-12	10:53:17	1.00612	643.098	FALSE	36
2022-09-12	10:53:18	0.860725	643.959	FALSE	36
2022-09-12	10:53:18	0.690394	644.649	FALSE	36
2022-09-12	10:53:18	0.52215	645.171	FALSE	36
2022-09-12	10:53:18	0.382812	645.554	FALSE	36
2022-09-12	10:53:19	0.561234	646.116	FALSE	36
2022-09-12	10:53:19	0.63075	646.746	FALSE	36
2022-09-12	10:53:19	0.400115	647.146	FALSE	36
2022-09-12	10:53:19	0.584796	647.731	FALSE	36
2022-09-12	10:53:20	1.74022	649.471	FALSE	36
2022-09-12	10:53:20	1.87589	651.347	FALSE	36
2022-09-12	10:53:20	2.88673	654.234	FALSE	36
2022-09-12	10:53:21	5.82525	660.059	1	37
2022-09-12	10:53:21	4.98948	665.049	1	38
2022-09-12	10:53:21	4.10083	669.15	1	39
2022-09-12	10:53:21	4.911	674.061	1	40
2022-09-12	10:53:22	2.90912	676.97	FALSE	40
2022-09-12	10:53:22	0.900623	677.87	FALSE	40
2022-09-12	10:53:22	0.618537	678.489	FALSE	40
2022-09-12	10:53:22	0.879249	679.368	FALSE	40
2022-09-12	10:53:23	0.942863	680.311	FALSE	40
2022-09-12	10:53:23	0.590445	680.901	FALSE	40
2022-09-12	10:53:23	0.662608	681.564	FALSE	40
2022-09-12	10:53:23	0.542354	682.106	FALSE	40
2022-09-12	10:53:24	0.633142	682.74	FALSE	40
2022-09-12	10:53:24	0.434517	683.174	FALSE	40
2022-09-12	10:53:24	0.329987	683.504	FALSE	40
2022-09-12	10:53:24	0.345509	683.85	FALSE	40
2022-09-12	10:53:25	0.445305	684.295	FALSE	40
2022-09-12	10:53:25	0.344135	684.639	FALSE	40
2022-09-12	10:53:25	0.307392	684.946	FALSE	40
2022-09-12	10:53:26	0.376094	685.322	FALSE	40
2022-09-12	10:53:26	0.347952	685.67	FALSE	40
2022-09-12	10:53:26	0.443473	686.114	FALSE	40
2022-09-12	10:53:26	0.35299	686.467	FALSE	40
2022-09-12	10:53:27	0.379911	686.847	FALSE	40
2022-09-12	10:53:27	0.492583	687.339	FALSE	40
2022-09-12	10:53:27	0.477519	687.817	FALSE	40
2022-09-12	10:53:27	0.483473	688.3	FALSE	40
2022-09-12	10:53:28	0.456349	688.757	FALSE	40
2022-09-12	10:53:28	0.438486	689.195	FALSE	40
2022-09-12	10:53:28	0.472176	689.667	FALSE	40
2022-09-12	10:53:28	0.456705	690.124	FALSE	40
2022-09-12	10:53:29	0.412634	690.537	FALSE	40
2022-09-12	10:53:29	0.468766	691.005	FALSE	40
2022-09-12	10:53:29	0.485611	691.491	FALSE	40
2022-09-12	10:53:30	0.338232	691.829	FALSE	40
2022-09-12	10:53:30	0.55416	692.383	FALSE	40
2022-09-12	10:53:30	0.501845	692.885	FALSE	40
2022-09-12	10:53:30	0.540674	693.426	FALSE	40
2022-09-12	10:53:31	0.554669	693.981	FALSE	40
2022-09-12	10:53:31	0.586679	694.567	FALSE	40
2022-09-12	10:53:31	0.558944	695.126	FALSE	40
2022-09-12	10:53:31	0.564186	695.69	FALSE	40
2022-09-12	10:53:32	0.503321	696.194	FALSE	40
2022-09-12	10:53:32	0.592481	696.786	FALSE	40
2022-09-12	10:53:32	0.579504	697.366	FALSE	40
2022-09-12	10:53:32	0.611972	697.978	FALSE	40
2022-09-12	10:53:33	0.552379	698.53	FALSE	40
2022-09-12	10:53:33	0.538893	699.069	FALSE	40
2022-09-12	10:53:33	0.522862	699.592	FALSE	40
2022-09-12	10:53:34	0.534873	700.127	FALSE	40
2022-09-12	10:53:34	0.518486	700.645	FALSE	40
2022-09-12	10:53:34	0.495789	701.141	FALSE	40
2022-09-12	10:53:34	0.498639	701.64	FALSE	40
2022-09-12	10:53:35	0.493855	702.134	FALSE	40
2022-09-12	10:53:35	0.500827	702.634	FALSE	40
2022-09-12	10:53:35	0.505967	703.14	FALSE	40
2022-09-12	10:53:35	0.506221	703.647	FALSE	40
2022-09-12	10:53:36	0.507901	704.154	FALSE	40
2022-09-12	10:53:36	0.531616	704.686	FALSE	40
2022-09-12	10:53:36	0.530496	705.217	FALSE	40
2022-09-12	10:53:36	0.537977	705.755	FALSE	40
2022-09-12	10:53:37	0.555433	706.31	FALSE	40
2022-09-12	10:53:37	0.55299	706.863	FALSE	40
2022-09-12	10:53:37	0.543575	707.407	FALSE	40
2022-09-12	10:53:38	0.528817	707.935	FALSE	40
2022-09-12	10:53:38	0.539707	708.475	FALSE	40
2022-09-12	10:53:38	0.588562	709.064	FALSE	40
2022-09-12	10:53:38	0.658842	709.722	FALSE	40
2022-09-12	10:53:39	0.473702	710.196	FALSE	40
2022-09-12	10:53:39	0.458486	710.655	FALSE	40
2022-09-12	10:53:39	0.447494	711.102	FALSE	40
2022-09-12	10:53:39	0.451616	711.554	FALSE	40
2022-09-12	10:53:40	0.451768	712.006	FALSE	40
2022-09-12	10:53:40	0.459402	712.465	FALSE	40
2022-09-12	10:53:40	0.456043	712.921	FALSE	40
2022-09-12	10:53:40	0.44612	713.367	FALSE	40
2022-09-12	10:53:41	0.449835	713.817	FALSE	40
2022-09-12	10:53:41	0.457163	714.274	FALSE	40
2022-09-12	10:53:41	0.454568	714.729	FALSE	40
2022-09-12	10:53:42	0.482863	715.212	FALSE	40
2022-09-12	10:53:42	0.461794	715.673	FALSE	40
2022-09-12	10:53:42	0.424593	716.098	FALSE	40
2022-09-12	10:53:42	0.388104	716.486	FALSE	40
2022-09-12	10:53:43	0.470191	716.956	FALSE	40
2022-09-12	10:53:43	0.424644	717.381	FALSE	40
2022-09-12	10:53:43	0.394567	717.775	FALSE	40
2022-09-12	10:53:43	0.392786	718.168	FALSE	40
2022-09-12	10:53:44	0.492634	718.661	FALSE	40
2022-09-12	10:53:44	0.487596	719.148	FALSE	40
2022-09-12	10:53:44	0.360573	719.509	FALSE	40
2022-09-12	10:53:44	0.418384	719.927	FALSE	40
2022-09-12	10:53:45	0.409682	720.337	FALSE	40
2022-09-12	10:53:45	0.409377	720.746	FALSE	40
2022-09-12	10:53:45	0.373143	721.12	FALSE	40
2022-09-12	10:53:45	0.382557	721.502	FALSE	40
2022-09-12	10:53:46	0.348461	721.851	FALSE	40
2022-09-12	10:53:46	0.325153	722.176	FALSE	40
2022-09-12	10:53:46	0.529835	722.706	FALSE	40
2022-09-12	10:53:47	0.500572	723.206	FALSE	40
2022-09-12	10:53:47	0.583066	723.789	FALSE	40
2022-09-12	10:53:47	0.443117	724.232	FALSE	40
2022-09-12	10:53:47	0.55299	724.785	FALSE	40
2022-09-12	10:53:48	0.506119	725.291	FALSE	40
2022-09-12	10:53:48	0.45701	725.748	FALSE	40
2022-09-12	10:53:48	0.446578	726.195	FALSE	40
2022-09-12	10:53:48	0.373448	726.568	FALSE	40
2022-09-12	10:53:49	0.52897	727.097	FALSE	40
2022-09-12	10:53:49	0.350242	727.448	FALSE	40
2022-09-12	10:53:49	0.47813	727.926	FALSE	40
2022-09-12	10:53:49	0.435891	728.362	FALSE	40
2022-09-12	10:53:50	0.371107	728.733	FALSE	40
2022-09-12	10:53:50	0.451768	729.185	FALSE	40
2022-09-12	10:53:50	0.565305	729.75	FALSE	40
2022-09-12	10:53:51	0.518588	730.268	FALSE	40
2022-09-12	10:53:51	0.493092	730.762	FALSE	40
2022-09-12	10:53:51	0.464033	731.226	FALSE	40
2022-09-12	10:53:51	0.524236	731.75	FALSE	40
2022-09-12	10:53:52	0.471667	732.222	FALSE	40
2022-09-12	10:53:52	0.669326	732.891	FALSE	40
2022-09-12	10:53:52	0.607239	733.498	FALSE	40
2022-09-12	10:53:52	0.7936	734.292	FALSE	40
2022-09-12	10:53:53	0.733957	735.026	FALSE	40
2022-09-12	10:53:53	0.546374	735.572	FALSE	40
2022-09-12	10:53:53	0.430496	736.002	FALSE	40
2022-09-12	10:53:53	0.414669	736.417	FALSE	40
2022-09-12	10:53:54	0.417316	736.834	FALSE	40
2022-09-12	10:53:54	0.408563	737.243	FALSE	40
2022-09-12	10:53:54	0.428359	737.671	FALSE	40
2022-09-12	10:53:55	0.3193	737.991	FALSE	40
2022-09-12	10:53:55	0.452277	738.443	FALSE	40
2022-09-12	10:53:55	0.359555	738.803	FALSE	40
2022-09-12	10:53:55	0.335535	739.138	FALSE	40
2022-09-12	10:53:56	0.411209	739.549	FALSE	40
2022-09-12	10:53:56	0.397723	739.947	FALSE	40
2022-09-12	10:53:56	0.374364	740.321	FALSE	40
2022-09-12	10:53:56	0.366374	740.688	FALSE	40
2022-09-12	10:53:57	0.398435	741.086	FALSE	40
2022-09-12	10:53:57	0.37355	741.46	FALSE	40
2022-09-12	10:53:57	0.307443	741.767	FALSE	40
2022-09-12	10:53:57	0.507901	742.275	FALSE	40
2022-09-12	10:53:58	0.31014	742.585	FALSE	40
2022-09-12	10:53:58	0.394771	742.98	FALSE	40
2022-09-12	10:53:58	0.462252	743.442	FALSE	40
2022-09-12	10:53:59	0.281743	743.724	FALSE	40
2022-09-12	10:53:59	0.432939	744.157	FALSE	40
2022-09-12	10:53:59	0.341489	744.498	FALSE	40
2022-09-12	10:53:59	1.91726	746.416	FALSE	40
2022-09-12	10:54:00	1.50902	747.925	FALSE	40
2022-09-12	10:54:00	2.09447	750.019	FALSE	40
2022-09-12	10:54:00	1.80877	751.828	FALSE	40
2022-09-12	10:54:00	3.51808	755.346	1	41
2022-09-12	10:54:01	6.18428	761.53	1	42
2022-09-12	10:54:01	8.09675	769.627	1	43
2022-09-12	10:54:01	3.11477	772.742	1	44
2022-09-12	10:54:01	3.02413	775.766	1	45
2022-09-12	10:54:02	1.99737	777.763	FALSE	45
2022-09-12	10:54:02	2.63156	780.395	FALSE	45
2022-09-12	10:54:02	1.5476	781.942	FALSE	45
2022-09-12	10:54:03	0.653295	782.596	FALSE	45
2022-09-12	10:54:03	0.701641	783.297	FALSE	45
2022-09-12	10:54:03	0.417265	783.715	FALSE	45
2022-09-12	10:54:03	0.787341	784.502	FALSE	45
2022-09-12	10:54:04	1.07365	785.576	FALSE	45
2022-09-12	10:54:04	2.54968	788.125	FALSE	45
2022-09-12	10:54:04	2.83406	790.959	FALSE	45
2022-09-12	10:54:04	5.31823	796.278	1	46
2022-09-12	10:54:05	2.09197	798.37	FALSE	46
2022-09-12	10:54:05	1.57304	799.943	FALSE	46
2022-09-12	10:54:05	0.672837	800.615	FALSE	46
2022-09-12	10:54:05	0.333804	800.949	FALSE	46
2022-09-12	10:54:06	0.618435	801.568	FALSE	46
2022-09-12	10:54:06	0.293194	801.861	FALSE	46
2022-09-12	10:54:06	0.516043	802.377	FALSE	46
2022-09-12	10:54:06	0.377265	802.754	FALSE	46
2022-09-12	10:54:07	0.977265	803.731	FALSE	46
2022-09-12	10:54:07	0.813652	804.545	FALSE	46
2022-09-12	10:54:07	2.02943	806.575	FALSE	46
2022-09-12	10:54:08	1.21625	807.791	FALSE	46
2022-09-12	10:54:08	1.21431	809.005	FALSE	46
2022-09-12	10:54:08	0.570751	809.576	FALSE	46
2022-09-12	10:54:08	0.325255	809.901	FALSE	46
2022-09-12	10:54:09	0.537417	810.439	FALSE	46
2022-09-12	10:54:09	0.314415	810.753	FALSE	46
2022-09-12	10:54:09	0.454364	811.207	FALSE	46
2022-09-12	10:54:09	0.287901	811.495	FALSE	46
2022-09-12	10:54:10	0.379453	811.875	FALSE	46
2022-09-12	10:54:10	0.290649	812.165	FALSE	46
2022-09-12	10:54:10	0.474059	812.639	FALSE	46
2022-09-12	10:54:10	0.670293	813.31	FALSE	46
2022-09-12	10:54:11	0.992939	814.303	FALSE	46
2022-09-12	10:54:11	1.10693	815.41	FALSE	46
2022-09-12	10:54:11	0.617672	816.027	FALSE	46
2022-09-12	10:54:12	0.563219	816.59	FALSE	46
2022-09-12	10:54:12	0.322812	816.913	FALSE	46
2022-09-12	10:54:12	0.834618	817.748	FALSE	46
2022-09-12	10:54:12	0.406272	818.154	FALSE	46
2022-09-12	10:54:13	0.454568	818.609	FALSE	46
2022-09-12	10:54:13	0.361845	818.971	FALSE	46
2022-09-12	10:54:13	0.389428	819.36	FALSE	46
2022-09-12	10:54:13	0.352685	819.713	FALSE	46
2022-09-12	10:54:14	0.452176	820.165	FALSE	46
2022-09-12	10:54:14	0.329937	820.495	FALSE	46
2022-09-12	10:54:14	0.445204	820.94	FALSE	46
2022-09-12	10:54:14	0.357825	821.298	FALSE	46
2022-09-12	10:54:15	0.594618	821.892	FALSE	46
2022-09-12	10:54:15	0.817519	822.71	FALSE	46
2022-09-12	10:54:15	1.39446	824.104	FALSE	46
2022-09-12	10:54:16	1.18454	825.289	FALSE	46
2022-09-12	10:54:16	0.975178	826.264	FALSE	46
2022-09-12	10:54:16	0.626069	826.89	FALSE	46
2022-09-12	10:54:16	1.17528	828.065	FALSE	46
2022-09-12	10:54:17	0.653651	828.719	FALSE	46
2022-09-12	10:54:17	0.443117	829.162	FALSE	46
2022-09-12	10:54:17	0.419046	829.581	FALSE	46
2022-09-12	10:54:17	0.461234	830.043	FALSE	46

## Sheet: Duke_martin_2022912104916
						**GoPro Fitting: 1038
2022-09-12	10:49:17	0.395636
2022-09-12	10:49:17	0.422557
2022-09-12	10:49:17	0.506629
2022-09-12	10:49:17	0.495534
2022-09-12	10:49:18	0.677824
2022-09-12	10:49:18	1.17324
2022-09-12	10:49:18	0.691768
2022-09-12	10:49:18	0.410293
2022-09-12	10:49:19	0.584287
2022-09-12	10:49:19	0.744033
2022-09-12	10:49:19	6.80098
2022-09-12	10:49:20	8.99395
2022-09-12	10:49:20	5.60016
2022-09-12	10:49:20	4.40652
2022-09-12	10:49:20	7.32306
2022-09-12	10:49:21	11.9481
2022-09-12	10:49:21	8.67889
2022-09-12	10:49:21	2.13177
2022-09-12	10:49:21	0.52556
2022-09-12	10:49:22	0.333957
2022-09-12	10:49:22	0.215942
2022-09-12	10:49:22	0.211311
2022-09-12	10:49:22	0.322863
2022-09-12	10:49:23	0.335331
2022-09-12	10:49:23	0.36271
2022-09-12	10:49:23	0.409835
2022-09-12	10:49:23	0.432277
2022-09-12	10:49:24	0.365356
2022-09-12	10:49:24	0.39584
2022-09-12	10:49:24	0.418588
2022-09-12	10:49:25	0.384033
2022-09-12	10:49:25	0.287646
2022-09-12	10:49:25	0.452227
2022-09-12	10:49:25	0.384542
2022-09-12	10:49:26	0.288868
2022-09-12	10:49:26	-0.0814628
2022-09-12	10:49:26	-0.23388
2022-09-12	10:49:26	-0.0159158
2022-09-12	10:49:27	0.0642878
2022-09-12	10:49:27	0.939911
2022-09-12	10:49:27	0.462608
2022-09-12	10:49:27	0.435941
2022-09-12	10:49:28	0.253041
2022-09-12	10:49:28	0.301794
2022-09-12	10:49:28	0.181794
2022-09-12	10:49:29	0.293601
2022-09-12	10:49:29	0.163626
2022-09-12	10:49:29	0.249173
2022-09-12	10:49:29	0.131209
2022-09-12	10:49:30	0.380115
2022-09-12	10:49:30	0.412227
2022-09-12	10:49:30	2.3166
2022-09-12	10:49:30	1.84673
2022-09-12	10:49:31	2.99273
2022-09-12	10:49:31	3.74418
2022-09-12	10:49:31	1.38902
2022-09-12	10:49:31	2.45141
2022-09-12	10:49:32	1.55106
2022-09-12	10:49:32	1.27101
2022-09-12	10:49:32	0.685051
2022-09-12	10:49:33	0.725814
2022-09-12	10:49:33	2.04525
2022-09-12	10:49:33	0.226374
2022-09-12	10:49:33	1.56337
2022-09-12	10:49:34	1.10989
2022-09-12	10:49:34	2.44128
2022-09-12	10:49:34	1.8081
2022-09-12	10:49:34	3.52698
2022-09-12	10:49:35	3.87212
2022-09-12	10:49:35	1.89258
2022-09-12	10:49:35	2.73523
2022-09-12	10:49:35	3.66714
2022-09-12	10:49:36	5.7995
2022-09-12	10:49:36	4.05467
2022-09-12	10:49:36	3.7224
2022-09-12	10:49:37	3.57355
2022-09-12	10:49:37	1.9193
2022-09-12	10:49:37	1.34927
2022-09-12	10:49:37	2.25228
2022-09-12	10:49:38	0.844949
2022-09-12	10:49:38	2.11981
2022-09-12	10:49:38	1.33777
2022-09-12	10:49:38	2.06592
2022-09-12	10:49:39	1.85243
2022-09-12	10:49:39	2.08459
2022-09-12	10:49:39	4.45894
2022-09-12	10:49:39	3.42561
2022-09-12	10:49:40	3.97467
2022-09-12	10:49:40	4.54765
2022-09-12	10:49:40	5.72199
2022-09-12	10:49:40	4.30037
2022-09-12	10:49:41	4.81691
2022-09-12	10:49:41	9.07344
2022-09-12	10:49:41	5.6765
2022-09-12	10:49:42	7.56723
2022-09-12	10:49:42	7.72479
2022-09-12	10:49:42	13.3358
2022-09-12	10:49:42	23.4945
2022-09-12	10:49:43	16.2267
2022-09-12	10:49:43	8.14688
2022-09-12	10:49:43	2.81416
2022-09-12	10:49:43	1.98765
2022-09-12	10:49:44	1.77976
2022-09-12	10:49:44	1.59808
2022-09-12	10:49:44	2.12866
2022-09-12	10:49:44	0.709885
2022-09-12	10:49:45	0.502964
2022-09-12	10:49:45	0.788053
2022-09-12	10:49:45	0.539605
2022-09-12	10:49:46	1.39146
2022-09-12	10:49:46	2.00938
2022-09-12	10:49:46	1.25355
2022-09-12	10:49:46	1.16454
2022-09-12	10:49:47	1.42968
2022-09-12	10:49:47	0.629173
2022-09-12	10:49:47	1.24363
2022-09-12	10:49:47	1.58347
2022-09-12	10:49:48	0.523982
2022-09-12	10:49:48	0.395891
2022-09-12	10:49:48	1.20617
2022-09-12	10:49:48	0.402659
2022-09-12	10:49:49	0.307087
2022-09-12	10:49:49	0.670852
2022-09-12	10:49:49	0.097163
2022-09-12	10:49:50	0.433448
2022-09-12	10:49:50	0.560064
2022-09-12	10:49:50	0.469835
2022-09-12	10:49:50	0.369428
2022-09-12	10:49:51	0.917621
2022-09-12	10:49:51	0.772277
2022-09-12	10:49:51	0.70444
2022-09-12	10:49:51	0.494211
2022-09-12	10:49:52	0.226578
2022-09-12	10:49:52	0.322354
2022-09-12	10:49:52	0.346476
2022-09-12	10:49:52	0.734008
2022-09-12	10:49:53	0.555229
2022-09-12	10:49:53	0.328613
2022-09-12	10:49:53	0.151005
2022-09-12	10:49:54	0.353041
2022-09-12	10:49:54	0.176909
2022-09-12	10:49:54	0.0912088
2022-09-12	10:49:54	0.574059
2022-09-12	10:49:55	0.386985
2022-09-12	10:49:55	0.257774
2022-09-12	10:49:55	0.397926
2022-09-12	10:49:55	0.572684
2022-09-12	10:49:56	0.404898
2022-09-12	10:49:56	0.389021
2022-09-12	10:49:56	0.280165
2022-09-12	10:49:56	0.292379
2022-09-12	10:49:57	0.339809
2022-09-12	10:49:57	0.307036
2022-09-12	10:49:57	0.30673
2022-09-12	10:49:57	0.309071
2022-09-12	10:49:58	0.310344
2022-09-12	10:49:58	0.328969
2022-09-12	10:49:58	0.334262
2022-09-12	10:49:59	0.381896
2022-09-12	10:49:59	0.356196
2022-09-12	10:49:59	0.339809
2022-09-12	10:49:59	0.329224
2022-09-12	10:50:00	0.354618
2022-09-12	10:50:00	0.364644
2022-09-12	10:50:00	0.34327
2022-09-12	10:50:00	0.400573
2022-09-12	10:50:01	0.267494
2022-09-12	10:50:01	0.353143
2022-09-12	10:50:01	0.415789
2022-09-12	10:50:01	0.435738
2022-09-12	10:50:02	0.355433
2022-09-12	10:50:02	0.371921
2022-09-12	10:50:02	0.463626
2022-09-12	10:50:03	0.377977
2022-09-12	10:50:03	0.416552
2022-09-12	10:50:03	0.388257
2022-09-12	10:50:03	0.364542
2022-09-12	10:50:04	0.456043
2022-09-12	10:50:04	0.461794
2022-09-12	10:50:04	0.465204
2022-09-12	10:50:04	0.411819
2022-09-12	10:50:05	0.396247
2022-09-12	10:50:05	0.349886
2022-09-12	10:50:05	0.350802
2022-09-12	10:50:05	0.340115
2022-09-12	10:50:06	0.345
2022-09-12	10:50:06	0.361336
2022-09-12	10:50:06	0.349682
2022-09-12	10:50:07	0.346985
2022-09-12	10:50:07	0.326629
2022-09-12	10:50:07	0.338181
2022-09-12	10:50:07	0.368003
2022-09-12	10:50:08	0.41472
2022-09-12	10:50:08	0.425814
2022-09-12	10:50:08	0.398232
2022-09-12	10:50:08	0.356959
2022-09-12	10:50:09	0.329122
2022-09-12	10:50:09	0.300522
2022-09-12	10:50:09	0.316043
2022-09-12	10:50:09	0.313906
2022-09-12	10:50:10	0.334873
2022-09-12	10:50:10	0.322252
2022-09-12	10:50:10	0.312634
2022-09-12	10:50:11	0.31243
2022-09-12	10:50:11	0.311616
2022-09-12	10:50:11	0.306629
2022-09-12	10:50:11	0.299046
2022-09-12	10:50:12	0.29472
2022-09-12	10:50:12	0.30154
2022-09-12	10:50:12	0.291361
2022-09-12	10:50:12	0.294669
2022-09-12	10:50:13	0.298792
2022-09-12	10:50:13	0.355585
2022-09-12	10:50:13	0.267138
2022-09-12	10:50:13	0.378741
2022-09-12	10:50:14	0.141591
2022-09-12	10:50:14	0.120878
2022-09-12	10:50:14	0.217875
2022-09-12	10:50:14	0.321998
2022-09-12	10:50:15	0.278283
2022-09-12	10:50:15	0.245458
2022-09-12	10:50:15	0.184135
2022-09-12	10:50:16	0.256858
2022-09-12	10:50:16	0.228054
2022-09-12	10:50:16	0.249478
2022-09-12	10:50:16	0.239708
2022-09-12	10:50:17	0.290802
2022-09-12	10:50:17	0.257926
2022-09-12	10:50:17	0.257977
2022-09-12	10:50:17	0.285356
2022-09-12	10:50:18	0.277061
2022-09-12	10:50:18	0.27472
2022-09-12	10:50:18	0.276451
2022-09-12	10:50:18	0.29584
2022-09-12	10:50:19	0.27243
2022-09-12	10:50:19	0.26271
2022-09-12	10:50:19	0.264033
2022-09-12	10:50:20	0.271565
2022-09-12	10:50:20	0.284288
2022-09-12	10:50:20	0.294211
2022-09-12	10:50:20	0.271819
2022-09-12	10:50:21	0.304237
2022-09-12	10:50:21	0.294822
2022-09-12	10:50:21	0.286883
2022-09-12	10:50:21	0.276959
2022-09-12	10:50:22	0.277621
2022-09-12	10:50:22	0.275433
2022-09-12	10:50:22	0.260318
2022-09-12	10:50:22	0.280827
2022-09-12	10:50:23	0.305255
2022-09-12	10:50:23	0.193855
2022-09-12	10:50:23	0.257417
2022-09-12	10:50:24	0.279555
2022-09-12	10:50:24	0.232379
2022-09-12	10:50:24	0.263321
2022-09-12	10:50:24	0.295127
2022-09-12	10:50:25	0.31869
2022-09-12	10:50:25	0.3507
2022-09-12	10:50:25	0.329784
2022-09-12	10:50:25	0.317417
2022-09-12	10:50:26	0.309886
2022-09-12	10:50:26	0.325458
2022-09-12	10:50:26	0.326323
2022-09-12	10:50:26	0.332328
2022-09-12	10:50:27	0.342863
2022-09-12	10:50:27	0.329122
2022-09-12	10:50:27	0.339351
2022-09-12	10:50:28	0.33126
2022-09-12	10:50:28	0.322964
2022-09-12	10:50:28	0.330903
2022-09-12	10:50:28	0.322761
2022-09-12	10:50:29	0.311209
2022-09-12	10:50:29	0.3164
2022-09-12	10:50:29	0.309886
2022-09-12	10:50:29	0.30383
2022-09-12	10:50:30	0.305967
2022-09-12	10:50:30	0.309122
2022-09-12	10:50:30	0.342964
2022-09-12	10:50:30	0.349275
2022-09-12	10:50:31	0.318384
2022-09-12	10:50:31	0.293295
2022-09-12	10:50:31	0.355127
2022-09-12	10:50:31	0.352888
2022-09-12	10:50:32	0.277774
2022-09-12	10:50:32	0.317876
2022-09-12	10:50:32	0.328104
2022-09-12	10:50:33	0.288308
2022-09-12	10:50:33	0.360369
2022-09-12	10:50:33	0.356756
2022-09-12	10:50:33	0.421489
2022-09-12	10:50:34	0.376654
2022-09-12	10:50:34	0.384288
2022-09-12	10:50:34	0.454364
2022-09-12	10:50:34	0.400725
2022-09-12	10:50:35	0.385967
2022-09-12	10:50:35	0.411565
2022-09-12	10:50:35	0.458893
2022-09-12	10:50:35	0.402506
2022-09-12	10:50:36	0.38271
2022-09-12	10:50:36	0.428359
2022-09-12	10:50:36	0.411565
2022-09-12	10:50:37	0.401489
2022-09-12	10:50:37	0.406272
2022-09-12	10:50:37	0.408359
2022-09-12	10:50:37	0.412379
2022-09-12	10:50:38	0.406578
2022-09-12	10:50:38	0.394211
2022-09-12	10:50:38	0.34673
2022-09-12	10:50:38	0.346171
2022-09-12	10:50:39	0.371209
2022-09-12	10:50:39	0.359249
2022-09-12	10:50:39	0.35182
2022-09-12	10:50:39	0.353092
2022-09-12	10:50:40	0.343473
2022-09-12	10:50:40	0.338283
2022-09-12	10:50:40	0.346425
2022-09-12	10:50:41	0.342048
2022-09-12	10:50:41	0.33813
2022-09-12	10:50:41	0.341947
2022-09-12	10:50:41	0.354771
2022-09-12	10:50:42	0.340878
2022-09-12	10:50:42	0.369835
2022-09-12	10:50:42	0.361489
2022-09-12	10:50:42	0.391514
2022-09-12	10:50:43	0.412125
2022-09-12	10:50:43	0.408969
2022-09-12	10:50:43	0.407443
2022-09-12	10:50:43	0.41701
2022-09-12	10:50:44	0.443066
2022-09-12	10:50:44	0.478791
2022-09-12	10:50:44	0.517672
2022-09-12	10:50:45	0.58215
2022-09-12	10:50:45	0.643626
2022-09-12	10:50:45	0.644542
2022-09-12	10:50:45	0.580623
2022-09-12	10:50:46	0.458537
2022-09-12	10:50:46	0.413651
2022-09-12	10:50:46	0.387697
2022-09-12	10:50:46	0.383473
2022-09-12	10:50:47	0.386629
2022-09-12	10:50:47	0.438079
2022-09-12	10:50:47	0.432074
2022-09-12	10:50:47	0.42897
2022-09-12	10:50:48	0.426221
2022-09-12	10:50:48	0.432277
2022-09-12	10:50:48	0.442761
2022-09-12	10:50:49	0.436959
2022-09-12	10:50:49	0.467188
2022-09-12	10:50:49	0.348511
2022-09-12	10:50:49	0.419402
2022-09-12	10:50:50	0.413092
2022-09-12	10:50:50	0.405814
2022-09-12	10:50:50	0.417519
2022-09-12	10:50:50	0.415992
2022-09-12	10:50:51	0.414109
2022-09-12	10:50:51	0.413855
2022-09-12	10:50:51	0.417417
2022-09-12	10:50:51	0.413346
2022-09-12	10:50:52	0.409886
2022-09-12	10:50:52	0.414059
2022-09-12	10:50:52	0.412532
2022-09-12	10:50:52	0.411107
2022-09-12	10:50:53	0.413143
2022-09-12	10:50:53	0.422099
2022-09-12	10:50:53	0.421387
2022-09-12	10:50:54	0.422099
2022-09-12	10:50:54	0.421641
2022-09-12	10:50:54	0.422965
2022-09-12	10:50:54	0.430038
2022-09-12	10:50:55	0.43986
2022-09-12	10:50:55	0.441641
2022-09-12	10:50:55	0.437519
2022-09-12	10:50:55	0.428817
2022-09-12	10:50:56	0.423321
2022-09-12	10:50:56	0.418639
2022-09-12	10:50:56	0.420624
2022-09-12	10:50:56	0.419758
2022-09-12	10:50:57	0.425865
2022-09-12	10:50:57	0.392888
2022-09-12	10:50:57	0.378486
2022-09-12	10:50:58	0.369835
2022-09-12	10:50:58	0.358944
2022-09-12	10:50:58	0.439148
2022-09-12	10:50:58	0.41528
2022-09-12	10:50:59	0.491769
2022-09-12	10:50:59	0.536196
2022-09-12	10:50:59	0.659554
2022-09-12	10:50:59	0.521794
2022-09-12	10:51:00	0.552328
2022-09-12	10:51:00	0.436654
2022-09-12	10:51:00	0.519046
2022-09-12	10:51:00	0.581743
2022-09-12	10:51:01	0.470751
2022-09-12	10:51:01	0.481387
2022-09-12	10:51:01	0.450802
2022-09-12	10:51:02	0.513601
2022-09-12	10:51:02	0.408868
2022-09-12	10:51:02	0.435178
2022-09-12	10:51:02	0.460115
2022-09-12	10:51:03	0.475636
2022-09-12	10:51:03	0.424746
2022-09-12	10:51:03	0.435127
2022-09-12	10:51:03	0.4393
2022-09-12	10:51:04	0.431921
2022-09-12	10:51:04	0.43701
2022-09-12	10:51:04	0.440471
2022-09-12	10:51:04	0.447087
2022-09-12	10:51:05	0.436043
2022-09-12	10:51:05	0.440827
2022-09-12	10:51:05	0.437875
2022-09-12	10:51:06	0.438435
2022-09-12	10:51:06	0.435331
2022-09-12	10:51:06	0.437417
2022-09-12	10:51:06	0.439758
2022-09-12	10:51:07	0.438333
2022-09-12	10:51:07	0.437265
2022-09-12	10:51:07	0.431718
2022-09-12	10:51:07	0.433397
2022-09-12	10:51:08	0.425356
2022-09-12	10:51:08	0.430445
2022-09-12	10:51:08	0.432227
2022-09-12	10:51:08	0.426221
2022-09-12	10:51:09	0.431107
2022-09-12	10:51:09	0.429478
2022-09-12	10:51:09	0.440624
2022-09-12	10:51:09	0.463117
2022-09-12	10:51:10	0.505356
2022-09-12	10:51:10	0.510801
2022-09-12	10:51:10	0.481183
2022-09-12	10:51:11	0.532074
2022-09-12	10:51:11	0.553194
2022-09-12	10:51:11	0.479199
2022-09-12	10:51:11	0.393397
2022-09-12	10:51:12	0.482049
2022-09-12	10:51:12	0.412939
2022-09-12	10:51:12	0.419606
2022-09-12	10:51:12	0.42729
2022-09-12	10:51:13	0.407901
2022-09-12	10:51:13	0.401489
2022-09-12	10:51:13	0.401336
2022-09-12	10:51:13	0.445305
2022-09-12	10:51:14	0.421947
2022-09-12	10:51:14	0.442608
2022-09-12	10:51:14	0.435433
2022-09-12	10:51:15	0.458995
2022-09-12	10:51:15	0.485458
2022-09-12	10:51:15	0.474975
2022-09-12	10:51:15	0.497774
2022-09-12	10:51:16	0.440776
2022-09-12	10:51:16	0.457672
2022-09-12	10:51:16	0.410089
2022-09-12	10:51:16	0.401234
2022-09-12	10:51:17	0.434262
2022-09-12	10:51:17	0.387341
2022-09-12	10:51:17	0.425153
2022-09-12	10:51:17	0.413601
2022-09-12	10:51:18	0.500267
2022-09-12	10:51:18	0.45813
2022-09-12	10:51:18	0.449377
2022-09-12	10:51:19	0.443575
2022-09-12	10:51:19	0.435636
2022-09-12	10:51:19	0.447137
2022-09-12	10:51:19	0.444796
2022-09-12	10:51:20	0.436756
2022-09-12	10:51:20	0.435178
2022-09-12	10:51:20	0.44042
2022-09-12	10:51:20	0.437825
2022-09-12	10:51:21	0.435891
2022-09-12	10:51:21	0.435585
2022-09-12	10:51:21	0.434873
2022-09-12	10:51:21	0.429377
2022-09-12	10:51:22	0.434364
2022-09-12	10:51:22	0.435076
2022-09-12	10:51:22	0.435941
2022-09-12	10:51:23	0.434873
2022-09-12	10:51:23	0.433193
2022-09-12	10:51:23	0.433855
2022-09-12	10:51:23	0.433092
2022-09-12	10:51:24	0.435331
2022-09-12	10:51:24	0.43299
2022-09-12	10:51:24	0.431514
2022-09-12	10:51:24	0.431514
2022-09-12	10:51:25	0.430598
2022-09-12	10:51:25	0.432125
2022-09-12	10:51:25	0.433041
2022-09-12	10:51:25	0.428919
2022-09-12	10:51:26	0.436145
2022-09-12	10:51:26	0.429071
2022-09-12	10:51:26	0.431718
2022-09-12	10:51:26	0.4307
2022-09-12	10:51:27	0.424746
2022-09-12	10:51:27	0.429224
2022-09-12	10:51:27	0.427188
2022-09-12	10:51:28	0.432125
2022-09-12	10:51:28	0.449733
2022-09-12	10:51:28	0.419402
2022-09-12	10:51:28	0.448155
2022-09-12	10:51:29	0.313448
2022-09-12	10:51:29	0.513092
2022-09-12	10:51:29	0.386527
2022-09-12	10:51:29	0.42958
2022-09-12	10:51:30	0.393346
2022-09-12	10:51:30	0.463677
2022-09-12	10:51:30	0.420522
2022-09-12	10:51:30	0.438333
2022-09-12	10:51:31	0.434415
2022-09-12	10:51:31	0.452125
2022-09-12	10:51:31	0.419962
2022-09-12	10:51:32	0.462456
2022-09-12	10:51:32	0.378435
2022-09-12	10:51:32	0.312837
2022-09-12	10:51:32	0.263779
2022-09-12	10:51:33	0.107748
2022-09-12	10:51:33	-0.0448725
2022-09-12	10:51:33	0.0754837
2022-09-12	10:51:34	0.0796567
2022-09-12	10:51:34	-0.0964755
2022-09-12	10:51:34	-0.370165
2022-09-12	10:51:34	-0.589503
2022-09-12	10:51:34	-0.275203
2022-09-12	10:51:35	0.202608
2022-09-12	10:51:35	0.321641
2022-09-12	10:51:35	0.331565
2022-09-12	10:51:36	0.397825
2022-09-12	10:51:36	0.294618
2022-09-12	10:51:36	0.397723
2022-09-12	10:51:36	0.266221
2022-09-12	10:51:37	0.316756
2022-09-12	10:51:37	0.367595
2022-09-12	10:51:37	0.344033
2022-09-12	10:51:37	0.199708
2022-09-12	10:51:38	0.548919
2022-09-12	10:51:38	1.96383
2022-09-12	10:51:38	3.79441
2022-09-12	10:51:38	3.10454
2022-09-12	10:51:39	1.80958
2022-09-12	10:51:39	1.64821
2022-09-12	10:51:39	0.834822
2022-09-12	10:51:40	0.475636
2022-09-12	10:51:40	0.395127
2022-09-12	10:51:40	0.526476
2022-09-12	10:51:40	0.393346
2022-09-12	10:51:41	0.432481
2022-09-12	10:51:41	0.447443
2022-09-12	10:51:41	0.791819
2022-09-12	10:51:41	0.555076
2022-09-12	10:51:42	0.505713
2022-09-12	10:51:42	0.452125
2022-09-12	10:51:42	0.461998
2022-09-12	10:51:42	0.397468
2022-09-12	10:51:43	0.455483
2022-09-12	10:51:43	0.692532
2022-09-12	10:51:43	1.35019
2022-09-12	10:51:44	1.84709
2022-09-12	10:51:44	1.95324
2022-09-12	10:51:44	0.766629
2022-09-12	10:51:44	0.456501
2022-09-12	10:51:45	0.568563
2022-09-12	10:51:45	0.424288
2022-09-12	10:51:45	0.505
2022-09-12	10:51:45	0.487901
2022-09-12	10:51:46	0.522252
2022-09-12	10:51:46	0.377061
2022-09-12	10:51:46	0.429071
2022-09-12	10:51:46	0.357926
2022-09-12	10:51:47	0.488308
2022-09-12	10:51:47	0.497926
2022-09-12	10:51:47	0.964542
2022-09-12	10:51:47	1.12851
2022-09-12	10:51:48	0.912735
2022-09-12	10:51:48	0.54841
2022-09-12	10:51:48	0.592685
2022-09-12	10:51:49	0.338181
2022-09-12	10:51:49	0.459453
2022-09-12	10:51:49	0.221998
2022-09-12	10:51:49	0.475382
2022-09-12	10:51:50	0.184644
2022-09-12	10:51:50	0.480827
2022-09-12	10:51:50	0.214822
2022-09-12	10:51:50	0.51299
2022-09-12	10:51:51	0.171311
2022-09-12	10:51:51	0.462252
2022-09-12	10:51:51	0.191514
2022-09-12	10:51:51	0.482099
2022-09-12	10:51:52	0.54042
2022-09-12	10:51:52	0.861336
2022-09-12	10:51:52	1.16795
2022-09-12	10:51:53	1.41452
2022-09-12	10:51:53	0.800878
2022-09-12	10:51:53	0.688155
2022-09-12	10:51:53	0.580674
2022-09-12	10:51:54	0.682659
2022-09-12	10:51:54	0.52042
2022-09-12	10:51:54	0.296349
2022-09-12	10:51:54	0.519606
2022-09-12	10:51:55	0.287494
2022-09-12	10:51:55	0.543473
2022-09-12	10:51:55	0.329428
2022-09-12	10:51:55	0.482354
2022-09-12	10:51:56	0.375534
2022-09-12	10:51:56	0.373855
2022-09-12	10:51:56	0.359046
2022-09-12	10:51:57	0.326985
2022-09-12	10:51:57	0.533295
2022-09-12	10:51:57	0.473448
2022-09-12	10:51:57	0.528715
2022-09-12	10:51:58	0.569376
2022-09-12	10:51:58	0.195229
2022-09-12	10:51:58	0.716807
2022-09-12	10:51:58	0.361336
2022-09-12	10:51:59	0.641743
2022-09-12	10:51:59	0.836349
2022-09-12	10:51:59	0.572888
2022-09-12	10:51:59	1.43121
2022-09-12	10:52:00	1.02342
2022-09-12	10:52:00	1.94317
2022-09-12	10:52:00	1.56388
2022-09-12	10:52:01	0.993041
2022-09-12	10:52:01	1.33584
2022-09-12	10:52:01	1.20205
2022-09-12	10:52:01	0.81243
2022-09-12	10:52:02	1.15141
2022-09-12	10:52:02	0.584186
2022-09-12	10:52:02	0.640471
2022-09-12	10:52:02	1.21197
2022-09-12	10:52:03	0.211005
2022-09-12	10:52:03	0.52042
2022-09-12	10:52:03	0.348104
2022-09-12	10:52:03	0.314924
2022-09-12	10:52:04	0.339657
2022-09-12	10:52:04	0.0344659
2022-09-12	10:52:04	0.160166
2022-09-12	10:52:04	0.136349
2022-09-12	10:52:05	0.143372
2022-09-12	10:52:05	0.0796058
2022-09-12	10:52:05	0.178028
2022-09-12	10:52:06	-0.157544
2022-09-12	10:52:06	-0.314287
2022-09-12	10:52:06	-0.301056
2022-09-12	10:52:06	-0.531641
2022-09-12	10:52:07	-0.461768
2022-09-12	10:52:07	-0.455814
2022-09-12	10:52:07	-0.282786
2022-09-12	10:52:07	-0.449707
2022-09-12	10:52:08	-0.29902
2022-09-12	10:52:08	-0.335254
2022-09-12	10:52:08	-0.17902
2022-09-12	10:52:08	-0.251285
2022-09-12	10:52:09	-0.184872
2022-09-12	10:52:09	-0.0948979
2022-09-12	10:52:09	-0.158002
2022-09-12	10:52:10	-0.148638
2022-09-12	10:52:10	-0.110928
2022-09-12	10:52:10	-0.114084
2022-09-12	10:52:10	-0.167875
2022-09-12	10:52:11	-0.193626
2022-09-12	10:52:11	-0.245636
2022-09-12	10:52:11	-0.199122
2022-09-12	10:52:11	-0.161768
2022-09-12	10:52:12	-0.185534
2022-09-12	10:52:12	-0.197544
2022-09-12	10:52:12	-0.191488
2022-09-12	10:52:12	-0.0808521
2022-09-12	10:52:13	-0.0406995
2022-09-12	10:52:13	-0.0077733
2022-09-12	10:52:13	0.12612
2022-09-12	10:52:14	0.0994022
2022-09-12	10:52:14	0.557163
2022-09-12	10:52:14	0.301031
2022-09-12	10:52:14	0.594975
2022-09-12	10:52:15	0.474415
2022-09-12	10:52:15	0.360064
2022-09-12	10:52:15	0.146527
2022-09-12	10:52:15	0.490802
2022-09-12	10:52:16	0.306781
2022-09-12	10:52:16	0.388359
2022-09-12	10:52:16	0.288715
2022-09-12	10:52:16	0.531972
2022-09-12	10:52:17	0.260471
2022-09-12	10:52:17	0.419046
2022-09-12	10:52:17	0.206323
2022-09-12	10:52:18	0.506119
2022-09-12	10:52:18	0.280267
2022-09-12	10:52:18	0.472176
2022-09-12	10:52:18	0.338791
2022-09-12	10:52:19	1.60113
2022-09-12	10:52:19	2.22103
2022-09-12	10:52:19	4.64149
2022-09-12	10:52:19	6.09685
2022-09-12	10:52:20	7.53171
2022-09-12	10:52:20	4.84281
2022-09-12	10:52:20	2.74307
2022-09-12	10:52:20	1.10388
2022-09-12	10:52:21	0.759351
2022-09-12	10:52:21	0.763779
2022-09-12	10:52:21	0.732532
2022-09-12	10:52:22	0.539351
2022-09-12	10:52:22	0.362812
2022-09-12	10:52:22	0.35131
2022-09-12	10:52:22	0.326374
2022-09-12	10:52:23	0.355229
2022-09-12	10:52:23	0.333753
2022-09-12	10:52:23	0.400674
2022-09-12	10:52:23	0.372328
2022-09-12	10:52:24	0.336094
2022-09-12	10:52:24	0.295484
2022-09-12	10:52:24	0.599606
2022-09-12	10:52:24	0.273295
2022-09-12	10:52:25	0.432227
2022-09-12	10:52:25	0.300929
2022-09-12	10:52:25	0.366883
2022-09-12	10:52:25	0.398639
2022-09-12	10:52:26	0.290293
2022-09-12	10:52:26	0.341183
2022-09-12	10:52:26	0.349478
2022-09-12	10:52:27	0.303015
2022-09-12	10:52:27	0.37243
2022-09-12	10:52:27	0.36902
2022-09-12	10:52:27	0.36215
2022-09-12	10:52:28	0.470903
2022-09-12	10:52:28	0.396094
2022-09-12	10:52:28	0.45126
2022-09-12	10:52:28	0.303931
2022-09-12	10:52:29	0.480573
2022-09-12	10:52:29	0.348359
2022-09-12	10:52:29	0.633041
2022-09-12	10:52:29	0.345356
2022-09-12	10:52:30	0.655941
2022-09-12	10:52:30	0.495687
2022-09-12	10:52:30	0.725305
2022-09-12	10:52:31	0.403677
2022-09-12	10:52:31	0.541438
2022-09-12	10:52:31	0.271921
2022-09-12	10:52:31	0.484949
2022-09-12	10:52:32	0.257163
2022-09-12	10:52:32	0.461692
2022-09-12	10:52:32	0.291768
2022-09-12	10:52:32	0.412735
2022-09-12	10:52:33	0.35472
2022-09-12	10:52:33	0.354517
2022-09-12	10:52:33	0.38729
2022-09-12	10:52:33	0.237214
2022-09-12	10:52:34	0.486527
2022-09-12	10:52:34	0.319249
2022-09-12	10:52:34	0.520776
2022-09-12	10:52:35	0.390903
2022-09-12	10:52:35	0.58159
2022-09-12	10:52:35	0.372939
2022-09-12	10:52:35	0.538232
2022-09-12	10:52:36	0.231565
2022-09-12	10:52:36	0.593194
2022-09-12	10:52:36	0.481234
2022-09-12	10:52:36	0.800471
2022-09-12	10:52:37	0.620624
2022-09-12	10:52:37	0.763931
2022-09-12	10:52:37	0.739402
2022-09-12	10:52:37	1.02342
2022-09-12	10:52:38	1.29447
2022-09-12	10:52:38	1.80062
2022-09-12	10:52:38	1.3821
2022-09-12	10:52:39	1.55762
2022-09-12	10:52:39	1.48668
2022-09-12	10:52:39	1.89889
2022-09-12	10:52:39	2.43976
2022-09-12	10:52:40	1.17289
2022-09-12	10:52:40	2.45752
2022-09-12	10:52:40	1.77966
2022-09-12	10:52:40	1.0566
2022-09-12	10:52:41	0.59182
2022-09-12	10:52:41	0.396043
2022-09-12	10:52:41	0.471514
2022-09-12	10:52:41	0.277112
2022-09-12	10:52:42	0.453448
2022-09-12	10:52:42	0.361896
2022-09-12	10:52:42	0.409275
2022-09-12	10:52:42	0.236756
2022-09-12	10:52:43	0.235229
2022-09-12	10:52:43	0.127596
2022-09-12	10:52:43	-0.0688928
2022-09-12	10:52:44	-0.159834
2022-09-12	10:52:44	-0.149911
2022-09-12	10:52:44	-0.169402
2022-09-12	10:52:44	0.135229
2022-09-12	10:52:45	0.0643895
2022-09-12	10:52:45	-0.0431422
2022-09-12	10:52:45	-0.127722
2022-09-12	10:52:45	-0.0446181
2022-09-12	10:52:46	0.0170104
2022-09-12	10:52:46	0.175178
2022-09-12	10:52:46	0.17243
2022-09-12	10:52:46	0.505305
2022-09-12	10:52:47	0.501896
2022-09-12	10:52:47	0.395229
2022-09-12	10:52:47	0.380674
2022-09-12	10:52:48	0.357366
2022-09-12	10:52:48	0.279453
2022-09-12	10:52:48	0.373753
2022-09-12	10:52:48	0.370751
2022-09-12	10:52:49	0.360674
2022-09-12	10:52:49	0.351718
2022-09-12	10:52:49	0.370802
2022-09-12	10:52:49	0.377926
2022-09-12	10:52:50	0.379402
2022-09-12	10:52:50	0.361794
2022-09-12	10:52:50	0.363473
2022-09-12	10:52:50	0.334262
2022-09-12	10:52:51	0.320166
2022-09-12	10:52:51	0.0709036
2022-09-12	10:52:51	-0.247163
2022-09-12	10:52:52	-0.414999
2022-09-12	10:52:52	-0.247722
2022-09-12	10:52:52	-0.240343
2022-09-12	10:52:52	-0.250572
2022-09-12	10:52:53	-0.443091
2022-09-12	10:52:53	-0.339936
2022-09-12	10:52:53	-0.298715
2022-09-12	10:52:53	-0.273727
2022-09-12	10:52:54	-0.158969
2022-09-12	10:52:54	0.0512597
2022-09-12	10:52:54	0.448715
2022-09-12	10:52:54	0.36383
2022-09-12	10:52:55	0.578791
2022-09-12	10:52:55	0.790954
2022-09-12	10:52:55	0.300369
2022-09-12	10:52:56	0.867137
2022-09-12	10:52:56	0.40785
2022-09-12	10:52:56	0.598435
2022-09-12	10:52:56	0.67645
2022-09-12	10:52:57	0.42556
2022-09-12	10:52:57	0.516298
2022-09-12	10:52:57	0.508562
2022-09-12	10:52:57	0.503422
2022-09-12	10:52:58	0.575738
2022-09-12	10:52:58	0.396451
2022-09-12	10:52:58	0.273804
2022-09-12	10:52:58	0.442099
2022-09-12	10:52:59	0.19528
2022-09-12	10:52:59	0.387443
2022-09-12	10:52:59	0.101438
2022-09-12	10:53:00	-0.0313356
2022-09-12	10:53:00	-0.161361
2022-09-12	10:53:00	-0.168944
2022-09-12	10:53:00	-0.0866537
2022-09-12	10:53:01	-0.0313356
2022-09-12	10:53:01	-0.171437
2022-09-12	10:53:01	-0.109453
2022-09-12	10:53:01	-0.266755
2022-09-12	10:53:02	-0.400089
2022-09-12	10:53:02	-0.547366
2022-09-12	10:53:02	-0.43958
2022-09-12	10:53:02	-0.417086
2022-09-12	10:53:03	-0.281819
2022-09-12	10:53:03	-0.356017
2022-09-12	10:53:03	-0.41388
2022-09-12	10:53:03	-0.530063
2022-09-12	10:53:04	-0.284669
2022-09-12	10:53:04	-0.321412
2022-09-12	10:53:04	-0.0992236
2022-09-12	10:53:05	-0.0691982
2022-09-12	10:53:05	-0.0436002
2022-09-12	10:53:05	-0.0140837
2022-09-12	10:53:05	-0.000241466
2022-09-12	10:53:06	-0.0170354
2022-09-12	10:53:06	0.045102
2022-09-12	10:53:06	0.103372
2022-09-12	10:53:06	0.0270867
2022-09-12	10:53:07	0.0207254
2022-09-12	10:53:07	0.229478
2022-09-12	10:53:07	0.074415
2022-09-12	10:53:07	0.0957381
2022-09-12	10:53:08	0.0924811
2022-09-12	10:53:08	0.0629137
2022-09-12	10:53:08	0.0510562
2022-09-12	10:53:09	0.25869
2022-09-12	10:53:09	0.0686644
2022-09-12	10:53:09	0.218232
2022-09-12	10:53:09	0.107596
2022-09-12	10:53:10	0.1364
2022-09-12	10:53:10	0.102557
2022-09-12	10:53:10	0.104084
2022-09-12	10:53:10	0.27757
2022-09-12	10:53:11	0.130242
2022-09-12	10:53:11	0.284542
2022-09-12	10:53:11	0.191565
2022-09-12	10:53:11	0.358486
2022-09-12	10:53:12	0.153906
2022-09-12	10:53:12	0.392786
2022-09-12	10:53:12	0.240064
2022-09-12	10:53:13	0.367494
2022-09-12	10:53:13	0.16902
2022-09-12	10:53:13	0.409377
2022-09-12	10:53:13	0.211718
2022-09-12	10:53:14	0.194466
2022-09-12	10:53:14	0.12383
2022-09-12	10:53:14	0.329224
2022-09-12	10:53:14	0.28154
2022-09-12	10:53:15	0.320624
2022-09-12	10:53:15	0.323677
2022-09-12	10:53:15	0.32556
2022-09-12	10:53:15	0.364186
2022-09-12	10:53:16	0.296603
2022-09-12	10:53:16	0.370802
2022-09-12	10:53:16	0.405662
2022-09-12	10:53:17	0.440674
2022-09-12	10:53:17	0.448003
2022-09-12	10:53:17	0.539504
2022-09-12	10:53:17	1.00612
2022-09-12	10:53:18	0.860725
2022-09-12	10:53:18	0.690394
2022-09-12	10:53:18	0.52215
2022-09-12	10:53:18	0.382812
2022-09-12	10:53:19	0.561234
2022-09-12	10:53:19	0.63075
2022-09-12	10:53:19	0.400115
2022-09-12	10:53:19	0.584796
2022-09-12	10:53:20	1.74022
2022-09-12	10:53:20	1.87589
2022-09-12	10:53:20	2.88673
2022-09-12	10:53:21	5.82525
2022-09-12	10:53:21	4.98948
2022-09-12	10:53:21	4.10083
2022-09-12	10:53:21	4.911
2022-09-12	10:53:22	2.90912
2022-09-12	10:53:22	0.900623
2022-09-12	10:53:22	0.618537
2022-09-12	10:53:22	0.879249
2022-09-12	10:53:23	0.942863
2022-09-12	10:53:23	0.590445
2022-09-12	10:53:23	0.662608
2022-09-12	10:53:23	0.542354
2022-09-12	10:53:24	0.633142
2022-09-12	10:53:24	0.434517
2022-09-12	10:53:24	0.329987
2022-09-12	10:53:24	0.345509
2022-09-12	10:53:25	0.445305
2022-09-12	10:53:25	0.344135
2022-09-12	10:53:25	0.307392
2022-09-12	10:53:26	0.376094
2022-09-12	10:53:26	0.347952
2022-09-12	10:53:26	0.443473
2022-09-12	10:53:26	0.35299
2022-09-12	10:53:27	0.379911
2022-09-12	10:53:27	0.492583
2022-09-12	10:53:27	0.477519
2022-09-12	10:53:27	0.483473
2022-09-12	10:53:28	0.456349
2022-09-12	10:53:28	0.438486
2022-09-12	10:53:28	0.472176
2022-09-12	10:53:28	0.456705
2022-09-12	10:53:29	0.412634
2022-09-12	10:53:29	0.468766
2022-09-12	10:53:29	0.485611
2022-09-12	10:53:30	0.338232
2022-09-12	10:53:30	0.55416
2022-09-12	10:53:30	0.501845
2022-09-12	10:53:30	0.540674
2022-09-12	10:53:31	0.554669
2022-09-12	10:53:31	0.586679
2022-09-12	10:53:31	0.558944
2022-09-12	10:53:31	0.564186
2022-09-12	10:53:32	0.503321
2022-09-12	10:53:32	0.592481
2022-09-12	10:53:32	0.579504
2022-09-12	10:53:32	0.611972
2022-09-12	10:53:33	0.552379
2022-09-12	10:53:33	0.538893
2022-09-12	10:53:33	0.522862
2022-09-12	10:53:34	0.534873
2022-09-12	10:53:34	0.518486
2022-09-12	10:53:34	0.495789
2022-09-12	10:53:34	0.498639
2022-09-12	10:53:35	0.493855
2022-09-12	10:53:35	0.500827
2022-09-12	10:53:35	0.505967
2022-09-12	10:53:35	0.506221
2022-09-12	10:53:36	0.507901
2022-09-12	10:53:36	0.531616
2022-09-12	10:53:36	0.530496
2022-09-12	10:53:36	0.537977
2022-09-12	10:53:37	0.555433
2022-09-12	10:53:37	0.55299
2022-09-12	10:53:37	0.543575
2022-09-12	10:53:38	0.528817
2022-09-12	10:53:38	0.539707
2022-09-12	10:53:38	0.588562
2022-09-12	10:53:38	0.658842
2022-09-12	10:53:39	0.473702
2022-09-12	10:53:39	0.458486
2022-09-12	10:53:39	0.447494
2022-09-12	10:53:39	0.451616
2022-09-12	10:53:40	0.451768
2022-09-12	10:53:40	0.459402
2022-09-12	10:53:40	0.456043
2022-09-12	10:53:40	0.44612
2022-09-12	10:53:41	0.449835
2022-09-12	10:53:41	0.457163
2022-09-12	10:53:41	0.454568
2022-09-12	10:53:42	0.482863
2022-09-12	10:53:42	0.461794
2022-09-12	10:53:42	0.424593
2022-09-12	10:53:42	0.388104
2022-09-12	10:53:43	0.470191
2022-09-12	10:53:43	0.424644
2022-09-12	10:53:43	0.394567
2022-09-12	10:53:43	0.392786
2022-09-12	10:53:44	0.492634
2022-09-12	10:53:44	0.487596
2022-09-12	10:53:44	0.360573
2022-09-12	10:53:44	0.418384
2022-09-12	10:53:45	0.409682
2022-09-12	10:53:45	0.409377
2022-09-12	10:53:45	0.373143
2022-09-12	10:53:45	0.382557
2022-09-12	10:53:46	0.348461
2022-09-12	10:53:46	0.325153
2022-09-12	10:53:46	0.529835
2022-09-12	10:53:47	0.500572
2022-09-12	10:53:47	0.583066
2022-09-12	10:53:47	0.443117
2022-09-12	10:53:47	0.55299
2022-09-12	10:53:48	0.506119
2022-09-12	10:53:48	0.45701
2022-09-12	10:53:48	0.446578
2022-09-12	10:53:48	0.373448
2022-09-12	10:53:49	0.52897
2022-09-12	10:53:49	0.350242
2022-09-12	10:53:49	0.47813
2022-09-12	10:53:49	0.435891
2022-09-12	10:53:50	0.371107
2022-09-12	10:53:50	0.451768
2022-09-12	10:53:50	0.565305
2022-09-12	10:53:51	0.518588
2022-09-12	10:53:51	0.493092
2022-09-12	10:53:51	0.464033
2022-09-12	10:53:51	0.524236
2022-09-12	10:53:52	0.471667
2022-09-12	10:53:52	0.669326
2022-09-12	10:53:52	0.607239
2022-09-12	10:53:52	0.7936
2022-09-12	10:53:53	0.733957
2022-09-12	10:53:53	0.546374
2022-09-12	10:53:53	0.430496
2022-09-12	10:53:53	0.414669
2022-09-12	10:53:54	0.417316
2022-09-12	10:53:54	0.408563
2022-09-12	10:53:54	0.428359
2022-09-12	10:53:55	0.3193
2022-09-12	10:53:55	0.452277
2022-09-12	10:53:55	0.359555
2022-09-12	10:53:55	0.335535
2022-09-12	10:53:56	0.411209
2022-09-12	10:53:56	0.397723
2022-09-12	10:53:56	0.374364
2022-09-12	10:53:56	0.366374
2022-09-12	10:53:57	0.398435
2022-09-12	10:53:57	0.37355
2022-09-12	10:53:57	0.307443
2022-09-12	10:53:57	0.507901
2022-09-12	10:53:58	0.31014
2022-09-12	10:53:58	0.394771
2022-09-12	10:53:58	0.462252
2022-09-12	10:53:59	0.281743
2022-09-12	10:53:59	0.432939
2022-09-12	10:53:59	0.341489
2022-09-12	10:53:59	1.91726
2022-09-12	10:54:00	1.50902
2022-09-12	10:54:00	2.09447
2022-09-12	10:54:00	1.80877
2022-09-12	10:54:00	3.51808
2022-09-12	10:54:01	6.18428
2022-09-12	10:54:01	8.09675
2022-09-12	10:54:01	3.11477
2022-09-12	10:54:01	3.02413
2022-09-12	10:54:02	1.99737
2022-09-12	10:54:02	2.63156
2022-09-12	10:54:02	1.5476
2022-09-12	10:54:03	0.653295
2022-09-12	10:54:03	0.701641
2022-09-12	10:54:03	0.417265
2022-09-12	10:54:03	0.787341
2022-09-12	10:54:04	1.07365
2022-09-12	10:54:04	2.54968
2022-09-12	10:54:04	2.83406
2022-09-12	10:54:04	5.31823
2022-09-12	10:54:05	2.09197
2022-09-12	10:54:05	1.57304
2022-09-12	10:54:05	0.672837
2022-09-12	10:54:05	0.333804
2022-09-12	10:54:06	0.618435
2022-09-12	10:54:06	0.293194
2022-09-12	10:54:06	0.516043
2022-09-12	10:54:06	0.377265
2022-09-12	10:54:07	0.977265
2022-09-12	10:54:07	0.813652
2022-09-12	10:54:07	2.02943
2022-09-12	10:54:08	1.21625
2022-09-12	10:54:08	1.21431
2022-09-12	10:54:08	0.570751
2022-09-12	10:54:08	0.325255
2022-09-12	10:54:09	0.537417
2022-09-12	10:54:09	0.314415
2022-09-12	10:54:09	0.454364
2022-09-12	10:54:09	0.287901
2022-09-12	10:54:10	0.379453
2022-09-12	10:54:10	0.290649
2022-09-12	10:54:10	0.474059
2022-09-12	10:54:10	0.670293
2022-09-12	10:54:11	0.992939
2022-09-12	10:54:11	1.10693
2022-09-12	10:54:11	0.617672
2022-09-12	10:54:12	0.563219
2022-09-12	10:54:12	0.322812
2022-09-12	10:54:12	0.834618
2022-09-12	10:54:12	0.406272
2022-09-12	10:54:13	0.454568
2022-09-12	10:54:13	0.361845
2022-09-12	10:54:13	0.389428
2022-09-12	10:54:13	0.352685
2022-09-12	10:54:14	0.452176
2022-09-12	10:54:14	0.329937
2022-09-12	10:54:14	0.445204
2022-09-12	10:54:14	0.357825
2022-09-12	10:54:15	0.594618
2022-09-12	10:54:15	0.817519
2022-09-12	10:54:15	1.39446
2022-09-12	10:54:16	1.18454
2022-09-12	10:54:16	0.975178
2022-09-12	10:54:16	0.626069
2022-09-12	10:54:16	1.17528
2022-09-12	10:54:17	0.653651
2022-09-12	10:54:17	0.443117
2022-09-12	10:54:17	0.419046
2022-09-12	10:54:17	0.461234
2022-09-12	10:54:18	0.402812
2022-09-12	10:54:18	0.410242
2022-09-12	10:54:18	0.383117
2022-09-12	10:54:18	0.366171
2022-09-12	10:54:19	0.376552
2022-09-12	10:54:19	0.403321
2022-09-12	10:54:19	0.405662
2022-09-12	10:54:20	0.381438
2022-09-12	10:54:20	0.404797
2022-09-12	10:54:20	0.439402
2022-09-12	10:54:20	0.370242
2022-09-12	10:54:21	0.427137
2022-09-12	10:54:21	0.373143
2022-09-12	10:54:21	0.35869
2022-09-12	10:54:21	0.37472
2022-09-12	10:54:22	0.314873
2022-09-12	10:54:22	1.88907
2022-09-12	10:54:22	1.53747
2022-09-12	10:54:22	1.97447
2022-09-12	10:54:23	1.25996
2022-09-12	10:54:23	1.4221
2022-09-12	10:54:23	3.28271
2022-09-12	10:54:23	7.46281
2022-09-12	10:54:24	6.06479
2022-09-12	10:54:24	6.93085
2022-09-12	10:54:24	3.39543
2022-09-12	10:54:25	4.47095
2022-09-12	10:54:25	1.80327
2022-09-12	10:54:25	3.31696
2022-09-12	10:54:25	5.54469
2022-09-12	10:54:26	11.5962
2022-09-12	10:54:26	6.44545
2022-09-12	10:54:26	2.71823
2022-09-12	10:54:26	2.26006
2022-09-12	10:54:27	1.0252
2022-09-12	10:54:27	0.263779
2022-09-12	10:54:27	0.45243
2022-09-12	10:54:27	0.694058
2022-09-12	10:54:28	0.941336
2022-09-12	10:54:28	2.99441
2022-09-12	10:54:28	1.03314
2022-09-12	10:54:29	1.26357
2022-09-12	10:54:29	1.80235
2022-09-12	10:54:29	1.14067
2022-09-12	10:54:29	1.0252
2022-09-12	10:54:30	0.423117
2022-09-12	10:54:30	0.390547
2022-09-12	10:54:30	0.435738
2022-09-12	10:54:30	0.553194
2022-09-12	10:54:31	0.411616
2022-09-12	10:54:31	0.270954
2022-09-12	10:54:31	0.211769
2022-09-12	10:54:31	0.206374
2022-09-12	10:54:32	0.214211
2022-09-12	10:54:32	0.185204
2022-09-12	10:54:32	0.129122
2022-09-12	10:54:33	0.0587407
2022-09-12	10:54:33	-0.00685724
2022-09-12	10:54:33	0.0639315
2022-09-12	10:54:33	0.239555
2022-09-12	10:54:34	0.640064
2022-09-12	10:54:34	0.359249
2022-09-12	10:54:34	0.460369
2022-09-12	10:54:34	0.431565
2022-09-12	10:54:35	0.473143
2022-09-12	10:54:35	0.313448
2022-09-12	10:54:35	1.39187
2022-09-12	10:54:35	0.652074
2022-09-12	10:54:36	1.63869
2022-09-12	10:54:36	1.07793
2022-09-12	10:54:36	0.716349
2022-09-12	10:54:37	0.975636
2022-09-12	10:54:37	0.557672
2022-09-12	10:54:37	0.638435
2022-09-12	10:54:37	0.618282
2022-09-12	10:54:38	0.383931
2022-09-12	10:54:38	1.29116
2022-09-12	10:54:38	3.13645
2022-09-12	10:54:38	1.64475
2022-09-12	10:54:39	2.3223
2022-09-12	10:54:39	3.22393
2022-09-12	10:54:39	5.51487
2022-09-12	10:54:39	1.66424
2022-09-12	10:54:40	1.46978
2022-09-12	10:54:40	1.17905
2022-09-12	10:54:40	1.67788
2022-09-12	10:54:41	1.62093
2022-09-12	10:54:41	2.26373
2022-09-12	10:54:41	1.84256
2022-09-12	10:54:41	1.56749
2022-09-12	10:54:42	0.664695
2022-09-12	10:54:42	0.45874
2022-09-12	10:54:42	0.353041
2022-09-12	10:54:42	0.285
2022-09-12	10:54:43	0.344847
2022-09-12	10:54:43	0.713143
2022-09-12	10:54:43	0.93528
2022-09-12	10:54:43	1.4135
2022-09-12	10:54:44	1.99823
2022-09-12	10:54:44	2.02602
2022-09-12	10:54:44	1.62235
2022-09-12	10:54:45	0.863372
2022-09-12	10:54:45	0.497163
2022-09-12	10:54:45	0.404695
2022-09-12	10:54:45	0.304949
2022-09-12	10:54:46	0.328003
2022-09-12	10:54:46	0.393601
2022-09-12	10:54:46	0.47014
2022-09-12	10:54:46	1.3876
2022-09-12	10:54:47	1.18581
2022-09-12	10:54:47	0.307494
2022-09-12	10:54:47	0.614516
2022-09-12	10:54:47	0.667392
2022-09-12	10:54:48	0.245967
2022-09-12	10:54:48	0.293804
2022-09-12	10:54:48	0.3707
2022-09-12	10:54:48	0.488817
2022-09-12	10:54:49	0.560216
2022-09-12	10:54:49	0.338028
2022-09-12	10:54:49	0.269936
2022-09-12	10:54:50	0.245916
2022-09-12	10:54:50	0.223575
2022-09-12	10:54:50	0.200318
2022-09-12	10:54:50	0.252837
2022-09-12	10:54:51	0.883829
2022-09-12	10:54:51	1.2538
2022-09-12	10:54:51	1.1166
2022-09-12	10:54:51	1.57961
2022-09-12	10:54:52	0.884135
2022-09-12	10:54:52	0.260878
2022-09-12	10:54:52	0.313651
2022-09-12	10:54:52	0.296858
2022-09-12	10:54:53	0.342405
2022-09-12	10:54:53	0.24159
2022-09-12	10:54:53	0.434873
2022-09-12	10:54:54	1.35228
2022-09-12	10:54:54	1.788
2022-09-12	10:54:54	1.0909
2022-09-12	10:54:54	0.525305
2022-09-12	10:54:55	0.723626
2022-09-12	10:54:55	0.928003
2022-09-12	10:54:55	1.75894
2022-09-12	10:54:55	2.90983
2022-09-12	10:54:56	2.86642
2022-09-12	10:54:56	1.99436
2022-09-12	10:54:56	1.37151
2022-09-12	10:54:56	1.54144
2022-09-12	10:54:57	1.37971
2022-09-12	10:54:57	1.69757
2022-09-12	10:54:57	1.86261
2022-09-12	10:54:58	4.07375
2022-09-12	10:54:58	5.89945
2022-09-12	10:54:58	7.40032
2022-09-12	10:54:58	5.72576
2022-09-12	10:54:59	2.34225
2022-09-12	10:54:59	1.54042
2022-09-12	10:54:59	0.479402
2022-09-12	10:54:59	0.498333
2022-09-12	10:55:00	0.329733
2022-09-12	10:55:00	0.236094
2022-09-12	10:55:00	0.161183
2022-09-12	10:55:00	0.453804
2022-09-12	10:55:01	0.564033
2022-09-12	10:55:01	0.379911
2022-09-12	10:55:01	0.498537
2022-09-12	10:55:02	0.311819
2022-09-12	10:55:02	0.432125
2022-09-12	10:55:02	0.215891
2022-09-12	10:55:02	0.465611
2022-09-12	10:55:03	0.625305
2022-09-12	10:55:03	1.31487
2022-09-12	10:55:03	1.45258
2022-09-12	10:55:03	0.599046
2022-09-12	10:55:04	1.74744
2022-09-12	10:55:04	4.06937
2022-09-12	10:55:04	3.6651
2022-09-12	10:55:04	3.55584
2022-09-12	10:55:05	4.70205
2022-09-12	10:55:05	3.98749
2022-09-12	10:55:05	3.18612
2022-09-12	10:55:06	6.32856
