# Supplementary material for: Comparing efficacy in reducing pulling and welfare impacts of four types of leash walking equipment
Source: PeerJ journal article supplement (doi:10.7717/peerj.18131), 2024-10-24
Supplement: Shelter1_Tension_files.zip [file Duke_prong_2022912141147 copy.xlsx]

## Sheet: average newtons
Date	Time	averaged newtons
2022-09-12	14:12:07	11.6355	11.6355	0		Impulse Newtons	1523.34
2022-09-12	14:12:08	0.915353	12.5508	0		Total steps	26
2022-09-12	14:12:09	0.520316	13.0712	0		# >5sec	1
2022-09-12	14:12:10	10.4748	23.5459	0
2022-09-12	14:12:11	5.50143	29.0474	0
2022-09-12	14:12:12	1.60466	30.652	0
2022-09-12	14:12:13	1.02495	31.677	0
2022-09-12	14:12:14	-0.297848	31.677	0
2022-09-12	14:12:15	0.631747	32.3087	0
2022-09-12	14:12:16	0.981529	33.2903	0
2022-09-12	14:12:17	2.50565	35.7959	0
2022-09-12	14:12:18	2.79795	38.5939	0
2022-09-12	14:12:19	2.72359	41.3174	0
2022-09-12	14:12:20	2.01144	43.3289	0
2022-09-12	14:12:21	1.81142	45.1403	0
2022-09-12	14:12:22	2.66287	47.8032	0
2022-09-12	14:12:23	4.82346	52.6266	0
2022-09-12	14:12:24	4.68217	57.3088	0
2022-09-12	14:12:25	4.75147	62.0603	0
2022-09-12	14:12:26	4.09248	66.1528	0
2022-09-12	14:12:27	3.80011	69.9529	0
2022-09-12	14:12:28	5.97754	75.9304	0
2022-09-12	14:12:29	9.09996	85.0304	0
2022-09-12	14:12:30	6.013	91.0434	0
2022-09-12	14:12:31	5.13914	96.1825	0
2022-09-12	14:12:32	7.82594	104.008	0
2022-09-12	14:12:33	8.77156	112.78	0
2022-09-12	14:12:34	5.27473	118.055	0
2022-09-12	14:12:35	3.54968	121.604	0
2022-09-12	14:12:36	3.84557	125.45	0
2022-09-12	14:12:37	6.66172	132.112	0
2022-09-12	14:12:38	9.29787	141.41	0
2022-09-12	14:12:39	8.15628	149.566	0
2022-09-12	14:12:40	10.8374	160.403	0
2022-09-12	14:12:41	15.8027	176.206	1
2022-09-12	14:12:42	16.4767	192.683	2
2022-09-12	14:12:43	20.5842	213.267	3
2022-09-12	14:12:44	8.93569	222.203	3
2022-09-12	14:12:45	3.06145	225.264	3
2022-09-12	14:12:46	6.28735	231.551	3
2022-09-12	14:12:47	11.7883	243.34	3
2022-09-12	14:12:48	4.37491	247.715	3
2022-09-12	14:12:49	8.40043	256.115	3
2022-09-12	14:12:50	16.2729	272.388	4
2022-09-12	14:12:51	37.0224	309.41	5
2022-09-12	14:12:52	12.9162	322.327	5
2022-09-12	14:12:53	1.76287	324.089	5
2022-09-12	14:12:54	2.88007	326.97	5
2022-09-12	14:12:55	0.770569	327.74	5
2022-09-12	14:12:56	0.348593	328.089	5
2022-09-12	14:12:57	0.556139	328.645	5
2022-09-12	14:12:58	0.962984	329.608	5
2022-09-12	14:12:59	0.833556	330.441	5
2022-09-12	14:13:00	0.948932	331.39	5
2022-09-12	14:13:01	-1.28137	331.39	5
2022-09-12	14:13:02	0.896546	332.287	5
2022-09-12	14:13:03	1.41516	333.702	5
2022-09-12	14:13:04	6.38035	340.082	5
2022-09-12	14:13:05	1.48352	341.566	5
2022-09-12	14:13:06	1.19518	342.761	5
2022-09-12	14:13:07	3.02416	345.785	5
2022-09-12	14:13:08	1.02399	346.809	5
2022-09-12	14:13:09	0.433446	347.243	5
2022-09-12	14:13:10	0.651668	347.894	5
2022-09-12	14:13:11	1.76387	349.658	5
2022-09-12	14:13:12	2.11171	351.77	5
2022-09-12	14:13:13	2.09926	353.869	5
2022-09-12	14:13:14	1.5812	355.45	5
2022-09-12	14:13:15	0.289737	355.74	5
2022-09-12	14:13:16	1.36479	357.105	5
2022-09-12	14:13:17	1.32784	358.433	5
2022-09-12	14:13:18	2.74759	361.18	5
2022-09-12	14:13:19	1.46845	362.649	5
2022-09-12	14:13:20	-0.484207	362.649	5
2022-09-12	14:13:21	1.12445	363.773	5
2022-09-12	14:13:22	1.48913	365.262	5
2022-09-12	14:13:23	1.47985	366.742	5
2022-09-12	14:13:24	1.33706	368.079	5
2022-09-12	14:13:25	1.49937	369.579	5
2022-09-12	14:13:26	-0.262477	369.579	5
2022-09-12	14:13:27	1.69686	371.275	5
2022-09-12	14:13:28	0.607413	371.883	5
2022-09-12	14:13:29	4.0722	375.955	5
2022-09-12	14:13:30	2.42212	378.377	5
2022-09-12	14:13:31	2.86071	381.238	5
2022-09-12	14:13:32	2.49971	383.738	5
2022-09-12	14:13:33	2.17792	385.916	5
2022-09-12	14:13:34	5.26087	391.176	5
2022-09-12	14:13:35	4.6944	395.871	5
2022-09-12	14:13:36	3.48538	399.356	5
2022-09-12	14:13:37	1.95053	401.307	5
2022-09-12	14:13:38	1.22133	402.528	5
2022-09-12	14:13:39	1.14089	403.669	5
2022-09-12	14:13:40	0.887829	404.557	5
2022-09-12	14:13:41	0.122581	404.679	5
2022-09-12	14:13:42	-0.265306	404.679	5
2022-09-12	14:13:43	2.24272	406.922	5
2022-09-12	14:13:44	1.27487	408.197	5
2022-09-12	14:13:45	0.629031	408.826	5
2022-09-12	14:13:46	-0.204751	408.826	5
2022-09-12	14:13:47	-0.217635	408.826	5
2022-09-12	14:13:48	-0.813069	408.826	5
2022-09-12	14:13:49	-0.155912	408.826	5
2022-09-12	14:13:50	6.03262	414.859	5
2022-09-12	14:13:51	7.53814	422.397	5
2022-09-12	14:13:52	5.97133	428.368	5
2022-09-12	14:13:53	2.00746	430.376	5
2022-09-12	14:13:54	1.66587	432.041	5
2022-09-12	14:13:55	0.833708	432.875	5
2022-09-12	14:13:56	1.02173	433.897	5
2022-09-12	14:13:57	1.30305	435.2	5
2022-09-12	14:13:58	0.959702	436.16	5
2022-09-12	14:13:59	0.721729	436.881	5
2022-09-12	14:14:00	0.811145	437.692	5
2022-09-12	14:14:01	1.0987	438.791	5
2022-09-12	14:14:02	1.22054	440.012	5
2022-09-12	14:14:03	1.65136	441.663	5
2022-09-12	14:14:04	1.69473	443.358	5
2022-09-12	14:14:05	1.46168	444.819	5
2022-09-12	14:14:06	1.57623	446.396	5
2022-09-12	14:14:07	1.41473	447.81	5
2022-09-12	14:14:08	1.53729	449.348	5
2022-09-12	14:14:09	1.22773	450.575	5
2022-09-12	14:14:10	1.48551	452.061	5
2022-09-12	14:14:11	1.30826	453.369	5
2022-09-12	14:14:12	1.97996	455.349	5
2022-09-12	14:14:13	3.69891	459.048	5
2022-09-12	14:14:14	2.34821	461.396	5
2022-09-12	14:14:15	2.32882	463.725	5
2022-09-12	14:14:16	2.64413	466.369	5
2022-09-12	14:14:17	3.39121	469.76	5
2022-09-12	14:14:18	4.66846	474.429	5
2022-09-12	14:14:19	9.62378	484.053	5
2022-09-12	14:14:20	9.39124	493.444	5
2022-09-12	14:14:21	2.44713	495.891	5
2022-09-12	14:14:22	3.16337	499.054	5
2022-09-12	14:14:23	2.24617	501.301	5
2022-09-12	14:14:24	0.0372396	501.338	5
2022-09-12	14:14:25	1.14821	502.486	5
2022-09-12	14:14:26	1.95938	504.445	5
2022-09-12	14:14:27	9.59486	514.04	5
2022-09-12	14:14:28	9.82424	523.865	5
2022-09-12	14:14:29	1.83208	525.697	5
2022-09-12	14:14:30	1.66351	527.36	5
2022-09-12	14:14:31	2.16836	529.528	5
2022-09-12	14:14:32	1.96706	531.496	5
2022-09-12	14:14:33	1.80441	533.3	5
2022-09-12	14:14:34	1.25815	534.558	5
2022-09-12	14:14:35	0.970909	535.529	5
2022-09-12	14:14:36	0.920145	536.449	5
2022-09-12	14:14:37	2.66269	539.112	5
2022-09-12	14:14:38	5.89371	545.006	5
2022-09-12	14:14:39	4.19478	549.2	5
2022-09-12	14:14:40	3.12432	552.325	5
2022-09-12	14:14:41	4.05046	556.375	5
2022-09-12	14:14:42	2.23314	558.608	5
2022-09-12	14:14:43	1.80463	560.413	5
2022-09-12	14:14:44	1.53293	561.946	5
2022-09-12	14:14:45	3.99359	565.939	5
2022-09-12	14:14:46	7.48481	573.424	5
2022-09-12	14:14:47	4.86121	578.285	5
2022-09-12	14:14:48	3.65936	581.945	5
2022-09-12	14:14:49	2.55511	584.5	5
2022-09-12	14:14:50	3.71104	588.211	5
2022-09-12	14:14:51	2.57781	590.789	5
2022-09-12	14:14:52	2.12489	592.914	5
2022-09-12	14:14:53	1.68579	594.599	5
2022-09-12	14:14:54	1.64872	596.248	5
2022-09-12	14:14:55	0.7219	596.97	5
2022-09-12	14:14:56	1.61301	598.583	5
2022-09-12	14:14:57	0.877757	599.461	5
2022-09-12	14:14:58	1.38424	600.845	5
2022-09-12	14:14:59	1.77685	602.622	5
2022-09-12	14:15:00	1.93293	604.555	5
2022-09-12	14:15:01	1.66061	606.215	5
2022-09-12	14:15:02	2.66121	608.877	5
2022-09-12	14:15:03	5.87831	614.755	5
2022-09-12	14:15:04	6.04955	620.805	5
2022-09-12	14:15:05	3.26009	624.065	5
2022-09-12	14:15:06	2.37666	626.441	5
2022-09-12	14:15:07	3.85595	630.297	5
2022-09-12	14:15:08	5.55561	635.853	5
2022-09-12	14:15:09	5.39546	641.248	5
2022-09-12	14:15:10	4.72857	645.977	5
2022-09-12	14:15:11	4.88605	650.863	5
2022-09-12	14:15:12	4.82692	655.69	5
2022-09-12	14:15:13	10.314	666.004	5
2022-09-12	14:15:14	7.74566	673.749	5
2022-09-12	14:15:15	2.39252	676.142	5
2022-09-12	14:15:16	12.3169	688.459	5
2022-09-12	14:15:17	7.20738	695.666	5
2022-09-12	14:15:18	5.82173	701.488	5
2022-09-12	14:15:19	10.2702	711.758	5
2022-09-12	14:15:20	3.23949	714.998	5
2022-09-12	14:15:21	2.96264	717.96	5
2022-09-12	14:15:22	2.4626	720.423	5
2022-09-12	14:15:23	3.6808	724.104	5
2022-09-12	14:15:24	5.32714	729.431	5
2022-09-12	14:15:25	5.87683	735.308	5
2022-09-12	14:15:26	2.29448	737.602	5
2022-09-12	14:15:27	3.27435	740.877	5
2022-09-12	14:15:28	4.37287	745.249	5
2022-09-12	14:15:29	3.76817	749.018	5
2022-09-12	14:15:30	7.23159	756.249	5
2022-09-12	14:15:31	4.0598	760.309	5
2022-09-12	14:15:32	10.7436	771.053	5
2022-09-12	14:15:33	16.0327	787.085	6
2022-09-12	14:15:34	16.1068	803.192	7
2022-09-12	14:15:35	15.2662	818.458	8
2022-09-12	14:15:36	10.6131	829.071	8
2022-09-12	14:15:37	3.17612	832.248	8
2022-09-12	14:15:38	9.11423	841.362	8
2022-09-12	14:15:39	2.18743	843.549	8
2022-09-12	14:15:40	1.71839	845.268	8
2022-09-12	14:15:41	1.81842	847.086	8
2022-09-12	14:15:42	4.99805	852.084	8
2022-09-12	14:15:43	15.7835	867.868	9
2022-09-12	14:15:44	14.2564	882.124	10
2022-09-12	14:15:45	20.8636	902.988	11
2022-09-12	14:15:46	12.2843	915.272	11
2022-09-12	14:15:47	14.4293	929.701	12
2022-09-12	14:15:48	13.3921	943.093	13
2022-09-12	14:15:49	0.996016	944.089	13
2022-09-12	14:15:50	-0.830726	944.089	13
2022-09-12	14:15:51	0.209621	944.299	13
2022-09-12	14:15:52	5.86268	950.162	13
2022-09-12	14:15:53	11.7761	961.938	13
2022-09-12	14:15:54	6.51677	968.454	13
2022-09-12	14:15:55	12.7374	981.192	13
2022-09-12	14:15:56	1.60775	982.8	13
2022-09-12	14:15:57	0.394095	983.194	13
2022-09-12	14:15:58	0.719352	983.913	13
2022-09-12	14:15:59	2.57079	986.484	13
2022-09-12	14:16:00	1.49439	987.978	13
2022-09-12	14:16:01	1.36047	989.339	13
2022-09-12	14:16:02	2.30503	991.644	13
2022-09-12	14:16:03	3.29008	994.934	13
2022-09-12	14:16:04	0.741706	995.676	13
2022-09-12	14:16:05	1.00084	996.676	13
2022-09-12	14:16:06	1.17662	997.853	13
2022-09-12	14:16:07	1.18268	999.036	13
2022-09-12	14:16:08	2.18737	1001.22	13
2022-09-12	14:16:09	7.9863	1009.21	13
2022-09-12	14:16:10	6.79165	1016	13
2022-09-12	14:16:11	16.0679	1032.07	14
2022-09-12	14:16:12	13.2085	1045.28	15
2022-09-12	14:16:13	16.7614	1062.04	16
2022-09-12	14:16:14	8.0139	1070.05	16
2022-09-12	14:16:15	7.19941	1077.25	16
2022-09-12	14:16:16	7.97065	1085.22	16
2022-09-12	14:16:17	3.68644	1088.91	16
2022-09-12	14:16:18	5.23217	1094.14	16
2022-09-12	14:16:19	5.49777	1099.64	16
2022-09-12	14:16:20	2.72495	1102.36	16
2022-09-12	14:16:21	9.4614	1111.83	16
2022-09-12	14:16:22	15.826	1127.65	17
2022-09-12	14:16:23	8.26194	1135.91	17
2022-09-12	14:16:24	15.4122	1151.33	18
2022-09-12	14:16:25	16.926	1168.25	19
2022-09-12	14:16:26	5.79845	1174.05	19
2022-09-12	14:16:27	16.7612	1190.81	20
2022-09-12	14:16:28	5.49666	1196.31	20
2022-09-12	14:16:29	4.71181	1201.02	20
2022-09-12	14:16:30	9.32995	1210.35	20
2022-09-12	14:16:31	11.057	1221.41	20
2022-09-12	14:16:32	17.0236	1238.43	21
2022-09-12	14:16:33	12.2567	1250.69	21
2022-09-12	14:16:34	14.2822	1264.97	22
2022-09-12	14:16:35	9.35174	1274.32	22
2022-09-12	14:16:36	17.7572	1292.08	23
2022-09-12	14:16:37	11.1966	1303.27	23
2022-09-12	14:16:38	11.8606	1315.14	23
2022-09-12	14:16:39	16.2536	1331.39	24
2022-09-12	14:16:40	5.7474	1337.14	24
2022-09-12	14:16:41	7.61428	1344.75	24
2022-09-12	14:16:42	9.89235	1354.64	24
2022-09-12	14:16:43	12.7821	1367.42	24
2022-09-12	14:16:44	9.86141	1377.29	24
2022-09-12	14:16:45	7.56064	1384.85	24
2022-09-12	14:16:46	8.61909	1393.47	24
2022-09-12	14:16:47	13.9541	1407.42	25
2022-09-12	14:16:48	6.0226	1413.44	25
2022-09-12	14:16:49	9.82888	1423.27	25
2022-09-12	14:16:50	5.09239	1428.36	25
2022-09-12	14:16:51	6.36947	1434.73	25
2022-09-12	14:16:52	5.6425	1440.38	25
2022-09-12	14:16:53	6.46155	1446.84	25
2022-09-12	14:16:54	4.70966	1451.55	25
2022-09-12	14:16:55	3.60344	1455.15	25
2022-09-12	14:16:56	4.44003	1459.59	25
2022-09-12	14:16:57	11.5151	1471.11	25
2022-09-12	14:16:58	20.767	1491.87	26
2022-09-12	14:16:59	8.29838	1500.17	26
2022-09-12	14:17:00	4.7119	1504.88	26
2022-09-12	14:17:01	11.1982	1516.08	26
2022-09-12	14:17:02	1.19388	1517.28	26
2022-09-12	14:17:03	0.640009	1517.92	26
2022-09-12	14:17:04	0.625672	1518.54	26
2022-09-12	14:17:05	0.733575	1519.27	26
2022-09-12	14:17:06	3.02619	1522.3	26
2022-09-12	14:17:07	1.03695	1523.34	26

## Sheet: Duke_prong_2022912141147 (E (3)
Date	Time	Lbs	Newtons	averaged newtons	Total Force x Time	Total Time Steps Force >13.345		**GoPro Fitting: 1401
2022-09-12	14:12:07	5.38026	23.9325	11.6355	23.9325	1
2022-09-12	14:12:07	3.84337	17.0961	11.6355	41.0286	1
2022-09-12	14:12:07	0.848257	3.77322	11.6355	44.8018	FALSE
2022-09-12	14:12:07	0.391209	1.74018	11.6355	46.5419	FALSE
2022-09-12	14:12:08	0.231311	1.02892	0.915353	47.5709	FALSE
2022-09-12	14:12:08	0.298842	1.32931	0.915353	48.9002	FALSE
2022-09-12	14:12:08	0.0871885	0.387832	0.915353	49.288	FALSE
2022-09-12	14:12:09	-0.00309134	-0.0137509	0.520316	49.288	FALSE
2022-09-12	14:12:09	0.190191	0.846008	0.520316	50.134	FALSE
2022-09-12	14:12:09	0.138639	0.616694	0.520316	50.7507	FALSE
2022-09-12	14:12:09	0.14215	0.632312	0.520316	51.383	FALSE
2022-09-12	14:12:10	0.769631	3.42347	10.4748	54.8065	FALSE
2022-09-12	14:12:10	2.07538	9.23171	10.4748	64.0382	FALSE
2022-09-12	14:12:10	4.2195	18.7692	10.4748	82.8074	1
2022-09-12	14:12:11	3.831	17.0411	5.50143	99.8484	1
2022-09-12	14:12:11	1.10765	4.92705	5.50143	104.775	FALSE
2022-09-12	14:12:11	0.565153	2.51391	5.50143	107.289	FALSE
2022-09-12	14:12:11	0.413244	1.83819	5.50143	109.128	FALSE
2022-09-12	14:12:11	0.266832	1.18692	5.50143	110.315	FALSE
2022-09-12	14:12:12	0.423321	1.88302	1.60466	112.198	FALSE
2022-09-12	14:12:12	0.269886	1.20051	1.60466	113.398	FALSE
2022-09-12	14:12:12	0.389021	1.73044	1.60466	115.128	FALSE
2022-09-12	14:12:13	0.177977	0.791677	1.02495	115.92	FALSE
2022-09-12	14:12:13	0.25701	1.14323	1.02495	117.063	FALSE
2022-09-12	14:12:13	0.231463	1.02959	1.02495	118.093	FALSE
2022-09-12	14:12:13	0.255229	1.13531	1.02495	119.228	FALSE
2022-09-12	14:12:14	-0.108842	-0.484151	-0.297848	119.228	FALSE
2022-09-12	14:12:14	-0.139682	-0.621333	-0.297848	119.228	FALSE
2022-09-12	14:12:14	-0.0747453	-0.332482	-0.297848	119.228	FALSE
2022-09-12	14:12:14	0.0554328	0.246576	-0.297848	119.475	FALSE
2022-09-12	14:12:15	-0.0411575	-0.183077	0.631747	119.475	FALSE
2022-09-12	14:12:15	0.231158	1.02824	0.631747	120.503	FALSE
2022-09-12	14:12:15	0.168359	0.748895	0.631747	121.252	FALSE
2022-09-12	14:12:15	0.209733	0.932934	0.631747	122.185	FALSE
2022-09-12	14:12:16	0.130802	0.581833	0.981529	122.767	FALSE
2022-09-12	14:12:16	0.242761	1.07985	0.981529	123.847	FALSE
2022-09-12	14:12:16	0.28841	1.28291	0.981529	125.13	FALSE
2022-09-12	14:12:17	0.140064	0.623033	2.50565	125.753	FALSE	#REF!			Total Force x Time	5733.24
2022-09-12	14:12:17	0.412481	1.8348	2.50565	127.587	FALSE	#REF!			Total Time Steps Force >3	99
2022-09-12	14:12:17	0.601183	2.67418	2.50565	130.262	FALSE	#REF!
2022-09-12	14:12:17	1.09945	4.89057	2.50565	135.152	FALSE	#REF!
2022-09-12	14:12:18	0.671463	2.9868	2.79795	138.139	FALSE	#REF!
2022-09-12	14:12:18	0.728257	3.23943	2.79795	141.378	FALSE	#REF!
2022-09-12	14:12:18	0.321336	1.42937	2.79795	142.808	FALSE	#REF!
2022-09-12	14:12:18	0.794975	3.53621	2.79795	146.344	FALSE	#REF!
2022-09-12	14:12:19	0.380827	1.69399	2.72359	148.038	FALSE	#REF!
2022-09-12	14:12:19	0.722659	3.21453	2.72359	151.252	FALSE	#REF!
2022-09-12	14:12:19	0.641132	2.85188	2.72359	154.104	FALSE	#REF!
2022-09-12	14:12:19	0.704542	3.13394	2.72359	157.238	FALSE	#REF!
2022-09-12	14:12:20	0.469071	2.08652	2.01144	159.325	FALSE	#REF!
2022-09-12	14:12:20	0.394415	1.75444	2.01144	161.079	FALSE	#REF!
2022-09-12	14:12:20	0.493092	2.19337	2.01144	163.273	FALSE	#REF!
2022-09-12	14:12:21	0.28215	1.25506	1.81142	164.528	FALSE	#REF!
2022-09-12	14:12:21	0.557214	2.4786	1.81142	167.006	FALSE	#REF!
2022-09-12	14:12:21	0.2107	0.937236	1.81142	167.943	FALSE	#REF!
2022-09-12	14:12:21	0.578842	2.5748	1.81142	170.518	FALSE	#REF!
2022-09-12	14:12:22	0.332074	1.47713	2.66287	171.995	FALSE	#REF!
2022-09-12	14:12:22	0.724389	3.22223	2.66287	175.218	FALSE	#REF!
2022-09-12	14:12:22	0.330344	1.46944	2.66287	176.687	FALSE	#REF!
2022-09-12	14:12:22	1.00775	4.48267	2.66287	181.17	FALSE	#REF!
2022-09-12	14:12:23	0.504033	2.24204	4.82346	183.412	FALSE	#REF!
2022-09-12	14:12:23	1.66413	7.40238	4.82346	190.814	FALSE	#REF!
2022-09-12	14:12:23	0.665458	2.96009	4.82346	193.774	FALSE	#REF!
2022-09-12	14:12:23	1.50383	6.68934	4.82346	200.464	FALSE	#REF!
2022-09-12	14:12:24	0.800725	3.56178	4.68217	204.025	FALSE	#REF!
2022-09-12	14:12:24	1.43095	6.36515	4.68217	210.391	FALSE	#REF!
2022-09-12	14:12:24	0.92612	4.11957	4.68217	214.51	FALSE	#REF!
2022-09-12	14:12:25	1.02357	4.55304	4.75147	219.063	FALSE	#REF!
2022-09-12	14:12:25	1.00693	4.47903	4.75147	223.542	FALSE	#REF!
2022-09-12	14:12:25	1.01304	4.5062	4.75147	228.048	FALSE	#REF!
2022-09-12	14:12:25	1.22917	5.46759	4.75147	233.516	FALSE	#REF!
2022-09-12	14:12:26	1.11747	4.97073	4.09248	238.487	FALSE	#REF!
2022-09-12	14:12:26	1.1049	4.91482	4.09248	243.402	FALSE	#REF!
2022-09-12	14:12:26	0.537723	2.3919	4.09248	245.793	FALSE	#REF!
2022-09-12	14:12:27	1.05345	4.68596	3.80011	250.479	FALSE	#REF!
2022-09-12	14:12:27	0.427646	1.90225	3.80011	252.382	FALSE	#REF!
2022-09-12	14:12:27	1.19752	5.32681	3.80011	257.708	FALSE	#REF!
2022-09-12	14:12:27	0.464339	2.06547	3.80011	259.774	FALSE	#REF!
2022-09-12	14:12:27	1.12856	5.02006	3.80011	264.794	FALSE	#REF!
2022-09-12	14:12:28	0.993702	4.42019	5.97754	269.214	FALSE	#REF!
2022-09-12	14:12:28	1.53243	6.81656	5.97754	276.031	FALSE	#REF!
2022-09-12	14:12:28	1.5053	6.69588	5.97754	282.727	FALSE	#REF!
2022-09-12	14:12:29	2.125	9.45242	9.09996	292.179	FALSE	#REF!
2022-09-12	14:12:29	1.67106	7.43321	9.09996	299.612	FALSE	#REF!
2022-09-12	14:12:29	2.62988	11.6982	9.09996	311.31	FALSE	#REF!
2022-09-12	14:12:29	1.75711	7.81598	9.09996	319.126	FALSE	#REF!
2022-09-12	14:12:30	1.58592	7.05449	6.013	326.181	FALSE	#REF!
2022-09-12	14:12:30	1.49742	6.66082	6.013	332.842	FALSE	#REF!
2022-09-12	14:12:30	0.81243	3.61385	6.013	336.456	FALSE	#REF!
2022-09-12	14:12:30	1.51136	6.72283	6.013	343.178	FALSE	#REF!
2022-09-12	14:12:31	0.720114	3.20321	5.13914	346.382	FALSE	#REF!
2022-09-12	14:12:31	1.41212	6.28139	5.13914	352.663	FALSE	#REF!
2022-09-12	14:12:31	0.720165	3.20344	5.13914	355.866	FALSE	#REF!
2022-09-12	14:12:31	1.76892	7.86851	5.13914	363.735	FALSE	#REF!
2022-09-12	14:12:32	1.10617	4.92047	7.82594	368.655	FALSE	#REF!
2022-09-12	14:12:32	2.43085	10.8129	7.82594	379.468	FALSE	#REF!
2022-09-12	14:12:32	1.74103	7.74445	7.82594	387.213	FALSE	#REF!
2022-09-12	14:12:33	3.0192	13.43	8.77156	400.643	1	#REF!
2022-09-12	14:12:33	1.34108	5.96539	8.77156	406.608	FALSE	#REF!
2022-09-12	14:12:33	2.39757	10.6649	8.77156	417.273	FALSE	#REF!
2022-09-12	14:12:33	1.12989	5.02598	8.77156	422.299	FALSE	#REF!
2022-09-12	14:12:34	1.73309	7.70913	5.27473	430.008	FALSE	#REF!
2022-09-12	14:12:34	1.19777	5.32792	5.27473	435.336	FALSE	#REF!
2022-09-12	14:12:34	0.624338	2.77718	5.27473	438.113	FALSE	#REF!
2022-09-12	14:12:34	1.18805	5.28468	5.27473	443.398	FALSE	#REF!
2022-09-12	14:12:35	0.435484	1.93712	3.54968	445.335	FALSE	#REF!
2022-09-12	14:12:35	1.23803	5.50701	3.54968	450.842	FALSE	#REF!
2022-09-12	14:12:35	0.466018	2.07294	3.54968	452.915	FALSE	#REF!
2022-09-12	14:12:35	1.05248	4.68164	3.54968	457.597	FALSE	#REF!
2022-09-12	14:12:36	0.457163	2.03355	3.84557	459.63	FALSE	#REF!
2022-09-12	14:12:36	1.15609	5.14252	3.84557	464.773	FALSE	#REF!
2022-09-12	14:12:36	0.980318	4.36065	3.84557	469.133	FALSE	#REF!
2022-09-12	14:12:37	1.56546	6.96348	6.66172	476.097	FALSE	#REF!
2022-09-12	14:12:37	1.16607	5.18691	6.66172	481.284	FALSE	#REF!
2022-09-12	14:12:37	1.76658	7.8581	6.66172	489.142	FALSE	#REF!
2022-09-12	14:12:37	1.49238	6.6384	6.66172	495.78	FALSE	#REF!
2022-09-12	14:12:38	2.31838	10.3126	9.29787	506.093	FALSE	#REF!
2022-09-12	14:12:38	1.48383	6.60037	9.29787	512.693	FALSE	#REF!
2022-09-12	14:12:38	2.26602	10.0797	9.29787	522.773	FALSE	#REF!
2022-09-12	14:12:38	2.29279	10.1988	9.29787	532.972	FALSE	#REF!
2022-09-12	14:12:39	0.985916	4.38555	8.15628	537.357	FALSE	#REF!
2022-09-12	14:12:39	2.30134	10.2368	8.15628	547.594	FALSE	#REF!
2022-09-12	14:12:39	0.799402	3.5559	8.15628	551.15	FALSE	#REF!
2022-09-12	14:12:39	3.2478	14.4469	8.15628	565.597	1	#REF!
2022-09-12	14:12:40	1.16841	5.19732	10.8374	570.794	FALSE	#REF!
2022-09-12	14:12:40	3.93604	17.5083	10.8374	588.303	1	#REF!
2022-09-12	14:12:40	2.20459	9.80646	10.8374	598.109	FALSE	#REF!
2022-09-12	14:12:41	5.73919	25.5291	15.8027	623.638	1	#REF!
2022-09-12	14:12:41	1.93207	8.59423	15.8027	632.232	FALSE	#REF!
2022-09-12	14:12:41	4.36332	19.4089	15.8027	651.641	1	#REF!
2022-09-12	14:12:41	2.17584	9.67857	15.8027	661.32	FALSE	#REF!
2022-09-12	14:12:42	4.45864	19.8329	16.4767	681.153	1	#REF!
2022-09-12	14:12:42	2.82154	12.5508	16.4767	693.703	FALSE	#REF!
2022-09-12	14:12:42	3.88551	17.2835	16.4767	710.987	1	#REF!
2022-09-12	14:12:42	3.65085	16.2397	16.4767	727.227	1	#REF!
2022-09-12	14:12:43	5.4136	24.0808	20.5842	751.307	1	#REF!
2022-09-12	14:12:43	4.61141	20.5125	20.5842	771.82	1	#REF!
2022-09-12	14:12:43	4.35507	19.3722	20.5842	791.192	1	#REF!
2022-09-12	14:12:43	4.13009	18.3715	20.5842	809.564	1	#REF!
2022-09-12	14:12:44	2.68027	11.9224	8.93569	821.486	FALSE	#REF!
2022-09-12	14:12:44	2.1365	9.50358	8.93569	830.99	FALSE	#REF!
2022-09-12	14:12:44	1.20973	5.38112	8.93569	836.371	FALSE	#REF!
2022-09-12	14:12:45	1.14393	5.08843	3.06145	841.459	FALSE	#REF!
2022-09-12	14:12:45	0.639249	2.84351	3.06145	844.303	FALSE	#REF!
2022-09-12	14:12:45	0.551718	2.45415	3.06145	846.757	FALSE	#REF!
2022-09-12	14:12:45	0.418079	1.8597	3.06145	848.617	FALSE	#REF!
2022-09-12	14:12:46	1.02337	4.55215	6.28735	853.169	FALSE	#REF!
2022-09-12	14:12:46	0.985102	4.38193	6.28735	857.551	FALSE	#REF!
2022-09-12	14:12:46	1.61589	7.1878	6.28735	864.738	FALSE	#REF!
2022-09-12	14:12:46	2.02948	9.02753	6.28735	873.766	FALSE	#REF!
2022-09-12	14:12:47	4.66032	20.73	11.7883	894.496	1	#REF!
2022-09-12	14:12:47	2.68062	11.9239	11.7883	906.42	FALSE	#REF!
2022-09-12	14:12:47	1.99034	8.85343	11.7883	915.273	FALSE	#REF!
2022-09-12	14:12:47	1.26922	5.64574	11.7883	920.919	FALSE	#REF!
2022-09-12	14:12:48	0.730649	3.25007	4.37491	924.169	FALSE	#REF!
2022-09-12	14:12:48	1.21319	5.39651	4.37491	929.566	FALSE	#REF!
2022-09-12	14:12:48	1.00673	4.47814	4.37491	934.044	FALSE	#REF!
2022-09-12	14:12:49	1.87676	8.3482	8.40043	942.392	FALSE	#REF!
2022-09-12	14:12:49	1.19111	5.2983	8.40043	947.69	FALSE	#REF!
2022-09-12	14:12:49	2.92072	12.9919	8.40043	960.682	FALSE	#REF!
2022-09-12	14:12:49	1.56541	6.96326	8.40043	967.646	FALSE	#REF!
2022-09-12	14:12:50	2.71416	12.0731	16.2729	979.719	FALSE	#REF!
2022-09-12	14:12:50	3.60703	16.0448	16.2729	995.763	1	#REF!
2022-09-12	14:12:50	3.40271	15.1359	16.2729	1010.9	1	#REF!
2022-09-12	14:12:50	4.90937	21.8379	16.2729	1032.74	1	#REF!
2022-09-12	14:12:51	4.50841	20.0543	37.0224	1052.79	1	#REF!
2022-09-12	14:12:51	4.07716	18.136	37.0224	1070.93	1	#REF!
2022-09-12	14:12:51	11.4066	50.7388	37.0224	1121.67	1	#REF!
2022-09-12	14:12:51	13.2999	59.1606	37.0224	1180.83	1	#REF!
2022-09-12	14:12:52	6.06886	26.9955	12.9162	1207.82	1	#REF!
2022-09-12	14:12:52	2.06744	9.19639	12.9162	1217.02	FALSE	#REF!
2022-09-12	14:12:52	0.574771	2.5567	12.9162	1219.58	FALSE	#REF!
2022-09-12	14:12:53	0.468104	2.08222	1.76287	1221.66	FALSE	#REF!
2022-09-12	14:12:53	0.33986	1.51177	1.76287	1223.17	FALSE	#REF!
2022-09-12	14:12:53	0.328359	1.46061	1.76287	1224.63	FALSE	#REF!
2022-09-12	14:12:53	0.448919	1.99688	1.76287	1226.63	FALSE	#REF!
2022-09-12	14:12:54	0.498435	2.21714	2.88007	1228.84	FALSE	#REF!
2022-09-12	14:12:54	0.628919	2.79756	2.88007	1231.64	FALSE	#REF!
2022-09-12	14:12:54	0.727036	3.234	2.88007	1234.88	FALSE	#REF!
2022-09-12	14:12:54	0.735483	3.27158	2.88007	1238.15	FALSE	#REF!
2022-09-12	14:12:55	0.329529	1.46581	0.770569	1239.61	FALSE	#REF!
2022-09-12	14:12:55	0.15869	0.705885	0.770569	1240.32	FALSE	#REF!
2022-09-12	14:12:55	0.143575	0.63865	0.770569	1240.96	FALSE	#REF!
2022-09-12	14:12:55	0.0611326	0.27193	0.770569	1241.23	FALSE	#REF!
2022-09-12	14:12:56	0.168104	0.74776	0.348593	1241.98	FALSE	#REF!
2022-09-12	14:12:56	-0.0159667	-0.0710231	0.348593	1241.98	FALSE	#REF!
2022-09-12	14:12:56	0.0829646	0.369043	0.348593	1242.35	FALSE	#REF!
2022-09-12	14:12:57	0.10841	0.482229	0.556139	1242.83	FALSE	#REF!
2022-09-12	14:12:57	0.113804	0.506223	0.556139	1243.33	FALSE	#REF!
2022-09-12	14:12:57	0.203728	0.906223	0.556139	1244.24	FALSE	#REF!
2022-09-12	14:12:57	0.0741605	0.329881	0.556139	1244.57	FALSE	#REF!
2022-09-12	14:12:58	0.271972	1.20979	0.962984	1245.78	FALSE	#REF!
2022-09-12	14:12:58	0.144593	0.643179	0.962984	1246.42	FALSE	#REF!
2022-09-12	14:12:58	0.348664	1.55093	0.962984	1247.97	FALSE	#REF!
2022-09-12	14:12:58	0.100725	0.448045	0.962984	1248.42	FALSE	#REF!
2022-09-12	14:12:59	0.215127	0.956928	0.833556	1249.38	FALSE	#REF!
2022-09-12	14:12:59	0.146883	0.653365	0.833556	1250.03	FALSE	#REF!
2022-09-12	14:12:59	0.1393	0.619634	0.833556	1250.65	FALSE	#REF!
2022-09-12	14:12:59	0.248257	1.1043	0.833556	1251.76	FALSE	#REF!
2022-09-12	14:13:00	0.20785	0.924558	0.948932	1252.68	FALSE	#REF!
2022-09-12	14:13:00	0.253601	1.12807	0.948932	1253.81	FALSE	#REF!
2022-09-12	14:13:00	0.178537	0.794168	0.948932	1254.6	FALSE	#REF!
2022-09-12	14:13:01	0.0298348	0.132711	-1.28137	1254.74	FALSE	#REF!
2022-09-12	14:13:01	-0.357391	-1.58975	-1.28137	1254.74	FALSE	#REF!
2022-09-12	14:13:01	-0.455712	-2.0271	-1.28137	1254.74	FALSE	#REF!
2022-09-12	14:13:01	-0.368994	-1.64136	-1.28137	1254.74	FALSE	#REF!
2022-09-12	14:13:02	0.219708	0.977305	0.896546	1255.71	FALSE	#REF!
2022-09-12	14:13:02	0.246069	1.09456	0.896546	1256.81	FALSE	#REF!
2022-09-12	14:13:02	0.054873	0.244086	0.896546	1257.05	FALSE	#REF!
2022-09-12	14:13:02	0.28556	1.27023	0.896546	1258.32	FALSE	#REF!
2022-09-12	14:13:03	0.258232	1.14867	1.41516	1259.47	FALSE	#REF!
2022-09-12	14:13:03	0.268613	1.19484	1.41516	1260.67	FALSE	#REF!
2022-09-12	14:13:03	0.398079	1.77074	1.41516	1262.44	FALSE	#REF!
2022-09-12	14:13:03	0.347646	1.5464	1.41516	1263.98	FALSE	#REF!
2022-09-12	14:13:04	0.991209	4.4091	6.38035	1268.39	FALSE	#REF!
2022-09-12	14:13:04	1.642	7.30394	6.38035	1275.7	FALSE	#REF!
2022-09-12	14:13:04	1.66989	7.428	6.38035	1283.12	FALSE	#REF!
2022-09-12	14:13:05	0.540165	2.40276	1.48352	1285.53	FALSE	#REF!
2022-09-12	14:13:05	0.247443	1.10068	1.48352	1286.63	FALSE	#REF!
2022-09-12	14:13:05	0.308104	1.37051	1.48352	1288	FALSE	#REF!
2022-09-12	14:13:05	0.238333	1.06015	1.48352	1289.06	FALSE	#REF!
2022-09-12	14:13:06	0.210089	0.934518	1.19518	1289.99	FALSE	#REF!
2022-09-12	14:13:06	0.285305	1.26909	1.19518	1291.26	FALSE	#REF!
2022-09-12	14:13:06	0.307901	1.36961	1.19518	1292.63	FALSE	#REF!
2022-09-12	14:13:06	0.271463	1.20752	1.19518	1293.84	FALSE	#REF!
2022-09-12	14:13:07	0.225153	1.00153	3.02416	1294.84	FALSE	#REF!
2022-09-12	14:13:07	0.28098	1.24986	3.02416	1296.09	FALSE	#REF!
2022-09-12	14:13:07	1.53345	6.82109	3.02416	1302.91	FALSE	#REF!
2022-09-12	14:13:08	0.240623	1.07034	1.02399	1303.98	FALSE	#REF!
2022-09-12	14:13:08	0.0846439	0.376513	1.02399	1304.36	FALSE	#REF!
2022-09-12	14:13:08	0.312939	1.39202	1.02399	1305.75	FALSE	#REF!
2022-09-12	14:13:08	0.282608	1.2571	1.02399	1307.01	FALSE	#REF!
2022-09-12	14:13:09	0.0146695	0.0652529	0.433446	1307.07	FALSE	#REF!
2022-09-12	14:13:09	-0.000241466	-0.00107409	0.433446	1307.07	FALSE	#REF!
2022-09-12	14:13:09	0.258486	1.1498	0.433446	1308.22	FALSE	#REF!
2022-09-12	14:13:09	0.116858	0.519808	0.433446	1308.74	FALSE	#REF!
2022-09-12	14:13:10	0.114008	0.50713	0.651668	1309.25	FALSE	#REF!
2022-09-12	14:13:10	0.0475956	0.211715	0.651668	1309.46	FALSE	#REF!
2022-09-12	14:13:10	0.258079	1.14799	0.651668	1310.61	FALSE	#REF!
2022-09-12	14:13:10	0.166323	0.739838	0.651668	1311.35	FALSE	#REF!
2022-09-12	14:13:11	0.238792	1.06219	1.76387	1312.41	FALSE	#REF!
2022-09-12	14:13:11	0.471565	2.09762	1.76387	1314.51	FALSE	#REF!
2022-09-12	14:13:11	0.479249	2.1318	1.76387	1316.64	FALSE	#REF!
2022-09-12	14:13:12	0.395229	1.75806	2.11171	1318.4	FALSE	#REF!
2022-09-12	14:13:12	0.670649	2.98318	2.11171	1321.38	FALSE	#REF!
2022-09-12	14:13:12	0.151514	0.673965	2.11171	1322.06	FALSE	#REF!
2022-09-12	14:13:12	0.68154	3.03163	2.11171	1325.09	FALSE	#REF!
2022-09-12	14:13:13	0.422608	1.87984	2.09926	1326.97	FALSE	#REF!
2022-09-12	14:13:13	0.463219	2.06049	2.09926	1329.03	FALSE	#REF!
2022-09-12	14:13:13	0.454466	2.02156	2.09926	1331.05	FALSE	#REF!
2022-09-12	14:13:13	0.547443	2.43514	2.09926	1333.48	FALSE	#REF!
2022-09-12	14:13:14	0.50902	2.26422	1.5812	1335.75	FALSE	#REF!
2022-09-12	14:13:14	0.626679	2.78759	1.5812	1338.54	FALSE	#REF!
2022-09-12	14:13:14	0.215076	0.956701	1.5812	1339.49	FALSE	#REF!
2022-09-12	14:13:14	0.0711071	0.316299	1.5812	1339.81	FALSE	#REF!
2022-09-12	14:13:15	0.0950257	0.422693	0.289737	1340.23	FALSE	#REF!
2022-09-12	14:13:15	0.116043	0.516182	0.289737	1340.75	FALSE	#REF!
2022-09-12	14:13:15	-0.0156613	-0.0696646	0.289737	1340.75	FALSE	#REF!
2022-09-12	14:13:16	0.198486	0.882905	1.36479	1341.63	FALSE	#REF!
2022-09-12	14:13:16	0.11355	0.505093	1.36479	1342.14	FALSE	#REF!
2022-09-12	14:13:16	0.384898	1.7121	1.36479	1343.85	FALSE	#REF!
2022-09-12	14:13:16	0.530344	2.35908	1.36479	1346.21	FALSE	#REF!
2022-09-12	14:13:17	0.435891	1.93893	1.32784	1348.15	FALSE	#REF!
2022-09-12	14:13:17	0.229529	1.02099	1.32784	1349.17	FALSE	#REF!
2022-09-12	14:13:17	0.321845	1.43163	1.32784	1350.6	FALSE	#REF!
2022-09-12	14:13:17	0.206781	0.919803	1.32784	1351.52	FALSE	#REF!
2022-09-12	14:13:18	0.544949	2.42404	2.74759	1353.94	FALSE	#REF!
2022-09-12	14:13:18	0.3564	1.58534	2.74759	1355.53	FALSE	#REF!
2022-09-12	14:13:18	1.44312	6.41929	2.74759	1361.95	FALSE	#REF!
2022-09-12	14:13:18	0.126272	0.561683	2.74759	1362.51	FALSE	#REF!
2022-09-12	14:13:19	0.422812	1.88075	1.46845	1364.39	FALSE	#REF!
2022-09-12	14:13:19	0.268715	1.1953	1.46845	1365.59	FALSE	#REF!
2022-09-12	14:13:19	0.298842	1.32931	1.46845	1366.91	FALSE	#REF!
2022-09-12	14:13:20	-0.0806486	-0.358741	-0.484207	1366.91	FALSE	#REF!
2022-09-12	14:13:20	-0.195407	-0.869209	-0.484207	1366.91	FALSE	#REF!
2022-09-12	14:13:20	-0.101259	-0.45042	-0.484207	1366.91	FALSE	#REF!
2022-09-12	14:13:20	-0.058104	-0.258458	-0.484207	1366.91	FALSE	#REF!
2022-09-12	14:13:21	0.0672394	0.299094	1.12445	1367.21	FALSE	#REF!
2022-09-12	14:13:21	0.299555	1.33248	1.12445	1368.55	FALSE	#REF!
2022-09-12	14:13:21	0.371718	1.65348	1.12445	1370.2	FALSE	#REF!
2022-09-12	14:13:21	0.272634	1.21273	1.12445	1371.41	FALSE	#REF!
2022-09-12	14:13:22	0.403931	1.79677	1.48913	1373.21	FALSE	#REF!
2022-09-12	14:13:22	0.284135	1.26389	1.48913	1374.47	FALSE	#REF!
2022-09-12	14:13:22	0.359758	1.60028	1.48913	1376.07	FALSE	#REF!
2022-09-12	14:13:22	0.29126	1.29558	1.48913	1377.37	FALSE	#REF!
2022-09-12	14:13:23	0.359351	1.59847	1.47985	1378.97	FALSE	#REF!
2022-09-12	14:13:23	0.274313	1.2202	1.47985	1380.19	FALSE	#REF!
2022-09-12	14:13:23	0.364389	1.62088	1.47985	1381.81	FALSE	#REF!
2022-09-12	14:13:24	0.276603	1.23039	1.33706	1383.04	FALSE	#REF!
2022-09-12	14:13:24	0.280929	1.24963	1.33706	1384.29	FALSE	#REF!
2022-09-12	14:13:24	0.276501	1.22993	1.33706	1385.52	FALSE	#REF!
2022-09-12	14:13:24	0.368308	1.63831	1.33706	1387.16	FALSE	#REF!
2022-09-12	14:13:25	0.321998	1.43231	1.49937	1388.59	FALSE	#REF!
2022-09-12	14:13:25	0.275738	1.22654	1.49937	1389.82	FALSE	#REF!
2022-09-12	14:13:25	0.366425	1.62993	1.49937	1391.45	FALSE	#REF!
2022-09-12	14:13:25	0.384135	1.70871	1.49937	1393.15	FALSE	#REF!
2022-09-12	14:13:26	0.0459671	0.204471	-0.262477	1393.36	FALSE	#REF!
2022-09-12	14:13:26	-0.0256868	-0.11426	-0.262477	1393.36	FALSE	#REF!
2022-09-12	14:13:26	-0.10472	-0.465816	-0.262477	1393.36	FALSE	#REF!
2022-09-12	14:13:26	-0.15159	-0.674303	-0.262477	1393.36	FALSE	#REF!
2022-09-12	14:13:27	0.149479	0.664912	1.69686	1394.02	FALSE	#REF!
2022-09-12	14:13:27	0.577723	2.56983	1.69686	1396.59	FALSE	#REF!
2022-09-12	14:13:27	0.417214	1.85585	1.69686	1398.45	FALSE	#REF!
2022-09-12	14:13:28	0.304186	1.35308	0.607413	1399.8	FALSE	#REF!
2022-09-12	14:13:28	0.164644	0.732369	0.607413	1400.53	FALSE	#REF!
2022-09-12	14:13:28	-0.105127	-0.467626	0.607413	1400.53	FALSE	#REF!
2022-09-12	14:13:28	0.182507	0.811828	0.607413	1401.35	FALSE	#REF!
2022-09-12	14:13:29	0.3193	1.42031	4.0722	1402.77	FALSE	#REF!
2022-09-12	14:13:29	0.967137	4.30202	4.0722	1407.07	FALSE	#REF!
2022-09-12	14:13:29	1.96251	8.72964	4.0722	1415.8	FALSE	#REF!
2022-09-12	14:13:29	0.412939	1.83684	4.0722	1417.64	FALSE	#REF!
2022-09-12	14:13:30	0.733499	3.26275	2.42212	1420.9	FALSE	#REF!
2022-09-12	14:13:30	0.697112	3.10089	2.42212	1424	FALSE	#REF!
2022-09-12	14:13:30	0.50673	2.25404	2.42212	1426.25	FALSE	#REF!
2022-09-12	14:13:30	0.240725	1.07079	2.42212	1427.32	FALSE	#REF!
2022-09-12	14:13:31	0.507239	2.2563	2.86071	1429.58	FALSE	#REF!
2022-09-12	14:13:31	0.866527	3.85449	2.86071	1433.43	FALSE	#REF!
2022-09-12	14:13:31	0.555585	2.47135	2.86071	1435.91	FALSE	#REF!
2022-09-12	14:13:32	1.13844	5.06401	2.49971	1440.97	FALSE	#REF!
2022-09-12	14:13:32	0.270191	1.20186	2.49971	1442.17	FALSE	#REF!
2022-09-12	14:13:32	0.325204	1.44657	2.49971	1443.62	FALSE	#REF!
2022-09-12	14:13:32	0.514008	2.28641	2.49971	1445.9	FALSE	#REF!
2022-09-12	14:13:33	0.409275	1.82054	2.17792	1447.73	FALSE	#REF!
2022-09-12	14:13:33	0.47701	2.12184	2.17792	1449.85	FALSE	#REF!
2022-09-12	14:13:33	0.500216	2.22506	2.17792	1452.07	FALSE	#REF!
2022-09-12	14:13:33	0.571972	2.54425	2.17792	1454.62	FALSE	#REF!
2022-09-12	14:13:34	0.774568	3.44543	5.26087	1458.06	FALSE	#REF!
2022-09-12	14:13:34	0.97869	4.35341	5.26087	1462.42	FALSE	#REF!
2022-09-12	14:13:34	1.20429	5.35692	5.26087	1467.77	FALSE	#REF!
2022-09-12	14:13:34	1.77324	7.88773	5.26087	1475.66	FALSE	#REF!
2022-09-12	14:13:35	1.14627	5.09884	4.6944	1480.76	FALSE	#REF!
2022-09-12	14:13:35	1.06724	4.7473	4.6944	1485.51	FALSE	#REF!
2022-09-12	14:13:35	0.952532	4.23705	4.6944	1489.74	FALSE	#REF!
2022-09-12	14:13:36	1.03726	4.61394	3.48538	1494.36	FALSE	#REF!
2022-09-12	14:13:36	0.944033	4.19925	3.48538	1498.56	FALSE	#REF!
2022-09-12	14:13:36	0.70103	3.11832	3.48538	1501.67	FALSE	#REF!
2022-09-12	14:13:36	0.45187	2.01001	3.48538	1503.68	FALSE	#REF!
2022-09-12	14:13:37	0.503931	2.24159	1.95053	1505.93	FALSE	#REF!
2022-09-12	14:13:37	0.564644	2.51165	1.95053	1508.44	FALSE	#REF!
2022-09-12	14:13:37	0.466476	2.07498	1.95053	1510.51	FALSE	#REF!
2022-09-12	14:13:37	0.218944	0.973907	1.95053	1511.49	FALSE	#REF!
2022-09-12	14:13:38	0.313753	1.39564	1.22133	1512.88	FALSE	#REF!
2022-09-12	14:13:38	0.278944	1.2408	1.22133	1514.12	FALSE	#REF!
2022-09-12	14:13:38	0.278842	1.24034	1.22133	1515.36	FALSE	#REF!
2022-09-12	14:13:38	0.22673	1.00854	1.22133	1516.37	FALSE	#REF!
2022-09-12	14:13:39	0.250751	1.11539	1.14089	1517.49	FALSE	#REF!
2022-09-12	14:13:39	0.32215	1.43299	1.14089	1518.92	FALSE	#REF!
2022-09-12	14:13:39	0.196552	0.874303	1.14089	1519.79	FALSE	#REF!
2022-09-12	14:13:40	0.259046	1.15229	0.887829	1520.95	FALSE	#REF!
2022-09-12	14:13:40	0.334771	1.48913	0.887829	1522.44	FALSE	#REF!
2022-09-12	14:13:40	0.0987407	0.439218	0.887829	1522.88	FALSE	#REF!
2022-09-12	14:13:40	0.105814	0.470682	0.887829	1523.35	FALSE	#REF!
2022-09-12	14:13:41	0.174415	0.775833	0.122581	1524.12	FALSE	#REF!
2022-09-12	14:13:41	0.128359	0.570967	0.122581	1524.69	FALSE	#REF!
2022-09-12	14:13:41	0.0321758	0.143124	0.122581	1524.84	FALSE	#REF!
2022-09-12	14:13:41	-0.22472	-0.9996	0.122581	1524.84	FALSE	#REF!
2022-09-12	14:13:42	-0.177137	-0.787941	-0.265306	1524.84	FALSE	#REF!
2022-09-12	14:13:42	-0.154745	-0.688337	-0.265306	1524.84	FALSE	#REF!
2022-09-12	14:13:42	-0.111692	-0.496828	-0.265306	1524.84	FALSE	#REF!
2022-09-12	14:13:42	0.205	0.911881	-0.265306	1525.75	FALSE	#REF!
2022-09-12	14:13:43	0.590191	2.62529	2.24272	1528.37	FALSE	#REF!
2022-09-12	14:13:43	0.471005	2.09512	2.24272	1530.47	FALSE	#REF!
2022-09-12	14:13:43	0.451361	2.00774	2.24272	1532.48	FALSE	#REF!
2022-09-12	14:13:44	0.435229	1.93599	1.27487	1534.41	FALSE	#REF!
2022-09-12	14:13:44	0.467647	2.08019	1.27487	1536.49	FALSE	#REF!
2022-09-12	14:13:44	0.220725	0.981829	1.27487	1537.47	FALSE	#REF!
2022-09-12	14:13:44	0.0228119	0.101472	1.27487	1537.58	FALSE	#REF!
2022-09-12	14:13:45	0.0113616	0.0505387	0.629031	1537.63	FALSE	#REF!
2022-09-12	14:13:45	0.26154	1.16338	0.629031	1538.79	FALSE	#REF!
2022-09-12	14:13:45	0.225102	1.0013	0.629031	1539.79	FALSE	#REF!
2022-09-12	14:13:45	0.0676465	0.300905	0.629031	1540.09	FALSE	#REF!
2022-09-12	14:13:46	-0.0271626	-0.120825	-0.204751	1540.09	FALSE	#REF!
2022-09-12	14:13:46	0.00886792	0.0394463	-0.204751	1540.13	FALSE	#REF!
2022-09-12	14:13:46	-0.110928	-0.49343	-0.204751	1540.13	FALSE	#REF!
2022-09-12	14:13:46	-0.054898	-0.244197	-0.204751	1540.13	FALSE	#REF!
2022-09-12	14:13:47	-0.0410557	-0.182624	-0.217635	1540.13	FALSE	#REF!
2022-09-12	14:13:47	-0.128587	-0.571981	-0.217635	1540.13	FALSE	#REF!
2022-09-12	14:13:47	0.0228628	0.101698	-0.217635	1540.23	FALSE	#REF!
2022-09-12	14:13:48	-0.118053	-0.525123	-0.813069	1540.23	FALSE	#REF!
2022-09-12	14:13:48	-0.142481	-0.633784	-0.813069	1540.23	FALSE	#REF!
2022-09-12	14:13:48	-0.26986	-1.20039	-0.813069	1540.23	FALSE	#REF!
2022-09-12	14:13:48	-0.20075	-0.892976	-0.813069	1540.23	FALSE	#REF!
2022-09-12	14:13:49	-0.200496	-0.891846	-0.155912	1540.23	FALSE	#REF!
2022-09-12	14:13:49	-0.250012	-1.1121	-0.155912	1540.23	FALSE	#REF!
2022-09-12	14:13:49	-0.0778496	-0.346291	-0.155912	1540.23	FALSE	#REF!
2022-09-12	14:13:49	0.388155	1.72659	-0.155912	1541.96	FALSE	#REF!
2022-09-12	14:13:50	0.663728	2.95239	6.03262	1544.91	FALSE	#REF!
2022-09-12	14:13:50	1.6194	7.20342	6.03262	1552.12	FALSE	#REF!
2022-09-12	14:13:50	1.43472	6.38192	6.03262	1558.5	FALSE	#REF!
2022-09-12	14:13:50	1.70693	7.59277	6.03262	1566.09	FALSE	#REF!
2022-09-12	14:13:51	1.36337	6.06454	7.53814	1572.15	FALSE	#REF!
2022-09-12	14:13:51	2.70179	12.0181	7.53814	1584.17	FALSE	#REF!
2022-09-12	14:13:51	1.01879	4.53178	7.53814	1588.7	FALSE	#REF!
2022-09-12	14:13:52	1.93085	8.58881	5.97133	1597.29	FALSE	#REF!
2022-09-12	14:13:52	1.74958	7.78248	5.97133	1605.08	FALSE	#REF!
2022-09-12	14:13:52	1.36072	6.05275	5.97133	1611.13	FALSE	#REF!
2022-09-12	14:13:52	0.328511	1.46128	5.97133	1612.59	FALSE	#REF!
2022-09-12	14:13:53	0.503677	2.24046	2.00746	1614.83	FALSE	#REF!
2022-09-12	14:13:53	0.526832	2.34345	2.00746	1617.17	FALSE	#REF!
2022-09-12	14:13:53	0.438588	1.95093	2.00746	1619.12	FALSE	#REF!
2022-09-12	14:13:53	0.336094	1.49501	2.00746	1620.62	FALSE	#REF!
2022-09-12	14:13:54	0.374415	1.66547	1.66587	1622.29	FALSE	#REF!
2022-09-12	14:13:54	0.454211	2.02042	1.66587	1624.31	FALSE	#REF!
2022-09-12	14:13:54	0.290954	1.29422	1.66587	1625.6	FALSE	#REF!
2022-09-12	14:13:54	0.378435	1.68335	1.66587	1627.28	FALSE	#REF!
2022-09-12	14:13:55	0.198232	0.881776	0.833708	1628.16	FALSE	#REF!
2022-09-12	14:13:55	0.105865	0.470909	0.833708	1628.64	FALSE	#REF!
2022-09-12	14:13:55	0.258181	1.14844	0.833708	1629.78	FALSE	#REF!
2022-09-12	14:13:56	0.220878	0.98251	1.02173	1630.77	FALSE	#REF!
2022-09-12	14:13:56	0.279148	1.24171	1.02173	1632.01	FALSE	#REF!
2022-09-12	14:13:56	0.28668	1.27521	1.02173	1633.28	FALSE	#REF!
2022-09-12	14:13:56	0.132074	0.587492	1.02173	1633.87	FALSE	#REF!
2022-09-12	14:13:57	0.390903	1.73881	1.30305	1635.61	FALSE	#REF!
2022-09-12	14:13:57	0.29014	1.2906	1.30305	1636.9	FALSE	#REF!
2022-09-12	14:13:57	0.290954	1.29422	1.30305	1638.19	FALSE	#REF!
2022-09-12	14:13:57	0.199758	0.888564	1.30305	1639.08	FALSE	#REF!
2022-09-12	14:13:58	0.203982	0.907353	0.959702	1639.99	FALSE	#REF!
2022-09-12	14:13:58	0.252125	1.1215	0.959702	1641.11	FALSE	#REF!
2022-09-12	14:13:58	0.221947	0.987265	0.959702	1642.1	FALSE	#REF!
2022-09-12	14:13:58	0.184949	0.82269	0.959702	1642.92	FALSE	#REF!
2022-09-12	14:13:59	0.149529	0.665135	0.721729	1643.59	FALSE	#REF!
2022-09-12	14:13:59	0.211718	0.941764	0.721729	1644.53	FALSE	#REF!
2022-09-12	14:13:59	0.125509	0.558289	0.721729	1645.09	FALSE	#REF!
2022-09-12	14:14:00	0.241081	1.07238	0.811145	1646.16	FALSE	#REF!
2022-09-12	14:14:00	0.169529	0.754099	0.811145	1646.91	FALSE	#REF!
2022-09-12	14:14:00	0.189733	0.84397	0.811145	1647.76	FALSE	#REF!
2022-09-12	14:14:00	0.129071	0.574134	0.811145	1648.33	FALSE	#REF!
2022-09-12	14:14:01	0.114008	0.50713	1.0987	1648.84	FALSE	#REF!
2022-09-12	14:14:01	0.214262	0.95308	1.0987	1649.79	FALSE	#REF!
2022-09-12	14:14:01	0.338232	1.50452	1.0987	1651.3	FALSE	#REF!
2022-09-12	14:14:01	0.321489	1.43005	1.0987	1652.73	FALSE	#REF!
2022-09-12	14:14:02	0.264949	1.17855	1.22054	1653.91	FALSE	#REF!
2022-09-12	14:14:02	0.221336	0.984547	1.22054	1654.89	FALSE	#REF!
2022-09-12	14:14:02	0.298079	1.32592	1.22054	1656.22	FALSE	#REF!
2022-09-12	14:14:02	0.313194	1.39315	1.22054	1657.61	FALSE	#REF!
2022-09-12	14:14:03	0.334669	1.48867	1.65136	1659.1	FALSE	#REF!
2022-09-12	14:14:03	0.392176	1.74448	1.65136	1660.84	FALSE	#REF!
2022-09-12	14:14:03	0.386883	1.72093	1.65136	1662.56	FALSE	#REF!
2022-09-12	14:14:04	0.372888	1.65868	1.69473	1664.22	FALSE	#REF!
2022-09-12	14:14:04	0.387341	1.72297	1.69473	1665.94	FALSE	#REF!
2022-09-12	14:14:04	0.400522	1.7816	1.69473	1667.73	FALSE	#REF!
2022-09-12	14:14:04	0.363219	1.61567	1.69473	1669.34	FALSE	#REF!
2022-09-12	14:14:05	0.340522	1.51471	1.46168	1670.86	FALSE	#REF!
2022-09-12	14:14:05	0.334975	1.49004	1.46168	1672.35	FALSE	#REF!
2022-09-12	14:14:05	0.323117	1.43729	1.46168	1673.78	FALSE	#REF!
2022-09-12	14:14:05	0.315789	1.40469	1.46168	1675.19	FALSE	#REF!
2022-09-12	14:14:06	0.32841	1.46083	1.57623	1676.65	FALSE	#REF!
2022-09-12	14:14:06	0.308613	1.37277	1.57623	1678.02	FALSE	#REF!
2022-09-12	14:14:06	0.420573	1.87079	1.57623	1679.89	FALSE	#REF!
2022-09-12	14:14:06	0.359809	1.6005	1.57623	1681.49	FALSE	#REF!
2022-09-12	14:14:07	0.360929	1.60548	1.41473	1683.1	FALSE	#REF!
2022-09-12	14:14:07	0.320166	1.42416	1.41473	1684.52	FALSE	#REF!
2022-09-12	14:14:07	0.273041	1.21454	1.41473	1685.74	FALSE	#REF!
2022-09-12	14:14:08	0.348308	1.54934	1.53729	1687.29	FALSE	#REF!
2022-09-12	14:14:08	0.342405	1.52309	1.53729	1688.81	FALSE	#REF!
2022-09-12	14:14:08	0.2993	1.33135	1.53729	1690.14	FALSE	#REF!
2022-09-12	14:14:08	0.392379	1.74538	1.53729	1691.89	FALSE	#REF!
2022-09-12	14:14:09	0.326934	1.45427	1.22773	1693.34	FALSE	#REF!
2022-09-12	14:14:09	0.243677	1.08392	1.22773	1694.43	FALSE	#REF!
2022-09-12	14:14:09	0.276908	1.23174	1.22773	1695.66	FALSE	#REF!
2022-09-12	14:14:09	0.256501	1.14097	1.22773	1696.8	FALSE	#REF!
2022-09-12	14:14:10	0.303931	1.35195	1.48551	1698.15	FALSE	#REF!
2022-09-12	14:14:10	0.398333	1.77186	1.48551	1699.92	FALSE	#REF!
2022-09-12	14:14:10	0.255178	1.13508	1.48551	1701.06	FALSE	#REF!
2022-09-12	14:14:10	0.378384	1.68313	1.48551	1702.74	FALSE	#REF!
2022-09-12	14:14:11	0.311921	1.38749	1.30826	1704.13	FALSE	#REF!
2022-09-12	14:14:11	0.311514	1.38568	1.30826	1705.51	FALSE	#REF!
2022-09-12	14:14:11	0.258893	1.15161	1.30826	1706.66	FALSE	#REF!
2022-09-12	14:14:12	0.229886	1.02258	1.97996	1707.69	FALSE	#REF!
2022-09-12	14:14:12	0.345763	1.53802	1.97996	1709.23	FALSE	#REF!
2022-09-12	14:14:12	0.463677	2.06253	1.97996	1711.29	FALSE	#REF!
2022-09-12	14:14:12	0.741132	3.2967	1.97996	1714.58	FALSE	#REF!
2022-09-12	14:14:13	0.788002	3.50519	3.69891	1718.09	FALSE	#REF!
2022-09-12	14:14:13	0.979606	4.35748	3.69891	1722.45	FALSE	#REF!
2022-09-12	14:14:13	0.632023	2.81136	3.69891	1725.26	FALSE	#REF!
2022-09-12	14:14:13	0.926578	4.1216	3.69891	1729.38	FALSE	#REF!
2022-09-12	14:14:14	0.335687	1.4932	2.34821	1730.87	FALSE	#REF!
2022-09-12	14:14:14	0.771412	3.43139	2.34821	1734.3	FALSE	#REF!
2022-09-12	14:14:14	0.25014	1.11267	2.34821	1735.42	FALSE	#REF!
2022-09-12	14:14:14	0.754364	3.35556	2.34821	1738.77	FALSE	#REF!
2022-09-12	14:14:15	0.36159	1.60842	2.32882	1740.38	FALSE	#REF!
2022-09-12	14:14:15	0.673651	2.99653	2.32882	1743.38	FALSE	#REF!
2022-09-12	14:14:15	0.535382	2.38149	2.32882	1745.76	FALSE	#REF!
2022-09-12	14:14:16	0.504847	2.24566	2.64413	1748	FALSE	#REF!
2022-09-12	14:14:16	0.609427	2.71085	2.64413	1750.72	FALSE	#REF!
2022-09-12	14:14:16	0.385814	1.71618	2.64413	1752.43	FALSE	#REF!
2022-09-12	14:14:16	0.877621	3.90383	2.64413	1756.34	FALSE	#REF!
2022-09-12	14:14:17	0.474211	2.10939	3.39121	1758.45	FALSE	#REF!
2022-09-12	14:14:17	1.01319	4.50687	3.39121	1762.95	FALSE	#REF!
2022-09-12	14:14:17	0.35528	1.58036	3.39121	1764.53	FALSE	#REF!
2022-09-12	14:14:17	1.20683	5.36822	3.39121	1769.9	FALSE	#REF!
2022-09-12	14:14:18	0.788918	3.50927	4.66846	1773.41	FALSE	#REF!
2022-09-12	14:14:18	1.55223	6.90463	4.66846	1780.31	FALSE	#REF!
2022-09-12	14:14:18	0.675382	3.00423	4.66846	1783.32	FALSE	#REF!
2022-09-12	14:14:18	1.18154	5.25573	4.66846	1788.57	FALSE	#REF!
2022-09-12	14:14:19	1.08668	4.83377	9.62378	1793.41	FALSE	#REF!
2022-09-12	14:14:19	2.582	11.4853	9.62378	1804.89	FALSE	#REF!
2022-09-12	14:14:19	2.82189	12.5523	9.62378	1817.45	FALSE	#REF!
2022-09-12	14:14:20	2.97228	13.2213	9.39124	1830.67	FALSE	#REF!
2022-09-12	14:14:20	1.47365	6.55509	9.39124	1837.22	FALSE	#REF!
2022-09-12	14:14:20	2.24876	10.0029	9.39124	1847.23	FALSE	#REF!
2022-09-12	14:14:20	1.75029	7.78564	9.39124	1855.01	FALSE	#REF!
2022-09-12	14:14:21	0.816654	3.63264	2.44713	1858.64	FALSE	#REF!
2022-09-12	14:14:21	0.48673	2.16507	2.44713	1860.81	FALSE	#REF!
2022-09-12	14:14:21	0.439708	1.95591	2.44713	1862.76	FALSE	#REF!
2022-09-12	14:14:21	0.457468	2.03491	2.44713	1864.8	FALSE	#REF!
2022-09-12	14:14:22	0.635687	2.82766	3.16337	1867.63	FALSE	#REF!
2022-09-12	14:14:22	0.547494	2.43536	3.16337	1870.06	FALSE	#REF!
2022-09-12	14:14:22	0.950293	4.22709	3.16337	1874.29	FALSE	#REF!
2022-09-12	14:14:23	0.429071	1.90859	2.24617	1876.2	FALSE	#REF!
2022-09-12	14:14:23	0.0540078	0.240237	2.24617	1876.44	FALSE	#REF!
2022-09-12	14:14:23	0.866832	3.85584	2.24617	1880.29	FALSE	#REF!
2022-09-12	14:14:23	0.669936	2.98001	2.24617	1883.27	FALSE	#REF!
2022-09-12	14:14:24	-0.0694017	-0.308713	0.0372396	1883.27	FALSE	#REF!
2022-09-12	14:14:24	-0.00304046	-0.0135246	0.0372396	1883.27	FALSE	#REF!
2022-09-12	14:14:24	0.133601	0.594284	0.0372396	1883.87	FALSE	#REF!
2022-09-12	14:14:24	-0.0276715	-0.123088	0.0372396	1883.87	FALSE	#REF!
2022-09-12	14:14:25	-0.179936	-0.800391	1.14821	1883.87	FALSE	#REF!
2022-09-12	14:14:25	0.23986	1.06695	1.14821	1884.94	FALSE	#REF!
2022-09-12	14:14:25	0.502964	2.23728	1.14821	1887.17	FALSE	#REF!
2022-09-12	14:14:25	0.469631	2.08901	1.14821	1889.26	FALSE	#REF!
2022-09-12	14:14:26	0.455382	2.02563	1.95938	1891.29	FALSE	#REF!
2022-09-12	14:14:26	0.432227	1.92263	1.95938	1893.21	FALSE	#REF!
2022-09-12	14:14:26	0.433855	1.92987	1.95938	1895.14	FALSE	#REF!
2022-09-12	14:14:27	0.487036	2.16643	9.59486	1897.31	FALSE	#REF!
2022-09-12	14:14:27	0.603015	2.68233	9.59486	1899.99	FALSE	#REF!
2022-09-12	14:14:27	1.91044	8.49802	9.59486	1908.49	FALSE	#REF!
2022-09-12	14:14:27	5.62759	25.0326	9.59486	1933.52	1	#REF!
2022-09-12	14:14:28	5.51146	24.5161	9.82424	1958.04	1	#REF!
2022-09-12	14:14:28	2.17172	9.66024	9.82424	1967.7	FALSE	#REF!
2022-09-12	14:14:28	0.758282	3.37299	9.82424	1971.07	FALSE	#REF!
2022-09-12	14:14:28	0.392888	1.74764	9.82424	1972.82	FALSE	#REF!
2022-09-12	14:14:29	0.421489	1.87487	1.83208	1974.69	FALSE	#REF!
2022-09-12	14:14:29	0.449478	1.99937	1.83208	1976.69	FALSE	#REF!
2022-09-12	14:14:29	0.306272	1.36236	1.83208	1978.05	FALSE	#REF!
2022-09-12	14:14:29	0.470242	2.09173	1.83208	1980.14	FALSE	#REF!
2022-09-12	14:14:30	0.338893	1.50746	1.66351	1981.65	FALSE	#REF!
2022-09-12	14:14:30	0.542252	2.41205	1.66351	1984.06	FALSE	#REF!
2022-09-12	14:14:30	0.240776	1.07102	1.66351	1985.14	FALSE	#REF!
2022-09-12	14:14:31	0.569682	2.53406	2.16836	1987.67	FALSE	#REF!
2022-09-12	14:14:31	0.390344	1.73633	2.16836	1989.41	FALSE	#REF!
2022-09-12	14:14:31	0.605204	2.69207	2.16836	1992.1	FALSE	#REF!
2022-09-12	14:14:31	0.384644	1.71097	2.16836	1993.81	FALSE	#REF!
2022-09-12	14:14:32	0.521845	2.32127	1.96706	1996.13	FALSE	#REF!
2022-09-12	14:14:32	0.430496	1.91493	1.96706	1998.04	FALSE	#REF!
2022-09-12	14:14:32	0.452532	2.01295	1.96706	2000.06	FALSE	#REF!
2022-09-12	14:14:32	0.363982	1.61906	1.96706	2001.68	FALSE	#REF!
2022-09-12	14:14:33	0.440216	1.95817	1.80441	2003.63	FALSE	#REF!
2022-09-12	14:14:33	0.507188	2.25607	1.80441	2005.89	FALSE	#REF!
2022-09-12	14:14:33	0.404542	1.79948	1.80441	2007.69	FALSE	#REF!
2022-09-12	14:14:33	0.270649	1.2039	1.80441	2008.89	FALSE	#REF!
2022-09-12	14:14:34	0.284847	1.26706	1.25815	2010.16	FALSE	#REF!
2022-09-12	14:14:34	0.319911	1.42303	1.25815	2011.58	FALSE	#REF!
2022-09-12	14:14:34	0.243779	1.08438	1.25815	2012.67	FALSE	#REF!
2022-09-12	14:14:35	0.179962	0.800507	0.970909	2013.47	FALSE	#REF!
2022-09-12	14:14:35	0.215331	0.957835	0.970909	2014.43	FALSE	#REF!
2022-09-12	14:14:35	0.310191	1.37979	0.970909	2015.81	FALSE	#REF!
2022-09-12	14:14:35	0.167596	0.745501	0.970909	2016.55	FALSE	#REF!
2022-09-12	14:14:36	0.188359	0.837859	0.920145	2017.39	FALSE	#REF!
2022-09-12	14:14:36	0.169886	0.755687	0.920145	2018.15	FALSE	#REF!
2022-09-12	14:14:36	0.267443	1.18964	0.920145	2019.34	FALSE	#REF!
2022-09-12	14:14:36	0.201743	0.897393	0.920145	2020.23	FALSE	#REF!
2022-09-12	14:14:37	0.227799	1.0133	2.66269	2021.25	FALSE	#REF!
2022-09-12	14:14:37	0.202863	0.902375	2.66269	2022.15	FALSE	#REF!
2022-09-12	14:14:37	0.646578	2.87611	2.66269	2025.02	FALSE	#REF!
2022-09-12	14:14:37	1.31716	5.85899	2.66269	2030.88	FALSE	#REF!
2022-09-12	14:14:38	1.67258	7.43997	5.89371	2038.32	FALSE	#REF!
2022-09-12	14:14:38	1.32037	5.87327	5.89371	2044.2	FALSE	#REF!
2022-09-12	14:14:38	0.981946	4.36789	5.89371	2048.56	FALSE	#REF!
2022-09-12	14:14:39	1.22485	5.44838	4.19478	2054.01	FALSE	#REF!
2022-09-12	14:14:39	1.2823	5.70393	4.19478	2059.72	FALSE	#REF!
2022-09-12	14:14:39	0.588919	2.61963	4.19478	2062.34	FALSE	#REF!
2022-09-12	14:14:39	0.676043	3.00717	4.19478	2065.34	FALSE	#REF!
2022-09-12	14:14:40	0.385051	1.71278	3.12432	2067.06	FALSE	#REF!
2022-09-12	14:14:40	0.738893	3.28674	3.12432	2070.34	FALSE	#REF!
2022-09-12	14:14:40	0.852379	3.79155	3.12432	2074.14	FALSE	#REF!
2022-09-12	14:14:40	0.833193	3.70621	3.12432	2077.84	FALSE	#REF!
2022-09-12	14:14:41	1.11553	4.9621	4.05046	2082.8	FALSE	#REF!
2022-09-12	14:14:41	1.21533	5.40603	4.05046	2088.21	FALSE	#REF!
2022-09-12	14:14:41	0.546119	2.42925	4.05046	2090.64	FALSE	#REF!
2022-09-12	14:14:41	0.765356	3.40446	4.05046	2094.04	FALSE	#REF!
2022-09-12	14:14:42	0.419249	1.8649	2.23314	2095.91	FALSE	#REF!
2022-09-12	14:14:42	0.632277	2.81249	2.23314	2098.72	FALSE	#REF!
2022-09-12	14:14:42	0.454568	2.02201	2.23314	2100.74	FALSE	#REF!
2022-09-12	14:14:43	0.376908	1.67656	1.80463	2102.42	FALSE	#REF!
2022-09-12	14:14:43	0.594466	2.6443	1.80463	2105.06	FALSE	#REF!
2022-09-12	14:14:43	0.211412	0.940403	1.80463	2106	FALSE	#REF!
2022-09-12	14:14:43	0.440013	1.95727	1.80463	2107.96	FALSE	#REF!
2022-09-12	14:14:44	0.122965	0.546973	1.53293	2108.51	FALSE	#REF!
2022-09-12	14:14:44	0.415026	1.84612	1.53293	2110.35	FALSE	#REF!
2022-09-12	14:14:44	0.261031	1.16112	1.53293	2111.52	FALSE	#REF!
2022-09-12	14:14:44	0.579453	2.57752	1.53293	2114.09	FALSE	#REF!
2022-09-12	14:14:45	0.736145	3.27452	3.99359	2117.37	FALSE	#REF!
2022-09-12	14:14:45	0.811311	3.60887	3.99359	2120.98	FALSE	#REF!
2022-09-12	14:14:45	0.890903	3.96291	3.99359	2124.94	FALSE	#REF!
2022-09-12	14:14:45	1.15284	5.12806	3.99359	2130.07	FALSE	#REF!
2022-09-12	14:14:46	1.38678	6.16867	7.48481	2136.24	FALSE	#REF!
2022-09-12	14:14:46	1.51401	6.73462	7.48481	2142.97	FALSE	#REF!
2022-09-12	14:14:46	2.14719	9.55113	7.48481	2152.52	FALSE	#REF!
2022-09-12	14:14:47	1.50897	6.7122	4.86121	2159.23	FALSE	#REF!
2022-09-12	14:14:47	1.25482	5.58169	4.86121	2164.82	FALSE	#REF!
2022-09-12	14:14:47	0.706781	3.1439	4.86121	2167.96	FALSE	#REF!
2022-09-12	14:14:47	0.900827	4.00706	4.86121	2171.97	FALSE	#REF!
2022-09-12	14:14:48	0.679249	3.02144	3.65936	2174.99	FALSE	#REF!
2022-09-12	14:14:48	1.03905	4.6219	3.65936	2179.61	FALSE	#REF!
2022-09-12	14:14:48	0.840064	3.73677	3.65936	2183.35	FALSE	#REF!
2022-09-12	14:14:48	0.732277	3.25731	3.65936	2186.6	FALSE	#REF!
2022-09-12	14:14:49	0.515891	2.29479	2.55511	2188.9	FALSE	#REF!
2022-09-12	14:14:49	0.399453	1.77685	2.55511	2190.68	FALSE	#REF!
2022-09-12	14:14:49	0.569631	2.53383	2.55511	2193.21	FALSE	#REF!
2022-09-12	14:14:49	0.812685	3.61499	2.55511	2196.82	FALSE	#REF!
2022-09-12	14:14:50	0.919555	4.09036	3.71104	2200.91	FALSE	#REF!
2022-09-12	14:14:50	0.919351	4.08946	3.71104	2205	FALSE	#REF!
2022-09-12	14:14:50	0.663931	2.9533	3.71104	2207.96	FALSE	#REF!
2022-09-12	14:14:51	0.602557	2.68029	2.57781	2210.64	FALSE	#REF!
2022-09-12	14:14:51	0.576756	2.56553	2.57781	2213.2	FALSE	#REF!
2022-09-12	14:14:51	0.617061	2.74481	2.57781	2215.95	FALSE	#REF!
2022-09-12	14:14:51	0.521692	2.32059	2.57781	2218.27	FALSE	#REF!
2022-09-12	14:14:52	0.503626	2.24023	2.12489	2220.51	FALSE	#REF!
2022-09-12	14:14:52	0.493957	2.19722	2.12489	2222.71	FALSE	#REF!
2022-09-12	14:14:52	0.469224	2.0872	2.12489	2224.79	FALSE	#REF!
2022-09-12	14:14:52	0.443982	1.97492	2.12489	2226.77	FALSE	#REF!
2022-09-12	14:14:53	0.42897	1.90814	1.68579	2228.68	FALSE	#REF!
2022-09-12	14:14:53	0.411616	1.83095	1.68579	2230.51	FALSE	#REF!
2022-09-12	14:14:53	0.374669	1.6666	1.68579	2232.17	FALSE	#REF!
2022-09-12	14:14:53	0.300674	1.33746	1.68579	2233.51	FALSE	#REF!
2022-09-12	14:14:54	0.324339	1.44272	1.64872	2234.95	FALSE	#REF!
2022-09-12	14:14:54	0.45874	2.04057	1.64872	2236.99	FALSE	#REF!
2022-09-12	14:14:54	0.328868	1.46287	1.64872	2238.46	FALSE	#REF!
2022-09-12	14:14:55	0.350191	1.55772	0.7219	2240.02	FALSE	#REF!
2022-09-12	14:14:55	0.0896821	0.398924	0.7219	2240.41	FALSE	#REF!
2022-09-12	14:14:55	0.0621503	0.276457	0.7219	2240.69	FALSE	#REF!
2022-09-12	14:14:55	0.147138	0.654499	0.7219	2241.35	FALSE	#REF!
2022-09-12	14:14:56	0.0523793	0.232994	1.61301	2241.58	FALSE	#REF!
2022-09-12	14:14:56	0.253753	1.12874	1.61301	2242.71	FALSE	#REF!
2022-09-12	14:14:56	0.616807	2.74368	1.61301	2245.45	FALSE	#REF!
2022-09-12	14:14:56	0.527544	2.34662	1.61301	2247.8	FALSE	#REF!
2022-09-12	14:14:57	0.206629	0.919127	0.877757	2248.72	FALSE	#REF!
2022-09-12	14:14:57	0.17299	0.769494	0.877757	2249.49	FALSE	#REF!
2022-09-12	14:14:57	0.244695	1.08845	0.877757	2250.57	FALSE	#REF!
2022-09-12	14:14:57	0.165	0.733953	0.877757	2251.31	FALSE	#REF!
2022-09-12	14:14:58	0.244491	1.08754	1.38424	2252.4	FALSE	#REF!
2022-09-12	14:14:58	0.227901	1.01375	1.38424	2253.41	FALSE	#REF!
2022-09-12	14:14:58	0.461183	2.05143	1.38424	2255.46	FALSE	#REF!
2022-09-12	14:14:59	0.369987	1.64578	1.77685	2257.11	FALSE	#REF!
2022-09-12	14:14:59	0.404542	1.79948	1.77685	2258.91	FALSE	#REF!
2022-09-12	14:14:59	0.686374	3.05313	1.77685	2261.96	FALSE	#REF!
2022-09-12	14:14:59	0.136909	0.608999	1.77685	2262.57	FALSE	#REF!
2022-09-12	14:15:00	0.163117	0.725577	1.93293	2263.29	FALSE	#REF!
2022-09-12	14:15:00	0.854669	3.80174	1.93293	2267.1	FALSE	#REF!
2022-09-12	14:15:00	0.200369	0.891281	1.93293	2267.99	FALSE	#REF!
2022-09-12	14:15:00	0.520013	2.31312	1.93293	2270.3	FALSE	#REF!
2022-09-12	14:15:01	0.361845	1.60956	1.66061	2271.91	FALSE	#REF!
2022-09-12	14:15:01	0.189173	0.841479	1.66061	2272.75	FALSE	#REF!
2022-09-12	14:15:01	0.648919	2.88652	1.66061	2275.64	FALSE	#REF!
2022-09-12	14:15:01	0.293346	1.30486	1.66061	2276.94	FALSE	#REF!
2022-09-12	14:15:02	0.641234	2.85234	2.66121	2279.79	FALSE	#REF!
2022-09-12	14:15:02	0.372227	1.65574	2.66121	2281.45	FALSE	#REF!
2022-09-12	14:15:02	0.781336	3.47554	2.66121	2284.93	FALSE	#REF!
2022-09-12	14:15:03	0.971463	4.32126	5.87831	2289.25	FALSE	#REF!
2022-09-12	14:15:03	1.20877	5.37685	5.87831	2294.62	FALSE	#REF!
2022-09-12	14:15:03	1.55564	6.9198	5.87831	2301.54	FALSE	#REF!
2022-09-12	14:15:03	1.55014	6.89533	5.87831	2308.44	FALSE	#REF!
2022-09-12	14:15:04	2.26622	10.0806	6.04955	2318.52	FALSE	#REF!
2022-09-12	14:15:04	0.83986	3.73587	6.04955	2322.26	FALSE	#REF!
2022-09-12	14:15:04	1.528	6.79685	6.04955	2329.05	FALSE	#REF!
2022-09-12	14:15:04	0.805916	3.58488	6.04955	2332.64	FALSE	#REF!
2022-09-12	14:15:05	1.03299	4.59495	3.26009	2337.23	FALSE	#REF!
2022-09-12	14:15:05	0.626832	2.78827	3.26009	2340.02	FALSE	#REF!
2022-09-12	14:15:05	0.493448	2.19496	3.26009	2342.22	FALSE	#REF!
2022-09-12	14:15:05	0.778333	3.46218	3.26009	2345.68	FALSE	#REF!
2022-09-12	14:15:06	0.364542	1.62156	2.37666	2347.3	FALSE	#REF!
2022-09-12	14:15:06	0.677061	3.0117	2.37666	2350.31	FALSE	#REF!
2022-09-12	14:15:06	0.561285	2.49671	2.37666	2352.81	FALSE	#REF!
2022-09-12	14:15:07	0.833092	3.70576	3.85595	2356.51	FALSE	#REF!
2022-09-12	14:15:07	0.691463	3.07577	3.85595	2359.59	FALSE	#REF!
2022-09-12	14:15:07	0.746171	3.31912	3.85595	2362.91	FALSE	#REF!
2022-09-12	14:15:07	1.1967	5.32316	3.85595	2368.23	FALSE	#REF!
2022-09-12	14:15:08	0.522252	2.32308	5.55561	2370.55	FALSE	#REF!
2022-09-12	14:15:08	1.28709	5.72523	5.55561	2376.28	FALSE	#REF!
2022-09-12	14:15:08	1.78205	7.92691	5.55561	2384.21	FALSE	#REF!
2022-09-12	14:15:08	1.40444	6.24723	5.55561	2390.45	FALSE	#REF!
2022-09-12	14:15:09	1.44917	6.4462	5.39546	2396.9	FALSE	#REF!
2022-09-12	14:15:09	1.29218	5.74788	5.39546	2402.65	FALSE	#REF!
2022-09-12	14:15:09	1.4963	6.65584	5.39546	2409.3	FALSE	#REF!
2022-09-12	14:15:09	0.61416	2.73191	5.39546	2412.04	FALSE	#REF!
2022-09-12	14:15:10	1.02072	4.54037	4.72857	2416.58	FALSE	#REF!
2022-09-12	14:15:10	0.974669	4.33552	4.72857	2420.91	FALSE	#REF!
2022-09-12	14:15:10	1.1937	5.30982	4.72857	2426.22	FALSE	#REF!
2022-09-12	14:15:11	1.15212	5.12486	4.88605	2431.35	FALSE	#REF!
2022-09-12	14:15:11	1.06251	4.72626	4.88605	2436.07	FALSE	#REF!
2022-09-12	14:15:11	1.5509	6.89871	4.88605	2442.97	FALSE	#REF!
2022-09-12	14:15:11	0.628206	2.79439	4.88605	2445.77	FALSE	#REF!
2022-09-12	14:15:12	1.45986	6.49375	4.82692	2452.26	FALSE	#REF!
2022-09-12	14:15:12	1.00861	4.4865	4.82692	2456.75	FALSE	#REF!
2022-09-12	14:15:12	1.01304	4.5062	4.82692	2461.25	FALSE	#REF!
2022-09-12	14:15:12	0.859046	3.82121	4.82692	2465.07	FALSE	#REF!
2022-09-12	14:15:13	1.08011	4.80455	10.314	2469.88	FALSE	#REF!
2022-09-12	14:15:13	2.22963	9.91784	10.314	2479.8	FALSE	#REF!
2022-09-12	14:15:13	2.31243	10.2862	10.314	2490.08	FALSE	#REF!
2022-09-12	14:15:13	3.65258	16.2474	10.314	2506.33	1	#REF!
2022-09-12	14:15:14	2.34765	10.4428	7.74566	2516.77	FALSE	#REF!
2022-09-12	14:15:14	2.05187	9.12713	7.74566	2525.9	FALSE	#REF!
2022-09-12	14:15:14	0.824389	3.66705	7.74566	2529.57	FALSE	#REF!
2022-09-12	14:15:15	0.596908	2.65517	2.39252	2532.22	FALSE	#REF!
2022-09-12	14:15:15	0.459402	2.04351	2.39252	2534.27	FALSE	#REF!
2022-09-12	14:15:15	0.590293	2.62574	2.39252	2536.89	FALSE	#REF!
2022-09-12	14:15:15	0.504847	2.24566	2.39252	2539.14	FALSE	#REF!
2022-09-12	14:15:16	1.6077	7.15137	12.3169	2546.29	FALSE	#REF!
2022-09-12	14:15:16	2.18678	9.72723	12.3169	2556.02	FALSE	#REF!
2022-09-12	14:15:16	3.80439	16.9227	12.3169	2572.94	1	#REF!
2022-09-12	14:15:16	3.47696	15.4662	12.3169	2588.4	1	#REF!
2022-09-12	14:15:17	2.81161	12.5066	7.20738	2600.91	FALSE	#REF!
2022-09-12	14:15:17	1.83192	8.14875	7.20738	2609.06	FALSE	#REF!
2022-09-12	14:15:17	1.31681	5.85743	7.20738	2614.92	FALSE	#REF!
2022-09-12	14:15:17	0.520827	2.31674	7.20738	2617.23	FALSE	#REF!
2022-09-12	14:15:18	0.584389	2.59948	5.82173	2619.83	FALSE	#REF!
2022-09-12	14:15:18	1.02872	4.57595	5.82173	2624.41	FALSE	#REF!
2022-09-12	14:15:18	2.31324	10.2898	5.82173	2634.7	FALSE	#REF!
2022-09-12	14:15:19	6.0509	26.9156	10.2702	2661.61	1	#REF!
2022-09-12	14:15:19	2.40474	10.6968	10.2702	2672.31	FALSE	#REF!
2022-09-12	14:15:19	0.454008	2.01952	10.2702	2674.33	FALSE	#REF!
2022-09-12	14:15:19	0.325763	1.44906	10.2702	2675.78	FALSE	#REF!
2022-09-12	14:15:20	0.71126	3.16383	3.23949	2678.94	FALSE	#REF!
2022-09-12	14:15:20	0.703117	3.12761	3.23949	2682.07	FALSE	#REF!
2022-09-12	14:15:20	0.735127	3.26999	3.23949	2685.34	FALSE	#REF!
2022-09-12	14:15:20	0.763575	3.39653	3.23949	2688.74	FALSE	#REF!
2022-09-12	14:15:21	0.686018	3.05155	2.96264	2691.79	FALSE	#REF!
2022-09-12	14:15:21	0.720623	3.20548	2.96264	2694.99	FALSE	#REF!
2022-09-12	14:15:21	0.718588	3.19642	2.96264	2698.19	FALSE	#REF!
2022-09-12	14:15:21	0.538893	2.3971	2.96264	2700.59	FALSE	#REF!
2022-09-12	14:15:22	0.505051	2.24657	2.4626	2702.83	FALSE	#REF!
2022-09-12	14:15:22	0.560318	2.49241	2.4626	2705.33	FALSE	#REF!
2022-09-12	14:15:22	0.595483	2.64883	2.4626	2707.98	FALSE	#REF!
2022-09-12	14:15:23	0.674669	3.00106	3.6808	2710.98	FALSE	#REF!
2022-09-12	14:15:23	1.04057	4.62866	3.6808	2715.61	FALSE	#REF!
2022-09-12	14:15:23	0.709326	3.15522	3.6808	2718.76	FALSE	#REF!
2022-09-12	14:15:23	0.885356	3.93824	3.6808	2722.7	FALSE	#REF!
2022-09-12	14:15:24	0.839046	3.73224	5.32714	2726.43	FALSE	#REF!
2022-09-12	14:15:24	1.54113	6.85525	5.32714	2733.29	FALSE	#REF!
2022-09-12	14:15:24	1.18698	5.27992	5.32714	2738.57	FALSE	#REF!
2022-09-12	14:15:24	1.22322	5.44113	5.32714	2744.01	FALSE	#REF!
2022-09-12	14:15:25	1.45253	6.46114	5.87683	2750.47	FALSE	#REF!
2022-09-12	14:15:25	1.31085	5.83092	5.87683	2756.3	FALSE	#REF!
2022-09-12	14:15:25	2.00994	8.94062	5.87683	2765.24	FALSE	#REF!
2022-09-12	14:15:25	0.511361	2.27464	5.87683	2767.52	FALSE	#REF!
2022-09-12	14:15:26	0.61813	2.74957	2.29448	2770.26	FALSE	#REF!
2022-09-12	14:15:26	0.43925	1.95387	2.29448	2772.22	FALSE	#REF!
2022-09-12	14:15:26	0.490089	2.18001	2.29448	2774.4	FALSE	#REF!
2022-09-12	14:15:27	0.345305	1.53599	3.27435	2775.93	FALSE	#REF!
2022-09-12	14:15:27	0.512939	2.28166	3.27435	2778.22	FALSE	#REF!
2022-09-12	14:15:27	0.506069	2.2511	3.27435	2780.47	FALSE	#REF!
2022-09-12	14:15:27	1.58011	7.02865	3.27435	2787.5	FALSE	#REF!
2022-09-12	14:15:28	0.914058	4.06591	4.37287	2791.56	FALSE	#REF!
2022-09-12	14:15:28	1.37828	6.13087	4.37287	2797.69	FALSE	#REF!
2022-09-12	14:15:28	0.80617	3.58601	4.37287	2801.28	FALSE	#REF!
2022-09-12	14:15:28	0.833753	3.7087	4.37287	2804.99	FALSE	#REF!
2022-09-12	14:15:29	0.505865	2.25019	3.76817	2807.24	FALSE	#REF!
2022-09-12	14:15:29	0.96841	4.30768	3.76817	2811.55	FALSE	#REF!
2022-09-12	14:15:29	1.06709	4.74663	3.76817	2816.29	FALSE	#REF!
2022-09-12	14:15:30	1.55711	6.92634	7.23159	2823.22	FALSE	#REF!
2022-09-12	14:15:30	1.75655	7.81349	7.23159	2831.03	FALSE	#REF!
2022-09-12	14:15:30	2.14637	9.54748	7.23159	2840.58	FALSE	#REF!
2022-09-12	14:15:30	1.04291	4.63907	7.23159	2845.22	FALSE	#REF!
2022-09-12	14:15:31	0.953397	4.2409	4.0598	2849.46	FALSE	#REF!
2022-09-12	14:15:31	0.885916	3.94073	4.0598	2853.4	FALSE	#REF!
2022-09-12	14:15:31	0.952888	4.23864	4.0598	2857.64	FALSE	#REF!
2022-09-12	14:15:31	0.858537	3.81894	4.0598	2861.46	FALSE	#REF!
2022-09-12	14:15:32	1.72358	7.66683	10.7436	2869.12	FALSE	#REF!
2022-09-12	14:15:32	1.52276	6.77354	10.7436	2875.9	FALSE	#REF!
2022-09-12	14:15:32	3.41553	15.193	10.7436	2891.09	1	#REF!
2022-09-12	14:15:32	2.99925	13.3413	10.7436	2904.43	FALSE	#REF!
2022-09-12	14:15:33	4.49681	20.0027	16.0327	2924.43	1	#REF!
2022-09-12	14:15:33	2.42637	10.793	16.0327	2935.23	FALSE	#REF!
2022-09-12	14:15:33	3.88978	17.3025	16.0327	2952.53	1	#REF!
2022-09-12	14:15:34	3.71162	16.51	16.1068	2969.04	1	#REF!
2022-09-12	14:15:34	3.16897	14.0962	16.1068	2983.14	1	#REF!
2022-09-12	14:15:34	5.06591	22.5342	16.1068	3005.67	1	#REF!
2022-09-12	14:15:34	2.53742	11.287	16.1068	3016.96	FALSE	#REF!
2022-09-12	14:15:35	3.88708	17.2905	15.2662	3034.25	1	#REF!
2022-09-12	14:15:35	3.23278	14.3801	15.2662	3048.63	1	#REF!
2022-09-12	14:15:35	2.80943	12.4969	15.2662	3061.13	FALSE	#REF!
2022-09-12	14:15:35	3.79869	16.8973	15.2662	3078.02	1	#REF!
2022-09-12	14:15:36	2.5652	11.4105	10.6131	3089.43	FALSE	#REF!
2022-09-12	14:15:36	4.60052	20.464	10.6131	3109.9	1	#REF!
2022-09-12	14:15:36	1.22113	5.43183	10.6131	3115.33	FALSE	#REF!
2022-09-12	14:15:36	1.15686	5.14594	10.6131	3120.47	FALSE	#REF!
2022-09-12	14:15:37	0.695738	3.09478	3.17612	3123.57	FALSE	#REF!
2022-09-12	14:15:37	0.72042	3.20457	3.17612	3126.77	FALSE	#REF!
2022-09-12	14:15:37	0.725916	3.22902	3.17612	3130	FALSE	#REF!
2022-09-12	14:15:38	0.725763	3.22834	9.11423	3133.23	FALSE	#REF!
2022-09-12	14:15:38	0.735026	3.26954	9.11423	3136.5	FALSE	#REF!
2022-09-12	14:15:38	4.31309	19.1855	9.11423	3155.69	1	#REF!
2022-09-12	14:15:38	2.422	10.7735	9.11423	3166.46	FALSE	#REF!
2022-09-12	14:15:39	0.730496	3.24939	2.18743	3169.71	FALSE	#REF!
2022-09-12	14:15:39	0.445814	1.98307	2.18743	3171.69	FALSE	#REF!
2022-09-12	14:15:39	0.565865	2.51708	2.18743	3174.21	FALSE	#REF!
2022-09-12	14:15:39	0.224848	1.00017	2.18743	3175.21	FALSE	#REF!
2022-09-12	14:15:40	0.396501	1.76372	1.71839	3176.97	FALSE	#REF!
2022-09-12	14:15:40	0.205509	0.914145	1.71839	3177.89	FALSE	#REF!
2022-09-12	14:15:40	0.527188	2.34504	1.71839	3180.23	FALSE	#REF!
2022-09-12	14:15:40	0.416043	1.85064	1.71839	3182.08	FALSE	#REF!
2022-09-12	14:15:41	0.391361	1.74085	1.81842	3183.82	FALSE	#REF!
2022-09-12	14:15:41	0.398181	1.77119	1.81842	3185.6	FALSE	#REF!
2022-09-12	14:15:41	0.436858	1.94323	1.81842	3187.54	FALSE	#REF!
2022-09-12	14:15:42	0.716349	3.18646	4.99805	3190.73	FALSE	#REF!
2022-09-12	14:15:42	1.42586	6.34251	4.99805	3197.07	FALSE	#REF!
2022-09-12	14:15:42	1.47726	6.57115	4.99805	3203.64	FALSE	#REF!
2022-09-12	14:15:42	0.874974	3.89206	4.99805	3207.53	FALSE	#REF!
2022-09-12	14:15:43	1.54912	6.8908	15.7835	3214.42	FALSE	#REF!
2022-09-12	14:15:43	2.79502	12.4328	15.7835	3226.85	FALSE	#REF!
2022-09-12	14:15:43	4.36383	19.4112	15.7835	3246.27	1	#REF!
2022-09-12	14:15:43	5.4852	24.3993	15.7835	3270.66	1	#REF!
2022-09-12	14:15:44	3.42133	15.2188	14.2564	3285.88	1	#REF!
2022-09-12	14:15:44	2.0077	8.93065	14.2564	3294.81	FALSE	#REF!
2022-09-12	14:15:44	3.81416	16.9661	14.2564	3311.78	1	#REF!
2022-09-12	14:15:44	3.5767	15.9099	14.2564	3327.69	1	#REF!
2022-09-12	14:15:45	4.45375	19.8112	20.8636	3347.5	1	#REF!
2022-09-12	14:15:45	4.08301	18.162	20.8636	3365.66	1	#REF!
2022-09-12	14:15:45	5.53426	24.6175	20.8636	3390.28	1	#REF!
2022-09-12	14:15:46	2.32927	10.3611	12.2843	3400.64	FALSE	#REF!
2022-09-12	14:15:46	2.42581	10.7905	12.2843	3411.43	FALSE	#REF!
2022-09-12	14:15:46	2.39462	10.6517	12.2843	3422.08	FALSE	#REF!
2022-09-12	14:15:46	3.89686	17.334	12.2843	3439.42	1	#REF!
2022-09-12	14:15:47	3.97655	17.6885	14.4293	3457.11	1	#REF!
2022-09-12	14:15:47	2.42062	10.7674	14.4293	3467.87	FALSE	#REF!
2022-09-12	14:15:47	4.17401	18.5668	14.4293	3486.44	1	#REF!
2022-09-12	14:15:47	2.40419	10.6943	14.4293	3497.14	FALSE	#REF!
2022-09-12	14:15:48	3.00398	13.3623	13.3921	3510.5	1	#REF!
2022-09-12	14:15:48	3.49049	15.5264	13.3921	3526.02	1	#REF!
2022-09-12	14:15:48	4.19126	18.6436	13.3921	3544.67	1	#REF!
2022-09-12	14:15:48	1.35701	6.03625	13.3921	3550.7	FALSE	#REF!
2022-09-12	14:15:49	0.272379	1.2116	0.996016	3551.92	FALSE	#REF!
2022-09-12	14:15:49	0.225407	1.00266	0.996016	3552.92	FALSE	#REF!
2022-09-12	14:15:49	0.173957	0.773796	0.996016	3553.69	FALSE	#REF!
2022-09-12	14:15:50	-0.0612593	-0.272494	-0.830726	3553.69	FALSE	#REF!
2022-09-12	14:15:50	-0.333626	-1.48404	-0.830726	3553.69	FALSE	#REF!
2022-09-12	14:15:50	-0.184211	-0.819407	-0.830726	3553.69	FALSE	#REF!
2022-09-12	14:15:50	-0.167926	-0.746968	-0.830726	3553.69	FALSE	#REF!
2022-09-12	14:15:51	0.0568577	0.252914	0.209621	3553.94	FALSE	#REF!
2022-09-12	14:15:51	-0.0797325	-0.354666	0.209621	3553.94	FALSE	#REF!
2022-09-12	14:15:51	0.201387	0.89581	0.209621	3554.84	FALSE	#REF!
2022-09-12	14:15:51	0.00998751	0.0444264	0.209621	3554.89	FALSE	#REF!
2022-09-12	14:15:52	0.298944	1.32976	5.86268	3556.21	FALSE	#REF!
2022-09-12	14:15:52	0.416959	1.85472	5.86268	3558.07	FALSE	#REF!
2022-09-12	14:15:52	1.40983	6.27121	5.86268	3564.34	FALSE	#REF!
2022-09-12	14:15:52	3.14622	13.995	5.86268	3578.34	1	#REF!
2022-09-12	14:15:53	3.34744	14.8901	11.7761	3593.23	1	#REF!
2022-09-12	14:15:53	2.6335	11.7143	11.7761	3604.94	FALSE	#REF!
2022-09-12	14:15:53	1.96123	8.72394	11.7761	3613.66	FALSE	#REF!
2022-09-12	14:15:54	1.4053	6.25106	6.51677	3619.92	FALSE	#REF!
2022-09-12	14:15:54	0.980114	4.35974	6.51677	3624.27	FALSE	#REF!
2022-09-12	14:15:54	1.31553	5.85174	6.51677	3630.13	FALSE	#REF!
2022-09-12	14:15:54	2.1592	9.60455	6.51677	3639.73	FALSE	#REF!
2022-09-12	14:15:55	2.13706	9.50607	12.7374	3649.24	FALSE	#REF!
2022-09-12	14:15:55	3.37706	15.0218	12.7374	3664.26	1	#REF!
2022-09-12	14:15:55	2.89762	12.8892	12.7374	3677.15	FALSE	#REF!
2022-09-12	14:15:55	3.04225	13.5325	12.7374	3690.68	1	#REF!
2022-09-12	14:15:56	0.469479	2.08834	1.60775	3692.77	FALSE	#REF!
2022-09-12	14:15:56	0.321896	1.43186	1.60775	3694.2	FALSE	#REF!
2022-09-12	14:15:56	0.398639	1.77323	1.60775	3695.97	FALSE	#REF!
2022-09-12	14:15:56	0.255738	1.13757	1.60775	3697.11	FALSE	#REF!
2022-09-12	14:15:57	0.145967	0.64929	0.394095	3697.76	FALSE	#REF!
2022-09-12	14:15:57	0.0943641	0.41975	0.394095	3698.18	FALSE	#REF!
2022-09-12	14:15:57	0.0254582	0.113243	0.394095	3698.29	FALSE	#REF!
2022-09-12	14:15:58	0.0700893	0.311771	0.719352	3698.61	FALSE	#REF!
2022-09-12	14:15:58	0.0908017	0.403904	0.719352	3699.01	FALSE	#REF!
2022-09-12	14:15:58	0.206679	0.91935	0.719352	3699.93	FALSE	#REF!
2022-09-12	14:15:58	0.2793	1.24238	0.719352	3701.17	FALSE	#REF!
2022-09-12	14:15:59	0.817265	3.63536	2.57079	3704.81	FALSE	#REF!
2022-09-12	14:15:59	0.632074	2.81159	2.57079	3707.62	FALSE	#REF!
2022-09-12	14:15:59	0.530649	2.36043	2.57079	3709.98	FALSE	#REF!
2022-09-12	14:15:59	0.331769	1.47577	2.57079	3711.45	FALSE	#REF!
2022-09-12	14:16:00	0.409377	1.82099	1.49439	3713.28	FALSE	#REF!
2022-09-12	14:16:00	0.441031	1.96179	1.49439	3715.24	FALSE	#REF!
2022-09-12	14:16:00	0.325255	1.4468	1.49439	3716.68	FALSE	#REF!
2022-09-12	14:16:00	0.168155	0.747987	1.49439	3717.43	FALSE	#REF!
2022-09-12	14:16:01	0.304135	1.35285	1.36047	3718.79	FALSE	#REF!
2022-09-12	14:16:01	0.210242	0.935198	1.36047	3719.72	FALSE	#REF!
2022-09-12	14:16:01	0.403168	1.79337	1.36047	3721.51	FALSE	#REF!
2022-09-12	14:16:02	0.137163	0.610128	2.30503	3722.12	FALSE	#REF!
2022-09-12	14:16:02	0.376552	1.67498	2.30503	3723.8	FALSE	#REF!
2022-09-12	14:16:02	0.45813	2.03785	2.30503	3725.84	FALSE	#REF!
2022-09-12	14:16:02	1.10093	4.89716	2.30503	3730.73	FALSE	#REF!
2022-09-12	14:16:03	1.41614	6.29927	3.29008	3737.03	FALSE	#REF!
2022-09-12	14:16:03	0.433855	1.92987	3.29008	3738.96	FALSE	#REF!
2022-09-12	14:16:03	0.955484	4.25018	3.29008	3743.21	FALSE	#REF!
2022-09-12	14:16:03	0.153092	0.680984	3.29008	3743.89	FALSE	#REF!
2022-09-12	14:16:04	0.162099	0.721049	0.741706	3744.62	FALSE	#REF!
2022-09-12	14:16:04	0.110445	0.491281	0.741706	3745.11	FALSE	#REF!
2022-09-12	14:16:04	0.250293	1.11335	0.741706	3746.22	FALSE	#REF!
2022-09-12	14:16:04	0.144135	0.641141	0.741706	3746.86	FALSE	#REF!
2022-09-12	14:16:05	0.271005	1.20548	1.00084	3748.07	FALSE	#REF!
2022-09-12	14:16:05	0.125916	0.5601	1.00084	3748.63	FALSE	#REF!
2022-09-12	14:16:05	0.278079	1.23695	1.00084	3749.86	FALSE	#REF!
2022-09-12	14:16:06	0.28271	1.25755	1.17662	3751.12	FALSE	#REF!
2022-09-12	14:16:06	0.230598	1.02575	1.17662	3752.15	FALSE	#REF!
2022-09-12	14:16:06	0.286781	1.27566	1.17662	3753.42	FALSE	#REF!
2022-09-12	14:16:06	0.257977	1.14753	1.17662	3754.57	FALSE	#REF!
2022-09-12	14:16:07	0.234568	1.04341	1.18268	3755.61	FALSE	#REF!
2022-09-12	14:16:07	0.239402	1.06491	1.18268	3756.68	FALSE	#REF!
2022-09-12	14:16:07	0.268868	1.19598	1.18268	3757.87	FALSE	#REF!
2022-09-12	14:16:07	0.320674	1.42642	1.18268	3759.3	FALSE	#REF!
2022-09-12	14:16:08	0.200725	0.892865	2.18737	3760.19	FALSE	#REF!
2022-09-12	14:16:08	0.330496	1.47011	2.18737	3761.66	FALSE	#REF!
2022-09-12	14:16:08	0.338181	1.5043	2.18737	3763.17	FALSE	#REF!
2022-09-12	14:16:08	1.09757	4.88221	2.18737	3768.05	FALSE	#REF!
2022-09-12	14:16:09	2.13284	9.4873	7.9863	3777.54	FALSE	#REF!
2022-09-12	14:16:09	1.86434	8.29296	7.9863	3785.83	FALSE	#REF!
2022-09-12	14:16:09	1.38902	6.17864	7.9863	3792.01	FALSE	#REF!
2022-09-12	14:16:10	1.09976	4.89195	6.79165	3796.9	FALSE	#REF!
2022-09-12	14:16:10	0.997366	4.43648	6.79165	3801.34	FALSE	#REF!
2022-09-12	14:16:10	2.08754	9.2858	6.79165	3810.62	FALSE	#REF!
2022-09-12	14:16:10	1.92266	8.55238	6.79165	3819.18	FALSE	#REF!
2022-09-12	14:16:11	4.95696	22.0495	16.0679	3841.23	1	#REF!
2022-09-12	14:16:11	3.34551	14.8815	16.0679	3856.11	1	#REF!
2022-09-12	14:16:11	3.73792	16.627	16.0679	3872.73	1	#REF!
2022-09-12	14:16:11	2.40851	10.7135	16.0679	3883.45	FALSE	#REF!
2022-09-12	14:16:12	2.80637	12.4833	13.2085	3895.93	FALSE	#REF!
2022-09-12	14:16:12	3.03167	13.4855	13.2085	3909.42	1	#REF!
2022-09-12	14:16:12	3.04174	13.5303	13.2085	3922.95	1	#REF!
2022-09-12	14:16:12	2.99782	13.3349	13.2085	3936.28	FALSE	#REF!
2022-09-12	14:16:13	3.40195	15.1326	16.7614	3951.41	1	#REF!
2022-09-12	14:16:13	3.4222	15.2226	16.7614	3966.64	1	#REF!
2022-09-12	14:16:13	4.48022	19.9289	16.7614	3986.57	1	#REF!
2022-09-12	14:16:14	4.77966	21.2609	8.0139	4007.83	1	#REF!
2022-09-12	14:16:14	0.427748	1.90271	8.0139	4009.73	FALSE	#REF!
2022-09-12	14:16:14	0.941081	4.18612	8.0139	4013.91	FALSE	#REF!
2022-09-12	14:16:14	1.05793	4.70588	8.0139	4018.62	FALSE	#REF!
2022-09-12	14:16:15	2.02968	9.02842	7.19941	4027.65	FALSE	#REF!
2022-09-12	14:16:15	0.945967	4.20785	7.19941	4031.86	FALSE	#REF!
2022-09-12	14:16:15	1.26368	5.6211	7.19941	4037.48	FALSE	#REF!
2022-09-12	14:16:15	2.23467	9.94026	7.19941	4047.42	FALSE	#REF!
2022-09-12	14:16:16	2.96836	13.2039	7.97065	4060.62	FALSE	#REF!
2022-09-12	14:16:16	1.61599	7.18825	7.97065	4067.81	FALSE	#REF!
2022-09-12	14:16:16	1.25162	5.56746	7.97065	4073.38	FALSE	#REF!
2022-09-12	14:16:16	1.33156	5.92305	7.97065	4079.3	FALSE	#REF!
2022-09-12	14:16:17	1.41492	6.29385	3.68644	4085.59	FALSE	#REF!
2022-09-12	14:16:17	0.764389	3.40016	3.68644	4089	FALSE	#REF!
2022-09-12	14:16:17	0.306934	1.3653	3.68644	4090.36	FALSE	#REF!
2022-09-12	14:16:18	1.40123	6.23295	5.23217	4096.59	FALSE	#REF!
2022-09-12	14:16:18	0.811107	3.60797	5.23217	4100.2	FALSE	#REF!
2022-09-12	14:16:18	1.19197	5.30212	5.23217	4105.5	FALSE	#REF!
2022-09-12	14:16:18	1.30067	5.78564	5.23217	4111.29	FALSE	#REF!
2022-09-12	14:16:19	2.63161	11.7059	5.49777	4123	FALSE	#REF!
2022-09-12	14:16:19	1.43447	6.38081	5.49777	4129.38	FALSE	#REF!
2022-09-12	14:16:19	0.503066	2.23774	5.49777	4131.61	FALSE	#REF!
2022-09-12	14:16:19	0.374669	1.6666	5.49777	4133.28	FALSE	#REF!
2022-09-12	14:16:20	0.333041	1.48143	2.72495	4134.76	FALSE	#REF!
2022-09-12	14:16:20	0.782557	3.48097	2.72495	4138.24	FALSE	#REF!
2022-09-12	14:16:20	0.623168	2.77198	2.72495	4141.01	FALSE	#REF!
2022-09-12	14:16:20	0.711616	3.16541	2.72495	4144.18	FALSE	#REF!
2022-09-12	14:16:21	1.23431	5.49046	9.4614	4149.67	FALSE	#REF!
2022-09-12	14:16:21	2.19365	9.75779	9.4614	4159.43	FALSE	#REF!
2022-09-12	14:16:21	2.95309	13.1359	9.4614	4172.56	FALSE	#REF!
2022-09-12	14:16:22	5.0021	22.2503	15.826	4194.81	1	#REF!
2022-09-12	14:16:22	4.50373	20.0335	15.826	4214.85	1	#REF!
2022-09-12	14:16:22	3.82444	17.0119	15.826	4231.86	1	#REF!
2022-09-12	14:16:22	0.901081	4.00819	15.826	4235.87	FALSE	#REF!
2022-09-12	14:16:23	1.35528	6.02856	8.26194	4241.9	FALSE	#REF!
2022-09-12	14:16:23	1.39111	6.18794	8.26194	4248.08	FALSE	#REF!
2022-09-12	14:16:23	2.82571	12.5693	8.26194	4260.65	FALSE	#REF!
2022-09-12	14:16:24	1.83314	8.15417	15.4122	4268.81	FALSE	#REF!
2022-09-12	14:16:24	2.7424	12.1987	15.4122	4281.01	FALSE	#REF!
2022-09-12	14:16:24	3.44546	15.3261	15.4122	4296.33	1	#REF!
2022-09-12	14:16:24	5.83828	25.9698	15.4122	4322.3	1	#REF!
2022-09-12	14:16:25	4.26607	18.9763	16.926	4341.28	1	#REF!
2022-09-12	14:16:25	5.30108	23.5803	16.926	4364.86	1	#REF!
2022-09-12	14:16:25	2.44022	10.8546	16.926	4375.71	FALSE	#REF!
2022-09-12	14:16:25	3.21314	14.2927	16.926	4390.01	1	#REF!
2022-09-12	14:16:26	1.81879	8.09034	5.79845	4398.1	FALSE	#REF!
2022-09-12	14:16:26	0.694517	3.08935	5.79845	4401.19	FALSE	#REF!
2022-09-12	14:16:26	0.59869	2.66309	5.79845	4403.85	FALSE	#REF!
2022-09-12	14:16:26	2.1022	9.35101	5.79845	4413.2	FALSE	#REF!
2022-09-12	14:16:27	4.92525	21.9085	16.7612	4435.11	1	#REF!
2022-09-12	14:16:27	4.96973	22.1064	16.7612	4457.22	1	#REF!
2022-09-12	14:16:27	2.30765	10.2649	16.7612	4467.48	FALSE	#REF!
2022-09-12	14:16:27	2.86973	12.7651	16.7612	4480.25	FALSE	#REF!
2022-09-12	14:16:28	1.80566	8.03194	5.49666	4488.28	FALSE	#REF!
2022-09-12	14:16:28	1.02653	4.56621	5.49666	4492.84	FALSE	#REF!
2022-09-12	14:16:28	0.874924	3.89184	5.49666	4496.74	FALSE	#REF!
2022-09-12	14:16:29	0.851565	3.78793	4.71181	4500.52	FALSE	#REF!
2022-09-12	14:16:29	1.05996	4.71491	4.71181	4505.24	FALSE	#REF!
2022-09-12	14:16:29	0.917926	4.08312	4.71181	4509.32	FALSE	#REF!
2022-09-12	14:16:29	1.4076	6.26129	4.71181	4515.58	FALSE	#REF!
2022-09-12	14:16:30	2.08856	9.29033	9.32995	4524.87	FALSE	#REF!
2022-09-12	14:16:30	2.29747	10.2196	9.32995	4535.09	FALSE	#REF!
2022-09-12	14:16:30	1.94607	8.65651	9.32995	4543.75	FALSE	#REF!
2022-09-12	14:16:30	2.05777	9.15337	9.32995	4552.9	FALSE	#REF!
2022-09-12	14:16:31	1.78037	7.91944	11.057	4560.82	FALSE	#REF!
2022-09-12	14:16:31	2.92088	12.9927	11.057	4573.81	FALSE	#REF!
2022-09-12	14:16:31	2.52195	11.2181	11.057	4585.03	FALSE	#REF!
2022-09-12	14:16:31	2.71966	12.0976	11.057	4597.13	FALSE	#REF!
2022-09-12	14:16:32	2.8338	12.6053	17.0236	4609.74	FALSE	#REF!
2022-09-12	14:16:32	3.74306	16.6499	17.0236	4626.39	1	#REF!
2022-09-12	14:16:32	4.90434	21.8155	17.0236	4648.2	1	#REF!
2022-09-12	14:16:33	3.63528	16.1705	12.2567	4664.37	1	#REF!
2022-09-12	14:16:33	2.95228	13.1323	12.2567	4677.5	FALSE	#REF!
2022-09-12	14:16:33	2.45065	10.901	12.2567	4688.4	FALSE	#REF!
2022-09-12	14:16:33	1.98352	8.82309	12.2567	4697.23	FALSE	#REF!
2022-09-12	14:16:34	3.23039	14.3694	14.2822	4711.6	1	#REF!
2022-09-12	14:16:34	5.06474	22.529	14.2822	4734.13	1	#REF!
2022-09-12	14:16:34	2.66877	11.8712	14.2822	4746	FALSE	#REF!
2022-09-12	14:16:34	1.8792	8.35906	14.2822	4754.36	FALSE	#REF!
2022-09-12	14:16:35	2.17365	9.66883	9.35174	4764.03	FALSE	#REF!
2022-09-12	14:16:35	2.22525	9.89836	9.35174	4773.92	FALSE	#REF!
2022-09-12	14:16:35	2.0022	8.90619	9.35174	4782.83	FALSE	#REF!
2022-09-12	14:16:35	2.00836	8.93359	9.35174	4791.76	FALSE	#REF!
2022-09-12	14:16:36	3.69156	16.4208	17.7572	4808.18	1	#REF!
2022-09-12	14:16:36	4.00373	17.8094	17.7572	4825.99	1	#REF!
2022-09-12	14:16:36	4.28067	19.0413	17.7572	4845.03	1	#REF!
2022-09-12	14:16:37	3.45436	15.3657	11.1966	4860.4	1	#REF!
2022-09-12	14:16:37	2.77574	12.347	11.1966	4872.75	FALSE	#REF!
2022-09-12	14:16:37	1.60872	7.15591	11.1966	4879.9	FALSE	#REF!
2022-09-12	14:16:37	2.22958	9.91762	11.1966	4889.82	FALSE	#REF!
2022-09-12	14:16:38	1.39065	6.18589	11.8606	4896.01	FALSE	#REF!
2022-09-12	14:16:38	2.61487	11.6315	11.8606	4907.64	FALSE	#REF!
2022-09-12	14:16:38	2.00983	8.94013	11.8606	4916.58	FALSE	#REF!
2022-09-12	14:16:38	4.65014	20.6848	11.8606	4937.26	1	#REF!
2022-09-12	14:16:39	4.70571	20.9319	16.2536	4958.2	1	#REF!
2022-09-12	14:16:39	5.18576	23.0673	16.2536	4981.26	1	#REF!
2022-09-12	14:16:39	2.41721	10.7522	16.2536	4992.01	FALSE	#REF!
2022-09-12	14:16:39	2.30724	10.2631	16.2536	5002.28	FALSE	#REF!
2022-09-12	14:16:40	1.23126	5.47689	5.7474	5007.75	FALSE	#REF!
2022-09-12	14:16:40	1.57742	7.01668	5.7474	5014.77	FALSE	#REF!
2022-09-12	14:16:40	1.06754	4.74863	5.7474	5019.52	FALSE	#REF!
2022-09-12	14:16:41	1.42749	6.34976	7.61428	5025.87	FALSE	#REF!
2022-09-12	14:16:41	1.17289	5.21725	7.61428	5031.09	FALSE	#REF!
2022-09-12	14:16:41	2.41166	10.7275	7.61428	5041.81	FALSE	#REF!
2022-09-12	14:16:41	1.83503	8.16258	7.61428	5049.98	FALSE	#REF!
2022-09-12	14:16:42	1.96184	8.72666	9.89235	5058.7	FALSE	#REF!
2022-09-12	14:16:42	1.23273	5.48343	9.89235	5064.19	FALSE	#REF!
2022-09-12	14:16:42	2.72194	12.1077	9.89235	5076.29	FALSE	#REF!
2022-09-12	14:16:42	2.97909	13.2516	9.89235	5089.55	FALSE	#REF!
2022-09-12	14:16:43	2.89197	12.8641	12.7821	5102.41	FALSE	#REF!
2022-09-12	14:16:43	1.66464	7.40465	12.7821	5109.82	FALSE	#REF!
2022-09-12	14:16:43	3.92134	17.4429	12.7821	5127.26	1	#REF!
2022-09-12	14:16:43	3.01619	13.4166	12.7821	5140.67	1	#REF!
2022-09-12	14:16:44	2.80948	12.4971	9.86141	5153.17	FALSE	#REF!
2022-09-12	14:16:44	1.49472	6.64881	9.86141	5159.82	FALSE	#REF!
2022-09-12	14:16:44	2.34663	10.4383	9.86141	5170.26	FALSE	#REF!
2022-09-12	14:16:45	1.68042	7.47484	7.56064	5177.73	FALSE	#REF!
2022-09-12	14:16:45	1.76123	7.8343	7.56064	5185.57	FALSE	#REF!
2022-09-12	14:16:45	1.12144	4.98839	7.56064	5190.56	FALSE	#REF!
2022-09-12	14:16:45	2.23574	9.94502	7.56064	5200.5	FALSE	#REF!
2022-09-12	14:16:46	1.92413	8.55892	8.61909	5209.06	FALSE	#REF!
2022-09-12	14:16:46	2.14927	9.56038	8.61909	5218.62	FALSE	#REF!
2022-09-12	14:16:46	1.61523	7.18487	8.61909	5225.81	FALSE	#REF!
2022-09-12	14:16:46	2.062	9.17219	8.61909	5234.98	FALSE	#REF!
2022-09-12	14:16:47	3.42988	15.2568	13.9541	5250.23	1	#REF!
2022-09-12	14:16:47	3.11726	13.8662	13.9541	5264.1	1	#REF!
2022-09-12	14:16:47	3.82123	16.9976	13.9541	5281.1	1	#REF!
2022-09-12	14:16:47	2.17976	9.69601	13.9541	5290.79	FALSE	#REF!
2022-09-12	14:16:48	1.73833	7.73244	6.0226	5298.53	FALSE	#REF!
2022-09-12	14:16:48	1.02368	4.55353	6.0226	5303.08	FALSE	#REF!
2022-09-12	14:16:48	1.29981	5.78181	6.0226	5308.86	FALSE	#REF!
2022-09-12	14:16:49	1.40246	6.23842	9.82888	5315.1	FALSE	#REF!
2022-09-12	14:16:49	2.61823	11.6464	9.82888	5326.75	FALSE	#REF!
2022-09-12	14:16:49	3.03217	13.4877	9.82888	5340.23	1	#REF!
2022-09-12	14:16:49	1.78566	7.94297	9.82888	5348.18	FALSE	#REF!
2022-09-12	14:16:50	0.996705	4.43354	5.09239	5352.61	FALSE	#REF!
2022-09-12	14:16:50	1.18062	5.25163	5.09239	5357.86	FALSE	#REF!
2022-09-12	14:16:50	0.949224	4.22234	5.09239	5362.09	FALSE	#REF!
2022-09-12	14:16:50	1.45273	6.46203	5.09239	5368.55	FALSE	#REF!
2022-09-12	14:16:51	2.0024	8.90708	6.36947	5377.45	FALSE	#REF!
2022-09-12	14:16:51	1.62235	7.21654	6.36947	5384.67	FALSE	#REF!
2022-09-12	14:16:51	1.05284	4.68324	6.36947	5389.35	FALSE	#REF!
2022-09-12	14:16:51	1.05009	4.67101	6.36947	5394.03	FALSE	#REF!
2022-09-12	14:16:52	0.919504	4.09014	5.6425	5398.12	FALSE	#REF!
2022-09-12	14:16:52	1.27838	5.68649	5.6425	5403.8	FALSE	#REF!
2022-09-12	14:16:52	1.60759	7.15088	5.6425	5410.95	FALSE	#REF!
2022-09-12	14:16:53	2.52434	11.2288	6.46155	5422.18	FALSE	#REF!
2022-09-12	14:16:53	1.12052	4.9843	6.46155	5427.17	FALSE	#REF!
2022-09-12	14:16:53	0.960522	4.27259	6.46155	5431.44	FALSE	#REF!
2022-09-12	14:16:53	1.2051	5.36053	6.46155	5436.8	FALSE	#REF!
2022-09-12	14:16:54	0.88215	3.92398	4.70966	5440.72	FALSE	#REF!
2022-09-12	14:16:54	1.24444	5.53552	4.70966	5446.26	FALSE	#REF!
2022-09-12	14:16:54	1.2937	5.75464	4.70966	5452.01	FALSE	#REF!
2022-09-12	14:16:54	0.814822	3.62449	4.70966	5455.64	FALSE	#REF!
2022-09-12	14:16:55	0.617519	2.74685	3.60344	5458.38	FALSE	#REF!
2022-09-12	14:16:55	0.67869	3.01895	3.60344	5461.4	FALSE	#REF!
2022-09-12	14:16:55	1.10744	4.92611	3.60344	5466.33	FALSE	#REF!
2022-09-12	14:16:55	0.836705	3.72183	3.60344	5470.05	FALSE	#REF!
2022-09-12	14:16:56	0.61187	2.72172	4.44003	5472.77	FALSE	#REF!
2022-09-12	14:16:56	1.17991	5.24848	4.44003	5478.02	FALSE	#REF!
2022-09-12	14:16:56	1.20271	5.34989	4.44003	5483.37	FALSE	#REF!
2022-09-12	14:16:57	1.80973	8.05004	11.5151	5491.42	FALSE	#REF!
2022-09-12	14:16:57	1.73589	7.72159	11.5151	5499.14	FALSE	#REF!
2022-09-12	14:16:57	2.06225	9.1733	11.5151	5508.32	FALSE	#REF!
2022-09-12	14:16:57	4.74693	21.1153	11.5151	5529.43	1	#REF!
2022-09-12	14:16:58	3.89818	17.3399	20.767	5546.77	1	#REF!
2022-09-12	14:16:58	5.92795	26.3687	20.767	5573.14	1	#REF!
2022-09-12	14:16:58	4.34179	19.3132	20.767	5592.45	1	#REF!
2022-09-12	14:16:58	4.50663	20.0464	20.767	5612.5	1	#REF!
2022-09-12	14:16:59	1.59996	7.11694	8.29838	5619.62	FALSE	#REF!
2022-09-12	14:16:59	1.88958	8.40523	8.29838	5628.02	FALSE	#REF!
2022-09-12	14:16:59	1.87106	8.32285	8.29838	5636.34	FALSE	#REF!
2022-09-12	14:16:59	2.10164	9.34852	8.29838	5645.69	FALSE	#REF!
2022-09-12	14:17:00	1.26851	5.64259	4.7119	5651.34	FALSE	#REF!
2022-09-12	14:17:00	0.92612	4.11957	4.7119	5655.46	FALSE	#REF!
2022-09-12	14:17:00	0.983219	4.37355	4.7119	5659.83	FALSE	#REF!
2022-09-12	14:17:01	2.70001	12.0102	11.1982	5671.84	FALSE	#REF!
2022-09-12	14:17:01	3.84184	17.0893	11.1982	5688.93	1	#REF!
2022-09-12	14:17:01	2.55233	11.3533	11.1982	5700.28	FALSE	#REF!
2022-09-12	14:17:01	0.975687	4.34005	11.1982	5704.62	FALSE	#REF!
2022-09-12	14:17:02	0.617468	2.74662	1.19388	5707.37	FALSE	#REF!
2022-09-12	14:17:02	0.0792496	0.352518	1.19388	5707.72	FALSE	#REF!
2022-09-12	14:17:02	0.313499	1.39451	1.19388	5709.12	FALSE	#REF!
2022-09-12	14:17:02	0.0633717	0.28189	1.19388	5709.4	FALSE	#REF!
2022-09-12	14:17:03	0.292481	1.30101	0.640009	5710.7	FALSE	#REF!
2022-09-12	14:17:03	0.0134481	0.0598198	0.640009	5710.76	FALSE	#REF!
2022-09-12	14:17:03	0.16271	0.723767	0.640009	5711.48	FALSE	#REF!
2022-09-12	14:17:03	0.106883	0.475437	0.640009	5711.96	FALSE	#REF!
2022-09-12	14:17:04	0.182659	0.812504	0.625672	5712.77	FALSE	#REF!
2022-09-12	14:17:04	0.0725829	0.322863	0.625672	5713.09	FALSE	#REF!
2022-09-12	14:17:04	0.16673	0.741648	0.625672	5713.83	FALSE	#REF!
2022-09-12	14:17:05	0.106272	0.472719	0.733575	5714.31	FALSE	#REF!
2022-09-12	14:17:05	0.165763	0.737347	0.733575	5715.04	FALSE	#REF!
2022-09-12	14:17:05	0.22271	0.990659	0.733575	5716.04	FALSE	#REF!
2022-09-12	14:17:06	0.0986389	0.438766	3.02619	5716.47	FALSE	#REF!
2022-09-12	14:17:06	0.229071	1.01895	3.02619	5717.49	FALSE	#REF!
2022-09-12	14:17:06	0.270089	1.20141	3.02619	5718.69	FALSE	#REF!
2022-09-12	14:17:06	1.91681	8.52635	3.02619	5727.22	FALSE	#REF!
2022-09-12	14:17:06	0.886985	3.94549	3.02619	5731.17	FALSE	#REF!
2022-09-12	14:17:07	0.341285	1.5181	1.03695	5732.68	FALSE	#REF!
2022-09-12	14:17:07	0.124949	0.555798	1.03695	5733.24	FALSE	#REF!

## Sheet: Duke_prong_2022912141147 (E (2)
Date	Time	Lbs	Newtons	Total Force x Time	Total Time Steps Force >13.345		**GoPro Fitting: 1401
2022-09-12	14:12:07	5.38026	23.9325	23.9325	1
2022-09-12	14:12:07	3.84337	17.0961	41.0286	1
2022-09-12	14:12:07	0.848257	3.77322	44.8018	FALSE
2022-09-12	14:12:07	0.391209	1.74018	46.5419	FALSE
2022-09-12	14:12:08	0.231311	1.02892	47.5709	FALSE
2022-09-12	14:12:08	0.298842	1.32931	48.9002	FALSE
2022-09-12	14:12:08	0.0871885	0.387832	49.288	FALSE
2022-09-12	14:12:09	-0.00309134	-0.0137509	49.288	FALSE
2022-09-12	14:12:09	0.190191	0.846008	50.134	FALSE
2022-09-12	14:12:09	0.138639	0.616694	50.7507	FALSE
2022-09-12	14:12:09	0.14215	0.632312	51.383	FALSE
2022-09-12	14:12:10	0.769631	3.42347	54.8065	FALSE
2022-09-12	14:12:10	2.07538	9.23171	64.0382	FALSE
2022-09-12	14:12:10	4.2195	18.7692	82.8074	1
2022-09-12	14:12:11	3.831	17.0411	99.8484	1
2022-09-12	14:12:11	1.10765	4.92705	104.775	FALSE
2022-09-12	14:12:11	0.565153	2.51391	107.289	FALSE
2022-09-12	14:12:11	0.413244	1.83819	109.128	FALSE
2022-09-12	14:12:11	0.266832	1.18692	110.315	FALSE
2022-09-12	14:12:12	0.423321	1.88302	112.198	FALSE
2022-09-12	14:12:12	0.269886	1.20051	113.398	FALSE
2022-09-12	14:12:12	0.389021	1.73044	115.128	FALSE
2022-09-12	14:12:13	0.177977	0.791677	115.92	FALSE
2022-09-12	14:12:13	0.25701	1.14323	117.063	FALSE
2022-09-12	14:12:13	0.231463	1.02959	118.093	FALSE
2022-09-12	14:12:13	0.255229	1.13531	119.228	FALSE
2022-09-12	14:12:14	-0.108842	-0.484151	119.228	FALSE
2022-09-12	14:12:14	-0.139682	-0.621333	119.228	FALSE
2022-09-12	14:12:14	-0.0747453	-0.332482	119.228	FALSE
2022-09-12	14:12:14	0.0554328	0.246576	119.475	FALSE
2022-09-12	14:12:15	-0.0411575	-0.183077	119.475	FALSE
2022-09-12	14:12:15	0.231158	1.02824	120.503	FALSE
2022-09-12	14:12:15	0.168359	0.748895	121.252	FALSE
2022-09-12	14:12:15	0.209733	0.932934	122.185	FALSE
2022-09-12	14:12:16	0.130802	0.581833	122.767	FALSE
2022-09-12	14:12:16	0.242761	1.07985	123.847	FALSE
2022-09-12	14:12:16	0.28841	1.28291	125.13	FALSE
2022-09-12	14:12:17	0.140064	0.623033	125.753	FALSE	#REF!			Total Force x Time	5733.24
2022-09-12	14:12:17	0.412481	1.8348	127.587	FALSE	#REF!			Total Time Steps Force >3	99
2022-09-12	14:12:17	0.601183	2.67418	130.262	FALSE	#REF!
2022-09-12	14:12:17	1.09945	4.89057	135.152	FALSE	#REF!
2022-09-12	14:12:18	0.671463	2.9868	138.139	FALSE	#REF!
2022-09-12	14:12:18	0.728257	3.23943	141.378	FALSE	#REF!
2022-09-12	14:12:18	0.321336	1.42937	142.808	FALSE	#REF!
2022-09-12	14:12:18	0.794975	3.53621	146.344	FALSE	#REF!
2022-09-12	14:12:19	0.380827	1.69399	148.038	FALSE	#REF!
2022-09-12	14:12:19	0.722659	3.21453	151.252	FALSE	#REF!
2022-09-12	14:12:19	0.641132	2.85188	154.104	FALSE	#REF!
2022-09-12	14:12:19	0.704542	3.13394	157.238	FALSE	#REF!
2022-09-12	14:12:20	0.469071	2.08652	159.325	FALSE	#REF!
2022-09-12	14:12:20	0.394415	1.75444	161.079	FALSE	#REF!
2022-09-12	14:12:20	0.493092	2.19337	163.273	FALSE	#REF!
2022-09-12	14:12:21	0.28215	1.25506	164.528	FALSE	#REF!
2022-09-12	14:12:21	0.557214	2.4786	167.006	FALSE	#REF!
2022-09-12	14:12:21	0.2107	0.937236	167.943	FALSE	#REF!
2022-09-12	14:12:21	0.578842	2.5748	170.518	FALSE	#REF!
2022-09-12	14:12:22	0.332074	1.47713	171.995	FALSE	#REF!
2022-09-12	14:12:22	0.724389	3.22223	175.218	FALSE	#REF!
2022-09-12	14:12:22	0.330344	1.46944	176.687	FALSE	#REF!
2022-09-12	14:12:22	1.00775	4.48267	181.17	FALSE	#REF!
2022-09-12	14:12:23	0.504033	2.24204	183.412	FALSE	#REF!
2022-09-12	14:12:23	1.66413	7.40238	190.814	FALSE	#REF!
2022-09-12	14:12:23	0.665458	2.96009	193.774	FALSE	#REF!
2022-09-12	14:12:23	1.50383	6.68934	200.464	FALSE	#REF!
2022-09-12	14:12:24	0.800725	3.56178	204.025	FALSE	#REF!
2022-09-12	14:12:24	1.43095	6.36515	210.391	FALSE	#REF!
2022-09-12	14:12:24	0.92612	4.11957	214.51	FALSE	#REF!
2022-09-12	14:12:25	1.02357	4.55304	219.063	FALSE	#REF!
2022-09-12	14:12:25	1.00693	4.47903	223.542	FALSE	#REF!
2022-09-12	14:12:25	1.01304	4.5062	228.048	FALSE	#REF!
2022-09-12	14:12:25	1.22917	5.46759	233.516	FALSE	#REF!
2022-09-12	14:12:26	1.11747	4.97073	238.487	FALSE	#REF!
2022-09-12	14:12:26	1.1049	4.91482	243.402	FALSE	#REF!
2022-09-12	14:12:26	0.537723	2.3919	245.793	FALSE	#REF!
2022-09-12	14:12:27	1.05345	4.68596	250.479	FALSE	#REF!
2022-09-12	14:12:27	0.427646	1.90225	252.382	FALSE	#REF!
2022-09-12	14:12:27	1.19752	5.32681	257.708	FALSE	#REF!
2022-09-12	14:12:27	0.464339	2.06547	259.774	FALSE	#REF!
2022-09-12	14:12:27	1.12856	5.02006	264.794	FALSE	#REF!
2022-09-12	14:12:28	0.993702	4.42019	269.214	FALSE	#REF!
2022-09-12	14:12:28	1.53243	6.81656	276.031	FALSE	#REF!
2022-09-12	14:12:28	1.5053	6.69588	282.727	FALSE	#REF!
2022-09-12	14:12:29	2.125	9.45242	292.179	FALSE	#REF!
2022-09-12	14:12:29	1.67106	7.43321	299.612	FALSE	#REF!
2022-09-12	14:12:29	2.62988	11.6982	311.31	FALSE	#REF!
2022-09-12	14:12:29	1.75711	7.81598	319.126	FALSE	#REF!
2022-09-12	14:12:30	1.58592	7.05449	326.181	FALSE	#REF!
2022-09-12	14:12:30	1.49742	6.66082	332.842	FALSE	#REF!
2022-09-12	14:12:30	0.81243	3.61385	336.456	FALSE	#REF!
2022-09-12	14:12:30	1.51136	6.72283	343.178	FALSE	#REF!
2022-09-12	14:12:31	0.720114	3.20321	346.382	FALSE	#REF!
2022-09-12	14:12:31	1.41212	6.28139	352.663	FALSE	#REF!
2022-09-12	14:12:31	0.720165	3.20344	355.866	FALSE	#REF!
2022-09-12	14:12:31	1.76892	7.86851	363.735	FALSE	#REF!
2022-09-12	14:12:32	1.10617	4.92047	368.655	FALSE	#REF!
2022-09-12	14:12:32	2.43085	10.8129	379.468	FALSE	#REF!
2022-09-12	14:12:32	1.74103	7.74445	387.213	FALSE	#REF!
2022-09-12	14:12:33	3.0192	13.43	400.643	1	#REF!
2022-09-12	14:12:33	1.34108	5.96539	406.608	FALSE	#REF!
2022-09-12	14:12:33	2.39757	10.6649	417.273	FALSE	#REF!
2022-09-12	14:12:33	1.12989	5.02598	422.299	FALSE	#REF!
2022-09-12	14:12:34	1.73309	7.70913	430.008	FALSE	#REF!
2022-09-12	14:12:34	1.19777	5.32792	435.336	FALSE	#REF!
2022-09-12	14:12:34	0.624338	2.77718	438.113	FALSE	#REF!
2022-09-12	14:12:34	1.18805	5.28468	443.398	FALSE	#REF!
2022-09-12	14:12:35	0.435484	1.93712	445.335	FALSE	#REF!
2022-09-12	14:12:35	1.23803	5.50701	450.842	FALSE	#REF!
2022-09-12	14:12:35	0.466018	2.07294	452.915	FALSE	#REF!
2022-09-12	14:12:35	1.05248	4.68164	457.597	FALSE	#REF!
2022-09-12	14:12:36	0.457163	2.03355	459.63	FALSE	#REF!
2022-09-12	14:12:36	1.15609	5.14252	464.773	FALSE	#REF!
2022-09-12	14:12:36	0.980318	4.36065	469.133	FALSE	#REF!
2022-09-12	14:12:37	1.56546	6.96348	476.097	FALSE	#REF!
2022-09-12	14:12:37	1.16607	5.18691	481.284	FALSE	#REF!
2022-09-12	14:12:37	1.76658	7.8581	489.142	FALSE	#REF!
2022-09-12	14:12:37	1.49238	6.6384	495.78	FALSE	#REF!
2022-09-12	14:12:38	2.31838	10.3126	506.093	FALSE	#REF!
2022-09-12	14:12:38	1.48383	6.60037	512.693	FALSE	#REF!
2022-09-12	14:12:38	2.26602	10.0797	522.773	FALSE	#REF!
2022-09-12	14:12:38	2.29279	10.1988	532.972	FALSE	#REF!
2022-09-12	14:12:39	0.985916	4.38555	537.357	FALSE	#REF!
2022-09-12	14:12:39	2.30134	10.2368	547.594	FALSE	#REF!
2022-09-12	14:12:39	0.799402	3.5559	551.15	FALSE	#REF!
2022-09-12	14:12:39	3.2478	14.4469	565.597	1	#REF!
2022-09-12	14:12:40	1.16841	5.19732	570.794	FALSE	#REF!
2022-09-12	14:12:40	3.93604	17.5083	588.303	1	#REF!
2022-09-12	14:12:40	2.20459	9.80646	598.109	FALSE	#REF!
2022-09-12	14:12:41	5.73919	25.5291	623.638	1	#REF!
2022-09-12	14:12:41	1.93207	8.59423	632.232	FALSE	#REF!
2022-09-12	14:12:41	4.36332	19.4089	651.641	1	#REF!
2022-09-12	14:12:41	2.17584	9.67857	661.32	FALSE	#REF!
2022-09-12	14:12:42	4.45864	19.8329	681.153	1	#REF!
2022-09-12	14:12:42	2.82154	12.5508	693.703	FALSE	#REF!
2022-09-12	14:12:42	3.88551	17.2835	710.987	1	#REF!
2022-09-12	14:12:42	3.65085	16.2397	727.227	1	#REF!
2022-09-12	14:12:43	5.4136	24.0808	751.307	1	#REF!
2022-09-12	14:12:43	4.61141	20.5125	771.82	1	#REF!
2022-09-12	14:12:43	4.35507	19.3722	791.192	1	#REF!
2022-09-12	14:12:43	4.13009	18.3715	809.564	1	#REF!
2022-09-12	14:12:44	2.68027	11.9224	821.486	FALSE	#REF!
2022-09-12	14:12:44	2.1365	9.50358	830.99	FALSE	#REF!
2022-09-12	14:12:44	1.20973	5.38112	836.371	FALSE	#REF!
2022-09-12	14:12:45	1.14393	5.08843	841.459	FALSE	#REF!
2022-09-12	14:12:45	0.639249	2.84351	844.303	FALSE	#REF!
2022-09-12	14:12:45	0.551718	2.45415	846.757	FALSE	#REF!
2022-09-12	14:12:45	0.418079	1.8597	848.617	FALSE	#REF!
2022-09-12	14:12:46	1.02337	4.55215	853.169	FALSE	#REF!
2022-09-12	14:12:46	0.985102	4.38193	857.551	FALSE	#REF!
2022-09-12	14:12:46	1.61589	7.1878	864.738	FALSE	#REF!
2022-09-12	14:12:46	2.02948	9.02753	873.766	FALSE	#REF!
2022-09-12	14:12:47	4.66032	20.73	894.496	1	#REF!
2022-09-12	14:12:47	2.68062	11.9239	906.42	FALSE	#REF!
2022-09-12	14:12:47	1.99034	8.85343	915.273	FALSE	#REF!
2022-09-12	14:12:47	1.26922	5.64574	920.919	FALSE	#REF!
2022-09-12	14:12:48	0.730649	3.25007	924.169	FALSE	#REF!
2022-09-12	14:12:48	1.21319	5.39651	929.566	FALSE	#REF!
2022-09-12	14:12:48	1.00673	4.47814	934.044	FALSE	#REF!
2022-09-12	14:12:49	1.87676	8.3482	942.392	FALSE	#REF!
2022-09-12	14:12:49	1.19111	5.2983	947.69	FALSE	#REF!
2022-09-12	14:12:49	2.92072	12.9919	960.682	FALSE	#REF!
2022-09-12	14:12:49	1.56541	6.96326	967.646	FALSE	#REF!
2022-09-12	14:12:50	2.71416	12.0731	979.719	FALSE	#REF!
2022-09-12	14:12:50	3.60703	16.0448	995.763	1	#REF!
2022-09-12	14:12:50	3.40271	15.1359	1010.9	1	#REF!
2022-09-12	14:12:50	4.90937	21.8379	1032.74	1	#REF!
2022-09-12	14:12:51	4.50841	20.0543	1052.79	1	#REF!
2022-09-12	14:12:51	4.07716	18.136	1070.93	1	#REF!
2022-09-12	14:12:51	11.4066	50.7388	1121.67	1	#REF!
2022-09-12	14:12:51	13.2999	59.1606	1180.83	1	#REF!
2022-09-12	14:12:52	6.06886	26.9955	1207.82	1	#REF!
2022-09-12	14:12:52	2.06744	9.19639	1217.02	FALSE	#REF!
2022-09-12	14:12:52	0.574771	2.5567	1219.58	FALSE	#REF!
2022-09-12	14:12:53	0.468104	2.08222	1221.66	FALSE	#REF!
2022-09-12	14:12:53	0.33986	1.51177	1223.17	FALSE	#REF!
2022-09-12	14:12:53	0.328359	1.46061	1224.63	FALSE	#REF!
2022-09-12	14:12:53	0.448919	1.99688	1226.63	FALSE	#REF!
2022-09-12	14:12:54	0.498435	2.21714	1228.84	FALSE	#REF!
2022-09-12	14:12:54	0.628919	2.79756	1231.64	FALSE	#REF!
2022-09-12	14:12:54	0.727036	3.234	1234.88	FALSE	#REF!
2022-09-12	14:12:54	0.735483	3.27158	1238.15	FALSE	#REF!
2022-09-12	14:12:55	0.329529	1.46581	1239.61	FALSE	#REF!
2022-09-12	14:12:55	0.15869	0.705885	1240.32	FALSE	#REF!
2022-09-12	14:12:55	0.143575	0.63865	1240.96	FALSE	#REF!
2022-09-12	14:12:55	0.0611326	0.27193	1241.23	FALSE	#REF!
2022-09-12	14:12:56	0.168104	0.74776	1241.98	FALSE	#REF!
2022-09-12	14:12:56	-0.0159667	-0.0710231	1241.98	FALSE	#REF!
2022-09-12	14:12:56	0.0829646	0.369043	1242.35	FALSE	#REF!
2022-09-12	14:12:57	0.10841	0.482229	1242.83	FALSE	#REF!
2022-09-12	14:12:57	0.113804	0.506223	1243.33	FALSE	#REF!
2022-09-12	14:12:57	0.203728	0.906223	1244.24	FALSE	#REF!
2022-09-12	14:12:57	0.0741605	0.329881	1244.57	FALSE	#REF!
2022-09-12	14:12:58	0.271972	1.20979	1245.78	FALSE	#REF!
2022-09-12	14:12:58	0.144593	0.643179	1246.42	FALSE	#REF!
2022-09-12	14:12:58	0.348664	1.55093	1247.97	FALSE	#REF!
2022-09-12	14:12:58	0.100725	0.448045	1248.42	FALSE	#REF!
2022-09-12	14:12:59	0.215127	0.956928	1249.38	FALSE	#REF!
2022-09-12	14:12:59	0.146883	0.653365	1250.03	FALSE	#REF!
2022-09-12	14:12:59	0.1393	0.619634	1250.65	FALSE	#REF!
2022-09-12	14:12:59	0.248257	1.1043	1251.76	FALSE	#REF!
2022-09-12	14:13:00	0.20785	0.924558	1252.68	FALSE	#REF!
2022-09-12	14:13:00	0.253601	1.12807	1253.81	FALSE	#REF!
2022-09-12	14:13:00	0.178537	0.794168	1254.6	FALSE	#REF!
2022-09-12	14:13:01	0.0298348	0.132711	1254.74	FALSE	#REF!
2022-09-12	14:13:01	-0.357391	-1.58975	1254.74	FALSE	#REF!
2022-09-12	14:13:01	-0.455712	-2.0271	1254.74	FALSE	#REF!
2022-09-12	14:13:01	-0.368994	-1.64136	1254.74	FALSE	#REF!
2022-09-12	14:13:02	0.219708	0.977305	1255.71	FALSE	#REF!
2022-09-12	14:13:02	0.246069	1.09456	1256.81	FALSE	#REF!
2022-09-12	14:13:02	0.054873	0.244086	1257.05	FALSE	#REF!
2022-09-12	14:13:02	0.28556	1.27023	1258.32	FALSE	#REF!
2022-09-12	14:13:03	0.258232	1.14867	1259.47	FALSE	#REF!
2022-09-12	14:13:03	0.268613	1.19484	1260.67	FALSE	#REF!
2022-09-12	14:13:03	0.398079	1.77074	1262.44	FALSE	#REF!
2022-09-12	14:13:03	0.347646	1.5464	1263.98	FALSE	#REF!
2022-09-12	14:13:04	0.991209	4.4091	1268.39	FALSE	#REF!
2022-09-12	14:13:04	1.642	7.30394	1275.7	FALSE	#REF!
2022-09-12	14:13:04	1.66989	7.428	1283.12	FALSE	#REF!
2022-09-12	14:13:05	0.540165	2.40276	1285.53	FALSE	#REF!
2022-09-12	14:13:05	0.247443	1.10068	1286.63	FALSE	#REF!
2022-09-12	14:13:05	0.308104	1.37051	1288	FALSE	#REF!
2022-09-12	14:13:05	0.238333	1.06015	1289.06	FALSE	#REF!
2022-09-12	14:13:06	0.210089	0.934518	1289.99	FALSE	#REF!
2022-09-12	14:13:06	0.285305	1.26909	1291.26	FALSE	#REF!
2022-09-12	14:13:06	0.307901	1.36961	1292.63	FALSE	#REF!
2022-09-12	14:13:06	0.271463	1.20752	1293.84	FALSE	#REF!
2022-09-12	14:13:07	0.225153	1.00153	1294.84	FALSE	#REF!
2022-09-12	14:13:07	0.28098	1.24986	1296.09	FALSE	#REF!
2022-09-12	14:13:07	1.53345	6.82109	1302.91	FALSE	#REF!
2022-09-12	14:13:08	0.240623	1.07034	1303.98	FALSE	#REF!
2022-09-12	14:13:08	0.0846439	0.376513	1304.36	FALSE	#REF!
2022-09-12	14:13:08	0.312939	1.39202	1305.75	FALSE	#REF!
2022-09-12	14:13:08	0.282608	1.2571	1307.01	FALSE	#REF!
2022-09-12	14:13:09	0.0146695	0.0652529	1307.07	FALSE	#REF!
2022-09-12	14:13:09	-0.000241466	-0.00107409	1307.07	FALSE	#REF!
2022-09-12	14:13:09	0.258486	1.1498	1308.22	FALSE	#REF!
2022-09-12	14:13:09	0.116858	0.519808	1308.74	FALSE	#REF!
2022-09-12	14:13:10	0.114008	0.50713	1309.25	FALSE	#REF!
2022-09-12	14:13:10	0.0475956	0.211715	1309.46	FALSE	#REF!
2022-09-12	14:13:10	0.258079	1.14799	1310.61	FALSE	#REF!
2022-09-12	14:13:10	0.166323	0.739838	1311.35	FALSE	#REF!
2022-09-12	14:13:11	0.238792	1.06219	1312.41	FALSE	#REF!
2022-09-12	14:13:11	0.471565	2.09762	1314.51	FALSE	#REF!
2022-09-12	14:13:11	0.479249	2.1318	1316.64	FALSE	#REF!
2022-09-12	14:13:12	0.395229	1.75806	1318.4	FALSE	#REF!
2022-09-12	14:13:12	0.670649	2.98318	1321.38	FALSE	#REF!
2022-09-12	14:13:12	0.151514	0.673965	1322.06	FALSE	#REF!
2022-09-12	14:13:12	0.68154	3.03163	1325.09	FALSE	#REF!
2022-09-12	14:13:13	0.422608	1.87984	1326.97	FALSE	#REF!
2022-09-12	14:13:13	0.463219	2.06049	1329.03	FALSE	#REF!
2022-09-12	14:13:13	0.454466	2.02156	1331.05	FALSE	#REF!
2022-09-12	14:13:13	0.547443	2.43514	1333.48	FALSE	#REF!
2022-09-12	14:13:14	0.50902	2.26422	1335.75	FALSE	#REF!
2022-09-12	14:13:14	0.626679	2.78759	1338.54	FALSE	#REF!
2022-09-12	14:13:14	0.215076	0.956701	1339.49	FALSE	#REF!
2022-09-12	14:13:14	0.0711071	0.316299	1339.81	FALSE	#REF!
2022-09-12	14:13:15	0.0950257	0.422693	1340.23	FALSE	#REF!
2022-09-12	14:13:15	0.116043	0.516182	1340.75	FALSE	#REF!
2022-09-12	14:13:15	-0.0156613	-0.0696646	1340.75	FALSE	#REF!
2022-09-12	14:13:16	0.198486	0.882905	1341.63	FALSE	#REF!
2022-09-12	14:13:16	0.11355	0.505093	1342.14	FALSE	#REF!
2022-09-12	14:13:16	0.384898	1.7121	1343.85	FALSE	#REF!
2022-09-12	14:13:16	0.530344	2.35908	1346.21	FALSE	#REF!
2022-09-12	14:13:17	0.435891	1.93893	1348.15	FALSE	#REF!
2022-09-12	14:13:17	0.229529	1.02099	1349.17	FALSE	#REF!
2022-09-12	14:13:17	0.321845	1.43163	1350.6	FALSE	#REF!
2022-09-12	14:13:17	0.206781	0.919803	1351.52	FALSE	#REF!
2022-09-12	14:13:18	0.544949	2.42404	1353.94	FALSE	#REF!
2022-09-12	14:13:18	0.3564	1.58534	1355.53	FALSE	#REF!
2022-09-12	14:13:18	1.44312	6.41929	1361.95	FALSE	#REF!
2022-09-12	14:13:18	0.126272	0.561683	1362.51	FALSE	#REF!
2022-09-12	14:13:19	0.422812	1.88075	1364.39	FALSE	#REF!
2022-09-12	14:13:19	0.268715	1.1953	1365.59	FALSE	#REF!
2022-09-12	14:13:19	0.298842	1.32931	1366.91	FALSE	#REF!
2022-09-12	14:13:20	-0.0806486	-0.358741	1366.91	FALSE	#REF!
2022-09-12	14:13:20	-0.195407	-0.869209	1366.91	FALSE	#REF!
2022-09-12	14:13:20	-0.101259	-0.45042	1366.91	FALSE	#REF!
2022-09-12	14:13:20	-0.058104	-0.258458	1366.91	FALSE	#REF!
2022-09-12	14:13:21	0.0672394	0.299094	1367.21	FALSE	#REF!
2022-09-12	14:13:21	0.299555	1.33248	1368.55	FALSE	#REF!
2022-09-12	14:13:21	0.371718	1.65348	1370.2	FALSE	#REF!
2022-09-12	14:13:21	0.272634	1.21273	1371.41	FALSE	#REF!
2022-09-12	14:13:22	0.403931	1.79677	1373.21	FALSE	#REF!
2022-09-12	14:13:22	0.284135	1.26389	1374.47	FALSE	#REF!
2022-09-12	14:13:22	0.359758	1.60028	1376.07	FALSE	#REF!
2022-09-12	14:13:22	0.29126	1.29558	1377.37	FALSE	#REF!
2022-09-12	14:13:23	0.359351	1.59847	1378.97	FALSE	#REF!
2022-09-12	14:13:23	0.274313	1.2202	1380.19	FALSE	#REF!
2022-09-12	14:13:23	0.364389	1.62088	1381.81	FALSE	#REF!
2022-09-12	14:13:24	0.276603	1.23039	1383.04	FALSE	#REF!
2022-09-12	14:13:24	0.280929	1.24963	1384.29	FALSE	#REF!
2022-09-12	14:13:24	0.276501	1.22993	1385.52	FALSE	#REF!
2022-09-12	14:13:24	0.368308	1.63831	1387.16	FALSE	#REF!
2022-09-12	14:13:25	0.321998	1.43231	1388.59	FALSE	#REF!
2022-09-12	14:13:25	0.275738	1.22654	1389.82	FALSE	#REF!
2022-09-12	14:13:25	0.366425	1.62993	1391.45	FALSE	#REF!
2022-09-12	14:13:25	0.384135	1.70871	1393.15	FALSE	#REF!
2022-09-12	14:13:26	0.0459671	0.204471	1393.36	FALSE	#REF!
2022-09-12	14:13:26	-0.0256868	-0.11426	1393.36	FALSE	#REF!
2022-09-12	14:13:26	-0.10472	-0.465816	1393.36	FALSE	#REF!
2022-09-12	14:13:26	-0.15159	-0.674303	1393.36	FALSE	#REF!
2022-09-12	14:13:27	0.149479	0.664912	1394.02	FALSE	#REF!
2022-09-12	14:13:27	0.577723	2.56983	1396.59	FALSE	#REF!
2022-09-12	14:13:27	0.417214	1.85585	1398.45	FALSE	#REF!
2022-09-12	14:13:28	0.304186	1.35308	1399.8	FALSE	#REF!
2022-09-12	14:13:28	0.164644	0.732369	1400.53	FALSE	#REF!
2022-09-12	14:13:28	-0.105127	-0.467626	1400.53	FALSE	#REF!
2022-09-12	14:13:28	0.182507	0.811828	1401.35	FALSE	#REF!
2022-09-12	14:13:29	0.3193	1.42031	1402.77	FALSE	#REF!
2022-09-12	14:13:29	0.967137	4.30202	1407.07	FALSE	#REF!
2022-09-12	14:13:29	1.96251	8.72964	1415.8	FALSE	#REF!
2022-09-12	14:13:29	0.412939	1.83684	1417.64	FALSE	#REF!
2022-09-12	14:13:30	0.733499	3.26275	1420.9	FALSE	#REF!
2022-09-12	14:13:30	0.697112	3.10089	1424	FALSE	#REF!
2022-09-12	14:13:30	0.50673	2.25404	1426.25	FALSE	#REF!
2022-09-12	14:13:30	0.240725	1.07079	1427.32	FALSE	#REF!
2022-09-12	14:13:31	0.507239	2.2563	1429.58	FALSE	#REF!
2022-09-12	14:13:31	0.866527	3.85449	1433.43	FALSE	#REF!
2022-09-12	14:13:31	0.555585	2.47135	1435.91	FALSE	#REF!
2022-09-12	14:13:32	1.13844	5.06401	1440.97	FALSE	#REF!
2022-09-12	14:13:32	0.270191	1.20186	1442.17	FALSE	#REF!
2022-09-12	14:13:32	0.325204	1.44657	1443.62	FALSE	#REF!
2022-09-12	14:13:32	0.514008	2.28641	1445.9	FALSE	#REF!
2022-09-12	14:13:33	0.409275	1.82054	1447.73	FALSE	#REF!
2022-09-12	14:13:33	0.47701	2.12184	1449.85	FALSE	#REF!
2022-09-12	14:13:33	0.500216	2.22506	1452.07	FALSE	#REF!
2022-09-12	14:13:33	0.571972	2.54425	1454.62	FALSE	#REF!
2022-09-12	14:13:34	0.774568	3.44543	1458.06	FALSE	#REF!
2022-09-12	14:13:34	0.97869	4.35341	1462.42	FALSE	#REF!
2022-09-12	14:13:34	1.20429	5.35692	1467.77	FALSE	#REF!
2022-09-12	14:13:34	1.77324	7.88773	1475.66	FALSE	#REF!
2022-09-12	14:13:35	1.14627	5.09884	1480.76	FALSE	#REF!
2022-09-12	14:13:35	1.06724	4.7473	1485.51	FALSE	#REF!
2022-09-12	14:13:35	0.952532	4.23705	1489.74	FALSE	#REF!
2022-09-12	14:13:36	1.03726	4.61394	1494.36	FALSE	#REF!
2022-09-12	14:13:36	0.944033	4.19925	1498.56	FALSE	#REF!
2022-09-12	14:13:36	0.70103	3.11832	1501.67	FALSE	#REF!
2022-09-12	14:13:36	0.45187	2.01001	1503.68	FALSE	#REF!
2022-09-12	14:13:37	0.503931	2.24159	1505.93	FALSE	#REF!
2022-09-12	14:13:37	0.564644	2.51165	1508.44	FALSE	#REF!
2022-09-12	14:13:37	0.466476	2.07498	1510.51	FALSE	#REF!
2022-09-12	14:13:37	0.218944	0.973907	1511.49	FALSE	#REF!
2022-09-12	14:13:38	0.313753	1.39564	1512.88	FALSE	#REF!
2022-09-12	14:13:38	0.278944	1.2408	1514.12	FALSE	#REF!
2022-09-12	14:13:38	0.278842	1.24034	1515.36	FALSE	#REF!
2022-09-12	14:13:38	0.22673	1.00854	1516.37	FALSE	#REF!
2022-09-12	14:13:39	0.250751	1.11539	1517.49	FALSE	#REF!
2022-09-12	14:13:39	0.32215	1.43299	1518.92	FALSE	#REF!
2022-09-12	14:13:39	0.196552	0.874303	1519.79	FALSE	#REF!
2022-09-12	14:13:40	0.259046	1.15229	1520.95	FALSE	#REF!
2022-09-12	14:13:40	0.334771	1.48913	1522.44	FALSE	#REF!
2022-09-12	14:13:40	0.0987407	0.439218	1522.88	FALSE	#REF!
2022-09-12	14:13:40	0.105814	0.470682	1523.35	FALSE	#REF!
2022-09-12	14:13:41	0.174415	0.775833	1524.12	FALSE	#REF!
2022-09-12	14:13:41	0.128359	0.570967	1524.69	FALSE	#REF!
2022-09-12	14:13:41	0.0321758	0.143124	1524.84	FALSE	#REF!
2022-09-12	14:13:41	-0.22472	-0.9996	1524.84	FALSE	#REF!
2022-09-12	14:13:42	-0.177137	-0.787941	1524.84	FALSE	#REF!
2022-09-12	14:13:42	-0.154745	-0.688337	1524.84	FALSE	#REF!
2022-09-12	14:13:42	-0.111692	-0.496828	1524.84	FALSE	#REF!
2022-09-12	14:13:42	0.205	0.911881	1525.75	FALSE	#REF!
2022-09-12	14:13:43	0.590191	2.62529	1528.37	FALSE	#REF!
2022-09-12	14:13:43	0.471005	2.09512	1530.47	FALSE	#REF!
2022-09-12	14:13:43	0.451361	2.00774	1532.48	FALSE	#REF!
2022-09-12	14:13:44	0.435229	1.93599	1534.41	FALSE	#REF!
2022-09-12	14:13:44	0.467647	2.08019	1536.49	FALSE	#REF!
2022-09-12	14:13:44	0.220725	0.981829	1537.47	FALSE	#REF!
2022-09-12	14:13:44	0.0228119	0.101472	1537.58	FALSE	#REF!
2022-09-12	14:13:45	0.0113616	0.0505387	1537.63	FALSE	#REF!
2022-09-12	14:13:45	0.26154	1.16338	1538.79	FALSE	#REF!
2022-09-12	14:13:45	0.225102	1.0013	1539.79	FALSE	#REF!
2022-09-12	14:13:45	0.0676465	0.300905	1540.09	FALSE	#REF!
2022-09-12	14:13:46	-0.0271626	-0.120825	1540.09	FALSE	#REF!
2022-09-12	14:13:46	0.00886792	0.0394463	1540.13	FALSE	#REF!
2022-09-12	14:13:46	-0.110928	-0.49343	1540.13	FALSE	#REF!
2022-09-12	14:13:46	-0.054898	-0.244197	1540.13	FALSE	#REF!
2022-09-12	14:13:47	-0.0410557	-0.182624	1540.13	FALSE	#REF!
2022-09-12	14:13:47	-0.128587	-0.571981	1540.13	FALSE	#REF!
2022-09-12	14:13:47	0.0228628	0.101698	1540.23	FALSE	#REF!
2022-09-12	14:13:48	-0.118053	-0.525123	1540.23	FALSE	#REF!
2022-09-12	14:13:48	-0.142481	-0.633784	1540.23	FALSE	#REF!
2022-09-12	14:13:48	-0.26986	-1.20039	1540.23	FALSE	#REF!
2022-09-12	14:13:48	-0.20075	-0.892976	1540.23	FALSE	#REF!
2022-09-12	14:13:49	-0.200496	-0.891846	1540.23	FALSE	#REF!
2022-09-12	14:13:49	-0.250012	-1.1121	1540.23	FALSE	#REF!
2022-09-12	14:13:49	-0.0778496	-0.346291	1540.23	FALSE	#REF!
2022-09-12	14:13:49	0.388155	1.72659	1541.96	FALSE	#REF!
2022-09-12	14:13:50	0.663728	2.95239	1544.91	FALSE	#REF!
2022-09-12	14:13:50	1.6194	7.20342	1552.12	FALSE	#REF!
2022-09-12	14:13:50	1.43472	6.38192	1558.5	FALSE	#REF!
2022-09-12	14:13:50	1.70693	7.59277	1566.09	FALSE	#REF!
2022-09-12	14:13:51	1.36337	6.06454	1572.15	FALSE	#REF!
2022-09-12	14:13:51	2.70179	12.0181	1584.17	FALSE	#REF!
2022-09-12	14:13:51	1.01879	4.53178	1588.7	FALSE	#REF!
2022-09-12	14:13:52	1.93085	8.58881	1597.29	FALSE	#REF!
2022-09-12	14:13:52	1.74958	7.78248	1605.08	FALSE	#REF!
2022-09-12	14:13:52	1.36072	6.05275	1611.13	FALSE	#REF!
2022-09-12	14:13:52	0.328511	1.46128	1612.59	FALSE	#REF!
2022-09-12	14:13:53	0.503677	2.24046	1614.83	FALSE	#REF!
2022-09-12	14:13:53	0.526832	2.34345	1617.17	FALSE	#REF!
2022-09-12	14:13:53	0.438588	1.95093	1619.12	FALSE	#REF!
2022-09-12	14:13:53	0.336094	1.49501	1620.62	FALSE	#REF!
2022-09-12	14:13:54	0.374415	1.66547	1622.29	FALSE	#REF!
2022-09-12	14:13:54	0.454211	2.02042	1624.31	FALSE	#REF!
2022-09-12	14:13:54	0.290954	1.29422	1625.6	FALSE	#REF!
2022-09-12	14:13:54	0.378435	1.68335	1627.28	FALSE	#REF!
2022-09-12	14:13:55	0.198232	0.881776	1628.16	FALSE	#REF!
2022-09-12	14:13:55	0.105865	0.470909	1628.64	FALSE	#REF!
2022-09-12	14:13:55	0.258181	1.14844	1629.78	FALSE	#REF!
2022-09-12	14:13:56	0.220878	0.98251	1630.77	FALSE	#REF!
2022-09-12	14:13:56	0.279148	1.24171	1632.01	FALSE	#REF!
2022-09-12	14:13:56	0.28668	1.27521	1633.28	FALSE	#REF!
2022-09-12	14:13:56	0.132074	0.587492	1633.87	FALSE	#REF!
2022-09-12	14:13:57	0.390903	1.73881	1635.61	FALSE	#REF!
2022-09-12	14:13:57	0.29014	1.2906	1636.9	FALSE	#REF!
2022-09-12	14:13:57	0.290954	1.29422	1638.19	FALSE	#REF!
2022-09-12	14:13:57	0.199758	0.888564	1639.08	FALSE	#REF!
2022-09-12	14:13:58	0.203982	0.907353	1639.99	FALSE	#REF!
2022-09-12	14:13:58	0.252125	1.1215	1641.11	FALSE	#REF!
2022-09-12	14:13:58	0.221947	0.987265	1642.1	FALSE	#REF!
2022-09-12	14:13:58	0.184949	0.82269	1642.92	FALSE	#REF!
2022-09-12	14:13:59	0.149529	0.665135	1643.59	FALSE	#REF!
2022-09-12	14:13:59	0.211718	0.941764	1644.53	FALSE	#REF!
2022-09-12	14:13:59	0.125509	0.558289	1645.09	FALSE	#REF!
2022-09-12	14:14:00	0.241081	1.07238	1646.16	FALSE	#REF!
2022-09-12	14:14:00	0.169529	0.754099	1646.91	FALSE	#REF!
2022-09-12	14:14:00	0.189733	0.84397	1647.76	FALSE	#REF!
2022-09-12	14:14:00	0.129071	0.574134	1648.33	FALSE	#REF!
2022-09-12	14:14:01	0.114008	0.50713	1648.84	FALSE	#REF!
2022-09-12	14:14:01	0.214262	0.95308	1649.79	FALSE	#REF!
2022-09-12	14:14:01	0.338232	1.50452	1651.3	FALSE	#REF!
2022-09-12	14:14:01	0.321489	1.43005	1652.73	FALSE	#REF!
2022-09-12	14:14:02	0.264949	1.17855	1653.91	FALSE	#REF!
2022-09-12	14:14:02	0.221336	0.984547	1654.89	FALSE	#REF!
2022-09-12	14:14:02	0.298079	1.32592	1656.22	FALSE	#REF!
2022-09-12	14:14:02	0.313194	1.39315	1657.61	FALSE	#REF!
2022-09-12	14:14:03	0.334669	1.48867	1659.1	FALSE	#REF!
2022-09-12	14:14:03	0.392176	1.74448	1660.84	FALSE	#REF!
2022-09-12	14:14:03	0.386883	1.72093	1662.56	FALSE	#REF!
2022-09-12	14:14:04	0.372888	1.65868	1664.22	FALSE	#REF!
2022-09-12	14:14:04	0.387341	1.72297	1665.94	FALSE	#REF!
2022-09-12	14:14:04	0.400522	1.7816	1667.73	FALSE	#REF!
2022-09-12	14:14:04	0.363219	1.61567	1669.34	FALSE	#REF!
2022-09-12	14:14:05	0.340522	1.51471	1670.86	FALSE	#REF!
2022-09-12	14:14:05	0.334975	1.49004	1672.35	FALSE	#REF!
2022-09-12	14:14:05	0.323117	1.43729	1673.78	FALSE	#REF!
2022-09-12	14:14:05	0.315789	1.40469	1675.19	FALSE	#REF!
2022-09-12	14:14:06	0.32841	1.46083	1676.65	FALSE	#REF!
2022-09-12	14:14:06	0.308613	1.37277	1678.02	FALSE	#REF!
2022-09-12	14:14:06	0.420573	1.87079	1679.89	FALSE	#REF!
2022-09-12	14:14:06	0.359809	1.6005	1681.49	FALSE	#REF!
2022-09-12	14:14:07	0.360929	1.60548	1683.1	FALSE	#REF!
2022-09-12	14:14:07	0.320166	1.42416	1684.52	FALSE	#REF!
2022-09-12	14:14:07	0.273041	1.21454	1685.74	FALSE	#REF!
2022-09-12	14:14:08	0.348308	1.54934	1687.29	FALSE	#REF!
2022-09-12	14:14:08	0.342405	1.52309	1688.81	FALSE	#REF!
2022-09-12	14:14:08	0.2993	1.33135	1690.14	FALSE	#REF!
2022-09-12	14:14:08	0.392379	1.74538	1691.89	FALSE	#REF!
2022-09-12	14:14:09	0.326934	1.45427	1693.34	FALSE	#REF!
2022-09-12	14:14:09	0.243677	1.08392	1694.43	FALSE	#REF!
2022-09-12	14:14:09	0.276908	1.23174	1695.66	FALSE	#REF!
2022-09-12	14:14:09	0.256501	1.14097	1696.8	FALSE	#REF!
2022-09-12	14:14:10	0.303931	1.35195	1698.15	FALSE	#REF!
2022-09-12	14:14:10	0.398333	1.77186	1699.92	FALSE	#REF!
2022-09-12	14:14:10	0.255178	1.13508	1701.06	FALSE	#REF!
2022-09-12	14:14:10	0.378384	1.68313	1702.74	FALSE	#REF!
2022-09-12	14:14:11	0.311921	1.38749	1704.13	FALSE	#REF!
2022-09-12	14:14:11	0.311514	1.38568	1705.51	FALSE	#REF!
2022-09-12	14:14:11	0.258893	1.15161	1706.66	FALSE	#REF!
2022-09-12	14:14:12	0.229886	1.02258	1707.69	FALSE	#REF!
2022-09-12	14:14:12	0.345763	1.53802	1709.23	FALSE	#REF!
2022-09-12	14:14:12	0.463677	2.06253	1711.29	FALSE	#REF!
2022-09-12	14:14:12	0.741132	3.2967	1714.58	FALSE	#REF!
2022-09-12	14:14:13	0.788002	3.50519	1718.09	FALSE	#REF!
2022-09-12	14:14:13	0.979606	4.35748	1722.45	FALSE	#REF!
2022-09-12	14:14:13	0.632023	2.81136	1725.26	FALSE	#REF!
2022-09-12	14:14:13	0.926578	4.1216	1729.38	FALSE	#REF!
2022-09-12	14:14:14	0.335687	1.4932	1730.87	FALSE	#REF!
2022-09-12	14:14:14	0.771412	3.43139	1734.3	FALSE	#REF!
2022-09-12	14:14:14	0.25014	1.11267	1735.42	FALSE	#REF!
2022-09-12	14:14:14	0.754364	3.35556	1738.77	FALSE	#REF!
2022-09-12	14:14:15	0.36159	1.60842	1740.38	FALSE	#REF!
2022-09-12	14:14:15	0.673651	2.99653	1743.38	FALSE	#REF!
2022-09-12	14:14:15	0.535382	2.38149	1745.76	FALSE	#REF!
2022-09-12	14:14:16	0.504847	2.24566	1748	FALSE	#REF!
2022-09-12	14:14:16	0.609427	2.71085	1750.72	FALSE	#REF!
2022-09-12	14:14:16	0.385814	1.71618	1752.43	FALSE	#REF!
2022-09-12	14:14:16	0.877621	3.90383	1756.34	FALSE	#REF!
2022-09-12	14:14:17	0.474211	2.10939	1758.45	FALSE	#REF!
2022-09-12	14:14:17	1.01319	4.50687	1762.95	FALSE	#REF!
2022-09-12	14:14:17	0.35528	1.58036	1764.53	FALSE	#REF!
2022-09-12	14:14:17	1.20683	5.36822	1769.9	FALSE	#REF!
2022-09-12	14:14:18	0.788918	3.50927	1773.41	FALSE	#REF!
2022-09-12	14:14:18	1.55223	6.90463	1780.31	FALSE	#REF!
2022-09-12	14:14:18	0.675382	3.00423	1783.32	FALSE	#REF!
2022-09-12	14:14:18	1.18154	5.25573	1788.57	FALSE	#REF!
2022-09-12	14:14:19	1.08668	4.83377	1793.41	FALSE	#REF!
2022-09-12	14:14:19	2.582	11.4853	1804.89	FALSE	#REF!
2022-09-12	14:14:19	2.82189	12.5523	1817.45	FALSE	#REF!
2022-09-12	14:14:20	2.97228	13.2213	1830.67	FALSE	#REF!
2022-09-12	14:14:20	1.47365	6.55509	1837.22	FALSE	#REF!
2022-09-12	14:14:20	2.24876	10.0029	1847.23	FALSE	#REF!
2022-09-12	14:14:20	1.75029	7.78564	1855.01	FALSE	#REF!
2022-09-12	14:14:21	0.816654	3.63264	1858.64	FALSE	#REF!
2022-09-12	14:14:21	0.48673	2.16507	1860.81	FALSE	#REF!
2022-09-12	14:14:21	0.439708	1.95591	1862.76	FALSE	#REF!
2022-09-12	14:14:21	0.457468	2.03491	1864.8	FALSE	#REF!
2022-09-12	14:14:22	0.635687	2.82766	1867.63	FALSE	#REF!
2022-09-12	14:14:22	0.547494	2.43536	1870.06	FALSE	#REF!
2022-09-12	14:14:22	0.950293	4.22709	1874.29	FALSE	#REF!
2022-09-12	14:14:23	0.429071	1.90859	1876.2	FALSE	#REF!
2022-09-12	14:14:23	0.0540078	0.240237	1876.44	FALSE	#REF!
2022-09-12	14:14:23	0.866832	3.85584	1880.29	FALSE	#REF!
2022-09-12	14:14:23	0.669936	2.98001	1883.27	FALSE	#REF!
2022-09-12	14:14:24	-0.0694017	-0.308713	1883.27	FALSE	#REF!
2022-09-12	14:14:24	-0.00304046	-0.0135246	1883.27	FALSE	#REF!
2022-09-12	14:14:24	0.133601	0.594284	1883.87	FALSE	#REF!
2022-09-12	14:14:24	-0.0276715	-0.123088	1883.87	FALSE	#REF!
2022-09-12	14:14:25	-0.179936	-0.800391	1883.87	FALSE	#REF!
2022-09-12	14:14:25	0.23986	1.06695	1884.94	FALSE	#REF!
2022-09-12	14:14:25	0.502964	2.23728	1887.17	FALSE	#REF!
2022-09-12	14:14:25	0.469631	2.08901	1889.26	FALSE	#REF!
2022-09-12	14:14:26	0.455382	2.02563	1891.29	FALSE	#REF!
2022-09-12	14:14:26	0.432227	1.92263	1893.21	FALSE	#REF!
2022-09-12	14:14:26	0.433855	1.92987	1895.14	FALSE	#REF!
2022-09-12	14:14:27	0.487036	2.16643	1897.31	FALSE	#REF!
2022-09-12	14:14:27	0.603015	2.68233	1899.99	FALSE	#REF!
2022-09-12	14:14:27	1.91044	8.49802	1908.49	FALSE	#REF!
2022-09-12	14:14:27	5.62759	25.0326	1933.52	1	#REF!
2022-09-12	14:14:28	5.51146	24.5161	1958.04	1	#REF!
2022-09-12	14:14:28	2.17172	9.66024	1967.7	FALSE	#REF!
2022-09-12	14:14:28	0.758282	3.37299	1971.07	FALSE	#REF!
2022-09-12	14:14:28	0.392888	1.74764	1972.82	FALSE	#REF!
2022-09-12	14:14:29	0.421489	1.87487	1974.69	FALSE	#REF!
2022-09-12	14:14:29	0.449478	1.99937	1976.69	FALSE	#REF!
2022-09-12	14:14:29	0.306272	1.36236	1978.05	FALSE	#REF!
2022-09-12	14:14:29	0.470242	2.09173	1980.14	FALSE	#REF!
2022-09-12	14:14:30	0.338893	1.50746	1981.65	FALSE	#REF!
2022-09-12	14:14:30	0.542252	2.41205	1984.06	FALSE	#REF!
2022-09-12	14:14:30	0.240776	1.07102	1985.14	FALSE	#REF!
2022-09-12	14:14:31	0.569682	2.53406	1987.67	FALSE	#REF!
2022-09-12	14:14:31	0.390344	1.73633	1989.41	FALSE	#REF!
2022-09-12	14:14:31	0.605204	2.69207	1992.1	FALSE	#REF!
2022-09-12	14:14:31	0.384644	1.71097	1993.81	FALSE	#REF!
2022-09-12	14:14:32	0.521845	2.32127	1996.13	FALSE	#REF!
2022-09-12	14:14:32	0.430496	1.91493	1998.04	FALSE	#REF!
2022-09-12	14:14:32	0.452532	2.01295	2000.06	FALSE	#REF!
2022-09-12	14:14:32	0.363982	1.61906	2001.68	FALSE	#REF!
2022-09-12	14:14:33	0.440216	1.95817	2003.63	FALSE	#REF!
2022-09-12	14:14:33	0.507188	2.25607	2005.89	FALSE	#REF!
2022-09-12	14:14:33	0.404542	1.79948	2007.69	FALSE	#REF!
2022-09-12	14:14:33	0.270649	1.2039	2008.89	FALSE	#REF!
2022-09-12	14:14:34	0.284847	1.26706	2010.16	FALSE	#REF!
2022-09-12	14:14:34	0.319911	1.42303	2011.58	FALSE	#REF!
2022-09-12	14:14:34	0.243779	1.08438	2012.67	FALSE	#REF!
2022-09-12	14:14:35	0.179962	0.800507	2013.47	FALSE	#REF!
2022-09-12	14:14:35	0.215331	0.957835	2014.43	FALSE	#REF!
2022-09-12	14:14:35	0.310191	1.37979	2015.81	FALSE	#REF!
2022-09-12	14:14:35	0.167596	0.745501	2016.55	FALSE	#REF!
2022-09-12	14:14:36	0.188359	0.837859	2017.39	FALSE	#REF!
2022-09-12	14:14:36	0.169886	0.755687	2018.15	FALSE	#REF!
2022-09-12	14:14:36	0.267443	1.18964	2019.34	FALSE	#REF!
2022-09-12	14:14:36	0.201743	0.897393	2020.23	FALSE	#REF!
2022-09-12	14:14:37	0.227799	1.0133	2021.25	FALSE	#REF!
2022-09-12	14:14:37	0.202863	0.902375	2022.15	FALSE	#REF!
2022-09-12	14:14:37	0.646578	2.87611	2025.02	FALSE	#REF!
2022-09-12	14:14:37	1.31716	5.85899	2030.88	FALSE	#REF!
2022-09-12	14:14:38	1.67258	7.43997	2038.32	FALSE	#REF!
2022-09-12	14:14:38	1.32037	5.87327	2044.2	FALSE	#REF!
2022-09-12	14:14:38	0.981946	4.36789	2048.56	FALSE	#REF!
2022-09-12	14:14:39	1.22485	5.44838	2054.01	FALSE	#REF!
2022-09-12	14:14:39	1.2823	5.70393	2059.72	FALSE	#REF!
2022-09-12	14:14:39	0.588919	2.61963	2062.34	FALSE	#REF!
2022-09-12	14:14:39	0.676043	3.00717	2065.34	FALSE	#REF!
2022-09-12	14:14:40	0.385051	1.71278	2067.06	FALSE	#REF!
2022-09-12	14:14:40	0.738893	3.28674	2070.34	FALSE	#REF!
2022-09-12	14:14:40	0.852379	3.79155	2074.14	FALSE	#REF!
2022-09-12	14:14:40	0.833193	3.70621	2077.84	FALSE	#REF!
2022-09-12	14:14:41	1.11553	4.9621	2082.8	FALSE	#REF!
2022-09-12	14:14:41	1.21533	5.40603	2088.21	FALSE	#REF!
2022-09-12	14:14:41	0.546119	2.42925	2090.64	FALSE	#REF!
2022-09-12	14:14:41	0.765356	3.40446	2094.04	FALSE	#REF!
2022-09-12	14:14:42	0.419249	1.8649	2095.91	FALSE	#REF!
2022-09-12	14:14:42	0.632277	2.81249	2098.72	FALSE	#REF!
2022-09-12	14:14:42	0.454568	2.02201	2100.74	FALSE	#REF!
2022-09-12	14:14:43	0.376908	1.67656	2102.42	FALSE	#REF!
2022-09-12	14:14:43	0.594466	2.6443	2105.06	FALSE	#REF!
2022-09-12	14:14:43	0.211412	0.940403	2106	FALSE	#REF!
2022-09-12	14:14:43	0.440013	1.95727	2107.96	FALSE	#REF!
2022-09-12	14:14:44	0.122965	0.546973	2108.51	FALSE	#REF!
2022-09-12	14:14:44	0.415026	1.84612	2110.35	FALSE	#REF!
2022-09-12	14:14:44	0.261031	1.16112	2111.52	FALSE	#REF!
2022-09-12	14:14:44	0.579453	2.57752	2114.09	FALSE	#REF!
2022-09-12	14:14:45	0.736145	3.27452	2117.37	FALSE	#REF!
2022-09-12	14:14:45	0.811311	3.60887	2120.98	FALSE	#REF!
2022-09-12	14:14:45	0.890903	3.96291	2124.94	FALSE	#REF!
2022-09-12	14:14:45	1.15284	5.12806	2130.07	FALSE	#REF!
2022-09-12	14:14:46	1.38678	6.16867	2136.24	FALSE	#REF!
2022-09-12	14:14:46	1.51401	6.73462	2142.97	FALSE	#REF!
2022-09-12	14:14:46	2.14719	9.55113	2152.52	FALSE	#REF!
2022-09-12	14:14:47	1.50897	6.7122	2159.23	FALSE	#REF!
2022-09-12	14:14:47	1.25482	5.58169	2164.82	FALSE	#REF!
2022-09-12	14:14:47	0.706781	3.1439	2167.96	FALSE	#REF!
2022-09-12	14:14:47	0.900827	4.00706	2171.97	FALSE	#REF!
2022-09-12	14:14:48	0.679249	3.02144	2174.99	FALSE	#REF!
2022-09-12	14:14:48	1.03905	4.6219	2179.61	FALSE	#REF!
2022-09-12	14:14:48	0.840064	3.73677	2183.35	FALSE	#REF!
2022-09-12	14:14:48	0.732277	3.25731	2186.6	FALSE	#REF!
2022-09-12	14:14:49	0.515891	2.29479	2188.9	FALSE	#REF!
2022-09-12	14:14:49	0.399453	1.77685	2190.68	FALSE	#REF!
2022-09-12	14:14:49	0.569631	2.53383	2193.21	FALSE	#REF!
2022-09-12	14:14:49	0.812685	3.61499	2196.82	FALSE	#REF!
2022-09-12	14:14:50	0.919555	4.09036	2200.91	FALSE	#REF!
2022-09-12	14:14:50	0.919351	4.08946	2205	FALSE	#REF!
2022-09-12	14:14:50	0.663931	2.9533	2207.96	FALSE	#REF!
2022-09-12	14:14:51	0.602557	2.68029	2210.64	FALSE	#REF!
2022-09-12	14:14:51	0.576756	2.56553	2213.2	FALSE	#REF!
2022-09-12	14:14:51	0.617061	2.74481	2215.95	FALSE	#REF!
2022-09-12	14:14:51	0.521692	2.32059	2218.27	FALSE	#REF!
2022-09-12	14:14:52	0.503626	2.24023	2220.51	FALSE	#REF!
2022-09-12	14:14:52	0.493957	2.19722	2222.71	FALSE	#REF!
2022-09-12	14:14:52	0.469224	2.0872	2224.79	FALSE	#REF!
2022-09-12	14:14:52	0.443982	1.97492	2226.77	FALSE	#REF!
2022-09-12	14:14:53	0.42897	1.90814	2228.68	FALSE	#REF!
2022-09-12	14:14:53	0.411616	1.83095	2230.51	FALSE	#REF!
2022-09-12	14:14:53	0.374669	1.6666	2232.17	FALSE	#REF!
2022-09-12	14:14:53	0.300674	1.33746	2233.51	FALSE	#REF!
2022-09-12	14:14:54	0.324339	1.44272	2234.95	FALSE	#REF!
2022-09-12	14:14:54	0.45874	2.04057	2236.99	FALSE	#REF!
2022-09-12	14:14:54	0.328868	1.46287	2238.46	FALSE	#REF!
2022-09-12	14:14:55	0.350191	1.55772	2240.02	FALSE	#REF!
2022-09-12	14:14:55	0.0896821	0.398924	2240.41	FALSE	#REF!
2022-09-12	14:14:55	0.0621503	0.276457	2240.69	FALSE	#REF!
2022-09-12	14:14:55	0.147138	0.654499	2241.35	FALSE	#REF!
2022-09-12	14:14:56	0.0523793	0.232994	2241.58	FALSE	#REF!
2022-09-12	14:14:56	0.253753	1.12874	2242.71	FALSE	#REF!
2022-09-12	14:14:56	0.616807	2.74368	2245.45	FALSE	#REF!
2022-09-12	14:14:56	0.527544	2.34662	2247.8	FALSE	#REF!
2022-09-12	14:14:57	0.206629	0.919127	2248.72	FALSE	#REF!
2022-09-12	14:14:57	0.17299	0.769494	2249.49	FALSE	#REF!
2022-09-12	14:14:57	0.244695	1.08845	2250.57	FALSE	#REF!
2022-09-12	14:14:57	0.165	0.733953	2251.31	FALSE	#REF!
2022-09-12	14:14:58	0.244491	1.08754	2252.4	FALSE	#REF!
2022-09-12	14:14:58	0.227901	1.01375	2253.41	FALSE	#REF!
2022-09-12	14:14:58	0.461183	2.05143	2255.46	FALSE	#REF!
2022-09-12	14:14:59	0.369987	1.64578	2257.11	FALSE	#REF!
2022-09-12	14:14:59	0.404542	1.79948	2258.91	FALSE	#REF!
2022-09-12	14:14:59	0.686374	3.05313	2261.96	FALSE	#REF!
2022-09-12	14:14:59	0.136909	0.608999	2262.57	FALSE	#REF!
2022-09-12	14:15:00	0.163117	0.725577	2263.29	FALSE	#REF!
2022-09-12	14:15:00	0.854669	3.80174	2267.1	FALSE	#REF!
2022-09-12	14:15:00	0.200369	0.891281	2267.99	FALSE	#REF!
2022-09-12	14:15:00	0.520013	2.31312	2270.3	FALSE	#REF!
2022-09-12	14:15:01	0.361845	1.60956	2271.91	FALSE	#REF!
2022-09-12	14:15:01	0.189173	0.841479	2272.75	FALSE	#REF!
2022-09-12	14:15:01	0.648919	2.88652	2275.64	FALSE	#REF!
2022-09-12	14:15:01	0.293346	1.30486	2276.94	FALSE	#REF!
2022-09-12	14:15:02	0.641234	2.85234	2279.79	FALSE	#REF!
2022-09-12	14:15:02	0.372227	1.65574	2281.45	FALSE	#REF!
2022-09-12	14:15:02	0.781336	3.47554	2284.93	FALSE	#REF!
2022-09-12	14:15:03	0.971463	4.32126	2289.25	FALSE	#REF!
2022-09-12	14:15:03	1.20877	5.37685	2294.62	FALSE	#REF!
2022-09-12	14:15:03	1.55564	6.9198	2301.54	FALSE	#REF!
2022-09-12	14:15:03	1.55014	6.89533	2308.44	FALSE	#REF!
2022-09-12	14:15:04	2.26622	10.0806	2318.52	FALSE	#REF!
2022-09-12	14:15:04	0.83986	3.73587	2322.26	FALSE	#REF!
2022-09-12	14:15:04	1.528	6.79685	2329.05	FALSE	#REF!
2022-09-12	14:15:04	0.805916	3.58488	2332.64	FALSE	#REF!
2022-09-12	14:15:05	1.03299	4.59495	2337.23	FALSE	#REF!
2022-09-12	14:15:05	0.626832	2.78827	2340.02	FALSE	#REF!
2022-09-12	14:15:05	0.493448	2.19496	2342.22	FALSE	#REF!
2022-09-12	14:15:05	0.778333	3.46218	2345.68	FALSE	#REF!
2022-09-12	14:15:06	0.364542	1.62156	2347.3	FALSE	#REF!
2022-09-12	14:15:06	0.677061	3.0117	2350.31	FALSE	#REF!
2022-09-12	14:15:06	0.561285	2.49671	2352.81	FALSE	#REF!
2022-09-12	14:15:07	0.833092	3.70576	2356.51	FALSE	#REF!
2022-09-12	14:15:07	0.691463	3.07577	2359.59	FALSE	#REF!
2022-09-12	14:15:07	0.746171	3.31912	2362.91	FALSE	#REF!
2022-09-12	14:15:07	1.1967	5.32316	2368.23	FALSE	#REF!
2022-09-12	14:15:08	0.522252	2.32308	2370.55	FALSE	#REF!
2022-09-12	14:15:08	1.28709	5.72523	2376.28	FALSE	#REF!
2022-09-12	14:15:08	1.78205	7.92691	2384.21	FALSE	#REF!
2022-09-12	14:15:08	1.40444	6.24723	2390.45	FALSE	#REF!
2022-09-12	14:15:09	1.44917	6.4462	2396.9	FALSE	#REF!
2022-09-12	14:15:09	1.29218	5.74788	2402.65	FALSE	#REF!
2022-09-12	14:15:09	1.4963	6.65584	2409.3	FALSE	#REF!
2022-09-12	14:15:09	0.61416	2.73191	2412.04	FALSE	#REF!
2022-09-12	14:15:10	1.02072	4.54037	2416.58	FALSE	#REF!
2022-09-12	14:15:10	0.974669	4.33552	2420.91	FALSE	#REF!
2022-09-12	14:15:10	1.1937	5.30982	2426.22	FALSE	#REF!
2022-09-12	14:15:11	1.15212	5.12486	2431.35	FALSE	#REF!
2022-09-12	14:15:11	1.06251	4.72626	2436.07	FALSE	#REF!
2022-09-12	14:15:11	1.5509	6.89871	2442.97	FALSE	#REF!
2022-09-12	14:15:11	0.628206	2.79439	2445.77	FALSE	#REF!
2022-09-12	14:15:12	1.45986	6.49375	2452.26	FALSE	#REF!
2022-09-12	14:15:12	1.00861	4.4865	2456.75	FALSE	#REF!
2022-09-12	14:15:12	1.01304	4.5062	2461.25	FALSE	#REF!
2022-09-12	14:15:12	0.859046	3.82121	2465.07	FALSE	#REF!
2022-09-12	14:15:13	1.08011	4.80455	2469.88	FALSE	#REF!
2022-09-12	14:15:13	2.22963	9.91784	2479.8	FALSE	#REF!
2022-09-12	14:15:13	2.31243	10.2862	2490.08	FALSE	#REF!
2022-09-12	14:15:13	3.65258	16.2474	2506.33	1	#REF!
2022-09-12	14:15:14	2.34765	10.4428	2516.77	FALSE	#REF!
2022-09-12	14:15:14	2.05187	9.12713	2525.9	FALSE	#REF!
2022-09-12	14:15:14	0.824389	3.66705	2529.57	FALSE	#REF!
2022-09-12	14:15:15	0.596908	2.65517	2532.22	FALSE	#REF!
2022-09-12	14:15:15	0.459402	2.04351	2534.27	FALSE	#REF!
2022-09-12	14:15:15	0.590293	2.62574	2536.89	FALSE	#REF!
2022-09-12	14:15:15	0.504847	2.24566	2539.14	FALSE	#REF!
2022-09-12	14:15:16	1.6077	7.15137	2546.29	FALSE	#REF!
2022-09-12	14:15:16	2.18678	9.72723	2556.02	FALSE	#REF!
2022-09-12	14:15:16	3.80439	16.9227	2572.94	1	#REF!
2022-09-12	14:15:16	3.47696	15.4662	2588.4	1	#REF!
2022-09-12	14:15:17	2.81161	12.5066	2600.91	FALSE	#REF!
2022-09-12	14:15:17	1.83192	8.14875	2609.06	FALSE	#REF!
2022-09-12	14:15:17	1.31681	5.85743	2614.92	FALSE	#REF!
2022-09-12	14:15:17	0.520827	2.31674	2617.23	FALSE	#REF!
2022-09-12	14:15:18	0.584389	2.59948	2619.83	FALSE	#REF!
2022-09-12	14:15:18	1.02872	4.57595	2624.41	FALSE	#REF!
2022-09-12	14:15:18	2.31324	10.2898	2634.7	FALSE	#REF!
2022-09-12	14:15:19	6.0509	26.9156	2661.61	1	#REF!
2022-09-12	14:15:19	2.40474	10.6968	2672.31	FALSE	#REF!
2022-09-12	14:15:19	0.454008	2.01952	2674.33	FALSE	#REF!
2022-09-12	14:15:19	0.325763	1.44906	2675.78	FALSE	#REF!
2022-09-12	14:15:20	0.71126	3.16383	2678.94	FALSE	#REF!
2022-09-12	14:15:20	0.703117	3.12761	2682.07	FALSE	#REF!
2022-09-12	14:15:20	0.735127	3.26999	2685.34	FALSE	#REF!
2022-09-12	14:15:20	0.763575	3.39653	2688.74	FALSE	#REF!
2022-09-12	14:15:21	0.686018	3.05155	2691.79	FALSE	#REF!
2022-09-12	14:15:21	0.720623	3.20548	2694.99	FALSE	#REF!
2022-09-12	14:15:21	0.718588	3.19642	2698.19	FALSE	#REF!
2022-09-12	14:15:21	0.538893	2.3971	2700.59	FALSE	#REF!
2022-09-12	14:15:22	0.505051	2.24657	2702.83	FALSE	#REF!
2022-09-12	14:15:22	0.560318	2.49241	2705.33	FALSE	#REF!
2022-09-12	14:15:22	0.595483	2.64883	2707.98	FALSE	#REF!
2022-09-12	14:15:23	0.674669	3.00106	2710.98	FALSE	#REF!
2022-09-12	14:15:23	1.04057	4.62866	2715.61	FALSE	#REF!
2022-09-12	14:15:23	0.709326	3.15522	2718.76	FALSE	#REF!
2022-09-12	14:15:23	0.885356	3.93824	2722.7	FALSE	#REF!
2022-09-12	14:15:24	0.839046	3.73224	2726.43	FALSE	#REF!
2022-09-12	14:15:24	1.54113	6.85525	2733.29	FALSE	#REF!
2022-09-12	14:15:24	1.18698	5.27992	2738.57	FALSE	#REF!
2022-09-12	14:15:24	1.22322	5.44113	2744.01	FALSE	#REF!
2022-09-12	14:15:25	1.45253	6.46114	2750.47	FALSE	#REF!
2022-09-12	14:15:25	1.31085	5.83092	2756.3	FALSE	#REF!
2022-09-12	14:15:25	2.00994	8.94062	2765.24	FALSE	#REF!
2022-09-12	14:15:25	0.511361	2.27464	2767.52	FALSE	#REF!
2022-09-12	14:15:26	0.61813	2.74957	2770.26	FALSE	#REF!
2022-09-12	14:15:26	0.43925	1.95387	2772.22	FALSE	#REF!
2022-09-12	14:15:26	0.490089	2.18001	2774.4	FALSE	#REF!
2022-09-12	14:15:27	0.345305	1.53599	2775.93	FALSE	#REF!
2022-09-12	14:15:27	0.512939	2.28166	2778.22	FALSE	#REF!
2022-09-12	14:15:27	0.506069	2.2511	2780.47	FALSE	#REF!
2022-09-12	14:15:27	1.58011	7.02865	2787.5	FALSE	#REF!
2022-09-12	14:15:28	0.914058	4.06591	2791.56	FALSE	#REF!
2022-09-12	14:15:28	1.37828	6.13087	2797.69	FALSE	#REF!
2022-09-12	14:15:28	0.80617	3.58601	2801.28	FALSE	#REF!
2022-09-12	14:15:28	0.833753	3.7087	2804.99	FALSE	#REF!
2022-09-12	14:15:29	0.505865	2.25019	2807.24	FALSE	#REF!
2022-09-12	14:15:29	0.96841	4.30768	2811.55	FALSE	#REF!
2022-09-12	14:15:29	1.06709	4.74663	2816.29	FALSE	#REF!
2022-09-12	14:15:30	1.55711	6.92634	2823.22	FALSE	#REF!
2022-09-12	14:15:30	1.75655	7.81349	2831.03	FALSE	#REF!
2022-09-12	14:15:30	2.14637	9.54748	2840.58	FALSE	#REF!
2022-09-12	14:15:30	1.04291	4.63907	2845.22	FALSE	#REF!
2022-09-12	14:15:31	0.953397	4.2409	2849.46	FALSE	#REF!
2022-09-12	14:15:31	0.885916	3.94073	2853.4	FALSE	#REF!
2022-09-12	14:15:31	0.952888	4.23864	2857.64	FALSE	#REF!
2022-09-12	14:15:31	0.858537	3.81894	2861.46	FALSE	#REF!
2022-09-12	14:15:32	1.72358	7.66683	2869.12	FALSE	#REF!
2022-09-12	14:15:32	1.52276	6.77354	2875.9	FALSE	#REF!
2022-09-12	14:15:32	3.41553	15.193	2891.09	1	#REF!
2022-09-12	14:15:32	2.99925	13.3413	2904.43	FALSE	#REF!
2022-09-12	14:15:33	4.49681	20.0027	2924.43	1	#REF!
2022-09-12	14:15:33	2.42637	10.793	2935.23	FALSE	#REF!
2022-09-12	14:15:33	3.88978	17.3025	2952.53	1	#REF!
2022-09-12	14:15:34	3.71162	16.51	2969.04	1	#REF!
2022-09-12	14:15:34	3.16897	14.0962	2983.14	1	#REF!
2022-09-12	14:15:34	5.06591	22.5342	3005.67	1	#REF!
2022-09-12	14:15:34	2.53742	11.287	3016.96	FALSE	#REF!
2022-09-12	14:15:35	3.88708	17.2905	3034.25	1	#REF!
2022-09-12	14:15:35	3.23278	14.3801	3048.63	1	#REF!
2022-09-12	14:15:35	2.80943	12.4969	3061.13	FALSE	#REF!
2022-09-12	14:15:35	3.79869	16.8973	3078.02	1	#REF!
2022-09-12	14:15:36	2.5652	11.4105	3089.43	FALSE	#REF!
2022-09-12	14:15:36	4.60052	20.464	3109.9	1	#REF!
2022-09-12	14:15:36	1.22113	5.43183	3115.33	FALSE	#REF!
2022-09-12	14:15:36	1.15686	5.14594	3120.47	FALSE	#REF!
2022-09-12	14:15:37	0.695738	3.09478	3123.57	FALSE	#REF!
2022-09-12	14:15:37	0.72042	3.20457	3126.77	FALSE	#REF!
2022-09-12	14:15:37	0.725916	3.22902	3130	FALSE	#REF!
2022-09-12	14:15:38	0.725763	3.22834	3133.23	FALSE	#REF!
2022-09-12	14:15:38	0.735026	3.26954	3136.5	FALSE	#REF!
2022-09-12	14:15:38	4.31309	19.1855	3155.69	1	#REF!
2022-09-12	14:15:38	2.422	10.7735	3166.46	FALSE	#REF!
2022-09-12	14:15:39	0.730496	3.24939	3169.71	FALSE	#REF!
2022-09-12	14:15:39	0.445814	1.98307	3171.69	FALSE	#REF!
2022-09-12	14:15:39	0.565865	2.51708	3174.21	FALSE	#REF!
2022-09-12	14:15:39	0.224848	1.00017	3175.21	FALSE	#REF!
2022-09-12	14:15:40	0.396501	1.76372	3176.97	FALSE	#REF!
2022-09-12	14:15:40	0.205509	0.914145	3177.89	FALSE	#REF!
2022-09-12	14:15:40	0.527188	2.34504	3180.23	FALSE	#REF!
2022-09-12	14:15:40	0.416043	1.85064	3182.08	FALSE	#REF!
2022-09-12	14:15:41	0.391361	1.74085	3183.82	FALSE	#REF!
2022-09-12	14:15:41	0.398181	1.77119	3185.6	FALSE	#REF!
2022-09-12	14:15:41	0.436858	1.94323	3187.54	FALSE	#REF!
2022-09-12	14:15:42	0.716349	3.18646	3190.73	FALSE	#REF!
2022-09-12	14:15:42	1.42586	6.34251	3197.07	FALSE	#REF!
2022-09-12	14:15:42	1.47726	6.57115	3203.64	FALSE	#REF!
2022-09-12	14:15:42	0.874974	3.89206	3207.53	FALSE	#REF!
2022-09-12	14:15:43	1.54912	6.8908	3214.42	FALSE	#REF!
2022-09-12	14:15:43	2.79502	12.4328	3226.85	FALSE	#REF!
2022-09-12	14:15:43	4.36383	19.4112	3246.27	1	#REF!
2022-09-12	14:15:43	5.4852	24.3993	3270.66	1	#REF!
2022-09-12	14:15:44	3.42133	15.2188	3285.88	1	#REF!
2022-09-12	14:15:44	2.0077	8.93065	3294.81	FALSE	#REF!
2022-09-12	14:15:44	3.81416	16.9661	3311.78	1	#REF!
2022-09-12	14:15:44	3.5767	15.9099	3327.69	1	#REF!
2022-09-12	14:15:45	4.45375	19.8112	3347.5	1	#REF!
2022-09-12	14:15:45	4.08301	18.162	3365.66	1	#REF!
2022-09-12	14:15:45	5.53426	24.6175	3390.28	1	#REF!
2022-09-12	14:15:46	2.32927	10.3611	3400.64	FALSE	#REF!
2022-09-12	14:15:46	2.42581	10.7905	3411.43	FALSE	#REF!
2022-09-12	14:15:46	2.39462	10.6517	3422.08	FALSE	#REF!
2022-09-12	14:15:46	3.89686	17.334	3439.42	1	#REF!
2022-09-12	14:15:47	3.97655	17.6885	3457.11	1	#REF!
2022-09-12	14:15:47	2.42062	10.7674	3467.87	FALSE	#REF!
2022-09-12	14:15:47	4.17401	18.5668	3486.44	1	#REF!
2022-09-12	14:15:47	2.40419	10.6943	3497.14	FALSE	#REF!
2022-09-12	14:15:48	3.00398	13.3623	3510.5	1	#REF!
2022-09-12	14:15:48	3.49049	15.5264	3526.02	1	#REF!
2022-09-12	14:15:48	4.19126	18.6436	3544.67	1	#REF!
2022-09-12	14:15:48	1.35701	6.03625	3550.7	FALSE	#REF!
2022-09-12	14:15:49	0.272379	1.2116	3551.92	FALSE	#REF!
2022-09-12	14:15:49	0.225407	1.00266	3552.92	FALSE	#REF!
2022-09-12	14:15:49	0.173957	0.773796	3553.69	FALSE	#REF!
2022-09-12	14:15:50	-0.0612593	-0.272494	3553.69	FALSE	#REF!
2022-09-12	14:15:50	-0.333626	-1.48404	3553.69	FALSE	#REF!
2022-09-12	14:15:50	-0.184211	-0.819407	3553.69	FALSE	#REF!
2022-09-12	14:15:50	-0.167926	-0.746968	3553.69	FALSE	#REF!
2022-09-12	14:15:51	0.0568577	0.252914	3553.94	FALSE	#REF!
2022-09-12	14:15:51	-0.0797325	-0.354666	3553.94	FALSE	#REF!
2022-09-12	14:15:51	0.201387	0.89581	3554.84	FALSE	#REF!
2022-09-12	14:15:51	0.00998751	0.0444264	3554.89	FALSE	#REF!
2022-09-12	14:15:52	0.298944	1.32976	3556.21	FALSE	#REF!
2022-09-12	14:15:52	0.416959	1.85472	3558.07	FALSE	#REF!
2022-09-12	14:15:52	1.40983	6.27121	3564.34	FALSE	#REF!
2022-09-12	14:15:52	3.14622	13.995	3578.34	1	#REF!
2022-09-12	14:15:53	3.34744	14.8901	3593.23	1	#REF!
2022-09-12	14:15:53	2.6335	11.7143	3604.94	FALSE	#REF!
2022-09-12	14:15:53	1.96123	8.72394	3613.66	FALSE	#REF!
2022-09-12	14:15:54	1.4053	6.25106	3619.92	FALSE	#REF!
2022-09-12	14:15:54	0.980114	4.35974	3624.27	FALSE	#REF!
2022-09-12	14:15:54	1.31553	5.85174	3630.13	FALSE	#REF!
2022-09-12	14:15:54	2.1592	9.60455	3639.73	FALSE	#REF!
2022-09-12	14:15:55	2.13706	9.50607	3649.24	FALSE	#REF!
2022-09-12	14:15:55	3.37706	15.0218	3664.26	1	#REF!
2022-09-12	14:15:55	2.89762	12.8892	3677.15	FALSE	#REF!
2022-09-12	14:15:55	3.04225	13.5325	3690.68	1	#REF!
2022-09-12	14:15:56	0.469479	2.08834	3692.77	FALSE	#REF!
2022-09-12	14:15:56	0.321896	1.43186	3694.2	FALSE	#REF!
2022-09-12	14:15:56	0.398639	1.77323	3695.97	FALSE	#REF!
2022-09-12	14:15:56	0.255738	1.13757	3697.11	FALSE	#REF!
2022-09-12	14:15:57	0.145967	0.64929	3697.76	FALSE	#REF!
2022-09-12	14:15:57	0.0943641	0.41975	3698.18	FALSE	#REF!
2022-09-12	14:15:57	0.0254582	0.113243	3698.29	FALSE	#REF!
2022-09-12	14:15:58	0.0700893	0.311771	3698.61	FALSE	#REF!
2022-09-12	14:15:58	0.0908017	0.403904	3699.01	FALSE	#REF!
2022-09-12	14:15:58	0.206679	0.91935	3699.93	FALSE	#REF!
2022-09-12	14:15:58	0.2793	1.24238	3701.17	FALSE	#REF!
2022-09-12	14:15:59	0.817265	3.63536	3704.81	FALSE	#REF!
2022-09-12	14:15:59	0.632074	2.81159	3707.62	FALSE	#REF!
2022-09-12	14:15:59	0.530649	2.36043	3709.98	FALSE	#REF!
2022-09-12	14:15:59	0.331769	1.47577	3711.45	FALSE	#REF!
2022-09-12	14:16:00	0.409377	1.82099	3713.28	FALSE	#REF!
2022-09-12	14:16:00	0.441031	1.96179	3715.24	FALSE	#REF!
2022-09-12	14:16:00	0.325255	1.4468	3716.68	FALSE	#REF!
2022-09-12	14:16:00	0.168155	0.747987	3717.43	FALSE	#REF!
2022-09-12	14:16:01	0.304135	1.35285	3718.79	FALSE	#REF!
2022-09-12	14:16:01	0.210242	0.935198	3719.72	FALSE	#REF!
2022-09-12	14:16:01	0.403168	1.79337	3721.51	FALSE	#REF!
2022-09-12	14:16:02	0.137163	0.610128	3722.12	FALSE	#REF!
2022-09-12	14:16:02	0.376552	1.67498	3723.8	FALSE	#REF!
2022-09-12	14:16:02	0.45813	2.03785	3725.84	FALSE	#REF!
2022-09-12	14:16:02	1.10093	4.89716	3730.73	FALSE	#REF!
2022-09-12	14:16:03	1.41614	6.29927	3737.03	FALSE	#REF!
2022-09-12	14:16:03	0.433855	1.92987	3738.96	FALSE	#REF!
2022-09-12	14:16:03	0.955484	4.25018	3743.21	FALSE	#REF!
2022-09-12	14:16:03	0.153092	0.680984	3743.89	FALSE	#REF!
2022-09-12	14:16:04	0.162099	0.721049	3744.62	FALSE	#REF!
2022-09-12	14:16:04	0.110445	0.491281	3745.11	FALSE	#REF!
2022-09-12	14:16:04	0.250293	1.11335	3746.22	FALSE	#REF!
2022-09-12	14:16:04	0.144135	0.641141	3746.86	FALSE	#REF!
2022-09-12	14:16:05	0.271005	1.20548	3748.07	FALSE	#REF!
2022-09-12	14:16:05	0.125916	0.5601	3748.63	FALSE	#REF!
2022-09-12	14:16:05	0.278079	1.23695	3749.86	FALSE	#REF!
2022-09-12	14:16:06	0.28271	1.25755	3751.12	FALSE	#REF!
2022-09-12	14:16:06	0.230598	1.02575	3752.15	FALSE	#REF!
2022-09-12	14:16:06	0.286781	1.27566	3753.42	FALSE	#REF!
2022-09-12	14:16:06	0.257977	1.14753	3754.57	FALSE	#REF!
2022-09-12	14:16:07	0.234568	1.04341	3755.61	FALSE	#REF!
2022-09-12	14:16:07	0.239402	1.06491	3756.68	FALSE	#REF!
2022-09-12	14:16:07	0.268868	1.19598	3757.87	FALSE	#REF!
2022-09-12	14:16:07	0.320674	1.42642	3759.3	FALSE	#REF!
2022-09-12	14:16:08	0.200725	0.892865	3760.19	FALSE	#REF!
2022-09-12	14:16:08	0.330496	1.47011	3761.66	FALSE	#REF!
2022-09-12	14:16:08	0.338181	1.5043	3763.17	FALSE	#REF!
2022-09-12	14:16:08	1.09757	4.88221	3768.05	FALSE	#REF!
2022-09-12	14:16:09	2.13284	9.4873	3777.54	FALSE	#REF!
2022-09-12	14:16:09	1.86434	8.29296	3785.83	FALSE	#REF!
2022-09-12	14:16:09	1.38902	6.17864	3792.01	FALSE	#REF!
2022-09-12	14:16:10	1.09976	4.89195	3796.9	FALSE	#REF!
2022-09-12	14:16:10	0.997366	4.43648	3801.34	FALSE	#REF!
2022-09-12	14:16:10	2.08754	9.2858	3810.62	FALSE	#REF!
2022-09-12	14:16:10	1.92266	8.55238	3819.18	FALSE	#REF!
2022-09-12	14:16:11	4.95696	22.0495	3841.23	1	#REF!
2022-09-12	14:16:11	3.34551	14.8815	3856.11	1	#REF!
2022-09-12	14:16:11	3.73792	16.627	3872.73	1	#REF!
2022-09-12	14:16:11	2.40851	10.7135	3883.45	FALSE	#REF!
2022-09-12	14:16:12	2.80637	12.4833	3895.93	FALSE	#REF!
2022-09-12	14:16:12	3.03167	13.4855	3909.42	1	#REF!
2022-09-12	14:16:12	3.04174	13.5303	3922.95	1	#REF!
2022-09-12	14:16:12	2.99782	13.3349	3936.28	FALSE	#REF!
2022-09-12	14:16:13	3.40195	15.1326	3951.41	1	#REF!
2022-09-12	14:16:13	3.4222	15.2226	3966.64	1	#REF!
2022-09-12	14:16:13	4.48022	19.9289	3986.57	1	#REF!
2022-09-12	14:16:14	4.77966	21.2609	4007.83	1	#REF!
2022-09-12	14:16:14	0.427748	1.90271	4009.73	FALSE	#REF!
2022-09-12	14:16:14	0.941081	4.18612	4013.91	FALSE	#REF!
2022-09-12	14:16:14	1.05793	4.70588	4018.62	FALSE	#REF!
2022-09-12	14:16:15	2.02968	9.02842	4027.65	FALSE	#REF!
2022-09-12	14:16:15	0.945967	4.20785	4031.86	FALSE	#REF!
2022-09-12	14:16:15	1.26368	5.6211	4037.48	FALSE	#REF!
2022-09-12	14:16:15	2.23467	9.94026	4047.42	FALSE	#REF!
2022-09-12	14:16:16	2.96836	13.2039	4060.62	FALSE	#REF!
2022-09-12	14:16:16	1.61599	7.18825	4067.81	FALSE	#REF!
2022-09-12	14:16:16	1.25162	5.56746	4073.38	FALSE	#REF!
2022-09-12	14:16:16	1.33156	5.92305	4079.3	FALSE	#REF!
2022-09-12	14:16:17	1.41492	6.29385	4085.59	FALSE	#REF!
2022-09-12	14:16:17	0.764389	3.40016	4089	FALSE	#REF!
2022-09-12	14:16:17	0.306934	1.3653	4090.36	FALSE	#REF!
2022-09-12	14:16:18	1.40123	6.23295	4096.59	FALSE	#REF!
2022-09-12	14:16:18	0.811107	3.60797	4100.2	FALSE	#REF!
2022-09-12	14:16:18	1.19197	5.30212	4105.5	FALSE	#REF!
2022-09-12	14:16:18	1.30067	5.78564	4111.29	FALSE	#REF!
2022-09-12	14:16:19	2.63161	11.7059	4123	FALSE	#REF!
2022-09-12	14:16:19	1.43447	6.38081	4129.38	FALSE	#REF!
2022-09-12	14:16:19	0.503066	2.23774	4131.61	FALSE	#REF!
2022-09-12	14:16:19	0.374669	1.6666	4133.28	FALSE	#REF!
2022-09-12	14:16:20	0.333041	1.48143	4134.76	FALSE	#REF!
2022-09-12	14:16:20	0.782557	3.48097	4138.24	FALSE	#REF!
2022-09-12	14:16:20	0.623168	2.77198	4141.01	FALSE	#REF!
2022-09-12	14:16:20	0.711616	3.16541	4144.18	FALSE	#REF!
2022-09-12	14:16:21	1.23431	5.49046	4149.67	FALSE	#REF!
2022-09-12	14:16:21	2.19365	9.75779	4159.43	FALSE	#REF!
2022-09-12	14:16:21	2.95309	13.1359	4172.56	FALSE	#REF!
2022-09-12	14:16:22	5.0021	22.2503	4194.81	1	#REF!
2022-09-12	14:16:22	4.50373	20.0335	4214.85	1	#REF!
2022-09-12	14:16:22	3.82444	17.0119	4231.86	1	#REF!
2022-09-12	14:16:22	0.901081	4.00819	4235.87	FALSE	#REF!
2022-09-12	14:16:23	1.35528	6.02856	4241.9	FALSE	#REF!
2022-09-12	14:16:23	1.39111	6.18794	4248.08	FALSE	#REF!
2022-09-12	14:16:23	2.82571	12.5693	4260.65	FALSE	#REF!
2022-09-12	14:16:24	1.83314	8.15417	4268.81	FALSE	#REF!
2022-09-12	14:16:24	2.7424	12.1987	4281.01	FALSE	#REF!
2022-09-12	14:16:24	3.44546	15.3261	4296.33	1	#REF!
2022-09-12	14:16:24	5.83828	25.9698	4322.3	1	#REF!
2022-09-12	14:16:25	4.26607	18.9763	4341.28	1	#REF!
2022-09-12	14:16:25	5.30108	23.5803	4364.86	1	#REF!
2022-09-12	14:16:25	2.44022	10.8546	4375.71	FALSE	#REF!
2022-09-12	14:16:25	3.21314	14.2927	4390.01	1	#REF!
2022-09-12	14:16:26	1.81879	8.09034	4398.1	FALSE	#REF!
2022-09-12	14:16:26	0.694517	3.08935	4401.19	FALSE	#REF!
2022-09-12	14:16:26	0.59869	2.66309	4403.85	FALSE	#REF!
2022-09-12	14:16:26	2.1022	9.35101	4413.2	FALSE	#REF!
2022-09-12	14:16:27	4.92525	21.9085	4435.11	1	#REF!
2022-09-12	14:16:27	4.96973	22.1064	4457.22	1	#REF!
2022-09-12	14:16:27	2.30765	10.2649	4467.48	FALSE	#REF!
2022-09-12	14:16:27	2.86973	12.7651	4480.25	FALSE	#REF!
2022-09-12	14:16:28	1.80566	8.03194	4488.28	FALSE	#REF!
2022-09-12	14:16:28	1.02653	4.56621	4492.84	FALSE	#REF!
2022-09-12	14:16:28	0.874924	3.89184	4496.74	FALSE	#REF!
2022-09-12	14:16:29	0.851565	3.78793	4500.52	FALSE	#REF!
2022-09-12	14:16:29	1.05996	4.71491	4505.24	FALSE	#REF!
2022-09-12	14:16:29	0.917926	4.08312	4509.32	FALSE	#REF!
2022-09-12	14:16:29	1.4076	6.26129	4515.58	FALSE	#REF!
2022-09-12	14:16:30	2.08856	9.29033	4524.87	FALSE	#REF!
2022-09-12	14:16:30	2.29747	10.2196	4535.09	FALSE	#REF!
2022-09-12	14:16:30	1.94607	8.65651	4543.75	FALSE	#REF!
2022-09-12	14:16:30	2.05777	9.15337	4552.9	FALSE	#REF!
2022-09-12	14:16:31	1.78037	7.91944	4560.82	FALSE	#REF!
2022-09-12	14:16:31	2.92088	12.9927	4573.81	FALSE	#REF!
2022-09-12	14:16:31	2.52195	11.2181	4585.03	FALSE	#REF!
2022-09-12	14:16:31	2.71966	12.0976	4597.13	FALSE	#REF!
2022-09-12	14:16:32	2.8338	12.6053	4609.74	FALSE	#REF!
2022-09-12	14:16:32	3.74306	16.6499	4626.39	1	#REF!
2022-09-12	14:16:32	4.90434	21.8155	4648.2	1	#REF!
2022-09-12	14:16:33	3.63528	16.1705	4664.37	1	#REF!
2022-09-12	14:16:33	2.95228	13.1323	4677.5	FALSE	#REF!
2022-09-12	14:16:33	2.45065	10.901	4688.4	FALSE	#REF!
2022-09-12	14:16:33	1.98352	8.82309	4697.23	FALSE	#REF!
2022-09-12	14:16:34	3.23039	14.3694	4711.6	1	#REF!
2022-09-12	14:16:34	5.06474	22.529	4734.13	1	#REF!
2022-09-12	14:16:34	2.66877	11.8712	4746	FALSE	#REF!
2022-09-12	14:16:34	1.8792	8.35906	4754.36	FALSE	#REF!
2022-09-12	14:16:35	2.17365	9.66883	4764.03	FALSE	#REF!
2022-09-12	14:16:35	2.22525	9.89836	4773.92	FALSE	#REF!
2022-09-12	14:16:35	2.0022	8.90619	4782.83	FALSE	#REF!
2022-09-12	14:16:35	2.00836	8.93359	4791.76	FALSE	#REF!
2022-09-12	14:16:36	3.69156	16.4208	4808.18	1	#REF!
2022-09-12	14:16:36	4.00373	17.8094	4825.99	1	#REF!
2022-09-12	14:16:36	4.28067	19.0413	4845.03	1	#REF!
2022-09-12	14:16:37	3.45436	15.3657	4860.4	1	#REF!
2022-09-12	14:16:37	2.77574	12.347	4872.75	FALSE	#REF!
2022-09-12	14:16:37	1.60872	7.15591	4879.9	FALSE	#REF!
2022-09-12	14:16:37	2.22958	9.91762	4889.82	FALSE	#REF!
2022-09-12	14:16:38	1.39065	6.18589	4896.01	FALSE	#REF!
2022-09-12	14:16:38	2.61487	11.6315	4907.64	FALSE	#REF!
2022-09-12	14:16:38	2.00983	8.94013	4916.58	FALSE	#REF!
2022-09-12	14:16:38	4.65014	20.6848	4937.26	1	#REF!
2022-09-12	14:16:39	4.70571	20.9319	4958.2	1	#REF!
2022-09-12	14:16:39	5.18576	23.0673	4981.26	1	#REF!
2022-09-12	14:16:39	2.41721	10.7522	4992.01	FALSE	#REF!
2022-09-12	14:16:39	2.30724	10.2631	5002.28	FALSE	#REF!
2022-09-12	14:16:40	1.23126	5.47689	5007.75	FALSE	#REF!
2022-09-12	14:16:40	1.57742	7.01668	5014.77	FALSE	#REF!
2022-09-12	14:16:40	1.06754	4.74863	5019.52	FALSE	#REF!
2022-09-12	14:16:41	1.42749	6.34976	5025.87	FALSE	#REF!
2022-09-12	14:16:41	1.17289	5.21725	5031.09	FALSE	#REF!
2022-09-12	14:16:41	2.41166	10.7275	5041.81	FALSE	#REF!
2022-09-12	14:16:41	1.83503	8.16258	5049.98	FALSE	#REF!
2022-09-12	14:16:42	1.96184	8.72666	5058.7	FALSE	#REF!
2022-09-12	14:16:42	1.23273	5.48343	5064.19	FALSE	#REF!
2022-09-12	14:16:42	2.72194	12.1077	5076.29	FALSE	#REF!
2022-09-12	14:16:42	2.97909	13.2516	5089.55	FALSE	#REF!
2022-09-12	14:16:43	2.89197	12.8641	5102.41	FALSE	#REF!
2022-09-12	14:16:43	1.66464	7.40465	5109.82	FALSE	#REF!
2022-09-12	14:16:43	3.92134	17.4429	5127.26	1	#REF!
2022-09-12	14:16:43	3.01619	13.4166	5140.67	1	#REF!
2022-09-12	14:16:44	2.80948	12.4971	5153.17	FALSE	#REF!
2022-09-12	14:16:44	1.49472	6.64881	5159.82	FALSE	#REF!
2022-09-12	14:16:44	2.34663	10.4383	5170.26	FALSE	#REF!
2022-09-12	14:16:45	1.68042	7.47484	5177.73	FALSE	#REF!
2022-09-12	14:16:45	1.76123	7.8343	5185.57	FALSE	#REF!
2022-09-12	14:16:45	1.12144	4.98839	5190.56	FALSE	#REF!
2022-09-12	14:16:45	2.23574	9.94502	5200.5	FALSE	#REF!
2022-09-12	14:16:46	1.92413	8.55892	5209.06	FALSE	#REF!
2022-09-12	14:16:46	2.14927	9.56038	5218.62	FALSE	#REF!
2022-09-12	14:16:46	1.61523	7.18487	5225.81	FALSE	#REF!
2022-09-12	14:16:46	2.062	9.17219	5234.98	FALSE	#REF!
2022-09-12	14:16:47	3.42988	15.2568	5250.23	1	#REF!
2022-09-12	14:16:47	3.11726	13.8662	5264.1	1	#REF!
2022-09-12	14:16:47	3.82123	16.9976	5281.1	1	#REF!
2022-09-12	14:16:47	2.17976	9.69601	5290.79	FALSE	#REF!
2022-09-12	14:16:48	1.73833	7.73244	5298.53	FALSE	#REF!
2022-09-12	14:16:48	1.02368	4.55353	5303.08	FALSE	#REF!
2022-09-12	14:16:48	1.29981	5.78181	5308.86	FALSE	#REF!
2022-09-12	14:16:49	1.40246	6.23842	5315.1	FALSE	#REF!
2022-09-12	14:16:49	2.61823	11.6464	5326.75	FALSE	#REF!
2022-09-12	14:16:49	3.03217	13.4877	5340.23	1	#REF!
2022-09-12	14:16:49	1.78566	7.94297	5348.18	FALSE	#REF!
2022-09-12	14:16:50	0.996705	4.43354	5352.61	FALSE	#REF!
2022-09-12	14:16:50	1.18062	5.25163	5357.86	FALSE	#REF!
2022-09-12	14:16:50	0.949224	4.22234	5362.09	FALSE	#REF!
2022-09-12	14:16:50	1.45273	6.46203	5368.55	FALSE	#REF!
2022-09-12	14:16:51	2.0024	8.90708	5377.45	FALSE	#REF!
2022-09-12	14:16:51	1.62235	7.21654	5384.67	FALSE	#REF!
2022-09-12	14:16:51	1.05284	4.68324	5389.35	FALSE	#REF!
2022-09-12	14:16:51	1.05009	4.67101	5394.03	FALSE	#REF!
2022-09-12	14:16:52	0.919504	4.09014	5398.12	FALSE	#REF!
2022-09-12	14:16:52	1.27838	5.68649	5403.8	FALSE	#REF!
2022-09-12	14:16:52	1.60759	7.15088	5410.95	FALSE	#REF!
2022-09-12	14:16:53	2.52434	11.2288	5422.18	FALSE	#REF!
2022-09-12	14:16:53	1.12052	4.9843	5427.17	FALSE	#REF!
2022-09-12	14:16:53	0.960522	4.27259	5431.44	FALSE	#REF!
2022-09-12	14:16:53	1.2051	5.36053	5436.8	FALSE	#REF!
2022-09-12	14:16:54	0.88215	3.92398	5440.72	FALSE	#REF!
2022-09-12	14:16:54	1.24444	5.53552	5446.26	FALSE	#REF!
2022-09-12	14:16:54	1.2937	5.75464	5452.01	FALSE	#REF!
2022-09-12	14:16:54	0.814822	3.62449	5455.64	FALSE	#REF!
2022-09-12	14:16:55	0.617519	2.74685	5458.38	FALSE	#REF!
2022-09-12	14:16:55	0.67869	3.01895	5461.4	FALSE	#REF!
2022-09-12	14:16:55	1.10744	4.92611	5466.33	FALSE	#REF!
2022-09-12	14:16:55	0.836705	3.72183	5470.05	FALSE	#REF!
2022-09-12	14:16:56	0.61187	2.72172	5472.77	FALSE	#REF!
2022-09-12	14:16:56	1.17991	5.24848	5478.02	FALSE	#REF!
2022-09-12	14:16:56	1.20271	5.34989	5483.37	FALSE	#REF!
2022-09-12	14:16:57	1.80973	8.05004	5491.42	FALSE	#REF!
2022-09-12	14:16:57	1.73589	7.72159	5499.14	FALSE	#REF!
2022-09-12	14:16:57	2.06225	9.1733	5508.32	FALSE	#REF!
2022-09-12	14:16:57	4.74693	21.1153	5529.43	1	#REF!
2022-09-12	14:16:58	3.89818	17.3399	5546.77	1	#REF!
2022-09-12	14:16:58	5.92795	26.3687	5573.14	1	#REF!
2022-09-12	14:16:58	4.34179	19.3132	5592.45	1	#REF!
2022-09-12	14:16:58	4.50663	20.0464	5612.5	1	#REF!
2022-09-12	14:16:59	1.59996	7.11694	5619.62	FALSE	#REF!
2022-09-12	14:16:59	1.88958	8.40523	5628.02	FALSE	#REF!
2022-09-12	14:16:59	1.87106	8.32285	5636.34	FALSE	#REF!
2022-09-12	14:16:59	2.10164	9.34852	5645.69	FALSE	#REF!
2022-09-12	14:17:00	1.26851	5.64259	5651.34	FALSE	#REF!
2022-09-12	14:17:00	0.92612	4.11957	5655.46	FALSE	#REF!
2022-09-12	14:17:00	0.983219	4.37355	5659.83	FALSE	#REF!
2022-09-12	14:17:01	2.70001	12.0102	5671.84	FALSE	#REF!
2022-09-12	14:17:01	3.84184	17.0893	5688.93	1	#REF!
2022-09-12	14:17:01	2.55233	11.3533	5700.28	FALSE	#REF!
2022-09-12	14:17:01	0.975687	4.34005	5704.62	FALSE	#REF!
2022-09-12	14:17:02	0.617468	2.74662	5707.37	FALSE	#REF!
2022-09-12	14:17:02	0.0792496	0.352518	5707.72	FALSE	#REF!
2022-09-12	14:17:02	0.313499	1.39451	5709.12	FALSE	#REF!
2022-09-12	14:17:02	0.0633717	0.28189	5709.4	FALSE	#REF!
2022-09-12	14:17:03	0.292481	1.30101	5710.7	FALSE	#REF!
2022-09-12	14:17:03	0.0134481	0.0598198	5710.76	FALSE	#REF!
2022-09-12	14:17:03	0.16271	0.723767	5711.48	FALSE	#REF!
2022-09-12	14:17:03	0.106883	0.475437	5711.96	FALSE	#REF!
2022-09-12	14:17:04	0.182659	0.812504	5712.77	FALSE	#REF!
2022-09-12	14:17:04	0.0725829	0.322863	5713.09	FALSE	#REF!
2022-09-12	14:17:04	0.16673	0.741648	5713.83	FALSE	#REF!
2022-09-12	14:17:05	0.106272	0.472719	5714.31	FALSE	#REF!
2022-09-12	14:17:05	0.165763	0.737347	5715.04	FALSE	#REF!
2022-09-12	14:17:05	0.22271	0.990659	5716.04	FALSE	#REF!
2022-09-12	14:17:06	0.0986389	0.438766	5716.47	FALSE	#REF!
2022-09-12	14:17:06	0.229071	1.01895	5717.49	FALSE	#REF!
2022-09-12	14:17:06	0.270089	1.20141	5718.69	FALSE	#REF!
2022-09-12	14:17:06	1.91681	8.52635	5727.22	FALSE	#REF!
2022-09-12	14:17:06	0.886985	3.94549	5731.17	FALSE	#REF!
2022-09-12	14:17:07	0.341285	1.5181	5732.68	FALSE	#REF!
2022-09-12	14:17:07	0.124949	0.555798	5733.24	FALSE	#REF!

## Sheet: Duke_prong_2022912141147 (Edit)
Date	Time	Lbs	Total Force x Time	Total Time Steps Force >3		**GoPro Fitting: 1401
2022-09-12	14:12:07	5.38026	5.38026
2022-09-12	14:12:07	3.84337	9.22363
2022-09-12	14:12:07	0.848257	10.0719
2022-09-12	14:12:07	0.391209	10.4631
2022-09-12	14:12:08	0.231311	10.6944
2022-09-12	14:12:08	0.298842	10.9932
2022-09-12	14:12:08	0.0871885	11.0804
2022-09-12	14:12:09	-0.00309134	11.0804
2022-09-12	14:12:09	0.190191	11.2706
2022-09-12	14:12:09	0.138639	11.4093
2022-09-12	14:12:09	0.14215	11.5514
2022-09-12	14:12:10	0.769631	12.321
2022-09-12	14:12:10	2.07538	14.3964
2022-09-12	14:12:10	4.2195	18.6159
2022-09-12	14:12:11	3.831	22.4469
2022-09-12	14:12:11	1.10765	23.5546
2022-09-12	14:12:11	0.565153	24.1197
2022-09-12	14:12:11	0.413244	24.533
2022-09-12	14:12:11	0.266832	24.7998
2022-09-12	14:12:12	0.423321	25.2231
2022-09-12	14:12:12	0.269886	25.493
2022-09-12	14:12:12	0.389021	25.882
2022-09-12	14:12:13	0.177977	26.06
2022-09-12	14:12:13	0.25701	26.317
2022-09-12	14:12:13	0.231463	26.5485
2022-09-12	14:12:13	0.255229	26.8037
2022-09-12	14:12:14	-0.108842	26.8037
2022-09-12	14:12:14	-0.139682	26.8037
2022-09-12	14:12:14	-0.0747453	26.8037
2022-09-12	14:12:14	0.0554328	26.8591
2022-09-12	14:12:15	-0.0411575	26.8591
2022-09-12	14:12:15	0.231158	27.0903
2022-09-12	14:12:15	0.168359	27.2587
2022-09-12	14:12:15	0.209733	27.4684
2022-09-12	14:12:16	0.130802	27.5992
2022-09-12	14:12:16	0.242761	27.842
2022-09-12	14:12:16	0.28841	28.1304
2022-09-12	14:12:17	1.09945	29.2298	FALSE	0
2022-09-12	14:12:18	0.671463	29.9013	FALSE	0
2022-09-12	14:12:18	0.728257	30.6295	FALSE	0
2022-09-12	14:12:18	0.321336	30.9509	FALSE	0
2022-09-12	14:12:18	0.794975	31.7459	FALSE	0
2022-09-12	14:12:19	0.380827	32.1267	FALSE	0
2022-09-12	14:12:19	0.722659	32.8493	FALSE	0
2022-09-12	14:12:19	0.641132	33.4905	FALSE	0
2022-09-12	14:12:19	0.704542	34.195	FALSE	0
2022-09-12	14:12:20	0.469071	34.6641	FALSE	0
2022-09-12	14:12:20	0.394415	35.0585	FALSE	0
2022-09-12	14:12:20	0.493092	35.5516	FALSE	0
2022-09-12	14:12:21	0.28215	35.8337	FALSE	0
2022-09-12	14:12:21	0.557214	36.391	FALSE	0
2022-09-12	14:12:21	0.2107	36.6017	FALSE	0
2022-09-12	14:12:21	0.578842	37.1805	FALSE	0
2022-09-12	14:12:22	0.332074	37.5126	FALSE	0
2022-09-12	14:12:22	0.724389	38.237	FALSE	0
2022-09-12	14:12:22	0.330344	38.5673	FALSE	0
2022-09-12	14:12:22	1.00775	39.5751	FALSE	0
2022-09-12	14:12:23	0.504033	40.0791	FALSE	0
2022-09-12	14:12:23	1.66413	41.7432	FALSE	0
2022-09-12	14:12:23	0.665458	42.4087	FALSE	0
2022-09-12	14:12:23	1.50383	43.9125	FALSE	0
2022-09-12	14:12:24	0.800725	44.7132	FALSE	0
2022-09-12	14:12:24	1.43095	46.1442	FALSE	0
2022-09-12	14:12:24	0.92612	47.0703	FALSE	0
2022-09-12	14:12:25	1.02357	48.0939	FALSE	0
2022-09-12	14:12:25	1.00693	49.1008	FALSE	0
2022-09-12	14:12:25	1.01304	50.1138	FALSE	0
2022-09-12	14:12:25	1.22917	51.343	FALSE	0
2022-09-12	14:12:26	1.11747	52.4605	FALSE	0
2022-09-12	14:12:26	1.1049	53.5654	FALSE	0
2022-09-12	14:12:26	0.537723	54.1031	FALSE	0
2022-09-12	14:12:27	1.05345	55.1566	FALSE	0
2022-09-12	14:12:27	0.427646	55.5842	FALSE	0
2022-09-12	14:12:27	1.19752	56.7817	FALSE	0
2022-09-12	14:12:27	0.464339	57.2461	FALSE	0
2022-09-12	14:12:27	1.12856	58.3746	FALSE	0
2022-09-12	14:12:28	0.993702	59.3683	FALSE	0
2022-09-12	14:12:28	1.53243	60.9007	FALSE	0
2022-09-12	14:12:28	1.5053	62.406	FALSE	0
2022-09-12	14:12:29	2.125	64.531	FALSE	0
2022-09-12	14:12:29	1.67106	66.2021	FALSE	0
2022-09-12	14:12:29	2.62988	68.832	FALSE	0
2022-09-12	14:12:29	1.75711	70.5891	FALSE	0
2022-09-12	14:12:30	1.58592	72.175	FALSE	0
2022-09-12	14:12:30	1.49742	73.6724	FALSE	0
2022-09-12	14:12:30	0.81243	74.4849	FALSE	0
2022-09-12	14:12:30	1.51136	75.9962	FALSE	0
2022-09-12	14:12:31	0.720114	76.7163	FALSE	0
2022-09-12	14:12:31	1.41212	78.1285	FALSE	0
2022-09-12	14:12:31	0.720165	78.8486	FALSE	0
2022-09-12	14:12:31	1.76892	80.6175	FALSE	0
2022-09-12	14:12:32	1.10617	81.7237	FALSE	0
2022-09-12	14:12:32	2.43085	84.1546	FALSE	0
2022-09-12	14:12:32	1.74103	85.8956	FALSE	0
2022-09-12	14:12:33	3.0192	88.9148	1	1
2022-09-12	14:12:33	1.34108	90.2559	FALSE	1
2022-09-12	14:12:33	2.39757	92.6534	FALSE	1
2022-09-12	14:12:33	1.12989	93.7833	FALSE	1
2022-09-12	14:12:34	1.73309	95.5164	FALSE	1
2022-09-12	14:12:34	1.19777	96.7142	FALSE	1
2022-09-12	14:12:34	0.624338	97.3385	FALSE	1
2022-09-12	14:12:34	1.18805	98.5266	FALSE	1
2022-09-12	14:12:35	0.435484	98.9621	FALSE	1
2022-09-12	14:12:35	1.23803	100.2	FALSE	1
2022-09-12	14:12:35	0.466018	100.666	FALSE	1
2022-09-12	14:12:35	1.05248	101.719	FALSE	1
2022-09-12	14:12:36	0.457163	102.176	FALSE	1
2022-09-12	14:12:36	1.15609	103.332	FALSE	1
2022-09-12	14:12:36	0.980318	104.312	FALSE	1
2022-09-12	14:12:37	1.56546	105.878	FALSE	1
2022-09-12	14:12:37	1.16607	107.044	FALSE	1
2022-09-12	14:12:37	1.76658	108.81	FALSE	1
2022-09-12	14:12:37	1.49238	110.303	FALSE	1
2022-09-12	14:12:38	2.31838	112.621	FALSE	1
2022-09-12	14:12:38	1.48383	114.105	FALSE	1
2022-09-12	14:12:38	2.26602	116.371	FALSE	1
2022-09-12	14:12:38	2.29279	118.664	FALSE	1
2022-09-12	14:12:39	0.985916	119.65	FALSE	1
2022-09-12	14:12:39	2.30134	121.951	FALSE	1
2022-09-12	14:12:39	0.799402	122.75	FALSE	1
2022-09-12	14:12:39	3.2478	125.998	1	2
2022-09-12	14:12:40	1.16841	127.167	FALSE	2
2022-09-12	14:12:40	3.93604	131.103	1	3
2022-09-12	14:12:40	2.20459	133.307	FALSE	3
2022-09-12	14:12:41	5.73919	139.046	1	4
2022-09-12	14:12:41	1.93207	140.978	FALSE	4
2022-09-12	14:12:41	4.36332	145.342	1	5
2022-09-12	14:12:41	2.17584	147.518	FALSE	5
2022-09-12	14:12:42	4.45864	151.976	1	6
2022-09-12	14:12:42	2.82154	154.798	FALSE	6
2022-09-12	14:12:42	3.88551	158.683	1	7
2022-09-12	14:12:42	3.65085	162.334	1	8
2022-09-12	14:12:43	5.4136	167.748	1	9
2022-09-12	14:12:43	4.61141	172.359	1	10
2022-09-12	14:12:43	4.35507	176.714	1	11
2022-09-12	14:12:43	4.13009	180.844	1	12
2022-09-12	14:12:44	2.68027	183.525	FALSE	12
2022-09-12	14:12:44	2.1365	185.661	FALSE	12
2022-09-12	14:12:44	1.20973	186.871	FALSE	12
2022-09-12	14:12:45	1.14393	188.015	FALSE	12
2022-09-12	14:12:45	0.639249	188.654	FALSE	12
2022-09-12	14:12:45	0.551718	189.206	FALSE	12
2022-09-12	14:12:45	0.418079	189.624	FALSE	12
2022-09-12	14:12:46	1.02337	190.647	FALSE	12
2022-09-12	14:12:46	0.985102	191.632	FALSE	12
2022-09-12	14:12:46	1.61589	193.248	FALSE	12
2022-09-12	14:12:46	2.02948	195.278	FALSE	12
2022-09-12	14:12:47	4.66032	199.938	1	13
2022-09-12	14:12:47	2.68062	202.619	FALSE	13
2022-09-12	14:12:47	1.99034	204.609	FALSE	13
2022-09-12	14:12:47	1.26922	205.878	FALSE	13
2022-09-12	14:12:48	0.730649	206.609	FALSE	13
2022-09-12	14:12:48	1.21319	207.822	FALSE	13
2022-09-12	14:12:48	1.00673	208.829	FALSE	13
2022-09-12	14:12:49	1.87676	210.705	FALSE	13
2022-09-12	14:12:49	1.19111	211.897	FALSE	13
2022-09-12	14:12:49	2.92072	214.817	FALSE	13
2022-09-12	14:12:49	1.56541	216.383	FALSE	13
2022-09-12	14:12:50	2.71416	219.097	FALSE	13
2022-09-12	14:12:50	3.60703	222.704	1	14
2022-09-12	14:12:50	3.40271	226.107	1	15
2022-09-12	14:12:50	4.90937	231.016	1	16
2022-09-12	14:12:51	4.50841	235.524	1	17
2022-09-12	14:12:51	4.07716	239.602	1	18
2022-09-12	14:12:51	11.4066	251.008	1	19
2022-09-12	14:12:51	13.2999	264.308	1	20
2022-09-12	14:12:52	6.06886	270.377	1	21
2022-09-12	14:12:52	2.06744	272.444	FALSE	21
2022-09-12	14:12:52	0.574771	273.019	FALSE	21
2022-09-12	14:12:53	0.468104	273.487	FALSE	21
2022-09-12	14:12:53	0.33986	273.827	FALSE	21
2022-09-12	14:12:53	0.328359	274.155	FALSE	21
2022-09-12	14:12:53	0.448919	274.604	FALSE	21
2022-09-12	14:12:54	0.498435	275.103	FALSE	21
2022-09-12	14:12:54	0.628919	275.732	FALSE	21
2022-09-12	14:12:54	0.727036	276.459	FALSE	21
2022-09-12	14:12:54	0.735483	277.194	FALSE	21
2022-09-12	14:12:55	0.329529	277.524	FALSE	21
2022-09-12	14:12:55	0.15869	277.682	FALSE	21
2022-09-12	14:12:55	0.143575	277.826	FALSE	21
2022-09-12	14:12:55	0.0611326	277.887	FALSE	21
2022-09-12	14:12:56	0.168104	278.055	FALSE	21
2022-09-12	14:12:56	-0.0159667	278.055	FALSE	21
2022-09-12	14:12:56	0.0829646	278.138	FALSE	21
2022-09-12	14:12:57	0.10841	278.247	FALSE	21
2022-09-12	14:12:57	0.113804	278.36	FALSE	21
2022-09-12	14:12:57	0.203728	278.564	FALSE	21
2022-09-12	14:12:57	0.0741605	278.638	FALSE	21
2022-09-12	14:12:58	0.271972	278.91	FALSE	21
2022-09-12	14:12:58	0.144593	279.055	FALSE	21
2022-09-12	14:12:58	0.348664	279.404	FALSE	21
2022-09-12	14:12:58	0.100725	279.504	FALSE	21
2022-09-12	14:12:59	0.215127	279.719	FALSE	21
2022-09-12	14:12:59	0.146883	279.866	FALSE	21
2022-09-12	14:12:59	0.1393	280.006	FALSE	21
2022-09-12	14:12:59	0.248257	280.254	FALSE	21
2022-09-12	14:13:00	0.20785	280.462	FALSE	21
2022-09-12	14:13:00	0.253601	280.715	FALSE	21
2022-09-12	14:13:00	0.178537	280.894	FALSE	21
2022-09-12	14:13:01	0.0298348	280.924	FALSE	21
2022-09-12	14:13:01	-0.357391	280.924	FALSE	21
2022-09-12	14:13:01	-0.455712	280.924	FALSE	21
2022-09-12	14:13:01	-0.368994	280.924	FALSE	21
2022-09-12	14:13:02	0.219708	281.143	FALSE	21
2022-09-12	14:13:02	0.246069	281.389	FALSE	21
2022-09-12	14:13:02	0.054873	281.444	FALSE	21
2022-09-12	14:13:02	0.28556	281.73	FALSE	21
2022-09-12	14:13:03	0.258232	281.988	FALSE	21
2022-09-12	14:13:03	0.268613	282.257	FALSE	21
2022-09-12	14:13:03	0.398079	282.655	FALSE	21
2022-09-12	14:13:03	0.347646	283.002	FALSE	21
2022-09-12	14:13:04	0.991209	283.994	FALSE	21
2022-09-12	14:13:04	1.642	285.636	FALSE	21
2022-09-12	14:13:04	1.66989	287.306	FALSE	21
2022-09-12	14:13:05	0.540165	287.846	FALSE	21
2022-09-12	14:13:05	0.247443	288.093	FALSE	21
2022-09-12	14:13:05	0.308104	288.401	FALSE	21
2022-09-12	14:13:05	0.238333	288.64	FALSE	21
2022-09-12	14:13:06	0.210089	288.85	FALSE	21
2022-09-12	14:13:06	0.285305	289.135	FALSE	21
2022-09-12	14:13:06	0.307901	289.443	FALSE	21
2022-09-12	14:13:06	0.271463	289.714	FALSE	21
2022-09-12	14:13:07	0.225153	289.939	FALSE	21
2022-09-12	14:13:07	0.28098	290.22	FALSE	21
2022-09-12	14:13:07	1.53345	291.754	FALSE	21
2022-09-12	14:13:08	0.240623	291.995	FALSE	21
2022-09-12	14:13:08	0.0846439	292.079	FALSE	21
2022-09-12	14:13:08	0.312939	292.392	FALSE	21
2022-09-12	14:13:08	0.282608	292.675	FALSE	21
2022-09-12	14:13:09	0.0146695	292.689	FALSE	21
2022-09-12	14:13:09	-0.000241466	292.689	FALSE	21
2022-09-12	14:13:09	0.258486	292.948	FALSE	21
2022-09-12	14:13:09	0.116858	293.065	FALSE	21
2022-09-12	14:13:10	0.114008	293.179	FALSE	21
2022-09-12	14:13:10	0.0475956	293.226	FALSE	21
2022-09-12	14:13:10	0.258079	293.484	FALSE	21
2022-09-12	14:13:10	0.166323	293.651	FALSE	21
2022-09-12	14:13:11	0.238792	293.89	FALSE	21
2022-09-12	14:13:11	0.471565	294.361	FALSE	21
2022-09-12	14:13:11	0.479249	294.84	FALSE	21
2022-09-12	14:13:12	0.395229	295.236	FALSE	21
2022-09-12	14:13:12	0.670649	295.906	FALSE	21
2022-09-12	14:13:12	0.151514	296.058	FALSE	21
2022-09-12	14:13:12	0.68154	296.739	FALSE	21
2022-09-12	14:13:13	0.422608	297.162	FALSE	21
2022-09-12	14:13:13	0.463219	297.625	FALSE	21
2022-09-12	14:13:13	0.454466	298.08	FALSE	21
2022-09-12	14:13:13	0.547443	298.627	FALSE	21
2022-09-12	14:13:14	0.50902	299.136	FALSE	21
2022-09-12	14:13:14	0.626679	299.763	FALSE	21
2022-09-12	14:13:14	0.215076	299.978	FALSE	21
2022-09-12	14:13:14	0.0711071	300.049	FALSE	21
2022-09-12	14:13:15	0.0950257	300.144	FALSE	21
2022-09-12	14:13:15	0.116043	300.26	FALSE	21
2022-09-12	14:13:15	-0.0156613	300.26	FALSE	21
2022-09-12	14:13:16	0.198486	300.458	FALSE	21
2022-09-12	14:13:16	0.11355	300.572	FALSE	21
2022-09-12	14:13:16	0.384898	300.957	FALSE	21
2022-09-12	14:13:16	0.530344	301.487	FALSE	21
2022-09-12	14:13:17	0.435891	301.923	FALSE	21
2022-09-12	14:13:17	0.229529	302.153	FALSE	21
2022-09-12	14:13:17	0.321845	302.475	FALSE	21
2022-09-12	14:13:17	0.206781	302.681	FALSE	21
2022-09-12	14:13:18	0.544949	303.226	FALSE	21
2022-09-12	14:13:18	0.3564	303.583	FALSE	21
2022-09-12	14:13:18	1.44312	305.026	FALSE	21
2022-09-12	14:13:18	0.126272	305.152	FALSE	21
2022-09-12	14:13:19	0.422812	305.575	FALSE	21
2022-09-12	14:13:19	0.268715	305.844	FALSE	21
2022-09-12	14:13:19	0.298842	306.142	FALSE	21
2022-09-12	14:13:20	-0.0806486	306.142	FALSE	21
2022-09-12	14:13:20	-0.195407	306.142	FALSE	21
2022-09-12	14:13:20	-0.101259	306.142	FALSE	21
2022-09-12	14:13:20	-0.058104	306.142	FALSE	21
2022-09-12	14:13:21	0.0672394	306.21	FALSE	21
2022-09-12	14:13:21	0.299555	306.509	FALSE	21
2022-09-12	14:13:21	0.371718	306.881	FALSE	21
2022-09-12	14:13:21	0.272634	307.154	FALSE	21
2022-09-12	14:13:22	0.403931	307.557	FALSE	21
2022-09-12	14:13:22	0.284135	307.842	FALSE	21
2022-09-12	14:13:22	0.359758	308.201	FALSE	21
2022-09-12	14:13:22	0.29126	308.493	FALSE	21
2022-09-12	14:13:23	0.359351	308.852	FALSE	21
2022-09-12	14:13:23	0.274313	309.126	FALSE	21
2022-09-12	14:13:23	0.364389	309.491	FALSE	21
2022-09-12	14:13:24	0.276603	309.767	FALSE	21
2022-09-12	14:13:24	0.280929	310.048	FALSE	21
2022-09-12	14:13:24	0.276501	310.325	FALSE	21
2022-09-12	14:13:24	0.368308	310.693	FALSE	21
2022-09-12	14:13:25	0.321998	311.015	FALSE	21
2022-09-12	14:13:25	0.275738	311.291	FALSE	21
2022-09-12	14:13:25	0.366425	311.657	FALSE	21
2022-09-12	14:13:25	0.384135	312.041	FALSE	21
2022-09-12	14:13:26	0.0459671	312.087	FALSE	21
2022-09-12	14:13:26	-0.0256868	312.087	FALSE	21
2022-09-12	14:13:26	-0.10472	312.087	FALSE	21
2022-09-12	14:13:26	-0.15159	312.087	FALSE	21
2022-09-12	14:13:27	0.149479	312.237	FALSE	21
2022-09-12	14:13:27	0.577723	312.815	FALSE	21
2022-09-12	14:13:27	0.417214	313.232	FALSE	21
2022-09-12	14:13:28	0.304186	313.536	FALSE	21
2022-09-12	14:13:28	0.164644	313.701	FALSE	21
2022-09-12	14:13:28	-0.105127	313.701	FALSE	21
2022-09-12	14:13:28	0.182507	313.883	FALSE	21
2022-09-12	14:13:29	0.3193	314.202	FALSE	21
2022-09-12	14:13:29	0.967137	315.169	FALSE	21
2022-09-12	14:13:29	1.96251	317.132	FALSE	21
2022-09-12	14:13:29	0.412939	317.545	FALSE	21
2022-09-12	14:13:30	0.733499	318.278	FALSE	21
2022-09-12	14:13:30	0.697112	318.976	FALSE	21
2022-09-12	14:13:30	0.50673	319.482	FALSE	21
2022-09-12	14:13:30	0.240725	319.723	FALSE	21
2022-09-12	14:13:31	0.507239	320.23	FALSE	21
2022-09-12	14:13:31	0.866527	321.097	FALSE	21
2022-09-12	14:13:31	0.555585	321.652	FALSE	21
2022-09-12	14:13:32	1.13844	322.791	FALSE	21
2022-09-12	14:13:32	0.270191	323.061	FALSE	21
2022-09-12	14:13:32	0.325204	323.386	FALSE	21
2022-09-12	14:13:32	0.514008	323.9	FALSE	21
2022-09-12	14:13:33	0.409275	324.309	FALSE	21
2022-09-12	14:13:33	0.47701	324.786	FALSE	21
2022-09-12	14:13:33	0.500216	325.287	FALSE	21
2022-09-12	14:13:33	0.571972	325.859	FALSE	21
2022-09-12	14:13:34	0.774568	326.633	FALSE	21
2022-09-12	14:13:34	0.97869	327.612	FALSE	21
2022-09-12	14:13:34	1.20429	328.816	FALSE	21
2022-09-12	14:13:34	1.77324	330.589	FALSE	21
2022-09-12	14:13:35	1.14627	331.736	FALSE	21
2022-09-12	14:13:35	1.06724	332.803	FALSE	21
2022-09-12	14:13:35	0.952532	333.756	FALSE	21
2022-09-12	14:13:36	1.03726	334.793	FALSE	21
2022-09-12	14:13:36	0.944033	335.737	FALSE	21
2022-09-12	14:13:36	0.70103	336.438	FALSE	21
2022-09-12	14:13:36	0.45187	336.89	FALSE	21
2022-09-12	14:13:37	0.503931	337.394	FALSE	21
2022-09-12	14:13:37	0.564644	337.958	FALSE	21
2022-09-12	14:13:37	0.466476	338.425	FALSE	21
2022-09-12	14:13:37	0.218944	338.644	FALSE	21
2022-09-12	14:13:38	0.313753	338.957	FALSE	21
2022-09-12	14:13:38	0.278944	339.236	FALSE	21
2022-09-12	14:13:38	0.278842	339.515	FALSE	21
2022-09-12	14:13:38	0.22673	339.742	FALSE	21
2022-09-12	14:13:39	0.250751	339.993	FALSE	21
2022-09-12	14:13:39	0.32215	340.315	FALSE	21
2022-09-12	14:13:39	0.196552	340.511	FALSE	21
2022-09-12	14:13:40	0.259046	340.77	FALSE	21
2022-09-12	14:13:40	0.334771	341.105	FALSE	21
2022-09-12	14:13:40	0.0987407	341.204	FALSE	21
2022-09-12	14:13:40	0.105814	341.31	FALSE	21
2022-09-12	14:13:41	0.174415	341.484	FALSE	21
2022-09-12	14:13:41	0.128359	341.613	FALSE	21
2022-09-12	14:13:41	0.0321758	341.645	FALSE	21
2022-09-12	14:13:41	-0.22472	341.645	FALSE	21
2022-09-12	14:13:42	-0.177137	341.645	FALSE	21
2022-09-12	14:13:42	-0.154745	341.645	FALSE	21
2022-09-12	14:13:42	-0.111692	341.645	FALSE	21
2022-09-12	14:13:42	0.205	341.85	FALSE	21
2022-09-12	14:13:43	0.590191	342.44	FALSE	21
2022-09-12	14:13:43	0.471005	342.911	FALSE	21
2022-09-12	14:13:43	0.451361	343.362	FALSE	21
2022-09-12	14:13:44	0.435229	343.798	FALSE	21
2022-09-12	14:13:44	0.467647	344.265	FALSE	21
2022-09-12	14:13:44	0.220725	344.486	FALSE	21
2022-09-12	14:13:44	0.0228119	344.509	FALSE	21
2022-09-12	14:13:45	0.0113616	344.52	FALSE	21
2022-09-12	14:13:45	0.26154	344.782	FALSE	21
2022-09-12	14:13:45	0.225102	345.007	FALSE	21
2022-09-12	14:13:45	0.0676465	345.074	FALSE	21
2022-09-12	14:13:46	-0.0271626	345.074	FALSE	21
2022-09-12	14:13:46	0.00886792	345.083	FALSE	21
2022-09-12	14:13:46	-0.110928	345.083	FALSE	21
2022-09-12	14:13:46	-0.054898	345.083	FALSE	21
2022-09-12	14:13:47	-0.0410557	345.083	FALSE	21
2022-09-12	14:13:47	-0.128587	345.083	FALSE	21
2022-09-12	14:13:47	0.0228628	345.106	FALSE	21
2022-09-12	14:13:48	-0.118053	345.106	FALSE	21
2022-09-12	14:13:48	-0.142481	345.106	FALSE	21
2022-09-12	14:13:48	-0.26986	345.106	FALSE	21
2022-09-12	14:13:48	-0.20075	345.106	FALSE	21
2022-09-12	14:13:49	-0.200496	345.106	FALSE	21
2022-09-12	14:13:49	-0.250012	345.106	FALSE	21
2022-09-12	14:13:49	-0.0778496	345.106	FALSE	21
2022-09-12	14:13:49	0.388155	345.494	FALSE	21
2022-09-12	14:13:50	0.663728	346.158	FALSE	21
2022-09-12	14:13:50	1.6194	347.777	FALSE	21
2022-09-12	14:13:50	1.43472	349.212	FALSE	21
2022-09-12	14:13:50	1.70693	350.919	FALSE	21
2022-09-12	14:13:51	1.36337	352.282	FALSE	21
2022-09-12	14:13:51	2.70179	354.984	FALSE	21
2022-09-12	14:13:51	1.01879	356.003	FALSE	21
2022-09-12	14:13:52	1.93085	357.934	FALSE	21
2022-09-12	14:13:52	1.74958	359.683	FALSE	21
2022-09-12	14:13:52	1.36072	361.044	FALSE	21
2022-09-12	14:13:52	0.328511	361.373	FALSE	21
2022-09-12	14:13:53	0.503677	361.876	FALSE	21
2022-09-12	14:13:53	0.526832	362.403	FALSE	21
2022-09-12	14:13:53	0.438588	362.842	FALSE	21
2022-09-12	14:13:53	0.336094	363.178	FALSE	21
2022-09-12	14:13:54	0.374415	363.552	FALSE	21
2022-09-12	14:13:54	0.454211	364.006	FALSE	21
2022-09-12	14:13:54	0.290954	364.297	FALSE	21
2022-09-12	14:13:54	0.378435	364.676	FALSE	21
2022-09-12	14:13:55	0.198232	364.874	FALSE	21
2022-09-12	14:13:55	0.105865	364.98	FALSE	21
2022-09-12	14:13:55	0.258181	365.238	FALSE	21
2022-09-12	14:13:56	0.220878	365.459	FALSE	21
2022-09-12	14:13:56	0.279148	365.738	FALSE	21
2022-09-12	14:13:56	0.28668	366.025	FALSE	21
2022-09-12	14:13:56	0.132074	366.157	FALSE	21
2022-09-12	14:13:57	0.390903	366.548	FALSE	21
2022-09-12	14:13:57	0.29014	366.838	FALSE	21
2022-09-12	14:13:57	0.290954	367.129	FALSE	21
2022-09-12	14:13:57	0.199758	367.329	FALSE	21
2022-09-12	14:13:58	0.203982	367.533	FALSE	21
2022-09-12	14:13:58	0.252125	367.785	FALSE	21
2022-09-12	14:13:58	0.221947	368.007	FALSE	21
2022-09-12	14:13:58	0.184949	368.192	FALSE	21
2022-09-12	14:13:59	0.149529	368.341	FALSE	21
2022-09-12	14:13:59	0.211718	368.553	FALSE	21
2022-09-12	14:13:59	0.125509	368.678	FALSE	21
2022-09-12	14:14:00	0.241081	368.919	FALSE	21
2022-09-12	14:14:00	0.169529	369.089	FALSE	21
2022-09-12	14:14:00	0.189733	369.279	FALSE	21
2022-09-12	14:14:00	0.129071	369.408	FALSE	21
2022-09-12	14:14:01	0.114008	369.522	FALSE	21
2022-09-12	14:14:01	0.214262	369.736	FALSE	21
2022-09-12	14:14:01	0.338232	370.074	FALSE	21
2022-09-12	14:14:01	0.321489	370.396	FALSE	21
2022-09-12	14:14:02	0.264949	370.661	FALSE	21
2022-09-12	14:14:02	0.221336	370.882	FALSE	21
2022-09-12	14:14:02	0.298079	371.18	FALSE	21
2022-09-12	14:14:02	0.313194	371.493	FALSE	21
2022-09-12	14:14:03	0.334669	371.828	FALSE	21
2022-09-12	14:14:03	0.392176	372.22	FALSE	21
2022-09-12	14:14:03	0.386883	372.607	FALSE	21
2022-09-12	14:14:04	0.372888	372.98	FALSE	21
2022-09-12	14:14:04	0.387341	373.367	FALSE	21
2022-09-12	14:14:04	0.400522	373.768	FALSE	21
2022-09-12	14:14:04	0.363219	374.131	FALSE	21
2022-09-12	14:14:05	0.340522	374.472	FALSE	21
2022-09-12	14:14:05	0.334975	374.807	FALSE	21
2022-09-12	14:14:05	0.323117	375.13	FALSE	21
2022-09-12	14:14:05	0.315789	375.445	FALSE	21
2022-09-12	14:14:06	0.32841	375.774	FALSE	21
2022-09-12	14:14:06	0.308613	376.082	FALSE	21
2022-09-12	14:14:06	0.420573	376.503	FALSE	21
2022-09-12	14:14:06	0.359809	376.863	FALSE	21
2022-09-12	14:14:07	0.360929	377.224	FALSE	21
2022-09-12	14:14:07	0.320166	377.544	FALSE	21
2022-09-12	14:14:07	0.273041	377.817	FALSE	21
2022-09-12	14:14:08	0.348308	378.165	FALSE	21
2022-09-12	14:14:08	0.342405	378.508	FALSE	21
2022-09-12	14:14:08	0.2993	378.807	FALSE	21
2022-09-12	14:14:08	0.392379	379.199	FALSE	21
2022-09-12	14:14:09	0.326934	379.526	FALSE	21
2022-09-12	14:14:09	0.243677	379.77	FALSE	21
2022-09-12	14:14:09	0.276908	380.047	FALSE	21
2022-09-12	14:14:09	0.256501	380.303	FALSE	21
2022-09-12	14:14:10	0.303931	380.607	FALSE	21
2022-09-12	14:14:10	0.398333	381.006	FALSE	21
2022-09-12	14:14:10	0.255178	381.261	FALSE	21
2022-09-12	14:14:10	0.378384	381.639	FALSE	21
2022-09-12	14:14:11	0.311921	381.951	FALSE	21
2022-09-12	14:14:11	0.311514	382.263	FALSE	21
2022-09-12	14:14:11	0.258893	382.522	FALSE	21
2022-09-12	14:14:12	0.229886	382.751	FALSE	21
2022-09-12	14:14:12	0.345763	383.097	FALSE	21
2022-09-12	14:14:12	0.463677	383.561	FALSE	21
2022-09-12	14:14:12	0.741132	384.302	FALSE	21
2022-09-12	14:14:13	0.788002	385.09	FALSE	21
2022-09-12	14:14:13	0.979606	386.07	FALSE	21
2022-09-12	14:14:13	0.632023	386.702	FALSE	21
2022-09-12	14:14:13	0.926578	387.628	FALSE	21
2022-09-12	14:14:14	0.335687	387.964	FALSE	21
2022-09-12	14:14:14	0.771412	388.735	FALSE	21
2022-09-12	14:14:14	0.25014	388.985	FALSE	21
2022-09-12	14:14:14	0.754364	389.74	FALSE	21
2022-09-12	14:14:15	0.36159	390.101	FALSE	21
2022-09-12	14:14:15	0.673651	390.775	FALSE	21
2022-09-12	14:14:15	0.535382	391.31	FALSE	21
2022-09-12	14:14:16	0.504847	391.815	FALSE	21
2022-09-12	14:14:16	0.609427	392.425	FALSE	21
2022-09-12	14:14:16	0.385814	392.811	FALSE	21
2022-09-12	14:14:16	0.877621	393.688	FALSE	21
2022-09-12	14:14:17	0.474211	394.162	FALSE	21
2022-09-12	14:14:17	1.01319	395.176	FALSE	21
2022-09-12	14:14:17	0.35528	395.531	FALSE	21
2022-09-12	14:14:17	1.20683	396.738	FALSE	21
2022-09-12	14:14:18	0.788918	397.527	FALSE	21
2022-09-12	14:14:18	1.55223	399.079	FALSE	21
2022-09-12	14:14:18	0.675382	399.754	FALSE	21
2022-09-12	14:14:18	1.18154	400.936	FALSE	21
2022-09-12	14:14:19	1.08668	402.022	FALSE	21
2022-09-12	14:14:19	2.582	404.604	FALSE	21
2022-09-12	14:14:19	2.82189	407.426	FALSE	21
2022-09-12	14:14:20	2.97228	410.399	FALSE	21
2022-09-12	14:14:20	1.47365	411.872	FALSE	21
2022-09-12	14:14:20	2.24876	414.121	FALSE	21
2022-09-12	14:14:20	1.75029	415.871	FALSE	21
2022-09-12	14:14:21	0.816654	416.688	FALSE	21
2022-09-12	14:14:21	0.48673	417.175	FALSE	21
2022-09-12	14:14:21	0.439708	417.614	FALSE	21
2022-09-12	14:14:21	0.457468	418.072	FALSE	21
2022-09-12	14:14:22	0.635687	418.708	FALSE	21
2022-09-12	14:14:22	0.547494	419.255	FALSE	21
2022-09-12	14:14:22	0.950293	420.205	FALSE	21
2022-09-12	14:14:23	0.429071	420.634	FALSE	21
2022-09-12	14:14:23	0.0540078	420.688	FALSE	21
2022-09-12	14:14:23	0.866832	421.555	FALSE	21
2022-09-12	14:14:23	0.669936	422.225	FALSE	21
2022-09-12	14:14:24	-0.0694017	422.225	FALSE	21
2022-09-12	14:14:24	-0.00304046	422.225	FALSE	21
2022-09-12	14:14:24	0.133601	422.359	FALSE	21
2022-09-12	14:14:24	-0.0276715	422.359	FALSE	21
2022-09-12	14:14:25	-0.179936	422.359	FALSE	21
2022-09-12	14:14:25	0.23986	422.599	FALSE	21
2022-09-12	14:14:25	0.502964	423.102	FALSE	21
2022-09-12	14:14:25	0.469631	423.571	FALSE	21
2022-09-12	14:14:26	0.455382	424.027	FALSE	21
2022-09-12	14:14:26	0.432227	424.459	FALSE	21
2022-09-12	14:14:26	0.433855	424.893	FALSE	21
2022-09-12	14:14:27	0.487036	425.38	FALSE	21
2022-09-12	14:14:27	0.603015	425.983	FALSE	21
2022-09-12	14:14:27	1.91044	427.893	FALSE	21
2022-09-12	14:14:27	5.62759	433.521	1	22
2022-09-12	14:14:28	5.51146	439.032	1	23
2022-09-12	14:14:28	2.17172	441.204	FALSE	23
2022-09-12	14:14:28	0.758282	441.962	FALSE	23
2022-09-12	14:14:28	0.392888	442.355	FALSE	23
2022-09-12	14:14:29	0.421489	442.777	FALSE	23
2022-09-12	14:14:29	0.449478	443.226	FALSE	23
2022-09-12	14:14:29	0.306272	443.532	FALSE	23
2022-09-12	14:14:29	0.470242	444.003	FALSE	23
2022-09-12	14:14:30	0.338893	444.342	FALSE	23
2022-09-12	14:14:30	0.542252	444.884	FALSE	23
2022-09-12	14:14:30	0.240776	445.125	FALSE	23
2022-09-12	14:14:31	0.569682	445.694	FALSE	23
2022-09-12	14:14:31	0.390344	446.085	FALSE	23
2022-09-12	14:14:31	0.605204	446.69	FALSE	23
2022-09-12	14:14:31	0.384644	447.074	FALSE	23
2022-09-12	14:14:32	0.521845	447.596	FALSE	23
2022-09-12	14:14:32	0.430496	448.027	FALSE	23
2022-09-12	14:14:32	0.452532	448.479	FALSE	23
2022-09-12	14:14:32	0.363982	448.843	FALSE	23
2022-09-12	14:14:33	0.440216	449.283	FALSE	23
2022-09-12	14:14:33	0.507188	449.791	FALSE	23
2022-09-12	14:14:33	0.404542	450.195	FALSE	23
2022-09-12	14:14:33	0.270649	450.466	FALSE	23
2022-09-12	14:14:34	0.284847	450.751	FALSE	23
2022-09-12	14:14:34	0.319911	451.071	FALSE	23
2022-09-12	14:14:34	0.243779	451.314	FALSE	23
2022-09-12	14:14:35	0.179962	451.494	FALSE	23
2022-09-12	14:14:35	0.215331	451.71	FALSE	23
2022-09-12	14:14:35	0.310191	452.02	FALSE	23
2022-09-12	14:14:35	0.167596	452.187	FALSE	23
2022-09-12	14:14:36	0.188359	452.376	FALSE	23
2022-09-12	14:14:36	0.169886	452.546	FALSE	23
2022-09-12	14:14:36	0.267443	452.813	FALSE	23
2022-09-12	14:14:36	0.201743	453.015	FALSE	23
2022-09-12	14:14:37	0.227799	453.243	FALSE	23
2022-09-12	14:14:37	0.202863	453.446	FALSE	23
2022-09-12	14:14:37	0.646578	454.092	FALSE	23
2022-09-12	14:14:37	1.31716	455.409	FALSE	23
2022-09-12	14:14:38	1.67258	457.082	FALSE	23
2022-09-12	14:14:38	1.32037	458.402	FALSE	23
2022-09-12	14:14:38	0.981946	459.384	FALSE	23
2022-09-12	14:14:39	1.22485	460.609	FALSE	23
2022-09-12	14:14:39	1.2823	461.891	FALSE	23
2022-09-12	14:14:39	0.588919	462.48	FALSE	23
2022-09-12	14:14:39	0.676043	463.156	FALSE	23
2022-09-12	14:14:40	0.385051	463.541	FALSE	23
2022-09-12	14:14:40	0.738893	464.28	FALSE	23
2022-09-12	14:14:40	0.852379	465.133	FALSE	23
2022-09-12	14:14:40	0.833193	465.966	FALSE	23
2022-09-12	14:14:41	1.11553	467.081	FALSE	23
2022-09-12	14:14:41	1.21533	468.297	FALSE	23
2022-09-12	14:14:41	0.546119	468.843	FALSE	23
2022-09-12	14:14:41	0.765356	469.608	FALSE	23
2022-09-12	14:14:42	0.419249	470.027	FALSE	23
2022-09-12	14:14:42	0.632277	470.66	FALSE	23
2022-09-12	14:14:42	0.454568	471.114	FALSE	23
2022-09-12	14:14:43	0.376908	471.491	FALSE	23
2022-09-12	14:14:43	0.594466	472.086	FALSE	23
2022-09-12	14:14:43	0.211412	472.297	FALSE	23
2022-09-12	14:14:43	0.440013	472.737	FALSE	23
2022-09-12	14:14:44	0.122965	472.86	FALSE	23
2022-09-12	14:14:44	0.415026	473.275	FALSE	23
2022-09-12	14:14:44	0.261031	473.536	FALSE	23
2022-09-12	14:14:44	0.579453	474.116	FALSE	23
2022-09-12	14:14:45	0.736145	474.852	FALSE	23
2022-09-12	14:14:45	0.811311	475.663	FALSE	23
2022-09-12	14:14:45	0.890903	476.554	FALSE	23
2022-09-12	14:14:45	1.15284	477.707	FALSE	23
2022-09-12	14:14:46	1.38678	479.094	FALSE	23
2022-09-12	14:14:46	1.51401	480.608	FALSE	23
2022-09-12	14:14:46	2.14719	482.755	FALSE	23
2022-09-12	14:14:47	1.50897	484.264	FALSE	23
2022-09-12	14:14:47	1.25482	485.519	FALSE	23
2022-09-12	14:14:47	0.706781	486.225	FALSE	23
2022-09-12	14:14:47	0.900827	487.126	FALSE	23
2022-09-12	14:14:48	0.679249	487.805	FALSE	23
2022-09-12	14:14:48	1.03905	488.844	FALSE	23
2022-09-12	14:14:48	0.840064	489.684	FALSE	23
2022-09-12	14:14:48	0.732277	490.417	FALSE	23
2022-09-12	14:14:49	0.515891	490.933	FALSE	23
2022-09-12	14:14:49	0.399453	491.332	FALSE	23
2022-09-12	14:14:49	0.569631	491.902	FALSE	23
2022-09-12	14:14:49	0.812685	492.714	FALSE	23
2022-09-12	14:14:50	0.919555	493.634	FALSE	23
2022-09-12	14:14:50	0.919351	494.553	FALSE	23
2022-09-12	14:14:50	0.663931	495.217	FALSE	23
2022-09-12	14:14:51	0.602557	495.82	FALSE	23
2022-09-12	14:14:51	0.576756	496.397	FALSE	23
2022-09-12	14:14:51	0.617061	497.014	FALSE	23
2022-09-12	14:14:51	0.521692	497.535	FALSE	23
2022-09-12	14:14:52	0.503626	498.039	FALSE	23
2022-09-12	14:14:52	0.493957	498.533	FALSE	23
2022-09-12	14:14:52	0.469224	499.002	FALSE	23
2022-09-12	14:14:52	0.443982	499.446	FALSE	23
2022-09-12	14:14:53	0.42897	499.875	FALSE	23
2022-09-12	14:14:53	0.411616	500.287	FALSE	23
2022-09-12	14:14:53	0.374669	500.661	FALSE	23
2022-09-12	14:14:53	0.300674	500.962	FALSE	23
2022-09-12	14:14:54	0.324339	501.286	FALSE	23
2022-09-12	14:14:54	0.45874	501.745	FALSE	23
2022-09-12	14:14:54	0.328868	502.074	FALSE	23
2022-09-12	14:14:55	0.350191	502.424	FALSE	23
2022-09-12	14:14:55	0.0896821	502.514	FALSE	23
2022-09-12	14:14:55	0.0621503	502.576	FALSE	23
2022-09-12	14:14:55	0.147138	502.723	FALSE	23
2022-09-12	14:14:56	0.0523793	502.776	FALSE	23
2022-09-12	14:14:56	0.253753	503.029	FALSE	23
2022-09-12	14:14:56	0.616807	503.646	FALSE	23
2022-09-12	14:14:56	0.527544	504.174	FALSE	23
2022-09-12	14:14:57	0.206629	504.38	FALSE	23
2022-09-12	14:14:57	0.17299	504.553	FALSE	23
2022-09-12	14:14:57	0.244695	504.798	FALSE	23
2022-09-12	14:14:57	0.165	504.963	FALSE	23
2022-09-12	14:14:58	0.244491	505.207	FALSE	23
2022-09-12	14:14:58	0.227901	505.435	FALSE	23
2022-09-12	14:14:58	0.461183	505.897	FALSE	23
2022-09-12	14:14:59	0.369987	506.267	FALSE	23
2022-09-12	14:14:59	0.404542	506.671	FALSE	23
2022-09-12	14:14:59	0.686374	507.357	FALSE	23
2022-09-12	14:14:59	0.136909	507.494	FALSE	23
2022-09-12	14:15:00	0.163117	507.657	FALSE	23
2022-09-12	14:15:00	0.854669	508.512	FALSE	23
2022-09-12	14:15:00	0.200369	508.712	FALSE	23
2022-09-12	14:15:00	0.520013	509.233	FALSE	23
2022-09-12	14:15:01	0.361845	509.594	FALSE	23
2022-09-12	14:15:01	0.189173	509.784	FALSE	23
2022-09-12	14:15:01	0.648919	510.432	FALSE	23
2022-09-12	14:15:01	0.293346	510.726	FALSE	23
2022-09-12	14:15:02	0.641234	511.367	FALSE	23
2022-09-12	14:15:02	0.372227	511.739	FALSE	23
2022-09-12	14:15:02	0.781336	512.521	FALSE	23
2022-09-12	14:15:03	0.971463	513.492	FALSE	23
2022-09-12	14:15:03	1.20877	514.701	FALSE	23
2022-09-12	14:15:03	1.55564	516.256	FALSE	23
2022-09-12	14:15:03	1.55014	517.807	FALSE	23
2022-09-12	14:15:04	2.26622	520.073	FALSE	23
2022-09-12	14:15:04	0.83986	520.913	FALSE	23
2022-09-12	14:15:04	1.528	522.441	FALSE	23
2022-09-12	14:15:04	0.805916	523.247	FALSE	23
2022-09-12	14:15:05	1.03299	524.28	FALSE	23
2022-09-12	14:15:05	0.626832	524.906	FALSE	23
2022-09-12	14:15:05	0.493448	525.4	FALSE	23
2022-09-12	14:15:05	0.778333	526.178	FALSE	23
2022-09-12	14:15:06	0.364542	526.543	FALSE	23
2022-09-12	14:15:06	0.677061	527.22	FALSE	23
2022-09-12	14:15:06	0.561285	527.781	FALSE	23
2022-09-12	14:15:07	0.833092	528.614	FALSE	23
2022-09-12	14:15:07	0.691463	529.306	FALSE	23
2022-09-12	14:15:07	0.746171	530.052	FALSE	23
2022-09-12	14:15:07	1.1967	531.249	FALSE	23
2022-09-12	14:15:08	0.522252	531.771	FALSE	23
2022-09-12	14:15:08	1.28709	533.058	FALSE	23
2022-09-12	14:15:08	1.78205	534.84	FALSE	23
2022-09-12	14:15:08	1.40444	536.244	FALSE	23
2022-09-12	14:15:09	1.44917	537.694	FALSE	23
2022-09-12	14:15:09	1.29218	538.986	FALSE	23
2022-09-12	14:15:09	1.4963	540.482	FALSE	23
2022-09-12	14:15:09	0.61416	541.096	FALSE	23
2022-09-12	14:15:10	1.02072	542.117	FALSE	23
2022-09-12	14:15:10	0.974669	543.092	FALSE	23
2022-09-12	14:15:10	1.1937	544.285	FALSE	23
2022-09-12	14:15:11	1.15212	545.437	FALSE	23
2022-09-12	14:15:11	1.06251	546.5	FALSE	23
2022-09-12	14:15:11	1.5509	548.051	FALSE	23
2022-09-12	14:15:11	0.628206	548.679	FALSE	23
2022-09-12	14:15:12	1.45986	550.139	FALSE	23
2022-09-12	14:15:12	1.00861	551.147	FALSE	23
2022-09-12	14:15:12	1.01304	552.16	FALSE	23
2022-09-12	14:15:12	0.859046	553.02	FALSE	23
2022-09-12	14:15:13	1.08011	554.1	FALSE	23
2022-09-12	14:15:13	2.22963	556.329	FALSE	23
2022-09-12	14:15:13	2.31243	558.642	FALSE	23
2022-09-12	14:15:13	3.65258	562.294	1	24
2022-09-12	14:15:14	2.34765	564.642	FALSE	24
2022-09-12	14:15:14	2.05187	566.694	FALSE	24
2022-09-12	14:15:14	0.824389	567.518	FALSE	24
2022-09-12	14:15:15	0.596908	568.115	FALSE	24
2022-09-12	14:15:15	0.459402	568.575	FALSE	24
2022-09-12	14:15:15	0.590293	569.165	FALSE	24
2022-09-12	14:15:15	0.504847	569.67	FALSE	24
2022-09-12	14:15:16	1.6077	571.277	FALSE	24
2022-09-12	14:15:16	2.18678	573.464	FALSE	24
2022-09-12	14:15:16	3.80439	577.269	1	25
2022-09-12	14:15:16	3.47696	580.745	1	26
2022-09-12	14:15:17	2.81161	583.557	FALSE	26
2022-09-12	14:15:17	1.83192	585.389	FALSE	26
2022-09-12	14:15:17	1.31681	586.706	FALSE	26
2022-09-12	14:15:17	0.520827	587.227	FALSE	26
2022-09-12	14:15:18	0.584389	587.811	FALSE	26
2022-09-12	14:15:18	1.02872	588.84	FALSE	26
2022-09-12	14:15:18	2.31324	591.153	FALSE	26
2022-09-12	14:15:19	6.0509	597.204	1	27
2022-09-12	14:15:19	2.40474	599.609	FALSE	27
2022-09-12	14:15:19	0.454008	600.063	FALSE	27
2022-09-12	14:15:19	0.325763	600.388	FALSE	27
2022-09-12	14:15:20	0.71126	601.1	FALSE	27
2022-09-12	14:15:20	0.703117	601.803	FALSE	27
2022-09-12	14:15:20	0.735127	602.538	FALSE	27
2022-09-12	14:15:20	0.763575	603.301	FALSE	27
2022-09-12	14:15:21	0.686018	603.987	FALSE	27
2022-09-12	14:15:21	0.720623	604.708	FALSE	27
2022-09-12	14:15:21	0.718588	605.427	FALSE	27
2022-09-12	14:15:21	0.538893	605.966	FALSE	27
2022-09-12	14:15:22	0.505051	606.471	FALSE	27
2022-09-12	14:15:22	0.560318	607.031	FALSE	27
2022-09-12	14:15:22	0.595483	607.626	FALSE	27
2022-09-12	14:15:23	0.674669	608.301	FALSE	27
2022-09-12	14:15:23	1.04057	609.342	FALSE	27
2022-09-12	14:15:23	0.709326	610.051	FALSE	27
2022-09-12	14:15:23	0.885356	610.936	FALSE	27
2022-09-12	14:15:24	0.839046	611.775	FALSE	27
2022-09-12	14:15:24	1.54113	613.317	FALSE	27
2022-09-12	14:15:24	1.18698	614.504	FALSE	27
2022-09-12	14:15:24	1.22322	615.727	FALSE	27
2022-09-12	14:15:25	1.45253	617.179	FALSE	27
2022-09-12	14:15:25	1.31085	618.49	FALSE	27
2022-09-12	14:15:25	2.00994	620.5	FALSE	27
2022-09-12	14:15:25	0.511361	621.011	FALSE	27
2022-09-12	14:15:26	0.61813	621.63	FALSE	27
2022-09-12	14:15:26	0.43925	622.069	FALSE	27
2022-09-12	14:15:26	0.490089	622.559	FALSE	27
2022-09-12	14:15:27	0.345305	622.904	FALSE	27
2022-09-12	14:15:27	0.512939	623.417	FALSE	27
2022-09-12	14:15:27	0.506069	623.923	FALSE	27
2022-09-12	14:15:27	1.58011	625.503	FALSE	27
2022-09-12	14:15:28	0.914058	626.417	FALSE	27
2022-09-12	14:15:28	1.37828	627.796	FALSE	27
2022-09-12	14:15:28	0.80617	628.602	FALSE	27
2022-09-12	14:15:28	0.833753	629.436	FALSE	27
2022-09-12	14:15:29	0.505865	629.941	FALSE	27
2022-09-12	14:15:29	0.96841	630.91	FALSE	27
2022-09-12	14:15:29	1.06709	631.977	FALSE	27
2022-09-12	14:15:30	1.55711	633.534	FALSE	27
2022-09-12	14:15:30	1.75655	635.291	FALSE	27
2022-09-12	14:15:30	2.14637	637.437	FALSE	27
2022-09-12	14:15:30	1.04291	638.48	FALSE	27
2022-09-12	14:15:31	0.953397	639.433	FALSE	27
2022-09-12	14:15:31	0.885916	640.319	FALSE	27
2022-09-12	14:15:31	0.952888	641.272	FALSE	27
2022-09-12	14:15:31	0.858537	642.131	FALSE	27
2022-09-12	14:15:32	1.72358	643.854	FALSE	27
2022-09-12	14:15:32	1.52276	645.377	FALSE	27
2022-09-12	14:15:32	3.41553	648.792	1	28
2022-09-12	14:15:32	2.99925	651.792	FALSE	28
2022-09-12	14:15:33	4.49681	656.289	1	29
2022-09-12	14:15:33	2.42637	658.715	FALSE	29
2022-09-12	14:15:33	3.88978	662.605	1	30
2022-09-12	14:15:34	3.71162	666.316	1	31
2022-09-12	14:15:34	3.16897	669.485	1	32
2022-09-12	14:15:34	5.06591	674.551	1	33
2022-09-12	14:15:34	2.53742	677.089	FALSE	33
2022-09-12	14:15:35	3.88708	680.976	1	34
2022-09-12	14:15:35	3.23278	684.208	1	35
2022-09-12	14:15:35	2.80943	687.018	FALSE	35
2022-09-12	14:15:35	3.79869	690.817	1	36
2022-09-12	14:15:36	2.5652	693.382	FALSE	36
2022-09-12	14:15:36	4.60052	697.982	1	37
2022-09-12	14:15:36	1.22113	699.203	FALSE	37
2022-09-12	14:15:36	1.15686	700.36	FALSE	37
2022-09-12	14:15:37	0.695738	701.056	FALSE	37
2022-09-12	14:15:37	0.72042	701.776	FALSE	37
2022-09-12	14:15:37	0.725916	702.502	FALSE	37
2022-09-12	14:15:38	0.725763	703.228	FALSE	37
2022-09-12	14:15:38	0.735026	703.963	FALSE	37
2022-09-12	14:15:38	4.31309	708.276	1	38
2022-09-12	14:15:38	2.422	710.698	FALSE	38
2022-09-12	14:15:39	0.730496	711.429	FALSE	38
2022-09-12	14:15:39	0.445814	711.875	FALSE	38
2022-09-12	14:15:39	0.565865	712.44	FALSE	38
2022-09-12	14:15:39	0.224848	712.665	FALSE	38
2022-09-12	14:15:40	0.396501	713.062	FALSE	38
2022-09-12	14:15:40	0.205509	713.267	FALSE	38
2022-09-12	14:15:40	0.527188	713.794	FALSE	38
2022-09-12	14:15:40	0.416043	714.211	FALSE	38
2022-09-12	14:15:41	0.391361	714.602	FALSE	38
2022-09-12	14:15:41	0.398181	715	FALSE	38
2022-09-12	14:15:41	0.436858	715.437	FALSE	38
2022-09-12	14:15:42	0.716349	716.153	FALSE	38
2022-09-12	14:15:42	1.42586	717.579	FALSE	38
2022-09-12	14:15:42	1.47726	719.056	FALSE	38
2022-09-12	14:15:42	0.874974	719.931	FALSE	38
2022-09-12	14:15:43	1.54912	721.48	FALSE	38
2022-09-12	14:15:43	2.79502	724.276	FALSE	38
2022-09-12	14:15:43	4.36383	728.639	1	39
2022-09-12	14:15:43	5.4852	734.125	1	40
2022-09-12	14:15:44	3.42133	737.546	1	41
2022-09-12	14:15:44	2.0077	739.554	FALSE	41
2022-09-12	14:15:44	3.81416	743.368	1	42
2022-09-12	14:15:44	3.5767	746.944	1	43
2022-09-12	14:15:45	4.45375	751.398	1	44
2022-09-12	14:15:45	4.08301	755.481	1	45
2022-09-12	14:15:45	5.53426	761.015	1	46
2022-09-12	14:15:46	2.32927	763.345	FALSE	46
2022-09-12	14:15:46	2.42581	765.771	FALSE	46
2022-09-12	14:15:46	2.39462	768.165	FALSE	46
2022-09-12	14:15:46	3.89686	772.062	1	47
2022-09-12	14:15:47	3.97655	776.039	1	48
2022-09-12	14:15:47	2.42062	778.459	FALSE	48
2022-09-12	14:15:47	4.17401	782.633	1	49
2022-09-12	14:15:47	2.40419	785.037	FALSE	49
2022-09-12	14:15:48	3.00398	788.041	1	50
2022-09-12	14:15:48	3.49049	791.532	1	51
2022-09-12	14:15:48	4.19126	795.723	1	52
2022-09-12	14:15:48	1.35701	797.08	FALSE	52
2022-09-12	14:15:49	0.272379	797.353	FALSE	52
2022-09-12	14:15:49	0.225407	797.578	FALSE	52
2022-09-12	14:15:49	0.173957	797.752	FALSE	52
2022-09-12	14:15:50	-0.0612593	797.752	FALSE	52
2022-09-12	14:15:50	-0.333626	797.752	FALSE	52
2022-09-12	14:15:50	-0.184211	797.752	FALSE	52
2022-09-12	14:15:50	-0.167926	797.752	FALSE	52
2022-09-12	14:15:51	0.0568577	797.809	FALSE	52
2022-09-12	14:15:51	-0.0797325	797.809	FALSE	52
2022-09-12	14:15:51	0.201387	798.01	FALSE	52
2022-09-12	14:15:51	0.00998751	798.02	FALSE	52
2022-09-12	14:15:52	0.298944	798.319	FALSE	52
2022-09-12	14:15:52	0.416959	798.736	FALSE	52
2022-09-12	14:15:52	1.40983	800.146	FALSE	52
2022-09-12	14:15:52	3.14622	803.292	1	53
2022-09-12	14:15:53	3.34744	806.639	1	54
2022-09-12	14:15:53	2.6335	809.273	FALSE	54
2022-09-12	14:15:53	1.96123	811.234	FALSE	54
2022-09-12	14:15:54	1.4053	812.64	FALSE	54
2022-09-12	14:15:54	0.980114	813.62	FALSE	54
2022-09-12	14:15:54	1.31553	814.935	FALSE	54
2022-09-12	14:15:54	2.1592	817.094	FALSE	54
2022-09-12	14:15:55	2.13706	819.231	FALSE	54
2022-09-12	14:15:55	3.37706	822.608	1	55
2022-09-12	14:15:55	2.89762	825.506	FALSE	55
2022-09-12	14:15:55	3.04225	828.548	1	56
2022-09-12	14:15:56	0.469479	829.018	FALSE	56
2022-09-12	14:15:56	0.321896	829.34	FALSE	56
2022-09-12	14:15:56	0.398639	829.738	FALSE	56
2022-09-12	14:15:56	0.255738	829.994	FALSE	56
2022-09-12	14:15:57	0.145967	830.14	FALSE	56
2022-09-12	14:15:57	0.0943641	830.234	FALSE	56
2022-09-12	14:15:57	0.0254582	830.26	FALSE	56
2022-09-12	14:15:58	0.0700893	830.33	FALSE	56
2022-09-12	14:15:58	0.0908017	830.421	FALSE	56
2022-09-12	14:15:58	0.206679	830.627	FALSE	56
2022-09-12	14:15:58	0.2793	830.907	FALSE	56
2022-09-12	14:15:59	0.817265	831.724	FALSE	56
2022-09-12	14:15:59	0.632074	832.356	FALSE	56
2022-09-12	14:15:59	0.530649	832.887	FALSE	56
2022-09-12	14:15:59	0.331769	833.219	FALSE	56
2022-09-12	14:16:00	0.409377	833.628	FALSE	56
2022-09-12	14:16:00	0.441031	834.069	FALSE	56
2022-09-12	14:16:00	0.325255	834.394	FALSE	56
2022-09-12	14:16:00	0.168155	834.562	FALSE	56
2022-09-12	14:16:01	0.304135	834.866	FALSE	56
2022-09-12	14:16:01	0.210242	835.077	FALSE	56
2022-09-12	14:16:01	0.403168	835.48	FALSE	56
2022-09-12	14:16:02	0.137163	835.617	FALSE	56
2022-09-12	14:16:02	0.376552	835.994	FALSE	56
2022-09-12	14:16:02	0.45813	836.452	FALSE	56
2022-09-12	14:16:02	1.10093	837.553	FALSE	56
2022-09-12	14:16:03	1.41614	838.969	FALSE	56
2022-09-12	14:16:03	0.433855	839.403	FALSE	56
2022-09-12	14:16:03	0.955484	840.358	FALSE	56
2022-09-12	14:16:03	0.153092	840.511	FALSE	56
2022-09-12	14:16:04	0.162099	840.673	FALSE	56
2022-09-12	14:16:04	0.110445	840.784	FALSE	56
2022-09-12	14:16:04	0.250293	841.034	FALSE	56
2022-09-12	14:16:04	0.144135	841.178	FALSE	56
2022-09-12	14:16:05	0.271005	841.449	FALSE	56
2022-09-12	14:16:05	0.125916	841.575	FALSE	56
2022-09-12	14:16:05	0.278079	841.853	FALSE	56
2022-09-12	14:16:06	0.28271	842.136	FALSE	56
2022-09-12	14:16:06	0.230598	842.367	FALSE	56
2022-09-12	14:16:06	0.286781	842.653	FALSE	56
2022-09-12	14:16:06	0.257977	842.911	FALSE	56
2022-09-12	14:16:07	0.234568	843.146	FALSE	56
2022-09-12	14:16:07	0.239402	843.385	FALSE	56
2022-09-12	14:16:07	0.268868	843.654	FALSE	56
2022-09-12	14:16:07	0.320674	843.975	FALSE	56
2022-09-12	14:16:08	0.200725	844.176	FALSE	56
2022-09-12	14:16:08	0.330496	844.506	FALSE	56
2022-09-12	14:16:08	0.338181	844.844	FALSE	56
2022-09-12	14:16:08	1.09757	845.942	FALSE	56
2022-09-12	14:16:09	2.13284	848.075	FALSE	56
2022-09-12	14:16:09	1.86434	849.939	FALSE	56
2022-09-12	14:16:09	1.38902	851.328	FALSE	56
2022-09-12	14:16:10	1.09976	852.428	FALSE	56
2022-09-12	14:16:10	0.997366	853.425	FALSE	56
2022-09-12	14:16:10	2.08754	855.513	FALSE	56
2022-09-12	14:16:10	1.92266	857.435	FALSE	56
2022-09-12	14:16:11	4.95696	862.392	1	57
2022-09-12	14:16:11	3.34551	865.738	1	58
2022-09-12	14:16:11	3.73792	869.476	1	59
2022-09-12	14:16:11	2.40851	871.884	FALSE	59
2022-09-12	14:16:12	2.80637	874.691	FALSE	59
2022-09-12	14:16:12	3.03167	877.722	1	60
2022-09-12	14:16:12	3.04174	880.764	1	61
2022-09-12	14:16:12	2.99782	883.762	FALSE	61
2022-09-12	14:16:13	3.40195	887.164	1	62
2022-09-12	14:16:13	3.4222	890.586	1	63
2022-09-12	14:16:13	4.48022	895.066	1	64
2022-09-12	14:16:14	4.77966	899.846	1	65
2022-09-12	14:16:14	0.427748	900.274	FALSE	65
2022-09-12	14:16:14	0.941081	901.215	FALSE	65
2022-09-12	14:16:14	1.05793	902.273	FALSE	65
2022-09-12	14:16:15	2.02968	904.302	FALSE	65
2022-09-12	14:16:15	0.945967	905.248	FALSE	65
2022-09-12	14:16:15	1.26368	906.512	FALSE	65
2022-09-12	14:16:15	2.23467	908.747	FALSE	65
2022-09-12	14:16:16	2.96836	911.715	FALSE	65
2022-09-12	14:16:16	1.61599	913.331	FALSE	65
2022-09-12	14:16:16	1.25162	914.583	FALSE	65
2022-09-12	14:16:16	1.33156	915.914	FALSE	65
2022-09-12	14:16:17	1.41492	917.329	FALSE	65
2022-09-12	14:16:17	0.764389	918.093	FALSE	65
2022-09-12	14:16:17	0.306934	918.4	FALSE	65
2022-09-12	14:16:18	1.40123	919.802	FALSE	65
2022-09-12	14:16:18	0.811107	920.613	FALSE	65
2022-09-12	14:16:18	1.19197	921.805	FALSE	65
2022-09-12	14:16:18	1.30067	923.105	FALSE	65
2022-09-12	14:16:19	2.63161	925.737	FALSE	65
2022-09-12	14:16:19	1.43447	927.171	FALSE	65
2022-09-12	14:16:19	0.503066	927.674	FALSE	65
2022-09-12	14:16:19	0.374669	928.049	FALSE	65
2022-09-12	14:16:20	0.333041	928.382	FALSE	65
2022-09-12	14:16:20	0.782557	929.165	FALSE	65
2022-09-12	14:16:20	0.623168	929.788	FALSE	65
2022-09-12	14:16:20	0.711616	930.5	FALSE	65
2022-09-12	14:16:21	1.23431	931.734	FALSE	65
2022-09-12	14:16:21	2.19365	933.927	FALSE	65
2022-09-12	14:16:21	2.95309	936.881	FALSE	65
2022-09-12	14:16:22	5.0021	941.883	1	66
2022-09-12	14:16:22	4.50373	946.386	1	67
2022-09-12	14:16:22	3.82444	950.211	1	68
2022-09-12	14:16:22	0.901081	951.112	FALSE	68
2022-09-12	14:16:23	1.35528	952.467	FALSE	68
2022-09-12	14:16:23	1.39111	953.858	FALSE	68
2022-09-12	14:16:23	2.82571	956.684	FALSE	68
2022-09-12	14:16:24	1.83314	958.517	FALSE	68
2022-09-12	14:16:24	2.7424	961.26	FALSE	68
2022-09-12	14:16:24	3.44546	964.705	1	69
2022-09-12	14:16:24	5.83828	970.543	1	70
2022-09-12	14:16:25	4.26607	974.809	1	71
2022-09-12	14:16:25	5.30108	980.11	1	72
2022-09-12	14:16:25	2.44022	982.551	FALSE	72
2022-09-12	14:16:25	3.21314	985.764	1	73
2022-09-12	14:16:26	1.81879	987.583	FALSE	73
2022-09-12	14:16:26	0.694517	988.277	FALSE	73
2022-09-12	14:16:26	0.59869	988.876	FALSE	73
2022-09-12	14:16:26	2.1022	990.978	FALSE	73
2022-09-12	14:16:27	4.92525	995.903	1	74
2022-09-12	14:16:27	4.96973	1000.87	1	75
2022-09-12	14:16:27	2.30765	1003.18	FALSE	75
2022-09-12	14:16:27	2.86973	1006.05	FALSE	75
2022-09-12	14:16:28	1.80566	1007.86	FALSE	75
2022-09-12	14:16:28	1.02653	1008.88	FALSE	75
2022-09-12	14:16:28	0.874924	1009.76	FALSE	75
2022-09-12	14:16:29	0.851565	1010.61	FALSE	75
2022-09-12	14:16:29	1.05996	1011.67	FALSE	75
2022-09-12	14:16:29	0.917926	1012.59	FALSE	75
2022-09-12	14:16:29	1.4076	1013.99	FALSE	75
2022-09-12	14:16:30	2.08856	1016.08	FALSE	75
2022-09-12	14:16:30	2.29747	1018.38	FALSE	75
2022-09-12	14:16:30	1.94607	1020.33	FALSE	75
2022-09-12	14:16:30	2.05777	1022.38	FALSE	75
2022-09-12	14:16:31	1.78037	1024.16	FALSE	75
2022-09-12	14:16:31	2.92088	1027.09	FALSE	75
2022-09-12	14:16:31	2.52195	1029.61	FALSE	75
2022-09-12	14:16:31	2.71966	1032.33	FALSE	75
2022-09-12	14:16:32	2.8338	1035.16	FALSE	75
2022-09-12	14:16:32	3.74306	1038.9	1	76
2022-09-12	14:16:32	4.90434	1043.81	1	77
2022-09-12	14:16:33	3.63528	1047.44	1	78
2022-09-12	14:16:33	2.95228	1050.4	FALSE	78
2022-09-12	14:16:33	2.45065	1052.85	FALSE	78
2022-09-12	14:16:33	1.98352	1054.83	FALSE	78
2022-09-12	14:16:34	3.23039	1058.06	1	79
2022-09-12	14:16:34	5.06474	1063.13	1	80
2022-09-12	14:16:34	2.66877	1065.79	FALSE	80
2022-09-12	14:16:34	1.8792	1067.67	FALSE	80
2022-09-12	14:16:35	2.17365	1069.85	FALSE	80
2022-09-12	14:16:35	2.22525	1072.07	FALSE	80
2022-09-12	14:16:35	2.0022	1074.07	FALSE	80
2022-09-12	14:16:35	2.00836	1076.08	FALSE	80
2022-09-12	14:16:36	3.69156	1079.77	1	81
2022-09-12	14:16:36	4.00373	1083.78	1	82
2022-09-12	14:16:36	4.28067	1088.06	1	83
2022-09-12	14:16:37	3.45436	1091.51	1	84
2022-09-12	14:16:37	2.77574	1094.29	FALSE	84
2022-09-12	14:16:37	1.60872	1095.9	FALSE	84
2022-09-12	14:16:37	2.22958	1098.13	FALSE	84
2022-09-12	14:16:38	1.39065	1099.52	FALSE	84
2022-09-12	14:16:38	2.61487	1102.13	FALSE	84
2022-09-12	14:16:38	2.00983	1104.14	FALSE	84
2022-09-12	14:16:38	4.65014	1108.79	1	85
2022-09-12	14:16:39	4.70571	1113.5	1	86
2022-09-12	14:16:39	5.18576	1118.68	1	87
2022-09-12	14:16:39	2.41721	1121.1	FALSE	87
2022-09-12	14:16:39	2.30724	1123.41	FALSE	87
2022-09-12	14:16:40	1.23126	1124.64	FALSE	87
2022-09-12	14:16:40	1.57742	1126.22	FALSE	87
2022-09-12	14:16:40	1.06754	1127.28	FALSE	87
2022-09-12	14:16:41	1.42749	1128.71	FALSE	87
2022-09-12	14:16:41	1.17289	1129.89	FALSE	87
2022-09-12	14:16:41	2.41166	1132.3	FALSE	87
2022-09-12	14:16:41	1.83503	1134.13	FALSE	87
2022-09-12	14:16:42	1.96184	1136.09	FALSE	87
2022-09-12	14:16:42	1.23273	1137.33	FALSE	87
2022-09-12	14:16:42	2.72194	1140.05	FALSE	87
2022-09-12	14:16:42	2.97909	1143.03	FALSE	87
2022-09-12	14:16:43	2.89197	1145.92	FALSE	87
2022-09-12	14:16:43	1.66464	1147.58	FALSE	87
2022-09-12	14:16:43	3.92134	1151.51	1	88
2022-09-12	14:16:43	3.01619	1154.52	1	89
2022-09-12	14:16:44	2.80948	1157.33	FALSE	89
2022-09-12	14:16:44	1.49472	1158.83	FALSE	89
2022-09-12	14:16:44	2.34663	1161.17	FALSE	89
2022-09-12	14:16:45	1.68042	1162.85	FALSE	89
2022-09-12	14:16:45	1.76123	1164.61	FALSE	89
2022-09-12	14:16:45	1.12144	1165.74	FALSE	89
2022-09-12	14:16:45	2.23574	1167.97	FALSE	89
2022-09-12	14:16:46	1.92413	1169.9	FALSE	89
2022-09-12	14:16:46	2.14927	1172.04	FALSE	89
2022-09-12	14:16:46	1.61523	1173.66	FALSE	89
2022-09-12	14:16:46	2.062	1175.72	FALSE	89
2022-09-12	14:16:47	3.42988	1179.15	1	90
2022-09-12	14:16:47	3.11726	1182.27	1	91
2022-09-12	14:16:47	3.82123	1186.09	1	92
2022-09-12	14:16:47	2.17976	1188.27	FALSE	92
2022-09-12	14:16:48	1.73833	1190.01	FALSE	92
2022-09-12	14:16:48	1.02368	1191.03	FALSE	92
2022-09-12	14:16:48	1.29981	1192.33	FALSE	92
2022-09-12	14:16:49	1.40246	1193.73	FALSE	92
2022-09-12	14:16:49	2.61823	1196.35	FALSE	92
2022-09-12	14:16:49	3.03217	1199.38	1	93
2022-09-12	14:16:49	1.78566	1201.17	FALSE	93
2022-09-12	14:16:50	0.996705	1202.17	FALSE	93
2022-09-12	14:16:50	1.18062	1203.35	FALSE	93
2022-09-12	14:16:50	0.949224	1204.3	FALSE	93
2022-09-12	14:16:50	1.45273	1205.75	FALSE	93
2022-09-12	14:16:51	2.0024	1207.75	FALSE	93
2022-09-12	14:16:51	1.62235	1209.37	FALSE	93
2022-09-12	14:16:51	1.05284	1210.43	FALSE	93
2022-09-12	14:16:51	1.05009	1211.48	FALSE	93
2022-09-12	14:16:52	0.919504	1212.4	FALSE	93
2022-09-12	14:16:52	1.27838	1213.68	FALSE	93
2022-09-12	14:16:52	1.60759	1215.28	FALSE	93
2022-09-12	14:16:53	2.52434	1217.81	FALSE	93
2022-09-12	14:16:53	1.12052	1218.93	FALSE	93
2022-09-12	14:16:53	0.960522	1219.89	FALSE	93
2022-09-12	14:16:53	1.2051	1221.09	FALSE	93
2022-09-12	14:16:54	0.88215	1221.98	FALSE	93
2022-09-12	14:16:54	1.24444	1223.22	FALSE	93
2022-09-12	14:16:54	1.2937	1224.51	FALSE	93
2022-09-12	14:16:54	0.814822	1225.33	FALSE	93
2022-09-12	14:16:55	0.617519	1225.95	FALSE	93
2022-09-12	14:16:55	0.67869	1226.62	FALSE	93
2022-09-12	14:16:55	1.10744	1227.73	FALSE	93
2022-09-12	14:16:55	0.836705	1228.57	FALSE	93
2022-09-12	14:16:56	0.61187	1229.18	FALSE	93
2022-09-12	14:16:56	1.17991	1230.36	FALSE	93
2022-09-12	14:16:56	1.20271	1231.56	FALSE	93
2022-09-12	14:16:57	1.80973	1233.37	FALSE	93
2022-09-12	14:16:57	1.73589	1235.11	FALSE	93
2022-09-12	14:16:57	2.06225	1237.17	FALSE	93
2022-09-12	14:16:57	4.74693	1241.92	1	94
2022-09-12	14:16:58	3.89818	1245.82	1	95
2022-09-12	14:16:58	5.92795	1251.74	1	96
2022-09-12	14:16:58	4.34179	1256.09	1	97
2022-09-12	14:16:58	4.50663	1260.59	1	98
2022-09-12	14:16:59	1.59996	1262.19	FALSE	98
2022-09-12	14:16:59	1.88958	1264.08	FALSE	98
2022-09-12	14:16:59	1.87106	1265.95	FALSE	98
2022-09-12	14:16:59	2.10164	1268.05	FALSE	98
2022-09-12	14:17:00	1.26851	1269.32	FALSE	98
2022-09-12	14:17:00	0.92612	1270.25	FALSE	98
2022-09-12	14:17:00	0.983219	1271.23	FALSE	98
2022-09-12	14:17:01	2.70001	1273.93	FALSE	98
2022-09-12	14:17:01	3.84184	1277.77	1	99
2022-09-12	14:17:01	2.55233	1280.33	FALSE	99
2022-09-12	14:17:01	0.975687	1281.3	FALSE	99
2022-09-12	14:17:02	0.617468	1281.92	FALSE	99
2022-09-12	14:17:02	0.0792496	1282	FALSE	99
2022-09-12	14:17:02	0.313499	1282.31	FALSE	99
2022-09-12	14:17:02	0.0633717	1282.38	FALSE	99
2022-09-12	14:17:03	0.292481	1282.67	FALSE	99
2022-09-12	14:17:03	0.0134481	1282.68	FALSE	99
2022-09-12	14:17:03	0.16271	1282.84	FALSE	99
2022-09-12	14:17:03	0.106883	1282.95	FALSE	99
2022-09-12	14:17:04	0.182659	1283.13	FALSE	99
2022-09-12	14:17:04	0.0725829	1283.21	FALSE	99
2022-09-12	14:17:04	0.16673	1283.37	FALSE	99
2022-09-12	14:17:05	0.106272	1283.48	FALSE	99
2022-09-12	14:17:05	0.165763	1283.65	FALSE	99
2022-09-12	14:17:05	0.22271	1283.87	FALSE	99
2022-09-12	14:17:06	0.0986389	1283.97	FALSE	99
2022-09-12	14:17:06	0.229071	1284.2	FALSE	99
2022-09-12	14:17:06	0.270089	1284.47	FALSE	99
2022-09-12	14:17:06	1.91681	1286.38	FALSE	99
2022-09-12	14:17:06	0.886985	1287.27	FALSE	99
2022-09-12	14:17:07	0.341285	1287.61	FALSE	99
2022-09-12	14:17:07	0.124949	1287.74	FALSE	99

## Sheet: Duke_prong_2022912141147
						**GoPro Fitting: 1401
2022-09-12	14:11:47	0.237723
2022-09-12	14:11:47	0.230751
2022-09-12	14:11:47	0.238893
2022-09-12	14:11:48	0.24902
2022-09-12	14:11:48	0.249377
2022-09-12	14:11:48	0.270242
2022-09-12	14:11:49	0.28668
2022-09-12	14:11:49	0.270445
2022-09-12	14:11:49	0.323575
2022-09-12	14:11:49	0.290445
2022-09-12	14:11:50	0.356501
2022-09-12	14:11:50	0.317417
2022-09-12	14:11:50	0.33757
2022-09-12	14:11:50	0.340369
2022-09-12	14:11:51	0.320522
2022-09-12	14:11:51	0.316145
2022-09-12	14:11:51	0.33126
2022-09-12	14:11:51	0.327494
2022-09-12	14:11:52	0.311921
2022-09-12	14:11:52	0.327188
2022-09-12	14:11:52	0.318893
2022-09-12	14:11:53	0.323931
2022-09-12	14:11:53	0.322252
2022-09-12	14:11:53	0.328511
2022-09-12	14:11:53	0.328511
2022-09-12	14:11:54	0.329326
2022-09-12	14:11:54	0.336705
2022-09-12	14:11:54	0.329377
2022-09-12	14:11:54	0.315738
2022-09-12	14:11:55	0.301031
2022-09-12	14:11:55	0.288664
2022-09-12	14:11:55	0.439046
2022-09-12	14:11:55	0.563575
2022-09-12	14:11:56	0.358079
2022-09-12	14:11:56	0.201336
2022-09-12	14:11:56	0.480878
2022-09-12	14:11:57	0.242405
2022-09-12	14:11:57	0.414568
2022-09-12	14:11:57	0.18042
2022-09-12	14:11:57	0.285356
2022-09-12	14:11:58	0.451463
2022-09-12	14:11:58	0.238792
2022-09-12	14:11:58	0.392786
2022-09-12	14:11:58	0.394313
2022-09-12	14:11:59	0.416451
2022-09-12	14:11:59	0.361896
2022-09-12	14:11:59	0.339046
2022-09-12	14:11:59	0.350394
2022-09-12	14:12:00	0.549835
2022-09-12	14:12:00	0.296247
2022-09-12	14:12:00	0.288562
2022-09-12	14:12:01	0.476858
2022-09-12	14:12:01	0.213702
2022-09-12	14:12:01	0.361845
2022-09-12	14:12:01	1.39462
2022-09-12	14:12:02	9.58795
2022-09-12	14:12:02	16.3669
2022-09-12	14:12:02	6.23431
2022-09-12	14:12:02	1.04994
2022-09-12	14:12:03	1.44632
2022-09-12	14:12:03	5.53518
2022-09-12	14:12:03	3.68373
2022-09-12	14:12:03	1.40917
2022-09-12	14:12:04	0.995891
2022-09-12	14:12:04	1.35767
2022-09-12	14:12:04	1.63304
2022-09-12	14:12:05	1.50627
2022-09-12	14:12:05	0.0856109
2022-09-12	14:12:05	0.217723
2022-09-12	14:12:05	0.236247
2022-09-12	14:12:06	0.241998
2022-09-12	14:12:06	0.114619
2022-09-12	14:12:06	0.163372
2022-09-12	14:12:06	0.774466
2022-09-12	14:12:07	5.38026
2022-09-12	14:12:07	3.84337
2022-09-12	14:12:07	0.848257
2022-09-12	14:12:07	0.391209
2022-09-12	14:12:08	0.231311
2022-09-12	14:12:08	0.298842
2022-09-12	14:12:08	0.0871885
2022-09-12	14:12:09	-0.00309134
2022-09-12	14:12:09	0.190191
2022-09-12	14:12:09	0.138639
2022-09-12	14:12:09	0.14215
2022-09-12	14:12:10	0.769631
2022-09-12	14:12:10	2.07538
2022-09-12	14:12:10	4.2195
2022-09-12	14:12:11	3.831
2022-09-12	14:12:11	1.10765
2022-09-12	14:12:11	0.565153
2022-09-12	14:12:11	0.413244
2022-09-12	14:12:11	0.266832
2022-09-12	14:12:12	0.423321
2022-09-12	14:12:12	0.269886
2022-09-12	14:12:12	0.389021
2022-09-12	14:12:13	0.177977
2022-09-12	14:12:13	0.25701
2022-09-12	14:12:13	0.231463
2022-09-12	14:12:13	0.255229
2022-09-12	14:12:14	-0.108842
2022-09-12	14:12:14	-0.139682
2022-09-12	14:12:14	-0.0747453
2022-09-12	14:12:14	0.0554328
2022-09-12	14:12:15	-0.0411575
2022-09-12	14:12:15	0.231158
2022-09-12	14:12:15	0.168359
2022-09-12	14:12:15	0.209733
2022-09-12	14:12:16	0.130802
2022-09-12	14:12:16	0.242761
2022-09-12	14:12:16	0.28841
2022-09-12	14:12:17	0.140064
2022-09-12	14:12:17	0.412481
2022-09-12	14:12:17	0.601183
2022-09-12	14:12:17	1.09945
2022-09-12	14:12:18	0.671463
2022-09-12	14:12:18	0.728257
2022-09-12	14:12:18	0.321336
2022-09-12	14:12:18	0.794975
2022-09-12	14:12:19	0.380827
2022-09-12	14:12:19	0.722659
2022-09-12	14:12:19	0.641132
2022-09-12	14:12:19	0.704542
2022-09-12	14:12:20	0.469071
2022-09-12	14:12:20	0.394415
2022-09-12	14:12:20	0.493092
2022-09-12	14:12:21	0.28215
2022-09-12	14:12:21	0.557214
2022-09-12	14:12:21	0.2107
2022-09-12	14:12:21	0.578842
2022-09-12	14:12:22	0.332074
2022-09-12	14:12:22	0.724389
2022-09-12	14:12:22	0.330344
2022-09-12	14:12:22	1.00775
2022-09-12	14:12:23	0.504033
2022-09-12	14:12:23	1.66413
2022-09-12	14:12:23	0.665458
2022-09-12	14:12:23	1.50383
2022-09-12	14:12:24	0.800725
2022-09-12	14:12:24	1.43095
2022-09-12	14:12:24	0.92612
2022-09-12	14:12:25	1.02357
2022-09-12	14:12:25	1.00693
2022-09-12	14:12:25	1.01304
2022-09-12	14:12:25	1.22917
2022-09-12	14:12:26	1.11747
2022-09-12	14:12:26	1.1049
2022-09-12	14:12:26	0.537723
2022-09-12	14:12:27	1.05345
2022-09-12	14:12:27	0.427646
2022-09-12	14:12:27	1.19752
2022-09-12	14:12:27	0.464339
2022-09-12	14:12:27	1.12856
2022-09-12	14:12:28	0.993702
2022-09-12	14:12:28	1.53243
2022-09-12	14:12:28	1.5053
2022-09-12	14:12:29	2.125
2022-09-12	14:12:29	1.67106
2022-09-12	14:12:29	2.62988
2022-09-12	14:12:29	1.75711
2022-09-12	14:12:30	1.58592
2022-09-12	14:12:30	1.49742
2022-09-12	14:12:30	0.81243
2022-09-12	14:12:30	1.51136
2022-09-12	14:12:31	0.720114
2022-09-12	14:12:31	1.41212
2022-09-12	14:12:31	0.720165
2022-09-12	14:12:31	1.76892
2022-09-12	14:12:32	1.10617
2022-09-12	14:12:32	2.43085
2022-09-12	14:12:32	1.74103
2022-09-12	14:12:33	3.0192
2022-09-12	14:12:33	1.34108
2022-09-12	14:12:33	2.39757
2022-09-12	14:12:33	1.12989
2022-09-12	14:12:34	1.73309
2022-09-12	14:12:34	1.19777
2022-09-12	14:12:34	0.624338
2022-09-12	14:12:34	1.18805
2022-09-12	14:12:35	0.435484
2022-09-12	14:12:35	1.23803
2022-09-12	14:12:35	0.466018
2022-09-12	14:12:35	1.05248
2022-09-12	14:12:36	0.457163
2022-09-12	14:12:36	1.15609
2022-09-12	14:12:36	0.980318
2022-09-12	14:12:37	1.56546
2022-09-12	14:12:37	1.16607
2022-09-12	14:12:37	1.76658
2022-09-12	14:12:37	1.49238
2022-09-12	14:12:38	2.31838
2022-09-12	14:12:38	1.48383
2022-09-12	14:12:38	2.26602
2022-09-12	14:12:38	2.29279
2022-09-12	14:12:39	0.985916
2022-09-12	14:12:39	2.30134
2022-09-12	14:12:39	0.799402
2022-09-12	14:12:39	3.2478
2022-09-12	14:12:40	1.16841
2022-09-12	14:12:40	3.93604
2022-09-12	14:12:40	2.20459
2022-09-12	14:12:41	5.73919
2022-09-12	14:12:41	1.93207
2022-09-12	14:12:41	4.36332
2022-09-12	14:12:41	2.17584
2022-09-12	14:12:42	4.45864
2022-09-12	14:12:42	2.82154
2022-09-12	14:12:42	3.88551
2022-09-12	14:12:42	3.65085
2022-09-12	14:12:43	5.4136
2022-09-12	14:12:43	4.61141
2022-09-12	14:12:43	4.35507
2022-09-12	14:12:43	4.13009
2022-09-12	14:12:44	2.68027
2022-09-12	14:12:44	2.1365
2022-09-12	14:12:44	1.20973
2022-09-12	14:12:45	1.14393
2022-09-12	14:12:45	0.639249
2022-09-12	14:12:45	0.551718
2022-09-12	14:12:45	0.418079
2022-09-12	14:12:46	1.02337
2022-09-12	14:12:46	0.985102
2022-09-12	14:12:46	1.61589
2022-09-12	14:12:46	2.02948
2022-09-12	14:12:47	4.66032
2022-09-12	14:12:47	2.68062
2022-09-12	14:12:47	1.99034
2022-09-12	14:12:47	1.26922
2022-09-12	14:12:48	0.730649
2022-09-12	14:12:48	1.21319
2022-09-12	14:12:48	1.00673
2022-09-12	14:12:49	1.87676
2022-09-12	14:12:49	1.19111
2022-09-12	14:12:49	2.92072
2022-09-12	14:12:49	1.56541
2022-09-12	14:12:50	2.71416
2022-09-12	14:12:50	3.60703
2022-09-12	14:12:50	3.40271
2022-09-12	14:12:50	4.90937
2022-09-12	14:12:51	4.50841
2022-09-12	14:12:51	4.07716
2022-09-12	14:12:51	11.4066
2022-09-12	14:12:51	13.2999
2022-09-12	14:12:52	6.06886
2022-09-12	14:12:52	2.06744
2022-09-12	14:12:52	0.574771
2022-09-12	14:12:53	0.468104
2022-09-12	14:12:53	0.33986
2022-09-12	14:12:53	0.328359
2022-09-12	14:12:53	0.448919
2022-09-12	14:12:54	0.498435
2022-09-12	14:12:54	0.628919
2022-09-12	14:12:54	0.727036
2022-09-12	14:12:54	0.735483
2022-09-12	14:12:55	0.329529
2022-09-12	14:12:55	0.15869
2022-09-12	14:12:55	0.143575
2022-09-12	14:12:55	0.0611326
2022-09-12	14:12:56	0.168104
2022-09-12	14:12:56	-0.0159667
2022-09-12	14:12:56	0.0829646
2022-09-12	14:12:57	0.10841
2022-09-12	14:12:57	0.113804
2022-09-12	14:12:57	0.203728
2022-09-12	14:12:57	0.0741605
2022-09-12	14:12:58	0.271972
2022-09-12	14:12:58	0.144593
2022-09-12	14:12:58	0.348664
2022-09-12	14:12:58	0.100725
2022-09-12	14:12:59	0.215127
2022-09-12	14:12:59	0.146883
2022-09-12	14:12:59	0.1393
2022-09-12	14:12:59	0.248257
2022-09-12	14:13:00	0.20785
2022-09-12	14:13:00	0.253601
2022-09-12	14:13:00	0.178537
2022-09-12	14:13:01	0.0298348
2022-09-12	14:13:01	-0.357391
2022-09-12	14:13:01	-0.455712
2022-09-12	14:13:01	-0.368994
2022-09-12	14:13:02	0.219708
2022-09-12	14:13:02	0.246069
2022-09-12	14:13:02	0.054873
2022-09-12	14:13:02	0.28556
2022-09-12	14:13:03	0.258232
2022-09-12	14:13:03	0.268613
2022-09-12	14:13:03	0.398079
2022-09-12	14:13:03	0.347646
2022-09-12	14:13:04	0.991209
2022-09-12	14:13:04	1.642
2022-09-12	14:13:04	1.66989
2022-09-12	14:13:05	0.540165
2022-09-12	14:13:05	0.247443
2022-09-12	14:13:05	0.308104
2022-09-12	14:13:05	0.238333
2022-09-12	14:13:06	0.210089
2022-09-12	14:13:06	0.285305
2022-09-12	14:13:06	0.307901
2022-09-12	14:13:06	0.271463
2022-09-12	14:13:07	0.225153
2022-09-12	14:13:07	0.28098
2022-09-12	14:13:07	1.53345
2022-09-12	14:13:08	0.240623
2022-09-12	14:13:08	0.0846439
2022-09-12	14:13:08	0.312939
2022-09-12	14:13:08	0.282608
2022-09-12	14:13:09	0.0146695
2022-09-12	14:13:09	-0.000241466
2022-09-12	14:13:09	0.258486
2022-09-12	14:13:09	0.116858
2022-09-12	14:13:10	0.114008
2022-09-12	14:13:10	0.0475956
2022-09-12	14:13:10	0.258079
2022-09-12	14:13:10	0.166323
2022-09-12	14:13:11	0.238792
2022-09-12	14:13:11	0.471565
2022-09-12	14:13:11	0.479249
2022-09-12	14:13:12	0.395229
2022-09-12	14:13:12	0.670649
2022-09-12	14:13:12	0.151514
2022-09-12	14:13:12	0.68154
2022-09-12	14:13:13	0.422608
2022-09-12	14:13:13	0.463219
2022-09-12	14:13:13	0.454466
2022-09-12	14:13:13	0.547443
2022-09-12	14:13:14	0.50902
2022-09-12	14:13:14	0.626679
2022-09-12	14:13:14	0.215076
2022-09-12	14:13:14	0.0711071
2022-09-12	14:13:15	0.0950257
2022-09-12	14:13:15	0.116043
2022-09-12	14:13:15	-0.0156613
2022-09-12	14:13:16	0.198486
2022-09-12	14:13:16	0.11355
2022-09-12	14:13:16	0.384898
2022-09-12	14:13:16	0.530344
2022-09-12	14:13:17	0.435891
2022-09-12	14:13:17	0.229529
2022-09-12	14:13:17	0.321845
2022-09-12	14:13:17	0.206781
2022-09-12	14:13:18	0.544949
2022-09-12	14:13:18	0.3564
2022-09-12	14:13:18	1.44312
2022-09-12	14:13:18	0.126272
2022-09-12	14:13:19	0.422812
2022-09-12	14:13:19	0.268715
2022-09-12	14:13:19	0.298842
2022-09-12	14:13:20	-0.0806486
2022-09-12	14:13:20	-0.195407
2022-09-12	14:13:20	-0.101259
2022-09-12	14:13:20	-0.058104
2022-09-12	14:13:21	0.0672394
2022-09-12	14:13:21	0.299555
2022-09-12	14:13:21	0.371718
2022-09-12	14:13:21	0.272634
2022-09-12	14:13:22	0.403931
2022-09-12	14:13:22	0.284135
2022-09-12	14:13:22	0.359758
2022-09-12	14:13:22	0.29126
2022-09-12	14:13:23	0.359351
2022-09-12	14:13:23	0.274313
2022-09-12	14:13:23	0.364389
2022-09-12	14:13:24	0.276603
2022-09-12	14:13:24	0.280929
2022-09-12	14:13:24	0.276501
2022-09-12	14:13:24	0.368308
2022-09-12	14:13:25	0.321998
2022-09-12	14:13:25	0.275738
2022-09-12	14:13:25	0.366425
2022-09-12	14:13:25	0.384135
2022-09-12	14:13:26	0.0459671
2022-09-12	14:13:26	-0.0256868
2022-09-12	14:13:26	-0.10472
2022-09-12	14:13:26	-0.15159
2022-09-12	14:13:27	0.149479
2022-09-12	14:13:27	0.577723
2022-09-12	14:13:27	0.417214
2022-09-12	14:13:28	0.304186
2022-09-12	14:13:28	0.164644
2022-09-12	14:13:28	-0.105127
2022-09-12	14:13:28	0.182507
2022-09-12	14:13:29	0.3193
2022-09-12	14:13:29	0.967137
2022-09-12	14:13:29	1.96251
2022-09-12	14:13:29	0.412939
2022-09-12	14:13:30	0.733499
2022-09-12	14:13:30	0.697112
2022-09-12	14:13:30	0.50673
2022-09-12	14:13:30	0.240725
2022-09-12	14:13:31	0.507239
2022-09-12	14:13:31	0.866527
2022-09-12	14:13:31	0.555585
2022-09-12	14:13:32	1.13844
2022-09-12	14:13:32	0.270191
2022-09-12	14:13:32	0.325204
2022-09-12	14:13:32	0.514008
2022-09-12	14:13:33	0.409275
2022-09-12	14:13:33	0.47701
2022-09-12	14:13:33	0.500216
2022-09-12	14:13:33	0.571972
2022-09-12	14:13:34	0.774568
2022-09-12	14:13:34	0.97869
2022-09-12	14:13:34	1.20429
2022-09-12	14:13:34	1.77324
2022-09-12	14:13:35	1.14627
2022-09-12	14:13:35	1.06724
2022-09-12	14:13:35	0.952532
2022-09-12	14:13:36	1.03726
2022-09-12	14:13:36	0.944033
2022-09-12	14:13:36	0.70103
2022-09-12	14:13:36	0.45187
2022-09-12	14:13:37	0.503931
2022-09-12	14:13:37	0.564644
2022-09-12	14:13:37	0.466476
2022-09-12	14:13:37	0.218944
2022-09-12	14:13:38	0.313753
2022-09-12	14:13:38	0.278944
2022-09-12	14:13:38	0.278842
2022-09-12	14:13:38	0.22673
2022-09-12	14:13:39	0.250751
2022-09-12	14:13:39	0.32215
2022-09-12	14:13:39	0.196552
2022-09-12	14:13:40	0.259046
2022-09-12	14:13:40	0.334771
2022-09-12	14:13:40	0.0987407
2022-09-12	14:13:40	0.105814
2022-09-12	14:13:41	0.174415
2022-09-12	14:13:41	0.128359
2022-09-12	14:13:41	0.0321758
2022-09-12	14:13:41	-0.22472
2022-09-12	14:13:42	-0.177137
2022-09-12	14:13:42	-0.154745
2022-09-12	14:13:42	-0.111692
2022-09-12	14:13:42	0.205
2022-09-12	14:13:43	0.590191
2022-09-12	14:13:43	0.471005
2022-09-12	14:13:43	0.451361
2022-09-12	14:13:44	0.435229
2022-09-12	14:13:44	0.467647
2022-09-12	14:13:44	0.220725
2022-09-12	14:13:44	0.0228119
2022-09-12	14:13:45	0.0113616
2022-09-12	14:13:45	0.26154
2022-09-12	14:13:45	0.225102
2022-09-12	14:13:45	0.0676465
2022-09-12	14:13:46	-0.0271626
2022-09-12	14:13:46	0.00886792
2022-09-12	14:13:46	-0.110928
2022-09-12	14:13:46	-0.054898
2022-09-12	14:13:47	-0.0410557
2022-09-12	14:13:47	-0.128587
2022-09-12	14:13:47	0.0228628
2022-09-12	14:13:48	-0.118053
2022-09-12	14:13:48	-0.142481
2022-09-12	14:13:48	-0.26986
2022-09-12	14:13:48	-0.20075
2022-09-12	14:13:49	-0.200496
2022-09-12	14:13:49	-0.250012
2022-09-12	14:13:49	-0.0778496
2022-09-12	14:13:49	0.388155
2022-09-12	14:13:50	0.663728
2022-09-12	14:13:50	1.6194
2022-09-12	14:13:50	1.43472
2022-09-12	14:13:50	1.70693
2022-09-12	14:13:51	1.36337
2022-09-12	14:13:51	2.70179
2022-09-12	14:13:51	1.01879
2022-09-12	14:13:52	1.93085
2022-09-12	14:13:52	1.74958
2022-09-12	14:13:52	1.36072
2022-09-12	14:13:52	0.328511
2022-09-12	14:13:53	0.503677
2022-09-12	14:13:53	0.526832
2022-09-12	14:13:53	0.438588
2022-09-12	14:13:53	0.336094
2022-09-12	14:13:54	0.374415
2022-09-12	14:13:54	0.454211
2022-09-12	14:13:54	0.290954
2022-09-12	14:13:54	0.378435
2022-09-12	14:13:55	0.198232
2022-09-12	14:13:55	0.105865
2022-09-12	14:13:55	0.258181
2022-09-12	14:13:56	0.220878
2022-09-12	14:13:56	0.279148
2022-09-12	14:13:56	0.28668
2022-09-12	14:13:56	0.132074
2022-09-12	14:13:57	0.390903
2022-09-12	14:13:57	0.29014
2022-09-12	14:13:57	0.290954
2022-09-12	14:13:57	0.199758
2022-09-12	14:13:58	0.203982
2022-09-12	14:13:58	0.252125
2022-09-12	14:13:58	0.221947
2022-09-12	14:13:58	0.184949
2022-09-12	14:13:59	0.149529
2022-09-12	14:13:59	0.211718
2022-09-12	14:13:59	0.125509
2022-09-12	14:14:00	0.241081
2022-09-12	14:14:00	0.169529
2022-09-12	14:14:00	0.189733
2022-09-12	14:14:00	0.129071
2022-09-12	14:14:01	0.114008
2022-09-12	14:14:01	0.214262
2022-09-12	14:14:01	0.338232
2022-09-12	14:14:01	0.321489
2022-09-12	14:14:02	0.264949
2022-09-12	14:14:02	0.221336
2022-09-12	14:14:02	0.298079
2022-09-12	14:14:02	0.313194
2022-09-12	14:14:03	0.334669
2022-09-12	14:14:03	0.392176
2022-09-12	14:14:03	0.386883
2022-09-12	14:14:04	0.372888
2022-09-12	14:14:04	0.387341
2022-09-12	14:14:04	0.400522
2022-09-12	14:14:04	0.363219
2022-09-12	14:14:05	0.340522
2022-09-12	14:14:05	0.334975
2022-09-12	14:14:05	0.323117
2022-09-12	14:14:05	0.315789
2022-09-12	14:14:06	0.32841
2022-09-12	14:14:06	0.308613
2022-09-12	14:14:06	0.420573
2022-09-12	14:14:06	0.359809
2022-09-12	14:14:07	0.360929
2022-09-12	14:14:07	0.320166
2022-09-12	14:14:07	0.273041
2022-09-12	14:14:08	0.348308
2022-09-12	14:14:08	0.342405
2022-09-12	14:14:08	0.2993
2022-09-12	14:14:08	0.392379
2022-09-12	14:14:09	0.326934
2022-09-12	14:14:09	0.243677
2022-09-12	14:14:09	0.276908
2022-09-12	14:14:09	0.256501
2022-09-12	14:14:10	0.303931
2022-09-12	14:14:10	0.398333
2022-09-12	14:14:10	0.255178
2022-09-12	14:14:10	0.378384
2022-09-12	14:14:11	0.311921
2022-09-12	14:14:11	0.311514
2022-09-12	14:14:11	0.258893
2022-09-12	14:14:12	0.229886
2022-09-12	14:14:12	0.345763
2022-09-12	14:14:12	0.463677
2022-09-12	14:14:12	0.741132
2022-09-12	14:14:13	0.788002
2022-09-12	14:14:13	0.979606
2022-09-12	14:14:13	0.632023
2022-09-12	14:14:13	0.926578
2022-09-12	14:14:14	0.335687
2022-09-12	14:14:14	0.771412
2022-09-12	14:14:14	0.25014
2022-09-12	14:14:14	0.754364
2022-09-12	14:14:15	0.36159
2022-09-12	14:14:15	0.673651
2022-09-12	14:14:15	0.535382
2022-09-12	14:14:16	0.504847
2022-09-12	14:14:16	0.609427
2022-09-12	14:14:16	0.385814
2022-09-12	14:14:16	0.877621
2022-09-12	14:14:17	0.474211
2022-09-12	14:14:17	1.01319
2022-09-12	14:14:17	0.35528
2022-09-12	14:14:17	1.20683
2022-09-12	14:14:18	0.788918
2022-09-12	14:14:18	1.55223
2022-09-12	14:14:18	0.675382
2022-09-12	14:14:18	1.18154
2022-09-12	14:14:19	1.08668
2022-09-12	14:14:19	2.582
2022-09-12	14:14:19	2.82189
2022-09-12	14:14:20	2.97228
2022-09-12	14:14:20	1.47365
2022-09-12	14:14:20	2.24876
2022-09-12	14:14:20	1.75029
2022-09-12	14:14:21	0.816654
2022-09-12	14:14:21	0.48673
2022-09-12	14:14:21	0.439708
2022-09-12	14:14:21	0.457468
2022-09-12	14:14:22	0.635687
2022-09-12	14:14:22	0.547494
2022-09-12	14:14:22	0.950293
2022-09-12	14:14:23	0.429071
2022-09-12	14:14:23	0.0540078
2022-09-12	14:14:23	0.866832
2022-09-12	14:14:23	0.669936
2022-09-12	14:14:24	-0.0694017
2022-09-12	14:14:24	-0.00304046
2022-09-12	14:14:24	0.133601
2022-09-12	14:14:24	-0.0276715
2022-09-12	14:14:25	-0.179936
2022-09-12	14:14:25	0.23986
2022-09-12	14:14:25	0.502964
2022-09-12	14:14:25	0.469631
2022-09-12	14:14:26	0.455382
2022-09-12	14:14:26	0.432227
2022-09-12	14:14:26	0.433855
2022-09-12	14:14:27	0.487036
2022-09-12	14:14:27	0.603015
2022-09-12	14:14:27	1.91044
2022-09-12	14:14:27	5.62759
2022-09-12	14:14:28	5.51146
2022-09-12	14:14:28	2.17172
2022-09-12	14:14:28	0.758282
2022-09-12	14:14:28	0.392888
2022-09-12	14:14:29	0.421489
2022-09-12	14:14:29	0.449478
2022-09-12	14:14:29	0.306272
2022-09-12	14:14:29	0.470242
2022-09-12	14:14:30	0.338893
2022-09-12	14:14:30	0.542252
2022-09-12	14:14:30	0.240776
2022-09-12	14:14:31	0.569682
2022-09-12	14:14:31	0.390344
2022-09-12	14:14:31	0.605204
2022-09-12	14:14:31	0.384644
2022-09-12	14:14:32	0.521845
2022-09-12	14:14:32	0.430496
2022-09-12	14:14:32	0.452532
2022-09-12	14:14:32	0.363982
2022-09-12	14:14:33	0.440216
2022-09-12	14:14:33	0.507188
2022-09-12	14:14:33	0.404542
2022-09-12	14:14:33	0.270649
2022-09-12	14:14:34	0.284847
2022-09-12	14:14:34	0.319911
2022-09-12	14:14:34	0.243779
2022-09-12	14:14:35	0.179962
2022-09-12	14:14:35	0.215331
2022-09-12	14:14:35	0.310191
2022-09-12	14:14:35	0.167596
2022-09-12	14:14:36	0.188359
2022-09-12	14:14:36	0.169886
2022-09-12	14:14:36	0.267443
2022-09-12	14:14:36	0.201743
2022-09-12	14:14:37	0.227799
2022-09-12	14:14:37	0.202863
2022-09-12	14:14:37	0.646578
2022-09-12	14:14:37	1.31716
2022-09-12	14:14:38	1.67258
2022-09-12	14:14:38	1.32037
2022-09-12	14:14:38	0.981946
2022-09-12	14:14:39	1.22485
2022-09-12	14:14:39	1.2823
2022-09-12	14:14:39	0.588919
2022-09-12	14:14:39	0.676043
2022-09-12	14:14:40	0.385051
2022-09-12	14:14:40	0.738893
2022-09-12	14:14:40	0.852379
2022-09-12	14:14:40	0.833193
2022-09-12	14:14:41	1.11553
2022-09-12	14:14:41	1.21533
2022-09-12	14:14:41	0.546119
2022-09-12	14:14:41	0.765356
2022-09-12	14:14:42	0.419249
2022-09-12	14:14:42	0.632277
2022-09-12	14:14:42	0.454568
2022-09-12	14:14:43	0.376908
2022-09-12	14:14:43	0.594466
2022-09-12	14:14:43	0.211412
2022-09-12	14:14:43	0.440013
2022-09-12	14:14:44	0.122965
2022-09-12	14:14:44	0.415026
2022-09-12	14:14:44	0.261031
2022-09-12	14:14:44	0.579453
2022-09-12	14:14:45	0.736145
2022-09-12	14:14:45	0.811311
2022-09-12	14:14:45	0.890903
2022-09-12	14:14:45	1.15284
2022-09-12	14:14:46	1.38678
2022-09-12	14:14:46	1.51401
2022-09-12	14:14:46	2.14719
2022-09-12	14:14:47	1.50897
2022-09-12	14:14:47	1.25482
2022-09-12	14:14:47	0.706781
2022-09-12	14:14:47	0.900827
2022-09-12	14:14:48	0.679249
2022-09-12	14:14:48	1.03905
2022-09-12	14:14:48	0.840064
2022-09-12	14:14:48	0.732277
2022-09-12	14:14:49	0.515891
2022-09-12	14:14:49	0.399453
2022-09-12	14:14:49	0.569631
2022-09-12	14:14:49	0.812685
2022-09-12	14:14:50	0.919555
2022-09-12	14:14:50	0.919351
2022-09-12	14:14:50	0.663931
2022-09-12	14:14:51	0.602557
2022-09-12	14:14:51	0.576756
2022-09-12	14:14:51	0.617061
2022-09-12	14:14:51	0.521692
2022-09-12	14:14:52	0.503626
2022-09-12	14:14:52	0.493957
2022-09-12	14:14:52	0.469224
2022-09-12	14:14:52	0.443982
2022-09-12	14:14:53	0.42897
2022-09-12	14:14:53	0.411616
2022-09-12	14:14:53	0.374669
2022-09-12	14:14:53	0.300674
2022-09-12	14:14:54	0.324339
2022-09-12	14:14:54	0.45874
2022-09-12	14:14:54	0.328868
2022-09-12	14:14:55	0.350191
2022-09-12	14:14:55	0.0896821
2022-09-12	14:14:55	0.0621503
2022-09-12	14:14:55	0.147138
2022-09-12	14:14:56	0.0523793
2022-09-12	14:14:56	0.253753
2022-09-12	14:14:56	0.616807
2022-09-12	14:14:56	0.527544
2022-09-12	14:14:57	0.206629
2022-09-12	14:14:57	0.17299
2022-09-12	14:14:57	0.244695
2022-09-12	14:14:57	0.165
2022-09-12	14:14:58	0.244491
2022-09-12	14:14:58	0.227901
2022-09-12	14:14:58	0.461183
2022-09-12	14:14:59	0.369987
2022-09-12	14:14:59	0.404542
2022-09-12	14:14:59	0.686374
2022-09-12	14:14:59	0.136909
2022-09-12	14:15:00	0.163117
2022-09-12	14:15:00	0.854669
2022-09-12	14:15:00	0.200369
2022-09-12	14:15:00	0.520013
2022-09-12	14:15:01	0.361845
2022-09-12	14:15:01	0.189173
2022-09-12	14:15:01	0.648919
2022-09-12	14:15:01	0.293346
2022-09-12	14:15:02	0.641234
2022-09-12	14:15:02	0.372227
2022-09-12	14:15:02	0.781336
2022-09-12	14:15:03	0.971463
2022-09-12	14:15:03	1.20877
2022-09-12	14:15:03	1.55564
2022-09-12	14:15:03	1.55014
2022-09-12	14:15:04	2.26622
2022-09-12	14:15:04	0.83986
2022-09-12	14:15:04	1.528
2022-09-12	14:15:04	0.805916
2022-09-12	14:15:05	1.03299
2022-09-12	14:15:05	0.626832
2022-09-12	14:15:05	0.493448
2022-09-12	14:15:05	0.778333
2022-09-12	14:15:06	0.364542
2022-09-12	14:15:06	0.677061
2022-09-12	14:15:06	0.561285
2022-09-12	14:15:07	0.833092
2022-09-12	14:15:07	0.691463
2022-09-12	14:15:07	0.746171
2022-09-12	14:15:07	1.1967
2022-09-12	14:15:08	0.522252
2022-09-12	14:15:08	1.28709
2022-09-12	14:15:08	1.78205
2022-09-12	14:15:08	1.40444
2022-09-12	14:15:09	1.44917
2022-09-12	14:15:09	1.29218
2022-09-12	14:15:09	1.4963
2022-09-12	14:15:09	0.61416
2022-09-12	14:15:10	1.02072
2022-09-12	14:15:10	0.974669
2022-09-12	14:15:10	1.1937
2022-09-12	14:15:11	1.15212
2022-09-12	14:15:11	1.06251
2022-09-12	14:15:11	1.5509
2022-09-12	14:15:11	0.628206
2022-09-12	14:15:12	1.45986
2022-09-12	14:15:12	1.00861
2022-09-12	14:15:12	1.01304
2022-09-12	14:15:12	0.859046
2022-09-12	14:15:13	1.08011
2022-09-12	14:15:13	2.22963
2022-09-12	14:15:13	2.31243
2022-09-12	14:15:13	3.65258
2022-09-12	14:15:14	2.34765
2022-09-12	14:15:14	2.05187
2022-09-12	14:15:14	0.824389
2022-09-12	14:15:15	0.596908
2022-09-12	14:15:15	0.459402
2022-09-12	14:15:15	0.590293
2022-09-12	14:15:15	0.504847
2022-09-12	14:15:16	1.6077
2022-09-12	14:15:16	2.18678
2022-09-12	14:15:16	3.80439
2022-09-12	14:15:16	3.47696
2022-09-12	14:15:17	2.81161
2022-09-12	14:15:17	1.83192
2022-09-12	14:15:17	1.31681
2022-09-12	14:15:17	0.520827
2022-09-12	14:15:18	0.584389
2022-09-12	14:15:18	1.02872
2022-09-12	14:15:18	2.31324
2022-09-12	14:15:19	6.0509
2022-09-12	14:15:19	2.40474
2022-09-12	14:15:19	0.454008
2022-09-12	14:15:19	0.325763
2022-09-12	14:15:20	0.71126
2022-09-12	14:15:20	0.703117
2022-09-12	14:15:20	0.735127
2022-09-12	14:15:20	0.763575
2022-09-12	14:15:21	0.686018
2022-09-12	14:15:21	0.720623
2022-09-12	14:15:21	0.718588
2022-09-12	14:15:21	0.538893
2022-09-12	14:15:22	0.505051
2022-09-12	14:15:22	0.560318
2022-09-12	14:15:22	0.595483
2022-09-12	14:15:23	0.674669
2022-09-12	14:15:23	1.04057
2022-09-12	14:15:23	0.709326
2022-09-12	14:15:23	0.885356
2022-09-12	14:15:24	0.839046
2022-09-12	14:15:24	1.54113
2022-09-12	14:15:24	1.18698
2022-09-12	14:15:24	1.22322
2022-09-12	14:15:25	1.45253
2022-09-12	14:15:25	1.31085
2022-09-12	14:15:25	2.00994
2022-09-12	14:15:25	0.511361
2022-09-12	14:15:26	0.61813
2022-09-12	14:15:26	0.43925
2022-09-12	14:15:26	0.490089
2022-09-12	14:15:27	0.345305
2022-09-12	14:15:27	0.512939
2022-09-12	14:15:27	0.506069
2022-09-12	14:15:27	1.58011
2022-09-12	14:15:28	0.914058
2022-09-12	14:15:28	1.37828
2022-09-12	14:15:28	0.80617
2022-09-12	14:15:28	0.833753
2022-09-12	14:15:29	0.505865
2022-09-12	14:15:29	0.96841
2022-09-12	14:15:29	1.06709
2022-09-12	14:15:30	1.55711
2022-09-12	14:15:30	1.75655
2022-09-12	14:15:30	2.14637
2022-09-12	14:15:30	1.04291
2022-09-12	14:15:31	0.953397
2022-09-12	14:15:31	0.885916
2022-09-12	14:15:31	0.952888
2022-09-12	14:15:31	0.858537
2022-09-12	14:15:32	1.72358
2022-09-12	14:15:32	1.52276
2022-09-12	14:15:32	3.41553
2022-09-12	14:15:32	2.99925
2022-09-12	14:15:33	4.49681
2022-09-12	14:15:33	2.42637
2022-09-12	14:15:33	3.88978
2022-09-12	14:15:34	3.71162
2022-09-12	14:15:34	3.16897
2022-09-12	14:15:34	5.06591
2022-09-12	14:15:34	2.53742
2022-09-12	14:15:35	3.88708
2022-09-12	14:15:35	3.23278
2022-09-12	14:15:35	2.80943
2022-09-12	14:15:35	3.79869
2022-09-12	14:15:36	2.5652
2022-09-12	14:15:36	4.60052
2022-09-12	14:15:36	1.22113
2022-09-12	14:15:36	1.15686
2022-09-12	14:15:37	0.695738
2022-09-12	14:15:37	0.72042
2022-09-12	14:15:37	0.725916
2022-09-12	14:15:38	0.725763
2022-09-12	14:15:38	0.735026
2022-09-12	14:15:38	4.31309
2022-09-12	14:15:38	2.422
2022-09-12	14:15:39	0.730496
2022-09-12	14:15:39	0.445814
2022-09-12	14:15:39	0.565865
2022-09-12	14:15:39	0.224848
2022-09-12	14:15:40	0.396501
2022-09-12	14:15:40	0.205509
2022-09-12	14:15:40	0.527188
2022-09-12	14:15:40	0.416043
2022-09-12	14:15:41	0.391361
2022-09-12	14:15:41	0.398181
2022-09-12	14:15:41	0.436858
2022-09-12	14:15:42	0.716349
2022-09-12	14:15:42	1.42586
2022-09-12	14:15:42	1.47726
2022-09-12	14:15:42	0.874974
2022-09-12	14:15:43	1.54912
2022-09-12	14:15:43	2.79502
2022-09-12	14:15:43	4.36383
2022-09-12	14:15:43	5.4852
2022-09-12	14:15:44	3.42133
2022-09-12	14:15:44	2.0077
2022-09-12	14:15:44	3.81416
2022-09-12	14:15:44	3.5767
2022-09-12	14:15:45	4.45375
2022-09-12	14:15:45	4.08301
2022-09-12	14:15:45	5.53426
2022-09-12	14:15:46	2.32927
2022-09-12	14:15:46	2.42581
2022-09-12	14:15:46	2.39462
2022-09-12	14:15:46	3.89686
2022-09-12	14:15:47	3.97655
2022-09-12	14:15:47	2.42062
2022-09-12	14:15:47	4.17401
2022-09-12	14:15:47	2.40419
2022-09-12	14:15:48	3.00398
2022-09-12	14:15:48	3.49049
2022-09-12	14:15:48	4.19126
2022-09-12	14:15:48	1.35701
2022-09-12	14:15:49	0.272379
2022-09-12	14:15:49	0.225407
2022-09-12	14:15:49	0.173957
2022-09-12	14:15:50	-0.0612593
2022-09-12	14:15:50	-0.333626
2022-09-12	14:15:50	-0.184211
2022-09-12	14:15:50	-0.167926
2022-09-12	14:15:51	0.0568577
2022-09-12	14:15:51	-0.0797325
2022-09-12	14:15:51	0.201387
2022-09-12	14:15:51	0.00998751
2022-09-12	14:15:52	0.298944
2022-09-12	14:15:52	0.416959
2022-09-12	14:15:52	1.40983
2022-09-12	14:15:52	3.14622
2022-09-12	14:15:53	3.34744
2022-09-12	14:15:53	2.6335
2022-09-12	14:15:53	1.96123
2022-09-12	14:15:54	1.4053
2022-09-12	14:15:54	0.980114
2022-09-12	14:15:54	1.31553
2022-09-12	14:15:54	2.1592
2022-09-12	14:15:55	2.13706
2022-09-12	14:15:55	3.37706
2022-09-12	14:15:55	2.89762
2022-09-12	14:15:55	3.04225
2022-09-12	14:15:56	0.469479
2022-09-12	14:15:56	0.321896
2022-09-12	14:15:56	0.398639
2022-09-12	14:15:56	0.255738
2022-09-12	14:15:57	0.145967
2022-09-12	14:15:57	0.0943641
2022-09-12	14:15:57	0.0254582
2022-09-12	14:15:58	0.0700893
2022-09-12	14:15:58	0.0908017
2022-09-12	14:15:58	0.206679
2022-09-12	14:15:58	0.2793
2022-09-12	14:15:59	0.817265
2022-09-12	14:15:59	0.632074
2022-09-12	14:15:59	0.530649
2022-09-12	14:15:59	0.331769
2022-09-12	14:16:00	0.409377
2022-09-12	14:16:00	0.441031
2022-09-12	14:16:00	0.325255
2022-09-12	14:16:00	0.168155
2022-09-12	14:16:01	0.304135
2022-09-12	14:16:01	0.210242
2022-09-12	14:16:01	0.403168
2022-09-12	14:16:02	0.137163
2022-09-12	14:16:02	0.376552
2022-09-12	14:16:02	0.45813
2022-09-12	14:16:02	1.10093
2022-09-12	14:16:03	1.41614
2022-09-12	14:16:03	0.433855
2022-09-12	14:16:03	0.955484
2022-09-12	14:16:03	0.153092
2022-09-12	14:16:04	0.162099
2022-09-12	14:16:04	0.110445
2022-09-12	14:16:04	0.250293
2022-09-12	14:16:04	0.144135
2022-09-12	14:16:05	0.271005
2022-09-12	14:16:05	0.125916
2022-09-12	14:16:05	0.278079
2022-09-12	14:16:06	0.28271
2022-09-12	14:16:06	0.230598
2022-09-12	14:16:06	0.286781
2022-09-12	14:16:06	0.257977
2022-09-12	14:16:07	0.234568
2022-09-12	14:16:07	0.239402
2022-09-12	14:16:07	0.268868
2022-09-12	14:16:07	0.320674
2022-09-12	14:16:08	0.200725
2022-09-12	14:16:08	0.330496
2022-09-12	14:16:08	0.338181
2022-09-12	14:16:08	1.09757
2022-09-12	14:16:09	2.13284
2022-09-12	14:16:09	1.86434
2022-09-12	14:16:09	1.38902
2022-09-12	14:16:10	1.09976
2022-09-12	14:16:10	0.997366
2022-09-12	14:16:10	2.08754
2022-09-12	14:16:10	1.92266
2022-09-12	14:16:11	4.95696
2022-09-12	14:16:11	3.34551
2022-09-12	14:16:11	3.73792
2022-09-12	14:16:11	2.40851
2022-09-12	14:16:12	2.80637
2022-09-12	14:16:12	3.03167
2022-09-12	14:16:12	3.04174
2022-09-12	14:16:12	2.99782
2022-09-12	14:16:13	3.40195
2022-09-12	14:16:13	3.4222
2022-09-12	14:16:13	4.48022
2022-09-12	14:16:14	4.77966
2022-09-12	14:16:14	0.427748
2022-09-12	14:16:14	0.941081
2022-09-12	14:16:14	1.05793
2022-09-12	14:16:15	2.02968
2022-09-12	14:16:15	0.945967
2022-09-12	14:16:15	1.26368
2022-09-12	14:16:15	2.23467
2022-09-12	14:16:16	2.96836
2022-09-12	14:16:16	1.61599
2022-09-12	14:16:16	1.25162
2022-09-12	14:16:16	1.33156
2022-09-12	14:16:17	1.41492
2022-09-12	14:16:17	0.764389
2022-09-12	14:16:17	0.306934
2022-09-12	14:16:18	1.40123
2022-09-12	14:16:18	0.811107
2022-09-12	14:16:18	1.19197
2022-09-12	14:16:18	1.30067
2022-09-12	14:16:19	2.63161
2022-09-12	14:16:19	1.43447
2022-09-12	14:16:19	0.503066
2022-09-12	14:16:19	0.374669
2022-09-12	14:16:20	0.333041
2022-09-12	14:16:20	0.782557
2022-09-12	14:16:20	0.623168
2022-09-12	14:16:20	0.711616
2022-09-12	14:16:21	1.23431
2022-09-12	14:16:21	2.19365
2022-09-12	14:16:21	2.95309
2022-09-12	14:16:22	5.0021
2022-09-12	14:16:22	4.50373
2022-09-12	14:16:22	3.82444
2022-09-12	14:16:22	0.901081
2022-09-12	14:16:23	1.35528
2022-09-12	14:16:23	1.39111
2022-09-12	14:16:23	2.82571
2022-09-12	14:16:24	1.83314
2022-09-12	14:16:24	2.7424
2022-09-12	14:16:24	3.44546
2022-09-12	14:16:24	5.83828
2022-09-12	14:16:25	4.26607
2022-09-12	14:16:25	5.30108
2022-09-12	14:16:25	2.44022
2022-09-12	14:16:25	3.21314
2022-09-12	14:16:26	1.81879
2022-09-12	14:16:26	0.694517
2022-09-12	14:16:26	0.59869
2022-09-12	14:16:26	2.1022
2022-09-12	14:16:27	4.92525
2022-09-12	14:16:27	4.96973
2022-09-12	14:16:27	2.30765
2022-09-12	14:16:27	2.86973
2022-09-12	14:16:28	1.80566
2022-09-12	14:16:28	1.02653
2022-09-12	14:16:28	0.874924
2022-09-12	14:16:29	0.851565
2022-09-12	14:16:29	1.05996
2022-09-12	14:16:29	0.917926
2022-09-12	14:16:29	1.4076
2022-09-12	14:16:30	2.08856
2022-09-12	14:16:30	2.29747
2022-09-12	14:16:30	1.94607
2022-09-12	14:16:30	2.05777
2022-09-12	14:16:31	1.78037
2022-09-12	14:16:31	2.92088
2022-09-12	14:16:31	2.52195
2022-09-12	14:16:31	2.71966
2022-09-12	14:16:32	2.8338
2022-09-12	14:16:32	3.74306
2022-09-12	14:16:32	4.90434
2022-09-12	14:16:33	3.63528
2022-09-12	14:16:33	2.95228
2022-09-12	14:16:33	2.45065
2022-09-12	14:16:33	1.98352
2022-09-12	14:16:34	3.23039
2022-09-12	14:16:34	5.06474
2022-09-12	14:16:34	2.66877
2022-09-12	14:16:34	1.8792
2022-09-12	14:16:35	2.17365
2022-09-12	14:16:35	2.22525
2022-09-12	14:16:35	2.0022
2022-09-12	14:16:35	2.00836
2022-09-12	14:16:36	3.69156
2022-09-12	14:16:36	4.00373
2022-09-12	14:16:36	4.28067
2022-09-12	14:16:37	3.45436
2022-09-12	14:16:37	2.77574
2022-09-12	14:16:37	1.60872
2022-09-12	14:16:37	2.22958
2022-09-12	14:16:38	1.39065
2022-09-12	14:16:38	2.61487
2022-09-12	14:16:38	2.00983
2022-09-12	14:16:38	4.65014
2022-09-12	14:16:39	4.70571
2022-09-12	14:16:39	5.18576
2022-09-12	14:16:39	2.41721
2022-09-12	14:16:39	2.30724
2022-09-12	14:16:40	1.23126
2022-09-12	14:16:40	1.57742
2022-09-12	14:16:40	1.06754
2022-09-12	14:16:41	1.42749
2022-09-12	14:16:41	1.17289
2022-09-12	14:16:41	2.41166
2022-09-12	14:16:41	1.83503
2022-09-12	14:16:42	1.96184
2022-09-12	14:16:42	1.23273
2022-09-12	14:16:42	2.72194
2022-09-12	14:16:42	2.97909
2022-09-12	14:16:43	2.89197
2022-09-12	14:16:43	1.66464
2022-09-12	14:16:43	3.92134
2022-09-12	14:16:43	3.01619
2022-09-12	14:16:44	2.80948
2022-09-12	14:16:44	1.49472
2022-09-12	14:16:44	2.34663
2022-09-12	14:16:45	1.68042
2022-09-12	14:16:45	1.76123
2022-09-12	14:16:45	1.12144
2022-09-12	14:16:45	2.23574
2022-09-12	14:16:46	1.92413
2022-09-12	14:16:46	2.14927
2022-09-12	14:16:46	1.61523
2022-09-12	14:16:46	2.062
2022-09-12	14:16:47	3.42988
2022-09-12	14:16:47	3.11726
2022-09-12	14:16:47	3.82123
2022-09-12	14:16:47	2.17976
2022-09-12	14:16:48	1.73833
2022-09-12	14:16:48	1.02368
2022-09-12	14:16:48	1.29981
2022-09-12	14:16:49	1.40246
2022-09-12	14:16:49	2.61823
2022-09-12	14:16:49	3.03217
2022-09-12	14:16:49	1.78566
2022-09-12	14:16:50	0.996705
2022-09-12	14:16:50	1.18062
2022-09-12	14:16:50	0.949224
2022-09-12	14:16:50	1.45273
2022-09-12	14:16:51	2.0024
2022-09-12	14:16:51	1.62235
2022-09-12	14:16:51	1.05284
2022-09-12	14:16:51	1.05009
2022-09-12	14:16:52	0.919504
2022-09-12	14:16:52	1.27838
2022-09-12	14:16:52	1.60759
2022-09-12	14:16:53	2.52434
2022-09-12	14:16:53	1.12052
2022-09-12	14:16:53	0.960522
2022-09-12	14:16:53	1.2051
2022-09-12	14:16:54	0.88215
2022-09-12	14:16:54	1.24444
2022-09-12	14:16:54	1.2937
2022-09-12	14:16:54	0.814822
2022-09-12	14:16:55	0.617519
2022-09-12	14:16:55	0.67869
2022-09-12	14:16:55	1.10744
2022-09-12	14:16:55	0.836705
2022-09-12	14:16:56	0.61187
2022-09-12	14:16:56	1.17991
2022-09-12	14:16:56	1.20271
2022-09-12	14:16:57	1.80973
2022-09-12	14:16:57	1.73589
2022-09-12	14:16:57	2.06225
2022-09-12	14:16:57	4.74693
2022-09-12	14:16:58	3.89818
2022-09-12	14:16:58	5.92795
2022-09-12	14:16:58	4.34179
2022-09-12	14:16:58	4.50663
2022-09-12	14:16:59	1.59996
2022-09-12	14:16:59	1.88958
2022-09-12	14:16:59	1.87106
2022-09-12	14:16:59	2.10164
2022-09-12	14:17:00	1.26851
2022-09-12	14:17:00	0.92612
2022-09-12	14:17:00	0.983219
2022-09-12	14:17:01	2.70001
2022-09-12	14:17:01	3.84184
2022-09-12	14:17:01	2.55233
2022-09-12	14:17:01	0.975687
2022-09-12	14:17:02	0.617468
2022-09-12	14:17:02	0.0792496
2022-09-12	14:17:02	0.313499
2022-09-12	14:17:02	0.0633717
2022-09-12	14:17:03	0.292481
2022-09-12	14:17:03	0.0134481
2022-09-12	14:17:03	0.16271
2022-09-12	14:17:03	0.106883
2022-09-12	14:17:04	0.182659
2022-09-12	14:17:04	0.0725829
2022-09-12	14:17:04	0.16673
2022-09-12	14:17:05	0.106272
2022-09-12	14:17:05	0.165763
2022-09-12	14:17:05	0.22271
2022-09-12	14:17:06	0.0986389
2022-09-12	14:17:06	0.229071
2022-09-12	14:17:06	0.270089
2022-09-12	14:17:06	1.91681
2022-09-12	14:17:06	0.886985
2022-09-12	14:17:07	0.341285
2022-09-12	14:17:07	0.124949
