# Supplementary material for: Comparing efficacy in reducing pulling and welfare impacts of four types of leash walking equipment
Source: PeerJ journal article supplement (doi:10.7717/peerj.18131), 2024-10-24
Supplement: Shelter1_Tension_files.zip [file Duke_star_2022912125340 copy.xlsx]

## Sheet: Averaged Newtons
Date	Time	averaged newtons	impulse newton	total steps
2022-09-12	12:53:44	1.81375	1.81375	0			Impulse Newton	638.422
2022-09-12	12:53:45	1.80333	3.61708	0			total steps	2
2022-09-12	12:53:46	1.90956	5.52663	0
2022-09-12	12:53:47	1.99235	7.51899	0
2022-09-12	12:53:48	1.88749	9.40647	0
2022-09-12	12:53:49	1.69869	11.1052	0
2022-09-12	12:53:50	1.37243	12.4776	0
2022-09-12	12:53:51	1.26359	13.7412	0
2022-09-12	12:53:52	1.29626	15.0374	0
2022-09-12	12:53:53	5.31146	20.3489	0
2022-09-12	12:53:54	1.83514	22.184	0
2022-09-12	12:53:55	1.5676	23.7516	0
2022-09-12	12:53:56	1.01799	24.7696	0
2022-09-12	12:53:57	1.08517	25.8548	0
2022-09-12	12:53:58	1.12784	26.9827	0
2022-09-12	12:53:59	1.43699	28.4196	0
2022-09-12	12:54:00	2.00067	30.4203	0
2022-09-12	12:54:01	2.47356	32.8939	0
2022-09-12	12:54:02	1.49875	34.3926	0
2022-09-12	12:54:03	2.52832	36.9209	0
2022-09-12	12:54:04	-0.576453	36.9209	0
2022-09-12	12:54:05	0.989244	37.9102	0
2022-09-12	12:54:06	3.34894	41.2591	0
2022-09-12	12:54:07	16.6325	57.8916	1
2022-09-12	12:54:08	19.5201	77.4117	2
2022-09-12	12:54:09	11.9963	89.4079	2
2022-09-12	12:54:10	2.91374	92.3217	2
2022-09-12	12:54:11	1.90852	94.2302	2
2022-09-12	12:54:12	2.31346	96.5437	2
2022-09-12	12:54:13	5.28453	101.828	2
2022-09-12	12:54:14	3.89398	105.722	2
2022-09-12	12:54:15	2.68467	108.407	2
2022-09-12	12:54:16	4.01685	112.424	2
2022-09-12	12:54:17	2.93287	115.357	2
2022-09-12	12:54:18	2.99552	118.352	2
2022-09-12	12:54:19	1.7613	120.113	2
2022-09-12	12:54:20	2.14504	122.258	2
2022-09-12	12:54:21	1.58103	123.839	2
2022-09-12	12:54:22	4.71306	128.553	2
2022-09-12	12:54:23	4.19322	132.746	2
2022-09-12	12:54:24	3.04294	135.789	2
2022-09-12	12:54:25	1.67085	137.46	2
2022-09-12	12:54:26	1.65393	139.113	2
2022-09-12	12:54:27	1.78077	140.894	2
2022-09-12	12:54:28	1.63469	142.529	2
2022-09-12	12:54:29	1.6704	144.199	2
2022-09-12	12:54:30	1.94453	146.144	2
2022-09-12	12:54:31	2.54862	148.692	2
2022-09-12	12:54:32	3.10723	151.8	2
2022-09-12	12:54:33	3.6735	155.473	2
2022-09-12	12:54:34	2.62065	158.094	2
2022-09-12	12:54:35	2.94636	161.04	2
2022-09-12	12:54:36	3.14622	164.186	2
2022-09-12	12:54:37	3.21318	167.4	2
2022-09-12	12:54:38	3.22076	170.62	2
2022-09-12	12:54:39	3.2045	173.825	2
2022-09-12	12:54:40	3.21498	177.04	2
2022-09-12	12:54:41	3.22545	180.265	2
2022-09-12	12:54:42	3.22489	183.49	2
2022-09-12	12:54:43	3.22661	186.717	2
2022-09-12	12:54:44	3.22698	189.944	2
2022-09-12	12:54:45	3.21053	193.154	2
2022-09-12	12:54:46	3.23124	196.386	2
2022-09-12	12:54:47	3.23438	199.62	2
2022-09-12	12:54:48	3.21159	202.832	2
2022-09-12	12:54:49	3.23168	206.063	2
2022-09-12	12:54:50	3.2233	209.286	2
2022-09-12	12:54:51	3.2177	212.504	2
2022-09-12	12:54:52	3.23338	215.738	2
2022-09-12	12:54:53	3.23021	218.968	2
2022-09-12	12:54:54	3.23275	222.201	2
2022-09-12	12:54:55	3.22789	225.428	2
2022-09-12	12:54:56	3.24402	228.672	2
2022-09-12	12:54:57	3.23751	231.91	2
2022-09-12	12:54:58	3.22087	235.131	2
2022-09-12	12:54:59	3.2343	238.365	2
2022-09-12	12:55:00	3.20735	241.572	2
2022-09-12	12:55:01	3.21866	244.791	2
2022-09-12	12:55:02	3.22993	248.021	2
2022-09-12	12:55:03	3.2248	251.246	2
2022-09-12	12:55:04	3.23321	254.479	2
2022-09-12	12:55:05	3.22874	257.708	2
2022-09-12	12:55:06	3.22625	260.934	2
2022-09-12	12:55:07	3.22547	264.16	2
2022-09-12	12:55:08	3.23162	267.391	2
2022-09-12	12:55:09	3.27186	270.663	2
2022-09-12	12:55:10	7.31491	277.978	2
2022-09-12	12:55:11	1.96383	279.942	2
2022-09-12	12:55:12	2.55262	282.494	2
2022-09-12	12:55:13	2.67073	285.165	2
2022-09-12	12:55:14	2.80678	287.972	2
2022-09-12	12:55:15	2.57405	290.546	2
2022-09-12	12:55:16	3.22149	293.767	2
2022-09-12	12:55:17	2.63083	296.398	2
2022-09-12	12:55:18	1.83163	298.23	2
2022-09-12	12:55:19	1.24827	299.478	2
2022-09-12	12:55:20	-0.239387	299.478	2
2022-09-12	12:55:21	-0.671079	299.478	2
2022-09-12	12:55:22	-0.19134	299.478	2
2022-09-12	12:55:23	0.483436	299.962	2
2022-09-12	12:55:24	1.16225	301.124	2
2022-09-12	12:55:25	2.10741	303.231	2
2022-09-12	12:55:26	1.39179	304.623	2
2022-09-12	12:55:27	1.05185	305.675	2
2022-09-12	12:55:28	0.241313	305.916	2
2022-09-12	12:55:29	-0.295753	305.916	2
2022-09-12	12:55:30	-0.182794	305.916	2
2022-09-12	12:55:31	0.0395971	305.956	2
2022-09-12	12:55:32	0.181551	306.137	2
2022-09-12	12:55:33	0.348952	306.486	2
2022-09-12	12:55:34	0.57889	307.065	2
2022-09-12	12:55:35	0.591038	307.656	2
2022-09-12	12:55:36	0.694622	308.351	2
2022-09-12	12:55:37	0.505658	308.857	2
2022-09-12	12:55:38	0.610524	309.467	2
2022-09-12	12:55:39	0.989981	310.457	2
2022-09-12	12:55:40	1.09683	311.554	2
2022-09-12	12:55:41	0.996373	312.55	2
2022-09-12	12:55:42	1.29592	313.846	2
2022-09-12	12:55:43	1.57666	315.423	2
2022-09-12	12:55:44	1.76394	317.187	2
2022-09-12	12:55:45	1.94962	319.136	2
2022-09-12	12:55:46	2.0683	321.205	2
2022-09-12	12:55:47	2.11271	323.317	2
2022-09-12	12:55:48	2.06785	325.385	2
2022-09-12	12:55:49	2.09348	327.479	2
2022-09-12	12:55:50	3.80196	331.281	2
2022-09-12	12:55:51	2.08109	333.362	2
2022-09-12	12:55:52	1.12954	334.491	2
2022-09-12	12:55:53	1.22099	335.712	2
2022-09-12	12:55:54	-0.553364	335.712	2
2022-09-12	12:55:55	-0.303053	335.712	2
2022-09-12	12:55:56	1.02999	336.742	2
2022-09-12	12:55:57	1.53933	338.282	2
2022-09-12	12:55:58	1.75744	340.039	2
2022-09-12	12:55:59	1.58428	341.623	2
2022-09-12	12:56:00	1.59484	343.218	2
2022-09-12	12:56:01	1.82874	345.047	2
2022-09-12	12:56:02	1.48302	346.53	2
2022-09-12	12:56:03	2.71599	349.246	2
2022-09-12	12:56:04	1.28279	350.529	2
2022-09-12	12:56:05	0.86638	351.395	2
2022-09-12	12:56:06	1.48432	352.879	2
2022-09-12	12:56:07	1.48362	354.363	2
2022-09-12	12:56:08	1.24284	355.606	2
2022-09-12	12:56:09	1.13927	356.745	2
2022-09-12	12:56:10	0.267459	357.013	2
2022-09-12	12:56:11	0.63088	357.643	2
2022-09-12	12:56:12	0.256253	357.9	2
2022-09-12	12:56:13	0.287662	358.187	2
2022-09-12	12:56:14	-0.0664955	358.187	2
2022-09-12	12:56:15	-1.44683	358.187	2
2022-09-12	12:56:16	0.0826266	358.27	2
2022-09-12	12:56:17	0.974134	359.244	2
2022-09-12	12:56:18	1.10837	360.352	2
2022-09-12	12:56:19	1.20918	361.562	2
2022-09-12	12:56:20	1.43327	362.995	2
2022-09-12	12:56:21	2.57974	365.575	2
2022-09-12	12:56:22	3.46139	369.036	2
2022-09-12	12:56:23	5.12179	374.158	2
2022-09-12	12:56:24	4.3212	378.479	2
2022-09-12	12:56:25	1.80441	380.283	2
2022-09-12	12:56:26	0.755515	381.039	2
2022-09-12	12:56:27	0.565156	381.604	2
2022-09-12	12:56:28	1.40362	383.008	2
2022-09-12	12:56:29	1.2863	384.294	2
2022-09-12	12:56:30	1.4069	385.701	2
2022-09-12	12:56:31	1.19983	386.901	2
2022-09-12	12:56:32	0.98551	387.886	2
2022-09-12	12:56:33	0.470456	388.357	2
2022-09-12	12:56:34	0.724785	389.082	2
2022-09-12	12:56:35	1.04936	390.131	2
2022-09-12	12:56:36	1.22863	391.36	2
2022-09-12	12:56:37	1.50458	392.864	2
2022-09-12	12:56:38	1.66689	394.531	2
2022-09-12	12:56:39	1.53478	396.066	2
2022-09-12	12:56:40	1.66796	397.734	2
2022-09-12	12:56:41	1.52173	399.255	2
2022-09-12	12:56:42	1.63627	400.892	2
2022-09-12	12:56:43	1.53229	402.424	2
2022-09-12	12:56:44	1.96456	404.389	2
2022-09-12	12:56:45	2.5795	406.968	2
2022-09-12	12:56:46	3.83134	410.799	2
2022-09-12	12:56:47	3.32651	414.126	2
2022-09-12	12:56:48	2.81595	416.942	2
2022-09-12	12:56:49	0.576231	417.518	2
2022-09-12	12:56:50	0.145218	417.663	2
2022-09-12	12:56:51	0.928935	418.592	2
2022-09-12	12:56:52	1.30152	419.894	2
2022-09-12	12:56:53	2.11165	422.005	2
2022-09-12	12:56:54	1.93372	423.939	2
2022-09-12	12:56:55	2.34753	426.287	2
2022-09-12	12:56:56	2.77226	429.059	2
2022-09-12	12:56:57	2.12195	431.181	2
2022-09-12	12:56:58	1.55206	432.733	2
2022-09-12	12:56:59	0.917692	433.651	2
2022-09-12	12:57:00	1.29903	434.95	2
2022-09-12	12:57:01	1.59767	436.547	2
2022-09-12	12:57:02	2.07762	438.625	2
2022-09-12	12:57:03	1.99037	440.615	2
2022-09-12	12:57:04	1.99631	442.612	2
2022-09-12	12:57:05	1.8966	444.508	2
2022-09-12	12:57:06	1.39586	445.904	2
2022-09-12	12:57:07	1.42495	447.329	2
2022-09-12	12:57:08	1.3215	448.651	2
2022-09-12	12:57:09	1.18472	449.835	2
2022-09-12	12:57:10	1.25136	451.087	2
2022-09-12	12:57:11	1.55036	452.637	2
2022-09-12	12:57:12	1.5232	454.16	2
2022-09-12	12:57:13	2.03559	456.196	2
2022-09-12	12:57:14	1.5458	457.742	2
2022-09-12	12:57:15	2.00543	459.747	2
2022-09-12	12:57:16	1.61799	461.365	2
2022-09-12	12:57:17	1.76083	463.126	2
2022-09-12	12:57:18	2.30557	465.431	2
2022-09-12	12:57:19	1.03095	466.462	2
2022-09-12	12:57:20	-0.262986	466.462	2
2022-09-12	12:57:21	0.104924	466.567	2
2022-09-12	12:57:22	0.191719	466.759	2
2022-09-12	12:57:23	0.531747	467.291	2
2022-09-12	12:57:24	2.66785	469.959	2
2022-09-12	12:57:25	3.88047	473.839	2
2022-09-12	12:57:26	4.49836	478.337	2
2022-09-12	12:57:27	4.0104	482.348	2
2022-09-12	12:57:28	2.40446	484.752	2
2022-09-12	12:57:29	1.40362	486.156	2
2022-09-12	12:57:30	1.65438	487.81	2
2022-09-12	12:57:31	4.74662	492.557	2
2022-09-12	12:57:32	1.30033	493.857	2
2022-09-12	12:57:33	1.52042	495.378	2
2022-09-12	12:57:34	1.47245	496.85	2
2022-09-12	12:57:35	-0.467569	496.85	2
2022-09-12	12:57:36	1.65789	498.508	2
2022-09-12	12:57:37	2.76009	501.268	2
2022-09-12	12:57:38	1.79978	503.068	2
2022-09-12	12:57:39	1.79615	504.864	2
2022-09-12	12:57:40	2.24696	507.111	2
2022-09-12	12:57:41	1.72693	508.838	2
2022-09-12	12:57:42	2.24189	511.08	2
2022-09-12	12:57:43	8.64854	519.728	2
2022-09-12	12:57:44	2.06253	521.791	2
2022-09-12	12:57:45	1.63548	523.426	2
2022-09-12	12:57:46	1.65046	525.077	2
2022-09-12	12:57:47	1.79366	526.87	2
2022-09-12	12:57:48	2.32608	529.197	2
2022-09-12	12:57:49	1.97854	531.175	2
2022-09-12	12:57:50	1.9347	533.11	2
2022-09-12	12:57:51	2.14708	535.257	2
2022-09-12	12:57:52	1.60939	536.866	2
2022-09-12	12:57:53	1.52671	538.393	2
2022-09-12	12:57:54	1.2611	539.654	2
2022-09-12	12:57:55	1.75098	541.405	2
2022-09-12	12:57:56	1.46417	542.869	2
2022-09-12	12:57:57	1.31607	544.185	2
2022-09-12	12:57:58	1.7533	545.939	2
2022-09-12	12:57:59	2.74028	548.679	2
2022-09-12	12:58:00	1.75653	550.435	2
2022-09-12	12:58:01	2.10322	552.539	2
2022-09-12	12:58:02	2.07083	554.609	2
2022-09-12	12:58:03	1.70277	556.312	2
2022-09-12	12:58:04	1.89682	558.209	2
2022-09-12	12:58:05	2.55568	560.765	2
2022-09-12	12:58:06	2.08826	562.853	2
2022-09-12	12:58:07	1.78964	564.643	2
2022-09-12	12:58:08	1.92959	566.572	2
2022-09-12	12:58:09	1.92314	568.495	2
2022-09-12	12:58:10	1.95719	570.453	2
2022-09-12	12:58:11	1.96077	572.413	2
2022-09-12	12:58:12	1.90367	574.317	2
2022-09-12	12:58:13	1.89066	576.208	2
2022-09-12	12:58:14	1.88807	578.096	2
2022-09-12	12:58:15	1.86632	579.962	2
2022-09-12	12:58:16	1.79796	581.76	2
2022-09-12	12:58:17	1.77753	583.538	2
2022-09-12	12:58:18	1.76824	585.306	2
2022-09-12	12:58:19	1.79767	587.103	2
2022-09-12	12:58:20	1.8421	588.946	2
2022-09-12	12:58:21	1.85228	590.798	2
2022-09-12	12:58:22	1.84212	592.64	2
2022-09-12	12:58:23	1.75489	594.395	2
2022-09-12	12:58:24	1.76655	596.161	2
2022-09-12	12:58:25	1.81606	597.977	2
2022-09-12	12:58:26	1.86581	599.843	2
2022-09-12	12:58:27	2.90768	602.751	2
2022-09-12	12:58:28	1.90424	604.655	2
2022-09-12	12:58:29	1.85047	606.506	2
2022-09-12	12:58:30	1.65883	608.164	2
2022-09-12	12:58:31	1.70718	609.872	2
2022-09-12	12:58:32	1.60594	611.478	2
2022-09-12	12:58:33	1.7653	613.243	2
2022-09-12	12:58:34	2.3793	615.622	2
2022-09-12	12:58:35	2.52365	618.146	2
2022-09-12	12:58:36	2.80932	620.955	2
2022-09-12	12:58:37	1.65363	622.609	2
2022-09-12	12:58:38	1.17634	623.785	2
2022-09-12	12:58:39	0.617089	624.402	2
2022-09-12	12:58:40	2.00803	626.41	2
2022-09-12	12:58:41	1.99514	628.405	2
2022-09-12	12:58:42	2.00418	630.41	2
2022-09-12	12:58:43	1.97085	632.38	2
2022-09-12	12:58:44	6.04168	638.422	2

## Sheet: Duke_star_2022912125340 (E) (3)
Date	Time	Lbs	Newtons	averaged newtons	Total Force x Time	Total Time Steps Force >13.345		**GoPro Fitting: 1242
2022-09-12	12:53:44	0.406934	1.81012	1.81375	1.81012	FALSE	0			Total Force x Time	1177.67
2022-09-12	12:53:44	0.427952	1.90362	1.81375	1.90362	FALSE	0			Total Time Steps Force >3	9
2022-09-12	12:53:44	0.380165	1.69105	1.81375	3.50117	FALSE	0
2022-09-12	12:53:44	0.415942	1.85019	1.81375	3.75381	FALSE	0
2022-09-12	12:53:45	0.405	1.80152	1.80333	5.30269	FALSE	0
2022-09-12	12:53:45	0.405356	1.8031	1.80333	5.55691	FALSE	0
2022-09-12	12:53:45	0.401336	1.78522	1.80333	7.08792	FALSE	0
2022-09-12	12:53:45	0.409936	1.82348	1.80333	7.38039	FALSE	0
2022-09-12	12:53:46	0.425305	1.89184	1.90956	8.97976	FALSE	0
2022-09-12	12:53:46	0.405102	1.80197	1.90956	9.18237	FALSE	0
2022-09-12	12:53:46	0.479504	2.13293	1.90956	11.1127	FALSE	0
2022-09-12	12:53:46	0.407239	1.81148	1.90956	10.9938	FALSE	0
2022-09-12	12:53:47	0.47874	2.12953	1.99235	13.2422	FALSE	0
2022-09-12	12:53:47	0.44159	1.96428	1.99235	12.9581	FALSE	0
2022-09-12	12:53:47	0.423372	1.88324	1.99235	15.1255	FALSE	0
2022-09-12	12:53:48	0.416705	1.85359	1.88749	14.8117	FALSE	0
2022-09-12	12:53:48	0.429275	1.9095	1.88749	17.035	FALSE	0
2022-09-12	12:53:48	0.455789	2.02744	1.88749	16.8392	FALSE	0
2022-09-12	12:53:48	0.395534	1.75941	1.88749	18.7944	FALSE	0
2022-09-12	12:53:49	0.446934	1.98805	1.69869	18.8272	FALSE	0
2022-09-12	12:53:49	0.395382	1.75874	1.69869	20.5531	FALSE	0
2022-09-12	12:53:49	0.372735	1.658	1.69869	20.4852	FALSE	0
2022-09-12	12:53:49	0.312481	1.38998	1.69869	21.9431	FALSE	0
2022-09-12	12:53:50	0.287138	1.27725	1.37243	21.7625	FALSE	0
2022-09-12	12:53:50	0.368053	1.63717	1.37243	23.5803	FALSE	0
2022-09-12	12:53:50	0.411412	1.83004	1.37243	23.5925	FALSE	0
2022-09-12	12:53:50	0.167545	0.745274	1.37243	24.3255	FALSE	0
2022-09-12	12:53:51	0.371768	1.6537	1.26359	25.2462	FALSE	0
2022-09-12	12:53:51	0.190751	0.848499	1.26359	25.174	FALSE	0
2022-09-12	12:53:51	0.289682	1.28856	1.26359	26.5348	FALSE	0
2022-09-12	12:53:52	0.137468	0.611485	1.29626	25.7855	FALSE	0
2022-09-12	12:53:52	0.285814	1.27136	1.29626	27.8061	FALSE	0
2022-09-12	12:53:52	0.370344	1.64736	1.29626	27.4329	FALSE	0
2022-09-12	12:53:52	0.372023	1.65483	1.29626	29.4609	FALSE	0
2022-09-12	12:53:53	0.790751	3.51742	5.31146	30.9503	FALSE	0
2022-09-12	12:53:53	1.57818	7.02006	5.31146	36.481	FALSE	0
2022-09-12	12:53:53	1.64917	7.33584	5.31146	38.2861	FALSE	0
2022-09-12	12:53:53	0.758181	3.37254	5.31146	39.8536	FALSE	0
2022-09-12	12:53:54	0.717824	3.19302	1.83514	41.4792	FALSE	0
2022-09-12	12:53:54	0.337519	1.50135	1.83514	41.3549	FALSE	0
2022-09-12	12:53:54	0.312074	1.38817	1.83514	42.8673	FALSE	0
2022-09-12	12:53:54	0.282812	1.258	1.83514	42.6129	FALSE	0
2022-09-12	12:53:55	0.349071	1.55274	1.5676	44.4201	FALSE	0
2022-09-12	12:53:55	0.172176	0.765873	1.5676	43.3788	FALSE	0
2022-09-12	12:53:55	0.535992	2.3842	1.5676	46.8043	FALSE	0
2022-09-12	12:53:56	0.0377738	0.168025	1.01799	43.5468	FALSE	0
2022-09-12	12:53:56	0.381794	1.6983	1.01799	48.5026	FALSE	0
2022-09-12	12:53:56	0.186018	0.827445	1.01799	44.3743	FALSE	0
2022-09-12	12:53:56	0.309835	1.37821	1.01799	49.8808	FALSE	0
2022-09-12	12:53:57	0.181234	0.806165	1.08517	45.1804	FALSE	0
2022-09-12	12:53:57	0.390293	1.7361	1.08517	51.6169	FALSE	0
2022-09-12	12:53:57	0.176909	0.786927	1.08517	45.9673	FALSE	0
2022-09-12	12:53:57	0.227392	1.01149	1.08517	52.6284	FALSE	0
2022-09-12	12:53:58	0.223626	0.994733	1.12784	46.9621	FALSE	0
2022-09-12	12:53:58	0.265356	1.18036	1.12784	53.8087	FALSE	0
2022-09-12	12:53:58	0.283728	1.26208	1.12784	48.2242	FALSE	0
2022-09-12	12:53:58	0.241489	1.07419	1.12784	54.8829	FALSE	0
2022-09-12	12:53:59	0.281896	1.25393	1.43699	49.4781	FALSE	0
2022-09-12	12:53:59	0.311412	1.38522	1.43699	56.2681	FALSE	0
2022-09-12	12:53:59	0.37584	1.67181	1.43699	51.1499	FALSE	0
2022-09-12	12:54:00	0.372583	1.65732	2.00067	57.9255	FALSE	0
2022-09-12	12:54:00	0.436959	1.94368	2.00067	53.0936	FALSE	0
2022-09-12	12:54:00	0.528664	2.3516	2.00067	60.2771	FALSE	0
2022-09-12	12:54:00	0.460878	2.05008	2.00067	55.1437	FALSE	0
2022-09-12	12:54:01	0.770242	3.42619	2.47356	63.7033	FALSE	0
2022-09-12	12:54:01	0.481336	2.14108	2.47356	57.2847	FALSE	0
2022-09-12	12:54:01	0.563473	2.50644	2.47356	66.2097	FALSE	0
2022-09-12	12:54:01	0.409275	1.82054	2.47356	59.1053	FALSE	0
2022-09-12	12:54:02	0.360165	1.60209	1.49875	67.8118	FALSE	0
2022-09-12	12:54:02	0.235433	1.04725	1.49875	60.1525	FALSE	0
2022-09-12	12:54:02	0.39187	1.74312	1.49875	69.5549	FALSE	0
2022-09-12	12:54:02	0.360267	1.60254	1.49875	61.7551	FALSE	0
2022-09-12	12:54:03	0.581896	2.58839	2.52832	72.1433	FALSE	0
2022-09-12	12:54:03	0.736043	3.27407	2.52832	65.0291	FALSE	0
2022-09-12	12:54:03	0.387239	1.72252	2.52832	73.8658	FALSE	0
2022-09-12	12:54:04	0.234517	1.04318	-0.576453	66.0723	FALSE	0
2022-09-12	12:54:04	-0.0851778	-0.378888	-0.576453	73.8658	FALSE	0
2022-09-12	12:54:04	-0.384363	-1.70972	-0.576453	66.0723	FALSE	0
2022-09-12	12:54:04	-0.283346	-1.26038	-0.576453	73.8658	FALSE	0
2022-09-12	12:54:05	0.004186	0.0186202	0.989244	66.0909	FALSE	0
2022-09-12	12:54:05	0.293194	1.30419	0.989244	75.17	FALSE	0
2022-09-12	12:54:05	0.327392	1.45631	0.989244	67.5472	FALSE	0
2022-09-12	12:54:05	0.264796	1.17787	0.989244	76.3479	FALSE	0
2022-09-12	12:54:06	0.320471	1.42552	3.34894	68.9728	FALSE	0
2022-09-12	12:54:06	0.323779	1.44023	3.34894	77.7881	FALSE	0
2022-09-12	12:54:06	0.65528	2.91482	3.34894	71.8876	FALSE	0
2022-09-12	12:54:06	1.71197	7.61518	3.34894	85.4033	FALSE	0
2022-09-12	12:54:07	3.43742	15.2903	16.6325	87.1779	1	1
2022-09-12	12:54:07	2.99131	13.3059	16.6325	98.7092	FALSE	1
2022-09-12	12:54:07	4.78871	21.3011	16.6325	108.479	1	2
2022-09-12	12:54:08	4.43828	19.7424	19.5201	118.452	1	3
2022-09-12	12:54:08	5.84296	25.9907	19.5201	134.47	1	4
2022-09-12	12:54:08	4.6535	20.6997	19.5201	139.151	1	5
2022-09-12	12:54:08	2.61848	11.6475	19.5201	146.117	FALSE	5
2022-09-12	12:54:09	3.29579	14.6603	11.9963	153.812	1	6
2022-09-12	12:54:09	3.20322	14.2486	11.9963	160.366	1	7
2022-09-12	12:54:09	2.95284	13.1348	11.9963	166.946	FALSE	7
2022-09-12	12:54:09	1.33569	5.94142	11.9963	166.307	FALSE	7
2022-09-12	12:54:10	0.637519	2.83581	2.91374	169.782	FALSE	7
2022-09-12	12:54:10	0.527544	2.34662	2.91374	168.654	FALSE	7
2022-09-12	12:54:10	0.725254	3.22607	2.91374	173.008	FALSE	7
2022-09-12	12:54:10	0.729835	3.24645	2.91374	171.9	FALSE	7
2022-09-12	12:54:11	0.649886	2.89082	1.90852	175.899	FALSE	7
2022-09-12	12:54:11	0.254059	1.13011	1.90852	173.03	FALSE	7
2022-09-12	12:54:11	0.383219	1.70463	1.90852	177.604	FALSE	7
2022-09-12	12:54:12	0.498893	2.21918	2.31346	175.25	FALSE	7
2022-09-12	12:54:12	0.434415	1.93236	2.31346	179.536	FALSE	7
2022-09-12	12:54:12	0.418537	1.86174	2.31346	177.111	FALSE	7
2022-09-12	12:54:12	0.728512	3.24057	2.31346	182.777	FALSE	7
2022-09-12	12:54:13	0.739453	3.28923	5.28453	180.401	FALSE	7
2022-09-12	12:54:13	1.20032	5.33926	5.28453	188.116	FALSE	7
2022-09-12	12:54:13	2.01396	8.9585	5.28453	189.359	FALSE	7
2022-09-12	12:54:13	0.798333	3.55114	5.28453	191.667	FALSE	7
2022-09-12	12:54:14	1.51762	6.75068	3.89398	196.11	FALSE	7
2022-09-12	12:54:14	0.937417	4.16982	3.89398	195.837	FALSE	7
2022-09-12	12:54:14	0.570089	2.53587	3.89398	198.646	FALSE	7
2022-09-12	12:54:14	0.476501	2.11957	3.89398	197.957	FALSE	7
2022-09-12	12:54:15	0.863321	3.84022	2.68467	202.486	FALSE	7
2022-09-12	12:54:15	0.306272	1.36236	2.68467	199.319	FALSE	7
2022-09-12	12:54:15	0.64103	2.85143	2.68467	205.337	FALSE	7
2022-09-12	12:54:16	0.67645	3.00898	4.01685	202.328	FALSE	7
2022-09-12	12:54:16	1.22037	5.42845	4.01685	210.766	FALSE	7
2022-09-12	12:54:16	1.14785	5.10587	4.01685	207.434	FALSE	7
2022-09-12	12:54:16	0.567443	2.5241	4.01685	213.29	FALSE	7
2022-09-12	12:54:17	0.531819	2.36564	2.93287	209.799	FALSE	7
2022-09-12	12:54:17	0.878232	3.90655	2.93287	217.196	FALSE	7
2022-09-12	12:54:17	0.500471	2.2262	2.93287	212.026	FALSE	7
2022-09-12	12:54:17	0.726832	3.23309	2.93287	220.429	FALSE	7
2022-09-12	12:54:18	0.500063	2.22438	2.99552	214.25	FALSE	7
2022-09-12	12:54:18	0.690344	3.07079	2.99552	223.5	FALSE	7
2022-09-12	12:54:18	0.919199	4.08878	2.99552	218.339	FALSE	7
2022-09-12	12:54:18	0.584084	2.59812	2.99552	226.098	FALSE	7
2022-09-12	12:54:19	0.380827	1.69399	1.7613	220.033	FALSE	7
2022-09-12	12:54:19	0.475076	2.11323	1.7613	228.212	FALSE	7
2022-09-12	12:54:19	0.331972	1.47668	1.7613	221.509	FALSE	7
2022-09-12	12:54:20	0.494059	2.19767	2.14504	230.409	FALSE	7
2022-09-12	12:54:20	0.554415	2.46615	2.14504	223.976	FALSE	7
2022-09-12	12:54:20	0.54556	2.42676	2.14504	232.836	FALSE	7
2022-09-12	12:54:20	0.334873	1.48958	2.14504	225.465	FALSE	7
2022-09-12	12:54:21	0.390954	1.73904	1.58103	234.575	FALSE	7
2022-09-12	12:54:21	0.209987	0.934064	1.58103	226.399	FALSE	7
2022-09-12	12:54:21	0.538893	2.3971	1.58103	236.972	FALSE	7
2022-09-12	12:54:21	0.281896	1.25393	1.58103	227.653	FALSE	7
2022-09-12	12:54:22	0.725	3.22494	4.71306	240.197	FALSE	7
2022-09-12	12:54:22	0.847341	3.76914	4.71306	231.422	FALSE	7
2022-09-12	12:54:22	1.65564	7.36462	4.71306	247.562	FALSE	7
2022-09-12	12:54:22	1.01019	4.49353	4.71306	235.916	FALSE	7
2022-09-12	12:54:23	1.01045	4.49468	4.19322	252.056	FALSE	7
2022-09-12	12:54:23	0.864898	3.84724	4.19322	239.763	FALSE	7
2022-09-12	12:54:23	0.952684	4.23773	4.19322	256.294	FALSE	7
2022-09-12	12:54:24	1.0506	4.67328	3.04294	244.436	FALSE	7
2022-09-12	12:54:24	0.488919	2.17481	3.04294	258.469	FALSE	7
2022-09-12	12:54:24	0.584033	2.5979	3.04294	247.034	FALSE	7
2022-09-12	12:54:24	0.612786	2.72579	3.04294	261.195	FALSE	7
2022-09-12	12:54:25	0.358384	1.59416	1.67085	248.628	FALSE	7
2022-09-12	12:54:25	0.381947	1.69898	1.67085	262.894	FALSE	7
2022-09-12	12:54:25	0.410038	1.82393	1.67085	250.452	FALSE	7
2022-09-12	12:54:25	0.352125	1.56632	1.67085	264.46	FALSE	7
2022-09-12	12:54:26	0.426018	1.89501	1.65393	252.347	FALSE	7
2022-09-12	12:54:26	0.343168	1.52648	1.65393	265.986	FALSE	7
2022-09-12	12:54:26	0.398435	1.77232	1.65393	254.12	FALSE	7
2022-09-12	12:54:26	0.319657	1.4219	1.65393	267.408	FALSE	7
2022-09-12	12:54:27	0.366832	1.63174	1.78077	255.751	FALSE	7
2022-09-12	12:54:27	0.317519	1.41239	1.78077	268.821	FALSE	7
2022-09-12	12:54:27	0.516654	2.29818	1.78077	258.05	FALSE	7
2022-09-12	12:54:28	0.300929	1.33859	1.63469	270.159	FALSE	7
2022-09-12	12:54:28	0.4193	1.86513	1.63469	259.915	FALSE	7
2022-09-12	12:54:28	0.321489	1.43005	1.63469	271.589	FALSE	7
2022-09-12	12:54:28	0.428257	1.90497	1.63469	261.82	FALSE	7
2022-09-12	12:54:29	0.285662	1.27068	1.6704	272.86	FALSE	7
2022-09-12	12:54:29	0.422303	1.87849	1.6704	263.698	FALSE	7
2022-09-12	12:54:29	0.345763	1.53802	1.6704	274.398	FALSE	7
2022-09-12	12:54:29	0.448359	1.99439	1.6704	265.693	FALSE	7
2022-09-12	12:54:30	0.366934	1.6322	1.94453	276.03	FALSE	7
2022-09-12	12:54:30	0.414822	1.84521	1.94453	267.538	FALSE	7
2022-09-12	12:54:30	0.454517	2.02178	1.94453	278.052	FALSE	7
2022-09-12	12:54:30	0.512328	2.27894	1.94453	269.817	FALSE	7
2022-09-12	12:54:31	0.674873	3.00197	2.54862	281.054	FALSE	7
2022-09-12	12:54:31	0.577621	2.56937	2.54862	272.386	FALSE	7
2022-09-12	12:54:31	0.466374	2.07452	2.54862	283.129	FALSE	7
2022-09-12	12:54:32	0.52271	2.32512	3.10723	274.711	FALSE	7
2022-09-12	12:54:32	0.605153	2.69184	3.10723	285.82	FALSE	7
2022-09-12	12:54:32	0.54785	2.43695	3.10723	277.148	FALSE	7
2022-09-12	12:54:32	1.11843	4.975	3.10723	290.795	FALSE	7
2022-09-12	12:54:33	0.920878	4.09625	3.6735	281.244	FALSE	7
2022-09-12	12:54:33	1.14729	5.10338	3.6735	295.899	FALSE	7
2022-09-12	12:54:33	0.585356	2.60378	3.6735	283.848	FALSE	7
2022-09-12	12:54:33	0.649835	2.8906	3.6735	298.789	FALSE	7
2022-09-12	12:54:34	0.39299	1.7481	2.62065	285.596	FALSE	7
2022-09-12	12:54:34	0.509275	2.26536	2.62065	301.055	FALSE	7
2022-09-12	12:54:34	0.731158	3.25234	2.62065	288.849	FALSE	7
2022-09-12	12:54:34	0.723168	3.2168	2.62065	304.272	FALSE	7
2022-09-12	12:54:35	0.726985	3.23377	2.94636	292.082	FALSE	7
2022-09-12	12:54:35	0.531311	2.36338	2.94636	306.635	FALSE	7
2022-09-12	12:54:35	0.728817	3.24192	2.94636	295.324	FALSE	7
2022-09-12	12:54:36	0.653549	2.90712	3.14622	309.542	FALSE	7
2022-09-12	12:54:36	0.725865	3.22879	3.14622	298.553	FALSE	7
2022-09-12	12:54:36	0.726018	3.22947	3.14622	312.772	FALSE	7
2022-09-12	12:54:36	0.723779	3.21951	3.14622	301.773	FALSE	7
2022-09-12	12:54:37	0.724237	3.22155	3.21318	315.993	FALSE	7
2022-09-12	12:54:37	0.718384	3.19552	3.21318	304.968	FALSE	7
2022-09-12	12:54:37	0.72383	3.21974	3.21318	319.213	FALSE	7
2022-09-12	12:54:37	0.722965	3.21589	3.21318	308.184	FALSE	7
2022-09-12	12:54:38	0.72673	3.23264	3.22076	322.445	FALSE	7
2022-09-12	12:54:38	0.730852	3.25098	3.22076	311.435	FALSE	7
2022-09-12	12:54:38	0.718333	3.19529	3.22076	325.641	FALSE	7
2022-09-12	12:54:38	0.720318	3.20412	3.22076	314.639	FALSE	7
2022-09-12	12:54:39	0.711565	3.16518	3.2045	328.806	FALSE	7
2022-09-12	12:54:39	0.723066	3.21634	3.2045	317.855	FALSE	7
2022-09-12	12:54:39	0.726578	3.23196	3.2045	332.038	FALSE	7
2022-09-12	12:54:40	0.723117	3.21657	3.21498	321.072	FALSE	7
2022-09-12	12:54:40	0.719249	3.19936	3.21498	335.237	FALSE	7
2022-09-12	12:54:40	0.721946	3.21136	3.21498	324.283	FALSE	7
2022-09-12	12:54:40	0.72673	3.23264	3.21498	338.47	FALSE	7
2022-09-12	12:54:41	0.722099	3.21204	3.22545	327.495	FALSE	7
2022-09-12	12:54:41	0.726374	3.23106	3.22545	341.701	FALSE	7
2022-09-12	12:54:41	0.72612	3.22993	3.22545	330.725	FALSE	7
2022-09-12	12:54:41	0.725865	3.22879	3.22545	344.93	FALSE	7
2022-09-12	12:54:42	0.727596	3.23649	3.22489	333.962	FALSE	7
2022-09-12	12:54:42	0.723931	3.22019	3.22489	348.15	FALSE	7
2022-09-12	12:54:42	0.726985	3.23377	3.22489	337.196	FALSE	7
2022-09-12	12:54:42	0.721437	3.2091	3.22489	351.359	FALSE	7
2022-09-12	12:54:43	0.722812	3.21521	3.22661	340.411	FALSE	7
2022-09-12	12:54:43	0.729631	3.24554	3.22661	354.605	FALSE	7
2022-09-12	12:54:43	0.723677	3.21906	3.22661	343.63	FALSE	7
2022-09-12	12:54:44	0.721539	3.20955	3.22698	357.814	FALSE	7
2022-09-12	12:54:44	0.724491	3.22268	3.22698	346.853	FALSE	7
2022-09-12	12:54:44	0.727494	3.23604	3.22698	361.05	FALSE	7
2022-09-12	12:54:44	0.728308	3.23966	3.22698	350.092	FALSE	7
2022-09-12	12:54:45	0.720114	3.20321	3.21053	364.253	FALSE	7
2022-09-12	12:54:45	0.726527	3.23174	3.21053	353.324	FALSE	7
2022-09-12	12:54:45	0.718639	3.19665	3.21053	367.45	FALSE	7
2022-09-12	12:54:46	0.724949	3.22472	3.23124	356.549	FALSE	7
2022-09-12	12:54:46	0.730394	3.24894	3.23124	370.699	FALSE	7
2022-09-12	12:54:46	0.723575	3.21861	3.23124	359.767	FALSE	7
2022-09-12	12:54:46	0.723321	3.21748	3.23124	373.916	FALSE	7
2022-09-12	12:54:46	0.729835	3.24645	3.23124	363.014	FALSE	7
2022-09-12	12:54:47	0.725407	3.22676	3.23438	377.143	FALSE	7
2022-09-12	12:54:47	0.727596	3.23649	3.23438	366.25	FALSE	7
2022-09-12	12:54:47	0.728359	3.23989	3.23438	380.383	FALSE	7
2022-09-12	12:54:48	0.718537	3.1962	3.21159	369.446	FALSE	7
2022-09-12	12:54:48	0.723473	3.21815	3.21159	383.601	FALSE	7
2022-09-12	12:54:48	0.723219	3.21702	3.21159	372.663	FALSE	7
2022-09-12	12:54:48	0.722761	3.21499	3.21159	386.816	FALSE	7
2022-09-12	12:54:49	0.725916	3.22902	3.23168	375.892	FALSE	7
2022-09-12	12:54:49	0.728104	3.23875	3.23168	390.055	FALSE	7
2022-09-12	12:54:49	0.72617	3.23015	3.23168	379.123	FALSE	7
2022-09-12	12:54:49	0.725865	3.22879	3.23168	393.284	FALSE	7
2022-09-12	12:54:50	0.731921	3.25573	3.2233	382.378	FALSE	7
2022-09-12	12:54:50	0.721539	3.20955	3.2233	396.493	FALSE	7
2022-09-12	12:54:50	0.722201	3.21249	3.2233	385.591	FALSE	7
2022-09-12	12:54:50	0.722862	3.21543	3.2233	399.709	FALSE	7
2022-09-12	12:54:51	0.725509	3.22721	3.2177	388.818	FALSE	7
2022-09-12	12:54:51	0.721081	3.20751	3.2177	402.916	FALSE	7
2022-09-12	12:54:51	0.723524	3.21838	3.2177	392.036	FALSE	7
2022-09-12	12:54:52	0.723168	3.2168	3.23338	406.133	FALSE	7
2022-09-12	12:54:52	0.727545	3.23627	3.23338	395.273	FALSE	7
2022-09-12	12:54:52	0.728919	3.24238	3.23338	409.375	FALSE	7
2022-09-12	12:54:52	0.727952	3.23808	3.23338	398.511	FALSE	7
2022-09-12	12:54:53	0.726272	3.2306	3.23021	412.606	FALSE	7
2022-09-12	12:54:53	0.725	3.22494	3.23021	401.736	FALSE	7
2022-09-12	12:54:53	0.726934	3.23355	3.23021	415.84	FALSE	7
2022-09-12	12:54:53	0.726527	3.23174	3.23021	404.967	FALSE	7
2022-09-12	12:54:54	0.728461	3.24034	3.23275	419.08	FALSE	7
2022-09-12	12:54:54	0.723524	3.21838	3.23275	408.186	FALSE	7
2022-09-12	12:54:54	0.724695	3.22359	3.23275	422.304	FALSE	7
2022-09-12	12:54:54	0.730343	3.24871	3.23275	411.435	FALSE	7
2022-09-12	12:54:55	0.72383	3.21974	3.22789	425.523	FALSE	7
2022-09-12	12:54:55	0.721539	3.20955	3.22789	414.644	FALSE	7
2022-09-12	12:54:55	0.731616	3.25437	3.22789	428.778	FALSE	7
2022-09-12	12:54:56	0.730801	3.25075	3.24402	417.895	FALSE	7
2022-09-12	12:54:56	0.728868	3.24215	3.24402	432.02	FALSE	7
2022-09-12	12:54:56	0.73243	3.258	3.24402	421.153	FALSE	7
2022-09-12	12:54:56	0.725051	3.22517	3.24402	435.245	FALSE	7
2022-09-12	12:54:57	0.728003	3.2383	3.23751	424.391	FALSE	7
2022-09-12	12:54:57	0.724186	3.22132	3.23751	438.466	FALSE	7
2022-09-12	12:54:57	0.725356	3.22653	3.23751	427.618	FALSE	7
2022-09-12	12:54:57	0.733753	3.26388	3.23751	441.73	FALSE	7
2022-09-12	12:54:58	0.725305	3.2263	3.22087	430.844	FALSE	7
2022-09-12	12:54:58	0.718995	3.19823	3.22087	444.928	FALSE	7
2022-09-12	12:54:58	0.730089	3.24758	3.22087	434.092	FALSE	7
2022-09-12	12:54:58	0.721946	3.21136	3.22087	448.14	FALSE	7
2022-09-12	12:54:59	0.727087	3.23423	3.2343	437.326	FALSE	7
2022-09-12	12:54:59	0.726781	3.23287	3.2343	451.373	FALSE	7
2022-09-12	12:54:59	0.727443	3.23581	3.2343	440.562	FALSE	7
2022-09-12	12:55:00	0.724135	3.2211	3.20735	454.594	FALSE	7
2022-09-12	12:55:00	0.706578	3.143	3.20735	443.705	FALSE	7
2022-09-12	12:55:00	0.725102	3.2254	3.20735	457.819	FALSE	7
2022-09-12	12:55:00	0.728359	3.23989	3.20735	446.944	FALSE	7
2022-09-12	12:55:01	0.725763	3.22834	3.21866	461.047	FALSE	7
2022-09-12	12:55:01	0.722557	3.21408	3.21866	450.159	FALSE	7
2022-09-12	12:55:01	0.726018	3.22947	3.21866	464.277	FALSE	7
2022-09-12	12:55:01	0.720013	3.20276	3.21866	453.361	FALSE	7
2022-09-12	12:55:02	0.721387	3.20887	3.22993	467.486	FALSE	7
2022-09-12	12:55:02	0.73416	3.26569	3.22993	456.627	FALSE	7
2022-09-12	12:55:02	0.72556	3.22744	3.22993	470.713	FALSE	7
2022-09-12	12:55:02	0.723372	3.2177	3.22993	459.845	FALSE	7
2022-09-12	12:55:03	0.724237	3.22155	3.2248	473.935	FALSE	7
2022-09-12	12:55:03	0.72612	3.22993	3.2248	463.075	FALSE	7
2022-09-12	12:55:03	0.724542	3.22291	3.2248	477.158	FALSE	7
2022-09-12	12:55:04	0.725254	3.22607	3.23321	466.301	FALSE	7
2022-09-12	12:55:04	0.726527	3.23174	3.23321	480.389	FALSE	7
2022-09-12	12:55:04	0.726578	3.23196	3.23321	469.533	FALSE	7
2022-09-12	12:55:04	0.729071	3.24305	3.23321	483.632	FALSE	7
2022-09-12	12:55:05	0.727188	3.23468	3.22874	472.767	FALSE	7
2022-09-12	12:55:05	0.731056	3.25188	3.22874	486.884	FALSE	7
2022-09-12	12:55:05	0.719911	3.20231	3.22874	475.97	FALSE	7
2022-09-12	12:55:05	0.725254	3.22607	3.22874	490.11	FALSE	7
2022-09-12	12:55:06	0.728308	3.23966	3.22625	479.209	FALSE	7
2022-09-12	12:55:06	0.723015	3.21612	3.22625	493.327	FALSE	7
2022-09-12	12:55:06	0.720623	3.20548	3.22625	482.415	FALSE	7
2022-09-12	12:55:06	0.729224	3.24373	3.22625	496.57	FALSE	7
2022-09-12	12:55:07	0.72271	3.21476	3.22547	485.63	FALSE	7
2022-09-12	12:55:07	0.726985	3.23377	3.22547	499.804	FALSE	7
2022-09-12	12:55:07	0.725662	3.22789	3.22547	488.857	FALSE	7
2022-09-12	12:55:08	0.728054	3.23853	3.23162	503.043	FALSE	7
2022-09-12	12:55:08	0.725712	3.22811	3.23162	492.086	FALSE	7
2022-09-12	12:55:08	0.729224	3.24373	3.23162	506.286	FALSE	7
2022-09-12	12:55:08	0.723015	3.21612	3.23162	495.302	FALSE	7
2022-09-12	12:55:09	0.723219	3.21702	3.27186	509.503	FALSE	7
2022-09-12	12:55:09	0.711616	3.16541	3.27186	498.467	FALSE	7
2022-09-12	12:55:09	0.728104	3.23875	3.27186	512.742	FALSE	7
2022-09-12	12:55:09	0.779249	3.46626	3.27186	501.933	FALSE	7
2022-09-12	12:55:10	3.4824	15.4904	7.31491	528.233	1	8
2022-09-12	12:55:10	1.84536	8.20853	7.31491	510.142	FALSE	8
2022-09-12	12:55:10	0.760979	3.38499	7.31491	531.618	FALSE	8
2022-09-12	12:55:10	0.489122	2.17571	7.31491	512.318	FALSE	8
2022-09-12	12:55:11	0.490751	2.18296	1.96383	533.8	FALSE	8
2022-09-12	12:55:11	0.194211	0.863889	1.96383	513.181	FALSE	8
2022-09-12	12:55:11	0.639504	2.84464	1.96383	536.645	FALSE	8
2022-09-12	12:55:12	0.464695	2.06706	2.55262	515.249	FALSE	8
2022-09-12	12:55:12	0.850191	3.78182	2.55262	540.427	FALSE	8
2022-09-12	12:55:12	0.317316	1.41149	2.55262	516.66	FALSE	8
2022-09-12	12:55:12	0.663219	2.95013	2.55262	543.377	FALSE	8
2022-09-12	12:55:13	0.732175	3.25686	2.67073	519.917	FALSE	8
2022-09-12	12:55:13	0.478842	2.12998	2.67073	545.507	FALSE	8
2022-09-12	12:55:13	0.555433	2.47068	2.67073	522.388	FALSE	8
2022-09-12	12:55:13	0.635178	2.8254	2.67073	548.332	FALSE	8
2022-09-12	12:55:14	0.725305	3.2263	2.80678	525.614	FALSE	8
2022-09-12	12:55:14	0.348155	1.54866	2.80678	549.881	FALSE	8
2022-09-12	12:55:14	0.726425	3.23128	2.80678	528.845	FALSE	8
2022-09-12	12:55:14	0.724084	3.22087	2.80678	553.102	FALSE	8
2022-09-12	12:55:15	0.732226	3.25709	2.57405	532.102	FALSE	8
2022-09-12	12:55:15	0.286222	1.27317	2.57405	554.375	FALSE	8
2022-09-12	12:55:15	0.71757	3.19189	2.57405	535.294	FALSE	8
2022-09-12	12:55:16	0.714974	3.18035	3.22149	557.556	FALSE	8
2022-09-12	12:55:16	0.729428	3.24464	3.22149	538.539	FALSE	8
2022-09-12	12:55:16	0.71874	3.1971	3.22149	560.753	FALSE	8
2022-09-12	12:55:16	0.733753	3.26388	3.22149	541.803	FALSE	8
2022-09-12	12:55:17	0.722049	3.21182	2.63083	563.964	FALSE	8
2022-09-12	12:55:17	0.73014	3.24781	2.63083	545.05	FALSE	8
2022-09-12	12:55:17	0.391616	1.74199	2.63083	565.706	FALSE	8
2022-09-12	12:55:17	0.521947	2.32172	2.63083	547.372	FALSE	8
2022-09-12	12:55:18	0.210598	0.936782	1.83163	566.643	FALSE	8
2022-09-12	12:55:18	0.452125	2.01114	1.83163	549.383	FALSE	8
2022-09-12	12:55:18	0.252735	1.12422	1.83163	567.767	FALSE	8
2022-09-12	12:55:18	0.731616	3.25437	1.83163	552.638	FALSE	8
2022-09-12	12:55:19	0.363473	1.6168	1.24827	569.384	FALSE	8
2022-09-12	12:55:19	0.260471	1.15863	1.24827	553.796	FALSE	8
2022-09-12	12:55:19	0.217926	0.969378	1.24827	570.354	FALSE	8
2022-09-12	12:55:20	0.158893	0.706788	-0.239387	554.503	FALSE	8
2022-09-12	12:55:20	-0.0783585	-0.348554	-0.239387	570.354	FALSE	8
2022-09-12	12:55:20	-0.199376	-0.886864	-0.239387	554.503	FALSE	8
2022-09-12	12:55:20	-0.0964246	-0.428916	-0.239387	570.354	FALSE	8
2022-09-12	12:55:21	-0.127621	-0.567684	-0.671079	554.503	FALSE	8
2022-09-12	12:55:21	-0.11785	-0.52422	-0.671079	570.354	FALSE	8
2022-09-12	12:55:21	-0.244364	-1.08698	-0.671079	554.503	FALSE	8
2022-09-12	12:55:21	-0.113626	-0.505431	-0.671079	570.354	FALSE	8
2022-09-12	12:55:22	-0.13785	-0.613184	-0.19134	554.503	FALSE	8
2022-09-12	12:55:22	-0.0402924	-0.179229	-0.19134	570.354	FALSE	8
2022-09-12	12:55:22	-0.0803941	-0.357609	-0.19134	554.503	FALSE	8
2022-09-12	12:55:22	0.0864761	0.384663	-0.19134	570.738	FALSE	8
2022-09-12	12:55:23	0.0560435	0.249293	0.483436	554.752	FALSE	8
2022-09-12	12:55:23	0.188359	0.837859	0.483436	571.576	FALSE	8
2022-09-12	12:55:23	0.0816414	0.363157	0.483436	555.116	FALSE	8
2022-09-12	12:55:24	0.310496	1.38115	1.16225	572.957	FALSE	8
2022-09-12	12:55:24	0.244644	1.08823	1.16225	556.204	FALSE	8
2022-09-12	12:55:24	0.30098	1.33882	1.16225	574.296	FALSE	8
2022-09-12	12:55:24	0.18902	0.840799	1.16225	557.045	FALSE	8
2022-09-12	12:55:25	0.468613	2.08448	2.10741	576.381	FALSE	8
2022-09-12	12:55:25	0.620674	2.76088	2.10741	559.805	FALSE	8
2022-09-12	12:55:25	0.437316	1.94527	2.10741	578.326	FALSE	8
2022-09-12	12:55:25	0.368461	1.63899	2.10741	561.444	FALSE	8
2022-09-12	12:55:26	0.310598	1.3816	1.39179	579.707	FALSE	8
2022-09-12	12:55:26	0.305713	1.35987	1.39179	562.804	FALSE	8
2022-09-12	12:55:26	0.329122	1.464	1.39179	581.171	FALSE	8
2022-09-12	12:55:26	0.30612	1.36168	1.39179	564.166	FALSE	8
2022-09-12	12:55:27	0.210038	0.934291	1.05185	582.106	FALSE	8
2022-09-12	12:55:27	0.281285	1.25121	1.05185	565.417	FALSE	8
2022-09-12	12:55:27	0.218079	0.970059	1.05185	583.076	FALSE	8
2022-09-12	12:55:28	0.291056	1.29468	0.241313	566.712	FALSE	8
2022-09-12	12:55:28	0.0424557	0.188851	0.241313	583.265	FALSE	8
2022-09-12	12:55:28	-0.0588674	-0.261854	0.241313	566.712	FALSE	8
2022-09-12	12:55:28	-0.057646	-0.256421	0.241313	583.265	FALSE	8
2022-09-12	12:55:29	-0.109351	-0.486415	-0.295753	566.712	FALSE	8
2022-09-12	12:55:29	-0.0627351	-0.279058	-0.295753	583.265	FALSE	8
2022-09-12	12:55:29	-0.104465	-0.464681	-0.295753	566.712	FALSE	8
2022-09-12	12:55:29	0.0105982	0.0471429	-0.295753	583.312	FALSE	8
2022-09-12	12:55:30	-0.0211575	-0.0941128	-0.182794	566.712	FALSE	8
2022-09-12	12:55:30	-0.0550506	-0.244876	-0.182794	583.312	FALSE	8
2022-09-12	12:55:30	-0.103397	-0.459931	-0.182794	566.712	FALSE	8
2022-09-12	12:55:30	0.0152293	0.067743	-0.182794	583.38	FALSE	8
2022-09-12	12:55:31	0.0109035	0.0485009	0.0395971	566.76	FALSE	8
2022-09-12	12:55:31	0.0347203	0.154443	0.0395971	583.534	FALSE	8
2022-09-12	12:55:31	-0.0189183	-0.0841524	0.0395971	566.76	FALSE	8
2022-09-12	12:55:32	0.0332445	0.147878	0.181551	583.682	FALSE	8
2022-09-12	12:55:32	0.109937	0.489022	0.181551	567.249	FALSE	8
2022-09-12	12:55:32	-0.0106232	-0.0472541	0.181551	583.682	FALSE	8
2022-09-12	12:55:32	0.0306999	0.136559	0.181551	567.386	FALSE	8
2022-09-12	12:55:33	0.0351783	0.15648	0.348952	583.838	FALSE	8
2022-09-12	12:55:33	0.163219	0.726031	0.348952	568.112	FALSE	8
2022-09-12	12:55:33	0.00912238	0.0405782	0.348952	583.879	FALSE	8
2022-09-12	12:55:33	0.106272	0.472719	0.348952	568.585	FALSE	8
2022-09-12	12:55:34	0.0639824	0.284607	0.57889	584.164	FALSE	8
2022-09-12	12:55:34	0.184033	0.818616	0.57889	569.403	FALSE	8
2022-09-12	12:55:34	0.0361453	0.160782	0.57889	584.324	FALSE	8
2022-09-12	12:55:34	0.2364	1.05155	0.57889	570.455	FALSE	8
2022-09-12	12:55:35	0.0794022	0.353197	0.591038	584.677	FALSE	8
2022-09-12	12:55:35	0.253041	1.12558	0.591038	571.58	FALSE	8
2022-09-12	12:55:35	0.0661707	0.294341	0.591038	584.972	FALSE	8
2022-09-12	12:55:36	0.190496	0.847364	0.694622	572.428	FALSE	8
2022-09-12	12:55:36	0.103423	0.460046	0.694622	585.432	FALSE	8
2022-09-12	12:55:36	0.214975	0.956252	0.694622	573.384	FALSE	8
2022-09-12	12:55:36	0.115738	0.514826	0.694622	585.947	FALSE	8
2022-09-12	12:55:37	0.206832	0.92003	0.505658	574.304	FALSE	8
2022-09-12	12:55:37	0.109224	0.48585	0.505658	586.433	FALSE	8
2022-09-12	12:55:37	0.143423	0.637974	0.505658	574.942	FALSE	8
2022-09-12	12:55:37	-0.00477074	-0.0212212	0.505658	586.433	FALSE	8
2022-09-12	12:55:38	0.154873	0.688906	0.610524	575.631	FALSE	8
2022-09-12	12:55:38	0.0913106	0.406168	0.610524	586.839	FALSE	8
2022-09-12	12:55:38	0.133804	0.595187	0.610524	576.226	FALSE	8
2022-09-12	12:55:38	0.16902	0.751835	0.610524	587.591	FALSE	8
2022-09-12	12:55:39	0.15411	0.685512	0.989981	576.912	FALSE	8
2022-09-12	12:55:39	0.242049	1.07668	0.989981	588.667	FALSE	8
2022-09-12	12:55:39	0.271514	1.20775	0.989981	578.119	FALSE	8
2022-09-12	12:55:40	0.172328	0.766549	1.09683	589.434	FALSE	8
2022-09-12	12:55:40	0.191463	0.851666	1.09683	578.971	FALSE	8
2022-09-12	12:55:40	0.303372	1.34946	1.09683	590.783	FALSE	8
2022-09-12	12:55:40	0.319148	1.41963	1.09683	580.391	FALSE	8
2022-09-12	12:55:41	0.275636	1.22608	0.996373	592.009	FALSE	8
2022-09-12	12:55:41	0.20215	0.899204	0.996373	581.29	FALSE	8
2022-09-12	12:55:41	0.193295	0.859815	0.996373	592.869	FALSE	8
2022-09-12	12:55:41	0.224898	1.00039	0.996373	582.29	FALSE	8
2022-09-12	12:55:42	0.252226	1.12195	1.29592	593.991	FALSE	8
2022-09-12	12:55:42	0.282964	1.25868	1.29592	583.549	FALSE	8
2022-09-12	12:55:42	0.310445	1.38092	1.29592	595.372	FALSE	8
2022-09-12	12:55:42	0.319707	1.42212	1.29592	584.971	FALSE	8
2022-09-12	12:55:43	0.295127	1.31278	1.57666	596.685	FALSE	8
2022-09-12	12:55:43	0.323168	1.43752	1.57666	586.409	FALSE	8
2022-09-12	12:55:43	0.445051	1.97968	1.57666	598.664	FALSE	8
2022-09-12	12:55:44	0.413651	1.84	1.76394	588.249	FALSE	8
2022-09-12	12:55:44	0.348053	1.54821	1.76394	600.213	FALSE	8
2022-09-12	12:55:44	0.348562	1.55047	1.76394	589.799	FALSE	8
2022-09-12	12:55:44	0.475942	2.11709	1.76394	602.33	FALSE	8
2022-09-12	12:55:45	0.377367	1.6786	1.94962	591.478	FALSE	8
2022-09-12	12:55:45	0.469122	2.08675	1.94962	604.417	FALSE	8
2022-09-12	12:55:45	0.454873	2.02337	1.94962	593.501	FALSE	8
2022-09-12	12:55:45	0.451819	2.00978	1.94962	606.426	FALSE	8
2022-09-12	12:55:46	0.461438	2.05257	2.0683	595.554	FALSE	8
2022-09-12	12:55:46	0.464237	2.06502	2.0683	608.491	FALSE	8
2022-09-12	12:55:46	0.466018	2.07294	2.0683	597.627	FALSE	8
2022-09-12	12:55:46	0.468206	2.08267	2.0683	610.574	FALSE	8
2022-09-12	12:55:47	0.478588	2.12886	2.11271	599.755	FALSE	8
2022-09-12	12:55:47	0.474262	2.10961	2.11271	612.684	FALSE	8
2022-09-12	12:55:47	0.472023	2.09965	2.11271	601.855	FALSE	8
2022-09-12	12:55:48	0.472837	2.10327	2.06785	614.787	FALSE	8
2022-09-12	12:55:48	0.465916	2.07249	2.06785	603.928	FALSE	8
2022-09-12	12:55:48	0.466527	2.07521	2.06785	616.862	FALSE	8
2022-09-12	12:55:48	0.454211	2.02042	2.06785	605.948	FALSE	8
2022-09-12	12:55:49	0.466934	2.07702	2.09348	618.939	FALSE	8
2022-09-12	12:55:49	0.468359	2.08335	2.09348	608.031	FALSE	8
2022-09-12	12:55:49	0.470089	2.09105	2.09348	621.03	FALSE	8
2022-09-12	12:55:49	0.477163	2.12252	2.09348	610.154	FALSE	8
2022-09-12	12:55:50	0.496399	2.20808	3.80196	623.238	FALSE	8
2022-09-12	12:55:50	0.600878	2.67283	3.80196	612.827	FALSE	8
2022-09-12	12:55:50	0.97472	4.33575	3.80196	627.574	FALSE	8
2022-09-12	12:55:50	1.34688	5.99119	3.80196	618.818	FALSE	8
2022-09-12	12:55:51	0.959555	4.26829	2.08109	631.842	FALSE	8
2022-09-12	12:55:51	0.203779	0.90645	2.08109	619.724	FALSE	8
2022-09-12	12:55:51	0.240216	1.06853	2.08109	632.911	FALSE	8
2022-09-12	12:55:52	0.130853	0.58206	1.12954	620.306	FALSE	8
2022-09-12	12:55:52	0.240471	1.06966	1.12954	633.98	FALSE	8
2022-09-12	12:55:52	0.286934	1.27634	1.12954	621.583	FALSE	8
2022-09-12	12:55:52	0.357468	1.59009	1.12954	635.571	FALSE	8
2022-09-12	12:55:53	0.422812	1.88075	1.22099	623.464	FALSE	8
2022-09-12	12:55:53	0.377875	1.68086	1.22099	637.251	FALSE	8
2022-09-12	12:55:53	0.184593	0.821107	1.22099	624.285	FALSE	8
2022-09-12	12:55:53	0.112685	0.501245	1.22099	637.753	FALSE	8
2022-09-12	12:55:54	-0.118308	-0.526258	-0.553364	624.285	FALSE	8
2022-09-12	12:55:54	-0.120496	-0.53599	-0.553364	637.753	FALSE	8
2022-09-12	12:55:54	-0.126806	-0.564058	-0.553364	624.285	FALSE	8
2022-09-12	12:55:54	-0.131997	-0.587149	-0.553364	637.753	FALSE	8
2022-09-12	12:55:55	-0.150521	-0.669548	-0.303053	624.285	FALSE	8
2022-09-12	12:55:55	-0.147824	-0.657551	-0.303053	637.753	FALSE	8
2022-09-12	12:55:55	0.093957	0.41794	-0.303053	624.703	FALSE	8
2022-09-12	12:55:56	0.203321	0.904412	1.02999	638.657	FALSE	8
2022-09-12	12:55:56	0.115891	0.515506	1.02999	625.218	FALSE	8
2022-09-12	12:55:56	0.24673	1.0975	1.02999	639.755	FALSE	8
2022-09-12	12:55:56	0.360267	1.60254	1.02999	626.821	FALSE	8
2022-09-12	12:55:57	0.310802	1.38251	1.53933	641.137	FALSE	8
2022-09-12	12:55:57	0.365	1.62359	1.53933	628.444	FALSE	8
2022-09-12	12:55:57	0.377163	1.6777	1.53933	642.815	FALSE	8
2022-09-12	12:55:57	0.33126	1.47351	1.53933	629.918	FALSE	8
2022-09-12	12:55:58	0.38841	1.72773	1.75744	644.543	FALSE	8
2022-09-12	12:55:58	0.38673	1.72025	1.75744	631.638	FALSE	8
2022-09-12	12:55:58	0.332634	1.47962	1.75744	646.022	FALSE	8
2022-09-12	12:55:58	0.472583	2.10214	1.75744	633.74	FALSE	8
2022-09-12	12:55:59	0.255382	1.13599	1.58428	647.158	FALSE	8
2022-09-12	12:55:59	0.499911	2.2237	1.58428	635.964	FALSE	8
2022-09-12	12:55:59	0.313194	1.39315	1.58428	648.551	FALSE	8
2022-09-12	12:56:00	0.433244	1.92716	1.59484	637.891	FALSE	8
2022-09-12	12:56:00	0.290903	1.29399	1.59484	649.845	FALSE	8
2022-09-12	12:56:00	0.312176	1.38862	1.59484	639.28	FALSE	8
2022-09-12	12:56:00	0.397825	1.76961	1.59484	651.615	FALSE	8
2022-09-12	12:56:01	0.326781	1.45359	1.82874	640.733	FALSE	8
2022-09-12	12:56:01	0.527188	2.34504	1.82874	653.96	FALSE	8
2022-09-12	12:56:01	0.257672	1.14618	1.82874	641.879	FALSE	8
2022-09-12	12:56:01	0.532837	2.37017	1.82874	656.33	FALSE	8
2022-09-12	12:56:02	0.25243	1.12286	1.48302	643.002	FALSE	8
2022-09-12	12:56:02	0.403015	1.79269	1.48302	658.123	FALSE	8
2022-09-12	12:56:02	0.304898	1.35625	1.48302	644.358	FALSE	8
2022-09-12	12:56:02	0.373244	1.66026	1.48302	659.783	FALSE	8
2022-09-12	12:56:03	0.64729	2.87928	2.71599	647.238	FALSE	8
2022-09-12	12:56:03	0.72902	3.24283	2.71599	663.026	FALSE	8
2022-09-12	12:56:03	0.455433	2.02586	2.71599	649.264	FALSE	8
2022-09-12	12:56:04	0.189529	0.843063	1.28279	663.869	FALSE	8
2022-09-12	12:56:04	0.392634	1.74651	1.28279	651.01	FALSE	8
2022-09-12	12:56:04	0.22159	0.985677	1.28279	664.855	FALSE	8
2022-09-12	12:56:04	0.349784	1.55591	1.28279	652.566	FALSE	8
2022-09-12	12:56:05	0.169326	0.753196	0.86638	665.608	FALSE	8
2022-09-12	12:56:05	0.195229	0.868418	0.86638	653.434	FALSE	8
2022-09-12	12:56:05	0.158028	0.70294	0.86638	666.311	FALSE	8
2022-09-12	12:56:05	0.256501	1.14097	0.86638	654.575	FALSE	8
2022-09-12	12:56:06	0.241234	1.07306	1.48432	667.384	FALSE	8
2022-09-12	12:56:06	0.344949	1.5344	1.48432	656.11	FALSE	8
2022-09-12	12:56:06	0.281132	1.25053	1.48432	668.634	FALSE	8
2022-09-12	12:56:06	0.467443	2.07928	1.48432	658.189	FALSE	8
2022-09-12	12:56:07	0.434313	1.93191	1.48362	670.566	FALSE	8
2022-09-12	12:56:07	0.329122	1.464	1.48362	659.653	FALSE	8
2022-09-12	12:56:07	0.237163	1.05495	1.48362	671.621	FALSE	8
2022-09-12	12:56:08	0.352481	1.56791	1.24284	661.221	FALSE	8
2022-09-12	12:56:08	0.292277	1.30011	1.24284	672.921	FALSE	8
2022-09-12	12:56:08	0.268257	1.19326	1.24284	662.414	FALSE	8
2022-09-12	12:56:08	0.204593	0.910071	1.24284	673.831	FALSE	8
2022-09-12	12:56:09	0.29528	1.31346	1.13927	663.728	FALSE	8
2022-09-12	12:56:09	0.25299	1.12535	1.13927	674.957	FALSE	8
2022-09-12	12:56:09	0.25416	1.13055	1.13927	664.858	FALSE	8
2022-09-12	12:56:09	0.222049	0.987718	1.13927	675.944	FALSE	8
2022-09-12	12:56:10	0.168257	0.748441	0.267459	665.607	FALSE	8
2022-09-12	12:56:10	-0.0088929	-0.0395574	0.267459	675.944	FALSE	8
2022-09-12	12:56:10	0.0369595	0.164403	0.267459	665.771	FALSE	8
2022-09-12	12:56:10	0.044186	0.196548	0.267459	676.141	FALSE	8
2022-09-12	12:56:11	0.0983844	0.437633	0.63088	666.209	FALSE	8
2022-09-12	12:56:11	0.201845	0.897847	0.63088	677.039	FALSE	8
2022-09-12	12:56:11	0.125255	0.557159	0.63088	666.766	FALSE	8
2022-09-12	12:56:12	0.170649	0.759081	0.256253	677.798	FALSE	8
2022-09-12	12:56:12	0.0150257	0.0668373	0.256253	666.833	FALSE	8
2022-09-12	12:56:12	0.0526338	0.234126	0.256253	678.032	FALSE	8
2022-09-12	12:56:12	-0.00787507	-0.0350299	0.256253	666.833	FALSE	8
2022-09-12	12:56:13	0.0263743	0.117318	0.287662	678.149	FALSE	8
2022-09-12	12:56:13	0.0864252	0.384437	0.287662	667.217	FALSE	8
2022-09-12	12:56:13	-0.00553411	-0.0246168	0.287662	678.149	FALSE	8
2022-09-12	12:56:13	0.151412	0.673511	0.287662	667.891	FALSE	8
2022-09-12	12:56:14	0.171616	0.763382	-0.0664955	678.913	FALSE	8
2022-09-12	12:56:14	0.148613	0.66106	-0.0664955	668.552	FALSE	8
2022-09-12	12:56:14	-0.0997834	-0.443857	-0.0664955	678.913	FALSE	8
2022-09-12	12:56:14	-0.280241	-1.24657	-0.0664955	668.552	FALSE	8
2022-09-12	12:56:15	-0.402328	-1.78964	-1.44683	678.913	FALSE	8
2022-09-12	12:56:15	-0.369656	-1.6443	-1.44683	668.552	FALSE	8
2022-09-12	12:56:15	-0.203804	-0.906561	-1.44683	678.913	FALSE	8
2022-09-12	12:56:16	-0.0335748	-0.149347	0.0826266	668.552	FALSE	8
2022-09-12	12:56:16	0.00591628	0.0263168	0.0826266	678.939	FALSE	8
2022-09-12	12:56:16	0.0300893	0.133843	0.0826266	668.686	FALSE	8
2022-09-12	12:56:16	0.0718704	0.319694	0.0826266	679.259	FALSE	8
2022-09-12	12:56:17	0.104746	0.465931	0.974134	669.152	FALSE	8
2022-09-12	12:56:17	0.225356	1.00243	0.974134	680.261	FALSE	8
2022-09-12	12:56:17	0.316603	1.40831	0.974134	670.56	FALSE	8
2022-09-12	12:56:17	0.229275	1.01986	0.974134	681.281	FALSE	8
2022-09-12	12:56:18	0.307748	1.36892	1.10837	671.929	FALSE	8
2022-09-12	12:56:18	0.165153	0.734634	1.10837	682.016	FALSE	8
2022-09-12	12:56:18	0.281336	1.25144	1.10837	673.18	FALSE	8
2022-09-12	12:56:18	0.242456	1.07849	1.10837	683.094	FALSE	8
2022-09-12	12:56:19	0.284644	1.26615	1.20918	674.446	FALSE	8
2022-09-12	12:56:19	0.294517	1.31007	1.20918	684.404	FALSE	8
2022-09-12	12:56:19	0.236349	1.05133	1.20918	675.498	FALSE	8
2022-09-12	12:56:20	0.337061	1.49931	1.43327	685.904	FALSE	8
2022-09-12	12:56:20	0.278741	1.2399	1.43327	676.738	FALSE	8
2022-09-12	12:56:20	0.403015	1.79269	1.43327	687.696	FALSE	8
2022-09-12	12:56:20	0.270038	1.20118	1.43327	677.939	FALSE	8
2022-09-12	12:56:21	0.268919	1.19621	2.57974	688.892	FALSE	8
2022-09-12	12:56:21	0.367036	1.63265	2.57974	679.571	FALSE	8
2022-09-12	12:56:21	0.534517	2.37764	2.57974	691.27	FALSE	8
2022-09-12	12:56:21	1.14933	5.11245	2.57974	684.684	FALSE	8
2022-09-12	12:56:22	0.781845	3.4778	3.46139	694.748	FALSE	8
2022-09-12	12:56:22	0.559707	2.48969	3.46139	687.174	FALSE	8
2022-09-12	12:56:22	0.923422	4.10757	3.46139	698.855	FALSE	8
2022-09-12	12:56:22	0.847646	3.7705	3.46139	690.944	FALSE	8
2022-09-12	12:56:23	1.23177	5.47916	5.12179	704.335	FALSE	8
2022-09-12	12:56:23	1.15263	5.12713	5.12179	696.071	FALSE	8
2022-09-12	12:56:23	1.06989	4.75908	5.12179	709.094	FALSE	8
2022-09-12	12:56:24	1.14963	5.11378	4.3212	701.185	FALSE	8
2022-09-12	12:56:24	1.22464	5.44744	4.3212	714.541	FALSE	8
2022-09-12	12:56:24	0.770089	3.42551	4.3212	704.61	FALSE	8
2022-09-12	12:56:24	0.741438	3.29806	4.3212	717.839	FALSE	8
2022-09-12	12:56:25	0.420929	1.87238	1.80441	706.483	FALSE	8
2022-09-12	12:56:25	0.542354	2.4125	1.80441	720.252	FALSE	8
2022-09-12	12:56:25	0.311209	1.38432	1.80441	707.867	FALSE	8
2022-09-12	12:56:25	0.348104	1.54844	1.80441	721.8	FALSE	8
2022-09-12	12:56:26	0.280369	1.24714	0.755515	709.114	FALSE	8
2022-09-12	12:56:26	0.27757	1.23469	0.755515	723.035	FALSE	8
2022-09-12	12:56:26	0.126323	0.56191	0.755515	709.676	FALSE	8
2022-09-12	12:56:26	-0.00487254	-0.021674	0.755515	723.035	FALSE	8
2022-09-12	12:56:27	-0.0639056	-0.284265	0.565156	709.676	FALSE	8
2022-09-12	12:56:27	0.149377	0.664459	0.565156	723.699	FALSE	8
2022-09-12	12:56:27	0.295687	1.31527	0.565156	710.991	FALSE	8
2022-09-12	12:56:28	0.310445	1.38092	1.40362	725.08	FALSE	8
2022-09-12	12:56:28	0.277672	1.23514	1.40362	712.227	FALSE	8
2022-09-12	12:56:28	0.333702	1.48437	1.40362	726.565	FALSE	8
2022-09-12	12:56:28	0.340369	1.51403	1.40362	713.741	FALSE	8
2022-09-12	12:56:29	0.254008	1.12988	1.2863	727.694	FALSE	8
2022-09-12	12:56:29	0.277875	1.23604	1.2863	714.977	FALSE	8
2022-09-12	12:56:29	0.281794	1.25348	1.2863	728.948	FALSE	8
2022-09-12	12:56:29	0.343015	1.5258	1.2863	716.502	FALSE	8
2022-09-12	12:56:30	0.285255	1.26887	1.4069	730.217	FALSE	8
2022-09-12	12:56:30	0.343168	1.52648	1.4069	718.029	FALSE	8
2022-09-12	12:56:30	0.33299	1.48121	1.4069	731.698	FALSE	8
2022-09-12	12:56:30	0.303728	1.35104	1.4069	719.38	FALSE	8
2022-09-12	12:56:31	0.228257	1.01533	1.19983	732.713	FALSE	8
2022-09-12	12:56:31	0.283575	1.2614	1.19983	720.641	FALSE	8
2022-09-12	12:56:31	0.297367	1.32275	1.19983	734.036	FALSE	8
2022-09-12	12:56:32	0.244288	1.08664	0.98551	721.728	FALSE	8
2022-09-12	12:56:32	0.216196	0.961683	0.98551	734.998	FALSE	8
2022-09-12	12:56:32	0.235331	1.0468	0.98551	722.775	FALSE	8
2022-09-12	12:56:32	0.190395	0.846915	0.98551	735.845	FALSE	8
2022-09-12	12:56:33	0.159707	0.710409	0.470456	723.485	FALSE	8
2022-09-12	12:56:33	0.0450002	0.20017	0.470456	736.045	FALSE	8
2022-09-12	12:56:33	0.0273921	0.121846	0.470456	723.607	FALSE	8
2022-09-12	12:56:33	0.190954	0.849402	0.470456	736.894	FALSE	8
2022-09-12	12:56:34	0.243117	1.08143	0.724785	724.689	FALSE	8
2022-09-12	12:56:34	0.179249	0.797335	0.724785	737.692	FALSE	8
2022-09-12	12:56:34	0.113855	0.50645	0.724785	725.195	FALSE	8
2022-09-12	12:56:34	0.115535	0.513923	0.724785	738.206	FALSE	8
2022-09-12	12:56:35	0.152685	0.679173	1.04936	725.874	FALSE	8
2022-09-12	12:56:35	0.317824	1.41374	1.04936	739.619	FALSE	8
2022-09-12	12:56:35	0.237214	1.05518	1.04936	726.929	FALSE	8
2022-09-12	12:56:36	0.391361	1.74085	1.22863	741.36	FALSE	8
2022-09-12	12:56:36	0.220267	0.979792	1.22863	727.909	FALSE	8
2022-09-12	12:56:36	0.258639	1.15048	1.22863	742.511	FALSE	8
2022-09-12	12:56:36	0.234568	1.04341	1.22863	728.953	FALSE	8
2022-09-12	12:56:37	0.252277	1.12218	1.50458	743.633	FALSE	8
2022-09-12	12:56:37	0.362608	1.61295	1.50458	730.565	FALSE	8
2022-09-12	12:56:37	0.368868	1.6408	1.50458	745.274	FALSE	8
2022-09-12	12:56:37	0.369224	1.64238	1.50458	732.208	FALSE	8
2022-09-12	12:56:38	0.350344	1.5584	1.66689	746.832	FALSE	8
2022-09-12	12:56:38	0.36444	1.6211	1.66689	733.829	FALSE	8
2022-09-12	12:56:38	0.463066	2.05981	1.66689	748.892	FALSE	8
2022-09-12	12:56:38	0.321082	1.42824	1.66689	735.257	FALSE	8
2022-09-12	12:56:39	0.378232	1.68245	1.53478	750.574	FALSE	8
2022-09-12	12:56:39	0.317366	1.41171	1.53478	736.669	FALSE	8
2022-09-12	12:56:39	0.339504	1.51018	1.53478	752.084	FALSE	8
2022-09-12	12:56:40	0.398893	1.77436	1.66796	738.443	FALSE	8
2022-09-12	12:56:40	0.369173	1.64216	1.66796	753.727	FALSE	8
2022-09-12	12:56:40	0.36668	1.63107	1.66796	740.074	FALSE	8
2022-09-12	12:56:40	0.365153	1.62427	1.66796	755.351	FALSE	8
2022-09-12	12:56:41	0.359249	1.59801	1.52173	741.672	FALSE	8
2022-09-12	12:56:41	0.341438	1.51878	1.52173	756.87	FALSE	8
2022-09-12	12:56:41	0.279504	1.24329	1.52173	742.916	FALSE	8
2022-09-12	12:56:41	0.388206	1.72682	1.52173	758.596	FALSE	8
2022-09-12	12:56:42	0.240216	1.06853	1.63627	743.984	FALSE	8
2022-09-12	12:56:42	0.555076	2.46909	1.63627	761.066	FALSE	8
2022-09-12	12:56:42	0.209835	0.933388	1.63627	744.918	FALSE	8
2022-09-12	12:56:42	0.466272	2.07407	1.63627	763.14	FALSE	8
2022-09-12	12:56:43	0.303015	1.34787	1.53229	746.265	FALSE	8
2022-09-12	12:56:43	0.429936	1.91244	1.53229	765.052	FALSE	8
2022-09-12	12:56:43	0.300471	1.33656	1.53229	747.602	FALSE	8
2022-09-12	12:56:44	0.45701	2.03287	1.96456	767.085	FALSE	8
2022-09-12	12:56:44	0.367646	1.63536	1.96456	749.237	FALSE	8
2022-09-12	12:56:44	0.611107	2.71833	1.96456	769.803	FALSE	8
2022-09-12	12:56:44	0.330852	1.4717	1.96456	750.709	FALSE	8
2022-09-12	12:56:45	0.337977	1.50339	2.5795	771.307	FALSE	8
2022-09-12	12:56:45	0.36668	1.63107	2.5795	752.34	FALSE	8
2022-09-12	12:56:45	0.86159	3.83252	2.5795	775.139	FALSE	8
2022-09-12	12:56:45	0.753346	3.35103	2.5795	755.691	FALSE	8
2022-09-12	12:56:46	1.06887	4.75455	3.83134	779.894	FALSE	8
2022-09-12	12:56:46	0.774211	3.44385	3.83134	759.135	FALSE	8
2022-09-12	12:56:46	0.76668	3.41035	3.83134	783.304	FALSE	8
2022-09-12	12:56:46	0.835535	3.71663	3.83134	762.852	FALSE	8
2022-09-12	12:56:47	0.979046	4.35499	3.32651	787.659	FALSE	8
2022-09-12	12:56:47	0.487748	2.1696	3.32651	765.021	FALSE	8
2022-09-12	12:56:47	0.776705	3.45494	3.32651	791.114	FALSE	8
2022-09-12	12:56:48	0.482507	2.14629	2.81595	767.168	FALSE	8
2022-09-12	12:56:48	1.14225	5.08096	2.81595	796.195	FALSE	8
2022-09-12	12:56:48	0.578232	2.57209	2.81595	769.74	FALSE	8
2022-09-12	12:56:48	0.329224	1.46445	2.81595	797.659	FALSE	8
2022-09-12	12:56:49	0.344797	1.53373	0.576231	771.273	FALSE	8
2022-09-12	12:56:49	0.103881	0.462083	0.576231	798.121	FALSE	8
2022-09-12	12:56:49	0.176349	0.784436	0.576231	772.058	FALSE	8
2022-09-12	12:56:49	-0.106857	-0.475321	0.576231	798.121	FALSE	8
2022-09-12	12:56:50	0.00673053	0.0299387	0.145218	772.088	FALSE	8
2022-09-12	12:56:50	0.0472903	0.210357	0.145218	798.332	FALSE	8
2022-09-12	12:56:50	0.0904455	0.40232	0.145218	772.49	FALSE	8
2022-09-12	12:56:50	-0.0138802	-0.0617419	0.145218	798.332	FALSE	8
2022-09-12	12:56:51	0.160318	0.713127	0.928935	773.203	FALSE	8
2022-09-12	12:56:51	0.21584	0.960099	0.928935	799.292	FALSE	8
2022-09-12	12:56:51	0.250344	1.11358	0.928935	774.317	FALSE	8
2022-09-12	12:56:52	0.33472	1.4889	1.30152	800.781	FALSE	8
2022-09-12	12:56:52	0.194517	0.865251	1.30152	775.182	FALSE	8
2022-09-12	12:56:52	0.400267	1.78047	1.30152	802.561	FALSE	8
2022-09-12	12:56:52	0.240878	1.07147	1.30152	776.253	FALSE	8
2022-09-12	12:56:53	0.519249	2.30972	2.11165	804.871	FALSE	8
2022-09-12	12:56:53	0.460929	2.0503	2.11165	778.304	FALSE	8
2022-09-12	12:56:53	0.483728	2.15172	2.11165	807.023	FALSE	8
2022-09-12	12:56:53	0.434975	1.93486	2.11165	780.239	FALSE	8
2022-09-12	12:56:54	0.447596	1.991	1.93372	809.014	FALSE	8
2022-09-12	12:56:54	0.498435	2.21714	1.93372	782.456	FALSE	8
2022-09-12	12:56:54	0.35813	1.59303	1.93372	810.607	FALSE	8
2022-09-12	12:56:55	0.442048	1.96632	2.34753	784.422	FALSE	8
2022-09-12	12:56:55	0.359249	1.59801	2.34753	812.205	FALSE	8
2022-09-12	12:56:55	0.780369	3.47124	2.34753	787.893	FALSE	8
2022-09-12	12:56:55	0.529325	2.35454	2.34753	814.559	FALSE	8
2022-09-12	12:56:56	0.756552	3.36529	2.77226	791.259	FALSE	8
2022-09-12	12:56:56	0.484746	2.15625	2.77226	816.716	FALSE	8
2022-09-12	12:56:56	0.842557	3.74786	2.77226	795.006	FALSE	8
2022-09-12	12:56:56	0.409071	1.81963	2.77226	818.535	FALSE	8
2022-09-12	12:56:57	0.407392	1.81216	2.12195	796.819	FALSE	8
2022-09-12	12:56:57	0.44958	1.99982	2.12195	820.535	FALSE	8
2022-09-12	12:56:57	0.600572	2.67146	2.12195	799.49	FALSE	8
2022-09-12	12:56:57	0.450598	2.00435	2.12195	822.539	FALSE	8
2022-09-12	12:56:58	0.323626	1.43955	1.55206	800.93	FALSE	8
2022-09-12	12:56:58	0.457774	2.03627	1.55206	824.576	FALSE	8
2022-09-12	12:56:58	0.220623	0.981375	1.55206	801.911	FALSE	8
2022-09-12	12:56:58	0.393651	1.75104	1.55206	826.327	FALSE	8
2022-09-12	12:56:59	0.180115	0.801188	0.917692	802.712	FALSE	8
2022-09-12	12:56:59	0.290903	1.29399	0.917692	827.621	FALSE	8
2022-09-12	12:56:59	0.147901	0.657893	0.917692	803.37	FALSE	8
2022-09-12	12:57:00	0.255484	1.13644	1.29903	828.757	FALSE	8
2022-09-12	12:57:00	0.287596	1.27928	1.29903	804.649	FALSE	8
2022-09-12	12:57:00	0.255229	1.13531	1.29903	829.892	FALSE	8
2022-09-12	12:57:00	0.369835	1.6451	1.29903	806.294	FALSE	8
2022-09-12	12:57:01	0.290293	1.29128	1.59767	831.184	FALSE	8
2022-09-12	12:57:01	0.354618	1.57741	1.59767	807.872	FALSE	8
2022-09-12	12:57:01	0.393295	1.74945	1.59767	832.933	FALSE	8
2022-09-12	12:57:01	0.398486	1.77255	1.59767	809.644	FALSE	8
2022-09-12	12:57:02	0.695433	3.09343	2.07762	836.027	FALSE	8
2022-09-12	12:57:02	0.399148	1.77549	2.07762	811.42	FALSE	8
2022-09-12	12:57:02	0.306629	1.36395	2.07762	837.391	FALSE	8
2022-09-12	12:57:03	0.42729	1.90067	1.99037	813.321	FALSE	8
2022-09-12	12:57:03	0.475992	2.11731	1.99037	839.508	FALSE	8
2022-09-12	12:57:03	0.45701	2.03287	1.99037	815.353	FALSE	8
2022-09-12	12:57:03	0.429529	1.91063	1.99037	841.418	FALSE	8
2022-09-12	12:57:04	0.476094	2.11776	1.99631	817.471	FALSE	8
2022-09-12	12:57:04	0.437977	1.94821	1.99631	843.367	FALSE	8
2022-09-12	12:57:04	0.454618	2.02223	1.99631	819.493	FALSE	8
2022-09-12	12:57:04	0.426476	1.89705	1.99631	845.264	FALSE	8
2022-09-12	12:57:05	0.502455	2.23502	1.8966	821.728	FALSE	8
2022-09-12	12:57:05	0.432227	1.92263	1.8966	847.186	FALSE	8
2022-09-12	12:57:05	0.40612	1.8065	1.8966	823.535	FALSE	8
2022-09-12	12:57:05	0.364695	1.62224	1.8966	848.809	FALSE	8
2022-09-12	12:57:06	0.363117	1.61522	1.39586	825.15	FALSE	8
2022-09-12	12:57:06	0.292277	1.30011	1.39586	850.109	FALSE	8
2022-09-12	12:57:06	0.286018	1.27227	1.39586	826.422	FALSE	8
2022-09-12	12:57:07	0.378893	1.68539	1.42495	851.794	FALSE	8
2022-09-12	12:57:07	0.280471	1.24759	1.42495	827.67	FALSE	8
2022-09-12	12:57:07	0.355789	1.58262	1.42495	853.377	FALSE	8
2022-09-12	12:57:07	0.266221	1.1842	1.42495	828.854	FALSE	8
2022-09-12	12:57:08	0.350445	1.55885	1.3215	854.936	FALSE	8
2022-09-12	12:57:08	0.308766	1.37345	1.3215	830.228	FALSE	8
2022-09-12	12:57:08	0.282863	1.25823	1.3215	856.194	FALSE	8
2022-09-12	12:57:08	0.246272	1.09547	1.3215	831.323	FALSE	8
2022-09-12	12:57:09	0.214924	0.956025	1.18472	857.15	FALSE	8
2022-09-12	12:57:09	0.330496	1.47011	1.18472	832.793	FALSE	8
2022-09-12	12:57:09	0.157774	0.70181	1.18472	857.852	FALSE	8
2022-09-12	12:57:09	0.36215	1.61092	1.18472	834.404	FALSE	8
2022-09-12	12:57:10	0.217061	0.965531	1.25136	858.817	FALSE	8
2022-09-12	12:57:10	0.376501	1.67475	1.25136	836.079	FALSE	8
2022-09-12	12:57:10	0.250394	1.1138	1.25136	859.931	FALSE	8
2022-09-12	12:57:11	0.324949	1.44544	1.55036	837.524	FALSE	8
2022-09-12	12:57:11	0.388104	1.72636	1.55036	861.657	FALSE	8
2022-09-12	12:57:11	0.340522	1.51471	1.55036	839.039	FALSE	8
2022-09-12	12:57:11	0.340573	1.51494	1.55036	863.172	FALSE	8
2022-09-12	12:57:12	0.317977	1.41443	1.5232	840.454	FALSE	8
2022-09-12	12:57:12	0.354211	1.5756	1.5232	864.748	FALSE	8
2022-09-12	12:57:12	0.381082	1.69513	1.5232	842.149	FALSE	8
2022-09-12	12:57:12	0.31645	1.40763	1.5232	866.156	FALSE	8
2022-09-12	12:57:13	0.429733	1.91154	2.03559	844.06	FALSE	8
2022-09-12	12:57:13	0.49757	2.21329	2.03559	868.369	FALSE	8
2022-09-12	12:57:13	0.474313	2.10984	2.03559	846.17	FALSE	8
2022-09-12	12:57:13	0.428868	1.90769	2.03559	870.276	FALSE	8
2022-09-12	12:57:14	0.350751	1.56021	1.5458	847.73	FALSE	8
2022-09-12	12:57:14	0.391972	1.74357	1.5458	872.02	FALSE	8
2022-09-12	12:57:14	0.299809	1.33361	1.5458	849.064	FALSE	8
2022-09-12	12:57:15	0.380522	1.69264	2.00543	873.713	FALSE	8
2022-09-12	12:57:15	0.217214	0.966211	2.00543	850.03	FALSE	8
2022-09-12	12:57:15	0.857213	3.81305	2.00543	877.526	FALSE	8
2022-09-12	12:57:15	0.34841	1.5498	2.00543	851.58	FALSE	8
2022-09-12	12:57:16	0.183015	0.814087	1.61799	878.34	FALSE	8
2022-09-12	12:57:16	0.191972	0.85393	1.61799	852.434	FALSE	8
2022-09-12	12:57:16	0.770394	3.42687	1.61799	881.767	FALSE	8
2022-09-12	12:57:16	0.30958	1.37707	1.61799	853.811	FALSE	8
2022-09-12	12:57:17	0.188359	0.837859	1.76083	882.605	FALSE	8
2022-09-12	12:57:17	0.409631	1.82212	1.76083	855.633	FALSE	8
2022-09-12	12:57:17	0.458842	2.04102	1.76083	884.646	FALSE	8
2022-09-12	12:57:17	0.526578	2.34232	1.76083	857.975	FALSE	8
2022-09-12	12:57:18	0.57187	2.54379	2.30557	887.189	FALSE	8
2022-09-12	12:57:18	0.452634	2.01341	2.30557	859.989	FALSE	8
2022-09-12	12:57:18	0.530445	2.35953	2.30557	889.549	FALSE	8
2022-09-12	12:57:19	0.44897	1.99711	1.03095	861.986	FALSE	8
2022-09-12	12:57:19	0.207087	0.921164	1.03095	890.47	FALSE	8
2022-09-12	12:57:19	0.18902	0.840799	1.03095	862.827	FALSE	8
2022-09-12	12:57:19	0.0819977	0.364742	1.03095	890.835	FALSE	8
2022-09-12	12:57:20	-0.168995	-0.751724	-0.262986	862.827	FALSE	8
2022-09-12	12:57:20	-0.0936765	-0.416692	-0.262986	890.835	FALSE	8
2022-09-12	12:57:20	-0.0389692	-0.173343	-0.262986	862.827	FALSE	8
2022-09-12	12:57:20	0.0651529	0.289813	-0.262986	891.125	FALSE	8
2022-09-12	12:57:21	-0.075814	-0.337236	0.104924	862.827	FALSE	8
2022-09-12	12:57:21	0.0118705	0.0528024	0.104924	891.177	FALSE	8
2022-09-12	12:57:21	0.081845	0.364063	0.104924	863.191	FALSE	8
2022-09-12	12:57:21	0.0764506	0.340068	0.104924	891.517	FALSE	8
2022-09-12	12:57:22	0.0209289	0.0930959	0.191719	863.284	FALSE	8
2022-09-12	12:57:22	0.0509544	0.226655	0.191719	891.744	FALSE	8
2022-09-12	12:57:22	0.0574175	0.255405	0.191719	863.539	FALSE	8
2022-09-12	12:57:23	0.120522	0.536106	0.531747	892.28	FALSE	8
2022-09-12	12:57:23	0.0822521	0.365874	0.531747	863.905	FALSE	8
2022-09-12	12:57:23	0.153753	0.683924	0.531747	892.964	FALSE	8
2022-09-12	12:57:23	0.121641	0.541083	0.531747	864.446	FALSE	8
2022-09-12	12:57:24	0.33701	1.49909	2.66785	894.463	FALSE	8
2022-09-12	12:57:24	0.301183	1.33972	2.66785	865.786	FALSE	8
2022-09-12	12:57:24	0.708664	3.15228	2.66785	897.616	FALSE	8
2022-09-12	12:57:24	1.05218	4.68031	2.66785	870.466	FALSE	8
2022-09-12	12:57:25	1.29106	5.74289	3.88047	903.358	FALSE	8
2022-09-12	12:57:25	1.24134	5.52173	3.88047	875.988	FALSE	8
2022-09-12	12:57:25	0.531107	2.36247	3.88047	905.721	FALSE	8
2022-09-12	12:57:25	0.425967	1.89479	3.88047	877.883	FALSE	8
2022-09-12	12:57:26	0.63986	2.84623	4.49836	908.567	FALSE	8
2022-09-12	12:57:26	0.714008	3.17605	4.49836	881.059	FALSE	8
2022-09-12	12:57:26	1.67996	7.4728	4.49836	916.04	FALSE	8
2022-09-12	12:57:27	0.698231	3.10587	4.0104	884.165	FALSE	8
2022-09-12	12:57:27	0.94388	4.19857	4.0104	920.238	FALSE	8
2022-09-12	12:57:27	0.934771	4.15805	4.0104	888.323	FALSE	8
2022-09-12	12:57:27	1.02943	4.57911	4.0104	924.818	FALSE	8
2022-09-12	12:57:28	0.87131	3.87576	2.40446	892.198	FALSE	8
2022-09-12	12:57:28	0.668359	2.97299	2.40446	927.791	FALSE	8
2022-09-12	12:57:28	0.347545	1.54595	2.40446	893.744	FALSE	8
2022-09-12	12:57:28	0.274975	1.22314	2.40446	929.014	FALSE	8
2022-09-12	12:57:29	0.28841	1.28291	1.40362	895.027	FALSE	8
2022-09-12	12:57:29	0.340878	1.51629	1.40362	930.53	FALSE	8
2022-09-12	12:57:29	0.295534	1.31459	1.40362	896.342	FALSE	8
2022-09-12	12:57:29	0.337366	1.50067	1.40362	932.031	FALSE	8
2022-09-12	12:57:30	0.361031	1.60594	1.65438	897.948	FALSE	8
2022-09-12	12:57:30	0.289377	1.28721	1.65438	933.318	FALSE	8
2022-09-12	12:57:30	0.465356	2.07	1.65438	900.018	FALSE	8
2022-09-12	12:57:31	1.51233	6.72715	4.74662	940.045	FALSE	8
2022-09-12	12:57:31	1.88531	8.38624	4.74662	908.404	FALSE	8
2022-09-12	12:57:31	0.496552	2.20876	4.74662	942.254	FALSE	8
2022-09-12	12:57:31	0.37416	1.66434	4.74662	910.068	FALSE	8
2022-09-12	12:57:32	0.293346	1.30486	1.30033	943.559	FALSE	8
2022-09-12	12:57:32	0.282405	1.25619	1.30033	911.325	FALSE	8
2022-09-12	12:57:32	0.287188	1.27747	1.30033	944.836	FALSE	8
2022-09-12	12:57:32	0.306374	1.36281	1.30033	912.687	FALSE	8
2022-09-12	12:57:33	0.194924	0.867061	1.52042	945.703	FALSE	8
2022-09-12	12:57:33	0.371972	1.65461	1.52042	914.342	FALSE	8
2022-09-12	12:57:33	0.454924	2.02359	1.52042	947.727	FALSE	8
2022-09-12	12:57:33	0.345407	1.53644	1.52042	915.878	FALSE	8
2022-09-12	12:57:34	0.373041	1.65936	1.47245	949.386	FALSE	8
2022-09-12	12:57:34	0.273855	1.21816	1.47245	917.097	FALSE	8
2022-09-12	12:57:34	0.346171	1.53984	1.47245	950.926	FALSE	8
2022-09-12	12:57:35	0.149173	0.663551	-0.467569	917.76	FALSE	8
2022-09-12	12:57:35	-0.115712	-0.51471	-0.467569	950.926	FALSE	8
2022-09-12	12:57:35	-0.183091	-0.814425	-0.467569	917.76	FALSE	8
2022-09-12	12:57:35	-0.270827	-1.20469	-0.467569	950.926	FALSE	8
2022-09-12	12:57:36	-0.120496	-0.53599	1.65789	917.76	FALSE	8
2022-09-12	12:57:36	0.321998	1.43231	1.65789	952.358	FALSE	8
2022-09-12	12:57:36	0.790954	3.51832	1.65789	921.278	FALSE	8
2022-09-12	12:57:36	0.498384	2.21691	1.65789	954.575	FALSE	8
2022-09-12	12:57:37	0.579707	2.57865	2.76009	923.857	FALSE	8
2022-09-12	12:57:37	0.901336	4.00932	2.76009	958.585	FALSE	8
2022-09-12	12:57:37	0.483066	2.14877	2.76009	926.006	FALSE	8
2022-09-12	12:57:37	0.517875	2.30361	2.76009	960.888	FALSE	8
2022-09-12	12:57:38	0.381132	1.69535	1.79978	927.701	FALSE	8
2022-09-12	12:57:38	0.423219	1.88256	1.79978	962.771	FALSE	8
2022-09-12	12:57:38	0.409478	1.82144	1.79978	929.523	FALSE	8
2022-09-12	12:57:39	0.402659	1.79111	1.79615	964.562	FALSE	8
2022-09-12	12:57:39	0.413092	1.83752	1.79615	931.36	FALSE	8
2022-09-12	12:57:39	0.427697	1.90248	1.79615	966.464	FALSE	8
2022-09-12	12:57:39	0.371718	1.65348	1.79615	933.014	FALSE	8
2022-09-12	12:57:40	0.451005	2.00616	2.24696	968.47	FALSE	8
2022-09-12	12:57:40	0.465255	2.06955	2.24696	935.083	FALSE	8
2022-09-12	12:57:40	0.619148	2.75409	2.24696	971.225	FALSE	8
2022-09-12	12:57:40	0.485153	2.15806	2.24696	937.241	FALSE	8
2022-09-12	12:57:41	0.43757	1.9464	1.72693	973.171	FALSE	8
2022-09-12	12:57:41	0.381438	1.69671	1.72693	938.938	FALSE	8
2022-09-12	12:57:41	0.375127	1.66864	1.72693	974.84	FALSE	8
2022-09-12	12:57:41	0.358791	1.59597	1.72693	940.534	FALSE	8
2022-09-12	12:57:42	0.504491	2.24408	2.24189	977.084	FALSE	8
2022-09-12	12:57:42	0.370496	1.64804	2.24189	942.182	FALSE	8
2022-09-12	12:57:42	0.63701	2.83355	2.24189	979.917	FALSE	8
2022-09-12	12:57:43	1.23971	5.51448	8.64854	947.696	FALSE	8
2022-09-12	12:57:43	2.26256	10.0643	8.64854	989.982	FALSE	8
2022-09-12	12:57:43	2.48831	11.0685	8.64854	958.765	FALSE	8
2022-09-12	12:57:43	1.78653	7.94684	8.64854	997.928	FALSE	8
2022-09-12	12:57:44	0.641794	2.85483	2.06253	961.62	FALSE	8
2022-09-12	12:57:44	0.382354	1.70079	2.06253	999.629	FALSE	8
2022-09-12	12:57:44	0.43701	1.94391	2.06253	963.564	FALSE	8
2022-09-12	12:57:44	0.39355	1.75059	2.06253	1001.38	FALSE	8
2022-09-12	12:57:45	0.413448	1.8391	1.63548	965.403	FALSE	8
2022-09-12	12:57:45	0.343015	1.5258	1.63548	1002.91	FALSE	8
2022-09-12	12:57:45	0.363931	1.61884	1.63548	967.022	FALSE	8
2022-09-12	12:57:45	0.350293	1.55817	1.63548	1004.46	FALSE	8
2022-09-12	12:57:46	0.324389	1.44295	1.65046	968.465	FALSE	8
2022-09-12	12:57:46	0.396349	1.76304	1.65046	1006.23	FALSE	8
2022-09-12	12:57:46	0.392379	1.74538	1.65046	970.21	FALSE	8
2022-09-12	12:57:47	0.343728	1.52897	1.79366	1007.76	FALSE	8
2022-09-12	12:57:47	0.411616	1.83095	1.79366	972.041	FALSE	8
2022-09-12	12:57:47	0.425967	1.89479	1.79366	1009.65	FALSE	8
2022-09-12	12:57:47	0.431616	1.91991	1.79366	973.961	FALSE	8
2022-09-12	12:57:48	0.402761	1.79156	2.32608	1011.44	FALSE	8
2022-09-12	12:57:48	0.784135	3.48799	2.32608	977.449	FALSE	8
2022-09-12	12:57:48	0.392023	1.7438	2.32608	1013.19	FALSE	8
2022-09-12	12:57:48	0.512786	2.28097	2.32608	979.73	FALSE	8
2022-09-12	12:57:49	0.358741	1.59575	1.97854	1014.78	FALSE	8
2022-09-12	12:57:49	0.58388	2.59722	1.97854	982.327	FALSE	8
2022-09-12	12:57:49	0.243931	1.08505	1.97854	1015.87	FALSE	8
2022-09-12	12:57:49	0.592633	2.63615	1.97854	984.963	FALSE	8
2022-09-12	12:57:50	0.292786	1.30237	1.9347	1017.17	FALSE	8
2022-09-12	12:57:50	0.574313	2.55466	1.9347	987.518	FALSE	8
2022-09-12	12:57:50	0.437723	1.94708	1.9347	1019.12	FALSE	8
2022-09-12	12:57:51	0.817265	3.63536	2.14708	991.153	FALSE	8
2022-09-12	12:57:51	0.387646	1.72433	2.14708	1020.84	FALSE	8
2022-09-12	12:57:51	0.436959	1.94368	2.14708	993.097	FALSE	8
2022-09-12	12:57:51	0.288868	1.28494	2.14708	1022.13	FALSE	8
2022-09-12	12:57:52	0.214568	0.954441	1.60939	994.051	FALSE	8
2022-09-12	12:57:52	0.41986	1.86762	1.60939	1023.99	FALSE	8
2022-09-12	12:57:52	0.442048	1.96632	1.60939	996.018	FALSE	8
2022-09-12	12:57:52	0.370751	1.64917	1.60939	1025.64	FALSE	8
2022-09-12	12:57:53	0.378791	1.68494	1.52671	997.703	FALSE	8
2022-09-12	12:57:53	0.387697	1.72455	1.52671	1027.37	FALSE	8
2022-09-12	12:57:53	0.278232	1.23763	1.52671	998.94	FALSE	8
2022-09-12	12:57:53	0.328155	1.4597	1.52671	1028.83	FALSE	8
2022-09-12	12:57:54	0.199606	0.887887	1.2611	999.828	FALSE	8
2022-09-12	12:57:54	0.365153	1.62427	1.2611	1030.45	FALSE	8
2022-09-12	12:57:54	0.285763	1.27113	1.2611	1001.1	FALSE	8
2022-09-12	12:57:55	0.416145	1.8511	1.75098	1032.3	FALSE	8
2022-09-12	12:57:55	0.642914	2.85981	1.75098	1003.96	FALSE	8
2022-09-12	12:57:55	0.28612	1.27272	1.75098	1033.57	FALSE	8
2022-09-12	12:57:55	0.229377	1.02031	1.75098	1004.98	FALSE	8
2022-09-12	12:57:56	0.304644	1.35512	1.46417	1034.93	FALSE	8
2022-09-12	12:57:56	0.309479	1.37662	1.46417	1006.36	FALSE	8
2022-09-12	12:57:56	0.387239	1.72252	1.46417	1036.65	FALSE	8
2022-09-12	12:57:56	0.31528	1.40243	1.46417	1007.76	FALSE	8
2022-09-12	12:57:57	0.323881	1.44069	1.31607	1038.09	FALSE	8
2022-09-12	12:57:57	0.277163	1.23288	1.31607	1008.99	FALSE	8
2022-09-12	12:57:57	0.28612	1.27272	1.31607	1039.37	FALSE	8
2022-09-12	12:57:57	0.296298	1.31799	1.31607	1010.31	FALSE	8
2022-09-12	12:57:58	0.339453	1.50995	1.7533	1040.88	FALSE	8
2022-09-12	12:57:58	0.362812	1.61386	1.7533	1011.92	FALSE	8
2022-09-12	12:57:58	0.480216	2.1361	1.7533	1043.01	FALSE	8
2022-09-12	12:57:59	0.645865	2.87294	2.74028	1014.8	FALSE	8
2022-09-12	12:57:59	0.961692	4.2778	2.74028	1047.29	FALSE	8
2022-09-12	12:57:59	0.476196	2.11822	2.74028	1016.91	FALSE	8
2022-09-12	12:57:59	0.38042	1.69218	2.74028	1048.98	FALSE	8
2022-09-12	12:58:00	0.376807	1.67611	1.75653	1018.59	FALSE	8
2022-09-12	12:58:00	0.385102	1.71301	1.75653	1050.69	FALSE	8
2022-09-12	12:58:00	0.402914	1.79224	1.75653	1020.38	FALSE	8
2022-09-12	12:58:00	0.41472	1.84476	1.75653	1052.54	FALSE	8
2022-09-12	12:58:01	0.445763	1.98284	2.10322	1022.37	FALSE	8
2022-09-12	12:58:01	0.436654	1.94232	2.10322	1054.48	FALSE	8
2022-09-12	12:58:01	0.480929	2.13927	2.10322	1024.5	FALSE	8
2022-09-12	12:58:01	0.527952	2.34844	2.10322	1056.83	FALSE	8
2022-09-12	12:58:02	0.536909	2.38828	2.07083	1026.89	FALSE	8
2022-09-12	12:58:02	0.451667	2.00911	2.07083	1058.84	FALSE	8
2022-09-12	12:58:02	0.408053	1.8151	2.07083	1028.71	FALSE	8
2022-09-12	12:58:03	0.391005	1.73927	1.70277	1060.58	FALSE	8
2022-09-12	12:58:03	0.377875	1.68086	1.70277	1030.39	FALSE	8
2022-09-12	12:58:03	0.37701	1.67702	1.70277	1062.26	FALSE	8
2022-09-12	12:58:03	0.385305	1.71391	1.70277	1032.1	FALSE	8
2022-09-12	12:58:04	0.39187	1.74312	1.89682	1064	FALSE	8
2022-09-12	12:58:04	0.411972	1.83253	1.89682	1033.94	FALSE	8
2022-09-12	12:58:04	0.437112	1.94436	1.89682	1065.94	FALSE	8
2022-09-12	12:58:04	0.464746	2.06728	1.89682	1036	FALSE	8
2022-09-12	12:58:05	0.454008	2.01952	2.55568	1067.96	FALSE	8
2022-09-12	12:58:05	0.666323	2.96394	2.55568	1038.97	FALSE	8
2022-09-12	12:58:05	0.681794	3.03276	2.55568	1071	FALSE	8
2022-09-12	12:58:05	0.496043	2.2065	2.55568	1041.17	FALSE	8
2022-09-12	12:58:06	0.532481	2.36858	2.08826	1073.36	FALSE	8
2022-09-12	12:58:06	0.489936	2.17933	2.08826	1043.35	FALSE	8
2022-09-12	12:58:06	0.385967	1.71686	2.08826	1075.08	FALSE	8
2022-09-12	12:58:07	0.373193	1.66004	1.78964	1045.01	FALSE	8
2022-09-12	12:58:07	0.393753	1.75149	1.78964	1076.83	FALSE	8
2022-09-12	12:58:07	0.435941	1.93915	1.78964	1046.95	FALSE	8
2022-09-12	12:58:07	0.406425	1.80786	1.78964	1078.64	FALSE	8
2022-09-12	12:58:08	0.404949	1.80129	1.92959	1048.75	FALSE	8
2022-09-12	12:58:08	0.435433	1.93689	1.92959	1080.58	FALSE	8
2022-09-12	12:58:08	0.442099	1.96654	1.92959	1050.72	FALSE	8
2022-09-12	12:58:08	0.452685	2.01363	1.92959	1082.59	FALSE	8
2022-09-12	12:58:09	0.444084	1.97537	1.92314	1052.69	FALSE	8
2022-09-12	12:58:09	0.429784	1.91177	1.92314	1084.5	FALSE	8
2022-09-12	12:58:09	0.429987	1.91267	1.92314	1054.61	FALSE	8
2022-09-12	12:58:09	0.425509	1.89275	1.92314	1086.4	FALSE	8
2022-09-12	12:58:10	0.442099	1.96654	1.95719	1056.57	FALSE	8
2022-09-12	12:58:10	0.438283	1.94957	1.95719	1088.34	FALSE	8
2022-09-12	12:58:10	0.439606	1.95546	1.95719	1058.53	FALSE	8
2022-09-12	12:58:11	0.439198	1.95364	1.96077	1090.3	FALSE	8
2022-09-12	12:58:11	0.444695	1.97809	1.96077	1060.51	FALSE	8
2022-09-12	12:58:11	0.440776	1.96066	1.96077	1092.26	FALSE	8
2022-09-12	12:58:11	0.438537	1.9507	1.96077	1062.46	FALSE	8
2022-09-12	12:58:12	0.428766	1.90724	1.90367	1094.17	FALSE	8
2022-09-12	12:58:12	0.427494	1.90158	1.90367	1064.36	FALSE	8
2022-09-12	12:58:12	0.425305	1.89184	1.90367	1096.06	FALSE	8
2022-09-12	12:58:12	0.430293	1.91403	1.90367	1066.27	FALSE	8
2022-09-12	12:58:13	0.430395	1.91448	1.89066	1097.97	FALSE	8
2022-09-12	12:58:13	0.429529	1.91063	1.89066	1068.18	FALSE	8
2022-09-12	12:58:13	0.416959	1.85472	1.89066	1099.83	FALSE	8
2022-09-12	12:58:13	0.42327	1.88279	1.89066	1070.07	FALSE	8
2022-09-12	12:58:14	0.435433	1.93689	1.88807	1101.76	FALSE	8
2022-09-12	12:58:14	0.404898	1.80107	1.88807	1071.87	FALSE	8
2022-09-12	12:58:14	0.433041	1.92625	1.88807	1103.69	FALSE	8
2022-09-12	12:58:15	0.421031	1.87283	1.86632	1073.74	FALSE	8
2022-09-12	12:58:15	0.417774	1.85834	1.86632	1105.55	FALSE	8
2022-09-12	12:58:15	0.431514	1.91946	1.86632	1075.66	FALSE	8
2022-09-12	12:58:15	0.407952	1.81465	1.86632	1107.36	FALSE	8
2022-09-12	12:58:16	0.409071	1.81963	1.79796	1077.48	FALSE	8
2022-09-12	12:58:16	0.399046	1.77504	1.79796	1109.14	FALSE	8
2022-09-12	12:58:16	0.402761	1.79156	1.79796	1079.27	FALSE	8
2022-09-12	12:58:16	0.405916	1.8056	1.79796	1110.94	FALSE	8
2022-09-12	12:58:17	0.404847	1.80084	1.77753	1081.07	FALSE	8
2022-09-12	12:58:17	0.402863	1.79202	1.77753	1112.74	FALSE	8
2022-09-12	12:58:17	0.396858	1.7653	1.77753	1082.84	FALSE	8
2022-09-12	12:58:17	0.393855	1.75195	1.77753	1114.49	FALSE	8
2022-09-12	12:58:18	0.398842	1.77413	1.76824	1084.61	FALSE	8
2022-09-12	12:58:18	0.392481	1.74583	1.76824	1116.23	FALSE	8
2022-09-12	12:58:18	0.401234	1.78477	1.76824	1086.4	FALSE	8
2022-09-12	12:58:19	0.394466	1.75466	1.79767	1117.99	FALSE	8
2022-09-12	12:58:19	0.405	1.80152	1.79767	1088.2	FALSE	8
2022-09-12	12:58:19	0.406629	1.80877	1.79767	1119.8	FALSE	8
2022-09-12	12:58:19	0.410445	1.82574	1.79767	1090.02	FALSE	8
2022-09-12	12:58:20	0.412532	1.83502	1.8421	1121.63	FALSE	8
2022-09-12	12:58:20	0.411056	1.82846	1.8421	1091.85	FALSE	8
2022-09-12	12:58:20	0.414975	1.84589	1.8421	1123.48	FALSE	8
2022-09-12	12:58:20	0.417926	1.85902	1.8421	1093.71	FALSE	8
2022-09-12	12:58:21	0.419402	1.86558	1.85228	1125.34	FALSE	8
2022-09-12	12:58:21	0.411412	1.83004	1.85228	1095.54	FALSE	8
2022-09-12	12:58:21	0.420064	1.86853	1.85228	1127.21	FALSE	8
2022-09-12	12:58:21	0.414771	1.84498	1.85228	1097.39	FALSE	8
2022-09-12	12:58:22	0.417774	1.85834	1.84212	1129.07	FALSE	8
2022-09-12	12:58:22	0.415178	1.84679	1.84212	1099.23	FALSE	8
2022-09-12	12:58:22	0.409428	1.82122	1.84212	1130.89	FALSE	8
2022-09-12	12:58:23	0.40215	1.78884	1.75489	1101.02	FALSE	8
2022-09-12	12:58:23	0.398537	1.77277	1.75489	1132.66	FALSE	8
2022-09-12	12:58:23	0.389682	1.73338	1.75489	1102.76	FALSE	8
2022-09-12	12:58:23	0.387697	1.72455	1.75489	1134.39	FALSE	8
2022-09-12	12:58:24	0.385662	1.7155	1.76655	1104.47	FALSE	8
2022-09-12	12:58:24	0.389377	1.73203	1.76655	1136.12	FALSE	8
2022-09-12	12:58:24	0.40729	1.81171	1.76655	1106.28	FALSE	8
2022-09-12	12:58:24	0.406221	1.80695	1.76655	1137.93	FALSE	8
2022-09-12	12:58:25	0.404847	1.80084	1.81606	1108.08	FALSE	8
2022-09-12	12:58:25	0.411005	1.82823	1.81606	1139.76	FALSE	8
2022-09-12	12:58:25	0.409936	1.82348	1.81606	1109.91	FALSE	8
2022-09-12	12:58:25	0.40729	1.81171	1.81606	1141.57	FALSE	8
2022-09-12	12:58:26	0.425764	1.89388	1.86581	1111.8	FALSE	8
2022-09-12	12:58:26	0.414008	1.84159	1.86581	1143.41	FALSE	8
2022-09-12	12:58:26	0.418588	1.86196	1.86581	1113.66	FALSE	8
2022-09-12	12:58:27	0.948053	4.21713	2.90768	1147.63	FALSE	8
2022-09-12	12:58:27	0.845712	3.7619	2.90768	1117.43	FALSE	8
2022-09-12	12:58:27	0.560522	2.49331	2.90768	1150.12	FALSE	8
2022-09-12	12:58:27	0.26042	1.1584	2.90768	1118.58	FALSE	8
2022-09-12	12:58:28	0.406476	1.80809	1.90424	1151.93	FALSE	8
2022-09-12	12:58:28	0.515483	2.29297	1.90424	1120.88	FALSE	8
2022-09-12	12:58:28	0.405814	1.80514	1.90424	1153.73	FALSE	8
2022-09-12	12:58:28	0.384593	1.71075	1.90424	1122.59	FALSE	8
2022-09-12	12:58:29	0.405916	1.8056	1.85047	1155.54	FALSE	8
2022-09-12	12:58:29	0.407443	1.81239	1.85047	1124.4	FALSE	8
2022-09-12	12:58:29	0.490547	2.18205	1.85047	1157.72	FALSE	8
2022-09-12	12:58:29	0.360115	1.60186	1.85047	1126	FALSE	8
2022-09-12	12:58:30	0.435331	1.93644	1.65883	1159.66	FALSE	8
2022-09-12	12:58:30	0.383931	1.7078	1.65883	1127.71	FALSE	8
2022-09-12	12:58:30	0.299504	1.33225	1.65883	1160.99	FALSE	8
2022-09-12	12:58:31	0.444695	1.97809	1.70718	1129.69	FALSE	8
2022-09-12	12:58:31	0.344339	1.53169	1.70718	1162.52	FALSE	8
2022-09-12	12:58:31	0.399249	1.77594	1.70718	1131.46	FALSE	8
2022-09-12	12:58:31	0.346883	1.543	1.70718	1164.06	FALSE	8
2022-09-12	12:58:32	0.333957	1.48551	1.60594	1132.95	FALSE	8
2022-09-12	12:58:32	0.291005	1.29445	1.60594	1165.36	FALSE	8
2022-09-12	12:58:32	0.361234	1.60684	1.60594	1134.56	FALSE	8
2022-09-12	12:58:32	0.457926	2.03695	1.60594	1167.4	FALSE	8
2022-09-12	12:58:33	0.346171	1.53984	1.7653	1136.1	FALSE	8
2022-09-12	12:58:33	0.400318	1.78069	1.7653	1169.18	FALSE	8
2022-09-12	12:58:33	0.358995	1.59688	1.7653	1137.69	FALSE	8
2022-09-12	12:58:33	0.481947	2.1438	1.7653	1171.32	FALSE	8
2022-09-12	12:58:34	0.419504	1.86604	2.3793	1139.56	FALSE	8
2022-09-12	12:58:34	0.828308	3.68448	2.3793	1175	FALSE	8
2022-09-12	12:58:34	0.356858	1.58738	2.3793	1141.15	FALSE	8
2022-09-12	12:58:35	0.598079	2.66038	2.52365	1177.67	FALSE	8
2022-09-12	12:58:35	0.846883	3.7671	2.52365	1144.91	FALSE	8
2022-09-12	12:58:35	0.567443	2.5241	2.52365	1180.19	FALSE	8
2022-09-12	12:58:35	0.256959	1.14301	2.52365	1146.06	FALSE	8
2022-09-12	12:58:36	0.493957	2.19722	2.80932	1182.39	FALSE	8
2022-09-12	12:58:36	0.286527	1.27453	2.80932	1147.33	FALSE	8
2022-09-12	12:58:36	0.473092	2.10441	2.80932	1184.49	FALSE	8
2022-09-12	12:58:36	1.27268	5.66114	2.80932	1152.99	FALSE	8
2022-09-12	12:58:37	0.427545	1.90181	1.65363	1186.39	FALSE	8
2022-09-12	12:58:37	0.265051	1.179	1.65363	1154.17	FALSE	8
2022-09-12	12:58:37	0.422659	1.88007	1.65363	1188.27	FALSE	8
2022-09-12	12:58:38	0.191819	0.853249	1.17634	1155.02	FALSE	8
2022-09-12	12:58:38	0.426476	1.89705	1.17634	1190.17	FALSE	8
2022-09-12	12:58:38	0.237163	1.05495	1.17634	1156.08	FALSE	8
2022-09-12	12:58:38	0.202354	0.900111	1.17634	1191.07	FALSE	8
2022-09-12	12:58:39	-0.00950358	-0.0422738	0.617089	1156.08	FALSE	8
2022-09-12	12:58:39	-0.223346	-0.993488	0.617089	1191.07	FALSE	8
2022-09-12	12:58:39	0.429682	1.91131	0.617089	1157.99	FALSE	8
2022-09-12	12:58:39	0.358079	1.59281	0.617089	1192.66	FALSE	8
2022-09-12	12:58:40	0.362048	1.61046	2.00803	1159.6	FALSE	8
2022-09-12	12:58:40	0.423423	1.88347	2.00803	1194.55	FALSE	8
2022-09-12	12:58:40	0.537774	2.39213	2.00803	1161.99	FALSE	8
2022-09-12	12:58:40	0.482456	2.14606	2.00803	1196.69	FALSE	8
2022-09-12	12:58:41	0.43757	1.9464	1.99514	1163.94	FALSE	8
2022-09-12	12:58:41	0.458537	2.03966	1.99514	1198.73	FALSE	8
2022-09-12	12:58:41	0.449478	1.99937	1.99514	1165.94	FALSE	8
2022-09-12	12:58:42	0.449631	2.00005	2.00418	1200.73	FALSE	8
2022-09-12	12:58:42	0.463728	2.06275	2.00418	1168	FALSE	8
2022-09-12	12:58:42	0.43243	1.92354	2.00418	1202.66	FALSE	8
2022-09-12	12:58:42	0.45645	2.03038	2.00418	1170.03	FALSE	8
2022-09-12	12:58:43	0.432685	1.92467	1.97085	1204.58	FALSE	8
2022-09-12	12:58:43	0.410496	1.82597	1.97085	1171.86	FALSE	8
2022-09-12	12:58:43	0.423117	1.88211	1.97085	1206.46	FALSE	8
2022-09-12	12:58:43	0.505967	2.25064	1.97085	1174.11	FALSE	8
2022-09-12	12:58:44	3.9137	17.4089	6.04168	1223.87	1	9
2022-09-12	12:58:44	0.601692	2.67645	6.04168	1176.78	FALSE	9
2022-09-12	12:58:44	0.718995	3.19823	6.04168	1227.07	FALSE	9
2022-09-12	12:58:44	0.198537	0.883132	6.04168	1177.67	FALSE	9

## Sheet: Duke_star_2022912125340 (E) (2)
Date	Time	Lbs	Newtons	Total Force x Time	Total Time Steps Force >13.345		**GoPro Fitting: 1242
2022-09-12	12:53:44	0.406934	1.81012	1.81012	FALSE	0			Total Force x Time	1177.67
2022-09-12	12:53:44	0.427952	1.90362	1.90362	FALSE	0			Total Time Steps Force >3	9
2022-09-12	12:53:44	0.380165	1.69105	3.50117	FALSE	0
2022-09-12	12:53:44	0.415942	1.85019	3.75381	FALSE	0
2022-09-12	12:53:45	0.405	1.80152	5.30269	FALSE	0
2022-09-12	12:53:45	0.405356	1.8031	5.55691	FALSE	0
2022-09-12	12:53:45	0.401336	1.78522	7.08792	FALSE	0
2022-09-12	12:53:45	0.409936	1.82348	7.38039	FALSE	0
2022-09-12	12:53:46	0.425305	1.89184	8.97976	FALSE	0
2022-09-12	12:53:46	0.405102	1.80197	9.18237	FALSE	0
2022-09-12	12:53:46	0.479504	2.13293	11.1127	FALSE	0
2022-09-12	12:53:46	0.407239	1.81148	10.9938	FALSE	0
2022-09-12	12:53:47	0.47874	2.12953	13.2422	FALSE	0
2022-09-12	12:53:47	0.44159	1.96428	12.9581	FALSE	0
2022-09-12	12:53:47	0.423372	1.88324	15.1255	FALSE	0
2022-09-12	12:53:48	0.416705	1.85359	14.8117	FALSE	0
2022-09-12	12:53:48	0.429275	1.9095	17.035	FALSE	0
2022-09-12	12:53:48	0.455789	2.02744	16.8392	FALSE	0
2022-09-12	12:53:48	0.395534	1.75941	18.7944	FALSE	0
2022-09-12	12:53:49	0.446934	1.98805	18.8272	FALSE	0
2022-09-12	12:53:49	0.395382	1.75874	20.5531	FALSE	0
2022-09-12	12:53:49	0.372735	1.658	20.4852	FALSE	0
2022-09-12	12:53:49	0.312481	1.38998	21.9431	FALSE	0
2022-09-12	12:53:50	0.287138	1.27725	21.7625	FALSE	0
2022-09-12	12:53:50	0.368053	1.63717	23.5803	FALSE	0
2022-09-12	12:53:50	0.411412	1.83004	23.5925	FALSE	0
2022-09-12	12:53:50	0.167545	0.745274	24.3255	FALSE	0
2022-09-12	12:53:51	0.371768	1.6537	25.2462	FALSE	0
2022-09-12	12:53:51	0.190751	0.848499	25.174	FALSE	0
2022-09-12	12:53:51	0.289682	1.28856	26.5348	FALSE	0
2022-09-12	12:53:52	0.137468	0.611485	25.7855	FALSE	0
2022-09-12	12:53:52	0.285814	1.27136	27.8061	FALSE	0
2022-09-12	12:53:52	0.370344	1.64736	27.4329	FALSE	0
2022-09-12	12:53:52	0.372023	1.65483	29.4609	FALSE	0
2022-09-12	12:53:53	0.790751	3.51742	30.9503	FALSE	0
2022-09-12	12:53:53	1.57818	7.02006	36.481	FALSE	0
2022-09-12	12:53:53	1.64917	7.33584	38.2861	FALSE	0
2022-09-12	12:53:53	0.758181	3.37254	39.8536	FALSE	0
2022-09-12	12:53:54	0.717824	3.19302	41.4792	FALSE	0
2022-09-12	12:53:54	0.337519	1.50135	41.3549	FALSE	0
2022-09-12	12:53:54	0.312074	1.38817	42.8673	FALSE	0
2022-09-12	12:53:54	0.282812	1.258	42.6129	FALSE	0
2022-09-12	12:53:55	0.349071	1.55274	44.4201	FALSE	0
2022-09-12	12:53:55	0.172176	0.765873	43.3788	FALSE	0
2022-09-12	12:53:55	0.535992	2.3842	46.8043	FALSE	0
2022-09-12	12:53:56	0.0377738	0.168025	43.5468	FALSE	0
2022-09-12	12:53:56	0.381794	1.6983	48.5026	FALSE	0
2022-09-12	12:53:56	0.186018	0.827445	44.3743	FALSE	0
2022-09-12	12:53:56	0.309835	1.37821	49.8808	FALSE	0
2022-09-12	12:53:57	0.181234	0.806165	45.1804	FALSE	0
2022-09-12	12:53:57	0.390293	1.7361	51.6169	FALSE	0
2022-09-12	12:53:57	0.176909	0.786927	45.9673	FALSE	0
2022-09-12	12:53:57	0.227392	1.01149	52.6284	FALSE	0
2022-09-12	12:53:58	0.223626	0.994733	46.9621	FALSE	0
2022-09-12	12:53:58	0.265356	1.18036	53.8087	FALSE	0
2022-09-12	12:53:58	0.283728	1.26208	48.2242	FALSE	0
2022-09-12	12:53:58	0.241489	1.07419	54.8829	FALSE	0
2022-09-12	12:53:59	0.281896	1.25393	49.4781	FALSE	0
2022-09-12	12:53:59	0.311412	1.38522	56.2681	FALSE	0
2022-09-12	12:53:59	0.37584	1.67181	51.1499	FALSE	0
2022-09-12	12:54:00	0.372583	1.65732	57.9255	FALSE	0
2022-09-12	12:54:00	0.436959	1.94368	53.0936	FALSE	0
2022-09-12	12:54:00	0.528664	2.3516	60.2771	FALSE	0
2022-09-12	12:54:00	0.460878	2.05008	55.1437	FALSE	0
2022-09-12	12:54:01	0.770242	3.42619	63.7033	FALSE	0
2022-09-12	12:54:01	0.481336	2.14108	57.2847	FALSE	0
2022-09-12	12:54:01	0.563473	2.50644	66.2097	FALSE	0
2022-09-12	12:54:01	0.409275	1.82054	59.1053	FALSE	0
2022-09-12	12:54:02	0.360165	1.60209	67.8118	FALSE	0
2022-09-12	12:54:02	0.235433	1.04725	60.1525	FALSE	0
2022-09-12	12:54:02	0.39187	1.74312	69.5549	FALSE	0
2022-09-12	12:54:02	0.360267	1.60254	61.7551	FALSE	0
2022-09-12	12:54:03	0.581896	2.58839	72.1433	FALSE	0
2022-09-12	12:54:03	0.736043	3.27407	65.0291	FALSE	0
2022-09-12	12:54:03	0.387239	1.72252	73.8658	FALSE	0
2022-09-12	12:54:04	0.234517	1.04318	66.0723	FALSE	0
2022-09-12	12:54:04	-0.0851778	-0.378888	73.8658	FALSE	0
2022-09-12	12:54:04	-0.384363	-1.70972	66.0723	FALSE	0
2022-09-12	12:54:04	-0.283346	-1.26038	73.8658	FALSE	0
2022-09-12	12:54:05	0.004186	0.0186202	66.0909	FALSE	0
2022-09-12	12:54:05	0.293194	1.30419	75.17	FALSE	0
2022-09-12	12:54:05	0.327392	1.45631	67.5472	FALSE	0
2022-09-12	12:54:05	0.264796	1.17787	76.3479	FALSE	0
2022-09-12	12:54:06	0.320471	1.42552	68.9728	FALSE	0
2022-09-12	12:54:06	0.323779	1.44023	77.7881	FALSE	0
2022-09-12	12:54:06	0.65528	2.91482	71.8876	FALSE	0
2022-09-12	12:54:06	1.71197	7.61518	85.4033	FALSE	0
2022-09-12	12:54:07	3.43742	15.2903	87.1779	1	1
2022-09-12	12:54:07	2.99131	13.3059	98.7092	FALSE	1
2022-09-12	12:54:07	4.78871	21.3011	108.479	1	2
2022-09-12	12:54:08	4.43828	19.7424	118.452	1	3
2022-09-12	12:54:08	5.84296	25.9907	134.47	1	4
2022-09-12	12:54:08	4.6535	20.6997	139.151	1	5
2022-09-12	12:54:08	2.61848	11.6475	146.117	FALSE	5
2022-09-12	12:54:09	3.29579	14.6603	153.812	1	6
2022-09-12	12:54:09	3.20322	14.2486	160.366	1	7
2022-09-12	12:54:09	2.95284	13.1348	166.946	FALSE	7
2022-09-12	12:54:09	1.33569	5.94142	166.307	FALSE	7
2022-09-12	12:54:10	0.637519	2.83581	169.782	FALSE	7
2022-09-12	12:54:10	0.527544	2.34662	168.654	FALSE	7
2022-09-12	12:54:10	0.725254	3.22607	173.008	FALSE	7
2022-09-12	12:54:10	0.729835	3.24645	171.9	FALSE	7
2022-09-12	12:54:11	0.649886	2.89082	175.899	FALSE	7
2022-09-12	12:54:11	0.254059	1.13011	173.03	FALSE	7
2022-09-12	12:54:11	0.383219	1.70463	177.604	FALSE	7
2022-09-12	12:54:12	0.498893	2.21918	175.25	FALSE	7
2022-09-12	12:54:12	0.434415	1.93236	179.536	FALSE	7
2022-09-12	12:54:12	0.418537	1.86174	177.111	FALSE	7
2022-09-12	12:54:12	0.728512	3.24057	182.777	FALSE	7
2022-09-12	12:54:13	0.739453	3.28923	180.401	FALSE	7
2022-09-12	12:54:13	1.20032	5.33926	188.116	FALSE	7
2022-09-12	12:54:13	2.01396	8.9585	189.359	FALSE	7
2022-09-12	12:54:13	0.798333	3.55114	191.667	FALSE	7
2022-09-12	12:54:14	1.51762	6.75068	196.11	FALSE	7
2022-09-12	12:54:14	0.937417	4.16982	195.837	FALSE	7
2022-09-12	12:54:14	0.570089	2.53587	198.646	FALSE	7
2022-09-12	12:54:14	0.476501	2.11957	197.957	FALSE	7
2022-09-12	12:54:15	0.863321	3.84022	202.486	FALSE	7
2022-09-12	12:54:15	0.306272	1.36236	199.319	FALSE	7
2022-09-12	12:54:15	0.64103	2.85143	205.337	FALSE	7
2022-09-12	12:54:16	0.67645	3.00898	202.328	FALSE	7
2022-09-12	12:54:16	1.22037	5.42845	210.766	FALSE	7
2022-09-12	12:54:16	1.14785	5.10587	207.434	FALSE	7
2022-09-12	12:54:16	0.567443	2.5241	213.29	FALSE	7
2022-09-12	12:54:17	0.531819	2.36564	209.799	FALSE	7
2022-09-12	12:54:17	0.878232	3.90655	217.196	FALSE	7
2022-09-12	12:54:17	0.500471	2.2262	212.026	FALSE	7
2022-09-12	12:54:17	0.726832	3.23309	220.429	FALSE	7
2022-09-12	12:54:18	0.500063	2.22438	214.25	FALSE	7
2022-09-12	12:54:18	0.690344	3.07079	223.5	FALSE	7
2022-09-12	12:54:18	0.919199	4.08878	218.339	FALSE	7
2022-09-12	12:54:18	0.584084	2.59812	226.098	FALSE	7
2022-09-12	12:54:19	0.380827	1.69399	220.033	FALSE	7
2022-09-12	12:54:19	0.475076	2.11323	228.212	FALSE	7
2022-09-12	12:54:19	0.331972	1.47668	221.509	FALSE	7
2022-09-12	12:54:20	0.494059	2.19767	230.409	FALSE	7
2022-09-12	12:54:20	0.554415	2.46615	223.976	FALSE	7
2022-09-12	12:54:20	0.54556	2.42676	232.836	FALSE	7
2022-09-12	12:54:20	0.334873	1.48958	225.465	FALSE	7
2022-09-12	12:54:21	0.390954	1.73904	234.575	FALSE	7
2022-09-12	12:54:21	0.209987	0.934064	226.399	FALSE	7
2022-09-12	12:54:21	0.538893	2.3971	236.972	FALSE	7
2022-09-12	12:54:21	0.281896	1.25393	227.653	FALSE	7
2022-09-12	12:54:22	0.725	3.22494	240.197	FALSE	7
2022-09-12	12:54:22	0.847341	3.76914	231.422	FALSE	7
2022-09-12	12:54:22	1.65564	7.36462	247.562	FALSE	7
2022-09-12	12:54:22	1.01019	4.49353	235.916	FALSE	7
2022-09-12	12:54:23	1.01045	4.49468	252.056	FALSE	7
2022-09-12	12:54:23	0.864898	3.84724	239.763	FALSE	7
2022-09-12	12:54:23	0.952684	4.23773	256.294	FALSE	7
2022-09-12	12:54:24	1.0506	4.67328	244.436	FALSE	7
2022-09-12	12:54:24	0.488919	2.17481	258.469	FALSE	7
2022-09-12	12:54:24	0.584033	2.5979	247.034	FALSE	7
2022-09-12	12:54:24	0.612786	2.72579	261.195	FALSE	7
2022-09-12	12:54:25	0.358384	1.59416	248.628	FALSE	7
2022-09-12	12:54:25	0.381947	1.69898	262.894	FALSE	7
2022-09-12	12:54:25	0.410038	1.82393	250.452	FALSE	7
2022-09-12	12:54:25	0.352125	1.56632	264.46	FALSE	7
2022-09-12	12:54:26	0.426018	1.89501	252.347	FALSE	7
2022-09-12	12:54:26	0.343168	1.52648	265.986	FALSE	7
2022-09-12	12:54:26	0.398435	1.77232	254.12	FALSE	7
2022-09-12	12:54:26	0.319657	1.4219	267.408	FALSE	7
2022-09-12	12:54:27	0.366832	1.63174	255.751	FALSE	7
2022-09-12	12:54:27	0.317519	1.41239	268.821	FALSE	7
2022-09-12	12:54:27	0.516654	2.29818	258.05	FALSE	7
2022-09-12	12:54:28	0.300929	1.33859	270.159	FALSE	7
2022-09-12	12:54:28	0.4193	1.86513	259.915	FALSE	7
2022-09-12	12:54:28	0.321489	1.43005	271.589	FALSE	7
2022-09-12	12:54:28	0.428257	1.90497	261.82	FALSE	7
2022-09-12	12:54:29	0.285662	1.27068	272.86	FALSE	7
2022-09-12	12:54:29	0.422303	1.87849	263.698	FALSE	7
2022-09-12	12:54:29	0.345763	1.53802	274.398	FALSE	7
2022-09-12	12:54:29	0.448359	1.99439	265.693	FALSE	7
2022-09-12	12:54:30	0.366934	1.6322	276.03	FALSE	7
2022-09-12	12:54:30	0.414822	1.84521	267.538	FALSE	7
2022-09-12	12:54:30	0.454517	2.02178	278.052	FALSE	7
2022-09-12	12:54:30	0.512328	2.27894	269.817	FALSE	7
2022-09-12	12:54:31	0.674873	3.00197	281.054	FALSE	7
2022-09-12	12:54:31	0.577621	2.56937	272.386	FALSE	7
2022-09-12	12:54:31	0.466374	2.07452	283.129	FALSE	7
2022-09-12	12:54:32	0.52271	2.32512	274.711	FALSE	7
2022-09-12	12:54:32	0.605153	2.69184	285.82	FALSE	7
2022-09-12	12:54:32	0.54785	2.43695	277.148	FALSE	7
2022-09-12	12:54:32	1.11843	4.975	290.795	FALSE	7
2022-09-12	12:54:33	0.920878	4.09625	281.244	FALSE	7
2022-09-12	12:54:33	1.14729	5.10338	295.899	FALSE	7
2022-09-12	12:54:33	0.585356	2.60378	283.848	FALSE	7
2022-09-12	12:54:33	0.649835	2.8906	298.789	FALSE	7
2022-09-12	12:54:34	0.39299	1.7481	285.596	FALSE	7
2022-09-12	12:54:34	0.509275	2.26536	301.055	FALSE	7
2022-09-12	12:54:34	0.731158	3.25234	288.849	FALSE	7
2022-09-12	12:54:34	0.723168	3.2168	304.272	FALSE	7
2022-09-12	12:54:35	0.726985	3.23377	292.082	FALSE	7
2022-09-12	12:54:35	0.531311	2.36338	306.635	FALSE	7
2022-09-12	12:54:35	0.728817	3.24192	295.324	FALSE	7
2022-09-12	12:54:36	0.653549	2.90712	309.542	FALSE	7
2022-09-12	12:54:36	0.725865	3.22879	298.553	FALSE	7
2022-09-12	12:54:36	0.726018	3.22947	312.772	FALSE	7
2022-09-12	12:54:36	0.723779	3.21951	301.773	FALSE	7
2022-09-12	12:54:37	0.724237	3.22155	315.993	FALSE	7
2022-09-12	12:54:37	0.718384	3.19552	304.968	FALSE	7
2022-09-12	12:54:37	0.72383	3.21974	319.213	FALSE	7
2022-09-12	12:54:37	0.722965	3.21589	308.184	FALSE	7
2022-09-12	12:54:38	0.72673	3.23264	322.445	FALSE	7
2022-09-12	12:54:38	0.730852	3.25098	311.435	FALSE	7
2022-09-12	12:54:38	0.718333	3.19529	325.641	FALSE	7
2022-09-12	12:54:38	0.720318	3.20412	314.639	FALSE	7
2022-09-12	12:54:39	0.711565	3.16518	328.806	FALSE	7
2022-09-12	12:54:39	0.723066	3.21634	317.855	FALSE	7
2022-09-12	12:54:39	0.726578	3.23196	332.038	FALSE	7
2022-09-12	12:54:40	0.723117	3.21657	321.072	FALSE	7
2022-09-12	12:54:40	0.719249	3.19936	335.237	FALSE	7
2022-09-12	12:54:40	0.721946	3.21136	324.283	FALSE	7
2022-09-12	12:54:40	0.72673	3.23264	338.47	FALSE	7
2022-09-12	12:54:41	0.722099	3.21204	327.495	FALSE	7
2022-09-12	12:54:41	0.726374	3.23106	341.701	FALSE	7
2022-09-12	12:54:41	0.72612	3.22993	330.725	FALSE	7
2022-09-12	12:54:41	0.725865	3.22879	344.93	FALSE	7
2022-09-12	12:54:42	0.727596	3.23649	333.962	FALSE	7
2022-09-12	12:54:42	0.723931	3.22019	348.15	FALSE	7
2022-09-12	12:54:42	0.726985	3.23377	337.196	FALSE	7
2022-09-12	12:54:42	0.721437	3.2091	351.359	FALSE	7
2022-09-12	12:54:43	0.722812	3.21521	340.411	FALSE	7
2022-09-12	12:54:43	0.729631	3.24554	354.605	FALSE	7
2022-09-12	12:54:43	0.723677	3.21906	343.63	FALSE	7
2022-09-12	12:54:44	0.721539	3.20955	357.814	FALSE	7
2022-09-12	12:54:44	0.724491	3.22268	346.853	FALSE	7
2022-09-12	12:54:44	0.727494	3.23604	361.05	FALSE	7
2022-09-12	12:54:44	0.728308	3.23966	350.092	FALSE	7
2022-09-12	12:54:45	0.720114	3.20321	364.253	FALSE	7
2022-09-12	12:54:45	0.726527	3.23174	353.324	FALSE	7
2022-09-12	12:54:45	0.718639	3.19665	367.45	FALSE	7
2022-09-12	12:54:46	0.724949	3.22472	356.549	FALSE	7
2022-09-12	12:54:46	0.730394	3.24894	370.699	FALSE	7
2022-09-12	12:54:46	0.723575	3.21861	359.767	FALSE	7
2022-09-12	12:54:46	0.723321	3.21748	373.916	FALSE	7
2022-09-12	12:54:46	0.729835	3.24645	363.014	FALSE	7
2022-09-12	12:54:47	0.725407	3.22676	377.143	FALSE	7
2022-09-12	12:54:47	0.727596	3.23649	366.25	FALSE	7
2022-09-12	12:54:47	0.728359	3.23989	380.383	FALSE	7
2022-09-12	12:54:48	0.718537	3.1962	369.446	FALSE	7
2022-09-12	12:54:48	0.723473	3.21815	383.601	FALSE	7
2022-09-12	12:54:48	0.723219	3.21702	372.663	FALSE	7
2022-09-12	12:54:48	0.722761	3.21499	386.816	FALSE	7
2022-09-12	12:54:49	0.725916	3.22902	375.892	FALSE	7
2022-09-12	12:54:49	0.728104	3.23875	390.055	FALSE	7
2022-09-12	12:54:49	0.72617	3.23015	379.123	FALSE	7
2022-09-12	12:54:49	0.725865	3.22879	393.284	FALSE	7
2022-09-12	12:54:50	0.731921	3.25573	382.378	FALSE	7
2022-09-12	12:54:50	0.721539	3.20955	396.493	FALSE	7
2022-09-12	12:54:50	0.722201	3.21249	385.591	FALSE	7
2022-09-12	12:54:50	0.722862	3.21543	399.709	FALSE	7
2022-09-12	12:54:51	0.725509	3.22721	388.818	FALSE	7
2022-09-12	12:54:51	0.721081	3.20751	402.916	FALSE	7
2022-09-12	12:54:51	0.723524	3.21838	392.036	FALSE	7
2022-09-12	12:54:52	0.723168	3.2168	406.133	FALSE	7
2022-09-12	12:54:52	0.727545	3.23627	395.273	FALSE	7
2022-09-12	12:54:52	0.728919	3.24238	409.375	FALSE	7
2022-09-12	12:54:52	0.727952	3.23808	398.511	FALSE	7
2022-09-12	12:54:53	0.726272	3.2306	412.606	FALSE	7
2022-09-12	12:54:53	0.725	3.22494	401.736	FALSE	7
2022-09-12	12:54:53	0.726934	3.23355	415.84	FALSE	7
2022-09-12	12:54:53	0.726527	3.23174	404.967	FALSE	7
2022-09-12	12:54:54	0.728461	3.24034	419.08	FALSE	7
2022-09-12	12:54:54	0.723524	3.21838	408.186	FALSE	7
2022-09-12	12:54:54	0.724695	3.22359	422.304	FALSE	7
2022-09-12	12:54:54	0.730343	3.24871	411.435	FALSE	7
2022-09-12	12:54:55	0.72383	3.21974	425.523	FALSE	7
2022-09-12	12:54:55	0.721539	3.20955	414.644	FALSE	7
2022-09-12	12:54:55	0.731616	3.25437	428.778	FALSE	7
2022-09-12	12:54:56	0.730801	3.25075	417.895	FALSE	7
2022-09-12	12:54:56	0.728868	3.24215	432.02	FALSE	7
2022-09-12	12:54:56	0.73243	3.258	421.153	FALSE	7
2022-09-12	12:54:56	0.725051	3.22517	435.245	FALSE	7
2022-09-12	12:54:57	0.728003	3.2383	424.391	FALSE	7
2022-09-12	12:54:57	0.724186	3.22132	438.466	FALSE	7
2022-09-12	12:54:57	0.725356	3.22653	427.618	FALSE	7
2022-09-12	12:54:57	0.733753	3.26388	441.73	FALSE	7
2022-09-12	12:54:58	0.725305	3.2263	430.844	FALSE	7
2022-09-12	12:54:58	0.718995	3.19823	444.928	FALSE	7
2022-09-12	12:54:58	0.730089	3.24758	434.092	FALSE	7
2022-09-12	12:54:58	0.721946	3.21136	448.14	FALSE	7
2022-09-12	12:54:59	0.727087	3.23423	437.326	FALSE	7
2022-09-12	12:54:59	0.726781	3.23287	451.373	FALSE	7
2022-09-12	12:54:59	0.727443	3.23581	440.562	FALSE	7
2022-09-12	12:55:00	0.724135	3.2211	454.594	FALSE	7
2022-09-12	12:55:00	0.706578	3.143	443.705	FALSE	7
2022-09-12	12:55:00	0.725102	3.2254	457.819	FALSE	7
2022-09-12	12:55:00	0.728359	3.23989	446.944	FALSE	7
2022-09-12	12:55:01	0.725763	3.22834	461.047	FALSE	7
2022-09-12	12:55:01	0.722557	3.21408	450.159	FALSE	7
2022-09-12	12:55:01	0.726018	3.22947	464.277	FALSE	7
2022-09-12	12:55:01	0.720013	3.20276	453.361	FALSE	7
2022-09-12	12:55:02	0.721387	3.20887	467.486	FALSE	7
2022-09-12	12:55:02	0.73416	3.26569	456.627	FALSE	7
2022-09-12	12:55:02	0.72556	3.22744	470.713	FALSE	7
2022-09-12	12:55:02	0.723372	3.2177	459.845	FALSE	7
2022-09-12	12:55:03	0.724237	3.22155	473.935	FALSE	7
2022-09-12	12:55:03	0.72612	3.22993	463.075	FALSE	7
2022-09-12	12:55:03	0.724542	3.22291	477.158	FALSE	7
2022-09-12	12:55:04	0.725254	3.22607	466.301	FALSE	7
2022-09-12	12:55:04	0.726527	3.23174	480.389	FALSE	7
2022-09-12	12:55:04	0.726578	3.23196	469.533	FALSE	7
2022-09-12	12:55:04	0.729071	3.24305	483.632	FALSE	7
2022-09-12	12:55:05	0.727188	3.23468	472.767	FALSE	7
2022-09-12	12:55:05	0.731056	3.25188	486.884	FALSE	7
2022-09-12	12:55:05	0.719911	3.20231	475.97	FALSE	7
2022-09-12	12:55:05	0.725254	3.22607	490.11	FALSE	7
2022-09-12	12:55:06	0.728308	3.23966	479.209	FALSE	7
2022-09-12	12:55:06	0.723015	3.21612	493.327	FALSE	7
2022-09-12	12:55:06	0.720623	3.20548	482.415	FALSE	7
2022-09-12	12:55:06	0.729224	3.24373	496.57	FALSE	7
2022-09-12	12:55:07	0.72271	3.21476	485.63	FALSE	7
2022-09-12	12:55:07	0.726985	3.23377	499.804	FALSE	7
2022-09-12	12:55:07	0.725662	3.22789	488.857	FALSE	7
2022-09-12	12:55:08	0.728054	3.23853	503.043	FALSE	7
2022-09-12	12:55:08	0.725712	3.22811	492.086	FALSE	7
2022-09-12	12:55:08	0.729224	3.24373	506.286	FALSE	7
2022-09-12	12:55:08	0.723015	3.21612	495.302	FALSE	7
2022-09-12	12:55:09	0.723219	3.21702	509.503	FALSE	7
2022-09-12	12:55:09	0.711616	3.16541	498.467	FALSE	7
2022-09-12	12:55:09	0.728104	3.23875	512.742	FALSE	7
2022-09-12	12:55:09	0.779249	3.46626	501.933	FALSE	7
2022-09-12	12:55:10	3.4824	15.4904	528.233	1	8
2022-09-12	12:55:10	1.84536	8.20853	510.142	FALSE	8
2022-09-12	12:55:10	0.760979	3.38499	531.618	FALSE	8
2022-09-12	12:55:10	0.489122	2.17571	512.318	FALSE	8
2022-09-12	12:55:11	0.490751	2.18296	533.8	FALSE	8
2022-09-12	12:55:11	0.194211	0.863889	513.181	FALSE	8
2022-09-12	12:55:11	0.639504	2.84464	536.645	FALSE	8
2022-09-12	12:55:12	0.464695	2.06706	515.249	FALSE	8
2022-09-12	12:55:12	0.850191	3.78182	540.427	FALSE	8
2022-09-12	12:55:12	0.317316	1.41149	516.66	FALSE	8
2022-09-12	12:55:12	0.663219	2.95013	543.377	FALSE	8
2022-09-12	12:55:13	0.732175	3.25686	519.917	FALSE	8
2022-09-12	12:55:13	0.478842	2.12998	545.507	FALSE	8
2022-09-12	12:55:13	0.555433	2.47068	522.388	FALSE	8
2022-09-12	12:55:13	0.635178	2.8254	548.332	FALSE	8
2022-09-12	12:55:14	0.725305	3.2263	525.614	FALSE	8
2022-09-12	12:55:14	0.348155	1.54866	549.881	FALSE	8
2022-09-12	12:55:14	0.726425	3.23128	528.845	FALSE	8
2022-09-12	12:55:14	0.724084	3.22087	553.102	FALSE	8
2022-09-12	12:55:15	0.732226	3.25709	532.102	FALSE	8
2022-09-12	12:55:15	0.286222	1.27317	554.375	FALSE	8
2022-09-12	12:55:15	0.71757	3.19189	535.294	FALSE	8
2022-09-12	12:55:16	0.714974	3.18035	557.556	FALSE	8
2022-09-12	12:55:16	0.729428	3.24464	538.539	FALSE	8
2022-09-12	12:55:16	0.71874	3.1971	560.753	FALSE	8
2022-09-12	12:55:16	0.733753	3.26388	541.803	FALSE	8
2022-09-12	12:55:17	0.722049	3.21182	563.964	FALSE	8
2022-09-12	12:55:17	0.73014	3.24781	545.05	FALSE	8
2022-09-12	12:55:17	0.391616	1.74199	565.706	FALSE	8
2022-09-12	12:55:17	0.521947	2.32172	547.372	FALSE	8
2022-09-12	12:55:18	0.210598	0.936782	566.643	FALSE	8
2022-09-12	12:55:18	0.452125	2.01114	549.383	FALSE	8
2022-09-12	12:55:18	0.252735	1.12422	567.767	FALSE	8
2022-09-12	12:55:18	0.731616	3.25437	552.638	FALSE	8
2022-09-12	12:55:19	0.363473	1.6168	569.384	FALSE	8
2022-09-12	12:55:19	0.260471	1.15863	553.796	FALSE	8
2022-09-12	12:55:19	0.217926	0.969378	570.354	FALSE	8
2022-09-12	12:55:20	0.158893	0.706788	554.503	FALSE	8
2022-09-12	12:55:20	-0.0783585	-0.348554	570.354	FALSE	8
2022-09-12	12:55:20	-0.199376	-0.886864	554.503	FALSE	8
2022-09-12	12:55:20	-0.0964246	-0.428916	570.354	FALSE	8
2022-09-12	12:55:21	-0.127621	-0.567684	554.503	FALSE	8
2022-09-12	12:55:21	-0.11785	-0.52422	570.354	FALSE	8
2022-09-12	12:55:21	-0.244364	-1.08698	554.503	FALSE	8
2022-09-12	12:55:21	-0.113626	-0.505431	570.354	FALSE	8
2022-09-12	12:55:22	-0.13785	-0.613184	554.503	FALSE	8
2022-09-12	12:55:22	-0.0402924	-0.179229	570.354	FALSE	8
2022-09-12	12:55:22	-0.0803941	-0.357609	554.503	FALSE	8
2022-09-12	12:55:22	0.0864761	0.384663	570.738	FALSE	8
2022-09-12	12:55:23	0.0560435	0.249293	554.752	FALSE	8
2022-09-12	12:55:23	0.188359	0.837859	571.576	FALSE	8
2022-09-12	12:55:23	0.0816414	0.363157	555.116	FALSE	8
2022-09-12	12:55:24	0.310496	1.38115	572.957	FALSE	8
2022-09-12	12:55:24	0.244644	1.08823	556.204	FALSE	8
2022-09-12	12:55:24	0.30098	1.33882	574.296	FALSE	8
2022-09-12	12:55:24	0.18902	0.840799	557.045	FALSE	8
2022-09-12	12:55:25	0.468613	2.08448	576.381	FALSE	8
2022-09-12	12:55:25	0.620674	2.76088	559.805	FALSE	8
2022-09-12	12:55:25	0.437316	1.94527	578.326	FALSE	8
2022-09-12	12:55:25	0.368461	1.63899	561.444	FALSE	8
2022-09-12	12:55:26	0.310598	1.3816	579.707	FALSE	8
2022-09-12	12:55:26	0.305713	1.35987	562.804	FALSE	8
2022-09-12	12:55:26	0.329122	1.464	581.171	FALSE	8
2022-09-12	12:55:26	0.30612	1.36168	564.166	FALSE	8
2022-09-12	12:55:27	0.210038	0.934291	582.106	FALSE	8
2022-09-12	12:55:27	0.281285	1.25121	565.417	FALSE	8
2022-09-12	12:55:27	0.218079	0.970059	583.076	FALSE	8
2022-09-12	12:55:28	0.291056	1.29468	566.712	FALSE	8
2022-09-12	12:55:28	0.0424557	0.188851	583.265	FALSE	8
2022-09-12	12:55:28	-0.0588674	-0.261854	566.712	FALSE	8
2022-09-12	12:55:28	-0.057646	-0.256421	583.265	FALSE	8
2022-09-12	12:55:29	-0.109351	-0.486415	566.712	FALSE	8
2022-09-12	12:55:29	-0.0627351	-0.279058	583.265	FALSE	8
2022-09-12	12:55:29	-0.104465	-0.464681	566.712	FALSE	8
2022-09-12	12:55:29	0.0105982	0.0471429	583.312	FALSE	8
2022-09-12	12:55:30	-0.0211575	-0.0941128	566.712	FALSE	8
2022-09-12	12:55:30	-0.0550506	-0.244876	583.312	FALSE	8
2022-09-12	12:55:30	-0.103397	-0.459931	566.712	FALSE	8
2022-09-12	12:55:30	0.0152293	0.067743	583.38	FALSE	8
2022-09-12	12:55:31	0.0109035	0.0485009	566.76	FALSE	8
2022-09-12	12:55:31	0.0347203	0.154443	583.534	FALSE	8
2022-09-12	12:55:31	-0.0189183	-0.0841524	566.76	FALSE	8
2022-09-12	12:55:32	0.0332445	0.147878	583.682	FALSE	8
2022-09-12	12:55:32	0.109937	0.489022	567.249	FALSE	8
2022-09-12	12:55:32	-0.0106232	-0.0472541	583.682	FALSE	8
2022-09-12	12:55:32	0.0306999	0.136559	567.386	FALSE	8
2022-09-12	12:55:33	0.0351783	0.15648	583.838	FALSE	8
2022-09-12	12:55:33	0.163219	0.726031	568.112	FALSE	8
2022-09-12	12:55:33	0.00912238	0.0405782	583.879	FALSE	8
2022-09-12	12:55:33	0.106272	0.472719	568.585	FALSE	8
2022-09-12	12:55:34	0.0639824	0.284607	584.164	FALSE	8
2022-09-12	12:55:34	0.184033	0.818616	569.403	FALSE	8
2022-09-12	12:55:34	0.0361453	0.160782	584.324	FALSE	8
2022-09-12	12:55:34	0.2364	1.05155	570.455	FALSE	8
2022-09-12	12:55:35	0.0794022	0.353197	584.677	FALSE	8
2022-09-12	12:55:35	0.253041	1.12558	571.58	FALSE	8
2022-09-12	12:55:35	0.0661707	0.294341	584.972	FALSE	8
2022-09-12	12:55:36	0.190496	0.847364	572.428	FALSE	8
2022-09-12	12:55:36	0.103423	0.460046	585.432	FALSE	8
2022-09-12	12:55:36	0.214975	0.956252	573.384	FALSE	8
2022-09-12	12:55:36	0.115738	0.514826	585.947	FALSE	8
2022-09-12	12:55:37	0.206832	0.92003	574.304	FALSE	8
2022-09-12	12:55:37	0.109224	0.48585	586.433	FALSE	8
2022-09-12	12:55:37	0.143423	0.637974	574.942	FALSE	8
2022-09-12	12:55:37	-0.00477074	-0.0212212	586.433	FALSE	8
2022-09-12	12:55:38	0.154873	0.688906	575.631	FALSE	8
2022-09-12	12:55:38	0.0913106	0.406168	586.839	FALSE	8
2022-09-12	12:55:38	0.133804	0.595187	576.226	FALSE	8
2022-09-12	12:55:38	0.16902	0.751835	587.591	FALSE	8
2022-09-12	12:55:39	0.15411	0.685512	576.912	FALSE	8
2022-09-12	12:55:39	0.242049	1.07668	588.667	FALSE	8
2022-09-12	12:55:39	0.271514	1.20775	578.119	FALSE	8
2022-09-12	12:55:40	0.172328	0.766549	589.434	FALSE	8
2022-09-12	12:55:40	0.191463	0.851666	578.971	FALSE	8
2022-09-12	12:55:40	0.303372	1.34946	590.783	FALSE	8
2022-09-12	12:55:40	0.319148	1.41963	580.391	FALSE	8
2022-09-12	12:55:41	0.275636	1.22608	592.009	FALSE	8
2022-09-12	12:55:41	0.20215	0.899204	581.29	FALSE	8
2022-09-12	12:55:41	0.193295	0.859815	592.869	FALSE	8
2022-09-12	12:55:41	0.224898	1.00039	582.29	FALSE	8
2022-09-12	12:55:42	0.252226	1.12195	593.991	FALSE	8
2022-09-12	12:55:42	0.282964	1.25868	583.549	FALSE	8
2022-09-12	12:55:42	0.310445	1.38092	595.372	FALSE	8
2022-09-12	12:55:42	0.319707	1.42212	584.971	FALSE	8
2022-09-12	12:55:43	0.295127	1.31278	596.685	FALSE	8
2022-09-12	12:55:43	0.323168	1.43752	586.409	FALSE	8
2022-09-12	12:55:43	0.445051	1.97968	598.664	FALSE	8
2022-09-12	12:55:44	0.413651	1.84	588.249	FALSE	8
2022-09-12	12:55:44	0.348053	1.54821	600.213	FALSE	8
2022-09-12	12:55:44	0.348562	1.55047	589.799	FALSE	8
2022-09-12	12:55:44	0.475942	2.11709	602.33	FALSE	8
2022-09-12	12:55:45	0.377367	1.6786	591.478	FALSE	8
2022-09-12	12:55:45	0.469122	2.08675	604.417	FALSE	8
2022-09-12	12:55:45	0.454873	2.02337	593.501	FALSE	8
2022-09-12	12:55:45	0.451819	2.00978	606.426	FALSE	8
2022-09-12	12:55:46	0.461438	2.05257	595.554	FALSE	8
2022-09-12	12:55:46	0.464237	2.06502	608.491	FALSE	8
2022-09-12	12:55:46	0.466018	2.07294	597.627	FALSE	8
2022-09-12	12:55:46	0.468206	2.08267	610.574	FALSE	8
2022-09-12	12:55:47	0.478588	2.12886	599.755	FALSE	8
2022-09-12	12:55:47	0.474262	2.10961	612.684	FALSE	8
2022-09-12	12:55:47	0.472023	2.09965	601.855	FALSE	8
2022-09-12	12:55:48	0.472837	2.10327	614.787	FALSE	8
2022-09-12	12:55:48	0.465916	2.07249	603.928	FALSE	8
2022-09-12	12:55:48	0.466527	2.07521	616.862	FALSE	8
2022-09-12	12:55:48	0.454211	2.02042	605.948	FALSE	8
2022-09-12	12:55:49	0.466934	2.07702	618.939	FALSE	8
2022-09-12	12:55:49	0.468359	2.08335	608.031	FALSE	8
2022-09-12	12:55:49	0.470089	2.09105	621.03	FALSE	8
2022-09-12	12:55:49	0.477163	2.12252	610.154	FALSE	8
2022-09-12	12:55:50	0.496399	2.20808	623.238	FALSE	8
2022-09-12	12:55:50	0.600878	2.67283	612.827	FALSE	8
2022-09-12	12:55:50	0.97472	4.33575	627.574	FALSE	8
2022-09-12	12:55:50	1.34688	5.99119	618.818	FALSE	8
2022-09-12	12:55:51	0.959555	4.26829	631.842	FALSE	8
2022-09-12	12:55:51	0.203779	0.90645	619.724	FALSE	8
2022-09-12	12:55:51	0.240216	1.06853	632.911	FALSE	8
2022-09-12	12:55:52	0.130853	0.58206	620.306	FALSE	8
2022-09-12	12:55:52	0.240471	1.06966	633.98	FALSE	8
2022-09-12	12:55:52	0.286934	1.27634	621.583	FALSE	8
2022-09-12	12:55:52	0.357468	1.59009	635.571	FALSE	8
2022-09-12	12:55:53	0.422812	1.88075	623.464	FALSE	8
2022-09-12	12:55:53	0.377875	1.68086	637.251	FALSE	8
2022-09-12	12:55:53	0.184593	0.821107	624.285	FALSE	8
2022-09-12	12:55:53	0.112685	0.501245	637.753	FALSE	8
2022-09-12	12:55:54	-0.118308	-0.526258	624.285	FALSE	8
2022-09-12	12:55:54	-0.120496	-0.53599	637.753	FALSE	8
2022-09-12	12:55:54	-0.126806	-0.564058	624.285	FALSE	8
2022-09-12	12:55:54	-0.131997	-0.587149	637.753	FALSE	8
2022-09-12	12:55:55	-0.150521	-0.669548	624.285	FALSE	8
2022-09-12	12:55:55	-0.147824	-0.657551	637.753	FALSE	8
2022-09-12	12:55:55	0.093957	0.41794	624.703	FALSE	8
2022-09-12	12:55:56	0.203321	0.904412	638.657	FALSE	8
2022-09-12	12:55:56	0.115891	0.515506	625.218	FALSE	8
2022-09-12	12:55:56	0.24673	1.0975	639.755	FALSE	8
2022-09-12	12:55:56	0.360267	1.60254	626.821	FALSE	8
2022-09-12	12:55:57	0.310802	1.38251	641.137	FALSE	8
2022-09-12	12:55:57	0.365	1.62359	628.444	FALSE	8
2022-09-12	12:55:57	0.377163	1.6777	642.815	FALSE	8
2022-09-12	12:55:57	0.33126	1.47351	629.918	FALSE	8
2022-09-12	12:55:58	0.38841	1.72773	644.543	FALSE	8
2022-09-12	12:55:58	0.38673	1.72025	631.638	FALSE	8
2022-09-12	12:55:58	0.332634	1.47962	646.022	FALSE	8
2022-09-12	12:55:58	0.472583	2.10214	633.74	FALSE	8
2022-09-12	12:55:59	0.255382	1.13599	647.158	FALSE	8
2022-09-12	12:55:59	0.499911	2.2237	635.964	FALSE	8
2022-09-12	12:55:59	0.313194	1.39315	648.551	FALSE	8
2022-09-12	12:56:00	0.433244	1.92716	637.891	FALSE	8
2022-09-12	12:56:00	0.290903	1.29399	649.845	FALSE	8
2022-09-12	12:56:00	0.312176	1.38862	639.28	FALSE	8
2022-09-12	12:56:00	0.397825	1.76961	651.615	FALSE	8
2022-09-12	12:56:01	0.326781	1.45359	640.733	FALSE	8
2022-09-12	12:56:01	0.527188	2.34504	653.96	FALSE	8
2022-09-12	12:56:01	0.257672	1.14618	641.879	FALSE	8
2022-09-12	12:56:01	0.532837	2.37017	656.33	FALSE	8
2022-09-12	12:56:02	0.25243	1.12286	643.002	FALSE	8
2022-09-12	12:56:02	0.403015	1.79269	658.123	FALSE	8
2022-09-12	12:56:02	0.304898	1.35625	644.358	FALSE	8
2022-09-12	12:56:02	0.373244	1.66026	659.783	FALSE	8
2022-09-12	12:56:03	0.64729	2.87928	647.238	FALSE	8
2022-09-12	12:56:03	0.72902	3.24283	663.026	FALSE	8
2022-09-12	12:56:03	0.455433	2.02586	649.264	FALSE	8
2022-09-12	12:56:04	0.189529	0.843063	663.869	FALSE	8
2022-09-12	12:56:04	0.392634	1.74651	651.01	FALSE	8
2022-09-12	12:56:04	0.22159	0.985677	664.855	FALSE	8
2022-09-12	12:56:04	0.349784	1.55591	652.566	FALSE	8
2022-09-12	12:56:05	0.169326	0.753196	665.608	FALSE	8
2022-09-12	12:56:05	0.195229	0.868418	653.434	FALSE	8
2022-09-12	12:56:05	0.158028	0.70294	666.311	FALSE	8
2022-09-12	12:56:05	0.256501	1.14097	654.575	FALSE	8
2022-09-12	12:56:06	0.241234	1.07306	667.384	FALSE	8
2022-09-12	12:56:06	0.344949	1.5344	656.11	FALSE	8
2022-09-12	12:56:06	0.281132	1.25053	668.634	FALSE	8
2022-09-12	12:56:06	0.467443	2.07928	658.189	FALSE	8
2022-09-12	12:56:07	0.434313	1.93191	670.566	FALSE	8
2022-09-12	12:56:07	0.329122	1.464	659.653	FALSE	8
2022-09-12	12:56:07	0.237163	1.05495	671.621	FALSE	8
2022-09-12	12:56:08	0.352481	1.56791	661.221	FALSE	8
2022-09-12	12:56:08	0.292277	1.30011	672.921	FALSE	8
2022-09-12	12:56:08	0.268257	1.19326	662.414	FALSE	8
2022-09-12	12:56:08	0.204593	0.910071	673.831	FALSE	8
2022-09-12	12:56:09	0.29528	1.31346	663.728	FALSE	8
2022-09-12	12:56:09	0.25299	1.12535	674.957	FALSE	8
2022-09-12	12:56:09	0.25416	1.13055	664.858	FALSE	8
2022-09-12	12:56:09	0.222049	0.987718	675.944	FALSE	8
2022-09-12	12:56:10	0.168257	0.748441	665.607	FALSE	8
2022-09-12	12:56:10	-0.0088929	-0.0395574	675.944	FALSE	8
2022-09-12	12:56:10	0.0369595	0.164403	665.771	FALSE	8
2022-09-12	12:56:10	0.044186	0.196548	676.141	FALSE	8
2022-09-12	12:56:11	0.0983844	0.437633	666.209	FALSE	8
2022-09-12	12:56:11	0.201845	0.897847	677.039	FALSE	8
2022-09-12	12:56:11	0.125255	0.557159	666.766	FALSE	8
2022-09-12	12:56:12	0.170649	0.759081	677.798	FALSE	8
2022-09-12	12:56:12	0.0150257	0.0668373	666.833	FALSE	8
2022-09-12	12:56:12	0.0526338	0.234126	678.032	FALSE	8
2022-09-12	12:56:12	-0.00787507	-0.0350299	666.833	FALSE	8
2022-09-12	12:56:13	0.0263743	0.117318	678.149	FALSE	8
2022-09-12	12:56:13	0.0864252	0.384437	667.217	FALSE	8
2022-09-12	12:56:13	-0.00553411	-0.0246168	678.149	FALSE	8
2022-09-12	12:56:13	0.151412	0.673511	667.891	FALSE	8
2022-09-12	12:56:14	0.171616	0.763382	678.913	FALSE	8
2022-09-12	12:56:14	0.148613	0.66106	668.552	FALSE	8
2022-09-12	12:56:14	-0.0997834	-0.443857	678.913	FALSE	8
2022-09-12	12:56:14	-0.280241	-1.24657	668.552	FALSE	8
2022-09-12	12:56:15	-0.402328	-1.78964	678.913	FALSE	8
2022-09-12	12:56:15	-0.369656	-1.6443	668.552	FALSE	8
2022-09-12	12:56:15	-0.203804	-0.906561	678.913	FALSE	8
2022-09-12	12:56:16	-0.0335748	-0.149347	668.552	FALSE	8
2022-09-12	12:56:16	0.00591628	0.0263168	678.939	FALSE	8
2022-09-12	12:56:16	0.0300893	0.133843	668.686	FALSE	8
2022-09-12	12:56:16	0.0718704	0.319694	679.259	FALSE	8
2022-09-12	12:56:17	0.104746	0.465931	669.152	FALSE	8
2022-09-12	12:56:17	0.225356	1.00243	680.261	FALSE	8
2022-09-12	12:56:17	0.316603	1.40831	670.56	FALSE	8
2022-09-12	12:56:17	0.229275	1.01986	681.281	FALSE	8
2022-09-12	12:56:18	0.307748	1.36892	671.929	FALSE	8
2022-09-12	12:56:18	0.165153	0.734634	682.016	FALSE	8
2022-09-12	12:56:18	0.281336	1.25144	673.18	FALSE	8
2022-09-12	12:56:18	0.242456	1.07849	683.094	FALSE	8
2022-09-12	12:56:19	0.284644	1.26615	674.446	FALSE	8
2022-09-12	12:56:19	0.294517	1.31007	684.404	FALSE	8
2022-09-12	12:56:19	0.236349	1.05133	675.498	FALSE	8
2022-09-12	12:56:20	0.337061	1.49931	685.904	FALSE	8
2022-09-12	12:56:20	0.278741	1.2399	676.738	FALSE	8
2022-09-12	12:56:20	0.403015	1.79269	687.696	FALSE	8
2022-09-12	12:56:20	0.270038	1.20118	677.939	FALSE	8
2022-09-12	12:56:21	0.268919	1.19621	688.892	FALSE	8
2022-09-12	12:56:21	0.367036	1.63265	679.571	FALSE	8
2022-09-12	12:56:21	0.534517	2.37764	691.27	FALSE	8
2022-09-12	12:56:21	1.14933	5.11245	684.684	FALSE	8
2022-09-12	12:56:22	0.781845	3.4778	694.748	FALSE	8
2022-09-12	12:56:22	0.559707	2.48969	687.174	FALSE	8
2022-09-12	12:56:22	0.923422	4.10757	698.855	FALSE	8
2022-09-12	12:56:22	0.847646	3.7705	690.944	FALSE	8
2022-09-12	12:56:23	1.23177	5.47916	704.335	FALSE	8
2022-09-12	12:56:23	1.15263	5.12713	696.071	FALSE	8
2022-09-12	12:56:23	1.06989	4.75908	709.094	FALSE	8
2022-09-12	12:56:24	1.14963	5.11378	701.185	FALSE	8
2022-09-12	12:56:24	1.22464	5.44744	714.541	FALSE	8
2022-09-12	12:56:24	0.770089	3.42551	704.61	FALSE	8
2022-09-12	12:56:24	0.741438	3.29806	717.839	FALSE	8
2022-09-12	12:56:25	0.420929	1.87238	706.483	FALSE	8
2022-09-12	12:56:25	0.542354	2.4125	720.252	FALSE	8
2022-09-12	12:56:25	0.311209	1.38432	707.867	FALSE	8
2022-09-12	12:56:25	0.348104	1.54844	721.8	FALSE	8
2022-09-12	12:56:26	0.280369	1.24714	709.114	FALSE	8
2022-09-12	12:56:26	0.27757	1.23469	723.035	FALSE	8
2022-09-12	12:56:26	0.126323	0.56191	709.676	FALSE	8
2022-09-12	12:56:26	-0.00487254	-0.021674	723.035	FALSE	8
2022-09-12	12:56:27	-0.0639056	-0.284265	709.676	FALSE	8
2022-09-12	12:56:27	0.149377	0.664459	723.699	FALSE	8
2022-09-12	12:56:27	0.295687	1.31527	710.991	FALSE	8
2022-09-12	12:56:28	0.310445	1.38092	725.08	FALSE	8
2022-09-12	12:56:28	0.277672	1.23514	712.227	FALSE	8
2022-09-12	12:56:28	0.333702	1.48437	726.565	FALSE	8
2022-09-12	12:56:28	0.340369	1.51403	713.741	FALSE	8
2022-09-12	12:56:29	0.254008	1.12988	727.694	FALSE	8
2022-09-12	12:56:29	0.277875	1.23604	714.977	FALSE	8
2022-09-12	12:56:29	0.281794	1.25348	728.948	FALSE	8
2022-09-12	12:56:29	0.343015	1.5258	716.502	FALSE	8
2022-09-12	12:56:30	0.285255	1.26887	730.217	FALSE	8
2022-09-12	12:56:30	0.343168	1.52648	718.029	FALSE	8
2022-09-12	12:56:30	0.33299	1.48121	731.698	FALSE	8
2022-09-12	12:56:30	0.303728	1.35104	719.38	FALSE	8
2022-09-12	12:56:31	0.228257	1.01533	732.713	FALSE	8
2022-09-12	12:56:31	0.283575	1.2614	720.641	FALSE	8
2022-09-12	12:56:31	0.297367	1.32275	734.036	FALSE	8
2022-09-12	12:56:32	0.244288	1.08664	721.728	FALSE	8
2022-09-12	12:56:32	0.216196	0.961683	734.998	FALSE	8
2022-09-12	12:56:32	0.235331	1.0468	722.775	FALSE	8
2022-09-12	12:56:32	0.190395	0.846915	735.845	FALSE	8
2022-09-12	12:56:33	0.159707	0.710409	723.485	FALSE	8
2022-09-12	12:56:33	0.0450002	0.20017	736.045	FALSE	8
2022-09-12	12:56:33	0.0273921	0.121846	723.607	FALSE	8
2022-09-12	12:56:33	0.190954	0.849402	736.894	FALSE	8
2022-09-12	12:56:34	0.243117	1.08143	724.689	FALSE	8
2022-09-12	12:56:34	0.179249	0.797335	737.692	FALSE	8
2022-09-12	12:56:34	0.113855	0.50645	725.195	FALSE	8
2022-09-12	12:56:34	0.115535	0.513923	738.206	FALSE	8
2022-09-12	12:56:35	0.152685	0.679173	725.874	FALSE	8
2022-09-12	12:56:35	0.317824	1.41374	739.619	FALSE	8
2022-09-12	12:56:35	0.237214	1.05518	726.929	FALSE	8
2022-09-12	12:56:36	0.391361	1.74085	741.36	FALSE	8
2022-09-12	12:56:36	0.220267	0.979792	727.909	FALSE	8
2022-09-12	12:56:36	0.258639	1.15048	742.511	FALSE	8
2022-09-12	12:56:36	0.234568	1.04341	728.953	FALSE	8
2022-09-12	12:56:37	0.252277	1.12218	743.633	FALSE	8
2022-09-12	12:56:37	0.362608	1.61295	730.565	FALSE	8
2022-09-12	12:56:37	0.368868	1.6408	745.274	FALSE	8
2022-09-12	12:56:37	0.369224	1.64238	732.208	FALSE	8
2022-09-12	12:56:38	0.350344	1.5584	746.832	FALSE	8
2022-09-12	12:56:38	0.36444	1.6211	733.829	FALSE	8
2022-09-12	12:56:38	0.463066	2.05981	748.892	FALSE	8
2022-09-12	12:56:38	0.321082	1.42824	735.257	FALSE	8
2022-09-12	12:56:39	0.378232	1.68245	750.574	FALSE	8
2022-09-12	12:56:39	0.317366	1.41171	736.669	FALSE	8
2022-09-12	12:56:39	0.339504	1.51018	752.084	FALSE	8
2022-09-12	12:56:40	0.398893	1.77436	738.443	FALSE	8
2022-09-12	12:56:40	0.369173	1.64216	753.727	FALSE	8
2022-09-12	12:56:40	0.36668	1.63107	740.074	FALSE	8
2022-09-12	12:56:40	0.365153	1.62427	755.351	FALSE	8
2022-09-12	12:56:41	0.359249	1.59801	741.672	FALSE	8
2022-09-12	12:56:41	0.341438	1.51878	756.87	FALSE	8
2022-09-12	12:56:41	0.279504	1.24329	742.916	FALSE	8
2022-09-12	12:56:41	0.388206	1.72682	758.596	FALSE	8
2022-09-12	12:56:42	0.240216	1.06853	743.984	FALSE	8
2022-09-12	12:56:42	0.555076	2.46909	761.066	FALSE	8
2022-09-12	12:56:42	0.209835	0.933388	744.918	FALSE	8
2022-09-12	12:56:42	0.466272	2.07407	763.14	FALSE	8
2022-09-12	12:56:43	0.303015	1.34787	746.265	FALSE	8
2022-09-12	12:56:43	0.429936	1.91244	765.052	FALSE	8
2022-09-12	12:56:43	0.300471	1.33656	747.602	FALSE	8
2022-09-12	12:56:44	0.45701	2.03287	767.085	FALSE	8
2022-09-12	12:56:44	0.367646	1.63536	749.237	FALSE	8
2022-09-12	12:56:44	0.611107	2.71833	769.803	FALSE	8
2022-09-12	12:56:44	0.330852	1.4717	750.709	FALSE	8
2022-09-12	12:56:45	0.337977	1.50339	771.307	FALSE	8
2022-09-12	12:56:45	0.36668	1.63107	752.34	FALSE	8
2022-09-12	12:56:45	0.86159	3.83252	775.139	FALSE	8
2022-09-12	12:56:45	0.753346	3.35103	755.691	FALSE	8
2022-09-12	12:56:46	1.06887	4.75455	779.894	FALSE	8
2022-09-12	12:56:46	0.774211	3.44385	759.135	FALSE	8
2022-09-12	12:56:46	0.76668	3.41035	783.304	FALSE	8
2022-09-12	12:56:46	0.835535	3.71663	762.852	FALSE	8
2022-09-12	12:56:47	0.979046	4.35499	787.659	FALSE	8
2022-09-12	12:56:47	0.487748	2.1696	765.021	FALSE	8
2022-09-12	12:56:47	0.776705	3.45494	791.114	FALSE	8
2022-09-12	12:56:48	0.482507	2.14629	767.168	FALSE	8
2022-09-12	12:56:48	1.14225	5.08096	796.195	FALSE	8
2022-09-12	12:56:48	0.578232	2.57209	769.74	FALSE	8
2022-09-12	12:56:48	0.329224	1.46445	797.659	FALSE	8
2022-09-12	12:56:49	0.344797	1.53373	771.273	FALSE	8
2022-09-12	12:56:49	0.103881	0.462083	798.121	FALSE	8
2022-09-12	12:56:49	0.176349	0.784436	772.058	FALSE	8
2022-09-12	12:56:49	-0.106857	-0.475321	798.121	FALSE	8
2022-09-12	12:56:50	0.00673053	0.0299387	772.088	FALSE	8
2022-09-12	12:56:50	0.0472903	0.210357	798.332	FALSE	8
2022-09-12	12:56:50	0.0904455	0.40232	772.49	FALSE	8
2022-09-12	12:56:50	-0.0138802	-0.0617419	798.332	FALSE	8
2022-09-12	12:56:51	0.160318	0.713127	773.203	FALSE	8
2022-09-12	12:56:51	0.21584	0.960099	799.292	FALSE	8
2022-09-12	12:56:51	0.250344	1.11358	774.317	FALSE	8
2022-09-12	12:56:52	0.33472	1.4889	800.781	FALSE	8
2022-09-12	12:56:52	0.194517	0.865251	775.182	FALSE	8
2022-09-12	12:56:52	0.400267	1.78047	802.561	FALSE	8
2022-09-12	12:56:52	0.240878	1.07147	776.253	FALSE	8
2022-09-12	12:56:53	0.519249	2.30972	804.871	FALSE	8
2022-09-12	12:56:53	0.460929	2.0503	778.304	FALSE	8
2022-09-12	12:56:53	0.483728	2.15172	807.023	FALSE	8
2022-09-12	12:56:53	0.434975	1.93486	780.239	FALSE	8
2022-09-12	12:56:54	0.447596	1.991	809.014	FALSE	8
2022-09-12	12:56:54	0.498435	2.21714	782.456	FALSE	8
2022-09-12	12:56:54	0.35813	1.59303	810.607	FALSE	8
2022-09-12	12:56:55	0.442048	1.96632	784.422	FALSE	8
2022-09-12	12:56:55	0.359249	1.59801	812.205	FALSE	8
2022-09-12	12:56:55	0.780369	3.47124	787.893	FALSE	8
2022-09-12	12:56:55	0.529325	2.35454	814.559	FALSE	8
2022-09-12	12:56:56	0.756552	3.36529	791.259	FALSE	8
2022-09-12	12:56:56	0.484746	2.15625	816.716	FALSE	8
2022-09-12	12:56:56	0.842557	3.74786	795.006	FALSE	8
2022-09-12	12:56:56	0.409071	1.81963	818.535	FALSE	8
2022-09-12	12:56:57	0.407392	1.81216	796.819	FALSE	8
2022-09-12	12:56:57	0.44958	1.99982	820.535	FALSE	8
2022-09-12	12:56:57	0.600572	2.67146	799.49	FALSE	8
2022-09-12	12:56:57	0.450598	2.00435	822.539	FALSE	8
2022-09-12	12:56:58	0.323626	1.43955	800.93	FALSE	8
2022-09-12	12:56:58	0.457774	2.03627	824.576	FALSE	8
2022-09-12	12:56:58	0.220623	0.981375	801.911	FALSE	8
2022-09-12	12:56:58	0.393651	1.75104	826.327	FALSE	8
2022-09-12	12:56:59	0.180115	0.801188	802.712	FALSE	8
2022-09-12	12:56:59	0.290903	1.29399	827.621	FALSE	8
2022-09-12	12:56:59	0.147901	0.657893	803.37	FALSE	8
2022-09-12	12:57:00	0.255484	1.13644	828.757	FALSE	8
2022-09-12	12:57:00	0.287596	1.27928	804.649	FALSE	8
2022-09-12	12:57:00	0.255229	1.13531	829.892	FALSE	8
2022-09-12	12:57:00	0.369835	1.6451	806.294	FALSE	8
2022-09-12	12:57:01	0.290293	1.29128	831.184	FALSE	8
2022-09-12	12:57:01	0.354618	1.57741	807.872	FALSE	8
2022-09-12	12:57:01	0.393295	1.74945	832.933	FALSE	8
2022-09-12	12:57:01	0.398486	1.77255	809.644	FALSE	8
2022-09-12	12:57:02	0.695433	3.09343	836.027	FALSE	8
2022-09-12	12:57:02	0.399148	1.77549	811.42	FALSE	8
2022-09-12	12:57:02	0.306629	1.36395	837.391	FALSE	8
2022-09-12	12:57:03	0.42729	1.90067	813.321	FALSE	8
2022-09-12	12:57:03	0.475992	2.11731	839.508	FALSE	8
2022-09-12	12:57:03	0.45701	2.03287	815.353	FALSE	8
2022-09-12	12:57:03	0.429529	1.91063	841.418	FALSE	8
2022-09-12	12:57:04	0.476094	2.11776	817.471	FALSE	8
2022-09-12	12:57:04	0.437977	1.94821	843.367	FALSE	8
2022-09-12	12:57:04	0.454618	2.02223	819.493	FALSE	8
2022-09-12	12:57:04	0.426476	1.89705	845.264	FALSE	8
2022-09-12	12:57:05	0.502455	2.23502	821.728	FALSE	8
2022-09-12	12:57:05	0.432227	1.92263	847.186	FALSE	8
2022-09-12	12:57:05	0.40612	1.8065	823.535	FALSE	8
2022-09-12	12:57:05	0.364695	1.62224	848.809	FALSE	8
2022-09-12	12:57:06	0.363117	1.61522	825.15	FALSE	8
2022-09-12	12:57:06	0.292277	1.30011	850.109	FALSE	8
2022-09-12	12:57:06	0.286018	1.27227	826.422	FALSE	8
2022-09-12	12:57:07	0.378893	1.68539	851.794	FALSE	8
2022-09-12	12:57:07	0.280471	1.24759	827.67	FALSE	8
2022-09-12	12:57:07	0.355789	1.58262	853.377	FALSE	8
2022-09-12	12:57:07	0.266221	1.1842	828.854	FALSE	8
2022-09-12	12:57:08	0.350445	1.55885	854.936	FALSE	8
2022-09-12	12:57:08	0.308766	1.37345	830.228	FALSE	8
2022-09-12	12:57:08	0.282863	1.25823	856.194	FALSE	8
2022-09-12	12:57:08	0.246272	1.09547	831.323	FALSE	8
2022-09-12	12:57:09	0.214924	0.956025	857.15	FALSE	8
2022-09-12	12:57:09	0.330496	1.47011	832.793	FALSE	8
2022-09-12	12:57:09	0.157774	0.70181	857.852	FALSE	8
2022-09-12	12:57:09	0.36215	1.61092	834.404	FALSE	8
2022-09-12	12:57:10	0.217061	0.965531	858.817	FALSE	8
2022-09-12	12:57:10	0.376501	1.67475	836.079	FALSE	8
2022-09-12	12:57:10	0.250394	1.1138	859.931	FALSE	8
2022-09-12	12:57:11	0.324949	1.44544	837.524	FALSE	8
2022-09-12	12:57:11	0.388104	1.72636	861.657	FALSE	8
2022-09-12	12:57:11	0.340522	1.51471	839.039	FALSE	8
2022-09-12	12:57:11	0.340573	1.51494	863.172	FALSE	8
2022-09-12	12:57:12	0.317977	1.41443	840.454	FALSE	8
2022-09-12	12:57:12	0.354211	1.5756	864.748	FALSE	8
2022-09-12	12:57:12	0.381082	1.69513	842.149	FALSE	8
2022-09-12	12:57:12	0.31645	1.40763	866.156	FALSE	8
2022-09-12	12:57:13	0.429733	1.91154	844.06	FALSE	8
2022-09-12	12:57:13	0.49757	2.21329	868.369	FALSE	8
2022-09-12	12:57:13	0.474313	2.10984	846.17	FALSE	8
2022-09-12	12:57:13	0.428868	1.90769	870.276	FALSE	8
2022-09-12	12:57:14	0.350751	1.56021	847.73	FALSE	8
2022-09-12	12:57:14	0.391972	1.74357	872.02	FALSE	8
2022-09-12	12:57:14	0.299809	1.33361	849.064	FALSE	8
2022-09-12	12:57:15	0.380522	1.69264	873.713	FALSE	8
2022-09-12	12:57:15	0.217214	0.966211	850.03	FALSE	8
2022-09-12	12:57:15	0.857213	3.81305	877.526	FALSE	8
2022-09-12	12:57:15	0.34841	1.5498	851.58	FALSE	8
2022-09-12	12:57:16	0.183015	0.814087	878.34	FALSE	8
2022-09-12	12:57:16	0.191972	0.85393	852.434	FALSE	8
2022-09-12	12:57:16	0.770394	3.42687	881.767	FALSE	8
2022-09-12	12:57:16	0.30958	1.37707	853.811	FALSE	8
2022-09-12	12:57:17	0.188359	0.837859	882.605	FALSE	8
2022-09-12	12:57:17	0.409631	1.82212	855.633	FALSE	8
2022-09-12	12:57:17	0.458842	2.04102	884.646	FALSE	8
2022-09-12	12:57:17	0.526578	2.34232	857.975	FALSE	8
2022-09-12	12:57:18	0.57187	2.54379	887.189	FALSE	8
2022-09-12	12:57:18	0.452634	2.01341	859.989	FALSE	8
2022-09-12	12:57:18	0.530445	2.35953	889.549	FALSE	8
2022-09-12	12:57:19	0.44897	1.99711	861.986	FALSE	8
2022-09-12	12:57:19	0.207087	0.921164	890.47	FALSE	8
2022-09-12	12:57:19	0.18902	0.840799	862.827	FALSE	8
2022-09-12	12:57:19	0.0819977	0.364742	890.835	FALSE	8
2022-09-12	12:57:20	-0.168995	-0.751724	862.827	FALSE	8
2022-09-12	12:57:20	-0.0936765	-0.416692	890.835	FALSE	8
2022-09-12	12:57:20	-0.0389692	-0.173343	862.827	FALSE	8
2022-09-12	12:57:20	0.0651529	0.289813	891.125	FALSE	8
2022-09-12	12:57:21	-0.075814	-0.337236	862.827	FALSE	8
2022-09-12	12:57:21	0.0118705	0.0528024	891.177	FALSE	8
2022-09-12	12:57:21	0.081845	0.364063	863.191	FALSE	8
2022-09-12	12:57:21	0.0764506	0.340068	891.517	FALSE	8
2022-09-12	12:57:22	0.0209289	0.0930959	863.284	FALSE	8
2022-09-12	12:57:22	0.0509544	0.226655	891.744	FALSE	8
2022-09-12	12:57:22	0.0574175	0.255405	863.539	FALSE	8
2022-09-12	12:57:23	0.120522	0.536106	892.28	FALSE	8
2022-09-12	12:57:23	0.0822521	0.365874	863.905	FALSE	8
2022-09-12	12:57:23	0.153753	0.683924	892.964	FALSE	8
2022-09-12	12:57:23	0.121641	0.541083	864.446	FALSE	8
2022-09-12	12:57:24	0.33701	1.49909	894.463	FALSE	8
2022-09-12	12:57:24	0.301183	1.33972	865.786	FALSE	8
2022-09-12	12:57:24	0.708664	3.15228	897.616	FALSE	8
2022-09-12	12:57:24	1.05218	4.68031	870.466	FALSE	8
2022-09-12	12:57:25	1.29106	5.74289	903.358	FALSE	8
2022-09-12	12:57:25	1.24134	5.52173	875.988	FALSE	8
2022-09-12	12:57:25	0.531107	2.36247	905.721	FALSE	8
2022-09-12	12:57:25	0.425967	1.89479	877.883	FALSE	8
2022-09-12	12:57:26	0.63986	2.84623	908.567	FALSE	8
2022-09-12	12:57:26	0.714008	3.17605	881.059	FALSE	8
2022-09-12	12:57:26	1.67996	7.4728	916.04	FALSE	8
2022-09-12	12:57:27	0.698231	3.10587	884.165	FALSE	8
2022-09-12	12:57:27	0.94388	4.19857	920.238	FALSE	8
2022-09-12	12:57:27	0.934771	4.15805	888.323	FALSE	8
2022-09-12	12:57:27	1.02943	4.57911	924.818	FALSE	8
2022-09-12	12:57:28	0.87131	3.87576	892.198	FALSE	8
2022-09-12	12:57:28	0.668359	2.97299	927.791	FALSE	8
2022-09-12	12:57:28	0.347545	1.54595	893.744	FALSE	8
2022-09-12	12:57:28	0.274975	1.22314	929.014	FALSE	8
2022-09-12	12:57:29	0.28841	1.28291	895.027	FALSE	8
2022-09-12	12:57:29	0.340878	1.51629	930.53	FALSE	8
2022-09-12	12:57:29	0.295534	1.31459	896.342	FALSE	8
2022-09-12	12:57:29	0.337366	1.50067	932.031	FALSE	8
2022-09-12	12:57:30	0.361031	1.60594	897.948	FALSE	8
2022-09-12	12:57:30	0.289377	1.28721	933.318	FALSE	8
2022-09-12	12:57:30	0.465356	2.07	900.018	FALSE	8
2022-09-12	12:57:31	1.51233	6.72715	940.045	FALSE	8
2022-09-12	12:57:31	1.88531	8.38624	908.404	FALSE	8
2022-09-12	12:57:31	0.496552	2.20876	942.254	FALSE	8
2022-09-12	12:57:31	0.37416	1.66434	910.068	FALSE	8
2022-09-12	12:57:32	0.293346	1.30486	943.559	FALSE	8
2022-09-12	12:57:32	0.282405	1.25619	911.325	FALSE	8
2022-09-12	12:57:32	0.287188	1.27747	944.836	FALSE	8
2022-09-12	12:57:32	0.306374	1.36281	912.687	FALSE	8
2022-09-12	12:57:33	0.194924	0.867061	945.703	FALSE	8
2022-09-12	12:57:33	0.371972	1.65461	914.342	FALSE	8
2022-09-12	12:57:33	0.454924	2.02359	947.727	FALSE	8
2022-09-12	12:57:33	0.345407	1.53644	915.878	FALSE	8
2022-09-12	12:57:34	0.373041	1.65936	949.386	FALSE	8
2022-09-12	12:57:34	0.273855	1.21816	917.097	FALSE	8
2022-09-12	12:57:34	0.346171	1.53984	950.926	FALSE	8
2022-09-12	12:57:35	0.149173	0.663551	917.76	FALSE	8
2022-09-12	12:57:35	-0.115712	-0.51471	950.926	FALSE	8
2022-09-12	12:57:35	-0.183091	-0.814425	917.76	FALSE	8
2022-09-12	12:57:35	-0.270827	-1.20469	950.926	FALSE	8
2022-09-12	12:57:36	-0.120496	-0.53599	917.76	FALSE	8
2022-09-12	12:57:36	0.321998	1.43231	952.358	FALSE	8
2022-09-12	12:57:36	0.790954	3.51832	921.278	FALSE	8
2022-09-12	12:57:36	0.498384	2.21691	954.575	FALSE	8
2022-09-12	12:57:37	0.579707	2.57865	923.857	FALSE	8
2022-09-12	12:57:37	0.901336	4.00932	958.585	FALSE	8
2022-09-12	12:57:37	0.483066	2.14877	926.006	FALSE	8
2022-09-12	12:57:37	0.517875	2.30361	960.888	FALSE	8
2022-09-12	12:57:38	0.381132	1.69535	927.701	FALSE	8
2022-09-12	12:57:38	0.423219	1.88256	962.771	FALSE	8
2022-09-12	12:57:38	0.409478	1.82144	929.523	FALSE	8
2022-09-12	12:57:39	0.402659	1.79111	964.562	FALSE	8
2022-09-12	12:57:39	0.413092	1.83752	931.36	FALSE	8
2022-09-12	12:57:39	0.427697	1.90248	966.464	FALSE	8
2022-09-12	12:57:39	0.371718	1.65348	933.014	FALSE	8
2022-09-12	12:57:40	0.451005	2.00616	968.47	FALSE	8
2022-09-12	12:57:40	0.465255	2.06955	935.083	FALSE	8
2022-09-12	12:57:40	0.619148	2.75409	971.225	FALSE	8
2022-09-12	12:57:40	0.485153	2.15806	937.241	FALSE	8
2022-09-12	12:57:41	0.43757	1.9464	973.171	FALSE	8
2022-09-12	12:57:41	0.381438	1.69671	938.938	FALSE	8
2022-09-12	12:57:41	0.375127	1.66864	974.84	FALSE	8
2022-09-12	12:57:41	0.358791	1.59597	940.534	FALSE	8
2022-09-12	12:57:42	0.504491	2.24408	977.084	FALSE	8
2022-09-12	12:57:42	0.370496	1.64804	942.182	FALSE	8
2022-09-12	12:57:42	0.63701	2.83355	979.917	FALSE	8
2022-09-12	12:57:43	1.23971	5.51448	947.696	FALSE	8
2022-09-12	12:57:43	2.26256	10.0643	989.982	FALSE	8
2022-09-12	12:57:43	2.48831	11.0685	958.765	FALSE	8
2022-09-12	12:57:43	1.78653	7.94684	997.928	FALSE	8
2022-09-12	12:57:44	0.641794	2.85483	961.62	FALSE	8
2022-09-12	12:57:44	0.382354	1.70079	999.629	FALSE	8
2022-09-12	12:57:44	0.43701	1.94391	963.564	FALSE	8
2022-09-12	12:57:44	0.39355	1.75059	1001.38	FALSE	8
2022-09-12	12:57:45	0.413448	1.8391	965.403	FALSE	8
2022-09-12	12:57:45	0.343015	1.5258	1002.91	FALSE	8
2022-09-12	12:57:45	0.363931	1.61884	967.022	FALSE	8
2022-09-12	12:57:45	0.350293	1.55817	1004.46	FALSE	8
2022-09-12	12:57:46	0.324389	1.44295	968.465	FALSE	8
2022-09-12	12:57:46	0.396349	1.76304	1006.23	FALSE	8
2022-09-12	12:57:46	0.392379	1.74538	970.21	FALSE	8
2022-09-12	12:57:47	0.343728	1.52897	1007.76	FALSE	8
2022-09-12	12:57:47	0.411616	1.83095	972.041	FALSE	8
2022-09-12	12:57:47	0.425967	1.89479	1009.65	FALSE	8
2022-09-12	12:57:47	0.431616	1.91991	973.961	FALSE	8
2022-09-12	12:57:48	0.402761	1.79156	1011.44	FALSE	8
2022-09-12	12:57:48	0.784135	3.48799	977.449	FALSE	8
2022-09-12	12:57:48	0.392023	1.7438	1013.19	FALSE	8
2022-09-12	12:57:48	0.512786	2.28097	979.73	FALSE	8
2022-09-12	12:57:49	0.358741	1.59575	1014.78	FALSE	8
2022-09-12	12:57:49	0.58388	2.59722	982.327	FALSE	8
2022-09-12	12:57:49	0.243931	1.08505	1015.87	FALSE	8
2022-09-12	12:57:49	0.592633	2.63615	984.963	FALSE	8
2022-09-12	12:57:50	0.292786	1.30237	1017.17	FALSE	8
2022-09-12	12:57:50	0.574313	2.55466	987.518	FALSE	8
2022-09-12	12:57:50	0.437723	1.94708	1019.12	FALSE	8
2022-09-12	12:57:51	0.817265	3.63536	991.153	FALSE	8
2022-09-12	12:57:51	0.387646	1.72433	1020.84	FALSE	8
2022-09-12	12:57:51	0.436959	1.94368	993.097	FALSE	8
2022-09-12	12:57:51	0.288868	1.28494	1022.13	FALSE	8
2022-09-12	12:57:52	0.214568	0.954441	994.051	FALSE	8
2022-09-12	12:57:52	0.41986	1.86762	1023.99	FALSE	8
2022-09-12	12:57:52	0.442048	1.96632	996.018	FALSE	8
2022-09-12	12:57:52	0.370751	1.64917	1025.64	FALSE	8
2022-09-12	12:57:53	0.378791	1.68494	997.703	FALSE	8
2022-09-12	12:57:53	0.387697	1.72455	1027.37	FALSE	8
2022-09-12	12:57:53	0.278232	1.23763	998.94	FALSE	8
2022-09-12	12:57:53	0.328155	1.4597	1028.83	FALSE	8
2022-09-12	12:57:54	0.199606	0.887887	999.828	FALSE	8
2022-09-12	12:57:54	0.365153	1.62427	1030.45	FALSE	8
2022-09-12	12:57:54	0.285763	1.27113	1001.1	FALSE	8
2022-09-12	12:57:55	0.416145	1.8511	1032.3	FALSE	8
2022-09-12	12:57:55	0.642914	2.85981	1003.96	FALSE	8
2022-09-12	12:57:55	0.28612	1.27272	1033.57	FALSE	8
2022-09-12	12:57:55	0.229377	1.02031	1004.98	FALSE	8
2022-09-12	12:57:56	0.304644	1.35512	1034.93	FALSE	8
2022-09-12	12:57:56	0.309479	1.37662	1006.36	FALSE	8
2022-09-12	12:57:56	0.387239	1.72252	1036.65	FALSE	8
2022-09-12	12:57:56	0.31528	1.40243	1007.76	FALSE	8
2022-09-12	12:57:57	0.323881	1.44069	1038.09	FALSE	8
2022-09-12	12:57:57	0.277163	1.23288	1008.99	FALSE	8
2022-09-12	12:57:57	0.28612	1.27272	1039.37	FALSE	8
2022-09-12	12:57:57	0.296298	1.31799	1010.31	FALSE	8
2022-09-12	12:57:58	0.339453	1.50995	1040.88	FALSE	8
2022-09-12	12:57:58	0.362812	1.61386	1011.92	FALSE	8
2022-09-12	12:57:58	0.480216	2.1361	1043.01	FALSE	8
2022-09-12	12:57:59	0.645865	2.87294	1014.8	FALSE	8
2022-09-12	12:57:59	0.961692	4.2778	1047.29	FALSE	8
2022-09-12	12:57:59	0.476196	2.11822	1016.91	FALSE	8
2022-09-12	12:57:59	0.38042	1.69218	1048.98	FALSE	8
2022-09-12	12:58:00	0.376807	1.67611	1018.59	FALSE	8
2022-09-12	12:58:00	0.385102	1.71301	1050.69	FALSE	8
2022-09-12	12:58:00	0.402914	1.79224	1020.38	FALSE	8
2022-09-12	12:58:00	0.41472	1.84476	1052.54	FALSE	8
2022-09-12	12:58:01	0.445763	1.98284	1022.37	FALSE	8
2022-09-12	12:58:01	0.436654	1.94232	1054.48	FALSE	8
2022-09-12	12:58:01	0.480929	2.13927	1024.5	FALSE	8
2022-09-12	12:58:01	0.527952	2.34844	1056.83	FALSE	8
2022-09-12	12:58:02	0.536909	2.38828	1026.89	FALSE	8
2022-09-12	12:58:02	0.451667	2.00911	1058.84	FALSE	8
2022-09-12	12:58:02	0.408053	1.8151	1028.71	FALSE	8
2022-09-12	12:58:03	0.391005	1.73927	1060.58	FALSE	8
2022-09-12	12:58:03	0.377875	1.68086	1030.39	FALSE	8
2022-09-12	12:58:03	0.37701	1.67702	1062.26	FALSE	8
2022-09-12	12:58:03	0.385305	1.71391	1032.1	FALSE	8
2022-09-12	12:58:04	0.39187	1.74312	1064	FALSE	8
2022-09-12	12:58:04	0.411972	1.83253	1033.94	FALSE	8
2022-09-12	12:58:04	0.437112	1.94436	1065.94	FALSE	8
2022-09-12	12:58:04	0.464746	2.06728	1036	FALSE	8
2022-09-12	12:58:05	0.454008	2.01952	1067.96	FALSE	8
2022-09-12	12:58:05	0.666323	2.96394	1038.97	FALSE	8
2022-09-12	12:58:05	0.681794	3.03276	1071	FALSE	8
2022-09-12	12:58:05	0.496043	2.2065	1041.17	FALSE	8
2022-09-12	12:58:06	0.532481	2.36858	1073.36	FALSE	8
2022-09-12	12:58:06	0.489936	2.17933	1043.35	FALSE	8
2022-09-12	12:58:06	0.385967	1.71686	1075.08	FALSE	8
2022-09-12	12:58:07	0.373193	1.66004	1045.01	FALSE	8
2022-09-12	12:58:07	0.393753	1.75149	1076.83	FALSE	8
2022-09-12	12:58:07	0.435941	1.93915	1046.95	FALSE	8
2022-09-12	12:58:07	0.406425	1.80786	1078.64	FALSE	8
2022-09-12	12:58:08	0.404949	1.80129	1048.75	FALSE	8
2022-09-12	12:58:08	0.435433	1.93689	1080.58	FALSE	8
2022-09-12	12:58:08	0.442099	1.96654	1050.72	FALSE	8
2022-09-12	12:58:08	0.452685	2.01363	1082.59	FALSE	8
2022-09-12	12:58:09	0.444084	1.97537	1052.69	FALSE	8
2022-09-12	12:58:09	0.429784	1.91177	1084.5	FALSE	8
2022-09-12	12:58:09	0.429987	1.91267	1054.61	FALSE	8
2022-09-12	12:58:09	0.425509	1.89275	1086.4	FALSE	8
2022-09-12	12:58:10	0.442099	1.96654	1056.57	FALSE	8
2022-09-12	12:58:10	0.438283	1.94957	1088.34	FALSE	8
2022-09-12	12:58:10	0.439606	1.95546	1058.53	FALSE	8
2022-09-12	12:58:11	0.439198	1.95364	1090.3	FALSE	8
2022-09-12	12:58:11	0.444695	1.97809	1060.51	FALSE	8
2022-09-12	12:58:11	0.440776	1.96066	1092.26	FALSE	8
2022-09-12	12:58:11	0.438537	1.9507	1062.46	FALSE	8
2022-09-12	12:58:12	0.428766	1.90724	1094.17	FALSE	8
2022-09-12	12:58:12	0.427494	1.90158	1064.36	FALSE	8
2022-09-12	12:58:12	0.425305	1.89184	1096.06	FALSE	8
2022-09-12	12:58:12	0.430293	1.91403	1066.27	FALSE	8
2022-09-12	12:58:13	0.430395	1.91448	1097.97	FALSE	8
2022-09-12	12:58:13	0.429529	1.91063	1068.18	FALSE	8
2022-09-12	12:58:13	0.416959	1.85472	1099.83	FALSE	8
2022-09-12	12:58:13	0.42327	1.88279	1070.07	FALSE	8
2022-09-12	12:58:14	0.435433	1.93689	1101.76	FALSE	8
2022-09-12	12:58:14	0.404898	1.80107	1071.87	FALSE	8
2022-09-12	12:58:14	0.433041	1.92625	1103.69	FALSE	8
2022-09-12	12:58:15	0.421031	1.87283	1073.74	FALSE	8
2022-09-12	12:58:15	0.417774	1.85834	1105.55	FALSE	8
2022-09-12	12:58:15	0.431514	1.91946	1075.66	FALSE	8
2022-09-12	12:58:15	0.407952	1.81465	1107.36	FALSE	8
2022-09-12	12:58:16	0.409071	1.81963	1077.48	FALSE	8
2022-09-12	12:58:16	0.399046	1.77504	1109.14	FALSE	8
2022-09-12	12:58:16	0.402761	1.79156	1079.27	FALSE	8
2022-09-12	12:58:16	0.405916	1.8056	1110.94	FALSE	8
2022-09-12	12:58:17	0.404847	1.80084	1081.07	FALSE	8
2022-09-12	12:58:17	0.402863	1.79202	1112.74	FALSE	8
2022-09-12	12:58:17	0.396858	1.7653	1082.84	FALSE	8
2022-09-12	12:58:17	0.393855	1.75195	1114.49	FALSE	8
2022-09-12	12:58:18	0.398842	1.77413	1084.61	FALSE	8
2022-09-12	12:58:18	0.392481	1.74583	1116.23	FALSE	8
2022-09-12	12:58:18	0.401234	1.78477	1086.4	FALSE	8
2022-09-12	12:58:19	0.394466	1.75466	1117.99	FALSE	8
2022-09-12	12:58:19	0.405	1.80152	1088.2	FALSE	8
2022-09-12	12:58:19	0.406629	1.80877	1119.8	FALSE	8
2022-09-12	12:58:19	0.410445	1.82574	1090.02	FALSE	8
2022-09-12	12:58:20	0.412532	1.83502	1121.63	FALSE	8
2022-09-12	12:58:20	0.411056	1.82846	1091.85	FALSE	8
2022-09-12	12:58:20	0.414975	1.84589	1123.48	FALSE	8
2022-09-12	12:58:20	0.417926	1.85902	1093.71	FALSE	8
2022-09-12	12:58:21	0.419402	1.86558	1125.34	FALSE	8
2022-09-12	12:58:21	0.411412	1.83004	1095.54	FALSE	8
2022-09-12	12:58:21	0.420064	1.86853	1127.21	FALSE	8
2022-09-12	12:58:21	0.414771	1.84498	1097.39	FALSE	8
2022-09-12	12:58:22	0.417774	1.85834	1129.07	FALSE	8
2022-09-12	12:58:22	0.415178	1.84679	1099.23	FALSE	8
2022-09-12	12:58:22	0.409428	1.82122	1130.89	FALSE	8
2022-09-12	12:58:23	0.40215	1.78884	1101.02	FALSE	8
2022-09-12	12:58:23	0.398537	1.77277	1132.66	FALSE	8
2022-09-12	12:58:23	0.389682	1.73338	1102.76	FALSE	8
2022-09-12	12:58:23	0.387697	1.72455	1134.39	FALSE	8
2022-09-12	12:58:24	0.385662	1.7155	1104.47	FALSE	8
2022-09-12	12:58:24	0.389377	1.73203	1136.12	FALSE	8
2022-09-12	12:58:24	0.40729	1.81171	1106.28	FALSE	8
2022-09-12	12:58:24	0.406221	1.80695	1137.93	FALSE	8
2022-09-12	12:58:25	0.404847	1.80084	1108.08	FALSE	8
2022-09-12	12:58:25	0.411005	1.82823	1139.76	FALSE	8
2022-09-12	12:58:25	0.409936	1.82348	1109.91	FALSE	8
2022-09-12	12:58:25	0.40729	1.81171	1141.57	FALSE	8
2022-09-12	12:58:26	0.425764	1.89388	1111.8	FALSE	8
2022-09-12	12:58:26	0.414008	1.84159	1143.41	FALSE	8
2022-09-12	12:58:26	0.418588	1.86196	1113.66	FALSE	8
2022-09-12	12:58:27	0.948053	4.21713	1147.63	FALSE	8
2022-09-12	12:58:27	0.845712	3.7619	1117.43	FALSE	8
2022-09-12	12:58:27	0.560522	2.49331	1150.12	FALSE	8
2022-09-12	12:58:27	0.26042	1.1584	1118.58	FALSE	8
2022-09-12	12:58:28	0.406476	1.80809	1151.93	FALSE	8
2022-09-12	12:58:28	0.515483	2.29297	1120.88	FALSE	8
2022-09-12	12:58:28	0.405814	1.80514	1153.73	FALSE	8
2022-09-12	12:58:28	0.384593	1.71075	1122.59	FALSE	8
2022-09-12	12:58:29	0.405916	1.8056	1155.54	FALSE	8
2022-09-12	12:58:29	0.407443	1.81239	1124.4	FALSE	8
2022-09-12	12:58:29	0.490547	2.18205	1157.72	FALSE	8
2022-09-12	12:58:29	0.360115	1.60186	1126	FALSE	8
2022-09-12	12:58:30	0.435331	1.93644	1159.66	FALSE	8
2022-09-12	12:58:30	0.383931	1.7078	1127.71	FALSE	8
2022-09-12	12:58:30	0.299504	1.33225	1160.99	FALSE	8
2022-09-12	12:58:31	0.444695	1.97809	1129.69	FALSE	8
2022-09-12	12:58:31	0.344339	1.53169	1162.52	FALSE	8
2022-09-12	12:58:31	0.399249	1.77594	1131.46	FALSE	8
2022-09-12	12:58:31	0.346883	1.543	1164.06	FALSE	8
2022-09-12	12:58:32	0.333957	1.48551	1132.95	FALSE	8
2022-09-12	12:58:32	0.291005	1.29445	1165.36	FALSE	8
2022-09-12	12:58:32	0.361234	1.60684	1134.56	FALSE	8
2022-09-12	12:58:32	0.457926	2.03695	1167.4	FALSE	8
2022-09-12	12:58:33	0.346171	1.53984	1136.1	FALSE	8
2022-09-12	12:58:33	0.400318	1.78069	1169.18	FALSE	8
2022-09-12	12:58:33	0.358995	1.59688	1137.69	FALSE	8
2022-09-12	12:58:33	0.481947	2.1438	1171.32	FALSE	8
2022-09-12	12:58:34	0.419504	1.86604	1139.56	FALSE	8
2022-09-12	12:58:34	0.828308	3.68448	1175	FALSE	8
2022-09-12	12:58:34	0.356858	1.58738	1141.15	FALSE	8
2022-09-12	12:58:35	0.598079	2.66038	1177.67	FALSE	8
2022-09-12	12:58:35	0.846883	3.7671	1144.91	FALSE	8
2022-09-12	12:58:35	0.567443	2.5241	1180.19	FALSE	8
2022-09-12	12:58:35	0.256959	1.14301	1146.06	FALSE	8
2022-09-12	12:58:36	0.493957	2.19722	1182.39	FALSE	8
2022-09-12	12:58:36	0.286527	1.27453	1147.33	FALSE	8
2022-09-12	12:58:36	0.473092	2.10441	1184.49	FALSE	8
2022-09-12	12:58:36	1.27268	5.66114	1152.99	FALSE	8
2022-09-12	12:58:37	0.427545	1.90181	1186.39	FALSE	8
2022-09-12	12:58:37	0.265051	1.179	1154.17	FALSE	8
2022-09-12	12:58:37	0.422659	1.88007	1188.27	FALSE	8
2022-09-12	12:58:38	0.191819	0.853249	1155.02	FALSE	8
2022-09-12	12:58:38	0.426476	1.89705	1190.17	FALSE	8
2022-09-12	12:58:38	0.237163	1.05495	1156.08	FALSE	8
2022-09-12	12:58:38	0.202354	0.900111	1191.07	FALSE	8
2022-09-12	12:58:39	-0.00950358	-0.0422738	1156.08	FALSE	8
2022-09-12	12:58:39	-0.223346	-0.993488	1191.07	FALSE	8
2022-09-12	12:58:39	0.429682	1.91131	1157.99	FALSE	8
2022-09-12	12:58:39	0.358079	1.59281	1192.66	FALSE	8
2022-09-12	12:58:40	0.362048	1.61046	1159.6	FALSE	8
2022-09-12	12:58:40	0.423423	1.88347	1194.55	FALSE	8
2022-09-12	12:58:40	0.537774	2.39213	1161.99	FALSE	8
2022-09-12	12:58:40	0.482456	2.14606	1196.69	FALSE	8
2022-09-12	12:58:41	0.43757	1.9464	1163.94	FALSE	8
2022-09-12	12:58:41	0.458537	2.03966	1198.73	FALSE	8
2022-09-12	12:58:41	0.449478	1.99937	1165.94	FALSE	8
2022-09-12	12:58:42	0.449631	2.00005	1200.73	FALSE	8
2022-09-12	12:58:42	0.463728	2.06275	1168	FALSE	8
2022-09-12	12:58:42	0.43243	1.92354	1202.66	FALSE	8
2022-09-12	12:58:42	0.45645	2.03038	1170.03	FALSE	8
2022-09-12	12:58:43	0.432685	1.92467	1204.58	FALSE	8
2022-09-12	12:58:43	0.410496	1.82597	1171.86	FALSE	8
2022-09-12	12:58:43	0.423117	1.88211	1206.46	FALSE	8
2022-09-12	12:58:43	0.505967	2.25064	1174.11	FALSE	8
2022-09-12	12:58:44	3.9137	17.4089	1223.87	1	9
2022-09-12	12:58:44	0.601692	2.67645	1176.78	FALSE	9
2022-09-12	12:58:44	0.718995	3.19823	1227.07	FALSE	9
2022-09-12	12:58:44	0.198537	0.883132	1177.67	FALSE	9

## Sheet: Duke_star_2022912125340 (E)
Date	Time	Lbs	Total Force x Time	Total Time Steps Force >3		**GoPro Fitting: 1242
2022-09-12	12:53:44	0.406934	0.406934	FALSE	0			Total Force x Time	540.609
2022-09-12	12:53:44	0.427952	0.834886	FALSE	0			Total Time Steps Force >3	9
2022-09-12	12:53:44	0.380165	1.21505	FALSE	0
2022-09-12	12:53:44	0.415942	1.63099	FALSE	0
2022-09-12	12:53:45	0.405	2.03599	FALSE	0
2022-09-12	12:53:45	0.405356	2.44135	FALSE	0
2022-09-12	12:53:45	0.401336	2.84268	FALSE	0
2022-09-12	12:53:45	0.409936	3.25262	FALSE	0
2022-09-12	12:53:46	0.425305	3.67793	FALSE	0
2022-09-12	12:53:46	0.405102	4.08303	FALSE	0
2022-09-12	12:53:46	0.479504	4.56253	FALSE	0
2022-09-12	12:53:46	0.407239	4.96977	FALSE	0
2022-09-12	12:53:47	0.47874	5.44851	FALSE	0
2022-09-12	12:53:47	0.44159	5.8901	FALSE	0
2022-09-12	12:53:47	0.423372	6.31347	FALSE	0
2022-09-12	12:53:48	0.416705	6.73018	FALSE	0
2022-09-12	12:53:48	0.429275	7.15945	FALSE	0
2022-09-12	12:53:48	0.455789	7.61524	FALSE	0
2022-09-12	12:53:48	0.395534	8.01078	FALSE	0
2022-09-12	12:53:49	0.446934	8.45771	FALSE	0
2022-09-12	12:53:49	0.395382	8.85309	FALSE	0
2022-09-12	12:53:49	0.372735	9.22583	FALSE	0
2022-09-12	12:53:49	0.312481	9.53831	FALSE	0
2022-09-12	12:53:50	0.287138	9.82545	FALSE	0
2022-09-12	12:53:50	0.368053	10.1935	FALSE	0
2022-09-12	12:53:50	0.411412	10.6049	FALSE	0
2022-09-12	12:53:50	0.167545	10.7725	FALSE	0
2022-09-12	12:53:51	0.371768	11.1442	FALSE	0
2022-09-12	12:53:51	0.190751	11.335	FALSE	0
2022-09-12	12:53:51	0.289682	11.6247	FALSE	0
2022-09-12	12:53:52	0.137468	11.7621	FALSE	0
2022-09-12	12:53:52	0.285814	12.0479	FALSE	0
2022-09-12	12:53:52	0.370344	12.4183	FALSE	0
2022-09-12	12:53:52	0.372023	12.7903	FALSE	0
2022-09-12	12:53:53	0.790751	13.5811	FALSE	0
2022-09-12	12:53:53	1.57818	15.1592	FALSE	0
2022-09-12	12:53:53	1.64917	16.8084	FALSE	0
2022-09-12	12:53:53	0.758181	17.5666	FALSE	0
2022-09-12	12:53:54	0.717824	18.2844	FALSE	0
2022-09-12	12:53:54	0.337519	18.6219	FALSE	0
2022-09-12	12:53:54	0.312074	18.934	FALSE	0
2022-09-12	12:53:54	0.282812	19.2168	FALSE	0
2022-09-12	12:53:55	0.349071	19.5659	FALSE	0
2022-09-12	12:53:55	0.172176	19.7381	FALSE	0
2022-09-12	12:53:55	0.535992	20.2741	FALSE	0
2022-09-12	12:53:56	0.0377738	20.3118	FALSE	0
2022-09-12	12:53:56	0.381794	20.6936	FALSE	0
2022-09-12	12:53:56	0.186018	20.8796	FALSE	0
2022-09-12	12:53:56	0.309835	21.1895	FALSE	0
2022-09-12	12:53:57	0.181234	21.3707	FALSE	0
2022-09-12	12:53:57	0.390293	21.761	FALSE	0
2022-09-12	12:53:57	0.176909	21.9379	FALSE	0
2022-09-12	12:53:57	0.227392	22.1653	FALSE	0
2022-09-12	12:53:58	0.223626	22.3889	FALSE	0
2022-09-12	12:53:58	0.265356	22.6543	FALSE	0
2022-09-12	12:53:58	0.283728	22.938	FALSE	0
2022-09-12	12:53:58	0.241489	23.1795	FALSE	0
2022-09-12	12:53:59	0.281896	23.4614	FALSE	0
2022-09-12	12:53:59	0.311412	23.7728	FALSE	0
2022-09-12	12:53:59	0.37584	24.1487	FALSE	0
2022-09-12	12:54:00	0.372583	24.5212	FALSE	0
2022-09-12	12:54:00	0.436959	24.9582	FALSE	0
2022-09-12	12:54:00	0.528664	25.4869	FALSE	0
2022-09-12	12:54:00	0.460878	25.9477	FALSE	0
2022-09-12	12:54:01	0.770242	26.718	FALSE	0
2022-09-12	12:54:01	0.481336	27.1993	FALSE	0
2022-09-12	12:54:01	0.563473	27.7628	FALSE	0
2022-09-12	12:54:01	0.409275	28.1721	FALSE	0
2022-09-12	12:54:02	0.360165	28.5322	FALSE	0
2022-09-12	12:54:02	0.235433	28.7677	FALSE	0
2022-09-12	12:54:02	0.39187	29.1595	FALSE	0
2022-09-12	12:54:02	0.360267	29.5198	FALSE	0
2022-09-12	12:54:03	0.581896	30.1017	FALSE	0
2022-09-12	12:54:03	0.736043	30.8377	FALSE	0
2022-09-12	12:54:03	0.387239	31.225	FALSE	0
2022-09-12	12:54:04	0.234517	31.4595	FALSE	0
2022-09-12	12:54:04	-0.0851778	31.4595	FALSE	0
2022-09-12	12:54:04	-0.384363	31.4595	FALSE	0
2022-09-12	12:54:04	-0.283346	31.4595	FALSE	0
2022-09-12	12:54:05	0.004186	31.4637	FALSE	0
2022-09-12	12:54:05	0.293194	31.7569	FALSE	0
2022-09-12	12:54:05	0.327392	32.0843	FALSE	0
2022-09-12	12:54:05	0.264796	32.3491	FALSE	0
2022-09-12	12:54:06	0.320471	32.6695	FALSE	0
2022-09-12	12:54:06	0.323779	32.9933	FALSE	0
2022-09-12	12:54:06	0.65528	33.6486	FALSE	0
2022-09-12	12:54:06	1.71197	35.3606	FALSE	0
2022-09-12	12:54:07	3.43742	38.798	1	1
2022-09-12	12:54:07	2.99131	41.7893	FALSE	1
2022-09-12	12:54:07	4.78871	46.578	1	2
2022-09-12	12:54:08	4.43828	51.0163	1	3
2022-09-12	12:54:08	5.84296	56.8592	1	4
2022-09-12	12:54:08	4.6535	61.5127	1	5
2022-09-12	12:54:08	2.61848	64.1312	FALSE	5
2022-09-12	12:54:09	3.29579	67.427	1	6
2022-09-12	12:54:09	3.20322	70.6302	1	7
2022-09-12	12:54:09	2.95284	73.5831	FALSE	7
2022-09-12	12:54:09	1.33569	74.9188	FALSE	7
2022-09-12	12:54:10	0.637519	75.5563	FALSE	7
2022-09-12	12:54:10	0.527544	76.0838	FALSE	7
2022-09-12	12:54:10	0.725254	76.8091	FALSE	7
2022-09-12	12:54:10	0.729835	77.5389	FALSE	7
2022-09-12	12:54:11	0.649886	78.1888	FALSE	7
2022-09-12	12:54:11	0.254059	78.4429	FALSE	7
2022-09-12	12:54:11	0.383219	78.8261	FALSE	7
2022-09-12	12:54:12	0.498893	79.325	FALSE	7
2022-09-12	12:54:12	0.434415	79.7594	FALSE	7
2022-09-12	12:54:12	0.418537	80.1779	FALSE	7
2022-09-12	12:54:12	0.728512	80.9064	FALSE	7
2022-09-12	12:54:13	0.739453	81.6459	FALSE	7
2022-09-12	12:54:13	1.20032	82.8462	FALSE	7
2022-09-12	12:54:13	2.01396	84.8602	FALSE	7
2022-09-12	12:54:13	0.798333	85.6585	FALSE	7
2022-09-12	12:54:14	1.51762	87.1761	FALSE	7
2022-09-12	12:54:14	0.937417	88.1135	FALSE	7
2022-09-12	12:54:14	0.570089	88.6836	FALSE	7
2022-09-12	12:54:14	0.476501	89.1601	FALSE	7
2022-09-12	12:54:15	0.863321	90.0234	FALSE	7
2022-09-12	12:54:15	0.306272	90.3297	FALSE	7
2022-09-12	12:54:15	0.64103	90.9707	FALSE	7
2022-09-12	12:54:16	0.67645	91.6472	FALSE	7
2022-09-12	12:54:16	1.22037	92.8676	FALSE	7
2022-09-12	12:54:16	1.14785	94.0154	FALSE	7
2022-09-12	12:54:16	0.567443	94.5829	FALSE	7
2022-09-12	12:54:17	0.531819	95.1147	FALSE	7
2022-09-12	12:54:17	0.878232	95.9929	FALSE	7
2022-09-12	12:54:17	0.500471	96.4934	FALSE	7
2022-09-12	12:54:17	0.726832	97.2202	FALSE	7
2022-09-12	12:54:18	0.500063	97.7203	FALSE	7
2022-09-12	12:54:18	0.690344	98.4106	FALSE	7
2022-09-12	12:54:18	0.919199	99.3298	FALSE	7
2022-09-12	12:54:18	0.584084	99.9139	FALSE	7
2022-09-12	12:54:19	0.380827	100.295	FALSE	7
2022-09-12	12:54:19	0.475076	100.77	FALSE	7
2022-09-12	12:54:19	0.331972	101.102	FALSE	7
2022-09-12	12:54:20	0.494059	101.596	FALSE	7
2022-09-12	12:54:20	0.554415	102.15	FALSE	7
2022-09-12	12:54:20	0.54556	102.696	FALSE	7
2022-09-12	12:54:20	0.334873	103.031	FALSE	7
2022-09-12	12:54:21	0.390954	103.422	FALSE	7
2022-09-12	12:54:21	0.209987	103.632	FALSE	7
2022-09-12	12:54:21	0.538893	104.171	FALSE	7
2022-09-12	12:54:21	0.281896	104.452	FALSE	7
2022-09-12	12:54:22	0.725	105.177	FALSE	7
2022-09-12	12:54:22	0.847341	106.025	FALSE	7
2022-09-12	12:54:22	1.65564	107.68	FALSE	7
2022-09-12	12:54:22	1.01019	108.691	FALSE	7
2022-09-12	12:54:23	1.01045	109.701	FALSE	7
2022-09-12	12:54:23	0.864898	110.566	FALSE	7
2022-09-12	12:54:23	0.952684	111.519	FALSE	7
2022-09-12	12:54:24	1.0506	112.569	FALSE	7
2022-09-12	12:54:24	0.488919	113.058	FALSE	7
2022-09-12	12:54:24	0.584033	113.642	FALSE	7
2022-09-12	12:54:24	0.612786	114.255	FALSE	7
2022-09-12	12:54:25	0.358384	114.613	FALSE	7
2022-09-12	12:54:25	0.381947	114.995	FALSE	7
2022-09-12	12:54:25	0.410038	115.405	FALSE	7
2022-09-12	12:54:25	0.352125	115.757	FALSE	7
2022-09-12	12:54:26	0.426018	116.183	FALSE	7
2022-09-12	12:54:26	0.343168	116.527	FALSE	7
2022-09-12	12:54:26	0.398435	116.925	FALSE	7
2022-09-12	12:54:26	0.319657	117.245	FALSE	7
2022-09-12	12:54:27	0.366832	117.612	FALSE	7
2022-09-12	12:54:27	0.317519	117.929	FALSE	7
2022-09-12	12:54:27	0.516654	118.446	FALSE	7
2022-09-12	12:54:28	0.300929	118.747	FALSE	7
2022-09-12	12:54:28	0.4193	119.166	FALSE	7
2022-09-12	12:54:28	0.321489	119.487	FALSE	7
2022-09-12	12:54:28	0.428257	119.916	FALSE	7
2022-09-12	12:54:29	0.285662	120.201	FALSE	7
2022-09-12	12:54:29	0.422303	120.624	FALSE	7
2022-09-12	12:54:29	0.345763	120.969	FALSE	7
2022-09-12	12:54:29	0.448359	121.418	FALSE	7
2022-09-12	12:54:30	0.366934	121.785	FALSE	7
2022-09-12	12:54:30	0.414822	122.2	FALSE	7
2022-09-12	12:54:30	0.454517	122.654	FALSE	7
2022-09-12	12:54:30	0.512328	123.166	FALSE	7
2022-09-12	12:54:31	0.674873	123.841	FALSE	7
2022-09-12	12:54:31	0.577621	124.419	FALSE	7
2022-09-12	12:54:31	0.466374	124.885	FALSE	7
2022-09-12	12:54:32	0.52271	125.408	FALSE	7
2022-09-12	12:54:32	0.605153	126.013	FALSE	7
2022-09-12	12:54:32	0.54785	126.561	FALSE	7
2022-09-12	12:54:32	1.11843	127.679	FALSE	7
2022-09-12	12:54:33	0.920878	128.6	FALSE	7
2022-09-12	12:54:33	1.14729	129.748	FALSE	7
2022-09-12	12:54:33	0.585356	130.333	FALSE	7
2022-09-12	12:54:33	0.649835	130.983	FALSE	7
2022-09-12	12:54:34	0.39299	131.376	FALSE	7
2022-09-12	12:54:34	0.509275	131.885	FALSE	7
2022-09-12	12:54:34	0.731158	132.616	FALSE	7
2022-09-12	12:54:34	0.723168	133.339	FALSE	7
2022-09-12	12:54:35	0.726985	134.066	FALSE	7
2022-09-12	12:54:35	0.531311	134.598	FALSE	7
2022-09-12	12:54:35	0.728817	135.326	FALSE	7
2022-09-12	12:54:36	0.653549	135.98	FALSE	7
2022-09-12	12:54:36	0.725865	136.706	FALSE	7
2022-09-12	12:54:36	0.726018	137.432	FALSE	7
2022-09-12	12:54:36	0.723779	138.156	FALSE	7
2022-09-12	12:54:37	0.724237	138.88	FALSE	7
2022-09-12	12:54:37	0.718384	139.598	FALSE	7
2022-09-12	12:54:37	0.72383	140.322	FALSE	7
2022-09-12	12:54:37	0.722965	141.045	FALSE	7
2022-09-12	12:54:38	0.72673	141.772	FALSE	7
2022-09-12	12:54:38	0.730852	142.503	FALSE	7
2022-09-12	12:54:38	0.718333	143.221	FALSE	7
2022-09-12	12:54:38	0.720318	143.941	FALSE	7
2022-09-12	12:54:39	0.711565	144.653	FALSE	7
2022-09-12	12:54:39	0.723066	145.376	FALSE	7
2022-09-12	12:54:39	0.726578	146.103	FALSE	7
2022-09-12	12:54:40	0.723117	146.826	FALSE	7
2022-09-12	12:54:40	0.719249	147.545	FALSE	7
2022-09-12	12:54:40	0.721946	148.267	FALSE	7
2022-09-12	12:54:40	0.72673	148.994	FALSE	7
2022-09-12	12:54:41	0.722099	149.716	FALSE	7
2022-09-12	12:54:41	0.726374	150.442	FALSE	7
2022-09-12	12:54:41	0.72612	151.168	FALSE	7
2022-09-12	12:54:41	0.725865	151.894	FALSE	7
2022-09-12	12:54:42	0.727596	152.622	FALSE	7
2022-09-12	12:54:42	0.723931	153.346	FALSE	7
2022-09-12	12:54:42	0.726985	154.073	FALSE	7
2022-09-12	12:54:42	0.721437	154.794	FALSE	7
2022-09-12	12:54:43	0.722812	155.517	FALSE	7
2022-09-12	12:54:43	0.729631	156.246	FALSE	7
2022-09-12	12:54:43	0.723677	156.97	FALSE	7
2022-09-12	12:54:44	0.721539	157.692	FALSE	7
2022-09-12	12:54:44	0.724491	158.416	FALSE	7
2022-09-12	12:54:44	0.727494	159.144	FALSE	7
2022-09-12	12:54:44	0.728308	159.872	FALSE	7
2022-09-12	12:54:45	0.720114	160.592	FALSE	7
2022-09-12	12:54:45	0.726527	161.319	FALSE	7
2022-09-12	12:54:45	0.718639	162.037	FALSE	7
2022-09-12	12:54:46	0.724949	162.762	FALSE	7
2022-09-12	12:54:46	0.730394	163.493	FALSE	7
2022-09-12	12:54:46	0.723575	164.216	FALSE	7
2022-09-12	12:54:46	0.723321	164.939	FALSE	7
2022-09-12	12:54:46	0.729835	165.669	FALSE	7
2022-09-12	12:54:47	0.725407	166.395	FALSE	7
2022-09-12	12:54:47	0.727596	167.122	FALSE	7
2022-09-12	12:54:47	0.728359	167.851	FALSE	7
2022-09-12	12:54:48	0.718537	168.569	FALSE	7
2022-09-12	12:54:48	0.723473	169.293	FALSE	7
2022-09-12	12:54:48	0.723219	170.016	FALSE	7
2022-09-12	12:54:48	0.722761	170.739	FALSE	7
2022-09-12	12:54:49	0.725916	171.465	FALSE	7
2022-09-12	12:54:49	0.728104	172.193	FALSE	7
2022-09-12	12:54:49	0.72617	172.919	FALSE	7
2022-09-12	12:54:49	0.725865	173.645	FALSE	7
2022-09-12	12:54:50	0.731921	174.377	FALSE	7
2022-09-12	12:54:50	0.721539	175.098	FALSE	7
2022-09-12	12:54:50	0.722201	175.82	FALSE	7
2022-09-12	12:54:50	0.722862	176.543	FALSE	7
2022-09-12	12:54:51	0.725509	177.269	FALSE	7
2022-09-12	12:54:51	0.721081	177.99	FALSE	7
2022-09-12	12:54:51	0.723524	178.713	FALSE	7
2022-09-12	12:54:52	0.723168	179.437	FALSE	7
2022-09-12	12:54:52	0.727545	180.164	FALSE	7
2022-09-12	12:54:52	0.728919	180.893	FALSE	7
2022-09-12	12:54:52	0.727952	181.621	FALSE	7
2022-09-12	12:54:53	0.726272	182.347	FALSE	7
2022-09-12	12:54:53	0.725	183.072	FALSE	7
2022-09-12	12:54:53	0.726934	183.799	FALSE	7
2022-09-12	12:54:53	0.726527	184.526	FALSE	7
2022-09-12	12:54:54	0.728461	185.254	FALSE	7
2022-09-12	12:54:54	0.723524	185.978	FALSE	7
2022-09-12	12:54:54	0.724695	186.702	FALSE	7
2022-09-12	12:54:54	0.730343	187.433	FALSE	7
2022-09-12	12:54:55	0.72383	188.157	FALSE	7
2022-09-12	12:54:55	0.721539	188.878	FALSE	7
2022-09-12	12:54:55	0.731616	189.61	FALSE	7
2022-09-12	12:54:56	0.730801	190.34	FALSE	7
2022-09-12	12:54:56	0.728868	191.069	FALSE	7
2022-09-12	12:54:56	0.73243	191.802	FALSE	7
2022-09-12	12:54:56	0.725051	192.527	FALSE	7
2022-09-12	12:54:57	0.728003	193.255	FALSE	7
2022-09-12	12:54:57	0.724186	193.979	FALSE	7
2022-09-12	12:54:57	0.725356	194.704	FALSE	7
2022-09-12	12:54:57	0.733753	195.438	FALSE	7
2022-09-12	12:54:58	0.725305	196.163	FALSE	7
2022-09-12	12:54:58	0.718995	196.882	FALSE	7
2022-09-12	12:54:58	0.730089	197.613	FALSE	7
2022-09-12	12:54:58	0.721946	198.334	FALSE	7
2022-09-12	12:54:59	0.727087	199.062	FALSE	7
2022-09-12	12:54:59	0.726781	199.788	FALSE	7
2022-09-12	12:54:59	0.727443	200.516	FALSE	7
2022-09-12	12:55:00	0.724135	201.24	FALSE	7
2022-09-12	12:55:00	0.706578	201.946	FALSE	7
2022-09-12	12:55:00	0.725102	202.672	FALSE	7
2022-09-12	12:55:00	0.728359	203.4	FALSE	7
2022-09-12	12:55:01	0.725763	204.126	FALSE	7
2022-09-12	12:55:01	0.722557	204.848	FALSE	7
2022-09-12	12:55:01	0.726018	205.574	FALSE	7
2022-09-12	12:55:01	0.720013	206.294	FALSE	7
2022-09-12	12:55:02	0.721387	207.016	FALSE	7
2022-09-12	12:55:02	0.73416	207.75	FALSE	7
2022-09-12	12:55:02	0.72556	208.475	FALSE	7
2022-09-12	12:55:02	0.723372	209.199	FALSE	7
2022-09-12	12:55:03	0.724237	209.923	FALSE	7
2022-09-12	12:55:03	0.72612	210.649	FALSE	7
2022-09-12	12:55:03	0.724542	211.374	FALSE	7
2022-09-12	12:55:04	0.725254	212.099	FALSE	7
2022-09-12	12:55:04	0.726527	212.825	FALSE	7
2022-09-12	12:55:04	0.726578	213.552	FALSE	7
2022-09-12	12:55:04	0.729071	214.281	FALSE	7
2022-09-12	12:55:05	0.727188	215.008	FALSE	7
2022-09-12	12:55:05	0.731056	215.739	FALSE	7
2022-09-12	12:55:05	0.719911	216.459	FALSE	7
2022-09-12	12:55:05	0.725254	217.185	FALSE	7
2022-09-12	12:55:06	0.728308	217.913	FALSE	7
2022-09-12	12:55:06	0.723015	218.636	FALSE	7
2022-09-12	12:55:06	0.720623	219.356	FALSE	7
2022-09-12	12:55:06	0.729224	220.086	FALSE	7
2022-09-12	12:55:07	0.72271	220.808	FALSE	7
2022-09-12	12:55:07	0.726985	221.535	FALSE	7
2022-09-12	12:55:07	0.725662	222.261	FALSE	7
2022-09-12	12:55:08	0.728054	222.989	FALSE	7
2022-09-12	12:55:08	0.725712	223.715	FALSE	7
2022-09-12	12:55:08	0.729224	224.444	FALSE	7
2022-09-12	12:55:08	0.723015	225.167	FALSE	7
2022-09-12	12:55:09	0.723219	225.89	FALSE	7
2022-09-12	12:55:09	0.711616	226.602	FALSE	7
2022-09-12	12:55:09	0.728104	227.33	FALSE	7
2022-09-12	12:55:09	0.779249	228.109	FALSE	7
2022-09-12	12:55:10	3.4824	231.592	1	8
2022-09-12	12:55:10	1.84536	233.437	FALSE	8
2022-09-12	12:55:10	0.760979	234.198	FALSE	8
2022-09-12	12:55:10	0.489122	234.687	FALSE	8
2022-09-12	12:55:11	0.490751	235.178	FALSE	8
2022-09-12	12:55:11	0.194211	235.372	FALSE	8
2022-09-12	12:55:11	0.639504	236.012	FALSE	8
2022-09-12	12:55:12	0.464695	236.476	FALSE	8
2022-09-12	12:55:12	0.850191	237.326	FALSE	8
2022-09-12	12:55:12	0.317316	237.644	FALSE	8
2022-09-12	12:55:12	0.663219	238.307	FALSE	8
2022-09-12	12:55:13	0.732175	239.039	FALSE	8
2022-09-12	12:55:13	0.478842	239.518	FALSE	8
2022-09-12	12:55:13	0.555433	240.073	FALSE	8
2022-09-12	12:55:13	0.635178	240.709	FALSE	8
2022-09-12	12:55:14	0.725305	241.434	FALSE	8
2022-09-12	12:55:14	0.348155	241.782	FALSE	8
2022-09-12	12:55:14	0.726425	242.508	FALSE	8
2022-09-12	12:55:14	0.724084	243.233	FALSE	8
2022-09-12	12:55:15	0.732226	243.965	FALSE	8
2022-09-12	12:55:15	0.286222	244.251	FALSE	8
2022-09-12	12:55:15	0.71757	244.969	FALSE	8
2022-09-12	12:55:16	0.714974	245.684	FALSE	8
2022-09-12	12:55:16	0.729428	246.413	FALSE	8
2022-09-12	12:55:16	0.71874	247.132	FALSE	8
2022-09-12	12:55:16	0.733753	247.865	FALSE	8
2022-09-12	12:55:17	0.722049	248.588	FALSE	8
2022-09-12	12:55:17	0.73014	249.318	FALSE	8
2022-09-12	12:55:17	0.391616	249.709	FALSE	8
2022-09-12	12:55:17	0.521947	250.231	FALSE	8
2022-09-12	12:55:18	0.210598	250.442	FALSE	8
2022-09-12	12:55:18	0.452125	250.894	FALSE	8
2022-09-12	12:55:18	0.252735	251.147	FALSE	8
2022-09-12	12:55:18	0.731616	251.878	FALSE	8
2022-09-12	12:55:19	0.363473	252.242	FALSE	8
2022-09-12	12:55:19	0.260471	252.502	FALSE	8
2022-09-12	12:55:19	0.217926	252.72	FALSE	8
2022-09-12	12:55:20	0.158893	252.879	FALSE	8
2022-09-12	12:55:20	-0.0783585	252.879	FALSE	8
2022-09-12	12:55:20	-0.199376	252.879	FALSE	8
2022-09-12	12:55:20	-0.0964246	252.879	FALSE	8
2022-09-12	12:55:21	-0.127621	252.879	FALSE	8
2022-09-12	12:55:21	-0.11785	252.879	FALSE	8
2022-09-12	12:55:21	-0.244364	252.879	FALSE	8
2022-09-12	12:55:21	-0.113626	252.879	FALSE	8
2022-09-12	12:55:22	-0.13785	252.879	FALSE	8
2022-09-12	12:55:22	-0.0402924	252.879	FALSE	8
2022-09-12	12:55:22	-0.0803941	252.879	FALSE	8
2022-09-12	12:55:22	0.0864761	252.966	FALSE	8
2022-09-12	12:55:23	0.0560435	253.022	FALSE	8
2022-09-12	12:55:23	0.188359	253.21	FALSE	8
2022-09-12	12:55:23	0.0816414	253.292	FALSE	8
2022-09-12	12:55:24	0.310496	253.602	FALSE	8
2022-09-12	12:55:24	0.244644	253.847	FALSE	8
2022-09-12	12:55:24	0.30098	254.148	FALSE	8
2022-09-12	12:55:24	0.18902	254.337	FALSE	8
2022-09-12	12:55:25	0.468613	254.805	FALSE	8
2022-09-12	12:55:25	0.620674	255.426	FALSE	8
2022-09-12	12:55:25	0.437316	255.863	FALSE	8
2022-09-12	12:55:25	0.368461	256.232	FALSE	8
2022-09-12	12:55:26	0.310598	256.542	FALSE	8
2022-09-12	12:55:26	0.305713	256.848	FALSE	8
2022-09-12	12:55:26	0.329122	257.177	FALSE	8
2022-09-12	12:55:26	0.30612	257.483	FALSE	8
2022-09-12	12:55:27	0.210038	257.693	FALSE	8
2022-09-12	12:55:27	0.281285	257.975	FALSE	8
2022-09-12	12:55:27	0.218079	258.193	FALSE	8
2022-09-12	12:55:28	0.291056	258.484	FALSE	8
2022-09-12	12:55:28	0.0424557	258.526	FALSE	8
2022-09-12	12:55:28	-0.0588674	258.526	FALSE	8
2022-09-12	12:55:28	-0.057646	258.526	FALSE	8
2022-09-12	12:55:29	-0.109351	258.526	FALSE	8
2022-09-12	12:55:29	-0.0627351	258.526	FALSE	8
2022-09-12	12:55:29	-0.104465	258.526	FALSE	8
2022-09-12	12:55:29	0.0105982	258.537	FALSE	8
2022-09-12	12:55:30	-0.0211575	258.537	FALSE	8
2022-09-12	12:55:30	-0.0550506	258.537	FALSE	8
2022-09-12	12:55:30	-0.103397	258.537	FALSE	8
2022-09-12	12:55:30	0.0152293	258.552	FALSE	8
2022-09-12	12:55:31	0.0109035	258.563	FALSE	8
2022-09-12	12:55:31	0.0347203	258.598	FALSE	8
2022-09-12	12:55:31	-0.0189183	258.598	FALSE	8
2022-09-12	12:55:32	0.0332445	258.631	FALSE	8
2022-09-12	12:55:32	0.109937	258.741	FALSE	8
2022-09-12	12:55:32	-0.0106232	258.741	FALSE	8
2022-09-12	12:55:32	0.0306999	258.772	FALSE	8
2022-09-12	12:55:33	0.0351783	258.807	FALSE	8
2022-09-12	12:55:33	0.163219	258.97	FALSE	8
2022-09-12	12:55:33	0.00912238	258.979	FALSE	8
2022-09-12	12:55:33	0.106272	259.085	FALSE	8
2022-09-12	12:55:34	0.0639824	259.149	FALSE	8
2022-09-12	12:55:34	0.184033	259.333	FALSE	8
2022-09-12	12:55:34	0.0361453	259.37	FALSE	8
2022-09-12	12:55:34	0.2364	259.606	FALSE	8
2022-09-12	12:55:35	0.0794022	259.685	FALSE	8
2022-09-12	12:55:35	0.253041	259.938	FALSE	8
2022-09-12	12:55:35	0.0661707	260.005	FALSE	8
2022-09-12	12:55:36	0.190496	260.195	FALSE	8
2022-09-12	12:55:36	0.103423	260.298	FALSE	8
2022-09-12	12:55:36	0.214975	260.513	FALSE	8
2022-09-12	12:55:36	0.115738	260.629	FALSE	8
2022-09-12	12:55:37	0.206832	260.836	FALSE	8
2022-09-12	12:55:37	0.109224	260.945	FALSE	8
2022-09-12	12:55:37	0.143423	261.089	FALSE	8
2022-09-12	12:55:37	-0.00477074	261.089	FALSE	8
2022-09-12	12:55:38	0.154873	261.244	FALSE	8
2022-09-12	12:55:38	0.0913106	261.335	FALSE	8
2022-09-12	12:55:38	0.133804	261.469	FALSE	8
2022-09-12	12:55:38	0.16902	261.638	FALSE	8
2022-09-12	12:55:39	0.15411	261.792	FALSE	8
2022-09-12	12:55:39	0.242049	262.034	FALSE	8
2022-09-12	12:55:39	0.271514	262.305	FALSE	8
2022-09-12	12:55:40	0.172328	262.478	FALSE	8
2022-09-12	12:55:40	0.191463	262.669	FALSE	8
2022-09-12	12:55:40	0.303372	262.973	FALSE	8
2022-09-12	12:55:40	0.319148	263.292	FALSE	8
2022-09-12	12:55:41	0.275636	263.567	FALSE	8
2022-09-12	12:55:41	0.20215	263.769	FALSE	8
2022-09-12	12:55:41	0.193295	263.963	FALSE	8
2022-09-12	12:55:41	0.224898	264.188	FALSE	8
2022-09-12	12:55:42	0.252226	264.44	FALSE	8
2022-09-12	12:55:42	0.282964	264.723	FALSE	8
2022-09-12	12:55:42	0.310445	265.033	FALSE	8
2022-09-12	12:55:42	0.319707	265.353	FALSE	8
2022-09-12	12:55:43	0.295127	265.648	FALSE	8
2022-09-12	12:55:43	0.323168	265.971	FALSE	8
2022-09-12	12:55:43	0.445051	266.416	FALSE	8
2022-09-12	12:55:44	0.413651	266.83	FALSE	8
2022-09-12	12:55:44	0.348053	267.178	FALSE	8
2022-09-12	12:55:44	0.348562	267.527	FALSE	8
2022-09-12	12:55:44	0.475942	268.003	FALSE	8
2022-09-12	12:55:45	0.377367	268.38	FALSE	8
2022-09-12	12:55:45	0.469122	268.849	FALSE	8
2022-09-12	12:55:45	0.454873	269.304	FALSE	8
2022-09-12	12:55:45	0.451819	269.756	FALSE	8
2022-09-12	12:55:46	0.461438	270.217	FALSE	8
2022-09-12	12:55:46	0.464237	270.681	FALSE	8
2022-09-12	12:55:46	0.466018	271.147	FALSE	8
2022-09-12	12:55:46	0.468206	271.616	FALSE	8
2022-09-12	12:55:47	0.478588	272.094	FALSE	8
2022-09-12	12:55:47	0.474262	272.568	FALSE	8
2022-09-12	12:55:47	0.472023	273.04	FALSE	8
2022-09-12	12:55:48	0.472837	273.513	FALSE	8
2022-09-12	12:55:48	0.465916	273.979	FALSE	8
2022-09-12	12:55:48	0.466527	274.446	FALSE	8
2022-09-12	12:55:48	0.454211	274.9	FALSE	8
2022-09-12	12:55:49	0.466934	275.367	FALSE	8
2022-09-12	12:55:49	0.468359	275.835	FALSE	8
2022-09-12	12:55:49	0.470089	276.305	FALSE	8
2022-09-12	12:55:49	0.477163	276.783	FALSE	8
2022-09-12	12:55:50	0.496399	277.279	FALSE	8
2022-09-12	12:55:50	0.600878	277.88	FALSE	8
2022-09-12	12:55:50	0.97472	278.855	FALSE	8
2022-09-12	12:55:50	1.34688	280.201	FALSE	8
2022-09-12	12:55:51	0.959555	281.161	FALSE	8
2022-09-12	12:55:51	0.203779	281.365	FALSE	8
2022-09-12	12:55:51	0.240216	281.605	FALSE	8
2022-09-12	12:55:52	0.130853	281.736	FALSE	8
2022-09-12	12:55:52	0.240471	281.976	FALSE	8
2022-09-12	12:55:52	0.286934	282.263	FALSE	8
2022-09-12	12:55:52	0.357468	282.621	FALSE	8
2022-09-12	12:55:53	0.422812	283.043	FALSE	8
2022-09-12	12:55:53	0.377875	283.421	FALSE	8
2022-09-12	12:55:53	0.184593	283.606	FALSE	8
2022-09-12	12:55:53	0.112685	283.719	FALSE	8
2022-09-12	12:55:54	-0.118308	283.719	FALSE	8
2022-09-12	12:55:54	-0.120496	283.719	FALSE	8
2022-09-12	12:55:54	-0.126806	283.719	FALSE	8
2022-09-12	12:55:54	-0.131997	283.719	FALSE	8
2022-09-12	12:55:55	-0.150521	283.719	FALSE	8
2022-09-12	12:55:55	-0.147824	283.719	FALSE	8
2022-09-12	12:55:55	0.093957	283.813	FALSE	8
2022-09-12	12:55:56	0.203321	284.016	FALSE	8
2022-09-12	12:55:56	0.115891	284.132	FALSE	8
2022-09-12	12:55:56	0.24673	284.379	FALSE	8
2022-09-12	12:55:56	0.360267	284.739	FALSE	8
2022-09-12	12:55:57	0.310802	285.05	FALSE	8
2022-09-12	12:55:57	0.365	285.415	FALSE	8
2022-09-12	12:55:57	0.377163	285.792	FALSE	8
2022-09-12	12:55:57	0.33126	286.123	FALSE	8
2022-09-12	12:55:58	0.38841	286.511	FALSE	8
2022-09-12	12:55:58	0.38673	286.898	FALSE	8
2022-09-12	12:55:58	0.332634	287.231	FALSE	8
2022-09-12	12:55:58	0.472583	287.703	FALSE	8
2022-09-12	12:55:59	0.255382	287.959	FALSE	8
2022-09-12	12:55:59	0.499911	288.459	FALSE	8
2022-09-12	12:55:59	0.313194	288.772	FALSE	8
2022-09-12	12:56:00	0.433244	289.205	FALSE	8
2022-09-12	12:56:00	0.290903	289.496	FALSE	8
2022-09-12	12:56:00	0.312176	289.808	FALSE	8
2022-09-12	12:56:00	0.397825	290.206	FALSE	8
2022-09-12	12:56:01	0.326781	290.533	FALSE	8
2022-09-12	12:56:01	0.527188	291.06	FALSE	8
2022-09-12	12:56:01	0.257672	291.318	FALSE	8
2022-09-12	12:56:01	0.532837	291.851	FALSE	8
2022-09-12	12:56:02	0.25243	292.103	FALSE	8
2022-09-12	12:56:02	0.403015	292.506	FALSE	8
2022-09-12	12:56:02	0.304898	292.811	FALSE	8
2022-09-12	12:56:02	0.373244	293.184	FALSE	8
2022-09-12	12:56:03	0.64729	293.831	FALSE	8
2022-09-12	12:56:03	0.72902	294.56	FALSE	8
2022-09-12	12:56:03	0.455433	295.016	FALSE	8
2022-09-12	12:56:04	0.189529	295.205	FALSE	8
2022-09-12	12:56:04	0.392634	295.598	FALSE	8
2022-09-12	12:56:04	0.22159	295.82	FALSE	8
2022-09-12	12:56:04	0.349784	296.169	FALSE	8
2022-09-12	12:56:05	0.169326	296.339	FALSE	8
2022-09-12	12:56:05	0.195229	296.534	FALSE	8
2022-09-12	12:56:05	0.158028	296.692	FALSE	8
2022-09-12	12:56:05	0.256501	296.948	FALSE	8
2022-09-12	12:56:06	0.241234	297.19	FALSE	8
2022-09-12	12:56:06	0.344949	297.535	FALSE	8
2022-09-12	12:56:06	0.281132	297.816	FALSE	8
2022-09-12	12:56:06	0.467443	298.283	FALSE	8
2022-09-12	12:56:07	0.434313	298.718	FALSE	8
2022-09-12	12:56:07	0.329122	299.047	FALSE	8
2022-09-12	12:56:07	0.237163	299.284	FALSE	8
2022-09-12	12:56:08	0.352481	299.636	FALSE	8
2022-09-12	12:56:08	0.292277	299.929	FALSE	8
2022-09-12	12:56:08	0.268257	300.197	FALSE	8
2022-09-12	12:56:08	0.204593	300.401	FALSE	8
2022-09-12	12:56:09	0.29528	300.697	FALSE	8
2022-09-12	12:56:09	0.25299	300.95	FALSE	8
2022-09-12	12:56:09	0.25416	301.204	FALSE	8
2022-09-12	12:56:09	0.222049	301.426	FALSE	8
2022-09-12	12:56:10	0.168257	301.594	FALSE	8
2022-09-12	12:56:10	-0.0088929	301.594	FALSE	8
2022-09-12	12:56:10	0.0369595	301.631	FALSE	8
2022-09-12	12:56:10	0.044186	301.675	FALSE	8
2022-09-12	12:56:11	0.0983844	301.774	FALSE	8
2022-09-12	12:56:11	0.201845	301.976	FALSE	8
2022-09-12	12:56:11	0.125255	302.101	FALSE	8
2022-09-12	12:56:12	0.170649	302.271	FALSE	8
2022-09-12	12:56:12	0.0150257	302.286	FALSE	8
2022-09-12	12:56:12	0.0526338	302.339	FALSE	8
2022-09-12	12:56:12	-0.00787507	302.339	FALSE	8
2022-09-12	12:56:13	0.0263743	302.365	FALSE	8
2022-09-12	12:56:13	0.0864252	302.452	FALSE	8
2022-09-12	12:56:13	-0.00553411	302.452	FALSE	8
2022-09-12	12:56:13	0.151412	302.603	FALSE	8
2022-09-12	12:56:14	0.171616	302.775	FALSE	8
2022-09-12	12:56:14	0.148613	302.924	FALSE	8
2022-09-12	12:56:14	-0.0997834	302.924	FALSE	8
2022-09-12	12:56:14	-0.280241	302.924	FALSE	8
2022-09-12	12:56:15	-0.402328	302.924	FALSE	8
2022-09-12	12:56:15	-0.369656	302.924	FALSE	8
2022-09-12	12:56:15	-0.203804	302.924	FALSE	8
2022-09-12	12:56:16	-0.0335748	302.924	FALSE	8
2022-09-12	12:56:16	0.00591628	302.929	FALSE	8
2022-09-12	12:56:16	0.0300893	302.96	FALSE	8
2022-09-12	12:56:16	0.0718704	303.031	FALSE	8
2022-09-12	12:56:17	0.104746	303.136	FALSE	8
2022-09-12	12:56:17	0.225356	303.362	FALSE	8
2022-09-12	12:56:17	0.316603	303.678	FALSE	8
2022-09-12	12:56:17	0.229275	303.907	FALSE	8
2022-09-12	12:56:18	0.307748	304.215	FALSE	8
2022-09-12	12:56:18	0.165153	304.38	FALSE	8
2022-09-12	12:56:18	0.281336	304.662	FALSE	8
2022-09-12	12:56:18	0.242456	304.904	FALSE	8
2022-09-12	12:56:19	0.284644	305.189	FALSE	8
2022-09-12	12:56:19	0.294517	305.483	FALSE	8
2022-09-12	12:56:19	0.236349	305.72	FALSE	8
2022-09-12	12:56:20	0.337061	306.057	FALSE	8
2022-09-12	12:56:20	0.278741	306.335	FALSE	8
2022-09-12	12:56:20	0.403015	306.738	FALSE	8
2022-09-12	12:56:20	0.270038	307.008	FALSE	8
2022-09-12	12:56:21	0.268919	307.277	FALSE	8
2022-09-12	12:56:21	0.367036	307.644	FALSE	8
2022-09-12	12:56:21	0.534517	308.179	FALSE	8
2022-09-12	12:56:21	1.14933	309.328	FALSE	8
2022-09-12	12:56:22	0.781845	310.11	FALSE	8
2022-09-12	12:56:22	0.559707	310.67	FALSE	8
2022-09-12	12:56:22	0.923422	311.593	FALSE	8
2022-09-12	12:56:22	0.847646	312.441	FALSE	8
2022-09-12	12:56:23	1.23177	313.673	FALSE	8
2022-09-12	12:56:23	1.15263	314.825	FALSE	8
2022-09-12	12:56:23	1.06989	315.895	FALSE	8
2022-09-12	12:56:24	1.14963	317.045	FALSE	8
2022-09-12	12:56:24	1.22464	318.269	FALSE	8
2022-09-12	12:56:24	0.770089	319.04	FALSE	8
2022-09-12	12:56:24	0.741438	319.781	FALSE	8
2022-09-12	12:56:25	0.420929	320.202	FALSE	8
2022-09-12	12:56:25	0.542354	320.744	FALSE	8
2022-09-12	12:56:25	0.311209	321.055	FALSE	8
2022-09-12	12:56:25	0.348104	321.404	FALSE	8
2022-09-12	12:56:26	0.280369	321.684	FALSE	8
2022-09-12	12:56:26	0.27757	321.961	FALSE	8
2022-09-12	12:56:26	0.126323	322.088	FALSE	8
2022-09-12	12:56:26	-0.00487254	322.088	FALSE	8
2022-09-12	12:56:27	-0.0639056	322.088	FALSE	8
2022-09-12	12:56:27	0.149377	322.237	FALSE	8
2022-09-12	12:56:27	0.295687	322.533	FALSE	8
2022-09-12	12:56:28	0.310445	322.843	FALSE	8
2022-09-12	12:56:28	0.277672	323.121	FALSE	8
2022-09-12	12:56:28	0.333702	323.455	FALSE	8
2022-09-12	12:56:28	0.340369	323.795	FALSE	8
2022-09-12	12:56:29	0.254008	324.049	FALSE	8
2022-09-12	12:56:29	0.277875	324.327	FALSE	8
2022-09-12	12:56:29	0.281794	324.609	FALSE	8
2022-09-12	12:56:29	0.343015	324.952	FALSE	8
2022-09-12	12:56:30	0.285255	325.237	FALSE	8
2022-09-12	12:56:30	0.343168	325.58	FALSE	8
2022-09-12	12:56:30	0.33299	325.913	FALSE	8
2022-09-12	12:56:30	0.303728	326.217	FALSE	8
2022-09-12	12:56:31	0.228257	326.445	FALSE	8
2022-09-12	12:56:31	0.283575	326.729	FALSE	8
2022-09-12	12:56:31	0.297367	327.026	FALSE	8
2022-09-12	12:56:32	0.244288	327.27	FALSE	8
2022-09-12	12:56:32	0.216196	327.487	FALSE	8
2022-09-12	12:56:32	0.235331	327.722	FALSE	8
2022-09-12	12:56:32	0.190395	327.912	FALSE	8
2022-09-12	12:56:33	0.159707	328.072	FALSE	8
2022-09-12	12:56:33	0.0450002	328.117	FALSE	8
2022-09-12	12:56:33	0.0273921	328.144	FALSE	8
2022-09-12	12:56:33	0.190954	328.335	FALSE	8
2022-09-12	12:56:34	0.243117	328.578	FALSE	8
2022-09-12	12:56:34	0.179249	328.758	FALSE	8
2022-09-12	12:56:34	0.113855	328.872	FALSE	8
2022-09-12	12:56:34	0.115535	328.987	FALSE	8
2022-09-12	12:56:35	0.152685	329.14	FALSE	8
2022-09-12	12:56:35	0.317824	329.458	FALSE	8
2022-09-12	12:56:35	0.237214	329.695	FALSE	8
2022-09-12	12:56:36	0.391361	330.086	FALSE	8
2022-09-12	12:56:36	0.220267	330.306	FALSE	8
2022-09-12	12:56:36	0.258639	330.565	FALSE	8
2022-09-12	12:56:36	0.234568	330.8	FALSE	8
2022-09-12	12:56:37	0.252277	331.052	FALSE	8
2022-09-12	12:56:37	0.362608	331.415	FALSE	8
2022-09-12	12:56:37	0.368868	331.783	FALSE	8
2022-09-12	12:56:37	0.369224	332.153	FALSE	8
2022-09-12	12:56:38	0.350344	332.503	FALSE	8
2022-09-12	12:56:38	0.36444	332.867	FALSE	8
2022-09-12	12:56:38	0.463066	333.331	FALSE	8
2022-09-12	12:56:38	0.321082	333.652	FALSE	8
2022-09-12	12:56:39	0.378232	334.03	FALSE	8
2022-09-12	12:56:39	0.317366	334.347	FALSE	8
2022-09-12	12:56:39	0.339504	334.687	FALSE	8
2022-09-12	12:56:40	0.398893	335.086	FALSE	8
2022-09-12	12:56:40	0.369173	335.455	FALSE	8
2022-09-12	12:56:40	0.36668	335.821	FALSE	8
2022-09-12	12:56:40	0.365153	336.187	FALSE	8
2022-09-12	12:56:41	0.359249	336.546	FALSE	8
2022-09-12	12:56:41	0.341438	336.887	FALSE	8
2022-09-12	12:56:41	0.279504	337.167	FALSE	8
2022-09-12	12:56:41	0.388206	337.555	FALSE	8
2022-09-12	12:56:42	0.240216	337.795	FALSE	8
2022-09-12	12:56:42	0.555076	338.35	FALSE	8
2022-09-12	12:56:42	0.209835	338.56	FALSE	8
2022-09-12	12:56:42	0.466272	339.026	FALSE	8
2022-09-12	12:56:43	0.303015	339.329	FALSE	8
2022-09-12	12:56:43	0.429936	339.759	FALSE	8
2022-09-12	12:56:43	0.300471	340.06	FALSE	8
2022-09-12	12:56:44	0.45701	340.517	FALSE	8
2022-09-12	12:56:44	0.367646	340.884	FALSE	8
2022-09-12	12:56:44	0.611107	341.496	FALSE	8
2022-09-12	12:56:44	0.330852	341.826	FALSE	8
2022-09-12	12:56:45	0.337977	342.164	FALSE	8
2022-09-12	12:56:45	0.36668	342.531	FALSE	8
2022-09-12	12:56:45	0.86159	343.393	FALSE	8
2022-09-12	12:56:45	0.753346	344.146	FALSE	8
2022-09-12	12:56:46	1.06887	345.215	FALSE	8
2022-09-12	12:56:46	0.774211	345.989	FALSE	8
2022-09-12	12:56:46	0.76668	346.756	FALSE	8
2022-09-12	12:56:46	0.835535	347.591	FALSE	8
2022-09-12	12:56:47	0.979046	348.57	FALSE	8
2022-09-12	12:56:47	0.487748	349.058	FALSE	8
2022-09-12	12:56:47	0.776705	349.835	FALSE	8
2022-09-12	12:56:48	0.482507	350.317	FALSE	8
2022-09-12	12:56:48	1.14225	351.46	FALSE	8
2022-09-12	12:56:48	0.578232	352.038	FALSE	8
2022-09-12	12:56:48	0.329224	352.367	FALSE	8
2022-09-12	12:56:49	0.344797	352.712	FALSE	8
2022-09-12	12:56:49	0.103881	352.816	FALSE	8
2022-09-12	12:56:49	0.176349	352.992	FALSE	8
2022-09-12	12:56:49	-0.106857	352.992	FALSE	8
2022-09-12	12:56:50	0.00673053	352.999	FALSE	8
2022-09-12	12:56:50	0.0472903	353.046	FALSE	8
2022-09-12	12:56:50	0.0904455	353.137	FALSE	8
2022-09-12	12:56:50	-0.0138802	353.137	FALSE	8
2022-09-12	12:56:51	0.160318	353.297	FALSE	8
2022-09-12	12:56:51	0.21584	353.513	FALSE	8
2022-09-12	12:56:51	0.250344	353.763	FALSE	8
2022-09-12	12:56:52	0.33472	354.098	FALSE	8
2022-09-12	12:56:52	0.194517	354.292	FALSE	8
2022-09-12	12:56:52	0.400267	354.693	FALSE	8
2022-09-12	12:56:52	0.240878	354.933	FALSE	8
2022-09-12	12:56:53	0.519249	355.453	FALSE	8
2022-09-12	12:56:53	0.460929	355.914	FALSE	8
2022-09-12	12:56:53	0.483728	356.397	FALSE	8
2022-09-12	12:56:53	0.434975	356.832	FALSE	8
2022-09-12	12:56:54	0.447596	357.28	FALSE	8
2022-09-12	12:56:54	0.498435	357.778	FALSE	8
2022-09-12	12:56:54	0.35813	358.136	FALSE	8
2022-09-12	12:56:55	0.442048	358.578	FALSE	8
2022-09-12	12:56:55	0.359249	358.938	FALSE	8
2022-09-12	12:56:55	0.780369	359.718	FALSE	8
2022-09-12	12:56:55	0.529325	360.247	FALSE	8
2022-09-12	12:56:56	0.756552	361.004	FALSE	8
2022-09-12	12:56:56	0.484746	361.489	FALSE	8
2022-09-12	12:56:56	0.842557	362.331	FALSE	8
2022-09-12	12:56:56	0.409071	362.74	FALSE	8
2022-09-12	12:56:57	0.407392	363.148	FALSE	8
2022-09-12	12:56:57	0.44958	363.597	FALSE	8
2022-09-12	12:56:57	0.600572	364.198	FALSE	8
2022-09-12	12:56:57	0.450598	364.648	FALSE	8
2022-09-12	12:56:58	0.323626	364.972	FALSE	8
2022-09-12	12:56:58	0.457774	365.43	FALSE	8
2022-09-12	12:56:58	0.220623	365.651	FALSE	8
2022-09-12	12:56:58	0.393651	366.044	FALSE	8
2022-09-12	12:56:59	0.180115	366.224	FALSE	8
2022-09-12	12:56:59	0.290903	366.515	FALSE	8
2022-09-12	12:56:59	0.147901	366.663	FALSE	8
2022-09-12	12:57:00	0.255484	366.919	FALSE	8
2022-09-12	12:57:00	0.287596	367.206	FALSE	8
2022-09-12	12:57:00	0.255229	367.461	FALSE	8
2022-09-12	12:57:00	0.369835	367.831	FALSE	8
2022-09-12	12:57:01	0.290293	368.122	FALSE	8
2022-09-12	12:57:01	0.354618	368.476	FALSE	8
2022-09-12	12:57:01	0.393295	368.869	FALSE	8
2022-09-12	12:57:01	0.398486	369.268	FALSE	8
2022-09-12	12:57:02	0.695433	369.963	FALSE	8
2022-09-12	12:57:02	0.399148	370.363	FALSE	8
2022-09-12	12:57:02	0.306629	370.669	FALSE	8
2022-09-12	12:57:03	0.42729	371.096	FALSE	8
2022-09-12	12:57:03	0.475992	371.572	FALSE	8
2022-09-12	12:57:03	0.45701	372.029	FALSE	8
2022-09-12	12:57:03	0.429529	372.459	FALSE	8
2022-09-12	12:57:04	0.476094	372.935	FALSE	8
2022-09-12	12:57:04	0.437977	373.373	FALSE	8
2022-09-12	12:57:04	0.454618	373.828	FALSE	8
2022-09-12	12:57:04	0.426476	374.254	FALSE	8
2022-09-12	12:57:05	0.502455	374.757	FALSE	8
2022-09-12	12:57:05	0.432227	375.189	FALSE	8
2022-09-12	12:57:05	0.40612	375.595	FALSE	8
2022-09-12	12:57:05	0.364695	375.96	FALSE	8
2022-09-12	12:57:06	0.363117	376.323	FALSE	8
2022-09-12	12:57:06	0.292277	376.615	FALSE	8
2022-09-12	12:57:06	0.286018	376.901	FALSE	8
2022-09-12	12:57:07	0.378893	377.28	FALSE	8
2022-09-12	12:57:07	0.280471	377.56	FALSE	8
2022-09-12	12:57:07	0.355789	377.916	FALSE	8
2022-09-12	12:57:07	0.266221	378.182	FALSE	8
2022-09-12	12:57:08	0.350445	378.533	FALSE	8
2022-09-12	12:57:08	0.308766	378.842	FALSE	8
2022-09-12	12:57:08	0.282863	379.124	FALSE	8
2022-09-12	12:57:08	0.246272	379.371	FALSE	8
2022-09-12	12:57:09	0.214924	379.586	FALSE	8
2022-09-12	12:57:09	0.330496	379.916	FALSE	8
2022-09-12	12:57:09	0.157774	380.074	FALSE	8
2022-09-12	12:57:09	0.36215	380.436	FALSE	8
2022-09-12	12:57:10	0.217061	380.653	FALSE	8
2022-09-12	12:57:10	0.376501	381.03	FALSE	8
2022-09-12	12:57:10	0.250394	381.28	FALSE	8
2022-09-12	12:57:11	0.324949	381.605	FALSE	8
2022-09-12	12:57:11	0.388104	381.993	FALSE	8
2022-09-12	12:57:11	0.340522	382.334	FALSE	8
2022-09-12	12:57:11	0.340573	382.674	FALSE	8
2022-09-12	12:57:12	0.317977	382.992	FALSE	8
2022-09-12	12:57:12	0.354211	383.346	FALSE	8
2022-09-12	12:57:12	0.381082	383.727	FALSE	8
2022-09-12	12:57:12	0.31645	384.044	FALSE	8
2022-09-12	12:57:13	0.429733	384.474	FALSE	8
2022-09-12	12:57:13	0.49757	384.971	FALSE	8
2022-09-12	12:57:13	0.474313	385.446	FALSE	8
2022-09-12	12:57:13	0.428868	385.874	FALSE	8
2022-09-12	12:57:14	0.350751	386.225	FALSE	8
2022-09-12	12:57:14	0.391972	386.617	FALSE	8
2022-09-12	12:57:14	0.299809	386.917	FALSE	8
2022-09-12	12:57:15	0.380522	387.297	FALSE	8
2022-09-12	12:57:15	0.217214	387.515	FALSE	8
2022-09-12	12:57:15	0.857213	388.372	FALSE	8
2022-09-12	12:57:15	0.34841	388.72	FALSE	8
2022-09-12	12:57:16	0.183015	388.903	FALSE	8
2022-09-12	12:57:16	0.191972	389.095	FALSE	8
2022-09-12	12:57:16	0.770394	389.866	FALSE	8
2022-09-12	12:57:16	0.30958	390.175	FALSE	8
2022-09-12	12:57:17	0.188359	390.364	FALSE	8
2022-09-12	12:57:17	0.409631	390.773	FALSE	8
2022-09-12	12:57:17	0.458842	391.232	FALSE	8
2022-09-12	12:57:17	0.526578	391.759	FALSE	8
2022-09-12	12:57:18	0.57187	392.331	FALSE	8
2022-09-12	12:57:18	0.452634	392.783	FALSE	8
2022-09-12	12:57:18	0.530445	393.314	FALSE	8
2022-09-12	12:57:19	0.44897	393.763	FALSE	8
2022-09-12	12:57:19	0.207087	393.97	FALSE	8
2022-09-12	12:57:19	0.18902	394.159	FALSE	8
2022-09-12	12:57:19	0.0819977	394.241	FALSE	8
2022-09-12	12:57:20	-0.168995	394.241	FALSE	8
2022-09-12	12:57:20	-0.0936765	394.241	FALSE	8
2022-09-12	12:57:20	-0.0389692	394.241	FALSE	8
2022-09-12	12:57:20	0.0651529	394.306	FALSE	8
2022-09-12	12:57:21	-0.075814	394.306	FALSE	8
2022-09-12	12:57:21	0.0118705	394.318	FALSE	8
2022-09-12	12:57:21	0.081845	394.4	FALSE	8
2022-09-12	12:57:21	0.0764506	394.476	FALSE	8
2022-09-12	12:57:22	0.0209289	394.497	FALSE	8
2022-09-12	12:57:22	0.0509544	394.548	FALSE	8
2022-09-12	12:57:22	0.0574175	394.605	FALSE	8
2022-09-12	12:57:23	0.120522	394.726	FALSE	8
2022-09-12	12:57:23	0.0822521	394.808	FALSE	8
2022-09-12	12:57:23	0.153753	394.962	FALSE	8
2022-09-12	12:57:23	0.121641	395.083	FALSE	8
2022-09-12	12:57:24	0.33701	395.42	FALSE	8
2022-09-12	12:57:24	0.301183	395.722	FALSE	8
2022-09-12	12:57:24	0.708664	396.43	FALSE	8
2022-09-12	12:57:24	1.05218	397.483	FALSE	8
2022-09-12	12:57:25	1.29106	398.774	FALSE	8
2022-09-12	12:57:25	1.24134	400.015	FALSE	8
2022-09-12	12:57:25	0.531107	400.546	FALSE	8
2022-09-12	12:57:25	0.425967	400.972	FALSE	8
2022-09-12	12:57:26	0.63986	401.612	FALSE	8
2022-09-12	12:57:26	0.714008	402.326	FALSE	8
2022-09-12	12:57:26	1.67996	404.006	FALSE	8
2022-09-12	12:57:27	0.698231	404.704	FALSE	8
2022-09-12	12:57:27	0.94388	405.648	FALSE	8
2022-09-12	12:57:27	0.934771	406.583	FALSE	8
2022-09-12	12:57:27	1.02943	407.612	FALSE	8
2022-09-12	12:57:28	0.87131	408.483	FALSE	8
2022-09-12	12:57:28	0.668359	409.152	FALSE	8
2022-09-12	12:57:28	0.347545	409.499	FALSE	8
2022-09-12	12:57:28	0.274975	409.774	FALSE	8
2022-09-12	12:57:29	0.28841	410.063	FALSE	8
2022-09-12	12:57:29	0.340878	410.404	FALSE	8
2022-09-12	12:57:29	0.295534	410.699	FALSE	8
2022-09-12	12:57:29	0.337366	411.037	FALSE	8
2022-09-12	12:57:30	0.361031	411.398	FALSE	8
2022-09-12	12:57:30	0.289377	411.687	FALSE	8
2022-09-12	12:57:30	0.465356	412.152	FALSE	8
2022-09-12	12:57:31	1.51233	413.665	FALSE	8
2022-09-12	12:57:31	1.88531	415.55	FALSE	8
2022-09-12	12:57:31	0.496552	416.046	FALSE	8
2022-09-12	12:57:31	0.37416	416.421	FALSE	8
2022-09-12	12:57:32	0.293346	416.714	FALSE	8
2022-09-12	12:57:32	0.282405	416.996	FALSE	8
2022-09-12	12:57:32	0.287188	417.284	FALSE	8
2022-09-12	12:57:32	0.306374	417.59	FALSE	8
2022-09-12	12:57:33	0.194924	417.785	FALSE	8
2022-09-12	12:57:33	0.371972	418.157	FALSE	8
2022-09-12	12:57:33	0.454924	418.612	FALSE	8
2022-09-12	12:57:33	0.345407	418.957	FALSE	8
2022-09-12	12:57:34	0.373041	419.33	FALSE	8
2022-09-12	12:57:34	0.273855	419.604	FALSE	8
2022-09-12	12:57:34	0.346171	419.95	FALSE	8
2022-09-12	12:57:35	0.149173	420.099	FALSE	8
2022-09-12	12:57:35	-0.115712	420.099	FALSE	8
2022-09-12	12:57:35	-0.183091	420.099	FALSE	8
2022-09-12	12:57:35	-0.270827	420.099	FALSE	8
2022-09-12	12:57:36	-0.120496	420.099	FALSE	8
2022-09-12	12:57:36	0.321998	420.421	FALSE	8
2022-09-12	12:57:36	0.790954	421.212	FALSE	8
2022-09-12	12:57:36	0.498384	421.711	FALSE	8
2022-09-12	12:57:37	0.579707	422.29	FALSE	8
2022-09-12	12:57:37	0.901336	423.192	FALSE	8
2022-09-12	12:57:37	0.483066	423.675	FALSE	8
2022-09-12	12:57:37	0.517875	424.193	FALSE	8
2022-09-12	12:57:38	0.381132	424.574	FALSE	8
2022-09-12	12:57:38	0.423219	424.997	FALSE	8
2022-09-12	12:57:38	0.409478	425.407	FALSE	8
2022-09-12	12:57:39	0.402659	425.809	FALSE	8
2022-09-12	12:57:39	0.413092	426.222	FALSE	8
2022-09-12	12:57:39	0.427697	426.65	FALSE	8
2022-09-12	12:57:39	0.371718	427.022	FALSE	8
2022-09-12	12:57:40	0.451005	427.473	FALSE	8
2022-09-12	12:57:40	0.465255	427.938	FALSE	8
2022-09-12	12:57:40	0.619148	428.557	FALSE	8
2022-09-12	12:57:40	0.485153	429.042	FALSE	8
2022-09-12	12:57:41	0.43757	429.48	FALSE	8
2022-09-12	12:57:41	0.381438	429.861	FALSE	8
2022-09-12	12:57:41	0.375127	430.236	FALSE	8
2022-09-12	12:57:41	0.358791	430.595	FALSE	8
2022-09-12	12:57:42	0.504491	431.1	FALSE	8
2022-09-12	12:57:42	0.370496	431.47	FALSE	8
2022-09-12	12:57:42	0.63701	432.107	FALSE	8
2022-09-12	12:57:43	1.23971	433.347	FALSE	8
2022-09-12	12:57:43	2.26256	435.609	FALSE	8
2022-09-12	12:57:43	2.48831	438.098	FALSE	8
2022-09-12	12:57:43	1.78653	439.884	FALSE	8
2022-09-12	12:57:44	0.641794	440.526	FALSE	8
2022-09-12	12:57:44	0.382354	440.908	FALSE	8
2022-09-12	12:57:44	0.43701	441.345	FALSE	8
2022-09-12	12:57:44	0.39355	441.739	FALSE	8
2022-09-12	12:57:45	0.413448	442.152	FALSE	8
2022-09-12	12:57:45	0.343015	442.495	FALSE	8
2022-09-12	12:57:45	0.363931	442.859	FALSE	8
2022-09-12	12:57:45	0.350293	443.21	FALSE	8
2022-09-12	12:57:46	0.324389	443.534	FALSE	8
2022-09-12	12:57:46	0.396349	443.93	FALSE	8
2022-09-12	12:57:46	0.392379	444.323	FALSE	8
2022-09-12	12:57:47	0.343728	444.667	FALSE	8
2022-09-12	12:57:47	0.411616	445.078	FALSE	8
2022-09-12	12:57:47	0.425967	445.504	FALSE	8
2022-09-12	12:57:47	0.431616	445.936	FALSE	8
2022-09-12	12:57:48	0.402761	446.339	FALSE	8
2022-09-12	12:57:48	0.784135	447.123	FALSE	8
2022-09-12	12:57:48	0.392023	447.515	FALSE	8
2022-09-12	12:57:48	0.512786	448.027	FALSE	8
2022-09-12	12:57:49	0.358741	448.386	FALSE	8
2022-09-12	12:57:49	0.58388	448.97	FALSE	8
2022-09-12	12:57:49	0.243931	449.214	FALSE	8
2022-09-12	12:57:49	0.592633	449.807	FALSE	8
2022-09-12	12:57:50	0.292786	450.099	FALSE	8
2022-09-12	12:57:50	0.574313	450.674	FALSE	8
2022-09-12	12:57:50	0.437723	451.111	FALSE	8
2022-09-12	12:57:51	0.817265	451.929	FALSE	8
2022-09-12	12:57:51	0.387646	452.316	FALSE	8
2022-09-12	12:57:51	0.436959	452.753	FALSE	8
2022-09-12	12:57:51	0.288868	453.042	FALSE	8
2022-09-12	12:57:52	0.214568	453.257	FALSE	8
2022-09-12	12:57:52	0.41986	453.677	FALSE	8
2022-09-12	12:57:52	0.442048	454.119	FALSE	8
2022-09-12	12:57:52	0.370751	454.489	FALSE	8
2022-09-12	12:57:53	0.378791	454.868	FALSE	8
2022-09-12	12:57:53	0.387697	455.256	FALSE	8
2022-09-12	12:57:53	0.278232	455.534	FALSE	8
2022-09-12	12:57:53	0.328155	455.862	FALSE	8
2022-09-12	12:57:54	0.199606	456.062	FALSE	8
2022-09-12	12:57:54	0.365153	456.427	FALSE	8
2022-09-12	12:57:54	0.285763	456.713	FALSE	8
2022-09-12	12:57:55	0.416145	457.129	FALSE	8
2022-09-12	12:57:55	0.642914	457.772	FALSE	8
2022-09-12	12:57:55	0.28612	458.058	FALSE	8
2022-09-12	12:57:55	0.229377	458.287	FALSE	8
2022-09-12	12:57:56	0.304644	458.592	FALSE	8
2022-09-12	12:57:56	0.309479	458.902	FALSE	8
2022-09-12	12:57:56	0.387239	459.289	FALSE	8
2022-09-12	12:57:56	0.31528	459.604	FALSE	8
2022-09-12	12:57:57	0.323881	459.928	FALSE	8
2022-09-12	12:57:57	0.277163	460.205	FALSE	8
2022-09-12	12:57:57	0.28612	460.491	FALSE	8
2022-09-12	12:57:57	0.296298	460.787	FALSE	8
2022-09-12	12:57:58	0.339453	461.127	FALSE	8
2022-09-12	12:57:58	0.362812	461.49	FALSE	8
2022-09-12	12:57:58	0.480216	461.97	FALSE	8
2022-09-12	12:57:59	0.645865	462.616	FALSE	8
2022-09-12	12:57:59	0.961692	463.578	FALSE	8
2022-09-12	12:57:59	0.476196	464.054	FALSE	8
2022-09-12	12:57:59	0.38042	464.434	FALSE	8
2022-09-12	12:58:00	0.376807	464.811	FALSE	8
2022-09-12	12:58:00	0.385102	465.196	FALSE	8
2022-09-12	12:58:00	0.402914	465.599	FALSE	8
2022-09-12	12:58:00	0.41472	466.014	FALSE	8
2022-09-12	12:58:01	0.445763	466.459	FALSE	8
2022-09-12	12:58:01	0.436654	466.896	FALSE	8
2022-09-12	12:58:01	0.480929	467.377	FALSE	8
2022-09-12	12:58:01	0.527952	467.905	FALSE	8
2022-09-12	12:58:02	0.536909	468.442	FALSE	8
2022-09-12	12:58:02	0.451667	468.894	FALSE	8
2022-09-12	12:58:02	0.408053	469.302	FALSE	8
2022-09-12	12:58:03	0.391005	469.693	FALSE	8
2022-09-12	12:58:03	0.377875	470.07	FALSE	8
2022-09-12	12:58:03	0.37701	470.447	FALSE	8
2022-09-12	12:58:03	0.385305	470.833	FALSE	8
2022-09-12	12:58:04	0.39187	471.225	FALSE	8
2022-09-12	12:58:04	0.411972	471.637	FALSE	8
2022-09-12	12:58:04	0.437112	472.074	FALSE	8
2022-09-12	12:58:04	0.464746	472.539	FALSE	8
2022-09-12	12:58:05	0.454008	472.993	FALSE	8
2022-09-12	12:58:05	0.666323	473.659	FALSE	8
2022-09-12	12:58:05	0.681794	474.341	FALSE	8
2022-09-12	12:58:05	0.496043	474.837	FALSE	8
2022-09-12	12:58:06	0.532481	475.369	FALSE	8
2022-09-12	12:58:06	0.489936	475.859	FALSE	8
2022-09-12	12:58:06	0.385967	476.245	FALSE	8
2022-09-12	12:58:07	0.373193	476.618	FALSE	8
2022-09-12	12:58:07	0.393753	477.012	FALSE	8
2022-09-12	12:58:07	0.435941	477.448	FALSE	8
2022-09-12	12:58:07	0.406425	477.854	FALSE	8
2022-09-12	12:58:08	0.404949	478.259	FALSE	8
2022-09-12	12:58:08	0.435433	478.695	FALSE	8
2022-09-12	12:58:08	0.442099	479.137	FALSE	8
2022-09-12	12:58:08	0.452685	479.59	FALSE	8
2022-09-12	12:58:09	0.444084	480.034	FALSE	8
2022-09-12	12:58:09	0.429784	480.463	FALSE	8
2022-09-12	12:58:09	0.429987	480.893	FALSE	8
2022-09-12	12:58:09	0.425509	481.319	FALSE	8
2022-09-12	12:58:10	0.442099	481.761	FALSE	8
2022-09-12	12:58:10	0.438283	482.199	FALSE	8
2022-09-12	12:58:10	0.439606	482.639	FALSE	8
2022-09-12	12:58:11	0.439198	483.078	FALSE	8
2022-09-12	12:58:11	0.444695	483.523	FALSE	8
2022-09-12	12:58:11	0.440776	483.964	FALSE	8
2022-09-12	12:58:11	0.438537	484.402	FALSE	8
2022-09-12	12:58:12	0.428766	484.831	FALSE	8
2022-09-12	12:58:12	0.427494	485.258	FALSE	8
2022-09-12	12:58:12	0.425305	485.684	FALSE	8
2022-09-12	12:58:12	0.430293	486.114	FALSE	8
2022-09-12	12:58:13	0.430395	486.544	FALSE	8
2022-09-12	12:58:13	0.429529	486.974	FALSE	8
2022-09-12	12:58:13	0.416959	487.391	FALSE	8
2022-09-12	12:58:13	0.42327	487.814	FALSE	8
2022-09-12	12:58:14	0.435433	488.25	FALSE	8
2022-09-12	12:58:14	0.404898	488.654	FALSE	8
2022-09-12	12:58:14	0.433041	489.087	FALSE	8
2022-09-12	12:58:15	0.421031	489.509	FALSE	8
2022-09-12	12:58:15	0.417774	489.926	FALSE	8
2022-09-12	12:58:15	0.431514	490.358	FALSE	8
2022-09-12	12:58:15	0.407952	490.766	FALSE	8
2022-09-12	12:58:16	0.409071	491.175	FALSE	8
2022-09-12	12:58:16	0.399046	491.574	FALSE	8
2022-09-12	12:58:16	0.402761	491.977	FALSE	8
2022-09-12	12:58:16	0.405916	492.383	FALSE	8
2022-09-12	12:58:17	0.404847	492.787	FALSE	8
2022-09-12	12:58:17	0.402863	493.19	FALSE	8
2022-09-12	12:58:17	0.396858	493.587	FALSE	8
2022-09-12	12:58:17	0.393855	493.981	FALSE	8
2022-09-12	12:58:18	0.398842	494.38	FALSE	8
2022-09-12	12:58:18	0.392481	494.772	FALSE	8
2022-09-12	12:58:18	0.401234	495.174	FALSE	8
2022-09-12	12:58:19	0.394466	495.568	FALSE	8
2022-09-12	12:58:19	0.405	495.973	FALSE	8
2022-09-12	12:58:19	0.406629	496.38	FALSE	8
2022-09-12	12:58:19	0.410445	496.79	FALSE	8
2022-09-12	12:58:20	0.412532	497.203	FALSE	8
2022-09-12	12:58:20	0.411056	497.614	FALSE	8
2022-09-12	12:58:20	0.414975	498.029	FALSE	8
2022-09-12	12:58:20	0.417926	498.447	FALSE	8
2022-09-12	12:58:21	0.419402	498.866	FALSE	8
2022-09-12	12:58:21	0.411412	499.277	FALSE	8
2022-09-12	12:58:21	0.420064	499.697	FALSE	8
2022-09-12	12:58:21	0.414771	500.112	FALSE	8
2022-09-12	12:58:22	0.417774	500.53	FALSE	8
2022-09-12	12:58:22	0.415178	500.945	FALSE	8
2022-09-12	12:58:22	0.409428	501.355	FALSE	8
2022-09-12	12:58:23	0.40215	501.757	FALSE	8
2022-09-12	12:58:23	0.398537	502.155	FALSE	8
2022-09-12	12:58:23	0.389682	502.545	FALSE	8
2022-09-12	12:58:23	0.387697	502.933	FALSE	8
2022-09-12	12:58:24	0.385662	503.318	FALSE	8
2022-09-12	12:58:24	0.389377	503.708	FALSE	8
2022-09-12	12:58:24	0.40729	504.115	FALSE	8
2022-09-12	12:58:24	0.406221	504.521	FALSE	8
2022-09-12	12:58:25	0.404847	504.926	FALSE	8
2022-09-12	12:58:25	0.411005	505.337	FALSE	8
2022-09-12	12:58:25	0.409936	505.747	FALSE	8
2022-09-12	12:58:25	0.40729	506.154	FALSE	8
2022-09-12	12:58:26	0.425764	506.58	FALSE	8
2022-09-12	12:58:26	0.414008	506.994	FALSE	8
2022-09-12	12:58:26	0.418588	507.413	FALSE	8
2022-09-12	12:58:27	0.948053	508.361	FALSE	8
2022-09-12	12:58:27	0.845712	509.206	FALSE	8
2022-09-12	12:58:27	0.560522	509.767	FALSE	8
2022-09-12	12:58:27	0.26042	510.027	FALSE	8
2022-09-12	12:58:28	0.406476	510.434	FALSE	8
2022-09-12	12:58:28	0.515483	510.949	FALSE	8
2022-09-12	12:58:28	0.405814	511.355	FALSE	8
2022-09-12	12:58:28	0.384593	511.74	FALSE	8
2022-09-12	12:58:29	0.405916	512.146	FALSE	8
2022-09-12	12:58:29	0.407443	512.553	FALSE	8
2022-09-12	12:58:29	0.490547	513.044	FALSE	8
2022-09-12	12:58:29	0.360115	513.404	FALSE	8
2022-09-12	12:58:30	0.435331	513.839	FALSE	8
2022-09-12	12:58:30	0.383931	514.223	FALSE	8
2022-09-12	12:58:30	0.299504	514.522	FALSE	8
2022-09-12	12:58:31	0.444695	514.967	FALSE	8
2022-09-12	12:58:31	0.344339	515.312	FALSE	8
2022-09-12	12:58:31	0.399249	515.711	FALSE	8
2022-09-12	12:58:31	0.346883	516.058	FALSE	8
2022-09-12	12:58:32	0.333957	516.392	FALSE	8
2022-09-12	12:58:32	0.291005	516.683	FALSE	8
2022-09-12	12:58:32	0.361234	517.044	FALSE	8
2022-09-12	12:58:32	0.457926	517.502	FALSE	8
2022-09-12	12:58:33	0.346171	517.848	FALSE	8
2022-09-12	12:58:33	0.400318	518.248	FALSE	8
2022-09-12	12:58:33	0.358995	518.607	FALSE	8
2022-09-12	12:58:33	0.481947	519.089	FALSE	8
2022-09-12	12:58:34	0.419504	519.509	FALSE	8
2022-09-12	12:58:34	0.828308	520.337	FALSE	8
2022-09-12	12:58:34	0.356858	520.694	FALSE	8
2022-09-12	12:58:35	0.598079	521.292	FALSE	8
2022-09-12	12:58:35	0.846883	522.139	FALSE	8
2022-09-12	12:58:35	0.567443	522.706	FALSE	8
2022-09-12	12:58:35	0.256959	522.963	FALSE	8
2022-09-12	12:58:36	0.493957	523.457	FALSE	8
2022-09-12	12:58:36	0.286527	523.744	FALSE	8
2022-09-12	12:58:36	0.473092	524.217	FALSE	8
2022-09-12	12:58:36	1.27268	525.49	FALSE	8
2022-09-12	12:58:37	0.427545	525.917	FALSE	8
2022-09-12	12:58:37	0.265051	526.182	FALSE	8
2022-09-12	12:58:37	0.422659	526.605	FALSE	8
2022-09-12	12:58:38	0.191819	526.797	FALSE	8
2022-09-12	12:58:38	0.426476	527.223	FALSE	8
2022-09-12	12:58:38	0.237163	527.46	FALSE	8
2022-09-12	12:58:38	0.202354	527.663	FALSE	8
2022-09-12	12:58:39	-0.00950358	527.663	FALSE	8
2022-09-12	12:58:39	-0.223346	527.663	FALSE	8
2022-09-12	12:58:39	0.429682	528.092	FALSE	8
2022-09-12	12:58:39	0.358079	528.45	FALSE	8
2022-09-12	12:58:40	0.362048	528.812	FALSE	8
2022-09-12	12:58:40	0.423423	529.236	FALSE	8
2022-09-12	12:58:40	0.537774	529.774	FALSE	8
2022-09-12	12:58:40	0.482456	530.256	FALSE	8
2022-09-12	12:58:41	0.43757	530.694	FALSE	8
2022-09-12	12:58:41	0.458537	531.152	FALSE	8
2022-09-12	12:58:41	0.449478	531.602	FALSE	8
2022-09-12	12:58:42	0.449631	532.051	FALSE	8
2022-09-12	12:58:42	0.463728	532.515	FALSE	8
2022-09-12	12:58:42	0.43243	532.947	FALSE	8
2022-09-12	12:58:42	0.45645	533.404	FALSE	8
2022-09-12	12:58:43	0.432685	533.837	FALSE	8
2022-09-12	12:58:43	0.410496	534.247	FALSE	8
2022-09-12	12:58:43	0.423117	534.67	FALSE	8
2022-09-12	12:58:43	0.505967	535.176	FALSE	8
2022-09-12	12:58:44	3.9137	539.09	1	9
2022-09-12	12:58:44	0.601692	539.692	FALSE	9
2022-09-12	12:58:44	0.718995	540.411	FALSE	9
2022-09-12	12:58:44	0.198537	540.609	FALSE	9

## Sheet: Duke_star_2022912125340
						**GoPro Fitting: 1242
2022-09-12	12:53:41	0.343423
2022-09-12	12:53:41	0.344135
2022-09-12	12:53:41	0.341234
2022-09-12	12:53:41	0.359555
2022-09-12	12:53:41	0.405967
2022-09-12	12:53:42	0.397875
2022-09-12	12:53:42	0.427748
2022-09-12	12:53:42	0.402048
2022-09-12	12:53:42	0.363372
2022-09-12	12:53:43	0.447087
2022-09-12	12:53:43	0.382608
2022-09-12	12:53:43	0.415636
2022-09-12	12:53:44	0.406934
2022-09-12	12:53:44	0.427952
2022-09-12	12:53:44	0.380165
2022-09-12	12:53:44	0.415942
2022-09-12	12:53:45	0.405
2022-09-12	12:53:45	0.405356
2022-09-12	12:53:45	0.401336
2022-09-12	12:53:45	0.409936
2022-09-12	12:53:46	0.425305
2022-09-12	12:53:46	0.405102
2022-09-12	12:53:46	0.479504
2022-09-12	12:53:46	0.407239
2022-09-12	12:53:47	0.47874
2022-09-12	12:53:47	0.44159
2022-09-12	12:53:47	0.423372
2022-09-12	12:53:48	0.416705
2022-09-12	12:53:48	0.429275
2022-09-12	12:53:48	0.455789
2022-09-12	12:53:48	0.395534
2022-09-12	12:53:49	0.446934
2022-09-12	12:53:49	0.395382
2022-09-12	12:53:49	0.372735
2022-09-12	12:53:49	0.312481
2022-09-12	12:53:50	0.287138
2022-09-12	12:53:50	0.368053
2022-09-12	12:53:50	0.411412
2022-09-12	12:53:50	0.167545
2022-09-12	12:53:51	0.371768
2022-09-12	12:53:51	0.190751
2022-09-12	12:53:51	0.289682
2022-09-12	12:53:52	0.137468
2022-09-12	12:53:52	0.285814
2022-09-12	12:53:52	0.370344
2022-09-12	12:53:52	0.372023
2022-09-12	12:53:53	0.790751
2022-09-12	12:53:53	1.57818
2022-09-12	12:53:53	1.64917
2022-09-12	12:53:53	0.758181
2022-09-12	12:53:54	0.717824
2022-09-12	12:53:54	0.337519
2022-09-12	12:53:54	0.312074
2022-09-12	12:53:54	0.282812
2022-09-12	12:53:55	0.349071
2022-09-12	12:53:55	0.172176
2022-09-12	12:53:55	0.535992
2022-09-12	12:53:56	0.0377738
2022-09-12	12:53:56	0.381794
2022-09-12	12:53:56	0.186018
2022-09-12	12:53:56	0.309835
2022-09-12	12:53:57	0.181234
2022-09-12	12:53:57	0.390293
2022-09-12	12:53:57	0.176909
2022-09-12	12:53:57	0.227392
2022-09-12	12:53:58	0.223626
2022-09-12	12:53:58	0.265356
2022-09-12	12:53:58	0.283728
2022-09-12	12:53:58	0.241489
2022-09-12	12:53:59	0.281896
2022-09-12	12:53:59	0.311412
2022-09-12	12:53:59	0.37584
2022-09-12	12:54:00	0.372583
2022-09-12	12:54:00	0.436959
2022-09-12	12:54:00	0.528664
2022-09-12	12:54:00	0.460878
2022-09-12	12:54:01	0.770242
2022-09-12	12:54:01	0.481336
2022-09-12	12:54:01	0.563473
2022-09-12	12:54:01	0.409275
2022-09-12	12:54:02	0.360165
2022-09-12	12:54:02	0.235433
2022-09-12	12:54:02	0.39187
2022-09-12	12:54:02	0.360267
2022-09-12	12:54:03	0.581896
2022-09-12	12:54:03	0.736043
2022-09-12	12:54:03	0.387239
2022-09-12	12:54:04	0.234517
2022-09-12	12:54:04	-0.0851778
2022-09-12	12:54:04	-0.384363
2022-09-12	12:54:04	-0.283346
2022-09-12	12:54:05	0.004186
2022-09-12	12:54:05	0.293194
2022-09-12	12:54:05	0.327392
2022-09-12	12:54:05	0.264796
2022-09-12	12:54:06	0.320471
2022-09-12	12:54:06	0.323779
2022-09-12	12:54:06	0.65528
2022-09-12	12:54:06	1.71197
2022-09-12	12:54:07	3.43742
2022-09-12	12:54:07	2.99131
2022-09-12	12:54:07	4.78871
2022-09-12	12:54:08	4.43828
2022-09-12	12:54:08	5.84296
2022-09-12	12:54:08	4.6535
2022-09-12	12:54:08	2.61848
2022-09-12	12:54:09	3.29579
2022-09-12	12:54:09	3.20322
2022-09-12	12:54:09	2.95284
2022-09-12	12:54:09	1.33569
2022-09-12	12:54:10	0.637519
2022-09-12	12:54:10	0.527544
2022-09-12	12:54:10	0.725254
2022-09-12	12:54:10	0.729835
2022-09-12	12:54:11	0.649886
2022-09-12	12:54:11	0.254059
2022-09-12	12:54:11	0.383219
2022-09-12	12:54:12	0.498893
2022-09-12	12:54:12	0.434415
2022-09-12	12:54:12	0.418537
2022-09-12	12:54:12	0.728512
2022-09-12	12:54:13	0.739453
2022-09-12	12:54:13	1.20032
2022-09-12	12:54:13	2.01396
2022-09-12	12:54:13	0.798333
2022-09-12	12:54:14	1.51762
2022-09-12	12:54:14	0.937417
2022-09-12	12:54:14	0.570089
2022-09-12	12:54:14	0.476501
2022-09-12	12:54:15	0.863321
2022-09-12	12:54:15	0.306272
2022-09-12	12:54:15	0.64103
2022-09-12	12:54:16	0.67645
2022-09-12	12:54:16	1.22037
2022-09-12	12:54:16	1.14785
2022-09-12	12:54:16	0.567443
2022-09-12	12:54:17	0.531819
2022-09-12	12:54:17	0.878232
2022-09-12	12:54:17	0.500471
2022-09-12	12:54:17	0.726832
2022-09-12	12:54:18	0.500063
2022-09-12	12:54:18	0.690344
2022-09-12	12:54:18	0.919199
2022-09-12	12:54:18	0.584084
2022-09-12	12:54:19	0.380827
2022-09-12	12:54:19	0.475076
2022-09-12	12:54:19	0.331972
2022-09-12	12:54:20	0.494059
2022-09-12	12:54:20	0.554415
2022-09-12	12:54:20	0.54556
2022-09-12	12:54:20	0.334873
2022-09-12	12:54:21	0.390954
2022-09-12	12:54:21	0.209987
2022-09-12	12:54:21	0.538893
2022-09-12	12:54:21	0.281896
2022-09-12	12:54:22	0.725
2022-09-12	12:54:22	0.847341
2022-09-12	12:54:22	1.65564
2022-09-12	12:54:22	1.01019
2022-09-12	12:54:23	1.01045
2022-09-12	12:54:23	0.864898
2022-09-12	12:54:23	0.952684
2022-09-12	12:54:24	1.0506
2022-09-12	12:54:24	0.488919
2022-09-12	12:54:24	0.584033
2022-09-12	12:54:24	0.612786
2022-09-12	12:54:25	0.358384
2022-09-12	12:54:25	0.381947
2022-09-12	12:54:25	0.410038
2022-09-12	12:54:25	0.352125
2022-09-12	12:54:26	0.426018
2022-09-12	12:54:26	0.343168
2022-09-12	12:54:26	0.398435
2022-09-12	12:54:26	0.319657
2022-09-12	12:54:27	0.366832
2022-09-12	12:54:27	0.317519
2022-09-12	12:54:27	0.516654
2022-09-12	12:54:28	0.300929
2022-09-12	12:54:28	0.4193
2022-09-12	12:54:28	0.321489
2022-09-12	12:54:28	0.428257
2022-09-12	12:54:29	0.285662
2022-09-12	12:54:29	0.422303
2022-09-12	12:54:29	0.345763
2022-09-12	12:54:29	0.448359
2022-09-12	12:54:30	0.366934
2022-09-12	12:54:30	0.414822
2022-09-12	12:54:30	0.454517
2022-09-12	12:54:30	0.512328
2022-09-12	12:54:31	0.674873
2022-09-12	12:54:31	0.577621
2022-09-12	12:54:31	0.466374
2022-09-12	12:54:32	0.52271
2022-09-12	12:54:32	0.605153
2022-09-12	12:54:32	0.54785
2022-09-12	12:54:32	1.11843
2022-09-12	12:54:33	0.920878
2022-09-12	12:54:33	1.14729
2022-09-12	12:54:33	0.585356
2022-09-12	12:54:33	0.649835
2022-09-12	12:54:34	0.39299
2022-09-12	12:54:34	0.509275
2022-09-12	12:54:34	0.731158
2022-09-12	12:54:34	0.723168
2022-09-12	12:54:35	0.726985
2022-09-12	12:54:35	0.531311
2022-09-12	12:54:35	0.728817
2022-09-12	12:54:36	0.653549
2022-09-12	12:54:36	0.725865
2022-09-12	12:54:36	0.726018
2022-09-12	12:54:36	0.723779
2022-09-12	12:54:37	0.724237
2022-09-12	12:54:37	0.718384
2022-09-12	12:54:37	0.72383
2022-09-12	12:54:37	0.722965
2022-09-12	12:54:38	0.72673
2022-09-12	12:54:38	0.730852
2022-09-12	12:54:38	0.718333
2022-09-12	12:54:38	0.720318
2022-09-12	12:54:39	0.711565
2022-09-12	12:54:39	0.723066
2022-09-12	12:54:39	0.726578
2022-09-12	12:54:40	0.723117
2022-09-12	12:54:40	0.719249
2022-09-12	12:54:40	0.721946
2022-09-12	12:54:40	0.72673
2022-09-12	12:54:41	0.722099
2022-09-12	12:54:41	0.726374
2022-09-12	12:54:41	0.72612
2022-09-12	12:54:41	0.725865
2022-09-12	12:54:42	0.727596
2022-09-12	12:54:42	0.723931
2022-09-12	12:54:42	0.726985
2022-09-12	12:54:42	0.721437
2022-09-12	12:54:43	0.722812
2022-09-12	12:54:43	0.729631
2022-09-12	12:54:43	0.723677
2022-09-12	12:54:44	0.721539
2022-09-12	12:54:44	0.724491
2022-09-12	12:54:44	0.727494
2022-09-12	12:54:44	0.728308
2022-09-12	12:54:45	0.720114
2022-09-12	12:54:45	0.726527
2022-09-12	12:54:45	0.718639
2022-09-12	12:54:46	0.724949
2022-09-12	12:54:46	0.730394
2022-09-12	12:54:46	0.723575
2022-09-12	12:54:46	0.723321
2022-09-12	12:54:46	0.729835
2022-09-12	12:54:47	0.725407
2022-09-12	12:54:47	0.727596
2022-09-12	12:54:47	0.728359
2022-09-12	12:54:48	0.718537
2022-09-12	12:54:48	0.723473
2022-09-12	12:54:48	0.723219
2022-09-12	12:54:48	0.722761
2022-09-12	12:54:49	0.725916
2022-09-12	12:54:49	0.728104
2022-09-12	12:54:49	0.72617
2022-09-12	12:54:49	0.725865
2022-09-12	12:54:50	0.731921
2022-09-12	12:54:50	0.721539
2022-09-12	12:54:50	0.722201
2022-09-12	12:54:50	0.722862
2022-09-12	12:54:51	0.725509
2022-09-12	12:54:51	0.721081
2022-09-12	12:54:51	0.723524
2022-09-12	12:54:52	0.723168
2022-09-12	12:54:52	0.727545
2022-09-12	12:54:52	0.728919
2022-09-12	12:54:52	0.727952
2022-09-12	12:54:53	0.726272
2022-09-12	12:54:53	0.725
2022-09-12	12:54:53	0.726934
2022-09-12	12:54:53	0.726527
2022-09-12	12:54:54	0.728461
2022-09-12	12:54:54	0.723524
2022-09-12	12:54:54	0.724695
2022-09-12	12:54:54	0.730343
2022-09-12	12:54:55	0.72383
2022-09-12	12:54:55	0.721539
2022-09-12	12:54:55	0.731616
2022-09-12	12:54:56	0.730801
2022-09-12	12:54:56	0.728868
2022-09-12	12:54:56	0.73243
2022-09-12	12:54:56	0.725051
2022-09-12	12:54:57	0.728003
2022-09-12	12:54:57	0.724186
2022-09-12	12:54:57	0.725356
2022-09-12	12:54:57	0.733753
2022-09-12	12:54:58	0.725305
2022-09-12	12:54:58	0.718995
2022-09-12	12:54:58	0.730089
2022-09-12	12:54:58	0.721946
2022-09-12	12:54:59	0.727087
2022-09-12	12:54:59	0.726781
2022-09-12	12:54:59	0.727443
2022-09-12	12:55:00	0.724135
2022-09-12	12:55:00	0.706578
2022-09-12	12:55:00	0.725102
2022-09-12	12:55:00	0.728359
2022-09-12	12:55:01	0.725763
2022-09-12	12:55:01	0.722557
2022-09-12	12:55:01	0.726018
2022-09-12	12:55:01	0.720013
2022-09-12	12:55:02	0.721387
2022-09-12	12:55:02	0.73416
2022-09-12	12:55:02	0.72556
2022-09-12	12:55:02	0.723372
2022-09-12	12:55:03	0.724237
2022-09-12	12:55:03	0.72612
2022-09-12	12:55:03	0.724542
2022-09-12	12:55:04	0.725254
2022-09-12	12:55:04	0.726527
2022-09-12	12:55:04	0.726578
2022-09-12	12:55:04	0.729071
2022-09-12	12:55:05	0.727188
2022-09-12	12:55:05	0.731056
2022-09-12	12:55:05	0.719911
2022-09-12	12:55:05	0.725254
2022-09-12	12:55:06	0.728308
2022-09-12	12:55:06	0.723015
2022-09-12	12:55:06	0.720623
2022-09-12	12:55:06	0.729224
2022-09-12	12:55:07	0.72271
2022-09-12	12:55:07	0.726985
2022-09-12	12:55:07	0.725662
2022-09-12	12:55:08	0.728054
2022-09-12	12:55:08	0.725712
2022-09-12	12:55:08	0.729224
2022-09-12	12:55:08	0.723015
2022-09-12	12:55:09	0.723219
2022-09-12	12:55:09	0.711616
2022-09-12	12:55:09	0.728104
2022-09-12	12:55:09	0.779249
2022-09-12	12:55:10	3.4824
2022-09-12	12:55:10	1.84536
2022-09-12	12:55:10	0.760979
2022-09-12	12:55:10	0.489122
2022-09-12	12:55:11	0.490751
2022-09-12	12:55:11	0.194211
2022-09-12	12:55:11	0.639504
2022-09-12	12:55:12	0.464695
2022-09-12	12:55:12	0.850191
2022-09-12	12:55:12	0.317316
2022-09-12	12:55:12	0.663219
2022-09-12	12:55:13	0.732175
2022-09-12	12:55:13	0.478842
2022-09-12	12:55:13	0.555433
2022-09-12	12:55:13	0.635178
2022-09-12	12:55:14	0.725305
2022-09-12	12:55:14	0.348155
2022-09-12	12:55:14	0.726425
2022-09-12	12:55:14	0.724084
2022-09-12	12:55:15	0.732226
2022-09-12	12:55:15	0.286222
2022-09-12	12:55:15	0.71757
2022-09-12	12:55:16	0.714974
2022-09-12	12:55:16	0.729428
2022-09-12	12:55:16	0.71874
2022-09-12	12:55:16	0.733753
2022-09-12	12:55:17	0.722049
2022-09-12	12:55:17	0.73014
2022-09-12	12:55:17	0.391616
2022-09-12	12:55:17	0.521947
2022-09-12	12:55:18	0.210598
2022-09-12	12:55:18	0.452125
2022-09-12	12:55:18	0.252735
2022-09-12	12:55:18	0.731616
2022-09-12	12:55:19	0.363473
2022-09-12	12:55:19	0.260471
2022-09-12	12:55:19	0.217926
2022-09-12	12:55:20	0.158893
2022-09-12	12:55:20	-0.0783585
2022-09-12	12:55:20	-0.199376
2022-09-12	12:55:20	-0.0964246
2022-09-12	12:55:21	-0.127621
2022-09-12	12:55:21	-0.11785
2022-09-12	12:55:21	-0.244364
2022-09-12	12:55:21	-0.113626
2022-09-12	12:55:22	-0.13785
2022-09-12	12:55:22	-0.0402924
2022-09-12	12:55:22	-0.0803941
2022-09-12	12:55:22	0.0864761
2022-09-12	12:55:23	0.0560435
2022-09-12	12:55:23	0.188359
2022-09-12	12:55:23	0.0816414
2022-09-12	12:55:24	0.310496
2022-09-12	12:55:24	0.244644
2022-09-12	12:55:24	0.30098
2022-09-12	12:55:24	0.18902
2022-09-12	12:55:25	0.468613
2022-09-12	12:55:25	0.620674
2022-09-12	12:55:25	0.437316
2022-09-12	12:55:25	0.368461
2022-09-12	12:55:26	0.310598
2022-09-12	12:55:26	0.305713
2022-09-12	12:55:26	0.329122
2022-09-12	12:55:26	0.30612
2022-09-12	12:55:27	0.210038
2022-09-12	12:55:27	0.281285
2022-09-12	12:55:27	0.218079
2022-09-12	12:55:28	0.291056
2022-09-12	12:55:28	0.0424557
2022-09-12	12:55:28	-0.0588674
2022-09-12	12:55:28	-0.057646
2022-09-12	12:55:29	-0.109351
2022-09-12	12:55:29	-0.0627351
2022-09-12	12:55:29	-0.104465
2022-09-12	12:55:29	0.0105982
2022-09-12	12:55:30	-0.0211575
2022-09-12	12:55:30	-0.0550506
2022-09-12	12:55:30	-0.103397
2022-09-12	12:55:30	0.0152293
2022-09-12	12:55:31	0.0109035
2022-09-12	12:55:31	0.0347203
2022-09-12	12:55:31	-0.0189183
2022-09-12	12:55:32	0.0332445
2022-09-12	12:55:32	0.109937
2022-09-12	12:55:32	-0.0106232
2022-09-12	12:55:32	0.0306999
2022-09-12	12:55:33	0.0351783
2022-09-12	12:55:33	0.163219
2022-09-12	12:55:33	0.00912238
2022-09-12	12:55:33	0.106272
2022-09-12	12:55:34	0.0639824
2022-09-12	12:55:34	0.184033
2022-09-12	12:55:34	0.0361453
2022-09-12	12:55:34	0.2364
2022-09-12	12:55:35	0.0794022
2022-09-12	12:55:35	0.253041
2022-09-12	12:55:35	0.0661707
2022-09-12	12:55:36	0.190496
2022-09-12	12:55:36	0.103423
2022-09-12	12:55:36	0.214975
2022-09-12	12:55:36	0.115738
2022-09-12	12:55:37	0.206832
2022-09-12	12:55:37	0.109224
2022-09-12	12:55:37	0.143423
2022-09-12	12:55:37	-0.00477074
2022-09-12	12:55:38	0.154873
2022-09-12	12:55:38	0.0913106
2022-09-12	12:55:38	0.133804
2022-09-12	12:55:38	0.16902
2022-09-12	12:55:39	0.15411
2022-09-12	12:55:39	0.242049
2022-09-12	12:55:39	0.271514
2022-09-12	12:55:40	0.172328
2022-09-12	12:55:40	0.191463
2022-09-12	12:55:40	0.303372
2022-09-12	12:55:40	0.319148
2022-09-12	12:55:41	0.275636
2022-09-12	12:55:41	0.20215
2022-09-12	12:55:41	0.193295
2022-09-12	12:55:41	0.224898
2022-09-12	12:55:42	0.252226
2022-09-12	12:55:42	0.282964
2022-09-12	12:55:42	0.310445
2022-09-12	12:55:42	0.319707
2022-09-12	12:55:43	0.295127
2022-09-12	12:55:43	0.323168
2022-09-12	12:55:43	0.445051
2022-09-12	12:55:44	0.413651
2022-09-12	12:55:44	0.348053
2022-09-12	12:55:44	0.348562
2022-09-12	12:55:44	0.475942
2022-09-12	12:55:45	0.377367
2022-09-12	12:55:45	0.469122
2022-09-12	12:55:45	0.454873
2022-09-12	12:55:45	0.451819
2022-09-12	12:55:46	0.461438
2022-09-12	12:55:46	0.464237
2022-09-12	12:55:46	0.466018
2022-09-12	12:55:46	0.468206
2022-09-12	12:55:47	0.478588
2022-09-12	12:55:47	0.474262
2022-09-12	12:55:47	0.472023
2022-09-12	12:55:48	0.472837
2022-09-12	12:55:48	0.465916
2022-09-12	12:55:48	0.466527
2022-09-12	12:55:48	0.454211
2022-09-12	12:55:49	0.466934
2022-09-12	12:55:49	0.468359
2022-09-12	12:55:49	0.470089
2022-09-12	12:55:49	0.477163
2022-09-12	12:55:50	0.496399
2022-09-12	12:55:50	0.600878
2022-09-12	12:55:50	0.97472
2022-09-12	12:55:50	1.34688
2022-09-12	12:55:51	0.959555
2022-09-12	12:55:51	0.203779
2022-09-12	12:55:51	0.240216
2022-09-12	12:55:52	0.130853
2022-09-12	12:55:52	0.240471
2022-09-12	12:55:52	0.286934
2022-09-12	12:55:52	0.357468
2022-09-12	12:55:53	0.422812
2022-09-12	12:55:53	0.377875
2022-09-12	12:55:53	0.184593
2022-09-12	12:55:53	0.112685
2022-09-12	12:55:54	-0.118308
2022-09-12	12:55:54	-0.120496
2022-09-12	12:55:54	-0.126806
2022-09-12	12:55:54	-0.131997
2022-09-12	12:55:55	-0.150521
2022-09-12	12:55:55	-0.147824
2022-09-12	12:55:55	0.093957
2022-09-12	12:55:56	0.203321
2022-09-12	12:55:56	0.115891
2022-09-12	12:55:56	0.24673
2022-09-12	12:55:56	0.360267
2022-09-12	12:55:57	0.310802
2022-09-12	12:55:57	0.365
2022-09-12	12:55:57	0.377163
2022-09-12	12:55:57	0.33126
2022-09-12	12:55:58	0.38841
2022-09-12	12:55:58	0.38673
2022-09-12	12:55:58	0.332634
2022-09-12	12:55:58	0.472583
2022-09-12	12:55:59	0.255382
2022-09-12	12:55:59	0.499911
2022-09-12	12:55:59	0.313194
2022-09-12	12:56:00	0.433244
2022-09-12	12:56:00	0.290903
2022-09-12	12:56:00	0.312176
2022-09-12	12:56:00	0.397825
2022-09-12	12:56:01	0.326781
2022-09-12	12:56:01	0.527188
2022-09-12	12:56:01	0.257672
2022-09-12	12:56:01	0.532837
2022-09-12	12:56:02	0.25243
2022-09-12	12:56:02	0.403015
2022-09-12	12:56:02	0.304898
2022-09-12	12:56:02	0.373244
2022-09-12	12:56:03	0.64729
2022-09-12	12:56:03	0.72902
2022-09-12	12:56:03	0.455433
2022-09-12	12:56:04	0.189529
2022-09-12	12:56:04	0.392634
2022-09-12	12:56:04	0.22159
2022-09-12	12:56:04	0.349784
2022-09-12	12:56:05	0.169326
2022-09-12	12:56:05	0.195229
2022-09-12	12:56:05	0.158028
2022-09-12	12:56:05	0.256501
2022-09-12	12:56:06	0.241234
2022-09-12	12:56:06	0.344949
2022-09-12	12:56:06	0.281132
2022-09-12	12:56:06	0.467443
2022-09-12	12:56:07	0.434313
2022-09-12	12:56:07	0.329122
2022-09-12	12:56:07	0.237163
2022-09-12	12:56:08	0.352481
2022-09-12	12:56:08	0.292277
2022-09-12	12:56:08	0.268257
2022-09-12	12:56:08	0.204593
2022-09-12	12:56:09	0.29528
2022-09-12	12:56:09	0.25299
2022-09-12	12:56:09	0.25416
2022-09-12	12:56:09	0.222049
2022-09-12	12:56:10	0.168257
2022-09-12	12:56:10	-0.0088929
2022-09-12	12:56:10	0.0369595
2022-09-12	12:56:10	0.044186
2022-09-12	12:56:11	0.0983844
2022-09-12	12:56:11	0.201845
2022-09-12	12:56:11	0.125255
2022-09-12	12:56:12	0.170649
2022-09-12	12:56:12	0.0150257
2022-09-12	12:56:12	0.0526338
2022-09-12	12:56:12	-0.00787507
2022-09-12	12:56:13	0.0263743
2022-09-12	12:56:13	0.0864252
2022-09-12	12:56:13	-0.00553411
2022-09-12	12:56:13	0.151412
2022-09-12	12:56:14	0.171616
2022-09-12	12:56:14	0.148613
2022-09-12	12:56:14	-0.0997834
2022-09-12	12:56:14	-0.280241
2022-09-12	12:56:15	-0.402328
2022-09-12	12:56:15	-0.369656
2022-09-12	12:56:15	-0.203804
2022-09-12	12:56:16	-0.0335748
2022-09-12	12:56:16	0.00591628
2022-09-12	12:56:16	0.0300893
2022-09-12	12:56:16	0.0718704
2022-09-12	12:56:17	0.104746
2022-09-12	12:56:17	0.225356
2022-09-12	12:56:17	0.316603
2022-09-12	12:56:17	0.229275
2022-09-12	12:56:18	0.307748
2022-09-12	12:56:18	0.165153
2022-09-12	12:56:18	0.281336
2022-09-12	12:56:18	0.242456
2022-09-12	12:56:19	0.284644
2022-09-12	12:56:19	0.294517
2022-09-12	12:56:19	0.236349
2022-09-12	12:56:20	0.337061
2022-09-12	12:56:20	0.278741
2022-09-12	12:56:20	0.403015
2022-09-12	12:56:20	0.270038
2022-09-12	12:56:21	0.268919
2022-09-12	12:56:21	0.367036
2022-09-12	12:56:21	0.534517
2022-09-12	12:56:21	1.14933
2022-09-12	12:56:22	0.781845
2022-09-12	12:56:22	0.559707
2022-09-12	12:56:22	0.923422
2022-09-12	12:56:22	0.847646
2022-09-12	12:56:23	1.23177
2022-09-12	12:56:23	1.15263
2022-09-12	12:56:23	1.06989
2022-09-12	12:56:24	1.14963
2022-09-12	12:56:24	1.22464
2022-09-12	12:56:24	0.770089
2022-09-12	12:56:24	0.741438
2022-09-12	12:56:25	0.420929
2022-09-12	12:56:25	0.542354
2022-09-12	12:56:25	0.311209
2022-09-12	12:56:25	0.348104
2022-09-12	12:56:26	0.280369
2022-09-12	12:56:26	0.27757
2022-09-12	12:56:26	0.126323
2022-09-12	12:56:26	-0.00487254
2022-09-12	12:56:27	-0.0639056
2022-09-12	12:56:27	0.149377
2022-09-12	12:56:27	0.295687
2022-09-12	12:56:28	0.310445
2022-09-12	12:56:28	0.277672
2022-09-12	12:56:28	0.333702
2022-09-12	12:56:28	0.340369
2022-09-12	12:56:29	0.254008
2022-09-12	12:56:29	0.277875
2022-09-12	12:56:29	0.281794
2022-09-12	12:56:29	0.343015
2022-09-12	12:56:30	0.285255
2022-09-12	12:56:30	0.343168
2022-09-12	12:56:30	0.33299
2022-09-12	12:56:30	0.303728
2022-09-12	12:56:31	0.228257
2022-09-12	12:56:31	0.283575
2022-09-12	12:56:31	0.297367
2022-09-12	12:56:32	0.244288
2022-09-12	12:56:32	0.216196
2022-09-12	12:56:32	0.235331
2022-09-12	12:56:32	0.190395
2022-09-12	12:56:33	0.159707
2022-09-12	12:56:33	0.0450002
2022-09-12	12:56:33	0.0273921
2022-09-12	12:56:33	0.190954
2022-09-12	12:56:34	0.243117
2022-09-12	12:56:34	0.179249
2022-09-12	12:56:34	0.113855
2022-09-12	12:56:34	0.115535
2022-09-12	12:56:35	0.152685
2022-09-12	12:56:35	0.317824
2022-09-12	12:56:35	0.237214
2022-09-12	12:56:36	0.391361
2022-09-12	12:56:36	0.220267
2022-09-12	12:56:36	0.258639
2022-09-12	12:56:36	0.234568
2022-09-12	12:56:37	0.252277
2022-09-12	12:56:37	0.362608
2022-09-12	12:56:37	0.368868
2022-09-12	12:56:37	0.369224
2022-09-12	12:56:38	0.350344
2022-09-12	12:56:38	0.36444
2022-09-12	12:56:38	0.463066
2022-09-12	12:56:38	0.321082
2022-09-12	12:56:39	0.378232
2022-09-12	12:56:39	0.317366
2022-09-12	12:56:39	0.339504
2022-09-12	12:56:40	0.398893
2022-09-12	12:56:40	0.369173
2022-09-12	12:56:40	0.36668
2022-09-12	12:56:40	0.365153
2022-09-12	12:56:41	0.359249
2022-09-12	12:56:41	0.341438
2022-09-12	12:56:41	0.279504
2022-09-12	12:56:41	0.388206
2022-09-12	12:56:42	0.240216
2022-09-12	12:56:42	0.555076
2022-09-12	12:56:42	0.209835
2022-09-12	12:56:42	0.466272
2022-09-12	12:56:43	0.303015
2022-09-12	12:56:43	0.429936
2022-09-12	12:56:43	0.300471
2022-09-12	12:56:44	0.45701
2022-09-12	12:56:44	0.367646
2022-09-12	12:56:44	0.611107
2022-09-12	12:56:44	0.330852
2022-09-12	12:56:45	0.337977
2022-09-12	12:56:45	0.36668
2022-09-12	12:56:45	0.86159
2022-09-12	12:56:45	0.753346
2022-09-12	12:56:46	1.06887
2022-09-12	12:56:46	0.774211
2022-09-12	12:56:46	0.76668
2022-09-12	12:56:46	0.835535
2022-09-12	12:56:47	0.979046
2022-09-12	12:56:47	0.487748
2022-09-12	12:56:47	0.776705
2022-09-12	12:56:48	0.482507
2022-09-12	12:56:48	1.14225
2022-09-12	12:56:48	0.578232
2022-09-12	12:56:48	0.329224
2022-09-12	12:56:49	0.344797
2022-09-12	12:56:49	0.103881
2022-09-12	12:56:49	0.176349
2022-09-12	12:56:49	-0.106857
2022-09-12	12:56:50	0.00673053
2022-09-12	12:56:50	0.0472903
2022-09-12	12:56:50	0.0904455
2022-09-12	12:56:50	-0.0138802
2022-09-12	12:56:51	0.160318
2022-09-12	12:56:51	0.21584
2022-09-12	12:56:51	0.250344
2022-09-12	12:56:52	0.33472
2022-09-12	12:56:52	0.194517
2022-09-12	12:56:52	0.400267
2022-09-12	12:56:52	0.240878
2022-09-12	12:56:53	0.519249
2022-09-12	12:56:53	0.460929
2022-09-12	12:56:53	0.483728
2022-09-12	12:56:53	0.434975
2022-09-12	12:56:54	0.447596
2022-09-12	12:56:54	0.498435
2022-09-12	12:56:54	0.35813
2022-09-12	12:56:55	0.442048
2022-09-12	12:56:55	0.359249
2022-09-12	12:56:55	0.780369
2022-09-12	12:56:55	0.529325
2022-09-12	12:56:56	0.756552
2022-09-12	12:56:56	0.484746
2022-09-12	12:56:56	0.842557
2022-09-12	12:56:56	0.409071
2022-09-12	12:56:57	0.407392
2022-09-12	12:56:57	0.44958
2022-09-12	12:56:57	0.600572
2022-09-12	12:56:57	0.450598
2022-09-12	12:56:58	0.323626
2022-09-12	12:56:58	0.457774
2022-09-12	12:56:58	0.220623
2022-09-12	12:56:58	0.393651
2022-09-12	12:56:59	0.180115
2022-09-12	12:56:59	0.290903
2022-09-12	12:56:59	0.147901
2022-09-12	12:57:00	0.255484
2022-09-12	12:57:00	0.287596
2022-09-12	12:57:00	0.255229
2022-09-12	12:57:00	0.369835
2022-09-12	12:57:01	0.290293
2022-09-12	12:57:01	0.354618
2022-09-12	12:57:01	0.393295
2022-09-12	12:57:01	0.398486
2022-09-12	12:57:02	0.695433
2022-09-12	12:57:02	0.399148
2022-09-12	12:57:02	0.306629
2022-09-12	12:57:03	0.42729
2022-09-12	12:57:03	0.475992
2022-09-12	12:57:03	0.45701
2022-09-12	12:57:03	0.429529
2022-09-12	12:57:04	0.476094
2022-09-12	12:57:04	0.437977
2022-09-12	12:57:04	0.454618
2022-09-12	12:57:04	0.426476
2022-09-12	12:57:05	0.502455
2022-09-12	12:57:05	0.432227
2022-09-12	12:57:05	0.40612
2022-09-12	12:57:05	0.364695
2022-09-12	12:57:06	0.363117
2022-09-12	12:57:06	0.292277
2022-09-12	12:57:06	0.286018
2022-09-12	12:57:07	0.378893
2022-09-12	12:57:07	0.280471
2022-09-12	12:57:07	0.355789
2022-09-12	12:57:07	0.266221
2022-09-12	12:57:08	0.350445
2022-09-12	12:57:08	0.308766
2022-09-12	12:57:08	0.282863
2022-09-12	12:57:08	0.246272
2022-09-12	12:57:09	0.214924
2022-09-12	12:57:09	0.330496
2022-09-12	12:57:09	0.157774
2022-09-12	12:57:09	0.36215
2022-09-12	12:57:10	0.217061
2022-09-12	12:57:10	0.376501
2022-09-12	12:57:10	0.250394
2022-09-12	12:57:11	0.324949
2022-09-12	12:57:11	0.388104
2022-09-12	12:57:11	0.340522
2022-09-12	12:57:11	0.340573
2022-09-12	12:57:12	0.317977
2022-09-12	12:57:12	0.354211
2022-09-12	12:57:12	0.381082
2022-09-12	12:57:12	0.31645
2022-09-12	12:57:13	0.429733
2022-09-12	12:57:13	0.49757
2022-09-12	12:57:13	0.474313
2022-09-12	12:57:13	0.428868
2022-09-12	12:57:14	0.350751
2022-09-12	12:57:14	0.391972
2022-09-12	12:57:14	0.299809
2022-09-12	12:57:15	0.380522
2022-09-12	12:57:15	0.217214
2022-09-12	12:57:15	0.857213
2022-09-12	12:57:15	0.34841
2022-09-12	12:57:16	0.183015
2022-09-12	12:57:16	0.191972
2022-09-12	12:57:16	0.770394
2022-09-12	12:57:16	0.30958
2022-09-12	12:57:17	0.188359
2022-09-12	12:57:17	0.409631
2022-09-12	12:57:17	0.458842
2022-09-12	12:57:17	0.526578
2022-09-12	12:57:18	0.57187
2022-09-12	12:57:18	0.452634
2022-09-12	12:57:18	0.530445
2022-09-12	12:57:19	0.44897
2022-09-12	12:57:19	0.207087
2022-09-12	12:57:19	0.18902
2022-09-12	12:57:19	0.0819977
2022-09-12	12:57:20	-0.168995
2022-09-12	12:57:20	-0.0936765
2022-09-12	12:57:20	-0.0389692
2022-09-12	12:57:20	0.0651529
2022-09-12	12:57:21	-0.075814
2022-09-12	12:57:21	0.0118705
2022-09-12	12:57:21	0.081845
2022-09-12	12:57:21	0.0764506
2022-09-12	12:57:22	0.0209289
2022-09-12	12:57:22	0.0509544
2022-09-12	12:57:22	0.0574175
2022-09-12	12:57:23	0.120522
2022-09-12	12:57:23	0.0822521
2022-09-12	12:57:23	0.153753
2022-09-12	12:57:23	0.121641
2022-09-12	12:57:24	0.33701
2022-09-12	12:57:24	0.301183
2022-09-12	12:57:24	0.708664
2022-09-12	12:57:24	1.05218
2022-09-12	12:57:25	1.29106
2022-09-12	12:57:25	1.24134
2022-09-12	12:57:25	0.531107
2022-09-12	12:57:25	0.425967
2022-09-12	12:57:26	0.63986
2022-09-12	12:57:26	0.714008
2022-09-12	12:57:26	1.67996
2022-09-12	12:57:27	0.698231
2022-09-12	12:57:27	0.94388
2022-09-12	12:57:27	0.934771
2022-09-12	12:57:27	1.02943
2022-09-12	12:57:28	0.87131
2022-09-12	12:57:28	0.668359
2022-09-12	12:57:28	0.347545
2022-09-12	12:57:28	0.274975
2022-09-12	12:57:29	0.28841
2022-09-12	12:57:29	0.340878
2022-09-12	12:57:29	0.295534
2022-09-12	12:57:29	0.337366
2022-09-12	12:57:30	0.361031
2022-09-12	12:57:30	0.289377
2022-09-12	12:57:30	0.465356
2022-09-12	12:57:31	1.51233
2022-09-12	12:57:31	1.88531
2022-09-12	12:57:31	0.496552
2022-09-12	12:57:31	0.37416
2022-09-12	12:57:32	0.293346
2022-09-12	12:57:32	0.282405
2022-09-12	12:57:32	0.287188
2022-09-12	12:57:32	0.306374
2022-09-12	12:57:33	0.194924
2022-09-12	12:57:33	0.371972
2022-09-12	12:57:33	0.454924
2022-09-12	12:57:33	0.345407
2022-09-12	12:57:34	0.373041
2022-09-12	12:57:34	0.273855
2022-09-12	12:57:34	0.346171
2022-09-12	12:57:35	0.149173
2022-09-12	12:57:35	-0.115712
2022-09-12	12:57:35	-0.183091
2022-09-12	12:57:35	-0.270827
2022-09-12	12:57:36	-0.120496
2022-09-12	12:57:36	0.321998
2022-09-12	12:57:36	0.790954
2022-09-12	12:57:36	0.498384
2022-09-12	12:57:37	0.579707
2022-09-12	12:57:37	0.901336
2022-09-12	12:57:37	0.483066
2022-09-12	12:57:37	0.517875
2022-09-12	12:57:38	0.381132
2022-09-12	12:57:38	0.423219
2022-09-12	12:57:38	0.409478
2022-09-12	12:57:39	0.402659
2022-09-12	12:57:39	0.413092
2022-09-12	12:57:39	0.427697
2022-09-12	12:57:39	0.371718
2022-09-12	12:57:40	0.451005
2022-09-12	12:57:40	0.465255
2022-09-12	12:57:40	0.619148
2022-09-12	12:57:40	0.485153
2022-09-12	12:57:41	0.43757
2022-09-12	12:57:41	0.381438
2022-09-12	12:57:41	0.375127
2022-09-12	12:57:41	0.358791
2022-09-12	12:57:42	0.504491
2022-09-12	12:57:42	0.370496
2022-09-12	12:57:42	0.63701
2022-09-12	12:57:43	1.23971
2022-09-12	12:57:43	2.26256
2022-09-12	12:57:43	2.48831
2022-09-12	12:57:43	1.78653
2022-09-12	12:57:44	0.641794
2022-09-12	12:57:44	0.382354
2022-09-12	12:57:44	0.43701
2022-09-12	12:57:44	0.39355
2022-09-12	12:57:45	0.413448
2022-09-12	12:57:45	0.343015
2022-09-12	12:57:45	0.363931
2022-09-12	12:57:45	0.350293
2022-09-12	12:57:46	0.324389
2022-09-12	12:57:46	0.396349
2022-09-12	12:57:46	0.392379
2022-09-12	12:57:47	0.343728
2022-09-12	12:57:47	0.411616
2022-09-12	12:57:47	0.425967
2022-09-12	12:57:47	0.431616
2022-09-12	12:57:48	0.402761
2022-09-12	12:57:48	0.784135
2022-09-12	12:57:48	0.392023
2022-09-12	12:57:48	0.512786
2022-09-12	12:57:49	0.358741
2022-09-12	12:57:49	0.58388
2022-09-12	12:57:49	0.243931
2022-09-12	12:57:49	0.592633
2022-09-12	12:57:50	0.292786
2022-09-12	12:57:50	0.574313
2022-09-12	12:57:50	0.437723
2022-09-12	12:57:51	0.817265
2022-09-12	12:57:51	0.387646
2022-09-12	12:57:51	0.436959
2022-09-12	12:57:51	0.288868
2022-09-12	12:57:52	0.214568
2022-09-12	12:57:52	0.41986
2022-09-12	12:57:52	0.442048
2022-09-12	12:57:52	0.370751
2022-09-12	12:57:53	0.378791
2022-09-12	12:57:53	0.387697
2022-09-12	12:57:53	0.278232
2022-09-12	12:57:53	0.328155
2022-09-12	12:57:54	0.199606
2022-09-12	12:57:54	0.365153
2022-09-12	12:57:54	0.285763
2022-09-12	12:57:55	0.416145
2022-09-12	12:57:55	0.642914
2022-09-12	12:57:55	0.28612
2022-09-12	12:57:55	0.229377
2022-09-12	12:57:56	0.304644
2022-09-12	12:57:56	0.309479
2022-09-12	12:57:56	0.387239
2022-09-12	12:57:56	0.31528
2022-09-12	12:57:57	0.323881
2022-09-12	12:57:57	0.277163
2022-09-12	12:57:57	0.28612
2022-09-12	12:57:57	0.296298
2022-09-12	12:57:58	0.339453
2022-09-12	12:57:58	0.362812
2022-09-12	12:57:58	0.480216
2022-09-12	12:57:59	0.645865
2022-09-12	12:57:59	0.961692
2022-09-12	12:57:59	0.476196
2022-09-12	12:57:59	0.38042
2022-09-12	12:58:00	0.376807
2022-09-12	12:58:00	0.385102
2022-09-12	12:58:00	0.402914
2022-09-12	12:58:00	0.41472
2022-09-12	12:58:01	0.445763
2022-09-12	12:58:01	0.436654
2022-09-12	12:58:01	0.480929
2022-09-12	12:58:01	0.527952
2022-09-12	12:58:02	0.536909
2022-09-12	12:58:02	0.451667
2022-09-12	12:58:02	0.408053
2022-09-12	12:58:03	0.391005
2022-09-12	12:58:03	0.377875
2022-09-12	12:58:03	0.37701
2022-09-12	12:58:03	0.385305
2022-09-12	12:58:04	0.39187
2022-09-12	12:58:04	0.411972
2022-09-12	12:58:04	0.437112
2022-09-12	12:58:04	0.464746
2022-09-12	12:58:05	0.454008
2022-09-12	12:58:05	0.666323
2022-09-12	12:58:05	0.681794
2022-09-12	12:58:05	0.496043
2022-09-12	12:58:06	0.532481
2022-09-12	12:58:06	0.489936
2022-09-12	12:58:06	0.385967
2022-09-12	12:58:07	0.373193
2022-09-12	12:58:07	0.393753
2022-09-12	12:58:07	0.435941
2022-09-12	12:58:07	0.406425
2022-09-12	12:58:08	0.404949
2022-09-12	12:58:08	0.435433
2022-09-12	12:58:08	0.442099
2022-09-12	12:58:08	0.452685
2022-09-12	12:58:09	0.444084
2022-09-12	12:58:09	0.429784
2022-09-12	12:58:09	0.429987
2022-09-12	12:58:09	0.425509
2022-09-12	12:58:10	0.442099
2022-09-12	12:58:10	0.438283
2022-09-12	12:58:10	0.439606
2022-09-12	12:58:11	0.439198
2022-09-12	12:58:11	0.444695
2022-09-12	12:58:11	0.440776
2022-09-12	12:58:11	0.438537
2022-09-12	12:58:12	0.428766
2022-09-12	12:58:12	0.427494
2022-09-12	12:58:12	0.425305
2022-09-12	12:58:12	0.430293
2022-09-12	12:58:13	0.430395
2022-09-12	12:58:13	0.429529
2022-09-12	12:58:13	0.416959
2022-09-12	12:58:13	0.42327
2022-09-12	12:58:14	0.435433
2022-09-12	12:58:14	0.404898
2022-09-12	12:58:14	0.433041
2022-09-12	12:58:15	0.421031
2022-09-12	12:58:15	0.417774
2022-09-12	12:58:15	0.431514
2022-09-12	12:58:15	0.407952
2022-09-12	12:58:16	0.409071
2022-09-12	12:58:16	0.399046
2022-09-12	12:58:16	0.402761
2022-09-12	12:58:16	0.405916
2022-09-12	12:58:17	0.404847
2022-09-12	12:58:17	0.402863
2022-09-12	12:58:17	0.396858
2022-09-12	12:58:17	0.393855
2022-09-12	12:58:18	0.398842
2022-09-12	12:58:18	0.392481
2022-09-12	12:58:18	0.401234
2022-09-12	12:58:19	0.394466
2022-09-12	12:58:19	0.405
2022-09-12	12:58:19	0.406629
2022-09-12	12:58:19	0.410445
2022-09-12	12:58:20	0.412532
2022-09-12	12:58:20	0.411056
2022-09-12	12:58:20	0.414975
2022-09-12	12:58:20	0.417926
2022-09-12	12:58:21	0.419402
2022-09-12	12:58:21	0.411412
2022-09-12	12:58:21	0.420064
2022-09-12	12:58:21	0.414771
2022-09-12	12:58:22	0.417774
2022-09-12	12:58:22	0.415178
2022-09-12	12:58:22	0.409428
2022-09-12	12:58:23	0.40215
2022-09-12	12:58:23	0.398537
2022-09-12	12:58:23	0.389682
2022-09-12	12:58:23	0.387697
2022-09-12	12:58:24	0.385662
2022-09-12	12:58:24	0.389377
2022-09-12	12:58:24	0.40729
2022-09-12	12:58:24	0.406221
2022-09-12	12:58:25	0.404847
2022-09-12	12:58:25	0.411005
2022-09-12	12:58:25	0.409936
2022-09-12	12:58:25	0.40729
2022-09-12	12:58:26	0.425764
2022-09-12	12:58:26	0.414008
2022-09-12	12:58:26	0.418588
2022-09-12	12:58:27	0.948053
2022-09-12	12:58:27	0.845712
2022-09-12	12:58:27	0.560522
2022-09-12	12:58:27	0.26042
2022-09-12	12:58:28	0.406476
2022-09-12	12:58:28	0.515483
2022-09-12	12:58:28	0.405814
2022-09-12	12:58:28	0.384593
2022-09-12	12:58:29	0.405916
2022-09-12	12:58:29	0.407443
2022-09-12	12:58:29	0.490547
2022-09-12	12:58:29	0.360115
2022-09-12	12:58:30	0.435331
2022-09-12	12:58:30	0.383931
2022-09-12	12:58:30	0.299504
2022-09-12	12:58:31	0.444695
2022-09-12	12:58:31	0.344339
2022-09-12	12:58:31	0.399249
2022-09-12	12:58:31	0.346883
2022-09-12	12:58:32	0.333957
2022-09-12	12:58:32	0.291005
2022-09-12	12:58:32	0.361234
2022-09-12	12:58:32	0.457926
2022-09-12	12:58:33	0.346171
2022-09-12	12:58:33	0.400318
2022-09-12	12:58:33	0.358995
2022-09-12	12:58:33	0.481947
2022-09-12	12:58:34	0.419504
2022-09-12	12:58:34	0.828308
2022-09-12	12:58:34	0.356858
2022-09-12	12:58:35	0.598079
2022-09-12	12:58:35	0.846883
2022-09-12	12:58:35	0.567443
2022-09-12	12:58:35	0.256959
2022-09-12	12:58:36	0.493957
2022-09-12	12:58:36	0.286527
2022-09-12	12:58:36	0.473092
2022-09-12	12:58:36	1.27268
2022-09-12	12:58:37	0.427545
2022-09-12	12:58:37	0.265051
2022-09-12	12:58:37	0.422659
2022-09-12	12:58:38	0.191819
2022-09-12	12:58:38	0.426476
2022-09-12	12:58:38	0.237163
2022-09-12	12:58:38	0.202354
2022-09-12	12:58:39	-0.00950358
2022-09-12	12:58:39	-0.223346
2022-09-12	12:58:39	0.429682
2022-09-12	12:58:39	0.358079
2022-09-12	12:58:40	0.362048
2022-09-12	12:58:40	0.423423
2022-09-12	12:58:40	0.537774
2022-09-12	12:58:40	0.482456
2022-09-12	12:58:41	0.43757
2022-09-12	12:58:41	0.458537
2022-09-12	12:58:41	0.449478
2022-09-12	12:58:42	0.449631
2022-09-12	12:58:42	0.463728
2022-09-12	12:58:42	0.43243
2022-09-12	12:58:42	0.45645
2022-09-12	12:58:43	0.432685
2022-09-12	12:58:43	0.410496
2022-09-12	12:58:43	0.423117
2022-09-12	12:58:43	0.505967
2022-09-12	12:58:44	3.9137
2022-09-12	12:58:44	0.601692
2022-09-12	12:58:44	0.718995
2022-09-12	12:58:44	0.198537
2022-09-12	12:58:45	0.339402
2022-09-12	12:58:45	0.717672
2022-09-12	12:58:45	0.653804
2022-09-12	12:58:46	0.31986
2022-09-12	12:58:46	0.329631
2022-09-12	12:58:46	0.259402
2022-09-12	12:58:46	0.187799
2022-09-12	12:58:47	0.274924
2022-09-12	12:58:47	0.291819
2022-09-12	12:58:47	0.247748
2022-09-12	12:58:47	0.227239
2022-09-12	12:58:48	0.18042
2022-09-12	12:58:48	0.243881
2022-09-12	12:58:48	0.160369
2022-09-12	12:58:48	0.324797
2022-09-12	12:58:49	0.165916
2022-09-12	12:58:49	0.483066
2022-09-12	12:58:49	0.360471
2022-09-12	12:58:50	1.01391
2022-09-12	12:58:50	0.796705
2022-09-12	12:58:50	0.869122
2022-09-12	12:58:50	0.727494
2022-09-12	12:58:51	0.674109
2022-09-12	12:58:51	0.788257
2022-09-12	12:58:51	0.35299
2022-09-12	12:58:51	0.732583
2022-09-12	12:58:52	0.757112
2022-09-12	12:58:52	0.997722
2022-09-12	12:58:52	0.688053
2022-09-12	12:58:52	0.588511
2022-09-12	12:58:53	0.56388
2022-09-12	12:58:53	0.284237
2022-09-12	12:58:53	0.885305
2022-09-12	12:58:54	0.850903
2022-09-12	12:58:54	2.03263
2022-09-12	12:58:54	1.78195
2022-09-12	12:58:54	1.83014
2022-09-12	12:58:55	2.46469
2022-09-12	12:58:55	2.1996
2022-09-12	12:58:55	1.95604
2022-09-12	12:58:55	0.844745
2022-09-12	12:58:56	1.20922
2022-09-12	12:58:56	0.468613
2022-09-12	12:58:56	0.625458
2022-09-12	12:58:56	1.91065
2022-09-12	12:58:57	1.49019
2022-09-12	12:58:57	4.02307
2022-09-12	12:58:57	3.51136
2022-09-12	12:58:58	4.48245
2022-09-12	12:58:58	1.84882
2022-09-12	12:58:58	1.41314
2022-09-12	12:58:58	2.02403
2022-09-12	12:58:59	1.25391
2022-09-12	12:58:59	1.50388
2022-09-12	12:58:59	0.705305
2022-09-12	12:58:59	1.45945
2022-09-12	12:59:00	1.31553
2022-09-12	12:59:00	1.15365
2022-09-12	12:59:00	1.73625
2022-09-12	12:59:00	0.334313
2022-09-12	12:59:01	0.410191
2022-09-12	12:59:01	0.376654
2022-09-12	12:59:01	0.277621
2022-09-12	12:59:02	0.448919
2022-09-12	12:59:02	0.332125
2022-09-12	12:59:02	1.1909
2022-09-12	12:59:02	0.625967
2022-09-12	12:59:03	1.55813
2022-09-12	12:59:03	1.31396
2022-09-12	12:59:03	0.91126
2022-09-12	12:59:03	0.480623
2022-09-12	12:59:04	0.237367
2022-09-12	12:59:04	0.308613
2022-09-12	12:59:04	0.185255
2022-09-12	12:59:04	0.208104
2022-09-12	12:59:05	0.667799
2022-09-12	12:59:05	0.813499
2022-09-12	12:59:05	1.60179
2022-09-12	12:59:06	0.747697
2022-09-12	12:59:06	1.53406
2022-09-12	12:59:06	1.27574
2022-09-12	12:59:06	3.3279
2022-09-12	12:59:07	2.51105
2022-09-12	12:59:07	3.11925
2022-09-12	12:59:07	1.54439
2022-09-12	12:59:07	0.538639
2022-09-12	12:59:08	1.342
2022-09-12	12:59:08	1.84312
2022-09-12	12:59:08	1.73268
2022-09-12	12:59:08	1.53701
2022-09-12	12:59:09	0.911616
2022-09-12	12:59:09	0.620929
2022-09-12	12:59:09	1.85747
2022-09-12	12:59:10	1.23319
2022-09-12	12:59:10	4.68612
2022-09-12	12:59:10	3.54485
2022-09-12	12:59:10	2.55116
2022-09-12	12:59:11	3.37004
2022-09-12	12:59:11	7.35726
2022-09-12	12:59:11	3.18805
2022-09-12	12:59:11	3.06398
2022-09-12	12:59:12	3.34907
2022-09-12	12:59:12	1.57726
2022-09-12	12:59:12	2.20698
2022-09-12	12:59:12	4.00912
2022-09-12	12:59:13	1.09431
2022-09-12	12:59:13	0.208868
2022-09-12	12:59:13	0.268054
2022-09-12	12:59:14	0.190191
2022-09-12	12:59:14	0.243728
2022-09-12	12:59:14	0.185051
2022-09-12	12:59:14	0.183575
2022-09-12	12:59:15	0.231361
2022-09-12	12:59:15	0.282456
2022-09-12	12:59:15	0.150445
2022-09-12	12:59:15	0.159249
2022-09-12	12:59:16	0.239758
