# Supplementary material for: Comparing efficacy in reducing pulling and welfare impacts of four types of leash walking equipment
Source: PeerJ journal article supplement (doi:10.7717/peerj.18131), 2024-10-24
Supplement: Shelter1_Tension_files.zip [file Harley_harness_2022912145017 copy.xlsx]

## Sheet: Averaged Newtons
Date	Time	Averaged Newtons	Impulse	total step
2022-09-12	14:50:39	2.62453	2.62453	0		Impulse Newton	1442.91
2022-09-12	14:50:40	5.24266	7.86719	0		Total steps	23
2022-09-12	14:50:41	6.07208	13.9393	0		# > 5sec	1
2022-09-12	14:50:42	4.6075	18.5468	0
2022-09-12	14:50:43	3.87931	22.4261	0
2022-09-12	14:50:44	0.58636	23.0124	0
2022-09-12	14:50:45	1.40339	24.4158	0
2022-09-12	14:50:46	3.68296	28.0988	0
2022-09-12	14:50:47	15.2729	43.3717	1
2022-09-12	14:50:48	0.0903801	43.462	1
2022-09-12	14:50:49	-2.59716	43.462	1
2022-09-12	14:50:50	11.6444	55.1065	1
2022-09-12	14:50:51	6.81052	61.917	1
2022-09-12	14:50:52	1.22688	63.1439	1
2022-09-12	14:50:53	0.773116	63.917	1
2022-09-12	14:50:54	1.21786	65.1348	1
2022-09-12	14:50:55	4.80253	69.9374	1
2022-09-12	14:50:56	1.397	71.3344	1
2022-09-12	14:50:57	4.01345	75.3478	1
2022-09-12	14:50:58	1.7481	77.0959	1
2022-09-12	14:50:59	0.452461	77.5484	1
2022-09-12	14:51:00	1.36921	78.9176	1
2022-09-12	14:51:01	3.48895	82.4065	1
2022-09-12	14:51:02	4.0555	86.462	1
2022-09-12	14:51:03	0.000736844	86.4628	1
2022-09-12	14:51:04	-0.295187	86.4628	1
2022-09-12	14:51:05	2.61957	89.0823	1
2022-09-12	14:51:06	2.70535	91.7877	1
2022-09-12	14:51:07	4.91899	96.7067	1
2022-09-12	14:51:08	7.85871	104.565	1
2022-09-12	14:51:09	2.17962	106.745	1
2022-09-12	14:51:10	1.02801	107.773	1
2022-09-12	14:51:11	-0.664626	107.773	1
2022-09-12	14:51:12	-1.26732	107.773	1
2022-09-12	14:51:13	1.63206	109.405	1
2022-09-12	14:51:14	2.93836	112.343	1
2022-09-12	14:51:15	2.48907	114.833	1
2022-09-12	14:51:16	0.354895	115.187	1
2022-09-12	14:51:17	0.330862	115.518	1
2022-09-12	14:51:18	3.17045	118.689	1
2022-09-12	14:51:19	4.62154	123.31	1
2022-09-12	14:51:20	3.43247	126.743	1
2022-09-12	14:51:21	1.63712	128.38	1
2022-09-12	14:51:22	0.982887	129.363	1
2022-09-12	14:51:23	1.40973	130.772	1
2022-09-12	14:51:24	2.23457	133.007	1
2022-09-12	14:51:25	1.2322	134.239	1
2022-09-12	14:51:26	1.20767	135.447	1
2022-09-12	14:51:27	1.23967	136.687	1
2022-09-12	14:51:28	5.53104	142.218	1
2022-09-12	14:51:29	3.21946	145.437	1
2022-09-12	14:51:30	4.08145	149.519	1
2022-09-12	14:51:31	3.23626	152.755	1
2022-09-12	14:51:32	6.65344	159.408	1
2022-09-12	14:51:33	2.36445	161.773	1
2022-09-12	14:51:34	1.77111	163.544	1
2022-09-12	14:51:35	0.0124516	163.556	1
2022-09-12	14:51:36	3.00168	166.558	1
2022-09-12	14:51:37	6.73087	173.289	1
2022-09-12	14:51:38	1.69218	174.981	1
2022-09-12	14:51:39	1.06457	176.046	1
2022-09-12	14:51:40	1.06519	177.111	1
2022-09-12	14:51:41	-0.294753	177.111	1
2022-09-12	14:51:42	1.19553	178.306	1
2022-09-12	14:51:43	1.15172	179.458	1
2022-09-12	14:51:44	4.76722	184.225	1
2022-09-12	14:51:45	3.73292	187.958	1
2022-09-12	14:51:46	1.47374	189.432	1
2022-09-12	14:51:47	1.62094	191.053	1
2022-09-12	14:51:48	2.76711	193.82	1
2022-09-12	14:51:49	3.66833	197.488	1
2022-09-12	14:51:50	1.394	198.882	1
2022-09-12	14:51:51	1.0786	199.961	1
2022-09-12	14:51:52	4.19986	204.161	1
2022-09-12	14:51:53	12.824	216.985	1
2022-09-12	14:51:54	1.42099	218.406	1
2022-09-12	14:51:55	1.29422	219.7	1
2022-09-12	14:51:56	1.32501	221.025	1
2022-09-12	14:51:57	5.46617	226.491	1
2022-09-12	14:51:58	6.17863	232.67	1
2022-09-12	14:51:59	2.42919	235.099	1
2022-09-12	14:52:00	8.79844	243.897	1
2022-09-12	14:52:01	9.90675	253.804	1
2022-09-12	14:52:02	34.3159	288.12	2
2022-09-12	14:52:03	7.44434	295.564	2
2022-09-12	14:52:04	1.50509	297.069	2
2022-09-12	14:52:05	1.99152	299.061	2
2022-09-12	14:52:06	6.24921	305.31	2
2022-09-12	14:52:07	2.49286	307.803	2
2022-09-12	14:52:08	1.90967	309.713	2
2022-09-12	14:52:09	1.87834	311.591	2
2022-09-12	14:52:10	4.15041	315.741	2
2022-09-12	14:52:11	3.56042	319.302	2
2022-09-12	14:52:12	1.285	320.587	2
2022-09-12	14:52:13	1.55266	322.14	2
2022-09-12	14:52:14	13.0023	335.142	3
2022-09-12	14:52:15	10.0551	345.197	3
2022-09-12	14:52:16	6.78396	351.981	3
2022-09-12	14:52:17	8.14845	360.129	3
2022-09-12	14:52:18	7.53595	367.665	3
2022-09-12	14:52:19	4.07837	371.744	3
2022-09-12	14:52:20	3.56035	375.304	3
2022-09-12	14:52:21	1.30515	376.609	3
2022-09-12	14:52:22	2.00961	378.619	3
2022-09-12	14:52:23	8.99713	387.616	3
2022-09-12	14:52:24	5.74906	393.365	3
2022-09-12	14:52:25	7.07463	400.44	3
2022-09-12	14:52:26	10.7878	411.227	3
2022-09-12	14:52:27	4.45306	415.68	3
2022-09-12	14:52:28	4.83362	420.514	3
2022-09-12	14:52:29	6.31502	426.829	3
2022-09-12	14:52:30	2.85132	429.68	3
2022-09-12	14:52:31	5.50325	435.184	3
2022-09-12	14:52:32	4.63606	439.82	3
2022-09-12	14:52:33	8.92606	448.746	3
2022-09-12	14:52:34	8.25469	457	3
2022-09-12	14:52:35	2.04804	459.049	3
2022-09-12	14:52:36	1.65128	460.7	3
2022-09-12	14:52:37	1.41561	462.115	3
2022-09-12	14:52:38	1.06412	463.18	3
2022-09-12	14:52:39	1.76887	464.948	3
2022-09-12	14:52:40	3.24314	468.192	3
2022-09-12	14:52:41	1.16089	469.352	3
2022-09-12	14:52:42	0.971871	470.324	3
2022-09-12	14:52:43	1.04239	471.367	3
2022-09-12	14:52:44	0.879285	472.246	3
2022-09-12	14:52:45	0.984208	473.23	3
2022-09-12	14:52:46	1.37402	474.604	3
2022-09-12	14:52:47	4.47275	479.077	3
2022-09-12	14:52:48	5.41538	484.492	3
2022-09-12	14:52:49	4.05488	488.547	3
2022-09-12	14:52:50	1.06678	489.614	3
2022-09-12	14:52:51	1.15506	490.769	3
2022-09-12	14:52:52	1.42688	492.196	3
2022-09-12	14:52:53	1.31737	493.513	3
2022-09-12	14:52:54	1.47843	494.992	3
2022-09-12	14:52:55	1.49869	496.49	3
2022-09-12	14:52:56	1.38568	497.876	3
2022-09-12	14:52:57	1.79858	499.675	3
2022-09-12	14:52:58	6.49052	506.165	3
2022-09-12	14:52:59	5.58464	511.75	3
2022-09-12	14:53:00	3.40167	515.151	3
2022-09-12	14:53:01	5.19534	520.347	3
2022-09-12	14:53:02	2.76513	523.112	3
2022-09-12	14:53:03	1.18421	524.296	3
2022-09-12	14:53:04	-0.19847	524.296	3
2022-09-12	14:53:05	-1.01991	524.296	3
2022-09-12	14:53:06	0.911654	525.208	3
2022-09-12	14:53:07	1.11228	526.32	3
2022-09-12	14:53:08	1.54448	527.865	3
2022-09-12	14:53:09	1.32212	529.187	3
2022-09-12	14:53:10	0.493718	529.68	3
2022-09-12	14:53:11	-1.33848	529.68	3
2022-09-12	14:53:12	-1.81454	529.68	3
2022-09-12	14:53:13	-0.983186	529.68	3
2022-09-12	14:53:14	0.950309	530.631	3
2022-09-12	14:53:15	0.600622	531.231	3
2022-09-12	14:53:16	0.682964	531.914	3
2022-09-12	14:53:17	0.56242	532.477	3
2022-09-12	14:53:18	0.246462	532.723	3
2022-09-12	14:53:19	-0.388697	532.723	3
2022-09-12	14:53:20	-0.964059	532.723	3
2022-09-12	14:53:21	7.9466	540.67	3
2022-09-12	14:53:22	-0.746005	540.67	3
2022-09-12	14:53:23	-3.43482	540.67	3
2022-09-12	14:53:24	-1.80967	540.67	3
2022-09-12	14:53:25	-2.50831	540.67	3
2022-09-12	14:53:26	-2.67231	540.67	3
2022-09-12	14:53:27	-2.05426	540.67	3
2022-09-12	14:53:28	-1.21833	540.67	3
2022-09-12	14:53:29	-0.970509	540.67	3
2022-09-12	14:53:30	-1.46875	540.67	3
2022-09-12	14:53:31	-1.0162	540.67	3
2022-09-12	14:53:32	1.22224	541.892	3
2022-09-12	14:53:33	1.17577	543.068	3
2022-09-12	14:53:34	3.12727	546.195	3
2022-09-12	14:53:35	3.30976	549.505	3
2022-09-12	14:53:36	4.21368	553.719	3
2022-09-12	14:53:37	4.96579	558.684	3
2022-09-12	14:53:38	4.80575	563.49	3
2022-09-12	14:53:39	2.23947	565.73	3
2022-09-12	14:53:40	3.73213	569.462	3
2022-09-12	14:53:41	5.51821	574.98	3
2022-09-12	14:53:42	3.7951	578.775	3
2022-09-12	14:53:43	3.31867	582.094	3
2022-09-12	14:53:44	5.86952	587.963	3
2022-09-12	14:53:45	6.79368	594.757	3
2022-09-12	14:53:46	3.72318	598.48	3
2022-09-12	14:53:47	6.75029	605.23	3
2022-09-12	14:53:48	6.71021	611.941	3
2022-09-12	14:53:49	4.03784	615.978	3
2022-09-12	14:53:50	2.93443	618.913	3
2022-09-12	14:53:51	4.8748	623.788	3
2022-09-12	14:53:52	11.8494	635.637	3
2022-09-12	14:53:53	7.70772	643.345	3
2022-09-12	14:53:54	3.10686	646.452	3
2022-09-12	14:53:55	7.94191	654.393	3
2022-09-12	14:53:56	7.82277	662.216	3
2022-09-12	14:53:57	9.90811	672.124	3
2022-09-12	14:53:58	4.98256	677.107	3
2022-09-12	14:53:59	15.3838	692.491	4
2022-09-12	14:54:00	23.8755	716.366	5
2022-09-12	14:54:01	14.6142	730.98	6
2022-09-12	14:54:02	15.238	746.218	7
2022-09-12	14:54:03	15.9169	762.135	8
2022-09-12	14:54:04	18.5726	780.708	9
2022-09-12	14:54:05	13.2292	793.937	10
2022-09-12	14:54:06	11.3038	805.241	10
2022-09-12	14:54:07	7.27852	812.519	10
2022-09-12	14:54:08	9.40844	821.928	10
2022-09-12	14:54:09	10.6325	832.56	10
2022-09-12	14:54:10	10.8437	843.404	10
2022-09-12	14:54:11	10.2685	853.673	10
2022-09-12	14:54:12	10.2204	863.893	10
2022-09-12	14:54:13	9.81796	873.711	10
2022-09-12	14:54:14	10.2126	883.924	10
2022-09-12	14:54:15	10.1474	894.071	10
2022-09-12	14:54:16	9.95916	904.03	10
2022-09-12	14:54:17	4.98516	909.015	10
2022-09-12	14:54:18	1.91539	910.931	10
2022-09-12	14:54:19	0.221166	911.152	10
2022-09-12	14:54:20	-0.989242	911.152	10
2022-09-12	14:54:21	-0.00861957	911.152	10
2022-09-12	14:54:22	1.02739	912.179	10
2022-09-12	14:54:23	3.87853	916.058	10
2022-09-12	14:54:24	7.4621	923.52	10
2022-09-12	14:54:25	0.959269	924.479	10
2022-09-12	14:54:26	12.3452	936.824	10
2022-09-12	14:54:27	-0.192471	936.824	10
2022-09-12	14:54:28	-0.941026	936.824	10
2022-09-12	14:54:29	-0.910483	936.824	10
2022-09-12	14:54:30	8.00387	944.828	10
2022-09-12	14:54:31	15.5779	960.406	11
2022-09-12	14:54:32	16.7767	977.183	12
2022-09-12	14:54:33	4.93044	982.113	12
2022-09-12	14:54:34	28.6392	1010.75	13
2022-09-12	14:54:35	10.6332	1021.39	13
2022-09-12	14:54:36	2.71431	1024.1	13
2022-09-12	14:54:37	2.59971	1026.7	13
2022-09-12	14:54:38	6.21004	1032.91	13
2022-09-12	14:54:39	5.25244	1038.16	13
2022-09-12	14:54:40	1.73112	1039.89	13
2022-09-12	14:54:41	3.67097	1043.56	13
2022-09-12	14:54:42	9.05633	1052.62	13
2022-09-12	14:54:43	2.53366	1055.15	13
2022-09-12	14:54:44	0.328806	1055.48	13
2022-09-12	14:54:45	0.556025	1056.04	13
2022-09-12	14:54:46	0.883358	1056.92	13
2022-09-12	14:54:47	0.668645	1057.59	13
2022-09-12	14:54:48	2.28862	1059.88	13
2022-09-12	14:54:49	0.444274	1060.32	13
2022-09-12	14:54:50	-3.1941	1060.32	13
2022-09-12	14:54:51	-1.28403	1060.32	13
2022-09-12	14:54:52	0.223882	1060.55	13
2022-09-12	14:54:53	-1.54976	1060.55	13
2022-09-12	14:54:54	0.468816	1061.02	13
2022-09-12	14:54:55	-2.14136	1061.02	13
2022-09-12	14:54:56	-2.75473	1061.02	13
2022-09-12	14:54:57	-0.947986	1061.02	13
2022-09-12	14:54:58	15.6267	1076.64	14
2022-09-12	14:54:59	18.2568	1094.9	15
2022-09-12	14:55:00	7.73864	1102.64	15
2022-09-12	14:55:01	4.65426	1107.29	15
2022-09-12	14:55:02	2.31618	1109.61	15
2022-09-12	14:55:03	15.3629	1124.97	16
2022-09-12	14:55:04	15.583	1140.56	17
2022-09-12	14:55:05	7.69222	1148.25	17
2022-09-12	14:55:06	-0.429483	1148.25	17
2022-09-12	14:55:07	12.2133	1160.46	17
2022-09-12	14:55:08	2.89406	1163.35	17
2022-09-12	14:55:09	0.429937	1163.78	17
2022-09-12	14:55:10	7.17683	1170.96	17
2022-09-12	14:55:11	7.686	1178.65	17
2022-09-12	14:55:12	1.27438	1179.92	17
2022-09-12	14:55:13	16.2398	1196.16	18
2022-09-12	14:55:14	6.68077	1202.84	18
2022-09-12	14:55:15	8.99509	1211.84	18
2022-09-12	14:55:16	6.44411	1218.28	18
2022-09-12	14:55:17	8.85022	1227.13	18
2022-09-12	14:55:18	19.9711	1247.1	19
2022-09-12	14:55:19	2.35636	1249.46	19
2022-09-12	14:55:20	39.9865	1289.45	20
2022-09-12	14:55:21	4.49653	1293.94	20
2022-09-12	14:55:22	0.680474	1294.62	20
2022-09-12	14:55:23	1.26661	1295.89	20
2022-09-12	14:55:24	2.86978	1298.76	20
2022-09-12	14:55:25	3.99008	1302.75	20
2022-09-12	14:55:26	8.19748	1310.95	20
2022-09-12	14:55:27	8.86025	1319.81	20
2022-09-12	14:55:28	5.27165	1325.08	20
2022-09-12	14:55:29	4.21142	1329.29	20
2022-09-12	14:55:30	9.51133	1338.8	20
2022-09-12	14:55:31	22.5771	1361.38	21
2022-09-12	14:55:32	44.2301	1405.61	22
2022-09-12	14:55:33	16.513	1422.12	23
2022-09-12	14:55:34	5.35216	1427.47	23
2022-09-12	14:55:35	1.4311	1428.9	23
2022-09-12	14:55:36	8.90234	1437.81	23
2022-09-12	14:55:37	1.48194	1439.29	23
2022-09-12	14:55:38	1.48188	1440.77	23
2022-09-12	14:55:39	2.13844	1442.91	23

## Sheet: Harley_harness_202291214501 (3)
Date	Time	Lbs	Newtons	Averaged Newtons	Total Force x time	Total Time Steps Force >13.345		**GoPro Fitting: 1440
2022-09-12	14:50:39	0.499351	2.22121	2.62453	2.22121	FALSE	0			Total Force x Time	2776.95
2022-09-12	14:50:39	0.839046	3.73224	2.62453	3.73224	FALSE	0			Total Time Steps Force >3	86
2022-09-12	14:50:39	0.431667	1.92014	2.62453	4.14135	FALSE	0
2022-09-12	14:50:40	1.96648	8.7473	5.24266	12.4795	FALSE	0
2022-09-12	14:50:40	0.459911	2.04578	5.24266	6.18713	FALSE	0
2022-09-12	14:50:40	1.68073	7.47622	5.24266	19.9558	FALSE	0
2022-09-12	14:50:40	0.60729	2.70135	5.24266	8.88848	FALSE	0
2022-09-12	14:50:41	0.915382	4.0718	6.07208	24.0276	FALSE	0
2022-09-12	14:50:41	1.8248	8.11708	6.07208	17.0056	FALSE	0
2022-09-12	14:50:41	0.949173	4.22211	6.07208	28.2497	FALSE	0
2022-09-12	14:50:41	1.7709	7.87732	6.07208	24.8829	FALSE	0
2022-09-12	14:50:42	1.22922	5.46782	4.6075	33.7175	FALSE	0
2022-09-12	14:50:42	0.616654	2.743	4.6075	27.6259	FALSE	0
2022-09-12	14:50:42	1.64861	7.33335	4.6075	41.0508	FALSE	0
2022-09-12	14:50:42	0.648766	2.88584	4.6075	30.5117	FALSE	0
2022-09-12	14:50:43	0.997722	4.43807	3.87931	45.4889	FALSE	0
2022-09-12	14:50:43	0.858333	3.81804	3.87931	34.3297	FALSE	0
2022-09-12	14:50:43	0.760267	3.38182	3.87931	48.8707	FALSE	0
2022-09-12	14:50:44	0.193092	0.858912	0.58636	35.1887	FALSE	0
2022-09-12	14:50:44	0.0611835	0.272156	0.58636	49.1429	FALSE	0
2022-09-12	14:50:44	0.225967	1.00515	0.58636	36.1938	FALSE	0
2022-09-12	14:50:44	0.0470358	0.209225	0.58636	49.3521	FALSE	0
2022-09-12	14:50:45	0.15355	0.683021	1.40339	36.8768	FALSE	0
2022-09-12	14:50:45	0.22098	0.982963	1.40339	50.3351	FALSE	0
2022-09-12	14:50:45	0.261132	1.16157	1.40339	38.0384	FALSE	0
2022-09-12	14:50:45	0.626323	2.78601	1.40339	53.1211	FALSE	0
2022-09-12	14:50:46	0.200674	0.892638	3.68296	38.931	FALSE	0
2022-09-12	14:50:46	0.651463	2.89784	3.68296	56.0189	FALSE	0
2022-09-12	14:50:46	1.93218	8.59472	3.68296	47.5258	FALSE	0
2022-09-12	14:50:46	0.527544	2.34662	3.68296	58.3655	FALSE	0
2022-09-12	14:50:47	4.35436	19.3691	15.2729	66.8948	1	1
2022-09-12	14:50:47	3.38912	15.0755	15.2729	73.441	1	2
2022-09-12	14:50:47	2.55701	11.3741	15.2729	78.2689	FALSE	2
2022-09-12	14:50:48	0.256349	1.14029	0.0903801	74.5813	FALSE	2
2022-09-12	14:50:48	0.00881704	0.03922	0.0903801	78.3081	FALSE	2
2022-09-12	14:50:48	0.0104964	0.0466901	0.0903801	74.628	FALSE	2
2022-09-12	14:50:48	-0.194389	-0.864681	0.0903801	78.3081	FALSE	2
2022-09-12	14:50:49	-0.431437	-1.91912	-2.59716	74.628	FALSE	2
2022-09-12	14:50:49	-0.643396	-2.86195	-2.59716	78.3081	FALSE	2
2022-09-12	14:50:49	-0.670368	-2.98193	-2.59716	74.628	FALSE	2
2022-09-12	14:50:49	-0.590267	-2.62563	-2.59716	78.3081	FALSE	2
2022-09-12	14:50:50	0.0928883	0.413186	11.6444	75.0412	FALSE	2
2022-09-12	14:50:50	0.236145	1.05042	11.6444	79.3586	FALSE	2
2022-09-12	14:50:50	4.71375	20.9677	11.6444	96.0089	1	3
2022-09-12	14:50:50	5.42835	24.1464	11.6444	103.505	1	4
2022-09-12	14:50:51	1.54826	6.88697	6.81052	102.896	FALSE	4
2022-09-12	14:50:51	1.99823	8.88853	6.81052	112.393	FALSE	4
2022-09-12	14:50:51	1.04673	4.65606	6.81052	107.552	FALSE	4
2022-09-12	14:50:52	0.16159	0.718785	1.22688	113.112	FALSE	4
2022-09-12	14:50:52	0.507138	2.25585	1.22688	109.808	FALSE	4
2022-09-12	14:50:52	0.0619977	0.275778	1.22688	113.388	FALSE	4
2022-09-12	14:50:52	0.372532	1.6571	1.22688	111.465	FALSE	4
2022-09-12	14:50:53	0.265458	1.18081	0.773116	114.569	FALSE	4
2022-09-12	14:50:53	0.152685	0.679173	0.773116	112.144	FALSE	4
2022-09-12	14:50:53	0.212023	0.943121	0.773116	115.512	FALSE	4
2022-09-12	14:50:53	0.0650511	0.28936	0.773116	112.433	FALSE	4
2022-09-12	14:50:54	0.357417	1.58986	1.21786	117.102	FALSE	4
2022-09-12	14:50:54	0.0354328	0.157612	1.21786	112.591	FALSE	4
2022-09-12	14:50:54	0.428512	1.90611	1.21786	119.008	FALSE	4
2022-09-12	14:50:55	0.261387	1.1627	4.80253	113.754	FALSE	4
2022-09-12	14:50:55	3.00515	13.3675	4.80253	132.375	1	5
2022-09-12	14:50:55	0.203626	0.905769	4.80253	114.659	FALSE	5
2022-09-12	14:50:55	0.848461	3.77412	4.80253	136.15	FALSE	5
2022-09-12	14:50:56	0.555738	2.47203	1.397	117.132	FALSE	5
2022-09-12	14:50:56	0.0857635	0.381493	1.397	136.531	FALSE	5
2022-09-12	14:50:56	0.472328	2.10101	1.397	119.233	FALSE	5
2022-09-12	14:50:56	0.142405	0.633446	1.397	137.165	FALSE	5
2022-09-12	14:50:57	0.70388	3.131	4.01345	122.364	FALSE	5
2022-09-12	14:50:57	0.577061	2.56688	4.01345	139.731	FALSE	5
2022-09-12	14:50:57	0.649224	2.88788	4.01345	125.251	FALSE	5
2022-09-12	14:50:57	1.67889	7.46804	4.01345	147.199	FALSE	5
2022-09-12	14:50:58	0.201081	0.894449	1.7481	126.146	FALSE	5
2022-09-12	14:50:58	0.231718	1.03073	1.7481	148.23	FALSE	5
2022-09-12	14:50:58	0.746171	3.31912	1.7481	129.465	FALSE	5
2022-09-12	14:50:59	0.129784	0.577305	0.452461	148.807	FALSE	5
2022-09-12	14:50:59	-0.0759158	-0.337689	0.452461	129.465	FALSE	5
2022-09-12	14:50:59	0.245	1.08981	0.452461	149.897	FALSE	5
2022-09-12	14:50:59	0.108003	0.480419	0.452461	129.945	FALSE	5
2022-09-12	14:51:00	0.289937	1.2897	1.36921	151.187	FALSE	5
2022-09-12	14:51:00	0.0990969	0.440803	1.36921	130.386	FALSE	5
2022-09-12	14:51:00	0.284237	1.26434	1.36921	152.451	FALSE	5
2022-09-12	14:51:00	0.557977	2.48199	1.36921	132.868	FALSE	5
2022-09-12	14:51:01	0.33416	1.48641	3.48895	153.938	FALSE	5
2022-09-12	14:51:01	0.618079	2.74934	3.48895	135.618	FALSE	5
2022-09-12	14:51:01	1.23905	5.51154	3.48895	159.449	FALSE	5
2022-09-12	14:51:01	0.946119	4.20853	3.48895	139.826	FALSE	5
2022-09-12	14:51:02	2.63121	11.7041	4.0555	171.153	FALSE	5
2022-09-12	14:51:02	0.110242	0.490378	4.0555	140.316	FALSE	5
2022-09-12	14:51:02	-0.00629748	-0.0280125	4.0555	171.153	FALSE	5
2022-09-12	14:51:03	0.339097	1.50837	0.000736844	141.825	FALSE	5
2022-09-12	14:51:03	-0.116628	-0.518785	0.000736844	171.153	FALSE	5
2022-09-12	14:51:03	-0.0486384	-0.216353	0.000736844	141.825	FALSE	5
2022-09-12	14:51:03	-0.173168	-0.770286	0.000736844	171.153	FALSE	5
2022-09-12	14:51:04	0.0117178	0.0521231	-0.295187	141.877	FALSE	5
2022-09-12	14:51:04	-0.168791	-0.750816	-0.295187	171.153	FALSE	5
2022-09-12	14:51:04	-0.0266537	-0.118561	-0.295187	141.877	FALSE	5
2022-09-12	14:51:04	-0.0817173	-0.363495	-0.295187	171.153	FALSE	5
2022-09-12	14:51:05	-0.0480277	-0.213637	2.61957	141.877	FALSE	5
2022-09-12	14:51:05	1.57894	7.02344	2.61957	178.177	FALSE	5
2022-09-12	14:51:05	0.320064	1.42371	2.61957	143.301	FALSE	5
2022-09-12	14:51:05	0.504644	2.24476	2.61957	180.422	FALSE	5
2022-09-12	14:51:06	0.483779	2.15195	2.70535	145.453	FALSE	5
2022-09-12	14:51:06	0.73014	3.24781	2.70535	183.669	FALSE	5
2022-09-12	14:51:06	0.610649	2.71629	2.70535	148.169	FALSE	5
2022-09-12	14:51:07	0.658181	2.92772	4.91899	186.597	FALSE	5
2022-09-12	14:51:07	0.925662	4.11753	4.91899	152.286	FALSE	5
2022-09-12	14:51:07	1.87558	8.34295	4.91899	194.94	FALSE	5
2022-09-12	14:51:07	0.963931	4.28776	4.91899	156.574	FALSE	5
2022-09-12	14:51:08	2.88093	12.815	7.85871	207.755	FALSE	5
2022-09-12	14:51:08	0.255942	1.13848	7.85871	157.713	FALSE	5
2022-09-12	14:51:08	0.725458	3.22698	7.85871	210.982	FALSE	5
2022-09-12	14:51:08	3.20454	14.2544	7.85871	171.967	1	6
2022-09-12	14:51:09	0.139097	0.618731	2.17962	211.601	FALSE	6
2022-09-12	14:51:09	0.413702	1.84023	2.17962	173.807	FALSE	6
2022-09-12	14:51:09	1.05599	4.69725	2.17962	216.298	FALSE	6
2022-09-12	14:51:09	0.351209	1.56225	2.17962	175.37	FALSE	6
2022-09-12	14:51:10	0.167494	0.745047	1.02801	217.043	FALSE	6
2022-09-12	14:51:10	0.591208	2.62981	1.02801	177.999	FALSE	6
2022-09-12	14:51:10	-0.0653814	-0.29083	1.02801	217.043	FALSE	6
2022-09-12	14:51:11	-0.252455	-1.12297	-0.664626	177.999	FALSE	6
2022-09-12	14:51:11	-0.22757	-1.01228	-0.664626	217.043	FALSE	6
2022-09-12	14:51:11	-0.0514883	-0.22903	-0.664626	177.999	FALSE	6
2022-09-12	14:51:11	-0.0661448	-0.294225	-0.664626	217.043	FALSE	6
2022-09-12	14:51:12	-0.357544	-1.59043	-1.26732	177.999	FALSE	6
2022-09-12	14:51:12	-0.265788	-1.18228	-1.26732	217.043	FALSE	6
2022-09-12	14:51:12	-0.231386	-1.02925	-1.26732	177.999	FALSE	6
2022-09-12	14:51:13	-0.0919462	-0.408995	1.63206	217.043	FALSE	6
2022-09-12	14:51:13	-0.0610557	-0.271588	1.63206	177.999	FALSE	6
2022-09-12	14:51:13	0.2107	0.937236	1.63206	217.98	FALSE	6
2022-09-12	14:51:13	0.358944	1.59665	1.63206	179.596	FALSE	6
2022-09-12	14:51:13	1.41788	6.30701	1.63206	224.287	FALSE	6
2022-09-12	14:51:14	0.373346	1.66072	2.93836	181.257	FALSE	6
2022-09-12	14:51:14	1.17009	5.20479	2.93836	229.492	FALSE	6
2022-09-12	14:51:14	0.438283	1.94957	2.93836	183.206	FALSE	6
2022-09-12	14:51:15	1.03162	4.58885	2.48907	234.081	FALSE	6
2022-09-12	14:51:15	0.36668	1.63107	2.48907	184.837	FALSE	6
2022-09-12	14:51:15	0.192277	0.855287	2.48907	234.936	FALSE	6
2022-09-12	14:51:15	0.647697	2.88109	2.48907	187.718	FALSE	6
2022-09-12	14:51:16	-0.0696562	-0.309845	0.354895	234.936	FALSE	6
2022-09-12	14:51:16	0.10271	0.456875	0.354895	188.175	FALSE	6
2022-09-12	14:51:16	0.175738	0.781718	0.354895	235.718	FALSE	6
2022-09-12	14:51:16	0.110344	0.490832	0.354895	188.666	FALSE	6
2022-09-12	14:51:17	0.0458654	0.204018	0.330862	235.922	FALSE	6
2022-09-12	14:51:17	0.167901	0.746857	0.330862	189.413	FALSE	6
2022-09-12	14:51:17	0.00937683	0.04171	0.330862	235.964	FALSE	6
2022-09-12	14:51:18	0.173855	0.773342	3.17045	190.186	FALSE	6
2022-09-12	14:51:18	0.66612	2.96303	3.17045	238.927	FALSE	6
2022-09-12	14:51:18	0.478282	2.12749	3.17045	192.314	FALSE	6
2022-09-12	14:51:18	1.53274	6.81793	3.17045	245.745	FALSE	6
2022-09-12	14:51:19	0.505916	2.25042	4.62154	194.564	FALSE	6
2022-09-12	14:51:19	0.800369	3.5602	4.62154	249.305	FALSE	6
2022-09-12	14:51:19	2.40062	10.6784	4.62154	205.243	FALSE	6
2022-09-12	14:51:19	0.44897	1.99711	4.62154	251.302	FALSE	6
2022-09-12	14:51:20	1.62668	7.2358	3.43247	212.479	FALSE	6
2022-09-12	14:51:20	0.302608	1.34606	3.43247	252.648	FALSE	6
2022-09-12	14:51:20	0.456654	2.03129	3.43247	214.51	FALSE	6
2022-09-12	14:51:20	0.700674	3.11674	3.43247	255.765	FALSE	6
2022-09-12	14:51:21	0.465865	2.07226	1.63712	216.582	FALSE	6
2022-09-12	14:51:21	0.483779	2.15195	1.63712	257.917	FALSE	6
2022-09-12	14:51:21	0.167596	0.745501	1.63712	217.328	FALSE	6
2022-09-12	14:51:21	0.354924	1.57877	1.63712	259.495	FALSE	6
2022-09-12	14:51:22	0.441183	1.96247	0.982887	219.29	FALSE	6
2022-09-12	14:51:22	0.154924	0.689133	0.982887	260.185	FALSE	6
2022-09-12	14:51:22	0.0667814	0.297057	0.982887	219.587	FALSE	6
2022-09-12	14:51:23	0.180929	0.804808	1.40973	260.989	FALSE	6
2022-09-12	14:51:23	0.131718	0.585908	1.40973	220.173	FALSE	6
2022-09-12	14:51:23	0.408359	1.81646	1.40973	262.806	FALSE	6
2022-09-12	14:51:23	0.546679	2.43174	1.40973	222.605	FALSE	6
2022-09-12	14:51:24	0.849173	3.77729	2.23457	266.583	FALSE	6
2022-09-12	14:51:24	0.431005	1.9172	2.23457	224.522	FALSE	6
2022-09-12	14:51:24	0.357875	1.5919	2.23457	268.175	FALSE	6
2022-09-12	14:51:24	0.371361	1.65189	2.23457	226.174	FALSE	6
2022-09-12	14:51:25	0.302201	1.34425	1.2322	269.519	FALSE	6
2022-09-12	14:51:25	0.258333	1.14912	1.2322	227.323	FALSE	6
2022-09-12	14:51:25	0.282354	1.25597	1.2322	270.775	FALSE	6
2022-09-12	14:51:25	0.265153	1.17945	1.2322	228.502	FALSE	6
2022-09-12	14:51:26	0.318639	1.41737	1.20767	272.193	FALSE	6
2022-09-12	14:51:26	0.245255	1.09094	1.20767	229.593	FALSE	6
2022-09-12	14:51:26	0.250598	1.11471	1.20767	273.307	FALSE	6
2022-09-12	14:51:27	0.26098	1.16089	1.23967	230.754	FALSE	6
2022-09-12	14:51:27	0.271921	1.20956	1.23967	274.517	FALSE	6
2022-09-12	14:51:27	0.280776	1.24895	1.23967	232.003	FALSE	6
2022-09-12	14:51:27	0.301082	1.33927	1.23967	275.856	FALSE	6
2022-09-12	14:51:28	0.794008	3.53191	5.53104	235.535	FALSE	6
2022-09-12	14:51:28	1.87543	8.34229	5.53104	284.198	FALSE	6
2022-09-12	14:51:28	1.30678	5.81282	5.53104	241.348	FALSE	6
2022-09-12	14:51:28	0.997519	4.43716	5.53104	288.636	FALSE	6
2022-09-12	14:51:29	0.747036	3.32297	3.21946	244.671	FALSE	6
2022-09-12	14:51:29	0.835331	3.71572	3.21946	292.351	FALSE	6
2022-09-12	14:51:29	0.646323	2.87497	3.21946	247.546	FALSE	6
2022-09-12	14:51:29	0.666374	2.96416	3.21946	295.316	FALSE	6
2022-09-12	14:51:30	0.732074	3.25641	4.08145	250.802	FALSE	6
2022-09-12	14:51:30	1.04464	4.64677	4.08145	299.962	FALSE	6
2022-09-12	14:51:30	0.975941	4.34118	4.08145	255.143	FALSE	6
2022-09-12	14:51:31	0.95757	4.25946	3.23626	304.222	FALSE	6
2022-09-12	14:51:31	0.549377	2.44374	3.23626	257.587	FALSE	6
2022-09-12	14:51:31	0.705153	3.13666	3.23626	307.358	FALSE	6
2022-09-12	14:51:31	0.698079	3.1052	3.23626	260.692	FALSE	6
2022-09-12	14:51:32	0.853244	3.7954	6.65344	311.154	FALSE	6
2022-09-12	14:51:32	1.45955	6.49237	6.65344	267.185	FALSE	6
2022-09-12	14:51:32	1.7338	7.71229	6.65344	318.866	FALSE	6
2022-09-12	14:51:32	1.93645	8.61372	6.65344	275.798	FALSE	6
2022-09-12	14:51:33	0.60042	2.67079	2.36445	321.537	FALSE	6
2022-09-12	14:51:33	0.824898	3.66931	2.36445	279.468	FALSE	6
2022-09-12	14:51:33	0.365611	1.62631	2.36445	323.163	FALSE	6
2022-09-12	14:51:33	0.33528	1.49139	2.36445	280.959	FALSE	6
2022-09-12	14:51:34	0.482964	2.14832	1.77111	325.312	FALSE	6
2022-09-12	14:51:34	0.45874	2.04057	1.77111	283	FALSE	6
2022-09-12	14:51:34	0.252786	1.12444	1.77111	326.436	FALSE	6
2022-09-12	14:51:35	0.319606	1.42167	0.0124516	284.421	FALSE	6
2022-09-12	14:51:35	0.205662	0.914826	0.0124516	327.351	FALSE	6
2022-09-12	14:51:35	-0.319529	-1.42133	0.0124516	284.421	FALSE	6
2022-09-12	14:51:35	-0.194542	-0.865362	0.0124516	327.351	FALSE	6
2022-09-12	14:51:36	-0.314796	-1.40028	3.00168	284.421	FALSE	6
2022-09-12	14:51:36	0.583117	2.59382	3.00168	329.945	FALSE	6
2022-09-12	14:51:36	1.11487	4.95916	3.00168	289.381	FALSE	6
2022-09-12	14:51:36	1.31604	5.85401	3.00168	335.799	FALSE	6
2022-09-12	14:51:37	1.91248	8.50709	6.73087	297.888	FALSE	6
2022-09-12	14:51:37	2.69701	11.9968	6.73087	347.795	FALSE	6
2022-09-12	14:51:37	0.732481	3.25822	6.73087	301.146	FALSE	6
2022-09-12	14:51:37	0.7107	3.16134	6.73087	350.957	FALSE	6
2022-09-12	14:51:38	0.465153	2.06909	1.69218	303.215	FALSE	6
2022-09-12	14:51:38	0.21416	0.952627	1.69218	351.909	FALSE	6
2022-09-12	14:51:38	0.461947	2.05483	1.69218	305.27	FALSE	6
2022-09-12	14:51:39	0.148919	0.662421	1.06457	352.572	FALSE	6
2022-09-12	14:51:39	0.283575	1.2614	1.06457	306.531	FALSE	6
2022-09-12	14:51:39	0.226578	1.00786	1.06457	353.58	FALSE	6
2022-09-12	14:51:39	0.298232	1.3266	1.06457	307.858	FALSE	6
2022-09-12	14:51:40	0.223931	0.99609	1.06519	354.576	FALSE	6
2022-09-12	14:51:40	0.214975	0.956252	1.06519	308.814	FALSE	6
2022-09-12	14:51:40	0.291056	1.29468	1.06519	355.87	FALSE	6
2022-09-12	14:51:40	0.227901	1.01375	1.06519	309.828	FALSE	6
2022-09-12	14:51:41	0.0264252	0.117545	-0.294753	355.988	FALSE	6
2022-09-12	14:51:41	-0.0527605	-0.234689	-0.294753	309.828	FALSE	6
2022-09-12	14:51:41	-0.172455	-0.767114	-0.294753	355.988	FALSE	6
2022-09-12	14:51:42	-0.513778	-2.28539	1.19553	309.828	FALSE	6
2022-09-12	14:51:42	-0.546399	-2.43049	1.19553	355.988	FALSE	6
2022-09-12	14:51:42	0.489326	2.17662	1.19553	312.004	FALSE	6
2022-09-12	14:51:42	1.64592	7.32138	1.19553	363.309	FALSE	6
2022-09-12	14:51:43	0.378283	1.68268	1.15172	313.687	FALSE	6
2022-09-12	14:51:43	0.180522	0.802998	1.15172	364.112	FALSE	6
2022-09-12	14:51:43	0.10612	0.472043	1.15172	314.159	FALSE	6
2022-09-12	14:51:43	0.370751	1.64917	1.15172	365.762	FALSE	6
2022-09-12	14:51:44	0.249733	1.11086	4.76722	315.27	FALSE	6
2022-09-12	14:51:44	0.959962	4.2701	4.76722	370.032	FALSE	6
2022-09-12	14:51:44	1.28042	5.69556	4.76722	320.966	FALSE	6
2022-09-12	14:51:44	1.79676	7.99235	4.76722	378.024	FALSE	6
2022-09-12	14:51:45	1.61716	7.19345	3.73292	328.159	FALSE	6
2022-09-12	14:51:45	0.681387	3.03095	3.73292	381.055	FALSE	6
2022-09-12	14:51:45	0.219046	0.97436	3.73292	329.133	FALSE	6
2022-09-12	14:51:46	0.846527	3.76552	1.47374	384.821	FALSE	6
2022-09-12	14:51:46	0.165509	0.736217	1.47374	329.87	FALSE	6
2022-09-12	14:51:46	0.0496822	0.220996	1.47374	385.042	FALSE	6
2022-09-12	14:51:46	0.263524	1.17221	1.47374	331.042	FALSE	6
2022-09-12	14:51:47	-0.0289947	-0.128974	1.62094	385.042	FALSE	6
2022-09-12	14:51:47	1.04429	4.64521	1.62094	335.687	FALSE	6
2022-09-12	14:51:47	0.0994022	0.442161	1.62094	385.484	FALSE	6
2022-09-12	14:51:47	0.342914	1.52535	1.62094	337.212	FALSE	6
2022-09-12	14:51:48	0.398283	1.77164	2.76711	387.255	FALSE	6
2022-09-12	14:51:48	0.301082	1.33927	2.76711	338.552	FALSE	6
2022-09-12	14:51:48	1.46006	6.49464	2.76711	393.75	FALSE	6
2022-09-12	14:51:48	0.328868	1.46287	2.76711	340.015	FALSE	6
2022-09-12	14:51:49	1.41034	6.27347	3.66833	400.023	FALSE	6
2022-09-12	14:51:49	0.429173	1.90905	3.66833	341.924	FALSE	6
2022-09-12	14:51:49	0.634517	2.82246	3.66833	402.846	FALSE	6
2022-09-12	14:51:50	0.514924	2.29048	1.394	344.214	FALSE	6
2022-09-12	14:51:50	0.217112	0.965758	1.394	403.812	FALSE	6
2022-09-12	14:51:50	0.3993	1.77617	1.394	345.99	FALSE	6
2022-09-12	14:51:50	0.122201	0.543574	1.394	404.355	FALSE	6
2022-09-12	14:51:51	0.38098	1.69468	1.0786	347.685	FALSE	6
2022-09-12	14:51:51	0.194771	0.86638	1.0786	405.222	FALSE	6
2022-09-12	14:51:51	0.251107	1.11697	1.0786	348.802	FALSE	6
2022-09-12	14:51:51	0.143066	0.636386	1.0786	405.858	FALSE	6
2022-09-12	14:51:52	0.355127	1.57968	4.19986	350.382	FALSE	6
2022-09-12	14:51:52	0.530293	2.35885	4.19986	408.217	FALSE	6
2022-09-12	14:51:52	0.569427	2.53293	4.19986	352.914	FALSE	6
2022-09-12	14:51:52	2.32184	10.328	4.19986	418.545	FALSE	6
2022-09-12	14:51:53	3.28922	14.6311	12.824	367.546	1	7
2022-09-12	14:51:53	2.16948	9.65028	12.824	428.195	FALSE	7
2022-09-12	14:51:53	3.19019	14.1906	12.824	381.736	1	8
2022-09-12	14:51:54	0.31528	1.40243	1.42099	429.598	FALSE	8
2022-09-12	14:51:54	0.21869	0.972777	1.42099	382.709	FALSE	8
2022-09-12	14:51:54	0.513499	2.28415	1.42099	431.882	FALSE	8
2022-09-12	14:51:54	0.230344	1.02462	1.42099	383.734	FALSE	8
2022-09-12	14:51:55	0.250954	1.11629	1.29422	432.998	FALSE	8
2022-09-12	14:51:55	0.361082	1.60616	1.29422	385.34	FALSE	8
2022-09-12	14:51:55	0.265763	1.18217	1.29422	434.18	FALSE	8
2022-09-12	14:51:55	0.286018	1.27227	1.29422	386.612	FALSE	8
2022-09-12	14:51:56	0.176756	0.786246	1.32501	434.966	FALSE	8
2022-09-12	14:51:56	0.392176	1.74448	1.32501	388.356	FALSE	8
2022-09-12	14:51:56	0.184033	0.818616	1.32501	435.785	FALSE	8
2022-09-12	14:51:56	0.438537	1.9507	1.32501	390.307	FALSE	8
2022-09-12	14:51:57	0.353041	1.5704	5.46617	437.355	FALSE	8
2022-09-12	14:51:57	2.32815	10.3561	5.46617	400.663	FALSE	8
2022-09-12	14:51:57	1.00536	4.47204	5.46617	441.827	FALSE	8
2022-09-12	14:51:58	2.9738	13.2281	6.17863	413.891	FALSE	8
2022-09-12	14:51:58	0.543219	2.41635	6.17863	444.244	FALSE	8
2022-09-12	14:51:58	1.34057	5.96312	6.17863	419.854	FALSE	8
2022-09-12	14:51:58	0.698486	3.10701	6.17863	447.351	FALSE	8
2022-09-12	14:51:59	0.248257	1.1043	2.42919	420.959	FALSE	8
2022-09-12	14:51:59	0.525814	2.33893	2.42919	449.69	FALSE	8
2022-09-12	14:51:59	0.125255	0.557159	2.42919	421.516	FALSE	8
2022-09-12	14:51:59	1.2851	5.71638	2.42919	455.406	FALSE	8
2022-09-12	14:52:00	2.39258	10.6427	8.79844	432.159	FALSE	8
2022-09-12	14:52:00	3.4621	15.4001	8.79844	470.806	1	9
2022-09-12	14:52:00	1.2821	5.70304	8.79844	437.862	FALSE	9
2022-09-12	14:52:00	0.775127	3.44792	8.79844	474.254	FALSE	9
2022-09-12	14:52:01	1.35864	6.0435	9.90675	443.905	FALSE	9
2022-09-12	14:52:01	0.774669	3.44588	9.90675	477.7	FALSE	9
2022-09-12	14:52:01	4.5481	20.2309	9.90675	464.136	1	10
2022-09-12	14:52:02	7.07197	31.4575	34.3159	509.158	1	11
2022-09-12	14:52:02	10.3478	46.0291	34.3159	510.165	1	12
2022-09-12	14:52:02	10.679	47.5023	34.3159	556.66	1	13
2022-09-12	14:52:02	2.75945	12.2746	34.3159	522.44	FALSE	13
2022-09-12	14:52:03	3.56495	15.8576	7.44434	572.518	1	14
2022-09-12	14:52:03	1.87803	8.35385	7.44434	530.793	FALSE	14
2022-09-12	14:52:03	0.477824	2.12546	7.44434	574.643	FALSE	14
2022-09-12	14:52:03	0.773448	3.44045	7.44434	534.234	FALSE	14
2022-09-12	14:52:04	0.285814	1.27136	1.50509	575.914	FALSE	14
2022-09-12	14:52:04	0.433651	1.92897	1.50509	536.163	FALSE	14
2022-09-12	14:52:04	0.163524	0.727387	1.50509	576.642	FALSE	14
2022-09-12	14:52:04	0.470446	2.09264	1.50509	538.256	FALSE	14
2022-09-12	14:52:05	0.489733	2.17843	1.99152	578.82	FALSE	14
2022-09-12	14:52:05	0.347341	1.54504	1.99152	539.801	FALSE	14
2022-09-12	14:52:05	0.506069	2.2511	1.99152	581.071	FALSE	14
2022-09-12	14:52:06	1.80505	8.02922	6.24921	547.83	FALSE	14
2022-09-12	14:52:06	1.16032	5.16134	6.24921	586.233	FALSE	14
2022-09-12	14:52:06	0.627748	2.79235	6.24921	550.622	FALSE	14
2022-09-12	14:52:06	2.02642	9.01392	6.24921	595.246	FALSE	14
2022-09-12	14:52:07	0.628817	2.7971	2.49286	553.419	FALSE	14
2022-09-12	14:52:07	0.716043	3.1851	2.49286	598.432	FALSE	14
2022-09-12	14:52:07	0.645102	2.86954	2.49286	556.289	FALSE	14
2022-09-12	14:52:07	0.251718	1.11969	2.49286	599.551	FALSE	14
2022-09-12	14:52:08	0.637163	2.83423	1.90967	559.123	FALSE	14
2022-09-12	14:52:08	0.325509	1.44793	1.90967	600.999	FALSE	14
2022-09-12	14:52:08	0.407697	1.81352	1.90967	560.937	FALSE	14
2022-09-12	14:52:08	0.346883	1.543	1.90967	602.542	FALSE	14
2022-09-12	14:52:09	0.44958	1.99982	1.87834	562.936	FALSE	14
2022-09-12	14:52:09	0.208664	0.928179	1.87834	603.47	FALSE	14
2022-09-12	14:52:09	0.608562	2.70701	1.87834	565.643	FALSE	14
2022-09-12	14:52:10	0.268206	1.19303	4.15041	604.663	FALSE	14
2022-09-12	14:52:10	0.505611	2.24906	4.15041	567.892	FALSE	14
2022-09-12	14:52:10	0.257316	1.14459	4.15041	605.808	FALSE	14
2022-09-12	14:52:10	2.70108	12.0149	4.15041	579.907	FALSE	14
2022-09-12	14:52:11	1.50963	6.71514	3.56042	612.523	FALSE	14
2022-09-12	14:52:11	1.14805	5.10676	3.56042	585.014	FALSE	14
2022-09-12	14:52:11	0.211056	0.938819	3.56042	613.462	FALSE	14
2022-09-12	14:52:11	0.332939	1.48098	3.56042	586.495	FALSE	14
2022-09-12	14:52:12	0.345102	1.53508	1.285	614.997	FALSE	14
2022-09-12	14:52:12	0.389835	1.73406	1.285	588.229	FALSE	14
2022-09-12	14:52:12	0.294771	1.3112	1.285	616.308	FALSE	14
2022-09-12	14:52:12	0.125814	0.559646	1.285	588.789	FALSE	14
2022-09-12	14:52:13	0.391616	1.74199	1.55266	618.05	FALSE	14
2022-09-12	14:52:13	0.208461	0.927276	1.55266	589.716	FALSE	14
2022-09-12	14:52:13	0.447087	1.98873	1.55266	620.039	FALSE	14
2022-09-12	14:52:14	0.296705	1.3198	13.0023	591.036	FALSE	14
2022-09-12	14:52:14	2.4248	10.786	13.0023	630.825	FALSE	14
2022-09-12	14:52:14	3.3909	15.0834	13.0023	606.119	1	15
2022-09-12	14:52:14	5.57976	24.8199	13.0023	655.645	1	16
2022-09-12	14:52:15	2.26073	10.0562	10.0551	616.175	FALSE	16
2022-09-12	14:52:15	4.46485	19.8605	10.0551	675.505	1	17
2022-09-12	14:52:15	0.516959	2.29954	10.0551	618.475	FALSE	17
2022-09-12	14:52:15	1.7994	8.00409	10.0551	683.51	FALSE	17
2022-09-12	14:52:16	1.90184	8.45976	6.78396	626.935	FALSE	17
2022-09-12	14:52:16	2.01004	8.94106	6.78396	692.451	FALSE	17
2022-09-12	14:52:16	1.96129	8.72421	6.78396	635.659	FALSE	17
2022-09-12	14:52:16	0.227239	1.0108	6.78396	693.461	FALSE	17
2022-09-12	14:52:17	1.61233	7.17197	8.14845	642.831	FALSE	17
2022-09-12	14:52:17	2.73487	12.1652	8.14845	705.627	FALSE	17
2022-09-12	14:52:17	1.14836	5.10813	8.14845	647.939	FALSE	17
2022-09-12	14:52:18	1.17772	5.23873	7.53595	710.865	FALSE	17
2022-09-12	14:52:18	1.99273	8.86406	7.53595	656.803	FALSE	17
2022-09-12	14:52:18	1.40983	6.27121	7.53595	717.137	FALSE	17
2022-09-12	14:52:18	2.19635	9.7698	7.53595	666.573	FALSE	17
2022-09-12	14:52:19	0.833142	3.70598	4.07837	720.843	FALSE	17
2022-09-12	14:52:19	1.38398	6.15622	4.07837	672.729	FALSE	17
2022-09-12	14:52:19	1.10943	4.93497	4.07837	725.778	FALSE	17
2022-09-12	14:52:19	0.340878	1.51629	4.07837	674.245	FALSE	17
2022-09-12	14:52:20	1.01874	4.53156	3.56035	730.309	FALSE	17
2022-09-12	14:52:20	0.948461	4.21894	3.56035	678.464	FALSE	17
2022-09-12	14:52:20	0.434008	1.93055	3.56035	732.24	FALSE	17
2022-09-12	14:52:21	0.270293	1.20232	1.30515	679.667	FALSE	17
2022-09-12	14:52:21	0.554924	2.46841	1.30515	734.708	FALSE	17
2022-09-12	14:52:21	0.220064	0.978889	1.30515	680.646	FALSE	17
2022-09-12	14:52:21	0.128359	0.570967	1.30515	735.279	FALSE	17
2022-09-12	14:52:22	0.264084	1.1747	2.00961	681.82	FALSE	17
2022-09-12	14:52:22	0.50159	2.23117	2.00961	737.51	FALSE	17
2022-09-12	14:52:22	0.315687	1.40424	2.00961	683.225	FALSE	17
2022-09-12	14:52:22	0.725763	3.22834	2.00961	740.739	FALSE	17
2022-09-12	14:52:23	2.84795	12.6683	8.99713	695.893	FALSE	17
2022-09-12	14:52:23	1.32816	5.90792	8.99713	746.646	FALSE	17
2022-09-12	14:52:23	2.7339	12.1609	8.99713	708.054	FALSE	17
2022-09-12	14:52:23	1.18057	5.25141	8.99713	751.898	FALSE	17
2022-09-12	14:52:24	1.2136	5.39834	5.74906	713.452	FALSE	17
2022-09-12	14:52:24	2.0337	9.0463	5.74906	760.944	FALSE	17
2022-09-12	14:52:24	0.630038	2.80254	5.74906	716.255	FALSE	17
2022-09-12	14:52:25	1.66195	7.39269	7.07463	768.337	FALSE	17
2022-09-12	14:52:25	0.300318	1.33587	7.07463	717.59	FALSE	17
2022-09-12	14:52:25	3.03243	13.4889	7.07463	781.826	1	18
2022-09-12	14:52:25	1.36709	6.08109	7.07463	723.672	FALSE	18
2022-09-12	14:52:26	3.63798	16.1825	10.7878	798.008	1	19
2022-09-12	14:52:26	3.38474	15.056	10.7878	738.728	1	20
2022-09-12	14:52:26	1.61172	7.16925	10.7878	805.177	FALSE	20
2022-09-12	14:52:26	1.06642	4.74365	10.7878	743.471	FALSE	20
2022-09-12	14:52:27	0.447036	1.98851	4.45306	807.166	FALSE	20
2022-09-12	14:52:27	1.19777	5.32792	4.45306	748.799	FALSE	20
2022-09-12	14:52:27	1.38296	6.15168	4.45306	813.318	FALSE	20
2022-09-12	14:52:27	0.976603	4.34413	4.45306	753.143	FALSE	20
2022-09-12	14:52:28	0.698638	3.10768	4.83362	816.425	FALSE	20
2022-09-12	14:52:28	2.02078	8.98883	4.83362	762.132	FALSE	20
2022-09-12	14:52:28	0.540522	2.40435	4.83362	818.83	FALSE	20
2022-09-12	14:52:29	0.74673	3.3216	6.31502	765.454	FALSE	20
2022-09-12	14:52:29	2.84627	12.6608	6.31502	831.49	FALSE	20
2022-09-12	14:52:29	0.243982	1.08528	6.31502	766.539	FALSE	20
2022-09-12	14:52:29	1.84174	8.19243	6.31502	839.683	FALSE	20
2022-09-12	14:52:30	0.860522	3.82777	2.85132	770.367	FALSE	20
2022-09-12	14:52:30	0.536909	2.38828	2.85132	842.071	FALSE	20
2022-09-12	14:52:30	0.432227	1.92263	2.85132	772.289	FALSE	20
2022-09-12	14:52:30	0.734364	3.2666	2.85132	845.338	FALSE	20
2022-09-12	14:52:31	0.724186	3.22132	5.50325	775.511	FALSE	20
2022-09-12	14:52:31	0.69701	3.10044	5.50325	848.438	FALSE	20
2022-09-12	14:52:31	2.35599	10.4799	5.50325	785.991	FALSE	20
2022-09-12	14:52:31	1.17156	5.21133	5.50325	853.649	FALSE	20
2022-09-12	14:52:32	1.7852	7.94093	4.63606	793.932	FALSE	20
2022-09-12	14:52:32	0.530547	2.35998	4.63606	856.009	FALSE	20
2022-09-12	14:52:32	0.810954	3.60729	4.63606	797.539	FALSE	20
2022-09-12	14:52:33	0.627952	2.79326	8.92606	858.803	FALSE	20
2022-09-12	14:52:33	1.97055	8.7654	8.92606	806.304	FALSE	20
2022-09-12	14:52:33	2.75513	12.2554	8.92606	871.058	FALSE	20
2022-09-12	14:52:33	2.67304	11.8902	8.92606	818.194	FALSE	20
2022-09-12	14:52:34	2.68658	11.9504	8.25469	883.009	FALSE	20
2022-09-12	14:52:34	1.69329	7.53209	8.25469	825.727	FALSE	20
2022-09-12	14:52:34	2.41218	10.7299	8.25469	893.738	FALSE	20
2022-09-12	14:52:34	0.630903	2.80638	8.25469	828.533	FALSE	20
2022-09-12	14:52:35	0.572226	2.54538	2.04804	896.284	FALSE	20
2022-09-12	14:52:35	0.935229	4.16009	2.04804	832.693	FALSE	20
2022-09-12	14:52:35	0.163066	0.72535	2.04804	897.009	FALSE	20
2022-09-12	14:52:35	0.171158	0.761345	2.04804	833.454	FALSE	20
2022-09-12	14:52:36	0.359809	1.6005	1.65128	898.61	FALSE	20
2022-09-12	14:52:36	0.515534	2.2932	1.65128	835.748	FALSE	20
2022-09-12	14:52:36	0.238333	1.06015	1.65128	899.67	FALSE	20
2022-09-12	14:52:37	0.522201	2.32285	1.41561	838.07	FALSE	20
2022-09-12	14:52:37	0.264898	1.17832	1.41561	900.848	FALSE	20
2022-09-12	14:52:37	0.179911	0.80028	1.41561	838.871	FALSE	20
2022-09-12	14:52:37	0.305967	1.361	1.41561	902.209	FALSE	20
2022-09-12	14:52:38	0.280318	1.24691	1.06412	840.118	FALSE	20
2022-09-12	14:52:38	0.283982	1.26321	1.06412	903.472	FALSE	20
2022-09-12	14:52:38	0.114415	0.508941	1.06412	840.627	FALSE	20
2022-09-12	14:52:38	0.278181	1.2374	1.06412	904.71	FALSE	20
2022-09-12	14:52:39	0.58388	2.59722	1.76887	843.224	FALSE	20
2022-09-12	14:52:39	0.236247	1.05087	1.76887	905.761	FALSE	20
2022-09-12	14:52:39	0.441031	1.96179	1.76887	845.186	FALSE	20
2022-09-12	14:52:39	0.329479	1.46559	1.76887	907.226	FALSE	20
2022-09-12	14:52:40	0.360267	1.60254	3.24314	846.788	FALSE	20
2022-09-12	14:52:40	1.47732	6.57141	3.24314	913.798	FALSE	20
2022-09-12	14:52:40	0.349682	1.55546	3.24314	848.344	FALSE	20
2022-09-12	14:52:41	0.19472	0.866154	1.16089	914.664	FALSE	20
2022-09-12	14:52:41	0.464949	2.06819	1.16089	850.412	FALSE	20
2022-09-12	14:52:41	0.192023	0.854157	1.16089	915.518	FALSE	20
2022-09-12	14:52:41	0.192227	0.855064	1.16089	851.267	FALSE	20
2022-09-12	14:52:42	0.261438	1.16293	0.971871	916.681	FALSE	20
2022-09-12	14:52:42	0.14098	0.627107	0.971871	851.894	FALSE	20
2022-09-12	14:52:42	0.288206	1.282	0.971871	917.963	FALSE	20
2022-09-12	14:52:42	0.183321	0.815448	0.971871	852.709	FALSE	20
2022-09-12	14:52:43	0.233092	1.03684	1.04239	919	FALSE	20
2022-09-12	14:52:43	0.100318	0.446235	1.04239	853.156	FALSE	20
2022-09-12	14:52:43	0.335026	1.49026	1.04239	920.49	FALSE	20
2022-09-12	14:52:43	0.268919	1.19621	1.04239	854.352	FALSE	20
2022-09-12	14:52:44	0.173957	0.773796	0.879285	921.264	FALSE	20
2022-09-12	14:52:44	0.188105	0.836729	0.879285	855.189	FALSE	20
2022-09-12	14:52:44	0.230954	1.02733	0.879285	922.291	FALSE	20
2022-09-12	14:52:45	0.386781	1.72048	0.984208	856.909	FALSE	20
2022-09-12	14:52:45	0.137825	0.613073	0.984208	922.904	FALSE	20
2022-09-12	14:52:45	0.205967	0.916182	0.984208	857.825	FALSE	20
2022-09-12	14:52:45	0.154466	0.687096	0.984208	923.591	FALSE	20
2022-09-12	14:52:46	0.374771	1.66706	1.37402	859.492	FALSE	20
2022-09-12	14:52:46	0.121031	0.53837	1.37402	924.13	FALSE	20
2022-09-12	14:52:46	0.438486	1.95047	1.37402	861.443	FALSE	20
2022-09-12	14:52:46	0.301285	1.34018	1.37402	925.47	FALSE	20
2022-09-12	14:52:47	0.682507	3.03593	4.47275	864.479	FALSE	20
2022-09-12	14:52:47	1.34357	5.97647	4.47275	931.446	FALSE	20
2022-09-12	14:52:47	0.797723	3.54843	4.47275	868.027	FALSE	20
2022-09-12	14:52:47	1.19828	5.33019	4.47275	936.776	FALSE	20
2022-09-12	14:52:48	2.311	10.2798	5.41538	878.307	FALSE	20
2022-09-12	14:52:48	0.231005	1.02756	5.41538	937.804	FALSE	20
2022-09-12	14:52:48	1.11029	4.93879	5.41538	883.246	FALSE	20
2022-09-12	14:52:49	1.42663	6.34594	4.05488	944.15	FALSE	20
2022-09-12	14:52:49	0.459249	2.04283	4.05488	885.288	FALSE	20
2022-09-12	14:52:49	0.765967	3.40717	4.05488	947.557	FALSE	20
2022-09-12	14:52:49	0.994466	4.42358	4.05488	889.712	FALSE	20
2022-09-12	14:52:50	0.373193	1.66004	1.06678	949.217	FALSE	20
2022-09-12	14:52:50	0.118639	0.52773	1.06678	890.24	FALSE	20
2022-09-12	14:52:50	0.433346	1.92761	1.06678	951.145	FALSE	20
2022-09-12	14:52:50	0.0341096	0.151726	1.06678	890.392	FALSE	20
2022-09-12	14:52:51	0.332379	1.47849	1.15506	952.623	FALSE	20
2022-09-12	14:52:51	0.157265	0.699546	1.15506	891.091	FALSE	20
2022-09-12	14:52:51	0.365967	1.62789	1.15506	954.251	FALSE	20
2022-09-12	14:52:51	0.183066	0.814314	1.15506	891.905	FALSE	20
2022-09-12	14:52:52	0.427087	1.89977	1.42688	956.151	FALSE	20
2022-09-12	14:52:52	0.183677	0.817032	1.42688	892.722	FALSE	20
2022-09-12	14:52:52	0.351565	1.56383	1.42688	957.715	FALSE	20
2022-09-12	14:52:53	0.227188	1.01058	1.31737	893.733	FALSE	20
2022-09-12	14:52:53	0.376858	1.67634	1.31737	959.391	FALSE	20
2022-09-12	14:52:53	0.266883	1.18715	1.31737	894.92	FALSE	20
2022-09-12	14:52:53	0.313702	1.39541	1.31737	960.786	FALSE	20
2022-09-12	14:52:54	0.362557	1.61273	1.47843	896.533	FALSE	20
2022-09-12	14:52:54	0.261692	1.16406	1.47843	961.951	FALSE	20
2022-09-12	14:52:54	0.455178	2.02472	1.47843	898.558	FALSE	20
2022-09-12	14:52:54	0.250038	1.11222	1.47843	963.063	FALSE	20
2022-09-12	14:52:55	0.410852	1.82755	1.49869	900.385	FALSE	20
2022-09-12	14:52:55	0.303728	1.35104	1.49869	964.414	FALSE	20
2022-09-12	14:52:55	0.273855	1.21816	1.49869	901.603	FALSE	20
2022-09-12	14:52:55	0.359249	1.59801	1.49869	966.012	FALSE	20
2022-09-12	14:52:56	0.245611	1.09253	1.38568	902.696	FALSE	20
2022-09-12	14:52:56	0.445255	1.98058	1.38568	967.992	FALSE	20
2022-09-12	14:52:56	0.243677	1.08392	1.38568	903.78	FALSE	20
2022-09-12	14:52:57	0.459504	2.04397	1.79858	970.036	FALSE	20
2022-09-12	14:52:57	0.229733	1.0219	1.79858	904.802	FALSE	20
2022-09-12	14:52:57	0.377875	1.68086	1.79858	971.717	FALSE	20
2022-09-12	14:52:57	0.550242	2.44759	1.79858	907.249	FALSE	20
2022-09-12	14:52:58	1.9477	8.66376	6.49052	980.381	FALSE	20
2022-09-12	14:52:58	0.907799	4.03807	6.49052	911.287	FALSE	20
2022-09-12	14:52:58	1.57034	6.98519	6.49052	987.366	FALSE	20
2022-09-12	14:52:58	1.4107	6.27508	6.49052	917.562	FALSE	20
2022-09-12	14:52:59	1.14459	5.09137	5.58464	992.458	FALSE	20
2022-09-12	14:52:59	1.51258	6.72826	5.58464	924.291	FALSE	20
2022-09-12	14:52:59	1.33564	5.94119	5.58464	998.399	FALSE	20
2022-09-12	14:52:59	1.02912	4.57773	5.58464	928.868	FALSE	20
2022-09-12	14:53:00	0.757621	3.37005	3.40167	1001.77	FALSE	20
2022-09-12	14:53:00	0.813957	3.62064	3.40167	932.489	FALSE	20
2022-09-12	14:53:00	0.722608	3.2143	3.40167	1004.98	FALSE	20
2022-09-12	14:53:01	0.972277	4.32488	5.19534	936.814	FALSE	20
2022-09-12	14:53:01	1.571	6.98812	5.19534	1011.97	FALSE	20
2022-09-12	14:53:01	1.21859	5.42053	5.19534	942.234	FALSE	20
2022-09-12	14:53:01	0.909987	4.0478	5.19534	1016.02	FALSE	20
2022-09-12	14:53:02	0.890801	3.96246	2.76513	946.197	FALSE	20
2022-09-12	14:53:02	0.688308	3.06173	2.76513	1019.08	FALSE	20
2022-09-12	14:53:02	0.495636	2.20469	2.76513	948.402	FALSE	20
2022-09-12	14:53:02	0.411769	1.83163	2.76513	1020.91	FALSE	20
2022-09-12	14:53:03	0.449275	1.99847	1.18421	950.4	FALSE	20
2022-09-12	14:53:03	0.318079	1.41488	1.18421	1022.33	FALSE	20
2022-09-12	14:53:03	0.285865	1.27158	1.18421	951.672	FALSE	20
2022-09-12	14:53:03	0.0116669	0.0518967	1.18421	1022.38	FALSE	20
2022-09-12	14:53:04	-0.117188	-0.521276	-0.19847	951.672	FALSE	20
2022-09-12	14:53:04	-0.0034476	-0.0153356	-0.19847	1022.38	FALSE	20
2022-09-12	14:53:04	-0.0132186	-0.058799	-0.19847	951.672	FALSE	20
2022-09-12	14:53:05	-0.0519972	-0.231294	-1.01991	1022.38	FALSE	20
2022-09-12	14:53:05	-0.349147	-1.55308	-1.01991	951.672	FALSE	20
2022-09-12	14:53:05	-0.37047	-1.64792	-1.01991	1022.38	FALSE	20
2022-09-12	14:53:05	-0.145534	-0.647364	-1.01991	951.672	FALSE	20
2022-09-12	14:53:06	0.239351	1.06468	0.911654	1023.44	FALSE	20
2022-09-12	14:53:06	0.191361	0.851212	0.911654	952.523	FALSE	20
2022-09-12	14:53:06	0.184135	0.819069	0.911654	1024.26	FALSE	20
2022-09-12	14:53:07	0.0756364	0.336446	1.11228	952.859	FALSE	20
2022-09-12	14:53:07	0.272074	1.21024	1.11228	1025.47	FALSE	20
2022-09-12	14:53:07	0.316349	1.40718	1.11228	954.266	FALSE	20
2022-09-12	14:53:07	0.336145	1.49524	1.11228	1026.97	FALSE	20
2022-09-12	14:53:08	0.369987	1.64578	1.54448	955.912	FALSE	20
2022-09-12	14:53:08	0.340725	1.51561	1.54448	1028.48	FALSE	20
2022-09-12	14:53:08	0.342405	1.52309	1.54448	957.435	FALSE	20
2022-09-12	14:53:08	0.335738	1.49343	1.54448	1029.98	FALSE	20
2022-09-12	14:53:09	0.309427	1.37639	1.32212	958.812	FALSE	20
2022-09-12	14:53:09	0.299453	1.33203	1.32212	1031.31	FALSE	20
2022-09-12	14:53:09	0.294059	1.30803	1.32212	960.12	FALSE	20
2022-09-12	14:53:09	0.285967	1.27204	1.32212	1032.58	FALSE	20
2022-09-12	14:53:10	0.288817	1.28472	0.493718	961.404	FALSE	20
2022-09-12	14:53:10	0.225662	1.00379	0.493718	1033.59	FALSE	20
2022-09-12	14:53:10	-0.0201397	-0.0895854	0.493718	961.404	FALSE	20
2022-09-12	14:53:10	-0.0503687	-0.22405	0.493718	1033.59	FALSE	20
2022-09-12	14:53:11	-0.116425	-0.517882	-1.33848	961.404	FALSE	20
2022-09-12	14:53:11	-0.349351	-1.55398	-1.33848	1033.59	FALSE	20
2022-09-12	14:53:11	-0.436933	-1.94357	-1.33848	961.404	FALSE	20
2022-09-12	14:53:12	-0.387162	-1.72217	-1.81454	1033.59	FALSE	20
2022-09-12	14:53:12	-0.29958	-1.33259	-1.81454	961.404	FALSE	20
2022-09-12	14:53:12	-0.484109	-2.15341	-1.81454	1033.59	FALSE	20
2022-09-12	14:53:12	-0.460852	-2.04996	-1.81454	961.404	FALSE	20
2022-09-12	14:53:13	-0.421106	-1.87316	-0.983186	1033.59	FALSE	20
2022-09-12	14:53:13	-0.433066	-1.92636	-0.983186	961.404	FALSE	20
2022-09-12	14:53:13	0.0177229	0.078835	-0.983186	1033.66	FALSE	20
2022-09-12	14:53:13	-0.0476715	-0.212052	-0.983186	961.404	FALSE	20
2022-09-12	14:53:14	0.221998	0.987492	0.950309	1034.65	FALSE	20
2022-09-12	14:53:14	0.147494	0.656083	0.950309	962.061	FALSE	20
2022-09-12	14:53:14	0.324542	1.44363	0.950309	1036.1	FALSE	20
2022-09-12	14:53:14	0.160522	0.714034	0.950309	962.775	FALSE	20
2022-09-12	14:53:15	0.119148	0.529994	0.600622	1036.63	FALSE	20
2022-09-12	14:53:15	0.0751275	0.334182	0.600622	963.109	FALSE	20
2022-09-12	14:53:15	0.210802	0.937689	0.600622	1037.56	FALSE	20
2022-09-12	14:53:16	0.0848984	0.377645	0.682964	963.486	FALSE	20
2022-09-12	14:53:16	0.117418	0.522299	0.682964	1038.09	FALSE	20
2022-09-12	14:53:16	0.111463	0.49581	0.682964	963.982	FALSE	20
2022-09-12	14:53:16	0.300369	1.3361	0.682964	1039.42	FALSE	20
2022-09-12	14:53:17	0.113397	0.504413	0.56242	964.487	FALSE	20
2022-09-12	14:53:17	0.145509	0.647253	0.56242	1040.07	FALSE	20
2022-09-12	14:53:17	0.12958	0.576398	0.56242	965.063	FALSE	20
2022-09-12	14:53:17	0.117265	0.521618	0.56242	1040.59	FALSE	20
2022-09-12	14:53:18	0.159707	0.710409	0.246462	965.773	FALSE	20
2022-09-12	14:53:18	-0.105127	-0.467626	0.246462	1040.59	FALSE	20
2022-09-12	14:53:18	0.0833208	0.370628	0.246462	966.144	FALSE	20
2022-09-12	14:53:18	0.083728	0.372439	0.246462	1040.96	FALSE	20
2022-09-12	14:53:19	-0.0208522	-0.0927548	-0.388697	966.144	FALSE	20
2022-09-12	14:53:19	-0.114033	-0.507242	-0.388697	1040.96	FALSE	20
2022-09-12	14:53:19	-0.127264	-0.566096	-0.388697	966.144	FALSE	20
2022-09-12	14:53:20	-0.150165	-0.667964	-0.964059	1040.96	FALSE	20
2022-09-12	14:53:20	-1.11093	-4.94164	-0.964059	966.144	FALSE	20
2022-09-12	14:53:20	0.134568	0.598585	-0.964059	1041.56	FALSE	20
2022-09-12	14:53:20	0.259606	1.15478	-0.964059	967.299	FALSE	20
2022-09-12	14:53:21	0.789529	3.51198	7.9466	1045.07	FALSE	20
2022-09-12	14:53:21	3.58378	15.9414	7.9466	983.24	1	21
2022-09-12	14:53:21	2.12724	9.46239	7.9466	1054.54	FALSE	21
2022-09-12	14:53:21	0.645356	2.87067	7.9466	986.111	FALSE	21
2022-09-12	14:53:22	0.317163	1.4108	-0.746005	1055.95	FALSE	21
2022-09-12	14:53:22	0.089733	0.39915	-0.746005	986.51	FALSE	21
2022-09-12	14:53:22	-0.459681	-2.04475	-0.746005	1055.95	FALSE	21
2022-09-12	14:53:22	-0.618053	-2.74922	-0.746005	986.51	FALSE	21
2022-09-12	14:53:23	-0.790368	-3.51571	-3.43482	1055.95	FALSE	21
2022-09-12	14:53:23	-0.744312	-3.31085	-3.43482	986.51	FALSE	21
2022-09-12	14:53:23	-0.781869	-3.47791	-3.43482	1055.95	FALSE	21
2022-09-12	14:53:24	-0.560241	-2.49206	-1.80967	986.51	FALSE	21
2022-09-12	14:53:24	-0.451335	-2.00763	-1.80967	1055.95	FALSE	21
2022-09-12	14:53:24	-0.434592	-1.93315	-1.80967	986.51	FALSE	21
2022-09-12	14:53:24	-0.181157	-0.805823	-1.80967	1055.95	FALSE	21
2022-09-12	14:53:25	-0.406552	-1.80842	-2.50831	986.51	FALSE	21
2022-09-12	14:53:25	-0.552048	-2.45562	-2.50831	1055.95	FALSE	21
2022-09-12	14:53:25	-0.60589	-2.69512	-2.50831	986.51	FALSE	21
2022-09-12	14:53:25	-0.691081	-3.07407	-2.50831	1055.95	FALSE	21
2022-09-12	14:53:26	-0.707315	-3.14628	-2.67231	986.51	FALSE	21
2022-09-12	14:53:26	-0.575101	-2.55816	-2.67231	1055.95	FALSE	21
2022-09-12	14:53:26	-0.613269	-2.72794	-2.67231	986.51	FALSE	21
2022-09-12	14:53:26	-0.507366	-2.25687	-2.67231	1055.95	FALSE	21
2022-09-12	14:53:27	-0.474745	-2.11176	-2.05426	986.51	FALSE	21
2022-09-12	14:53:27	-0.433066	-1.92636	-2.05426	1055.95	FALSE	21
2022-09-12	14:53:27	-0.477646	-2.12466	-2.05426	986.51	FALSE	21
2022-09-12	14:53:28	-0.294491	-1.30995	-1.21833	1055.95	FALSE	21
2022-09-12	14:53:28	-0.356832	-1.58726	-1.21833	986.51	FALSE	21
2022-09-12	14:53:28	-0.226501	-1.00752	-1.21833	1055.95	FALSE	21
2022-09-12	14:53:28	-0.217748	-0.968587	-1.21833	986.51	FALSE	21
2022-09-12	14:53:29	-0.0982058	-0.436839	-0.970509	1055.95	FALSE	21
2022-09-12	14:53:29	-0.244567	-1.08788	-0.970509	986.51	FALSE	21
2022-09-12	14:53:29	-0.218918	-0.973791	-0.970509	1055.95	FALSE	21
2022-09-12	14:53:29	-0.31103	-1.38352	-0.970509	986.51	FALSE	21
2022-09-12	14:53:30	-0.328384	-1.46072	-1.46875	1055.95	FALSE	21
2022-09-12	14:53:30	-0.389961	-1.73462	-1.46875	986.51	FALSE	21
2022-09-12	14:53:30	-0.32416	-1.44193	-1.46875	1055.95	FALSE	21
2022-09-12	14:53:30	-0.278257	-1.23774	-1.46875	986.51	FALSE	21
2022-09-12	14:53:31	-0.164007	-0.729536	-1.0162	1055.95	FALSE	21
2022-09-12	14:53:31	-0.334745	-1.48901	-1.0162	986.51	FALSE	21
2022-09-12	14:53:31	-0.186603	-0.830047	-1.0162	1055.95	FALSE	21
2022-09-12	14:53:32	-0.101107	-0.449744	1.22224	986.51	FALSE	21
2022-09-12	14:53:32	0.0380282	0.169157	1.22224	1056.12	FALSE	21
2022-09-12	14:53:32	0.691717	3.0769	1.22224	989.587	FALSE	21
2022-09-12	14:53:32	0.470446	2.09264	1.22224	1058.21	FALSE	21
2022-09-12	14:53:33	0.292074	1.2992	1.17577	990.886	FALSE	21
2022-09-12	14:53:33	0.16556	0.736444	1.17577	1058.94	FALSE	21
2022-09-12	14:53:33	0.394822	1.75625	1.17577	992.642	FALSE	21
2022-09-12	14:53:33	0.204848	0.911205	1.17577	1059.86	FALSE	21
2022-09-12	14:53:34	0.573448	2.55081	3.12727	995.193	FALSE	21
2022-09-12	14:53:34	0.738995	3.2872	3.12727	1063.14	FALSE	21
2022-09-12	14:53:34	0.5336	2.37356	3.12727	997.567	FALSE	21
2022-09-12	14:53:34	0.96612	4.29749	3.12727	1067.44	FALSE	21
2022-09-12	14:53:35	0.737163	3.27905	3.30976	1000.85	FALSE	21
2022-09-12	14:53:35	0.857926	3.81623	3.30976	1071.26	FALSE	21
2022-09-12	14:53:35	0.637112	2.834	3.30976	1003.68	FALSE	21
2022-09-12	14:53:36	0.611209	2.71878	4.21368	1073.98	FALSE	21
2022-09-12	14:53:36	0.799758	3.55748	4.21368	1007.24	FALSE	21
2022-09-12	14:53:36	1.60693	7.14795	4.21368	1081.12	FALSE	21
2022-09-12	14:53:36	0.771209	3.43049	4.21368	1010.67	FALSE	21
2022-09-12	14:53:37	1.73497	7.71749	4.96579	1088.84	FALSE	21
2022-09-12	14:53:37	0.333651	1.48415	4.96579	1012.15	FALSE	21
2022-09-12	14:53:37	0.660776	2.93926	4.96579	1091.78	FALSE	21
2022-09-12	14:53:37	1.73604	7.72225	4.96579	1019.87	FALSE	21
2022-09-12	14:53:38	0.615738	2.73893	4.80575	1094.52	FALSE	21
2022-09-12	14:53:38	1.67528	7.45198	4.80575	1027.33	FALSE	21
2022-09-12	14:53:38	1.12927	5.02322	4.80575	1099.54	FALSE	21
2022-09-12	14:53:38	0.901234	4.00887	4.80575	1031.34	FALSE	21
2022-09-12	14:53:39	0.943524	4.19698	2.23947	1103.74	FALSE	21
2022-09-12	14:53:39	0.32215	1.43299	2.23947	1032.77	FALSE	21
2022-09-12	14:53:39	0.244695	1.08845	2.23947	1104.83	FALSE	21
2022-09-12	14:53:40	1.56408	6.95734	3.73213	1039.73	FALSE	21
2022-09-12	14:53:40	0.14785	0.657666	3.73213	1105.49	FALSE	21
2022-09-12	14:53:40	0.57874	2.57435	3.73213	1042.3	FALSE	21
2022-09-12	14:53:40	1.06541	4.73916	3.73213	1110.22	FALSE	21
2022-09-12	14:53:41	1.25879	5.59935	5.51821	1047.9	FALSE	21
2022-09-12	14:53:41	1.44363	6.42155	5.51821	1116.65	FALSE	21
2022-09-12	14:53:41	0.878944	3.90972	5.51821	1051.81	FALSE	21
2022-09-12	14:53:41	1.38083	6.14221	5.51821	1122.79	FALSE	21
2022-09-12	14:53:42	1.14566	5.09612	3.7951	1056.9	FALSE	21
2022-09-12	14:53:42	0.697824	3.10406	3.7951	1125.89	FALSE	21
2022-09-12	14:53:42	0.716043	3.1851	3.7951	1060.09	FALSE	21
2022-09-12	14:53:43	1.04037	4.62777	3.31867	1130.52	FALSE	21
2022-09-12	14:53:43	0.346425	1.54097	3.31867	1061.63	FALSE	21
2022-09-12	14:53:43	1.17503	5.22677	3.31867	1135.75	FALSE	21
2022-09-12	14:53:43	0.422456	1.87917	3.31867	1063.51	FALSE	21
2022-09-12	14:53:44	2.34296	10.422	5.86952	1146.17	FALSE	21
2022-09-12	14:53:44	0.368308	1.63831	5.86952	1065.15	FALSE	21
2022-09-12	14:53:44	2.07492	9.22966	5.86952	1155.4	FALSE	21
2022-09-12	14:53:44	0.491921	2.18816	5.86952	1067.34	FALSE	21
2022-09-12	14:53:45	1.96637	8.74681	6.79368	1164.15	FALSE	21
2022-09-12	14:53:45	1.17304	5.21792	6.79368	1072.55	FALSE	21
2022-09-12	14:53:45	1.00454	4.46839	6.79368	1168.61	FALSE	21
2022-09-12	14:53:45	1.9652	8.7416	6.79368	1081.3	FALSE	21
2022-09-12	14:53:46	0.383321	1.70509	3.72318	1170.32	FALSE	21
2022-09-12	14:53:46	1.8281	8.13175	3.72318	1089.43	FALSE	21
2022-09-12	14:53:46	0.299606	1.33271	3.72318	1171.65	FALSE	21
2022-09-12	14:53:47	1.95009	8.67439	6.75029	1098.1	FALSE	21
2022-09-12	14:53:47	0.887901	3.94956	6.75029	1175.6	FALSE	21
2022-09-12	14:53:47	1.33309	5.92985	6.75029	1104.03	FALSE	21
2022-09-12	14:53:47	1.89905	8.44735	6.75029	1184.05	FALSE	21
2022-09-12	14:53:48	0.911107	4.05279	6.71021	1108.08	FALSE	21
2022-09-12	14:53:48	2.27782	10.1322	6.71021	1194.18	FALSE	21
2022-09-12	14:53:48	0.40785	1.8142	6.71021	1109.9	FALSE	21
2022-09-12	14:53:48	2.43731	10.8416	6.71021	1205.02	FALSE	21
2022-09-12	14:53:49	0.82617	3.67497	4.03784	1113.57	FALSE	21
2022-09-12	14:53:49	1.27548	5.67359	4.03784	1210.7	FALSE	21
2022-09-12	14:53:49	0.917773	4.08244	4.03784	1117.66	FALSE	21
2022-09-12	14:53:49	0.611565	2.72036	4.03784	1213.42	FALSE	21
2022-09-12	14:53:50	0.7193	3.19959	2.93443	1120.86	FALSE	21
2022-09-12	14:53:50	0.484084	2.1533	2.93443	1215.57	FALSE	21
2022-09-12	14:53:50	0.775687	3.45041	2.93443	1124.31	FALSE	21
2022-09-12	14:53:51	0.719555	3.20072	4.8748	1218.77	FALSE	21
2022-09-12	14:53:51	0.885356	3.93824	4.8748	1128.24	FALSE	21
2022-09-12	14:53:51	0.516654	2.29818	4.8748	1221.07	FALSE	21
2022-09-12	14:53:51	2.26205	10.0621	4.8748	1138.31	FALSE	21
2022-09-12	14:53:52	0.626883	2.7885	11.8494	1223.86	FALSE	21
2022-09-12	14:53:52	3.371	14.9949	11.8494	1153.3	1	22
2022-09-12	14:53:52	0.94327	4.19585	11.8494	1228.05	FALSE	22
2022-09-12	14:53:52	5.71431	25.4184	11.8494	1178.72	1	23
2022-09-12	14:53:53	1.45833	6.48694	7.70772	1234.54	FALSE	23
2022-09-12	14:53:53	3.59691	15.9998	7.70772	1194.72	1	24
2022-09-12	14:53:53	1.05899	4.7106	7.70772	1239.25	FALSE	24
2022-09-12	14:53:53	0.816857	3.63354	7.70772	1198.35	FALSE	24
2022-09-12	14:53:54	1.06541	4.73916	3.10686	1243.99	FALSE	24
2022-09-12	14:53:54	0.259606	1.15478	3.10686	1199.51	FALSE	24
2022-09-12	14:53:54	0.770343	3.42664	3.10686	1247.42	FALSE	24
2022-09-12	14:53:55	1.44164	6.4127	7.94191	1205.92	FALSE	24
2022-09-12	14:53:55	1.29472	5.75917	7.94191	1253.18	FALSE	24
2022-09-12	14:53:55	2.29737	10.2192	7.94191	1216.14	FALSE	24
2022-09-12	14:53:55	2.10795	9.37658	7.94191	1262.55	FALSE	24
2022-09-12	14:53:56	1.84749	8.21801	7.82277	1224.36	FALSE	24
2022-09-12	14:53:56	1.88698	8.39366	7.82277	1270.95	FALSE	24
2022-09-12	14:53:56	1.54144	6.85663	7.82277	1231.21	FALSE	24
2022-09-12	14:53:57	2.0962	9.32432	9.90811	1280.27	FALSE	24
2022-09-12	14:53:57	1.99126	8.85752	9.90811	1240.07	FALSE	24
2022-09-12	14:53:57	2.40393	10.6932	9.90811	1290.96	FALSE	24
2022-09-12	14:53:57	2.18978	9.74058	9.90811	1249.81	FALSE	24
2022-09-12	14:53:57	2.45604	10.925	9.90811	1301.89	FALSE	24
2022-09-12	14:53:58	1.05899	4.7106	4.98256	1254.52	FALSE	24
2022-09-12	14:53:58	1.26999	5.64917	4.98256	1307.54	FALSE	24
2022-09-12	14:53:58	1.03141	4.58792	4.98256	1259.11	FALSE	24
2022-09-12	14:53:59	1.57294	6.99675	15.3838	1314.53	FALSE	24
2022-09-12	14:53:59	1.63314	7.26453	15.3838	1266.38	FALSE	24
2022-09-12	14:53:59	4.04261	17.9823	15.3838	1332.52	1	25
2022-09-12	14:53:59	6.58505	29.2916	15.3838	1295.67	1	26
2022-09-12	14:54:00	4.98184	22.1602	23.8755	1354.68	1	27
2022-09-12	14:54:00	9.73502	43.3033	23.8755	1338.97	1	28
2022-09-12	14:54:00	2.5738	11.4488	23.8755	1366.13	FALSE	28
2022-09-12	14:54:00	4.17915	18.5897	23.8755	1357.56	1	29
2022-09-12	14:54:01	3.61477	16.0792	14.6142	1382.2	1	30
2022-09-12	14:54:01	4.46454	19.8592	14.6142	1377.42	1	31
2022-09-12	14:54:01	2.19263	9.75326	14.6142	1391.96	FALSE	31
2022-09-12	14:54:01	2.86973	12.7651	14.6142	1390.18	FALSE	31
2022-09-12	14:54:02	3.67991	16.369	15.238	1408.33	1	32
2022-09-12	14:54:02	3.26933	14.5426	15.238	1404.73	1	33
2022-09-12	14:54:02	3.3277	14.8023	15.238	1423.13	1	34
2022-09-12	14:54:03	2.05182	9.12691	15.9169	1413.85	FALSE	34
2022-09-12	14:54:03	2.53726	11.2862	15.9169	1434.42	FALSE	34
2022-09-12	14:54:03	3.482	15.4886	15.9169	1429.34	1	35
2022-09-12	14:54:03	6.24204	27.7658	15.9169	1462.18	1	36
2022-09-12	14:54:04	4.86505	21.6407	18.5726	1450.98	1	37
2022-09-12	14:54:04	5.42937	24.1509	18.5726	1486.33	1	38
2022-09-12	14:54:04	3.49884	15.5635	18.5726	1466.55	1	39
2022-09-12	14:54:04	2.908	12.9354	18.5726	1499.27	FALSE	39
2022-09-12	14:54:05	2.92439	13.0083	13.2292	1479.56	FALSE	39
2022-09-12	14:54:05	2.84006	12.6332	13.2292	1511.9	FALSE	39
2022-09-12	14:54:05	2.93772	13.0676	13.2292	1492.62	FALSE	39
2022-09-12	14:54:05	3.19406	14.2078	13.2292	1526.11	1	40
2022-09-12	14:54:06	3.02887	13.473	11.3038	1506.1	1	41
2022-09-12	14:54:06	2.4737	11.0035	11.3038	1537.11	FALSE	41
2022-09-12	14:54:06	2.12108	9.43499	11.3038	1515.53	FALSE	41
2022-09-12	14:54:07	1.96678	8.74863	7.27852	1545.86	FALSE	41
2022-09-12	14:54:07	1.7764	7.90178	7.27852	1523.43	FALSE	41
2022-09-12	14:54:07	1.07396	4.77719	7.27852	1550.64	FALSE	41
2022-09-12	14:54:07	1.728	7.68649	7.27852	1531.12	FALSE	41
2022-09-12	14:54:08	1.81706	8.08265	9.40844	1558.72	FALSE	41
2022-09-12	14:54:08	2.11599	9.41235	9.40844	1540.53	FALSE	41
2022-09-12	14:54:08	2.25426	10.0274	9.40844	1568.75	FALSE	41
2022-09-12	14:54:08	2.27314	10.1114	9.40844	1550.64	FALSE	41
2022-09-12	14:54:09	2.33039	10.366	10.6325	1579.11	FALSE	41
2022-09-12	14:54:09	2.31156	10.2823	10.6325	1560.93	FALSE	41
2022-09-12	14:54:09	2.42378	10.7815	10.6325	1589.9	FALSE	41
2022-09-12	14:54:09	2.49543	11.1002	10.6325	1572.03	FALSE	41
2022-09-12	14:54:10	2.48408	11.0497	10.8437	1600.94	FALSE	41
2022-09-12	14:54:10	2.4367	10.8389	10.8437	1582.86	FALSE	41
2022-09-12	14:54:10	2.39253	10.6425	10.8437	1611.59	FALSE	41
2022-09-12	14:54:11	2.36556	10.5225	10.2685	1593.39	FALSE	41
2022-09-12	14:54:11	2.31172	10.283	10.2685	1621.87	FALSE	41
2022-09-12	14:54:11	2.25772	10.0428	10.2685	1603.43	FALSE	41
2022-09-12	14:54:11	2.29889	10.2259	10.2685	1632.1	FALSE	41
2022-09-12	14:54:12	2.28139	10.1481	10.2204	1613.58	FALSE	41
2022-09-12	14:54:12	2.27894	10.1372	10.2204	1642.23	FALSE	41
2022-09-12	14:54:12	2.30184	10.239	10.2204	1623.82	FALSE	41
2022-09-12	14:54:12	2.32846	10.3575	10.2204	1652.59	FALSE	41
2022-09-12	14:54:13	2.33101	10.3688	9.81796	1634.19	FALSE	41
2022-09-12	14:54:13	2.26927	10.0942	9.81796	1662.69	FALSE	41
2022-09-12	14:54:13	2.07273	9.21992	9.81796	1643.41	FALSE	41
2022-09-12	14:54:13	2.15569	9.58894	9.81796	1672.27	FALSE	41
2022-09-12	14:54:14	2.165	9.63035	10.2126	1653.04	FALSE	41
2022-09-12	14:54:14	2.3937	10.6477	10.2126	1682.92	FALSE	41
2022-09-12	14:54:14	2.32897	10.3597	10.2126	1663.4	FALSE	41
2022-09-12	14:54:15	2.27955	10.1399	10.1474	1693.06	FALSE	41
2022-09-12	14:54:15	2.28668	10.1716	10.1474	1673.57	FALSE	41
2022-09-12	14:54:15	2.30062	10.2336	10.1474	1703.3	FALSE	41
2022-09-12	14:54:15	2.25813	10.0446	10.1474	1683.61	FALSE	41
2022-09-12	14:54:16	2.22088	9.87892	9.95916	1713.17	FALSE	41
2022-09-12	14:54:16	2.21859	9.86873	9.95916	1693.48	FALSE	41
2022-09-12	14:54:16	2.25996	10.0528	9.95916	1723.23	FALSE	41
2022-09-12	14:54:16	2.25625	10.0363	9.95916	1703.52	FALSE	41
2022-09-12	14:54:17	1.72429	7.66999	4.98516	1730.9	FALSE	41
2022-09-12	14:54:17	1.45528	6.47338	4.98516	1709.99	FALSE	41
2022-09-12	14:54:17	0.792023	3.52308	4.98516	1734.42	FALSE	41
2022-09-12	14:54:17	0.511259	2.27418	4.98516	1712.26	FALSE	41
2022-09-12	14:54:18	0.440674	1.96021	1.91539	1736.38	FALSE	41
2022-09-12	14:54:18	0.369733	1.64465	1.91539	1713.91	FALSE	41
2022-09-12	14:54:18	0.481387	2.14131	1.91539	1738.52	FALSE	41
2022-09-12	14:54:19	0.247952	1.10294	0.221166	1715.01	FALSE	41
2022-09-12	14:54:19	0.250649	1.11494	0.221166	1739.64	FALSE	41
2022-09-12	14:54:19	0.0947712	0.421561	0.221166	1715.43	FALSE	41
2022-09-12	14:54:19	-0.394491	-1.75477	0.221166	1739.64	FALSE	41
2022-09-12	14:54:20	-0.631081	-2.80717	-0.989242	1715.43	FALSE	41
2022-09-12	14:54:20	-0.276628	-1.2305	-0.989242	1739.64	FALSE	41
2022-09-12	14:54:20	-0.0568318	-0.252799	-0.989242	1715.43	FALSE	41
2022-09-12	14:54:20	0.0749748	0.333503	-0.989242	1739.97	FALSE	41
2022-09-12	14:54:21	-0.10075	-0.448156	-0.00861957	1715.43	FALSE	41
2022-09-12	14:54:21	-0.0324043	-0.144141	-0.00861957	1739.97	FALSE	41
2022-09-12	14:54:21	0.127341	0.566438	-0.00861957	1716	FALSE	41
2022-09-12	14:54:22	0.182049	0.80979	1.02739	1740.78	FALSE	41
2022-09-12	14:54:22	0.268155	1.19281	1.02739	1717.19	FALSE	41
2022-09-12	14:54:22	0.0359926	0.160102	1.02739	1740.94	FALSE	41
2022-09-12	14:54:22	0.437672	1.94685	1.02739	1719.14	FALSE	41
2022-09-12	14:54:23	0.845153	3.75941	3.87853	1744.7	FALSE	41
2022-09-12	14:54:23	0.0794531	0.353423	3.87853	1719.49	FALSE	41
2022-09-12	14:54:23	0.404288	1.79835	3.87853	1746.5	FALSE	41
2022-09-12	14:54:23	2.15884	9.60295	3.87853	1729.1	FALSE	41
2022-09-12	14:54:24	1.49202	6.6368	7.4621	1753.13	FALSE	41
2022-09-12	14:54:24	4.10983	18.2813	7.4621	1747.38	1	42
2022-09-12	14:54:24	0.864949	3.84747	7.4621	1756.98	FALSE	42
2022-09-12	14:54:24	0.243422	1.08279	7.4621	1748.46	FALSE	42
2022-09-12	14:54:25	0.174873	0.77787	0.959269	1757.76	FALSE	42
2022-09-12	14:54:25	-0.119529	-0.531689	0.959269	1748.46	FALSE	42
2022-09-12	14:54:25	0.591616	2.63163	0.959269	1760.39	FALSE	42
2022-09-12	14:54:26	4.04383	17.9878	12.3452	1766.45	1	43
2022-09-12	14:54:26	4.21665	18.7565	12.3452	1779.15	1	44
2022-09-12	14:54:26	2.58541	11.5004	12.3452	1777.95	FALSE	44
2022-09-12	14:54:26	0.255382	1.13599	12.3452	1780.28	FALSE	44
2022-09-12	14:54:27	-8.88145e-05	-0.000395065	-0.192471	1777.95	FALSE	44
2022-09-12	14:54:27	0.0605218	0.269213	-0.192471	1780.55	FALSE	44
2022-09-12	14:54:27	0.0365015	0.162366	-0.192471	1778.11	FALSE	44
2022-09-12	14:54:27	-0.270012	-1.20107	-0.192471	1780.55	FALSE	44
2022-09-12	14:54:28	-0.288079	-1.28143	-0.941026	1778.11	FALSE	44
2022-09-12	14:54:28	-0.25271	-1.1241	-0.941026	1780.55	FALSE	44
2022-09-12	14:54:28	-0.147926	-0.658004	-0.941026	1778.11	FALSE	44
2022-09-12	14:54:28	-0.157493	-0.70056	-0.941026	1780.55	FALSE	44
2022-09-12	14:54:29	-0.225432	-1.00277	-0.910483	1778.11	FALSE	44
2022-09-12	14:54:29	-0.233218	-1.0374	-0.910483	1780.55	FALSE	44
2022-09-12	14:54:29	-0.155407	-0.691281	-0.910483	1778.11	FALSE	44
2022-09-12	14:54:30	-0.122888	-0.54663	8.00387	1780.55	FALSE	44
2022-09-12	14:54:30	0.318486	1.41669	8.00387	1779.53	FALSE	44
2022-09-12	14:54:30	1.62403	7.22401	8.00387	1787.78	FALSE	44
2022-09-12	14:54:30	5.37777	23.9214	8.00387	1803.45	1	45
2022-09-12	14:54:31	5.55996	24.7318	15.5779	1812.51	1	46
2022-09-12	14:54:31	2.90907	12.9401	15.5779	1816.39	FALSE	46
2022-09-12	14:54:31	3.36535	14.9697	15.5779	1827.48	1	47
2022-09-12	14:54:31	2.17385	9.66972	15.5779	1826.06	FALSE	47
2022-09-12	14:54:32	2.8134	12.5146	16.7767	1839.99	FALSE	47
2022-09-12	14:54:32	3.05121	13.5724	16.7767	1839.63	1	48
2022-09-12	14:54:32	3.58271	15.9366	16.7767	1855.93	1	49
2022-09-12	14:54:32	5.63894	25.0831	16.7767	1864.71	1	50
2022-09-12	14:54:33	2.16704	9.63943	4.93044	1865.57	FALSE	50
2022-09-12	14:54:33	0.583677	2.59631	4.93044	1867.31	FALSE	50
2022-09-12	14:54:33	0.574517	2.55557	4.93044	1868.12	FALSE	50
2022-09-12	14:54:34	1.07228	4.76972	28.6392	1872.08	FALSE	50
2022-09-12	14:54:34	8.14489	36.2301	28.6392	1904.35	1	51
2022-09-12	14:54:34	12.9445	57.5797	28.6392	1929.66	1	52
2022-09-12	14:54:34	3.59187	15.9774	28.6392	1920.33	1	53
2022-09-12	14:54:35	5.73533	25.5119	10.6332	1955.17	1	54
2022-09-12	14:54:35	1.5164	6.74525	10.6332	1927.08	FALSE	54
2022-09-12	14:54:35	1.44612	6.43263	10.6332	1961.6	FALSE	54
2022-09-12	14:54:35	0.863982	3.84316	10.6332	1930.92	FALSE	54
2022-09-12	14:54:36	0.929885	4.13631	2.71431	1965.74	FALSE	54
2022-09-12	14:54:36	0.188461	0.838312	2.71431	1931.76	FALSE	54
2022-09-12	14:54:36	0.387697	1.72455	2.71431	1967.47	FALSE	54
2022-09-12	14:54:36	0.934771	4.15805	2.71431	1935.92	FALSE	54
2022-09-12	14:54:37	0.188003	0.836275	2.59971	1968.3	FALSE	54
2022-09-12	14:54:37	0.214822	0.955571	2.59971	1936.87	FALSE	54
2022-09-12	14:54:37	1.3505	6.00729	2.59971	1974.31	FALSE	54
2022-09-12	14:54:38	0.383321	1.70509	6.21004	1938.58	FALSE	54
2022-09-12	14:54:38	1.96098	8.72283	6.21004	1983.03	FALSE	54
2022-09-12	14:54:38	1.16673	5.18985	6.21004	1943.77	FALSE	54
2022-09-12	14:54:38	2.07329	9.22241	6.21004	1992.25	FALSE	54
2022-09-12	14:54:39	2.87742	12.7993	5.25244	1956.57	FALSE	54
2022-09-12	14:54:39	0.397316	1.76734	5.25244	1994.02	FALSE	54
2022-09-12	14:54:39	0.599046	2.66468	5.25244	1959.23	FALSE	54
2022-09-12	14:54:39	0.849427	3.77842	5.25244	1997.8	FALSE	54
2022-09-12	14:54:40	0.319402	1.42076	1.73112	1960.65	FALSE	54
2022-09-12	14:54:40	0.540318	2.40344	1.73112	2000.2	FALSE	54
2022-09-12	14:54:40	0.24327	1.08211	1.73112	1961.73	FALSE	54
2022-09-12	14:54:40	0.453702	2.01816	1.73112	2002.22	FALSE	54
2022-09-12	14:54:41	0.179199	0.797113	3.67097	1962.53	FALSE	54
2022-09-12	14:54:41	0.777214	3.4572	3.67097	2005.68	FALSE	54
2022-09-12	14:54:41	1.5194	6.7586	3.67097	1969.29	FALSE	54
2022-09-12	14:54:42	4.66128	20.7343	9.05633	2026.41	1	55
2022-09-12	14:54:42	1.09716	4.88039	9.05633	1974.17	FALSE	55
2022-09-12	14:54:42	2.02887	9.02482	9.05633	2035.44	FALSE	55
2022-09-12	14:54:42	0.356501	1.58579	9.05633	1975.76	FALSE	55
2022-09-12	14:54:43	0.718232	3.19484	2.53366	2038.63	FALSE	55
2022-09-12	14:54:43	1.04836	4.66331	2.53366	1980.42	FALSE	55
2022-09-12	14:54:43	0.312786	1.39133	2.53366	2040.02	FALSE	55
2022-09-12	14:54:43	0.198995	0.88517	2.53366	1981.3	FALSE	55
2022-09-12	14:54:44	0.181794	0.808656	0.328806	2040.83	FALSE	55
2022-09-12	14:54:44	0.109377	0.486531	0.328806	1981.79	FALSE	55
2022-09-12	14:54:44	-0.0182567	-0.0812095	0.328806	2040.83	FALSE	55
2022-09-12	14:54:44	0.0227611	0.101246	0.328806	1981.89	FALSE	55
2022-09-12	14:54:45	0.0188934	0.0840416	0.556025	2040.92	FALSE	55
2022-09-12	14:54:45	0.0856618	0.381041	0.556025	1982.27	FALSE	55
2022-09-12	14:54:45	0.270445	1.20299	0.556025	2042.12	FALSE	55
2022-09-12	14:54:46	0.236196	1.05065	0.883358	1983.32	FALSE	55
2022-09-12	14:54:46	0.183677	0.817032	0.883358	2042.94	FALSE	55
2022-09-12	14:54:46	0.253244	1.12648	0.883358	1984.45	FALSE	55
2022-09-12	14:54:46	0.121234	0.539273	0.883358	2043.48	FALSE	55
2022-09-12	14:54:47	0.0639824	0.284607	0.668645	1984.74	FALSE	55
2022-09-12	14:54:47	0.031616	0.140634	0.668645	2043.62	FALSE	55
2022-09-12	14:54:47	0.236959	1.05404	0.668645	1985.79	FALSE	55
2022-09-12	14:54:47	0.268715	1.1953	0.668645	2044.81	FALSE	55
2022-09-12	14:54:48	0.384898	1.7121	2.28862	1987.5	FALSE	55
2022-09-12	14:54:48	0.419351	1.86536	2.28862	2046.68	FALSE	55
2022-09-12	14:54:48	0.433601	1.92874	2.28862	1989.43	FALSE	55
2022-09-12	14:54:48	0.820165	3.64826	2.28862	2050.33	FALSE	55
2022-09-12	14:54:49	0.924033	4.11028	0.444274	1993.54	FALSE	55
2022-09-12	14:54:49	0.158537	0.705204	0.444274	2051.03	FALSE	55
2022-09-12	14:54:49	-0.782938	-3.48266	0.444274	1993.54	FALSE	55
2022-09-12	14:54:50	-0.824465	-3.66739	-3.1941	2051.03	FALSE	55
2022-09-12	14:54:50	-0.697238	-3.10145	-3.1941	1993.54	FALSE	55
2022-09-12	14:54:50	-0.725177	-3.22573	-3.1941	2051.03	FALSE	55
2022-09-12	14:54:50	-0.625381	-2.78182	-3.1941	1993.54	FALSE	55
2022-09-12	14:54:51	-0.461921	-2.05472	-1.28403	2051.03	FALSE	55
2022-09-12	14:54:51	-0.319834	-1.42269	-1.28403	1993.54	FALSE	55
2022-09-12	14:54:51	-0.270216	-1.20197	-1.28403	2051.03	FALSE	55
2022-09-12	14:54:51	-0.102684	-0.456759	-1.28403	1993.54	FALSE	55
2022-09-12	14:54:52	0.13528	0.601752	0.223882	2051.63	FALSE	55
2022-09-12	14:54:52	0.196501	0.874076	0.223882	1994.41	FALSE	55
2022-09-12	14:54:52	0.0187916	0.0835888	0.223882	2051.72	FALSE	55
2022-09-12	14:54:52	-0.149249	-0.663889	0.223882	1994.41	FALSE	55
2022-09-12	14:54:53	-0.361361	-1.60741	-1.54976	2051.72	FALSE	55
2022-09-12	14:54:53	-0.36991	-1.64543	-1.54976	1994.41	FALSE	55
2022-09-12	14:54:53	-0.313931	-1.39643	-1.54976	2051.72	FALSE	55
2022-09-12	14:54:54	0.490038	2.17979	0.468816	1996.59	FALSE	55
2022-09-12	14:54:54	0.215229	0.957382	0.468816	2052.67	FALSE	55
2022-09-12	14:54:54	-0.0415646	-0.184888	0.468816	1996.59	FALSE	55
2022-09-12	14:54:54	-0.242124	-1.07702	0.468816	2052.67	FALSE	55
2022-09-12	14:54:55	-0.306043	-1.36134	-2.14136	1996.59	FALSE	55
2022-09-12	14:54:55	-0.179631	-0.799035	-2.14136	2052.67	FALSE	55
2022-09-12	14:54:55	-0.725381	-3.22664	-2.14136	1996.59	FALSE	55
2022-09-12	14:54:55	-0.714541	-3.17842	-2.14136	2052.67	FALSE	55
2022-09-12	14:54:56	-0.711386	-3.16439	-2.75473	1996.59	FALSE	55
2022-09-12	14:54:56	-0.622887	-2.77073	-2.75473	2052.67	FALSE	55
2022-09-12	14:54:56	-0.5236	-2.32908	-2.75473	1996.59	FALSE	55
2022-09-12	14:54:57	-0.405483	-1.80367	-0.947986	2052.67	FALSE	55
2022-09-12	14:54:57	-0.25902	-1.15217	-0.947986	1996.59	FALSE	55
2022-09-12	14:54:57	-0.291234	-1.29547	-0.947986	2052.67	FALSE	55
2022-09-12	14:54:57	0.10327	0.459366	-0.947986	1997.05	FALSE	55
2022-09-12	14:54:58	1.07452	4.77968	15.6267	2057.45	FALSE	55
2022-09-12	14:54:58	2.39024	10.6323	15.6267	2007.69	FALSE	55
2022-09-12	14:54:58	5.28759	23.5203	15.6267	2080.97	1	56
2022-09-12	14:54:58	5.2998	23.5746	15.6267	2031.26	1	57
2022-09-12	14:54:59	4.81126	21.4014	18.2568	2102.37	1	58
2022-09-12	14:54:59	4.52322	20.1202	18.2568	2051.38	1	59
2022-09-12	14:54:59	2.33864	10.4027	18.2568	2112.78	FALSE	59
2022-09-12	14:54:59	4.74413	21.1028	18.2568	2072.48	1	60
2022-09-12	14:55:00	1.74429	7.75895	7.73864	2120.54	FALSE	60
2022-09-12	14:55:00	2.23314	9.93345	7.73864	2082.42	FALSE	60
2022-09-12	14:55:00	1.24174	5.52351	7.73864	2126.06	FALSE	60
2022-09-12	14:55:01	1.28017	5.69445	4.65426	2088.11	FALSE	60
2022-09-12	14:55:01	1.44861	6.44371	4.65426	2132.5	FALSE	60
2022-09-12	14:55:01	0.737265	3.2795	4.65426	2091.39	FALSE	60
2022-09-12	14:55:01	0.719249	3.19936	4.65426	2135.7	FALSE	60
2022-09-12	14:55:02	0.160624	0.714488	2.31618	2092.11	FALSE	60
2022-09-12	14:55:02	0.108155	0.481095	2.31618	2136.18	FALSE	60
2022-09-12	14:55:02	0.524542	2.33327	2.31618	2094.44	FALSE	60
2022-09-12	14:55:02	1.28948	5.73586	2.31618	2141.92	FALSE	60
2022-09-12	14:55:03	1.65411	7.35781	15.3629	2101.8	FALSE	60
2022-09-12	14:55:03	2.48067	11.0345	15.3629	2152.95	FALSE	60
2022-09-12	14:55:03	4.11014	18.2827	15.3629	2120.08	1	61
2022-09-12	14:55:03	5.56998	24.7764	15.3629	2177.73	1	62
2022-09-12	14:55:04	3.79406	16.8767	15.583	2136.96	1	63
2022-09-12	14:55:04	3.21136	14.2848	15.583	2192.02	1	64
2022-09-12	14:55:04	3.50424	15.5876	15.583	2152.54	1	65
2022-09-12	14:55:05	5.49121	24.426	7.69222	2216.44	1	66
2022-09-12	14:55:05	0.648359	2.88403	7.69222	2155.43	FALSE	66
2022-09-12	14:55:05	0.356908	1.5876	7.69222	2218.03	FALSE	66
2022-09-12	14:55:05	0.420674	1.87124	7.69222	2157.3	FALSE	66
2022-09-12	14:55:06	0.156501	0.696148	-0.429483	2218.73	FALSE	66
2022-09-12	14:55:06	0.16612	0.738935	-0.429483	2158.04	FALSE	66
2022-09-12	14:55:06	-0.22757	-1.01228	-0.429483	2218.73	FALSE	66
2022-09-12	14:55:06	-0.481259	-2.14074	-0.429483	2158.04	FALSE	66
2022-09-12	14:55:07	1.31803	5.86286	12.2133	2224.59	FALSE	66
2022-09-12	14:55:07	2.92469	13.0096	12.2133	2171.05	FALSE	66
2022-09-12	14:55:07	4.52515	20.1288	12.2133	2244.72	1	67
2022-09-12	14:55:07	2.21482	9.85196	12.2133	2180.9	FALSE	67
2022-09-12	14:55:08	1.28734	5.72635	2.89406	2250.44	FALSE	67
2022-09-12	14:55:08	0.360064	1.60164	2.89406	2182.5	FALSE	67
2022-09-12	14:55:08	0.30444	1.35421	2.89406	2251.8	FALSE	67
2022-09-12	14:55:09	0.0363997	0.161913	0.429937	2182.66	FALSE	67
2022-09-12	14:55:09	0.0227102	0.10102	0.429937	2251.9	FALSE	67
2022-09-12	14:55:09	-0.0812593	-0.361458	0.429937	2182.66	FALSE	67
2022-09-12	14:55:09	0.408766	1.81827	0.429937	2253.72	FALSE	67
2022-09-12	14:55:10	0.773041	3.43864	7.17683	2186.1	FALSE	67
2022-09-12	14:55:10	1.63238	7.26115	7.17683	2260.98	FALSE	67
2022-09-12	14:55:10	1.98408	8.82558	7.17683	2194.93	FALSE	67
2022-09-12	14:55:10	2.06419	9.18193	7.17683	2270.16	FALSE	67
2022-09-12	14:55:11	1.81523	8.07451	7.686	2203	FALSE	67
2022-09-12	14:55:11	2.47248	10.9981	7.686	2281.16	FALSE	67
2022-09-12	14:55:11	1.87218	8.32783	7.686	2211.33	FALSE	67
2022-09-12	14:55:11	0.751667	3.34357	7.686	2284.5	FALSE	67
2022-09-12	14:55:12	0.455026	2.02405	1.27438	2213.35	FALSE	67
2022-09-12	14:55:12	0.31131	1.38477	1.27438	2285.89	FALSE	67
2022-09-12	14:55:12	0.0931427	0.414317	1.27438	2213.77	FALSE	67
2022-09-12	14:55:13	0.304797	1.3558	16.2398	2287.24	FALSE	67
2022-09-12	14:55:13	5.0507	22.4665	16.2398	2236.23	1	68
2022-09-12	14:55:13	5.70831	25.3917	16.2398	2312.63	1	69
2022-09-12	14:55:13	3.53971	15.7453	16.2398	2251.98	1	70
2022-09-12	14:55:14	2.60301	11.5787	6.68077	2324.21	FALSE	70
2022-09-12	14:55:14	1.04968	4.66919	6.68077	2256.65	FALSE	70
2022-09-12	14:55:14	1.14123	5.07642	6.68077	2329.29	FALSE	70
2022-09-12	14:55:14	1.2137	5.39878	6.68077	2262.05	FALSE	70
2022-09-12	14:55:15	1.37294	6.10711	8.99509	2335.4	FALSE	70
2022-09-12	14:55:15	2.02246	8.99631	8.99509	2271.04	FALSE	70
2022-09-12	14:55:15	2.48357	11.0474	8.99509	2346.44	FALSE	70
2022-09-12	14:55:15	2.20978	9.82954	8.99509	2280.87	FALSE	70
2022-09-12	14:55:16	1.25447	5.58013	6.44411	2352.02	FALSE	70
2022-09-12	14:55:16	1.13197	5.03523	6.44411	2285.91	FALSE	70
2022-09-12	14:55:16	1.95966	8.71696	6.44411	2360.74	FALSE	70
2022-09-12	14:55:17	2.33355	10.3801	8.85022	2296.29	FALSE	70
2022-09-12	14:55:17	1.67263	7.44019	8.85022	2368.18	FALSE	70
2022-09-12	14:55:17	1.32261	5.88323	8.85022	2302.17	FALSE	70
2022-09-12	14:55:17	2.62968	11.6973	8.85022	2379.88	FALSE	70
2022-09-12	14:55:18	3.02785	13.4685	19.9711	2315.64	1	71
2022-09-12	14:55:18	3.22505	14.3457	19.9711	2394.22	1	72
2022-09-12	14:55:18	5.00922	22.282	19.9711	2337.92	1	73
2022-09-12	14:55:18	6.69665	29.788	19.9711	2424.01	1	74
2022-09-12	14:55:19	1.40042	6.22935	2.35636	2344.15	FALSE	74
2022-09-12	14:55:19	0.407901	1.81443	2.35636	2425.83	FALSE	74
2022-09-12	14:55:19	0.257774	1.14663	2.35636	2345.3	FALSE	74
2022-09-12	14:55:19	0.0528374	0.235031	2.35636	2426.06	FALSE	74
2022-09-12	14:55:20	0.400624	1.78206	39.9865	2347.08	FALSE	74
2022-09-12	14:55:20	15.5164	69.0201	39.9865	2495.08	1	75
2022-09-12	14:55:20	11.0511	49.1575	39.9865	2396.24	1	76
2022-09-12	14:55:21	2.72627	12.127	4.49653	2507.21	FALSE	76
2022-09-12	14:55:21	0.753193	3.35035	4.49653	2399.59	FALSE	76
2022-09-12	14:55:21	0.311412	1.38522	4.49653	2508.59	FALSE	76
2022-09-12	14:55:21	0.252583	1.12354	4.49653	2400.71	FALSE	76
2022-09-12	14:55:22	0.107087	0.476344	0.680474	2509.07	FALSE	76
2022-09-12	14:55:22	0.204746	0.910751	0.680474	2401.62	FALSE	76
2022-09-12	14:55:22	-0.0484348	-0.215448	0.680474	2509.07	FALSE	76
2022-09-12	14:55:22	0.348511	1.55025	0.680474	2403.17	FALSE	76
2022-09-12	14:55:23	0.0626084	0.278495	1.26661	2509.35	FALSE	76
2022-09-12	14:55:23	0.507392	2.25698	1.26661	2405.43	FALSE	76
2022-09-12	14:55:23	0.274313	1.2202	1.26661	2510.57	FALSE	76
2022-09-12	14:55:23	0.294669	1.31075	1.26661	2406.74	FALSE	76
2022-09-12	14:55:24	0.333957	1.48551	2.86978	2512.05	FALSE	76
2022-09-12	14:55:24	0.331616	1.47509	2.86978	2408.22	FALSE	76
2022-09-12	14:55:24	1.26989	5.64872	2.86978	2517.7	FALSE	76
2022-09-12	14:55:25	0.673346	2.99518	3.99008	2411.21	FALSE	76
2022-09-12	14:55:25	1.02663	4.56666	3.99008	2522.27	FALSE	76
2022-09-12	14:55:25	0.759402	3.37797	3.99008	2414.59	FALSE	76
2022-09-12	14:55:25	1.12866	5.02051	3.99008	2527.29	FALSE	76
2022-09-12	14:55:26	2.48149	11.0382	8.19748	2425.63	FALSE	76
2022-09-12	14:55:26	1.01889	4.53223	8.19748	2531.82	FALSE	76
2022-09-12	14:55:26	1.52744	6.79436	8.19748	2432.42	FALSE	76
2022-09-12	14:55:26	2.34368	10.4252	8.19748	2542.25	FALSE	76
2022-09-12	14:55:27	1.78724	7.95	8.86025	2440.37	FALSE	76
2022-09-12	14:55:27	1.75905	7.82461	8.86025	2550.07	FALSE	76
2022-09-12	14:55:27	2.89584	12.8813	8.86025	2453.25	FALSE	76
2022-09-12	14:55:27	1.52536	6.78511	8.86025	2556.86	FALSE	76
2022-09-12	14:55:28	1.60383	7.13416	5.27165	2460.39	FALSE	76
2022-09-12	14:55:28	0.91187	4.05618	5.27165	2560.91	FALSE	76
2022-09-12	14:55:28	1.03966	4.62462	5.27165	2465.01	FALSE	76
2022-09-12	14:55:29	0.817112	3.63468	4.21142	2564.55	FALSE	76
2022-09-12	14:55:29	1.40134	6.23344	4.21142	2471.25	FALSE	76
2022-09-12	14:55:29	0.762252	3.39065	4.21142	2567.94	FALSE	76
2022-09-12	14:55:29	0.806374	3.58691	4.21142	2474.83	FALSE	76
2022-09-12	14:55:30	0.882863	3.92715	9.51133	2571.87	FALSE	76
2022-09-12	14:55:30	1.10159	4.90009	9.51133	2479.73	FALSE	76
2022-09-12	14:55:30	4.78881	21.3016	9.51133	2593.17	1	77
2022-09-12	14:55:30	1.77971	7.91651	9.51133	2487.65	FALSE	77
2022-09-12	14:55:31	2.0592	9.15973	22.5771	2602.33	FALSE	77
2022-09-12	14:55:31	2.61131	11.6156	22.5771	2499.26	FALSE	77
2022-09-12	14:55:31	6.41925	28.5541	22.5771	2630.88	1	78
2022-09-12	14:55:31	9.21243	40.9787	22.5771	2540.24	1	79
2022-09-12	14:55:32	13.9861	62.213	44.2301	2693.09	1	80
2022-09-12	14:55:32	9.47024	42.1255	44.2301	2582.37	1	81
2022-09-12	14:55:32	6.3738	28.3519	44.2301	2721.45	1	82
2022-09-12	14:55:33	4.39676	19.5577	16.513	2601.93	1	83
2022-09-12	14:55:33	3.52408	15.6758	16.513	2737.12	1	84
2022-09-12	14:55:33	5.05426	22.4824	16.513	2624.41	1	85
2022-09-12	14:55:33	1.87406	8.33619	16.513	2745.46	FALSE	85
2022-09-12	14:55:34	2.5194	11.2068	5.35216	2635.62	FALSE	85
2022-09-12	14:55:34	1.1276	5.01579	5.35216	2750.47	FALSE	85
2022-09-12	14:55:34	0.690802	3.07283	5.35216	2638.69	FALSE	85
2022-09-12	14:55:34	0.475076	2.11323	5.35216	2752.59	FALSE	85
2022-09-12	14:55:35	0.373855	1.66298	1.4311	2640.35	FALSE	85
2022-09-12	14:55:35	0.17472	0.77719	1.4311	2753.36	FALSE	85
2022-09-12	14:55:35	0.416603	1.85313	1.4311	2642.2	FALSE	85
2022-09-12	14:55:36	0.355127	1.57968	8.90234	2754.94	FALSE	85
2022-09-12	14:55:36	1.50327	6.68685	8.90234	2648.89	FALSE	85
2022-09-12	14:55:36	2.55823	11.3795	8.90234	2766.32	FALSE	85
2022-09-12	14:55:36	3.58871	15.9633	8.90234	2664.85	1	86
2022-09-12	14:55:37	0.930547	4.13926	1.48194	2770.46	FALSE	86
2022-09-12	14:55:37	0.435382	1.93667	1.48194	2666.79	FALSE	86
2022-09-12	14:55:37	0.0523285	0.232768	1.48194	2770.7	FALSE	86
2022-09-12	14:55:37	-0.0856358	-0.380925	1.48194	2666.79	FALSE	86
2022-09-12	14:55:38	0.149275	0.664005	1.48188	2771.36	FALSE	86
2022-09-12	14:55:38	0.0451529	0.200849	1.48188	2666.99	FALSE	86
2022-09-12	14:55:38	0.371361	1.65189	1.48188	2773.01	FALSE	86
2022-09-12	14:55:38	0.766781	3.4108	1.48188	2670.4	FALSE	86
2022-09-12	14:55:39	0.512226	2.27848	2.13844	2775.29	FALSE	86
2022-09-12	14:55:39	0.55701	2.47769	2.13844	2672.88	FALSE	86
2022-09-12	14:55:39	0.37299	1.65913	2.13844	2776.95	FALSE	86

## Sheet: Harley_harness_202291214501 (2)
Date	Time	Lbs	Newtons	Total Force x time	Total Time Steps Force >13.345		**GoPro Fitting: 1440
2022-09-12	14:50:39	0.499351	2.22121	2.22121	FALSE	0			Total Force x Time	2776.95
2022-09-12	14:50:39	0.839046	3.73224	3.73224	FALSE	0			Total Time Steps Force >3	86
2022-09-12	14:50:39	0.431667	1.92014	4.14135	FALSE	0
2022-09-12	14:50:40	1.96648	8.7473	12.4795	FALSE	0
2022-09-12	14:50:40	0.459911	2.04578	6.18713	FALSE	0
2022-09-12	14:50:40	1.68073	7.47622	19.9558	FALSE	0
2022-09-12	14:50:40	0.60729	2.70135	8.88848	FALSE	0
2022-09-12	14:50:41	0.915382	4.0718	24.0276	FALSE	0
2022-09-12	14:50:41	1.8248	8.11708	17.0056	FALSE	0
2022-09-12	14:50:41	0.949173	4.22211	28.2497	FALSE	0
2022-09-12	14:50:41	1.7709	7.87732	24.8829	FALSE	0
2022-09-12	14:50:42	1.22922	5.46782	33.7175	FALSE	0
2022-09-12	14:50:42	0.616654	2.743	27.6259	FALSE	0
2022-09-12	14:50:42	1.64861	7.33335	41.0508	FALSE	0
2022-09-12	14:50:42	0.648766	2.88584	30.5117	FALSE	0
2022-09-12	14:50:43	0.997722	4.43807	45.4889	FALSE	0
2022-09-12	14:50:43	0.858333	3.81804	34.3297	FALSE	0
2022-09-12	14:50:43	0.760267	3.38182	48.8707	FALSE	0
2022-09-12	14:50:44	0.193092	0.858912	35.1887	FALSE	0
2022-09-12	14:50:44	0.0611835	0.272156	49.1429	FALSE	0
2022-09-12	14:50:44	0.225967	1.00515	36.1938	FALSE	0
2022-09-12	14:50:44	0.0470358	0.209225	49.3521	FALSE	0
2022-09-12	14:50:45	0.15355	0.683021	36.8768	FALSE	0
2022-09-12	14:50:45	0.22098	0.982963	50.3351	FALSE	0
2022-09-12	14:50:45	0.261132	1.16157	38.0384	FALSE	0
2022-09-12	14:50:45	0.626323	2.78601	53.1211	FALSE	0
2022-09-12	14:50:46	0.200674	0.892638	38.931	FALSE	0
2022-09-12	14:50:46	0.651463	2.89784	56.0189	FALSE	0
2022-09-12	14:50:46	1.93218	8.59472	47.5258	FALSE	0
2022-09-12	14:50:46	0.527544	2.34662	58.3655	FALSE	0
2022-09-12	14:50:47	4.35436	19.3691	66.8948	1	1
2022-09-12	14:50:47	3.38912	15.0755	73.441	1	2
2022-09-12	14:50:47	2.55701	11.3741	78.2689	FALSE	2
2022-09-12	14:50:48	0.256349	1.14029	74.5813	FALSE	2
2022-09-12	14:50:48	0.00881704	0.03922	78.3081	FALSE	2
2022-09-12	14:50:48	0.0104964	0.0466901	74.628	FALSE	2
2022-09-12	14:50:48	-0.194389	-0.864681	78.3081	FALSE	2
2022-09-12	14:50:49	-0.431437	-1.91912	74.628	FALSE	2
2022-09-12	14:50:49	-0.643396	-2.86195	78.3081	FALSE	2
2022-09-12	14:50:49	-0.670368	-2.98193	74.628	FALSE	2
2022-09-12	14:50:49	-0.590267	-2.62563	78.3081	FALSE	2
2022-09-12	14:50:50	0.0928883	0.413186	75.0412	FALSE	2
2022-09-12	14:50:50	0.236145	1.05042	79.3586	FALSE	2
2022-09-12	14:50:50	4.71375	20.9677	96.0089	1	3
2022-09-12	14:50:50	5.42835	24.1464	103.505	1	4
2022-09-12	14:50:51	1.54826	6.88697	102.896	FALSE	4
2022-09-12	14:50:51	1.99823	8.88853	112.393	FALSE	4
2022-09-12	14:50:51	1.04673	4.65606	107.552	FALSE	4
2022-09-12	14:50:52	0.16159	0.718785	113.112	FALSE	4
2022-09-12	14:50:52	0.507138	2.25585	109.808	FALSE	4
2022-09-12	14:50:52	0.0619977	0.275778	113.388	FALSE	4
2022-09-12	14:50:52	0.372532	1.6571	111.465	FALSE	4
2022-09-12	14:50:53	0.265458	1.18081	114.569	FALSE	4
2022-09-12	14:50:53	0.152685	0.679173	112.144	FALSE	4
2022-09-12	14:50:53	0.212023	0.943121	115.512	FALSE	4
2022-09-12	14:50:53	0.0650511	0.28936	112.433	FALSE	4
2022-09-12	14:50:54	0.357417	1.58986	117.102	FALSE	4
2022-09-12	14:50:54	0.0354328	0.157612	112.591	FALSE	4
2022-09-12	14:50:54	0.428512	1.90611	119.008	FALSE	4
2022-09-12	14:50:55	0.261387	1.1627	113.754	FALSE	4
2022-09-12	14:50:55	3.00515	13.3675	132.375	1	5
2022-09-12	14:50:55	0.203626	0.905769	114.659	FALSE	5
2022-09-12	14:50:55	0.848461	3.77412	136.15	FALSE	5
2022-09-12	14:50:56	0.555738	2.47203	117.132	FALSE	5
2022-09-12	14:50:56	0.0857635	0.381493	136.531	FALSE	5
2022-09-12	14:50:56	0.472328	2.10101	119.233	FALSE	5
2022-09-12	14:50:56	0.142405	0.633446	137.165	FALSE	5
2022-09-12	14:50:57	0.70388	3.131	122.364	FALSE	5
2022-09-12	14:50:57	0.577061	2.56688	139.731	FALSE	5
2022-09-12	14:50:57	0.649224	2.88788	125.251	FALSE	5
2022-09-12	14:50:57	1.67889	7.46804	147.199	FALSE	5
2022-09-12	14:50:58	0.201081	0.894449	126.146	FALSE	5
2022-09-12	14:50:58	0.231718	1.03073	148.23	FALSE	5
2022-09-12	14:50:58	0.746171	3.31912	129.465	FALSE	5
2022-09-12	14:50:59	0.129784	0.577305	148.807	FALSE	5
2022-09-12	14:50:59	-0.0759158	-0.337689	129.465	FALSE	5
2022-09-12	14:50:59	0.245	1.08981	149.897	FALSE	5
2022-09-12	14:50:59	0.108003	0.480419	129.945	FALSE	5
2022-09-12	14:51:00	0.289937	1.2897	151.187	FALSE	5
2022-09-12	14:51:00	0.0990969	0.440803	130.386	FALSE	5
2022-09-12	14:51:00	0.284237	1.26434	152.451	FALSE	5
2022-09-12	14:51:00	0.557977	2.48199	132.868	FALSE	5
2022-09-12	14:51:01	0.33416	1.48641	153.938	FALSE	5
2022-09-12	14:51:01	0.618079	2.74934	135.618	FALSE	5
2022-09-12	14:51:01	1.23905	5.51154	159.449	FALSE	5
2022-09-12	14:51:01	0.946119	4.20853	139.826	FALSE	5
2022-09-12	14:51:02	2.63121	11.7041	171.153	FALSE	5
2022-09-12	14:51:02	0.110242	0.490378	140.316	FALSE	5
2022-09-12	14:51:02	-0.00629748	-0.0280125	171.153	FALSE	5
2022-09-12	14:51:03	0.339097	1.50837	141.825	FALSE	5
2022-09-12	14:51:03	-0.116628	-0.518785	171.153	FALSE	5
2022-09-12	14:51:03	-0.0486384	-0.216353	141.825	FALSE	5
2022-09-12	14:51:03	-0.173168	-0.770286	171.153	FALSE	5
2022-09-12	14:51:04	0.0117178	0.0521231	141.877	FALSE	5
2022-09-12	14:51:04	-0.168791	-0.750816	171.153	FALSE	5
2022-09-12	14:51:04	-0.0266537	-0.118561	141.877	FALSE	5
2022-09-12	14:51:04	-0.0817173	-0.363495	171.153	FALSE	5
2022-09-12	14:51:05	-0.0480277	-0.213637	141.877	FALSE	5
2022-09-12	14:51:05	1.57894	7.02344	178.177	FALSE	5
2022-09-12	14:51:05	0.320064	1.42371	143.301	FALSE	5
2022-09-12	14:51:05	0.504644	2.24476	180.422	FALSE	5
2022-09-12	14:51:06	0.483779	2.15195	145.453	FALSE	5
2022-09-12	14:51:06	0.73014	3.24781	183.669	FALSE	5
2022-09-12	14:51:06	0.610649	2.71629	148.169	FALSE	5
2022-09-12	14:51:07	0.658181	2.92772	186.597	FALSE	5
2022-09-12	14:51:07	0.925662	4.11753	152.286	FALSE	5
2022-09-12	14:51:07	1.87558	8.34295	194.94	FALSE	5
2022-09-12	14:51:07	0.963931	4.28776	156.574	FALSE	5
2022-09-12	14:51:08	2.88093	12.815	207.755	FALSE	5
2022-09-12	14:51:08	0.255942	1.13848	157.713	FALSE	5
2022-09-12	14:51:08	0.725458	3.22698	210.982	FALSE	5
2022-09-12	14:51:08	3.20454	14.2544	171.967	1	6
2022-09-12	14:51:09	0.139097	0.618731	211.601	FALSE	6
2022-09-12	14:51:09	0.413702	1.84023	173.807	FALSE	6
2022-09-12	14:51:09	1.05599	4.69725	216.298	FALSE	6
2022-09-12	14:51:09	0.351209	1.56225	175.37	FALSE	6
2022-09-12	14:51:10	0.167494	0.745047	217.043	FALSE	6
2022-09-12	14:51:10	0.591208	2.62981	177.999	FALSE	6
2022-09-12	14:51:10	-0.0653814	-0.29083	217.043	FALSE	6
2022-09-12	14:51:11	-0.252455	-1.12297	177.999	FALSE	6
2022-09-12	14:51:11	-0.22757	-1.01228	217.043	FALSE	6
2022-09-12	14:51:11	-0.0514883	-0.22903	177.999	FALSE	6
2022-09-12	14:51:11	-0.0661448	-0.294225	217.043	FALSE	6
2022-09-12	14:51:12	-0.357544	-1.59043	177.999	FALSE	6
2022-09-12	14:51:12	-0.265788	-1.18228	217.043	FALSE	6
2022-09-12	14:51:12	-0.231386	-1.02925	177.999	FALSE	6
2022-09-12	14:51:13	-0.0919462	-0.408995	217.043	FALSE	6
2022-09-12	14:51:13	-0.0610557	-0.271588	177.999	FALSE	6
2022-09-12	14:51:13	0.2107	0.937236	217.98	FALSE	6
2022-09-12	14:51:13	0.358944	1.59665	179.596	FALSE	6
2022-09-12	14:51:13	1.41788	6.30701	224.287	FALSE	6
2022-09-12	14:51:14	0.373346	1.66072	181.257	FALSE	6
2022-09-12	14:51:14	1.17009	5.20479	229.492	FALSE	6
2022-09-12	14:51:14	0.438283	1.94957	183.206	FALSE	6
2022-09-12	14:51:15	1.03162	4.58885	234.081	FALSE	6
2022-09-12	14:51:15	0.36668	1.63107	184.837	FALSE	6
2022-09-12	14:51:15	0.192277	0.855287	234.936	FALSE	6
2022-09-12	14:51:15	0.647697	2.88109	187.718	FALSE	6
2022-09-12	14:51:16	-0.0696562	-0.309845	234.936	FALSE	6
2022-09-12	14:51:16	0.10271	0.456875	188.175	FALSE	6
2022-09-12	14:51:16	0.175738	0.781718	235.718	FALSE	6
2022-09-12	14:51:16	0.110344	0.490832	188.666	FALSE	6
2022-09-12	14:51:17	0.0458654	0.204018	235.922	FALSE	6
2022-09-12	14:51:17	0.167901	0.746857	189.413	FALSE	6
2022-09-12	14:51:17	0.00937683	0.04171	235.964	FALSE	6
2022-09-12	14:51:18	0.173855	0.773342	190.186	FALSE	6
2022-09-12	14:51:18	0.66612	2.96303	238.927	FALSE	6
2022-09-12	14:51:18	0.478282	2.12749	192.314	FALSE	6
2022-09-12	14:51:18	1.53274	6.81793	245.745	FALSE	6
2022-09-12	14:51:19	0.505916	2.25042	194.564	FALSE	6
2022-09-12	14:51:19	0.800369	3.5602	249.305	FALSE	6
2022-09-12	14:51:19	2.40062	10.6784	205.243	FALSE	6
2022-09-12	14:51:19	0.44897	1.99711	251.302	FALSE	6
2022-09-12	14:51:20	1.62668	7.2358	212.479	FALSE	6
2022-09-12	14:51:20	0.302608	1.34606	252.648	FALSE	6
2022-09-12	14:51:20	0.456654	2.03129	214.51	FALSE	6
2022-09-12	14:51:20	0.700674	3.11674	255.765	FALSE	6
2022-09-12	14:51:21	0.465865	2.07226	216.582	FALSE	6
2022-09-12	14:51:21	0.483779	2.15195	257.917	FALSE	6
2022-09-12	14:51:21	0.167596	0.745501	217.328	FALSE	6
2022-09-12	14:51:21	0.354924	1.57877	259.495	FALSE	6
2022-09-12	14:51:22	0.441183	1.96247	219.29	FALSE	6
2022-09-12	14:51:22	0.154924	0.689133	260.185	FALSE	6
2022-09-12	14:51:22	0.0667814	0.297057	219.587	FALSE	6
2022-09-12	14:51:23	0.180929	0.804808	260.989	FALSE	6
2022-09-12	14:51:23	0.131718	0.585908	220.173	FALSE	6
2022-09-12	14:51:23	0.408359	1.81646	262.806	FALSE	6
2022-09-12	14:51:23	0.546679	2.43174	222.605	FALSE	6
2022-09-12	14:51:24	0.849173	3.77729	266.583	FALSE	6
2022-09-12	14:51:24	0.431005	1.9172	224.522	FALSE	6
2022-09-12	14:51:24	0.357875	1.5919	268.175	FALSE	6
2022-09-12	14:51:24	0.371361	1.65189	226.174	FALSE	6
2022-09-12	14:51:25	0.302201	1.34425	269.519	FALSE	6
2022-09-12	14:51:25	0.258333	1.14912	227.323	FALSE	6
2022-09-12	14:51:25	0.282354	1.25597	270.775	FALSE	6
2022-09-12	14:51:25	0.265153	1.17945	228.502	FALSE	6
2022-09-12	14:51:26	0.318639	1.41737	272.193	FALSE	6
2022-09-12	14:51:26	0.245255	1.09094	229.593	FALSE	6
2022-09-12	14:51:26	0.250598	1.11471	273.307	FALSE	6
2022-09-12	14:51:27	0.26098	1.16089	230.754	FALSE	6
2022-09-12	14:51:27	0.271921	1.20956	274.517	FALSE	6
2022-09-12	14:51:27	0.280776	1.24895	232.003	FALSE	6
2022-09-12	14:51:27	0.301082	1.33927	275.856	FALSE	6
2022-09-12	14:51:28	0.794008	3.53191	235.535	FALSE	6
2022-09-12	14:51:28	1.87543	8.34229	284.198	FALSE	6
2022-09-12	14:51:28	1.30678	5.81282	241.348	FALSE	6
2022-09-12	14:51:28	0.997519	4.43716	288.636	FALSE	6
2022-09-12	14:51:29	0.747036	3.32297	244.671	FALSE	6
2022-09-12	14:51:29	0.835331	3.71572	292.351	FALSE	6
2022-09-12	14:51:29	0.646323	2.87497	247.546	FALSE	6
2022-09-12	14:51:29	0.666374	2.96416	295.316	FALSE	6
2022-09-12	14:51:30	0.732074	3.25641	250.802	FALSE	6
2022-09-12	14:51:30	1.04464	4.64677	299.962	FALSE	6
2022-09-12	14:51:30	0.975941	4.34118	255.143	FALSE	6
2022-09-12	14:51:31	0.95757	4.25946	304.222	FALSE	6
2022-09-12	14:51:31	0.549377	2.44374	257.587	FALSE	6
2022-09-12	14:51:31	0.705153	3.13666	307.358	FALSE	6
2022-09-12	14:51:31	0.698079	3.1052	260.692	FALSE	6
2022-09-12	14:51:32	0.853244	3.7954	311.154	FALSE	6
2022-09-12	14:51:32	1.45955	6.49237	267.185	FALSE	6
2022-09-12	14:51:32	1.7338	7.71229	318.866	FALSE	6
2022-09-12	14:51:32	1.93645	8.61372	275.798	FALSE	6
2022-09-12	14:51:33	0.60042	2.67079	321.537	FALSE	6
2022-09-12	14:51:33	0.824898	3.66931	279.468	FALSE	6
2022-09-12	14:51:33	0.365611	1.62631	323.163	FALSE	6
2022-09-12	14:51:33	0.33528	1.49139	280.959	FALSE	6
2022-09-12	14:51:34	0.482964	2.14832	325.312	FALSE	6
2022-09-12	14:51:34	0.45874	2.04057	283	FALSE	6
2022-09-12	14:51:34	0.252786	1.12444	326.436	FALSE	6
2022-09-12	14:51:35	0.319606	1.42167	284.421	FALSE	6
2022-09-12	14:51:35	0.205662	0.914826	327.351	FALSE	6
2022-09-12	14:51:35	-0.319529	-1.42133	284.421	FALSE	6
2022-09-12	14:51:35	-0.194542	-0.865362	327.351	FALSE	6
2022-09-12	14:51:36	-0.314796	-1.40028	284.421	FALSE	6
2022-09-12	14:51:36	0.583117	2.59382	329.945	FALSE	6
2022-09-12	14:51:36	1.11487	4.95916	289.381	FALSE	6
2022-09-12	14:51:36	1.31604	5.85401	335.799	FALSE	6
2022-09-12	14:51:37	1.91248	8.50709	297.888	FALSE	6
2022-09-12	14:51:37	2.69701	11.9968	347.795	FALSE	6
2022-09-12	14:51:37	0.732481	3.25822	301.146	FALSE	6
2022-09-12	14:51:37	0.7107	3.16134	350.957	FALSE	6
2022-09-12	14:51:38	0.465153	2.06909	303.215	FALSE	6
2022-09-12	14:51:38	0.21416	0.952627	351.909	FALSE	6
2022-09-12	14:51:38	0.461947	2.05483	305.27	FALSE	6
2022-09-12	14:51:39	0.148919	0.662421	352.572	FALSE	6
2022-09-12	14:51:39	0.283575	1.2614	306.531	FALSE	6
2022-09-12	14:51:39	0.226578	1.00786	353.58	FALSE	6
2022-09-12	14:51:39	0.298232	1.3266	307.858	FALSE	6
2022-09-12	14:51:40	0.223931	0.99609	354.576	FALSE	6
2022-09-12	14:51:40	0.214975	0.956252	308.814	FALSE	6
2022-09-12	14:51:40	0.291056	1.29468	355.87	FALSE	6
2022-09-12	14:51:40	0.227901	1.01375	309.828	FALSE	6
2022-09-12	14:51:41	0.0264252	0.117545	355.988	FALSE	6
2022-09-12	14:51:41	-0.0527605	-0.234689	309.828	FALSE	6
2022-09-12	14:51:41	-0.172455	-0.767114	355.988	FALSE	6
2022-09-12	14:51:42	-0.513778	-2.28539	309.828	FALSE	6
2022-09-12	14:51:42	-0.546399	-2.43049	355.988	FALSE	6
2022-09-12	14:51:42	0.489326	2.17662	312.004	FALSE	6
2022-09-12	14:51:42	1.64592	7.32138	363.309	FALSE	6
2022-09-12	14:51:43	0.378283	1.68268	313.687	FALSE	6
2022-09-12	14:51:43	0.180522	0.802998	364.112	FALSE	6
2022-09-12	14:51:43	0.10612	0.472043	314.159	FALSE	6
2022-09-12	14:51:43	0.370751	1.64917	365.762	FALSE	6
2022-09-12	14:51:44	0.249733	1.11086	315.27	FALSE	6
2022-09-12	14:51:44	0.959962	4.2701	370.032	FALSE	6
2022-09-12	14:51:44	1.28042	5.69556	320.966	FALSE	6
2022-09-12	14:51:44	1.79676	7.99235	378.024	FALSE	6
2022-09-12	14:51:45	1.61716	7.19345	328.159	FALSE	6
2022-09-12	14:51:45	0.681387	3.03095	381.055	FALSE	6
2022-09-12	14:51:45	0.219046	0.97436	329.133	FALSE	6
2022-09-12	14:51:46	0.846527	3.76552	384.821	FALSE	6
2022-09-12	14:51:46	0.165509	0.736217	329.87	FALSE	6
2022-09-12	14:51:46	0.0496822	0.220996	385.042	FALSE	6
2022-09-12	14:51:46	0.263524	1.17221	331.042	FALSE	6
2022-09-12	14:51:47	-0.0289947	-0.128974	385.042	FALSE	6
2022-09-12	14:51:47	1.04429	4.64521	335.687	FALSE	6
2022-09-12	14:51:47	0.0994022	0.442161	385.484	FALSE	6
2022-09-12	14:51:47	0.342914	1.52535	337.212	FALSE	6
2022-09-12	14:51:48	0.398283	1.77164	387.255	FALSE	6
2022-09-12	14:51:48	0.301082	1.33927	338.552	FALSE	6
2022-09-12	14:51:48	1.46006	6.49464	393.75	FALSE	6
2022-09-12	14:51:48	0.328868	1.46287	340.015	FALSE	6
2022-09-12	14:51:49	1.41034	6.27347	400.023	FALSE	6
2022-09-12	14:51:49	0.429173	1.90905	341.924	FALSE	6
2022-09-12	14:51:49	0.634517	2.82246	402.846	FALSE	6
2022-09-12	14:51:50	0.514924	2.29048	344.214	FALSE	6
2022-09-12	14:51:50	0.217112	0.965758	403.812	FALSE	6
2022-09-12	14:51:50	0.3993	1.77617	345.99	FALSE	6
2022-09-12	14:51:50	0.122201	0.543574	404.355	FALSE	6
2022-09-12	14:51:51	0.38098	1.69468	347.685	FALSE	6
2022-09-12	14:51:51	0.194771	0.86638	405.222	FALSE	6
2022-09-12	14:51:51	0.251107	1.11697	348.802	FALSE	6
2022-09-12	14:51:51	0.143066	0.636386	405.858	FALSE	6
2022-09-12	14:51:52	0.355127	1.57968	350.382	FALSE	6
2022-09-12	14:51:52	0.530293	2.35885	408.217	FALSE	6
2022-09-12	14:51:52	0.569427	2.53293	352.914	FALSE	6
2022-09-12	14:51:52	2.32184	10.328	418.545	FALSE	6
2022-09-12	14:51:53	3.28922	14.6311	367.546	1	7
2022-09-12	14:51:53	2.16948	9.65028	428.195	FALSE	7
2022-09-12	14:51:53	3.19019	14.1906	381.736	1	8
2022-09-12	14:51:54	0.31528	1.40243	429.598	FALSE	8
2022-09-12	14:51:54	0.21869	0.972777	382.709	FALSE	8
2022-09-12	14:51:54	0.513499	2.28415	431.882	FALSE	8
2022-09-12	14:51:54	0.230344	1.02462	383.734	FALSE	8
2022-09-12	14:51:55	0.250954	1.11629	432.998	FALSE	8
2022-09-12	14:51:55	0.361082	1.60616	385.34	FALSE	8
2022-09-12	14:51:55	0.265763	1.18217	434.18	FALSE	8
2022-09-12	14:51:55	0.286018	1.27227	386.612	FALSE	8
2022-09-12	14:51:56	0.176756	0.786246	434.966	FALSE	8
2022-09-12	14:51:56	0.392176	1.74448	388.356	FALSE	8
2022-09-12	14:51:56	0.184033	0.818616	435.785	FALSE	8
2022-09-12	14:51:56	0.438537	1.9507	390.307	FALSE	8
2022-09-12	14:51:57	0.353041	1.5704	437.355	FALSE	8
2022-09-12	14:51:57	2.32815	10.3561	400.663	FALSE	8
2022-09-12	14:51:57	1.00536	4.47204	441.827	FALSE	8
2022-09-12	14:51:58	2.9738	13.2281	413.891	FALSE	8
2022-09-12	14:51:58	0.543219	2.41635	444.244	FALSE	8
2022-09-12	14:51:58	1.34057	5.96312	419.854	FALSE	8
2022-09-12	14:51:58	0.698486	3.10701	447.351	FALSE	8
2022-09-12	14:51:59	0.248257	1.1043	420.959	FALSE	8
2022-09-12	14:51:59	0.525814	2.33893	449.69	FALSE	8
2022-09-12	14:51:59	0.125255	0.557159	421.516	FALSE	8
2022-09-12	14:51:59	1.2851	5.71638	455.406	FALSE	8
2022-09-12	14:52:00	2.39258	10.6427	432.159	FALSE	8
2022-09-12	14:52:00	3.4621	15.4001	470.806	1	9
2022-09-12	14:52:00	1.2821	5.70304	437.862	FALSE	9
2022-09-12	14:52:00	0.775127	3.44792	474.254	FALSE	9
2022-09-12	14:52:01	1.35864	6.0435	443.905	FALSE	9
2022-09-12	14:52:01	0.774669	3.44588	477.7	FALSE	9
2022-09-12	14:52:01	4.5481	20.2309	464.136	1	10
2022-09-12	14:52:02	7.07197	31.4575	509.158	1	11
2022-09-12	14:52:02	10.3478	46.0291	510.165	1	12
2022-09-12	14:52:02	10.679	47.5023	556.66	1	13
2022-09-12	14:52:02	2.75945	12.2746	522.44	FALSE	13
2022-09-12	14:52:03	3.56495	15.8576	572.518	1	14
2022-09-12	14:52:03	1.87803	8.35385	530.793	FALSE	14
2022-09-12	14:52:03	0.477824	2.12546	574.643	FALSE	14
2022-09-12	14:52:03	0.773448	3.44045	534.234	FALSE	14
2022-09-12	14:52:04	0.285814	1.27136	575.914	FALSE	14
2022-09-12	14:52:04	0.433651	1.92897	536.163	FALSE	14
2022-09-12	14:52:04	0.163524	0.727387	576.642	FALSE	14
2022-09-12	14:52:04	0.470446	2.09264	538.256	FALSE	14
2022-09-12	14:52:05	0.489733	2.17843	578.82	FALSE	14
2022-09-12	14:52:05	0.347341	1.54504	539.801	FALSE	14
2022-09-12	14:52:05	0.506069	2.2511	581.071	FALSE	14
2022-09-12	14:52:06	1.80505	8.02922	547.83	FALSE	14
2022-09-12	14:52:06	1.16032	5.16134	586.233	FALSE	14
2022-09-12	14:52:06	0.627748	2.79235	550.622	FALSE	14
2022-09-12	14:52:06	2.02642	9.01392	595.246	FALSE	14
2022-09-12	14:52:07	0.628817	2.7971	553.419	FALSE	14
2022-09-12	14:52:07	0.716043	3.1851	598.432	FALSE	14
2022-09-12	14:52:07	0.645102	2.86954	556.289	FALSE	14
2022-09-12	14:52:07	0.251718	1.11969	599.551	FALSE	14
2022-09-12	14:52:08	0.637163	2.83423	559.123	FALSE	14
2022-09-12	14:52:08	0.325509	1.44793	600.999	FALSE	14
2022-09-12	14:52:08	0.407697	1.81352	560.937	FALSE	14
2022-09-12	14:52:08	0.346883	1.543	602.542	FALSE	14
2022-09-12	14:52:09	0.44958	1.99982	562.936	FALSE	14
2022-09-12	14:52:09	0.208664	0.928179	603.47	FALSE	14
2022-09-12	14:52:09	0.608562	2.70701	565.643	FALSE	14
2022-09-12	14:52:10	0.268206	1.19303	604.663	FALSE	14
2022-09-12	14:52:10	0.505611	2.24906	567.892	FALSE	14
2022-09-12	14:52:10	0.257316	1.14459	605.808	FALSE	14
2022-09-12	14:52:10	2.70108	12.0149	579.907	FALSE	14
2022-09-12	14:52:11	1.50963	6.71514	612.523	FALSE	14
2022-09-12	14:52:11	1.14805	5.10676	585.014	FALSE	14
2022-09-12	14:52:11	0.211056	0.938819	613.462	FALSE	14
2022-09-12	14:52:11	0.332939	1.48098	586.495	FALSE	14
2022-09-12	14:52:12	0.345102	1.53508	614.997	FALSE	14
2022-09-12	14:52:12	0.389835	1.73406	588.229	FALSE	14
2022-09-12	14:52:12	0.294771	1.3112	616.308	FALSE	14
2022-09-12	14:52:12	0.125814	0.559646	588.789	FALSE	14
2022-09-12	14:52:13	0.391616	1.74199	618.05	FALSE	14
2022-09-12	14:52:13	0.208461	0.927276	589.716	FALSE	14
2022-09-12	14:52:13	0.447087	1.98873	620.039	FALSE	14
2022-09-12	14:52:14	0.296705	1.3198	591.036	FALSE	14
2022-09-12	14:52:14	2.4248	10.786	630.825	FALSE	14
2022-09-12	14:52:14	3.3909	15.0834	606.119	1	15
2022-09-12	14:52:14	5.57976	24.8199	655.645	1	16
2022-09-12	14:52:15	2.26073	10.0562	616.175	FALSE	16
2022-09-12	14:52:15	4.46485	19.8605	675.505	1	17
2022-09-12	14:52:15	0.516959	2.29954	618.475	FALSE	17
2022-09-12	14:52:15	1.7994	8.00409	683.51	FALSE	17
2022-09-12	14:52:16	1.90184	8.45976	626.935	FALSE	17
2022-09-12	14:52:16	2.01004	8.94106	692.451	FALSE	17
2022-09-12	14:52:16	1.96129	8.72421	635.659	FALSE	17
2022-09-12	14:52:16	0.227239	1.0108	693.461	FALSE	17
2022-09-12	14:52:17	1.61233	7.17197	642.831	FALSE	17
2022-09-12	14:52:17	2.73487	12.1652	705.627	FALSE	17
2022-09-12	14:52:17	1.14836	5.10813	647.939	FALSE	17
2022-09-12	14:52:18	1.17772	5.23873	710.865	FALSE	17
2022-09-12	14:52:18	1.99273	8.86406	656.803	FALSE	17
2022-09-12	14:52:18	1.40983	6.27121	717.137	FALSE	17
2022-09-12	14:52:18	2.19635	9.7698	666.573	FALSE	17
2022-09-12	14:52:19	0.833142	3.70598	720.843	FALSE	17
2022-09-12	14:52:19	1.38398	6.15622	672.729	FALSE	17
2022-09-12	14:52:19	1.10943	4.93497	725.778	FALSE	17
2022-09-12	14:52:19	0.340878	1.51629	674.245	FALSE	17
2022-09-12	14:52:20	1.01874	4.53156	730.309	FALSE	17
2022-09-12	14:52:20	0.948461	4.21894	678.464	FALSE	17
2022-09-12	14:52:20	0.434008	1.93055	732.24	FALSE	17
2022-09-12	14:52:21	0.270293	1.20232	679.667	FALSE	17
2022-09-12	14:52:21	0.554924	2.46841	734.708	FALSE	17
2022-09-12	14:52:21	0.220064	0.978889	680.646	FALSE	17
2022-09-12	14:52:21	0.128359	0.570967	735.279	FALSE	17
2022-09-12	14:52:22	0.264084	1.1747	681.82	FALSE	17
2022-09-12	14:52:22	0.50159	2.23117	737.51	FALSE	17
2022-09-12	14:52:22	0.315687	1.40424	683.225	FALSE	17
2022-09-12	14:52:22	0.725763	3.22834	740.739	FALSE	17
2022-09-12	14:52:23	2.84795	12.6683	695.893	FALSE	17
2022-09-12	14:52:23	1.32816	5.90792	746.646	FALSE	17
2022-09-12	14:52:23	2.7339	12.1609	708.054	FALSE	17
2022-09-12	14:52:23	1.18057	5.25141	751.898	FALSE	17
2022-09-12	14:52:24	1.2136	5.39834	713.452	FALSE	17
2022-09-12	14:52:24	2.0337	9.0463	760.944	FALSE	17
2022-09-12	14:52:24	0.630038	2.80254	716.255	FALSE	17
2022-09-12	14:52:25	1.66195	7.39269	768.337	FALSE	17
2022-09-12	14:52:25	0.300318	1.33587	717.59	FALSE	17
2022-09-12	14:52:25	3.03243	13.4889	781.826	1	18
2022-09-12	14:52:25	1.36709	6.08109	723.672	FALSE	18
2022-09-12	14:52:26	3.63798	16.1825	798.008	1	19
2022-09-12	14:52:26	3.38474	15.056	738.728	1	20
2022-09-12	14:52:26	1.61172	7.16925	805.177	FALSE	20
2022-09-12	14:52:26	1.06642	4.74365	743.471	FALSE	20
2022-09-12	14:52:27	0.447036	1.98851	807.166	FALSE	20
2022-09-12	14:52:27	1.19777	5.32792	748.799	FALSE	20
2022-09-12	14:52:27	1.38296	6.15168	813.318	FALSE	20
2022-09-12	14:52:27	0.976603	4.34413	753.143	FALSE	20
2022-09-12	14:52:28	0.698638	3.10768	816.425	FALSE	20
2022-09-12	14:52:28	2.02078	8.98883	762.132	FALSE	20
2022-09-12	14:52:28	0.540522	2.40435	818.83	FALSE	20
2022-09-12	14:52:29	0.74673	3.3216	765.454	FALSE	20
2022-09-12	14:52:29	2.84627	12.6608	831.49	FALSE	20
2022-09-12	14:52:29	0.243982	1.08528	766.539	FALSE	20
2022-09-12	14:52:29	1.84174	8.19243	839.683	FALSE	20
2022-09-12	14:52:30	0.860522	3.82777	770.367	FALSE	20
2022-09-12	14:52:30	0.536909	2.38828	842.071	FALSE	20
2022-09-12	14:52:30	0.432227	1.92263	772.289	FALSE	20
2022-09-12	14:52:30	0.734364	3.2666	845.338	FALSE	20
2022-09-12	14:52:31	0.724186	3.22132	775.511	FALSE	20
2022-09-12	14:52:31	0.69701	3.10044	848.438	FALSE	20
2022-09-12	14:52:31	2.35599	10.4799	785.991	FALSE	20
2022-09-12	14:52:31	1.17156	5.21133	853.649	FALSE	20
2022-09-12	14:52:32	1.7852	7.94093	793.932	FALSE	20
2022-09-12	14:52:32	0.530547	2.35998	856.009	FALSE	20
2022-09-12	14:52:32	0.810954	3.60729	797.539	FALSE	20
2022-09-12	14:52:33	0.627952	2.79326	858.803	FALSE	20
2022-09-12	14:52:33	1.97055	8.7654	806.304	FALSE	20
2022-09-12	14:52:33	2.75513	12.2554	871.058	FALSE	20
2022-09-12	14:52:33	2.67304	11.8902	818.194	FALSE	20
2022-09-12	14:52:34	2.68658	11.9504	883.009	FALSE	20
2022-09-12	14:52:34	1.69329	7.53209	825.727	FALSE	20
2022-09-12	14:52:34	2.41218	10.7299	893.738	FALSE	20
2022-09-12	14:52:34	0.630903	2.80638	828.533	FALSE	20
2022-09-12	14:52:35	0.572226	2.54538	896.284	FALSE	20
2022-09-12	14:52:35	0.935229	4.16009	832.693	FALSE	20
2022-09-12	14:52:35	0.163066	0.72535	897.009	FALSE	20
2022-09-12	14:52:35	0.171158	0.761345	833.454	FALSE	20
2022-09-12	14:52:36	0.359809	1.6005	898.61	FALSE	20
2022-09-12	14:52:36	0.515534	2.2932	835.748	FALSE	20
2022-09-12	14:52:36	0.238333	1.06015	899.67	FALSE	20
2022-09-12	14:52:37	0.522201	2.32285	838.07	FALSE	20
2022-09-12	14:52:37	0.264898	1.17832	900.848	FALSE	20
2022-09-12	14:52:37	0.179911	0.80028	838.871	FALSE	20
2022-09-12	14:52:37	0.305967	1.361	902.209	FALSE	20
2022-09-12	14:52:38	0.280318	1.24691	840.118	FALSE	20
2022-09-12	14:52:38	0.283982	1.26321	903.472	FALSE	20
2022-09-12	14:52:38	0.114415	0.508941	840.627	FALSE	20
2022-09-12	14:52:38	0.278181	1.2374	904.71	FALSE	20
2022-09-12	14:52:39	0.58388	2.59722	843.224	FALSE	20
2022-09-12	14:52:39	0.236247	1.05087	905.761	FALSE	20
2022-09-12	14:52:39	0.441031	1.96179	845.186	FALSE	20
2022-09-12	14:52:39	0.329479	1.46559	907.226	FALSE	20
2022-09-12	14:52:40	0.360267	1.60254	846.788	FALSE	20
2022-09-12	14:52:40	1.47732	6.57141	913.798	FALSE	20
2022-09-12	14:52:40	0.349682	1.55546	848.344	FALSE	20
2022-09-12	14:52:41	0.19472	0.866154	914.664	FALSE	20
2022-09-12	14:52:41	0.464949	2.06819	850.412	FALSE	20
2022-09-12	14:52:41	0.192023	0.854157	915.518	FALSE	20
2022-09-12	14:52:41	0.192227	0.855064	851.267	FALSE	20
2022-09-12	14:52:42	0.261438	1.16293	916.681	FALSE	20
2022-09-12	14:52:42	0.14098	0.627107	851.894	FALSE	20
2022-09-12	14:52:42	0.288206	1.282	917.963	FALSE	20
2022-09-12	14:52:42	0.183321	0.815448	852.709	FALSE	20
2022-09-12	14:52:43	0.233092	1.03684	919	FALSE	20
2022-09-12	14:52:43	0.100318	0.446235	853.156	FALSE	20
2022-09-12	14:52:43	0.335026	1.49026	920.49	FALSE	20
2022-09-12	14:52:43	0.268919	1.19621	854.352	FALSE	20
2022-09-12	14:52:44	0.173957	0.773796	921.264	FALSE	20
2022-09-12	14:52:44	0.188105	0.836729	855.189	FALSE	20
2022-09-12	14:52:44	0.230954	1.02733	922.291	FALSE	20
2022-09-12	14:52:45	0.386781	1.72048	856.909	FALSE	20
2022-09-12	14:52:45	0.137825	0.613073	922.904	FALSE	20
2022-09-12	14:52:45	0.205967	0.916182	857.825	FALSE	20
2022-09-12	14:52:45	0.154466	0.687096	923.591	FALSE	20
2022-09-12	14:52:46	0.374771	1.66706	859.492	FALSE	20
2022-09-12	14:52:46	0.121031	0.53837	924.13	FALSE	20
2022-09-12	14:52:46	0.438486	1.95047	861.443	FALSE	20
2022-09-12	14:52:46	0.301285	1.34018	925.47	FALSE	20
2022-09-12	14:52:47	0.682507	3.03593	864.479	FALSE	20
2022-09-12	14:52:47	1.34357	5.97647	931.446	FALSE	20
2022-09-12	14:52:47	0.797723	3.54843	868.027	FALSE	20
2022-09-12	14:52:47	1.19828	5.33019	936.776	FALSE	20
2022-09-12	14:52:48	2.311	10.2798	878.307	FALSE	20
2022-09-12	14:52:48	0.231005	1.02756	937.804	FALSE	20
2022-09-12	14:52:48	1.11029	4.93879	883.246	FALSE	20
2022-09-12	14:52:49	1.42663	6.34594	944.15	FALSE	20
2022-09-12	14:52:49	0.459249	2.04283	885.288	FALSE	20
2022-09-12	14:52:49	0.765967	3.40717	947.557	FALSE	20
2022-09-12	14:52:49	0.994466	4.42358	889.712	FALSE	20
2022-09-12	14:52:50	0.373193	1.66004	949.217	FALSE	20
2022-09-12	14:52:50	0.118639	0.52773	890.24	FALSE	20
2022-09-12	14:52:50	0.433346	1.92761	951.145	FALSE	20
2022-09-12	14:52:50	0.0341096	0.151726	890.392	FALSE	20
2022-09-12	14:52:51	0.332379	1.47849	952.623	FALSE	20
2022-09-12	14:52:51	0.157265	0.699546	891.091	FALSE	20
2022-09-12	14:52:51	0.365967	1.62789	954.251	FALSE	20
2022-09-12	14:52:51	0.183066	0.814314	891.905	FALSE	20
2022-09-12	14:52:52	0.427087	1.89977	956.151	FALSE	20
2022-09-12	14:52:52	0.183677	0.817032	892.722	FALSE	20
2022-09-12	14:52:52	0.351565	1.56383	957.715	FALSE	20
2022-09-12	14:52:53	0.227188	1.01058	893.733	FALSE	20
2022-09-12	14:52:53	0.376858	1.67634	959.391	FALSE	20
2022-09-12	14:52:53	0.266883	1.18715	894.92	FALSE	20
2022-09-12	14:52:53	0.313702	1.39541	960.786	FALSE	20
2022-09-12	14:52:54	0.362557	1.61273	896.533	FALSE	20
2022-09-12	14:52:54	0.261692	1.16406	961.951	FALSE	20
2022-09-12	14:52:54	0.455178	2.02472	898.558	FALSE	20
2022-09-12	14:52:54	0.250038	1.11222	963.063	FALSE	20
2022-09-12	14:52:55	0.410852	1.82755	900.385	FALSE	20
2022-09-12	14:52:55	0.303728	1.35104	964.414	FALSE	20
2022-09-12	14:52:55	0.273855	1.21816	901.603	FALSE	20
2022-09-12	14:52:55	0.359249	1.59801	966.012	FALSE	20
2022-09-12	14:52:56	0.245611	1.09253	902.696	FALSE	20
2022-09-12	14:52:56	0.445255	1.98058	967.992	FALSE	20
2022-09-12	14:52:56	0.243677	1.08392	903.78	FALSE	20
2022-09-12	14:52:57	0.459504	2.04397	970.036	FALSE	20
2022-09-12	14:52:57	0.229733	1.0219	904.802	FALSE	20
2022-09-12	14:52:57	0.377875	1.68086	971.717	FALSE	20
2022-09-12	14:52:57	0.550242	2.44759	907.249	FALSE	20
2022-09-12	14:52:58	1.9477	8.66376	980.381	FALSE	20
2022-09-12	14:52:58	0.907799	4.03807	911.287	FALSE	20
2022-09-12	14:52:58	1.57034	6.98519	987.366	FALSE	20
2022-09-12	14:52:58	1.4107	6.27508	917.562	FALSE	20
2022-09-12	14:52:59	1.14459	5.09137	992.458	FALSE	20
2022-09-12	14:52:59	1.51258	6.72826	924.291	FALSE	20
2022-09-12	14:52:59	1.33564	5.94119	998.399	FALSE	20
2022-09-12	14:52:59	1.02912	4.57773	928.868	FALSE	20
2022-09-12	14:53:00	0.757621	3.37005	1001.77	FALSE	20
2022-09-12	14:53:00	0.813957	3.62064	932.489	FALSE	20
2022-09-12	14:53:00	0.722608	3.2143	1004.98	FALSE	20
2022-09-12	14:53:01	0.972277	4.32488	936.814	FALSE	20
2022-09-12	14:53:01	1.571	6.98812	1011.97	FALSE	20
2022-09-12	14:53:01	1.21859	5.42053	942.234	FALSE	20
2022-09-12	14:53:01	0.909987	4.0478	1016.02	FALSE	20
2022-09-12	14:53:02	0.890801	3.96246	946.197	FALSE	20
2022-09-12	14:53:02	0.688308	3.06173	1019.08	FALSE	20
2022-09-12	14:53:02	0.495636	2.20469	948.402	FALSE	20
2022-09-12	14:53:02	0.411769	1.83163	1020.91	FALSE	20
2022-09-12	14:53:03	0.449275	1.99847	950.4	FALSE	20
2022-09-12	14:53:03	0.318079	1.41488	1022.33	FALSE	20
2022-09-12	14:53:03	0.285865	1.27158	951.672	FALSE	20
2022-09-12	14:53:03	0.0116669	0.0518967	1022.38	FALSE	20
2022-09-12	14:53:04	-0.117188	-0.521276	951.672	FALSE	20
2022-09-12	14:53:04	-0.0034476	-0.0153356	1022.38	FALSE	20
2022-09-12	14:53:04	-0.0132186	-0.058799	951.672	FALSE	20
2022-09-12	14:53:05	-0.0519972	-0.231294	1022.38	FALSE	20
2022-09-12	14:53:05	-0.349147	-1.55308	951.672	FALSE	20
2022-09-12	14:53:05	-0.37047	-1.64792	1022.38	FALSE	20
2022-09-12	14:53:05	-0.145534	-0.647364	951.672	FALSE	20
2022-09-12	14:53:06	0.239351	1.06468	1023.44	FALSE	20
2022-09-12	14:53:06	0.191361	0.851212	952.523	FALSE	20
2022-09-12	14:53:06	0.184135	0.819069	1024.26	FALSE	20
2022-09-12	14:53:07	0.0756364	0.336446	952.859	FALSE	20
2022-09-12	14:53:07	0.272074	1.21024	1025.47	FALSE	20
2022-09-12	14:53:07	0.316349	1.40718	954.266	FALSE	20
2022-09-12	14:53:07	0.336145	1.49524	1026.97	FALSE	20
2022-09-12	14:53:08	0.369987	1.64578	955.912	FALSE	20
2022-09-12	14:53:08	0.340725	1.51561	1028.48	FALSE	20
2022-09-12	14:53:08	0.342405	1.52309	957.435	FALSE	20
2022-09-12	14:53:08	0.335738	1.49343	1029.98	FALSE	20
2022-09-12	14:53:09	0.309427	1.37639	958.812	FALSE	20
2022-09-12	14:53:09	0.299453	1.33203	1031.31	FALSE	20
2022-09-12	14:53:09	0.294059	1.30803	960.12	FALSE	20
2022-09-12	14:53:09	0.285967	1.27204	1032.58	FALSE	20
2022-09-12	14:53:10	0.288817	1.28472	961.404	FALSE	20
2022-09-12	14:53:10	0.225662	1.00379	1033.59	FALSE	20
2022-09-12	14:53:10	-0.0201397	-0.0895854	961.404	FALSE	20
2022-09-12	14:53:10	-0.0503687	-0.22405	1033.59	FALSE	20
2022-09-12	14:53:11	-0.116425	-0.517882	961.404	FALSE	20
2022-09-12	14:53:11	-0.349351	-1.55398	1033.59	FALSE	20
2022-09-12	14:53:11	-0.436933	-1.94357	961.404	FALSE	20
2022-09-12	14:53:12	-0.387162	-1.72217	1033.59	FALSE	20
2022-09-12	14:53:12	-0.29958	-1.33259	961.404	FALSE	20
2022-09-12	14:53:12	-0.484109	-2.15341	1033.59	FALSE	20
2022-09-12	14:53:12	-0.460852	-2.04996	961.404	FALSE	20
2022-09-12	14:53:13	-0.421106	-1.87316	1033.59	FALSE	20
2022-09-12	14:53:13	-0.433066	-1.92636	961.404	FALSE	20
2022-09-12	14:53:13	0.0177229	0.078835	1033.66	FALSE	20
2022-09-12	14:53:13	-0.0476715	-0.212052	961.404	FALSE	20
2022-09-12	14:53:14	0.221998	0.987492	1034.65	FALSE	20
2022-09-12	14:53:14	0.147494	0.656083	962.061	FALSE	20
2022-09-12	14:53:14	0.324542	1.44363	1036.1	FALSE	20
2022-09-12	14:53:14	0.160522	0.714034	962.775	FALSE	20
2022-09-12	14:53:15	0.119148	0.529994	1036.63	FALSE	20
2022-09-12	14:53:15	0.0751275	0.334182	963.109	FALSE	20
2022-09-12	14:53:15	0.210802	0.937689	1037.56	FALSE	20
2022-09-12	14:53:16	0.0848984	0.377645	963.486	FALSE	20
2022-09-12	14:53:16	0.117418	0.522299	1038.09	FALSE	20
2022-09-12	14:53:16	0.111463	0.49581	963.982	FALSE	20
2022-09-12	14:53:16	0.300369	1.3361	1039.42	FALSE	20
2022-09-12	14:53:17	0.113397	0.504413	964.487	FALSE	20
2022-09-12	14:53:17	0.145509	0.647253	1040.07	FALSE	20
2022-09-12	14:53:17	0.12958	0.576398	965.063	FALSE	20
2022-09-12	14:53:17	0.117265	0.521618	1040.59	FALSE	20
2022-09-12	14:53:18	0.159707	0.710409	965.773	FALSE	20
2022-09-12	14:53:18	-0.105127	-0.467626	1040.59	FALSE	20
2022-09-12	14:53:18	0.0833208	0.370628	966.144	FALSE	20
2022-09-12	14:53:18	0.083728	0.372439	1040.96	FALSE	20
2022-09-12	14:53:19	-0.0208522	-0.0927548	966.144	FALSE	20
2022-09-12	14:53:19	-0.114033	-0.507242	1040.96	FALSE	20
2022-09-12	14:53:19	-0.127264	-0.566096	966.144	FALSE	20
2022-09-12	14:53:20	-0.150165	-0.667964	1040.96	FALSE	20
2022-09-12	14:53:20	-1.11093	-4.94164	966.144	FALSE	20
2022-09-12	14:53:20	0.134568	0.598585	1041.56	FALSE	20
2022-09-12	14:53:20	0.259606	1.15478	967.299	FALSE	20
2022-09-12	14:53:21	0.789529	3.51198	1045.07	FALSE	20
2022-09-12	14:53:21	3.58378	15.9414	983.24	1	21
2022-09-12	14:53:21	2.12724	9.46239	1054.54	FALSE	21
2022-09-12	14:53:21	0.645356	2.87067	986.111	FALSE	21
2022-09-12	14:53:22	0.317163	1.4108	1055.95	FALSE	21
2022-09-12	14:53:22	0.089733	0.39915	986.51	FALSE	21
2022-09-12	14:53:22	-0.459681	-2.04475	1055.95	FALSE	21
2022-09-12	14:53:22	-0.618053	-2.74922	986.51	FALSE	21
2022-09-12	14:53:23	-0.790368	-3.51571	1055.95	FALSE	21
2022-09-12	14:53:23	-0.744312	-3.31085	986.51	FALSE	21
2022-09-12	14:53:23	-0.781869	-3.47791	1055.95	FALSE	21
2022-09-12	14:53:24	-0.560241	-2.49206	986.51	FALSE	21
2022-09-12	14:53:24	-0.451335	-2.00763	1055.95	FALSE	21
2022-09-12	14:53:24	-0.434592	-1.93315	986.51	FALSE	21
2022-09-12	14:53:24	-0.181157	-0.805823	1055.95	FALSE	21
2022-09-12	14:53:25	-0.406552	-1.80842	986.51	FALSE	21
2022-09-12	14:53:25	-0.552048	-2.45562	1055.95	FALSE	21
2022-09-12	14:53:25	-0.60589	-2.69512	986.51	FALSE	21
2022-09-12	14:53:25	-0.691081	-3.07407	1055.95	FALSE	21
2022-09-12	14:53:26	-0.707315	-3.14628	986.51	FALSE	21
2022-09-12	14:53:26	-0.575101	-2.55816	1055.95	FALSE	21
2022-09-12	14:53:26	-0.613269	-2.72794	986.51	FALSE	21
2022-09-12	14:53:26	-0.507366	-2.25687	1055.95	FALSE	21
2022-09-12	14:53:27	-0.474745	-2.11176	986.51	FALSE	21
2022-09-12	14:53:27	-0.433066	-1.92636	1055.95	FALSE	21
2022-09-12	14:53:27	-0.477646	-2.12466	986.51	FALSE	21
2022-09-12	14:53:28	-0.294491	-1.30995	1055.95	FALSE	21
2022-09-12	14:53:28	-0.356832	-1.58726	986.51	FALSE	21
2022-09-12	14:53:28	-0.226501	-1.00752	1055.95	FALSE	21
2022-09-12	14:53:28	-0.217748	-0.968587	986.51	FALSE	21
2022-09-12	14:53:29	-0.0982058	-0.436839	1055.95	FALSE	21
2022-09-12	14:53:29	-0.244567	-1.08788	986.51	FALSE	21
2022-09-12	14:53:29	-0.218918	-0.973791	1055.95	FALSE	21
2022-09-12	14:53:29	-0.31103	-1.38352	986.51	FALSE	21
2022-09-12	14:53:30	-0.328384	-1.46072	1055.95	FALSE	21
2022-09-12	14:53:30	-0.389961	-1.73462	986.51	FALSE	21
2022-09-12	14:53:30	-0.32416	-1.44193	1055.95	FALSE	21
2022-09-12	14:53:30	-0.278257	-1.23774	986.51	FALSE	21
2022-09-12	14:53:31	-0.164007	-0.729536	1055.95	FALSE	21
2022-09-12	14:53:31	-0.334745	-1.48901	986.51	FALSE	21
2022-09-12	14:53:31	-0.186603	-0.830047	1055.95	FALSE	21
2022-09-12	14:53:32	-0.101107	-0.449744	986.51	FALSE	21
2022-09-12	14:53:32	0.0380282	0.169157	1056.12	FALSE	21
2022-09-12	14:53:32	0.691717	3.0769	989.587	FALSE	21
2022-09-12	14:53:32	0.470446	2.09264	1058.21	FALSE	21
2022-09-12	14:53:33	0.292074	1.2992	990.886	FALSE	21
2022-09-12	14:53:33	0.16556	0.736444	1058.94	FALSE	21
2022-09-12	14:53:33	0.394822	1.75625	992.642	FALSE	21
2022-09-12	14:53:33	0.204848	0.911205	1059.86	FALSE	21
2022-09-12	14:53:34	0.573448	2.55081	995.193	FALSE	21
2022-09-12	14:53:34	0.738995	3.2872	1063.14	FALSE	21
2022-09-12	14:53:34	0.5336	2.37356	997.567	FALSE	21
2022-09-12	14:53:34	0.96612	4.29749	1067.44	FALSE	21
2022-09-12	14:53:35	0.737163	3.27905	1000.85	FALSE	21
2022-09-12	14:53:35	0.857926	3.81623	1071.26	FALSE	21
2022-09-12	14:53:35	0.637112	2.834	1003.68	FALSE	21
2022-09-12	14:53:36	0.611209	2.71878	1073.98	FALSE	21
2022-09-12	14:53:36	0.799758	3.55748	1007.24	FALSE	21
2022-09-12	14:53:36	1.60693	7.14795	1081.12	FALSE	21
2022-09-12	14:53:36	0.771209	3.43049	1010.67	FALSE	21
2022-09-12	14:53:37	1.73497	7.71749	1088.84	FALSE	21
2022-09-12	14:53:37	0.333651	1.48415	1012.15	FALSE	21
2022-09-12	14:53:37	0.660776	2.93926	1091.78	FALSE	21
2022-09-12	14:53:37	1.73604	7.72225	1019.87	FALSE	21
2022-09-12	14:53:38	0.615738	2.73893	1094.52	FALSE	21
2022-09-12	14:53:38	1.67528	7.45198	1027.33	FALSE	21
2022-09-12	14:53:38	1.12927	5.02322	1099.54	FALSE	21
2022-09-12	14:53:38	0.901234	4.00887	1031.34	FALSE	21
2022-09-12	14:53:39	0.943524	4.19698	1103.74	FALSE	21
2022-09-12	14:53:39	0.32215	1.43299	1032.77	FALSE	21
2022-09-12	14:53:39	0.244695	1.08845	1104.83	FALSE	21
2022-09-12	14:53:40	1.56408	6.95734	1039.73	FALSE	21
2022-09-12	14:53:40	0.14785	0.657666	1105.49	FALSE	21
2022-09-12	14:53:40	0.57874	2.57435	1042.3	FALSE	21
2022-09-12	14:53:40	1.06541	4.73916	1110.22	FALSE	21
2022-09-12	14:53:41	1.25879	5.59935	1047.9	FALSE	21
2022-09-12	14:53:41	1.44363	6.42155	1116.65	FALSE	21
2022-09-12	14:53:41	0.878944	3.90972	1051.81	FALSE	21
2022-09-12	14:53:41	1.38083	6.14221	1122.79	FALSE	21
2022-09-12	14:53:42	1.14566	5.09612	1056.9	FALSE	21
2022-09-12	14:53:42	0.697824	3.10406	1125.89	FALSE	21
2022-09-12	14:53:42	0.716043	3.1851	1060.09	FALSE	21
2022-09-12	14:53:43	1.04037	4.62777	1130.52	FALSE	21
2022-09-12	14:53:43	0.346425	1.54097	1061.63	FALSE	21
2022-09-12	14:53:43	1.17503	5.22677	1135.75	FALSE	21
2022-09-12	14:53:43	0.422456	1.87917	1063.51	FALSE	21
2022-09-12	14:53:44	2.34296	10.422	1146.17	FALSE	21
2022-09-12	14:53:44	0.368308	1.63831	1065.15	FALSE	21
2022-09-12	14:53:44	2.07492	9.22966	1155.4	FALSE	21
2022-09-12	14:53:44	0.491921	2.18816	1067.34	FALSE	21
2022-09-12	14:53:45	1.96637	8.74681	1164.15	FALSE	21
2022-09-12	14:53:45	1.17304	5.21792	1072.55	FALSE	21
2022-09-12	14:53:45	1.00454	4.46839	1168.61	FALSE	21
2022-09-12	14:53:45	1.9652	8.7416	1081.3	FALSE	21
2022-09-12	14:53:46	0.383321	1.70509	1170.32	FALSE	21
2022-09-12	14:53:46	1.8281	8.13175	1089.43	FALSE	21
2022-09-12	14:53:46	0.299606	1.33271	1171.65	FALSE	21
2022-09-12	14:53:47	1.95009	8.67439	1098.1	FALSE	21
2022-09-12	14:53:47	0.887901	3.94956	1175.6	FALSE	21
2022-09-12	14:53:47	1.33309	5.92985	1104.03	FALSE	21
2022-09-12	14:53:47	1.89905	8.44735	1184.05	FALSE	21
2022-09-12	14:53:48	0.911107	4.05279	1108.08	FALSE	21
2022-09-12	14:53:48	2.27782	10.1322	1194.18	FALSE	21
2022-09-12	14:53:48	0.40785	1.8142	1109.9	FALSE	21
2022-09-12	14:53:48	2.43731	10.8416	1205.02	FALSE	21
2022-09-12	14:53:49	0.82617	3.67497	1113.57	FALSE	21
2022-09-12	14:53:49	1.27548	5.67359	1210.7	FALSE	21
2022-09-12	14:53:49	0.917773	4.08244	1117.66	FALSE	21
2022-09-12	14:53:49	0.611565	2.72036	1213.42	FALSE	21
2022-09-12	14:53:50	0.7193	3.19959	1120.86	FALSE	21
2022-09-12	14:53:50	0.484084	2.1533	1215.57	FALSE	21
2022-09-12	14:53:50	0.775687	3.45041	1124.31	FALSE	21
2022-09-12	14:53:51	0.719555	3.20072	1218.77	FALSE	21
2022-09-12	14:53:51	0.885356	3.93824	1128.24	FALSE	21
2022-09-12	14:53:51	0.516654	2.29818	1221.07	FALSE	21
2022-09-12	14:53:51	2.26205	10.0621	1138.31	FALSE	21
2022-09-12	14:53:52	0.626883	2.7885	1223.86	FALSE	21
2022-09-12	14:53:52	3.371	14.9949	1153.3	1	22
2022-09-12	14:53:52	0.94327	4.19585	1228.05	FALSE	22
2022-09-12	14:53:52	5.71431	25.4184	1178.72	1	23
2022-09-12	14:53:53	1.45833	6.48694	1234.54	FALSE	23
2022-09-12	14:53:53	3.59691	15.9998	1194.72	1	24
2022-09-12	14:53:53	1.05899	4.7106	1239.25	FALSE	24
2022-09-12	14:53:53	0.816857	3.63354	1198.35	FALSE	24
2022-09-12	14:53:54	1.06541	4.73916	1243.99	FALSE	24
2022-09-12	14:53:54	0.259606	1.15478	1199.51	FALSE	24
2022-09-12	14:53:54	0.770343	3.42664	1247.42	FALSE	24
2022-09-12	14:53:55	1.44164	6.4127	1205.92	FALSE	24
2022-09-12	14:53:55	1.29472	5.75917	1253.18	FALSE	24
2022-09-12	14:53:55	2.29737	10.2192	1216.14	FALSE	24
2022-09-12	14:53:55	2.10795	9.37658	1262.55	FALSE	24
2022-09-12	14:53:56	1.84749	8.21801	1224.36	FALSE	24
2022-09-12	14:53:56	1.88698	8.39366	1270.95	FALSE	24
2022-09-12	14:53:56	1.54144	6.85663	1231.21	FALSE	24
2022-09-12	14:53:57	2.0962	9.32432	1280.27	FALSE	24
2022-09-12	14:53:57	1.99126	8.85752	1240.07	FALSE	24
2022-09-12	14:53:57	2.40393	10.6932	1290.96	FALSE	24
2022-09-12	14:53:57	2.18978	9.74058	1249.81	FALSE	24
2022-09-12	14:53:57	2.45604	10.925	1301.89	FALSE	24
2022-09-12	14:53:58	1.05899	4.7106	1254.52	FALSE	24
2022-09-12	14:53:58	1.26999	5.64917	1307.54	FALSE	24
2022-09-12	14:53:58	1.03141	4.58792	1259.11	FALSE	24
2022-09-12	14:53:59	1.57294	6.99675	1314.53	FALSE	24
2022-09-12	14:53:59	1.63314	7.26453	1266.38	FALSE	24
2022-09-12	14:53:59	4.04261	17.9823	1332.52	1	25
2022-09-12	14:53:59	6.58505	29.2916	1295.67	1	26
2022-09-12	14:54:00	4.98184	22.1602	1354.68	1	27
2022-09-12	14:54:00	9.73502	43.3033	1338.97	1	28
2022-09-12	14:54:00	2.5738	11.4488	1366.13	FALSE	28
2022-09-12	14:54:00	4.17915	18.5897	1357.56	1	29
2022-09-12	14:54:01	3.61477	16.0792	1382.2	1	30
2022-09-12	14:54:01	4.46454	19.8592	1377.42	1	31
2022-09-12	14:54:01	2.19263	9.75326	1391.96	FALSE	31
2022-09-12	14:54:01	2.86973	12.7651	1390.18	FALSE	31
2022-09-12	14:54:02	3.67991	16.369	1408.33	1	32
2022-09-12	14:54:02	3.26933	14.5426	1404.73	1	33
2022-09-12	14:54:02	3.3277	14.8023	1423.13	1	34
2022-09-12	14:54:03	2.05182	9.12691	1413.85	FALSE	34
2022-09-12	14:54:03	2.53726	11.2862	1434.42	FALSE	34
2022-09-12	14:54:03	3.482	15.4886	1429.34	1	35
2022-09-12	14:54:03	6.24204	27.7658	1462.18	1	36
2022-09-12	14:54:04	4.86505	21.6407	1450.98	1	37
2022-09-12	14:54:04	5.42937	24.1509	1486.33	1	38
2022-09-12	14:54:04	3.49884	15.5635	1466.55	1	39
2022-09-12	14:54:04	2.908	12.9354	1499.27	FALSE	39
2022-09-12	14:54:05	2.92439	13.0083	1479.56	FALSE	39
2022-09-12	14:54:05	2.84006	12.6332	1511.9	FALSE	39
2022-09-12	14:54:05	2.93772	13.0676	1492.62	FALSE	39
2022-09-12	14:54:05	3.19406	14.2078	1526.11	1	40
2022-09-12	14:54:06	3.02887	13.473	1506.1	1	41
2022-09-12	14:54:06	2.4737	11.0035	1537.11	FALSE	41
2022-09-12	14:54:06	2.12108	9.43499	1515.53	FALSE	41
2022-09-12	14:54:07	1.96678	8.74863	1545.86	FALSE	41
2022-09-12	14:54:07	1.7764	7.90178	1523.43	FALSE	41
2022-09-12	14:54:07	1.07396	4.77719	1550.64	FALSE	41
2022-09-12	14:54:07	1.728	7.68649	1531.12	FALSE	41
2022-09-12	14:54:08	1.81706	8.08265	1558.72	FALSE	41
2022-09-12	14:54:08	2.11599	9.41235	1540.53	FALSE	41
2022-09-12	14:54:08	2.25426	10.0274	1568.75	FALSE	41
2022-09-12	14:54:08	2.27314	10.1114	1550.64	FALSE	41
2022-09-12	14:54:09	2.33039	10.366	1579.11	FALSE	41
2022-09-12	14:54:09	2.31156	10.2823	1560.93	FALSE	41
2022-09-12	14:54:09	2.42378	10.7815	1589.9	FALSE	41
2022-09-12	14:54:09	2.49543	11.1002	1572.03	FALSE	41
2022-09-12	14:54:10	2.48408	11.0497	1600.94	FALSE	41
2022-09-12	14:54:10	2.4367	10.8389	1582.86	FALSE	41
2022-09-12	14:54:10	2.39253	10.6425	1611.59	FALSE	41
2022-09-12	14:54:11	2.36556	10.5225	1593.39	FALSE	41
2022-09-12	14:54:11	2.31172	10.283	1621.87	FALSE	41
2022-09-12	14:54:11	2.25772	10.0428	1603.43	FALSE	41
2022-09-12	14:54:11	2.29889	10.2259	1632.1	FALSE	41
2022-09-12	14:54:12	2.28139	10.1481	1613.58	FALSE	41
2022-09-12	14:54:12	2.27894	10.1372	1642.23	FALSE	41
2022-09-12	14:54:12	2.30184	10.239	1623.82	FALSE	41
2022-09-12	14:54:12	2.32846	10.3575	1652.59	FALSE	41
2022-09-12	14:54:13	2.33101	10.3688	1634.19	FALSE	41
2022-09-12	14:54:13	2.26927	10.0942	1662.69	FALSE	41
2022-09-12	14:54:13	2.07273	9.21992	1643.41	FALSE	41
2022-09-12	14:54:13	2.15569	9.58894	1672.27	FALSE	41
2022-09-12	14:54:14	2.165	9.63035	1653.04	FALSE	41
2022-09-12	14:54:14	2.3937	10.6477	1682.92	FALSE	41
2022-09-12	14:54:14	2.32897	10.3597	1663.4	FALSE	41
2022-09-12	14:54:15	2.27955	10.1399	1693.06	FALSE	41
2022-09-12	14:54:15	2.28668	10.1716	1673.57	FALSE	41
2022-09-12	14:54:15	2.30062	10.2336	1703.3	FALSE	41
2022-09-12	14:54:15	2.25813	10.0446	1683.61	FALSE	41
2022-09-12	14:54:16	2.22088	9.87892	1713.17	FALSE	41
2022-09-12	14:54:16	2.21859	9.86873	1693.48	FALSE	41
2022-09-12	14:54:16	2.25996	10.0528	1723.23	FALSE	41
2022-09-12	14:54:16	2.25625	10.0363	1703.52	FALSE	41
2022-09-12	14:54:17	1.72429	7.66999	1730.9	FALSE	41
2022-09-12	14:54:17	1.45528	6.47338	1709.99	FALSE	41
2022-09-12	14:54:17	0.792023	3.52308	1734.42	FALSE	41
2022-09-12	14:54:17	0.511259	2.27418	1712.26	FALSE	41
2022-09-12	14:54:18	0.440674	1.96021	1736.38	FALSE	41
2022-09-12	14:54:18	0.369733	1.64465	1713.91	FALSE	41
2022-09-12	14:54:18	0.481387	2.14131	1738.52	FALSE	41
2022-09-12	14:54:19	0.247952	1.10294	1715.01	FALSE	41
2022-09-12	14:54:19	0.250649	1.11494	1739.64	FALSE	41
2022-09-12	14:54:19	0.0947712	0.421561	1715.43	FALSE	41
2022-09-12	14:54:19	-0.394491	-1.75477	1739.64	FALSE	41
2022-09-12	14:54:20	-0.631081	-2.80717	1715.43	FALSE	41
2022-09-12	14:54:20	-0.276628	-1.2305	1739.64	FALSE	41
2022-09-12	14:54:20	-0.0568318	-0.252799	1715.43	FALSE	41
2022-09-12	14:54:20	0.0749748	0.333503	1739.97	FALSE	41
2022-09-12	14:54:21	-0.10075	-0.448156	1715.43	FALSE	41
2022-09-12	14:54:21	-0.0324043	-0.144141	1739.97	FALSE	41
2022-09-12	14:54:21	0.127341	0.566438	1716	FALSE	41
2022-09-12	14:54:22	0.182049	0.80979	1740.78	FALSE	41
2022-09-12	14:54:22	0.268155	1.19281	1717.19	FALSE	41
2022-09-12	14:54:22	0.0359926	0.160102	1740.94	FALSE	41
2022-09-12	14:54:22	0.437672	1.94685	1719.14	FALSE	41
2022-09-12	14:54:23	0.845153	3.75941	1744.7	FALSE	41
2022-09-12	14:54:23	0.0794531	0.353423	1719.49	FALSE	41
2022-09-12	14:54:23	0.404288	1.79835	1746.5	FALSE	41
2022-09-12	14:54:23	2.15884	9.60295	1729.1	FALSE	41
2022-09-12	14:54:24	1.49202	6.6368	1753.13	FALSE	41
2022-09-12	14:54:24	4.10983	18.2813	1747.38	1	42
2022-09-12	14:54:24	0.864949	3.84747	1756.98	FALSE	42
2022-09-12	14:54:24	0.243422	1.08279	1748.46	FALSE	42
2022-09-12	14:54:25	0.174873	0.77787	1757.76	FALSE	42
2022-09-12	14:54:25	-0.119529	-0.531689	1748.46	FALSE	42
2022-09-12	14:54:25	0.591616	2.63163	1760.39	FALSE	42
2022-09-12	14:54:26	4.04383	17.9878	1766.45	1	43
2022-09-12	14:54:26	4.21665	18.7565	1779.15	1	44
2022-09-12	14:54:26	2.58541	11.5004	1777.95	FALSE	44
2022-09-12	14:54:26	0.255382	1.13599	1780.28	FALSE	44
2022-09-12	14:54:27	-8.88145e-05	-0.000395065	1777.95	FALSE	44
2022-09-12	14:54:27	0.0605218	0.269213	1780.55	FALSE	44
2022-09-12	14:54:27	0.0365015	0.162366	1778.11	FALSE	44
2022-09-12	14:54:27	-0.270012	-1.20107	1780.55	FALSE	44
2022-09-12	14:54:28	-0.288079	-1.28143	1778.11	FALSE	44
2022-09-12	14:54:28	-0.25271	-1.1241	1780.55	FALSE	44
2022-09-12	14:54:28	-0.147926	-0.658004	1778.11	FALSE	44
2022-09-12	14:54:28	-0.157493	-0.70056	1780.55	FALSE	44
2022-09-12	14:54:29	-0.225432	-1.00277	1778.11	FALSE	44
2022-09-12	14:54:29	-0.233218	-1.0374	1780.55	FALSE	44
2022-09-12	14:54:29	-0.155407	-0.691281	1778.11	FALSE	44
2022-09-12	14:54:30	-0.122888	-0.54663	1780.55	FALSE	44
2022-09-12	14:54:30	0.318486	1.41669	1779.53	FALSE	44
2022-09-12	14:54:30	1.62403	7.22401	1787.78	FALSE	44
2022-09-12	14:54:30	5.37777	23.9214	1803.45	1	45
2022-09-12	14:54:31	5.55996	24.7318	1812.51	1	46
2022-09-12	14:54:31	2.90907	12.9401	1816.39	FALSE	46
2022-09-12	14:54:31	3.36535	14.9697	1827.48	1	47
2022-09-12	14:54:31	2.17385	9.66972	1826.06	FALSE	47
2022-09-12	14:54:32	2.8134	12.5146	1839.99	FALSE	47
2022-09-12	14:54:32	3.05121	13.5724	1839.63	1	48
2022-09-12	14:54:32	3.58271	15.9366	1855.93	1	49
2022-09-12	14:54:32	5.63894	25.0831	1864.71	1	50
2022-09-12	14:54:33	2.16704	9.63943	1865.57	FALSE	50
2022-09-12	14:54:33	0.583677	2.59631	1867.31	FALSE	50
2022-09-12	14:54:33	0.574517	2.55557	1868.12	FALSE	50
2022-09-12	14:54:34	1.07228	4.76972	1872.08	FALSE	50
2022-09-12	14:54:34	8.14489	36.2301	1904.35	1	51
2022-09-12	14:54:34	12.9445	57.5797	1929.66	1	52
2022-09-12	14:54:34	3.59187	15.9774	1920.33	1	53
2022-09-12	14:54:35	5.73533	25.5119	1955.17	1	54
2022-09-12	14:54:35	1.5164	6.74525	1927.08	FALSE	54
2022-09-12	14:54:35	1.44612	6.43263	1961.6	FALSE	54
2022-09-12	14:54:35	0.863982	3.84316	1930.92	FALSE	54
2022-09-12	14:54:36	0.929885	4.13631	1965.74	FALSE	54
2022-09-12	14:54:36	0.188461	0.838312	1931.76	FALSE	54
2022-09-12	14:54:36	0.387697	1.72455	1967.47	FALSE	54
2022-09-12	14:54:36	0.934771	4.15805	1935.92	FALSE	54
2022-09-12	14:54:37	0.188003	0.836275	1968.3	FALSE	54
2022-09-12	14:54:37	0.214822	0.955571	1936.87	FALSE	54
2022-09-12	14:54:37	1.3505	6.00729	1974.31	FALSE	54
2022-09-12	14:54:38	0.383321	1.70509	1938.58	FALSE	54
2022-09-12	14:54:38	1.96098	8.72283	1983.03	FALSE	54
2022-09-12	14:54:38	1.16673	5.18985	1943.77	FALSE	54
2022-09-12	14:54:38	2.07329	9.22241	1992.25	FALSE	54
2022-09-12	14:54:39	2.87742	12.7993	1956.57	FALSE	54
2022-09-12	14:54:39	0.397316	1.76734	1994.02	FALSE	54
2022-09-12	14:54:39	0.599046	2.66468	1959.23	FALSE	54
2022-09-12	14:54:39	0.849427	3.77842	1997.8	FALSE	54
2022-09-12	14:54:40	0.319402	1.42076	1960.65	FALSE	54
2022-09-12	14:54:40	0.540318	2.40344	2000.2	FALSE	54
2022-09-12	14:54:40	0.24327	1.08211	1961.73	FALSE	54
2022-09-12	14:54:40	0.453702	2.01816	2002.22	FALSE	54
2022-09-12	14:54:41	0.179199	0.797113	1962.53	FALSE	54
2022-09-12	14:54:41	0.777214	3.4572	2005.68	FALSE	54
2022-09-12	14:54:41	1.5194	6.7586	1969.29	FALSE	54
2022-09-12	14:54:42	4.66128	20.7343	2026.41	1	55
2022-09-12	14:54:42	1.09716	4.88039	1974.17	FALSE	55
2022-09-12	14:54:42	2.02887	9.02482	2035.44	FALSE	55
2022-09-12	14:54:42	0.356501	1.58579	1975.76	FALSE	55
2022-09-12	14:54:43	0.718232	3.19484	2038.63	FALSE	55
2022-09-12	14:54:43	1.04836	4.66331	1980.42	FALSE	55
2022-09-12	14:54:43	0.312786	1.39133	2040.02	FALSE	55
2022-09-12	14:54:43	0.198995	0.88517	1981.3	FALSE	55
2022-09-12	14:54:44	0.181794	0.808656	2040.83	FALSE	55
2022-09-12	14:54:44	0.109377	0.486531	1981.79	FALSE	55
2022-09-12	14:54:44	-0.0182567	-0.0812095	2040.83	FALSE	55
2022-09-12	14:54:44	0.0227611	0.101246	1981.89	FALSE	55
2022-09-12	14:54:45	0.0188934	0.0840416	2040.92	FALSE	55
2022-09-12	14:54:45	0.0856618	0.381041	1982.27	FALSE	55
2022-09-12	14:54:45	0.270445	1.20299	2042.12	FALSE	55
2022-09-12	14:54:46	0.236196	1.05065	1983.32	FALSE	55
2022-09-12	14:54:46	0.183677	0.817032	2042.94	FALSE	55
2022-09-12	14:54:46	0.253244	1.12648	1984.45	FALSE	55
2022-09-12	14:54:46	0.121234	0.539273	2043.48	FALSE	55
2022-09-12	14:54:47	0.0639824	0.284607	1984.74	FALSE	55
2022-09-12	14:54:47	0.031616	0.140634	2043.62	FALSE	55
2022-09-12	14:54:47	0.236959	1.05404	1985.79	FALSE	55
2022-09-12	14:54:47	0.268715	1.1953	2044.81	FALSE	55
2022-09-12	14:54:48	0.384898	1.7121	1987.5	FALSE	55
2022-09-12	14:54:48	0.419351	1.86536	2046.68	FALSE	55
2022-09-12	14:54:48	0.433601	1.92874	1989.43	FALSE	55
2022-09-12	14:54:48	0.820165	3.64826	2050.33	FALSE	55
2022-09-12	14:54:49	0.924033	4.11028	1993.54	FALSE	55
2022-09-12	14:54:49	0.158537	0.705204	2051.03	FALSE	55
2022-09-12	14:54:49	-0.782938	-3.48266	1993.54	FALSE	55
2022-09-12	14:54:50	-0.824465	-3.66739	2051.03	FALSE	55
2022-09-12	14:54:50	-0.697238	-3.10145	1993.54	FALSE	55
2022-09-12	14:54:50	-0.725177	-3.22573	2051.03	FALSE	55
2022-09-12	14:54:50	-0.625381	-2.78182	1993.54	FALSE	55
2022-09-12	14:54:51	-0.461921	-2.05472	2051.03	FALSE	55
2022-09-12	14:54:51	-0.319834	-1.42269	1993.54	FALSE	55
2022-09-12	14:54:51	-0.270216	-1.20197	2051.03	FALSE	55
2022-09-12	14:54:51	-0.102684	-0.456759	1993.54	FALSE	55
2022-09-12	14:54:52	0.13528	0.601752	2051.63	FALSE	55
2022-09-12	14:54:52	0.196501	0.874076	1994.41	FALSE	55
2022-09-12	14:54:52	0.0187916	0.0835888	2051.72	FALSE	55
2022-09-12	14:54:52	-0.149249	-0.663889	1994.41	FALSE	55
2022-09-12	14:54:53	-0.361361	-1.60741	2051.72	FALSE	55
2022-09-12	14:54:53	-0.36991	-1.64543	1994.41	FALSE	55
2022-09-12	14:54:53	-0.313931	-1.39643	2051.72	FALSE	55
2022-09-12	14:54:54	0.490038	2.17979	1996.59	FALSE	55
2022-09-12	14:54:54	0.215229	0.957382	2052.67	FALSE	55
2022-09-12	14:54:54	-0.0415646	-0.184888	1996.59	FALSE	55
2022-09-12	14:54:54	-0.242124	-1.07702	2052.67	FALSE	55
2022-09-12	14:54:55	-0.306043	-1.36134	1996.59	FALSE	55
2022-09-12	14:54:55	-0.179631	-0.799035	2052.67	FALSE	55
2022-09-12	14:54:55	-0.725381	-3.22664	1996.59	FALSE	55
2022-09-12	14:54:55	-0.714541	-3.17842	2052.67	FALSE	55
2022-09-12	14:54:56	-0.711386	-3.16439	1996.59	FALSE	55
2022-09-12	14:54:56	-0.622887	-2.77073	2052.67	FALSE	55
2022-09-12	14:54:56	-0.5236	-2.32908	1996.59	FALSE	55
2022-09-12	14:54:57	-0.405483	-1.80367	2052.67	FALSE	55
2022-09-12	14:54:57	-0.25902	-1.15217	1996.59	FALSE	55
2022-09-12	14:54:57	-0.291234	-1.29547	2052.67	FALSE	55
2022-09-12	14:54:57	0.10327	0.459366	1997.05	FALSE	55
2022-09-12	14:54:58	1.07452	4.77968	2057.45	FALSE	55
2022-09-12	14:54:58	2.39024	10.6323	2007.69	FALSE	55
2022-09-12	14:54:58	5.28759	23.5203	2080.97	1	56
2022-09-12	14:54:58	5.2998	23.5746	2031.26	1	57
2022-09-12	14:54:59	4.81126	21.4014	2102.37	1	58
2022-09-12	14:54:59	4.52322	20.1202	2051.38	1	59
2022-09-12	14:54:59	2.33864	10.4027	2112.78	FALSE	59
2022-09-12	14:54:59	4.74413	21.1028	2072.48	1	60
2022-09-12	14:55:00	1.74429	7.75895	2120.54	FALSE	60
2022-09-12	14:55:00	2.23314	9.93345	2082.42	FALSE	60
2022-09-12	14:55:00	1.24174	5.52351	2126.06	FALSE	60
2022-09-12	14:55:01	1.28017	5.69445	2088.11	FALSE	60
2022-09-12	14:55:01	1.44861	6.44371	2132.5	FALSE	60
2022-09-12	14:55:01	0.737265	3.2795	2091.39	FALSE	60
2022-09-12	14:55:01	0.719249	3.19936	2135.7	FALSE	60
2022-09-12	14:55:02	0.160624	0.714488	2092.11	FALSE	60
2022-09-12	14:55:02	0.108155	0.481095	2136.18	FALSE	60
2022-09-12	14:55:02	0.524542	2.33327	2094.44	FALSE	60
2022-09-12	14:55:02	1.28948	5.73586	2141.92	FALSE	60
2022-09-12	14:55:03	1.65411	7.35781	2101.8	FALSE	60
2022-09-12	14:55:03	2.48067	11.0345	2152.95	FALSE	60
2022-09-12	14:55:03	4.11014	18.2827	2120.08	1	61
2022-09-12	14:55:03	5.56998	24.7764	2177.73	1	62
2022-09-12	14:55:04	3.79406	16.8767	2136.96	1	63
2022-09-12	14:55:04	3.21136	14.2848	2192.02	1	64
2022-09-12	14:55:04	3.50424	15.5876	2152.54	1	65
2022-09-12	14:55:05	5.49121	24.426	2216.44	1	66
2022-09-12	14:55:05	0.648359	2.88403	2155.43	FALSE	66
2022-09-12	14:55:05	0.356908	1.5876	2218.03	FALSE	66
2022-09-12	14:55:05	0.420674	1.87124	2157.3	FALSE	66
2022-09-12	14:55:06	0.156501	0.696148	2218.73	FALSE	66
2022-09-12	14:55:06	0.16612	0.738935	2158.04	FALSE	66
2022-09-12	14:55:06	-0.22757	-1.01228	2218.73	FALSE	66
2022-09-12	14:55:06	-0.481259	-2.14074	2158.04	FALSE	66
2022-09-12	14:55:07	1.31803	5.86286	2224.59	FALSE	66
2022-09-12	14:55:07	2.92469	13.0096	2171.05	FALSE	66
2022-09-12	14:55:07	4.52515	20.1288	2244.72	1	67
2022-09-12	14:55:07	2.21482	9.85196	2180.9	FALSE	67
2022-09-12	14:55:08	1.28734	5.72635	2250.44	FALSE	67
2022-09-12	14:55:08	0.360064	1.60164	2182.5	FALSE	67
2022-09-12	14:55:08	0.30444	1.35421	2251.8	FALSE	67
2022-09-12	14:55:09	0.0363997	0.161913	2182.66	FALSE	67
2022-09-12	14:55:09	0.0227102	0.10102	2251.9	FALSE	67
2022-09-12	14:55:09	-0.0812593	-0.361458	2182.66	FALSE	67
2022-09-12	14:55:09	0.408766	1.81827	2253.72	FALSE	67
2022-09-12	14:55:10	0.773041	3.43864	2186.1	FALSE	67
2022-09-12	14:55:10	1.63238	7.26115	2260.98	FALSE	67
2022-09-12	14:55:10	1.98408	8.82558	2194.93	FALSE	67
2022-09-12	14:55:10	2.06419	9.18193	2270.16	FALSE	67
2022-09-12	14:55:11	1.81523	8.07451	2203	FALSE	67
2022-09-12	14:55:11	2.47248	10.9981	2281.16	FALSE	67
2022-09-12	14:55:11	1.87218	8.32783	2211.33	FALSE	67
2022-09-12	14:55:11	0.751667	3.34357	2284.5	FALSE	67
2022-09-12	14:55:12	0.455026	2.02405	2213.35	FALSE	67
2022-09-12	14:55:12	0.31131	1.38477	2285.89	FALSE	67
2022-09-12	14:55:12	0.0931427	0.414317	2213.77	FALSE	67
2022-09-12	14:55:13	0.304797	1.3558	2287.24	FALSE	67
2022-09-12	14:55:13	5.0507	22.4665	2236.23	1	68
2022-09-12	14:55:13	5.70831	25.3917	2312.63	1	69
2022-09-12	14:55:13	3.53971	15.7453	2251.98	1	70
2022-09-12	14:55:14	2.60301	11.5787	2324.21	FALSE	70
2022-09-12	14:55:14	1.04968	4.66919	2256.65	FALSE	70
2022-09-12	14:55:14	1.14123	5.07642	2329.29	FALSE	70
2022-09-12	14:55:14	1.2137	5.39878	2262.05	FALSE	70
2022-09-12	14:55:15	1.37294	6.10711	2335.4	FALSE	70
2022-09-12	14:55:15	2.02246	8.99631	2271.04	FALSE	70
2022-09-12	14:55:15	2.48357	11.0474	2346.44	FALSE	70
2022-09-12	14:55:15	2.20978	9.82954	2280.87	FALSE	70
2022-09-12	14:55:16	1.25447	5.58013	2352.02	FALSE	70
2022-09-12	14:55:16	1.13197	5.03523	2285.91	FALSE	70
2022-09-12	14:55:16	1.95966	8.71696	2360.74	FALSE	70
2022-09-12	14:55:17	2.33355	10.3801	2296.29	FALSE	70
2022-09-12	14:55:17	1.67263	7.44019	2368.18	FALSE	70
2022-09-12	14:55:17	1.32261	5.88323	2302.17	FALSE	70
2022-09-12	14:55:17	2.62968	11.6973	2379.88	FALSE	70
2022-09-12	14:55:18	3.02785	13.4685	2315.64	1	71
2022-09-12	14:55:18	3.22505	14.3457	2394.22	1	72
2022-09-12	14:55:18	5.00922	22.282	2337.92	1	73
2022-09-12	14:55:18	6.69665	29.788	2424.01	1	74
2022-09-12	14:55:19	1.40042	6.22935	2344.15	FALSE	74
2022-09-12	14:55:19	0.407901	1.81443	2425.83	FALSE	74
2022-09-12	14:55:19	0.257774	1.14663	2345.3	FALSE	74
2022-09-12	14:55:19	0.0528374	0.235031	2426.06	FALSE	74
2022-09-12	14:55:20	0.400624	1.78206	2347.08	FALSE	74
2022-09-12	14:55:20	15.5164	69.0201	2495.08	1	75
2022-09-12	14:55:20	11.0511	49.1575	2396.24	1	76
2022-09-12	14:55:21	2.72627	12.127	2507.21	FALSE	76
2022-09-12	14:55:21	0.753193	3.35035	2399.59	FALSE	76
2022-09-12	14:55:21	0.311412	1.38522	2508.59	FALSE	76
2022-09-12	14:55:21	0.252583	1.12354	2400.71	FALSE	76
2022-09-12	14:55:22	0.107087	0.476344	2509.07	FALSE	76
2022-09-12	14:55:22	0.204746	0.910751	2401.62	FALSE	76
2022-09-12	14:55:22	-0.0484348	-0.215448	2509.07	FALSE	76
2022-09-12	14:55:22	0.348511	1.55025	2403.17	FALSE	76
2022-09-12	14:55:23	0.0626084	0.278495	2509.35	FALSE	76
2022-09-12	14:55:23	0.507392	2.25698	2405.43	FALSE	76
2022-09-12	14:55:23	0.274313	1.2202	2510.57	FALSE	76
2022-09-12	14:55:23	0.294669	1.31075	2406.74	FALSE	76
2022-09-12	14:55:24	0.333957	1.48551	2512.05	FALSE	76
2022-09-12	14:55:24	0.331616	1.47509	2408.22	FALSE	76
2022-09-12	14:55:24	1.26989	5.64872	2517.7	FALSE	76
2022-09-12	14:55:25	0.673346	2.99518	2411.21	FALSE	76
2022-09-12	14:55:25	1.02663	4.56666	2522.27	FALSE	76
2022-09-12	14:55:25	0.759402	3.37797	2414.59	FALSE	76
2022-09-12	14:55:25	1.12866	5.02051	2527.29	FALSE	76
2022-09-12	14:55:26	2.48149	11.0382	2425.63	FALSE	76
2022-09-12	14:55:26	1.01889	4.53223	2531.82	FALSE	76
2022-09-12	14:55:26	1.52744	6.79436	2432.42	FALSE	76
2022-09-12	14:55:26	2.34368	10.4252	2542.25	FALSE	76
2022-09-12	14:55:27	1.78724	7.95	2440.37	FALSE	76
2022-09-12	14:55:27	1.75905	7.82461	2550.07	FALSE	76
2022-09-12	14:55:27	2.89584	12.8813	2453.25	FALSE	76
2022-09-12	14:55:27	1.52536	6.78511	2556.86	FALSE	76
2022-09-12	14:55:28	1.60383	7.13416	2460.39	FALSE	76
2022-09-12	14:55:28	0.91187	4.05618	2560.91	FALSE	76
2022-09-12	14:55:28	1.03966	4.62462	2465.01	FALSE	76
2022-09-12	14:55:29	0.817112	3.63468	2564.55	FALSE	76
2022-09-12	14:55:29	1.40134	6.23344	2471.25	FALSE	76
2022-09-12	14:55:29	0.762252	3.39065	2567.94	FALSE	76
2022-09-12	14:55:29	0.806374	3.58691	2474.83	FALSE	76
2022-09-12	14:55:30	0.882863	3.92715	2571.87	FALSE	76
2022-09-12	14:55:30	1.10159	4.90009	2479.73	FALSE	76
2022-09-12	14:55:30	4.78881	21.3016	2593.17	1	77
2022-09-12	14:55:30	1.77971	7.91651	2487.65	FALSE	77
2022-09-12	14:55:31	2.0592	9.15973	2602.33	FALSE	77
2022-09-12	14:55:31	2.61131	11.6156	2499.26	FALSE	77
2022-09-12	14:55:31	6.41925	28.5541	2630.88	1	78
2022-09-12	14:55:31	9.21243	40.9787	2540.24	1	79
2022-09-12	14:55:32	13.9861	62.213	2693.09	1	80
2022-09-12	14:55:32	9.47024	42.1255	2582.37	1	81
2022-09-12	14:55:32	6.3738	28.3519	2721.45	1	82
2022-09-12	14:55:33	4.39676	19.5577	2601.93	1	83
2022-09-12	14:55:33	3.52408	15.6758	2737.12	1	84
2022-09-12	14:55:33	5.05426	22.4824	2624.41	1	85
2022-09-12	14:55:33	1.87406	8.33619	2745.46	FALSE	85
2022-09-12	14:55:34	2.5194	11.2068	2635.62	FALSE	85
2022-09-12	14:55:34	1.1276	5.01579	2750.47	FALSE	85
2022-09-12	14:55:34	0.690802	3.07283	2638.69	FALSE	85
2022-09-12	14:55:34	0.475076	2.11323	2752.59	FALSE	85
2022-09-12	14:55:35	0.373855	1.66298	2640.35	FALSE	85
2022-09-12	14:55:35	0.17472	0.77719	2753.36	FALSE	85
2022-09-12	14:55:35	0.416603	1.85313	2642.2	FALSE	85
2022-09-12	14:55:36	0.355127	1.57968	2754.94	FALSE	85
2022-09-12	14:55:36	1.50327	6.68685	2648.89	FALSE	85
2022-09-12	14:55:36	2.55823	11.3795	2766.32	FALSE	85
2022-09-12	14:55:36	3.58871	15.9633	2664.85	1	86
2022-09-12	14:55:37	0.930547	4.13926	2770.46	FALSE	86
2022-09-12	14:55:37	0.435382	1.93667	2666.79	FALSE	86
2022-09-12	14:55:37	0.0523285	0.232768	2770.7	FALSE	86
2022-09-12	14:55:37	-0.0856358	-0.380925	2666.79	FALSE	86
2022-09-12	14:55:38	0.149275	0.664005	2771.36	FALSE	86
2022-09-12	14:55:38	0.0451529	0.200849	2666.99	FALSE	86
2022-09-12	14:55:38	0.371361	1.65189	2773.01	FALSE	86
2022-09-12	14:55:38	0.766781	3.4108	2670.4	FALSE	86
2022-09-12	14:55:39	0.512226	2.27848	2775.29	FALSE	86
2022-09-12	14:55:39	0.55701	2.47769	2672.88	FALSE	86
2022-09-12	14:55:39	0.37299	1.65913	2776.95	FALSE	86

## Sheet: Harley_harness_202291214501 (E)
Date	Time	Lbs	Total Force x time	Total Time Steps Force >3		**GoPro Fitting: 1440
2022-09-12	14:50:39	0.499351	0.499351	FALSE	0			Total Force x Time	1225.18
2022-09-12	14:50:39	0.839046	1.3384	FALSE	0			Total Time Steps Force >3	86
2022-09-12	14:50:39	0.431667	1.77006	FALSE	0
2022-09-12	14:50:40	1.96648	3.73654	FALSE	0
2022-09-12	14:50:40	0.459911	4.19646	FALSE	0
2022-09-12	14:50:40	1.68073	5.87719	FALSE	0
2022-09-12	14:50:40	0.60729	6.48448	FALSE	0
2022-09-12	14:50:41	0.915382	7.39986	FALSE	0
2022-09-12	14:50:41	1.8248	9.22466	FALSE	0
2022-09-12	14:50:41	0.949173	10.1738	FALSE	0
2022-09-12	14:50:41	1.7709	11.9447	FALSE	0
2022-09-12	14:50:42	1.22922	13.1739	FALSE	0
2022-09-12	14:50:42	0.616654	13.7906	FALSE	0
2022-09-12	14:50:42	1.64861	15.4392	FALSE	0
2022-09-12	14:50:42	0.648766	16.088	FALSE	0
2022-09-12	14:50:43	0.997722	17.0857	FALSE	0
2022-09-12	14:50:43	0.858333	17.944	FALSE	0
2022-09-12	14:50:43	0.760267	18.7043	FALSE	0
2022-09-12	14:50:44	0.193092	18.8974	FALSE	0
2022-09-12	14:50:44	0.0611835	18.9586	FALSE	0
2022-09-12	14:50:44	0.225967	19.1845	FALSE	0
2022-09-12	14:50:44	0.0470358	19.2316	FALSE	0
2022-09-12	14:50:45	0.15355	19.3851	FALSE	0
2022-09-12	14:50:45	0.22098	19.6061	FALSE	0
2022-09-12	14:50:45	0.261132	19.8672	FALSE	0
2022-09-12	14:50:45	0.626323	20.4936	FALSE	0
2022-09-12	14:50:46	0.200674	20.6942	FALSE	0
2022-09-12	14:50:46	0.651463	21.3457	FALSE	0
2022-09-12	14:50:46	1.93218	23.2779	FALSE	0
2022-09-12	14:50:46	0.527544	23.8054	FALSE	0
2022-09-12	14:50:47	4.35436	28.1598	1	1
2022-09-12	14:50:47	3.38912	31.5489	1	2
2022-09-12	14:50:47	2.55701	34.1059	FALSE	2
2022-09-12	14:50:48	0.256349	34.3623	FALSE	2
2022-09-12	14:50:48	0.00881704	34.3711	FALSE	2
2022-09-12	14:50:48	0.0104964	34.3816	FALSE	2
2022-09-12	14:50:48	-0.194389	34.3816	FALSE	2
2022-09-12	14:50:49	-0.431437	34.3816	FALSE	2
2022-09-12	14:50:49	-0.643396	34.3816	FALSE	2
2022-09-12	14:50:49	-0.670368	34.3816	FALSE	2
2022-09-12	14:50:49	-0.590267	34.3816	FALSE	2
2022-09-12	14:50:50	0.0928883	34.4745	FALSE	2
2022-09-12	14:50:50	0.236145	34.7106	FALSE	2
2022-09-12	14:50:50	4.71375	39.4244	1	3
2022-09-12	14:50:50	5.42835	44.8527	1	4
2022-09-12	14:50:51	1.54826	46.401	FALSE	4
2022-09-12	14:50:51	1.99823	48.3992	FALSE	4
2022-09-12	14:50:51	1.04673	49.4459	FALSE	4
2022-09-12	14:50:52	0.16159	49.6075	FALSE	4
2022-09-12	14:50:52	0.507138	50.1147	FALSE	4
2022-09-12	14:50:52	0.0619977	50.1767	FALSE	4
2022-09-12	14:50:52	0.372532	50.5492	FALSE	4
2022-09-12	14:50:53	0.265458	50.8146	FALSE	4
2022-09-12	14:50:53	0.152685	50.9673	FALSE	4
2022-09-12	14:50:53	0.212023	51.1794	FALSE	4
2022-09-12	14:50:53	0.0650511	51.2444	FALSE	4
2022-09-12	14:50:54	0.357417	51.6018	FALSE	4
2022-09-12	14:50:54	0.0354328	51.6373	FALSE	4
2022-09-12	14:50:54	0.428512	52.0658	FALSE	4
2022-09-12	14:50:55	0.261387	52.3272	FALSE	4
2022-09-12	14:50:55	3.00515	55.3323	1	5
2022-09-12	14:50:55	0.203626	55.5359	FALSE	5
2022-09-12	14:50:55	0.848461	56.3844	FALSE	5
2022-09-12	14:50:56	0.555738	56.9401	FALSE	5
2022-09-12	14:50:56	0.0857635	57.0259	FALSE	5
2022-09-12	14:50:56	0.472328	57.4982	FALSE	5
2022-09-12	14:50:56	0.142405	57.6406	FALSE	5
2022-09-12	14:50:57	0.70388	58.3445	FALSE	5
2022-09-12	14:50:57	0.577061	58.9216	FALSE	5
2022-09-12	14:50:57	0.649224	59.5708	FALSE	5
2022-09-12	14:50:57	1.67889	61.2497	FALSE	5
2022-09-12	14:50:58	0.201081	61.4508	FALSE	5
2022-09-12	14:50:58	0.231718	61.6825	FALSE	5
2022-09-12	14:50:58	0.746171	62.4287	FALSE	5
2022-09-12	14:50:59	0.129784	62.5584	FALSE	5
2022-09-12	14:50:59	-0.0759158	62.5584	FALSE	5
2022-09-12	14:50:59	0.245	62.8034	FALSE	5
2022-09-12	14:50:59	0.108003	62.9114	FALSE	5
2022-09-12	14:51:00	0.289937	63.2014	FALSE	5
2022-09-12	14:51:00	0.0990969	63.3005	FALSE	5
2022-09-12	14:51:00	0.284237	63.5847	FALSE	5
2022-09-12	14:51:00	0.557977	64.1427	FALSE	5
2022-09-12	14:51:01	0.33416	64.4768	FALSE	5
2022-09-12	14:51:01	0.618079	65.0949	FALSE	5
2022-09-12	14:51:01	1.23905	66.334	FALSE	5
2022-09-12	14:51:01	0.946119	67.2801	FALSE	5
2022-09-12	14:51:02	2.63121	69.9113	FALSE	5
2022-09-12	14:51:02	0.110242	70.0215	FALSE	5
2022-09-12	14:51:02	-0.00629748	70.0215	FALSE	5
2022-09-12	14:51:03	0.339097	70.3606	FALSE	5
2022-09-12	14:51:03	-0.116628	70.3606	FALSE	5
2022-09-12	14:51:03	-0.0486384	70.3606	FALSE	5
2022-09-12	14:51:03	-0.173168	70.3606	FALSE	5
2022-09-12	14:51:04	0.0117178	70.3724	FALSE	5
2022-09-12	14:51:04	-0.168791	70.3724	FALSE	5
2022-09-12	14:51:04	-0.0266537	70.3724	FALSE	5
2022-09-12	14:51:04	-0.0817173	70.3724	FALSE	5
2022-09-12	14:51:05	-0.0480277	70.3724	FALSE	5
2022-09-12	14:51:05	1.57894	71.9513	FALSE	5
2022-09-12	14:51:05	0.320064	72.2714	FALSE	5
2022-09-12	14:51:05	0.504644	72.776	FALSE	5
2022-09-12	14:51:06	0.483779	73.2598	FALSE	5
2022-09-12	14:51:06	0.73014	73.9899	FALSE	5
2022-09-12	14:51:06	0.610649	74.6006	FALSE	5
2022-09-12	14:51:07	0.658181	75.2588	FALSE	5
2022-09-12	14:51:07	0.925662	76.1844	FALSE	5
2022-09-12	14:51:07	1.87558	78.06	FALSE	5
2022-09-12	14:51:07	0.963931	79.0239	FALSE	5
2022-09-12	14:51:08	2.88093	81.9049	FALSE	5
2022-09-12	14:51:08	0.255942	82.1608	FALSE	5
2022-09-12	14:51:08	0.725458	82.8863	FALSE	5
2022-09-12	14:51:08	3.20454	86.0908	1	6
2022-09-12	14:51:09	0.139097	86.2299	FALSE	6
2022-09-12	14:51:09	0.413702	86.6436	FALSE	6
2022-09-12	14:51:09	1.05599	87.6996	FALSE	6
2022-09-12	14:51:09	0.351209	88.0508	FALSE	6
2022-09-12	14:51:10	0.167494	88.2183	FALSE	6
2022-09-12	14:51:10	0.591208	88.8095	FALSE	6
2022-09-12	14:51:10	-0.0653814	88.8095	FALSE	6
2022-09-12	14:51:11	-0.252455	88.8095	FALSE	6
2022-09-12	14:51:11	-0.22757	88.8095	FALSE	6
2022-09-12	14:51:11	-0.0514883	88.8095	FALSE	6
2022-09-12	14:51:11	-0.0661448	88.8095	FALSE	6
2022-09-12	14:51:12	-0.357544	88.8095	FALSE	6
2022-09-12	14:51:12	-0.265788	88.8095	FALSE	6
2022-09-12	14:51:12	-0.231386	88.8095	FALSE	6
2022-09-12	14:51:13	-0.0919462	88.8095	FALSE	6
2022-09-12	14:51:13	-0.0610557	88.8095	FALSE	6
2022-09-12	14:51:13	0.2107	89.0202	FALSE	6
2022-09-12	14:51:13	0.358944	89.3791	FALSE	6
2022-09-12	14:51:13	1.41788	90.797	FALSE	6
2022-09-12	14:51:14	0.373346	91.1704	FALSE	6
2022-09-12	14:51:14	1.17009	92.3405	FALSE	6
2022-09-12	14:51:14	0.438283	92.7787	FALSE	6
2022-09-12	14:51:15	1.03162	93.8104	FALSE	6
2022-09-12	14:51:15	0.36668	94.177	FALSE	6
2022-09-12	14:51:15	0.192277	94.3693	FALSE	6
2022-09-12	14:51:15	0.647697	95.017	FALSE	6
2022-09-12	14:51:16	-0.0696562	95.017	FALSE	6
2022-09-12	14:51:16	0.10271	95.1197	FALSE	6
2022-09-12	14:51:16	0.175738	95.2955	FALSE	6
2022-09-12	14:51:16	0.110344	95.4058	FALSE	6
2022-09-12	14:51:17	0.0458654	95.4517	FALSE	6
2022-09-12	14:51:17	0.167901	95.6196	FALSE	6
2022-09-12	14:51:17	0.00937683	95.629	FALSE	6
2022-09-12	14:51:18	0.173855	95.8028	FALSE	6
2022-09-12	14:51:18	0.66612	96.4689	FALSE	6
2022-09-12	14:51:18	0.478282	96.9472	FALSE	6
2022-09-12	14:51:18	1.53274	98.48	FALSE	6
2022-09-12	14:51:19	0.505916	98.9859	FALSE	6
2022-09-12	14:51:19	0.800369	99.7862	FALSE	6
2022-09-12	14:51:19	2.40062	102.187	FALSE	6
2022-09-12	14:51:19	0.44897	102.636	FALSE	6
2022-09-12	14:51:20	1.62668	104.263	FALSE	6
2022-09-12	14:51:20	0.302608	104.565	FALSE	6
2022-09-12	14:51:20	0.456654	105.022	FALSE	6
2022-09-12	14:51:20	0.700674	105.722	FALSE	6
2022-09-12	14:51:21	0.465865	106.188	FALSE	6
2022-09-12	14:51:21	0.483779	106.672	FALSE	6
2022-09-12	14:51:21	0.167596	106.84	FALSE	6
2022-09-12	14:51:21	0.354924	107.195	FALSE	6
2022-09-12	14:51:22	0.441183	107.636	FALSE	6
2022-09-12	14:51:22	0.154924	107.791	FALSE	6
2022-09-12	14:51:22	0.0667814	107.857	FALSE	6
2022-09-12	14:51:23	0.180929	108.038	FALSE	6
2022-09-12	14:51:23	0.131718	108.17	FALSE	6
2022-09-12	14:51:23	0.408359	108.579	FALSE	6
2022-09-12	14:51:23	0.546679	109.125	FALSE	6
2022-09-12	14:51:24	0.849173	109.974	FALSE	6
2022-09-12	14:51:24	0.431005	110.405	FALSE	6
2022-09-12	14:51:24	0.357875	110.763	FALSE	6
2022-09-12	14:51:24	0.371361	111.135	FALSE	6
2022-09-12	14:51:25	0.302201	111.437	FALSE	6
2022-09-12	14:51:25	0.258333	111.695	FALSE	6
2022-09-12	14:51:25	0.282354	111.977	FALSE	6
2022-09-12	14:51:25	0.265153	112.243	FALSE	6
2022-09-12	14:51:26	0.318639	112.561	FALSE	6
2022-09-12	14:51:26	0.245255	112.807	FALSE	6
2022-09-12	14:51:26	0.250598	113.057	FALSE	6
2022-09-12	14:51:27	0.26098	113.318	FALSE	6
2022-09-12	14:51:27	0.271921	113.59	FALSE	6
2022-09-12	14:51:27	0.280776	113.871	FALSE	6
2022-09-12	14:51:27	0.301082	114.172	FALSE	6
2022-09-12	14:51:28	0.794008	114.966	FALSE	6
2022-09-12	14:51:28	1.87543	116.841	FALSE	6
2022-09-12	14:51:28	1.30678	118.148	FALSE	6
2022-09-12	14:51:28	0.997519	119.146	FALSE	6
2022-09-12	14:51:29	0.747036	119.893	FALSE	6
2022-09-12	14:51:29	0.835331	120.728	FALSE	6
2022-09-12	14:51:29	0.646323	121.374	FALSE	6
2022-09-12	14:51:29	0.666374	122.041	FALSE	6
2022-09-12	14:51:30	0.732074	122.773	FALSE	6
2022-09-12	14:51:30	1.04464	123.817	FALSE	6
2022-09-12	14:51:30	0.975941	124.793	FALSE	6
2022-09-12	14:51:31	0.95757	125.751	FALSE	6
2022-09-12	14:51:31	0.549377	126.3	FALSE	6
2022-09-12	14:51:31	0.705153	127.005	FALSE	6
2022-09-12	14:51:31	0.698079	127.704	FALSE	6
2022-09-12	14:51:32	0.853244	128.557	FALSE	6
2022-09-12	14:51:32	1.45955	130.016	FALSE	6
2022-09-12	14:51:32	1.7338	131.75	FALSE	6
2022-09-12	14:51:32	1.93645	133.687	FALSE	6
2022-09-12	14:51:33	0.60042	134.287	FALSE	6
2022-09-12	14:51:33	0.824898	135.112	FALSE	6
2022-09-12	14:51:33	0.365611	135.477	FALSE	6
2022-09-12	14:51:33	0.33528	135.813	FALSE	6
2022-09-12	14:51:34	0.482964	136.296	FALSE	6
2022-09-12	14:51:34	0.45874	136.754	FALSE	6
2022-09-12	14:51:34	0.252786	137.007	FALSE	6
2022-09-12	14:51:35	0.319606	137.327	FALSE	6
2022-09-12	14:51:35	0.205662	137.533	FALSE	6
2022-09-12	14:51:35	-0.319529	137.533	FALSE	6
2022-09-12	14:51:35	-0.194542	137.533	FALSE	6
2022-09-12	14:51:36	-0.314796	137.533	FALSE	6
2022-09-12	14:51:36	0.583117	138.116	FALSE	6
2022-09-12	14:51:36	1.11487	139.231	FALSE	6
2022-09-12	14:51:36	1.31604	140.547	FALSE	6
2022-09-12	14:51:37	1.91248	142.459	FALSE	6
2022-09-12	14:51:37	2.69701	145.156	FALSE	6
2022-09-12	14:51:37	0.732481	145.889	FALSE	6
2022-09-12	14:51:37	0.7107	146.599	FALSE	6
2022-09-12	14:51:38	0.465153	147.064	FALSE	6
2022-09-12	14:51:38	0.21416	147.279	FALSE	6
2022-09-12	14:51:38	0.461947	147.74	FALSE	6
2022-09-12	14:51:39	0.148919	147.889	FALSE	6
2022-09-12	14:51:39	0.283575	148.173	FALSE	6
2022-09-12	14:51:39	0.226578	148.4	FALSE	6
2022-09-12	14:51:39	0.298232	148.698	FALSE	6
2022-09-12	14:51:40	0.223931	148.922	FALSE	6
2022-09-12	14:51:40	0.214975	149.137	FALSE	6
2022-09-12	14:51:40	0.291056	149.428	FALSE	6
2022-09-12	14:51:40	0.227901	149.656	FALSE	6
2022-09-12	14:51:41	0.0264252	149.682	FALSE	6
2022-09-12	14:51:41	-0.0527605	149.682	FALSE	6
2022-09-12	14:51:41	-0.172455	149.682	FALSE	6
2022-09-12	14:51:42	-0.513778	149.682	FALSE	6
2022-09-12	14:51:42	-0.546399	149.682	FALSE	6
2022-09-12	14:51:42	0.489326	150.171	FALSE	6
2022-09-12	14:51:42	1.64592	151.817	FALSE	6
2022-09-12	14:51:43	0.378283	152.196	FALSE	6
2022-09-12	14:51:43	0.180522	152.376	FALSE	6
2022-09-12	14:51:43	0.10612	152.482	FALSE	6
2022-09-12	14:51:43	0.370751	152.853	FALSE	6
2022-09-12	14:51:44	0.249733	153.103	FALSE	6
2022-09-12	14:51:44	0.959962	154.063	FALSE	6
2022-09-12	14:51:44	1.28042	155.343	FALSE	6
2022-09-12	14:51:44	1.79676	157.14	FALSE	6
2022-09-12	14:51:45	1.61716	158.757	FALSE	6
2022-09-12	14:51:45	0.681387	159.438	FALSE	6
2022-09-12	14:51:45	0.219046	159.657	FALSE	6
2022-09-12	14:51:46	0.846527	160.504	FALSE	6
2022-09-12	14:51:46	0.165509	160.67	FALSE	6
2022-09-12	14:51:46	0.0496822	160.719	FALSE	6
2022-09-12	14:51:46	0.263524	160.983	FALSE	6
2022-09-12	14:51:47	-0.0289947	160.983	FALSE	6
2022-09-12	14:51:47	1.04429	162.027	FALSE	6
2022-09-12	14:51:47	0.0994022	162.126	FALSE	6
2022-09-12	14:51:47	0.342914	162.469	FALSE	6
2022-09-12	14:51:48	0.398283	162.868	FALSE	6
2022-09-12	14:51:48	0.301082	163.169	FALSE	6
2022-09-12	14:51:48	1.46006	164.629	FALSE	6
2022-09-12	14:51:48	0.328868	164.958	FALSE	6
2022-09-12	14:51:49	1.41034	166.368	FALSE	6
2022-09-12	14:51:49	0.429173	166.797	FALSE	6
2022-09-12	14:51:49	0.634517	167.432	FALSE	6
2022-09-12	14:51:50	0.514924	167.947	FALSE	6
2022-09-12	14:51:50	0.217112	168.164	FALSE	6
2022-09-12	14:51:50	0.3993	168.563	FALSE	6
2022-09-12	14:51:50	0.122201	168.685	FALSE	6
2022-09-12	14:51:51	0.38098	169.066	FALSE	6
2022-09-12	14:51:51	0.194771	169.261	FALSE	6
2022-09-12	14:51:51	0.251107	169.512	FALSE	6
2022-09-12	14:51:51	0.143066	169.655	FALSE	6
2022-09-12	14:51:52	0.355127	170.01	FALSE	6
2022-09-12	14:51:52	0.530293	170.541	FALSE	6
2022-09-12	14:51:52	0.569427	171.11	FALSE	6
2022-09-12	14:51:52	2.32184	173.432	FALSE	6
2022-09-12	14:51:53	3.28922	176.721	1	7
2022-09-12	14:51:53	2.16948	178.89	FALSE	7
2022-09-12	14:51:53	3.19019	182.081	1	8
2022-09-12	14:51:54	0.31528	182.396	FALSE	8
2022-09-12	14:51:54	0.21869	182.615	FALSE	8
2022-09-12	14:51:54	0.513499	183.128	FALSE	8
2022-09-12	14:51:54	0.230344	183.358	FALSE	8
2022-09-12	14:51:55	0.250954	183.609	FALSE	8
2022-09-12	14:51:55	0.361082	183.971	FALSE	8
2022-09-12	14:51:55	0.265763	184.236	FALSE	8
2022-09-12	14:51:55	0.286018	184.522	FALSE	8
2022-09-12	14:51:56	0.176756	184.699	FALSE	8
2022-09-12	14:51:56	0.392176	185.091	FALSE	8
2022-09-12	14:51:56	0.184033	185.275	FALSE	8
2022-09-12	14:51:56	0.438537	185.714	FALSE	8
2022-09-12	14:51:57	0.353041	186.067	FALSE	8
2022-09-12	14:51:57	2.32815	188.395	FALSE	8
2022-09-12	14:51:57	1.00536	189.4	FALSE	8
2022-09-12	14:51:58	2.9738	192.374	FALSE	8
2022-09-12	14:51:58	0.543219	192.917	FALSE	8
2022-09-12	14:51:58	1.34057	194.258	FALSE	8
2022-09-12	14:51:58	0.698486	194.956	FALSE	8
2022-09-12	14:51:59	0.248257	195.205	FALSE	8
2022-09-12	14:51:59	0.525814	195.731	FALSE	8
2022-09-12	14:51:59	0.125255	195.856	FALSE	8
2022-09-12	14:51:59	1.2851	197.141	FALSE	8
2022-09-12	14:52:00	2.39258	199.533	FALSE	8
2022-09-12	14:52:00	3.4621	202.996	1	9
2022-09-12	14:52:00	1.2821	204.278	FALSE	9
2022-09-12	14:52:00	0.775127	205.053	FALSE	9
2022-09-12	14:52:01	1.35864	206.411	FALSE	9
2022-09-12	14:52:01	0.774669	207.186	FALSE	9
2022-09-12	14:52:01	4.5481	211.734	1	10
2022-09-12	14:52:02	7.07197	218.806	1	11
2022-09-12	14:52:02	10.3478	229.154	1	12
2022-09-12	14:52:02	10.679	239.833	1	13
2022-09-12	14:52:02	2.75945	242.592	FALSE	13
2022-09-12	14:52:03	3.56495	246.157	1	14
2022-09-12	14:52:03	1.87803	248.035	FALSE	14
2022-09-12	14:52:03	0.477824	248.513	FALSE	14
2022-09-12	14:52:03	0.773448	249.287	FALSE	14
2022-09-12	14:52:04	0.285814	249.572	FALSE	14
2022-09-12	14:52:04	0.433651	250.006	FALSE	14
2022-09-12	14:52:04	0.163524	250.17	FALSE	14
2022-09-12	14:52:04	0.470446	250.64	FALSE	14
2022-09-12	14:52:05	0.489733	251.13	FALSE	14
2022-09-12	14:52:05	0.347341	251.477	FALSE	14
2022-09-12	14:52:05	0.506069	251.983	FALSE	14
2022-09-12	14:52:06	1.80505	253.788	FALSE	14
2022-09-12	14:52:06	1.16032	254.949	FALSE	14
2022-09-12	14:52:06	0.627748	255.576	FALSE	14
2022-09-12	14:52:06	2.02642	257.603	FALSE	14
2022-09-12	14:52:07	0.628817	258.232	FALSE	14
2022-09-12	14:52:07	0.716043	258.948	FALSE	14
2022-09-12	14:52:07	0.645102	259.593	FALSE	14
2022-09-12	14:52:07	0.251718	259.844	FALSE	14
2022-09-12	14:52:08	0.637163	260.482	FALSE	14
2022-09-12	14:52:08	0.325509	260.807	FALSE	14
2022-09-12	14:52:08	0.407697	261.215	FALSE	14
2022-09-12	14:52:08	0.346883	261.562	FALSE	14
2022-09-12	14:52:09	0.44958	262.011	FALSE	14
2022-09-12	14:52:09	0.208664	262.22	FALSE	14
2022-09-12	14:52:09	0.608562	262.829	FALSE	14
2022-09-12	14:52:10	0.268206	263.097	FALSE	14
2022-09-12	14:52:10	0.505611	263.602	FALSE	14
2022-09-12	14:52:10	0.257316	263.86	FALSE	14
2022-09-12	14:52:10	2.70108	266.561	FALSE	14
2022-09-12	14:52:11	1.50963	268.07	FALSE	14
2022-09-12	14:52:11	1.14805	269.218	FALSE	14
2022-09-12	14:52:11	0.211056	269.429	FALSE	14
2022-09-12	14:52:11	0.332939	269.762	FALSE	14
2022-09-12	14:52:12	0.345102	270.107	FALSE	14
2022-09-12	14:52:12	0.389835	270.497	FALSE	14
2022-09-12	14:52:12	0.294771	270.792	FALSE	14
2022-09-12	14:52:12	0.125814	270.918	FALSE	14
2022-09-12	14:52:13	0.391616	271.31	FALSE	14
2022-09-12	14:52:13	0.208461	271.518	FALSE	14
2022-09-12	14:52:13	0.447087	271.965	FALSE	14
2022-09-12	14:52:14	0.296705	272.262	FALSE	14
2022-09-12	14:52:14	2.4248	274.687	FALSE	14
2022-09-12	14:52:14	3.3909	278.077	1	15
2022-09-12	14:52:14	5.57976	283.657	1	16
2022-09-12	14:52:15	2.26073	285.918	FALSE	16
2022-09-12	14:52:15	4.46485	290.383	1	17
2022-09-12	14:52:15	0.516959	290.9	FALSE	17
2022-09-12	14:52:15	1.7994	292.699	FALSE	17
2022-09-12	14:52:16	1.90184	294.601	FALSE	17
2022-09-12	14:52:16	2.01004	296.611	FALSE	17
2022-09-12	14:52:16	1.96129	298.572	FALSE	17
2022-09-12	14:52:16	0.227239	298.8	FALSE	17
2022-09-12	14:52:17	1.61233	300.412	FALSE	17
2022-09-12	14:52:17	2.73487	303.147	FALSE	17
2022-09-12	14:52:17	1.14836	304.295	FALSE	17
2022-09-12	14:52:18	1.17772	305.473	FALSE	17
2022-09-12	14:52:18	1.99273	307.466	FALSE	17
2022-09-12	14:52:18	1.40983	308.875	FALSE	17
2022-09-12	14:52:18	2.19635	311.072	FALSE	17
2022-09-12	14:52:19	0.833142	311.905	FALSE	17
2022-09-12	14:52:19	1.38398	313.289	FALSE	17
2022-09-12	14:52:19	1.10943	314.398	FALSE	17
2022-09-12	14:52:19	0.340878	314.739	FALSE	17
2022-09-12	14:52:20	1.01874	315.758	FALSE	17
2022-09-12	14:52:20	0.948461	316.706	FALSE	17
2022-09-12	14:52:20	0.434008	317.14	FALSE	17
2022-09-12	14:52:21	0.270293	317.411	FALSE	17
2022-09-12	14:52:21	0.554924	317.966	FALSE	17
2022-09-12	14:52:21	0.220064	318.186	FALSE	17
2022-09-12	14:52:21	0.128359	318.314	FALSE	17
2022-09-12	14:52:22	0.264084	318.578	FALSE	17
2022-09-12	14:52:22	0.50159	319.08	FALSE	17
2022-09-12	14:52:22	0.315687	319.395	FALSE	17
2022-09-12	14:52:22	0.725763	320.121	FALSE	17
2022-09-12	14:52:23	2.84795	322.969	FALSE	17
2022-09-12	14:52:23	1.32816	324.297	FALSE	17
2022-09-12	14:52:23	2.7339	327.031	FALSE	17
2022-09-12	14:52:23	1.18057	328.212	FALSE	17
2022-09-12	14:52:24	1.2136	329.425	FALSE	17
2022-09-12	14:52:24	2.0337	331.459	FALSE	17
2022-09-12	14:52:24	0.630038	332.089	FALSE	17
2022-09-12	14:52:25	1.66195	333.751	FALSE	17
2022-09-12	14:52:25	0.300318	334.051	FALSE	17
2022-09-12	14:52:25	3.03243	337.084	1	18
2022-09-12	14:52:25	1.36709	338.451	FALSE	18
2022-09-12	14:52:26	3.63798	342.089	1	19
2022-09-12	14:52:26	3.38474	345.474	1	20
2022-09-12	14:52:26	1.61172	347.085	FALSE	20
2022-09-12	14:52:26	1.06642	348.152	FALSE	20
2022-09-12	14:52:27	0.447036	348.599	FALSE	20
2022-09-12	14:52:27	1.19777	349.797	FALSE	20
2022-09-12	14:52:27	1.38296	351.18	FALSE	20
2022-09-12	14:52:27	0.976603	352.156	FALSE	20
2022-09-12	14:52:28	0.698638	352.855	FALSE	20
2022-09-12	14:52:28	2.02078	354.876	FALSE	20
2022-09-12	14:52:28	0.540522	355.416	FALSE	20
2022-09-12	14:52:29	0.74673	356.163	FALSE	20
2022-09-12	14:52:29	2.84627	359.009	FALSE	20
2022-09-12	14:52:29	0.243982	359.253	FALSE	20
2022-09-12	14:52:29	1.84174	361.095	FALSE	20
2022-09-12	14:52:30	0.860522	361.955	FALSE	20
2022-09-12	14:52:30	0.536909	362.492	FALSE	20
2022-09-12	14:52:30	0.432227	362.924	FALSE	20
2022-09-12	14:52:30	0.734364	363.659	FALSE	20
2022-09-12	14:52:31	0.724186	364.383	FALSE	20
2022-09-12	14:52:31	0.69701	365.08	FALSE	20
2022-09-12	14:52:31	2.35599	367.436	FALSE	20
2022-09-12	14:52:31	1.17156	368.608	FALSE	20
2022-09-12	14:52:32	1.7852	370.393	FALSE	20
2022-09-12	14:52:32	0.530547	370.923	FALSE	20
2022-09-12	14:52:32	0.810954	371.734	FALSE	20
2022-09-12	14:52:33	0.627952	372.362	FALSE	20
2022-09-12	14:52:33	1.97055	374.333	FALSE	20
2022-09-12	14:52:33	2.75513	377.088	FALSE	20
2022-09-12	14:52:33	2.67304	379.761	FALSE	20
2022-09-12	14:52:34	2.68658	382.448	FALSE	20
2022-09-12	14:52:34	1.69329	384.141	FALSE	20
2022-09-12	14:52:34	2.41218	386.553	FALSE	20
2022-09-12	14:52:34	0.630903	387.184	FALSE	20
2022-09-12	14:52:35	0.572226	387.756	FALSE	20
2022-09-12	14:52:35	0.935229	388.691	FALSE	20
2022-09-12	14:52:35	0.163066	388.854	FALSE	20
2022-09-12	14:52:35	0.171158	389.026	FALSE	20
2022-09-12	14:52:36	0.359809	389.385	FALSE	20
2022-09-12	14:52:36	0.515534	389.901	FALSE	20
2022-09-12	14:52:36	0.238333	390.139	FALSE	20
2022-09-12	14:52:37	0.522201	390.661	FALSE	20
2022-09-12	14:52:37	0.264898	390.926	FALSE	20
2022-09-12	14:52:37	0.179911	391.106	FALSE	20
2022-09-12	14:52:37	0.305967	391.412	FALSE	20
2022-09-12	14:52:38	0.280318	391.693	FALSE	20
2022-09-12	14:52:38	0.283982	391.977	FALSE	20
2022-09-12	14:52:38	0.114415	392.091	FALSE	20
2022-09-12	14:52:38	0.278181	392.369	FALSE	20
2022-09-12	14:52:39	0.58388	392.953	FALSE	20
2022-09-12	14:52:39	0.236247	393.189	FALSE	20
2022-09-12	14:52:39	0.441031	393.63	FALSE	20
2022-09-12	14:52:39	0.329479	393.96	FALSE	20
2022-09-12	14:52:40	0.360267	394.32	FALSE	20
2022-09-12	14:52:40	1.47732	395.797	FALSE	20
2022-09-12	14:52:40	0.349682	396.147	FALSE	20
2022-09-12	14:52:41	0.19472	396.342	FALSE	20
2022-09-12	14:52:41	0.464949	396.807	FALSE	20
2022-09-12	14:52:41	0.192023	396.999	FALSE	20
2022-09-12	14:52:41	0.192227	397.191	FALSE	20
2022-09-12	14:52:42	0.261438	397.452	FALSE	20
2022-09-12	14:52:42	0.14098	397.593	FALSE	20
2022-09-12	14:52:42	0.288206	397.882	FALSE	20
2022-09-12	14:52:42	0.183321	398.065	FALSE	20
2022-09-12	14:52:43	0.233092	398.298	FALSE	20
2022-09-12	14:52:43	0.100318	398.398	FALSE	20
2022-09-12	14:52:43	0.335026	398.733	FALSE	20
2022-09-12	14:52:43	0.268919	399.002	FALSE	20
2022-09-12	14:52:44	0.173957	399.176	FALSE	20
2022-09-12	14:52:44	0.188105	399.364	FALSE	20
2022-09-12	14:52:44	0.230954	399.595	FALSE	20
2022-09-12	14:52:45	0.386781	399.982	FALSE	20
2022-09-12	14:52:45	0.137825	400.12	FALSE	20
2022-09-12	14:52:45	0.205967	400.326	FALSE	20
2022-09-12	14:52:45	0.154466	400.48	FALSE	20
2022-09-12	14:52:46	0.374771	400.855	FALSE	20
2022-09-12	14:52:46	0.121031	400.976	FALSE	20
2022-09-12	14:52:46	0.438486	401.415	FALSE	20
2022-09-12	14:52:46	0.301285	401.716	FALSE	20
2022-09-12	14:52:47	0.682507	402.398	FALSE	20
2022-09-12	14:52:47	1.34357	403.742	FALSE	20
2022-09-12	14:52:47	0.797723	404.54	FALSE	20
2022-09-12	14:52:47	1.19828	405.738	FALSE	20
2022-09-12	14:52:48	2.311	408.049	FALSE	20
2022-09-12	14:52:48	0.231005	408.28	FALSE	20
2022-09-12	14:52:48	1.11029	409.39	FALSE	20
2022-09-12	14:52:49	1.42663	410.817	FALSE	20
2022-09-12	14:52:49	0.459249	411.276	FALSE	20
2022-09-12	14:52:49	0.765967	412.042	FALSE	20
2022-09-12	14:52:49	0.994466	413.037	FALSE	20
2022-09-12	14:52:50	0.373193	413.41	FALSE	20
2022-09-12	14:52:50	0.118639	413.528	FALSE	20
2022-09-12	14:52:50	0.433346	413.962	FALSE	20
2022-09-12	14:52:50	0.0341096	413.996	FALSE	20
2022-09-12	14:52:51	0.332379	414.328	FALSE	20
2022-09-12	14:52:51	0.157265	414.485	FALSE	20
2022-09-12	14:52:51	0.365967	414.851	FALSE	20
2022-09-12	14:52:51	0.183066	415.035	FALSE	20
2022-09-12	14:52:52	0.427087	415.462	FALSE	20
2022-09-12	14:52:52	0.183677	415.645	FALSE	20
2022-09-12	14:52:52	0.351565	415.997	FALSE	20
2022-09-12	14:52:53	0.227188	416.224	FALSE	20
2022-09-12	14:52:53	0.376858	416.601	FALSE	20
2022-09-12	14:52:53	0.266883	416.868	FALSE	20
2022-09-12	14:52:53	0.313702	417.181	FALSE	20
2022-09-12	14:52:54	0.362557	417.544	FALSE	20
2022-09-12	14:52:54	0.261692	417.806	FALSE	20
2022-09-12	14:52:54	0.455178	418.261	FALSE	20
2022-09-12	14:52:54	0.250038	418.511	FALSE	20
2022-09-12	14:52:55	0.410852	418.922	FALSE	20
2022-09-12	14:52:55	0.303728	419.226	FALSE	20
2022-09-12	14:52:55	0.273855	419.499	FALSE	20
2022-09-12	14:52:55	0.359249	419.859	FALSE	20
2022-09-12	14:52:56	0.245611	420.104	FALSE	20
2022-09-12	14:52:56	0.445255	420.549	FALSE	20
2022-09-12	14:52:56	0.243677	420.793	FALSE	20
2022-09-12	14:52:57	0.459504	421.253	FALSE	20
2022-09-12	14:52:57	0.229733	421.482	FALSE	20
2022-09-12	14:52:57	0.377875	421.86	FALSE	20
2022-09-12	14:52:57	0.550242	422.411	FALSE	20
2022-09-12	14:52:58	1.9477	424.358	FALSE	20
2022-09-12	14:52:58	0.907799	425.266	FALSE	20
2022-09-12	14:52:58	1.57034	426.836	FALSE	20
2022-09-12	14:52:58	1.4107	428.247	FALSE	20
2022-09-12	14:52:59	1.14459	429.392	FALSE	20
2022-09-12	14:52:59	1.51258	430.904	FALSE	20
2022-09-12	14:52:59	1.33564	432.24	FALSE	20
2022-09-12	14:52:59	1.02912	433.269	FALSE	20
2022-09-12	14:53:00	0.757621	434.027	FALSE	20
2022-09-12	14:53:00	0.813957	434.841	FALSE	20
2022-09-12	14:53:00	0.722608	435.563	FALSE	20
2022-09-12	14:53:01	0.972277	436.535	FALSE	20
2022-09-12	14:53:01	1.571	438.106	FALSE	20
2022-09-12	14:53:01	1.21859	439.325	FALSE	20
2022-09-12	14:53:01	0.909987	440.235	FALSE	20
2022-09-12	14:53:02	0.890801	441.126	FALSE	20
2022-09-12	14:53:02	0.688308	441.814	FALSE	20
2022-09-12	14:53:02	0.495636	442.31	FALSE	20
2022-09-12	14:53:02	0.411769	442.722	FALSE	20
2022-09-12	14:53:03	0.449275	443.171	FALSE	20
2022-09-12	14:53:03	0.318079	443.489	FALSE	20
2022-09-12	14:53:03	0.285865	443.775	FALSE	20
2022-09-12	14:53:03	0.0116669	443.786	FALSE	20
2022-09-12	14:53:04	-0.117188	443.786	FALSE	20
2022-09-12	14:53:04	-0.0034476	443.786	FALSE	20
2022-09-12	14:53:04	-0.0132186	443.786	FALSE	20
2022-09-12	14:53:05	-0.0519972	443.786	FALSE	20
2022-09-12	14:53:05	-0.349147	443.786	FALSE	20
2022-09-12	14:53:05	-0.37047	443.786	FALSE	20
2022-09-12	14:53:05	-0.145534	443.786	FALSE	20
2022-09-12	14:53:06	0.239351	444.026	FALSE	20
2022-09-12	14:53:06	0.191361	444.217	FALSE	20
2022-09-12	14:53:06	0.184135	444.401	FALSE	20
2022-09-12	14:53:07	0.0756364	444.477	FALSE	20
2022-09-12	14:53:07	0.272074	444.749	FALSE	20
2022-09-12	14:53:07	0.316349	445.065	FALSE	20
2022-09-12	14:53:07	0.336145	445.401	FALSE	20
2022-09-12	14:53:08	0.369987	445.771	FALSE	20
2022-09-12	14:53:08	0.340725	446.112	FALSE	20
2022-09-12	14:53:08	0.342405	446.455	FALSE	20
2022-09-12	14:53:08	0.335738	446.79	FALSE	20
2022-09-12	14:53:09	0.309427	447.1	FALSE	20
2022-09-12	14:53:09	0.299453	447.399	FALSE	20
2022-09-12	14:53:09	0.294059	447.693	FALSE	20
2022-09-12	14:53:09	0.285967	447.979	FALSE	20
2022-09-12	14:53:10	0.288817	448.268	FALSE	20
2022-09-12	14:53:10	0.225662	448.494	FALSE	20
2022-09-12	14:53:10	-0.0201397	448.494	FALSE	20
2022-09-12	14:53:10	-0.0503687	448.494	FALSE	20
2022-09-12	14:53:11	-0.116425	448.494	FALSE	20
2022-09-12	14:53:11	-0.349351	448.494	FALSE	20
2022-09-12	14:53:11	-0.436933	448.494	FALSE	20
2022-09-12	14:53:12	-0.387162	448.494	FALSE	20
2022-09-12	14:53:12	-0.29958	448.494	FALSE	20
2022-09-12	14:53:12	-0.484109	448.494	FALSE	20
2022-09-12	14:53:12	-0.460852	448.494	FALSE	20
2022-09-12	14:53:13	-0.421106	448.494	FALSE	20
2022-09-12	14:53:13	-0.433066	448.494	FALSE	20
2022-09-12	14:53:13	0.0177229	448.511	FALSE	20
2022-09-12	14:53:13	-0.0476715	448.511	FALSE	20
2022-09-12	14:53:14	0.221998	448.733	FALSE	20
2022-09-12	14:53:14	0.147494	448.881	FALSE	20
2022-09-12	14:53:14	0.324542	449.205	FALSE	20
2022-09-12	14:53:14	0.160522	449.366	FALSE	20
2022-09-12	14:53:15	0.119148	449.485	FALSE	20
2022-09-12	14:53:15	0.0751275	449.56	FALSE	20
2022-09-12	14:53:15	0.210802	449.771	FALSE	20
2022-09-12	14:53:16	0.0848984	449.856	FALSE	20
2022-09-12	14:53:16	0.117418	449.973	FALSE	20
2022-09-12	14:53:16	0.111463	450.085	FALSE	20
2022-09-12	14:53:16	0.300369	450.385	FALSE	20
2022-09-12	14:53:17	0.113397	450.499	FALSE	20
2022-09-12	14:53:17	0.145509	450.644	FALSE	20
2022-09-12	14:53:17	0.12958	450.774	FALSE	20
2022-09-12	14:53:17	0.117265	450.891	FALSE	20
2022-09-12	14:53:18	0.159707	451.051	FALSE	20
2022-09-12	14:53:18	-0.105127	451.051	FALSE	20
2022-09-12	14:53:18	0.0833208	451.134	FALSE	20
2022-09-12	14:53:18	0.083728	451.218	FALSE	20
2022-09-12	14:53:19	-0.0208522	451.218	FALSE	20
2022-09-12	14:53:19	-0.114033	451.218	FALSE	20
2022-09-12	14:53:19	-0.127264	451.218	FALSE	20
2022-09-12	14:53:20	-0.150165	451.218	FALSE	20
2022-09-12	14:53:20	-1.11093	451.218	FALSE	20
2022-09-12	14:53:20	0.134568	451.352	FALSE	20
2022-09-12	14:53:20	0.259606	451.612	FALSE	20
2022-09-12	14:53:21	0.789529	452.401	FALSE	20
2022-09-12	14:53:21	3.58378	455.985	1	21
2022-09-12	14:53:21	2.12724	458.112	FALSE	21
2022-09-12	14:53:21	0.645356	458.758	FALSE	21
2022-09-12	14:53:22	0.317163	459.075	FALSE	21
2022-09-12	14:53:22	0.089733	459.165	FALSE	21
2022-09-12	14:53:22	-0.459681	459.165	FALSE	21
2022-09-12	14:53:22	-0.618053	459.165	FALSE	21
2022-09-12	14:53:23	-0.790368	459.165	FALSE	21
2022-09-12	14:53:23	-0.744312	459.165	FALSE	21
2022-09-12	14:53:23	-0.781869	459.165	FALSE	21
2022-09-12	14:53:24	-0.560241	459.165	FALSE	21
2022-09-12	14:53:24	-0.451335	459.165	FALSE	21
2022-09-12	14:53:24	-0.434592	459.165	FALSE	21
2022-09-12	14:53:24	-0.181157	459.165	FALSE	21
2022-09-12	14:53:25	-0.406552	459.165	FALSE	21
2022-09-12	14:53:25	-0.552048	459.165	FALSE	21
2022-09-12	14:53:25	-0.60589	459.165	FALSE	21
2022-09-12	14:53:25	-0.691081	459.165	FALSE	21
2022-09-12	14:53:26	-0.707315	459.165	FALSE	21
2022-09-12	14:53:26	-0.575101	459.165	FALSE	21
2022-09-12	14:53:26	-0.613269	459.165	FALSE	21
2022-09-12	14:53:26	-0.507366	459.165	FALSE	21
2022-09-12	14:53:27	-0.474745	459.165	FALSE	21
2022-09-12	14:53:27	-0.433066	459.165	FALSE	21
2022-09-12	14:53:27	-0.477646	459.165	FALSE	21
2022-09-12	14:53:28	-0.294491	459.165	FALSE	21
2022-09-12	14:53:28	-0.356832	459.165	FALSE	21
2022-09-12	14:53:28	-0.226501	459.165	FALSE	21
2022-09-12	14:53:28	-0.217748	459.165	FALSE	21
2022-09-12	14:53:29	-0.0982058	459.165	FALSE	21
2022-09-12	14:53:29	-0.244567	459.165	FALSE	21
2022-09-12	14:53:29	-0.218918	459.165	FALSE	21
2022-09-12	14:53:29	-0.31103	459.165	FALSE	21
2022-09-12	14:53:30	-0.328384	459.165	FALSE	21
2022-09-12	14:53:30	-0.389961	459.165	FALSE	21
2022-09-12	14:53:30	-0.32416	459.165	FALSE	21
2022-09-12	14:53:30	-0.278257	459.165	FALSE	21
2022-09-12	14:53:31	-0.164007	459.165	FALSE	21
2022-09-12	14:53:31	-0.334745	459.165	FALSE	21
2022-09-12	14:53:31	-0.186603	459.165	FALSE	21
2022-09-12	14:53:32	-0.101107	459.165	FALSE	21
2022-09-12	14:53:32	0.0380282	459.203	FALSE	21
2022-09-12	14:53:32	0.691717	459.894	FALSE	21
2022-09-12	14:53:32	0.470446	460.365	FALSE	21
2022-09-12	14:53:33	0.292074	460.657	FALSE	21
2022-09-12	14:53:33	0.16556	460.823	FALSE	21
2022-09-12	14:53:33	0.394822	461.217	FALSE	21
2022-09-12	14:53:33	0.204848	461.422	FALSE	21
2022-09-12	14:53:34	0.573448	461.996	FALSE	21
2022-09-12	14:53:34	0.738995	462.735	FALSE	21
2022-09-12	14:53:34	0.5336	463.268	FALSE	21
2022-09-12	14:53:34	0.96612	464.234	FALSE	21
2022-09-12	14:53:35	0.737163	464.972	FALSE	21
2022-09-12	14:53:35	0.857926	465.829	FALSE	21
2022-09-12	14:53:35	0.637112	466.467	FALSE	21
2022-09-12	14:53:36	0.611209	467.078	FALSE	21
2022-09-12	14:53:36	0.799758	467.878	FALSE	21
2022-09-12	14:53:36	1.60693	469.484	FALSE	21
2022-09-12	14:53:36	0.771209	470.256	FALSE	21
2022-09-12	14:53:37	1.73497	471.991	FALSE	21
2022-09-12	14:53:37	0.333651	472.324	FALSE	21
2022-09-12	14:53:37	0.660776	472.985	FALSE	21
2022-09-12	14:53:37	1.73604	474.721	FALSE	21
2022-09-12	14:53:38	0.615738	475.337	FALSE	21
2022-09-12	14:53:38	1.67528	477.012	FALSE	21
2022-09-12	14:53:38	1.12927	478.141	FALSE	21
2022-09-12	14:53:38	0.901234	479.043	FALSE	21
2022-09-12	14:53:39	0.943524	479.986	FALSE	21
2022-09-12	14:53:39	0.32215	480.308	FALSE	21
2022-09-12	14:53:39	0.244695	480.553	FALSE	21
2022-09-12	14:53:40	1.56408	482.117	FALSE	21
2022-09-12	14:53:40	0.14785	482.265	FALSE	21
2022-09-12	14:53:40	0.57874	482.844	FALSE	21
2022-09-12	14:53:40	1.06541	483.909	FALSE	21
2022-09-12	14:53:41	1.25879	485.168	FALSE	21
2022-09-12	14:53:41	1.44363	486.611	FALSE	21
2022-09-12	14:53:41	0.878944	487.49	FALSE	21
2022-09-12	14:53:41	1.38083	488.871	FALSE	21
2022-09-12	14:53:42	1.14566	490.017	FALSE	21
2022-09-12	14:53:42	0.697824	490.715	FALSE	21
2022-09-12	14:53:42	0.716043	491.431	FALSE	21
2022-09-12	14:53:43	1.04037	492.471	FALSE	21
2022-09-12	14:53:43	0.346425	492.818	FALSE	21
2022-09-12	14:53:43	1.17503	493.993	FALSE	21
2022-09-12	14:53:43	0.422456	494.415	FALSE	21
2022-09-12	14:53:44	2.34296	496.758	FALSE	21
2022-09-12	14:53:44	0.368308	497.126	FALSE	21
2022-09-12	14:53:44	2.07492	499.201	FALSE	21
2022-09-12	14:53:44	0.491921	499.693	FALSE	21
2022-09-12	14:53:45	1.96637	501.66	FALSE	21
2022-09-12	14:53:45	1.17304	502.833	FALSE	21
2022-09-12	14:53:45	1.00454	503.837	FALSE	21
2022-09-12	14:53:45	1.9652	505.802	FALSE	21
2022-09-12	14:53:46	0.383321	506.186	FALSE	21
2022-09-12	14:53:46	1.8281	508.014	FALSE	21
2022-09-12	14:53:46	0.299606	508.313	FALSE	21
2022-09-12	14:53:47	1.95009	510.263	FALSE	21
2022-09-12	14:53:47	0.887901	511.151	FALSE	21
2022-09-12	14:53:47	1.33309	512.484	FALSE	21
2022-09-12	14:53:47	1.89905	514.383	FALSE	21
2022-09-12	14:53:48	0.911107	515.295	FALSE	21
2022-09-12	14:53:48	2.27782	517.572	FALSE	21
2022-09-12	14:53:48	0.40785	517.98	FALSE	21
2022-09-12	14:53:48	2.43731	520.418	FALSE	21
2022-09-12	14:53:49	0.82617	521.244	FALSE	21
2022-09-12	14:53:49	1.27548	522.519	FALSE	21
2022-09-12	14:53:49	0.917773	523.437	FALSE	21
2022-09-12	14:53:49	0.611565	524.049	FALSE	21
2022-09-12	14:53:50	0.7193	524.768	FALSE	21
2022-09-12	14:53:50	0.484084	525.252	FALSE	21
2022-09-12	14:53:50	0.775687	526.028	FALSE	21
2022-09-12	14:53:51	0.719555	526.747	FALSE	21
2022-09-12	14:53:51	0.885356	527.633	FALSE	21
2022-09-12	14:53:51	0.516654	528.149	FALSE	21
2022-09-12	14:53:51	2.26205	530.411	FALSE	21
2022-09-12	14:53:52	0.626883	531.038	FALSE	21
2022-09-12	14:53:52	3.371	534.409	1	22
2022-09-12	14:53:52	0.94327	535.352	FALSE	22
2022-09-12	14:53:52	5.71431	541.067	1	23
2022-09-12	14:53:53	1.45833	542.525	FALSE	23
2022-09-12	14:53:53	3.59691	546.122	1	24
2022-09-12	14:53:53	1.05899	547.181	FALSE	24
2022-09-12	14:53:53	0.816857	547.998	FALSE	24
2022-09-12	14:53:54	1.06541	549.063	FALSE	24
2022-09-12	14:53:54	0.259606	549.323	FALSE	24
2022-09-12	14:53:54	0.770343	550.093	FALSE	24
2022-09-12	14:53:55	1.44164	551.535	FALSE	24
2022-09-12	14:53:55	1.29472	552.83	FALSE	24
2022-09-12	14:53:55	2.29737	555.127	FALSE	24
2022-09-12	14:53:55	2.10795	557.235	FALSE	24
2022-09-12	14:53:56	1.84749	559.082	FALSE	24
2022-09-12	14:53:56	1.88698	560.969	FALSE	24
2022-09-12	14:53:56	1.54144	562.511	FALSE	24
2022-09-12	14:53:57	2.0962	564.607	FALSE	24
2022-09-12	14:53:57	1.99126	566.598	FALSE	24
2022-09-12	14:53:57	2.40393	569.002	FALSE	24
2022-09-12	14:53:57	2.18978	571.192	FALSE	24
2022-09-12	14:53:57	2.45604	573.648	FALSE	24
2022-09-12	14:53:58	1.05899	574.707	FALSE	24
2022-09-12	14:53:58	1.26999	575.977	FALSE	24
2022-09-12	14:53:58	1.03141	577.008	FALSE	24
2022-09-12	14:53:59	1.57294	578.581	FALSE	24
2022-09-12	14:53:59	1.63314	580.214	FALSE	24
2022-09-12	14:53:59	4.04261	584.257	1	25
2022-09-12	14:53:59	6.58505	590.842	1	26
2022-09-12	14:54:00	4.98184	595.824	1	27
2022-09-12	14:54:00	9.73502	605.559	1	28
2022-09-12	14:54:00	2.5738	608.133	FALSE	28
2022-09-12	14:54:00	4.17915	612.312	1	29
2022-09-12	14:54:01	3.61477	615.927	1	30
2022-09-12	14:54:01	4.46454	620.391	1	31
2022-09-12	14:54:01	2.19263	622.584	FALSE	31
2022-09-12	14:54:01	2.86973	625.454	FALSE	31
2022-09-12	14:54:02	3.67991	629.133	1	32
2022-09-12	14:54:02	3.26933	632.403	1	33
2022-09-12	14:54:02	3.3277	635.731	1	34
2022-09-12	14:54:03	2.05182	637.782	FALSE	34
2022-09-12	14:54:03	2.53726	640.32	FALSE	34
2022-09-12	14:54:03	3.482	643.802	1	35
2022-09-12	14:54:03	6.24204	650.044	1	36
2022-09-12	14:54:04	4.86505	654.909	1	37
2022-09-12	14:54:04	5.42937	660.338	1	38
2022-09-12	14:54:04	3.49884	663.837	1	39
2022-09-12	14:54:04	2.908	666.745	FALSE	39
2022-09-12	14:54:05	2.92439	669.669	FALSE	39
2022-09-12	14:54:05	2.84006	672.509	FALSE	39
2022-09-12	14:54:05	2.93772	675.447	FALSE	39
2022-09-12	14:54:05	3.19406	678.641	1	40
2022-09-12	14:54:06	3.02887	681.67	1	41
2022-09-12	14:54:06	2.4737	684.144	FALSE	41
2022-09-12	14:54:06	2.12108	686.265	FALSE	41
2022-09-12	14:54:07	1.96678	688.232	FALSE	41
2022-09-12	14:54:07	1.7764	690.008	FALSE	41
2022-09-12	14:54:07	1.07396	691.082	FALSE	41
2022-09-12	14:54:07	1.728	692.81	FALSE	41
2022-09-12	14:54:08	1.81706	694.627	FALSE	41
2022-09-12	14:54:08	2.11599	696.743	FALSE	41
2022-09-12	14:54:08	2.25426	698.997	FALSE	41
2022-09-12	14:54:08	2.27314	701.27	FALSE	41
2022-09-12	14:54:09	2.33039	703.601	FALSE	41
2022-09-12	14:54:09	2.31156	705.912	FALSE	41
2022-09-12	14:54:09	2.42378	708.336	FALSE	41
2022-09-12	14:54:09	2.49543	710.832	FALSE	41
2022-09-12	14:54:10	2.48408	713.316	FALSE	41
2022-09-12	14:54:10	2.4367	715.752	FALSE	41
2022-09-12	14:54:10	2.39253	718.145	FALSE	41
2022-09-12	14:54:11	2.36556	720.51	FALSE	41
2022-09-12	14:54:11	2.31172	722.822	FALSE	41
2022-09-12	14:54:11	2.25772	725.08	FALSE	41
2022-09-12	14:54:11	2.29889	727.379	FALSE	41
2022-09-12	14:54:12	2.28139	729.66	FALSE	41
2022-09-12	14:54:12	2.27894	731.939	FALSE	41
2022-09-12	14:54:12	2.30184	734.241	FALSE	41
2022-09-12	14:54:12	2.32846	736.569	FALSE	41
2022-09-12	14:54:13	2.33101	738.9	FALSE	41
2022-09-12	14:54:13	2.26927	741.17	FALSE	41
2022-09-12	14:54:13	2.07273	743.242	FALSE	41
2022-09-12	14:54:13	2.15569	745.398	FALSE	41
2022-09-12	14:54:14	2.165	747.563	FALSE	41
2022-09-12	14:54:14	2.3937	749.957	FALSE	41
2022-09-12	14:54:14	2.32897	752.286	FALSE	41
2022-09-12	14:54:15	2.27955	754.565	FALSE	41
2022-09-12	14:54:15	2.28668	756.852	FALSE	41
2022-09-12	14:54:15	2.30062	759.153	FALSE	41
2022-09-12	14:54:15	2.25813	761.411	FALSE	41
2022-09-12	14:54:16	2.22088	763.632	FALSE	41
2022-09-12	14:54:16	2.21859	765.85	FALSE	41
2022-09-12	14:54:16	2.25996	768.11	FALSE	41
2022-09-12	14:54:16	2.25625	770.366	FALSE	41
2022-09-12	14:54:17	1.72429	772.091	FALSE	41
2022-09-12	14:54:17	1.45528	773.546	FALSE	41
2022-09-12	14:54:17	0.792023	774.338	FALSE	41
2022-09-12	14:54:17	0.511259	774.849	FALSE	41
2022-09-12	14:54:18	0.440674	775.29	FALSE	41
2022-09-12	14:54:18	0.369733	775.66	FALSE	41
2022-09-12	14:54:18	0.481387	776.141	FALSE	41
2022-09-12	14:54:19	0.247952	776.389	FALSE	41
2022-09-12	14:54:19	0.250649	776.64	FALSE	41
2022-09-12	14:54:19	0.0947712	776.734	FALSE	41
2022-09-12	14:54:19	-0.394491	776.734	FALSE	41
2022-09-12	14:54:20	-0.631081	776.734	FALSE	41
2022-09-12	14:54:20	-0.276628	776.734	FALSE	41
2022-09-12	14:54:20	-0.0568318	776.734	FALSE	41
2022-09-12	14:54:20	0.0749748	776.809	FALSE	41
2022-09-12	14:54:21	-0.10075	776.809	FALSE	41
2022-09-12	14:54:21	-0.0324043	776.809	FALSE	41
2022-09-12	14:54:21	0.127341	776.937	FALSE	41
2022-09-12	14:54:22	0.182049	777.119	FALSE	41
2022-09-12	14:54:22	0.268155	777.387	FALSE	41
2022-09-12	14:54:22	0.0359926	777.423	FALSE	41
2022-09-12	14:54:22	0.437672	777.861	FALSE	41
2022-09-12	14:54:23	0.845153	778.706	FALSE	41
2022-09-12	14:54:23	0.0794531	778.785	FALSE	41
2022-09-12	14:54:23	0.404288	779.189	FALSE	41
2022-09-12	14:54:23	2.15884	781.348	FALSE	41
2022-09-12	14:54:24	1.49202	782.84	FALSE	41
2022-09-12	14:54:24	4.10983	786.95	1	42
2022-09-12	14:54:24	0.864949	787.815	FALSE	42
2022-09-12	14:54:24	0.243422	788.059	FALSE	42
2022-09-12	14:54:25	0.174873	788.233	FALSE	42
2022-09-12	14:54:25	-0.119529	788.233	FALSE	42
2022-09-12	14:54:25	0.591616	788.825	FALSE	42
2022-09-12	14:54:26	4.04383	792.869	1	43
2022-09-12	14:54:26	4.21665	797.086	1	44
2022-09-12	14:54:26	2.58541	799.671	FALSE	44
2022-09-12	14:54:26	0.255382	799.926	FALSE	44
2022-09-12	14:54:27	-8.88145e-05	799.926	FALSE	44
2022-09-12	14:54:27	0.0605218	799.987	FALSE	44
2022-09-12	14:54:27	0.0365015	800.023	FALSE	44
2022-09-12	14:54:27	-0.270012	800.023	FALSE	44
2022-09-12	14:54:28	-0.288079	800.023	FALSE	44
2022-09-12	14:54:28	-0.25271	800.023	FALSE	44
2022-09-12	14:54:28	-0.147926	800.023	FALSE	44
2022-09-12	14:54:28	-0.157493	800.023	FALSE	44
2022-09-12	14:54:29	-0.225432	800.023	FALSE	44
2022-09-12	14:54:29	-0.233218	800.023	FALSE	44
2022-09-12	14:54:29	-0.155407	800.023	FALSE	44
2022-09-12	14:54:30	-0.122888	800.023	FALSE	44
2022-09-12	14:54:30	0.318486	800.342	FALSE	44
2022-09-12	14:54:30	1.62403	801.966	FALSE	44
2022-09-12	14:54:30	5.37777	807.344	1	45
2022-09-12	14:54:31	5.55996	812.904	1	46
2022-09-12	14:54:31	2.90907	815.813	FALSE	46
2022-09-12	14:54:31	3.36535	819.178	1	47
2022-09-12	14:54:31	2.17385	821.352	FALSE	47
2022-09-12	14:54:32	2.8134	824.165	FALSE	47
2022-09-12	14:54:32	3.05121	827.216	1	48
2022-09-12	14:54:32	3.58271	830.799	1	49
2022-09-12	14:54:32	5.63894	836.438	1	50
2022-09-12	14:54:33	2.16704	838.605	FALSE	50
2022-09-12	14:54:33	0.583677	839.189	FALSE	50
2022-09-12	14:54:33	0.574517	839.763	FALSE	50
2022-09-12	14:54:34	1.07228	840.836	FALSE	50
2022-09-12	14:54:34	8.14489	848.981	1	51
2022-09-12	14:54:34	12.9445	861.925	1	52
2022-09-12	14:54:34	3.59187	865.517	1	53
2022-09-12	14:54:35	5.73533	871.252	1	54
2022-09-12	14:54:35	1.5164	872.769	FALSE	54
2022-09-12	14:54:35	1.44612	874.215	FALSE	54
2022-09-12	14:54:35	0.863982	875.079	FALSE	54
2022-09-12	14:54:36	0.929885	876.009	FALSE	54
2022-09-12	14:54:36	0.188461	876.197	FALSE	54
2022-09-12	14:54:36	0.387697	876.585	FALSE	54
2022-09-12	14:54:36	0.934771	877.52	FALSE	54
2022-09-12	14:54:37	0.188003	877.708	FALSE	54
2022-09-12	14:54:37	0.214822	877.922	FALSE	54
2022-09-12	14:54:37	1.3505	879.273	FALSE	54
2022-09-12	14:54:38	0.383321	879.656	FALSE	54
2022-09-12	14:54:38	1.96098	881.617	FALSE	54
2022-09-12	14:54:38	1.16673	882.784	FALSE	54
2022-09-12	14:54:38	2.07329	884.857	FALSE	54
2022-09-12	14:54:39	2.87742	887.735	FALSE	54
2022-09-12	14:54:39	0.397316	888.132	FALSE	54
2022-09-12	14:54:39	0.599046	888.731	FALSE	54
2022-09-12	14:54:39	0.849427	889.58	FALSE	54
2022-09-12	14:54:40	0.319402	889.9	FALSE	54
2022-09-12	14:54:40	0.540318	890.44	FALSE	54
2022-09-12	14:54:40	0.24327	890.683	FALSE	54
2022-09-12	14:54:40	0.453702	891.137	FALSE	54
2022-09-12	14:54:41	0.179199	891.316	FALSE	54
2022-09-12	14:54:41	0.777214	892.093	FALSE	54
2022-09-12	14:54:41	1.5194	893.613	FALSE	54
2022-09-12	14:54:42	4.66128	898.274	1	55
2022-09-12	14:54:42	1.09716	899.371	FALSE	55
2022-09-12	14:54:42	2.02887	901.4	FALSE	55
2022-09-12	14:54:42	0.356501	901.757	FALSE	55
2022-09-12	14:54:43	0.718232	902.475	FALSE	55
2022-09-12	14:54:43	1.04836	903.523	FALSE	55
2022-09-12	14:54:43	0.312786	903.836	FALSE	55
2022-09-12	14:54:43	0.198995	904.035	FALSE	55
2022-09-12	14:54:44	0.181794	904.217	FALSE	55
2022-09-12	14:54:44	0.109377	904.326	FALSE	55
2022-09-12	14:54:44	-0.0182567	904.326	FALSE	55
2022-09-12	14:54:44	0.0227611	904.349	FALSE	55
2022-09-12	14:54:45	0.0188934	904.368	FALSE	55
2022-09-12	14:54:45	0.0856618	904.454	FALSE	55
2022-09-12	14:54:45	0.270445	904.724	FALSE	55
2022-09-12	14:54:46	0.236196	904.96	FALSE	55
2022-09-12	14:54:46	0.183677	905.144	FALSE	55
2022-09-12	14:54:46	0.253244	905.397	FALSE	55
2022-09-12	14:54:46	0.121234	905.518	FALSE	55
2022-09-12	14:54:47	0.0639824	905.582	FALSE	55
2022-09-12	14:54:47	0.031616	905.614	FALSE	55
2022-09-12	14:54:47	0.236959	905.851	FALSE	55
2022-09-12	14:54:47	0.268715	906.12	FALSE	55
2022-09-12	14:54:48	0.384898	906.505	FALSE	55
2022-09-12	14:54:48	0.419351	906.924	FALSE	55
2022-09-12	14:54:48	0.433601	907.357	FALSE	55
2022-09-12	14:54:48	0.820165	908.178	FALSE	55
2022-09-12	14:54:49	0.924033	909.102	FALSE	55
2022-09-12	14:54:49	0.158537	909.26	FALSE	55
2022-09-12	14:54:49	-0.782938	909.26	FALSE	55
2022-09-12	14:54:50	-0.824465	909.26	FALSE	55
2022-09-12	14:54:50	-0.697238	909.26	FALSE	55
2022-09-12	14:54:50	-0.725177	909.26	FALSE	55
2022-09-12	14:54:50	-0.625381	909.26	FALSE	55
2022-09-12	14:54:51	-0.461921	909.26	FALSE	55
2022-09-12	14:54:51	-0.319834	909.26	FALSE	55
2022-09-12	14:54:51	-0.270216	909.26	FALSE	55
2022-09-12	14:54:51	-0.102684	909.26	FALSE	55
2022-09-12	14:54:52	0.13528	909.395	FALSE	55
2022-09-12	14:54:52	0.196501	909.592	FALSE	55
2022-09-12	14:54:52	0.0187916	909.611	FALSE	55
2022-09-12	14:54:52	-0.149249	909.611	FALSE	55
2022-09-12	14:54:53	-0.361361	909.611	FALSE	55
2022-09-12	14:54:53	-0.36991	909.611	FALSE	55
2022-09-12	14:54:53	-0.313931	909.611	FALSE	55
2022-09-12	14:54:54	0.490038	910.101	FALSE	55
2022-09-12	14:54:54	0.215229	910.316	FALSE	55
2022-09-12	14:54:54	-0.0415646	910.316	FALSE	55
2022-09-12	14:54:54	-0.242124	910.316	FALSE	55
2022-09-12	14:54:55	-0.306043	910.316	FALSE	55
2022-09-12	14:54:55	-0.179631	910.316	FALSE	55
2022-09-12	14:54:55	-0.725381	910.316	FALSE	55
2022-09-12	14:54:55	-0.714541	910.316	FALSE	55
2022-09-12	14:54:56	-0.711386	910.316	FALSE	55
2022-09-12	14:54:56	-0.622887	910.316	FALSE	55
2022-09-12	14:54:56	-0.5236	910.316	FALSE	55
2022-09-12	14:54:57	-0.405483	910.316	FALSE	55
2022-09-12	14:54:57	-0.25902	910.316	FALSE	55
2022-09-12	14:54:57	-0.291234	910.316	FALSE	55
2022-09-12	14:54:57	0.10327	910.419	FALSE	55
2022-09-12	14:54:58	1.07452	911.494	FALSE	55
2022-09-12	14:54:58	2.39024	913.884	FALSE	55
2022-09-12	14:54:58	5.28759	919.172	1	56
2022-09-12	14:54:58	5.2998	924.471	1	57
2022-09-12	14:54:59	4.81126	929.283	1	58
2022-09-12	14:54:59	4.52322	933.806	1	59
2022-09-12	14:54:59	2.33864	936.145	FALSE	59
2022-09-12	14:54:59	4.74413	940.889	1	60
2022-09-12	14:55:00	1.74429	942.633	FALSE	60
2022-09-12	14:55:00	2.23314	944.866	FALSE	60
2022-09-12	14:55:00	1.24174	946.108	FALSE	60
2022-09-12	14:55:01	1.28017	947.388	FALSE	60
2022-09-12	14:55:01	1.44861	948.837	FALSE	60
2022-09-12	14:55:01	0.737265	949.574	FALSE	60
2022-09-12	14:55:01	0.719249	950.293	FALSE	60
2022-09-12	14:55:02	0.160624	950.454	FALSE	60
2022-09-12	14:55:02	0.108155	950.562	FALSE	60
2022-09-12	14:55:02	0.524542	951.087	FALSE	60
2022-09-12	14:55:02	1.28948	952.376	FALSE	60
2022-09-12	14:55:03	1.65411	954.03	FALSE	60
2022-09-12	14:55:03	2.48067	956.511	FALSE	60
2022-09-12	14:55:03	4.11014	960.621	1	61
2022-09-12	14:55:03	5.56998	966.191	1	62
2022-09-12	14:55:04	3.79406	969.985	1	63
2022-09-12	14:55:04	3.21136	973.196	1	64
2022-09-12	14:55:04	3.50424	976.701	1	65
2022-09-12	14:55:05	5.49121	982.192	1	66
2022-09-12	14:55:05	0.648359	982.84	FALSE	66
2022-09-12	14:55:05	0.356908	983.197	FALSE	66
2022-09-12	14:55:05	0.420674	983.618	FALSE	66
2022-09-12	14:55:06	0.156501	983.774	FALSE	66
2022-09-12	14:55:06	0.16612	983.94	FALSE	66
2022-09-12	14:55:06	-0.22757	983.94	FALSE	66
2022-09-12	14:55:06	-0.481259	983.94	FALSE	66
2022-09-12	14:55:07	1.31803	985.258	FALSE	66
2022-09-12	14:55:07	2.92469	988.183	FALSE	66
2022-09-12	14:55:07	4.52515	992.708	1	67
2022-09-12	14:55:07	2.21482	994.923	FALSE	67
2022-09-12	14:55:08	1.28734	996.21	FALSE	67
2022-09-12	14:55:08	0.360064	996.57	FALSE	67
2022-09-12	14:55:08	0.30444	996.875	FALSE	67
2022-09-12	14:55:09	0.0363997	996.911	FALSE	67
2022-09-12	14:55:09	0.0227102	996.934	FALSE	67
2022-09-12	14:55:09	-0.0812593	996.934	FALSE	67
2022-09-12	14:55:09	0.408766	997.343	FALSE	67
2022-09-12	14:55:10	0.773041	998.116	FALSE	67
2022-09-12	14:55:10	1.63238	999.748	FALSE	67
2022-09-12	14:55:10	1.98408	1001.73	FALSE	67
2022-09-12	14:55:10	2.06419	1003.8	FALSE	67
2022-09-12	14:55:11	1.81523	1005.61	FALSE	67
2022-09-12	14:55:11	2.47248	1008.08	FALSE	67
2022-09-12	14:55:11	1.87218	1009.96	FALSE	67
2022-09-12	14:55:11	0.751667	1010.71	FALSE	67
2022-09-12	14:55:12	0.455026	1011.16	FALSE	67
2022-09-12	14:55:12	0.31131	1011.47	FALSE	67
2022-09-12	14:55:12	0.0931427	1011.57	FALSE	67
2022-09-12	14:55:13	0.304797	1011.87	FALSE	67
2022-09-12	14:55:13	5.0507	1016.92	1	68
2022-09-12	14:55:13	5.70831	1022.63	1	69
2022-09-12	14:55:13	3.53971	1026.17	1	70
2022-09-12	14:55:14	2.60301	1028.77	FALSE	70
2022-09-12	14:55:14	1.04968	1029.82	FALSE	70
2022-09-12	14:55:14	1.14123	1030.96	FALSE	70
2022-09-12	14:55:14	1.2137	1032.18	FALSE	70
2022-09-12	14:55:15	1.37294	1033.55	FALSE	70
2022-09-12	14:55:15	2.02246	1035.57	FALSE	70
2022-09-12	14:55:15	2.48357	1038.06	FALSE	70
2022-09-12	14:55:15	2.20978	1040.27	FALSE	70
2022-09-12	14:55:16	1.25447	1041.52	FALSE	70
2022-09-12	14:55:16	1.13197	1042.65	FALSE	70
2022-09-12	14:55:16	1.95966	1044.61	FALSE	70
2022-09-12	14:55:17	2.33355	1046.95	FALSE	70
2022-09-12	14:55:17	1.67263	1048.62	FALSE	70
2022-09-12	14:55:17	1.32261	1049.94	FALSE	70
2022-09-12	14:55:17	2.62968	1052.57	FALSE	70
2022-09-12	14:55:18	3.02785	1055.6	1	71
2022-09-12	14:55:18	3.22505	1058.82	1	72
2022-09-12	14:55:18	5.00922	1063.83	1	73
2022-09-12	14:55:18	6.69665	1070.53	1	74
2022-09-12	14:55:19	1.40042	1071.93	FALSE	74
2022-09-12	14:55:19	0.407901	1072.34	FALSE	74
2022-09-12	14:55:19	0.257774	1072.6	FALSE	74
2022-09-12	14:55:19	0.0528374	1072.65	FALSE	74
2022-09-12	14:55:20	0.400624	1073.05	FALSE	74
2022-09-12	14:55:20	15.5164	1088.57	1	75
2022-09-12	14:55:20	11.0511	1099.62	1	76
2022-09-12	14:55:21	2.72627	1102.34	FALSE	76
2022-09-12	14:55:21	0.753193	1103.1	FALSE	76
2022-09-12	14:55:21	0.311412	1103.41	FALSE	76
2022-09-12	14:55:21	0.252583	1103.66	FALSE	76
2022-09-12	14:55:22	0.107087	1103.77	FALSE	76
2022-09-12	14:55:22	0.204746	1103.97	FALSE	76
2022-09-12	14:55:22	-0.0484348	1103.97	FALSE	76
2022-09-12	14:55:22	0.348511	1104.32	FALSE	76
2022-09-12	14:55:23	0.0626084	1104.38	FALSE	76
2022-09-12	14:55:23	0.507392	1104.89	FALSE	76
2022-09-12	14:55:23	0.274313	1105.17	FALSE	76
2022-09-12	14:55:23	0.294669	1105.46	FALSE	76
2022-09-12	14:55:24	0.333957	1105.79	FALSE	76
2022-09-12	14:55:24	0.331616	1106.13	FALSE	76
2022-09-12	14:55:24	1.26989	1107.4	FALSE	76
2022-09-12	14:55:25	0.673346	1108.07	FALSE	76
2022-09-12	14:55:25	1.02663	1109.1	FALSE	76
2022-09-12	14:55:25	0.759402	1109.86	FALSE	76
2022-09-12	14:55:25	1.12866	1110.98	FALSE	76
2022-09-12	14:55:26	2.48149	1113.47	FALSE	76
2022-09-12	14:55:26	1.01889	1114.48	FALSE	76
2022-09-12	14:55:26	1.52744	1116.01	FALSE	76
2022-09-12	14:55:26	2.34368	1118.36	FALSE	76
2022-09-12	14:55:27	1.78724	1120.14	FALSE	76
2022-09-12	14:55:27	1.75905	1121.9	FALSE	76
2022-09-12	14:55:27	2.89584	1124.8	FALSE	76
2022-09-12	14:55:27	1.52536	1126.32	FALSE	76
2022-09-12	14:55:28	1.60383	1127.93	FALSE	76
2022-09-12	14:55:28	0.91187	1128.84	FALSE	76
2022-09-12	14:55:28	1.03966	1129.88	FALSE	76
2022-09-12	14:55:29	0.817112	1130.7	FALSE	76
2022-09-12	14:55:29	1.40134	1132.1	FALSE	76
2022-09-12	14:55:29	0.762252	1132.86	FALSE	76
2022-09-12	14:55:29	0.806374	1133.67	FALSE	76
2022-09-12	14:55:30	0.882863	1134.55	FALSE	76
2022-09-12	14:55:30	1.10159	1135.65	FALSE	76
2022-09-12	14:55:30	4.78881	1140.44	1	77
2022-09-12	14:55:30	1.77971	1142.22	FALSE	77
2022-09-12	14:55:31	2.0592	1144.28	FALSE	77
2022-09-12	14:55:31	2.61131	1146.89	FALSE	77
2022-09-12	14:55:31	6.41925	1153.31	1	78
2022-09-12	14:55:31	9.21243	1162.52	1	79
2022-09-12	14:55:32	13.9861	1176.51	1	80
2022-09-12	14:55:32	9.47024	1185.98	1	81
2022-09-12	14:55:32	6.3738	1192.35	1	82
2022-09-12	14:55:33	4.39676	1196.75	1	83
2022-09-12	14:55:33	3.52408	1200.27	1	84
2022-09-12	14:55:33	5.05426	1205.33	1	85
2022-09-12	14:55:33	1.87406	1207.2	FALSE	85
2022-09-12	14:55:34	2.5194	1209.72	FALSE	85
2022-09-12	14:55:34	1.1276	1210.85	FALSE	85
2022-09-12	14:55:34	0.690802	1211.54	FALSE	85
2022-09-12	14:55:34	0.475076	1212.01	FALSE	85
2022-09-12	14:55:35	0.373855	1212.39	FALSE	85
2022-09-12	14:55:35	0.17472	1212.56	FALSE	85
2022-09-12	14:55:35	0.416603	1212.98	FALSE	85
2022-09-12	14:55:36	0.355127	1213.33	FALSE	85
2022-09-12	14:55:36	1.50327	1214.84	FALSE	85
2022-09-12	14:55:36	2.55823	1217.39	FALSE	85
2022-09-12	14:55:36	3.58871	1220.98	1	86
2022-09-12	14:55:37	0.930547	1221.91	FALSE	86
2022-09-12	14:55:37	0.435382	1222.35	FALSE	86
2022-09-12	14:55:37	0.0523285	1222.4	FALSE	86
2022-09-12	14:55:37	-0.0856358	1222.4	FALSE	86
2022-09-12	14:55:38	0.149275	1222.55	FALSE	86
2022-09-12	14:55:38	0.0451529	1222.6	FALSE	86
2022-09-12	14:55:38	0.371361	1222.97	FALSE	86
2022-09-12	14:55:38	0.766781	1223.73	FALSE	86
2022-09-12	14:55:39	0.512226	1224.25	FALSE	86
2022-09-12	14:55:39	0.55701	1224.8	FALSE	86
2022-09-12	14:55:39	0.37299	1225.18	FALSE	86

## Sheet: Harley_harness_2022912145017
						**GoPro Fitting: 1440
2022-09-12	14:50:17	0.401336
2022-09-12	14:50:17	0.398333
2022-09-12	14:50:17	0.388664
2022-09-12	14:50:18	0.399402
2022-09-12	14:50:18	0.403982
2022-09-12	14:50:18	0.397417
2022-09-12	14:50:18	0.404084
2022-09-12	14:50:19	0.403066
2022-09-12	14:50:19	0.388766
2022-09-12	14:50:19	0.479962
2022-09-12	14:50:20	0.375229
2022-09-12	14:50:20	0.330293
2022-09-12	14:50:20	0.417519
2022-09-12	14:50:20	0.397621
2022-09-12	14:50:21	0.52841
2022-09-12	14:50:21	0.371921
2022-09-12	14:50:21	0.33986
2022-09-12	14:50:21	0.516399
2022-09-12	14:50:22	0.4564
2022-09-12	14:50:22	0.392074
2022-09-12	14:50:22	0.381641
2022-09-12	14:50:22	0.390598
2022-09-12	14:50:23	0.277061
2022-09-12	14:50:23	0.326171
2022-09-12	14:50:23	0.357774
2022-09-12	14:50:24	1.19467
2022-09-12	14:50:24	1.9453
2022-09-12	14:50:24	4.74057
2022-09-12	14:50:24	3.17482
2022-09-12	14:50:25	1.25976
2022-09-12	14:50:25	0.644542
2022-09-12	14:50:25	0.443219
2022-09-12	14:50:25	0.257621
2022-09-12	14:50:26	0.205255
2022-09-12	14:50:26	0.248206
2022-09-12	14:50:26	0.396705
2022-09-12	14:50:26	0.493753
2022-09-12	14:50:27	2.19462
2022-09-12	14:50:27	2.79446
2022-09-12	14:50:27	2.5135
2022-09-12	14:50:28	2.64434
2022-09-12	14:50:28	2.17274
2022-09-12	14:50:28	0.997824
2022-09-12	14:50:28	1.21502
2022-09-12	14:50:29	0.716756
2022-09-12	14:50:29	1.89386
2022-09-12	14:50:29	1.07431
2022-09-12	14:50:29	3.46205
2022-09-12	14:50:30	1.54271
2022-09-12	14:50:30	2.00968
2022-09-12	14:50:30	1.78841
2022-09-12	14:50:30	2.01599
2022-09-12	14:50:31	3.47655
2022-09-12	14:50:31	4.42673
2022-09-12	14:50:31	3.43686
2022-09-12	14:50:32	0.804338
2022-09-12	14:50:32	1.0023
2022-09-12	14:50:32	0.0811834
2022-09-12	14:50:32	0.297367
2022-09-12	14:50:33	0.469275
2022-09-12	14:50:33	0.498079
2022-09-12	14:50:33	14.4678
2022-09-12	14:50:33	8.93008
2022-09-12	14:50:34	0.802405
2022-09-12	14:50:34	0.237367
2022-09-12	14:50:34	0.285153
2022-09-12	14:50:34	-0.132404
2022-09-12	14:50:35	0.0315651
2022-09-12	14:50:35	-0.038613
2022-09-12	14:50:35	-0.0416155
2022-09-12	14:50:36	0.158588
2022-09-12	14:50:36	0.451718
2022-09-12	14:50:36	0.520318
2022-09-12	14:50:36	0.940114
2022-09-12	14:50:37	0.880115
2022-09-12	14:50:37	1.22459
2022-09-12	14:50:37	2.3823
2022-09-12	14:50:37	0.298435
2022-09-12	14:50:38	0.346781
2022-09-12	14:50:38	0.081845
2022-09-12	14:50:38	0.344797
2022-09-12	14:50:38	0.476552
2022-09-12	14:50:39	0.499351
2022-09-12	14:50:39	0.839046
2022-09-12	14:50:39	0.431667
2022-09-12	14:50:40	1.96648
2022-09-12	14:50:40	0.459911
2022-09-12	14:50:40	1.68073
2022-09-12	14:50:40	0.60729
2022-09-12	14:50:41	0.915382
2022-09-12	14:50:41	1.8248
2022-09-12	14:50:41	0.949173
2022-09-12	14:50:41	1.7709
2022-09-12	14:50:42	1.22922
2022-09-12	14:50:42	0.616654
2022-09-12	14:50:42	1.64861
2022-09-12	14:50:42	0.648766
2022-09-12	14:50:43	0.997722
2022-09-12	14:50:43	0.858333
2022-09-12	14:50:43	0.760267
2022-09-12	14:50:44	0.193092
2022-09-12	14:50:44	0.0611835
2022-09-12	14:50:44	0.225967
2022-09-12	14:50:44	0.0470358
2022-09-12	14:50:45	0.15355
2022-09-12	14:50:45	0.22098
2022-09-12	14:50:45	0.261132
2022-09-12	14:50:45	0.626323
2022-09-12	14:50:46	0.200674
2022-09-12	14:50:46	0.651463
2022-09-12	14:50:46	1.93218
2022-09-12	14:50:46	0.527544
2022-09-12	14:50:47	4.35436
2022-09-12	14:50:47	3.38912
2022-09-12	14:50:47	2.55701
2022-09-12	14:50:48	0.256349
2022-09-12	14:50:48	0.00881704
2022-09-12	14:50:48	0.0104964
2022-09-12	14:50:48	-0.194389
2022-09-12	14:50:49	-0.431437
2022-09-12	14:50:49	-0.643396
2022-09-12	14:50:49	-0.670368
2022-09-12	14:50:49	-0.590267
2022-09-12	14:50:50	0.0928883
2022-09-12	14:50:50	0.236145
2022-09-12	14:50:50	4.71375
2022-09-12	14:50:50	5.42835
2022-09-12	14:50:51	1.54826
2022-09-12	14:50:51	1.99823
2022-09-12	14:50:51	1.04673
2022-09-12	14:50:52	0.16159
2022-09-12	14:50:52	0.507138
2022-09-12	14:50:52	0.0619977
2022-09-12	14:50:52	0.372532
2022-09-12	14:50:53	0.265458
2022-09-12	14:50:53	0.152685
2022-09-12	14:50:53	0.212023
2022-09-12	14:50:53	0.0650511
2022-09-12	14:50:54	0.357417
2022-09-12	14:50:54	0.0354328
2022-09-12	14:50:54	0.428512
2022-09-12	14:50:55	0.261387
2022-09-12	14:50:55	3.00515
2022-09-12	14:50:55	0.203626
2022-09-12	14:50:55	0.848461
2022-09-12	14:50:56	0.555738
2022-09-12	14:50:56	0.0857635
2022-09-12	14:50:56	0.472328
2022-09-12	14:50:56	0.142405
2022-09-12	14:50:57	0.70388
2022-09-12	14:50:57	0.577061
2022-09-12	14:50:57	0.649224
2022-09-12	14:50:57	1.67889
2022-09-12	14:50:58	0.201081
2022-09-12	14:50:58	0.231718
2022-09-12	14:50:58	0.746171
2022-09-12	14:50:59	0.129784
2022-09-12	14:50:59	-0.0759158
2022-09-12	14:50:59	0.245
2022-09-12	14:50:59	0.108003
2022-09-12	14:51:00	0.289937
2022-09-12	14:51:00	0.0990969
2022-09-12	14:51:00	0.284237
2022-09-12	14:51:00	0.557977
2022-09-12	14:51:01	0.33416
2022-09-12	14:51:01	0.618079
2022-09-12	14:51:01	1.23905
2022-09-12	14:51:01	0.946119
2022-09-12	14:51:02	2.63121
2022-09-12	14:51:02	0.110242
2022-09-12	14:51:02	-0.00629748
2022-09-12	14:51:03	0.339097
2022-09-12	14:51:03	-0.116628
2022-09-12	14:51:03	-0.0486384
2022-09-12	14:51:03	-0.173168
2022-09-12	14:51:04	0.0117178
2022-09-12	14:51:04	-0.168791
2022-09-12	14:51:04	-0.0266537
2022-09-12	14:51:04	-0.0817173
2022-09-12	14:51:05	-0.0480277
2022-09-12	14:51:05	1.57894
2022-09-12	14:51:05	0.320064
2022-09-12	14:51:05	0.504644
2022-09-12	14:51:06	0.483779
2022-09-12	14:51:06	0.73014
2022-09-12	14:51:06	0.610649
2022-09-12	14:51:07	0.658181
2022-09-12	14:51:07	0.925662
2022-09-12	14:51:07	1.87558
2022-09-12	14:51:07	0.963931
2022-09-12	14:51:08	2.88093
2022-09-12	14:51:08	0.255942
2022-09-12	14:51:08	0.725458
2022-09-12	14:51:08	3.20454
2022-09-12	14:51:09	0.139097
2022-09-12	14:51:09	0.413702
2022-09-12	14:51:09	1.05599
2022-09-12	14:51:09	0.351209
2022-09-12	14:51:10	0.167494
2022-09-12	14:51:10	0.591208
2022-09-12	14:51:10	-0.0653814
2022-09-12	14:51:11	-0.252455
2022-09-12	14:51:11	-0.22757
2022-09-12	14:51:11	-0.0514883
2022-09-12	14:51:11	-0.0661448
2022-09-12	14:51:12	-0.357544
2022-09-12	14:51:12	-0.265788
2022-09-12	14:51:12	-0.231386
2022-09-12	14:51:13	-0.0919462
2022-09-12	14:51:13	-0.0610557
2022-09-12	14:51:13	0.2107
2022-09-12	14:51:13	0.358944
2022-09-12	14:51:13	1.41788
2022-09-12	14:51:14	0.373346
2022-09-12	14:51:14	1.17009
2022-09-12	14:51:14	0.438283
2022-09-12	14:51:15	1.03162
2022-09-12	14:51:15	0.36668
2022-09-12	14:51:15	0.192277
2022-09-12	14:51:15	0.647697
2022-09-12	14:51:16	-0.0696562
2022-09-12	14:51:16	0.10271
2022-09-12	14:51:16	0.175738
2022-09-12	14:51:16	0.110344
2022-09-12	14:51:17	0.0458654
2022-09-12	14:51:17	0.167901
2022-09-12	14:51:17	0.00937683
2022-09-12	14:51:18	0.173855
2022-09-12	14:51:18	0.66612
2022-09-12	14:51:18	0.478282
2022-09-12	14:51:18	1.53274
2022-09-12	14:51:19	0.505916
2022-09-12	14:51:19	0.800369
2022-09-12	14:51:19	2.40062
2022-09-12	14:51:19	0.44897
2022-09-12	14:51:20	1.62668
2022-09-12	14:51:20	0.302608
2022-09-12	14:51:20	0.456654
2022-09-12	14:51:20	0.700674
2022-09-12	14:51:21	0.465865
2022-09-12	14:51:21	0.483779
2022-09-12	14:51:21	0.167596
2022-09-12	14:51:21	0.354924
2022-09-12	14:51:22	0.441183
2022-09-12	14:51:22	0.154924
2022-09-12	14:51:22	0.0667814
2022-09-12	14:51:23	0.180929
2022-09-12	14:51:23	0.131718
2022-09-12	14:51:23	0.408359
2022-09-12	14:51:23	0.546679
2022-09-12	14:51:24	0.849173
2022-09-12	14:51:24	0.431005
2022-09-12	14:51:24	0.357875
2022-09-12	14:51:24	0.371361
2022-09-12	14:51:25	0.302201
2022-09-12	14:51:25	0.258333
2022-09-12	14:51:25	0.282354
2022-09-12	14:51:25	0.265153
2022-09-12	14:51:26	0.318639
2022-09-12	14:51:26	0.245255
2022-09-12	14:51:26	0.250598
2022-09-12	14:51:27	0.26098
2022-09-12	14:51:27	0.271921
2022-09-12	14:51:27	0.280776
2022-09-12	14:51:27	0.301082
2022-09-12	14:51:28	0.794008
2022-09-12	14:51:28	1.87543
2022-09-12	14:51:28	1.30678
2022-09-12	14:51:28	0.997519
2022-09-12	14:51:29	0.747036
2022-09-12	14:51:29	0.835331
2022-09-12	14:51:29	0.646323
2022-09-12	14:51:29	0.666374
2022-09-12	14:51:30	0.732074
2022-09-12	14:51:30	1.04464
2022-09-12	14:51:30	0.975941
2022-09-12	14:51:31	0.95757
2022-09-12	14:51:31	0.549377
2022-09-12	14:51:31	0.705153
2022-09-12	14:51:31	0.698079
2022-09-12	14:51:32	0.853244
2022-09-12	14:51:32	1.45955
2022-09-12	14:51:32	1.7338
2022-09-12	14:51:32	1.93645
2022-09-12	14:51:33	0.60042
2022-09-12	14:51:33	0.824898
2022-09-12	14:51:33	0.365611
2022-09-12	14:51:33	0.33528
2022-09-12	14:51:34	0.482964
2022-09-12	14:51:34	0.45874
2022-09-12	14:51:34	0.252786
2022-09-12	14:51:35	0.319606
2022-09-12	14:51:35	0.205662
2022-09-12	14:51:35	-0.319529
2022-09-12	14:51:35	-0.194542
2022-09-12	14:51:36	-0.314796
2022-09-12	14:51:36	0.583117
2022-09-12	14:51:36	1.11487
2022-09-12	14:51:36	1.31604
2022-09-12	14:51:37	1.91248
2022-09-12	14:51:37	2.69701
2022-09-12	14:51:37	0.732481
2022-09-12	14:51:37	0.7107
2022-09-12	14:51:38	0.465153
2022-09-12	14:51:38	0.21416
2022-09-12	14:51:38	0.461947
2022-09-12	14:51:39	0.148919
2022-09-12	14:51:39	0.283575
2022-09-12	14:51:39	0.226578
2022-09-12	14:51:39	0.298232
2022-09-12	14:51:40	0.223931
2022-09-12	14:51:40	0.214975
2022-09-12	14:51:40	0.291056
2022-09-12	14:51:40	0.227901
2022-09-12	14:51:41	0.0264252
2022-09-12	14:51:41	-0.0527605
2022-09-12	14:51:41	-0.172455
2022-09-12	14:51:42	-0.513778
2022-09-12	14:51:42	-0.546399
2022-09-12	14:51:42	0.489326
2022-09-12	14:51:42	1.64592
2022-09-12	14:51:43	0.378283
2022-09-12	14:51:43	0.180522
2022-09-12	14:51:43	0.10612
2022-09-12	14:51:43	0.370751
2022-09-12	14:51:44	0.249733
2022-09-12	14:51:44	0.959962
2022-09-12	14:51:44	1.28042
2022-09-12	14:51:44	1.79676
2022-09-12	14:51:45	1.61716
2022-09-12	14:51:45	0.681387
2022-09-12	14:51:45	0.219046
2022-09-12	14:51:46	0.846527
2022-09-12	14:51:46	0.165509
2022-09-12	14:51:46	0.0496822
2022-09-12	14:51:46	0.263524
2022-09-12	14:51:47	-0.0289947
2022-09-12	14:51:47	1.04429
2022-09-12	14:51:47	0.0994022
2022-09-12	14:51:47	0.342914
2022-09-12	14:51:48	0.398283
2022-09-12	14:51:48	0.301082
2022-09-12	14:51:48	1.46006
2022-09-12	14:51:48	0.328868
2022-09-12	14:51:49	1.41034
2022-09-12	14:51:49	0.429173
2022-09-12	14:51:49	0.634517
2022-09-12	14:51:50	0.514924
2022-09-12	14:51:50	0.217112
2022-09-12	14:51:50	0.3993
2022-09-12	14:51:50	0.122201
2022-09-12	14:51:51	0.38098
2022-09-12	14:51:51	0.194771
2022-09-12	14:51:51	0.251107
2022-09-12	14:51:51	0.143066
2022-09-12	14:51:52	0.355127
2022-09-12	14:51:52	0.530293
2022-09-12	14:51:52	0.569427
2022-09-12	14:51:52	2.32184
2022-09-12	14:51:53	3.28922
2022-09-12	14:51:53	2.16948
2022-09-12	14:51:53	3.19019
2022-09-12	14:51:54	0.31528
2022-09-12	14:51:54	0.21869
2022-09-12	14:51:54	0.513499
2022-09-12	14:51:54	0.230344
2022-09-12	14:51:55	0.250954
2022-09-12	14:51:55	0.361082
2022-09-12	14:51:55	0.265763
2022-09-12	14:51:55	0.286018
2022-09-12	14:51:56	0.176756
2022-09-12	14:51:56	0.392176
2022-09-12	14:51:56	0.184033
2022-09-12	14:51:56	0.438537
2022-09-12	14:51:57	0.353041
2022-09-12	14:51:57	2.32815
2022-09-12	14:51:57	1.00536
2022-09-12	14:51:58	2.9738
2022-09-12	14:51:58	0.543219
2022-09-12	14:51:58	1.34057
2022-09-12	14:51:58	0.698486
2022-09-12	14:51:59	0.248257
2022-09-12	14:51:59	0.525814
2022-09-12	14:51:59	0.125255
2022-09-12	14:51:59	1.2851
2022-09-12	14:52:00	2.39258
2022-09-12	14:52:00	3.4621
2022-09-12	14:52:00	1.2821
2022-09-12	14:52:00	0.775127
2022-09-12	14:52:01	1.35864
2022-09-12	14:52:01	0.774669
2022-09-12	14:52:01	4.5481
2022-09-12	14:52:02	7.07197
2022-09-12	14:52:02	10.3478
2022-09-12	14:52:02	10.679
2022-09-12	14:52:02	2.75945
2022-09-12	14:52:03	3.56495
2022-09-12	14:52:03	1.87803
2022-09-12	14:52:03	0.477824
2022-09-12	14:52:03	0.773448
2022-09-12	14:52:04	0.285814
2022-09-12	14:52:04	0.433651
2022-09-12	14:52:04	0.163524
2022-09-12	14:52:04	0.470446
2022-09-12	14:52:05	0.489733
2022-09-12	14:52:05	0.347341
2022-09-12	14:52:05	0.506069
2022-09-12	14:52:06	1.80505
2022-09-12	14:52:06	1.16032
2022-09-12	14:52:06	0.627748
2022-09-12	14:52:06	2.02642
2022-09-12	14:52:07	0.628817
2022-09-12	14:52:07	0.716043
2022-09-12	14:52:07	0.645102
2022-09-12	14:52:07	0.251718
2022-09-12	14:52:08	0.637163
2022-09-12	14:52:08	0.325509
2022-09-12	14:52:08	0.407697
2022-09-12	14:52:08	0.346883
2022-09-12	14:52:09	0.44958
2022-09-12	14:52:09	0.208664
2022-09-12	14:52:09	0.608562
2022-09-12	14:52:10	0.268206
2022-09-12	14:52:10	0.505611
2022-09-12	14:52:10	0.257316
2022-09-12	14:52:10	2.70108
2022-09-12	14:52:11	1.50963
2022-09-12	14:52:11	1.14805
2022-09-12	14:52:11	0.211056
2022-09-12	14:52:11	0.332939
2022-09-12	14:52:12	0.345102
2022-09-12	14:52:12	0.389835
2022-09-12	14:52:12	0.294771
2022-09-12	14:52:12	0.125814
2022-09-12	14:52:13	0.391616
2022-09-12	14:52:13	0.208461
2022-09-12	14:52:13	0.447087
2022-09-12	14:52:14	0.296705
2022-09-12	14:52:14	2.4248
2022-09-12	14:52:14	3.3909
2022-09-12	14:52:14	5.57976
2022-09-12	14:52:15	2.26073
2022-09-12	14:52:15	4.46485
2022-09-12	14:52:15	0.516959
2022-09-12	14:52:15	1.7994
2022-09-12	14:52:16	1.90184
2022-09-12	14:52:16	2.01004
2022-09-12	14:52:16	1.96129
2022-09-12	14:52:16	0.227239
2022-09-12	14:52:17	1.61233
2022-09-12	14:52:17	2.73487
2022-09-12	14:52:17	1.14836
2022-09-12	14:52:18	1.17772
2022-09-12	14:52:18	1.99273
2022-09-12	14:52:18	1.40983
2022-09-12	14:52:18	2.19635
2022-09-12	14:52:19	0.833142
2022-09-12	14:52:19	1.38398
2022-09-12	14:52:19	1.10943
2022-09-12	14:52:19	0.340878
2022-09-12	14:52:20	1.01874
2022-09-12	14:52:20	0.948461
2022-09-12	14:52:20	0.434008
2022-09-12	14:52:21	0.270293
2022-09-12	14:52:21	0.554924
2022-09-12	14:52:21	0.220064
2022-09-12	14:52:21	0.128359
2022-09-12	14:52:22	0.264084
2022-09-12	14:52:22	0.50159
2022-09-12	14:52:22	0.315687
2022-09-12	14:52:22	0.725763
2022-09-12	14:52:23	2.84795
2022-09-12	14:52:23	1.32816
2022-09-12	14:52:23	2.7339
2022-09-12	14:52:23	1.18057
2022-09-12	14:52:24	1.2136
2022-09-12	14:52:24	2.0337
2022-09-12	14:52:24	0.630038
2022-09-12	14:52:25	1.66195
2022-09-12	14:52:25	0.300318
2022-09-12	14:52:25	3.03243
2022-09-12	14:52:25	1.36709
2022-09-12	14:52:26	3.63798
2022-09-12	14:52:26	3.38474
2022-09-12	14:52:26	1.61172
2022-09-12	14:52:26	1.06642
2022-09-12	14:52:27	0.447036
2022-09-12	14:52:27	1.19777
2022-09-12	14:52:27	1.38296
2022-09-12	14:52:27	0.976603
2022-09-12	14:52:28	0.698638
2022-09-12	14:52:28	2.02078
2022-09-12	14:52:28	0.540522
2022-09-12	14:52:29	0.74673
2022-09-12	14:52:29	2.84627
2022-09-12	14:52:29	0.243982
2022-09-12	14:52:29	1.84174
2022-09-12	14:52:30	0.860522
2022-09-12	14:52:30	0.536909
2022-09-12	14:52:30	0.432227
2022-09-12	14:52:30	0.734364
2022-09-12	14:52:31	0.724186
2022-09-12	14:52:31	0.69701
2022-09-12	14:52:31	2.35599
2022-09-12	14:52:31	1.17156
2022-09-12	14:52:32	1.7852
2022-09-12	14:52:32	0.530547
2022-09-12	14:52:32	0.810954
2022-09-12	14:52:33	0.627952
2022-09-12	14:52:33	1.97055
2022-09-12	14:52:33	2.75513
2022-09-12	14:52:33	2.67304
2022-09-12	14:52:34	2.68658
2022-09-12	14:52:34	1.69329
2022-09-12	14:52:34	2.41218
2022-09-12	14:52:34	0.630903
2022-09-12	14:52:35	0.572226
2022-09-12	14:52:35	0.935229
2022-09-12	14:52:35	0.163066
2022-09-12	14:52:35	0.171158
2022-09-12	14:52:36	0.359809
2022-09-12	14:52:36	0.515534
2022-09-12	14:52:36	0.238333
2022-09-12	14:52:37	0.522201
2022-09-12	14:52:37	0.264898
2022-09-12	14:52:37	0.179911
2022-09-12	14:52:37	0.305967
2022-09-12	14:52:38	0.280318
2022-09-12	14:52:38	0.283982
2022-09-12	14:52:38	0.114415
2022-09-12	14:52:38	0.278181
2022-09-12	14:52:39	0.58388
2022-09-12	14:52:39	0.236247
2022-09-12	14:52:39	0.441031
2022-09-12	14:52:39	0.329479
2022-09-12	14:52:40	0.360267
2022-09-12	14:52:40	1.47732
2022-09-12	14:52:40	0.349682
2022-09-12	14:52:41	0.19472
2022-09-12	14:52:41	0.464949
2022-09-12	14:52:41	0.192023
2022-09-12	14:52:41	0.192227
2022-09-12	14:52:42	0.261438
2022-09-12	14:52:42	0.14098
2022-09-12	14:52:42	0.288206
2022-09-12	14:52:42	0.183321
2022-09-12	14:52:43	0.233092
2022-09-12	14:52:43	0.100318
2022-09-12	14:52:43	0.335026
2022-09-12	14:52:43	0.268919
2022-09-12	14:52:44	0.173957
2022-09-12	14:52:44	0.188105
2022-09-12	14:52:44	0.230954
2022-09-12	14:52:45	0.386781
2022-09-12	14:52:45	0.137825
2022-09-12	14:52:45	0.205967
2022-09-12	14:52:45	0.154466
2022-09-12	14:52:46	0.374771
2022-09-12	14:52:46	0.121031
2022-09-12	14:52:46	0.438486
2022-09-12	14:52:46	0.301285
2022-09-12	14:52:47	0.682507
2022-09-12	14:52:47	1.34357
2022-09-12	14:52:47	0.797723
2022-09-12	14:52:47	1.19828
2022-09-12	14:52:48	2.311
2022-09-12	14:52:48	0.231005
2022-09-12	14:52:48	1.11029
2022-09-12	14:52:49	1.42663
2022-09-12	14:52:49	0.459249
2022-09-12	14:52:49	0.765967
2022-09-12	14:52:49	0.994466
2022-09-12	14:52:50	0.373193
2022-09-12	14:52:50	0.118639
2022-09-12	14:52:50	0.433346
2022-09-12	14:52:50	0.0341096
2022-09-12	14:52:51	0.332379
2022-09-12	14:52:51	0.157265
2022-09-12	14:52:51	0.365967
2022-09-12	14:52:51	0.183066
2022-09-12	14:52:52	0.427087
2022-09-12	14:52:52	0.183677
2022-09-12	14:52:52	0.351565
2022-09-12	14:52:53	0.227188
2022-09-12	14:52:53	0.376858
2022-09-12	14:52:53	0.266883
2022-09-12	14:52:53	0.313702
2022-09-12	14:52:54	0.362557
2022-09-12	14:52:54	0.261692
2022-09-12	14:52:54	0.455178
2022-09-12	14:52:54	0.250038
2022-09-12	14:52:55	0.410852
2022-09-12	14:52:55	0.303728
2022-09-12	14:52:55	0.273855
2022-09-12	14:52:55	0.359249
2022-09-12	14:52:56	0.245611
2022-09-12	14:52:56	0.445255
2022-09-12	14:52:56	0.243677
2022-09-12	14:52:57	0.459504
2022-09-12	14:52:57	0.229733
2022-09-12	14:52:57	0.377875
2022-09-12	14:52:57	0.550242
2022-09-12	14:52:58	1.9477
2022-09-12	14:52:58	0.907799
2022-09-12	14:52:58	1.57034
2022-09-12	14:52:58	1.4107
2022-09-12	14:52:59	1.14459
2022-09-12	14:52:59	1.51258
2022-09-12	14:52:59	1.33564
2022-09-12	14:52:59	1.02912
2022-09-12	14:53:00	0.757621
2022-09-12	14:53:00	0.813957
2022-09-12	14:53:00	0.722608
2022-09-12	14:53:01	0.972277
2022-09-12	14:53:01	1.571
2022-09-12	14:53:01	1.21859
2022-09-12	14:53:01	0.909987
2022-09-12	14:53:02	0.890801
2022-09-12	14:53:02	0.688308
2022-09-12	14:53:02	0.495636
2022-09-12	14:53:02	0.411769
2022-09-12	14:53:03	0.449275
2022-09-12	14:53:03	0.318079
2022-09-12	14:53:03	0.285865
2022-09-12	14:53:03	0.0116669
2022-09-12	14:53:04	-0.117188
2022-09-12	14:53:04	-0.0034476
2022-09-12	14:53:04	-0.0132186
2022-09-12	14:53:05	-0.0519972
2022-09-12	14:53:05	-0.349147
2022-09-12	14:53:05	-0.37047
2022-09-12	14:53:05	-0.145534
2022-09-12	14:53:06	0.239351
2022-09-12	14:53:06	0.191361
2022-09-12	14:53:06	0.184135
2022-09-12	14:53:07	0.0756364
2022-09-12	14:53:07	0.272074
2022-09-12	14:53:07	0.316349
2022-09-12	14:53:07	0.336145
2022-09-12	14:53:08	0.369987
2022-09-12	14:53:08	0.340725
2022-09-12	14:53:08	0.342405
2022-09-12	14:53:08	0.335738
2022-09-12	14:53:09	0.309427
2022-09-12	14:53:09	0.299453
2022-09-12	14:53:09	0.294059
2022-09-12	14:53:09	0.285967
2022-09-12	14:53:10	0.288817
2022-09-12	14:53:10	0.225662
2022-09-12	14:53:10	-0.0201397
2022-09-12	14:53:10	-0.0503687
2022-09-12	14:53:11	-0.116425
2022-09-12	14:53:11	-0.349351
2022-09-12	14:53:11	-0.436933
2022-09-12	14:53:12	-0.387162
2022-09-12	14:53:12	-0.29958
2022-09-12	14:53:12	-0.484109
2022-09-12	14:53:12	-0.460852
2022-09-12	14:53:13	-0.421106
2022-09-12	14:53:13	-0.433066
2022-09-12	14:53:13	0.0177229
2022-09-12	14:53:13	-0.0476715
2022-09-12	14:53:14	0.221998
2022-09-12	14:53:14	0.147494
2022-09-12	14:53:14	0.324542
2022-09-12	14:53:14	0.160522
2022-09-12	14:53:15	0.119148
2022-09-12	14:53:15	0.0751275
2022-09-12	14:53:15	0.210802
2022-09-12	14:53:16	0.0848984
2022-09-12	14:53:16	0.117418
2022-09-12	14:53:16	0.111463
2022-09-12	14:53:16	0.300369
2022-09-12	14:53:17	0.113397
2022-09-12	14:53:17	0.145509
2022-09-12	14:53:17	0.12958
2022-09-12	14:53:17	0.117265
2022-09-12	14:53:18	0.159707
2022-09-12	14:53:18	-0.105127
2022-09-12	14:53:18	0.0833208
2022-09-12	14:53:18	0.083728
2022-09-12	14:53:19	-0.0208522
2022-09-12	14:53:19	-0.114033
2022-09-12	14:53:19	-0.127264
2022-09-12	14:53:20	-0.150165
2022-09-12	14:53:20	-1.11093
2022-09-12	14:53:20	0.134568
2022-09-12	14:53:20	0.259606
2022-09-12	14:53:21	0.789529
2022-09-12	14:53:21	3.58378
2022-09-12	14:53:21	2.12724
2022-09-12	14:53:21	0.645356
2022-09-12	14:53:22	0.317163
2022-09-12	14:53:22	0.089733
2022-09-12	14:53:22	-0.459681
2022-09-12	14:53:22	-0.618053
2022-09-12	14:53:23	-0.790368
2022-09-12	14:53:23	-0.744312
2022-09-12	14:53:23	-0.781869
2022-09-12	14:53:24	-0.560241
2022-09-12	14:53:24	-0.451335
2022-09-12	14:53:24	-0.434592
2022-09-12	14:53:24	-0.181157
2022-09-12	14:53:25	-0.406552
2022-09-12	14:53:25	-0.552048
2022-09-12	14:53:25	-0.60589
2022-09-12	14:53:25	-0.691081
2022-09-12	14:53:26	-0.707315
2022-09-12	14:53:26	-0.575101
2022-09-12	14:53:26	-0.613269
2022-09-12	14:53:26	-0.507366
2022-09-12	14:53:27	-0.474745
2022-09-12	14:53:27	-0.433066
2022-09-12	14:53:27	-0.477646
2022-09-12	14:53:28	-0.294491
2022-09-12	14:53:28	-0.356832
2022-09-12	14:53:28	-0.226501
2022-09-12	14:53:28	-0.217748
2022-09-12	14:53:29	-0.0982058
2022-09-12	14:53:29	-0.244567
2022-09-12	14:53:29	-0.218918
2022-09-12	14:53:29	-0.31103
2022-09-12	14:53:30	-0.328384
2022-09-12	14:53:30	-0.389961
2022-09-12	14:53:30	-0.32416
2022-09-12	14:53:30	-0.278257
2022-09-12	14:53:31	-0.164007
2022-09-12	14:53:31	-0.334745
2022-09-12	14:53:31	-0.186603
2022-09-12	14:53:32	-0.101107
2022-09-12	14:53:32	0.0380282
2022-09-12	14:53:32	0.691717
2022-09-12	14:53:32	0.470446
2022-09-12	14:53:33	0.292074
2022-09-12	14:53:33	0.16556
2022-09-12	14:53:33	0.394822
2022-09-12	14:53:33	0.204848
2022-09-12	14:53:34	0.573448
2022-09-12	14:53:34	0.738995
2022-09-12	14:53:34	0.5336
2022-09-12	14:53:34	0.96612
2022-09-12	14:53:35	0.737163
2022-09-12	14:53:35	0.857926
2022-09-12	14:53:35	0.637112
2022-09-12	14:53:36	0.611209
2022-09-12	14:53:36	0.799758
2022-09-12	14:53:36	1.60693
2022-09-12	14:53:36	0.771209
2022-09-12	14:53:37	1.73497
2022-09-12	14:53:37	0.333651
2022-09-12	14:53:37	0.660776
2022-09-12	14:53:37	1.73604
2022-09-12	14:53:38	0.615738
2022-09-12	14:53:38	1.67528
2022-09-12	14:53:38	1.12927
2022-09-12	14:53:38	0.901234
2022-09-12	14:53:39	0.943524
2022-09-12	14:53:39	0.32215
2022-09-12	14:53:39	0.244695
2022-09-12	14:53:40	1.56408
2022-09-12	14:53:40	0.14785
2022-09-12	14:53:40	0.57874
2022-09-12	14:53:40	1.06541
2022-09-12	14:53:41	1.25879
2022-09-12	14:53:41	1.44363
2022-09-12	14:53:41	0.878944
2022-09-12	14:53:41	1.38083
2022-09-12	14:53:42	1.14566
2022-09-12	14:53:42	0.697824
2022-09-12	14:53:42	0.716043
2022-09-12	14:53:43	1.04037
2022-09-12	14:53:43	0.346425
2022-09-12	14:53:43	1.17503
2022-09-12	14:53:43	0.422456
2022-09-12	14:53:44	2.34296
2022-09-12	14:53:44	0.368308
2022-09-12	14:53:44	2.07492
2022-09-12	14:53:44	0.491921
2022-09-12	14:53:45	1.96637
2022-09-12	14:53:45	1.17304
2022-09-12	14:53:45	1.00454
2022-09-12	14:53:45	1.9652
2022-09-12	14:53:46	0.383321
2022-09-12	14:53:46	1.8281
2022-09-12	14:53:46	0.299606
2022-09-12	14:53:47	1.95009
2022-09-12	14:53:47	0.887901
2022-09-12	14:53:47	1.33309
2022-09-12	14:53:47	1.89905
2022-09-12	14:53:48	0.911107
2022-09-12	14:53:48	2.27782
2022-09-12	14:53:48	0.40785
2022-09-12	14:53:48	2.43731
2022-09-12	14:53:49	0.82617
2022-09-12	14:53:49	1.27548
2022-09-12	14:53:49	0.917773
2022-09-12	14:53:49	0.611565
2022-09-12	14:53:50	0.7193
2022-09-12	14:53:50	0.484084
2022-09-12	14:53:50	0.775687
2022-09-12	14:53:51	0.719555
2022-09-12	14:53:51	0.885356
2022-09-12	14:53:51	0.516654
2022-09-12	14:53:51	2.26205
2022-09-12	14:53:52	0.626883
2022-09-12	14:53:52	3.371
2022-09-12	14:53:52	0.94327
2022-09-12	14:53:52	5.71431
2022-09-12	14:53:53	1.45833
2022-09-12	14:53:53	3.59691
2022-09-12	14:53:53	1.05899
2022-09-12	14:53:53	0.816857
2022-09-12	14:53:54	1.06541
2022-09-12	14:53:54	0.259606
2022-09-12	14:53:54	0.770343
2022-09-12	14:53:55	1.44164
2022-09-12	14:53:55	1.29472
2022-09-12	14:53:55	2.29737
2022-09-12	14:53:55	2.10795
2022-09-12	14:53:56	1.84749
2022-09-12	14:53:56	1.88698
2022-09-12	14:53:56	1.54144
2022-09-12	14:53:57	2.0962
2022-09-12	14:53:57	1.99126
2022-09-12	14:53:57	2.40393
2022-09-12	14:53:57	2.18978
2022-09-12	14:53:57	2.45604
2022-09-12	14:53:58	1.05899
2022-09-12	14:53:58	1.26999
2022-09-12	14:53:58	1.03141
2022-09-12	14:53:59	1.57294
2022-09-12	14:53:59	1.63314
2022-09-12	14:53:59	4.04261
2022-09-12	14:53:59	6.58505
2022-09-12	14:54:00	4.98184
2022-09-12	14:54:00	9.73502
2022-09-12	14:54:00	2.5738
2022-09-12	14:54:00	4.17915
2022-09-12	14:54:01	3.61477
2022-09-12	14:54:01	4.46454
2022-09-12	14:54:01	2.19263
2022-09-12	14:54:01	2.86973
2022-09-12	14:54:02	3.67991
2022-09-12	14:54:02	3.26933
2022-09-12	14:54:02	3.3277
2022-09-12	14:54:03	2.05182
2022-09-12	14:54:03	2.53726
2022-09-12	14:54:03	3.482
2022-09-12	14:54:03	6.24204
2022-09-12	14:54:04	4.86505
2022-09-12	14:54:04	5.42937
2022-09-12	14:54:04	3.49884
2022-09-12	14:54:04	2.908
2022-09-12	14:54:05	2.92439
2022-09-12	14:54:05	2.84006
2022-09-12	14:54:05	2.93772
2022-09-12	14:54:05	3.19406
2022-09-12	14:54:06	3.02887
2022-09-12	14:54:06	2.4737
2022-09-12	14:54:06	2.12108
2022-09-12	14:54:07	1.96678
2022-09-12	14:54:07	1.7764
2022-09-12	14:54:07	1.07396
2022-09-12	14:54:07	1.728
2022-09-12	14:54:08	1.81706
2022-09-12	14:54:08	2.11599
2022-09-12	14:54:08	2.25426
2022-09-12	14:54:08	2.27314
2022-09-12	14:54:09	2.33039
2022-09-12	14:54:09	2.31156
2022-09-12	14:54:09	2.42378
2022-09-12	14:54:09	2.49543
2022-09-12	14:54:10	2.48408
2022-09-12	14:54:10	2.4367
2022-09-12	14:54:10	2.39253
2022-09-12	14:54:11	2.36556
2022-09-12	14:54:11	2.31172
2022-09-12	14:54:11	2.25772
2022-09-12	14:54:11	2.29889
2022-09-12	14:54:12	2.28139
2022-09-12	14:54:12	2.27894
2022-09-12	14:54:12	2.30184
2022-09-12	14:54:12	2.32846
2022-09-12	14:54:13	2.33101
2022-09-12	14:54:13	2.26927
2022-09-12	14:54:13	2.07273
2022-09-12	14:54:13	2.15569
2022-09-12	14:54:14	2.165
2022-09-12	14:54:14	2.3937
2022-09-12	14:54:14	2.32897
2022-09-12	14:54:15	2.27955
2022-09-12	14:54:15	2.28668
2022-09-12	14:54:15	2.30062
2022-09-12	14:54:15	2.25813
2022-09-12	14:54:16	2.22088
2022-09-12	14:54:16	2.21859
2022-09-12	14:54:16	2.25996
2022-09-12	14:54:16	2.25625
2022-09-12	14:54:17	1.72429
2022-09-12	14:54:17	1.45528
2022-09-12	14:54:17	0.792023
2022-09-12	14:54:17	0.511259
2022-09-12	14:54:18	0.440674
2022-09-12	14:54:18	0.369733
2022-09-12	14:54:18	0.481387
2022-09-12	14:54:19	0.247952
2022-09-12	14:54:19	0.250649
2022-09-12	14:54:19	0.0947712
2022-09-12	14:54:19	-0.394491
2022-09-12	14:54:20	-0.631081
2022-09-12	14:54:20	-0.276628
2022-09-12	14:54:20	-0.0568318
2022-09-12	14:54:20	0.0749748
2022-09-12	14:54:21	-0.10075
2022-09-12	14:54:21	-0.0324043
2022-09-12	14:54:21	0.127341
2022-09-12	14:54:22	0.182049
2022-09-12	14:54:22	0.268155
2022-09-12	14:54:22	0.0359926
2022-09-12	14:54:22	0.437672
2022-09-12	14:54:23	0.845153
2022-09-12	14:54:23	0.0794531
2022-09-12	14:54:23	0.404288
2022-09-12	14:54:23	2.15884
2022-09-12	14:54:24	1.49202
2022-09-12	14:54:24	4.10983
2022-09-12	14:54:24	0.864949
2022-09-12	14:54:24	0.243422
2022-09-12	14:54:25	0.174873
2022-09-12	14:54:25	-0.119529
2022-09-12	14:54:25	0.591616
2022-09-12	14:54:26	4.04383
2022-09-12	14:54:26	4.21665
2022-09-12	14:54:26	2.58541
2022-09-12	14:54:26	0.255382
2022-09-12	14:54:27	-8.88145e-05
2022-09-12	14:54:27	0.0605218
2022-09-12	14:54:27	0.0365015
2022-09-12	14:54:27	-0.270012
2022-09-12	14:54:28	-0.288079
2022-09-12	14:54:28	-0.25271
2022-09-12	14:54:28	-0.147926
2022-09-12	14:54:28	-0.157493
2022-09-12	14:54:29	-0.225432
2022-09-12	14:54:29	-0.233218
2022-09-12	14:54:29	-0.155407
2022-09-12	14:54:30	-0.122888
2022-09-12	14:54:30	0.318486
2022-09-12	14:54:30	1.62403
2022-09-12	14:54:30	5.37777
2022-09-12	14:54:31	5.55996
2022-09-12	14:54:31	2.90907
2022-09-12	14:54:31	3.36535
2022-09-12	14:54:31	2.17385
2022-09-12	14:54:32	2.8134
2022-09-12	14:54:32	3.05121
2022-09-12	14:54:32	3.58271
2022-09-12	14:54:32	5.63894
2022-09-12	14:54:33	2.16704
2022-09-12	14:54:33	0.583677
2022-09-12	14:54:33	0.574517
2022-09-12	14:54:34	1.07228
2022-09-12	14:54:34	8.14489
2022-09-12	14:54:34	12.9445
2022-09-12	14:54:34	3.59187
2022-09-12	14:54:35	5.73533
2022-09-12	14:54:35	1.5164
2022-09-12	14:54:35	1.44612
2022-09-12	14:54:35	0.863982
2022-09-12	14:54:36	0.929885
2022-09-12	14:54:36	0.188461
2022-09-12	14:54:36	0.387697
2022-09-12	14:54:36	0.934771
2022-09-12	14:54:37	0.188003
2022-09-12	14:54:37	0.214822
2022-09-12	14:54:37	1.3505
2022-09-12	14:54:38	0.383321
2022-09-12	14:54:38	1.96098
2022-09-12	14:54:38	1.16673
2022-09-12	14:54:38	2.07329
2022-09-12	14:54:39	2.87742
2022-09-12	14:54:39	0.397316
2022-09-12	14:54:39	0.599046
2022-09-12	14:54:39	0.849427
2022-09-12	14:54:40	0.319402
2022-09-12	14:54:40	0.540318
2022-09-12	14:54:40	0.24327
2022-09-12	14:54:40	0.453702
2022-09-12	14:54:41	0.179199
2022-09-12	14:54:41	0.777214
2022-09-12	14:54:41	1.5194
2022-09-12	14:54:42	4.66128
2022-09-12	14:54:42	1.09716
2022-09-12	14:54:42	2.02887
2022-09-12	14:54:42	0.356501
2022-09-12	14:54:43	0.718232
2022-09-12	14:54:43	1.04836
2022-09-12	14:54:43	0.312786
2022-09-12	14:54:43	0.198995
2022-09-12	14:54:44	0.181794
2022-09-12	14:54:44	0.109377
2022-09-12	14:54:44	-0.0182567
2022-09-12	14:54:44	0.0227611
2022-09-12	14:54:45	0.0188934
2022-09-12	14:54:45	0.0856618
2022-09-12	14:54:45	0.270445
2022-09-12	14:54:46	0.236196
2022-09-12	14:54:46	0.183677
2022-09-12	14:54:46	0.253244
2022-09-12	14:54:46	0.121234
2022-09-12	14:54:47	0.0639824
2022-09-12	14:54:47	0.031616
2022-09-12	14:54:47	0.236959
2022-09-12	14:54:47	0.268715
2022-09-12	14:54:48	0.384898
2022-09-12	14:54:48	0.419351
2022-09-12	14:54:48	0.433601
2022-09-12	14:54:48	0.820165
2022-09-12	14:54:49	0.924033
2022-09-12	14:54:49	0.158537
2022-09-12	14:54:49	-0.782938
2022-09-12	14:54:50	-0.824465
2022-09-12	14:54:50	-0.697238
2022-09-12	14:54:50	-0.725177
2022-09-12	14:54:50	-0.625381
2022-09-12	14:54:51	-0.461921
2022-09-12	14:54:51	-0.319834
2022-09-12	14:54:51	-0.270216
2022-09-12	14:54:51	-0.102684
2022-09-12	14:54:52	0.13528
2022-09-12	14:54:52	0.196501
2022-09-12	14:54:52	0.0187916
2022-09-12	14:54:52	-0.149249
2022-09-12	14:54:53	-0.361361
2022-09-12	14:54:53	-0.36991
2022-09-12	14:54:53	-0.313931
2022-09-12	14:54:54	0.490038
2022-09-12	14:54:54	0.215229
2022-09-12	14:54:54	-0.0415646
2022-09-12	14:54:54	-0.242124
2022-09-12	14:54:55	-0.306043
2022-09-12	14:54:55	-0.179631
2022-09-12	14:54:55	-0.725381
2022-09-12	14:54:55	-0.714541
2022-09-12	14:54:56	-0.711386
2022-09-12	14:54:56	-0.622887
2022-09-12	14:54:56	-0.5236
2022-09-12	14:54:57	-0.405483
2022-09-12	14:54:57	-0.25902
2022-09-12	14:54:57	-0.291234
2022-09-12	14:54:57	0.10327
2022-09-12	14:54:58	1.07452
2022-09-12	14:54:58	2.39024
2022-09-12	14:54:58	5.28759
2022-09-12	14:54:58	5.2998
2022-09-12	14:54:59	4.81126
2022-09-12	14:54:59	4.52322
2022-09-12	14:54:59	2.33864
2022-09-12	14:54:59	4.74413
2022-09-12	14:55:00	1.74429
2022-09-12	14:55:00	2.23314
2022-09-12	14:55:00	1.24174
2022-09-12	14:55:01	1.28017
2022-09-12	14:55:01	1.44861
2022-09-12	14:55:01	0.737265
2022-09-12	14:55:01	0.719249
2022-09-12	14:55:02	0.160624
2022-09-12	14:55:02	0.108155
2022-09-12	14:55:02	0.524542
2022-09-12	14:55:02	1.28948
2022-09-12	14:55:03	1.65411
2022-09-12	14:55:03	2.48067
2022-09-12	14:55:03	4.11014
2022-09-12	14:55:03	5.56998
2022-09-12	14:55:04	3.79406
2022-09-12	14:55:04	3.21136
2022-09-12	14:55:04	3.50424
2022-09-12	14:55:05	5.49121
2022-09-12	14:55:05	0.648359
2022-09-12	14:55:05	0.356908
2022-09-12	14:55:05	0.420674
2022-09-12	14:55:06	0.156501
2022-09-12	14:55:06	0.16612
2022-09-12	14:55:06	-0.22757
2022-09-12	14:55:06	-0.481259
2022-09-12	14:55:07	1.31803
2022-09-12	14:55:07	2.92469
2022-09-12	14:55:07	4.52515
2022-09-12	14:55:07	2.21482
2022-09-12	14:55:08	1.28734
2022-09-12	14:55:08	0.360064
2022-09-12	14:55:08	0.30444
2022-09-12	14:55:09	0.0363997
2022-09-12	14:55:09	0.0227102
2022-09-12	14:55:09	-0.0812593
2022-09-12	14:55:09	0.408766
2022-09-12	14:55:10	0.773041
2022-09-12	14:55:10	1.63238
2022-09-12	14:55:10	1.98408
2022-09-12	14:55:10	2.06419
2022-09-12	14:55:11	1.81523
2022-09-12	14:55:11	2.47248
2022-09-12	14:55:11	1.87218
2022-09-12	14:55:11	0.751667
2022-09-12	14:55:12	0.455026
2022-09-12	14:55:12	0.31131
2022-09-12	14:55:12	0.0931427
2022-09-12	14:55:13	0.304797
2022-09-12	14:55:13	5.0507
2022-09-12	14:55:13	5.70831
2022-09-12	14:55:13	3.53971
2022-09-12	14:55:14	2.60301
2022-09-12	14:55:14	1.04968
2022-09-12	14:55:14	1.14123
2022-09-12	14:55:14	1.2137
2022-09-12	14:55:15	1.37294
2022-09-12	14:55:15	2.02246
2022-09-12	14:55:15	2.48357
2022-09-12	14:55:15	2.20978
2022-09-12	14:55:16	1.25447
2022-09-12	14:55:16	1.13197
2022-09-12	14:55:16	1.95966
2022-09-12	14:55:17	2.33355
2022-09-12	14:55:17	1.67263
2022-09-12	14:55:17	1.32261
2022-09-12	14:55:17	2.62968
2022-09-12	14:55:18	3.02785
2022-09-12	14:55:18	3.22505
2022-09-12	14:55:18	5.00922
2022-09-12	14:55:18	6.69665
2022-09-12	14:55:19	1.40042
2022-09-12	14:55:19	0.407901
2022-09-12	14:55:19	0.257774
2022-09-12	14:55:19	0.0528374
2022-09-12	14:55:20	0.400624
2022-09-12	14:55:20	15.5164
2022-09-12	14:55:20	11.0511
2022-09-12	14:55:21	2.72627
2022-09-12	14:55:21	0.753193
2022-09-12	14:55:21	0.311412
2022-09-12	14:55:21	0.252583
2022-09-12	14:55:22	0.107087
2022-09-12	14:55:22	0.204746
2022-09-12	14:55:22	-0.0484348
2022-09-12	14:55:22	0.348511
2022-09-12	14:55:23	0.0626084
2022-09-12	14:55:23	0.507392
2022-09-12	14:55:23	0.274313
2022-09-12	14:55:23	0.294669
2022-09-12	14:55:24	0.333957
2022-09-12	14:55:24	0.331616
2022-09-12	14:55:24	1.26989
2022-09-12	14:55:25	0.673346
2022-09-12	14:55:25	1.02663
2022-09-12	14:55:25	0.759402
2022-09-12	14:55:25	1.12866
2022-09-12	14:55:26	2.48149
2022-09-12	14:55:26	1.01889
2022-09-12	14:55:26	1.52744
2022-09-12	14:55:26	2.34368
2022-09-12	14:55:27	1.78724
2022-09-12	14:55:27	1.75905
2022-09-12	14:55:27	2.89584
2022-09-12	14:55:27	1.52536
2022-09-12	14:55:28	1.60383
2022-09-12	14:55:28	0.91187
2022-09-12	14:55:28	1.03966
2022-09-12	14:55:29	0.817112
2022-09-12	14:55:29	1.40134
2022-09-12	14:55:29	0.762252
2022-09-12	14:55:29	0.806374
2022-09-12	14:55:30	0.882863
2022-09-12	14:55:30	1.10159
2022-09-12	14:55:30	4.78881
2022-09-12	14:55:30	1.77971
2022-09-12	14:55:31	2.0592
2022-09-12	14:55:31	2.61131
2022-09-12	14:55:31	6.41925
2022-09-12	14:55:31	9.21243
2022-09-12	14:55:32	13.9861
2022-09-12	14:55:32	9.47024
2022-09-12	14:55:32	6.3738
2022-09-12	14:55:33	4.39676
2022-09-12	14:55:33	3.52408
2022-09-12	14:55:33	5.05426
2022-09-12	14:55:33	1.87406
2022-09-12	14:55:34	2.5194
2022-09-12	14:55:34	1.1276
2022-09-12	14:55:34	0.690802
2022-09-12	14:55:34	0.475076
2022-09-12	14:55:35	0.373855
2022-09-12	14:55:35	0.17472
2022-09-12	14:55:35	0.416603
2022-09-12	14:55:36	0.355127
2022-09-12	14:55:36	1.50327
2022-09-12	14:55:36	2.55823
2022-09-12	14:55:36	3.58871
2022-09-12	14:55:37	0.930547
2022-09-12	14:55:37	0.435382
2022-09-12	14:55:37	0.0523285
2022-09-12	14:55:37	-0.0856358
2022-09-12	14:55:38	0.149275
2022-09-12	14:55:38	0.0451529
2022-09-12	14:55:38	0.371361
2022-09-12	14:55:38	0.766781
2022-09-12	14:55:39	0.512226
2022-09-12	14:55:39	0.55701
2022-09-12	14:55:39	0.37299
2022-09-12	14:55:40	0.196858
2022-09-12	14:55:40	-0.00746796
2022-09-12	14:55:40	0.253702
2022-09-12	14:55:40	0.00866438
2022-09-12	14:55:41	0.424796
2022-09-12	14:55:41	0.362201
2022-09-12	14:55:41	1.91635
2022-09-12	14:55:41	1.13961
2022-09-12	14:55:42	3.44368
2022-09-12	14:55:42	1.12195
2022-09-12	14:55:42	3.04642
2022-09-12	14:55:42	0.465916
2022-09-12	14:55:43	2.04235
2022-09-12	14:55:43	1.39396
2022-09-12	14:55:43	1.02709
2022-09-12	14:55:44	1.47508
2022-09-12	14:55:44	0.280725
2022-09-12	14:55:44	0.903066
2022-09-12	14:55:44	0.489478
2022-09-12	14:55:45	0.371565
2022-09-12	14:55:45	0.422303
2022-09-12	14:55:45	1.1508
2022-09-12	14:55:45	1.06235
2022-09-12	14:55:46	3.79055
2022-09-12	14:55:46	1.24989
2022-09-12	14:55:46	4.77996
2022-09-12	14:55:46	1.41467
2022-09-12	14:55:47	2.03268
2022-09-12	14:55:47	4.04032
2022-09-12	14:55:47	1.94749
2022-09-12	14:55:48	6.38398
2022-09-12	14:55:48	3.17701
2022-09-12	14:55:48	7.68179
2022-09-12	14:55:48	1.15732
2022-09-12	14:55:49	0.679962
2022-09-12	14:55:49	1.13523
2022-09-12	14:55:49	0.272481
2022-09-12	14:55:49	7.17675
2022-09-12	14:55:50	4.75721
2022-09-12	14:55:50	1.34663
2022-09-12	14:55:50	1.58775
2022-09-12	14:55:50	0.978893
2022-09-12	14:55:51	1.54225
2022-09-12	14:55:51	2.85777
2022-09-12	14:55:51	1.6907
2022-09-12	14:55:52	5.35161
2022-09-12	14:55:52	1.43803
2022-09-12	14:55:52	5.62459
2022-09-12	14:55:52	0.737214
2022-09-12	14:55:53	0.445713
2022-09-12	14:55:53	1.99655
2022-09-12	14:55:53	0.932786
2022-09-12	14:55:53	2.99996
2022-09-12	14:55:54	0.586781
2022-09-12	14:55:54	0.461998
2022-09-12	14:55:54	2.38434
2022-09-12	14:55:54	2.37564
2022-09-12	14:55:55	5.55609
2022-09-12	14:55:55	1.12846
2022-09-12	14:55:55	0.634415
2022-09-12	14:55:56	0.660012
2022-09-12	14:55:56	0.142405
2022-09-12	14:55:56	0.0980282
2022-09-12	14:55:56	0.360573
2022-09-12	14:55:57	0.244237
2022-09-12	14:55:57	3.15849
2022-09-12	14:55:57	1.82826
2022-09-12	14:55:57	3.55055
2022-09-12	14:55:58	2.23726
2022-09-12	14:55:58	0.446221
2022-09-12	14:55:58	1.14663
2022-09-12	14:55:58	0.837265
