# Supplementary material for: Comparing efficacy in reducing pulling and welfare impacts of four types of leash walking equipment
Source: PeerJ journal article supplement (doi:10.7717/peerj.18131), 2024-10-24
Supplement: Shelter1_Tension_files.zip [file Harley_martin_2022912133721 copy.xlsx]

## Sheet: Averaged Newtons
Date	Time	average newtons	Impulse	Total step
2022-09-12	13:37:39	15.844	15.844	1		Newton Impulse	4363.04
2022-09-12	13:37:40	17.8684	33.7124	2		Total step	72
2022-09-12	13:37:41	20.6246	54.337	3		# > 5sec	7
2022-09-12	13:37:42	0.914674	55.2517	3
2022-09-12	13:37:43	4.72766	59.9794	3
2022-09-12	13:37:44	54.2243	114.204	4
2022-09-12	13:37:45	118.31	232.513	5
2022-09-12	13:37:46	117.542	350.055	6
2022-09-12	13:37:47	168.035	518.09	7
2022-09-12	13:37:48	155.213	673.303	8
2022-09-12	13:37:49	115.332	788.635	9
2022-09-12	13:37:50	2.80698	791.442	9
2022-09-12	13:37:51	0.806505	792.248	9
2022-09-12	13:37:52	0.201472	792.45	9
2022-09-12	13:37:53	2.41895	794.869	9
2022-09-12	13:37:54	0.923728	795.793	9
2022-09-12	13:37:55	0.64318	796.436	9
2022-09-12	13:37:56	150.911	947.347	10
2022-09-12	13:37:57	131.473	1078.82	11
2022-09-12	13:37:58	141.739	1220.56	12
2022-09-12	13:37:59	138.014	1358.57	13
2022-09-12	13:38:00	153.01	1511.58	14
2022-09-12	13:38:01	151.48	1663.06	15
2022-09-12	13:38:02	46.5823	1709.65	16
2022-09-12	13:38:03	1.11397	1710.76	16
2022-09-12	13:38:04	1.51171	1712.27	16
2022-09-12	13:38:05	1.4842	1713.75	16
2022-09-12	13:38:06	7.1943	1720.95	16
2022-09-12	13:38:07	0.965872	1721.92	16
2022-09-12	13:38:08	38.7167	1760.63	17
2022-09-12	13:38:09	67.3522	1827.98	18
2022-09-12	13:38:10	67.4928	1895.48	19
2022-09-12	13:38:11	46.1618	1941.64	20
2022-09-12	13:38:12	11.9734	1953.61	20
2022-09-12	13:38:13	54.5496	2008.16	21
2022-09-12	13:38:14	27.1168	2035.28	22
2022-09-12	13:38:15	12.0171	2047.3	22
2022-09-12	13:38:16	26.9564	2074.25	23
2022-09-12	13:38:17	31.7252	2105.98	24
2022-09-12	13:38:18	2.90435	2108.88	24
2022-09-12	13:38:19	0.332484	2109.21	24
2022-09-12	13:38:20	7.01389	2116.23	24
2022-09-12	13:38:21	8.93221	2125.16	24
2022-09-12	13:38:22	20.2446	2145.4	25
2022-09-12	13:38:23	6.87773	2152.28	25
2022-09-12	13:38:24	9.55859	2161.84	25
2022-09-12	13:38:25	24.9941	2186.84	26
2022-09-12	13:38:26	20.2891	2207.12	27
2022-09-12	13:38:27	81.5858	2288.71	28
2022-09-12	13:38:28	43.0739	2331.78	29
2022-09-12	13:38:29	76.5268	2408.31	30
2022-09-12	13:38:30	78.2867	2486.6	31
2022-09-12	13:38:31	66.8638	2553.46	32
2022-09-12	13:38:32	57.8422	2611.3	33
2022-09-12	13:38:33	78.9704	2690.27	34
2022-09-12	13:38:34	44.6552	2734.93	35
2022-09-12	13:38:35	37.7931	2772.72	36
2022-09-12	13:38:36	26.3479	2799.07	37
2022-09-12	13:38:37	66.8762	2865.95	38
2022-09-12	13:38:38	9.84959	2875.8	38
2022-09-12	13:38:39	3.883	2879.68	38
2022-09-12	13:38:40	4.37141	2884.05	38
2022-09-12	13:38:41	4.02185	2888.07	38
2022-09-12	13:38:42	2.10231	2890.17	38
2022-09-12	13:38:43	1.81657	2891.99	38
2022-09-12	13:38:44	0.171081	2892.16	38
2022-09-12	13:38:45	0.491585	2892.65	38
2022-09-12	13:38:46	1.30345	2893.96	38
2022-09-12	13:38:47	2.73791	2896.69	38
2022-09-12	13:38:48	1.74385	2898.44	38
2022-09-12	13:38:49	2.19835	2900.64	38
2022-09-12	13:38:50	9.12271	2909.76	38
2022-09-12	13:38:51	2.41703	2912.18	38
2022-09-12	13:38:52	4.31458	2916.49	38
2022-09-12	13:38:53	10.4903	2926.98	38
2022-09-12	13:38:54	4.67531	2931.66	38
2022-09-12	13:38:55	3.28946	2934.95	38
2022-09-12	13:38:56	2.60237	2937.55	38
2022-09-12	13:38:57	2.10365	2939.65	38
2022-09-12	13:38:58	1.94481	2941.6	38
2022-09-12	13:38:59	1.9773	2943.57	38
2022-09-12	13:39:00	1.99518	2945.57	38
2022-09-12	13:39:01	2.0131	2947.58	38
2022-09-12	13:39:02	2.03061	2949.61	38
2022-09-12	13:39:03	1.97124	2951.58	38
2022-09-12	13:39:04	1.87956	2953.46	38
2022-09-12	13:39:05	1.92859	2955.39	38
2022-09-12	13:39:06	2.02767	2957.42	38
2022-09-12	13:39:07	2.08681	2959.51	38
2022-09-12	13:39:08	2.07724	2961.58	38
2022-09-12	13:39:09	2.09263	2963.68	38
2022-09-12	13:39:10	2.09252	2965.77	38
2022-09-12	13:39:11	3.07424	2968.84	38
2022-09-12	13:39:12	3.28516	2972.13	38
2022-09-12	13:39:13	6.43829	2978.57	38
2022-09-12	13:39:14	2.3155	2980.88	38
2022-09-12	13:39:15	3.19206	2984.08	38
2022-09-12	13:39:16	2.20537	2986.28	38
2022-09-12	13:39:17	2.31855	2988.6	38
2022-09-12	13:39:18	2.38692	2990.99	38
2022-09-12	13:39:19	5.6908	2996.68	38
2022-09-12	13:39:20	14.8798	3011.56	39
2022-09-12	13:39:21	9.0402	3020.6	39
2022-09-12	13:39:22	3.13621	3023.73	39
2022-09-12	13:39:23	23.8734	3047.61	40
2022-09-12	13:39:24	26.4798	3074.09	41
2022-09-12	13:39:25	23.8667	3097.95	42
2022-09-12	13:39:26	33.0278	3130.98	43
2022-09-12	13:39:27	31.0337	3162.01	44
2022-09-12	13:39:28	17.146	3179.16	45
2022-09-12	13:39:29	13.5861	3192.75	46
2022-09-12	13:39:30	2.02795	3194.77	46
2022-09-12	13:39:31	4.97621	3199.75	46
2022-09-12	13:39:32	2.10358	3201.85	46
2022-09-12	13:39:33	1.13457	3202.99	46
2022-09-12	13:39:34	1.59948	3204.59	46
2022-09-12	13:39:35	2.23746	3206.83	46
2022-09-12	13:39:36	2.27366	3209.1	46
2022-09-12	13:39:37	2.08109	3211.18	46
2022-09-12	13:39:38	2.57147	3213.75	46
2022-09-12	13:39:39	2.4868	3216.24	46
2022-09-12	13:39:40	8.15268	3224.39	46
2022-09-12	13:39:41	1.61629	3226.01	46
2022-09-12	13:39:42	20.5169	3246.52	47
2022-09-12	13:39:43	6.85911	3253.38	47
2022-09-12	13:39:44	12.8464	3266.23	47
2022-09-12	13:39:45	41.0124	3307.24	48
2022-09-12	13:39:46	49.3062	3356.55	49
2022-09-12	13:39:47	2.53909	3359.09	49
2022-09-12	13:39:48	1.91976	3361.01	49
2022-09-12	13:39:49	3.25528	3364.26	49
2022-09-12	13:39:50	4.56133	3368.82	49
2022-09-12	13:39:51	6.65708	3375.48	49
2022-09-12	13:39:52	7.38738	3382.87	49
2022-09-12	13:39:53	8.88632	3391.75	49
2022-09-12	13:39:54	6.41955	3398.17	49
2022-09-12	13:39:55	8.84281	3407.02	49
2022-09-12	13:39:56	5.25979	3412.28	49
2022-09-12	13:39:57	3.9967	3416.27	49
2022-09-12	13:39:58	3.43372	3419.71	49
2022-09-12	13:39:59	2.94396	3422.65	49
2022-09-12	13:40:00	3.23242	3425.88	49
2022-09-12	13:40:01	2.73253	3428.62	49
2022-09-12	13:40:02	3.58222	3432.2	49
2022-09-12	13:40:03	3.12229	3435.32	49
2022-09-12	13:40:04	3.35345	3438.67	49
2022-09-12	13:40:05	3.58935	3442.26	49
2022-09-12	13:40:06	2.87877	3445.14	49
2022-09-12	13:40:07	3.9117	3449.05	49
2022-09-12	13:40:08	12.968	3462.02	49
2022-09-12	13:40:09	7.04218	3469.06	49
2022-09-12	13:40:10	1.70203	3470.77	49
2022-09-12	13:40:11	17.8642	3488.63	50
2022-09-12	13:40:12	11.7157	3500.35	50
2022-09-12	13:40:13	34.6392	3534.99	51
2022-09-12	13:40:14	9.01909	3544	51
2022-09-12	13:40:15	1.13395	3545.14	51
2022-09-12	13:40:16	2.22038	3547.36	51
2022-09-12	13:40:17	1.21997	3548.58	51
2022-09-12	13:40:18	1.10186	3549.68	51
2022-09-12	13:40:19	1.65521	3551.34	51
2022-09-12	13:40:20	1.88618	3553.22	51
2022-09-12	13:40:21	2.74657	3555.97	51
2022-09-12	13:40:22	2.17634	3558.15	51
2022-09-12	13:40:23	2.1868	3560.33	51
2022-09-12	13:40:24	2.74328	3563.08	51
2022-09-12	13:40:25	3.41662	3566.49	51
2022-09-12	13:40:26	2.95986	3569.45	51
2022-09-12	13:40:27	2.08939	3571.54	51
2022-09-12	13:40:28	1.56123	3573.1	51
2022-09-12	13:40:29	1.77634	3574.88	51
2022-09-12	13:40:30	4.29155	3579.17	51
2022-09-12	13:40:31	2.20356	3581.37	51
2022-09-12	13:40:32	2.0739	3583.45	51
2022-09-12	13:40:33	2.85653	3586.3	51
2022-09-12	13:40:34	1.80718	3588.11	51
2022-09-12	13:40:35	1.48581	3589.6	51
2022-09-12	13:40:36	7.52944	3597.13	51
2022-09-12	13:40:37	1.4661	3598.59	51
2022-09-12	13:40:38	1.40379	3600	51
2022-09-12	13:40:39	3.66268	3603.66	51
2022-09-12	13:40:40	2.23785	3605.9	51
2022-09-12	13:40:41	0.904128	3606.8	51
2022-09-12	13:40:42	1.19886	3608	51
2022-09-12	13:40:43	0.609978	3608.61	51
2022-09-12	13:40:44	1.31573	3609.93	51
2022-09-12	13:40:45	2.48228	3612.41	51
2022-09-12	13:40:46	2.39252	3614.8	51
2022-09-12	13:40:47	3.37593	3618.18	51
2022-09-12	13:40:48	5.53014	3623.71	51
2022-09-12	13:40:49	5.26003	3628.97	51
2022-09-12	13:40:50	1.61533	3630.58	51
2022-09-12	13:40:51	2.18507	3632.77	51
2022-09-12	13:40:52	14.8	3647.57	52
2022-09-12	13:40:53	19.1336	3666.7	53
2022-09-12	13:40:54	32.8591	3699.56	54
2022-09-12	13:40:55	19.0798	3718.64	55
2022-09-12	13:40:56	17.4987	3736.14	56
2022-09-12	13:40:57	26.7537	3762.89	57
2022-09-12	13:40:58	28.7984	3791.69	58
2022-09-12	13:40:59	24.7945	3816.48	59
2022-09-12	13:41:00	16.7577	3833.24	60
2022-09-12	13:41:01	26.4262	3859.67	61
2022-09-12	13:41:02	15.3553	3875.02	62
2022-09-12	13:41:03	19.8702	3894.89	63
2022-09-12	13:41:04	29.499	3924.39	64
2022-09-12	13:41:05	29.1069	3953.5	65
2022-09-12	13:41:06	38.3357	3991.84	66
2022-09-12	13:41:07	18.8794	4010.72	67
2022-09-12	13:41:08	3.23355	4013.95	67
2022-09-12	13:41:09	7.47508	4021.42	67
2022-09-12	13:41:10	12.9062	4034.33	67
2022-09-12	13:41:11	14.8628	4049.19	68
2022-09-12	13:41:12	18.1992	4067.39	69
2022-09-12	13:41:13	6.68259	4074.07	69
2022-09-12	13:41:14	0.910373	4074.99	69
2022-09-12	13:41:15	1.23814	4076.22	69
2022-09-12	13:41:16	1.39343	4077.62	69
2022-09-12	13:41:17	0.952402	4078.57	69
2022-09-12	13:41:18	1.26057	4079.83	69
2022-09-12	13:41:19	1.45591	4081.29	69
2022-09-12	13:41:20	1.04906	4082.33	69
2022-09-12	13:41:21	1.14697	4083.48	69
2022-09-12	13:41:22	1.20752	4084.69	69
2022-09-12	13:41:23	1.20594	4085.9	69
2022-09-12	13:41:24	1.25778	4087.15	69
2022-09-12	13:41:25	1.24657	4088.4	69
2022-09-12	13:41:26	1.23288	4089.63	69
2022-09-12	13:41:27	1.26038	4090.89	69
2022-09-12	13:41:28	1.30152	4092.19	69
2022-09-12	13:41:29	1.33338	4093.53	69
2022-09-12	13:41:30	1.34765	4094.88	69
2022-09-12	13:41:31	1.36938	4096.24	69
2022-09-12	13:41:32	1.38505	4097.63	69
2022-09-12	13:41:33	1.40175	4099.03	69
2022-09-12	13:41:34	1.40718	4100.44	69
2022-09-12	13:41:35	1.36819	4101.81	69
2022-09-12	13:41:36	4.07984	4105.89	69
2022-09-12	13:41:37	2.25721	4108.14	69
2022-09-12	13:41:38	2.61872	4110.76	69
2022-09-12	13:41:39	1.74125	4112.5	69
2022-09-12	13:41:40	0.525862	4113.03	69
2022-09-12	13:41:41	0.797866	4113.83	69
2022-09-12	13:41:42	0.312337	4114.14	69
2022-09-12	13:41:43	-1.02088	4114.14	69
2022-09-12	13:41:44	0.235258	4114.38	69
2022-09-12	13:41:45	0.627276	4115	69
2022-09-12	13:41:46	2.56138	4117.56	69
2022-09-12	13:41:47	5.04898	4122.61	69
2022-09-12	13:41:48	5.24553	4127.86	69
2022-09-12	13:41:49	4.97207	4132.83	69
2022-09-12	13:41:50	3.70953	4136.54	69
2022-09-12	13:41:51	4.21481	4140.75	69
2022-09-12	13:41:52	4.79867	4145.55	69
2022-09-12	13:41:53	2.77085	4148.32	69
2022-09-12	13:41:54	0.839593	4149.16	69
2022-09-12	13:41:55	-1.74691	4149.16	69
2022-09-12	13:41:56	14.5234	4163.69	70
2022-09-12	13:41:57	9.44491	4173.13	70
2022-09-12	13:41:58	5.60003	4178.73	70
2022-09-12	13:41:59	11.4263	4190.16	70
2022-09-12	13:42:00	27.4479	4217.61	71
2022-09-12	13:42:01	41.5133	4259.12	72
2022-09-12	13:42:02	8.62458	4267.74	72
2022-09-12	13:42:03	12.5825	4280.33	72
2022-09-12	13:42:04	7.9822	4288.31	72
2022-09-12	13:42:05	0.930142	4289.24	72
2022-09-12	13:42:06	1.62025	4290.86	72
2022-09-12	13:42:07	1.18743	4292.05	72
2022-09-12	13:42:08	0.934235	4292.98	72
2022-09-12	13:42:09	0.754477	4293.74	72
2022-09-12	13:42:10	1.20192	4294.94	72
2022-09-12	13:42:11	1.98613	4296.92	72
2022-09-12	13:42:12	2.00922	4298.93	72
2022-09-12	13:42:13	2.01129	4300.94	72
2022-09-12	13:42:14	1.78217	4302.73	72
2022-09-12	13:42:15	1.34125	4304.07	72
2022-09-12	13:42:16	1.19315	4305.26	72
2022-09-12	13:42:17	0.934067	4306.19	72
2022-09-12	13:42:18	-1.02767	4306.19	72
2022-09-12	13:42:19	0.519466	4306.71	72
2022-09-12	13:42:20	3.04113	4309.76	72
2022-09-12	13:42:21	2.60597	4312.36	72
2022-09-12	13:42:22	7.25606	4319.62	72
2022-09-12	13:42:23	5.1775	4324.79	72
2022-09-12	13:42:24	2.08584	4326.88	72
2022-09-12	13:42:25	0.927878	4327.81	72
2022-09-12	13:42:26	1.22563	4329.03	72
2022-09-12	13:42:27	3.45414	4332.49	72
2022-09-12	13:42:28	2.39479	4334.88	72
2022-09-12	13:42:29	3.74206	4338.63	72
2022-09-12	13:42:30	0.623089	4339.25	72
2022-09-12	13:42:31	1.06191	4340.31	72
2022-09-12	13:42:32	2.5426	4342.85	72
2022-09-12	13:42:33	2.33583	4345.19	72
2022-09-12	13:42:34	2.1494	4347.34	72
2022-09-12	13:42:35	2.13157	4349.47	72
2022-09-12	13:42:36	7.84127	4357.31	72
2022-09-12	13:42:37	1.9541	4359.26	72
2022-09-12	13:42:38	1.44504	4360.71	72
2022-09-12	13:42:39	2.33383	4363.04	72

## Sheet: Harley_martin_2022912133721 (3)
Date	Time	Lbs	Newtons	average newtons	Total Force x time	Total Time Steps Force >13.345		**GoPro Fitting: 13:26
2022-09-12	13:37:39	3.71558	16.5276	15.844	16.5276	1	1			Total Force x time	8308.8
2022-09-12	13:37:39	2.31945	10.3174	15.844	10.3174	FALSE	1			Total Time Steps Force >3	254
2022-09-12	13:37:39	4.08963	18.1915	15.844	34.7191	1	2
2022-09-12	13:37:39	4.12291	18.3395	15.844	28.6569	1	3
2022-09-12	13:37:40	3.68581	16.3952	17.8684	51.1144	1	4
2022-09-12	13:37:40	1.5678	6.97389	17.8684	35.6308	FALSE	4
2022-09-12	13:37:40	2.84983	12.6766	17.8684	63.791	FALSE	4	First 30 seconds or so pulling at dog
2022-09-12	13:37:40	7.96454	35.4279	17.8684	71.0587	1	5
2022-09-12	13:37:41	11.6519	51.83	20.6246	115.621	1	6
2022-09-12	13:37:41	4.92821	21.9217	20.6246	92.9803	1	7
2022-09-12	13:37:41	1.56729	6.97162	20.6246	122.593	FALSE	7
2022-09-12	13:37:41	0.399097	1.77526	20.6246	94.7556	FALSE	7
2022-09-12	13:37:42	0.426883	1.89886	0.914674	124.491	FALSE	7
2022-09-12	13:37:42	-0.0761193	-0.338594	0.914674	94.7556	FALSE	7
2022-09-12	13:37:42	0.26612	1.18375	0.914674	125.675	FALSE	7
2022-09-12	13:37:43	0.050242	0.223486	4.72766	94.9791	FALSE	7
2022-09-12	13:37:43	0.202557	0.901014	4.72766	126.576	FALSE	7
2022-09-12	13:37:43	1.06098	4.71945	4.72766	99.6985	FALSE	7
2022-09-12	13:37:43	2.93752	13.0667	4.72766	139.643	FALSE	7
2022-09-12	13:37:44	2.21492	9.85241	54.2243	109.551	FALSE	7
2022-09-12	13:37:44	5.12932	22.8162	54.2243	162.459	1	8
2022-09-12	13:37:44	24.2486	107.863	54.2243	217.414	1	9
2022-09-12	13:37:44	17.1678	76.3658	54.2243	238.825	1	10
2022-09-12	13:37:45	31.2888	139.179	118.31	356.592	1	11
2022-09-12	13:37:45	29.9366	133.164	118.31	371.989	1	12
2022-09-12	13:37:45	12.2524	54.5011	118.31	411.094	1	13
2022-09-12	13:37:45	32.911	146.395	118.31	518.384	1	14
2022-09-12	13:37:46	20.7018	92.0857	117.542	503.179	1	15
2022-09-12	13:37:46	27.3353	121.593	117.542	639.977	1	16
2022-09-12	13:37:46	31.2367	138.947	117.542	642.126	1	17
2022-09-12	13:37:47	49.3907	219.7	168.035	859.676	1	18
2022-09-12	13:37:47	33.6152	149.527	168.035	791.653	1	19
2022-09-12	13:37:47	36.85	163.916	168.035	1023.59	1	20
2022-09-12	13:37:47	31.2476	138.996	168.035	930.649	1	21
2022-09-12	13:37:48	29.7907	132.515	155.213	1156.11	1	22
2022-09-12	13:37:48	36.6076	162.838	155.213	1093.49	1	23
2022-09-12	13:37:48	44.5354	198.102	155.213	1354.21	1	24
2022-09-12	13:37:48	28.6403	127.398	155.213	1220.88	1	25
2022-09-12	13:37:49	22.4141	99.7024	115.332	1453.91	1	26
2022-09-12	13:37:49	63.7686	283.655	115.332	1504.54	1	27
2022-09-12	13:37:49	15.1224	67.2675	115.332	1521.18	1	28
2022-09-12	13:37:49	2.40586	10.7017	115.332	1515.24	FALSE	28
2022-09-12	13:37:50	1.24052	5.51808	2.80698	1526.7	FALSE	28
2022-09-12	13:37:50	0.414618	1.8443	2.80698	1517.09	FALSE	28
2022-09-12	13:37:50	0.237977	1.05857	2.80698	1527.76	FALSE	28
2022-09-12	13:37:51	0.40444	1.79903	0.806505	1518.89	FALSE	28
2022-09-12	13:37:51	0.366272	1.62925	0.806505	1529.39	FALSE	28
2022-09-12	13:37:51	0.0330919	0.147199	0.806505	1519.03	FALSE	28
2022-09-12	13:37:51	-0.078562	-0.349459	0.806505	1529.39	FALSE	28
2022-09-12	13:37:52	0.13355	0.594057	0.201472	1519.63	FALSE	28
2022-09-12	13:37:52	0.0717687	0.319242	0.201472	1529.7	FALSE	28
2022-09-12	13:37:52	0.0337534	0.150142	0.201472	1519.78	FALSE	28
2022-09-12	13:37:52	-0.0579005	-0.257553	0.201472	1529.7	FALSE	28
2022-09-12	13:37:53	0.263473	1.17198	2.41895	1520.95	FALSE	28
2022-09-12	13:37:53	0.608308	2.70588	2.41895	1532.41	FALSE	28
2022-09-12	13:37:53	0.380267	1.6915	2.41895	1522.64	FALSE	28
2022-09-12	13:37:53	0.923168	4.10644	2.41895	1536.52	FALSE	28
2022-09-12	13:37:54	0.305	1.3567	0.923728	1524	FALSE	28
2022-09-12	13:37:54	0.188155	0.836951	0.923728	1537.35	FALSE	28
2022-09-12	13:37:54	0.129835	0.577532	0.923728	1524.57	FALSE	28
2022-09-12	13:37:55	0.0893259	0.397339	0.64318	1537.75	FALSE	28
2022-09-12	13:37:55	0.108257	0.481549	0.64318	1525.06	FALSE	28
2022-09-12	13:37:55	0.14154	0.629598	0.64318	1538.38	FALSE	28
2022-09-12	13:37:55	0.23925	1.06423	0.64318	1526.12	FALSE	28
2022-09-12	13:37:56	18.7833	83.5519	150.911	1621.93	1	29
2022-09-12	13:37:56	57.5304	255.907	150.911	1782.03	1	30
2022-09-12	13:37:56	35.4379	157.635	150.911	1779.57	1	31
2022-09-12	13:37:56	23.9536	106.55	150.911	1888.58	1	32
2022-09-12	13:37:57	37.8792	168.494	131.473	1948.06	1	33
2022-09-12	13:37:57	22.0404	98.0401	131.473	1986.62	1	34
2022-09-12	13:37:57	32.9214	146.441	131.473	2094.5	1	35
2022-09-12	13:37:57	25.3849	112.917	131.473	2099.53	1	36
2022-09-12	13:37:58	26.9276	119.779	141.739	2214.28	1	37
2022-09-12	13:37:58	18.6358	82.8958	141.739	2182.43	1	38
2022-09-12	13:37:58	50.0297	222.542	141.739	2436.82	1	39
2022-09-12	13:37:59	27.8926	124.072	138.014	2306.5	1	40
2022-09-12	13:37:59	33.03	146.924	138.014	2583.75	1	41
2022-09-12	13:37:59	23.101	102.758	138.014	2409.26	1	42
2022-09-12	13:37:59	40.0838	178.301	138.014	2762.05	1	43
2022-09-12	13:38:00	48.2024	214.414	153.01	2623.67	1	44
2022-09-12	13:38:00	24.9666	111.056	153.01	2873.11	1	45
2022-09-12	13:38:00	32.2554	143.478	153.01	2767.15	1	46
2022-09-12	13:38:00	32.1682	143.091	153.01	3016.2	1	47
2022-09-12	13:38:01	40.8461	181.692	151.48	2948.84	1	48
2022-09-12	13:38:01	41.4269	184.275	151.48	3200.47	1	49
2022-09-12	13:38:01	22.5535	100.322	151.48	3049.17	1	50
2022-09-12	13:38:01	31.3908	139.633	151.48	3340.1	1	51
2022-09-12	13:38:02	25.214	112.157	46.5823	3161.32	1	52
2022-09-12	13:38:02	5.53008	24.5989	46.5823	3364.7	1	53
2022-09-12	13:38:02	0.67243	2.9911	46.5823	3164.31	FALSE	53
2022-09-12	13:38:03	0.0798602	0.355234	1.11397	3365.06	FALSE	53
2022-09-12	13:38:03	0.305763	1.36009	1.11397	3165.67	FALSE	53
2022-09-12	13:38:03	0.229682	1.02167	1.11397	3366.08	FALSE	53
2022-09-12	13:38:03	0.386425	1.7189	1.11397	3167.39	FALSE	53
2022-09-12	13:38:04	0.061845	0.275099	1.51171	3366.35	FALSE	53
2022-09-12	13:38:04	0.364898	1.62314	1.51171	3169.02	FALSE	53
2022-09-12	13:38:04	0.418639	1.86219	1.51171	3368.22	FALSE	53
2022-09-12	13:38:04	0.514008	2.28641	1.51171	3171.3	FALSE	53
2022-09-12	13:38:05	0.342506	1.52354	1.4842	3369.74	FALSE	53
2022-09-12	13:38:05	0.257163	1.14391	1.4842	3172.45	FALSE	53
2022-09-12	13:38:05	0.36444	1.6211	1.4842	3371.36	FALSE	53
2022-09-12	13:38:05	0.370547	1.64827	1.4842	3174.1	FALSE	53
2022-09-12	13:38:06	2.51808	11.2009	7.1943	3382.56	FALSE	53
2022-09-12	13:38:06	2.07457	9.2281	7.1943	3183.32	FALSE	53
2022-09-12	13:38:06	0.259402	1.15387	7.1943	3383.72	FALSE	53
2022-09-12	13:38:07	0.240064	1.06785	0.965872	3184.39	FALSE	53
2022-09-12	13:38:07	0.186171	0.828126	0.965872	3384.54	FALSE	53
2022-09-12	13:38:07	0.137621	0.612166	0.965872	3185	FALSE	53
2022-09-12	13:38:07	0.304695	1.35534	0.965872	3385.9	FALSE	53
2022-09-12	13:38:08	0.279809	1.24465	38.7167	3186.25	FALSE	53
2022-09-12	13:38:08	2.08154	9.25911	38.7167	3395.16	FALSE	53
2022-09-12	13:38:08	12.8815	57.2995	38.7167	3243.55	1	54
2022-09-12	13:38:08	19.5728	87.0637	38.7167	3482.22	1	55
2022-09-12	13:38:09	23.051	102.535	67.3522	3346.08	1	56
2022-09-12	13:38:09	8.79472	39.1207	67.3522	3521.34	1	57
2022-09-12	13:38:09	15.2666	67.9089	67.3522	3413.99	1	58
2022-09-12	13:38:09	13.4535	59.8439	67.3522	3581.19	1	59
2022-09-12	13:38:10	17.8979	79.6134	67.4928	3493.61	1	60
2022-09-12	13:38:10	18.2562	81.2072	67.4928	3662.39	1	61
2022-09-12	13:38:10	9.3651	41.6578	67.4928	3535.26	1	62
2022-09-12	13:38:11	9.07823	40.3818	46.1618	3702.78	1	63
2022-09-12	13:38:11	20.006	88.9907	46.1618	3624.25	1	64
2022-09-12	13:38:11	6.82668	30.3664	46.1618	3733.14	1	65
2022-09-12	13:38:11	5.5996	24.9081	46.1618	3649.16	1	66
2022-09-12	13:38:12	3.79248	16.8697	11.9734	3750.01	1	67
2022-09-12	13:38:12	1.77497	7.89542	11.9734	3657.06	FALSE	67
2022-09-12	13:38:12	2.21106	9.83524	11.9734	3759.85	FALSE	67
2022-09-12	13:38:12	2.98841	13.293	11.9734	3670.35	FALSE	67
2022-09-12	13:38:13	14.7371	65.5536	54.5496	3825.4	1	68
2022-09-12	13:38:13	18.2655	81.2486	54.5496	3751.6	1	69
2022-09-12	13:38:13	3.78729	16.8466	54.5496	3842.25	1	70
2022-09-12	13:38:14	3.62714	16.1342	27.1168	3767.73	1	71
2022-09-12	13:38:14	11.3644	50.5511	27.1168	3892.8	1	72
2022-09-12	13:38:14	4.30057	19.1298	27.1168	3786.86	1	73
2022-09-12	13:38:14	5.09243	22.6521	27.1168	3915.45	1	74
2022-09-12	13:38:15	4.42805	19.6969	12.0171	3806.56	1	75
2022-09-12	13:38:15	3.47121	15.4406	12.0171	3930.89	1	76
2022-09-12	13:38:15	0.947646	4.21532	12.0171	3810.78	FALSE	76
2022-09-12	13:38:15	1.95935	8.71558	12.0171	3939.61	FALSE	76
2022-09-12	13:38:16	5.47919	24.3725	26.9564	3835.15	1	77
2022-09-12	13:38:16	5.28856	23.5246	26.9564	3963.13	1	78
2022-09-12	13:38:16	6.85609	30.4973	26.9564	3865.65	1	79
2022-09-12	13:38:16	6.6164	29.4311	26.9564	3992.56	1	80
2022-09-12	13:38:17	10.1586	45.1875	31.7252	3910.83	1	81
2022-09-12	13:38:17	6.10953	27.1764	31.7252	4019.74	1	82
2022-09-12	13:38:17	5.1283	22.8117	31.7252	3933.64	1	83
2022-09-12	13:38:18	2.04821	9.11085	2.90435	4028.85	FALSE	83
2022-09-12	13:38:18	0.264644	1.17719	2.90435	3934.82	FALSE	83
2022-09-12	13:38:18	0.339046	1.50814	2.90435	4030.36	FALSE	83
2022-09-12	13:38:18	-0.0401906	-0.178776	2.90435	3934.82	FALSE	83
2022-09-12	13:38:19	0.0928883	0.413186	0.332484	4030.77	FALSE	83
2022-09-12	13:38:19	0.0714124	0.317657	0.332484	3935.14	FALSE	83
2022-09-12	13:38:19	0.068817	0.306112	0.332484	4031.08	FALSE	83
2022-09-12	13:38:19	0.0658654	0.292982	0.332484	3935.43	FALSE	83
2022-09-12	13:38:20	0.741438	3.29806	7.01389	4034.38	FALSE	83
2022-09-12	13:38:20	1.03538	4.60558	7.01389	3940.04	FALSE	83
2022-09-12	13:38:20	2.93034	13.0347	7.01389	4047.41	FALSE	83
2022-09-12	13:38:20	1.60001	7.11716	7.01389	3947.15	FALSE	83
2022-09-12	13:38:21	2.16189	9.61652	8.93221	4057.03	FALSE	83
2022-09-12	13:38:21	1.51752	6.75023	8.93221	3953.91	FALSE	83
2022-09-12	13:38:21	2.34474	10.4299	8.93221	4067.46	FALSE	83
2022-09-12	13:38:22	1.84882	8.22392	20.2446	3962.13	FALSE	83
2022-09-12	13:38:22	3.67945	16.3669	20.2446	4083.82	1	84
2022-09-12	13:38:22	6.7908	30.2068	20.2446	3992.34	1	85
2022-09-12	13:38:22	5.88566	26.1806	20.2446	4110	1	86
2022-09-12	13:38:23	3.47833	15.4723	6.87773	4007.81	1	87
2022-09-12	13:38:23	1.16169	5.16743	6.87773	4115.17	FALSE	87
2022-09-12	13:38:23	0.702201	3.12353	6.87773	4010.93	FALSE	87
2022-09-12	13:38:23	0.842506	3.74764	6.87773	4118.92	FALSE	87
2022-09-12	13:38:24	3.0137	13.4055	9.55859	4024.34	1	88
2022-09-12	13:38:24	2.105	9.36346	9.55859	4128.28	FALSE	88
2022-09-12	13:38:24	1.3279	5.90676	9.55859	4030.24	FALSE	88
2022-09-12	13:38:25	1.98805	8.84324	24.9941	4137.13	FALSE	88
2022-09-12	13:38:25	8.02174	35.6823	24.9941	4065.93	1	89
2022-09-12	13:38:25	8.62474	38.3646	24.9941	4175.49	1	90
2022-09-12	13:38:25	3.84118	17.0863	24.9941	4083.01	1	91
2022-09-12	13:38:26	2.82566	12.5691	20.2891	4188.06	FALSE	91
2022-09-12	13:38:26	1.23615	5.49864	20.2891	4088.51	FALSE	91
2022-09-12	13:38:26	3.34357	14.8729	20.2891	4202.93	1	92
2022-09-12	13:38:26	10.8394	48.2158	20.2891	4136.73	1	93
2022-09-12	13:38:27	18.0029	80.0805	81.5858	4283.01	1	94
2022-09-12	13:38:27	16.4448	73.1498	81.5858	4209.88	1	95
2022-09-12	13:38:27	14.696	65.3707	81.5858	4348.38	1	96
2022-09-12	13:38:27	24.2215	107.742	81.5858	4317.62	1	97
2022-09-12	13:38:28	4.38943	19.5251	43.0739	4367.91	1	98
2022-09-12	13:38:28	18.7476	83.3931	43.0739	4401.01	1	99
2022-09-12	13:38:28	6.44291	28.6594	43.0739	4396.57	1	100
2022-09-12	13:38:28	9.1538	40.7179	43.0739	4441.73	1	101
2022-09-12	13:38:29	23.6065	105.006	76.5268	4501.57	1	102
2022-09-12	13:38:29	13.6484	60.7108	76.5268	4502.44	1	103
2022-09-12	13:38:29	14.3571	63.8633	76.5268	4565.44	1	104
2022-09-12	13:38:30	10.8075	48.0739	78.2867	4550.51	1	105
2022-09-12	13:38:30	10.7993	48.0374	78.2867	4613.48	1	106
2022-09-12	13:38:30	29.0558	129.246	78.2867	4679.76	1	107
2022-09-12	13:38:30	19.7359	87.7892	78.2867	4701.26	1	108
2022-09-12	13:38:31	19.3776	86.1954	66.8638	4765.96	1	109
2022-09-12	13:38:31	6.46143	28.7417	66.8638	4730.01	1	110
2022-09-12	13:38:31	12.4999	55.6021	66.8638	4821.56	1	111
2022-09-12	13:38:31	21.7877	96.916	66.8638	4826.92	1	112
2022-09-12	13:38:32	7.50866	33.4	57.8422	4854.96	1	113
2022-09-12	13:38:32	12.1978	54.2583	57.8422	4881.18	1	114
2022-09-12	13:38:32	14.4805	64.4122	57.8422	4919.37	1	115
2022-09-12	13:38:32	17.8271	79.2985	57.8422	4960.48	1	116
2022-09-12	13:38:33	24.1089	107.241	78.9704	5026.61	1	117
2022-09-12	13:38:33	13.669	60.8024	78.9704	5021.28	1	118
2022-09-12	13:38:33	15.4821	68.8675	78.9704	5095.48	1	119
2022-09-12	13:38:34	4.6166	20.5356	44.6552	5041.82	1	120
2022-09-12	13:38:34	14.9178	66.3574	44.6552	5161.84	1	121
2022-09-12	13:38:34	17.1451	76.2648	44.6552	5118.08	1	122
2022-09-12	13:38:34	3.47625	15.4631	44.6552	5177.3	1	123
2022-09-12	13:38:35	19.1189	85.0447	37.7931	5203.13	1	124
2022-09-12	13:38:35	7.35009	32.6947	37.7931	5209.99	1	125
2022-09-12	13:38:35	6.26846	27.8834	37.7931	5231.01	1	126
2022-09-12	13:38:35	1.2476	5.54957	37.7931	5215.54	FALSE	126
2022-09-12	13:38:36	2.6507	11.7908	26.3479	5242.8	FALSE	126
2022-09-12	13:38:36	7.14377	31.7769	26.3479	5247.32	1	127
2022-09-12	13:38:36	4.07238	18.1148	26.3479	5260.92	1	128
2022-09-12	13:38:36	9.82622	43.709	26.3479	5291.03	1	129
2022-09-12	13:38:37	19.6477	87.3969	66.8762	5348.31	1	130
2022-09-12	13:38:37	17.2621	76.7853	66.8762	5367.81	1	131
2022-09-12	13:38:37	8.19355	36.4465	66.8762	5384.76	1	132
2022-09-12	13:38:38	4.58851	20.4106	9.84959	5388.23	1	133
2022-09-12	13:38:38	3.27441	14.5652	9.84959	5399.32	1	134
2022-09-12	13:38:38	0.247494	1.1009	9.84959	5389.33	FALSE	134
2022-09-12	13:38:38	0.74673	3.3216	9.84959	5402.65	FALSE	134
2022-09-12	13:38:39	1.08978	4.84756	3.883	5394.17	FALSE	134
2022-09-12	13:38:39	1.64551	7.31956	3.883	5409.97	FALSE	134
2022-09-12	13:38:39	0.662506	2.94696	3.883	5397.12	FALSE	134
2022-09-12	13:38:39	0.093957	0.41794	3.883	5410.38	FALSE	134
2022-09-12	13:38:40	-0.199427	-0.887091	4.37141	5397.12	FALSE	134
2022-09-12	13:38:40	0.144237	0.641595	4.37141	5411.03	FALSE	134
2022-09-12	13:38:40	0.437825	1.94753	4.37141	5399.07	FALSE	134
2022-09-12	13:38:40	3.54831	15.7836	4.37141	5426.81	1	135
2022-09-12	13:38:41	0.521234	2.31855	4.02185	5401.39	FALSE	135
2022-09-12	13:38:41	1.11996	4.98181	4.02185	5431.79	FALSE	135
2022-09-12	13:38:41	1.07126	4.76518	4.02185	5406.15	FALSE	135
2022-09-12	13:38:42	0.721641	3.21	2.10231	5435	FALSE	135
2022-09-12	13:38:42	0.396451	1.76349	2.10231	5407.92	FALSE	135
2022-09-12	13:38:42	0.312634	1.39066	2.10231	5436.39	FALSE	135
2022-09-12	13:38:42	0.459758	2.0451	2.10231	5409.96	FALSE	135
2022-09-12	13:38:43	0.306679	1.36417	1.81657	5437.76	FALSE	135
2022-09-12	13:38:43	0.43411	1.93101	1.81657	5411.89	FALSE	135
2022-09-12	13:38:43	0.346272	1.54029	1.81657	5439.3	FALSE	135
2022-09-12	13:38:43	0.546476	2.43083	1.81657	5414.32	FALSE	135
2022-09-12	13:38:44	0.185662	0.825862	0.171081	5440.12	FALSE	135
2022-09-12	13:38:44	-0.0914883	-0.406958	0.171081	5414.32	FALSE	135
2022-09-12	13:38:44	0.0465778	0.207187	0.171081	5440.33	FALSE	135
2022-09-12	13:38:44	0.0130918	0.0582349	0.171081	5414.38	FALSE	135
2022-09-12	13:38:45	0.249886	1.11154	0.491585	5441.44	FALSE	135
2022-09-12	13:38:45	-0.129962	-0.578097	0.491585	5414.38	FALSE	135
2022-09-12	13:38:45	0.211616	0.94131	0.491585	5442.38	FALSE	135
2022-09-12	13:38:46	0.320471	1.42552	1.30345	5415.81	FALSE	135
2022-09-12	13:38:46	0.390802	1.73837	1.30345	5444.12	FALSE	135
2022-09-12	13:38:46	0.108308	0.481776	1.30345	5416.29	FALSE	135
2022-09-12	13:38:46	0.352532	1.56813	1.30345	5445.69	FALSE	135
2022-09-12	13:38:47	0.550242	2.44759	2.73791	5418.74	FALSE	135
2022-09-12	13:38:47	0.916043	4.07474	2.73791	5449.76	FALSE	135
2022-09-12	13:38:47	0.622405	2.76858	2.73791	5421.5	FALSE	135
2022-09-12	13:38:47	0.373346	1.66072	2.73791	5451.42	FALSE	135
2022-09-12	13:38:48	1.12276	4.99426	1.74385	5426.5	FALSE	135
2022-09-12	13:38:48	0.132481	0.589302	1.74385	5452.01	FALSE	135
2022-09-12	13:38:48	0.250191	1.1129	1.74385	5427.61	FALSE	135
2022-09-12	13:38:48	0.0627101	0.278947	1.74385	5452.29	FALSE	135
2022-09-12	13:38:49	0.00754479	0.0335607	2.19835	5427.65	FALSE	135
2022-09-12	13:38:49	0.0473412	0.210583	2.19835	5452.5	FALSE	135
2022-09-12	13:38:49	1.42775	6.35092	2.19835	5434	FALSE	135
2022-09-12	13:38:50	1.9767	8.79276	9.12271	5461.3	FALSE	135
2022-09-12	13:38:50	3.86368	17.1864	9.12271	5451.18	1	136
2022-09-12	13:38:50	1.33757	5.94978	9.12271	5467.24	FALSE	136
2022-09-12	13:38:50	1.02556	4.5619	9.12271	5455.74	FALSE	136
2022-09-12	13:38:51	0.220573	0.981153	2.41703	5468.23	FALSE	136
2022-09-12	13:38:51	0.36154	1.6082	2.41703	5457.35	FALSE	136
2022-09-12	13:38:51	0.386323	1.71844	2.41703	5469.94	FALSE	136
2022-09-12	13:38:51	1.20505	5.3603	2.41703	5462.71	FALSE	136
2022-09-12	13:38:52	0.898079	3.99484	4.31458	5473.94	FALSE	136
2022-09-12	13:38:52	0.872786	3.88233	4.31458	5466.6	FALSE	136
2022-09-12	13:38:52	0.687443	3.05788	4.31458	5477	FALSE	136
2022-09-12	13:38:52	1.42154	6.32329	4.31458	5472.92	FALSE	136
2022-09-12	13:38:53	2.6336	11.7148	10.4903	5488.71	FALSE	136
2022-09-12	13:38:53	2.79879	12.4496	10.4903	5485.37	FALSE	136
2022-09-12	13:38:53	1.64261	7.30666	10.4903	5496.02	FALSE	136
2022-09-12	13:38:54	1.53513	6.82857	4.67531	5492.2	FALSE	136
2022-09-12	13:38:54	1.74154	7.74672	4.67531	5503.77	FALSE	136
2022-09-12	13:38:54	0.562608	2.50259	4.67531	5494.7	FALSE	136
2022-09-12	13:38:54	0.364949	1.62337	4.67531	5505.39	FALSE	136
2022-09-12	13:38:55	0.580623	2.58273	3.28946	5497.28	FALSE	136
2022-09-12	13:38:55	0.607341	2.70157	3.28946	5508.09	FALSE	136
2022-09-12	13:38:55	0.712634	3.16994	3.28946	5500.45	FALSE	136
2022-09-12	13:38:55	1.05742	4.70362	3.28946	5512.79	FALSE	136
2022-09-12	13:38:56	0.772277	3.43524	2.60237	5503.89	FALSE	136
2022-09-12	13:38:56	0.543117	2.41589	2.60237	5515.21	FALSE	136
2022-09-12	13:38:56	0.623779	2.77469	2.60237	5506.66	FALSE	136
2022-09-12	13:38:56	0.40098	1.78364	2.60237	5516.99	FALSE	136
2022-09-12	13:38:57	0.514008	2.28641	2.10365	5508.95	FALSE	136
2022-09-12	13:38:57	0.472583	2.10214	2.10365	5519.1	FALSE	136
2022-09-12	13:38:57	0.432176	1.92241	2.10365	5510.87	FALSE	136
2022-09-12	13:38:58	0.434313	1.93191	1.94481	5521.03	FALSE	136
2022-09-12	13:38:58	0.453601	2.01771	1.94481	5512.89	FALSE	136
2022-09-12	13:38:58	0.439758	1.95613	1.94481	5522.98	FALSE	136
2022-09-12	13:38:58	0.421183	1.87351	1.94481	5514.76	FALSE	136
2022-09-12	13:38:59	0.431616	1.91991	1.9773	5524.9	FALSE	136
2022-09-12	13:38:59	0.42958	1.91086	1.9773	5516.67	FALSE	136
2022-09-12	13:38:59	0.460369	2.04781	1.9773	5526.95	FALSE	136
2022-09-12	13:38:59	0.456501	2.03061	1.9773	5518.7	FALSE	136
2022-09-12	13:39:00	0.434262	1.93168	1.99518	5528.88	FALSE	136
2022-09-12	13:39:00	0.459453	2.04374	1.99518	5520.75	FALSE	136
2022-09-12	13:39:00	0.445611	1.98217	1.99518	5530.87	FALSE	136
2022-09-12	13:39:00	0.454822	2.02314	1.99518	5522.77	FALSE	136
2022-09-12	13:39:01	0.458232	2.03831	2.0131	5532.9	FALSE	136
2022-09-12	13:39:01	0.431005	1.9172	2.0131	5524.69	FALSE	136
2022-09-12	13:39:01	0.468461	2.08381	2.0131	5534.99	FALSE	136
2022-09-12	13:39:02	0.488817	2.17436	2.03061	5526.86	FALSE	136
2022-09-12	13:39:02	0.475433	2.11482	2.03061	5537.1	FALSE	136
2022-09-12	13:39:02	0.459758	2.0451	2.03061	5528.91	FALSE	136
2022-09-12	13:39:02	0.401997	1.78816	2.03061	5538.89	FALSE	136
2022-09-12	13:39:03	0.442252	1.96723	1.97124	5530.87	FALSE	136
2022-09-12	13:39:03	0.471412	2.09693	1.97124	5540.99	FALSE	136
2022-09-12	13:39:03	0.431158	1.91788	1.97124	5532.79	FALSE	136
2022-09-12	13:39:03	0.427799	1.90294	1.97124	5542.89	FALSE	136
2022-09-12	13:39:04	0.436247	1.94051	1.87956	5534.73	FALSE	136
2022-09-12	13:39:04	0.412176	1.83344	1.87956	5544.72	FALSE	136
2022-09-12	13:39:04	0.4193	1.86513	1.87956	5536.6	FALSE	136
2022-09-12	13:39:04	0.422456	1.87917	1.87956	5546.6	FALSE	136
2022-09-12	13:39:05	0.434059	1.93078	1.92859	5538.53	FALSE	136
2022-09-12	13:39:05	0.419097	1.86423	1.92859	5548.47	FALSE	136
2022-09-12	13:39:05	0.447545	1.99077	1.92859	5540.52	FALSE	136
2022-09-12	13:39:06	0.467341	2.07883	2.02767	5550.55	FALSE	136
2022-09-12	13:39:06	0.450852	2.00548	2.02767	5542.52	FALSE	136
2022-09-12	13:39:06	0.434313	1.93191	2.02767	5552.48	FALSE	136
2022-09-12	13:39:06	0.470852	2.09444	2.02767	5544.62	FALSE	136
2022-09-12	13:39:07	0.481997	2.14402	2.08681	5554.62	FALSE	136
2022-09-12	13:39:07	0.456959	2.03265	2.08681	5546.65	FALSE	136
2022-09-12	13:39:07	0.462965	2.05936	2.08681	5556.68	FALSE	136
2022-09-12	13:39:07	0.474618	2.1112	2.08681	5548.76	FALSE	136
2022-09-12	13:39:08	0.467341	2.07883	2.07724	5558.76	FALSE	136
2022-09-12	13:39:08	0.472328	2.10101	2.07724	5550.86	FALSE	136
2022-09-12	13:39:08	0.460623	2.04894	2.07724	5560.81	FALSE	136
2022-09-12	13:39:08	0.467647	2.08019	2.07724	5552.94	FALSE	136
2022-09-12	13:39:09	0.503779	2.24091	2.09263	5563.05	FALSE	136
2022-09-12	13:39:09	0.435738	1.93825	2.09263	5554.88	FALSE	136
2022-09-12	13:39:09	0.471819	2.09875	2.09263	5565.15	FALSE	136
2022-09-12	13:39:10	0.445407	1.98126	2.09252	5556.86	FALSE	136
2022-09-12	13:39:10	0.471158	2.09581	2.09252	5567.24	FALSE	136
2022-09-12	13:39:10	0.492074	2.18884	2.09252	5559.05	FALSE	136
2022-09-12	13:39:10	0.473041	2.10418	2.09252	5569.35	FALSE	136
2022-09-12	13:39:11	0.496247	2.20741	3.07424	5561.26	FALSE	136
2022-09-12	13:39:11	0.563219	2.50531	3.07424	5571.85	FALSE	136
2022-09-12	13:39:11	0.440471	1.9593	3.07424	5563.22	FALSE	136
2022-09-12	13:39:11	1.26454	5.62493	3.07424	5577.48	FALSE	136
2022-09-12	13:39:12	0.53584	2.38352	3.28516	5565.6	FALSE	136
2022-09-12	13:39:12	0.395382	1.75874	3.28516	5579.24	FALSE	136
2022-09-12	13:39:12	0.318232	1.41556	3.28516	5567.02	FALSE	136
2022-09-12	13:39:12	1.70469	7.5828	3.28516	5586.82	FALSE	136
2022-09-12	13:39:13	2.36307	10.5114	6.43829	5577.53	FALSE	136
2022-09-12	13:39:13	1.35426	6.02402	6.43829	5592.84	FALSE	136
2022-09-12	13:39:13	0.624847	2.77944	6.43829	5580.31	FALSE	136
2022-09-12	13:39:14	0.504898	2.24589	2.3155	5595.09	FALSE	136
2022-09-12	13:39:14	0.473652	2.1069	2.3155	5582.42	FALSE	136
2022-09-12	13:39:14	0.391209	1.74018	2.3155	5596.83	FALSE	136
2022-09-12	13:39:14	0.71243	3.16903	2.3155	5585.58	FALSE	136
2022-09-12	13:39:15	0.946527	4.21034	3.19206	5601.04	FALSE	136
2022-09-12	13:39:15	0.89243	3.96971	3.19206	5589.55	FALSE	136
2022-09-12	13:39:15	0.596399	2.6529	3.19206	5603.69	FALSE	136
2022-09-12	13:39:15	0.435076	1.93531	3.19206	5591.49	FALSE	136
2022-09-12	13:39:16	0.361998	1.61024	2.20537	5605.3	FALSE	136
2022-09-12	13:39:16	0.576349	2.56372	2.20537	5594.05	FALSE	136
2022-09-12	13:39:16	0.523982	2.33078	2.20537	5607.63	FALSE	136
2022-09-12	13:39:16	0.520827	2.31674	2.20537	5596.37	FALSE	136
2022-09-12	13:39:17	0.599809	2.66807	2.31855	5610.3	FALSE	136
2022-09-12	13:39:17	0.525051	2.33553	2.31855	5598.71	FALSE	136
2022-09-12	13:39:17	0.438842	1.95206	2.31855	5612.25	FALSE	136
2022-09-12	13:39:18	0.370903	1.64985	2.38692	5600.36	FALSE	136
2022-09-12	13:39:18	0.537265	2.38986	2.38692	5614.64	FALSE	136
2022-09-12	13:39:18	0.519453	2.31063	2.38692	5602.67	FALSE	136
2022-09-12	13:39:18	0.718791	3.19733	2.38692	5617.84	FALSE	136
2022-09-12	13:39:19	0.543015	2.41544	5.6908	5605.08	FALSE	136
2022-09-12	13:39:19	0.705814	3.1396	5.6908	5620.98	FALSE	136
2022-09-12	13:39:19	1.19044	5.29532	5.6908	5610.38	FALSE	136
2022-09-12	13:39:19	2.67813	11.9129	5.6908	5632.89	FALSE	136
2022-09-12	13:39:20	4.46149	19.8456	14.8798	5630.22	1	137
2022-09-12	13:39:20	3.88642	17.2876	14.8798	5650.18	1	138
2022-09-12	13:39:20	1.68749	7.50629	14.8798	5637.73	FALSE	138
2022-09-12	13:39:21	2.04627	9.10222	9.0402	5659.28	FALSE	138
2022-09-12	13:39:21	3.94851	17.5638	9.0402	5655.29	1	139
2022-09-12	13:39:21	1.58887	7.06761	9.0402	5666.35	FALSE	139
2022-09-12	13:39:21	0.545661	2.42721	9.0402	5657.72	FALSE	139
2022-09-12	13:39:22	0.86846	3.86308	3.13621	5670.21	FALSE	139
2022-09-12	13:39:22	0.599351	2.66603	3.13621	5660.39	FALSE	139
2022-09-12	13:39:22	0.708359	3.15092	3.13621	5673.37	FALSE	139
2022-09-12	13:39:22	0.644033	2.86479	3.13621	5663.25	FALSE	139
2022-09-12	13:39:23	1.51981	6.76042	23.8734	5680.13	FALSE	139
2022-09-12	13:39:23	4.82902	21.4804	23.8734	5684.73	1	140
2022-09-12	13:39:23	5.58886	24.8604	23.8734	5704.99	1	141
2022-09-12	13:39:23	9.53019	42.3922	23.8734	5727.12	1	142
2022-09-12	13:39:24	8.58438	38.185	26.4798	5743.17	1	143
2022-09-12	13:39:24	7.16271	31.8612	26.4798	5758.98	1	144
2022-09-12	13:39:24	2.11167	9.39313	26.4798	5752.56	FALSE	144
2022-09-12	13:39:25	4.76149	21.1801	23.8667	5780.16	1	145
2022-09-12	13:39:25	2.27976	10.1408	23.8667	5762.71	FALSE	145
2022-09-12	13:39:25	3.83752	17.0701	23.8667	5797.23	1	146
2022-09-12	13:39:25	10.5831	47.0757	23.8667	5809.78	1	147
2022-09-12	13:39:26	5.26362	23.4136	33.0278	5820.65	1	148
2022-09-12	13:39:26	13.1389	58.4445	33.0278	5868.23	1	149
2022-09-12	13:39:26	4.84739	21.5622	33.0278	5842.21	1	150
2022-09-12	13:39:26	6.45004	28.6911	33.0278	5896.92	1	151
2022-09-12	13:39:27	5.86719	26.0984	31.0337	5868.31	1	152
2022-09-12	13:39:27	4.22042	18.7733	31.0337	5915.69	1	153
2022-09-12	13:39:27	13.1172	58.3479	31.0337	5926.66	1	154
2022-09-12	13:39:27	4.70194	20.9152	31.0337	5936.61	1	155
2022-09-12	13:39:28	5.93828	26.4147	17.146	5953.07	1	156
2022-09-12	13:39:28	3.14866	14.0059	17.146	5950.61	1	157
2022-09-12	13:39:28	2.47686	11.0176	17.146	5964.09	FALSE	157
2022-09-12	13:39:29	2.75431	12.2517	13.5861	5962.86	FALSE	157
2022-09-12	13:39:29	3.12576	13.904	13.5861	5977.99	1	158
2022-09-12	13:39:29	4.48093	19.9321	13.5861	5982.8	1	159
2022-09-12	13:39:29	1.85614	8.25648	13.5861	5986.25	FALSE	159
2022-09-12	13:39:30	0.714313	3.17741	2.02795	5985.97	FALSE	159
2022-09-12	13:39:30	0.328257	1.46015	2.02795	5987.71	FALSE	159
2022-09-12	13:39:30	0.397061	1.76621	2.02795	5987.74	FALSE	159
2022-09-12	13:39:30	0.383982	1.70803	2.02795	5989.42	FALSE	159
2022-09-12	13:39:31	0.502506	2.23525	4.97621	5989.97	FALSE	159
2022-09-12	13:39:31	0.58444	2.59971	4.97621	5992.02	FALSE	159
2022-09-12	13:39:31	0.894415	3.97854	4.97621	5993.95	FALSE	159
2022-09-12	13:39:31	2.49345	11.0914	4.97621	6003.11	FALSE	159
2022-09-12	13:39:32	0.59528	2.64792	2.10358	5996.6	FALSE	159
2022-09-12	13:39:32	0.472888	2.1035	2.10358	6005.21	FALSE	159
2022-09-12	13:39:32	0.350547	1.5593	2.10358	5998.16	FALSE	159
2022-09-12	13:39:33	0.21299	0.947422	1.13457	6006.16	FALSE	159
2022-09-12	13:39:33	0.154669	0.687999	1.13457	5998.85	FALSE	159
2022-09-12	13:39:33	0.154415	0.686869	1.13457	6006.85	FALSE	159
2022-09-12	13:39:33	0.498181	2.21601	1.13457	6001.06	FALSE	159
2022-09-12	13:39:34	0.386934	1.72116	1.59948	6008.57	FALSE	159
2022-09-12	13:39:34	0.286527	1.27453	1.59948	6002.34	FALSE	159
2022-09-12	13:39:34	0.368715	1.64012	1.59948	6010.21	FALSE	159
2022-09-12	13:39:34	0.396145	1.76213	1.59948	6004.1	FALSE	159
2022-09-12	13:39:35	0.599606	2.66717	2.23746	6012.88	FALSE	159
2022-09-12	13:39:35	0.414568	1.84408	2.23746	6005.94	FALSE	159
2022-09-12	13:39:35	0.510903	2.2726	2.23746	6015.15	FALSE	159
2022-09-12	13:39:35	0.486934	2.16598	2.23746	6008.11	FALSE	159
2022-09-12	13:39:36	0.568104	2.52704	2.27366	6017.67	FALSE	159
2022-09-12	13:39:36	0.505407	2.24815	2.27366	6010.36	FALSE	159
2022-09-12	13:39:36	0.459911	2.04578	2.27366	6019.72	FALSE	159
2022-09-12	13:39:37	0.47014	2.09128	2.08109	6012.45	FALSE	159
2022-09-12	13:39:37	0.408715	1.81805	2.08109	6021.54	FALSE	159
2022-09-12	13:39:37	0.436247	1.94051	2.08109	6014.39	FALSE	159
2022-09-12	13:39:37	0.556298	2.47452	2.08109	6024.01	FALSE	159
2022-09-12	13:39:38	0.481641	2.14244	2.57147	6016.53	FALSE	159
2022-09-12	13:39:38	0.602455	2.67984	2.57147	6026.69	FALSE	159
2022-09-12	13:39:38	0.620064	2.75817	2.57147	6019.29	FALSE	159
2022-09-12	13:39:38	0.608206	2.70542	2.57147	6029.4	FALSE	159
2022-09-12	13:39:39	0.693702	3.08573	2.4868	6022.38	FALSE	159
2022-09-12	13:39:39	0.568308	2.52795	2.4868	6031.93	FALSE	159
2022-09-12	13:39:39	0.545153	2.42495	2.4868	6024.8	FALSE	159
2022-09-12	13:39:39	0.429071	1.90859	2.4868	6033.83	FALSE	159
2022-09-12	13:39:40	1.08179	4.81202	8.15268	6029.61	FALSE	159
2022-09-12	13:39:40	1.43396	6.37854	8.15268	6040.21	FALSE	159
2022-09-12	13:39:40	2.98266	13.2675	8.15268	6042.88	FALSE	159
2022-09-12	13:39:41	0.097163	0.4322	1.61629	6040.65	FALSE	159
2022-09-12	13:39:41	0.0969595	0.431295	1.61629	6043.31	FALSE	159
2022-09-12	13:39:41	-0.114236	-0.508145	1.61629	6040.65	FALSE	159
2022-09-12	13:39:41	1.37355	6.10983	1.61629	6049.42	FALSE	159
2022-09-12	13:39:42	2.00632	8.92451	20.5169	6049.57	FALSE	159
2022-09-12	13:39:42	5.99996	26.689	20.5169	6076.11	1	160
2022-09-12	13:39:42	8.09533	36.0096	20.5169	6085.58	1	161
2022-09-12	13:39:42	2.348	10.4444	20.5169	6086.56	FALSE	161
2022-09-12	13:39:43	2.98851	13.2935	6.85911	6098.87	FALSE	161
2022-09-12	13:39:43	1.15533	5.13914	6.85911	6091.69	FALSE	161
2022-09-12	13:39:43	0.64612	2.87407	6.85911	6101.75	FALSE	161
2022-09-12	13:39:43	1.37803	6.12975	6.85911	6097.82	FALSE	161
2022-09-12	13:39:44	1.13579	5.05222	12.8464	6106.8	FALSE	161
2022-09-12	13:39:44	2.76413	12.2954	12.8464	6110.12	FALSE	161
2022-09-12	13:39:44	4.76408	21.1916	12.8464	6127.99	1	162
2022-09-12	13:39:45	7.48561	33.2975	41.0124	6143.42	1	163
2022-09-12	13:39:45	6.38225	28.3895	41.0124	6156.38	1	164
2022-09-12	13:39:45	6.55858	29.1739	41.0124	6172.59	1	165
2022-09-12	13:39:45	16.4536	73.1889	41.0124	6229.57	1	166
2022-09-12	13:39:46	18.1621	80.7887	49.3062	6253.38	1	167
2022-09-12	13:39:46	21.0298	93.5448	49.3062	6323.11	1	168
2022-09-12	13:39:46	4.20703	18.7137	49.3062	6272.09	1	169
2022-09-12	13:39:46	0.939198	4.17774	49.3062	6327.29	FALSE	169
2022-09-12	13:39:47	0.689987	3.0692	2.53909	6275.16	FALSE	169
2022-09-12	13:39:47	0.636755	2.83241	2.53909	6330.12	FALSE	169
2022-09-12	13:39:47	0.42159	1.87532	2.53909	6277.04	FALSE	169
2022-09-12	13:39:47	0.534924	2.37945	2.53909	6332.5	FALSE	169
2022-09-12	13:39:48	0.686272	3.05268	1.91976	6280.09	FALSE	169
2022-09-12	13:39:48	0.289275	1.28675	1.91976	6333.79	FALSE	169
2022-09-12	13:39:48	0.319199	1.41986	1.91976	6281.51	FALSE	169
2022-09-12	13:39:49	0.240522	1.06989	3.25528	6334.86	FALSE	169
2022-09-12	13:39:49	0.0115143	0.0512179	3.25528	6281.56	FALSE	169
2022-09-12	13:39:49	0.834211	3.71074	3.25528	6338.57	FALSE	169
2022-09-12	13:39:49	1.84103	8.18927	3.25528	6289.75	FALSE	169
2022-09-12	13:39:50	1.14205	5.08007	4.56133	6343.65	FALSE	169
2022-09-12	13:39:50	0.78902	3.50972	4.56133	6293.26	FALSE	169
2022-09-12	13:39:50	0.965	4.29251	4.56133	6347.94	FALSE	169
2022-09-12	13:39:50	1.20566	5.36302	4.56133	6298.62	FALSE	169
2022-09-12	13:39:51	2.22062	9.87776	6.65708	6357.82	FALSE	169
2022-09-12	13:39:51	1.19625	5.32116	6.65708	6303.95	FALSE	169
2022-09-12	13:39:51	1.31126	5.83275	6.65708	6363.65	FALSE	169
2022-09-12	13:39:51	1.25818	5.59664	6.65708	6309.54	FALSE	169
2022-09-12	13:39:52	1.49177	6.63569	7.38738	6370.29	FALSE	169
2022-09-12	13:39:52	1.59894	7.1124	7.38738	6316.65	FALSE	169
2022-09-12	13:39:52	1.89156	8.41404	7.38738	6378.7	FALSE	169
2022-09-12	13:39:53	1.9452	8.65264	8.88632	6325.31	FALSE	169
2022-09-12	13:39:53	2.59696	11.5518	8.88632	6390.26	FALSE	169
2022-09-12	13:39:53	1.79411	7.98056	8.88632	6333.29	FALSE	169
2022-09-12	13:39:53	1.65467	7.3603	8.88632	6397.62	FALSE	169
2022-09-12	13:39:54	1.20286	5.35056	6.41955	6338.64	FALSE	169
2022-09-12	13:39:54	1.27263	5.66091	6.41955	6403.28	FALSE	169
2022-09-12	13:39:54	1.3505	6.00729	6.41955	6344.65	FALSE	169
2022-09-12	13:39:54	1.94673	8.65944	6.41955	6411.94	FALSE	169
2022-09-12	13:39:55	1.64673	7.32498	8.84281	6351.97	FALSE	169
2022-09-12	13:39:55	2.58195	11.485	8.84281	6423.42	FALSE	169
2022-09-12	13:39:55	1.98439	8.82696	8.84281	6360.8	FALSE	169
2022-09-12	13:39:55	1.73874	7.73426	8.84281	6431.16	FALSE	169
2022-09-12	13:39:56	1.43492	6.38281	5.25979	6367.18	FALSE	169
2022-09-12	13:39:56	1.08164	4.81135	5.25979	6435.97	FALSE	169
2022-09-12	13:39:56	1.0308	4.5852	5.25979	6371.77	FALSE	169
2022-09-12	13:39:57	0.861488	3.83207	3.9967	6439.8	FALSE	169
2022-09-12	13:39:57	1.14785	5.10587	3.9967	6376.87	FALSE	169
2022-09-12	13:39:57	0.822404	3.65822	3.9967	6443.46	FALSE	169
2022-09-12	13:39:57	0.762252	3.39065	3.9967	6380.26	FALSE	169
2022-09-12	13:39:58	0.676908	3.01102	3.43372	6446.47	FALSE	169
2022-09-12	13:39:58	0.794618	3.53462	3.43372	6383.8	FALSE	169
2022-09-12	13:39:58	0.825051	3.66999	3.43372	6450.14	FALSE	169
2022-09-12	13:39:58	0.791158	3.51923	3.43372	6387.32	FALSE	169
2022-09-12	13:39:59	0.685305	3.04837	2.94396	6453.19	FALSE	169
2022-09-12	13:39:59	0.626527	2.78692	2.94396	6390.1	FALSE	169
2022-09-12	13:39:59	0.647544	2.88041	2.94396	6456.07	FALSE	169
2022-09-12	13:39:59	0.687952	3.06015	2.94396	6393.16	FALSE	169
2022-09-12	13:40:00	0.721743	3.21046	3.23242	6459.28	FALSE	169
2022-09-12	13:40:00	0.760929	3.38476	3.23242	6396.55	FALSE	169
2022-09-12	13:40:00	0.697366	3.10202	3.23242	6462.38	FALSE	169
2022-09-12	13:40:01	0.640522	2.84917	2.73253	6399.4	FALSE	169
2022-09-12	13:40:01	0.578486	2.57322	2.73253	6464.95	FALSE	169
2022-09-12	13:40:01	0.564898	2.51278	2.73253	6401.91	FALSE	169
2022-09-12	13:40:01	0.673295	2.99495	2.73253	6467.95	FALSE	169
2022-09-12	13:40:02	0.72785	3.23762	3.58222	6405.15	FALSE	169
2022-09-12	13:40:02	0.854008	3.7988	3.58222	6471.75	FALSE	169
2022-09-12	13:40:02	0.818435	3.64056	3.58222	6408.79	FALSE	169
2022-09-12	13:40:02	0.82098	3.65188	3.58222	6475.4	FALSE	169
2022-09-12	13:40:03	0.723626	3.21883	3.12229	6412.01	FALSE	169
2022-09-12	13:40:03	0.683168	3.03887	3.12229	6478.44	FALSE	169
2022-09-12	13:40:03	0.684237	3.04362	3.12229	6415.05	FALSE	169
2022-09-12	13:40:03	0.716654	3.18782	3.12229	6481.63	FALSE	169
2022-09-12	13:40:04	0.742557	3.30304	3.35345	6418.35	FALSE	169
2022-09-12	13:40:04	0.754364	3.35556	3.35345	6484.98	FALSE	169
2022-09-12	13:40:04	0.764745	3.40174	3.35345	6421.75	FALSE	169
2022-09-12	13:40:05	0.829224	3.68855	3.58935	6488.67	FALSE	169
2022-09-12	13:40:05	0.831463	3.69851	3.58935	6425.45	FALSE	169
2022-09-12	13:40:05	0.820674	3.65052	3.58935	6492.32	FALSE	169
2022-09-12	13:40:05	0.746323	3.31979	3.58935	6428.77	FALSE	169
2022-09-12	13:40:06	0.725153	3.22563	2.87877	6495.55	FALSE	169
2022-09-12	13:40:06	0.69472	3.09025	2.87877	6431.86	FALSE	169
2022-09-12	13:40:06	0.563371	2.50599	2.87877	6498.05	FALSE	169
2022-09-12	13:40:06	0.605458	2.6932	2.87877	6434.56	FALSE	169
2022-09-12	13:40:07	0.578181	2.57186	3.9117	6500.62	FALSE	169
2022-09-12	13:40:07	0.616501	2.74232	3.9117	6437.3	FALSE	169
2022-09-12	13:40:07	0.862354	3.83592	3.9117	6504.46	FALSE	169
2022-09-12	13:40:07	1.46052	6.49669	3.9117	6443.8	FALSE	169
2022-09-12	13:40:08	2.25757	10.0421	12.968	6514.5	FALSE	169
2022-09-12	13:40:08	2.58668	11.5061	12.968	6455.3	FALSE	169
2022-09-12	13:40:08	3.90179	17.3559	12.968	6531.86	1	170
2022-09-12	13:40:09	2.52973	11.2527	7.04218	6466.55	FALSE	170
2022-09-12	13:40:09	2.25721	10.0405	7.04218	6541.9	FALSE	170
2022-09-12	13:40:09	1.06449	4.73506	7.04218	6471.29	FALSE	170
2022-09-12	13:40:09	0.481183	2.1404	7.04218	6544.04	FALSE	170
2022-09-12	13:40:10	0.370191	1.64668	1.70203	6472.94	FALSE	170
2022-09-12	13:40:10	0.437825	1.94753	1.70203	6545.99	FALSE	170
2022-09-12	13:40:10	0.441489	1.96383	1.70203	6474.9	FALSE	170
2022-09-12	13:40:10	0.281031	1.25008	1.70203	6547.24	FALSE	170
2022-09-12	13:40:11	0.445713	1.98262	17.8642	6476.88	FALSE	170
2022-09-12	13:40:11	3.5591	15.8316	17.8642	6563.07	1	171
2022-09-12	13:40:11	8.95329	39.826	17.8642	6516.71	1	172
2022-09-12	13:40:11	3.10612	13.8166	17.8642	6576.88	1	173
2022-09-12	13:40:12	3.39742	15.1124	11.7157	6531.82	1	174
2022-09-12	13:40:12	1.60256	7.12851	11.7157	6584.01	FALSE	174
2022-09-12	13:40:12	2.90144	12.9062	11.7157	6544.73	FALSE	174
2022-09-12	13:40:13	5.77996	25.7104	34.6392	6609.72	1	175
2022-09-12	13:40:13	7.31248	32.5274	34.6392	6577.25	1	176
2022-09-12	13:40:13	12.2023	54.2783	34.6392	6664	1	177
2022-09-12	13:40:13	5.85426	26.0409	34.6392	6603.3	1	178
2022-09-12	13:40:14	6.7995	30.2455	9.01909	6694.25	1	179
2022-09-12	13:40:14	0.61986	2.75726	9.01909	6606.05	FALSE	179
2022-09-12	13:40:14	0.226323	1.00673	9.01909	6695.25	FALSE	179
2022-09-12	13:40:14	0.464644	2.06683	9.01909	6608.12	FALSE	179
2022-09-12	13:40:15	0.250445	1.11403	1.13395	6696.37	FALSE	179
2022-09-12	13:40:15	0.319504	1.42122	1.13395	6609.54	FALSE	179
2022-09-12	13:40:15	0.238435	1.06061	1.13395	6697.43	FALSE	179
2022-09-12	13:40:15	0.211311	0.939954	1.13395	6610.48	FALSE	179
2022-09-12	13:40:16	0.262812	1.16904	2.22038	6698.6	FALSE	179
2022-09-12	13:40:16	0.491158	2.18477	2.22038	6612.67	FALSE	179
2022-09-12	13:40:16	0.743524	3.30734	2.22038	6701.9	FALSE	179
2022-09-12	13:40:17	0.356298	1.58488	1.21997	6614.25	FALSE	179
2022-09-12	13:40:17	0.171209	0.761572	1.21997	6702.67	FALSE	179
2022-09-12	13:40:17	0.46383	2.06321	1.21997	6616.31	FALSE	179
2022-09-12	13:40:17	0.105713	0.470233	1.21997	6703.14	FALSE	179
2022-09-12	13:40:18	0.239657	1.06604	1.10186	6617.38	FALSE	179
2022-09-12	13:40:18	0.129784	0.577305	1.10186	6703.71	FALSE	179
2022-09-12	13:40:18	0.450852	2.00548	1.10186	6619.39	FALSE	179
2022-09-12	13:40:18	0.170547	0.758627	1.10186	6704.47	FALSE	179
2022-09-12	13:40:19	0.389733	1.73361	1.65521	6621.12	FALSE	179
2022-09-12	13:40:19	0.388664	1.72886	1.65521	6706.2	FALSE	179
2022-09-12	13:40:19	0.337926	1.50316	1.65521	6622.62	FALSE	179
2022-09-12	13:40:20	0.313448	1.39428	1.88618	6707.6	FALSE	179
2022-09-12	13:40:20	0.436705	1.94255	1.88618	6624.56	FALSE	179
2022-09-12	13:40:20	0.403423	1.79451	1.88618	6709.39	FALSE	179
2022-09-12	13:40:20	0.542557	2.4134	1.88618	6626.98	FALSE	179
2022-09-12	13:40:21	0.718028	3.19393	2.74657	6712.58	FALSE	179
2022-09-12	13:40:21	0.795585	3.53892	2.74657	6630.52	FALSE	179
2022-09-12	13:40:21	0.569784	2.53451	2.74657	6715.12	FALSE	179
2022-09-12	13:40:21	0.386425	1.7189	2.74657	6632.24	FALSE	179
2022-09-12	13:40:22	0.581998	2.58884	2.17634	6717.71	FALSE	179
2022-09-12	13:40:22	0.466679	2.07588	2.17634	6634.31	FALSE	179
2022-09-12	13:40:22	0.399657	1.77775	2.17634	6719.49	FALSE	179
2022-09-12	13:40:22	0.508715	2.26287	2.17634	6636.57	FALSE	179
2022-09-12	13:40:23	0.423728	1.88483	2.1868	6721.37	FALSE	179
2022-09-12	13:40:23	0.481285	2.14085	2.1868	6638.72	FALSE	179
2022-09-12	13:40:23	0.569834	2.53474	2.1868	6723.9	FALSE	179
2022-09-12	13:40:24	0.578384	2.57277	2.74328	6641.29	FALSE	179
2022-09-12	13:40:24	0.578384	2.57277	2.74328	6726.48	FALSE	179
2022-09-12	13:40:24	0.628206	2.79439	2.74328	6644.08	FALSE	179
2022-09-12	13:40:24	0.681895	3.03321	2.74328	6729.51	FALSE	179
2022-09-12	13:40:25	0.703321	3.12851	3.41662	6647.21	FALSE	179
2022-09-12	13:40:25	0.764338	3.39993	3.41662	6732.91	FALSE	179
2022-09-12	13:40:25	0.766577	3.40989	3.41662	6650.62	FALSE	179
2022-09-12	13:40:25	0.83813	3.72817	3.41662	6736.64	FALSE	179
2022-09-12	13:40:26	0.535127	2.38035	2.95986	6653	FALSE	179
2022-09-12	13:40:26	0.708868	3.15319	2.95986	6739.79	FALSE	179
2022-09-12	13:40:26	0.693448	3.0846	2.95986	6656.09	FALSE	179
2022-09-12	13:40:26	0.724186	3.22132	2.95986	6743.01	FALSE	179
2022-09-12	13:40:27	0.584745	2.60106	2.08939	6658.69	FALSE	179
2022-09-12	13:40:27	0.493804	2.19654	2.08939	6745.21	FALSE	179
2022-09-12	13:40:27	0.330598	1.47057	2.08939	6660.16	FALSE	179
2022-09-12	13:40:28	0.333397	1.48302	1.56123	6746.69	FALSE	179
2022-09-12	13:40:28	0.346069	1.53938	1.56123	6661.7	FALSE	179
2022-09-12	13:40:28	0.348155	1.54866	1.56123	6748.24	FALSE	179
2022-09-12	13:40:28	0.376298	1.67385	1.56123	6663.37	FALSE	179
2022-09-12	13:40:29	0.381998	1.6992	1.77634	6749.94	FALSE	179
2022-09-12	13:40:29	0.389326	1.7318	1.77634	6665.1	FALSE	179
2022-09-12	13:40:29	0.397163	1.76666	1.77634	6751.71	FALSE	179
2022-09-12	13:40:29	0.428868	1.90769	1.77634	6667.01	FALSE	179
2022-09-12	13:40:30	0.533651	2.37379	4.29155	6754.08	FALSE	179
2022-09-12	13:40:30	0.653499	2.90689	4.29155	6669.92	FALSE	179
2022-09-12	13:40:30	1.52968	6.80432	4.29155	6760.89	FALSE	179
2022-09-12	13:40:30	1.1423	5.08118	4.29155	6675	FALSE	179
2022-09-12	13:40:31	0.744593	3.3121	2.20356	6764.2	FALSE	179
2022-09-12	13:40:31	0.340675	1.51539	2.20356	6676.51	FALSE	179
2022-09-12	13:40:31	0.400878	1.78319	2.20356	6765.98	FALSE	179
2022-09-12	13:40:32	0.413601	1.83978	2.0739	6678.35	FALSE	179
2022-09-12	13:40:32	0.272277	1.21114	2.0739	6767.19	FALSE	179
2022-09-12	13:40:32	0.39813	1.77096	2.0739	6680.12	FALSE	179
2022-09-12	13:40:32	0.780929	3.47373	2.0739	6770.67	FALSE	179
2022-09-12	13:40:33	0.594008	2.64227	2.85653	6682.77	FALSE	179
2022-09-12	13:40:33	0.538486	2.39529	2.85653	6773.06	FALSE	179
2022-09-12	13:40:33	0.625611	2.78284	2.85653	6685.55	FALSE	179
2022-09-12	13:40:33	0.810598	3.6057	2.85653	6776.67	FALSE	179
2022-09-12	13:40:34	0.253346	1.12693	1.80718	6686.68	FALSE	179
2022-09-12	13:40:34	0.525509	2.33757	1.80718	6779	FALSE	179
2022-09-12	13:40:34	0.19986	0.889017	1.80718	6687.57	FALSE	179
2022-09-12	13:40:34	0.646374	2.8752	1.80718	6781.88	FALSE	179
2022-09-12	13:40:35	0.232837	1.03571	1.48581	6688.6	FALSE	179
2022-09-12	13:40:35	0.487596	2.16892	1.48581	6784.05	FALSE	179
2022-09-12	13:40:35	0.281641	1.2528	1.48581	6689.85	FALSE	179
2022-09-12	13:40:36	1.96357	8.73435	7.52944	6792.78	FALSE	179
2022-09-12	13:40:36	2.16515	9.63102	7.52944	6699.48	FALSE	179
2022-09-12	13:40:36	2.04123	9.0798	7.52944	6801.86	FALSE	179
2022-09-12	13:40:36	0.600827	2.6726	7.52944	6702.16	FALSE	179
2022-09-12	13:40:37	0.558893	2.48607	1.4661	6804.35	FALSE	179
2022-09-12	13:40:37	0.299097	1.33044	1.4661	6703.49	FALSE	179
2022-09-12	13:40:37	0.0461198	0.20515	1.4661	6804.55	FALSE	179
2022-09-12	13:40:37	0.414262	1.84272	1.4661	6705.33	FALSE	179
2022-09-12	13:40:38	0.061845	0.275099	1.40379	6804.83	FALSE	179
2022-09-12	13:40:38	0.172481	0.76723	1.40379	6706.1	FALSE	179
2022-09-12	13:40:38	0.328969	1.46332	1.40379	6806.29	FALSE	179
2022-09-12	13:40:38	0.699046	3.1095	1.40379	6709.21	FALSE	179
2022-09-12	13:40:39	0.498944	2.2194	3.66268	6808.51	FALSE	179
2022-09-12	13:40:39	0.648766	2.88584	3.66268	6712.09	FALSE	179
2022-09-12	13:40:39	1.32251	5.88279	3.66268	6814.39	FALSE	179
2022-09-12	13:40:40	1.09029	4.84983	2.23785	6716.94	FALSE	179
2022-09-12	13:40:40	0.535484	2.38194	2.23785	6816.78	FALSE	179
2022-09-12	13:40:40	0.132227	0.588172	2.23785	6717.53	FALSE	179
2022-09-12	13:40:40	0.254364	1.13146	2.23785	6817.91	FALSE	179
2022-09-12	13:40:41	0.0588425	0.261743	0.904128	6717.79	FALSE	179
2022-09-12	13:40:41	0.240725	1.07079	0.904128	6818.98	FALSE	179
2022-09-12	13:40:41	0.267748	1.191	0.904128	6718.98	FALSE	179
2022-09-12	13:40:41	0.245713	1.09298	0.904128	6820.07	FALSE	179
2022-09-12	13:40:42	0.253499	1.12761	1.19886	6720.11	FALSE	179
2022-09-12	13:40:42	0.196349	0.8734	1.19886	6820.94	FALSE	179
2022-09-12	13:40:42	0.301285	1.34018	1.19886	6721.45	FALSE	179
2022-09-12	13:40:42	0.326934	1.45427	1.19886	6822.4	FALSE	179
2022-09-12	13:40:43	0.209835	0.933388	0.609978	6722.39	FALSE	179
2022-09-12	13:40:43	0.0983844	0.437633	0.609978	6822.84	FALSE	179
2022-09-12	13:40:43	0.103168	0.458912	0.609978	6722.84	FALSE	179
2022-09-12	13:40:44	0.106069	0.471816	1.31573	6823.31	FALSE	179
2022-09-12	13:40:44	0.275535	1.22563	1.31573	6724.07	FALSE	179
2022-09-12	13:40:44	0.270649	1.2039	1.31573	6824.51	FALSE	179
2022-09-12	13:40:44	0.530903	2.36156	1.31573	6726.43	FALSE	179
2022-09-12	13:40:45	0.357672	1.591	2.48228	6826.1	FALSE	179
2022-09-12	13:40:45	0.442812	1.96972	2.48228	6728.4	FALSE	179
2022-09-12	13:40:45	0.854466	3.80084	2.48228	6829.9	FALSE	179
2022-09-12	13:40:45	0.577214	2.56756	2.48228	6730.97	FALSE	179
2022-09-12	13:40:46	0.487036	2.16643	2.39252	6832.07	FALSE	179
2022-09-12	13:40:46	0.631717	2.81	2.39252	6733.78	FALSE	179
2022-09-12	13:40:46	0.574059	2.55353	2.39252	6834.62	FALSE	179
2022-09-12	13:40:46	0.458639	2.04012	2.39252	6735.82	FALSE	179
2022-09-12	13:40:47	0.680623	3.02755	3.37593	6837.65	FALSE	179
2022-09-12	13:40:47	0.632532	2.81363	3.37593	6738.63	FALSE	179
2022-09-12	13:40:47	0.963677	4.28663	3.37593	6841.94	FALSE	179
2022-09-12	13:40:48	0.675636	3.00536	5.53014	6741.64	FALSE	179
2022-09-12	13:40:48	1.15187	5.12375	5.53014	6847.06	FALSE	179
2022-09-12	13:40:48	0.945407	4.20536	5.53014	6745.84	FALSE	179
2022-09-12	13:40:48	2.20001	9.78608	5.53014	6856.85	FALSE	179
2022-09-12	13:40:49	2.47513	11.0099	5.26003	6756.85	FALSE	179
2022-09-12	13:40:49	1.63518	7.27361	5.26003	6864.12	FALSE	179
2022-09-12	13:40:49	0.179351	0.797789	5.26003	6757.65	FALSE	179
2022-09-12	13:40:49	0.440369	1.95885	5.26003	6866.08	FALSE	179
2022-09-12	13:40:50	0.518995	2.30859	1.61533	6759.96	FALSE	179
2022-09-12	13:40:50	0.389631	1.73316	1.61533	6867.81	FALSE	179
2022-09-12	13:40:50	0.282659	1.25732	1.61533	6761.22	FALSE	179
2022-09-12	13:40:50	0.261285	1.16225	1.61533	6868.98	FALSE	179
2022-09-12	13:40:51	0.25416	1.13055	2.18507	6762.35	FALSE	179
2022-09-12	13:40:51	0.230089	1.02348	2.18507	6870	FALSE	179
2022-09-12	13:40:51	0.989428	4.40117	2.18507	6766.75	FALSE	179
2022-09-12	13:40:52	0.954262	4.24475	14.8	6874.24	FALSE	179
2022-09-12	13:40:52	3.95329	17.585	14.8	6784.33	1	180
2022-09-12	13:40:52	4.29859	19.121	14.8	6893.37	1	181
2022-09-12	13:40:52	4.10261	18.2492	14.8	6802.58	1	182
2022-09-12	13:40:53	3.02271	13.4456	19.1336	6906.81	1	183
2022-09-12	13:40:53	2.90688	12.9304	19.1336	6815.51	FALSE	183
2022-09-12	13:40:53	5.50713	24.4968	19.1336	6931.31	1	184
2022-09-12	13:40:53	5.76902	25.6618	19.1336	6841.17	1	185
2022-09-12	13:40:54	11.4501	50.9323	32.8591	6982.24	1	186
2022-09-12	13:40:54	7.92433	35.249	32.8591	6876.42	1	187
2022-09-12	13:40:54	4.53222	20.1602	32.8591	7002.4	1	188
2022-09-12	13:40:54	5.64159	25.0949	32.8591	6901.52	1	189
2022-09-12	13:40:55	3.59406	15.9871	19.0798	7018.39	1	190
2022-09-12	13:40:55	4.09752	18.2266	19.0798	6919.75	1	191
2022-09-12	13:40:55	5.1764	23.0257	19.0798	7041.41	1	192
2022-09-12	13:40:56	3.17879	14.1399	17.4987	6933.89	1	193
2022-09-12	13:40:56	6.29731	28.0117	17.4987	7069.42	1	194
2022-09-12	13:40:56	3.69319	16.428	17.4987	6950.31	1	195
2022-09-12	13:40:56	2.56627	11.4153	17.4987	7080.84	FALSE	195
2022-09-12	13:40:57	2.66403	11.8501	26.7537	6962.16	FALSE	195
2022-09-12	13:40:57	1.91609	8.52315	26.7537	7089.36	FALSE	195
2022-09-12	13:40:57	6.51039	28.9595	26.7537	6991.12	1	196
2022-09-12	13:40:57	12.9675	57.682	26.7537	7147.05	1	197
2022-09-12	13:40:58	9.27324	41.2492	28.7984	7032.37	1	198
2022-09-12	13:40:58	8.33131	37.0593	28.7984	7184.1	1	199
2022-09-12	13:40:58	3.56307	15.8492	28.7984	7048.22	1	200
2022-09-12	13:40:58	4.72907	21.0358	28.7984	7205.14	1	201
2022-09-12	13:40:59	5.68688	25.2964	24.7945	7073.52	1	202
2022-09-12	13:40:59	4.07904	18.1444	24.7945	7223.28	1	203
2022-09-12	13:40:59	6.95624	30.9427	24.7945	7104.46	1	204
2022-09-12	13:41:00	3.22841	14.3606	16.7577	7237.65	1	205
2022-09-12	13:41:00	3.10144	13.7958	16.7577	7118.26	1	206
2022-09-12	13:41:00	4.97202	22.1165	16.7577	7259.76	1	207
2022-09-12	13:41:01	5.17461	23.0177	26.4262	7141.27	1	208
2022-09-12	13:41:01	7.41584	32.9871	26.4262	7292.75	1	209
2022-09-12	13:41:01	7.82042	34.7868	26.4262	7176.06	1	210
2022-09-12	13:41:01	4.78765	21.2964	26.4262	7314.05	1	211
2022-09-12	13:41:01	4.50581	20.0427	26.4262	7196.1	1	212
2022-09-12	13:41:02	3.30739	14.7119	15.3553	7328.76	1	213
2022-09-12	13:41:02	3.32022	14.769	15.3553	7210.87	1	214
2022-09-12	13:41:02	3.04739	13.5554	15.3553	7342.31	1	215
2022-09-12	13:41:02	4.13309	18.3848	15.3553	7229.26	1	216
2022-09-12	13:41:03	5.83777	25.9676	19.8702	7368.28	1	217
2022-09-12	13:41:03	4.20306	18.6961	19.8702	7247.95	1	218
2022-09-12	13:41:03	3.36022	14.9469	19.8702	7383.23	1	219
2022-09-12	13:41:04	7.24993	32.2491	29.499	7280.2	1	220
2022-09-12	13:41:04	4.00266	17.8046	29.499	7401.03	1	221
2022-09-12	13:41:04	5.41879	24.1039	29.499	7304.31	1	222
2022-09-12	13:41:04	9.85533	43.8385	29.499	7444.87	1	223
2022-09-12	13:41:05	4.13864	18.4095	29.1069	7322.72	1	224
2022-09-12	13:41:05	8.76276	38.9785	29.1069	7483.85	1	225
2022-09-12	13:41:05	8.38576	37.3015	29.1069	7360.02	1	226
2022-09-12	13:41:05	4.88693	21.738	29.1069	7505.59	1	227
2022-09-12	13:41:06	8.47915	37.717	38.3357	7397.73	1	228
2022-09-12	13:41:06	8.75456	38.942	38.3357	7544.53	1	229
2022-09-12	13:41:06	6.9709	31.008	38.3357	7428.74	1	230
2022-09-12	13:41:06	10.2684	45.6759	38.3357	7590.21	1	231
2022-09-12	13:41:07	6.8564	30.4986	18.8794	7459.24	1	232
2022-09-12	13:41:07	5.17085	23.001	18.8794	7613.21	1	233
2022-09-12	13:41:07	0.705611	3.1387	18.8794	7462.38	FALSE	233
2022-09-12	13:41:08	0.72729	3.23513	3.23355	7616.44	FALSE	233
2022-09-12	13:41:08	0.727697	3.23694	3.23355	7465.62	FALSE	233
2022-09-12	13:41:08	0.722914	3.21567	3.23355	7619.66	FALSE	233
2022-09-12	13:41:08	0.729835	3.24645	3.23355	7468.86	FALSE	233
2022-09-12	13:41:09	1.06195	4.72377	7.47508	7624.38	FALSE	233
2022-09-12	13:41:09	1.38134	6.14448	7.47508	7475.01	FALSE	233
2022-09-12	13:41:09	1.49441	6.64743	7.47508	7631.03	FALSE	233
2022-09-12	13:41:09	2.78419	12.3846	7.47508	7487.39	FALSE	233
2022-09-12	13:41:10	5.80581	25.8254	12.9062	7656.85	1	234
2022-09-12	13:41:10	1.86363	8.2898	12.9062	7495.68	FALSE	234
2022-09-12	13:41:10	2.56999	11.4318	12.9062	7668.29	FALSE	234
2022-09-12	13:41:10	1.36632	6.07766	12.9062	7501.76	FALSE	234
2022-09-12	13:41:11	2.36556	10.5225	14.8628	7678.81	FALSE	234
2022-09-12	13:41:11	3.90953	17.3904	14.8628	7519.15	1	235
2022-09-12	13:41:11	3.74882	16.6755	14.8628	7695.48	1	236
2022-09-12	13:41:12	5.0309	22.3784	18.1992	7541.53	1	237
2022-09-12	13:41:12	3.30637	14.7074	18.1992	7710.19	1	238
2022-09-12	13:41:12	4.12836	18.3638	18.1992	7559.89	1	239
2022-09-12	13:41:12	3.89981	17.3471	18.1992	7727.54	1	240
2022-09-12	13:41:13	1.88184	8.3708	6.68259	7568.26	FALSE	240
2022-09-12	13:41:13	2.36235	10.5082	6.68259	7738.05	FALSE	240
2022-09-12	13:41:13	1.01248	4.50371	6.68259	7572.77	FALSE	240
2022-09-12	13:41:13	0.752583	3.34764	6.68259	7741.39	FALSE	240
2022-09-12	13:41:14	0.172379	0.766776	0.910373	7573.53	FALSE	240
2022-09-12	13:41:14	0.294517	1.31007	0.910373	7742.7	FALSE	240
2022-09-12	13:41:14	0.147087	0.654272	0.910373	7574.19	FALSE	240
2022-09-12	13:41:15	0.260165	1.15727	1.23814	7743.86	FALSE	240
2022-09-12	13:41:15	0.196552	0.874303	1.23814	7575.06	FALSE	240
2022-09-12	13:41:15	0.365255	1.62473	1.23814	7745.49	FALSE	240
2022-09-12	13:41:15	0.291412	1.29626	1.23814	7576.36	FALSE	240
2022-09-12	13:41:16	0.412634	1.83548	1.39343	7747.32	FALSE	240
2022-09-12	13:41:16	0.220318	0.980019	1.39343	7577.34	FALSE	240
2022-09-12	13:41:16	0.40098	1.78364	1.39343	7749.1	FALSE	240
2022-09-12	13:41:16	0.219097	0.974587	1.39343	7578.31	FALSE	240
2022-09-12	13:41:17	0.129835	0.577532	0.952402	7749.68	FALSE	240
2022-09-12	13:41:17	0.201285	0.895356	0.952402	7579.21	FALSE	240
2022-09-12	13:41:17	0.270038	1.20118	0.952402	7750.88	FALSE	240
2022-09-12	13:41:17	0.25528	1.13554	0.952402	7580.34	FALSE	240
2022-09-12	13:41:18	0.210038	0.934291	1.26057	7751.82	FALSE	240
2022-09-12	13:41:18	0.362608	1.61295	1.26057	7581.96	FALSE	240
2022-09-12	13:41:18	0.277519	1.23446	1.26057	7753.05	FALSE	240
2022-09-12	13:41:19	0.410751	1.8271	1.45591	7583.78	FALSE	240
2022-09-12	13:41:19	0.382303	1.70056	1.45591	7754.75	FALSE	240
2022-09-12	13:41:19	0.277265	1.23333	1.45591	7585.02	FALSE	240
2022-09-12	13:41:19	0.238893	1.06264	1.45591	7755.82	FALSE	240
2022-09-12	13:41:20	0.237672	1.05721	1.04906	7586.07	FALSE	240
2022-09-12	13:41:20	0.227646	1.01261	1.04906	7756.83	FALSE	240
2022-09-12	13:41:20	0.235942	1.04952	1.04906	7587.12	FALSE	240
2022-09-12	13:41:20	0.242099	1.0769	1.04906	7757.9	FALSE	240
2022-09-12	13:41:21	0.241896	1.076	1.14697	7588.2	FALSE	240
2022-09-12	13:41:21	0.254975	1.13418	1.14697	7759.04	FALSE	240
2022-09-12	13:41:21	0.260013	1.15659	1.14697	7589.36	FALSE	240
2022-09-12	13:41:21	0.274517	1.22111	1.14697	7760.26	FALSE	240
2022-09-12	13:41:22	0.272176	1.21069	1.20752	7590.57	FALSE	240
2022-09-12	13:41:22	0.267138	1.18828	1.20752	7761.45	FALSE	240
2022-09-12	13:41:22	0.275076	1.22359	1.20752	7591.79	FALSE	240
2022-09-12	13:41:23	0.270598	1.20367	1.20594	7762.65	FALSE	240
2022-09-12	13:41:23	0.27126	1.20662	1.20594	7593	FALSE	240
2022-09-12	13:41:23	0.270344	1.20254	1.20594	7763.85	FALSE	240
2022-09-12	13:41:23	0.272226	1.21092	1.20594	7594.21	FALSE	240
2022-09-12	13:41:24	0.284084	1.26366	1.25778	7765.12	FALSE	240
2022-09-12	13:41:24	0.28383	1.26253	1.25778	7595.47	FALSE	240
2022-09-12	13:41:24	0.283372	1.2605	1.25778	7766.38	FALSE	240
2022-09-12	13:41:24	0.279758	1.24442	1.25778	7596.72	FALSE	240
2022-09-12	13:41:25	0.27986	1.24487	1.24657	7767.62	FALSE	240
2022-09-12	13:41:25	0.281387	1.25167	1.24657	7597.97	FALSE	240
2022-09-12	13:41:25	0.279046	1.24125	1.24657	7768.87	FALSE	240
2022-09-12	13:41:25	0.280674	1.24849	1.24657	7599.22	FALSE	240
2022-09-12	13:41:26	0.270445	1.20299	1.23288	7770.07	FALSE	240
2022-09-12	13:41:26	0.282405	1.25619	1.23288	7600.47	FALSE	240
2022-09-12	13:41:26	0.278639	1.23944	1.23288	7771.31	FALSE	240
2022-09-12	13:41:27	0.275941	1.22744	1.26038	7601.7	FALSE	240
2022-09-12	13:41:27	0.287952	1.28087	1.26038	7772.59	FALSE	240
2022-09-12	13:41:27	0.286018	1.27227	1.26038	7602.97	FALSE	240
2022-09-12	13:41:27	0.283473	1.26094	1.26038	7773.85	FALSE	240
2022-09-12	13:41:28	0.296654	1.31958	1.30152	7604.29	FALSE	240
2022-09-12	13:41:28	0.288155	1.28177	1.30152	7775.13	FALSE	240
2022-09-12	13:41:28	0.292735	1.30214	1.30152	7605.59	FALSE	240
2022-09-12	13:41:28	0.292837	1.3026	1.30152	7776.43	FALSE	240
2022-09-12	13:41:29	0.298893	1.32954	1.33338	7606.92	FALSE	240
2022-09-12	13:41:29	0.298842	1.32931	1.33338	7777.76	FALSE	240
2022-09-12	13:41:29	0.301998	1.34335	1.33338	7608.27	FALSE	240
2022-09-12	13:41:29	0.2993	1.33135	1.33338	7779.09	FALSE	240
2022-09-12	13:41:30	0.304746	1.35557	1.34765	7609.62	FALSE	240
2022-09-12	13:41:30	0.300318	1.33587	1.34765	7780.43	FALSE	240
2022-09-12	13:41:30	0.30383	1.3515	1.34765	7610.97	FALSE	240
2022-09-12	13:41:31	0.307545	1.36802	1.36938	7781.8	FALSE	240
2022-09-12	13:41:31	0.30673	1.3644	1.36938	7612.34	FALSE	240
2022-09-12	13:41:31	0.307799	1.36915	1.36938	7783.17	FALSE	240
2022-09-12	13:41:31	0.309326	1.37594	1.36938	7613.71	FALSE	240
2022-09-12	13:41:32	0.308715	1.37323	1.38505	7784.54	FALSE	240
2022-09-12	13:41:32	0.312277	1.38907	1.38505	7615.1	FALSE	240
2022-09-12	13:41:32	0.309937	1.37866	1.38505	7785.92	FALSE	240
2022-09-12	13:41:32	0.314567	1.39926	1.38505	7616.5	FALSE	240
2022-09-12	13:41:33	0.317265	1.41126	1.40175	7787.33	FALSE	240
2022-09-12	13:41:33	0.315585	1.40379	1.40175	7617.91	FALSE	240
2022-09-12	13:41:33	0.313194	1.39315	1.40175	7788.72	FALSE	240
2022-09-12	13:41:33	0.314466	1.39881	1.40175	7619.3	FALSE	240
2022-09-12	13:41:34	0.314313	1.39813	1.40718	7790.12	FALSE	240
2022-09-12	13:41:34	0.320674	1.42642	1.40718	7620.73	FALSE	240
2022-09-12	13:41:34	0.314059	1.397	1.40718	7791.52	FALSE	240
2022-09-12	13:41:35	0.309886	1.37843	1.36819	7622.11	FALSE	240
2022-09-12	13:41:35	0.298028	1.32569	1.36819	7792.84	FALSE	240
2022-09-12	13:41:35	0.304542	1.35466	1.36819	7623.46	FALSE	240
2022-09-12	13:41:35	0.317876	1.41398	1.36819	7794.26	FALSE	240
2022-09-12	13:41:36	0.376552	1.67498	4.07984	7625.14	FALSE	240
2022-09-12	13:41:36	1.07146	4.76607	4.07984	7799.02	FALSE	240
2022-09-12	13:41:36	0.96902	4.31039	4.07984	7629.45	FALSE	240
2022-09-12	13:41:36	1.25172	5.5679	4.07984	7804.59	FALSE	240
2022-09-12	13:41:37	0.835331	3.71572	2.25721	7633.16	FALSE	240
2022-09-12	13:41:37	0.480623	2.13791	2.25721	7806.73	FALSE	240
2022-09-12	13:41:37	0.528206	2.34957	2.25721	7635.51	FALSE	240
2022-09-12	13:41:37	0.185611	0.825635	2.25721	7807.56	FALSE	240
2022-09-12	13:41:38	0.321387	1.42959	2.61872	7636.94	FALSE	240
2022-09-12	13:41:38	0.72042	3.20457	2.61872	7810.76	FALSE	240
2022-09-12	13:41:38	0.724338	3.222	2.61872	7640.17	FALSE	240
2022-09-12	13:41:39	0.603677	2.68528	1.74125	7813.45	FALSE	240
2022-09-12	13:41:39	0.250751	1.11539	1.74125	7641.28	FALSE	240
2022-09-12	13:41:39	0.490802	2.18319	1.74125	7815.63	FALSE	240
2022-09-12	13:41:39	0.220573	0.981153	1.74125	7642.26	FALSE	240
2022-09-12	13:41:40	0.144186	0.641368	0.525862	7816.27	FALSE	240
2022-09-12	13:41:40	-0.0124043	-0.0551768	0.525862	7642.26	FALSE	240
2022-09-12	13:41:40	0.0866796	0.385568	0.525862	7816.66	FALSE	240
2022-09-12	13:41:40	0.254415	1.13169	0.525862	7643.39	FALSE	240
2022-09-12	13:41:41	0.229224	1.01963	0.797866	7817.68	FALSE	240
2022-09-12	13:41:41	0.189326	0.84216	0.797866	7644.24	FALSE	240
2022-09-12	13:41:41	0.119555	0.531805	0.797866	7818.21	FALSE	240
2022-09-12	13:41:42	0.0915142	0.407073	0.312337	7644.64	FALSE	240
2022-09-12	13:41:42	0.200573	0.892189	0.312337	7819.1	FALSE	240
2022-09-12	13:41:42	0.0767051	0.3412	0.312337	7644.98	FALSE	240
2022-09-12	13:41:42	-0.0879259	-0.391112	0.312337	7819.1	FALSE	240
2022-09-12	13:41:43	-0.368231	-1.63797	-1.02088	7644.98	FALSE	240
2022-09-12	13:41:43	-0.407926	-1.81454	-1.02088	7819.1	FALSE	240
2022-09-12	13:41:43	-0.152557	-0.678604	-1.02088	7644.98	FALSE	240
2022-09-12	13:41:43	0.0107	0.0475957	-1.02088	7819.15	FALSE	240
2022-09-12	13:41:44	0.0872394	0.388058	0.235258	7645.37	FALSE	240
2022-09-12	13:41:44	0.0432699	0.192473	0.235258	7819.34	FALSE	240
2022-09-12	13:41:44	0.0415396	0.184776	0.235258	7645.56	FALSE	240
2022-09-12	13:41:44	0.0395041	0.175722	0.235258	7819.52	FALSE	240
2022-09-12	13:41:45	0.055789	0.248161	0.627276	7645.81	FALSE	240
2022-09-12	13:41:45	0.0811834	0.36112	0.627276	7819.88	FALSE	240
2022-09-12	13:41:45	0.167341	0.744366	0.627276	7646.55	FALSE	240
2022-09-12	13:41:45	0.259758	1.15546	0.627276	7821.03	FALSE	240
2022-09-12	13:41:46	0.34098	1.51675	2.56138	7648.07	FALSE	240
2022-09-12	13:41:46	0.56042	2.49286	2.56138	7823.52	FALSE	240
2022-09-12	13:41:46	0.826069	3.67452	2.56138	7651.74	FALSE	240
2022-09-12	13:41:47	0.831107	3.69693	5.04898	7827.22	FALSE	240
2022-09-12	13:41:47	1.25772	5.59459	5.04898	7657.34	FALSE	240
2022-09-12	13:41:47	1.38352	6.15417	5.04898	7833.38	FALSE	240
2022-09-12	13:41:47	1.0679	4.75023	5.04898	7662.09	FALSE	240
2022-09-12	13:41:48	0.974415	4.33439	5.24553	7837.71	FALSE	240
2022-09-12	13:41:48	1.09996	4.89284	5.24553	7666.98	FALSE	240
2022-09-12	13:41:48	1.31345	5.84249	5.24553	7843.55	FALSE	240
2022-09-12	13:41:48	1.32917	5.91241	5.24553	7672.89	FALSE	240
2022-09-12	13:41:49	1.31156	5.83408	4.97207	7849.39	FALSE	240
2022-09-12	13:41:49	1.1706	5.20706	4.97207	7678.1	FALSE	240
2022-09-12	13:41:49	1.05212	4.68004	4.97207	7854.07	FALSE	240
2022-09-12	13:41:49	0.936806	4.1671	4.97207	7682.27	FALSE	240
2022-09-12	13:41:50	0.870903	3.87395	3.70953	7857.94	FALSE	240
2022-09-12	13:41:50	0.812786	3.61543	3.70953	7685.88	FALSE	240
2022-09-12	13:41:50	0.81813	3.63921	3.70953	7861.58	FALSE	240
2022-09-12	13:41:51	0.958282	4.26263	4.21481	7690.14	FALSE	240
2022-09-12	13:41:51	0.989886	4.40321	4.21481	7865.98	FALSE	240
2022-09-12	13:41:51	0.913142	4.06184	4.21481	7694.21	FALSE	240
2022-09-12	13:41:51	0.928817	4.13156	4.21481	7870.11	FALSE	240
2022-09-12	13:41:52	1.00871	4.48694	4.79867	7698.69	FALSE	240
2022-09-12	13:41:52	1.09553	4.87314	4.79867	7874.99	FALSE	240
2022-09-12	13:41:52	1.1362	5.05404	4.79867	7703.75	FALSE	240
2022-09-12	13:41:52	1.07472	4.78057	4.79867	7879.77	FALSE	240
2022-09-12	13:41:53	1.26368	5.6211	2.77085	7709.37	FALSE	240
2022-09-12	13:41:53	0.519809	2.31221	2.77085	7882.08	FALSE	240
2022-09-12	13:41:53	0.350445	1.55885	2.77085	7710.93	FALSE	240
2022-09-12	13:41:53	0.357723	1.59122	2.77085	7883.67	FALSE	240
2022-09-12	13:41:54	0.207443	0.922748	0.839593	7711.85	FALSE	240
2022-09-12	13:41:54	0.250445	1.11403	0.839593	7884.79	FALSE	240
2022-09-12	13:41:54	0.108359	0.482003	0.839593	7712.33	FALSE	240
2022-09-12	13:41:55	-0.30131	-1.34029	-1.74691	7884.79	FALSE	240
2022-09-12	13:41:55	-0.173524	-0.771869	-1.74691	7712.33	FALSE	240
2022-09-12	13:41:55	-0.540292	-2.40333	-1.74691	7884.79	FALSE	240
2022-09-12	13:41:55	-0.555763	-2.47214	-1.74691	7712.33	FALSE	240
2022-09-12	13:41:56	0.69416	3.08776	14.5234	7887.87	FALSE	240
2022-09-12	13:41:56	2.84999	12.6773	14.5234	7725.01	FALSE	240
2022-09-12	13:41:56	5.06698	22.5389	14.5234	7910.41	1	241
2022-09-12	13:41:56	4.44892	19.7897	14.5234	7744.8	1	242
2022-09-12	13:41:57	2.4906	11.0787	9.44491	7921.49	FALSE	242
2022-09-12	13:41:57	1.63477	7.27178	9.44491	7752.07	FALSE	242
2022-09-12	13:41:57	2.44022	10.8546	9.44491	7932.35	FALSE	242
2022-09-12	13:41:57	1.92765	8.57457	9.44491	7760.64	FALSE	242
2022-09-12	13:41:58	1.70744	7.59503	5.60003	7939.94	FALSE	242
2022-09-12	13:41:58	1.03548	4.60602	5.60003	7765.25	FALSE	242
2022-09-12	13:41:58	1.03391	4.59904	5.60003	7944.54	FALSE	242
2022-09-12	13:41:59	1.31467	5.84792	11.4263	7771.1	FALSE	242
2022-09-12	13:41:59	2.762	12.2859	11.4263	7956.83	FALSE	242
2022-09-12	13:41:59	3.15457	14.0322	11.4263	7785.13	1	243
2022-09-12	13:41:59	3.04378	13.5393	11.4263	7970.37	1	244
2022-09-12	13:42:00	4.56174	20.2915	27.4479	7805.42	1	245
2022-09-12	13:42:00	4.80754	21.3849	27.4479	7991.75	1	246
2022-09-12	13:42:00	6.74596	30.0074	27.4479	7835.43	1	247
2022-09-12	13:42:00	8.56698	38.1076	27.4479	8029.86	1	248
2022-09-12	13:42:01	10.9934	48.9008	41.5133	7884.33	1	249
2022-09-12	13:42:01	15.1712	67.4845	41.5133	8097.34	1	250
2022-09-12	13:42:01	1.83324	8.15462	41.5133	7892.48	FALSE	250
2022-09-12	13:42:02	2.17609	9.67968	8.62458	8107.02	FALSE	250
2022-09-12	13:42:02	3.04663	13.552	8.62458	7906.04	1	251
2022-09-12	13:42:02	1.03508	4.60424	8.62458	8111.63	FALSE	251
2022-09-12	13:42:02	1.49777	6.66238	8.62458	7912.7	FALSE	251
2022-09-12	13:42:03	2.19767	9.77568	12.5825	8121.4	FALSE	251
2022-09-12	13:42:03	2.82541	12.568	12.5825	7925.27	FALSE	251
2022-09-12	13:42:03	3.90256	17.3594	12.5825	8138.76	1	252
2022-09-12	13:42:03	2.38902	10.6268	12.5825	7935.89	FALSE	252
2022-09-12	13:42:04	5.1108	22.7339	7.9822	8161.5	1	253
2022-09-12	13:42:04	0.530241	2.35862	7.9822	7938.25	FALSE	253
2022-09-12	13:42:04	1.19304	5.30688	7.9822	8166.8	FALSE	253
2022-09-12	13:42:04	0.34383	1.52942	7.9822	7939.78	FALSE	253
2022-09-12	13:42:05	0.129529	0.576171	0.930142	8167.38	FALSE	253
2022-09-12	13:42:05	0.191311	0.85099	0.930142	7940.63	FALSE	253
2022-09-12	13:42:05	0.306476	1.36327	0.930142	8168.74	FALSE	253
2022-09-12	13:42:06	0.636705	2.83219	1.62025	7943.47	FALSE	253
2022-09-12	13:42:06	0.566323	2.51912	1.62025	8171.26	FALSE	253
2022-09-12	13:42:06	0.118792	0.528411	1.62025	7943.99	FALSE	253
2022-09-12	13:42:06	0.135178	0.601299	1.62025	8171.86	FALSE	253
2022-09-12	13:42:07	0.500013	2.22416	1.18743	7946.22	FALSE	253
2022-09-12	13:42:07	0.209224	0.93067	1.18743	8172.79	FALSE	253
2022-09-12	13:42:07	0.149479	0.664912	1.18743	7946.88	FALSE	253
2022-09-12	13:42:07	0.209071	0.92999	1.18743	8173.72	FALSE	253
2022-09-12	13:42:08	0.248308	1.10452	0.934235	7947.99	FALSE	253
2022-09-12	13:42:08	0.209784	0.933161	0.934235	8174.66	FALSE	253
2022-09-12	13:42:08	0.204949	0.911654	0.934235	7948.9	FALSE	253
2022-09-12	13:42:08	0.177061	0.787603	0.934235	8175.44	FALSE	253
2022-09-12	13:42:09	0.181539	0.807522	0.754477	7949.71	FALSE	253
2022-09-12	13:42:09	0.174517	0.776287	0.754477	8176.22	FALSE	253
2022-09-12	13:42:09	0.152786	0.679623	0.754477	7950.39	FALSE	253
2022-09-12	13:42:10	0.151311	0.673062	1.20192	8176.89	FALSE	253
2022-09-12	13:42:10	0.339351	1.5095	1.20192	7951.9	FALSE	253
2022-09-12	13:42:10	0.305407	1.35851	1.20192	8178.25	FALSE	253
2022-09-12	13:42:10	0.284746	1.26661	1.20192	7953.16	FALSE	253
2022-09-12	13:42:11	0.412125	1.83321	1.98613	8180.08	FALSE	253
2022-09-12	13:42:11	0.444491	1.97718	1.98613	7955.14	FALSE	253
2022-09-12	13:42:11	0.471311	2.09649	1.98613	8182.18	FALSE	253
2022-09-12	13:42:11	0.458079	2.03763	1.98613	7957.18	FALSE	253
2022-09-12	13:42:12	0.441794	1.96519	2.00922	8184.15	FALSE	253
2022-09-12	13:42:12	0.456756	2.03174	2.00922	7959.21	FALSE	253
2022-09-12	13:42:12	0.445814	1.98307	2.00922	8186.13	FALSE	253
2022-09-12	13:42:12	0.462405	2.05687	2.00922	7961.27	FALSE	253
2022-09-12	13:42:13	0.451819	2.00978	2.01129	8188.14	FALSE	253
2022-09-12	13:42:13	0.466781	2.07634	2.01129	7963.34	FALSE	253
2022-09-12	13:42:13	0.437875	1.94776	2.01129	8190.09	FALSE	253
2022-09-12	13:42:14	0.446781	1.98737	1.78217	7965.33	FALSE	253
2022-09-12	13:42:14	0.353193	1.57107	1.78217	8191.66	FALSE	253
2022-09-12	13:42:14	0.543321	2.4168	1.78217	7967.75	FALSE	253
2022-09-12	13:42:14	0.2593	1.15342	1.78217	8192.81	FALSE	253
2022-09-12	13:42:15	0.297112	1.32161	1.34125	7969.07	FALSE	253
2022-09-12	13:42:15	0.318537	1.41692	1.34125	8194.23	FALSE	253
2022-09-12	13:42:15	0.278283	1.23786	1.34125	7970.31	FALSE	253
2022-09-12	13:42:15	0.312176	1.38862	1.34125	8195.62	FALSE	253
2022-09-12	13:42:16	0.265051	1.179	1.19315	7971.48	FALSE	253
2022-09-12	13:42:16	0.3593	1.59824	1.19315	8197.21	FALSE	253
2022-09-12	13:42:16	0.27869	1.23967	1.19315	7972.72	FALSE	253
2022-09-12	13:42:16	0.169886	0.755687	1.19315	8197.97	FALSE	253
2022-09-12	13:42:17	0.196807	0.875437	0.934067	7973.6	FALSE	253
2022-09-12	13:42:17	0.317672	1.41307	0.934067	8199.38	FALSE	253
2022-09-12	13:42:17	0.115484	0.513696	0.934067	7974.11	FALSE	253
2022-09-12	13:42:18	-0.357849	-1.59178	-1.02767	8199.38	FALSE	253
2022-09-12	13:42:18	-0.387875	-1.72535	-1.02767	7974.11	FALSE	253
2022-09-12	13:42:18	-0.176577	-0.78545	-1.02767	8199.38	FALSE	253
2022-09-12	13:42:18	-0.00181909	-0.00809168	-1.02767	7974.11	FALSE	253
2022-09-12	13:42:19	-0.141921	-0.631293	0.519466	8199.38	FALSE	253
2022-09-12	13:42:19	-0.124313	-0.552969	0.519466	7974.11	FALSE	253
2022-09-12	13:42:19	0.30098	1.33882	0.519466	8200.72	FALSE	253
2022-09-12	13:42:19	0.432379	1.92331	0.519466	7976.04	FALSE	253
2022-09-12	13:42:20	0.441387	1.96338	3.04113	8202.69	FALSE	253
2022-09-12	13:42:20	0.796247	3.54187	3.04113	7979.58	FALSE	253
2022-09-12	13:42:20	0.829326	3.68901	3.04113	8206.37	FALSE	253
2022-09-12	13:42:20	0.667748	2.97028	3.04113	7982.55	FALSE	253
2022-09-12	13:42:21	0.475229	2.11391	2.60597	8208.49	FALSE	253
2022-09-12	13:42:21	0.520064	2.31335	2.60597	7984.86	FALSE	253
2022-09-12	13:42:21	0.762252	3.39065	2.60597	8211.88	FALSE	253
2022-09-12	13:42:22	1.6992	7.55838	7.25606	7992.42	FALSE	253
2022-09-12	13:42:22	2.11599	9.41235	7.25606	8221.29	FALSE	253
2022-09-12	13:42:22	1.47396	6.55647	7.25606	7998.98	FALSE	253
2022-09-12	13:42:22	1.23579	5.49704	7.25606	8226.79	FALSE	253
2022-09-12	13:42:23	1.0281	4.57319	5.1775	8003.55	FALSE	253
2022-09-12	13:42:23	1.09757	4.88221	5.1775	8231.67	FALSE	253
2022-09-12	13:42:23	1.2108	5.38588	5.1775	8008.94	FALSE	253
2022-09-12	13:42:23	1.31935	5.86873	5.1775	8237.54	FALSE	253
2022-09-12	13:42:24	0.559351	2.48811	2.08584	8011.42	FALSE	253
2022-09-12	13:42:24	0.569021	2.53112	2.08584	8240.07	FALSE	253
2022-09-12	13:42:24	0.511616	2.27577	2.08584	8013.7	FALSE	253
2022-09-12	13:42:24	0.235687	1.04838	2.08584	8241.12	FALSE	253
2022-09-12	13:42:25	0.245407	1.09162	0.927878	8014.79	FALSE	253
2022-09-12	13:42:25	0.180624	0.803452	0.927878	8241.92	FALSE	253
2022-09-12	13:42:25	0.199758	0.888564	0.927878	8015.68	FALSE	253
2022-09-12	13:42:26	0.221234	0.984093	1.22563	8242.91	FALSE	253
2022-09-12	13:42:26	0.288766	1.28449	1.22563	8016.96	FALSE	253
2022-09-12	13:42:26	0.340725	1.51561	1.22563	8244.42	FALSE	253
2022-09-12	13:42:26	0.251412	1.11833	1.22563	8018.08	FALSE	253
2022-09-12	13:42:27	0.286832	1.27589	3.45414	8245.7	FALSE	253
2022-09-12	13:42:27	0.224491	0.998581	3.45414	8019.08	FALSE	253
2022-09-12	13:42:27	1.05813	4.70677	3.45414	8250.41	FALSE	253
2022-09-12	13:42:27	1.53665	6.83533	3.45414	8025.92	FALSE	253
2022-09-12	13:42:28	0.756349	3.36439	2.39479	8253.77	FALSE	253
2022-09-12	13:42:28	0.27757	1.23469	2.39479	8027.15	FALSE	253
2022-09-12	13:42:28	0.184644	0.821333	2.39479	8254.59	FALSE	253
2022-09-12	13:42:28	0.934924	4.15873	2.39479	8031.31	FALSE	253
2022-09-12	13:42:29	0.76902	3.42075	3.74206	8258.01	FALSE	253
2022-09-12	13:42:29	1.38541	6.16258	3.74206	8037.47	FALSE	253
2022-09-12	13:42:29	0.369326	1.64284	3.74206	8259.65	FALSE	253
2022-09-12	13:42:30	0.261998	1.16542	0.623089	8038.64	FALSE	253
2022-09-12	13:42:30	0.168155	0.747987	0.623089	8260.4	FALSE	253
2022-09-12	13:42:30	0.051158	0.227561	0.623089	8038.87	FALSE	253
2022-09-12	13:42:30	0.0789952	0.351386	0.623089	8260.75	FALSE	253
2022-09-12	13:42:31	0.089275	0.397113	1.06191	8039.26	FALSE	253
2022-09-12	13:42:31	0.0256109	0.113922	1.06191	8260.87	FALSE	253
2022-09-12	13:42:31	0.475127	2.11346	1.06191	8041.38	FALSE	253
2022-09-12	13:42:31	0.364898	1.62314	1.06191	8262.49	FALSE	253
2022-09-12	13:42:32	0.507951	2.25947	2.5426	8043.64	FALSE	253
2022-09-12	13:42:32	0.528919	2.35274	2.5426	8264.84	FALSE	253
2022-09-12	13:42:32	0.643626	2.86298	2.5426	8046.5	FALSE	253
2022-09-12	13:42:32	0.605916	2.69524	2.5426	8267.54	FALSE	253
2022-09-12	13:42:33	0.536552	2.38669	2.33583	8048.89	FALSE	253
2022-09-12	13:42:33	0.517723	2.30294	2.33583	8269.84	FALSE	253
2022-09-12	13:42:33	0.521081	2.31787	2.33583	8051.2	FALSE	253
2022-09-12	13:42:34	0.489173	2.17594	2.1494	8272.02	FALSE	253
2022-09-12	13:42:34	0.480623	2.13791	2.1494	8053.34	FALSE	253
2022-09-12	13:42:34	0.489987	2.17956	2.1494	8274.2	FALSE	253
2022-09-12	13:42:34	0.473041	2.10418	2.1494	8055.45	FALSE	253
2022-09-12	13:42:35	0.475178	2.11369	2.13157	8276.31	FALSE	253
2022-09-12	13:42:35	0.47243	2.10146	2.13157	8057.55	FALSE	253
2022-09-12	13:42:35	0.489529	2.17752	2.13157	8278.49	FALSE	253
2022-09-12	13:42:35	0.479657	2.13361	2.13157	8059.68	FALSE	253
2022-09-12	13:42:36	0.609478	2.71108	7.84127	8281.2	FALSE	253
2022-09-12	13:42:36	2.10296	9.35439	7.84127	8069.04	FALSE	253
2022-09-12	13:42:36	3.39721	15.1115	7.84127	8296.31	1	254
2022-09-12	13:42:36	0.94154	4.18816	7.84127	8073.22	FALSE	254
2022-09-12	13:42:37	0.536756	2.3876	1.9541	8298.7	FALSE	254
2022-09-12	13:42:37	0.462099	2.05551	1.9541	8075.28	FALSE	254
2022-09-12	13:42:37	0.319046	1.41918	1.9541	8300.12	FALSE	254
2022-09-12	13:42:38	0.238333	1.06015	1.44504	8076.34	FALSE	254
2022-09-12	13:42:38	0.270089	1.20141	1.44504	8301.32	FALSE	254
2022-09-12	13:42:38	0.333092	1.48166	1.44504	8077.82	FALSE	254
2022-09-12	13:42:38	0.457926	2.03695	1.44504	8303.36	FALSE	254
2022-09-12	13:42:39	0.398537	1.77277	2.33383	8079.59	FALSE	254
2022-09-12	13:42:39	0.409478	1.82144	2.33383	8305.18	FALSE	254
2022-09-12	13:42:39	0.475585	2.1155	2.33383	8081.71	FALSE	254
2022-09-12	13:42:39	0.815076	3.62562	2.33383	8308.8	FALSE	254

## Sheet: Harley_martin_2022912133721 (2)
Date	Time	Lbs	Newtons	Total Force x time	Total Time Steps Force >13.345		**GoPro Fitting: 13:26
2022-09-12	13:37:39	3.71558	16.5276	16.5276	1	1			Total Force x time	8308.8
2022-09-12	13:37:39	2.31945	10.3174	10.3174	FALSE	1			Total Time Steps Force >3	254
2022-09-12	13:37:39	4.08963	18.1915	34.7191	1	2
2022-09-12	13:37:39	4.12291	18.3395	28.6569	1	3
2022-09-12	13:37:40	3.68581	16.3952	51.1144	1	4
2022-09-12	13:37:40	1.5678	6.97389	35.6308	FALSE	4
2022-09-12	13:37:40	2.84983	12.6766	63.791	FALSE	4	First 30 seconds or so pulling at dog
2022-09-12	13:37:40	7.96454	35.4279	71.0587	1	5
2022-09-12	13:37:41	11.6519	51.83	115.621	1	6
2022-09-12	13:37:41	4.92821	21.9217	92.9803	1	7
2022-09-12	13:37:41	1.56729	6.97162	122.593	FALSE	7
2022-09-12	13:37:41	0.399097	1.77526	94.7556	FALSE	7
2022-09-12	13:37:42	0.426883	1.89886	124.491	FALSE	7
2022-09-12	13:37:42	-0.0761193	-0.338594	94.7556	FALSE	7
2022-09-12	13:37:42	0.26612	1.18375	125.675	FALSE	7
2022-09-12	13:37:43	0.050242	0.223486	94.9791	FALSE	7
2022-09-12	13:37:43	0.202557	0.901014	126.576	FALSE	7
2022-09-12	13:37:43	1.06098	4.71945	99.6985	FALSE	7
2022-09-12	13:37:43	2.93752	13.0667	139.643	FALSE	7
2022-09-12	13:37:44	2.21492	9.85241	109.551	FALSE	7
2022-09-12	13:37:44	5.12932	22.8162	162.459	1	8
2022-09-12	13:37:44	24.2486	107.863	217.414	1	9
2022-09-12	13:37:44	17.1678	76.3658	238.825	1	10
2022-09-12	13:37:45	31.2888	139.179	356.592	1	11
2022-09-12	13:37:45	29.9366	133.164	371.989	1	12
2022-09-12	13:37:45	12.2524	54.5011	411.094	1	13
2022-09-12	13:37:45	32.911	146.395	518.384	1	14
2022-09-12	13:37:46	20.7018	92.0857	503.179	1	15
2022-09-12	13:37:46	27.3353	121.593	639.977	1	16
2022-09-12	13:37:46	31.2367	138.947	642.126	1	17
2022-09-12	13:37:47	49.3907	219.7	859.676	1	18
2022-09-12	13:37:47	33.6152	149.527	791.653	1	19
2022-09-12	13:37:47	36.85	163.916	1023.59	1	20
2022-09-12	13:37:47	31.2476	138.996	930.649	1	21
2022-09-12	13:37:48	29.7907	132.515	1156.11	1	22
2022-09-12	13:37:48	36.6076	162.838	1093.49	1	23
2022-09-12	13:37:48	44.5354	198.102	1354.21	1	24
2022-09-12	13:37:48	28.6403	127.398	1220.88	1	25
2022-09-12	13:37:49	22.4141	99.7024	1453.91	1	26
2022-09-12	13:37:49	63.7686	283.655	1504.54	1	27
2022-09-12	13:37:49	15.1224	67.2675	1521.18	1	28
2022-09-12	13:37:49	2.40586	10.7017	1515.24	FALSE	28
2022-09-12	13:37:50	1.24052	5.51808	1526.7	FALSE	28
2022-09-12	13:37:50	0.414618	1.8443	1517.09	FALSE	28
2022-09-12	13:37:50	0.237977	1.05857	1527.76	FALSE	28
2022-09-12	13:37:51	0.40444	1.79903	1518.89	FALSE	28
2022-09-12	13:37:51	0.366272	1.62925	1529.39	FALSE	28
2022-09-12	13:37:51	0.0330919	0.147199	1519.03	FALSE	28
2022-09-12	13:37:51	-0.078562	-0.349459	1529.39	FALSE	28
2022-09-12	13:37:52	0.13355	0.594057	1519.63	FALSE	28
2022-09-12	13:37:52	0.0717687	0.319242	1529.7	FALSE	28
2022-09-12	13:37:52	0.0337534	0.150142	1519.78	FALSE	28
2022-09-12	13:37:52	-0.0579005	-0.257553	1529.7	FALSE	28
2022-09-12	13:37:53	0.263473	1.17198	1520.95	FALSE	28
2022-09-12	13:37:53	0.608308	2.70588	1532.41	FALSE	28
2022-09-12	13:37:53	0.380267	1.6915	1522.64	FALSE	28
2022-09-12	13:37:53	0.923168	4.10644	1536.52	FALSE	28
2022-09-12	13:37:54	0.305	1.3567	1524	FALSE	28
2022-09-12	13:37:54	0.188155	0.836951	1537.35	FALSE	28
2022-09-12	13:37:54	0.129835	0.577532	1524.57	FALSE	28
2022-09-12	13:37:55	0.0893259	0.397339	1537.75	FALSE	28
2022-09-12	13:37:55	0.108257	0.481549	1525.06	FALSE	28
2022-09-12	13:37:55	0.14154	0.629598	1538.38	FALSE	28
2022-09-12	13:37:55	0.23925	1.06423	1526.12	FALSE	28
2022-09-12	13:37:56	18.7833	83.5519	1621.93	1	29
2022-09-12	13:37:56	57.5304	255.907	1782.03	1	30
2022-09-12	13:37:56	35.4379	157.635	1779.57	1	31
2022-09-12	13:37:56	23.9536	106.55	1888.58	1	32
2022-09-12	13:37:57	37.8792	168.494	1948.06	1	33
2022-09-12	13:37:57	22.0404	98.0401	1986.62	1	34
2022-09-12	13:37:57	32.9214	146.441	2094.5	1	35
2022-09-12	13:37:57	25.3849	112.917	2099.53	1	36
2022-09-12	13:37:58	26.9276	119.779	2214.28	1	37
2022-09-12	13:37:58	18.6358	82.8958	2182.43	1	38
2022-09-12	13:37:58	50.0297	222.542	2436.82	1	39
2022-09-12	13:37:59	27.8926	124.072	2306.5	1	40
2022-09-12	13:37:59	33.03	146.924	2583.75	1	41
2022-09-12	13:37:59	23.101	102.758	2409.26	1	42
2022-09-12	13:37:59	40.0838	178.301	2762.05	1	43
2022-09-12	13:38:00	48.2024	214.414	2623.67	1	44
2022-09-12	13:38:00	24.9666	111.056	2873.11	1	45
2022-09-12	13:38:00	32.2554	143.478	2767.15	1	46
2022-09-12	13:38:00	32.1682	143.091	3016.2	1	47
2022-09-12	13:38:01	40.8461	181.692	2948.84	1	48
2022-09-12	13:38:01	41.4269	184.275	3200.47	1	49
2022-09-12	13:38:01	22.5535	100.322	3049.17	1	50
2022-09-12	13:38:01	31.3908	139.633	3340.1	1	51
2022-09-12	13:38:02	25.214	112.157	3161.32	1	52
2022-09-12	13:38:02	5.53008	24.5989	3364.7	1	53
2022-09-12	13:38:02	0.67243	2.9911	3164.31	FALSE	53
2022-09-12	13:38:03	0.0798602	0.355234	3365.06	FALSE	53
2022-09-12	13:38:03	0.305763	1.36009	3165.67	FALSE	53
2022-09-12	13:38:03	0.229682	1.02167	3366.08	FALSE	53
2022-09-12	13:38:03	0.386425	1.7189	3167.39	FALSE	53
2022-09-12	13:38:04	0.061845	0.275099	3366.35	FALSE	53
2022-09-12	13:38:04	0.364898	1.62314	3169.02	FALSE	53
2022-09-12	13:38:04	0.418639	1.86219	3368.22	FALSE	53
2022-09-12	13:38:04	0.514008	2.28641	3171.3	FALSE	53
2022-09-12	13:38:05	0.342506	1.52354	3369.74	FALSE	53
2022-09-12	13:38:05	0.257163	1.14391	3172.45	FALSE	53
2022-09-12	13:38:05	0.36444	1.6211	3371.36	FALSE	53
2022-09-12	13:38:05	0.370547	1.64827	3174.1	FALSE	53
2022-09-12	13:38:06	2.51808	11.2009	3382.56	FALSE	53
2022-09-12	13:38:06	2.07457	9.2281	3183.32	FALSE	53
2022-09-12	13:38:06	0.259402	1.15387	3383.72	FALSE	53
2022-09-12	13:38:07	0.240064	1.06785	3184.39	FALSE	53
2022-09-12	13:38:07	0.186171	0.828126	3384.54	FALSE	53
2022-09-12	13:38:07	0.137621	0.612166	3185	FALSE	53
2022-09-12	13:38:07	0.304695	1.35534	3385.9	FALSE	53
2022-09-12	13:38:08	0.279809	1.24465	3186.25	FALSE	53
2022-09-12	13:38:08	2.08154	9.25911	3395.16	FALSE	53
2022-09-12	13:38:08	12.8815	57.2995	3243.55	1	54
2022-09-12	13:38:08	19.5728	87.0637	3482.22	1	55
2022-09-12	13:38:09	23.051	102.535	3346.08	1	56
2022-09-12	13:38:09	8.79472	39.1207	3521.34	1	57
2022-09-12	13:38:09	15.2666	67.9089	3413.99	1	58
2022-09-12	13:38:09	13.4535	59.8439	3581.19	1	59
2022-09-12	13:38:10	17.8979	79.6134	3493.61	1	60
2022-09-12	13:38:10	18.2562	81.2072	3662.39	1	61
2022-09-12	13:38:10	9.3651	41.6578	3535.26	1	62
2022-09-12	13:38:11	9.07823	40.3818	3702.78	1	63
2022-09-12	13:38:11	20.006	88.9907	3624.25	1	64
2022-09-12	13:38:11	6.82668	30.3664	3733.14	1	65
2022-09-12	13:38:11	5.5996	24.9081	3649.16	1	66
2022-09-12	13:38:12	3.79248	16.8697	3750.01	1	67
2022-09-12	13:38:12	1.77497	7.89542	3657.06	FALSE	67
2022-09-12	13:38:12	2.21106	9.83524	3759.85	FALSE	67
2022-09-12	13:38:12	2.98841	13.293	3670.35	FALSE	67
2022-09-12	13:38:13	14.7371	65.5536	3825.4	1	68
2022-09-12	13:38:13	18.2655	81.2486	3751.6	1	69
2022-09-12	13:38:13	3.78729	16.8466	3842.25	1	70
2022-09-12	13:38:14	3.62714	16.1342	3767.73	1	71
2022-09-12	13:38:14	11.3644	50.5511	3892.8	1	72
2022-09-12	13:38:14	4.30057	19.1298	3786.86	1	73
2022-09-12	13:38:14	5.09243	22.6521	3915.45	1	74
2022-09-12	13:38:15	4.42805	19.6969	3806.56	1	75
2022-09-12	13:38:15	3.47121	15.4406	3930.89	1	76
2022-09-12	13:38:15	0.947646	4.21532	3810.78	FALSE	76
2022-09-12	13:38:15	1.95935	8.71558	3939.61	FALSE	76
2022-09-12	13:38:16	5.47919	24.3725	3835.15	1	77
2022-09-12	13:38:16	5.28856	23.5246	3963.13	1	78
2022-09-12	13:38:16	6.85609	30.4973	3865.65	1	79
2022-09-12	13:38:16	6.6164	29.4311	3992.56	1	80
2022-09-12	13:38:17	10.1586	45.1875	3910.83	1	81
2022-09-12	13:38:17	6.10953	27.1764	4019.74	1	82
2022-09-12	13:38:17	5.1283	22.8117	3933.64	1	83
2022-09-12	13:38:18	2.04821	9.11085	4028.85	FALSE	83
2022-09-12	13:38:18	0.264644	1.17719	3934.82	FALSE	83
2022-09-12	13:38:18	0.339046	1.50814	4030.36	FALSE	83
2022-09-12	13:38:18	-0.0401906	-0.178776	3934.82	FALSE	83
2022-09-12	13:38:19	0.0928883	0.413186	4030.77	FALSE	83
2022-09-12	13:38:19	0.0714124	0.317657	3935.14	FALSE	83
2022-09-12	13:38:19	0.068817	0.306112	4031.08	FALSE	83
2022-09-12	13:38:19	0.0658654	0.292982	3935.43	FALSE	83
2022-09-12	13:38:20	0.741438	3.29806	4034.38	FALSE	83
2022-09-12	13:38:20	1.03538	4.60558	3940.04	FALSE	83
2022-09-12	13:38:20	2.93034	13.0347	4047.41	FALSE	83
2022-09-12	13:38:20	1.60001	7.11716	3947.15	FALSE	83
2022-09-12	13:38:21	2.16189	9.61652	4057.03	FALSE	83
2022-09-12	13:38:21	1.51752	6.75023	3953.91	FALSE	83
2022-09-12	13:38:21	2.34474	10.4299	4067.46	FALSE	83
2022-09-12	13:38:22	1.84882	8.22392	3962.13	FALSE	83
2022-09-12	13:38:22	3.67945	16.3669	4083.82	1	84
2022-09-12	13:38:22	6.7908	30.2068	3992.34	1	85
2022-09-12	13:38:22	5.88566	26.1806	4110	1	86
2022-09-12	13:38:23	3.47833	15.4723	4007.81	1	87
2022-09-12	13:38:23	1.16169	5.16743	4115.17	FALSE	87
2022-09-12	13:38:23	0.702201	3.12353	4010.93	FALSE	87
2022-09-12	13:38:23	0.842506	3.74764	4118.92	FALSE	87
2022-09-12	13:38:24	3.0137	13.4055	4024.34	1	88
2022-09-12	13:38:24	2.105	9.36346	4128.28	FALSE	88
2022-09-12	13:38:24	1.3279	5.90676	4030.24	FALSE	88
2022-09-12	13:38:25	1.98805	8.84324	4137.13	FALSE	88
2022-09-12	13:38:25	8.02174	35.6823	4065.93	1	89
2022-09-12	13:38:25	8.62474	38.3646	4175.49	1	90
2022-09-12	13:38:25	3.84118	17.0863	4083.01	1	91
2022-09-12	13:38:26	2.82566	12.5691	4188.06	FALSE	91
2022-09-12	13:38:26	1.23615	5.49864	4088.51	FALSE	91
2022-09-12	13:38:26	3.34357	14.8729	4202.93	1	92
2022-09-12	13:38:26	10.8394	48.2158	4136.73	1	93
2022-09-12	13:38:27	18.0029	80.0805	4283.01	1	94
2022-09-12	13:38:27	16.4448	73.1498	4209.88	1	95
2022-09-12	13:38:27	14.696	65.3707	4348.38	1	96
2022-09-12	13:38:27	24.2215	107.742	4317.62	1	97
2022-09-12	13:38:28	4.38943	19.5251	4367.91	1	98
2022-09-12	13:38:28	18.7476	83.3931	4401.01	1	99
2022-09-12	13:38:28	6.44291	28.6594	4396.57	1	100
2022-09-12	13:38:28	9.1538	40.7179	4441.73	1	101
2022-09-12	13:38:29	23.6065	105.006	4501.57	1	102
2022-09-12	13:38:29	13.6484	60.7108	4502.44	1	103
2022-09-12	13:38:29	14.3571	63.8633	4565.44	1	104
2022-09-12	13:38:30	10.8075	48.0739	4550.51	1	105
2022-09-12	13:38:30	10.7993	48.0374	4613.48	1	106
2022-09-12	13:38:30	29.0558	129.246	4679.76	1	107
2022-09-12	13:38:30	19.7359	87.7892	4701.26	1	108
2022-09-12	13:38:31	19.3776	86.1954	4765.96	1	109
2022-09-12	13:38:31	6.46143	28.7417	4730.01	1	110
2022-09-12	13:38:31	12.4999	55.6021	4821.56	1	111
2022-09-12	13:38:31	21.7877	96.916	4826.92	1	112
2022-09-12	13:38:32	7.50866	33.4	4854.96	1	113
2022-09-12	13:38:32	12.1978	54.2583	4881.18	1	114
2022-09-12	13:38:32	14.4805	64.4122	4919.37	1	115
2022-09-12	13:38:32	17.8271	79.2985	4960.48	1	116
2022-09-12	13:38:33	24.1089	107.241	5026.61	1	117
2022-09-12	13:38:33	13.669	60.8024	5021.28	1	118
2022-09-12	13:38:33	15.4821	68.8675	5095.48	1	119
2022-09-12	13:38:34	4.6166	20.5356	5041.82	1	120
2022-09-12	13:38:34	14.9178	66.3574	5161.84	1	121
2022-09-12	13:38:34	17.1451	76.2648	5118.08	1	122
2022-09-12	13:38:34	3.47625	15.4631	5177.3	1	123
2022-09-12	13:38:35	19.1189	85.0447	5203.13	1	124
2022-09-12	13:38:35	7.35009	32.6947	5209.99	1	125
2022-09-12	13:38:35	6.26846	27.8834	5231.01	1	126
2022-09-12	13:38:35	1.2476	5.54957	5215.54	FALSE	126
2022-09-12	13:38:36	2.6507	11.7908	5242.8	FALSE	126
2022-09-12	13:38:36	7.14377	31.7769	5247.32	1	127
2022-09-12	13:38:36	4.07238	18.1148	5260.92	1	128
2022-09-12	13:38:36	9.82622	43.709	5291.03	1	129
2022-09-12	13:38:37	19.6477	87.3969	5348.31	1	130
2022-09-12	13:38:37	17.2621	76.7853	5367.81	1	131
2022-09-12	13:38:37	8.19355	36.4465	5384.76	1	132
2022-09-12	13:38:38	4.58851	20.4106	5388.23	1	133
2022-09-12	13:38:38	3.27441	14.5652	5399.32	1	134
2022-09-12	13:38:38	0.247494	1.1009	5389.33	FALSE	134
2022-09-12	13:38:38	0.74673	3.3216	5402.65	FALSE	134
2022-09-12	13:38:39	1.08978	4.84756	5394.17	FALSE	134
2022-09-12	13:38:39	1.64551	7.31956	5409.97	FALSE	134
2022-09-12	13:38:39	0.662506	2.94696	5397.12	FALSE	134
2022-09-12	13:38:39	0.093957	0.41794	5410.38	FALSE	134
2022-09-12	13:38:40	-0.199427	-0.887091	5397.12	FALSE	134
2022-09-12	13:38:40	0.144237	0.641595	5411.03	FALSE	134
2022-09-12	13:38:40	0.437825	1.94753	5399.07	FALSE	134
2022-09-12	13:38:40	3.54831	15.7836	5426.81	1	135
2022-09-12	13:38:41	0.521234	2.31855	5401.39	FALSE	135
2022-09-12	13:38:41	1.11996	4.98181	5431.79	FALSE	135
2022-09-12	13:38:41	1.07126	4.76518	5406.15	FALSE	135
2022-09-12	13:38:42	0.721641	3.21	5435	FALSE	135
2022-09-12	13:38:42	0.396451	1.76349	5407.92	FALSE	135
2022-09-12	13:38:42	0.312634	1.39066	5436.39	FALSE	135
2022-09-12	13:38:42	0.459758	2.0451	5409.96	FALSE	135
2022-09-12	13:38:43	0.306679	1.36417	5437.76	FALSE	135
2022-09-12	13:38:43	0.43411	1.93101	5411.89	FALSE	135
2022-09-12	13:38:43	0.346272	1.54029	5439.3	FALSE	135
2022-09-12	13:38:43	0.546476	2.43083	5414.32	FALSE	135
2022-09-12	13:38:44	0.185662	0.825862	5440.12	FALSE	135
2022-09-12	13:38:44	-0.0914883	-0.406958	5414.32	FALSE	135
2022-09-12	13:38:44	0.0465778	0.207187	5440.33	FALSE	135
2022-09-12	13:38:44	0.0130918	0.0582349	5414.38	FALSE	135
2022-09-12	13:38:45	0.249886	1.11154	5441.44	FALSE	135
2022-09-12	13:38:45	-0.129962	-0.578097	5414.38	FALSE	135
2022-09-12	13:38:45	0.211616	0.94131	5442.38	FALSE	135
2022-09-12	13:38:46	0.320471	1.42552	5415.81	FALSE	135
2022-09-12	13:38:46	0.390802	1.73837	5444.12	FALSE	135
2022-09-12	13:38:46	0.108308	0.481776	5416.29	FALSE	135
2022-09-12	13:38:46	0.352532	1.56813	5445.69	FALSE	135
2022-09-12	13:38:47	0.550242	2.44759	5418.74	FALSE	135
2022-09-12	13:38:47	0.916043	4.07474	5449.76	FALSE	135
2022-09-12	13:38:47	0.622405	2.76858	5421.5	FALSE	135
2022-09-12	13:38:47	0.373346	1.66072	5451.42	FALSE	135
2022-09-12	13:38:48	1.12276	4.99426	5426.5	FALSE	135
2022-09-12	13:38:48	0.132481	0.589302	5452.01	FALSE	135
2022-09-12	13:38:48	0.250191	1.1129	5427.61	FALSE	135
2022-09-12	13:38:48	0.0627101	0.278947	5452.29	FALSE	135
2022-09-12	13:38:49	0.00754479	0.0335607	5427.65	FALSE	135
2022-09-12	13:38:49	0.0473412	0.210583	5452.5	FALSE	135
2022-09-12	13:38:49	1.42775	6.35092	5434	FALSE	135
2022-09-12	13:38:50	1.9767	8.79276	5461.3	FALSE	135
2022-09-12	13:38:50	3.86368	17.1864	5451.18	1	136
2022-09-12	13:38:50	1.33757	5.94978	5467.24	FALSE	136
2022-09-12	13:38:50	1.02556	4.5619	5455.74	FALSE	136
2022-09-12	13:38:51	0.220573	0.981153	5468.23	FALSE	136
2022-09-12	13:38:51	0.36154	1.6082	5457.35	FALSE	136
2022-09-12	13:38:51	0.386323	1.71844	5469.94	FALSE	136
2022-09-12	13:38:51	1.20505	5.3603	5462.71	FALSE	136
2022-09-12	13:38:52	0.898079	3.99484	5473.94	FALSE	136
2022-09-12	13:38:52	0.872786	3.88233	5466.6	FALSE	136
2022-09-12	13:38:52	0.687443	3.05788	5477	FALSE	136
2022-09-12	13:38:52	1.42154	6.32329	5472.92	FALSE	136
2022-09-12	13:38:53	2.6336	11.7148	5488.71	FALSE	136
2022-09-12	13:38:53	2.79879	12.4496	5485.37	FALSE	136
2022-09-12	13:38:53	1.64261	7.30666	5496.02	FALSE	136
2022-09-12	13:38:54	1.53513	6.82857	5492.2	FALSE	136
2022-09-12	13:38:54	1.74154	7.74672	5503.77	FALSE	136
2022-09-12	13:38:54	0.562608	2.50259	5494.7	FALSE	136
2022-09-12	13:38:54	0.364949	1.62337	5505.39	FALSE	136
2022-09-12	13:38:55	0.580623	2.58273	5497.28	FALSE	136
2022-09-12	13:38:55	0.607341	2.70157	5508.09	FALSE	136
2022-09-12	13:38:55	0.712634	3.16994	5500.45	FALSE	136
2022-09-12	13:38:55	1.05742	4.70362	5512.79	FALSE	136
2022-09-12	13:38:56	0.772277	3.43524	5503.89	FALSE	136
2022-09-12	13:38:56	0.543117	2.41589	5515.21	FALSE	136
2022-09-12	13:38:56	0.623779	2.77469	5506.66	FALSE	136
2022-09-12	13:38:56	0.40098	1.78364	5516.99	FALSE	136
2022-09-12	13:38:57	0.514008	2.28641	5508.95	FALSE	136
2022-09-12	13:38:57	0.472583	2.10214	5519.1	FALSE	136
2022-09-12	13:38:57	0.432176	1.92241	5510.87	FALSE	136
2022-09-12	13:38:58	0.434313	1.93191	5521.03	FALSE	136
2022-09-12	13:38:58	0.453601	2.01771	5512.89	FALSE	136
2022-09-12	13:38:58	0.439758	1.95613	5522.98	FALSE	136
2022-09-12	13:38:58	0.421183	1.87351	5514.76	FALSE	136
2022-09-12	13:38:59	0.431616	1.91991	5524.9	FALSE	136
2022-09-12	13:38:59	0.42958	1.91086	5516.67	FALSE	136
2022-09-12	13:38:59	0.460369	2.04781	5526.95	FALSE	136
2022-09-12	13:38:59	0.456501	2.03061	5518.7	FALSE	136
2022-09-12	13:39:00	0.434262	1.93168	5528.88	FALSE	136
2022-09-12	13:39:00	0.459453	2.04374	5520.75	FALSE	136
2022-09-12	13:39:00	0.445611	1.98217	5530.87	FALSE	136
2022-09-12	13:39:00	0.454822	2.02314	5522.77	FALSE	136
2022-09-12	13:39:01	0.458232	2.03831	5532.9	FALSE	136
2022-09-12	13:39:01	0.431005	1.9172	5524.69	FALSE	136
2022-09-12	13:39:01	0.468461	2.08381	5534.99	FALSE	136
2022-09-12	13:39:02	0.488817	2.17436	5526.86	FALSE	136
2022-09-12	13:39:02	0.475433	2.11482	5537.1	FALSE	136
2022-09-12	13:39:02	0.459758	2.0451	5528.91	FALSE	136
2022-09-12	13:39:02	0.401997	1.78816	5538.89	FALSE	136
2022-09-12	13:39:03	0.442252	1.96723	5530.87	FALSE	136
2022-09-12	13:39:03	0.471412	2.09693	5540.99	FALSE	136
2022-09-12	13:39:03	0.431158	1.91788	5532.79	FALSE	136
2022-09-12	13:39:03	0.427799	1.90294	5542.89	FALSE	136
2022-09-12	13:39:04	0.436247	1.94051	5534.73	FALSE	136
2022-09-12	13:39:04	0.412176	1.83344	5544.72	FALSE	136
2022-09-12	13:39:04	0.4193	1.86513	5536.6	FALSE	136
2022-09-12	13:39:04	0.422456	1.87917	5546.6	FALSE	136
2022-09-12	13:39:05	0.434059	1.93078	5538.53	FALSE	136
2022-09-12	13:39:05	0.419097	1.86423	5548.47	FALSE	136
2022-09-12	13:39:05	0.447545	1.99077	5540.52	FALSE	136
2022-09-12	13:39:06	0.467341	2.07883	5550.55	FALSE	136
2022-09-12	13:39:06	0.450852	2.00548	5542.52	FALSE	136
2022-09-12	13:39:06	0.434313	1.93191	5552.48	FALSE	136
2022-09-12	13:39:06	0.470852	2.09444	5544.62	FALSE	136
2022-09-12	13:39:07	0.481997	2.14402	5554.62	FALSE	136
2022-09-12	13:39:07	0.456959	2.03265	5546.65	FALSE	136
2022-09-12	13:39:07	0.462965	2.05936	5556.68	FALSE	136
2022-09-12	13:39:07	0.474618	2.1112	5548.76	FALSE	136
2022-09-12	13:39:08	0.467341	2.07883	5558.76	FALSE	136
2022-09-12	13:39:08	0.472328	2.10101	5550.86	FALSE	136
2022-09-12	13:39:08	0.460623	2.04894	5560.81	FALSE	136
2022-09-12	13:39:08	0.467647	2.08019	5552.94	FALSE	136
2022-09-12	13:39:09	0.503779	2.24091	5563.05	FALSE	136
2022-09-12	13:39:09	0.435738	1.93825	5554.88	FALSE	136
2022-09-12	13:39:09	0.471819	2.09875	5565.15	FALSE	136
2022-09-12	13:39:10	0.445407	1.98126	5556.86	FALSE	136
2022-09-12	13:39:10	0.471158	2.09581	5567.24	FALSE	136
2022-09-12	13:39:10	0.492074	2.18884	5559.05	FALSE	136
2022-09-12	13:39:10	0.473041	2.10418	5569.35	FALSE	136
2022-09-12	13:39:11	0.496247	2.20741	5561.26	FALSE	136
2022-09-12	13:39:11	0.563219	2.50531	5571.85	FALSE	136
2022-09-12	13:39:11	0.440471	1.9593	5563.22	FALSE	136
2022-09-12	13:39:11	1.26454	5.62493	5577.48	FALSE	136
2022-09-12	13:39:12	0.53584	2.38352	5565.6	FALSE	136
2022-09-12	13:39:12	0.395382	1.75874	5579.24	FALSE	136
2022-09-12	13:39:12	0.318232	1.41556	5567.02	FALSE	136
2022-09-12	13:39:12	1.70469	7.5828	5586.82	FALSE	136
2022-09-12	13:39:13	2.36307	10.5114	5577.53	FALSE	136
2022-09-12	13:39:13	1.35426	6.02402	5592.84	FALSE	136
2022-09-12	13:39:13	0.624847	2.77944	5580.31	FALSE	136
2022-09-12	13:39:14	0.504898	2.24589	5595.09	FALSE	136
2022-09-12	13:39:14	0.473652	2.1069	5582.42	FALSE	136
2022-09-12	13:39:14	0.391209	1.74018	5596.83	FALSE	136
2022-09-12	13:39:14	0.71243	3.16903	5585.58	FALSE	136
2022-09-12	13:39:15	0.946527	4.21034	5601.04	FALSE	136
2022-09-12	13:39:15	0.89243	3.96971	5589.55	FALSE	136
2022-09-12	13:39:15	0.596399	2.6529	5603.69	FALSE	136
2022-09-12	13:39:15	0.435076	1.93531	5591.49	FALSE	136
2022-09-12	13:39:16	0.361998	1.61024	5605.3	FALSE	136
2022-09-12	13:39:16	0.576349	2.56372	5594.05	FALSE	136
2022-09-12	13:39:16	0.523982	2.33078	5607.63	FALSE	136
2022-09-12	13:39:16	0.520827	2.31674	5596.37	FALSE	136
2022-09-12	13:39:17	0.599809	2.66807	5610.3	FALSE	136
2022-09-12	13:39:17	0.525051	2.33553	5598.71	FALSE	136
2022-09-12	13:39:17	0.438842	1.95206	5612.25	FALSE	136
2022-09-12	13:39:18	0.370903	1.64985	5600.36	FALSE	136
2022-09-12	13:39:18	0.537265	2.38986	5614.64	FALSE	136
2022-09-12	13:39:18	0.519453	2.31063	5602.67	FALSE	136
2022-09-12	13:39:18	0.718791	3.19733	5617.84	FALSE	136
2022-09-12	13:39:19	0.543015	2.41544	5605.08	FALSE	136
2022-09-12	13:39:19	0.705814	3.1396	5620.98	FALSE	136
2022-09-12	13:39:19	1.19044	5.29532	5610.38	FALSE	136
2022-09-12	13:39:19	2.67813	11.9129	5632.89	FALSE	136
2022-09-12	13:39:20	4.46149	19.8456	5630.22	1	137
2022-09-12	13:39:20	3.88642	17.2876	5650.18	1	138
2022-09-12	13:39:20	1.68749	7.50629	5637.73	FALSE	138
2022-09-12	13:39:21	2.04627	9.10222	5659.28	FALSE	138
2022-09-12	13:39:21	3.94851	17.5638	5655.29	1	139
2022-09-12	13:39:21	1.58887	7.06761	5666.35	FALSE	139
2022-09-12	13:39:21	0.545661	2.42721	5657.72	FALSE	139
2022-09-12	13:39:22	0.86846	3.86308	5670.21	FALSE	139
2022-09-12	13:39:22	0.599351	2.66603	5660.39	FALSE	139
2022-09-12	13:39:22	0.708359	3.15092	5673.37	FALSE	139
2022-09-12	13:39:22	0.644033	2.86479	5663.25	FALSE	139
2022-09-12	13:39:23	1.51981	6.76042	5680.13	FALSE	139
2022-09-12	13:39:23	4.82902	21.4804	5684.73	1	140
2022-09-12	13:39:23	5.58886	24.8604	5704.99	1	141
2022-09-12	13:39:23	9.53019	42.3922	5727.12	1	142
2022-09-12	13:39:24	8.58438	38.185	5743.17	1	143
2022-09-12	13:39:24	7.16271	31.8612	5758.98	1	144
2022-09-12	13:39:24	2.11167	9.39313	5752.56	FALSE	144
2022-09-12	13:39:25	4.76149	21.1801	5780.16	1	145
2022-09-12	13:39:25	2.27976	10.1408	5762.71	FALSE	145
2022-09-12	13:39:25	3.83752	17.0701	5797.23	1	146
2022-09-12	13:39:25	10.5831	47.0757	5809.78	1	147
2022-09-12	13:39:26	5.26362	23.4136	5820.65	1	148
2022-09-12	13:39:26	13.1389	58.4445	5868.23	1	149
2022-09-12	13:39:26	4.84739	21.5622	5842.21	1	150
2022-09-12	13:39:26	6.45004	28.6911	5896.92	1	151
2022-09-12	13:39:27	5.86719	26.0984	5868.31	1	152
2022-09-12	13:39:27	4.22042	18.7733	5915.69	1	153
2022-09-12	13:39:27	13.1172	58.3479	5926.66	1	154
2022-09-12	13:39:27	4.70194	20.9152	5936.61	1	155
2022-09-12	13:39:28	5.93828	26.4147	5953.07	1	156
2022-09-12	13:39:28	3.14866	14.0059	5950.61	1	157
2022-09-12	13:39:28	2.47686	11.0176	5964.09	FALSE	157
2022-09-12	13:39:29	2.75431	12.2517	5962.86	FALSE	157
2022-09-12	13:39:29	3.12576	13.904	5977.99	1	158
2022-09-12	13:39:29	4.48093	19.9321	5982.8	1	159
2022-09-12	13:39:29	1.85614	8.25648	5986.25	FALSE	159
2022-09-12	13:39:30	0.714313	3.17741	5985.97	FALSE	159
2022-09-12	13:39:30	0.328257	1.46015	5987.71	FALSE	159
2022-09-12	13:39:30	0.397061	1.76621	5987.74	FALSE	159
2022-09-12	13:39:30	0.383982	1.70803	5989.42	FALSE	159
2022-09-12	13:39:31	0.502506	2.23525	5989.97	FALSE	159
2022-09-12	13:39:31	0.58444	2.59971	5992.02	FALSE	159
2022-09-12	13:39:31	0.894415	3.97854	5993.95	FALSE	159
2022-09-12	13:39:31	2.49345	11.0914	6003.11	FALSE	159
2022-09-12	13:39:32	0.59528	2.64792	5996.6	FALSE	159
2022-09-12	13:39:32	0.472888	2.1035	6005.21	FALSE	159
2022-09-12	13:39:32	0.350547	1.5593	5998.16	FALSE	159
2022-09-12	13:39:33	0.21299	0.947422	6006.16	FALSE	159
2022-09-12	13:39:33	0.154669	0.687999	5998.85	FALSE	159
2022-09-12	13:39:33	0.154415	0.686869	6006.85	FALSE	159
2022-09-12	13:39:33	0.498181	2.21601	6001.06	FALSE	159
2022-09-12	13:39:34	0.386934	1.72116	6008.57	FALSE	159
2022-09-12	13:39:34	0.286527	1.27453	6002.34	FALSE	159
2022-09-12	13:39:34	0.368715	1.64012	6010.21	FALSE	159
2022-09-12	13:39:34	0.396145	1.76213	6004.1	FALSE	159
2022-09-12	13:39:35	0.599606	2.66717	6012.88	FALSE	159
2022-09-12	13:39:35	0.414568	1.84408	6005.94	FALSE	159
2022-09-12	13:39:35	0.510903	2.2726	6015.15	FALSE	159
2022-09-12	13:39:35	0.486934	2.16598	6008.11	FALSE	159
2022-09-12	13:39:36	0.568104	2.52704	6017.67	FALSE	159
2022-09-12	13:39:36	0.505407	2.24815	6010.36	FALSE	159
2022-09-12	13:39:36	0.459911	2.04578	6019.72	FALSE	159
2022-09-12	13:39:37	0.47014	2.09128	6012.45	FALSE	159
2022-09-12	13:39:37	0.408715	1.81805	6021.54	FALSE	159
2022-09-12	13:39:37	0.436247	1.94051	6014.39	FALSE	159
2022-09-12	13:39:37	0.556298	2.47452	6024.01	FALSE	159
2022-09-12	13:39:38	0.481641	2.14244	6016.53	FALSE	159
2022-09-12	13:39:38	0.602455	2.67984	6026.69	FALSE	159
2022-09-12	13:39:38	0.620064	2.75817	6019.29	FALSE	159
2022-09-12	13:39:38	0.608206	2.70542	6029.4	FALSE	159
2022-09-12	13:39:39	0.693702	3.08573	6022.38	FALSE	159
2022-09-12	13:39:39	0.568308	2.52795	6031.93	FALSE	159
2022-09-12	13:39:39	0.545153	2.42495	6024.8	FALSE	159
2022-09-12	13:39:39	0.429071	1.90859	6033.83	FALSE	159
2022-09-12	13:39:40	1.08179	4.81202	6029.61	FALSE	159
2022-09-12	13:39:40	1.43396	6.37854	6040.21	FALSE	159
2022-09-12	13:39:40	2.98266	13.2675	6042.88	FALSE	159
2022-09-12	13:39:41	0.097163	0.4322	6040.65	FALSE	159
2022-09-12	13:39:41	0.0969595	0.431295	6043.31	FALSE	159
2022-09-12	13:39:41	-0.114236	-0.508145	6040.65	FALSE	159
2022-09-12	13:39:41	1.37355	6.10983	6049.42	FALSE	159
2022-09-12	13:39:42	2.00632	8.92451	6049.57	FALSE	159
2022-09-12	13:39:42	5.99996	26.689	6076.11	1	160
2022-09-12	13:39:42	8.09533	36.0096	6085.58	1	161
2022-09-12	13:39:42	2.348	10.4444	6086.56	FALSE	161
2022-09-12	13:39:43	2.98851	13.2935	6098.87	FALSE	161
2022-09-12	13:39:43	1.15533	5.13914	6091.69	FALSE	161
2022-09-12	13:39:43	0.64612	2.87407	6101.75	FALSE	161
2022-09-12	13:39:43	1.37803	6.12975	6097.82	FALSE	161
2022-09-12	13:39:44	1.13579	5.05222	6106.8	FALSE	161
2022-09-12	13:39:44	2.76413	12.2954	6110.12	FALSE	161
2022-09-12	13:39:44	4.76408	21.1916	6127.99	1	162
2022-09-12	13:39:45	7.48561	33.2975	6143.42	1	163
2022-09-12	13:39:45	6.38225	28.3895	6156.38	1	164
2022-09-12	13:39:45	6.55858	29.1739	6172.59	1	165
2022-09-12	13:39:45	16.4536	73.1889	6229.57	1	166
2022-09-12	13:39:46	18.1621	80.7887	6253.38	1	167
2022-09-12	13:39:46	21.0298	93.5448	6323.11	1	168
2022-09-12	13:39:46	4.20703	18.7137	6272.09	1	169
2022-09-12	13:39:46	0.939198	4.17774	6327.29	FALSE	169
2022-09-12	13:39:47	0.689987	3.0692	6275.16	FALSE	169
2022-09-12	13:39:47	0.636755	2.83241	6330.12	FALSE	169
2022-09-12	13:39:47	0.42159	1.87532	6277.04	FALSE	169
2022-09-12	13:39:47	0.534924	2.37945	6332.5	FALSE	169
2022-09-12	13:39:48	0.686272	3.05268	6280.09	FALSE	169
2022-09-12	13:39:48	0.289275	1.28675	6333.79	FALSE	169
2022-09-12	13:39:48	0.319199	1.41986	6281.51	FALSE	169
2022-09-12	13:39:49	0.240522	1.06989	6334.86	FALSE	169
2022-09-12	13:39:49	0.0115143	0.0512179	6281.56	FALSE	169
2022-09-12	13:39:49	0.834211	3.71074	6338.57	FALSE	169
2022-09-12	13:39:49	1.84103	8.18927	6289.75	FALSE	169
2022-09-12	13:39:50	1.14205	5.08007	6343.65	FALSE	169
2022-09-12	13:39:50	0.78902	3.50972	6293.26	FALSE	169
2022-09-12	13:39:50	0.965	4.29251	6347.94	FALSE	169
2022-09-12	13:39:50	1.20566	5.36302	6298.62	FALSE	169
2022-09-12	13:39:51	2.22062	9.87776	6357.82	FALSE	169
2022-09-12	13:39:51	1.19625	5.32116	6303.95	FALSE	169
2022-09-12	13:39:51	1.31126	5.83275	6363.65	FALSE	169
2022-09-12	13:39:51	1.25818	5.59664	6309.54	FALSE	169
2022-09-12	13:39:52	1.49177	6.63569	6370.29	FALSE	169
2022-09-12	13:39:52	1.59894	7.1124	6316.65	FALSE	169
2022-09-12	13:39:52	1.89156	8.41404	6378.7	FALSE	169
2022-09-12	13:39:53	1.9452	8.65264	6325.31	FALSE	169
2022-09-12	13:39:53	2.59696	11.5518	6390.26	FALSE	169
2022-09-12	13:39:53	1.79411	7.98056	6333.29	FALSE	169
2022-09-12	13:39:53	1.65467	7.3603	6397.62	FALSE	169
2022-09-12	13:39:54	1.20286	5.35056	6338.64	FALSE	169
2022-09-12	13:39:54	1.27263	5.66091	6403.28	FALSE	169
2022-09-12	13:39:54	1.3505	6.00729	6344.65	FALSE	169
2022-09-12	13:39:54	1.94673	8.65944	6411.94	FALSE	169
2022-09-12	13:39:55	1.64673	7.32498	6351.97	FALSE	169
2022-09-12	13:39:55	2.58195	11.485	6423.42	FALSE	169
2022-09-12	13:39:55	1.98439	8.82696	6360.8	FALSE	169
2022-09-12	13:39:55	1.73874	7.73426	6431.16	FALSE	169
2022-09-12	13:39:56	1.43492	6.38281	6367.18	FALSE	169
2022-09-12	13:39:56	1.08164	4.81135	6435.97	FALSE	169
2022-09-12	13:39:56	1.0308	4.5852	6371.77	FALSE	169
2022-09-12	13:39:57	0.861488	3.83207	6439.8	FALSE	169
2022-09-12	13:39:57	1.14785	5.10587	6376.87	FALSE	169
2022-09-12	13:39:57	0.822404	3.65822	6443.46	FALSE	169
2022-09-12	13:39:57	0.762252	3.39065	6380.26	FALSE	169
2022-09-12	13:39:58	0.676908	3.01102	6446.47	FALSE	169
2022-09-12	13:39:58	0.794618	3.53462	6383.8	FALSE	169
2022-09-12	13:39:58	0.825051	3.66999	6450.14	FALSE	169
2022-09-12	13:39:58	0.791158	3.51923	6387.32	FALSE	169
2022-09-12	13:39:59	0.685305	3.04837	6453.19	FALSE	169
2022-09-12	13:39:59	0.626527	2.78692	6390.1	FALSE	169
2022-09-12	13:39:59	0.647544	2.88041	6456.07	FALSE	169
2022-09-12	13:39:59	0.687952	3.06015	6393.16	FALSE	169
2022-09-12	13:40:00	0.721743	3.21046	6459.28	FALSE	169
2022-09-12	13:40:00	0.760929	3.38476	6396.55	FALSE	169
2022-09-12	13:40:00	0.697366	3.10202	6462.38	FALSE	169
2022-09-12	13:40:01	0.640522	2.84917	6399.4	FALSE	169
2022-09-12	13:40:01	0.578486	2.57322	6464.95	FALSE	169
2022-09-12	13:40:01	0.564898	2.51278	6401.91	FALSE	169
2022-09-12	13:40:01	0.673295	2.99495	6467.95	FALSE	169
2022-09-12	13:40:02	0.72785	3.23762	6405.15	FALSE	169
2022-09-12	13:40:02	0.854008	3.7988	6471.75	FALSE	169
2022-09-12	13:40:02	0.818435	3.64056	6408.79	FALSE	169
2022-09-12	13:40:02	0.82098	3.65188	6475.4	FALSE	169
2022-09-12	13:40:03	0.723626	3.21883	6412.01	FALSE	169
2022-09-12	13:40:03	0.683168	3.03887	6478.44	FALSE	169
2022-09-12	13:40:03	0.684237	3.04362	6415.05	FALSE	169
2022-09-12	13:40:03	0.716654	3.18782	6481.63	FALSE	169
2022-09-12	13:40:04	0.742557	3.30304	6418.35	FALSE	169
2022-09-12	13:40:04	0.754364	3.35556	6484.98	FALSE	169
2022-09-12	13:40:04	0.764745	3.40174	6421.75	FALSE	169
2022-09-12	13:40:05	0.829224	3.68855	6488.67	FALSE	169
2022-09-12	13:40:05	0.831463	3.69851	6425.45	FALSE	169
2022-09-12	13:40:05	0.820674	3.65052	6492.32	FALSE	169
2022-09-12	13:40:05	0.746323	3.31979	6428.77	FALSE	169
2022-09-12	13:40:06	0.725153	3.22563	6495.55	FALSE	169
2022-09-12	13:40:06	0.69472	3.09025	6431.86	FALSE	169
2022-09-12	13:40:06	0.563371	2.50599	6498.05	FALSE	169
2022-09-12	13:40:06	0.605458	2.6932	6434.56	FALSE	169
2022-09-12	13:40:07	0.578181	2.57186	6500.62	FALSE	169
2022-09-12	13:40:07	0.616501	2.74232	6437.3	FALSE	169
2022-09-12	13:40:07	0.862354	3.83592	6504.46	FALSE	169
2022-09-12	13:40:07	1.46052	6.49669	6443.8	FALSE	169
2022-09-12	13:40:08	2.25757	10.0421	6514.5	FALSE	169
2022-09-12	13:40:08	2.58668	11.5061	6455.3	FALSE	169
2022-09-12	13:40:08	3.90179	17.3559	6531.86	1	170
2022-09-12	13:40:09	2.52973	11.2527	6466.55	FALSE	170
2022-09-12	13:40:09	2.25721	10.0405	6541.9	FALSE	170
2022-09-12	13:40:09	1.06449	4.73506	6471.29	FALSE	170
2022-09-12	13:40:09	0.481183	2.1404	6544.04	FALSE	170
2022-09-12	13:40:10	0.370191	1.64668	6472.94	FALSE	170
2022-09-12	13:40:10	0.437825	1.94753	6545.99	FALSE	170
2022-09-12	13:40:10	0.441489	1.96383	6474.9	FALSE	170
2022-09-12	13:40:10	0.281031	1.25008	6547.24	FALSE	170
2022-09-12	13:40:11	0.445713	1.98262	6476.88	FALSE	170
2022-09-12	13:40:11	3.5591	15.8316	6563.07	1	171
2022-09-12	13:40:11	8.95329	39.826	6516.71	1	172
2022-09-12	13:40:11	3.10612	13.8166	6576.88	1	173
2022-09-12	13:40:12	3.39742	15.1124	6531.82	1	174
2022-09-12	13:40:12	1.60256	7.12851	6584.01	FALSE	174
2022-09-12	13:40:12	2.90144	12.9062	6544.73	FALSE	174
2022-09-12	13:40:13	5.77996	25.7104	6609.72	1	175
2022-09-12	13:40:13	7.31248	32.5274	6577.25	1	176
2022-09-12	13:40:13	12.2023	54.2783	6664	1	177
2022-09-12	13:40:13	5.85426	26.0409	6603.3	1	178
2022-09-12	13:40:14	6.7995	30.2455	6694.25	1	179
2022-09-12	13:40:14	0.61986	2.75726	6606.05	FALSE	179
2022-09-12	13:40:14	0.226323	1.00673	6695.25	FALSE	179
2022-09-12	13:40:14	0.464644	2.06683	6608.12	FALSE	179
2022-09-12	13:40:15	0.250445	1.11403	6696.37	FALSE	179
2022-09-12	13:40:15	0.319504	1.42122	6609.54	FALSE	179
2022-09-12	13:40:15	0.238435	1.06061	6697.43	FALSE	179
2022-09-12	13:40:15	0.211311	0.939954	6610.48	FALSE	179
2022-09-12	13:40:16	0.262812	1.16904	6698.6	FALSE	179
2022-09-12	13:40:16	0.491158	2.18477	6612.67	FALSE	179
2022-09-12	13:40:16	0.743524	3.30734	6701.9	FALSE	179
2022-09-12	13:40:17	0.356298	1.58488	6614.25	FALSE	179
2022-09-12	13:40:17	0.171209	0.761572	6702.67	FALSE	179
2022-09-12	13:40:17	0.46383	2.06321	6616.31	FALSE	179
2022-09-12	13:40:17	0.105713	0.470233	6703.14	FALSE	179
2022-09-12	13:40:18	0.239657	1.06604	6617.38	FALSE	179
2022-09-12	13:40:18	0.129784	0.577305	6703.71	FALSE	179
2022-09-12	13:40:18	0.450852	2.00548	6619.39	FALSE	179
2022-09-12	13:40:18	0.170547	0.758627	6704.47	FALSE	179
2022-09-12	13:40:19	0.389733	1.73361	6621.12	FALSE	179
2022-09-12	13:40:19	0.388664	1.72886	6706.2	FALSE	179
2022-09-12	13:40:19	0.337926	1.50316	6622.62	FALSE	179
2022-09-12	13:40:20	0.313448	1.39428	6707.6	FALSE	179
2022-09-12	13:40:20	0.436705	1.94255	6624.56	FALSE	179
2022-09-12	13:40:20	0.403423	1.79451	6709.39	FALSE	179
2022-09-12	13:40:20	0.542557	2.4134	6626.98	FALSE	179
2022-09-12	13:40:21	0.718028	3.19393	6712.58	FALSE	179
2022-09-12	13:40:21	0.795585	3.53892	6630.52	FALSE	179
2022-09-12	13:40:21	0.569784	2.53451	6715.12	FALSE	179
2022-09-12	13:40:21	0.386425	1.7189	6632.24	FALSE	179
2022-09-12	13:40:22	0.581998	2.58884	6717.71	FALSE	179
2022-09-12	13:40:22	0.466679	2.07588	6634.31	FALSE	179
2022-09-12	13:40:22	0.399657	1.77775	6719.49	FALSE	179
2022-09-12	13:40:22	0.508715	2.26287	6636.57	FALSE	179
2022-09-12	13:40:23	0.423728	1.88483	6721.37	FALSE	179
2022-09-12	13:40:23	0.481285	2.14085	6638.72	FALSE	179
2022-09-12	13:40:23	0.569834	2.53474	6723.9	FALSE	179
2022-09-12	13:40:24	0.578384	2.57277	6641.29	FALSE	179
2022-09-12	13:40:24	0.578384	2.57277	6726.48	FALSE	179
2022-09-12	13:40:24	0.628206	2.79439	6644.08	FALSE	179
2022-09-12	13:40:24	0.681895	3.03321	6729.51	FALSE	179
2022-09-12	13:40:25	0.703321	3.12851	6647.21	FALSE	179
2022-09-12	13:40:25	0.764338	3.39993	6732.91	FALSE	179
2022-09-12	13:40:25	0.766577	3.40989	6650.62	FALSE	179
2022-09-12	13:40:25	0.83813	3.72817	6736.64	FALSE	179
2022-09-12	13:40:26	0.535127	2.38035	6653	FALSE	179
2022-09-12	13:40:26	0.708868	3.15319	6739.79	FALSE	179
2022-09-12	13:40:26	0.693448	3.0846	6656.09	FALSE	179
2022-09-12	13:40:26	0.724186	3.22132	6743.01	FALSE	179
2022-09-12	13:40:27	0.584745	2.60106	6658.69	FALSE	179
2022-09-12	13:40:27	0.493804	2.19654	6745.21	FALSE	179
2022-09-12	13:40:27	0.330598	1.47057	6660.16	FALSE	179
2022-09-12	13:40:28	0.333397	1.48302	6746.69	FALSE	179
2022-09-12	13:40:28	0.346069	1.53938	6661.7	FALSE	179
2022-09-12	13:40:28	0.348155	1.54866	6748.24	FALSE	179
2022-09-12	13:40:28	0.376298	1.67385	6663.37	FALSE	179
2022-09-12	13:40:29	0.381998	1.6992	6749.94	FALSE	179
2022-09-12	13:40:29	0.389326	1.7318	6665.1	FALSE	179
2022-09-12	13:40:29	0.397163	1.76666	6751.71	FALSE	179
2022-09-12	13:40:29	0.428868	1.90769	6667.01	FALSE	179
2022-09-12	13:40:30	0.533651	2.37379	6754.08	FALSE	179
2022-09-12	13:40:30	0.653499	2.90689	6669.92	FALSE	179
2022-09-12	13:40:30	1.52968	6.80432	6760.89	FALSE	179
2022-09-12	13:40:30	1.1423	5.08118	6675	FALSE	179
2022-09-12	13:40:31	0.744593	3.3121	6764.2	FALSE	179
2022-09-12	13:40:31	0.340675	1.51539	6676.51	FALSE	179
2022-09-12	13:40:31	0.400878	1.78319	6765.98	FALSE	179
2022-09-12	13:40:32	0.413601	1.83978	6678.35	FALSE	179
2022-09-12	13:40:32	0.272277	1.21114	6767.19	FALSE	179
2022-09-12	13:40:32	0.39813	1.77096	6680.12	FALSE	179
2022-09-12	13:40:32	0.780929	3.47373	6770.67	FALSE	179
2022-09-12	13:40:33	0.594008	2.64227	6682.77	FALSE	179
2022-09-12	13:40:33	0.538486	2.39529	6773.06	FALSE	179
2022-09-12	13:40:33	0.625611	2.78284	6685.55	FALSE	179
2022-09-12	13:40:33	0.810598	3.6057	6776.67	FALSE	179
2022-09-12	13:40:34	0.253346	1.12693	6686.68	FALSE	179
2022-09-12	13:40:34	0.525509	2.33757	6779	FALSE	179
2022-09-12	13:40:34	0.19986	0.889017	6687.57	FALSE	179
2022-09-12	13:40:34	0.646374	2.8752	6781.88	FALSE	179
2022-09-12	13:40:35	0.232837	1.03571	6688.6	FALSE	179
2022-09-12	13:40:35	0.487596	2.16892	6784.05	FALSE	179
2022-09-12	13:40:35	0.281641	1.2528	6689.85	FALSE	179
2022-09-12	13:40:36	1.96357	8.73435	6792.78	FALSE	179
2022-09-12	13:40:36	2.16515	9.63102	6699.48	FALSE	179
2022-09-12	13:40:36	2.04123	9.0798	6801.86	FALSE	179
2022-09-12	13:40:36	0.600827	2.6726	6702.16	FALSE	179
2022-09-12	13:40:37	0.558893	2.48607	6804.35	FALSE	179
2022-09-12	13:40:37	0.299097	1.33044	6703.49	FALSE	179
2022-09-12	13:40:37	0.0461198	0.20515	6804.55	FALSE	179
2022-09-12	13:40:37	0.414262	1.84272	6705.33	FALSE	179
2022-09-12	13:40:38	0.061845	0.275099	6804.83	FALSE	179
2022-09-12	13:40:38	0.172481	0.76723	6706.1	FALSE	179
2022-09-12	13:40:38	0.328969	1.46332	6806.29	FALSE	179
2022-09-12	13:40:38	0.699046	3.1095	6709.21	FALSE	179
2022-09-12	13:40:39	0.498944	2.2194	6808.51	FALSE	179
2022-09-12	13:40:39	0.648766	2.88584	6712.09	FALSE	179
2022-09-12	13:40:39	1.32251	5.88279	6814.39	FALSE	179
2022-09-12	13:40:40	1.09029	4.84983	6716.94	FALSE	179
2022-09-12	13:40:40	0.535484	2.38194	6816.78	FALSE	179
2022-09-12	13:40:40	0.132227	0.588172	6717.53	FALSE	179
2022-09-12	13:40:40	0.254364	1.13146	6817.91	FALSE	179
2022-09-12	13:40:41	0.0588425	0.261743	6717.79	FALSE	179
2022-09-12	13:40:41	0.240725	1.07079	6818.98	FALSE	179
2022-09-12	13:40:41	0.267748	1.191	6718.98	FALSE	179
2022-09-12	13:40:41	0.245713	1.09298	6820.07	FALSE	179
2022-09-12	13:40:42	0.253499	1.12761	6720.11	FALSE	179
2022-09-12	13:40:42	0.196349	0.8734	6820.94	FALSE	179
2022-09-12	13:40:42	0.301285	1.34018	6721.45	FALSE	179
2022-09-12	13:40:42	0.326934	1.45427	6822.4	FALSE	179
2022-09-12	13:40:43	0.209835	0.933388	6722.39	FALSE	179
2022-09-12	13:40:43	0.0983844	0.437633	6822.84	FALSE	179
2022-09-12	13:40:43	0.103168	0.458912	6722.84	FALSE	179
2022-09-12	13:40:44	0.106069	0.471816	6823.31	FALSE	179
2022-09-12	13:40:44	0.275535	1.22563	6724.07	FALSE	179
2022-09-12	13:40:44	0.270649	1.2039	6824.51	FALSE	179
2022-09-12	13:40:44	0.530903	2.36156	6726.43	FALSE	179
2022-09-12	13:40:45	0.357672	1.591	6826.1	FALSE	179
2022-09-12	13:40:45	0.442812	1.96972	6728.4	FALSE	179
2022-09-12	13:40:45	0.854466	3.80084	6829.9	FALSE	179
2022-09-12	13:40:45	0.577214	2.56756	6730.97	FALSE	179
2022-09-12	13:40:46	0.487036	2.16643	6832.07	FALSE	179
2022-09-12	13:40:46	0.631717	2.81	6733.78	FALSE	179
2022-09-12	13:40:46	0.574059	2.55353	6834.62	FALSE	179
2022-09-12	13:40:46	0.458639	2.04012	6735.82	FALSE	179
2022-09-12	13:40:47	0.680623	3.02755	6837.65	FALSE	179
2022-09-12	13:40:47	0.632532	2.81363	6738.63	FALSE	179
2022-09-12	13:40:47	0.963677	4.28663	6841.94	FALSE	179
2022-09-12	13:40:48	0.675636	3.00536	6741.64	FALSE	179
2022-09-12	13:40:48	1.15187	5.12375	6847.06	FALSE	179
2022-09-12	13:40:48	0.945407	4.20536	6745.84	FALSE	179
2022-09-12	13:40:48	2.20001	9.78608	6856.85	FALSE	179
2022-09-12	13:40:49	2.47513	11.0099	6756.85	FALSE	179
2022-09-12	13:40:49	1.63518	7.27361	6864.12	FALSE	179
2022-09-12	13:40:49	0.179351	0.797789	6757.65	FALSE	179
2022-09-12	13:40:49	0.440369	1.95885	6866.08	FALSE	179
2022-09-12	13:40:50	0.518995	2.30859	6759.96	FALSE	179
2022-09-12	13:40:50	0.389631	1.73316	6867.81	FALSE	179
2022-09-12	13:40:50	0.282659	1.25732	6761.22	FALSE	179
2022-09-12	13:40:50	0.261285	1.16225	6868.98	FALSE	179
2022-09-12	13:40:51	0.25416	1.13055	6762.35	FALSE	179
2022-09-12	13:40:51	0.230089	1.02348	6870	FALSE	179
2022-09-12	13:40:51	0.989428	4.40117	6766.75	FALSE	179
2022-09-12	13:40:52	0.954262	4.24475	6874.24	FALSE	179
2022-09-12	13:40:52	3.95329	17.585	6784.33	1	180
2022-09-12	13:40:52	4.29859	19.121	6893.37	1	181
2022-09-12	13:40:52	4.10261	18.2492	6802.58	1	182
2022-09-12	13:40:53	3.02271	13.4456	6906.81	1	183
2022-09-12	13:40:53	2.90688	12.9304	6815.51	FALSE	183
2022-09-12	13:40:53	5.50713	24.4968	6931.31	1	184
2022-09-12	13:40:53	5.76902	25.6618	6841.17	1	185
2022-09-12	13:40:54	11.4501	50.9323	6982.24	1	186
2022-09-12	13:40:54	7.92433	35.249	6876.42	1	187
2022-09-12	13:40:54	4.53222	20.1602	7002.4	1	188
2022-09-12	13:40:54	5.64159	25.0949	6901.52	1	189
2022-09-12	13:40:55	3.59406	15.9871	7018.39	1	190
2022-09-12	13:40:55	4.09752	18.2266	6919.75	1	191
2022-09-12	13:40:55	5.1764	23.0257	7041.41	1	192
2022-09-12	13:40:56	3.17879	14.1399	6933.89	1	193
2022-09-12	13:40:56	6.29731	28.0117	7069.42	1	194
2022-09-12	13:40:56	3.69319	16.428	6950.31	1	195
2022-09-12	13:40:56	2.56627	11.4153	7080.84	FALSE	195
2022-09-12	13:40:57	2.66403	11.8501	6962.16	FALSE	195
2022-09-12	13:40:57	1.91609	8.52315	7089.36	FALSE	195
2022-09-12	13:40:57	6.51039	28.9595	6991.12	1	196
2022-09-12	13:40:57	12.9675	57.682	7147.05	1	197
2022-09-12	13:40:58	9.27324	41.2492	7032.37	1	198
2022-09-12	13:40:58	8.33131	37.0593	7184.1	1	199
2022-09-12	13:40:58	3.56307	15.8492	7048.22	1	200
2022-09-12	13:40:58	4.72907	21.0358	7205.14	1	201
2022-09-12	13:40:59	5.68688	25.2964	7073.52	1	202
2022-09-12	13:40:59	4.07904	18.1444	7223.28	1	203
2022-09-12	13:40:59	6.95624	30.9427	7104.46	1	204
2022-09-12	13:41:00	3.22841	14.3606	7237.65	1	205
2022-09-12	13:41:00	3.10144	13.7958	7118.26	1	206
2022-09-12	13:41:00	4.97202	22.1165	7259.76	1	207
2022-09-12	13:41:01	5.17461	23.0177	7141.27	1	208
2022-09-12	13:41:01	7.41584	32.9871	7292.75	1	209
2022-09-12	13:41:01	7.82042	34.7868	7176.06	1	210
2022-09-12	13:41:01	4.78765	21.2964	7314.05	1	211
2022-09-12	13:41:01	4.50581	20.0427	7196.1	1	212
2022-09-12	13:41:02	3.30739	14.7119	7328.76	1	213
2022-09-12	13:41:02	3.32022	14.769	7210.87	1	214
2022-09-12	13:41:02	3.04739	13.5554	7342.31	1	215
2022-09-12	13:41:02	4.13309	18.3848	7229.26	1	216
2022-09-12	13:41:03	5.83777	25.9676	7368.28	1	217
2022-09-12	13:41:03	4.20306	18.6961	7247.95	1	218
2022-09-12	13:41:03	3.36022	14.9469	7383.23	1	219
2022-09-12	13:41:04	7.24993	32.2491	7280.2	1	220
2022-09-12	13:41:04	4.00266	17.8046	7401.03	1	221
2022-09-12	13:41:04	5.41879	24.1039	7304.31	1	222
2022-09-12	13:41:04	9.85533	43.8385	7444.87	1	223
2022-09-12	13:41:05	4.13864	18.4095	7322.72	1	224
2022-09-12	13:41:05	8.76276	38.9785	7483.85	1	225
2022-09-12	13:41:05	8.38576	37.3015	7360.02	1	226
2022-09-12	13:41:05	4.88693	21.738	7505.59	1	227
2022-09-12	13:41:06	8.47915	37.717	7397.73	1	228
2022-09-12	13:41:06	8.75456	38.942	7544.53	1	229
2022-09-12	13:41:06	6.9709	31.008	7428.74	1	230
2022-09-12	13:41:06	10.2684	45.6759	7590.21	1	231
2022-09-12	13:41:07	6.8564	30.4986	7459.24	1	232
2022-09-12	13:41:07	5.17085	23.001	7613.21	1	233
2022-09-12	13:41:07	0.705611	3.1387	7462.38	FALSE	233
2022-09-12	13:41:08	0.72729	3.23513	7616.44	FALSE	233
2022-09-12	13:41:08	0.727697	3.23694	7465.62	FALSE	233
2022-09-12	13:41:08	0.722914	3.21567	7619.66	FALSE	233
2022-09-12	13:41:08	0.729835	3.24645	7468.86	FALSE	233
2022-09-12	13:41:09	1.06195	4.72377	7624.38	FALSE	233
2022-09-12	13:41:09	1.38134	6.14448	7475.01	FALSE	233
2022-09-12	13:41:09	1.49441	6.64743	7631.03	FALSE	233
2022-09-12	13:41:09	2.78419	12.3846	7487.39	FALSE	233
2022-09-12	13:41:10	5.80581	25.8254	7656.85	1	234
2022-09-12	13:41:10	1.86363	8.2898	7495.68	FALSE	234
2022-09-12	13:41:10	2.56999	11.4318	7668.29	FALSE	234
2022-09-12	13:41:10	1.36632	6.07766	7501.76	FALSE	234
2022-09-12	13:41:11	2.36556	10.5225	7678.81	FALSE	234
2022-09-12	13:41:11	3.90953	17.3904	7519.15	1	235
2022-09-12	13:41:11	3.74882	16.6755	7695.48	1	236
2022-09-12	13:41:12	5.0309	22.3784	7541.53	1	237
2022-09-12	13:41:12	3.30637	14.7074	7710.19	1	238
2022-09-12	13:41:12	4.12836	18.3638	7559.89	1	239
2022-09-12	13:41:12	3.89981	17.3471	7727.54	1	240
2022-09-12	13:41:13	1.88184	8.3708	7568.26	FALSE	240
2022-09-12	13:41:13	2.36235	10.5082	7738.05	FALSE	240
2022-09-12	13:41:13	1.01248	4.50371	7572.77	FALSE	240
2022-09-12	13:41:13	0.752583	3.34764	7741.39	FALSE	240
2022-09-12	13:41:14	0.172379	0.766776	7573.53	FALSE	240
2022-09-12	13:41:14	0.294517	1.31007	7742.7	FALSE	240
2022-09-12	13:41:14	0.147087	0.654272	7574.19	FALSE	240
2022-09-12	13:41:15	0.260165	1.15727	7743.86	FALSE	240
2022-09-12	13:41:15	0.196552	0.874303	7575.06	FALSE	240
2022-09-12	13:41:15	0.365255	1.62473	7745.49	FALSE	240
2022-09-12	13:41:15	0.291412	1.29626	7576.36	FALSE	240
2022-09-12	13:41:16	0.412634	1.83548	7747.32	FALSE	240
2022-09-12	13:41:16	0.220318	0.980019	7577.34	FALSE	240
2022-09-12	13:41:16	0.40098	1.78364	7749.1	FALSE	240
2022-09-12	13:41:16	0.219097	0.974587	7578.31	FALSE	240
2022-09-12	13:41:17	0.129835	0.577532	7749.68	FALSE	240
2022-09-12	13:41:17	0.201285	0.895356	7579.21	FALSE	240
2022-09-12	13:41:17	0.270038	1.20118	7750.88	FALSE	240
2022-09-12	13:41:17	0.25528	1.13554	7580.34	FALSE	240
2022-09-12	13:41:18	0.210038	0.934291	7751.82	FALSE	240
2022-09-12	13:41:18	0.362608	1.61295	7581.96	FALSE	240
2022-09-12	13:41:18	0.277519	1.23446	7753.05	FALSE	240
2022-09-12	13:41:19	0.410751	1.8271	7583.78	FALSE	240
2022-09-12	13:41:19	0.382303	1.70056	7754.75	FALSE	240
2022-09-12	13:41:19	0.277265	1.23333	7585.02	FALSE	240
2022-09-12	13:41:19	0.238893	1.06264	7755.82	FALSE	240
2022-09-12	13:41:20	0.237672	1.05721	7586.07	FALSE	240
2022-09-12	13:41:20	0.227646	1.01261	7756.83	FALSE	240
2022-09-12	13:41:20	0.235942	1.04952	7587.12	FALSE	240
2022-09-12	13:41:20	0.242099	1.0769	7757.9	FALSE	240
2022-09-12	13:41:21	0.241896	1.076	7588.2	FALSE	240
2022-09-12	13:41:21	0.254975	1.13418	7759.04	FALSE	240
2022-09-12	13:41:21	0.260013	1.15659	7589.36	FALSE	240
2022-09-12	13:41:21	0.274517	1.22111	7760.26	FALSE	240
2022-09-12	13:41:22	0.272176	1.21069	7590.57	FALSE	240
2022-09-12	13:41:22	0.267138	1.18828	7761.45	FALSE	240
2022-09-12	13:41:22	0.275076	1.22359	7591.79	FALSE	240
2022-09-12	13:41:23	0.270598	1.20367	7762.65	FALSE	240
2022-09-12	13:41:23	0.27126	1.20662	7593	FALSE	240
2022-09-12	13:41:23	0.270344	1.20254	7763.85	FALSE	240
2022-09-12	13:41:23	0.272226	1.21092	7594.21	FALSE	240
2022-09-12	13:41:24	0.284084	1.26366	7765.12	FALSE	240
2022-09-12	13:41:24	0.28383	1.26253	7595.47	FALSE	240
2022-09-12	13:41:24	0.283372	1.2605	7766.38	FALSE	240
2022-09-12	13:41:24	0.279758	1.24442	7596.72	FALSE	240
2022-09-12	13:41:25	0.27986	1.24487	7767.62	FALSE	240
2022-09-12	13:41:25	0.281387	1.25167	7597.97	FALSE	240
2022-09-12	13:41:25	0.279046	1.24125	7768.87	FALSE	240
2022-09-12	13:41:25	0.280674	1.24849	7599.22	FALSE	240
2022-09-12	13:41:26	0.270445	1.20299	7770.07	FALSE	240
2022-09-12	13:41:26	0.282405	1.25619	7600.47	FALSE	240
2022-09-12	13:41:26	0.278639	1.23944	7771.31	FALSE	240
2022-09-12	13:41:27	0.275941	1.22744	7601.7	FALSE	240
2022-09-12	13:41:27	0.287952	1.28087	7772.59	FALSE	240
2022-09-12	13:41:27	0.286018	1.27227	7602.97	FALSE	240
2022-09-12	13:41:27	0.283473	1.26094	7773.85	FALSE	240
2022-09-12	13:41:28	0.296654	1.31958	7604.29	FALSE	240
2022-09-12	13:41:28	0.288155	1.28177	7775.13	FALSE	240
2022-09-12	13:41:28	0.292735	1.30214	7605.59	FALSE	240
2022-09-12	13:41:28	0.292837	1.3026	7776.43	FALSE	240
2022-09-12	13:41:29	0.298893	1.32954	7606.92	FALSE	240
2022-09-12	13:41:29	0.298842	1.32931	7777.76	FALSE	240
2022-09-12	13:41:29	0.301998	1.34335	7608.27	FALSE	240
2022-09-12	13:41:29	0.2993	1.33135	7779.09	FALSE	240
2022-09-12	13:41:30	0.304746	1.35557	7609.62	FALSE	240
2022-09-12	13:41:30	0.300318	1.33587	7780.43	FALSE	240
2022-09-12	13:41:30	0.30383	1.3515	7610.97	FALSE	240
2022-09-12	13:41:31	0.307545	1.36802	7781.8	FALSE	240
2022-09-12	13:41:31	0.30673	1.3644	7612.34	FALSE	240
2022-09-12	13:41:31	0.307799	1.36915	7783.17	FALSE	240
2022-09-12	13:41:31	0.309326	1.37594	7613.71	FALSE	240
2022-09-12	13:41:32	0.308715	1.37323	7784.54	FALSE	240
2022-09-12	13:41:32	0.312277	1.38907	7615.1	FALSE	240
2022-09-12	13:41:32	0.309937	1.37866	7785.92	FALSE	240
2022-09-12	13:41:32	0.314567	1.39926	7616.5	FALSE	240
2022-09-12	13:41:33	0.317265	1.41126	7787.33	FALSE	240
2022-09-12	13:41:33	0.315585	1.40379	7617.91	FALSE	240
2022-09-12	13:41:33	0.313194	1.39315	7788.72	FALSE	240
2022-09-12	13:41:33	0.314466	1.39881	7619.3	FALSE	240
2022-09-12	13:41:34	0.314313	1.39813	7790.12	FALSE	240
2022-09-12	13:41:34	0.320674	1.42642	7620.73	FALSE	240
2022-09-12	13:41:34	0.314059	1.397	7791.52	FALSE	240
2022-09-12	13:41:35	0.309886	1.37843	7622.11	FALSE	240
2022-09-12	13:41:35	0.298028	1.32569	7792.84	FALSE	240
2022-09-12	13:41:35	0.304542	1.35466	7623.46	FALSE	240
2022-09-12	13:41:35	0.317876	1.41398	7794.26	FALSE	240
2022-09-12	13:41:36	0.376552	1.67498	7625.14	FALSE	240
2022-09-12	13:41:36	1.07146	4.76607	7799.02	FALSE	240
2022-09-12	13:41:36	0.96902	4.31039	7629.45	FALSE	240
2022-09-12	13:41:36	1.25172	5.5679	7804.59	FALSE	240
2022-09-12	13:41:37	0.835331	3.71572	7633.16	FALSE	240
2022-09-12	13:41:37	0.480623	2.13791	7806.73	FALSE	240
2022-09-12	13:41:37	0.528206	2.34957	7635.51	FALSE	240
2022-09-12	13:41:37	0.185611	0.825635	7807.56	FALSE	240
2022-09-12	13:41:38	0.321387	1.42959	7636.94	FALSE	240
2022-09-12	13:41:38	0.72042	3.20457	7810.76	FALSE	240
2022-09-12	13:41:38	0.724338	3.222	7640.17	FALSE	240
2022-09-12	13:41:39	0.603677	2.68528	7813.45	FALSE	240
2022-09-12	13:41:39	0.250751	1.11539	7641.28	FALSE	240
2022-09-12	13:41:39	0.490802	2.18319	7815.63	FALSE	240
2022-09-12	13:41:39	0.220573	0.981153	7642.26	FALSE	240
2022-09-12	13:41:40	0.144186	0.641368	7816.27	FALSE	240
2022-09-12	13:41:40	-0.0124043	-0.0551768	7642.26	FALSE	240
2022-09-12	13:41:40	0.0866796	0.385568	7816.66	FALSE	240
2022-09-12	13:41:40	0.254415	1.13169	7643.39	FALSE	240
2022-09-12	13:41:41	0.229224	1.01963	7817.68	FALSE	240
2022-09-12	13:41:41	0.189326	0.84216	7644.24	FALSE	240
2022-09-12	13:41:41	0.119555	0.531805	7818.21	FALSE	240
2022-09-12	13:41:42	0.0915142	0.407073	7644.64	FALSE	240
2022-09-12	13:41:42	0.200573	0.892189	7819.1	FALSE	240
2022-09-12	13:41:42	0.0767051	0.3412	7644.98	FALSE	240
2022-09-12	13:41:42	-0.0879259	-0.391112	7819.1	FALSE	240
2022-09-12	13:41:43	-0.368231	-1.63797	7644.98	FALSE	240
2022-09-12	13:41:43	-0.407926	-1.81454	7819.1	FALSE	240
2022-09-12	13:41:43	-0.152557	-0.678604	7644.98	FALSE	240
2022-09-12	13:41:43	0.0107	0.0475957	7819.15	FALSE	240
2022-09-12	13:41:44	0.0872394	0.388058	7645.37	FALSE	240
2022-09-12	13:41:44	0.0432699	0.192473	7819.34	FALSE	240
2022-09-12	13:41:44	0.0415396	0.184776	7645.56	FALSE	240
2022-09-12	13:41:44	0.0395041	0.175722	7819.52	FALSE	240
2022-09-12	13:41:45	0.055789	0.248161	7645.81	FALSE	240
2022-09-12	13:41:45	0.0811834	0.36112	7819.88	FALSE	240
2022-09-12	13:41:45	0.167341	0.744366	7646.55	FALSE	240
2022-09-12	13:41:45	0.259758	1.15546	7821.03	FALSE	240
2022-09-12	13:41:46	0.34098	1.51675	7648.07	FALSE	240
2022-09-12	13:41:46	0.56042	2.49286	7823.52	FALSE	240
2022-09-12	13:41:46	0.826069	3.67452	7651.74	FALSE	240
2022-09-12	13:41:47	0.831107	3.69693	7827.22	FALSE	240
2022-09-12	13:41:47	1.25772	5.59459	7657.34	FALSE	240
2022-09-12	13:41:47	1.38352	6.15417	7833.38	FALSE	240
2022-09-12	13:41:47	1.0679	4.75023	7662.09	FALSE	240
2022-09-12	13:41:48	0.974415	4.33439	7837.71	FALSE	240
2022-09-12	13:41:48	1.09996	4.89284	7666.98	FALSE	240
2022-09-12	13:41:48	1.31345	5.84249	7843.55	FALSE	240
2022-09-12	13:41:48	1.32917	5.91241	7672.89	FALSE	240
2022-09-12	13:41:49	1.31156	5.83408	7849.39	FALSE	240
2022-09-12	13:41:49	1.1706	5.20706	7678.1	FALSE	240
2022-09-12	13:41:49	1.05212	4.68004	7854.07	FALSE	240
2022-09-12	13:41:49	0.936806	4.1671	7682.27	FALSE	240
2022-09-12	13:41:50	0.870903	3.87395	7857.94	FALSE	240
2022-09-12	13:41:50	0.812786	3.61543	7685.88	FALSE	240
2022-09-12	13:41:50	0.81813	3.63921	7861.58	FALSE	240
2022-09-12	13:41:51	0.958282	4.26263	7690.14	FALSE	240
2022-09-12	13:41:51	0.989886	4.40321	7865.98	FALSE	240
2022-09-12	13:41:51	0.913142	4.06184	7694.21	FALSE	240
2022-09-12	13:41:51	0.928817	4.13156	7870.11	FALSE	240
2022-09-12	13:41:52	1.00871	4.48694	7698.69	FALSE	240
2022-09-12	13:41:52	1.09553	4.87314	7874.99	FALSE	240
2022-09-12	13:41:52	1.1362	5.05404	7703.75	FALSE	240
2022-09-12	13:41:52	1.07472	4.78057	7879.77	FALSE	240
2022-09-12	13:41:53	1.26368	5.6211	7709.37	FALSE	240
2022-09-12	13:41:53	0.519809	2.31221	7882.08	FALSE	240
2022-09-12	13:41:53	0.350445	1.55885	7710.93	FALSE	240
2022-09-12	13:41:53	0.357723	1.59122	7883.67	FALSE	240
2022-09-12	13:41:54	0.207443	0.922748	7711.85	FALSE	240
2022-09-12	13:41:54	0.250445	1.11403	7884.79	FALSE	240
2022-09-12	13:41:54	0.108359	0.482003	7712.33	FALSE	240
2022-09-12	13:41:55	-0.30131	-1.34029	7884.79	FALSE	240
2022-09-12	13:41:55	-0.173524	-0.771869	7712.33	FALSE	240
2022-09-12	13:41:55	-0.540292	-2.40333	7884.79	FALSE	240
2022-09-12	13:41:55	-0.555763	-2.47214	7712.33	FALSE	240
2022-09-12	13:41:56	0.69416	3.08776	7887.87	FALSE	240
2022-09-12	13:41:56	2.84999	12.6773	7725.01	FALSE	240
2022-09-12	13:41:56	5.06698	22.5389	7910.41	1	241
2022-09-12	13:41:56	4.44892	19.7897	7744.8	1	242
2022-09-12	13:41:57	2.4906	11.0787	7921.49	FALSE	242
2022-09-12	13:41:57	1.63477	7.27178	7752.07	FALSE	242
2022-09-12	13:41:57	2.44022	10.8546	7932.35	FALSE	242
2022-09-12	13:41:57	1.92765	8.57457	7760.64	FALSE	242
2022-09-12	13:41:58	1.70744	7.59503	7939.94	FALSE	242
2022-09-12	13:41:58	1.03548	4.60602	7765.25	FALSE	242
2022-09-12	13:41:58	1.03391	4.59904	7944.54	FALSE	242
2022-09-12	13:41:59	1.31467	5.84792	7771.1	FALSE	242
2022-09-12	13:41:59	2.762	12.2859	7956.83	FALSE	242
2022-09-12	13:41:59	3.15457	14.0322	7785.13	1	243
2022-09-12	13:41:59	3.04378	13.5393	7970.37	1	244
2022-09-12	13:42:00	4.56174	20.2915	7805.42	1	245
2022-09-12	13:42:00	4.80754	21.3849	7991.75	1	246
2022-09-12	13:42:00	6.74596	30.0074	7835.43	1	247
2022-09-12	13:42:00	8.56698	38.1076	8029.86	1	248
2022-09-12	13:42:01	10.9934	48.9008	7884.33	1	249
2022-09-12	13:42:01	15.1712	67.4845	8097.34	1	250
2022-09-12	13:42:01	1.83324	8.15462	7892.48	FALSE	250
2022-09-12	13:42:02	2.17609	9.67968	8107.02	FALSE	250
2022-09-12	13:42:02	3.04663	13.552	7906.04	1	251
2022-09-12	13:42:02	1.03508	4.60424	8111.63	FALSE	251
2022-09-12	13:42:02	1.49777	6.66238	7912.7	FALSE	251
2022-09-12	13:42:03	2.19767	9.77568	8121.4	FALSE	251
2022-09-12	13:42:03	2.82541	12.568	7925.27	FALSE	251
2022-09-12	13:42:03	3.90256	17.3594	8138.76	1	252
2022-09-12	13:42:03	2.38902	10.6268	7935.89	FALSE	252
2022-09-12	13:42:04	5.1108	22.7339	8161.5	1	253
2022-09-12	13:42:04	0.530241	2.35862	7938.25	FALSE	253
2022-09-12	13:42:04	1.19304	5.30688	8166.8	FALSE	253
2022-09-12	13:42:04	0.34383	1.52942	7939.78	FALSE	253
2022-09-12	13:42:05	0.129529	0.576171	8167.38	FALSE	253
2022-09-12	13:42:05	0.191311	0.85099	7940.63	FALSE	253
2022-09-12	13:42:05	0.306476	1.36327	8168.74	FALSE	253
2022-09-12	13:42:06	0.636705	2.83219	7943.47	FALSE	253
2022-09-12	13:42:06	0.566323	2.51912	8171.26	FALSE	253
2022-09-12	13:42:06	0.118792	0.528411	7943.99	FALSE	253
2022-09-12	13:42:06	0.135178	0.601299	8171.86	FALSE	253
2022-09-12	13:42:07	0.500013	2.22416	7946.22	FALSE	253
2022-09-12	13:42:07	0.209224	0.93067	8172.79	FALSE	253
2022-09-12	13:42:07	0.149479	0.664912	7946.88	FALSE	253
2022-09-12	13:42:07	0.209071	0.92999	8173.72	FALSE	253
2022-09-12	13:42:08	0.248308	1.10452	7947.99	FALSE	253
2022-09-12	13:42:08	0.209784	0.933161	8174.66	FALSE	253
2022-09-12	13:42:08	0.204949	0.911654	7948.9	FALSE	253
2022-09-12	13:42:08	0.177061	0.787603	8175.44	FALSE	253
2022-09-12	13:42:09	0.181539	0.807522	7949.71	FALSE	253
2022-09-12	13:42:09	0.174517	0.776287	8176.22	FALSE	253
2022-09-12	13:42:09	0.152786	0.679623	7950.39	FALSE	253
2022-09-12	13:42:10	0.151311	0.673062	8176.89	FALSE	253
2022-09-12	13:42:10	0.339351	1.5095	7951.9	FALSE	253
2022-09-12	13:42:10	0.305407	1.35851	8178.25	FALSE	253
2022-09-12	13:42:10	0.284746	1.26661	7953.16	FALSE	253
2022-09-12	13:42:11	0.412125	1.83321	8180.08	FALSE	253
2022-09-12	13:42:11	0.444491	1.97718	7955.14	FALSE	253
2022-09-12	13:42:11	0.471311	2.09649	8182.18	FALSE	253
2022-09-12	13:42:11	0.458079	2.03763	7957.18	FALSE	253
2022-09-12	13:42:12	0.441794	1.96519	8184.15	FALSE	253
2022-09-12	13:42:12	0.456756	2.03174	7959.21	FALSE	253
2022-09-12	13:42:12	0.445814	1.98307	8186.13	FALSE	253
2022-09-12	13:42:12	0.462405	2.05687	7961.27	FALSE	253
2022-09-12	13:42:13	0.451819	2.00978	8188.14	FALSE	253
2022-09-12	13:42:13	0.466781	2.07634	7963.34	FALSE	253
2022-09-12	13:42:13	0.437875	1.94776	8190.09	FALSE	253
2022-09-12	13:42:14	0.446781	1.98737	7965.33	FALSE	253
2022-09-12	13:42:14	0.353193	1.57107	8191.66	FALSE	253
2022-09-12	13:42:14	0.543321	2.4168	7967.75	FALSE	253
2022-09-12	13:42:14	0.2593	1.15342	8192.81	FALSE	253
2022-09-12	13:42:15	0.297112	1.32161	7969.07	FALSE	253
2022-09-12	13:42:15	0.318537	1.41692	8194.23	FALSE	253
2022-09-12	13:42:15	0.278283	1.23786	7970.31	FALSE	253
2022-09-12	13:42:15	0.312176	1.38862	8195.62	FALSE	253
2022-09-12	13:42:16	0.265051	1.179	7971.48	FALSE	253
2022-09-12	13:42:16	0.3593	1.59824	8197.21	FALSE	253
2022-09-12	13:42:16	0.27869	1.23967	7972.72	FALSE	253
2022-09-12	13:42:16	0.169886	0.755687	8197.97	FALSE	253
2022-09-12	13:42:17	0.196807	0.875437	7973.6	FALSE	253
2022-09-12	13:42:17	0.317672	1.41307	8199.38	FALSE	253
2022-09-12	13:42:17	0.115484	0.513696	7974.11	FALSE	253
2022-09-12	13:42:18	-0.357849	-1.59178	8199.38	FALSE	253
2022-09-12	13:42:18	-0.387875	-1.72535	7974.11	FALSE	253
2022-09-12	13:42:18	-0.176577	-0.78545	8199.38	FALSE	253
2022-09-12	13:42:18	-0.00181909	-0.00809168	7974.11	FALSE	253
2022-09-12	13:42:19	-0.141921	-0.631293	8199.38	FALSE	253
2022-09-12	13:42:19	-0.124313	-0.552969	7974.11	FALSE	253
2022-09-12	13:42:19	0.30098	1.33882	8200.72	FALSE	253
2022-09-12	13:42:19	0.432379	1.92331	7976.04	FALSE	253
2022-09-12	13:42:20	0.441387	1.96338	8202.69	FALSE	253
2022-09-12	13:42:20	0.796247	3.54187	7979.58	FALSE	253
2022-09-12	13:42:20	0.829326	3.68901	8206.37	FALSE	253
2022-09-12	13:42:20	0.667748	2.97028	7982.55	FALSE	253
2022-09-12	13:42:21	0.475229	2.11391	8208.49	FALSE	253
2022-09-12	13:42:21	0.520064	2.31335	7984.86	FALSE	253
2022-09-12	13:42:21	0.762252	3.39065	8211.88	FALSE	253
2022-09-12	13:42:22	1.6992	7.55838	7992.42	FALSE	253
2022-09-12	13:42:22	2.11599	9.41235	8221.29	FALSE	253
2022-09-12	13:42:22	1.47396	6.55647	7998.98	FALSE	253
2022-09-12	13:42:22	1.23579	5.49704	8226.79	FALSE	253
2022-09-12	13:42:23	1.0281	4.57319	8003.55	FALSE	253
2022-09-12	13:42:23	1.09757	4.88221	8231.67	FALSE	253
2022-09-12	13:42:23	1.2108	5.38588	8008.94	FALSE	253
2022-09-12	13:42:23	1.31935	5.86873	8237.54	FALSE	253
2022-09-12	13:42:24	0.559351	2.48811	8011.42	FALSE	253
2022-09-12	13:42:24	0.569021	2.53112	8240.07	FALSE	253
2022-09-12	13:42:24	0.511616	2.27577	8013.7	FALSE	253
2022-09-12	13:42:24	0.235687	1.04838	8241.12	FALSE	253
2022-09-12	13:42:25	0.245407	1.09162	8014.79	FALSE	253
2022-09-12	13:42:25	0.180624	0.803452	8241.92	FALSE	253
2022-09-12	13:42:25	0.199758	0.888564	8015.68	FALSE	253
2022-09-12	13:42:26	0.221234	0.984093	8242.91	FALSE	253
2022-09-12	13:42:26	0.288766	1.28449	8016.96	FALSE	253
2022-09-12	13:42:26	0.340725	1.51561	8244.42	FALSE	253
2022-09-12	13:42:26	0.251412	1.11833	8018.08	FALSE	253
2022-09-12	13:42:27	0.286832	1.27589	8245.7	FALSE	253
2022-09-12	13:42:27	0.224491	0.998581	8019.08	FALSE	253
2022-09-12	13:42:27	1.05813	4.70677	8250.41	FALSE	253
2022-09-12	13:42:27	1.53665	6.83533	8025.92	FALSE	253
2022-09-12	13:42:28	0.756349	3.36439	8253.77	FALSE	253
2022-09-12	13:42:28	0.27757	1.23469	8027.15	FALSE	253
2022-09-12	13:42:28	0.184644	0.821333	8254.59	FALSE	253
2022-09-12	13:42:28	0.934924	4.15873	8031.31	FALSE	253
2022-09-12	13:42:29	0.76902	3.42075	8258.01	FALSE	253
2022-09-12	13:42:29	1.38541	6.16258	8037.47	FALSE	253
2022-09-12	13:42:29	0.369326	1.64284	8259.65	FALSE	253
2022-09-12	13:42:30	0.261998	1.16542	8038.64	FALSE	253
2022-09-12	13:42:30	0.168155	0.747987	8260.4	FALSE	253
2022-09-12	13:42:30	0.051158	0.227561	8038.87	FALSE	253
2022-09-12	13:42:30	0.0789952	0.351386	8260.75	FALSE	253
2022-09-12	13:42:31	0.089275	0.397113	8039.26	FALSE	253
2022-09-12	13:42:31	0.0256109	0.113922	8260.87	FALSE	253
2022-09-12	13:42:31	0.475127	2.11346	8041.38	FALSE	253
2022-09-12	13:42:31	0.364898	1.62314	8262.49	FALSE	253
2022-09-12	13:42:32	0.507951	2.25947	8043.64	FALSE	253
2022-09-12	13:42:32	0.528919	2.35274	8264.84	FALSE	253
2022-09-12	13:42:32	0.643626	2.86298	8046.5	FALSE	253
2022-09-12	13:42:32	0.605916	2.69524	8267.54	FALSE	253
2022-09-12	13:42:33	0.536552	2.38669	8048.89	FALSE	253
2022-09-12	13:42:33	0.517723	2.30294	8269.84	FALSE	253
2022-09-12	13:42:33	0.521081	2.31787	8051.2	FALSE	253
2022-09-12	13:42:34	0.489173	2.17594	8272.02	FALSE	253
2022-09-12	13:42:34	0.480623	2.13791	8053.34	FALSE	253
2022-09-12	13:42:34	0.489987	2.17956	8274.2	FALSE	253
2022-09-12	13:42:34	0.473041	2.10418	8055.45	FALSE	253
2022-09-12	13:42:35	0.475178	2.11369	8276.31	FALSE	253
2022-09-12	13:42:35	0.47243	2.10146	8057.55	FALSE	253
2022-09-12	13:42:35	0.489529	2.17752	8278.49	FALSE	253
2022-09-12	13:42:35	0.479657	2.13361	8059.68	FALSE	253
2022-09-12	13:42:36	0.609478	2.71108	8281.2	FALSE	253
2022-09-12	13:42:36	2.10296	9.35439	8069.04	FALSE	253
2022-09-12	13:42:36	3.39721	15.1115	8296.31	1	254
2022-09-12	13:42:36	0.94154	4.18816	8073.22	FALSE	254
2022-09-12	13:42:37	0.536756	2.3876	8298.7	FALSE	254
2022-09-12	13:42:37	0.462099	2.05551	8075.28	FALSE	254
2022-09-12	13:42:37	0.319046	1.41918	8300.12	FALSE	254
2022-09-12	13:42:38	0.238333	1.06015	8076.34	FALSE	254
2022-09-12	13:42:38	0.270089	1.20141	8301.32	FALSE	254
2022-09-12	13:42:38	0.333092	1.48166	8077.82	FALSE	254
2022-09-12	13:42:38	0.457926	2.03695	8303.36	FALSE	254
2022-09-12	13:42:39	0.398537	1.77277	8079.59	FALSE	254
2022-09-12	13:42:39	0.409478	1.82144	8305.18	FALSE	254
2022-09-12	13:42:39	0.475585	2.1155	8081.71	FALSE	254
2022-09-12	13:42:39	0.815076	3.62562	8308.8	FALSE	254

## Sheet: Harley_martin_2022912133721 (E)
Date	Time	Lbs	Total Force x time	Total Time Steps Force >3		**GoPro Fitting: 13:26
2022-09-12	13:37:39	3.71558	3.71558	1	1			Total Force x time	3684.75
2022-09-12	13:37:39	2.31945	6.03503	FALSE	1			Total Time Steps Force >3	254
2022-09-12	13:37:39	4.08963	10.1247	1	2
2022-09-12	13:37:39	4.12291	14.2476	1	3
2022-09-12	13:37:40	3.68581	17.9334	1	4
2022-09-12	13:37:40	1.5678	19.5012	FALSE	4
2022-09-12	13:37:40	2.84983	22.351	FALSE	4	First 30 seconds or so pulling at dog
2022-09-12	13:37:40	7.96454	30.3155	1	5
2022-09-12	13:37:41	11.6519	41.9674	1	6
2022-09-12	13:37:41	4.92821	46.8957	1	7
2022-09-12	13:37:41	1.56729	48.4629	FALSE	7
2022-09-12	13:37:41	0.399097	48.862	FALSE	7
2022-09-12	13:37:42	0.426883	49.2889	FALSE	7
2022-09-12	13:37:42	-0.0761193	49.2889	FALSE	7
2022-09-12	13:37:42	0.26612	49.555	FALSE	7
2022-09-12	13:37:43	0.050242	49.6053	FALSE	7
2022-09-12	13:37:43	0.202557	49.8078	FALSE	7
2022-09-12	13:37:43	1.06098	50.8688	FALSE	7
2022-09-12	13:37:43	2.93752	53.8063	FALSE	7
2022-09-12	13:37:44	2.21492	56.0213	FALSE	7
2022-09-12	13:37:44	5.12932	61.1506	1	8
2022-09-12	13:37:44	24.2486	85.3992	1	9
2022-09-12	13:37:44	17.1678	102.567	1	10
2022-09-12	13:37:45	31.2888	133.856	1	11
2022-09-12	13:37:45	29.9366	163.792	1	12
2022-09-12	13:37:45	12.2524	176.045	1	13
2022-09-12	13:37:45	32.911	208.956	1	14
2022-09-12	13:37:46	20.7018	229.658	1	15
2022-09-12	13:37:46	27.3353	256.993	1	16
2022-09-12	13:37:46	31.2367	288.23	1	17
2022-09-12	13:37:47	49.3907	337.62	1	18
2022-09-12	13:37:47	33.6152	371.235	1	19
2022-09-12	13:37:47	36.85	408.085	1	20
2022-09-12	13:37:47	31.2476	439.333	1	21
2022-09-12	13:37:48	29.7907	469.124	1	22
2022-09-12	13:37:48	36.6076	505.731	1	23
2022-09-12	13:37:48	44.5354	550.267	1	24
2022-09-12	13:37:48	28.6403	578.907	1	25
2022-09-12	13:37:49	22.4141	601.321	1	26
2022-09-12	13:37:49	63.7686	665.09	1	27
2022-09-12	13:37:49	15.1224	680.212	1	28
2022-09-12	13:37:49	2.40586	682.618	FALSE	28
2022-09-12	13:37:50	1.24052	683.859	FALSE	28
2022-09-12	13:37:50	0.414618	684.273	FALSE	28
2022-09-12	13:37:50	0.237977	684.511	FALSE	28
2022-09-12	13:37:51	0.40444	684.916	FALSE	28
2022-09-12	13:37:51	0.366272	685.282	FALSE	28
2022-09-12	13:37:51	0.0330919	685.315	FALSE	28
2022-09-12	13:37:51	-0.078562	685.315	FALSE	28
2022-09-12	13:37:52	0.13355	685.449	FALSE	28
2022-09-12	13:37:52	0.0717687	685.52	FALSE	28
2022-09-12	13:37:52	0.0337534	685.554	FALSE	28
2022-09-12	13:37:52	-0.0579005	685.554	FALSE	28
2022-09-12	13:37:53	0.263473	685.818	FALSE	28
2022-09-12	13:37:53	0.608308	686.426	FALSE	28
2022-09-12	13:37:53	0.380267	686.806	FALSE	28
2022-09-12	13:37:53	0.923168	687.729	FALSE	28
2022-09-12	13:37:54	0.305	688.034	FALSE	28
2022-09-12	13:37:54	0.188155	688.222	FALSE	28
2022-09-12	13:37:54	0.129835	688.352	FALSE	28
2022-09-12	13:37:55	0.0893259	688.442	FALSE	28
2022-09-12	13:37:55	0.108257	688.55	FALSE	28
2022-09-12	13:37:55	0.14154	688.691	FALSE	28
2022-09-12	13:37:55	0.23925	688.931	FALSE	28
2022-09-12	13:37:56	18.7833	707.714	1	29
2022-09-12	13:37:56	57.5304	765.244	1	30
2022-09-12	13:37:56	35.4379	800.682	1	31
2022-09-12	13:37:56	23.9536	824.636	1	32
2022-09-12	13:37:57	37.8792	862.515	1	33
2022-09-12	13:37:57	22.0404	884.555	1	34
2022-09-12	13:37:57	32.9214	917.477	1	35
2022-09-12	13:37:57	25.3849	942.862	1	36
2022-09-12	13:37:58	26.9276	969.789	1	37
2022-09-12	13:37:58	18.6358	988.425	1	38
2022-09-12	13:37:58	50.0297	1038.45	1	39
2022-09-12	13:37:59	27.8926	1066.35	1	40
2022-09-12	13:37:59	33.03	1099.38	1	41
2022-09-12	13:37:59	23.101	1122.48	1	42
2022-09-12	13:37:59	40.0838	1162.56	1	43
2022-09-12	13:38:00	48.2024	1210.76	1	44
2022-09-12	13:38:00	24.9666	1235.73	1	45
2022-09-12	13:38:00	32.2554	1267.99	1	46
2022-09-12	13:38:00	32.1682	1300.15	1	47
2022-09-12	13:38:01	40.8461	1341	1	48
2022-09-12	13:38:01	41.4269	1382.43	1	49
2022-09-12	13:38:01	22.5535	1404.98	1	50
2022-09-12	13:38:01	31.3908	1436.37	1	51
2022-09-12	13:38:02	25.214	1461.59	1	52
2022-09-12	13:38:02	5.53008	1467.12	1	53
2022-09-12	13:38:02	0.67243	1467.79	FALSE	53
2022-09-12	13:38:03	0.0798602	1467.87	FALSE	53
2022-09-12	13:38:03	0.305763	1468.17	FALSE	53
2022-09-12	13:38:03	0.229682	1468.4	FALSE	53
2022-09-12	13:38:03	0.386425	1468.79	FALSE	53
2022-09-12	13:38:04	0.061845	1468.85	FALSE	53
2022-09-12	13:38:04	0.364898	1469.22	FALSE	53
2022-09-12	13:38:04	0.418639	1469.64	FALSE	53
2022-09-12	13:38:04	0.514008	1470.15	FALSE	53
2022-09-12	13:38:05	0.342506	1470.49	FALSE	53
2022-09-12	13:38:05	0.257163	1470.75	FALSE	53
2022-09-12	13:38:05	0.36444	1471.11	FALSE	53
2022-09-12	13:38:05	0.370547	1471.48	FALSE	53
2022-09-12	13:38:06	2.51808	1474	FALSE	53
2022-09-12	13:38:06	2.07457	1476.08	FALSE	53
2022-09-12	13:38:06	0.259402	1476.34	FALSE	53
2022-09-12	13:38:07	0.240064	1476.58	FALSE	53
2022-09-12	13:38:07	0.186171	1476.76	FALSE	53
2022-09-12	13:38:07	0.137621	1476.9	FALSE	53
2022-09-12	13:38:07	0.304695	1477.21	FALSE	53
2022-09-12	13:38:08	0.279809	1477.48	FALSE	53
2022-09-12	13:38:08	2.08154	1479.57	FALSE	53
2022-09-12	13:38:08	12.8815	1492.45	1	54
2022-09-12	13:38:08	19.5728	1512.02	1	55
2022-09-12	13:38:09	23.051	1535.07	1	56
2022-09-12	13:38:09	8.79472	1543.87	1	57
2022-09-12	13:38:09	15.2666	1559.13	1	58
2022-09-12	13:38:09	13.4535	1572.59	1	59
2022-09-12	13:38:10	17.8979	1590.48	1	60
2022-09-12	13:38:10	18.2562	1608.74	1	61
2022-09-12	13:38:10	9.3651	1618.11	1	62
2022-09-12	13:38:11	9.07823	1627.18	1	63
2022-09-12	13:38:11	20.006	1647.19	1	64
2022-09-12	13:38:11	6.82668	1654.02	1	65
2022-09-12	13:38:11	5.5996	1659.62	1	66
2022-09-12	13:38:12	3.79248	1663.41	1	67
2022-09-12	13:38:12	1.77497	1665.18	FALSE	67
2022-09-12	13:38:12	2.21106	1667.39	FALSE	67
2022-09-12	13:38:12	2.98841	1670.38	FALSE	67
2022-09-12	13:38:13	14.7371	1685.12	1	68
2022-09-12	13:38:13	18.2655	1703.39	1	69
2022-09-12	13:38:13	3.78729	1707.17	1	70
2022-09-12	13:38:14	3.62714	1710.8	1	71
2022-09-12	13:38:14	11.3644	1722.16	1	72
2022-09-12	13:38:14	4.30057	1726.47	1	73
2022-09-12	13:38:14	5.09243	1731.56	1	74
2022-09-12	13:38:15	4.42805	1735.99	1	75
2022-09-12	13:38:15	3.47121	1739.46	1	76
2022-09-12	13:38:15	0.947646	1740.4	FALSE	76
2022-09-12	13:38:15	1.95935	1742.36	FALSE	76
2022-09-12	13:38:16	5.47919	1747.84	1	77
2022-09-12	13:38:16	5.28856	1753.13	1	78
2022-09-12	13:38:16	6.85609	1759.99	1	79
2022-09-12	13:38:16	6.6164	1766.6	1	80
2022-09-12	13:38:17	10.1586	1776.76	1	81
2022-09-12	13:38:17	6.10953	1782.87	1	82
2022-09-12	13:38:17	5.1283	1788	1	83
2022-09-12	13:38:18	2.04821	1790.05	FALSE	83
2022-09-12	13:38:18	0.264644	1790.31	FALSE	83
2022-09-12	13:38:18	0.339046	1790.65	FALSE	83
2022-09-12	13:38:18	-0.0401906	1790.65	FALSE	83
2022-09-12	13:38:19	0.0928883	1790.75	FALSE	83
2022-09-12	13:38:19	0.0714124	1790.82	FALSE	83
2022-09-12	13:38:19	0.068817	1790.89	FALSE	83
2022-09-12	13:38:19	0.0658654	1790.95	FALSE	83
2022-09-12	13:38:20	0.741438	1791.69	FALSE	83
2022-09-12	13:38:20	1.03538	1792.73	FALSE	83
2022-09-12	13:38:20	2.93034	1795.66	FALSE	83
2022-09-12	13:38:20	1.60001	1797.26	FALSE	83
2022-09-12	13:38:21	2.16189	1799.42	FALSE	83
2022-09-12	13:38:21	1.51752	1800.94	FALSE	83
2022-09-12	13:38:21	2.34474	1803.28	FALSE	83
2022-09-12	13:38:22	1.84882	1805.13	FALSE	83
2022-09-12	13:38:22	3.67945	1808.81	1	84
2022-09-12	13:38:22	6.7908	1815.6	1	85
2022-09-12	13:38:22	5.88566	1821.49	1	86
2022-09-12	13:38:23	3.47833	1824.97	1	87
2022-09-12	13:38:23	1.16169	1826.13	FALSE	87
2022-09-12	13:38:23	0.702201	1826.83	FALSE	87
2022-09-12	13:38:23	0.842506	1827.67	FALSE	87
2022-09-12	13:38:24	3.0137	1830.69	1	88
2022-09-12	13:38:24	2.105	1832.79	FALSE	88
2022-09-12	13:38:24	1.3279	1834.12	FALSE	88
2022-09-12	13:38:25	1.98805	1836.11	FALSE	88
2022-09-12	13:38:25	8.02174	1844.13	1	89
2022-09-12	13:38:25	8.62474	1852.75	1	90
2022-09-12	13:38:25	3.84118	1856.59	1	91
2022-09-12	13:38:26	2.82566	1859.42	FALSE	91
2022-09-12	13:38:26	1.23615	1860.66	FALSE	91
2022-09-12	13:38:26	3.34357	1864	1	92
2022-09-12	13:38:26	10.8394	1874.84	1	93
2022-09-12	13:38:27	18.0029	1892.84	1	94
2022-09-12	13:38:27	16.4448	1909.29	1	95
2022-09-12	13:38:27	14.696	1923.98	1	96
2022-09-12	13:38:27	24.2215	1948.2	1	97
2022-09-12	13:38:28	4.38943	1952.59	1	98
2022-09-12	13:38:28	18.7476	1971.34	1	99
2022-09-12	13:38:28	6.44291	1977.78	1	100
2022-09-12	13:38:28	9.1538	1986.94	1	101
2022-09-12	13:38:29	23.6065	2010.54	1	102
2022-09-12	13:38:29	13.6484	2024.19	1	103
2022-09-12	13:38:29	14.3571	2038.55	1	104
2022-09-12	13:38:30	10.8075	2049.36	1	105
2022-09-12	13:38:30	10.7993	2060.16	1	106
2022-09-12	13:38:30	29.0558	2089.21	1	107
2022-09-12	13:38:30	19.7359	2108.95	1	108
2022-09-12	13:38:31	19.3776	2128.33	1	109
2022-09-12	13:38:31	6.46143	2134.79	1	110
2022-09-12	13:38:31	12.4999	2147.29	1	111
2022-09-12	13:38:31	21.7877	2169.08	1	112
2022-09-12	13:38:32	7.50866	2176.58	1	113
2022-09-12	13:38:32	12.1978	2188.78	1	114
2022-09-12	13:38:32	14.4805	2203.26	1	115
2022-09-12	13:38:32	17.8271	2221.09	1	116
2022-09-12	13:38:33	24.1089	2245.2	1	117
2022-09-12	13:38:33	13.669	2258.87	1	118
2022-09-12	13:38:33	15.4821	2274.35	1	119
2022-09-12	13:38:34	4.6166	2278.97	1	120
2022-09-12	13:38:34	14.9178	2293.88	1	121
2022-09-12	13:38:34	17.1451	2311.03	1	122
2022-09-12	13:38:34	3.47625	2314.51	1	123
2022-09-12	13:38:35	19.1189	2333.62	1	124
2022-09-12	13:38:35	7.35009	2340.97	1	125
2022-09-12	13:38:35	6.26846	2347.24	1	126
2022-09-12	13:38:35	1.2476	2348.49	FALSE	126
2022-09-12	13:38:36	2.6507	2351.14	FALSE	126
2022-09-12	13:38:36	7.14377	2358.28	1	127
2022-09-12	13:38:36	4.07238	2362.36	1	128
2022-09-12	13:38:36	9.82622	2372.18	1	129
2022-09-12	13:38:37	19.6477	2391.83	1	130
2022-09-12	13:38:37	17.2621	2409.09	1	131
2022-09-12	13:38:37	8.19355	2417.29	1	132
2022-09-12	13:38:38	4.58851	2421.88	1	133
2022-09-12	13:38:38	3.27441	2425.15	1	134
2022-09-12	13:38:38	0.247494	2425.4	FALSE	134
2022-09-12	13:38:38	0.74673	2426.14	FALSE	134
2022-09-12	13:38:39	1.08978	2427.23	FALSE	134
2022-09-12	13:38:39	1.64551	2428.88	FALSE	134
2022-09-12	13:38:39	0.662506	2429.54	FALSE	134
2022-09-12	13:38:39	0.093957	2429.64	FALSE	134
2022-09-12	13:38:40	-0.199427	2429.64	FALSE	134
2022-09-12	13:38:40	0.144237	2429.78	FALSE	134
2022-09-12	13:38:40	0.437825	2430.22	FALSE	134
2022-09-12	13:38:40	3.54831	2433.77	1	135
2022-09-12	13:38:41	0.521234	2434.29	FALSE	135
2022-09-12	13:38:41	1.11996	2435.41	FALSE	135
2022-09-12	13:38:41	1.07126	2436.48	FALSE	135
2022-09-12	13:38:42	0.721641	2437.2	FALSE	135
2022-09-12	13:38:42	0.396451	2437.6	FALSE	135
2022-09-12	13:38:42	0.312634	2437.91	FALSE	135
2022-09-12	13:38:42	0.459758	2438.37	FALSE	135
2022-09-12	13:38:43	0.306679	2438.68	FALSE	135
2022-09-12	13:38:43	0.43411	2439.11	FALSE	135
2022-09-12	13:38:43	0.346272	2439.46	FALSE	135
2022-09-12	13:38:43	0.546476	2440	FALSE	135
2022-09-12	13:38:44	0.185662	2440.19	FALSE	135
2022-09-12	13:38:44	-0.0914883	2440.19	FALSE	135
2022-09-12	13:38:44	0.0465778	2440.23	FALSE	135
2022-09-12	13:38:44	0.0130918	2440.25	FALSE	135
2022-09-12	13:38:45	0.249886	2440.5	FALSE	135
2022-09-12	13:38:45	-0.129962	2440.5	FALSE	135
2022-09-12	13:38:45	0.211616	2440.71	FALSE	135
2022-09-12	13:38:46	0.320471	2441.03	FALSE	135
2022-09-12	13:38:46	0.390802	2441.42	FALSE	135
2022-09-12	13:38:46	0.108308	2441.53	FALSE	135
2022-09-12	13:38:46	0.352532	2441.88	FALSE	135
2022-09-12	13:38:47	0.550242	2442.43	FALSE	135
2022-09-12	13:38:47	0.916043	2443.35	FALSE	135
2022-09-12	13:38:47	0.622405	2443.97	FALSE	135
2022-09-12	13:38:47	0.373346	2444.34	FALSE	135
2022-09-12	13:38:48	1.12276	2445.47	FALSE	135
2022-09-12	13:38:48	0.132481	2445.6	FALSE	135
2022-09-12	13:38:48	0.250191	2445.85	FALSE	135
2022-09-12	13:38:48	0.0627101	2445.91	FALSE	135
2022-09-12	13:38:49	0.00754479	2445.92	FALSE	135
2022-09-12	13:38:49	0.0473412	2445.97	FALSE	135
2022-09-12	13:38:49	1.42775	2447.39	FALSE	135
2022-09-12	13:38:50	1.9767	2449.37	FALSE	135
2022-09-12	13:38:50	3.86368	2453.23	1	136
2022-09-12	13:38:50	1.33757	2454.57	FALSE	136
2022-09-12	13:38:50	1.02556	2455.6	FALSE	136
2022-09-12	13:38:51	0.220573	2455.82	FALSE	136
2022-09-12	13:38:51	0.36154	2456.18	FALSE	136
2022-09-12	13:38:51	0.386323	2456.57	FALSE	136
2022-09-12	13:38:51	1.20505	2457.77	FALSE	136
2022-09-12	13:38:52	0.898079	2458.67	FALSE	136
2022-09-12	13:38:52	0.872786	2459.54	FALSE	136
2022-09-12	13:38:52	0.687443	2460.23	FALSE	136
2022-09-12	13:38:52	1.42154	2461.65	FALSE	136
2022-09-12	13:38:53	2.6336	2464.28	FALSE	136
2022-09-12	13:38:53	2.79879	2467.08	FALSE	136
2022-09-12	13:38:53	1.64261	2468.73	FALSE	136
2022-09-12	13:38:54	1.53513	2470.26	FALSE	136
2022-09-12	13:38:54	1.74154	2472	FALSE	136
2022-09-12	13:38:54	0.562608	2472.57	FALSE	136
2022-09-12	13:38:54	0.364949	2472.93	FALSE	136
2022-09-12	13:38:55	0.580623	2473.51	FALSE	136
2022-09-12	13:38:55	0.607341	2474.12	FALSE	136
2022-09-12	13:38:55	0.712634	2474.83	FALSE	136
2022-09-12	13:38:55	1.05742	2475.89	FALSE	136
2022-09-12	13:38:56	0.772277	2476.66	FALSE	136
2022-09-12	13:38:56	0.543117	2477.2	FALSE	136
2022-09-12	13:38:56	0.623779	2477.83	FALSE	136
2022-09-12	13:38:56	0.40098	2478.23	FALSE	136
2022-09-12	13:38:57	0.514008	2478.74	FALSE	136
2022-09-12	13:38:57	0.472583	2479.21	FALSE	136
2022-09-12	13:38:57	0.432176	2479.65	FALSE	136
2022-09-12	13:38:58	0.434313	2480.08	FALSE	136
2022-09-12	13:38:58	0.453601	2480.53	FALSE	136
2022-09-12	13:38:58	0.439758	2480.97	FALSE	136
2022-09-12	13:38:58	0.421183	2481.4	FALSE	136
2022-09-12	13:38:59	0.431616	2481.83	FALSE	136
2022-09-12	13:38:59	0.42958	2482.26	FALSE	136
2022-09-12	13:38:59	0.460369	2482.72	FALSE	136
2022-09-12	13:38:59	0.456501	2483.17	FALSE	136
2022-09-12	13:39:00	0.434262	2483.61	FALSE	136
2022-09-12	13:39:00	0.459453	2484.07	FALSE	136
2022-09-12	13:39:00	0.445611	2484.51	FALSE	136
2022-09-12	13:39:00	0.454822	2484.97	FALSE	136
2022-09-12	13:39:01	0.458232	2485.43	FALSE	136
2022-09-12	13:39:01	0.431005	2485.86	FALSE	136
2022-09-12	13:39:01	0.468461	2486.33	FALSE	136
2022-09-12	13:39:02	0.488817	2486.81	FALSE	136
2022-09-12	13:39:02	0.475433	2487.29	FALSE	136
2022-09-12	13:39:02	0.459758	2487.75	FALSE	136
2022-09-12	13:39:02	0.401997	2488.15	FALSE	136
2022-09-12	13:39:03	0.442252	2488.59	FALSE	136
2022-09-12	13:39:03	0.471412	2489.07	FALSE	136
2022-09-12	13:39:03	0.431158	2489.5	FALSE	136
2022-09-12	13:39:03	0.427799	2489.92	FALSE	136
2022-09-12	13:39:04	0.436247	2490.36	FALSE	136
2022-09-12	13:39:04	0.412176	2490.77	FALSE	136
2022-09-12	13:39:04	0.4193	2491.19	FALSE	136
2022-09-12	13:39:04	0.422456	2491.61	FALSE	136
2022-09-12	13:39:05	0.434059	2492.05	FALSE	136
2022-09-12	13:39:05	0.419097	2492.47	FALSE	136
2022-09-12	13:39:05	0.447545	2492.92	FALSE	136
2022-09-12	13:39:06	0.467341	2493.38	FALSE	136
2022-09-12	13:39:06	0.450852	2493.83	FALSE	136
2022-09-12	13:39:06	0.434313	2494.27	FALSE	136
2022-09-12	13:39:06	0.470852	2494.74	FALSE	136
2022-09-12	13:39:07	0.481997	2495.22	FALSE	136
2022-09-12	13:39:07	0.456959	2495.68	FALSE	136
2022-09-12	13:39:07	0.462965	2496.14	FALSE	136
2022-09-12	13:39:07	0.474618	2496.62	FALSE	136
2022-09-12	13:39:08	0.467341	2497.08	FALSE	136
2022-09-12	13:39:08	0.472328	2497.55	FALSE	136
2022-09-12	13:39:08	0.460623	2498.02	FALSE	136
2022-09-12	13:39:08	0.467647	2498.48	FALSE	136
2022-09-12	13:39:09	0.503779	2498.99	FALSE	136
2022-09-12	13:39:09	0.435738	2499.42	FALSE	136
2022-09-12	13:39:09	0.471819	2499.89	FALSE	136
2022-09-12	13:39:10	0.445407	2500.34	FALSE	136
2022-09-12	13:39:10	0.471158	2500.81	FALSE	136
2022-09-12	13:39:10	0.492074	2501.3	FALSE	136
2022-09-12	13:39:10	0.473041	2501.78	FALSE	136
2022-09-12	13:39:11	0.496247	2502.27	FALSE	136
2022-09-12	13:39:11	0.563219	2502.84	FALSE	136
2022-09-12	13:39:11	0.440471	2503.28	FALSE	136
2022-09-12	13:39:11	1.26454	2504.54	FALSE	136
2022-09-12	13:39:12	0.53584	2505.08	FALSE	136
2022-09-12	13:39:12	0.395382	2505.47	FALSE	136
2022-09-12	13:39:12	0.318232	2505.79	FALSE	136
2022-09-12	13:39:12	1.70469	2507.49	FALSE	136
2022-09-12	13:39:13	2.36307	2509.86	FALSE	136
2022-09-12	13:39:13	1.35426	2511.21	FALSE	136
2022-09-12	13:39:13	0.624847	2511.84	FALSE	136
2022-09-12	13:39:14	0.504898	2512.34	FALSE	136
2022-09-12	13:39:14	0.473652	2512.82	FALSE	136
2022-09-12	13:39:14	0.391209	2513.21	FALSE	136
2022-09-12	13:39:14	0.71243	2513.92	FALSE	136
2022-09-12	13:39:15	0.946527	2514.87	FALSE	136
2022-09-12	13:39:15	0.89243	2515.76	FALSE	136
2022-09-12	13:39:15	0.596399	2516.35	FALSE	136
2022-09-12	13:39:15	0.435076	2516.79	FALSE	136
2022-09-12	13:39:16	0.361998	2517.15	FALSE	136
2022-09-12	13:39:16	0.576349	2517.73	FALSE	136
2022-09-12	13:39:16	0.523982	2518.25	FALSE	136
2022-09-12	13:39:16	0.520827	2518.77	FALSE	136
2022-09-12	13:39:17	0.599809	2519.37	FALSE	136
2022-09-12	13:39:17	0.525051	2519.9	FALSE	136
2022-09-12	13:39:17	0.438842	2520.34	FALSE	136
2022-09-12	13:39:18	0.370903	2520.71	FALSE	136
2022-09-12	13:39:18	0.537265	2521.24	FALSE	136
2022-09-12	13:39:18	0.519453	2521.76	FALSE	136
2022-09-12	13:39:18	0.718791	2522.48	FALSE	136
2022-09-12	13:39:19	0.543015	2523.03	FALSE	136
2022-09-12	13:39:19	0.705814	2523.73	FALSE	136
2022-09-12	13:39:19	1.19044	2524.92	FALSE	136
2022-09-12	13:39:19	2.67813	2527.6	FALSE	136
2022-09-12	13:39:20	4.46149	2532.06	1	137
2022-09-12	13:39:20	3.88642	2535.95	1	138
2022-09-12	13:39:20	1.68749	2537.64	FALSE	138
2022-09-12	13:39:21	2.04627	2539.68	FALSE	138
2022-09-12	13:39:21	3.94851	2543.63	1	139
2022-09-12	13:39:21	1.58887	2545.22	FALSE	139
2022-09-12	13:39:21	0.545661	2545.76	FALSE	139
2022-09-12	13:39:22	0.86846	2546.63	FALSE	139
2022-09-12	13:39:22	0.599351	2547.23	FALSE	139
2022-09-12	13:39:22	0.708359	2547.94	FALSE	139
2022-09-12	13:39:22	0.644033	2548.59	FALSE	139
2022-09-12	13:39:23	1.51981	2550.11	FALSE	139
2022-09-12	13:39:23	4.82902	2554.93	1	140
2022-09-12	13:39:23	5.58886	2560.52	1	141
2022-09-12	13:39:23	9.53019	2570.05	1	142
2022-09-12	13:39:24	8.58438	2578.64	1	143
2022-09-12	13:39:24	7.16271	2585.8	1	144
2022-09-12	13:39:24	2.11167	2587.91	FALSE	144
2022-09-12	13:39:25	4.76149	2592.67	1	145
2022-09-12	13:39:25	2.27976	2594.95	FALSE	145
2022-09-12	13:39:25	3.83752	2598.79	1	146
2022-09-12	13:39:25	10.5831	2609.37	1	147
2022-09-12	13:39:26	5.26362	2614.64	1	148
2022-09-12	13:39:26	13.1389	2627.78	1	149
2022-09-12	13:39:26	4.84739	2632.62	1	150
2022-09-12	13:39:26	6.45004	2639.07	1	151
2022-09-12	13:39:27	5.86719	2644.94	1	152
2022-09-12	13:39:27	4.22042	2649.16	1	153
2022-09-12	13:39:27	13.1172	2662.28	1	154
2022-09-12	13:39:27	4.70194	2666.98	1	155
2022-09-12	13:39:28	5.93828	2672.92	1	156
2022-09-12	13:39:28	3.14866	2676.07	1	157
2022-09-12	13:39:28	2.47686	2678.54	FALSE	157
2022-09-12	13:39:29	2.75431	2681.3	FALSE	157
2022-09-12	13:39:29	3.12576	2684.42	1	158
2022-09-12	13:39:29	4.48093	2688.91	1	159
2022-09-12	13:39:29	1.85614	2690.76	FALSE	159
2022-09-12	13:39:30	0.714313	2691.48	FALSE	159
2022-09-12	13:39:30	0.328257	2691.8	FALSE	159
2022-09-12	13:39:30	0.397061	2692.2	FALSE	159
2022-09-12	13:39:30	0.383982	2692.58	FALSE	159
2022-09-12	13:39:31	0.502506	2693.09	FALSE	159
2022-09-12	13:39:31	0.58444	2693.67	FALSE	159
2022-09-12	13:39:31	0.894415	2694.57	FALSE	159
2022-09-12	13:39:31	2.49345	2697.06	FALSE	159
2022-09-12	13:39:32	0.59528	2697.66	FALSE	159
2022-09-12	13:39:32	0.472888	2698.13	FALSE	159
2022-09-12	13:39:32	0.350547	2698.48	FALSE	159
2022-09-12	13:39:33	0.21299	2698.69	FALSE	159
2022-09-12	13:39:33	0.154669	2698.85	FALSE	159
2022-09-12	13:39:33	0.154415	2699	FALSE	159
2022-09-12	13:39:33	0.498181	2699.5	FALSE	159
2022-09-12	13:39:34	0.386934	2699.89	FALSE	159
2022-09-12	13:39:34	0.286527	2700.17	FALSE	159
2022-09-12	13:39:34	0.368715	2700.54	FALSE	159
2022-09-12	13:39:34	0.396145	2700.94	FALSE	159
2022-09-12	13:39:35	0.599606	2701.54	FALSE	159
2022-09-12	13:39:35	0.414568	2701.95	FALSE	159
2022-09-12	13:39:35	0.510903	2702.46	FALSE	159
2022-09-12	13:39:35	0.486934	2702.95	FALSE	159
2022-09-12	13:39:36	0.568104	2703.52	FALSE	159
2022-09-12	13:39:36	0.505407	2704.02	FALSE	159
2022-09-12	13:39:36	0.459911	2704.48	FALSE	159
2022-09-12	13:39:37	0.47014	2704.95	FALSE	159
2022-09-12	13:39:37	0.408715	2705.36	FALSE	159
2022-09-12	13:39:37	0.436247	2705.8	FALSE	159
2022-09-12	13:39:37	0.556298	2706.35	FALSE	159
2022-09-12	13:39:38	0.481641	2706.84	FALSE	159
2022-09-12	13:39:38	0.602455	2707.44	FALSE	159
2022-09-12	13:39:38	0.620064	2708.06	FALSE	159
2022-09-12	13:39:38	0.608206	2708.67	FALSE	159
2022-09-12	13:39:39	0.693702	2709.36	FALSE	159
2022-09-12	13:39:39	0.568308	2709.93	FALSE	159
2022-09-12	13:39:39	0.545153	2710.47	FALSE	159
2022-09-12	13:39:39	0.429071	2710.9	FALSE	159
2022-09-12	13:39:40	1.08179	2711.98	FALSE	159
2022-09-12	13:39:40	1.43396	2713.42	FALSE	159
2022-09-12	13:39:40	2.98266	2716.4	FALSE	159
2022-09-12	13:39:41	0.097163	2716.5	FALSE	159
2022-09-12	13:39:41	0.0969595	2716.6	FALSE	159
2022-09-12	13:39:41	-0.114236	2716.6	FALSE	159
2022-09-12	13:39:41	1.37355	2717.97	FALSE	159
2022-09-12	13:39:42	2.00632	2719.97	FALSE	159
2022-09-12	13:39:42	5.99996	2725.97	1	160
2022-09-12	13:39:42	8.09533	2734.07	1	161
2022-09-12	13:39:42	2.348	2736.42	FALSE	161
2022-09-12	13:39:43	2.98851	2739.41	FALSE	161
2022-09-12	13:39:43	1.15533	2740.56	FALSE	161
2022-09-12	13:39:43	0.64612	2741.21	FALSE	161
2022-09-12	13:39:43	1.37803	2742.59	FALSE	161
2022-09-12	13:39:44	1.13579	2743.72	FALSE	161
2022-09-12	13:39:44	2.76413	2746.49	FALSE	161
2022-09-12	13:39:44	4.76408	2751.25	1	162
2022-09-12	13:39:45	7.48561	2758.74	1	163
2022-09-12	13:39:45	6.38225	2765.12	1	164
2022-09-12	13:39:45	6.55858	2771.68	1	165
2022-09-12	13:39:45	16.4536	2788.13	1	166
2022-09-12	13:39:46	18.1621	2806.29	1	167
2022-09-12	13:39:46	21.0298	2827.32	1	168
2022-09-12	13:39:46	4.20703	2831.53	1	169
2022-09-12	13:39:46	0.939198	2832.47	FALSE	169
2022-09-12	13:39:47	0.689987	2833.16	FALSE	169
2022-09-12	13:39:47	0.636755	2833.8	FALSE	169
2022-09-12	13:39:47	0.42159	2834.22	FALSE	169
2022-09-12	13:39:47	0.534924	2834.75	FALSE	169
2022-09-12	13:39:48	0.686272	2835.44	FALSE	169
2022-09-12	13:39:48	0.289275	2835.73	FALSE	169
2022-09-12	13:39:48	0.319199	2836.05	FALSE	169
2022-09-12	13:39:49	0.240522	2836.29	FALSE	169
2022-09-12	13:39:49	0.0115143	2836.3	FALSE	169
2022-09-12	13:39:49	0.834211	2837.13	FALSE	169
2022-09-12	13:39:49	1.84103	2838.97	FALSE	169
2022-09-12	13:39:50	1.14205	2840.12	FALSE	169
2022-09-12	13:39:50	0.78902	2840.9	FALSE	169
2022-09-12	13:39:50	0.965	2841.87	FALSE	169
2022-09-12	13:39:50	1.20566	2843.08	FALSE	169
2022-09-12	13:39:51	2.22062	2845.3	FALSE	169
2022-09-12	13:39:51	1.19625	2846.49	FALSE	169
2022-09-12	13:39:51	1.31126	2847.8	FALSE	169
2022-09-12	13:39:51	1.25818	2849.06	FALSE	169
2022-09-12	13:39:52	1.49177	2850.55	FALSE	169
2022-09-12	13:39:52	1.59894	2852.15	FALSE	169
2022-09-12	13:39:52	1.89156	2854.04	FALSE	169
2022-09-12	13:39:53	1.9452	2855.99	FALSE	169
2022-09-12	13:39:53	2.59696	2858.59	FALSE	169
2022-09-12	13:39:53	1.79411	2860.38	FALSE	169
2022-09-12	13:39:53	1.65467	2862.03	FALSE	169
2022-09-12	13:39:54	1.20286	2863.24	FALSE	169
2022-09-12	13:39:54	1.27263	2864.51	FALSE	169
2022-09-12	13:39:54	1.3505	2865.86	FALSE	169
2022-09-12	13:39:54	1.94673	2867.81	FALSE	169
2022-09-12	13:39:55	1.64673	2869.45	FALSE	169
2022-09-12	13:39:55	2.58195	2872.04	FALSE	169
2022-09-12	13:39:55	1.98439	2874.02	FALSE	169
2022-09-12	13:39:55	1.73874	2875.76	FALSE	169
2022-09-12	13:39:56	1.43492	2877.19	FALSE	169
2022-09-12	13:39:56	1.08164	2878.28	FALSE	169
2022-09-12	13:39:56	1.0308	2879.31	FALSE	169
2022-09-12	13:39:57	0.861488	2880.17	FALSE	169
2022-09-12	13:39:57	1.14785	2881.32	FALSE	169
2022-09-12	13:39:57	0.822404	2882.14	FALSE	169
2022-09-12	13:39:57	0.762252	2882.9	FALSE	169
2022-09-12	13:39:58	0.676908	2883.58	FALSE	169
2022-09-12	13:39:58	0.794618	2884.37	FALSE	169
2022-09-12	13:39:58	0.825051	2885.2	FALSE	169
2022-09-12	13:39:58	0.791158	2885.99	FALSE	169
2022-09-12	13:39:59	0.685305	2886.67	FALSE	169
2022-09-12	13:39:59	0.626527	2887.3	FALSE	169
2022-09-12	13:39:59	0.647544	2887.95	FALSE	169
2022-09-12	13:39:59	0.687952	2888.64	FALSE	169
2022-09-12	13:40:00	0.721743	2889.36	FALSE	169
2022-09-12	13:40:00	0.760929	2890.12	FALSE	169
2022-09-12	13:40:00	0.697366	2890.82	FALSE	169
2022-09-12	13:40:01	0.640522	2891.46	FALSE	169
2022-09-12	13:40:01	0.578486	2892.03	FALSE	169
2022-09-12	13:40:01	0.564898	2892.6	FALSE	169
2022-09-12	13:40:01	0.673295	2893.27	FALSE	169
2022-09-12	13:40:02	0.72785	2894	FALSE	169
2022-09-12	13:40:02	0.854008	2894.85	FALSE	169
2022-09-12	13:40:02	0.818435	2895.67	FALSE	169
2022-09-12	13:40:02	0.82098	2896.49	FALSE	169
2022-09-12	13:40:03	0.723626	2897.22	FALSE	169
2022-09-12	13:40:03	0.683168	2897.9	FALSE	169
2022-09-12	13:40:03	0.684237	2898.59	FALSE	169
2022-09-12	13:40:03	0.716654	2899.3	FALSE	169
2022-09-12	13:40:04	0.742557	2900.04	FALSE	169
2022-09-12	13:40:04	0.754364	2900.8	FALSE	169
2022-09-12	13:40:04	0.764745	2901.56	FALSE	169
2022-09-12	13:40:05	0.829224	2902.39	FALSE	169
2022-09-12	13:40:05	0.831463	2903.22	FALSE	169
2022-09-12	13:40:05	0.820674	2904.05	FALSE	169
2022-09-12	13:40:05	0.746323	2904.79	FALSE	169
2022-09-12	13:40:06	0.725153	2905.52	FALSE	169
2022-09-12	13:40:06	0.69472	2906.21	FALSE	169
2022-09-12	13:40:06	0.563371	2906.77	FALSE	169
2022-09-12	13:40:06	0.605458	2907.38	FALSE	169
2022-09-12	13:40:07	0.578181	2907.96	FALSE	169
2022-09-12	13:40:07	0.616501	2908.57	FALSE	169
2022-09-12	13:40:07	0.862354	2909.44	FALSE	169
2022-09-12	13:40:07	1.46052	2910.9	FALSE	169
2022-09-12	13:40:08	2.25757	2913.16	FALSE	169
2022-09-12	13:40:08	2.58668	2915.74	FALSE	169
2022-09-12	13:40:08	3.90179	2919.64	1	170
2022-09-12	13:40:09	2.52973	2922.17	FALSE	170
2022-09-12	13:40:09	2.25721	2924.43	FALSE	170
2022-09-12	13:40:09	1.06449	2925.5	FALSE	170
2022-09-12	13:40:09	0.481183	2925.98	FALSE	170
2022-09-12	13:40:10	0.370191	2926.35	FALSE	170
2022-09-12	13:40:10	0.437825	2926.78	FALSE	170
2022-09-12	13:40:10	0.441489	2927.23	FALSE	170
2022-09-12	13:40:10	0.281031	2927.51	FALSE	170
2022-09-12	13:40:11	0.445713	2927.95	FALSE	170
2022-09-12	13:40:11	3.5591	2931.51	1	171
2022-09-12	13:40:11	8.95329	2940.46	1	172
2022-09-12	13:40:11	3.10612	2943.57	1	173
2022-09-12	13:40:12	3.39742	2946.97	1	174
2022-09-12	13:40:12	1.60256	2948.57	FALSE	174
2022-09-12	13:40:12	2.90144	2951.47	FALSE	174
2022-09-12	13:40:13	5.77996	2957.25	1	175
2022-09-12	13:40:13	7.31248	2964.56	1	176
2022-09-12	13:40:13	12.2023	2976.77	1	177
2022-09-12	13:40:13	5.85426	2982.62	1	178
2022-09-12	13:40:14	6.7995	2989.42	1	179
2022-09-12	13:40:14	0.61986	2990.04	FALSE	179
2022-09-12	13:40:14	0.226323	2990.27	FALSE	179
2022-09-12	13:40:14	0.464644	2990.73	FALSE	179
2022-09-12	13:40:15	0.250445	2990.98	FALSE	179
2022-09-12	13:40:15	0.319504	2991.3	FALSE	179
2022-09-12	13:40:15	0.238435	2991.54	FALSE	179
2022-09-12	13:40:15	0.211311	2991.75	FALSE	179
2022-09-12	13:40:16	0.262812	2992.01	FALSE	179
2022-09-12	13:40:16	0.491158	2992.51	FALSE	179
2022-09-12	13:40:16	0.743524	2993.25	FALSE	179
2022-09-12	13:40:17	0.356298	2993.61	FALSE	179
2022-09-12	13:40:17	0.171209	2993.78	FALSE	179
2022-09-12	13:40:17	0.46383	2994.24	FALSE	179
2022-09-12	13:40:17	0.105713	2994.35	FALSE	179
2022-09-12	13:40:18	0.239657	2994.59	FALSE	179
2022-09-12	13:40:18	0.129784	2994.72	FALSE	179
2022-09-12	13:40:18	0.450852	2995.17	FALSE	179
2022-09-12	13:40:18	0.170547	2995.34	FALSE	179
2022-09-12	13:40:19	0.389733	2995.73	FALSE	179
2022-09-12	13:40:19	0.388664	2996.12	FALSE	179
2022-09-12	13:40:19	0.337926	2996.45	FALSE	179
2022-09-12	13:40:20	0.313448	2996.77	FALSE	179
2022-09-12	13:40:20	0.436705	2997.2	FALSE	179
2022-09-12	13:40:20	0.403423	2997.61	FALSE	179
2022-09-12	13:40:20	0.542557	2998.15	FALSE	179
2022-09-12	13:40:21	0.718028	2998.87	FALSE	179
2022-09-12	13:40:21	0.795585	2999.66	FALSE	179
2022-09-12	13:40:21	0.569784	3000.23	FALSE	179
2022-09-12	13:40:21	0.386425	3000.62	FALSE	179
2022-09-12	13:40:22	0.581998	3001.2	FALSE	179
2022-09-12	13:40:22	0.466679	3001.67	FALSE	179
2022-09-12	13:40:22	0.399657	3002.07	FALSE	179
2022-09-12	13:40:22	0.508715	3002.58	FALSE	179
2022-09-12	13:40:23	0.423728	3003	FALSE	179
2022-09-12	13:40:23	0.481285	3003.48	FALSE	179
2022-09-12	13:40:23	0.569834	3004.05	FALSE	179
2022-09-12	13:40:24	0.578384	3004.63	FALSE	179
2022-09-12	13:40:24	0.578384	3005.21	FALSE	179
2022-09-12	13:40:24	0.628206	3005.84	FALSE	179
2022-09-12	13:40:24	0.681895	3006.52	FALSE	179
2022-09-12	13:40:25	0.703321	3007.22	FALSE	179
2022-09-12	13:40:25	0.764338	3007.99	FALSE	179
2022-09-12	13:40:25	0.766577	3008.75	FALSE	179
2022-09-12	13:40:25	0.83813	3009.59	FALSE	179
2022-09-12	13:40:26	0.535127	3010.13	FALSE	179
2022-09-12	13:40:26	0.708868	3010.83	FALSE	179
2022-09-12	13:40:26	0.693448	3011.53	FALSE	179
2022-09-12	13:40:26	0.724186	3012.25	FALSE	179
2022-09-12	13:40:27	0.584745	3012.84	FALSE	179
2022-09-12	13:40:27	0.493804	3013.33	FALSE	179
2022-09-12	13:40:27	0.330598	3013.66	FALSE	179
2022-09-12	13:40:28	0.333397	3013.99	FALSE	179
2022-09-12	13:40:28	0.346069	3014.34	FALSE	179
2022-09-12	13:40:28	0.348155	3014.69	FALSE	179
2022-09-12	13:40:28	0.376298	3015.06	FALSE	179
2022-09-12	13:40:29	0.381998	3015.45	FALSE	179
2022-09-12	13:40:29	0.389326	3015.84	FALSE	179
2022-09-12	13:40:29	0.397163	3016.23	FALSE	179
2022-09-12	13:40:29	0.428868	3016.66	FALSE	179
2022-09-12	13:40:30	0.533651	3017.2	FALSE	179
2022-09-12	13:40:30	0.653499	3017.85	FALSE	179
2022-09-12	13:40:30	1.52968	3019.38	FALSE	179
2022-09-12	13:40:30	1.1423	3020.52	FALSE	179
2022-09-12	13:40:31	0.744593	3021.27	FALSE	179
2022-09-12	13:40:31	0.340675	3021.61	FALSE	179
2022-09-12	13:40:31	0.400878	3022.01	FALSE	179
2022-09-12	13:40:32	0.413601	3022.42	FALSE	179
2022-09-12	13:40:32	0.272277	3022.69	FALSE	179
2022-09-12	13:40:32	0.39813	3023.09	FALSE	179
2022-09-12	13:40:32	0.780929	3023.87	FALSE	179
2022-09-12	13:40:33	0.594008	3024.47	FALSE	179
2022-09-12	13:40:33	0.538486	3025.01	FALSE	179
2022-09-12	13:40:33	0.625611	3025.63	FALSE	179
2022-09-12	13:40:33	0.810598	3026.44	FALSE	179
2022-09-12	13:40:34	0.253346	3026.69	FALSE	179
2022-09-12	13:40:34	0.525509	3027.22	FALSE	179
2022-09-12	13:40:34	0.19986	3027.42	FALSE	179
2022-09-12	13:40:34	0.646374	3028.07	FALSE	179
2022-09-12	13:40:35	0.232837	3028.3	FALSE	179
2022-09-12	13:40:35	0.487596	3028.79	FALSE	179
2022-09-12	13:40:35	0.281641	3029.07	FALSE	179
2022-09-12	13:40:36	1.96357	3031.03	FALSE	179
2022-09-12	13:40:36	2.16515	3033.2	FALSE	179
2022-09-12	13:40:36	2.04123	3035.24	FALSE	179
2022-09-12	13:40:36	0.600827	3035.84	FALSE	179
2022-09-12	13:40:37	0.558893	3036.4	FALSE	179
2022-09-12	13:40:37	0.299097	3036.7	FALSE	179
2022-09-12	13:40:37	0.0461198	3036.74	FALSE	179
2022-09-12	13:40:37	0.414262	3037.16	FALSE	179
2022-09-12	13:40:38	0.061845	3037.22	FALSE	179
2022-09-12	13:40:38	0.172481	3037.39	FALSE	179
2022-09-12	13:40:38	0.328969	3037.72	FALSE	179
2022-09-12	13:40:38	0.699046	3038.42	FALSE	179
2022-09-12	13:40:39	0.498944	3038.92	FALSE	179
2022-09-12	13:40:39	0.648766	3039.57	FALSE	179
2022-09-12	13:40:39	1.32251	3040.89	FALSE	179
2022-09-12	13:40:40	1.09029	3041.98	FALSE	179
2022-09-12	13:40:40	0.535484	3042.52	FALSE	179
2022-09-12	13:40:40	0.132227	3042.65	FALSE	179
2022-09-12	13:40:40	0.254364	3042.9	FALSE	179
2022-09-12	13:40:41	0.0588425	3042.96	FALSE	179
2022-09-12	13:40:41	0.240725	3043.2	FALSE	179
2022-09-12	13:40:41	0.267748	3043.47	FALSE	179
2022-09-12	13:40:41	0.245713	3043.72	FALSE	179
2022-09-12	13:40:42	0.253499	3043.97	FALSE	179
2022-09-12	13:40:42	0.196349	3044.17	FALSE	179
2022-09-12	13:40:42	0.301285	3044.47	FALSE	179
2022-09-12	13:40:42	0.326934	3044.79	FALSE	179
2022-09-12	13:40:43	0.209835	3045	FALSE	179
2022-09-12	13:40:43	0.0983844	3045.1	FALSE	179
2022-09-12	13:40:43	0.103168	3045.2	FALSE	179
2022-09-12	13:40:44	0.106069	3045.31	FALSE	179
2022-09-12	13:40:44	0.275535	3045.59	FALSE	179
2022-09-12	13:40:44	0.270649	3045.86	FALSE	179
2022-09-12	13:40:44	0.530903	3046.39	FALSE	179
2022-09-12	13:40:45	0.357672	3046.75	FALSE	179
2022-09-12	13:40:45	0.442812	3047.19	FALSE	179
2022-09-12	13:40:45	0.854466	3048.04	FALSE	179
2022-09-12	13:40:45	0.577214	3048.62	FALSE	179
2022-09-12	13:40:46	0.487036	3049.11	FALSE	179
2022-09-12	13:40:46	0.631717	3049.74	FALSE	179
2022-09-12	13:40:46	0.574059	3050.31	FALSE	179
2022-09-12	13:40:46	0.458639	3050.77	FALSE	179
2022-09-12	13:40:47	0.680623	3051.45	FALSE	179
2022-09-12	13:40:47	0.632532	3052.08	FALSE	179
2022-09-12	13:40:47	0.963677	3053.05	FALSE	179
2022-09-12	13:40:48	0.675636	3053.72	FALSE	179
2022-09-12	13:40:48	1.15187	3054.88	FALSE	179
2022-09-12	13:40:48	0.945407	3055.82	FALSE	179
2022-09-12	13:40:48	2.20001	3058.02	FALSE	179
2022-09-12	13:40:49	2.47513	3060.5	FALSE	179
2022-09-12	13:40:49	1.63518	3062.13	FALSE	179
2022-09-12	13:40:49	0.179351	3062.31	FALSE	179
2022-09-12	13:40:49	0.440369	3062.75	FALSE	179
2022-09-12	13:40:50	0.518995	3063.27	FALSE	179
2022-09-12	13:40:50	0.389631	3063.66	FALSE	179
2022-09-12	13:40:50	0.282659	3063.94	FALSE	179
2022-09-12	13:40:50	0.261285	3064.2	FALSE	179
2022-09-12	13:40:51	0.25416	3064.46	FALSE	179
2022-09-12	13:40:51	0.230089	3064.69	FALSE	179
2022-09-12	13:40:51	0.989428	3065.68	FALSE	179
2022-09-12	13:40:52	0.954262	3066.63	FALSE	179
2022-09-12	13:40:52	3.95329	3070.59	1	180
2022-09-12	13:40:52	4.29859	3074.88	1	181
2022-09-12	13:40:52	4.10261	3078.99	1	182
2022-09-12	13:40:53	3.02271	3082.01	1	183
2022-09-12	13:40:53	2.90688	3084.92	FALSE	183
2022-09-12	13:40:53	5.50713	3090.42	1	184
2022-09-12	13:40:53	5.76902	3096.19	1	185
2022-09-12	13:40:54	11.4501	3107.64	1	186
2022-09-12	13:40:54	7.92433	3115.57	1	187
2022-09-12	13:40:54	4.53222	3120.1	1	188
2022-09-12	13:40:54	5.64159	3125.74	1	189
2022-09-12	13:40:55	3.59406	3129.33	1	190
2022-09-12	13:40:55	4.09752	3133.43	1	191
2022-09-12	13:40:55	5.1764	3138.61	1	192
2022-09-12	13:40:56	3.17879	3141.79	1	193
2022-09-12	13:40:56	6.29731	3148.08	1	194
2022-09-12	13:40:56	3.69319	3151.78	1	195
2022-09-12	13:40:56	2.56627	3154.34	FALSE	195
2022-09-12	13:40:57	2.66403	3157.01	FALSE	195
2022-09-12	13:40:57	1.91609	3158.92	FALSE	195
2022-09-12	13:40:57	6.51039	3165.43	1	196
2022-09-12	13:40:57	12.9675	3178.4	1	197
2022-09-12	13:40:58	9.27324	3187.68	1	198
2022-09-12	13:40:58	8.33131	3196.01	1	199
2022-09-12	13:40:58	3.56307	3199.57	1	200
2022-09-12	13:40:58	4.72907	3204.3	1	201
2022-09-12	13:40:59	5.68688	3209.99	1	202
2022-09-12	13:40:59	4.07904	3214.06	1	203
2022-09-12	13:40:59	6.95624	3221.02	1	204
2022-09-12	13:41:00	3.22841	3224.25	1	205
2022-09-12	13:41:00	3.10144	3227.35	1	206
2022-09-12	13:41:00	4.97202	3232.32	1	207
2022-09-12	13:41:01	5.17461	3237.5	1	208
2022-09-12	13:41:01	7.41584	3244.91	1	209
2022-09-12	13:41:01	7.82042	3252.73	1	210
2022-09-12	13:41:01	4.78765	3257.52	1	211
2022-09-12	13:41:01	4.50581	3262.03	1	212
2022-09-12	13:41:02	3.30739	3265.33	1	213
2022-09-12	13:41:02	3.32022	3268.65	1	214
2022-09-12	13:41:02	3.04739	3271.7	1	215
2022-09-12	13:41:02	4.13309	3275.84	1	216
2022-09-12	13:41:03	5.83777	3281.67	1	217
2022-09-12	13:41:03	4.20306	3285.88	1	218
2022-09-12	13:41:03	3.36022	3289.24	1	219
2022-09-12	13:41:04	7.24993	3296.49	1	220
2022-09-12	13:41:04	4.00266	3300.49	1	221
2022-09-12	13:41:04	5.41879	3305.91	1	222
2022-09-12	13:41:04	9.85533	3315.76	1	223
2022-09-12	13:41:05	4.13864	3319.9	1	224
2022-09-12	13:41:05	8.76276	3328.66	1	225
2022-09-12	13:41:05	8.38576	3337.05	1	226
2022-09-12	13:41:05	4.88693	3341.94	1	227
2022-09-12	13:41:06	8.47915	3350.42	1	228
2022-09-12	13:41:06	8.75456	3359.17	1	229
2022-09-12	13:41:06	6.9709	3366.14	1	230
2022-09-12	13:41:06	10.2684	3376.41	1	231
2022-09-12	13:41:07	6.8564	3383.27	1	232
2022-09-12	13:41:07	5.17085	3388.44	1	233
2022-09-12	13:41:07	0.705611	3389.14	FALSE	233
2022-09-12	13:41:08	0.72729	3389.87	FALSE	233
2022-09-12	13:41:08	0.727697	3390.6	FALSE	233
2022-09-12	13:41:08	0.722914	3391.32	FALSE	233
2022-09-12	13:41:08	0.729835	3392.05	FALSE	233
2022-09-12	13:41:09	1.06195	3393.11	FALSE	233
2022-09-12	13:41:09	1.38134	3394.49	FALSE	233
2022-09-12	13:41:09	1.49441	3395.99	FALSE	233
2022-09-12	13:41:09	2.78419	3398.77	FALSE	233
2022-09-12	13:41:10	5.80581	3404.58	1	234
2022-09-12	13:41:10	1.86363	3406.44	FALSE	234
2022-09-12	13:41:10	2.56999	3409.01	FALSE	234
2022-09-12	13:41:10	1.36632	3410.38	FALSE	234
2022-09-12	13:41:11	2.36556	3412.74	FALSE	234
2022-09-12	13:41:11	3.90953	3416.65	1	235
2022-09-12	13:41:11	3.74882	3420.4	1	236
2022-09-12	13:41:12	5.0309	3425.43	1	237
2022-09-12	13:41:12	3.30637	3428.74	1	238
2022-09-12	13:41:12	4.12836	3432.87	1	239
2022-09-12	13:41:12	3.89981	3436.77	1	240
2022-09-12	13:41:13	1.88184	3438.65	FALSE	240
2022-09-12	13:41:13	2.36235	3441.01	FALSE	240
2022-09-12	13:41:13	1.01248	3442.02	FALSE	240
2022-09-12	13:41:13	0.752583	3442.78	FALSE	240
2022-09-12	13:41:14	0.172379	3442.95	FALSE	240
2022-09-12	13:41:14	0.294517	3443.24	FALSE	240
2022-09-12	13:41:14	0.147087	3443.39	FALSE	240
2022-09-12	13:41:15	0.260165	3443.65	FALSE	240
2022-09-12	13:41:15	0.196552	3443.85	FALSE	240
2022-09-12	13:41:15	0.365255	3444.21	FALSE	240
2022-09-12	13:41:15	0.291412	3444.5	FALSE	240
2022-09-12	13:41:16	0.412634	3444.92	FALSE	240
2022-09-12	13:41:16	0.220318	3445.14	FALSE	240
2022-09-12	13:41:16	0.40098	3445.54	FALSE	240
2022-09-12	13:41:16	0.219097	3445.76	FALSE	240
2022-09-12	13:41:17	0.129835	3445.89	FALSE	240
2022-09-12	13:41:17	0.201285	3446.09	FALSE	240
2022-09-12	13:41:17	0.270038	3446.36	FALSE	240
2022-09-12	13:41:17	0.25528	3446.61	FALSE	240
2022-09-12	13:41:18	0.210038	3446.82	FALSE	240
2022-09-12	13:41:18	0.362608	3447.19	FALSE	240
2022-09-12	13:41:18	0.277519	3447.46	FALSE	240
2022-09-12	13:41:19	0.410751	3447.87	FALSE	240
2022-09-12	13:41:19	0.382303	3448.26	FALSE	240
2022-09-12	13:41:19	0.277265	3448.53	FALSE	240
2022-09-12	13:41:19	0.238893	3448.77	FALSE	240
2022-09-12	13:41:20	0.237672	3449.01	FALSE	240
2022-09-12	13:41:20	0.227646	3449.24	FALSE	240
2022-09-12	13:41:20	0.235942	3449.47	FALSE	240
2022-09-12	13:41:20	0.242099	3449.72	FALSE	240
2022-09-12	13:41:21	0.241896	3449.96	FALSE	240
2022-09-12	13:41:21	0.254975	3450.21	FALSE	240
2022-09-12	13:41:21	0.260013	3450.47	FALSE	240
2022-09-12	13:41:21	0.274517	3450.75	FALSE	240
2022-09-12	13:41:22	0.272176	3451.02	FALSE	240
2022-09-12	13:41:22	0.267138	3451.29	FALSE	240
2022-09-12	13:41:22	0.275076	3451.56	FALSE	240
2022-09-12	13:41:23	0.270598	3451.83	FALSE	240
2022-09-12	13:41:23	0.27126	3452.1	FALSE	240
2022-09-12	13:41:23	0.270344	3452.37	FALSE	240
2022-09-12	13:41:23	0.272226	3452.65	FALSE	240
2022-09-12	13:41:24	0.284084	3452.93	FALSE	240
2022-09-12	13:41:24	0.28383	3453.21	FALSE	240
2022-09-12	13:41:24	0.283372	3453.5	FALSE	240
2022-09-12	13:41:24	0.279758	3453.78	FALSE	240
2022-09-12	13:41:25	0.27986	3454.06	FALSE	240
2022-09-12	13:41:25	0.281387	3454.34	FALSE	240
2022-09-12	13:41:25	0.279046	3454.62	FALSE	240
2022-09-12	13:41:25	0.280674	3454.9	FALSE	240
2022-09-12	13:41:26	0.270445	3455.17	FALSE	240
2022-09-12	13:41:26	0.282405	3455.45	FALSE	240
2022-09-12	13:41:26	0.278639	3455.73	FALSE	240
2022-09-12	13:41:27	0.275941	3456.01	FALSE	240
2022-09-12	13:41:27	0.287952	3456.29	FALSE	240
2022-09-12	13:41:27	0.286018	3456.58	FALSE	240
2022-09-12	13:41:27	0.283473	3456.86	FALSE	240
2022-09-12	13:41:28	0.296654	3457.16	FALSE	240
2022-09-12	13:41:28	0.288155	3457.45	FALSE	240
2022-09-12	13:41:28	0.292735	3457.74	FALSE	240
2022-09-12	13:41:28	0.292837	3458.03	FALSE	240
2022-09-12	13:41:29	0.298893	3458.33	FALSE	240
2022-09-12	13:41:29	0.298842	3458.63	FALSE	240
2022-09-12	13:41:29	0.301998	3458.93	FALSE	240
2022-09-12	13:41:29	0.2993	3459.23	FALSE	240
2022-09-12	13:41:30	0.304746	3459.54	FALSE	240
2022-09-12	13:41:30	0.300318	3459.84	FALSE	240
2022-09-12	13:41:30	0.30383	3460.14	FALSE	240
2022-09-12	13:41:31	0.307545	3460.45	FALSE	240
2022-09-12	13:41:31	0.30673	3460.76	FALSE	240
2022-09-12	13:41:31	0.307799	3461.06	FALSE	240
2022-09-12	13:41:31	0.309326	3461.37	FALSE	240
2022-09-12	13:41:32	0.308715	3461.68	FALSE	240
2022-09-12	13:41:32	0.312277	3461.99	FALSE	240
2022-09-12	13:41:32	0.309937	3462.3	FALSE	240
2022-09-12	13:41:32	0.314567	3462.62	FALSE	240
2022-09-12	13:41:33	0.317265	3462.94	FALSE	240
2022-09-12	13:41:33	0.315585	3463.25	FALSE	240
2022-09-12	13:41:33	0.313194	3463.56	FALSE	240
2022-09-12	13:41:33	0.314466	3463.88	FALSE	240
2022-09-12	13:41:34	0.314313	3464.19	FALSE	240
2022-09-12	13:41:34	0.320674	3464.51	FALSE	240
2022-09-12	13:41:34	0.314059	3464.83	FALSE	240
2022-09-12	13:41:35	0.309886	3465.14	FALSE	240
2022-09-12	13:41:35	0.298028	3465.44	FALSE	240
2022-09-12	13:41:35	0.304542	3465.74	FALSE	240
2022-09-12	13:41:35	0.317876	3466.06	FALSE	240
2022-09-12	13:41:36	0.376552	3466.44	FALSE	240
2022-09-12	13:41:36	1.07146	3467.51	FALSE	240
2022-09-12	13:41:36	0.96902	3468.48	FALSE	240
2022-09-12	13:41:36	1.25172	3469.73	FALSE	240
2022-09-12	13:41:37	0.835331	3470.56	FALSE	240
2022-09-12	13:41:37	0.480623	3471.04	FALSE	240
2022-09-12	13:41:37	0.528206	3471.57	FALSE	240
2022-09-12	13:41:37	0.185611	3471.76	FALSE	240
2022-09-12	13:41:38	0.321387	3472.08	FALSE	240
2022-09-12	13:41:38	0.72042	3472.8	FALSE	240
2022-09-12	13:41:38	0.724338	3473.52	FALSE	240
2022-09-12	13:41:39	0.603677	3474.13	FALSE	240
2022-09-12	13:41:39	0.250751	3474.38	FALSE	240
2022-09-12	13:41:39	0.490802	3474.87	FALSE	240
2022-09-12	13:41:39	0.220573	3475.09	FALSE	240
2022-09-12	13:41:40	0.144186	3475.23	FALSE	240
2022-09-12	13:41:40	-0.0124043	3475.23	FALSE	240
2022-09-12	13:41:40	0.0866796	3475.32	FALSE	240
2022-09-12	13:41:40	0.254415	3475.57	FALSE	240
2022-09-12	13:41:41	0.229224	3475.8	FALSE	240
2022-09-12	13:41:41	0.189326	3475.99	FALSE	240
2022-09-12	13:41:41	0.119555	3476.11	FALSE	240
2022-09-12	13:41:42	0.0915142	3476.2	FALSE	240
2022-09-12	13:41:42	0.200573	3476.4	FALSE	240
2022-09-12	13:41:42	0.0767051	3476.48	FALSE	240
2022-09-12	13:41:42	-0.0879259	3476.48	FALSE	240
2022-09-12	13:41:43	-0.368231	3476.48	FALSE	240
2022-09-12	13:41:43	-0.407926	3476.48	FALSE	240
2022-09-12	13:41:43	-0.152557	3476.48	FALSE	240
2022-09-12	13:41:43	0.0107	3476.49	FALSE	240
2022-09-12	13:41:44	0.0872394	3476.58	FALSE	240
2022-09-12	13:41:44	0.0432699	3476.62	FALSE	240
2022-09-12	13:41:44	0.0415396	3476.66	FALSE	240
2022-09-12	13:41:44	0.0395041	3476.7	FALSE	240
2022-09-12	13:41:45	0.055789	3476.76	FALSE	240
2022-09-12	13:41:45	0.0811834	3476.84	FALSE	240
2022-09-12	13:41:45	0.167341	3477.01	FALSE	240
2022-09-12	13:41:45	0.259758	3477.27	FALSE	240
2022-09-12	13:41:46	0.34098	3477.61	FALSE	240
2022-09-12	13:41:46	0.56042	3478.17	FALSE	240
2022-09-12	13:41:46	0.826069	3479	FALSE	240
2022-09-12	13:41:47	0.831107	3479.83	FALSE	240
2022-09-12	13:41:47	1.25772	3481.08	FALSE	240
2022-09-12	13:41:47	1.38352	3482.47	FALSE	240
2022-09-12	13:41:47	1.0679	3483.54	FALSE	240
2022-09-12	13:41:48	0.974415	3484.51	FALSE	240
2022-09-12	13:41:48	1.09996	3485.61	FALSE	240
2022-09-12	13:41:48	1.31345	3486.92	FALSE	240
2022-09-12	13:41:48	1.32917	3488.25	FALSE	240
2022-09-12	13:41:49	1.31156	3489.56	FALSE	240
2022-09-12	13:41:49	1.1706	3490.73	FALSE	240
2022-09-12	13:41:49	1.05212	3491.79	FALSE	240
2022-09-12	13:41:49	0.936806	3492.72	FALSE	240
2022-09-12	13:41:50	0.870903	3493.59	FALSE	240
2022-09-12	13:41:50	0.812786	3494.41	FALSE	240
2022-09-12	13:41:50	0.81813	3495.23	FALSE	240
2022-09-12	13:41:51	0.958282	3496.18	FALSE	240
2022-09-12	13:41:51	0.989886	3497.17	FALSE	240
2022-09-12	13:41:51	0.913142	3498.09	FALSE	240
2022-09-12	13:41:51	0.928817	3499.02	FALSE	240
2022-09-12	13:41:52	1.00871	3500.02	FALSE	240
2022-09-12	13:41:52	1.09553	3501.12	FALSE	240
2022-09-12	13:41:52	1.1362	3502.26	FALSE	240
2022-09-12	13:41:52	1.07472	3503.33	FALSE	240
2022-09-12	13:41:53	1.26368	3504.59	FALSE	240
2022-09-12	13:41:53	0.519809	3505.11	FALSE	240
2022-09-12	13:41:53	0.350445	3505.46	FALSE	240
2022-09-12	13:41:53	0.357723	3505.82	FALSE	240
2022-09-12	13:41:54	0.207443	3506.03	FALSE	240
2022-09-12	13:41:54	0.250445	3506.28	FALSE	240
2022-09-12	13:41:54	0.108359	3506.39	FALSE	240
2022-09-12	13:41:55	-0.30131	3506.39	FALSE	240
2022-09-12	13:41:55	-0.173524	3506.39	FALSE	240
2022-09-12	13:41:55	-0.540292	3506.39	FALSE	240
2022-09-12	13:41:55	-0.555763	3506.39	FALSE	240
2022-09-12	13:41:56	0.69416	3507.08	FALSE	240
2022-09-12	13:41:56	2.84999	3509.93	FALSE	240
2022-09-12	13:41:56	5.06698	3515	1	241
2022-09-12	13:41:56	4.44892	3519.45	1	242
2022-09-12	13:41:57	2.4906	3521.94	FALSE	242
2022-09-12	13:41:57	1.63477	3523.57	FALSE	242
2022-09-12	13:41:57	2.44022	3526.01	FALSE	242
2022-09-12	13:41:57	1.92765	3527.94	FALSE	242
2022-09-12	13:41:58	1.70744	3529.65	FALSE	242
2022-09-12	13:41:58	1.03548	3530.68	FALSE	242
2022-09-12	13:41:58	1.03391	3531.72	FALSE	242
2022-09-12	13:41:59	1.31467	3533.03	FALSE	242
2022-09-12	13:41:59	2.762	3535.8	FALSE	242
2022-09-12	13:41:59	3.15457	3538.95	1	243
2022-09-12	13:41:59	3.04378	3541.99	1	244
2022-09-12	13:42:00	4.56174	3546.56	1	245
2022-09-12	13:42:00	4.80754	3551.36	1	246
2022-09-12	13:42:00	6.74596	3558.11	1	247
2022-09-12	13:42:00	8.56698	3566.68	1	248
2022-09-12	13:42:01	10.9934	3577.67	1	249
2022-09-12	13:42:01	15.1712	3592.84	1	250
2022-09-12	13:42:01	1.83324	3594.67	FALSE	250
2022-09-12	13:42:02	2.17609	3596.85	FALSE	250
2022-09-12	13:42:02	3.04663	3599.9	1	251
2022-09-12	13:42:02	1.03508	3600.93	FALSE	251
2022-09-12	13:42:02	1.49777	3602.43	FALSE	251
2022-09-12	13:42:03	2.19767	3604.63	FALSE	251
2022-09-12	13:42:03	2.82541	3607.45	FALSE	251
2022-09-12	13:42:03	3.90256	3611.35	1	252
2022-09-12	13:42:03	2.38902	3613.74	FALSE	252
2022-09-12	13:42:04	5.1108	3618.85	1	253
2022-09-12	13:42:04	0.530241	3619.38	FALSE	253
2022-09-12	13:42:04	1.19304	3620.58	FALSE	253
2022-09-12	13:42:04	0.34383	3620.92	FALSE	253
2022-09-12	13:42:05	0.129529	3621.05	FALSE	253
2022-09-12	13:42:05	0.191311	3621.24	FALSE	253
2022-09-12	13:42:05	0.306476	3621.55	FALSE	253
2022-09-12	13:42:06	0.636705	3622.19	FALSE	253
2022-09-12	13:42:06	0.566323	3622.75	FALSE	253
2022-09-12	13:42:06	0.118792	3622.87	FALSE	253
2022-09-12	13:42:06	0.135178	3623.01	FALSE	253
2022-09-12	13:42:07	0.500013	3623.51	FALSE	253
2022-09-12	13:42:07	0.209224	3623.72	FALSE	253
2022-09-12	13:42:07	0.149479	3623.86	FALSE	253
2022-09-12	13:42:07	0.209071	3624.07	FALSE	253
2022-09-12	13:42:08	0.248308	3624.32	FALSE	253
2022-09-12	13:42:08	0.209784	3624.53	FALSE	253
2022-09-12	13:42:08	0.204949	3624.74	FALSE	253
2022-09-12	13:42:08	0.177061	3624.91	FALSE	253
2022-09-12	13:42:09	0.181539	3625.1	FALSE	253
2022-09-12	13:42:09	0.174517	3625.27	FALSE	253
2022-09-12	13:42:09	0.152786	3625.42	FALSE	253
2022-09-12	13:42:10	0.151311	3625.57	FALSE	253
2022-09-12	13:42:10	0.339351	3625.91	FALSE	253
2022-09-12	13:42:10	0.305407	3626.22	FALSE	253
2022-09-12	13:42:10	0.284746	3626.5	FALSE	253
2022-09-12	13:42:11	0.412125	3626.92	FALSE	253
2022-09-12	13:42:11	0.444491	3627.36	FALSE	253
2022-09-12	13:42:11	0.471311	3627.83	FALSE	253
2022-09-12	13:42:11	0.458079	3628.29	FALSE	253
2022-09-12	13:42:12	0.441794	3628.73	FALSE	253
2022-09-12	13:42:12	0.456756	3629.19	FALSE	253
2022-09-12	13:42:12	0.445814	3629.63	FALSE	253
2022-09-12	13:42:12	0.462405	3630.1	FALSE	253
2022-09-12	13:42:13	0.451819	3630.55	FALSE	253
2022-09-12	13:42:13	0.466781	3631.02	FALSE	253
2022-09-12	13:42:13	0.437875	3631.45	FALSE	253
2022-09-12	13:42:14	0.446781	3631.9	FALSE	253
2022-09-12	13:42:14	0.353193	3632.25	FALSE	253
2022-09-12	13:42:14	0.543321	3632.8	FALSE	253
2022-09-12	13:42:14	0.2593	3633.06	FALSE	253
2022-09-12	13:42:15	0.297112	3633.35	FALSE	253
2022-09-12	13:42:15	0.318537	3633.67	FALSE	253
2022-09-12	13:42:15	0.278283	3633.95	FALSE	253
2022-09-12	13:42:15	0.312176	3634.26	FALSE	253
2022-09-12	13:42:16	0.265051	3634.53	FALSE	253
2022-09-12	13:42:16	0.3593	3634.89	FALSE	253
2022-09-12	13:42:16	0.27869	3635.16	FALSE	253
2022-09-12	13:42:16	0.169886	3635.33	FALSE	253
2022-09-12	13:42:17	0.196807	3635.53	FALSE	253
2022-09-12	13:42:17	0.317672	3635.85	FALSE	253
2022-09-12	13:42:17	0.115484	3635.96	FALSE	253
2022-09-12	13:42:18	-0.357849	3635.96	FALSE	253
2022-09-12	13:42:18	-0.387875	3635.96	FALSE	253
2022-09-12	13:42:18	-0.176577	3635.96	FALSE	253
2022-09-12	13:42:18	-0.00181909	3635.96	FALSE	253
2022-09-12	13:42:19	-0.141921	3635.96	FALSE	253
2022-09-12	13:42:19	-0.124313	3635.96	FALSE	253
2022-09-12	13:42:19	0.30098	3636.27	FALSE	253
2022-09-12	13:42:19	0.432379	3636.7	FALSE	253
2022-09-12	13:42:20	0.441387	3637.14	FALSE	253
2022-09-12	13:42:20	0.796247	3637.94	FALSE	253
2022-09-12	13:42:20	0.829326	3638.76	FALSE	253
2022-09-12	13:42:20	0.667748	3639.43	FALSE	253
2022-09-12	13:42:21	0.475229	3639.91	FALSE	253
2022-09-12	13:42:21	0.520064	3640.43	FALSE	253
2022-09-12	13:42:21	0.762252	3641.19	FALSE	253
2022-09-12	13:42:22	1.6992	3642.89	FALSE	253
2022-09-12	13:42:22	2.11599	3645.01	FALSE	253
2022-09-12	13:42:22	1.47396	3646.48	FALSE	253
2022-09-12	13:42:22	1.23579	3647.72	FALSE	253
2022-09-12	13:42:23	1.0281	3648.74	FALSE	253
2022-09-12	13:42:23	1.09757	3649.84	FALSE	253
2022-09-12	13:42:23	1.2108	3651.05	FALSE	253
2022-09-12	13:42:23	1.31935	3652.37	FALSE	253
2022-09-12	13:42:24	0.559351	3652.93	FALSE	253
2022-09-12	13:42:24	0.569021	3653.5	FALSE	253
2022-09-12	13:42:24	0.511616	3654.01	FALSE	253
2022-09-12	13:42:24	0.235687	3654.25	FALSE	253
2022-09-12	13:42:25	0.245407	3654.49	FALSE	253
2022-09-12	13:42:25	0.180624	3654.67	FALSE	253
2022-09-12	13:42:25	0.199758	3654.87	FALSE	253
2022-09-12	13:42:26	0.221234	3655.09	FALSE	253
2022-09-12	13:42:26	0.288766	3655.38	FALSE	253
2022-09-12	13:42:26	0.340725	3655.72	FALSE	253
2022-09-12	13:42:26	0.251412	3655.97	FALSE	253
2022-09-12	13:42:27	0.286832	3656.26	FALSE	253
2022-09-12	13:42:27	0.224491	3656.49	FALSE	253
2022-09-12	13:42:27	1.05813	3657.54	FALSE	253
2022-09-12	13:42:27	1.53665	3659.08	FALSE	253
2022-09-12	13:42:28	0.756349	3659.84	FALSE	253
2022-09-12	13:42:28	0.27757	3660.11	FALSE	253
2022-09-12	13:42:28	0.184644	3660.3	FALSE	253
2022-09-12	13:42:28	0.934924	3661.23	FALSE	253
2022-09-12	13:42:29	0.76902	3662	FALSE	253
2022-09-12	13:42:29	1.38541	3663.39	FALSE	253
2022-09-12	13:42:29	0.369326	3663.76	FALSE	253
2022-09-12	13:42:30	0.261998	3664.02	FALSE	253
2022-09-12	13:42:30	0.168155	3664.19	FALSE	253
2022-09-12	13:42:30	0.051158	3664.24	FALSE	253
2022-09-12	13:42:30	0.0789952	3664.32	FALSE	253
2022-09-12	13:42:31	0.089275	3664.41	FALSE	253
2022-09-12	13:42:31	0.0256109	3664.43	FALSE	253
2022-09-12	13:42:31	0.475127	3664.91	FALSE	253
2022-09-12	13:42:31	0.364898	3665.27	FALSE	253
2022-09-12	13:42:32	0.507951	3665.78	FALSE	253
2022-09-12	13:42:32	0.528919	3666.31	FALSE	253
2022-09-12	13:42:32	0.643626	3666.95	FALSE	253
2022-09-12	13:42:32	0.605916	3667.56	FALSE	253
2022-09-12	13:42:33	0.536552	3668.1	FALSE	253
2022-09-12	13:42:33	0.517723	3668.61	FALSE	253
2022-09-12	13:42:33	0.521081	3669.13	FALSE	253
2022-09-12	13:42:34	0.489173	3669.62	FALSE	253
2022-09-12	13:42:34	0.480623	3670.1	FALSE	253
2022-09-12	13:42:34	0.489987	3670.59	FALSE	253
2022-09-12	13:42:34	0.473041	3671.07	FALSE	253
2022-09-12	13:42:35	0.475178	3671.54	FALSE	253
2022-09-12	13:42:35	0.47243	3672.02	FALSE	253
2022-09-12	13:42:35	0.489529	3672.5	FALSE	253
2022-09-12	13:42:35	0.479657	3672.98	FALSE	253
2022-09-12	13:42:36	0.609478	3673.59	FALSE	253
2022-09-12	13:42:36	2.10296	3675.7	FALSE	253
2022-09-12	13:42:36	3.39721	3679.09	1	254
2022-09-12	13:42:36	0.94154	3680.04	FALSE	254
2022-09-12	13:42:37	0.536756	3680.57	FALSE	254
2022-09-12	13:42:37	0.462099	3681.03	FALSE	254
2022-09-12	13:42:37	0.319046	3681.35	FALSE	254
2022-09-12	13:42:38	0.238333	3681.59	FALSE	254
2022-09-12	13:42:38	0.270089	3681.86	FALSE	254
2022-09-12	13:42:38	0.333092	3682.2	FALSE	254
2022-09-12	13:42:38	0.457926	3682.65	FALSE	254
2022-09-12	13:42:39	0.398537	3683.05	FALSE	254
2022-09-12	13:42:39	0.409478	3683.46	FALSE	254
2022-09-12	13:42:39	0.475585	3683.94	FALSE	254
2022-09-12	13:42:39	0.815076	3684.75	FALSE	254

## Sheet: Harley_martin_2022912133721
						**GoPro Fitting: 13:26
2022-09-12	13:37:21	0.432074
2022-09-12	13:37:21	0.431514
2022-09-12	13:37:21	0.428053
2022-09-12	13:37:22	0.44383
2022-09-12	13:37:22	0.43874
2022-09-12	13:37:22	0.426171
2022-09-12	13:37:23	0.519148
2022-09-12	13:37:23	0.407697
2022-09-12	13:37:23	0.439453
2022-09-12	13:37:23	0.459707
2022-09-12	13:37:24	0.489377
2022-09-12	13:37:24	0.458028
2022-09-12	13:37:24	0.921896
2022-09-12	13:37:24	17.1107
2022-09-12	13:37:25	22.1778
2022-09-12	13:37:25	10.8295
2022-09-12	13:37:25	10.6347
2022-09-12	13:37:25	30.8156
2022-09-12	13:37:26	16.2825
2022-09-12	13:37:26	11.2804
2022-09-12	13:37:26	1.28795
2022-09-12	13:37:27	0.168155
2022-09-12	13:37:27	0.170649
2022-09-12	13:37:27	0.0569086
2022-09-12	13:37:27	0.402405
2022-09-12	13:37:28	0.355942
2022-09-12	13:37:28	0.191514
2022-09-12	13:37:28	0.00622162
2022-09-12	13:37:28	6.23573
2022-09-12	13:37:29	42.4476
2022-09-12	13:37:29	42.7555
2022-09-12	13:37:29	34.2061
2022-09-12	13:37:29	32.4825
2022-09-12	13:37:30	42.2125
2022-09-12	13:37:30	25.9295
2022-09-12	13:37:30	27.4145
2022-09-12	13:37:31	24.3751
2022-09-12	13:37:31	38.9616
2022-09-12	13:37:31	9.70612
2022-09-12	13:37:31	6.58647
2022-09-12	13:37:32	1.33553
2022-09-12	13:37:32	0.629529
2022-09-12	13:37:32	0.487137
2022-09-12	13:37:32	0.0435244
2022-09-12	13:37:33	0.0378755
2022-09-12	13:37:33	0.626934
2022-09-12	13:37:33	21.7592
2022-09-12	13:37:33	11.3307
2022-09-12	13:37:34	6.06571
2022-09-12	13:37:34	17.3126
2022-09-12	13:37:34	8.68846
2022-09-12	13:37:35	8.21502
2022-09-12	13:37:35	8.38113
2022-09-12	13:37:35	3.49197
2022-09-12	13:37:35	11.0346
2022-09-12	13:37:36	9.46896
2022-09-12	13:37:36	4.62764
2022-09-12	13:37:36	7.62011
2022-09-12	13:37:36	1.93024
2022-09-12	13:37:37	3.46296
2022-09-12	13:37:37	0.315636
2022-09-12	13:37:37	0.224542
2022-09-12	13:37:37	0.703422
2022-09-12	13:37:38	0.626527
2022-09-12	13:37:38	1.08235
2022-09-12	13:37:38	1.74566
2022-09-12	13:37:39	3.71558
2022-09-12	13:37:39	2.31945
2022-09-12	13:37:39	4.08963
2022-09-12	13:37:39	4.12291
2022-09-12	13:37:40	3.68581
2022-09-12	13:37:40	1.5678
2022-09-12	13:37:40	2.84983
2022-09-12	13:37:40	7.96454
2022-09-12	13:37:41	11.6519
2022-09-12	13:37:41	4.92821
2022-09-12	13:37:41	1.56729
2022-09-12	13:37:41	0.399097
2022-09-12	13:37:42	0.426883
2022-09-12	13:37:42	-0.0761193
2022-09-12	13:37:42	0.26612
2022-09-12	13:37:43	0.050242
2022-09-12	13:37:43	0.202557
2022-09-12	13:37:43	1.06098
2022-09-12	13:37:43	2.93752
2022-09-12	13:37:44	2.21492
2022-09-12	13:37:44	5.12932
2022-09-12	13:37:44	24.2486
2022-09-12	13:37:44	17.1678
2022-09-12	13:37:45	31.2888
2022-09-12	13:37:45	29.9366
2022-09-12	13:37:45	12.2524
2022-09-12	13:37:45	32.911
2022-09-12	13:37:46	20.7018
2022-09-12	13:37:46	27.3353
2022-09-12	13:37:46	31.2367
2022-09-12	13:37:47	49.3907
2022-09-12	13:37:47	33.6152
2022-09-12	13:37:47	36.85
2022-09-12	13:37:47	31.2476
2022-09-12	13:37:48	29.7907
2022-09-12	13:37:48	36.6076
2022-09-12	13:37:48	44.5354
2022-09-12	13:37:48	28.6403
2022-09-12	13:37:49	22.4141
2022-09-12	13:37:49	63.7686
2022-09-12	13:37:49	15.1224
2022-09-12	13:37:49	2.40586
2022-09-12	13:37:50	1.24052
2022-09-12	13:37:50	0.414618
2022-09-12	13:37:50	0.237977
2022-09-12	13:37:51	0.40444
2022-09-12	13:37:51	0.366272
2022-09-12	13:37:51	0.0330919
2022-09-12	13:37:51	-0.078562
2022-09-12	13:37:52	0.13355
2022-09-12	13:37:52	0.0717687
2022-09-12	13:37:52	0.0337534
2022-09-12	13:37:52	-0.0579005
2022-09-12	13:37:53	0.263473
2022-09-12	13:37:53	0.608308
2022-09-12	13:37:53	0.380267
2022-09-12	13:37:53	0.923168
2022-09-12	13:37:54	0.305
2022-09-12	13:37:54	0.188155
2022-09-12	13:37:54	0.129835
2022-09-12	13:37:55	0.0893259
2022-09-12	13:37:55	0.108257
2022-09-12	13:37:55	0.14154
2022-09-12	13:37:55	0.23925
2022-09-12	13:37:56	18.7833
2022-09-12	13:37:56	57.5304
2022-09-12	13:37:56	35.4379
2022-09-12	13:37:56	23.9536
2022-09-12	13:37:57	37.8792
2022-09-12	13:37:57	22.0404
2022-09-12	13:37:57	32.9214
2022-09-12	13:37:57	25.3849
2022-09-12	13:37:58	26.9276
2022-09-12	13:37:58	18.6358
2022-09-12	13:37:58	50.0297
2022-09-12	13:37:59	27.8926
2022-09-12	13:37:59	33.03
2022-09-12	13:37:59	23.101
2022-09-12	13:37:59	40.0838
2022-09-12	13:38:00	48.2024
2022-09-12	13:38:00	24.9666
2022-09-12	13:38:00	32.2554
2022-09-12	13:38:00	32.1682
2022-09-12	13:38:01	40.8461
2022-09-12	13:38:01	41.4269
2022-09-12	13:38:01	22.5535
2022-09-12	13:38:01	31.3908
2022-09-12	13:38:02	25.214
2022-09-12	13:38:02	5.53008
2022-09-12	13:38:02	0.67243
2022-09-12	13:38:03	0.0798602
2022-09-12	13:38:03	0.305763
2022-09-12	13:38:03	0.229682
2022-09-12	13:38:03	0.386425
2022-09-12	13:38:04	0.061845
2022-09-12	13:38:04	0.364898
2022-09-12	13:38:04	0.418639
2022-09-12	13:38:04	0.514008
2022-09-12	13:38:05	0.342506
2022-09-12	13:38:05	0.257163
2022-09-12	13:38:05	0.36444
2022-09-12	13:38:05	0.370547
2022-09-12	13:38:06	2.51808
2022-09-12	13:38:06	2.07457
2022-09-12	13:38:06	0.259402
2022-09-12	13:38:07	0.240064
2022-09-12	13:38:07	0.186171
2022-09-12	13:38:07	0.137621
2022-09-12	13:38:07	0.304695
2022-09-12	13:38:08	0.279809
2022-09-12	13:38:08	2.08154
2022-09-12	13:38:08	12.8815
2022-09-12	13:38:08	19.5728
2022-09-12	13:38:09	23.051
2022-09-12	13:38:09	8.79472
2022-09-12	13:38:09	15.2666
2022-09-12	13:38:09	13.4535
2022-09-12	13:38:10	17.8979
2022-09-12	13:38:10	18.2562
2022-09-12	13:38:10	9.3651
2022-09-12	13:38:11	9.07823
2022-09-12	13:38:11	20.006
2022-09-12	13:38:11	6.82668
2022-09-12	13:38:11	5.5996
2022-09-12	13:38:12	3.79248
2022-09-12	13:38:12	1.77497
2022-09-12	13:38:12	2.21106
2022-09-12	13:38:12	2.98841
2022-09-12	13:38:13	14.7371
2022-09-12	13:38:13	18.2655
2022-09-12	13:38:13	3.78729
2022-09-12	13:38:14	3.62714
2022-09-12	13:38:14	11.3644
2022-09-12	13:38:14	4.30057
2022-09-12	13:38:14	5.09243
2022-09-12	13:38:15	4.42805
2022-09-12	13:38:15	3.47121
2022-09-12	13:38:15	0.947646
2022-09-12	13:38:15	1.95935
2022-09-12	13:38:16	5.47919
2022-09-12	13:38:16	5.28856
2022-09-12	13:38:16	6.85609
2022-09-12	13:38:16	6.6164
2022-09-12	13:38:17	10.1586
2022-09-12	13:38:17	6.10953
2022-09-12	13:38:17	5.1283
2022-09-12	13:38:18	2.04821
2022-09-12	13:38:18	0.264644
2022-09-12	13:38:18	0.339046
2022-09-12	13:38:18	-0.0401906
2022-09-12	13:38:19	0.0928883
2022-09-12	13:38:19	0.0714124
2022-09-12	13:38:19	0.068817
2022-09-12	13:38:19	0.0658654
2022-09-12	13:38:20	0.741438
2022-09-12	13:38:20	1.03538
2022-09-12	13:38:20	2.93034
2022-09-12	13:38:20	1.60001
2022-09-12	13:38:21	2.16189
2022-09-12	13:38:21	1.51752
2022-09-12	13:38:21	2.34474
2022-09-12	13:38:22	1.84882
2022-09-12	13:38:22	3.67945
2022-09-12	13:38:22	6.7908
2022-09-12	13:38:22	5.88566
2022-09-12	13:38:23	3.47833
2022-09-12	13:38:23	1.16169
2022-09-12	13:38:23	0.702201
2022-09-12	13:38:23	0.842506
2022-09-12	13:38:24	3.0137
2022-09-12	13:38:24	2.105
2022-09-12	13:38:24	1.3279
2022-09-12	13:38:25	1.98805
2022-09-12	13:38:25	8.02174
2022-09-12	13:38:25	8.62474
2022-09-12	13:38:25	3.84118
2022-09-12	13:38:26	2.82566
2022-09-12	13:38:26	1.23615
2022-09-12	13:38:26	3.34357
2022-09-12	13:38:26	10.8394
2022-09-12	13:38:27	18.0029
2022-09-12	13:38:27	16.4448
2022-09-12	13:38:27	14.696
2022-09-12	13:38:27	24.2215
2022-09-12	13:38:28	4.38943
2022-09-12	13:38:28	18.7476
2022-09-12	13:38:28	6.44291
2022-09-12	13:38:28	9.1538
2022-09-12	13:38:29	23.6065
2022-09-12	13:38:29	13.6484
2022-09-12	13:38:29	14.3571
2022-09-12	13:38:30	10.8075
2022-09-12	13:38:30	10.7993
2022-09-12	13:38:30	29.0558
2022-09-12	13:38:30	19.7359
2022-09-12	13:38:31	19.3776
2022-09-12	13:38:31	6.46143
2022-09-12	13:38:31	12.4999
2022-09-12	13:38:31	21.7877
2022-09-12	13:38:32	7.50866
2022-09-12	13:38:32	12.1978
2022-09-12	13:38:32	14.4805
2022-09-12	13:38:32	17.8271
2022-09-12	13:38:33	24.1089
2022-09-12	13:38:33	13.669
2022-09-12	13:38:33	15.4821
2022-09-12	13:38:34	4.6166
2022-09-12	13:38:34	14.9178
2022-09-12	13:38:34	17.1451
2022-09-12	13:38:34	3.47625
2022-09-12	13:38:35	19.1189
2022-09-12	13:38:35	7.35009
2022-09-12	13:38:35	6.26846
2022-09-12	13:38:35	1.2476
2022-09-12	13:38:36	2.6507
2022-09-12	13:38:36	7.14377
2022-09-12	13:38:36	4.07238
2022-09-12	13:38:36	9.82622
2022-09-12	13:38:37	19.6477
2022-09-12	13:38:37	17.2621
2022-09-12	13:38:37	8.19355
2022-09-12	13:38:38	4.58851
2022-09-12	13:38:38	3.27441
2022-09-12	13:38:38	0.247494
2022-09-12	13:38:38	0.74673
2022-09-12	13:38:39	1.08978
2022-09-12	13:38:39	1.64551
2022-09-12	13:38:39	0.662506
2022-09-12	13:38:39	0.093957
2022-09-12	13:38:40	-0.199427
2022-09-12	13:38:40	0.144237
2022-09-12	13:38:40	0.437825
2022-09-12	13:38:40	3.54831
2022-09-12	13:38:41	0.521234
2022-09-12	13:38:41	1.11996
2022-09-12	13:38:41	1.07126
2022-09-12	13:38:42	0.721641
2022-09-12	13:38:42	0.396451
2022-09-12	13:38:42	0.312634
2022-09-12	13:38:42	0.459758
2022-09-12	13:38:43	0.306679
2022-09-12	13:38:43	0.43411
2022-09-12	13:38:43	0.346272
2022-09-12	13:38:43	0.546476
2022-09-12	13:38:44	0.185662
2022-09-12	13:38:44	-0.0914883
2022-09-12	13:38:44	0.0465778
2022-09-12	13:38:44	0.0130918
2022-09-12	13:38:45	0.249886
2022-09-12	13:38:45	-0.129962
2022-09-12	13:38:45	0.211616
2022-09-12	13:38:46	0.320471
2022-09-12	13:38:46	0.390802
2022-09-12	13:38:46	0.108308
2022-09-12	13:38:46	0.352532
2022-09-12	13:38:47	0.550242
2022-09-12	13:38:47	0.916043
2022-09-12	13:38:47	0.622405
2022-09-12	13:38:47	0.373346
2022-09-12	13:38:48	1.12276
2022-09-12	13:38:48	0.132481
2022-09-12	13:38:48	0.250191
2022-09-12	13:38:48	0.0627101
2022-09-12	13:38:49	0.00754479
2022-09-12	13:38:49	0.0473412
2022-09-12	13:38:49	1.42775
2022-09-12	13:38:50	1.9767
2022-09-12	13:38:50	3.86368
2022-09-12	13:38:50	1.33757
2022-09-12	13:38:50	1.02556
2022-09-12	13:38:51	0.220573
2022-09-12	13:38:51	0.36154
2022-09-12	13:38:51	0.386323
2022-09-12	13:38:51	1.20505
2022-09-12	13:38:52	0.898079
2022-09-12	13:38:52	0.872786
2022-09-12	13:38:52	0.687443
2022-09-12	13:38:52	1.42154
2022-09-12	13:38:53	2.6336
2022-09-12	13:38:53	2.79879
2022-09-12	13:38:53	1.64261
2022-09-12	13:38:54	1.53513
2022-09-12	13:38:54	1.74154
2022-09-12	13:38:54	0.562608
2022-09-12	13:38:54	0.364949
2022-09-12	13:38:55	0.580623
2022-09-12	13:38:55	0.607341
2022-09-12	13:38:55	0.712634
2022-09-12	13:38:55	1.05742
2022-09-12	13:38:56	0.772277
2022-09-12	13:38:56	0.543117
2022-09-12	13:38:56	0.623779
2022-09-12	13:38:56	0.40098
2022-09-12	13:38:57	0.514008
2022-09-12	13:38:57	0.472583
2022-09-12	13:38:57	0.432176
2022-09-12	13:38:58	0.434313
2022-09-12	13:38:58	0.453601
2022-09-12	13:38:58	0.439758
2022-09-12	13:38:58	0.421183
2022-09-12	13:38:59	0.431616
2022-09-12	13:38:59	0.42958
2022-09-12	13:38:59	0.460369
2022-09-12	13:38:59	0.456501
2022-09-12	13:39:00	0.434262
2022-09-12	13:39:00	0.459453
2022-09-12	13:39:00	0.445611
2022-09-12	13:39:00	0.454822
2022-09-12	13:39:01	0.458232
2022-09-12	13:39:01	0.431005
2022-09-12	13:39:01	0.468461
2022-09-12	13:39:02	0.488817
2022-09-12	13:39:02	0.475433
2022-09-12	13:39:02	0.459758
2022-09-12	13:39:02	0.401997
2022-09-12	13:39:03	0.442252
2022-09-12	13:39:03	0.471412
2022-09-12	13:39:03	0.431158
2022-09-12	13:39:03	0.427799
2022-09-12	13:39:04	0.436247
2022-09-12	13:39:04	0.412176
2022-09-12	13:39:04	0.4193
2022-09-12	13:39:04	0.422456
2022-09-12	13:39:05	0.434059
2022-09-12	13:39:05	0.419097
2022-09-12	13:39:05	0.447545
2022-09-12	13:39:06	0.467341
2022-09-12	13:39:06	0.450852
2022-09-12	13:39:06	0.434313
2022-09-12	13:39:06	0.470852
2022-09-12	13:39:07	0.481997
2022-09-12	13:39:07	0.456959
2022-09-12	13:39:07	0.462965
2022-09-12	13:39:07	0.474618
2022-09-12	13:39:08	0.467341
2022-09-12	13:39:08	0.472328
2022-09-12	13:39:08	0.460623
2022-09-12	13:39:08	0.467647
2022-09-12	13:39:09	0.503779
2022-09-12	13:39:09	0.435738
2022-09-12	13:39:09	0.471819
2022-09-12	13:39:10	0.445407
2022-09-12	13:39:10	0.471158
2022-09-12	13:39:10	0.492074
2022-09-12	13:39:10	0.473041
2022-09-12	13:39:11	0.496247
2022-09-12	13:39:11	0.563219
2022-09-12	13:39:11	0.440471
2022-09-12	13:39:11	1.26454
2022-09-12	13:39:12	0.53584
2022-09-12	13:39:12	0.395382
2022-09-12	13:39:12	0.318232
2022-09-12	13:39:12	1.70469
2022-09-12	13:39:13	2.36307
2022-09-12	13:39:13	1.35426
2022-09-12	13:39:13	0.624847
2022-09-12	13:39:14	0.504898
2022-09-12	13:39:14	0.473652
2022-09-12	13:39:14	0.391209
2022-09-12	13:39:14	0.71243
2022-09-12	13:39:15	0.946527
2022-09-12	13:39:15	0.89243
2022-09-12	13:39:15	0.596399
2022-09-12	13:39:15	0.435076
2022-09-12	13:39:16	0.361998
2022-09-12	13:39:16	0.576349
2022-09-12	13:39:16	0.523982
2022-09-12	13:39:16	0.520827
2022-09-12	13:39:17	0.599809
2022-09-12	13:39:17	0.525051
2022-09-12	13:39:17	0.438842
2022-09-12	13:39:18	0.370903
2022-09-12	13:39:18	0.537265
2022-09-12	13:39:18	0.519453
2022-09-12	13:39:18	0.718791
2022-09-12	13:39:19	0.543015
2022-09-12	13:39:19	0.705814
2022-09-12	13:39:19	1.19044
2022-09-12	13:39:19	2.67813
2022-09-12	13:39:20	4.46149
2022-09-12	13:39:20	3.88642
2022-09-12	13:39:20	1.68749
2022-09-12	13:39:21	2.04627
2022-09-12	13:39:21	3.94851
2022-09-12	13:39:21	1.58887
2022-09-12	13:39:21	0.545661
2022-09-12	13:39:22	0.86846
2022-09-12	13:39:22	0.599351
2022-09-12	13:39:22	0.708359
2022-09-12	13:39:22	0.644033
2022-09-12	13:39:23	1.51981
2022-09-12	13:39:23	4.82902
2022-09-12	13:39:23	5.58886
2022-09-12	13:39:23	9.53019
2022-09-12	13:39:24	8.58438
2022-09-12	13:39:24	7.16271
2022-09-12	13:39:24	2.11167
2022-09-12	13:39:25	4.76149
2022-09-12	13:39:25	2.27976
2022-09-12	13:39:25	3.83752
2022-09-12	13:39:25	10.5831
2022-09-12	13:39:26	5.26362
2022-09-12	13:39:26	13.1389
2022-09-12	13:39:26	4.84739
2022-09-12	13:39:26	6.45004
2022-09-12	13:39:27	5.86719
2022-09-12	13:39:27	4.22042
2022-09-12	13:39:27	13.1172
2022-09-12	13:39:27	4.70194
2022-09-12	13:39:28	5.93828
2022-09-12	13:39:28	3.14866
2022-09-12	13:39:28	2.47686
2022-09-12	13:39:29	2.75431
2022-09-12	13:39:29	3.12576
2022-09-12	13:39:29	4.48093
2022-09-12	13:39:29	1.85614
2022-09-12	13:39:30	0.714313
2022-09-12	13:39:30	0.328257
2022-09-12	13:39:30	0.397061
2022-09-12	13:39:30	0.383982
2022-09-12	13:39:31	0.502506
2022-09-12	13:39:31	0.58444
2022-09-12	13:39:31	0.894415
2022-09-12	13:39:31	2.49345
2022-09-12	13:39:32	0.59528
2022-09-12	13:39:32	0.472888
2022-09-12	13:39:32	0.350547
2022-09-12	13:39:33	0.21299
2022-09-12	13:39:33	0.154669
2022-09-12	13:39:33	0.154415
2022-09-12	13:39:33	0.498181
2022-09-12	13:39:34	0.386934
2022-09-12	13:39:34	0.286527
2022-09-12	13:39:34	0.368715
2022-09-12	13:39:34	0.396145
2022-09-12	13:39:35	0.599606
2022-09-12	13:39:35	0.414568
2022-09-12	13:39:35	0.510903
2022-09-12	13:39:35	0.486934
2022-09-12	13:39:36	0.568104
2022-09-12	13:39:36	0.505407
2022-09-12	13:39:36	0.459911
2022-09-12	13:39:37	0.47014
2022-09-12	13:39:37	0.408715
2022-09-12	13:39:37	0.436247
2022-09-12	13:39:37	0.556298
2022-09-12	13:39:38	0.481641
2022-09-12	13:39:38	0.602455
2022-09-12	13:39:38	0.620064
2022-09-12	13:39:38	0.608206
2022-09-12	13:39:39	0.693702
2022-09-12	13:39:39	0.568308
2022-09-12	13:39:39	0.545153
2022-09-12	13:39:39	0.429071
2022-09-12	13:39:40	1.08179
2022-09-12	13:39:40	1.43396
2022-09-12	13:39:40	2.98266
2022-09-12	13:39:41	0.097163
2022-09-12	13:39:41	0.0969595
2022-09-12	13:39:41	-0.114236
2022-09-12	13:39:41	1.37355
2022-09-12	13:39:42	2.00632
2022-09-12	13:39:42	5.99996
2022-09-12	13:39:42	8.09533
2022-09-12	13:39:42	2.348
2022-09-12	13:39:43	2.98851
2022-09-12	13:39:43	1.15533
2022-09-12	13:39:43	0.64612
2022-09-12	13:39:43	1.37803
2022-09-12	13:39:44	1.13579
2022-09-12	13:39:44	2.76413
2022-09-12	13:39:44	4.76408
2022-09-12	13:39:45	7.48561
2022-09-12	13:39:45	6.38225
2022-09-12	13:39:45	6.55858
2022-09-12	13:39:45	16.4536
2022-09-12	13:39:46	18.1621
2022-09-12	13:39:46	21.0298
2022-09-12	13:39:46	4.20703
2022-09-12	13:39:46	0.939198
2022-09-12	13:39:47	0.689987
2022-09-12	13:39:47	0.636755
2022-09-12	13:39:47	0.42159
2022-09-12	13:39:47	0.534924
2022-09-12	13:39:48	0.686272
2022-09-12	13:39:48	0.289275
2022-09-12	13:39:48	0.319199
2022-09-12	13:39:49	0.240522
2022-09-12	13:39:49	0.0115143
2022-09-12	13:39:49	0.834211
2022-09-12	13:39:49	1.84103
2022-09-12	13:39:50	1.14205
2022-09-12	13:39:50	0.78902
2022-09-12	13:39:50	0.965
2022-09-12	13:39:50	1.20566
2022-09-12	13:39:51	2.22062
2022-09-12	13:39:51	1.19625
2022-09-12	13:39:51	1.31126
2022-09-12	13:39:51	1.25818
2022-09-12	13:39:52	1.49177
2022-09-12	13:39:52	1.59894
2022-09-12	13:39:52	1.89156
2022-09-12	13:39:53	1.9452
2022-09-12	13:39:53	2.59696
2022-09-12	13:39:53	1.79411
2022-09-12	13:39:53	1.65467
2022-09-12	13:39:54	1.20286
2022-09-12	13:39:54	1.27263
2022-09-12	13:39:54	1.3505
2022-09-12	13:39:54	1.94673
2022-09-12	13:39:55	1.64673
2022-09-12	13:39:55	2.58195
2022-09-12	13:39:55	1.98439
2022-09-12	13:39:55	1.73874
2022-09-12	13:39:56	1.43492
2022-09-12	13:39:56	1.08164
2022-09-12	13:39:56	1.0308
2022-09-12	13:39:57	0.861488
2022-09-12	13:39:57	1.14785
2022-09-12	13:39:57	0.822404
2022-09-12	13:39:57	0.762252
2022-09-12	13:39:58	0.676908
2022-09-12	13:39:58	0.794618
2022-09-12	13:39:58	0.825051
2022-09-12	13:39:58	0.791158
2022-09-12	13:39:59	0.685305
2022-09-12	13:39:59	0.626527
2022-09-12	13:39:59	0.647544
2022-09-12	13:39:59	0.687952
2022-09-12	13:40:00	0.721743
2022-09-12	13:40:00	0.760929
2022-09-12	13:40:00	0.697366
2022-09-12	13:40:01	0.640522
2022-09-12	13:40:01	0.578486
2022-09-12	13:40:01	0.564898
2022-09-12	13:40:01	0.673295
2022-09-12	13:40:02	0.72785
2022-09-12	13:40:02	0.854008
2022-09-12	13:40:02	0.818435
2022-09-12	13:40:02	0.82098
2022-09-12	13:40:03	0.723626
2022-09-12	13:40:03	0.683168
2022-09-12	13:40:03	0.684237
2022-09-12	13:40:03	0.716654
2022-09-12	13:40:04	0.742557
2022-09-12	13:40:04	0.754364
2022-09-12	13:40:04	0.764745
2022-09-12	13:40:05	0.829224
2022-09-12	13:40:05	0.831463
2022-09-12	13:40:05	0.820674
2022-09-12	13:40:05	0.746323
2022-09-12	13:40:06	0.725153
2022-09-12	13:40:06	0.69472
2022-09-12	13:40:06	0.563371
2022-09-12	13:40:06	0.605458
2022-09-12	13:40:07	0.578181
2022-09-12	13:40:07	0.616501
2022-09-12	13:40:07	0.862354
2022-09-12	13:40:07	1.46052
2022-09-12	13:40:08	2.25757
2022-09-12	13:40:08	2.58668
2022-09-12	13:40:08	3.90179
2022-09-12	13:40:09	2.52973
2022-09-12	13:40:09	2.25721
2022-09-12	13:40:09	1.06449
2022-09-12	13:40:09	0.481183
2022-09-12	13:40:10	0.370191
2022-09-12	13:40:10	0.437825
2022-09-12	13:40:10	0.441489
2022-09-12	13:40:10	0.281031
2022-09-12	13:40:11	0.445713
2022-09-12	13:40:11	3.5591
2022-09-12	13:40:11	8.95329
2022-09-12	13:40:11	3.10612
2022-09-12	13:40:12	3.39742
2022-09-12	13:40:12	1.60256
2022-09-12	13:40:12	2.90144
2022-09-12	13:40:13	5.77996
2022-09-12	13:40:13	7.31248
2022-09-12	13:40:13	12.2023
2022-09-12	13:40:13	5.85426
2022-09-12	13:40:14	6.7995
2022-09-12	13:40:14	0.61986
2022-09-12	13:40:14	0.226323
2022-09-12	13:40:14	0.464644
2022-09-12	13:40:15	0.250445
2022-09-12	13:40:15	0.319504
2022-09-12	13:40:15	0.238435
2022-09-12	13:40:15	0.211311
2022-09-12	13:40:16	0.262812
2022-09-12	13:40:16	0.491158
2022-09-12	13:40:16	0.743524
2022-09-12	13:40:17	0.356298
2022-09-12	13:40:17	0.171209
2022-09-12	13:40:17	0.46383
2022-09-12	13:40:17	0.105713
2022-09-12	13:40:18	0.239657
2022-09-12	13:40:18	0.129784
2022-09-12	13:40:18	0.450852
2022-09-12	13:40:18	0.170547
2022-09-12	13:40:19	0.389733
2022-09-12	13:40:19	0.388664
2022-09-12	13:40:19	0.337926
2022-09-12	13:40:20	0.313448
2022-09-12	13:40:20	0.436705
2022-09-12	13:40:20	0.403423
2022-09-12	13:40:20	0.542557
2022-09-12	13:40:21	0.718028
2022-09-12	13:40:21	0.795585
2022-09-12	13:40:21	0.569784
2022-09-12	13:40:21	0.386425
2022-09-12	13:40:22	0.581998
2022-09-12	13:40:22	0.466679
2022-09-12	13:40:22	0.399657
2022-09-12	13:40:22	0.508715
2022-09-12	13:40:23	0.423728
2022-09-12	13:40:23	0.481285
2022-09-12	13:40:23	0.569834
2022-09-12	13:40:24	0.578384
2022-09-12	13:40:24	0.578384
2022-09-12	13:40:24	0.628206
2022-09-12	13:40:24	0.681895
2022-09-12	13:40:25	0.703321
2022-09-12	13:40:25	0.764338
2022-09-12	13:40:25	0.766577
2022-09-12	13:40:25	0.83813
2022-09-12	13:40:26	0.535127
2022-09-12	13:40:26	0.708868
2022-09-12	13:40:26	0.693448
2022-09-12	13:40:26	0.724186
2022-09-12	13:40:27	0.584745
2022-09-12	13:40:27	0.493804
2022-09-12	13:40:27	0.330598
2022-09-12	13:40:28	0.333397
2022-09-12	13:40:28	0.346069
2022-09-12	13:40:28	0.348155
2022-09-12	13:40:28	0.376298
2022-09-12	13:40:29	0.381998
2022-09-12	13:40:29	0.389326
2022-09-12	13:40:29	0.397163
2022-09-12	13:40:29	0.428868
2022-09-12	13:40:30	0.533651
2022-09-12	13:40:30	0.653499
2022-09-12	13:40:30	1.52968
2022-09-12	13:40:30	1.1423
2022-09-12	13:40:31	0.744593
2022-09-12	13:40:31	0.340675
2022-09-12	13:40:31	0.400878
2022-09-12	13:40:32	0.413601
2022-09-12	13:40:32	0.272277
2022-09-12	13:40:32	0.39813
2022-09-12	13:40:32	0.780929
2022-09-12	13:40:33	0.594008
2022-09-12	13:40:33	0.538486
2022-09-12	13:40:33	0.625611
2022-09-12	13:40:33	0.810598
2022-09-12	13:40:34	0.253346
2022-09-12	13:40:34	0.525509
2022-09-12	13:40:34	0.19986
2022-09-12	13:40:34	0.646374
2022-09-12	13:40:35	0.232837
2022-09-12	13:40:35	0.487596
2022-09-12	13:40:35	0.281641
2022-09-12	13:40:36	1.96357
2022-09-12	13:40:36	2.16515
2022-09-12	13:40:36	2.04123
2022-09-12	13:40:36	0.600827
2022-09-12	13:40:37	0.558893
2022-09-12	13:40:37	0.299097
2022-09-12	13:40:37	0.0461198
2022-09-12	13:40:37	0.414262
2022-09-12	13:40:38	0.061845
2022-09-12	13:40:38	0.172481
2022-09-12	13:40:38	0.328969
2022-09-12	13:40:38	0.699046
2022-09-12	13:40:39	0.498944
2022-09-12	13:40:39	0.648766
2022-09-12	13:40:39	1.32251
2022-09-12	13:40:40	1.09029
2022-09-12	13:40:40	0.535484
2022-09-12	13:40:40	0.132227
2022-09-12	13:40:40	0.254364
2022-09-12	13:40:41	0.0588425
2022-09-12	13:40:41	0.240725
2022-09-12	13:40:41	0.267748
2022-09-12	13:40:41	0.245713
2022-09-12	13:40:42	0.253499
2022-09-12	13:40:42	0.196349
2022-09-12	13:40:42	0.301285
2022-09-12	13:40:42	0.326934
2022-09-12	13:40:43	0.209835
2022-09-12	13:40:43	0.0983844
2022-09-12	13:40:43	0.103168
2022-09-12	13:40:44	0.106069
2022-09-12	13:40:44	0.275535
2022-09-12	13:40:44	0.270649
2022-09-12	13:40:44	0.530903
2022-09-12	13:40:45	0.357672
2022-09-12	13:40:45	0.442812
2022-09-12	13:40:45	0.854466
2022-09-12	13:40:45	0.577214
2022-09-12	13:40:46	0.487036
2022-09-12	13:40:46	0.631717
2022-09-12	13:40:46	0.574059
2022-09-12	13:40:46	0.458639
2022-09-12	13:40:47	0.680623
2022-09-12	13:40:47	0.632532
2022-09-12	13:40:47	0.963677
2022-09-12	13:40:48	0.675636
2022-09-12	13:40:48	1.15187
2022-09-12	13:40:48	0.945407
2022-09-12	13:40:48	2.20001
2022-09-12	13:40:49	2.47513
2022-09-12	13:40:49	1.63518
2022-09-12	13:40:49	0.179351
2022-09-12	13:40:49	0.440369
2022-09-12	13:40:50	0.518995
2022-09-12	13:40:50	0.389631
2022-09-12	13:40:50	0.282659
2022-09-12	13:40:50	0.261285
2022-09-12	13:40:51	0.25416
2022-09-12	13:40:51	0.230089
2022-09-12	13:40:51	0.989428
2022-09-12	13:40:52	0.954262
2022-09-12	13:40:52	3.95329
2022-09-12	13:40:52	4.29859
2022-09-12	13:40:52	4.10261
2022-09-12	13:40:53	3.02271
2022-09-12	13:40:53	2.90688
2022-09-12	13:40:53	5.50713
2022-09-12	13:40:53	5.76902
2022-09-12	13:40:54	11.4501
2022-09-12	13:40:54	7.92433
2022-09-12	13:40:54	4.53222
2022-09-12	13:40:54	5.64159
2022-09-12	13:40:55	3.59406
2022-09-12	13:40:55	4.09752
2022-09-12	13:40:55	5.1764
2022-09-12	13:40:56	3.17879
2022-09-12	13:40:56	6.29731
2022-09-12	13:40:56	3.69319
2022-09-12	13:40:56	2.56627
2022-09-12	13:40:57	2.66403
2022-09-12	13:40:57	1.91609
2022-09-12	13:40:57	6.51039
2022-09-12	13:40:57	12.9675
2022-09-12	13:40:58	9.27324
2022-09-12	13:40:58	8.33131
2022-09-12	13:40:58	3.56307
2022-09-12	13:40:58	4.72907
2022-09-12	13:40:59	5.68688
2022-09-12	13:40:59	4.07904
2022-09-12	13:40:59	6.95624
2022-09-12	13:41:00	3.22841
2022-09-12	13:41:00	3.10144
2022-09-12	13:41:00	4.97202
2022-09-12	13:41:01	5.17461
2022-09-12	13:41:01	7.41584
2022-09-12	13:41:01	7.82042
2022-09-12	13:41:01	4.78765
2022-09-12	13:41:01	4.50581
2022-09-12	13:41:02	3.30739
2022-09-12	13:41:02	3.32022
2022-09-12	13:41:02	3.04739
2022-09-12	13:41:02	4.13309
2022-09-12	13:41:03	5.83777
2022-09-12	13:41:03	4.20306
2022-09-12	13:41:03	3.36022
2022-09-12	13:41:04	7.24993
2022-09-12	13:41:04	4.00266
2022-09-12	13:41:04	5.41879
2022-09-12	13:41:04	9.85533
2022-09-12	13:41:05	4.13864
2022-09-12	13:41:05	8.76276
2022-09-12	13:41:05	8.38576
2022-09-12	13:41:05	4.88693
2022-09-12	13:41:06	8.47915
2022-09-12	13:41:06	8.75456
2022-09-12	13:41:06	6.9709
2022-09-12	13:41:06	10.2684
2022-09-12	13:41:07	6.8564
2022-09-12	13:41:07	5.17085
2022-09-12	13:41:07	0.705611
2022-09-12	13:41:08	0.72729
2022-09-12	13:41:08	0.727697
2022-09-12	13:41:08	0.722914
2022-09-12	13:41:08	0.729835
2022-09-12	13:41:09	1.06195
2022-09-12	13:41:09	1.38134
2022-09-12	13:41:09	1.49441
2022-09-12	13:41:09	2.78419
2022-09-12	13:41:10	5.80581
2022-09-12	13:41:10	1.86363
2022-09-12	13:41:10	2.56999
2022-09-12	13:41:10	1.36632
2022-09-12	13:41:11	2.36556
2022-09-12	13:41:11	3.90953
2022-09-12	13:41:11	3.74882
2022-09-12	13:41:12	5.0309
2022-09-12	13:41:12	3.30637
2022-09-12	13:41:12	4.12836
2022-09-12	13:41:12	3.89981
2022-09-12	13:41:13	1.88184
2022-09-12	13:41:13	2.36235
2022-09-12	13:41:13	1.01248
2022-09-12	13:41:13	0.752583
2022-09-12	13:41:14	0.172379
2022-09-12	13:41:14	0.294517
2022-09-12	13:41:14	0.147087
2022-09-12	13:41:15	0.260165
2022-09-12	13:41:15	0.196552
2022-09-12	13:41:15	0.365255
2022-09-12	13:41:15	0.291412
2022-09-12	13:41:16	0.412634
2022-09-12	13:41:16	0.220318
2022-09-12	13:41:16	0.40098
2022-09-12	13:41:16	0.219097
2022-09-12	13:41:17	0.129835
2022-09-12	13:41:17	0.201285
2022-09-12	13:41:17	0.270038
2022-09-12	13:41:17	0.25528
2022-09-12	13:41:18	0.210038
2022-09-12	13:41:18	0.362608
2022-09-12	13:41:18	0.277519
2022-09-12	13:41:19	0.410751
2022-09-12	13:41:19	0.382303
2022-09-12	13:41:19	0.277265
2022-09-12	13:41:19	0.238893
2022-09-12	13:41:20	0.237672
2022-09-12	13:41:20	0.227646
2022-09-12	13:41:20	0.235942
2022-09-12	13:41:20	0.242099
2022-09-12	13:41:21	0.241896
2022-09-12	13:41:21	0.254975
2022-09-12	13:41:21	0.260013
2022-09-12	13:41:21	0.274517
2022-09-12	13:41:22	0.272176
2022-09-12	13:41:22	0.267138
2022-09-12	13:41:22	0.275076
2022-09-12	13:41:23	0.270598
2022-09-12	13:41:23	0.27126
2022-09-12	13:41:23	0.270344
2022-09-12	13:41:23	0.272226
2022-09-12	13:41:24	0.284084
2022-09-12	13:41:24	0.28383
2022-09-12	13:41:24	0.283372
2022-09-12	13:41:24	0.279758
2022-09-12	13:41:25	0.27986
2022-09-12	13:41:25	0.281387
2022-09-12	13:41:25	0.279046
2022-09-12	13:41:25	0.280674
2022-09-12	13:41:26	0.270445
2022-09-12	13:41:26	0.282405
2022-09-12	13:41:26	0.278639
2022-09-12	13:41:27	0.275941
2022-09-12	13:41:27	0.287952
2022-09-12	13:41:27	0.286018
2022-09-12	13:41:27	0.283473
2022-09-12	13:41:28	0.296654
2022-09-12	13:41:28	0.288155
2022-09-12	13:41:28	0.292735
2022-09-12	13:41:28	0.292837
2022-09-12	13:41:29	0.298893
2022-09-12	13:41:29	0.298842
2022-09-12	13:41:29	0.301998
2022-09-12	13:41:29	0.2993
2022-09-12	13:41:30	0.304746
2022-09-12	13:41:30	0.300318
2022-09-12	13:41:30	0.30383
2022-09-12	13:41:31	0.307545
2022-09-12	13:41:31	0.30673
2022-09-12	13:41:31	0.307799
2022-09-12	13:41:31	0.309326
2022-09-12	13:41:32	0.308715
2022-09-12	13:41:32	0.312277
2022-09-12	13:41:32	0.309937
2022-09-12	13:41:32	0.314567
2022-09-12	13:41:33	0.317265
2022-09-12	13:41:33	0.315585
2022-09-12	13:41:33	0.313194
2022-09-12	13:41:33	0.314466
2022-09-12	13:41:34	0.314313
2022-09-12	13:41:34	0.320674
2022-09-12	13:41:34	0.314059
2022-09-12	13:41:35	0.309886
2022-09-12	13:41:35	0.298028
2022-09-12	13:41:35	0.304542
2022-09-12	13:41:35	0.317876
2022-09-12	13:41:36	0.376552
2022-09-12	13:41:36	1.07146
2022-09-12	13:41:36	0.96902
2022-09-12	13:41:36	1.25172
2022-09-12	13:41:37	0.835331
2022-09-12	13:41:37	0.480623
2022-09-12	13:41:37	0.528206
2022-09-12	13:41:37	0.185611
2022-09-12	13:41:38	0.321387
2022-09-12	13:41:38	0.72042
2022-09-12	13:41:38	0.724338
2022-09-12	13:41:39	0.603677
2022-09-12	13:41:39	0.250751
2022-09-12	13:41:39	0.490802
2022-09-12	13:41:39	0.220573
2022-09-12	13:41:40	0.144186
2022-09-12	13:41:40	-0.0124043
2022-09-12	13:41:40	0.0866796
2022-09-12	13:41:40	0.254415
2022-09-12	13:41:41	0.229224
2022-09-12	13:41:41	0.189326
2022-09-12	13:41:41	0.119555
2022-09-12	13:41:42	0.0915142
2022-09-12	13:41:42	0.200573
2022-09-12	13:41:42	0.0767051
2022-09-12	13:41:42	-0.0879259
2022-09-12	13:41:43	-0.368231
2022-09-12	13:41:43	-0.407926
2022-09-12	13:41:43	-0.152557
2022-09-12	13:41:43	0.0107
2022-09-12	13:41:44	0.0872394
2022-09-12	13:41:44	0.0432699
2022-09-12	13:41:44	0.0415396
2022-09-12	13:41:44	0.0395041
2022-09-12	13:41:45	0.055789
2022-09-12	13:41:45	0.0811834
2022-09-12	13:41:45	0.167341
2022-09-12	13:41:45	0.259758
2022-09-12	13:41:46	0.34098
2022-09-12	13:41:46	0.56042
2022-09-12	13:41:46	0.826069
2022-09-12	13:41:47	0.831107
2022-09-12	13:41:47	1.25772
2022-09-12	13:41:47	1.38352
2022-09-12	13:41:47	1.0679
2022-09-12	13:41:48	0.974415
2022-09-12	13:41:48	1.09996
2022-09-12	13:41:48	1.31345
2022-09-12	13:41:48	1.32917
2022-09-12	13:41:49	1.31156
2022-09-12	13:41:49	1.1706
2022-09-12	13:41:49	1.05212
2022-09-12	13:41:49	0.936806
2022-09-12	13:41:50	0.870903
2022-09-12	13:41:50	0.812786
2022-09-12	13:41:50	0.81813
2022-09-12	13:41:51	0.958282
2022-09-12	13:41:51	0.989886
2022-09-12	13:41:51	0.913142
2022-09-12	13:41:51	0.928817
2022-09-12	13:41:52	1.00871
2022-09-12	13:41:52	1.09553
2022-09-12	13:41:52	1.1362
2022-09-12	13:41:52	1.07472
2022-09-12	13:41:53	1.26368
2022-09-12	13:41:53	0.519809
2022-09-12	13:41:53	0.350445
2022-09-12	13:41:53	0.357723
2022-09-12	13:41:54	0.207443
2022-09-12	13:41:54	0.250445
2022-09-12	13:41:54	0.108359
2022-09-12	13:41:55	-0.30131
2022-09-12	13:41:55	-0.173524
2022-09-12	13:41:55	-0.540292
2022-09-12	13:41:55	-0.555763
2022-09-12	13:41:56	0.69416
2022-09-12	13:41:56	2.84999
2022-09-12	13:41:56	5.06698
2022-09-12	13:41:56	4.44892
2022-09-12	13:41:57	2.4906
2022-09-12	13:41:57	1.63477
2022-09-12	13:41:57	2.44022
2022-09-12	13:41:57	1.92765
2022-09-12	13:41:58	1.70744
2022-09-12	13:41:58	1.03548
2022-09-12	13:41:58	1.03391
2022-09-12	13:41:59	1.31467
2022-09-12	13:41:59	2.762
2022-09-12	13:41:59	3.15457
2022-09-12	13:41:59	3.04378
2022-09-12	13:42:00	4.56174
2022-09-12	13:42:00	4.80754
2022-09-12	13:42:00	6.74596
2022-09-12	13:42:00	8.56698
2022-09-12	13:42:01	10.9934
2022-09-12	13:42:01	15.1712
2022-09-12	13:42:01	1.83324
2022-09-12	13:42:02	2.17609
2022-09-12	13:42:02	3.04663
2022-09-12	13:42:02	1.03508
2022-09-12	13:42:02	1.49777
2022-09-12	13:42:03	2.19767
2022-09-12	13:42:03	2.82541
2022-09-12	13:42:03	3.90256
2022-09-12	13:42:03	2.38902
2022-09-12	13:42:04	5.1108
2022-09-12	13:42:04	0.530241
2022-09-12	13:42:04	1.19304
2022-09-12	13:42:04	0.34383
2022-09-12	13:42:05	0.129529
2022-09-12	13:42:05	0.191311
2022-09-12	13:42:05	0.306476
2022-09-12	13:42:06	0.636705
2022-09-12	13:42:06	0.566323
2022-09-12	13:42:06	0.118792
2022-09-12	13:42:06	0.135178
2022-09-12	13:42:07	0.500013
2022-09-12	13:42:07	0.209224
2022-09-12	13:42:07	0.149479
2022-09-12	13:42:07	0.209071
2022-09-12	13:42:08	0.248308
2022-09-12	13:42:08	0.209784
2022-09-12	13:42:08	0.204949
2022-09-12	13:42:08	0.177061
2022-09-12	13:42:09	0.181539
2022-09-12	13:42:09	0.174517
2022-09-12	13:42:09	0.152786
2022-09-12	13:42:10	0.151311
2022-09-12	13:42:10	0.339351
2022-09-12	13:42:10	0.305407
2022-09-12	13:42:10	0.284746
2022-09-12	13:42:11	0.412125
2022-09-12	13:42:11	0.444491
2022-09-12	13:42:11	0.471311
2022-09-12	13:42:11	0.458079
2022-09-12	13:42:12	0.441794
2022-09-12	13:42:12	0.456756
2022-09-12	13:42:12	0.445814
2022-09-12	13:42:12	0.462405
2022-09-12	13:42:13	0.451819
2022-09-12	13:42:13	0.466781
2022-09-12	13:42:13	0.437875
2022-09-12	13:42:14	0.446781
2022-09-12	13:42:14	0.353193
2022-09-12	13:42:14	0.543321
2022-09-12	13:42:14	0.2593
2022-09-12	13:42:15	0.297112
2022-09-12	13:42:15	0.318537
2022-09-12	13:42:15	0.278283
2022-09-12	13:42:15	0.312176
2022-09-12	13:42:16	0.265051
2022-09-12	13:42:16	0.3593
2022-09-12	13:42:16	0.27869
2022-09-12	13:42:16	0.169886
2022-09-12	13:42:17	0.196807
2022-09-12	13:42:17	0.317672
2022-09-12	13:42:17	0.115484
2022-09-12	13:42:18	-0.357849
2022-09-12	13:42:18	-0.387875
2022-09-12	13:42:18	-0.176577
2022-09-12	13:42:18	-0.00181909
2022-09-12	13:42:19	-0.141921
2022-09-12	13:42:19	-0.124313
2022-09-12	13:42:19	0.30098
2022-09-12	13:42:19	0.432379
2022-09-12	13:42:20	0.441387
2022-09-12	13:42:20	0.796247
2022-09-12	13:42:20	0.829326
2022-09-12	13:42:20	0.667748
2022-09-12	13:42:21	0.475229
2022-09-12	13:42:21	0.520064
2022-09-12	13:42:21	0.762252
2022-09-12	13:42:22	1.6992
2022-09-12	13:42:22	2.11599
2022-09-12	13:42:22	1.47396
2022-09-12	13:42:22	1.23579
2022-09-12	13:42:23	1.0281
2022-09-12	13:42:23	1.09757
2022-09-12	13:42:23	1.2108
2022-09-12	13:42:23	1.31935
2022-09-12	13:42:24	0.559351
2022-09-12	13:42:24	0.569021
2022-09-12	13:42:24	0.511616
2022-09-12	13:42:24	0.235687
2022-09-12	13:42:25	0.245407
2022-09-12	13:42:25	0.180624
2022-09-12	13:42:25	0.199758
2022-09-12	13:42:26	0.221234
2022-09-12	13:42:26	0.288766
2022-09-12	13:42:26	0.340725
2022-09-12	13:42:26	0.251412
2022-09-12	13:42:27	0.286832
2022-09-12	13:42:27	0.224491
2022-09-12	13:42:27	1.05813
2022-09-12	13:42:27	1.53665
2022-09-12	13:42:28	0.756349
2022-09-12	13:42:28	0.27757
2022-09-12	13:42:28	0.184644
2022-09-12	13:42:28	0.934924
2022-09-12	13:42:29	0.76902
2022-09-12	13:42:29	1.38541
2022-09-12	13:42:29	0.369326
2022-09-12	13:42:30	0.261998
2022-09-12	13:42:30	0.168155
2022-09-12	13:42:30	0.051158
2022-09-12	13:42:30	0.0789952
2022-09-12	13:42:31	0.089275
2022-09-12	13:42:31	0.0256109
2022-09-12	13:42:31	0.475127
2022-09-12	13:42:31	0.364898
2022-09-12	13:42:32	0.507951
2022-09-12	13:42:32	0.528919
2022-09-12	13:42:32	0.643626
2022-09-12	13:42:32	0.605916
2022-09-12	13:42:33	0.536552
2022-09-12	13:42:33	0.517723
2022-09-12	13:42:33	0.521081
2022-09-12	13:42:34	0.489173
2022-09-12	13:42:34	0.480623
2022-09-12	13:42:34	0.489987
2022-09-12	13:42:34	0.473041
2022-09-12	13:42:35	0.475178
2022-09-12	13:42:35	0.47243
2022-09-12	13:42:35	0.489529
2022-09-12	13:42:35	0.479657
2022-09-12	13:42:36	0.609478
2022-09-12	13:42:36	2.10296
2022-09-12	13:42:36	3.39721
2022-09-12	13:42:36	0.94154
2022-09-12	13:42:37	0.536756
2022-09-12	13:42:37	0.462099
2022-09-12	13:42:37	0.319046
2022-09-12	13:42:38	0.238333
2022-09-12	13:42:38	0.270089
2022-09-12	13:42:38	0.333092
2022-09-12	13:42:38	0.457926
2022-09-12	13:42:39	0.398537
2022-09-12	13:42:39	0.409478
2022-09-12	13:42:39	0.475585
2022-09-12	13:42:39	0.815076
2022-09-12	13:42:40	1.01996
2022-09-12	13:42:40	1.09854
2022-09-12	13:42:40	0.403168
2022-09-12	13:42:40	0.40958
2022-09-12	13:42:41	0.384135
2022-09-12	13:42:41	0.997875
2022-09-12	13:42:41	1.75803
2022-09-12	13:42:42	0.841896
2022-09-12	13:42:42	1.52688
2022-09-12	13:42:42	1.21085
2022-09-12	13:42:42	0.973092
2022-09-12	13:42:43	1.80642
2022-09-12	13:42:43	0.817061
2022-09-12	13:42:43	0.614568
2022-09-12	13:42:43	1.64037
2022-09-12	13:42:44	0.730191
2022-09-12	13:42:44	0.509987
2022-09-12	13:42:44	1.69803
2022-09-12	13:42:44	0.296043
2022-09-12	13:42:45	0.2107
2022-09-12	13:42:45	0.0732954
2022-09-12	13:42:45	0.227188
2022-09-12	13:42:46	0.803066
2022-09-12	13:42:46	2.29894
2022-09-12	13:42:46	3.22759
2022-09-12	13:42:46	4.70032
2022-09-12	13:42:47	4.99034
2022-09-12	13:42:47	4.97375
2022-09-12	13:42:47	2.80709
2022-09-12	13:42:47	4.52011
2022-09-12	13:42:48	3.2024
2022-09-12	13:42:48	3.2738
2022-09-12	13:42:48	2.68088
