# Supplementary material for: Comparing efficacy in reducing pulling and welfare impacts of four types of leash walking equipment
Source: PeerJ journal article supplement (doi:10.7717/peerj.18131), 2024-10-24
Supplement: Shelter1_Tension_files.zip [file Harley_prong_2022912160856 copy.xlsx]

## Sheet: averaged newtons
Date	Time	Averaged Newtons	Impulse	total steps
2022-09-12	16:09:13	3.57989	3.57989	0		Impulse	977.74
2022-09-12	16:09:14	3.24803	6.82793	0		Total steps	14
2022-09-12	16:09:15	2.77167	9.5996	0		# > 5 sec	2
2022-09-12	16:09:16	2.65704	12.2566	0
2022-09-12	16:09:17	2.40078	14.6574	0
2022-09-12	16:09:18	2.20831	16.8657	0
2022-09-12	16:09:19	1.95676	18.8225	0
2022-09-12	16:09:20	2.55902	21.3815	0
2022-09-12	16:09:21	2.21833	23.5998	0
2022-09-12	16:09:22	2.06524	25.6651	0
2022-09-12	16:09:23	2.08839	27.7535	0
2022-09-12	16:09:24	2.56009	30.3136	0
2022-09-12	16:09:25	2.52874	32.8423	0
2022-09-12	16:09:26	2.34806	35.1904	0
2022-09-12	16:09:27	2.09733	37.2877	0
2022-09-12	16:09:28	2.00022	39.2879	0
2022-09-12	16:09:29	1.96938	41.2573	0
2022-09-12	16:09:30	1.9636	43.2209	0
2022-09-12	16:09:31	2.03123	45.2521	0
2022-09-12	16:09:32	1.94142	47.1935	0
2022-09-12	16:09:33	2.59473	49.7883	0
2022-09-12	16:09:34	2.58869	52.377	0
2022-09-12	16:09:35	2.00254	54.3795	0
2022-09-12	16:09:36	2.29348	56.673	0
2022-09-12	16:09:37	2.35669	59.0297	0
2022-09-12	16:09:38	1.05578	60.0855	0
2022-09-12	16:09:39	1.77894	61.8644	0
2022-09-12	16:09:40	3.43768	65.3021	0
2022-09-12	16:09:41	0.961532	66.2636	0
2022-09-12	16:09:42	5.56846	71.8321	0
2022-09-12	16:09:43	1.39569	73.2278	0
2022-09-12	16:09:44	4.94741	78.1752	0
2022-09-12	16:09:45	5.19272	83.3679	0
2022-09-12	16:09:46	0.79117	84.159	0
2022-09-12	16:09:47	1.26989	85.4289	0
2022-09-12	16:09:48	3.16558	88.5945	0
2022-09-12	16:09:49	3.21861	91.8131	0
2022-09-12	16:09:50	3.20599	95.0191	0
2022-09-12	16:09:51	3.20701	98.2261	0
2022-09-12	16:09:52	2.41397	100.64	0
2022-09-12	16:09:53	3.22811	103.868	0
2022-09-12	16:09:54	1.11432	104.983	0
2022-09-12	16:09:55	1.06417	106.047	0
2022-09-12	16:09:56	2.08743	108.134	0
2022-09-12	16:09:57	4.94664	113.081	0
2022-09-12	16:09:58	8.86868	121.949	0
2022-09-12	16:09:59	4.24175	126.191	0
2022-09-12	16:10:00	2.51587	128.707	0
2022-09-12	16:10:01	2.1516	130.859	0
2022-09-12	16:10:02	2.32421	133.183	0
2022-09-12	16:10:03	2.16802	135.351	0
2022-09-12	16:10:04	3.44363	138.795	0
2022-09-12	16:10:05	2.54702	141.342	0
2022-09-12	16:10:06	1.97871	143.32	0
2022-09-12	16:10:07	2.07045	145.391	0
2022-09-12	16:10:08	2.02419	147.415	0
2022-09-12	16:10:09	2.03864	149.454	0
2022-09-12	16:10:10	2.04085	151.494	0
2022-09-12	16:10:11	0.141936	151.636	0
2022-09-12	16:10:12	-0.342895	151.636	0
2022-09-12	16:10:13	-2.04787	151.636	0
2022-09-12	16:10:14	0.617541	152.254	0
2022-09-12	16:10:15	1.25885	153.513	0
2022-09-12	16:10:16	1.06868	154.581	0
2022-09-12	16:10:17	1.44821	156.03	0
2022-09-12	16:10:18	1.53321	157.563	0
2022-09-12	16:10:19	0.175892	157.739	0
2022-09-12	16:10:20	1.95062	159.689	0
2022-09-12	16:10:21	2.76552	162.455	0
2022-09-12	16:10:22	2.27549	164.73	0
2022-09-12	16:10:23	2.22197	166.952	0
2022-09-12	16:10:24	2.61787	169.57	0
2022-09-12	16:10:25	2.71838	172.289	0
2022-09-12	16:10:26	2.91833	175.207	0
2022-09-12	16:10:27	2.20303	177.41	0
2022-09-12	16:10:28	2.02427	179.434	0
2022-09-12	16:10:29	2.1204	181.555	0
2022-09-12	16:10:30	2.46764	184.022	0
2022-09-12	16:10:31	8.46039	192.483	0
2022-09-12	16:10:32	8.19176	200.674	0
2022-09-12	16:10:33	6.88809	207.562	0
2022-09-12	16:10:34	0.945158	208.508	0
2022-09-12	16:10:35	2.70497	211.213	0
2022-09-12	16:10:36	2.90803	214.121	0
2022-09-12	16:10:37	7.05408	221.175	0
2022-09-12	16:10:38	6.19182	227.367	0
2022-09-12	16:10:39	5.15605	232.523	0
2022-09-12	16:10:40	6.82209	239.345	0
2022-09-12	16:10:41	9.24666	248.591	0
2022-09-12	16:10:42	2.19382	250.785	0
2022-09-12	16:10:43	0.705486	251.491	0
2022-09-12	16:10:44	0.9541	252.445	0
2022-09-12	16:10:45	2.18579	254.631	0
2022-09-12	16:10:46	0.652686	255.283	0
2022-09-12	16:10:47	0.917316	256.201	0
2022-09-12	16:10:48	1.12393	257.324	0
2022-09-12	16:10:49	0.847422	258.172	0
2022-09-12	16:10:50	1.63861	259.811	0
2022-09-12	16:10:51	1.58941	261.4	0
2022-09-12	16:10:52	2.08997	263.49	0
2022-09-12	16:10:53	1.46242	264.952	0
2022-09-12	16:10:54	0.336597	265.289	0
2022-09-12	16:10:55	1.51709	266.806	0
2022-09-12	16:10:56	1.38992	268.196	0
2022-09-12	16:10:57	2.02212	270.218	0
2022-09-12	16:10:58	2.97443	273.192	0
2022-09-12	16:10:59	1.61499	274.807	0
2022-09-12	16:11:00	2.43649	277.244	0
2022-09-12	16:11:01	2.00605	279.25	0
2022-09-12	16:11:02	1.32192	280.572	0
2022-09-12	16:11:03	1.61901	282.191	0
2022-09-12	16:11:04	3.29444	285.485	0
2022-09-12	16:11:05	3.27165	288.757	0
2022-09-12	16:11:06	7.28192	296.039	0
2022-09-12	16:11:07	-1.61357	296.039	0
2022-09-12	16:11:08	-0.963265	296.039	0
2022-09-12	16:11:09	0.691622	296.731	0
2022-09-12	16:11:10	1.50865	298.239	0
2022-09-12	16:11:11	3.05019	301.289	0
2022-09-12	16:11:12	5.67542	306.965	0
2022-09-12	16:11:13	2.26951	309.234	0
2022-09-12	16:11:14	3.32602	312.56	0
2022-09-12	16:11:15	3.45964	316.02	0
2022-09-12	16:11:16	3.94356	319.964	0
2022-09-12	16:11:17	3.90066	323.864	0
2022-09-12	16:11:18	2.52138	326.386	0
2022-09-12	16:11:19	1.60226	327.988	0
2022-09-12	16:11:20	3.1198	331.108	0
2022-09-12	16:11:21	1.53825	332.646	0
2022-09-12	16:11:22	2.17617	334.822	0
2022-09-12	16:11:23	5.15035	339.972	0
2022-09-12	16:11:24	2.77665	342.749	0
2022-09-12	16:11:25	1.51279	344.262	0
2022-09-12	16:11:26	2.21312	346.475	0
2022-09-12	16:11:27	2.20825	348.683	0
2022-09-12	16:11:28	1.4809	350.164	0
2022-09-12	16:11:29	1.40781	351.572	0
2022-09-12	16:11:30	1.15744	352.729	0
2022-09-12	16:11:31	1.67447	354.404	0
2022-09-12	16:11:32	1.69558	356.099	0
2022-09-12	16:11:33	1.92144	358.021	0
2022-09-12	16:11:34	1.97883	360	0
2022-09-12	16:11:35	1.66949	361.669	0
2022-09-12	16:11:36	1.51501	363.184	0
2022-09-12	16:11:37	1.52212	364.706	0
2022-09-12	16:11:38	1.47922	366.186	0
2022-09-12	16:11:39	1.50311	367.689	0
2022-09-12	16:11:40	1.91818	369.607	0
2022-09-12	16:11:41	1.97221	371.579	0
2022-09-12	16:11:42	1.98279	373.562	0
2022-09-12	16:11:43	1.99009	375.552	0
2022-09-12	16:11:44	2.00633	377.558	0
2022-09-12	16:11:45	2.07928	379.638	0
2022-09-12	16:11:46	2.05511	381.693	0
2022-09-12	16:11:47	1.94497	383.638	0
2022-09-12	16:11:48	1.90978	385.547	0
2022-09-12	16:11:49	2.09156	387.639	0
2022-09-12	16:11:50	0.961175	388.6	0
2022-09-12	16:11:51	3.72001	392.32	0
2022-09-12	16:11:52	2.16801	394.488	0
2022-09-12	16:11:53	1.03559	395.524	0
2022-09-12	16:11:54	0.0263729	395.55	0
2022-09-12	16:11:55	0.727992	396.278	0
2022-09-12	16:11:56	1.95483	398.233	0
2022-09-12	16:11:57	2.07379	400.307	0
2022-09-12	16:11:58	2.02829	402.335	0
2022-09-12	16:11:59	2.18952	404.525	0
2022-09-12	16:12:00	0.887377	405.412	0
2022-09-12	16:12:01	1.47034	406.882	0
2022-09-12	16:12:02	0.442388	407.325	0
2022-09-12	16:12:03	0.693661	408.018	0
2022-09-12	16:12:04	0.770852	408.789	0
2022-09-12	16:12:05	1.11845	409.908	0
2022-09-12	16:12:06	1.43782	411.345	0
2022-09-12	16:12:07	-0.319409	411.345	0
2022-09-12	16:12:08	-3.35024	411.345	0
2022-09-12	16:12:09	-3.49557	411.345	0
2022-09-12	16:12:10	-3.65508	411.345	0
2022-09-12	16:12:11	-3.79172	411.345	0
2022-09-12	16:12:12	-2.99568	411.345	0
2022-09-12	16:12:13	1.62529	412.971	0
2022-09-12	16:12:14	2.11142	415.082	0
2022-09-12	16:12:15	1.87804	416.96	0
2022-09-12	16:12:16	2.45126	419.411	0
2022-09-12	16:12:17	4.47253	423.884	0
2022-09-12	16:12:18	2.82585	426.71	0
2022-09-12	16:12:19	2.69852	429.408	0
2022-09-12	16:12:20	2.90672	432.315	0
2022-09-12	16:12:21	2.20939	434.524	0
2022-09-12	16:12:22	2.04336	436.568	0
2022-09-12	16:12:23	3.58556	440.153	0
2022-09-12	16:12:24	3.76049	443.914	0
2022-09-12	16:12:25	1.89456	445.808	0
2022-09-12	16:12:26	3.10576	448.914	0
2022-09-12	16:12:27	5.60202	454.516	0
2022-09-12	16:12:28	13.113	467.629	1
2022-09-12	16:12:29	16.3383	483.967	2
2022-09-12	16:12:30	19.5362	503.504	3
2022-09-12	16:12:31	20.0739	523.578	4
2022-09-12	16:12:32	20.0964	543.674	5
2022-09-12	16:12:33	20.2272	563.901	6
2022-09-12	16:12:34	16.7273	580.628	7
2022-09-12	16:12:35	13.766	594.394	8
2022-09-12	16:12:36	9.31116	603.706	8
2022-09-12	16:12:37	2.72104	606.427	8
2022-09-12	16:12:38	2.02031	608.447	8
2022-09-12	16:12:39	1.76655	610.214	8
2022-09-12	16:12:40	1.791	612.005	8
2022-09-12	16:12:41	2.01854	614.023	8
2022-09-12	16:12:42	2.44487	616.468	8
2022-09-12	16:12:43	2.05613	618.524	8
2022-09-12	16:12:44	2.44879	620.973	8
2022-09-12	16:12:45	2.3121	623.285	8
2022-09-12	16:12:46	1.25297	624.538	8
2022-09-12	16:12:47	-0.37685	624.538	8
2022-09-12	16:12:48	1.43193	625.97	8
2022-09-12	16:12:49	2.74362	628.713	8
2022-09-12	16:12:50	5.75193	634.465	8
2022-09-12	16:12:51	8.17756	642.643	8
2022-09-12	16:12:52	7.37033	650.013	8
2022-09-12	16:12:53	5.90881	655.922	8
2022-09-12	16:12:54	6.0363	661.958	8
2022-09-12	16:12:55	5.87792	667.836	8
2022-09-12	16:12:56	5.37948	673.216	8
2022-09-12	16:12:57	5.78634	679.002	8
2022-09-12	16:12:58	3.90944	682.912	8
2022-09-12	16:12:59	3.17243	686.084	8
2022-09-12	16:13:00	2.21148	688.295	8
2022-09-12	16:13:01	2.36151	690.657	8
2022-09-12	16:13:02	3.15386	693.811	8
2022-09-12	16:13:03	3.6598	697.471	8
2022-09-12	16:13:04	2.19133	699.662	8
2022-09-12	16:13:05	0.0239967	699.686	8
2022-09-12	16:13:06	-0.287264	699.686	8
2022-09-12	16:13:07	0.00669783	699.693	8
2022-09-12	16:13:08	1.9713	701.664	8
2022-09-12	16:13:09	10.5696	712.234	8
2022-09-12	16:13:10	3.04011	715.274	8
2022-09-12	16:13:11	3.49003	718.764	8
2022-09-12	16:13:12	4.10502	722.869	8
2022-09-12	16:13:13	3.76026	726.629	8
2022-09-12	16:13:14	2.26892	728.898	8
2022-09-12	16:13:15	2.64725	731.545	8
2022-09-12	16:13:16	1.93933	733.485	8
2022-09-12	16:13:17	1.62654	735.111	8
2022-09-12	16:13:18	-3.90627	735.111	8
2022-09-12	16:13:19	-2.43215	735.111	8
2022-09-12	16:13:20	0.0895308	735.201	8
2022-09-12	16:13:21	2.68873	737.889	8
2022-09-12	16:13:22	1.84063	739.73	8
2022-09-12	16:13:23	1.91275	741.643	8
2022-09-12	16:13:24	2.12823	743.771	8
2022-09-12	16:13:25	0.709958	744.481	8
2022-09-12	16:13:26	-0.987828	744.481	8
2022-09-12	16:13:27	0.624993	745.106	8
2022-09-12	16:13:28	1.37159	746.477	8
2022-09-12	16:13:29	4.0495	750.527	8
2022-09-12	16:13:30	-0.0859631	750.527	8
2022-09-12	16:13:31	1.55212	752.079	8
2022-09-12	16:13:32	2.47814	754.557	8
2022-09-12	16:13:33	4.84253	759.4	8
2022-09-12	16:13:34	3.95062	763.35	8
2022-09-12	16:13:35	1.80978	765.16	8
2022-09-12	16:13:36	1.42438	766.585	8
2022-09-12	16:13:37	1.12456	767.709	8
2022-09-12	16:13:38	0.0992837	767.808	8
2022-09-12	16:13:39	0.0520665	767.86	8
2022-09-12	16:13:40	3.0215	770.882	8
2022-09-12	16:13:41	2.11991	773.002	8
2022-09-12	16:13:42	1.05102	774.053	8
2022-09-12	16:13:43	-0.514201	774.053	8
2022-09-12	16:13:44	0.46525	774.518	8
2022-09-12	16:13:45	1.44674	775.965	8
2022-09-12	16:13:46	1.21522	777.18	8
2022-09-12	16:13:47	1.15591	778.336	8
2022-09-12	16:13:48	1.16593	779.502	8
2022-09-12	16:13:49	0.892036	780.394	8
2022-09-12	16:13:50	4.28511	784.679	8
2022-09-12	16:13:51	4.38182	789.061	8
2022-09-12	16:13:52	9.74903	798.81	8
2022-09-12	16:13:53	2.62506	801.435	8
2022-09-12	16:13:54	3.05529	804.49	8
2022-09-12	16:13:55	3.51968	808.01	8
2022-09-12	16:13:56	3.9341	811.944	8
2022-09-12	16:13:57	3.32576	815.27	8
2022-09-12	16:13:58	8.58724	823.857	8
2022-09-12	16:13:59	9.87387	833.731	8
2022-09-12	16:14:00	3.5739	837.305	8
2022-09-12	16:14:01	5.18961	842.494	8
2022-09-12	16:14:02	5.21334	847.708	8
2022-09-12	16:14:03	15.8964	863.604	9
2022-09-12	16:14:04	2.73545	866.34	9
2022-09-12	16:14:05	16.7955	883.135	10
2022-09-12	16:14:06	17.6307	900.766	11
2022-09-12	16:14:07	25.9561	926.722	12
2022-09-12	16:14:08	22.1964	948.918	13
2022-09-12	16:14:09	14.5609	963.479	14
2022-09-12	16:14:10	5.6856	969.165	14
2022-09-12	16:14:11	2.33757	971.502	14
2022-09-12	16:14:12	1.30086	972.803	14
2022-09-12	16:14:13	4.93653	977.74	14

## Sheet: Harley_prong_2022912160856 (4)
Date	Time	Lbs	Newtons	Averaged Newtons	Total Force x time	Total Time Steps Force >13.345		**GoPro Fitting: 1558
2022-09-12	16:09:13	0.898893	3.99846	3.57989	3.99846	FALSE	0		Total force xtime	1820.63
2022-09-12	16:09:13	0.873702	3.8864	3.57989	3.8864	FALSE	0		Total Time Steps Force >3	54
2022-09-12	16:09:13	0.765153	3.40355	3.57989	7.40201	FALSE	0
2022-09-12	16:09:13	0.681437	3.03117	3.57989	6.91757	FALSE	0
2022-09-12	16:09:14	0.747544	3.32523	3.24803	10.7272	FALSE	0
2022-09-12	16:09:14	0.719707	3.2014	3.24803	10.119	FALSE	0
2022-09-12	16:09:14	0.734568	3.26751	3.24803	13.9947	FALSE	0
2022-09-12	16:09:14	0.718944	3.19801	3.24803	13.317	FALSE	0
2022-09-12	16:09:15	0.63584	2.82834	2.77167	16.8231	FALSE	0
2022-09-12	16:09:15	0.605	2.69116	2.77167	16.0081	FALSE	0
2022-09-12	16:09:15	0.628461	2.79552	2.77167	19.6186	FALSE	0
2022-09-12	16:09:16	0.664746	2.95692	2.65704	18.9651	FALSE	0
2022-09-12	16:09:16	0.639657	2.84532	2.65704	22.4639	FALSE	0
2022-09-12	16:09:16	0.515636	2.29365	2.65704	21.2587	FALSE	0
2022-09-12	16:09:16	0.569275	2.53225	2.65704	24.9962	FALSE	0
2022-09-12	16:09:17	0.631107	2.80729	2.40078	24.066	FALSE	0
2022-09-12	16:09:17	0.549936	2.44623	2.40078	27.4424	FALSE	0
2022-09-12	16:09:17	0.479249	2.1318	2.40078	26.1978	FALSE	0
2022-09-12	16:09:17	0.498588	2.21782	2.40078	29.6602	FALSE	0
2022-09-12	16:09:18	0.501845	2.23231	2.20831	28.4301	FALSE	0
2022-09-12	16:09:18	0.510852	2.27237	2.20831	31.9326	FALSE	0
2022-09-12	16:09:18	0.476654	2.12025	2.20831	30.5504	FALSE	0
2022-09-12	16:09:19	0.434059	1.93078	1.95676	33.8634	FALSE	0
2022-09-12	16:09:19	0.463219	2.06049	1.95676	32.6108	FALSE	0
2022-09-12	16:09:19	0.493702	2.19609	1.95676	36.0595	FALSE	0
2022-09-12	16:09:19	0.368613	1.63966	1.95676	34.2505	FALSE	0
2022-09-12	16:09:20	0.518333	2.30565	2.55902	38.3651	FALSE	0
2022-09-12	16:09:20	0.641896	2.85528	2.55902	37.1058	FALSE	0
2022-09-12	16:09:20	0.566985	2.52206	2.55902	40.8872	FALSE	0
2022-09-12	16:09:20	0.573957	2.55308	2.55902	39.6589	FALSE	0
2022-09-12	16:09:21	0.545509	2.42653	2.21833	43.3137	FALSE	0
2022-09-12	16:09:21	0.508562	2.26219	2.21833	41.9211	FALSE	0
2022-09-12	16:09:21	0.479402	2.13248	2.21833	45.4462	FALSE	0
2022-09-12	16:09:21	0.461336	2.05211	2.21833	43.9732	FALSE	0
2022-09-12	16:09:22	0.464695	2.06706	2.06524	47.5132	FALSE	0
2022-09-12	16:09:22	0.477265	2.12297	2.06524	46.0961	FALSE	0
2022-09-12	16:09:22	0.450903	2.00571	2.06524	49.5189	FALSE	0
2022-09-12	16:09:23	0.463677	2.06253	2.08839	48.1587	FALSE	0
2022-09-12	16:09:23	0.462456	2.0571	2.08839	51.576	FALSE	0
2022-09-12	16:09:23	0.466069	2.07317	2.08839	50.2318	FALSE	0
2022-09-12	16:09:23	0.485763	2.16077	2.08839	53.7368	FALSE	0
2022-09-12	16:09:24	0.497367	2.21239	2.56009	52.4442	FALSE	0
2022-09-12	16:09:24	0.530445	2.35953	2.56009	56.0963	FALSE	0
2022-09-12	16:09:24	0.604237	2.68777	2.56009	55.132	FALSE	0
2022-09-12	16:09:24	0.670089	2.98069	2.56009	59.077	FALSE	0
2022-09-12	16:09:25	0.639758	2.84577	2.52874	57.9778	FALSE	0
2022-09-12	16:09:25	0.610293	2.71471	2.52874	61.7917	FALSE	0
2022-09-12	16:09:25	0.514008	2.28641	2.52874	60.2642	FALSE	0
2022-09-12	16:09:25	0.509886	2.26807	2.52874	64.0598	FALSE	0
2022-09-12	16:09:26	0.53472	2.37854	2.34806	62.6427	FALSE	0
2022-09-12	16:09:26	0.520471	2.31516	2.34806	66.375	FALSE	0
2022-09-12	16:09:26	0.52841	2.35047	2.34806	64.9932	FALSE	0
2022-09-12	16:09:27	0.497417	2.21261	2.09733	68.5876	FALSE	0
2022-09-12	16:09:27	0.46612	2.07339	2.09733	67.0666	FALSE	0
2022-09-12	16:09:27	0.460878	2.05008	2.09733	70.6377	FALSE	0
2022-09-12	16:09:27	0.46159	2.05324	2.09733	69.1198	FALSE	0
2022-09-12	16:09:28	0.44902	1.99733	2.00022	72.635	FALSE	0
2022-09-12	16:09:28	0.45014	2.00231	2.00022	71.1221	FALSE	0
2022-09-12	16:09:28	0.451972	2.01046	2.00022	74.6454	FALSE	0
2022-09-12	16:09:28	0.447545	1.99077	2.00022	73.1129	FALSE	0
2022-09-12	16:09:29	0.44215	1.96677	1.96938	76.6122	FALSE	0
2022-09-12	16:09:29	0.437774	1.94731	1.96938	75.0602	FALSE	0
2022-09-12	16:09:29	0.449326	1.99869	1.96938	78.6109	FALSE	0
2022-09-12	16:09:29	0.441692	1.96473	1.96938	77.025	FALSE	0
2022-09-12	16:09:30	0.446883	1.98782	1.9636	80.5987	FALSE	0
2022-09-12	16:09:30	0.436705	1.94255	1.9636	78.9675	FALSE	0
2022-09-12	16:09:30	0.440725	1.96043	1.9636	82.5592	FALSE	0
2022-09-12	16:09:31	0.438333	1.94979	2.03123	80.9173	FALSE	0
2022-09-12	16:09:31	0.471056	2.09535	2.03123	84.6545	FALSE	0
2022-09-12	16:09:31	0.460878	2.05008	2.03123	82.9674	FALSE	0
2022-09-12	16:09:31	0.456298	2.0297	2.03123	86.6842	FALSE	0
2022-09-12	16:09:32	0.395127	1.7576	1.94142	84.725	FALSE	0
2022-09-12	16:09:32	0.404033	1.79722	1.94142	88.4814	FALSE	0
2022-09-12	16:09:32	0.610649	2.71629	1.94142	87.4413	FALSE	0
2022-09-12	16:09:32	0.335992	1.49456	1.94142	89.976	FALSE	0
2022-09-12	16:09:33	0.578639	2.5739	2.59473	90.0152	FALSE	0
2022-09-12	16:09:33	0.354771	1.57809	2.59473	91.5541	FALSE	0
2022-09-12	16:09:33	0.847392	3.76937	2.59473	93.7845	FALSE	0
2022-09-12	16:09:33	0.552481	2.45755	2.59473	94.0116	FALSE	0
2022-09-12	16:09:34	0.748664	3.33021	2.58869	97.1147	FALSE	0
2022-09-12	16:09:34	0.406934	1.81012	2.58869	95.8218	FALSE	0
2022-09-12	16:09:34	0.590293	2.62574	2.58869	99.7405	FALSE	0
2022-09-12	16:09:35	0.415178	1.84679	2.00254	97.6686	FALSE	0
2022-09-12	16:09:35	0.473346	2.10554	2.00254	101.846	FALSE	0
2022-09-12	16:09:35	0.420166	1.86898	2.00254	99.5375	FALSE	0
2022-09-12	16:09:35	0.492074	2.18884	2.00254	104.035	FALSE	0
2022-09-12	16:09:36	0.634059	2.82042	2.29348	102.358	FALSE	0
2022-09-12	16:09:36	0.533295	2.3722	2.29348	106.407	FALSE	0
2022-09-12	16:09:36	0.525763	2.3387	2.29348	104.697	FALSE	0
2022-09-12	16:09:36	0.369275	1.64261	2.29348	108.05	FALSE	0
2022-09-12	16:09:37	0.456552	2.03083	2.35669	106.727	FALSE	0
2022-09-12	16:09:37	0.249326	1.10905	2.35669	109.159	FALSE	0
2022-09-12	16:09:37	1.15151	5.12215	2.35669	111.85	FALSE	0
2022-09-12	16:09:37	0.261845	1.16474	2.35669	110.323	FALSE	0
2022-09-12	16:09:38	0.355382	1.58081	1.05578	113.43	FALSE	0
2022-09-12	16:09:38	0.060013	0.26695	1.05578	110.59	FALSE	0
2022-09-12	16:09:38	0.296654	1.31958	1.05578	114.75	FALSE	0
2022-09-12	16:09:39	0.163931	0.729198	1.77894	111.32	FALSE	0
2022-09-12	16:09:39	0.404084	1.79745	1.77894	116.547	FALSE	0
2022-09-12	16:09:39	0.313092	1.3927	1.77894	112.712	FALSE	0
2022-09-12	16:09:39	0.718588	3.19642	1.77894	119.744	FALSE	0
2022-09-12	16:09:40	0.810751	3.60638	3.43768	116.319	FALSE	0
2022-09-12	16:09:40	1.41294	6.28504	3.43768	126.029	FALSE	0
2022-09-12	16:09:40	0.413346	1.83865	3.43768	118.157	FALSE	0
2022-09-12	16:09:40	0.454262	2.02065	3.43768	128.05	FALSE	0
2022-09-12	16:09:41	0.269886	1.20051	0.961532	119.358	FALSE	0
2022-09-12	16:09:41	0.00729033	0.0324288	0.961532	128.082	FALSE	0
2022-09-12	16:09:41	0.37131	1.65166	0.961532	121.01	FALSE	0
2022-09-12	16:09:42	1.33991	5.96019	5.56846	134.042	FALSE	0
2022-09-12	16:09:42	0.840827	3.74017	5.56846	124.75	FALSE	0
2022-09-12	16:09:42	2.38312	10.6006	5.56846	144.643	FALSE	0
2022-09-12	16:09:42	0.443524	1.97288	5.56846	126.723	FALSE	0
2022-09-12	16:09:43	0.272481	1.21205	1.39569	145.855	FALSE	0
2022-09-12	16:09:43	0.0100384	0.0446528	1.39569	126.767	FALSE	0
2022-09-12	16:09:43	0.346883	1.543	1.39569	147.398	FALSE	0
2022-09-12	16:09:43	0.625662	2.78307	1.39569	129.55	FALSE	0
2022-09-12	16:09:44	3.42953	15.2552	4.94741	162.653	1	1
2022-09-12	16:09:44	0.563524	2.50667	4.94741	132.057	FALSE	1
2022-09-12	16:09:44	0.0057127	0.0254112	4.94741	162.678	FALSE	1
2022-09-12	16:09:44	0.45014	2.00231	4.94741	134.059	FALSE	1
2022-09-12	16:09:45	3.36449	14.9659	5.19272	177.644	1	2
2022-09-12	16:09:45	0.117265	0.521618	5.19272	134.581	FALSE	2
2022-09-12	16:09:45	0.0203692	0.0906063	5.19272	177.735	FALSE	2
2022-09-12	16:09:46	0.235026	1.04544	0.79117	135.626	FALSE	2
2022-09-12	16:09:46	0.142405	0.633446	0.79117	178.368	FALSE	2
2022-09-12	16:09:46	0.228512	1.01647	0.79117	136.643	FALSE	2
2022-09-12	16:09:46	0.105509	0.469325	0.79117	178.838	FALSE	2
2022-09-12	16:09:47	0.488206	2.17164	1.26989	138.814	FALSE	2
2022-09-12	16:09:47	0.171463	0.762702	1.26989	179.601	FALSE	2
2022-09-12	16:09:47	0.295738	1.3155	1.26989	140.13	FALSE	2
2022-09-12	16:09:47	0.186527	0.829709	1.26989	180.43	FALSE	2
2022-09-12	16:09:48	0.676094	3.0074	3.16558	143.137	FALSE	2
2022-09-12	16:09:48	0.725865	3.22879	3.16558	183.659	FALSE	2
2022-09-12	16:09:48	0.722456	3.21363	3.16558	146.351	FALSE	2
2022-09-12	16:09:48	0.722201	3.21249	3.16558	186.871	FALSE	2
2022-09-12	16:09:49	0.725814	3.22857	3.21861	149.58	FALSE	2
2022-09-12	16:09:49	0.724542	3.22291	3.21861	190.094	FALSE	2
2022-09-12	16:09:49	0.720369	3.20435	3.21861	152.784	FALSE	2
2022-09-12	16:09:50	0.725712	3.22811	3.20599	193.323	FALSE	2
2022-09-12	16:09:50	0.719097	3.19869	3.20599	155.983	FALSE	2
2022-09-12	16:09:50	0.719504	3.2005	3.20599	196.523	FALSE	2
2022-09-12	16:09:50	0.718639	3.19665	3.20599	159.179	FALSE	2
2022-09-12	16:09:51	0.72383	3.21974	3.20701	199.743	FALSE	2
2022-09-12	16:09:51	0.723677	3.21906	3.20701	162.398	FALSE	2
2022-09-12	16:09:51	0.722404	3.2134	3.20701	202.956	FALSE	2
2022-09-12	16:09:51	0.713957	3.17582	3.20701	165.574	FALSE	2
2022-09-12	16:09:52	0.718435	3.19574	2.41397	206.152	FALSE	2
2022-09-12	16:09:52	0.664338	2.95511	2.41397	168.529	FALSE	2
2022-09-12	16:09:52	0.113041	0.502829	2.41397	206.655	FALSE	2
2022-09-12	16:09:52	0.674924	3.0022	2.41397	171.531	FALSE	2
2022-09-12	16:09:53	0.722557	3.21408	3.22811	209.869	FALSE	2
2022-09-12	16:09:53	0.723321	3.21748	3.22811	174.749	FALSE	2
2022-09-12	16:09:53	0.731259	3.25279	3.22811	213.122	FALSE	2
2022-09-12	16:09:54	0.512023	2.27758	1.11432	177.026	FALSE	2
2022-09-12	16:09:54	0.0577229	0.256763	1.11432	213.378	FALSE	2
2022-09-12	16:09:54	0.369479	1.64352	1.11432	178.67	FALSE	2
2022-09-12	16:09:54	0.0628119	0.2794	1.11432	213.658	FALSE	2
2022-09-12	16:09:55	0.447137	1.98895	1.06417	180.659	FALSE	2
2022-09-12	16:09:55	0.183728	0.817259	1.06417	214.475	FALSE	2
2022-09-12	16:09:55	0.223372	0.993603	1.06417	181.653	FALSE	2
2022-09-12	16:09:55	0.10271	0.456875	1.06417	214.932	FALSE	2
2022-09-12	16:09:56	0.228003	1.0142	2.08743	182.667	FALSE	2
2022-09-12	16:09:56	0.433855	1.92987	2.08743	216.862	FALSE	2
2022-09-12	16:09:56	0.587646	2.61397	2.08743	185.281	FALSE	2
2022-09-12	16:09:56	0.627596	2.79167	2.08743	219.653	FALSE	2
2022-09-12	16:09:57	0.907646	4.03739	4.94664	189.318	FALSE	2
2022-09-12	16:09:57	1.24973	5.55905	4.94664	225.212	FALSE	2
2022-09-12	16:09:57	1.17879	5.24349	4.94664	194.562	FALSE	2
2022-09-12	16:09:58	1.80663	8.03625	8.86868	233.249	FALSE	2
2022-09-12	16:09:58	1.20953	5.38023	8.86868	199.942	FALSE	2
2022-09-12	16:09:58	2.37915	10.5829	8.86868	243.832	FALSE	2
2022-09-12	16:09:58	2.57976	11.4753	8.86868	211.417	FALSE	2
2022-09-12	16:09:59	0.986679	4.38895	4.24175	248.221	FALSE	2
2022-09-12	16:09:59	1.68592	7.49931	4.24175	218.916	FALSE	2
2022-09-12	16:09:59	0.385102	1.71301	4.24175	249.934	FALSE	2
2022-09-12	16:09:59	0.756654	3.36575	4.24175	222.282	FALSE	2
2022-09-12	16:10:00	0.688053	3.0606	2.51587	252.994	FALSE	2
2022-09-12	16:10:00	0.378537	1.68381	2.51587	223.966	FALSE	2
2022-09-12	16:10:00	0.630191	2.80322	2.51587	255.797	FALSE	2
2022-09-12	16:10:01	0.242812	1.08008	2.1516	225.046	FALSE	2
2022-09-12	16:10:01	0.674211	2.99903	2.1516	258.796	FALSE	2
2022-09-12	16:10:01	0.272226	1.21092	2.1516	226.257	FALSE	2
2022-09-12	16:10:01	0.74556	3.3164	2.1516	262.113	FALSE	2
2022-09-12	16:10:02	0.365509	1.62586	2.32421	227.883	FALSE	2
2022-09-12	16:10:02	0.626629	2.78737	2.32421	264.9	FALSE	2
2022-09-12	16:10:02	0.543372	2.41703	2.32421	230.3	FALSE	2
2022-09-12	16:10:02	0.554517	2.4666	2.32421	267.367	FALSE	2
2022-09-12	16:10:03	0.538639	2.39597	2.16802	232.696	FALSE	2
2022-09-12	16:10:03	0.354313	1.57606	2.16802	268.943	FALSE	2
2022-09-12	16:10:03	0.668359	2.97299	2.16802	235.669	FALSE	2
2022-09-12	16:10:03	0.388257	1.72704	2.16802	270.67	FALSE	2
2022-09-12	16:10:04	1.11045	4.9395	3.44363	240.608	FALSE	2
2022-09-12	16:10:04	0.497214	2.21171	3.44363	272.882	FALSE	2
2022-09-12	16:10:04	0.714822	3.17967	3.44363	243.788	FALSE	2
2022-09-12	16:10:05	0.571514	2.54221	2.54702	275.424	FALSE	2
2022-09-12	16:10:05	0.819148	3.64373	2.54702	247.432	FALSE	2
2022-09-12	16:10:05	0.37355	1.66163	2.54702	277.085	FALSE	2
2022-09-12	16:10:05	0.52617	2.34051	2.54702	249.772	FALSE	2
2022-09-12	16:10:06	0.564491	2.51097	1.97871	279.596	FALSE	2
2022-09-12	16:10:06	0.35182	1.56497	1.97871	251.337	FALSE	2
2022-09-12	16:10:06	0.57131	2.5413	1.97871	282.138	FALSE	2
2022-09-12	16:10:06	0.291718	1.29762	1.97871	252.635	FALSE	2
2022-09-12	16:10:07	0.596145	2.65177	2.07045	284.79	FALSE	2
2022-09-12	16:10:07	0.33472	1.4889	2.07045	254.124	FALSE	2
2022-09-12	16:10:07	0.550496	2.44872	2.07045	287.238	FALSE	2
2022-09-12	16:10:07	0.380471	1.69241	2.07045	255.816	FALSE	2
2022-09-12	16:10:08	0.555941	2.47294	2.02419	289.711	FALSE	2
2022-09-12	16:10:08	0.384847	1.71188	2.02419	257.528	FALSE	2
2022-09-12	16:10:08	0.424389	1.88777	2.02419	291.599	FALSE	2
2022-09-12	16:10:09	0.502252	2.23412	2.03864	259.762	FALSE	2
2022-09-12	16:10:09	0.445763	1.98284	2.03864	293.582	FALSE	2
2022-09-12	16:10:09	0.453804	2.01861	2.03864	261.781	FALSE	2
2022-09-12	16:10:09	0.431412	1.91901	2.03864	295.501	FALSE	2
2022-09-12	16:10:10	0.440471	1.9593	2.04085	263.74	FALSE	2
2022-09-12	16:10:10	0.451972	2.01046	2.04085	297.511	FALSE	2
2022-09-12	16:10:10	0.484084	2.1533	2.04085	265.893	FALSE	2
2022-09-12	16:10:10	0.45869	2.04034	2.04085	299.552	FALSE	2
2022-09-12	16:10:11	0.434466	1.93259	0.141936	267.826	FALSE	2
2022-09-12	16:10:11	0.0927865	0.412733	0.141936	299.964	FALSE	2
2022-09-12	16:10:11	-0.153219	-0.681549	0.141936	267.826	FALSE	2
2022-09-12	16:10:11	-0.246399	-1.09603	0.141936	299.964	FALSE	2
2022-09-12	16:10:12	0.0108018	0.0480486	-0.342895	267.874	FALSE	2
2022-09-12	16:10:12	-0.0677223	-0.301242	-0.342895	299.964	FALSE	2
2022-09-12	16:10:12	-0.174338	-0.77549	-0.342895	267.874	FALSE	2
2022-09-12	16:10:13	-0.545381	-2.42596	-2.04787	299.964	FALSE	2
2022-09-12	16:10:13	-0.626552	-2.78703	-2.04787	267.874	FALSE	2
2022-09-12	16:10:13	-0.472659	-2.10248	-2.04787	299.964	FALSE	2
2022-09-12	16:10:13	-0.196934	-0.876002	-2.04787	267.874	FALSE	2
2022-09-12	16:10:14	-0.135712	-0.603674	0.617541	299.964	FALSE	2
2022-09-12	16:10:14	0.143524	0.638423	0.617541	268.512	FALSE	2
2022-09-12	16:10:14	0.208664	0.928179	0.617541	300.893	FALSE	2
2022-09-12	16:10:14	0.338842	1.50724	0.617541	270.02	FALSE	2
2022-09-12	16:10:15	0.240878	1.07147	1.25885	301.964	FALSE	2
2022-09-12	16:10:15	0.334873	1.48958	1.25885	271.509	FALSE	2
2022-09-12	16:10:15	0.261234	1.16202	1.25885	303.126	FALSE	2
2022-09-12	16:10:15	0.295025	1.31233	1.25885	272.822	FALSE	2
2022-09-12	16:10:16	0.244084	1.08573	1.06868	304.212	FALSE	2
2022-09-12	16:10:16	0.220115	0.979116	1.06868	273.801	FALSE	2
2022-09-12	16:10:16	0.256552	1.14119	1.06868	305.353	FALSE	2
2022-09-12	16:10:17	0.291819	1.29807	1.44821	275.099	FALSE	2
2022-09-12	16:10:17	0.288054	1.28132	1.44821	306.634	FALSE	2
2022-09-12	16:10:17	0.295331	1.31369	1.44821	276.412	FALSE	2
2022-09-12	16:10:17	0.427087	1.89977	1.44821	308.534	FALSE	2
2022-09-12	16:10:18	0.271514	1.20775	1.53321	277.62	FALSE	2
2022-09-12	16:10:18	0.324186	1.44204	1.53321	309.976	FALSE	2
2022-09-12	16:10:18	0.315789	1.40469	1.53321	279.025	FALSE	2
2022-09-12	16:10:18	0.467239	2.07837	1.53321	312.054	FALSE	2
2022-09-12	16:10:19	0.0458654	0.204018	0.175892	279.229	FALSE	2
2022-09-12	16:10:19	-0.0376461	-0.167457	0.175892	312.054	FALSE	2
2022-09-12	16:10:19	-0.0403432	-0.179455	0.175892	279.229	FALSE	2
2022-09-12	16:10:19	0.190293	0.846461	0.175892	312.901	FALSE	2
2022-09-12	16:10:20	0.42673	1.89818	1.95062	281.127	FALSE	2
2022-09-12	16:10:20	0.498028	2.21533	1.95062	315.116	FALSE	2
2022-09-12	16:10:20	0.390802	1.73837	1.95062	282.865	FALSE	2
2022-09-12	16:10:21	0.694211	3.08799	2.76552	318.204	FALSE	2
2022-09-12	16:10:21	0.700318	3.11515	2.76552	285.981	FALSE	2
2022-09-12	16:10:21	0.494975	2.20175	2.76552	320.406	FALSE	2
2022-09-12	16:10:21	0.597366	2.6572	2.76552	288.638	FALSE	2
2022-09-12	16:10:22	0.43126	1.91833	2.27549	322.324	FALSE	2
2022-09-12	16:10:22	0.625763	2.78352	2.27549	291.421	FALSE	2
2022-09-12	16:10:22	0.318282	1.41578	2.27549	323.74	FALSE	2
2022-09-12	16:10:22	0.670903	2.98431	2.27549	294.406	FALSE	2
2022-09-12	16:10:23	0.366476	1.63016	2.22197	325.37	FALSE	2
2022-09-12	16:10:23	0.664491	2.95579	2.22197	297.361	FALSE	2
2022-09-12	16:10:23	0.467595	2.07996	2.22197	327.45	FALSE	2
2022-09-12	16:10:24	0.795382	3.53802	2.61787	300.899	FALSE	2
2022-09-12	16:10:24	0.442456	1.96813	2.61787	329.418	FALSE	2
2022-09-12	16:10:24	0.822455	3.65844	2.61787	304.558	FALSE	2
2022-09-12	16:10:24	0.293804	1.3069	2.61787	330.725	FALSE	2
2022-09-12	16:10:25	0.714262	3.17718	2.71838	307.735	FALSE	2
2022-09-12	16:10:25	0.376349	1.67408	2.71838	332.399	FALSE	2
2022-09-12	16:10:25	0.750242	3.33723	2.71838	311.072	FALSE	2
2022-09-12	16:10:25	0.603626	2.68505	2.71838	335.084	FALSE	2
2022-09-12	16:10:26	0.844186	3.75511	2.91833	314.827	FALSE	2
2022-09-12	16:10:26	0.496196	2.20718	2.91833	337.292	FALSE	2
2022-09-12	16:10:26	0.686119	3.05199	2.91833	317.879	FALSE	2
2022-09-12	16:10:26	0.597774	2.65902	2.91833	339.951	FALSE	2
2022-09-12	16:10:27	0.486679	2.16485	2.20303	320.044	FALSE	2
2022-09-12	16:10:27	0.520725	2.31629	2.20303	342.267	FALSE	2
2022-09-12	16:10:27	0.478384	2.12795	2.20303	322.172	FALSE	2
2022-09-12	16:10:28	0.650547	2.89376	2.02427	345.161	FALSE	2
2022-09-12	16:10:28	0.319199	1.41986	2.02427	323.592	FALSE	2
2022-09-12	16:10:28	0.529071	2.35341	2.02427	347.514	FALSE	2
2022-09-12	16:10:28	0.321489	1.43005	2.02427	325.022	FALSE	2
2022-09-12	16:10:29	0.612583	2.72489	2.1204	350.239	FALSE	2
2022-09-12	16:10:29	0.320776	1.42688	2.1204	326.449	FALSE	2
2022-09-12	16:10:29	0.496705	2.20944	2.1204	352.448	FALSE	2
2022-09-12	16:10:30	0.342099	1.52172	2.46764	327.971	FALSE	2
2022-09-12	16:10:30	0.852176	3.79065	2.46764	356.239	FALSE	2
2022-09-12	16:10:30	0.343575	1.52829	2.46764	329.499	FALSE	2
2022-09-12	16:10:30	0.734618	3.26773	2.46764	359.507	FALSE	2
2022-09-12	16:10:30	0.501285	2.22982	2.46764	331.729	FALSE	2
2022-09-12	16:10:31	0.944949	4.20332	8.46039	363.71	FALSE	2
2022-09-12	16:10:31	2.09543	9.32089	8.46039	341.05	FALSE	2
2022-09-12	16:10:31	2.66556	11.8569	8.46039	375.567	FALSE	2
2022-09-12	16:10:32	1.89686	8.43761	8.19176	349.487	FALSE	2
2022-09-12	16:10:32	2.00632	8.92451	8.19176	384.492	FALSE	2
2022-09-12	16:10:32	1.63788	7.28562	8.19176	356.773	FALSE	2
2022-09-12	16:10:32	1.8253	8.1193	8.19176	392.611	FALSE	2
2022-09-12	16:10:33	2.11212	9.39513	6.88809	366.168	FALSE	2
2022-09-12	16:10:33	1.7278	7.6856	6.88809	400.296	FALSE	2
2022-09-12	16:10:33	1.53513	6.82857	6.88809	372.997	FALSE	2
2022-09-12	16:10:33	0.818995	3.64305	6.88809	403.939	FALSE	2
2022-09-12	16:10:34	0.323219	1.43774	0.945158	374.434	FALSE	2
2022-09-12	16:10:34	0.0617941	0.274873	0.945158	404.214	FALSE	2
2022-09-12	16:10:34	0.309071	1.37481	0.945158	375.809	FALSE	2
2022-09-12	16:10:34	0.15584	0.693207	0.945158	404.908	FALSE	2
2022-09-12	16:10:35	0.411616	1.83095	2.70497	377.64	FALSE	2
2022-09-12	16:10:35	0.698638	3.10768	2.70497	408.015	FALSE	2
2022-09-12	16:10:35	0.714058	3.17627	2.70497	380.816	FALSE	2
2022-09-12	16:10:36	0.296654	1.31958	2.90803	409.335	FALSE	2
2022-09-12	16:10:36	0.483677	2.15149	2.90803	382.968	FALSE	2
2022-09-12	16:10:36	0.634974	2.82449	2.90803	412.159	FALSE	2
2022-09-12	16:10:36	1.19971	5.33655	2.90803	388.304	FALSE	2
2022-09-12	16:10:37	1.19294	5.30644	7.05408	417.466	FALSE	2
2022-09-12	16:10:37	2.0536	9.13482	7.05408	397.439	FALSE	2
2022-09-12	16:10:37	1.32266	5.88346	7.05408	423.349	FALSE	2
2022-09-12	16:10:37	1.77411	7.8916	7.05408	405.331	FALSE	2
2022-09-12	16:10:38	1.57162	6.99088	6.19182	430.34	FALSE	2
2022-09-12	16:10:38	0.977214	4.34684	6.19182	409.678	FALSE	2
2022-09-12	16:10:38	1.95385	8.69112	6.19182	439.031	FALSE	2
2022-09-12	16:10:38	1.06525	4.73845	6.19182	414.416	FALSE	2
2022-09-12	16:10:39	1.8848	8.38397	5.15605	447.415	FALSE	2
2022-09-12	16:10:39	0.412176	1.83344	5.15605	416.25	FALSE	2
2022-09-12	16:10:39	1.18042	5.25074	5.15605	452.666	FALSE	2
2022-09-12	16:10:40	1.33589	5.94231	6.82209	422.192	FALSE	2
2022-09-12	16:10:40	1.55594	6.92113	6.82209	459.587	FALSE	2
2022-09-12	16:10:40	1.11309	4.95125	6.82209	427.143	FALSE	2
2022-09-12	16:10:40	2.12978	9.47369	6.82209	469.061	FALSE	2
2022-09-12	16:10:41	3.85752	17.159	9.24666	444.302	1	3
2022-09-12	16:10:41	1.63533	7.27427	9.24666	476.335	FALSE	3
2022-09-12	16:10:41	0.551056	2.45121	9.24666	446.753	FALSE	3
2022-09-12	16:10:41	2.27106	10.1021	9.24666	486.437	FALSE	3
2022-09-12	16:10:42	0.455891	2.02789	2.19382	448.781	FALSE	3
2022-09-12	16:10:42	0.746119	3.31889	2.19382	489.756	FALSE	3
2022-09-12	16:10:42	0.27757	1.23469	2.19382	450.016	FALSE	3
2022-09-12	16:10:43	0.356908	1.5876	0.705486	491.344	FALSE	3
2022-09-12	16:10:43	0.17757	0.789867	0.705486	450.806	FALSE	3
2022-09-12	16:10:43	0.110496	0.491508	0.705486	491.835	FALSE	3
2022-09-12	16:10:43	-0.0105723	-0.0470277	0.705486	450.806	FALSE	3
2022-09-12	16:10:44	0.0917178	0.407979	0.9541	492.243	FALSE	3
2022-09-12	16:10:44	0.128715	0.57255	0.9541	451.378	FALSE	3
2022-09-12	16:10:44	0.426069	1.89524	0.9541	494.138	FALSE	3
2022-09-12	16:10:44	0.211463	0.94063	0.9541	452.319	FALSE	3
2022-09-12	16:10:45	0.692125	3.07871	2.18579	497.217	FALSE	3
2022-09-12	16:10:45	0.572074	2.5447	2.18579	454.864	FALSE	3
2022-09-12	16:10:45	0.486018	2.16191	2.18579	499.379	FALSE	3
2022-09-12	16:10:45	0.215331	0.957835	2.18579	455.822	FALSE	3
2022-09-12	16:10:46	0.0916669	0.407753	0.652686	499.787	FALSE	3
2022-09-12	16:10:46	0.125814	0.559646	0.652686	456.381	FALSE	3
2022-09-12	16:10:46	0.22271	0.990659	0.652686	500.777	FALSE	3
2022-09-12	16:10:47	0.126731	0.563725	0.917316	456.945	FALSE	3
2022-09-12	16:10:47	0.282099	1.25483	0.917316	502.032	FALSE	3
2022-09-12	16:10:47	0.192685	0.857101	0.917316	457.802	FALSE	3
2022-09-12	16:10:47	0.223372	0.993603	0.917316	503.026	FALSE	3
2022-09-12	16:10:48	0.224186	0.997224	1.12393	458.799	FALSE	3
2022-09-12	16:10:48	0.431616	1.91991	1.12393	504.946	FALSE	3
2022-09-12	16:10:48	0.146781	0.652911	1.12393	459.452	FALSE	3
2022-09-12	16:10:48	0.208104	0.925688	1.12393	505.871	FALSE	3
2022-09-12	16:10:49	0.209173	0.930443	0.847422	460.383	FALSE	3
2022-09-12	16:10:49	0.299809	1.33361	0.847422	507.205	FALSE	3
2022-09-12	16:10:49	0.158639	0.705658	0.847422	461.088	FALSE	3
2022-09-12	16:10:49	0.0944149	0.419976	0.847422	507.625	FALSE	3
2022-09-12	16:10:50	0.387392	1.7232	1.63861	462.811	FALSE	3
2022-09-12	16:10:50	0.387494	1.72365	1.63861	509.349	FALSE	3
2022-09-12	16:10:50	0.330242	1.46898	1.63861	464.28	FALSE	3
2022-09-12	16:10:51	0.383881	1.70758	1.58941	511.056	FALSE	3
2022-09-12	16:10:51	0.401387	1.78545	1.58941	466.066	FALSE	3
2022-09-12	16:10:51	0.357417	1.58986	1.58941	512.646	FALSE	3
2022-09-12	16:10:51	0.286578	1.27476	1.58941	467.341	FALSE	3
2022-09-12	16:10:52	0.468664	2.08471	2.08997	514.731	FALSE	3
2022-09-12	16:10:52	0.468664	2.08471	2.08997	469.425	FALSE	3
2022-09-12	16:10:52	0.399707	1.77798	2.08997	516.509	FALSE	3
2022-09-12	16:10:52	0.542354	2.4125	2.08997	471.838	FALSE	3
2022-09-12	16:10:53	0.402506	1.79043	1.46242	518.299	FALSE	3
2022-09-12	16:10:53	0.468104	2.08222	1.46242	473.92	FALSE	3
2022-09-12	16:10:53	0.337316	1.50045	1.46242	519.8	FALSE	3
2022-09-12	16:10:53	0.107138	0.476571	1.46242	474.397	FALSE	3
2022-09-12	16:10:54	0.00617073	0.0274486	0.336597	519.827	FALSE	3
2022-09-12	16:10:54	0.149937	0.66695	0.336597	475.064	FALSE	3
2022-09-12	16:10:54	0.0709036	0.315393	0.336597	520.142	FALSE	3
2022-09-12	16:10:55	0.324695	1.44431	1.51709	476.508	FALSE	3
2022-09-12	16:10:55	0.262812	1.16904	1.51709	521.312	FALSE	3
2022-09-12	16:10:55	0.467595	2.07996	1.51709	478.588	FALSE	3
2022-09-12	16:10:55	0.309122	1.37504	1.51709	522.687	FALSE	3
2022-09-12	16:10:56	0.519148	2.30927	1.38992	480.897	FALSE	3
2022-09-12	16:10:56	0.239402	1.06491	1.38992	523.751	FALSE	3
2022-09-12	16:10:56	0.191056	0.849855	1.38992	481.747	FALSE	3
2022-09-12	16:10:56	0.300267	1.33565	1.38992	525.087	FALSE	3
2022-09-12	16:10:57	0.253753	1.12874	2.02212	482.876	FALSE	3
2022-09-12	16:10:57	0.24958	1.11018	2.02212	526.197	FALSE	3
2022-09-12	16:10:57	0.256807	1.14233	2.02212	484.018	FALSE	3
2022-09-12	16:10:57	1.05823	4.70722	2.02212	530.905	FALSE	3
2022-09-12	16:10:58	1.06831	4.75206	2.97443	488.77	FALSE	3
2022-09-12	16:10:58	0.541438	2.40842	2.97443	533.313	FALSE	3
2022-09-12	16:10:58	0.396298	1.76281	2.97443	490.533	FALSE	3
2022-09-12	16:10:59	0.257163	1.14391	1.61499	534.457	FALSE	3
2022-09-12	16:10:59	0.496858	2.21012	1.61499	492.743	FALSE	3
2022-09-12	16:10:59	0.306527	1.36349	1.61499	535.82	FALSE	3
2022-09-12	16:10:59	0.391718	1.74244	1.61499	494.485	FALSE	3
2022-09-12	16:11:00	0.515992	2.29524	2.43649	538.116	FALSE	3
2022-09-12	16:11:00	0.438842	1.95206	2.43649	496.438	FALSE	3
2022-09-12	16:11:00	0.251005	1.11652	2.43649	539.232	FALSE	3
2022-09-12	16:11:00	0.985153	4.38216	2.43649	500.82	FALSE	3
2022-09-12	16:11:01	0.60383	2.68596	2.00605	541.918	FALSE	3
2022-09-12	16:11:01	0.365356	1.62518	2.00605	502.445	FALSE	3
2022-09-12	16:11:01	0.314567	1.39926	2.00605	543.317	FALSE	3
2022-09-12	16:11:01	0.520165	2.3138	2.00605	504.759	FALSE	3
2022-09-12	16:11:02	0.243015	1.08098	1.32192	544.398	FALSE	3
2022-09-12	16:11:02	0.407494	1.81261	1.32192	506.571	FALSE	3
2022-09-12	16:11:02	0.241031	1.07215	1.32192	545.47	FALSE	3
2022-09-12	16:11:03	0.453601	2.01771	1.61901	508.589	FALSE	3
2022-09-12	16:11:03	0.241845	1.07577	1.61901	546.546	FALSE	3
2022-09-12	16:11:03	0.323168	1.43752	1.61901	510.026	FALSE	3
2022-09-12	16:11:03	0.437265	1.94504	1.61901	548.491	FALSE	3
2022-09-12	16:11:04	0.575738	2.561	3.29444	512.587	FALSE	3
2022-09-12	16:11:04	0.682863	3.03751	3.29444	551.529	FALSE	3
2022-09-12	16:11:04	0.83014	3.69263	3.29444	516.28	FALSE	3
2022-09-12	16:11:04	0.873753	3.88663	3.29444	555.415	FALSE	3
2022-09-12	16:11:05	1.36118	6.0548	3.27165	522.335	FALSE	3
2022-09-12	16:11:05	0.338537	1.50588	3.27165	556.921	FALSE	3
2022-09-12	16:11:05	0.506781	2.25426	3.27165	524.589	FALSE	3
2022-09-12	16:11:06	0.241896	1.076	7.28192	557.997	FALSE	3
2022-09-12	16:11:06	6.39548	28.4484	7.28192	553.038	1	4
2022-09-12	16:11:06	-0.0197326	-0.0877746	7.28192	557.997	FALSE	4
2022-09-12	16:11:06	-0.0694526	-0.308939	7.28192	553.038	FALSE	4
2022-09-12	16:11:07	-0.234338	-1.04238	-1.61357	557.997	FALSE	4
2022-09-12	16:11:07	-0.330877	-1.47181	-1.61357	553.038	FALSE	4
2022-09-12	16:11:07	-0.463702	-2.06264	-1.61357	557.997	FALSE	4
2022-09-12	16:11:07	-0.422073	-1.87747	-1.61357	553.038	FALSE	4
2022-09-12	16:11:08	-0.402633	-1.79099	-0.963265	557.997	FALSE	4
2022-09-12	16:11:08	-0.348842	-1.55172	-0.963265	553.038	FALSE	4
2022-09-12	16:11:08	-0.124974	-0.555909	-0.963265	557.997	FALSE	4
2022-09-12	16:11:08	0.010242	0.0455585	-0.963265	553.083	FALSE	4
2022-09-12	16:11:09	0.0954328	0.424504	0.691622	558.422	FALSE	4
2022-09-12	16:11:09	0.289733	1.28879	0.691622	554.372	FALSE	4
2022-09-12	16:11:09	0.0812852	0.361573	0.691622	558.783	FALSE	4
2022-09-12	16:11:10	0.353651	1.57311	1.50865	555.945	FALSE	4
2022-09-12	16:11:10	0.230954	1.02733	1.50865	559.811	FALSE	4
2022-09-12	16:11:10	0.369835	1.6451	1.50865	557.59	FALSE	4
2022-09-12	16:11:10	0.402201	1.78907	1.50865	561.6	FALSE	4
2022-09-12	16:11:11	0.765153	3.40355	3.05019	560.994	FALSE	4
2022-09-12	16:11:11	0.44958	1.99982	3.05019	563.6	FALSE	4
2022-09-12	16:11:11	0.458079	2.03763	3.05019	563.031	FALSE	4
2022-09-12	16:11:11	1.07004	4.75975	3.05019	568.359	FALSE	4
2022-09-12	16:11:12	1.70653	7.59099	5.67542	570.622	FALSE	4
2022-09-12	16:11:12	1.74963	7.7827	5.67542	576.142	FALSE	4
2022-09-12	16:11:12	1.16332	5.17468	5.67542	575.797	FALSE	4
2022-09-12	16:11:12	0.484084	2.1533	5.67542	578.295	FALSE	4
2022-09-12	16:11:13	0.512328	2.27894	2.26951	578.076	FALSE	4
2022-09-12	16:11:13	0.413651	1.84	2.26951	580.135	FALSE	4
2022-09-12	16:11:13	0.604644	2.68958	2.26951	580.765	FALSE	4
2022-09-12	16:11:14	0.849987	3.78091	3.32602	583.916	FALSE	4
2022-09-12	16:11:14	0.635076	2.82495	3.32602	583.59	FALSE	4
2022-09-12	16:11:14	0.862405	3.83615	3.32602	587.752	FALSE	4
2022-09-12	16:11:14	0.643423	2.86207	3.32602	586.453	FALSE	4
2022-09-12	16:11:15	0.648817	2.88607	3.45964	590.638	FALSE	4
2022-09-12	16:11:15	0.822557	3.6589	3.45964	590.111	FALSE	4
2022-09-12	16:11:15	0.74729	3.3241	3.45964	593.963	FALSE	4
2022-09-12	16:11:15	0.892379	3.96948	3.45964	594.081	FALSE	4
2022-09-12	16:11:16	0.851107	3.78589	3.94356	597.748	FALSE	4
2022-09-12	16:11:16	0.910954	4.05211	3.94356	598.133	FALSE	4
2022-09-12	16:11:16	0.907036	4.03468	3.94356	601.783	FALSE	4
2022-09-12	16:11:16	0.877112	3.90157	3.94356	602.035	FALSE	4
2022-09-12	16:11:17	0.881183	3.91968	3.90066	605.703	FALSE	4
2022-09-12	16:11:17	0.907341	4.03603	3.90066	606.071	FALSE	4
2022-09-12	16:11:17	0.842201	3.74628	3.90066	609.449	FALSE	4
2022-09-12	16:11:18	0.768257	3.41736	2.52138	609.488	FALSE	4
2022-09-12	16:11:18	0.586476	2.60876	2.52138	612.058	FALSE	4
2022-09-12	16:11:18	0.484695	2.15602	2.52138	611.644	FALSE	4
2022-09-12	16:11:18	0.427901	1.90339	2.52138	613.961	FALSE	4
2022-09-12	16:11:19	0.310751	1.38228	1.60226	613.026	FALSE	4
2022-09-12	16:11:19	0.381692	1.69784	1.60226	615.659	FALSE	4
2022-09-12	16:11:19	0.437367	1.9455	1.60226	614.972	FALSE	4
2022-09-12	16:11:19	0.311005	1.38341	1.60226	617.042	FALSE	4
2022-09-12	16:11:20	0.538282	2.39439	3.1198	617.366	FALSE	4
2022-09-12	16:11:20	0.812328	3.6134	3.1198	620.656	FALSE	4
2022-09-12	16:11:20	0.987392	4.39212	3.1198	621.758	FALSE	4
2022-09-12	16:11:20	0.467443	2.07928	3.1198	622.735	FALSE	4
2022-09-12	16:11:21	0.381082	1.69513	1.53825	623.453	FALSE	4
2022-09-12	16:11:21	0.315433	1.40311	1.53825	624.138	FALSE	4
2022-09-12	16:11:21	0.340929	1.51652	1.53825	624.97	FALSE	4
2022-09-12	16:11:22	0.504389	2.24362	2.17617	626.382	FALSE	4
2022-09-12	16:11:22	0.326629	1.45291	2.17617	626.423	FALSE	4
2022-09-12	16:11:22	0.71528	3.18171	2.17617	629.564	FALSE	4
2022-09-12	16:11:22	0.410598	1.82642	2.17617	628.249	FALSE	4
2022-09-12	16:11:23	0.976094	4.34186	5.15035	633.905	FALSE	4
2022-09-12	16:11:23	1.39319	6.19719	5.15035	634.446	FALSE	4
2022-09-12	16:11:23	1.79966	8.00525	5.15035	641.911	FALSE	4
2022-09-12	16:11:23	0.462456	2.0571	5.15035	636.504	FALSE	4
2022-09-12	16:11:24	0.853906	3.79834	2.77665	645.709	FALSE	4
2022-09-12	16:11:24	0.662303	2.94606	2.77665	639.45	FALSE	4
2022-09-12	16:11:24	0.35645	1.58556	2.77665	647.295	FALSE	4
2022-09-12	16:11:25	0.36154	1.6082	1.51279	641.058	FALSE	4
2022-09-12	16:11:25	0.41299	1.83706	1.51279	649.132	FALSE	4
2022-09-12	16:11:25	0.263168	1.17062	1.51279	642.228	FALSE	4
2022-09-12	16:11:25	0.322659	1.43525	1.51279	650.567	FALSE	4
2022-09-12	16:11:26	0.364186	1.61997	2.21312	643.848	FALSE	4
2022-09-12	16:11:26	0.513397	2.28369	2.21312	652.851	FALSE	4
2022-09-12	16:11:26	0.567086	2.52251	2.21312	646.371	FALSE	4
2022-09-12	16:11:26	0.545458	2.42631	2.21312	655.277	FALSE	4
2022-09-12	16:11:27	0.886527	3.94345	2.20825	650.314	FALSE	4
2022-09-12	16:11:27	0.437367	1.9455	2.20825	657.222	FALSE	4
2022-09-12	16:11:27	0.392735	1.74696	2.20825	652.061	FALSE	4
2022-09-12	16:11:27	0.269122	1.19711	2.20825	658.42	FALSE	4
2022-09-12	16:11:28	0.322048	1.43253	1.4809	653.494	FALSE	4
2022-09-12	16:11:28	0.359504	1.59915	1.4809	660.019	FALSE	4
2022-09-12	16:11:28	0.317214	1.41103	1.4809	654.905	FALSE	4
2022-09-12	16:11:29	0.230802	1.02665	1.40781	661.045	FALSE	4
2022-09-12	16:11:29	0.360471	1.60345	1.40781	656.508	FALSE	4
2022-09-12	16:11:29	0.345153	1.53531	1.40781	662.581	FALSE	4
2022-09-12	16:11:29	0.329529	1.46581	1.40781	657.974	FALSE	4
2022-09-12	16:11:30	0.230496	1.02529	1.15744	663.606	FALSE	4
2022-09-12	16:11:30	0.174975	0.778324	1.15744	658.752	FALSE	4
2022-09-12	16:11:30	0.340318	1.5138	1.15744	665.12	FALSE	4
2022-09-12	16:11:30	0.295025	1.31233	1.15744	660.065	FALSE	4
2022-09-12	16:11:31	0.334975	1.49004	1.67447	666.61	FALSE	4
2022-09-12	16:11:31	0.309529	1.37685	1.67447	661.442	FALSE	4
2022-09-12	16:11:31	0.424593	1.88867	1.67447	668.498	FALSE	4
2022-09-12	16:11:31	0.436654	1.94232	1.67447	663.384	FALSE	4
2022-09-12	16:11:32	0.37645	1.67452	1.69558	670.173	FALSE	4
2022-09-12	16:11:32	0.396807	1.76508	1.69558	665.149	FALSE	4
2022-09-12	16:11:32	0.370293	1.64714	1.69558	671.82	FALSE	4
2022-09-12	16:11:33	0.410394	1.82551	1.92144	666.975	FALSE	4
2022-09-12	16:11:33	0.425254	1.89161	1.92144	673.712	FALSE	4
2022-09-12	16:11:33	0.434008	1.93055	1.92144	668.905	FALSE	4
2022-09-12	16:11:33	0.458181	2.03808	1.92144	675.75	FALSE	4
2022-09-12	16:11:34	0.487646	2.16915	1.97883	671.074	FALSE	4
2022-09-12	16:11:34	0.451005	2.00616	1.97883	677.756	FALSE	4
2022-09-12	16:11:34	0.421336	1.87419	1.97883	672.948	FALSE	4
2022-09-12	16:11:34	0.419453	1.86581	1.97883	679.622	FALSE	4
2022-09-12	16:11:35	0.401438	1.78568	1.66949	674.734	FALSE	4
2022-09-12	16:11:35	0.351361	1.56292	1.66949	681.185	FALSE	4
2022-09-12	16:11:35	0.371412	1.65211	1.66949	676.386	FALSE	4
2022-09-12	16:11:35	0.377061	1.67724	1.66949	682.862	FALSE	4
2022-09-12	16:11:36	0.330191	1.46876	1.51501	677.855	FALSE	4
2022-09-12	16:11:36	0.341845	1.52059	1.51501	684.383	FALSE	4
2022-09-12	16:11:36	0.349733	1.55568	1.51501	679.411	FALSE	4
2022-09-12	16:11:37	0.351921	1.56541	1.52212	685.948	FALSE	4
2022-09-12	16:11:37	0.333753	1.4846	1.52212	680.895	FALSE	4
2022-09-12	16:11:37	0.340115	1.5129	1.52212	687.461	FALSE	4
2022-09-12	16:11:37	0.342964	1.52557	1.52212	682.421	FALSE	4
2022-09-12	16:11:38	0.345356	1.53621	1.47922	688.997	FALSE	4
2022-09-12	16:11:38	0.324847	1.44498	1.47922	683.866	FALSE	4
2022-09-12	16:11:38	0.422761	1.88053	1.47922	690.878	FALSE	4
2022-09-12	16:11:38	0.237214	1.05518	1.47922	684.921	FALSE	4
2022-09-12	16:11:39	0.178893	0.795752	1.50311	691.673	FALSE	4
2022-09-12	16:11:39	0.297112	1.32161	1.50311	686.243	FALSE	4
2022-09-12	16:11:39	0.359402	1.59869	1.50311	693.272	FALSE	4
2022-09-12	16:11:39	0.516247	2.29637	1.50311	688.539	FALSE	4
2022-09-12	16:11:40	0.400013	1.77934	1.91818	695.051	FALSE	4
2022-09-12	16:11:40	0.462201	2.05596	1.91818	690.595	FALSE	4
2022-09-12	16:11:40	0.431463	1.91923	1.91818	696.971	FALSE	4
2022-09-12	16:11:41	0.436654	1.94232	1.97221	692.537	FALSE	4
2022-09-12	16:11:41	0.447596	1.991	1.97221	698.962	FALSE	4
2022-09-12	16:11:41	0.443779	1.97402	1.97221	694.511	FALSE	4
2022-09-12	16:11:41	0.445458	1.98149	1.97221	700.943	FALSE	4
2022-09-12	16:11:42	0.451005	2.00616	1.98279	696.517	FALSE	4
2022-09-12	16:11:42	0.442405	1.96791	1.98279	702.911	FALSE	4
2022-09-12	16:11:42	0.444135	1.9756	1.98279	698.493	FALSE	4
2022-09-12	16:11:42	0.445458	1.98149	1.98279	704.892	FALSE	4
2022-09-12	16:11:43	0.444746	1.97832	1.99009	700.471	FALSE	4
2022-09-12	16:11:43	0.447799	1.9919	1.99009	706.884	FALSE	4
2022-09-12	16:11:43	0.449631	2.00005	1.99009	702.471	FALSE	4
2022-09-12	16:11:44	0.451412	2.00797	2.00633	708.892	FALSE	4
2022-09-12	16:11:44	0.452685	2.01363	2.00633	704.485	FALSE	4
2022-09-12	16:11:44	0.449478	1.99937	2.00633	710.892	FALSE	4
2022-09-12	16:11:44	0.450598	2.00435	2.00633	706.489	FALSE	4
2022-09-12	16:11:45	0.463321	2.06094	2.07928	712.953	FALSE	4
2022-09-12	16:11:45	0.473295	2.10531	2.07928	708.595	FALSE	4
2022-09-12	16:11:45	0.467137	2.07792	2.07928	715.031	FALSE	4
2022-09-12	16:11:45	0.466018	2.07294	2.07928	710.668	FALSE	4
2022-09-12	16:11:46	0.461285	2.05189	2.05511	717.082	FALSE	4
2022-09-12	16:11:46	0.462812	2.05868	2.05511	712.726	FALSE	4
2022-09-12	16:11:46	0.465763	2.07181	2.05511	719.154	FALSE	4
2022-09-12	16:11:46	0.458181	2.03808	2.05511	714.764	FALSE	4
2022-09-12	16:11:47	0.442201	1.967	1.94497	721.121	FALSE	4
2022-09-12	16:11:47	0.435331	1.93644	1.94497	716.701	FALSE	4
2022-09-12	16:11:47	0.434211	1.93146	1.94497	723.053	FALSE	4
2022-09-12	16:11:48	0.431311	1.91856	1.90978	718.619	FALSE	4
2022-09-12	16:11:48	0.430496	1.91493	1.90978	724.968	FALSE	4
2022-09-12	16:11:48	0.424338	1.88754	1.90978	720.507	FALSE	4
2022-09-12	16:11:48	0.431209	1.9181	1.90978	726.886	FALSE	4
2022-09-12	16:11:49	0.437061	1.94413	2.09156	722.451	FALSE	4
2022-09-12	16:11:49	0.437875	1.94776	2.09156	728.834	FALSE	4
2022-09-12	16:11:49	0.704491	3.13372	2.09156	725.585	FALSE	4
2022-09-12	16:11:49	0.301387	1.34063	2.09156	730.174	FALSE	4
2022-09-12	16:11:50	0.405509	1.80379	0.961175	727.389	FALSE	4
2022-09-12	16:11:50	0.181387	0.806846	0.961175	730.981	FALSE	4
2022-09-12	16:11:50	0.0549239	0.244312	0.961175	727.633	FALSE	4
2022-09-12	16:11:50	0.222507	0.989756	0.961175	731.971	FALSE	4
2022-09-12	16:11:51	0.363779	1.61816	3.72001	729.251	FALSE	4
2022-09-12	16:11:51	1.13604	5.05333	3.72001	737.024	FALSE	4
2022-09-12	16:11:51	1.00907	4.48855	3.72001	733.74	FALSE	4
2022-09-12	16:11:52	1.16225	5.16992	2.16801	742.194	FALSE	4
2022-09-12	16:11:52	0.363321	1.61612	2.16801	735.356	FALSE	4
2022-09-12	16:11:52	0.169326	0.753196	2.16801	742.947	FALSE	4
2022-09-12	16:11:52	0.254669	1.13282	2.16801	736.489	FALSE	4
2022-09-12	16:11:53	0.270903	1.20503	1.03559	744.152	FALSE	4
2022-09-12	16:11:53	0.257926	1.14731	1.03559	737.636	FALSE	4
2022-09-12	16:11:53	0.130293	0.579569	1.03559	744.732	FALSE	4
2022-09-12	16:11:53	0.272125	1.21047	1.03559	738.846	FALSE	4
2022-09-12	16:11:54	0.205814	0.915502	0.0263729	745.647	FALSE	4
2022-09-12	16:11:54	0.0416415	0.18523	0.0263729	739.032	FALSE	4
2022-09-12	16:11:54	-0.177188	-0.788168	0.0263729	745.647	FALSE	4
2022-09-12	16:11:54	-0.0465519	-0.207072	0.0263729	739.032	FALSE	4
2022-09-12	16:11:55	0.106832	0.47521	0.727992	746.123	FALSE	4
2022-09-12	16:11:55	0.158944	0.707015	0.727992	739.739	FALSE	4
2022-09-12	16:11:55	0.225204	1.00175	0.727992	747.124	FALSE	4
2022-09-12	16:11:56	0.419555	1.86626	1.95483	741.605	FALSE	4
2022-09-12	16:11:56	0.443168	1.9713	1.95483	749.096	FALSE	4
2022-09-12	16:11:56	0.461336	2.05211	1.95483	743.657	FALSE	4
2022-09-12	16:11:56	0.433804	1.92965	1.95483	751.025	FALSE	4
2022-09-12	16:11:57	0.328664	1.46196	2.07379	745.119	FALSE	4
2022-09-12	16:11:57	0.480064	2.13542	2.07379	753.161	FALSE	4
2022-09-12	16:11:57	0.52327	2.32761	2.07379	747.447	FALSE	4
2022-09-12	16:11:57	0.532837	2.37017	2.07379	755.531	FALSE	4
2022-09-12	16:11:58	0.397926	1.77005	2.02829	749.217	FALSE	4
2022-09-12	16:11:58	0.667952	2.97118	2.02829	758.502	FALSE	4
2022-09-12	16:11:58	0.355178	1.5799	2.02829	750.796	FALSE	4
2022-09-12	16:11:58	0.402863	1.79202	2.02829	760.294	FALSE	4
2022-09-12	16:11:59	0.517214	2.30067	2.18952	753.097	FALSE	4
2022-09-12	16:11:59	0.451565	2.00865	2.18952	762.303	FALSE	4
2022-09-12	16:11:59	0.507901	2.25925	2.18952	755.356	FALSE	4
2022-09-12	16:12:00	0.273906	1.21839	0.887377	763.521	FALSE	4
2022-09-12	16:12:00	0.0914633	0.406847	0.887377	755.763	FALSE	4
2022-09-12	16:12:00	0.121438	0.540181	0.887377	764.061	FALSE	4
2022-09-12	16:12:00	0.311158	1.38409	0.887377	757.147	FALSE	4
2022-09-12	16:12:01	0.415891	1.84997	1.47034	765.911	FALSE	4
2022-09-12	16:12:01	0.352685	1.56881	1.47034	758.716	FALSE	4
2022-09-12	16:12:01	0.401285	1.785	1.47034	767.696	FALSE	4
2022-09-12	16:12:01	0.152328	0.677585	1.47034	759.394	FALSE	4
2022-09-12	16:12:02	0.0788424	0.350707	0.442388	768.047	FALSE	4
2022-09-12	16:12:02	0.233397	1.0382	0.442388	760.432	FALSE	4
2022-09-12	16:12:02	0.143932	0.640238	0.442388	768.687	FALSE	4
2022-09-12	16:12:02	-0.0583585	-0.25959	0.442388	760.432	FALSE	4
2022-09-12	16:12:03	0.0275956	0.122751	0.693661	768.81	FALSE	4
2022-09-12	16:12:03	0.24383	1.0846	0.693661	761.517	FALSE	4
2022-09-12	16:12:03	0.1964	0.873626	0.693661	769.684	FALSE	4
2022-09-12	16:12:04	0.175229	0.779454	0.770852	762.296	FALSE	4
2022-09-12	16:12:04	0.212939	0.947195	0.770852	770.631	FALSE	4
2022-09-12	16:12:04	0.18383	0.817713	0.770852	763.114	FALSE	4
2022-09-12	16:12:04	0.121183	0.539046	0.770852	771.17	FALSE	4
2022-09-12	16:12:05	0.213804	0.951043	1.11845	764.065	FALSE	4
2022-09-12	16:12:05	0.225814	1.00447	1.11845	772.174	FALSE	4
2022-09-12	16:12:05	0.278537	1.23899	1.11845	765.304	FALSE	4
2022-09-12	16:12:05	0.287596	1.27928	1.11845	773.454	FALSE	4
2022-09-12	16:12:06	0.321743	1.43118	1.43782	766.735	FALSE	4
2022-09-12	16:12:06	0.308969	1.37436	1.43782	774.828	FALSE	4
2022-09-12	16:12:06	0.338995	1.50792	1.43782	768.243	FALSE	4
2022-09-12	16:12:07	0.348664	1.55093	-0.319409	776.379	FALSE	4
2022-09-12	16:12:07	0.166374	0.740065	-0.319409	768.983	FALSE	4
2022-09-12	16:12:07	-0.240699	-1.07068	-0.319409	776.379	FALSE	4
2022-09-12	16:12:07	-0.561564	-2.49795	-0.319409	768.983	FALSE	4
2022-09-12	16:12:08	-0.876271	-3.89783	-3.35024	776.379	FALSE	4
2022-09-12	16:12:08	-0.673473	-2.99574	-3.35024	768.983	FALSE	4
2022-09-12	16:12:08	-0.693981	-3.08697	-3.35024	776.379	FALSE	4
2022-09-12	16:12:08	-0.768943	-3.42041	-3.35024	768.983	FALSE	4
2022-09-12	16:12:09	-0.834236	-3.71085	-3.49557	776.379	FALSE	4
2022-09-12	16:12:09	-0.791895	-3.52251	-3.49557	768.983	FALSE	4
2022-09-12	16:12:09	-0.827925	-3.68278	-3.49557	776.379	FALSE	4
2022-09-12	16:12:09	-0.6893	-3.06614	-3.49557	768.983	FALSE	4
2022-09-12	16:12:10	-0.776729	-3.45505	-3.65508	776.379	FALSE	4
2022-09-12	16:12:10	-0.882022	-3.92341	-3.65508	768.983	FALSE	4
2022-09-12	16:12:10	-0.806348	-3.5868	-3.65508	776.379	FALSE	4
2022-09-12	16:12:11	-0.905585	-4.02822	-3.79172	768.983	FALSE	4
2022-09-12	16:12:11	-0.815355	-3.62686	-3.79172	776.379	FALSE	4
2022-09-12	16:12:11	-0.835152	-3.71492	-3.79172	768.983	FALSE	4
2022-09-12	16:12:11	-0.853574	-3.79687	-3.79172	776.379	FALSE	4
2022-09-12	16:12:12	-0.856984	-3.81204	-2.99568	768.983	FALSE	4
2022-09-12	16:12:12	-0.846348	-3.76473	-2.99568	776.379	FALSE	4
2022-09-12	16:12:12	-0.685992	-3.05143	-2.99568	768.983	FALSE	4
2022-09-12	16:12:12	-0.304516	-1.35455	-2.99568	776.379	FALSE	4
2022-09-12	16:12:13	0.183321	0.815448	1.62529	769.798	FALSE	4
2022-09-12	16:12:13	0.269275	1.19779	1.62529	777.577	FALSE	4
2022-09-12	16:12:13	0.559707	2.48969	1.62529	772.288	FALSE	4
2022-09-12	16:12:13	0.449224	1.99824	1.62529	779.575	FALSE	4
2022-09-12	16:12:14	0.398639	1.77323	2.11142	774.061	FALSE	4
2022-09-12	16:12:14	0.514568	2.2889	2.11142	781.864	FALSE	4
2022-09-12	16:12:14	0.510801	2.27215	2.11142	776.333	FALSE	4
2022-09-12	16:12:15	0.45355	2.01748	1.87804	783.881	FALSE	4
2022-09-12	16:12:15	0.43528	1.93621	1.87804	778.27	FALSE	4
2022-09-12	16:12:15	0.469428	2.08811	1.87804	785.969	FALSE	4
2022-09-12	16:12:15	0.330547	1.47034	1.87804	779.74	FALSE	4
2022-09-12	16:12:16	0.409224	1.82031	2.45126	787.79	FALSE	4
2022-09-12	16:12:16	0.393346	1.74968	2.45126	781.49	FALSE	4
2022-09-12	16:12:16	0.591259	2.63004	2.45126	790.42	FALSE	4
2022-09-12	16:12:16	0.810445	3.60502	2.45126	785.095	FALSE	4
2022-09-12	16:12:17	1.29833	5.77523	4.47253	796.195	FALSE	4
2022-09-12	16:12:17	0.993143	4.4177	4.47253	789.512	FALSE	4
2022-09-12	16:12:17	1.02337	4.55215	4.47253	800.747	FALSE	4
2022-09-12	16:12:17	0.707036	3.14504	4.47253	792.657	FALSE	4
2022-09-12	16:12:18	0.67528	3.00378	2.82585	803.751	FALSE	4
2022-09-12	16:12:18	0.625051	2.78035	2.82585	795.438	FALSE	4
2022-09-12	16:12:18	0.605509	2.69343	2.82585	806.444	FALSE	4
2022-09-12	16:12:19	0.555025	2.46886	2.69852	797.907	FALSE	4
2022-09-12	16:12:19	0.641641	2.85415	2.69852	809.298	FALSE	4
2022-09-12	16:12:19	0.598842	2.66377	2.69852	800.57	FALSE	4
2022-09-12	16:12:19	0.631107	2.80729	2.69852	812.106	FALSE	4
2022-09-12	16:12:20	0.629784	2.80141	2.90672	803.372	FALSE	4
2022-09-12	16:12:20	0.67187	2.98861	2.90672	815.094	FALSE	4
2022-09-12	16:12:20	0.682761	3.03706	2.90672	806.409	FALSE	4
2022-09-12	16:12:20	0.629427	2.79982	2.90672	817.894	FALSE	4
2022-09-12	16:12:21	0.511565	2.27554	2.20939	808.684	FALSE	4
2022-09-12	16:12:21	0.484033	2.15308	2.20939	820.047	FALSE	4
2022-09-12	16:12:21	0.487494	2.16847	2.20939	810.853	FALSE	4
2022-09-12	16:12:21	0.503677	2.24046	2.20939	822.288	FALSE	4
2022-09-12	16:12:22	0.469377	2.08788	2.04336	812.941	FALSE	4
2022-09-12	16:12:22	0.473906	2.10803	2.04336	824.396	FALSE	4
2022-09-12	16:12:22	0.434822	1.93418	2.04336	814.875	FALSE	4
2022-09-12	16:12:23	0.546119	2.42925	3.58556	826.825	FALSE	4
2022-09-12	16:12:23	0.759911	3.38024	3.58556	818.255	FALSE	4
2022-09-12	16:12:23	1.11218	4.9472	3.58556	831.772	FALSE	4
2022-09-12	16:12:24	1.33263	5.9278	3.76049	824.183	FALSE	4
2022-09-12	16:12:24	1.3051	5.80535	3.76049	837.577	FALSE	4
2022-09-12	16:12:24	0.480776	2.13859	3.76049	826.322	FALSE	4
2022-09-12	16:12:24	0.520725	2.31629	3.76049	839.894	FALSE	4
2022-09-12	16:12:24	0.587748	2.61442	3.76049	828.936	FALSE	4
2022-09-12	16:12:25	0.439708	1.95591	1.89456	841.85	FALSE	4
2022-09-12	16:12:25	0.429122	1.90882	1.89456	830.845	FALSE	4
2022-09-12	16:12:25	0.408919	1.81895	1.89456	843.669	FALSE	4
2022-09-12	16:12:26	0.39584	1.76078	3.10576	832.606	FALSE	4
2022-09-12	16:12:26	0.495178	2.20265	3.10576	845.871	FALSE	4
2022-09-12	16:12:26	0.671412	2.98657	3.10576	835.592	FALSE	4
2022-09-12	16:12:26	1.23039	5.47302	3.10576	851.344	FALSE	4
2022-09-12	16:12:27	1.1736	5.22041	5.60202	840.813	FALSE	4
2022-09-12	16:12:27	1.19564	5.31845	5.60202	856.663	FALSE	4
2022-09-12	16:12:27	1.16617	5.18736	5.60202	846	FALSE	4
2022-09-12	16:12:27	1.50215	6.68186	5.60202	863.345	FALSE	4
2022-09-12	16:12:28	1.76841	7.86624	13.113	853.866	FALSE	4
2022-09-12	16:12:28	2.52108	11.2143	13.113	874.559	FALSE	4
2022-09-12	16:12:28	3.37726	15.0227	13.113	868.889	1	5
2022-09-12	16:12:28	4.125	18.3488	13.113	892.908	1	6
2022-09-12	16:12:29	3.5594	15.8329	16.3383	884.722	1	7
2022-09-12	16:12:29	3.5134	15.6283	16.3383	908.536	1	8
2022-09-12	16:12:29	3.94622	17.5536	16.3383	902.275	1	9
2022-09-12	16:12:30	4.40368	19.5884	19.5362	928.124	1	10
2022-09-12	16:12:30	4.40983	19.6158	19.5362	921.891	1	11
2022-09-12	16:12:30	4.37167	19.4461	19.5362	947.571	1	12
2022-09-12	16:12:30	4.38256	19.4945	19.5362	941.386	1	13
2022-09-12	16:12:31	4.56978	20.3273	20.0739	967.898	1	14
2022-09-12	16:12:31	4.62612	20.5779	20.0739	961.964	1	15
2022-09-12	16:12:31	4.4679	19.8741	20.0739	987.772	1	16
2022-09-12	16:12:31	4.38749	19.5164	20.0739	981.48	1	17
2022-09-12	16:12:32	4.38357	19.499	20.0964	1007.27	1	18
2022-09-12	16:12:32	4.47859	19.9217	20.0964	1001.4	1	19
2022-09-12	16:12:32	4.5852	20.3959	20.0964	1027.67	1	20
2022-09-12	16:12:32	4.62413	20.5691	20.0964	1021.97	1	21
2022-09-12	16:12:33	4.65126	20.6897	20.2272	1048.36	1	22
2022-09-12	16:12:33	4.59884	20.4566	20.2272	1042.43	1	23
2022-09-12	16:12:33	4.39172	19.5352	20.2272	1067.89	1	24
2022-09-12	16:12:34	4.30413	19.1456	16.7273	1061.57	1	25
2022-09-12	16:12:34	3.93889	17.521	16.7273	1085.41	1	26
2022-09-12	16:12:34	3.73614	16.6191	16.7273	1078.19	1	27
2022-09-12	16:12:34	3.06266	13.6233	16.7273	1099.04	1	28
2022-09-12	16:12:35	2.98556	13.2804	13.766	1091.47	FALSE	28
2022-09-12	16:12:35	3.09681	13.7752	13.766	1112.81	1	29
2022-09-12	16:12:35	3.14342	13.9826	13.766	1105.45	1	30
2022-09-12	16:12:35	3.15319	14.026	13.766	1126.84	1	31
2022-09-12	16:12:36	3.13742	13.9559	9.31116	1119.41	1	32
2022-09-12	16:12:36	2.55446	11.3627	9.31116	1138.2	FALSE	32
2022-09-12	16:12:36	1.51141	6.72305	9.31116	1126.13	FALSE	32
2022-09-12	16:12:36	1.16968	5.20297	9.31116	1143.4	FALSE	32
2022-09-12	16:12:37	0.654567	2.91164	2.72104	1129.05	FALSE	32
2022-09-12	16:12:37	0.3707	1.64895	2.72104	1145.05	FALSE	32
2022-09-12	16:12:37	0.809885	3.60253	2.72104	1132.65	FALSE	32
2022-09-12	16:12:38	0.550038	2.44668	2.02031	1147.5	FALSE	32
2022-09-12	16:12:38	0.521081	2.31787	2.02031	1134.97	FALSE	32
2022-09-12	16:12:38	0.361336	1.60729	2.02031	1149.11	FALSE	32
2022-09-12	16:12:38	0.384288	1.70939	2.02031	1136.68	FALSE	32
2022-09-12	16:12:39	0.393601	1.75082	1.76655	1150.86	FALSE	32
2022-09-12	16:12:39	0.389326	1.7318	1.76655	1138.41	FALSE	32
2022-09-12	16:12:39	0.42042	1.87011	1.76655	1152.73	FALSE	32
2022-09-12	16:12:39	0.385204	1.71346	1.76655	1140.12	FALSE	32
2022-09-12	16:12:40	0.386018	1.71709	1.791	1154.44	FALSE	32
2022-09-12	16:12:40	0.406832	1.80967	1.791	1141.93	FALSE	32
2022-09-12	16:12:40	0.414568	1.84408	1.791	1156.29	FALSE	32
2022-09-12	16:12:40	0.403117	1.79315	1.791	1143.72	FALSE	32
2022-09-12	16:12:41	0.406629	1.80877	2.01854	1158.1	FALSE	32
2022-09-12	16:12:41	0.45874	2.04057	2.01854	1145.76	FALSE	32
2022-09-12	16:12:41	0.495993	2.20628	2.01854	1160.3	FALSE	32
2022-09-12	16:12:42	0.531565	2.36451	2.44487	1148.13	FALSE	32
2022-09-12	16:12:42	0.553143	2.46049	2.44487	1162.76	FALSE	32
2022-09-12	16:12:42	0.576603	2.56485	2.44487	1150.69	FALSE	32
2022-09-12	16:12:42	0.537214	2.38964	2.44487	1165.15	FALSE	32
2022-09-12	16:12:43	0.512888	2.28143	2.05613	1152.97	FALSE	32
2022-09-12	16:12:43	0.454771	2.02291	2.05613	1167.18	FALSE	32
2022-09-12	16:12:43	0.335942	1.49434	2.05613	1154.47	FALSE	32
2022-09-12	16:12:43	0.545356	2.42585	2.05613	1169.6	FALSE	32
2022-09-12	16:12:44	0.51701	2.29976	2.44879	1156.77	FALSE	32
2022-09-12	16:12:44	0.525051	2.33553	2.44879	1171.94	FALSE	32
2022-09-12	16:12:44	0.609478	2.71108	2.44879	1159.48	FALSE	32
2022-09-12	16:12:45	0.542048	2.41114	2.3121	1174.35	FALSE	32
2022-09-12	16:12:45	0.514517	2.28867	2.3121	1161.77	FALSE	32
2022-09-12	16:12:45	0.494466	2.19948	2.3121	1176.55	FALSE	32
2022-09-12	16:12:45	0.528104	2.34911	2.3121	1164.12	FALSE	32
2022-09-12	16:12:46	0.443422	1.97243	1.25297	1178.52	FALSE	32
2022-09-12	16:12:46	0.562659	2.50282	1.25297	1166.62	FALSE	32
2022-09-12	16:12:46	0.186323	0.828802	1.25297	1179.35	FALSE	32
2022-09-12	16:12:46	-0.0656867	-0.292188	1.25297	1166.62	FALSE	32
2022-09-12	16:12:47	0.00907149	0.0403518	-0.37685	1179.39	FALSE	32
2022-09-12	16:12:47	0.0888679	0.395302	-0.37685	1167.02	FALSE	32
2022-09-12	16:12:47	-0.214643	-0.954775	-0.37685	1179.39	FALSE	32
2022-09-12	16:12:47	-0.222175	-0.988279	-0.37685	1167.02	FALSE	32
2022-09-12	16:12:48	-0.0991727	-0.44114	1.43193	1179.39	FALSE	32
2022-09-12	16:12:48	0.503982	2.24181	1.43193	1169.26	FALSE	32
2022-09-12	16:12:48	0.560929	2.49512	1.43193	1181.88	FALSE	32
2022-09-12	16:12:49	0.443473	1.97266	2.74362	1171.23	FALSE	32
2022-09-12	16:12:49	0.61243	2.72421	2.74362	1184.61	FALSE	32
2022-09-12	16:12:49	0.603219	2.68324	2.74362	1173.91	FALSE	32
2022-09-12	16:12:49	0.808053	3.59438	2.74362	1188.2	FALSE	32
2022-09-12	16:12:50	0.890394	3.96065	5.75193	1177.87	FALSE	32
2022-09-12	16:12:50	1.24032	5.51719	5.75193	1193.72	FALSE	32
2022-09-12	16:12:50	1.41431	6.29113	5.75193	1184.17	FALSE	32
2022-09-12	16:12:50	1.62734	7.23873	5.75193	1200.96	FALSE	32
2022-09-12	16:12:51	1.59162	7.07984	8.17756	1191.25	FALSE	32
2022-09-12	16:12:51	1.97676	8.79302	8.17756	1209.75	FALSE	32
2022-09-12	16:12:51	1.95823	8.7106	8.17756	1199.96	FALSE	32
2022-09-12	16:12:51	1.82698	8.12677	8.17756	1217.88	FALSE	32
2022-09-12	16:12:52	1.73833	7.73244	7.37033	1207.69	FALSE	32
2022-09-12	16:12:52	1.68123	7.47845	7.37033	1225.36	FALSE	32
2022-09-12	16:12:52	1.55121	6.90009	7.37033	1214.59	FALSE	32
2022-09-12	16:12:53	1.37762	6.12793	5.90881	1231.49	FALSE	32
2022-09-12	16:12:53	1.3905	6.18522	5.90881	1220.77	FALSE	32
2022-09-12	16:12:53	1.24541	5.53983	5.90881	1237.03	FALSE	32
2022-09-12	16:12:53	1.29991	5.78226	5.90881	1226.56	FALSE	32
2022-09-12	16:12:54	1.44958	6.44802	6.0363	1243.47	FALSE	32
2022-09-12	16:12:54	0.983575	4.37514	6.0363	1230.93	FALSE	32
2022-09-12	16:12:54	1.45319	6.46408	6.0363	1249.94	FALSE	32
2022-09-12	16:12:54	1.54174	6.85797	6.0363	1237.79	FALSE	32
2022-09-12	16:12:55	1.44363	6.42155	5.87792	1256.36	FALSE	32
2022-09-12	16:12:55	1.32658	5.90089	5.87792	1243.69	FALSE	32
2022-09-12	16:12:55	1.282	5.70259	5.87792	1262.06	FALSE	32
2022-09-12	16:12:55	1.23345	5.48663	5.87792	1249.18	FALSE	32
2022-09-12	16:12:56	1.188	5.28446	5.37948	1267.35	FALSE	32
2022-09-12	16:12:56	1.22078	5.43027	5.37948	1254.61	FALSE	32
2022-09-12	16:12:56	1.2193	5.42369	5.37948	1272.77	FALSE	32
2022-09-12	16:12:57	1.2852	5.71683	5.78634	1260.32	FALSE	32
2022-09-12	16:12:57	1.4366	6.39028	5.78634	1279.16	FALSE	32
2022-09-12	16:12:57	1.31676	5.85721	5.78634	1266.18	FALSE	32
2022-09-12	16:12:57	1.16475	5.18104	5.78634	1284.34	FALSE	32
2022-09-12	16:12:58	1.01564	4.51777	3.90944	1270.7	FALSE	32
2022-09-12	16:12:58	0.851616	3.78816	3.90944	1288.13	FALSE	32
2022-09-12	16:12:58	0.797875	3.54911	3.90944	1274.25	FALSE	32
2022-09-12	16:12:58	0.850394	3.78272	3.90944	1291.91	FALSE	32
2022-09-12	16:12:59	0.843371	3.75148	3.17243	1278	FALSE	32
2022-09-12	16:12:59	0.802608	3.57016	3.17243	1295.48	FALSE	32
2022-09-12	16:12:59	0.633906	2.81974	3.17243	1280.82	FALSE	32
2022-09-12	16:12:59	0.572888	2.54832	3.17243	1298.03	FALSE	32
2022-09-12	16:13:00	0.490394	2.18137	2.21148	1283	FALSE	32
2022-09-12	16:13:00	0.496603	2.20899	2.21148	1300.24	FALSE	32
2022-09-12	16:13:00	0.504491	2.24408	2.21148	1285.24	FALSE	32
2022-09-12	16:13:01	0.501183	2.22936	2.36151	1302.47	FALSE	32
2022-09-12	16:13:01	0.500725	2.22732	2.36151	1287.47	FALSE	32
2022-09-12	16:13:01	0.53813	2.39371	2.36151	1304.86	FALSE	32
2022-09-12	16:13:01	0.583524	2.59563	2.36151	1290.07	FALSE	32
2022-09-12	16:13:02	0.607392	2.7018	3.15386	1307.56	FALSE	32
2022-09-12	16:13:02	0.656756	2.92138	3.15386	1292.99	FALSE	32
2022-09-12	16:13:02	0.72841	3.24011	3.15386	1310.8	FALSE	32
2022-09-12	16:13:02	0.843524	3.75216	3.15386	1296.74	FALSE	32
2022-09-12	16:13:03	0.910852	4.05165	3.6598	1314.86	FALSE	32
2022-09-12	16:13:03	0.953855	4.24294	3.6598	1300.98	FALSE	32
2022-09-12	16:13:03	0.953295	4.24045	3.6598	1319.1	FALSE	32
2022-09-12	16:13:03	0.473041	2.10418	3.6598	1303.09	FALSE	32
2022-09-12	16:13:04	0.0245422	0.109169	2.19133	1319.21	FALSE	32
2022-09-12	16:13:04	0.853957	3.79857	2.19133	1306.89	FALSE	32
2022-09-12	16:13:04	0.599402	2.66626	2.19133	1321.87	FALSE	32
2022-09-12	16:13:05	0.0407763	0.181381	0.0239967	1307.07	FALSE	32
2022-09-12	16:13:05	0.214008	0.95195	0.0239967	1322.82	FALSE	32
2022-09-12	16:13:05	-0.0946435	-0.420993	0.0239967	1307.07	FALSE	32
2022-09-12	16:13:05	-0.138562	-0.616351	0.0239967	1322.82	FALSE	32
2022-09-12	16:13:06	-0.152811	-0.679734	-0.287264	1307.07	FALSE	32
2022-09-12	16:13:06	-0.0252797	-0.112449	-0.287264	1322.82	FALSE	32
2022-09-12	16:13:06	-0.0291473	-0.129653	-0.287264	1307.07	FALSE	32
2022-09-12	16:13:06	-0.0510812	-0.227219	-0.287264	1322.82	FALSE	32
2022-09-12	16:13:07	0.019504	0.0867577	0.00669783	1307.15	FALSE	32
2022-09-12	16:13:07	0.00952952	0.0423892	0.00669783	1322.87	FALSE	32
2022-09-12	16:13:07	-0.0245163	-0.109053	0.00669783	1307.15	FALSE	32
2022-09-12	16:13:08	0.0657127	0.292303	1.9713	1323.16	FALSE	32
2022-09-12	16:13:08	0.274059	1.21907	1.9713	1308.37	FALSE	32
2022-09-12	16:13:08	0.463931	2.06366	1.9713	1325.22	FALSE	32
2022-09-12	16:13:08	0.968969	4.31017	1.9713	1312.68	FALSE	32
2022-09-12	16:13:09	1.54149	6.85686	10.5696	1332.08	FALSE	32
2022-09-12	16:13:09	2.62627	11.6822	10.5696	1324.37	FALSE	32
2022-09-12	16:13:09	3.09971	13.7881	10.5696	1345.87	1	33
2022-09-12	16:13:09	2.23716	9.95134	10.5696	1334.32	FALSE	33
2022-09-12	16:13:10	0.448817	1.99643	3.04011	1347.86	FALSE	33
2022-09-12	16:13:10	0.637214	2.83446	3.04011	1337.15	FALSE	33
2022-09-12	16:13:10	0.769987	3.42506	3.04011	1351.29	FALSE	33
2022-09-12	16:13:10	0.877773	3.90451	3.04011	1341.06	FALSE	33
2022-09-12	16:13:11	0.706221	3.14141	3.49003	1354.43	FALSE	33
2022-09-12	16:13:11	0.781387	3.47577	3.49003	1344.53	FALSE	33
2022-09-12	16:13:11	0.86617	3.8529	3.49003	1358.28	FALSE	33
2022-09-12	16:13:12	0.922863	4.10508	4.10502	1348.64	FALSE	33
2022-09-12	16:13:12	0.909478	4.04554	4.10502	1362.33	FALSE	33
2022-09-12	16:13:12	0.934109	4.1551	4.10502	1352.79	FALSE	33
2022-09-12	16:13:12	0.924949	4.11436	4.10502	1366.44	FALSE	33
2022-09-12	16:13:13	1.06078	4.71856	3.76026	1357.51	FALSE	33
2022-09-12	16:13:13	0.956094	4.2529	3.76026	1370.7	FALSE	33
2022-09-12	16:13:13	0.790853	3.51787	3.76026	1361.03	FALSE	33
2022-09-12	16:13:13	0.573651	2.55171	3.76026	1373.25	FALSE	33
2022-09-12	16:13:14	0.541132	2.40706	2.26892	1363.44	FALSE	33
2022-09-12	16:13:14	0.486171	2.16259	2.26892	1375.41	FALSE	33
2022-09-12	16:13:14	0.493142	2.19359	2.26892	1365.63	FALSE	33
2022-09-12	16:13:14	0.51986	2.31244	2.26892	1377.72	FALSE	33
2022-09-12	16:13:15	0.603219	2.68324	2.64725	1368.31	FALSE	33
2022-09-12	16:13:15	0.671972	2.98907	2.64725	1380.71	FALSE	33
2022-09-12	16:13:15	0.510191	2.26943	2.64725	1370.58	FALSE	33
2022-09-12	16:13:16	0.421082	1.87306	1.93933	1382.58	FALSE	33
2022-09-12	16:13:16	0.446221	1.98488	1.93933	1372.57	FALSE	33
2022-09-12	16:13:16	0.408155	1.81556	1.93933	1384.4	FALSE	33
2022-09-12	16:13:16	0.468461	2.08381	1.93933	1374.65	FALSE	33
2022-09-12	16:13:17	0.515076	2.29116	1.62654	1386.69	FALSE	33
2022-09-12	16:13:17	0.312227	1.38885	1.62654	1376.04	FALSE	33
2022-09-12	16:13:17	0.586119	2.60717	1.62654	1389.3	FALSE	33
2022-09-12	16:13:17	0.0492242	0.218959	1.62654	1376.26	FALSE	33
2022-09-12	16:13:18	-0.500597	-2.22676	-3.90627	1389.3	FALSE	33
2022-09-12	16:13:18	-0.984465	-4.3791	-3.90627	1376.26	FALSE	33
2022-09-12	16:13:18	-0.94187	-4.18963	-3.90627	1389.3	FALSE	33
2022-09-12	16:13:18	-1.08574	-4.82959	-3.90627	1376.26	FALSE	33
2022-09-12	16:13:19	-0.662277	-2.94594	-2.43215	1389.3	FALSE	33
2022-09-12	16:13:19	-0.690216	-3.07022	-2.43215	1376.26	FALSE	33
2022-09-12	16:13:19	-0.287824	-1.2803	-2.43215	1389.3	FALSE	33
2022-09-12	16:13:20	-0.162939	-0.724785	0.0895308	1376.26	FALSE	33
2022-09-12	16:13:20	-0.219427	-0.976055	0.0895308	1389.3	FALSE	33
2022-09-12	16:13:20	0.00896972	0.0398991	0.0895308	1376.3	FALSE	33
2022-09-12	16:13:20	0.453906	2.01906	0.0895308	1391.32	FALSE	33
2022-09-12	16:13:21	0.882201	3.92421	2.68873	1380.22	FALSE	33
2022-09-12	16:13:21	0.476043	2.11753	2.68873	1393.44	FALSE	33
2022-09-12	16:13:21	0.33869	1.50656	2.68873	1381.73	FALSE	33
2022-09-12	16:13:21	0.720878	3.20661	2.68873	1396.64	FALSE	33
2022-09-12	16:13:22	0.223728	0.995187	1.84063	1382.72	FALSE	33
2022-09-12	16:13:22	0.509987	2.26852	1.84063	1398.91	FALSE	33
2022-09-12	16:13:22	0.526832	2.34345	1.84063	1385.07	FALSE	33
2022-09-12	16:13:22	0.394618	1.75534	1.84063	1400.67	FALSE	33
2022-09-12	16:13:23	0.455433	2.02586	1.91275	1387.09	FALSE	33
2022-09-12	16:13:23	0.461183	2.05143	1.91275	1402.72	FALSE	33
2022-09-12	16:13:23	0.373397	1.66094	1.91275	1388.75	FALSE	33
2022-09-12	16:13:24	0.624135	2.77628	2.12823	1405.49	FALSE	33
2022-09-12	16:13:24	0.476349	2.1189	2.12823	1390.87	FALSE	33
2022-09-12	16:13:24	0.338232	1.50452	2.12823	1407	FALSE	33
2022-09-12	16:13:24	0.475076	2.11323	2.12823	1392.99	FALSE	33
2022-09-12	16:13:25	0.162812	0.72422	0.709958	1407.72	FALSE	33
2022-09-12	16:13:25	0.151412	0.673511	0.709958	1393.66	FALSE	33
2022-09-12	16:13:25	0.164746	0.732823	0.709958	1408.45	FALSE	33
2022-09-12	16:13:25	0.159453	0.709279	0.709958	1394.37	FALSE	33
2022-09-12	16:13:26	-0.00395648	-0.0175992	-0.987828	1408.45	FALSE	33
2022-09-12	16:13:26	-0.246145	-1.0949	-0.987828	1394.37	FALSE	33
2022-09-12	16:13:26	-0.30014	-1.33508	-0.987828	1408.45	FALSE	33
2022-09-12	16:13:26	-0.338053	-1.50373	-0.987828	1394.37	FALSE	33
2022-09-12	16:13:27	-0.141005	-0.627218	0.624993	1408.45	FALSE	33
2022-09-12	16:13:27	0.264847	1.17809	0.624993	1395.55	FALSE	33
2022-09-12	16:13:27	0.297672	1.3241	0.624993	1409.78	FALSE	33
2022-09-12	16:13:28	0.213804	0.951043	1.37159	1396.5	FALSE	33
2022-09-12	16:13:28	0.305458	1.35874	1.37159	1411.14	FALSE	33
2022-09-12	16:13:28	0.265611	1.18149	1.37159	1397.68	FALSE	33
2022-09-12	16:13:28	0.448512	1.99507	1.37159	1413.13	FALSE	33
2022-09-12	16:13:29	2.02678	9.01552	4.0495	1406.7	FALSE	33
2022-09-12	16:13:29	0.61528	2.73689	4.0495	1415.87	FALSE	33
2022-09-12	16:13:29	0.526476	2.34187	4.0495	1409.04	FALSE	33
2022-09-12	16:13:29	0.472939	2.10373	4.0495	1417.97	FALSE	33
2022-09-12	16:13:30	0.186527	0.829709	-0.0859631	1409.87	FALSE	33
2022-09-12	16:13:30	-0.0399361	-0.177644	-0.0859631	1417.97	FALSE	33
2022-09-12	16:13:30	-0.204567	-0.909955	-0.0859631	1409.87	FALSE	33
2022-09-12	16:13:31	-0.0718954	-0.319805	1.55212	1417.97	FALSE	33
2022-09-12	16:13:31	0.187137	0.832423	1.55212	1410.7	FALSE	33
2022-09-12	16:13:31	0.471972	2.09943	1.55212	1420.07	FALSE	33
2022-09-12	16:13:31	0.808512	3.59642	1.55212	1414.3	FALSE	33
2022-09-12	16:13:32	0.688562	3.06286	2.47814	1423.14	FALSE	33
2022-09-12	16:13:32	0.682608	3.03638	2.47814	1417.33	FALSE	33
2022-09-12	16:13:32	0.425407	1.8923	2.47814	1425.03	FALSE	33
2022-09-12	16:13:32	0.43187	1.92104	2.47814	1419.25	FALSE	33
2022-09-12	16:13:33	0.350394	1.55862	4.84253	1426.59	FALSE	33
2022-09-12	16:13:33	0.691005	3.07373	4.84253	1422.33	FALSE	33
2022-09-12	16:13:33	1.57319	6.99786	4.84253	1433.58	FALSE	33
2022-09-12	16:13:33	1.74001	7.73991	4.84253	1430.07	FALSE	33
2022-09-12	16:13:34	1.24383	5.5328	3.95062	1439.12	FALSE	33
2022-09-12	16:13:34	0.863626	3.84158	3.95062	1433.91	FALSE	33
2022-09-12	16:13:34	0.556959	2.47747	3.95062	1441.59	FALSE	33
2022-09-12	16:13:35	0.41757	1.85743	1.80978	1435.77	FALSE	33
2022-09-12	16:13:35	0.280013	1.24555	1.80978	1442.84	FALSE	33
2022-09-12	16:13:35	0.429275	1.9095	1.80978	1437.68	FALSE	33
2022-09-12	16:13:35	0.500572	2.22664	1.80978	1445.07	FALSE	33
2022-09-12	16:13:36	0.357366	1.58964	1.42438	1439.27	FALSE	33
2022-09-12	16:13:36	0.317366	1.41171	1.42438	1446.48	FALSE	33
2022-09-12	16:13:36	0.299453	1.33203	1.42438	1440.6	FALSE	33
2022-09-12	16:13:36	0.306679	1.36417	1.42438	1447.84	FALSE	33
2022-09-12	16:13:37	0.27701	1.2322	1.12456	1441.83	FALSE	33
2022-09-12	16:13:37	0.2307	1.0262	1.12456	1448.87	FALSE	33
2022-09-12	16:13:37	0.245102	1.09026	1.12456	1442.92	FALSE	33
2022-09-12	16:13:37	0.258435	1.14957	1.12456	1450.02	FALSE	33
2022-09-12	16:13:38	0.0266287	0.11845	0.0992837	1443.04	FALSE	33
2022-09-12	16:13:38	0.0201656	0.0897006	0.0992837	1450.11	FALSE	33
2022-09-12	16:13:38	0.0201656	0.0897006	0.0992837	1443.13	FALSE	33
2022-09-12	16:13:39	0.027901	0.124109	0.0520665	1450.23	FALSE	33
2022-09-12	16:13:39	-0.0364247	-0.162024	0.0520665	1443.13	FALSE	33
2022-09-12	16:13:39	0.0401147	0.178438	0.0520665	1450.41	FALSE	33
2022-09-12	16:13:39	0.0152293	0.067743	0.0520665	1443.2	FALSE	33
2022-09-12	16:13:40	0.687494	3.05811	3.0215	1453.47	FALSE	33
2022-09-12	16:13:40	0.408868	1.81873	3.0215	1445.01	FALSE	33
2022-09-12	16:13:40	0.382761	1.7026	3.0215	1455.17	FALSE	33
2022-09-12	16:13:40	1.23793	5.50656	3.0215	1450.52	FALSE	33
2022-09-12	16:13:41	0.786578	3.49886	2.11991	1458.67	FALSE	33
2022-09-12	16:13:41	0.526679	2.34277	2.11991	1452.86	FALSE	33
2022-09-12	16:13:41	0.370445	1.64781	2.11991	1460.32	FALSE	33
2022-09-12	16:13:41	0.222608	0.990205	2.11991	1453.85	FALSE	33
2022-09-12	16:13:42	0.247392	1.10045	1.05102	1461.42	FALSE	33
2022-09-12	16:13:42	0.210445	0.936101	1.05102	1454.79	FALSE	33
2022-09-12	16:13:42	0.251005	1.11652	1.05102	1462.54	FALSE	33
2022-09-12	16:13:43	-0.0736766	-0.327728	-0.514201	1454.79	FALSE	33
2022-09-12	16:13:43	-0.0858394	-0.381831	-0.514201	1462.54	FALSE	33
2022-09-12	16:13:43	-0.129503	-0.576055	-0.514201	1454.79	FALSE	33
2022-09-12	16:13:43	-0.173371	-0.771189	-0.514201	1462.54	FALSE	33
2022-09-12	16:13:44	-0.135356	-0.602091	0.46525	1454.79	FALSE	33
2022-09-12	16:13:44	-0.0243127	-0.108148	0.46525	1462.54	FALSE	33
2022-09-12	16:13:44	0.303473	1.34991	0.46525	1456.14	FALSE	33
2022-09-12	16:13:44	0.274567	1.22133	0.46525	1463.76	FALSE	33
2022-09-12	16:13:45	0.333397	1.48302	1.44674	1457.62	FALSE	33
2022-09-12	16:13:45	0.360115	1.60186	1.44674	1465.36	FALSE	33
2022-09-12	16:13:45	0.278384	1.23831	1.44674	1458.86	FALSE	33
2022-09-12	16:13:45	0.329071	1.46377	1.44674	1466.82	FALSE	33
2022-09-12	16:13:46	0.347138	1.54414	1.21522	1460.41	FALSE	33
2022-09-12	16:13:46	0.227341	1.01126	1.21522	1467.83	FALSE	33
2022-09-12	16:13:46	0.245102	1.09026	1.21522	1461.5	FALSE	33
2022-09-12	16:13:47	0.19243	0.855967	1.15591	1468.69	FALSE	33
2022-09-12	16:13:47	0.331514	1.47464	1.15591	1462.97	FALSE	33
2022-09-12	16:13:47	0.253804	1.12897	1.15591	1469.82	FALSE	33
2022-09-12	16:13:47	0.261692	1.16406	1.15591	1464.13	FALSE	33
2022-09-12	16:13:48	0.308562	1.37255	1.16593	1471.19	FALSE	33
2022-09-12	16:13:48	0.213702	0.950589	1.16593	1465.08	FALSE	33
2022-09-12	16:13:48	0.324593	1.44385	1.16593	1472.63	FALSE	33
2022-09-12	16:13:48	0.20159	0.896713	1.16593	1465.98	FALSE	33
2022-09-12	16:13:49	0.236552	1.05223	0.892036	1473.69	FALSE	33
2022-09-12	16:13:49	0.0994531	0.442387	0.892036	1466.42	FALSE	33
2022-09-12	16:13:49	0.265611	1.18149	0.892036	1474.87	FALSE	33
2022-09-12	16:13:50	0.205102	0.912335	4.28511	1467.34	FALSE	33
2022-09-12	16:13:50	0.984847	4.3808	4.28511	1479.25	FALSE	33
2022-09-12	16:13:50	1.37559	6.1189	4.28511	1473.46	FALSE	33
2022-09-12	16:13:50	1.2878	5.72839	4.28511	1484.98	FALSE	33
2022-09-12	16:13:51	0.880725	3.91764	4.38182	1477.37	FALSE	33
2022-09-12	16:13:51	1.24866	5.55429	4.38182	1490.53	FALSE	33
2022-09-12	16:13:51	0.718181	3.19461	4.38182	1480.57	FALSE	33
2022-09-12	16:13:51	1.09274	4.86073	4.38182	1495.39	FALSE	33
2022-09-12	16:13:52	0.584491	2.59993	9.74903	1483.17	FALSE	33
2022-09-12	16:13:52	1.62139	7.21227	9.74903	1502.61	FALSE	33
2022-09-12	16:13:52	2.41569	10.7455	9.74903	1493.91	FALSE	33
2022-09-12	16:13:52	4.14515	18.4385	9.74903	1521.04	1	34
2022-09-12	16:13:53	0.582048	2.58907	2.62506	1496.5	FALSE	34
2022-09-12	16:13:53	0.663524	2.95149	2.62506	1523.99	FALSE	34
2022-09-12	16:13:53	0.524848	2.33463	2.62506	1498.84	FALSE	34
2022-09-12	16:13:54	1.3962	6.21058	3.05529	1530.21	FALSE	34
2022-09-12	16:13:54	0.263728	1.17311	3.05529	1500.01	FALSE	34
2022-09-12	16:13:54	0.570293	2.53678	3.05529	1532.74	FALSE	34
2022-09-12	16:13:54	0.517214	2.30067	3.05529	1502.31	FALSE	34
2022-09-12	16:13:55	0.650649	2.89422	3.51968	1535.64	FALSE	34
2022-09-12	16:13:55	0.279453	1.24306	3.51968	1503.55	FALSE	34
2022-09-12	16:13:55	1.07569	4.78488	3.51968	1540.42	FALSE	34
2022-09-12	16:13:55	1.15925	5.15658	3.51968	1508.71	FALSE	34
2022-09-12	16:13:56	1.13894	5.06623	3.9341	1545.49	FALSE	34
2022-09-12	16:13:56	0.638842	2.8417	3.9341	1511.55	FALSE	34
2022-09-12	16:13:56	1.16128	5.16561	3.9341	1550.65	FALSE	34
2022-09-12	16:13:56	0.598639	2.66287	3.9341	1514.21	FALSE	34
2022-09-12	16:13:57	0.801692	3.56609	3.32576	1554.22	FALSE	34
2022-09-12	16:13:57	0.714924	3.18012	3.32576	1517.39	FALSE	34
2022-09-12	16:13:57	0.726374	3.23106	3.32576	1557.45	FALSE	34
2022-09-12	16:13:58	0.679198	3.02121	8.58724	1520.42	FALSE	34
2022-09-12	16:13:58	1.62261	7.21769	8.58724	1564.67	FALSE	34
2022-09-12	16:13:58	2.60607	11.5923	8.58724	1532.01	FALSE	34
2022-09-12	16:13:58	2.81411	12.5177	8.58724	1577.19	FALSE	34
2022-09-12	16:13:59	2.1539	9.58098	9.87387	1541.59	FALSE	34
2022-09-12	16:13:59	3.27289	14.5585	9.87387	1591.74	1	35
2022-09-12	16:13:59	2.10673	9.37116	9.87387	1550.96	FALSE	35
2022-09-12	16:13:59	1.34546	5.98488	9.87387	1597.73	FALSE	35
2022-09-12	16:14:00	0.828359	3.68471	3.5739	1554.65	FALSE	35
2022-09-12	16:14:00	0.997163	4.43558	3.5739	1602.16	FALSE	35
2022-09-12	16:14:00	0.628817	2.7971	3.5739	1557.44	FALSE	35
2022-09-12	16:14:00	0.759453	3.3782	3.5739	1605.54	FALSE	35
2022-09-12	16:14:01	0.864542	3.84566	5.18961	1561.29	FALSE	35
2022-09-12	16:14:01	1.44337	6.4204	5.18961	1611.96	FALSE	35
2022-09-12	16:14:01	1.19212	5.30279	5.18961	1566.59	FALSE	35
2022-09-12	16:14:02	1.1736	5.22041	5.21334	1617.18	FALSE	35
2022-09-12	16:14:02	0.828461	3.68516	5.21334	1570.28	FALSE	35
2022-09-12	16:14:02	1.09055	4.85098	5.21334	1622.03	FALSE	35
2022-09-12	16:14:02	1.59543	7.09679	5.21334	1577.37	FALSE	35
2022-09-12	16:14:03	3.29207	14.6438	15.8964	1636.68	1	36
2022-09-12	16:14:03	4.48505	19.9504	15.8964	1597.32	1	37
2022-09-12	16:14:03	5.17986	23.0411	15.8964	1659.72	1	38
2022-09-12	16:14:03	1.33767	5.95022	15.8964	1603.27	FALSE	38
2022-09-12	16:14:04	0.63187	2.81068	2.73545	1662.53	FALSE	38
2022-09-12	16:14:04	0.554059	2.46457	2.73545	1605.74	FALSE	38
2022-09-12	16:14:04	0.658944	2.93111	2.73545	1665.46	FALSE	38
2022-09-12	16:14:05	1.4305	6.36315	16.7955	1612.1	FALSE	38
2022-09-12	16:14:05	3.68602	16.3962	16.7955	1681.86	1	39
2022-09-12	16:14:05	5.02062	22.3327	16.7955	1634.43	1	40
2022-09-12	16:14:05	4.96607	22.0901	16.7955	1703.95	1	41
2022-09-12	16:14:06	5.40413	24.0387	17.6307	1658.47	1	42
2022-09-12	16:14:06	3.26693	14.532	17.6307	1718.48	1	43
2022-09-12	16:14:06	2.79314	12.4244	17.6307	1670.9	FALSE	43
2022-09-12	16:14:06	4.39004	19.5278	17.6307	1738.01	1	44
2022-09-12	16:14:07	5.52184	24.5622	25.9561	1695.46	1	45
2022-09-12	16:14:07	7.07405	31.4668	25.9561	1769.47	1	46
2022-09-12	16:14:07	3.31014	14.7242	25.9561	1710.18	1	47
2022-09-12	16:14:07	7.43477	33.0713	25.9561	1802.55	1	48
2022-09-12	16:14:08	9.10673	40.5086	22.1964	1750.69	1	49
2022-09-12	16:14:08	4.26342	18.9645	22.1964	1821.51	1	50
2022-09-12	16:14:08	3.32948	14.8102	22.1964	1765.5	1	51
2022-09-12	16:14:08	3.26027	14.5023	22.1964	1836.01	1	52
2022-09-12	16:14:09	4.37594	19.4651	14.5609	1784.97	1	53
2022-09-12	16:14:09	3.13324	13.9373	14.5609	1849.95	1	54
2022-09-12	16:14:09	2.31116	10.2805	14.5609	1795.25	FALSE	54
2022-09-12	16:14:10	1.77925	7.91446	5.6856	1857.86	FALSE	54
2022-09-12	16:14:10	1.40088	6.23139	5.6856	1801.48	FALSE	54
2022-09-12	16:14:10	1.07548	4.78395	5.6856	1862.65	FALSE	54
2022-09-12	16:14:10	0.857112	3.81261	5.6856	1805.29	FALSE	54
2022-09-12	16:14:11	0.749733	3.33496	2.33757	1865.98	FALSE	54
2022-09-12	16:14:11	0.549173	2.44283	2.33757	1807.73	FALSE	54
2022-09-12	16:14:11	0.402659	1.79111	2.33757	1867.77	FALSE	54
2022-09-12	16:14:11	0.400471	1.78138	2.33757	1809.52	FALSE	54
2022-09-12	16:14:12	0.343728	1.52897	1.30086	1869.3	FALSE	54
2022-09-12	16:14:12	0.301031	1.33905	1.30086	1810.85	FALSE	54
2022-09-12	16:14:12	0.232583	1.03458	1.30086	1870.34	FALSE	54
2022-09-12	16:14:13	0.187595	0.83446	4.93653	1811.69	FALSE	54
2022-09-12	16:14:13	1.1309	5.03047	4.93653	1875.37	FALSE	54
2022-09-12	16:14:13	2.01085	8.94466	4.93653	1820.63	FALSE	54

## Sheet: Harley_prong_2022912160856 (3)
Date	Time	Lbs	Newtons	Total Force x time	Total Time Steps Force >13.345		**GoPro Fitting: 1558
2022-09-12	16:09:13	0.898893	3.99846	3.99846	FALSE	0		Total force xtime	1820.63
2022-09-12	16:09:13	0.873702	3.8864	3.8864	FALSE	0		Total Time Steps Force >3	54
2022-09-12	16:09:13	0.765153	3.40355	7.40201	FALSE	0
2022-09-12	16:09:13	0.681437	3.03117	6.91757	FALSE	0
2022-09-12	16:09:14	0.747544	3.32523	10.7272	FALSE	0
2022-09-12	16:09:14	0.719707	3.2014	10.119	FALSE	0
2022-09-12	16:09:14	0.734568	3.26751	13.9947	FALSE	0
2022-09-12	16:09:14	0.718944	3.19801	13.317	FALSE	0
2022-09-12	16:09:15	0.63584	2.82834	16.8231	FALSE	0
2022-09-12	16:09:15	0.605	2.69116	16.0081	FALSE	0
2022-09-12	16:09:15	0.628461	2.79552	19.6186	FALSE	0
2022-09-12	16:09:16	0.664746	2.95692	18.9651	FALSE	0
2022-09-12	16:09:16	0.639657	2.84532	22.4639	FALSE	0
2022-09-12	16:09:16	0.515636	2.29365	21.2587	FALSE	0
2022-09-12	16:09:16	0.569275	2.53225	24.9962	FALSE	0
2022-09-12	16:09:17	0.631107	2.80729	24.066	FALSE	0
2022-09-12	16:09:17	0.549936	2.44623	27.4424	FALSE	0
2022-09-12	16:09:17	0.479249	2.1318	26.1978	FALSE	0
2022-09-12	16:09:17	0.498588	2.21782	29.6602	FALSE	0
2022-09-12	16:09:18	0.501845	2.23231	28.4301	FALSE	0
2022-09-12	16:09:18	0.510852	2.27237	31.9326	FALSE	0
2022-09-12	16:09:18	0.476654	2.12025	30.5504	FALSE	0
2022-09-12	16:09:19	0.434059	1.93078	33.8634	FALSE	0
2022-09-12	16:09:19	0.463219	2.06049	32.6108	FALSE	0
2022-09-12	16:09:19	0.493702	2.19609	36.0595	FALSE	0
2022-09-12	16:09:19	0.368613	1.63966	34.2505	FALSE	0
2022-09-12	16:09:20	0.518333	2.30565	38.3651	FALSE	0
2022-09-12	16:09:20	0.641896	2.85528	37.1058	FALSE	0
2022-09-12	16:09:20	0.566985	2.52206	40.8872	FALSE	0
2022-09-12	16:09:20	0.573957	2.55308	39.6589	FALSE	0
2022-09-12	16:09:21	0.545509	2.42653	43.3137	FALSE	0
2022-09-12	16:09:21	0.508562	2.26219	41.9211	FALSE	0
2022-09-12	16:09:21	0.479402	2.13248	45.4462	FALSE	0
2022-09-12	16:09:21	0.461336	2.05211	43.9732	FALSE	0
2022-09-12	16:09:22	0.464695	2.06706	47.5132	FALSE	0
2022-09-12	16:09:22	0.477265	2.12297	46.0961	FALSE	0
2022-09-12	16:09:22	0.450903	2.00571	49.5189	FALSE	0
2022-09-12	16:09:23	0.463677	2.06253	48.1587	FALSE	0
2022-09-12	16:09:23	0.462456	2.0571	51.576	FALSE	0
2022-09-12	16:09:23	0.466069	2.07317	50.2318	FALSE	0
2022-09-12	16:09:23	0.485763	2.16077	53.7368	FALSE	0
2022-09-12	16:09:24	0.497367	2.21239	52.4442	FALSE	0
2022-09-12	16:09:24	0.530445	2.35953	56.0963	FALSE	0
2022-09-12	16:09:24	0.604237	2.68777	55.132	FALSE	0
2022-09-12	16:09:24	0.670089	2.98069	59.077	FALSE	0
2022-09-12	16:09:25	0.639758	2.84577	57.9778	FALSE	0
2022-09-12	16:09:25	0.610293	2.71471	61.7917	FALSE	0
2022-09-12	16:09:25	0.514008	2.28641	60.2642	FALSE	0
2022-09-12	16:09:25	0.509886	2.26807	64.0598	FALSE	0
2022-09-12	16:09:26	0.53472	2.37854	62.6427	FALSE	0
2022-09-12	16:09:26	0.520471	2.31516	66.375	FALSE	0
2022-09-12	16:09:26	0.52841	2.35047	64.9932	FALSE	0
2022-09-12	16:09:27	0.497417	2.21261	68.5876	FALSE	0
2022-09-12	16:09:27	0.46612	2.07339	67.0666	FALSE	0
2022-09-12	16:09:27	0.460878	2.05008	70.6377	FALSE	0
2022-09-12	16:09:27	0.46159	2.05324	69.1198	FALSE	0
2022-09-12	16:09:28	0.44902	1.99733	72.635	FALSE	0
2022-09-12	16:09:28	0.45014	2.00231	71.1221	FALSE	0
2022-09-12	16:09:28	0.451972	2.01046	74.6454	FALSE	0
2022-09-12	16:09:28	0.447545	1.99077	73.1129	FALSE	0
2022-09-12	16:09:29	0.44215	1.96677	76.6122	FALSE	0
2022-09-12	16:09:29	0.437774	1.94731	75.0602	FALSE	0
2022-09-12	16:09:29	0.449326	1.99869	78.6109	FALSE	0
2022-09-12	16:09:29	0.441692	1.96473	77.025	FALSE	0
2022-09-12	16:09:30	0.446883	1.98782	80.5987	FALSE	0
2022-09-12	16:09:30	0.436705	1.94255	78.9675	FALSE	0
2022-09-12	16:09:30	0.440725	1.96043	82.5592	FALSE	0
2022-09-12	16:09:31	0.438333	1.94979	80.9173	FALSE	0
2022-09-12	16:09:31	0.471056	2.09535	84.6545	FALSE	0
2022-09-12	16:09:31	0.460878	2.05008	82.9674	FALSE	0
2022-09-12	16:09:31	0.456298	2.0297	86.6842	FALSE	0
2022-09-12	16:09:32	0.395127	1.7576	84.725	FALSE	0
2022-09-12	16:09:32	0.404033	1.79722	88.4814	FALSE	0
2022-09-12	16:09:32	0.610649	2.71629	87.4413	FALSE	0
2022-09-12	16:09:32	0.335992	1.49456	89.976	FALSE	0
2022-09-12	16:09:33	0.578639	2.5739	90.0152	FALSE	0
2022-09-12	16:09:33	0.354771	1.57809	91.5541	FALSE	0
2022-09-12	16:09:33	0.847392	3.76937	93.7845	FALSE	0
2022-09-12	16:09:33	0.552481	2.45755	94.0116	FALSE	0
2022-09-12	16:09:34	0.748664	3.33021	97.1147	FALSE	0
2022-09-12	16:09:34	0.406934	1.81012	95.8218	FALSE	0
2022-09-12	16:09:34	0.590293	2.62574	99.7405	FALSE	0
2022-09-12	16:09:35	0.415178	1.84679	97.6686	FALSE	0
2022-09-12	16:09:35	0.473346	2.10554	101.846	FALSE	0
2022-09-12	16:09:35	0.420166	1.86898	99.5375	FALSE	0
2022-09-12	16:09:35	0.492074	2.18884	104.035	FALSE	0
2022-09-12	16:09:36	0.634059	2.82042	102.358	FALSE	0
2022-09-12	16:09:36	0.533295	2.3722	106.407	FALSE	0
2022-09-12	16:09:36	0.525763	2.3387	104.697	FALSE	0
2022-09-12	16:09:36	0.369275	1.64261	108.05	FALSE	0
2022-09-12	16:09:37	0.456552	2.03083	106.727	FALSE	0
2022-09-12	16:09:37	0.249326	1.10905	109.159	FALSE	0
2022-09-12	16:09:37	1.15151	5.12215	111.85	FALSE	0
2022-09-12	16:09:37	0.261845	1.16474	110.323	FALSE	0
2022-09-12	16:09:38	0.355382	1.58081	113.43	FALSE	0
2022-09-12	16:09:38	0.060013	0.26695	110.59	FALSE	0
2022-09-12	16:09:38	0.296654	1.31958	114.75	FALSE	0
2022-09-12	16:09:39	0.163931	0.729198	111.32	FALSE	0
2022-09-12	16:09:39	0.404084	1.79745	116.547	FALSE	0
2022-09-12	16:09:39	0.313092	1.3927	112.712	FALSE	0
2022-09-12	16:09:39	0.718588	3.19642	119.744	FALSE	0
2022-09-12	16:09:40	0.810751	3.60638	116.319	FALSE	0
2022-09-12	16:09:40	1.41294	6.28504	126.029	FALSE	0
2022-09-12	16:09:40	0.413346	1.83865	118.157	FALSE	0
2022-09-12	16:09:40	0.454262	2.02065	128.05	FALSE	0
2022-09-12	16:09:41	0.269886	1.20051	119.358	FALSE	0
2022-09-12	16:09:41	0.00729033	0.0324288	128.082	FALSE	0
2022-09-12	16:09:41	0.37131	1.65166	121.01	FALSE	0
2022-09-12	16:09:42	1.33991	5.96019	134.042	FALSE	0
2022-09-12	16:09:42	0.840827	3.74017	124.75	FALSE	0
2022-09-12	16:09:42	2.38312	10.6006	144.643	FALSE	0
2022-09-12	16:09:42	0.443524	1.97288	126.723	FALSE	0
2022-09-12	16:09:43	0.272481	1.21205	145.855	FALSE	0
2022-09-12	16:09:43	0.0100384	0.0446528	126.767	FALSE	0
2022-09-12	16:09:43	0.346883	1.543	147.398	FALSE	0
2022-09-12	16:09:43	0.625662	2.78307	129.55	FALSE	0
2022-09-12	16:09:44	3.42953	15.2552	162.653	1	1
2022-09-12	16:09:44	0.563524	2.50667	132.057	FALSE	1
2022-09-12	16:09:44	0.0057127	0.0254112	162.678	FALSE	1
2022-09-12	16:09:44	0.45014	2.00231	134.059	FALSE	1
2022-09-12	16:09:45	3.36449	14.9659	177.644	1	2
2022-09-12	16:09:45	0.117265	0.521618	134.581	FALSE	2
2022-09-12	16:09:45	0.0203692	0.0906063	177.735	FALSE	2
2022-09-12	16:09:46	0.235026	1.04544	135.626	FALSE	2
2022-09-12	16:09:46	0.142405	0.633446	178.368	FALSE	2
2022-09-12	16:09:46	0.228512	1.01647	136.643	FALSE	2
2022-09-12	16:09:46	0.105509	0.469325	178.838	FALSE	2
2022-09-12	16:09:47	0.488206	2.17164	138.814	FALSE	2
2022-09-12	16:09:47	0.171463	0.762702	179.601	FALSE	2
2022-09-12	16:09:47	0.295738	1.3155	140.13	FALSE	2
2022-09-12	16:09:47	0.186527	0.829709	180.43	FALSE	2
2022-09-12	16:09:48	0.676094	3.0074	143.137	FALSE	2
2022-09-12	16:09:48	0.725865	3.22879	183.659	FALSE	2
2022-09-12	16:09:48	0.722456	3.21363	146.351	FALSE	2
2022-09-12	16:09:48	0.722201	3.21249	186.871	FALSE	2
2022-09-12	16:09:49	0.725814	3.22857	149.58	FALSE	2
2022-09-12	16:09:49	0.724542	3.22291	190.094	FALSE	2
2022-09-12	16:09:49	0.720369	3.20435	152.784	FALSE	2
2022-09-12	16:09:50	0.725712	3.22811	193.323	FALSE	2
2022-09-12	16:09:50	0.719097	3.19869	155.983	FALSE	2
2022-09-12	16:09:50	0.719504	3.2005	196.523	FALSE	2
2022-09-12	16:09:50	0.718639	3.19665	159.179	FALSE	2
2022-09-12	16:09:51	0.72383	3.21974	199.743	FALSE	2
2022-09-12	16:09:51	0.723677	3.21906	162.398	FALSE	2
2022-09-12	16:09:51	0.722404	3.2134	202.956	FALSE	2
2022-09-12	16:09:51	0.713957	3.17582	165.574	FALSE	2
2022-09-12	16:09:52	0.718435	3.19574	206.152	FALSE	2
2022-09-12	16:09:52	0.664338	2.95511	168.529	FALSE	2
2022-09-12	16:09:52	0.113041	0.502829	206.655	FALSE	2
2022-09-12	16:09:52	0.674924	3.0022	171.531	FALSE	2
2022-09-12	16:09:53	0.722557	3.21408	209.869	FALSE	2
2022-09-12	16:09:53	0.723321	3.21748	174.749	FALSE	2
2022-09-12	16:09:53	0.731259	3.25279	213.122	FALSE	2
2022-09-12	16:09:54	0.512023	2.27758	177.026	FALSE	2
2022-09-12	16:09:54	0.0577229	0.256763	213.378	FALSE	2
2022-09-12	16:09:54	0.369479	1.64352	178.67	FALSE	2
2022-09-12	16:09:54	0.0628119	0.2794	213.658	FALSE	2
2022-09-12	16:09:55	0.447137	1.98895	180.659	FALSE	2
2022-09-12	16:09:55	0.183728	0.817259	214.475	FALSE	2
2022-09-12	16:09:55	0.223372	0.993603	181.653	FALSE	2
2022-09-12	16:09:55	0.10271	0.456875	214.932	FALSE	2
2022-09-12	16:09:56	0.228003	1.0142	182.667	FALSE	2
2022-09-12	16:09:56	0.433855	1.92987	216.862	FALSE	2
2022-09-12	16:09:56	0.587646	2.61397	185.281	FALSE	2
2022-09-12	16:09:56	0.627596	2.79167	219.653	FALSE	2
2022-09-12	16:09:57	0.907646	4.03739	189.318	FALSE	2
2022-09-12	16:09:57	1.24973	5.55905	225.212	FALSE	2
2022-09-12	16:09:57	1.17879	5.24349	194.562	FALSE	2
2022-09-12	16:09:58	1.80663	8.03625	233.249	FALSE	2
2022-09-12	16:09:58	1.20953	5.38023	199.942	FALSE	2
2022-09-12	16:09:58	2.37915	10.5829	243.832	FALSE	2
2022-09-12	16:09:58	2.57976	11.4753	211.417	FALSE	2
2022-09-12	16:09:59	0.986679	4.38895	248.221	FALSE	2
2022-09-12	16:09:59	1.68592	7.49931	218.916	FALSE	2
2022-09-12	16:09:59	0.385102	1.71301	249.934	FALSE	2
2022-09-12	16:09:59	0.756654	3.36575	222.282	FALSE	2
2022-09-12	16:10:00	0.688053	3.0606	252.994	FALSE	2
2022-09-12	16:10:00	0.378537	1.68381	223.966	FALSE	2
2022-09-12	16:10:00	0.630191	2.80322	255.797	FALSE	2
2022-09-12	16:10:01	0.242812	1.08008	225.046	FALSE	2
2022-09-12	16:10:01	0.674211	2.99903	258.796	FALSE	2
2022-09-12	16:10:01	0.272226	1.21092	226.257	FALSE	2
2022-09-12	16:10:01	0.74556	3.3164	262.113	FALSE	2
2022-09-12	16:10:02	0.365509	1.62586	227.883	FALSE	2
2022-09-12	16:10:02	0.626629	2.78737	264.9	FALSE	2
2022-09-12	16:10:02	0.543372	2.41703	230.3	FALSE	2
2022-09-12	16:10:02	0.554517	2.4666	267.367	FALSE	2
2022-09-12	16:10:03	0.538639	2.39597	232.696	FALSE	2
2022-09-12	16:10:03	0.354313	1.57606	268.943	FALSE	2
2022-09-12	16:10:03	0.668359	2.97299	235.669	FALSE	2
2022-09-12	16:10:03	0.388257	1.72704	270.67	FALSE	2
2022-09-12	16:10:04	1.11045	4.9395	240.608	FALSE	2
2022-09-12	16:10:04	0.497214	2.21171	272.882	FALSE	2
2022-09-12	16:10:04	0.714822	3.17967	243.788	FALSE	2
2022-09-12	16:10:05	0.571514	2.54221	275.424	FALSE	2
2022-09-12	16:10:05	0.819148	3.64373	247.432	FALSE	2
2022-09-12	16:10:05	0.37355	1.66163	277.085	FALSE	2
2022-09-12	16:10:05	0.52617	2.34051	249.772	FALSE	2
2022-09-12	16:10:06	0.564491	2.51097	279.596	FALSE	2
2022-09-12	16:10:06	0.35182	1.56497	251.337	FALSE	2
2022-09-12	16:10:06	0.57131	2.5413	282.138	FALSE	2
2022-09-12	16:10:06	0.291718	1.29762	252.635	FALSE	2
2022-09-12	16:10:07	0.596145	2.65177	284.79	FALSE	2
2022-09-12	16:10:07	0.33472	1.4889	254.124	FALSE	2
2022-09-12	16:10:07	0.550496	2.44872	287.238	FALSE	2
2022-09-12	16:10:07	0.380471	1.69241	255.816	FALSE	2
2022-09-12	16:10:08	0.555941	2.47294	289.711	FALSE	2
2022-09-12	16:10:08	0.384847	1.71188	257.528	FALSE	2
2022-09-12	16:10:08	0.424389	1.88777	291.599	FALSE	2
2022-09-12	16:10:09	0.502252	2.23412	259.762	FALSE	2
2022-09-12	16:10:09	0.445763	1.98284	293.582	FALSE	2
2022-09-12	16:10:09	0.453804	2.01861	261.781	FALSE	2
2022-09-12	16:10:09	0.431412	1.91901	295.501	FALSE	2
2022-09-12	16:10:10	0.440471	1.9593	263.74	FALSE	2
2022-09-12	16:10:10	0.451972	2.01046	297.511	FALSE	2
2022-09-12	16:10:10	0.484084	2.1533	265.893	FALSE	2
2022-09-12	16:10:10	0.45869	2.04034	299.552	FALSE	2
2022-09-12	16:10:11	0.434466	1.93259	267.826	FALSE	2
2022-09-12	16:10:11	0.0927865	0.412733	299.964	FALSE	2
2022-09-12	16:10:11	-0.153219	-0.681549	267.826	FALSE	2
2022-09-12	16:10:11	-0.246399	-1.09603	299.964	FALSE	2
2022-09-12	16:10:12	0.0108018	0.0480486	267.874	FALSE	2
2022-09-12	16:10:12	-0.0677223	-0.301242	299.964	FALSE	2
2022-09-12	16:10:12	-0.174338	-0.77549	267.874	FALSE	2
2022-09-12	16:10:13	-0.545381	-2.42596	299.964	FALSE	2
2022-09-12	16:10:13	-0.626552	-2.78703	267.874	FALSE	2
2022-09-12	16:10:13	-0.472659	-2.10248	299.964	FALSE	2
2022-09-12	16:10:13	-0.196934	-0.876002	267.874	FALSE	2
2022-09-12	16:10:14	-0.135712	-0.603674	299.964	FALSE	2
2022-09-12	16:10:14	0.143524	0.638423	268.512	FALSE	2
2022-09-12	16:10:14	0.208664	0.928179	300.893	FALSE	2
2022-09-12	16:10:14	0.338842	1.50724	270.02	FALSE	2
2022-09-12	16:10:15	0.240878	1.07147	301.964	FALSE	2
2022-09-12	16:10:15	0.334873	1.48958	271.509	FALSE	2
2022-09-12	16:10:15	0.261234	1.16202	303.126	FALSE	2
2022-09-12	16:10:15	0.295025	1.31233	272.822	FALSE	2
2022-09-12	16:10:16	0.244084	1.08573	304.212	FALSE	2
2022-09-12	16:10:16	0.220115	0.979116	273.801	FALSE	2
2022-09-12	16:10:16	0.256552	1.14119	305.353	FALSE	2
2022-09-12	16:10:17	0.291819	1.29807	275.099	FALSE	2
2022-09-12	16:10:17	0.288054	1.28132	306.634	FALSE	2
2022-09-12	16:10:17	0.295331	1.31369	276.412	FALSE	2
2022-09-12	16:10:17	0.427087	1.89977	308.534	FALSE	2
2022-09-12	16:10:18	0.271514	1.20775	277.62	FALSE	2
2022-09-12	16:10:18	0.324186	1.44204	309.976	FALSE	2
2022-09-12	16:10:18	0.315789	1.40469	279.025	FALSE	2
2022-09-12	16:10:18	0.467239	2.07837	312.054	FALSE	2
2022-09-12	16:10:19	0.0458654	0.204018	279.229	FALSE	2
2022-09-12	16:10:19	-0.0376461	-0.167457	312.054	FALSE	2
2022-09-12	16:10:19	-0.0403432	-0.179455	279.229	FALSE	2
2022-09-12	16:10:19	0.190293	0.846461	312.901	FALSE	2
2022-09-12	16:10:20	0.42673	1.89818	281.127	FALSE	2
2022-09-12	16:10:20	0.498028	2.21533	315.116	FALSE	2
2022-09-12	16:10:20	0.390802	1.73837	282.865	FALSE	2
2022-09-12	16:10:21	0.694211	3.08799	318.204	FALSE	2
2022-09-12	16:10:21	0.700318	3.11515	285.981	FALSE	2
2022-09-12	16:10:21	0.494975	2.20175	320.406	FALSE	2
2022-09-12	16:10:21	0.597366	2.6572	288.638	FALSE	2
2022-09-12	16:10:22	0.43126	1.91833	322.324	FALSE	2
2022-09-12	16:10:22	0.625763	2.78352	291.421	FALSE	2
2022-09-12	16:10:22	0.318282	1.41578	323.74	FALSE	2
2022-09-12	16:10:22	0.670903	2.98431	294.406	FALSE	2
2022-09-12	16:10:23	0.366476	1.63016	325.37	FALSE	2
2022-09-12	16:10:23	0.664491	2.95579	297.361	FALSE	2
2022-09-12	16:10:23	0.467595	2.07996	327.45	FALSE	2
2022-09-12	16:10:24	0.795382	3.53802	300.899	FALSE	2
2022-09-12	16:10:24	0.442456	1.96813	329.418	FALSE	2
2022-09-12	16:10:24	0.822455	3.65844	304.558	FALSE	2
2022-09-12	16:10:24	0.293804	1.3069	330.725	FALSE	2
2022-09-12	16:10:25	0.714262	3.17718	307.735	FALSE	2
2022-09-12	16:10:25	0.376349	1.67408	332.399	FALSE	2
2022-09-12	16:10:25	0.750242	3.33723	311.072	FALSE	2
2022-09-12	16:10:25	0.603626	2.68505	335.084	FALSE	2
2022-09-12	16:10:26	0.844186	3.75511	314.827	FALSE	2
2022-09-12	16:10:26	0.496196	2.20718	337.292	FALSE	2
2022-09-12	16:10:26	0.686119	3.05199	317.879	FALSE	2
2022-09-12	16:10:26	0.597774	2.65902	339.951	FALSE	2
2022-09-12	16:10:27	0.486679	2.16485	320.044	FALSE	2
2022-09-12	16:10:27	0.520725	2.31629	342.267	FALSE	2
2022-09-12	16:10:27	0.478384	2.12795	322.172	FALSE	2
2022-09-12	16:10:28	0.650547	2.89376	345.161	FALSE	2
2022-09-12	16:10:28	0.319199	1.41986	323.592	FALSE	2
2022-09-12	16:10:28	0.529071	2.35341	347.514	FALSE	2
2022-09-12	16:10:28	0.321489	1.43005	325.022	FALSE	2
2022-09-12	16:10:29	0.612583	2.72489	350.239	FALSE	2
2022-09-12	16:10:29	0.320776	1.42688	326.449	FALSE	2
2022-09-12	16:10:29	0.496705	2.20944	352.448	FALSE	2
2022-09-12	16:10:30	0.342099	1.52172	327.971	FALSE	2
2022-09-12	16:10:30	0.852176	3.79065	356.239	FALSE	2
2022-09-12	16:10:30	0.343575	1.52829	329.499	FALSE	2
2022-09-12	16:10:30	0.734618	3.26773	359.507	FALSE	2
2022-09-12	16:10:30	0.501285	2.22982	331.729	FALSE	2
2022-09-12	16:10:31	0.944949	4.20332	363.71	FALSE	2
2022-09-12	16:10:31	2.09543	9.32089	341.05	FALSE	2
2022-09-12	16:10:31	2.66556	11.8569	375.567	FALSE	2
2022-09-12	16:10:32	1.89686	8.43761	349.487	FALSE	2
2022-09-12	16:10:32	2.00632	8.92451	384.492	FALSE	2
2022-09-12	16:10:32	1.63788	7.28562	356.773	FALSE	2
2022-09-12	16:10:32	1.8253	8.1193	392.611	FALSE	2
2022-09-12	16:10:33	2.11212	9.39513	366.168	FALSE	2
2022-09-12	16:10:33	1.7278	7.6856	400.296	FALSE	2
2022-09-12	16:10:33	1.53513	6.82857	372.997	FALSE	2
2022-09-12	16:10:33	0.818995	3.64305	403.939	FALSE	2
2022-09-12	16:10:34	0.323219	1.43774	374.434	FALSE	2
2022-09-12	16:10:34	0.0617941	0.274873	404.214	FALSE	2
2022-09-12	16:10:34	0.309071	1.37481	375.809	FALSE	2
2022-09-12	16:10:34	0.15584	0.693207	404.908	FALSE	2
2022-09-12	16:10:35	0.411616	1.83095	377.64	FALSE	2
2022-09-12	16:10:35	0.698638	3.10768	408.015	FALSE	2
2022-09-12	16:10:35	0.714058	3.17627	380.816	FALSE	2
2022-09-12	16:10:36	0.296654	1.31958	409.335	FALSE	2
2022-09-12	16:10:36	0.483677	2.15149	382.968	FALSE	2
2022-09-12	16:10:36	0.634974	2.82449	412.159	FALSE	2
2022-09-12	16:10:36	1.19971	5.33655	388.304	FALSE	2
2022-09-12	16:10:37	1.19294	5.30644	417.466	FALSE	2
2022-09-12	16:10:37	2.0536	9.13482	397.439	FALSE	2
2022-09-12	16:10:37	1.32266	5.88346	423.349	FALSE	2
2022-09-12	16:10:37	1.77411	7.8916	405.331	FALSE	2
2022-09-12	16:10:38	1.57162	6.99088	430.34	FALSE	2
2022-09-12	16:10:38	0.977214	4.34684	409.678	FALSE	2
2022-09-12	16:10:38	1.95385	8.69112	439.031	FALSE	2
2022-09-12	16:10:38	1.06525	4.73845	414.416	FALSE	2
2022-09-12	16:10:39	1.8848	8.38397	447.415	FALSE	2
2022-09-12	16:10:39	0.412176	1.83344	416.25	FALSE	2
2022-09-12	16:10:39	1.18042	5.25074	452.666	FALSE	2
2022-09-12	16:10:40	1.33589	5.94231	422.192	FALSE	2
2022-09-12	16:10:40	1.55594	6.92113	459.587	FALSE	2
2022-09-12	16:10:40	1.11309	4.95125	427.143	FALSE	2
2022-09-12	16:10:40	2.12978	9.47369	469.061	FALSE	2
2022-09-12	16:10:41	3.85752	17.159	444.302	1	3
2022-09-12	16:10:41	1.63533	7.27427	476.335	FALSE	3
2022-09-12	16:10:41	0.551056	2.45121	446.753	FALSE	3
2022-09-12	16:10:41	2.27106	10.1021	486.437	FALSE	3
2022-09-12	16:10:42	0.455891	2.02789	448.781	FALSE	3
2022-09-12	16:10:42	0.746119	3.31889	489.756	FALSE	3
2022-09-12	16:10:42	0.27757	1.23469	450.016	FALSE	3
2022-09-12	16:10:43	0.356908	1.5876	491.344	FALSE	3
2022-09-12	16:10:43	0.17757	0.789867	450.806	FALSE	3
2022-09-12	16:10:43	0.110496	0.491508	491.835	FALSE	3
2022-09-12	16:10:43	-0.0105723	-0.0470277	450.806	FALSE	3
2022-09-12	16:10:44	0.0917178	0.407979	492.243	FALSE	3
2022-09-12	16:10:44	0.128715	0.57255	451.378	FALSE	3
2022-09-12	16:10:44	0.426069	1.89524	494.138	FALSE	3
2022-09-12	16:10:44	0.211463	0.94063	452.319	FALSE	3
2022-09-12	16:10:45	0.692125	3.07871	497.217	FALSE	3
2022-09-12	16:10:45	0.572074	2.5447	454.864	FALSE	3
2022-09-12	16:10:45	0.486018	2.16191	499.379	FALSE	3
2022-09-12	16:10:45	0.215331	0.957835	455.822	FALSE	3
2022-09-12	16:10:46	0.0916669	0.407753	499.787	FALSE	3
2022-09-12	16:10:46	0.125814	0.559646	456.381	FALSE	3
2022-09-12	16:10:46	0.22271	0.990659	500.777	FALSE	3
2022-09-12	16:10:47	0.126731	0.563725	456.945	FALSE	3
2022-09-12	16:10:47	0.282099	1.25483	502.032	FALSE	3
2022-09-12	16:10:47	0.192685	0.857101	457.802	FALSE	3
2022-09-12	16:10:47	0.223372	0.993603	503.026	FALSE	3
2022-09-12	16:10:48	0.224186	0.997224	458.799	FALSE	3
2022-09-12	16:10:48	0.431616	1.91991	504.946	FALSE	3
2022-09-12	16:10:48	0.146781	0.652911	459.452	FALSE	3
2022-09-12	16:10:48	0.208104	0.925688	505.871	FALSE	3
2022-09-12	16:10:49	0.209173	0.930443	460.383	FALSE	3
2022-09-12	16:10:49	0.299809	1.33361	507.205	FALSE	3
2022-09-12	16:10:49	0.158639	0.705658	461.088	FALSE	3
2022-09-12	16:10:49	0.0944149	0.419976	507.625	FALSE	3
2022-09-12	16:10:50	0.387392	1.7232	462.811	FALSE	3
2022-09-12	16:10:50	0.387494	1.72365	509.349	FALSE	3
2022-09-12	16:10:50	0.330242	1.46898	464.28	FALSE	3
2022-09-12	16:10:51	0.383881	1.70758	511.056	FALSE	3
2022-09-12	16:10:51	0.401387	1.78545	466.066	FALSE	3
2022-09-12	16:10:51	0.357417	1.58986	512.646	FALSE	3
2022-09-12	16:10:51	0.286578	1.27476	467.341	FALSE	3
2022-09-12	16:10:52	0.468664	2.08471	514.731	FALSE	3
2022-09-12	16:10:52	0.468664	2.08471	469.425	FALSE	3
2022-09-12	16:10:52	0.399707	1.77798	516.509	FALSE	3
2022-09-12	16:10:52	0.542354	2.4125	471.838	FALSE	3
2022-09-12	16:10:53	0.402506	1.79043	518.299	FALSE	3
2022-09-12	16:10:53	0.468104	2.08222	473.92	FALSE	3
2022-09-12	16:10:53	0.337316	1.50045	519.8	FALSE	3
2022-09-12	16:10:53	0.107138	0.476571	474.397	FALSE	3
2022-09-12	16:10:54	0.00617073	0.0274486	519.827	FALSE	3
2022-09-12	16:10:54	0.149937	0.66695	475.064	FALSE	3
2022-09-12	16:10:54	0.0709036	0.315393	520.142	FALSE	3
2022-09-12	16:10:55	0.324695	1.44431	476.508	FALSE	3
2022-09-12	16:10:55	0.262812	1.16904	521.312	FALSE	3
2022-09-12	16:10:55	0.467595	2.07996	478.588	FALSE	3
2022-09-12	16:10:55	0.309122	1.37504	522.687	FALSE	3
2022-09-12	16:10:56	0.519148	2.30927	480.897	FALSE	3
2022-09-12	16:10:56	0.239402	1.06491	523.751	FALSE	3
2022-09-12	16:10:56	0.191056	0.849855	481.747	FALSE	3
2022-09-12	16:10:56	0.300267	1.33565	525.087	FALSE	3
2022-09-12	16:10:57	0.253753	1.12874	482.876	FALSE	3
2022-09-12	16:10:57	0.24958	1.11018	526.197	FALSE	3
2022-09-12	16:10:57	0.256807	1.14233	484.018	FALSE	3
2022-09-12	16:10:57	1.05823	4.70722	530.905	FALSE	3
2022-09-12	16:10:58	1.06831	4.75206	488.77	FALSE	3
2022-09-12	16:10:58	0.541438	2.40842	533.313	FALSE	3
2022-09-12	16:10:58	0.396298	1.76281	490.533	FALSE	3
2022-09-12	16:10:59	0.257163	1.14391	534.457	FALSE	3
2022-09-12	16:10:59	0.496858	2.21012	492.743	FALSE	3
2022-09-12	16:10:59	0.306527	1.36349	535.82	FALSE	3
2022-09-12	16:10:59	0.391718	1.74244	494.485	FALSE	3
2022-09-12	16:11:00	0.515992	2.29524	538.116	FALSE	3
2022-09-12	16:11:00	0.438842	1.95206	496.438	FALSE	3
2022-09-12	16:11:00	0.251005	1.11652	539.232	FALSE	3
2022-09-12	16:11:00	0.985153	4.38216	500.82	FALSE	3
2022-09-12	16:11:01	0.60383	2.68596	541.918	FALSE	3
2022-09-12	16:11:01	0.365356	1.62518	502.445	FALSE	3
2022-09-12	16:11:01	0.314567	1.39926	543.317	FALSE	3
2022-09-12	16:11:01	0.520165	2.3138	504.759	FALSE	3
2022-09-12	16:11:02	0.243015	1.08098	544.398	FALSE	3
2022-09-12	16:11:02	0.407494	1.81261	506.571	FALSE	3
2022-09-12	16:11:02	0.241031	1.07215	545.47	FALSE	3
2022-09-12	16:11:03	0.453601	2.01771	508.589	FALSE	3
2022-09-12	16:11:03	0.241845	1.07577	546.546	FALSE	3
2022-09-12	16:11:03	0.323168	1.43752	510.026	FALSE	3
2022-09-12	16:11:03	0.437265	1.94504	548.491	FALSE	3
2022-09-12	16:11:04	0.575738	2.561	512.587	FALSE	3
2022-09-12	16:11:04	0.682863	3.03751	551.529	FALSE	3
2022-09-12	16:11:04	0.83014	3.69263	516.28	FALSE	3
2022-09-12	16:11:04	0.873753	3.88663	555.415	FALSE	3
2022-09-12	16:11:05	1.36118	6.0548	522.335	FALSE	3
2022-09-12	16:11:05	0.338537	1.50588	556.921	FALSE	3
2022-09-12	16:11:05	0.506781	2.25426	524.589	FALSE	3
2022-09-12	16:11:06	0.241896	1.076	557.997	FALSE	3
2022-09-12	16:11:06	6.39548	28.4484	553.038	1	4
2022-09-12	16:11:06	-0.0197326	-0.0877746	557.997	FALSE	4
2022-09-12	16:11:06	-0.0694526	-0.308939	553.038	FALSE	4
2022-09-12	16:11:07	-0.234338	-1.04238	557.997	FALSE	4
2022-09-12	16:11:07	-0.330877	-1.47181	553.038	FALSE	4
2022-09-12	16:11:07	-0.463702	-2.06264	557.997	FALSE	4
2022-09-12	16:11:07	-0.422073	-1.87747	553.038	FALSE	4
2022-09-12	16:11:08	-0.402633	-1.79099	557.997	FALSE	4
2022-09-12	16:11:08	-0.348842	-1.55172	553.038	FALSE	4
2022-09-12	16:11:08	-0.124974	-0.555909	557.997	FALSE	4
2022-09-12	16:11:08	0.010242	0.0455585	553.083	FALSE	4
2022-09-12	16:11:09	0.0954328	0.424504	558.422	FALSE	4
2022-09-12	16:11:09	0.289733	1.28879	554.372	FALSE	4
2022-09-12	16:11:09	0.0812852	0.361573	558.783	FALSE	4
2022-09-12	16:11:10	0.353651	1.57311	555.945	FALSE	4
2022-09-12	16:11:10	0.230954	1.02733	559.811	FALSE	4
2022-09-12	16:11:10	0.369835	1.6451	557.59	FALSE	4
2022-09-12	16:11:10	0.402201	1.78907	561.6	FALSE	4
2022-09-12	16:11:11	0.765153	3.40355	560.994	FALSE	4
2022-09-12	16:11:11	0.44958	1.99982	563.6	FALSE	4
2022-09-12	16:11:11	0.458079	2.03763	563.031	FALSE	4
2022-09-12	16:11:11	1.07004	4.75975	568.359	FALSE	4
2022-09-12	16:11:12	1.70653	7.59099	570.622	FALSE	4
2022-09-12	16:11:12	1.74963	7.7827	576.142	FALSE	4
2022-09-12	16:11:12	1.16332	5.17468	575.797	FALSE	4
2022-09-12	16:11:12	0.484084	2.1533	578.295	FALSE	4
2022-09-12	16:11:13	0.512328	2.27894	578.076	FALSE	4
2022-09-12	16:11:13	0.413651	1.84	580.135	FALSE	4
2022-09-12	16:11:13	0.604644	2.68958	580.765	FALSE	4
2022-09-12	16:11:14	0.849987	3.78091	583.916	FALSE	4
2022-09-12	16:11:14	0.635076	2.82495	583.59	FALSE	4
2022-09-12	16:11:14	0.862405	3.83615	587.752	FALSE	4
2022-09-12	16:11:14	0.643423	2.86207	586.453	FALSE	4
2022-09-12	16:11:15	0.648817	2.88607	590.638	FALSE	4
2022-09-12	16:11:15	0.822557	3.6589	590.111	FALSE	4
2022-09-12	16:11:15	0.74729	3.3241	593.963	FALSE	4
2022-09-12	16:11:15	0.892379	3.96948	594.081	FALSE	4
2022-09-12	16:11:16	0.851107	3.78589	597.748	FALSE	4
2022-09-12	16:11:16	0.910954	4.05211	598.133	FALSE	4
2022-09-12	16:11:16	0.907036	4.03468	601.783	FALSE	4
2022-09-12	16:11:16	0.877112	3.90157	602.035	FALSE	4
2022-09-12	16:11:17	0.881183	3.91968	605.703	FALSE	4
2022-09-12	16:11:17	0.907341	4.03603	606.071	FALSE	4
2022-09-12	16:11:17	0.842201	3.74628	609.449	FALSE	4
2022-09-12	16:11:18	0.768257	3.41736	609.488	FALSE	4
2022-09-12	16:11:18	0.586476	2.60876	612.058	FALSE	4
2022-09-12	16:11:18	0.484695	2.15602	611.644	FALSE	4
2022-09-12	16:11:18	0.427901	1.90339	613.961	FALSE	4
2022-09-12	16:11:19	0.310751	1.38228	613.026	FALSE	4
2022-09-12	16:11:19	0.381692	1.69784	615.659	FALSE	4
2022-09-12	16:11:19	0.437367	1.9455	614.972	FALSE	4
2022-09-12	16:11:19	0.311005	1.38341	617.042	FALSE	4
2022-09-12	16:11:20	0.538282	2.39439	617.366	FALSE	4
2022-09-12	16:11:20	0.812328	3.6134	620.656	FALSE	4
2022-09-12	16:11:20	0.987392	4.39212	621.758	FALSE	4
2022-09-12	16:11:20	0.467443	2.07928	622.735	FALSE	4
2022-09-12	16:11:21	0.381082	1.69513	623.453	FALSE	4
2022-09-12	16:11:21	0.315433	1.40311	624.138	FALSE	4
2022-09-12	16:11:21	0.340929	1.51652	624.97	FALSE	4
2022-09-12	16:11:22	0.504389	2.24362	626.382	FALSE	4
2022-09-12	16:11:22	0.326629	1.45291	626.423	FALSE	4
2022-09-12	16:11:22	0.71528	3.18171	629.564	FALSE	4
2022-09-12	16:11:22	0.410598	1.82642	628.249	FALSE	4
2022-09-12	16:11:23	0.976094	4.34186	633.905	FALSE	4
2022-09-12	16:11:23	1.39319	6.19719	634.446	FALSE	4
2022-09-12	16:11:23	1.79966	8.00525	641.911	FALSE	4
2022-09-12	16:11:23	0.462456	2.0571	636.504	FALSE	4
2022-09-12	16:11:24	0.853906	3.79834	645.709	FALSE	4
2022-09-12	16:11:24	0.662303	2.94606	639.45	FALSE	4
2022-09-12	16:11:24	0.35645	1.58556	647.295	FALSE	4
2022-09-12	16:11:25	0.36154	1.6082	641.058	FALSE	4
2022-09-12	16:11:25	0.41299	1.83706	649.132	FALSE	4
2022-09-12	16:11:25	0.263168	1.17062	642.228	FALSE	4
2022-09-12	16:11:25	0.322659	1.43525	650.567	FALSE	4
2022-09-12	16:11:26	0.364186	1.61997	643.848	FALSE	4
2022-09-12	16:11:26	0.513397	2.28369	652.851	FALSE	4
2022-09-12	16:11:26	0.567086	2.52251	646.371	FALSE	4
2022-09-12	16:11:26	0.545458	2.42631	655.277	FALSE	4
2022-09-12	16:11:27	0.886527	3.94345	650.314	FALSE	4
2022-09-12	16:11:27	0.437367	1.9455	657.222	FALSE	4
2022-09-12	16:11:27	0.392735	1.74696	652.061	FALSE	4
2022-09-12	16:11:27	0.269122	1.19711	658.42	FALSE	4
2022-09-12	16:11:28	0.322048	1.43253	653.494	FALSE	4
2022-09-12	16:11:28	0.359504	1.59915	660.019	FALSE	4
2022-09-12	16:11:28	0.317214	1.41103	654.905	FALSE	4
2022-09-12	16:11:29	0.230802	1.02665	661.045	FALSE	4
2022-09-12	16:11:29	0.360471	1.60345	656.508	FALSE	4
2022-09-12	16:11:29	0.345153	1.53531	662.581	FALSE	4
2022-09-12	16:11:29	0.329529	1.46581	657.974	FALSE	4
2022-09-12	16:11:30	0.230496	1.02529	663.606	FALSE	4
2022-09-12	16:11:30	0.174975	0.778324	658.752	FALSE	4
2022-09-12	16:11:30	0.340318	1.5138	665.12	FALSE	4
2022-09-12	16:11:30	0.295025	1.31233	660.065	FALSE	4
2022-09-12	16:11:31	0.334975	1.49004	666.61	FALSE	4
2022-09-12	16:11:31	0.309529	1.37685	661.442	FALSE	4
2022-09-12	16:11:31	0.424593	1.88867	668.498	FALSE	4
2022-09-12	16:11:31	0.436654	1.94232	663.384	FALSE	4
2022-09-12	16:11:32	0.37645	1.67452	670.173	FALSE	4
2022-09-12	16:11:32	0.396807	1.76508	665.149	FALSE	4
2022-09-12	16:11:32	0.370293	1.64714	671.82	FALSE	4
2022-09-12	16:11:33	0.410394	1.82551	666.975	FALSE	4
2022-09-12	16:11:33	0.425254	1.89161	673.712	FALSE	4
2022-09-12	16:11:33	0.434008	1.93055	668.905	FALSE	4
2022-09-12	16:11:33	0.458181	2.03808	675.75	FALSE	4
2022-09-12	16:11:34	0.487646	2.16915	671.074	FALSE	4
2022-09-12	16:11:34	0.451005	2.00616	677.756	FALSE	4
2022-09-12	16:11:34	0.421336	1.87419	672.948	FALSE	4
2022-09-12	16:11:34	0.419453	1.86581	679.622	FALSE	4
2022-09-12	16:11:35	0.401438	1.78568	674.734	FALSE	4
2022-09-12	16:11:35	0.351361	1.56292	681.185	FALSE	4
2022-09-12	16:11:35	0.371412	1.65211	676.386	FALSE	4
2022-09-12	16:11:35	0.377061	1.67724	682.862	FALSE	4
2022-09-12	16:11:36	0.330191	1.46876	677.855	FALSE	4
2022-09-12	16:11:36	0.341845	1.52059	684.383	FALSE	4
2022-09-12	16:11:36	0.349733	1.55568	679.411	FALSE	4
2022-09-12	16:11:37	0.351921	1.56541	685.948	FALSE	4
2022-09-12	16:11:37	0.333753	1.4846	680.895	FALSE	4
2022-09-12	16:11:37	0.340115	1.5129	687.461	FALSE	4
2022-09-12	16:11:37	0.342964	1.52557	682.421	FALSE	4
2022-09-12	16:11:38	0.345356	1.53621	688.997	FALSE	4
2022-09-12	16:11:38	0.324847	1.44498	683.866	FALSE	4
2022-09-12	16:11:38	0.422761	1.88053	690.878	FALSE	4
2022-09-12	16:11:38	0.237214	1.05518	684.921	FALSE	4
2022-09-12	16:11:39	0.178893	0.795752	691.673	FALSE	4
2022-09-12	16:11:39	0.297112	1.32161	686.243	FALSE	4
2022-09-12	16:11:39	0.359402	1.59869	693.272	FALSE	4
2022-09-12	16:11:39	0.516247	2.29637	688.539	FALSE	4
2022-09-12	16:11:40	0.400013	1.77934	695.051	FALSE	4
2022-09-12	16:11:40	0.462201	2.05596	690.595	FALSE	4
2022-09-12	16:11:40	0.431463	1.91923	696.971	FALSE	4
2022-09-12	16:11:41	0.436654	1.94232	692.537	FALSE	4
2022-09-12	16:11:41	0.447596	1.991	698.962	FALSE	4
2022-09-12	16:11:41	0.443779	1.97402	694.511	FALSE	4
2022-09-12	16:11:41	0.445458	1.98149	700.943	FALSE	4
2022-09-12	16:11:42	0.451005	2.00616	696.517	FALSE	4
2022-09-12	16:11:42	0.442405	1.96791	702.911	FALSE	4
2022-09-12	16:11:42	0.444135	1.9756	698.493	FALSE	4
2022-09-12	16:11:42	0.445458	1.98149	704.892	FALSE	4
2022-09-12	16:11:43	0.444746	1.97832	700.471	FALSE	4
2022-09-12	16:11:43	0.447799	1.9919	706.884	FALSE	4
2022-09-12	16:11:43	0.449631	2.00005	702.471	FALSE	4
2022-09-12	16:11:44	0.451412	2.00797	708.892	FALSE	4
2022-09-12	16:11:44	0.452685	2.01363	704.485	FALSE	4
2022-09-12	16:11:44	0.449478	1.99937	710.892	FALSE	4
2022-09-12	16:11:44	0.450598	2.00435	706.489	FALSE	4
2022-09-12	16:11:45	0.463321	2.06094	712.953	FALSE	4
2022-09-12	16:11:45	0.473295	2.10531	708.595	FALSE	4
2022-09-12	16:11:45	0.467137	2.07792	715.031	FALSE	4
2022-09-12	16:11:45	0.466018	2.07294	710.668	FALSE	4
2022-09-12	16:11:46	0.461285	2.05189	717.082	FALSE	4
2022-09-12	16:11:46	0.462812	2.05868	712.726	FALSE	4
2022-09-12	16:11:46	0.465763	2.07181	719.154	FALSE	4
2022-09-12	16:11:46	0.458181	2.03808	714.764	FALSE	4
2022-09-12	16:11:47	0.442201	1.967	721.121	FALSE	4
2022-09-12	16:11:47	0.435331	1.93644	716.701	FALSE	4
2022-09-12	16:11:47	0.434211	1.93146	723.053	FALSE	4
2022-09-12	16:11:48	0.431311	1.91856	718.619	FALSE	4
2022-09-12	16:11:48	0.430496	1.91493	724.968	FALSE	4
2022-09-12	16:11:48	0.424338	1.88754	720.507	FALSE	4
2022-09-12	16:11:48	0.431209	1.9181	726.886	FALSE	4
2022-09-12	16:11:49	0.437061	1.94413	722.451	FALSE	4
2022-09-12	16:11:49	0.437875	1.94776	728.834	FALSE	4
2022-09-12	16:11:49	0.704491	3.13372	725.585	FALSE	4
2022-09-12	16:11:49	0.301387	1.34063	730.174	FALSE	4
2022-09-12	16:11:50	0.405509	1.80379	727.389	FALSE	4
2022-09-12	16:11:50	0.181387	0.806846	730.981	FALSE	4
2022-09-12	16:11:50	0.0549239	0.244312	727.633	FALSE	4
2022-09-12	16:11:50	0.222507	0.989756	731.971	FALSE	4
2022-09-12	16:11:51	0.363779	1.61816	729.251	FALSE	4
2022-09-12	16:11:51	1.13604	5.05333	737.024	FALSE	4
2022-09-12	16:11:51	1.00907	4.48855	733.74	FALSE	4
2022-09-12	16:11:52	1.16225	5.16992	742.194	FALSE	4
2022-09-12	16:11:52	0.363321	1.61612	735.356	FALSE	4
2022-09-12	16:11:52	0.169326	0.753196	742.947	FALSE	4
2022-09-12	16:11:52	0.254669	1.13282	736.489	FALSE	4
2022-09-12	16:11:53	0.270903	1.20503	744.152	FALSE	4
2022-09-12	16:11:53	0.257926	1.14731	737.636	FALSE	4
2022-09-12	16:11:53	0.130293	0.579569	744.732	FALSE	4
2022-09-12	16:11:53	0.272125	1.21047	738.846	FALSE	4
2022-09-12	16:11:54	0.205814	0.915502	745.647	FALSE	4
2022-09-12	16:11:54	0.0416415	0.18523	739.032	FALSE	4
2022-09-12	16:11:54	-0.177188	-0.788168	745.647	FALSE	4
2022-09-12	16:11:54	-0.0465519	-0.207072	739.032	FALSE	4
2022-09-12	16:11:55	0.106832	0.47521	746.123	FALSE	4
2022-09-12	16:11:55	0.158944	0.707015	739.739	FALSE	4
2022-09-12	16:11:55	0.225204	1.00175	747.124	FALSE	4
2022-09-12	16:11:56	0.419555	1.86626	741.605	FALSE	4
2022-09-12	16:11:56	0.443168	1.9713	749.096	FALSE	4
2022-09-12	16:11:56	0.461336	2.05211	743.657	FALSE	4
2022-09-12	16:11:56	0.433804	1.92965	751.025	FALSE	4
2022-09-12	16:11:57	0.328664	1.46196	745.119	FALSE	4
2022-09-12	16:11:57	0.480064	2.13542	753.161	FALSE	4
2022-09-12	16:11:57	0.52327	2.32761	747.447	FALSE	4
2022-09-12	16:11:57	0.532837	2.37017	755.531	FALSE	4
2022-09-12	16:11:58	0.397926	1.77005	749.217	FALSE	4
2022-09-12	16:11:58	0.667952	2.97118	758.502	FALSE	4
2022-09-12	16:11:58	0.355178	1.5799	750.796	FALSE	4
2022-09-12	16:11:58	0.402863	1.79202	760.294	FALSE	4
2022-09-12	16:11:59	0.517214	2.30067	753.097	FALSE	4
2022-09-12	16:11:59	0.451565	2.00865	762.303	FALSE	4
2022-09-12	16:11:59	0.507901	2.25925	755.356	FALSE	4
2022-09-12	16:12:00	0.273906	1.21839	763.521	FALSE	4
2022-09-12	16:12:00	0.0914633	0.406847	755.763	FALSE	4
2022-09-12	16:12:00	0.121438	0.540181	764.061	FALSE	4
2022-09-12	16:12:00	0.311158	1.38409	757.147	FALSE	4
2022-09-12	16:12:01	0.415891	1.84997	765.911	FALSE	4
2022-09-12	16:12:01	0.352685	1.56881	758.716	FALSE	4
2022-09-12	16:12:01	0.401285	1.785	767.696	FALSE	4
2022-09-12	16:12:01	0.152328	0.677585	759.394	FALSE	4
2022-09-12	16:12:02	0.0788424	0.350707	768.047	FALSE	4
2022-09-12	16:12:02	0.233397	1.0382	760.432	FALSE	4
2022-09-12	16:12:02	0.143932	0.640238	768.687	FALSE	4
2022-09-12	16:12:02	-0.0583585	-0.25959	760.432	FALSE	4
2022-09-12	16:12:03	0.0275956	0.122751	768.81	FALSE	4
2022-09-12	16:12:03	0.24383	1.0846	761.517	FALSE	4
2022-09-12	16:12:03	0.1964	0.873626	769.684	FALSE	4
2022-09-12	16:12:04	0.175229	0.779454	762.296	FALSE	4
2022-09-12	16:12:04	0.212939	0.947195	770.631	FALSE	4
2022-09-12	16:12:04	0.18383	0.817713	763.114	FALSE	4
2022-09-12	16:12:04	0.121183	0.539046	771.17	FALSE	4
2022-09-12	16:12:05	0.213804	0.951043	764.065	FALSE	4
2022-09-12	16:12:05	0.225814	1.00447	772.174	FALSE	4
2022-09-12	16:12:05	0.278537	1.23899	765.304	FALSE	4
2022-09-12	16:12:05	0.287596	1.27928	773.454	FALSE	4
2022-09-12	16:12:06	0.321743	1.43118	766.735	FALSE	4
2022-09-12	16:12:06	0.308969	1.37436	774.828	FALSE	4
2022-09-12	16:12:06	0.338995	1.50792	768.243	FALSE	4
2022-09-12	16:12:07	0.348664	1.55093	776.379	FALSE	4
2022-09-12	16:12:07	0.166374	0.740065	768.983	FALSE	4
2022-09-12	16:12:07	-0.240699	-1.07068	776.379	FALSE	4
2022-09-12	16:12:07	-0.561564	-2.49795	768.983	FALSE	4
2022-09-12	16:12:08	-0.876271	-3.89783	776.379	FALSE	4
2022-09-12	16:12:08	-0.673473	-2.99574	768.983	FALSE	4
2022-09-12	16:12:08	-0.693981	-3.08697	776.379	FALSE	4
2022-09-12	16:12:08	-0.768943	-3.42041	768.983	FALSE	4
2022-09-12	16:12:09	-0.834236	-3.71085	776.379	FALSE	4
2022-09-12	16:12:09	-0.791895	-3.52251	768.983	FALSE	4
2022-09-12	16:12:09	-0.827925	-3.68278	776.379	FALSE	4
2022-09-12	16:12:09	-0.6893	-3.06614	768.983	FALSE	4
2022-09-12	16:12:10	-0.776729	-3.45505	776.379	FALSE	4
2022-09-12	16:12:10	-0.882022	-3.92341	768.983	FALSE	4
2022-09-12	16:12:10	-0.806348	-3.5868	776.379	FALSE	4
2022-09-12	16:12:11	-0.905585	-4.02822	768.983	FALSE	4
2022-09-12	16:12:11	-0.815355	-3.62686	776.379	FALSE	4
2022-09-12	16:12:11	-0.835152	-3.71492	768.983	FALSE	4
2022-09-12	16:12:11	-0.853574	-3.79687	776.379	FALSE	4
2022-09-12	16:12:12	-0.856984	-3.81204	768.983	FALSE	4
2022-09-12	16:12:12	-0.846348	-3.76473	776.379	FALSE	4
2022-09-12	16:12:12	-0.685992	-3.05143	768.983	FALSE	4
2022-09-12	16:12:12	-0.304516	-1.35455	776.379	FALSE	4
2022-09-12	16:12:13	0.183321	0.815448	769.798	FALSE	4
2022-09-12	16:12:13	0.269275	1.19779	777.577	FALSE	4
2022-09-12	16:12:13	0.559707	2.48969	772.288	FALSE	4
2022-09-12	16:12:13	0.449224	1.99824	779.575	FALSE	4
2022-09-12	16:12:14	0.398639	1.77323	774.061	FALSE	4
2022-09-12	16:12:14	0.514568	2.2889	781.864	FALSE	4
2022-09-12	16:12:14	0.510801	2.27215	776.333	FALSE	4
2022-09-12	16:12:15	0.45355	2.01748	783.881	FALSE	4
2022-09-12	16:12:15	0.43528	1.93621	778.27	FALSE	4
2022-09-12	16:12:15	0.469428	2.08811	785.969	FALSE	4
2022-09-12	16:12:15	0.330547	1.47034	779.74	FALSE	4
2022-09-12	16:12:16	0.409224	1.82031	787.79	FALSE	4
2022-09-12	16:12:16	0.393346	1.74968	781.49	FALSE	4
2022-09-12	16:12:16	0.591259	2.63004	790.42	FALSE	4
2022-09-12	16:12:16	0.810445	3.60502	785.095	FALSE	4
2022-09-12	16:12:17	1.29833	5.77523	796.195	FALSE	4
2022-09-12	16:12:17	0.993143	4.4177	789.512	FALSE	4
2022-09-12	16:12:17	1.02337	4.55215	800.747	FALSE	4
2022-09-12	16:12:17	0.707036	3.14504	792.657	FALSE	4
2022-09-12	16:12:18	0.67528	3.00378	803.751	FALSE	4
2022-09-12	16:12:18	0.625051	2.78035	795.438	FALSE	4
2022-09-12	16:12:18	0.605509	2.69343	806.444	FALSE	4
2022-09-12	16:12:19	0.555025	2.46886	797.907	FALSE	4
2022-09-12	16:12:19	0.641641	2.85415	809.298	FALSE	4
2022-09-12	16:12:19	0.598842	2.66377	800.57	FALSE	4
2022-09-12	16:12:19	0.631107	2.80729	812.106	FALSE	4
2022-09-12	16:12:20	0.629784	2.80141	803.372	FALSE	4
2022-09-12	16:12:20	0.67187	2.98861	815.094	FALSE	4
2022-09-12	16:12:20	0.682761	3.03706	806.409	FALSE	4
2022-09-12	16:12:20	0.629427	2.79982	817.894	FALSE	4
2022-09-12	16:12:21	0.511565	2.27554	808.684	FALSE	4
2022-09-12	16:12:21	0.484033	2.15308	820.047	FALSE	4
2022-09-12	16:12:21	0.487494	2.16847	810.853	FALSE	4
2022-09-12	16:12:21	0.503677	2.24046	822.288	FALSE	4
2022-09-12	16:12:22	0.469377	2.08788	812.941	FALSE	4
2022-09-12	16:12:22	0.473906	2.10803	824.396	FALSE	4
2022-09-12	16:12:22	0.434822	1.93418	814.875	FALSE	4
2022-09-12	16:12:23	0.546119	2.42925	826.825	FALSE	4
2022-09-12	16:12:23	0.759911	3.38024	818.255	FALSE	4
2022-09-12	16:12:23	1.11218	4.9472	831.772	FALSE	4
2022-09-12	16:12:24	1.33263	5.9278	824.183	FALSE	4
2022-09-12	16:12:24	1.3051	5.80535	837.577	FALSE	4
2022-09-12	16:12:24	0.480776	2.13859	826.322	FALSE	4
2022-09-12	16:12:24	0.520725	2.31629	839.894	FALSE	4
2022-09-12	16:12:24	0.587748	2.61442	828.936	FALSE	4
2022-09-12	16:12:25	0.439708	1.95591	841.85	FALSE	4
2022-09-12	16:12:25	0.429122	1.90882	830.845	FALSE	4
2022-09-12	16:12:25	0.408919	1.81895	843.669	FALSE	4
2022-09-12	16:12:26	0.39584	1.76078	832.606	FALSE	4
2022-09-12	16:12:26	0.495178	2.20265	845.871	FALSE	4
2022-09-12	16:12:26	0.671412	2.98657	835.592	FALSE	4
2022-09-12	16:12:26	1.23039	5.47302	851.344	FALSE	4
2022-09-12	16:12:27	1.1736	5.22041	840.813	FALSE	4
2022-09-12	16:12:27	1.19564	5.31845	856.663	FALSE	4
2022-09-12	16:12:27	1.16617	5.18736	846	FALSE	4
2022-09-12	16:12:27	1.50215	6.68186	863.345	FALSE	4
2022-09-12	16:12:28	1.76841	7.86624	853.866	FALSE	4
2022-09-12	16:12:28	2.52108	11.2143	874.559	FALSE	4
2022-09-12	16:12:28	3.37726	15.0227	868.889	1	5
2022-09-12	16:12:28	4.125	18.3488	892.908	1	6
2022-09-12	16:12:29	3.5594	15.8329	884.722	1	7
2022-09-12	16:12:29	3.5134	15.6283	908.536	1	8
2022-09-12	16:12:29	3.94622	17.5536	902.275	1	9
2022-09-12	16:12:30	4.40368	19.5884	928.124	1	10
2022-09-12	16:12:30	4.40983	19.6158	921.891	1	11
2022-09-12	16:12:30	4.37167	19.4461	947.571	1	12
2022-09-12	16:12:30	4.38256	19.4945	941.386	1	13
2022-09-12	16:12:31	4.56978	20.3273	967.898	1	14
2022-09-12	16:12:31	4.62612	20.5779	961.964	1	15
2022-09-12	16:12:31	4.4679	19.8741	987.772	1	16
2022-09-12	16:12:31	4.38749	19.5164	981.48	1	17
2022-09-12	16:12:32	4.38357	19.499	1007.27	1	18
2022-09-12	16:12:32	4.47859	19.9217	1001.4	1	19
2022-09-12	16:12:32	4.5852	20.3959	1027.67	1	20
2022-09-12	16:12:32	4.62413	20.5691	1021.97	1	21
2022-09-12	16:12:33	4.65126	20.6897	1048.36	1	22
2022-09-12	16:12:33	4.59884	20.4566	1042.43	1	23
2022-09-12	16:12:33	4.39172	19.5352	1067.89	1	24
2022-09-12	16:12:34	4.30413	19.1456	1061.57	1	25
2022-09-12	16:12:34	3.93889	17.521	1085.41	1	26
2022-09-12	16:12:34	3.73614	16.6191	1078.19	1	27
2022-09-12	16:12:34	3.06266	13.6233	1099.04	1	28
2022-09-12	16:12:35	2.98556	13.2804	1091.47	FALSE	28
2022-09-12	16:12:35	3.09681	13.7752	1112.81	1	29
2022-09-12	16:12:35	3.14342	13.9826	1105.45	1	30
2022-09-12	16:12:35	3.15319	14.026	1126.84	1	31
2022-09-12	16:12:36	3.13742	13.9559	1119.41	1	32
2022-09-12	16:12:36	2.55446	11.3627	1138.2	FALSE	32
2022-09-12	16:12:36	1.51141	6.72305	1126.13	FALSE	32
2022-09-12	16:12:36	1.16968	5.20297	1143.4	FALSE	32
2022-09-12	16:12:37	0.654567	2.91164	1129.05	FALSE	32
2022-09-12	16:12:37	0.3707	1.64895	1145.05	FALSE	32
2022-09-12	16:12:37	0.809885	3.60253	1132.65	FALSE	32
2022-09-12	16:12:38	0.550038	2.44668	1147.5	FALSE	32
2022-09-12	16:12:38	0.521081	2.31787	1134.97	FALSE	32
2022-09-12	16:12:38	0.361336	1.60729	1149.11	FALSE	32
2022-09-12	16:12:38	0.384288	1.70939	1136.68	FALSE	32
2022-09-12	16:12:39	0.393601	1.75082	1150.86	FALSE	32
2022-09-12	16:12:39	0.389326	1.7318	1138.41	FALSE	32
2022-09-12	16:12:39	0.42042	1.87011	1152.73	FALSE	32
2022-09-12	16:12:39	0.385204	1.71346	1140.12	FALSE	32
2022-09-12	16:12:40	0.386018	1.71709	1154.44	FALSE	32
2022-09-12	16:12:40	0.406832	1.80967	1141.93	FALSE	32
2022-09-12	16:12:40	0.414568	1.84408	1156.29	FALSE	32
2022-09-12	16:12:40	0.403117	1.79315	1143.72	FALSE	32
2022-09-12	16:12:41	0.406629	1.80877	1158.1	FALSE	32
2022-09-12	16:12:41	0.45874	2.04057	1145.76	FALSE	32
2022-09-12	16:12:41	0.495993	2.20628	1160.3	FALSE	32
2022-09-12	16:12:42	0.531565	2.36451	1148.13	FALSE	32
2022-09-12	16:12:42	0.553143	2.46049	1162.76	FALSE	32
2022-09-12	16:12:42	0.576603	2.56485	1150.69	FALSE	32
2022-09-12	16:12:42	0.537214	2.38964	1165.15	FALSE	32
2022-09-12	16:12:43	0.512888	2.28143	1152.97	FALSE	32
2022-09-12	16:12:43	0.454771	2.02291	1167.18	FALSE	32
2022-09-12	16:12:43	0.335942	1.49434	1154.47	FALSE	32
2022-09-12	16:12:43	0.545356	2.42585	1169.6	FALSE	32
2022-09-12	16:12:44	0.51701	2.29976	1156.77	FALSE	32
2022-09-12	16:12:44	0.525051	2.33553	1171.94	FALSE	32
2022-09-12	16:12:44	0.609478	2.71108	1159.48	FALSE	32
2022-09-12	16:12:45	0.542048	2.41114	1174.35	FALSE	32
2022-09-12	16:12:45	0.514517	2.28867	1161.77	FALSE	32
2022-09-12	16:12:45	0.494466	2.19948	1176.55	FALSE	32
2022-09-12	16:12:45	0.528104	2.34911	1164.12	FALSE	32
2022-09-12	16:12:46	0.443422	1.97243	1178.52	FALSE	32
2022-09-12	16:12:46	0.562659	2.50282	1166.62	FALSE	32
2022-09-12	16:12:46	0.186323	0.828802	1179.35	FALSE	32
2022-09-12	16:12:46	-0.0656867	-0.292188	1166.62	FALSE	32
2022-09-12	16:12:47	0.00907149	0.0403518	1179.39	FALSE	32
2022-09-12	16:12:47	0.0888679	0.395302	1167.02	FALSE	32
2022-09-12	16:12:47	-0.214643	-0.954775	1179.39	FALSE	32
2022-09-12	16:12:47	-0.222175	-0.988279	1167.02	FALSE	32
2022-09-12	16:12:48	-0.0991727	-0.44114	1179.39	FALSE	32
2022-09-12	16:12:48	0.503982	2.24181	1169.26	FALSE	32
2022-09-12	16:12:48	0.560929	2.49512	1181.88	FALSE	32
2022-09-12	16:12:49	0.443473	1.97266	1171.23	FALSE	32
2022-09-12	16:12:49	0.61243	2.72421	1184.61	FALSE	32
2022-09-12	16:12:49	0.603219	2.68324	1173.91	FALSE	32
2022-09-12	16:12:49	0.808053	3.59438	1188.2	FALSE	32
2022-09-12	16:12:50	0.890394	3.96065	1177.87	FALSE	32
2022-09-12	16:12:50	1.24032	5.51719	1193.72	FALSE	32
2022-09-12	16:12:50	1.41431	6.29113	1184.17	FALSE	32
2022-09-12	16:12:50	1.62734	7.23873	1200.96	FALSE	32
2022-09-12	16:12:51	1.59162	7.07984	1191.25	FALSE	32
2022-09-12	16:12:51	1.97676	8.79302	1209.75	FALSE	32
2022-09-12	16:12:51	1.95823	8.7106	1199.96	FALSE	32
2022-09-12	16:12:51	1.82698	8.12677	1217.88	FALSE	32
2022-09-12	16:12:52	1.73833	7.73244	1207.69	FALSE	32
2022-09-12	16:12:52	1.68123	7.47845	1225.36	FALSE	32
2022-09-12	16:12:52	1.55121	6.90009	1214.59	FALSE	32
2022-09-12	16:12:53	1.37762	6.12793	1231.49	FALSE	32
2022-09-12	16:12:53	1.3905	6.18522	1220.77	FALSE	32
2022-09-12	16:12:53	1.24541	5.53983	1237.03	FALSE	32
2022-09-12	16:12:53	1.29991	5.78226	1226.56	FALSE	32
2022-09-12	16:12:54	1.44958	6.44802	1243.47	FALSE	32
2022-09-12	16:12:54	0.983575	4.37514	1230.93	FALSE	32
2022-09-12	16:12:54	1.45319	6.46408	1249.94	FALSE	32
2022-09-12	16:12:54	1.54174	6.85797	1237.79	FALSE	32
2022-09-12	16:12:55	1.44363	6.42155	1256.36	FALSE	32
2022-09-12	16:12:55	1.32658	5.90089	1243.69	FALSE	32
2022-09-12	16:12:55	1.282	5.70259	1262.06	FALSE	32
2022-09-12	16:12:55	1.23345	5.48663	1249.18	FALSE	32
2022-09-12	16:12:56	1.188	5.28446	1267.35	FALSE	32
2022-09-12	16:12:56	1.22078	5.43027	1254.61	FALSE	32
2022-09-12	16:12:56	1.2193	5.42369	1272.77	FALSE	32
2022-09-12	16:12:57	1.2852	5.71683	1260.32	FALSE	32
2022-09-12	16:12:57	1.4366	6.39028	1279.16	FALSE	32
2022-09-12	16:12:57	1.31676	5.85721	1266.18	FALSE	32
2022-09-12	16:12:57	1.16475	5.18104	1284.34	FALSE	32
2022-09-12	16:12:58	1.01564	4.51777	1270.7	FALSE	32
2022-09-12	16:12:58	0.851616	3.78816	1288.13	FALSE	32
2022-09-12	16:12:58	0.797875	3.54911	1274.25	FALSE	32
2022-09-12	16:12:58	0.850394	3.78272	1291.91	FALSE	32
2022-09-12	16:12:59	0.843371	3.75148	1278	FALSE	32
2022-09-12	16:12:59	0.802608	3.57016	1295.48	FALSE	32
2022-09-12	16:12:59	0.633906	2.81974	1280.82	FALSE	32
2022-09-12	16:12:59	0.572888	2.54832	1298.03	FALSE	32
2022-09-12	16:13:00	0.490394	2.18137	1283	FALSE	32
2022-09-12	16:13:00	0.496603	2.20899	1300.24	FALSE	32
2022-09-12	16:13:00	0.504491	2.24408	1285.24	FALSE	32
2022-09-12	16:13:01	0.501183	2.22936	1302.47	FALSE	32
2022-09-12	16:13:01	0.500725	2.22732	1287.47	FALSE	32
2022-09-12	16:13:01	0.53813	2.39371	1304.86	FALSE	32
2022-09-12	16:13:01	0.583524	2.59563	1290.07	FALSE	32
2022-09-12	16:13:02	0.607392	2.7018	1307.56	FALSE	32
2022-09-12	16:13:02	0.656756	2.92138	1292.99	FALSE	32
2022-09-12	16:13:02	0.72841	3.24011	1310.8	FALSE	32
2022-09-12	16:13:02	0.843524	3.75216	1296.74	FALSE	32
2022-09-12	16:13:03	0.910852	4.05165	1314.86	FALSE	32
2022-09-12	16:13:03	0.953855	4.24294	1300.98	FALSE	32
2022-09-12	16:13:03	0.953295	4.24045	1319.1	FALSE	32
2022-09-12	16:13:03	0.473041	2.10418	1303.09	FALSE	32
2022-09-12	16:13:04	0.0245422	0.109169	1319.21	FALSE	32
2022-09-12	16:13:04	0.853957	3.79857	1306.89	FALSE	32
2022-09-12	16:13:04	0.599402	2.66626	1321.87	FALSE	32
2022-09-12	16:13:05	0.0407763	0.181381	1307.07	FALSE	32
2022-09-12	16:13:05	0.214008	0.95195	1322.82	FALSE	32
2022-09-12	16:13:05	-0.0946435	-0.420993	1307.07	FALSE	32
2022-09-12	16:13:05	-0.138562	-0.616351	1322.82	FALSE	32
2022-09-12	16:13:06	-0.152811	-0.679734	1307.07	FALSE	32
2022-09-12	16:13:06	-0.0252797	-0.112449	1322.82	FALSE	32
2022-09-12	16:13:06	-0.0291473	-0.129653	1307.07	FALSE	32
2022-09-12	16:13:06	-0.0510812	-0.227219	1322.82	FALSE	32
2022-09-12	16:13:07	0.019504	0.0867577	1307.15	FALSE	32
2022-09-12	16:13:07	0.00952952	0.0423892	1322.87	FALSE	32
2022-09-12	16:13:07	-0.0245163	-0.109053	1307.15	FALSE	32
2022-09-12	16:13:08	0.0657127	0.292303	1323.16	FALSE	32
2022-09-12	16:13:08	0.274059	1.21907	1308.37	FALSE	32
2022-09-12	16:13:08	0.463931	2.06366	1325.22	FALSE	32
2022-09-12	16:13:08	0.968969	4.31017	1312.68	FALSE	32
2022-09-12	16:13:09	1.54149	6.85686	1332.08	FALSE	32
2022-09-12	16:13:09	2.62627	11.6822	1324.37	FALSE	32
2022-09-12	16:13:09	3.09971	13.7881	1345.87	1	33
2022-09-12	16:13:09	2.23716	9.95134	1334.32	FALSE	33
2022-09-12	16:13:10	0.448817	1.99643	1347.86	FALSE	33
2022-09-12	16:13:10	0.637214	2.83446	1337.15	FALSE	33
2022-09-12	16:13:10	0.769987	3.42506	1351.29	FALSE	33
2022-09-12	16:13:10	0.877773	3.90451	1341.06	FALSE	33
2022-09-12	16:13:11	0.706221	3.14141	1354.43	FALSE	33
2022-09-12	16:13:11	0.781387	3.47577	1344.53	FALSE	33
2022-09-12	16:13:11	0.86617	3.8529	1358.28	FALSE	33
2022-09-12	16:13:12	0.922863	4.10508	1348.64	FALSE	33
2022-09-12	16:13:12	0.909478	4.04554	1362.33	FALSE	33
2022-09-12	16:13:12	0.934109	4.1551	1352.79	FALSE	33
2022-09-12	16:13:12	0.924949	4.11436	1366.44	FALSE	33
2022-09-12	16:13:13	1.06078	4.71856	1357.51	FALSE	33
2022-09-12	16:13:13	0.956094	4.2529	1370.7	FALSE	33
2022-09-12	16:13:13	0.790853	3.51787	1361.03	FALSE	33
2022-09-12	16:13:13	0.573651	2.55171	1373.25	FALSE	33
2022-09-12	16:13:14	0.541132	2.40706	1363.44	FALSE	33
2022-09-12	16:13:14	0.486171	2.16259	1375.41	FALSE	33
2022-09-12	16:13:14	0.493142	2.19359	1365.63	FALSE	33
2022-09-12	16:13:14	0.51986	2.31244	1377.72	FALSE	33
2022-09-12	16:13:15	0.603219	2.68324	1368.31	FALSE	33
2022-09-12	16:13:15	0.671972	2.98907	1380.71	FALSE	33
2022-09-12	16:13:15	0.510191	2.26943	1370.58	FALSE	33
2022-09-12	16:13:16	0.421082	1.87306	1382.58	FALSE	33
2022-09-12	16:13:16	0.446221	1.98488	1372.57	FALSE	33
2022-09-12	16:13:16	0.408155	1.81556	1384.4	FALSE	33
2022-09-12	16:13:16	0.468461	2.08381	1374.65	FALSE	33
2022-09-12	16:13:17	0.515076	2.29116	1386.69	FALSE	33
2022-09-12	16:13:17	0.312227	1.38885	1376.04	FALSE	33
2022-09-12	16:13:17	0.586119	2.60717	1389.3	FALSE	33
2022-09-12	16:13:17	0.0492242	0.218959	1376.26	FALSE	33
2022-09-12	16:13:18	-0.500597	-2.22676	1389.3	FALSE	33
2022-09-12	16:13:18	-0.984465	-4.3791	1376.26	FALSE	33
2022-09-12	16:13:18	-0.94187	-4.18963	1389.3	FALSE	33
2022-09-12	16:13:18	-1.08574	-4.82959	1376.26	FALSE	33
2022-09-12	16:13:19	-0.662277	-2.94594	1389.3	FALSE	33
2022-09-12	16:13:19	-0.690216	-3.07022	1376.26	FALSE	33
2022-09-12	16:13:19	-0.287824	-1.2803	1389.3	FALSE	33
2022-09-12	16:13:20	-0.162939	-0.724785	1376.26	FALSE	33
2022-09-12	16:13:20	-0.219427	-0.976055	1389.3	FALSE	33
2022-09-12	16:13:20	0.00896972	0.0398991	1376.3	FALSE	33
2022-09-12	16:13:20	0.453906	2.01906	1391.32	FALSE	33
2022-09-12	16:13:21	0.882201	3.92421	1380.22	FALSE	33
2022-09-12	16:13:21	0.476043	2.11753	1393.44	FALSE	33
2022-09-12	16:13:21	0.33869	1.50656	1381.73	FALSE	33
2022-09-12	16:13:21	0.720878	3.20661	1396.64	FALSE	33
2022-09-12	16:13:22	0.223728	0.995187	1382.72	FALSE	33
2022-09-12	16:13:22	0.509987	2.26852	1398.91	FALSE	33
2022-09-12	16:13:22	0.526832	2.34345	1385.07	FALSE	33
2022-09-12	16:13:22	0.394618	1.75534	1400.67	FALSE	33
2022-09-12	16:13:23	0.455433	2.02586	1387.09	FALSE	33
2022-09-12	16:13:23	0.461183	2.05143	1402.72	FALSE	33
2022-09-12	16:13:23	0.373397	1.66094	1388.75	FALSE	33
2022-09-12	16:13:24	0.624135	2.77628	1405.49	FALSE	33
2022-09-12	16:13:24	0.476349	2.1189	1390.87	FALSE	33
2022-09-12	16:13:24	0.338232	1.50452	1407	FALSE	33
2022-09-12	16:13:24	0.475076	2.11323	1392.99	FALSE	33
2022-09-12	16:13:25	0.162812	0.72422	1407.72	FALSE	33
2022-09-12	16:13:25	0.151412	0.673511	1393.66	FALSE	33
2022-09-12	16:13:25	0.164746	0.732823	1408.45	FALSE	33
2022-09-12	16:13:25	0.159453	0.709279	1394.37	FALSE	33
2022-09-12	16:13:26	-0.00395648	-0.0175992	1408.45	FALSE	33
2022-09-12	16:13:26	-0.246145	-1.0949	1394.37	FALSE	33
2022-09-12	16:13:26	-0.30014	-1.33508	1408.45	FALSE	33
2022-09-12	16:13:26	-0.338053	-1.50373	1394.37	FALSE	33
2022-09-12	16:13:27	-0.141005	-0.627218	1408.45	FALSE	33
2022-09-12	16:13:27	0.264847	1.17809	1395.55	FALSE	33
2022-09-12	16:13:27	0.297672	1.3241	1409.78	FALSE	33
2022-09-12	16:13:28	0.213804	0.951043	1396.5	FALSE	33
2022-09-12	16:13:28	0.305458	1.35874	1411.14	FALSE	33
2022-09-12	16:13:28	0.265611	1.18149	1397.68	FALSE	33
2022-09-12	16:13:28	0.448512	1.99507	1413.13	FALSE	33
2022-09-12	16:13:29	2.02678	9.01552	1406.7	FALSE	33
2022-09-12	16:13:29	0.61528	2.73689	1415.87	FALSE	33
2022-09-12	16:13:29	0.526476	2.34187	1409.04	FALSE	33
2022-09-12	16:13:29	0.472939	2.10373	1417.97	FALSE	33
2022-09-12	16:13:30	0.186527	0.829709	1409.87	FALSE	33
2022-09-12	16:13:30	-0.0399361	-0.177644	1417.97	FALSE	33
2022-09-12	16:13:30	-0.204567	-0.909955	1409.87	FALSE	33
2022-09-12	16:13:31	-0.0718954	-0.319805	1417.97	FALSE	33
2022-09-12	16:13:31	0.187137	0.832423	1410.7	FALSE	33
2022-09-12	16:13:31	0.471972	2.09943	1420.07	FALSE	33
2022-09-12	16:13:31	0.808512	3.59642	1414.3	FALSE	33
2022-09-12	16:13:32	0.688562	3.06286	1423.14	FALSE	33
2022-09-12	16:13:32	0.682608	3.03638	1417.33	FALSE	33
2022-09-12	16:13:32	0.425407	1.8923	1425.03	FALSE	33
2022-09-12	16:13:32	0.43187	1.92104	1419.25	FALSE	33
2022-09-12	16:13:33	0.350394	1.55862	1426.59	FALSE	33
2022-09-12	16:13:33	0.691005	3.07373	1422.33	FALSE	33
2022-09-12	16:13:33	1.57319	6.99786	1433.58	FALSE	33
2022-09-12	16:13:33	1.74001	7.73991	1430.07	FALSE	33
2022-09-12	16:13:34	1.24383	5.5328	1439.12	FALSE	33
2022-09-12	16:13:34	0.863626	3.84158	1433.91	FALSE	33
2022-09-12	16:13:34	0.556959	2.47747	1441.59	FALSE	33
2022-09-12	16:13:35	0.41757	1.85743	1435.77	FALSE	33
2022-09-12	16:13:35	0.280013	1.24555	1442.84	FALSE	33
2022-09-12	16:13:35	0.429275	1.9095	1437.68	FALSE	33
2022-09-12	16:13:35	0.500572	2.22664	1445.07	FALSE	33
2022-09-12	16:13:36	0.357366	1.58964	1439.27	FALSE	33
2022-09-12	16:13:36	0.317366	1.41171	1446.48	FALSE	33
2022-09-12	16:13:36	0.299453	1.33203	1440.6	FALSE	33
2022-09-12	16:13:36	0.306679	1.36417	1447.84	FALSE	33
2022-09-12	16:13:37	0.27701	1.2322	1441.83	FALSE	33
2022-09-12	16:13:37	0.2307	1.0262	1448.87	FALSE	33
2022-09-12	16:13:37	0.245102	1.09026	1442.92	FALSE	33
2022-09-12	16:13:37	0.258435	1.14957	1450.02	FALSE	33
2022-09-12	16:13:38	0.0266287	0.11845	1443.04	FALSE	33
2022-09-12	16:13:38	0.0201656	0.0897006	1450.11	FALSE	33
2022-09-12	16:13:38	0.0201656	0.0897006	1443.13	FALSE	33
2022-09-12	16:13:39	0.027901	0.124109	1450.23	FALSE	33
2022-09-12	16:13:39	-0.0364247	-0.162024	1443.13	FALSE	33
2022-09-12	16:13:39	0.0401147	0.178438	1450.41	FALSE	33
2022-09-12	16:13:39	0.0152293	0.067743	1443.2	FALSE	33
2022-09-12	16:13:40	0.687494	3.05811	1453.47	FALSE	33
2022-09-12	16:13:40	0.408868	1.81873	1445.01	FALSE	33
2022-09-12	16:13:40	0.382761	1.7026	1455.17	FALSE	33
2022-09-12	16:13:40	1.23793	5.50656	1450.52	FALSE	33
2022-09-12	16:13:41	0.786578	3.49886	1458.67	FALSE	33
2022-09-12	16:13:41	0.526679	2.34277	1452.86	FALSE	33
2022-09-12	16:13:41	0.370445	1.64781	1460.32	FALSE	33
2022-09-12	16:13:41	0.222608	0.990205	1453.85	FALSE	33
2022-09-12	16:13:42	0.247392	1.10045	1461.42	FALSE	33
2022-09-12	16:13:42	0.210445	0.936101	1454.79	FALSE	33
2022-09-12	16:13:42	0.251005	1.11652	1462.54	FALSE	33
2022-09-12	16:13:43	-0.0736766	-0.327728	1454.79	FALSE	33
2022-09-12	16:13:43	-0.0858394	-0.381831	1462.54	FALSE	33
2022-09-12	16:13:43	-0.129503	-0.576055	1454.79	FALSE	33
2022-09-12	16:13:43	-0.173371	-0.771189	1462.54	FALSE	33
2022-09-12	16:13:44	-0.135356	-0.602091	1454.79	FALSE	33
2022-09-12	16:13:44	-0.0243127	-0.108148	1462.54	FALSE	33
2022-09-12	16:13:44	0.303473	1.34991	1456.14	FALSE	33
2022-09-12	16:13:44	0.274567	1.22133	1463.76	FALSE	33
2022-09-12	16:13:45	0.333397	1.48302	1457.62	FALSE	33
2022-09-12	16:13:45	0.360115	1.60186	1465.36	FALSE	33
2022-09-12	16:13:45	0.278384	1.23831	1458.86	FALSE	33
2022-09-12	16:13:45	0.329071	1.46377	1466.82	FALSE	33
2022-09-12	16:13:46	0.347138	1.54414	1460.41	FALSE	33
2022-09-12	16:13:46	0.227341	1.01126	1467.83	FALSE	33
2022-09-12	16:13:46	0.245102	1.09026	1461.5	FALSE	33
2022-09-12	16:13:47	0.19243	0.855967	1468.69	FALSE	33
2022-09-12	16:13:47	0.331514	1.47464	1462.97	FALSE	33
2022-09-12	16:13:47	0.253804	1.12897	1469.82	FALSE	33
2022-09-12	16:13:47	0.261692	1.16406	1464.13	FALSE	33
2022-09-12	16:13:48	0.308562	1.37255	1471.19	FALSE	33
2022-09-12	16:13:48	0.213702	0.950589	1465.08	FALSE	33
2022-09-12	16:13:48	0.324593	1.44385	1472.63	FALSE	33
2022-09-12	16:13:48	0.20159	0.896713	1465.98	FALSE	33
2022-09-12	16:13:49	0.236552	1.05223	1473.69	FALSE	33
2022-09-12	16:13:49	0.0994531	0.442387	1466.42	FALSE	33
2022-09-12	16:13:49	0.265611	1.18149	1474.87	FALSE	33
2022-09-12	16:13:50	0.205102	0.912335	1467.34	FALSE	33
2022-09-12	16:13:50	0.984847	4.3808	1479.25	FALSE	33
2022-09-12	16:13:50	1.37559	6.1189	1473.46	FALSE	33
2022-09-12	16:13:50	1.2878	5.72839	1484.98	FALSE	33
2022-09-12	16:13:51	0.880725	3.91764	1477.37	FALSE	33
2022-09-12	16:13:51	1.24866	5.55429	1490.53	FALSE	33
2022-09-12	16:13:51	0.718181	3.19461	1480.57	FALSE	33
2022-09-12	16:13:51	1.09274	4.86073	1495.39	FALSE	33
2022-09-12	16:13:52	0.584491	2.59993	1483.17	FALSE	33
2022-09-12	16:13:52	1.62139	7.21227	1502.61	FALSE	33
2022-09-12	16:13:52	2.41569	10.7455	1493.91	FALSE	33
2022-09-12	16:13:52	4.14515	18.4385	1521.04	1	34
2022-09-12	16:13:53	0.582048	2.58907	1496.5	FALSE	34
2022-09-12	16:13:53	0.663524	2.95149	1523.99	FALSE	34
2022-09-12	16:13:53	0.524848	2.33463	1498.84	FALSE	34
2022-09-12	16:13:54	1.3962	6.21058	1530.21	FALSE	34
2022-09-12	16:13:54	0.263728	1.17311	1500.01	FALSE	34
2022-09-12	16:13:54	0.570293	2.53678	1532.74	FALSE	34
2022-09-12	16:13:54	0.517214	2.30067	1502.31	FALSE	34
2022-09-12	16:13:55	0.650649	2.89422	1535.64	FALSE	34
2022-09-12	16:13:55	0.279453	1.24306	1503.55	FALSE	34
2022-09-12	16:13:55	1.07569	4.78488	1540.42	FALSE	34
2022-09-12	16:13:55	1.15925	5.15658	1508.71	FALSE	34
2022-09-12	16:13:56	1.13894	5.06623	1545.49	FALSE	34
2022-09-12	16:13:56	0.638842	2.8417	1511.55	FALSE	34
2022-09-12	16:13:56	1.16128	5.16561	1550.65	FALSE	34
2022-09-12	16:13:56	0.598639	2.66287	1514.21	FALSE	34
2022-09-12	16:13:57	0.801692	3.56609	1554.22	FALSE	34
2022-09-12	16:13:57	0.714924	3.18012	1517.39	FALSE	34
2022-09-12	16:13:57	0.726374	3.23106	1557.45	FALSE	34
2022-09-12	16:13:58	0.679198	3.02121	1520.42	FALSE	34
2022-09-12	16:13:58	1.62261	7.21769	1564.67	FALSE	34
2022-09-12	16:13:58	2.60607	11.5923	1532.01	FALSE	34
2022-09-12	16:13:58	2.81411	12.5177	1577.19	FALSE	34
2022-09-12	16:13:59	2.1539	9.58098	1541.59	FALSE	34
2022-09-12	16:13:59	3.27289	14.5585	1591.74	1	35
2022-09-12	16:13:59	2.10673	9.37116	1550.96	FALSE	35
2022-09-12	16:13:59	1.34546	5.98488	1597.73	FALSE	35
2022-09-12	16:14:00	0.828359	3.68471	1554.65	FALSE	35
2022-09-12	16:14:00	0.997163	4.43558	1602.16	FALSE	35
2022-09-12	16:14:00	0.628817	2.7971	1557.44	FALSE	35
2022-09-12	16:14:00	0.759453	3.3782	1605.54	FALSE	35
2022-09-12	16:14:01	0.864542	3.84566	1561.29	FALSE	35
2022-09-12	16:14:01	1.44337	6.4204	1611.96	FALSE	35
2022-09-12	16:14:01	1.19212	5.30279	1566.59	FALSE	35
2022-09-12	16:14:02	1.1736	5.22041	1617.18	FALSE	35
2022-09-12	16:14:02	0.828461	3.68516	1570.28	FALSE	35
2022-09-12	16:14:02	1.09055	4.85098	1622.03	FALSE	35
2022-09-12	16:14:02	1.59543	7.09679	1577.37	FALSE	35
2022-09-12	16:14:03	3.29207	14.6438	1636.68	1	36
2022-09-12	16:14:03	4.48505	19.9504	1597.32	1	37
2022-09-12	16:14:03	5.17986	23.0411	1659.72	1	38
2022-09-12	16:14:03	1.33767	5.95022	1603.27	FALSE	38
2022-09-12	16:14:04	0.63187	2.81068	1662.53	FALSE	38
2022-09-12	16:14:04	0.554059	2.46457	1605.74	FALSE	38
2022-09-12	16:14:04	0.658944	2.93111	1665.46	FALSE	38
2022-09-12	16:14:05	1.4305	6.36315	1612.1	FALSE	38
2022-09-12	16:14:05	3.68602	16.3962	1681.86	1	39
2022-09-12	16:14:05	5.02062	22.3327	1634.43	1	40
2022-09-12	16:14:05	4.96607	22.0901	1703.95	1	41
2022-09-12	16:14:06	5.40413	24.0387	1658.47	1	42
2022-09-12	16:14:06	3.26693	14.532	1718.48	1	43
2022-09-12	16:14:06	2.79314	12.4244	1670.9	FALSE	43
2022-09-12	16:14:06	4.39004	19.5278	1738.01	1	44
2022-09-12	16:14:07	5.52184	24.5622	1695.46	1	45
2022-09-12	16:14:07	7.07405	31.4668	1769.47	1	46
2022-09-12	16:14:07	3.31014	14.7242	1710.18	1	47
2022-09-12	16:14:07	7.43477	33.0713	1802.55	1	48
2022-09-12	16:14:08	9.10673	40.5086	1750.69	1	49
2022-09-12	16:14:08	4.26342	18.9645	1821.51	1	50
2022-09-12	16:14:08	3.32948	14.8102	1765.5	1	51
2022-09-12	16:14:08	3.26027	14.5023	1836.01	1	52
2022-09-12	16:14:09	4.37594	19.4651	1784.97	1	53
2022-09-12	16:14:09	3.13324	13.9373	1849.95	1	54
2022-09-12	16:14:09	2.31116	10.2805	1795.25	FALSE	54
2022-09-12	16:14:10	1.77925	7.91446	1857.86	FALSE	54
2022-09-12	16:14:10	1.40088	6.23139	1801.48	FALSE	54
2022-09-12	16:14:10	1.07548	4.78395	1862.65	FALSE	54
2022-09-12	16:14:10	0.857112	3.81261	1805.29	FALSE	54
2022-09-12	16:14:11	0.749733	3.33496	1865.98	FALSE	54
2022-09-12	16:14:11	0.549173	2.44283	1807.73	FALSE	54
2022-09-12	16:14:11	0.402659	1.79111	1867.77	FALSE	54
2022-09-12	16:14:11	0.400471	1.78138	1809.52	FALSE	54
2022-09-12	16:14:12	0.343728	1.52897	1869.3	FALSE	54
2022-09-12	16:14:12	0.301031	1.33905	1810.85	FALSE	54
2022-09-12	16:14:12	0.232583	1.03458	1870.34	FALSE	54
2022-09-12	16:14:13	0.187595	0.83446	1811.69	FALSE	54
2022-09-12	16:14:13	1.1309	5.03047	1875.37	FALSE	54
2022-09-12	16:14:13	2.01085	8.94466	1820.63	FALSE	54

## Sheet: Harley_prong_2022912160856 (2)
Date	Time	Lbs	Total Force x time	Total Time Steps Force >3		**GoPro Fitting: 1558
2022-09-12	16:09:13	0.898893	0.898893	FALSE	0		Total force xtime	830.898
2022-09-12	16:09:13	0.873702	1.77259	FALSE	0		Total Time Steps Force >3	54
2022-09-12	16:09:13	0.765153	2.53775	FALSE	0
2022-09-12	16:09:13	0.681437	3.21918	FALSE	0
2022-09-12	16:09:14	0.747544	3.96673	FALSE	0
2022-09-12	16:09:14	0.719707	4.68644	FALSE	0
2022-09-12	16:09:14	0.734568	5.421	FALSE	0
2022-09-12	16:09:14	0.718944	6.13995	FALSE	0
2022-09-12	16:09:15	0.63584	6.77579	FALSE	0
2022-09-12	16:09:15	0.605	7.38079	FALSE	0
2022-09-12	16:09:15	0.628461	8.00925	FALSE	0
2022-09-12	16:09:16	0.664746	8.67399	FALSE	0
2022-09-12	16:09:16	0.639657	9.31365	FALSE	0
2022-09-12	16:09:16	0.515636	9.82929	FALSE	0
2022-09-12	16:09:16	0.569275	10.3986	FALSE	0
2022-09-12	16:09:17	0.631107	11.0297	FALSE	0
2022-09-12	16:09:17	0.549936	11.5796	FALSE	0
2022-09-12	16:09:17	0.479249	12.0589	FALSE	0
2022-09-12	16:09:17	0.498588	12.5574	FALSE	0
2022-09-12	16:09:18	0.501845	13.0593	FALSE	0
2022-09-12	16:09:18	0.510852	13.5701	FALSE	0
2022-09-12	16:09:18	0.476654	14.0468	FALSE	0
2022-09-12	16:09:19	0.434059	14.4809	FALSE	0
2022-09-12	16:09:19	0.463219	14.9441	FALSE	0
2022-09-12	16:09:19	0.493702	15.4378	FALSE	0
2022-09-12	16:09:19	0.368613	15.8064	FALSE	0
2022-09-12	16:09:20	0.518333	16.3247	FALSE	0
2022-09-12	16:09:20	0.641896	16.9666	FALSE	0
2022-09-12	16:09:20	0.566985	17.5336	FALSE	0
2022-09-12	16:09:20	0.573957	18.1076	FALSE	0
2022-09-12	16:09:21	0.545509	18.6531	FALSE	0
2022-09-12	16:09:21	0.508562	19.1616	FALSE	0
2022-09-12	16:09:21	0.479402	19.641	FALSE	0
2022-09-12	16:09:21	0.461336	20.1024	FALSE	0
2022-09-12	16:09:22	0.464695	20.5671	FALSE	0
2022-09-12	16:09:22	0.477265	21.0443	FALSE	0
2022-09-12	16:09:22	0.450903	21.4952	FALSE	0
2022-09-12	16:09:23	0.463677	21.9589	FALSE	0
2022-09-12	16:09:23	0.462456	22.4214	FALSE	0
2022-09-12	16:09:23	0.466069	22.8874	FALSE	0
2022-09-12	16:09:23	0.485763	23.3732	FALSE	0
2022-09-12	16:09:24	0.497367	23.8706	FALSE	0
2022-09-12	16:09:24	0.530445	24.401	FALSE	0
2022-09-12	16:09:24	0.604237	25.0052	FALSE	0
2022-09-12	16:09:24	0.670089	25.6753	FALSE	0
2022-09-12	16:09:25	0.639758	26.3151	FALSE	0
2022-09-12	16:09:25	0.610293	26.9254	FALSE	0
2022-09-12	16:09:25	0.514008	27.4394	FALSE	0
2022-09-12	16:09:25	0.509886	27.9493	FALSE	0
2022-09-12	16:09:26	0.53472	28.484	FALSE	0
2022-09-12	16:09:26	0.520471	29.0045	FALSE	0
2022-09-12	16:09:26	0.52841	29.5329	FALSE	0
2022-09-12	16:09:27	0.497417	30.0303	FALSE	0
2022-09-12	16:09:27	0.46612	30.4964	FALSE	0
2022-09-12	16:09:27	0.460878	30.9573	FALSE	0
2022-09-12	16:09:27	0.46159	31.4189	FALSE	0
2022-09-12	16:09:28	0.44902	31.8679	FALSE	0
2022-09-12	16:09:28	0.45014	32.318	FALSE	0
2022-09-12	16:09:28	0.451972	32.77	FALSE	0
2022-09-12	16:09:28	0.447545	33.2176	FALSE	0
2022-09-12	16:09:29	0.44215	33.6597	FALSE	0
2022-09-12	16:09:29	0.437774	34.0975	FALSE	0
2022-09-12	16:09:29	0.449326	34.5468	FALSE	0
2022-09-12	16:09:29	0.441692	34.9885	FALSE	0
2022-09-12	16:09:30	0.446883	35.4354	FALSE	0
2022-09-12	16:09:30	0.436705	35.8721	FALSE	0
2022-09-12	16:09:30	0.440725	36.3128	FALSE	0
2022-09-12	16:09:31	0.438333	36.7511	FALSE	0
2022-09-12	16:09:31	0.471056	37.2222	FALSE	0
2022-09-12	16:09:31	0.460878	37.6831	FALSE	0
2022-09-12	16:09:31	0.456298	38.1394	FALSE	0
2022-09-12	16:09:32	0.395127	38.5345	FALSE	0
2022-09-12	16:09:32	0.404033	38.9385	FALSE	0
2022-09-12	16:09:32	0.610649	39.5492	FALSE	0
2022-09-12	16:09:32	0.335992	39.8852	FALSE	0
2022-09-12	16:09:33	0.578639	40.4638	FALSE	0
2022-09-12	16:09:33	0.354771	40.8186	FALSE	0
2022-09-12	16:09:33	0.847392	41.666	FALSE	0
2022-09-12	16:09:33	0.552481	42.2185	FALSE	0
2022-09-12	16:09:34	0.748664	42.9671	FALSE	0
2022-09-12	16:09:34	0.406934	43.3741	FALSE	0
2022-09-12	16:09:34	0.590293	43.9644	FALSE	0
2022-09-12	16:09:35	0.415178	44.3795	FALSE	0
2022-09-12	16:09:35	0.473346	44.8529	FALSE	0
2022-09-12	16:09:35	0.420166	45.273	FALSE	0
2022-09-12	16:09:35	0.492074	45.7651	FALSE	0
2022-09-12	16:09:36	0.634059	46.3992	FALSE	0
2022-09-12	16:09:36	0.533295	46.9325	FALSE	0
2022-09-12	16:09:36	0.525763	47.4582	FALSE	0
2022-09-12	16:09:36	0.369275	47.8275	FALSE	0
2022-09-12	16:09:37	0.456552	48.2841	FALSE	0
2022-09-12	16:09:37	0.249326	48.5334	FALSE	0
2022-09-12	16:09:37	1.15151	49.6849	FALSE	0
2022-09-12	16:09:37	0.261845	49.9467	FALSE	0
2022-09-12	16:09:38	0.355382	50.3021	FALSE	0
2022-09-12	16:09:38	0.060013	50.3621	FALSE	0
2022-09-12	16:09:38	0.296654	50.6588	FALSE	0
2022-09-12	16:09:39	0.163931	50.8227	FALSE	0
2022-09-12	16:09:39	0.404084	51.2268	FALSE	0
2022-09-12	16:09:39	0.313092	51.5399	FALSE	0
2022-09-12	16:09:39	0.718588	52.2585	FALSE	0
2022-09-12	16:09:40	0.810751	53.0692	FALSE	0
2022-09-12	16:09:40	1.41294	54.4822	FALSE	0
2022-09-12	16:09:40	0.413346	54.8955	FALSE	0
2022-09-12	16:09:40	0.454262	55.3498	FALSE	0
2022-09-12	16:09:41	0.269886	55.6197	FALSE	0
2022-09-12	16:09:41	0.00729033	55.627	FALSE	0
2022-09-12	16:09:41	0.37131	55.9983	FALSE	0
2022-09-12	16:09:42	1.33991	57.3382	FALSE	0
2022-09-12	16:09:42	0.840827	58.179	FALSE	0
2022-09-12	16:09:42	2.38312	60.5621	FALSE	0
2022-09-12	16:09:42	0.443524	61.0057	FALSE	0
2022-09-12	16:09:43	0.272481	61.2781	FALSE	0
2022-09-12	16:09:43	0.0100384	61.2882	FALSE	0
2022-09-12	16:09:43	0.346883	61.6351	FALSE	0
2022-09-12	16:09:43	0.625662	62.2607	FALSE	0
2022-09-12	16:09:44	3.42953	65.6902	1	1
2022-09-12	16:09:44	0.563524	66.2538	FALSE	1
2022-09-12	16:09:44	0.0057127	66.2595	FALSE	1
2022-09-12	16:09:44	0.45014	66.7096	FALSE	1
2022-09-12	16:09:45	3.36449	70.0741	1	2
2022-09-12	16:09:45	0.117265	70.1914	FALSE	2
2022-09-12	16:09:45	0.0203692	70.2118	FALSE	2
2022-09-12	16:09:46	0.235026	70.4468	FALSE	2
2022-09-12	16:09:46	0.142405	70.5892	FALSE	2
2022-09-12	16:09:46	0.228512	70.8177	FALSE	2
2022-09-12	16:09:46	0.105509	70.9232	FALSE	2
2022-09-12	16:09:47	0.488206	71.4114	FALSE	2
2022-09-12	16:09:47	0.171463	71.5829	FALSE	2
2022-09-12	16:09:47	0.295738	71.8786	FALSE	2
2022-09-12	16:09:47	0.186527	72.0651	FALSE	2
2022-09-12	16:09:48	0.676094	72.7412	FALSE	2
2022-09-12	16:09:48	0.725865	73.4671	FALSE	2
2022-09-12	16:09:48	0.722456	74.1896	FALSE	2
2022-09-12	16:09:48	0.722201	74.9118	FALSE	2
2022-09-12	16:09:49	0.725814	75.6376	FALSE	2
2022-09-12	16:09:49	0.724542	76.3621	FALSE	2
2022-09-12	16:09:49	0.720369	77.0825	FALSE	2
2022-09-12	16:09:50	0.725712	77.8082	FALSE	2
2022-09-12	16:09:50	0.719097	78.5273	FALSE	2
2022-09-12	16:09:50	0.719504	79.2468	FALSE	2
2022-09-12	16:09:50	0.718639	79.9654	FALSE	2
2022-09-12	16:09:51	0.72383	80.6893	FALSE	2
2022-09-12	16:09:51	0.723677	81.4129	FALSE	2
2022-09-12	16:09:51	0.722404	82.1353	FALSE	2
2022-09-12	16:09:51	0.713957	82.8493	FALSE	2
2022-09-12	16:09:52	0.718435	83.5677	FALSE	2
2022-09-12	16:09:52	0.664338	84.2321	FALSE	2
2022-09-12	16:09:52	0.113041	84.3451	FALSE	2
2022-09-12	16:09:52	0.674924	85.02	FALSE	2
2022-09-12	16:09:53	0.722557	85.7426	FALSE	2
2022-09-12	16:09:53	0.723321	86.4659	FALSE	2
2022-09-12	16:09:53	0.731259	87.1972	FALSE	2
2022-09-12	16:09:54	0.512023	87.7092	FALSE	2
2022-09-12	16:09:54	0.0577229	87.7669	FALSE	2
2022-09-12	16:09:54	0.369479	88.1364	FALSE	2
2022-09-12	16:09:54	0.0628119	88.1992	FALSE	2
2022-09-12	16:09:55	0.447137	88.6463	FALSE	2
2022-09-12	16:09:55	0.183728	88.8301	FALSE	2
2022-09-12	16:09:55	0.223372	89.0534	FALSE	2
2022-09-12	16:09:55	0.10271	89.1562	FALSE	2
2022-09-12	16:09:56	0.228003	89.3842	FALSE	2
2022-09-12	16:09:56	0.433855	89.818	FALSE	2
2022-09-12	16:09:56	0.587646	90.4057	FALSE	2
2022-09-12	16:09:56	0.627596	91.0333	FALSE	2
2022-09-12	16:09:57	0.907646	91.9409	FALSE	2
2022-09-12	16:09:57	1.24973	93.1906	FALSE	2
2022-09-12	16:09:57	1.17879	94.3694	FALSE	2
2022-09-12	16:09:58	1.80663	96.1761	FALSE	2
2022-09-12	16:09:58	1.20953	97.3856	FALSE	2
2022-09-12	16:09:58	2.37915	99.7647	FALSE	2
2022-09-12	16:09:58	2.57976	102.344	FALSE	2
2022-09-12	16:09:59	0.986679	103.331	FALSE	2
2022-09-12	16:09:59	1.68592	105.017	FALSE	2
2022-09-12	16:09:59	0.385102	105.402	FALSE	2
2022-09-12	16:09:59	0.756654	106.159	FALSE	2
2022-09-12	16:10:00	0.688053	106.847	FALSE	2
2022-09-12	16:10:00	0.378537	107.225	FALSE	2
2022-09-12	16:10:00	0.630191	107.856	FALSE	2
2022-09-12	16:10:01	0.242812	108.098	FALSE	2
2022-09-12	16:10:01	0.674211	108.773	FALSE	2
2022-09-12	16:10:01	0.272226	109.045	FALSE	2
2022-09-12	16:10:01	0.74556	109.79	FALSE	2
2022-09-12	16:10:02	0.365509	110.156	FALSE	2
2022-09-12	16:10:02	0.626629	110.783	FALSE	2
2022-09-12	16:10:02	0.543372	111.326	FALSE	2
2022-09-12	16:10:02	0.554517	111.88	FALSE	2
2022-09-12	16:10:03	0.538639	112.419	FALSE	2
2022-09-12	16:10:03	0.354313	112.773	FALSE	2
2022-09-12	16:10:03	0.668359	113.442	FALSE	2
2022-09-12	16:10:03	0.388257	113.83	FALSE	2
2022-09-12	16:10:04	1.11045	114.94	FALSE	2
2022-09-12	16:10:04	0.497214	115.438	FALSE	2
2022-09-12	16:10:04	0.714822	116.153	FALSE	2
2022-09-12	16:10:05	0.571514	116.724	FALSE	2
2022-09-12	16:10:05	0.819148	117.543	FALSE	2
2022-09-12	16:10:05	0.37355	117.917	FALSE	2
2022-09-12	16:10:05	0.52617	118.443	FALSE	2
2022-09-12	16:10:06	0.564491	119.007	FALSE	2
2022-09-12	16:10:06	0.35182	119.359	FALSE	2
2022-09-12	16:10:06	0.57131	119.931	FALSE	2
2022-09-12	16:10:06	0.291718	120.222	FALSE	2
2022-09-12	16:10:07	0.596145	120.818	FALSE	2
2022-09-12	16:10:07	0.33472	121.153	FALSE	2
2022-09-12	16:10:07	0.550496	121.704	FALSE	2
2022-09-12	16:10:07	0.380471	122.084	FALSE	2
2022-09-12	16:10:08	0.555941	122.64	FALSE	2
2022-09-12	16:10:08	0.384847	123.025	FALSE	2
2022-09-12	16:10:08	0.424389	123.449	FALSE	2
2022-09-12	16:10:09	0.502252	123.952	FALSE	2
2022-09-12	16:10:09	0.445763	124.397	FALSE	2
2022-09-12	16:10:09	0.453804	124.851	FALSE	2
2022-09-12	16:10:09	0.431412	125.282	FALSE	2
2022-09-12	16:10:10	0.440471	125.723	FALSE	2
2022-09-12	16:10:10	0.451972	126.175	FALSE	2
2022-09-12	16:10:10	0.484084	126.659	FALSE	2
2022-09-12	16:10:10	0.45869	127.118	FALSE	2
2022-09-12	16:10:11	0.434466	127.552	FALSE	2
2022-09-12	16:10:11	0.0927865	127.645	FALSE	2
2022-09-12	16:10:11	-0.153219	127.645	FALSE	2
2022-09-12	16:10:11	-0.246399	127.645	FALSE	2
2022-09-12	16:10:12	0.0108018	127.656	FALSE	2
2022-09-12	16:10:12	-0.0677223	127.656	FALSE	2
2022-09-12	16:10:12	-0.174338	127.656	FALSE	2
2022-09-12	16:10:13	-0.545381	127.656	FALSE	2
2022-09-12	16:10:13	-0.626552	127.656	FALSE	2
2022-09-12	16:10:13	-0.472659	127.656	FALSE	2
2022-09-12	16:10:13	-0.196934	127.656	FALSE	2
2022-09-12	16:10:14	-0.135712	127.656	FALSE	2
2022-09-12	16:10:14	0.143524	127.799	FALSE	2
2022-09-12	16:10:14	0.208664	128.008	FALSE	2
2022-09-12	16:10:14	0.338842	128.347	FALSE	2
2022-09-12	16:10:15	0.240878	128.588	FALSE	2
2022-09-12	16:10:15	0.334873	128.923	FALSE	2
2022-09-12	16:10:15	0.261234	129.184	FALSE	2
2022-09-12	16:10:15	0.295025	129.479	FALSE	2
2022-09-12	16:10:16	0.244084	129.723	FALSE	2
2022-09-12	16:10:16	0.220115	129.943	FALSE	2
2022-09-12	16:10:16	0.256552	130.2	FALSE	2
2022-09-12	16:10:17	0.291819	130.491	FALSE	2
2022-09-12	16:10:17	0.288054	130.779	FALSE	2
2022-09-12	16:10:17	0.295331	131.075	FALSE	2
2022-09-12	16:10:17	0.427087	131.502	FALSE	2
2022-09-12	16:10:18	0.271514	131.773	FALSE	2
2022-09-12	16:10:18	0.324186	132.098	FALSE	2
2022-09-12	16:10:18	0.315789	132.413	FALSE	2
2022-09-12	16:10:18	0.467239	132.881	FALSE	2
2022-09-12	16:10:19	0.0458654	132.926	FALSE	2
2022-09-12	16:10:19	-0.0376461	132.926	FALSE	2
2022-09-12	16:10:19	-0.0403432	132.926	FALSE	2
2022-09-12	16:10:19	0.190293	133.117	FALSE	2
2022-09-12	16:10:20	0.42673	133.543	FALSE	2
2022-09-12	16:10:20	0.498028	134.041	FALSE	2
2022-09-12	16:10:20	0.390802	134.432	FALSE	2
2022-09-12	16:10:21	0.694211	135.126	FALSE	2
2022-09-12	16:10:21	0.700318	135.827	FALSE	2
2022-09-12	16:10:21	0.494975	136.322	FALSE	2
2022-09-12	16:10:21	0.597366	136.919	FALSE	2
2022-09-12	16:10:22	0.43126	137.35	FALSE	2
2022-09-12	16:10:22	0.625763	137.976	FALSE	2
2022-09-12	16:10:22	0.318282	138.294	FALSE	2
2022-09-12	16:10:22	0.670903	138.965	FALSE	2
2022-09-12	16:10:23	0.366476	139.332	FALSE	2
2022-09-12	16:10:23	0.664491	139.996	FALSE	2
2022-09-12	16:10:23	0.467595	140.464	FALSE	2
2022-09-12	16:10:24	0.795382	141.259	FALSE	2
2022-09-12	16:10:24	0.442456	141.702	FALSE	2
2022-09-12	16:10:24	0.822455	142.524	FALSE	2
2022-09-12	16:10:24	0.293804	142.818	FALSE	2
2022-09-12	16:10:25	0.714262	143.532	FALSE	2
2022-09-12	16:10:25	0.376349	143.909	FALSE	2
2022-09-12	16:10:25	0.750242	144.659	FALSE	2
2022-09-12	16:10:25	0.603626	145.262	FALSE	2
2022-09-12	16:10:26	0.844186	146.107	FALSE	2
2022-09-12	16:10:26	0.496196	146.603	FALSE	2
2022-09-12	16:10:26	0.686119	147.289	FALSE	2
2022-09-12	16:10:26	0.597774	147.887	FALSE	2
2022-09-12	16:10:27	0.486679	148.373	FALSE	2
2022-09-12	16:10:27	0.520725	148.894	FALSE	2
2022-09-12	16:10:27	0.478384	149.373	FALSE	2
2022-09-12	16:10:28	0.650547	150.023	FALSE	2
2022-09-12	16:10:28	0.319199	150.342	FALSE	2
2022-09-12	16:10:28	0.529071	150.871	FALSE	2
2022-09-12	16:10:28	0.321489	151.193	FALSE	2
2022-09-12	16:10:29	0.612583	151.805	FALSE	2
2022-09-12	16:10:29	0.320776	152.126	FALSE	2
2022-09-12	16:10:29	0.496705	152.623	FALSE	2
2022-09-12	16:10:30	0.342099	152.965	FALSE	2
2022-09-12	16:10:30	0.852176	153.817	FALSE	2
2022-09-12	16:10:30	0.343575	154.161	FALSE	2
2022-09-12	16:10:30	0.734618	154.895	FALSE	2
2022-09-12	16:10:30	0.501285	155.397	FALSE	2
2022-09-12	16:10:31	0.944949	156.342	FALSE	2
2022-09-12	16:10:31	2.09543	158.437	FALSE	2
2022-09-12	16:10:31	2.66556	161.103	FALSE	2
2022-09-12	16:10:32	1.89686	162.999	FALSE	2
2022-09-12	16:10:32	2.00632	165.006	FALSE	2
2022-09-12	16:10:32	1.63788	166.644	FALSE	2
2022-09-12	16:10:32	1.8253	168.469	FALSE	2
2022-09-12	16:10:33	2.11212	170.581	FALSE	2
2022-09-12	16:10:33	1.7278	172.309	FALSE	2
2022-09-12	16:10:33	1.53513	173.844	FALSE	2
2022-09-12	16:10:33	0.818995	174.663	FALSE	2
2022-09-12	16:10:34	0.323219	174.986	FALSE	2
2022-09-12	16:10:34	0.0617941	175.048	FALSE	2
2022-09-12	16:10:34	0.309071	175.357	FALSE	2
2022-09-12	16:10:34	0.15584	175.513	FALSE	2
2022-09-12	16:10:35	0.411616	175.925	FALSE	2
2022-09-12	16:10:35	0.698638	176.623	FALSE	2
2022-09-12	16:10:35	0.714058	177.337	FALSE	2
2022-09-12	16:10:36	0.296654	177.634	FALSE	2
2022-09-12	16:10:36	0.483677	178.118	FALSE	2
2022-09-12	16:10:36	0.634974	178.753	FALSE	2
2022-09-12	16:10:36	1.19971	179.952	FALSE	2
2022-09-12	16:10:37	1.19294	181.145	FALSE	2
2022-09-12	16:10:37	2.0536	183.199	FALSE	2
2022-09-12	16:10:37	1.32266	184.521	FALSE	2
2022-09-12	16:10:37	1.77411	186.296	FALSE	2
2022-09-12	16:10:38	1.57162	187.867	FALSE	2
2022-09-12	16:10:38	0.977214	188.844	FALSE	2
2022-09-12	16:10:38	1.95385	190.798	FALSE	2
2022-09-12	16:10:38	1.06525	191.864	FALSE	2
2022-09-12	16:10:39	1.8848	193.748	FALSE	2
2022-09-12	16:10:39	0.412176	194.16	FALSE	2
2022-09-12	16:10:39	1.18042	195.341	FALSE	2
2022-09-12	16:10:40	1.33589	196.677	FALSE	2
2022-09-12	16:10:40	1.55594	198.233	FALSE	2
2022-09-12	16:10:40	1.11309	199.346	FALSE	2
2022-09-12	16:10:40	2.12978	201.476	FALSE	2
2022-09-12	16:10:41	3.85752	205.333	1	3
2022-09-12	16:10:41	1.63533	206.968	FALSE	3
2022-09-12	16:10:41	0.551056	207.52	FALSE	3
2022-09-12	16:10:41	2.27106	209.791	FALSE	3
2022-09-12	16:10:42	0.455891	210.246	FALSE	3
2022-09-12	16:10:42	0.746119	210.993	FALSE	3
2022-09-12	16:10:42	0.27757	211.27	FALSE	3
2022-09-12	16:10:43	0.356908	211.627	FALSE	3
2022-09-12	16:10:43	0.17757	211.805	FALSE	3
2022-09-12	16:10:43	0.110496	211.915	FALSE	3
2022-09-12	16:10:43	-0.0105723	211.915	FALSE	3
2022-09-12	16:10:44	0.0917178	212.007	FALSE	3
2022-09-12	16:10:44	0.128715	212.136	FALSE	3
2022-09-12	16:10:44	0.426069	212.562	FALSE	3
2022-09-12	16:10:44	0.211463	212.773	FALSE	3
2022-09-12	16:10:45	0.692125	213.465	FALSE	3
2022-09-12	16:10:45	0.572074	214.037	FALSE	3
2022-09-12	16:10:45	0.486018	214.523	FALSE	3
2022-09-12	16:10:45	0.215331	214.739	FALSE	3
2022-09-12	16:10:46	0.0916669	214.83	FALSE	3
2022-09-12	16:10:46	0.125814	214.956	FALSE	3
2022-09-12	16:10:46	0.22271	215.179	FALSE	3
2022-09-12	16:10:47	0.126731	215.306	FALSE	3
2022-09-12	16:10:47	0.282099	215.588	FALSE	3
2022-09-12	16:10:47	0.192685	215.78	FALSE	3
2022-09-12	16:10:47	0.223372	216.004	FALSE	3
2022-09-12	16:10:48	0.224186	216.228	FALSE	3
2022-09-12	16:10:48	0.431616	216.66	FALSE	3
2022-09-12	16:10:48	0.146781	216.806	FALSE	3
2022-09-12	16:10:48	0.208104	217.014	FALSE	3
2022-09-12	16:10:49	0.209173	217.224	FALSE	3
2022-09-12	16:10:49	0.299809	217.523	FALSE	3
2022-09-12	16:10:49	0.158639	217.682	FALSE	3
2022-09-12	16:10:49	0.0944149	217.776	FALSE	3
2022-09-12	16:10:50	0.387392	218.164	FALSE	3
2022-09-12	16:10:50	0.387494	218.551	FALSE	3
2022-09-12	16:10:50	0.330242	218.882	FALSE	3
2022-09-12	16:10:51	0.383881	219.265	FALSE	3
2022-09-12	16:10:51	0.401387	219.667	FALSE	3
2022-09-12	16:10:51	0.357417	220.024	FALSE	3
2022-09-12	16:10:51	0.286578	220.311	FALSE	3
2022-09-12	16:10:52	0.468664	220.78	FALSE	3
2022-09-12	16:10:52	0.468664	221.248	FALSE	3
2022-09-12	16:10:52	0.399707	221.648	FALSE	3
2022-09-12	16:10:52	0.542354	222.19	FALSE	3
2022-09-12	16:10:53	0.402506	222.593	FALSE	3
2022-09-12	16:10:53	0.468104	223.061	FALSE	3
2022-09-12	16:10:53	0.337316	223.398	FALSE	3
2022-09-12	16:10:53	0.107138	223.505	FALSE	3
2022-09-12	16:10:54	0.00617073	223.511	FALSE	3
2022-09-12	16:10:54	0.149937	223.661	FALSE	3
2022-09-12	16:10:54	0.0709036	223.732	FALSE	3
2022-09-12	16:10:55	0.324695	224.057	FALSE	3
2022-09-12	16:10:55	0.262812	224.32	FALSE	3
2022-09-12	16:10:55	0.467595	224.787	FALSE	3
2022-09-12	16:10:55	0.309122	225.097	FALSE	3
2022-09-12	16:10:56	0.519148	225.616	FALSE	3
2022-09-12	16:10:56	0.239402	225.855	FALSE	3
2022-09-12	16:10:56	0.191056	226.046	FALSE	3
2022-09-12	16:10:56	0.300267	226.346	FALSE	3
2022-09-12	16:10:57	0.253753	226.6	FALSE	3
2022-09-12	16:10:57	0.24958	226.85	FALSE	3
2022-09-12	16:10:57	0.256807	227.107	FALSE	3
2022-09-12	16:10:57	1.05823	228.165	FALSE	3
2022-09-12	16:10:58	1.06831	229.233	FALSE	3
2022-09-12	16:10:58	0.541438	229.775	FALSE	3
2022-09-12	16:10:58	0.396298	230.171	FALSE	3
2022-09-12	16:10:59	0.257163	230.428	FALSE	3
2022-09-12	16:10:59	0.496858	230.925	FALSE	3
2022-09-12	16:10:59	0.306527	231.231	FALSE	3
2022-09-12	16:10:59	0.391718	231.623	FALSE	3
2022-09-12	16:11:00	0.515992	232.139	FALSE	3
2022-09-12	16:11:00	0.438842	232.578	FALSE	3
2022-09-12	16:11:00	0.251005	232.829	FALSE	3
2022-09-12	16:11:00	0.985153	233.814	FALSE	3
2022-09-12	16:11:01	0.60383	234.418	FALSE	3
2022-09-12	16:11:01	0.365356	234.783	FALSE	3
2022-09-12	16:11:01	0.314567	235.098	FALSE	3
2022-09-12	16:11:01	0.520165	235.618	FALSE	3
2022-09-12	16:11:02	0.243015	235.861	FALSE	3
2022-09-12	16:11:02	0.407494	236.269	FALSE	3
2022-09-12	16:11:02	0.241031	236.51	FALSE	3
2022-09-12	16:11:03	0.453601	236.963	FALSE	3
2022-09-12	16:11:03	0.241845	237.205	FALSE	3
2022-09-12	16:11:03	0.323168	237.528	FALSE	3
2022-09-12	16:11:03	0.437265	237.965	FALSE	3
2022-09-12	16:11:04	0.575738	238.541	FALSE	3
2022-09-12	16:11:04	0.682863	239.224	FALSE	3
2022-09-12	16:11:04	0.83014	240.054	FALSE	3
2022-09-12	16:11:04	0.873753	240.928	FALSE	3
2022-09-12	16:11:05	1.36118	242.289	FALSE	3
2022-09-12	16:11:05	0.338537	242.628	FALSE	3
2022-09-12	16:11:05	0.506781	243.134	FALSE	3
2022-09-12	16:11:06	0.241896	243.376	FALSE	3
2022-09-12	16:11:06	6.39548	249.772	1	4
2022-09-12	16:11:06	-0.0197326	249.772	FALSE	4
2022-09-12	16:11:06	-0.0694526	249.772	FALSE	4
2022-09-12	16:11:07	-0.234338	249.772	FALSE	4
2022-09-12	16:11:07	-0.330877	249.772	FALSE	4
2022-09-12	16:11:07	-0.463702	249.772	FALSE	4
2022-09-12	16:11:07	-0.422073	249.772	FALSE	4
2022-09-12	16:11:08	-0.402633	249.772	FALSE	4
2022-09-12	16:11:08	-0.348842	249.772	FALSE	4
2022-09-12	16:11:08	-0.124974	249.772	FALSE	4
2022-09-12	16:11:08	0.010242	249.782	FALSE	4
2022-09-12	16:11:09	0.0954328	249.877	FALSE	4
2022-09-12	16:11:09	0.289733	250.167	FALSE	4
2022-09-12	16:11:09	0.0812852	250.248	FALSE	4
2022-09-12	16:11:10	0.353651	250.602	FALSE	4
2022-09-12	16:11:10	0.230954	250.833	FALSE	4
2022-09-12	16:11:10	0.369835	251.203	FALSE	4
2022-09-12	16:11:10	0.402201	251.605	FALSE	4
2022-09-12	16:11:11	0.765153	252.37	FALSE	4
2022-09-12	16:11:11	0.44958	252.82	FALSE	4
2022-09-12	16:11:11	0.458079	253.278	FALSE	4
2022-09-12	16:11:11	1.07004	254.348	FALSE	4
2022-09-12	16:11:12	1.70653	256.054	FALSE	4
2022-09-12	16:11:12	1.74963	257.804	FALSE	4
2022-09-12	16:11:12	1.16332	258.967	FALSE	4
2022-09-12	16:11:12	0.484084	259.452	FALSE	4
2022-09-12	16:11:13	0.512328	259.964	FALSE	4
2022-09-12	16:11:13	0.413651	260.378	FALSE	4
2022-09-12	16:11:13	0.604644	260.982	FALSE	4
2022-09-12	16:11:14	0.849987	261.832	FALSE	4
2022-09-12	16:11:14	0.635076	262.467	FALSE	4
2022-09-12	16:11:14	0.862405	263.33	FALSE	4
2022-09-12	16:11:14	0.643423	263.973	FALSE	4
2022-09-12	16:11:15	0.648817	264.622	FALSE	4
2022-09-12	16:11:15	0.822557	265.444	FALSE	4
2022-09-12	16:11:15	0.74729	266.192	FALSE	4
2022-09-12	16:11:15	0.892379	267.084	FALSE	4
2022-09-12	16:11:16	0.851107	267.935	FALSE	4
2022-09-12	16:11:16	0.910954	268.846	FALSE	4
2022-09-12	16:11:16	0.907036	269.753	FALSE	4
2022-09-12	16:11:16	0.877112	270.63	FALSE	4
2022-09-12	16:11:17	0.881183	271.511	FALSE	4
2022-09-12	16:11:17	0.907341	272.419	FALSE	4
2022-09-12	16:11:17	0.842201	273.261	FALSE	4
2022-09-12	16:11:18	0.768257	274.029	FALSE	4
2022-09-12	16:11:18	0.586476	274.616	FALSE	4
2022-09-12	16:11:18	0.484695	275.1	FALSE	4
2022-09-12	16:11:18	0.427901	275.528	FALSE	4
2022-09-12	16:11:19	0.310751	275.839	FALSE	4
2022-09-12	16:11:19	0.381692	276.221	FALSE	4
2022-09-12	16:11:19	0.437367	276.658	FALSE	4
2022-09-12	16:11:19	0.311005	276.969	FALSE	4
2022-09-12	16:11:20	0.538282	277.507	FALSE	4
2022-09-12	16:11:20	0.812328	278.32	FALSE	4
2022-09-12	16:11:20	0.987392	279.307	FALSE	4
2022-09-12	16:11:20	0.467443	279.775	FALSE	4
2022-09-12	16:11:21	0.381082	280.156	FALSE	4
2022-09-12	16:11:21	0.315433	280.471	FALSE	4
2022-09-12	16:11:21	0.340929	280.812	FALSE	4
2022-09-12	16:11:22	0.504389	281.316	FALSE	4
2022-09-12	16:11:22	0.326629	281.643	FALSE	4
2022-09-12	16:11:22	0.71528	282.358	FALSE	4
2022-09-12	16:11:22	0.410598	282.769	FALSE	4
2022-09-12	16:11:23	0.976094	283.745	FALSE	4
2022-09-12	16:11:23	1.39319	285.138	FALSE	4
2022-09-12	16:11:23	1.79966	286.938	FALSE	4
2022-09-12	16:11:23	0.462456	287.4	FALSE	4
2022-09-12	16:11:24	0.853906	288.254	FALSE	4
2022-09-12	16:11:24	0.662303	288.917	FALSE	4
2022-09-12	16:11:24	0.35645	289.273	FALSE	4
2022-09-12	16:11:25	0.36154	289.635	FALSE	4
2022-09-12	16:11:25	0.41299	290.048	FALSE	4
2022-09-12	16:11:25	0.263168	290.311	FALSE	4
2022-09-12	16:11:25	0.322659	290.633	FALSE	4
2022-09-12	16:11:26	0.364186	290.998	FALSE	4
2022-09-12	16:11:26	0.513397	291.511	FALSE	4
2022-09-12	16:11:26	0.567086	292.078	FALSE	4
2022-09-12	16:11:26	0.545458	292.623	FALSE	4
2022-09-12	16:11:27	0.886527	293.51	FALSE	4
2022-09-12	16:11:27	0.437367	293.947	FALSE	4
2022-09-12	16:11:27	0.392735	294.34	FALSE	4
2022-09-12	16:11:27	0.269122	294.609	FALSE	4
2022-09-12	16:11:28	0.322048	294.931	FALSE	4
2022-09-12	16:11:28	0.359504	295.291	FALSE	4
2022-09-12	16:11:28	0.317214	295.608	FALSE	4
2022-09-12	16:11:29	0.230802	295.839	FALSE	4
2022-09-12	16:11:29	0.360471	296.199	FALSE	4
2022-09-12	16:11:29	0.345153	296.544	FALSE	4
2022-09-12	16:11:29	0.329529	296.874	FALSE	4
2022-09-12	16:11:30	0.230496	297.104	FALSE	4
2022-09-12	16:11:30	0.174975	297.279	FALSE	4
2022-09-12	16:11:30	0.340318	297.62	FALSE	4
2022-09-12	16:11:30	0.295025	297.915	FALSE	4
2022-09-12	16:11:31	0.334975	298.25	FALSE	4
2022-09-12	16:11:31	0.309529	298.559	FALSE	4
2022-09-12	16:11:31	0.424593	298.984	FALSE	4
2022-09-12	16:11:31	0.436654	299.421	FALSE	4
2022-09-12	16:11:32	0.37645	299.797	FALSE	4
2022-09-12	16:11:32	0.396807	300.194	FALSE	4
2022-09-12	16:11:32	0.370293	300.564	FALSE	4
2022-09-12	16:11:33	0.410394	300.974	FALSE	4
2022-09-12	16:11:33	0.425254	301.4	FALSE	4
2022-09-12	16:11:33	0.434008	301.834	FALSE	4
2022-09-12	16:11:33	0.458181	302.292	FALSE	4
2022-09-12	16:11:34	0.487646	302.78	FALSE	4
2022-09-12	16:11:34	0.451005	303.231	FALSE	4
2022-09-12	16:11:34	0.421336	303.652	FALSE	4
2022-09-12	16:11:34	0.419453	304.071	FALSE	4
2022-09-12	16:11:35	0.401438	304.473	FALSE	4
2022-09-12	16:11:35	0.351361	304.824	FALSE	4
2022-09-12	16:11:35	0.371412	305.196	FALSE	4
2022-09-12	16:11:35	0.377061	305.573	FALSE	4
2022-09-12	16:11:36	0.330191	305.903	FALSE	4
2022-09-12	16:11:36	0.341845	306.245	FALSE	4
2022-09-12	16:11:36	0.349733	306.594	FALSE	4
2022-09-12	16:11:37	0.351921	306.946	FALSE	4
2022-09-12	16:11:37	0.333753	307.28	FALSE	4
2022-09-12	16:11:37	0.340115	307.62	FALSE	4
2022-09-12	16:11:37	0.342964	307.963	FALSE	4
2022-09-12	16:11:38	0.345356	308.309	FALSE	4
2022-09-12	16:11:38	0.324847	308.633	FALSE	4
2022-09-12	16:11:38	0.422761	309.056	FALSE	4
2022-09-12	16:11:38	0.237214	309.293	FALSE	4
2022-09-12	16:11:39	0.178893	309.472	FALSE	4
2022-09-12	16:11:39	0.297112	309.769	FALSE	4
2022-09-12	16:11:39	0.359402	310.129	FALSE	4
2022-09-12	16:11:39	0.516247	310.645	FALSE	4
2022-09-12	16:11:40	0.400013	311.045	FALSE	4
2022-09-12	16:11:40	0.462201	311.507	FALSE	4
2022-09-12	16:11:40	0.431463	311.939	FALSE	4
2022-09-12	16:11:41	0.436654	312.375	FALSE	4
2022-09-12	16:11:41	0.447596	312.823	FALSE	4
2022-09-12	16:11:41	0.443779	313.267	FALSE	4
2022-09-12	16:11:41	0.445458	313.712	FALSE	4
2022-09-12	16:11:42	0.451005	314.163	FALSE	4
2022-09-12	16:11:42	0.442405	314.606	FALSE	4
2022-09-12	16:11:42	0.444135	315.05	FALSE	4
2022-09-12	16:11:42	0.445458	315.495	FALSE	4
2022-09-12	16:11:43	0.444746	315.94	FALSE	4
2022-09-12	16:11:43	0.447799	316.388	FALSE	4
2022-09-12	16:11:43	0.449631	316.837	FALSE	4
2022-09-12	16:11:44	0.451412	317.289	FALSE	4
2022-09-12	16:11:44	0.452685	317.741	FALSE	4
2022-09-12	16:11:44	0.449478	318.191	FALSE	4
2022-09-12	16:11:44	0.450598	318.642	FALSE	4
2022-09-12	16:11:45	0.463321	319.105	FALSE	4
2022-09-12	16:11:45	0.473295	319.578	FALSE	4
2022-09-12	16:11:45	0.467137	320.045	FALSE	4
2022-09-12	16:11:45	0.466018	320.511	FALSE	4
2022-09-12	16:11:46	0.461285	320.973	FALSE	4
2022-09-12	16:11:46	0.462812	321.435	FALSE	4
2022-09-12	16:11:46	0.465763	321.901	FALSE	4
2022-09-12	16:11:46	0.458181	322.359	FALSE	4
2022-09-12	16:11:47	0.442201	322.802	FALSE	4
2022-09-12	16:11:47	0.435331	323.237	FALSE	4
2022-09-12	16:11:47	0.434211	323.671	FALSE	4
2022-09-12	16:11:48	0.431311	324.102	FALSE	4
2022-09-12	16:11:48	0.430496	324.533	FALSE	4
2022-09-12	16:11:48	0.424338	324.957	FALSE	4
2022-09-12	16:11:48	0.431209	325.388	FALSE	4
2022-09-12	16:11:49	0.437061	325.825	FALSE	4
2022-09-12	16:11:49	0.437875	326.263	FALSE	4
2022-09-12	16:11:49	0.704491	326.968	FALSE	4
2022-09-12	16:11:49	0.301387	327.269	FALSE	4
2022-09-12	16:11:50	0.405509	327.675	FALSE	4
2022-09-12	16:11:50	0.181387	327.856	FALSE	4
2022-09-12	16:11:50	0.0549239	327.911	FALSE	4
2022-09-12	16:11:50	0.222507	328.134	FALSE	4
2022-09-12	16:11:51	0.363779	328.497	FALSE	4
2022-09-12	16:11:51	1.13604	329.633	FALSE	4
2022-09-12	16:11:51	1.00907	330.642	FALSE	4
2022-09-12	16:11:52	1.16225	331.805	FALSE	4
2022-09-12	16:11:52	0.363321	332.168	FALSE	4
2022-09-12	16:11:52	0.169326	332.337	FALSE	4
2022-09-12	16:11:52	0.254669	332.592	FALSE	4
2022-09-12	16:11:53	0.270903	332.863	FALSE	4
2022-09-12	16:11:53	0.257926	333.121	FALSE	4
2022-09-12	16:11:53	0.130293	333.251	FALSE	4
2022-09-12	16:11:53	0.272125	333.523	FALSE	4
2022-09-12	16:11:54	0.205814	333.729	FALSE	4
2022-09-12	16:11:54	0.0416415	333.771	FALSE	4
2022-09-12	16:11:54	-0.177188	333.771	FALSE	4
2022-09-12	16:11:54	-0.0465519	333.771	FALSE	4
2022-09-12	16:11:55	0.106832	333.878	FALSE	4
2022-09-12	16:11:55	0.158944	334.036	FALSE	4
2022-09-12	16:11:55	0.225204	334.262	FALSE	4
2022-09-12	16:11:56	0.419555	334.681	FALSE	4
2022-09-12	16:11:56	0.443168	335.124	FALSE	4
2022-09-12	16:11:56	0.461336	335.586	FALSE	4
2022-09-12	16:11:56	0.433804	336.02	FALSE	4
2022-09-12	16:11:57	0.328664	336.348	FALSE	4
2022-09-12	16:11:57	0.480064	336.828	FALSE	4
2022-09-12	16:11:57	0.52327	337.352	FALSE	4
2022-09-12	16:11:57	0.532837	337.884	FALSE	4
2022-09-12	16:11:58	0.397926	338.282	FALSE	4
2022-09-12	16:11:58	0.667952	338.95	FALSE	4
2022-09-12	16:11:58	0.355178	339.305	FALSE	4
2022-09-12	16:11:58	0.402863	339.708	FALSE	4
2022-09-12	16:11:59	0.517214	340.226	FALSE	4
2022-09-12	16:11:59	0.451565	340.677	FALSE	4
2022-09-12	16:11:59	0.507901	341.185	FALSE	4
2022-09-12	16:12:00	0.273906	341.459	FALSE	4
2022-09-12	16:12:00	0.0914633	341.55	FALSE	4
2022-09-12	16:12:00	0.121438	341.672	FALSE	4
2022-09-12	16:12:00	0.311158	341.983	FALSE	4
2022-09-12	16:12:01	0.415891	342.399	FALSE	4
2022-09-12	16:12:01	0.352685	342.752	FALSE	4
2022-09-12	16:12:01	0.401285	343.153	FALSE	4
2022-09-12	16:12:01	0.152328	343.305	FALSE	4
2022-09-12	16:12:02	0.0788424	343.384	FALSE	4
2022-09-12	16:12:02	0.233397	343.617	FALSE	4
2022-09-12	16:12:02	0.143932	343.761	FALSE	4
2022-09-12	16:12:02	-0.0583585	343.761	FALSE	4
2022-09-12	16:12:03	0.0275956	343.789	FALSE	4
2022-09-12	16:12:03	0.24383	344.033	FALSE	4
2022-09-12	16:12:03	0.1964	344.229	FALSE	4
2022-09-12	16:12:04	0.175229	344.404	FALSE	4
2022-09-12	16:12:04	0.212939	344.617	FALSE	4
2022-09-12	16:12:04	0.18383	344.801	FALSE	4
2022-09-12	16:12:04	0.121183	344.922	FALSE	4
2022-09-12	16:12:05	0.213804	345.136	FALSE	4
2022-09-12	16:12:05	0.225814	345.362	FALSE	4
2022-09-12	16:12:05	0.278537	345.64	FALSE	4
2022-09-12	16:12:05	0.287596	345.928	FALSE	4
2022-09-12	16:12:06	0.321743	346.25	FALSE	4
2022-09-12	16:12:06	0.308969	346.559	FALSE	4
2022-09-12	16:12:06	0.338995	346.898	FALSE	4
2022-09-12	16:12:07	0.348664	347.246	FALSE	4
2022-09-12	16:12:07	0.166374	347.413	FALSE	4
2022-09-12	16:12:07	-0.240699	347.413	FALSE	4
2022-09-12	16:12:07	-0.561564	347.413	FALSE	4
2022-09-12	16:12:08	-0.876271	347.413	FALSE	4
2022-09-12	16:12:08	-0.673473	347.413	FALSE	4
2022-09-12	16:12:08	-0.693981	347.413	FALSE	4
2022-09-12	16:12:08	-0.768943	347.413	FALSE	4
2022-09-12	16:12:09	-0.834236	347.413	FALSE	4
2022-09-12	16:12:09	-0.791895	347.413	FALSE	4
2022-09-12	16:12:09	-0.827925	347.413	FALSE	4
2022-09-12	16:12:09	-0.6893	347.413	FALSE	4
2022-09-12	16:12:10	-0.776729	347.413	FALSE	4
2022-09-12	16:12:10	-0.882022	347.413	FALSE	4
2022-09-12	16:12:10	-0.806348	347.413	FALSE	4
2022-09-12	16:12:11	-0.905585	347.413	FALSE	4
2022-09-12	16:12:11	-0.815355	347.413	FALSE	4
2022-09-12	16:12:11	-0.835152	347.413	FALSE	4
2022-09-12	16:12:11	-0.853574	347.413	FALSE	4
2022-09-12	16:12:12	-0.856984	347.413	FALSE	4
2022-09-12	16:12:12	-0.846348	347.413	FALSE	4
2022-09-12	16:12:12	-0.685992	347.413	FALSE	4
2022-09-12	16:12:12	-0.304516	347.413	FALSE	4
2022-09-12	16:12:13	0.183321	347.596	FALSE	4
2022-09-12	16:12:13	0.269275	347.865	FALSE	4
2022-09-12	16:12:13	0.559707	348.425	FALSE	4
2022-09-12	16:12:13	0.449224	348.874	FALSE	4
2022-09-12	16:12:14	0.398639	349.273	FALSE	4
2022-09-12	16:12:14	0.514568	349.788	FALSE	4
2022-09-12	16:12:14	0.510801	350.298	FALSE	4
2022-09-12	16:12:15	0.45355	350.752	FALSE	4
2022-09-12	16:12:15	0.43528	351.187	FALSE	4
2022-09-12	16:12:15	0.469428	351.657	FALSE	4
2022-09-12	16:12:15	0.330547	351.987	FALSE	4
2022-09-12	16:12:16	0.409224	352.396	FALSE	4
2022-09-12	16:12:16	0.393346	352.79	FALSE	4
2022-09-12	16:12:16	0.591259	353.381	FALSE	4
2022-09-12	16:12:16	0.810445	354.191	FALSE	4
2022-09-12	16:12:17	1.29833	355.49	FALSE	4
2022-09-12	16:12:17	0.993143	356.483	FALSE	4
2022-09-12	16:12:17	1.02337	357.506	FALSE	4
2022-09-12	16:12:17	0.707036	358.213	FALSE	4
2022-09-12	16:12:18	0.67528	358.889	FALSE	4
2022-09-12	16:12:18	0.625051	359.514	FALSE	4
2022-09-12	16:12:18	0.605509	360.119	FALSE	4
2022-09-12	16:12:19	0.555025	360.674	FALSE	4
2022-09-12	16:12:19	0.641641	361.316	FALSE	4
2022-09-12	16:12:19	0.598842	361.915	FALSE	4
2022-09-12	16:12:19	0.631107	362.546	FALSE	4
2022-09-12	16:12:20	0.629784	363.176	FALSE	4
2022-09-12	16:12:20	0.67187	363.847	FALSE	4
2022-09-12	16:12:20	0.682761	364.53	FALSE	4
2022-09-12	16:12:20	0.629427	365.16	FALSE	4
2022-09-12	16:12:21	0.511565	365.671	FALSE	4
2022-09-12	16:12:21	0.484033	366.155	FALSE	4
2022-09-12	16:12:21	0.487494	366.643	FALSE	4
2022-09-12	16:12:21	0.503677	367.146	FALSE	4
2022-09-12	16:12:22	0.469377	367.616	FALSE	4
2022-09-12	16:12:22	0.473906	368.09	FALSE	4
2022-09-12	16:12:22	0.434822	368.524	FALSE	4
2022-09-12	16:12:23	0.546119	369.071	FALSE	4
2022-09-12	16:12:23	0.759911	369.831	FALSE	4
2022-09-12	16:12:23	1.11218	370.943	FALSE	4
2022-09-12	16:12:24	1.33263	372.275	FALSE	4
2022-09-12	16:12:24	1.3051	373.58	FALSE	4
2022-09-12	16:12:24	0.480776	374.061	FALSE	4
2022-09-12	16:12:24	0.520725	374.582	FALSE	4
2022-09-12	16:12:24	0.587748	375.17	FALSE	4
2022-09-12	16:12:25	0.439708	375.609	FALSE	4
2022-09-12	16:12:25	0.429122	376.038	FALSE	4
2022-09-12	16:12:25	0.408919	376.447	FALSE	4
2022-09-12	16:12:26	0.39584	376.843	FALSE	4
2022-09-12	16:12:26	0.495178	377.338	FALSE	4
2022-09-12	16:12:26	0.671412	378.01	FALSE	4
2022-09-12	16:12:26	1.23039	379.24	FALSE	4
2022-09-12	16:12:27	1.1736	380.414	FALSE	4
2022-09-12	16:12:27	1.19564	381.609	FALSE	4
2022-09-12	16:12:27	1.16617	382.776	FALSE	4
2022-09-12	16:12:27	1.50215	384.278	FALSE	4
2022-09-12	16:12:28	1.76841	386.046	FALSE	4
2022-09-12	16:12:28	2.52108	388.567	FALSE	4
2022-09-12	16:12:28	3.37726	391.945	1	5
2022-09-12	16:12:28	4.125	396.07	1	6
2022-09-12	16:12:29	3.5594	399.629	1	7
2022-09-12	16:12:29	3.5134	403.142	1	8
2022-09-12	16:12:29	3.94622	407.089	1	9
2022-09-12	16:12:30	4.40368	411.492	1	10
2022-09-12	16:12:30	4.40983	415.902	1	11
2022-09-12	16:12:30	4.37167	420.274	1	12
2022-09-12	16:12:30	4.38256	424.656	1	13
2022-09-12	16:12:31	4.56978	429.226	1	14
2022-09-12	16:12:31	4.62612	433.852	1	15
2022-09-12	16:12:31	4.4679	438.32	1	16
2022-09-12	16:12:31	4.38749	442.708	1	17
2022-09-12	16:12:32	4.38357	447.091	1	18
2022-09-12	16:12:32	4.47859	451.57	1	19
2022-09-12	16:12:32	4.5852	456.155	1	20
2022-09-12	16:12:32	4.62413	460.779	1	21
2022-09-12	16:12:33	4.65126	465.43	1	22
2022-09-12	16:12:33	4.59884	470.029	1	23
2022-09-12	16:12:33	4.39172	474.421	1	24
2022-09-12	16:12:34	4.30413	478.725	1	25
2022-09-12	16:12:34	3.93889	482.664	1	26
2022-09-12	16:12:34	3.73614	486.4	1	27
2022-09-12	16:12:34	3.06266	489.463	1	28
2022-09-12	16:12:35	2.98556	492.448	FALSE	28
2022-09-12	16:12:35	3.09681	495.545	1	29
2022-09-12	16:12:35	3.14342	498.689	1	30
2022-09-12	16:12:35	3.15319	501.842	1	31
2022-09-12	16:12:36	3.13742	504.979	1	32
2022-09-12	16:12:36	2.55446	507.534	FALSE	32
2022-09-12	16:12:36	1.51141	509.045	FALSE	32
2022-09-12	16:12:36	1.16968	510.215	FALSE	32
2022-09-12	16:12:37	0.654567	510.869	FALSE	32
2022-09-12	16:12:37	0.3707	511.24	FALSE	32
2022-09-12	16:12:37	0.809885	512.05	FALSE	32
2022-09-12	16:12:38	0.550038	512.6	FALSE	32
2022-09-12	16:12:38	0.521081	513.121	FALSE	32
2022-09-12	16:12:38	0.361336	513.482	FALSE	32
2022-09-12	16:12:38	0.384288	513.867	FALSE	32
2022-09-12	16:12:39	0.393601	514.26	FALSE	32
2022-09-12	16:12:39	0.389326	514.649	FALSE	32
2022-09-12	16:12:39	0.42042	515.07	FALSE	32
2022-09-12	16:12:39	0.385204	515.455	FALSE	32
2022-09-12	16:12:40	0.386018	515.841	FALSE	32
2022-09-12	16:12:40	0.406832	516.248	FALSE	32
2022-09-12	16:12:40	0.414568	516.663	FALSE	32
2022-09-12	16:12:40	0.403117	517.066	FALSE	32
2022-09-12	16:12:41	0.406629	517.472	FALSE	32
2022-09-12	16:12:41	0.45874	517.931	FALSE	32
2022-09-12	16:12:41	0.495993	518.427	FALSE	32
2022-09-12	16:12:42	0.531565	518.959	FALSE	32
2022-09-12	16:12:42	0.553143	519.512	FALSE	32
2022-09-12	16:12:42	0.576603	520.088	FALSE	32
2022-09-12	16:12:42	0.537214	520.626	FALSE	32
2022-09-12	16:12:43	0.512888	521.138	FALSE	32
2022-09-12	16:12:43	0.454771	521.593	FALSE	32
2022-09-12	16:12:43	0.335942	521.929	FALSE	32
2022-09-12	16:12:43	0.545356	522.474	FALSE	32
2022-09-12	16:12:44	0.51701	522.992	FALSE	32
2022-09-12	16:12:44	0.525051	523.517	FALSE	32
2022-09-12	16:12:44	0.609478	524.126	FALSE	32
2022-09-12	16:12:45	0.542048	524.668	FALSE	32
2022-09-12	16:12:45	0.514517	525.183	FALSE	32
2022-09-12	16:12:45	0.494466	525.677	FALSE	32
2022-09-12	16:12:45	0.528104	526.205	FALSE	32
2022-09-12	16:12:46	0.443422	526.649	FALSE	32
2022-09-12	16:12:46	0.562659	527.211	FALSE	32
2022-09-12	16:12:46	0.186323	527.398	FALSE	32
2022-09-12	16:12:46	-0.0656867	527.398	FALSE	32
2022-09-12	16:12:47	0.00907149	527.407	FALSE	32
2022-09-12	16:12:47	0.0888679	527.496	FALSE	32
2022-09-12	16:12:47	-0.214643	527.496	FALSE	32
2022-09-12	16:12:47	-0.222175	527.496	FALSE	32
2022-09-12	16:12:48	-0.0991727	527.496	FALSE	32
2022-09-12	16:12:48	0.503982	527.999	FALSE	32
2022-09-12	16:12:48	0.560929	528.56	FALSE	32
2022-09-12	16:12:49	0.443473	529.004	FALSE	32
2022-09-12	16:12:49	0.61243	529.616	FALSE	32
2022-09-12	16:12:49	0.603219	530.22	FALSE	32
2022-09-12	16:12:49	0.808053	531.028	FALSE	32
2022-09-12	16:12:50	0.890394	531.918	FALSE	32
2022-09-12	16:12:50	1.24032	533.158	FALSE	32
2022-09-12	16:12:50	1.41431	534.573	FALSE	32
2022-09-12	16:12:50	1.62734	536.2	FALSE	32
2022-09-12	16:12:51	1.59162	537.792	FALSE	32
2022-09-12	16:12:51	1.97676	539.768	FALSE	32
2022-09-12	16:12:51	1.95823	541.727	FALSE	32
2022-09-12	16:12:51	1.82698	543.554	FALSE	32
2022-09-12	16:12:52	1.73833	545.292	FALSE	32
2022-09-12	16:12:52	1.68123	546.973	FALSE	32
2022-09-12	16:12:52	1.55121	548.524	FALSE	32
2022-09-12	16:12:53	1.37762	549.902	FALSE	32
2022-09-12	16:12:53	1.3905	551.292	FALSE	32
2022-09-12	16:12:53	1.24541	552.538	FALSE	32
2022-09-12	16:12:53	1.29991	553.838	FALSE	32
2022-09-12	16:12:54	1.44958	555.287	FALSE	32
2022-09-12	16:12:54	0.983575	556.271	FALSE	32
2022-09-12	16:12:54	1.45319	557.724	FALSE	32
2022-09-12	16:12:54	1.54174	559.266	FALSE	32
2022-09-12	16:12:55	1.44363	560.709	FALSE	32
2022-09-12	16:12:55	1.32658	562.036	FALSE	32
2022-09-12	16:12:55	1.282	563.318	FALSE	32
2022-09-12	16:12:55	1.23345	564.552	FALSE	32
2022-09-12	16:12:56	1.188	565.74	FALSE	32
2022-09-12	16:12:56	1.22078	566.96	FALSE	32
2022-09-12	16:12:56	1.2193	568.18	FALSE	32
2022-09-12	16:12:57	1.2852	569.465	FALSE	32
2022-09-12	16:12:57	1.4366	570.901	FALSE	32
2022-09-12	16:12:57	1.31676	572.218	FALSE	32
2022-09-12	16:12:57	1.16475	573.383	FALSE	32
2022-09-12	16:12:58	1.01564	574.399	FALSE	32
2022-09-12	16:12:58	0.851616	575.25	FALSE	32
2022-09-12	16:12:58	0.797875	576.048	FALSE	32
2022-09-12	16:12:58	0.850394	576.898	FALSE	32
2022-09-12	16:12:59	0.843371	577.742	FALSE	32
2022-09-12	16:12:59	0.802608	578.544	FALSE	32
2022-09-12	16:12:59	0.633906	579.178	FALSE	32
2022-09-12	16:12:59	0.572888	579.751	FALSE	32
2022-09-12	16:13:00	0.490394	580.242	FALSE	32
2022-09-12	16:13:00	0.496603	580.738	FALSE	32
2022-09-12	16:13:00	0.504491	581.243	FALSE	32
2022-09-12	16:13:01	0.501183	581.744	FALSE	32
2022-09-12	16:13:01	0.500725	582.245	FALSE	32
2022-09-12	16:13:01	0.53813	582.783	FALSE	32
2022-09-12	16:13:01	0.583524	583.366	FALSE	32
2022-09-12	16:13:02	0.607392	583.974	FALSE	32
2022-09-12	16:13:02	0.656756	584.63	FALSE	32
2022-09-12	16:13:02	0.72841	585.359	FALSE	32
2022-09-12	16:13:02	0.843524	586.202	FALSE	32
2022-09-12	16:13:03	0.910852	587.113	FALSE	32
2022-09-12	16:13:03	0.953855	588.067	FALSE	32
2022-09-12	16:13:03	0.953295	589.02	FALSE	32
2022-09-12	16:13:03	0.473041	589.493	FALSE	32
2022-09-12	16:13:04	0.0245422	589.518	FALSE	32
2022-09-12	16:13:04	0.853957	590.372	FALSE	32
2022-09-12	16:13:04	0.599402	590.971	FALSE	32
2022-09-12	16:13:05	0.0407763	591.012	FALSE	32
2022-09-12	16:13:05	0.214008	591.226	FALSE	32
2022-09-12	16:13:05	-0.0946435	591.226	FALSE	32
2022-09-12	16:13:05	-0.138562	591.226	FALSE	32
2022-09-12	16:13:06	-0.152811	591.226	FALSE	32
2022-09-12	16:13:06	-0.0252797	591.226	FALSE	32
2022-09-12	16:13:06	-0.0291473	591.226	FALSE	32
2022-09-12	16:13:06	-0.0510812	591.226	FALSE	32
2022-09-12	16:13:07	0.019504	591.246	FALSE	32
2022-09-12	16:13:07	0.00952952	591.255	FALSE	32
2022-09-12	16:13:07	-0.0245163	591.255	FALSE	32
2022-09-12	16:13:08	0.0657127	591.321	FALSE	32
2022-09-12	16:13:08	0.274059	591.595	FALSE	32
2022-09-12	16:13:08	0.463931	592.059	FALSE	32
2022-09-12	16:13:08	0.968969	593.028	FALSE	32
2022-09-12	16:13:09	1.54149	594.569	FALSE	32
2022-09-12	16:13:09	2.62627	597.196	FALSE	32
2022-09-12	16:13:09	3.09971	600.295	1	33
2022-09-12	16:13:09	2.23716	602.532	FALSE	33
2022-09-12	16:13:10	0.448817	602.981	FALSE	33
2022-09-12	16:13:10	0.637214	603.618	FALSE	33
2022-09-12	16:13:10	0.769987	604.388	FALSE	33
2022-09-12	16:13:10	0.877773	605.266	FALSE	33
2022-09-12	16:13:11	0.706221	605.972	FALSE	33
2022-09-12	16:13:11	0.781387	606.754	FALSE	33
2022-09-12	16:13:11	0.86617	607.62	FALSE	33
2022-09-12	16:13:12	0.922863	608.543	FALSE	33
2022-09-12	16:13:12	0.909478	609.452	FALSE	33
2022-09-12	16:13:12	0.934109	610.386	FALSE	33
2022-09-12	16:13:12	0.924949	611.311	FALSE	33
2022-09-12	16:13:13	1.06078	612.372	FALSE	33
2022-09-12	16:13:13	0.956094	613.328	FALSE	33
2022-09-12	16:13:13	0.790853	614.119	FALSE	33
2022-09-12	16:13:13	0.573651	614.693	FALSE	33
2022-09-12	16:13:14	0.541132	615.234	FALSE	33
2022-09-12	16:13:14	0.486171	615.72	FALSE	33
2022-09-12	16:13:14	0.493142	616.213	FALSE	33
2022-09-12	16:13:14	0.51986	616.733	FALSE	33
2022-09-12	16:13:15	0.603219	617.336	FALSE	33
2022-09-12	16:13:15	0.671972	618.008	FALSE	33
2022-09-12	16:13:15	0.510191	618.518	FALSE	33
2022-09-12	16:13:16	0.421082	618.94	FALSE	33
2022-09-12	16:13:16	0.446221	619.386	FALSE	33
2022-09-12	16:13:16	0.408155	619.794	FALSE	33
2022-09-12	16:13:16	0.468461	620.262	FALSE	33
2022-09-12	16:13:17	0.515076	620.777	FALSE	33
2022-09-12	16:13:17	0.312227	621.09	FALSE	33
2022-09-12	16:13:17	0.586119	621.676	FALSE	33
2022-09-12	16:13:17	0.0492242	621.725	FALSE	33
2022-09-12	16:13:18	-0.500597	621.725	FALSE	33
2022-09-12	16:13:18	-0.984465	621.725	FALSE	33
2022-09-12	16:13:18	-0.94187	621.725	FALSE	33
2022-09-12	16:13:18	-1.08574	621.725	FALSE	33
2022-09-12	16:13:19	-0.662277	621.725	FALSE	33
2022-09-12	16:13:19	-0.690216	621.725	FALSE	33
2022-09-12	16:13:19	-0.287824	621.725	FALSE	33
2022-09-12	16:13:20	-0.162939	621.725	FALSE	33
2022-09-12	16:13:20	-0.219427	621.725	FALSE	33
2022-09-12	16:13:20	0.00896972	621.734	FALSE	33
2022-09-12	16:13:20	0.453906	622.188	FALSE	33
2022-09-12	16:13:21	0.882201	623.07	FALSE	33
2022-09-12	16:13:21	0.476043	623.546	FALSE	33
2022-09-12	16:13:21	0.33869	623.885	FALSE	33
2022-09-12	16:13:21	0.720878	624.606	FALSE	33
2022-09-12	16:13:22	0.223728	624.829	FALSE	33
2022-09-12	16:13:22	0.509987	625.339	FALSE	33
2022-09-12	16:13:22	0.526832	625.866	FALSE	33
2022-09-12	16:13:22	0.394618	626.261	FALSE	33
2022-09-12	16:13:23	0.455433	626.716	FALSE	33
2022-09-12	16:13:23	0.461183	627.177	FALSE	33
2022-09-12	16:13:23	0.373397	627.551	FALSE	33
2022-09-12	16:13:24	0.624135	628.175	FALSE	33
2022-09-12	16:13:24	0.476349	628.651	FALSE	33
2022-09-12	16:13:24	0.338232	628.99	FALSE	33
2022-09-12	16:13:24	0.475076	629.465	FALSE	33
2022-09-12	16:13:25	0.162812	629.627	FALSE	33
2022-09-12	16:13:25	0.151412	629.779	FALSE	33
2022-09-12	16:13:25	0.164746	629.944	FALSE	33
2022-09-12	16:13:25	0.159453	630.103	FALSE	33
2022-09-12	16:13:26	-0.00395648	630.103	FALSE	33
2022-09-12	16:13:26	-0.246145	630.103	FALSE	33
2022-09-12	16:13:26	-0.30014	630.103	FALSE	33
2022-09-12	16:13:26	-0.338053	630.103	FALSE	33
2022-09-12	16:13:27	-0.141005	630.103	FALSE	33
2022-09-12	16:13:27	0.264847	630.368	FALSE	33
2022-09-12	16:13:27	0.297672	630.666	FALSE	33
2022-09-12	16:13:28	0.213804	630.879	FALSE	33
2022-09-12	16:13:28	0.305458	631.185	FALSE	33
2022-09-12	16:13:28	0.265611	631.45	FALSE	33
2022-09-12	16:13:28	0.448512	631.899	FALSE	33
2022-09-12	16:13:29	2.02678	633.926	FALSE	33
2022-09-12	16:13:29	0.61528	634.541	FALSE	33
2022-09-12	16:13:29	0.526476	635.068	FALSE	33
2022-09-12	16:13:29	0.472939	635.54	FALSE	33
2022-09-12	16:13:30	0.186527	635.727	FALSE	33
2022-09-12	16:13:30	-0.0399361	635.727	FALSE	33
2022-09-12	16:13:30	-0.204567	635.727	FALSE	33
2022-09-12	16:13:31	-0.0718954	635.727	FALSE	33
2022-09-12	16:13:31	0.187137	635.914	FALSE	33
2022-09-12	16:13:31	0.471972	636.386	FALSE	33
2022-09-12	16:13:31	0.808512	637.195	FALSE	33
2022-09-12	16:13:32	0.688562	637.883	FALSE	33
2022-09-12	16:13:32	0.682608	638.566	FALSE	33
2022-09-12	16:13:32	0.425407	638.991	FALSE	33
2022-09-12	16:13:32	0.43187	639.423	FALSE	33
2022-09-12	16:13:33	0.350394	639.773	FALSE	33
2022-09-12	16:13:33	0.691005	640.464	FALSE	33
2022-09-12	16:13:33	1.57319	642.038	FALSE	33
2022-09-12	16:13:33	1.74001	643.778	FALSE	33
2022-09-12	16:13:34	1.24383	645.021	FALSE	33
2022-09-12	16:13:34	0.863626	645.885	FALSE	33
2022-09-12	16:13:34	0.556959	646.442	FALSE	33
2022-09-12	16:13:35	0.41757	646.86	FALSE	33
2022-09-12	16:13:35	0.280013	647.14	FALSE	33
2022-09-12	16:13:35	0.429275	647.569	FALSE	33
2022-09-12	16:13:35	0.500572	648.069	FALSE	33
2022-09-12	16:13:36	0.357366	648.427	FALSE	33
2022-09-12	16:13:36	0.317366	648.744	FALSE	33
2022-09-12	16:13:36	0.299453	649.044	FALSE	33
2022-09-12	16:13:36	0.306679	649.35	FALSE	33
2022-09-12	16:13:37	0.27701	649.627	FALSE	33
2022-09-12	16:13:37	0.2307	649.858	FALSE	33
2022-09-12	16:13:37	0.245102	650.103	FALSE	33
2022-09-12	16:13:37	0.258435	650.362	FALSE	33
2022-09-12	16:13:38	0.0266287	650.388	FALSE	33
2022-09-12	16:13:38	0.0201656	650.408	FALSE	33
2022-09-12	16:13:38	0.0201656	650.429	FALSE	33
2022-09-12	16:13:39	0.027901	650.456	FALSE	33
2022-09-12	16:13:39	-0.0364247	650.456	FALSE	33
2022-09-12	16:13:39	0.0401147	650.497	FALSE	33
2022-09-12	16:13:39	0.0152293	650.512	FALSE	33
2022-09-12	16:13:40	0.687494	651.199	FALSE	33
2022-09-12	16:13:40	0.408868	651.608	FALSE	33
2022-09-12	16:13:40	0.382761	651.991	FALSE	33
2022-09-12	16:13:40	1.23793	653.229	FALSE	33
2022-09-12	16:13:41	0.786578	654.015	FALSE	33
2022-09-12	16:13:41	0.526679	654.542	FALSE	33
2022-09-12	16:13:41	0.370445	654.913	FALSE	33
2022-09-12	16:13:41	0.222608	655.135	FALSE	33
2022-09-12	16:13:42	0.247392	655.383	FALSE	33
2022-09-12	16:13:42	0.210445	655.593	FALSE	33
2022-09-12	16:13:42	0.251005	655.844	FALSE	33
2022-09-12	16:13:43	-0.0736766	655.844	FALSE	33
2022-09-12	16:13:43	-0.0858394	655.844	FALSE	33
2022-09-12	16:13:43	-0.129503	655.844	FALSE	33
2022-09-12	16:13:43	-0.173371	655.844	FALSE	33
2022-09-12	16:13:44	-0.135356	655.844	FALSE	33
2022-09-12	16:13:44	-0.0243127	655.844	FALSE	33
2022-09-12	16:13:44	0.303473	656.147	FALSE	33
2022-09-12	16:13:44	0.274567	656.422	FALSE	33
2022-09-12	16:13:45	0.333397	656.755	FALSE	33
2022-09-12	16:13:45	0.360115	657.116	FALSE	33
2022-09-12	16:13:45	0.278384	657.394	FALSE	33
2022-09-12	16:13:45	0.329071	657.723	FALSE	33
2022-09-12	16:13:46	0.347138	658.07	FALSE	33
2022-09-12	16:13:46	0.227341	658.297	FALSE	33
2022-09-12	16:13:46	0.245102	658.543	FALSE	33
2022-09-12	16:13:47	0.19243	658.735	FALSE	33
2022-09-12	16:13:47	0.331514	659.067	FALSE	33
2022-09-12	16:13:47	0.253804	659.32	FALSE	33
2022-09-12	16:13:47	0.261692	659.582	FALSE	33
2022-09-12	16:13:48	0.308562	659.891	FALSE	33
2022-09-12	16:13:48	0.213702	660.104	FALSE	33
2022-09-12	16:13:48	0.324593	660.429	FALSE	33
2022-09-12	16:13:48	0.20159	660.63	FALSE	33
2022-09-12	16:13:49	0.236552	660.867	FALSE	33
2022-09-12	16:13:49	0.0994531	660.966	FALSE	33
2022-09-12	16:13:49	0.265611	661.232	FALSE	33
2022-09-12	16:13:50	0.205102	661.437	FALSE	33
2022-09-12	16:13:50	0.984847	662.422	FALSE	33
2022-09-12	16:13:50	1.37559	663.798	FALSE	33
2022-09-12	16:13:50	1.2878	665.085	FALSE	33
2022-09-12	16:13:51	0.880725	665.966	FALSE	33
2022-09-12	16:13:51	1.24866	667.215	FALSE	33
2022-09-12	16:13:51	0.718181	667.933	FALSE	33
2022-09-12	16:13:51	1.09274	669.026	FALSE	33
2022-09-12	16:13:52	0.584491	669.61	FALSE	33
2022-09-12	16:13:52	1.62139	671.232	FALSE	33
2022-09-12	16:13:52	2.41569	673.647	FALSE	33
2022-09-12	16:13:52	4.14515	677.792	1	34
2022-09-12	16:13:53	0.582048	678.375	FALSE	34
2022-09-12	16:13:53	0.663524	679.038	FALSE	34
2022-09-12	16:13:53	0.524848	679.563	FALSE	34
2022-09-12	16:13:54	1.3962	680.959	FALSE	34
2022-09-12	16:13:54	0.263728	681.223	FALSE	34
2022-09-12	16:13:54	0.570293	681.793	FALSE	34
2022-09-12	16:13:54	0.517214	682.31	FALSE	34
2022-09-12	16:13:55	0.650649	682.961	FALSE	34
2022-09-12	16:13:55	0.279453	683.24	FALSE	34
2022-09-12	16:13:55	1.07569	684.316	FALSE	34
2022-09-12	16:13:55	1.15925	685.475	FALSE	34
2022-09-12	16:13:56	1.13894	686.614	FALSE	34
2022-09-12	16:13:56	0.638842	687.253	FALSE	34
2022-09-12	16:13:56	1.16128	688.414	FALSE	34
2022-09-12	16:13:56	0.598639	689.013	FALSE	34
2022-09-12	16:13:57	0.801692	689.815	FALSE	34
2022-09-12	16:13:57	0.714924	690.53	FALSE	34
2022-09-12	16:13:57	0.726374	691.256	FALSE	34
2022-09-12	16:13:58	0.679198	691.935	FALSE	34
2022-09-12	16:13:58	1.62261	693.558	FALSE	34
2022-09-12	16:13:58	2.60607	696.164	FALSE	34
2022-09-12	16:13:58	2.81411	698.978	FALSE	34
2022-09-12	16:13:59	2.1539	701.132	FALSE	34
2022-09-12	16:13:59	3.27289	704.405	1	35
2022-09-12	16:13:59	2.10673	706.512	FALSE	35
2022-09-12	16:13:59	1.34546	707.857	FALSE	35
2022-09-12	16:14:00	0.828359	708.685	FALSE	35
2022-09-12	16:14:00	0.997163	709.683	FALSE	35
2022-09-12	16:14:00	0.628817	710.311	FALSE	35
2022-09-12	16:14:00	0.759453	711.071	FALSE	35
2022-09-12	16:14:01	0.864542	711.935	FALSE	35
2022-09-12	16:14:01	1.44337	713.379	FALSE	35
2022-09-12	16:14:01	1.19212	714.571	FALSE	35
2022-09-12	16:14:02	1.1736	715.744	FALSE	35
2022-09-12	16:14:02	0.828461	716.573	FALSE	35
2022-09-12	16:14:02	1.09055	717.663	FALSE	35
2022-09-12	16:14:02	1.59543	719.259	FALSE	35
2022-09-12	16:14:03	3.29207	722.551	1	36
2022-09-12	16:14:03	4.48505	727.036	1	37
2022-09-12	16:14:03	5.17986	732.216	1	38
2022-09-12	16:14:03	1.33767	733.554	FALSE	38
2022-09-12	16:14:04	0.63187	734.185	FALSE	38
2022-09-12	16:14:04	0.554059	734.739	FALSE	38
2022-09-12	16:14:04	0.658944	735.398	FALSE	38
2022-09-12	16:14:05	1.4305	736.829	FALSE	38
2022-09-12	16:14:05	3.68602	740.515	1	39
2022-09-12	16:14:05	5.02062	745.536	1	40
2022-09-12	16:14:05	4.96607	750.502	1	41
2022-09-12	16:14:06	5.40413	755.906	1	42
2022-09-12	16:14:06	3.26693	759.173	1	43
2022-09-12	16:14:06	2.79314	761.966	FALSE	43
2022-09-12	16:14:06	4.39004	766.356	1	44
2022-09-12	16:14:07	5.52184	771.878	1	45
2022-09-12	16:14:07	7.07405	778.952	1	46
2022-09-12	16:14:07	3.31014	782.262	1	47
2022-09-12	16:14:07	7.43477	789.697	1	48
2022-09-12	16:14:08	9.10673	798.803	1	49
2022-09-12	16:14:08	4.26342	803.067	1	50
2022-09-12	16:14:08	3.32948	806.396	1	51
2022-09-12	16:14:08	3.26027	809.657	1	52
2022-09-12	16:14:09	4.37594	814.033	1	53
2022-09-12	16:14:09	3.13324	817.166	1	54
2022-09-12	16:14:09	2.31116	819.477	FALSE	54
2022-09-12	16:14:10	1.77925	821.256	FALSE	54
2022-09-12	16:14:10	1.40088	822.657	FALSE	54
2022-09-12	16:14:10	1.07548	823.733	FALSE	54
2022-09-12	16:14:10	0.857112	824.59	FALSE	54
2022-09-12	16:14:11	0.749733	825.339	FALSE	54
2022-09-12	16:14:11	0.549173	825.889	FALSE	54
2022-09-12	16:14:11	0.402659	826.291	FALSE	54
2022-09-12	16:14:11	0.400471	826.692	FALSE	54
2022-09-12	16:14:12	0.343728	827.035	FALSE	54
2022-09-12	16:14:12	0.301031	827.336	FALSE	54
2022-09-12	16:14:12	0.232583	827.569	FALSE	54
2022-09-12	16:14:13	0.187595	827.757	FALSE	54
2022-09-12	16:14:13	1.1309	828.887	FALSE	54
2022-09-12	16:14:13	2.01085	830.898	FALSE	54

## Sheet: Harley_prong_2022912160856
						**GoPro Fitting: 1558
2022-09-12	16:08:56	0.383015
2022-09-12	16:08:56	0.383626
2022-09-12	16:08:57	0.370852
2022-09-12	16:08:57	0.438588
2022-09-12	16:08:57	0.411921
2022-09-12	16:08:57	0.484033
2022-09-12	16:08:58	0.406781
2022-09-12	16:08:58	0.425967
2022-09-12	16:08:58	0.476654
2022-09-12	16:08:58	0.36556
2022-09-12	16:08:59	0.408308
2022-09-12	16:08:59	0.460725
2022-09-12	16:08:59	0.716196
2022-09-12	16:09:00	0.464186
2022-09-12	16:09:00	0.977061
2022-09-12	16:09:00	0.975585
2022-09-12	16:09:00	0.415636
2022-09-12	16:09:01	0.35757
2022-09-12	16:09:01	0.246578
2022-09-12	16:09:01	-0.0338802
2022-09-12	16:09:01	0.449071
2022-09-12	16:09:02	0.508054
2022-09-12	16:09:02	0.418842
2022-09-12	16:09:02	0.198486
2022-09-12	16:09:02	0.724389
2022-09-12	16:09:03	0.918486
2022-09-12	16:09:03	2.30057
2022-09-12	16:09:03	7.84678
2022-09-12	16:09:04	6.5139
2022-09-12	16:09:04	2.87299
2022-09-12	16:09:04	1.6937
2022-09-12	16:09:04	0.324797
2022-09-12	16:09:05	0.320216
2022-09-12	16:09:05	0.374364
2022-09-12	16:09:05	0.465814
2022-09-12	16:09:05	0.329428
2022-09-12	16:09:06	0.630903
2022-09-12	16:09:06	0.289173
2022-09-12	16:09:06	0.491921
2022-09-12	16:09:06	0.282557
2022-09-12	16:09:07	0.466323
2022-09-12	16:09:07	0.502659
2022-09-12	16:09:07	0.228919
2022-09-12	16:09:08	0.617621
2022-09-12	16:09:08	0.193448
2022-09-12	16:09:08	0.530649
2022-09-12	16:09:08	0.310751
2022-09-12	16:09:09	0.394262
2022-09-12	16:09:09	0.439046
2022-09-12	16:09:09	0.424084
2022-09-12	16:09:09	0.434313
2022-09-12	16:09:10	0.439351
2022-09-12	16:09:10	0.413753
2022-09-12	16:09:10	0.310089
2022-09-12	16:09:10	0.762557
2022-09-12	16:09:11	0.544644
2022-09-12	16:09:11	1.11686
2022-09-12	16:09:11	1.1049
2022-09-12	16:09:12	1.70815
2022-09-12	16:09:12	1.21477
2022-09-12	16:09:12	1.18078
2022-09-12	16:09:12	1.30627
2022-09-12	16:09:13	0.898893
2022-09-12	16:09:13	0.873702
2022-09-12	16:09:13	0.765153
2022-09-12	16:09:13	0.681437
2022-09-12	16:09:14	0.747544
2022-09-12	16:09:14	0.719707
2022-09-12	16:09:14	0.734568
2022-09-12	16:09:14	0.718944
2022-09-12	16:09:15	0.63584
2022-09-12	16:09:15	0.605
2022-09-12	16:09:15	0.628461
2022-09-12	16:09:16	0.664746
2022-09-12	16:09:16	0.639657
2022-09-12	16:09:16	0.515636
2022-09-12	16:09:16	0.569275
2022-09-12	16:09:17	0.631107
2022-09-12	16:09:17	0.549936
2022-09-12	16:09:17	0.479249
2022-09-12	16:09:17	0.498588
2022-09-12	16:09:18	0.501845
2022-09-12	16:09:18	0.510852
2022-09-12	16:09:18	0.476654
2022-09-12	16:09:19	0.434059
2022-09-12	16:09:19	0.463219
2022-09-12	16:09:19	0.493702
2022-09-12	16:09:19	0.368613
2022-09-12	16:09:20	0.518333
2022-09-12	16:09:20	0.641896
2022-09-12	16:09:20	0.566985
2022-09-12	16:09:20	0.573957
2022-09-12	16:09:21	0.545509
2022-09-12	16:09:21	0.508562
2022-09-12	16:09:21	0.479402
2022-09-12	16:09:21	0.461336
2022-09-12	16:09:22	0.464695
2022-09-12	16:09:22	0.477265
2022-09-12	16:09:22	0.450903
2022-09-12	16:09:23	0.463677
2022-09-12	16:09:23	0.462456
2022-09-12	16:09:23	0.466069
2022-09-12	16:09:23	0.485763
2022-09-12	16:09:24	0.497367
2022-09-12	16:09:24	0.530445
2022-09-12	16:09:24	0.604237
2022-09-12	16:09:24	0.670089
2022-09-12	16:09:25	0.639758
2022-09-12	16:09:25	0.610293
2022-09-12	16:09:25	0.514008
2022-09-12	16:09:25	0.509886
2022-09-12	16:09:26	0.53472
2022-09-12	16:09:26	0.520471
2022-09-12	16:09:26	0.52841
2022-09-12	16:09:27	0.497417
2022-09-12	16:09:27	0.46612
2022-09-12	16:09:27	0.460878
2022-09-12	16:09:27	0.46159
2022-09-12	16:09:28	0.44902
2022-09-12	16:09:28	0.45014
2022-09-12	16:09:28	0.451972
2022-09-12	16:09:28	0.447545
2022-09-12	16:09:29	0.44215
2022-09-12	16:09:29	0.437774
2022-09-12	16:09:29	0.449326
2022-09-12	16:09:29	0.441692
2022-09-12	16:09:30	0.446883
2022-09-12	16:09:30	0.436705
2022-09-12	16:09:30	0.440725
2022-09-12	16:09:31	0.438333
2022-09-12	16:09:31	0.471056
2022-09-12	16:09:31	0.460878
2022-09-12	16:09:31	0.456298
2022-09-12	16:09:32	0.395127
2022-09-12	16:09:32	0.404033
2022-09-12	16:09:32	0.610649
2022-09-12	16:09:32	0.335992
2022-09-12	16:09:33	0.578639
2022-09-12	16:09:33	0.354771
2022-09-12	16:09:33	0.847392
2022-09-12	16:09:33	0.552481
2022-09-12	16:09:34	0.748664
2022-09-12	16:09:34	0.406934
2022-09-12	16:09:34	0.590293
2022-09-12	16:09:35	0.415178
2022-09-12	16:09:35	0.473346
2022-09-12	16:09:35	0.420166
2022-09-12	16:09:35	0.492074
2022-09-12	16:09:36	0.634059
2022-09-12	16:09:36	0.533295
2022-09-12	16:09:36	0.525763
2022-09-12	16:09:36	0.369275
2022-09-12	16:09:37	0.456552
2022-09-12	16:09:37	0.249326
2022-09-12	16:09:37	1.15151
2022-09-12	16:09:37	0.261845
2022-09-12	16:09:38	0.355382
2022-09-12	16:09:38	0.060013
2022-09-12	16:09:38	0.296654
2022-09-12	16:09:39	0.163931
2022-09-12	16:09:39	0.404084
2022-09-12	16:09:39	0.313092
2022-09-12	16:09:39	0.718588
2022-09-12	16:09:40	0.810751
2022-09-12	16:09:40	1.41294
2022-09-12	16:09:40	0.413346
2022-09-12	16:09:40	0.454262
2022-09-12	16:09:41	0.269886
2022-09-12	16:09:41	0.00729033
2022-09-12	16:09:41	0.37131
2022-09-12	16:09:42	1.33991
2022-09-12	16:09:42	0.840827
2022-09-12	16:09:42	2.38312
2022-09-12	16:09:42	0.443524
2022-09-12	16:09:43	0.272481
2022-09-12	16:09:43	0.0100384
2022-09-12	16:09:43	0.346883
2022-09-12	16:09:43	0.625662
2022-09-12	16:09:44	3.42953
2022-09-12	16:09:44	0.563524
2022-09-12	16:09:44	0.0057127
2022-09-12	16:09:44	0.45014
2022-09-12	16:09:45	3.36449
2022-09-12	16:09:45	0.117265
2022-09-12	16:09:45	0.0203692
2022-09-12	16:09:46	0.235026
2022-09-12	16:09:46	0.142405
2022-09-12	16:09:46	0.228512
2022-09-12	16:09:46	0.105509
2022-09-12	16:09:47	0.488206
2022-09-12	16:09:47	0.171463
2022-09-12	16:09:47	0.295738
2022-09-12	16:09:47	0.186527
2022-09-12	16:09:48	0.676094
2022-09-12	16:09:48	0.725865
2022-09-12	16:09:48	0.722456
2022-09-12	16:09:48	0.722201
2022-09-12	16:09:49	0.725814
2022-09-12	16:09:49	0.724542
2022-09-12	16:09:49	0.720369
2022-09-12	16:09:50	0.725712
2022-09-12	16:09:50	0.719097
2022-09-12	16:09:50	0.719504
2022-09-12	16:09:50	0.718639
2022-09-12	16:09:51	0.72383
2022-09-12	16:09:51	0.723677
2022-09-12	16:09:51	0.722404
2022-09-12	16:09:51	0.713957
2022-09-12	16:09:52	0.718435
2022-09-12	16:09:52	0.664338
2022-09-12	16:09:52	0.113041
2022-09-12	16:09:52	0.674924
2022-09-12	16:09:53	0.722557
2022-09-12	16:09:53	0.723321
2022-09-12	16:09:53	0.731259
2022-09-12	16:09:54	0.512023
2022-09-12	16:09:54	0.0577229
2022-09-12	16:09:54	0.369479
2022-09-12	16:09:54	0.0628119
2022-09-12	16:09:55	0.447137
2022-09-12	16:09:55	0.183728
2022-09-12	16:09:55	0.223372
2022-09-12	16:09:55	0.10271
2022-09-12	16:09:56	0.228003
2022-09-12	16:09:56	0.433855
2022-09-12	16:09:56	0.587646
2022-09-12	16:09:56	0.627596
2022-09-12	16:09:57	0.907646
2022-09-12	16:09:57	1.24973
2022-09-12	16:09:57	1.17879
2022-09-12	16:09:58	1.80663
2022-09-12	16:09:58	1.20953
2022-09-12	16:09:58	2.37915
2022-09-12	16:09:58	2.57976
2022-09-12	16:09:59	0.986679
2022-09-12	16:09:59	1.68592
2022-09-12	16:09:59	0.385102
2022-09-12	16:09:59	0.756654
2022-09-12	16:10:00	0.688053
2022-09-12	16:10:00	0.378537
2022-09-12	16:10:00	0.630191
2022-09-12	16:10:01	0.242812
2022-09-12	16:10:01	0.674211
2022-09-12	16:10:01	0.272226
2022-09-12	16:10:01	0.74556
2022-09-12	16:10:02	0.365509
2022-09-12	16:10:02	0.626629
2022-09-12	16:10:02	0.543372
2022-09-12	16:10:02	0.554517
2022-09-12	16:10:03	0.538639
2022-09-12	16:10:03	0.354313
2022-09-12	16:10:03	0.668359
2022-09-12	16:10:03	0.388257
2022-09-12	16:10:04	1.11045
2022-09-12	16:10:04	0.497214
2022-09-12	16:10:04	0.714822
2022-09-12	16:10:05	0.571514
2022-09-12	16:10:05	0.819148
2022-09-12	16:10:05	0.37355
2022-09-12	16:10:05	0.52617
2022-09-12	16:10:06	0.564491
2022-09-12	16:10:06	0.35182
2022-09-12	16:10:06	0.57131
2022-09-12	16:10:06	0.291718
2022-09-12	16:10:07	0.596145
2022-09-12	16:10:07	0.33472
2022-09-12	16:10:07	0.550496
2022-09-12	16:10:07	0.380471
2022-09-12	16:10:08	0.555941
2022-09-12	16:10:08	0.384847
2022-09-12	16:10:08	0.424389
2022-09-12	16:10:09	0.502252
2022-09-12	16:10:09	0.445763
2022-09-12	16:10:09	0.453804
2022-09-12	16:10:09	0.431412
2022-09-12	16:10:10	0.440471
2022-09-12	16:10:10	0.451972
2022-09-12	16:10:10	0.484084
2022-09-12	16:10:10	0.45869
2022-09-12	16:10:11	0.434466
2022-09-12	16:10:11	0.0927865
2022-09-12	16:10:11	-0.153219
2022-09-12	16:10:11	-0.246399
2022-09-12	16:10:12	0.0108018
2022-09-12	16:10:12	-0.0677223
2022-09-12	16:10:12	-0.174338
2022-09-12	16:10:13	-0.545381
2022-09-12	16:10:13	-0.626552
2022-09-12	16:10:13	-0.472659
2022-09-12	16:10:13	-0.196934
2022-09-12	16:10:14	-0.135712
2022-09-12	16:10:14	0.143524
2022-09-12	16:10:14	0.208664
2022-09-12	16:10:14	0.338842
2022-09-12	16:10:15	0.240878
2022-09-12	16:10:15	0.334873
2022-09-12	16:10:15	0.261234
2022-09-12	16:10:15	0.295025
2022-09-12	16:10:16	0.244084
2022-09-12	16:10:16	0.220115
2022-09-12	16:10:16	0.256552
2022-09-12	16:10:17	0.291819
2022-09-12	16:10:17	0.288054
2022-09-12	16:10:17	0.295331
2022-09-12	16:10:17	0.427087
2022-09-12	16:10:18	0.271514
2022-09-12	16:10:18	0.324186
2022-09-12	16:10:18	0.315789
2022-09-12	16:10:18	0.467239
2022-09-12	16:10:19	0.0458654
2022-09-12	16:10:19	-0.0376461
2022-09-12	16:10:19	-0.0403432
2022-09-12	16:10:19	0.190293
2022-09-12	16:10:20	0.42673
2022-09-12	16:10:20	0.498028
2022-09-12	16:10:20	0.390802
2022-09-12	16:10:21	0.694211
2022-09-12	16:10:21	0.700318
2022-09-12	16:10:21	0.494975
2022-09-12	16:10:21	0.597366
2022-09-12	16:10:22	0.43126
2022-09-12	16:10:22	0.625763
2022-09-12	16:10:22	0.318282
2022-09-12	16:10:22	0.670903
2022-09-12	16:10:23	0.366476
2022-09-12	16:10:23	0.664491
2022-09-12	16:10:23	0.467595
2022-09-12	16:10:24	0.795382
2022-09-12	16:10:24	0.442456
2022-09-12	16:10:24	0.822455
2022-09-12	16:10:24	0.293804
2022-09-12	16:10:25	0.714262
2022-09-12	16:10:25	0.376349
2022-09-12	16:10:25	0.750242
2022-09-12	16:10:25	0.603626
2022-09-12	16:10:26	0.844186
2022-09-12	16:10:26	0.496196
2022-09-12	16:10:26	0.686119
2022-09-12	16:10:26	0.597774
2022-09-12	16:10:27	0.486679
2022-09-12	16:10:27	0.520725
2022-09-12	16:10:27	0.478384
2022-09-12	16:10:28	0.650547
2022-09-12	16:10:28	0.319199
2022-09-12	16:10:28	0.529071
2022-09-12	16:10:28	0.321489
2022-09-12	16:10:29	0.612583
2022-09-12	16:10:29	0.320776
2022-09-12	16:10:29	0.496705
2022-09-12	16:10:30	0.342099
2022-09-12	16:10:30	0.852176
2022-09-12	16:10:30	0.343575
2022-09-12	16:10:30	0.734618
2022-09-12	16:10:30	0.501285
2022-09-12	16:10:31	0.944949
2022-09-12	16:10:31	2.09543
2022-09-12	16:10:31	2.66556
2022-09-12	16:10:32	1.89686
2022-09-12	16:10:32	2.00632
2022-09-12	16:10:32	1.63788
2022-09-12	16:10:32	1.8253
2022-09-12	16:10:33	2.11212
2022-09-12	16:10:33	1.7278
2022-09-12	16:10:33	1.53513
2022-09-12	16:10:33	0.818995
2022-09-12	16:10:34	0.323219
2022-09-12	16:10:34	0.0617941
2022-09-12	16:10:34	0.309071
2022-09-12	16:10:34	0.15584
2022-09-12	16:10:35	0.411616
2022-09-12	16:10:35	0.698638
2022-09-12	16:10:35	0.714058
2022-09-12	16:10:36	0.296654
2022-09-12	16:10:36	0.483677
2022-09-12	16:10:36	0.634974
2022-09-12	16:10:36	1.19971
2022-09-12	16:10:37	1.19294
2022-09-12	16:10:37	2.0536
2022-09-12	16:10:37	1.32266
2022-09-12	16:10:37	1.77411
2022-09-12	16:10:38	1.57162
2022-09-12	16:10:38	0.977214
2022-09-12	16:10:38	1.95385
2022-09-12	16:10:38	1.06525
2022-09-12	16:10:39	1.8848
2022-09-12	16:10:39	0.412176
2022-09-12	16:10:39	1.18042
2022-09-12	16:10:40	1.33589
2022-09-12	16:10:40	1.55594
2022-09-12	16:10:40	1.11309
2022-09-12	16:10:40	2.12978
2022-09-12	16:10:41	3.85752
2022-09-12	16:10:41	1.63533
2022-09-12	16:10:41	0.551056
2022-09-12	16:10:41	2.27106
2022-09-12	16:10:42	0.455891
2022-09-12	16:10:42	0.746119
2022-09-12	16:10:42	0.27757
2022-09-12	16:10:43	0.356908
2022-09-12	16:10:43	0.17757
2022-09-12	16:10:43	0.110496
2022-09-12	16:10:43	-0.0105723
2022-09-12	16:10:44	0.0917178
2022-09-12	16:10:44	0.128715
2022-09-12	16:10:44	0.426069
2022-09-12	16:10:44	0.211463
2022-09-12	16:10:45	0.692125
2022-09-12	16:10:45	0.572074
2022-09-12	16:10:45	0.486018
2022-09-12	16:10:45	0.215331
2022-09-12	16:10:46	0.0916669
2022-09-12	16:10:46	0.125814
2022-09-12	16:10:46	0.22271
2022-09-12	16:10:47	0.126731
2022-09-12	16:10:47	0.282099
2022-09-12	16:10:47	0.192685
2022-09-12	16:10:47	0.223372
2022-09-12	16:10:48	0.224186
2022-09-12	16:10:48	0.431616
2022-09-12	16:10:48	0.146781
2022-09-12	16:10:48	0.208104
2022-09-12	16:10:49	0.209173
2022-09-12	16:10:49	0.299809
2022-09-12	16:10:49	0.158639
2022-09-12	16:10:49	0.0944149
2022-09-12	16:10:50	0.387392
2022-09-12	16:10:50	0.387494
2022-09-12	16:10:50	0.330242
2022-09-12	16:10:51	0.383881
2022-09-12	16:10:51	0.401387
2022-09-12	16:10:51	0.357417
2022-09-12	16:10:51	0.286578
2022-09-12	16:10:52	0.468664
2022-09-12	16:10:52	0.468664
2022-09-12	16:10:52	0.399707
2022-09-12	16:10:52	0.542354
2022-09-12	16:10:53	0.402506
2022-09-12	16:10:53	0.468104
2022-09-12	16:10:53	0.337316
2022-09-12	16:10:53	0.107138
2022-09-12	16:10:54	0.00617073
2022-09-12	16:10:54	0.149937
2022-09-12	16:10:54	0.0709036
2022-09-12	16:10:55	0.324695
2022-09-12	16:10:55	0.262812
2022-09-12	16:10:55	0.467595
2022-09-12	16:10:55	0.309122
2022-09-12	16:10:56	0.519148
2022-09-12	16:10:56	0.239402
2022-09-12	16:10:56	0.191056
2022-09-12	16:10:56	0.300267
2022-09-12	16:10:57	0.253753
2022-09-12	16:10:57	0.24958
2022-09-12	16:10:57	0.256807
2022-09-12	16:10:57	1.05823
2022-09-12	16:10:58	1.06831
2022-09-12	16:10:58	0.541438
2022-09-12	16:10:58	0.396298
2022-09-12	16:10:59	0.257163
2022-09-12	16:10:59	0.496858
2022-09-12	16:10:59	0.306527
2022-09-12	16:10:59	0.391718
2022-09-12	16:11:00	0.515992
2022-09-12	16:11:00	0.438842
2022-09-12	16:11:00	0.251005
2022-09-12	16:11:00	0.985153
2022-09-12	16:11:01	0.60383
2022-09-12	16:11:01	0.365356
2022-09-12	16:11:01	0.314567
2022-09-12	16:11:01	0.520165
2022-09-12	16:11:02	0.243015
2022-09-12	16:11:02	0.407494
2022-09-12	16:11:02	0.241031
2022-09-12	16:11:03	0.453601
2022-09-12	16:11:03	0.241845
2022-09-12	16:11:03	0.323168
2022-09-12	16:11:03	0.437265
2022-09-12	16:11:04	0.575738
2022-09-12	16:11:04	0.682863
2022-09-12	16:11:04	0.83014
2022-09-12	16:11:04	0.873753
2022-09-12	16:11:05	1.36118
2022-09-12	16:11:05	0.338537
2022-09-12	16:11:05	0.506781
2022-09-12	16:11:06	0.241896
2022-09-12	16:11:06	6.39548
2022-09-12	16:11:06	-0.0197326
2022-09-12	16:11:06	-0.0694526
2022-09-12	16:11:07	-0.234338
2022-09-12	16:11:07	-0.330877
2022-09-12	16:11:07	-0.463702
2022-09-12	16:11:07	-0.422073
2022-09-12	16:11:08	-0.402633
2022-09-12	16:11:08	-0.348842
2022-09-12	16:11:08	-0.124974
2022-09-12	16:11:08	0.010242
2022-09-12	16:11:09	0.0954328
2022-09-12	16:11:09	0.289733
2022-09-12	16:11:09	0.0812852
2022-09-12	16:11:10	0.353651
2022-09-12	16:11:10	0.230954
2022-09-12	16:11:10	0.369835
2022-09-12	16:11:10	0.402201
2022-09-12	16:11:11	0.765153
2022-09-12	16:11:11	0.44958
2022-09-12	16:11:11	0.458079
2022-09-12	16:11:11	1.07004
2022-09-12	16:11:12	1.70653
2022-09-12	16:11:12	1.74963
2022-09-12	16:11:12	1.16332
2022-09-12	16:11:12	0.484084
2022-09-12	16:11:13	0.512328
2022-09-12	16:11:13	0.413651
2022-09-12	16:11:13	0.604644
2022-09-12	16:11:14	0.849987
2022-09-12	16:11:14	0.635076
2022-09-12	16:11:14	0.862405
2022-09-12	16:11:14	0.643423
2022-09-12	16:11:15	0.648817
2022-09-12	16:11:15	0.822557
2022-09-12	16:11:15	0.74729
2022-09-12	16:11:15	0.892379
2022-09-12	16:11:16	0.851107
2022-09-12	16:11:16	0.910954
2022-09-12	16:11:16	0.907036
2022-09-12	16:11:16	0.877112
2022-09-12	16:11:17	0.881183
2022-09-12	16:11:17	0.907341
2022-09-12	16:11:17	0.842201
2022-09-12	16:11:18	0.768257
2022-09-12	16:11:18	0.586476
2022-09-12	16:11:18	0.484695
2022-09-12	16:11:18	0.427901
2022-09-12	16:11:19	0.310751
2022-09-12	16:11:19	0.381692
2022-09-12	16:11:19	0.437367
2022-09-12	16:11:19	0.311005
2022-09-12	16:11:20	0.538282
2022-09-12	16:11:20	0.812328
2022-09-12	16:11:20	0.987392
2022-09-12	16:11:20	0.467443
2022-09-12	16:11:21	0.381082
2022-09-12	16:11:21	0.315433
2022-09-12	16:11:21	0.340929
2022-09-12	16:11:22	0.504389
2022-09-12	16:11:22	0.326629
2022-09-12	16:11:22	0.71528
2022-09-12	16:11:22	0.410598
2022-09-12	16:11:23	0.976094
2022-09-12	16:11:23	1.39319
2022-09-12	16:11:23	1.79966
2022-09-12	16:11:23	0.462456
2022-09-12	16:11:24	0.853906
2022-09-12	16:11:24	0.662303
2022-09-12	16:11:24	0.35645
2022-09-12	16:11:25	0.36154
2022-09-12	16:11:25	0.41299
2022-09-12	16:11:25	0.263168
2022-09-12	16:11:25	0.322659
2022-09-12	16:11:26	0.364186
2022-09-12	16:11:26	0.513397
2022-09-12	16:11:26	0.567086
2022-09-12	16:11:26	0.545458
2022-09-12	16:11:27	0.886527
2022-09-12	16:11:27	0.437367
2022-09-12	16:11:27	0.392735
2022-09-12	16:11:27	0.269122
2022-09-12	16:11:28	0.322048
2022-09-12	16:11:28	0.359504
2022-09-12	16:11:28	0.317214
2022-09-12	16:11:29	0.230802
2022-09-12	16:11:29	0.360471
2022-09-12	16:11:29	0.345153
2022-09-12	16:11:29	0.329529
2022-09-12	16:11:30	0.230496
2022-09-12	16:11:30	0.174975
2022-09-12	16:11:30	0.340318
2022-09-12	16:11:30	0.295025
2022-09-12	16:11:31	0.334975
2022-09-12	16:11:31	0.309529
2022-09-12	16:11:31	0.424593
2022-09-12	16:11:31	0.436654
2022-09-12	16:11:32	0.37645
2022-09-12	16:11:32	0.396807
2022-09-12	16:11:32	0.370293
2022-09-12	16:11:33	0.410394
2022-09-12	16:11:33	0.425254
2022-09-12	16:11:33	0.434008
2022-09-12	16:11:33	0.458181
2022-09-12	16:11:34	0.487646
2022-09-12	16:11:34	0.451005
2022-09-12	16:11:34	0.421336
2022-09-12	16:11:34	0.419453
2022-09-12	16:11:35	0.401438
2022-09-12	16:11:35	0.351361
2022-09-12	16:11:35	0.371412
2022-09-12	16:11:35	0.377061
2022-09-12	16:11:36	0.330191
2022-09-12	16:11:36	0.341845
2022-09-12	16:11:36	0.349733
2022-09-12	16:11:37	0.351921
2022-09-12	16:11:37	0.333753
2022-09-12	16:11:37	0.340115
2022-09-12	16:11:37	0.342964
2022-09-12	16:11:38	0.345356
2022-09-12	16:11:38	0.324847
2022-09-12	16:11:38	0.422761
2022-09-12	16:11:38	0.237214
2022-09-12	16:11:39	0.178893
2022-09-12	16:11:39	0.297112
2022-09-12	16:11:39	0.359402
2022-09-12	16:11:39	0.516247
2022-09-12	16:11:40	0.400013
2022-09-12	16:11:40	0.462201
2022-09-12	16:11:40	0.431463
2022-09-12	16:11:41	0.436654
2022-09-12	16:11:41	0.447596
2022-09-12	16:11:41	0.443779
2022-09-12	16:11:41	0.445458
2022-09-12	16:11:42	0.451005
2022-09-12	16:11:42	0.442405
2022-09-12	16:11:42	0.444135
2022-09-12	16:11:42	0.445458
2022-09-12	16:11:43	0.444746
2022-09-12	16:11:43	0.447799
2022-09-12	16:11:43	0.449631
2022-09-12	16:11:44	0.451412
2022-09-12	16:11:44	0.452685
2022-09-12	16:11:44	0.449478
2022-09-12	16:11:44	0.450598
2022-09-12	16:11:45	0.463321
2022-09-12	16:11:45	0.473295
2022-09-12	16:11:45	0.467137
2022-09-12	16:11:45	0.466018
2022-09-12	16:11:46	0.461285
2022-09-12	16:11:46	0.462812
2022-09-12	16:11:46	0.465763
2022-09-12	16:11:46	0.458181
2022-09-12	16:11:47	0.442201
2022-09-12	16:11:47	0.435331
2022-09-12	16:11:47	0.434211
2022-09-12	16:11:48	0.431311
2022-09-12	16:11:48	0.430496
2022-09-12	16:11:48	0.424338
2022-09-12	16:11:48	0.431209
2022-09-12	16:11:49	0.437061
2022-09-12	16:11:49	0.437875
2022-09-12	16:11:49	0.704491
2022-09-12	16:11:49	0.301387
2022-09-12	16:11:50	0.405509
2022-09-12	16:11:50	0.181387
2022-09-12	16:11:50	0.0549239
2022-09-12	16:11:50	0.222507
2022-09-12	16:11:51	0.363779
2022-09-12	16:11:51	1.13604
2022-09-12	16:11:51	1.00907
2022-09-12	16:11:52	1.16225
2022-09-12	16:11:52	0.363321
2022-09-12	16:11:52	0.169326
2022-09-12	16:11:52	0.254669
2022-09-12	16:11:53	0.270903
2022-09-12	16:11:53	0.257926
2022-09-12	16:11:53	0.130293
2022-09-12	16:11:53	0.272125
2022-09-12	16:11:54	0.205814
2022-09-12	16:11:54	0.0416415
2022-09-12	16:11:54	-0.177188
2022-09-12	16:11:54	-0.0465519
2022-09-12	16:11:55	0.106832
2022-09-12	16:11:55	0.158944
2022-09-12	16:11:55	0.225204
2022-09-12	16:11:56	0.419555
2022-09-12	16:11:56	0.443168
2022-09-12	16:11:56	0.461336
2022-09-12	16:11:56	0.433804
2022-09-12	16:11:57	0.328664
2022-09-12	16:11:57	0.480064
2022-09-12	16:11:57	0.52327
2022-09-12	16:11:57	0.532837
2022-09-12	16:11:58	0.397926
2022-09-12	16:11:58	0.667952
2022-09-12	16:11:58	0.355178
2022-09-12	16:11:58	0.402863
2022-09-12	16:11:59	0.517214
2022-09-12	16:11:59	0.451565
2022-09-12	16:11:59	0.507901
2022-09-12	16:12:00	0.273906
2022-09-12	16:12:00	0.0914633
2022-09-12	16:12:00	0.121438
2022-09-12	16:12:00	0.311158
2022-09-12	16:12:01	0.415891
2022-09-12	16:12:01	0.352685
2022-09-12	16:12:01	0.401285
2022-09-12	16:12:01	0.152328
2022-09-12	16:12:02	0.0788424
2022-09-12	16:12:02	0.233397
2022-09-12	16:12:02	0.143932
2022-09-12	16:12:02	-0.0583585
2022-09-12	16:12:03	0.0275956
2022-09-12	16:12:03	0.24383
2022-09-12	16:12:03	0.1964
2022-09-12	16:12:04	0.175229
2022-09-12	16:12:04	0.212939
2022-09-12	16:12:04	0.18383
2022-09-12	16:12:04	0.121183
2022-09-12	16:12:05	0.213804
2022-09-12	16:12:05	0.225814
2022-09-12	16:12:05	0.278537
2022-09-12	16:12:05	0.287596
2022-09-12	16:12:06	0.321743
2022-09-12	16:12:06	0.308969
2022-09-12	16:12:06	0.338995
2022-09-12	16:12:07	0.348664
2022-09-12	16:12:07	0.166374
2022-09-12	16:12:07	-0.240699
2022-09-12	16:12:07	-0.561564
2022-09-12	16:12:08	-0.876271
2022-09-12	16:12:08	-0.673473
2022-09-12	16:12:08	-0.693981
2022-09-12	16:12:08	-0.768943
2022-09-12	16:12:09	-0.834236
2022-09-12	16:12:09	-0.791895
2022-09-12	16:12:09	-0.827925
2022-09-12	16:12:09	-0.6893
2022-09-12	16:12:10	-0.776729
2022-09-12	16:12:10	-0.882022
2022-09-12	16:12:10	-0.806348
2022-09-12	16:12:11	-0.905585
2022-09-12	16:12:11	-0.815355
2022-09-12	16:12:11	-0.835152
2022-09-12	16:12:11	-0.853574
2022-09-12	16:12:12	-0.856984
2022-09-12	16:12:12	-0.846348
2022-09-12	16:12:12	-0.685992
2022-09-12	16:12:12	-0.304516
2022-09-12	16:12:13	0.183321
2022-09-12	16:12:13	0.269275
2022-09-12	16:12:13	0.559707
2022-09-12	16:12:13	0.449224
2022-09-12	16:12:14	0.398639
2022-09-12	16:12:14	0.514568
2022-09-12	16:12:14	0.510801
2022-09-12	16:12:15	0.45355
2022-09-12	16:12:15	0.43528
2022-09-12	16:12:15	0.469428
2022-09-12	16:12:15	0.330547
2022-09-12	16:12:16	0.409224
2022-09-12	16:12:16	0.393346
2022-09-12	16:12:16	0.591259
2022-09-12	16:12:16	0.810445
2022-09-12	16:12:17	1.29833
2022-09-12	16:12:17	0.993143
2022-09-12	16:12:17	1.02337
2022-09-12	16:12:17	0.707036
2022-09-12	16:12:18	0.67528
2022-09-12	16:12:18	0.625051
2022-09-12	16:12:18	0.605509
2022-09-12	16:12:19	0.555025
2022-09-12	16:12:19	0.641641
2022-09-12	16:12:19	0.598842
2022-09-12	16:12:19	0.631107
2022-09-12	16:12:20	0.629784
2022-09-12	16:12:20	0.67187
2022-09-12	16:12:20	0.682761
2022-09-12	16:12:20	0.629427
2022-09-12	16:12:21	0.511565
2022-09-12	16:12:21	0.484033
2022-09-12	16:12:21	0.487494
2022-09-12	16:12:21	0.503677
2022-09-12	16:12:22	0.469377
2022-09-12	16:12:22	0.473906
2022-09-12	16:12:22	0.434822
2022-09-12	16:12:23	0.546119
2022-09-12	16:12:23	0.759911
2022-09-12	16:12:23	1.11218
2022-09-12	16:12:24	1.33263
2022-09-12	16:12:24	1.3051
2022-09-12	16:12:24	0.480776
2022-09-12	16:12:24	0.520725
2022-09-12	16:12:24	0.587748
2022-09-12	16:12:25	0.439708
2022-09-12	16:12:25	0.429122
2022-09-12	16:12:25	0.408919
2022-09-12	16:12:26	0.39584
2022-09-12	16:12:26	0.495178
2022-09-12	16:12:26	0.671412
2022-09-12	16:12:26	1.23039
2022-09-12	16:12:27	1.1736
2022-09-12	16:12:27	1.19564
2022-09-12	16:12:27	1.16617
2022-09-12	16:12:27	1.50215
2022-09-12	16:12:28	1.76841
2022-09-12	16:12:28	2.52108
2022-09-12	16:12:28	3.37726
2022-09-12	16:12:28	4.125
2022-09-12	16:12:29	3.5594
2022-09-12	16:12:29	3.5134
2022-09-12	16:12:29	3.94622
2022-09-12	16:12:30	4.40368
2022-09-12	16:12:30	4.40983
2022-09-12	16:12:30	4.37167
2022-09-12	16:12:30	4.38256
2022-09-12	16:12:31	4.56978
2022-09-12	16:12:31	4.62612
2022-09-12	16:12:31	4.4679
2022-09-12	16:12:31	4.38749
2022-09-12	16:12:32	4.38357
2022-09-12	16:12:32	4.47859
2022-09-12	16:12:32	4.5852
2022-09-12	16:12:32	4.62413
2022-09-12	16:12:33	4.65126
2022-09-12	16:12:33	4.59884
2022-09-12	16:12:33	4.39172
2022-09-12	16:12:34	4.30413
2022-09-12	16:12:34	3.93889
2022-09-12	16:12:34	3.73614
2022-09-12	16:12:34	3.06266
2022-09-12	16:12:35	2.98556
2022-09-12	16:12:35	3.09681
2022-09-12	16:12:35	3.14342
2022-09-12	16:12:35	3.15319
2022-09-12	16:12:36	3.13742
2022-09-12	16:12:36	2.55446
2022-09-12	16:12:36	1.51141
2022-09-12	16:12:36	1.16968
2022-09-12	16:12:37	0.654567
2022-09-12	16:12:37	0.3707
2022-09-12	16:12:37	0.809885
2022-09-12	16:12:38	0.550038
2022-09-12	16:12:38	0.521081
2022-09-12	16:12:38	0.361336
2022-09-12	16:12:38	0.384288
2022-09-12	16:12:39	0.393601
2022-09-12	16:12:39	0.389326
2022-09-12	16:12:39	0.42042
2022-09-12	16:12:39	0.385204
2022-09-12	16:12:40	0.386018
2022-09-12	16:12:40	0.406832
2022-09-12	16:12:40	0.414568
2022-09-12	16:12:40	0.403117
2022-09-12	16:12:41	0.406629
2022-09-12	16:12:41	0.45874
2022-09-12	16:12:41	0.495993
2022-09-12	16:12:42	0.531565
2022-09-12	16:12:42	0.553143
2022-09-12	16:12:42	0.576603
2022-09-12	16:12:42	0.537214
2022-09-12	16:12:43	0.512888
2022-09-12	16:12:43	0.454771
2022-09-12	16:12:43	0.335942
2022-09-12	16:12:43	0.545356
2022-09-12	16:12:44	0.51701
2022-09-12	16:12:44	0.525051
2022-09-12	16:12:44	0.609478
2022-09-12	16:12:45	0.542048
2022-09-12	16:12:45	0.514517
2022-09-12	16:12:45	0.494466
2022-09-12	16:12:45	0.528104
2022-09-12	16:12:46	0.443422
2022-09-12	16:12:46	0.562659
2022-09-12	16:12:46	0.186323
2022-09-12	16:12:46	-0.0656867
2022-09-12	16:12:47	0.00907149
2022-09-12	16:12:47	0.0888679
2022-09-12	16:12:47	-0.214643
2022-09-12	16:12:47	-0.222175
2022-09-12	16:12:48	-0.0991727
2022-09-12	16:12:48	0.503982
2022-09-12	16:12:48	0.560929
2022-09-12	16:12:49	0.443473
2022-09-12	16:12:49	0.61243
2022-09-12	16:12:49	0.603219
2022-09-12	16:12:49	0.808053
2022-09-12	16:12:50	0.890394
2022-09-12	16:12:50	1.24032
2022-09-12	16:12:50	1.41431
2022-09-12	16:12:50	1.62734
2022-09-12	16:12:51	1.59162
2022-09-12	16:12:51	1.97676
2022-09-12	16:12:51	1.95823
2022-09-12	16:12:51	1.82698
2022-09-12	16:12:52	1.73833
2022-09-12	16:12:52	1.68123
2022-09-12	16:12:52	1.55121
2022-09-12	16:12:53	1.37762
2022-09-12	16:12:53	1.3905
2022-09-12	16:12:53	1.24541
2022-09-12	16:12:53	1.29991
2022-09-12	16:12:54	1.44958
2022-09-12	16:12:54	0.983575
2022-09-12	16:12:54	1.45319
2022-09-12	16:12:54	1.54174
2022-09-12	16:12:55	1.44363
2022-09-12	16:12:55	1.32658
2022-09-12	16:12:55	1.282
2022-09-12	16:12:55	1.23345
2022-09-12	16:12:56	1.188
2022-09-12	16:12:56	1.22078
2022-09-12	16:12:56	1.2193
2022-09-12	16:12:57	1.2852
2022-09-12	16:12:57	1.4366
2022-09-12	16:12:57	1.31676
2022-09-12	16:12:57	1.16475
2022-09-12	16:12:58	1.01564
2022-09-12	16:12:58	0.851616
2022-09-12	16:12:58	0.797875
2022-09-12	16:12:58	0.850394
2022-09-12	16:12:59	0.843371
2022-09-12	16:12:59	0.802608
2022-09-12	16:12:59	0.633906
2022-09-12	16:12:59	0.572888
2022-09-12	16:13:00	0.490394
2022-09-12	16:13:00	0.496603
2022-09-12	16:13:00	0.504491
2022-09-12	16:13:01	0.501183
2022-09-12	16:13:01	0.500725
2022-09-12	16:13:01	0.53813
2022-09-12	16:13:01	0.583524
2022-09-12	16:13:02	0.607392
2022-09-12	16:13:02	0.656756
2022-09-12	16:13:02	0.72841
2022-09-12	16:13:02	0.843524
2022-09-12	16:13:03	0.910852
2022-09-12	16:13:03	0.953855
2022-09-12	16:13:03	0.953295
2022-09-12	16:13:03	0.473041
2022-09-12	16:13:04	0.0245422
2022-09-12	16:13:04	0.853957
2022-09-12	16:13:04	0.599402
2022-09-12	16:13:05	0.0407763
2022-09-12	16:13:05	0.214008
2022-09-12	16:13:05	-0.0946435
2022-09-12	16:13:05	-0.138562
2022-09-12	16:13:06	-0.152811
2022-09-12	16:13:06	-0.0252797
2022-09-12	16:13:06	-0.0291473
2022-09-12	16:13:06	-0.0510812
2022-09-12	16:13:07	0.019504
2022-09-12	16:13:07	0.00952952
2022-09-12	16:13:07	-0.0245163
2022-09-12	16:13:08	0.0657127
2022-09-12	16:13:08	0.274059
2022-09-12	16:13:08	0.463931
2022-09-12	16:13:08	0.968969
2022-09-12	16:13:09	1.54149
2022-09-12	16:13:09	2.62627
2022-09-12	16:13:09	3.09971
2022-09-12	16:13:09	2.23716
2022-09-12	16:13:10	0.448817
2022-09-12	16:13:10	0.637214
2022-09-12	16:13:10	0.769987
2022-09-12	16:13:10	0.877773
2022-09-12	16:13:11	0.706221
2022-09-12	16:13:11	0.781387
2022-09-12	16:13:11	0.86617
2022-09-12	16:13:12	0.922863
2022-09-12	16:13:12	0.909478
2022-09-12	16:13:12	0.934109
2022-09-12	16:13:12	0.924949
2022-09-12	16:13:13	1.06078
2022-09-12	16:13:13	0.956094
2022-09-12	16:13:13	0.790853
2022-09-12	16:13:13	0.573651
2022-09-12	16:13:14	0.541132
2022-09-12	16:13:14	0.486171
2022-09-12	16:13:14	0.493142
2022-09-12	16:13:14	0.51986
2022-09-12	16:13:15	0.603219
2022-09-12	16:13:15	0.671972
2022-09-12	16:13:15	0.510191
2022-09-12	16:13:16	0.421082
2022-09-12	16:13:16	0.446221
2022-09-12	16:13:16	0.408155
2022-09-12	16:13:16	0.468461
2022-09-12	16:13:17	0.515076
2022-09-12	16:13:17	0.312227
2022-09-12	16:13:17	0.586119
2022-09-12	16:13:17	0.0492242
2022-09-12	16:13:18	-0.500597
2022-09-12	16:13:18	-0.984465
2022-09-12	16:13:18	-0.94187
2022-09-12	16:13:18	-1.08574
2022-09-12	16:13:19	-0.662277
2022-09-12	16:13:19	-0.690216
2022-09-12	16:13:19	-0.287824
2022-09-12	16:13:20	-0.162939
2022-09-12	16:13:20	-0.219427
2022-09-12	16:13:20	0.00896972
2022-09-12	16:13:20	0.453906
2022-09-12	16:13:21	0.882201
2022-09-12	16:13:21	0.476043
2022-09-12	16:13:21	0.33869
2022-09-12	16:13:21	0.720878
2022-09-12	16:13:22	0.223728
2022-09-12	16:13:22	0.509987
2022-09-12	16:13:22	0.526832
2022-09-12	16:13:22	0.394618
2022-09-12	16:13:23	0.455433
2022-09-12	16:13:23	0.461183
2022-09-12	16:13:23	0.373397
2022-09-12	16:13:24	0.624135
2022-09-12	16:13:24	0.476349
2022-09-12	16:13:24	0.338232
2022-09-12	16:13:24	0.475076
2022-09-12	16:13:25	0.162812
2022-09-12	16:13:25	0.151412
2022-09-12	16:13:25	0.164746
2022-09-12	16:13:25	0.159453
2022-09-12	16:13:26	-0.00395648
2022-09-12	16:13:26	-0.246145
2022-09-12	16:13:26	-0.30014
2022-09-12	16:13:26	-0.338053
2022-09-12	16:13:27	-0.141005
2022-09-12	16:13:27	0.264847
2022-09-12	16:13:27	0.297672
2022-09-12	16:13:28	0.213804
2022-09-12	16:13:28	0.305458
2022-09-12	16:13:28	0.265611
2022-09-12	16:13:28	0.448512
2022-09-12	16:13:29	2.02678
2022-09-12	16:13:29	0.61528
2022-09-12	16:13:29	0.526476
2022-09-12	16:13:29	0.472939
2022-09-12	16:13:30	0.186527
2022-09-12	16:13:30	-0.0399361
2022-09-12	16:13:30	-0.204567
2022-09-12	16:13:31	-0.0718954
2022-09-12	16:13:31	0.187137
2022-09-12	16:13:31	0.471972
2022-09-12	16:13:31	0.808512
2022-09-12	16:13:32	0.688562
2022-09-12	16:13:32	0.682608
2022-09-12	16:13:32	0.425407
2022-09-12	16:13:32	0.43187
2022-09-12	16:13:33	0.350394
2022-09-12	16:13:33	0.691005
2022-09-12	16:13:33	1.57319
2022-09-12	16:13:33	1.74001
2022-09-12	16:13:34	1.24383
2022-09-12	16:13:34	0.863626
2022-09-12	16:13:34	0.556959
2022-09-12	16:13:35	0.41757
2022-09-12	16:13:35	0.280013
2022-09-12	16:13:35	0.429275
2022-09-12	16:13:35	0.500572
2022-09-12	16:13:36	0.357366
2022-09-12	16:13:36	0.317366
2022-09-12	16:13:36	0.299453
2022-09-12	16:13:36	0.306679
2022-09-12	16:13:37	0.27701
2022-09-12	16:13:37	0.2307
2022-09-12	16:13:37	0.245102
2022-09-12	16:13:37	0.258435
2022-09-12	16:13:38	0.0266287
2022-09-12	16:13:38	0.0201656
2022-09-12	16:13:38	0.0201656
2022-09-12	16:13:39	0.027901
2022-09-12	16:13:39	-0.0364247
2022-09-12	16:13:39	0.0401147
2022-09-12	16:13:39	0.0152293
2022-09-12	16:13:40	0.687494
2022-09-12	16:13:40	0.408868
2022-09-12	16:13:40	0.382761
2022-09-12	16:13:40	1.23793
2022-09-12	16:13:41	0.786578
2022-09-12	16:13:41	0.526679
2022-09-12	16:13:41	0.370445
2022-09-12	16:13:41	0.222608
2022-09-12	16:13:42	0.247392
2022-09-12	16:13:42	0.210445
2022-09-12	16:13:42	0.251005
2022-09-12	16:13:43	-0.0736766
2022-09-12	16:13:43	-0.0858394
2022-09-12	16:13:43	-0.129503
2022-09-12	16:13:43	-0.173371
2022-09-12	16:13:44	-0.135356
2022-09-12	16:13:44	-0.0243127
2022-09-12	16:13:44	0.303473
2022-09-12	16:13:44	0.274567
2022-09-12	16:13:45	0.333397
2022-09-12	16:13:45	0.360115
2022-09-12	16:13:45	0.278384
2022-09-12	16:13:45	0.329071
2022-09-12	16:13:46	0.347138
2022-09-12	16:13:46	0.227341
2022-09-12	16:13:46	0.245102
2022-09-12	16:13:47	0.19243
2022-09-12	16:13:47	0.331514
2022-09-12	16:13:47	0.253804
2022-09-12	16:13:47	0.261692
2022-09-12	16:13:48	0.308562
2022-09-12	16:13:48	0.213702
2022-09-12	16:13:48	0.324593
2022-09-12	16:13:48	0.20159
2022-09-12	16:13:49	0.236552
2022-09-12	16:13:49	0.0994531
2022-09-12	16:13:49	0.265611
2022-09-12	16:13:50	0.205102
2022-09-12	16:13:50	0.984847
2022-09-12	16:13:50	1.37559
2022-09-12	16:13:50	1.2878
2022-09-12	16:13:51	0.880725
2022-09-12	16:13:51	1.24866
2022-09-12	16:13:51	0.718181
2022-09-12	16:13:51	1.09274
2022-09-12	16:13:52	0.584491
2022-09-12	16:13:52	1.62139
2022-09-12	16:13:52	2.41569
2022-09-12	16:13:52	4.14515
2022-09-12	16:13:53	0.582048
2022-09-12	16:13:53	0.663524
2022-09-12	16:13:53	0.524848
2022-09-12	16:13:54	1.3962
2022-09-12	16:13:54	0.263728
2022-09-12	16:13:54	0.570293
2022-09-12	16:13:54	0.517214
2022-09-12	16:13:55	0.650649
2022-09-12	16:13:55	0.279453
2022-09-12	16:13:55	1.07569
2022-09-12	16:13:55	1.15925
2022-09-12	16:13:56	1.13894
2022-09-12	16:13:56	0.638842
2022-09-12	16:13:56	1.16128
2022-09-12	16:13:56	0.598639
2022-09-12	16:13:57	0.801692
2022-09-12	16:13:57	0.714924
2022-09-12	16:13:57	0.726374
2022-09-12	16:13:58	0.679198
2022-09-12	16:13:58	1.62261
2022-09-12	16:13:58	2.60607
2022-09-12	16:13:58	2.81411
2022-09-12	16:13:59	2.1539
2022-09-12	16:13:59	3.27289
2022-09-12	16:13:59	2.10673
2022-09-12	16:13:59	1.34546
2022-09-12	16:14:00	0.828359
2022-09-12	16:14:00	0.997163
2022-09-12	16:14:00	0.628817
2022-09-12	16:14:00	0.759453
2022-09-12	16:14:01	0.864542
2022-09-12	16:14:01	1.44337
2022-09-12	16:14:01	1.19212
2022-09-12	16:14:02	1.1736
2022-09-12	16:14:02	0.828461
2022-09-12	16:14:02	1.09055
2022-09-12	16:14:02	1.59543
2022-09-12	16:14:03	3.29207
2022-09-12	16:14:03	4.48505
2022-09-12	16:14:03	5.17986
2022-09-12	16:14:03	1.33767
2022-09-12	16:14:04	0.63187
2022-09-12	16:14:04	0.554059
2022-09-12	16:14:04	0.658944
2022-09-12	16:14:05	1.4305
2022-09-12	16:14:05	3.68602
2022-09-12	16:14:05	5.02062
2022-09-12	16:14:05	4.96607
2022-09-12	16:14:06	5.40413
2022-09-12	16:14:06	3.26693
2022-09-12	16:14:06	2.79314
2022-09-12	16:14:06	4.39004
2022-09-12	16:14:07	5.52184
2022-09-12	16:14:07	7.07405
2022-09-12	16:14:07	3.31014
2022-09-12	16:14:07	7.43477
2022-09-12	16:14:08	9.10673
2022-09-12	16:14:08	4.26342
2022-09-12	16:14:08	3.32948
2022-09-12	16:14:08	3.26027
2022-09-12	16:14:09	4.37594
2022-09-12	16:14:09	3.13324
2022-09-12	16:14:09	2.31116
2022-09-12	16:14:10	1.77925
2022-09-12	16:14:10	1.40088
2022-09-12	16:14:10	1.07548
2022-09-12	16:14:10	0.857112
2022-09-12	16:14:11	0.749733
2022-09-12	16:14:11	0.549173
2022-09-12	16:14:11	0.402659
2022-09-12	16:14:11	0.400471
2022-09-12	16:14:12	0.343728
2022-09-12	16:14:12	0.301031
2022-09-12	16:14:12	0.232583
2022-09-12	16:14:13	0.187595
2022-09-12	16:14:13	1.1309
2022-09-12	16:14:13	2.01085
