# Supplementary material for: Comparing efficacy in reducing pulling and welfare impacts of four types of leash walking equipment
Source: PeerJ journal article supplement (doi:10.7717/peerj.18131), 2024-10-24
Supplement: Shelter1_Tension_files.zip [file Harley_star_2022912153319 copy.xlsx]

## Sheet: averaged newtons
Date	Time	averaged newtons	Impulse	total steps
2022-09-12	15:33:35	1.08588	1.08588	0		Impulse	1569.15
2022-09-12	15:33:36	0.671137	1.75702	0		Total steps	28
2022-09-12	15:33:37	0.188795	1.94582	0		# > 5sec	2
2022-09-12	15:33:38	2.30033	4.24615	0
2022-09-12	15:33:39	1.79722	6.04337	0
2022-09-12	15:33:40	1.52812	7.57149	0
2022-09-12	15:33:41	1.45687	9.02836	0
2022-09-12	15:33:42	6.56268	15.591	0
2022-09-12	15:33:43	6.84886	22.4399	0
2022-09-12	15:33:44	2.31369	24.7536	0
2022-09-12	15:33:45	1.06191	25.8155	0
2022-09-12	15:33:46	1.19371	27.0092	0
2022-09-12	15:33:47	7.75948	34.7687	0
2022-09-12	15:33:48	6.62957	41.3983	0
2022-09-12	15:33:49	3.72313	45.1214	0
2022-09-12	15:33:50	0.799829	45.9212	0
2022-09-12	15:33:51	1.62671	47.5479	0
2022-09-12	15:33:52	1.90724	49.4552	0
2022-09-12	15:33:53	4.79981	54.255	0
2022-09-12	15:33:54	11.2286	65.4836	0
2022-09-12	15:33:55	19.1036	84.5872	1
2022-09-12	15:33:56	4.23592	88.8231	1
2022-09-12	15:33:57	2.16066	90.9838	1
2022-09-12	15:33:58	2.74685	93.7306	1
2022-09-12	15:33:59	7.04253	100.773	1
2022-09-12	15:34:00	13.3327	114.106	2
2022-09-12	15:34:01	4.02709	118.133	2
2022-09-12	15:34:02	12.1624	130.295	2
2022-09-12	15:34:03	4.56149	134.857	2
2022-09-12	15:34:04	2.85477	137.712	2
2022-09-12	15:34:05	1.24527	138.957	2
2022-09-12	15:34:06	0.906071	139.863	2
2022-09-12	15:34:07	1.39773	141.261	2
2022-09-12	15:34:08	1.17459	142.435	2
2022-09-12	15:34:09	-0.0538188	142.435	2
2022-09-12	15:34:10	-1.30331	142.435	2
2022-09-12	15:34:11	0.751328	143.187	2
2022-09-12	15:34:12	1.97413	145.161	2
2022-09-12	15:34:13	2.90706	148.068	2
2022-09-12	15:34:14	0.297736	148.365	2
2022-09-12	15:34:15	-0.496375	148.365	2
2022-09-12	15:34:16	-1.00135	148.365	2
2022-09-12	15:34:17	0.605978	148.971	2
2022-09-12	15:34:18	1.38568	150.357	2
2022-09-12	15:34:19	6.46969	156.827	2
2022-09-12	15:34:20	12.1545	168.981	2
2022-09-12	15:34:21	4.70617	173.687	2
2022-09-12	15:34:22	23.244	196.931	3
2022-09-12	15:34:23	36.3542	233.286	4
2022-09-12	15:34:24	24.9946	258.28	5
2022-09-12	15:34:25	29.5641	287.844	6
2022-09-12	15:34:26	38.7219	326.566	7
2022-09-12	15:34:27	15.1205	341.687	8
2022-09-12	15:34:28	6.15799	347.845	8
2022-09-12	15:34:29	9.88246	357.727	8
2022-09-12	15:34:30	7.15589	364.883	8
2022-09-12	15:34:31	3.28482	368.168	8
2022-09-12	15:34:32	8.42142	376.589	8
2022-09-12	15:34:33	42.1742	418.763	9
2022-09-12	15:34:34	45.1089	463.872	10
2022-09-12	15:34:35	28.4856	492.358	11
2022-09-12	15:34:36	18.0656	510.424	12
2022-09-12	15:34:37	11.5421	521.966	12
2022-09-12	15:34:38	30.9447	552.91	13
2022-09-12	15:34:39	11.7413	564.652	13
2022-09-12	15:34:40	13.8896	578.541	14
2022-09-12	15:34:41	7.24416	585.785	14
2022-09-12	15:34:42	3.3263	589.112	14
2022-09-12	15:34:43	1.22501	590.337	14
2022-09-12	15:34:44	0.656838	590.994	14
2022-09-12	15:34:45	-0.0089411	590.994	14
2022-09-12	15:34:46	1.18522	592.179	14
2022-09-12	15:34:47	1.06519	593.244	14
2022-09-12	15:34:48	0.663175	593.907	14
2022-09-12	15:34:49	0.885396	594.793	14
2022-09-12	15:34:50	1.76185	596.554	14
2022-09-12	15:34:51	2.11725	598.672	14
2022-09-12	15:34:52	0.73237	599.404	14
2022-09-12	15:34:53	0.851384	600.255	14
2022-09-12	15:34:54	1.16485	601.42	14
2022-09-12	15:34:55	-2.93128	601.42	14
2022-09-12	15:34:56	-3.42056	601.42	14
2022-09-12	15:34:57	-2.75047	601.42	14
2022-09-12	15:34:58	1.02037	602.441	14
2022-09-12	15:34:59	2.23351	604.674	14
2022-09-12	15:35:00	1.68505	606.359	14
2022-09-12	15:35:01	1.91856	608.278	14
2022-09-12	15:35:02	5.24208	613.52	14
2022-09-12	15:35:03	3.4203	616.94	14
2022-09-12	15:35:04	1.22088	618.161	14
2022-09-12	15:35:05	1.1588	619.32	14
2022-09-12	15:35:06	1.09779	620.418	14
2022-09-12	15:35:07	0.418091	620.836	14
2022-09-12	15:35:08	0.978604	621.814	14
2022-09-12	15:35:09	3.23485	625.049	14
2022-09-12	15:35:10	4.36891	629.418	14
2022-09-12	15:35:11	6.19834	635.616	14
2022-09-12	15:35:12	5.30332	640.92	14
2022-09-12	15:35:13	7.23161	648.151	14
2022-09-12	15:35:14	10.0992	658.251	14
2022-09-12	15:35:15	5.03894	663.289	14
2022-09-12	15:35:16	3.78657	667.076	14
2022-09-12	15:35:17	2.9709	670.047	14
2022-09-12	15:35:18	1.66491	671.712	14
2022-09-12	15:35:19	2.60318	674.315	14
2022-09-12	15:35:20	0.819125	675.134	14
2022-09-12	15:35:21	0.488623	675.623	14
2022-09-12	15:35:22	-0.249555	675.623	14
2022-09-12	15:35:23	5.46121	681.084	14
2022-09-12	15:35:24	0.955513	682.039	14
2022-09-12	15:35:25	0.887095	682.927	14
2022-09-12	15:35:26	2.58031	685.507	14
2022-09-12	15:35:27	1.29456	686.801	14
2022-09-12	15:35:28	1.19071	687.992	14
2022-09-12	15:35:29	0.886131	688.878	14
2022-09-12	15:35:30	2.33666	691.215	14
2022-09-12	15:35:31	3.02229	694.237	14
2022-09-12	15:35:32	2.84883	697.086	14
2022-09-12	15:35:33	3.87486	700.961	14
2022-09-12	15:35:34	1.95244	702.913	14
2022-09-12	15:35:35	1.38262	704.296	14
2022-09-12	15:35:36	3.40101	707.697	14
2022-09-12	15:35:37	5.1885	712.885	14
2022-09-12	15:35:38	2.83853	715.724	14
2022-09-12	15:35:39	1.64363	717.368	14
2022-09-12	15:35:40	0.653478	718.021	14
2022-09-12	15:35:41	-1.68211	718.021	14
2022-09-12	15:35:42	-2.18397	718.021	14
2022-09-12	15:35:43	-0.801863	718.021	14
2022-09-12	15:35:44	3.15188	721.173	14
2022-09-12	15:35:45	1.00884	722.182	14
2022-09-12	15:35:46	1.64402	723.826	14
2022-09-12	15:35:47	2.76818	726.594	14
2022-09-12	15:35:48	1.47906	728.073	14
2022-09-12	15:35:49	1.52557	729.599	14
2022-09-12	15:35:50	1.48619	731.085	14
2022-09-12	15:35:51	1.48522	732.57	14
2022-09-12	15:35:52	1.50769	734.078	14
2022-09-12	15:35:53	1.62352	735.701	14
2022-09-12	15:35:54	1.59162	737.293	14
2022-09-12	15:35:55	1.4614	738.754	14
2022-09-12	15:35:56	1.85449	740.609	14
2022-09-12	15:35:57	1.58798	742.197	14
2022-09-12	15:35:58	1.61426	743.811	14
2022-09-12	15:35:59	2.63706	746.448	14
2022-09-12	15:36:00	3.59704	750.045	14
2022-09-12	15:36:01	4.97283	755.018	14
2022-09-12	15:36:02	12.0328	767.051	14
2022-09-12	15:36:03	17.8985	784.949	15
2022-09-12	15:36:04	12.5514	797.501	15
2022-09-12	15:36:05	6.08526	803.586	15
2022-09-12	15:36:06	15.9062	819.492	16
2022-09-12	15:36:07	29.1227	848.615	17
2022-09-12	15:36:08	15.8028	864.418	18
2022-09-12	15:36:09	16.4924	880.91	19
2022-09-12	15:36:10	12.5083	893.418	19
2022-09-12	15:36:11	5.16603	898.584	19
2022-09-12	15:36:12	7.4095	905.994	19
2022-09-12	15:36:13	5.45177	911.446	19
2022-09-12	15:36:14	8.6497	920.095	19
2022-09-12	15:36:15	5.5251	925.621	19
2022-09-12	15:36:16	1.87049	927.491	19
2022-09-12	15:36:17	3.25183	930.743	19
2022-09-12	15:36:18	1.82801	932.571	19
2022-09-12	15:36:19	5.07632	937.647	19
2022-09-12	15:36:20	12.9395	950.587	19
2022-09-12	15:36:21	4.8074	955.394	19
2022-09-12	15:36:22	3.5374	958.931	19
2022-09-12	15:36:23	2.79806	961.73	19
2022-09-12	15:36:24	4.87151	966.601	19
2022-09-12	15:36:25	4.1495	970.751	19
2022-09-12	15:36:26	1.84844	972.599	19
2022-09-12	15:36:27	2.04012	974.639	19
2022-09-12	15:36:28	1.70673	976.346	19
2022-09-12	15:36:29	1.74742	978.093	19
2022-09-12	15:36:30	1.43254	979.526	19
2022-09-12	15:36:31	0.99677	980.523	19
2022-09-12	15:36:32	2.9838	983.506	19
2022-09-12	15:36:33	1.81692	985.323	19
2022-09-12	15:36:34	0.346632	985.67	19
2022-09-12	15:36:35	-0.239217	985.67	19
2022-09-12	15:36:36	1.37442	987.044	19
2022-09-12	15:36:37	3.48776	990.532	19
2022-09-12	15:36:38	2.63282	993.165	19
2022-09-12	15:36:39	2.13715	995.302	19
2022-09-12	15:36:40	-0.915219	995.302	19
2022-09-12	15:36:41	-3.5147	995.302	19
2022-09-12	15:36:42	-3.30417	995.302	19
2022-09-12	15:36:43	-1.37575	995.302	19
2022-09-12	15:36:44	3.57079	998.873	19
2022-09-12	15:36:45	0.554102	999.427	19
2022-09-12	15:36:46	-0.710598	999.427	19
2022-09-12	15:36:47	-2.01697	999.427	19
2022-09-12	15:36:48	-1.09207	999.427	19
2022-09-12	15:36:49	-0.0634963	999.427	19
2022-09-12	15:36:50	0.280381	999.707	19
2022-09-12	15:36:51	1.08873	1000.8	19
2022-09-12	15:36:52	1.679	1002.48	19
2022-09-12	15:36:53	1.5391	1004.01	19
2022-09-12	15:36:54	0.894527	1004.91	19
2022-09-12	15:36:55	1.01171	1005.92	19
2022-09-12	15:36:56	1.6498	1007.57	19
2022-09-12	15:36:57	1.40226	1008.97	19
2022-09-12	15:36:58	1.88792	1010.86	19
2022-09-12	15:36:59	1.90548	1012.77	19
2022-09-12	15:37:00	1.91742	1014.68	19
2022-09-12	15:37:01	1.91171	1016.59	19
2022-09-12	15:37:02	1.88294	1018.48	19
2022-09-12	15:37:03	2.33678	1020.81	19
2022-09-12	15:37:04	1.43288	1022.25	19
2022-09-12	15:37:05	6.40592	1028.65	19
2022-09-12	15:37:06	8.78107	1037.43	19
2022-09-12	15:37:07	7.67173	1045.11	19
2022-09-12	15:37:08	2.56298	1047.67	19
2022-09-12	15:37:09	-0.974095	1047.67	19
2022-09-12	15:37:10	3.22308	1050.89	19
2022-09-12	15:37:11	3.64939	1054.54	19
2022-09-12	15:37:12	3.65545	1058.2	19
2022-09-12	15:37:13	1.8935	1060.09	19
2022-09-12	15:37:14	1.28381	1061.37	19
2022-09-12	15:37:15	2.97	1064.34	19
2022-09-12	15:37:16	4.47073	1068.82	19
2022-09-12	15:37:17	1.44416	1070.26	19
2022-09-12	15:37:18	2.57628	1072.84	19
2022-09-12	15:37:19	0.851837	1073.69	19
2022-09-12	15:37:20	1.44335	1075.13	19
2022-09-12	15:37:21	1.45231	1076.58	19
2022-09-12	15:37:22	1.63531	1078.22	19
2022-09-12	15:37:23	5.93081	1084.15	19
2022-09-12	15:37:24	22.9091	1107.06	20
2022-09-12	15:37:25	13.8433	1120.9	21
2022-09-12	15:37:26	7.28593	1128.19	21
2022-09-12	15:37:27	8.73369	1136.92	21
2022-09-12	15:37:28	10.7831	1147.7	21
2022-09-12	15:37:29	5.07205	1152.78	21
2022-09-12	15:37:30	0.851214	1153.63	21
2022-09-12	15:37:31	2.96337	1156.59	21
2022-09-12	15:37:32	12.8724	1169.46	21
2022-09-12	15:37:33	19.843	1189.31	22
2022-09-12	15:37:34	11.8111	1201.12	22
2022-09-12	15:37:35	4.35375	1205.47	22
2022-09-12	15:37:36	14.8339	1220.31	23
2022-09-12	15:37:37	7.21163	1227.52	23
2022-09-12	15:37:38	1.88607	1229.4	23
2022-09-12	15:37:39	30.6817	1260.08	24
2022-09-12	15:37:40	31.3936	1291.48	25
2022-09-12	15:37:41	23.3826	1314.86	26
2022-09-12	15:37:42	6.97903	1321.84	26
2022-09-12	15:37:43	11.5369	1333.38	26
2022-09-12	15:37:44	4.63554	1338.01	26
2022-09-12	15:37:45	4.38131	1342.39	26
2022-09-12	15:37:46	9.93601	1352.33	26
2022-09-12	15:37:47	4.44367	1356.77	26
2022-09-12	15:37:48	2.19179	1358.97	26
2022-09-12	15:37:49	4.02217	1362.99	26
2022-09-12	15:37:50	1.77741	1364.76	26
2022-09-12	15:37:51	1.58798	1366.35	26
2022-09-12	15:37:52	2.23779	1368.59	26
2022-09-12	15:37:53	2.42659	1371.02	26
2022-09-12	15:37:54	2.25789	1373.27	26
2022-09-12	15:37:55	1.7822	1375.06	26
2022-09-12	15:37:56	2.7164	1377.77	26
2022-09-12	15:37:57	3.28754	1381.06	26
2022-09-12	15:37:58	3.11872	1384.18	26
2022-09-12	15:37:59	2.87799	1387.06	26
2022-09-12	15:38:00	2.0284	1389.09	26
2022-09-12	15:38:01	1.48177	1390.57	26
2022-09-12	15:38:02	2.62608	1393.19	26
2022-09-12	15:38:03	3.69926	1396.89	26
2022-09-12	15:38:04	4.41899	1401.31	26
2022-09-12	15:38:05	3.86518	1405.18	26
2022-09-12	15:38:06	5.81265	1410.99	26
2022-09-12	15:38:07	5.07704	1416.07	26
2022-09-12	15:38:08	5.49126	1421.56	26
2022-09-12	15:38:09	5.84332	1427.4	26
2022-09-12	15:38:10	4.88599	1432.29	26
2022-09-12	15:38:11	4.06237	1436.35	26
2022-09-12	15:38:12	4.0585	1440.41	26
2022-09-12	15:38:13	5.75012	1446.16	26
2022-09-12	15:38:14	5.70627	1451.87	26
2022-09-12	15:38:15	4.72036	1456.59	26
2022-09-12	15:38:16	5.33156	1461.92	26
2022-09-12	15:38:17	7.032	1468.95	26
2022-09-12	15:38:18	2.77032	1471.72	26
2022-09-12	15:38:19	2.95251	1474.67	26
2022-09-12	15:38:20	3.14305	1477.81	26
2022-09-12	15:38:21	3.31029	1481.13	26
2022-09-12	15:38:22	3.14096	1484.27	26
2022-09-12	15:38:23	3.36394	1487.63	26
2022-09-12	15:38:24	4.06999	1491.7	26
2022-09-12	15:38:25	6.3218	1498.02	26
2022-09-12	15:38:26	4.05791	1502.08	26
2022-09-12	15:38:27	1.84946	1503.93	26
2022-09-12	15:38:28	0.728635	1504.66	26
2022-09-12	15:38:29	-1.09835	1504.66	26
2022-09-12	15:38:30	-0.332482	1504.66	26
2022-09-12	15:38:31	0.43554	1505.09	26
2022-09-12	15:38:32	18.0705	1523.16	27
2022-09-12	15:38:33	11.9574	1535.12	27
2022-09-12	15:38:34	28.4458	1563.57	28
2022-09-12	15:38:35	5.57887	1569.15	28

## Sheet: Harley_star_2022912153319 (4)
Date	Time	Lbs	Newtons	averaged newtons	Total force x time	Total Time Steps Force >13.345		**GoPro Fitting: 1522
2022-09-12	15:33:35	0.195992	0.871812	1.08588	0.871812	FALSE	0		Total force x time	3032.82
2022-09-12	15:33:35	0.354618	1.57741	1.08588	1.57741	FALSE	0		Total Time Steps Force >3	108
2022-09-12	15:33:35	0.181743	0.808429	1.08588	1.68024	FALSE	0
2022-09-12	15:33:36	0.442303	1.96745	0.671137	3.54486	FALSE	0
2022-09-12	15:33:36	0.188054	0.836502	0.671137	2.51674	FALSE	0
2022-09-12	15:33:36	0.185306	0.824278	0.671137	4.36914	FALSE	0
2022-09-12	15:33:36	-0.21215	-0.943686	0.671137	2.51674	FALSE	0
2022-09-12	15:33:37	-0.499936	-2.22382	0.188795	4.36914	FALSE	0
2022-09-12	15:33:37	-0.36589	-1.62755	0.188795	2.51674	FALSE	0
2022-09-12	15:33:37	0.334924	1.48981	0.188795	5.85895	FALSE	0
2022-09-12	15:33:37	0.700674	3.11674	0.188795	5.63348	FALSE	0
2022-09-12	15:33:38	0.623066	2.77152	2.30033	8.63047	FALSE	0
2022-09-12	15:33:38	0.613702	2.72987	2.30033	8.36335	FALSE	0
2022-09-12	15:33:38	0.301234	1.33995	2.30033	9.97042	FALSE	0
2022-09-12	15:33:38	0.530547	2.35998	2.30033	10.7233	FALSE	0
2022-09-12	15:33:39	0.163015	0.725123	1.79722	10.6955	FALSE	0
2022-09-12	15:33:39	0.561031	2.49558	1.79722	13.2189	FALSE	0
2022-09-12	15:33:39	0.488054	2.17096	1.79722	12.8665	FALSE	0
2022-09-12	15:33:40	0.384084	1.70848	1.52812	14.9274	FALSE	0
2022-09-12	15:33:40	0.241692	1.07509	1.52812	13.9416	FALSE	0
2022-09-12	15:33:40	0.625763	2.78352	1.52812	17.7109	FALSE	0
2022-09-12	15:33:40	0.122608	0.545385	1.52812	14.487	FALSE	0
2022-09-12	15:33:41	0.353193	1.57107	1.45687	19.282	FALSE	0
2022-09-12	15:33:41	0.472023	2.09965	1.45687	16.5866	FALSE	0
2022-09-12	15:33:41	0.116298	0.517317	1.45687	19.7993	FALSE	0
2022-09-12	15:33:41	0.368562	1.63944	1.45687	18.2261	FALSE	0
2022-09-12	15:33:42	0.108461	0.482456	6.56268	20.2818	FALSE	0
2022-09-12	15:33:42	0.249631	1.11041	6.56268	19.3365	FALSE	0
2022-09-12	15:33:42	0.75416	3.35465	6.56268	23.6364	FALSE	0
2022-09-12	15:33:42	4.78917	21.3032	6.56268	40.6397	1	1
2022-09-12	15:33:43	2.28312	10.1558	6.84886	33.7922	FALSE	1
2022-09-12	15:33:43	1.18429	5.26796	6.84886	45.9076	FALSE	1
2022-09-12	15:33:43	1.15167	5.12286	6.84886	38.915	FALSE	1
2022-09-12	15:33:44	0.434669	1.93349	2.31369	47.8411	FALSE	1
2022-09-12	15:33:44	1.00429	4.46728	2.31369	43.3823	FALSE	1
2022-09-12	15:33:44	0.168512	0.749575	2.31369	48.5907	FALSE	1
2022-09-12	15:33:44	0.473092	2.10441	2.31369	45.4867	FALSE	1
2022-09-12	15:33:45	0.146527	0.651781	1.06191	49.2425	FALSE	1
2022-09-12	15:33:45	0.407952	1.81465	1.06191	47.3014	FALSE	1
2022-09-12	15:33:45	0.238537	1.06106	1.06191	50.3035	FALSE	1
2022-09-12	15:33:45	0.161896	0.720146	1.06191	48.0215	FALSE	1
2022-09-12	15:33:46	0.253143	1.12603	1.19371	51.4296	FALSE	1
2022-09-12	15:33:46	0.235789	1.04884	1.19371	49.0704	FALSE	1
2022-09-12	15:33:46	0.411769	1.83163	1.19371	53.2612	FALSE	1
2022-09-12	15:33:46	0.172735	0.76836	1.19371	49.8387	FALSE	1
2022-09-12	15:33:47	3.35457	14.9218	7.75948	68.183	1	2
2022-09-12	15:33:47	0.306425	1.36304	7.75948	51.2018	FALSE	2
2022-09-12	15:33:47	1.57223	6.99359	7.75948	75.1766	FALSE	2
2022-09-12	15:33:48	0.844389	3.75601	6.62957	54.9578	FALSE	2
2022-09-12	15:33:48	1.50729	6.70473	6.62957	81.8813	FALSE	2
2022-09-12	15:33:48	2.07279	9.22018	6.62957	64.178	FALSE	2
2022-09-12	15:33:48	1.53711	6.83737	6.62957	88.7187	FALSE	2
2022-09-12	15:33:49	1.79991	8.00636	3.72313	72.1843	FALSE	2
2022-09-12	15:33:49	0.872379	3.88052	3.72313	92.5992	FALSE	2
2022-09-12	15:33:49	0.297163	1.32184	3.72313	73.5062	FALSE	2
2022-09-12	15:33:49	0.378537	1.68381	3.72313	94.283	FALSE	2
2022-09-12	15:33:50	0.0401656	0.178665	0.799829	73.6848	FALSE	2
2022-09-12	15:33:50	0.218283	0.970966	0.799829	95.254	FALSE	2
2022-09-12	15:33:50	0.28098	1.24986	0.799829	74.9347	FALSE	2
2022-09-12	15:33:51	0.338232	1.50452	1.62671	96.7585	FALSE	2
2022-09-12	15:33:51	0.279046	1.24125	1.62671	76.1759	FALSE	2
2022-09-12	15:33:51	0.445305	1.98081	1.62671	98.7393	FALSE	2
2022-09-12	15:33:51	0.400216	1.78024	1.62671	77.9562	FALSE	2
2022-09-12	15:33:52	0.325967	1.44997	1.90724	100.189	FALSE	2
2022-09-12	15:33:52	0.204797	0.910978	1.90724	78.8672	FALSE	2
2022-09-12	15:33:52	0.268664	1.19507	1.90724	101.384	FALSE	2
2022-09-12	15:33:52	0.915636	4.07293	1.90724	82.9401	FALSE	2
2022-09-12	15:33:53	0.738944	3.28697	4.79981	104.671	FALSE	2
2022-09-12	15:33:53	0.770649	3.428	4.79981	86.3681	FALSE	2
2022-09-12	15:33:53	1.16617	5.18736	4.79981	109.859	FALSE	2
2022-09-12	15:33:53	1.64042	7.29692	4.79981	93.665	FALSE	2
2022-09-12	15:33:54	1.58022	7.02913	11.2286	116.888	FALSE	2
2022-09-12	15:33:54	1.91156	8.503	11.2286	102.168	FALSE	2
2022-09-12	15:33:54	4.08113	18.1537	11.2286	135.041	1	3
2022-09-12	15:33:55	5.86001	26.0665	19.1036	128.235	1	4
2022-09-12	15:33:55	3.96973	17.6582	19.1036	152.7	1	5
2022-09-12	15:33:55	3.27915	14.5863	19.1036	142.821	1	6
2022-09-12	15:33:55	4.06983	18.1034	19.1036	170.803	1	7
2022-09-12	15:33:56	0.742252	3.30169	4.23592	146.123	FALSE	7
2022-09-12	15:33:56	0.97701	4.34594	4.23592	175.149	FALSE	7
2022-09-12	15:33:56	1.61604	7.18847	4.23592	153.311	FALSE	7
2022-09-12	15:33:56	0.473804	2.10757	4.23592	177.257	FALSE	7
2022-09-12	15:33:57	0.431718	1.92037	2.16066	155.231	FALSE	7
2022-09-12	15:33:57	0.60383	2.68596	2.16066	179.943	FALSE	7
2022-09-12	15:33:57	0.26841	1.19394	2.16066	156.425	FALSE	7
2022-09-12	15:33:57	0.638995	2.84238	2.16066	182.785	FALSE	7
2022-09-12	15:33:58	0.198028	0.880868	2.74685	157.306	FALSE	7
2022-09-12	15:33:58	0.910496	4.05007	2.74685	186.835	FALSE	7
2022-09-12	15:33:58	0.744033	3.30961	2.74685	160.616	FALSE	7
2022-09-12	15:33:59	1.77289	7.88617	7.04253	194.721	FALSE	7
2022-09-12	15:33:59	0.994466	4.42358	7.04253	165.039	FALSE	7
2022-09-12	15:33:59	1.86261	8.28526	7.04253	203.006	FALSE	7
2022-09-12	15:33:59	1.70296	7.57511	7.04253	172.614	FALSE	7
2022-09-12	15:34:00	1.98072	8.81064	13.3327	211.817	FALSE	7
2022-09-12	15:34:00	6.00021	26.6901	13.3327	199.305	1	8
2022-09-12	15:34:00	2.60072	11.5685	13.3327	223.386	FALSE	8
2022-09-12	15:34:00	1.40765	6.26151	13.3327	205.566	FALSE	8
2022-09-12	15:34:01	0.965713	4.29568	4.02709	227.681	FALSE	8
2022-09-12	15:34:01	1.25253	5.5715	4.02709	211.138	FALSE	8
2022-09-12	15:34:01	0.561641	2.49829	4.02709	230.18	FALSE	8
2022-09-12	15:34:01	0.841438	3.74288	4.02709	214.88	FALSE	8
2022-09-12	15:34:02	1.40688	6.25808	12.1624	236.438	FALSE	8
2022-09-12	15:34:02	3.77915	16.8104	12.1624	231.691	1	9
2022-09-12	15:34:02	3.01665	13.4187	12.1624	249.856	1	10
2022-09-12	15:34:03	1.10739	4.92589	4.56149	236.617	FALSE	10
2022-09-12	15:34:03	1.41156	6.2789	4.56149	256.135	FALSE	10
2022-09-12	15:34:03	1.09085	4.85232	4.56149	241.469	FALSE	10
2022-09-12	15:34:03	0.492074	2.18884	4.56149	258.324	FALSE	10
2022-09-12	15:34:04	1.19894	5.33312	2.85477	246.802	FALSE	10
2022-09-12	15:34:04	0.20154	0.89649	2.85477	259.221	FALSE	10
2022-09-12	15:34:04	0.726679	3.23241	2.85477	250.035	FALSE	10
2022-09-12	15:34:04	0.439962	1.95704	2.85477	261.178	FALSE	10
2022-09-12	15:34:05	0.433041	1.92625	1.24527	251.961	FALSE	10
2022-09-12	15:34:05	0.233804	1.04001	1.24527	262.218	FALSE	10
2022-09-12	15:34:05	0.214517	0.954215	1.24527	252.915	FALSE	10
2022-09-12	15:34:05	0.238435	1.06061	1.24527	263.278	FALSE	10
2022-09-12	15:34:06	0.0169595	0.0754392	0.906071	252.991	FALSE	10
2022-09-12	15:34:06	0.352532	1.56813	0.906071	264.846	FALSE	10
2022-09-12	15:34:06	0.24159	1.07464	0.906071	254.065	FALSE	10
2022-09-12	15:34:07	0.354822	1.57832	1.39773	266.425	FALSE	10
2022-09-12	15:34:07	0.269377	1.19824	1.39773	255.263	FALSE	10
2022-09-12	15:34:07	0.298537	1.32795	1.39773	267.753	FALSE	10
2022-09-12	15:34:07	0.33416	1.48641	1.39773	256.75	FALSE	10
2022-09-12	15:34:08	0.327494	1.45676	1.17459	269.209	FALSE	10
2022-09-12	15:34:08	0.30215	1.34402	1.17459	258.094	FALSE	10
2022-09-12	15:34:08	0.314109	1.39722	1.17459	270.607	FALSE	10
2022-09-12	15:34:08	0.112481	0.500338	1.17459	258.594	FALSE	10
2022-09-12	15:34:09	-0.0499107	-0.222013	-0.0538188	270.607	FALSE	10
2022-09-12	15:34:09	0.0145676	0.0647996	-0.0538188	258.659	FALSE	10
2022-09-12	15:34:09	0.0305473	0.13588	-0.0538188	270.742	FALSE	10
2022-09-12	15:34:09	-0.0436002	-0.193942	-0.0538188	258.659	FALSE	10
2022-09-12	15:34:10	-0.193626	-0.861287	-1.30331	270.742	FALSE	10
2022-09-12	15:34:10	-0.480038	-2.13531	-1.30331	258.659	FALSE	10
2022-09-12	15:34:10	-0.20533	-0.913349	-1.30331	270.742	FALSE	10
2022-09-12	15:34:11	-0.127163	-0.565646	0.751328	258.659	FALSE	10
2022-09-12	15:34:11	0.254975	1.13418	0.751328	271.877	FALSE	10
2022-09-12	15:34:11	0.319402	1.42076	0.751328	260.08	FALSE	10
2022-09-12	15:34:11	0.22841	1.01601	0.751328	272.893	FALSE	10
2022-09-12	15:34:12	0.0880536	0.39168	1.97413	260.471	FALSE	10
2022-09-12	15:34:12	0.377875	1.68086	1.97413	274.574	FALSE	10
2022-09-12	15:34:12	0.375127	1.66864	1.97413	262.14	FALSE	10
2022-09-12	15:34:12	0.93416	4.15533	1.97413	278.729	FALSE	10
2022-09-12	15:34:13	0.945051	4.20378	2.90706	266.344	FALSE	10
2022-09-12	15:34:13	1.1966	5.32272	2.90706	284.052	FALSE	10
2022-09-12	15:34:13	0.327443	1.45653	2.90706	267.8	FALSE	10
2022-09-12	15:34:13	0.145051	0.645216	2.90706	284.697	FALSE	10
2022-09-12	15:34:14	0.343677	1.52874	0.297736	269.329	FALSE	10
2022-09-12	15:34:14	-0.0814119	-0.362136	0.297736	284.697	FALSE	10
2022-09-12	15:34:14	-0.0614629	-0.273399	0.297736	269.329	FALSE	10
2022-09-12	15:34:15	-0.161107	-0.716636	-0.496375	284.697	FALSE	10
2022-09-12	15:34:15	-0.0854832	-0.380246	-0.496375	269.329	FALSE	10
2022-09-12	15:34:15	-0.154694	-0.68811	-0.496375	284.697	FALSE	10
2022-09-12	15:34:15	-0.0450761	-0.200508	-0.496375	269.329	FALSE	10
2022-09-12	15:34:16	-0.0724552	-0.322295	-1.00135	284.697	FALSE	10
2022-09-12	15:34:16	-0.250928	-1.11618	-1.00135	269.329	FALSE	10
2022-09-12	15:34:16	-0.210521	-0.93644	-1.00135	284.697	FALSE	10
2022-09-12	15:34:16	-0.366552	-1.6305	-1.00135	269.329	FALSE	10
2022-09-12	15:34:17	-0.0250252	-0.111317	0.605978	284.697	FALSE	10
2022-09-12	15:34:17	0.235178	1.04612	0.605978	270.375	FALSE	10
2022-09-12	15:34:17	0.198537	0.883132	0.605978	285.58	FALSE	10
2022-09-12	15:34:18	0.328562	1.46151	1.38568	271.837	FALSE	10
2022-09-12	15:34:18	0.365611	1.62631	1.38568	287.206	FALSE	10
2022-09-12	15:34:18	0.402303	1.78952	1.38568	273.626	FALSE	10
2022-09-12	15:34:18	0.14958	0.665362	1.38568	287.872	FALSE	10
2022-09-12	15:34:19	0.782862	3.48233	6.46969	277.109	FALSE	10
2022-09-12	15:34:19	0.791005	3.51855	6.46969	291.39	FALSE	10
2022-09-12	15:34:19	2.18871	9.73582	6.46969	286.844	FALSE	10
2022-09-12	15:34:19	2.05523	9.14207	6.46969	300.532	FALSE	10
2022-09-12	15:34:20	3.22622	14.3509	12.1545	301.195	1	11
2022-09-12	15:34:20	2.98922	13.2966	12.1545	313.829	FALSE	11
2022-09-12	15:34:20	2.40383	10.6927	12.1545	311.888	FALSE	11
2022-09-12	15:34:20	2.3105	10.2776	12.1545	324.106	FALSE	11
2022-09-12	15:34:21	0.617875	2.74843	4.70617	314.636	FALSE	11
2022-09-12	15:34:21	0.987596	4.39302	4.70617	328.499	FALSE	11
2022-09-12	15:34:21	1.56851	6.97705	4.70617	321.614	FALSE	11
2022-09-12	15:34:22	3.03162	13.4853	23.244	341.985	1	12
2022-09-12	15:34:22	4.2167	18.7567	23.244	340.37	1	13
2022-09-12	15:34:22	5.42434	24.1285	23.244	366.113	1	14
2022-09-12	15:34:22	8.22932	36.6057	23.244	376.976	1	15
2022-09-12	15:34:23	6.59294	29.3267	36.3542	395.44	1	16
2022-09-12	15:34:23	9.40474	41.8342	36.3542	418.81	1	17
2022-09-12	15:34:23	6.55314	29.1497	36.3542	424.59	1	18
2022-09-12	15:34:23	10.1403	45.1061	36.3542	463.916	1	19
2022-09-12	15:34:24	5.52286	24.5668	24.9946	449.156	1	20
2022-09-12	15:34:24	4.85049	21.5759	24.9946	485.492	1	21
2022-09-12	15:34:24	5.834	25.9508	24.9946	475.107	1	22
2022-09-12	15:34:24	6.26881	27.8849	24.9946	513.377	1	23
2022-09-12	15:34:25	4.46535	19.8628	29.5641	494.97	1	24
2022-09-12	15:34:25	4.13075	18.3744	29.5641	531.751	1	25
2022-09-12	15:34:25	11.3428	50.455	29.5641	545.425	1	26
2022-09-12	15:34:26	9.22423	41.0312	38.7219	572.783	1	27
2022-09-12	15:34:26	7.74255	34.4404	38.7219	579.865	1	28
2022-09-12	15:34:26	9.20612	40.9507	38.7219	613.733	1	29
2022-09-12	15:34:26	8.64739	38.4653	38.7219	618.331	1	30
2022-09-12	15:34:27	4.79609	21.334	15.1205	635.067	1	31
2022-09-12	15:34:27	1.93406	8.60309	15.1205	626.934	FALSE	31
2022-09-12	15:34:27	4.41055	19.619	15.1205	654.686	1	32
2022-09-12	15:34:27	2.45625	10.9259	15.1205	637.86	FALSE	32
2022-09-12	15:34:28	1.60276	7.1294	6.15799	661.816	FALSE	32
2022-09-12	15:34:28	0.986069	4.38623	6.15799	642.246	FALSE	32
2022-09-12	15:34:28	1.24775	5.55024	6.15799	667.366	FALSE	32
2022-09-12	15:34:28	1.70093	7.56608	6.15799	649.812	FALSE	32
2022-09-12	15:34:29	2.00434	8.91571	9.88246	676.282	FALSE	32
2022-09-12	15:34:29	2.54561	11.3234	9.88246	661.135	FALSE	32
2022-09-12	15:34:29	2.11508	9.4083	9.88246	685.69	FALSE	32
2022-09-12	15:34:30	1.91345	8.51141	7.15589	669.647	FALSE	32
2022-09-12	15:34:30	1.34434	5.97989	7.15589	691.67	FALSE	32
2022-09-12	15:34:30	2.37966	10.5852	7.15589	680.232	FALSE	32
2022-09-12	15:34:30	0.797417	3.54707	7.15589	695.217	FALSE	32
2022-09-12	15:34:31	0.420216	1.8692	3.28482	682.101	FALSE	32
2022-09-12	15:34:31	0.358791	1.59597	3.28482	696.813	FALSE	32
2022-09-12	15:34:31	1.48953	6.62573	3.28482	688.727	FALSE	32
2022-09-12	15:34:31	0.685305	3.04837	3.28482	699.861	FALSE	32
2022-09-12	15:34:32	0.645204	2.87	8.42142	691.597	FALSE	32
2022-09-12	15:34:32	0.568053	2.52681	8.42142	702.388	FALSE	32
2022-09-12	15:34:32	1.12953	5.02438	8.42142	696.621	FALSE	32
2022-09-12	15:34:32	5.23009	23.2645	8.42142	725.653	1	33
2022-09-12	15:34:33	6.84428	30.4447	42.1742	727.066	1	34
2022-09-12	15:34:33	14.8605	66.1025	42.1742	791.755	1	35
2022-09-12	15:34:33	6.73874	29.9753	42.1742	757.041	1	36
2022-09-12	15:34:34	11.6628	51.8785	45.1089	843.633	1	37
2022-09-12	15:34:34	11.4937	51.1263	45.1089	808.168	1	38
2022-09-12	15:34:34	12.3694	55.0216	45.1089	898.655	1	39
2022-09-12	15:34:34	5.03787	22.4095	45.1089	830.577	1	40
2022-09-12	15:34:35	5.08596	22.6234	28.4856	921.278	1	41
2022-09-12	15:34:35	4.24978	18.9039	28.4856	849.481	1	42
2022-09-12	15:34:35	8.44001	37.5429	28.4856	958.821	1	43
2022-09-12	15:34:35	7.83965	34.8723	28.4856	884.353	1	44
2022-09-12	15:34:36	6.78627	30.1867	18.0656	989.008	1	45
2022-09-12	15:34:36	6.62423	29.4659	18.0656	913.819	1	46
2022-09-12	15:34:36	1.85991	8.27325	18.0656	997.281	FALSE	46
2022-09-12	15:34:36	0.974924	4.33666	18.0656	918.156	FALSE	46
2022-09-12	15:34:37	0.84617	3.76393	11.5421	1001.05	FALSE	46
2022-09-12	15:34:37	2.1735	9.66816	11.5421	927.824	FALSE	46
2022-09-12	15:34:37	4.76464	21.1941	11.5421	1022.24	1	47
2022-09-12	15:34:38	13.8318	61.5266	30.9447	989.351	1	48
2022-09-12	15:34:38	9.70927	43.1888	30.9447	1065.43	1	49
2022-09-12	15:34:38	3.34846	14.8946	30.9447	1004.25	1	50
2022-09-12	15:34:38	0.937214	4.16892	30.9447	1069.6	FALSE	50
2022-09-12	15:34:39	0.687239	3.05698	11.7413	1007.3	FALSE	50
2022-09-12	15:34:39	2.12169	9.4377	11.7413	1079.03	FALSE	50
2022-09-12	15:34:39	2.63889	11.7383	11.7413	1019.04	FALSE	50
2022-09-12	15:34:39	5.11039	22.732	11.7413	1101.77	1	51
2022-09-12	15:34:40	3.64703	16.2227	13.8896	1035.26	1	52
2022-09-12	15:34:40	3.3108	14.7271	13.8896	1116.49	1	53
2022-09-12	15:34:40	2.40973	10.719	13.8896	1045.98	FALSE	53
2022-09-12	15:34:41	1.87324	8.33255	7.24416	1124.83	FALSE	53
2022-09-12	15:34:41	2.06622	9.19096	7.24416	1055.17	FALSE	53
2022-09-12	15:34:41	1.39197	6.19176	7.24416	1131.02	FALSE	53
2022-09-12	15:34:41	1.18281	5.26138	7.24416	1060.43	FALSE	53
2022-09-12	15:34:42	1.36561	6.07451	3.3263	1137.09	FALSE	53
2022-09-12	15:34:42	0.842201	3.74628	3.3263	1064.18	FALSE	53
2022-09-12	15:34:42	0.309631	1.3773	3.3263	1138.47	FALSE	53
2022-09-12	15:34:42	0.473702	2.10712	3.3263	1066.29	FALSE	53
2022-09-12	15:34:43	0.191667	0.852573	1.22501	1139.32	FALSE	53
2022-09-12	15:34:43	0.297875	1.32501	1.22501	1067.61	FALSE	53
2022-09-12	15:34:43	0.155535	0.691851	1.22501	1140.01	FALSE	53
2022-09-12	15:34:43	0.456501	2.03061	1.22501	1069.64	FALSE	53
2022-09-12	15:34:44	0.149479	0.664912	0.656838	1140.68	FALSE	53
2022-09-12	15:34:44	0.216349	0.962364	0.656838	1070.61	FALSE	53
2022-09-12	15:34:44	0.077163	0.343236	0.656838	1141.02	FALSE	53
2022-09-12	15:34:45	0.0336008	0.149463	-0.0089411	1070.76	FALSE	53
2022-09-12	15:34:45	-0.111336	-0.495245	-0.0089411	1141.02	FALSE	53
2022-09-12	15:34:45	-0.361768	-1.60922	-0.0089411	1070.76	FALSE	53
2022-09-12	15:34:45	0.431463	1.91923	-0.0089411	1142.94	FALSE	53
2022-09-12	15:34:46	0.48902	2.17526	1.18522	1072.93	FALSE	53
2022-09-12	15:34:46	0.442608	1.96881	1.18522	1144.91	FALSE	53
2022-09-12	15:34:46	0.0159926	0.0711383	1.18522	1073	FALSE	53
2022-09-12	15:34:46	0.118181	0.525693	1.18522	1145.44	FALSE	53
2022-09-12	15:34:47	0.237468	1.05631	1.06519	1074.06	FALSE	53
2022-09-12	15:34:47	0.277723	1.23537	1.06519	1146.67	FALSE	53
2022-09-12	15:34:47	0.215738	0.959646	1.06519	1075.02	FALSE	53
2022-09-12	15:34:47	0.226934	1.00945	1.06519	1147.68	FALSE	53
2022-09-12	15:34:48	0.234364	1.0425	0.663175	1076.06	FALSE	53
2022-09-12	15:34:48	0.0724811	0.32241	0.663175	1148	FALSE	53
2022-09-12	15:34:48	0.14042	0.624616	0.663175	1076.68	FALSE	53
2022-09-12	15:34:49	0.225255	1.00198	0.885396	1149.01	FALSE	53
2022-09-12	15:34:49	0.196603	0.874529	0.885396	1077.56	FALSE	53
2022-09-12	15:34:49	0.0846949	0.37674	0.885396	1149.38	FALSE	53
2022-09-12	15:34:49	0.289631	1.28834	0.885396	1078.85	FALSE	53
2022-09-12	15:34:50	0.301234	1.33995	1.76185	1150.72	FALSE	53
2022-09-12	15:34:50	0.309071	1.37481	1.76185	1080.22	FALSE	53
2022-09-12	15:34:50	0.492023	2.18862	1.76185	1152.91	FALSE	53
2022-09-12	15:34:50	0.481997	2.14402	1.76185	1082.37	FALSE	53
2022-09-12	15:34:51	0.406323	1.80741	2.11725	1154.72	FALSE	53
2022-09-12	15:34:51	0.56958	2.53361	2.11725	1084.9	FALSE	53
2022-09-12	15:34:51	0.443219	1.97153	2.11725	1156.69	FALSE	53
2022-09-12	15:34:51	0.484797	2.15647	2.11725	1087.06	FALSE	53
2022-09-12	15:34:52	0.372227	1.65574	0.73237	1158.35	FALSE	53
2022-09-12	15:34:52	0.0636771	0.283248	0.73237	1087.34	FALSE	53
2022-09-12	15:34:52	0.0580282	0.258121	0.73237	1158.6	FALSE	53
2022-09-12	15:34:53	0.0643386	0.286191	0.851384	1087.63	FALSE	53
2022-09-12	15:34:53	0.182965	0.813865	0.851384	1159.42	FALSE	53
2022-09-12	15:34:53	0.283524	1.26117	0.851384	1088.89	FALSE	53
2022-09-12	15:34:53	0.234771	1.04431	0.851384	1160.46	FALSE	53
2022-09-12	15:34:54	0.199809	0.88879	1.16485	1089.78	FALSE	53
2022-09-12	15:34:54	0.336298	1.49592	1.16485	1161.96	FALSE	53
2022-09-12	15:34:54	0.448206	1.99371	1.16485	1091.77	FALSE	53
2022-09-12	15:34:54	0.0631681	0.280984	1.16485	1162.24	FALSE	53
2022-09-12	15:34:55	-0.353575	-1.57277	-2.93128	1091.77	FALSE	53
2022-09-12	15:34:55	-0.640597	-2.8495	-2.93128	1162.24	FALSE	53
2022-09-12	15:34:55	-0.79103	-3.51866	-2.93128	1091.77	FALSE	53
2022-09-12	15:34:55	-0.850724	-3.78419	-2.93128	1162.24	FALSE	53
2022-09-12	15:34:56	-0.874389	-3.88946	-3.42056	1091.77	FALSE	53
2022-09-12	15:34:56	-0.721411	-3.20898	-3.42056	1162.24	FALSE	53
2022-09-12	15:34:56	-0.711132	-3.16326	-3.42056	1091.77	FALSE	53
2022-09-12	15:34:57	-0.611844	-2.7216	-2.75047	1162.24	FALSE	53
2022-09-12	15:34:57	-0.711284	-3.16393	-2.75047	1091.77	FALSE	53
2022-09-12	15:34:57	-0.578765	-2.57446	-2.75047	1162.24	FALSE	53
2022-09-12	15:34:57	-0.571437	-2.54187	-2.75047	1091.77	FALSE	53
2022-09-12	15:34:58	0.336552	1.49705	1.02037	1163.74	FALSE	53
2022-09-12	15:34:58	0.273499	1.21658	1.02037	1092.99	FALSE	53
2022-09-12	15:34:58	0.134161	0.596775	1.02037	1164.33	FALSE	53
2022-09-12	15:34:58	0.173346	0.771078	1.02037	1093.76	FALSE	53
2022-09-12	15:34:59	0.39131	1.74063	2.23351	1166.07	FALSE	53
2022-09-12	15:34:59	0.481794	2.14312	2.23351	1095.9	FALSE	53
2022-09-12	15:34:59	0.633244	2.8168	2.23351	1168.89	FALSE	53
2022-09-12	15:35:00	0.439911	1.95681	1.68505	1097.86	FALSE	53
2022-09-12	15:35:00	0.383626	1.70645	1.68505	1170.6	FALSE	53
2022-09-12	15:35:00	0.356858	1.58738	1.68505	1099.44	FALSE	53
2022-09-12	15:35:00	0.334873	1.48958	1.68505	1172.09	FALSE	53
2022-09-12	15:35:01	0.395484	1.75919	1.91856	1101.2	FALSE	53
2022-09-12	15:35:01	0.341438	1.51878	1.91856	1173.6	FALSE	53
2022-09-12	15:35:01	0.350496	1.55908	1.91856	1102.76	FALSE	53
2022-09-12	15:35:01	0.637825	2.83717	1.91856	1176.44	FALSE	53
2022-09-12	15:35:02	0.683982	3.04249	5.24208	1105.81	FALSE	53
2022-09-12	15:35:02	1.5193	6.75815	5.24208	1183.2	FALSE	53
2022-09-12	15:35:02	1.15558	5.14025	5.24208	1110.95	FALSE	53
2022-09-12	15:35:02	1.35503	6.02744	5.24208	1189.23	FALSE	53
2022-09-12	15:35:03	1.42098	6.3208	3.4203	1117.27	FALSE	53
2022-09-12	15:35:03	0.439453	1.95477	3.4203	1191.18	FALSE	53
2022-09-12	15:35:03	0.446323	1.98533	3.4203	1119.25	FALSE	53
2022-09-12	15:35:04	0.292634	1.30169	1.22088	1192.48	FALSE	53
2022-09-12	15:35:04	0.288512	1.28336	1.22088	1120.54	FALSE	53
2022-09-12	15:35:04	0.27757	1.23469	1.22088	1193.72	FALSE	53
2022-09-12	15:35:04	0.239148	1.06378	1.22088	1121.6	FALSE	53
2022-09-12	15:35:05	0.294669	1.31075	1.1588	1195.03	FALSE	53
2022-09-12	15:35:05	0.301692	1.34199	1.1588	1122.94	FALSE	53
2022-09-12	15:35:05	0.167596	0.745501	1.1588	1195.77	FALSE	53
2022-09-12	15:35:05	0.278079	1.23695	1.1588	1124.18	FALSE	53
2022-09-12	15:35:06	0.243626	1.0837	1.09779	1196.86	FALSE	53
2022-09-12	15:35:06	0.356043	1.58375	1.09779	1125.76	FALSE	53
2022-09-12	15:35:06	0.102914	0.457782	1.09779	1197.32	FALSE	53
2022-09-12	15:35:06	0.284593	1.26593	1.09779	1127.03	FALSE	53
2022-09-12	15:35:07	0.117367	0.522072	0.418091	1197.84	FALSE	53
2022-09-12	15:35:07	0.156807	0.697509	0.418091	1127.73	FALSE	53
2022-09-12	15:35:07	0.00779924	0.0346926	0.418091	1197.87	FALSE	53
2022-09-12	15:35:08	0.203321	0.904412	0.978604	1128.63	FALSE	53
2022-09-12	15:35:08	0.0858654	0.381946	0.978604	1198.25	FALSE	53
2022-09-12	15:35:08	0.14271	0.634803	0.978604	1129.26	FALSE	53
2022-09-12	15:35:08	0.448104	1.99326	0.978604	1200.25	FALSE	53
2022-09-12	15:35:09	0.720318	3.20412	3.23485	1132.47	FALSE	53
2022-09-12	15:35:09	0.477468	2.12387	3.23485	1202.37	FALSE	53
2022-09-12	15:35:09	0.819606	3.64577	3.23485	1136.11	FALSE	53
2022-09-12	15:35:09	0.891514	3.96563	3.23485	1206.34	FALSE	53
2022-09-12	15:35:10	0.837519	3.72545	4.36891	1139.84	FALSE	53
2022-09-12	15:35:10	1.02368	4.55353	4.36891	1210.89	FALSE	53
2022-09-12	15:35:10	0.600522	2.67124	4.36891	1142.51	FALSE	53
2022-09-12	15:35:10	1.46698	6.52542	4.36891	1217.42	FALSE	53
2022-09-12	15:35:11	1.23116	5.47645	6.19834	1147.99	FALSE	53
2022-09-12	15:35:11	2.15981	9.60727	6.19834	1227.02	FALSE	53
2022-09-12	15:35:11	0.789376	3.5113	6.19834	1151.5	FALSE	53
2022-09-12	15:35:12	1.02531	4.56078	5.30332	1231.58	FALSE	53
2022-09-12	15:35:12	0.862303	3.8357	5.30332	1155.33	FALSE	53
2022-09-12	15:35:12	0.926578	4.1216	5.30332	1235.71	FALSE	53
2022-09-12	15:35:12	1.95477	8.69521	5.30332	1164.03	FALSE	53
2022-09-12	15:35:13	1.50388	6.68956	7.23161	1242.4	FALSE	53
2022-09-12	15:35:13	1.22856	5.46488	7.23161	1169.49	FALSE	53
2022-09-12	15:35:13	2.36006	10.498	7.23161	1252.89	FALSE	53
2022-09-12	15:35:13	1.41045	6.27396	7.23161	1175.77	FALSE	53
2022-09-12	15:35:14	1.72805	7.68671	10.0992	1260.58	FALSE	53
2022-09-12	15:35:14	2.72841	12.1365	10.0992	1187.9	FALSE	53
2022-09-12	15:35:14	2.94866	13.1162	10.0992	1273.7	FALSE	53
2022-09-12	15:35:14	1.67645	7.45718	10.0992	1195.36	FALSE	53
2022-09-12	15:35:15	1.72439	7.67043	5.03894	1281.37	FALSE	53
2022-09-12	15:35:15	0.554924	2.46841	5.03894	1197.83	FALSE	53
2022-09-12	15:35:15	1.1191	4.97798	5.03894	1286.35	FALSE	53
2022-09-12	15:35:16	0.856603	3.81034	3.78657	1201.64	FALSE	53
2022-09-12	15:35:16	0.569529	2.53338	3.78657	1288.88	FALSE	53
2022-09-12	15:35:16	0.683117	3.03864	3.78657	1204.68	FALSE	53
2022-09-12	15:35:16	1.29579	5.76393	3.78657	1294.64	FALSE	53
2022-09-12	15:35:17	0.796807	3.54436	2.9709	1208.22	FALSE	53
2022-09-12	15:35:17	1.07141	4.76585	2.9709	1299.41	FALSE	53
2022-09-12	15:35:17	0.477417	2.12365	2.9709	1210.35	FALSE	53
2022-09-12	15:35:17	0.325916	1.44974	2.9709	1300.86	FALSE	53
2022-09-12	15:35:18	0.310242	1.38002	1.66491	1211.73	FALSE	53
2022-09-12	15:35:18	0.439708	1.95591	1.66491	1302.81	FALSE	53
2022-09-12	15:35:18	0.296705	1.3198	1.66491	1213.05	FALSE	53
2022-09-12	15:35:18	0.450496	2.0039	1.66491	1304.82	FALSE	53
2022-09-12	15:35:19	0.675636	3.00536	2.60318	1216.05	FALSE	53
2022-09-12	15:35:19	0.714771	3.17944	2.60318	1308	FALSE	53
2022-09-12	15:35:19	0.365255	1.62473	2.60318	1217.68	FALSE	53
2022-09-12	15:35:20	0.172023	0.765193	0.819125	1308.76	FALSE	53
2022-09-12	15:35:20	0.280776	1.24895	0.819125	1218.93	FALSE	53
2022-09-12	15:35:20	0.183931	0.818162	0.819125	1309.58	FALSE	53
2022-09-12	15:35:20	0.0998602	0.444198	0.819125	1219.37	FALSE	53
2022-09-12	15:35:21	0.093448	0.415675	0.488623	1310	FALSE	53
2022-09-12	15:35:21	0.0876465	0.389869	0.488623	1219.76	FALSE	53
2022-09-12	15:35:21	0.145916	0.649064	0.488623	1310.65	FALSE	53
2022-09-12	15:35:21	0.112379	0.499884	0.488623	1220.26	FALSE	53
2022-09-12	15:35:22	-0.110827	-0.492981	-0.249555	1310.65	FALSE	53
2022-09-12	15:35:22	-0.0728623	-0.324106	-0.249555	1220.26	FALSE	53
2022-09-12	15:35:22	0.0153819	0.0684218	-0.249555	1310.71	FALSE	53
2022-09-12	15:35:23	0.645051	2.86932	5.46121	1223.13	FALSE	53
2022-09-12	15:35:23	3.51029	15.6145	5.46121	1326.33	1	54
2022-09-12	15:35:23	0.391158	1.73995	5.46121	1224.87	FALSE	54
2022-09-12	15:35:23	0.36444	1.6211	5.46121	1327.95	FALSE	54
2022-09-12	15:35:24	0.330445	1.46989	0.955513	1226.34	FALSE	54
2022-09-12	15:35:24	0.242557	1.07894	0.955513	1329.03	FALSE	54
2022-09-12	15:35:24	0.106374	0.473173	0.955513	1226.81	FALSE	54
2022-09-12	15:35:24	0.17986	0.800053	0.955513	1329.83	FALSE	54
2022-09-12	15:35:25	0.139962	0.622579	0.887095	1227.44	FALSE	54
2022-09-12	15:35:25	0.245255	1.09094	0.887095	1330.92	FALSE	54
2022-09-12	15:35:25	0.228155	1.01488	0.887095	1228.45	FALSE	54
2022-09-12	15:35:25	0.184339	0.819977	0.887095	1331.74	FALSE	54
2022-09-12	15:35:26	0.219351	0.975717	2.58031	1229.43	FALSE	54
2022-09-12	15:35:26	0.493346	2.1945	2.58031	1333.93	FALSE	54
2022-09-12	15:35:26	1.02754	4.5707	2.58031	1234	FALSE	54
2022-09-12	15:35:27	0.291056	1.29468	1.29456	1335.23	FALSE	54
2022-09-12	15:35:27	0.28668	1.27521	1.29456	1235.27	FALSE	54
2022-09-12	15:35:27	0.258537	1.15002	1.29456	1336.38	FALSE	54
2022-09-12	15:35:27	0.32785	1.45834	1.29456	1236.73	FALSE	54
2022-09-12	15:35:28	0.283015	1.25891	1.19071	1337.64	FALSE	54
2022-09-12	15:35:28	0.198842	0.884489	1.19071	1237.61	FALSE	54
2022-09-12	15:35:28	0.303982	1.35217	1.19071	1338.99	FALSE	54
2022-09-12	15:35:28	0.284898	1.26728	1.19071	1238.88	FALSE	54
2022-09-12	15:35:29	0.303779	1.35127	0.886131	1340.34	FALSE	54
2022-09-12	15:35:29	0.209224	0.93067	0.886131	1239.81	FALSE	54
2022-09-12	15:35:29	0.152888	0.680076	0.886131	1341.02	FALSE	54
2022-09-12	15:35:29	0.130954	0.58251	0.886131	1240.39	FALSE	54
2022-09-12	15:35:30	0.294059	1.30803	2.33666	1342.33	FALSE	54
2022-09-12	15:35:30	0.563117	2.50486	2.33666	1242.9	FALSE	54
2022-09-12	15:35:30	0.71874	3.1971	2.33666	1345.53	FALSE	54
2022-09-12	15:35:31	0.657977	2.92681	3.02229	1245.83	FALSE	54
2022-09-12	15:35:31	0.788257	3.50632	3.02229	1349.03	FALSE	54
2022-09-12	15:35:31	0.625509	2.78239	3.02229	1248.61	FALSE	54
2022-09-12	15:35:31	0.646018	2.87362	3.02229	1351.91	FALSE	54
2022-09-12	15:35:32	0.477163	2.12252	2.84883	1250.73	FALSE	54
2022-09-12	15:35:32	0.514618	2.28912	2.84883	1354.2	FALSE	54
2022-09-12	15:35:32	0.580369	2.5816	2.84883	1253.31	FALSE	54
2022-09-12	15:35:32	0.989631	4.40208	2.84883	1358.6	FALSE	54
2022-09-12	15:35:33	0.98042	4.3611	3.87486	1257.67	FALSE	54
2022-09-12	15:35:33	0.771209	3.43049	3.87486	1362.03	FALSE	54
2022-09-12	15:35:33	0.870242	3.87101	3.87486	1261.55	FALSE	54
2022-09-12	15:35:33	0.862557	3.83683	3.87486	1365.86	FALSE	54
2022-09-12	15:35:34	0.687595	3.05856	1.95244	1264.6	FALSE	54
2022-09-12	15:35:34	0.332888	1.48075	1.95244	1367.35	FALSE	54
2022-09-12	15:35:34	0.296298	1.31799	1.95244	1265.92	FALSE	54
2022-09-12	15:35:35	0.298588	1.32818	1.38262	1368.67	FALSE	54
2022-09-12	15:35:35	0.384491	1.71029	1.38262	1267.63	FALSE	54
2022-09-12	15:35:35	0.215331	0.957835	1.38262	1369.63	FALSE	54
2022-09-12	15:35:35	0.344898	1.53418	1.38262	1269.17	FALSE	54
2022-09-12	15:35:36	0.238435	1.06061	3.40101	1370.69	FALSE	54
2022-09-12	15:35:36	0.985509	4.38374	3.40101	1273.55	FALSE	54
2022-09-12	15:35:36	0.784898	3.49138	3.40101	1374.18	FALSE	54
2022-09-12	15:35:36	1.04948	4.6683	3.40101	1278.22	FALSE	54
2022-09-12	15:35:37	1.30042	5.78453	5.1885	1379.97	FALSE	54
2022-09-12	15:35:37	1.36332	6.06432	5.1885	1284.28	FALSE	54
2022-09-12	15:35:37	1.2362	5.49886	5.1885	1385.47	FALSE	54
2022-09-12	15:35:37	0.765763	3.40627	5.1885	1287.69	FALSE	54
2022-09-12	15:35:38	0.649478	2.88901	2.83853	1388.36	FALSE	54
2022-09-12	15:35:38	0.58841	2.61737	2.83853	1290.31	FALSE	54
2022-09-12	15:35:38	0.676502	3.00922	2.83853	1391.36	FALSE	54
2022-09-12	15:35:39	0.362507	1.6125	1.64363	1291.92	FALSE	54
2022-09-12	15:35:39	0.35299	1.57017	1.64363	1392.94	FALSE	54
2022-09-12	15:35:39	0.323575	1.43933	1.64363	1293.36	FALSE	54
2022-09-12	15:35:39	0.438944	1.95251	1.64363	1394.89	FALSE	54
2022-09-12	15:35:40	0.113601	0.50532	0.653478	1293.86	FALSE	54
2022-09-12	15:35:40	0.113702	0.505769	0.653478	1395.39	FALSE	54
2022-09-12	15:35:40	0.229478	1.02076	0.653478	1294.88	FALSE	54
2022-09-12	15:35:40	0.130853	0.58206	0.653478	1395.98	FALSE	54
2022-09-12	15:35:41	0.0165015	0.073402	-1.68211	1294.96	FALSE	54
2022-09-12	15:35:41	-0.483651	-2.15138	-1.68211	1395.98	FALSE	54
2022-09-12	15:35:41	-0.503549	-2.23989	-1.68211	1294.96	FALSE	54
2022-09-12	15:35:41	-0.541921	-2.41057	-1.68211	1395.98	FALSE	54
2022-09-12	15:35:42	-0.531234	-2.36304	-2.18397	1294.96	FALSE	54
2022-09-12	15:35:42	-0.438206	-1.94923	-2.18397	1395.98	FALSE	54
2022-09-12	15:35:42	-0.503498	-2.23966	-2.18397	1294.96	FALSE	54
2022-09-12	15:35:43	-0.512048	-2.27769	-0.801863	1395.98	FALSE	54
2022-09-12	15:35:43	-0.344872	-1.53406	-0.801863	1294.96	FALSE	54
2022-09-12	15:35:43	-0.174033	-0.774134	-0.801863	1395.98	FALSE	54
2022-09-12	15:35:43	0.309886	1.37843	-0.801863	1296.34	FALSE	54
2022-09-12	15:35:44	1.60917	7.15791	3.15188	1403.13	FALSE	54
2022-09-12	15:35:44	0.691819	3.07735	3.15188	1299.41	FALSE	54
2022-09-12	15:35:44	0.184135	0.819069	3.15188	1403.95	FALSE	54
2022-09-12	15:35:44	0.349173	1.55319	3.15188	1300.97	FALSE	54
2022-09-12	15:35:45	0.296858	1.32048	1.00884	1405.27	FALSE	54
2022-09-12	15:35:45	0.210242	0.935198	1.00884	1301.9	FALSE	54
2022-09-12	15:35:45	0.173295	0.770851	1.00884	1406.04	FALSE	54
2022-09-12	15:35:46	0.429784	1.91177	1.64402	1303.81	FALSE	54
2022-09-12	15:35:46	0.322303	1.43367	1.64402	1407.48	FALSE	54
2022-09-12	15:35:46	0.337723	1.50226	1.64402	1305.32	FALSE	54
2022-09-12	15:35:46	0.388562	1.7284	1.64402	1409.21	FALSE	54
2022-09-12	15:35:47	0.711056	3.16292	2.76818	1308.48	FALSE	54
2022-09-12	15:35:47	0.719758	3.20163	2.76818	1412.41	FALSE	54
2022-09-12	15:35:47	0.71874	3.1971	2.76818	1311.68	FALSE	54
2022-09-12	15:35:47	0.339707	1.51108	2.76818	1413.92	FALSE	54
2022-09-12	15:35:48	0.320166	1.42416	1.47906	1313.1	FALSE	54
2022-09-12	15:35:48	0.32154	1.43027	1.47906	1415.35	FALSE	54
2022-09-12	15:35:48	0.337875	1.50294	1.47906	1314.6	FALSE	54
2022-09-12	15:35:48	0.350445	1.55885	1.47906	1416.91	FALSE	54
2022-09-12	15:35:49	0.339351	1.5095	1.52557	1316.11	FALSE	54
2022-09-12	15:35:49	0.343117	1.52625	1.52557	1418.43	FALSE	54
2022-09-12	15:35:49	0.346425	1.54097	1.52557	1317.65	FALSE	54
2022-09-12	15:35:50	0.312023	1.38794	1.48619	1419.82	FALSE	54
2022-09-12	15:35:50	0.332837	1.48053	1.48619	1319.13	FALSE	54
2022-09-12	15:35:50	0.357774	1.59145	1.48619	1421.41	FALSE	54
2022-09-12	15:35:50	0.333804	1.48483	1.48619	1320.62	FALSE	54
2022-09-12	15:35:51	0.329835	1.46717	1.48522	1422.88	FALSE	54
2022-09-12	15:35:51	0.338893	1.50746	1.48522	1322.13	FALSE	54
2022-09-12	15:35:51	0.330547	1.47034	1.48522	1424.35	FALSE	54
2022-09-12	15:35:51	0.336298	1.49592	1.48522	1323.62	FALSE	54
2022-09-12	15:35:52	0.336807	1.49818	1.50769	1425.85	FALSE	54
2022-09-12	15:35:52	0.328104	1.45947	1.50769	1325.08	FALSE	54
2022-09-12	15:35:52	0.344898	1.53418	1.50769	1427.38	FALSE	54
2022-09-12	15:35:52	0.345967	1.53893	1.50769	1326.62	FALSE	54
2022-09-12	15:35:53	0.345814	1.53825	1.62352	1428.92	FALSE	54
2022-09-12	15:35:53	0.366578	1.63061	1.62352	1328.25	FALSE	54
2022-09-12	15:35:53	0.382557	1.70169	1.62352	1430.62	FALSE	54
2022-09-12	15:35:54	0.387799	1.72501	1.59162	1329.98	FALSE	54
2022-09-12	15:35:54	0.356908	1.5876	1.59162	1432.21	FALSE	54
2022-09-12	15:35:54	0.336552	1.49705	1.59162	1331.47	FALSE	54
2022-09-12	15:35:54	0.349987	1.55681	1.59162	1433.77	FALSE	54
2022-09-12	15:35:55	0.311972	1.38771	1.4614	1332.86	FALSE	54
2022-09-12	15:35:55	0.285967	1.27204	1.4614	1435.04	FALSE	54
2022-09-12	15:35:55	0.360623	1.60412	1.4614	1334.47	FALSE	54
2022-09-12	15:35:55	0.355585	1.58171	1.4614	1436.62	FALSE	54
2022-09-12	15:35:56	0.421132	1.87328	1.85449	1336.34	FALSE	54
2022-09-12	15:35:56	0.456756	2.03174	1.85449	1438.65	FALSE	54
2022-09-12	15:35:56	0.39528	1.75828	1.85449	1338.1	FALSE	54
2022-09-12	15:35:56	0.394466	1.75466	1.85449	1440.41	FALSE	54
2022-09-12	15:35:57	0.372634	1.65755	1.58798	1339.75	FALSE	54
2022-09-12	15:35:57	0.378079	1.68177	1.58798	1442.09	FALSE	54
2022-09-12	15:35:57	0.320267	1.42461	1.58798	1341.18	FALSE	54
2022-09-12	15:35:58	0.35131	1.5627	1.61426	1443.65	FALSE	54
2022-09-12	15:35:58	0.363728	1.61793	1.61426	1342.8	FALSE	54
2022-09-12	15:35:58	0.364746	1.62246	1.61426	1445.27	FALSE	54
2022-09-12	15:35:58	0.371819	1.65393	1.61426	1344.45	FALSE	54
2022-09-12	15:35:59	0.74556	3.3164	2.63706	1448.59	FALSE	54
2022-09-12	15:35:59	0.449733	2.0005	2.63706	1346.45	FALSE	54
2022-09-12	15:35:59	0.570801	2.53904	2.63706	1451.13	FALSE	54
2022-09-12	15:35:59	0.605255	2.6923	2.63706	1349.14	FALSE	54
2022-09-12	15:36:00	0.742964	3.30485	3.59704	1454.43	FALSE	54
2022-09-12	15:36:00	0.83131	3.69783	3.59704	1352.84	FALSE	54
2022-09-12	15:36:00	1.15436	5.13482	3.59704	1459.57	FALSE	54
2022-09-12	15:36:00	0.505967	2.25064	3.59704	1355.09	FALSE	54
2022-09-12	15:36:01	1.03268	4.59357	4.97283	1464.16	FALSE	54
2022-09-12	15:36:01	0.865305	3.84905	4.97283	1358.94	FALSE	54
2022-09-12	15:36:01	1.45584	6.47587	4.97283	1470.64	FALSE	54
2022-09-12	15:36:02	2.09971	9.33993	12.0328	1368.28	FALSE	54
2022-09-12	15:36:02	2.97894	13.2509	12.0328	1483.89	FALSE	54
2022-09-12	15:36:02	2.61406	11.6279	12.0328	1379.91	FALSE	54
2022-09-12	15:36:02	3.12764	13.9124	12.0328	1497.8	1	55
2022-09-12	15:36:03	3.11843	13.8714	17.8985	1393.78	1	56
2022-09-12	15:36:03	4.66271	20.7407	17.8985	1518.54	1	57
2022-09-12	15:36:03	3.68663	16.3989	17.8985	1410.18	1	58
2022-09-12	15:36:03	4.62724	20.5829	17.8985	1539.13	1	59
2022-09-12	15:36:04	3.33268	14.8244	12.5514	1425	1	60
2022-09-12	15:36:04	3.71121	16.5082	12.5514	1555.63	1	61
2022-09-12	15:36:04	1.42118	6.32169	12.5514	1431.33	FALSE	61
2022-09-12	15:36:05	1.23004	5.47146	6.08526	1561.11	FALSE	61
2022-09-12	15:36:05	1.1965	5.32227	6.08526	1436.65	FALSE	61
2022-09-12	15:36:05	1.27411	5.6675	6.08526	1566.77	FALSE	61
2022-09-12	15:36:05	1.77146	7.87981	6.08526	1444.53	FALSE	61
2022-09-12	15:36:06	2.3563	10.4813	15.9062	1577.25	FALSE	61
2022-09-12	15:36:06	2.28108	10.1467	15.9062	1454.67	FALSE	61
2022-09-12	15:36:06	4.08673	18.1786	15.9062	1595.43	1	62
2022-09-12	15:36:06	5.5794	24.8183	15.9062	1479.49	1	63
2022-09-12	15:36:07	6.73105	29.9411	29.1227	1625.37	1	64
2022-09-12	15:36:07	10.4462	46.4668	29.1227	1525.96	1	65
2022-09-12	15:36:07	7.52978	33.494	29.1227	1658.87	1	66
2022-09-12	15:36:07	1.48128	6.58903	29.1227	1532.55	FALSE	66
2022-09-12	15:36:08	4.14103	18.4201	15.8028	1677.29	1	67
2022-09-12	15:36:08	5.53691	24.6293	15.8028	1557.18	1	68
2022-09-12	15:36:08	0.979962	4.35907	15.8028	1681.65	FALSE	68
2022-09-12	15:36:09	0.998231	4.44033	16.4924	1561.62	FALSE	68
2022-09-12	15:36:09	2.57339	11.447	16.4924	1693.09	FALSE	68
2022-09-12	15:36:09	4.08067	18.1516	16.4924	1579.77	1	69
2022-09-12	15:36:09	7.17838	31.9309	16.4924	1725.03	1	70
2022-09-12	15:36:10	5.38403	23.9492	12.5083	1603.72	1	71
2022-09-12	15:36:10	2.89726	12.8876	12.5083	1737.91	FALSE	71
2022-09-12	15:36:10	0.986425	4.38782	12.5083	1608.11	FALSE	71
2022-09-12	15:36:10	1.98027	8.80864	12.5083	1746.72	FALSE	71
2022-09-12	15:36:11	0.52958	2.35568	5.16603	1610.46	FALSE	71
2022-09-12	15:36:11	1.46261	6.50598	5.16603	1753.23	FALSE	71
2022-09-12	15:36:11	0.80958	3.60117	5.16603	1614.06	FALSE	71
2022-09-12	15:36:11	1.84373	8.20128	5.16603	1761.43	FALSE	71
2022-09-12	15:36:12	1.22902	5.46693	7.4095	1619.53	FALSE	71
2022-09-12	15:36:12	2.68678	11.9513	7.4095	1773.38	FALSE	71
2022-09-12	15:36:12	1.08139	4.81024	7.4095	1624.34	FALSE	71
2022-09-12	15:36:13	0.913397	4.06297	5.45177	1777.44	FALSE	71
2022-09-12	15:36:13	0.920522	4.09467	5.45177	1628.43	FALSE	71
2022-09-12	15:36:13	1.51452	6.73689	5.45177	1784.18	FALSE	71
2022-09-12	15:36:13	1.55401	6.91255	5.45177	1635.35	FALSE	71
2022-09-12	15:36:14	2.53462	11.2745	8.6497	1795.45	FALSE	71
2022-09-12	15:36:14	2.13726	9.50696	8.6497	1644.85	FALSE	71
2022-09-12	15:36:14	1.61131	7.16743	8.6497	1802.62	FALSE	71
2022-09-12	15:36:14	1.49497	6.64993	8.6497	1651.5	FALSE	71
2022-09-12	15:36:15	1.64515	7.31796	5.5251	1809.94	FALSE	71
2022-09-12	15:36:15	1.6477	7.3293	5.5251	1658.83	FALSE	71
2022-09-12	15:36:15	1.31248	5.83817	5.5251	1815.78	FALSE	71
2022-09-12	15:36:15	0.363066	1.61499	5.5251	1660.45	FALSE	71
2022-09-12	15:36:16	0.347596	1.54618	1.87049	1817.32	FALSE	71
2022-09-12	15:36:16	0.453702	2.01816	1.87049	1662.47	FALSE	71
2022-09-12	15:36:16	0.460216	2.04713	1.87049	1819.37	FALSE	71
2022-09-12	15:36:17	0.54159	2.4091	3.25183	1664.88	FALSE	71
2022-09-12	15:36:17	0.709224	3.15477	3.25183	1822.53	FALSE	71
2022-09-12	15:36:17	1.02709	4.5687	3.25183	1669.44	FALSE	71
2022-09-12	15:36:17	0.646272	2.87475	3.25183	1825.4	FALSE	71
2022-09-12	15:36:18	0.338995	1.50792	1.82801	1670.95	FALSE	71
2022-09-12	15:36:18	0.445305	1.98081	1.82801	1827.38	FALSE	71
2022-09-12	15:36:18	0.435789	1.93848	1.82801	1672.89	FALSE	71
2022-09-12	15:36:18	0.423728	1.88483	1.82801	1829.27	FALSE	71
2022-09-12	15:36:19	0.438181	1.94912	5.07632	1674.84	FALSE	71
2022-09-12	15:36:19	0.747952	3.32704	5.07632	1832.59	FALSE	71
2022-09-12	15:36:19	1.151	5.11988	5.07632	1679.96	FALSE	71
2022-09-12	15:36:19	2.2277	9.90926	5.07632	1842.5	FALSE	71
2022-09-12	15:36:20	4.0879	18.1838	12.9395	1698.14	1	72
2022-09-12	15:36:20	2.89502	12.8776	12.9395	1855.38	FALSE	72
2022-09-12	15:36:20	1.74388	7.75713	12.9395	1705.9	FALSE	72
2022-09-12	15:36:21	1.28078	5.69717	4.8074	1861.08	FALSE	72
2022-09-12	15:36:21	0.95645	4.25448	4.8074	1710.16	FALSE	72
2022-09-12	15:36:21	1.05416	4.68911	4.8074	1865.77	FALSE	72
2022-09-12	15:36:21	1.03162	4.58885	4.8074	1714.74	FALSE	72
2022-09-12	15:36:22	0.866425	3.85403	3.5374	1869.62	FALSE	72
2022-09-12	15:36:22	0.734568	3.26751	3.5374	1718.01	FALSE	72
2022-09-12	15:36:22	0.826578	3.67678	3.5374	1873.3	FALSE	72
2022-09-12	15:36:22	0.753397	3.35126	3.5374	1721.36	FALSE	72
2022-09-12	15:36:23	0.665458	2.96009	2.79806	1876.26	FALSE	72
2022-09-12	15:36:23	0.671158	2.98545	2.79806	1724.35	FALSE	72
2022-09-12	15:36:23	0.511412	2.27486	2.79806	1878.53	FALSE	72
2022-09-12	15:36:23	0.668104	2.97186	2.79806	1727.32	FALSE	72
2022-09-12	15:36:24	1.2276	5.46061	4.87151	1883.99	FALSE	72
2022-09-12	15:36:24	1.00149	4.45483	4.87151	1731.78	FALSE	72
2022-09-12	15:36:24	1.0564	4.69908	4.87151	1888.69	FALSE	72
2022-09-12	15:36:25	0.753702	3.35262	4.1495	1735.13	FALSE	72
2022-09-12	15:36:25	0.947799	4.216	4.1495	1892.91	FALSE	72
2022-09-12	15:36:25	0.717366	3.19099	4.1495	1738.32	FALSE	72
2022-09-12	15:36:25	1.31253	5.8384	4.1495	1898.75	FALSE	72
2022-09-12	15:36:26	0.509428	2.26604	1.84844	1740.58	FALSE	72
2022-09-12	15:36:26	0.439809	1.95636	1.84844	1900.7	FALSE	72
2022-09-12	15:36:26	0.389682	1.73338	1.84844	1742.32	FALSE	72
2022-09-12	15:36:26	0.32327	1.43797	1.84844	1902.14	FALSE	72
2022-09-12	15:36:27	0.360929	1.60548	2.04012	1743.92	FALSE	72
2022-09-12	15:36:27	0.579911	2.57956	2.04012	1904.72	FALSE	72
2022-09-12	15:36:27	0.435076	1.93531	2.04012	1745.86	FALSE	72
2022-09-12	15:36:28	0.477214	2.12274	1.70673	1906.84	FALSE	72
2022-09-12	15:36:28	0.362507	1.6125	1.70673	1747.47	FALSE	72
2022-09-12	15:36:28	0.351565	1.56383	1.70673	1908.41	FALSE	72
2022-09-12	15:36:28	0.343473	1.52784	1.70673	1749	FALSE	72
2022-09-12	15:36:29	0.408308	1.81624	1.74742	1910.22	FALSE	72
2022-09-12	15:36:29	0.441285	1.96292	1.74742	1750.96	FALSE	72
2022-09-12	15:36:29	0.326018	1.45019	1.74742	1911.67	FALSE	72
2022-09-12	15:36:29	0.395738	1.76032	1.74742	1752.72	FALSE	72
2022-09-12	15:36:30	0.358537	1.59484	1.43254	1913.27	FALSE	72
2022-09-12	15:36:30	0.426323	1.89637	1.43254	1754.62	FALSE	72
2022-09-12	15:36:30	0.126069	0.56078	1.43254	1913.83	FALSE	72
2022-09-12	15:36:30	0.377265	1.67815	1.43254	1756.3	FALSE	72
2022-09-12	15:36:31	0.186374	0.829029	0.99677	1914.66	FALSE	72
2022-09-12	15:36:31	0.277621	1.23491	0.99677	1757.53	FALSE	72
2022-09-12	15:36:31	0.208257	0.926369	0.99677	1915.58	FALSE	72
2022-09-12	15:36:32	1.02103	4.54175	2.9838	1762.07	FALSE	72
2022-09-12	15:36:32	0.227596	1.01239	2.9838	1916.6	FALSE	72
2022-09-12	15:36:32	0.983473	4.37468	2.9838	1766.45	FALSE	72
2022-09-12	15:36:32	0.451056	2.00639	2.9838	1918.6	FALSE	72
2022-09-12	15:36:33	0.510191	2.26943	1.81692	1768.72	FALSE	72
2022-09-12	15:36:33	0.293041	1.3035	1.81692	1919.91	FALSE	72
2022-09-12	15:36:33	0.375178	1.66887	1.81692	1770.39	FALSE	72
2022-09-12	15:36:33	0.455433	2.02586	1.81692	1921.93	FALSE	72
2022-09-12	15:36:34	0.271921	1.20956	0.346632	1771.6	FALSE	72
2022-09-12	15:36:34	0.093448	0.415675	0.346632	1922.35	FALSE	72
2022-09-12	15:36:34	0.162201	0.721502	0.346632	1772.32	FALSE	72
2022-09-12	15:36:34	-0.215865	-0.960211	0.346632	1922.35	FALSE	72
2022-09-12	15:36:35	-0.114745	-0.510409	-0.239217	1772.32	FALSE	72
2022-09-12	15:36:35	-0.107519	-0.478266	-0.239217	1922.35	FALSE	72
2022-09-12	15:36:35	0.060929	0.271024	-0.239217	1772.59	FALSE	72
2022-09-12	15:36:36	0.0872394	0.388058	1.37442	1922.74	FALSE	72
2022-09-12	15:36:36	0.386985	1.72139	1.37442	1774.31	FALSE	72
2022-09-12	15:36:36	0.278639	1.23944	1.37442	1923.98	FALSE	72
2022-09-12	15:36:36	0.483066	2.14877	1.37442	1776.46	FALSE	72
2022-09-12	15:36:37	0.406425	1.80786	3.48776	1925.78	FALSE	72
2022-09-12	15:36:37	0.403779	1.79609	3.48776	1778.26	FALSE	72
2022-09-12	15:36:37	0.779962	3.46943	3.48776	1929.25	FALSE	72
2022-09-12	15:36:37	1.54617	6.87767	3.48776	1785.13	FALSE	72
2022-09-12	15:36:38	0.553143	2.46049	2.63282	1931.71	FALSE	72
2022-09-12	15:36:38	0.610649	2.71629	2.63282	1787.85	FALSE	72
2022-09-12	15:36:38	0.973346	4.32964	2.63282	1936.04	FALSE	72
2022-09-12	15:36:38	0.230395	1.02484	2.63282	1788.87	FALSE	72
2022-09-12	15:36:39	0.517824	2.30338	2.13715	1938.35	FALSE	72
2022-09-12	15:36:39	0.53986	2.40141	2.13715	1791.28	FALSE	72
2022-09-12	15:36:39	0.383677	1.70667	2.13715	1940.05	FALSE	72
2022-09-12	15:36:40	0.0278501	0.123883	-0.915219	1791.4	FALSE	72
2022-09-12	15:36:40	-0.0822771	-0.365985	-0.915219	1940.05	FALSE	72
2022-09-12	15:36:40	-0.176832	-0.786584	-0.915219	1791.4	FALSE	72
2022-09-12	15:36:40	-0.591743	-2.63219	-0.915219	1940.05	FALSE	72
2022-09-12	15:36:41	-0.747467	-3.32488	-3.5147	1791.4	FALSE	72
2022-09-12	15:36:41	-0.770572	-3.42766	-3.5147	1940.05	FALSE	72
2022-09-12	15:36:41	-0.788943	-3.50938	-3.5147	1791.4	FALSE	72
2022-09-12	15:36:41	-0.853574	-3.79687	-3.5147	1940.05	FALSE	72
2022-09-12	15:36:42	-0.813727	-3.61962	-3.30417	1791.4	FALSE	72
2022-09-12	15:36:42	-0.763651	-3.39687	-3.30417	1940.05	FALSE	72
2022-09-12	15:36:42	-0.867569	-3.85912	-3.30417	1791.4	FALSE	72
2022-09-12	15:36:42	-0.526297	-2.34107	-3.30417	1940.05	FALSE	72
2022-09-12	15:36:43	-0.429198	-1.90916	-1.37575	1791.4	FALSE	72
2022-09-12	15:36:43	-0.340699	-1.5155	-1.37575	1940.05	FALSE	72
2022-09-12	15:36:43	-0.157951	-0.702598	-1.37575	1791.4	FALSE	72
2022-09-12	15:36:44	0.0365524	0.162592	3.57079	1940.22	FALSE	72
2022-09-12	15:36:44	0.444288	1.97628	3.57079	1793.38	FALSE	72
2022-09-12	15:36:44	1.82083	8.09942	3.57079	1948.32	FALSE	72
2022-09-12	15:36:44	0.909326	4.04486	3.57079	1797.42	FALSE	72
2022-09-12	15:36:45	0.11411	0.507584	0.554102	1948.82	FALSE	72
2022-09-12	15:36:45	0.253499	1.12761	0.554102	1798.55	FALSE	72
2022-09-12	15:36:45	0.0370104	0.16463	0.554102	1948.99	FALSE	72
2022-09-12	15:36:45	0.0936516	0.416581	0.554102	1798.96	FALSE	72
2022-09-12	15:36:46	0.0454582	0.202207	-0.710598	1949.19	FALSE	72
2022-09-12	15:36:46	-0.111132	-0.494337	-0.710598	1798.96	FALSE	72
2022-09-12	15:36:46	-0.413575	-1.83966	-0.710598	1949.19	FALSE	72
2022-09-12	15:36:47	-0.518358	-2.30576	-2.01697	1798.96	FALSE	72
2022-09-12	15:36:47	-0.472811	-2.10316	-2.01697	1949.19	FALSE	72
2022-09-12	15:36:47	-0.434796	-1.93406	-2.01697	1798.96	FALSE	72
2022-09-12	15:36:47	-0.387773	-1.72489	-2.01697	1949.19	FALSE	72
2022-09-12	15:36:48	-0.205381	-0.913576	-1.09207	1798.96	FALSE	72
2022-09-12	15:36:48	-0.204567	-0.909955	-1.09207	1949.19	FALSE	72
2022-09-12	15:36:48	-0.277799	-1.23571	-1.09207	1798.96	FALSE	72
2022-09-12	15:36:48	-0.294287	-1.30905	-1.09207	1949.19	FALSE	72
2022-09-12	15:36:49	-0.324058	-1.44147	-0.0634963	1798.96	FALSE	72
2022-09-12	15:36:49	0.241234	1.07306	-0.0634963	1950.26	FALSE	72
2022-09-12	15:36:49	0.0454582	0.202207	-0.0634963	1799.17	FALSE	72
2022-09-12	15:36:49	-0.0197326	-0.0877746	-0.0634963	1950.26	FALSE	72
2022-09-12	15:36:50	-0.0625824	-0.278379	0.280381	1799.17	FALSE	72
2022-09-12	15:36:50	0.0978756	0.43537	0.280381	1950.7	FALSE	72
2022-09-12	15:36:50	0.153804	0.684151	0.280381	1799.85	FALSE	72
2022-09-12	15:36:51	0.28159	1.25257	1.08873	1951.95	FALSE	72
2022-09-12	15:36:51	0.201794	0.89762	1.08873	1800.75	FALSE	72
2022-09-12	15:36:51	0.22327	0.99315	1.08873	1952.94	FALSE	72
2022-09-12	15:36:51	0.272379	1.2116	1.08873	1801.96	FALSE	72
2022-09-12	15:36:52	0.331056	1.4726	1.679	1954.42	FALSE	72
2022-09-12	15:36:52	0.392837	1.74742	1.679	1803.71	FALSE	72
2022-09-12	15:36:52	0.331565	1.47487	1.679	1955.89	FALSE	72
2022-09-12	15:36:52	0.454364	2.0211	1.679	1805.73	FALSE	72
2022-09-12	15:36:53	0.374313	1.66502	1.5391	1957.56	FALSE	72
2022-09-12	15:36:53	0.36042	1.60322	1.5391	1807.33	FALSE	72
2022-09-12	15:36:53	0.370751	1.64917	1.5391	1959.21	FALSE	72
2022-09-12	15:36:53	0.278537	1.23899	1.5391	1808.57	FALSE	72
2022-09-12	15:36:54	0.239962	1.0674	0.894527	1960.27	FALSE	72
2022-09-12	15:36:54	0.296756	1.32003	0.894527	1809.89	FALSE	72
2022-09-12	15:36:54	0.0665778	0.296151	0.894527	1960.57	FALSE	72
2022-09-12	15:36:55	-0.00161552	-0.00718616	1.01171	1809.89	FALSE	72
2022-09-12	15:36:55	0.281947	1.25416	1.01171	1961.82	FALSE	72
2022-09-12	15:36:55	0.238181	1.05948	1.01171	1810.95	FALSE	72
2022-09-12	15:36:55	0.39126	1.7404	1.01171	1963.56	FALSE	72
2022-09-12	15:36:56	0.339555	1.51041	1.6498	1812.46	FALSE	72
2022-09-12	15:36:56	0.344593	1.53282	1.6498	1965.1	FALSE	72
2022-09-12	15:36:56	0.432888	1.92557	1.6498	1814.39	FALSE	72
2022-09-12	15:36:56	0.366527	1.63039	1.6498	1966.73	FALSE	72
2022-09-12	15:36:57	0.272837	1.21363	1.40226	1815.6	FALSE	72
2022-09-12	15:36:57	0.310038	1.37911	1.40226	1968.11	FALSE	72
2022-09-12	15:36:57	0.325255	1.4468	1.40226	1817.05	FALSE	72
2022-09-12	15:36:57	0.352837	1.56949	1.40226	1969.68	FALSE	72
2022-09-12	15:36:58	0.465356	2.07	1.88792	1819.12	FALSE	72
2022-09-12	15:36:58	0.378791	1.68494	1.88792	1971.36	FALSE	72
2022-09-12	15:36:58	0.429122	1.90882	1.88792	1821.03	FALSE	72
2022-09-12	15:36:59	0.384898	1.7121	1.90548	1973.07	FALSE	72
2022-09-12	15:36:59	0.458282	2.03853	1.90548	1823.06	FALSE	72
2022-09-12	15:36:59	0.443219	1.97153	1.90548	1975.04	FALSE	72
2022-09-12	15:36:59	0.427087	1.89977	1.90548	1824.96	FALSE	72
2022-09-12	15:37:00	0.43187	1.92104	1.91742	1976.96	FALSE	72
2022-09-12	15:37:00	0.430802	1.91629	1.91742	1826.88	FALSE	72
2022-09-12	15:37:00	0.428359	1.90543	1.91742	1978.87	FALSE	72
2022-09-12	15:37:00	0.433193	1.92693	1.91742	1828.81	FALSE	72
2022-09-12	15:37:01	0.432328	1.92308	1.91171	1980.79	FALSE	72
2022-09-12	15:37:01	0.430649	1.91561	1.91171	1830.72	FALSE	72
2022-09-12	15:37:01	0.429173	1.90905	1.91171	1982.7	FALSE	72
2022-09-12	15:37:01	0.426934	1.89909	1.91171	1832.62	FALSE	72
2022-09-12	15:37:02	0.430395	1.91448	1.88294	1984.62	FALSE	72
2022-09-12	15:37:02	0.42673	1.89818	1.88294	1834.52	FALSE	72
2022-09-12	15:37:02	0.412786	1.83615	1.88294	1986.45	FALSE	72
2022-09-12	15:37:03	0.568613	2.5293	2.33678	1837.05	FALSE	72
2022-09-12	15:37:03	0.418639	1.86219	2.33678	1988.32	FALSE	72
2022-09-12	15:37:03	0.572074	2.5447	2.33678	1839.59	FALSE	72
2022-09-12	15:37:03	0.541997	2.41091	2.33678	1990.73	FALSE	72
2022-09-12	15:37:04	0.379555	1.68834	1.43288	1841.28	FALSE	72
2022-09-12	15:37:04	0.374669	1.6666	1.43288	1992.39	FALSE	72
2022-09-12	15:37:04	0.327901	1.45857	1.43288	1842.74	FALSE	72
2022-09-12	15:37:04	0.206374	0.917993	1.43288	1993.31	FALSE	72
2022-09-12	15:37:05	0.730496	3.24939	6.40592	1845.99	FALSE	72
2022-09-12	15:37:05	1.48983	6.62706	6.40592	1999.94	FALSE	72
2022-09-12	15:37:05	1.67971	7.47169	6.40592	1853.46	FALSE	72
2022-09-12	15:37:05	1.86042	8.27552	6.40592	2008.21	FALSE	72
2022-09-12	15:37:06	1.70515	7.58485	8.78107	1861.05	FALSE	72
2022-09-12	15:37:06	1.91594	8.52248	8.78107	2016.74	FALSE	72
2022-09-12	15:37:06	2.30113	10.2359	8.78107	1871.28	FALSE	72
2022-09-12	15:37:07	2.43029	10.8104	7.67173	2027.55	FALSE	72
2022-09-12	15:37:07	1.52612	6.78849	7.67173	1878.07	FALSE	72
2022-09-12	15:37:07	1.99411	8.8702	7.67173	2036.42	FALSE	72
2022-09-12	15:37:07	0.948206	4.21781	7.67173	1882.29	FALSE	72
2022-09-12	15:37:08	0.264084	1.1747	2.56298	2037.59	FALSE	72
2022-09-12	15:37:08	0.616603	2.74277	2.56298	1885.03	FALSE	72
2022-09-12	15:37:08	0.164288	0.730786	2.56298	2038.32	FALSE	72
2022-09-12	15:37:08	1.25976	5.60366	2.56298	1890.64	FALSE	72
2022-09-12	15:37:09	-0.198715	-0.883924	-0.974095	2038.32	FALSE	72
2022-09-12	15:37:09	-0.40472	-1.80028	-0.974095	1890.64	FALSE	72
2022-09-12	15:37:09	-0.0535239	-0.238085	-0.974095	2038.32	FALSE	72
2022-09-12	15:37:10	-0.117188	-0.521276	3.22308	1890.64	FALSE	72
2022-09-12	15:37:10	1.10332	4.90779	3.22308	2043.23	FALSE	72
2022-09-12	15:37:10	1.09238	4.85912	3.22308	1895.49	FALSE	72
2022-09-12	15:37:10	0.819809	3.64667	3.22308	2046.88	FALSE	72
2022-09-12	15:37:11	1.27492	5.6711	3.64939	1901.17	FALSE	72
2022-09-12	15:37:11	0.593091	2.63819	3.64939	2049.51	FALSE	72
2022-09-12	15:37:11	0.742964	3.30485	3.64939	1904.47	FALSE	72
2022-09-12	15:37:11	0.6707	2.98341	3.64939	2052.5	FALSE	72
2022-09-12	15:37:12	0.636196	2.82993	3.65545	1907.3	FALSE	72
2022-09-12	15:37:12	1.38948	6.18068	3.65545	2058.68	FALSE	72
2022-09-12	15:37:12	0.639504	2.84464	3.65545	1910.15	FALSE	72
2022-09-12	15:37:12	0.621947	2.76654	3.65545	2061.45	FALSE	72
2022-09-12	15:37:13	0.316705	1.40877	1.8935	1911.55	FALSE	72
2022-09-12	15:37:13	0.576908	2.5662	1.8935	2064.01	FALSE	72
2022-09-12	15:37:13	0.383422	1.70554	1.8935	1913.26	FALSE	72
2022-09-12	15:37:14	0.361489	1.60798	1.28381	2065.62	FALSE	72
2022-09-12	15:37:14	0.357672	1.591	1.28381	1914.85	FALSE	72
2022-09-12	15:37:14	0.169478	0.753872	1.28381	2066.37	FALSE	72
2022-09-12	15:37:14	0.265814	1.18239	1.28381	1916.03	FALSE	72
2022-09-12	15:37:15	0.225763	1.00424	2.97	2067.38	FALSE	72
2022-09-12	15:37:15	0.675076	3.00287	2.97	1919.04	FALSE	72
2022-09-12	15:37:15	0.708003	3.14934	2.97	2070.53	FALSE	72
2022-09-12	15:37:15	1.0619	4.72354	2.97	1923.76	FALSE	72
2022-09-12	15:37:16	1.57996	7.02798	4.47073	2077.55	FALSE	72
2022-09-12	15:37:16	1.30648	5.81148	4.47073	1929.57	FALSE	72
2022-09-12	15:37:16	0.584796	2.60129	4.47073	2080.16	FALSE	72
2022-09-12	15:37:16	0.54902	2.44215	4.47073	1932.01	FALSE	72
2022-09-12	15:37:17	0.278537	1.23899	1.44416	2081.4	FALSE	72
2022-09-12	15:37:17	0.351768	1.56473	1.44416	1933.58	FALSE	72
2022-09-12	15:37:17	0.343677	1.52874	1.44416	2082.92	FALSE	72
2022-09-12	15:37:18	0.511463	2.27509	2.57628	1935.85	FALSE	72
2022-09-12	15:37:18	0.557315	2.47905	2.57628	2085.4	FALSE	72
2022-09-12	15:37:18	0.732175	3.25686	2.57628	1939.11	FALSE	72
2022-09-12	15:37:18	0.515738	2.29411	2.57628	2087.7	FALSE	72
2022-09-12	15:37:19	0.29416	1.30848	0.851837	1940.42	FALSE	72
2022-09-12	15:37:19	0.156349	0.695472	0.851837	2088.39	FALSE	72
2022-09-12	15:37:19	0.163779	0.728522	0.851837	1941.15	FALSE	72
2022-09-12	15:37:19	0.151718	0.674872	0.851837	2089.07	FALSE	72
2022-09-12	15:37:20	0.247901	1.10271	1.44335	1942.25	FALSE	72
2022-09-12	15:37:20	0.351565	1.56383	1.44335	2090.63	FALSE	72
2022-09-12	15:37:20	0.206272	0.917539	1.44335	1943.17	FALSE	72
2022-09-12	15:37:20	0.492176	2.1893	1.44335	2092.82	FALSE	72
2022-09-12	15:37:21	0.152736	0.6794	1.45231	1943.85	FALSE	72
2022-09-12	15:37:21	0.421896	1.87668	1.45231	2094.7	FALSE	72
2022-09-12	15:37:21	0.404847	1.80084	1.45231	1945.65	FALSE	72
2022-09-12	15:37:22	0.3164	1.40741	1.63531	2096.1	FALSE	72
2022-09-12	15:37:22	0.324797	1.44476	1.63531	1947.09	FALSE	72
2022-09-12	15:37:22	0.281896	1.25393	1.63531	2097.36	FALSE	72
2022-09-12	15:37:22	0.547443	2.43514	1.63531	1949.53	FALSE	72
2022-09-12	15:37:23	0.446476	1.98601	5.93081	2099.34	FALSE	72
2022-09-12	15:37:23	1.01599	4.51933	5.93081	1954.05	FALSE	72
2022-09-12	15:37:23	0.697417	3.10225	5.93081	2102.45	FALSE	72
2022-09-12	15:37:23	3.17334	14.1157	5.93081	1968.16	1	73
2022-09-12	15:37:24	1.94022	8.63049	22.9091	2111.08	FALSE	73
2022-09-12	15:37:24	6.53049	29.0489	22.9091	1997.21	1	74
2022-09-12	15:37:24	3.86347	17.1855	22.9091	2128.26	1	75
2022-09-12	15:37:24	8.26662	36.7716	22.9091	2033.98	1	76
2022-09-12	15:37:25	3.64999	16.2359	13.8433	2144.5	1	77
2022-09-12	15:37:25	3.28607	14.6171	13.8433	2048.6	1	78
2022-09-12	15:37:25	2.40027	10.6769	13.8433	2155.18	FALSE	78
2022-09-12	15:37:26	1.14536	5.09479	7.28593	2053.69	FALSE	78
2022-09-12	15:37:26	1.79838	7.99955	7.28593	2163.18	FALSE	78
2022-09-12	15:37:26	2.5537	11.3594	7.28593	2065.05	FALSE	78
2022-09-12	15:37:26	1.05436	4.69	7.28593	2167.87	FALSE	78
2022-09-12	15:37:27	2.37691	10.573	8.73369	2075.63	FALSE	78
2022-09-12	15:37:27	0.866679	3.85516	8.73369	2171.72	FALSE	78
2022-09-12	15:37:27	2.98749	13.289	8.73369	2088.92	FALSE	78
2022-09-12	15:37:27	1.62261	7.21769	8.73369	2178.94	FALSE	78
2022-09-12	15:37:28	2.23396	9.9371	10.7831	2098.85	FALSE	78
2022-09-12	15:37:28	2.09273	9.30888	10.7831	2188.25	FALSE	78
2022-09-12	15:37:28	1.13884	5.06579	10.7831	2103.92	FALSE	78
2022-09-12	15:37:28	4.23111	18.8208	10.7831	2207.07	1	79
2022-09-12	15:37:29	1.17553	5.22899	5.07205	2109.15	FALSE	79
2022-09-12	15:37:29	1.84973	8.22797	5.07205	2215.3	FALSE	79
2022-09-12	15:37:29	0.395484	1.75919	5.07205	2110.91	FALSE	79
2022-09-12	15:37:30	0.118181	0.525693	0.851214	2215.82	FALSE	79
2022-09-12	15:37:30	0.327901	1.45857	0.851214	2112.37	FALSE	79
2022-09-12	15:37:30	0.0301402	0.13407	0.851214	2215.96	FALSE	79
2022-09-12	15:37:30	0.289224	1.28653	0.851214	2113.65	FALSE	79
2022-09-12	15:37:31	0.373295	1.66049	2.96337	2217.62	FALSE	79
2022-09-12	15:37:31	0.615636	2.73847	2.96337	2116.39	FALSE	79
2022-09-12	15:37:31	1.00332	4.46297	2.96337	2222.08	FALSE	79
2022-09-12	15:37:31	0.672532	2.99156	2.96337	2119.38	FALSE	79
2022-09-12	15:37:32	2.41864	10.7586	12.8724	2232.84	FALSE	79
2022-09-12	15:37:32	1.51655	6.74592	12.8724	2126.13	FALSE	79
2022-09-12	15:37:32	4.74637	21.1128	12.8724	2253.95	1	80
2022-09-12	15:37:33	3.59518	15.9921	19.843	2142.12	1	81
2022-09-12	15:37:33	8.1021	36.0398	19.843	2289.99	1	82
2022-09-12	15:37:33	3.0392	13.519	19.843	2155.64	1	83
2022-09-12	15:37:33	3.10714	13.8212	19.843	2303.81	1	84
2022-09-12	15:37:34	6.1197	27.2216	11.8111	2182.86	1	85
2022-09-12	15:37:34	1.40062	6.23024	11.8111	2310.04	FALSE	85
2022-09-12	15:37:34	1.74973	7.78315	11.8111	2190.64	FALSE	85
2022-09-12	15:37:34	1.35095	6.0093	11.8111	2316.05	FALSE	85
2022-09-12	15:37:35	0.966527	4.29931	4.35375	2194.94	FALSE	85
2022-09-12	15:37:35	0.966883	4.30089	4.35375	2320.35	FALSE	85
2022-09-12	15:37:35	0.455636	2.02676	4.35375	2196.97	FALSE	85
2022-09-12	15:37:35	1.52602	6.78804	4.35375	2327.14	FALSE	85
2022-09-12	15:37:36	1.91146	8.50256	14.8339	2205.47	FALSE	85
2022-09-12	15:37:36	3.31518	14.7466	14.8339	2341.89	1	86
2022-09-12	15:37:36	4.77782	21.2527	14.8339	2226.72	1	87
2022-09-12	15:37:37	4.68754	20.8511	7.21163	2362.74	1	88
2022-09-12	15:37:37	0.728104	3.23875	7.21163	2229.96	FALSE	88
2022-09-12	15:37:37	0.499402	2.22144	7.21163	2364.96	FALSE	88
2022-09-12	15:37:37	0.569937	2.53519	7.21163	2232.5	FALSE	88
2022-09-12	15:37:38	0.270802	1.20458	1.88607	2366.16	FALSE	88
2022-09-12	15:37:38	0.245662	1.09275	1.88607	2233.59	FALSE	88
2022-09-12	15:37:38	0.582048	2.58907	1.88607	2368.75	FALSE	88
2022-09-12	15:37:38	0.597519	2.65788	1.88607	2236.25	FALSE	88
2022-09-12	15:37:39	3.32368	14.7844	30.6817	2383.54	1	89
2022-09-12	15:37:39	6.24902	27.7969	30.6817	2264.05	1	90
2022-09-12	15:37:39	13.7288	61.0684	30.6817	2444.61	1	91
2022-09-12	15:37:39	4.28871	19.077	30.6817	2283.12	1	92
2022-09-12	15:37:40	6.31192	28.0767	31.3936	2472.68	1	93
2022-09-12	15:37:40	4.92423	21.904	31.3936	2305.03	1	94
2022-09-12	15:37:40	9.93665	44.2002	31.3936	2516.88	1	95
2022-09-12	15:37:41	7.28088	32.3868	23.3826	2337.41	1	96
2022-09-12	15:37:41	5.99884	26.684	23.3826	2543.57	1	97
2022-09-12	15:37:41	6.0823	27.0553	23.3826	2364.47	1	98
2022-09-12	15:37:41	1.66454	7.40421	23.3826	2550.97	FALSE	98
2022-09-12	15:37:42	3.1139	13.8512	6.97903	2378.32	1	99
2022-09-12	15:37:42	1.47854	6.57684	6.97903	2557.55	FALSE	99
2022-09-12	15:37:42	1.2135	5.39789	6.97903	2383.72	FALSE	99
2022-09-12	15:37:42	0.469886	2.09015	6.97903	2559.64	FALSE	99
2022-09-12	15:37:43	0.815992	3.6297	11.5369	2387.35	FALSE	99
2022-09-12	15:37:43	2.1905	9.74378	11.5369	2569.38	FALSE	99
2022-09-12	15:37:43	2.86525	12.7452	11.5369	2400.09	FALSE	99
2022-09-12	15:37:43	4.50271	20.029	11.5369	2589.41	1	100
2022-09-12	15:37:44	2.13574	9.5002	4.63554	2409.59	FALSE	100
2022-09-12	15:37:44	0.462863	2.05891	4.63554	2591.47	FALSE	100
2022-09-12	15:37:44	0.527748	2.34753	4.63554	2411.94	FALSE	100
2022-09-12	15:37:45	0.397417	1.76779	4.38131	2593.24	FALSE	100
2022-09-12	15:37:45	0.72388	3.21996	4.38131	2415.16	FALSE	100
2022-09-12	15:37:45	1.64902	7.33517	4.38131	2600.57	FALSE	100
2022-09-12	15:37:45	1.16953	5.2023	4.38131	2420.36	FALSE	100
2022-09-12	15:37:46	1.00821	4.48472	9.93601	2605.06	FALSE	100
2022-09-12	15:37:46	0.802863	3.5713	9.93601	2423.93	FALSE	100
2022-09-12	15:37:46	2.15462	9.58418	9.93601	2614.64	FALSE	100
2022-09-12	15:37:46	4.96917	22.1039	9.93601	2446.04	1	101
2022-09-12	15:37:47	2.40215	10.6852	4.44367	2625.33	FALSE	101
2022-09-12	15:37:47	0.82958	3.69014	4.44367	2449.73	FALSE	101
2022-09-12	15:37:47	0.485814	2.161	4.44367	2627.49	FALSE	101
2022-09-12	15:37:47	0.278384	1.23831	4.44367	2450.97	FALSE	101
2022-09-12	15:37:48	0.385407	1.71437	2.19179	2629.2	FALSE	101
2022-09-12	15:37:48	0.715636	3.18329	2.19179	2454.15	FALSE	101
2022-09-12	15:37:48	0.377163	1.6777	2.19179	2630.88	FALSE	101
2022-09-12	15:37:49	0.778435	3.46263	4.02217	2457.61	FALSE	101
2022-09-12	15:37:49	1.08251	4.81522	4.02217	2635.69	FALSE	101
2022-09-12	15:37:49	1.08734	4.83671	4.02217	2462.45	FALSE	101
2022-09-12	15:37:49	0.668613	2.97412	4.02217	2638.67	FALSE	101
2022-09-12	15:37:50	0.553194	2.46072	1.77741	2464.91	FALSE	101
2022-09-12	15:37:50	0.38098	1.69468	1.77741	2640.36	FALSE	101
2022-09-12	15:37:50	0.316196	1.4065	1.77741	2466.32	FALSE	101
2022-09-12	15:37:50	0.347952	1.54776	1.77741	2641.91	FALSE	101
2022-09-12	15:37:51	0.392125	1.74425	1.58798	2468.06	FALSE	101
2022-09-12	15:37:51	0.326985	1.45449	1.58798	2643.37	FALSE	101
2022-09-12	15:37:51	0.35187	1.56519	1.58798	2469.63	FALSE	101
2022-09-12	15:37:52	0.50444	2.24385	2.23779	2645.61	FALSE	101
2022-09-12	15:37:52	0.477875	2.12568	2.23779	2471.75	FALSE	101
2022-09-12	15:37:52	0.529275	2.35432	2.23779	2647.96	FALSE	101
2022-09-12	15:37:52	0.500725	2.22732	2.23779	2473.98	FALSE	101
2022-09-12	15:37:53	0.53584	2.38352	2.42659	2650.35	FALSE	101
2022-09-12	15:37:53	0.550089	2.44691	2.42659	2476.43	FALSE	101
2022-09-12	15:37:53	0.548817	2.44125	2.42659	2652.79	FALSE	101
2022-09-12	15:37:53	0.547341	2.43468	2.42659	2478.86	FALSE	101
2022-09-12	15:37:54	0.556348	2.47475	2.25789	2655.26	FALSE	101
2022-09-12	15:37:54	0.539962	2.40186	2.25789	2481.26	FALSE	101
2022-09-12	15:37:54	0.496298	2.20763	2.25789	2657.47	FALSE	101
2022-09-12	15:37:54	0.437774	1.94731	2.25789	2483.21	FALSE	101
2022-09-12	15:37:55	0.403372	1.79428	1.7822	2659.27	FALSE	101
2022-09-12	15:37:55	0.390496	1.737	1.7822	2484.95	FALSE	101
2022-09-12	15:37:55	0.408104	1.81533	1.7822	2661.08	FALSE	101
2022-09-12	15:37:56	0.467748	2.08064	2.7164	2487.03	FALSE	101
2022-09-12	15:37:56	0.601438	2.67532	2.7164	2663.76	FALSE	101
2022-09-12	15:37:56	0.679504	3.02257	2.7164	2490.05	FALSE	101
2022-09-12	15:37:56	0.694008	3.08709	2.7164	2666.84	FALSE	101
2022-09-12	15:37:57	0.728206	3.23921	3.28754	2493.29	FALSE	101
2022-09-12	15:37:57	0.746629	3.32116	3.28754	2670.16	FALSE	101
2022-09-12	15:37:57	0.751514	3.34288	3.28754	2496.63	FALSE	101
2022-09-12	15:37:57	0.729936	3.2469	3.28754	2673.41	FALSE	101
2022-09-12	15:37:58	0.729428	3.24464	3.11872	2499.88	FALSE	101
2022-09-12	15:37:58	0.719758	3.20163	3.11872	2676.61	FALSE	101
2022-09-12	15:37:58	0.685967	3.05132	3.11872	2502.93	FALSE	101
2022-09-12	15:37:58	0.669326	2.9773	3.11872	2679.59	FALSE	101
2022-09-12	15:37:59	0.659962	2.93564	2.87799	2505.86	FALSE	101
2022-09-12	15:37:59	0.668511	2.97367	2.87799	2682.56	FALSE	101
2022-09-12	15:37:59	0.612532	2.72466	2.87799	2508.59	FALSE	101
2022-09-12	15:38:00	0.646323	2.87497	2.0284	2685.44	FALSE	101
2022-09-12	15:38:00	0.455382	2.02563	2.0284	2510.61	FALSE	101
2022-09-12	15:38:00	0.380522	1.69264	2.0284	2687.13	FALSE	101
2022-09-12	15:38:00	0.341794	1.52037	2.0284	2512.13	FALSE	101
2022-09-12	15:38:01	0.335789	1.49366	1.48177	2688.62	FALSE	101
2022-09-12	15:38:01	0.324797	1.44476	1.48177	2513.58	FALSE	101
2022-09-12	15:38:01	0.328461	1.46106	1.48177	2690.09	FALSE	101
2022-09-12	15:38:01	0.343423	1.52761	1.48177	2515.11	FALSE	101
2022-09-12	15:38:02	0.547086	2.43355	2.62608	2692.52	FALSE	101
2022-09-12	15:38:02	0.676247	3.00808	2.62608	2518.12	FALSE	101
2022-09-12	15:38:02	0.584084	2.59812	2.62608	2695.12	FALSE	101
2022-09-12	15:38:02	0.554059	2.46457	2.62608	2520.58	FALSE	101
2022-09-12	15:38:03	0.500267	2.22529	3.69926	2697.34	FALSE	101
2022-09-12	15:38:03	0.684186	3.0434	3.69926	2523.62	FALSE	101
2022-09-12	15:38:03	1.31044	5.8291	3.69926	2703.17	FALSE	101
2022-09-12	15:38:04	0.97757	4.34843	4.41899	2527.97	FALSE	101
2022-09-12	15:38:04	1.00983	4.49193	4.41899	2707.66	FALSE	101
2022-09-12	15:38:04	0.999962	4.44803	4.41899	2532.42	FALSE	101
2022-09-12	15:38:04	0.986374	4.38759	4.41899	2712.05	FALSE	101
2022-09-12	15:38:05	1.02088	4.54108	3.86518	2536.96	FALSE	101
2022-09-12	15:38:05	0.870598	3.87259	3.86518	2715.92	FALSE	101
2022-09-12	15:38:05	0.742048	3.30078	3.86518	2540.26	FALSE	101
2022-09-12	15:38:05	0.842201	3.74628	3.86518	2719.67	FALSE	101
2022-09-12	15:38:06	0.951361	4.23184	5.81265	2544.49	FALSE	101
2022-09-12	15:38:06	1.35324	6.01948	5.81265	2725.69	FALSE	101
2022-09-12	15:38:06	1.5736	6.99969	5.81265	2551.49	FALSE	101
2022-09-12	15:38:06	1.34877	5.9996	5.81265	2731.69	FALSE	101
2022-09-12	15:38:07	1.32668	5.90134	5.07704	2557.39	FALSE	101
2022-09-12	15:38:07	1.07065	4.76247	5.07704	2736.45	FALSE	101
2022-09-12	15:38:07	1.02678	4.56732	5.07704	2561.96	FALSE	101
2022-09-12	15:38:08	1.17355	5.22019	5.49126	2741.67	FALSE	101
2022-09-12	15:38:08	1.2307	5.4744	5.49126	2567.44	FALSE	101
2022-09-12	15:38:08	1.26103	5.60931	5.49126	2747.28	FALSE	101
2022-09-12	15:38:08	1.27268	5.66114	5.49126	2573.1	FALSE	101
2022-09-12	15:38:09	1.2337	5.48774	5.84332	2752.77	FALSE	101
2022-09-12	15:38:09	1.28841	5.73111	5.84332	2578.83	FALSE	101
2022-09-12	15:38:09	1.35782	6.03985	5.84332	2758.81	FALSE	101
2022-09-12	15:38:09	1.37462	6.11458	5.84332	2584.94	FALSE	101
2022-09-12	15:38:10	1.32393	5.88911	4.88599	2764.7	FALSE	101
2022-09-12	15:38:10	1.22072	5.43001	4.88599	2590.37	FALSE	101
2022-09-12	15:38:10	1.0166	4.52204	4.88599	2769.22	FALSE	101
2022-09-12	15:38:10	0.83243	3.70282	4.88599	2594.08	FALSE	101
2022-09-12	15:38:11	0.882964	3.9276	4.06237	2773.15	FALSE	101
2022-09-12	15:38:11	0.928868	4.13179	4.06237	2598.21	FALSE	101
2022-09-12	15:38:11	0.927952	4.12772	4.06237	2777.28	FALSE	101
2022-09-12	15:38:12	0.830598	3.69467	4.0585	2601.9	FALSE	101
2022-09-12	15:38:12	0.839504	3.73428	4.0585	2781.01	FALSE	101
2022-09-12	15:38:12	0.941081	4.18612	4.0585	2606.09	FALSE	101
2022-09-12	15:38:12	1.03838	4.61892	4.0585	2785.63	FALSE	101
2022-09-12	15:38:13	1.18164	5.25617	5.75012	2611.34	FALSE	101
2022-09-12	15:38:13	1.31905	5.8674	5.75012	2791.5	FALSE	101
2022-09-12	15:38:13	1.32062	5.87438	5.75012	2617.22	FALSE	101
2022-09-12	15:38:13	1.34943	6.00253	5.75012	2797.5	FALSE	101
2022-09-12	15:38:14	1.32383	5.88866	5.70627	2623.11	FALSE	101
2022-09-12	15:38:14	1.2937	5.75464	5.70627	2803.25	FALSE	101
2022-09-12	15:38:14	1.23095	5.47551	5.70627	2628.58	FALSE	101
2022-09-12	15:38:15	1.13905	5.06672	4.72036	2808.32	FALSE	101
2022-09-12	15:38:15	1.01462	4.51323	4.72036	2633.1	FALSE	101
2022-09-12	15:38:15	1.06139	4.72127	4.72036	2813.04	FALSE	101
2022-09-12	15:38:15	1.02968	4.58022	4.72036	2637.68	FALSE	101
2022-09-12	15:38:16	1.14164	5.07824	5.33156	2818.12	FALSE	101
2022-09-12	15:38:16	1.03009	4.58205	5.33156	2642.26	FALSE	101
2022-09-12	15:38:16	1.2392	5.51221	5.33156	2823.63	FALSE	101
2022-09-12	15:38:16	1.38342	6.15373	5.33156	2648.41	FALSE	101
2022-09-12	15:38:17	1.82536	8.11957	7.032	2831.75	FALSE	101
2022-09-12	15:38:17	1.8076	8.04057	7.032	2656.45	FALSE	101
2022-09-12	15:38:17	1.64072	7.29825	7.032	2839.05	FALSE	101
2022-09-12	15:38:17	1.04978	4.66963	7.032	2661.12	FALSE	101
2022-09-12	15:38:18	0.631921	2.81091	2.77032	2841.86	FALSE	101
2022-09-12	15:38:18	0.596654	2.65404	2.77032	2663.78	FALSE	101
2022-09-12	15:38:18	0.639809	2.846	2.77032	2844.71	FALSE	101
2022-09-12	15:38:19	0.622456	2.76881	2.95251	2666.55	FALSE	101
2022-09-12	15:38:19	0.661641	2.94311	2.95251	2847.65	FALSE	101
2022-09-12	15:38:19	0.678435	3.01781	2.95251	2669.56	FALSE	101
2022-09-12	15:38:19	0.692481	3.08029	2.95251	2850.73	FALSE	101
2022-09-12	15:38:20	0.682456	3.0357	3.14305	2672.6	FALSE	101
2022-09-12	15:38:20	0.688562	3.06286	3.14305	2853.79	FALSE	101
2022-09-12	15:38:20	0.721641	3.21	3.14305	2675.81	FALSE	101
2022-09-12	15:38:20	0.733702	3.26365	3.14305	2857.06	FALSE	101
2022-09-12	15:38:21	0.754567	3.35646	3.31029	2679.17	FALSE	101
2022-09-12	15:38:21	0.769987	3.42506	3.31029	2860.48	FALSE	101
2022-09-12	15:38:21	0.736552	3.27633	3.31029	2682.44	FALSE	101
2022-09-12	15:38:21	0.715636	3.18329	3.31029	2863.66	FALSE	101
2022-09-12	15:38:22	0.712328	3.16858	3.14096	2685.61	FALSE	101
2022-09-12	15:38:22	0.700166	3.11448	3.14096	2866.78	FALSE	101
2022-09-12	15:38:22	0.705865	3.13983	3.14096	2688.75	FALSE	101
2022-09-12	15:38:23	0.681692	3.0323	3.36394	2869.81	FALSE	101
2022-09-12	15:38:23	0.745102	3.31436	3.36394	2692.06	FALSE	101
2022-09-12	15:38:23	0.779198	3.46603	3.36394	2873.28	FALSE	101
2022-09-12	15:38:23	0.818995	3.64305	3.36394	2695.71	FALSE	101
2022-09-12	15:38:24	0.520878	2.31697	4.06999	2875.59	FALSE	101
2022-09-12	15:38:24	0.612633	2.72511	4.06999	2698.43	FALSE	101
2022-09-12	15:38:24	1.04826	4.66287	4.06999	2880.26	FALSE	101
2022-09-12	15:38:24	1.47813	6.57502	4.06999	2705.01	FALSE	101
2022-09-12	15:38:25	1.30927	5.82389	6.3218	2886.08	FALSE	101
2022-09-12	15:38:25	1.49253	6.63907	6.3218	2711.65	FALSE	101
2022-09-12	15:38:25	1.45207	6.4591	6.3218	2892.54	FALSE	101
2022-09-12	15:38:25	1.43095	6.36515	6.3218	2718.01	FALSE	101
2022-09-12	15:38:26	1.27772	5.68355	4.05791	2898.22	FALSE	101
2022-09-12	15:38:26	0.84388	3.75375	4.05791	2721.77	FALSE	101
2022-09-12	15:38:26	0.615178	2.73643	4.05791	2900.96	FALSE	101
2022-09-12	15:38:27	0.564491	2.51097	1.84946	2724.28	FALSE	101
2022-09-12	15:38:27	0.507392	2.25698	1.84946	2903.22	FALSE	101
2022-09-12	15:38:27	0.328817	1.46264	1.84946	2725.74	FALSE	101
2022-09-12	15:38:27	0.262405	1.16723	1.84946	2904.38	FALSE	101
2022-09-12	15:38:28	0.190395	0.846915	0.728635	2726.59	FALSE	101
2022-09-12	15:38:28	0.196247	0.872946	0.728635	2905.26	FALSE	101
2022-09-12	15:38:28	0.0937025	0.416807	0.728635	2727	FALSE	101
2022-09-12	15:38:28	0.174873	0.77787	0.728635	2906.04	FALSE	101
2022-09-12	15:38:29	-0.0867045	-0.385679	-1.09835	2727	FALSE	101
2022-09-12	15:38:29	-0.188893	-0.840234	-1.09835	2906.04	FALSE	101
2022-09-12	15:38:29	-0.330419	-1.46977	-1.09835	2727	FALSE	101
2022-09-12	15:38:29	-0.381666	-1.69773	-1.09835	2906.04	FALSE	101
2022-09-12	15:38:30	-0.339478	-1.51007	-0.332482	2727	FALSE	101
2022-09-12	15:38:30	0.0327356	0.145614	-0.332482	2906.18	FALSE	101
2022-09-12	15:38:30	0.0825066	0.367006	-0.332482	2727.37	FALSE	101
2022-09-12	15:38:31	0.107443	0.477928	0.43554	2906.66	FALSE	101
2022-09-12	15:38:31	0.1764	0.784662	0.43554	2728.15	FALSE	101
2022-09-12	15:38:31	-0.0233967	-0.104073	0.43554	2906.66	FALSE	101
2022-09-12	15:38:31	0.131209	0.583644	0.43554	2728.74	FALSE	101
2022-09-12	15:38:32	5.44968	24.2413	18.0705	2930.9	1	102
2022-09-12	15:38:32	7.45619	33.1666	18.0705	2761.9	1	103
2022-09-12	15:38:32	1.59838	7.10991	18.0705	2938.01	FALSE	103
2022-09-12	15:38:32	1.74551	7.76438	18.0705	2769.67	FALSE	103
2022-09-12	15:38:33	1.46765	6.5284	11.9574	2944.54	FALSE	103
2022-09-12	15:38:33	2.7996	12.4532	11.9574	2782.12	FALSE	103
2022-09-12	15:38:33	3.79721	16.8907	11.9574	2961.43	1	104
2022-09-12	15:38:34	6.57558	29.2495	28.4458	2811.37	1	105
2022-09-12	15:38:34	9.08968	40.4327	28.4458	3001.86	1	106
2022-09-12	15:38:34	5.24708	23.3401	28.4458	2834.71	1	107
2022-09-12	15:38:34	4.66729	20.761	28.4458	3022.62	1	108
2022-09-12	15:38:35	2.10429	9.3603	5.57887	2844.07	FALSE	108
2022-09-12	15:38:35	1.70973	7.60522	5.57887	3030.23	FALSE	108
2022-09-12	15:38:35	0.62098	2.76224	5.57887	2846.83	FALSE	108
2022-09-12	15:38:35	0.581743	2.58771	5.57887	3032.82	FALSE	108

## Sheet: Harley_star_2022912153319 (3)
Date	Time	Lbs	Newtons	Total force x time	Total Time Steps Force >13.345		**GoPro Fitting: 1522
2022-09-12	15:33:35	0.195992	0.871812	0.871812	FALSE	0		Total force x time	3032.82
2022-09-12	15:33:35	0.354618	1.57741	1.57741	FALSE	0		Total Time Steps Force >3	108
2022-09-12	15:33:35	0.181743	0.808429	1.68024	FALSE	0
2022-09-12	15:33:36	0.442303	1.96745	3.54486	FALSE	0
2022-09-12	15:33:36	0.188054	0.836502	2.51674	FALSE	0
2022-09-12	15:33:36	0.185306	0.824278	4.36914	FALSE	0
2022-09-12	15:33:36	-0.21215	-0.943686	2.51674	FALSE	0
2022-09-12	15:33:37	-0.499936	-2.22382	4.36914	FALSE	0
2022-09-12	15:33:37	-0.36589	-1.62755	2.51674	FALSE	0
2022-09-12	15:33:37	0.334924	1.48981	5.85895	FALSE	0
2022-09-12	15:33:37	0.700674	3.11674	5.63348	FALSE	0
2022-09-12	15:33:38	0.623066	2.77152	8.63047	FALSE	0
2022-09-12	15:33:38	0.613702	2.72987	8.36335	FALSE	0
2022-09-12	15:33:38	0.301234	1.33995	9.97042	FALSE	0
2022-09-12	15:33:38	0.530547	2.35998	10.7233	FALSE	0
2022-09-12	15:33:39	0.163015	0.725123	10.6955	FALSE	0
2022-09-12	15:33:39	0.561031	2.49558	13.2189	FALSE	0
2022-09-12	15:33:39	0.488054	2.17096	12.8665	FALSE	0
2022-09-12	15:33:40	0.384084	1.70848	14.9274	FALSE	0
2022-09-12	15:33:40	0.241692	1.07509	13.9416	FALSE	0
2022-09-12	15:33:40	0.625763	2.78352	17.7109	FALSE	0
2022-09-12	15:33:40	0.122608	0.545385	14.487	FALSE	0
2022-09-12	15:33:41	0.353193	1.57107	19.282	FALSE	0
2022-09-12	15:33:41	0.472023	2.09965	16.5866	FALSE	0
2022-09-12	15:33:41	0.116298	0.517317	19.7993	FALSE	0
2022-09-12	15:33:41	0.368562	1.63944	18.2261	FALSE	0
2022-09-12	15:33:42	0.108461	0.482456	20.2818	FALSE	0
2022-09-12	15:33:42	0.249631	1.11041	19.3365	FALSE	0
2022-09-12	15:33:42	0.75416	3.35465	23.6364	FALSE	0
2022-09-12	15:33:42	4.78917	21.3032	40.6397	1	1
2022-09-12	15:33:43	2.28312	10.1558	33.7922	FALSE	1
2022-09-12	15:33:43	1.18429	5.26796	45.9076	FALSE	1
2022-09-12	15:33:43	1.15167	5.12286	38.915	FALSE	1
2022-09-12	15:33:44	0.434669	1.93349	47.8411	FALSE	1
2022-09-12	15:33:44	1.00429	4.46728	43.3823	FALSE	1
2022-09-12	15:33:44	0.168512	0.749575	48.5907	FALSE	1
2022-09-12	15:33:44	0.473092	2.10441	45.4867	FALSE	1
2022-09-12	15:33:45	0.146527	0.651781	49.2425	FALSE	1
2022-09-12	15:33:45	0.407952	1.81465	47.3014	FALSE	1
2022-09-12	15:33:45	0.238537	1.06106	50.3035	FALSE	1
2022-09-12	15:33:45	0.161896	0.720146	48.0215	FALSE	1
2022-09-12	15:33:46	0.253143	1.12603	51.4296	FALSE	1
2022-09-12	15:33:46	0.235789	1.04884	49.0704	FALSE	1
2022-09-12	15:33:46	0.411769	1.83163	53.2612	FALSE	1
2022-09-12	15:33:46	0.172735	0.76836	49.8387	FALSE	1
2022-09-12	15:33:47	3.35457	14.9218	68.183	1	2
2022-09-12	15:33:47	0.306425	1.36304	51.2018	FALSE	2
2022-09-12	15:33:47	1.57223	6.99359	75.1766	FALSE	2
2022-09-12	15:33:48	0.844389	3.75601	54.9578	FALSE	2
2022-09-12	15:33:48	1.50729	6.70473	81.8813	FALSE	2
2022-09-12	15:33:48	2.07279	9.22018	64.178	FALSE	2
2022-09-12	15:33:48	1.53711	6.83737	88.7187	FALSE	2
2022-09-12	15:33:49	1.79991	8.00636	72.1843	FALSE	2
2022-09-12	15:33:49	0.872379	3.88052	92.5992	FALSE	2
2022-09-12	15:33:49	0.297163	1.32184	73.5062	FALSE	2
2022-09-12	15:33:49	0.378537	1.68381	94.283	FALSE	2
2022-09-12	15:33:50	0.0401656	0.178665	73.6848	FALSE	2
2022-09-12	15:33:50	0.218283	0.970966	95.254	FALSE	2
2022-09-12	15:33:50	0.28098	1.24986	74.9347	FALSE	2
2022-09-12	15:33:51	0.338232	1.50452	96.7585	FALSE	2
2022-09-12	15:33:51	0.279046	1.24125	76.1759	FALSE	2
2022-09-12	15:33:51	0.445305	1.98081	98.7393	FALSE	2
2022-09-12	15:33:51	0.400216	1.78024	77.9562	FALSE	2
2022-09-12	15:33:52	0.325967	1.44997	100.189	FALSE	2
2022-09-12	15:33:52	0.204797	0.910978	78.8672	FALSE	2
2022-09-12	15:33:52	0.268664	1.19507	101.384	FALSE	2
2022-09-12	15:33:52	0.915636	4.07293	82.9401	FALSE	2
2022-09-12	15:33:53	0.738944	3.28697	104.671	FALSE	2
2022-09-12	15:33:53	0.770649	3.428	86.3681	FALSE	2
2022-09-12	15:33:53	1.16617	5.18736	109.859	FALSE	2
2022-09-12	15:33:53	1.64042	7.29692	93.665	FALSE	2
2022-09-12	15:33:54	1.58022	7.02913	116.888	FALSE	2
2022-09-12	15:33:54	1.91156	8.503	102.168	FALSE	2
2022-09-12	15:33:54	4.08113	18.1537	135.041	1	3
2022-09-12	15:33:55	5.86001	26.0665	128.235	1	4
2022-09-12	15:33:55	3.96973	17.6582	152.7	1	5
2022-09-12	15:33:55	3.27915	14.5863	142.821	1	6
2022-09-12	15:33:55	4.06983	18.1034	170.803	1	7
2022-09-12	15:33:56	0.742252	3.30169	146.123	FALSE	7
2022-09-12	15:33:56	0.97701	4.34594	175.149	FALSE	7
2022-09-12	15:33:56	1.61604	7.18847	153.311	FALSE	7
2022-09-12	15:33:56	0.473804	2.10757	177.257	FALSE	7
2022-09-12	15:33:57	0.431718	1.92037	155.231	FALSE	7
2022-09-12	15:33:57	0.60383	2.68596	179.943	FALSE	7
2022-09-12	15:33:57	0.26841	1.19394	156.425	FALSE	7
2022-09-12	15:33:57	0.638995	2.84238	182.785	FALSE	7
2022-09-12	15:33:58	0.198028	0.880868	157.306	FALSE	7
2022-09-12	15:33:58	0.910496	4.05007	186.835	FALSE	7
2022-09-12	15:33:58	0.744033	3.30961	160.616	FALSE	7
2022-09-12	15:33:59	1.77289	7.88617	194.721	FALSE	7
2022-09-12	15:33:59	0.994466	4.42358	165.039	FALSE	7
2022-09-12	15:33:59	1.86261	8.28526	203.006	FALSE	7
2022-09-12	15:33:59	1.70296	7.57511	172.614	FALSE	7
2022-09-12	15:34:00	1.98072	8.81064	211.817	FALSE	7
2022-09-12	15:34:00	6.00021	26.6901	199.305	1	8
2022-09-12	15:34:00	2.60072	11.5685	223.386	FALSE	8
2022-09-12	15:34:00	1.40765	6.26151	205.566	FALSE	8
2022-09-12	15:34:01	0.965713	4.29568	227.681	FALSE	8
2022-09-12	15:34:01	1.25253	5.5715	211.138	FALSE	8
2022-09-12	15:34:01	0.561641	2.49829	230.18	FALSE	8
2022-09-12	15:34:01	0.841438	3.74288	214.88	FALSE	8
2022-09-12	15:34:02	1.40688	6.25808	236.438	FALSE	8
2022-09-12	15:34:02	3.77915	16.8104	231.691	1	9
2022-09-12	15:34:02	3.01665	13.4187	249.856	1	10
2022-09-12	15:34:03	1.10739	4.92589	236.617	FALSE	10
2022-09-12	15:34:03	1.41156	6.2789	256.135	FALSE	10
2022-09-12	15:34:03	1.09085	4.85232	241.469	FALSE	10
2022-09-12	15:34:03	0.492074	2.18884	258.324	FALSE	10
2022-09-12	15:34:04	1.19894	5.33312	246.802	FALSE	10
2022-09-12	15:34:04	0.20154	0.89649	259.221	FALSE	10
2022-09-12	15:34:04	0.726679	3.23241	250.035	FALSE	10
2022-09-12	15:34:04	0.439962	1.95704	261.178	FALSE	10
2022-09-12	15:34:05	0.433041	1.92625	251.961	FALSE	10
2022-09-12	15:34:05	0.233804	1.04001	262.218	FALSE	10
2022-09-12	15:34:05	0.214517	0.954215	252.915	FALSE	10
2022-09-12	15:34:05	0.238435	1.06061	263.278	FALSE	10
2022-09-12	15:34:06	0.0169595	0.0754392	252.991	FALSE	10
2022-09-12	15:34:06	0.352532	1.56813	264.846	FALSE	10
2022-09-12	15:34:06	0.24159	1.07464	254.065	FALSE	10
2022-09-12	15:34:07	0.354822	1.57832	266.425	FALSE	10
2022-09-12	15:34:07	0.269377	1.19824	255.263	FALSE	10
2022-09-12	15:34:07	0.298537	1.32795	267.753	FALSE	10
2022-09-12	15:34:07	0.33416	1.48641	256.75	FALSE	10
2022-09-12	15:34:08	0.327494	1.45676	269.209	FALSE	10
2022-09-12	15:34:08	0.30215	1.34402	258.094	FALSE	10
2022-09-12	15:34:08	0.314109	1.39722	270.607	FALSE	10
2022-09-12	15:34:08	0.112481	0.500338	258.594	FALSE	10
2022-09-12	15:34:09	-0.0499107	-0.222013	270.607	FALSE	10
2022-09-12	15:34:09	0.0145676	0.0647996	258.659	FALSE	10
2022-09-12	15:34:09	0.0305473	0.13588	270.742	FALSE	10
2022-09-12	15:34:09	-0.0436002	-0.193942	258.659	FALSE	10
2022-09-12	15:34:10	-0.193626	-0.861287	270.742	FALSE	10
2022-09-12	15:34:10	-0.480038	-2.13531	258.659	FALSE	10
2022-09-12	15:34:10	-0.20533	-0.913349	270.742	FALSE	10
2022-09-12	15:34:11	-0.127163	-0.565646	258.659	FALSE	10
2022-09-12	15:34:11	0.254975	1.13418	271.877	FALSE	10
2022-09-12	15:34:11	0.319402	1.42076	260.08	FALSE	10
2022-09-12	15:34:11	0.22841	1.01601	272.893	FALSE	10
2022-09-12	15:34:12	0.0880536	0.39168	260.471	FALSE	10
2022-09-12	15:34:12	0.377875	1.68086	274.574	FALSE	10
2022-09-12	15:34:12	0.375127	1.66864	262.14	FALSE	10
2022-09-12	15:34:12	0.93416	4.15533	278.729	FALSE	10
2022-09-12	15:34:13	0.945051	4.20378	266.344	FALSE	10
2022-09-12	15:34:13	1.1966	5.32272	284.052	FALSE	10
2022-09-12	15:34:13	0.327443	1.45653	267.8	FALSE	10
2022-09-12	15:34:13	0.145051	0.645216	284.697	FALSE	10
2022-09-12	15:34:14	0.343677	1.52874	269.329	FALSE	10
2022-09-12	15:34:14	-0.0814119	-0.362136	284.697	FALSE	10
2022-09-12	15:34:14	-0.0614629	-0.273399	269.329	FALSE	10
2022-09-12	15:34:15	-0.161107	-0.716636	284.697	FALSE	10
2022-09-12	15:34:15	-0.0854832	-0.380246	269.329	FALSE	10
2022-09-12	15:34:15	-0.154694	-0.68811	284.697	FALSE	10
2022-09-12	15:34:15	-0.0450761	-0.200508	269.329	FALSE	10
2022-09-12	15:34:16	-0.0724552	-0.322295	284.697	FALSE	10
2022-09-12	15:34:16	-0.250928	-1.11618	269.329	FALSE	10
2022-09-12	15:34:16	-0.210521	-0.93644	284.697	FALSE	10
2022-09-12	15:34:16	-0.366552	-1.6305	269.329	FALSE	10
2022-09-12	15:34:17	-0.0250252	-0.111317	284.697	FALSE	10
2022-09-12	15:34:17	0.235178	1.04612	270.375	FALSE	10
2022-09-12	15:34:17	0.198537	0.883132	285.58	FALSE	10
2022-09-12	15:34:18	0.328562	1.46151	271.837	FALSE	10
2022-09-12	15:34:18	0.365611	1.62631	287.206	FALSE	10
2022-09-12	15:34:18	0.402303	1.78952	273.626	FALSE	10
2022-09-12	15:34:18	0.14958	0.665362	287.872	FALSE	10
2022-09-12	15:34:19	0.782862	3.48233	277.109	FALSE	10
2022-09-12	15:34:19	0.791005	3.51855	291.39	FALSE	10
2022-09-12	15:34:19	2.18871	9.73582	286.844	FALSE	10
2022-09-12	15:34:19	2.05523	9.14207	300.532	FALSE	10
2022-09-12	15:34:20	3.22622	14.3509	301.195	1	11
2022-09-12	15:34:20	2.98922	13.2966	313.829	FALSE	11
2022-09-12	15:34:20	2.40383	10.6927	311.888	FALSE	11
2022-09-12	15:34:20	2.3105	10.2776	324.106	FALSE	11
2022-09-12	15:34:21	0.617875	2.74843	314.636	FALSE	11
2022-09-12	15:34:21	0.987596	4.39302	328.499	FALSE	11
2022-09-12	15:34:21	1.56851	6.97705	321.614	FALSE	11
2022-09-12	15:34:22	3.03162	13.4853	341.985	1	12
2022-09-12	15:34:22	4.2167	18.7567	340.37	1	13
2022-09-12	15:34:22	5.42434	24.1285	366.113	1	14
2022-09-12	15:34:22	8.22932	36.6057	376.976	1	15
2022-09-12	15:34:23	6.59294	29.3267	395.44	1	16
2022-09-12	15:34:23	9.40474	41.8342	418.81	1	17
2022-09-12	15:34:23	6.55314	29.1497	424.59	1	18
2022-09-12	15:34:23	10.1403	45.1061	463.916	1	19
2022-09-12	15:34:24	5.52286	24.5668	449.156	1	20
2022-09-12	15:34:24	4.85049	21.5759	485.492	1	21
2022-09-12	15:34:24	5.834	25.9508	475.107	1	22
2022-09-12	15:34:24	6.26881	27.8849	513.377	1	23
2022-09-12	15:34:25	4.46535	19.8628	494.97	1	24
2022-09-12	15:34:25	4.13075	18.3744	531.751	1	25
2022-09-12	15:34:25	11.3428	50.455	545.425	1	26
2022-09-12	15:34:26	9.22423	41.0312	572.783	1	27
2022-09-12	15:34:26	7.74255	34.4404	579.865	1	28
2022-09-12	15:34:26	9.20612	40.9507	613.733	1	29
2022-09-12	15:34:26	8.64739	38.4653	618.331	1	30
2022-09-12	15:34:27	4.79609	21.334	635.067	1	31
2022-09-12	15:34:27	1.93406	8.60309	626.934	FALSE	31
2022-09-12	15:34:27	4.41055	19.619	654.686	1	32
2022-09-12	15:34:27	2.45625	10.9259	637.86	FALSE	32
2022-09-12	15:34:28	1.60276	7.1294	661.816	FALSE	32
2022-09-12	15:34:28	0.986069	4.38623	642.246	FALSE	32
2022-09-12	15:34:28	1.24775	5.55024	667.366	FALSE	32
2022-09-12	15:34:28	1.70093	7.56608	649.812	FALSE	32
2022-09-12	15:34:29	2.00434	8.91571	676.282	FALSE	32
2022-09-12	15:34:29	2.54561	11.3234	661.135	FALSE	32
2022-09-12	15:34:29	2.11508	9.4083	685.69	FALSE	32
2022-09-12	15:34:30	1.91345	8.51141	669.647	FALSE	32
2022-09-12	15:34:30	1.34434	5.97989	691.67	FALSE	32
2022-09-12	15:34:30	2.37966	10.5852	680.232	FALSE	32
2022-09-12	15:34:30	0.797417	3.54707	695.217	FALSE	32
2022-09-12	15:34:31	0.420216	1.8692	682.101	FALSE	32
2022-09-12	15:34:31	0.358791	1.59597	696.813	FALSE	32
2022-09-12	15:34:31	1.48953	6.62573	688.727	FALSE	32
2022-09-12	15:34:31	0.685305	3.04837	699.861	FALSE	32
2022-09-12	15:34:32	0.645204	2.87	691.597	FALSE	32
2022-09-12	15:34:32	0.568053	2.52681	702.388	FALSE	32
2022-09-12	15:34:32	1.12953	5.02438	696.621	FALSE	32
2022-09-12	15:34:32	5.23009	23.2645	725.653	1	33
2022-09-12	15:34:33	6.84428	30.4447	727.066	1	34
2022-09-12	15:34:33	14.8605	66.1025	791.755	1	35
2022-09-12	15:34:33	6.73874	29.9753	757.041	1	36
2022-09-12	15:34:34	11.6628	51.8785	843.633	1	37
2022-09-12	15:34:34	11.4937	51.1263	808.168	1	38
2022-09-12	15:34:34	12.3694	55.0216	898.655	1	39
2022-09-12	15:34:34	5.03787	22.4095	830.577	1	40
2022-09-12	15:34:35	5.08596	22.6234	921.278	1	41
2022-09-12	15:34:35	4.24978	18.9039	849.481	1	42
2022-09-12	15:34:35	8.44001	37.5429	958.821	1	43
2022-09-12	15:34:35	7.83965	34.8723	884.353	1	44
2022-09-12	15:34:36	6.78627	30.1867	989.008	1	45
2022-09-12	15:34:36	6.62423	29.4659	913.819	1	46
2022-09-12	15:34:36	1.85991	8.27325	997.281	FALSE	46
2022-09-12	15:34:36	0.974924	4.33666	918.156	FALSE	46
2022-09-12	15:34:37	0.84617	3.76393	1001.05	FALSE	46
2022-09-12	15:34:37	2.1735	9.66816	927.824	FALSE	46
2022-09-12	15:34:37	4.76464	21.1941	1022.24	1	47
2022-09-12	15:34:38	13.8318	61.5266	989.351	1	48
2022-09-12	15:34:38	9.70927	43.1888	1065.43	1	49
2022-09-12	15:34:38	3.34846	14.8946	1004.25	1	50
2022-09-12	15:34:38	0.937214	4.16892	1069.6	FALSE	50
2022-09-12	15:34:39	0.687239	3.05698	1007.3	FALSE	50
2022-09-12	15:34:39	2.12169	9.4377	1079.03	FALSE	50
2022-09-12	15:34:39	2.63889	11.7383	1019.04	FALSE	50
2022-09-12	15:34:39	5.11039	22.732	1101.77	1	51
2022-09-12	15:34:40	3.64703	16.2227	1035.26	1	52
2022-09-12	15:34:40	3.3108	14.7271	1116.49	1	53
2022-09-12	15:34:40	2.40973	10.719	1045.98	FALSE	53
2022-09-12	15:34:41	1.87324	8.33255	1124.83	FALSE	53
2022-09-12	15:34:41	2.06622	9.19096	1055.17	FALSE	53
2022-09-12	15:34:41	1.39197	6.19176	1131.02	FALSE	53
2022-09-12	15:34:41	1.18281	5.26138	1060.43	FALSE	53
2022-09-12	15:34:42	1.36561	6.07451	1137.09	FALSE	53
2022-09-12	15:34:42	0.842201	3.74628	1064.18	FALSE	53
2022-09-12	15:34:42	0.309631	1.3773	1138.47	FALSE	53
2022-09-12	15:34:42	0.473702	2.10712	1066.29	FALSE	53
2022-09-12	15:34:43	0.191667	0.852573	1139.32	FALSE	53
2022-09-12	15:34:43	0.297875	1.32501	1067.61	FALSE	53
2022-09-12	15:34:43	0.155535	0.691851	1140.01	FALSE	53
2022-09-12	15:34:43	0.456501	2.03061	1069.64	FALSE	53
2022-09-12	15:34:44	0.149479	0.664912	1140.68	FALSE	53
2022-09-12	15:34:44	0.216349	0.962364	1070.61	FALSE	53
2022-09-12	15:34:44	0.077163	0.343236	1141.02	FALSE	53
2022-09-12	15:34:45	0.0336008	0.149463	1070.76	FALSE	53
2022-09-12	15:34:45	-0.111336	-0.495245	1141.02	FALSE	53
2022-09-12	15:34:45	-0.361768	-1.60922	1070.76	FALSE	53
2022-09-12	15:34:45	0.431463	1.91923	1142.94	FALSE	53
2022-09-12	15:34:46	0.48902	2.17526	1072.93	FALSE	53
2022-09-12	15:34:46	0.442608	1.96881	1144.91	FALSE	53
2022-09-12	15:34:46	0.0159926	0.0711383	1073	FALSE	53
2022-09-12	15:34:46	0.118181	0.525693	1145.44	FALSE	53
2022-09-12	15:34:47	0.237468	1.05631	1074.06	FALSE	53
2022-09-12	15:34:47	0.277723	1.23537	1146.67	FALSE	53
2022-09-12	15:34:47	0.215738	0.959646	1075.02	FALSE	53
2022-09-12	15:34:47	0.226934	1.00945	1147.68	FALSE	53
2022-09-12	15:34:48	0.234364	1.0425	1076.06	FALSE	53
2022-09-12	15:34:48	0.0724811	0.32241	1148	FALSE	53
2022-09-12	15:34:48	0.14042	0.624616	1076.68	FALSE	53
2022-09-12	15:34:49	0.225255	1.00198	1149.01	FALSE	53
2022-09-12	15:34:49	0.196603	0.874529	1077.56	FALSE	53
2022-09-12	15:34:49	0.0846949	0.37674	1149.38	FALSE	53
2022-09-12	15:34:49	0.289631	1.28834	1078.85	FALSE	53
2022-09-12	15:34:50	0.301234	1.33995	1150.72	FALSE	53
2022-09-12	15:34:50	0.309071	1.37481	1080.22	FALSE	53
2022-09-12	15:34:50	0.492023	2.18862	1152.91	FALSE	53
2022-09-12	15:34:50	0.481997	2.14402	1082.37	FALSE	53
2022-09-12	15:34:51	0.406323	1.80741	1154.72	FALSE	53
2022-09-12	15:34:51	0.56958	2.53361	1084.9	FALSE	53
2022-09-12	15:34:51	0.443219	1.97153	1156.69	FALSE	53
2022-09-12	15:34:51	0.484797	2.15647	1087.06	FALSE	53
2022-09-12	15:34:52	0.372227	1.65574	1158.35	FALSE	53
2022-09-12	15:34:52	0.0636771	0.283248	1087.34	FALSE	53
2022-09-12	15:34:52	0.0580282	0.258121	1158.6	FALSE	53
2022-09-12	15:34:53	0.0643386	0.286191	1087.63	FALSE	53
2022-09-12	15:34:53	0.182965	0.813865	1159.42	FALSE	53
2022-09-12	15:34:53	0.283524	1.26117	1088.89	FALSE	53
2022-09-12	15:34:53	0.234771	1.04431	1160.46	FALSE	53
2022-09-12	15:34:54	0.199809	0.88879	1089.78	FALSE	53
2022-09-12	15:34:54	0.336298	1.49592	1161.96	FALSE	53
2022-09-12	15:34:54	0.448206	1.99371	1091.77	FALSE	53
2022-09-12	15:34:54	0.0631681	0.280984	1162.24	FALSE	53
2022-09-12	15:34:55	-0.353575	-1.57277	1091.77	FALSE	53
2022-09-12	15:34:55	-0.640597	-2.8495	1162.24	FALSE	53
2022-09-12	15:34:55	-0.79103	-3.51866	1091.77	FALSE	53
2022-09-12	15:34:55	-0.850724	-3.78419	1162.24	FALSE	53
2022-09-12	15:34:56	-0.874389	-3.88946	1091.77	FALSE	53
2022-09-12	15:34:56	-0.721411	-3.20898	1162.24	FALSE	53
2022-09-12	15:34:56	-0.711132	-3.16326	1091.77	FALSE	53
2022-09-12	15:34:57	-0.611844	-2.7216	1162.24	FALSE	53
2022-09-12	15:34:57	-0.711284	-3.16393	1091.77	FALSE	53
2022-09-12	15:34:57	-0.578765	-2.57446	1162.24	FALSE	53
2022-09-12	15:34:57	-0.571437	-2.54187	1091.77	FALSE	53
2022-09-12	15:34:58	0.336552	1.49705	1163.74	FALSE	53
2022-09-12	15:34:58	0.273499	1.21658	1092.99	FALSE	53
2022-09-12	15:34:58	0.134161	0.596775	1164.33	FALSE	53
2022-09-12	15:34:58	0.173346	0.771078	1093.76	FALSE	53
2022-09-12	15:34:59	0.39131	1.74063	1166.07	FALSE	53
2022-09-12	15:34:59	0.481794	2.14312	1095.9	FALSE	53
2022-09-12	15:34:59	0.633244	2.8168	1168.89	FALSE	53
2022-09-12	15:35:00	0.439911	1.95681	1097.86	FALSE	53
2022-09-12	15:35:00	0.383626	1.70645	1170.6	FALSE	53
2022-09-12	15:35:00	0.356858	1.58738	1099.44	FALSE	53
2022-09-12	15:35:00	0.334873	1.48958	1172.09	FALSE	53
2022-09-12	15:35:01	0.395484	1.75919	1101.2	FALSE	53
2022-09-12	15:35:01	0.341438	1.51878	1173.6	FALSE	53
2022-09-12	15:35:01	0.350496	1.55908	1102.76	FALSE	53
2022-09-12	15:35:01	0.637825	2.83717	1176.44	FALSE	53
2022-09-12	15:35:02	0.683982	3.04249	1105.81	FALSE	53
2022-09-12	15:35:02	1.5193	6.75815	1183.2	FALSE	53
2022-09-12	15:35:02	1.15558	5.14025	1110.95	FALSE	53
2022-09-12	15:35:02	1.35503	6.02744	1189.23	FALSE	53
2022-09-12	15:35:03	1.42098	6.3208	1117.27	FALSE	53
2022-09-12	15:35:03	0.439453	1.95477	1191.18	FALSE	53
2022-09-12	15:35:03	0.446323	1.98533	1119.25	FALSE	53
2022-09-12	15:35:04	0.292634	1.30169	1192.48	FALSE	53
2022-09-12	15:35:04	0.288512	1.28336	1120.54	FALSE	53
2022-09-12	15:35:04	0.27757	1.23469	1193.72	FALSE	53
2022-09-12	15:35:04	0.239148	1.06378	1121.6	FALSE	53
2022-09-12	15:35:05	0.294669	1.31075	1195.03	FALSE	53
2022-09-12	15:35:05	0.301692	1.34199	1122.94	FALSE	53
2022-09-12	15:35:05	0.167596	0.745501	1195.77	FALSE	53
2022-09-12	15:35:05	0.278079	1.23695	1124.18	FALSE	53
2022-09-12	15:35:06	0.243626	1.0837	1196.86	FALSE	53
2022-09-12	15:35:06	0.356043	1.58375	1125.76	FALSE	53
2022-09-12	15:35:06	0.102914	0.457782	1197.32	FALSE	53
2022-09-12	15:35:06	0.284593	1.26593	1127.03	FALSE	53
2022-09-12	15:35:07	0.117367	0.522072	1197.84	FALSE	53
2022-09-12	15:35:07	0.156807	0.697509	1127.73	FALSE	53
2022-09-12	15:35:07	0.00779924	0.0346926	1197.87	FALSE	53
2022-09-12	15:35:08	0.203321	0.904412	1128.63	FALSE	53
2022-09-12	15:35:08	0.0858654	0.381946	1198.25	FALSE	53
2022-09-12	15:35:08	0.14271	0.634803	1129.26	FALSE	53
2022-09-12	15:35:08	0.448104	1.99326	1200.25	FALSE	53
2022-09-12	15:35:09	0.720318	3.20412	1132.47	FALSE	53
2022-09-12	15:35:09	0.477468	2.12387	1202.37	FALSE	53
2022-09-12	15:35:09	0.819606	3.64577	1136.11	FALSE	53
2022-09-12	15:35:09	0.891514	3.96563	1206.34	FALSE	53
2022-09-12	15:35:10	0.837519	3.72545	1139.84	FALSE	53
2022-09-12	15:35:10	1.02368	4.55353	1210.89	FALSE	53
2022-09-12	15:35:10	0.600522	2.67124	1142.51	FALSE	53
2022-09-12	15:35:10	1.46698	6.52542	1217.42	FALSE	53
2022-09-12	15:35:11	1.23116	5.47645	1147.99	FALSE	53
2022-09-12	15:35:11	2.15981	9.60727	1227.02	FALSE	53
2022-09-12	15:35:11	0.789376	3.5113	1151.5	FALSE	53
2022-09-12	15:35:12	1.02531	4.56078	1231.58	FALSE	53
2022-09-12	15:35:12	0.862303	3.8357	1155.33	FALSE	53
2022-09-12	15:35:12	0.926578	4.1216	1235.71	FALSE	53
2022-09-12	15:35:12	1.95477	8.69521	1164.03	FALSE	53
2022-09-12	15:35:13	1.50388	6.68956	1242.4	FALSE	53
2022-09-12	15:35:13	1.22856	5.46488	1169.49	FALSE	53
2022-09-12	15:35:13	2.36006	10.498	1252.89	FALSE	53
2022-09-12	15:35:13	1.41045	6.27396	1175.77	FALSE	53
2022-09-12	15:35:14	1.72805	7.68671	1260.58	FALSE	53
2022-09-12	15:35:14	2.72841	12.1365	1187.9	FALSE	53
2022-09-12	15:35:14	2.94866	13.1162	1273.7	FALSE	53
2022-09-12	15:35:14	1.67645	7.45718	1195.36	FALSE	53
2022-09-12	15:35:15	1.72439	7.67043	1281.37	FALSE	53
2022-09-12	15:35:15	0.554924	2.46841	1197.83	FALSE	53
2022-09-12	15:35:15	1.1191	4.97798	1286.35	FALSE	53
2022-09-12	15:35:16	0.856603	3.81034	1201.64	FALSE	53
2022-09-12	15:35:16	0.569529	2.53338	1288.88	FALSE	53
2022-09-12	15:35:16	0.683117	3.03864	1204.68	FALSE	53
2022-09-12	15:35:16	1.29579	5.76393	1294.64	FALSE	53
2022-09-12	15:35:17	0.796807	3.54436	1208.22	FALSE	53
2022-09-12	15:35:17	1.07141	4.76585	1299.41	FALSE	53
2022-09-12	15:35:17	0.477417	2.12365	1210.35	FALSE	53
2022-09-12	15:35:17	0.325916	1.44974	1300.86	FALSE	53
2022-09-12	15:35:18	0.310242	1.38002	1211.73	FALSE	53
2022-09-12	15:35:18	0.439708	1.95591	1302.81	FALSE	53
2022-09-12	15:35:18	0.296705	1.3198	1213.05	FALSE	53
2022-09-12	15:35:18	0.450496	2.0039	1304.82	FALSE	53
2022-09-12	15:35:19	0.675636	3.00536	1216.05	FALSE	53
2022-09-12	15:35:19	0.714771	3.17944	1308	FALSE	53
2022-09-12	15:35:19	0.365255	1.62473	1217.68	FALSE	53
2022-09-12	15:35:20	0.172023	0.765193	1308.76	FALSE	53
2022-09-12	15:35:20	0.280776	1.24895	1218.93	FALSE	53
2022-09-12	15:35:20	0.183931	0.818162	1309.58	FALSE	53
2022-09-12	15:35:20	0.0998602	0.444198	1219.37	FALSE	53
2022-09-12	15:35:21	0.093448	0.415675	1310	FALSE	53
2022-09-12	15:35:21	0.0876465	0.389869	1219.76	FALSE	53
2022-09-12	15:35:21	0.145916	0.649064	1310.65	FALSE	53
2022-09-12	15:35:21	0.112379	0.499884	1220.26	FALSE	53
2022-09-12	15:35:22	-0.110827	-0.492981	1310.65	FALSE	53
2022-09-12	15:35:22	-0.0728623	-0.324106	1220.26	FALSE	53
2022-09-12	15:35:22	0.0153819	0.0684218	1310.71	FALSE	53
2022-09-12	15:35:23	0.645051	2.86932	1223.13	FALSE	53
2022-09-12	15:35:23	3.51029	15.6145	1326.33	1	54
2022-09-12	15:35:23	0.391158	1.73995	1224.87	FALSE	54
2022-09-12	15:35:23	0.36444	1.6211	1327.95	FALSE	54
2022-09-12	15:35:24	0.330445	1.46989	1226.34	FALSE	54
2022-09-12	15:35:24	0.242557	1.07894	1329.03	FALSE	54
2022-09-12	15:35:24	0.106374	0.473173	1226.81	FALSE	54
2022-09-12	15:35:24	0.17986	0.800053	1329.83	FALSE	54
2022-09-12	15:35:25	0.139962	0.622579	1227.44	FALSE	54
2022-09-12	15:35:25	0.245255	1.09094	1330.92	FALSE	54
2022-09-12	15:35:25	0.228155	1.01488	1228.45	FALSE	54
2022-09-12	15:35:25	0.184339	0.819977	1331.74	FALSE	54
2022-09-12	15:35:26	0.219351	0.975717	1229.43	FALSE	54
2022-09-12	15:35:26	0.493346	2.1945	1333.93	FALSE	54
2022-09-12	15:35:26	1.02754	4.5707	1234	FALSE	54
2022-09-12	15:35:27	0.291056	1.29468	1335.23	FALSE	54
2022-09-12	15:35:27	0.28668	1.27521	1235.27	FALSE	54
2022-09-12	15:35:27	0.258537	1.15002	1336.38	FALSE	54
2022-09-12	15:35:27	0.32785	1.45834	1236.73	FALSE	54
2022-09-12	15:35:28	0.283015	1.25891	1337.64	FALSE	54
2022-09-12	15:35:28	0.198842	0.884489	1237.61	FALSE	54
2022-09-12	15:35:28	0.303982	1.35217	1338.99	FALSE	54
2022-09-12	15:35:28	0.284898	1.26728	1238.88	FALSE	54
2022-09-12	15:35:29	0.303779	1.35127	1340.34	FALSE	54
2022-09-12	15:35:29	0.209224	0.93067	1239.81	FALSE	54
2022-09-12	15:35:29	0.152888	0.680076	1341.02	FALSE	54
2022-09-12	15:35:29	0.130954	0.58251	1240.39	FALSE	54
2022-09-12	15:35:30	0.294059	1.30803	1342.33	FALSE	54
2022-09-12	15:35:30	0.563117	2.50486	1242.9	FALSE	54
2022-09-12	15:35:30	0.71874	3.1971	1345.53	FALSE	54
2022-09-12	15:35:31	0.657977	2.92681	1245.83	FALSE	54
2022-09-12	15:35:31	0.788257	3.50632	1349.03	FALSE	54
2022-09-12	15:35:31	0.625509	2.78239	1248.61	FALSE	54
2022-09-12	15:35:31	0.646018	2.87362	1351.91	FALSE	54
2022-09-12	15:35:32	0.477163	2.12252	1250.73	FALSE	54
2022-09-12	15:35:32	0.514618	2.28912	1354.2	FALSE	54
2022-09-12	15:35:32	0.580369	2.5816	1253.31	FALSE	54
2022-09-12	15:35:32	0.989631	4.40208	1358.6	FALSE	54
2022-09-12	15:35:33	0.98042	4.3611	1257.67	FALSE	54
2022-09-12	15:35:33	0.771209	3.43049	1362.03	FALSE	54
2022-09-12	15:35:33	0.870242	3.87101	1261.55	FALSE	54
2022-09-12	15:35:33	0.862557	3.83683	1365.86	FALSE	54
2022-09-12	15:35:34	0.687595	3.05856	1264.6	FALSE	54
2022-09-12	15:35:34	0.332888	1.48075	1367.35	FALSE	54
2022-09-12	15:35:34	0.296298	1.31799	1265.92	FALSE	54
2022-09-12	15:35:35	0.298588	1.32818	1368.67	FALSE	54
2022-09-12	15:35:35	0.384491	1.71029	1267.63	FALSE	54
2022-09-12	15:35:35	0.215331	0.957835	1369.63	FALSE	54
2022-09-12	15:35:35	0.344898	1.53418	1269.17	FALSE	54
2022-09-12	15:35:36	0.238435	1.06061	1370.69	FALSE	54
2022-09-12	15:35:36	0.985509	4.38374	1273.55	FALSE	54
2022-09-12	15:35:36	0.784898	3.49138	1374.18	FALSE	54
2022-09-12	15:35:36	1.04948	4.6683	1278.22	FALSE	54
2022-09-12	15:35:37	1.30042	5.78453	1379.97	FALSE	54
2022-09-12	15:35:37	1.36332	6.06432	1284.28	FALSE	54
2022-09-12	15:35:37	1.2362	5.49886	1385.47	FALSE	54
2022-09-12	15:35:37	0.765763	3.40627	1287.69	FALSE	54
2022-09-12	15:35:38	0.649478	2.88901	1388.36	FALSE	54
2022-09-12	15:35:38	0.58841	2.61737	1290.31	FALSE	54
2022-09-12	15:35:38	0.676502	3.00922	1391.36	FALSE	54
2022-09-12	15:35:39	0.362507	1.6125	1291.92	FALSE	54
2022-09-12	15:35:39	0.35299	1.57017	1392.94	FALSE	54
2022-09-12	15:35:39	0.323575	1.43933	1293.36	FALSE	54
2022-09-12	15:35:39	0.438944	1.95251	1394.89	FALSE	54
2022-09-12	15:35:40	0.113601	0.50532	1293.86	FALSE	54
2022-09-12	15:35:40	0.113702	0.505769	1395.39	FALSE	54
2022-09-12	15:35:40	0.229478	1.02076	1294.88	FALSE	54
2022-09-12	15:35:40	0.130853	0.58206	1395.98	FALSE	54
2022-09-12	15:35:41	0.0165015	0.073402	1294.96	FALSE	54
2022-09-12	15:35:41	-0.483651	-2.15138	1395.98	FALSE	54
2022-09-12	15:35:41	-0.503549	-2.23989	1294.96	FALSE	54
2022-09-12	15:35:41	-0.541921	-2.41057	1395.98	FALSE	54
2022-09-12	15:35:42	-0.531234	-2.36304	1294.96	FALSE	54
2022-09-12	15:35:42	-0.438206	-1.94923	1395.98	FALSE	54
2022-09-12	15:35:42	-0.503498	-2.23966	1294.96	FALSE	54
2022-09-12	15:35:43	-0.512048	-2.27769	1395.98	FALSE	54
2022-09-12	15:35:43	-0.344872	-1.53406	1294.96	FALSE	54
2022-09-12	15:35:43	-0.174033	-0.774134	1395.98	FALSE	54
2022-09-12	15:35:43	0.309886	1.37843	1296.34	FALSE	54
2022-09-12	15:35:44	1.60917	7.15791	1403.13	FALSE	54
2022-09-12	15:35:44	0.691819	3.07735	1299.41	FALSE	54
2022-09-12	15:35:44	0.184135	0.819069	1403.95	FALSE	54
2022-09-12	15:35:44	0.349173	1.55319	1300.97	FALSE	54
2022-09-12	15:35:45	0.296858	1.32048	1405.27	FALSE	54
2022-09-12	15:35:45	0.210242	0.935198	1301.9	FALSE	54
2022-09-12	15:35:45	0.173295	0.770851	1406.04	FALSE	54
2022-09-12	15:35:46	0.429784	1.91177	1303.81	FALSE	54
2022-09-12	15:35:46	0.322303	1.43367	1407.48	FALSE	54
2022-09-12	15:35:46	0.337723	1.50226	1305.32	FALSE	54
2022-09-12	15:35:46	0.388562	1.7284	1409.21	FALSE	54
2022-09-12	15:35:47	0.711056	3.16292	1308.48	FALSE	54
2022-09-12	15:35:47	0.719758	3.20163	1412.41	FALSE	54
2022-09-12	15:35:47	0.71874	3.1971	1311.68	FALSE	54
2022-09-12	15:35:47	0.339707	1.51108	1413.92	FALSE	54
2022-09-12	15:35:48	0.320166	1.42416	1313.1	FALSE	54
2022-09-12	15:35:48	0.32154	1.43027	1415.35	FALSE	54
2022-09-12	15:35:48	0.337875	1.50294	1314.6	FALSE	54
2022-09-12	15:35:48	0.350445	1.55885	1416.91	FALSE	54
2022-09-12	15:35:49	0.339351	1.5095	1316.11	FALSE	54
2022-09-12	15:35:49	0.343117	1.52625	1418.43	FALSE	54
2022-09-12	15:35:49	0.346425	1.54097	1317.65	FALSE	54
2022-09-12	15:35:50	0.312023	1.38794	1419.82	FALSE	54
2022-09-12	15:35:50	0.332837	1.48053	1319.13	FALSE	54
2022-09-12	15:35:50	0.357774	1.59145	1421.41	FALSE	54
2022-09-12	15:35:50	0.333804	1.48483	1320.62	FALSE	54
2022-09-12	15:35:51	0.329835	1.46717	1422.88	FALSE	54
2022-09-12	15:35:51	0.338893	1.50746	1322.13	FALSE	54
2022-09-12	15:35:51	0.330547	1.47034	1424.35	FALSE	54
2022-09-12	15:35:51	0.336298	1.49592	1323.62	FALSE	54
2022-09-12	15:35:52	0.336807	1.49818	1425.85	FALSE	54
2022-09-12	15:35:52	0.328104	1.45947	1325.08	FALSE	54
2022-09-12	15:35:52	0.344898	1.53418	1427.38	FALSE	54
2022-09-12	15:35:52	0.345967	1.53893	1326.62	FALSE	54
2022-09-12	15:35:53	0.345814	1.53825	1428.92	FALSE	54
2022-09-12	15:35:53	0.366578	1.63061	1328.25	FALSE	54
2022-09-12	15:35:53	0.382557	1.70169	1430.62	FALSE	54
2022-09-12	15:35:54	0.387799	1.72501	1329.98	FALSE	54
2022-09-12	15:35:54	0.356908	1.5876	1432.21	FALSE	54
2022-09-12	15:35:54	0.336552	1.49705	1331.47	FALSE	54
2022-09-12	15:35:54	0.349987	1.55681	1433.77	FALSE	54
2022-09-12	15:35:55	0.311972	1.38771	1332.86	FALSE	54
2022-09-12	15:35:55	0.285967	1.27204	1435.04	FALSE	54
2022-09-12	15:35:55	0.360623	1.60412	1334.47	FALSE	54
2022-09-12	15:35:55	0.355585	1.58171	1436.62	FALSE	54
2022-09-12	15:35:56	0.421132	1.87328	1336.34	FALSE	54
2022-09-12	15:35:56	0.456756	2.03174	1438.65	FALSE	54
2022-09-12	15:35:56	0.39528	1.75828	1338.1	FALSE	54
2022-09-12	15:35:56	0.394466	1.75466	1440.41	FALSE	54
2022-09-12	15:35:57	0.372634	1.65755	1339.75	FALSE	54
2022-09-12	15:35:57	0.378079	1.68177	1442.09	FALSE	54
2022-09-12	15:35:57	0.320267	1.42461	1341.18	FALSE	54
2022-09-12	15:35:58	0.35131	1.5627	1443.65	FALSE	54
2022-09-12	15:35:58	0.363728	1.61793	1342.8	FALSE	54
2022-09-12	15:35:58	0.364746	1.62246	1445.27	FALSE	54
2022-09-12	15:35:58	0.371819	1.65393	1344.45	FALSE	54
2022-09-12	15:35:59	0.74556	3.3164	1448.59	FALSE	54
2022-09-12	15:35:59	0.449733	2.0005	1346.45	FALSE	54
2022-09-12	15:35:59	0.570801	2.53904	1451.13	FALSE	54
2022-09-12	15:35:59	0.605255	2.6923	1349.14	FALSE	54
2022-09-12	15:36:00	0.742964	3.30485	1454.43	FALSE	54
2022-09-12	15:36:00	0.83131	3.69783	1352.84	FALSE	54
2022-09-12	15:36:00	1.15436	5.13482	1459.57	FALSE	54
2022-09-12	15:36:00	0.505967	2.25064	1355.09	FALSE	54
2022-09-12	15:36:01	1.03268	4.59357	1464.16	FALSE	54
2022-09-12	15:36:01	0.865305	3.84905	1358.94	FALSE	54
2022-09-12	15:36:01	1.45584	6.47587	1470.64	FALSE	54
2022-09-12	15:36:02	2.09971	9.33993	1368.28	FALSE	54
2022-09-12	15:36:02	2.97894	13.2509	1483.89	FALSE	54
2022-09-12	15:36:02	2.61406	11.6279	1379.91	FALSE	54
2022-09-12	15:36:02	3.12764	13.9124	1497.8	1	55
2022-09-12	15:36:03	3.11843	13.8714	1393.78	1	56
2022-09-12	15:36:03	4.66271	20.7407	1518.54	1	57
2022-09-12	15:36:03	3.68663	16.3989	1410.18	1	58
2022-09-12	15:36:03	4.62724	20.5829	1539.13	1	59
2022-09-12	15:36:04	3.33268	14.8244	1425	1	60
2022-09-12	15:36:04	3.71121	16.5082	1555.63	1	61
2022-09-12	15:36:04	1.42118	6.32169	1431.33	FALSE	61
2022-09-12	15:36:05	1.23004	5.47146	1561.11	FALSE	61
2022-09-12	15:36:05	1.1965	5.32227	1436.65	FALSE	61
2022-09-12	15:36:05	1.27411	5.6675	1566.77	FALSE	61
2022-09-12	15:36:05	1.77146	7.87981	1444.53	FALSE	61
2022-09-12	15:36:06	2.3563	10.4813	1577.25	FALSE	61
2022-09-12	15:36:06	2.28108	10.1467	1454.67	FALSE	61
2022-09-12	15:36:06	4.08673	18.1786	1595.43	1	62
2022-09-12	15:36:06	5.5794	24.8183	1479.49	1	63
2022-09-12	15:36:07	6.73105	29.9411	1625.37	1	64
2022-09-12	15:36:07	10.4462	46.4668	1525.96	1	65
2022-09-12	15:36:07	7.52978	33.494	1658.87	1	66
2022-09-12	15:36:07	1.48128	6.58903	1532.55	FALSE	66
2022-09-12	15:36:08	4.14103	18.4201	1677.29	1	67
2022-09-12	15:36:08	5.53691	24.6293	1557.18	1	68
2022-09-12	15:36:08	0.979962	4.35907	1681.65	FALSE	68
2022-09-12	15:36:09	0.998231	4.44033	1561.62	FALSE	68
2022-09-12	15:36:09	2.57339	11.447	1693.09	FALSE	68
2022-09-12	15:36:09	4.08067	18.1516	1579.77	1	69
2022-09-12	15:36:09	7.17838	31.9309	1725.03	1	70
2022-09-12	15:36:10	5.38403	23.9492	1603.72	1	71
2022-09-12	15:36:10	2.89726	12.8876	1737.91	FALSE	71
2022-09-12	15:36:10	0.986425	4.38782	1608.11	FALSE	71
2022-09-12	15:36:10	1.98027	8.80864	1746.72	FALSE	71
2022-09-12	15:36:11	0.52958	2.35568	1610.46	FALSE	71
2022-09-12	15:36:11	1.46261	6.50598	1753.23	FALSE	71
2022-09-12	15:36:11	0.80958	3.60117	1614.06	FALSE	71
2022-09-12	15:36:11	1.84373	8.20128	1761.43	FALSE	71
2022-09-12	15:36:12	1.22902	5.46693	1619.53	FALSE	71
2022-09-12	15:36:12	2.68678	11.9513	1773.38	FALSE	71
2022-09-12	15:36:12	1.08139	4.81024	1624.34	FALSE	71
2022-09-12	15:36:13	0.913397	4.06297	1777.44	FALSE	71
2022-09-12	15:36:13	0.920522	4.09467	1628.43	FALSE	71
2022-09-12	15:36:13	1.51452	6.73689	1784.18	FALSE	71
2022-09-12	15:36:13	1.55401	6.91255	1635.35	FALSE	71
2022-09-12	15:36:14	2.53462	11.2745	1795.45	FALSE	71
2022-09-12	15:36:14	2.13726	9.50696	1644.85	FALSE	71
2022-09-12	15:36:14	1.61131	7.16743	1802.62	FALSE	71
2022-09-12	15:36:14	1.49497	6.64993	1651.5	FALSE	71
2022-09-12	15:36:15	1.64515	7.31796	1809.94	FALSE	71
2022-09-12	15:36:15	1.6477	7.3293	1658.83	FALSE	71
2022-09-12	15:36:15	1.31248	5.83817	1815.78	FALSE	71
2022-09-12	15:36:15	0.363066	1.61499	1660.45	FALSE	71
2022-09-12	15:36:16	0.347596	1.54618	1817.32	FALSE	71
2022-09-12	15:36:16	0.453702	2.01816	1662.47	FALSE	71
2022-09-12	15:36:16	0.460216	2.04713	1819.37	FALSE	71
2022-09-12	15:36:17	0.54159	2.4091	1664.88	FALSE	71
2022-09-12	15:36:17	0.709224	3.15477	1822.53	FALSE	71
2022-09-12	15:36:17	1.02709	4.5687	1669.44	FALSE	71
2022-09-12	15:36:17	0.646272	2.87475	1825.4	FALSE	71
2022-09-12	15:36:18	0.338995	1.50792	1670.95	FALSE	71
2022-09-12	15:36:18	0.445305	1.98081	1827.38	FALSE	71
2022-09-12	15:36:18	0.435789	1.93848	1672.89	FALSE	71
2022-09-12	15:36:18	0.423728	1.88483	1829.27	FALSE	71
2022-09-12	15:36:19	0.438181	1.94912	1674.84	FALSE	71
2022-09-12	15:36:19	0.747952	3.32704	1832.59	FALSE	71
2022-09-12	15:36:19	1.151	5.11988	1679.96	FALSE	71
2022-09-12	15:36:19	2.2277	9.90926	1842.5	FALSE	71
2022-09-12	15:36:20	4.0879	18.1838	1698.14	1	72
2022-09-12	15:36:20	2.89502	12.8776	1855.38	FALSE	72
2022-09-12	15:36:20	1.74388	7.75713	1705.9	FALSE	72
2022-09-12	15:36:21	1.28078	5.69717	1861.08	FALSE	72
2022-09-12	15:36:21	0.95645	4.25448	1710.16	FALSE	72
2022-09-12	15:36:21	1.05416	4.68911	1865.77	FALSE	72
2022-09-12	15:36:21	1.03162	4.58885	1714.74	FALSE	72
2022-09-12	15:36:22	0.866425	3.85403	1869.62	FALSE	72
2022-09-12	15:36:22	0.734568	3.26751	1718.01	FALSE	72
2022-09-12	15:36:22	0.826578	3.67678	1873.3	FALSE	72
2022-09-12	15:36:22	0.753397	3.35126	1721.36	FALSE	72
2022-09-12	15:36:23	0.665458	2.96009	1876.26	FALSE	72
2022-09-12	15:36:23	0.671158	2.98545	1724.35	FALSE	72
2022-09-12	15:36:23	0.511412	2.27486	1878.53	FALSE	72
2022-09-12	15:36:23	0.668104	2.97186	1727.32	FALSE	72
2022-09-12	15:36:24	1.2276	5.46061	1883.99	FALSE	72
2022-09-12	15:36:24	1.00149	4.45483	1731.78	FALSE	72
2022-09-12	15:36:24	1.0564	4.69908	1888.69	FALSE	72
2022-09-12	15:36:25	0.753702	3.35262	1735.13	FALSE	72
2022-09-12	15:36:25	0.947799	4.216	1892.91	FALSE	72
2022-09-12	15:36:25	0.717366	3.19099	1738.32	FALSE	72
2022-09-12	15:36:25	1.31253	5.8384	1898.75	FALSE	72
2022-09-12	15:36:26	0.509428	2.26604	1740.58	FALSE	72
2022-09-12	15:36:26	0.439809	1.95636	1900.7	FALSE	72
2022-09-12	15:36:26	0.389682	1.73338	1742.32	FALSE	72
2022-09-12	15:36:26	0.32327	1.43797	1902.14	FALSE	72
2022-09-12	15:36:27	0.360929	1.60548	1743.92	FALSE	72
2022-09-12	15:36:27	0.579911	2.57956	1904.72	FALSE	72
2022-09-12	15:36:27	0.435076	1.93531	1745.86	FALSE	72
2022-09-12	15:36:28	0.477214	2.12274	1906.84	FALSE	72
2022-09-12	15:36:28	0.362507	1.6125	1747.47	FALSE	72
2022-09-12	15:36:28	0.351565	1.56383	1908.41	FALSE	72
2022-09-12	15:36:28	0.343473	1.52784	1749	FALSE	72
2022-09-12	15:36:29	0.408308	1.81624	1910.22	FALSE	72
2022-09-12	15:36:29	0.441285	1.96292	1750.96	FALSE	72
2022-09-12	15:36:29	0.326018	1.45019	1911.67	FALSE	72
2022-09-12	15:36:29	0.395738	1.76032	1752.72	FALSE	72
2022-09-12	15:36:30	0.358537	1.59484	1913.27	FALSE	72
2022-09-12	15:36:30	0.426323	1.89637	1754.62	FALSE	72
2022-09-12	15:36:30	0.126069	0.56078	1913.83	FALSE	72
2022-09-12	15:36:30	0.377265	1.67815	1756.3	FALSE	72
2022-09-12	15:36:31	0.186374	0.829029	1914.66	FALSE	72
2022-09-12	15:36:31	0.277621	1.23491	1757.53	FALSE	72
2022-09-12	15:36:31	0.208257	0.926369	1915.58	FALSE	72
2022-09-12	15:36:32	1.02103	4.54175	1762.07	FALSE	72
2022-09-12	15:36:32	0.227596	1.01239	1916.6	FALSE	72
2022-09-12	15:36:32	0.983473	4.37468	1766.45	FALSE	72
2022-09-12	15:36:32	0.451056	2.00639	1918.6	FALSE	72
2022-09-12	15:36:33	0.510191	2.26943	1768.72	FALSE	72
2022-09-12	15:36:33	0.293041	1.3035	1919.91	FALSE	72
2022-09-12	15:36:33	0.375178	1.66887	1770.39	FALSE	72
2022-09-12	15:36:33	0.455433	2.02586	1921.93	FALSE	72
2022-09-12	15:36:34	0.271921	1.20956	1771.6	FALSE	72
2022-09-12	15:36:34	0.093448	0.415675	1922.35	FALSE	72
2022-09-12	15:36:34	0.162201	0.721502	1772.32	FALSE	72
2022-09-12	15:36:34	-0.215865	-0.960211	1922.35	FALSE	72
2022-09-12	15:36:35	-0.114745	-0.510409	1772.32	FALSE	72
2022-09-12	15:36:35	-0.107519	-0.478266	1922.35	FALSE	72
2022-09-12	15:36:35	0.060929	0.271024	1772.59	FALSE	72
2022-09-12	15:36:36	0.0872394	0.388058	1922.74	FALSE	72
2022-09-12	15:36:36	0.386985	1.72139	1774.31	FALSE	72
2022-09-12	15:36:36	0.278639	1.23944	1923.98	FALSE	72
2022-09-12	15:36:36	0.483066	2.14877	1776.46	FALSE	72
2022-09-12	15:36:37	0.406425	1.80786	1925.78	FALSE	72
2022-09-12	15:36:37	0.403779	1.79609	1778.26	FALSE	72
2022-09-12	15:36:37	0.779962	3.46943	1929.25	FALSE	72
2022-09-12	15:36:37	1.54617	6.87767	1785.13	FALSE	72
2022-09-12	15:36:38	0.553143	2.46049	1931.71	FALSE	72
2022-09-12	15:36:38	0.610649	2.71629	1787.85	FALSE	72
2022-09-12	15:36:38	0.973346	4.32964	1936.04	FALSE	72
2022-09-12	15:36:38	0.230395	1.02484	1788.87	FALSE	72
2022-09-12	15:36:39	0.517824	2.30338	1938.35	FALSE	72
2022-09-12	15:36:39	0.53986	2.40141	1791.28	FALSE	72
2022-09-12	15:36:39	0.383677	1.70667	1940.05	FALSE	72
2022-09-12	15:36:40	0.0278501	0.123883	1791.4	FALSE	72
2022-09-12	15:36:40	-0.0822771	-0.365985	1940.05	FALSE	72
2022-09-12	15:36:40	-0.176832	-0.786584	1791.4	FALSE	72
2022-09-12	15:36:40	-0.591743	-2.63219	1940.05	FALSE	72
2022-09-12	15:36:41	-0.747467	-3.32488	1791.4	FALSE	72
2022-09-12	15:36:41	-0.770572	-3.42766	1940.05	FALSE	72
2022-09-12	15:36:41	-0.788943	-3.50938	1791.4	FALSE	72
2022-09-12	15:36:41	-0.853574	-3.79687	1940.05	FALSE	72
2022-09-12	15:36:42	-0.813727	-3.61962	1791.4	FALSE	72
2022-09-12	15:36:42	-0.763651	-3.39687	1940.05	FALSE	72
2022-09-12	15:36:42	-0.867569	-3.85912	1791.4	FALSE	72
2022-09-12	15:36:42	-0.526297	-2.34107	1940.05	FALSE	72
2022-09-12	15:36:43	-0.429198	-1.90916	1791.4	FALSE	72
2022-09-12	15:36:43	-0.340699	-1.5155	1940.05	FALSE	72
2022-09-12	15:36:43	-0.157951	-0.702598	1791.4	FALSE	72
2022-09-12	15:36:44	0.0365524	0.162592	1940.22	FALSE	72
2022-09-12	15:36:44	0.444288	1.97628	1793.38	FALSE	72
2022-09-12	15:36:44	1.82083	8.09942	1948.32	FALSE	72
2022-09-12	15:36:44	0.909326	4.04486	1797.42	FALSE	72
2022-09-12	15:36:45	0.11411	0.507584	1948.82	FALSE	72
2022-09-12	15:36:45	0.253499	1.12761	1798.55	FALSE	72
2022-09-12	15:36:45	0.0370104	0.16463	1948.99	FALSE	72
2022-09-12	15:36:45	0.0936516	0.416581	1798.96	FALSE	72
2022-09-12	15:36:46	0.0454582	0.202207	1949.19	FALSE	72
2022-09-12	15:36:46	-0.111132	-0.494337	1798.96	FALSE	72
2022-09-12	15:36:46	-0.413575	-1.83966	1949.19	FALSE	72
2022-09-12	15:36:47	-0.518358	-2.30576	1798.96	FALSE	72
2022-09-12	15:36:47	-0.472811	-2.10316	1949.19	FALSE	72
2022-09-12	15:36:47	-0.434796	-1.93406	1798.96	FALSE	72
2022-09-12	15:36:47	-0.387773	-1.72489	1949.19	FALSE	72
2022-09-12	15:36:48	-0.205381	-0.913576	1798.96	FALSE	72
2022-09-12	15:36:48	-0.204567	-0.909955	1949.19	FALSE	72
2022-09-12	15:36:48	-0.277799	-1.23571	1798.96	FALSE	72
2022-09-12	15:36:48	-0.294287	-1.30905	1949.19	FALSE	72
2022-09-12	15:36:49	-0.324058	-1.44147	1798.96	FALSE	72
2022-09-12	15:36:49	0.241234	1.07306	1950.26	FALSE	72
2022-09-12	15:36:49	0.0454582	0.202207	1799.17	FALSE	72
2022-09-12	15:36:49	-0.0197326	-0.0877746	1950.26	FALSE	72
2022-09-12	15:36:50	-0.0625824	-0.278379	1799.17	FALSE	72
2022-09-12	15:36:50	0.0978756	0.43537	1950.7	FALSE	72
2022-09-12	15:36:50	0.153804	0.684151	1799.85	FALSE	72
2022-09-12	15:36:51	0.28159	1.25257	1951.95	FALSE	72
2022-09-12	15:36:51	0.201794	0.89762	1800.75	FALSE	72
2022-09-12	15:36:51	0.22327	0.99315	1952.94	FALSE	72
2022-09-12	15:36:51	0.272379	1.2116	1801.96	FALSE	72
2022-09-12	15:36:52	0.331056	1.4726	1954.42	FALSE	72
2022-09-12	15:36:52	0.392837	1.74742	1803.71	FALSE	72
2022-09-12	15:36:52	0.331565	1.47487	1955.89	FALSE	72
2022-09-12	15:36:52	0.454364	2.0211	1805.73	FALSE	72
2022-09-12	15:36:53	0.374313	1.66502	1957.56	FALSE	72
2022-09-12	15:36:53	0.36042	1.60322	1807.33	FALSE	72
2022-09-12	15:36:53	0.370751	1.64917	1959.21	FALSE	72
2022-09-12	15:36:53	0.278537	1.23899	1808.57	FALSE	72
2022-09-12	15:36:54	0.239962	1.0674	1960.27	FALSE	72
2022-09-12	15:36:54	0.296756	1.32003	1809.89	FALSE	72
2022-09-12	15:36:54	0.0665778	0.296151	1960.57	FALSE	72
2022-09-12	15:36:55	-0.00161552	-0.00718616	1809.89	FALSE	72
2022-09-12	15:36:55	0.281947	1.25416	1961.82	FALSE	72
2022-09-12	15:36:55	0.238181	1.05948	1810.95	FALSE	72
2022-09-12	15:36:55	0.39126	1.7404	1963.56	FALSE	72
2022-09-12	15:36:56	0.339555	1.51041	1812.46	FALSE	72
2022-09-12	15:36:56	0.344593	1.53282	1965.1	FALSE	72
2022-09-12	15:36:56	0.432888	1.92557	1814.39	FALSE	72
2022-09-12	15:36:56	0.366527	1.63039	1966.73	FALSE	72
2022-09-12	15:36:57	0.272837	1.21363	1815.6	FALSE	72
2022-09-12	15:36:57	0.310038	1.37911	1968.11	FALSE	72
2022-09-12	15:36:57	0.325255	1.4468	1817.05	FALSE	72
2022-09-12	15:36:57	0.352837	1.56949	1969.68	FALSE	72
2022-09-12	15:36:58	0.465356	2.07	1819.12	FALSE	72
2022-09-12	15:36:58	0.378791	1.68494	1971.36	FALSE	72
2022-09-12	15:36:58	0.429122	1.90882	1821.03	FALSE	72
2022-09-12	15:36:59	0.384898	1.7121	1973.07	FALSE	72
2022-09-12	15:36:59	0.458282	2.03853	1823.06	FALSE	72
2022-09-12	15:36:59	0.443219	1.97153	1975.04	FALSE	72
2022-09-12	15:36:59	0.427087	1.89977	1824.96	FALSE	72
2022-09-12	15:37:00	0.43187	1.92104	1976.96	FALSE	72
2022-09-12	15:37:00	0.430802	1.91629	1826.88	FALSE	72
2022-09-12	15:37:00	0.428359	1.90543	1978.87	FALSE	72
2022-09-12	15:37:00	0.433193	1.92693	1828.81	FALSE	72
2022-09-12	15:37:01	0.432328	1.92308	1980.79	FALSE	72
2022-09-12	15:37:01	0.430649	1.91561	1830.72	FALSE	72
2022-09-12	15:37:01	0.429173	1.90905	1982.7	FALSE	72
2022-09-12	15:37:01	0.426934	1.89909	1832.62	FALSE	72
2022-09-12	15:37:02	0.430395	1.91448	1984.62	FALSE	72
2022-09-12	15:37:02	0.42673	1.89818	1834.52	FALSE	72
2022-09-12	15:37:02	0.412786	1.83615	1986.45	FALSE	72
2022-09-12	15:37:03	0.568613	2.5293	1837.05	FALSE	72
2022-09-12	15:37:03	0.418639	1.86219	1988.32	FALSE	72
2022-09-12	15:37:03	0.572074	2.5447	1839.59	FALSE	72
2022-09-12	15:37:03	0.541997	2.41091	1990.73	FALSE	72
2022-09-12	15:37:04	0.379555	1.68834	1841.28	FALSE	72
2022-09-12	15:37:04	0.374669	1.6666	1992.39	FALSE	72
2022-09-12	15:37:04	0.327901	1.45857	1842.74	FALSE	72
2022-09-12	15:37:04	0.206374	0.917993	1993.31	FALSE	72
2022-09-12	15:37:05	0.730496	3.24939	1845.99	FALSE	72
2022-09-12	15:37:05	1.48983	6.62706	1999.94	FALSE	72
2022-09-12	15:37:05	1.67971	7.47169	1853.46	FALSE	72
2022-09-12	15:37:05	1.86042	8.27552	2008.21	FALSE	72
2022-09-12	15:37:06	1.70515	7.58485	1861.05	FALSE	72
2022-09-12	15:37:06	1.91594	8.52248	2016.74	FALSE	72
2022-09-12	15:37:06	2.30113	10.2359	1871.28	FALSE	72
2022-09-12	15:37:07	2.43029	10.8104	2027.55	FALSE	72
2022-09-12	15:37:07	1.52612	6.78849	1878.07	FALSE	72
2022-09-12	15:37:07	1.99411	8.8702	2036.42	FALSE	72
2022-09-12	15:37:07	0.948206	4.21781	1882.29	FALSE	72
2022-09-12	15:37:08	0.264084	1.1747	2037.59	FALSE	72
2022-09-12	15:37:08	0.616603	2.74277	1885.03	FALSE	72
2022-09-12	15:37:08	0.164288	0.730786	2038.32	FALSE	72
2022-09-12	15:37:08	1.25976	5.60366	1890.64	FALSE	72
2022-09-12	15:37:09	-0.198715	-0.883924	2038.32	FALSE	72
2022-09-12	15:37:09	-0.40472	-1.80028	1890.64	FALSE	72
2022-09-12	15:37:09	-0.0535239	-0.238085	2038.32	FALSE	72
2022-09-12	15:37:10	-0.117188	-0.521276	1890.64	FALSE	72
2022-09-12	15:37:10	1.10332	4.90779	2043.23	FALSE	72
2022-09-12	15:37:10	1.09238	4.85912	1895.49	FALSE	72
2022-09-12	15:37:10	0.819809	3.64667	2046.88	FALSE	72
2022-09-12	15:37:11	1.27492	5.6711	1901.17	FALSE	72
2022-09-12	15:37:11	0.593091	2.63819	2049.51	FALSE	72
2022-09-12	15:37:11	0.742964	3.30485	1904.47	FALSE	72
2022-09-12	15:37:11	0.6707	2.98341	2052.5	FALSE	72
2022-09-12	15:37:12	0.636196	2.82993	1907.3	FALSE	72
2022-09-12	15:37:12	1.38948	6.18068	2058.68	FALSE	72
2022-09-12	15:37:12	0.639504	2.84464	1910.15	FALSE	72
2022-09-12	15:37:12	0.621947	2.76654	2061.45	FALSE	72
2022-09-12	15:37:13	0.316705	1.40877	1911.55	FALSE	72
2022-09-12	15:37:13	0.576908	2.5662	2064.01	FALSE	72
2022-09-12	15:37:13	0.383422	1.70554	1913.26	FALSE	72
2022-09-12	15:37:14	0.361489	1.60798	2065.62	FALSE	72
2022-09-12	15:37:14	0.357672	1.591	1914.85	FALSE	72
2022-09-12	15:37:14	0.169478	0.753872	2066.37	FALSE	72
2022-09-12	15:37:14	0.265814	1.18239	1916.03	FALSE	72
2022-09-12	15:37:15	0.225763	1.00424	2067.38	FALSE	72
2022-09-12	15:37:15	0.675076	3.00287	1919.04	FALSE	72
2022-09-12	15:37:15	0.708003	3.14934	2070.53	FALSE	72
2022-09-12	15:37:15	1.0619	4.72354	1923.76	FALSE	72
2022-09-12	15:37:16	1.57996	7.02798	2077.55	FALSE	72
2022-09-12	15:37:16	1.30648	5.81148	1929.57	FALSE	72
2022-09-12	15:37:16	0.584796	2.60129	2080.16	FALSE	72
2022-09-12	15:37:16	0.54902	2.44215	1932.01	FALSE	72
2022-09-12	15:37:17	0.278537	1.23899	2081.4	FALSE	72
2022-09-12	15:37:17	0.351768	1.56473	1933.58	FALSE	72
2022-09-12	15:37:17	0.343677	1.52874	2082.92	FALSE	72
2022-09-12	15:37:18	0.511463	2.27509	1935.85	FALSE	72
2022-09-12	15:37:18	0.557315	2.47905	2085.4	FALSE	72
2022-09-12	15:37:18	0.732175	3.25686	1939.11	FALSE	72
2022-09-12	15:37:18	0.515738	2.29411	2087.7	FALSE	72
2022-09-12	15:37:19	0.29416	1.30848	1940.42	FALSE	72
2022-09-12	15:37:19	0.156349	0.695472	2088.39	FALSE	72
2022-09-12	15:37:19	0.163779	0.728522	1941.15	FALSE	72
2022-09-12	15:37:19	0.151718	0.674872	2089.07	FALSE	72
2022-09-12	15:37:20	0.247901	1.10271	1942.25	FALSE	72
2022-09-12	15:37:20	0.351565	1.56383	2090.63	FALSE	72
2022-09-12	15:37:20	0.206272	0.917539	1943.17	FALSE	72
2022-09-12	15:37:20	0.492176	2.1893	2092.82	FALSE	72
2022-09-12	15:37:21	0.152736	0.6794	1943.85	FALSE	72
2022-09-12	15:37:21	0.421896	1.87668	2094.7	FALSE	72
2022-09-12	15:37:21	0.404847	1.80084	1945.65	FALSE	72
2022-09-12	15:37:22	0.3164	1.40741	2096.1	FALSE	72
2022-09-12	15:37:22	0.324797	1.44476	1947.09	FALSE	72
2022-09-12	15:37:22	0.281896	1.25393	2097.36	FALSE	72
2022-09-12	15:37:22	0.547443	2.43514	1949.53	FALSE	72
2022-09-12	15:37:23	0.446476	1.98601	2099.34	FALSE	72
2022-09-12	15:37:23	1.01599	4.51933	1954.05	FALSE	72
2022-09-12	15:37:23	0.697417	3.10225	2102.45	FALSE	72
2022-09-12	15:37:23	3.17334	14.1157	1968.16	1	73
2022-09-12	15:37:24	1.94022	8.63049	2111.08	FALSE	73
2022-09-12	15:37:24	6.53049	29.0489	1997.21	1	74
2022-09-12	15:37:24	3.86347	17.1855	2128.26	1	75
2022-09-12	15:37:24	8.26662	36.7716	2033.98	1	76
2022-09-12	15:37:25	3.64999	16.2359	2144.5	1	77
2022-09-12	15:37:25	3.28607	14.6171	2048.6	1	78
2022-09-12	15:37:25	2.40027	10.6769	2155.18	FALSE	78
2022-09-12	15:37:26	1.14536	5.09479	2053.69	FALSE	78
2022-09-12	15:37:26	1.79838	7.99955	2163.18	FALSE	78
2022-09-12	15:37:26	2.5537	11.3594	2065.05	FALSE	78
2022-09-12	15:37:26	1.05436	4.69	2167.87	FALSE	78
2022-09-12	15:37:27	2.37691	10.573	2075.63	FALSE	78
2022-09-12	15:37:27	0.866679	3.85516	2171.72	FALSE	78
2022-09-12	15:37:27	2.98749	13.289	2088.92	FALSE	78
2022-09-12	15:37:27	1.62261	7.21769	2178.94	FALSE	78
2022-09-12	15:37:28	2.23396	9.9371	2098.85	FALSE	78
2022-09-12	15:37:28	2.09273	9.30888	2188.25	FALSE	78
2022-09-12	15:37:28	1.13884	5.06579	2103.92	FALSE	78
2022-09-12	15:37:28	4.23111	18.8208	2207.07	1	79
2022-09-12	15:37:29	1.17553	5.22899	2109.15	FALSE	79
2022-09-12	15:37:29	1.84973	8.22797	2215.3	FALSE	79
2022-09-12	15:37:29	0.395484	1.75919	2110.91	FALSE	79
2022-09-12	15:37:30	0.118181	0.525693	2215.82	FALSE	79
2022-09-12	15:37:30	0.327901	1.45857	2112.37	FALSE	79
2022-09-12	15:37:30	0.0301402	0.13407	2215.96	FALSE	79
2022-09-12	15:37:30	0.289224	1.28653	2113.65	FALSE	79
2022-09-12	15:37:31	0.373295	1.66049	2217.62	FALSE	79
2022-09-12	15:37:31	0.615636	2.73847	2116.39	FALSE	79
2022-09-12	15:37:31	1.00332	4.46297	2222.08	FALSE	79
2022-09-12	15:37:31	0.672532	2.99156	2119.38	FALSE	79
2022-09-12	15:37:32	2.41864	10.7586	2232.84	FALSE	79
2022-09-12	15:37:32	1.51655	6.74592	2126.13	FALSE	79
2022-09-12	15:37:32	4.74637	21.1128	2253.95	1	80
2022-09-12	15:37:33	3.59518	15.9921	2142.12	1	81
2022-09-12	15:37:33	8.1021	36.0398	2289.99	1	82
2022-09-12	15:37:33	3.0392	13.519	2155.64	1	83
2022-09-12	15:37:33	3.10714	13.8212	2303.81	1	84
2022-09-12	15:37:34	6.1197	27.2216	2182.86	1	85
2022-09-12	15:37:34	1.40062	6.23024	2310.04	FALSE	85
2022-09-12	15:37:34	1.74973	7.78315	2190.64	FALSE	85
2022-09-12	15:37:34	1.35095	6.0093	2316.05	FALSE	85
2022-09-12	15:37:35	0.966527	4.29931	2194.94	FALSE	85
2022-09-12	15:37:35	0.966883	4.30089	2320.35	FALSE	85
2022-09-12	15:37:35	0.455636	2.02676	2196.97	FALSE	85
2022-09-12	15:37:35	1.52602	6.78804	2327.14	FALSE	85
2022-09-12	15:37:36	1.91146	8.50256	2205.47	FALSE	85
2022-09-12	15:37:36	3.31518	14.7466	2341.89	1	86
2022-09-12	15:37:36	4.77782	21.2527	2226.72	1	87
2022-09-12	15:37:37	4.68754	20.8511	2362.74	1	88
2022-09-12	15:37:37	0.728104	3.23875	2229.96	FALSE	88
2022-09-12	15:37:37	0.499402	2.22144	2364.96	FALSE	88
2022-09-12	15:37:37	0.569937	2.53519	2232.5	FALSE	88
2022-09-12	15:37:38	0.270802	1.20458	2366.16	FALSE	88
2022-09-12	15:37:38	0.245662	1.09275	2233.59	FALSE	88
2022-09-12	15:37:38	0.582048	2.58907	2368.75	FALSE	88
2022-09-12	15:37:38	0.597519	2.65788	2236.25	FALSE	88
2022-09-12	15:37:39	3.32368	14.7844	2383.54	1	89
2022-09-12	15:37:39	6.24902	27.7969	2264.05	1	90
2022-09-12	15:37:39	13.7288	61.0684	2444.61	1	91
2022-09-12	15:37:39	4.28871	19.077	2283.12	1	92
2022-09-12	15:37:40	6.31192	28.0767	2472.68	1	93
2022-09-12	15:37:40	4.92423	21.904	2305.03	1	94
2022-09-12	15:37:40	9.93665	44.2002	2516.88	1	95
2022-09-12	15:37:41	7.28088	32.3868	2337.41	1	96
2022-09-12	15:37:41	5.99884	26.684	2543.57	1	97
2022-09-12	15:37:41	6.0823	27.0553	2364.47	1	98
2022-09-12	15:37:41	1.66454	7.40421	2550.97	FALSE	98
2022-09-12	15:37:42	3.1139	13.8512	2378.32	1	99
2022-09-12	15:37:42	1.47854	6.57684	2557.55	FALSE	99
2022-09-12	15:37:42	1.2135	5.39789	2383.72	FALSE	99
2022-09-12	15:37:42	0.469886	2.09015	2559.64	FALSE	99
2022-09-12	15:37:43	0.815992	3.6297	2387.35	FALSE	99
2022-09-12	15:37:43	2.1905	9.74378	2569.38	FALSE	99
2022-09-12	15:37:43	2.86525	12.7452	2400.09	FALSE	99
2022-09-12	15:37:43	4.50271	20.029	2589.41	1	100
2022-09-12	15:37:44	2.13574	9.5002	2409.59	FALSE	100
2022-09-12	15:37:44	0.462863	2.05891	2591.47	FALSE	100
2022-09-12	15:37:44	0.527748	2.34753	2411.94	FALSE	100
2022-09-12	15:37:45	0.397417	1.76779	2593.24	FALSE	100
2022-09-12	15:37:45	0.72388	3.21996	2415.16	FALSE	100
2022-09-12	15:37:45	1.64902	7.33517	2600.57	FALSE	100
2022-09-12	15:37:45	1.16953	5.2023	2420.36	FALSE	100
2022-09-12	15:37:46	1.00821	4.48472	2605.06	FALSE	100
2022-09-12	15:37:46	0.802863	3.5713	2423.93	FALSE	100
2022-09-12	15:37:46	2.15462	9.58418	2614.64	FALSE	100
2022-09-12	15:37:46	4.96917	22.1039	2446.04	1	101
2022-09-12	15:37:47	2.40215	10.6852	2625.33	FALSE	101
2022-09-12	15:37:47	0.82958	3.69014	2449.73	FALSE	101
2022-09-12	15:37:47	0.485814	2.161	2627.49	FALSE	101
2022-09-12	15:37:47	0.278384	1.23831	2450.97	FALSE	101
2022-09-12	15:37:48	0.385407	1.71437	2629.2	FALSE	101
2022-09-12	15:37:48	0.715636	3.18329	2454.15	FALSE	101
2022-09-12	15:37:48	0.377163	1.6777	2630.88	FALSE	101
2022-09-12	15:37:49	0.778435	3.46263	2457.61	FALSE	101
2022-09-12	15:37:49	1.08251	4.81522	2635.69	FALSE	101
2022-09-12	15:37:49	1.08734	4.83671	2462.45	FALSE	101
2022-09-12	15:37:49	0.668613	2.97412	2638.67	FALSE	101
2022-09-12	15:37:50	0.553194	2.46072	2464.91	FALSE	101
2022-09-12	15:37:50	0.38098	1.69468	2640.36	FALSE	101
2022-09-12	15:37:50	0.316196	1.4065	2466.32	FALSE	101
2022-09-12	15:37:50	0.347952	1.54776	2641.91	FALSE	101
2022-09-12	15:37:51	0.392125	1.74425	2468.06	FALSE	101
2022-09-12	15:37:51	0.326985	1.45449	2643.37	FALSE	101
2022-09-12	15:37:51	0.35187	1.56519	2469.63	FALSE	101
2022-09-12	15:37:52	0.50444	2.24385	2645.61	FALSE	101
2022-09-12	15:37:52	0.477875	2.12568	2471.75	FALSE	101
2022-09-12	15:37:52	0.529275	2.35432	2647.96	FALSE	101
2022-09-12	15:37:52	0.500725	2.22732	2473.98	FALSE	101
2022-09-12	15:37:53	0.53584	2.38352	2650.35	FALSE	101
2022-09-12	15:37:53	0.550089	2.44691	2476.43	FALSE	101
2022-09-12	15:37:53	0.548817	2.44125	2652.79	FALSE	101
2022-09-12	15:37:53	0.547341	2.43468	2478.86	FALSE	101
2022-09-12	15:37:54	0.556348	2.47475	2655.26	FALSE	101
2022-09-12	15:37:54	0.539962	2.40186	2481.26	FALSE	101
2022-09-12	15:37:54	0.496298	2.20763	2657.47	FALSE	101
2022-09-12	15:37:54	0.437774	1.94731	2483.21	FALSE	101
2022-09-12	15:37:55	0.403372	1.79428	2659.27	FALSE	101
2022-09-12	15:37:55	0.390496	1.737	2484.95	FALSE	101
2022-09-12	15:37:55	0.408104	1.81533	2661.08	FALSE	101
2022-09-12	15:37:56	0.467748	2.08064	2487.03	FALSE	101
2022-09-12	15:37:56	0.601438	2.67532	2663.76	FALSE	101
2022-09-12	15:37:56	0.679504	3.02257	2490.05	FALSE	101
2022-09-12	15:37:56	0.694008	3.08709	2666.84	FALSE	101
2022-09-12	15:37:57	0.728206	3.23921	2493.29	FALSE	101
2022-09-12	15:37:57	0.746629	3.32116	2670.16	FALSE	101
2022-09-12	15:37:57	0.751514	3.34288	2496.63	FALSE	101
2022-09-12	15:37:57	0.729936	3.2469	2673.41	FALSE	101
2022-09-12	15:37:58	0.729428	3.24464	2499.88	FALSE	101
2022-09-12	15:37:58	0.719758	3.20163	2676.61	FALSE	101
2022-09-12	15:37:58	0.685967	3.05132	2502.93	FALSE	101
2022-09-12	15:37:58	0.669326	2.9773	2679.59	FALSE	101
2022-09-12	15:37:59	0.659962	2.93564	2505.86	FALSE	101
2022-09-12	15:37:59	0.668511	2.97367	2682.56	FALSE	101
2022-09-12	15:37:59	0.612532	2.72466	2508.59	FALSE	101
2022-09-12	15:38:00	0.646323	2.87497	2685.44	FALSE	101
2022-09-12	15:38:00	0.455382	2.02563	2510.61	FALSE	101
2022-09-12	15:38:00	0.380522	1.69264	2687.13	FALSE	101
2022-09-12	15:38:00	0.341794	1.52037	2512.13	FALSE	101
2022-09-12	15:38:01	0.335789	1.49366	2688.62	FALSE	101
2022-09-12	15:38:01	0.324797	1.44476	2513.58	FALSE	101
2022-09-12	15:38:01	0.328461	1.46106	2690.09	FALSE	101
2022-09-12	15:38:01	0.343423	1.52761	2515.11	FALSE	101
2022-09-12	15:38:02	0.547086	2.43355	2692.52	FALSE	101
2022-09-12	15:38:02	0.676247	3.00808	2518.12	FALSE	101
2022-09-12	15:38:02	0.584084	2.59812	2695.12	FALSE	101
2022-09-12	15:38:02	0.554059	2.46457	2520.58	FALSE	101
2022-09-12	15:38:03	0.500267	2.22529	2697.34	FALSE	101
2022-09-12	15:38:03	0.684186	3.0434	2523.62	FALSE	101
2022-09-12	15:38:03	1.31044	5.8291	2703.17	FALSE	101
2022-09-12	15:38:04	0.97757	4.34843	2527.97	FALSE	101
2022-09-12	15:38:04	1.00983	4.49193	2707.66	FALSE	101
2022-09-12	15:38:04	0.999962	4.44803	2532.42	FALSE	101
2022-09-12	15:38:04	0.986374	4.38759	2712.05	FALSE	101
2022-09-12	15:38:05	1.02088	4.54108	2536.96	FALSE	101
2022-09-12	15:38:05	0.870598	3.87259	2715.92	FALSE	101
2022-09-12	15:38:05	0.742048	3.30078	2540.26	FALSE	101
2022-09-12	15:38:05	0.842201	3.74628	2719.67	FALSE	101
2022-09-12	15:38:06	0.951361	4.23184	2544.49	FALSE	101
2022-09-12	15:38:06	1.35324	6.01948	2725.69	FALSE	101
2022-09-12	15:38:06	1.5736	6.99969	2551.49	FALSE	101
2022-09-12	15:38:06	1.34877	5.9996	2731.69	FALSE	101
2022-09-12	15:38:07	1.32668	5.90134	2557.39	FALSE	101
2022-09-12	15:38:07	1.07065	4.76247	2736.45	FALSE	101
2022-09-12	15:38:07	1.02678	4.56732	2561.96	FALSE	101
2022-09-12	15:38:08	1.17355	5.22019	2741.67	FALSE	101
2022-09-12	15:38:08	1.2307	5.4744	2567.44	FALSE	101
2022-09-12	15:38:08	1.26103	5.60931	2747.28	FALSE	101
2022-09-12	15:38:08	1.27268	5.66114	2573.1	FALSE	101
2022-09-12	15:38:09	1.2337	5.48774	2752.77	FALSE	101
2022-09-12	15:38:09	1.28841	5.73111	2578.83	FALSE	101
2022-09-12	15:38:09	1.35782	6.03985	2758.81	FALSE	101
2022-09-12	15:38:09	1.37462	6.11458	2584.94	FALSE	101
2022-09-12	15:38:10	1.32393	5.88911	2764.7	FALSE	101
2022-09-12	15:38:10	1.22072	5.43001	2590.37	FALSE	101
2022-09-12	15:38:10	1.0166	4.52204	2769.22	FALSE	101
2022-09-12	15:38:10	0.83243	3.70282	2594.08	FALSE	101
2022-09-12	15:38:11	0.882964	3.9276	2773.15	FALSE	101
2022-09-12	15:38:11	0.928868	4.13179	2598.21	FALSE	101
2022-09-12	15:38:11	0.927952	4.12772	2777.28	FALSE	101
2022-09-12	15:38:12	0.830598	3.69467	2601.9	FALSE	101
2022-09-12	15:38:12	0.839504	3.73428	2781.01	FALSE	101
2022-09-12	15:38:12	0.941081	4.18612	2606.09	FALSE	101
2022-09-12	15:38:12	1.03838	4.61892	2785.63	FALSE	101
2022-09-12	15:38:13	1.18164	5.25617	2611.34	FALSE	101
2022-09-12	15:38:13	1.31905	5.8674	2791.5	FALSE	101
2022-09-12	15:38:13	1.32062	5.87438	2617.22	FALSE	101
2022-09-12	15:38:13	1.34943	6.00253	2797.5	FALSE	101
2022-09-12	15:38:14	1.32383	5.88866	2623.11	FALSE	101
2022-09-12	15:38:14	1.2937	5.75464	2803.25	FALSE	101
2022-09-12	15:38:14	1.23095	5.47551	2628.58	FALSE	101
2022-09-12	15:38:15	1.13905	5.06672	2808.32	FALSE	101
2022-09-12	15:38:15	1.01462	4.51323	2633.1	FALSE	101
2022-09-12	15:38:15	1.06139	4.72127	2813.04	FALSE	101
2022-09-12	15:38:15	1.02968	4.58022	2637.68	FALSE	101
2022-09-12	15:38:16	1.14164	5.07824	2818.12	FALSE	101
2022-09-12	15:38:16	1.03009	4.58205	2642.26	FALSE	101
2022-09-12	15:38:16	1.2392	5.51221	2823.63	FALSE	101
2022-09-12	15:38:16	1.38342	6.15373	2648.41	FALSE	101
2022-09-12	15:38:17	1.82536	8.11957	2831.75	FALSE	101
2022-09-12	15:38:17	1.8076	8.04057	2656.45	FALSE	101
2022-09-12	15:38:17	1.64072	7.29825	2839.05	FALSE	101
2022-09-12	15:38:17	1.04978	4.66963	2661.12	FALSE	101
2022-09-12	15:38:18	0.631921	2.81091	2841.86	FALSE	101
2022-09-12	15:38:18	0.596654	2.65404	2663.78	FALSE	101
2022-09-12	15:38:18	0.639809	2.846	2844.71	FALSE	101
2022-09-12	15:38:19	0.622456	2.76881	2666.55	FALSE	101
2022-09-12	15:38:19	0.661641	2.94311	2847.65	FALSE	101
2022-09-12	15:38:19	0.678435	3.01781	2669.56	FALSE	101
2022-09-12	15:38:19	0.692481	3.08029	2850.73	FALSE	101
2022-09-12	15:38:20	0.682456	3.0357	2672.6	FALSE	101
2022-09-12	15:38:20	0.688562	3.06286	2853.79	FALSE	101
2022-09-12	15:38:20	0.721641	3.21	2675.81	FALSE	101
2022-09-12	15:38:20	0.733702	3.26365	2857.06	FALSE	101
2022-09-12	15:38:21	0.754567	3.35646	2679.17	FALSE	101
2022-09-12	15:38:21	0.769987	3.42506	2860.48	FALSE	101
2022-09-12	15:38:21	0.736552	3.27633	2682.44	FALSE	101
2022-09-12	15:38:21	0.715636	3.18329	2863.66	FALSE	101
2022-09-12	15:38:22	0.712328	3.16858	2685.61	FALSE	101
2022-09-12	15:38:22	0.700166	3.11448	2866.78	FALSE	101
2022-09-12	15:38:22	0.705865	3.13983	2688.75	FALSE	101
2022-09-12	15:38:23	0.681692	3.0323	2869.81	FALSE	101
2022-09-12	15:38:23	0.745102	3.31436	2692.06	FALSE	101
2022-09-12	15:38:23	0.779198	3.46603	2873.28	FALSE	101
2022-09-12	15:38:23	0.818995	3.64305	2695.71	FALSE	101
2022-09-12	15:38:24	0.520878	2.31697	2875.59	FALSE	101
2022-09-12	15:38:24	0.612633	2.72511	2698.43	FALSE	101
2022-09-12	15:38:24	1.04826	4.66287	2880.26	FALSE	101
2022-09-12	15:38:24	1.47813	6.57502	2705.01	FALSE	101
2022-09-12	15:38:25	1.30927	5.82389	2886.08	FALSE	101
2022-09-12	15:38:25	1.49253	6.63907	2711.65	FALSE	101
2022-09-12	15:38:25	1.45207	6.4591	2892.54	FALSE	101
2022-09-12	15:38:25	1.43095	6.36515	2718.01	FALSE	101
2022-09-12	15:38:26	1.27772	5.68355	2898.22	FALSE	101
2022-09-12	15:38:26	0.84388	3.75375	2721.77	FALSE	101
2022-09-12	15:38:26	0.615178	2.73643	2900.96	FALSE	101
2022-09-12	15:38:27	0.564491	2.51097	2724.28	FALSE	101
2022-09-12	15:38:27	0.507392	2.25698	2903.22	FALSE	101
2022-09-12	15:38:27	0.328817	1.46264	2725.74	FALSE	101
2022-09-12	15:38:27	0.262405	1.16723	2904.38	FALSE	101
2022-09-12	15:38:28	0.190395	0.846915	2726.59	FALSE	101
2022-09-12	15:38:28	0.196247	0.872946	2905.26	FALSE	101
2022-09-12	15:38:28	0.0937025	0.416807	2727	FALSE	101
2022-09-12	15:38:28	0.174873	0.77787	2906.04	FALSE	101
2022-09-12	15:38:29	-0.0867045	-0.385679	2727	FALSE	101
2022-09-12	15:38:29	-0.188893	-0.840234	2906.04	FALSE	101
2022-09-12	15:38:29	-0.330419	-1.46977	2727	FALSE	101
2022-09-12	15:38:29	-0.381666	-1.69773	2906.04	FALSE	101
2022-09-12	15:38:30	-0.339478	-1.51007	2727	FALSE	101
2022-09-12	15:38:30	0.0327356	0.145614	2906.18	FALSE	101
2022-09-12	15:38:30	0.0825066	0.367006	2727.37	FALSE	101
2022-09-12	15:38:31	0.107443	0.477928	2906.66	FALSE	101
2022-09-12	15:38:31	0.1764	0.784662	2728.15	FALSE	101
2022-09-12	15:38:31	-0.0233967	-0.104073	2906.66	FALSE	101
2022-09-12	15:38:31	0.131209	0.583644	2728.74	FALSE	101
2022-09-12	15:38:32	5.44968	24.2413	2930.9	1	102
2022-09-12	15:38:32	7.45619	33.1666	2761.9	1	103
2022-09-12	15:38:32	1.59838	7.10991	2938.01	FALSE	103
2022-09-12	15:38:32	1.74551	7.76438	2769.67	FALSE	103
2022-09-12	15:38:33	1.46765	6.5284	2944.54	FALSE	103
2022-09-12	15:38:33	2.7996	12.4532	2782.12	FALSE	103
2022-09-12	15:38:33	3.79721	16.8907	2961.43	1	104
2022-09-12	15:38:34	6.57558	29.2495	2811.37	1	105
2022-09-12	15:38:34	9.08968	40.4327	3001.86	1	106
2022-09-12	15:38:34	5.24708	23.3401	2834.71	1	107
2022-09-12	15:38:34	4.66729	20.761	3022.62	1	108
2022-09-12	15:38:35	2.10429	9.3603	2844.07	FALSE	108
2022-09-12	15:38:35	1.70973	7.60522	3030.23	FALSE	108
2022-09-12	15:38:35	0.62098	2.76224	2846.83	FALSE	108
2022-09-12	15:38:35	0.581743	2.58771	3032.82	FALSE	108

## Sheet: Harley_star_2022912153319 (2)
Date	Time	Lbs	Total force x time	Total Time Steps Force >3		**GoPro Fitting: 1522
2022-09-12	15:33:35	0.195992	0.195992	FALSE	0		Total force x time	1321.8
2022-09-12	15:33:35	0.354618	0.55061	FALSE	0		Total Time Steps Force >3	108
2022-09-12	15:33:35	0.181743	0.732353	FALSE	0
2022-09-12	15:33:36	0.442303	1.17466	FALSE	0
2022-09-12	15:33:36	0.188054	1.36271	FALSE	0
2022-09-12	15:33:36	0.185306	1.54802	FALSE	0
2022-09-12	15:33:36	-0.21215	1.54802	FALSE	0
2022-09-12	15:33:37	-0.499936	1.54802	FALSE	0
2022-09-12	15:33:37	-0.36589	1.54802	FALSE	0
2022-09-12	15:33:37	0.334924	1.88294	FALSE	0
2022-09-12	15:33:37	0.700674	2.58361	FALSE	0
2022-09-12	15:33:38	0.623066	3.20668	FALSE	0
2022-09-12	15:33:38	0.613702	3.82038	FALSE	0
2022-09-12	15:33:38	0.301234	4.12162	FALSE	0
2022-09-12	15:33:38	0.530547	4.65216	FALSE	0
2022-09-12	15:33:39	0.163015	4.81518	FALSE	0
2022-09-12	15:33:39	0.561031	5.37621	FALSE	0
2022-09-12	15:33:39	0.488054	5.86426	FALSE	0
2022-09-12	15:33:40	0.384084	6.24835	FALSE	0
2022-09-12	15:33:40	0.241692	6.49004	FALSE	0
2022-09-12	15:33:40	0.625763	7.1158	FALSE	0
2022-09-12	15:33:40	0.122608	7.23841	FALSE	0
2022-09-12	15:33:41	0.353193	7.5916	FALSE	0
2022-09-12	15:33:41	0.472023	8.06363	FALSE	0
2022-09-12	15:33:41	0.116298	8.17992	FALSE	0
2022-09-12	15:33:41	0.368562	8.54849	FALSE	0
2022-09-12	15:33:42	0.108461	8.65695	FALSE	0
2022-09-12	15:33:42	0.249631	8.90658	FALSE	0
2022-09-12	15:33:42	0.75416	9.66074	1	0
2022-09-12	15:33:42	4.78917	14.4499	FALSE	1
2022-09-12	15:33:43	2.28312	16.733	FALSE	1
2022-09-12	15:33:43	1.18429	17.9173	FALSE	1
2022-09-12	15:33:43	1.15167	19.069	FALSE	1
2022-09-12	15:33:44	0.434669	19.5037	FALSE	1
2022-09-12	15:33:44	1.00429	20.5079	FALSE	1
2022-09-12	15:33:44	0.168512	20.6765	FALSE	1
2022-09-12	15:33:44	0.473092	21.1496	FALSE	1
2022-09-12	15:33:45	0.146527	21.2961	FALSE	1
2022-09-12	15:33:45	0.407952	21.704	FALSE	1
2022-09-12	15:33:45	0.238537	21.9426	FALSE	1
2022-09-12	15:33:45	0.161896	22.1045	FALSE	1
2022-09-12	15:33:46	0.253143	22.3576	FALSE	1
2022-09-12	15:33:46	0.235789	22.5934	FALSE	1
2022-09-12	15:33:46	0.411769	23.0052	FALSE	1
2022-09-12	15:33:46	0.172735	23.1779	1	1
2022-09-12	15:33:47	3.35457	26.5325	FALSE	2
2022-09-12	15:33:47	0.306425	26.8389	FALSE	2
2022-09-12	15:33:47	1.57223	28.4111	FALSE	2
2022-09-12	15:33:48	0.844389	29.2555	FALSE	2
2022-09-12	15:33:48	1.50729	30.7628	FALSE	2
2022-09-12	15:33:48	2.07279	32.8356	FALSE	2
2022-09-12	15:33:48	1.53711	34.3727	FALSE	2
2022-09-12	15:33:49	1.79991	36.1726	FALSE	2
2022-09-12	15:33:49	0.872379	37.045	FALSE	2
2022-09-12	15:33:49	0.297163	37.3422	FALSE	2
2022-09-12	15:33:49	0.378537	37.7207	FALSE	2
2022-09-12	15:33:50	0.0401656	37.7609	FALSE	2
2022-09-12	15:33:50	0.218283	37.9791	FALSE	2
2022-09-12	15:33:50	0.28098	38.2601	FALSE	2
2022-09-12	15:33:51	0.338232	38.5984	FALSE	2
2022-09-12	15:33:51	0.279046	38.8774	FALSE	2
2022-09-12	15:33:51	0.445305	39.3227	FALSE	2
2022-09-12	15:33:51	0.400216	39.7229	FALSE	2
2022-09-12	15:33:52	0.325967	40.0489	FALSE	2
2022-09-12	15:33:52	0.204797	40.2537	FALSE	2
2022-09-12	15:33:52	0.268664	40.5223	FALSE	2
2022-09-12	15:33:52	0.915636	41.438	FALSE	2
2022-09-12	15:33:53	0.738944	42.1769	FALSE	2
2022-09-12	15:33:53	0.770649	42.9476	FALSE	2
2022-09-12	15:33:53	1.16617	44.1137	FALSE	2
2022-09-12	15:33:53	1.64042	45.7542	FALSE	2
2022-09-12	15:33:54	1.58022	47.3344	FALSE	2
2022-09-12	15:33:54	1.91156	49.2459	1	2
2022-09-12	15:33:54	4.08113	53.3271	1	3
2022-09-12	15:33:55	5.86001	59.1871	1	4
2022-09-12	15:33:55	3.96973	63.1568	1	5
2022-09-12	15:33:55	3.27915	66.436	1	6
2022-09-12	15:33:55	4.06983	70.5058	FALSE	7
2022-09-12	15:33:56	0.742252	71.248	FALSE	7
2022-09-12	15:33:56	0.97701	72.2251	FALSE	7
2022-09-12	15:33:56	1.61604	73.8411	FALSE	7
2022-09-12	15:33:56	0.473804	74.3149	FALSE	7
2022-09-12	15:33:57	0.431718	74.7466	FALSE	7
2022-09-12	15:33:57	0.60383	75.3505	FALSE	7
2022-09-12	15:33:57	0.26841	75.6189	FALSE	7
2022-09-12	15:33:57	0.638995	76.2579	FALSE	7
2022-09-12	15:33:58	0.198028	76.4559	FALSE	7
2022-09-12	15:33:58	0.910496	77.3664	FALSE	7
2022-09-12	15:33:58	0.744033	78.1104	FALSE	7
2022-09-12	15:33:59	1.77289	79.8833	FALSE	7
2022-09-12	15:33:59	0.994466	80.8778	FALSE	7
2022-09-12	15:33:59	1.86261	82.7404	FALSE	7
2022-09-12	15:33:59	1.70296	84.4433	FALSE	7
2022-09-12	15:34:00	1.98072	86.4241	1	7
2022-09-12	15:34:00	6.00021	92.4243	FALSE	8
2022-09-12	15:34:00	2.60072	95.025	FALSE	8
2022-09-12	15:34:00	1.40765	96.4326	FALSE	8
2022-09-12	15:34:01	0.965713	97.3984	FALSE	8
2022-09-12	15:34:01	1.25253	98.6509	FALSE	8
2022-09-12	15:34:01	0.561641	99.2125	FALSE	8
2022-09-12	15:34:01	0.841438	100.054	FALSE	8
2022-09-12	15:34:02	1.40688	101.461	1	8
2022-09-12	15:34:02	3.77915	105.24	1	9
2022-09-12	15:34:02	3.01665	108.257	FALSE	10
2022-09-12	15:34:03	1.10739	109.364	FALSE	10
2022-09-12	15:34:03	1.41156	110.776	FALSE	10
2022-09-12	15:34:03	1.09085	111.866	FALSE	10
2022-09-12	15:34:03	0.492074	112.359	FALSE	10
2022-09-12	15:34:04	1.19894	113.557	FALSE	10
2022-09-12	15:34:04	0.20154	113.759	FALSE	10
2022-09-12	15:34:04	0.726679	114.486	FALSE	10
2022-09-12	15:34:04	0.439962	114.926	FALSE	10
2022-09-12	15:34:05	0.433041	115.359	FALSE	10
2022-09-12	15:34:05	0.233804	115.592	FALSE	10
2022-09-12	15:34:05	0.214517	115.807	FALSE	10
2022-09-12	15:34:05	0.238435	116.045	FALSE	10
2022-09-12	15:34:06	0.0169595	116.062	FALSE	10
2022-09-12	15:34:06	0.352532	116.415	FALSE	10
2022-09-12	15:34:06	0.24159	116.657	FALSE	10
2022-09-12	15:34:07	0.354822	117.011	FALSE	10
2022-09-12	15:34:07	0.269377	117.281	FALSE	10
2022-09-12	15:34:07	0.298537	117.579	FALSE	10
2022-09-12	15:34:07	0.33416	117.913	FALSE	10
2022-09-12	15:34:08	0.327494	118.241	FALSE	10
2022-09-12	15:34:08	0.30215	118.543	FALSE	10
2022-09-12	15:34:08	0.314109	118.857	FALSE	10
2022-09-12	15:34:08	0.112481	118.97	FALSE	10
2022-09-12	15:34:09	-0.0499107	118.97	FALSE	10
2022-09-12	15:34:09	0.0145676	118.984	FALSE	10
2022-09-12	15:34:09	0.0305473	119.015	FALSE	10
2022-09-12	15:34:09	-0.0436002	119.015	FALSE	10
2022-09-12	15:34:10	-0.193626	119.015	FALSE	10
2022-09-12	15:34:10	-0.480038	119.015	FALSE	10
2022-09-12	15:34:10	-0.20533	119.015	FALSE	10
2022-09-12	15:34:11	-0.127163	119.015	FALSE	10
2022-09-12	15:34:11	0.254975	119.27	FALSE	10
2022-09-12	15:34:11	0.319402	119.589	FALSE	10
2022-09-12	15:34:11	0.22841	119.818	FALSE	10
2022-09-12	15:34:12	0.0880536	119.906	FALSE	10
2022-09-12	15:34:12	0.377875	120.283	FALSE	10
2022-09-12	15:34:12	0.375127	120.659	FALSE	10
2022-09-12	15:34:12	0.93416	121.593	FALSE	10
2022-09-12	15:34:13	0.945051	122.538	FALSE	10
2022-09-12	15:34:13	1.1966	123.734	FALSE	10
2022-09-12	15:34:13	0.327443	124.062	FALSE	10
2022-09-12	15:34:13	0.145051	124.207	FALSE	10
2022-09-12	15:34:14	0.343677	124.551	FALSE	10
2022-09-12	15:34:14	-0.0814119	124.551	FALSE	10
2022-09-12	15:34:14	-0.0614629	124.551	FALSE	10
2022-09-12	15:34:15	-0.161107	124.551	FALSE	10
2022-09-12	15:34:15	-0.0854832	124.551	FALSE	10
2022-09-12	15:34:15	-0.154694	124.551	FALSE	10
2022-09-12	15:34:15	-0.0450761	124.551	FALSE	10
2022-09-12	15:34:16	-0.0724552	124.551	FALSE	10
2022-09-12	15:34:16	-0.250928	124.551	FALSE	10
2022-09-12	15:34:16	-0.210521	124.551	FALSE	10
2022-09-12	15:34:16	-0.366552	124.551	FALSE	10
2022-09-12	15:34:17	-0.0250252	124.551	FALSE	10
2022-09-12	15:34:17	0.235178	124.786	FALSE	10
2022-09-12	15:34:17	0.198537	124.984	FALSE	10
2022-09-12	15:34:18	0.328562	125.313	FALSE	10
2022-09-12	15:34:18	0.365611	125.678	FALSE	10
2022-09-12	15:34:18	0.402303	126.081	FALSE	10
2022-09-12	15:34:18	0.14958	126.23	FALSE	10
2022-09-12	15:34:19	0.782862	127.013	FALSE	10
2022-09-12	15:34:19	0.791005	127.804	FALSE	10
2022-09-12	15:34:19	2.18871	129.993	FALSE	10
2022-09-12	15:34:19	2.05523	132.048	1	10
2022-09-12	15:34:20	3.22622	135.274	FALSE	11
2022-09-12	15:34:20	2.98922	138.264	FALSE	11
2022-09-12	15:34:20	2.40383	140.667	FALSE	11
2022-09-12	15:34:20	2.3105	142.978	FALSE	11
2022-09-12	15:34:21	0.617875	143.596	FALSE	11
2022-09-12	15:34:21	0.987596	144.583	FALSE	11
2022-09-12	15:34:21	1.56851	146.152	1	11
2022-09-12	15:34:22	3.03162	149.184	1	12
2022-09-12	15:34:22	4.2167	153.4	1	13
2022-09-12	15:34:22	5.42434	158.825	1	14
2022-09-12	15:34:22	8.22932	167.054	1	15
2022-09-12	15:34:23	6.59294	173.647	1	16
2022-09-12	15:34:23	9.40474	183.052	1	17
2022-09-12	15:34:23	6.55314	189.605	1	18
2022-09-12	15:34:23	10.1403	199.745	1	19
2022-09-12	15:34:24	5.52286	205.268	1	20
2022-09-12	15:34:24	4.85049	210.118	1	21
2022-09-12	15:34:24	5.834	215.952	1	22
2022-09-12	15:34:24	6.26881	222.221	1	23
2022-09-12	15:34:25	4.46535	226.687	1	24
2022-09-12	15:34:25	4.13075	230.817	1	25
2022-09-12	15:34:25	11.3428	242.16	1	26
2022-09-12	15:34:26	9.22423	251.384	1	27
2022-09-12	15:34:26	7.74255	259.127	1	28
2022-09-12	15:34:26	9.20612	268.333	1	29
2022-09-12	15:34:26	8.64739	276.98	1	30
2022-09-12	15:34:27	4.79609	281.776	FALSE	31
2022-09-12	15:34:27	1.93406	283.711	1	31
2022-09-12	15:34:27	4.41055	288.121	FALSE	32
2022-09-12	15:34:27	2.45625	290.577	FALSE	32
2022-09-12	15:34:28	1.60276	292.18	FALSE	32
2022-09-12	15:34:28	0.986069	293.166	FALSE	32
2022-09-12	15:34:28	1.24775	294.414	FALSE	32
2022-09-12	15:34:28	1.70093	296.115	FALSE	32
2022-09-12	15:34:29	2.00434	298.119	FALSE	32
2022-09-12	15:34:29	2.54561	300.665	FALSE	32
2022-09-12	15:34:29	2.11508	302.78	FALSE	32
2022-09-12	15:34:30	1.91345	304.693	FALSE	32
2022-09-12	15:34:30	1.34434	306.038	FALSE	32
2022-09-12	15:34:30	2.37966	308.417	FALSE	32
2022-09-12	15:34:30	0.797417	309.215	FALSE	32
2022-09-12	15:34:31	0.420216	309.635	FALSE	32
2022-09-12	15:34:31	0.358791	309.994	FALSE	32
2022-09-12	15:34:31	1.48953	311.483	FALSE	32
2022-09-12	15:34:31	0.685305	312.169	FALSE	32
2022-09-12	15:34:32	0.645204	312.814	FALSE	32
2022-09-12	15:34:32	0.568053	313.382	FALSE	32
2022-09-12	15:34:32	1.12953	314.511	1	32
2022-09-12	15:34:32	5.23009	319.741	1	33
2022-09-12	15:34:33	6.84428	326.586	1	34
2022-09-12	15:34:33	14.8605	341.446	1	35
2022-09-12	15:34:33	6.73874	348.185	1	36
2022-09-12	15:34:34	11.6628	359.848	1	37
2022-09-12	15:34:34	11.4937	371.341	1	38
2022-09-12	15:34:34	12.3694	383.711	1	39
2022-09-12	15:34:34	5.03787	388.749	1	40
2022-09-12	15:34:35	5.08596	393.835	1	41
2022-09-12	15:34:35	4.24978	398.084	1	42
2022-09-12	15:34:35	8.44001	406.524	1	43
2022-09-12	15:34:35	7.83965	414.364	1	44
2022-09-12	15:34:36	6.78627	421.15	1	45
2022-09-12	15:34:36	6.62423	427.775	FALSE	46
2022-09-12	15:34:36	1.85991	429.635	FALSE	46
2022-09-12	15:34:36	0.974924	430.609	FALSE	46
2022-09-12	15:34:37	0.84617	431.456	FALSE	46
2022-09-12	15:34:37	2.1735	433.629	1	46
2022-09-12	15:34:37	4.76464	438.394	1	47
2022-09-12	15:34:38	13.8318	452.226	1	48
2022-09-12	15:34:38	9.70927	461.935	1	49
2022-09-12	15:34:38	3.34846	465.283	FALSE	50
2022-09-12	15:34:38	0.937214	466.221	FALSE	50
2022-09-12	15:34:39	0.687239	466.908	FALSE	50
2022-09-12	15:34:39	2.12169	469.029	FALSE	50
2022-09-12	15:34:39	2.63889	471.668	1	50
2022-09-12	15:34:39	5.11039	476.779	1	51
2022-09-12	15:34:40	3.64703	480.426	1	52
2022-09-12	15:34:40	3.3108	483.737	FALSE	53
2022-09-12	15:34:40	2.40973	486.146	FALSE	53
2022-09-12	15:34:41	1.87324	488.02	FALSE	53
2022-09-12	15:34:41	2.06622	490.086	FALSE	53
2022-09-12	15:34:41	1.39197	491.478	FALSE	53
2022-09-12	15:34:41	1.18281	492.661	FALSE	53
2022-09-12	15:34:42	1.36561	494.026	FALSE	53
2022-09-12	15:34:42	0.842201	494.868	FALSE	53
2022-09-12	15:34:42	0.309631	495.178	FALSE	53
2022-09-12	15:34:42	0.473702	495.652	FALSE	53
2022-09-12	15:34:43	0.191667	495.843	FALSE	53
2022-09-12	15:34:43	0.297875	496.141	FALSE	53
2022-09-12	15:34:43	0.155535	496.297	FALSE	53
2022-09-12	15:34:43	0.456501	496.753	FALSE	53
2022-09-12	15:34:44	0.149479	496.903	FALSE	53
2022-09-12	15:34:44	0.216349	497.119	FALSE	53
2022-09-12	15:34:44	0.077163	497.196	FALSE	53
2022-09-12	15:34:45	0.0336008	497.23	FALSE	53
2022-09-12	15:34:45	-0.111336	497.23	FALSE	53
2022-09-12	15:34:45	-0.361768	497.23	FALSE	53
2022-09-12	15:34:45	0.431463	497.661	FALSE	53
2022-09-12	15:34:46	0.48902	498.15	FALSE	53
2022-09-12	15:34:46	0.442608	498.593	FALSE	53
2022-09-12	15:34:46	0.0159926	498.609	FALSE	53
2022-09-12	15:34:46	0.118181	498.727	FALSE	53
2022-09-12	15:34:47	0.237468	498.965	FALSE	53
2022-09-12	15:34:47	0.277723	499.242	FALSE	53
2022-09-12	15:34:47	0.215738	499.458	FALSE	53
2022-09-12	15:34:47	0.226934	499.685	FALSE	53
2022-09-12	15:34:48	0.234364	499.919	FALSE	53
2022-09-12	15:34:48	0.0724811	499.992	FALSE	53
2022-09-12	15:34:48	0.14042	500.132	FALSE	53
2022-09-12	15:34:49	0.225255	500.357	FALSE	53
2022-09-12	15:34:49	0.196603	500.554	FALSE	53
2022-09-12	15:34:49	0.0846949	500.639	FALSE	53
2022-09-12	15:34:49	0.289631	500.928	FALSE	53
2022-09-12	15:34:50	0.301234	501.23	FALSE	53
2022-09-12	15:34:50	0.309071	501.539	FALSE	53
2022-09-12	15:34:50	0.492023	502.031	FALSE	53
2022-09-12	15:34:50	0.481997	502.513	FALSE	53
2022-09-12	15:34:51	0.406323	502.919	FALSE	53
2022-09-12	15:34:51	0.56958	503.489	FALSE	53
2022-09-12	15:34:51	0.443219	503.932	FALSE	53
2022-09-12	15:34:51	0.484797	504.417	FALSE	53
2022-09-12	15:34:52	0.372227	504.789	FALSE	53
2022-09-12	15:34:52	0.0636771	504.853	FALSE	53
2022-09-12	15:34:52	0.0580282	504.911	FALSE	53
2022-09-12	15:34:53	0.0643386	504.975	FALSE	53
2022-09-12	15:34:53	0.182965	505.158	FALSE	53
2022-09-12	15:34:53	0.283524	505.441	FALSE	53
2022-09-12	15:34:53	0.234771	505.676	FALSE	53
2022-09-12	15:34:54	0.199809	505.876	FALSE	53
2022-09-12	15:34:54	0.336298	506.212	FALSE	53
2022-09-12	15:34:54	0.448206	506.661	FALSE	53
2022-09-12	15:34:54	0.0631681	506.724	FALSE	53
2022-09-12	15:34:55	-0.353575	506.724	FALSE	53
2022-09-12	15:34:55	-0.640597	506.724	FALSE	53
2022-09-12	15:34:55	-0.79103	506.724	FALSE	53
2022-09-12	15:34:55	-0.850724	506.724	FALSE	53
2022-09-12	15:34:56	-0.874389	506.724	FALSE	53
2022-09-12	15:34:56	-0.721411	506.724	FALSE	53
2022-09-12	15:34:56	-0.711132	506.724	FALSE	53
2022-09-12	15:34:57	-0.611844	506.724	FALSE	53
2022-09-12	15:34:57	-0.711284	506.724	FALSE	53
2022-09-12	15:34:57	-0.578765	506.724	FALSE	53
2022-09-12	15:34:57	-0.571437	506.724	FALSE	53
2022-09-12	15:34:58	0.336552	507.06	FALSE	53
2022-09-12	15:34:58	0.273499	507.334	FALSE	53
2022-09-12	15:34:58	0.134161	507.468	FALSE	53
2022-09-12	15:34:58	0.173346	507.641	FALSE	53
2022-09-12	15:34:59	0.39131	508.033	FALSE	53
2022-09-12	15:34:59	0.481794	508.514	FALSE	53
2022-09-12	15:34:59	0.633244	509.148	FALSE	53
2022-09-12	15:35:00	0.439911	509.587	FALSE	53
2022-09-12	15:35:00	0.383626	509.971	FALSE	53
2022-09-12	15:35:00	0.356858	510.328	FALSE	53
2022-09-12	15:35:00	0.334873	510.663	FALSE	53
2022-09-12	15:35:01	0.395484	511.058	FALSE	53
2022-09-12	15:35:01	0.341438	511.4	FALSE	53
2022-09-12	15:35:01	0.350496	511.75	FALSE	53
2022-09-12	15:35:01	0.637825	512.388	FALSE	53
2022-09-12	15:35:02	0.683982	513.072	FALSE	53
2022-09-12	15:35:02	1.5193	514.591	FALSE	53
2022-09-12	15:35:02	1.15558	515.747	FALSE	53
2022-09-12	15:35:02	1.35503	517.102	FALSE	53
2022-09-12	15:35:03	1.42098	518.523	FALSE	53
2022-09-12	15:35:03	0.439453	518.962	FALSE	53
2022-09-12	15:35:03	0.446323	519.409	FALSE	53
2022-09-12	15:35:04	0.292634	519.701	FALSE	53
2022-09-12	15:35:04	0.288512	519.99	FALSE	53
2022-09-12	15:35:04	0.27757	520.267	FALSE	53
2022-09-12	15:35:04	0.239148	520.507	FALSE	53
2022-09-12	15:35:05	0.294669	520.801	FALSE	53
2022-09-12	15:35:05	0.301692	521.103	FALSE	53
2022-09-12	15:35:05	0.167596	521.271	FALSE	53
2022-09-12	15:35:05	0.278079	521.549	FALSE	53
2022-09-12	15:35:06	0.243626	521.792	FALSE	53
2022-09-12	15:35:06	0.356043	522.148	FALSE	53
2022-09-12	15:35:06	0.102914	522.251	FALSE	53
2022-09-12	15:35:06	0.284593	522.536	FALSE	53
2022-09-12	15:35:07	0.117367	522.653	FALSE	53
2022-09-12	15:35:07	0.156807	522.81	FALSE	53
2022-09-12	15:35:07	0.00779924	522.818	FALSE	53
2022-09-12	15:35:08	0.203321	523.021	FALSE	53
2022-09-12	15:35:08	0.0858654	523.107	FALSE	53
2022-09-12	15:35:08	0.14271	523.25	FALSE	53
2022-09-12	15:35:08	0.448104	523.698	FALSE	53
2022-09-12	15:35:09	0.720318	524.418	FALSE	53
2022-09-12	15:35:09	0.477468	524.896	FALSE	53
2022-09-12	15:35:09	0.819606	525.715	FALSE	53
2022-09-12	15:35:09	0.891514	526.607	FALSE	53
2022-09-12	15:35:10	0.837519	527.444	FALSE	53
2022-09-12	15:35:10	1.02368	528.468	FALSE	53
2022-09-12	15:35:10	0.600522	529.068	FALSE	53
2022-09-12	15:35:10	1.46698	530.535	FALSE	53
2022-09-12	15:35:11	1.23116	531.767	FALSE	53
2022-09-12	15:35:11	2.15981	533.926	FALSE	53
2022-09-12	15:35:11	0.789376	534.716	FALSE	53
2022-09-12	15:35:12	1.02531	535.741	FALSE	53
2022-09-12	15:35:12	0.862303	536.603	FALSE	53
2022-09-12	15:35:12	0.926578	537.53	FALSE	53
2022-09-12	15:35:12	1.95477	539.485	FALSE	53
2022-09-12	15:35:13	1.50388	540.989	FALSE	53
2022-09-12	15:35:13	1.22856	542.217	FALSE	53
2022-09-12	15:35:13	2.36006	544.577	FALSE	53
2022-09-12	15:35:13	1.41045	545.988	FALSE	53
2022-09-12	15:35:14	1.72805	547.716	FALSE	53
2022-09-12	15:35:14	2.72841	550.444	FALSE	53
2022-09-12	15:35:14	2.94866	553.393	FALSE	53
2022-09-12	15:35:14	1.67645	555.069	FALSE	53
2022-09-12	15:35:15	1.72439	556.794	FALSE	53
2022-09-12	15:35:15	0.554924	557.349	FALSE	53
2022-09-12	15:35:15	1.1191	558.468	FALSE	53
2022-09-12	15:35:16	0.856603	559.324	FALSE	53
2022-09-12	15:35:16	0.569529	559.894	FALSE	53
2022-09-12	15:35:16	0.683117	560.577	FALSE	53
2022-09-12	15:35:16	1.29579	561.873	FALSE	53
2022-09-12	15:35:17	0.796807	562.669	FALSE	53
2022-09-12	15:35:17	1.07141	563.741	FALSE	53
2022-09-12	15:35:17	0.477417	564.218	FALSE	53
2022-09-12	15:35:17	0.325916	564.544	FALSE	53
2022-09-12	15:35:18	0.310242	564.854	FALSE	53
2022-09-12	15:35:18	0.439708	565.294	FALSE	53
2022-09-12	15:35:18	0.296705	565.591	FALSE	53
2022-09-12	15:35:18	0.450496	566.041	FALSE	53
2022-09-12	15:35:19	0.675636	566.717	FALSE	53
2022-09-12	15:35:19	0.714771	567.432	FALSE	53
2022-09-12	15:35:19	0.365255	567.797	FALSE	53
2022-09-12	15:35:20	0.172023	567.969	FALSE	53
2022-09-12	15:35:20	0.280776	568.25	FALSE	53
2022-09-12	15:35:20	0.183931	568.434	FALSE	53
2022-09-12	15:35:20	0.0998602	568.534	FALSE	53
2022-09-12	15:35:21	0.093448	568.627	FALSE	53
2022-09-12	15:35:21	0.0876465	568.715	FALSE	53
2022-09-12	15:35:21	0.145916	568.861	FALSE	53
2022-09-12	15:35:21	0.112379	568.973	FALSE	53
2022-09-12	15:35:22	-0.110827	568.973	FALSE	53
2022-09-12	15:35:22	-0.0728623	568.973	FALSE	53
2022-09-12	15:35:22	0.0153819	568.988	FALSE	53
2022-09-12	15:35:23	0.645051	569.633	1	53
2022-09-12	15:35:23	3.51029	573.144	FALSE	54
2022-09-12	15:35:23	0.391158	573.535	FALSE	54
2022-09-12	15:35:23	0.36444	573.899	FALSE	54
2022-09-12	15:35:24	0.330445	574.23	FALSE	54
2022-09-12	15:35:24	0.242557	574.472	FALSE	54
2022-09-12	15:35:24	0.106374	574.579	FALSE	54
2022-09-12	15:35:24	0.17986	574.759	FALSE	54
2022-09-12	15:35:25	0.139962	574.899	FALSE	54
2022-09-12	15:35:25	0.245255	575.144	FALSE	54
2022-09-12	15:35:25	0.228155	575.372	FALSE	54
2022-09-12	15:35:25	0.184339	575.556	FALSE	54
2022-09-12	15:35:26	0.219351	575.776	FALSE	54
2022-09-12	15:35:26	0.493346	576.269	FALSE	54
2022-09-12	15:35:26	1.02754	577.297	FALSE	54
2022-09-12	15:35:27	0.291056	577.588	FALSE	54
2022-09-12	15:35:27	0.28668	577.874	FALSE	54
2022-09-12	15:35:27	0.258537	578.133	FALSE	54
2022-09-12	15:35:27	0.32785	578.461	FALSE	54
2022-09-12	15:35:28	0.283015	578.744	FALSE	54
2022-09-12	15:35:28	0.198842	578.943	FALSE	54
2022-09-12	15:35:28	0.303982	579.246	FALSE	54
2022-09-12	15:35:28	0.284898	579.531	FALSE	54
2022-09-12	15:35:29	0.303779	579.835	FALSE	54
2022-09-12	15:35:29	0.209224	580.044	FALSE	54
2022-09-12	15:35:29	0.152888	580.197	FALSE	54
2022-09-12	15:35:29	0.130954	580.328	FALSE	54
2022-09-12	15:35:30	0.294059	580.622	FALSE	54
2022-09-12	15:35:30	0.563117	581.185	FALSE	54
2022-09-12	15:35:30	0.71874	581.904	FALSE	54
2022-09-12	15:35:31	0.657977	582.562	FALSE	54
2022-09-12	15:35:31	0.788257	583.35	FALSE	54
2022-09-12	15:35:31	0.625509	583.976	FALSE	54
2022-09-12	15:35:31	0.646018	584.622	FALSE	54
2022-09-12	15:35:32	0.477163	585.099	FALSE	54
2022-09-12	15:35:32	0.514618	585.614	FALSE	54
2022-09-12	15:35:32	0.580369	586.194	FALSE	54
2022-09-12	15:35:32	0.989631	587.184	FALSE	54
2022-09-12	15:35:33	0.98042	588.164	FALSE	54
2022-09-12	15:35:33	0.771209	588.935	FALSE	54
2022-09-12	15:35:33	0.870242	589.806	FALSE	54
2022-09-12	15:35:33	0.862557	590.668	FALSE	54
2022-09-12	15:35:34	0.687595	591.356	FALSE	54
2022-09-12	15:35:34	0.332888	591.689	FALSE	54
2022-09-12	15:35:34	0.296298	591.985	FALSE	54
2022-09-12	15:35:35	0.298588	592.283	FALSE	54
2022-09-12	15:35:35	0.384491	592.668	FALSE	54
2022-09-12	15:35:35	0.215331	592.883	FALSE	54
2022-09-12	15:35:35	0.344898	593.228	FALSE	54
2022-09-12	15:35:36	0.238435	593.467	FALSE	54
2022-09-12	15:35:36	0.985509	594.452	FALSE	54
2022-09-12	15:35:36	0.784898	595.237	FALSE	54
2022-09-12	15:35:36	1.04948	596.287	FALSE	54
2022-09-12	15:35:37	1.30042	597.587	FALSE	54
2022-09-12	15:35:37	1.36332	598.95	FALSE	54
2022-09-12	15:35:37	1.2362	600.186	FALSE	54
2022-09-12	15:35:37	0.765763	600.952	FALSE	54
2022-09-12	15:35:38	0.649478	601.602	FALSE	54
2022-09-12	15:35:38	0.58841	602.19	FALSE	54
2022-09-12	15:35:38	0.676502	602.867	FALSE	54
2022-09-12	15:35:39	0.362507	603.229	FALSE	54
2022-09-12	15:35:39	0.35299	603.582	FALSE	54
2022-09-12	15:35:39	0.323575	603.906	FALSE	54
2022-09-12	15:35:39	0.438944	604.345	FALSE	54
2022-09-12	15:35:40	0.113601	604.458	FALSE	54
2022-09-12	15:35:40	0.113702	604.572	FALSE	54
2022-09-12	15:35:40	0.229478	604.801	FALSE	54
2022-09-12	15:35:40	0.130853	604.932	FALSE	54
2022-09-12	15:35:41	0.0165015	604.949	FALSE	54
2022-09-12	15:35:41	-0.483651	604.949	FALSE	54
2022-09-12	15:35:41	-0.503549	604.949	FALSE	54
2022-09-12	15:35:41	-0.541921	604.949	FALSE	54
2022-09-12	15:35:42	-0.531234	604.949	FALSE	54
2022-09-12	15:35:42	-0.438206	604.949	FALSE	54
2022-09-12	15:35:42	-0.503498	604.949	FALSE	54
2022-09-12	15:35:43	-0.512048	604.949	FALSE	54
2022-09-12	15:35:43	-0.344872	604.949	FALSE	54
2022-09-12	15:35:43	-0.174033	604.949	FALSE	54
2022-09-12	15:35:43	0.309886	605.259	FALSE	54
2022-09-12	15:35:44	1.60917	606.868	FALSE	54
2022-09-12	15:35:44	0.691819	607.56	FALSE	54
2022-09-12	15:35:44	0.184135	607.744	FALSE	54
2022-09-12	15:35:44	0.349173	608.093	FALSE	54
2022-09-12	15:35:45	0.296858	608.39	FALSE	54
2022-09-12	15:35:45	0.210242	608.6	FALSE	54
2022-09-12	15:35:45	0.173295	608.773	FALSE	54
2022-09-12	15:35:46	0.429784	609.203	FALSE	54
2022-09-12	15:35:46	0.322303	609.525	FALSE	54
2022-09-12	15:35:46	0.337723	609.863	FALSE	54
2022-09-12	15:35:46	0.388562	610.252	FALSE	54
2022-09-12	15:35:47	0.711056	610.963	FALSE	54
2022-09-12	15:35:47	0.719758	611.683	FALSE	54
2022-09-12	15:35:47	0.71874	612.401	FALSE	54
2022-09-12	15:35:47	0.339707	612.741	FALSE	54
2022-09-12	15:35:48	0.320166	613.061	FALSE	54
2022-09-12	15:35:48	0.32154	613.383	FALSE	54
2022-09-12	15:35:48	0.337875	613.721	FALSE	54
2022-09-12	15:35:48	0.350445	614.071	FALSE	54
2022-09-12	15:35:49	0.339351	614.41	FALSE	54
2022-09-12	15:35:49	0.343117	614.753	FALSE	54
2022-09-12	15:35:49	0.346425	615.1	FALSE	54
2022-09-12	15:35:50	0.312023	615.412	FALSE	54
2022-09-12	15:35:50	0.332837	615.745	FALSE	54
2022-09-12	15:35:50	0.357774	616.103	FALSE	54
2022-09-12	15:35:50	0.333804	616.436	FALSE	54
2022-09-12	15:35:51	0.329835	616.766	FALSE	54
2022-09-12	15:35:51	0.338893	617.105	FALSE	54
2022-09-12	15:35:51	0.330547	617.436	FALSE	54
2022-09-12	15:35:51	0.336298	617.772	FALSE	54
2022-09-12	15:35:52	0.336807	618.109	FALSE	54
2022-09-12	15:35:52	0.328104	618.437	FALSE	54
2022-09-12	15:35:52	0.344898	618.782	FALSE	54
2022-09-12	15:35:52	0.345967	619.128	FALSE	54
2022-09-12	15:35:53	0.345814	619.473	FALSE	54
2022-09-12	15:35:53	0.366578	619.84	FALSE	54
2022-09-12	15:35:53	0.382557	620.223	FALSE	54
2022-09-12	15:35:54	0.387799	620.61	FALSE	54
2022-09-12	15:35:54	0.356908	620.967	FALSE	54
2022-09-12	15:35:54	0.336552	621.304	FALSE	54
2022-09-12	15:35:54	0.349987	621.654	FALSE	54
2022-09-12	15:35:55	0.311972	621.966	FALSE	54
2022-09-12	15:35:55	0.285967	622.252	FALSE	54
2022-09-12	15:35:55	0.360623	622.612	FALSE	54
2022-09-12	15:35:55	0.355585	622.968	FALSE	54
2022-09-12	15:35:56	0.421132	623.389	FALSE	54
2022-09-12	15:35:56	0.456756	623.846	FALSE	54
2022-09-12	15:35:56	0.39528	624.241	FALSE	54
2022-09-12	15:35:56	0.394466	624.636	FALSE	54
2022-09-12	15:35:57	0.372634	625.008	FALSE	54
2022-09-12	15:35:57	0.378079	625.386	FALSE	54
2022-09-12	15:35:57	0.320267	625.707	FALSE	54
2022-09-12	15:35:58	0.35131	626.058	FALSE	54
2022-09-12	15:35:58	0.363728	626.422	FALSE	54
2022-09-12	15:35:58	0.364746	626.786	FALSE	54
2022-09-12	15:35:58	0.371819	627.158	FALSE	54
2022-09-12	15:35:59	0.74556	627.904	FALSE	54
2022-09-12	15:35:59	0.449733	628.354	FALSE	54
2022-09-12	15:35:59	0.570801	628.924	FALSE	54
2022-09-12	15:35:59	0.605255	629.53	FALSE	54
2022-09-12	15:36:00	0.742964	630.273	FALSE	54
2022-09-12	15:36:00	0.83131	631.104	FALSE	54
2022-09-12	15:36:00	1.15436	632.258	FALSE	54
2022-09-12	15:36:00	0.505967	632.764	FALSE	54
2022-09-12	15:36:01	1.03268	633.797	FALSE	54
2022-09-12	15:36:01	0.865305	634.662	FALSE	54
2022-09-12	15:36:01	1.45584	636.118	FALSE	54
2022-09-12	15:36:02	2.09971	638.218	FALSE	54
2022-09-12	15:36:02	2.97894	641.197	FALSE	54
2022-09-12	15:36:02	2.61406	643.811	1	54
2022-09-12	15:36:02	3.12764	646.938	1	55
2022-09-12	15:36:03	3.11843	650.057	1	56
2022-09-12	15:36:03	4.66271	654.72	1	57
2022-09-12	15:36:03	3.68663	658.406	1	58
2022-09-12	15:36:03	4.62724	663.033	1	59
2022-09-12	15:36:04	3.33268	666.366	1	60
2022-09-12	15:36:04	3.71121	670.077	FALSE	61
2022-09-12	15:36:04	1.42118	671.498	FALSE	61
2022-09-12	15:36:05	1.23004	672.728	FALSE	61
2022-09-12	15:36:05	1.1965	673.925	FALSE	61
2022-09-12	15:36:05	1.27411	675.199	FALSE	61
2022-09-12	15:36:05	1.77146	676.971	FALSE	61
2022-09-12	15:36:06	2.3563	679.327	FALSE	61
2022-09-12	15:36:06	2.28108	681.608	1	61
2022-09-12	15:36:06	4.08673	685.695	1	62
2022-09-12	15:36:06	5.5794	691.274	1	63
2022-09-12	15:36:07	6.73105	698.005	1	64
2022-09-12	15:36:07	10.4462	708.451	1	65
2022-09-12	15:36:07	7.52978	715.981	FALSE	66
2022-09-12	15:36:07	1.48128	717.462	1	66
2022-09-12	15:36:08	4.14103	721.603	1	67
2022-09-12	15:36:08	5.53691	727.14	FALSE	68
2022-09-12	15:36:08	0.979962	728.12	FALSE	68
2022-09-12	15:36:09	0.998231	729.119	FALSE	68
2022-09-12	15:36:09	2.57339	731.692	1	68
2022-09-12	15:36:09	4.08067	735.773	1	69
2022-09-12	15:36:09	7.17838	742.951	1	70
2022-09-12	15:36:10	5.38403	748.335	FALSE	71
2022-09-12	15:36:10	2.89726	751.232	FALSE	71
2022-09-12	15:36:10	0.986425	752.219	FALSE	71
2022-09-12	15:36:10	1.98027	754.199	FALSE	71
2022-09-12	15:36:11	0.52958	754.729	FALSE	71
2022-09-12	15:36:11	1.46261	756.191	FALSE	71
2022-09-12	15:36:11	0.80958	757.001	FALSE	71
2022-09-12	15:36:11	1.84373	758.844	FALSE	71
2022-09-12	15:36:12	1.22902	760.073	FALSE	71
2022-09-12	15:36:12	2.68678	762.76	FALSE	71
2022-09-12	15:36:12	1.08139	763.842	FALSE	71
2022-09-12	15:36:13	0.913397	764.755	FALSE	71
2022-09-12	15:36:13	0.920522	765.676	FALSE	71
2022-09-12	15:36:13	1.51452	767.19	FALSE	71
2022-09-12	15:36:13	1.55401	768.744	FALSE	71
2022-09-12	15:36:14	2.53462	771.279	FALSE	71
2022-09-12	15:36:14	2.13726	773.416	FALSE	71
2022-09-12	15:36:14	1.61131	775.027	FALSE	71
2022-09-12	15:36:14	1.49497	776.522	FALSE	71
2022-09-12	15:36:15	1.64515	778.167	FALSE	71
2022-09-12	15:36:15	1.6477	779.815	FALSE	71
2022-09-12	15:36:15	1.31248	781.128	FALSE	71
2022-09-12	15:36:15	0.363066	781.491	FALSE	71
2022-09-12	15:36:16	0.347596	781.838	FALSE	71
2022-09-12	15:36:16	0.453702	782.292	FALSE	71
2022-09-12	15:36:16	0.460216	782.752	FALSE	71
2022-09-12	15:36:17	0.54159	783.294	FALSE	71
2022-09-12	15:36:17	0.709224	784.003	FALSE	71
2022-09-12	15:36:17	1.02709	785.03	FALSE	71
2022-09-12	15:36:17	0.646272	785.676	FALSE	71
2022-09-12	15:36:18	0.338995	786.015	FALSE	71
2022-09-12	15:36:18	0.445305	786.461	FALSE	71
2022-09-12	15:36:18	0.435789	786.896	FALSE	71
2022-09-12	15:36:18	0.423728	787.32	FALSE	71
2022-09-12	15:36:19	0.438181	787.758	FALSE	71
2022-09-12	15:36:19	0.747952	788.506	FALSE	71
2022-09-12	15:36:19	1.151	789.657	FALSE	71
2022-09-12	15:36:19	2.2277	791.885	1	71
2022-09-12	15:36:20	4.0879	795.973	FALSE	72
2022-09-12	15:36:20	2.89502	798.868	FALSE	72
2022-09-12	15:36:20	1.74388	800.612	FALSE	72
2022-09-12	15:36:21	1.28078	801.893	FALSE	72
2022-09-12	15:36:21	0.95645	802.849	FALSE	72
2022-09-12	15:36:21	1.05416	803.903	FALSE	72
2022-09-12	15:36:21	1.03162	804.935	FALSE	72
2022-09-12	15:36:22	0.866425	805.801	FALSE	72
2022-09-12	15:36:22	0.734568	806.536	FALSE	72
2022-09-12	15:36:22	0.826578	807.362	FALSE	72
2022-09-12	15:36:22	0.753397	808.116	FALSE	72
2022-09-12	15:36:23	0.665458	808.781	FALSE	72
2022-09-12	15:36:23	0.671158	809.452	FALSE	72
2022-09-12	15:36:23	0.511412	809.964	FALSE	72
2022-09-12	15:36:23	0.668104	810.632	FALSE	72
2022-09-12	15:36:24	1.2276	811.859	FALSE	72
2022-09-12	15:36:24	1.00149	812.861	FALSE	72
2022-09-12	15:36:24	1.0564	813.917	FALSE	72
2022-09-12	15:36:25	0.753702	814.671	FALSE	72
2022-09-12	15:36:25	0.947799	815.619	FALSE	72
2022-09-12	15:36:25	0.717366	816.336	FALSE	72
2022-09-12	15:36:25	1.31253	817.649	FALSE	72
2022-09-12	15:36:26	0.509428	818.158	FALSE	72
2022-09-12	15:36:26	0.439809	818.598	FALSE	72
2022-09-12	15:36:26	0.389682	818.988	FALSE	72
2022-09-12	15:36:26	0.32327	819.311	FALSE	72
2022-09-12	15:36:27	0.360929	819.672	FALSE	72
2022-09-12	15:36:27	0.579911	820.252	FALSE	72
2022-09-12	15:36:27	0.435076	820.687	FALSE	72
2022-09-12	15:36:28	0.477214	821.164	FALSE	72
2022-09-12	15:36:28	0.362507	821.527	FALSE	72
2022-09-12	15:36:28	0.351565	821.878	FALSE	72
2022-09-12	15:36:28	0.343473	822.222	FALSE	72
2022-09-12	15:36:29	0.408308	822.63	FALSE	72
2022-09-12	15:36:29	0.441285	823.071	FALSE	72
2022-09-12	15:36:29	0.326018	823.397	FALSE	72
2022-09-12	15:36:29	0.395738	823.793	FALSE	72
2022-09-12	15:36:30	0.358537	824.152	FALSE	72
2022-09-12	15:36:30	0.426323	824.578	FALSE	72
2022-09-12	15:36:30	0.126069	824.704	FALSE	72
2022-09-12	15:36:30	0.377265	825.081	FALSE	72
2022-09-12	15:36:31	0.186374	825.268	FALSE	72
2022-09-12	15:36:31	0.277621	825.545	FALSE	72
2022-09-12	15:36:31	0.208257	825.753	FALSE	72
2022-09-12	15:36:32	1.02103	826.774	FALSE	72
2022-09-12	15:36:32	0.227596	827.002	FALSE	72
2022-09-12	15:36:32	0.983473	827.986	FALSE	72
2022-09-12	15:36:32	0.451056	828.437	FALSE	72
2022-09-12	15:36:33	0.510191	828.947	FALSE	72
2022-09-12	15:36:33	0.293041	829.24	FALSE	72
2022-09-12	15:36:33	0.375178	829.615	FALSE	72
2022-09-12	15:36:33	0.455433	830.07	FALSE	72
2022-09-12	15:36:34	0.271921	830.342	FALSE	72
2022-09-12	15:36:34	0.093448	830.436	FALSE	72
2022-09-12	15:36:34	0.162201	830.598	FALSE	72
2022-09-12	15:36:34	-0.215865	830.598	FALSE	72
2022-09-12	15:36:35	-0.114745	830.598	FALSE	72
2022-09-12	15:36:35	-0.107519	830.598	FALSE	72
2022-09-12	15:36:35	0.060929	830.659	FALSE	72
2022-09-12	15:36:36	0.0872394	830.746	FALSE	72
2022-09-12	15:36:36	0.386985	831.133	FALSE	72
2022-09-12	15:36:36	0.278639	831.412	FALSE	72
2022-09-12	15:36:36	0.483066	831.895	FALSE	72
2022-09-12	15:36:37	0.406425	832.301	FALSE	72
2022-09-12	15:36:37	0.403779	832.705	FALSE	72
2022-09-12	15:36:37	0.779962	833.485	FALSE	72
2022-09-12	15:36:37	1.54617	835.031	FALSE	72
2022-09-12	15:36:38	0.553143	835.584	FALSE	72
2022-09-12	15:36:38	0.610649	836.195	FALSE	72
2022-09-12	15:36:38	0.973346	837.168	FALSE	72
2022-09-12	15:36:38	0.230395	837.399	FALSE	72
2022-09-12	15:36:39	0.517824	837.917	FALSE	72
2022-09-12	15:36:39	0.53986	838.456	FALSE	72
2022-09-12	15:36:39	0.383677	838.84	FALSE	72
2022-09-12	15:36:40	0.0278501	838.868	FALSE	72
2022-09-12	15:36:40	-0.0822771	838.868	FALSE	72
2022-09-12	15:36:40	-0.176832	838.868	FALSE	72
2022-09-12	15:36:40	-0.591743	838.868	FALSE	72
2022-09-12	15:36:41	-0.747467	838.868	FALSE	72
2022-09-12	15:36:41	-0.770572	838.868	FALSE	72
2022-09-12	15:36:41	-0.788943	838.868	FALSE	72
2022-09-12	15:36:41	-0.853574	838.868	FALSE	72
2022-09-12	15:36:42	-0.813727	838.868	FALSE	72
2022-09-12	15:36:42	-0.763651	838.868	FALSE	72
2022-09-12	15:36:42	-0.867569	838.868	FALSE	72
2022-09-12	15:36:42	-0.526297	838.868	FALSE	72
2022-09-12	15:36:43	-0.429198	838.868	FALSE	72
2022-09-12	15:36:43	-0.340699	838.868	FALSE	72
2022-09-12	15:36:43	-0.157951	838.868	FALSE	72
2022-09-12	15:36:44	0.0365524	838.904	FALSE	72
2022-09-12	15:36:44	0.444288	839.349	FALSE	72
2022-09-12	15:36:44	1.82083	841.17	FALSE	72
2022-09-12	15:36:44	0.909326	842.079	FALSE	72
2022-09-12	15:36:45	0.11411	842.193	FALSE	72
2022-09-12	15:36:45	0.253499	842.447	FALSE	72
2022-09-12	15:36:45	0.0370104	842.484	FALSE	72
2022-09-12	15:36:45	0.0936516	842.577	FALSE	72
2022-09-12	15:36:46	0.0454582	842.623	FALSE	72
2022-09-12	15:36:46	-0.111132	842.623	FALSE	72
2022-09-12	15:36:46	-0.413575	842.623	FALSE	72
2022-09-12	15:36:47	-0.518358	842.623	FALSE	72
2022-09-12	15:36:47	-0.472811	842.623	FALSE	72
2022-09-12	15:36:47	-0.434796	842.623	FALSE	72
2022-09-12	15:36:47	-0.387773	842.623	FALSE	72
2022-09-12	15:36:48	-0.205381	842.623	FALSE	72
2022-09-12	15:36:48	-0.204567	842.623	FALSE	72
2022-09-12	15:36:48	-0.277799	842.623	FALSE	72
2022-09-12	15:36:48	-0.294287	842.623	FALSE	72
2022-09-12	15:36:49	-0.324058	842.623	FALSE	72
2022-09-12	15:36:49	0.241234	842.864	FALSE	72
2022-09-12	15:36:49	0.0454582	842.909	FALSE	72
2022-09-12	15:36:49	-0.0197326	842.909	FALSE	72
2022-09-12	15:36:50	-0.0625824	842.909	FALSE	72
2022-09-12	15:36:50	0.0978756	843.007	FALSE	72
2022-09-12	15:36:50	0.153804	843.161	FALSE	72
2022-09-12	15:36:51	0.28159	843.443	FALSE	72
2022-09-12	15:36:51	0.201794	843.644	FALSE	72
2022-09-12	15:36:51	0.22327	843.868	FALSE	72
2022-09-12	15:36:51	0.272379	844.14	FALSE	72
2022-09-12	15:36:52	0.331056	844.471	FALSE	72
2022-09-12	15:36:52	0.392837	844.864	FALSE	72
2022-09-12	15:36:52	0.331565	845.196	FALSE	72
2022-09-12	15:36:52	0.454364	845.65	FALSE	72
2022-09-12	15:36:53	0.374313	846.024	FALSE	72
2022-09-12	15:36:53	0.36042	846.385	FALSE	72
2022-09-12	15:36:53	0.370751	846.755	FALSE	72
2022-09-12	15:36:53	0.278537	847.034	FALSE	72
2022-09-12	15:36:54	0.239962	847.274	FALSE	72
2022-09-12	15:36:54	0.296756	847.571	FALSE	72
2022-09-12	15:36:54	0.0665778	847.637	FALSE	72
2022-09-12	15:36:55	-0.00161552	847.637	FALSE	72
2022-09-12	15:36:55	0.281947	847.919	FALSE	72
2022-09-12	15:36:55	0.238181	848.157	FALSE	72
2022-09-12	15:36:55	0.39126	848.549	FALSE	72
2022-09-12	15:36:56	0.339555	848.888	FALSE	72
2022-09-12	15:36:56	0.344593	849.233	FALSE	72
2022-09-12	15:36:56	0.432888	849.666	FALSE	72
2022-09-12	15:36:56	0.366527	850.032	FALSE	72
2022-09-12	15:36:57	0.272837	850.305	FALSE	72
2022-09-12	15:36:57	0.310038	850.615	FALSE	72
2022-09-12	15:36:57	0.325255	850.94	FALSE	72
2022-09-12	15:36:57	0.352837	851.293	FALSE	72
2022-09-12	15:36:58	0.465356	851.758	FALSE	72
2022-09-12	15:36:58	0.378791	852.137	FALSE	72
2022-09-12	15:36:58	0.429122	852.566	FALSE	72
2022-09-12	15:36:59	0.384898	852.951	FALSE	72
2022-09-12	15:36:59	0.458282	853.41	FALSE	72
2022-09-12	15:36:59	0.443219	853.853	FALSE	72
2022-09-12	15:36:59	0.427087	854.28	FALSE	72
2022-09-12	15:37:00	0.43187	854.712	FALSE	72
2022-09-12	15:37:00	0.430802	855.143	FALSE	72
2022-09-12	15:37:00	0.428359	855.571	FALSE	72
2022-09-12	15:37:00	0.433193	856.004	FALSE	72
2022-09-12	15:37:01	0.432328	856.436	FALSE	72
2022-09-12	15:37:01	0.430649	856.867	FALSE	72
2022-09-12	15:37:01	0.429173	857.296	FALSE	72
2022-09-12	15:37:01	0.426934	857.723	FALSE	72
2022-09-12	15:37:02	0.430395	858.154	FALSE	72
2022-09-12	15:37:02	0.42673	858.58	FALSE	72
2022-09-12	15:37:02	0.412786	858.993	FALSE	72
2022-09-12	15:37:03	0.568613	859.562	FALSE	72
2022-09-12	15:37:03	0.418639	859.98	FALSE	72
2022-09-12	15:37:03	0.572074	860.552	FALSE	72
2022-09-12	15:37:03	0.541997	861.094	FALSE	72
2022-09-12	15:37:04	0.379555	861.474	FALSE	72
2022-09-12	15:37:04	0.374669	861.849	FALSE	72
2022-09-12	15:37:04	0.327901	862.177	FALSE	72
2022-09-12	15:37:04	0.206374	862.383	FALSE	72
2022-09-12	15:37:05	0.730496	863.113	FALSE	72
2022-09-12	15:37:05	1.48983	864.603	FALSE	72
2022-09-12	15:37:05	1.67971	866.283	FALSE	72
2022-09-12	15:37:05	1.86042	868.143	FALSE	72
2022-09-12	15:37:06	1.70515	869.849	FALSE	72
2022-09-12	15:37:06	1.91594	871.764	FALSE	72
2022-09-12	15:37:06	2.30113	874.066	FALSE	72
2022-09-12	15:37:07	2.43029	876.496	FALSE	72
2022-09-12	15:37:07	1.52612	878.022	FALSE	72
2022-09-12	15:37:07	1.99411	880.016	FALSE	72
2022-09-12	15:37:07	0.948206	880.964	FALSE	72
2022-09-12	15:37:08	0.264084	881.228	FALSE	72
2022-09-12	15:37:08	0.616603	881.845	FALSE	72
2022-09-12	15:37:08	0.164288	882.009	FALSE	72
2022-09-12	15:37:08	1.25976	883.269	FALSE	72
2022-09-12	15:37:09	-0.198715	883.269	FALSE	72
2022-09-12	15:37:09	-0.40472	883.269	FALSE	72
2022-09-12	15:37:09	-0.0535239	883.269	FALSE	72
2022-09-12	15:37:10	-0.117188	883.269	FALSE	72
2022-09-12	15:37:10	1.10332	884.372	FALSE	72
2022-09-12	15:37:10	1.09238	885.465	FALSE	72
2022-09-12	15:37:10	0.819809	886.285	FALSE	72
2022-09-12	15:37:11	1.27492	887.559	FALSE	72
2022-09-12	15:37:11	0.593091	888.153	FALSE	72
2022-09-12	15:37:11	0.742964	888.896	FALSE	72
2022-09-12	15:37:11	0.6707	889.566	FALSE	72
2022-09-12	15:37:12	0.636196	890.202	FALSE	72
2022-09-12	15:37:12	1.38948	891.592	FALSE	72
2022-09-12	15:37:12	0.639504	892.231	FALSE	72
2022-09-12	15:37:12	0.621947	892.853	FALSE	72
2022-09-12	15:37:13	0.316705	893.17	FALSE	72
2022-09-12	15:37:13	0.576908	893.747	FALSE	72
2022-09-12	15:37:13	0.383422	894.13	FALSE	72
2022-09-12	15:37:14	0.361489	894.492	FALSE	72
2022-09-12	15:37:14	0.357672	894.85	FALSE	72
2022-09-12	15:37:14	0.169478	895.019	FALSE	72
2022-09-12	15:37:14	0.265814	895.285	FALSE	72
2022-09-12	15:37:15	0.225763	895.511	FALSE	72
2022-09-12	15:37:15	0.675076	896.186	FALSE	72
2022-09-12	15:37:15	0.708003	896.894	FALSE	72
2022-09-12	15:37:15	1.0619	897.956	FALSE	72
2022-09-12	15:37:16	1.57996	899.536	FALSE	72
2022-09-12	15:37:16	1.30648	900.842	FALSE	72
2022-09-12	15:37:16	0.584796	901.427	FALSE	72
2022-09-12	15:37:16	0.54902	901.976	FALSE	72
2022-09-12	15:37:17	0.278537	902.254	FALSE	72
2022-09-12	15:37:17	0.351768	902.606	FALSE	72
2022-09-12	15:37:17	0.343677	902.95	FALSE	72
2022-09-12	15:37:18	0.511463	903.461	FALSE	72
2022-09-12	15:37:18	0.557315	904.019	FALSE	72
2022-09-12	15:37:18	0.732175	904.751	FALSE	72
2022-09-12	15:37:18	0.515738	905.267	FALSE	72
2022-09-12	15:37:19	0.29416	905.561	FALSE	72
2022-09-12	15:37:19	0.156349	905.717	FALSE	72
2022-09-12	15:37:19	0.163779	905.881	FALSE	72
2022-09-12	15:37:19	0.151718	906.033	FALSE	72
2022-09-12	15:37:20	0.247901	906.28	FALSE	72
2022-09-12	15:37:20	0.351565	906.632	FALSE	72
2022-09-12	15:37:20	0.206272	906.838	FALSE	72
2022-09-12	15:37:20	0.492176	907.33	FALSE	72
2022-09-12	15:37:21	0.152736	907.483	FALSE	72
2022-09-12	15:37:21	0.421896	907.905	FALSE	72
2022-09-12	15:37:21	0.404847	908.31	FALSE	72
2022-09-12	15:37:22	0.3164	908.626	FALSE	72
2022-09-12	15:37:22	0.324797	908.951	FALSE	72
2022-09-12	15:37:22	0.281896	909.233	FALSE	72
2022-09-12	15:37:22	0.547443	909.78	FALSE	72
2022-09-12	15:37:23	0.446476	910.227	FALSE	72
2022-09-12	15:37:23	1.01599	911.243	FALSE	72
2022-09-12	15:37:23	0.697417	911.94	1	72
2022-09-12	15:37:23	3.17334	915.114	FALSE	73
2022-09-12	15:37:24	1.94022	917.054	1	73
2022-09-12	15:37:24	6.53049	923.584	1	74
2022-09-12	15:37:24	3.86347	927.448	1	75
2022-09-12	15:37:24	8.26662	935.714	1	76
2022-09-12	15:37:25	3.64999	939.364	1	77
2022-09-12	15:37:25	3.28607	942.651	FALSE	78
2022-09-12	15:37:25	2.40027	945.051	FALSE	78
2022-09-12	15:37:26	1.14536	946.196	FALSE	78
2022-09-12	15:37:26	1.79838	947.995	FALSE	78
2022-09-12	15:37:26	2.5537	950.548	FALSE	78
2022-09-12	15:37:26	1.05436	951.603	FALSE	78
2022-09-12	15:37:27	2.37691	953.98	FALSE	78
2022-09-12	15:37:27	0.866679	954.846	FALSE	78
2022-09-12	15:37:27	2.98749	957.834	FALSE	78
2022-09-12	15:37:27	1.62261	959.456	FALSE	78
2022-09-12	15:37:28	2.23396	961.69	FALSE	78
2022-09-12	15:37:28	2.09273	963.783	FALSE	78
2022-09-12	15:37:28	1.13884	964.922	1	78
2022-09-12	15:37:28	4.23111	969.153	FALSE	79
2022-09-12	15:37:29	1.17553	970.328	FALSE	79
2022-09-12	15:37:29	1.84973	972.178	FALSE	79
2022-09-12	15:37:29	0.395484	972.574	FALSE	79
2022-09-12	15:37:30	0.118181	972.692	FALSE	79
2022-09-12	15:37:30	0.327901	973.02	FALSE	79
2022-09-12	15:37:30	0.0301402	973.05	FALSE	79
2022-09-12	15:37:30	0.289224	973.339	FALSE	79
2022-09-12	15:37:31	0.373295	973.712	FALSE	79
2022-09-12	15:37:31	0.615636	974.328	FALSE	79
2022-09-12	15:37:31	1.00332	975.331	FALSE	79
2022-09-12	15:37:31	0.672532	976.004	FALSE	79
2022-09-12	15:37:32	2.41864	978.423	FALSE	79
2022-09-12	15:37:32	1.51655	979.939	1	79
2022-09-12	15:37:32	4.74637	984.685	1	80
2022-09-12	15:37:33	3.59518	988.281	1	81
2022-09-12	15:37:33	8.1021	996.383	1	82
2022-09-12	15:37:33	3.0392	999.422	1	83
2022-09-12	15:37:33	3.10714	1002.53	1	84
2022-09-12	15:37:34	6.1197	1008.65	FALSE	85
2022-09-12	15:37:34	1.40062	1010.05	FALSE	85
2022-09-12	15:37:34	1.74973	1011.8	FALSE	85
2022-09-12	15:37:34	1.35095	1013.15	FALSE	85
2022-09-12	15:37:35	0.966527	1014.12	FALSE	85
2022-09-12	15:37:35	0.966883	1015.08	FALSE	85
2022-09-12	15:37:35	0.455636	1015.54	FALSE	85
2022-09-12	15:37:35	1.52602	1017.07	FALSE	85
2022-09-12	15:37:36	1.91146	1018.98	1	85
2022-09-12	15:37:36	3.31518	1022.29	1	86
2022-09-12	15:37:36	4.77782	1027.07	1	87
2022-09-12	15:37:37	4.68754	1031.76	FALSE	88
2022-09-12	15:37:37	0.728104	1032.49	FALSE	88
2022-09-12	15:37:37	0.499402	1032.98	FALSE	88
2022-09-12	15:37:37	0.569937	1033.55	FALSE	88
2022-09-12	15:37:38	0.270802	1033.83	FALSE	88
2022-09-12	15:37:38	0.245662	1034.07	FALSE	88
2022-09-12	15:37:38	0.582048	1034.65	FALSE	88
2022-09-12	15:37:38	0.597519	1035.25	1	88
2022-09-12	15:37:39	3.32368	1038.57	1	89
2022-09-12	15:37:39	6.24902	1044.82	1	90
2022-09-12	15:37:39	13.7288	1058.55	1	91
2022-09-12	15:37:39	4.28871	1062.84	1	92
2022-09-12	15:37:40	6.31192	1069.15	1	93
2022-09-12	15:37:40	4.92423	1074.08	1	94
2022-09-12	15:37:40	9.93665	1084.01	1	95
2022-09-12	15:37:41	7.28088	1091.29	1	96
2022-09-12	15:37:41	5.99884	1097.29	1	97
2022-09-12	15:37:41	6.0823	1103.38	FALSE	98
2022-09-12	15:37:41	1.66454	1105.04	1	98
2022-09-12	15:37:42	3.1139	1108.15	FALSE	99
2022-09-12	15:37:42	1.47854	1109.63	FALSE	99
2022-09-12	15:37:42	1.2135	1110.85	FALSE	99
2022-09-12	15:37:42	0.469886	1111.32	FALSE	99
2022-09-12	15:37:43	0.815992	1112.13	FALSE	99
2022-09-12	15:37:43	2.1905	1114.32	FALSE	99
2022-09-12	15:37:43	2.86525	1117.19	1	99
2022-09-12	15:37:43	4.50271	1121.69	FALSE	100
2022-09-12	15:37:44	2.13574	1123.83	FALSE	100
2022-09-12	15:37:44	0.462863	1124.29	FALSE	100
2022-09-12	15:37:44	0.527748	1124.82	FALSE	100
2022-09-12	15:37:45	0.397417	1125.21	FALSE	100
2022-09-12	15:37:45	0.72388	1125.94	FALSE	100
2022-09-12	15:37:45	1.64902	1127.59	FALSE	100
2022-09-12	15:37:45	1.16953	1128.76	FALSE	100
2022-09-12	15:37:46	1.00821	1129.76	FALSE	100
2022-09-12	15:37:46	0.802863	1130.57	FALSE	100
2022-09-12	15:37:46	2.15462	1132.72	1	100
2022-09-12	15:37:46	4.96917	1137.69	FALSE	101
2022-09-12	15:37:47	2.40215	1140.09	FALSE	101
2022-09-12	15:37:47	0.82958	1140.92	FALSE	101
2022-09-12	15:37:47	0.485814	1141.41	FALSE	101
2022-09-12	15:37:47	0.278384	1141.69	FALSE	101
2022-09-12	15:37:48	0.385407	1142.07	FALSE	101
2022-09-12	15:37:48	0.715636	1142.79	FALSE	101
2022-09-12	15:37:48	0.377163	1143.17	FALSE	101
2022-09-12	15:37:49	0.778435	1143.94	FALSE	101
2022-09-12	15:37:49	1.08251	1145.03	FALSE	101
2022-09-12	15:37:49	1.08734	1146.11	FALSE	101
2022-09-12	15:37:49	0.668613	1146.78	FALSE	101
2022-09-12	15:37:50	0.553194	1147.34	FALSE	101
2022-09-12	15:37:50	0.38098	1147.72	FALSE	101
2022-09-12	15:37:50	0.316196	1148.03	FALSE	101
2022-09-12	15:37:50	0.347952	1148.38	FALSE	101
2022-09-12	15:37:51	0.392125	1148.77	FALSE	101
2022-09-12	15:37:51	0.326985	1149.1	FALSE	101
2022-09-12	15:37:51	0.35187	1149.45	FALSE	101
2022-09-12	15:37:52	0.50444	1149.96	FALSE	101
2022-09-12	15:37:52	0.477875	1150.43	FALSE	101
2022-09-12	15:37:52	0.529275	1150.96	FALSE	101
2022-09-12	15:37:52	0.500725	1151.46	FALSE	101
2022-09-12	15:37:53	0.53584	1152	FALSE	101
2022-09-12	15:37:53	0.550089	1152.55	FALSE	101
2022-09-12	15:37:53	0.548817	1153.1	FALSE	101
2022-09-12	15:37:53	0.547341	1153.65	FALSE	101
2022-09-12	15:37:54	0.556348	1154.2	FALSE	101
2022-09-12	15:37:54	0.539962	1154.74	FALSE	101
2022-09-12	15:37:54	0.496298	1155.24	FALSE	101
2022-09-12	15:37:54	0.437774	1155.68	FALSE	101
2022-09-12	15:37:55	0.403372	1156.08	FALSE	101
2022-09-12	15:37:55	0.390496	1156.47	FALSE	101
2022-09-12	15:37:55	0.408104	1156.88	FALSE	101
2022-09-12	15:37:56	0.467748	1157.35	FALSE	101
2022-09-12	15:37:56	0.601438	1157.95	FALSE	101
2022-09-12	15:37:56	0.679504	1158.63	FALSE	101
2022-09-12	15:37:56	0.694008	1159.32	FALSE	101
2022-09-12	15:37:57	0.728206	1160.05	FALSE	101
2022-09-12	15:37:57	0.746629	1160.8	FALSE	101
2022-09-12	15:37:57	0.751514	1161.55	FALSE	101
2022-09-12	15:37:57	0.729936	1162.28	FALSE	101
2022-09-12	15:37:58	0.729428	1163.01	FALSE	101
2022-09-12	15:37:58	0.719758	1163.73	FALSE	101
2022-09-12	15:37:58	0.685967	1164.41	FALSE	101
2022-09-12	15:37:58	0.669326	1165.08	FALSE	101
2022-09-12	15:37:59	0.659962	1165.74	FALSE	101
2022-09-12	15:37:59	0.668511	1166.41	FALSE	101
2022-09-12	15:37:59	0.612532	1167.02	FALSE	101
2022-09-12	15:38:00	0.646323	1167.67	FALSE	101
2022-09-12	15:38:00	0.455382	1168.12	FALSE	101
2022-09-12	15:38:00	0.380522	1168.51	FALSE	101
2022-09-12	15:38:00	0.341794	1168.85	FALSE	101
2022-09-12	15:38:01	0.335789	1169.18	FALSE	101
2022-09-12	15:38:01	0.324797	1169.51	FALSE	101
2022-09-12	15:38:01	0.328461	1169.84	FALSE	101
2022-09-12	15:38:01	0.343423	1170.18	FALSE	101
2022-09-12	15:38:02	0.547086	1170.73	FALSE	101
2022-09-12	15:38:02	0.676247	1171.4	FALSE	101
2022-09-12	15:38:02	0.584084	1171.99	FALSE	101
2022-09-12	15:38:02	0.554059	1172.54	FALSE	101
2022-09-12	15:38:03	0.500267	1173.04	FALSE	101
2022-09-12	15:38:03	0.684186	1173.73	FALSE	101
2022-09-12	15:38:03	1.31044	1175.04	FALSE	101
2022-09-12	15:38:04	0.97757	1176.01	FALSE	101
2022-09-12	15:38:04	1.00983	1177.02	FALSE	101
2022-09-12	15:38:04	0.999962	1178.02	FALSE	101
2022-09-12	15:38:04	0.986374	1179.01	FALSE	101
2022-09-12	15:38:05	1.02088	1180.03	FALSE	101
2022-09-12	15:38:05	0.870598	1180.9	FALSE	101
2022-09-12	15:38:05	0.742048	1181.64	FALSE	101
2022-09-12	15:38:05	0.842201	1182.49	FALSE	101
2022-09-12	15:38:06	0.951361	1183.44	FALSE	101
2022-09-12	15:38:06	1.35324	1184.79	FALSE	101
2022-09-12	15:38:06	1.5736	1186.36	FALSE	101
2022-09-12	15:38:06	1.34877	1187.71	FALSE	101
2022-09-12	15:38:07	1.32668	1189.04	FALSE	101
2022-09-12	15:38:07	1.07065	1190.11	FALSE	101
2022-09-12	15:38:07	1.02678	1191.14	FALSE	101
2022-09-12	15:38:08	1.17355	1192.31	FALSE	101
2022-09-12	15:38:08	1.2307	1193.54	FALSE	101
2022-09-12	15:38:08	1.26103	1194.8	FALSE	101
2022-09-12	15:38:08	1.27268	1196.07	FALSE	101
2022-09-12	15:38:09	1.2337	1197.31	FALSE	101
2022-09-12	15:38:09	1.28841	1198.6	FALSE	101
2022-09-12	15:38:09	1.35782	1199.95	FALSE	101
2022-09-12	15:38:09	1.37462	1201.33	FALSE	101
2022-09-12	15:38:10	1.32393	1202.65	FALSE	101
2022-09-12	15:38:10	1.22072	1203.87	FALSE	101
2022-09-12	15:38:10	1.0166	1204.89	FALSE	101
2022-09-12	15:38:10	0.83243	1205.72	FALSE	101
2022-09-12	15:38:11	0.882964	1206.61	FALSE	101
2022-09-12	15:38:11	0.928868	1207.53	FALSE	101
2022-09-12	15:38:11	0.927952	1208.46	FALSE	101
2022-09-12	15:38:12	0.830598	1209.29	FALSE	101
2022-09-12	15:38:12	0.839504	1210.13	FALSE	101
2022-09-12	15:38:12	0.941081	1211.07	FALSE	101
2022-09-12	15:38:12	1.03838	1212.11	FALSE	101
2022-09-12	15:38:13	1.18164	1213.29	FALSE	101
2022-09-12	15:38:13	1.31905	1214.61	FALSE	101
2022-09-12	15:38:13	1.32062	1215.93	FALSE	101
2022-09-12	15:38:13	1.34943	1217.28	FALSE	101
2022-09-12	15:38:14	1.32383	1218.61	FALSE	101
2022-09-12	15:38:14	1.2937	1219.9	FALSE	101
2022-09-12	15:38:14	1.23095	1221.13	FALSE	101
2022-09-12	15:38:15	1.13905	1222.27	FALSE	101
2022-09-12	15:38:15	1.01462	1223.28	FALSE	101
2022-09-12	15:38:15	1.06139	1224.35	FALSE	101
2022-09-12	15:38:15	1.02968	1225.38	FALSE	101
2022-09-12	15:38:16	1.14164	1226.52	FALSE	101
2022-09-12	15:38:16	1.03009	1227.55	FALSE	101
2022-09-12	15:38:16	1.2392	1228.79	FALSE	101
2022-09-12	15:38:16	1.38342	1230.17	FALSE	101
2022-09-12	15:38:17	1.82536	1232	FALSE	101
2022-09-12	15:38:17	1.8076	1233.8	FALSE	101
2022-09-12	15:38:17	1.64072	1235.44	FALSE	101
2022-09-12	15:38:17	1.04978	1236.49	FALSE	101
2022-09-12	15:38:18	0.631921	1237.13	FALSE	101
2022-09-12	15:38:18	0.596654	1237.72	FALSE	101
2022-09-12	15:38:18	0.639809	1238.36	FALSE	101
2022-09-12	15:38:19	0.622456	1238.98	FALSE	101
2022-09-12	15:38:19	0.661641	1239.65	FALSE	101
2022-09-12	15:38:19	0.678435	1240.32	FALSE	101
2022-09-12	15:38:19	0.692481	1241.02	FALSE	101
2022-09-12	15:38:20	0.682456	1241.7	FALSE	101
2022-09-12	15:38:20	0.688562	1242.39	FALSE	101
2022-09-12	15:38:20	0.721641	1243.11	FALSE	101
2022-09-12	15:38:20	0.733702	1243.84	FALSE	101
2022-09-12	15:38:21	0.754567	1244.6	FALSE	101
2022-09-12	15:38:21	0.769987	1245.37	FALSE	101
2022-09-12	15:38:21	0.736552	1246.1	FALSE	101
2022-09-12	15:38:21	0.715636	1246.82	FALSE	101
2022-09-12	15:38:22	0.712328	1247.53	FALSE	101
2022-09-12	15:38:22	0.700166	1248.23	FALSE	101
2022-09-12	15:38:22	0.705865	1248.94	FALSE	101
2022-09-12	15:38:23	0.681692	1249.62	FALSE	101
2022-09-12	15:38:23	0.745102	1250.37	FALSE	101
2022-09-12	15:38:23	0.779198	1251.14	FALSE	101
2022-09-12	15:38:23	0.818995	1251.96	FALSE	101
2022-09-12	15:38:24	0.520878	1252.48	FALSE	101
2022-09-12	15:38:24	0.612633	1253.1	FALSE	101
2022-09-12	15:38:24	1.04826	1254.15	FALSE	101
2022-09-12	15:38:24	1.47813	1255.62	FALSE	101
2022-09-12	15:38:25	1.30927	1256.93	FALSE	101
2022-09-12	15:38:25	1.49253	1258.43	FALSE	101
2022-09-12	15:38:25	1.45207	1259.88	FALSE	101
2022-09-12	15:38:25	1.43095	1261.31	FALSE	101
2022-09-12	15:38:26	1.27772	1262.59	FALSE	101
2022-09-12	15:38:26	0.84388	1263.43	FALSE	101
2022-09-12	15:38:26	0.615178	1264.05	FALSE	101
2022-09-12	15:38:27	0.564491	1264.61	FALSE	101
2022-09-12	15:38:27	0.507392	1265.12	FALSE	101
2022-09-12	15:38:27	0.328817	1265.45	FALSE	101
2022-09-12	15:38:27	0.262405	1265.71	FALSE	101
2022-09-12	15:38:28	0.190395	1265.9	FALSE	101
2022-09-12	15:38:28	0.196247	1266.09	FALSE	101
2022-09-12	15:38:28	0.0937025	1266.19	FALSE	101
2022-09-12	15:38:28	0.174873	1266.36	FALSE	101
2022-09-12	15:38:29	-0.0867045	1266.36	FALSE	101
2022-09-12	15:38:29	-0.188893	1266.36	FALSE	101
2022-09-12	15:38:29	-0.330419	1266.36	FALSE	101
2022-09-12	15:38:29	-0.381666	1266.36	FALSE	101
2022-09-12	15:38:30	-0.339478	1266.36	FALSE	101
2022-09-12	15:38:30	0.0327356	1266.4	FALSE	101
2022-09-12	15:38:30	0.0825066	1266.48	FALSE	101
2022-09-12	15:38:31	0.107443	1266.59	FALSE	101
2022-09-12	15:38:31	0.1764	1266.76	FALSE	101
2022-09-12	15:38:31	-0.0233967	1266.76	FALSE	101
2022-09-12	15:38:31	0.131209	1266.89	1	101
2022-09-12	15:38:32	5.44968	1272.34	1	102
2022-09-12	15:38:32	7.45619	1279.8	FALSE	103
2022-09-12	15:38:32	1.59838	1281.4	FALSE	103
2022-09-12	15:38:32	1.74551	1283.14	FALSE	103
2022-09-12	15:38:33	1.46765	1284.61	FALSE	103
2022-09-12	15:38:33	2.7996	1287.41	1	103
2022-09-12	15:38:33	3.79721	1291.21	1	104
2022-09-12	15:38:34	6.57558	1297.78	1	105
2022-09-12	15:38:34	9.08968	1306.87	1	106
2022-09-12	15:38:34	5.24708	1312.12	1	107
2022-09-12	15:38:34	4.66729	1316.79	FALSE	108
2022-09-12	15:38:35	2.10429	1318.89	FALSE	108
2022-09-12	15:38:35	1.70973	1320.6	FALSE	108
2022-09-12	15:38:35	0.62098	1321.22	FALSE	108
2022-09-12	15:38:35	0.581743	1321.8	FALSE	108

## Sheet: Harley_star_2022912153319
						**GoPro Fitting: 1522
2022-09-12	15:33:19	0.34673
2022-09-12	15:33:19	0.341387
2022-09-12	15:33:20	0.355229
2022-09-12	15:33:20	0.363931
2022-09-12	15:33:20	0.329479
2022-09-12	15:33:21	0.379199
2022-09-12	15:33:21	0.380115
2022-09-12	15:33:21	0.323219
2022-09-12	15:33:21	0.328919
2022-09-12	15:33:22	0.281896
2022-09-12	15:33:22	0.326476
2022-09-12	15:33:22	0.352074
2022-09-12	15:33:22	0.376094
2022-09-12	15:33:23	0.410089
2022-09-12	15:33:23	0.403524
2022-09-12	15:33:23	0.420216
2022-09-12	15:33:23	0.280115
2022-09-12	15:33:24	0.337163
2022-09-12	15:33:24	0.511616
2022-09-12	15:33:24	0.314618
2022-09-12	15:33:25	0.341183
2022-09-12	15:33:25	0.360064
2022-09-12	15:33:25	0.333092
2022-09-12	15:33:25	0.50215
2022-09-12	15:33:26	0.495585
2022-09-12	15:33:26	0.335127
2022-09-12	15:33:26	0.243117
2022-09-12	15:33:26	0.356349
2022-09-12	15:33:27	0.207443
2022-09-12	15:33:27	0.27187
2022-09-12	15:33:27	0.157875
2022-09-12	15:33:27	0.445814
2022-09-12	15:33:28	0.0774684
2022-09-12	15:33:28	0.453906
2022-09-12	15:33:28	0.376145
2022-09-12	15:33:29	2.99177
2022-09-12	15:33:29	3.80469
2022-09-12	15:33:29	1.61391
2022-09-12	15:33:29	0.812634
2022-09-12	15:33:30	0.278792
2022-09-12	15:33:30	0.78556
2022-09-12	15:33:30	0.263117
2022-09-12	15:33:30	1.21803
2022-09-12	15:33:31	3.27151
2022-09-12	15:33:31	2.92439
2022-09-12	15:33:31	1.64597
2022-09-12	15:33:32	0.5764
2022-09-12	15:33:32	0.356145
2022-09-12	15:33:32	0.551514
2022-09-12	15:33:32	0.394567
2022-09-12	15:33:33	0.487239
2022-09-12	15:33:33	0.41243
2022-09-12	15:33:33	0.486323
2022-09-12	15:33:33	0.335433
2022-09-12	15:33:34	0.331005
2022-09-12	15:33:34	0.22556
2022-09-12	15:33:34	0.234873
2022-09-12	15:33:34	0.319249
2022-09-12	15:33:35	0.195992
2022-09-12	15:33:35	0.354618
2022-09-12	15:33:35	0.181743
2022-09-12	15:33:36	0.442303
2022-09-12	15:33:36	0.188054
2022-09-12	15:33:36	0.185306
2022-09-12	15:33:36	-0.21215
2022-09-12	15:33:37	-0.499936
2022-09-12	15:33:37	-0.36589
2022-09-12	15:33:37	0.334924
2022-09-12	15:33:37	0.700674
2022-09-12	15:33:38	0.623066
2022-09-12	15:33:38	0.613702
2022-09-12	15:33:38	0.301234
2022-09-12	15:33:38	0.530547
2022-09-12	15:33:39	0.163015
2022-09-12	15:33:39	0.561031
2022-09-12	15:33:39	0.488054
2022-09-12	15:33:40	0.384084
2022-09-12	15:33:40	0.241692
2022-09-12	15:33:40	0.625763
2022-09-12	15:33:40	0.122608
2022-09-12	15:33:41	0.353193
2022-09-12	15:33:41	0.472023
2022-09-12	15:33:41	0.116298
2022-09-12	15:33:41	0.368562
2022-09-12	15:33:42	0.108461
2022-09-12	15:33:42	0.249631
2022-09-12	15:33:42	0.75416
2022-09-12	15:33:42	4.78917
2022-09-12	15:33:43	2.28312
2022-09-12	15:33:43	1.18429
2022-09-12	15:33:43	1.15167
2022-09-12	15:33:44	0.434669
2022-09-12	15:33:44	1.00429
2022-09-12	15:33:44	0.168512
2022-09-12	15:33:44	0.473092
2022-09-12	15:33:45	0.146527
2022-09-12	15:33:45	0.407952
2022-09-12	15:33:45	0.238537
2022-09-12	15:33:45	0.161896
2022-09-12	15:33:46	0.253143
2022-09-12	15:33:46	0.235789
2022-09-12	15:33:46	0.411769
2022-09-12	15:33:46	0.172735
2022-09-12	15:33:47	3.35457
2022-09-12	15:33:47	0.306425
2022-09-12	15:33:47	1.57223
2022-09-12	15:33:48	0.844389
2022-09-12	15:33:48	1.50729
2022-09-12	15:33:48	2.07279
2022-09-12	15:33:48	1.53711
2022-09-12	15:33:49	1.79991
2022-09-12	15:33:49	0.872379
2022-09-12	15:33:49	0.297163
2022-09-12	15:33:49	0.378537
2022-09-12	15:33:50	0.0401656
2022-09-12	15:33:50	0.218283
2022-09-12	15:33:50	0.28098
2022-09-12	15:33:51	0.338232
2022-09-12	15:33:51	0.279046
2022-09-12	15:33:51	0.445305
2022-09-12	15:33:51	0.400216
2022-09-12	15:33:52	0.325967
2022-09-12	15:33:52	0.204797
2022-09-12	15:33:52	0.268664
2022-09-12	15:33:52	0.915636
2022-09-12	15:33:53	0.738944
2022-09-12	15:33:53	0.770649
2022-09-12	15:33:53	1.16617
2022-09-12	15:33:53	1.64042
2022-09-12	15:33:54	1.58022
2022-09-12	15:33:54	1.91156
2022-09-12	15:33:54	4.08113
2022-09-12	15:33:55	5.86001
2022-09-12	15:33:55	3.96973
2022-09-12	15:33:55	3.27915
2022-09-12	15:33:55	4.06983
2022-09-12	15:33:56	0.742252
2022-09-12	15:33:56	0.97701
2022-09-12	15:33:56	1.61604
2022-09-12	15:33:56	0.473804
2022-09-12	15:33:57	0.431718
2022-09-12	15:33:57	0.60383
2022-09-12	15:33:57	0.26841
2022-09-12	15:33:57	0.638995
2022-09-12	15:33:58	0.198028
2022-09-12	15:33:58	0.910496
2022-09-12	15:33:58	0.744033
2022-09-12	15:33:59	1.77289
2022-09-12	15:33:59	0.994466
2022-09-12	15:33:59	1.86261
2022-09-12	15:33:59	1.70296
2022-09-12	15:34:00	1.98072
2022-09-12	15:34:00	6.00021
2022-09-12	15:34:00	2.60072
2022-09-12	15:34:00	1.40765
2022-09-12	15:34:01	0.965713
2022-09-12	15:34:01	1.25253
2022-09-12	15:34:01	0.561641
2022-09-12	15:34:01	0.841438
2022-09-12	15:34:02	1.40688
2022-09-12	15:34:02	3.77915
2022-09-12	15:34:02	3.01665
2022-09-12	15:34:03	1.10739
2022-09-12	15:34:03	1.41156
2022-09-12	15:34:03	1.09085
2022-09-12	15:34:03	0.492074
2022-09-12	15:34:04	1.19894
2022-09-12	15:34:04	0.20154
2022-09-12	15:34:04	0.726679
2022-09-12	15:34:04	0.439962
2022-09-12	15:34:05	0.433041
2022-09-12	15:34:05	0.233804
2022-09-12	15:34:05	0.214517
2022-09-12	15:34:05	0.238435
2022-09-12	15:34:06	0.0169595
2022-09-12	15:34:06	0.352532
2022-09-12	15:34:06	0.24159
2022-09-12	15:34:07	0.354822
2022-09-12	15:34:07	0.269377
2022-09-12	15:34:07	0.298537
2022-09-12	15:34:07	0.33416
2022-09-12	15:34:08	0.327494
2022-09-12	15:34:08	0.30215
2022-09-12	15:34:08	0.314109
2022-09-12	15:34:08	0.112481
2022-09-12	15:34:09	-0.0499107
2022-09-12	15:34:09	0.0145676
2022-09-12	15:34:09	0.0305473
2022-09-12	15:34:09	-0.0436002
2022-09-12	15:34:10	-0.193626
2022-09-12	15:34:10	-0.480038
2022-09-12	15:34:10	-0.20533
2022-09-12	15:34:11	-0.127163
2022-09-12	15:34:11	0.254975
2022-09-12	15:34:11	0.319402
2022-09-12	15:34:11	0.22841
2022-09-12	15:34:12	0.0880536
2022-09-12	15:34:12	0.377875
2022-09-12	15:34:12	0.375127
2022-09-12	15:34:12	0.93416
2022-09-12	15:34:13	0.945051
2022-09-12	15:34:13	1.1966
2022-09-12	15:34:13	0.327443
2022-09-12	15:34:13	0.145051
2022-09-12	15:34:14	0.343677
2022-09-12	15:34:14	-0.0814119
2022-09-12	15:34:14	-0.0614629
2022-09-12	15:34:15	-0.161107
2022-09-12	15:34:15	-0.0854832
2022-09-12	15:34:15	-0.154694
2022-09-12	15:34:15	-0.0450761
2022-09-12	15:34:16	-0.0724552
2022-09-12	15:34:16	-0.250928
2022-09-12	15:34:16	-0.210521
2022-09-12	15:34:16	-0.366552
2022-09-12	15:34:17	-0.0250252
2022-09-12	15:34:17	0.235178
2022-09-12	15:34:17	0.198537
2022-09-12	15:34:18	0.328562
2022-09-12	15:34:18	0.365611
2022-09-12	15:34:18	0.402303
2022-09-12	15:34:18	0.14958
2022-09-12	15:34:19	0.782862
2022-09-12	15:34:19	0.791005
2022-09-12	15:34:19	2.18871
2022-09-12	15:34:19	2.05523
2022-09-12	15:34:20	3.22622
2022-09-12	15:34:20	2.98922
2022-09-12	15:34:20	2.40383
2022-09-12	15:34:20	2.3105
2022-09-12	15:34:21	0.617875
2022-09-12	15:34:21	0.987596
2022-09-12	15:34:21	1.56851
2022-09-12	15:34:22	3.03162
2022-09-12	15:34:22	4.2167
2022-09-12	15:34:22	5.42434
2022-09-12	15:34:22	8.22932
2022-09-12	15:34:23	6.59294
2022-09-12	15:34:23	9.40474
2022-09-12	15:34:23	6.55314
2022-09-12	15:34:23	10.1403
2022-09-12	15:34:24	5.52286
2022-09-12	15:34:24	4.85049
2022-09-12	15:34:24	5.834
2022-09-12	15:34:24	6.26881
2022-09-12	15:34:25	4.46535
2022-09-12	15:34:25	4.13075
2022-09-12	15:34:25	11.3428
2022-09-12	15:34:26	9.22423
2022-09-12	15:34:26	7.74255
2022-09-12	15:34:26	9.20612
2022-09-12	15:34:26	8.64739
2022-09-12	15:34:27	4.79609
2022-09-12	15:34:27	1.93406
2022-09-12	15:34:27	4.41055
2022-09-12	15:34:27	2.45625
2022-09-12	15:34:28	1.60276
2022-09-12	15:34:28	0.986069
2022-09-12	15:34:28	1.24775
2022-09-12	15:34:28	1.70093
2022-09-12	15:34:29	2.00434
2022-09-12	15:34:29	2.54561
2022-09-12	15:34:29	2.11508
2022-09-12	15:34:30	1.91345
2022-09-12	15:34:30	1.34434
2022-09-12	15:34:30	2.37966
2022-09-12	15:34:30	0.797417
2022-09-12	15:34:31	0.420216
2022-09-12	15:34:31	0.358791
2022-09-12	15:34:31	1.48953
2022-09-12	15:34:31	0.685305
2022-09-12	15:34:32	0.645204
2022-09-12	15:34:32	0.568053
2022-09-12	15:34:32	1.12953
2022-09-12	15:34:32	5.23009
2022-09-12	15:34:33	6.84428
2022-09-12	15:34:33	14.8605
2022-09-12	15:34:33	6.73874
2022-09-12	15:34:34	11.6628
2022-09-12	15:34:34	11.4937
2022-09-12	15:34:34	12.3694
2022-09-12	15:34:34	5.03787
2022-09-12	15:34:35	5.08596
2022-09-12	15:34:35	4.24978
2022-09-12	15:34:35	8.44001
2022-09-12	15:34:35	7.83965
2022-09-12	15:34:36	6.78627
2022-09-12	15:34:36	6.62423
2022-09-12	15:34:36	1.85991
2022-09-12	15:34:36	0.974924
2022-09-12	15:34:37	0.84617
2022-09-12	15:34:37	2.1735
2022-09-12	15:34:37	4.76464
2022-09-12	15:34:38	13.8318
2022-09-12	15:34:38	9.70927
2022-09-12	15:34:38	3.34846
2022-09-12	15:34:38	0.937214
2022-09-12	15:34:39	0.687239
2022-09-12	15:34:39	2.12169
2022-09-12	15:34:39	2.63889
2022-09-12	15:34:39	5.11039
2022-09-12	15:34:40	3.64703
2022-09-12	15:34:40	3.3108
2022-09-12	15:34:40	2.40973
2022-09-12	15:34:41	1.87324
2022-09-12	15:34:41	2.06622
2022-09-12	15:34:41	1.39197
2022-09-12	15:34:41	1.18281
2022-09-12	15:34:42	1.36561
2022-09-12	15:34:42	0.842201
2022-09-12	15:34:42	0.309631
2022-09-12	15:34:42	0.473702
2022-09-12	15:34:43	0.191667
2022-09-12	15:34:43	0.297875
2022-09-12	15:34:43	0.155535
2022-09-12	15:34:43	0.456501
2022-09-12	15:34:44	0.149479
2022-09-12	15:34:44	0.216349
2022-09-12	15:34:44	0.077163
2022-09-12	15:34:45	0.0336008
2022-09-12	15:34:45	-0.111336
2022-09-12	15:34:45	-0.361768
2022-09-12	15:34:45	0.431463
2022-09-12	15:34:46	0.48902
2022-09-12	15:34:46	0.442608
2022-09-12	15:34:46	0.0159926
2022-09-12	15:34:46	0.118181
2022-09-12	15:34:47	0.237468
2022-09-12	15:34:47	0.277723
2022-09-12	15:34:47	0.215738
2022-09-12	15:34:47	0.226934
2022-09-12	15:34:48	0.234364
2022-09-12	15:34:48	0.0724811
2022-09-12	15:34:48	0.14042
2022-09-12	15:34:49	0.225255
2022-09-12	15:34:49	0.196603
2022-09-12	15:34:49	0.0846949
2022-09-12	15:34:49	0.289631
2022-09-12	15:34:50	0.301234
2022-09-12	15:34:50	0.309071
2022-09-12	15:34:50	0.492023
2022-09-12	15:34:50	0.481997
2022-09-12	15:34:51	0.406323
2022-09-12	15:34:51	0.56958
2022-09-12	15:34:51	0.443219
2022-09-12	15:34:51	0.484797
2022-09-12	15:34:52	0.372227
2022-09-12	15:34:52	0.0636771
2022-09-12	15:34:52	0.0580282
2022-09-12	15:34:53	0.0643386
2022-09-12	15:34:53	0.182965
2022-09-12	15:34:53	0.283524
2022-09-12	15:34:53	0.234771
2022-09-12	15:34:54	0.199809
2022-09-12	15:34:54	0.336298
2022-09-12	15:34:54	0.448206
2022-09-12	15:34:54	0.0631681
2022-09-12	15:34:55	-0.353575
2022-09-12	15:34:55	-0.640597
2022-09-12	15:34:55	-0.79103
2022-09-12	15:34:55	-0.850724
2022-09-12	15:34:56	-0.874389
2022-09-12	15:34:56	-0.721411
2022-09-12	15:34:56	-0.711132
2022-09-12	15:34:57	-0.611844
2022-09-12	15:34:57	-0.711284
2022-09-12	15:34:57	-0.578765
2022-09-12	15:34:57	-0.571437
2022-09-12	15:34:58	0.336552
2022-09-12	15:34:58	0.273499
2022-09-12	15:34:58	0.134161
2022-09-12	15:34:58	0.173346
2022-09-12	15:34:59	0.39131
2022-09-12	15:34:59	0.481794
2022-09-12	15:34:59	0.633244
2022-09-12	15:35:00	0.439911
2022-09-12	15:35:00	0.383626
2022-09-12	15:35:00	0.356858
2022-09-12	15:35:00	0.334873
2022-09-12	15:35:01	0.395484
2022-09-12	15:35:01	0.341438
2022-09-12	15:35:01	0.350496
2022-09-12	15:35:01	0.637825
2022-09-12	15:35:02	0.683982
2022-09-12	15:35:02	1.5193
2022-09-12	15:35:02	1.15558
2022-09-12	15:35:02	1.35503
2022-09-12	15:35:03	1.42098
2022-09-12	15:35:03	0.439453
2022-09-12	15:35:03	0.446323
2022-09-12	15:35:04	0.292634
2022-09-12	15:35:04	0.288512
2022-09-12	15:35:04	0.27757
2022-09-12	15:35:04	0.239148
2022-09-12	15:35:05	0.294669
2022-09-12	15:35:05	0.301692
2022-09-12	15:35:05	0.167596
2022-09-12	15:35:05	0.278079
2022-09-12	15:35:06	0.243626
2022-09-12	15:35:06	0.356043
2022-09-12	15:35:06	0.102914
2022-09-12	15:35:06	0.284593
2022-09-12	15:35:07	0.117367
2022-09-12	15:35:07	0.156807
2022-09-12	15:35:07	0.00779924
2022-09-12	15:35:08	0.203321
2022-09-12	15:35:08	0.0858654
2022-09-12	15:35:08	0.14271
2022-09-12	15:35:08	0.448104
2022-09-12	15:35:09	0.720318
2022-09-12	15:35:09	0.477468
2022-09-12	15:35:09	0.819606
2022-09-12	15:35:09	0.891514
2022-09-12	15:35:10	0.837519
2022-09-12	15:35:10	1.02368
2022-09-12	15:35:10	0.600522
2022-09-12	15:35:10	1.46698
2022-09-12	15:35:11	1.23116
2022-09-12	15:35:11	2.15981
2022-09-12	15:35:11	0.789376
2022-09-12	15:35:12	1.02531
2022-09-12	15:35:12	0.862303
2022-09-12	15:35:12	0.926578
2022-09-12	15:35:12	1.95477
2022-09-12	15:35:13	1.50388
2022-09-12	15:35:13	1.22856
2022-09-12	15:35:13	2.36006
2022-09-12	15:35:13	1.41045
2022-09-12	15:35:14	1.72805
2022-09-12	15:35:14	2.72841
2022-09-12	15:35:14	2.94866
2022-09-12	15:35:14	1.67645
2022-09-12	15:35:15	1.72439
2022-09-12	15:35:15	0.554924
2022-09-12	15:35:15	1.1191
2022-09-12	15:35:16	0.856603
2022-09-12	15:35:16	0.569529
2022-09-12	15:35:16	0.683117
2022-09-12	15:35:16	1.29579
2022-09-12	15:35:17	0.796807
2022-09-12	15:35:17	1.07141
2022-09-12	15:35:17	0.477417
2022-09-12	15:35:17	0.325916
2022-09-12	15:35:18	0.310242
2022-09-12	15:35:18	0.439708
2022-09-12	15:35:18	0.296705
2022-09-12	15:35:18	0.450496
2022-09-12	15:35:19	0.675636
2022-09-12	15:35:19	0.714771
2022-09-12	15:35:19	0.365255
2022-09-12	15:35:20	0.172023
2022-09-12	15:35:20	0.280776
2022-09-12	15:35:20	0.183931
2022-09-12	15:35:20	0.0998602
2022-09-12	15:35:21	0.093448
2022-09-12	15:35:21	0.0876465
2022-09-12	15:35:21	0.145916
2022-09-12	15:35:21	0.112379
2022-09-12	15:35:22	-0.110827
2022-09-12	15:35:22	-0.0728623
2022-09-12	15:35:22	0.0153819
2022-09-12	15:35:23	0.645051
2022-09-12	15:35:23	3.51029
2022-09-12	15:35:23	0.391158
2022-09-12	15:35:23	0.36444
2022-09-12	15:35:24	0.330445
2022-09-12	15:35:24	0.242557
2022-09-12	15:35:24	0.106374
2022-09-12	15:35:24	0.17986
2022-09-12	15:35:25	0.139962
2022-09-12	15:35:25	0.245255
2022-09-12	15:35:25	0.228155
2022-09-12	15:35:25	0.184339
2022-09-12	15:35:26	0.219351
2022-09-12	15:35:26	0.493346
2022-09-12	15:35:26	1.02754
2022-09-12	15:35:27	0.291056
2022-09-12	15:35:27	0.28668
2022-09-12	15:35:27	0.258537
2022-09-12	15:35:27	0.32785
2022-09-12	15:35:28	0.283015
2022-09-12	15:35:28	0.198842
2022-09-12	15:35:28	0.303982
2022-09-12	15:35:28	0.284898
2022-09-12	15:35:29	0.303779
2022-09-12	15:35:29	0.209224
2022-09-12	15:35:29	0.152888
2022-09-12	15:35:29	0.130954
2022-09-12	15:35:30	0.294059
2022-09-12	15:35:30	0.563117
2022-09-12	15:35:30	0.71874
2022-09-12	15:35:31	0.657977
2022-09-12	15:35:31	0.788257
2022-09-12	15:35:31	0.625509
2022-09-12	15:35:31	0.646018
2022-09-12	15:35:32	0.477163
2022-09-12	15:35:32	0.514618
2022-09-12	15:35:32	0.580369
2022-09-12	15:35:32	0.989631
2022-09-12	15:35:33	0.98042
2022-09-12	15:35:33	0.771209
2022-09-12	15:35:33	0.870242
2022-09-12	15:35:33	0.862557
2022-09-12	15:35:34	0.687595
2022-09-12	15:35:34	0.332888
2022-09-12	15:35:34	0.296298
2022-09-12	15:35:35	0.298588
2022-09-12	15:35:35	0.384491
2022-09-12	15:35:35	0.215331
2022-09-12	15:35:35	0.344898
2022-09-12	15:35:36	0.238435
2022-09-12	15:35:36	0.985509
2022-09-12	15:35:36	0.784898
2022-09-12	15:35:36	1.04948
2022-09-12	15:35:37	1.30042
2022-09-12	15:35:37	1.36332
2022-09-12	15:35:37	1.2362
2022-09-12	15:35:37	0.765763
2022-09-12	15:35:38	0.649478
2022-09-12	15:35:38	0.58841
2022-09-12	15:35:38	0.676502
2022-09-12	15:35:39	0.362507
2022-09-12	15:35:39	0.35299
2022-09-12	15:35:39	0.323575
2022-09-12	15:35:39	0.438944
2022-09-12	15:35:40	0.113601
2022-09-12	15:35:40	0.113702
2022-09-12	15:35:40	0.229478
2022-09-12	15:35:40	0.130853
2022-09-12	15:35:41	0.0165015
2022-09-12	15:35:41	-0.483651
2022-09-12	15:35:41	-0.503549
2022-09-12	15:35:41	-0.541921
2022-09-12	15:35:42	-0.531234
2022-09-12	15:35:42	-0.438206
2022-09-12	15:35:42	-0.503498
2022-09-12	15:35:43	-0.512048
2022-09-12	15:35:43	-0.344872
2022-09-12	15:35:43	-0.174033
2022-09-12	15:35:43	0.309886
2022-09-12	15:35:44	1.60917
2022-09-12	15:35:44	0.691819
2022-09-12	15:35:44	0.184135
2022-09-12	15:35:44	0.349173
2022-09-12	15:35:45	0.296858
2022-09-12	15:35:45	0.210242
2022-09-12	15:35:45	0.173295
2022-09-12	15:35:46	0.429784
2022-09-12	15:35:46	0.322303
2022-09-12	15:35:46	0.337723
2022-09-12	15:35:46	0.388562
2022-09-12	15:35:47	0.711056
2022-09-12	15:35:47	0.719758
2022-09-12	15:35:47	0.71874
2022-09-12	15:35:47	0.339707
2022-09-12	15:35:48	0.320166
2022-09-12	15:35:48	0.32154
2022-09-12	15:35:48	0.337875
2022-09-12	15:35:48	0.350445
2022-09-12	15:35:49	0.339351
2022-09-12	15:35:49	0.343117
2022-09-12	15:35:49	0.346425
2022-09-12	15:35:50	0.312023
2022-09-12	15:35:50	0.332837
2022-09-12	15:35:50	0.357774
2022-09-12	15:35:50	0.333804
2022-09-12	15:35:51	0.329835
2022-09-12	15:35:51	0.338893
2022-09-12	15:35:51	0.330547
2022-09-12	15:35:51	0.336298
2022-09-12	15:35:52	0.336807
2022-09-12	15:35:52	0.328104
2022-09-12	15:35:52	0.344898
2022-09-12	15:35:52	0.345967
2022-09-12	15:35:53	0.345814
2022-09-12	15:35:53	0.366578
2022-09-12	15:35:53	0.382557
2022-09-12	15:35:54	0.387799
2022-09-12	15:35:54	0.356908
2022-09-12	15:35:54	0.336552
2022-09-12	15:35:54	0.349987
2022-09-12	15:35:55	0.311972
2022-09-12	15:35:55	0.285967
2022-09-12	15:35:55	0.360623
2022-09-12	15:35:55	0.355585
2022-09-12	15:35:56	0.421132
2022-09-12	15:35:56	0.456756
2022-09-12	15:35:56	0.39528
2022-09-12	15:35:56	0.394466
2022-09-12	15:35:57	0.372634
2022-09-12	15:35:57	0.378079
2022-09-12	15:35:57	0.320267
2022-09-12	15:35:58	0.35131
2022-09-12	15:35:58	0.363728
2022-09-12	15:35:58	0.364746
2022-09-12	15:35:58	0.371819
2022-09-12	15:35:59	0.74556
2022-09-12	15:35:59	0.449733
2022-09-12	15:35:59	0.570801
2022-09-12	15:35:59	0.605255
2022-09-12	15:36:00	0.742964
2022-09-12	15:36:00	0.83131
2022-09-12	15:36:00	1.15436
2022-09-12	15:36:00	0.505967
2022-09-12	15:36:01	1.03268
2022-09-12	15:36:01	0.865305
2022-09-12	15:36:01	1.45584
2022-09-12	15:36:02	2.09971
2022-09-12	15:36:02	2.97894
2022-09-12	15:36:02	2.61406
2022-09-12	15:36:02	3.12764
2022-09-12	15:36:03	3.11843
2022-09-12	15:36:03	4.66271
2022-09-12	15:36:03	3.68663
2022-09-12	15:36:03	4.62724
2022-09-12	15:36:04	3.33268
2022-09-12	15:36:04	3.71121
2022-09-12	15:36:04	1.42118
2022-09-12	15:36:05	1.23004
2022-09-12	15:36:05	1.1965
2022-09-12	15:36:05	1.27411
2022-09-12	15:36:05	1.77146
2022-09-12	15:36:06	2.3563
2022-09-12	15:36:06	2.28108
2022-09-12	15:36:06	4.08673
2022-09-12	15:36:06	5.5794
2022-09-12	15:36:07	6.73105
2022-09-12	15:36:07	10.4462
2022-09-12	15:36:07	7.52978
2022-09-12	15:36:07	1.48128
2022-09-12	15:36:08	4.14103
2022-09-12	15:36:08	5.53691
2022-09-12	15:36:08	0.979962
2022-09-12	15:36:09	0.998231
2022-09-12	15:36:09	2.57339
2022-09-12	15:36:09	4.08067
2022-09-12	15:36:09	7.17838
2022-09-12	15:36:10	5.38403
2022-09-12	15:36:10	2.89726
2022-09-12	15:36:10	0.986425
2022-09-12	15:36:10	1.98027
2022-09-12	15:36:11	0.52958
2022-09-12	15:36:11	1.46261
2022-09-12	15:36:11	0.80958
2022-09-12	15:36:11	1.84373
2022-09-12	15:36:12	1.22902
2022-09-12	15:36:12	2.68678
2022-09-12	15:36:12	1.08139
2022-09-12	15:36:13	0.913397
2022-09-12	15:36:13	0.920522
2022-09-12	15:36:13	1.51452
2022-09-12	15:36:13	1.55401
2022-09-12	15:36:14	2.53462
2022-09-12	15:36:14	2.13726
2022-09-12	15:36:14	1.61131
2022-09-12	15:36:14	1.49497
2022-09-12	15:36:15	1.64515
2022-09-12	15:36:15	1.6477
2022-09-12	15:36:15	1.31248
2022-09-12	15:36:15	0.363066
2022-09-12	15:36:16	0.347596
2022-09-12	15:36:16	0.453702
2022-09-12	15:36:16	0.460216
2022-09-12	15:36:17	0.54159
2022-09-12	15:36:17	0.709224
2022-09-12	15:36:17	1.02709
2022-09-12	15:36:17	0.646272
2022-09-12	15:36:18	0.338995
2022-09-12	15:36:18	0.445305
2022-09-12	15:36:18	0.435789
2022-09-12	15:36:18	0.423728
2022-09-12	15:36:19	0.438181
2022-09-12	15:36:19	0.747952
2022-09-12	15:36:19	1.151
2022-09-12	15:36:19	2.2277
2022-09-12	15:36:20	4.0879
2022-09-12	15:36:20	2.89502
2022-09-12	15:36:20	1.74388
2022-09-12	15:36:21	1.28078
2022-09-12	15:36:21	0.95645
2022-09-12	15:36:21	1.05416
2022-09-12	15:36:21	1.03162
2022-09-12	15:36:22	0.866425
2022-09-12	15:36:22	0.734568
2022-09-12	15:36:22	0.826578
2022-09-12	15:36:22	0.753397
2022-09-12	15:36:23	0.665458
2022-09-12	15:36:23	0.671158
2022-09-12	15:36:23	0.511412
2022-09-12	15:36:23	0.668104
2022-09-12	15:36:24	1.2276
2022-09-12	15:36:24	1.00149
2022-09-12	15:36:24	1.0564
2022-09-12	15:36:25	0.753702
2022-09-12	15:36:25	0.947799
2022-09-12	15:36:25	0.717366
2022-09-12	15:36:25	1.31253
2022-09-12	15:36:26	0.509428
2022-09-12	15:36:26	0.439809
2022-09-12	15:36:26	0.389682
2022-09-12	15:36:26	0.32327
2022-09-12	15:36:27	0.360929
2022-09-12	15:36:27	0.579911
2022-09-12	15:36:27	0.435076
2022-09-12	15:36:28	0.477214
2022-09-12	15:36:28	0.362507
2022-09-12	15:36:28	0.351565
2022-09-12	15:36:28	0.343473
2022-09-12	15:36:29	0.408308
2022-09-12	15:36:29	0.441285
2022-09-12	15:36:29	0.326018
2022-09-12	15:36:29	0.395738
2022-09-12	15:36:30	0.358537
2022-09-12	15:36:30	0.426323
2022-09-12	15:36:30	0.126069
2022-09-12	15:36:30	0.377265
2022-09-12	15:36:31	0.186374
2022-09-12	15:36:31	0.277621
2022-09-12	15:36:31	0.208257
2022-09-12	15:36:32	1.02103
2022-09-12	15:36:32	0.227596
2022-09-12	15:36:32	0.983473
2022-09-12	15:36:32	0.451056
2022-09-12	15:36:33	0.510191
2022-09-12	15:36:33	0.293041
2022-09-12	15:36:33	0.375178
2022-09-12	15:36:33	0.455433
2022-09-12	15:36:34	0.271921
2022-09-12	15:36:34	0.093448
2022-09-12	15:36:34	0.162201
2022-09-12	15:36:34	-0.215865
2022-09-12	15:36:35	-0.114745
2022-09-12	15:36:35	-0.107519
2022-09-12	15:36:35	0.060929
2022-09-12	15:36:36	0.0872394
2022-09-12	15:36:36	0.386985
2022-09-12	15:36:36	0.278639
2022-09-12	15:36:36	0.483066
2022-09-12	15:36:37	0.406425
2022-09-12	15:36:37	0.403779
2022-09-12	15:36:37	0.779962
2022-09-12	15:36:37	1.54617
2022-09-12	15:36:38	0.553143
2022-09-12	15:36:38	0.610649
2022-09-12	15:36:38	0.973346
2022-09-12	15:36:38	0.230395
2022-09-12	15:36:39	0.517824
2022-09-12	15:36:39	0.53986
2022-09-12	15:36:39	0.383677
2022-09-12	15:36:40	0.0278501
2022-09-12	15:36:40	-0.0822771
2022-09-12	15:36:40	-0.176832
2022-09-12	15:36:40	-0.591743
2022-09-12	15:36:41	-0.747467
2022-09-12	15:36:41	-0.770572
2022-09-12	15:36:41	-0.788943
2022-09-12	15:36:41	-0.853574
2022-09-12	15:36:42	-0.813727
2022-09-12	15:36:42	-0.763651
2022-09-12	15:36:42	-0.867569
2022-09-12	15:36:42	-0.526297
2022-09-12	15:36:43	-0.429198
2022-09-12	15:36:43	-0.340699
2022-09-12	15:36:43	-0.157951
2022-09-12	15:36:44	0.0365524
2022-09-12	15:36:44	0.444288
2022-09-12	15:36:44	1.82083
2022-09-12	15:36:44	0.909326
2022-09-12	15:36:45	0.11411
2022-09-12	15:36:45	0.253499
2022-09-12	15:36:45	0.0370104
2022-09-12	15:36:45	0.0936516
2022-09-12	15:36:46	0.0454582
2022-09-12	15:36:46	-0.111132
2022-09-12	15:36:46	-0.413575
2022-09-12	15:36:47	-0.518358
2022-09-12	15:36:47	-0.472811
2022-09-12	15:36:47	-0.434796
2022-09-12	15:36:47	-0.387773
2022-09-12	15:36:48	-0.205381
2022-09-12	15:36:48	-0.204567
2022-09-12	15:36:48	-0.277799
2022-09-12	15:36:48	-0.294287
2022-09-12	15:36:49	-0.324058
2022-09-12	15:36:49	0.241234
2022-09-12	15:36:49	0.0454582
2022-09-12	15:36:49	-0.0197326
2022-09-12	15:36:50	-0.0625824
2022-09-12	15:36:50	0.0978756
2022-09-12	15:36:50	0.153804
2022-09-12	15:36:51	0.28159
2022-09-12	15:36:51	0.201794
2022-09-12	15:36:51	0.22327
2022-09-12	15:36:51	0.272379
2022-09-12	15:36:52	0.331056
2022-09-12	15:36:52	0.392837
2022-09-12	15:36:52	0.331565
2022-09-12	15:36:52	0.454364
2022-09-12	15:36:53	0.374313
2022-09-12	15:36:53	0.36042
2022-09-12	15:36:53	0.370751
2022-09-12	15:36:53	0.278537
2022-09-12	15:36:54	0.239962
2022-09-12	15:36:54	0.296756
2022-09-12	15:36:54	0.0665778
2022-09-12	15:36:55	-0.00161552
2022-09-12	15:36:55	0.281947
2022-09-12	15:36:55	0.238181
2022-09-12	15:36:55	0.39126
2022-09-12	15:36:56	0.339555
2022-09-12	15:36:56	0.344593
2022-09-12	15:36:56	0.432888
2022-09-12	15:36:56	0.366527
2022-09-12	15:36:57	0.272837
2022-09-12	15:36:57	0.310038
2022-09-12	15:36:57	0.325255
2022-09-12	15:36:57	0.352837
2022-09-12	15:36:58	0.465356
2022-09-12	15:36:58	0.378791
2022-09-12	15:36:58	0.429122
2022-09-12	15:36:59	0.384898
2022-09-12	15:36:59	0.458282
2022-09-12	15:36:59	0.443219
2022-09-12	15:36:59	0.427087
2022-09-12	15:37:00	0.43187
2022-09-12	15:37:00	0.430802
2022-09-12	15:37:00	0.428359
2022-09-12	15:37:00	0.433193
2022-09-12	15:37:01	0.432328
2022-09-12	15:37:01	0.430649
2022-09-12	15:37:01	0.429173
2022-09-12	15:37:01	0.426934
2022-09-12	15:37:02	0.430395
2022-09-12	15:37:02	0.42673
2022-09-12	15:37:02	0.412786
2022-09-12	15:37:03	0.568613
2022-09-12	15:37:03	0.418639
2022-09-12	15:37:03	0.572074
2022-09-12	15:37:03	0.541997
2022-09-12	15:37:04	0.379555
2022-09-12	15:37:04	0.374669
2022-09-12	15:37:04	0.327901
2022-09-12	15:37:04	0.206374
2022-09-12	15:37:05	0.730496
2022-09-12	15:37:05	1.48983
2022-09-12	15:37:05	1.67971
2022-09-12	15:37:05	1.86042
2022-09-12	15:37:06	1.70515
2022-09-12	15:37:06	1.91594
2022-09-12	15:37:06	2.30113
2022-09-12	15:37:07	2.43029
2022-09-12	15:37:07	1.52612
2022-09-12	15:37:07	1.99411
2022-09-12	15:37:07	0.948206
2022-09-12	15:37:08	0.264084
2022-09-12	15:37:08	0.616603
2022-09-12	15:37:08	0.164288
2022-09-12	15:37:08	1.25976
2022-09-12	15:37:09	-0.198715
2022-09-12	15:37:09	-0.40472
2022-09-12	15:37:09	-0.0535239
2022-09-12	15:37:10	-0.117188
2022-09-12	15:37:10	1.10332
2022-09-12	15:37:10	1.09238
2022-09-12	15:37:10	0.819809
2022-09-12	15:37:11	1.27492
2022-09-12	15:37:11	0.593091
2022-09-12	15:37:11	0.742964
2022-09-12	15:37:11	0.6707
2022-09-12	15:37:12	0.636196
2022-09-12	15:37:12	1.38948
2022-09-12	15:37:12	0.639504
2022-09-12	15:37:12	0.621947
2022-09-12	15:37:13	0.316705
2022-09-12	15:37:13	0.576908
2022-09-12	15:37:13	0.383422
2022-09-12	15:37:14	0.361489
2022-09-12	15:37:14	0.357672
2022-09-12	15:37:14	0.169478
2022-09-12	15:37:14	0.265814
2022-09-12	15:37:15	0.225763
2022-09-12	15:37:15	0.675076
2022-09-12	15:37:15	0.708003
2022-09-12	15:37:15	1.0619
2022-09-12	15:37:16	1.57996
2022-09-12	15:37:16	1.30648
2022-09-12	15:37:16	0.584796
2022-09-12	15:37:16	0.54902
2022-09-12	15:37:17	0.278537
2022-09-12	15:37:17	0.351768
2022-09-12	15:37:17	0.343677
2022-09-12	15:37:18	0.511463
2022-09-12	15:37:18	0.557315
2022-09-12	15:37:18	0.732175
2022-09-12	15:37:18	0.515738
2022-09-12	15:37:19	0.29416
2022-09-12	15:37:19	0.156349
2022-09-12	15:37:19	0.163779
2022-09-12	15:37:19	0.151718
2022-09-12	15:37:20	0.247901
2022-09-12	15:37:20	0.351565
2022-09-12	15:37:20	0.206272
2022-09-12	15:37:20	0.492176
2022-09-12	15:37:21	0.152736
2022-09-12	15:37:21	0.421896
2022-09-12	15:37:21	0.404847
2022-09-12	15:37:22	0.3164
2022-09-12	15:37:22	0.324797
2022-09-12	15:37:22	0.281896
2022-09-12	15:37:22	0.547443
2022-09-12	15:37:23	0.446476
2022-09-12	15:37:23	1.01599
2022-09-12	15:37:23	0.697417
2022-09-12	15:37:23	3.17334
2022-09-12	15:37:24	1.94022
2022-09-12	15:37:24	6.53049
2022-09-12	15:37:24	3.86347
2022-09-12	15:37:24	8.26662
2022-09-12	15:37:25	3.64999
2022-09-12	15:37:25	3.28607
2022-09-12	15:37:25	2.40027
2022-09-12	15:37:26	1.14536
2022-09-12	15:37:26	1.79838
2022-09-12	15:37:26	2.5537
2022-09-12	15:37:26	1.05436
2022-09-12	15:37:27	2.37691
2022-09-12	15:37:27	0.866679
2022-09-12	15:37:27	2.98749
2022-09-12	15:37:27	1.62261
2022-09-12	15:37:28	2.23396
2022-09-12	15:37:28	2.09273
2022-09-12	15:37:28	1.13884
2022-09-12	15:37:28	4.23111
2022-09-12	15:37:29	1.17553
2022-09-12	15:37:29	1.84973
2022-09-12	15:37:29	0.395484
2022-09-12	15:37:30	0.118181
2022-09-12	15:37:30	0.327901
2022-09-12	15:37:30	0.0301402
2022-09-12	15:37:30	0.289224
2022-09-12	15:37:31	0.373295
2022-09-12	15:37:31	0.615636
2022-09-12	15:37:31	1.00332
2022-09-12	15:37:31	0.672532
2022-09-12	15:37:32	2.41864
2022-09-12	15:37:32	1.51655
2022-09-12	15:37:32	4.74637
2022-09-12	15:37:33	3.59518
2022-09-12	15:37:33	8.1021
2022-09-12	15:37:33	3.0392
2022-09-12	15:37:33	3.10714
2022-09-12	15:37:34	6.1197
2022-09-12	15:37:34	1.40062
2022-09-12	15:37:34	1.74973
2022-09-12	15:37:34	1.35095
2022-09-12	15:37:35	0.966527
2022-09-12	15:37:35	0.966883
2022-09-12	15:37:35	0.455636
2022-09-12	15:37:35	1.52602
2022-09-12	15:37:36	1.91146
2022-09-12	15:37:36	3.31518
2022-09-12	15:37:36	4.77782
2022-09-12	15:37:37	4.68754
2022-09-12	15:37:37	0.728104
2022-09-12	15:37:37	0.499402
2022-09-12	15:37:37	0.569937
2022-09-12	15:37:38	0.270802
2022-09-12	15:37:38	0.245662
2022-09-12	15:37:38	0.582048
2022-09-12	15:37:38	0.597519
2022-09-12	15:37:39	3.32368
2022-09-12	15:37:39	6.24902
2022-09-12	15:37:39	13.7288
2022-09-12	15:37:39	4.28871
2022-09-12	15:37:40	6.31192
2022-09-12	15:37:40	4.92423
2022-09-12	15:37:40	9.93665
2022-09-12	15:37:41	7.28088
2022-09-12	15:37:41	5.99884
2022-09-12	15:37:41	6.0823
2022-09-12	15:37:41	1.66454
2022-09-12	15:37:42	3.1139
2022-09-12	15:37:42	1.47854
2022-09-12	15:37:42	1.2135
2022-09-12	15:37:42	0.469886
2022-09-12	15:37:43	0.815992
2022-09-12	15:37:43	2.1905
2022-09-12	15:37:43	2.86525
2022-09-12	15:37:43	4.50271
2022-09-12	15:37:44	2.13574
2022-09-12	15:37:44	0.462863
2022-09-12	15:37:44	0.527748
2022-09-12	15:37:45	0.397417
2022-09-12	15:37:45	0.72388
2022-09-12	15:37:45	1.64902
2022-09-12	15:37:45	1.16953
2022-09-12	15:37:46	1.00821
2022-09-12	15:37:46	0.802863
2022-09-12	15:37:46	2.15462
2022-09-12	15:37:46	4.96917
2022-09-12	15:37:47	2.40215
2022-09-12	15:37:47	0.82958
2022-09-12	15:37:47	0.485814
2022-09-12	15:37:47	0.278384
2022-09-12	15:37:48	0.385407
2022-09-12	15:37:48	0.715636
2022-09-12	15:37:48	0.377163
2022-09-12	15:37:49	0.778435
2022-09-12	15:37:49	1.08251
2022-09-12	15:37:49	1.08734
2022-09-12	15:37:49	0.668613
2022-09-12	15:37:50	0.553194
2022-09-12	15:37:50	0.38098
2022-09-12	15:37:50	0.316196
2022-09-12	15:37:50	0.347952
2022-09-12	15:37:51	0.392125
2022-09-12	15:37:51	0.326985
2022-09-12	15:37:51	0.35187
2022-09-12	15:37:52	0.50444
2022-09-12	15:37:52	0.477875
2022-09-12	15:37:52	0.529275
2022-09-12	15:37:52	0.500725
2022-09-12	15:37:53	0.53584
2022-09-12	15:37:53	0.550089
2022-09-12	15:37:53	0.548817
2022-09-12	15:37:53	0.547341
2022-09-12	15:37:54	0.556348
2022-09-12	15:37:54	0.539962
2022-09-12	15:37:54	0.496298
2022-09-12	15:37:54	0.437774
2022-09-12	15:37:55	0.403372
2022-09-12	15:37:55	0.390496
2022-09-12	15:37:55	0.408104
2022-09-12	15:37:56	0.467748
2022-09-12	15:37:56	0.601438
2022-09-12	15:37:56	0.679504
2022-09-12	15:37:56	0.694008
2022-09-12	15:37:57	0.728206
2022-09-12	15:37:57	0.746629
2022-09-12	15:37:57	0.751514
2022-09-12	15:37:57	0.729936
2022-09-12	15:37:58	0.729428
2022-09-12	15:37:58	0.719758
2022-09-12	15:37:58	0.685967
2022-09-12	15:37:58	0.669326
2022-09-12	15:37:59	0.659962
2022-09-12	15:37:59	0.668511
2022-09-12	15:37:59	0.612532
2022-09-12	15:38:00	0.646323
2022-09-12	15:38:00	0.455382
2022-09-12	15:38:00	0.380522
2022-09-12	15:38:00	0.341794
2022-09-12	15:38:01	0.335789
2022-09-12	15:38:01	0.324797
2022-09-12	15:38:01	0.328461
2022-09-12	15:38:01	0.343423
2022-09-12	15:38:02	0.547086
2022-09-12	15:38:02	0.676247
2022-09-12	15:38:02	0.584084
2022-09-12	15:38:02	0.554059
2022-09-12	15:38:03	0.500267
2022-09-12	15:38:03	0.684186
2022-09-12	15:38:03	1.31044
2022-09-12	15:38:04	0.97757
2022-09-12	15:38:04	1.00983
2022-09-12	15:38:04	0.999962
2022-09-12	15:38:04	0.986374
2022-09-12	15:38:05	1.02088
2022-09-12	15:38:05	0.870598
2022-09-12	15:38:05	0.742048
2022-09-12	15:38:05	0.842201
2022-09-12	15:38:06	0.951361
2022-09-12	15:38:06	1.35324
2022-09-12	15:38:06	1.5736
2022-09-12	15:38:06	1.34877
2022-09-12	15:38:07	1.32668
2022-09-12	15:38:07	1.07065
2022-09-12	15:38:07	1.02678
2022-09-12	15:38:08	1.17355
2022-09-12	15:38:08	1.2307
2022-09-12	15:38:08	1.26103
2022-09-12	15:38:08	1.27268
2022-09-12	15:38:09	1.2337
2022-09-12	15:38:09	1.28841
2022-09-12	15:38:09	1.35782
2022-09-12	15:38:09	1.37462
2022-09-12	15:38:10	1.32393
2022-09-12	15:38:10	1.22072
2022-09-12	15:38:10	1.0166
2022-09-12	15:38:10	0.83243
2022-09-12	15:38:11	0.882964
2022-09-12	15:38:11	0.928868
2022-09-12	15:38:11	0.927952
2022-09-12	15:38:12	0.830598
2022-09-12	15:38:12	0.839504
2022-09-12	15:38:12	0.941081
2022-09-12	15:38:12	1.03838
2022-09-12	15:38:13	1.18164
2022-09-12	15:38:13	1.31905
2022-09-12	15:38:13	1.32062
2022-09-12	15:38:13	1.34943
2022-09-12	15:38:14	1.32383
2022-09-12	15:38:14	1.2937
2022-09-12	15:38:14	1.23095
2022-09-12	15:38:15	1.13905
2022-09-12	15:38:15	1.01462
2022-09-12	15:38:15	1.06139
2022-09-12	15:38:15	1.02968
2022-09-12	15:38:16	1.14164
2022-09-12	15:38:16	1.03009
2022-09-12	15:38:16	1.2392
2022-09-12	15:38:16	1.38342
2022-09-12	15:38:17	1.82536
2022-09-12	15:38:17	1.8076
2022-09-12	15:38:17	1.64072
2022-09-12	15:38:17	1.04978
2022-09-12	15:38:18	0.631921
2022-09-12	15:38:18	0.596654
2022-09-12	15:38:18	0.639809
2022-09-12	15:38:19	0.622456
2022-09-12	15:38:19	0.661641
2022-09-12	15:38:19	0.678435
2022-09-12	15:38:19	0.692481
2022-09-12	15:38:20	0.682456
2022-09-12	15:38:20	0.688562
2022-09-12	15:38:20	0.721641
2022-09-12	15:38:20	0.733702
2022-09-12	15:38:21	0.754567
2022-09-12	15:38:21	0.769987
2022-09-12	15:38:21	0.736552
2022-09-12	15:38:21	0.715636
2022-09-12	15:38:22	0.712328
2022-09-12	15:38:22	0.700166
2022-09-12	15:38:22	0.705865
2022-09-12	15:38:23	0.681692
2022-09-12	15:38:23	0.745102
2022-09-12	15:38:23	0.779198
2022-09-12	15:38:23	0.818995
2022-09-12	15:38:24	0.520878
2022-09-12	15:38:24	0.612633
2022-09-12	15:38:24	1.04826
2022-09-12	15:38:24	1.47813
2022-09-12	15:38:25	1.30927
2022-09-12	15:38:25	1.49253
2022-09-12	15:38:25	1.45207
2022-09-12	15:38:25	1.43095
2022-09-12	15:38:26	1.27772
2022-09-12	15:38:26	0.84388
2022-09-12	15:38:26	0.615178
2022-09-12	15:38:27	0.564491
2022-09-12	15:38:27	0.507392
2022-09-12	15:38:27	0.328817
2022-09-12	15:38:27	0.262405
2022-09-12	15:38:28	0.190395
2022-09-12	15:38:28	0.196247
2022-09-12	15:38:28	0.0937025
2022-09-12	15:38:28	0.174873
2022-09-12	15:38:29	-0.0867045
2022-09-12	15:38:29	-0.188893
2022-09-12	15:38:29	-0.330419
2022-09-12	15:38:29	-0.381666
2022-09-12	15:38:30	-0.339478
2022-09-12	15:38:30	0.0327356
2022-09-12	15:38:30	0.0825066
2022-09-12	15:38:31	0.107443
2022-09-12	15:38:31	0.1764
2022-09-12	15:38:31	-0.0233967
2022-09-12	15:38:31	0.131209
2022-09-12	15:38:32	5.44968
2022-09-12	15:38:32	7.45619
2022-09-12	15:38:32	1.59838
2022-09-12	15:38:32	1.74551
2022-09-12	15:38:33	1.46765
2022-09-12	15:38:33	2.7996
2022-09-12	15:38:33	3.79721
2022-09-12	15:38:34	6.57558
2022-09-12	15:38:34	9.08968
2022-09-12	15:38:34	5.24708
2022-09-12	15:38:34	4.66729
2022-09-12	15:38:35	2.10429
2022-09-12	15:38:35	1.70973
2022-09-12	15:38:35	0.62098
2022-09-12	15:38:35	0.581743
2022-09-12	15:38:36	1.1709
2022-09-12	15:38:36	2.73121
2022-09-12	15:38:36	4.42688
2022-09-12	15:38:36	3.92688
