# Supplementary material for: Comparing efficacy in reducing pulling and welfare impacts of four types of leash walking equipment
Source: PeerJ journal article supplement (doi:10.7717/peerj.18131), 2024-10-24
Supplement: Shelter1_Tension_files.zip [file Juju_harness_2022913100745 copy.xlsx]

## Sheet: Averaged Newtons
Date	Time	Averaged Newtons	Impulse	Total steps
2022-09-13	10:08:03	3.03015	3.03015	0		Impul;se	1675.76
2022-09-13	10:08:04	6.88611	9.91626	0		Total steps	31
2022-09-13	10:08:05	11.3598	21.276	0		# > 5 sec	1
2022-09-13	10:08:06	5.19914	26.4752	0
2022-09-13	10:08:07	9.54093	36.0161	0
2022-09-13	10:08:08	20.9551	56.9712	1
2022-09-13	10:08:09	12.8147	69.7859	1
2022-09-13	10:08:10	5.01464	74.8006	1
2022-09-13	10:08:11	0.668362	75.4689	1
2022-09-13	10:08:12	-0.886583	75.4689	1
2022-09-13	10:08:13	-2.32936	75.4689	1
2022-09-13	10:08:14	-2.75737	75.4689	1
2022-09-13	10:08:15	0.725351	76.1943	1
2022-09-13	10:08:16	1.26157	77.4559	1
2022-09-13	10:08:17	8.25464	85.7105	1
2022-09-13	10:08:18	26.0325	111.743	2
2022-09-13	10:08:19	13.9369	125.68	3
2022-09-13	10:08:20	5.77672	131.457	3
2022-09-13	10:08:21	13.1871	144.644	4
2022-09-13	10:08:22	2.08007	146.724	4
2022-09-13	10:08:23	6.01037	152.734	4
2022-09-13	10:08:24	17.0746	169.809	5
2022-09-13	10:08:25	11.5001	181.309	5
2022-09-13	10:08:26	11.02	192.329	5
2022-09-13	10:08:27	8.9759	201.305	5
2022-09-13	10:08:28	8.3775	209.682	5
2022-09-13	10:08:29	24.868	234.55	6
2022-09-13	10:08:30	9.89604	244.446	6
2022-09-13	10:08:31	4.7636	249.21	6
2022-09-13	10:08:32	2.63762	251.848	6
2022-09-13	10:08:33	5.50999	257.358	6
2022-09-13	10:08:34	7.12436	264.482	6
2022-09-13	10:08:35	7.34021	271.822	6
2022-09-13	10:08:36	2.10048	273.923	6
2022-09-13	10:08:37	0.76157	274.684	6
2022-09-13	10:08:38	-0.24997	274.684	6
2022-09-13	10:08:39	5.58995	280.274	6
2022-09-13	10:08:40	8.02501	288.299	6
2022-09-13	10:08:41	11.9255	300.225	6
2022-09-13	10:08:42	3.43648	303.661	6
2022-09-13	10:08:43	2.46439	306.126	6
2022-09-13	10:08:44	6.26262	312.388	6
2022-09-13	10:08:45	9.86955	322.258	6
2022-09-13	10:08:46	16.2158	338.474	7
2022-09-13	10:08:47	13.7276	352.201	8
2022-09-13	10:08:48	9.87771	362.079	8
2022-09-13	10:08:49	5.64561	367.724	8
2022-09-13	10:08:50	2.57441	370.299	8
2022-09-13	10:08:51	4.58895	374.888	8
2022-09-13	10:08:52	11.4611	386.349	8
2022-09-13	10:08:53	2.17435	388.523	8
2022-09-13	10:08:54	3.64708	392.17	8
2022-09-13	10:08:55	5.62771	397.798	8
2022-09-13	10:08:56	5.10694	402.905	8
2022-09-13	10:08:57	7.19573	410.101	8
2022-09-13	10:08:58	2.22718	412.328	8
2022-09-13	10:08:59	0.558854	412.887	8
2022-09-13	10:09:00	0.640745	413.528	8
2022-09-13	10:09:01	0.741028	414.269	8
2022-09-13	10:09:02	0.639331	414.908	8
2022-09-13	10:09:03	0.590435	415.498	8
2022-09-13	10:09:04	1.09219	416.59	8
2022-09-13	10:09:05	1.31584	417.906	8
2022-09-13	10:09:06	40.5699	458.476	9
2022-09-13	10:09:07	0.242728	458.719	9
2022-09-13	10:09:08	19.0504	477.769	10
2022-09-13	10:09:09	29.5334	507.303	11
2022-09-13	10:09:10	14.5239	521.827	12
2022-09-13	10:09:11	12.259	534.086	12
2022-09-13	10:09:12	-0.199206	534.086	12
2022-09-13	10:09:13	3.68635	537.772	12
2022-09-13	10:09:14	1.98556	539.758	12
2022-09-13	10:09:15	1.097	540.855	12
2022-09-13	10:09:16	11.1999	552.055	12
2022-09-13	10:09:17	14.9723	567.027	13
2022-09-13	10:09:18	1.72925	568.756	13
2022-09-13	10:09:19	0.83169	569.588	13
2022-09-13	10:09:20	0.284908	569.873	13
2022-09-13	10:09:21	-0.524954	569.873	13
2022-09-13	10:09:22	-0.592016	569.873	13
2022-09-13	10:09:23	-2.13157	569.873	13
2022-09-13	10:09:24	-2.50867	569.873	13
2022-09-13	10:09:25	-2.04821	569.873	13
2022-09-13	10:09:26	-1.30243	569.873	13
2022-09-13	10:09:27	6.00315	575.876	13
2022-09-13	10:09:28	5.21362	581.089	13
2022-09-13	10:09:29	3.71368	584.803	13
2022-09-13	10:09:30	4.31154	589.115	13
2022-09-13	10:09:31	1.96977	591.084	13
2022-09-13	10:09:32	0.101132	591.186	13
2022-09-13	10:09:33	0.0251844	591.211	13
2022-09-13	10:09:34	10.6319	601.843	13
2022-09-13	10:09:35	8.4273	610.27	13
2022-09-13	10:09:36	1.7069	611.977	13
2022-09-13	10:09:37	1.56955	613.546	13
2022-09-13	10:09:38	2.30037	615.847	13
2022-09-13	10:09:39	5.36223	621.209	13
2022-09-13	10:09:40	7.13466	628.344	13
2022-09-13	10:09:41	5.22901	633.573	13
2022-09-13	10:09:42	0.043822	633.617	13
2022-09-13	10:09:43	-0.366607	633.617	13
2022-09-13	10:09:44	-0.537744	633.617	13
2022-09-13	10:09:45	-1.07113	633.617	13
2022-09-13	10:09:46	-0.196206	633.617	13
2022-09-13	10:09:47	2.40163	636.018	13
2022-09-13	10:09:48	9.36584	645.384	13
2022-09-13	10:09:49	4.12167	649.506	13
2022-09-13	10:09:50	2.65149	652.157	13
2022-09-13	10:09:51	1.56466	653.722	13
2022-09-13	10:09:52	1.5211	655.243	13
2022-09-13	10:09:53	3.90932	659.152	13
2022-09-13	10:09:54	1.28228	660.435	13
2022-09-13	10:09:55	1.73625	662.171	13
2022-09-13	10:09:56	1.98879	664.16	13
2022-09-13	10:09:57	7.58814	671.748	13
2022-09-13	10:09:58	4.79659	676.544	13
2022-09-13	10:09:59	1.30158	677.846	13
2022-09-13	10:10:00	4.27222	682.118	13
2022-09-13	10:10:01	6.80116	688.919	13
2022-09-13	10:10:02	4.8774	693.797	13
2022-09-13	10:10:03	3.09615	696.893	13
2022-09-13	10:10:04	3.71203	700.605	13
2022-09-13	10:10:05	1.63802	702.243	13
2022-09-13	10:10:06	1.18692	703.43	13
2022-09-13	10:10:07	-0.247196	703.43	13
2022-09-13	10:10:08	1.25174	704.682	13
2022-09-13	10:10:09	3.6426	708.324	13
2022-09-13	10:10:10	1.44787	709.772	13
2022-09-13	10:10:11	0.516977	710.289	13
2022-09-13	10:10:12	0.840235	711.129	13
2022-09-13	10:10:13	10.6368	721.766	13
2022-09-13	10:10:14	17.4807	739.247	14
2022-09-13	10:10:15	9.62798	748.875	14
2022-09-13	10:10:16	8.76306	757.638	14
2022-09-13	10:10:17	5.52828	763.166	14
2022-09-13	10:10:18	11.401	774.567	14
2022-09-13	10:10:19	7.90189	782.469	14
2022-09-13	10:10:20	2.6018	785.071	14
2022-09-13	10:10:21	7.85752	792.928	14
2022-09-13	10:10:22	7.03425	799.963	14
2022-09-13	10:10:23	16.0015	815.964	15
2022-09-13	10:10:24	19.7374	835.701	16
2022-09-13	10:10:25	16.4875	852.189	17
2022-09-13	10:10:26	13.3462	865.535	18
2022-09-13	10:10:27	13.2188	878.754	19
2022-09-13	10:10:28	9.75854	888.513	19
2022-09-13	10:10:29	12.1883	900.701	19
2022-09-13	10:10:30	14.1816	914.882	20
2022-09-13	10:10:31	9.17619	924.059	20
2022-09-13	10:10:32	6.62679	930.685	20
2022-09-13	10:10:33	26.725	957.41	21
2022-09-13	10:10:34	5.04135	962.452	21
2022-09-13	10:10:35	2.16613	964.618	21
2022-09-13	10:10:36	4.02104	968.639	21
2022-09-13	10:10:37	4.67976	973.319	21
2022-09-13	10:10:38	8.5477	981.866	21
2022-09-13	10:10:39	9.16697	991.033	21
2022-09-13	10:10:40	11.4129	1002.45	21
2022-09-13	10:10:41	4.30576	1006.75	21
2022-09-13	10:10:42	5.229	1011.98	21
2022-09-13	10:10:43	4.10561	1016.09	21
2022-09-13	10:10:44	3.46738	1019.55	21
2022-09-13	10:10:45	2.64583	1022.2	21
2022-09-13	10:10:46	3.02947	1025.23	21
2022-09-13	10:10:47	4.02715	1029.26	21
2022-09-13	10:10:48	6.41043	1035.67	21
2022-09-13	10:10:49	6.67852	1042.35	21
2022-09-13	10:10:50	4.49919	1046.84	21
2022-09-13	10:10:51	1.74929	1048.59	21
2022-09-13	10:10:52	3.11983	1051.71	21
2022-09-13	10:10:53	5.85686	1057.57	21
2022-09-13	10:10:54	1.52574	1059.1	21
2022-09-13	10:10:55	-3.09914	1059.1	21
2022-09-13	10:10:56	-4.22997	1059.1	21
2022-09-13	10:10:57	-2.85765	1059.1	21
2022-09-13	10:10:58	-1.27719	1059.1	21
2022-09-13	10:10:59	10.8339	1069.93	21
2022-09-13	10:11:00	9.57676	1079.51	21
2022-09-13	10:11:01	10.3953	1089.9	21
2022-09-13	10:11:02	6.68826	1096.59	21
2022-09-13	10:11:03	6.03617	1102.63	21
2022-09-13	10:11:04	2.07688	1104.7	21
2022-09-13	10:11:05	1.69015	1106.39	21
2022-09-13	10:11:06	1.75483	1108.15	21
2022-09-13	10:11:07	0.64997	1108.8	21
2022-09-13	10:11:08	0.463553	1109.26	21
2022-09-13	10:11:09	0.880473	1110.14	21
2022-09-13	10:11:10	0.231636	1110.37	21
2022-09-13	10:11:11	0.727842	1111.1	21
2022-09-13	10:11:12	0.815165	1111.92	21
2022-09-13	10:11:13	-0.530953	1111.92	21
2022-09-13	10:11:14	1.12029	1113.04	21
2022-09-13	10:11:15	4.24168	1117.28	21
2022-09-13	10:11:16	1.53123	1118.81	21
2022-09-13	10:11:17	1.20837	1120.02	21
2022-09-13	10:11:18	1.8893	1121.91	21
2022-09-13	10:11:19	1.54799	1123.46	21
2022-09-13	10:11:20	2.11991	1125.58	21
2022-09-13	10:11:21	4.23173	1129.81	21
2022-09-13	10:11:22	9.00387	1138.81	21
2022-09-13	10:11:23	7.59293	1146.4	21
2022-09-13	10:11:24	2.62998	1149.03	21
2022-09-13	10:11:25	3.69218	1152.73	21
2022-09-13	10:11:26	5.5924	1158.32	21
2022-09-13	10:11:27	1.2328	1159.55	21
2022-09-13	10:11:28	1.14606	1160.7	21
2022-09-13	10:11:29	5.89885	1166.6	21
2022-09-13	10:11:30	7.20064	1173.8	21
2022-09-13	10:11:31	22.1415	1195.94	22
2022-09-13	10:11:32	4.50809	1200.45	22
2022-09-13	10:11:33	4.63241	1205.08	22
2022-09-13	10:11:34	18.9618	1224.04	23
2022-09-13	10:11:35	16.854	1240.9	24
2022-09-13	10:11:36	10.2782	1251.17	24
2022-09-13	10:11:37	17.2065	1268.38	25
2022-09-13	10:11:38	5.74706	1274.13	25
2022-09-13	10:11:39	4.65465	1278.78	25
2022-09-13	10:11:40	2.37577	1281.16	25
2022-09-13	10:11:41	6.35755	1287.51	25
2022-09-13	10:11:42	8.0132	1295.53	25
2022-09-13	10:11:43	4.67005	1300.2	25
2022-09-13	10:11:44	12.3927	1312.59	25
2022-09-13	10:11:45	11.2689	1323.86	25
2022-09-13	10:11:46	12.2997	1336.16	25
2022-09-13	10:11:47	14.9331	1351.09	26
2022-09-13	10:11:48	8.92469	1360.02	26
2022-09-13	10:11:49	21.4255	1381.44	27
2022-09-13	10:11:50	20.8261	1402.27	28
2022-09-13	10:11:51	12.3811	1414.65	28
2022-09-13	10:11:52	3.07554	1417.73	28
2022-09-13	10:11:53	7.26958	1425	28
2022-09-13	10:11:54	14.6246	1439.62	29
2022-09-13	10:11:55	6.3903	1446.01	29
2022-09-13	10:11:56	8.77682	1454.79	29
2022-09-13	10:11:57	3.56388	1458.35	29
2022-09-13	10:11:58	3.3948	1461.75	29
2022-09-13	10:11:59	3.97514	1465.72	29
2022-09-13	10:12:00	2.91878	1468.64	29
2022-09-13	10:12:01	3.9787	1472.62	29
2022-09-13	10:12:02	2.15568	1474.77	29
2022-09-13	10:12:03	2.51037	1477.28	29
2022-09-13	10:12:04	3.53779	1480.82	29
2022-09-13	10:12:05	2.94028	1483.76	29
2022-09-13	10:12:06	3.2748	1487.04	29
2022-09-13	10:12:07	3.30689	1490.34	29
2022-09-13	10:12:08	3.27769	1493.62	29
2022-09-13	10:12:09	3.2752	1496.9	29
2022-09-13	10:12:10	3.28176	1500.18	29
2022-09-13	10:12:11	3.27279	1503.45	29
2022-09-13	10:12:12	3.28154	1506.73	29
2022-09-13	10:12:13	3.28159	1510.01	29
2022-09-13	10:12:14	3.27322	1513.29	29
2022-09-13	10:12:15	3.27995	1516.57	29
2022-09-13	10:12:16	3.28207	1519.85	29
2022-09-13	10:12:17	3.27763	1523.13	29
2022-09-13	10:12:18	3.26575	1526.39	29
2022-09-13	10:12:19	3.29195	1529.69	29
2022-09-13	10:12:20	3.28388	1532.97	29
2022-09-13	10:12:21	3.28307	1536.25	29
2022-09-13	10:12:22	3.2829	1539.53	29
2022-09-13	10:12:23	3.28669	1542.82	29
2022-09-13	10:12:24	3.27792	1546.1	29
2022-09-13	10:12:25	3.27459	1549.37	29
2022-09-13	10:12:26	3.27978	1552.65	29
2022-09-13	10:12:27	3.28108	1555.93	29
2022-09-13	10:12:28	3.27656	1559.21	29
2022-09-13	10:12:29	3.27535	1562.49	29
2022-09-13	10:12:30	3.28216	1565.77	29
2022-09-13	10:12:31	3.28431	1569.05	29
2022-09-13	10:12:32	3.26994	1572.32	29
2022-09-13	10:12:33	3.26886	1575.59	29
2022-09-13	10:12:34	3.26416	1578.86	29
2022-09-13	10:12:35	1.33865	1580.19	29
2022-09-13	10:12:36	1.88188	1582.08	29
2022-09-13	10:12:37	6.77688	1588.85	29
2022-09-13	10:12:38	15.048	1603.9	30
2022-09-13	10:12:39	5.72216	1609.62	30
2022-09-13	10:12:40	0.694113	1610.32	30
2022-09-13	10:12:41	-3.08323	1610.32	30
2022-09-13	10:12:42	-1.19896	1610.32	30
2022-09-13	10:12:43	1.48087	1611.8	30
2022-09-13	10:12:44	1.61856	1613.42	30
2022-09-13	10:12:45	1.62439	1615.04	30
2022-09-13	10:12:46	1.18834	1616.23	30
2022-09-13	10:12:47	1.22594	1617.46	30
2022-09-13	10:12:48	1.25891	1618.71	30
2022-09-13	10:12:49	1.23486	1619.95	30
2022-09-13	10:12:50	1.24335	1621.19	30
2022-09-13	10:12:51	1.33995	1622.53	30
2022-09-13	10:12:52	1.29728	1623.83	30
2022-09-13	10:12:53	1.2584	1625.09	30
2022-09-13	10:12:54	2.12682	1627.22	30
2022-09-13	10:12:55	2.75786	1629.97	30
2022-09-13	10:12:56	2.0172	1631.99	30
2022-09-13	10:12:57	2.99779	1634.99	30
2022-09-13	10:12:58	8.67976	1643.67	30
2022-09-13	10:12:59	14.2931	1657.96	31
2022-09-13	10:13:00	10.0128	1667.97	31
2022-09-13	10:13:01	3.91125	1671.89	31
2022-09-13	10:13:02	1.92325	1673.81	31
2022-09-13	10:13:03	1.95387	1675.76	31

## Sheet: Juju_harness_2022913100745  (3)
Date	Time	Lbs	Newtons	Averaged Newtons	Total force x time	Total steps > 13.345		**GoPro Fitting: 952
2022-09-13	10:08:03	0.378995	1.68585	3.03015	1.68585	FALSE	0			Total force x time	3180.97
2022-09-13	10:08:03	1.19294	5.30644	3.03015	5.30644	FALSE	0			Total steps	125
2022-09-13	10:08:03	0.550343	2.44804	3.03015	4.13388	FALSE	0
2022-09-13	10:08:03	0.602557	2.68029	3.03015	7.98673	FALSE	0
2022-09-13	10:08:04	0.583677	2.59631	6.88611	6.73019	FALSE	0
2022-09-13	10:08:04	0.638537	2.84034	6.88611	10.8271	FALSE	0
2022-09-13	10:08:04	2.83976	12.6318	6.88611	19.362	FALSE	0
2022-09-13	10:08:04	2.13029	9.47596	6.88611	20.303	FALSE	0
2022-09-13	10:08:05	5.01202	22.2945	11.3598	41.6565	1	1
2022-09-13	10:08:05	1.17406	5.22245	11.3598	25.5255	FALSE	1
2022-09-13	10:08:05	1.47528	6.56234	11.3598	48.2188	FALSE	1
2022-09-13	10:08:06	0.792125	3.52353	5.19914	29.049	FALSE	1
2022-09-13	10:08:06	1.12149	4.98861	5.19914	53.2074	FALSE	1
2022-09-13	10:08:06	0.601997	2.6778	5.19914	31.7268	FALSE	1
2022-09-13	10:08:06	2.15966	9.6066	5.19914	62.814	FALSE	1
2022-09-13	10:08:07	1.24057	5.5183	9.54093	37.2451	FALSE	1
2022-09-13	10:08:07	3.74683	16.6666	9.54093	79.4807	1	2
2022-09-13	10:08:07	2.17202	9.66158	9.54093	46.9067	FALSE	2
2022-09-13	10:08:07	1.42017	6.3172	9.54093	85.7979	FALSE	2
2022-09-13	10:08:08	2.89502	12.8776	20.9551	59.7843	FALSE	2
2022-09-13	10:08:08	6.35797	28.2815	20.9551	114.079	1	3
2022-09-13	10:08:08	6.64764	29.57	20.9551	89.3544	1	4
2022-09-13	10:08:08	2.94307	13.0914	20.9551	127.171	FALSE	4
2022-09-13	10:08:09	3.99258	17.7598	12.8147	107.114	1	5
2022-09-13	10:08:09	2.45859	10.9363	12.8147	138.107	FALSE	5
2022-09-13	10:08:09	2.19146	9.74805	12.8147	116.862	FALSE	5
2022-09-13	10:08:10	2.21319	9.84471	5.01464	147.952	FALSE	5
2022-09-13	10:08:10	1.31915	5.86784	5.01464	122.73	FALSE	5
2022-09-13	10:08:10	0.535433	2.38171	5.01464	150.333	FALSE	5
2022-09-13	10:08:10	0.44159	1.96428	5.01464	124.694	FALSE	5
2022-09-13	10:08:11	0.295687	1.31527	0.668362	151.649	FALSE	5
2022-09-13	10:08:11	-0.36472	-1.62235	0.668362	124.694	FALSE	5
2022-09-13	10:08:11	0.15584	0.693207	0.668362	152.342	FALSE	5
2022-09-13	10:08:11	0.514211	2.28731	0.668362	126.982	FALSE	5
2022-09-13	10:08:12	0.0931427	0.414317	-0.886583	152.756	FALSE	5
2022-09-13	10:08:12	0.0401147	0.178438	-0.886583	127.16	FALSE	5
2022-09-13	10:08:12	-0.441412	-1.96349	-0.886583	152.756	FALSE	5
2022-09-13	10:08:12	-0.489096	-2.1756	-0.886583	127.16	FALSE	5
2022-09-13	10:08:13	-0.538053	-2.39337	-2.32936	152.756	FALSE	5
2022-09-13	10:08:13	-0.528995	-2.35308	-2.32936	127.16	FALSE	5
2022-09-13	10:08:13	-0.514643	-2.28923	-2.32936	152.756	FALSE	5
2022-09-13	10:08:13	-0.512964	-2.28177	-2.32936	127.16	FALSE	5
2022-09-13	10:08:14	-0.520394	-2.31482	-2.75737	152.756	FALSE	5
2022-09-13	10:08:14	-0.596424	-2.65301	-2.75737	127.16	FALSE	5
2022-09-13	10:08:14	-0.742836	-3.30428	-2.75737	152.756	FALSE	5
2022-09-13	10:08:15	-0.120598	-0.536444	0.725351	127.16	FALSE	5
2022-09-13	10:08:15	0.149937	0.66695	0.725351	153.423	FALSE	5
2022-09-13	10:08:15	0.282608	1.2571	0.725351	128.417	FALSE	5
2022-09-13	10:08:15	0.340318	1.5138	0.725351	154.937	FALSE	5
2022-09-13	10:08:16	0.247392	1.10045	1.26157	129.518	FALSE	5
2022-09-13	10:08:16	0.345204	1.53554	1.26157	156.473	FALSE	5
2022-09-13	10:08:16	0.342557	1.52376	1.26157	131.041	FALSE	5
2022-09-13	10:08:16	0.1993	0.886526	1.26157	157.359	FALSE	5
2022-09-13	10:08:17	0.429886	1.91222	8.25464	132.954	FALSE	5
2022-09-13	10:08:17	0.525865	2.33915	8.25464	159.698	FALSE	5
2022-09-13	10:08:17	3.79065	16.8616	8.25464	149.815	1	6
2022-09-13	10:08:17	2.6765	11.9056	8.25464	171.604	FALSE	6
2022-09-13	10:08:18	6.33192	28.1656	26.0325	177.981	1	7
2022-09-13	10:08:18	4.51558	20.0862	26.0325	191.69	1	8
2022-09-13	10:08:18	6.70963	29.8458	26.0325	207.827	1	9
2022-09-13	10:08:19	5.042	22.4278	13.9369	214.118	1	10
2022-09-13	10:08:19	4.86571	21.6437	13.9369	229.47	1	11
2022-09-13	10:08:19	1.35828	6.0419	13.9369	220.16	FALSE	11
2022-09-13	10:08:19	1.26663	5.63422	13.9369	235.104	FALSE	11
2022-09-13	10:08:20	0.790445	3.51606	5.77672	223.676	FALSE	11
2022-09-13	10:08:20	0.769835	3.42438	5.77672	238.529	FALSE	11
2022-09-13	10:08:20	1.69935	7.55905	5.77672	231.235	FALSE	11
2022-09-13	10:08:20	1.93503	8.6074	5.77672	247.136	FALSE	11
2022-09-13	10:08:21	5.20026	23.1318	13.1871	254.367	1	12
2022-09-13	10:08:21	5.02922	22.371	13.1871	269.507	1	13
2022-09-13	10:08:21	1.03508	4.60424	13.1871	258.971	FALSE	13
2022-09-13	10:08:21	0.593804	2.64136	13.1871	272.149	FALSE	13
2022-09-13	10:08:22	0.463168	2.06026	2.08007	261.031	FALSE	13
2022-09-13	10:08:22	0.656298	2.91934	2.08007	275.068	FALSE	13
2022-09-13	10:08:22	0.275891	1.22722	2.08007	262.258	FALSE	13
2022-09-13	10:08:22	0.475127	2.11346	2.08007	277.181	FALSE	13
2022-09-13	10:08:23	0.351616	1.56406	6.01037	263.822	FALSE	13
2022-09-13	10:08:23	0.914109	4.06614	6.01037	281.248	FALSE	13
2022-09-13	10:08:23	2.78785	12.4009	6.01037	276.223	FALSE	13
2022-09-13	10:08:24	2.56052	11.3897	17.0746	292.637	FALSE	13
2022-09-13	10:08:24	4.71019	20.9519	17.0746	297.175	1	14
2022-09-13	10:08:24	2.89686	12.8858	17.0746	305.523	FALSE	14
2022-09-13	10:08:24	5.18663	23.0712	17.0746	320.246	1	15
2022-09-13	10:08:25	1.38581	6.16436	11.5001	311.687	FALSE	15
2022-09-13	10:08:25	4.39706	19.559	11.5001	339.805	1	16
2022-09-13	10:08:25	0.783117	3.48346	11.5001	315.171	FALSE	16
2022-09-13	10:08:25	3.77533	16.7934	11.5001	356.599	1	17
2022-09-13	10:08:26	0.824898	3.66931	11.02	318.84	FALSE	17
2022-09-13	10:08:26	2.828	12.5795	11.02	369.178	FALSE	17
2022-09-13	10:08:26	1.98556	8.83217	11.02	327.672	FALSE	17
2022-09-13	10:08:26	4.27121	18.9992	11.02	388.178	1	18
2022-09-13	10:08:27	1.63803	7.28629	8.9759	334.959	FALSE	18
2022-09-13	10:08:27	3.17665	14.1304	8.9759	402.308	1	19
2022-09-13	10:08:27	1.23894	5.51105	8.9759	340.47	FALSE	19
2022-09-13	10:08:28	1.65747	7.37276	8.3775	409.681	FALSE	19
2022-09-13	10:08:28	0.410547	1.8262	8.3775	342.296	FALSE	19
2022-09-13	10:08:28	3.63314	16.1609	8.3775	425.842	1	20
2022-09-13	10:08:28	1.83223	8.15013	8.3775	350.446	FALSE	20
2022-09-13	10:08:29	8.71909	38.7843	24.868	464.626	1	21
2022-09-13	10:08:29	7.16037	31.8508	24.868	382.297	1	22
2022-09-13	10:08:29	4.2506	18.9075	24.868	483.533	1	23
2022-09-13	10:08:29	2.23228	9.92963	24.868	392.226	FALSE	23
2022-09-13	10:08:30	2.68072	11.9244	9.89604	495.458	FALSE	23
2022-09-13	10:08:30	2.02011	8.98585	9.89604	401.212	FALSE	23
2022-09-13	10:08:30	2.02968	9.02842	9.89604	504.486	FALSE	23
2022-09-13	10:08:30	2.16841	9.64552	9.89604	410.858	FALSE	23
2022-09-13	10:08:31	2.00368	8.91277	4.7636	513.399	FALSE	23
2022-09-13	10:08:31	0.707901	3.14889	4.7636	414.007	FALSE	23
2022-09-13	10:08:31	0.501132	2.22914	4.7636	515.628	FALSE	23
2022-09-13	10:08:32	0.530649	2.36043	2.63762	416.367	FALSE	23
2022-09-13	10:08:32	0.465153	2.06909	2.63762	517.697	FALSE	23
2022-09-13	10:08:32	0.49014	2.18024	2.63762	418.547	FALSE	23
2022-09-13	10:08:32	0.885916	3.94073	2.63762	521.638	FALSE	23
2022-09-13	10:08:33	1.30602	5.80944	5.50999	424.357	FALSE	23
2022-09-13	10:08:33	1.26632	5.63284	5.50999	527.271	FALSE	23
2022-09-13	10:08:33	0.836247	3.71979	5.50999	428.077	FALSE	23
2022-09-13	10:08:33	1.54622	6.8779	5.50999	534.149	FALSE	23
2022-09-13	10:08:34	1.60083	7.12081	7.12436	435.197	FALSE	23
2022-09-13	10:08:34	1.65426	7.35848	7.12436	541.507	FALSE	23
2022-09-13	10:08:34	1.57757	7.01735	7.12436	442.215	FALSE	23
2022-09-13	10:08:34	1.57385	7.0008	7.12436	548.508	FALSE	23
2022-09-13	10:08:35	1.56561	6.96415	7.34021	449.179	FALSE	23
2022-09-13	10:08:35	1.59849	7.1104	7.34021	555.618	FALSE	23
2022-09-13	10:08:35	1.66637	7.41235	7.34021	456.591	FALSE	23
2022-09-13	10:08:35	1.77014	7.87394	7.34021	563.492	FALSE	23
2022-09-13	10:08:36	0.620929	2.76202	2.10048	459.353	FALSE	23
2022-09-13	10:08:36	0.396807	1.76508	2.10048	565.257	FALSE	23
2022-09-13	10:08:36	0.398893	1.77436	2.10048	461.128	FALSE	23
2022-09-13	10:08:37	0.362608	1.61295	0.76157	566.87	FALSE	23
2022-09-13	10:08:37	0.293244	1.30441	0.76157	462.432	FALSE	23
2022-09-13	10:08:37	0.0895295	0.398245	0.76157	567.269	FALSE	23
2022-09-13	10:08:37	-0.0605468	-0.269324	0.76157	462.432	FALSE	23
2022-09-13	10:08:38	-0.110827	-0.492981	-0.24997	567.269	FALSE	23
2022-09-13	10:08:38	-0.116272	-0.517201	-0.24997	462.432	FALSE	23
2022-09-13	10:08:38	0.0294277	0.1309	-0.24997	567.399	FALSE	23
2022-09-13	10:08:38	-0.0271117	-0.120598	-0.24997	462.432	FALSE	23
2022-09-13	10:08:39	0.0581809	0.2588	5.58995	567.658	FALSE	23
2022-09-13	10:08:39	0.92444	4.11209	5.58995	466.544	FALSE	23
2022-09-13	10:08:39	1.03991	4.62573	5.58995	572.284	FALSE	23
2022-09-13	10:08:39	3.00418	13.3632	5.58995	479.907	1	24
2022-09-13	10:08:40	0.768155	3.41691	8.02501	575.701	FALSE	24
2022-09-13	10:08:40	3.57925	15.9212	8.02501	495.829	1	25
2022-09-13	10:08:40	1.0649	4.73689	8.02501	580.438	FALSE	25
2022-09-13	10:08:41	4.66596	20.7551	11.9255	516.584	1	26
2022-09-13	10:08:41	0.911921	4.05641	11.9255	584.494	FALSE	26
2022-09-13	10:08:41	3.75599	16.7074	11.9255	533.291	1	27
2022-09-13	10:08:41	1.38999	6.18295	11.9255	590.677	FALSE	27
2022-09-13	10:08:42	1.2822	5.70348	3.43648	538.995	FALSE	27
2022-09-13	10:08:42	0.447087	1.98873	3.43648	592.666	FALSE	27
2022-09-13	10:08:42	1.0452	4.64926	3.43648	543.644	FALSE	27
2022-09-13	10:08:42	0.315738	1.40447	3.43648	594.07	FALSE	27
2022-09-13	10:08:43	0.860369	3.82709	2.46439	547.471	FALSE	27
2022-09-13	10:08:43	0.212837	0.946742	2.46439	595.017	FALSE	27
2022-09-13	10:08:43	0.690649	3.07214	2.46439	550.543	FALSE	27
2022-09-13	10:08:43	0.452227	2.0116	2.46439	597.029	FALSE	27
2022-09-13	10:08:44	2.02474	9.00645	6.26262	559.549	FALSE	27
2022-09-13	10:08:44	1.15874	5.15431	6.26262	602.183	FALSE	27
2022-09-13	10:08:44	1.69416	7.53596	6.26262	567.085	FALSE	27
2022-09-13	10:08:44	0.753957	3.35375	6.26262	605.537	FALSE	27
2022-09-13	10:08:45	2.0678	9.19799	9.86955	576.283	FALSE	27
2022-09-13	10:08:45	1.07955	4.80205	9.86955	610.339	FALSE	27
2022-09-13	10:08:45	3.50897	15.6086	9.86955	591.892	1	28
2022-09-13	10:08:46	2.41202	10.7291	16.2158	621.068	FALSE	28
2022-09-13	10:08:46	5.39344	23.9911	16.2158	615.883	1	29
2022-09-13	10:08:46	2.93172	13.0409	16.2158	634.109	FALSE	29
2022-09-13	10:08:46	3.84474	17.1022	16.2158	632.985	1	30
2022-09-13	10:08:47	4.19528	18.6614	13.7276	652.77	1	31
2022-09-13	10:08:47	2.03981	9.07348	13.7276	642.059	FALSE	31
2022-09-13	10:08:47	4.06759	18.0935	13.7276	670.864	1	32
2022-09-13	10:08:47	2.04174	9.08207	13.7276	651.141	FALSE	32
2022-09-13	10:08:48	4.74311	21.0983	9.87771	691.962	1	33
2022-09-13	10:08:48	2.62179	11.6622	9.87771	662.803	FALSE	33
2022-09-13	10:08:48	0.770394	3.42687	9.87771	695.389	FALSE	33
2022-09-13	10:08:48	0.747137	3.32341	9.87771	666.126	FALSE	33
2022-09-13	10:08:49	1.71559	7.63129	5.64561	703.02	FALSE	33
2022-09-13	10:08:49	1.57258	6.99515	5.64561	673.122	FALSE	33
2022-09-13	10:08:49	0.519402	2.3104	5.64561	705.331	FALSE	33
2022-09-13	10:08:50	0.480674	2.13813	2.57441	675.26	FALSE	33
2022-09-13	10:08:50	0.369326	1.64284	2.57441	706.973	FALSE	33
2022-09-13	10:08:50	0.732074	3.25641	2.57441	678.516	FALSE	33
2022-09-13	10:08:50	0.732939	3.26026	2.57441	710.234	FALSE	33
2022-09-13	10:08:51	0.736654	3.27678	4.58895	681.793	FALSE	33
2022-09-13	10:08:51	0.719504	3.2005	4.58895	713.434	FALSE	33
2022-09-13	10:08:51	0.656298	2.91934	4.58895	684.712	FALSE	33
2022-09-13	10:08:51	2.01411	8.95916	4.58895	722.393	FALSE	33
2022-09-13	10:08:52	2.96546	13.191	11.4611	697.903	FALSE	33
2022-09-13	10:08:52	1.29279	5.75059	11.4611	728.144	FALSE	33
2022-09-13	10:08:52	4.33314	19.2747	11.4611	717.178	1	34
2022-09-13	10:08:52	1.71487	7.62808	11.4611	735.772	FALSE	34
2022-09-13	10:08:53	0.64444	2.8666	2.17435	720.045	FALSE	34
2022-09-13	10:08:53	0.501641	2.2314	2.17435	738.003	FALSE	34
2022-09-13	10:08:53	0.320369	1.42507	2.17435	721.47	FALSE	34
2022-09-13	10:08:54	0.319657	1.4219	3.64708	739.425	FALSE	34
2022-09-13	10:08:54	0.409478	1.82144	3.64708	723.291	FALSE	34
2022-09-13	10:08:54	0.675432	3.00446	3.64708	742.43	FALSE	34
2022-09-13	10:08:54	1.87503	8.34051	3.64708	731.632	FALSE	34
2022-09-13	10:08:55	1.41162	6.27917	5.62771	748.709	FALSE	34
2022-09-13	10:08:55	1.79039	7.96401	5.62771	739.596	FALSE	34
2022-09-13	10:08:55	0.819555	3.64554	5.62771	752.354	FALSE	34
2022-09-13	10:08:55	1.0391	4.62212	5.62771	744.218	FALSE	34
2022-09-13	10:08:56	1.08856	4.84213	5.10694	757.197	FALSE	34
2022-09-13	10:08:56	0.910954	4.05211	5.10694	748.27	FALSE	34
2022-09-13	10:08:56	1.11095	4.94173	5.10694	762.138	FALSE	34
2022-09-13	10:08:56	1.4819	6.59179	5.10694	754.862	FALSE	34
2022-09-13	10:08:57	1.788	7.95338	7.19573	770.092	FALSE	34
2022-09-13	10:08:57	2.14144	9.52555	7.19573	764.387	FALSE	34
2022-09-13	10:08:57	1.27854	5.6872	7.19573	775.779	FALSE	34
2022-09-13	10:08:57	1.26271	5.61679	7.19573	770.004	FALSE	34
2022-09-13	10:08:58	0.927341	4.125	2.22718	779.904	FALSE	34
2022-09-13	10:08:58	0.387748	1.72478	2.22718	771.729	FALSE	34
2022-09-13	10:08:58	0.186985	0.831747	2.22718	780.736	FALSE	34
2022-09-13	10:08:59	0.149122	0.663324	0.558854	772.392	FALSE	34
2022-09-13	10:08:59	0.13243	0.589075	0.558854	781.325	FALSE	34
2022-09-13	10:08:59	0.103015	0.458231	0.558854	772.85	FALSE	34
2022-09-13	10:08:59	0.117977	0.524785	0.558854	781.85	FALSE	34
2022-09-13	10:09:00	0.125458	0.558062	0.640745	773.408	FALSE	34
2022-09-13	10:09:00	0.147138	0.654499	0.640745	782.504	FALSE	34
2022-09-13	10:09:00	0.146171	0.650198	0.640745	774.059	FALSE	34
2022-09-13	10:09:00	0.157417	0.700222	0.640745	783.204	FALSE	34
2022-09-13	10:09:01	0.168308	0.748668	0.741028	774.807	FALSE	34
2022-09-13	10:09:01	0.164135	0.730105	0.741028	783.934	FALSE	34
2022-09-13	10:09:01	0.173295	0.770851	0.741028	775.578	FALSE	34
2022-09-13	10:09:01	0.160624	0.714488	0.741028	784.649	FALSE	34
2022-09-13	10:09:02	0.153041	0.680757	0.639331	776.259	FALSE	34
2022-09-13	10:09:02	0.142201	0.632538	0.639331	785.281	FALSE	34
2022-09-13	10:09:02	0.135942	0.604697	0.639331	776.863	FALSE	34
2022-09-13	10:09:03	0.141082	0.627561	0.590435	785.909	FALSE	34
2022-09-13	10:09:03	0.136247	0.606054	0.590435	777.47	FALSE	34
2022-09-13	10:09:03	0.101591	0.451897	0.590435	786.361	FALSE	34
2022-09-13	10:09:03	0.152023	0.676229	0.590435	778.146	FALSE	34
2022-09-13	10:09:04	0.0974175	0.433333	1.09219	786.794	FALSE	34
2022-09-13	10:09:04	0.441998	1.9661	1.09219	780.112	FALSE	34
2022-09-13	10:09:04	0.261692	1.16406	1.09219	787.958	FALSE	34
2022-09-13	10:09:04	0.181031	0.805262	1.09219	780.917	FALSE	34
2022-09-13	10:09:05	0.114008	0.50713	1.31584	788.465	FALSE	34
2022-09-13	10:09:05	0.23355	1.03888	1.31584	781.956	FALSE	34
2022-09-13	10:09:05	0.100776	0.448272	1.31584	788.914	FALSE	34
2022-09-13	10:09:05	0.734924	3.26909	1.31584	785.225	FALSE	34
2022-09-13	10:09:06	6.64978	29.5796	40.5699	818.493	1	35
2022-09-13	10:09:06	27.2488	121.208	40.5699	906.433	1	36
2022-09-13	10:09:06	1.67742	7.4615	40.5699	825.955	FALSE	36
2022-09-13	10:09:06	0.90612	4.0306	40.5699	910.464	FALSE	36
2022-09-13	10:09:07	0.154873	0.688906	0.242728	826.644	FALSE	36
2022-09-13	10:09:07	0.21187	0.94244	0.242728	911.406	FALSE	36
2022-09-13	10:09:07	-0.20304	-0.903163	0.242728	826.644	FALSE	36
2022-09-13	10:09:08	0.824135	3.66592	19.0504	915.072	FALSE	36
2022-09-13	10:09:08	4.3479	19.3403	19.0504	845.984	1	37
2022-09-13	10:09:08	5.20667	23.1603	19.0504	938.232	1	38
2022-09-13	10:09:08	6.75222	30.0352	19.0504	876.019	1	39
2022-09-13	10:09:09	6.81136	30.2983	29.5334	968.531	1	40
2022-09-13	10:09:09	6.04612	26.8944	29.5334	902.913	1	41
2022-09-13	10:09:09	9.90556	44.0619	29.5334	1012.59	1	42
2022-09-13	10:09:09	3.79457	16.879	29.5334	919.793	1	43
2022-09-13	10:09:10	3.25136	14.4627	14.5239	1027.06	1	44
2022-09-13	10:09:10	2.79019	12.4113	14.5239	932.204	FALSE	44
2022-09-13	10:09:10	3.44597	15.3284	14.5239	1042.38	1	45
2022-09-13	10:09:10	3.57294	15.8932	14.5239	948.097	1	46
2022-09-13	10:09:11	4.85131	21.5796	12.259	1063.96	1	47
2022-09-13	10:09:11	2.70775	12.0446	12.259	960.142	FALSE	47
2022-09-13	10:09:11	0.708766	3.15273	12.259	1067.12	FALSE	47
2022-09-13	10:09:12	0.224949	1.00062	-0.199206	961.142	FALSE	47
2022-09-13	10:09:12	-0.112252	-0.499319	-0.199206	1067.12	FALSE	47
2022-09-13	10:09:12	-0.154694	-0.68811	-0.199206	961.142	FALSE	47
2022-09-13	10:09:12	-0.137137	-0.610013	-0.199206	1067.12	FALSE	47
2022-09-13	10:09:13	-0.624567	-2.7782	3.68635	961.142	FALSE	47
2022-09-13	10:09:13	-0.041412	-0.184209	3.68635	1067.12	FALSE	47
2022-09-13	10:09:13	1.95284	8.68662	3.68635	969.829	FALSE	47
2022-09-13	10:09:13	2.02805	9.02117	3.68635	1076.14	FALSE	47
2022-09-13	10:09:14	0.762455	3.39155	1.98556	973.22	FALSE	47
2022-09-13	10:09:14	0.285763	1.27113	1.98556	1077.41	FALSE	47
2022-09-13	10:09:14	0.204593	0.910071	1.98556	974.13	FALSE	47
2022-09-13	10:09:14	0.532684	2.36948	1.98556	1079.78	FALSE	47
2022-09-13	10:09:15	0.586476	2.60876	1.097	976.739	FALSE	47
2022-09-13	10:09:15	0.129275	0.575041	1.097	1080.35	FALSE	47
2022-09-13	10:09:15	0.124237	0.552631	1.097	977.292	FALSE	47
2022-09-13	10:09:15	0.146476	0.651555	1.097	1081	FALSE	47
2022-09-13	10:09:16	0.479911	2.13474	11.1999	979.427	FALSE	47
2022-09-13	10:09:16	0.739351	3.28878	11.1999	1084.29	FALSE	47
2022-09-13	10:09:16	6.33431	28.1763	11.1999	1007.6	1	48
2022-09-13	10:09:17	6.75472	30.0463	14.9723	1114.34	1	49
2022-09-13	10:09:17	3.43543	15.2815	14.9723	1022.88	1	50
2022-09-13	10:09:17	2.79833	12.4475	14.9723	1126.79	FALSE	50
2022-09-13	10:09:17	0.475229	2.11391	14.9723	1025	FALSE	50
2022-09-13	10:09:18	0.477316	2.1232	1.72925	1128.91	FALSE	50
2022-09-13	10:09:18	0.387799	1.72501	1.72925	1026.72	FALSE	50
2022-09-13	10:09:18	0.386832	1.72071	1.72925	1130.63	FALSE	50
2022-09-13	10:09:18	0.303066	1.3481	1.72925	1028.07	FALSE	50
2022-09-13	10:09:19	0.256552	1.14119	0.83169	1131.77	FALSE	50
2022-09-13	10:09:19	0.274975	1.22314	0.83169	1029.29	FALSE	50
2022-09-13	10:09:19	0.0432699	0.192473	0.83169	1131.96	FALSE	50
2022-09-13	10:09:19	0.173092	0.769948	0.83169	1030.06	FALSE	50
2022-09-13	10:09:20	0.125051	0.556252	0.284908	1132.52	FALSE	50
2022-09-13	10:09:20	0.086018	0.382625	0.284908	1030.45	FALSE	50
2022-09-13	10:09:20	-0.0189183	-0.0841524	0.284908	1132.52	FALSE	50
2022-09-13	10:09:21	-0.105178	-0.467853	-0.524954	1030.45	FALSE	50
2022-09-13	10:09:21	-0.103498	-0.46038	-0.524954	1132.52	FALSE	50
2022-09-13	10:09:21	-0.14701	-0.65393	-0.524954	1030.45	FALSE	50
2022-09-13	10:09:21	-0.116374	-0.517655	-0.524954	1132.52	FALSE	50
2022-09-13	10:09:22	-0.208791	-0.928744	-0.592016	1030.45	FALSE	50
2022-09-13	10:09:22	-0.151081	-0.672039	-0.592016	1132.52	FALSE	50
2022-09-13	10:09:22	-0.209605	-0.932365	-0.592016	1030.45	FALSE	50
2022-09-13	10:09:22	0.0371122	0.165082	-0.592016	1132.69	FALSE	50
2022-09-13	10:09:23	-0.186603	-0.830047	-2.13157	1030.45	FALSE	50
2022-09-13	10:09:23	-0.458816	-2.04091	-2.13157	1132.69	FALSE	50
2022-09-13	10:09:23	-0.576628	-2.56496	-2.13157	1030.45	FALSE	50
2022-09-13	10:09:23	-0.694745	-3.09036	-2.13157	1132.69	FALSE	50
2022-09-13	10:09:24	-0.61159	-2.72047	-2.50867	1030.45	FALSE	50
2022-09-13	10:09:24	-0.627926	-2.79314	-2.50867	1132.69	FALSE	50
2022-09-13	10:09:24	-0.452404	-2.01238	-2.50867	1030.45	FALSE	50
2022-09-13	10:09:25	-0.392557	-1.74617	-2.04821	1132.69	FALSE	50
2022-09-13	10:09:25	-0.405992	-1.80593	-2.04821	1030.45	FALSE	50
2022-09-13	10:09:25	-0.554949	-2.46852	-2.04821	1132.69	FALSE	50
2022-09-13	10:09:25	-0.488333	-2.1722	-2.04821	1030.45	FALSE	50
2022-09-13	10:09:26	-0.498511	-2.21748	-1.30243	1132.69	FALSE	50
2022-09-13	10:09:26	-0.298816	-1.32919	-1.30243	1030.45	FALSE	50
2022-09-13	10:09:26	-0.296119	-1.3172	-1.30243	1132.69	FALSE	50
2022-09-13	10:09:26	-0.0777478	-0.345838	-1.30243	1030.45	FALSE	50
2022-09-13	10:09:27	0.813702	3.61951	6.00315	1136.31	FALSE	50
2022-09-13	10:09:27	2.06775	9.19777	6.00315	1039.64	FALSE	50
2022-09-13	10:09:27	0.928104	4.12839	6.00315	1140.43	FALSE	50
2022-09-13	10:09:27	1.58872	7.06694	6.00315	1046.71	FALSE	50
2022-09-13	10:09:28	0.504796	2.24543	5.21362	1142.68	FALSE	50
2022-09-13	10:09:28	1.76902	7.86895	5.21362	1054.58	FALSE	50
2022-09-13	10:09:28	1.10592	4.91935	5.21362	1147.6	FALSE	50
2022-09-13	10:09:28	1.30856	5.82074	5.21362	1060.4	FALSE	50
2022-09-13	10:09:29	0.603372	2.68392	3.71368	1150.28	FALSE	50
2022-09-13	10:09:29	0.810903	3.60706	3.71368	1064.01	FALSE	50
2022-09-13	10:09:29	1.09034	4.85005	3.71368	1155.13	FALSE	50
2022-09-13	10:09:30	0.251107	1.11697	4.31154	1065.13	FALSE	50
2022-09-13	10:09:30	1.16434	5.17922	4.31154	1160.31	FALSE	50
2022-09-13	10:09:30	1.83559	8.16507	4.31154	1073.29	FALSE	50
2022-09-13	10:09:30	0.626069	2.78488	4.31154	1163.1	FALSE	50
2022-09-13	10:09:31	0.983779	4.37605	1.96977	1077.67	FALSE	50
2022-09-13	10:09:31	0.458486	2.03944	1.96977	1165.14	FALSE	50
2022-09-13	10:09:31	0.0529391	0.235484	1.96977	1077.9	FALSE	50
2022-09-13	10:09:31	0.276094	1.22812	1.96977	1166.36	FALSE	50
2022-09-13	10:09:32	-0.000495923	-0.00220596	0.101132	1077.9	FALSE	50
2022-09-13	10:09:32	0.114313	0.508487	0.101132	1166.87	FALSE	50
2022-09-13	10:09:32	-0.0327606	-0.145726	0.101132	1077.9	FALSE	50
2022-09-13	10:09:32	0.00988575	0.0439738	0.101132	1166.92	FALSE	50
2022-09-13	10:09:33	-0.166705	-0.741537	0.0251844	1077.9	FALSE	50
2022-09-13	10:09:33	0.00830812	0.0369562	0.0251844	1166.95	FALSE	50
2022-09-13	10:09:33	0.175382	0.780134	0.0251844	1078.68	FALSE	50
2022-09-13	10:09:34	0.984084	4.3774	10.6319	1171.33	FALSE	50
2022-09-13	10:09:34	3.4277	15.2471	10.6319	1093.93	1	51
2022-09-13	10:09:34	2.35696	10.4842	10.6319	1181.82	FALSE	51
2022-09-13	10:09:34	2.79192	12.419	10.6319	1106.35	FALSE	51
2022-09-13	10:09:35	2.11584	9.41168	8.4273	1191.23	FALSE	51
2022-09-13	10:09:35	2.86332	12.7366	8.4273	1119.08	FALSE	51
2022-09-13	10:09:35	1.04073	4.62938	8.4273	1195.86	FALSE	51
2022-09-13	10:09:35	1.55828	6.93154	8.4273	1126.02	FALSE	51
2022-09-13	10:09:36	0.291005	1.29445	1.7069	1197.15	FALSE	51
2022-09-13	10:09:36	0.277977	1.2365	1.7069	1127.25	FALSE	51
2022-09-13	10:09:36	0.8993	4.00027	1.7069	1201.15	FALSE	51
2022-09-13	10:09:36	0.0666287	0.296378	1.7069	1127.55	FALSE	51
2022-09-13	10:09:37	0.138283	0.61511	1.56955	1201.77	FALSE	51
2022-09-13	10:09:37	0.101692	0.452346	1.56955	1128	FALSE	51
2022-09-13	10:09:37	0.0253564	0.11279	1.56955	1201.88	FALSE	51
2022-09-13	10:09:37	1.14607	5.09795	1.56955	1133.1	FALSE	51
2022-09-13	10:09:38	0.230242	1.02416	2.30037	1202.9	FALSE	51
2022-09-13	10:09:38	1.05803	4.70633	2.30037	1137.81	FALSE	51
2022-09-13	10:09:38	0.263168	1.17062	2.30037	1204.07	FALSE	51
2022-09-13	10:09:39	0.636043	2.82925	5.36223	1140.64	FALSE	51
2022-09-13	10:09:39	2.52719	11.2414	5.36223	1215.32	FALSE	51
2022-09-13	10:09:39	0.529783	2.35658	5.36223	1142.99	FALSE	51
2022-09-13	10:09:39	1.12892	5.02166	5.36223	1220.34	FALSE	51
2022-09-13	10:09:40	1.09808	4.88448	7.13466	1147.88	FALSE	51
2022-09-13	10:09:40	0.848308	3.77344	7.13466	1224.11	FALSE	51
2022-09-13	10:09:40	3.48556	15.5045	7.13466	1163.38	1	52
2022-09-13	10:09:40	0.983829	4.37627	7.13466	1228.49	FALSE	52
2022-09-13	10:09:41	3.05731	13.5995	5.22901	1176.98	1	53
2022-09-13	10:09:41	0.455483	2.02608	5.22901	1230.51	FALSE	53
2022-09-13	10:09:41	0.72271	3.21476	5.22901	1180.2	FALSE	53
2022-09-13	10:09:41	0.466629	2.07566	5.22901	1232.59	FALSE	53
2022-09-13	10:09:42	-0.0467046	-0.207751	0.043822	1180.2	FALSE	53
2022-09-13	10:09:42	0.100674	0.447818	0.043822	1233.04	FALSE	53
2022-09-13	10:09:42	-0.0244145	-0.108601	0.043822	1180.2	FALSE	53
2022-09-13	10:09:43	-0.0634476	-0.282228	-0.366607	1233.04	FALSE	53
2022-09-13	10:09:43	-0.107773	-0.479396	-0.366607	1180.2	FALSE	53
2022-09-13	10:09:43	-0.082328	-0.366211	-0.366607	1233.04	FALSE	53
2022-09-13	10:09:43	-0.0761193	-0.338594	-0.366607	1180.2	FALSE	53
2022-09-13	10:09:44	-0.0504705	-0.224503	-0.537744	1233.04	FALSE	53
2022-09-13	10:09:44	-0.19271	-0.857213	-0.537744	1180.2	FALSE	53
2022-09-13	10:09:44	-0.0865519	-0.385	-0.537744	1233.04	FALSE	53
2022-09-13	10:09:44	-0.153829	-0.684262	-0.537744	1180.2	FALSE	53
2022-09-13	10:09:45	-0.222124	-0.988052	-1.07113	1233.04	FALSE	53
2022-09-13	10:09:45	-0.278766	-1.24001	-1.07113	1180.2	FALSE	53
2022-09-13	10:09:45	-0.339376	-1.50961	-1.07113	1233.04	FALSE	53
2022-09-13	10:09:45	-0.122939	-0.546857	-1.07113	1180.2	FALSE	53
2022-09-13	10:09:46	-0.0354577	-0.157723	-0.196206	1233.04	FALSE	53
2022-09-13	10:09:46	-0.0418699	-0.186246	-0.196206	1180.2	FALSE	53
2022-09-13	10:09:46	-0.0549997	-0.24465	-0.196206	1233.04	FALSE	53
2022-09-13	10:09:47	0.0726338	0.32309	2.40163	1180.52	FALSE	53
2022-09-13	10:09:47	0.149428	0.664686	2.40163	1233.7	FALSE	53
2022-09-13	10:09:47	0.233753	1.03978	2.40163	1181.56	FALSE	53
2022-09-13	10:09:47	1.70383	7.57898	2.40163	1241.28	FALSE	53
2022-09-13	10:09:48	1.06179	4.72305	9.36584	1186.28	FALSE	53
2022-09-13	10:09:48	3.46424	15.4096	9.36584	1256.69	1	54
2022-09-13	10:09:48	1.71223	7.61634	9.36584	1193.9	FALSE	54
2022-09-13	10:09:48	2.18388	9.71434	9.36584	1266.4	FALSE	54
2022-09-13	10:09:49	0.752227	3.34606	4.12167	1197.24	FALSE	54
2022-09-13	10:09:49	1.69274	7.52965	4.12167	1273.93	FALSE	54
2022-09-13	10:09:49	0.676298	3.00831	4.12167	1200.25	FALSE	54
2022-09-13	10:09:49	0.585102	2.60265	4.12167	1276.54	FALSE	54
2022-09-13	10:09:50	1.24022	5.51675	2.65149	1205.77	FALSE	54
2022-09-13	10:09:50	0.48327	2.14968	2.65149	1278.69	FALSE	54
2022-09-13	10:09:50	0.238893	1.06264	2.65149	1206.83	FALSE	54
2022-09-13	10:09:50	0.421947	1.8769	2.65149	1280.56	FALSE	54
2022-09-13	10:09:51	0.285204	1.26864	1.56466	1208.1	FALSE	54
2022-09-13	10:09:51	0.465814	2.07203	1.56466	1282.63	FALSE	54
2022-09-13	10:09:51	0.304237	1.35331	1.56466	1209.45	FALSE	54
2022-09-13	10:09:52	0.215992	0.960776	1.5211	1283.6	FALSE	54
2022-09-13	10:09:52	0.349224	1.55342	1.5211	1211.01	FALSE	54
2022-09-13	10:09:52	0.347697	1.54663	1.5211	1285.14	FALSE	54
2022-09-13	10:09:52	0.454924	2.02359	1.5211	1213.03	FALSE	54
2022-09-13	10:09:53	1.60103	7.1217	3.90932	1292.26	FALSE	54
2022-09-13	10:09:53	0.623524	2.77356	3.90932	1215.8	FALSE	54
2022-09-13	10:09:53	0.679758	3.0237	3.90932	1295.29	FALSE	54
2022-09-13	10:09:53	0.611107	2.71833	3.90932	1218.52	FALSE	54
2022-09-13	10:09:54	0.202659	0.901468	1.28228	1296.19	FALSE	54
2022-09-13	10:09:54	0.286578	1.27476	1.28228	1219.8	FALSE	54
2022-09-13	10:09:54	0.336858	1.49841	1.28228	1297.69	FALSE	54
2022-09-13	10:09:54	0.326985	1.45449	1.28228	1221.25	FALSE	54
2022-09-13	10:09:55	0.425	1.89048	1.73625	1299.58	FALSE	54
2022-09-13	10:09:55	0.320674	1.42642	1.73625	1222.68	FALSE	54
2022-09-13	10:09:55	0.425305	1.89184	1.73625	1301.47	FALSE	54
2022-09-13	10:09:56	0.349835	1.55614	1.98879	1224.23	FALSE	54
2022-09-13	10:09:56	0.457875	2.03672	1.98879	1303.51	FALSE	54
2022-09-13	10:09:56	0.484593	2.15557	1.98879	1226.39	FALSE	54
2022-09-13	10:09:56	0.496094	2.20673	1.98879	1305.71	FALSE	54
2022-09-13	10:09:57	0.467901	2.08132	7.58814	1228.47	FALSE	54
2022-09-13	10:09:57	1.79793	7.99755	7.58814	1313.71	FALSE	54
2022-09-13	10:09:57	3.11309	13.8476	7.58814	1242.32	1	55
2022-09-13	10:09:57	1.44464	6.42605	7.58814	1320.14	FALSE	55
2022-09-13	10:09:58	1.43136	6.36698	4.79659	1248.69	FALSE	55
2022-09-13	10:09:58	0.657061	2.92274	4.79659	1323.06	FALSE	55
2022-09-13	10:09:58	0.481641	2.14244	4.79659	1250.83	FALSE	55
2022-09-13	10:09:58	1.74322	7.75419	4.79659	1330.81	FALSE	55
2022-09-13	10:09:59	0.236094	1.05019	1.30158	1251.88	FALSE	55
2022-09-13	10:09:59	0.0280028	0.124562	1.30158	1330.94	FALSE	55
2022-09-13	10:09:59	0.495229	2.20288	1.30158	1254.08	FALSE	55
2022-09-13	10:09:59	0.411107	1.82869	1.30158	1332.77	FALSE	55
2022-09-13	10:10:00	1.30877	5.82167	4.27222	1259.9	FALSE	55
2022-09-13	10:10:00	0.333855	1.48505	4.27222	1334.25	FALSE	55
2022-09-13	10:10:00	1.23869	5.50994	4.27222	1265.41	FALSE	55
2022-09-13	10:10:01	1.02546	4.56145	6.80116	1338.81	FALSE	55
2022-09-13	10:10:01	0.805916	3.58488	6.80116	1269	FALSE	55
2022-09-13	10:10:01	2.47843	11.0246	6.80116	1349.84	FALSE	55
2022-09-13	10:10:01	1.80607	8.03376	6.80116	1277.03	FALSE	55
2022-09-13	10:10:02	2.01019	8.94173	4.8774	1358.78	FALSE	55
2022-09-13	10:10:02	0.70612	3.14096	4.8774	1280.17	FALSE	55
2022-09-13	10:10:02	0.817061	3.63445	4.8774	1362.41	FALSE	55
2022-09-13	10:10:02	0.852583	3.79246	4.8774	1283.96	FALSE	55
2022-09-13	10:10:03	0.41584	1.84974	3.09615	1364.26	FALSE	55
2022-09-13	10:10:03	1.12989	5.02598	3.09615	1288.99	FALSE	55
2022-09-13	10:10:03	0.380318	1.69173	3.09615	1365.96	FALSE	55
2022-09-13	10:10:03	0.85813	3.81713	3.09615	1292.81	FALSE	55
2022-09-13	10:10:04	1.35335	6.01997	3.71203	1371.98	FALSE	55
2022-09-13	10:10:04	0.46327	2.06072	3.71203	1294.87	FALSE	55
2022-09-13	10:10:04	0.686883	3.05539	3.71203	1375.03	FALSE	55
2022-09-13	10:10:05	0.417977	1.85925	1.63802	1296.73	FALSE	55
2022-09-13	10:10:05	0.146476	0.651555	1.63802	1375.68	FALSE	55
2022-09-13	10:10:05	0.635738	2.82789	1.63802	1299.56	FALSE	55
2022-09-13	10:10:05	0.272786	1.21341	1.63802	1376.9	FALSE	55
2022-09-13	10:10:06	0.624033	2.77582	1.18692	1302.33	FALSE	55
2022-09-13	10:10:06	0.326221	1.4511	1.18692	1378.35	FALSE	55
2022-09-13	10:10:06	0.115331	0.513015	1.18692	1302.84	FALSE	55
2022-09-13	10:10:06	0.00174323	0.00775424	1.18692	1378.35	FALSE	55
2022-09-13	10:10:07	-0.153422	-0.682452	-0.247196	1302.84	FALSE	55
2022-09-13	10:10:07	-0.00349849	-0.015562	-0.247196	1378.35	FALSE	55
2022-09-13	10:10:07	-0.0579514	-0.257779	-0.247196	1302.84	FALSE	55
2022-09-13	10:10:07	-0.00741704	-0.0329925	-0.247196	1378.35	FALSE	55
2022-09-13	10:10:08	0.0282063	0.125467	1.25174	1302.97	FALSE	55
2022-09-13	10:10:08	0.249428	1.10951	1.25174	1379.46	FALSE	55
2022-09-13	10:10:08	0.566578	2.52025	1.25174	1305.49	FALSE	55
2022-09-13	10:10:09	1.56581	6.96504	3.6426	1386.43	FALSE	55
2022-09-13	10:10:09	0.413397	1.83887	3.6426	1307.33	FALSE	55
2022-09-13	10:10:09	0.802303	3.5688	3.6426	1390	FALSE	55
2022-09-13	10:10:09	0.494059	2.19767	3.6426	1309.53	FALSE	55
2022-09-13	10:10:10	0.408817	1.8185	1.44787	1391.82	FALSE	55
2022-09-13	10:10:10	0.230344	1.02462	1.44787	1310.55	FALSE	55
2022-09-13	10:10:10	0.55126	2.45211	1.44787	1394.27	FALSE	55
2022-09-13	10:10:10	0.111565	0.496263	1.44787	1311.05	FALSE	55
2022-09-13	10:10:11	0.285713	1.27091	0.516977	1395.54	FALSE	55
2022-09-13	10:10:11	0.134415	0.597905	0.516977	1311.65	FALSE	55
2022-09-13	10:10:11	0.0135499	0.0602727	0.516977	1395.6	FALSE	55
2022-09-13	10:10:11	0.0312088	0.138823	0.516977	1311.78	FALSE	55
2022-09-13	10:10:12	0.16902	0.751835	0.840235	1396.35	FALSE	55
2022-09-13	10:10:12	0.121082	0.538597	0.840235	1312.32	FALSE	55
2022-09-13	10:10:12	0.311616	1.38613	0.840235	1397.74	FALSE	55
2022-09-13	10:10:12	0.153855	0.684378	0.840235	1313.01	FALSE	55
2022-09-13	10:10:13	0.843728	3.75307	10.6368	1401.49	FALSE	55
2022-09-13	10:10:13	2.71477	12.0758	10.6368	1325.08	FALSE	55
2022-09-13	10:10:13	3.61528	16.0815	10.6368	1417.57	1	56
2022-09-13	10:10:14	5.54948	24.6852	17.4807	1349.77	1	57
2022-09-13	10:10:14	2.7078	12.0448	17.4807	1429.62	FALSE	57
2022-09-13	10:10:14	5.30637	23.6038	17.4807	1373.37	1	58
2022-09-13	10:10:14	2.15574	9.58916	17.4807	1439.21	FALSE	58
2022-09-13	10:10:15	4.088	18.1842	9.62798	1391.56	1	59
2022-09-13	10:10:15	0.498639	2.21805	9.62798	1441.42	FALSE	59
2022-09-13	10:10:15	3.68719	16.4014	9.62798	1407.96	1	60
2022-09-13	10:10:15	0.384033	1.70826	9.62798	1443.13	FALSE	60
2022-09-13	10:10:16	3.64927	16.2327	8.76306	1424.19	1	61
2022-09-13	10:10:16	0.828308	3.68448	8.76306	1446.82	FALSE	61
2022-09-13	10:10:16	1.97981	8.80659	8.76306	1433	FALSE	61
2022-09-13	10:10:16	1.42271	6.3285	8.76306	1453.15	FALSE	61
2022-09-13	10:10:17	1.01457	4.51301	5.52828	1437.51	FALSE	61
2022-09-13	10:10:17	2.40454	10.6959	5.52828	1463.84	FALSE	61
2022-09-13	10:10:17	0.309326	1.37594	5.52828	1438.89	FALSE	61
2022-09-13	10:10:18	2.25324	10.0229	11.401	1473.86	FALSE	61
2022-09-13	10:10:18	1.3334	5.93123	11.401	1444.82	FALSE	61
2022-09-13	10:10:18	2.88907	12.8512	11.401	1486.72	FALSE	61
2022-09-13	10:10:18	3.77655	16.7988	11.401	1461.62	1	62
2022-09-13	10:10:19	1.64739	7.32792	7.90189	1494.04	FALSE	62
2022-09-13	10:10:19	3.1996	14.2325	7.90189	1475.85	1	63
2022-09-13	10:10:19	0.281896	1.25393	7.90189	1495.3	FALSE	63
2022-09-13	10:10:19	1.97681	8.79325	7.90189	1484.64	FALSE	63
2022-09-13	10:10:20	0.381845	1.69852	2.6018	1497	FALSE	63
2022-09-13	10:10:20	0.677417	3.01329	2.6018	1487.65	FALSE	63
2022-09-13	10:10:20	0.682863	3.03751	2.6018	1500.03	FALSE	63
2022-09-13	10:10:20	0.597519	2.65788	2.6018	1490.31	FALSE	63
2022-09-13	10:10:21	1.37762	6.12793	7.85752	1506.16	FALSE	63
2022-09-13	10:10:21	1.75248	7.79538	7.85752	1498.11	FALSE	63
2022-09-13	10:10:21	1.82144	8.10213	7.85752	1514.26	FALSE	63
2022-09-13	10:10:21	2.11426	9.40465	7.85752	1507.51	FALSE	63
2022-09-13	10:10:22	1.26622	5.6324	7.03425	1519.9	FALSE	63
2022-09-13	10:10:22	1.9563	8.70201	7.03425	1516.21	FALSE	63
2022-09-13	10:10:22	1.52159	6.76834	7.03425	1526.66	FALSE	63
2022-09-13	10:10:23	3.95859	17.6086	16.0015	1533.82	1	64
2022-09-13	10:10:23	2.10195	9.34989	16.0015	1536.01	FALSE	64
2022-09-13	10:10:23	5.77319	25.6803	16.0015	1559.5	1	65
2022-09-13	10:10:23	2.55543	11.3671	16.0015	1547.38	FALSE	65
2022-09-13	10:10:24	7.10912	31.6228	19.7374	1591.13	1	66
2022-09-13	10:10:24	1.87447	8.33802	19.7374	1555.72	FALSE	66
2022-09-13	10:10:24	6.79645	30.232	19.7374	1621.36	1	67
2022-09-13	10:10:24	1.96866	8.75699	19.7374	1564.48	FALSE	67
2022-09-13	10:10:25	5.14225	22.8738	16.4875	1644.23	1	68
2022-09-13	10:10:25	2.5334	11.2691	16.4875	1575.75	FALSE	68
2022-09-13	10:10:25	3.2168	14.309	16.4875	1658.54	1	69
2022-09-13	10:10:25	3.9338	17.4983	16.4875	1593.24	1	70
2022-09-13	10:10:26	2.15721	9.5957	13.3462	1668.14	FALSE	70
2022-09-13	10:10:26	4.108	18.2732	13.3462	1611.52	1	71
2022-09-13	10:10:26	2.73584	12.1696	13.3462	1680.31	FALSE	71
2022-09-13	10:10:27	2.41619	10.7477	13.2188	1622.26	FALSE	71
2022-09-13	10:10:27	3.41737	15.2011	13.2188	1695.51	1	72
2022-09-13	10:10:27	2.42072	10.7678	13.2188	1633.03	FALSE	72
2022-09-13	10:10:27	3.63263	16.1587	13.2188	1711.67	1	73
2022-09-13	10:10:28	1.84312	8.19857	9.75854	1641.23	FALSE	73
2022-09-13	10:10:28	2.52622	11.2371	9.75854	1722.9	FALSE	73
2022-09-13	10:10:28	2.8509	12.6814	9.75854	1653.91	FALSE	73
2022-09-13	10:10:28	1.55503	6.91708	9.75854	1729.82	FALSE	73
2022-09-13	10:10:29	2.81044	12.5014	12.1883	1666.41	FALSE	73
2022-09-13	10:10:29	1.87156	8.32507	12.1883	1738.15	FALSE	73
2022-09-13	10:10:29	3.30032	14.6805	12.1883	1681.09	1	74
2022-09-13	10:10:29	2.97787	13.2462	12.1883	1751.39	FALSE	74
2022-09-13	10:10:30	3.505	15.5909	14.1816	1696.69	1	75
2022-09-13	10:10:30	3.88744	17.2921	14.1816	1768.68	1	76
2022-09-13	10:10:30	2.17207	9.6618	14.1816	1706.35	FALSE	76
2022-09-13	10:10:31	2.54673	11.3284	9.17619	1780.01	FALSE	76
2022-09-13	10:10:31	1.8162	8.07882	9.17619	1714.43	FALSE	76
2022-09-13	10:10:31	2.87141	12.7726	9.17619	1792.78	FALSE	76
2022-09-13	10:10:31	1.01726	4.52498	9.17619	1718.95	FALSE	76
2022-09-13	10:10:32	1.62128	7.21178	6.62679	1800	FALSE	76
2022-09-13	10:10:32	1.30383	5.7997	6.62679	1724.75	FALSE	76
2022-09-13	10:10:32	1.41869	6.31062	6.62679	1806.31	FALSE	76
2022-09-13	10:10:32	1.61528	7.18509	6.62679	1731.94	FALSE	76
2022-09-13	10:10:33	3.9591	17.6109	26.725	1823.92	1	77
2022-09-13	10:10:33	8.55502	38.0544	26.725	1769.99	1	78
2022-09-13	10:10:33	7.04708	31.3468	26.725	1855.26	1	79
2022-09-13	10:10:33	4.47095	19.8877	26.725	1789.88	1	80
2022-09-13	10:10:34	1.90958	8.49419	5.04135	1863.76	FALSE	80
2022-09-13	10:10:34	1.01767	4.5268	5.04135	1794.4	FALSE	80
2022-09-13	10:10:34	0.987901	4.39438	5.04135	1868.15	FALSE	80
2022-09-13	10:10:34	0.618231	2.75002	5.04135	1797.15	FALSE	80
2022-09-13	10:10:35	0.440827	1.96089	2.16613	1870.11	FALSE	80
2022-09-13	10:10:35	0.428308	1.9052	2.16613	1799.06	FALSE	80
2022-09-13	10:10:35	0.591769	2.63231	2.16613	1872.75	FALSE	80
2022-09-13	10:10:36	0.518435	2.3061	4.02104	1801.37	FALSE	80
2022-09-13	10:10:36	1.32989	5.91562	4.02104	1878.66	FALSE	80
2022-09-13	10:10:36	0.571616	2.54266	4.02104	1803.91	FALSE	80
2022-09-13	10:10:36	1.19594	5.31978	4.02104	1883.98	FALSE	80
2022-09-13	10:10:37	0.483575	2.15104	4.67976	1806.06	FALSE	80
2022-09-13	10:10:37	2.05645	9.1475	4.67976	1893.13	FALSE	80
2022-09-13	10:10:37	0.616145	2.74074	4.67976	1808.8	FALSE	80
2022-09-13	10:10:38	2.04393	9.09181	8.5477	1902.22	FALSE	80
2022-09-13	10:10:38	0.952786	4.23818	8.5477	1813.04	FALSE	80
2022-09-13	10:10:38	2.62474	11.6754	8.5477	1913.9	FALSE	80
2022-09-13	10:10:38	1.44846	6.44304	8.5477	1819.48	FALSE	80
2022-09-13	10:10:38	2.53813	11.2901	8.5477	1925.19	FALSE	80
2022-09-13	10:10:39	2.32627	10.3477	9.16697	1829.83	FALSE	80
2022-09-13	10:10:39	1.14892	5.11063	9.16697	1930.3	FALSE	80
2022-09-13	10:10:39	2.70729	12.0426	9.16697	1841.87	FALSE	80
2022-09-13	10:10:40	1.18388	5.26614	11.4129	1935.56	FALSE	80
2022-09-13	10:10:40	4.8251	21.463	11.4129	1863.33	1	81
2022-09-13	10:10:40	1.62602	7.23286	11.4129	1942.8	FALSE	81
2022-09-13	10:10:40	2.6279	11.6894	11.4129	1875.02	FALSE	81
2022-09-13	10:10:41	1.45854	6.48788	4.30576	1949.28	FALSE	81
2022-09-13	10:10:41	0.601743	2.67667	4.30576	1877.7	FALSE	81
2022-09-13	10:10:41	1.56062	6.94195	4.30576	1956.23	FALSE	81
2022-09-13	10:10:41	0.251005	1.11652	4.30576	1878.82	FALSE	81
2022-09-13	10:10:42	1.26678	5.63489	5.229	1961.86	FALSE	81
2022-09-13	10:10:42	0.665356	2.95964	5.229	1881.78	FALSE	81
2022-09-13	10:10:42	0.781845	3.4778	5.229	1965.34	FALSE	81
2022-09-13	10:10:42	1.98815	8.84369	5.229	1890.62	FALSE	81
2022-09-13	10:10:43	0.536807	2.38782	4.10561	1967.73	FALSE	81
2022-09-13	10:10:43	2.0134	8.95601	4.10561	1899.58	FALSE	81
2022-09-13	10:10:43	0.218741	0.973004	4.10561	1968.7	FALSE	81
2022-09-13	10:10:44	1.61899	7.20159	3.46738	1906.78	FALSE	81
2022-09-13	10:10:44	0.0999111	0.444425	3.46738	1969.14	FALSE	81
2022-09-13	10:10:44	0.986018	4.38601	3.46738	1911.16	FALSE	81
2022-09-13	10:10:44	0.413092	1.83752	3.46738	1970.98	FALSE	81
2022-09-13	10:10:45	0.560318	2.49241	2.64583	1913.66	FALSE	81
2022-09-13	10:10:45	1.24637	5.5441	2.64583	1976.53	FALSE	81
2022-09-13	10:10:45	0.225662	1.00379	2.64583	1914.66	FALSE	81
2022-09-13	10:10:45	0.346883	1.543	2.64583	1978.07	FALSE	81
2022-09-13	10:10:46	0.137926	0.613522	3.02947	1915.27	FALSE	81
2022-09-13	10:10:46	0.304695	1.35534	3.02947	1979.42	FALSE	81
2022-09-13	10:10:46	1.97604	8.78982	3.02947	1924.06	FALSE	81
2022-09-13	10:10:46	0.30556	1.35919	3.02947	1980.78	FALSE	81
2022-09-13	10:10:47	2.02327	8.99991	4.02715	1933.06	FALSE	81
2022-09-13	10:10:47	0.234466	1.04295	4.02715	1981.83	FALSE	81
2022-09-13	10:10:47	0.706934	3.14458	4.02715	1936.21	FALSE	81
2022-09-13	10:10:47	0.656705	2.92116	4.02715	1984.75	FALSE	81
2022-09-13	10:10:48	1.55971	6.9379	6.41043	1943.15	FALSE	81
2022-09-13	10:10:48	1.55039	6.89644	6.41043	1991.64	FALSE	81
2022-09-13	10:10:48	1.21329	5.39696	6.41043	1948.54	FALSE	81
2022-09-13	10:10:49	2.95248	13.1332	6.67852	2004.78	FALSE	81
2022-09-13	10:10:49	0.344237	1.53124	6.67852	1950.07	FALSE	81
2022-09-13	10:10:49	2.28749	10.1752	6.67852	2014.95	FALSE	81
2022-09-13	10:10:49	0.421387	1.87441	6.67852	1951.95	FALSE	81
2022-09-13	10:10:50	1.74897	7.77977	4.49919	2022.73	FALSE	81
2022-09-13	10:10:50	0.638283	2.83921	4.49919	1954.79	FALSE	81
2022-09-13	10:10:50	0.993855	4.42087	4.49919	2027.15	FALSE	81
2022-09-13	10:10:50	0.664746	2.95692	4.49919	1957.75	FALSE	81
2022-09-13	10:10:51	0.88673	3.94435	1.74929	2031.1	FALSE	81
2022-09-13	10:10:51	0.475026	2.11301	1.74929	1959.86	FALSE	81
2022-09-13	10:10:51	0.0939061	0.417713	1.74929	2031.52	FALSE	81
2022-09-13	10:10:51	0.117367	0.522072	1.74929	1960.38	FALSE	81
2022-09-13	10:10:52	0.00489845	0.0217893	3.11983	2031.54	FALSE	81
2022-09-13	10:10:52	0.324847	1.44498	3.11983	1961.83	FALSE	81
2022-09-13	10:10:52	1.77436	7.89271	3.11983	2039.43	FALSE	81
2022-09-13	10:10:53	0.689478	3.06694	5.85686	1964.89	FALSE	81
2022-09-13	10:10:53	2.4707	10.9902	5.85686	2050.42	FALSE	81
2022-09-13	10:10:53	1.23737	5.50407	5.85686	1970.4	FALSE	81
2022-09-13	10:10:53	0.869173	3.86626	5.85686	2054.29	FALSE	81
2022-09-13	10:10:54	0.773652	3.44136	1.52574	1973.84	FALSE	81
2022-09-13	10:10:54	0.196094	0.872265	1.52574	2055.16	FALSE	81
2022-09-13	10:10:54	0.553601	2.46253	1.52574	1976.3	FALSE	81
2022-09-13	10:10:54	-0.151336	-0.673173	1.52574	2055.16	FALSE	81
2022-09-13	10:10:55	-0.457137	-2.03344	-3.09914	1976.3	FALSE	81
2022-09-13	10:10:55	-0.649147	-2.88754	-3.09914	2055.16	FALSE	81
2022-09-13	10:10:55	-0.912455	-4.05878	-3.09914	1976.3	FALSE	81
2022-09-13	10:10:55	-0.768129	-3.41679	-3.09914	2055.16	FALSE	81
2022-09-13	10:10:56	-1.20777	-5.3724	-4.22997	1976.3	FALSE	81
2022-09-13	10:10:56	-1.09098	-4.8529	-4.22997	2055.16	FALSE	81
2022-09-13	10:10:56	-0.820954	-3.65177	-4.22997	1976.3	FALSE	81
2022-09-13	10:10:56	-0.684058	-3.04283	-4.22997	2055.16	FALSE	81
2022-09-13	10:10:57	-0.655814	-2.91719	-2.85765	1976.3	FALSE	81
2022-09-13	10:10:57	-0.668994	-2.97582	-2.85765	2055.16	FALSE	81
2022-09-13	10:10:57	-0.60248	-2.67995	-2.85765	1976.3	FALSE	81
2022-09-13	10:10:58	-0.526094	-2.34017	-1.27719	2055.16	FALSE	81
2022-09-13	10:10:58	-0.333778	-1.48471	-1.27719	1976.3	FALSE	81
2022-09-13	10:10:58	-0.203193	-0.903843	-1.27719	2055.16	FALSE	81
2022-09-13	10:10:58	-0.0854323	-0.38002	-1.27719	1976.3	FALSE	81
2022-09-13	10:10:59	-0.230012	-1.02314	10.8339	2055.16	FALSE	81
2022-09-13	10:10:59	0.347748	1.54685	10.8339	1977.85	FALSE	81
2022-09-13	10:10:59	3.19406	14.2078	10.8339	2069.37	1	82
2022-09-13	10:10:59	6.43044	28.6039	10.8339	2006.45	1	83
2022-09-13	10:11:00	2.2878	10.1766	9.57676	2079.54	FALSE	83
2022-09-13	10:11:00	2.4963	11.104	9.57676	2017.55	FALSE	83
2022-09-13	10:11:00	1.10144	4.89943	9.57676	2084.44	FALSE	83
2022-09-13	10:11:00	2.72627	12.127	9.57676	2029.68	FALSE	83
2022-09-13	10:11:01	3.47915	15.476	10.3953	2099.92	1	84
2022-09-13	10:11:01	0.8764	3.8984	10.3953	2033.58	FALSE	84
2022-09-13	10:11:01	2.65533	11.8114	10.3953	2111.73	FALSE	84
2022-09-13	10:11:02	1.42795	6.35181	6.68826	2039.93	FALSE	84
2022-09-13	10:11:02	2.12373	9.44678	6.68826	2121.18	FALSE	84
2022-09-13	10:11:02	1.92902	8.58067	6.68826	2048.51	FALSE	84
2022-09-13	10:11:02	0.533651	2.37379	6.68826	2123.55	FALSE	84
2022-09-13	10:11:03	1.93436	8.60442	6.03617	2057.12	FALSE	84
2022-09-13	10:11:03	1.88658	8.39189	6.03617	2131.94	FALSE	84
2022-09-13	10:11:03	0.250038	1.11222	6.03617	2058.23	FALSE	84
2022-09-13	10:11:04	0.504746	2.24521	2.07688	2134.19	FALSE	84
2022-09-13	10:11:04	0.711514	3.16496	2.07688	2061.39	FALSE	84
2022-09-13	10:11:04	0.483931	2.15262	2.07688	2136.34	FALSE	84
2022-09-13	10:11:04	0.332227	1.47781	2.07688	2062.87	FALSE	84
2022-09-13	10:11:04	0.302099	1.3438	2.07688	2137.68	FALSE	84
2022-09-13	10:11:05	0.300267	1.33565	1.69015	2064.21	FALSE	84
2022-09-13	10:11:05	0.425305	1.89184	1.69015	2139.58	FALSE	84
2022-09-13	10:11:05	0.414313	1.84295	1.69015	2066.05	FALSE	84
2022-09-13	10:11:06	0.556705	2.47634	1.75483	2142.05	FALSE	84
2022-09-13	10:11:06	0.427036	1.89954	1.75483	2067.95	FALSE	84
2022-09-13	10:11:06	0.312277	1.38907	1.75483	2143.44	FALSE	84
2022-09-13	10:11:06	0.281998	1.25438	1.75483	2069.2	FALSE	84
2022-09-13	10:11:07	0.180776	0.804128	0.64997	2144.24	FALSE	84
2022-09-13	10:11:07	0.147799	0.65744	0.64997	2069.86	FALSE	84
2022-09-13	10:11:07	0.11925	0.530448	0.64997	2144.78	FALSE	84
2022-09-13	10:11:07	0.136654	0.607864	0.64997	2070.47	FALSE	84
2022-09-13	10:11:08	0.111107	0.494226	0.463553	2145.27	FALSE	84
2022-09-13	10:11:08	0.141998	0.631636	0.463553	2071.1	FALSE	84
2022-09-13	10:11:08	0.0367559	0.163498	0.463553	2145.43	FALSE	84
2022-09-13	10:11:08	0.126985	0.564855	0.463553	2071.67	FALSE	84
2022-09-13	10:11:09	0.0993004	0.441708	0.880473	2145.87	FALSE	84
2022-09-13	10:11:09	0.202761	0.901921	0.880473	2072.57	FALSE	84
2022-09-13	10:11:09	0.218741	0.973004	0.880473	2146.85	FALSE	84
2022-09-13	10:11:09	0.270954	1.20526	0.880473	2073.77	FALSE	84
2022-09-13	10:11:10	0.0670867	0.298415	0.231636	2147.15	FALSE	84
2022-09-13	10:11:10	0.0247458	0.110074	0.231636	2073.88	FALSE	84
2022-09-13	10:11:10	0.0643895	0.286417	0.231636	2147.43	FALSE	84
2022-09-13	10:11:11	0.184237	0.819523	0.727842	2074.7	FALSE	84
2022-09-13	10:11:11	0.218181	0.970513	0.727842	2148.4	FALSE	84
2022-09-13	10:11:11	0.0693259	0.308375	0.727842	2075.01	FALSE	84
2022-09-13	10:11:11	0.182761	0.812957	0.727842	2149.22	FALSE	84
2022-09-13	10:11:12	0.12154	0.540634	0.815165	2075.55	FALSE	84
2022-09-13	10:11:12	0.173397	0.771305	0.815165	2149.99	FALSE	84
2022-09-13	10:11:12	0.415636	1.84883	0.815165	2077.4	FALSE	84
2022-09-13	10:11:12	0.0224557	0.0998874	0.815165	2150.09	FALSE	84
2022-09-13	10:11:13	-0.0932694	-0.414881	-0.530953	2077.4	FALSE	84
2022-09-13	10:11:13	-0.109249	-0.485961	-0.530953	2150.09	FALSE	84
2022-09-13	10:11:13	-0.217748	-0.968587	-0.530953	2077.4	FALSE	84
2022-09-13	10:11:13	-0.057188	-0.254384	-0.530953	2150.09	FALSE	84
2022-09-13	10:11:14	0.0412343	0.183418	1.12029	2077.58	FALSE	84
2022-09-13	10:11:14	0.343372	1.52739	1.12029	2151.61	FALSE	84
2022-09-13	10:11:14	0.370954	1.65008	1.12029	2079.23	FALSE	84
2022-09-13	10:11:15	1.12642	5.01054	4.24168	2156.63	FALSE	84
2022-09-13	10:11:15	1.13273	5.03861	4.24168	2084.27	FALSE	84
2022-09-13	10:11:15	1.19014	5.29398	4.24168	2161.92	FALSE	84
2022-09-13	10:11:15	0.365	1.62359	4.24168	2085.9	FALSE	84
2022-09-13	10:11:16	0.438486	1.95047	1.53123	2163.87	FALSE	84
2022-09-13	10:11:16	0.312634	1.39066	1.53123	2087.29	FALSE	84
2022-09-13	10:11:16	0.364847	1.62291	1.53123	2165.49	FALSE	84
2022-09-13	10:11:16	0.26098	1.16089	1.53123	2088.45	FALSE	84
2022-09-13	10:11:17	0.334262	1.48686	1.20837	2166.98	FALSE	84
2022-09-13	10:11:17	0.148054	0.658574	1.20837	2089.11	FALSE	84
2022-09-13	10:11:17	0.279758	1.24442	1.20837	2168.22	FALSE	84
2022-09-13	10:11:17	0.324542	1.44363	1.20837	2090.55	FALSE	84
2022-09-13	10:11:18	0.386323	1.71844	1.8893	2169.94	FALSE	84
2022-09-13	10:11:18	0.464847	2.06773	1.8893	2092.62	FALSE	84
2022-09-13	10:11:18	0.483422	2.15036	1.8893	2172.09	FALSE	84
2022-09-13	10:11:18	0.364339	1.62065	1.8893	2094.24	FALSE	84
2022-09-13	10:11:19	0.439453	1.95477	1.54799	2174.05	FALSE	84
2022-09-13	10:11:19	0.168308	0.748668	1.54799	2094.99	FALSE	84
2022-09-13	10:11:19	0.436247	1.94051	1.54799	2175.99	FALSE	84
2022-09-13	10:11:20	0.197519	0.878604	2.11991	2095.87	FALSE	84
2022-09-13	10:11:20	0.431209	1.9181	2.11991	2177.91	FALSE	84
2022-09-13	10:11:20	0.837824	3.72681	2.11991	2099.59	FALSE	84
2022-09-13	10:11:20	0.439758	1.95613	2.11991	2179.86	FALSE	84
2022-09-13	10:11:21	1.25609	5.58734	4.23173	2105.18	FALSE	84
2022-09-13	10:11:21	0.646476	2.87565	4.23173	2182.74	FALSE	84
2022-09-13	10:11:21	1.50592	6.69863	4.23173	2111.88	FALSE	84
2022-09-13	10:11:21	0.396858	1.7653	4.23173	2184.5	FALSE	84
2022-09-13	10:11:22	1.73243	7.7062	9.00387	2119.59	FALSE	84
2022-09-13	10:11:22	0.563829	2.50802	9.00387	2187.01	FALSE	84
2022-09-13	10:11:22	4.605	20.484	9.00387	2140.07	1	85
2022-09-13	10:11:22	1.19538	5.31729	9.00387	2192.33	FALSE	85
2022-09-13	10:11:23	3.08159	13.7075	7.59293	2153.78	1	86
2022-09-13	10:11:23	0.660929	2.93994	7.59293	2195.27	FALSE	86
2022-09-13	10:11:23	1.37838	6.13131	7.59293	2159.91	FALSE	86
2022-09-13	10:11:24	1.18978	5.29238	2.62998	2200.56	FALSE	86
2022-09-13	10:11:24	0.361132	1.60639	2.62998	2161.51	FALSE	86
2022-09-13	10:11:24	0.616807	2.74368	2.62998	2203.3	FALSE	86
2022-09-13	10:11:24	0.197265	0.877474	2.62998	2162.39	FALSE	86
2022-09-13	10:11:25	0.54103	2.40661	3.69218	2205.71	FALSE	86
2022-09-13	10:11:25	0.385356	1.71414	3.69218	2164.11	FALSE	86
2022-09-13	10:11:25	1.68322	7.4873	3.69218	2213.2	FALSE	86
2022-09-13	10:11:25	0.710547	3.16066	3.69218	2167.27	FALSE	86
2022-09-13	10:11:26	3.20653	14.2633	5.5924	2227.46	1	87
2022-09-13	10:11:26	0.893957	3.9765	5.5924	2171.24	FALSE	87
2022-09-13	10:11:26	0.507239	2.2563	5.5924	2229.72	FALSE	87
2022-09-13	10:11:26	0.421183	1.87351	5.5924	2173.12	FALSE	87
2022-09-13	10:11:27	0.167646	0.745723	1.2328	2230.46	FALSE	87
2022-09-13	10:11:27	0.500776	2.22755	1.2328	2175.34	FALSE	87
2022-09-13	10:11:27	0.163015	0.725123	1.2328	2231.19	FALSE	87
2022-09-13	10:11:28	0.166171	0.739162	1.14606	2176.08	FALSE	87
2022-09-13	10:11:28	0.210191	0.934972	1.14606	2232.12	FALSE	87
2022-09-13	10:11:28	0.271209	1.20639	1.14606	2177.29	FALSE	87
2022-09-13	10:11:28	0.383015	1.70373	1.14606	2233.83	FALSE	87
2022-09-13	10:11:29	0.939402	4.17865	5.89885	2181.47	FALSE	87
2022-09-13	10:11:29	0.912583	4.05935	5.89885	2237.89	FALSE	87
2022-09-13	10:11:29	1.45162	6.4571	5.89885	2187.93	FALSE	87
2022-09-13	10:11:29	2.00088	8.90031	5.89885	2246.79	FALSE	87
2022-09-13	10:11:30	2.09253	9.30799	7.20064	2197.23	FALSE	87
2022-09-13	10:11:30	1.92907	8.58089	7.20064	2255.37	FALSE	87
2022-09-13	10:11:30	1.57599	7.01032	7.20064	2204.24	FALSE	87
2022-09-13	10:11:30	0.877519	3.90338	7.20064	2259.27	FALSE	87
2022-09-13	10:11:31	2.54826	11.3352	22.1415	2215.58	FALSE	87
2022-09-13	10:11:31	3.33482	14.8339	22.1415	2274.11	1	88
2022-09-13	10:11:31	9.88902	43.9883	22.1415	2259.57	1	89
2022-09-13	10:11:31	4.13843	18.4086	22.1415	2292.51	1	90
2022-09-13	10:11:32	2.29202	10.1954	4.50809	2269.76	FALSE	90
2022-09-13	10:11:32	0.270598	1.20367	4.50809	2293.72	FALSE	90
2022-09-13	10:11:32	0.477774	2.12523	4.50809	2271.89	FALSE	90
2022-09-13	10:11:33	0.209275	0.930897	4.63241	2294.65	FALSE	90
2022-09-13	10:11:33	0.181183	0.805938	4.63241	2272.69	FALSE	90
2022-09-13	10:11:33	1.73319	7.70958	4.63241	2302.36	FALSE	90
2022-09-13	10:11:33	2.042	9.08322	4.63241	2281.78	FALSE	90
2022-09-13	10:11:34	4.73869	21.0786	18.9618	2323.44	1	91
2022-09-13	10:11:34	3.122	13.8873	18.9618	2295.66	1	92
2022-09-13	10:11:34	5.72108	25.4485	18.9618	2348.89	1	93
2022-09-13	10:11:34	3.46948	15.4329	18.9618	2311.1	1	94
2022-09-13	10:11:35	5.37395	23.9044	16.854	2372.79	1	95
2022-09-13	10:11:35	1.43045	6.36293	16.854	2317.46	FALSE	95
2022-09-13	10:11:35	3.99625	17.7761	16.854	2390.57	1	96
2022-09-13	10:11:35	4.35513	19.3725	16.854	2336.83	1	97
2022-09-13	10:11:36	2.83462	12.609	10.2782	2403.17	FALSE	97
2022-09-13	10:11:36	2.95238	13.1328	10.2782	2349.97	FALSE	97
2022-09-13	10:11:36	1.1449	5.09274	10.2782	2408.27	FALSE	97
2022-09-13	10:11:37	6.2739	27.9076	17.2065	2377.87	1	98
2022-09-13	10:11:37	5.34835	23.7905	17.2065	2432.06	1	99
2022-09-13	10:11:37	1.93955	8.62751	17.2065	2386.5	FALSE	99
2022-09-13	10:11:37	1.911	8.50051	17.2065	2440.56	FALSE	99
2022-09-13	10:11:38	2.52352	11.2251	5.74706	2397.73	FALSE	99
2022-09-13	10:11:38	0.466018	2.07294	5.74706	2442.63	FALSE	99
2022-09-13	10:11:38	1.45447	6.46977	5.74706	2404.2	FALSE	99
2022-09-13	10:11:38	0.723982	3.22042	5.74706	2445.85	FALSE	99
2022-09-13	10:11:39	1.22536	5.45065	4.65465	2409.65	FALSE	99
2022-09-13	10:11:39	0.861539	3.8323	4.65465	2449.68	FALSE	99
2022-09-13	10:11:39	0.80444	3.57831	4.65465	2413.22	FALSE	99
2022-09-13	10:11:39	1.29431	5.75735	4.65465	2455.44	FALSE	99
2022-09-13	10:11:40	0.515382	2.29252	2.37577	2415.52	FALSE	99
2022-09-13	10:11:40	0.416909	1.85449	2.37577	2457.3	FALSE	99
2022-09-13	10:11:40	0.679249	3.02144	2.37577	2418.54	FALSE	99
2022-09-13	10:11:40	0.524848	2.33463	2.37577	2459.63	FALSE	99
2022-09-13	10:11:41	0.505305	2.2477	6.35755	2420.79	FALSE	99
2022-09-13	10:11:41	1.30078	5.78613	6.35755	2465.42	FALSE	99
2022-09-13	10:11:41	2.48164	11.0388	6.35755	2431.82	FALSE	99
2022-09-13	10:11:42	1.97609	8.79004	8.0132	2474.21	FALSE	99
2022-09-13	10:11:42	2.09024	9.29781	8.0132	2441.12	FALSE	99
2022-09-13	10:11:42	2.64332	11.758	8.0132	2485.96	FALSE	99
2022-09-13	10:11:42	0.496145	2.20695	8.0132	2443.33	FALSE	99
2022-09-13	10:11:43	0.654924	2.91323	4.67005	2488.88	FALSE	99
2022-09-13	10:11:43	0.745407	3.31572	4.67005	2446.65	FALSE	99
2022-09-13	10:11:43	0.753753	3.35284	4.67005	2492.23	FALSE	99
2022-09-13	10:11:43	2.04541	9.09839	4.67005	2455.74	FALSE	99
2022-09-13	10:11:44	3.38169	15.0424	12.3927	2507.27	1	100
2022-09-13	10:11:44	2.65518	11.8108	12.3927	2467.55	FALSE	100
2022-09-13	10:11:44	2.75538	12.2565	12.3927	2519.53	FALSE	100
2022-09-13	10:11:44	2.35172	10.4609	12.3927	2478.02	FALSE	100
2022-09-13	10:11:45	3.29645	14.6633	11.2689	2534.19	1	101
2022-09-13	10:11:45	3.77161	16.7769	11.2689	2494.79	1	102
2022-09-13	10:11:45	0.532023	2.36654	11.2689	2536.56	FALSE	102
2022-09-13	10:11:46	2.91808	12.9802	12.2997	2507.77	FALSE	102
2022-09-13	10:11:46	3.89146	17.31	12.2997	2553.87	1	103
2022-09-13	10:11:46	2.4363	10.8371	12.2997	2518.61	FALSE	103
2022-09-13	10:11:46	1.81452	8.07135	12.2997	2561.94	FALSE	103
2022-09-13	10:11:47	3.6453	16.215	14.9331	2534.82	1	104
2022-09-13	10:11:47	4.06016	18.0604	14.9331	2580	1	105
2022-09-13	10:11:47	5.09833	22.6784	14.9331	2557.5	1	106
2022-09-13	10:11:47	0.624695	2.77877	14.9331	2582.78	FALSE	106
2022-09-13	10:11:48	1.72765	7.68493	8.92469	2565.19	FALSE	106
2022-09-13	10:11:48	1.05843	4.70811	8.92469	2587.49	FALSE	106
2022-09-13	10:11:48	1.98322	8.82176	8.92469	2574.01	FALSE	106
2022-09-13	10:11:48	3.25614	14.484	8.92469	2601.97	1	107
2022-09-13	10:11:49	2.82688	12.5745	21.4255	2586.58	FALSE	107
2022-09-13	10:11:49	6.23151	27.719	21.4255	2629.69	1	108
2022-09-13	10:11:49	5.39161	23.983	21.4255	2610.57	1	109
2022-09-13	10:11:50	6.63263	29.5033	20.8261	2659.19	1	110
2022-09-13	10:11:50	6.6221	29.4564	20.8261	2640.02	1	111
2022-09-13	10:11:50	3.41263	15.1801	20.8261	2674.37	1	112
2022-09-13	10:11:50	2.06032	9.16472	20.8261	2649.19	FALSE	112
2022-09-13	10:11:51	2.50709	11.152	12.3811	2685.53	FALSE	112
2022-09-13	10:11:51	3.18342	14.1605	12.3811	2663.35	1	113
2022-09-13	10:11:51	3.35304	14.915	12.3811	2700.44	1	114
2022-09-13	10:11:51	2.09004	9.29692	12.3811	2672.65	FALSE	114
2022-09-13	10:11:52	1.03691	4.61238	3.07554	2705.05	FALSE	114
2022-09-13	10:11:52	0.647086	2.87837	3.07554	2675.52	FALSE	114
2022-09-13	10:11:52	0.505407	2.24815	3.07554	2707.3	FALSE	114
2022-09-13	10:11:52	0.576247	2.56326	3.07554	2678.09	FALSE	114
2022-09-13	10:11:53	0.673448	2.99563	7.26958	2710.3	FALSE	114
2022-09-13	10:11:53	0.71355	3.17401	7.26958	2681.26	FALSE	114
2022-09-13	10:11:53	1.27233	5.65958	7.26958	2715.96	FALSE	114
2022-09-13	10:11:53	3.87777	17.2491	7.26958	2698.51	1	115
2022-09-13	10:11:54	3.27034	14.5471	14.6246	2730.5	1	116
2022-09-13	10:11:54	2.30291	10.2438	14.6246	2708.75	FALSE	116
2022-09-13	10:11:54	4.29004	19.083	14.6246	2749.59	1	117
2022-09-13	10:11:55	3.37126	14.996	6.3903	2723.75	1	118
2022-09-13	10:11:55	0.886476	3.94322	6.3903	2753.53	FALSE	118
2022-09-13	10:11:55	0.825051	3.66999	6.3903	2727.42	FALSE	118
2022-09-13	10:11:55	0.663626	2.95194	6.3903	2756.48	FALSE	118
2022-09-13	10:11:56	1.03874	4.62052	8.77682	2732.04	FALSE	118
2022-09-13	10:11:56	2.44714	10.8854	8.77682	2767.37	FALSE	118
2022-09-13	10:11:56	3.32505	14.7905	8.77682	2746.83	1	119
2022-09-13	10:11:56	1.08154	4.81091	8.77682	2772.18	FALSE	119
2022-09-13	10:11:57	0.602659	2.68075	3.56388	2749.51	FALSE	119
2022-09-13	10:11:57	0.573041	2.549	3.56388	2774.73	FALSE	119
2022-09-13	10:11:57	1.11182	4.9456	3.56388	2754.46	FALSE	119
2022-09-13	10:11:57	0.917265	4.08018	3.56388	2778.81	FALSE	119
2022-09-13	10:11:58	0.795891	3.54028	3.3948	2758	FALSE	119
2022-09-13	10:11:58	0.896501	3.98782	3.3948	2782.8	FALSE	119
2022-09-13	10:11:58	0.597163	2.6563	3.3948	2760.65	FALSE	119
2022-09-13	10:11:59	0.623524	2.77356	3.97514	2785.57	FALSE	119
2022-09-13	10:11:59	1.25564	5.58534	3.97514	2766.24	FALSE	119
2022-09-13	10:11:59	0.687545	3.05834	3.97514	2788.63	FALSE	119
2022-09-13	10:11:59	1.0079	4.48334	3.97514	2770.72	FALSE	119
2022-09-13	10:12:00	0.831158	3.69716	2.91878	2792.32	FALSE	119
2022-09-13	10:12:00	0.50673	2.25404	2.91878	2772.98	FALSE	119
2022-09-13	10:12:00	0.60388	2.68618	2.91878	2795.01	FALSE	119
2022-09-13	10:12:00	0.682914	3.03774	2.91878	2776.01	FALSE	119
2022-09-13	10:12:01	1.23782	5.50607	3.9787	2800.52	FALSE	119
2022-09-13	10:12:01	0.591208	2.62981	3.9787	2778.64	FALSE	119
2022-09-13	10:12:01	0.750445	3.33813	3.9787	2803.86	FALSE	119
2022-09-13	10:12:01	0.998333	4.44078	3.9787	2783.09	FALSE	119
2022-09-13	10:12:02	0.428053	1.90407	2.15568	2805.76	FALSE	119
2022-09-13	10:12:02	0.567137	2.52274	2.15568	2785.61	FALSE	119
2022-09-13	10:12:02	0.534873	2.37922	2.15568	2808.14	FALSE	119
2022-09-13	10:12:02	0.40841	1.81669	2.15568	2787.42	FALSE	119
2022-09-13	10:12:03	0.513397	2.28369	2.51037	2810.42	FALSE	119
2022-09-13	10:12:03	0.564186	2.50961	2.51037	2789.93	FALSE	119
2022-09-13	10:12:03	0.615484	2.7378	2.51037	2813.16	FALSE	119
2022-09-13	10:12:04	0.738181	3.28358	3.53779	2793.22	FALSE	119
2022-09-13	10:12:04	0.738639	3.28561	3.53779	2816.45	FALSE	119
2022-09-13	10:12:04	0.86958	3.86807	3.53779	2797.09	FALSE	119
2022-09-13	10:12:04	0.834924	3.71391	3.53779	2820.16	FALSE	119
2022-09-13	10:12:05	0.731819	3.25528	2.94028	2800.34	FALSE	119
2022-09-13	10:12:05	0.521183	2.31833	2.94028	2822.48	FALSE	119
2022-09-13	10:12:05	0.662354	2.94628	2.94028	2803.29	FALSE	119
2022-09-13	10:12:05	0.728664	3.24124	2.94028	2825.72	FALSE	119
2022-09-13	10:12:06	0.734873	3.26886	3.2748	2806.56	FALSE	119
2022-09-13	10:12:06	0.733906	3.26456	3.2748	2828.98	FALSE	119
2022-09-13	10:12:06	0.737214	3.27928	3.2748	2809.84	FALSE	119
2022-09-13	10:12:06	0.738842	3.28652	3.2748	2832.27	FALSE	119
2022-09-13	10:12:07	0.741438	3.29806	3.30689	2813.13	FALSE	119
2022-09-13	10:12:07	0.747799	3.32636	3.30689	2835.6	FALSE	119
2022-09-13	10:12:07	0.741031	3.29625	3.30689	2816.43	FALSE	119
2022-09-13	10:12:08	0.739504	3.28946	3.27769	2838.89	FALSE	119
2022-09-13	10:12:08	0.735687	3.27248	3.27769	2819.7	FALSE	119
2022-09-13	10:12:08	0.736807	3.27746	3.27769	2842.16	FALSE	119
2022-09-13	10:12:08	0.735433	3.27135	3.27769	2822.97	FALSE	119
2022-09-13	10:12:09	0.732226	3.25709	3.2752	2845.42	FALSE	119
2022-09-13	10:12:09	0.736603	3.27656	3.2752	2826.25	FALSE	119
2022-09-13	10:12:09	0.736043	3.27407	3.2752	2848.69	FALSE	119
2022-09-13	10:12:09	0.740318	3.29308	3.2752	2829.54	FALSE	119
2022-09-13	10:12:10	0.741336	3.29761	3.28176	2851.99	FALSE	119
2022-09-13	10:12:10	0.736705	3.27701	3.28176	2832.82	FALSE	119
2022-09-13	10:12:10	0.737926	3.28244	3.28176	2855.27	FALSE	119
2022-09-13	10:12:10	0.735127	3.26999	3.28176	2836.09	FALSE	119
2022-09-13	10:12:11	0.736654	3.27678	3.27279	2858.55	FALSE	119
2022-09-13	10:12:11	0.735229	3.27045	3.27279	2839.36	FALSE	119
2022-09-13	10:12:11	0.735382	3.27113	3.27279	2861.82	FALSE	119
2022-09-13	10:12:12	0.735026	3.26954	3.28154	2842.63	FALSE	119
2022-09-13	10:12:12	0.739097	3.28765	3.28154	2865.11	FALSE	119
2022-09-13	10:12:12	0.740878	3.29557	3.28154	2845.93	FALSE	119
2022-09-13	10:12:12	0.735891	3.27339	3.28154	2868.38	FALSE	119
2022-09-13	10:12:13	0.739046	3.28742	3.28159	2849.21	FALSE	119
2022-09-13	10:12:13	0.741183	3.29693	3.28159	2871.68	FALSE	119
2022-09-13	10:12:13	0.738028	3.2829	3.28159	2852.5	FALSE	119
2022-09-13	10:12:13	0.732684	3.25912	3.28159	2874.94	FALSE	119
2022-09-13	10:12:14	0.730496	3.24939	3.27322	2855.75	FALSE	119
2022-09-13	10:12:14	0.736857	3.27769	3.27322	2878.22	FALSE	119
2022-09-13	10:12:14	0.73584	3.27316	3.27322	2859.02	FALSE	119
2022-09-13	10:12:14	0.740216	3.29263	3.27322	2881.51	FALSE	119
2022-09-13	10:12:15	0.740623	3.29444	3.27995	2862.31	FALSE	119
2022-09-13	10:12:15	0.735992	3.27384	3.27995	2884.78	FALSE	119
2022-09-13	10:12:15	0.739606	3.28992	3.27995	2865.6	FALSE	119
2022-09-13	10:12:15	0.733244	3.26162	3.27995	2888.05	FALSE	119
2022-09-13	10:12:16	0.741845	3.29987	3.28207	2868.9	FALSE	119
2022-09-13	10:12:16	0.738588	3.28539	3.28207	2891.33	FALSE	119
2022-09-13	10:12:16	0.733092	3.26094	3.28207	2872.16	FALSE	119
2022-09-13	10:12:17	0.735026	3.26954	3.27763	2894.6	FALSE	119
2022-09-13	10:12:17	0.739809	3.29082	3.27763	2875.45	FALSE	119
2022-09-13	10:12:17	0.734415	3.26682	3.27763	2897.87	FALSE	119
2022-09-13	10:12:17	0.73813	3.28335	3.27763	2878.74	FALSE	119
2022-09-13	10:12:18	0.737366	3.27995	3.26575	2901.15	FALSE	119
2022-09-13	10:12:18	0.72958	3.24532	3.26575	2881.98	FALSE	119
2022-09-13	10:12:18	0.732837	3.25981	3.26575	2904.41	FALSE	119
2022-09-13	10:12:18	0.736908	3.27791	3.26575	2885.26	FALSE	119
2022-09-13	10:12:19	0.736298	3.2752	3.29195	2907.68	FALSE	119
2022-09-13	10:12:19	0.746679	3.32138	3.29195	2888.58	FALSE	119
2022-09-13	10:12:19	0.737773	3.28176	3.29195	2910.96	FALSE	119
2022-09-13	10:12:19	0.739504	3.28946	3.29195	2891.87	FALSE	119
2022-09-13	10:12:20	0.736501	3.2761	3.28388	2914.24	FALSE	119
2022-09-13	10:12:20	0.744644	3.31233	3.28388	2895.18	FALSE	119
2022-09-13	10:12:20	0.733601	3.2632	3.28388	2917.5	FALSE	119
2022-09-13	10:12:21	0.739707	3.29036	3.28307	2898.48	FALSE	119
2022-09-13	10:12:21	0.734822	3.26864	3.28307	2920.77	FALSE	119
2022-09-13	10:12:21	0.738486	3.28493	3.28307	2901.76	FALSE	119
2022-09-13	10:12:21	0.739249	3.28833	3.28307	2924.06	FALSE	119
2022-09-13	10:12:22	0.738028	3.2829	3.2829	2905.04	FALSE	119
2022-09-13	10:12:22	0.740573	3.29422	3.2829	2927.35	FALSE	119
2022-09-13	10:12:22	0.735483	3.27158	3.2829	2908.31	FALSE	119
2022-09-13	10:12:22	0.738028	3.2829	3.2829	2930.64	FALSE	119
2022-09-13	10:12:23	0.73757	3.28086	3.28669	2911.6	FALSE	119
2022-09-13	10:12:23	0.739351	3.28878	3.28669	2933.93	FALSE	119
2022-09-13	10:12:23	0.738689	3.28584	3.28669	2914.88	FALSE	119
2022-09-13	10:12:23	0.739911	3.29127	3.28669	2937.22	FALSE	119
2022-09-13	10:12:24	0.733957	3.26479	3.27792	2918.15	FALSE	119
2022-09-13	10:12:24	0.739555	3.28969	3.27792	2940.51	FALSE	119
2022-09-13	10:12:24	0.737468	3.28041	3.27792	2921.43	FALSE	119
2022-09-13	10:12:24	0.736654	3.27678	3.27792	2943.78	FALSE	119
2022-09-13	10:12:25	0.737875	3.28222	3.27459	2924.71	FALSE	119
2022-09-13	10:12:25	0.734669	3.26795	3.27459	2947.05	FALSE	119
2022-09-13	10:12:25	0.735941	3.27361	3.27459	2927.98	FALSE	119
2022-09-13	10:12:26	0.734415	3.26682	3.27978	2950.32	FALSE	119
2022-09-13	10:12:26	0.733499	3.26275	3.27978	2931.24	FALSE	119
2022-09-13	10:12:26	0.74327	3.30621	3.27978	2953.62	FALSE	119
2022-09-13	10:12:26	0.73813	3.28335	3.27978	2934.53	FALSE	119
2022-09-13	10:12:27	0.734262	3.26614	3.28108	2956.89	FALSE	119
2022-09-13	10:12:27	0.739147	3.28787	3.28108	2937.82	FALSE	119
2022-09-13	10:12:27	0.740267	3.29286	3.28108	2960.18	FALSE	119
2022-09-13	10:12:27	0.736807	3.27746	3.28108	2941.09	FALSE	119
2022-09-13	10:12:28	0.731412	3.25347	3.27656	2963.44	FALSE	119
2022-09-13	10:12:28	0.735941	3.27361	3.27656	2944.37	FALSE	119
2022-09-13	10:12:28	0.741387	3.29784	3.27656	2966.74	FALSE	119
2022-09-13	10:12:28	0.737672	3.28131	3.27656	2947.65	FALSE	119
2022-09-13	10:12:29	0.733448	3.26252	3.27535	2970	FALSE	119
2022-09-13	10:12:29	0.739402	3.28901	3.27535	2950.94	FALSE	119
2022-09-13	10:12:29	0.736145	3.27452	3.27535	2973.27	FALSE	119
2022-09-13	10:12:30	0.737977	3.28267	3.28216	2954.22	FALSE	119
2022-09-13	10:12:30	0.741031	3.29625	3.28216	2976.57	FALSE	119
2022-09-13	10:12:30	0.73584	3.27316	3.28216	2957.49	FALSE	119
2022-09-13	10:12:30	0.736603	3.27656	3.28216	2979.85	FALSE	119
2022-09-13	10:12:31	0.742964	3.30485	3.28431	2960.8	FALSE	119
2022-09-13	10:12:31	0.739555	3.28969	3.28431	2983.13	FALSE	119
2022-09-13	10:12:31	0.734873	3.26886	3.28431	2964.07	FALSE	119
2022-09-13	10:12:31	0.735992	3.27384	3.28431	2986.41	FALSE	119
2022-09-13	10:12:32	0.73813	3.28335	3.26994	2967.35	FALSE	119
2022-09-13	10:12:32	0.738435	3.28471	3.26994	2989.69	FALSE	119
2022-09-13	10:12:32	0.727697	3.23694	3.26994	2970.59	FALSE	119
2022-09-13	10:12:32	0.736196	3.27475	3.26994	2992.97	FALSE	119
2022-09-13	10:12:33	0.732379	3.25777	3.26886	2973.85	FALSE	119
2022-09-13	10:12:33	0.733397	3.2623	3.26886	2996.23	FALSE	119
2022-09-13	10:12:33	0.738842	3.28652	3.26886	2977.13	FALSE	119
2022-09-13	10:12:34	0.735483	3.27158	3.26416	2999.5	FALSE	119
2022-09-13	10:12:34	0.737163	3.27905	3.26416	2980.41	FALSE	119
2022-09-13	10:12:34	0.73701	3.27837	3.26416	3002.78	FALSE	119
2022-09-13	10:12:34	0.725611	3.22766	3.26416	2983.64	FALSE	119
2022-09-13	10:12:35	0.444389	1.97673	1.33865	3004.76	FALSE	119
2022-09-13	10:12:35	0.139453	0.620315	1.33865	2984.26	FALSE	119
2022-09-13	10:12:35	0.290903	1.29399	1.33865	3006.05	FALSE	119
2022-09-13	10:12:35	0.329021	1.46355	1.33865	2985.72	FALSE	119
2022-09-13	10:12:36	0.33869	1.50656	1.88188	3007.56	FALSE	119
2022-09-13	10:12:36	0.40042	1.78115	1.88188	2987.5	FALSE	119
2022-09-13	10:12:36	0.351412	1.56315	1.88188	3009.12	FALSE	119
2022-09-13	10:12:36	0.601743	2.67667	1.88188	2990.18	FALSE	119
2022-09-13	10:12:37	0.272074	1.21024	6.77688	3010.33	FALSE	119
2022-09-13	10:12:37	0.468054	2.082	6.77688	2992.26	FALSE	119
2022-09-13	10:12:37	0.802252	3.56858	6.77688	3013.9	FALSE	119
2022-09-13	10:12:37	4.55166	20.2467	6.77688	3012.51	1	120
2022-09-13	10:12:38	3.83319	17.0508	15.048	3030.95	1	121
2022-09-13	10:12:38	5.14413	22.8821	15.048	3035.39	1	122
2022-09-13	10:12:38	1.17151	5.21111	15.048	3036.16	FALSE	122
2022-09-13	10:12:39	2.94871	13.1165	5.72216	3048.51	FALSE	122
2022-09-13	10:12:39	0.814109	3.62132	5.72216	3039.78	FALSE	122
2022-09-13	10:12:39	0.745306	3.31527	5.72216	3051.82	FALSE	122
2022-09-13	10:12:39	0.637468	2.83559	5.72216	3042.62	FALSE	122
2022-09-13	10:12:40	0.546374	2.43038	0.694113	3054.25	FALSE	122
2022-09-13	10:12:40	0.507901	2.25925	0.694113	3044.88	FALSE	122
2022-09-13	10:12:40	-0.0210048	-0.0934336	0.694113	3054.25	FALSE	122
2022-09-13	10:12:40	-0.409096	-1.81974	0.694113	3044.88	FALSE	122
2022-09-13	10:12:41	-0.643905	-2.86422	-3.08323	3054.25	FALSE	122
2022-09-13	10:12:41	-0.710012	-3.15828	-3.08323	3044.88	FALSE	122
2022-09-13	10:12:41	-0.694083	-3.08742	-3.08323	3054.25	FALSE	122
2022-09-13	10:12:41	-0.724567	-3.22302	-3.08323	3044.88	FALSE	122
2022-09-13	10:12:42	-0.529707	-2.35624	-1.19896	3054.25	FALSE	122
2022-09-13	10:12:42	-0.326653	-1.45302	-1.19896	3044.88	FALSE	122
2022-09-13	10:12:42	0.0477483	0.212394	-1.19896	3054.47	FALSE	122
2022-09-13	10:12:43	0.26444	1.17628	1.48087	3046.05	FALSE	122
2022-09-13	10:12:43	0.327596	1.45721	1.48087	3055.92	FALSE	122
2022-09-13	10:12:43	0.295992	1.31663	1.48087	3047.37	FALSE	122
2022-09-13	10:12:43	0.443626	1.97334	1.48087	3057.9	FALSE	122
2022-09-13	10:12:44	0.385916	1.71663	1.61856	3049.09	FALSE	122
2022-09-13	10:12:44	0.338537	1.50588	1.61856	3059.4	FALSE	122
2022-09-13	10:12:44	0.365611	1.62631	1.61856	3050.71	FALSE	122
2022-09-13	10:12:44	0.365407	1.6254	1.61856	3061.03	FALSE	122
2022-09-13	10:12:45	0.379962	1.69015	1.62439	3052.4	FALSE	122
2022-09-13	10:12:45	0.36383	1.61839	1.62439	3062.65	FALSE	122
2022-09-13	10:12:45	0.389987	1.73474	1.62439	3054.14	FALSE	122
2022-09-13	10:12:45	0.326934	1.45427	1.62439	3064.1	FALSE	122
2022-09-13	10:12:46	0.270242	1.20209	1.18834	3055.34	FALSE	122
2022-09-13	10:12:46	0.262303	1.16678	1.18834	3065.27	FALSE	122
2022-09-13	10:12:46	0.256043	1.13893	1.18834	3056.48	FALSE	122
2022-09-13	10:12:46	0.280013	1.24555	1.18834	3066.51	FALSE	122
2022-09-13	10:12:47	0.268512	1.1944	1.22594	3057.67	FALSE	122
2022-09-13	10:12:47	0.277316	1.23356	1.22594	3067.75	FALSE	122
2022-09-13	10:12:47	0.28098	1.24986	1.22594	3058.92	FALSE	122
2022-09-13	10:12:48	0.286323	1.27362	1.25891	3069.02	FALSE	122
2022-09-13	10:12:48	0.279606	1.24374	1.25891	3060.17	FALSE	122
2022-09-13	10:12:48	0.279758	1.24442	1.25891	3070.26	FALSE	122
2022-09-13	10:12:48	0.286374	1.27385	1.25891	3061.44	FALSE	122
2022-09-13	10:12:49	0.286628	1.27498	1.23486	3071.54	FALSE	122
2022-09-13	10:12:49	0.281845	1.2537	1.23486	3062.69	FALSE	122
2022-09-13	10:12:49	0.27243	1.21182	1.23486	3072.75	FALSE	122
2022-09-13	10:12:49	0.269529	1.19892	1.23486	3063.89	FALSE	122
2022-09-13	10:12:50	0.281031	1.25008	1.24335	3074	FALSE	122
2022-09-13	10:12:50	0.277468	1.23423	1.24335	3065.13	FALSE	122
2022-09-13	10:12:50	0.27584	1.22699	1.24335	3075.23	FALSE	122
2022-09-13	10:12:50	0.283728	1.26208	1.24335	3066.39	FALSE	122
2022-09-13	10:12:51	0.290853	1.29377	1.33995	3076.52	FALSE	122
2022-09-13	10:12:51	0.306221	1.36213	1.33995	3067.75	FALSE	122
2022-09-13	10:12:51	0.306629	1.36395	1.33995	3077.89	FALSE	122
2022-09-13	10:12:52	0.301845	1.34267	1.29728	3069.09	FALSE	122
2022-09-13	10:12:52	0.289529	1.28788	1.29728	3079.17	FALSE	122
2022-09-13	10:12:52	0.286171	1.27295	1.29728	3070.37	FALSE	122
2022-09-13	10:12:52	0.28902	1.28562	1.29728	3080.46	FALSE	122
2022-09-13	10:12:53	0.288206	1.282	1.2584	3071.65	FALSE	122
2022-09-13	10:12:53	0.281132	1.25053	1.2584	3081.71	FALSE	122
2022-09-13	10:12:53	0.278181	1.2374	1.2584	3072.89	FALSE	122
2022-09-13	10:12:53	0.284084	1.26366	1.2584	3082.97	FALSE	122
2022-09-13	10:12:54	0.356501	1.58579	2.12682	3074.47	FALSE	122
2022-09-13	10:12:54	0.440827	1.96089	2.12682	3084.93	FALSE	122
2022-09-13	10:12:54	0.541997	2.41091	2.12682	3076.88	FALSE	122
2022-09-13	10:12:54	0.573193	2.54968	2.12682	3087.48	FALSE	122
2022-09-13	10:12:55	0.431921	1.92127	2.75786	3078.81	FALSE	122
2022-09-13	10:12:55	0.725102	3.2254	2.75786	3090.71	FALSE	122
2022-09-13	10:12:55	0.702964	3.12692	2.75786	3081.93	FALSE	122
2022-09-13	10:12:56	0.494262	2.19858	2.0172	3092.91	FALSE	122
2022-09-13	10:12:56	0.47874	2.12953	2.0172	3084.06	FALSE	122
2022-09-13	10:12:56	0.394109	1.75308	2.0172	3094.66	FALSE	122
2022-09-13	10:12:56	0.446832	1.9876	2.0172	3086.05	FALSE	122
2022-09-13	10:12:57	0.449835	2.00096	2.99779	3096.66	FALSE	122
2022-09-13	10:12:57	0.500318	2.22551	2.99779	3088.27	FALSE	122
2022-09-13	10:12:57	0.504796	2.24543	2.99779	3098.91	FALSE	122
2022-09-13	10:12:57	1.24078	5.51924	2.99779	3093.79	FALSE	122
2022-09-13	10:12:58	1.87874	8.35701	8.67976	3107.26	FALSE	122
2022-09-13	10:12:58	2.77813	12.3577	8.67976	3106.15	FALSE	122
2022-09-13	10:12:58	1.53355	6.82154	8.67976	3114.09	FALSE	122
2022-09-13	10:12:58	1.61477	7.18282	8.67976	3113.33	FALSE	122
2022-09-13	10:12:59	1.9421	8.63885	14.2931	3122.72	FALSE	122
2022-09-13	10:12:59	3.02744	13.4667	14.2931	3126.8	1	123
2022-09-13	10:12:59	4.87609	21.6898	14.2931	3144.41	1	124
2022-09-13	10:12:59	3.00729	13.377	14.2931	3140.18	1	125
2022-09-13	10:13:00	2.8195	12.5417	10.0128	3156.96	FALSE	125
2022-09-13	10:13:00	1.97935	8.80454	10.0128	3148.98	FALSE	125
2022-09-13	10:13:00	1.95406	8.69205	10.0128	3165.65	FALSE	125
2022-09-13	10:13:01	1.50826	6.70904	3.91125	3155.69	FALSE	125
2022-09-13	10:13:01	0.68271	3.03683	3.91125	3168.68	FALSE	125
2022-09-13	10:13:01	0.496298	2.20763	3.91125	3157.9	FALSE	125
2022-09-13	10:13:01	0.829885	3.69149	3.91125	3172.38	FALSE	125
2022-09-13	10:13:02	0.366272	1.62925	1.92325	3159.53	FALSE	125
2022-09-13	10:13:02	0.43014	1.91335	1.92325	3174.29	FALSE	125
2022-09-13	10:13:02	0.513804	2.2855	1.92325	3161.81	FALSE	125
2022-09-13	10:13:02	0.419249	1.8649	1.92325	3176.15	FALSE	125
2022-09-13	10:13:03	0.296908	1.32071	1.95387	3163.13	FALSE	125
2022-09-13	10:13:03	0.600776	2.67237	1.95387	3178.83	FALSE	125
2022-09-13	10:13:03	0.377723	1.68019	1.95387	3164.82	FALSE	125
2022-09-13	10:13:03	0.481591	2.14221	1.95387	3180.97	FALSE	125

## Sheet: Juju_harness_2022913100745  (2)
Date	Time	Lbs	Newtons	Total force x time	Total steps > 13.345		**GoPro Fitting: 952
2022-09-13	10:08:03	0.378995	1.68585	1.68585	FALSE	0			Total force x time	3180.97
2022-09-13	10:08:03	1.19294	5.30644	5.30644	FALSE	0			Total steps	125
2022-09-13	10:08:03	0.550343	2.44804	4.13388	FALSE	0
2022-09-13	10:08:03	0.602557	2.68029	7.98673	FALSE	0
2022-09-13	10:08:04	0.583677	2.59631	6.73019	FALSE	0
2022-09-13	10:08:04	0.638537	2.84034	10.8271	FALSE	0
2022-09-13	10:08:04	2.83976	12.6318	19.362	FALSE	0
2022-09-13	10:08:04	2.13029	9.47596	20.303	FALSE	0
2022-09-13	10:08:05	5.01202	22.2945	41.6565	1	1
2022-09-13	10:08:05	1.17406	5.22245	25.5255	FALSE	1
2022-09-13	10:08:05	1.47528	6.56234	48.2188	FALSE	1
2022-09-13	10:08:06	0.792125	3.52353	29.049	FALSE	1
2022-09-13	10:08:06	1.12149	4.98861	53.2074	FALSE	1
2022-09-13	10:08:06	0.601997	2.6778	31.7268	FALSE	1
2022-09-13	10:08:06	2.15966	9.6066	62.814	FALSE	1
2022-09-13	10:08:07	1.24057	5.5183	37.2451	FALSE	1
2022-09-13	10:08:07	3.74683	16.6666	79.4807	1	2
2022-09-13	10:08:07	2.17202	9.66158	46.9067	FALSE	2
2022-09-13	10:08:07	1.42017	6.3172	85.7979	FALSE	2
2022-09-13	10:08:08	2.89502	12.8776	59.7843	FALSE	2
2022-09-13	10:08:08	6.35797	28.2815	114.079	1	3
2022-09-13	10:08:08	6.64764	29.57	89.3544	1	4
2022-09-13	10:08:08	2.94307	13.0914	127.171	FALSE	4
2022-09-13	10:08:09	3.99258	17.7598	107.114	1	5
2022-09-13	10:08:09	2.45859	10.9363	138.107	FALSE	5
2022-09-13	10:08:09	2.19146	9.74805	116.862	FALSE	5
2022-09-13	10:08:10	2.21319	9.84471	147.952	FALSE	5
2022-09-13	10:08:10	1.31915	5.86784	122.73	FALSE	5
2022-09-13	10:08:10	0.535433	2.38171	150.333	FALSE	5
2022-09-13	10:08:10	0.44159	1.96428	124.694	FALSE	5
2022-09-13	10:08:11	0.295687	1.31527	151.649	FALSE	5
2022-09-13	10:08:11	-0.36472	-1.62235	124.694	FALSE	5
2022-09-13	10:08:11	0.15584	0.693207	152.342	FALSE	5
2022-09-13	10:08:11	0.514211	2.28731	126.982	FALSE	5
2022-09-13	10:08:12	0.0931427	0.414317	152.756	FALSE	5
2022-09-13	10:08:12	0.0401147	0.178438	127.16	FALSE	5
2022-09-13	10:08:12	-0.441412	-1.96349	152.756	FALSE	5
2022-09-13	10:08:12	-0.489096	-2.1756	127.16	FALSE	5
2022-09-13	10:08:13	-0.538053	-2.39337	152.756	FALSE	5
2022-09-13	10:08:13	-0.528995	-2.35308	127.16	FALSE	5
2022-09-13	10:08:13	-0.514643	-2.28923	152.756	FALSE	5
2022-09-13	10:08:13	-0.512964	-2.28177	127.16	FALSE	5
2022-09-13	10:08:14	-0.520394	-2.31482	152.756	FALSE	5
2022-09-13	10:08:14	-0.596424	-2.65301	127.16	FALSE	5
2022-09-13	10:08:14	-0.742836	-3.30428	152.756	FALSE	5
2022-09-13	10:08:15	-0.120598	-0.536444	127.16	FALSE	5
2022-09-13	10:08:15	0.149937	0.66695	153.423	FALSE	5
2022-09-13	10:08:15	0.282608	1.2571	128.417	FALSE	5
2022-09-13	10:08:15	0.340318	1.5138	154.937	FALSE	5
2022-09-13	10:08:16	0.247392	1.10045	129.518	FALSE	5
2022-09-13	10:08:16	0.345204	1.53554	156.473	FALSE	5
2022-09-13	10:08:16	0.342557	1.52376	131.041	FALSE	5
2022-09-13	10:08:16	0.1993	0.886526	157.359	FALSE	5
2022-09-13	10:08:17	0.429886	1.91222	132.954	FALSE	5
2022-09-13	10:08:17	0.525865	2.33915	159.698	FALSE	5
2022-09-13	10:08:17	3.79065	16.8616	149.815	1	6
2022-09-13	10:08:17	2.6765	11.9056	171.604	FALSE	6
2022-09-13	10:08:18	6.33192	28.1656	177.981	1	7
2022-09-13	10:08:18	4.51558	20.0862	191.69	1	8
2022-09-13	10:08:18	6.70963	29.8458	207.827	1	9
2022-09-13	10:08:19	5.042	22.4278	214.118	1	10
2022-09-13	10:08:19	4.86571	21.6437	229.47	1	11
2022-09-13	10:08:19	1.35828	6.0419	220.16	FALSE	11
2022-09-13	10:08:19	1.26663	5.63422	235.104	FALSE	11
2022-09-13	10:08:20	0.790445	3.51606	223.676	FALSE	11
2022-09-13	10:08:20	0.769835	3.42438	238.529	FALSE	11
2022-09-13	10:08:20	1.69935	7.55905	231.235	FALSE	11
2022-09-13	10:08:20	1.93503	8.6074	247.136	FALSE	11
2022-09-13	10:08:21	5.20026	23.1318	254.367	1	12
2022-09-13	10:08:21	5.02922	22.371	269.507	1	13
2022-09-13	10:08:21	1.03508	4.60424	258.971	FALSE	13
2022-09-13	10:08:21	0.593804	2.64136	272.149	FALSE	13
2022-09-13	10:08:22	0.463168	2.06026	261.031	FALSE	13
2022-09-13	10:08:22	0.656298	2.91934	275.068	FALSE	13
2022-09-13	10:08:22	0.275891	1.22722	262.258	FALSE	13
2022-09-13	10:08:22	0.475127	2.11346	277.181	FALSE	13
2022-09-13	10:08:23	0.351616	1.56406	263.822	FALSE	13
2022-09-13	10:08:23	0.914109	4.06614	281.248	FALSE	13
2022-09-13	10:08:23	2.78785	12.4009	276.223	FALSE	13
2022-09-13	10:08:24	2.56052	11.3897	292.637	FALSE	13
2022-09-13	10:08:24	4.71019	20.9519	297.175	1	14
2022-09-13	10:08:24	2.89686	12.8858	305.523	FALSE	14
2022-09-13	10:08:24	5.18663	23.0712	320.246	1	15
2022-09-13	10:08:25	1.38581	6.16436	311.687	FALSE	15
2022-09-13	10:08:25	4.39706	19.559	339.805	1	16
2022-09-13	10:08:25	0.783117	3.48346	315.171	FALSE	16
2022-09-13	10:08:25	3.77533	16.7934	356.599	1	17
2022-09-13	10:08:26	0.824898	3.66931	318.84	FALSE	17
2022-09-13	10:08:26	2.828	12.5795	369.178	FALSE	17
2022-09-13	10:08:26	1.98556	8.83217	327.672	FALSE	17
2022-09-13	10:08:26	4.27121	18.9992	388.178	1	18
2022-09-13	10:08:27	1.63803	7.28629	334.959	FALSE	18
2022-09-13	10:08:27	3.17665	14.1304	402.308	1	19
2022-09-13	10:08:27	1.23894	5.51105	340.47	FALSE	19
2022-09-13	10:08:28	1.65747	7.37276	409.681	FALSE	19
2022-09-13	10:08:28	0.410547	1.8262	342.296	FALSE	19
2022-09-13	10:08:28	3.63314	16.1609	425.842	1	20
2022-09-13	10:08:28	1.83223	8.15013	350.446	FALSE	20
2022-09-13	10:08:29	8.71909	38.7843	464.626	1	21
2022-09-13	10:08:29	7.16037	31.8508	382.297	1	22
2022-09-13	10:08:29	4.2506	18.9075	483.533	1	23
2022-09-13	10:08:29	2.23228	9.92963	392.226	FALSE	23
2022-09-13	10:08:30	2.68072	11.9244	495.458	FALSE	23
2022-09-13	10:08:30	2.02011	8.98585	401.212	FALSE	23
2022-09-13	10:08:30	2.02968	9.02842	504.486	FALSE	23
2022-09-13	10:08:30	2.16841	9.64552	410.858	FALSE	23
2022-09-13	10:08:31	2.00368	8.91277	513.399	FALSE	23
2022-09-13	10:08:31	0.707901	3.14889	414.007	FALSE	23
2022-09-13	10:08:31	0.501132	2.22914	515.628	FALSE	23
2022-09-13	10:08:32	0.530649	2.36043	416.367	FALSE	23
2022-09-13	10:08:32	0.465153	2.06909	517.697	FALSE	23
2022-09-13	10:08:32	0.49014	2.18024	418.547	FALSE	23
2022-09-13	10:08:32	0.885916	3.94073	521.638	FALSE	23
2022-09-13	10:08:33	1.30602	5.80944	424.357	FALSE	23
2022-09-13	10:08:33	1.26632	5.63284	527.271	FALSE	23
2022-09-13	10:08:33	0.836247	3.71979	428.077	FALSE	23
2022-09-13	10:08:33	1.54622	6.8779	534.149	FALSE	23
2022-09-13	10:08:34	1.60083	7.12081	435.197	FALSE	23
2022-09-13	10:08:34	1.65426	7.35848	541.507	FALSE	23
2022-09-13	10:08:34	1.57757	7.01735	442.215	FALSE	23
2022-09-13	10:08:34	1.57385	7.0008	548.508	FALSE	23
2022-09-13	10:08:35	1.56561	6.96415	449.179	FALSE	23
2022-09-13	10:08:35	1.59849	7.1104	555.618	FALSE	23
2022-09-13	10:08:35	1.66637	7.41235	456.591	FALSE	23
2022-09-13	10:08:35	1.77014	7.87394	563.492	FALSE	23
2022-09-13	10:08:36	0.620929	2.76202	459.353	FALSE	23
2022-09-13	10:08:36	0.396807	1.76508	565.257	FALSE	23
2022-09-13	10:08:36	0.398893	1.77436	461.128	FALSE	23
2022-09-13	10:08:37	0.362608	1.61295	566.87	FALSE	23
2022-09-13	10:08:37	0.293244	1.30441	462.432	FALSE	23
2022-09-13	10:08:37	0.0895295	0.398245	567.269	FALSE	23
2022-09-13	10:08:37	-0.0605468	-0.269324	462.432	FALSE	23
2022-09-13	10:08:38	-0.110827	-0.492981	567.269	FALSE	23
2022-09-13	10:08:38	-0.116272	-0.517201	462.432	FALSE	23
2022-09-13	10:08:38	0.0294277	0.1309	567.399	FALSE	23
2022-09-13	10:08:38	-0.0271117	-0.120598	462.432	FALSE	23
2022-09-13	10:08:39	0.0581809	0.2588	567.658	FALSE	23
2022-09-13	10:08:39	0.92444	4.11209	466.544	FALSE	23
2022-09-13	10:08:39	1.03991	4.62573	572.284	FALSE	23
2022-09-13	10:08:39	3.00418	13.3632	479.907	1	24
2022-09-13	10:08:40	0.768155	3.41691	575.701	FALSE	24
2022-09-13	10:08:40	3.57925	15.9212	495.829	1	25
2022-09-13	10:08:40	1.0649	4.73689	580.438	FALSE	25
2022-09-13	10:08:41	4.66596	20.7551	516.584	1	26
2022-09-13	10:08:41	0.911921	4.05641	584.494	FALSE	26
2022-09-13	10:08:41	3.75599	16.7074	533.291	1	27
2022-09-13	10:08:41	1.38999	6.18295	590.677	FALSE	27
2022-09-13	10:08:42	1.2822	5.70348	538.995	FALSE	27
2022-09-13	10:08:42	0.447087	1.98873	592.666	FALSE	27
2022-09-13	10:08:42	1.0452	4.64926	543.644	FALSE	27
2022-09-13	10:08:42	0.315738	1.40447	594.07	FALSE	27
2022-09-13	10:08:43	0.860369	3.82709	547.471	FALSE	27
2022-09-13	10:08:43	0.212837	0.946742	595.017	FALSE	27
2022-09-13	10:08:43	0.690649	3.07214	550.543	FALSE	27
2022-09-13	10:08:43	0.452227	2.0116	597.029	FALSE	27
2022-09-13	10:08:44	2.02474	9.00645	559.549	FALSE	27
2022-09-13	10:08:44	1.15874	5.15431	602.183	FALSE	27
2022-09-13	10:08:44	1.69416	7.53596	567.085	FALSE	27
2022-09-13	10:08:44	0.753957	3.35375	605.537	FALSE	27
2022-09-13	10:08:45	2.0678	9.19799	576.283	FALSE	27
2022-09-13	10:08:45	1.07955	4.80205	610.339	FALSE	27
2022-09-13	10:08:45	3.50897	15.6086	591.892	1	28
2022-09-13	10:08:46	2.41202	10.7291	621.068	FALSE	28
2022-09-13	10:08:46	5.39344	23.9911	615.883	1	29
2022-09-13	10:08:46	2.93172	13.0409	634.109	FALSE	29
2022-09-13	10:08:46	3.84474	17.1022	632.985	1	30
2022-09-13	10:08:47	4.19528	18.6614	652.77	1	31
2022-09-13	10:08:47	2.03981	9.07348	642.059	FALSE	31
2022-09-13	10:08:47	4.06759	18.0935	670.864	1	32
2022-09-13	10:08:47	2.04174	9.08207	651.141	FALSE	32
2022-09-13	10:08:48	4.74311	21.0983	691.962	1	33
2022-09-13	10:08:48	2.62179	11.6622	662.803	FALSE	33
2022-09-13	10:08:48	0.770394	3.42687	695.389	FALSE	33
2022-09-13	10:08:48	0.747137	3.32341	666.126	FALSE	33
2022-09-13	10:08:49	1.71559	7.63129	703.02	FALSE	33
2022-09-13	10:08:49	1.57258	6.99515	673.122	FALSE	33
2022-09-13	10:08:49	0.519402	2.3104	705.331	FALSE	33
2022-09-13	10:08:50	0.480674	2.13813	675.26	FALSE	33
2022-09-13	10:08:50	0.369326	1.64284	706.973	FALSE	33
2022-09-13	10:08:50	0.732074	3.25641	678.516	FALSE	33
2022-09-13	10:08:50	0.732939	3.26026	710.234	FALSE	33
2022-09-13	10:08:51	0.736654	3.27678	681.793	FALSE	33
2022-09-13	10:08:51	0.719504	3.2005	713.434	FALSE	33
2022-09-13	10:08:51	0.656298	2.91934	684.712	FALSE	33
2022-09-13	10:08:51	2.01411	8.95916	722.393	FALSE	33
2022-09-13	10:08:52	2.96546	13.191	697.903	FALSE	33
2022-09-13	10:08:52	1.29279	5.75059	728.144	FALSE	33
2022-09-13	10:08:52	4.33314	19.2747	717.178	1	34
2022-09-13	10:08:52	1.71487	7.62808	735.772	FALSE	34
2022-09-13	10:08:53	0.64444	2.8666	720.045	FALSE	34
2022-09-13	10:08:53	0.501641	2.2314	738.003	FALSE	34
2022-09-13	10:08:53	0.320369	1.42507	721.47	FALSE	34
2022-09-13	10:08:54	0.319657	1.4219	739.425	FALSE	34
2022-09-13	10:08:54	0.409478	1.82144	723.291	FALSE	34
2022-09-13	10:08:54	0.675432	3.00446	742.43	FALSE	34
2022-09-13	10:08:54	1.87503	8.34051	731.632	FALSE	34
2022-09-13	10:08:55	1.41162	6.27917	748.709	FALSE	34
2022-09-13	10:08:55	1.79039	7.96401	739.596	FALSE	34
2022-09-13	10:08:55	0.819555	3.64554	752.354	FALSE	34
2022-09-13	10:08:55	1.0391	4.62212	744.218	FALSE	34
2022-09-13	10:08:56	1.08856	4.84213	757.197	FALSE	34
2022-09-13	10:08:56	0.910954	4.05211	748.27	FALSE	34
2022-09-13	10:08:56	1.11095	4.94173	762.138	FALSE	34
2022-09-13	10:08:56	1.4819	6.59179	754.862	FALSE	34
2022-09-13	10:08:57	1.788	7.95338	770.092	FALSE	34
2022-09-13	10:08:57	2.14144	9.52555	764.387	FALSE	34
2022-09-13	10:08:57	1.27854	5.6872	775.779	FALSE	34
2022-09-13	10:08:57	1.26271	5.61679	770.004	FALSE	34
2022-09-13	10:08:58	0.927341	4.125	779.904	FALSE	34
2022-09-13	10:08:58	0.387748	1.72478	771.729	FALSE	34
2022-09-13	10:08:58	0.186985	0.831747	780.736	FALSE	34
2022-09-13	10:08:59	0.149122	0.663324	772.392	FALSE	34
2022-09-13	10:08:59	0.13243	0.589075	781.325	FALSE	34
2022-09-13	10:08:59	0.103015	0.458231	772.85	FALSE	34
2022-09-13	10:08:59	0.117977	0.524785	781.85	FALSE	34
2022-09-13	10:09:00	0.125458	0.558062	773.408	FALSE	34
2022-09-13	10:09:00	0.147138	0.654499	782.504	FALSE	34
2022-09-13	10:09:00	0.146171	0.650198	774.059	FALSE	34
2022-09-13	10:09:00	0.157417	0.700222	783.204	FALSE	34
2022-09-13	10:09:01	0.168308	0.748668	774.807	FALSE	34
2022-09-13	10:09:01	0.164135	0.730105	783.934	FALSE	34
2022-09-13	10:09:01	0.173295	0.770851	775.578	FALSE	34
2022-09-13	10:09:01	0.160624	0.714488	784.649	FALSE	34
2022-09-13	10:09:02	0.153041	0.680757	776.259	FALSE	34
2022-09-13	10:09:02	0.142201	0.632538	785.281	FALSE	34
2022-09-13	10:09:02	0.135942	0.604697	776.863	FALSE	34
2022-09-13	10:09:03	0.141082	0.627561	785.909	FALSE	34
2022-09-13	10:09:03	0.136247	0.606054	777.47	FALSE	34
2022-09-13	10:09:03	0.101591	0.451897	786.361	FALSE	34
2022-09-13	10:09:03	0.152023	0.676229	778.146	FALSE	34
2022-09-13	10:09:04	0.0974175	0.433333	786.794	FALSE	34
2022-09-13	10:09:04	0.441998	1.9661	780.112	FALSE	34
2022-09-13	10:09:04	0.261692	1.16406	787.958	FALSE	34
2022-09-13	10:09:04	0.181031	0.805262	780.917	FALSE	34
2022-09-13	10:09:05	0.114008	0.50713	788.465	FALSE	34
2022-09-13	10:09:05	0.23355	1.03888	781.956	FALSE	34
2022-09-13	10:09:05	0.100776	0.448272	788.914	FALSE	34
2022-09-13	10:09:05	0.734924	3.26909	785.225	FALSE	34
2022-09-13	10:09:06	6.64978	29.5796	818.493	1	35
2022-09-13	10:09:06	27.2488	121.208	906.433	1	36
2022-09-13	10:09:06	1.67742	7.4615	825.955	FALSE	36
2022-09-13	10:09:06	0.90612	4.0306	910.464	FALSE	36
2022-09-13	10:09:07	0.154873	0.688906	826.644	FALSE	36
2022-09-13	10:09:07	0.21187	0.94244	911.406	FALSE	36
2022-09-13	10:09:07	-0.20304	-0.903163	826.644	FALSE	36
2022-09-13	10:09:08	0.824135	3.66592	915.072	FALSE	36
2022-09-13	10:09:08	4.3479	19.3403	845.984	1	37
2022-09-13	10:09:08	5.20667	23.1603	938.232	1	38
2022-09-13	10:09:08	6.75222	30.0352	876.019	1	39
2022-09-13	10:09:09	6.81136	30.2983	968.531	1	40
2022-09-13	10:09:09	6.04612	26.8944	902.913	1	41
2022-09-13	10:09:09	9.90556	44.0619	1012.59	1	42
2022-09-13	10:09:09	3.79457	16.879	919.793	1	43
2022-09-13	10:09:10	3.25136	14.4627	1027.06	1	44
2022-09-13	10:09:10	2.79019	12.4113	932.204	FALSE	44
2022-09-13	10:09:10	3.44597	15.3284	1042.38	1	45
2022-09-13	10:09:10	3.57294	15.8932	948.097	1	46
2022-09-13	10:09:11	4.85131	21.5796	1063.96	1	47
2022-09-13	10:09:11	2.70775	12.0446	960.142	FALSE	47
2022-09-13	10:09:11	0.708766	3.15273	1067.12	FALSE	47
2022-09-13	10:09:12	0.224949	1.00062	961.142	FALSE	47
2022-09-13	10:09:12	-0.112252	-0.499319	1067.12	FALSE	47
2022-09-13	10:09:12	-0.154694	-0.68811	961.142	FALSE	47
2022-09-13	10:09:12	-0.137137	-0.610013	1067.12	FALSE	47
2022-09-13	10:09:13	-0.624567	-2.7782	961.142	FALSE	47
2022-09-13	10:09:13	-0.041412	-0.184209	1067.12	FALSE	47
2022-09-13	10:09:13	1.95284	8.68662	969.829	FALSE	47
2022-09-13	10:09:13	2.02805	9.02117	1076.14	FALSE	47
2022-09-13	10:09:14	0.762455	3.39155	973.22	FALSE	47
2022-09-13	10:09:14	0.285763	1.27113	1077.41	FALSE	47
2022-09-13	10:09:14	0.204593	0.910071	974.13	FALSE	47
2022-09-13	10:09:14	0.532684	2.36948	1079.78	FALSE	47
2022-09-13	10:09:15	0.586476	2.60876	976.739	FALSE	47
2022-09-13	10:09:15	0.129275	0.575041	1080.35	FALSE	47
2022-09-13	10:09:15	0.124237	0.552631	977.292	FALSE	47
2022-09-13	10:09:15	0.146476	0.651555	1081	FALSE	47
2022-09-13	10:09:16	0.479911	2.13474	979.427	FALSE	47
2022-09-13	10:09:16	0.739351	3.28878	1084.29	FALSE	47
2022-09-13	10:09:16	6.33431	28.1763	1007.6	1	48
2022-09-13	10:09:17	6.75472	30.0463	1114.34	1	49
2022-09-13	10:09:17	3.43543	15.2815	1022.88	1	50
2022-09-13	10:09:17	2.79833	12.4475	1126.79	FALSE	50
2022-09-13	10:09:17	0.475229	2.11391	1025	FALSE	50
2022-09-13	10:09:18	0.477316	2.1232	1128.91	FALSE	50
2022-09-13	10:09:18	0.387799	1.72501	1026.72	FALSE	50
2022-09-13	10:09:18	0.386832	1.72071	1130.63	FALSE	50
2022-09-13	10:09:18	0.303066	1.3481	1028.07	FALSE	50
2022-09-13	10:09:19	0.256552	1.14119	1131.77	FALSE	50
2022-09-13	10:09:19	0.274975	1.22314	1029.29	FALSE	50
2022-09-13	10:09:19	0.0432699	0.192473	1131.96	FALSE	50
2022-09-13	10:09:19	0.173092	0.769948	1030.06	FALSE	50
2022-09-13	10:09:20	0.125051	0.556252	1132.52	FALSE	50
2022-09-13	10:09:20	0.086018	0.382625	1030.45	FALSE	50
2022-09-13	10:09:20	-0.0189183	-0.0841524	1132.52	FALSE	50
2022-09-13	10:09:21	-0.105178	-0.467853	1030.45	FALSE	50
2022-09-13	10:09:21	-0.103498	-0.46038	1132.52	FALSE	50
2022-09-13	10:09:21	-0.14701	-0.65393	1030.45	FALSE	50
2022-09-13	10:09:21	-0.116374	-0.517655	1132.52	FALSE	50
2022-09-13	10:09:22	-0.208791	-0.928744	1030.45	FALSE	50
2022-09-13	10:09:22	-0.151081	-0.672039	1132.52	FALSE	50
2022-09-13	10:09:22	-0.209605	-0.932365	1030.45	FALSE	50
2022-09-13	10:09:22	0.0371122	0.165082	1132.69	FALSE	50
2022-09-13	10:09:23	-0.186603	-0.830047	1030.45	FALSE	50
2022-09-13	10:09:23	-0.458816	-2.04091	1132.69	FALSE	50
2022-09-13	10:09:23	-0.576628	-2.56496	1030.45	FALSE	50
2022-09-13	10:09:23	-0.694745	-3.09036	1132.69	FALSE	50
2022-09-13	10:09:24	-0.61159	-2.72047	1030.45	FALSE	50
2022-09-13	10:09:24	-0.627926	-2.79314	1132.69	FALSE	50
2022-09-13	10:09:24	-0.452404	-2.01238	1030.45	FALSE	50
2022-09-13	10:09:25	-0.392557	-1.74617	1132.69	FALSE	50
2022-09-13	10:09:25	-0.405992	-1.80593	1030.45	FALSE	50
2022-09-13	10:09:25	-0.554949	-2.46852	1132.69	FALSE	50
2022-09-13	10:09:25	-0.488333	-2.1722	1030.45	FALSE	50
2022-09-13	10:09:26	-0.498511	-2.21748	1132.69	FALSE	50
2022-09-13	10:09:26	-0.298816	-1.32919	1030.45	FALSE	50
2022-09-13	10:09:26	-0.296119	-1.3172	1132.69	FALSE	50
2022-09-13	10:09:26	-0.0777478	-0.345838	1030.45	FALSE	50
2022-09-13	10:09:27	0.813702	3.61951	1136.31	FALSE	50
2022-09-13	10:09:27	2.06775	9.19777	1039.64	FALSE	50
2022-09-13	10:09:27	0.928104	4.12839	1140.43	FALSE	50
2022-09-13	10:09:27	1.58872	7.06694	1046.71	FALSE	50
2022-09-13	10:09:28	0.504796	2.24543	1142.68	FALSE	50
2022-09-13	10:09:28	1.76902	7.86895	1054.58	FALSE	50
2022-09-13	10:09:28	1.10592	4.91935	1147.6	FALSE	50
2022-09-13	10:09:28	1.30856	5.82074	1060.4	FALSE	50
2022-09-13	10:09:29	0.603372	2.68392	1150.28	FALSE	50
2022-09-13	10:09:29	0.810903	3.60706	1064.01	FALSE	50
2022-09-13	10:09:29	1.09034	4.85005	1155.13	FALSE	50
2022-09-13	10:09:30	0.251107	1.11697	1065.13	FALSE	50
2022-09-13	10:09:30	1.16434	5.17922	1160.31	FALSE	50
2022-09-13	10:09:30	1.83559	8.16507	1073.29	FALSE	50
2022-09-13	10:09:30	0.626069	2.78488	1163.1	FALSE	50
2022-09-13	10:09:31	0.983779	4.37605	1077.67	FALSE	50
2022-09-13	10:09:31	0.458486	2.03944	1165.14	FALSE	50
2022-09-13	10:09:31	0.0529391	0.235484	1077.9	FALSE	50
2022-09-13	10:09:31	0.276094	1.22812	1166.36	FALSE	50
2022-09-13	10:09:32	-0.000495923	-0.00220596	1077.9	FALSE	50
2022-09-13	10:09:32	0.114313	0.508487	1166.87	FALSE	50
2022-09-13	10:09:32	-0.0327606	-0.145726	1077.9	FALSE	50
2022-09-13	10:09:32	0.00988575	0.0439738	1166.92	FALSE	50
2022-09-13	10:09:33	-0.166705	-0.741537	1077.9	FALSE	50
2022-09-13	10:09:33	0.00830812	0.0369562	1166.95	FALSE	50
2022-09-13	10:09:33	0.175382	0.780134	1078.68	FALSE	50
2022-09-13	10:09:34	0.984084	4.3774	1171.33	FALSE	50
2022-09-13	10:09:34	3.4277	15.2471	1093.93	1	51
2022-09-13	10:09:34	2.35696	10.4842	1181.82	FALSE	51
2022-09-13	10:09:34	2.79192	12.419	1106.35	FALSE	51
2022-09-13	10:09:35	2.11584	9.41168	1191.23	FALSE	51
2022-09-13	10:09:35	2.86332	12.7366	1119.08	FALSE	51
2022-09-13	10:09:35	1.04073	4.62938	1195.86	FALSE	51
2022-09-13	10:09:35	1.55828	6.93154	1126.02	FALSE	51
2022-09-13	10:09:36	0.291005	1.29445	1197.15	FALSE	51
2022-09-13	10:09:36	0.277977	1.2365	1127.25	FALSE	51
2022-09-13	10:09:36	0.8993	4.00027	1201.15	FALSE	51
2022-09-13	10:09:36	0.0666287	0.296378	1127.55	FALSE	51
2022-09-13	10:09:37	0.138283	0.61511	1201.77	FALSE	51
2022-09-13	10:09:37	0.101692	0.452346	1128	FALSE	51
2022-09-13	10:09:37	0.0253564	0.11279	1201.88	FALSE	51
2022-09-13	10:09:37	1.14607	5.09795	1133.1	FALSE	51
2022-09-13	10:09:38	0.230242	1.02416	1202.9	FALSE	51
2022-09-13	10:09:38	1.05803	4.70633	1137.81	FALSE	51
2022-09-13	10:09:38	0.263168	1.17062	1204.07	FALSE	51
2022-09-13	10:09:39	0.636043	2.82925	1140.64	FALSE	51
2022-09-13	10:09:39	2.52719	11.2414	1215.32	FALSE	51
2022-09-13	10:09:39	0.529783	2.35658	1142.99	FALSE	51
2022-09-13	10:09:39	1.12892	5.02166	1220.34	FALSE	51
2022-09-13	10:09:40	1.09808	4.88448	1147.88	FALSE	51
2022-09-13	10:09:40	0.848308	3.77344	1224.11	FALSE	51
2022-09-13	10:09:40	3.48556	15.5045	1163.38	1	52
2022-09-13	10:09:40	0.983829	4.37627	1228.49	FALSE	52
2022-09-13	10:09:41	3.05731	13.5995	1176.98	1	53
2022-09-13	10:09:41	0.455483	2.02608	1230.51	FALSE	53
2022-09-13	10:09:41	0.72271	3.21476	1180.2	FALSE	53
2022-09-13	10:09:41	0.466629	2.07566	1232.59	FALSE	53
2022-09-13	10:09:42	-0.0467046	-0.207751	1180.2	FALSE	53
2022-09-13	10:09:42	0.100674	0.447818	1233.04	FALSE	53
2022-09-13	10:09:42	-0.0244145	-0.108601	1180.2	FALSE	53
2022-09-13	10:09:43	-0.0634476	-0.282228	1233.04	FALSE	53
2022-09-13	10:09:43	-0.107773	-0.479396	1180.2	FALSE	53
2022-09-13	10:09:43	-0.082328	-0.366211	1233.04	FALSE	53
2022-09-13	10:09:43	-0.0761193	-0.338594	1180.2	FALSE	53
2022-09-13	10:09:44	-0.0504705	-0.224503	1233.04	FALSE	53
2022-09-13	10:09:44	-0.19271	-0.857213	1180.2	FALSE	53
2022-09-13	10:09:44	-0.0865519	-0.385	1233.04	FALSE	53
2022-09-13	10:09:44	-0.153829	-0.684262	1180.2	FALSE	53
2022-09-13	10:09:45	-0.222124	-0.988052	1233.04	FALSE	53
2022-09-13	10:09:45	-0.278766	-1.24001	1180.2	FALSE	53
2022-09-13	10:09:45	-0.339376	-1.50961	1233.04	FALSE	53
2022-09-13	10:09:45	-0.122939	-0.546857	1180.2	FALSE	53
2022-09-13	10:09:46	-0.0354577	-0.157723	1233.04	FALSE	53
2022-09-13	10:09:46	-0.0418699	-0.186246	1180.2	FALSE	53
2022-09-13	10:09:46	-0.0549997	-0.24465	1233.04	FALSE	53
2022-09-13	10:09:47	0.0726338	0.32309	1180.52	FALSE	53
2022-09-13	10:09:47	0.149428	0.664686	1233.7	FALSE	53
2022-09-13	10:09:47	0.233753	1.03978	1181.56	FALSE	53
2022-09-13	10:09:47	1.70383	7.57898	1241.28	FALSE	53
2022-09-13	10:09:48	1.06179	4.72305	1186.28	FALSE	53
2022-09-13	10:09:48	3.46424	15.4096	1256.69	1	54
2022-09-13	10:09:48	1.71223	7.61634	1193.9	FALSE	54
2022-09-13	10:09:48	2.18388	9.71434	1266.4	FALSE	54
2022-09-13	10:09:49	0.752227	3.34606	1197.24	FALSE	54
2022-09-13	10:09:49	1.69274	7.52965	1273.93	FALSE	54
2022-09-13	10:09:49	0.676298	3.00831	1200.25	FALSE	54
2022-09-13	10:09:49	0.585102	2.60265	1276.54	FALSE	54
2022-09-13	10:09:50	1.24022	5.51675	1205.77	FALSE	54
2022-09-13	10:09:50	0.48327	2.14968	1278.69	FALSE	54
2022-09-13	10:09:50	0.238893	1.06264	1206.83	FALSE	54
2022-09-13	10:09:50	0.421947	1.8769	1280.56	FALSE	54
2022-09-13	10:09:51	0.285204	1.26864	1208.1	FALSE	54
2022-09-13	10:09:51	0.465814	2.07203	1282.63	FALSE	54
2022-09-13	10:09:51	0.304237	1.35331	1209.45	FALSE	54
2022-09-13	10:09:52	0.215992	0.960776	1283.6	FALSE	54
2022-09-13	10:09:52	0.349224	1.55342	1211.01	FALSE	54
2022-09-13	10:09:52	0.347697	1.54663	1285.14	FALSE	54
2022-09-13	10:09:52	0.454924	2.02359	1213.03	FALSE	54
2022-09-13	10:09:53	1.60103	7.1217	1292.26	FALSE	54
2022-09-13	10:09:53	0.623524	2.77356	1215.8	FALSE	54
2022-09-13	10:09:53	0.679758	3.0237	1295.29	FALSE	54
2022-09-13	10:09:53	0.611107	2.71833	1218.52	FALSE	54
2022-09-13	10:09:54	0.202659	0.901468	1296.19	FALSE	54
2022-09-13	10:09:54	0.286578	1.27476	1219.8	FALSE	54
2022-09-13	10:09:54	0.336858	1.49841	1297.69	FALSE	54
2022-09-13	10:09:54	0.326985	1.45449	1221.25	FALSE	54
2022-09-13	10:09:55	0.425	1.89048	1299.58	FALSE	54
2022-09-13	10:09:55	0.320674	1.42642	1222.68	FALSE	54
2022-09-13	10:09:55	0.425305	1.89184	1301.47	FALSE	54
2022-09-13	10:09:56	0.349835	1.55614	1224.23	FALSE	54
2022-09-13	10:09:56	0.457875	2.03672	1303.51	FALSE	54
2022-09-13	10:09:56	0.484593	2.15557	1226.39	FALSE	54
2022-09-13	10:09:56	0.496094	2.20673	1305.71	FALSE	54
2022-09-13	10:09:57	0.467901	2.08132	1228.47	FALSE	54
2022-09-13	10:09:57	1.79793	7.99755	1313.71	FALSE	54
2022-09-13	10:09:57	3.11309	13.8476	1242.32	1	55
2022-09-13	10:09:57	1.44464	6.42605	1320.14	FALSE	55
2022-09-13	10:09:58	1.43136	6.36698	1248.69	FALSE	55
2022-09-13	10:09:58	0.657061	2.92274	1323.06	FALSE	55
2022-09-13	10:09:58	0.481641	2.14244	1250.83	FALSE	55
2022-09-13	10:09:58	1.74322	7.75419	1330.81	FALSE	55
2022-09-13	10:09:59	0.236094	1.05019	1251.88	FALSE	55
2022-09-13	10:09:59	0.0280028	0.124562	1330.94	FALSE	55
2022-09-13	10:09:59	0.495229	2.20288	1254.08	FALSE	55
2022-09-13	10:09:59	0.411107	1.82869	1332.77	FALSE	55
2022-09-13	10:10:00	1.30877	5.82167	1259.9	FALSE	55
2022-09-13	10:10:00	0.333855	1.48505	1334.25	FALSE	55
2022-09-13	10:10:00	1.23869	5.50994	1265.41	FALSE	55
2022-09-13	10:10:01	1.02546	4.56145	1338.81	FALSE	55
2022-09-13	10:10:01	0.805916	3.58488	1269	FALSE	55
2022-09-13	10:10:01	2.47843	11.0246	1349.84	FALSE	55
2022-09-13	10:10:01	1.80607	8.03376	1277.03	FALSE	55
2022-09-13	10:10:02	2.01019	8.94173	1358.78	FALSE	55
2022-09-13	10:10:02	0.70612	3.14096	1280.17	FALSE	55
2022-09-13	10:10:02	0.817061	3.63445	1362.41	FALSE	55
2022-09-13	10:10:02	0.852583	3.79246	1283.96	FALSE	55
2022-09-13	10:10:03	0.41584	1.84974	1364.26	FALSE	55
2022-09-13	10:10:03	1.12989	5.02598	1288.99	FALSE	55
2022-09-13	10:10:03	0.380318	1.69173	1365.96	FALSE	55
2022-09-13	10:10:03	0.85813	3.81713	1292.81	FALSE	55
2022-09-13	10:10:04	1.35335	6.01997	1371.98	FALSE	55
2022-09-13	10:10:04	0.46327	2.06072	1294.87	FALSE	55
2022-09-13	10:10:04	0.686883	3.05539	1375.03	FALSE	55
2022-09-13	10:10:05	0.417977	1.85925	1296.73	FALSE	55
2022-09-13	10:10:05	0.146476	0.651555	1375.68	FALSE	55
2022-09-13	10:10:05	0.635738	2.82789	1299.56	FALSE	55
2022-09-13	10:10:05	0.272786	1.21341	1376.9	FALSE	55
2022-09-13	10:10:06	0.624033	2.77582	1302.33	FALSE	55
2022-09-13	10:10:06	0.326221	1.4511	1378.35	FALSE	55
2022-09-13	10:10:06	0.115331	0.513015	1302.84	FALSE	55
2022-09-13	10:10:06	0.00174323	0.00775424	1378.35	FALSE	55
2022-09-13	10:10:07	-0.153422	-0.682452	1302.84	FALSE	55
2022-09-13	10:10:07	-0.00349849	-0.015562	1378.35	FALSE	55
2022-09-13	10:10:07	-0.0579514	-0.257779	1302.84	FALSE	55
2022-09-13	10:10:07	-0.00741704	-0.0329925	1378.35	FALSE	55
2022-09-13	10:10:08	0.0282063	0.125467	1302.97	FALSE	55
2022-09-13	10:10:08	0.249428	1.10951	1379.46	FALSE	55
2022-09-13	10:10:08	0.566578	2.52025	1305.49	FALSE	55
2022-09-13	10:10:09	1.56581	6.96504	1386.43	FALSE	55
2022-09-13	10:10:09	0.413397	1.83887	1307.33	FALSE	55
2022-09-13	10:10:09	0.802303	3.5688	1390	FALSE	55
2022-09-13	10:10:09	0.494059	2.19767	1309.53	FALSE	55
2022-09-13	10:10:10	0.408817	1.8185	1391.82	FALSE	55
2022-09-13	10:10:10	0.230344	1.02462	1310.55	FALSE	55
2022-09-13	10:10:10	0.55126	2.45211	1394.27	FALSE	55
2022-09-13	10:10:10	0.111565	0.496263	1311.05	FALSE	55
2022-09-13	10:10:11	0.285713	1.27091	1395.54	FALSE	55
2022-09-13	10:10:11	0.134415	0.597905	1311.65	FALSE	55
2022-09-13	10:10:11	0.0135499	0.0602727	1395.6	FALSE	55
2022-09-13	10:10:11	0.0312088	0.138823	1311.78	FALSE	55
2022-09-13	10:10:12	0.16902	0.751835	1396.35	FALSE	55
2022-09-13	10:10:12	0.121082	0.538597	1312.32	FALSE	55
2022-09-13	10:10:12	0.311616	1.38613	1397.74	FALSE	55
2022-09-13	10:10:12	0.153855	0.684378	1313.01	FALSE	55
2022-09-13	10:10:13	0.843728	3.75307	1401.49	FALSE	55
2022-09-13	10:10:13	2.71477	12.0758	1325.08	FALSE	55
2022-09-13	10:10:13	3.61528	16.0815	1417.57	1	56
2022-09-13	10:10:14	5.54948	24.6852	1349.77	1	57
2022-09-13	10:10:14	2.7078	12.0448	1429.62	FALSE	57
2022-09-13	10:10:14	5.30637	23.6038	1373.37	1	58
2022-09-13	10:10:14	2.15574	9.58916	1439.21	FALSE	58
2022-09-13	10:10:15	4.088	18.1842	1391.56	1	59
2022-09-13	10:10:15	0.498639	2.21805	1441.42	FALSE	59
2022-09-13	10:10:15	3.68719	16.4014	1407.96	1	60
2022-09-13	10:10:15	0.384033	1.70826	1443.13	FALSE	60
2022-09-13	10:10:16	3.64927	16.2327	1424.19	1	61
2022-09-13	10:10:16	0.828308	3.68448	1446.82	FALSE	61
2022-09-13	10:10:16	1.97981	8.80659	1433	FALSE	61
2022-09-13	10:10:16	1.42271	6.3285	1453.15	FALSE	61
2022-09-13	10:10:17	1.01457	4.51301	1437.51	FALSE	61
2022-09-13	10:10:17	2.40454	10.6959	1463.84	FALSE	61
2022-09-13	10:10:17	0.309326	1.37594	1438.89	FALSE	61
2022-09-13	10:10:18	2.25324	10.0229	1473.86	FALSE	61
2022-09-13	10:10:18	1.3334	5.93123	1444.82	FALSE	61
2022-09-13	10:10:18	2.88907	12.8512	1486.72	FALSE	61
2022-09-13	10:10:18	3.77655	16.7988	1461.62	1	62
2022-09-13	10:10:19	1.64739	7.32792	1494.04	FALSE	62
2022-09-13	10:10:19	3.1996	14.2325	1475.85	1	63
2022-09-13	10:10:19	0.281896	1.25393	1495.3	FALSE	63
2022-09-13	10:10:19	1.97681	8.79325	1484.64	FALSE	63
2022-09-13	10:10:20	0.381845	1.69852	1497	FALSE	63
2022-09-13	10:10:20	0.677417	3.01329	1487.65	FALSE	63
2022-09-13	10:10:20	0.682863	3.03751	1500.03	FALSE	63
2022-09-13	10:10:20	0.597519	2.65788	1490.31	FALSE	63
2022-09-13	10:10:21	1.37762	6.12793	1506.16	FALSE	63
2022-09-13	10:10:21	1.75248	7.79538	1498.11	FALSE	63
2022-09-13	10:10:21	1.82144	8.10213	1514.26	FALSE	63
2022-09-13	10:10:21	2.11426	9.40465	1507.51	FALSE	63
2022-09-13	10:10:22	1.26622	5.6324	1519.9	FALSE	63
2022-09-13	10:10:22	1.9563	8.70201	1516.21	FALSE	63
2022-09-13	10:10:22	1.52159	6.76834	1526.66	FALSE	63
2022-09-13	10:10:23	3.95859	17.6086	1533.82	1	64
2022-09-13	10:10:23	2.10195	9.34989	1536.01	FALSE	64
2022-09-13	10:10:23	5.77319	25.6803	1559.5	1	65
2022-09-13	10:10:23	2.55543	11.3671	1547.38	FALSE	65
2022-09-13	10:10:24	7.10912	31.6228	1591.13	1	66
2022-09-13	10:10:24	1.87447	8.33802	1555.72	FALSE	66
2022-09-13	10:10:24	6.79645	30.232	1621.36	1	67
2022-09-13	10:10:24	1.96866	8.75699	1564.48	FALSE	67
2022-09-13	10:10:25	5.14225	22.8738	1644.23	1	68
2022-09-13	10:10:25	2.5334	11.2691	1575.75	FALSE	68
2022-09-13	10:10:25	3.2168	14.309	1658.54	1	69
2022-09-13	10:10:25	3.9338	17.4983	1593.24	1	70
2022-09-13	10:10:26	2.15721	9.5957	1668.14	FALSE	70
2022-09-13	10:10:26	4.108	18.2732	1611.52	1	71
2022-09-13	10:10:26	2.73584	12.1696	1680.31	FALSE	71
2022-09-13	10:10:27	2.41619	10.7477	1622.26	FALSE	71
2022-09-13	10:10:27	3.41737	15.2011	1695.51	1	72
2022-09-13	10:10:27	2.42072	10.7678	1633.03	FALSE	72
2022-09-13	10:10:27	3.63263	16.1587	1711.67	1	73
2022-09-13	10:10:28	1.84312	8.19857	1641.23	FALSE	73
2022-09-13	10:10:28	2.52622	11.2371	1722.9	FALSE	73
2022-09-13	10:10:28	2.8509	12.6814	1653.91	FALSE	73
2022-09-13	10:10:28	1.55503	6.91708	1729.82	FALSE	73
2022-09-13	10:10:29	2.81044	12.5014	1666.41	FALSE	73
2022-09-13	10:10:29	1.87156	8.32507	1738.15	FALSE	73
2022-09-13	10:10:29	3.30032	14.6805	1681.09	1	74
2022-09-13	10:10:29	2.97787	13.2462	1751.39	FALSE	74
2022-09-13	10:10:30	3.505	15.5909	1696.69	1	75
2022-09-13	10:10:30	3.88744	17.2921	1768.68	1	76
2022-09-13	10:10:30	2.17207	9.6618	1706.35	FALSE	76
2022-09-13	10:10:31	2.54673	11.3284	1780.01	FALSE	76
2022-09-13	10:10:31	1.8162	8.07882	1714.43	FALSE	76
2022-09-13	10:10:31	2.87141	12.7726	1792.78	FALSE	76
2022-09-13	10:10:31	1.01726	4.52498	1718.95	FALSE	76
2022-09-13	10:10:32	1.62128	7.21178	1800	FALSE	76
2022-09-13	10:10:32	1.30383	5.7997	1724.75	FALSE	76
2022-09-13	10:10:32	1.41869	6.31062	1806.31	FALSE	76
2022-09-13	10:10:32	1.61528	7.18509	1731.94	FALSE	76
2022-09-13	10:10:33	3.9591	17.6109	1823.92	1	77
2022-09-13	10:10:33	8.55502	38.0544	1769.99	1	78
2022-09-13	10:10:33	7.04708	31.3468	1855.26	1	79
2022-09-13	10:10:33	4.47095	19.8877	1789.88	1	80
2022-09-13	10:10:34	1.90958	8.49419	1863.76	FALSE	80
2022-09-13	10:10:34	1.01767	4.5268	1794.4	FALSE	80
2022-09-13	10:10:34	0.987901	4.39438	1868.15	FALSE	80
2022-09-13	10:10:34	0.618231	2.75002	1797.15	FALSE	80
2022-09-13	10:10:35	0.440827	1.96089	1870.11	FALSE	80
2022-09-13	10:10:35	0.428308	1.9052	1799.06	FALSE	80
2022-09-13	10:10:35	0.591769	2.63231	1872.75	FALSE	80
2022-09-13	10:10:36	0.518435	2.3061	1801.37	FALSE	80
2022-09-13	10:10:36	1.32989	5.91562	1878.66	FALSE	80
2022-09-13	10:10:36	0.571616	2.54266	1803.91	FALSE	80
2022-09-13	10:10:36	1.19594	5.31978	1883.98	FALSE	80
2022-09-13	10:10:37	0.483575	2.15104	1806.06	FALSE	80
2022-09-13	10:10:37	2.05645	9.1475	1893.13	FALSE	80
2022-09-13	10:10:37	0.616145	2.74074	1808.8	FALSE	80
2022-09-13	10:10:38	2.04393	9.09181	1902.22	FALSE	80
2022-09-13	10:10:38	0.952786	4.23818	1813.04	FALSE	80
2022-09-13	10:10:38	2.62474	11.6754	1913.9	FALSE	80
2022-09-13	10:10:38	1.44846	6.44304	1819.48	FALSE	80
2022-09-13	10:10:38	2.53813	11.2901	1925.19	FALSE	80
2022-09-13	10:10:39	2.32627	10.3477	1829.83	FALSE	80
2022-09-13	10:10:39	1.14892	5.11063	1930.3	FALSE	80
2022-09-13	10:10:39	2.70729	12.0426	1841.87	FALSE	80
2022-09-13	10:10:40	1.18388	5.26614	1935.56	FALSE	80
2022-09-13	10:10:40	4.8251	21.463	1863.33	1	81
2022-09-13	10:10:40	1.62602	7.23286	1942.8	FALSE	81
2022-09-13	10:10:40	2.6279	11.6894	1875.02	FALSE	81
2022-09-13	10:10:41	1.45854	6.48788	1949.28	FALSE	81
2022-09-13	10:10:41	0.601743	2.67667	1877.7	FALSE	81
2022-09-13	10:10:41	1.56062	6.94195	1956.23	FALSE	81
2022-09-13	10:10:41	0.251005	1.11652	1878.82	FALSE	81
2022-09-13	10:10:42	1.26678	5.63489	1961.86	FALSE	81
2022-09-13	10:10:42	0.665356	2.95964	1881.78	FALSE	81
2022-09-13	10:10:42	0.781845	3.4778	1965.34	FALSE	81
2022-09-13	10:10:42	1.98815	8.84369	1890.62	FALSE	81
2022-09-13	10:10:43	0.536807	2.38782	1967.73	FALSE	81
2022-09-13	10:10:43	2.0134	8.95601	1899.58	FALSE	81
2022-09-13	10:10:43	0.218741	0.973004	1968.7	FALSE	81
2022-09-13	10:10:44	1.61899	7.20159	1906.78	FALSE	81
2022-09-13	10:10:44	0.0999111	0.444425	1969.14	FALSE	81
2022-09-13	10:10:44	0.986018	4.38601	1911.16	FALSE	81
2022-09-13	10:10:44	0.413092	1.83752	1970.98	FALSE	81
2022-09-13	10:10:45	0.560318	2.49241	1913.66	FALSE	81
2022-09-13	10:10:45	1.24637	5.5441	1976.53	FALSE	81
2022-09-13	10:10:45	0.225662	1.00379	1914.66	FALSE	81
2022-09-13	10:10:45	0.346883	1.543	1978.07	FALSE	81
2022-09-13	10:10:46	0.137926	0.613522	1915.27	FALSE	81
2022-09-13	10:10:46	0.304695	1.35534	1979.42	FALSE	81
2022-09-13	10:10:46	1.97604	8.78982	1924.06	FALSE	81
2022-09-13	10:10:46	0.30556	1.35919	1980.78	FALSE	81
2022-09-13	10:10:47	2.02327	8.99991	1933.06	FALSE	81
2022-09-13	10:10:47	0.234466	1.04295	1981.83	FALSE	81
2022-09-13	10:10:47	0.706934	3.14458	1936.21	FALSE	81
2022-09-13	10:10:47	0.656705	2.92116	1984.75	FALSE	81
2022-09-13	10:10:48	1.55971	6.9379	1943.15	FALSE	81
2022-09-13	10:10:48	1.55039	6.89644	1991.64	FALSE	81
2022-09-13	10:10:48	1.21329	5.39696	1948.54	FALSE	81
2022-09-13	10:10:49	2.95248	13.1332	2004.78	FALSE	81
2022-09-13	10:10:49	0.344237	1.53124	1950.07	FALSE	81
2022-09-13	10:10:49	2.28749	10.1752	2014.95	FALSE	81
2022-09-13	10:10:49	0.421387	1.87441	1951.95	FALSE	81
2022-09-13	10:10:50	1.74897	7.77977	2022.73	FALSE	81
2022-09-13	10:10:50	0.638283	2.83921	1954.79	FALSE	81
2022-09-13	10:10:50	0.993855	4.42087	2027.15	FALSE	81
2022-09-13	10:10:50	0.664746	2.95692	1957.75	FALSE	81
2022-09-13	10:10:51	0.88673	3.94435	2031.1	FALSE	81
2022-09-13	10:10:51	0.475026	2.11301	1959.86	FALSE	81
2022-09-13	10:10:51	0.0939061	0.417713	2031.52	FALSE	81
2022-09-13	10:10:51	0.117367	0.522072	1960.38	FALSE	81
2022-09-13	10:10:52	0.00489845	0.0217893	2031.54	FALSE	81
2022-09-13	10:10:52	0.324847	1.44498	1961.83	FALSE	81
2022-09-13	10:10:52	1.77436	7.89271	2039.43	FALSE	81
2022-09-13	10:10:53	0.689478	3.06694	1964.89	FALSE	81
2022-09-13	10:10:53	2.4707	10.9902	2050.42	FALSE	81
2022-09-13	10:10:53	1.23737	5.50407	1970.4	FALSE	81
2022-09-13	10:10:53	0.869173	3.86626	2054.29	FALSE	81
2022-09-13	10:10:54	0.773652	3.44136	1973.84	FALSE	81
2022-09-13	10:10:54	0.196094	0.872265	2055.16	FALSE	81
2022-09-13	10:10:54	0.553601	2.46253	1976.3	FALSE	81
2022-09-13	10:10:54	-0.151336	-0.673173	2055.16	FALSE	81
2022-09-13	10:10:55	-0.457137	-2.03344	1976.3	FALSE	81
2022-09-13	10:10:55	-0.649147	-2.88754	2055.16	FALSE	81
2022-09-13	10:10:55	-0.912455	-4.05878	1976.3	FALSE	81
2022-09-13	10:10:55	-0.768129	-3.41679	2055.16	FALSE	81
2022-09-13	10:10:56	-1.20777	-5.3724	1976.3	FALSE	81
2022-09-13	10:10:56	-1.09098	-4.8529	2055.16	FALSE	81
2022-09-13	10:10:56	-0.820954	-3.65177	1976.3	FALSE	81
2022-09-13	10:10:56	-0.684058	-3.04283	2055.16	FALSE	81
2022-09-13	10:10:57	-0.655814	-2.91719	1976.3	FALSE	81
2022-09-13	10:10:57	-0.668994	-2.97582	2055.16	FALSE	81
2022-09-13	10:10:57	-0.60248	-2.67995	1976.3	FALSE	81
2022-09-13	10:10:58	-0.526094	-2.34017	2055.16	FALSE	81
2022-09-13	10:10:58	-0.333778	-1.48471	1976.3	FALSE	81
2022-09-13	10:10:58	-0.203193	-0.903843	2055.16	FALSE	81
2022-09-13	10:10:58	-0.0854323	-0.38002	1976.3	FALSE	81
2022-09-13	10:10:59	-0.230012	-1.02314	2055.16	FALSE	81
2022-09-13	10:10:59	0.347748	1.54685	1977.85	FALSE	81
2022-09-13	10:10:59	3.19406	14.2078	2069.37	1	82
2022-09-13	10:10:59	6.43044	28.6039	2006.45	1	83
2022-09-13	10:11:00	2.2878	10.1766	2079.54	FALSE	83
2022-09-13	10:11:00	2.4963	11.104	2017.55	FALSE	83
2022-09-13	10:11:00	1.10144	4.89943	2084.44	FALSE	83
2022-09-13	10:11:00	2.72627	12.127	2029.68	FALSE	83
2022-09-13	10:11:01	3.47915	15.476	2099.92	1	84
2022-09-13	10:11:01	0.8764	3.8984	2033.58	FALSE	84
2022-09-13	10:11:01	2.65533	11.8114	2111.73	FALSE	84
2022-09-13	10:11:02	1.42795	6.35181	2039.93	FALSE	84
2022-09-13	10:11:02	2.12373	9.44678	2121.18	FALSE	84
2022-09-13	10:11:02	1.92902	8.58067	2048.51	FALSE	84
2022-09-13	10:11:02	0.533651	2.37379	2123.55	FALSE	84
2022-09-13	10:11:03	1.93436	8.60442	2057.12	FALSE	84
2022-09-13	10:11:03	1.88658	8.39189	2131.94	FALSE	84
2022-09-13	10:11:03	0.250038	1.11222	2058.23	FALSE	84
2022-09-13	10:11:04	0.504746	2.24521	2134.19	FALSE	84
2022-09-13	10:11:04	0.711514	3.16496	2061.39	FALSE	84
2022-09-13	10:11:04	0.483931	2.15262	2136.34	FALSE	84
2022-09-13	10:11:04	0.332227	1.47781	2062.87	FALSE	84
2022-09-13	10:11:04	0.302099	1.3438	2137.68	FALSE	84
2022-09-13	10:11:05	0.300267	1.33565	2064.21	FALSE	84
2022-09-13	10:11:05	0.425305	1.89184	2139.58	FALSE	84
2022-09-13	10:11:05	0.414313	1.84295	2066.05	FALSE	84
2022-09-13	10:11:06	0.556705	2.47634	2142.05	FALSE	84
2022-09-13	10:11:06	0.427036	1.89954	2067.95	FALSE	84
2022-09-13	10:11:06	0.312277	1.38907	2143.44	FALSE	84
2022-09-13	10:11:06	0.281998	1.25438	2069.2	FALSE	84
2022-09-13	10:11:07	0.180776	0.804128	2144.24	FALSE	84
2022-09-13	10:11:07	0.147799	0.65744	2069.86	FALSE	84
2022-09-13	10:11:07	0.11925	0.530448	2144.78	FALSE	84
2022-09-13	10:11:07	0.136654	0.607864	2070.47	FALSE	84
2022-09-13	10:11:08	0.111107	0.494226	2145.27	FALSE	84
2022-09-13	10:11:08	0.141998	0.631636	2071.1	FALSE	84
2022-09-13	10:11:08	0.0367559	0.163498	2145.43	FALSE	84
2022-09-13	10:11:08	0.126985	0.564855	2071.67	FALSE	84
2022-09-13	10:11:09	0.0993004	0.441708	2145.87	FALSE	84
2022-09-13	10:11:09	0.202761	0.901921	2072.57	FALSE	84
2022-09-13	10:11:09	0.218741	0.973004	2146.85	FALSE	84
2022-09-13	10:11:09	0.270954	1.20526	2073.77	FALSE	84
2022-09-13	10:11:10	0.0670867	0.298415	2147.15	FALSE	84
2022-09-13	10:11:10	0.0247458	0.110074	2073.88	FALSE	84
2022-09-13	10:11:10	0.0643895	0.286417	2147.43	FALSE	84
2022-09-13	10:11:11	0.184237	0.819523	2074.7	FALSE	84
2022-09-13	10:11:11	0.218181	0.970513	2148.4	FALSE	84
2022-09-13	10:11:11	0.0693259	0.308375	2075.01	FALSE	84
2022-09-13	10:11:11	0.182761	0.812957	2149.22	FALSE	84
2022-09-13	10:11:12	0.12154	0.540634	2075.55	FALSE	84
2022-09-13	10:11:12	0.173397	0.771305	2149.99	FALSE	84
2022-09-13	10:11:12	0.415636	1.84883	2077.4	FALSE	84
2022-09-13	10:11:12	0.0224557	0.0998874	2150.09	FALSE	84
2022-09-13	10:11:13	-0.0932694	-0.414881	2077.4	FALSE	84
2022-09-13	10:11:13	-0.109249	-0.485961	2150.09	FALSE	84
2022-09-13	10:11:13	-0.217748	-0.968587	2077.4	FALSE	84
2022-09-13	10:11:13	-0.057188	-0.254384	2150.09	FALSE	84
2022-09-13	10:11:14	0.0412343	0.183418	2077.58	FALSE	84
2022-09-13	10:11:14	0.343372	1.52739	2151.61	FALSE	84
2022-09-13	10:11:14	0.370954	1.65008	2079.23	FALSE	84
2022-09-13	10:11:15	1.12642	5.01054	2156.63	FALSE	84
2022-09-13	10:11:15	1.13273	5.03861	2084.27	FALSE	84
2022-09-13	10:11:15	1.19014	5.29398	2161.92	FALSE	84
2022-09-13	10:11:15	0.365	1.62359	2085.9	FALSE	84
2022-09-13	10:11:16	0.438486	1.95047	2163.87	FALSE	84
2022-09-13	10:11:16	0.312634	1.39066	2087.29	FALSE	84
2022-09-13	10:11:16	0.364847	1.62291	2165.49	FALSE	84
2022-09-13	10:11:16	0.26098	1.16089	2088.45	FALSE	84
2022-09-13	10:11:17	0.334262	1.48686	2166.98	FALSE	84
2022-09-13	10:11:17	0.148054	0.658574	2089.11	FALSE	84
2022-09-13	10:11:17	0.279758	1.24442	2168.22	FALSE	84
2022-09-13	10:11:17	0.324542	1.44363	2090.55	FALSE	84
2022-09-13	10:11:18	0.386323	1.71844	2169.94	FALSE	84
2022-09-13	10:11:18	0.464847	2.06773	2092.62	FALSE	84
2022-09-13	10:11:18	0.483422	2.15036	2172.09	FALSE	84
2022-09-13	10:11:18	0.364339	1.62065	2094.24	FALSE	84
2022-09-13	10:11:19	0.439453	1.95477	2174.05	FALSE	84
2022-09-13	10:11:19	0.168308	0.748668	2094.99	FALSE	84
2022-09-13	10:11:19	0.436247	1.94051	2175.99	FALSE	84
2022-09-13	10:11:20	0.197519	0.878604	2095.87	FALSE	84
2022-09-13	10:11:20	0.431209	1.9181	2177.91	FALSE	84
2022-09-13	10:11:20	0.837824	3.72681	2099.59	FALSE	84
2022-09-13	10:11:20	0.439758	1.95613	2179.86	FALSE	84
2022-09-13	10:11:21	1.25609	5.58734	2105.18	FALSE	84
2022-09-13	10:11:21	0.646476	2.87565	2182.74	FALSE	84
2022-09-13	10:11:21	1.50592	6.69863	2111.88	FALSE	84
2022-09-13	10:11:21	0.396858	1.7653	2184.5	FALSE	84
2022-09-13	10:11:22	1.73243	7.7062	2119.59	FALSE	84
2022-09-13	10:11:22	0.563829	2.50802	2187.01	FALSE	84
2022-09-13	10:11:22	4.605	20.484	2140.07	1	85
2022-09-13	10:11:22	1.19538	5.31729	2192.33	FALSE	85
2022-09-13	10:11:23	3.08159	13.7075	2153.78	1	86
2022-09-13	10:11:23	0.660929	2.93994	2195.27	FALSE	86
2022-09-13	10:11:23	1.37838	6.13131	2159.91	FALSE	86
2022-09-13	10:11:24	1.18978	5.29238	2200.56	FALSE	86
2022-09-13	10:11:24	0.361132	1.60639	2161.51	FALSE	86
2022-09-13	10:11:24	0.616807	2.74368	2203.3	FALSE	86
2022-09-13	10:11:24	0.197265	0.877474	2162.39	FALSE	86
2022-09-13	10:11:25	0.54103	2.40661	2205.71	FALSE	86
2022-09-13	10:11:25	0.385356	1.71414	2164.11	FALSE	86
2022-09-13	10:11:25	1.68322	7.4873	2213.2	FALSE	86
2022-09-13	10:11:25	0.710547	3.16066	2167.27	FALSE	86
2022-09-13	10:11:26	3.20653	14.2633	2227.46	1	87
2022-09-13	10:11:26	0.893957	3.9765	2171.24	FALSE	87
2022-09-13	10:11:26	0.507239	2.2563	2229.72	FALSE	87
2022-09-13	10:11:26	0.421183	1.87351	2173.12	FALSE	87
2022-09-13	10:11:27	0.167646	0.745723	2230.46	FALSE	87
2022-09-13	10:11:27	0.500776	2.22755	2175.34	FALSE	87
2022-09-13	10:11:27	0.163015	0.725123	2231.19	FALSE	87
2022-09-13	10:11:28	0.166171	0.739162	2176.08	FALSE	87
2022-09-13	10:11:28	0.210191	0.934972	2232.12	FALSE	87
2022-09-13	10:11:28	0.271209	1.20639	2177.29	FALSE	87
2022-09-13	10:11:28	0.383015	1.70373	2233.83	FALSE	87
2022-09-13	10:11:29	0.939402	4.17865	2181.47	FALSE	87
2022-09-13	10:11:29	0.912583	4.05935	2237.89	FALSE	87
2022-09-13	10:11:29	1.45162	6.4571	2187.93	FALSE	87
2022-09-13	10:11:29	2.00088	8.90031	2246.79	FALSE	87
2022-09-13	10:11:30	2.09253	9.30799	2197.23	FALSE	87
2022-09-13	10:11:30	1.92907	8.58089	2255.37	FALSE	87
2022-09-13	10:11:30	1.57599	7.01032	2204.24	FALSE	87
2022-09-13	10:11:30	0.877519	3.90338	2259.27	FALSE	87
2022-09-13	10:11:31	2.54826	11.3352	2215.58	FALSE	87
2022-09-13	10:11:31	3.33482	14.8339	2274.11	1	88
2022-09-13	10:11:31	9.88902	43.9883	2259.57	1	89
2022-09-13	10:11:31	4.13843	18.4086	2292.51	1	90
2022-09-13	10:11:32	2.29202	10.1954	2269.76	FALSE	90
2022-09-13	10:11:32	0.270598	1.20367	2293.72	FALSE	90
2022-09-13	10:11:32	0.477774	2.12523	2271.89	FALSE	90
2022-09-13	10:11:33	0.209275	0.930897	2294.65	FALSE	90
2022-09-13	10:11:33	0.181183	0.805938	2272.69	FALSE	90
2022-09-13	10:11:33	1.73319	7.70958	2302.36	FALSE	90
2022-09-13	10:11:33	2.042	9.08322	2281.78	FALSE	90
2022-09-13	10:11:34	4.73869	21.0786	2323.44	1	91
2022-09-13	10:11:34	3.122	13.8873	2295.66	1	92
2022-09-13	10:11:34	5.72108	25.4485	2348.89	1	93
2022-09-13	10:11:34	3.46948	15.4329	2311.1	1	94
2022-09-13	10:11:35	5.37395	23.9044	2372.79	1	95
2022-09-13	10:11:35	1.43045	6.36293	2317.46	FALSE	95
2022-09-13	10:11:35	3.99625	17.7761	2390.57	1	96
2022-09-13	10:11:35	4.35513	19.3725	2336.83	1	97
2022-09-13	10:11:36	2.83462	12.609	2403.17	FALSE	97
2022-09-13	10:11:36	2.95238	13.1328	2349.97	FALSE	97
2022-09-13	10:11:36	1.1449	5.09274	2408.27	FALSE	97
2022-09-13	10:11:37	6.2739	27.9076	2377.87	1	98
2022-09-13	10:11:37	5.34835	23.7905	2432.06	1	99
2022-09-13	10:11:37	1.93955	8.62751	2386.5	FALSE	99
2022-09-13	10:11:37	1.911	8.50051	2440.56	FALSE	99
2022-09-13	10:11:38	2.52352	11.2251	2397.73	FALSE	99
2022-09-13	10:11:38	0.466018	2.07294	2442.63	FALSE	99
2022-09-13	10:11:38	1.45447	6.46977	2404.2	FALSE	99
2022-09-13	10:11:38	0.723982	3.22042	2445.85	FALSE	99
2022-09-13	10:11:39	1.22536	5.45065	2409.65	FALSE	99
2022-09-13	10:11:39	0.861539	3.8323	2449.68	FALSE	99
2022-09-13	10:11:39	0.80444	3.57831	2413.22	FALSE	99
2022-09-13	10:11:39	1.29431	5.75735	2455.44	FALSE	99
2022-09-13	10:11:40	0.515382	2.29252	2415.52	FALSE	99
2022-09-13	10:11:40	0.416909	1.85449	2457.3	FALSE	99
2022-09-13	10:11:40	0.679249	3.02144	2418.54	FALSE	99
2022-09-13	10:11:40	0.524848	2.33463	2459.63	FALSE	99
2022-09-13	10:11:41	0.505305	2.2477	2420.79	FALSE	99
2022-09-13	10:11:41	1.30078	5.78613	2465.42	FALSE	99
2022-09-13	10:11:41	2.48164	11.0388	2431.82	FALSE	99
2022-09-13	10:11:42	1.97609	8.79004	2474.21	FALSE	99
2022-09-13	10:11:42	2.09024	9.29781	2441.12	FALSE	99
2022-09-13	10:11:42	2.64332	11.758	2485.96	FALSE	99
2022-09-13	10:11:42	0.496145	2.20695	2443.33	FALSE	99
2022-09-13	10:11:43	0.654924	2.91323	2488.88	FALSE	99
2022-09-13	10:11:43	0.745407	3.31572	2446.65	FALSE	99
2022-09-13	10:11:43	0.753753	3.35284	2492.23	FALSE	99
2022-09-13	10:11:43	2.04541	9.09839	2455.74	FALSE	99
2022-09-13	10:11:44	3.38169	15.0424	2507.27	1	100
2022-09-13	10:11:44	2.65518	11.8108	2467.55	FALSE	100
2022-09-13	10:11:44	2.75538	12.2565	2519.53	FALSE	100
2022-09-13	10:11:44	2.35172	10.4609	2478.02	FALSE	100
2022-09-13	10:11:45	3.29645	14.6633	2534.19	1	101
2022-09-13	10:11:45	3.77161	16.7769	2494.79	1	102
2022-09-13	10:11:45	0.532023	2.36654	2536.56	FALSE	102
2022-09-13	10:11:46	2.91808	12.9802	2507.77	FALSE	102
2022-09-13	10:11:46	3.89146	17.31	2553.87	1	103
2022-09-13	10:11:46	2.4363	10.8371	2518.61	FALSE	103
2022-09-13	10:11:46	1.81452	8.07135	2561.94	FALSE	103
2022-09-13	10:11:47	3.6453	16.215	2534.82	1	104
2022-09-13	10:11:47	4.06016	18.0604	2580	1	105
2022-09-13	10:11:47	5.09833	22.6784	2557.5	1	106
2022-09-13	10:11:47	0.624695	2.77877	2582.78	FALSE	106
2022-09-13	10:11:48	1.72765	7.68493	2565.19	FALSE	106
2022-09-13	10:11:48	1.05843	4.70811	2587.49	FALSE	106
2022-09-13	10:11:48	1.98322	8.82176	2574.01	FALSE	106
2022-09-13	10:11:48	3.25614	14.484	2601.97	1	107
2022-09-13	10:11:49	2.82688	12.5745	2586.58	FALSE	107
2022-09-13	10:11:49	6.23151	27.719	2629.69	1	108
2022-09-13	10:11:49	5.39161	23.983	2610.57	1	109
2022-09-13	10:11:50	6.63263	29.5033	2659.19	1	110
2022-09-13	10:11:50	6.6221	29.4564	2640.02	1	111
2022-09-13	10:11:50	3.41263	15.1801	2674.37	1	112
2022-09-13	10:11:50	2.06032	9.16472	2649.19	FALSE	112
2022-09-13	10:11:51	2.50709	11.152	2685.53	FALSE	112
2022-09-13	10:11:51	3.18342	14.1605	2663.35	1	113
2022-09-13	10:11:51	3.35304	14.915	2700.44	1	114
2022-09-13	10:11:51	2.09004	9.29692	2672.65	FALSE	114
2022-09-13	10:11:52	1.03691	4.61238	2705.05	FALSE	114
2022-09-13	10:11:52	0.647086	2.87837	2675.52	FALSE	114
2022-09-13	10:11:52	0.505407	2.24815	2707.3	FALSE	114
2022-09-13	10:11:52	0.576247	2.56326	2678.09	FALSE	114
2022-09-13	10:11:53	0.673448	2.99563	2710.3	FALSE	114
2022-09-13	10:11:53	0.71355	3.17401	2681.26	FALSE	114
2022-09-13	10:11:53	1.27233	5.65958	2715.96	FALSE	114
2022-09-13	10:11:53	3.87777	17.2491	2698.51	1	115
2022-09-13	10:11:54	3.27034	14.5471	2730.5	1	116
2022-09-13	10:11:54	2.30291	10.2438	2708.75	FALSE	116
2022-09-13	10:11:54	4.29004	19.083	2749.59	1	117
2022-09-13	10:11:55	3.37126	14.996	2723.75	1	118
2022-09-13	10:11:55	0.886476	3.94322	2753.53	FALSE	118
2022-09-13	10:11:55	0.825051	3.66999	2727.42	FALSE	118
2022-09-13	10:11:55	0.663626	2.95194	2756.48	FALSE	118
2022-09-13	10:11:56	1.03874	4.62052	2732.04	FALSE	118
2022-09-13	10:11:56	2.44714	10.8854	2767.37	FALSE	118
2022-09-13	10:11:56	3.32505	14.7905	2746.83	1	119
2022-09-13	10:11:56	1.08154	4.81091	2772.18	FALSE	119
2022-09-13	10:11:57	0.602659	2.68075	2749.51	FALSE	119
2022-09-13	10:11:57	0.573041	2.549	2774.73	FALSE	119
2022-09-13	10:11:57	1.11182	4.9456	2754.46	FALSE	119
2022-09-13	10:11:57	0.917265	4.08018	2778.81	FALSE	119
2022-09-13	10:11:58	0.795891	3.54028	2758	FALSE	119
2022-09-13	10:11:58	0.896501	3.98782	2782.8	FALSE	119
2022-09-13	10:11:58	0.597163	2.6563	2760.65	FALSE	119
2022-09-13	10:11:59	0.623524	2.77356	2785.57	FALSE	119
2022-09-13	10:11:59	1.25564	5.58534	2766.24	FALSE	119
2022-09-13	10:11:59	0.687545	3.05834	2788.63	FALSE	119
2022-09-13	10:11:59	1.0079	4.48334	2770.72	FALSE	119
2022-09-13	10:12:00	0.831158	3.69716	2792.32	FALSE	119
2022-09-13	10:12:00	0.50673	2.25404	2772.98	FALSE	119
2022-09-13	10:12:00	0.60388	2.68618	2795.01	FALSE	119
2022-09-13	10:12:00	0.682914	3.03774	2776.01	FALSE	119
2022-09-13	10:12:01	1.23782	5.50607	2800.52	FALSE	119
2022-09-13	10:12:01	0.591208	2.62981	2778.64	FALSE	119
2022-09-13	10:12:01	0.750445	3.33813	2803.86	FALSE	119
2022-09-13	10:12:01	0.998333	4.44078	2783.09	FALSE	119
2022-09-13	10:12:02	0.428053	1.90407	2805.76	FALSE	119
2022-09-13	10:12:02	0.567137	2.52274	2785.61	FALSE	119
2022-09-13	10:12:02	0.534873	2.37922	2808.14	FALSE	119
2022-09-13	10:12:02	0.40841	1.81669	2787.42	FALSE	119
2022-09-13	10:12:03	0.513397	2.28369	2810.42	FALSE	119
2022-09-13	10:12:03	0.564186	2.50961	2789.93	FALSE	119
2022-09-13	10:12:03	0.615484	2.7378	2813.16	FALSE	119
2022-09-13	10:12:04	0.738181	3.28358	2793.22	FALSE	119
2022-09-13	10:12:04	0.738639	3.28561	2816.45	FALSE	119
2022-09-13	10:12:04	0.86958	3.86807	2797.09	FALSE	119
2022-09-13	10:12:04	0.834924	3.71391	2820.16	FALSE	119
2022-09-13	10:12:05	0.731819	3.25528	2800.34	FALSE	119
2022-09-13	10:12:05	0.521183	2.31833	2822.48	FALSE	119
2022-09-13	10:12:05	0.662354	2.94628	2803.29	FALSE	119
2022-09-13	10:12:05	0.728664	3.24124	2825.72	FALSE	119
2022-09-13	10:12:06	0.734873	3.26886	2806.56	FALSE	119
2022-09-13	10:12:06	0.733906	3.26456	2828.98	FALSE	119
2022-09-13	10:12:06	0.737214	3.27928	2809.84	FALSE	119
2022-09-13	10:12:06	0.738842	3.28652	2832.27	FALSE	119
2022-09-13	10:12:07	0.741438	3.29806	2813.13	FALSE	119
2022-09-13	10:12:07	0.747799	3.32636	2835.6	FALSE	119
2022-09-13	10:12:07	0.741031	3.29625	2816.43	FALSE	119
2022-09-13	10:12:08	0.739504	3.28946	2838.89	FALSE	119
2022-09-13	10:12:08	0.735687	3.27248	2819.7	FALSE	119
2022-09-13	10:12:08	0.736807	3.27746	2842.16	FALSE	119
2022-09-13	10:12:08	0.735433	3.27135	2822.97	FALSE	119
2022-09-13	10:12:09	0.732226	3.25709	2845.42	FALSE	119
2022-09-13	10:12:09	0.736603	3.27656	2826.25	FALSE	119
2022-09-13	10:12:09	0.736043	3.27407	2848.69	FALSE	119
2022-09-13	10:12:09	0.740318	3.29308	2829.54	FALSE	119
2022-09-13	10:12:10	0.741336	3.29761	2851.99	FALSE	119
2022-09-13	10:12:10	0.736705	3.27701	2832.82	FALSE	119
2022-09-13	10:12:10	0.737926	3.28244	2855.27	FALSE	119
2022-09-13	10:12:10	0.735127	3.26999	2836.09	FALSE	119
2022-09-13	10:12:11	0.736654	3.27678	2858.55	FALSE	119
2022-09-13	10:12:11	0.735229	3.27045	2839.36	FALSE	119
2022-09-13	10:12:11	0.735382	3.27113	2861.82	FALSE	119
2022-09-13	10:12:12	0.735026	3.26954	2842.63	FALSE	119
2022-09-13	10:12:12	0.739097	3.28765	2865.11	FALSE	119
2022-09-13	10:12:12	0.740878	3.29557	2845.93	FALSE	119
2022-09-13	10:12:12	0.735891	3.27339	2868.38	FALSE	119
2022-09-13	10:12:13	0.739046	3.28742	2849.21	FALSE	119
2022-09-13	10:12:13	0.741183	3.29693	2871.68	FALSE	119
2022-09-13	10:12:13	0.738028	3.2829	2852.5	FALSE	119
2022-09-13	10:12:13	0.732684	3.25912	2874.94	FALSE	119
2022-09-13	10:12:14	0.730496	3.24939	2855.75	FALSE	119
2022-09-13	10:12:14	0.736857	3.27769	2878.22	FALSE	119
2022-09-13	10:12:14	0.73584	3.27316	2859.02	FALSE	119
2022-09-13	10:12:14	0.740216	3.29263	2881.51	FALSE	119
2022-09-13	10:12:15	0.740623	3.29444	2862.31	FALSE	119
2022-09-13	10:12:15	0.735992	3.27384	2884.78	FALSE	119
2022-09-13	10:12:15	0.739606	3.28992	2865.6	FALSE	119
2022-09-13	10:12:15	0.733244	3.26162	2888.05	FALSE	119
2022-09-13	10:12:16	0.741845	3.29987	2868.9	FALSE	119
2022-09-13	10:12:16	0.738588	3.28539	2891.33	FALSE	119
2022-09-13	10:12:16	0.733092	3.26094	2872.16	FALSE	119
2022-09-13	10:12:17	0.735026	3.26954	2894.6	FALSE	119
2022-09-13	10:12:17	0.739809	3.29082	2875.45	FALSE	119
2022-09-13	10:12:17	0.734415	3.26682	2897.87	FALSE	119
2022-09-13	10:12:17	0.73813	3.28335	2878.74	FALSE	119
2022-09-13	10:12:18	0.737366	3.27995	2901.15	FALSE	119
2022-09-13	10:12:18	0.72958	3.24532	2881.98	FALSE	119
2022-09-13	10:12:18	0.732837	3.25981	2904.41	FALSE	119
2022-09-13	10:12:18	0.736908	3.27791	2885.26	FALSE	119
2022-09-13	10:12:19	0.736298	3.2752	2907.68	FALSE	119
2022-09-13	10:12:19	0.746679	3.32138	2888.58	FALSE	119
2022-09-13	10:12:19	0.737773	3.28176	2910.96	FALSE	119
2022-09-13	10:12:19	0.739504	3.28946	2891.87	FALSE	119
2022-09-13	10:12:20	0.736501	3.2761	2914.24	FALSE	119
2022-09-13	10:12:20	0.744644	3.31233	2895.18	FALSE	119
2022-09-13	10:12:20	0.733601	3.2632	2917.5	FALSE	119
2022-09-13	10:12:21	0.739707	3.29036	2898.48	FALSE	119
2022-09-13	10:12:21	0.734822	3.26864	2920.77	FALSE	119
2022-09-13	10:12:21	0.738486	3.28493	2901.76	FALSE	119
2022-09-13	10:12:21	0.739249	3.28833	2924.06	FALSE	119
2022-09-13	10:12:22	0.738028	3.2829	2905.04	FALSE	119
2022-09-13	10:12:22	0.740573	3.29422	2927.35	FALSE	119
2022-09-13	10:12:22	0.735483	3.27158	2908.31	FALSE	119
2022-09-13	10:12:22	0.738028	3.2829	2930.64	FALSE	119
2022-09-13	10:12:23	0.73757	3.28086	2911.6	FALSE	119
2022-09-13	10:12:23	0.739351	3.28878	2933.93	FALSE	119
2022-09-13	10:12:23	0.738689	3.28584	2914.88	FALSE	119
2022-09-13	10:12:23	0.739911	3.29127	2937.22	FALSE	119
2022-09-13	10:12:24	0.733957	3.26479	2918.15	FALSE	119
2022-09-13	10:12:24	0.739555	3.28969	2940.51	FALSE	119
2022-09-13	10:12:24	0.737468	3.28041	2921.43	FALSE	119
2022-09-13	10:12:24	0.736654	3.27678	2943.78	FALSE	119
2022-09-13	10:12:25	0.737875	3.28222	2924.71	FALSE	119
2022-09-13	10:12:25	0.734669	3.26795	2947.05	FALSE	119
2022-09-13	10:12:25	0.735941	3.27361	2927.98	FALSE	119
2022-09-13	10:12:26	0.734415	3.26682	2950.32	FALSE	119
2022-09-13	10:12:26	0.733499	3.26275	2931.24	FALSE	119
2022-09-13	10:12:26	0.74327	3.30621	2953.62	FALSE	119
2022-09-13	10:12:26	0.73813	3.28335	2934.53	FALSE	119
2022-09-13	10:12:27	0.734262	3.26614	2956.89	FALSE	119
2022-09-13	10:12:27	0.739147	3.28787	2937.82	FALSE	119
2022-09-13	10:12:27	0.740267	3.29286	2960.18	FALSE	119
2022-09-13	10:12:27	0.736807	3.27746	2941.09	FALSE	119
2022-09-13	10:12:28	0.731412	3.25347	2963.44	FALSE	119
2022-09-13	10:12:28	0.735941	3.27361	2944.37	FALSE	119
2022-09-13	10:12:28	0.741387	3.29784	2966.74	FALSE	119
2022-09-13	10:12:28	0.737672	3.28131	2947.65	FALSE	119
2022-09-13	10:12:29	0.733448	3.26252	2970	FALSE	119
2022-09-13	10:12:29	0.739402	3.28901	2950.94	FALSE	119
2022-09-13	10:12:29	0.736145	3.27452	2973.27	FALSE	119
2022-09-13	10:12:30	0.737977	3.28267	2954.22	FALSE	119
2022-09-13	10:12:30	0.741031	3.29625	2976.57	FALSE	119
2022-09-13	10:12:30	0.73584	3.27316	2957.49	FALSE	119
2022-09-13	10:12:30	0.736603	3.27656	2979.85	FALSE	119
2022-09-13	10:12:31	0.742964	3.30485	2960.8	FALSE	119
2022-09-13	10:12:31	0.739555	3.28969	2983.13	FALSE	119
2022-09-13	10:12:31	0.734873	3.26886	2964.07	FALSE	119
2022-09-13	10:12:31	0.735992	3.27384	2986.41	FALSE	119
2022-09-13	10:12:32	0.73813	3.28335	2967.35	FALSE	119
2022-09-13	10:12:32	0.738435	3.28471	2989.69	FALSE	119
2022-09-13	10:12:32	0.727697	3.23694	2970.59	FALSE	119
2022-09-13	10:12:32	0.736196	3.27475	2992.97	FALSE	119
2022-09-13	10:12:33	0.732379	3.25777	2973.85	FALSE	119
2022-09-13	10:12:33	0.733397	3.2623	2996.23	FALSE	119
2022-09-13	10:12:33	0.738842	3.28652	2977.13	FALSE	119
2022-09-13	10:12:34	0.735483	3.27158	2999.5	FALSE	119
2022-09-13	10:12:34	0.737163	3.27905	2980.41	FALSE	119
2022-09-13	10:12:34	0.73701	3.27837	3002.78	FALSE	119
2022-09-13	10:12:34	0.725611	3.22766	2983.64	FALSE	119
2022-09-13	10:12:35	0.444389	1.97673	3004.76	FALSE	119
2022-09-13	10:12:35	0.139453	0.620315	2984.26	FALSE	119
2022-09-13	10:12:35	0.290903	1.29399	3006.05	FALSE	119
2022-09-13	10:12:35	0.329021	1.46355	2985.72	FALSE	119
2022-09-13	10:12:36	0.33869	1.50656	3007.56	FALSE	119
2022-09-13	10:12:36	0.40042	1.78115	2987.5	FALSE	119
2022-09-13	10:12:36	0.351412	1.56315	3009.12	FALSE	119
2022-09-13	10:12:36	0.601743	2.67667	2990.18	FALSE	119
2022-09-13	10:12:37	0.272074	1.21024	3010.33	FALSE	119
2022-09-13	10:12:37	0.468054	2.082	2992.26	FALSE	119
2022-09-13	10:12:37	0.802252	3.56858	3013.9	FALSE	119
2022-09-13	10:12:37	4.55166	20.2467	3012.51	1	120
2022-09-13	10:12:38	3.83319	17.0508	3030.95	1	121
2022-09-13	10:12:38	5.14413	22.8821	3035.39	1	122
2022-09-13	10:12:38	1.17151	5.21111	3036.16	FALSE	122
2022-09-13	10:12:39	2.94871	13.1165	3048.51	FALSE	122
2022-09-13	10:12:39	0.814109	3.62132	3039.78	FALSE	122
2022-09-13	10:12:39	0.745306	3.31527	3051.82	FALSE	122
2022-09-13	10:12:39	0.637468	2.83559	3042.62	FALSE	122
2022-09-13	10:12:40	0.546374	2.43038	3054.25	FALSE	122
2022-09-13	10:12:40	0.507901	2.25925	3044.88	FALSE	122
2022-09-13	10:12:40	-0.0210048	-0.0934336	3054.25	FALSE	122
2022-09-13	10:12:40	-0.409096	-1.81974	3044.88	FALSE	122
2022-09-13	10:12:41	-0.643905	-2.86422	3054.25	FALSE	122
2022-09-13	10:12:41	-0.710012	-3.15828	3044.88	FALSE	122
2022-09-13	10:12:41	-0.694083	-3.08742	3054.25	FALSE	122
2022-09-13	10:12:41	-0.724567	-3.22302	3044.88	FALSE	122
2022-09-13	10:12:42	-0.529707	-2.35624	3054.25	FALSE	122
2022-09-13	10:12:42	-0.326653	-1.45302	3044.88	FALSE	122
2022-09-13	10:12:42	0.0477483	0.212394	3054.47	FALSE	122
2022-09-13	10:12:43	0.26444	1.17628	3046.05	FALSE	122
2022-09-13	10:12:43	0.327596	1.45721	3055.92	FALSE	122
2022-09-13	10:12:43	0.295992	1.31663	3047.37	FALSE	122
2022-09-13	10:12:43	0.443626	1.97334	3057.9	FALSE	122
2022-09-13	10:12:44	0.385916	1.71663	3049.09	FALSE	122
2022-09-13	10:12:44	0.338537	1.50588	3059.4	FALSE	122
2022-09-13	10:12:44	0.365611	1.62631	3050.71	FALSE	122
2022-09-13	10:12:44	0.365407	1.6254	3061.03	FALSE	122
2022-09-13	10:12:45	0.379962	1.69015	3052.4	FALSE	122
2022-09-13	10:12:45	0.36383	1.61839	3062.65	FALSE	122
2022-09-13	10:12:45	0.389987	1.73474	3054.14	FALSE	122
2022-09-13	10:12:45	0.326934	1.45427	3064.1	FALSE	122
2022-09-13	10:12:46	0.270242	1.20209	3055.34	FALSE	122
2022-09-13	10:12:46	0.262303	1.16678	3065.27	FALSE	122
2022-09-13	10:12:46	0.256043	1.13893	3056.48	FALSE	122
2022-09-13	10:12:46	0.280013	1.24555	3066.51	FALSE	122
2022-09-13	10:12:47	0.268512	1.1944	3057.67	FALSE	122
2022-09-13	10:12:47	0.277316	1.23356	3067.75	FALSE	122
2022-09-13	10:12:47	0.28098	1.24986	3058.92	FALSE	122
2022-09-13	10:12:48	0.286323	1.27362	3069.02	FALSE	122
2022-09-13	10:12:48	0.279606	1.24374	3060.17	FALSE	122
2022-09-13	10:12:48	0.279758	1.24442	3070.26	FALSE	122
2022-09-13	10:12:48	0.286374	1.27385	3061.44	FALSE	122
2022-09-13	10:12:49	0.286628	1.27498	3071.54	FALSE	122
2022-09-13	10:12:49	0.281845	1.2537	3062.69	FALSE	122
2022-09-13	10:12:49	0.27243	1.21182	3072.75	FALSE	122
2022-09-13	10:12:49	0.269529	1.19892	3063.89	FALSE	122
2022-09-13	10:12:50	0.281031	1.25008	3074	FALSE	122
2022-09-13	10:12:50	0.277468	1.23423	3065.13	FALSE	122
2022-09-13	10:12:50	0.27584	1.22699	3075.23	FALSE	122
2022-09-13	10:12:50	0.283728	1.26208	3066.39	FALSE	122
2022-09-13	10:12:51	0.290853	1.29377	3076.52	FALSE	122
2022-09-13	10:12:51	0.306221	1.36213	3067.75	FALSE	122
2022-09-13	10:12:51	0.306629	1.36395	3077.89	FALSE	122
2022-09-13	10:12:52	0.301845	1.34267	3069.09	FALSE	122
2022-09-13	10:12:52	0.289529	1.28788	3079.17	FALSE	122
2022-09-13	10:12:52	0.286171	1.27295	3070.37	FALSE	122
2022-09-13	10:12:52	0.28902	1.28562	3080.46	FALSE	122
2022-09-13	10:12:53	0.288206	1.282	3071.65	FALSE	122
2022-09-13	10:12:53	0.281132	1.25053	3081.71	FALSE	122
2022-09-13	10:12:53	0.278181	1.2374	3072.89	FALSE	122
2022-09-13	10:12:53	0.284084	1.26366	3082.97	FALSE	122
2022-09-13	10:12:54	0.356501	1.58579	3074.47	FALSE	122
2022-09-13	10:12:54	0.440827	1.96089	3084.93	FALSE	122
2022-09-13	10:12:54	0.541997	2.41091	3076.88	FALSE	122
2022-09-13	10:12:54	0.573193	2.54968	3087.48	FALSE	122
2022-09-13	10:12:55	0.431921	1.92127	3078.81	FALSE	122
2022-09-13	10:12:55	0.725102	3.2254	3090.71	FALSE	122
2022-09-13	10:12:55	0.702964	3.12692	3081.93	FALSE	122
2022-09-13	10:12:56	0.494262	2.19858	3092.91	FALSE	122
2022-09-13	10:12:56	0.47874	2.12953	3084.06	FALSE	122
2022-09-13	10:12:56	0.394109	1.75308	3094.66	FALSE	122
2022-09-13	10:12:56	0.446832	1.9876	3086.05	FALSE	122
2022-09-13	10:12:57	0.449835	2.00096	3096.66	FALSE	122
2022-09-13	10:12:57	0.500318	2.22551	3088.27	FALSE	122
2022-09-13	10:12:57	0.504796	2.24543	3098.91	FALSE	122
2022-09-13	10:12:57	1.24078	5.51924	3093.79	FALSE	122
2022-09-13	10:12:58	1.87874	8.35701	3107.26	FALSE	122
2022-09-13	10:12:58	2.77813	12.3577	3106.15	FALSE	122
2022-09-13	10:12:58	1.53355	6.82154	3114.09	FALSE	122
2022-09-13	10:12:58	1.61477	7.18282	3113.33	FALSE	122
2022-09-13	10:12:59	1.9421	8.63885	3122.72	FALSE	122
2022-09-13	10:12:59	3.02744	13.4667	3126.8	1	123
2022-09-13	10:12:59	4.87609	21.6898	3144.41	1	124
2022-09-13	10:12:59	3.00729	13.377	3140.18	1	125
2022-09-13	10:13:00	2.8195	12.5417	3156.96	FALSE	125
2022-09-13	10:13:00	1.97935	8.80454	3148.98	FALSE	125
2022-09-13	10:13:00	1.95406	8.69205	3165.65	FALSE	125
2022-09-13	10:13:01	1.50826	6.70904	3155.69	FALSE	125
2022-09-13	10:13:01	0.68271	3.03683	3168.68	FALSE	125
2022-09-13	10:13:01	0.496298	2.20763	3157.9	FALSE	125
2022-09-13	10:13:01	0.829885	3.69149	3172.38	FALSE	125
2022-09-13	10:13:02	0.366272	1.62925	3159.53	FALSE	125
2022-09-13	10:13:02	0.43014	1.91335	3174.29	FALSE	125
2022-09-13	10:13:02	0.513804	2.2855	3161.81	FALSE	125
2022-09-13	10:13:02	0.419249	1.8649	3176.15	FALSE	125
2022-09-13	10:13:03	0.296908	1.32071	3163.13	FALSE	125
2022-09-13	10:13:03	0.600776	2.67237	3178.83	FALSE	125
2022-09-13	10:13:03	0.377723	1.68019	3164.82	FALSE	125
2022-09-13	10:13:03	0.481591	2.14221	3180.97	FALSE	125

## Sheet: Juju_harness_2022913100745 (E)
Date	Time	Lbs	Total force x time			**GoPro Fitting: 952
2022-09-13	10:08:03	0.378995	0.378995	FALSE	0			Total force x time	1426.6
2022-09-13	10:08:03	1.19294	1.57193	FALSE	0			Total steps	125
2022-09-13	10:08:03	0.550343	2.12228	FALSE	0
2022-09-13	10:08:03	0.602557	2.72483	FALSE	0
2022-09-13	10:08:04	0.583677	3.30851	FALSE	0
2022-09-13	10:08:04	0.638537	3.94705	FALSE	0
2022-09-13	10:08:04	2.83976	6.78681	FALSE	0
2022-09-13	10:08:04	2.13029	8.9171	FALSE	0
2022-09-13	10:08:05	5.01202	13.9291	1	1
2022-09-13	10:08:05	1.17406	15.1032	FALSE	1
2022-09-13	10:08:05	1.47528	16.5785	FALSE	1
2022-09-13	10:08:06	0.792125	17.3706	FALSE	1
2022-09-13	10:08:06	1.12149	18.4921	FALSE	1
2022-09-13	10:08:06	0.601997	19.0941	FALSE	1
2022-09-13	10:08:06	2.15966	21.2537	FALSE	1
2022-09-13	10:08:07	1.24057	22.4943	FALSE	1
2022-09-13	10:08:07	3.74683	26.2411	1	2
2022-09-13	10:08:07	2.17202	28.4132	FALSE	2
2022-09-13	10:08:07	1.42017	29.8333	FALSE	2
2022-09-13	10:08:08	2.89502	32.7283	FALSE	2
2022-09-13	10:08:08	6.35797	39.0863	1	3
2022-09-13	10:08:08	6.64764	45.734	1	4
2022-09-13	10:08:08	2.94307	48.677	FALSE	4
2022-09-13	10:08:09	3.99258	52.6696	1	5
2022-09-13	10:08:09	2.45859	55.1282	FALSE	5
2022-09-13	10:08:09	2.19146	57.3197	FALSE	5
2022-09-13	10:08:10	2.21319	59.5328	FALSE	5
2022-09-13	10:08:10	1.31915	60.852	FALSE	5
2022-09-13	10:08:10	0.535433	61.3874	FALSE	5
2022-09-13	10:08:10	0.44159	61.829	FALSE	5
2022-09-13	10:08:11	0.295687	62.1247	FALSE	5
2022-09-13	10:08:11	-0.36472	62.1247	FALSE	5
2022-09-13	10:08:11	0.15584	62.2805	FALSE	5
2022-09-13	10:08:11	0.514211	62.7948	FALSE	5
2022-09-13	10:08:12	0.0931427	62.8879	FALSE	5
2022-09-13	10:08:12	0.0401147	62.928	FALSE	5
2022-09-13	10:08:12	-0.441412	62.928	FALSE	5
2022-09-13	10:08:12	-0.489096	62.928	FALSE	5
2022-09-13	10:08:13	-0.538053	62.928	FALSE	5
2022-09-13	10:08:13	-0.528995	62.928	FALSE	5
2022-09-13	10:08:13	-0.514643	62.928	FALSE	5
2022-09-13	10:08:13	-0.512964	62.928	FALSE	5
2022-09-13	10:08:14	-0.520394	62.928	FALSE	5
2022-09-13	10:08:14	-0.596424	62.928	FALSE	5
2022-09-13	10:08:14	-0.742836	62.928	FALSE	5
2022-09-13	10:08:15	-0.120598	62.928	FALSE	5
2022-09-13	10:08:15	0.149937	63.0779	FALSE	5
2022-09-13	10:08:15	0.282608	63.3606	FALSE	5
2022-09-13	10:08:15	0.340318	63.7009	FALSE	5
2022-09-13	10:08:16	0.247392	63.9483	FALSE	5
2022-09-13	10:08:16	0.345204	64.2935	FALSE	5
2022-09-13	10:08:16	0.342557	64.636	FALSE	5
2022-09-13	10:08:16	0.1993	64.8353	FALSE	5
2022-09-13	10:08:17	0.429886	65.2652	FALSE	5
2022-09-13	10:08:17	0.525865	65.7911	FALSE	5
2022-09-13	10:08:17	3.79065	69.5817	1	6
2022-09-13	10:08:17	2.6765	72.2582	FALSE	6
2022-09-13	10:08:18	6.33192	78.5901	1	7
2022-09-13	10:08:18	4.51558	83.1057	1	8
2022-09-13	10:08:18	6.70963	89.8154	1	9
2022-09-13	10:08:19	5.042	94.8574	1	10
2022-09-13	10:08:19	4.86571	99.7231	1	11
2022-09-13	10:08:19	1.35828	101.081	FALSE	11
2022-09-13	10:08:19	1.26663	102.348	FALSE	11
2022-09-13	10:08:20	0.790445	103.138	FALSE	11
2022-09-13	10:08:20	0.769835	103.908	FALSE	11
2022-09-13	10:08:20	1.69935	105.608	FALSE	11
2022-09-13	10:08:20	1.93503	107.543	FALSE	11
2022-09-13	10:08:21	5.20026	112.743	1	12
2022-09-13	10:08:21	5.02922	117.772	1	13
2022-09-13	10:08:21	1.03508	118.807	FALSE	13
2022-09-13	10:08:21	0.593804	119.401	FALSE	13
2022-09-13	10:08:22	0.463168	119.864	FALSE	13
2022-09-13	10:08:22	0.656298	120.52	FALSE	13
2022-09-13	10:08:22	0.275891	120.796	FALSE	13
2022-09-13	10:08:22	0.475127	121.271	FALSE	13
2022-09-13	10:08:23	0.351616	121.623	FALSE	13
2022-09-13	10:08:23	0.914109	122.537	FALSE	13
2022-09-13	10:08:23	2.78785	125.325	FALSE	13
2022-09-13	10:08:24	2.56052	127.886	FALSE	13
2022-09-13	10:08:24	4.71019	132.596	1	14
2022-09-13	10:08:24	2.89686	135.493	FALSE	14
2022-09-13	10:08:24	5.18663	140.679	1	15
2022-09-13	10:08:25	1.38581	142.065	FALSE	15
2022-09-13	10:08:25	4.39706	146.462	1	16
2022-09-13	10:08:25	0.783117	147.245	FALSE	16
2022-09-13	10:08:25	3.77533	151.021	1	17
2022-09-13	10:08:26	0.824898	151.845	FALSE	17
2022-09-13	10:08:26	2.828	154.673	FALSE	17
2022-09-13	10:08:26	1.98556	156.659	FALSE	17
2022-09-13	10:08:26	4.27121	160.93	1	18
2022-09-13	10:08:27	1.63803	162.568	FALSE	18
2022-09-13	10:08:27	3.17665	165.745	1	19
2022-09-13	10:08:27	1.23894	166.984	FALSE	19
2022-09-13	10:08:28	1.65747	168.641	FALSE	19
2022-09-13	10:08:28	0.410547	169.052	FALSE	19
2022-09-13	10:08:28	3.63314	172.685	1	20
2022-09-13	10:08:28	1.83223	174.517	FALSE	20
2022-09-13	10:08:29	8.71909	183.236	1	21
2022-09-13	10:08:29	7.16037	190.397	1	22
2022-09-13	10:08:29	4.2506	194.647	1	23
2022-09-13	10:08:29	2.23228	196.88	FALSE	23
2022-09-13	10:08:30	2.68072	199.56	FALSE	23
2022-09-13	10:08:30	2.02011	201.58	FALSE	23
2022-09-13	10:08:30	2.02968	203.61	FALSE	23
2022-09-13	10:08:30	2.16841	205.779	FALSE	23
2022-09-13	10:08:31	2.00368	207.782	FALSE	23
2022-09-13	10:08:31	0.707901	208.49	FALSE	23
2022-09-13	10:08:31	0.501132	208.991	FALSE	23
2022-09-13	10:08:32	0.530649	209.522	FALSE	23
2022-09-13	10:08:32	0.465153	209.987	FALSE	23
2022-09-13	10:08:32	0.49014	210.477	FALSE	23
2022-09-13	10:08:32	0.885916	211.363	FALSE	23
2022-09-13	10:08:33	1.30602	212.669	FALSE	23
2022-09-13	10:08:33	1.26632	213.935	FALSE	23
2022-09-13	10:08:33	0.836247	214.772	FALSE	23
2022-09-13	10:08:33	1.54622	216.318	FALSE	23
2022-09-13	10:08:34	1.60083	217.919	FALSE	23
2022-09-13	10:08:34	1.65426	219.573	FALSE	23
2022-09-13	10:08:34	1.57757	221.151	FALSE	23
2022-09-13	10:08:34	1.57385	222.724	FALSE	23
2022-09-13	10:08:35	1.56561	224.29	FALSE	23
2022-09-13	10:08:35	1.59849	225.888	FALSE	23
2022-09-13	10:08:35	1.66637	227.555	FALSE	23
2022-09-13	10:08:35	1.77014	229.325	FALSE	23
2022-09-13	10:08:36	0.620929	229.946	FALSE	23
2022-09-13	10:08:36	0.396807	230.343	FALSE	23
2022-09-13	10:08:36	0.398893	230.742	FALSE	23
2022-09-13	10:08:37	0.362608	231.104	FALSE	23
2022-09-13	10:08:37	0.293244	231.397	FALSE	23
2022-09-13	10:08:37	0.0895295	231.487	FALSE	23
2022-09-13	10:08:37	-0.0605468	231.487	FALSE	23
2022-09-13	10:08:38	-0.110827	231.487	FALSE	23
2022-09-13	10:08:38	-0.116272	231.487	FALSE	23
2022-09-13	10:08:38	0.0294277	231.516	FALSE	23
2022-09-13	10:08:38	-0.0271117	231.516	FALSE	23
2022-09-13	10:08:39	0.0581809	231.575	FALSE	23
2022-09-13	10:08:39	0.92444	232.499	FALSE	23
2022-09-13	10:08:39	1.03991	233.539	FALSE	23
2022-09-13	10:08:39	3.00418	236.543	1	24
2022-09-13	10:08:40	0.768155	237.311	FALSE	24
2022-09-13	10:08:40	3.57925	240.891	1	25
2022-09-13	10:08:40	1.0649	241.955	FALSE	25
2022-09-13	10:08:41	4.66596	246.621	1	26
2022-09-13	10:08:41	0.911921	247.533	FALSE	26
2022-09-13	10:08:41	3.75599	251.289	1	27
2022-09-13	10:08:41	1.38999	252.679	FALSE	27
2022-09-13	10:08:42	1.2822	253.962	FALSE	27
2022-09-13	10:08:42	0.447087	254.409	FALSE	27
2022-09-13	10:08:42	1.0452	255.454	FALSE	27
2022-09-13	10:08:42	0.315738	255.77	FALSE	27
2022-09-13	10:08:43	0.860369	256.63	FALSE	27
2022-09-13	10:08:43	0.212837	256.843	FALSE	27
2022-09-13	10:08:43	0.690649	257.533	FALSE	27
2022-09-13	10:08:43	0.452227	257.986	FALSE	27
2022-09-13	10:08:44	2.02474	260.01	FALSE	27
2022-09-13	10:08:44	1.15874	261.169	FALSE	27
2022-09-13	10:08:44	1.69416	262.863	FALSE	27
2022-09-13	10:08:44	0.753957	263.617	FALSE	27
2022-09-13	10:08:45	2.0678	265.685	FALSE	27
2022-09-13	10:08:45	1.07955	266.765	FALSE	27
2022-09-13	10:08:45	3.50897	270.274	1	28
2022-09-13	10:08:46	2.41202	272.686	FALSE	28
2022-09-13	10:08:46	5.39344	278.079	1	29
2022-09-13	10:08:46	2.93172	281.011	FALSE	29
2022-09-13	10:08:46	3.84474	284.855	1	30
2022-09-13	10:08:47	4.19528	289.051	1	31
2022-09-13	10:08:47	2.03981	291.091	FALSE	31
2022-09-13	10:08:47	4.06759	295.158	1	32
2022-09-13	10:08:47	2.04174	297.2	FALSE	32
2022-09-13	10:08:48	4.74311	301.943	1	33
2022-09-13	10:08:48	2.62179	304.565	FALSE	33
2022-09-13	10:08:48	0.770394	305.335	FALSE	33
2022-09-13	10:08:48	0.747137	306.082	FALSE	33
2022-09-13	10:08:49	1.71559	307.798	FALSE	33
2022-09-13	10:08:49	1.57258	309.37	FALSE	33
2022-09-13	10:08:49	0.519402	309.89	FALSE	33
2022-09-13	10:08:50	0.480674	310.371	FALSE	33
2022-09-13	10:08:50	0.369326	310.74	FALSE	33
2022-09-13	10:08:50	0.732074	311.472	FALSE	33
2022-09-13	10:08:50	0.732939	312.205	FALSE	33
2022-09-13	10:08:51	0.736654	312.942	FALSE	33
2022-09-13	10:08:51	0.719504	313.661	FALSE	33
2022-09-13	10:08:51	0.656298	314.317	FALSE	33
2022-09-13	10:08:51	2.01411	316.331	FALSE	33
2022-09-13	10:08:52	2.96546	319.297	FALSE	33
2022-09-13	10:08:52	1.29279	320.59	FALSE	33
2022-09-13	10:08:52	4.33314	324.923	1	34
2022-09-13	10:08:52	1.71487	326.638	FALSE	34
2022-09-13	10:08:53	0.64444	327.282	FALSE	34
2022-09-13	10:08:53	0.501641	327.784	FALSE	34
2022-09-13	10:08:53	0.320369	328.104	FALSE	34
2022-09-13	10:08:54	0.319657	328.424	FALSE	34
2022-09-13	10:08:54	0.409478	328.833	FALSE	34
2022-09-13	10:08:54	0.675432	329.509	FALSE	34
2022-09-13	10:08:54	1.87503	331.384	FALSE	34
2022-09-13	10:08:55	1.41162	332.795	FALSE	34
2022-09-13	10:08:55	1.79039	334.586	FALSE	34
2022-09-13	10:08:55	0.819555	335.405	FALSE	34
2022-09-13	10:08:55	1.0391	336.444	FALSE	34
2022-09-13	10:08:56	1.08856	337.533	FALSE	34
2022-09-13	10:08:56	0.910954	338.444	FALSE	34
2022-09-13	10:08:56	1.11095	339.555	FALSE	34
2022-09-13	10:08:56	1.4819	341.037	FALSE	34
2022-09-13	10:08:57	1.788	342.825	FALSE	34
2022-09-13	10:08:57	2.14144	344.966	FALSE	34
2022-09-13	10:08:57	1.27854	346.245	FALSE	34
2022-09-13	10:08:57	1.26271	347.507	FALSE	34
2022-09-13	10:08:58	0.927341	348.435	FALSE	34
2022-09-13	10:08:58	0.387748	348.823	FALSE	34
2022-09-13	10:08:58	0.186985	349.01	FALSE	34
2022-09-13	10:08:59	0.149122	349.159	FALSE	34
2022-09-13	10:08:59	0.13243	349.291	FALSE	34
2022-09-13	10:08:59	0.103015	349.394	FALSE	34
2022-09-13	10:08:59	0.117977	349.512	FALSE	34
2022-09-13	10:09:00	0.125458	349.638	FALSE	34
2022-09-13	10:09:00	0.147138	349.785	FALSE	34
2022-09-13	10:09:00	0.146171	349.931	FALSE	34
2022-09-13	10:09:00	0.157417	350.088	FALSE	34
2022-09-13	10:09:01	0.168308	350.257	FALSE	34
2022-09-13	10:09:01	0.164135	350.421	FALSE	34
2022-09-13	10:09:01	0.173295	350.594	FALSE	34
2022-09-13	10:09:01	0.160624	350.755	FALSE	34
2022-09-13	10:09:02	0.153041	350.908	FALSE	34
2022-09-13	10:09:02	0.142201	351.05	FALSE	34
2022-09-13	10:09:02	0.135942	351.186	FALSE	34
2022-09-13	10:09:03	0.141082	351.327	FALSE	34
2022-09-13	10:09:03	0.136247	351.463	FALSE	34
2022-09-13	10:09:03	0.101591	351.565	FALSE	34
2022-09-13	10:09:03	0.152023	351.717	FALSE	34
2022-09-13	10:09:04	0.0974175	351.814	FALSE	34
2022-09-13	10:09:04	0.441998	352.256	FALSE	34
2022-09-13	10:09:04	0.261692	352.518	FALSE	34
2022-09-13	10:09:04	0.181031	352.699	FALSE	34
2022-09-13	10:09:05	0.114008	352.813	FALSE	34
2022-09-13	10:09:05	0.23355	353.046	FALSE	34
2022-09-13	10:09:05	0.100776	353.147	FALSE	34
2022-09-13	10:09:05	0.734924	353.882	FALSE	34
2022-09-13	10:09:06	6.64978	360.532	1	35
2022-09-13	10:09:06	27.2488	387.781	1	36
2022-09-13	10:09:06	1.67742	389.458	FALSE	36
2022-09-13	10:09:06	0.90612	390.364	FALSE	36
2022-09-13	10:09:07	0.154873	390.519	FALSE	36
2022-09-13	10:09:07	0.21187	390.731	FALSE	36
2022-09-13	10:09:07	-0.20304	390.731	FALSE	36
2022-09-13	10:09:08	0.824135	391.555	FALSE	36
2022-09-13	10:09:08	4.3479	395.903	1	37
2022-09-13	10:09:08	5.20667	401.11	1	38
2022-09-13	10:09:08	6.75222	407.862	1	39
2022-09-13	10:09:09	6.81136	414.673	1	40
2022-09-13	10:09:09	6.04612	420.719	1	41
2022-09-13	10:09:09	9.90556	430.625	1	42
2022-09-13	10:09:09	3.79457	434.42	1	43
2022-09-13	10:09:10	3.25136	437.671	1	44
2022-09-13	10:09:10	2.79019	440.461	FALSE	44
2022-09-13	10:09:10	3.44597	443.907	1	45
2022-09-13	10:09:10	3.57294	447.48	1	46
2022-09-13	10:09:11	4.85131	452.331	1	47
2022-09-13	10:09:11	2.70775	455.039	FALSE	47
2022-09-13	10:09:11	0.708766	455.748	FALSE	47
2022-09-13	10:09:12	0.224949	455.973	FALSE	47
2022-09-13	10:09:12	-0.112252	455.973	FALSE	47
2022-09-13	10:09:12	-0.154694	455.973	FALSE	47
2022-09-13	10:09:12	-0.137137	455.973	FALSE	47
2022-09-13	10:09:13	-0.624567	455.973	FALSE	47
2022-09-13	10:09:13	-0.041412	455.973	FALSE	47
2022-09-13	10:09:13	1.95284	457.926	FALSE	47
2022-09-13	10:09:13	2.02805	459.954	FALSE	47
2022-09-13	10:09:14	0.762455	460.716	FALSE	47
2022-09-13	10:09:14	0.285763	461.002	FALSE	47
2022-09-13	10:09:14	0.204593	461.207	FALSE	47
2022-09-13	10:09:14	0.532684	461.739	FALSE	47
2022-09-13	10:09:15	0.586476	462.326	FALSE	47
2022-09-13	10:09:15	0.129275	462.455	FALSE	47
2022-09-13	10:09:15	0.124237	462.579	FALSE	47
2022-09-13	10:09:15	0.146476	462.726	FALSE	47
2022-09-13	10:09:16	0.479911	463.206	FALSE	47
2022-09-13	10:09:16	0.739351	463.945	FALSE	47
2022-09-13	10:09:16	6.33431	470.279	1	48
2022-09-13	10:09:17	6.75472	477.034	1	49
2022-09-13	10:09:17	3.43543	480.469	1	50
2022-09-13	10:09:17	2.79833	483.268	FALSE	50
2022-09-13	10:09:17	0.475229	483.743	FALSE	50
2022-09-13	10:09:18	0.477316	484.22	FALSE	50
2022-09-13	10:09:18	0.387799	484.608	FALSE	50
2022-09-13	10:09:18	0.386832	484.995	FALSE	50
2022-09-13	10:09:18	0.303066	485.298	FALSE	50
2022-09-13	10:09:19	0.256552	485.555	FALSE	50
2022-09-13	10:09:19	0.274975	485.829	FALSE	50
2022-09-13	10:09:19	0.0432699	485.873	FALSE	50
2022-09-13	10:09:19	0.173092	486.046	FALSE	50
2022-09-13	10:09:20	0.125051	486.171	FALSE	50
2022-09-13	10:09:20	0.086018	486.257	FALSE	50
2022-09-13	10:09:20	-0.0189183	486.257	FALSE	50
2022-09-13	10:09:21	-0.105178	486.257	FALSE	50
2022-09-13	10:09:21	-0.103498	486.257	FALSE	50
2022-09-13	10:09:21	-0.14701	486.257	FALSE	50
2022-09-13	10:09:21	-0.116374	486.257	FALSE	50
2022-09-13	10:09:22	-0.208791	486.257	FALSE	50
2022-09-13	10:09:22	-0.151081	486.257	FALSE	50
2022-09-13	10:09:22	-0.209605	486.257	FALSE	50
2022-09-13	10:09:22	0.0371122	486.294	FALSE	50
2022-09-13	10:09:23	-0.186603	486.294	FALSE	50
2022-09-13	10:09:23	-0.458816	486.294	FALSE	50
2022-09-13	10:09:23	-0.576628	486.294	FALSE	50
2022-09-13	10:09:23	-0.694745	486.294	FALSE	50
2022-09-13	10:09:24	-0.61159	486.294	FALSE	50
2022-09-13	10:09:24	-0.627926	486.294	FALSE	50
2022-09-13	10:09:24	-0.452404	486.294	FALSE	50
2022-09-13	10:09:25	-0.392557	486.294	FALSE	50
2022-09-13	10:09:25	-0.405992	486.294	FALSE	50
2022-09-13	10:09:25	-0.554949	486.294	FALSE	50
2022-09-13	10:09:25	-0.488333	486.294	FALSE	50
2022-09-13	10:09:26	-0.498511	486.294	FALSE	50
2022-09-13	10:09:26	-0.298816	486.294	FALSE	50
2022-09-13	10:09:26	-0.296119	486.294	FALSE	50
2022-09-13	10:09:26	-0.0777478	486.294	FALSE	50
2022-09-13	10:09:27	0.813702	487.108	FALSE	50
2022-09-13	10:09:27	2.06775	489.175	FALSE	50
2022-09-13	10:09:27	0.928104	490.104	FALSE	50
2022-09-13	10:09:27	1.58872	491.692	FALSE	50
2022-09-13	10:09:28	0.504796	492.197	FALSE	50
2022-09-13	10:09:28	1.76902	493.966	FALSE	50
2022-09-13	10:09:28	1.10592	495.072	FALSE	50
2022-09-13	10:09:28	1.30856	496.381	FALSE	50
2022-09-13	10:09:29	0.603372	496.984	FALSE	50
2022-09-13	10:09:29	0.810903	497.795	FALSE	50
2022-09-13	10:09:29	1.09034	498.885	FALSE	50
2022-09-13	10:09:30	0.251107	499.136	FALSE	50
2022-09-13	10:09:30	1.16434	500.301	FALSE	50
2022-09-13	10:09:30	1.83559	502.136	FALSE	50
2022-09-13	10:09:30	0.626069	502.762	FALSE	50
2022-09-13	10:09:31	0.983779	503.746	FALSE	50
2022-09-13	10:09:31	0.458486	504.205	FALSE	50
2022-09-13	10:09:31	0.0529391	504.258	FALSE	50
2022-09-13	10:09:31	0.276094	504.534	FALSE	50
2022-09-13	10:09:32	-0.000495923	504.534	FALSE	50
2022-09-13	10:09:32	0.114313	504.648	FALSE	50
2022-09-13	10:09:32	-0.0327606	504.648	FALSE	50
2022-09-13	10:09:32	0.00988575	504.658	FALSE	50
2022-09-13	10:09:33	-0.166705	504.658	FALSE	50
2022-09-13	10:09:33	0.00830812	504.666	FALSE	50
2022-09-13	10:09:33	0.175382	504.842	FALSE	50
2022-09-13	10:09:34	0.984084	505.826	FALSE	50
2022-09-13	10:09:34	3.4277	509.253	1	51
2022-09-13	10:09:34	2.35696	511.61	FALSE	51
2022-09-13	10:09:34	2.79192	514.402	FALSE	51
2022-09-13	10:09:35	2.11584	516.518	FALSE	51
2022-09-13	10:09:35	2.86332	519.381	FALSE	51
2022-09-13	10:09:35	1.04073	520.422	FALSE	51
2022-09-13	10:09:35	1.55828	521.98	FALSE	51
2022-09-13	10:09:36	0.291005	522.271	FALSE	51
2022-09-13	10:09:36	0.277977	522.549	FALSE	51
2022-09-13	10:09:36	0.8993	523.449	FALSE	51
2022-09-13	10:09:36	0.0666287	523.515	FALSE	51
2022-09-13	10:09:37	0.138283	523.654	FALSE	51
2022-09-13	10:09:37	0.101692	523.755	FALSE	51
2022-09-13	10:09:37	0.0253564	523.781	FALSE	51
2022-09-13	10:09:37	1.14607	524.927	FALSE	51
2022-09-13	10:09:38	0.230242	525.157	FALSE	51
2022-09-13	10:09:38	1.05803	526.215	FALSE	51
2022-09-13	10:09:38	0.263168	526.478	FALSE	51
2022-09-13	10:09:39	0.636043	527.114	FALSE	51
2022-09-13	10:09:39	2.52719	529.641	FALSE	51
2022-09-13	10:09:39	0.529783	530.171	FALSE	51
2022-09-13	10:09:39	1.12892	531.3	FALSE	51
2022-09-13	10:09:40	1.09808	532.398	FALSE	51
2022-09-13	10:09:40	0.848308	533.246	FALSE	51
2022-09-13	10:09:40	3.48556	536.732	1	52
2022-09-13	10:09:40	0.983829	537.716	FALSE	52
2022-09-13	10:09:41	3.05731	540.773	1	53
2022-09-13	10:09:41	0.455483	541.229	FALSE	53
2022-09-13	10:09:41	0.72271	541.951	FALSE	53
2022-09-13	10:09:41	0.466629	542.418	FALSE	53
2022-09-13	10:09:42	-0.0467046	542.418	FALSE	53
2022-09-13	10:09:42	0.100674	542.519	FALSE	53
2022-09-13	10:09:42	-0.0244145	542.519	FALSE	53
2022-09-13	10:09:43	-0.0634476	542.519	FALSE	53
2022-09-13	10:09:43	-0.107773	542.519	FALSE	53
2022-09-13	10:09:43	-0.082328	542.519	FALSE	53
2022-09-13	10:09:43	-0.0761193	542.519	FALSE	53
2022-09-13	10:09:44	-0.0504705	542.519	FALSE	53
2022-09-13	10:09:44	-0.19271	542.519	FALSE	53
2022-09-13	10:09:44	-0.0865519	542.519	FALSE	53
2022-09-13	10:09:44	-0.153829	542.519	FALSE	53
2022-09-13	10:09:45	-0.222124	542.519	FALSE	53
2022-09-13	10:09:45	-0.278766	542.519	FALSE	53
2022-09-13	10:09:45	-0.339376	542.519	FALSE	53
2022-09-13	10:09:45	-0.122939	542.519	FALSE	53
2022-09-13	10:09:46	-0.0354577	542.519	FALSE	53
2022-09-13	10:09:46	-0.0418699	542.519	FALSE	53
2022-09-13	10:09:46	-0.0549997	542.519	FALSE	53
2022-09-13	10:09:47	0.0726338	542.591	FALSE	53
2022-09-13	10:09:47	0.149428	542.741	FALSE	53
2022-09-13	10:09:47	0.233753	542.974	FALSE	53
2022-09-13	10:09:47	1.70383	544.678	FALSE	53
2022-09-13	10:09:48	1.06179	545.74	FALSE	53
2022-09-13	10:09:48	3.46424	549.204	1	54
2022-09-13	10:09:48	1.71223	550.917	FALSE	54
2022-09-13	10:09:48	2.18388	553.1	FALSE	54
2022-09-13	10:09:49	0.752227	553.853	FALSE	54
2022-09-13	10:09:49	1.69274	555.545	FALSE	54
2022-09-13	10:09:49	0.676298	556.222	FALSE	54
2022-09-13	10:09:49	0.585102	556.807	FALSE	54
2022-09-13	10:09:50	1.24022	558.047	FALSE	54
2022-09-13	10:09:50	0.48327	558.53	FALSE	54
2022-09-13	10:09:50	0.238893	558.769	FALSE	54
2022-09-13	10:09:50	0.421947	559.191	FALSE	54
2022-09-13	10:09:51	0.285204	559.476	FALSE	54
2022-09-13	10:09:51	0.465814	559.942	FALSE	54
2022-09-13	10:09:51	0.304237	560.246	FALSE	54
2022-09-13	10:09:52	0.215992	560.462	FALSE	54
2022-09-13	10:09:52	0.349224	560.812	FALSE	54
2022-09-13	10:09:52	0.347697	561.159	FALSE	54
2022-09-13	10:09:52	0.454924	561.614	FALSE	54
2022-09-13	10:09:53	1.60103	563.215	FALSE	54
2022-09-13	10:09:53	0.623524	563.839	FALSE	54
2022-09-13	10:09:53	0.679758	564.519	FALSE	54
2022-09-13	10:09:53	0.611107	565.13	FALSE	54
2022-09-13	10:09:54	0.202659	565.332	FALSE	54
2022-09-13	10:09:54	0.286578	565.619	FALSE	54
2022-09-13	10:09:54	0.336858	565.956	FALSE	54
2022-09-13	10:09:54	0.326985	566.283	FALSE	54
2022-09-13	10:09:55	0.425	566.708	FALSE	54
2022-09-13	10:09:55	0.320674	567.028	FALSE	54
2022-09-13	10:09:55	0.425305	567.454	FALSE	54
2022-09-13	10:09:56	0.349835	567.804	FALSE	54
2022-09-13	10:09:56	0.457875	568.261	FALSE	54
2022-09-13	10:09:56	0.484593	568.746	FALSE	54
2022-09-13	10:09:56	0.496094	569.242	FALSE	54
2022-09-13	10:09:57	0.467901	569.71	FALSE	54
2022-09-13	10:09:57	1.79793	571.508	FALSE	54
2022-09-13	10:09:57	3.11309	574.621	1	55
2022-09-13	10:09:57	1.44464	576.066	FALSE	55
2022-09-13	10:09:58	1.43136	577.497	FALSE	55
2022-09-13	10:09:58	0.657061	578.154	FALSE	55
2022-09-13	10:09:58	0.481641	578.636	FALSE	55
2022-09-13	10:09:58	1.74322	580.379	FALSE	55
2022-09-13	10:09:59	0.236094	580.615	FALSE	55
2022-09-13	10:09:59	0.0280028	580.643	FALSE	55
2022-09-13	10:09:59	0.495229	581.138	FALSE	55
2022-09-13	10:09:59	0.411107	581.549	FALSE	55
2022-09-13	10:10:00	1.30877	582.858	FALSE	55
2022-09-13	10:10:00	0.333855	583.192	FALSE	55
2022-09-13	10:10:00	1.23869	584.431	FALSE	55
2022-09-13	10:10:01	1.02546	585.456	FALSE	55
2022-09-13	10:10:01	0.805916	586.262	FALSE	55
2022-09-13	10:10:01	2.47843	588.74	FALSE	55
2022-09-13	10:10:01	1.80607	590.547	FALSE	55
2022-09-13	10:10:02	2.01019	592.557	FALSE	55
2022-09-13	10:10:02	0.70612	593.263	FALSE	55
2022-09-13	10:10:02	0.817061	594.08	FALSE	55
2022-09-13	10:10:02	0.852583	594.932	FALSE	55
2022-09-13	10:10:03	0.41584	595.348	FALSE	55
2022-09-13	10:10:03	1.12989	596.478	FALSE	55
2022-09-13	10:10:03	0.380318	596.859	FALSE	55
2022-09-13	10:10:03	0.85813	597.717	FALSE	55
2022-09-13	10:10:04	1.35335	599.07	FALSE	55
2022-09-13	10:10:04	0.46327	599.533	FALSE	55
2022-09-13	10:10:04	0.686883	600.22	FALSE	55
2022-09-13	10:10:05	0.417977	600.638	FALSE	55
2022-09-13	10:10:05	0.146476	600.785	FALSE	55
2022-09-13	10:10:05	0.635738	601.42	FALSE	55
2022-09-13	10:10:05	0.272786	601.693	FALSE	55
2022-09-13	10:10:06	0.624033	602.317	FALSE	55
2022-09-13	10:10:06	0.326221	602.643	FALSE	55
2022-09-13	10:10:06	0.115331	602.759	FALSE	55
2022-09-13	10:10:06	0.00174323	602.76	FALSE	55
2022-09-13	10:10:07	-0.153422	602.76	FALSE	55
2022-09-13	10:10:07	-0.00349849	602.76	FALSE	55
2022-09-13	10:10:07	-0.0579514	602.76	FALSE	55
2022-09-13	10:10:07	-0.00741704	602.76	FALSE	55
2022-09-13	10:10:08	0.0282063	602.789	FALSE	55
2022-09-13	10:10:08	0.249428	603.038	FALSE	55
2022-09-13	10:10:08	0.566578	603.605	FALSE	55
2022-09-13	10:10:09	1.56581	605.17	FALSE	55
2022-09-13	10:10:09	0.413397	605.584	FALSE	55
2022-09-13	10:10:09	0.802303	606.386	FALSE	55
2022-09-13	10:10:09	0.494059	606.88	FALSE	55
2022-09-13	10:10:10	0.408817	607.289	FALSE	55
2022-09-13	10:10:10	0.230344	607.519	FALSE	55
2022-09-13	10:10:10	0.55126	608.071	FALSE	55
2022-09-13	10:10:10	0.111565	608.182	FALSE	55
2022-09-13	10:10:11	0.285713	608.468	FALSE	55
2022-09-13	10:10:11	0.134415	608.602	FALSE	55
2022-09-13	10:10:11	0.0135499	608.616	FALSE	55
2022-09-13	10:10:11	0.0312088	608.647	FALSE	55
2022-09-13	10:10:12	0.16902	608.816	FALSE	55
2022-09-13	10:10:12	0.121082	608.937	FALSE	55
2022-09-13	10:10:12	0.311616	609.249	FALSE	55
2022-09-13	10:10:12	0.153855	609.403	FALSE	55
2022-09-13	10:10:13	0.843728	610.246	FALSE	55
2022-09-13	10:10:13	2.71477	612.961	FALSE	55
2022-09-13	10:10:13	3.61528	616.576	1	56
2022-09-13	10:10:14	5.54948	622.126	1	57
2022-09-13	10:10:14	2.7078	624.834	FALSE	57
2022-09-13	10:10:14	5.30637	630.14	1	58
2022-09-13	10:10:14	2.15574	632.296	FALSE	58
2022-09-13	10:10:15	4.088	636.384	1	59
2022-09-13	10:10:15	0.498639	636.883	FALSE	59
2022-09-13	10:10:15	3.68719	640.57	1	60
2022-09-13	10:10:15	0.384033	640.954	FALSE	60
2022-09-13	10:10:16	3.64927	644.603	1	61
2022-09-13	10:10:16	0.828308	645.431	FALSE	61
2022-09-13	10:10:16	1.97981	647.411	FALSE	61
2022-09-13	10:10:16	1.42271	648.834	FALSE	61
2022-09-13	10:10:17	1.01457	649.848	FALSE	61
2022-09-13	10:10:17	2.40454	652.253	FALSE	61
2022-09-13	10:10:17	0.309326	652.562	FALSE	61
2022-09-13	10:10:18	2.25324	654.816	FALSE	61
2022-09-13	10:10:18	1.3334	656.149	FALSE	61
2022-09-13	10:10:18	2.88907	659.038	FALSE	61
2022-09-13	10:10:18	3.77655	662.815	1	62
2022-09-13	10:10:19	1.64739	664.462	FALSE	62
2022-09-13	10:10:19	3.1996	667.662	1	63
2022-09-13	10:10:19	0.281896	667.943	FALSE	63
2022-09-13	10:10:19	1.97681	669.92	FALSE	63
2022-09-13	10:10:20	0.381845	670.302	FALSE	63
2022-09-13	10:10:20	0.677417	670.979	FALSE	63
2022-09-13	10:10:20	0.682863	671.662	FALSE	63
2022-09-13	10:10:20	0.597519	672.26	FALSE	63
2022-09-13	10:10:21	1.37762	673.637	FALSE	63
2022-09-13	10:10:21	1.75248	675.39	FALSE	63
2022-09-13	10:10:21	1.82144	677.211	FALSE	63
2022-09-13	10:10:21	2.11426	679.326	FALSE	63
2022-09-13	10:10:22	1.26622	680.592	FALSE	63
2022-09-13	10:10:22	1.9563	682.548	FALSE	63
2022-09-13	10:10:22	1.52159	684.07	FALSE	63
2022-09-13	10:10:23	3.95859	688.028	1	64
2022-09-13	10:10:23	2.10195	690.13	FALSE	64
2022-09-13	10:10:23	5.77319	695.904	1	65
2022-09-13	10:10:23	2.55543	698.459	FALSE	65
2022-09-13	10:10:24	7.10912	705.568	1	66
2022-09-13	10:10:24	1.87447	707.443	FALSE	66
2022-09-13	10:10:24	6.79645	714.239	1	67
2022-09-13	10:10:24	1.96866	716.208	FALSE	67
2022-09-13	10:10:25	5.14225	721.35	1	68
2022-09-13	10:10:25	2.5334	723.883	FALSE	68
2022-09-13	10:10:25	3.2168	727.1	1	69
2022-09-13	10:10:25	3.9338	731.034	1	70
2022-09-13	10:10:26	2.15721	733.191	FALSE	70
2022-09-13	10:10:26	4.108	737.299	1	71
2022-09-13	10:10:26	2.73584	740.035	FALSE	71
2022-09-13	10:10:27	2.41619	742.451	FALSE	71
2022-09-13	10:10:27	3.41737	745.868	1	72
2022-09-13	10:10:27	2.42072	748.289	FALSE	72
2022-09-13	10:10:27	3.63263	751.922	1	73
2022-09-13	10:10:28	1.84312	753.765	FALSE	73
2022-09-13	10:10:28	2.52622	756.291	FALSE	73
2022-09-13	10:10:28	2.8509	759.142	FALSE	73
2022-09-13	10:10:28	1.55503	760.697	FALSE	73
2022-09-13	10:10:29	2.81044	763.508	FALSE	73
2022-09-13	10:10:29	1.87156	765.379	FALSE	73
2022-09-13	10:10:29	3.30032	768.679	1	74
2022-09-13	10:10:29	2.97787	771.657	FALSE	74
2022-09-13	10:10:30	3.505	775.162	1	75
2022-09-13	10:10:30	3.88744	779.05	1	76
2022-09-13	10:10:30	2.17207	781.222	FALSE	76
2022-09-13	10:10:31	2.54673	783.769	FALSE	76
2022-09-13	10:10:31	1.8162	785.585	FALSE	76
2022-09-13	10:10:31	2.87141	788.456	FALSE	76
2022-09-13	10:10:31	1.01726	789.473	FALSE	76
2022-09-13	10:10:32	1.62128	791.095	FALSE	76
2022-09-13	10:10:32	1.30383	792.399	FALSE	76
2022-09-13	10:10:32	1.41869	793.817	FALSE	76
2022-09-13	10:10:32	1.61528	795.432	FALSE	76
2022-09-13	10:10:33	3.9591	799.392	1	77
2022-09-13	10:10:33	8.55502	807.947	1	78
2022-09-13	10:10:33	7.04708	814.994	1	79
2022-09-13	10:10:33	4.47095	819.465	1	80
2022-09-13	10:10:34	1.90958	821.374	FALSE	80
2022-09-13	10:10:34	1.01767	822.392	FALSE	80
2022-09-13	10:10:34	0.987901	823.38	FALSE	80
2022-09-13	10:10:34	0.618231	823.998	FALSE	80
2022-09-13	10:10:35	0.440827	824.439	FALSE	80
2022-09-13	10:10:35	0.428308	824.867	FALSE	80
2022-09-13	10:10:35	0.591769	825.459	FALSE	80
2022-09-13	10:10:36	0.518435	825.977	FALSE	80
2022-09-13	10:10:36	1.32989	827.307	FALSE	80
2022-09-13	10:10:36	0.571616	827.879	FALSE	80
2022-09-13	10:10:36	1.19594	829.075	FALSE	80
2022-09-13	10:10:37	0.483575	829.558	FALSE	80
2022-09-13	10:10:37	2.05645	831.615	FALSE	80
2022-09-13	10:10:37	0.616145	832.231	FALSE	80
2022-09-13	10:10:38	2.04393	834.275	FALSE	80
2022-09-13	10:10:38	0.952786	835.228	FALSE	80
2022-09-13	10:10:38	2.62474	837.852	FALSE	80
2022-09-13	10:10:38	1.44846	839.301	FALSE	80
2022-09-13	10:10:38	2.53813	841.839	FALSE	80
2022-09-13	10:10:39	2.32627	844.165	FALSE	80
2022-09-13	10:10:39	1.14892	845.314	FALSE	80
2022-09-13	10:10:39	2.70729	848.022	FALSE	80
2022-09-13	10:10:40	1.18388	849.205	FALSE	80
2022-09-13	10:10:40	4.8251	854.03	1	81
2022-09-13	10:10:40	1.62602	855.657	FALSE	81
2022-09-13	10:10:40	2.6279	858.284	FALSE	81
2022-09-13	10:10:41	1.45854	859.743	FALSE	81
2022-09-13	10:10:41	0.601743	860.345	FALSE	81
2022-09-13	10:10:41	1.56062	861.905	FALSE	81
2022-09-13	10:10:41	0.251005	862.156	FALSE	81
2022-09-13	10:10:42	1.26678	863.423	FALSE	81
2022-09-13	10:10:42	0.665356	864.088	FALSE	81
2022-09-13	10:10:42	0.781845	864.87	FALSE	81
2022-09-13	10:10:42	1.98815	866.858	FALSE	81
2022-09-13	10:10:43	0.536807	867.395	FALSE	81
2022-09-13	10:10:43	2.0134	869.409	FALSE	81
2022-09-13	10:10:43	0.218741	869.627	FALSE	81
2022-09-13	10:10:44	1.61899	871.246	FALSE	81
2022-09-13	10:10:44	0.0999111	871.346	FALSE	81
2022-09-13	10:10:44	0.986018	872.332	FALSE	81
2022-09-13	10:10:44	0.413092	872.745	FALSE	81
2022-09-13	10:10:45	0.560318	873.306	FALSE	81
2022-09-13	10:10:45	1.24637	874.552	FALSE	81
2022-09-13	10:10:45	0.225662	874.778	FALSE	81
2022-09-13	10:10:45	0.346883	875.125	FALSE	81
2022-09-13	10:10:46	0.137926	875.263	FALSE	81
2022-09-13	10:10:46	0.304695	875.567	FALSE	81
2022-09-13	10:10:46	1.97604	877.543	FALSE	81
2022-09-13	10:10:46	0.30556	877.849	FALSE	81
2022-09-13	10:10:47	2.02327	879.872	FALSE	81
2022-09-13	10:10:47	0.234466	880.107	FALSE	81
2022-09-13	10:10:47	0.706934	880.814	FALSE	81
2022-09-13	10:10:47	0.656705	881.47	FALSE	81
2022-09-13	10:10:48	1.55971	883.03	FALSE	81
2022-09-13	10:10:48	1.55039	884.58	FALSE	81
2022-09-13	10:10:48	1.21329	885.794	FALSE	81
2022-09-13	10:10:49	2.95248	888.746	FALSE	81
2022-09-13	10:10:49	0.344237	889.09	FALSE	81
2022-09-13	10:10:49	2.28749	891.378	FALSE	81
2022-09-13	10:10:49	0.421387	891.799	FALSE	81
2022-09-13	10:10:50	1.74897	893.548	FALSE	81
2022-09-13	10:10:50	0.638283	894.186	FALSE	81
2022-09-13	10:10:50	0.993855	895.18	FALSE	81
2022-09-13	10:10:50	0.664746	895.845	FALSE	81
2022-09-13	10:10:51	0.88673	896.732	FALSE	81
2022-09-13	10:10:51	0.475026	897.207	FALSE	81
2022-09-13	10:10:51	0.0939061	897.301	FALSE	81
2022-09-13	10:10:51	0.117367	897.418	FALSE	81
2022-09-13	10:10:52	0.00489845	897.423	FALSE	81
2022-09-13	10:10:52	0.324847	897.748	FALSE	81
2022-09-13	10:10:52	1.77436	899.522	FALSE	81
2022-09-13	10:10:53	0.689478	900.212	FALSE	81
2022-09-13	10:10:53	2.4707	902.682	FALSE	81
2022-09-13	10:10:53	1.23737	903.92	FALSE	81
2022-09-13	10:10:53	0.869173	904.789	FALSE	81
2022-09-13	10:10:54	0.773652	905.563	FALSE	81
2022-09-13	10:10:54	0.196094	905.759	FALSE	81
2022-09-13	10:10:54	0.553601	906.312	FALSE	81
2022-09-13	10:10:54	-0.151336	906.312	FALSE	81
2022-09-13	10:10:55	-0.457137	906.312	FALSE	81
2022-09-13	10:10:55	-0.649147	906.312	FALSE	81
2022-09-13	10:10:55	-0.912455	906.312	FALSE	81
2022-09-13	10:10:55	-0.768129	906.312	FALSE	81
2022-09-13	10:10:56	-1.20777	906.312	FALSE	81
2022-09-13	10:10:56	-1.09098	906.312	FALSE	81
2022-09-13	10:10:56	-0.820954	906.312	FALSE	81
2022-09-13	10:10:56	-0.684058	906.312	FALSE	81
2022-09-13	10:10:57	-0.655814	906.312	FALSE	81
2022-09-13	10:10:57	-0.668994	906.312	FALSE	81
2022-09-13	10:10:57	-0.60248	906.312	FALSE	81
2022-09-13	10:10:58	-0.526094	906.312	FALSE	81
2022-09-13	10:10:58	-0.333778	906.312	FALSE	81
2022-09-13	10:10:58	-0.203193	906.312	FALSE	81
2022-09-13	10:10:58	-0.0854323	906.312	FALSE	81
2022-09-13	10:10:59	-0.230012	906.312	FALSE	81
2022-09-13	10:10:59	0.347748	906.66	FALSE	81
2022-09-13	10:10:59	3.19406	909.854	1	82
2022-09-13	10:10:59	6.43044	916.285	1	83
2022-09-13	10:11:00	2.2878	918.572	FALSE	83
2022-09-13	10:11:00	2.4963	921.069	FALSE	83
2022-09-13	10:11:00	1.10144	922.17	FALSE	83
2022-09-13	10:11:00	2.72627	924.896	FALSE	83
2022-09-13	10:11:01	3.47915	928.375	1	84
2022-09-13	10:11:01	0.8764	929.252	FALSE	84
2022-09-13	10:11:01	2.65533	931.907	FALSE	84
2022-09-13	10:11:02	1.42795	933.335	FALSE	84
2022-09-13	10:11:02	2.12373	935.459	FALSE	84
2022-09-13	10:11:02	1.92902	937.388	FALSE	84
2022-09-13	10:11:02	0.533651	937.922	FALSE	84
2022-09-13	10:11:03	1.93436	939.856	FALSE	84
2022-09-13	10:11:03	1.88658	941.743	FALSE	84
2022-09-13	10:11:03	0.250038	941.993	FALSE	84
2022-09-13	10:11:04	0.504746	942.497	FALSE	84
2022-09-13	10:11:04	0.711514	943.209	FALSE	84
2022-09-13	10:11:04	0.483931	943.693	FALSE	84
2022-09-13	10:11:04	0.332227	944.025	FALSE	84
2022-09-13	10:11:04	0.302099	944.327	FALSE	84
2022-09-13	10:11:05	0.300267	944.627	FALSE	84
2022-09-13	10:11:05	0.425305	945.053	FALSE	84
2022-09-13	10:11:05	0.414313	945.467	FALSE	84
2022-09-13	10:11:06	0.556705	946.024	FALSE	84
2022-09-13	10:11:06	0.427036	946.451	FALSE	84
2022-09-13	10:11:06	0.312277	946.763	FALSE	84
2022-09-13	10:11:06	0.281998	947.045	FALSE	84
2022-09-13	10:11:07	0.180776	947.226	FALSE	84
2022-09-13	10:11:07	0.147799	947.374	FALSE	84
2022-09-13	10:11:07	0.11925	947.493	FALSE	84
2022-09-13	10:11:07	0.136654	947.629	FALSE	84
2022-09-13	10:11:08	0.111107	947.741	FALSE	84
2022-09-13	10:11:08	0.141998	947.883	FALSE	84
2022-09-13	10:11:08	0.0367559	947.919	FALSE	84
2022-09-13	10:11:08	0.126985	948.046	FALSE	84
2022-09-13	10:11:09	0.0993004	948.146	FALSE	84
2022-09-13	10:11:09	0.202761	948.348	FALSE	84
2022-09-13	10:11:09	0.218741	948.567	FALSE	84
2022-09-13	10:11:09	0.270954	948.838	FALSE	84
2022-09-13	10:11:10	0.0670867	948.905	FALSE	84
2022-09-13	10:11:10	0.0247458	948.93	FALSE	84
2022-09-13	10:11:10	0.0643895	948.994	FALSE	84
2022-09-13	10:11:11	0.184237	949.178	FALSE	84
2022-09-13	10:11:11	0.218181	949.397	FALSE	84
2022-09-13	10:11:11	0.0693259	949.466	FALSE	84
2022-09-13	10:11:11	0.182761	949.649	FALSE	84
2022-09-13	10:11:12	0.12154	949.77	FALSE	84
2022-09-13	10:11:12	0.173397	949.944	FALSE	84
2022-09-13	10:11:12	0.415636	950.359	FALSE	84
2022-09-13	10:11:12	0.0224557	950.382	FALSE	84
2022-09-13	10:11:13	-0.0932694	950.382	FALSE	84
2022-09-13	10:11:13	-0.109249	950.382	FALSE	84
2022-09-13	10:11:13	-0.217748	950.382	FALSE	84
2022-09-13	10:11:13	-0.057188	950.382	FALSE	84
2022-09-13	10:11:14	0.0412343	950.423	FALSE	84
2022-09-13	10:11:14	0.343372	950.766	FALSE	84
2022-09-13	10:11:14	0.370954	951.137	FALSE	84
2022-09-13	10:11:15	1.12642	952.264	FALSE	84
2022-09-13	10:11:15	1.13273	953.397	FALSE	84
2022-09-13	10:11:15	1.19014	954.587	FALSE	84
2022-09-13	10:11:15	0.365	954.952	FALSE	84
2022-09-13	10:11:16	0.438486	955.39	FALSE	84
2022-09-13	10:11:16	0.312634	955.703	FALSE	84
2022-09-13	10:11:16	0.364847	956.068	FALSE	84
2022-09-13	10:11:16	0.26098	956.329	FALSE	84
2022-09-13	10:11:17	0.334262	956.663	FALSE	84
2022-09-13	10:11:17	0.148054	956.811	FALSE	84
2022-09-13	10:11:17	0.279758	957.091	FALSE	84
2022-09-13	10:11:17	0.324542	957.415	FALSE	84
2022-09-13	10:11:18	0.386323	957.802	FALSE	84
2022-09-13	10:11:18	0.464847	958.266	FALSE	84
2022-09-13	10:11:18	0.483422	958.75	FALSE	84
2022-09-13	10:11:18	0.364339	959.114	FALSE	84
2022-09-13	10:11:19	0.439453	959.554	FALSE	84
2022-09-13	10:11:19	0.168308	959.722	FALSE	84
2022-09-13	10:11:19	0.436247	960.158	FALSE	84
2022-09-13	10:11:20	0.197519	960.356	FALSE	84
2022-09-13	10:11:20	0.431209	960.787	FALSE	84
2022-09-13	10:11:20	0.837824	961.625	FALSE	84
2022-09-13	10:11:20	0.439758	962.064	FALSE	84
2022-09-13	10:11:21	1.25609	963.321	FALSE	84
2022-09-13	10:11:21	0.646476	963.967	FALSE	84
2022-09-13	10:11:21	1.50592	965.473	FALSE	84
2022-09-13	10:11:21	0.396858	965.87	FALSE	84
2022-09-13	10:11:22	1.73243	967.602	FALSE	84
2022-09-13	10:11:22	0.563829	968.166	FALSE	84
2022-09-13	10:11:22	4.605	972.771	1	85
2022-09-13	10:11:22	1.19538	973.966	FALSE	85
2022-09-13	10:11:23	3.08159	977.048	1	86
2022-09-13	10:11:23	0.660929	977.709	FALSE	86
2022-09-13	10:11:23	1.37838	979.087	FALSE	86
2022-09-13	10:11:24	1.18978	980.277	FALSE	86
2022-09-13	10:11:24	0.361132	980.638	FALSE	86
2022-09-13	10:11:24	0.616807	981.255	FALSE	86
2022-09-13	10:11:24	0.197265	981.452	FALSE	86
2022-09-13	10:11:25	0.54103	981.993	FALSE	86
2022-09-13	10:11:25	0.385356	982.379	FALSE	86
2022-09-13	10:11:25	1.68322	984.062	FALSE	86
2022-09-13	10:11:25	0.710547	984.772	FALSE	86
2022-09-13	10:11:26	3.20653	987.979	1	87
2022-09-13	10:11:26	0.893957	988.873	FALSE	87
2022-09-13	10:11:26	0.507239	989.38	FALSE	87
2022-09-13	10:11:26	0.421183	989.801	FALSE	87
2022-09-13	10:11:27	0.167646	989.969	FALSE	87
2022-09-13	10:11:27	0.500776	990.47	FALSE	87
2022-09-13	10:11:27	0.163015	990.633	FALSE	87
2022-09-13	10:11:28	0.166171	990.799	FALSE	87
2022-09-13	10:11:28	0.210191	991.009	FALSE	87
2022-09-13	10:11:28	0.271209	991.28	FALSE	87
2022-09-13	10:11:28	0.383015	991.663	FALSE	87
2022-09-13	10:11:29	0.939402	992.603	FALSE	87
2022-09-13	10:11:29	0.912583	993.515	FALSE	87
2022-09-13	10:11:29	1.45162	994.967	FALSE	87
2022-09-13	10:11:29	2.00088	996.968	FALSE	87
2022-09-13	10:11:30	2.09253	999.06	FALSE	87
2022-09-13	10:11:30	1.92907	1000.99	FALSE	87
2022-09-13	10:11:30	1.57599	1002.57	FALSE	87
2022-09-13	10:11:30	0.877519	1003.44	FALSE	87
2022-09-13	10:11:31	2.54826	1005.99	FALSE	87
2022-09-13	10:11:31	3.33482	1009.33	1	88
2022-09-13	10:11:31	9.88902	1019.22	1	89
2022-09-13	10:11:31	4.13843	1023.35	1	90
2022-09-13	10:11:32	2.29202	1025.65	FALSE	90
2022-09-13	10:11:32	0.270598	1025.92	FALSE	90
2022-09-13	10:11:32	0.477774	1026.39	FALSE	90
2022-09-13	10:11:33	0.209275	1026.6	FALSE	90
2022-09-13	10:11:33	0.181183	1026.78	FALSE	90
2022-09-13	10:11:33	1.73319	1028.52	FALSE	90
2022-09-13	10:11:33	2.042	1030.56	FALSE	90
2022-09-13	10:11:34	4.73869	1035.3	1	91
2022-09-13	10:11:34	3.122	1038.42	1	92
2022-09-13	10:11:34	5.72108	1044.14	1	93
2022-09-13	10:11:34	3.46948	1047.61	1	94
2022-09-13	10:11:35	5.37395	1052.98	1	95
2022-09-13	10:11:35	1.43045	1054.42	FALSE	95
2022-09-13	10:11:35	3.99625	1058.41	1	96
2022-09-13	10:11:35	4.35513	1062.77	1	97
2022-09-13	10:11:36	2.83462	1065.6	FALSE	97
2022-09-13	10:11:36	2.95238	1068.55	FALSE	97
2022-09-13	10:11:36	1.1449	1069.7	FALSE	97
2022-09-13	10:11:37	6.2739	1075.97	1	98
2022-09-13	10:11:37	5.34835	1081.32	1	99
2022-09-13	10:11:37	1.93955	1083.26	FALSE	99
2022-09-13	10:11:37	1.911	1085.17	FALSE	99
2022-09-13	10:11:38	2.52352	1087.69	FALSE	99
2022-09-13	10:11:38	0.466018	1088.16	FALSE	99
2022-09-13	10:11:38	1.45447	1089.62	FALSE	99
2022-09-13	10:11:38	0.723982	1090.34	FALSE	99
2022-09-13	10:11:39	1.22536	1091.56	FALSE	99
2022-09-13	10:11:39	0.861539	1092.43	FALSE	99
2022-09-13	10:11:39	0.80444	1093.23	FALSE	99
2022-09-13	10:11:39	1.29431	1094.52	FALSE	99
2022-09-13	10:11:40	0.515382	1095.04	FALSE	99
2022-09-13	10:11:40	0.416909	1095.46	FALSE	99
2022-09-13	10:11:40	0.679249	1096.14	FALSE	99
2022-09-13	10:11:40	0.524848	1096.66	FALSE	99
2022-09-13	10:11:41	0.505305	1097.17	FALSE	99
2022-09-13	10:11:41	1.30078	1098.47	FALSE	99
2022-09-13	10:11:41	2.48164	1100.95	FALSE	99
2022-09-13	10:11:42	1.97609	1102.93	FALSE	99
2022-09-13	10:11:42	2.09024	1105.02	FALSE	99
2022-09-13	10:11:42	2.64332	1107.66	FALSE	99
2022-09-13	10:11:42	0.496145	1108.15	FALSE	99
2022-09-13	10:11:43	0.654924	1108.81	FALSE	99
2022-09-13	10:11:43	0.745407	1109.56	FALSE	99
2022-09-13	10:11:43	0.753753	1110.31	FALSE	99
2022-09-13	10:11:43	2.04541	1112.35	FALSE	99
2022-09-13	10:11:44	3.38169	1115.74	1	100
2022-09-13	10:11:44	2.65518	1118.39	FALSE	100
2022-09-13	10:11:44	2.75538	1121.15	FALSE	100
2022-09-13	10:11:44	2.35172	1123.5	FALSE	100
2022-09-13	10:11:45	3.29645	1126.79	1	101
2022-09-13	10:11:45	3.77161	1130.57	1	102
2022-09-13	10:11:45	0.532023	1131.1	FALSE	102
2022-09-13	10:11:46	2.91808	1134.02	FALSE	102
2022-09-13	10:11:46	3.89146	1137.91	1	103
2022-09-13	10:11:46	2.4363	1140.34	FALSE	103
2022-09-13	10:11:46	1.81452	1142.16	FALSE	103
2022-09-13	10:11:47	3.6453	1145.8	1	104
2022-09-13	10:11:47	4.06016	1149.86	1	105
2022-09-13	10:11:47	5.09833	1154.96	1	106
2022-09-13	10:11:47	0.624695	1155.59	FALSE	106
2022-09-13	10:11:48	1.72765	1157.31	FALSE	106
2022-09-13	10:11:48	1.05843	1158.37	FALSE	106
2022-09-13	10:11:48	1.98322	1160.36	FALSE	106
2022-09-13	10:11:48	3.25614	1163.61	1	107
2022-09-13	10:11:49	2.82688	1166.44	FALSE	107
2022-09-13	10:11:49	6.23151	1172.67	1	108
2022-09-13	10:11:49	5.39161	1178.06	1	109
2022-09-13	10:11:50	6.63263	1184.7	1	110
2022-09-13	10:11:50	6.6221	1191.32	1	111
2022-09-13	10:11:50	3.41263	1194.73	1	112
2022-09-13	10:11:50	2.06032	1196.79	FALSE	112
2022-09-13	10:11:51	2.50709	1199.3	FALSE	112
2022-09-13	10:11:51	3.18342	1202.48	1	113
2022-09-13	10:11:51	3.35304	1205.83	1	114
2022-09-13	10:11:51	2.09004	1207.92	FALSE	114
2022-09-13	10:11:52	1.03691	1208.96	FALSE	114
2022-09-13	10:11:52	0.647086	1209.61	FALSE	114
2022-09-13	10:11:52	0.505407	1210.11	FALSE	114
2022-09-13	10:11:52	0.576247	1210.69	FALSE	114
2022-09-13	10:11:53	0.673448	1211.36	FALSE	114
2022-09-13	10:11:53	0.71355	1212.08	FALSE	114
2022-09-13	10:11:53	1.27233	1213.35	FALSE	114
2022-09-13	10:11:53	3.87777	1217.23	1	115
2022-09-13	10:11:54	3.27034	1220.5	1	116
2022-09-13	10:11:54	2.30291	1222.8	FALSE	116
2022-09-13	10:11:54	4.29004	1227.09	1	117
2022-09-13	10:11:55	3.37126	1230.46	1	118
2022-09-13	10:11:55	0.886476	1231.35	FALSE	118
2022-09-13	10:11:55	0.825051	1232.17	FALSE	118
2022-09-13	10:11:55	0.663626	1232.84	FALSE	118
2022-09-13	10:11:56	1.03874	1233.88	FALSE	118
2022-09-13	10:11:56	2.44714	1236.32	FALSE	118
2022-09-13	10:11:56	3.32505	1239.65	1	119
2022-09-13	10:11:56	1.08154	1240.73	FALSE	119
2022-09-13	10:11:57	0.602659	1241.33	FALSE	119
2022-09-13	10:11:57	0.573041	1241.9	FALSE	119
2022-09-13	10:11:57	1.11182	1243.02	FALSE	119
2022-09-13	10:11:57	0.917265	1243.93	FALSE	119
2022-09-13	10:11:58	0.795891	1244.73	FALSE	119
2022-09-13	10:11:58	0.896501	1245.63	FALSE	119
2022-09-13	10:11:58	0.597163	1246.22	FALSE	119
2022-09-13	10:11:59	0.623524	1246.85	FALSE	119
2022-09-13	10:11:59	1.25564	1248.1	FALSE	119
2022-09-13	10:11:59	0.687545	1248.79	FALSE	119
2022-09-13	10:11:59	1.0079	1249.8	FALSE	119
2022-09-13	10:12:00	0.831158	1250.63	FALSE	119
2022-09-13	10:12:00	0.50673	1251.14	FALSE	119
2022-09-13	10:12:00	0.60388	1251.74	FALSE	119
2022-09-13	10:12:00	0.682914	1252.42	FALSE	119
2022-09-13	10:12:01	1.23782	1253.66	FALSE	119
2022-09-13	10:12:01	0.591208	1254.25	FALSE	119
2022-09-13	10:12:01	0.750445	1255	FALSE	119
2022-09-13	10:12:01	0.998333	1256	FALSE	119
2022-09-13	10:12:02	0.428053	1256.43	FALSE	119
2022-09-13	10:12:02	0.567137	1257	FALSE	119
2022-09-13	10:12:02	0.534873	1257.53	FALSE	119
2022-09-13	10:12:02	0.40841	1257.94	FALSE	119
2022-09-13	10:12:03	0.513397	1258.45	FALSE	119
2022-09-13	10:12:03	0.564186	1259.02	FALSE	119
2022-09-13	10:12:03	0.615484	1259.63	FALSE	119
2022-09-13	10:12:04	0.738181	1260.37	FALSE	119
2022-09-13	10:12:04	0.738639	1261.11	FALSE	119
2022-09-13	10:12:04	0.86958	1261.98	FALSE	119
2022-09-13	10:12:04	0.834924	1262.81	FALSE	119
2022-09-13	10:12:05	0.731819	1263.54	FALSE	119
2022-09-13	10:12:05	0.521183	1264.07	FALSE	119
2022-09-13	10:12:05	0.662354	1264.73	FALSE	119
2022-09-13	10:12:05	0.728664	1265.46	FALSE	119
2022-09-13	10:12:06	0.734873	1266.19	FALSE	119
2022-09-13	10:12:06	0.733906	1266.93	FALSE	119
2022-09-13	10:12:06	0.737214	1267.66	FALSE	119
2022-09-13	10:12:06	0.738842	1268.4	FALSE	119
2022-09-13	10:12:07	0.741438	1269.14	FALSE	119
2022-09-13	10:12:07	0.747799	1269.89	FALSE	119
2022-09-13	10:12:07	0.741031	1270.63	FALSE	119
2022-09-13	10:12:08	0.739504	1271.37	FALSE	119
2022-09-13	10:12:08	0.735687	1272.11	FALSE	119
2022-09-13	10:12:08	0.736807	1272.84	FALSE	119
2022-09-13	10:12:08	0.735433	1273.58	FALSE	119
2022-09-13	10:12:09	0.732226	1274.31	FALSE	119
2022-09-13	10:12:09	0.736603	1275.05	FALSE	119
2022-09-13	10:12:09	0.736043	1275.78	FALSE	119
2022-09-13	10:12:09	0.740318	1276.52	FALSE	119
2022-09-13	10:12:10	0.741336	1277.27	FALSE	119
2022-09-13	10:12:10	0.736705	1278	FALSE	119
2022-09-13	10:12:10	0.737926	1278.74	FALSE	119
2022-09-13	10:12:10	0.735127	1279.48	FALSE	119
2022-09-13	10:12:11	0.736654	1280.21	FALSE	119
2022-09-13	10:12:11	0.735229	1280.95	FALSE	119
2022-09-13	10:12:11	0.735382	1281.68	FALSE	119
2022-09-13	10:12:12	0.735026	1282.42	FALSE	119
2022-09-13	10:12:12	0.739097	1283.16	FALSE	119
2022-09-13	10:12:12	0.740878	1283.9	FALSE	119
2022-09-13	10:12:12	0.735891	1284.63	FALSE	119
2022-09-13	10:12:13	0.739046	1285.37	FALSE	119
2022-09-13	10:12:13	0.741183	1286.11	FALSE	119
2022-09-13	10:12:13	0.738028	1286.85	FALSE	119
2022-09-13	10:12:13	0.732684	1287.59	FALSE	119
2022-09-13	10:12:14	0.730496	1288.32	FALSE	119
2022-09-13	10:12:14	0.736857	1289.05	FALSE	119
2022-09-13	10:12:14	0.73584	1289.79	FALSE	119
2022-09-13	10:12:14	0.740216	1290.53	FALSE	119
2022-09-13	10:12:15	0.740623	1291.27	FALSE	119
2022-09-13	10:12:15	0.735992	1292.01	FALSE	119
2022-09-13	10:12:15	0.739606	1292.74	FALSE	119
2022-09-13	10:12:15	0.733244	1293.48	FALSE	119
2022-09-13	10:12:16	0.741845	1294.22	FALSE	119
2022-09-13	10:12:16	0.738588	1294.96	FALSE	119
2022-09-13	10:12:16	0.733092	1295.69	FALSE	119
2022-09-13	10:12:17	0.735026	1296.43	FALSE	119
2022-09-13	10:12:17	0.739809	1297.17	FALSE	119
2022-09-13	10:12:17	0.734415	1297.9	FALSE	119
2022-09-13	10:12:17	0.73813	1298.64	FALSE	119
2022-09-13	10:12:18	0.737366	1299.38	FALSE	119
2022-09-13	10:12:18	0.72958	1300.11	FALSE	119
2022-09-13	10:12:18	0.732837	1300.84	FALSE	119
2022-09-13	10:12:18	0.736908	1301.58	FALSE	119
2022-09-13	10:12:19	0.736298	1302.31	FALSE	119
2022-09-13	10:12:19	0.746679	1303.06	FALSE	119
2022-09-13	10:12:19	0.737773	1303.8	FALSE	119
2022-09-13	10:12:19	0.739504	1304.54	FALSE	119
2022-09-13	10:12:20	0.736501	1305.27	FALSE	119
2022-09-13	10:12:20	0.744644	1306.02	FALSE	119
2022-09-13	10:12:20	0.733601	1306.75	FALSE	119
2022-09-13	10:12:21	0.739707	1307.49	FALSE	119
2022-09-13	10:12:21	0.734822	1308.23	FALSE	119
2022-09-13	10:12:21	0.738486	1308.96	FALSE	119
2022-09-13	10:12:21	0.739249	1309.7	FALSE	119
2022-09-13	10:12:22	0.738028	1310.44	FALSE	119
2022-09-13	10:12:22	0.740573	1311.18	FALSE	119
2022-09-13	10:12:22	0.735483	1311.92	FALSE	119
2022-09-13	10:12:22	0.738028	1312.65	FALSE	119
2022-09-13	10:12:23	0.73757	1313.39	FALSE	119
2022-09-13	10:12:23	0.739351	1314.13	FALSE	119
2022-09-13	10:12:23	0.738689	1314.87	FALSE	119
2022-09-13	10:12:23	0.739911	1315.61	FALSE	119
2022-09-13	10:12:24	0.733957	1316.34	FALSE	119
2022-09-13	10:12:24	0.739555	1317.08	FALSE	119
2022-09-13	10:12:24	0.737468	1317.82	FALSE	119
2022-09-13	10:12:24	0.736654	1318.56	FALSE	119
2022-09-13	10:12:25	0.737875	1319.3	FALSE	119
2022-09-13	10:12:25	0.734669	1320.03	FALSE	119
2022-09-13	10:12:25	0.735941	1320.77	FALSE	119
2022-09-13	10:12:26	0.734415	1321.5	FALSE	119
2022-09-13	10:12:26	0.733499	1322.23	FALSE	119
2022-09-13	10:12:26	0.74327	1322.98	FALSE	119
2022-09-13	10:12:26	0.73813	1323.72	FALSE	119
2022-09-13	10:12:27	0.734262	1324.45	FALSE	119
2022-09-13	10:12:27	0.739147	1325.19	FALSE	119
2022-09-13	10:12:27	0.740267	1325.93	FALSE	119
2022-09-13	10:12:27	0.736807	1326.67	FALSE	119
2022-09-13	10:12:28	0.731412	1327.4	FALSE	119
2022-09-13	10:12:28	0.735941	1328.13	FALSE	119
2022-09-13	10:12:28	0.741387	1328.88	FALSE	119
2022-09-13	10:12:28	0.737672	1329.61	FALSE	119
2022-09-13	10:12:29	0.733448	1330.35	FALSE	119
2022-09-13	10:12:29	0.739402	1331.09	FALSE	119
2022-09-13	10:12:29	0.736145	1331.82	FALSE	119
2022-09-13	10:12:30	0.737977	1332.56	FALSE	119
2022-09-13	10:12:30	0.741031	1333.3	FALSE	119
2022-09-13	10:12:30	0.73584	1334.04	FALSE	119
2022-09-13	10:12:30	0.736603	1334.77	FALSE	119
2022-09-13	10:12:31	0.742964	1335.52	FALSE	119
2022-09-13	10:12:31	0.739555	1336.26	FALSE	119
2022-09-13	10:12:31	0.734873	1336.99	FALSE	119
2022-09-13	10:12:31	0.735992	1337.73	FALSE	119
2022-09-13	10:12:32	0.73813	1338.46	FALSE	119
2022-09-13	10:12:32	0.738435	1339.2	FALSE	119
2022-09-13	10:12:32	0.727697	1339.93	FALSE	119
2022-09-13	10:12:32	0.736196	1340.67	FALSE	119
2022-09-13	10:12:33	0.732379	1341.4	FALSE	119
2022-09-13	10:12:33	0.733397	1342.13	FALSE	119
2022-09-13	10:12:33	0.738842	1342.87	FALSE	119
2022-09-13	10:12:34	0.735483	1343.61	FALSE	119
2022-09-13	10:12:34	0.737163	1344.34	FALSE	119
2022-09-13	10:12:34	0.73701	1345.08	FALSE	119
2022-09-13	10:12:34	0.725611	1345.81	FALSE	119
2022-09-13	10:12:35	0.444389	1346.25	FALSE	119
2022-09-13	10:12:35	0.139453	1346.39	FALSE	119
2022-09-13	10:12:35	0.290903	1346.68	FALSE	119
2022-09-13	10:12:35	0.329021	1347.01	FALSE	119
2022-09-13	10:12:36	0.33869	1347.35	FALSE	119
2022-09-13	10:12:36	0.40042	1347.75	FALSE	119
2022-09-13	10:12:36	0.351412	1348.1	FALSE	119
2022-09-13	10:12:36	0.601743	1348.7	FALSE	119
2022-09-13	10:12:37	0.272074	1348.98	FALSE	119
2022-09-13	10:12:37	0.468054	1349.44	FALSE	119
2022-09-13	10:12:37	0.802252	1350.25	FALSE	119
2022-09-13	10:12:37	4.55166	1354.8	1	120
2022-09-13	10:12:38	3.83319	1358.63	1	121
2022-09-13	10:12:38	5.14413	1363.77	1	122
2022-09-13	10:12:38	1.17151	1364.95	FALSE	122
2022-09-13	10:12:39	2.94871	1367.89	FALSE	122
2022-09-13	10:12:39	0.814109	1368.71	FALSE	122
2022-09-13	10:12:39	0.745306	1369.45	FALSE	122
2022-09-13	10:12:39	0.637468	1370.09	FALSE	122
2022-09-13	10:12:40	0.546374	1370.64	FALSE	122
2022-09-13	10:12:40	0.507901	1371.15	FALSE	122
2022-09-13	10:12:40	-0.0210048	1371.15	FALSE	122
2022-09-13	10:12:40	-0.409096	1371.15	FALSE	122
2022-09-13	10:12:41	-0.643905	1371.15	FALSE	122
2022-09-13	10:12:41	-0.710012	1371.15	FALSE	122
2022-09-13	10:12:41	-0.694083	1371.15	FALSE	122
2022-09-13	10:12:41	-0.724567	1371.15	FALSE	122
2022-09-13	10:12:42	-0.529707	1371.15	FALSE	122
2022-09-13	10:12:42	-0.326653	1371.15	FALSE	122
2022-09-13	10:12:42	0.0477483	1371.19	FALSE	122
2022-09-13	10:12:43	0.26444	1371.46	FALSE	122
2022-09-13	10:12:43	0.327596	1371.79	FALSE	122
2022-09-13	10:12:43	0.295992	1372.08	FALSE	122
2022-09-13	10:12:43	0.443626	1372.53	FALSE	122
2022-09-13	10:12:44	0.385916	1372.91	FALSE	122
2022-09-13	10:12:44	0.338537	1373.25	FALSE	122
2022-09-13	10:12:44	0.365611	1373.62	FALSE	122
2022-09-13	10:12:44	0.365407	1373.98	FALSE	122
2022-09-13	10:12:45	0.379962	1374.36	FALSE	122
2022-09-13	10:12:45	0.36383	1374.72	FALSE	122
2022-09-13	10:12:45	0.389987	1375.11	FALSE	122
2022-09-13	10:12:45	0.326934	1375.44	FALSE	122
2022-09-13	10:12:46	0.270242	1375.71	FALSE	122
2022-09-13	10:12:46	0.262303	1375.97	FALSE	122
2022-09-13	10:12:46	0.256043	1376.23	FALSE	122
2022-09-13	10:12:46	0.280013	1376.51	FALSE	122
2022-09-13	10:12:47	0.268512	1376.78	FALSE	122
2022-09-13	10:12:47	0.277316	1377.06	FALSE	122
2022-09-13	10:12:47	0.28098	1377.34	FALSE	122
2022-09-13	10:12:48	0.286323	1377.62	FALSE	122
2022-09-13	10:12:48	0.279606	1377.9	FALSE	122
2022-09-13	10:12:48	0.279758	1378.18	FALSE	122
2022-09-13	10:12:48	0.286374	1378.47	FALSE	122
2022-09-13	10:12:49	0.286628	1378.76	FALSE	122
2022-09-13	10:12:49	0.281845	1379.04	FALSE	122
2022-09-13	10:12:49	0.27243	1379.31	FALSE	122
2022-09-13	10:12:49	0.269529	1379.58	FALSE	122
2022-09-13	10:12:50	0.281031	1379.86	FALSE	122
2022-09-13	10:12:50	0.277468	1380.14	FALSE	122
2022-09-13	10:12:50	0.27584	1380.41	FALSE	122
2022-09-13	10:12:50	0.283728	1380.7	FALSE	122
2022-09-13	10:12:51	0.290853	1380.99	FALSE	122
2022-09-13	10:12:51	0.306221	1381.29	FALSE	122
2022-09-13	10:12:51	0.306629	1381.6	FALSE	122
2022-09-13	10:12:52	0.301845	1381.9	FALSE	122
2022-09-13	10:12:52	0.289529	1382.19	FALSE	122
2022-09-13	10:12:52	0.286171	1382.48	FALSE	122
2022-09-13	10:12:52	0.28902	1382.77	FALSE	122
2022-09-13	10:12:53	0.288206	1383.06	FALSE	122
2022-09-13	10:12:53	0.281132	1383.34	FALSE	122
2022-09-13	10:12:53	0.278181	1383.62	FALSE	122
2022-09-13	10:12:53	0.284084	1383.9	FALSE	122
2022-09-13	10:12:54	0.356501	1384.26	FALSE	122
2022-09-13	10:12:54	0.440827	1384.7	FALSE	122
2022-09-13	10:12:54	0.541997	1385.24	FALSE	122
2022-09-13	10:12:54	0.573193	1385.81	FALSE	122
2022-09-13	10:12:55	0.431921	1386.24	FALSE	122
2022-09-13	10:12:55	0.725102	1386.97	FALSE	122
2022-09-13	10:12:55	0.702964	1387.67	FALSE	122
2022-09-13	10:12:56	0.494262	1388.17	FALSE	122
2022-09-13	10:12:56	0.47874	1388.64	FALSE	122
2022-09-13	10:12:56	0.394109	1389.04	FALSE	122
2022-09-13	10:12:56	0.446832	1389.49	FALSE	122
2022-09-13	10:12:57	0.449835	1389.94	FALSE	122
2022-09-13	10:12:57	0.500318	1390.44	FALSE	122
2022-09-13	10:12:57	0.504796	1390.94	FALSE	122
2022-09-13	10:12:57	1.24078	1392.18	FALSE	122
2022-09-13	10:12:58	1.87874	1394.06	FALSE	122
2022-09-13	10:12:58	2.77813	1396.84	FALSE	122
2022-09-13	10:12:58	1.53355	1398.37	FALSE	122
2022-09-13	10:12:58	1.61477	1399.99	FALSE	122
2022-09-13	10:12:59	1.9421	1401.93	FALSE	122
2022-09-13	10:12:59	3.02744	1404.96	1	123
2022-09-13	10:12:59	4.87609	1409.83	1	124
2022-09-13	10:12:59	3.00729	1412.84	1	125
2022-09-13	10:13:00	2.8195	1415.66	FALSE	125
2022-09-13	10:13:00	1.97935	1417.64	FALSE	125
2022-09-13	10:13:00	1.95406	1419.59	FALSE	125
2022-09-13	10:13:01	1.50826	1421.1	FALSE	125
2022-09-13	10:13:01	0.68271	1421.78	FALSE	125
2022-09-13	10:13:01	0.496298	1422.28	FALSE	125
2022-09-13	10:13:01	0.829885	1423.11	FALSE	125
2022-09-13	10:13:02	0.366272	1423.48	FALSE	125
2022-09-13	10:13:02	0.43014	1423.91	FALSE	125
2022-09-13	10:13:02	0.513804	1424.42	FALSE	125
2022-09-13	10:13:02	0.419249	1424.84	FALSE	125
2022-09-13	10:13:03	0.296908	1425.14	FALSE	125
2022-09-13	10:13:03	0.600776	1425.74	FALSE	125
2022-09-13	10:13:03	0.377723	1426.11	FALSE	125
2022-09-13	10:13:03	0.481591	1426.6	FALSE	125

## Sheet: Juju_harness_2022913100745
						**GoPro Fitting: 952
2022-09-13	10:07:46	1.04098
2022-09-13	10:07:46	1.1505
2022-09-13	10:07:46	1.08704
2022-09-13	10:07:46	0.928003
2022-09-13	10:07:47	0.960674
2022-09-13	10:07:47	0.97701
2022-09-13	10:07:47	0.891565
2022-09-13	10:07:48	0.969427
2022-09-13	10:07:48	0.969275
2022-09-13	10:07:48	0.960114
2022-09-13	10:07:48	0.811819
2022-09-13	10:07:49	0.496654
2022-09-13	10:07:49	0.424338
2022-09-13	10:07:49	0.479199
2022-09-13	10:07:49	0.460318
2022-09-13	10:07:50	0.459148
2022-09-13	10:07:50	0.468766
2022-09-13	10:07:50	1.48999
2022-09-13	10:07:50	3.8052
2022-09-13	10:07:51	1.5905
2022-09-13	10:07:51	0.629987
2022-09-13	10:07:51	0.537824
2022-09-13	10:07:51	0.536858
2022-09-13	10:07:52	0.531209
2022-09-13	10:07:52	0.525916
2022-09-13	10:07:52	0.519249
2022-09-13	10:07:53	0.518537
2022-09-13	10:07:53	0.534364
2022-09-13	10:07:53	0.518028
2022-09-13	10:07:53	0.520929
2022-09-13	10:07:54	0.559657
2022-09-13	10:07:54	0.60159
2022-09-13	10:07:54	0.652023
2022-09-13	10:07:54	0.487443
2022-09-13	10:07:55	0.530038
2022-09-13	10:07:55	0.469326
2022-09-13	10:07:55	0.575026
2022-09-13	10:07:55	0.53528
2022-09-13	10:07:56	0.658333
2022-09-13	10:07:56	1.10958
2022-09-13	10:07:56	0.868715
2022-09-13	10:07:57	0.469428
2022-09-13	10:07:57	0.242049
2022-09-13	10:07:57	0.441489
2022-09-13	10:07:57	0.452939
2022-09-13	10:07:58	0.215891
2022-09-13	10:07:58	-0.144211
2022-09-13	10:07:58	-0.0477224
2022-09-13	10:07:58	0.199097
2022-09-13	10:07:59	0.899199
2022-09-13	10:07:59	1.75523
2022-09-13	10:07:59	3.15854
2022-09-13	10:07:59	0.624949
2022-09-13	10:08:00	0.766984
2022-09-13	10:08:00	0.444338
2022-09-13	10:08:00	0.715534
2022-09-13	10:08:00	1.74022
2022-09-13	10:08:01	0.821641
2022-09-13	10:08:01	1.93192
2022-09-13	10:08:01	0.608613
2022-09-13	10:08:02	1.33345
2022-09-13	10:08:02	1.38948
2022-09-13	10:08:02	0.426425
2022-09-13	10:08:02	1.56714
2022-09-13	10:08:03	0.378995
2022-09-13	10:08:03	1.19294
2022-09-13	10:08:03	0.550343
2022-09-13	10:08:03	0.602557
2022-09-13	10:08:04	0.583677
2022-09-13	10:08:04	0.638537
2022-09-13	10:08:04	2.83976
2022-09-13	10:08:04	2.13029
2022-09-13	10:08:05	5.01202
2022-09-13	10:08:05	1.17406
2022-09-13	10:08:05	1.47528
2022-09-13	10:08:06	0.792125
2022-09-13	10:08:06	1.12149
2022-09-13	10:08:06	0.601997
2022-09-13	10:08:06	2.15966
2022-09-13	10:08:07	1.24057
2022-09-13	10:08:07	3.74683
2022-09-13	10:08:07	2.17202
2022-09-13	10:08:07	1.42017
2022-09-13	10:08:08	2.89502
2022-09-13	10:08:08	6.35797
2022-09-13	10:08:08	6.64764
2022-09-13	10:08:08	2.94307
2022-09-13	10:08:09	3.99258
2022-09-13	10:08:09	2.45859
2022-09-13	10:08:09	2.19146
2022-09-13	10:08:10	2.21319
2022-09-13	10:08:10	1.31915
2022-09-13	10:08:10	0.535433
2022-09-13	10:08:10	0.44159
2022-09-13	10:08:11	0.295687
2022-09-13	10:08:11	-0.36472
2022-09-13	10:08:11	0.15584
2022-09-13	10:08:11	0.514211
2022-09-13	10:08:12	0.0931427
2022-09-13	10:08:12	0.0401147
2022-09-13	10:08:12	-0.441412
2022-09-13	10:08:12	-0.489096
2022-09-13	10:08:13	-0.538053
2022-09-13	10:08:13	-0.528995
2022-09-13	10:08:13	-0.514643
2022-09-13	10:08:13	-0.512964
2022-09-13	10:08:14	-0.520394
2022-09-13	10:08:14	-0.596424
2022-09-13	10:08:14	-0.742836
2022-09-13	10:08:15	-0.120598
2022-09-13	10:08:15	0.149937
2022-09-13	10:08:15	0.282608
2022-09-13	10:08:15	0.340318
2022-09-13	10:08:16	0.247392
2022-09-13	10:08:16	0.345204
2022-09-13	10:08:16	0.342557
2022-09-13	10:08:16	0.1993
2022-09-13	10:08:17	0.429886
2022-09-13	10:08:17	0.525865
2022-09-13	10:08:17	3.79065
2022-09-13	10:08:17	2.6765
2022-09-13	10:08:18	6.33192
2022-09-13	10:08:18	4.51558
2022-09-13	10:08:18	6.70963
2022-09-13	10:08:19	5.042
2022-09-13	10:08:19	4.86571
2022-09-13	10:08:19	1.35828
2022-09-13	10:08:19	1.26663
2022-09-13	10:08:20	0.790445
2022-09-13	10:08:20	0.769835
2022-09-13	10:08:20	1.69935
2022-09-13	10:08:20	1.93503
2022-09-13	10:08:21	5.20026
2022-09-13	10:08:21	5.02922
2022-09-13	10:08:21	1.03508
2022-09-13	10:08:21	0.593804
2022-09-13	10:08:22	0.463168
2022-09-13	10:08:22	0.656298
2022-09-13	10:08:22	0.275891
2022-09-13	10:08:22	0.475127
2022-09-13	10:08:23	0.351616
2022-09-13	10:08:23	0.914109
2022-09-13	10:08:23	2.78785
2022-09-13	10:08:24	2.56052
2022-09-13	10:08:24	4.71019
2022-09-13	10:08:24	2.89686
2022-09-13	10:08:24	5.18663
2022-09-13	10:08:25	1.38581
2022-09-13	10:08:25	4.39706
2022-09-13	10:08:25	0.783117
2022-09-13	10:08:25	3.77533
2022-09-13	10:08:26	0.824898
2022-09-13	10:08:26	2.828
2022-09-13	10:08:26	1.98556
2022-09-13	10:08:26	4.27121
2022-09-13	10:08:27	1.63803
2022-09-13	10:08:27	3.17665
2022-09-13	10:08:27	1.23894
2022-09-13	10:08:28	1.65747
2022-09-13	10:08:28	0.410547
2022-09-13	10:08:28	3.63314
2022-09-13	10:08:28	1.83223
2022-09-13	10:08:29	8.71909
2022-09-13	10:08:29	7.16037
2022-09-13	10:08:29	4.2506
2022-09-13	10:08:29	2.23228
2022-09-13	10:08:30	2.68072
2022-09-13	10:08:30	2.02011
2022-09-13	10:08:30	2.02968
2022-09-13	10:08:30	2.16841
2022-09-13	10:08:31	2.00368
2022-09-13	10:08:31	0.707901
2022-09-13	10:08:31	0.501132
2022-09-13	10:08:32	0.530649
2022-09-13	10:08:32	0.465153
2022-09-13	10:08:32	0.49014
2022-09-13	10:08:32	0.885916
2022-09-13	10:08:33	1.30602
2022-09-13	10:08:33	1.26632
2022-09-13	10:08:33	0.836247
2022-09-13	10:08:33	1.54622
2022-09-13	10:08:34	1.60083
2022-09-13	10:08:34	1.65426
2022-09-13	10:08:34	1.57757
2022-09-13	10:08:34	1.57385
2022-09-13	10:08:35	1.56561
2022-09-13	10:08:35	1.59849
2022-09-13	10:08:35	1.66637
2022-09-13	10:08:35	1.77014
2022-09-13	10:08:36	0.620929
2022-09-13	10:08:36	0.396807
2022-09-13	10:08:36	0.398893
2022-09-13	10:08:37	0.362608
2022-09-13	10:08:37	0.293244
2022-09-13	10:08:37	0.0895295
2022-09-13	10:08:37	-0.0605468
2022-09-13	10:08:38	-0.110827
2022-09-13	10:08:38	-0.116272
2022-09-13	10:08:38	0.0294277
2022-09-13	10:08:38	-0.0271117
2022-09-13	10:08:39	0.0581809
2022-09-13	10:08:39	0.92444
2022-09-13	10:08:39	1.03991
2022-09-13	10:08:39	3.00418
2022-09-13	10:08:40	0.768155
2022-09-13	10:08:40	3.57925
2022-09-13	10:08:40	1.0649
2022-09-13	10:08:41	4.66596
2022-09-13	10:08:41	0.911921
2022-09-13	10:08:41	3.75599
2022-09-13	10:08:41	1.38999
2022-09-13	10:08:42	1.2822
2022-09-13	10:08:42	0.447087
2022-09-13	10:08:42	1.0452
2022-09-13	10:08:42	0.315738
2022-09-13	10:08:43	0.860369
2022-09-13	10:08:43	0.212837
2022-09-13	10:08:43	0.690649
2022-09-13	10:08:43	0.452227
2022-09-13	10:08:44	2.02474
2022-09-13	10:08:44	1.15874
2022-09-13	10:08:44	1.69416
2022-09-13	10:08:44	0.753957
2022-09-13	10:08:45	2.0678
2022-09-13	10:08:45	1.07955
2022-09-13	10:08:45	3.50897
2022-09-13	10:08:46	2.41202
2022-09-13	10:08:46	5.39344
2022-09-13	10:08:46	2.93172
2022-09-13	10:08:46	3.84474
2022-09-13	10:08:47	4.19528
2022-09-13	10:08:47	2.03981
2022-09-13	10:08:47	4.06759
2022-09-13	10:08:47	2.04174
2022-09-13	10:08:48	4.74311
2022-09-13	10:08:48	2.62179
2022-09-13	10:08:48	0.770394
2022-09-13	10:08:48	0.747137
2022-09-13	10:08:49	1.71559
2022-09-13	10:08:49	1.57258
2022-09-13	10:08:49	0.519402
2022-09-13	10:08:50	0.480674
2022-09-13	10:08:50	0.369326
2022-09-13	10:08:50	0.732074
2022-09-13	10:08:50	0.732939
2022-09-13	10:08:51	0.736654
2022-09-13	10:08:51	0.719504
2022-09-13	10:08:51	0.656298
2022-09-13	10:08:51	2.01411
2022-09-13	10:08:52	2.96546
2022-09-13	10:08:52	1.29279
2022-09-13	10:08:52	4.33314
2022-09-13	10:08:52	1.71487
2022-09-13	10:08:53	0.64444
2022-09-13	10:08:53	0.501641
2022-09-13	10:08:53	0.320369
2022-09-13	10:08:54	0.319657
2022-09-13	10:08:54	0.409478
2022-09-13	10:08:54	0.675432
2022-09-13	10:08:54	1.87503
2022-09-13	10:08:55	1.41162
2022-09-13	10:08:55	1.79039
2022-09-13	10:08:55	0.819555
2022-09-13	10:08:55	1.0391
2022-09-13	10:08:56	1.08856
2022-09-13	10:08:56	0.910954
2022-09-13	10:08:56	1.11095
2022-09-13	10:08:56	1.4819
2022-09-13	10:08:57	1.788
2022-09-13	10:08:57	2.14144
2022-09-13	10:08:57	1.27854
2022-09-13	10:08:57	1.26271
2022-09-13	10:08:58	0.927341
2022-09-13	10:08:58	0.387748
2022-09-13	10:08:58	0.186985
2022-09-13	10:08:59	0.149122
2022-09-13	10:08:59	0.13243
2022-09-13	10:08:59	0.103015
2022-09-13	10:08:59	0.117977
2022-09-13	10:09:00	0.125458
2022-09-13	10:09:00	0.147138
2022-09-13	10:09:00	0.146171
2022-09-13	10:09:00	0.157417
2022-09-13	10:09:01	0.168308
2022-09-13	10:09:01	0.164135
2022-09-13	10:09:01	0.173295
2022-09-13	10:09:01	0.160624
2022-09-13	10:09:02	0.153041
2022-09-13	10:09:02	0.142201
2022-09-13	10:09:02	0.135942
2022-09-13	10:09:03	0.141082
2022-09-13	10:09:03	0.136247
2022-09-13	10:09:03	0.101591
2022-09-13	10:09:03	0.152023
2022-09-13	10:09:04	0.0974175
2022-09-13	10:09:04	0.441998
2022-09-13	10:09:04	0.261692
2022-09-13	10:09:04	0.181031
2022-09-13	10:09:05	0.114008
2022-09-13	10:09:05	0.23355
2022-09-13	10:09:05	0.100776
2022-09-13	10:09:05	0.734924
2022-09-13	10:09:06	6.64978
2022-09-13	10:09:06	27.2488
2022-09-13	10:09:06	1.67742
2022-09-13	10:09:06	0.90612
2022-09-13	10:09:07	0.154873
2022-09-13	10:09:07	0.21187
2022-09-13	10:09:07	-0.20304
2022-09-13	10:09:08	0.824135
2022-09-13	10:09:08	4.3479
2022-09-13	10:09:08	5.20667
2022-09-13	10:09:08	6.75222
2022-09-13	10:09:09	6.81136
2022-09-13	10:09:09	6.04612
2022-09-13	10:09:09	9.90556
2022-09-13	10:09:09	3.79457
2022-09-13	10:09:10	3.25136
2022-09-13	10:09:10	2.79019
2022-09-13	10:09:10	3.44597
2022-09-13	10:09:10	3.57294
2022-09-13	10:09:11	4.85131
2022-09-13	10:09:11	2.70775
2022-09-13	10:09:11	0.708766
2022-09-13	10:09:12	0.224949
2022-09-13	10:09:12	-0.112252
2022-09-13	10:09:12	-0.154694
2022-09-13	10:09:12	-0.137137
2022-09-13	10:09:13	-0.624567
2022-09-13	10:09:13	-0.041412
2022-09-13	10:09:13	1.95284
2022-09-13	10:09:13	2.02805
2022-09-13	10:09:14	0.762455
2022-09-13	10:09:14	0.285763
2022-09-13	10:09:14	0.204593
2022-09-13	10:09:14	0.532684
2022-09-13	10:09:15	0.586476
2022-09-13	10:09:15	0.129275
2022-09-13	10:09:15	0.124237
2022-09-13	10:09:15	0.146476
2022-09-13	10:09:16	0.479911
2022-09-13	10:09:16	0.739351
2022-09-13	10:09:16	6.33431
2022-09-13	10:09:17	6.75472
2022-09-13	10:09:17	3.43543
2022-09-13	10:09:17	2.79833
2022-09-13	10:09:17	0.475229
2022-09-13	10:09:18	0.477316
2022-09-13	10:09:18	0.387799
2022-09-13	10:09:18	0.386832
2022-09-13	10:09:18	0.303066
2022-09-13	10:09:19	0.256552
2022-09-13	10:09:19	0.274975
2022-09-13	10:09:19	0.0432699
2022-09-13	10:09:19	0.173092
2022-09-13	10:09:20	0.125051
2022-09-13	10:09:20	0.086018
2022-09-13	10:09:20	-0.0189183
2022-09-13	10:09:21	-0.105178
2022-09-13	10:09:21	-0.103498
2022-09-13	10:09:21	-0.14701
2022-09-13	10:09:21	-0.116374
2022-09-13	10:09:22	-0.208791
2022-09-13	10:09:22	-0.151081
2022-09-13	10:09:22	-0.209605
2022-09-13	10:09:22	0.0371122
2022-09-13	10:09:23	-0.186603
2022-09-13	10:09:23	-0.458816
2022-09-13	10:09:23	-0.576628
2022-09-13	10:09:23	-0.694745
2022-09-13	10:09:24	-0.61159
2022-09-13	10:09:24	-0.627926
2022-09-13	10:09:24	-0.452404
2022-09-13	10:09:25	-0.392557
2022-09-13	10:09:25	-0.405992
2022-09-13	10:09:25	-0.554949
2022-09-13	10:09:25	-0.488333
2022-09-13	10:09:26	-0.498511
2022-09-13	10:09:26	-0.298816
2022-09-13	10:09:26	-0.296119
2022-09-13	10:09:26	-0.0777478
2022-09-13	10:09:27	0.813702
2022-09-13	10:09:27	2.06775
2022-09-13	10:09:27	0.928104
2022-09-13	10:09:27	1.58872
2022-09-13	10:09:28	0.504796
2022-09-13	10:09:28	1.76902
2022-09-13	10:09:28	1.10592
2022-09-13	10:09:28	1.30856
2022-09-13	10:09:29	0.603372
2022-09-13	10:09:29	0.810903
2022-09-13	10:09:29	1.09034
2022-09-13	10:09:30	0.251107
2022-09-13	10:09:30	1.16434
2022-09-13	10:09:30	1.83559
2022-09-13	10:09:30	0.626069
2022-09-13	10:09:31	0.983779
2022-09-13	10:09:31	0.458486
2022-09-13	10:09:31	0.0529391
2022-09-13	10:09:31	0.276094
2022-09-13	10:09:32	-0.000495923
2022-09-13	10:09:32	0.114313
2022-09-13	10:09:32	-0.0327606
2022-09-13	10:09:32	0.00988575
2022-09-13	10:09:33	-0.166705
2022-09-13	10:09:33	0.00830812
2022-09-13	10:09:33	0.175382
2022-09-13	10:09:34	0.984084
2022-09-13	10:09:34	3.4277
2022-09-13	10:09:34	2.35696
2022-09-13	10:09:34	2.79192
2022-09-13	10:09:35	2.11584
2022-09-13	10:09:35	2.86332
2022-09-13	10:09:35	1.04073
2022-09-13	10:09:35	1.55828
2022-09-13	10:09:36	0.291005
2022-09-13	10:09:36	0.277977
2022-09-13	10:09:36	0.8993
2022-09-13	10:09:36	0.0666287
2022-09-13	10:09:37	0.138283
2022-09-13	10:09:37	0.101692
2022-09-13	10:09:37	0.0253564
2022-09-13	10:09:37	1.14607
2022-09-13	10:09:38	0.230242
2022-09-13	10:09:38	1.05803
2022-09-13	10:09:38	0.263168
2022-09-13	10:09:39	0.636043
2022-09-13	10:09:39	2.52719
2022-09-13	10:09:39	0.529783
2022-09-13	10:09:39	1.12892
2022-09-13	10:09:40	1.09808
2022-09-13	10:09:40	0.848308
2022-09-13	10:09:40	3.48556
2022-09-13	10:09:40	0.983829
2022-09-13	10:09:41	3.05731
2022-09-13	10:09:41	0.455483
2022-09-13	10:09:41	0.72271
2022-09-13	10:09:41	0.466629
2022-09-13	10:09:42	-0.0467046
2022-09-13	10:09:42	0.100674
2022-09-13	10:09:42	-0.0244145
2022-09-13	10:09:43	-0.0634476
2022-09-13	10:09:43	-0.107773
2022-09-13	10:09:43	-0.082328
2022-09-13	10:09:43	-0.0761193
2022-09-13	10:09:44	-0.0504705
2022-09-13	10:09:44	-0.19271
2022-09-13	10:09:44	-0.0865519
2022-09-13	10:09:44	-0.153829
2022-09-13	10:09:45	-0.222124
2022-09-13	10:09:45	-0.278766
2022-09-13	10:09:45	-0.339376
2022-09-13	10:09:45	-0.122939
2022-09-13	10:09:46	-0.0354577
2022-09-13	10:09:46	-0.0418699
2022-09-13	10:09:46	-0.0549997
2022-09-13	10:09:47	0.0726338
2022-09-13	10:09:47	0.149428
2022-09-13	10:09:47	0.233753
2022-09-13	10:09:47	1.70383
2022-09-13	10:09:48	1.06179
2022-09-13	10:09:48	3.46424
2022-09-13	10:09:48	1.71223
2022-09-13	10:09:48	2.18388
2022-09-13	10:09:49	0.752227
2022-09-13	10:09:49	1.69274
2022-09-13	10:09:49	0.676298
2022-09-13	10:09:49	0.585102
2022-09-13	10:09:50	1.24022
2022-09-13	10:09:50	0.48327
2022-09-13	10:09:50	0.238893
2022-09-13	10:09:50	0.421947
2022-09-13	10:09:51	0.285204
2022-09-13	10:09:51	0.465814
2022-09-13	10:09:51	0.304237
2022-09-13	10:09:52	0.215992
2022-09-13	10:09:52	0.349224
2022-09-13	10:09:52	0.347697
2022-09-13	10:09:52	0.454924
2022-09-13	10:09:53	1.60103
2022-09-13	10:09:53	0.623524
2022-09-13	10:09:53	0.679758
2022-09-13	10:09:53	0.611107
2022-09-13	10:09:54	0.202659
2022-09-13	10:09:54	0.286578
2022-09-13	10:09:54	0.336858
2022-09-13	10:09:54	0.326985
2022-09-13	10:09:55	0.425
2022-09-13	10:09:55	0.320674
2022-09-13	10:09:55	0.425305
2022-09-13	10:09:56	0.349835
2022-09-13	10:09:56	0.457875
2022-09-13	10:09:56	0.484593
2022-09-13	10:09:56	0.496094
2022-09-13	10:09:57	0.467901
2022-09-13	10:09:57	1.79793
2022-09-13	10:09:57	3.11309
2022-09-13	10:09:57	1.44464
2022-09-13	10:09:58	1.43136
2022-09-13	10:09:58	0.657061
2022-09-13	10:09:58	0.481641
2022-09-13	10:09:58	1.74322
2022-09-13	10:09:59	0.236094
2022-09-13	10:09:59	0.0280028
2022-09-13	10:09:59	0.495229
2022-09-13	10:09:59	0.411107
2022-09-13	10:10:00	1.30877
2022-09-13	10:10:00	0.333855
2022-09-13	10:10:00	1.23869
2022-09-13	10:10:01	1.02546
2022-09-13	10:10:01	0.805916
2022-09-13	10:10:01	2.47843
2022-09-13	10:10:01	1.80607
2022-09-13	10:10:02	2.01019
2022-09-13	10:10:02	0.70612
2022-09-13	10:10:02	0.817061
2022-09-13	10:10:02	0.852583
2022-09-13	10:10:03	0.41584
2022-09-13	10:10:03	1.12989
2022-09-13	10:10:03	0.380318
2022-09-13	10:10:03	0.85813
2022-09-13	10:10:04	1.35335
2022-09-13	10:10:04	0.46327
2022-09-13	10:10:04	0.686883
2022-09-13	10:10:05	0.417977
2022-09-13	10:10:05	0.146476
2022-09-13	10:10:05	0.635738
2022-09-13	10:10:05	0.272786
2022-09-13	10:10:06	0.624033
2022-09-13	10:10:06	0.326221
2022-09-13	10:10:06	0.115331
2022-09-13	10:10:06	0.00174323
2022-09-13	10:10:07	-0.153422
2022-09-13	10:10:07	-0.00349849
2022-09-13	10:10:07	-0.0579514
2022-09-13	10:10:07	-0.00741704
2022-09-13	10:10:08	0.0282063
2022-09-13	10:10:08	0.249428
2022-09-13	10:10:08	0.566578
2022-09-13	10:10:09	1.56581
2022-09-13	10:10:09	0.413397
2022-09-13	10:10:09	0.802303
2022-09-13	10:10:09	0.494059
2022-09-13	10:10:10	0.408817
2022-09-13	10:10:10	0.230344
2022-09-13	10:10:10	0.55126
2022-09-13	10:10:10	0.111565
2022-09-13	10:10:11	0.285713
2022-09-13	10:10:11	0.134415
2022-09-13	10:10:11	0.0135499
2022-09-13	10:10:11	0.0312088
2022-09-13	10:10:12	0.16902
2022-09-13	10:10:12	0.121082
2022-09-13	10:10:12	0.311616
2022-09-13	10:10:12	0.153855
2022-09-13	10:10:13	0.843728
2022-09-13	10:10:13	2.71477
2022-09-13	10:10:13	3.61528
2022-09-13	10:10:14	5.54948
2022-09-13	10:10:14	2.7078
2022-09-13	10:10:14	5.30637
2022-09-13	10:10:14	2.15574
2022-09-13	10:10:15	4.088
2022-09-13	10:10:15	0.498639
2022-09-13	10:10:15	3.68719
2022-09-13	10:10:15	0.384033
2022-09-13	10:10:16	3.64927
2022-09-13	10:10:16	0.828308
2022-09-13	10:10:16	1.97981
2022-09-13	10:10:16	1.42271
2022-09-13	10:10:17	1.01457
2022-09-13	10:10:17	2.40454
2022-09-13	10:10:17	0.309326
2022-09-13	10:10:18	2.25324
2022-09-13	10:10:18	1.3334
2022-09-13	10:10:18	2.88907
2022-09-13	10:10:18	3.77655
2022-09-13	10:10:19	1.64739
2022-09-13	10:10:19	3.1996
2022-09-13	10:10:19	0.281896
2022-09-13	10:10:19	1.97681
2022-09-13	10:10:20	0.381845
2022-09-13	10:10:20	0.677417
2022-09-13	10:10:20	0.682863
2022-09-13	10:10:20	0.597519
2022-09-13	10:10:21	1.37762
2022-09-13	10:10:21	1.75248
2022-09-13	10:10:21	1.82144
2022-09-13	10:10:21	2.11426
2022-09-13	10:10:22	1.26622
2022-09-13	10:10:22	1.9563
2022-09-13	10:10:22	1.52159
2022-09-13	10:10:23	3.95859
2022-09-13	10:10:23	2.10195
2022-09-13	10:10:23	5.77319
2022-09-13	10:10:23	2.55543
2022-09-13	10:10:24	7.10912
2022-09-13	10:10:24	1.87447
2022-09-13	10:10:24	6.79645
2022-09-13	10:10:24	1.96866
2022-09-13	10:10:25	5.14225
2022-09-13	10:10:25	2.5334
2022-09-13	10:10:25	3.2168
2022-09-13	10:10:25	3.9338
2022-09-13	10:10:26	2.15721
2022-09-13	10:10:26	4.108
2022-09-13	10:10:26	2.73584
2022-09-13	10:10:27	2.41619
2022-09-13	10:10:27	3.41737
2022-09-13	10:10:27	2.42072
2022-09-13	10:10:27	3.63263
2022-09-13	10:10:28	1.84312
2022-09-13	10:10:28	2.52622
2022-09-13	10:10:28	2.8509
2022-09-13	10:10:28	1.55503
2022-09-13	10:10:29	2.81044
2022-09-13	10:10:29	1.87156
2022-09-13	10:10:29	3.30032
2022-09-13	10:10:29	2.97787
2022-09-13	10:10:30	3.505
2022-09-13	10:10:30	3.88744
2022-09-13	10:10:30	2.17207
2022-09-13	10:10:31	2.54673
2022-09-13	10:10:31	1.8162
2022-09-13	10:10:31	2.87141
2022-09-13	10:10:31	1.01726
2022-09-13	10:10:32	1.62128
2022-09-13	10:10:32	1.30383
2022-09-13	10:10:32	1.41869
2022-09-13	10:10:32	1.61528
2022-09-13	10:10:33	3.9591
2022-09-13	10:10:33	8.55502
2022-09-13	10:10:33	7.04708
2022-09-13	10:10:33	4.47095
2022-09-13	10:10:34	1.90958
2022-09-13	10:10:34	1.01767
2022-09-13	10:10:34	0.987901
2022-09-13	10:10:34	0.618231
2022-09-13	10:10:35	0.440827
2022-09-13	10:10:35	0.428308
2022-09-13	10:10:35	0.591769
2022-09-13	10:10:36	0.518435
2022-09-13	10:10:36	1.32989
2022-09-13	10:10:36	0.571616
2022-09-13	10:10:36	1.19594
2022-09-13	10:10:37	0.483575
2022-09-13	10:10:37	2.05645
2022-09-13	10:10:37	0.616145
2022-09-13	10:10:38	2.04393
2022-09-13	10:10:38	0.952786
2022-09-13	10:10:38	2.62474
2022-09-13	10:10:38	1.44846
2022-09-13	10:10:38	2.53813
2022-09-13	10:10:39	2.32627
2022-09-13	10:10:39	1.14892
2022-09-13	10:10:39	2.70729
2022-09-13	10:10:40	1.18388
2022-09-13	10:10:40	4.8251
2022-09-13	10:10:40	1.62602
2022-09-13	10:10:40	2.6279
2022-09-13	10:10:41	1.45854
2022-09-13	10:10:41	0.601743
2022-09-13	10:10:41	1.56062
2022-09-13	10:10:41	0.251005
2022-09-13	10:10:42	1.26678
2022-09-13	10:10:42	0.665356
2022-09-13	10:10:42	0.781845
2022-09-13	10:10:42	1.98815
2022-09-13	10:10:43	0.536807
2022-09-13	10:10:43	2.0134
2022-09-13	10:10:43	0.218741
2022-09-13	10:10:44	1.61899
2022-09-13	10:10:44	0.0999111
2022-09-13	10:10:44	0.986018
2022-09-13	10:10:44	0.413092
2022-09-13	10:10:45	0.560318
2022-09-13	10:10:45	1.24637
2022-09-13	10:10:45	0.225662
2022-09-13	10:10:45	0.346883
2022-09-13	10:10:46	0.137926
2022-09-13	10:10:46	0.304695
2022-09-13	10:10:46	1.97604
2022-09-13	10:10:46	0.30556
2022-09-13	10:10:47	2.02327
2022-09-13	10:10:47	0.234466
2022-09-13	10:10:47	0.706934
2022-09-13	10:10:47	0.656705
2022-09-13	10:10:48	1.55971
2022-09-13	10:10:48	1.55039
2022-09-13	10:10:48	1.21329
2022-09-13	10:10:49	2.95248
2022-09-13	10:10:49	0.344237
2022-09-13	10:10:49	2.28749
2022-09-13	10:10:49	0.421387
2022-09-13	10:10:50	1.74897
2022-09-13	10:10:50	0.638283
2022-09-13	10:10:50	0.993855
2022-09-13	10:10:50	0.664746
2022-09-13	10:10:51	0.88673
2022-09-13	10:10:51	0.475026
2022-09-13	10:10:51	0.0939061
2022-09-13	10:10:51	0.117367
2022-09-13	10:10:52	0.00489845
2022-09-13	10:10:52	0.324847
2022-09-13	10:10:52	1.77436
2022-09-13	10:10:53	0.689478
2022-09-13	10:10:53	2.4707
2022-09-13	10:10:53	1.23737
2022-09-13	10:10:53	0.869173
2022-09-13	10:10:54	0.773652
2022-09-13	10:10:54	0.196094
2022-09-13	10:10:54	0.553601
2022-09-13	10:10:54	-0.151336
2022-09-13	10:10:55	-0.457137
2022-09-13	10:10:55	-0.649147
2022-09-13	10:10:55	-0.912455
2022-09-13	10:10:55	-0.768129
2022-09-13	10:10:56	-1.20777
2022-09-13	10:10:56	-1.09098
2022-09-13	10:10:56	-0.820954
2022-09-13	10:10:56	-0.684058
2022-09-13	10:10:57	-0.655814
2022-09-13	10:10:57	-0.668994
2022-09-13	10:10:57	-0.60248
2022-09-13	10:10:58	-0.526094
2022-09-13	10:10:58	-0.333778
2022-09-13	10:10:58	-0.203193
2022-09-13	10:10:58	-0.0854323
2022-09-13	10:10:59	-0.230012
2022-09-13	10:10:59	0.347748
2022-09-13	10:10:59	3.19406
2022-09-13	10:10:59	6.43044
2022-09-13	10:11:00	2.2878
2022-09-13	10:11:00	2.4963
2022-09-13	10:11:00	1.10144
2022-09-13	10:11:00	2.72627
2022-09-13	10:11:01	3.47915
2022-09-13	10:11:01	0.8764
2022-09-13	10:11:01	2.65533
2022-09-13	10:11:02	1.42795
2022-09-13	10:11:02	2.12373
2022-09-13	10:11:02	1.92902
2022-09-13	10:11:02	0.533651
2022-09-13	10:11:03	1.93436
2022-09-13	10:11:03	1.88658
2022-09-13	10:11:03	0.250038
2022-09-13	10:11:04	0.504746
2022-09-13	10:11:04	0.711514
2022-09-13	10:11:04	0.483931
2022-09-13	10:11:04	0.332227
2022-09-13	10:11:04	0.302099
2022-09-13	10:11:05	0.300267
2022-09-13	10:11:05	0.425305
2022-09-13	10:11:05	0.414313
2022-09-13	10:11:06	0.556705
2022-09-13	10:11:06	0.427036
2022-09-13	10:11:06	0.312277
2022-09-13	10:11:06	0.281998
2022-09-13	10:11:07	0.180776
2022-09-13	10:11:07	0.147799
2022-09-13	10:11:07	0.11925
2022-09-13	10:11:07	0.136654
2022-09-13	10:11:08	0.111107
2022-09-13	10:11:08	0.141998
2022-09-13	10:11:08	0.0367559
2022-09-13	10:11:08	0.126985
2022-09-13	10:11:09	0.0993004
2022-09-13	10:11:09	0.202761
2022-09-13	10:11:09	0.218741
2022-09-13	10:11:09	0.270954
2022-09-13	10:11:10	0.0670867
2022-09-13	10:11:10	0.0247458
2022-09-13	10:11:10	0.0643895
2022-09-13	10:11:11	0.184237
2022-09-13	10:11:11	0.218181
2022-09-13	10:11:11	0.0693259
2022-09-13	10:11:11	0.182761
2022-09-13	10:11:12	0.12154
2022-09-13	10:11:12	0.173397
2022-09-13	10:11:12	0.415636
2022-09-13	10:11:12	0.0224557
2022-09-13	10:11:13	-0.0932694
2022-09-13	10:11:13	-0.109249
2022-09-13	10:11:13	-0.217748
2022-09-13	10:11:13	-0.057188
2022-09-13	10:11:14	0.0412343
2022-09-13	10:11:14	0.343372
2022-09-13	10:11:14	0.370954
2022-09-13	10:11:15	1.12642
2022-09-13	10:11:15	1.13273
2022-09-13	10:11:15	1.19014
2022-09-13	10:11:15	0.365
2022-09-13	10:11:16	0.438486
2022-09-13	10:11:16	0.312634
2022-09-13	10:11:16	0.364847
2022-09-13	10:11:16	0.26098
2022-09-13	10:11:17	0.334262
2022-09-13	10:11:17	0.148054
2022-09-13	10:11:17	0.279758
2022-09-13	10:11:17	0.324542
2022-09-13	10:11:18	0.386323
2022-09-13	10:11:18	0.464847
2022-09-13	10:11:18	0.483422
2022-09-13	10:11:18	0.364339
2022-09-13	10:11:19	0.439453
2022-09-13	10:11:19	0.168308
2022-09-13	10:11:19	0.436247
2022-09-13	10:11:20	0.197519
2022-09-13	10:11:20	0.431209
2022-09-13	10:11:20	0.837824
2022-09-13	10:11:20	0.439758
2022-09-13	10:11:21	1.25609
2022-09-13	10:11:21	0.646476
2022-09-13	10:11:21	1.50592
2022-09-13	10:11:21	0.396858
2022-09-13	10:11:22	1.73243
2022-09-13	10:11:22	0.563829
2022-09-13	10:11:22	4.605
2022-09-13	10:11:22	1.19538
2022-09-13	10:11:23	3.08159
2022-09-13	10:11:23	0.660929
2022-09-13	10:11:23	1.37838
2022-09-13	10:11:24	1.18978
2022-09-13	10:11:24	0.361132
2022-09-13	10:11:24	0.616807
2022-09-13	10:11:24	0.197265
2022-09-13	10:11:25	0.54103
2022-09-13	10:11:25	0.385356
2022-09-13	10:11:25	1.68322
2022-09-13	10:11:25	0.710547
2022-09-13	10:11:26	3.20653
2022-09-13	10:11:26	0.893957
2022-09-13	10:11:26	0.507239
2022-09-13	10:11:26	0.421183
2022-09-13	10:11:27	0.167646
2022-09-13	10:11:27	0.500776
2022-09-13	10:11:27	0.163015
2022-09-13	10:11:28	0.166171
2022-09-13	10:11:28	0.210191
2022-09-13	10:11:28	0.271209
2022-09-13	10:11:28	0.383015
2022-09-13	10:11:29	0.939402
2022-09-13	10:11:29	0.912583
2022-09-13	10:11:29	1.45162
2022-09-13	10:11:29	2.00088
2022-09-13	10:11:30	2.09253
2022-09-13	10:11:30	1.92907
2022-09-13	10:11:30	1.57599
2022-09-13	10:11:30	0.877519
2022-09-13	10:11:31	2.54826
2022-09-13	10:11:31	3.33482
2022-09-13	10:11:31	9.88902
2022-09-13	10:11:31	4.13843
2022-09-13	10:11:32	2.29202
2022-09-13	10:11:32	0.270598
2022-09-13	10:11:32	0.477774
2022-09-13	10:11:33	0.209275
2022-09-13	10:11:33	0.181183
2022-09-13	10:11:33	1.73319
2022-09-13	10:11:33	2.042
2022-09-13	10:11:34	4.73869
2022-09-13	10:11:34	3.122
2022-09-13	10:11:34	5.72108
2022-09-13	10:11:34	3.46948
2022-09-13	10:11:35	5.37395
2022-09-13	10:11:35	1.43045
2022-09-13	10:11:35	3.99625
2022-09-13	10:11:35	4.35513
2022-09-13	10:11:36	2.83462
2022-09-13	10:11:36	2.95238
2022-09-13	10:11:36	1.1449
2022-09-13	10:11:37	6.2739
2022-09-13	10:11:37	5.34835
2022-09-13	10:11:37	1.93955
2022-09-13	10:11:37	1.911
2022-09-13	10:11:38	2.52352
2022-09-13	10:11:38	0.466018
2022-09-13	10:11:38	1.45447
2022-09-13	10:11:38	0.723982
2022-09-13	10:11:39	1.22536
2022-09-13	10:11:39	0.861539
2022-09-13	10:11:39	0.80444
2022-09-13	10:11:39	1.29431
2022-09-13	10:11:40	0.515382
2022-09-13	10:11:40	0.416909
2022-09-13	10:11:40	0.679249
2022-09-13	10:11:40	0.524848
2022-09-13	10:11:41	0.505305
2022-09-13	10:11:41	1.30078
2022-09-13	10:11:41	2.48164
2022-09-13	10:11:42	1.97609
2022-09-13	10:11:42	2.09024
2022-09-13	10:11:42	2.64332
2022-09-13	10:11:42	0.496145
2022-09-13	10:11:43	0.654924
2022-09-13	10:11:43	0.745407
2022-09-13	10:11:43	0.753753
2022-09-13	10:11:43	2.04541
2022-09-13	10:11:44	3.38169
2022-09-13	10:11:44	2.65518
2022-09-13	10:11:44	2.75538
2022-09-13	10:11:44	2.35172
2022-09-13	10:11:45	3.29645
2022-09-13	10:11:45	3.77161
2022-09-13	10:11:45	0.532023
2022-09-13	10:11:46	2.91808
2022-09-13	10:11:46	3.89146
2022-09-13	10:11:46	2.4363
2022-09-13	10:11:46	1.81452
2022-09-13	10:11:47	3.6453
2022-09-13	10:11:47	4.06016
2022-09-13	10:11:47	5.09833
2022-09-13	10:11:47	0.624695
2022-09-13	10:11:48	1.72765
2022-09-13	10:11:48	1.05843
2022-09-13	10:11:48	1.98322
2022-09-13	10:11:48	3.25614
2022-09-13	10:11:49	2.82688
2022-09-13	10:11:49	6.23151
2022-09-13	10:11:49	5.39161
2022-09-13	10:11:50	6.63263
2022-09-13	10:11:50	6.6221
2022-09-13	10:11:50	3.41263
2022-09-13	10:11:50	2.06032
2022-09-13	10:11:51	2.50709
2022-09-13	10:11:51	3.18342
2022-09-13	10:11:51	3.35304
2022-09-13	10:11:51	2.09004
2022-09-13	10:11:52	1.03691
2022-09-13	10:11:52	0.647086
2022-09-13	10:11:52	0.505407
2022-09-13	10:11:52	0.576247
2022-09-13	10:11:53	0.673448
2022-09-13	10:11:53	0.71355
2022-09-13	10:11:53	1.27233
2022-09-13	10:11:53	3.87777
2022-09-13	10:11:54	3.27034
2022-09-13	10:11:54	2.30291
2022-09-13	10:11:54	4.29004
2022-09-13	10:11:55	3.37126
2022-09-13	10:11:55	0.886476
2022-09-13	10:11:55	0.825051
2022-09-13	10:11:55	0.663626
2022-09-13	10:11:56	1.03874
2022-09-13	10:11:56	2.44714
2022-09-13	10:11:56	3.32505
2022-09-13	10:11:56	1.08154
2022-09-13	10:11:57	0.602659
2022-09-13	10:11:57	0.573041
2022-09-13	10:11:57	1.11182
2022-09-13	10:11:57	0.917265
2022-09-13	10:11:58	0.795891
2022-09-13	10:11:58	0.896501
2022-09-13	10:11:58	0.597163
2022-09-13	10:11:59	0.623524
2022-09-13	10:11:59	1.25564
2022-09-13	10:11:59	0.687545
2022-09-13	10:11:59	1.0079
2022-09-13	10:12:00	0.831158
2022-09-13	10:12:00	0.50673
2022-09-13	10:12:00	0.60388
2022-09-13	10:12:00	0.682914
2022-09-13	10:12:01	1.23782
2022-09-13	10:12:01	0.591208
2022-09-13	10:12:01	0.750445
2022-09-13	10:12:01	0.998333
2022-09-13	10:12:02	0.428053
2022-09-13	10:12:02	0.567137
2022-09-13	10:12:02	0.534873
2022-09-13	10:12:02	0.40841
2022-09-13	10:12:03	0.513397
2022-09-13	10:12:03	0.564186
2022-09-13	10:12:03	0.615484
2022-09-13	10:12:04	0.738181
2022-09-13	10:12:04	0.738639
2022-09-13	10:12:04	0.86958
2022-09-13	10:12:04	0.834924
2022-09-13	10:12:05	0.731819
2022-09-13	10:12:05	0.521183
2022-09-13	10:12:05	0.662354
2022-09-13	10:12:05	0.728664
2022-09-13	10:12:06	0.734873
2022-09-13	10:12:06	0.733906
2022-09-13	10:12:06	0.737214
2022-09-13	10:12:06	0.738842
2022-09-13	10:12:07	0.741438
2022-09-13	10:12:07	0.747799
2022-09-13	10:12:07	0.741031
2022-09-13	10:12:08	0.739504
2022-09-13	10:12:08	0.735687
2022-09-13	10:12:08	0.736807
2022-09-13	10:12:08	0.735433
2022-09-13	10:12:09	0.732226
2022-09-13	10:12:09	0.736603
2022-09-13	10:12:09	0.736043
2022-09-13	10:12:09	0.740318
2022-09-13	10:12:10	0.741336
2022-09-13	10:12:10	0.736705
2022-09-13	10:12:10	0.737926
2022-09-13	10:12:10	0.735127
2022-09-13	10:12:11	0.736654
2022-09-13	10:12:11	0.735229
2022-09-13	10:12:11	0.735382
2022-09-13	10:12:12	0.735026
2022-09-13	10:12:12	0.739097
2022-09-13	10:12:12	0.740878
2022-09-13	10:12:12	0.735891
2022-09-13	10:12:13	0.739046
2022-09-13	10:12:13	0.741183
2022-09-13	10:12:13	0.738028
2022-09-13	10:12:13	0.732684
2022-09-13	10:12:14	0.730496
2022-09-13	10:12:14	0.736857
2022-09-13	10:12:14	0.73584
2022-09-13	10:12:14	0.740216
2022-09-13	10:12:15	0.740623
2022-09-13	10:12:15	0.735992
2022-09-13	10:12:15	0.739606
2022-09-13	10:12:15	0.733244
2022-09-13	10:12:16	0.741845
2022-09-13	10:12:16	0.738588
2022-09-13	10:12:16	0.733092
2022-09-13	10:12:17	0.735026
2022-09-13	10:12:17	0.739809
2022-09-13	10:12:17	0.734415
2022-09-13	10:12:17	0.73813
2022-09-13	10:12:18	0.737366
2022-09-13	10:12:18	0.72958
2022-09-13	10:12:18	0.732837
2022-09-13	10:12:18	0.736908
2022-09-13	10:12:19	0.736298
2022-09-13	10:12:19	0.746679
2022-09-13	10:12:19	0.737773
2022-09-13	10:12:19	0.739504
2022-09-13	10:12:20	0.736501
2022-09-13	10:12:20	0.744644
2022-09-13	10:12:20	0.733601
2022-09-13	10:12:21	0.739707
2022-09-13	10:12:21	0.734822
2022-09-13	10:12:21	0.738486
2022-09-13	10:12:21	0.739249
2022-09-13	10:12:22	0.738028
2022-09-13	10:12:22	0.740573
2022-09-13	10:12:22	0.735483
2022-09-13	10:12:22	0.738028
2022-09-13	10:12:23	0.73757
2022-09-13	10:12:23	0.739351
2022-09-13	10:12:23	0.738689
2022-09-13	10:12:23	0.739911
2022-09-13	10:12:24	0.733957
2022-09-13	10:12:24	0.739555
2022-09-13	10:12:24	0.737468
2022-09-13	10:12:24	0.736654
2022-09-13	10:12:25	0.737875
2022-09-13	10:12:25	0.734669
2022-09-13	10:12:25	0.735941
2022-09-13	10:12:26	0.734415
2022-09-13	10:12:26	0.733499
2022-09-13	10:12:26	0.74327
2022-09-13	10:12:26	0.73813
2022-09-13	10:12:27	0.734262
2022-09-13	10:12:27	0.739147
2022-09-13	10:12:27	0.740267
2022-09-13	10:12:27	0.736807
2022-09-13	10:12:28	0.731412
2022-09-13	10:12:28	0.735941
2022-09-13	10:12:28	0.741387
2022-09-13	10:12:28	0.737672
2022-09-13	10:12:29	0.733448
2022-09-13	10:12:29	0.739402
2022-09-13	10:12:29	0.736145
2022-09-13	10:12:30	0.737977
2022-09-13	10:12:30	0.741031
2022-09-13	10:12:30	0.73584
2022-09-13	10:12:30	0.736603
2022-09-13	10:12:31	0.742964
2022-09-13	10:12:31	0.739555
2022-09-13	10:12:31	0.734873
2022-09-13	10:12:31	0.735992
2022-09-13	10:12:32	0.73813
2022-09-13	10:12:32	0.738435
2022-09-13	10:12:32	0.727697
2022-09-13	10:12:32	0.736196
2022-09-13	10:12:33	0.732379
2022-09-13	10:12:33	0.733397
2022-09-13	10:12:33	0.738842
2022-09-13	10:12:34	0.735483
2022-09-13	10:12:34	0.737163
2022-09-13	10:12:34	0.73701
2022-09-13	10:12:34	0.725611
2022-09-13	10:12:35	0.444389
2022-09-13	10:12:35	0.139453
2022-09-13	10:12:35	0.290903
2022-09-13	10:12:35	0.329021
2022-09-13	10:12:36	0.33869
2022-09-13	10:12:36	0.40042
2022-09-13	10:12:36	0.351412
2022-09-13	10:12:36	0.601743
2022-09-13	10:12:37	0.272074
2022-09-13	10:12:37	0.468054
2022-09-13	10:12:37	0.802252
2022-09-13	10:12:37	4.55166
2022-09-13	10:12:38	3.83319
2022-09-13	10:12:38	5.14413
2022-09-13	10:12:38	1.17151
2022-09-13	10:12:39	2.94871
2022-09-13	10:12:39	0.814109
2022-09-13	10:12:39	0.745306
2022-09-13	10:12:39	0.637468
2022-09-13	10:12:40	0.546374
2022-09-13	10:12:40	0.507901
2022-09-13	10:12:40	-0.0210048
2022-09-13	10:12:40	-0.409096
2022-09-13	10:12:41	-0.643905
2022-09-13	10:12:41	-0.710012
2022-09-13	10:12:41	-0.694083
2022-09-13	10:12:41	-0.724567
2022-09-13	10:12:42	-0.529707
2022-09-13	10:12:42	-0.326653
2022-09-13	10:12:42	0.0477483
2022-09-13	10:12:43	0.26444
2022-09-13	10:12:43	0.327596
2022-09-13	10:12:43	0.295992
2022-09-13	10:12:43	0.443626
2022-09-13	10:12:44	0.385916
2022-09-13	10:12:44	0.338537
2022-09-13	10:12:44	0.365611
2022-09-13	10:12:44	0.365407
2022-09-13	10:12:45	0.379962
2022-09-13	10:12:45	0.36383
2022-09-13	10:12:45	0.389987
2022-09-13	10:12:45	0.326934
2022-09-13	10:12:46	0.270242
2022-09-13	10:12:46	0.262303
2022-09-13	10:12:46	0.256043
2022-09-13	10:12:46	0.280013
2022-09-13	10:12:47	0.268512
2022-09-13	10:12:47	0.277316
2022-09-13	10:12:47	0.28098
2022-09-13	10:12:48	0.286323
2022-09-13	10:12:48	0.279606
2022-09-13	10:12:48	0.279758
2022-09-13	10:12:48	0.286374
2022-09-13	10:12:49	0.286628
2022-09-13	10:12:49	0.281845
2022-09-13	10:12:49	0.27243
2022-09-13	10:12:49	0.269529
2022-09-13	10:12:50	0.281031
2022-09-13	10:12:50	0.277468
2022-09-13	10:12:50	0.27584
2022-09-13	10:12:50	0.283728
2022-09-13	10:12:51	0.290853
2022-09-13	10:12:51	0.306221
2022-09-13	10:12:51	0.306629
2022-09-13	10:12:52	0.301845
2022-09-13	10:12:52	0.289529
2022-09-13	10:12:52	0.286171
2022-09-13	10:12:52	0.28902
2022-09-13	10:12:53	0.288206
2022-09-13	10:12:53	0.281132
2022-09-13	10:12:53	0.278181
2022-09-13	10:12:53	0.284084
2022-09-13	10:12:54	0.356501
2022-09-13	10:12:54	0.440827
2022-09-13	10:12:54	0.541997
2022-09-13	10:12:54	0.573193
2022-09-13	10:12:55	0.431921
2022-09-13	10:12:55	0.725102
2022-09-13	10:12:55	0.702964
2022-09-13	10:12:56	0.494262
2022-09-13	10:12:56	0.47874
2022-09-13	10:12:56	0.394109
2022-09-13	10:12:56	0.446832
2022-09-13	10:12:57	0.449835
2022-09-13	10:12:57	0.500318
2022-09-13	10:12:57	0.504796
2022-09-13	10:12:57	1.24078
2022-09-13	10:12:58	1.87874
2022-09-13	10:12:58	2.77813
2022-09-13	10:12:58	1.53355
2022-09-13	10:12:58	1.61477
2022-09-13	10:12:59	1.9421
2022-09-13	10:12:59	3.02744
2022-09-13	10:12:59	4.87609
2022-09-13	10:12:59	3.00729
2022-09-13	10:13:00	2.8195
2022-09-13	10:13:00	1.97935
2022-09-13	10:13:00	1.95406
2022-09-13	10:13:01	1.50826
2022-09-13	10:13:01	0.68271
2022-09-13	10:13:01	0.496298
2022-09-13	10:13:01	0.829885
2022-09-13	10:13:02	0.366272
2022-09-13	10:13:02	0.43014
2022-09-13	10:13:02	0.513804
2022-09-13	10:13:02	0.419249
2022-09-13	10:13:03	0.296908
2022-09-13	10:13:03	0.600776
2022-09-13	10:13:03	0.377723
2022-09-13	10:13:03	0.481591
2022-09-13	10:13:04	1.21141
2022-09-13	10:13:04	0.954262
2022-09-13	10:13:04	1.40948
2022-09-13	10:13:05	0.321082
2022-09-13	10:13:05	0.380878
2022-09-13	10:13:05	0.733295
2022-09-13	10:13:05	0.730293
2022-09-13	10:13:06	0.727799
2022-09-13	10:13:06	0.735789
2022-09-13	10:13:06	0.739198
2022-09-13	10:13:06	0.732837
2022-09-13	10:13:07	0.736298
2022-09-13	10:13:07	0.739656
2022-09-13	10:13:07	0.735687
2022-09-13	10:13:07	0.737112
2022-09-13	10:13:08	0.743626
2022-09-13	10:13:08	0.720471
2022-09-13	10:13:08	2.25263
2022-09-13	10:13:08	1.28464
2022-09-13	10:13:09	2.92098
2022-09-13	10:13:09	2.46663
2022-09-13	10:13:09	0.733753
2022-09-13	10:13:10	0.739758
2022-09-13	10:13:10	0.721234
2022-09-13	10:13:10	0.716959
2022-09-13	10:13:10	0.738079
2022-09-13	10:13:11	0.734669
2022-09-13	10:13:11	0.730394
2022-09-13	10:13:11	0.667646
2022-09-13	10:13:11	0.385102
2022-09-13	10:13:12	0.618537
