# Supplementary material for: Comparing efficacy in reducing pulling and welfare impacts of four types of leash walking equipment
Source: PeerJ journal article supplement (doi:10.7717/peerj.18131), 2024-10-24
Supplement: Shelter1_Tension_files.zip [file Juju_martin_202291391711 copy.xlsx]

## Sheet: Averaged Newtons
Date	Time	Averaged Newtons	Impulse	Total steps
2022-09-13	09:17:18	1.97371	1.97371	0
2022-09-13	09:17:19	1.98092	3.95464	0		Impulse	3128.27
2022-09-13	09:17:20	2.04979	6.00443	0		Total steps	80
2022-09-13	09:17:21	1.86015	7.86458	0		# > 5 sec	4
2022-09-13	09:17:22	1.89139	9.75597	0
2022-09-13	09:17:23	1.82438	11.5804	0
2022-09-13	09:17:24	2.65234	14.2327	0
2022-09-13	09:17:25	6.82719	21.0599	0
2022-09-13	09:17:26	6.93889	27.9988	0
2022-09-13	09:17:27	21.8665	49.8652	1
2022-09-13	09:17:28	4.73774	54.603	1
2022-09-13	09:17:29	7.71717	62.3202	1
2022-09-13	09:17:30	22.5506	84.8707	2
2022-09-13	09:17:31	11.7184	96.5891	2
2022-09-13	09:17:32	13.4995	110.089	3
2022-09-13	09:17:33	19.3431	129.432	4
2022-09-13	09:17:34	3.143	132.575	4
2022-09-13	09:17:35	2.79806	135.373	4
2022-09-13	09:17:36	2.03593	137.409	4
2022-09-13	09:17:37	2.07045	139.479	4
2022-09-13	09:17:38	25.4925	164.972	5
2022-09-13	09:17:39	40.657	205.629	6
2022-09-13	09:17:40	26.5664	232.195	7
2022-09-13	09:17:41	26.9345	259.13	8
2022-09-13	09:17:42	18.49	277.62	9
2022-09-13	09:17:43	12.7881	290.408	9
2022-09-13	09:17:44	19.6395	310.047	10
2022-09-13	09:17:45	7.14287	317.19	10
2022-09-13	09:17:46	4.5385	321.729	10
2022-09-13	09:17:47	14.896	336.625	11
2022-09-13	09:17:48	17.9985	354.623	12
2022-09-13	09:17:49	11.5298	366.153	12
2022-09-13	09:17:50	5.08277	371.236	12
2022-09-13	09:17:51	3.60961	374.845	12
2022-09-13	09:17:52	5.14242	379.988	12
2022-09-13	09:17:53	15.3533	395.341	13
2022-09-13	09:17:54	15.5897	410.931	14
2022-09-13	09:17:55	26.6293	437.56	15
2022-09-13	09:17:56	26.3515	463.912	16
2022-09-13	09:17:57	34.6915	498.603	17
2022-09-13	09:17:58	5.34734	503.95	17
2022-09-13	09:17:59	17.101	521.051	18
2022-09-13	09:18:00	40.752	561.803	19
2022-09-13	09:18:01	19.0567	580.86	20
2022-09-13	09:18:02	20.3653	601.226	21
2022-09-13	09:18:03	10.1884	611.414	21
2022-09-13	09:18:04	5.55953	616.973	21
2022-09-13	09:18:05	8.92	625.893	21
2022-09-13	09:18:06	5.88283	631.776	21
2022-09-13	09:18:07	4.27293	636.049	21
2022-09-13	09:18:08	19.7277	655.777	22
2022-09-13	09:18:09	62.7215	718.499	23
2022-09-13	09:18:10	76.48	794.979	24
2022-09-13	09:18:11	45.9691	840.948	25
2022-09-13	09:18:12	56.5269	897.475	26
2022-09-13	09:18:13	17.2845	914.759	27
2022-09-13	09:18:14	3.82223	918.581	27
2022-09-13	09:18:15	4.63852	923.22	27
2022-09-13	09:18:16	41.668	964.888	28
2022-09-13	09:18:17	23.641	988.529	29
2022-09-13	09:18:18	23.1779	1011.71	30
2022-09-13	09:18:19	18.4095	1030.12	31
2022-09-13	09:18:20	19.7605	1049.88	32
2022-09-13	09:18:21	34.2909	1084.17	33
2022-09-13	09:18:22	10.3679	1094.54	33
2022-09-13	09:18:23	6.21407	1100.75	33
2022-09-13	09:18:24	4.04543	1104.8	33
2022-09-13	09:18:25	9.2424	1114.04	33
2022-09-13	09:18:26	7.72075	1121.76	33
2022-09-13	09:18:27	5.8396	1127.6	33
2022-09-13	09:18:28	4.93264	1132.53	33
2022-09-13	09:18:29	9.04002	1141.57	33
2022-09-13	09:18:30	2.56994	1144.14	33
2022-09-13	09:18:31	3.3447	1147.49	33
2022-09-13	09:18:32	6.50784	1153.99	33
2022-09-13	09:18:33	10.3305	1164.32	33
2022-09-13	09:18:34	14.8229	1179.15	34
2022-09-13	09:18:35	18.284	1197.43	35
2022-09-13	09:18:36	5.73193	1203.16	35
2022-09-13	09:18:37	13.2636	1216.43	36
2022-09-13	09:18:38	18.1157	1234.54	37
2022-09-13	09:18:39	14.909	1249.45	38
2022-09-13	09:18:40	3.42347	1252.87	38
2022-09-13	09:18:41	-1.0816	1252.87	38
2022-09-13	09:18:42	0.811373	1253.69	38
2022-09-13	09:18:43	2.10203	1255.79	38
2022-09-13	09:18:44	2.16541	1257.95	38
2022-09-13	09:18:45	2.73447	1260.69	38
2022-09-13	09:18:46	4.08493	1264.77	38
2022-09-13	09:18:47	5.01878	1269.79	38
2022-09-13	09:18:48	10.147	1279.94	38
2022-09-13	09:18:49	18.0441	1297.98	39
2022-09-13	09:18:50	12.8844	1310.87	39
2022-09-13	09:18:51	19.7957	1330.66	40
2022-09-13	09:18:52	12.2841	1342.95	40
2022-09-13	09:18:53	6.15006	1349.1	40
2022-09-13	09:18:54	10.2716	1359.37	40
2022-09-13	09:18:55	7.58831	1366.96	40
2022-09-13	09:18:56	4.52766	1371.48	40
2022-09-13	09:18:57	10.3683	1381.85	40
2022-09-13	09:18:58	22.7568	1404.61	41
2022-09-13	09:18:59	15.7923	1420.4	42
2022-09-13	09:19:00	15.0373	1435.44	43
2022-09-13	09:19:01	5.0696	1440.51	43
2022-09-13	09:19:02	2.0919	1442.6	43
2022-09-13	09:19:03	0.403	1443	43
2022-09-13	09:19:04	1.52987	1444.53	43
2022-09-13	09:19:05	2.34481	1446.88	43
2022-09-13	09:19:06	2.29133	1449.17	43
2022-09-13	09:19:07	2.1417	1451.31	43
2022-09-13	09:19:08	1.79028	1453.1	43
2022-09-13	09:19:09	1.83893	1454.94	43
2022-09-13	09:19:10	0.457045	1455.4	43
2022-09-13	09:19:11	-0.424219	1455.4	43
2022-09-13	09:19:12	9.72506	1465.12	43
2022-09-13	09:19:13	13.0409	1478.16	44
2022-09-13	09:19:14	7.26771	1485.43	44
2022-09-13	09:19:15	22.9045	1508.34	45
2022-09-13	09:19:16	21.1849	1529.52	46
2022-09-13	09:19:17	14.5567	1544.08	47
2022-09-13	09:19:18	8.5912	1552.67	47
2022-09-13	09:19:19	23.5726	1576.24	48
2022-09-13	09:19:20	28.5086	1604.75	49
2022-09-13	09:19:21	34.33	1639.08	50
2022-09-13	09:19:22	57.7679	1696.85	51
2022-09-13	09:19:23	23.5476	1720.39	52
2022-09-13	09:19:24	11.5296	1731.92	52
2022-09-13	09:19:25	30.533	1762.46	53
2022-09-13	09:19:26	23.0223	1785.48	54
2022-09-13	09:19:27	32.2979	1817.78	55
2022-09-13	09:19:28	25.775	1843.55	56
2022-09-13	09:19:29	37.7773	1881.33	57
2022-09-13	09:19:30	28.5332	1909.86	58
2022-09-13	09:19:31	30.8565	1940.72	59
2022-09-13	09:19:32	9.44134	1950.16	59
2022-09-13	09:19:33	5.85487	1956.02	59
2022-09-13	09:19:34	2.41589	1958.43	59
2022-09-13	09:19:35	1.26359	1959.7	59
2022-09-13	09:19:36	1.32009	1961.02	59
2022-09-13	09:19:37	1.52954	1962.54	59
2022-09-13	09:19:38	0.134352	1962.68	59
2022-09-13	09:19:39	20.2506	1982.93	60
2022-09-13	09:19:40	57.7824	2040.71	61
2022-09-13	09:19:41	5.36772	2046.08	61
2022-09-13	09:19:42	1.5494	2047.63	61
2022-09-13	09:19:43	2.03327	2049.66	61
2022-09-13	09:19:44	2.57677	2052.24	61
2022-09-13	09:19:45	7.84984	2060.09	61
2022-09-13	09:19:46	16.1379	2076.23	62
2022-09-13	09:19:47	21.9676	2098.19	63
2022-09-13	09:19:48	11.02	2109.21	63
2022-09-13	09:19:49	7.95836	2117.17	63
2022-09-13	09:19:50	5.0555	2122.23	63
2022-09-13	09:19:51	3.90061	2126.13	63
2022-09-13	09:19:52	8.85711	2134.99	63
2022-09-13	09:19:53	4.55341	2139.54	63
2022-09-13	09:19:54	1.93938	2141.48	63
2022-09-13	09:19:55	7.00183	2148.48	63
2022-09-13	09:19:56	6.94348	2155.42	63
2022-09-13	09:19:57	-0.20628	2155.42	63
2022-09-13	09:19:58	-1.73448	2155.42	63
2022-09-13	09:19:59	-0.306336	2155.42	63
2022-09-13	09:20:00	6.13518	2161.56	63
2022-09-13	09:20:01	7.46249	2169.02	63
2022-09-13	09:20:02	10.851	2179.87	63
2022-09-13	09:20:03	8.89729	2188.77	63
2022-09-13	09:20:04	4.43015	2193.2	63
2022-09-13	09:20:05	2.08375	2195.28	63
2022-09-13	09:20:06	2.81144	2198.1	63
2022-09-13	09:20:07	5.80665	2203.9	63
2022-09-13	09:20:08	3.94237	2207.84	63
2022-09-13	09:20:09	3.22104	2211.07	63
2022-09-13	09:20:10	-1.74572	2211.07	63
2022-09-13	09:20:11	0.213356	2211.28	63
2022-09-13	09:20:12	0.780209	2212.06	63
2022-09-13	09:20:13	12.2821	2224.34	63
2022-09-13	09:20:14	7.47246	2231.81	63
2022-09-13	09:20:15	5.13308	2236.95	63
2022-09-13	09:20:16	9.04141	2245.99	63
2022-09-13	09:20:17	12.3915	2258.38	63
2022-09-13	09:20:18	13.9011	2272.28	64
2022-09-13	09:20:19	5.8782	2278.16	64
2022-09-13	09:20:20	5.25199	2283.41	64
2022-09-13	09:20:21	6.8887	2290.3	64
2022-09-13	09:20:22	3.49087	2293.79	64
2022-09-13	09:20:23	8.50246	2302.29	64
2022-09-13	09:20:24	32.5006	2334.79	65
2022-09-13	09:20:25	32.5163	2367.31	66
2022-09-13	09:20:26	22.0319	2389.34	67
2022-09-13	09:20:27	37.2997	2426.64	68
2022-09-13	09:20:28	1.94844	2428.59	68
2022-09-13	09:20:29	1.0932	2429.68	68
2022-09-13	09:20:30	1.92271	2431.61	68
2022-09-13	09:20:31	2.99314	2434.6	68
2022-09-13	09:20:32	11.9019	2446.5	68
2022-09-13	09:20:33	2.69218	2449.19	68
2022-09-13	09:20:34	2.35862	2451.55	68
2022-09-13	09:20:35	3.23881	2454.79	68
2022-09-13	09:20:36	28.0057	2482.8	69
2022-09-13	09:20:37	11.2735	2494.07	69
2022-09-13	09:20:38	6.04129	2500.11	69
2022-09-13	09:20:39	3.24487	2503.36	69
2022-09-13	09:20:40	7.27212	2510.63	69
2022-09-13	09:20:41	7.23964	2517.87	69
2022-09-13	09:20:42	12.2326	2530.1	69
2022-09-13	09:20:43	23.1721	2553.27	70
2022-09-13	09:20:44	12.2541	2565.53	70
2022-09-13	09:20:45	10.5401	2576.07	70
2022-09-13	09:20:46	8.33391	2584.4	70
2022-09-13	09:20:47	5.57965	2589.98	70
2022-09-13	09:20:48	8.89654	2598.88	70
2022-09-13	09:20:49	19.7228	2618.6	71
2022-09-13	09:20:50	4.03343	2622.63	71
2022-09-13	09:20:51	2.65013	2625.28	71
2022-09-13	09:20:52	2.2859	2627.57	71
2022-09-13	09:20:53	1.92354	2629.49	71
2022-09-13	09:20:54	2.27871	2631.77	71
2022-09-13	09:20:55	4.93863	2636.71	71
2022-09-13	09:20:56	28.8789	2665.59	72
2022-09-13	09:20:57	12.6808	2678.27	72
2022-09-13	09:20:58	6.9161	2685.19	72
2022-09-13	09:20:59	5.3624	2690.55	72
2022-09-13	09:21:00	6.84547	2697.39	72
2022-09-13	09:21:01	20.461	2717.85	73
2022-09-13	09:21:02	12.2326	2730.09	73
2022-09-13	09:21:03	5.08951	2735.18	73
2022-09-13	09:21:04	2.25924	2737.44	73
2022-09-13	09:21:05	2.06352	2739.5	73
2022-09-13	09:21:06	2.01944	2741.52	73
2022-09-13	09:21:07	2.08166	2743.6	73
2022-09-13	09:21:08	2.00577	2745.61	73
2022-09-13	09:21:09	2.00373	2747.61	73
2022-09-13	09:21:10	1.61324	2749.22	73
2022-09-13	09:21:11	2.14659	2751.37	73
2022-09-13	09:21:12	2.05857	2753.43	73
2022-09-13	09:21:13	2.0267	2755.46	73
2022-09-13	09:21:14	2.08754	2757.54	73
2022-09-13	09:21:15	2.09075	2759.63	73
2022-09-13	09:21:16	2.10475	2761.74	73
2022-09-13	09:21:17	2.13236	2763.87	73
2022-09-13	09:21:18	2.14742	2766.02	73
2022-09-13	09:21:19	2.19529	2768.21	73
2022-09-13	09:21:20	2.13112	2770.34	73
2022-09-13	09:21:21	2.09388	2772.44	73
2022-09-13	09:21:22	2.06038	2774.5	73
2022-09-13	09:21:23	2.08154	2776.58	73
2022-09-13	09:21:24	2.05393	2778.63	73
2022-09-13	09:21:25	1.84544	2780.48	73
2022-09-13	09:21:26	0.0676299	2780.55	73
2022-09-13	09:21:27	-0.0395574	2780.55	73
2022-09-13	09:21:28	-0.00328144	2780.55	73
2022-09-13	09:21:29	4.14251	2784.69	73
2022-09-13	09:21:30	26.2237	2810.91	74
2022-09-13	09:21:31	8.09956	2819.01	74
2022-09-13	09:21:32	21.3508	2840.36	75
2022-09-13	09:21:33	26.4743	2866.84	76
2022-09-13	09:21:34	8.48282	2875.32	76
2022-09-13	09:21:35	9.33635	2884.66	76
2022-09-13	09:21:36	21.2288	2905.89	77
2022-09-13	09:21:37	6.54825	2912.43	77
2022-09-13	09:21:38	5.47433	2917.91	77
2022-09-13	09:21:39	3.86569	2921.77	77
2022-09-13	09:21:40	1.6095	2923.38	77
2022-09-13	09:21:41	0.56774	2923.95	77
2022-09-13	09:21:42	2.93089	2926.88	77
2022-09-13	09:21:43	2.36637	2929.25	77
2022-09-13	09:21:44	2.8486	2932.1	77
2022-09-13	09:21:45	2.90027	2935	77
2022-09-13	09:21:46	3.28623	2938.28	77
2022-09-13	09:21:47	3.31134	2941.6	77
2022-09-13	09:21:48	4.22596	2945.82	77
2022-09-13	09:21:49	3.13694	2948.96	77
2022-09-13	09:21:50	1.43208	2950.39	77
2022-09-13	09:21:51	31.99	2982.38	78
2022-09-13	09:21:52	22.4116	3004.79	79
2022-09-13	09:21:53	27.8895	3032.68	80
2022-09-13	09:21:54	3.83428	3036.52	80
2022-09-13	09:21:55	1.87792	3038.39	80
2022-09-13	09:21:56	2.81733	3041.21	80
2022-09-13	09:21:57	6.51327	3047.72	80
2022-09-13	09:21:58	5.27158	3053	80
2022-09-13	09:21:59	3.76841	3056.76	80
2022-09-13	09:22:00	1.70865	3058.47	80
2022-09-13	09:22:01	1.55289	3060.03	80
2022-09-13	09:22:02	2.31176	3062.34	80
2022-09-13	09:22:03	2.07221	3064.41	80
2022-09-13	09:22:04	6.75198	3071.16	80
2022-09-13	09:22:05	6.41595	3077.58	80
2022-09-13	09:22:06	3.27961	3080.86	80
2022-09-13	09:22:07	4.83671	3085.69	80
2022-09-13	09:22:08	12.8356	3098.53	80
2022-09-13	09:22:09	5.84954	3104.38	80
2022-09-13	09:22:10	2.24491	3106.62	80
2022-09-13	09:22:11	1.51912	3108.14	80
2022-09-13	09:22:12	2.70344	3110.85	80
2022-09-13	09:22:13	2.27752	3113.12	80
2022-09-13	09:22:14	2.33893	3115.46	80
2022-09-13	09:22:15	2.84266	3118.31	80
2022-09-13	09:22:16	3.2911	3121.6	80
2022-09-13	09:22:17	3.28861	3124.89	80
2022-09-13	09:22:18	3.38007	3128.27	80

## Sheet: Juju_martin_202291391711 (E (3)
Date	Time	Lbs	Newtons	Averaged Newtons	Total force x time	total steps > 13.345		**GoPro Fitting: 906
2022-09-13	09:17:18	0.447494	1.99054	1.97371	1.99054	FALSE	0			Total force x time	6143.24
2022-09-13	09:17:18	0.446679	1.98692	1.97371	1.98692	FALSE	0			Total steps	271
2022-09-13	09:17:18	0.436959	1.94368	1.97371	3.93422	FALSE	0
2022-09-13	09:17:19	0.433092	1.92648	1.98092	3.9134	FALSE	0
2022-09-13	09:17:19	0.437214	1.94482	1.98092	5.87904	FALSE	0
2022-09-13	09:17:19	0.449224	1.99824	1.98092	5.91164	FALSE	0
2022-09-13	09:17:19	0.461794	2.05415	1.98092	7.93319	FALSE	0
2022-09-13	09:17:20	0.466883	2.07679	2.04979	7.98842	FALSE	0
2022-09-13	09:17:20	0.464644	2.06683	2.04979	10	FALSE	0
2022-09-13	09:17:20	0.455229	2.02495	2.04979	10.0134	FALSE	0
2022-09-13	09:17:20	0.456501	2.03061	2.04979	12.0306	FALSE	0
2022-09-13	09:17:21	0.481234	2.14063	1.86015	12.154	FALSE	0
2022-09-13	09:17:21	0.443677	1.97356	1.86015	14.0042	FALSE	0
2022-09-13	09:17:21	0.395992	1.76145	1.86015	13.9155	FALSE	0
2022-09-13	09:17:21	0.35182	1.56497	1.86015	15.5692	FALSE	0
2022-09-13	09:17:22	0.303982	1.35217	1.89139	15.2676	FALSE	0
2022-09-13	09:17:22	0.473753	2.10735	1.89139	17.6765	FALSE	0
2022-09-13	09:17:22	0.480827	2.13881	1.89139	17.4064	FALSE	0
2022-09-13	09:17:22	0.442252	1.96723	1.89139	19.6437	FALSE	0
2022-09-13	09:17:23	0.406679	1.80899	1.82438	19.2154	FALSE	0
2022-09-13	09:17:23	0.399199	1.77572	1.82438	21.4194	FALSE	0
2022-09-13	09:17:23	0.424542	1.88845	1.82438	21.1039	FALSE	0
2022-09-13	09:17:24	0.443982	1.97492	2.65234	23.3944	FALSE	0
2022-09-13	09:17:24	0.398079	1.77074	2.65234	22.8746	FALSE	0
2022-09-13	09:17:24	0.501488	2.23072	2.65234	25.6251	FALSE	0
2022-09-13	09:17:24	1.04154	4.63298	2.65234	27.5076	FALSE	0
2022-09-13	09:17:25	1.44612	6.43263	6.82719	32.0577	FALSE	0
2022-09-13	09:17:25	1.8938	8.424	6.82719	35.9316	FALSE	0
2022-09-13	09:17:25	1.26454	5.62493	6.82719	37.6826	FALSE	0
2022-09-13	09:17:26	2.27574	10.1229	6.93889	46.0545	FALSE	0
2022-09-13	09:17:26	1.58902	7.06828	6.93889	44.7509	FALSE	0
2022-09-13	09:17:26	0.993295	4.41837	6.93889	50.4729	FALSE	0
2022-09-13	09:17:26	0.835585	3.71685	6.93889	48.4678	FALSE	0
2022-09-13	09:17:26	2.10602	9.368	6.93889	59.8409	FALSE	0
2022-09-13	09:17:27	7.2964	32.4558	21.8665	80.9236	1	1
2022-09-13	09:17:27	5.39853	24.0137	21.8665	83.8547	1	2
2022-09-13	09:17:27	2.05248	9.12984	21.8665	90.0535	FALSE	2
2022-09-13	09:17:28	1.23279	5.4837	4.73774	89.3383	FALSE	2
2022-09-13	09:17:28	0.627596	2.79167	4.73774	92.8451	FALSE	2
2022-09-13	09:17:28	0.644898	2.86864	4.73774	92.207	FALSE	2
2022-09-13	09:17:28	1.75508	7.80695	4.73774	100.652	FALSE	2
2022-09-13	09:17:29	1.37426	6.11298	7.71717	98.32	FALSE	2
2022-09-13	09:17:29	1.44363	6.42155	7.71717	107.074	FALSE	2
2022-09-13	09:17:29	2.54861	11.3367	7.71717	109.657	FALSE	2
2022-09-13	09:17:29	1.57309	6.99742	7.71717	114.071	FALSE	2
2022-09-13	09:17:30	3.11879	13.873	22.5506	123.53	1	3
2022-09-13	09:17:30	3.42459	15.2333	22.5506	129.304	1	4
2022-09-13	09:17:30	7.0567	31.3896	22.5506	154.919	1	5
2022-09-13	09:17:30	6.67828	29.7063	22.5506	159.011	1	6
2022-09-13	09:17:31	6.56815	29.2164	11.7184	184.136	1	7
2022-09-13	09:17:31	2.45121	10.9035	11.7184	169.914	FALSE	7
2022-09-13	09:17:31	0.561438	2.49739	11.7184	186.633	FALSE	7
2022-09-13	09:17:31	0.956857	4.25629	11.7184	174.17	FALSE	7
2022-09-13	09:17:32	2.10816	9.37752	13.4995	196.011	FALSE	7
2022-09-13	09:17:32	2.32688	10.3504	13.4995	184.521	FALSE	7
2022-09-13	09:17:32	4.66943	20.7706	13.4995	216.781	1	8
2022-09-13	09:17:33	5.18749	23.075	19.3431	207.596	1	9
2022-09-13	09:17:33	8.35563	37.1675	19.3431	253.949	1	10
2022-09-13	09:17:33	1.41513	6.29478	19.3431	213.891	FALSE	10
2022-09-13	09:17:33	2.43584	10.8351	19.3431	264.784	FALSE	10
2022-09-13	09:17:34	0.792634	3.52579	3.143	217.416	FALSE	10
2022-09-13	09:17:34	0.593143	2.63842	3.143	267.422	FALSE	10
2022-09-13	09:17:34	0.752939	3.34922	3.143	220.766	FALSE	10
2022-09-13	09:17:34	0.687595	3.05856	3.143	270.481	FALSE	10
2022-09-13	09:17:35	0.688461	3.06241	2.79806	223.828	FALSE	10
2022-09-13	09:17:35	0.640267	2.84804	2.79806	273.329	FALSE	10
2022-09-13	09:17:35	0.462557	2.05755	2.79806	225.886	FALSE	10
2022-09-13	09:17:35	0.724847	3.22426	2.79806	276.553	FALSE	10
2022-09-13	09:17:36	0.390394	1.73655	2.03593	227.622	FALSE	10
2022-09-13	09:17:36	0.465	2.06841	2.03593	278.622	FALSE	10
2022-09-13	09:17:36	0.411819	1.83185	2.03593	229.454	FALSE	10
2022-09-13	09:17:36	0.563575	2.50689	2.03593	281.128	FALSE	10
2022-09-13	09:17:37	0.86098	3.82981	2.07045	233.284	FALSE	10
2022-09-13	09:17:37	0.46897	2.08607	2.07045	283.214	FALSE	10
2022-09-13	09:17:37	0.0664252	0.295473	2.07045	233.579	FALSE	10
2022-09-13	09:17:38	1.58734	7.06081	25.4925	290.275	FALSE	10
2022-09-13	09:17:38	2.99513	13.3229	25.4925	246.902	FALSE	10
2022-09-13	09:17:38	7.45695	33.17	25.4925	323.445	1	11
2022-09-13	09:17:38	10.8845	48.4164	25.4925	295.319	1	12
2022-09-13	09:17:39	14.6596	65.2088	40.657	388.654	1	13
2022-09-13	09:17:39	7.45421	33.1578	40.657	328.476	1	14
2022-09-13	09:17:39	3.43019	15.2582	40.657	403.912	1	15
2022-09-13	09:17:39	11.0164	49.0032	40.657	377.48	1	16
2022-09-13	09:17:40	3.8793	17.2559	26.5664	421.168	1	17
2022-09-13	09:17:40	10.0455	44.6844	26.5664	422.164	1	18
2022-09-13	09:17:40	5.38154	23.9382	26.5664	445.106	1	19
2022-09-13	09:17:40	4.58327	20.3873	26.5664	442.551	1	20
2022-09-13	09:17:41	6.41141	28.5192	26.9345	473.626	1	21
2022-09-13	09:17:41	3.42576	15.2385	26.9345	457.79	1	22
2022-09-13	09:17:41	8.3283	37.0459	26.9345	510.672	1	23
2022-09-13	09:17:42	6.751	30.0298	18.49	487.82	1	24
2022-09-13	09:17:42	3.57111	15.885	18.49	526.557	1	25
2022-09-13	09:17:42	4.50556	20.0416	18.49	507.861	1	26
2022-09-13	09:17:42	1.7993	8.00365	18.49	534.56	FALSE	26
2022-09-13	09:17:43	4.50495	20.0389	12.7881	527.9	1	27
2022-09-13	09:17:43	1.08154	4.81091	12.7881	539.371	FALSE	27
2022-09-13	09:17:43	1.52424	6.78012	12.7881	534.68	FALSE	27
2022-09-13	09:17:43	4.38886	19.5225	12.7881	558.894	1	28
2022-09-13	09:17:44	2.38978	10.6302	19.6395	545.31	FALSE	28
2022-09-13	09:17:44	6.54988	29.1352	19.6395	588.029	1	29
2022-09-13	09:17:44	1.90856	8.48966	19.6395	553.8	FALSE	29
2022-09-13	09:17:44	6.81243	30.3031	19.6395	618.332	1	30
2022-09-13	09:17:45	1.58653	7.0572	7.14287	560.857	FALSE	30
2022-09-13	09:17:45	2.97691	13.2419	7.14287	631.574	FALSE	30
2022-09-13	09:17:45	1.011	4.49713	7.14287	565.354	FALSE	30
2022-09-13	09:17:45	0.848715	3.77525	7.14287	635.349	FALSE	30
2022-09-13	09:17:46	0.977316	4.3473	4.5385	569.702	FALSE	30
2022-09-13	09:17:46	0.702048	3.12285	4.5385	638.472	FALSE	30
2022-09-13	09:17:46	1.38154	6.14537	4.5385	575.847	FALSE	30
2022-09-13	09:17:47	1.19289	5.30621	14.896	643.778	FALSE	30
2022-09-13	09:17:47	3.08266	13.7123	14.896	589.559	1	31
2022-09-13	09:17:47	4.48138	19.9341	14.896	663.712	1	32
2022-09-13	09:17:47	4.63818	20.6316	14.896	610.191	1	33
2022-09-13	09:17:48	5.58357	24.8368	17.9985	688.549	1	34
2022-09-13	09:17:48	2.12673	9.46012	17.9985	619.651	FALSE	34
2022-09-13	09:17:48	7.78495	34.629	17.9985	723.178	1	35
2022-09-13	09:17:48	0.689682	3.06784	17.9985	622.719	FALSE	35
2022-09-13	09:17:49	3.3338	14.8294	11.5298	738.007	1	36
2022-09-13	09:17:49	2.5565	11.3718	11.5298	634.091	FALSE	36
2022-09-13	09:17:49	1.78922	7.95881	11.5298	745.966	FALSE	36
2022-09-13	09:17:49	2.68851	11.959	11.5298	646.05	FALSE	36
2022-09-13	09:17:50	0.539758	2.40095	5.08277	748.367	FALSE	36
2022-09-13	09:17:50	2.38357	10.6026	5.08277	656.652	FALSE	36
2022-09-13	09:17:50	0.504644	2.24476	5.08277	750.612	FALSE	36
2022-09-13	09:17:51	0.689122	3.06535	3.60961	659.718	FALSE	36
2022-09-13	09:17:51	0.844084	3.75465	3.60961	754.367	FALSE	36
2022-09-13	09:17:51	0.603677	2.68528	3.60961	662.403	FALSE	36
2022-09-13	09:17:51	1.10902	4.93314	3.60961	759.3	FALSE	36
2022-09-13	09:17:52	0.444949	1.97922	5.14242	664.382	FALSE	36
2022-09-13	09:17:52	1.77141	7.87959	5.14242	767.179	FALSE	36
2022-09-13	09:17:52	0.70785	3.14866	5.14242	667.531	FALSE	36
2022-09-13	09:17:52	1.70006	7.56221	5.14242	774.742	FALSE	36
2022-09-13	09:17:53	1.39477	6.20422	15.3533	673.735	FALSE	36
2022-09-13	09:17:53	2.43452	10.8292	15.3533	785.571	FALSE	36
2022-09-13	09:17:53	4.01767	17.8714	15.3533	691.606	1	37
2022-09-13	09:17:53	5.95935	26.5084	15.3533	812.079	1	38
2022-09-13	09:17:54	3.69574	16.4394	15.5897	708.046	1	39
2022-09-13	09:17:54	2.85843	12.7149	15.5897	824.794	FALSE	39
2022-09-13	09:17:54	4.94749	22.0074	15.5897	730.053	1	40
2022-09-13	09:17:54	2.51726	11.1973	15.5897	835.991	FALSE	40
2022-09-13	09:17:55	6.30591	28.0499	26.6293	758.103	1	41
2022-09-13	09:17:55	5.76322	25.636	26.6293	861.627	1	42
2022-09-13	09:17:55	5.89049	26.2021	26.6293	784.305	1	43
2022-09-13	09:17:56	13.1975	58.7051	26.3515	920.332	1	44
2022-09-13	09:17:56	1.31111	5.83208	26.3515	790.137	FALSE	44
2022-09-13	09:17:56	8.0681	35.8885	26.3515	956.221	1	45
2022-09-13	09:17:56	1.11961	4.98025	26.3515	795.118	FALSE	45
2022-09-13	09:17:57	9.95823	44.2962	34.6915	1000.52	1	46
2022-09-13	09:17:57	6.31619	28.0957	34.6915	823.213	1	47
2022-09-13	09:17:57	10.1392	45.1012	34.6915	1045.62	1	48
2022-09-13	09:17:57	4.78235	21.2728	34.6915	844.486	1	49
2022-09-13	09:17:58	1.34118	5.96584	5.34734	1051.58	FALSE	49
2022-09-13	09:17:58	1.51146	6.72328	5.34734	851.209	FALSE	49
2022-09-13	09:17:58	1.22978	5.47031	5.34734	1057.05	FALSE	49
2022-09-13	09:17:58	0.72612	3.22993	5.34734	854.439	FALSE	49
2022-09-13	09:17:59	2.09838	9.33401	17.101	1066.39	FALSE	49
2022-09-13	09:17:59	1.80139	8.01294	17.101	862.452	FALSE	49
2022-09-13	09:17:59	7.63365	33.956	17.101	1100.34	1	50
2022-09-13	09:18:00	3.2219	14.3317	40.752	876.784	1	51
2022-09-13	09:18:00	21.7214	96.6211	40.752	1196.97	1	52
2022-09-13	09:18:00	4.37334	19.4535	40.752	896.237	1	53
2022-09-13	09:18:00	7.32922	32.6018	40.752	1229.57	1	54
2022-09-13	09:18:01	3.13156	13.9298	19.0567	910.167	1	55
2022-09-13	09:18:01	3.7938	16.8756	19.0567	1246.44	1	56
2022-09-13	09:18:01	7.83187	34.8377	19.0567	945.005	1	57
2022-09-13	09:18:01	2.37935	10.5838	19.0567	1257.03	FALSE	57
2022-09-13	09:18:02	6.14337	27.3269	20.3653	972.332	1	58
2022-09-13	09:18:02	5.81594	25.8705	20.3653	1282.9	1	59
2022-09-13	09:18:02	2.96052	13.169	20.3653	985.501	FALSE	59
2022-09-13	09:18:02	3.3935	15.095	20.3653	1297.99	1	60
2022-09-13	09:18:03	1.77721	7.90539	10.1884	993.406	FALSE	60
2022-09-13	09:18:03	3.0024	13.3553	10.1884	1311.35	1	61
2022-09-13	09:18:03	1.91202	8.50505	10.1884	1001.91	FALSE	61
2022-09-13	09:18:03	2.47019	10.9879	10.1884	1322.34	FALSE	61
2022-09-13	09:18:04	1.78938	7.95952	5.55953	1009.87	FALSE	61
2022-09-13	09:18:04	0.900522	4.0057	5.55953	1326.34	FALSE	61
2022-09-13	09:18:04	1.05961	4.71336	5.55953	1014.58	FALSE	61
2022-09-13	09:18:05	0.72617	3.23015	8.92	1329.57	FALSE	61
2022-09-13	09:18:05	2.51167	11.1724	8.92	1025.76	FALSE	61
2022-09-13	09:18:05	1.12861	5.02028	8.92	1334.59	FALSE	61
2022-09-13	09:18:05	3.65477	16.2571	8.92	1042.01	1	62
2022-09-13	09:18:06	0.965814	4.29613	5.88283	1338.89	FALSE	62
2022-09-13	09:18:06	2.31421	10.2941	5.88283	1052.31	FALSE	62
2022-09-13	09:18:06	1.05345	4.68596	5.88283	1343.57	FALSE	62
2022-09-13	09:18:06	0.956603	4.25516	5.88283	1056.56	FALSE	62
2022-09-13	09:18:07	1.29386	5.75535	4.27293	1349.33	FALSE	62
2022-09-13	09:18:07	0.550191	2.44736	4.27293	1059.01	FALSE	62
2022-09-13	09:18:07	1.13838	5.06374	4.27293	1354.39	FALSE	62
2022-09-13	09:18:07	0.859962	3.82528	4.27293	1062.84	FALSE	62
2022-09-13	09:18:08	2.26291	10.0659	19.7277	1364.46	FALSE	62
2022-09-13	09:18:08	2.64001	11.7433	19.7277	1074.58	FALSE	62
2022-09-13	09:18:08	5.5967	24.8952	19.7277	1389.35	1	63
2022-09-13	09:18:08	7.24036	32.2066	19.7277	1106.79	1	64
2022-09-13	09:18:09	14.8029	65.8463	62.7215	1455.2	1	65
2022-09-13	09:18:09	17.0697	75.9294	62.7215	1182.71	1	66
2022-09-13	09:18:09	10.4287	46.3889	62.7215	1501.59	1	67
2022-09-13	09:18:10	20.4827	91.1111	76.48	1273.83	1	68
2022-09-13	09:18:10	18.157	80.766	76.48	1582.36	1	69
2022-09-13	09:18:10	15.2938	68.0299	76.48	1341.86	1	70
2022-09-13	09:18:10	14.8404	66.0131	76.48	1648.37	1	71
2022-09-13	09:18:11	8.60846	38.2922	45.9691	1380.15	1	72
2022-09-13	09:18:11	12.6339	56.1981	45.9691	1704.57	1	73
2022-09-13	09:18:11	9.27161	41.242	45.9691	1421.39	1	74
2022-09-13	09:18:11	10.8233	48.1442	45.9691	1752.71	1	75
2022-09-13	09:18:12	20.1592	89.6722	56.5269	1511.06	1	76
2022-09-13	09:18:12	5.27497	23.4641	56.5269	1776.17	1	77
2022-09-13	09:18:12	8.45528	37.6108	56.5269	1548.67	1	78
2022-09-13	09:18:12	16.9418	75.3605	56.5269	1851.54	1	79
2022-09-13	09:18:13	3.02647	13.4623	17.2845	1562.14	1	80
2022-09-13	09:18:13	7.60993	33.8505	17.2845	1885.39	1	81
2022-09-13	09:18:13	1.02078	4.54063	17.2845	1566.68	FALSE	81
2022-09-13	09:18:14	1.12938	5.02371	3.82223	1890.41	FALSE	81
2022-09-13	09:18:14	0.874465	3.8898	3.82223	1570.57	FALSE	81
2022-09-13	09:18:14	0.469479	2.08834	3.82223	1892.5	FALSE	81
2022-09-13	09:18:14	0.963778	4.28708	3.82223	1574.85	FALSE	81
2022-09-13	09:18:15	0.673295	2.99495	4.63852	1895.49	FALSE	81
2022-09-13	09:18:15	0.663728	2.95239	4.63852	1577.81	FALSE	81
2022-09-13	09:18:15	1.328	5.90721	4.63852	1901.4	FALSE	81
2022-09-13	09:18:15	1.50612	6.69952	4.63852	1584.5	FALSE	81
2022-09-13	09:18:16	4.98347	22.1675	41.668	1923.57	1	82
2022-09-13	09:18:16	7.46856	33.2216	41.668	1617.73	1	83
2022-09-13	09:18:16	20.0125	89.0196	41.668	2012.59	1	84
2022-09-13	09:18:16	5.00505	22.2635	41.668	1639.99	1	85
2022-09-13	09:18:17	4.91655	21.8698	23.641	2034.46	1	86
2022-09-13	09:18:17	8.4683	37.6687	23.641	1677.66	1	87
2022-09-13	09:18:17	1.61268	7.17352	23.641	2041.63	FALSE	87
2022-09-13	09:18:17	6.26138	27.8519	23.641	1705.51	1	88
2022-09-13	09:18:18	4.79625	21.3347	23.1779	2062.96	1	89
2022-09-13	09:18:18	2.86337	12.7368	23.1779	1718.25	FALSE	89
2022-09-13	09:18:18	7.97227	35.4623	23.1779	2098.43	1	90
2022-09-13	09:18:19	4.13574	18.3966	18.4095	1736.64	1	91
2022-09-13	09:18:19	4.94016	21.9748	18.4095	2120.4	1	92
2022-09-13	09:18:19	5.62754	25.0324	18.4095	1761.68	1	93
2022-09-13	09:18:19	1.85116	8.23433	18.4095	2128.64	FALSE	93
2022-09-13	09:18:20	7.37238	32.7938	19.7605	1794.47	1	94
2022-09-13	09:18:20	1.70729	7.59437	19.7605	2136.23	FALSE	94
2022-09-13	09:18:20	3.3764	15.0189	19.7605	1809.49	1	95
2022-09-13	09:18:20	5.31334	23.6348	19.7605	2159.87	1	96
2022-09-13	09:18:21	2.67263	11.8884	34.2909	1821.38	FALSE	96
2022-09-13	09:18:21	9.18383	40.8515	34.2909	2200.72	1	97
2022-09-13	09:18:21	7.72449	34.3601	34.2909	1855.74	1	98
2022-09-13	09:18:21	11.2548	50.0636	34.2909	2250.78	1	99
2022-09-13	09:18:22	2.76937	12.3187	10.3679	1868.06	FALSE	99
2022-09-13	09:18:22	2.29513	10.2092	10.3679	2260.99	FALSE	99
2022-09-13	09:18:22	1.92795	8.57591	10.3679	1876.63	FALSE	99
2022-09-13	09:18:23	1.26683	5.63511	6.21407	2266.62	FALSE	99
2022-09-13	09:18:23	1.55864	6.93314	6.21407	1883.57	FALSE	99
2022-09-13	09:18:23	1.55762	6.92861	6.21407	2273.55	FALSE	99
2022-09-13	09:18:23	1.20485	5.35941	6.21407	1888.92	FALSE	99
2022-09-13	09:18:24	1.16907	5.20026	4.04543	2278.75	FALSE	99
2022-09-13	09:18:24	1.29523	5.76144	4.04543	1894.69	FALSE	99
2022-09-13	09:18:24	0.701387	3.11991	4.04543	2281.87	FALSE	99
2022-09-13	09:18:24	0.472125	2.10011	4.04543	1896.79	FALSE	99
2022-09-13	09:18:25	0.595433	2.64861	9.2424	2284.52	FALSE	99
2022-09-13	09:18:25	1.02403	4.55509	9.2424	1901.34	FALSE	99
2022-09-13	09:18:25	1.65263	7.35123	9.2424	2291.87	FALSE	99
2022-09-13	09:18:25	5.03904	22.4147	9.2424	1923.76	1	100
2022-09-13	09:18:26	3.31396	14.7412	7.72075	2306.61	1	101
2022-09-13	09:18:26	1.2048	5.35919	7.72075	1929.12	FALSE	101
2022-09-13	09:18:26	0.839198	3.73292	7.72075	2310.35	FALSE	101
2022-09-13	09:18:26	1.58485	7.04973	7.72075	1936.16	FALSE	101
2022-09-13	09:18:27	0.946323	4.20943	5.8396	2314.56	FALSE	101
2022-09-13	09:18:27	1.93324	8.59944	5.8396	1944.76	FALSE	101
2022-09-13	09:18:27	1.05884	4.70993	5.8396	2319.27	FALSE	101
2022-09-13	09:18:28	1.10159	4.90009	4.93264	1949.66	FALSE	101
2022-09-13	09:18:28	0.7393	3.28855	4.93264	2322.56	FALSE	101
2022-09-13	09:18:28	0.735534	3.2718	4.93264	1952.94	FALSE	101
2022-09-13	09:18:28	1.8592	8.27009	4.93264	2330.83	FALSE	101
2022-09-13	09:18:29	3.69696	16.4448	9.04002	1969.38	1	102
2022-09-13	09:18:29	2.25716	10.0403	9.04002	2340.87	FALSE	102
2022-09-13	09:18:29	1.75787	7.81936	9.04002	1977.2	FALSE	102
2022-09-13	09:18:29	0.417163	1.85562	9.04002	2342.72	FALSE	102
2022-09-13	09:18:30	0.872837	3.88255	2.56994	1981.08	FALSE	102
2022-09-13	09:18:30	0.373652	1.66208	2.56994	2344.38	FALSE	102
2022-09-13	09:18:30	0.624237	2.77673	2.56994	1983.86	FALSE	102
2022-09-13	09:18:30	0.440267	1.9584	2.56994	2346.34	FALSE	102
2022-09-13	09:18:31	0.596858	2.65494	3.3447	1986.51	FALSE	102
2022-09-13	09:18:31	0.518639	2.30701	3.3447	2348.65	FALSE	102
2022-09-13	09:18:31	1.14027	5.07215	3.3447	1991.59	FALSE	102
2022-09-13	09:18:32	1.75162	7.79156	6.50784	2356.44	FALSE	102
2022-09-13	09:18:32	1.74917	7.78066	6.50784	1999.37	FALSE	102
2022-09-13	09:18:32	1.47309	6.5526	6.50784	2362.99	FALSE	102
2022-09-13	09:18:32	0.878232	3.90655	6.50784	2003.27	FALSE	102
2022-09-13	09:18:33	1.52475	6.78239	10.3305	2369.78	FALSE	102
2022-09-13	09:18:33	2.23742	9.95249	10.3305	2013.23	FALSE	102
2022-09-13	09:18:33	2.70154	12.017	10.3305	2381.79	FALSE	102
2022-09-13	09:18:33	2.82586	12.57	10.3305	2025.8	FALSE	102
2022-09-13	09:18:34	3.06001	13.6115	14.8229	2395.4	1	103
2022-09-13	09:18:34	3.71014	16.5034	14.8229	2042.3	1	104
2022-09-13	09:18:34	4.57864	20.3667	14.8229	2415.77	1	105
2022-09-13	09:18:34	1.98052	8.80975	14.8229	2051.11	FALSE	105
2022-09-13	09:18:35	1.38561	6.16347	18.284	2421.93	FALSE	105
2022-09-13	09:18:35	6.94545	30.8948	18.284	2082	1	106
2022-09-13	09:18:35	3.02714	13.4653	18.284	2435.4	1	107
2022-09-13	09:18:35	5.08347	22.6123	18.284	2104.62	1	108
2022-09-13	09:18:36	0.679809	3.02393	5.73193	2438.42	FALSE	108
2022-09-13	09:18:36	2.35253	10.4645	5.73193	2115.08	FALSE	108
2022-09-13	09:18:36	0.833448	3.70734	5.73193	2442.13	FALSE	108
2022-09-13	09:18:37	0.889326	3.9559	13.2636	2119.04	FALSE	108
2022-09-13	09:18:37	2.04439	9.09386	13.2636	2451.22	FALSE	108
2022-09-13	09:18:37	2.86444	12.7416	13.2636	2131.78	FALSE	108
2022-09-13	09:18:37	6.12902	27.2631	13.2636	2478.49	1	109
2022-09-13	09:18:38	2.06958	9.20591	18.1157	2140.98	FALSE	109
2022-09-13	09:18:38	5.75126	25.5828	18.1157	2504.07	1	110
2022-09-13	09:18:38	3.8823	17.2692	18.1157	2158.25	1	111
2022-09-13	09:18:38	4.58719	20.4047	18.1157	2524.48	1	112
2022-09-13	09:18:39	6.46759	28.7691	14.909	2187.02	1	113
2022-09-13	09:18:39	1.16439	5.17944	14.909	2529.65	FALSE	113
2022-09-13	09:18:39	5.191	23.0906	14.909	2210.11	1	114
2022-09-13	09:18:39	0.583829	2.59699	14.909	2532.25	FALSE	114
2022-09-13	09:18:40	1.46581	6.52022	3.42347	2216.63	FALSE	114
2022-09-13	09:18:40	0.463931	2.06366	3.42347	2534.32	FALSE	114
2022-09-13	09:18:40	0.379148	1.68653	3.42347	2218.32	FALSE	114
2022-09-13	09:18:41	0.00301552	0.0134136	-1.0816	2534.33	FALSE	114
2022-09-13	09:18:41	-0.0952542	-0.42371	-1.0816	2218.32	FALSE	114
2022-09-13	09:18:41	-0.318206	-1.41544	-1.0816	2534.33	FALSE	114
2022-09-13	09:18:41	-0.562175	-2.50067	-1.0816	2218.32	FALSE	114
2022-09-13	09:18:42	-0.318867	-1.41838	0.811373	2534.33	FALSE	114
2022-09-13	09:18:42	0.126476	0.562591	0.811373	2218.88	FALSE	114
2022-09-13	09:18:42	0.414059	1.84182	0.811373	2536.17	FALSE	114
2022-09-13	09:18:42	0.507951	2.25947	0.811373	2221.14	FALSE	114
2022-09-13	09:18:43	0.47243	2.10146	2.10203	2538.27	FALSE	114
2022-09-13	09:18:43	0.46729	2.0786	2.10203	2223.22	FALSE	114
2022-09-13	09:18:43	0.439606	1.95546	2.10203	2540.23	FALSE	114
2022-09-13	09:18:43	0.510903	2.2726	2.10203	2225.49	FALSE	114
2022-09-13	09:18:44	0.471921	2.0992	2.16541	2542.33	FALSE	114
2022-09-13	09:18:44	0.485305	2.15873	2.16541	2227.65	FALSE	114
2022-09-13	09:18:44	0.506577	2.25336	2.16541	2544.58	FALSE	114
2022-09-13	09:18:44	0.483422	2.15036	2.16541	2229.8	FALSE	114
2022-09-13	09:18:45	0.50729	2.25653	2.73447	2546.84	FALSE	114
2022-09-13	09:18:45	0.570293	2.53678	2.73447	2232.34	FALSE	114
2022-09-13	09:18:45	0.766629	3.41012	2.73447	2550.25	FALSE	114
2022-09-13	09:18:46	1.02235	4.54762	4.08493	2236.89	FALSE	114
2022-09-13	09:18:46	0.87584	3.89591	4.08493	2554.14	FALSE	114
2022-09-13	09:18:46	0.854873	3.80265	4.08493	2240.69	FALSE	114
2022-09-13	09:18:46	0.920267	4.09353	4.08493	2558.24	FALSE	114
2022-09-13	09:18:47	1.23986	5.51515	5.01878	2246.2	FALSE	114
2022-09-13	09:18:47	0.956145	4.25312	5.01878	2562.49	FALSE	114
2022-09-13	09:18:47	1.09279	4.86095	5.01878	2251.07	FALSE	114
2022-09-13	09:18:47	1.22429	5.44589	5.01878	2567.94	FALSE	114
2022-09-13	09:18:48	1.72846	7.68854	10.147	2258.75	FALSE	114
2022-09-13	09:18:48	1.94785	8.66443	10.147	2576.6	FALSE	114
2022-09-13	09:18:48	2.18673	9.72701	10.147	2268.48	FALSE	114
2022-09-13	09:18:48	3.26159	14.5082	10.147	2591.11	1	115
2022-09-13	09:18:49	3.5822	15.9343	18.0441	2284.42	1	116
2022-09-13	09:18:49	3.48958	15.5223	18.0441	2606.63	1	117
2022-09-13	09:18:49	2.90551	12.9243	18.0441	2297.34	FALSE	117
2022-09-13	09:18:49	6.24871	27.7955	18.0441	2634.43	1	118
2022-09-13	09:18:50	1.39935	6.22459	12.8844	2303.56	FALSE	118
2022-09-13	09:18:50	4.79507	21.3294	12.8844	2655.76	1	119
2022-09-13	09:18:50	2.49518	11.0991	12.8844	2314.66	FALSE	119
2022-09-13	09:18:51	4.51879	20.1005	19.7957	2675.86	1	120
2022-09-13	09:18:51	3.76561	16.7502	19.7957	2331.41	1	121
2022-09-13	09:18:51	1.83116	8.14537	19.7957	2684	FALSE	121
2022-09-13	09:18:51	7.6855	34.1866	19.7957	2365.6	1	122
2022-09-13	09:18:52	1.81559	8.07611	12.2841	2692.08	FALSE	122
2022-09-13	09:18:52	5.37212	23.8963	12.2841	2389.5	1	123
2022-09-13	09:18:52	2.02184	8.99355	12.2841	2701.07	FALSE	123
2022-09-13	09:18:52	1.83681	8.1705	12.2841	2397.67	FALSE	123
2022-09-13	09:18:53	2.45477	10.9193	6.15006	2711.99	FALSE	123
2022-09-13	09:18:53	0.281794	1.25348	6.15006	2398.92	FALSE	123
2022-09-13	09:18:53	2.03009	9.03025	6.15006	2721.02	FALSE	123
2022-09-13	09:18:53	0.763728	3.39721	6.15006	2402.32	FALSE	123
2022-09-13	09:18:54	2.24312	9.97785	10.2716	2731	FALSE	123
2022-09-13	09:18:54	2.32866	10.3583	10.2716	2412.68	FALSE	123
2022-09-13	09:18:54	2.35569	10.4786	10.2716	2741.48	FALSE	123
2022-09-13	09:18:55	2.17212	9.66202	7.58831	2422.34	FALSE	123
2022-09-13	09:18:55	1.54337	6.86522	7.58831	2748.34	FALSE	123
2022-09-13	09:18:55	2.06541	9.18736	7.58831	2431.53	FALSE	123
2022-09-13	09:18:55	1.04281	4.63863	7.58831	2752.98	FALSE	123
2022-09-13	09:18:56	1.52352	6.77692	4.52766	2438.3	FALSE	123
2022-09-13	09:18:56	0.520165	2.3138	4.52766	2755.29	FALSE	123
2022-09-13	09:18:56	1.62307	7.21974	4.52766	2445.52	FALSE	123
2022-09-13	09:18:56	0.404695	1.80016	4.52766	2757.09	FALSE	123
2022-09-13	09:18:57	1.59696	7.1036	10.3683	2452.63	FALSE	123
2022-09-13	09:18:57	2.11513	9.40852	10.3683	2766.5	FALSE	123
2022-09-13	09:18:57	2.26999	10.0974	10.3683	2462.72	FALSE	123
2022-09-13	09:18:57	3.34149	14.8636	10.3683	2781.37	1	124
2022-09-13	09:18:58	2.12062	9.43294	22.7568	2472.16	FALSE	124
2022-09-13	09:18:58	8.39629	37.3484	22.7568	2818.71	1	125
2022-09-13	09:18:58	1.37818	6.13042	22.7568	2478.29	FALSE	125
2022-09-13	09:18:58	8.56876	38.1156	22.7568	2856.83	1	126
2022-09-13	09:18:59	2.37396	10.5598	15.7923	2488.85	FALSE	126
2022-09-13	09:18:59	4.57335	20.3432	15.7923	2877.17	1	127
2022-09-13	09:18:59	3.70352	16.474	15.7923	2505.32	1	128
2022-09-13	09:19:00	2.41268	10.7321	15.0373	2887.91	FALSE	128
2022-09-13	09:19:00	4.91457	21.861	15.0373	2527.18	1	129
2022-09-13	09:19:00	2.23034	9.921	15.0373	2897.83	FALSE	129
2022-09-13	09:19:00	3.96459	17.6353	15.0373	2544.82	1	130
2022-09-13	09:19:01	1.39238	6.19358	5.0696	2904.02	FALSE	130
2022-09-13	09:19:01	1.68073	7.47622	5.0696	2552.29	FALSE	130
2022-09-13	09:19:01	0.903575	4.01928	5.0696	2908.04	FALSE	130
2022-09-13	09:19:01	0.582099	2.58929	5.0696	2554.88	FALSE	130
2022-09-13	09:19:02	0.368817	1.64057	2.0919	2909.68	FALSE	130
2022-09-13	09:19:02	0.482099	2.14447	2.0919	2557.03	FALSE	130
2022-09-13	09:19:02	0.467239	2.07837	2.0919	2911.76	FALSE	130
2022-09-13	09:19:02	0.562964	2.50418	2.0919	2559.53	FALSE	130
2022-09-13	09:19:03	0.436247	1.94051	0.403	2913.7	FALSE	130
2022-09-13	09:19:03	0.100471	0.446915	0.403	2559.98	FALSE	130
2022-09-13	09:19:03	-0.264923	-1.17843	0.403	2913.7	FALSE	130
2022-09-13	09:19:04	-0.117137	-0.521049	1.52987	2559.98	FALSE	130
2022-09-13	09:19:04	0.48042	2.137	1.52987	2915.84	FALSE	130
2022-09-13	09:19:04	0.569885	2.53496	1.52987	2562.51	FALSE	130
2022-09-13	09:19:04	0.442557	1.96858	1.52987	2917.8	FALSE	130
2022-09-13	09:19:05	0.496145	2.20695	2.34481	2564.72	FALSE	130
2022-09-13	09:19:05	0.518282	2.30542	2.34481	2920.11	FALSE	130
2022-09-13	09:19:05	0.546679	2.43174	2.34481	2567.15	FALSE	130
2022-09-13	09:19:05	0.547443	2.43514	2.34481	2922.55	FALSE	130
2022-09-13	09:19:06	0.528664	2.3516	2.29133	2569.5	FALSE	130
2022-09-13	09:19:06	0.511514	2.27532	2.29133	2924.82	FALSE	130
2022-09-13	09:19:06	0.517366	2.30135	2.29133	2571.8	FALSE	130
2022-09-13	09:19:06	0.502913	2.23706	2.29133	2927.06	FALSE	130
2022-09-13	09:19:07	0.48729	2.16756	2.1417	2573.97	FALSE	130
2022-09-13	09:19:07	0.475026	2.11301	2.1417	2929.17	FALSE	130
2022-09-13	09:19:07	0.462812	2.05868	2.1417	2576.03	FALSE	130
2022-09-13	09:19:07	0.500776	2.22755	2.1417	2931.4	FALSE	130
2022-09-13	09:19:08	0.389479	1.73248	1.79028	2577.76	FALSE	130
2022-09-13	09:19:08	0.351412	1.56315	1.79028	2932.96	FALSE	130
2022-09-13	09:19:08	0.466527	2.07521	1.79028	2579.84	FALSE	130
2022-09-13	09:19:09	0.394161	1.75331	1.83893	2934.71	FALSE	130
2022-09-13	09:19:09	0.531616	2.36473	1.83893	2582.2	FALSE	130
2022-09-13	09:19:09	0.40271	1.79133	1.83893	2936.51	FALSE	130
2022-09-13	09:19:09	0.325153	1.44635	1.83893	2583.65	FALSE	130
2022-09-13	09:19:10	0.347697	1.54663	0.457045	2938.05	FALSE	130
2022-09-13	09:19:10	0.254669	1.13282	0.457045	2584.78	FALSE	130
2022-09-13	09:19:10	0.11869	0.527957	0.457045	2938.58	FALSE	130
2022-09-13	09:19:10	-0.310063	-1.37922	0.457045	2584.78	FALSE	130
2022-09-13	09:19:11	-0.55958	-2.48912	-0.424219	2938.58	FALSE	130
2022-09-13	09:19:11	-0.336374	-1.49626	-0.424219	2584.78	FALSE	130
2022-09-13	09:19:11	-0.212048	-0.943232	-0.424219	2938.58	FALSE	130
2022-09-13	09:19:11	0.726527	3.23174	-0.424219	2588.01	FALSE	130
2022-09-13	09:19:12	3.56836	15.8728	9.72506	2954.45	1	131
2022-09-13	09:19:12	1.04113	4.63115	9.72506	2592.65	FALSE	131
2022-09-13	09:19:12	1.94938	8.67123	9.72506	2963.12	FALSE	131
2022-09-13	09:19:13	2.73355	12.1594	13.0409	2604.8	FALSE	131
2022-09-13	09:19:13	3.12424	13.8972	13.0409	2977.02	1	132
2022-09-13	09:19:13	3.83416	17.0551	13.0409	2621.86	1	133
2022-09-13	09:19:13	2.03497	9.05195	13.0409	2986.07	FALSE	133
2022-09-13	09:19:14	1.97192	8.77149	7.26771	2630.63	FALSE	133
2022-09-13	09:19:14	0.973651	4.33099	7.26771	2990.4	FALSE	133
2022-09-13	09:19:14	1.07335	4.77448	7.26771	2635.41	FALSE	133
2022-09-13	09:19:14	2.5165	11.1939	7.26771	3001.6	FALSE	133
2022-09-13	09:19:15	1.88556	8.38735	22.9045	2643.79	FALSE	133
2022-09-13	09:19:15	5.02159	22.337	22.9045	3023.94	1	134
2022-09-13	09:19:15	6.51634	28.986	22.9045	2672.78	1	135
2022-09-13	09:19:15	7.17314	31.9076	22.9045	3055.84	1	136
2022-09-13	09:19:16	4.20999	18.7269	21.1849	2691.51	1	137
2022-09-13	09:19:16	6.64581	29.5619	21.1849	3085.4	1	138
2022-09-13	09:19:16	3.56592	15.8619	21.1849	2707.37	1	139
2022-09-13	09:19:16	4.62861	20.589	21.1849	3105.99	1	140
2022-09-13	09:19:17	4.545	20.2171	14.5567	2727.58	1	141
2022-09-13	09:19:17	1.75431	7.80352	14.5567	3113.8	FALSE	141
2022-09-13	09:19:17	3.51818	15.6496	14.5567	2743.23	1	142
2022-09-13	09:19:18	1.21579	5.40808	8.5912	3119.21	FALSE	142
2022-09-13	09:19:18	1.06495	4.73711	8.5912	2747.97	FALSE	142
2022-09-13	09:19:18	2.58729	11.5088	8.5912	3130.71	FALSE	142
2022-09-13	09:19:18	2.85752	12.7108	8.5912	2760.68	FALSE	142
2022-09-13	09:19:19	5.18683	23.0721	23.5726	3153.79	1	143
2022-09-13	09:19:19	4.21177	18.7348	23.5726	2779.42	1	144
2022-09-13	09:19:19	6.90586	30.7186	23.5726	3184.51	1	145
2022-09-13	09:19:19	4.89294	21.7648	23.5726	2801.18	1	146
2022-09-13	09:19:20	5.50026	24.4663	28.5086	3208.97	1	147
2022-09-13	09:19:20	6.26713	27.8774	28.5086	2829.06	1	148
2022-09-13	09:19:20	3.44861	15.3401	28.5086	3224.31	1	149
2022-09-13	09:19:20	10.4201	46.3507	28.5086	2875.41	1	150
2022-09-13	09:19:21	4.41228	19.6267	34.33	3243.94	1	151
2022-09-13	09:19:21	8.47507	37.6988	34.33	2913.11	1	152
2022-09-13	09:19:21	10.4768	46.6029	34.33	3290.54	1	153
2022-09-13	09:19:21	7.50673	33.3914	34.33	2946.5	1	154
2022-09-13	09:19:22	16.4624	73.228	57.7679	3363.77	1	155
2022-09-13	09:19:22	12.5445	55.8004	57.7679	3002.3	1	156
2022-09-13	09:19:22	9.95354	44.2753	57.7679	3408.04	1	157
2022-09-13	09:19:23	11.3576	50.5209	23.5476	3052.82	1	158
2022-09-13	09:19:23	5.76291	25.6346	23.5476	3433.68	1	159
2022-09-13	09:19:23	3.15243	14.0226	23.5476	3066.84	1	160
2022-09-13	09:19:23	0.902048	4.01249	23.5476	3437.69	FALSE	160
2022-09-13	09:19:24	2.10846	9.37885	11.5296	3076.22	FALSE	160
2022-09-13	09:19:24	1.99762	8.88581	11.5296	3446.58	FALSE	160
2022-09-13	09:19:24	2.79533	12.4342	11.5296	3088.66	FALSE	160
2022-09-13	09:19:24	3.46647	15.4196	11.5296	3462	1	161
2022-09-13	09:19:25	7.17161	31.9008	30.533	3120.56	1	162
2022-09-13	09:19:25	5.3595	23.8401	30.533	3485.84	1	163
2022-09-13	09:19:25	10.5563	46.9565	30.533	3167.51	1	164
2022-09-13	09:19:25	4.36907	19.4345	30.533	3505.27	1	165
2022-09-13	09:19:26	5.96235	26.5217	23.0223	3194.04	1	166
2022-09-13	09:19:26	6.22143	27.6742	23.0223	3532.95	1	167
2022-09-13	09:19:26	3.34312	14.8709	23.0223	3208.91	1	168
2022-09-13	09:19:27	10.0581	44.7404	32.2979	3577.69	1	169
2022-09-13	09:19:27	3.38953	15.0773	32.2979	3223.98	1	170
2022-09-13	09:19:27	4.87533	21.6864	32.2979	3599.37	1	171
2022-09-13	09:19:27	10.7206	47.6874	32.2979	3271.67	1	172
2022-09-13	09:19:28	2.59223	11.5308	25.775	3610.9	FALSE	172
2022-09-13	09:19:28	10.3297	45.9486	25.775	3317.62	1	173
2022-09-13	09:19:28	6.09986	27.1334	25.775	3638.04	1	174
2022-09-13	09:19:28	4.15609	18.4871	25.775	3336.11	1	175
2022-09-13	09:19:29	8.84021	39.323	37.7773	3677.36	1	176
2022-09-13	09:19:29	6.19039	27.5361	37.7773	3363.64	1	177
2022-09-13	09:19:29	7.28047	32.385	37.7773	3709.74	1	178
2022-09-13	09:19:29	11.6598	51.8651	37.7773	3415.51	1	179
2022-09-13	09:19:30	5.91248	26.2999	28.5332	3736.04	1	180
2022-09-13	09:19:30	10.6847	47.5277	28.5332	3463.04	1	181
2022-09-13	09:19:30	5.08154	22.6037	28.5332	3758.65	1	182
2022-09-13	09:19:30	3.97945	17.7014	28.5332	3480.74	1	183
2022-09-13	09:19:31	14.3567	63.8615	30.8565	3822.51	1	184
2022-09-13	09:19:31	2.17731	9.68511	30.8565	3490.42	FALSE	184
2022-09-13	09:19:31	4.27655	19.0229	30.8565	3841.53	1	185
2022-09-13	09:19:32	2.79711	12.4421	9.44134	3502.87	FALSE	185
2022-09-13	09:19:32	1.28302	5.70713	9.44134	3847.24	FALSE	185
2022-09-13	09:19:32	1.81696	8.0822	9.44134	3510.95	FALSE	185
2022-09-13	09:19:32	2.59294	11.5339	9.44134	3858.77	FALSE	185
2022-09-13	09:19:33	1.5076	6.70611	5.85487	3517.65	FALSE	185
2022-09-13	09:19:33	1.86693	8.30448	5.85487	3867.08	FALSE	185
2022-09-13	09:19:33	0.928969	4.13224	5.85487	3521.79	FALSE	185
2022-09-13	09:19:33	0.961438	4.27667	5.85487	3871.35	FALSE	185
2022-09-13	09:19:34	0.415178	1.84679	2.41589	3523.63	FALSE	185
2022-09-13	09:19:34	0.741132	3.2967	2.41589	3874.65	FALSE	185
2022-09-13	09:19:34	0.730343	3.24871	2.41589	3526.88	FALSE	185
2022-09-13	09:19:34	0.285814	1.27136	2.41589	3875.92	FALSE	185
2022-09-13	09:19:35	0.300827	1.33814	1.26359	3528.22	FALSE	185
2022-09-13	09:19:35	0.30271	1.34651	1.26359	3877.27	FALSE	185
2022-09-13	09:19:35	0.248664	1.10611	1.26359	3529.33	FALSE	185
2022-09-13	09:19:36	0.341947	1.52105	1.32009	3878.79	FALSE	185
2022-09-13	09:19:36	0.219351	0.975717	1.32009	3530.3	FALSE	185
2022-09-13	09:19:36	0.349428	1.55433	1.32009	3880.34	FALSE	185
2022-09-13	09:19:36	0.276349	1.22926	1.32009	3531.53	FALSE	185
2022-09-13	09:19:37	0.324746	1.44454	1.52954	3881.79	FALSE	185
2022-09-13	09:19:37	0.303219	1.34878	1.52954	3532.88	FALSE	185
2022-09-13	09:19:37	0.310903	1.38296	1.52954	3883.17	FALSE	185
2022-09-13	09:19:37	0.436552	1.94187	1.52954	3534.82	FALSE	185
2022-09-13	09:19:38	0.138842	0.617597	0.134352	3883.79	FALSE	185
2022-09-13	09:19:38	0.114059	0.507357	0.134352	3535.33	FALSE	185
2022-09-13	09:19:38	0.0913615	0.406394	0.134352	3884.2	FALSE	185
2022-09-13	09:19:38	-0.223448	-0.993941	0.134352	3535.33	FALSE	185
2022-09-13	09:19:39	-0.498206	-2.21612	20.2506	3884.2	FALSE	185
2022-09-13	09:19:39	1.31014	5.82776	20.2506	3541.16	FALSE	185
2022-09-13	09:19:39	5.35701	23.8291	20.2506	3908.03	1	186
2022-09-13	09:19:39	12.0412	53.5617	20.2506	3594.72	1	187
2022-09-13	09:19:40	14.1445	62.9176	57.7824	3970.94	1	188
2022-09-13	09:19:40	15.2313	67.7519	57.7824	3662.47	1	189
2022-09-13	09:19:40	9.59436	42.6776	57.7824	4013.62	1	190
2022-09-13	09:19:41	3.44062	15.3046	5.36772	3677.77	1	191
2022-09-13	09:19:41	0.616959	2.74436	5.36772	4016.36	FALSE	191
2022-09-13	09:19:41	0.331158	1.47306	5.36772	3679.25	FALSE	191
2022-09-13	09:19:41	0.43813	1.94889	5.36772	4018.31	FALSE	191
2022-09-13	09:19:42	0.302914	1.34742	1.5494	3680.59	FALSE	191
2022-09-13	09:19:42	0.398639	1.77323	1.5494	4020.09	FALSE	191
2022-09-13	09:19:42	0.411819	1.83185	1.5494	3682.43	FALSE	191
2022-09-13	09:19:42	0.279911	1.2451	1.5494	4021.33	FALSE	191
2022-09-13	09:19:43	0.52388	2.33032	2.03327	3684.76	FALSE	191
2022-09-13	09:19:43	0.436145	1.94006	2.03327	4023.27	FALSE	191
2022-09-13	09:19:43	0.538028	2.39326	2.03327	3687.15	FALSE	191
2022-09-13	09:19:43	0.330344	1.46944	2.03327	4024.74	FALSE	191
2022-09-13	09:19:44	0.579351	2.57707	2.57677	3689.73	FALSE	191
2022-09-13	09:19:44	0.513906	2.28596	2.57677	4027.03	FALSE	191
2022-09-13	09:19:44	0.644593	2.86728	2.57677	3692.59	FALSE	191
2022-09-13	09:19:45	0.715331	3.18194	7.84984	4030.21	FALSE	191
2022-09-13	09:19:45	1.39508	6.20559	7.84984	3698.8	FALSE	191
2022-09-13	09:19:45	1.24877	5.55478	7.84984	4035.76	FALSE	191
2022-09-13	09:19:45	3.69971	16.4571	7.84984	3715.26	1	192
2022-09-13	09:19:46	4.0853	18.1722	16.1379	4053.94	1	193
2022-09-13	09:19:46	4.74474	21.1056	16.1379	3736.36	1	194
2022-09-13	09:19:46	2.36235	10.5082	16.1379	4064.44	FALSE	194
2022-09-13	09:19:46	3.31945	14.7656	16.1379	3751.13	1	195
2022-09-13	09:19:47	3.34943	14.8989	21.9676	4079.34	1	196
2022-09-13	09:19:47	5.64739	25.1207	21.9676	3776.25	1	197
2022-09-13	09:19:47	5.51237	24.5201	21.9676	4103.86	1	198
2022-09-13	09:19:47	5.245	23.3308	21.9676	3799.58	1	199
2022-09-13	09:19:48	2.02663	9.01486	11.02	4112.88	FALSE	199
2022-09-13	09:19:48	3.67334	16.3398	11.02	3815.92	1	200
2022-09-13	09:19:48	1.12627	5.00987	11.02	4117.89	FALSE	200
2022-09-13	09:19:48	3.08337	13.7154	11.02	3829.64	1	201
2022-09-13	09:19:49	1.50602	6.69908	7.95836	4124.59	FALSE	201
2022-09-13	09:19:49	2.32128	10.3255	7.95836	3839.96	FALSE	201
2022-09-13	09:19:49	1.54006	6.85049	7.95836	4131.44	FALSE	201
2022-09-13	09:19:50	1.7022	7.57173	5.0555	3847.53	FALSE	201
2022-09-13	09:19:50	0.977316	4.3473	5.0555	4135.79	FALSE	201
2022-09-13	09:19:50	1.24317	5.52987	5.0555	3853.06	FALSE	201
2022-09-13	09:19:50	0.623422	2.77311	5.0555	4138.56	FALSE	201
2022-09-13	09:19:51	0.952837	4.23841	3.90061	3857.3	FALSE	201
2022-09-13	09:19:51	0.877265	3.90225	3.90061	4142.46	FALSE	201
2022-09-13	09:19:51	0.851158	3.78612	3.90061	3861.09	FALSE	201
2022-09-13	09:19:51	0.826323	3.67565	3.90061	4146.14	FALSE	201
2022-09-13	09:19:52	1.57024	6.98474	8.85711	3868.07	FALSE	201
2022-09-13	09:19:52	1.48663	6.61283	8.85711	4152.75	FALSE	201
2022-09-13	09:19:52	1.82128	8.10142	8.85711	3876.17	FALSE	201
2022-09-13	09:19:52	3.08652	13.7295	8.85711	4166.48	1	202
2022-09-13	09:19:53	1.36225	6.05956	4.55341	3882.23	FALSE	202
2022-09-13	09:19:53	1.83518	8.16325	4.55341	4174.64	FALSE	202
2022-09-13	09:19:53	0.293448	1.30532	4.55341	3883.54	FALSE	202
2022-09-13	09:19:53	0.603728	2.6855	4.55341	4177.33	FALSE	202
2022-09-13	09:19:54	0.456807	2.03197	1.93938	3885.57	FALSE	202
2022-09-13	09:19:54	0.417926	1.85902	1.93938	4179.19	FALSE	202
2022-09-13	09:19:54	0.433244	1.92716	1.93938	3887.5	FALSE	202
2022-09-13	09:19:55	0.763728	3.39721	7.00183	4182.58	FALSE	202
2022-09-13	09:19:55	1.00459	4.46862	7.00183	3891.97	FALSE	202
2022-09-13	09:19:55	1.80785	8.04168	7.00183	4190.63	FALSE	202
2022-09-13	09:19:55	2.72016	12.0998	7.00183	3904.07	FALSE	202
2022-09-13	09:19:56	1.50281	6.6848	6.94348	4197.31	FALSE	202
2022-09-13	09:19:56	1.93238	8.59561	6.94348	3912.66	FALSE	202
2022-09-13	09:19:56	1.45197	6.45865	6.94348	4203.77	FALSE	202
2022-09-13	09:19:56	1.3567	6.03487	6.94348	3918.7	FALSE	202
2022-09-13	09:19:57	-0.0595799	-0.265023	-0.20628	4203.77	FALSE	202
2022-09-13	09:19:57	-0.0293509	-0.130559	-0.20628	3918.7	FALSE	202
2022-09-13	09:19:57	-0.019987	-0.0889062	-0.20628	4203.77	FALSE	202
2022-09-13	09:19:57	-0.0765773	-0.340631	-0.20628	3918.7	FALSE	202
2022-09-13	09:19:58	-0.312201	-1.38873	-1.73448	4203.77	FALSE	202
2022-09-13	09:19:58	-0.397646	-1.76881	-1.73448	3918.7	FALSE	202
2022-09-13	09:19:58	-0.459936	-2.04589	-1.73448	4203.77	FALSE	202
2022-09-13	09:19:59	-0.459681	-2.04475	-0.306336	3918.7	FALSE	202
2022-09-13	09:19:59	-0.250369	-1.11369	-0.306336	4203.77	FALSE	202
2022-09-13	09:19:59	0.0653565	0.290719	-0.306336	3918.99	FALSE	202
2022-09-13	09:19:59	0.369224	1.64238	-0.306336	4205.41	FALSE	202
2022-09-13	09:20:00	0.429071	1.90859	6.13518	3920.9	FALSE	202
2022-09-13	09:20:00	1.24877	5.55478	6.13518	4210.97	FALSE	202
2022-09-13	09:20:00	1.70505	7.5844	6.13518	3928.48	FALSE	202
2022-09-13	09:20:00	2.13411	9.49295	6.13518	4220.46	FALSE	202
2022-09-13	09:20:01	1.55894	6.93448	7.46249	3935.41	FALSE	202
2022-09-13	09:20:01	1.68454	7.49317	7.46249	4227.95	FALSE	202
2022-09-13	09:20:01	2.48647	11.0603	7.46249	3946.47	FALSE	202
2022-09-13	09:20:01	0.980623	4.36201	7.46249	4232.31	FALSE	202
2022-09-13	09:20:02	1.78378	7.93461	10.851	3954.41	FALSE	202
2022-09-13	09:20:02	1.64704	7.32636	10.851	4239.64	FALSE	202
2022-09-13	09:20:02	3.16831	14.0933	10.851	3968.5	1	203
2022-09-13	09:20:02	3.15854	14.0498	10.851	4253.69	1	204
2022-09-13	09:20:03	2.6591	11.8282	8.89729	3980.33	FALSE	204
2022-09-13	09:20:03	2.30551	10.2554	8.89729	4263.95	FALSE	204
2022-09-13	09:20:03	1.03599	4.60829	8.89729	3984.94	FALSE	204
2022-09-13	09:20:04	1.88683	8.393	4.43015	4272.34	FALSE	204
2022-09-13	09:20:04	0.534364	2.37696	4.43015	3987.32	FALSE	204
2022-09-13	09:20:04	1.18088	5.25279	4.43015	4277.59	FALSE	204
2022-09-13	09:20:04	0.381692	1.69784	4.43015	3989.01	FALSE	204
2022-09-13	09:20:05	0.656247	2.91912	2.08375	4280.51	FALSE	204
2022-09-13	09:20:05	0.547035	2.43332	2.08375	3991.45	FALSE	204
2022-09-13	09:20:05	0.417112	1.8554	2.08375	4282.37	FALSE	204
2022-09-13	09:20:05	0.253397	1.12716	2.08375	3992.57	FALSE	204
2022-09-13	09:20:06	0.44327	1.97175	2.81144	4284.34	FALSE	204
2022-09-13	09:20:06	0.477875	2.12568	2.81144	3994.7	FALSE	204
2022-09-13	09:20:06	0.974974	4.33688	2.81144	4288.67	FALSE	204
2022-09-13	09:20:07	1.64749	7.32837	5.80665	4002.03	FALSE	204
2022-09-13	09:20:07	2.98983	13.2994	5.80665	4301.97	FALSE	204
2022-09-13	09:20:07	0.494516	2.19971	5.80665	4004.23	FALSE	204
2022-09-13	09:20:07	0.089733	0.39915	5.80665	4302.37	FALSE	204
2022-09-13	09:20:08	0.355585	1.58171	3.94237	4005.81	FALSE	204
2022-09-13	09:20:08	0.360776	1.6048	3.94237	4303.98	FALSE	204
2022-09-13	09:20:08	0.819657	3.646	3.94237	4009.46	FALSE	204
2022-09-13	09:20:08	2.00912	8.93697	3.94237	4312.91	FALSE	204
2022-09-13	09:20:09	2.38938	10.6284	3.22104	4020.08	FALSE	204
2022-09-13	09:20:09	0.662201	2.9456	3.22104	4315.86	FALSE	204
2022-09-13	09:20:09	-0.171692	-0.76372	3.22104	4020.08	FALSE	204
2022-09-13	09:20:09	0.0166033	0.0738548	3.22104	4315.93	FALSE	204
2022-09-13	09:20:10	-0.153727	-0.683808	-1.74572	4020.08	FALSE	204
2022-09-13	09:20:10	-0.386094	-1.71742	-1.74572	4315.93	FALSE	204
2022-09-13	09:20:10	-0.47902	-2.13078	-1.74572	4020.08	FALSE	204
2022-09-13	09:20:10	-0.550979	-2.45086	-1.74572	4315.93	FALSE	204
2022-09-13	09:20:11	-0.324669	-1.44419	0.213356	4020.08	FALSE	204
2022-09-13	09:20:11	-0.0182567	-0.0812095	0.213356	4315.93	FALSE	204
2022-09-13	09:20:11	0.260064	1.15682	0.213356	4021.24	FALSE	204
2022-09-13	09:20:11	0.27472	1.22201	0.213356	4317.16	FALSE	204
2022-09-13	09:20:12	0.117519	0.522748	0.780209	4021.76	FALSE	204
2022-09-13	09:20:12	0.0802674	0.357045	0.780209	4317.51	FALSE	204
2022-09-13	09:20:12	0.32841	1.46083	0.780209	4023.22	FALSE	204
2022-09-13	09:20:13	2.50164	11.1278	12.2821	4328.64	FALSE	204
2022-09-13	09:20:13	2.68765	11.9552	12.2821	4035.18	FALSE	204
2022-09-13	09:20:13	2.01401	8.95872	12.2821	4337.6	FALSE	204
2022-09-13	09:20:13	3.84123	17.0866	12.2821	4052.27	1	205
2022-09-13	09:20:14	2.38347	10.6022	7.47246	4348.2	FALSE	205
2022-09-13	09:20:14	1.72083	7.6546	7.47246	4059.92	FALSE	205
2022-09-13	09:20:14	1.145	5.09319	7.47246	4353.3	FALSE	205
2022-09-13	09:20:14	1.47024	6.53992	7.47246	4066.46	FALSE	205
2022-09-13	09:20:15	1.0223	4.54739	5.13308	4357.84	FALSE	205
2022-09-13	09:20:15	0.966781	4.30044	5.13308	4070.76	FALSE	205
2022-09-13	09:20:15	1.60098	7.12148	5.13308	4364.96	FALSE	205
2022-09-13	09:20:15	1.02581	4.56301	5.13308	4075.32	FALSE	205
2022-09-13	09:20:16	1.88042	8.36448	9.04141	4373.33	FALSE	205
2022-09-13	09:20:16	1.43589	6.38713	9.04141	4081.71	FALSE	205
2022-09-13	09:20:16	2.78149	12.3726	9.04141	4385.7	FALSE	205
2022-09-13	09:20:17	1.58495	7.05017	12.3915	4088.76	FALSE	205
2022-09-13	09:20:17	2.11426	9.40465	12.3915	4395.11	FALSE	205
2022-09-13	09:20:17	3.62668	16.1322	12.3915	4104.89	1	206
2022-09-13	09:20:17	3.81706	16.979	12.3915	4412.08	1	207
2022-09-13	09:20:18	3.72067	16.5503	13.9011	4121.44	1	208
2022-09-13	09:20:18	5.25248	23.3641	13.9011	4435.45	1	209
2022-09-13	09:20:18	1.67696	7.45945	13.9011	4128.9	FALSE	209
2022-09-13	09:20:18	1.85034	8.23068	13.9011	4443.68	FALSE	209
2022-09-13	09:20:19	1.0591	4.71109	5.8782	4133.61	FALSE	209
2022-09-13	09:20:19	1.22704	5.45812	5.8782	4449.14	FALSE	209
2022-09-13	09:20:19	1.36581	6.0754	5.8782	4139.69	FALSE	209
2022-09-13	09:20:19	1.63396	7.26818	5.8782	4456.41	FALSE	209
2022-09-13	09:20:20	0.904339	4.02268	5.25199	4143.71	FALSE	209
2022-09-13	09:20:20	1.18561	5.27383	5.25199	4461.68	FALSE	209
2022-09-13	09:20:20	1.04576	4.65175	5.25199	4148.36	FALSE	209
2022-09-13	09:20:20	1.58709	7.05969	5.25199	4468.74	FALSE	209
2022-09-13	09:20:21	1.13401	5.0443	6.8887	4153.41	FALSE	209
2022-09-13	09:20:21	1.41747	6.30519	6.8887	4475.04	FALSE	209
2022-09-13	09:20:21	2.09447	9.31662	6.8887	4162.73	FALSE	209
2022-09-13	09:20:22	0.903168	4.01747	3.49087	4479.06	FALSE	209
2022-09-13	09:20:22	0.863931	3.84294	3.49087	4166.57	FALSE	209
2022-09-13	09:20:22	0.465763	2.07181	3.49087	4481.13	FALSE	209
2022-09-13	09:20:22	0.906272	4.03128	3.49087	4170.6	FALSE	209
2022-09-13	09:20:23	0.421641	1.87554	8.50246	4483.01	FALSE	209
2022-09-13	09:20:23	1.55284	6.90734	8.50246	4177.51	FALSE	209
2022-09-13	09:20:23	1.73635	7.72363	8.50246	4490.73	FALSE	209
2022-09-13	09:20:23	3.93492	17.5033	8.50246	4195.01	1	210
2022-09-13	09:20:24	3.00683	13.375	32.5006	4504.11	1	211
2022-09-13	09:20:24	7.46347	33.199	32.5006	4228.21	1	212
2022-09-13	09:20:24	5.02683	22.3603	32.5006	4526.47	1	213
2022-09-13	09:20:24	13.7287	61.068	32.5006	4289.28	1	214
2022-09-13	09:20:25	3.75772	16.7151	32.5163	4543.18	1	215
2022-09-13	09:20:25	6.32317	28.1267	32.5163	4317.4	1	216
2022-09-13	09:20:25	11.8491	52.7072	32.5163	4595.89	1	217
2022-09-13	09:20:26	2.22139	9.88119	22.0319	4327.28	FALSE	217
2022-09-13	09:20:26	7.69182	34.2148	22.0319	4630.11	1	218
2022-09-13	09:20:26	3.92653	17.466	22.0319	4344.75	1	219
2022-09-13	09:20:26	5.97222	26.5656	22.0319	4656.67	1	220
2022-09-13	09:20:27	14.4216	64.1502	37.2997	4408.9	1	221
2022-09-13	09:20:27	6.49863	28.9072	37.2997	4685.58	1	222
2022-09-13	09:20:27	11.5874	51.5431	37.2997	4460.44	1	223
2022-09-13	09:20:27	1.0338	4.59855	37.2997	4690.18	FALSE	223
2022-09-13	09:20:28	0.284135	1.26389	1.94844	4461.71	FALSE	223
2022-09-13	09:20:28	0.493295	2.19427	1.94844	4692.37	FALSE	223
2022-09-13	09:20:28	0.442405	1.96791	1.94844	4463.68	FALSE	223
2022-09-13	09:20:28	0.532277	2.36767	1.94844	4694.74	FALSE	223
2022-09-13	09:20:29	0.303524	1.35014	1.0932	4465.03	FALSE	223
2022-09-13	09:20:29	0.291972	1.29875	1.0932	4696.04	FALSE	223
2022-09-13	09:20:29	0.28215	1.25506	1.0932	4466.28	FALSE	223
2022-09-13	09:20:29	0.105407	0.468871	1.0932	4696.51	FALSE	223
2022-09-13	09:20:30	0.482201	2.14493	1.92271	4468.43	FALSE	223
2022-09-13	09:20:30	0.324339	1.44272	1.92271	4697.95	FALSE	223
2022-09-13	09:20:30	0.490191	2.18047	1.92271	4470.61	FALSE	223
2022-09-13	09:20:31	0.3993	1.77617	2.99314	4699.73	FALSE	223
2022-09-13	09:20:31	0.56215	2.50056	2.99314	4473.11	FALSE	223
2022-09-13	09:20:31	0.743015	3.30508	2.99314	4703.03	FALSE	223
2022-09-13	09:20:31	0.987086	4.39076	2.99314	4477.5	FALSE	223
2022-09-13	09:20:32	3.6482	16.2279	11.9019	4719.26	1	224
2022-09-13	09:20:32	3.77548	16.7941	11.9019	4494.29	1	225
2022-09-13	09:20:32	2.69182	11.9738	11.9019	4731.23	FALSE	225
2022-09-13	09:20:32	0.587188	2.61193	11.9019	4496.9	FALSE	225
2022-09-13	09:20:33	0.787392	3.50248	2.69218	4734.73	FALSE	225
2022-09-13	09:20:33	0.6164	2.74187	2.69218	4499.65	FALSE	225
2022-09-13	09:20:33	0.588664	2.6185	2.69218	4737.35	FALSE	225
2022-09-13	09:20:33	0.428461	1.90588	2.69218	4501.55	FALSE	225
2022-09-13	09:20:34	0.570598	2.53813	2.35862	4739.89	FALSE	225
2022-09-13	09:20:34	0.385865	1.7164	2.35862	4503.27	FALSE	225
2022-09-13	09:20:34	0.634262	2.82132	2.35862	4742.71	FALSE	225
2022-09-13	09:20:35	0.388512	1.72818	3.23881	4505	FALSE	225
2022-09-13	09:20:35	0.670852	2.98408	3.23881	4745.7	FALSE	225
2022-09-13	09:20:35	0.471718	2.0983	3.23881	4507.09	FALSE	225
2022-09-13	09:20:35	1.38139	6.1447	3.23881	4751.84	FALSE	225
2022-09-13	09:20:36	1.17131	5.21022	28.0057	4512.3	FALSE	225
2022-09-13	09:20:36	8.29731	36.9081	28.0057	4788.75	1	226
2022-09-13	09:20:36	3.868	17.2056	28.0057	4529.51	1	227
2022-09-13	09:20:36	11.8472	52.6987	28.0057	4841.45	1	228
2022-09-13	09:20:37	2.2619	10.0614	11.2735	4539.57	FALSE	228
2022-09-13	09:20:37	3.93767	17.5155	11.2735	4858.96	1	229
2022-09-13	09:20:37	2.67451	11.8968	11.2735	4551.47	FALSE	229
2022-09-13	09:20:37	1.26352	5.62039	11.2735	4864.58	FALSE	229
2022-09-13	09:20:38	3.4737	15.4517	6.04129	4566.92	1	230
2022-09-13	09:20:38	0.668308	2.97277	6.04129	4867.56	FALSE	230
2022-09-13	09:20:38	0.606527	2.69795	6.04129	4569.62	FALSE	230
2022-09-13	09:20:38	0.684033	3.04272	6.04129	4870.6	FALSE	230
2022-09-13	09:20:39	0.441641	1.96451	3.24487	4571.58	FALSE	230
2022-09-13	09:20:39	0.796094	3.54119	3.24487	4874.14	FALSE	230
2022-09-13	09:20:39	0.9507	4.2289	3.24487	4575.81	FALSE	230
2022-09-13	09:20:40	1.94134	8.63547	7.27212	4882.78	FALSE	230
2022-09-13	09:20:40	0.958486	4.26354	7.27212	4580.08	FALSE	230
2022-09-13	09:20:40	2.14118	9.5244	7.27212	4892.3	FALSE	230
2022-09-13	09:20:40	1.49838	6.66509	7.27212	4586.74	FALSE	230
2022-09-13	09:20:41	2.45187	10.9064	7.23964	4903.21	FALSE	230
2022-09-13	09:20:41	1.53131	6.81157	7.23964	4593.55	FALSE	230
2022-09-13	09:20:41	0.649173	2.88765	7.23964	4906.09	FALSE	230
2022-09-13	09:20:41	1.87782	8.35292	7.23964	4601.9	FALSE	230
2022-09-13	09:20:42	0.957163	4.25765	12.2326	4910.35	FALSE	230
2022-09-13	09:20:42	2.88235	12.8213	12.2326	4614.73	FALSE	230
2022-09-13	09:20:42	2.45396	10.9157	12.2326	4921.27	FALSE	230
2022-09-13	09:20:42	4.70653	20.9356	12.2326	4635.66	1	231
2022-09-13	09:20:43	4.18149	18.6001	23.1721	4939.87	1	232
2022-09-13	09:20:43	6.23879	27.7514	23.1721	4663.41	1	233
2022-09-13	09:20:43	7.74072	34.4323	23.1721	4974.3	1	234
2022-09-13	09:20:43	2.67624	11.9045	23.1721	4675.32	FALSE	234
2022-09-13	09:20:44	3.75299	16.6941	12.2541	4990.99	1	235
2022-09-13	09:20:44	1.01396	4.5103	12.2541	4679.83	FALSE	235
2022-09-13	09:20:44	3.49757	15.5579	12.2541	5006.55	1	236
2022-09-13	09:20:45	1.67406	7.44655	10.5401	4687.27	FALSE	236
2022-09-13	09:20:45	2.41782	10.7549	10.5401	5017.31	FALSE	236
2022-09-13	09:20:45	4.02948	17.9239	10.5401	4705.2	1	237
2022-09-13	09:20:45	1.35676	6.03514	10.5401	5023.34	FALSE	237
2022-09-13	09:20:46	2.67426	11.8956	8.33391	4717.09	FALSE	237
2022-09-13	09:20:46	1.02357	4.55304	8.33391	5027.9	FALSE	237
2022-09-13	09:20:46	2.40459	10.6961	8.33391	4727.79	FALSE	237
2022-09-13	09:20:46	1.39177	6.19087	8.33391	5034.09	FALSE	237
2022-09-13	09:20:47	1.00459	4.46862	5.57965	4732.26	FALSE	237
2022-09-13	09:20:47	1.52612	6.78849	5.57965	5040.87	FALSE	237
2022-09-13	09:20:47	0.931768	4.14469	5.57965	4736.4	FALSE	237
2022-09-13	09:20:47	1.55497	6.91682	5.57965	5047.79	FALSE	237
2022-09-13	09:20:48	0.897214	3.99099	8.89654	4740.39	FALSE	237
2022-09-13	09:20:48	3.20729	14.2667	8.89654	5062.06	1	238
2022-09-13	09:20:48	1.89559	8.43196	8.89654	4748.83	FALSE	238
2022-09-13	09:20:49	5.19314	23.1001	19.7228	5085.16	1	239
2022-09-13	09:20:49	4.47991	19.9275	19.7228	4768.75	1	240
2022-09-13	09:20:49	3.39263	15.0911	19.7228	5100.25	1	241
2022-09-13	09:20:49	4.66983	20.7723	19.7228	4789.53	1	242
2022-09-13	09:20:50	0.423015	1.88166	4.03343	5102.13	FALSE	242
2022-09-13	09:20:50	2.19986	9.78542	4.03343	4799.31	FALSE	242
2022-09-13	09:20:50	0.494109	2.1979	4.03343	5104.33	FALSE	242
2022-09-13	09:20:50	0.510038	2.26875	4.03343	4801.58	FALSE	242
2022-09-13	09:20:51	0.740064	3.29195	2.65013	5107.62	FALSE	242
2022-09-13	09:20:51	0.405051	1.80175	2.65013	4803.38	FALSE	242
2022-09-13	09:20:51	0.805	3.5808	2.65013	5111.2	FALSE	242
2022-09-13	09:20:51	0.43299	1.92603	2.65013	4805.31	FALSE	242
2022-09-13	09:20:52	0.668511	2.97367	2.2859	5114.18	FALSE	242
2022-09-13	09:20:52	0.351158	1.56202	2.2859	4806.87	FALSE	242
2022-09-13	09:20:52	0.638893	2.84192	2.2859	5117.02	FALSE	242
2022-09-13	09:20:52	0.39701	1.76598	2.2859	4808.64	FALSE	242
2022-09-13	09:20:53	0.420725	1.87147	1.92354	5118.89	FALSE	242
2022-09-13	09:20:53	0.398741	1.77368	1.92354	4810.41	FALSE	242
2022-09-13	09:20:53	0.477824	2.12546	1.92354	5121.01	FALSE	242
2022-09-13	09:20:54	0.453092	2.01544	2.27871	4812.43	FALSE	242
2022-09-13	09:20:54	0.561692	2.49852	2.27871	5123.51	FALSE	242
2022-09-13	09:20:54	0.393092	1.74855	2.27871	4814.17	FALSE	242
2022-09-13	09:20:54	0.641234	2.85234	2.27871	5126.37	FALSE	242
2022-09-13	09:20:55	0.425764	1.89388	4.93863	4816.07	FALSE	242
2022-09-13	09:20:55	0.834568	3.71233	4.93863	5130.08	FALSE	242
2022-09-13	09:20:55	0.819453	3.64509	4.93863	4819.71	FALSE	242
2022-09-13	09:20:55	2.36123	10.5032	4.93863	5140.58	FALSE	242
2022-09-13	09:20:56	2.05849	9.15658	28.8789	4828.87	FALSE	242
2022-09-13	09:20:56	8.98433	39.9641	28.8789	5180.54	1	243
2022-09-13	09:20:56	2.46841	10.98	28.8789	4839.85	FALSE	243
2022-09-13	09:20:56	12.4578	55.4148	28.8789	5235.96	1	244
2022-09-13	09:20:57	0.945356	4.20513	12.6808	4844.05	FALSE	244
2022-09-13	09:20:57	6.28749	27.968	12.6808	5263.93	1	245
2022-09-13	09:20:57	1.31945	5.86918	12.6808	4849.92	FALSE	245
2022-09-13	09:20:58	1.31034	5.82865	6.9161	5269.76	FALSE	245
2022-09-13	09:20:58	2.19126	9.74716	6.9161	4859.67	FALSE	245
2022-09-13	09:20:58	0.873041	3.88346	6.9161	5273.64	FALSE	245
2022-09-13	09:20:58	1.84459	8.20511	6.9161	4867.88	FALSE	245
2022-09-13	09:20:59	0.919351	4.08946	5.3624	5277.73	FALSE	245
2022-09-13	09:20:59	1.98892	8.84711	5.3624	4876.72	FALSE	245
2022-09-13	09:20:59	0.840216	3.73745	5.3624	5281.47	FALSE	245
2022-09-13	09:20:59	1.0736	4.77559	5.3624	4881.5	FALSE	245
2022-09-13	09:21:00	1.57665	7.01325	6.84547	5288.48	FALSE	245
2022-09-13	09:21:00	0.871819	3.87803	6.84547	4885.38	FALSE	245
2022-09-13	09:21:00	2.34729	10.4412	6.84547	5298.92	FALSE	245
2022-09-13	09:21:00	1.35996	6.04937	6.84547	4891.43	FALSE	245
2022-09-13	09:21:01	6.73548	29.9608	20.461	5328.88	1	246
2022-09-13	09:21:01	2.29212	10.1958	20.461	4901.62	FALSE	246
2022-09-13	09:21:01	7.98077	35.5001	20.461	5364.38	1	247
2022-09-13	09:21:01	1.391	6.18745	20.461	4907.81	FALSE	247
2022-09-13	09:21:02	4.89818	21.7881	12.2326	5386.17	1	248
2022-09-13	09:21:02	0.633804	2.81929	12.2326	4910.63	FALSE	248
2022-09-13	09:21:02	2.71808	12.0906	12.2326	5398.26	FALSE	248
2022-09-13	09:21:03	2.32734	10.3525	5.08951	4920.98	FALSE	248
2022-09-13	09:21:03	0.648766	2.88584	5.08951	5401.15	FALSE	248
2022-09-13	09:21:03	1.13625	5.05427	5.08951	4926.04	FALSE	248
2022-09-13	09:21:03	0.464339	2.06547	5.08951	5403.21	FALSE	248
2022-09-13	09:21:04	0.631005	2.80684	2.25924	4928.84	FALSE	248
2022-09-13	09:21:04	0.397519	1.76824	2.25924	5404.98	FALSE	248
2022-09-13	09:21:04	0.495178	2.20265	2.25924	4931.04	FALSE	248
2022-09-13	09:21:05	0.452074	2.01092	2.06352	5406.99	FALSE	248
2022-09-13	09:21:05	0.472277	2.10078	2.06352	4933.15	FALSE	248
2022-09-13	09:21:05	0.475026	2.11301	2.06352	5409.1	FALSE	248
2022-09-13	09:21:05	0.472328	2.10101	2.06352	4935.25	FALSE	248
2022-09-13	09:21:05	0.447799	1.9919	2.06352	5411.1	FALSE	248
2022-09-13	09:21:06	0.429122	1.90882	2.01944	4937.16	FALSE	248
2022-09-13	09:21:06	0.466171	2.07362	2.01944	5413.17	FALSE	248
2022-09-13	09:21:06	0.466679	2.07588	2.01944	4939.23	FALSE	248
2022-09-13	09:21:07	0.495076	2.2022	2.08166	5415.37	FALSE	248
2022-09-13	09:21:07	0.458944	2.04147	2.08166	4941.27	FALSE	248
2022-09-13	09:21:07	0.46388	2.06343	2.08166	5417.44	FALSE	248
2022-09-13	09:21:07	0.454008	2.01952	2.08166	4943.29	FALSE	248
2022-09-13	09:21:08	0.45528	2.02518	2.00577	5419.46	FALSE	248
2022-09-13	09:21:08	0.446476	1.98601	2.00577	4945.28	FALSE	248
2022-09-13	09:21:08	0.454364	2.0211	2.00577	5421.48	FALSE	248
2022-09-13	09:21:08	0.447545	1.99077	2.00577	4947.27	FALSE	248
2022-09-13	09:21:09	0.452277	2.01182	2.00373	5423.49	FALSE	248
2022-09-13	09:21:09	0.456247	2.02948	2.00373	4949.3	FALSE	248
2022-09-13	09:21:09	0.452532	2.01295	2.00373	5425.51	FALSE	248
2022-09-13	09:21:09	0.440776	1.96066	2.00373	4951.26	FALSE	248
2022-09-13	09:21:10	0.400064	1.77956	1.61324	5427.29	FALSE	248
2022-09-13	09:21:10	0.342964	1.52557	1.61324	4952.78	FALSE	248
2022-09-13	09:21:10	0.354008	1.5747	1.61324	5428.86	FALSE	248
2022-09-13	09:21:10	0.353651	1.57311	1.61324	4954.36	FALSE	248
2022-09-13	09:21:11	0.540471	2.40412	2.14659	5431.26	FALSE	248
2022-09-13	09:21:11	0.445407	1.98126	2.14659	4956.34	FALSE	248
2022-09-13	09:21:11	0.461845	2.05438	2.14659	5433.32	FALSE	248
2022-09-13	09:21:12	0.471311	2.09649	2.05857	4958.44	FALSE	248
2022-09-13	09:21:12	0.451209	2.00707	2.05857	5435.33	FALSE	248
2022-09-13	09:21:12	0.458639	2.04012	2.05857	4960.48	FALSE	248
2022-09-13	09:21:12	0.469987	2.0906	2.05857	5437.42	FALSE	248
2022-09-13	09:21:13	0.45416	2.02019	2.0267	4962.5	FALSE	248
2022-09-13	09:21:13	0.439555	1.95523	2.0267	5439.37	FALSE	248
2022-09-13	09:21:13	0.467036	2.07747	2.0267	4964.57	FALSE	248
2022-09-13	09:21:13	0.461743	2.05393	2.0267	5441.43	FALSE	248
2022-09-13	09:21:14	0.464288	2.06525	2.08754	4966.64	FALSE	248
2022-09-13	09:21:14	0.463626	2.0623	2.08754	5443.49	FALSE	248
2022-09-13	09:21:14	0.476603	2.12003	2.08754	4968.76	FALSE	248
2022-09-13	09:21:14	0.472684	2.10259	2.08754	5445.59	FALSE	248
2022-09-13	09:21:15	0.466171	2.07362	2.09075	4970.83	FALSE	248
2022-09-13	09:21:15	0.472074	2.09988	2.09075	5447.69	FALSE	248
2022-09-13	09:21:15	0.471819	2.09875	2.09075	4972.93	FALSE	248
2022-09-13	09:21:16	0.471769	2.09852	2.10475	5449.79	FALSE	248
2022-09-13	09:21:16	0.472684	2.10259	2.10475	4975.03	FALSE	248
2022-09-13	09:21:16	0.47813	2.12682	2.10475	5451.92	FALSE	248
2022-09-13	09:21:16	0.470089	2.09105	2.10475	4977.12	FALSE	248
2022-09-13	09:21:17	0.482354	2.14561	2.13236	5454.06	FALSE	248
2022-09-13	09:21:17	0.47874	2.12953	2.13236	4979.25	FALSE	248
2022-09-13	09:21:17	0.481794	2.14312	2.13236	5456.2	FALSE	248
2022-09-13	09:21:17	0.474618	2.1112	2.13236	4981.37	FALSE	248
2022-09-13	09:21:18	0.48271	2.14719	2.14742	5458.35	FALSE	248
2022-09-13	09:21:18	0.478944	2.13044	2.14742	4983.5	FALSE	248
2022-09-13	09:21:18	0.48271	2.14719	2.14742	5460.5	FALSE	248
2022-09-13	09:21:18	0.486679	2.16485	2.14742	4985.66	FALSE	248
2022-09-13	09:21:19	0.500063	2.22438	2.19529	5462.72	FALSE	248
2022-09-13	09:21:19	0.499606	2.22235	2.19529	4987.88	FALSE	248
2022-09-13	09:21:19	0.48958	2.17775	2.19529	5464.9	FALSE	248
2022-09-13	09:21:19	0.484847	2.1567	2.19529	4990.04	FALSE	248
2022-09-13	09:21:20	0.486985	2.16621	2.13112	5467.07	FALSE	248
2022-09-13	09:21:20	0.477672	2.12478	2.13112	4992.16	FALSE	248
2022-09-13	09:21:20	0.472634	2.10237	2.13112	5469.17	FALSE	248
2022-09-13	09:21:21	0.473397	2.10576	2.09388	4994.27	FALSE	248
2022-09-13	09:21:21	0.463728	2.06275	2.09388	5471.23	FALSE	248
2022-09-13	09:21:21	0.474822	2.1121	2.09388	4996.38	FALSE	248
2022-09-13	09:21:21	0.470954	2.0949	2.09388	5473.33	FALSE	248
2022-09-13	09:21:22	0.466272	2.07407	2.06038	4998.46	FALSE	248
2022-09-13	09:21:22	0.455433	2.02586	2.06038	5475.35	FALSE	248
2022-09-13	09:21:22	0.461285	2.05189	2.06038	5000.51	FALSE	248
2022-09-13	09:21:22	0.469784	2.08969	2.06038	5477.44	FALSE	248
2022-09-13	09:21:23	0.469682	2.08924	2.08154	5002.6	FALSE	248
2022-09-13	09:21:23	0.441794	1.96519	2.08154	5479.41	FALSE	248
2022-09-13	09:21:23	0.480267	2.13632	2.08154	5004.73	FALSE	248
2022-09-13	09:21:23	0.480064	2.13542	2.08154	5481.54	FALSE	248
2022-09-13	09:21:24	0.465662	2.07136	2.05393	5006.81	FALSE	248
2022-09-13	09:21:24	0.541896	2.41046	2.05393	5483.95	FALSE	248
2022-09-13	09:21:24	0.377672	1.67996	2.05393	5008.48	FALSE	248
2022-09-13	09:21:25	0.413397	1.83887	1.84544	5485.79	FALSE	248
2022-09-13	09:21:25	0.382506	1.70146	1.84544	5010.19	FALSE	248
2022-09-13	09:21:25	0.452328	2.01205	1.84544	5487.8	FALSE	248
2022-09-13	09:21:25	0.41126	1.82937	1.84544	5012.02	FALSE	248
2022-09-13	09:21:26	0.135433	0.602433	0.0676299	5488.41	FALSE	248
2022-09-13	09:21:26	0.045102	0.200623	0.0676299	5012.22	FALSE	248
2022-09-13	09:21:26	-0.0469081	-0.208657	0.0676299	5488.41	FALSE	248
2022-09-13	09:21:26	-0.0728114	-0.32388	0.0676299	5012.22	FALSE	248
2022-09-13	09:21:27	0.00449134	0.0199784	-0.0395574	5488.43	FALSE	248
2022-09-13	09:21:27	-0.0166792	-0.0741924	-0.0395574	5012.22	FALSE	248
2022-09-13	09:21:27	-0.0773407	-0.344027	-0.0395574	5488.43	FALSE	248
2022-09-13	09:21:27	0.053957	0.240012	-0.0395574	5012.46	FALSE	248
2022-09-13	09:21:28	-0.0371372	-0.165194	-0.00328144	5488.43	FALSE	248
2022-09-13	09:21:28	0.0737025	0.327843	-0.00328144	5012.78	FALSE	248
2022-09-13	09:21:28	-0.055814	-0.248272	-0.00328144	5488.43	FALSE	248
2022-09-13	09:21:28	0.0162979	0.0724963	-0.00328144	5012.86	FALSE	248
2022-09-13	09:21:29	0.0190969	0.0849468	4.14251	5488.51	FALSE	248
2022-09-13	09:21:29	0.412837	1.83638	4.14251	5014.69	FALSE	248
2022-09-13	09:21:29	2.3619	10.5062	4.14251	5499.02	FALSE	248
2022-09-13	09:21:30	4.53568	20.1756	26.2237	5034.87	1	249
2022-09-13	09:21:30	7.50851	33.3994	26.2237	5532.42	1	250
2022-09-13	09:21:30	9.34383	41.5632	26.2237	5076.43	1	251
2022-09-13	09:21:30	2.19335	9.75646	26.2237	5542.17	FALSE	251
2022-09-13	09:21:31	3.63156	16.1539	8.09956	5092.59	1	252
2022-09-13	09:21:31	1.02037	4.53881	8.09956	5546.71	FALSE	252
2022-09-13	09:21:31	0.559453	2.48856	8.09956	5095.07	FALSE	252
2022-09-13	09:21:31	2.07207	9.21698	8.09956	5555.93	FALSE	252
2022-09-13	09:21:32	1.23945	5.51332	21.3508	5100.59	FALSE	252
2022-09-13	09:21:32	4.07543	18.1283	21.3508	5574.06	1	253
2022-09-13	09:21:32	4.46093	19.8431	21.3508	5120.43	1	254
2022-09-13	09:21:32	9.42367	41.9184	21.3508	5615.98	1	255
2022-09-13	09:21:33	10.0722	44.8032	26.4743	5165.23	1	256
2022-09-13	09:21:33	1.88714	8.39438	26.4743	5624.37	FALSE	256
2022-09-13	09:21:33	5.89573	26.2254	26.4743	5191.46	1	257
2022-09-13	09:21:34	1.09564	4.87363	8.48282	5629.24	FALSE	257
2022-09-13	09:21:34	2.93472	13.0542	8.48282	5204.51	FALSE	257
2022-09-13	09:21:34	1.42413	6.33482	8.48282	5635.58	FALSE	257
2022-09-13	09:21:34	2.1736	9.66861	8.48282	5214.18	FALSE	257
2022-09-13	09:21:35	2.93935	13.0748	9.33635	5648.65	FALSE	257
2022-09-13	09:21:35	1.01726	4.52498	9.33635	5218.71	FALSE	257
2022-09-13	09:21:35	2.38958	10.6293	9.33635	5659.28	FALSE	257
2022-09-13	09:21:35	2.04943	9.11627	9.33635	5227.82	FALSE	257
2022-09-13	09:21:36	3.32892	14.8077	21.2288	5674.09	1	258
2022-09-13	09:21:36	4.34067	19.3082	21.2288	5247.13	1	259
2022-09-13	09:21:36	4.76576	21.1991	21.2288	5695.29	1	260
2022-09-13	09:21:36	6.65441	29.6001	21.2288	5276.73	1	261
2022-09-13	09:21:37	0.984542	4.37944	6.54825	5699.67	FALSE	261
2022-09-13	09:21:37	1.17981	5.24803	6.54825	5281.98	FALSE	261
2022-09-13	09:21:37	1.34704	5.9919	6.54825	5705.66	FALSE	261
2022-09-13	09:21:37	2.37706	10.5736	6.54825	5292.55	FALSE	261
2022-09-13	09:21:38	0.61813	2.74957	5.47433	5708.41	FALSE	261
2022-09-13	09:21:38	1.40093	6.23162	5.47433	5298.79	FALSE	261
2022-09-13	09:21:38	1.67299	7.44179	5.47433	5715.85	FALSE	261
2022-09-13	09:21:39	1.6108	7.16516	3.86569	5305.95	FALSE	261
2022-09-13	09:21:39	1.14627	5.09884	3.86569	5720.95	FALSE	261
2022-09-13	09:21:39	0.544135	2.42042	3.86569	5308.37	FALSE	261
2022-09-13	09:21:39	0.174975	0.778324	3.86569	5721.73	FALSE	261
2022-09-13	09:21:40	0.227239	1.0108	1.6095	5309.38	FALSE	261
2022-09-13	09:21:40	0.0332445	0.147878	1.6095	5721.88	FALSE	261
2022-09-13	09:21:40	0.441234	1.9627	1.6095	5311.34	FALSE	261
2022-09-13	09:21:40	0.745611	3.31663	1.6095	5725.19	FALSE	261
2022-09-13	09:21:41	0.0393514	0.175043	0.56774	5311.52	FALSE	261
2022-09-13	09:21:41	-0.0945926	-0.420767	0.56774	5725.19	FALSE	261
2022-09-13	09:21:41	0.127901	0.568929	0.56774	5312.09	FALSE	261
2022-09-13	09:21:41	0.437875	1.94776	0.56774	5727.14	FALSE	261
2022-09-13	09:21:42	0.688257	3.0615	2.93089	5315.15	FALSE	261
2022-09-13	09:21:42	0.787036	3.50089	2.93089	5730.64	FALSE	261
2022-09-13	09:21:42	0.501387	2.23027	2.93089	5317.38	FALSE	261
2022-09-13	09:21:43	0.45014	2.00231	2.36637	5732.65	FALSE	261
2022-09-13	09:21:43	0.423066	1.88188	2.36637	5319.26	FALSE	261
2022-09-13	09:21:43	0.528053	2.34889	2.36637	5734.99	FALSE	261
2022-09-13	09:21:43	0.726679	3.23241	2.36637	5322.49	FALSE	261
2022-09-13	09:21:44	0.733957	3.26479	2.8486	5738.26	FALSE	261
2022-09-13	09:21:44	0.733499	3.26275	2.8486	5325.76	FALSE	261
2022-09-13	09:21:44	0.557315	2.47905	2.8486	5740.74	FALSE	261
2022-09-13	09:21:44	0.536807	2.38782	2.8486	5328.14	FALSE	261
2022-09-13	09:21:45	0.403473	1.79473	2.90027	5742.53	FALSE	261
2022-09-13	09:21:45	0.735534	3.2718	2.90027	5331.42	FALSE	261
2022-09-13	09:21:45	0.734262	3.26614	2.90027	5745.8	FALSE	261
2022-09-13	09:21:45	0.734771	3.26841	2.90027	5334.69	FALSE	261
2022-09-13	09:21:46	0.737214	3.27928	3.28623	5749.08	FALSE	261
2022-09-13	09:21:46	0.737773	3.28176	3.28623	5337.97	FALSE	261
2022-09-13	09:21:46	0.742099	3.301	3.28623	5752.38	FALSE	261
2022-09-13	09:21:46	0.738028	3.2829	3.28623	5341.25	FALSE	261
2022-09-13	09:21:47	0.736399	3.27565	3.31134	5755.66	FALSE	261
2022-09-13	09:21:47	0.741183	3.29693	3.31134	5344.55	FALSE	261
2022-09-13	09:21:47	0.755687	3.36145	3.31134	5759.02	FALSE	261
2022-09-13	09:21:48	1.58973	7.07144	4.22596	5351.62	FALSE	261
2022-09-13	09:21:48	0.73645	3.27588	4.22596	5762.29	FALSE	261
2022-09-13	09:21:48	0.737163	3.27905	4.22596	5354.9	FALSE	261
2022-09-13	09:21:48	0.736807	3.27746	4.22596	5765.57	FALSE	261
2022-09-13	09:21:49	0.733855	3.26433	3.13694	5358.16	FALSE	261
2022-09-13	09:21:49	0.614771	2.73462	3.13694	5768.3	FALSE	261
2022-09-13	09:21:49	0.736094	3.27429	3.13694	5361.44	FALSE	261
2022-09-13	09:21:49	0.736145	3.27452	3.13694	5771.58	FALSE	261
2022-09-13	09:21:50	0.455127	2.0245	1.43208	5363.46	FALSE	261
2022-09-13	09:21:50	0.323677	1.43978	1.43208	5773.02	FALSE	261
2022-09-13	09:21:50	0.221539	0.98545	1.43208	5364.45	FALSE	261
2022-09-13	09:21:50	0.287443	1.2786	1.43208	5774.3	FALSE	261
2022-09-13	09:21:51	0.766832	3.41102	31.99	5367.86	FALSE	261
2022-09-13	09:21:51	2.96179	13.1746	31.99	5787.47	FALSE	261
2022-09-13	09:21:51	9.52479	42.3682	31.99	5410.22	1	262
2022-09-13	09:21:51	15.5133	69.0063	31.99	5856.48	1	263
2022-09-13	09:21:52	4.1682	18.541	22.4116	5428.77	1	264
2022-09-13	09:21:52	8.16973	36.3406	22.4116	5892.82	1	265
2022-09-13	09:21:52	2.77711	12.3531	22.4116	5441.12	FALSE	265
2022-09-13	09:21:53	8.3308	37.0571	27.8895	5929.88	1	266
2022-09-13	09:21:53	4.32474	19.2373	27.8895	5460.36	1	267
2022-09-13	09:21:53	6.48327	28.8389	27.8895	5958.72	1	268
2022-09-13	09:21:53	5.94052	26.4246	27.8895	5486.78	1	269
2022-09-13	09:21:54	1.07075	4.76291	3.83428	5963.48	FALSE	269
2022-09-13	09:21:54	1.37955	6.13651	3.83428	5492.92	FALSE	269
2022-09-13	09:21:54	0.585153	2.60288	3.83428	5966.08	FALSE	269
2022-09-13	09:21:54	0.412481	1.8348	3.83428	5494.75	FALSE	269
2022-09-13	09:21:55	0.419708	1.86695	1.87792	5967.95	FALSE	269
2022-09-13	09:21:55	0.387137	1.72206	1.87792	5496.47	FALSE	269
2022-09-13	09:21:55	0.407646	1.81329	1.87792	5969.76	FALSE	269
2022-09-13	09:21:55	0.474211	2.10939	1.87792	5498.58	FALSE	269
2022-09-13	09:21:56	0.367392	1.63423	2.81733	5971.4	FALSE	269
2022-09-13	09:21:56	0.789631	3.51244	2.81733	5502.1	FALSE	269
2022-09-13	09:21:56	0.743066	3.30531	2.81733	5974.7	FALSE	269
2022-09-13	09:21:57	1.89579	8.43285	6.51327	5510.53	FALSE	269
2022-09-13	09:21:57	0.868511	3.86331	6.51327	5978.56	FALSE	269
2022-09-13	09:21:57	2.58637	11.5047	6.51327	5522.03	FALSE	269
2022-09-13	09:21:57	0.506323	2.25223	6.51327	5980.82	FALSE	269
2022-09-13	09:21:58	1.9163	8.52409	5.27158	5530.56	FALSE	269
2022-09-13	09:21:58	0.705814	3.1396	5.27158	5983.96	FALSE	269
2022-09-13	09:21:58	1.11055	4.93995	5.27158	5535.5	FALSE	269
2022-09-13	09:21:58	1.00775	4.48267	5.27158	5988.44	FALSE	269
2022-09-13	09:21:59	1.84958	8.2273	3.76841	5543.73	FALSE	269
2022-09-13	09:21:59	0.455382	2.02563	3.76841	5990.46	FALSE	269
2022-09-13	09:21:59	0.495127	2.20242	3.76841	5545.93	FALSE	269
2022-09-13	09:21:59	0.588613	2.61827	3.76841	5993.08	FALSE	269
2022-09-13	09:22:00	0.304593	1.35489	1.70865	5547.28	FALSE	269
2022-09-13	09:22:00	0.384339	1.70962	1.70865	5994.79	FALSE	269
2022-09-13	09:22:00	0.391005	1.73927	1.70865	5549.02	FALSE	269
2022-09-13	09:22:00	0.456552	2.03083	1.70865	5996.82	FALSE	269
2022-09-13	09:22:01	0.341947	1.52105	1.55289	5550.54	FALSE	269
2022-09-13	09:22:01	0.350242	1.55795	1.55289	5998.38	FALSE	269
2022-09-13	09:22:01	0.355127	1.57968	1.55289	5552.12	FALSE	269
2022-09-13	09:22:02	0.490191	2.18047	2.31176	6000.56	FALSE	269
2022-09-13	09:22:02	0.610089	2.7138	2.31176	5554.84	FALSE	269
2022-09-13	09:22:02	0.478486	2.1284	2.31176	6002.69	FALSE	269
2022-09-13	09:22:02	0.500063	2.22438	2.31176	5557.06	FALSE	269
2022-09-13	09:22:03	0.55869	2.48516	2.07221	6005.17	FALSE	269
2022-09-13	09:22:03	0.433295	1.92738	2.07221	5558.99	FALSE	269
2022-09-13	09:22:03	0.407596	1.81307	2.07221	6006.99	FALSE	269
2022-09-13	09:22:03	0.46383	2.06321	2.07221	5561.05	FALSE	269
2022-09-13	09:22:04	0.779402	3.46694	6.75198	6010.45	FALSE	269
2022-09-13	09:22:04	1.52159	6.76834	6.75198	5567.82	FALSE	269
2022-09-13	09:22:04	1.80459	8.02718	6.75198	6018.48	FALSE	269
2022-09-13	09:22:04	1.96607	8.74547	6.75198	5576.56	FALSE	269
2022-09-13	09:22:05	2.73238	12.1542	6.41595	6030.64	FALSE	269
2022-09-13	09:22:05	0.870547	3.87237	6.41595	5580.44	FALSE	269
2022-09-13	09:22:05	0.724186	3.22132	6.41595	6033.86	FALSE	269
2022-09-13	09:22:06	0.740165	3.2924	3.27961	5583.73	FALSE	269
2022-09-13	09:22:06	0.73187	3.2555	3.27961	6037.11	FALSE	269
2022-09-13	09:22:06	0.736807	3.27746	3.27961	5587.01	FALSE	269
2022-09-13	09:22:06	0.740318	3.29308	3.27961	6040.41	FALSE	269
2022-09-13	09:22:07	0.741031	3.29625	4.83671	5590.3	FALSE	269
2022-09-13	09:22:07	0.820318	3.64894	4.83671	6044.06	FALSE	269
2022-09-13	09:22:07	0.861997	3.83434	4.83671	5594.14	FALSE	269
2022-09-13	09:22:07	1.92602	8.56732	4.83671	6052.62	FALSE	269
2022-09-13	09:22:08	1.75645	7.81304	12.8356	5601.95	FALSE	269
2022-09-13	09:22:08	4.08825	18.1854	12.8356	6070.81	1	270
2022-09-13	09:22:08	2.81202	12.5084	12.8356	5614.46	FALSE	270
2022-09-13	09:22:09	3.44144	15.3082	5.84954	6086.12	1	271
2022-09-13	09:22:09	0.82159	3.6546	5.84954	5618.11	FALSE	271
2022-09-13	09:22:09	1.28831	5.73066	5.84954	6091.85	FALSE	271
2022-09-13	09:22:09	0.501336	2.23004	5.84954	5620.34	FALSE	271
2022-09-13	09:22:09	0.522506	2.32421	5.84954	6094.17	FALSE	271
2022-09-13	09:22:10	0.419708	1.86695	2.24491	5622.21	FALSE	271
2022-09-13	09:22:10	0.669631	2.97865	2.24491	6097.15	FALSE	271
2022-09-13	09:22:10	0.424695	1.88913	2.24491	5624.1	FALSE	271
2022-09-13	09:22:11	0.448003	1.99281	1.51912	6099.14	FALSE	271
2022-09-13	09:22:11	0.303015	1.34787	1.51912	5625.45	FALSE	271
2022-09-13	09:22:11	0.415331	1.84748	1.51912	6100.99	FALSE	271
2022-09-13	09:22:11	0.199708	0.888341	1.51912	5626.34	FALSE	271
2022-09-13	09:22:12	0.458181	2.03808	2.70344	6103.03	FALSE	271
2022-09-13	09:22:12	0.234262	1.04204	2.70344	5627.38	FALSE	271
2022-09-13	09:22:12	0.742506	3.30282	2.70344	6106.33	FALSE	271
2022-09-13	09:22:12	0.996094	4.43083	2.70344	5631.81	FALSE	271
2022-09-13	09:22:13	0.522812	2.32557	2.27752	6108.66	FALSE	271
2022-09-13	09:22:13	0.56098	2.49535	2.27752	5634.3	FALSE	271
2022-09-13	09:22:13	0.627137	2.78963	2.27752	6111.45	FALSE	271
2022-09-13	09:22:13	0.337112	1.49954	2.27752	5635.8	FALSE	271
2022-09-13	09:22:14	0.52332	2.32783	2.33893	6113.77	FALSE	271
2022-09-13	09:22:14	0.417061	1.85517	2.33893	5637.66	FALSE	271
2022-09-13	09:22:14	0.637061	2.83377	2.33893	6116.61	FALSE	271
2022-09-13	09:22:15	0.353244	1.5713	2.84266	5639.23	FALSE	271
2022-09-13	09:22:15	0.725407	3.22676	2.84266	6119.83	FALSE	271
2022-09-13	09:22:15	0.736603	3.27656	2.84266	5642.51	FALSE	271
2022-09-13	09:22:15	0.74098	3.29603	2.84266	6123.13	FALSE	271
2022-09-13	09:22:16	0.744593	3.3121	3.2911	5645.82	FALSE	271
2022-09-13	09:22:16	0.735636	3.27226	3.2911	6126.4	FALSE	271
2022-09-13	09:22:16	0.735178	3.27022	3.2911	5649.09	FALSE	271
2022-09-13	09:22:16	0.744084	3.30983	3.2911	6129.71	FALSE	271
2022-09-13	09:22:17	0.738791	3.28629	3.28861	5652.38	FALSE	271
2022-09-13	09:22:17	0.738079	3.28312	3.28861	6133	FALSE	271
2022-09-13	09:22:17	0.741031	3.29625	3.28861	5655.67	FALSE	271
2022-09-13	09:22:17	0.739351	3.28878	3.28861	6136.28	FALSE	271
2022-09-13	09:22:18	0.736908	3.27791	3.38007	5658.95	FALSE	271
2022-09-13	09:22:18	0.73757	3.28086	3.38007	6139.57	FALSE	271
2022-09-13	09:22:18	0.738537	3.28516	3.38007	5662.23	FALSE	271
2022-09-13	09:22:18	0.826476	3.67633	3.38007	6143.24	FALSE	271

## Sheet: Juju_martin_202291391711 (E (2)
Date	Time	Lbs	Newtons	Total force x time	total steps > 13.345		**GoPro Fitting: 906
2022-09-13	09:17:18	0.447494	1.99054	1.99054	FALSE	0			Total force x time	6143.24
2022-09-13	09:17:18	0.446679	1.98692	1.98692	FALSE	0			Total steps	271
2022-09-13	09:17:18	0.436959	1.94368	3.93422	FALSE	0
2022-09-13	09:17:19	0.433092	1.92648	3.9134	FALSE	0
2022-09-13	09:17:19	0.437214	1.94482	5.87904	FALSE	0
2022-09-13	09:17:19	0.449224	1.99824	5.91164	FALSE	0
2022-09-13	09:17:19	0.461794	2.05415	7.93319	FALSE	0
2022-09-13	09:17:20	0.466883	2.07679	7.98842	FALSE	0
2022-09-13	09:17:20	0.464644	2.06683	10	FALSE	0
2022-09-13	09:17:20	0.455229	2.02495	10.0134	FALSE	0
2022-09-13	09:17:20	0.456501	2.03061	12.0306	FALSE	0
2022-09-13	09:17:21	0.481234	2.14063	12.154	FALSE	0
2022-09-13	09:17:21	0.443677	1.97356	14.0042	FALSE	0
2022-09-13	09:17:21	0.395992	1.76145	13.9155	FALSE	0
2022-09-13	09:17:21	0.35182	1.56497	15.5692	FALSE	0
2022-09-13	09:17:22	0.303982	1.35217	15.2676	FALSE	0
2022-09-13	09:17:22	0.473753	2.10735	17.6765	FALSE	0
2022-09-13	09:17:22	0.480827	2.13881	17.4064	FALSE	0
2022-09-13	09:17:22	0.442252	1.96723	19.6437	FALSE	0
2022-09-13	09:17:23	0.406679	1.80899	19.2154	FALSE	0
2022-09-13	09:17:23	0.399199	1.77572	21.4194	FALSE	0
2022-09-13	09:17:23	0.424542	1.88845	21.1039	FALSE	0
2022-09-13	09:17:24	0.443982	1.97492	23.3944	FALSE	0
2022-09-13	09:17:24	0.398079	1.77074	22.8746	FALSE	0
2022-09-13	09:17:24	0.501488	2.23072	25.6251	FALSE	0
2022-09-13	09:17:24	1.04154	4.63298	27.5076	FALSE	0
2022-09-13	09:17:25	1.44612	6.43263	32.0577	FALSE	0
2022-09-13	09:17:25	1.8938	8.424	35.9316	FALSE	0
2022-09-13	09:17:25	1.26454	5.62493	37.6826	FALSE	0
2022-09-13	09:17:26	2.27574	10.1229	46.0545	FALSE	0
2022-09-13	09:17:26	1.58902	7.06828	44.7509	FALSE	0
2022-09-13	09:17:26	0.993295	4.41837	50.4729	FALSE	0
2022-09-13	09:17:26	0.835585	3.71685	48.4678	FALSE	0
2022-09-13	09:17:26	2.10602	9.368	59.8409	FALSE	0
2022-09-13	09:17:27	7.2964	32.4558	80.9236	1	1
2022-09-13	09:17:27	5.39853	24.0137	83.8547	1	2
2022-09-13	09:17:27	2.05248	9.12984	90.0535	FALSE	2
2022-09-13	09:17:28	1.23279	5.4837	89.3383	FALSE	2
2022-09-13	09:17:28	0.627596	2.79167	92.8451	FALSE	2
2022-09-13	09:17:28	0.644898	2.86864	92.207	FALSE	2
2022-09-13	09:17:28	1.75508	7.80695	100.652	FALSE	2
2022-09-13	09:17:29	1.37426	6.11298	98.32	FALSE	2
2022-09-13	09:17:29	1.44363	6.42155	107.074	FALSE	2
2022-09-13	09:17:29	2.54861	11.3367	109.657	FALSE	2
2022-09-13	09:17:29	1.57309	6.99742	114.071	FALSE	2
2022-09-13	09:17:30	3.11879	13.873	123.53	1	3
2022-09-13	09:17:30	3.42459	15.2333	129.304	1	4
2022-09-13	09:17:30	7.0567	31.3896	154.919	1	5
2022-09-13	09:17:30	6.67828	29.7063	159.011	1	6
2022-09-13	09:17:31	6.56815	29.2164	184.136	1	7
2022-09-13	09:17:31	2.45121	10.9035	169.914	FALSE	7
2022-09-13	09:17:31	0.561438	2.49739	186.633	FALSE	7
2022-09-13	09:17:31	0.956857	4.25629	174.17	FALSE	7
2022-09-13	09:17:32	2.10816	9.37752	196.011	FALSE	7
2022-09-13	09:17:32	2.32688	10.3504	184.521	FALSE	7
2022-09-13	09:17:32	4.66943	20.7706	216.781	1	8
2022-09-13	09:17:33	5.18749	23.075	207.596	1	9
2022-09-13	09:17:33	8.35563	37.1675	253.949	1	10
2022-09-13	09:17:33	1.41513	6.29478	213.891	FALSE	10
2022-09-13	09:17:33	2.43584	10.8351	264.784	FALSE	10
2022-09-13	09:17:34	0.792634	3.52579	217.416	FALSE	10
2022-09-13	09:17:34	0.593143	2.63842	267.422	FALSE	10
2022-09-13	09:17:34	0.752939	3.34922	220.766	FALSE	10
2022-09-13	09:17:34	0.687595	3.05856	270.481	FALSE	10
2022-09-13	09:17:35	0.688461	3.06241	223.828	FALSE	10
2022-09-13	09:17:35	0.640267	2.84804	273.329	FALSE	10
2022-09-13	09:17:35	0.462557	2.05755	225.886	FALSE	10
2022-09-13	09:17:35	0.724847	3.22426	276.553	FALSE	10
2022-09-13	09:17:36	0.390394	1.73655	227.622	FALSE	10
2022-09-13	09:17:36	0.465	2.06841	278.622	FALSE	10
2022-09-13	09:17:36	0.411819	1.83185	229.454	FALSE	10
2022-09-13	09:17:36	0.563575	2.50689	281.128	FALSE	10
2022-09-13	09:17:37	0.86098	3.82981	233.284	FALSE	10
2022-09-13	09:17:37	0.46897	2.08607	283.214	FALSE	10
2022-09-13	09:17:37	0.0664252	0.295473	233.579	FALSE	10
2022-09-13	09:17:38	1.58734	7.06081	290.275	FALSE	10
2022-09-13	09:17:38	2.99513	13.3229	246.902	FALSE	10
2022-09-13	09:17:38	7.45695	33.17	323.445	1	11
2022-09-13	09:17:38	10.8845	48.4164	295.319	1	12
2022-09-13	09:17:39	14.6596	65.2088	388.654	1	13
2022-09-13	09:17:39	7.45421	33.1578	328.476	1	14
2022-09-13	09:17:39	3.43019	15.2582	403.912	1	15
2022-09-13	09:17:39	11.0164	49.0032	377.48	1	16
2022-09-13	09:17:40	3.8793	17.2559	421.168	1	17
2022-09-13	09:17:40	10.0455	44.6844	422.164	1	18
2022-09-13	09:17:40	5.38154	23.9382	445.106	1	19
2022-09-13	09:17:40	4.58327	20.3873	442.551	1	20
2022-09-13	09:17:41	6.41141	28.5192	473.626	1	21
2022-09-13	09:17:41	3.42576	15.2385	457.79	1	22
2022-09-13	09:17:41	8.3283	37.0459	510.672	1	23
2022-09-13	09:17:42	6.751	30.0298	487.82	1	24
2022-09-13	09:17:42	3.57111	15.885	526.557	1	25
2022-09-13	09:17:42	4.50556	20.0416	507.861	1	26
2022-09-13	09:17:42	1.7993	8.00365	534.56	FALSE	26
2022-09-13	09:17:43	4.50495	20.0389	527.9	1	27
2022-09-13	09:17:43	1.08154	4.81091	539.371	FALSE	27
2022-09-13	09:17:43	1.52424	6.78012	534.68	FALSE	27
2022-09-13	09:17:43	4.38886	19.5225	558.894	1	28
2022-09-13	09:17:44	2.38978	10.6302	545.31	FALSE	28
2022-09-13	09:17:44	6.54988	29.1352	588.029	1	29
2022-09-13	09:17:44	1.90856	8.48966	553.8	FALSE	29
2022-09-13	09:17:44	6.81243	30.3031	618.332	1	30
2022-09-13	09:17:45	1.58653	7.0572	560.857	FALSE	30
2022-09-13	09:17:45	2.97691	13.2419	631.574	FALSE	30
2022-09-13	09:17:45	1.011	4.49713	565.354	FALSE	30
2022-09-13	09:17:45	0.848715	3.77525	635.349	FALSE	30
2022-09-13	09:17:46	0.977316	4.3473	569.702	FALSE	30
2022-09-13	09:17:46	0.702048	3.12285	638.472	FALSE	30
2022-09-13	09:17:46	1.38154	6.14537	575.847	FALSE	30
2022-09-13	09:17:47	1.19289	5.30621	643.778	FALSE	30
2022-09-13	09:17:47	3.08266	13.7123	589.559	1	31
2022-09-13	09:17:47	4.48138	19.9341	663.712	1	32
2022-09-13	09:17:47	4.63818	20.6316	610.191	1	33
2022-09-13	09:17:48	5.58357	24.8368	688.549	1	34
2022-09-13	09:17:48	2.12673	9.46012	619.651	FALSE	34
2022-09-13	09:17:48	7.78495	34.629	723.178	1	35
2022-09-13	09:17:48	0.689682	3.06784	622.719	FALSE	35
2022-09-13	09:17:49	3.3338	14.8294	738.007	1	36
2022-09-13	09:17:49	2.5565	11.3718	634.091	FALSE	36
2022-09-13	09:17:49	1.78922	7.95881	745.966	FALSE	36
2022-09-13	09:17:49	2.68851	11.959	646.05	FALSE	36
2022-09-13	09:17:50	0.539758	2.40095	748.367	FALSE	36
2022-09-13	09:17:50	2.38357	10.6026	656.652	FALSE	36
2022-09-13	09:17:50	0.504644	2.24476	750.612	FALSE	36
2022-09-13	09:17:51	0.689122	3.06535	659.718	FALSE	36
2022-09-13	09:17:51	0.844084	3.75465	754.367	FALSE	36
2022-09-13	09:17:51	0.603677	2.68528	662.403	FALSE	36
2022-09-13	09:17:51	1.10902	4.93314	759.3	FALSE	36
2022-09-13	09:17:52	0.444949	1.97922	664.382	FALSE	36
2022-09-13	09:17:52	1.77141	7.87959	767.179	FALSE	36
2022-09-13	09:17:52	0.70785	3.14866	667.531	FALSE	36
2022-09-13	09:17:52	1.70006	7.56221	774.742	FALSE	36
2022-09-13	09:17:53	1.39477	6.20422	673.735	FALSE	36
2022-09-13	09:17:53	2.43452	10.8292	785.571	FALSE	36
2022-09-13	09:17:53	4.01767	17.8714	691.606	1	37
2022-09-13	09:17:53	5.95935	26.5084	812.079	1	38
2022-09-13	09:17:54	3.69574	16.4394	708.046	1	39
2022-09-13	09:17:54	2.85843	12.7149	824.794	FALSE	39
2022-09-13	09:17:54	4.94749	22.0074	730.053	1	40
2022-09-13	09:17:54	2.51726	11.1973	835.991	FALSE	40
2022-09-13	09:17:55	6.30591	28.0499	758.103	1	41
2022-09-13	09:17:55	5.76322	25.636	861.627	1	42
2022-09-13	09:17:55	5.89049	26.2021	784.305	1	43
2022-09-13	09:17:56	13.1975	58.7051	920.332	1	44
2022-09-13	09:17:56	1.31111	5.83208	790.137	FALSE	44
2022-09-13	09:17:56	8.0681	35.8885	956.221	1	45
2022-09-13	09:17:56	1.11961	4.98025	795.118	FALSE	45
2022-09-13	09:17:57	9.95823	44.2962	1000.52	1	46
2022-09-13	09:17:57	6.31619	28.0957	823.213	1	47
2022-09-13	09:17:57	10.1392	45.1012	1045.62	1	48
2022-09-13	09:17:57	4.78235	21.2728	844.486	1	49
2022-09-13	09:17:58	1.34118	5.96584	1051.58	FALSE	49
2022-09-13	09:17:58	1.51146	6.72328	851.209	FALSE	49
2022-09-13	09:17:58	1.22978	5.47031	1057.05	FALSE	49
2022-09-13	09:17:58	0.72612	3.22993	854.439	FALSE	49
2022-09-13	09:17:59	2.09838	9.33401	1066.39	FALSE	49
2022-09-13	09:17:59	1.80139	8.01294	862.452	FALSE	49
2022-09-13	09:17:59	7.63365	33.956	1100.34	1	50
2022-09-13	09:18:00	3.2219	14.3317	876.784	1	51
2022-09-13	09:18:00	21.7214	96.6211	1196.97	1	52
2022-09-13	09:18:00	4.37334	19.4535	896.237	1	53
2022-09-13	09:18:00	7.32922	32.6018	1229.57	1	54
2022-09-13	09:18:01	3.13156	13.9298	910.167	1	55
2022-09-13	09:18:01	3.7938	16.8756	1246.44	1	56
2022-09-13	09:18:01	7.83187	34.8377	945.005	1	57
2022-09-13	09:18:01	2.37935	10.5838	1257.03	FALSE	57
2022-09-13	09:18:02	6.14337	27.3269	972.332	1	58
2022-09-13	09:18:02	5.81594	25.8705	1282.9	1	59
2022-09-13	09:18:02	2.96052	13.169	985.501	FALSE	59
2022-09-13	09:18:02	3.3935	15.095	1297.99	1	60
2022-09-13	09:18:03	1.77721	7.90539	993.406	FALSE	60
2022-09-13	09:18:03	3.0024	13.3553	1311.35	1	61
2022-09-13	09:18:03	1.91202	8.50505	1001.91	FALSE	61
2022-09-13	09:18:03	2.47019	10.9879	1322.34	FALSE	61
2022-09-13	09:18:04	1.78938	7.95952	1009.87	FALSE	61
2022-09-13	09:18:04	0.900522	4.0057	1326.34	FALSE	61
2022-09-13	09:18:04	1.05961	4.71336	1014.58	FALSE	61
2022-09-13	09:18:05	0.72617	3.23015	1329.57	FALSE	61
2022-09-13	09:18:05	2.51167	11.1724	1025.76	FALSE	61
2022-09-13	09:18:05	1.12861	5.02028	1334.59	FALSE	61
2022-09-13	09:18:05	3.65477	16.2571	1042.01	1	62
2022-09-13	09:18:06	0.965814	4.29613	1338.89	FALSE	62
2022-09-13	09:18:06	2.31421	10.2941	1052.31	FALSE	62
2022-09-13	09:18:06	1.05345	4.68596	1343.57	FALSE	62
2022-09-13	09:18:06	0.956603	4.25516	1056.56	FALSE	62
2022-09-13	09:18:07	1.29386	5.75535	1349.33	FALSE	62
2022-09-13	09:18:07	0.550191	2.44736	1059.01	FALSE	62
2022-09-13	09:18:07	1.13838	5.06374	1354.39	FALSE	62
2022-09-13	09:18:07	0.859962	3.82528	1062.84	FALSE	62
2022-09-13	09:18:08	2.26291	10.0659	1364.46	FALSE	62
2022-09-13	09:18:08	2.64001	11.7433	1074.58	FALSE	62
2022-09-13	09:18:08	5.5967	24.8952	1389.35	1	63
2022-09-13	09:18:08	7.24036	32.2066	1106.79	1	64
2022-09-13	09:18:09	14.8029	65.8463	1455.2	1	65
2022-09-13	09:18:09	17.0697	75.9294	1182.71	1	66
2022-09-13	09:18:09	10.4287	46.3889	1501.59	1	67
2022-09-13	09:18:10	20.4827	91.1111	1273.83	1	68
2022-09-13	09:18:10	18.157	80.766	1582.36	1	69
2022-09-13	09:18:10	15.2938	68.0299	1341.86	1	70
2022-09-13	09:18:10	14.8404	66.0131	1648.37	1	71
2022-09-13	09:18:11	8.60846	38.2922	1380.15	1	72
2022-09-13	09:18:11	12.6339	56.1981	1704.57	1	73
2022-09-13	09:18:11	9.27161	41.242	1421.39	1	74
2022-09-13	09:18:11	10.8233	48.1442	1752.71	1	75
2022-09-13	09:18:12	20.1592	89.6722	1511.06	1	76
2022-09-13	09:18:12	5.27497	23.4641	1776.17	1	77
2022-09-13	09:18:12	8.45528	37.6108	1548.67	1	78
2022-09-13	09:18:12	16.9418	75.3605	1851.54	1	79
2022-09-13	09:18:13	3.02647	13.4623	1562.14	1	80
2022-09-13	09:18:13	7.60993	33.8505	1885.39	1	81
2022-09-13	09:18:13	1.02078	4.54063	1566.68	FALSE	81
2022-09-13	09:18:14	1.12938	5.02371	1890.41	FALSE	81
2022-09-13	09:18:14	0.874465	3.8898	1570.57	FALSE	81
2022-09-13	09:18:14	0.469479	2.08834	1892.5	FALSE	81
2022-09-13	09:18:14	0.963778	4.28708	1574.85	FALSE	81
2022-09-13	09:18:15	0.673295	2.99495	1895.49	FALSE	81
2022-09-13	09:18:15	0.663728	2.95239	1577.81	FALSE	81
2022-09-13	09:18:15	1.328	5.90721	1901.4	FALSE	81
2022-09-13	09:18:15	1.50612	6.69952	1584.5	FALSE	81
2022-09-13	09:18:16	4.98347	22.1675	1923.57	1	82
2022-09-13	09:18:16	7.46856	33.2216	1617.73	1	83
2022-09-13	09:18:16	20.0125	89.0196	2012.59	1	84
2022-09-13	09:18:16	5.00505	22.2635	1639.99	1	85
2022-09-13	09:18:17	4.91655	21.8698	2034.46	1	86
2022-09-13	09:18:17	8.4683	37.6687	1677.66	1	87
2022-09-13	09:18:17	1.61268	7.17352	2041.63	FALSE	87
2022-09-13	09:18:17	6.26138	27.8519	1705.51	1	88
2022-09-13	09:18:18	4.79625	21.3347	2062.96	1	89
2022-09-13	09:18:18	2.86337	12.7368	1718.25	FALSE	89
2022-09-13	09:18:18	7.97227	35.4623	2098.43	1	90
2022-09-13	09:18:19	4.13574	18.3966	1736.64	1	91
2022-09-13	09:18:19	4.94016	21.9748	2120.4	1	92
2022-09-13	09:18:19	5.62754	25.0324	1761.68	1	93
2022-09-13	09:18:19	1.85116	8.23433	2128.64	FALSE	93
2022-09-13	09:18:20	7.37238	32.7938	1794.47	1	94
2022-09-13	09:18:20	1.70729	7.59437	2136.23	FALSE	94
2022-09-13	09:18:20	3.3764	15.0189	1809.49	1	95
2022-09-13	09:18:20	5.31334	23.6348	2159.87	1	96
2022-09-13	09:18:21	2.67263	11.8884	1821.38	FALSE	96
2022-09-13	09:18:21	9.18383	40.8515	2200.72	1	97
2022-09-13	09:18:21	7.72449	34.3601	1855.74	1	98
2022-09-13	09:18:21	11.2548	50.0636	2250.78	1	99
2022-09-13	09:18:22	2.76937	12.3187	1868.06	FALSE	99
2022-09-13	09:18:22	2.29513	10.2092	2260.99	FALSE	99
2022-09-13	09:18:22	1.92795	8.57591	1876.63	FALSE	99
2022-09-13	09:18:23	1.26683	5.63511	2266.62	FALSE	99
2022-09-13	09:18:23	1.55864	6.93314	1883.57	FALSE	99
2022-09-13	09:18:23	1.55762	6.92861	2273.55	FALSE	99
2022-09-13	09:18:23	1.20485	5.35941	1888.92	FALSE	99
2022-09-13	09:18:24	1.16907	5.20026	2278.75	FALSE	99
2022-09-13	09:18:24	1.29523	5.76144	1894.69	FALSE	99
2022-09-13	09:18:24	0.701387	3.11991	2281.87	FALSE	99
2022-09-13	09:18:24	0.472125	2.10011	1896.79	FALSE	99
2022-09-13	09:18:25	0.595433	2.64861	2284.52	FALSE	99
2022-09-13	09:18:25	1.02403	4.55509	1901.34	FALSE	99
2022-09-13	09:18:25	1.65263	7.35123	2291.87	FALSE	99
2022-09-13	09:18:25	5.03904	22.4147	1923.76	1	100
2022-09-13	09:18:26	3.31396	14.7412	2306.61	1	101
2022-09-13	09:18:26	1.2048	5.35919	1929.12	FALSE	101
2022-09-13	09:18:26	0.839198	3.73292	2310.35	FALSE	101
2022-09-13	09:18:26	1.58485	7.04973	1936.16	FALSE	101
2022-09-13	09:18:27	0.946323	4.20943	2314.56	FALSE	101
2022-09-13	09:18:27	1.93324	8.59944	1944.76	FALSE	101
2022-09-13	09:18:27	1.05884	4.70993	2319.27	FALSE	101
2022-09-13	09:18:28	1.10159	4.90009	1949.66	FALSE	101
2022-09-13	09:18:28	0.7393	3.28855	2322.56	FALSE	101
2022-09-13	09:18:28	0.735534	3.2718	1952.94	FALSE	101
2022-09-13	09:18:28	1.8592	8.27009	2330.83	FALSE	101
2022-09-13	09:18:29	3.69696	16.4448	1969.38	1	102
2022-09-13	09:18:29	2.25716	10.0403	2340.87	FALSE	102
2022-09-13	09:18:29	1.75787	7.81936	1977.2	FALSE	102
2022-09-13	09:18:29	0.417163	1.85562	2342.72	FALSE	102
2022-09-13	09:18:30	0.872837	3.88255	1981.08	FALSE	102
2022-09-13	09:18:30	0.373652	1.66208	2344.38	FALSE	102
2022-09-13	09:18:30	0.624237	2.77673	1983.86	FALSE	102
2022-09-13	09:18:30	0.440267	1.9584	2346.34	FALSE	102
2022-09-13	09:18:31	0.596858	2.65494	1986.51	FALSE	102
2022-09-13	09:18:31	0.518639	2.30701	2348.65	FALSE	102
2022-09-13	09:18:31	1.14027	5.07215	1991.59	FALSE	102
2022-09-13	09:18:32	1.75162	7.79156	2356.44	FALSE	102
2022-09-13	09:18:32	1.74917	7.78066	1999.37	FALSE	102
2022-09-13	09:18:32	1.47309	6.5526	2362.99	FALSE	102
2022-09-13	09:18:32	0.878232	3.90655	2003.27	FALSE	102
2022-09-13	09:18:33	1.52475	6.78239	2369.78	FALSE	102
2022-09-13	09:18:33	2.23742	9.95249	2013.23	FALSE	102
2022-09-13	09:18:33	2.70154	12.017	2381.79	FALSE	102
2022-09-13	09:18:33	2.82586	12.57	2025.8	FALSE	102
2022-09-13	09:18:34	3.06001	13.6115	2395.4	1	103
2022-09-13	09:18:34	3.71014	16.5034	2042.3	1	104
2022-09-13	09:18:34	4.57864	20.3667	2415.77	1	105
2022-09-13	09:18:34	1.98052	8.80975	2051.11	FALSE	105
2022-09-13	09:18:35	1.38561	6.16347	2421.93	FALSE	105
2022-09-13	09:18:35	6.94545	30.8948	2082	1	106
2022-09-13	09:18:35	3.02714	13.4653	2435.4	1	107
2022-09-13	09:18:35	5.08347	22.6123	2104.62	1	108
2022-09-13	09:18:36	0.679809	3.02393	2438.42	FALSE	108
2022-09-13	09:18:36	2.35253	10.4645	2115.08	FALSE	108
2022-09-13	09:18:36	0.833448	3.70734	2442.13	FALSE	108
2022-09-13	09:18:37	0.889326	3.9559	2119.04	FALSE	108
2022-09-13	09:18:37	2.04439	9.09386	2451.22	FALSE	108
2022-09-13	09:18:37	2.86444	12.7416	2131.78	FALSE	108
2022-09-13	09:18:37	6.12902	27.2631	2478.49	1	109
2022-09-13	09:18:38	2.06958	9.20591	2140.98	FALSE	109
2022-09-13	09:18:38	5.75126	25.5828	2504.07	1	110
2022-09-13	09:18:38	3.8823	17.2692	2158.25	1	111
2022-09-13	09:18:38	4.58719	20.4047	2524.48	1	112
2022-09-13	09:18:39	6.46759	28.7691	2187.02	1	113
2022-09-13	09:18:39	1.16439	5.17944	2529.65	FALSE	113
2022-09-13	09:18:39	5.191	23.0906	2210.11	1	114
2022-09-13	09:18:39	0.583829	2.59699	2532.25	FALSE	114
2022-09-13	09:18:40	1.46581	6.52022	2216.63	FALSE	114
2022-09-13	09:18:40	0.463931	2.06366	2534.32	FALSE	114
2022-09-13	09:18:40	0.379148	1.68653	2218.32	FALSE	114
2022-09-13	09:18:41	0.00301552	0.0134136	2534.33	FALSE	114
2022-09-13	09:18:41	-0.0952542	-0.42371	2218.32	FALSE	114
2022-09-13	09:18:41	-0.318206	-1.41544	2534.33	FALSE	114
2022-09-13	09:18:41	-0.562175	-2.50067	2218.32	FALSE	114
2022-09-13	09:18:42	-0.318867	-1.41838	2534.33	FALSE	114
2022-09-13	09:18:42	0.126476	0.562591	2218.88	FALSE	114
2022-09-13	09:18:42	0.414059	1.84182	2536.17	FALSE	114
2022-09-13	09:18:42	0.507951	2.25947	2221.14	FALSE	114
2022-09-13	09:18:43	0.47243	2.10146	2538.27	FALSE	114
2022-09-13	09:18:43	0.46729	2.0786	2223.22	FALSE	114
2022-09-13	09:18:43	0.439606	1.95546	2540.23	FALSE	114
2022-09-13	09:18:43	0.510903	2.2726	2225.49	FALSE	114
2022-09-13	09:18:44	0.471921	2.0992	2542.33	FALSE	114
2022-09-13	09:18:44	0.485305	2.15873	2227.65	FALSE	114
2022-09-13	09:18:44	0.506577	2.25336	2544.58	FALSE	114
2022-09-13	09:18:44	0.483422	2.15036	2229.8	FALSE	114
2022-09-13	09:18:45	0.50729	2.25653	2546.84	FALSE	114
2022-09-13	09:18:45	0.570293	2.53678	2232.34	FALSE	114
2022-09-13	09:18:45	0.766629	3.41012	2550.25	FALSE	114
2022-09-13	09:18:46	1.02235	4.54762	2236.89	FALSE	114
2022-09-13	09:18:46	0.87584	3.89591	2554.14	FALSE	114
2022-09-13	09:18:46	0.854873	3.80265	2240.69	FALSE	114
2022-09-13	09:18:46	0.920267	4.09353	2558.24	FALSE	114
2022-09-13	09:18:47	1.23986	5.51515	2246.2	FALSE	114
2022-09-13	09:18:47	0.956145	4.25312	2562.49	FALSE	114
2022-09-13	09:18:47	1.09279	4.86095	2251.07	FALSE	114
2022-09-13	09:18:47	1.22429	5.44589	2567.94	FALSE	114
2022-09-13	09:18:48	1.72846	7.68854	2258.75	FALSE	114
2022-09-13	09:18:48	1.94785	8.66443	2576.6	FALSE	114
2022-09-13	09:18:48	2.18673	9.72701	2268.48	FALSE	114
2022-09-13	09:18:48	3.26159	14.5082	2591.11	1	115
2022-09-13	09:18:49	3.5822	15.9343	2284.42	1	116
2022-09-13	09:18:49	3.48958	15.5223	2606.63	1	117
2022-09-13	09:18:49	2.90551	12.9243	2297.34	FALSE	117
2022-09-13	09:18:49	6.24871	27.7955	2634.43	1	118
2022-09-13	09:18:50	1.39935	6.22459	2303.56	FALSE	118
2022-09-13	09:18:50	4.79507	21.3294	2655.76	1	119
2022-09-13	09:18:50	2.49518	11.0991	2314.66	FALSE	119
2022-09-13	09:18:51	4.51879	20.1005	2675.86	1	120
2022-09-13	09:18:51	3.76561	16.7502	2331.41	1	121
2022-09-13	09:18:51	1.83116	8.14537	2684	FALSE	121
2022-09-13	09:18:51	7.6855	34.1866	2365.6	1	122
2022-09-13	09:18:52	1.81559	8.07611	2692.08	FALSE	122
2022-09-13	09:18:52	5.37212	23.8963	2389.5	1	123
2022-09-13	09:18:52	2.02184	8.99355	2701.07	FALSE	123
2022-09-13	09:18:52	1.83681	8.1705	2397.67	FALSE	123
2022-09-13	09:18:53	2.45477	10.9193	2711.99	FALSE	123
2022-09-13	09:18:53	0.281794	1.25348	2398.92	FALSE	123
2022-09-13	09:18:53	2.03009	9.03025	2721.02	FALSE	123
2022-09-13	09:18:53	0.763728	3.39721	2402.32	FALSE	123
2022-09-13	09:18:54	2.24312	9.97785	2731	FALSE	123
2022-09-13	09:18:54	2.32866	10.3583	2412.68	FALSE	123
2022-09-13	09:18:54	2.35569	10.4786	2741.48	FALSE	123
2022-09-13	09:18:55	2.17212	9.66202	2422.34	FALSE	123
2022-09-13	09:18:55	1.54337	6.86522	2748.34	FALSE	123
2022-09-13	09:18:55	2.06541	9.18736	2431.53	FALSE	123
2022-09-13	09:18:55	1.04281	4.63863	2752.98	FALSE	123
2022-09-13	09:18:56	1.52352	6.77692	2438.3	FALSE	123
2022-09-13	09:18:56	0.520165	2.3138	2755.29	FALSE	123
2022-09-13	09:18:56	1.62307	7.21974	2445.52	FALSE	123
2022-09-13	09:18:56	0.404695	1.80016	2757.09	FALSE	123
2022-09-13	09:18:57	1.59696	7.1036	2452.63	FALSE	123
2022-09-13	09:18:57	2.11513	9.40852	2766.5	FALSE	123
2022-09-13	09:18:57	2.26999	10.0974	2462.72	FALSE	123
2022-09-13	09:18:57	3.34149	14.8636	2781.37	1	124
2022-09-13	09:18:58	2.12062	9.43294	2472.16	FALSE	124
2022-09-13	09:18:58	8.39629	37.3484	2818.71	1	125
2022-09-13	09:18:58	1.37818	6.13042	2478.29	FALSE	125
2022-09-13	09:18:58	8.56876	38.1156	2856.83	1	126
2022-09-13	09:18:59	2.37396	10.5598	2488.85	FALSE	126
2022-09-13	09:18:59	4.57335	20.3432	2877.17	1	127
2022-09-13	09:18:59	3.70352	16.474	2505.32	1	128
2022-09-13	09:19:00	2.41268	10.7321	2887.91	FALSE	128
2022-09-13	09:19:00	4.91457	21.861	2527.18	1	129
2022-09-13	09:19:00	2.23034	9.921	2897.83	FALSE	129
2022-09-13	09:19:00	3.96459	17.6353	2544.82	1	130
2022-09-13	09:19:01	1.39238	6.19358	2904.02	FALSE	130
2022-09-13	09:19:01	1.68073	7.47622	2552.29	FALSE	130
2022-09-13	09:19:01	0.903575	4.01928	2908.04	FALSE	130
2022-09-13	09:19:01	0.582099	2.58929	2554.88	FALSE	130
2022-09-13	09:19:02	0.368817	1.64057	2909.68	FALSE	130
2022-09-13	09:19:02	0.482099	2.14447	2557.03	FALSE	130
2022-09-13	09:19:02	0.467239	2.07837	2911.76	FALSE	130
2022-09-13	09:19:02	0.562964	2.50418	2559.53	FALSE	130
2022-09-13	09:19:03	0.436247	1.94051	2913.7	FALSE	130
2022-09-13	09:19:03	0.100471	0.446915	2559.98	FALSE	130
2022-09-13	09:19:03	-0.264923	-1.17843	2913.7	FALSE	130
2022-09-13	09:19:04	-0.117137	-0.521049	2559.98	FALSE	130
2022-09-13	09:19:04	0.48042	2.137	2915.84	FALSE	130
2022-09-13	09:19:04	0.569885	2.53496	2562.51	FALSE	130
2022-09-13	09:19:04	0.442557	1.96858	2917.8	FALSE	130
2022-09-13	09:19:05	0.496145	2.20695	2564.72	FALSE	130
2022-09-13	09:19:05	0.518282	2.30542	2920.11	FALSE	130
2022-09-13	09:19:05	0.546679	2.43174	2567.15	FALSE	130
2022-09-13	09:19:05	0.547443	2.43514	2922.55	FALSE	130
2022-09-13	09:19:06	0.528664	2.3516	2569.5	FALSE	130
2022-09-13	09:19:06	0.511514	2.27532	2924.82	FALSE	130
2022-09-13	09:19:06	0.517366	2.30135	2571.8	FALSE	130
2022-09-13	09:19:06	0.502913	2.23706	2927.06	FALSE	130
2022-09-13	09:19:07	0.48729	2.16756	2573.97	FALSE	130
2022-09-13	09:19:07	0.475026	2.11301	2929.17	FALSE	130
2022-09-13	09:19:07	0.462812	2.05868	2576.03	FALSE	130
2022-09-13	09:19:07	0.500776	2.22755	2931.4	FALSE	130
2022-09-13	09:19:08	0.389479	1.73248	2577.76	FALSE	130
2022-09-13	09:19:08	0.351412	1.56315	2932.96	FALSE	130
2022-09-13	09:19:08	0.466527	2.07521	2579.84	FALSE	130
2022-09-13	09:19:09	0.394161	1.75331	2934.71	FALSE	130
2022-09-13	09:19:09	0.531616	2.36473	2582.2	FALSE	130
2022-09-13	09:19:09	0.40271	1.79133	2936.51	FALSE	130
2022-09-13	09:19:09	0.325153	1.44635	2583.65	FALSE	130
2022-09-13	09:19:10	0.347697	1.54663	2938.05	FALSE	130
2022-09-13	09:19:10	0.254669	1.13282	2584.78	FALSE	130
2022-09-13	09:19:10	0.11869	0.527957	2938.58	FALSE	130
2022-09-13	09:19:10	-0.310063	-1.37922	2584.78	FALSE	130
2022-09-13	09:19:11	-0.55958	-2.48912	2938.58	FALSE	130
2022-09-13	09:19:11	-0.336374	-1.49626	2584.78	FALSE	130
2022-09-13	09:19:11	-0.212048	-0.943232	2938.58	FALSE	130
2022-09-13	09:19:11	0.726527	3.23174	2588.01	FALSE	130
2022-09-13	09:19:12	3.56836	15.8728	2954.45	1	131
2022-09-13	09:19:12	1.04113	4.63115	2592.65	FALSE	131
2022-09-13	09:19:12	1.94938	8.67123	2963.12	FALSE	131
2022-09-13	09:19:13	2.73355	12.1594	2604.8	FALSE	131
2022-09-13	09:19:13	3.12424	13.8972	2977.02	1	132
2022-09-13	09:19:13	3.83416	17.0551	2621.86	1	133
2022-09-13	09:19:13	2.03497	9.05195	2986.07	FALSE	133
2022-09-13	09:19:14	1.97192	8.77149	2630.63	FALSE	133
2022-09-13	09:19:14	0.973651	4.33099	2990.4	FALSE	133
2022-09-13	09:19:14	1.07335	4.77448	2635.41	FALSE	133
2022-09-13	09:19:14	2.5165	11.1939	3001.6	FALSE	133
2022-09-13	09:19:15	1.88556	8.38735	2643.79	FALSE	133
2022-09-13	09:19:15	5.02159	22.337	3023.94	1	134
2022-09-13	09:19:15	6.51634	28.986	2672.78	1	135
2022-09-13	09:19:15	7.17314	31.9076	3055.84	1	136
2022-09-13	09:19:16	4.20999	18.7269	2691.51	1	137
2022-09-13	09:19:16	6.64581	29.5619	3085.4	1	138
2022-09-13	09:19:16	3.56592	15.8619	2707.37	1	139
2022-09-13	09:19:16	4.62861	20.589	3105.99	1	140
2022-09-13	09:19:17	4.545	20.2171	2727.58	1	141
2022-09-13	09:19:17	1.75431	7.80352	3113.8	FALSE	141
2022-09-13	09:19:17	3.51818	15.6496	2743.23	1	142
2022-09-13	09:19:18	1.21579	5.40808	3119.21	FALSE	142
2022-09-13	09:19:18	1.06495	4.73711	2747.97	FALSE	142
2022-09-13	09:19:18	2.58729	11.5088	3130.71	FALSE	142
2022-09-13	09:19:18	2.85752	12.7108	2760.68	FALSE	142
2022-09-13	09:19:19	5.18683	23.0721	3153.79	1	143
2022-09-13	09:19:19	4.21177	18.7348	2779.42	1	144
2022-09-13	09:19:19	6.90586	30.7186	3184.51	1	145
2022-09-13	09:19:19	4.89294	21.7648	2801.18	1	146
2022-09-13	09:19:20	5.50026	24.4663	3208.97	1	147
2022-09-13	09:19:20	6.26713	27.8774	2829.06	1	148
2022-09-13	09:19:20	3.44861	15.3401	3224.31	1	149
2022-09-13	09:19:20	10.4201	46.3507	2875.41	1	150
2022-09-13	09:19:21	4.41228	19.6267	3243.94	1	151
2022-09-13	09:19:21	8.47507	37.6988	2913.11	1	152
2022-09-13	09:19:21	10.4768	46.6029	3290.54	1	153
2022-09-13	09:19:21	7.50673	33.3914	2946.5	1	154
2022-09-13	09:19:22	16.4624	73.228	3363.77	1	155
2022-09-13	09:19:22	12.5445	55.8004	3002.3	1	156
2022-09-13	09:19:22	9.95354	44.2753	3408.04	1	157
2022-09-13	09:19:23	11.3576	50.5209	3052.82	1	158
2022-09-13	09:19:23	5.76291	25.6346	3433.68	1	159
2022-09-13	09:19:23	3.15243	14.0226	3066.84	1	160
2022-09-13	09:19:23	0.902048	4.01249	3437.69	FALSE	160
2022-09-13	09:19:24	2.10846	9.37885	3076.22	FALSE	160
2022-09-13	09:19:24	1.99762	8.88581	3446.58	FALSE	160
2022-09-13	09:19:24	2.79533	12.4342	3088.66	FALSE	160
2022-09-13	09:19:24	3.46647	15.4196	3462	1	161
2022-09-13	09:19:25	7.17161	31.9008	3120.56	1	162
2022-09-13	09:19:25	5.3595	23.8401	3485.84	1	163
2022-09-13	09:19:25	10.5563	46.9565	3167.51	1	164
2022-09-13	09:19:25	4.36907	19.4345	3505.27	1	165
2022-09-13	09:19:26	5.96235	26.5217	3194.04	1	166
2022-09-13	09:19:26	6.22143	27.6742	3532.95	1	167
2022-09-13	09:19:26	3.34312	14.8709	3208.91	1	168
2022-09-13	09:19:27	10.0581	44.7404	3577.69	1	169
2022-09-13	09:19:27	3.38953	15.0773	3223.98	1	170
2022-09-13	09:19:27	4.87533	21.6864	3599.37	1	171
2022-09-13	09:19:27	10.7206	47.6874	3271.67	1	172
2022-09-13	09:19:28	2.59223	11.5308	3610.9	FALSE	172
2022-09-13	09:19:28	10.3297	45.9486	3317.62	1	173
2022-09-13	09:19:28	6.09986	27.1334	3638.04	1	174
2022-09-13	09:19:28	4.15609	18.4871	3336.11	1	175
2022-09-13	09:19:29	8.84021	39.323	3677.36	1	176
2022-09-13	09:19:29	6.19039	27.5361	3363.64	1	177
2022-09-13	09:19:29	7.28047	32.385	3709.74	1	178
2022-09-13	09:19:29	11.6598	51.8651	3415.51	1	179
2022-09-13	09:19:30	5.91248	26.2999	3736.04	1	180
2022-09-13	09:19:30	10.6847	47.5277	3463.04	1	181
2022-09-13	09:19:30	5.08154	22.6037	3758.65	1	182
2022-09-13	09:19:30	3.97945	17.7014	3480.74	1	183
2022-09-13	09:19:31	14.3567	63.8615	3822.51	1	184
2022-09-13	09:19:31	2.17731	9.68511	3490.42	FALSE	184
2022-09-13	09:19:31	4.27655	19.0229	3841.53	1	185
2022-09-13	09:19:32	2.79711	12.4421	3502.87	FALSE	185
2022-09-13	09:19:32	1.28302	5.70713	3847.24	FALSE	185
2022-09-13	09:19:32	1.81696	8.0822	3510.95	FALSE	185
2022-09-13	09:19:32	2.59294	11.5339	3858.77	FALSE	185
2022-09-13	09:19:33	1.5076	6.70611	3517.65	FALSE	185
2022-09-13	09:19:33	1.86693	8.30448	3867.08	FALSE	185
2022-09-13	09:19:33	0.928969	4.13224	3521.79	FALSE	185
2022-09-13	09:19:33	0.961438	4.27667	3871.35	FALSE	185
2022-09-13	09:19:34	0.415178	1.84679	3523.63	FALSE	185
2022-09-13	09:19:34	0.741132	3.2967	3874.65	FALSE	185
2022-09-13	09:19:34	0.730343	3.24871	3526.88	FALSE	185
2022-09-13	09:19:34	0.285814	1.27136	3875.92	FALSE	185
2022-09-13	09:19:35	0.300827	1.33814	3528.22	FALSE	185
2022-09-13	09:19:35	0.30271	1.34651	3877.27	FALSE	185
2022-09-13	09:19:35	0.248664	1.10611	3529.33	FALSE	185
2022-09-13	09:19:36	0.341947	1.52105	3878.79	FALSE	185
2022-09-13	09:19:36	0.219351	0.975717	3530.3	FALSE	185
2022-09-13	09:19:36	0.349428	1.55433	3880.34	FALSE	185
2022-09-13	09:19:36	0.276349	1.22926	3531.53	FALSE	185
2022-09-13	09:19:37	0.324746	1.44454	3881.79	FALSE	185
2022-09-13	09:19:37	0.303219	1.34878	3532.88	FALSE	185
2022-09-13	09:19:37	0.310903	1.38296	3883.17	FALSE	185
2022-09-13	09:19:37	0.436552	1.94187	3534.82	FALSE	185
2022-09-13	09:19:38	0.138842	0.617597	3883.79	FALSE	185
2022-09-13	09:19:38	0.114059	0.507357	3535.33	FALSE	185
2022-09-13	09:19:38	0.0913615	0.406394	3884.2	FALSE	185
2022-09-13	09:19:38	-0.223448	-0.993941	3535.33	FALSE	185
2022-09-13	09:19:39	-0.498206	-2.21612	3884.2	FALSE	185
2022-09-13	09:19:39	1.31014	5.82776	3541.16	FALSE	185
2022-09-13	09:19:39	5.35701	23.8291	3908.03	1	186
2022-09-13	09:19:39	12.0412	53.5617	3594.72	1	187
2022-09-13	09:19:40	14.1445	62.9176	3970.94	1	188
2022-09-13	09:19:40	15.2313	67.7519	3662.47	1	189
2022-09-13	09:19:40	9.59436	42.6776	4013.62	1	190
2022-09-13	09:19:41	3.44062	15.3046	3677.77	1	191
2022-09-13	09:19:41	0.616959	2.74436	4016.36	FALSE	191
2022-09-13	09:19:41	0.331158	1.47306	3679.25	FALSE	191
2022-09-13	09:19:41	0.43813	1.94889	4018.31	FALSE	191
2022-09-13	09:19:42	0.302914	1.34742	3680.59	FALSE	191
2022-09-13	09:19:42	0.398639	1.77323	4020.09	FALSE	191
2022-09-13	09:19:42	0.411819	1.83185	3682.43	FALSE	191
2022-09-13	09:19:42	0.279911	1.2451	4021.33	FALSE	191
2022-09-13	09:19:43	0.52388	2.33032	3684.76	FALSE	191
2022-09-13	09:19:43	0.436145	1.94006	4023.27	FALSE	191
2022-09-13	09:19:43	0.538028	2.39326	3687.15	FALSE	191
2022-09-13	09:19:43	0.330344	1.46944	4024.74	FALSE	191
2022-09-13	09:19:44	0.579351	2.57707	3689.73	FALSE	191
2022-09-13	09:19:44	0.513906	2.28596	4027.03	FALSE	191
2022-09-13	09:19:44	0.644593	2.86728	3692.59	FALSE	191
2022-09-13	09:19:45	0.715331	3.18194	4030.21	FALSE	191
2022-09-13	09:19:45	1.39508	6.20559	3698.8	FALSE	191
2022-09-13	09:19:45	1.24877	5.55478	4035.76	FALSE	191
2022-09-13	09:19:45	3.69971	16.4571	3715.26	1	192
2022-09-13	09:19:46	4.0853	18.1722	4053.94	1	193
2022-09-13	09:19:46	4.74474	21.1056	3736.36	1	194
2022-09-13	09:19:46	2.36235	10.5082	4064.44	FALSE	194
2022-09-13	09:19:46	3.31945	14.7656	3751.13	1	195
2022-09-13	09:19:47	3.34943	14.8989	4079.34	1	196
2022-09-13	09:19:47	5.64739	25.1207	3776.25	1	197
2022-09-13	09:19:47	5.51237	24.5201	4103.86	1	198
2022-09-13	09:19:47	5.245	23.3308	3799.58	1	199
2022-09-13	09:19:48	2.02663	9.01486	4112.88	FALSE	199
2022-09-13	09:19:48	3.67334	16.3398	3815.92	1	200
2022-09-13	09:19:48	1.12627	5.00987	4117.89	FALSE	200
2022-09-13	09:19:48	3.08337	13.7154	3829.64	1	201
2022-09-13	09:19:49	1.50602	6.69908	4124.59	FALSE	201
2022-09-13	09:19:49	2.32128	10.3255	3839.96	FALSE	201
2022-09-13	09:19:49	1.54006	6.85049	4131.44	FALSE	201
2022-09-13	09:19:50	1.7022	7.57173	3847.53	FALSE	201
2022-09-13	09:19:50	0.977316	4.3473	4135.79	FALSE	201
2022-09-13	09:19:50	1.24317	5.52987	3853.06	FALSE	201
2022-09-13	09:19:50	0.623422	2.77311	4138.56	FALSE	201
2022-09-13	09:19:51	0.952837	4.23841	3857.3	FALSE	201
2022-09-13	09:19:51	0.877265	3.90225	4142.46	FALSE	201
2022-09-13	09:19:51	0.851158	3.78612	3861.09	FALSE	201
2022-09-13	09:19:51	0.826323	3.67565	4146.14	FALSE	201
2022-09-13	09:19:52	1.57024	6.98474	3868.07	FALSE	201
2022-09-13	09:19:52	1.48663	6.61283	4152.75	FALSE	201
2022-09-13	09:19:52	1.82128	8.10142	3876.17	FALSE	201
2022-09-13	09:19:52	3.08652	13.7295	4166.48	1	202
2022-09-13	09:19:53	1.36225	6.05956	3882.23	FALSE	202
2022-09-13	09:19:53	1.83518	8.16325	4174.64	FALSE	202
2022-09-13	09:19:53	0.293448	1.30532	3883.54	FALSE	202
2022-09-13	09:19:53	0.603728	2.6855	4177.33	FALSE	202
2022-09-13	09:19:54	0.456807	2.03197	3885.57	FALSE	202
2022-09-13	09:19:54	0.417926	1.85902	4179.19	FALSE	202
2022-09-13	09:19:54	0.433244	1.92716	3887.5	FALSE	202
2022-09-13	09:19:55	0.763728	3.39721	4182.58	FALSE	202
2022-09-13	09:19:55	1.00459	4.46862	3891.97	FALSE	202
2022-09-13	09:19:55	1.80785	8.04168	4190.63	FALSE	202
2022-09-13	09:19:55	2.72016	12.0998	3904.07	FALSE	202
2022-09-13	09:19:56	1.50281	6.6848	4197.31	FALSE	202
2022-09-13	09:19:56	1.93238	8.59561	3912.66	FALSE	202
2022-09-13	09:19:56	1.45197	6.45865	4203.77	FALSE	202
2022-09-13	09:19:56	1.3567	6.03487	3918.7	FALSE	202
2022-09-13	09:19:57	-0.0595799	-0.265023	4203.77	FALSE	202
2022-09-13	09:19:57	-0.0293509	-0.130559	3918.7	FALSE	202
2022-09-13	09:19:57	-0.019987	-0.0889062	4203.77	FALSE	202
2022-09-13	09:19:57	-0.0765773	-0.340631	3918.7	FALSE	202
2022-09-13	09:19:58	-0.312201	-1.38873	4203.77	FALSE	202
2022-09-13	09:19:58	-0.397646	-1.76881	3918.7	FALSE	202
2022-09-13	09:19:58	-0.459936	-2.04589	4203.77	FALSE	202
2022-09-13	09:19:59	-0.459681	-2.04475	3918.7	FALSE	202
2022-09-13	09:19:59	-0.250369	-1.11369	4203.77	FALSE	202
2022-09-13	09:19:59	0.0653565	0.290719	3918.99	FALSE	202
2022-09-13	09:19:59	0.369224	1.64238	4205.41	FALSE	202
2022-09-13	09:20:00	0.429071	1.90859	3920.9	FALSE	202
2022-09-13	09:20:00	1.24877	5.55478	4210.97	FALSE	202
2022-09-13	09:20:00	1.70505	7.5844	3928.48	FALSE	202
2022-09-13	09:20:00	2.13411	9.49295	4220.46	FALSE	202
2022-09-13	09:20:01	1.55894	6.93448	3935.41	FALSE	202
2022-09-13	09:20:01	1.68454	7.49317	4227.95	FALSE	202
2022-09-13	09:20:01	2.48647	11.0603	3946.47	FALSE	202
2022-09-13	09:20:01	0.980623	4.36201	4232.31	FALSE	202
2022-09-13	09:20:02	1.78378	7.93461	3954.41	FALSE	202
2022-09-13	09:20:02	1.64704	7.32636	4239.64	FALSE	202
2022-09-13	09:20:02	3.16831	14.0933	3968.5	1	203
2022-09-13	09:20:02	3.15854	14.0498	4253.69	1	204
2022-09-13	09:20:03	2.6591	11.8282	3980.33	FALSE	204
2022-09-13	09:20:03	2.30551	10.2554	4263.95	FALSE	204
2022-09-13	09:20:03	1.03599	4.60829	3984.94	FALSE	204
2022-09-13	09:20:04	1.88683	8.393	4272.34	FALSE	204
2022-09-13	09:20:04	0.534364	2.37696	3987.32	FALSE	204
2022-09-13	09:20:04	1.18088	5.25279	4277.59	FALSE	204
2022-09-13	09:20:04	0.381692	1.69784	3989.01	FALSE	204
2022-09-13	09:20:05	0.656247	2.91912	4280.51	FALSE	204
2022-09-13	09:20:05	0.547035	2.43332	3991.45	FALSE	204
2022-09-13	09:20:05	0.417112	1.8554	4282.37	FALSE	204
2022-09-13	09:20:05	0.253397	1.12716	3992.57	FALSE	204
2022-09-13	09:20:06	0.44327	1.97175	4284.34	FALSE	204
2022-09-13	09:20:06	0.477875	2.12568	3994.7	FALSE	204
2022-09-13	09:20:06	0.974974	4.33688	4288.67	FALSE	204
2022-09-13	09:20:07	1.64749	7.32837	4002.03	FALSE	204
2022-09-13	09:20:07	2.98983	13.2994	4301.97	FALSE	204
2022-09-13	09:20:07	0.494516	2.19971	4004.23	FALSE	204
2022-09-13	09:20:07	0.089733	0.39915	4302.37	FALSE	204
2022-09-13	09:20:08	0.355585	1.58171	4005.81	FALSE	204
2022-09-13	09:20:08	0.360776	1.6048	4303.98	FALSE	204
2022-09-13	09:20:08	0.819657	3.646	4009.46	FALSE	204
2022-09-13	09:20:08	2.00912	8.93697	4312.91	FALSE	204
2022-09-13	09:20:09	2.38938	10.6284	4020.08	FALSE	204
2022-09-13	09:20:09	0.662201	2.9456	4315.86	FALSE	204
2022-09-13	09:20:09	-0.171692	-0.76372	4020.08	FALSE	204
2022-09-13	09:20:09	0.0166033	0.0738548	4315.93	FALSE	204
2022-09-13	09:20:10	-0.153727	-0.683808	4020.08	FALSE	204
2022-09-13	09:20:10	-0.386094	-1.71742	4315.93	FALSE	204
2022-09-13	09:20:10	-0.47902	-2.13078	4020.08	FALSE	204
2022-09-13	09:20:10	-0.550979	-2.45086	4315.93	FALSE	204
2022-09-13	09:20:11	-0.324669	-1.44419	4020.08	FALSE	204
2022-09-13	09:20:11	-0.0182567	-0.0812095	4315.93	FALSE	204
2022-09-13	09:20:11	0.260064	1.15682	4021.24	FALSE	204
2022-09-13	09:20:11	0.27472	1.22201	4317.16	FALSE	204
2022-09-13	09:20:12	0.117519	0.522748	4021.76	FALSE	204
2022-09-13	09:20:12	0.0802674	0.357045	4317.51	FALSE	204
2022-09-13	09:20:12	0.32841	1.46083	4023.22	FALSE	204
2022-09-13	09:20:13	2.50164	11.1278	4328.64	FALSE	204
2022-09-13	09:20:13	2.68765	11.9552	4035.18	FALSE	204
2022-09-13	09:20:13	2.01401	8.95872	4337.6	FALSE	204
2022-09-13	09:20:13	3.84123	17.0866	4052.27	1	205
2022-09-13	09:20:14	2.38347	10.6022	4348.2	FALSE	205
2022-09-13	09:20:14	1.72083	7.6546	4059.92	FALSE	205
2022-09-13	09:20:14	1.145	5.09319	4353.3	FALSE	205
2022-09-13	09:20:14	1.47024	6.53992	4066.46	FALSE	205
2022-09-13	09:20:15	1.0223	4.54739	4357.84	FALSE	205
2022-09-13	09:20:15	0.966781	4.30044	4070.76	FALSE	205
2022-09-13	09:20:15	1.60098	7.12148	4364.96	FALSE	205
2022-09-13	09:20:15	1.02581	4.56301	4075.32	FALSE	205
2022-09-13	09:20:16	1.88042	8.36448	4373.33	FALSE	205
2022-09-13	09:20:16	1.43589	6.38713	4081.71	FALSE	205
2022-09-13	09:20:16	2.78149	12.3726	4385.7	FALSE	205
2022-09-13	09:20:17	1.58495	7.05017	4088.76	FALSE	205
2022-09-13	09:20:17	2.11426	9.40465	4395.11	FALSE	205
2022-09-13	09:20:17	3.62668	16.1322	4104.89	1	206
2022-09-13	09:20:17	3.81706	16.979	4412.08	1	207
2022-09-13	09:20:18	3.72067	16.5503	4121.44	1	208
2022-09-13	09:20:18	5.25248	23.3641	4435.45	1	209
2022-09-13	09:20:18	1.67696	7.45945	4128.9	FALSE	209
2022-09-13	09:20:18	1.85034	8.23068	4443.68	FALSE	209
2022-09-13	09:20:19	1.0591	4.71109	4133.61	FALSE	209
2022-09-13	09:20:19	1.22704	5.45812	4449.14	FALSE	209
2022-09-13	09:20:19	1.36581	6.0754	4139.69	FALSE	209
2022-09-13	09:20:19	1.63396	7.26818	4456.41	FALSE	209
2022-09-13	09:20:20	0.904339	4.02268	4143.71	FALSE	209
2022-09-13	09:20:20	1.18561	5.27383	4461.68	FALSE	209
2022-09-13	09:20:20	1.04576	4.65175	4148.36	FALSE	209
2022-09-13	09:20:20	1.58709	7.05969	4468.74	FALSE	209
2022-09-13	09:20:21	1.13401	5.0443	4153.41	FALSE	209
2022-09-13	09:20:21	1.41747	6.30519	4475.04	FALSE	209
2022-09-13	09:20:21	2.09447	9.31662	4162.73	FALSE	209
2022-09-13	09:20:22	0.903168	4.01747	4479.06	FALSE	209
2022-09-13	09:20:22	0.863931	3.84294	4166.57	FALSE	209
2022-09-13	09:20:22	0.465763	2.07181	4481.13	FALSE	209
2022-09-13	09:20:22	0.906272	4.03128	4170.6	FALSE	209
2022-09-13	09:20:23	0.421641	1.87554	4483.01	FALSE	209
2022-09-13	09:20:23	1.55284	6.90734	4177.51	FALSE	209
2022-09-13	09:20:23	1.73635	7.72363	4490.73	FALSE	209
2022-09-13	09:20:23	3.93492	17.5033	4195.01	1	210
2022-09-13	09:20:24	3.00683	13.375	4504.11	1	211
2022-09-13	09:20:24	7.46347	33.199	4228.21	1	212
2022-09-13	09:20:24	5.02683	22.3603	4526.47	1	213
2022-09-13	09:20:24	13.7287	61.068	4289.28	1	214
2022-09-13	09:20:25	3.75772	16.7151	4543.18	1	215
2022-09-13	09:20:25	6.32317	28.1267	4317.4	1	216
2022-09-13	09:20:25	11.8491	52.7072	4595.89	1	217
2022-09-13	09:20:26	2.22139	9.88119	4327.28	FALSE	217
2022-09-13	09:20:26	7.69182	34.2148	4630.11	1	218
2022-09-13	09:20:26	3.92653	17.466	4344.75	1	219
2022-09-13	09:20:26	5.97222	26.5656	4656.67	1	220
2022-09-13	09:20:27	14.4216	64.1502	4408.9	1	221
2022-09-13	09:20:27	6.49863	28.9072	4685.58	1	222
2022-09-13	09:20:27	11.5874	51.5431	4460.44	1	223
2022-09-13	09:20:27	1.0338	4.59855	4690.18	FALSE	223
2022-09-13	09:20:28	0.284135	1.26389	4461.71	FALSE	223
2022-09-13	09:20:28	0.493295	2.19427	4692.37	FALSE	223
2022-09-13	09:20:28	0.442405	1.96791	4463.68	FALSE	223
2022-09-13	09:20:28	0.532277	2.36767	4694.74	FALSE	223
2022-09-13	09:20:29	0.303524	1.35014	4465.03	FALSE	223
2022-09-13	09:20:29	0.291972	1.29875	4696.04	FALSE	223
2022-09-13	09:20:29	0.28215	1.25506	4466.28	FALSE	223
2022-09-13	09:20:29	0.105407	0.468871	4696.51	FALSE	223
2022-09-13	09:20:30	0.482201	2.14493	4468.43	FALSE	223
2022-09-13	09:20:30	0.324339	1.44272	4697.95	FALSE	223
2022-09-13	09:20:30	0.490191	2.18047	4470.61	FALSE	223
2022-09-13	09:20:31	0.3993	1.77617	4699.73	FALSE	223
2022-09-13	09:20:31	0.56215	2.50056	4473.11	FALSE	223
2022-09-13	09:20:31	0.743015	3.30508	4703.03	FALSE	223
2022-09-13	09:20:31	0.987086	4.39076	4477.5	FALSE	223
2022-09-13	09:20:32	3.6482	16.2279	4719.26	1	224
2022-09-13	09:20:32	3.77548	16.7941	4494.29	1	225
2022-09-13	09:20:32	2.69182	11.9738	4731.23	FALSE	225
2022-09-13	09:20:32	0.587188	2.61193	4496.9	FALSE	225
2022-09-13	09:20:33	0.787392	3.50248	4734.73	FALSE	225
2022-09-13	09:20:33	0.6164	2.74187	4499.65	FALSE	225
2022-09-13	09:20:33	0.588664	2.6185	4737.35	FALSE	225
2022-09-13	09:20:33	0.428461	1.90588	4501.55	FALSE	225
2022-09-13	09:20:34	0.570598	2.53813	4739.89	FALSE	225
2022-09-13	09:20:34	0.385865	1.7164	4503.27	FALSE	225
2022-09-13	09:20:34	0.634262	2.82132	4742.71	FALSE	225
2022-09-13	09:20:35	0.388512	1.72818	4505	FALSE	225
2022-09-13	09:20:35	0.670852	2.98408	4745.7	FALSE	225
2022-09-13	09:20:35	0.471718	2.0983	4507.09	FALSE	225
2022-09-13	09:20:35	1.38139	6.1447	4751.84	FALSE	225
2022-09-13	09:20:36	1.17131	5.21022	4512.3	FALSE	225
2022-09-13	09:20:36	8.29731	36.9081	4788.75	1	226
2022-09-13	09:20:36	3.868	17.2056	4529.51	1	227
2022-09-13	09:20:36	11.8472	52.6987	4841.45	1	228
2022-09-13	09:20:37	2.2619	10.0614	4539.57	FALSE	228
2022-09-13	09:20:37	3.93767	17.5155	4858.96	1	229
2022-09-13	09:20:37	2.67451	11.8968	4551.47	FALSE	229
2022-09-13	09:20:37	1.26352	5.62039	4864.58	FALSE	229
2022-09-13	09:20:38	3.4737	15.4517	4566.92	1	230
2022-09-13	09:20:38	0.668308	2.97277	4867.56	FALSE	230
2022-09-13	09:20:38	0.606527	2.69795	4569.62	FALSE	230
2022-09-13	09:20:38	0.684033	3.04272	4870.6	FALSE	230
2022-09-13	09:20:39	0.441641	1.96451	4571.58	FALSE	230
2022-09-13	09:20:39	0.796094	3.54119	4874.14	FALSE	230
2022-09-13	09:20:39	0.9507	4.2289	4575.81	FALSE	230
2022-09-13	09:20:40	1.94134	8.63547	4882.78	FALSE	230
2022-09-13	09:20:40	0.958486	4.26354	4580.08	FALSE	230
2022-09-13	09:20:40	2.14118	9.5244	4892.3	FALSE	230
2022-09-13	09:20:40	1.49838	6.66509	4586.74	FALSE	230
2022-09-13	09:20:41	2.45187	10.9064	4903.21	FALSE	230
2022-09-13	09:20:41	1.53131	6.81157	4593.55	FALSE	230
2022-09-13	09:20:41	0.649173	2.88765	4906.09	FALSE	230
2022-09-13	09:20:41	1.87782	8.35292	4601.9	FALSE	230
2022-09-13	09:20:42	0.957163	4.25765	4910.35	FALSE	230
2022-09-13	09:20:42	2.88235	12.8213	4614.73	FALSE	230
2022-09-13	09:20:42	2.45396	10.9157	4921.27	FALSE	230
2022-09-13	09:20:42	4.70653	20.9356	4635.66	1	231
2022-09-13	09:20:43	4.18149	18.6001	4939.87	1	232
2022-09-13	09:20:43	6.23879	27.7514	4663.41	1	233
2022-09-13	09:20:43	7.74072	34.4323	4974.3	1	234
2022-09-13	09:20:43	2.67624	11.9045	4675.32	FALSE	234
2022-09-13	09:20:44	3.75299	16.6941	4990.99	1	235
2022-09-13	09:20:44	1.01396	4.5103	4679.83	FALSE	235
2022-09-13	09:20:44	3.49757	15.5579	5006.55	1	236
2022-09-13	09:20:45	1.67406	7.44655	4687.27	FALSE	236
2022-09-13	09:20:45	2.41782	10.7549	5017.31	FALSE	236
2022-09-13	09:20:45	4.02948	17.9239	4705.2	1	237
2022-09-13	09:20:45	1.35676	6.03514	5023.34	FALSE	237
2022-09-13	09:20:46	2.67426	11.8956	4717.09	FALSE	237
2022-09-13	09:20:46	1.02357	4.55304	5027.9	FALSE	237
2022-09-13	09:20:46	2.40459	10.6961	4727.79	FALSE	237
2022-09-13	09:20:46	1.39177	6.19087	5034.09	FALSE	237
2022-09-13	09:20:47	1.00459	4.46862	4732.26	FALSE	237
2022-09-13	09:20:47	1.52612	6.78849	5040.87	FALSE	237
2022-09-13	09:20:47	0.931768	4.14469	4736.4	FALSE	237
2022-09-13	09:20:47	1.55497	6.91682	5047.79	FALSE	237
2022-09-13	09:20:48	0.897214	3.99099	4740.39	FALSE	237
2022-09-13	09:20:48	3.20729	14.2667	5062.06	1	238
2022-09-13	09:20:48	1.89559	8.43196	4748.83	FALSE	238
2022-09-13	09:20:49	5.19314	23.1001	5085.16	1	239
2022-09-13	09:20:49	4.47991	19.9275	4768.75	1	240
2022-09-13	09:20:49	3.39263	15.0911	5100.25	1	241
2022-09-13	09:20:49	4.66983	20.7723	4789.53	1	242
2022-09-13	09:20:50	0.423015	1.88166	5102.13	FALSE	242
2022-09-13	09:20:50	2.19986	9.78542	4799.31	FALSE	242
2022-09-13	09:20:50	0.494109	2.1979	5104.33	FALSE	242
2022-09-13	09:20:50	0.510038	2.26875	4801.58	FALSE	242
2022-09-13	09:20:51	0.740064	3.29195	5107.62	FALSE	242
2022-09-13	09:20:51	0.405051	1.80175	4803.38	FALSE	242
2022-09-13	09:20:51	0.805	3.5808	5111.2	FALSE	242
2022-09-13	09:20:51	0.43299	1.92603	4805.31	FALSE	242
2022-09-13	09:20:52	0.668511	2.97367	5114.18	FALSE	242
2022-09-13	09:20:52	0.351158	1.56202	4806.87	FALSE	242
2022-09-13	09:20:52	0.638893	2.84192	5117.02	FALSE	242
2022-09-13	09:20:52	0.39701	1.76598	4808.64	FALSE	242
2022-09-13	09:20:53	0.420725	1.87147	5118.89	FALSE	242
2022-09-13	09:20:53	0.398741	1.77368	4810.41	FALSE	242
2022-09-13	09:20:53	0.477824	2.12546	5121.01	FALSE	242
2022-09-13	09:20:54	0.453092	2.01544	4812.43	FALSE	242
2022-09-13	09:20:54	0.561692	2.49852	5123.51	FALSE	242
2022-09-13	09:20:54	0.393092	1.74855	4814.17	FALSE	242
2022-09-13	09:20:54	0.641234	2.85234	5126.37	FALSE	242
2022-09-13	09:20:55	0.425764	1.89388	4816.07	FALSE	242
2022-09-13	09:20:55	0.834568	3.71233	5130.08	FALSE	242
2022-09-13	09:20:55	0.819453	3.64509	4819.71	FALSE	242
2022-09-13	09:20:55	2.36123	10.5032	5140.58	FALSE	242
2022-09-13	09:20:56	2.05849	9.15658	4828.87	FALSE	242
2022-09-13	09:20:56	8.98433	39.9641	5180.54	1	243
2022-09-13	09:20:56	2.46841	10.98	4839.85	FALSE	243
2022-09-13	09:20:56	12.4578	55.4148	5235.96	1	244
2022-09-13	09:20:57	0.945356	4.20513	4844.05	FALSE	244
2022-09-13	09:20:57	6.28749	27.968	5263.93	1	245
2022-09-13	09:20:57	1.31945	5.86918	4849.92	FALSE	245
2022-09-13	09:20:58	1.31034	5.82865	5269.76	FALSE	245
2022-09-13	09:20:58	2.19126	9.74716	4859.67	FALSE	245
2022-09-13	09:20:58	0.873041	3.88346	5273.64	FALSE	245
2022-09-13	09:20:58	1.84459	8.20511	4867.88	FALSE	245
2022-09-13	09:20:59	0.919351	4.08946	5277.73	FALSE	245
2022-09-13	09:20:59	1.98892	8.84711	4876.72	FALSE	245
2022-09-13	09:20:59	0.840216	3.73745	5281.47	FALSE	245
2022-09-13	09:20:59	1.0736	4.77559	4881.5	FALSE	245
2022-09-13	09:21:00	1.57665	7.01325	5288.48	FALSE	245
2022-09-13	09:21:00	0.871819	3.87803	4885.38	FALSE	245
2022-09-13	09:21:00	2.34729	10.4412	5298.92	FALSE	245
2022-09-13	09:21:00	1.35996	6.04937	4891.43	FALSE	245
2022-09-13	09:21:01	6.73548	29.9608	5328.88	1	246
2022-09-13	09:21:01	2.29212	10.1958	4901.62	FALSE	246
2022-09-13	09:21:01	7.98077	35.5001	5364.38	1	247
2022-09-13	09:21:01	1.391	6.18745	4907.81	FALSE	247
2022-09-13	09:21:02	4.89818	21.7881	5386.17	1	248
2022-09-13	09:21:02	0.633804	2.81929	4910.63	FALSE	248
2022-09-13	09:21:02	2.71808	12.0906	5398.26	FALSE	248
2022-09-13	09:21:03	2.32734	10.3525	4920.98	FALSE	248
2022-09-13	09:21:03	0.648766	2.88584	5401.15	FALSE	248
2022-09-13	09:21:03	1.13625	5.05427	4926.04	FALSE	248
2022-09-13	09:21:03	0.464339	2.06547	5403.21	FALSE	248
2022-09-13	09:21:04	0.631005	2.80684	4928.84	FALSE	248
2022-09-13	09:21:04	0.397519	1.76824	5404.98	FALSE	248
2022-09-13	09:21:04	0.495178	2.20265	4931.04	FALSE	248
2022-09-13	09:21:05	0.452074	2.01092	5406.99	FALSE	248
2022-09-13	09:21:05	0.472277	2.10078	4933.15	FALSE	248
2022-09-13	09:21:05	0.475026	2.11301	5409.1	FALSE	248
2022-09-13	09:21:05	0.472328	2.10101	4935.25	FALSE	248
2022-09-13	09:21:05	0.447799	1.9919	5411.1	FALSE	248
2022-09-13	09:21:06	0.429122	1.90882	4937.16	FALSE	248
2022-09-13	09:21:06	0.466171	2.07362	5413.17	FALSE	248
2022-09-13	09:21:06	0.466679	2.07588	4939.23	FALSE	248
2022-09-13	09:21:07	0.495076	2.2022	5415.37	FALSE	248
2022-09-13	09:21:07	0.458944	2.04147	4941.27	FALSE	248
2022-09-13	09:21:07	0.46388	2.06343	5417.44	FALSE	248
2022-09-13	09:21:07	0.454008	2.01952	4943.29	FALSE	248
2022-09-13	09:21:08	0.45528	2.02518	5419.46	FALSE	248
2022-09-13	09:21:08	0.446476	1.98601	4945.28	FALSE	248
2022-09-13	09:21:08	0.454364	2.0211	5421.48	FALSE	248
2022-09-13	09:21:08	0.447545	1.99077	4947.27	FALSE	248
2022-09-13	09:21:09	0.452277	2.01182	5423.49	FALSE	248
2022-09-13	09:21:09	0.456247	2.02948	4949.3	FALSE	248
2022-09-13	09:21:09	0.452532	2.01295	5425.51	FALSE	248
2022-09-13	09:21:09	0.440776	1.96066	4951.26	FALSE	248
2022-09-13	09:21:10	0.400064	1.77956	5427.29	FALSE	248
2022-09-13	09:21:10	0.342964	1.52557	4952.78	FALSE	248
2022-09-13	09:21:10	0.354008	1.5747	5428.86	FALSE	248
2022-09-13	09:21:10	0.353651	1.57311	4954.36	FALSE	248
2022-09-13	09:21:11	0.540471	2.40412	5431.26	FALSE	248
2022-09-13	09:21:11	0.445407	1.98126	4956.34	FALSE	248
2022-09-13	09:21:11	0.461845	2.05438	5433.32	FALSE	248
2022-09-13	09:21:12	0.471311	2.09649	4958.44	FALSE	248
2022-09-13	09:21:12	0.451209	2.00707	5435.33	FALSE	248
2022-09-13	09:21:12	0.458639	2.04012	4960.48	FALSE	248
2022-09-13	09:21:12	0.469987	2.0906	5437.42	FALSE	248
2022-09-13	09:21:13	0.45416	2.02019	4962.5	FALSE	248
2022-09-13	09:21:13	0.439555	1.95523	5439.37	FALSE	248
2022-09-13	09:21:13	0.467036	2.07747	4964.57	FALSE	248
2022-09-13	09:21:13	0.461743	2.05393	5441.43	FALSE	248
2022-09-13	09:21:14	0.464288	2.06525	4966.64	FALSE	248
2022-09-13	09:21:14	0.463626	2.0623	5443.49	FALSE	248
2022-09-13	09:21:14	0.476603	2.12003	4968.76	FALSE	248
2022-09-13	09:21:14	0.472684	2.10259	5445.59	FALSE	248
2022-09-13	09:21:15	0.466171	2.07362	4970.83	FALSE	248
2022-09-13	09:21:15	0.472074	2.09988	5447.69	FALSE	248
2022-09-13	09:21:15	0.471819	2.09875	4972.93	FALSE	248
2022-09-13	09:21:16	0.471769	2.09852	5449.79	FALSE	248
2022-09-13	09:21:16	0.472684	2.10259	4975.03	FALSE	248
2022-09-13	09:21:16	0.47813	2.12682	5451.92	FALSE	248
2022-09-13	09:21:16	0.470089	2.09105	4977.12	FALSE	248
2022-09-13	09:21:17	0.482354	2.14561	5454.06	FALSE	248
2022-09-13	09:21:17	0.47874	2.12953	4979.25	FALSE	248
2022-09-13	09:21:17	0.481794	2.14312	5456.2	FALSE	248
2022-09-13	09:21:17	0.474618	2.1112	4981.37	FALSE	248
2022-09-13	09:21:18	0.48271	2.14719	5458.35	FALSE	248
2022-09-13	09:21:18	0.478944	2.13044	4983.5	FALSE	248
2022-09-13	09:21:18	0.48271	2.14719	5460.5	FALSE	248
2022-09-13	09:21:18	0.486679	2.16485	4985.66	FALSE	248
2022-09-13	09:21:19	0.500063	2.22438	5462.72	FALSE	248
2022-09-13	09:21:19	0.499606	2.22235	4987.88	FALSE	248
2022-09-13	09:21:19	0.48958	2.17775	5464.9	FALSE	248
2022-09-13	09:21:19	0.484847	2.1567	4990.04	FALSE	248
2022-09-13	09:21:20	0.486985	2.16621	5467.07	FALSE	248
2022-09-13	09:21:20	0.477672	2.12478	4992.16	FALSE	248
2022-09-13	09:21:20	0.472634	2.10237	5469.17	FALSE	248
2022-09-13	09:21:21	0.473397	2.10576	4994.27	FALSE	248
2022-09-13	09:21:21	0.463728	2.06275	5471.23	FALSE	248
2022-09-13	09:21:21	0.474822	2.1121	4996.38	FALSE	248
2022-09-13	09:21:21	0.470954	2.0949	5473.33	FALSE	248
2022-09-13	09:21:22	0.466272	2.07407	4998.46	FALSE	248
2022-09-13	09:21:22	0.455433	2.02586	5475.35	FALSE	248
2022-09-13	09:21:22	0.461285	2.05189	5000.51	FALSE	248
2022-09-13	09:21:22	0.469784	2.08969	5477.44	FALSE	248
2022-09-13	09:21:23	0.469682	2.08924	5002.6	FALSE	248
2022-09-13	09:21:23	0.441794	1.96519	5479.41	FALSE	248
2022-09-13	09:21:23	0.480267	2.13632	5004.73	FALSE	248
2022-09-13	09:21:23	0.480064	2.13542	5481.54	FALSE	248
2022-09-13	09:21:24	0.465662	2.07136	5006.81	FALSE	248
2022-09-13	09:21:24	0.541896	2.41046	5483.95	FALSE	248
2022-09-13	09:21:24	0.377672	1.67996	5008.48	FALSE	248
2022-09-13	09:21:25	0.413397	1.83887	5485.79	FALSE	248
2022-09-13	09:21:25	0.382506	1.70146	5010.19	FALSE	248
2022-09-13	09:21:25	0.452328	2.01205	5487.8	FALSE	248
2022-09-13	09:21:25	0.41126	1.82937	5012.02	FALSE	248
2022-09-13	09:21:26	0.135433	0.602433	5488.41	FALSE	248
2022-09-13	09:21:26	0.045102	0.200623	5012.22	FALSE	248
2022-09-13	09:21:26	-0.0469081	-0.208657	5488.41	FALSE	248
2022-09-13	09:21:26	-0.0728114	-0.32388	5012.22	FALSE	248
2022-09-13	09:21:27	0.00449134	0.0199784	5488.43	FALSE	248
2022-09-13	09:21:27	-0.0166792	-0.0741924	5012.22	FALSE	248
2022-09-13	09:21:27	-0.0773407	-0.344027	5488.43	FALSE	248
2022-09-13	09:21:27	0.053957	0.240012	5012.46	FALSE	248
2022-09-13	09:21:28	-0.0371372	-0.165194	5488.43	FALSE	248
2022-09-13	09:21:28	0.0737025	0.327843	5012.78	FALSE	248
2022-09-13	09:21:28	-0.055814	-0.248272	5488.43	FALSE	248
2022-09-13	09:21:28	0.0162979	0.0724963	5012.86	FALSE	248
2022-09-13	09:21:29	0.0190969	0.0849468	5488.51	FALSE	248
2022-09-13	09:21:29	0.412837	1.83638	5014.69	FALSE	248
2022-09-13	09:21:29	2.3619	10.5062	5499.02	FALSE	248
2022-09-13	09:21:30	4.53568	20.1756	5034.87	1	249
2022-09-13	09:21:30	7.50851	33.3994	5532.42	1	250
2022-09-13	09:21:30	9.34383	41.5632	5076.43	1	251
2022-09-13	09:21:30	2.19335	9.75646	5542.17	FALSE	251
2022-09-13	09:21:31	3.63156	16.1539	5092.59	1	252
2022-09-13	09:21:31	1.02037	4.53881	5546.71	FALSE	252
2022-09-13	09:21:31	0.559453	2.48856	5095.07	FALSE	252
2022-09-13	09:21:31	2.07207	9.21698	5555.93	FALSE	252
2022-09-13	09:21:32	1.23945	5.51332	5100.59	FALSE	252
2022-09-13	09:21:32	4.07543	18.1283	5574.06	1	253
2022-09-13	09:21:32	4.46093	19.8431	5120.43	1	254
2022-09-13	09:21:32	9.42367	41.9184	5615.98	1	255
2022-09-13	09:21:33	10.0722	44.8032	5165.23	1	256
2022-09-13	09:21:33	1.88714	8.39438	5624.37	FALSE	256
2022-09-13	09:21:33	5.89573	26.2254	5191.46	1	257
2022-09-13	09:21:34	1.09564	4.87363	5629.24	FALSE	257
2022-09-13	09:21:34	2.93472	13.0542	5204.51	FALSE	257
2022-09-13	09:21:34	1.42413	6.33482	5635.58	FALSE	257
2022-09-13	09:21:34	2.1736	9.66861	5214.18	FALSE	257
2022-09-13	09:21:35	2.93935	13.0748	5648.65	FALSE	257
2022-09-13	09:21:35	1.01726	4.52498	5218.71	FALSE	257
2022-09-13	09:21:35	2.38958	10.6293	5659.28	FALSE	257
2022-09-13	09:21:35	2.04943	9.11627	5227.82	FALSE	257
2022-09-13	09:21:36	3.32892	14.8077	5674.09	1	258
2022-09-13	09:21:36	4.34067	19.3082	5247.13	1	259
2022-09-13	09:21:36	4.76576	21.1991	5695.29	1	260
2022-09-13	09:21:36	6.65441	29.6001	5276.73	1	261
2022-09-13	09:21:37	0.984542	4.37944	5699.67	FALSE	261
2022-09-13	09:21:37	1.17981	5.24803	5281.98	FALSE	261
2022-09-13	09:21:37	1.34704	5.9919	5705.66	FALSE	261
2022-09-13	09:21:37	2.37706	10.5736	5292.55	FALSE	261
2022-09-13	09:21:38	0.61813	2.74957	5708.41	FALSE	261
2022-09-13	09:21:38	1.40093	6.23162	5298.79	FALSE	261
2022-09-13	09:21:38	1.67299	7.44179	5715.85	FALSE	261
2022-09-13	09:21:39	1.6108	7.16516	5305.95	FALSE	261
2022-09-13	09:21:39	1.14627	5.09884	5720.95	FALSE	261
2022-09-13	09:21:39	0.544135	2.42042	5308.37	FALSE	261
2022-09-13	09:21:39	0.174975	0.778324	5721.73	FALSE	261
2022-09-13	09:21:40	0.227239	1.0108	5309.38	FALSE	261
2022-09-13	09:21:40	0.0332445	0.147878	5721.88	FALSE	261
2022-09-13	09:21:40	0.441234	1.9627	5311.34	FALSE	261
2022-09-13	09:21:40	0.745611	3.31663	5725.19	FALSE	261
2022-09-13	09:21:41	0.0393514	0.175043	5311.52	FALSE	261
2022-09-13	09:21:41	-0.0945926	-0.420767	5725.19	FALSE	261
2022-09-13	09:21:41	0.127901	0.568929	5312.09	FALSE	261
2022-09-13	09:21:41	0.437875	1.94776	5727.14	FALSE	261
2022-09-13	09:21:42	0.688257	3.0615	5315.15	FALSE	261
2022-09-13	09:21:42	0.787036	3.50089	5730.64	FALSE	261
2022-09-13	09:21:42	0.501387	2.23027	5317.38	FALSE	261
2022-09-13	09:21:43	0.45014	2.00231	5732.65	FALSE	261
2022-09-13	09:21:43	0.423066	1.88188	5319.26	FALSE	261
2022-09-13	09:21:43	0.528053	2.34889	5734.99	FALSE	261
2022-09-13	09:21:43	0.726679	3.23241	5322.49	FALSE	261
2022-09-13	09:21:44	0.733957	3.26479	5738.26	FALSE	261
2022-09-13	09:21:44	0.733499	3.26275	5325.76	FALSE	261
2022-09-13	09:21:44	0.557315	2.47905	5740.74	FALSE	261
2022-09-13	09:21:44	0.536807	2.38782	5328.14	FALSE	261
2022-09-13	09:21:45	0.403473	1.79473	5742.53	FALSE	261
2022-09-13	09:21:45	0.735534	3.2718	5331.42	FALSE	261
2022-09-13	09:21:45	0.734262	3.26614	5745.8	FALSE	261
2022-09-13	09:21:45	0.734771	3.26841	5334.69	FALSE	261
2022-09-13	09:21:46	0.737214	3.27928	5749.08	FALSE	261
2022-09-13	09:21:46	0.737773	3.28176	5337.97	FALSE	261
2022-09-13	09:21:46	0.742099	3.301	5752.38	FALSE	261
2022-09-13	09:21:46	0.738028	3.2829	5341.25	FALSE	261
2022-09-13	09:21:47	0.736399	3.27565	5755.66	FALSE	261
2022-09-13	09:21:47	0.741183	3.29693	5344.55	FALSE	261
2022-09-13	09:21:47	0.755687	3.36145	5759.02	FALSE	261
2022-09-13	09:21:48	1.58973	7.07144	5351.62	FALSE	261
2022-09-13	09:21:48	0.73645	3.27588	5762.29	FALSE	261
2022-09-13	09:21:48	0.737163	3.27905	5354.9	FALSE	261
2022-09-13	09:21:48	0.736807	3.27746	5765.57	FALSE	261
2022-09-13	09:21:49	0.733855	3.26433	5358.16	FALSE	261
2022-09-13	09:21:49	0.614771	2.73462	5768.3	FALSE	261
2022-09-13	09:21:49	0.736094	3.27429	5361.44	FALSE	261
2022-09-13	09:21:49	0.736145	3.27452	5771.58	FALSE	261
2022-09-13	09:21:50	0.455127	2.0245	5363.46	FALSE	261
2022-09-13	09:21:50	0.323677	1.43978	5773.02	FALSE	261
2022-09-13	09:21:50	0.221539	0.98545	5364.45	FALSE	261
2022-09-13	09:21:50	0.287443	1.2786	5774.3	FALSE	261
2022-09-13	09:21:51	0.766832	3.41102	5367.86	FALSE	261
2022-09-13	09:21:51	2.96179	13.1746	5787.47	FALSE	261
2022-09-13	09:21:51	9.52479	42.3682	5410.22	1	262
2022-09-13	09:21:51	15.5133	69.0063	5856.48	1	263
2022-09-13	09:21:52	4.1682	18.541	5428.77	1	264
2022-09-13	09:21:52	8.16973	36.3406	5892.82	1	265
2022-09-13	09:21:52	2.77711	12.3531	5441.12	FALSE	265
2022-09-13	09:21:53	8.3308	37.0571	5929.88	1	266
2022-09-13	09:21:53	4.32474	19.2373	5460.36	1	267
2022-09-13	09:21:53	6.48327	28.8389	5958.72	1	268
2022-09-13	09:21:53	5.94052	26.4246	5486.78	1	269
2022-09-13	09:21:54	1.07075	4.76291	5963.48	FALSE	269
2022-09-13	09:21:54	1.37955	6.13651	5492.92	FALSE	269
2022-09-13	09:21:54	0.585153	2.60288	5966.08	FALSE	269
2022-09-13	09:21:54	0.412481	1.8348	5494.75	FALSE	269
2022-09-13	09:21:55	0.419708	1.86695	5967.95	FALSE	269
2022-09-13	09:21:55	0.387137	1.72206	5496.47	FALSE	269
2022-09-13	09:21:55	0.407646	1.81329	5969.76	FALSE	269
2022-09-13	09:21:55	0.474211	2.10939	5498.58	FALSE	269
2022-09-13	09:21:56	0.367392	1.63423	5971.4	FALSE	269
2022-09-13	09:21:56	0.789631	3.51244	5502.1	FALSE	269
2022-09-13	09:21:56	0.743066	3.30531	5974.7	FALSE	269
2022-09-13	09:21:57	1.89579	8.43285	5510.53	FALSE	269
2022-09-13	09:21:57	0.868511	3.86331	5978.56	FALSE	269
2022-09-13	09:21:57	2.58637	11.5047	5522.03	FALSE	269
2022-09-13	09:21:57	0.506323	2.25223	5980.82	FALSE	269
2022-09-13	09:21:58	1.9163	8.52409	5530.56	FALSE	269
2022-09-13	09:21:58	0.705814	3.1396	5983.96	FALSE	269
2022-09-13	09:21:58	1.11055	4.93995	5535.5	FALSE	269
2022-09-13	09:21:58	1.00775	4.48267	5988.44	FALSE	269
2022-09-13	09:21:59	1.84958	8.2273	5543.73	FALSE	269
2022-09-13	09:21:59	0.455382	2.02563	5990.46	FALSE	269
2022-09-13	09:21:59	0.495127	2.20242	5545.93	FALSE	269
2022-09-13	09:21:59	0.588613	2.61827	5993.08	FALSE	269
2022-09-13	09:22:00	0.304593	1.35489	5547.28	FALSE	269
2022-09-13	09:22:00	0.384339	1.70962	5994.79	FALSE	269
2022-09-13	09:22:00	0.391005	1.73927	5549.02	FALSE	269
2022-09-13	09:22:00	0.456552	2.03083	5996.82	FALSE	269
2022-09-13	09:22:01	0.341947	1.52105	5550.54	FALSE	269
2022-09-13	09:22:01	0.350242	1.55795	5998.38	FALSE	269
2022-09-13	09:22:01	0.355127	1.57968	5552.12	FALSE	269
2022-09-13	09:22:02	0.490191	2.18047	6000.56	FALSE	269
2022-09-13	09:22:02	0.610089	2.7138	5554.84	FALSE	269
2022-09-13	09:22:02	0.478486	2.1284	6002.69	FALSE	269
2022-09-13	09:22:02	0.500063	2.22438	5557.06	FALSE	269
2022-09-13	09:22:03	0.55869	2.48516	6005.17	FALSE	269
2022-09-13	09:22:03	0.433295	1.92738	5558.99	FALSE	269
2022-09-13	09:22:03	0.407596	1.81307	6006.99	FALSE	269
2022-09-13	09:22:03	0.46383	2.06321	5561.05	FALSE	269
2022-09-13	09:22:04	0.779402	3.46694	6010.45	FALSE	269
2022-09-13	09:22:04	1.52159	6.76834	5567.82	FALSE	269
2022-09-13	09:22:04	1.80459	8.02718	6018.48	FALSE	269
2022-09-13	09:22:04	1.96607	8.74547	5576.56	FALSE	269
2022-09-13	09:22:05	2.73238	12.1542	6030.64	FALSE	269
2022-09-13	09:22:05	0.870547	3.87237	5580.44	FALSE	269
2022-09-13	09:22:05	0.724186	3.22132	6033.86	FALSE	269
2022-09-13	09:22:06	0.740165	3.2924	5583.73	FALSE	269
2022-09-13	09:22:06	0.73187	3.2555	6037.11	FALSE	269
2022-09-13	09:22:06	0.736807	3.27746	5587.01	FALSE	269
2022-09-13	09:22:06	0.740318	3.29308	6040.41	FALSE	269
2022-09-13	09:22:07	0.741031	3.29625	5590.3	FALSE	269
2022-09-13	09:22:07	0.820318	3.64894	6044.06	FALSE	269
2022-09-13	09:22:07	0.861997	3.83434	5594.14	FALSE	269
2022-09-13	09:22:07	1.92602	8.56732	6052.62	FALSE	269
2022-09-13	09:22:08	1.75645	7.81304	5601.95	FALSE	269
2022-09-13	09:22:08	4.08825	18.1854	6070.81	1	270
2022-09-13	09:22:08	2.81202	12.5084	5614.46	FALSE	270
2022-09-13	09:22:09	3.44144	15.3082	6086.12	1	271
2022-09-13	09:22:09	0.82159	3.6546	5618.11	FALSE	271
2022-09-13	09:22:09	1.28831	5.73066	6091.85	FALSE	271
2022-09-13	09:22:09	0.501336	2.23004	5620.34	FALSE	271
2022-09-13	09:22:09	0.522506	2.32421	6094.17	FALSE	271
2022-09-13	09:22:10	0.419708	1.86695	5622.21	FALSE	271
2022-09-13	09:22:10	0.669631	2.97865	6097.15	FALSE	271
2022-09-13	09:22:10	0.424695	1.88913	5624.1	FALSE	271
2022-09-13	09:22:11	0.448003	1.99281	6099.14	FALSE	271
2022-09-13	09:22:11	0.303015	1.34787	5625.45	FALSE	271
2022-09-13	09:22:11	0.415331	1.84748	6100.99	FALSE	271
2022-09-13	09:22:11	0.199708	0.888341	5626.34	FALSE	271
2022-09-13	09:22:12	0.458181	2.03808	6103.03	FALSE	271
2022-09-13	09:22:12	0.234262	1.04204	5627.38	FALSE	271
2022-09-13	09:22:12	0.742506	3.30282	6106.33	FALSE	271
2022-09-13	09:22:12	0.996094	4.43083	5631.81	FALSE	271
2022-09-13	09:22:13	0.522812	2.32557	6108.66	FALSE	271
2022-09-13	09:22:13	0.56098	2.49535	5634.3	FALSE	271
2022-09-13	09:22:13	0.627137	2.78963	6111.45	FALSE	271
2022-09-13	09:22:13	0.337112	1.49954	5635.8	FALSE	271
2022-09-13	09:22:14	0.52332	2.32783	6113.77	FALSE	271
2022-09-13	09:22:14	0.417061	1.85517	5637.66	FALSE	271
2022-09-13	09:22:14	0.637061	2.83377	6116.61	FALSE	271
2022-09-13	09:22:15	0.353244	1.5713	5639.23	FALSE	271
2022-09-13	09:22:15	0.725407	3.22676	6119.83	FALSE	271
2022-09-13	09:22:15	0.736603	3.27656	5642.51	FALSE	271
2022-09-13	09:22:15	0.74098	3.29603	6123.13	FALSE	271
2022-09-13	09:22:16	0.744593	3.3121	5645.82	FALSE	271
2022-09-13	09:22:16	0.735636	3.27226	6126.4	FALSE	271
2022-09-13	09:22:16	0.735178	3.27022	5649.09	FALSE	271
2022-09-13	09:22:16	0.744084	3.30983	6129.71	FALSE	271
2022-09-13	09:22:17	0.738791	3.28629	5652.38	FALSE	271
2022-09-13	09:22:17	0.738079	3.28312	6133	FALSE	271
2022-09-13	09:22:17	0.741031	3.29625	5655.67	FALSE	271
2022-09-13	09:22:17	0.739351	3.28878	6136.28	FALSE	271
2022-09-13	09:22:18	0.736908	3.27791	5658.95	FALSE	271
2022-09-13	09:22:18	0.73757	3.28086	6139.57	FALSE	271
2022-09-13	09:22:18	0.738537	3.28516	5662.23	FALSE	271
2022-09-13	09:22:18	0.826476	3.67633	6143.24	FALSE	271

## Sheet: Juju_martin_202291391711 (E)
Date	Time	Lbs	Total force x time			**GoPro Fitting: 906
2022-09-13	09:17:18	0.447494	0.447494	FALSE	0			Total force x time	2653.99
2022-09-13	09:17:18	0.446679	0.894173	FALSE	0			Total steps	271
2022-09-13	09:17:18	0.436959	1.33113	FALSE	0
2022-09-13	09:17:19	0.433092	1.76422	FALSE	0
2022-09-13	09:17:19	0.437214	2.20144	FALSE	0
2022-09-13	09:17:19	0.449224	2.65066	FALSE	0
2022-09-13	09:17:19	0.461794	3.11246	FALSE	0
2022-09-13	09:17:20	0.466883	3.57934	FALSE	0
2022-09-13	09:17:20	0.464644	4.04398	FALSE	0
2022-09-13	09:17:20	0.455229	4.49921	FALSE	0
2022-09-13	09:17:20	0.456501	4.95571	FALSE	0
2022-09-13	09:17:21	0.481234	5.43695	FALSE	0
2022-09-13	09:17:21	0.443677	5.88062	FALSE	0
2022-09-13	09:17:21	0.395992	6.27662	FALSE	0
2022-09-13	09:17:21	0.35182	6.62844	FALSE	0
2022-09-13	09:17:22	0.303982	6.93242	FALSE	0
2022-09-13	09:17:22	0.473753	7.40617	FALSE	0
2022-09-13	09:17:22	0.480827	7.887	FALSE	0
2022-09-13	09:17:22	0.442252	8.32925	FALSE	0
2022-09-13	09:17:23	0.406679	8.73593	FALSE	0
2022-09-13	09:17:23	0.399199	9.13513	FALSE	0
2022-09-13	09:17:23	0.424542	9.55967	FALSE	0
2022-09-13	09:17:24	0.443982	10.0037	FALSE	0
2022-09-13	09:17:24	0.398079	10.4017	FALSE	0
2022-09-13	09:17:24	0.501488	10.9032	FALSE	0
2022-09-13	09:17:24	1.04154	11.9448	FALSE	0
2022-09-13	09:17:25	1.44612	13.3909	FALSE	0
2022-09-13	09:17:25	1.8938	15.2847	FALSE	0
2022-09-13	09:17:25	1.26454	16.5492	FALSE	0
2022-09-13	09:17:26	2.27574	18.825	FALSE	0
2022-09-13	09:17:26	1.58902	20.414	FALSE	0
2022-09-13	09:17:26	0.993295	21.4073	FALSE	0
2022-09-13	09:17:26	0.835585	22.2429	FALSE	0
2022-09-13	09:17:26	2.10602	24.3489	FALSE	0
2022-09-13	09:17:27	7.2964	31.6453	1	1
2022-09-13	09:17:27	5.39853	37.0438	1	2
2022-09-13	09:17:27	2.05248	39.0963	FALSE	2
2022-09-13	09:17:28	1.23279	40.3291	FALSE	2
2022-09-13	09:17:28	0.627596	40.9567	FALSE	2
2022-09-13	09:17:28	0.644898	41.6016	FALSE	2
2022-09-13	09:17:28	1.75508	43.3567	FALSE	2
2022-09-13	09:17:29	1.37426	44.7309	FALSE	2
2022-09-13	09:17:29	1.44363	46.1745	FALSE	2
2022-09-13	09:17:29	2.54861	48.7232	FALSE	2
2022-09-13	09:17:29	1.57309	50.2962	FALSE	2
2022-09-13	09:17:30	3.11879	53.415	1	3
2022-09-13	09:17:30	3.42459	56.8396	1	4
2022-09-13	09:17:30	7.0567	63.8963	1	5
2022-09-13	09:17:30	6.67828	70.5746	1	6
2022-09-13	09:17:31	6.56815	77.1428	1	7
2022-09-13	09:17:31	2.45121	79.594	FALSE	7
2022-09-13	09:17:31	0.561438	80.1554	FALSE	7
2022-09-13	09:17:31	0.956857	81.1123	FALSE	7
2022-09-13	09:17:32	2.10816	83.2204	FALSE	7
2022-09-13	09:17:32	2.32688	85.5473	FALSE	7
2022-09-13	09:17:32	4.66943	90.2167	1	8
2022-09-13	09:17:33	5.18749	95.4042	1	9
2022-09-13	09:17:33	8.35563	103.76	1	10
2022-09-13	09:17:33	1.41513	105.175	FALSE	10
2022-09-13	09:17:33	2.43584	107.611	FALSE	10
2022-09-13	09:17:34	0.792634	108.403	FALSE	10
2022-09-13	09:17:34	0.593143	108.997	FALSE	10
2022-09-13	09:17:34	0.752939	109.75	FALSE	10
2022-09-13	09:17:34	0.687595	110.437	FALSE	10
2022-09-13	09:17:35	0.688461	111.126	FALSE	10
2022-09-13	09:17:35	0.640267	111.766	FALSE	10
2022-09-13	09:17:35	0.462557	112.228	FALSE	10
2022-09-13	09:17:35	0.724847	112.953	FALSE	10
2022-09-13	09:17:36	0.390394	113.344	FALSE	10
2022-09-13	09:17:36	0.465	113.809	FALSE	10
2022-09-13	09:17:36	0.411819	114.22	FALSE	10
2022-09-13	09:17:36	0.563575	114.784	FALSE	10
2022-09-13	09:17:37	0.86098	115.645	FALSE	10
2022-09-13	09:17:37	0.46897	116.114	FALSE	10
2022-09-13	09:17:37	0.0664252	116.18	FALSE	10
2022-09-13	09:17:38	1.58734	117.768	FALSE	10
2022-09-13	09:17:38	2.99513	120.763	FALSE	10
2022-09-13	09:17:38	7.45695	128.22	1	11
2022-09-13	09:17:38	10.8845	139.104	1	12
2022-09-13	09:17:39	14.6596	153.764	1	13
2022-09-13	09:17:39	7.45421	161.218	1	14
2022-09-13	09:17:39	3.43019	164.648	1	15
2022-09-13	09:17:39	11.0164	175.665	1	16
2022-09-13	09:17:40	3.8793	179.544	1	17
2022-09-13	09:17:40	10.0455	189.59	1	18
2022-09-13	09:17:40	5.38154	194.971	1	19
2022-09-13	09:17:40	4.58327	199.554	1	20
2022-09-13	09:17:41	6.41141	205.966	1	21
2022-09-13	09:17:41	3.42576	209.392	1	22
2022-09-13	09:17:41	8.3283	217.72	1	23
2022-09-13	09:17:42	6.751	224.471	1	24
2022-09-13	09:17:42	3.57111	228.042	1	25
2022-09-13	09:17:42	4.50556	232.547	1	26
2022-09-13	09:17:42	1.7993	234.347	FALSE	26
2022-09-13	09:17:43	4.50495	238.852	1	27
2022-09-13	09:17:43	1.08154	239.933	FALSE	27
2022-09-13	09:17:43	1.52424	241.458	FALSE	27
2022-09-13	09:17:43	4.38886	245.846	1	28
2022-09-13	09:17:44	2.38978	248.236	FALSE	28
2022-09-13	09:17:44	6.54988	254.786	1	29
2022-09-13	09:17:44	1.90856	256.695	FALSE	29
2022-09-13	09:17:44	6.81243	263.507	1	30
2022-09-13	09:17:45	1.58653	265.094	FALSE	30
2022-09-13	09:17:45	2.97691	268.07	FALSE	30
2022-09-13	09:17:45	1.011	269.081	FALSE	30
2022-09-13	09:17:45	0.848715	269.93	FALSE	30
2022-09-13	09:17:46	0.977316	270.908	FALSE	30
2022-09-13	09:17:46	0.702048	271.61	FALSE	30
2022-09-13	09:17:46	1.38154	272.991	FALSE	30
2022-09-13	09:17:47	1.19289	274.184	FALSE	30
2022-09-13	09:17:47	3.08266	277.267	1	31
2022-09-13	09:17:47	4.48138	281.748	1	32
2022-09-13	09:17:47	4.63818	286.386	1	33
2022-09-13	09:17:48	5.58357	291.97	1	34
2022-09-13	09:17:48	2.12673	294.097	FALSE	34
2022-09-13	09:17:48	7.78495	301.881	1	35
2022-09-13	09:17:48	0.689682	302.571	FALSE	35
2022-09-13	09:17:49	3.3338	305.905	1	36
2022-09-13	09:17:49	2.5565	308.461	FALSE	36
2022-09-13	09:17:49	1.78922	310.251	FALSE	36
2022-09-13	09:17:49	2.68851	312.939	FALSE	36
2022-09-13	09:17:50	0.539758	313.479	FALSE	36
2022-09-13	09:17:50	2.38357	315.862	FALSE	36
2022-09-13	09:17:50	0.504644	316.367	FALSE	36
2022-09-13	09:17:51	0.689122	317.056	FALSE	36
2022-09-13	09:17:51	0.844084	317.9	FALSE	36
2022-09-13	09:17:51	0.603677	318.504	FALSE	36
2022-09-13	09:17:51	1.10902	319.613	FALSE	36
2022-09-13	09:17:52	0.444949	320.058	FALSE	36
2022-09-13	09:17:52	1.77141	321.829	FALSE	36
2022-09-13	09:17:52	0.70785	322.537	FALSE	36
2022-09-13	09:17:52	1.70006	324.237	FALSE	36
2022-09-13	09:17:53	1.39477	325.632	FALSE	36
2022-09-13	09:17:53	2.43452	328.067	FALSE	36
2022-09-13	09:17:53	4.01767	332.084	1	37
2022-09-13	09:17:53	5.95935	338.044	1	38
2022-09-13	09:17:54	3.69574	341.739	1	39
2022-09-13	09:17:54	2.85843	344.598	FALSE	39
2022-09-13	09:17:54	4.94749	349.545	1	40
2022-09-13	09:17:54	2.51726	352.063	FALSE	40
2022-09-13	09:17:55	6.30591	358.368	1	41
2022-09-13	09:17:55	5.76322	364.132	1	42
2022-09-13	09:17:55	5.89049	370.022	1	43
2022-09-13	09:17:56	13.1975	383.22	1	44
2022-09-13	09:17:56	1.31111	384.531	FALSE	44
2022-09-13	09:17:56	8.0681	392.599	1	45
2022-09-13	09:17:56	1.11961	393.718	FALSE	45
2022-09-13	09:17:57	9.95823	403.677	1	46
2022-09-13	09:17:57	6.31619	409.993	1	47
2022-09-13	09:17:57	10.1392	420.132	1	48
2022-09-13	09:17:57	4.78235	424.914	1	49
2022-09-13	09:17:58	1.34118	426.256	FALSE	49
2022-09-13	09:17:58	1.51146	427.767	FALSE	49
2022-09-13	09:17:58	1.22978	428.997	FALSE	49
2022-09-13	09:17:58	0.72612	429.723	FALSE	49
2022-09-13	09:17:59	2.09838	431.821	FALSE	49
2022-09-13	09:17:59	1.80139	433.623	FALSE	49
2022-09-13	09:17:59	7.63365	441.256	1	50
2022-09-13	09:18:00	3.2219	444.478	1	51
2022-09-13	09:18:00	21.7214	466.2	1	52
2022-09-13	09:18:00	4.37334	470.573	1	53
2022-09-13	09:18:00	7.32922	477.902	1	54
2022-09-13	09:18:01	3.13156	481.034	1	55
2022-09-13	09:18:01	3.7938	484.828	1	56
2022-09-13	09:18:01	7.83187	492.659	1	57
2022-09-13	09:18:01	2.37935	495.039	FALSE	57
2022-09-13	09:18:02	6.14337	501.182	1	58
2022-09-13	09:18:02	5.81594	506.998	1	59
2022-09-13	09:18:02	2.96052	509.959	FALSE	59
2022-09-13	09:18:02	3.3935	513.352	1	60
2022-09-13	09:18:03	1.77721	515.129	FALSE	60
2022-09-13	09:18:03	3.0024	518.132	1	61
2022-09-13	09:18:03	1.91202	520.044	FALSE	61
2022-09-13	09:18:03	2.47019	522.514	FALSE	61
2022-09-13	09:18:04	1.78938	524.303	FALSE	61
2022-09-13	09:18:04	0.900522	525.204	FALSE	61
2022-09-13	09:18:04	1.05961	526.264	FALSE	61
2022-09-13	09:18:05	0.72617	526.99	FALSE	61
2022-09-13	09:18:05	2.51167	529.501	FALSE	61
2022-09-13	09:18:05	1.12861	530.63	FALSE	61
2022-09-13	09:18:05	3.65477	534.285	1	62
2022-09-13	09:18:06	0.965814	535.251	FALSE	62
2022-09-13	09:18:06	2.31421	537.565	FALSE	62
2022-09-13	09:18:06	1.05345	538.618	FALSE	62
2022-09-13	09:18:06	0.956603	539.575	FALSE	62
2022-09-13	09:18:07	1.29386	540.869	FALSE	62
2022-09-13	09:18:07	0.550191	541.419	FALSE	62
2022-09-13	09:18:07	1.13838	542.557	FALSE	62
2022-09-13	09:18:07	0.859962	543.417	FALSE	62
2022-09-13	09:18:08	2.26291	545.68	FALSE	62
2022-09-13	09:18:08	2.64001	548.32	FALSE	62
2022-09-13	09:18:08	5.5967	553.917	1	63
2022-09-13	09:18:08	7.24036	561.157	1	64
2022-09-13	09:18:09	14.8029	575.96	1	65
2022-09-13	09:18:09	17.0697	593.03	1	66
2022-09-13	09:18:09	10.4287	603.458	1	67
2022-09-13	09:18:10	20.4827	623.941	1	68
2022-09-13	09:18:10	18.157	642.098	1	69
2022-09-13	09:18:10	15.2938	657.392	1	70
2022-09-13	09:18:10	14.8404	672.232	1	71
2022-09-13	09:18:11	8.60846	680.841	1	72
2022-09-13	09:18:11	12.6339	693.475	1	73
2022-09-13	09:18:11	9.27161	702.746	1	74
2022-09-13	09:18:11	10.8233	713.57	1	75
2022-09-13	09:18:12	20.1592	733.729	1	76
2022-09-13	09:18:12	5.27497	739.004	1	77
2022-09-13	09:18:12	8.45528	747.459	1	78
2022-09-13	09:18:12	16.9418	764.401	1	79
2022-09-13	09:18:13	3.02647	767.427	1	80
2022-09-13	09:18:13	7.60993	775.037	1	81
2022-09-13	09:18:13	1.02078	776.058	FALSE	81
2022-09-13	09:18:14	1.12938	777.187	FALSE	81
2022-09-13	09:18:14	0.874465	778.062	FALSE	81
2022-09-13	09:18:14	0.469479	778.531	FALSE	81
2022-09-13	09:18:14	0.963778	779.495	FALSE	81
2022-09-13	09:18:15	0.673295	780.168	FALSE	81
2022-09-13	09:18:15	0.663728	780.832	FALSE	81
2022-09-13	09:18:15	1.328	782.16	FALSE	81
2022-09-13	09:18:15	1.50612	783.666	FALSE	81
2022-09-13	09:18:16	4.98347	788.65	1	82
2022-09-13	09:18:16	7.46856	796.118	1	83
2022-09-13	09:18:16	20.0125	816.131	1	84
2022-09-13	09:18:16	5.00505	821.136	1	85
2022-09-13	09:18:17	4.91655	826.052	1	86
2022-09-13	09:18:17	8.4683	834.521	1	87
2022-09-13	09:18:17	1.61268	836.133	FALSE	87
2022-09-13	09:18:17	6.26138	842.395	1	88
2022-09-13	09:18:18	4.79625	847.191	1	89
2022-09-13	09:18:18	2.86337	850.054	FALSE	89
2022-09-13	09:18:18	7.97227	858.027	1	90
2022-09-13	09:18:19	4.13574	862.162	1	91
2022-09-13	09:18:19	4.94016	867.103	1	92
2022-09-13	09:18:19	5.62754	872.73	1	93
2022-09-13	09:18:19	1.85116	874.581	FALSE	93
2022-09-13	09:18:20	7.37238	881.954	1	94
2022-09-13	09:18:20	1.70729	883.661	FALSE	94
2022-09-13	09:18:20	3.3764	887.037	1	95
2022-09-13	09:18:20	5.31334	892.351	1	96
2022-09-13	09:18:21	2.67263	895.023	FALSE	96
2022-09-13	09:18:21	9.18383	904.207	1	97
2022-09-13	09:18:21	7.72449	911.932	1	98
2022-09-13	09:18:21	11.2548	923.186	1	99
2022-09-13	09:18:22	2.76937	925.956	FALSE	99
2022-09-13	09:18:22	2.29513	928.251	FALSE	99
2022-09-13	09:18:22	1.92795	930.179	FALSE	99
2022-09-13	09:18:23	1.26683	931.446	FALSE	99
2022-09-13	09:18:23	1.55864	933.004	FALSE	99
2022-09-13	09:18:23	1.55762	934.562	FALSE	99
2022-09-13	09:18:23	1.20485	935.767	FALSE	99
2022-09-13	09:18:24	1.16907	936.936	FALSE	99
2022-09-13	09:18:24	1.29523	938.231	FALSE	99
2022-09-13	09:18:24	0.701387	938.933	FALSE	99
2022-09-13	09:18:24	0.472125	939.405	FALSE	99
2022-09-13	09:18:25	0.595433	940	FALSE	99
2022-09-13	09:18:25	1.02403	941.024	FALSE	99
2022-09-13	09:18:25	1.65263	942.677	FALSE	99
2022-09-13	09:18:25	5.03904	947.716	1	100
2022-09-13	09:18:26	3.31396	951.03	1	101
2022-09-13	09:18:26	1.2048	952.235	FALSE	101
2022-09-13	09:18:26	0.839198	953.074	FALSE	101
2022-09-13	09:18:26	1.58485	954.659	FALSE	101
2022-09-13	09:18:27	0.946323	955.605	FALSE	101
2022-09-13	09:18:27	1.93324	957.538	FALSE	101
2022-09-13	09:18:27	1.05884	958.597	FALSE	101
2022-09-13	09:18:28	1.10159	959.699	FALSE	101
2022-09-13	09:18:28	0.7393	960.438	FALSE	101
2022-09-13	09:18:28	0.735534	961.173	FALSE	101
2022-09-13	09:18:28	1.8592	963.033	FALSE	101
2022-09-13	09:18:29	3.69696	966.73	1	102
2022-09-13	09:18:29	2.25716	968.987	FALSE	102
2022-09-13	09:18:29	1.75787	970.745	FALSE	102
2022-09-13	09:18:29	0.417163	971.162	FALSE	102
2022-09-13	09:18:30	0.872837	972.035	FALSE	102
2022-09-13	09:18:30	0.373652	972.408	FALSE	102
2022-09-13	09:18:30	0.624237	973.033	FALSE	102
2022-09-13	09:18:30	0.440267	973.473	FALSE	102
2022-09-13	09:18:31	0.596858	974.07	FALSE	102
2022-09-13	09:18:31	0.518639	974.588	FALSE	102
2022-09-13	09:18:31	1.14027	975.729	FALSE	102
2022-09-13	09:18:32	1.75162	977.48	FALSE	102
2022-09-13	09:18:32	1.74917	979.229	FALSE	102
2022-09-13	09:18:32	1.47309	980.702	FALSE	102
2022-09-13	09:18:32	0.878232	981.581	FALSE	102
2022-09-13	09:18:33	1.52475	983.105	FALSE	102
2022-09-13	09:18:33	2.23742	985.343	FALSE	102
2022-09-13	09:18:33	2.70154	988.044	FALSE	102
2022-09-13	09:18:33	2.82586	990.87	FALSE	102
2022-09-13	09:18:34	3.06001	993.93	1	103
2022-09-13	09:18:34	3.71014	997.64	1	104
2022-09-13	09:18:34	4.57864	1002.22	1	105
2022-09-13	09:18:34	1.98052	1004.2	FALSE	105
2022-09-13	09:18:35	1.38561	1005.59	FALSE	105
2022-09-13	09:18:35	6.94545	1012.53	1	106
2022-09-13	09:18:35	3.02714	1015.56	1	107
2022-09-13	09:18:35	5.08347	1020.64	1	108
2022-09-13	09:18:36	0.679809	1021.32	FALSE	108
2022-09-13	09:18:36	2.35253	1023.67	FALSE	108
2022-09-13	09:18:36	0.833448	1024.51	FALSE	108
2022-09-13	09:18:37	0.889326	1025.4	FALSE	108
2022-09-13	09:18:37	2.04439	1027.44	FALSE	108
2022-09-13	09:18:37	2.86444	1030.31	FALSE	108
2022-09-13	09:18:37	6.12902	1036.43	1	109
2022-09-13	09:18:38	2.06958	1038.5	FALSE	109
2022-09-13	09:18:38	5.75126	1044.26	1	110
2022-09-13	09:18:38	3.8823	1048.14	1	111
2022-09-13	09:18:38	4.58719	1052.72	1	112
2022-09-13	09:18:39	6.46759	1059.19	1	113
2022-09-13	09:18:39	1.16439	1060.36	FALSE	113
2022-09-13	09:18:39	5.191	1065.55	1	114
2022-09-13	09:18:39	0.583829	1066.13	FALSE	114
2022-09-13	09:18:40	1.46581	1067.6	FALSE	114
2022-09-13	09:18:40	0.463931	1068.06	FALSE	114
2022-09-13	09:18:40	0.379148	1068.44	FALSE	114
2022-09-13	09:18:41	0.00301552	1068.44	FALSE	114
2022-09-13	09:18:41	-0.0952542	1068.44	FALSE	114
2022-09-13	09:18:41	-0.318206	1068.44	FALSE	114
2022-09-13	09:18:41	-0.562175	1068.44	FALSE	114
2022-09-13	09:18:42	-0.318867	1068.44	FALSE	114
2022-09-13	09:18:42	0.126476	1068.57	FALSE	114
2022-09-13	09:18:42	0.414059	1068.98	FALSE	114
2022-09-13	09:18:42	0.507951	1069.49	FALSE	114
2022-09-13	09:18:43	0.47243	1069.96	FALSE	114
2022-09-13	09:18:43	0.46729	1070.43	FALSE	114
2022-09-13	09:18:43	0.439606	1070.87	FALSE	114
2022-09-13	09:18:43	0.510903	1071.38	FALSE	114
2022-09-13	09:18:44	0.471921	1071.85	FALSE	114
2022-09-13	09:18:44	0.485305	1072.34	FALSE	114
2022-09-13	09:18:44	0.506577	1072.85	FALSE	114
2022-09-13	09:18:44	0.483422	1073.33	FALSE	114
2022-09-13	09:18:45	0.50729	1073.84	FALSE	114
2022-09-13	09:18:45	0.570293	1074.41	FALSE	114
2022-09-13	09:18:45	0.766629	1075.17	FALSE	114
2022-09-13	09:18:46	1.02235	1076.2	FALSE	114
2022-09-13	09:18:46	0.87584	1077.07	FALSE	114
2022-09-13	09:18:46	0.854873	1077.93	FALSE	114
2022-09-13	09:18:46	0.920267	1078.85	FALSE	114
2022-09-13	09:18:47	1.23986	1080.09	FALSE	114
2022-09-13	09:18:47	0.956145	1081.04	FALSE	114
2022-09-13	09:18:47	1.09279	1082.14	FALSE	114
2022-09-13	09:18:47	1.22429	1083.36	FALSE	114
2022-09-13	09:18:48	1.72846	1085.09	FALSE	114
2022-09-13	09:18:48	1.94785	1087.04	FALSE	114
2022-09-13	09:18:48	2.18673	1089.22	FALSE	114
2022-09-13	09:18:48	3.26159	1092.48	1	115
2022-09-13	09:18:49	3.5822	1096.07	1	116
2022-09-13	09:18:49	3.48958	1099.56	1	117
2022-09-13	09:18:49	2.90551	1102.46	FALSE	117
2022-09-13	09:18:49	6.24871	1108.71	1	118
2022-09-13	09:18:50	1.39935	1110.11	FALSE	118
2022-09-13	09:18:50	4.79507	1114.9	1	119
2022-09-13	09:18:50	2.49518	1117.4	FALSE	119
2022-09-13	09:18:51	4.51879	1121.92	1	120
2022-09-13	09:18:51	3.76561	1125.68	1	121
2022-09-13	09:18:51	1.83116	1127.52	FALSE	121
2022-09-13	09:18:51	7.6855	1135.2	1	122
2022-09-13	09:18:52	1.81559	1137.02	FALSE	122
2022-09-13	09:18:52	5.37212	1142.39	1	123
2022-09-13	09:18:52	2.02184	1144.41	FALSE	123
2022-09-13	09:18:52	1.83681	1146.25	FALSE	123
2022-09-13	09:18:53	2.45477	1148.7	FALSE	123
2022-09-13	09:18:53	0.281794	1148.98	FALSE	123
2022-09-13	09:18:53	2.03009	1151.01	FALSE	123
2022-09-13	09:18:53	0.763728	1151.78	FALSE	123
2022-09-13	09:18:54	2.24312	1154.02	FALSE	123
2022-09-13	09:18:54	2.32866	1156.35	FALSE	123
2022-09-13	09:18:54	2.35569	1158.71	FALSE	123
2022-09-13	09:18:55	2.17212	1160.88	FALSE	123
2022-09-13	09:18:55	1.54337	1162.42	FALSE	123
2022-09-13	09:18:55	2.06541	1164.49	FALSE	123
2022-09-13	09:18:55	1.04281	1165.53	FALSE	123
2022-09-13	09:18:56	1.52352	1167.05	FALSE	123
2022-09-13	09:18:56	0.520165	1167.57	FALSE	123
2022-09-13	09:18:56	1.62307	1169.2	FALSE	123
2022-09-13	09:18:56	0.404695	1169.6	FALSE	123
2022-09-13	09:18:57	1.59696	1171.2	FALSE	123
2022-09-13	09:18:57	2.11513	1173.31	FALSE	123
2022-09-13	09:18:57	2.26999	1175.58	FALSE	123
2022-09-13	09:18:57	3.34149	1178.92	1	124
2022-09-13	09:18:58	2.12062	1181.04	FALSE	124
2022-09-13	09:18:58	8.39629	1189.44	1	125
2022-09-13	09:18:58	1.37818	1190.82	FALSE	125
2022-09-13	09:18:58	8.56876	1199.39	1	126
2022-09-13	09:18:59	2.37396	1201.76	FALSE	126
2022-09-13	09:18:59	4.57335	1206.34	1	127
2022-09-13	09:18:59	3.70352	1210.04	1	128
2022-09-13	09:19:00	2.41268	1212.45	FALSE	128
2022-09-13	09:19:00	4.91457	1217.37	1	129
2022-09-13	09:19:00	2.23034	1219.6	FALSE	129
2022-09-13	09:19:00	3.96459	1223.56	1	130
2022-09-13	09:19:01	1.39238	1224.95	FALSE	130
2022-09-13	09:19:01	1.68073	1226.63	FALSE	130
2022-09-13	09:19:01	0.903575	1227.54	FALSE	130
2022-09-13	09:19:01	0.582099	1228.12	FALSE	130
2022-09-13	09:19:02	0.368817	1228.49	FALSE	130
2022-09-13	09:19:02	0.482099	1228.97	FALSE	130
2022-09-13	09:19:02	0.467239	1229.44	FALSE	130
2022-09-13	09:19:02	0.562964	1230	FALSE	130
2022-09-13	09:19:03	0.436247	1230.44	FALSE	130
2022-09-13	09:19:03	0.100471	1230.54	FALSE	130
2022-09-13	09:19:03	-0.264923	1230.54	FALSE	130
2022-09-13	09:19:04	-0.117137	1230.54	FALSE	130
2022-09-13	09:19:04	0.48042	1231.02	FALSE	130
2022-09-13	09:19:04	0.569885	1231.59	FALSE	130
2022-09-13	09:19:04	0.442557	1232.03	FALSE	130
2022-09-13	09:19:05	0.496145	1232.53	FALSE	130
2022-09-13	09:19:05	0.518282	1233.04	FALSE	130
2022-09-13	09:19:05	0.546679	1233.59	FALSE	130
2022-09-13	09:19:05	0.547443	1234.14	FALSE	130
2022-09-13	09:19:06	0.528664	1234.67	FALSE	130
2022-09-13	09:19:06	0.511514	1235.18	FALSE	130
2022-09-13	09:19:06	0.517366	1235.7	FALSE	130
2022-09-13	09:19:06	0.502913	1236.2	FALSE	130
2022-09-13	09:19:07	0.48729	1236.69	FALSE	130
2022-09-13	09:19:07	0.475026	1237.16	FALSE	130
2022-09-13	09:19:07	0.462812	1237.62	FALSE	130
2022-09-13	09:19:07	0.500776	1238.13	FALSE	130
2022-09-13	09:19:08	0.389479	1238.51	FALSE	130
2022-09-13	09:19:08	0.351412	1238.87	FALSE	130
2022-09-13	09:19:08	0.466527	1239.33	FALSE	130
2022-09-13	09:19:09	0.394161	1239.73	FALSE	130
2022-09-13	09:19:09	0.531616	1240.26	FALSE	130
2022-09-13	09:19:09	0.40271	1240.66	FALSE	130
2022-09-13	09:19:09	0.325153	1240.99	FALSE	130
2022-09-13	09:19:10	0.347697	1241.33	FALSE	130
2022-09-13	09:19:10	0.254669	1241.59	FALSE	130
2022-09-13	09:19:10	0.11869	1241.71	FALSE	130
2022-09-13	09:19:10	-0.310063	1241.71	FALSE	130
2022-09-13	09:19:11	-0.55958	1241.71	FALSE	130
2022-09-13	09:19:11	-0.336374	1241.71	FALSE	130
2022-09-13	09:19:11	-0.212048	1241.71	FALSE	130
2022-09-13	09:19:11	0.726527	1242.43	FALSE	130
2022-09-13	09:19:12	3.56836	1246	1	131
2022-09-13	09:19:12	1.04113	1247.04	FALSE	131
2022-09-13	09:19:12	1.94938	1248.99	FALSE	131
2022-09-13	09:19:13	2.73355	1251.73	FALSE	131
2022-09-13	09:19:13	3.12424	1254.85	1	132
2022-09-13	09:19:13	3.83416	1258.68	1	133
2022-09-13	09:19:13	2.03497	1260.72	FALSE	133
2022-09-13	09:19:14	1.97192	1262.69	FALSE	133
2022-09-13	09:19:14	0.973651	1263.67	FALSE	133
2022-09-13	09:19:14	1.07335	1264.74	FALSE	133
2022-09-13	09:19:14	2.5165	1267.26	FALSE	133
2022-09-13	09:19:15	1.88556	1269.14	FALSE	133
2022-09-13	09:19:15	5.02159	1274.16	1	134
2022-09-13	09:19:15	6.51634	1280.68	1	135
2022-09-13	09:19:15	7.17314	1287.85	1	136
2022-09-13	09:19:16	4.20999	1292.06	1	137
2022-09-13	09:19:16	6.64581	1298.71	1	138
2022-09-13	09:19:16	3.56592	1302.27	1	139
2022-09-13	09:19:16	4.62861	1306.9	1	140
2022-09-13	09:19:17	4.545	1311.45	1	141
2022-09-13	09:19:17	1.75431	1313.2	FALSE	141
2022-09-13	09:19:17	3.51818	1316.72	1	142
2022-09-13	09:19:18	1.21579	1317.94	FALSE	142
2022-09-13	09:19:18	1.06495	1319	FALSE	142
2022-09-13	09:19:18	2.58729	1321.59	FALSE	142
2022-09-13	09:19:18	2.85752	1324.45	FALSE	142
2022-09-13	09:19:19	5.18683	1329.63	1	143
2022-09-13	09:19:19	4.21177	1333.84	1	144
2022-09-13	09:19:19	6.90586	1340.75	1	145
2022-09-13	09:19:19	4.89294	1345.64	1	146
2022-09-13	09:19:20	5.50026	1351.14	1	147
2022-09-13	09:19:20	6.26713	1357.41	1	148
2022-09-13	09:19:20	3.44861	1360.86	1	149
2022-09-13	09:19:20	10.4201	1371.28	1	150
2022-09-13	09:19:21	4.41228	1375.69	1	151
2022-09-13	09:19:21	8.47507	1384.17	1	152
2022-09-13	09:19:21	10.4768	1394.64	1	153
2022-09-13	09:19:21	7.50673	1402.15	1	154
2022-09-13	09:19:22	16.4624	1418.61	1	155
2022-09-13	09:19:22	12.5445	1431.16	1	156
2022-09-13	09:19:22	9.95354	1441.11	1	157
2022-09-13	09:19:23	11.3576	1452.47	1	158
2022-09-13	09:19:23	5.76291	1458.23	1	159
2022-09-13	09:19:23	3.15243	1461.38	1	160
2022-09-13	09:19:23	0.902048	1462.28	FALSE	160
2022-09-13	09:19:24	2.10846	1464.39	FALSE	160
2022-09-13	09:19:24	1.99762	1466.39	FALSE	160
2022-09-13	09:19:24	2.79533	1469.19	FALSE	160
2022-09-13	09:19:24	3.46647	1472.65	1	161
2022-09-13	09:19:25	7.17161	1479.82	1	162
2022-09-13	09:19:25	5.3595	1485.18	1	163
2022-09-13	09:19:25	10.5563	1495.74	1	164
2022-09-13	09:19:25	4.36907	1500.11	1	165
2022-09-13	09:19:26	5.96235	1506.07	1	166
2022-09-13	09:19:26	6.22143	1512.29	1	167
2022-09-13	09:19:26	3.34312	1515.64	1	168
2022-09-13	09:19:27	10.0581	1525.69	1	169
2022-09-13	09:19:27	3.38953	1529.08	1	170
2022-09-13	09:19:27	4.87533	1533.96	1	171
2022-09-13	09:19:27	10.7206	1544.68	1	172
2022-09-13	09:19:28	2.59223	1547.27	FALSE	172
2022-09-13	09:19:28	10.3297	1557.6	1	173
2022-09-13	09:19:28	6.09986	1563.7	1	174
2022-09-13	09:19:28	4.15609	1567.86	1	175
2022-09-13	09:19:29	8.84021	1576.7	1	176
2022-09-13	09:19:29	6.19039	1582.89	1	177
2022-09-13	09:19:29	7.28047	1590.17	1	178
2022-09-13	09:19:29	11.6598	1601.83	1	179
2022-09-13	09:19:30	5.91248	1607.74	1	180
2022-09-13	09:19:30	10.6847	1618.43	1	181
2022-09-13	09:19:30	5.08154	1623.51	1	182
2022-09-13	09:19:30	3.97945	1627.49	1	183
2022-09-13	09:19:31	14.3567	1641.84	1	184
2022-09-13	09:19:31	2.17731	1644.02	FALSE	184
2022-09-13	09:19:31	4.27655	1648.3	1	185
2022-09-13	09:19:32	2.79711	1651.09	FALSE	185
2022-09-13	09:19:32	1.28302	1652.38	FALSE	185
2022-09-13	09:19:32	1.81696	1654.19	FALSE	185
2022-09-13	09:19:32	2.59294	1656.79	FALSE	185
2022-09-13	09:19:33	1.5076	1658.29	FALSE	185
2022-09-13	09:19:33	1.86693	1660.16	FALSE	185
2022-09-13	09:19:33	0.928969	1661.09	FALSE	185
2022-09-13	09:19:33	0.961438	1662.05	FALSE	185
2022-09-13	09:19:34	0.415178	1662.47	FALSE	185
2022-09-13	09:19:34	0.741132	1663.21	FALSE	185
2022-09-13	09:19:34	0.730343	1663.94	FALSE	185
2022-09-13	09:19:34	0.285814	1664.22	FALSE	185
2022-09-13	09:19:35	0.300827	1664.53	FALSE	185
2022-09-13	09:19:35	0.30271	1664.83	FALSE	185
2022-09-13	09:19:35	0.248664	1665.08	FALSE	185
2022-09-13	09:19:36	0.341947	1665.42	FALSE	185
2022-09-13	09:19:36	0.219351	1665.64	FALSE	185
2022-09-13	09:19:36	0.349428	1665.99	FALSE	185
2022-09-13	09:19:36	0.276349	1666.26	FALSE	185
2022-09-13	09:19:37	0.324746	1666.59	FALSE	185
2022-09-13	09:19:37	0.303219	1666.89	FALSE	185
2022-09-13	09:19:37	0.310903	1667.2	FALSE	185
2022-09-13	09:19:37	0.436552	1667.64	FALSE	185
2022-09-13	09:19:38	0.138842	1667.78	FALSE	185
2022-09-13	09:19:38	0.114059	1667.89	FALSE	185
2022-09-13	09:19:38	0.0913615	1667.98	FALSE	185
2022-09-13	09:19:38	-0.223448	1667.98	FALSE	185
2022-09-13	09:19:39	-0.498206	1667.98	FALSE	185
2022-09-13	09:19:39	1.31014	1669.29	FALSE	185
2022-09-13	09:19:39	5.35701	1674.65	1	186
2022-09-13	09:19:39	12.0412	1686.69	1	187
2022-09-13	09:19:40	14.1445	1700.84	1	188
2022-09-13	09:19:40	15.2313	1716.07	1	189
2022-09-13	09:19:40	9.59436	1725.66	1	190
2022-09-13	09:19:41	3.44062	1729.1	1	191
2022-09-13	09:19:41	0.616959	1729.72	FALSE	191
2022-09-13	09:19:41	0.331158	1730.05	FALSE	191
2022-09-13	09:19:41	0.43813	1730.49	FALSE	191
2022-09-13	09:19:42	0.302914	1730.79	FALSE	191
2022-09-13	09:19:42	0.398639	1731.19	FALSE	191
2022-09-13	09:19:42	0.411819	1731.6	FALSE	191
2022-09-13	09:19:42	0.279911	1731.88	FALSE	191
2022-09-13	09:19:43	0.52388	1732.41	FALSE	191
2022-09-13	09:19:43	0.436145	1732.84	FALSE	191
2022-09-13	09:19:43	0.538028	1733.38	FALSE	191
2022-09-13	09:19:43	0.330344	1733.71	FALSE	191
2022-09-13	09:19:44	0.579351	1734.29	FALSE	191
2022-09-13	09:19:44	0.513906	1734.8	FALSE	191
2022-09-13	09:19:44	0.644593	1735.45	FALSE	191
2022-09-13	09:19:45	0.715331	1736.16	FALSE	191
2022-09-13	09:19:45	1.39508	1737.56	FALSE	191
2022-09-13	09:19:45	1.24877	1738.81	FALSE	191
2022-09-13	09:19:45	3.69971	1742.51	1	192
2022-09-13	09:19:46	4.0853	1746.59	1	193
2022-09-13	09:19:46	4.74474	1751.34	1	194
2022-09-13	09:19:46	2.36235	1753.7	FALSE	194
2022-09-13	09:19:46	3.31945	1757.02	1	195
2022-09-13	09:19:47	3.34943	1760.37	1	196
2022-09-13	09:19:47	5.64739	1766.02	1	197
2022-09-13	09:19:47	5.51237	1771.53	1	198
2022-09-13	09:19:47	5.245	1776.77	1	199
2022-09-13	09:19:48	2.02663	1778.8	FALSE	199
2022-09-13	09:19:48	3.67334	1782.47	1	200
2022-09-13	09:19:48	1.12627	1783.6	FALSE	200
2022-09-13	09:19:48	3.08337	1786.68	1	201
2022-09-13	09:19:49	1.50602	1788.19	FALSE	201
2022-09-13	09:19:49	2.32128	1790.51	FALSE	201
2022-09-13	09:19:49	1.54006	1792.05	FALSE	201
2022-09-13	09:19:50	1.7022	1793.75	FALSE	201
2022-09-13	09:19:50	0.977316	1794.73	FALSE	201
2022-09-13	09:19:50	1.24317	1795.97	FALSE	201
2022-09-13	09:19:50	0.623422	1796.6	FALSE	201
2022-09-13	09:19:51	0.952837	1797.55	FALSE	201
2022-09-13	09:19:51	0.877265	1798.43	FALSE	201
2022-09-13	09:19:51	0.851158	1799.28	FALSE	201
2022-09-13	09:19:51	0.826323	1800.1	FALSE	201
2022-09-13	09:19:52	1.57024	1801.67	FALSE	201
2022-09-13	09:19:52	1.48663	1803.16	FALSE	201
2022-09-13	09:19:52	1.82128	1804.98	FALSE	201
2022-09-13	09:19:52	3.08652	1808.07	1	202
2022-09-13	09:19:53	1.36225	1809.43	FALSE	202
2022-09-13	09:19:53	1.83518	1811.27	FALSE	202
2022-09-13	09:19:53	0.293448	1811.56	FALSE	202
2022-09-13	09:19:53	0.603728	1812.16	FALSE	202
2022-09-13	09:19:54	0.456807	1812.62	FALSE	202
2022-09-13	09:19:54	0.417926	1813.04	FALSE	202
2022-09-13	09:19:54	0.433244	1813.47	FALSE	202
2022-09-13	09:19:55	0.763728	1814.24	FALSE	202
2022-09-13	09:19:55	1.00459	1815.24	FALSE	202
2022-09-13	09:19:55	1.80785	1817.05	FALSE	202
2022-09-13	09:19:55	2.72016	1819.77	FALSE	202
2022-09-13	09:19:56	1.50281	1821.27	FALSE	202
2022-09-13	09:19:56	1.93238	1823.2	FALSE	202
2022-09-13	09:19:56	1.45197	1824.65	FALSE	202
2022-09-13	09:19:56	1.3567	1826.01	FALSE	202
2022-09-13	09:19:57	-0.0595799	1826.01	FALSE	202
2022-09-13	09:19:57	-0.0293509	1826.01	FALSE	202
2022-09-13	09:19:57	-0.019987	1826.01	FALSE	202
2022-09-13	09:19:57	-0.0765773	1826.01	FALSE	202
2022-09-13	09:19:58	-0.312201	1826.01	FALSE	202
2022-09-13	09:19:58	-0.397646	1826.01	FALSE	202
2022-09-13	09:19:58	-0.459936	1826.01	FALSE	202
2022-09-13	09:19:59	-0.459681	1826.01	FALSE	202
2022-09-13	09:19:59	-0.250369	1826.01	FALSE	202
2022-09-13	09:19:59	0.0653565	1826.08	FALSE	202
2022-09-13	09:19:59	0.369224	1826.45	FALSE	202
2022-09-13	09:20:00	0.429071	1826.88	FALSE	202
2022-09-13	09:20:00	1.24877	1828.12	FALSE	202
2022-09-13	09:20:00	1.70505	1829.83	FALSE	202
2022-09-13	09:20:00	2.13411	1831.96	FALSE	202
2022-09-13	09:20:01	1.55894	1833.52	FALSE	202
2022-09-13	09:20:01	1.68454	1835.21	FALSE	202
2022-09-13	09:20:01	2.48647	1837.69	FALSE	202
2022-09-13	09:20:01	0.980623	1838.67	FALSE	202
2022-09-13	09:20:02	1.78378	1840.46	FALSE	202
2022-09-13	09:20:02	1.64704	1842.1	FALSE	202
2022-09-13	09:20:02	3.16831	1845.27	1	203
2022-09-13	09:20:02	3.15854	1848.43	1	204
2022-09-13	09:20:03	2.6591	1851.09	FALSE	204
2022-09-13	09:20:03	2.30551	1853.4	FALSE	204
2022-09-13	09:20:03	1.03599	1854.43	FALSE	204
2022-09-13	09:20:04	1.88683	1856.32	FALSE	204
2022-09-13	09:20:04	0.534364	1856.85	FALSE	204
2022-09-13	09:20:04	1.18088	1858.03	FALSE	204
2022-09-13	09:20:04	0.381692	1858.42	FALSE	204
2022-09-13	09:20:05	0.656247	1859.07	FALSE	204
2022-09-13	09:20:05	0.547035	1859.62	FALSE	204
2022-09-13	09:20:05	0.417112	1860.04	FALSE	204
2022-09-13	09:20:05	0.253397	1860.29	FALSE	204
2022-09-13	09:20:06	0.44327	1860.73	FALSE	204
2022-09-13	09:20:06	0.477875	1861.21	FALSE	204
2022-09-13	09:20:06	0.974974	1862.19	FALSE	204
2022-09-13	09:20:07	1.64749	1863.83	FALSE	204
2022-09-13	09:20:07	2.98983	1866.82	FALSE	204
2022-09-13	09:20:07	0.494516	1867.32	FALSE	204
2022-09-13	09:20:07	0.089733	1867.41	FALSE	204
2022-09-13	09:20:08	0.355585	1867.76	FALSE	204
2022-09-13	09:20:08	0.360776	1868.12	FALSE	204
2022-09-13	09:20:08	0.819657	1868.94	FALSE	204
2022-09-13	09:20:08	2.00912	1870.95	FALSE	204
2022-09-13	09:20:09	2.38938	1873.34	FALSE	204
2022-09-13	09:20:09	0.662201	1874	FALSE	204
2022-09-13	09:20:09	-0.171692	1874	FALSE	204
2022-09-13	09:20:09	0.0166033	1874.02	FALSE	204
2022-09-13	09:20:10	-0.153727	1874.02	FALSE	204
2022-09-13	09:20:10	-0.386094	1874.02	FALSE	204
2022-09-13	09:20:10	-0.47902	1874.02	FALSE	204
2022-09-13	09:20:10	-0.550979	1874.02	FALSE	204
2022-09-13	09:20:11	-0.324669	1874.02	FALSE	204
2022-09-13	09:20:11	-0.0182567	1874.02	FALSE	204
2022-09-13	09:20:11	0.260064	1874.28	FALSE	204
2022-09-13	09:20:11	0.27472	1874.56	FALSE	204
2022-09-13	09:20:12	0.117519	1874.67	FALSE	204
2022-09-13	09:20:12	0.0802674	1874.75	FALSE	204
2022-09-13	09:20:12	0.32841	1875.08	FALSE	204
2022-09-13	09:20:13	2.50164	1877.58	FALSE	204
2022-09-13	09:20:13	2.68765	1880.27	FALSE	204
2022-09-13	09:20:13	2.01401	1882.28	FALSE	204
2022-09-13	09:20:13	3.84123	1886.13	1	205
2022-09-13	09:20:14	2.38347	1888.51	FALSE	205
2022-09-13	09:20:14	1.72083	1890.23	FALSE	205
2022-09-13	09:20:14	1.145	1891.38	FALSE	205
2022-09-13	09:20:14	1.47024	1892.85	FALSE	205
2022-09-13	09:20:15	1.0223	1893.87	FALSE	205
2022-09-13	09:20:15	0.966781	1894.83	FALSE	205
2022-09-13	09:20:15	1.60098	1896.44	FALSE	205
2022-09-13	09:20:15	1.02581	1897.46	FALSE	205
2022-09-13	09:20:16	1.88042	1899.34	FALSE	205
2022-09-13	09:20:16	1.43589	1900.78	FALSE	205
2022-09-13	09:20:16	2.78149	1903.56	FALSE	205
2022-09-13	09:20:17	1.58495	1905.14	FALSE	205
2022-09-13	09:20:17	2.11426	1907.26	FALSE	205
2022-09-13	09:20:17	3.62668	1910.89	1	206
2022-09-13	09:20:17	3.81706	1914.7	1	207
2022-09-13	09:20:18	3.72067	1918.42	1	208
2022-09-13	09:20:18	5.25248	1923.68	1	209
2022-09-13	09:20:18	1.67696	1925.35	FALSE	209
2022-09-13	09:20:18	1.85034	1927.2	FALSE	209
2022-09-13	09:20:19	1.0591	1928.26	FALSE	209
2022-09-13	09:20:19	1.22704	1929.49	FALSE	209
2022-09-13	09:20:19	1.36581	1930.85	FALSE	209
2022-09-13	09:20:19	1.63396	1932.49	FALSE	209
2022-09-13	09:20:20	0.904339	1933.39	FALSE	209
2022-09-13	09:20:20	1.18561	1934.58	FALSE	209
2022-09-13	09:20:20	1.04576	1935.62	FALSE	209
2022-09-13	09:20:20	1.58709	1937.21	FALSE	209
2022-09-13	09:20:21	1.13401	1938.35	FALSE	209
2022-09-13	09:20:21	1.41747	1939.76	FALSE	209
2022-09-13	09:20:21	2.09447	1941.86	FALSE	209
2022-09-13	09:20:22	0.903168	1942.76	FALSE	209
2022-09-13	09:20:22	0.863931	1943.62	FALSE	209
2022-09-13	09:20:22	0.465763	1944.09	FALSE	209
2022-09-13	09:20:22	0.906272	1945	FALSE	209
2022-09-13	09:20:23	0.421641	1945.42	FALSE	209
2022-09-13	09:20:23	1.55284	1946.97	FALSE	209
2022-09-13	09:20:23	1.73635	1948.71	FALSE	209
2022-09-13	09:20:23	3.93492	1952.64	1	210
2022-09-13	09:20:24	3.00683	1955.65	1	211
2022-09-13	09:20:24	7.46347	1963.11	1	212
2022-09-13	09:20:24	5.02683	1968.14	1	213
2022-09-13	09:20:24	13.7287	1981.87	1	214
2022-09-13	09:20:25	3.75772	1985.63	1	215
2022-09-13	09:20:25	6.32317	1991.95	1	216
2022-09-13	09:20:25	11.8491	2003.8	1	217
2022-09-13	09:20:26	2.22139	2006.02	FALSE	217
2022-09-13	09:20:26	7.69182	2013.71	1	218
2022-09-13	09:20:26	3.92653	2017.64	1	219
2022-09-13	09:20:26	5.97222	2023.61	1	220
2022-09-13	09:20:27	14.4216	2038.03	1	221
2022-09-13	09:20:27	6.49863	2044.53	1	222
2022-09-13	09:20:27	11.5874	2056.12	1	223
2022-09-13	09:20:27	1.0338	2057.15	FALSE	223
2022-09-13	09:20:28	0.284135	2057.44	FALSE	223
2022-09-13	09:20:28	0.493295	2057.93	FALSE	223
2022-09-13	09:20:28	0.442405	2058.37	FALSE	223
2022-09-13	09:20:28	0.532277	2058.9	FALSE	223
2022-09-13	09:20:29	0.303524	2059.21	FALSE	223
2022-09-13	09:20:29	0.291972	2059.5	FALSE	223
2022-09-13	09:20:29	0.28215	2059.78	FALSE	223
2022-09-13	09:20:29	0.105407	2059.89	FALSE	223
2022-09-13	09:20:30	0.482201	2060.37	FALSE	223
2022-09-13	09:20:30	0.324339	2060.69	FALSE	223
2022-09-13	09:20:30	0.490191	2061.18	FALSE	223
2022-09-13	09:20:31	0.3993	2061.58	FALSE	223
2022-09-13	09:20:31	0.56215	2062.14	FALSE	223
2022-09-13	09:20:31	0.743015	2062.89	FALSE	223
2022-09-13	09:20:31	0.987086	2063.87	FALSE	223
2022-09-13	09:20:32	3.6482	2067.52	1	224
2022-09-13	09:20:32	3.77548	2071.3	1	225
2022-09-13	09:20:32	2.69182	2073.99	FALSE	225
2022-09-13	09:20:32	0.587188	2074.58	FALSE	225
2022-09-13	09:20:33	0.787392	2075.36	FALSE	225
2022-09-13	09:20:33	0.6164	2075.98	FALSE	225
2022-09-13	09:20:33	0.588664	2076.57	FALSE	225
2022-09-13	09:20:33	0.428461	2077	FALSE	225
2022-09-13	09:20:34	0.570598	2077.57	FALSE	225
2022-09-13	09:20:34	0.385865	2077.95	FALSE	225
2022-09-13	09:20:34	0.634262	2078.59	FALSE	225
2022-09-13	09:20:35	0.388512	2078.98	FALSE	225
2022-09-13	09:20:35	0.670852	2079.65	FALSE	225
2022-09-13	09:20:35	0.471718	2080.12	FALSE	225
2022-09-13	09:20:35	1.38139	2081.5	FALSE	225
2022-09-13	09:20:36	1.17131	2082.67	FALSE	225
2022-09-13	09:20:36	8.29731	2090.97	1	226
2022-09-13	09:20:36	3.868	2094.84	1	227
2022-09-13	09:20:36	11.8472	2106.69	1	228
2022-09-13	09:20:37	2.2619	2108.95	FALSE	228
2022-09-13	09:20:37	3.93767	2112.89	1	229
2022-09-13	09:20:37	2.67451	2115.56	FALSE	229
2022-09-13	09:20:37	1.26352	2116.82	FALSE	229
2022-09-13	09:20:38	3.4737	2120.3	1	230
2022-09-13	09:20:38	0.668308	2120.97	FALSE	230
2022-09-13	09:20:38	0.606527	2121.57	FALSE	230
2022-09-13	09:20:38	0.684033	2122.26	FALSE	230
2022-09-13	09:20:39	0.441641	2122.7	FALSE	230
2022-09-13	09:20:39	0.796094	2123.49	FALSE	230
2022-09-13	09:20:39	0.9507	2124.44	FALSE	230
2022-09-13	09:20:40	1.94134	2126.39	FALSE	230
2022-09-13	09:20:40	0.958486	2127.34	FALSE	230
2022-09-13	09:20:40	2.14118	2129.49	FALSE	230
2022-09-13	09:20:40	1.49838	2130.98	FALSE	230
2022-09-13	09:20:41	2.45187	2133.44	FALSE	230
2022-09-13	09:20:41	1.53131	2134.97	FALSE	230
2022-09-13	09:20:41	0.649173	2135.62	FALSE	230
2022-09-13	09:20:41	1.87782	2137.49	FALSE	230
2022-09-13	09:20:42	0.957163	2138.45	FALSE	230
2022-09-13	09:20:42	2.88235	2141.33	FALSE	230
2022-09-13	09:20:42	2.45396	2143.79	FALSE	230
2022-09-13	09:20:42	4.70653	2148.49	1	231
2022-09-13	09:20:43	4.18149	2152.68	1	232
2022-09-13	09:20:43	6.23879	2158.91	1	233
2022-09-13	09:20:43	7.74072	2166.65	1	234
2022-09-13	09:20:43	2.67624	2169.33	FALSE	234
2022-09-13	09:20:44	3.75299	2173.08	1	235
2022-09-13	09:20:44	1.01396	2174.1	FALSE	235
2022-09-13	09:20:44	3.49757	2177.6	1	236
2022-09-13	09:20:45	1.67406	2179.27	FALSE	236
2022-09-13	09:20:45	2.41782	2181.69	FALSE	236
2022-09-13	09:20:45	4.02948	2185.72	1	237
2022-09-13	09:20:45	1.35676	2187.07	FALSE	237
2022-09-13	09:20:46	2.67426	2189.75	FALSE	237
2022-09-13	09:20:46	1.02357	2190.77	FALSE	237
2022-09-13	09:20:46	2.40459	2193.18	FALSE	237
2022-09-13	09:20:46	1.39177	2194.57	FALSE	237
2022-09-13	09:20:47	1.00459	2195.57	FALSE	237
2022-09-13	09:20:47	1.52612	2197.1	FALSE	237
2022-09-13	09:20:47	0.931768	2198.03	FALSE	237
2022-09-13	09:20:47	1.55497	2199.59	FALSE	237
2022-09-13	09:20:48	0.897214	2200.48	FALSE	237
2022-09-13	09:20:48	3.20729	2203.69	1	238
2022-09-13	09:20:48	1.89559	2205.59	FALSE	238
2022-09-13	09:20:49	5.19314	2210.78	1	239
2022-09-13	09:20:49	4.47991	2215.26	1	240
2022-09-13	09:20:49	3.39263	2218.65	1	241
2022-09-13	09:20:49	4.66983	2223.32	1	242
2022-09-13	09:20:50	0.423015	2223.74	FALSE	242
2022-09-13	09:20:50	2.19986	2225.94	FALSE	242
2022-09-13	09:20:50	0.494109	2226.44	FALSE	242
2022-09-13	09:20:50	0.510038	2226.95	FALSE	242
2022-09-13	09:20:51	0.740064	2227.69	FALSE	242
2022-09-13	09:20:51	0.405051	2228.09	FALSE	242
2022-09-13	09:20:51	0.805	2228.9	FALSE	242
2022-09-13	09:20:51	0.43299	2229.33	FALSE	242
2022-09-13	09:20:52	0.668511	2230	FALSE	242
2022-09-13	09:20:52	0.351158	2230.35	FALSE	242
2022-09-13	09:20:52	0.638893	2230.99	FALSE	242
2022-09-13	09:20:52	0.39701	2231.39	FALSE	242
2022-09-13	09:20:53	0.420725	2231.81	FALSE	242
2022-09-13	09:20:53	0.398741	2232.21	FALSE	242
2022-09-13	09:20:53	0.477824	2232.68	FALSE	242
2022-09-13	09:20:54	0.453092	2233.14	FALSE	242
2022-09-13	09:20:54	0.561692	2233.7	FALSE	242
2022-09-13	09:20:54	0.393092	2234.09	FALSE	242
2022-09-13	09:20:54	0.641234	2234.73	FALSE	242
2022-09-13	09:20:55	0.425764	2235.16	FALSE	242
2022-09-13	09:20:55	0.834568	2235.99	FALSE	242
2022-09-13	09:20:55	0.819453	2236.81	FALSE	242
2022-09-13	09:20:55	2.36123	2239.17	FALSE	242
2022-09-13	09:20:56	2.05849	2241.23	FALSE	242
2022-09-13	09:20:56	8.98433	2250.22	1	243
2022-09-13	09:20:56	2.46841	2252.69	FALSE	243
2022-09-13	09:20:56	12.4578	2265.14	1	244
2022-09-13	09:20:57	0.945356	2266.09	FALSE	244
2022-09-13	09:20:57	6.28749	2272.38	1	245
2022-09-13	09:20:57	1.31945	2273.7	FALSE	245
2022-09-13	09:20:58	1.31034	2275.01	FALSE	245
2022-09-13	09:20:58	2.19126	2277.2	FALSE	245
2022-09-13	09:20:58	0.873041	2278.07	FALSE	245
2022-09-13	09:20:58	1.84459	2279.91	FALSE	245
2022-09-13	09:20:59	0.919351	2280.83	FALSE	245
2022-09-13	09:20:59	1.98892	2282.82	FALSE	245
2022-09-13	09:20:59	0.840216	2283.66	FALSE	245
2022-09-13	09:20:59	1.0736	2284.74	FALSE	245
2022-09-13	09:21:00	1.57665	2286.31	FALSE	245
2022-09-13	09:21:00	0.871819	2287.19	FALSE	245
2022-09-13	09:21:00	2.34729	2289.53	FALSE	245
2022-09-13	09:21:00	1.35996	2290.89	FALSE	245
2022-09-13	09:21:01	6.73548	2297.63	1	246
2022-09-13	09:21:01	2.29212	2299.92	FALSE	246
2022-09-13	09:21:01	7.98077	2307.9	1	247
2022-09-13	09:21:01	1.391	2309.29	FALSE	247
2022-09-13	09:21:02	4.89818	2314.19	1	248
2022-09-13	09:21:02	0.633804	2314.82	FALSE	248
2022-09-13	09:21:02	2.71808	2317.54	FALSE	248
2022-09-13	09:21:03	2.32734	2319.87	FALSE	248
2022-09-13	09:21:03	0.648766	2320.52	FALSE	248
2022-09-13	09:21:03	1.13625	2321.65	FALSE	248
2022-09-13	09:21:03	0.464339	2322.12	FALSE	248
2022-09-13	09:21:04	0.631005	2322.75	FALSE	248
2022-09-13	09:21:04	0.397519	2323.15	FALSE	248
2022-09-13	09:21:04	0.495178	2323.64	FALSE	248
2022-09-13	09:21:05	0.452074	2324.09	FALSE	248
2022-09-13	09:21:05	0.472277	2324.57	FALSE	248
2022-09-13	09:21:05	0.475026	2325.04	FALSE	248
2022-09-13	09:21:05	0.472328	2325.51	FALSE	248
2022-09-13	09:21:05	0.447799	2325.96	FALSE	248
2022-09-13	09:21:06	0.429122	2326.39	FALSE	248
2022-09-13	09:21:06	0.466171	2326.86	FALSE	248
2022-09-13	09:21:06	0.466679	2327.32	FALSE	248
2022-09-13	09:21:07	0.495076	2327.82	FALSE	248
2022-09-13	09:21:07	0.458944	2328.28	FALSE	248
2022-09-13	09:21:07	0.46388	2328.74	FALSE	248
2022-09-13	09:21:07	0.454008	2329.2	FALSE	248
2022-09-13	09:21:08	0.45528	2329.65	FALSE	248
2022-09-13	09:21:08	0.446476	2330.1	FALSE	248
2022-09-13	09:21:08	0.454364	2330.55	FALSE	248
2022-09-13	09:21:08	0.447545	2331	FALSE	248
2022-09-13	09:21:09	0.452277	2331.45	FALSE	248
2022-09-13	09:21:09	0.456247	2331.91	FALSE	248
2022-09-13	09:21:09	0.452532	2332.36	FALSE	248
2022-09-13	09:21:09	0.440776	2332.8	FALSE	248
2022-09-13	09:21:10	0.400064	2333.2	FALSE	248
2022-09-13	09:21:10	0.342964	2333.54	FALSE	248
2022-09-13	09:21:10	0.354008	2333.9	FALSE	248
2022-09-13	09:21:10	0.353651	2334.25	FALSE	248
2022-09-13	09:21:11	0.540471	2334.79	FALSE	248
2022-09-13	09:21:11	0.445407	2335.24	FALSE	248
2022-09-13	09:21:11	0.461845	2335.7	FALSE	248
2022-09-13	09:21:12	0.471311	2336.17	FALSE	248
2022-09-13	09:21:12	0.451209	2336.62	FALSE	248
2022-09-13	09:21:12	0.458639	2337.08	FALSE	248
2022-09-13	09:21:12	0.469987	2337.55	FALSE	248
2022-09-13	09:21:13	0.45416	2338	FALSE	248
2022-09-13	09:21:13	0.439555	2338.44	FALSE	248
2022-09-13	09:21:13	0.467036	2338.91	FALSE	248
2022-09-13	09:21:13	0.461743	2339.37	FALSE	248
2022-09-13	09:21:14	0.464288	2339.84	FALSE	248
2022-09-13	09:21:14	0.463626	2340.3	FALSE	248
2022-09-13	09:21:14	0.476603	2340.78	FALSE	248
2022-09-13	09:21:14	0.472684	2341.25	FALSE	248
2022-09-13	09:21:15	0.466171	2341.72	FALSE	248
2022-09-13	09:21:15	0.472074	2342.19	FALSE	248
2022-09-13	09:21:15	0.471819	2342.66	FALSE	248
2022-09-13	09:21:16	0.471769	2343.13	FALSE	248
2022-09-13	09:21:16	0.472684	2343.6	FALSE	248
2022-09-13	09:21:16	0.47813	2344.08	FALSE	248
2022-09-13	09:21:16	0.470089	2344.55	FALSE	248
2022-09-13	09:21:17	0.482354	2345.04	FALSE	248
2022-09-13	09:21:17	0.47874	2345.51	FALSE	248
2022-09-13	09:21:17	0.481794	2346	FALSE	248
2022-09-13	09:21:17	0.474618	2346.47	FALSE	248
2022-09-13	09:21:18	0.48271	2346.95	FALSE	248
2022-09-13	09:21:18	0.478944	2347.43	FALSE	248
2022-09-13	09:21:18	0.48271	2347.91	FALSE	248
2022-09-13	09:21:18	0.486679	2348.4	FALSE	248
2022-09-13	09:21:19	0.500063	2348.9	FALSE	248
2022-09-13	09:21:19	0.499606	2349.4	FALSE	248
2022-09-13	09:21:19	0.48958	2349.89	FALSE	248
2022-09-13	09:21:19	0.484847	2350.38	FALSE	248
2022-09-13	09:21:20	0.486985	2350.86	FALSE	248
2022-09-13	09:21:20	0.477672	2351.34	FALSE	248
2022-09-13	09:21:20	0.472634	2351.81	FALSE	248
2022-09-13	09:21:21	0.473397	2352.29	FALSE	248
2022-09-13	09:21:21	0.463728	2352.75	FALSE	248
2022-09-13	09:21:21	0.474822	2353.22	FALSE	248
2022-09-13	09:21:21	0.470954	2353.7	FALSE	248
2022-09-13	09:21:22	0.466272	2354.16	FALSE	248
2022-09-13	09:21:22	0.455433	2354.62	FALSE	248
2022-09-13	09:21:22	0.461285	2355.08	FALSE	248
2022-09-13	09:21:22	0.469784	2355.55	FALSE	248
2022-09-13	09:21:23	0.469682	2356.02	FALSE	248
2022-09-13	09:21:23	0.441794	2356.46	FALSE	248
2022-09-13	09:21:23	0.480267	2356.94	FALSE	248
2022-09-13	09:21:23	0.480064	2357.42	FALSE	248
2022-09-13	09:21:24	0.465662	2357.89	FALSE	248
2022-09-13	09:21:24	0.541896	2358.43	FALSE	248
2022-09-13	09:21:24	0.377672	2358.81	FALSE	248
2022-09-13	09:21:25	0.413397	2359.22	FALSE	248
2022-09-13	09:21:25	0.382506	2359.6	FALSE	248
2022-09-13	09:21:25	0.452328	2360.05	FALSE	248
2022-09-13	09:21:25	0.41126	2360.47	FALSE	248
2022-09-13	09:21:26	0.135433	2360.6	FALSE	248
2022-09-13	09:21:26	0.045102	2360.65	FALSE	248
2022-09-13	09:21:26	-0.0469081	2360.65	FALSE	248
2022-09-13	09:21:26	-0.0728114	2360.65	FALSE	248
2022-09-13	09:21:27	0.00449134	2360.65	FALSE	248
2022-09-13	09:21:27	-0.0166792	2360.65	FALSE	248
2022-09-13	09:21:27	-0.0773407	2360.65	FALSE	248
2022-09-13	09:21:27	0.053957	2360.7	FALSE	248
2022-09-13	09:21:28	-0.0371372	2360.7	FALSE	248
2022-09-13	09:21:28	0.0737025	2360.78	FALSE	248
2022-09-13	09:21:28	-0.055814	2360.78	FALSE	248
2022-09-13	09:21:28	0.0162979	2360.79	FALSE	248
2022-09-13	09:21:29	0.0190969	2360.81	FALSE	248
2022-09-13	09:21:29	0.412837	2361.23	FALSE	248
2022-09-13	09:21:29	2.3619	2363.59	FALSE	248
2022-09-13	09:21:30	4.53568	2368.12	1	249
2022-09-13	09:21:30	7.50851	2375.63	1	250
2022-09-13	09:21:30	9.34383	2384.98	1	251
2022-09-13	09:21:30	2.19335	2387.17	FALSE	251
2022-09-13	09:21:31	3.63156	2390.8	1	252
2022-09-13	09:21:31	1.02037	2391.82	FALSE	252
2022-09-13	09:21:31	0.559453	2392.38	FALSE	252
2022-09-13	09:21:31	2.07207	2394.45	FALSE	252
2022-09-13	09:21:32	1.23945	2395.69	FALSE	252
2022-09-13	09:21:32	4.07543	2399.77	1	253
2022-09-13	09:21:32	4.46093	2404.23	1	254
2022-09-13	09:21:32	9.42367	2413.65	1	255
2022-09-13	09:21:33	10.0722	2423.72	1	256
2022-09-13	09:21:33	1.88714	2425.61	FALSE	256
2022-09-13	09:21:33	5.89573	2431.51	1	257
2022-09-13	09:21:34	1.09564	2432.6	FALSE	257
2022-09-13	09:21:34	2.93472	2435.54	FALSE	257
2022-09-13	09:21:34	1.42413	2436.96	FALSE	257
2022-09-13	09:21:34	2.1736	2439.14	FALSE	257
2022-09-13	09:21:35	2.93935	2442.07	FALSE	257
2022-09-13	09:21:35	1.01726	2443.09	FALSE	257
2022-09-13	09:21:35	2.38958	2445.48	FALSE	257
2022-09-13	09:21:35	2.04943	2447.53	FALSE	257
2022-09-13	09:21:36	3.32892	2450.86	1	258
2022-09-13	09:21:36	4.34067	2455.2	1	259
2022-09-13	09:21:36	4.76576	2459.97	1	260
2022-09-13	09:21:36	6.65441	2466.62	1	261
2022-09-13	09:21:37	0.984542	2467.61	FALSE	261
2022-09-13	09:21:37	1.17981	2468.79	FALSE	261
2022-09-13	09:21:37	1.34704	2470.13	FALSE	261
2022-09-13	09:21:37	2.37706	2472.51	FALSE	261
2022-09-13	09:21:38	0.61813	2473.13	FALSE	261
2022-09-13	09:21:38	1.40093	2474.53	FALSE	261
2022-09-13	09:21:38	1.67299	2476.2	FALSE	261
2022-09-13	09:21:39	1.6108	2477.81	FALSE	261
2022-09-13	09:21:39	1.14627	2478.96	FALSE	261
2022-09-13	09:21:39	0.544135	2479.5	FALSE	261
2022-09-13	09:21:39	0.174975	2479.68	FALSE	261
2022-09-13	09:21:40	0.227239	2479.9	FALSE	261
2022-09-13	09:21:40	0.0332445	2479.94	FALSE	261
2022-09-13	09:21:40	0.441234	2480.38	FALSE	261
2022-09-13	09:21:40	0.745611	2481.12	FALSE	261
2022-09-13	09:21:41	0.0393514	2481.16	FALSE	261
2022-09-13	09:21:41	-0.0945926	2481.16	FALSE	261
2022-09-13	09:21:41	0.127901	2481.29	FALSE	261
2022-09-13	09:21:41	0.437875	2481.73	FALSE	261
2022-09-13	09:21:42	0.688257	2482.42	FALSE	261
2022-09-13	09:21:42	0.787036	2483.21	FALSE	261
2022-09-13	09:21:42	0.501387	2483.71	FALSE	261
2022-09-13	09:21:43	0.45014	2484.16	FALSE	261
2022-09-13	09:21:43	0.423066	2484.58	FALSE	261
2022-09-13	09:21:43	0.528053	2485.11	FALSE	261
2022-09-13	09:21:43	0.726679	2485.83	FALSE	261
2022-09-13	09:21:44	0.733957	2486.57	FALSE	261
2022-09-13	09:21:44	0.733499	2487.3	FALSE	261
2022-09-13	09:21:44	0.557315	2487.86	FALSE	261
2022-09-13	09:21:44	0.536807	2488.4	FALSE	261
2022-09-13	09:21:45	0.403473	2488.8	FALSE	261
2022-09-13	09:21:45	0.735534	2489.54	FALSE	261
2022-09-13	09:21:45	0.734262	2490.27	FALSE	261
2022-09-13	09:21:45	0.734771	2491	FALSE	261
2022-09-13	09:21:46	0.737214	2491.74	FALSE	261
2022-09-13	09:21:46	0.737773	2492.48	FALSE	261
2022-09-13	09:21:46	0.742099	2493.22	FALSE	261
2022-09-13	09:21:46	0.738028	2493.96	FALSE	261
2022-09-13	09:21:47	0.736399	2494.7	FALSE	261
2022-09-13	09:21:47	0.741183	2495.44	FALSE	261
2022-09-13	09:21:47	0.755687	2496.19	FALSE	261
2022-09-13	09:21:48	1.58973	2497.78	FALSE	261
2022-09-13	09:21:48	0.73645	2498.52	FALSE	261
2022-09-13	09:21:48	0.737163	2499.26	FALSE	261
2022-09-13	09:21:48	0.736807	2499.99	FALSE	261
2022-09-13	09:21:49	0.733855	2500.73	FALSE	261
2022-09-13	09:21:49	0.614771	2501.34	FALSE	261
2022-09-13	09:21:49	0.736094	2502.08	FALSE	261
2022-09-13	09:21:49	0.736145	2502.81	FALSE	261
2022-09-13	09:21:50	0.455127	2503.27	FALSE	261
2022-09-13	09:21:50	0.323677	2503.59	FALSE	261
2022-09-13	09:21:50	0.221539	2503.81	FALSE	261
2022-09-13	09:21:50	0.287443	2504.1	FALSE	261
2022-09-13	09:21:51	0.766832	2504.87	FALSE	261
2022-09-13	09:21:51	2.96179	2507.83	FALSE	261
2022-09-13	09:21:51	9.52479	2517.35	1	262
2022-09-13	09:21:51	15.5133	2532.87	1	263
2022-09-13	09:21:52	4.1682	2537.04	1	264
2022-09-13	09:21:52	8.16973	2545.21	1	265
2022-09-13	09:21:52	2.77711	2547.98	FALSE	265
2022-09-13	09:21:53	8.3308	2556.31	1	266
2022-09-13	09:21:53	4.32474	2560.64	1	267
2022-09-13	09:21:53	6.48327	2567.12	1	268
2022-09-13	09:21:53	5.94052	2573.06	1	269
2022-09-13	09:21:54	1.07075	2574.13	FALSE	269
2022-09-13	09:21:54	1.37955	2575.51	FALSE	269
2022-09-13	09:21:54	0.585153	2576.1	FALSE	269
2022-09-13	09:21:54	0.412481	2576.51	FALSE	269
2022-09-13	09:21:55	0.419708	2576.93	FALSE	269
2022-09-13	09:21:55	0.387137	2577.32	FALSE	269
2022-09-13	09:21:55	0.407646	2577.72	FALSE	269
2022-09-13	09:21:55	0.474211	2578.2	FALSE	269
2022-09-13	09:21:56	0.367392	2578.57	FALSE	269
2022-09-13	09:21:56	0.789631	2579.36	FALSE	269
2022-09-13	09:21:56	0.743066	2580.1	FALSE	269
2022-09-13	09:21:57	1.89579	2581.99	FALSE	269
2022-09-13	09:21:57	0.868511	2582.86	FALSE	269
2022-09-13	09:21:57	2.58637	2585.45	FALSE	269
2022-09-13	09:21:57	0.506323	2585.96	FALSE	269
2022-09-13	09:21:58	1.9163	2587.87	FALSE	269
2022-09-13	09:21:58	0.705814	2588.58	FALSE	269
2022-09-13	09:21:58	1.11055	2589.69	FALSE	269
2022-09-13	09:21:58	1.00775	2590.7	FALSE	269
2022-09-13	09:21:59	1.84958	2592.55	FALSE	269
2022-09-13	09:21:59	0.455382	2593	FALSE	269
2022-09-13	09:21:59	0.495127	2593.5	FALSE	269
2022-09-13	09:21:59	0.588613	2594.09	FALSE	269
2022-09-13	09:22:00	0.304593	2594.39	FALSE	269
2022-09-13	09:22:00	0.384339	2594.77	FALSE	269
2022-09-13	09:22:00	0.391005	2595.17	FALSE	269
2022-09-13	09:22:00	0.456552	2595.62	FALSE	269
2022-09-13	09:22:01	0.341947	2595.96	FALSE	269
2022-09-13	09:22:01	0.350242	2596.31	FALSE	269
2022-09-13	09:22:01	0.355127	2596.67	FALSE	269
2022-09-13	09:22:02	0.490191	2597.16	FALSE	269
2022-09-13	09:22:02	0.610089	2597.77	FALSE	269
2022-09-13	09:22:02	0.478486	2598.25	FALSE	269
2022-09-13	09:22:02	0.500063	2598.75	FALSE	269
2022-09-13	09:22:03	0.55869	2599.31	FALSE	269
2022-09-13	09:22:03	0.433295	2599.74	FALSE	269
2022-09-13	09:22:03	0.407596	2600.15	FALSE	269
2022-09-13	09:22:03	0.46383	2600.61	FALSE	269
2022-09-13	09:22:04	0.779402	2601.39	FALSE	269
2022-09-13	09:22:04	1.52159	2602.91	FALSE	269
2022-09-13	09:22:04	1.80459	2604.72	FALSE	269
2022-09-13	09:22:04	1.96607	2606.68	FALSE	269
2022-09-13	09:22:05	2.73238	2609.42	FALSE	269
2022-09-13	09:22:05	0.870547	2610.29	FALSE	269
2022-09-13	09:22:05	0.724186	2611.01	FALSE	269
2022-09-13	09:22:06	0.740165	2611.75	FALSE	269
2022-09-13	09:22:06	0.73187	2612.48	FALSE	269
2022-09-13	09:22:06	0.736807	2613.22	FALSE	269
2022-09-13	09:22:06	0.740318	2613.96	FALSE	269
2022-09-13	09:22:07	0.741031	2614.7	FALSE	269
2022-09-13	09:22:07	0.820318	2615.52	FALSE	269
2022-09-13	09:22:07	0.861997	2616.38	FALSE	269
2022-09-13	09:22:07	1.92602	2618.31	FALSE	269
2022-09-13	09:22:08	1.75645	2620.07	FALSE	269
2022-09-13	09:22:08	4.08825	2624.15	1	270
2022-09-13	09:22:08	2.81202	2626.97	FALSE	270
2022-09-13	09:22:09	3.44144	2630.41	1	271
2022-09-13	09:22:09	0.82159	2631.23	FALSE	271
2022-09-13	09:22:09	1.28831	2632.52	FALSE	271
2022-09-13	09:22:09	0.501336	2633.02	FALSE	271
2022-09-13	09:22:09	0.522506	2633.54	FALSE	271
2022-09-13	09:22:10	0.419708	2633.96	FALSE	271
2022-09-13	09:22:10	0.669631	2634.63	FALSE	271
2022-09-13	09:22:10	0.424695	2635.05	FALSE	271
2022-09-13	09:22:11	0.448003	2635.5	FALSE	271
2022-09-13	09:22:11	0.303015	2635.81	FALSE	271
2022-09-13	09:22:11	0.415331	2636.22	FALSE	271
2022-09-13	09:22:11	0.199708	2636.42	FALSE	271
2022-09-13	09:22:12	0.458181	2636.88	FALSE	271
2022-09-13	09:22:12	0.234262	2637.11	FALSE	271
2022-09-13	09:22:12	0.742506	2637.86	FALSE	271
2022-09-13	09:22:12	0.996094	2638.85	FALSE	271
2022-09-13	09:22:13	0.522812	2639.37	FALSE	271
2022-09-13	09:22:13	0.56098	2639.94	FALSE	271
2022-09-13	09:22:13	0.627137	2640.56	FALSE	271
2022-09-13	09:22:13	0.337112	2640.9	FALSE	271
2022-09-13	09:22:14	0.52332	2641.42	FALSE	271
2022-09-13	09:22:14	0.417061	2641.84	FALSE	271
2022-09-13	09:22:14	0.637061	2642.48	FALSE	271
2022-09-13	09:22:15	0.353244	2642.83	FALSE	271
2022-09-13	09:22:15	0.725407	2643.56	FALSE	271
2022-09-13	09:22:15	0.736603	2644.29	FALSE	271
2022-09-13	09:22:15	0.74098	2645.03	FALSE	271
2022-09-13	09:22:16	0.744593	2645.78	FALSE	271
2022-09-13	09:22:16	0.735636	2646.51	FALSE	271
2022-09-13	09:22:16	0.735178	2647.25	FALSE	271
2022-09-13	09:22:16	0.744084	2647.99	FALSE	271
2022-09-13	09:22:17	0.738791	2648.73	FALSE	271
2022-09-13	09:22:17	0.738079	2649.47	FALSE	271
2022-09-13	09:22:17	0.741031	2650.21	FALSE	271
2022-09-13	09:22:17	0.739351	2650.95	FALSE	271
2022-09-13	09:22:18	0.736908	2651.69	FALSE	271
2022-09-13	09:22:18	0.73757	2652.42	FALSE	271
2022-09-13	09:22:18	0.738537	2653.16	FALSE	271
2022-09-13	09:22:18	0.826476	2653.99	FALSE	271

## Sheet: Juju_martin_202291391711
						**GoPro Fitting: 906
2022-09-13	09:17:12	0.319555
2022-09-13	09:17:12	0.335535
2022-09-13	09:17:12	0.486832
2022-09-13	09:17:12	0.384186
2022-09-13	09:17:12	0.409377
2022-09-13	09:17:13	0.330903
2022-09-13	09:17:13	0.304135
2022-09-13	09:17:13	0.285814
2022-09-13	09:17:13	0.321692
2022-09-13	09:17:14	0.363626
2022-09-13	09:17:14	0.373957
2022-09-13	09:17:14	0.30785
2022-09-13	09:17:15	0.391972
2022-09-13	09:17:15	0.429631
2022-09-13	09:17:15	0.439555
2022-09-13	09:17:15	0.424796
2022-09-13	09:17:16	0.423015
2022-09-13	09:17:16	0.423524
2022-09-13	09:17:16	0.42215
2022-09-13	09:17:16	0.446476
2022-09-13	09:17:17	0.434975
2022-09-13	09:17:17	0.417316
2022-09-13	09:17:17	0.451768
2022-09-13	09:17:17	0.447901
2022-09-13	09:17:18	0.447494
2022-09-13	09:17:18	0.446679
2022-09-13	09:17:18	0.436959
2022-09-13	09:17:19	0.433092
2022-09-13	09:17:19	0.437214
2022-09-13	09:17:19	0.449224
2022-09-13	09:17:19	0.461794
2022-09-13	09:17:20	0.466883
2022-09-13	09:17:20	0.464644
2022-09-13	09:17:20	0.455229
2022-09-13	09:17:20	0.456501
2022-09-13	09:17:21	0.481234
2022-09-13	09:17:21	0.443677
2022-09-13	09:17:21	0.395992
2022-09-13	09:17:21	0.35182
2022-09-13	09:17:22	0.303982
2022-09-13	09:17:22	0.473753
2022-09-13	09:17:22	0.480827
2022-09-13	09:17:22	0.442252
2022-09-13	09:17:23	0.406679
2022-09-13	09:17:23	0.399199
2022-09-13	09:17:23	0.424542
2022-09-13	09:17:24	0.443982
2022-09-13	09:17:24	0.398079
2022-09-13	09:17:24	0.501488
2022-09-13	09:17:24	1.04154
2022-09-13	09:17:25	1.44612
2022-09-13	09:17:25	1.8938
2022-09-13	09:17:25	1.26454
2022-09-13	09:17:26	2.27574
2022-09-13	09:17:26	1.58902
2022-09-13	09:17:26	0.993295
2022-09-13	09:17:26	0.835585
2022-09-13	09:17:26	2.10602
2022-09-13	09:17:27	7.2964
2022-09-13	09:17:27	5.39853
2022-09-13	09:17:27	2.05248
2022-09-13	09:17:28	1.23279
2022-09-13	09:17:28	0.627596
2022-09-13	09:17:28	0.644898
2022-09-13	09:17:28	1.75508
2022-09-13	09:17:29	1.37426
2022-09-13	09:17:29	1.44363
2022-09-13	09:17:29	2.54861
2022-09-13	09:17:29	1.57309
2022-09-13	09:17:30	3.11879
2022-09-13	09:17:30	3.42459
2022-09-13	09:17:30	7.0567
2022-09-13	09:17:30	6.67828
2022-09-13	09:17:31	6.56815
2022-09-13	09:17:31	2.45121
2022-09-13	09:17:31	0.561438
2022-09-13	09:17:31	0.956857
2022-09-13	09:17:32	2.10816
2022-09-13	09:17:32	2.32688
2022-09-13	09:17:32	4.66943
2022-09-13	09:17:33	5.18749
2022-09-13	09:17:33	8.35563
2022-09-13	09:17:33	1.41513
2022-09-13	09:17:33	2.43584
2022-09-13	09:17:34	0.792634
2022-09-13	09:17:34	0.593143
2022-09-13	09:17:34	0.752939
2022-09-13	09:17:34	0.687595
2022-09-13	09:17:35	0.688461
2022-09-13	09:17:35	0.640267
2022-09-13	09:17:35	0.462557
2022-09-13	09:17:35	0.724847
2022-09-13	09:17:36	0.390394
2022-09-13	09:17:36	0.465
2022-09-13	09:17:36	0.411819
2022-09-13	09:17:36	0.563575
2022-09-13	09:17:37	0.86098
2022-09-13	09:17:37	0.46897
2022-09-13	09:17:37	0.0664252
2022-09-13	09:17:38	1.58734
2022-09-13	09:17:38	2.99513
2022-09-13	09:17:38	7.45695
2022-09-13	09:17:38	10.8845
2022-09-13	09:17:39	14.6596
2022-09-13	09:17:39	7.45421
2022-09-13	09:17:39	3.43019
2022-09-13	09:17:39	11.0164
2022-09-13	09:17:40	3.8793
2022-09-13	09:17:40	10.0455
2022-09-13	09:17:40	5.38154
2022-09-13	09:17:40	4.58327
2022-09-13	09:17:41	6.41141
2022-09-13	09:17:41	3.42576
2022-09-13	09:17:41	8.3283
2022-09-13	09:17:42	6.751
2022-09-13	09:17:42	3.57111
2022-09-13	09:17:42	4.50556
2022-09-13	09:17:42	1.7993
2022-09-13	09:17:43	4.50495
2022-09-13	09:17:43	1.08154
2022-09-13	09:17:43	1.52424
2022-09-13	09:17:43	4.38886
2022-09-13	09:17:44	2.38978
2022-09-13	09:17:44	6.54988
2022-09-13	09:17:44	1.90856
2022-09-13	09:17:44	6.81243
2022-09-13	09:17:45	1.58653
2022-09-13	09:17:45	2.97691
2022-09-13	09:17:45	1.011
2022-09-13	09:17:45	0.848715
2022-09-13	09:17:46	0.977316
2022-09-13	09:17:46	0.702048
2022-09-13	09:17:46	1.38154
2022-09-13	09:17:47	1.19289
2022-09-13	09:17:47	3.08266
2022-09-13	09:17:47	4.48138
2022-09-13	09:17:47	4.63818
2022-09-13	09:17:48	5.58357
2022-09-13	09:17:48	2.12673
2022-09-13	09:17:48	7.78495
2022-09-13	09:17:48	0.689682
2022-09-13	09:17:49	3.3338
2022-09-13	09:17:49	2.5565
2022-09-13	09:17:49	1.78922
2022-09-13	09:17:49	2.68851
2022-09-13	09:17:50	0.539758
2022-09-13	09:17:50	2.38357
2022-09-13	09:17:50	0.504644
2022-09-13	09:17:51	0.689122
2022-09-13	09:17:51	0.844084
2022-09-13	09:17:51	0.603677
2022-09-13	09:17:51	1.10902
2022-09-13	09:17:52	0.444949
2022-09-13	09:17:52	1.77141
2022-09-13	09:17:52	0.70785
2022-09-13	09:17:52	1.70006
2022-09-13	09:17:53	1.39477
2022-09-13	09:17:53	2.43452
2022-09-13	09:17:53	4.01767
2022-09-13	09:17:53	5.95935
2022-09-13	09:17:54	3.69574
2022-09-13	09:17:54	2.85843
2022-09-13	09:17:54	4.94749
2022-09-13	09:17:54	2.51726
2022-09-13	09:17:55	6.30591
2022-09-13	09:17:55	5.76322
2022-09-13	09:17:55	5.89049
2022-09-13	09:17:56	13.1975
2022-09-13	09:17:56	1.31111
2022-09-13	09:17:56	8.0681
2022-09-13	09:17:56	1.11961
2022-09-13	09:17:57	9.95823
2022-09-13	09:17:57	6.31619
2022-09-13	09:17:57	10.1392
2022-09-13	09:17:57	4.78235
2022-09-13	09:17:58	1.34118
2022-09-13	09:17:58	1.51146
2022-09-13	09:17:58	1.22978
2022-09-13	09:17:58	0.72612
2022-09-13	09:17:59	2.09838
2022-09-13	09:17:59	1.80139
2022-09-13	09:17:59	7.63365
2022-09-13	09:18:00	3.2219
2022-09-13	09:18:00	21.7214
2022-09-13	09:18:00	4.37334
2022-09-13	09:18:00	7.32922
2022-09-13	09:18:01	3.13156
2022-09-13	09:18:01	3.7938
2022-09-13	09:18:01	7.83187
2022-09-13	09:18:01	2.37935
2022-09-13	09:18:02	6.14337
2022-09-13	09:18:02	5.81594
2022-09-13	09:18:02	2.96052
2022-09-13	09:18:02	3.3935
2022-09-13	09:18:03	1.77721
2022-09-13	09:18:03	3.0024
2022-09-13	09:18:03	1.91202
2022-09-13	09:18:03	2.47019
2022-09-13	09:18:04	1.78938
2022-09-13	09:18:04	0.900522
2022-09-13	09:18:04	1.05961
2022-09-13	09:18:05	0.72617
2022-09-13	09:18:05	2.51167
2022-09-13	09:18:05	1.12861
2022-09-13	09:18:05	3.65477
2022-09-13	09:18:06	0.965814
2022-09-13	09:18:06	2.31421
2022-09-13	09:18:06	1.05345
2022-09-13	09:18:06	0.956603
2022-09-13	09:18:07	1.29386
2022-09-13	09:18:07	0.550191
2022-09-13	09:18:07	1.13838
2022-09-13	09:18:07	0.859962
2022-09-13	09:18:08	2.26291
2022-09-13	09:18:08	2.64001
2022-09-13	09:18:08	5.5967
2022-09-13	09:18:08	7.24036
2022-09-13	09:18:09	14.8029
2022-09-13	09:18:09	17.0697
2022-09-13	09:18:09	10.4287
2022-09-13	09:18:10	20.4827
2022-09-13	09:18:10	18.157
2022-09-13	09:18:10	15.2938
2022-09-13	09:18:10	14.8404
2022-09-13	09:18:11	8.60846
2022-09-13	09:18:11	12.6339
2022-09-13	09:18:11	9.27161
2022-09-13	09:18:11	10.8233
2022-09-13	09:18:12	20.1592
2022-09-13	09:18:12	5.27497
2022-09-13	09:18:12	8.45528
2022-09-13	09:18:12	16.9418
2022-09-13	09:18:13	3.02647
2022-09-13	09:18:13	7.60993
2022-09-13	09:18:13	1.02078
2022-09-13	09:18:14	1.12938
2022-09-13	09:18:14	0.874465
2022-09-13	09:18:14	0.469479
2022-09-13	09:18:14	0.963778
2022-09-13	09:18:15	0.673295
2022-09-13	09:18:15	0.663728
2022-09-13	09:18:15	1.328
2022-09-13	09:18:15	1.50612
2022-09-13	09:18:16	4.98347
2022-09-13	09:18:16	7.46856
2022-09-13	09:18:16	20.0125
2022-09-13	09:18:16	5.00505
2022-09-13	09:18:17	4.91655
2022-09-13	09:18:17	8.4683
2022-09-13	09:18:17	1.61268
2022-09-13	09:18:17	6.26138
2022-09-13	09:18:18	4.79625
2022-09-13	09:18:18	2.86337
2022-09-13	09:18:18	7.97227
2022-09-13	09:18:19	4.13574
2022-09-13	09:18:19	4.94016
2022-09-13	09:18:19	5.62754
2022-09-13	09:18:19	1.85116
2022-09-13	09:18:20	7.37238
2022-09-13	09:18:20	1.70729
2022-09-13	09:18:20	3.3764
2022-09-13	09:18:20	5.31334
2022-09-13	09:18:21	2.67263
2022-09-13	09:18:21	9.18383
2022-09-13	09:18:21	7.72449
2022-09-13	09:18:21	11.2548
2022-09-13	09:18:22	2.76937
2022-09-13	09:18:22	2.29513
2022-09-13	09:18:22	1.92795
2022-09-13	09:18:23	1.26683
2022-09-13	09:18:23	1.55864
2022-09-13	09:18:23	1.55762
2022-09-13	09:18:23	1.20485
2022-09-13	09:18:24	1.16907
2022-09-13	09:18:24	1.29523
2022-09-13	09:18:24	0.701387
2022-09-13	09:18:24	0.472125
2022-09-13	09:18:25	0.595433
2022-09-13	09:18:25	1.02403
2022-09-13	09:18:25	1.65263
2022-09-13	09:18:25	5.03904
2022-09-13	09:18:26	3.31396
2022-09-13	09:18:26	1.2048
2022-09-13	09:18:26	0.839198
2022-09-13	09:18:26	1.58485
2022-09-13	09:18:27	0.946323
2022-09-13	09:18:27	1.93324
2022-09-13	09:18:27	1.05884
2022-09-13	09:18:28	1.10159
2022-09-13	09:18:28	0.7393
2022-09-13	09:18:28	0.735534
2022-09-13	09:18:28	1.8592
2022-09-13	09:18:29	3.69696
2022-09-13	09:18:29	2.25716
2022-09-13	09:18:29	1.75787
2022-09-13	09:18:29	0.417163
2022-09-13	09:18:30	0.872837
2022-09-13	09:18:30	0.373652
2022-09-13	09:18:30	0.624237
2022-09-13	09:18:30	0.440267
2022-09-13	09:18:31	0.596858
2022-09-13	09:18:31	0.518639
2022-09-13	09:18:31	1.14027
2022-09-13	09:18:32	1.75162
2022-09-13	09:18:32	1.74917
2022-09-13	09:18:32	1.47309
2022-09-13	09:18:32	0.878232
2022-09-13	09:18:33	1.52475
2022-09-13	09:18:33	2.23742
2022-09-13	09:18:33	2.70154
2022-09-13	09:18:33	2.82586
2022-09-13	09:18:34	3.06001
2022-09-13	09:18:34	3.71014
2022-09-13	09:18:34	4.57864
2022-09-13	09:18:34	1.98052
2022-09-13	09:18:35	1.38561
2022-09-13	09:18:35	6.94545
2022-09-13	09:18:35	3.02714
2022-09-13	09:18:35	5.08347
2022-09-13	09:18:36	0.679809
2022-09-13	09:18:36	2.35253
2022-09-13	09:18:36	0.833448
2022-09-13	09:18:37	0.889326
2022-09-13	09:18:37	2.04439
2022-09-13	09:18:37	2.86444
2022-09-13	09:18:37	6.12902
2022-09-13	09:18:38	2.06958
2022-09-13	09:18:38	5.75126
2022-09-13	09:18:38	3.8823
2022-09-13	09:18:38	4.58719
2022-09-13	09:18:39	6.46759
2022-09-13	09:18:39	1.16439
2022-09-13	09:18:39	5.191
2022-09-13	09:18:39	0.583829
2022-09-13	09:18:40	1.46581
2022-09-13	09:18:40	0.463931
2022-09-13	09:18:40	0.379148
2022-09-13	09:18:41	0.00301552
2022-09-13	09:18:41	-0.0952542
2022-09-13	09:18:41	-0.318206
2022-09-13	09:18:41	-0.562175
2022-09-13	09:18:42	-0.318867
2022-09-13	09:18:42	0.126476
2022-09-13	09:18:42	0.414059
2022-09-13	09:18:42	0.507951
2022-09-13	09:18:43	0.47243
2022-09-13	09:18:43	0.46729
2022-09-13	09:18:43	0.439606
2022-09-13	09:18:43	0.510903
2022-09-13	09:18:44	0.471921
2022-09-13	09:18:44	0.485305
2022-09-13	09:18:44	0.506577
2022-09-13	09:18:44	0.483422
2022-09-13	09:18:45	0.50729
2022-09-13	09:18:45	0.570293
2022-09-13	09:18:45	0.766629
2022-09-13	09:18:46	1.02235
2022-09-13	09:18:46	0.87584
2022-09-13	09:18:46	0.854873
2022-09-13	09:18:46	0.920267
2022-09-13	09:18:47	1.23986
2022-09-13	09:18:47	0.956145
2022-09-13	09:18:47	1.09279
2022-09-13	09:18:47	1.22429
2022-09-13	09:18:48	1.72846
2022-09-13	09:18:48	1.94785
2022-09-13	09:18:48	2.18673
2022-09-13	09:18:48	3.26159
2022-09-13	09:18:49	3.5822
2022-09-13	09:18:49	3.48958
2022-09-13	09:18:49	2.90551
2022-09-13	09:18:49	6.24871
2022-09-13	09:18:50	1.39935
2022-09-13	09:18:50	4.79507
2022-09-13	09:18:50	2.49518
2022-09-13	09:18:51	4.51879
2022-09-13	09:18:51	3.76561
2022-09-13	09:18:51	1.83116
2022-09-13	09:18:51	7.6855
2022-09-13	09:18:52	1.81559
2022-09-13	09:18:52	5.37212
2022-09-13	09:18:52	2.02184
2022-09-13	09:18:52	1.83681
2022-09-13	09:18:53	2.45477
2022-09-13	09:18:53	0.281794
2022-09-13	09:18:53	2.03009
2022-09-13	09:18:53	0.763728
2022-09-13	09:18:54	2.24312
2022-09-13	09:18:54	2.32866
2022-09-13	09:18:54	2.35569
2022-09-13	09:18:55	2.17212
2022-09-13	09:18:55	1.54337
2022-09-13	09:18:55	2.06541
2022-09-13	09:18:55	1.04281
2022-09-13	09:18:56	1.52352
2022-09-13	09:18:56	0.520165
2022-09-13	09:18:56	1.62307
2022-09-13	09:18:56	0.404695
2022-09-13	09:18:57	1.59696
2022-09-13	09:18:57	2.11513
2022-09-13	09:18:57	2.26999
2022-09-13	09:18:57	3.34149
2022-09-13	09:18:58	2.12062
2022-09-13	09:18:58	8.39629
2022-09-13	09:18:58	1.37818
2022-09-13	09:18:58	8.56876
2022-09-13	09:18:59	2.37396
2022-09-13	09:18:59	4.57335
2022-09-13	09:18:59	3.70352
2022-09-13	09:19:00	2.41268
2022-09-13	09:19:00	4.91457
2022-09-13	09:19:00	2.23034
2022-09-13	09:19:00	3.96459
2022-09-13	09:19:01	1.39238
2022-09-13	09:19:01	1.68073
2022-09-13	09:19:01	0.903575
2022-09-13	09:19:01	0.582099
2022-09-13	09:19:02	0.368817
2022-09-13	09:19:02	0.482099
2022-09-13	09:19:02	0.467239
2022-09-13	09:19:02	0.562964
2022-09-13	09:19:03	0.436247
2022-09-13	09:19:03	0.100471
2022-09-13	09:19:03	-0.264923
2022-09-13	09:19:04	-0.117137
2022-09-13	09:19:04	0.48042
2022-09-13	09:19:04	0.569885
2022-09-13	09:19:04	0.442557
2022-09-13	09:19:05	0.496145
2022-09-13	09:19:05	0.518282
2022-09-13	09:19:05	0.546679
2022-09-13	09:19:05	0.547443
2022-09-13	09:19:06	0.528664
2022-09-13	09:19:06	0.511514
2022-09-13	09:19:06	0.517366
2022-09-13	09:19:06	0.502913
2022-09-13	09:19:07	0.48729
2022-09-13	09:19:07	0.475026
2022-09-13	09:19:07	0.462812
2022-09-13	09:19:07	0.500776
2022-09-13	09:19:08	0.389479
2022-09-13	09:19:08	0.351412
2022-09-13	09:19:08	0.466527
2022-09-13	09:19:09	0.394161
2022-09-13	09:19:09	0.531616
2022-09-13	09:19:09	0.40271
2022-09-13	09:19:09	0.325153
2022-09-13	09:19:10	0.347697
2022-09-13	09:19:10	0.254669
2022-09-13	09:19:10	0.11869
2022-09-13	09:19:10	-0.310063
2022-09-13	09:19:11	-0.55958
2022-09-13	09:19:11	-0.336374
2022-09-13	09:19:11	-0.212048
2022-09-13	09:19:11	0.726527
2022-09-13	09:19:12	3.56836
2022-09-13	09:19:12	1.04113
2022-09-13	09:19:12	1.94938
2022-09-13	09:19:13	2.73355
2022-09-13	09:19:13	3.12424
2022-09-13	09:19:13	3.83416
2022-09-13	09:19:13	2.03497
2022-09-13	09:19:14	1.97192
2022-09-13	09:19:14	0.973651
2022-09-13	09:19:14	1.07335
2022-09-13	09:19:14	2.5165
2022-09-13	09:19:15	1.88556
2022-09-13	09:19:15	5.02159
2022-09-13	09:19:15	6.51634
2022-09-13	09:19:15	7.17314
2022-09-13	09:19:16	4.20999
2022-09-13	09:19:16	6.64581
2022-09-13	09:19:16	3.56592
2022-09-13	09:19:16	4.62861
2022-09-13	09:19:17	4.545
2022-09-13	09:19:17	1.75431
2022-09-13	09:19:17	3.51818
2022-09-13	09:19:18	1.21579
2022-09-13	09:19:18	1.06495
2022-09-13	09:19:18	2.58729
2022-09-13	09:19:18	2.85752
2022-09-13	09:19:19	5.18683
2022-09-13	09:19:19	4.21177
2022-09-13	09:19:19	6.90586
2022-09-13	09:19:19	4.89294
2022-09-13	09:19:20	5.50026
2022-09-13	09:19:20	6.26713
2022-09-13	09:19:20	3.44861
2022-09-13	09:19:20	10.4201
2022-09-13	09:19:21	4.41228
2022-09-13	09:19:21	8.47507
2022-09-13	09:19:21	10.4768
2022-09-13	09:19:21	7.50673
2022-09-13	09:19:22	16.4624
2022-09-13	09:19:22	12.5445
2022-09-13	09:19:22	9.95354
2022-09-13	09:19:23	11.3576
2022-09-13	09:19:23	5.76291
2022-09-13	09:19:23	3.15243
2022-09-13	09:19:23	0.902048
2022-09-13	09:19:24	2.10846
2022-09-13	09:19:24	1.99762
2022-09-13	09:19:24	2.79533
2022-09-13	09:19:24	3.46647
2022-09-13	09:19:25	7.17161
2022-09-13	09:19:25	5.3595
2022-09-13	09:19:25	10.5563
2022-09-13	09:19:25	4.36907
2022-09-13	09:19:26	5.96235
2022-09-13	09:19:26	6.22143
2022-09-13	09:19:26	3.34312
2022-09-13	09:19:27	10.0581
2022-09-13	09:19:27	3.38953
2022-09-13	09:19:27	4.87533
2022-09-13	09:19:27	10.7206
2022-09-13	09:19:28	2.59223
2022-09-13	09:19:28	10.3297
2022-09-13	09:19:28	6.09986
2022-09-13	09:19:28	4.15609
2022-09-13	09:19:29	8.84021
2022-09-13	09:19:29	6.19039
2022-09-13	09:19:29	7.28047
2022-09-13	09:19:29	11.6598
2022-09-13	09:19:30	5.91248
2022-09-13	09:19:30	10.6847
2022-09-13	09:19:30	5.08154
2022-09-13	09:19:30	3.97945
2022-09-13	09:19:31	14.3567
2022-09-13	09:19:31	2.17731
2022-09-13	09:19:31	4.27655
2022-09-13	09:19:32	2.79711
2022-09-13	09:19:32	1.28302
2022-09-13	09:19:32	1.81696
2022-09-13	09:19:32	2.59294
2022-09-13	09:19:33	1.5076
2022-09-13	09:19:33	1.86693
2022-09-13	09:19:33	0.928969
2022-09-13	09:19:33	0.961438
2022-09-13	09:19:34	0.415178
2022-09-13	09:19:34	0.741132
2022-09-13	09:19:34	0.730343
2022-09-13	09:19:34	0.285814
2022-09-13	09:19:35	0.300827
2022-09-13	09:19:35	0.30271
2022-09-13	09:19:35	0.248664
2022-09-13	09:19:36	0.341947
2022-09-13	09:19:36	0.219351
2022-09-13	09:19:36	0.349428
2022-09-13	09:19:36	0.276349
2022-09-13	09:19:37	0.324746
2022-09-13	09:19:37	0.303219
2022-09-13	09:19:37	0.310903
2022-09-13	09:19:37	0.436552
2022-09-13	09:19:38	0.138842
2022-09-13	09:19:38	0.114059
2022-09-13	09:19:38	0.0913615
2022-09-13	09:19:38	-0.223448
2022-09-13	09:19:39	-0.498206
2022-09-13	09:19:39	1.31014
2022-09-13	09:19:39	5.35701
2022-09-13	09:19:39	12.0412
2022-09-13	09:19:40	14.1445
2022-09-13	09:19:40	15.2313
2022-09-13	09:19:40	9.59436
2022-09-13	09:19:41	3.44062
2022-09-13	09:19:41	0.616959
2022-09-13	09:19:41	0.331158
2022-09-13	09:19:41	0.43813
2022-09-13	09:19:42	0.302914
2022-09-13	09:19:42	0.398639
2022-09-13	09:19:42	0.411819
2022-09-13	09:19:42	0.279911
2022-09-13	09:19:43	0.52388
2022-09-13	09:19:43	0.436145
2022-09-13	09:19:43	0.538028
2022-09-13	09:19:43	0.330344
2022-09-13	09:19:44	0.579351
2022-09-13	09:19:44	0.513906
2022-09-13	09:19:44	0.644593
2022-09-13	09:19:45	0.715331
2022-09-13	09:19:45	1.39508
2022-09-13	09:19:45	1.24877
2022-09-13	09:19:45	3.69971
2022-09-13	09:19:46	4.0853
2022-09-13	09:19:46	4.74474
2022-09-13	09:19:46	2.36235
2022-09-13	09:19:46	3.31945
2022-09-13	09:19:47	3.34943
2022-09-13	09:19:47	5.64739
2022-09-13	09:19:47	5.51237
2022-09-13	09:19:47	5.245
2022-09-13	09:19:48	2.02663
2022-09-13	09:19:48	3.67334
2022-09-13	09:19:48	1.12627
2022-09-13	09:19:48	3.08337
2022-09-13	09:19:49	1.50602
2022-09-13	09:19:49	2.32128
2022-09-13	09:19:49	1.54006
2022-09-13	09:19:50	1.7022
2022-09-13	09:19:50	0.977316
2022-09-13	09:19:50	1.24317
2022-09-13	09:19:50	0.623422
2022-09-13	09:19:51	0.952837
2022-09-13	09:19:51	0.877265
2022-09-13	09:19:51	0.851158
2022-09-13	09:19:51	0.826323
2022-09-13	09:19:52	1.57024
2022-09-13	09:19:52	1.48663
2022-09-13	09:19:52	1.82128
2022-09-13	09:19:52	3.08652
2022-09-13	09:19:53	1.36225
2022-09-13	09:19:53	1.83518
2022-09-13	09:19:53	0.293448
2022-09-13	09:19:53	0.603728
2022-09-13	09:19:54	0.456807
2022-09-13	09:19:54	0.417926
2022-09-13	09:19:54	0.433244
2022-09-13	09:19:55	0.763728
2022-09-13	09:19:55	1.00459
2022-09-13	09:19:55	1.80785
2022-09-13	09:19:55	2.72016
2022-09-13	09:19:56	1.50281
2022-09-13	09:19:56	1.93238
2022-09-13	09:19:56	1.45197
2022-09-13	09:19:56	1.3567
2022-09-13	09:19:57	-0.0595799
2022-09-13	09:19:57	-0.0293509
2022-09-13	09:19:57	-0.019987
2022-09-13	09:19:57	-0.0765773
2022-09-13	09:19:58	-0.312201
2022-09-13	09:19:58	-0.397646
2022-09-13	09:19:58	-0.459936
2022-09-13	09:19:59	-0.459681
2022-09-13	09:19:59	-0.250369
2022-09-13	09:19:59	0.0653565
2022-09-13	09:19:59	0.369224
2022-09-13	09:20:00	0.429071
2022-09-13	09:20:00	1.24877
2022-09-13	09:20:00	1.70505
2022-09-13	09:20:00	2.13411
2022-09-13	09:20:01	1.55894
2022-09-13	09:20:01	1.68454
2022-09-13	09:20:01	2.48647
2022-09-13	09:20:01	0.980623
2022-09-13	09:20:02	1.78378
2022-09-13	09:20:02	1.64704
2022-09-13	09:20:02	3.16831
2022-09-13	09:20:02	3.15854
2022-09-13	09:20:03	2.6591
2022-09-13	09:20:03	2.30551
2022-09-13	09:20:03	1.03599
2022-09-13	09:20:04	1.88683
2022-09-13	09:20:04	0.534364
2022-09-13	09:20:04	1.18088
2022-09-13	09:20:04	0.381692
2022-09-13	09:20:05	0.656247
2022-09-13	09:20:05	0.547035
2022-09-13	09:20:05	0.417112
2022-09-13	09:20:05	0.253397
2022-09-13	09:20:06	0.44327
2022-09-13	09:20:06	0.477875
2022-09-13	09:20:06	0.974974
2022-09-13	09:20:07	1.64749
2022-09-13	09:20:07	2.98983
2022-09-13	09:20:07	0.494516
2022-09-13	09:20:07	0.089733
2022-09-13	09:20:08	0.355585
2022-09-13	09:20:08	0.360776
2022-09-13	09:20:08	0.819657
2022-09-13	09:20:08	2.00912
2022-09-13	09:20:09	2.38938
2022-09-13	09:20:09	0.662201
2022-09-13	09:20:09	-0.171692
2022-09-13	09:20:09	0.0166033
2022-09-13	09:20:10	-0.153727
2022-09-13	09:20:10	-0.386094
2022-09-13	09:20:10	-0.47902
2022-09-13	09:20:10	-0.550979
2022-09-13	09:20:11	-0.324669
2022-09-13	09:20:11	-0.0182567
2022-09-13	09:20:11	0.260064
2022-09-13	09:20:11	0.27472
2022-09-13	09:20:12	0.117519
2022-09-13	09:20:12	0.0802674
2022-09-13	09:20:12	0.32841
2022-09-13	09:20:13	2.50164
2022-09-13	09:20:13	2.68765
2022-09-13	09:20:13	2.01401
2022-09-13	09:20:13	3.84123
2022-09-13	09:20:14	2.38347
2022-09-13	09:20:14	1.72083
2022-09-13	09:20:14	1.145
2022-09-13	09:20:14	1.47024
2022-09-13	09:20:15	1.0223
2022-09-13	09:20:15	0.966781
2022-09-13	09:20:15	1.60098
2022-09-13	09:20:15	1.02581
2022-09-13	09:20:16	1.88042
2022-09-13	09:20:16	1.43589
2022-09-13	09:20:16	2.78149
2022-09-13	09:20:17	1.58495
2022-09-13	09:20:17	2.11426
2022-09-13	09:20:17	3.62668
2022-09-13	09:20:17	3.81706
2022-09-13	09:20:18	3.72067
2022-09-13	09:20:18	5.25248
2022-09-13	09:20:18	1.67696
2022-09-13	09:20:18	1.85034
2022-09-13	09:20:19	1.0591
2022-09-13	09:20:19	1.22704
2022-09-13	09:20:19	1.36581
2022-09-13	09:20:19	1.63396
2022-09-13	09:20:20	0.904339
2022-09-13	09:20:20	1.18561
2022-09-13	09:20:20	1.04576
2022-09-13	09:20:20	1.58709
2022-09-13	09:20:21	1.13401
2022-09-13	09:20:21	1.41747
2022-09-13	09:20:21	2.09447
2022-09-13	09:20:22	0.903168
2022-09-13	09:20:22	0.863931
2022-09-13	09:20:22	0.465763
2022-09-13	09:20:22	0.906272
2022-09-13	09:20:23	0.421641
2022-09-13	09:20:23	1.55284
2022-09-13	09:20:23	1.73635
2022-09-13	09:20:23	3.93492
2022-09-13	09:20:24	3.00683
2022-09-13	09:20:24	7.46347
2022-09-13	09:20:24	5.02683
2022-09-13	09:20:24	13.7287
2022-09-13	09:20:25	3.75772
2022-09-13	09:20:25	6.32317
2022-09-13	09:20:25	11.8491
2022-09-13	09:20:26	2.22139
2022-09-13	09:20:26	7.69182
2022-09-13	09:20:26	3.92653
2022-09-13	09:20:26	5.97222
2022-09-13	09:20:27	14.4216
2022-09-13	09:20:27	6.49863
2022-09-13	09:20:27	11.5874
2022-09-13	09:20:27	1.0338
2022-09-13	09:20:28	0.284135
2022-09-13	09:20:28	0.493295
2022-09-13	09:20:28	0.442405
2022-09-13	09:20:28	0.532277
2022-09-13	09:20:29	0.303524
2022-09-13	09:20:29	0.291972
2022-09-13	09:20:29	0.28215
2022-09-13	09:20:29	0.105407
2022-09-13	09:20:30	0.482201
2022-09-13	09:20:30	0.324339
2022-09-13	09:20:30	0.490191
2022-09-13	09:20:31	0.3993
2022-09-13	09:20:31	0.56215
2022-09-13	09:20:31	0.743015
2022-09-13	09:20:31	0.987086
2022-09-13	09:20:32	3.6482
2022-09-13	09:20:32	3.77548
2022-09-13	09:20:32	2.69182
2022-09-13	09:20:32	0.587188
2022-09-13	09:20:33	0.787392
2022-09-13	09:20:33	0.6164
2022-09-13	09:20:33	0.588664
2022-09-13	09:20:33	0.428461
2022-09-13	09:20:34	0.570598
2022-09-13	09:20:34	0.385865
2022-09-13	09:20:34	0.634262
2022-09-13	09:20:35	0.388512
2022-09-13	09:20:35	0.670852
2022-09-13	09:20:35	0.471718
2022-09-13	09:20:35	1.38139
2022-09-13	09:20:36	1.17131
2022-09-13	09:20:36	8.29731
2022-09-13	09:20:36	3.868
2022-09-13	09:20:36	11.8472
2022-09-13	09:20:37	2.2619
2022-09-13	09:20:37	3.93767
2022-09-13	09:20:37	2.67451
2022-09-13	09:20:37	1.26352
2022-09-13	09:20:38	3.4737
2022-09-13	09:20:38	0.668308
2022-09-13	09:20:38	0.606527
2022-09-13	09:20:38	0.684033
2022-09-13	09:20:39	0.441641
2022-09-13	09:20:39	0.796094
2022-09-13	09:20:39	0.9507
2022-09-13	09:20:40	1.94134
2022-09-13	09:20:40	0.958486
2022-09-13	09:20:40	2.14118
2022-09-13	09:20:40	1.49838
2022-09-13	09:20:41	2.45187
2022-09-13	09:20:41	1.53131
2022-09-13	09:20:41	0.649173
2022-09-13	09:20:41	1.87782
2022-09-13	09:20:42	0.957163
2022-09-13	09:20:42	2.88235
2022-09-13	09:20:42	2.45396
2022-09-13	09:20:42	4.70653
2022-09-13	09:20:43	4.18149
2022-09-13	09:20:43	6.23879
2022-09-13	09:20:43	7.74072
2022-09-13	09:20:43	2.67624
2022-09-13	09:20:44	3.75299
2022-09-13	09:20:44	1.01396
2022-09-13	09:20:44	3.49757
2022-09-13	09:20:45	1.67406
2022-09-13	09:20:45	2.41782
2022-09-13	09:20:45	4.02948
2022-09-13	09:20:45	1.35676
2022-09-13	09:20:46	2.67426
2022-09-13	09:20:46	1.02357
2022-09-13	09:20:46	2.40459
2022-09-13	09:20:46	1.39177
2022-09-13	09:20:47	1.00459
2022-09-13	09:20:47	1.52612
2022-09-13	09:20:47	0.931768
2022-09-13	09:20:47	1.55497
2022-09-13	09:20:48	0.897214
2022-09-13	09:20:48	3.20729
2022-09-13	09:20:48	1.89559
2022-09-13	09:20:49	5.19314
2022-09-13	09:20:49	4.47991
2022-09-13	09:20:49	3.39263
2022-09-13	09:20:49	4.66983
2022-09-13	09:20:50	0.423015
2022-09-13	09:20:50	2.19986
2022-09-13	09:20:50	0.494109
2022-09-13	09:20:50	0.510038
2022-09-13	09:20:51	0.740064
2022-09-13	09:20:51	0.405051
2022-09-13	09:20:51	0.805
2022-09-13	09:20:51	0.43299
2022-09-13	09:20:52	0.668511
2022-09-13	09:20:52	0.351158
2022-09-13	09:20:52	0.638893
2022-09-13	09:20:52	0.39701
2022-09-13	09:20:53	0.420725
2022-09-13	09:20:53	0.398741
2022-09-13	09:20:53	0.477824
2022-09-13	09:20:54	0.453092
2022-09-13	09:20:54	0.561692
2022-09-13	09:20:54	0.393092
2022-09-13	09:20:54	0.641234
2022-09-13	09:20:55	0.425764
2022-09-13	09:20:55	0.834568
2022-09-13	09:20:55	0.819453
2022-09-13	09:20:55	2.36123
2022-09-13	09:20:56	2.05849
2022-09-13	09:20:56	8.98433
2022-09-13	09:20:56	2.46841
2022-09-13	09:20:56	12.4578
2022-09-13	09:20:57	0.945356
2022-09-13	09:20:57	6.28749
2022-09-13	09:20:57	1.31945
2022-09-13	09:20:58	1.31034
2022-09-13	09:20:58	2.19126
2022-09-13	09:20:58	0.873041
2022-09-13	09:20:58	1.84459
2022-09-13	09:20:59	0.919351
2022-09-13	09:20:59	1.98892
2022-09-13	09:20:59	0.840216
2022-09-13	09:20:59	1.0736
2022-09-13	09:21:00	1.57665
2022-09-13	09:21:00	0.871819
2022-09-13	09:21:00	2.34729
2022-09-13	09:21:00	1.35996
2022-09-13	09:21:01	6.73548
2022-09-13	09:21:01	2.29212
2022-09-13	09:21:01	7.98077
2022-09-13	09:21:01	1.391
2022-09-13	09:21:02	4.89818
2022-09-13	09:21:02	0.633804
2022-09-13	09:21:02	2.71808
2022-09-13	09:21:03	2.32734
2022-09-13	09:21:03	0.648766
2022-09-13	09:21:03	1.13625
2022-09-13	09:21:03	0.464339
2022-09-13	09:21:04	0.631005
2022-09-13	09:21:04	0.397519
2022-09-13	09:21:04	0.495178
2022-09-13	09:21:05	0.452074
2022-09-13	09:21:05	0.472277
2022-09-13	09:21:05	0.475026
2022-09-13	09:21:05	0.472328
2022-09-13	09:21:05	0.447799
2022-09-13	09:21:06	0.429122
2022-09-13	09:21:06	0.466171
2022-09-13	09:21:06	0.466679
2022-09-13	09:21:07	0.495076
2022-09-13	09:21:07	0.458944
2022-09-13	09:21:07	0.46388
2022-09-13	09:21:07	0.454008
2022-09-13	09:21:08	0.45528
2022-09-13	09:21:08	0.446476
2022-09-13	09:21:08	0.454364
2022-09-13	09:21:08	0.447545
2022-09-13	09:21:09	0.452277
2022-09-13	09:21:09	0.456247
2022-09-13	09:21:09	0.452532
2022-09-13	09:21:09	0.440776
2022-09-13	09:21:10	0.400064
2022-09-13	09:21:10	0.342964
2022-09-13	09:21:10	0.354008
2022-09-13	09:21:10	0.353651
2022-09-13	09:21:11	0.540471
2022-09-13	09:21:11	0.445407
2022-09-13	09:21:11	0.461845
2022-09-13	09:21:12	0.471311
2022-09-13	09:21:12	0.451209
2022-09-13	09:21:12	0.458639
2022-09-13	09:21:12	0.469987
2022-09-13	09:21:13	0.45416
2022-09-13	09:21:13	0.439555
2022-09-13	09:21:13	0.467036
2022-09-13	09:21:13	0.461743
2022-09-13	09:21:14	0.464288
2022-09-13	09:21:14	0.463626
2022-09-13	09:21:14	0.476603
2022-09-13	09:21:14	0.472684
2022-09-13	09:21:15	0.466171
2022-09-13	09:21:15	0.472074
2022-09-13	09:21:15	0.471819
2022-09-13	09:21:16	0.471769
2022-09-13	09:21:16	0.472684
2022-09-13	09:21:16	0.47813
2022-09-13	09:21:16	0.470089
2022-09-13	09:21:17	0.482354
2022-09-13	09:21:17	0.47874
2022-09-13	09:21:17	0.481794
2022-09-13	09:21:17	0.474618
2022-09-13	09:21:18	0.48271
2022-09-13	09:21:18	0.478944
2022-09-13	09:21:18	0.48271
2022-09-13	09:21:18	0.486679
2022-09-13	09:21:19	0.500063
2022-09-13	09:21:19	0.499606
2022-09-13	09:21:19	0.48958
2022-09-13	09:21:19	0.484847
2022-09-13	09:21:20	0.486985
2022-09-13	09:21:20	0.477672
2022-09-13	09:21:20	0.472634
2022-09-13	09:21:21	0.473397
2022-09-13	09:21:21	0.463728
2022-09-13	09:21:21	0.474822
2022-09-13	09:21:21	0.470954
2022-09-13	09:21:22	0.466272
2022-09-13	09:21:22	0.455433
2022-09-13	09:21:22	0.461285
2022-09-13	09:21:22	0.469784
2022-09-13	09:21:23	0.469682
2022-09-13	09:21:23	0.441794
2022-09-13	09:21:23	0.480267
2022-09-13	09:21:23	0.480064
2022-09-13	09:21:24	0.465662
2022-09-13	09:21:24	0.541896
2022-09-13	09:21:24	0.377672
2022-09-13	09:21:25	0.413397
2022-09-13	09:21:25	0.382506
2022-09-13	09:21:25	0.452328
2022-09-13	09:21:25	0.41126
2022-09-13	09:21:26	0.135433
2022-09-13	09:21:26	0.045102
2022-09-13	09:21:26	-0.0469081
2022-09-13	09:21:26	-0.0728114
2022-09-13	09:21:27	0.00449134
2022-09-13	09:21:27	-0.0166792
2022-09-13	09:21:27	-0.0773407
2022-09-13	09:21:27	0.053957
2022-09-13	09:21:28	-0.0371372
2022-09-13	09:21:28	0.0737025
2022-09-13	09:21:28	-0.055814
2022-09-13	09:21:28	0.0162979
2022-09-13	09:21:29	0.0190969
2022-09-13	09:21:29	0.412837
2022-09-13	09:21:29	2.3619
2022-09-13	09:21:30	4.53568
2022-09-13	09:21:30	7.50851
2022-09-13	09:21:30	9.34383
2022-09-13	09:21:30	2.19335
2022-09-13	09:21:31	3.63156
2022-09-13	09:21:31	1.02037
2022-09-13	09:21:31	0.559453
2022-09-13	09:21:31	2.07207
2022-09-13	09:21:32	1.23945
2022-09-13	09:21:32	4.07543
2022-09-13	09:21:32	4.46093
2022-09-13	09:21:32	9.42367
2022-09-13	09:21:33	10.0722
2022-09-13	09:21:33	1.88714
2022-09-13	09:21:33	5.89573
2022-09-13	09:21:34	1.09564
2022-09-13	09:21:34	2.93472
2022-09-13	09:21:34	1.42413
2022-09-13	09:21:34	2.1736
2022-09-13	09:21:35	2.93935
2022-09-13	09:21:35	1.01726
2022-09-13	09:21:35	2.38958
2022-09-13	09:21:35	2.04943
2022-09-13	09:21:36	3.32892
2022-09-13	09:21:36	4.34067
2022-09-13	09:21:36	4.76576
2022-09-13	09:21:36	6.65441
2022-09-13	09:21:37	0.984542
2022-09-13	09:21:37	1.17981
2022-09-13	09:21:37	1.34704
2022-09-13	09:21:37	2.37706
2022-09-13	09:21:38	0.61813
2022-09-13	09:21:38	1.40093
2022-09-13	09:21:38	1.67299
2022-09-13	09:21:39	1.6108
2022-09-13	09:21:39	1.14627
2022-09-13	09:21:39	0.544135
2022-09-13	09:21:39	0.174975
2022-09-13	09:21:40	0.227239
2022-09-13	09:21:40	0.0332445
2022-09-13	09:21:40	0.441234
2022-09-13	09:21:40	0.745611
2022-09-13	09:21:41	0.0393514
2022-09-13	09:21:41	-0.0945926
2022-09-13	09:21:41	0.127901
2022-09-13	09:21:41	0.437875
2022-09-13	09:21:42	0.688257
2022-09-13	09:21:42	0.787036
2022-09-13	09:21:42	0.501387
2022-09-13	09:21:43	0.45014
2022-09-13	09:21:43	0.423066
2022-09-13	09:21:43	0.528053
2022-09-13	09:21:43	0.726679
2022-09-13	09:21:44	0.733957
2022-09-13	09:21:44	0.733499
2022-09-13	09:21:44	0.557315
2022-09-13	09:21:44	0.536807
2022-09-13	09:21:45	0.403473
2022-09-13	09:21:45	0.735534
2022-09-13	09:21:45	0.734262
2022-09-13	09:21:45	0.734771
2022-09-13	09:21:46	0.737214
2022-09-13	09:21:46	0.737773
2022-09-13	09:21:46	0.742099
2022-09-13	09:21:46	0.738028
2022-09-13	09:21:47	0.736399
2022-09-13	09:21:47	0.741183
2022-09-13	09:21:47	0.755687
2022-09-13	09:21:48	1.58973
2022-09-13	09:21:48	0.73645
2022-09-13	09:21:48	0.737163
2022-09-13	09:21:48	0.736807
2022-09-13	09:21:49	0.733855
2022-09-13	09:21:49	0.614771
2022-09-13	09:21:49	0.736094
2022-09-13	09:21:49	0.736145
2022-09-13	09:21:50	0.455127
2022-09-13	09:21:50	0.323677
2022-09-13	09:21:50	0.221539
2022-09-13	09:21:50	0.287443
2022-09-13	09:21:51	0.766832
2022-09-13	09:21:51	2.96179
2022-09-13	09:21:51	9.52479
2022-09-13	09:21:51	15.5133
2022-09-13	09:21:52	4.1682
2022-09-13	09:21:52	8.16973
2022-09-13	09:21:52	2.77711
2022-09-13	09:21:53	8.3308
2022-09-13	09:21:53	4.32474
2022-09-13	09:21:53	6.48327
2022-09-13	09:21:53	5.94052
2022-09-13	09:21:54	1.07075
2022-09-13	09:21:54	1.37955
2022-09-13	09:21:54	0.585153
2022-09-13	09:21:54	0.412481
2022-09-13	09:21:55	0.419708
2022-09-13	09:21:55	0.387137
2022-09-13	09:21:55	0.407646
2022-09-13	09:21:55	0.474211
2022-09-13	09:21:56	0.367392
2022-09-13	09:21:56	0.789631
2022-09-13	09:21:56	0.743066
2022-09-13	09:21:57	1.89579
2022-09-13	09:21:57	0.868511
2022-09-13	09:21:57	2.58637
2022-09-13	09:21:57	0.506323
2022-09-13	09:21:58	1.9163
2022-09-13	09:21:58	0.705814
2022-09-13	09:21:58	1.11055
2022-09-13	09:21:58	1.00775
2022-09-13	09:21:59	1.84958
2022-09-13	09:21:59	0.455382
2022-09-13	09:21:59	0.495127
2022-09-13	09:21:59	0.588613
2022-09-13	09:22:00	0.304593
2022-09-13	09:22:00	0.384339
2022-09-13	09:22:00	0.391005
2022-09-13	09:22:00	0.456552
2022-09-13	09:22:01	0.341947
2022-09-13	09:22:01	0.350242
2022-09-13	09:22:01	0.355127
2022-09-13	09:22:02	0.490191
2022-09-13	09:22:02	0.610089
2022-09-13	09:22:02	0.478486
2022-09-13	09:22:02	0.500063
2022-09-13	09:22:03	0.55869
2022-09-13	09:22:03	0.433295
2022-09-13	09:22:03	0.407596
2022-09-13	09:22:03	0.46383
2022-09-13	09:22:04	0.779402
2022-09-13	09:22:04	1.52159
2022-09-13	09:22:04	1.80459
2022-09-13	09:22:04	1.96607
2022-09-13	09:22:05	2.73238
2022-09-13	09:22:05	0.870547
2022-09-13	09:22:05	0.724186
2022-09-13	09:22:06	0.740165
2022-09-13	09:22:06	0.73187
2022-09-13	09:22:06	0.736807
2022-09-13	09:22:06	0.740318
2022-09-13	09:22:07	0.741031
2022-09-13	09:22:07	0.820318
2022-09-13	09:22:07	0.861997
2022-09-13	09:22:07	1.92602
2022-09-13	09:22:08	1.75645
2022-09-13	09:22:08	4.08825
2022-09-13	09:22:08	2.81202
2022-09-13	09:22:09	3.44144
2022-09-13	09:22:09	0.82159
2022-09-13	09:22:09	1.28831
2022-09-13	09:22:09	0.501336
2022-09-13	09:22:09	0.522506
2022-09-13	09:22:10	0.419708
2022-09-13	09:22:10	0.669631
2022-09-13	09:22:10	0.424695
2022-09-13	09:22:11	0.448003
2022-09-13	09:22:11	0.303015
2022-09-13	09:22:11	0.415331
2022-09-13	09:22:11	0.199708
2022-09-13	09:22:12	0.458181
2022-09-13	09:22:12	0.234262
2022-09-13	09:22:12	0.742506
2022-09-13	09:22:12	0.996094
2022-09-13	09:22:13	0.522812
2022-09-13	09:22:13	0.56098
2022-09-13	09:22:13	0.627137
2022-09-13	09:22:13	0.337112
2022-09-13	09:22:14	0.52332
2022-09-13	09:22:14	0.417061
2022-09-13	09:22:14	0.637061
2022-09-13	09:22:15	0.353244
2022-09-13	09:22:15	0.725407
2022-09-13	09:22:15	0.736603
2022-09-13	09:22:15	0.74098
2022-09-13	09:22:16	0.744593
2022-09-13	09:22:16	0.735636
2022-09-13	09:22:16	0.735178
2022-09-13	09:22:16	0.744084
2022-09-13	09:22:17	0.738791
2022-09-13	09:22:17	0.738079
2022-09-13	09:22:17	0.741031
2022-09-13	09:22:17	0.739351
2022-09-13	09:22:18	0.736908
2022-09-13	09:22:18	0.73757
2022-09-13	09:22:18	0.738537
2022-09-13	09:22:18	0.826476
2022-09-13	09:22:19	1.32805
2022-09-13	09:22:19	1.69711
2022-09-13	09:22:19	1.44042
2022-09-13	09:22:20	1.10037
2022-09-13	09:22:20	0.631768
2022-09-13	09:22:20	0.885407
2022-09-13	09:22:20	1.10739
2022-09-13	09:22:21	1.47263
2022-09-13	09:22:21	1.21854
2022-09-13	09:22:21	0.912786
2022-09-13	09:22:21	1.37915
2022-09-13	09:22:22	0.78673
2022-09-13	09:22:22	1.02302
2022-09-13	09:22:22	1.71762
2022-09-13	09:22:22	1.19034
2022-09-13	09:22:23	0.597977
2022-09-13	09:22:23	0.60556
2022-09-13	09:22:23	0.455636
2022-09-13	09:22:24	0.5107
2022-09-13	09:22:24	1.26612
2022-09-13	09:22:24	5.53161
2022-09-13	09:22:24	9.39451
2022-09-13	09:22:25	4.70434
2022-09-13	09:22:25	1.47869
2022-09-13	09:22:25	0.219097
2022-09-13	09:22:25	0.872532
2022-09-13	09:22:26	0.390445
2022-09-13	09:22:26	0.472939
2022-09-13	09:22:26	0.40444
2022-09-13	09:22:26	0.456094
2022-09-13	09:22:27	0.484135
2022-09-13	09:22:27	0.454059
2022-09-13	09:22:27	0.397468
2022-09-13	09:22:27	0.510089
2022-09-13	09:22:28	0.522964
2022-09-13	09:22:28	1.07996
2022-09-13	09:22:28	2.10078
2022-09-13	09:22:29	1.6533
2022-09-13	09:22:29	1.00536
2022-09-13	09:22:29	0.862048
2022-09-13	09:22:29	0.82215
2022-09-13	09:22:30	0.73701
2022-09-13	09:22:30	0.728206
2022-09-13	09:22:30	0.562048
2022-09-13	09:22:30	0.87986
2022-09-13	09:22:31	0.921896
2022-09-13	09:22:31	1.5678
2022-09-13	09:22:31	3.11263
2022-09-13	09:22:31	6.01309
2022-09-13	09:22:32	5.96225
2022-09-13	09:22:32	4.5939
2022-09-13	09:22:32	3.43864
2022-09-13	09:22:33	2.84485
2022-09-13	09:22:33	1.92561
2022-09-13	09:22:33	4.66352
2022-09-13	09:22:33	6.07263
2022-09-13	09:22:34	11.7189
2022-09-13	09:22:34	5.52993
2022-09-13	09:22:34	6.54663
2022-09-13	09:22:34	3.58597
2022-09-13	09:22:35	5.1681
2022-09-13	09:22:35	6.2912
2022-09-13	09:22:35	6.12001
2022-09-13	09:22:35	7.09843
2022-09-13	09:22:36	4.18836
2022-09-13	09:22:36	1.90683
2022-09-13	09:22:36	1.34434
2022-09-13	09:22:36	0.553397
2022-09-13	09:22:37	0.413143
2022-09-13	09:22:37	0.459504
2022-09-13	09:22:37	0.451768
2022-09-13	09:22:38	0.451209
