# Supplementary material for: Comparing efficacy in reducing pulling and welfare impacts of four types of leash walking equipment
Source: PeerJ journal article supplement (doi:10.7717/peerj.18131), 2024-10-24
Supplement: Shelter1_Tension_files.zip [file Juju_prong_202291311448 copy.xlsx]

## Sheet: Sheet2
Date	Time	Averaged Newtons	Impulse	Total steps
2022-09-13	11:44:10	5.70502	5.70502	0		Impulse newtons	1543.18
2022-09-13	11:44:11	4.28331	9.98832	0		total steps	30
2022-09-13	11:44:12	3.7825	13.7708	0		# > sec	0
2022-09-13	11:44:13	3.74656	17.5174	0
2022-09-13	11:44:14	2.42727	19.9447	0
2022-09-13	11:44:15	1.73987	21.6845	0
2022-09-13	11:44:16	1.6026	23.2871	0
2022-09-13	11:44:17	1.61754	24.9047	0
2022-09-13	11:44:18	1.78743	26.6921	0
2022-09-13	11:44:19	1.55447	28.2466	0
2022-09-13	11:44:20	1.53384	29.7804	0
2022-09-13	11:44:21	8.43976	38.2202	0
2022-09-13	11:44:22	6.39512	44.6153	0
2022-09-13	11:44:23	17.4856	62.1009	1
2022-09-13	11:44:24	8.33086	70.4317	1
2022-09-13	11:44:25	0.208037	70.6398	1
2022-09-13	11:44:26	27.9397	98.5794	2
2022-09-13	11:44:27	10.2787	108.858	2
2022-09-13	11:44:28	2.45285	111.311	2
2022-09-13	11:44:29	7.93138	119.242	2
2022-09-13	11:44:30	13.4364	132.679	3
2022-09-13	11:44:31	25.9936	158.672	4
2022-09-13	11:44:32	22.4625	181.135	5
2022-09-13	11:44:33	30.8466	211.981	6
2022-09-13	11:44:34	4.53325	216.515	6
2022-09-13	11:44:35	2.10644	218.621	6
2022-09-13	11:44:36	1.25725	219.878	6
2022-09-13	11:44:37	0.657044	220.535	6
2022-09-13	11:44:38	0.987604	221.523	6
2022-09-13	11:44:39	4.9087	226.432	6
2022-09-13	11:44:40	6.44961	232.881	6
2022-09-13	11:44:41	2.28166	235.163	6
2022-09-13	11:44:42	1.04578	236.209	6
2022-09-13	11:44:43	-0.348497	236.209	6
2022-09-13	11:44:44	-2.11742	236.209	6
2022-09-13	11:44:45	4.9006	241.109	6
2022-09-13	11:44:46	6.33385	247.443	6
2022-09-13	11:44:47	7.20882	254.652	6
2022-09-13	11:44:48	19.7746	274.427	7
2022-09-13	11:44:49	28.3664	302.793	8
2022-09-13	11:44:50	20.5284	323.321	9
2022-09-13	11:44:51	4.28555	327.607	9
2022-09-13	11:44:52	1.91961	329.527	9
2022-09-13	11:44:53	2.15376	331.68	9
2022-09-13	11:44:54	1.58964	333.27	9
2022-09-13	11:44:55	4.99319	338.263	9
2022-09-13	11:44:56	4.78307	343.046	9
2022-09-13	11:44:57	3.57797	346.624	9
2022-09-13	11:44:58	2.43842	349.063	9
2022-09-13	11:44:59	4.19075	353.253	9
2022-09-13	11:45:00	6.19794	359.451	9
2022-09-13	11:45:01	9.47642	368.928	9
2022-09-13	11:45:02	18.8349	387.763	10
2022-09-13	11:45:03	9.68891	397.452	10
2022-09-13	11:45:04	4.26088	401.712	10
2022-09-13	11:45:05	10.4058	412.118	10
2022-09-13	11:45:06	17.9183	430.037	11
2022-09-13	11:45:07	10.6249	440.662	11
2022-09-13	11:45:08	18.9592	459.621	12
2022-09-13	11:45:09	22.316	481.937	13
2022-09-13	11:45:10	19.5553	501.492	14
2022-09-13	11:45:11	18.4778	519.97	15
2022-09-13	11:45:12	16.047	536.017	16
2022-09-13	11:45:13	14.4884	550.505	17
2022-09-13	11:45:14	17.5213	568.027	18
2022-09-13	11:45:15	11.4492	579.476	18
2022-09-13	11:45:16	7.49952	586.975	18
2022-09-13	11:45:17	7.89944	594.875	18
2022-09-13	11:45:18	5.79817	600.673	18
2022-09-13	11:45:19	7.82635	608.499	18
2022-09-13	11:45:20	2.53621	611.035	18
2022-09-13	11:45:21	9.26018	620.296	18
2022-09-13	11:45:22	20.0637	640.359	19
2022-09-13	11:45:23	11.2973	651.657	19
2022-09-13	11:45:24	4.74328	656.4	19
2022-09-13	11:45:25	11.5723	667.972	19
2022-09-13	11:45:26	3.11221	671.084	19
2022-09-13	11:45:27	1.65364	672.738	19
2022-09-13	11:45:28	12.9286	685.667	19
2022-09-13	11:45:29	9.26788	694.934	19
2022-09-13	11:45:30	7.72528	702.66	19
2022-09-13	11:45:31	4.77445	707.434	19
2022-09-13	11:45:32	3.8825	711.317	19
2022-09-13	11:45:33	6.37513	717.692	19
2022-09-13	11:45:34	7.57534	725.267	19
2022-09-13	11:45:35	26.1838	751.451	20
2022-09-13	11:45:36	19.7638	771.215	21
2022-09-13	11:45:37	6.51893	777.734	21
2022-09-13	11:45:38	15.3539	793.088	22
2022-09-13	11:45:39	8.99429	802.082	22
2022-09-13	11:45:40	5.40218	807.484	22
2022-09-13	11:45:41	1.32574	808.81	22
2022-09-13	11:45:42	3.07607	811.886	22
2022-09-13	11:45:43	6.89494	818.781	22
2022-09-13	11:45:44	13.9175	832.698	23
2022-09-13	11:45:45	22.7753	855.474	24
2022-09-13	11:45:46	5.52635	861	24
2022-09-13	11:45:47	3.19069	864.191	24
2022-09-13	11:45:48	6.36291	870.554	24
2022-09-13	11:45:49	6.74926	877.303	24
2022-09-13	11:45:50	6.32458	883.627	24
2022-09-13	11:45:51	8.94241	892.57	24
2022-09-13	11:45:52	7.859	900.429	24
2022-09-13	11:45:53	5.24083	905.67	24
2022-09-13	11:45:54	6.14628	911.816	24
2022-09-13	11:45:55	10.1553	921.971	24
2022-09-13	11:45:56	4.18351	926.155	24
2022-09-13	11:45:57	2.94385	929.099	24
2022-09-13	11:45:58	2.57922	931.678	24
2022-09-13	11:45:59	16.1689	947.847	25
2022-09-13	11:46:00	14.8323	962.679	26
2022-09-13	11:46:01	8.29577	970.975	26
2022-09-13	11:46:02	9.97432	980.949	26
2022-09-13	11:46:03	27.3258	1008.28	27
2022-09-13	11:46:04	6.37722	1014.65	27
2022-09-13	11:46:05	0.90362	1015.56	27
2022-09-13	11:46:06	2.58363	1018.14	27
2022-09-13	11:46:07	1.6411	1019.78	27
2022-09-13	11:46:08	1.69218	1021.47	27
2022-09-13	11:46:09	2.46722	1023.94	27
2022-09-13	11:46:10	3.91266	1027.85	27
2022-09-13	11:46:11	1.1494	1029	27
2022-09-13	11:46:12	1.22178	1030.22	27
2022-09-13	11:46:13	4.54713	1034.77	27
2022-09-13	11:46:14	6.30274	1041.07	27
2022-09-13	11:46:15	6.22736	1047.3	27
2022-09-13	11:46:16	9.74165	1057.04	27
2022-09-13	11:46:17	4.5984	1061.64	27
2022-09-13	11:46:18	1.90808	1063.55	27
2022-09-13	11:46:19	2.04696	1065.6	27
2022-09-13	11:46:20	4.94733	1070.54	27
2022-09-13	11:46:21	3.96071	1074.5	27
2022-09-13	11:46:22	1.95262	1076.46	27
2022-09-13	11:46:23	1.8743	1078.33	27
2022-09-13	11:46:24	-0.413297	1078.33	27
2022-09-13	11:46:25	-0.838535	1078.33	27
2022-09-13	11:46:26	-0.922745	1078.33	27
2022-09-13	11:46:27	-0.697732	1078.33	27
2022-09-13	11:46:28	-0.321465	1078.33	27
2022-09-13	11:46:29	-0.225238	1078.33	27
2022-09-13	11:46:30	0.00164222	1078.33	27
2022-09-13	11:46:31	0.124222	1078.46	27
2022-09-13	11:46:32	0.0805704	1078.54	27
2022-09-13	11:46:33	0.0366168	1078.57	27
2022-09-13	11:46:34	-0.165307	1078.57	27
2022-09-13	11:46:35	0.874983	1079.45	27
2022-09-13	11:46:36	-1.0626	1079.45	27
2022-09-13	11:46:37	-3.51397	1079.45	27
2022-09-13	11:46:38	-4.59574	1079.45	27
2022-09-13	11:46:39	-2.03327	1079.45	27
2022-09-13	11:46:40	-5.79331	1079.45	27
2022-09-13	11:46:41	2.18997	1081.64	27
2022-09-13	11:46:42	-3.0503	1081.64	27
2022-09-13	11:46:43	-2.38386	1081.64	27
2022-09-13	11:46:44	1.22705	1082.87	27
2022-09-13	11:46:45	-2.38847	1082.87	27
2022-09-13	11:46:46	-0.184831	1082.87	27
2022-09-13	11:46:47	3.26858	1086.13	27
2022-09-13	11:46:48	3.25879	1089.39	27
2022-09-13	11:46:49	3.28207	1092.68	27
2022-09-13	11:46:50	3.28109	1095.96	27
2022-09-13	11:46:51	3.26348	1099.22	27
2022-09-13	11:46:52	3.27633	1102.5	27
2022-09-13	11:46:53	3.10572	1105.6	27
2022-09-13	11:46:54	-0.970849	1105.6	27
2022-09-13	11:46:55	6.23511	1111.84	27
2022-09-13	11:46:56	-0.420598	1111.84	27
2022-09-13	11:46:57	-1.70656	1111.84	27
2022-09-13	11:46:58	0.181834	1112.02	27
2022-09-13	11:46:59	4.64508	1116.66	27
2022-09-13	11:47:00	3.2653	1119.93	27
2022-09-13	11:47:01	3.26654	1123.2	27
2022-09-13	11:47:02	3.27844	1126.47	27
2022-09-13	11:47:03	3.27367	1129.75	27
2022-09-13	11:47:04	3.27757	1133.03	27
2022-09-13	11:47:05	3.25528	1136.28	27
2022-09-13	11:47:06	3.27784	1139.56	27
2022-09-13	11:47:07	3.2726	1142.83	27
2022-09-13	11:47:08	3.26586	1146.1	27
2022-09-13	11:47:09	3.26501	1149.36	27
2022-09-13	11:47:10	3.26909	1152.63	27
2022-09-13	11:47:11	3.26943	1155.9	27
2022-09-13	11:47:12	3.27565	1159.18	27
2022-09-13	11:47:13	3.26829	1162.44	27
2022-09-13	11:47:14	3.26041	1165.71	27
2022-09-13	11:47:15	3.25534	1168.96	27
2022-09-13	11:47:16	3.25183	1172.21	27
2022-09-13	11:47:17	3.27147	1175.48	27
2022-09-13	11:47:18	3.27392	1178.76	27
2022-09-13	11:47:19	3.26354	1182.02	27
2022-09-13	11:47:20	3.26977	1185.29	27
2022-09-13	11:47:21	3.26501	1188.56	27
2022-09-13	11:47:22	3.26622	1191.82	27
2022-09-13	11:47:23	3.28318	1195.11	27
2022-09-13	11:47:24	3.25664	1198.36	27
2022-09-13	11:47:25	3.26852	1201.63	27
2022-09-13	11:47:26	3.26473	1204.9	27
2022-09-13	11:47:27	-2.36538	1204.9	27
2022-09-13	11:47:28	-7.23058	1204.9	27
2022-09-13	11:47:29	-4.95351	1204.9	27
2022-09-13	11:47:30	-4.09867	1204.9	27
2022-09-13	11:47:31	-7.09351	1204.9	27
2022-09-13	11:47:32	-6.64365	1204.9	27
2022-09-13	11:47:33	-5.90852	1204.9	27
2022-09-13	11:47:34	-1.48923	1204.9	27
2022-09-13	11:47:35	-0.290604	1204.9	27
2022-09-13	11:47:36	0.397622	1205.29	27
2022-09-13	11:47:37	-0.536555	1205.29	27
2022-09-13	11:47:38	0.662873	1205.96	27
2022-09-13	11:47:39	-0.85955	1205.96	27
2022-09-13	11:47:40	-0.953871	1205.96	27
2022-09-13	11:47:41	-1.54815	1205.96	27
2022-09-13	11:47:42	-0.884543	1205.96	27
2022-09-13	11:47:43	1.92316	1207.88	27
2022-09-13	11:47:44	2.2992	1210.18	27
2022-09-13	11:47:45	3.28267	1213.46	27
2022-09-13	11:47:46	3.28284	1216.74	27
2022-09-13	11:47:47	3.26788	1220.01	27
2022-09-13	11:47:48	3.26173	1223.27	27
2022-09-13	11:47:49	3.2662	1226.54	27
2022-09-13	11:47:50	3.26179	1229.8	27
2022-09-13	11:47:51	2.45687	1232.26	27
2022-09-13	11:47:52	3.25596	1235.51	27
2022-09-13	11:47:53	3.26626	1238.78	27
2022-09-13	11:47:54	3.26807	1242.05	27
2022-09-13	11:47:55	2.88211	1244.93	27
2022-09-13	11:47:56	3.26343	1248.19	27
2022-09-13	11:47:57	3.26818	1251.46	27
2022-09-13	11:47:58	3.26445	1254.73	27
2022-09-13	11:47:59	3.27616	1258	27
2022-09-13	11:48:00	3.27603	1261.28	27
2022-09-13	11:48:01	3.26688	1264.55	27
2022-09-13	11:48:02	2.94532	1267.49	27
2022-09-13	11:48:03	3.05285	1270.54	27
2022-09-13	11:48:04	2.99782	1273.54	27
2022-09-13	11:48:05	2.60474	1276.15	27
2022-09-13	11:48:06	2.33033	1278.48	27
2022-09-13	11:48:07	2.03095	1280.51	27
2022-09-13	11:48:08	1.95417	1282.46	27
2022-09-13	11:48:09	1.87951	1284.34	27
2022-09-13	11:48:10	1.80152	1286.14	27
2022-09-13	11:48:11	1.86598	1288.01	27
2022-09-13	11:48:12	1.60601	1289.61	27
2022-09-13	11:48:13	1.373	1290.99	27
2022-09-13	11:48:14	0.993036	1291.98	27
2022-09-13	11:48:15	0.902771	1292.88	27
2022-09-13	11:48:16	0.345727	1293.23	27
2022-09-13	11:48:17	0.597226	1293.83	27
2022-09-13	11:48:18	3.2722	1297.1	27
2022-09-13	11:48:19	3.27514	1300.37	27
2022-09-13	11:48:20	3.26643	1303.64	27
2022-09-13	11:48:21	3.26705	1306.91	27
2022-09-13	11:48:22	3.27367	1310.18	27
2022-09-13	11:48:23	3.2718	1313.45	27
2022-09-13	11:48:24	3.26399	1316.72	27
2022-09-13	11:48:25	3.24139	1319.96	27
2022-09-13	11:48:26	3.23898	1323.2	27
2022-09-13	11:48:27	3.26852	1326.47	27
2022-09-13	11:48:28	3.25743	1329.72	27
2022-09-13	11:48:29	3.25724	1332.98	27
2022-09-13	11:48:30	3.26037	1336.24	27
2022-09-13	11:48:31	3.27135	1339.51	27
2022-09-13	11:48:32	3.27446	1342.79	27
2022-09-13	11:48:33	-0.0984139	1342.79	27
2022-09-13	11:48:34	0.702827	1343.49	27
2022-09-13	11:48:35	2.52212	1346.01	27
2022-09-13	11:48:36	3.06162	1349.07	27
2022-09-13	11:48:37	3.08927	1352.16	27
2022-09-13	11:48:38	2.31001	1354.47	27
2022-09-13	11:48:39	0.754271	1355.23	27
2022-09-13	11:48:40	0.398133	1355.63	27
2022-09-13	11:48:41	1.19009	1356.82	27
2022-09-13	11:48:42	10.1349	1366.95	27
2022-09-13	11:48:43	9.95926	1376.91	27
2022-09-13	11:48:44	11.442	1388.35	27
2022-09-13	11:48:45	11.7331	1400.08	27
2022-09-13	11:48:46	8.21031	1408.29	27
2022-09-13	11:48:47	7.86635	1416.16	27
2022-09-13	11:48:48	17.475	1433.64	28
2022-09-13	11:48:49	15.05	1448.69	29
2022-09-13	11:48:50	15.7317	1464.42	30
2022-09-13	11:48:51	8.48197	1472.9	30
2022-09-13	11:48:52	4.85096	1477.75	30
2022-09-13	11:48:53	6.16342	1483.91	30
2022-09-13	11:48:54	4.34216	1488.26	30
2022-09-13	11:48:55	6.26403	1494.52	30
2022-09-13	11:48:56	3.5941	1498.11	30
2022-09-13	11:48:57	2.31289	1500.43	30
2022-09-13	11:48:58	4.1262	1504.55	30
2022-09-13	11:48:59	4.87395	1509.43	30
2022-09-13	11:49:00	4.12556	1513.55	30
2022-09-13	11:49:01	3.52206	1517.07	30
2022-09-13	11:49:02	5.08085	1522.16	30
2022-09-13	11:49:03	3.00536	1525.16	30
2022-09-13	11:49:04	2.52585	1527.69	30
2022-09-13	11:49:05	2.91097	1530.6	30
2022-09-13	11:49:06	1.66055	1532.26	30
2022-09-13	11:49:07	1.6826	1533.94	30
2022-09-13	11:49:08	0.470514	1534.41	30
2022-09-13	11:49:09	0.553535	1534.97	30
2022-09-13	11:49:10	8.21371	1543.18	30

## Sheet: Juju_prong_202291311448 (4)
Date	Time	Lbs	Newtons	Averaged Newtons	Total force x time	total steps > 13.345		**GoPro Fitting: 1133
2022-09-13	11:44:10	1.01971	4.53587	5.70502	4.53587	FALSE	0			Total force x time	2885.73
2022-09-13	11:44:10	1.45645	6.47858	5.70502	6.47858	FALSE	0			Total steps	99
2022-09-13	11:44:10	1.49971	6.67101	5.70502	11.2069	FALSE	0
2022-09-13	11:44:10	1.15431	5.1346	5.70502	11.6132	FALSE	0
2022-09-13	11:44:11	1.00383	4.46524	4.28331	15.6721	FALSE	0
2022-09-13	11:44:11	0.965967	4.29681	4.28331	15.91	FALSE	0
2022-09-13	11:44:11	0.918995	4.08787	4.28331	19.76	FALSE	0
2022-09-13	11:44:12	0.907036	4.03468	3.7825	19.9447	FALSE	0
2022-09-13	11:44:12	0.833397	3.70712	3.7825	23.4671	FALSE	0
2022-09-13	11:44:12	0.841896	3.74492	3.7825	23.6896	FALSE	0
2022-09-13	11:44:12	0.819046	3.64328	3.7825	27.1104	FALSE	0
2022-09-13	11:44:13	0.780623	3.47237	3.74656	27.162	FALSE	0
2022-09-13	11:44:13	0.855433	3.80514	3.74656	30.9155	FALSE	0
2022-09-13	11:44:13	0.873092	3.88369	3.74656	31.0457	FALSE	0
2022-09-13	11:44:13	0.859911	3.82506	3.74656	34.7406	FALSE	0
2022-09-13	11:44:14	0.685051	3.04724	2.42727	34.0929	FALSE	0
2022-09-13	11:44:14	0.562964	2.50418	2.42727	37.2448	FALSE	0
2022-09-13	11:44:14	0.452837	2.01431	2.42727	36.1072	FALSE	0
2022-09-13	11:44:14	0.481845	2.14334	2.42727	39.3881	FALSE	0
2022-09-13	11:44:15	0.424084	1.88641	1.73987	37.9936	FALSE	0
2022-09-13	11:44:15	0.420318	1.86966	1.73987	41.2578	FALSE	0
2022-09-13	11:44:15	0.329021	1.46355	1.73987	39.4572	FALSE	0
2022-09-13	11:44:16	0.462507	2.05732	1.6026	43.3151	FALSE	0
2022-09-13	11:44:16	0.427901	1.90339	1.6026	41.3606	FALSE	0
2022-09-13	11:44:16	0.281998	1.25438	1.6026	44.5695	FALSE	0
2022-09-13	11:44:16	0.268715	1.1953	1.6026	42.5559	FALSE	0
2022-09-13	11:44:17	0.369479	1.64352	1.61754	46.213	FALSE	0
2022-09-13	11:44:17	0.307545	1.36802	1.61754	43.9239	FALSE	0
2022-09-13	11:44:17	0.381489	1.69694	1.61754	47.9099	FALSE	0
2022-09-13	11:44:17	0.396043	1.76168	1.61754	45.6856	FALSE	0
2022-09-13	11:44:18	0.482456	2.14606	1.78743	50.056	FALSE	0
2022-09-13	11:44:18	0.335076	1.49049	1.78743	47.176	FALSE	0
2022-09-13	11:44:18	0.424033	1.88618	1.78743	51.9422	FALSE	0
2022-09-13	11:44:18	0.365763	1.62699	1.78743	48.803	FALSE	0
2022-09-13	11:44:19	0.347392	1.54527	1.55447	53.4874	FALSE	0
2022-09-13	11:44:19	0.363982	1.61906	1.55447	50.4221	FALSE	0
2022-09-13	11:44:19	0.33701	1.49909	1.55447	54.9865	FALSE	0
2022-09-13	11:44:20	0.33472	1.4889	1.53384	51.911	FALSE	0
2022-09-13	11:44:20	0.347494	1.54572	1.53384	56.5322	FALSE	0
2022-09-13	11:44:20	0.372125	1.65529	1.53384	53.5663	FALSE	0
2022-09-13	11:44:20	0.324949	1.44544	1.53384	57.9777	FALSE	0
2022-09-13	11:44:21	0.624847	2.77944	8.43976	56.3457	FALSE	0
2022-09-13	11:44:21	1.07981	4.80321	8.43976	62.7809	FALSE	0
2022-09-13	11:44:21	3.25238	14.4672	8.43976	70.813	1	1
2022-09-13	11:44:21	2.63233	11.7091	8.43976	74.49	FALSE	1
2022-09-13	11:44:22	1.84256	8.19608	6.39512	79.009	FALSE	1
2022-09-13	11:44:22	1.27106	5.65393	6.39512	80.144	FALSE	1
2022-09-13	11:44:22	0.985458	4.38351	6.39512	83.3925	FALSE	1
2022-09-13	11:44:22	1.65167	7.34696	6.39512	87.4909	FALSE	1
2022-09-13	11:44:23	4.205	18.7047	17.4856	102.097	1	2
2022-09-13	11:44:23	3.67813	16.3611	17.4856	103.852	1	3
2022-09-13	11:44:23	3.90968	17.391	17.4856	119.488	1	4
2022-09-13	11:44:24	3.61105	16.0627	8.33086	119.915	1	5
2022-09-13	11:44:24	2.71828	12.0915	8.33086	131.58	FALSE	5
2022-09-13	11:44:24	0.502964	2.23728	8.33086	122.152	FALSE	5
2022-09-13	11:44:24	0.659148	2.93202	8.33086	134.512	FALSE	5
2022-09-13	11:44:25	0.226629	1.00809	0.208037	123.16	FALSE	5
2022-09-13	11:44:25	0.139606	0.620995	0.208037	135.133	FALSE	5
2022-09-13	11:44:25	-0.00131018	-0.00582794	0.208037	123.16	FALSE	5
2022-09-13	11:44:25	-0.17785	-0.791112	0.208037	135.133	FALSE	5
2022-09-13	11:44:26	-0.161921	-0.720257	27.9397	123.16	FALSE	5
2022-09-13	11:44:26	4.5195	20.1036	27.9397	155.236	1	6
2022-09-13	11:44:26	14.4645	64.341	27.9397	187.501	1	7
2022-09-13	11:44:26	6.3024	28.0343	27.9397	183.271	1	8
2022-09-13	11:44:27	4.21426	18.7459	10.2787	206.247	1	9
2022-09-13	11:44:27	1.66744	7.41711	10.2787	190.688	FALSE	9
2022-09-13	11:44:27	1.05055	4.67306	10.2787	210.92	FALSE	9
2022-09-13	11:44:28	0.947595	4.21509	2.45285	194.903	FALSE	9
2022-09-13	11:44:28	0.483931	2.15262	2.45285	213.073	FALSE	9
2022-09-13	11:44:28	0.402099	1.78862	2.45285	196.692	FALSE	9
2022-09-13	11:44:28	0.372074	1.65506	2.45285	214.728	FALSE	9
2022-09-13	11:44:29	0.612939	2.72648	7.93138	199.418	FALSE	9
2022-09-13	11:44:29	1.97421	8.78168	7.93138	223.509	FALSE	9
2022-09-13	11:44:29	2.76714	12.3088	7.93138	211.727	FALSE	9
2022-09-13	11:44:29	1.77793	7.90859	7.93138	231.418	FALSE	9
2022-09-13	11:44:30	2.06978	9.2068	13.4364	220.934	FALSE	9
2022-09-13	11:44:30	3.28144	14.5965	13.4364	246.014	1	10
2022-09-13	11:44:30	3.54546	15.7709	13.4364	236.705	1	11
2022-09-13	11:44:30	3.18586	14.1713	13.4364	260.186	1	12
2022-09-13	11:44:31	5.40118	24.0255	25.9936	260.73	1	13
2022-09-13	11:44:31	6.5279	29.0374	25.9936	289.223	1	14
2022-09-13	11:44:31	5.60179	24.9179	25.9936	285.648	1	15
2022-09-13	11:44:32	4.99538	22.2204	22.4625	311.444	1	16
2022-09-13	11:44:32	4.48062	19.9307	22.4625	305.579	1	17
2022-09-13	11:44:32	4.63675	20.6252	22.4625	332.069	1	18
2022-09-13	11:44:32	6.08647	27.0738	22.4625	332.652	1	19
2022-09-13	11:44:33	5.47858	24.3698	30.8466	356.439	1	20
2022-09-13	11:44:33	8.03507	35.7416	30.8466	368.394	1	21
2022-09-13	11:44:33	8.11415	36.0934	30.8466	392.532	1	22
2022-09-13	11:44:33	6.11069	27.1816	30.8466	395.576	1	23
2022-09-13	11:44:34	1.31095	5.83137	4.53325	398.363	FALSE	23
2022-09-13	11:44:34	0.663982	2.95352	4.53325	398.529	FALSE	23
2022-09-13	11:44:34	0.894211	3.97763	4.53325	402.341	FALSE	23
2022-09-13	11:44:34	1.20734	5.37049	4.53325	403.9	FALSE	23
2022-09-13	11:44:35	0.692735	3.08142	2.10644	405.422	FALSE	23
2022-09-13	11:44:35	0.527544	2.34662	2.10644	406.246	FALSE	23
2022-09-13	11:44:35	0.349478	1.55455	2.10644	406.977	FALSE	23
2022-09-13	11:44:35	0.32444	1.44317	2.10644	407.689	FALSE	23
2022-09-13	11:44:36	0.414109	1.84204	1.25725	408.819	FALSE	23
2022-09-13	11:44:36	0.259708	1.15523	1.25725	408.845	FALSE	23
2022-09-13	11:44:36	0.17411	0.774476	1.25725	409.593	FALSE	23
2022-09-13	11:44:37	0.123982	0.551497	0.657044	409.396	FALSE	23
2022-09-13	11:44:37	0.107799	0.479512	0.657044	410.073	FALSE	23
2022-09-13	11:44:37	0.110293	0.490605	0.657044	409.887	FALSE	23
2022-09-13	11:44:37	0.248766	1.10656	0.657044	411.18	FALSE	23
2022-09-13	11:44:38	0.135993	0.604924	0.987604	410.492	FALSE	23
2022-09-13	11:44:38	0.216247	0.96191	0.987604	412.141	FALSE	23
2022-09-13	11:44:38	0.201336	0.895583	0.987604	411.387	FALSE	23
2022-09-13	11:44:38	0.334517	1.488	0.987604	413.629	FALSE	23
2022-09-13	11:44:39	0.912532	4.05912	4.9087	415.446	FALSE	23
2022-09-13	11:44:39	1.09528	4.87202	4.9087	418.501	FALSE	23
2022-09-13	11:44:39	0.999504	4.44599	4.9087	419.892	FALSE	23
2022-09-13	11:44:39	1.40678	6.25764	4.9087	424.759	FALSE	23
2022-09-13	11:44:40	1.53411	6.82403	6.44961	426.716	FALSE	23
2022-09-13	11:44:40	1.53472	6.82674	6.44961	431.586	FALSE	23
2022-09-13	11:44:40	1.28098	5.69806	6.44961	432.414	FALSE	23
2022-09-13	11:44:41	0.699962	3.11357	2.28166	434.699	FALSE	23
2022-09-13	11:44:41	0.632634	2.81408	2.28166	435.229	FALSE	23
2022-09-13	11:44:41	0.423321	1.88302	2.28166	436.582	FALSE	23
2022-09-13	11:44:41	0.29584	1.31596	2.28166	436.545	FALSE	23
2022-09-13	11:44:42	0.380216	1.69128	1.04578	438.274	FALSE	23
2022-09-13	11:44:42	0.157875	0.70226	1.04578	437.247	FALSE	23
2022-09-13	11:44:42	0.354211	1.5756	1.04578	439.849	FALSE	23
2022-09-13	11:44:42	0.0481046	0.213979	1.04578	437.461	FALSE	23
2022-09-13	11:44:43	-0.266297	-1.18454	-0.348497	439.849	FALSE	23
2022-09-13	11:44:43	-0.194287	-0.864227	-0.348497	437.461	FALSE	23
2022-09-13	11:44:43	0.0635753	0.282796	-0.348497	440.132	FALSE	23
2022-09-13	11:44:43	0.0836262	0.371986	-0.348497	437.833	FALSE	23
2022-09-13	11:44:44	-0.417544	-1.85732	-2.11742	440.132	FALSE	23
2022-09-13	11:44:44	-0.715559	-3.18295	-2.11742	437.833	FALSE	23
2022-09-13	11:44:44	-0.294949	-1.31199	-2.11742	440.132	FALSE	23
2022-09-13	11:44:45	0.266781	1.1867	4.9006	439.019	FALSE	23
2022-09-13	11:44:45	1.36515	6.07246	4.9006	446.205	FALSE	23
2022-09-13	11:44:45	0.875229	3.89319	4.9006	442.913	FALSE	23
2022-09-13	11:44:45	1.89966	8.45007	4.9006	454.655	FALSE	23
2022-09-13	11:44:46	1.66744	7.41711	6.33385	450.33	FALSE	23
2022-09-13	11:44:46	2.07655	9.23691	6.33385	463.892	FALSE	23
2022-09-13	11:44:46	0.527748	2.34753	6.33385	452.677	FALSE	23
2022-09-13	11:44:47	1.67457	7.44882	7.20882	471.34	FALSE	23
2022-09-13	11:44:47	2.17467	9.67337	7.20882	462.351	FALSE	23
2022-09-13	11:44:47	1.75625	7.81215	7.20882	479.153	FALSE	23
2022-09-13	11:44:47	1.97009	8.76335	7.20882	471.114	FALSE	23
2022-09-13	11:44:47	0.527494	2.3464	7.20882	481.499	FALSE	23
2022-09-13	11:44:48	1.71065	7.60931	19.7746	478.723	FALSE	23
2022-09-13	11:44:48	3.99569	17.7736	19.7746	499.273	1	24
2022-09-13	11:44:48	7.63024	33.9408	19.7746	512.664	1	25
2022-09-13	11:44:49	15.7746	70.1686	28.3664	569.441	1	26
2022-09-13	11:44:49	2.868	12.7574	28.3664	525.422	FALSE	26
2022-09-13	11:44:49	3.44698	15.3329	28.3664	584.774	1	27
2022-09-13	11:44:49	3.41864	15.2068	28.3664	540.628	1	28
2022-09-13	11:44:50	4.23309	18.8296	20.5284	603.604	1	29
2022-09-13	11:44:50	6.14769	27.3462	20.5284	567.975	1	30
2022-09-13	11:44:50	3.89798	17.339	20.5284	620.943	1	31
2022-09-13	11:44:50	4.18118	18.5987	20.5284	586.573	1	32
2022-09-13	11:44:51	1.47701	6.57004	4.28555	627.513	FALSE	32
2022-09-13	11:44:51	1.43696	6.39189	4.28555	592.965	FALSE	32
2022-09-13	11:44:51	0.664746	2.95692	4.28555	630.47	FALSE	32
2022-09-13	11:44:51	0.275025	1.22337	4.28555	594.188	FALSE	32
2022-09-13	11:44:52	0.545865	2.42812	1.91961	632.898	FALSE	32
2022-09-13	11:44:52	0.168257	0.748441	1.91961	594.937	FALSE	32
2022-09-13	11:44:52	0.580522	2.58228	1.91961	635.48	FALSE	32
2022-09-13	11:44:53	0.312583	1.39043	2.15376	596.327	FALSE	32
2022-09-13	11:44:53	0.459758	2.0451	2.15376	637.525	FALSE	32
2022-09-13	11:44:53	0.780674	3.47259	2.15376	599.8	FALSE	32
2022-09-13	11:44:53	0.383728	1.7069	2.15376	639.232	FALSE	32
2022-09-13	11:44:54	0.59757	2.65811	1.58964	602.458	FALSE	32
2022-09-13	11:44:54	0.14098	0.627107	1.58964	639.859	FALSE	32
2022-09-13	11:44:54	0.465916	2.07249	1.58964	604.531	FALSE	32
2022-09-13	11:44:54	0.225	1.00084	1.58964	640.86	FALSE	32
2022-09-13	11:44:55	0.379046	1.68607	4.99319	606.217	FALSE	32
2022-09-13	11:44:55	0.855992	3.80762	4.99319	644.668	FALSE	32
2022-09-13	11:44:55	1.33335	5.93101	4.99319	612.148	FALSE	32
2022-09-13	11:44:55	1.92169	8.54806	4.99319	653.216	FALSE	32
2022-09-13	11:44:56	1.57289	6.99653	4.78307	619.144	FALSE	32
2022-09-13	11:44:56	1.31274	5.83933	4.78307	659.055	FALSE	32
2022-09-13	11:44:56	0.340216	1.51335	4.78307	620.658	FALSE	32
2022-09-13	11:44:57	1.11116	4.94266	3.57797	663.998	FALSE	32
2022-09-13	11:44:57	0.522404	2.32376	3.57797	622.981	FALSE	32
2022-09-13	11:44:57	0.794058	3.53213	3.57797	667.53	FALSE	32
2022-09-13	11:44:57	0.789834	3.51334	3.57797	626.495	FALSE	32
2022-09-13	11:44:58	0.417672	1.85789	2.43842	669.388	FALSE	32
2022-09-13	11:44:58	0.718588	3.19642	2.43842	629.691	FALSE	32
2022-09-13	11:44:58	0.3793	1.6872	2.43842	671.075	FALSE	32
2022-09-13	11:44:58	0.677163	3.01216	2.43842	632.703	FALSE	32
2022-09-13	11:44:59	0.659708	2.93451	4.19075	674.009	FALSE	32
2022-09-13	11:44:59	0.805611	3.58352	4.19075	636.287	FALSE	32
2022-09-13	11:44:59	1.36352	6.06521	4.19075	680.075	FALSE	32
2022-09-13	11:44:59	0.939656	4.17978	4.19075	640.466	FALSE	32
2022-09-13	11:45:00	1.80989	8.05075	6.19794	688.125	FALSE	32
2022-09-13	11:45:00	0.700318	3.11515	6.19794	643.582	FALSE	32
2022-09-13	11:45:00	2.05782	9.15359	6.19794	697.279	FALSE	32
2022-09-13	11:45:00	1.00541	4.47226	6.19794	648.054	FALSE	32
2022-09-13	11:45:01	1.42912	6.35701	9.47642	703.636	FALSE	32
2022-09-13	11:45:01	2.84749	12.6662	9.47642	660.72	FALSE	32
2022-09-13	11:45:01	2.11457	9.40603	9.47642	713.042	FALSE	32
2022-09-13	11:45:02	5.19451	23.1062	18.8349	683.826	1	33
2022-09-13	11:45:02	2.73813	12.1797	18.8349	725.222	FALSE	33
2022-09-13	11:45:02	7.01477	31.2031	18.8349	715.029	1	34
2022-09-13	11:45:02	1.98968	8.85049	18.8349	734.072	FALSE	34
2022-09-13	11:45:03	3.29772	14.6689	9.68891	729.698	1	35
2022-09-13	11:45:03	2.87207	12.7755	9.68891	746.848	FALSE	35
2022-09-13	11:45:03	1.31655	5.85628	9.68891	735.555	FALSE	35
2022-09-13	11:45:03	1.22632	5.45492	9.68891	752.303	FALSE	35
2022-09-13	11:45:04	0.895432	3.98306	4.26088	739.538	FALSE	35
2022-09-13	11:45:04	0.734466	3.26705	4.26088	755.57	FALSE	35
2022-09-13	11:45:04	1.23599	5.49793	4.26088	745.036	FALSE	35
2022-09-13	11:45:04	0.965662	4.29546	4.26088	759.865	FALSE	35
2022-09-13	11:45:05	2.61757	11.6435	10.4058	756.679	FALSE	35
2022-09-13	11:45:05	1.88561	8.38757	10.4058	768.253	FALSE	35
2022-09-13	11:45:05	2.51482	11.1864	10.4058	767.866	FALSE	35
2022-09-13	11:45:06	4.30882	19.1665	17.9183	787.419	1	36
2022-09-13	11:45:06	2.65421	11.8065	17.9183	779.672	FALSE	36
2022-09-13	11:45:06	7.81986	34.7843	17.9183	822.203	1	37
2022-09-13	11:45:06	1.32999	5.91606	17.9183	785.588	FALSE	37
2022-09-13	11:45:07	4.65472	20.7051	10.6249	842.909	1	38
2022-09-13	11:45:07	1.13106	5.03118	10.6249	790.619	FALSE	38
2022-09-13	11:45:07	0.940013	4.18137	10.6249	847.09	FALSE	38
2022-09-13	11:45:07	2.82856	12.582	10.6249	803.201	FALSE	38
2022-09-13	11:45:08	1.88373	8.37921	18.9592	855.469	FALSE	38
2022-09-13	11:45:08	3.51212	15.6226	18.9592	818.824	1	39
2022-09-13	11:45:08	7.28551	32.4074	18.9592	887.877	1	40
2022-09-13	11:45:08	4.36754	19.4277	18.9592	838.252	1	41
2022-09-13	11:45:09	8.26571	36.7675	22.316	924.644	1	42
2022-09-13	11:45:09	1.94113	8.63453	22.316	846.886	FALSE	42
2022-09-13	11:45:09	4.84373	21.5459	22.316	946.19	1	43
2022-09-13	11:45:10	3.18831	14.1822	19.5553	861.068	1	44
2022-09-13	11:45:10	3.33426	14.8315	19.5553	961.021	1	45
2022-09-13	11:45:10	8.06591	35.8788	19.5553	896.947	1	46
2022-09-13	11:45:10	2.9964	13.3286	19.5553	974.35	FALSE	46
2022-09-13	11:45:11	5.02077	22.3334	18.4778	919.28	1	47
2022-09-13	11:45:11	3.67263	16.3366	18.4778	990.687	1	48
2022-09-13	11:45:11	1.87299	8.33143	18.4778	927.612	FALSE	48
2022-09-13	11:45:11	6.04963	26.91	18.4778	1017.6	1	49
2022-09-13	11:45:12	2.16439	9.62764	16.047	937.24	FALSE	49
2022-09-13	11:45:12	4.69497	20.8842	16.047	1038.48	1	50
2022-09-13	11:45:12	4.85604	21.6006	16.047	958.84	1	51
2022-09-13	11:45:12	2.71467	12.0754	16.047	1050.56	FALSE	51
2022-09-13	11:45:13	4.70149	20.9132	14.4884	979.753	1	52
2022-09-13	11:45:13	2.92632	13.0169	14.4884	1063.57	FALSE	52
2022-09-13	11:45:13	2.14363	9.53529	14.4884	989.289	FALSE	52
2022-09-13	11:45:14	5.70459	25.3752	17.5213	1088.95	1	53
2022-09-13	11:45:14	1.55024	6.89578	17.5213	996.184	FALSE	53
2022-09-13	11:45:14	5.31665	23.6495	17.5213	1112.6	1	54
2022-09-13	11:45:14	3.18434	14.1646	17.5213	1010.35	1	55
2022-09-13	11:45:15	2.38301	10.6001	11.4492	1123.2	FALSE	55
2022-09-13	11:45:15	3.0594	13.6088	11.4492	1023.96	1	56
2022-09-13	11:45:15	1.67314	7.44246	11.4492	1130.64	FALSE	56
2022-09-13	11:45:15	3.18006	14.1455	11.4492	1038.1	1	57
2022-09-13	11:45:16	1.45574	6.47542	7.49952	1137.12	FALSE	57
2022-09-13	11:45:16	1.77457	7.89364	7.49952	1046	FALSE	57
2022-09-13	11:45:16	2.42546	10.7889	7.49952	1147.9	FALSE	57
2022-09-13	11:45:16	1.0881	4.84009	7.49952	1050.84	FALSE	57
2022-09-13	11:45:17	2.85594	12.7038	7.89944	1160.61	FALSE	57
2022-09-13	11:45:17	1.09665	4.87812	7.89944	1055.72	FALSE	57
2022-09-13	11:45:17	1.37503	6.11641	7.89944	1166.72	FALSE	57
2022-09-13	11:45:18	0.578282	2.57231	5.79817	1058.29	FALSE	57
2022-09-13	11:45:18	0.593906	2.64181	5.79817	1169.37	FALSE	57
2022-09-13	11:45:18	2.16846	9.64574	5.79817	1067.93	FALSE	57
2022-09-13	11:45:18	1.8733	8.33281	5.79817	1177.7	FALSE	57
2022-09-13	11:45:19	3.40037	15.1255	7.82635	1083.06	1	58
2022-09-13	11:45:19	1.11106	4.94222	7.82635	1182.64	FALSE	58
2022-09-13	11:45:19	1.54373	6.86682	7.82635	1089.93	FALSE	58
2022-09-13	11:45:19	0.982608	4.37084	7.82635	1187.01	FALSE	58
2022-09-13	11:45:20	0.301641	1.34176	2.53621	1091.27	FALSE	58
2022-09-13	11:45:20	0.733295	3.26184	2.53621	1190.27	FALSE	58
2022-09-13	11:45:20	0.362863	1.61409	2.53621	1092.88	FALSE	58
2022-09-13	11:45:20	0.882863	3.92715	2.53621	1194.2	FALSE	58
2022-09-13	11:45:21	1.12495	5.004	9.26018	1097.89	FALSE	58
2022-09-13	11:45:21	1.99676	8.88199	9.26018	1203.08	FALSE	58
2022-09-13	11:45:21	2.24551	9.98848	9.26018	1107.87	FALSE	58
2022-09-13	11:45:21	2.95991	13.1663	9.26018	1216.25	FALSE	58
2022-09-13	11:45:22	5.28398	23.5042	20.0637	1131.38	1	59
2022-09-13	11:45:22	2.55803	11.3786	20.0637	1227.63	FALSE	59
2022-09-13	11:45:22	5.68953	25.3082	20.0637	1156.69	1	60
2022-09-13	11:45:23	2.7681	12.3131	11.2973	1239.94	FALSE	60
2022-09-13	11:45:23	4.23935	18.8575	11.2973	1175.54	1	61
2022-09-13	11:45:23	2.34551	10.4333	11.2973	1250.37	FALSE	61
2022-09-13	11:45:23	0.806018	3.58533	11.2973	1179.13	FALSE	61
2022-09-13	11:45:24	1.50515	6.69521	4.74328	1257.07	FALSE	61
2022-09-13	11:45:24	0.583626	2.59609	4.74328	1181.73	FALSE	61
2022-09-13	11:45:24	0.803168	3.57265	4.74328	1260.64	FALSE	61
2022-09-13	11:45:24	1.3734	6.10916	4.74328	1187.83	FALSE	61
2022-09-13	11:45:25	2.01192	8.94942	11.5723	1269.59	FALSE	61
2022-09-13	11:45:25	4.11894	18.3219	11.5723	1206.16	1	62
2022-09-13	11:45:25	1.63716	7.28242	11.5723	1276.87	FALSE	62
2022-09-13	11:45:25	2.63823	11.7354	11.5723	1217.89	FALSE	62
2022-09-13	11:45:26	0.654109	2.90961	3.11221	1279.78	FALSE	62
2022-09-13	11:45:26	0.76556	3.40536	3.11221	1221.3	FALSE	62
2022-09-13	11:45:26	0.6793	3.02166	3.11221	1282.81	FALSE	62
2022-09-13	11:45:27	0.506272	2.252	1.65364	1223.55	FALSE	62
2022-09-13	11:45:27	0.290547	1.29241	1.65364	1284.1	FALSE	62
2022-09-13	11:45:27	0.250242	1.11313	1.65364	1224.66	FALSE	62
2022-09-13	11:45:27	0.439962	1.95704	1.65364	1286.06	FALSE	62
2022-09-13	11:45:28	2.15635	9.59188	12.9286	1234.25	FALSE	62
2022-09-13	11:45:28	2.76922	12.318	12.9286	1298.37	FALSE	62
2022-09-13	11:45:28	2.98556	13.2804	12.9286	1247.53	FALSE	62
2022-09-13	11:45:28	3.71482	16.5243	12.9286	1314.9	1	63
2022-09-13	11:45:29	1.71737	7.63921	9.26788	1255.17	FALSE	63
2022-09-13	11:45:29	2.7278	12.1338	9.26788	1327.03	FALSE	63
2022-09-13	11:45:29	1.41223	6.28188	9.26788	1261.46	FALSE	63
2022-09-13	11:45:29	2.47665	11.0166	9.26788	1338.05	FALSE	63
2022-09-13	11:45:30	1.56184	6.94738	7.72528	1268.4	FALSE	63
2022-09-13	11:45:30	2.40938	10.7174	7.72528	1348.77	FALSE	63
2022-09-13	11:45:30	1.23894	5.51105	7.72528	1273.91	FALSE	63
2022-09-13	11:45:31	1.80968	8.04982	4.77445	1356.82	FALSE	63
2022-09-13	11:45:31	0.80617	3.58601	4.77445	1277.5	FALSE	63
2022-09-13	11:45:31	1.31095	5.83137	4.77445	1362.65	FALSE	63
2022-09-13	11:45:31	0.366578	1.63061	4.77445	1279.13	FALSE	63
2022-09-13	11:45:32	0.122914	0.546746	3.8825	1363.19	FALSE	63
2022-09-13	11:45:32	0.438333	1.94979	3.8825	1281.08	FALSE	63
2022-09-13	11:45:32	1.08444	4.82381	3.8825	1368.02	FALSE	63
2022-09-13	11:45:32	1.84561	8.20964	3.8825	1289.29	FALSE	63
2022-09-13	11:45:33	1.17823	5.241	6.37513	1373.26	FALSE	63
2022-09-13	11:45:33	1.81487	8.0729	6.37513	1297.36	FALSE	63
2022-09-13	11:45:33	1.16775	5.19439	6.37513	1378.45	FALSE	63
2022-09-13	11:45:33	1.57192	6.99221	6.37513	1304.36	FALSE	63
2022-09-13	11:45:34	1.45609	6.47698	7.57534	1384.93	FALSE	63
2022-09-13	11:45:34	1.90062	8.45434	7.57534	1312.81	FALSE	63
2022-09-13	11:45:34	1.75233	7.79471	7.57534	1392.72	FALSE	63
2022-09-13	11:45:35	6.25472	27.8222	26.1838	1340.63	1	64
2022-09-13	11:45:35	8.94861	39.8052	26.1838	1432.53	1	65
2022-09-13	11:45:35	3.56362	15.8517	26.1838	1356.48	1	66
2022-09-13	11:45:35	4.77859	21.2561	26.1838	1453.79	1	67
2022-09-13	11:45:36	3.8707	17.2176	19.7638	1373.7	1	68
2022-09-13	11:45:36	5.66932	25.2183	19.7638	1479	1	69
2022-09-13	11:45:36	5.25349	23.3686	19.7638	1397.07	1	70
2022-09-13	11:45:36	2.97889	13.2507	19.7638	1492.25	FALSE	70
2022-09-13	11:45:37	1.76505	7.8513	6.51893	1404.92	FALSE	70
2022-09-13	11:45:37	1.3792	6.13496	6.51893	1498.39	FALSE	70
2022-09-13	11:45:37	1.50525	6.69565	6.51893	1411.62	FALSE	70
2022-09-13	11:45:37	1.21258	5.3938	6.51893	1503.78	FALSE	70
2022-09-13	11:45:38	2.04373	9.09092	15.3539	1420.71	FALSE	70
2022-09-13	11:45:38	3.91874	17.4313	15.3539	1521.21	1	71
2022-09-13	11:45:38	4.39263	19.5393	15.3539	1440.25	1	72
2022-09-13	11:45:39	3.02072	13.4368	8.99429	1534.65	1	73
2022-09-13	11:45:39	2.21314	9.84449	8.99429	1450.09	FALSE	73
2022-09-13	11:45:39	1.37843	6.13153	8.99429	1540.78	FALSE	73
2022-09-13	11:45:39	1.47574	6.56439	8.99429	1456.66	FALSE	73
2022-09-13	11:45:40	2.45889	10.9376	5.40218	1551.72	FALSE	73
2022-09-13	11:45:40	1.51823	6.75339	5.40218	1463.41	FALSE	73
2022-09-13	11:45:40	0.657265	2.92365	5.40218	1554.64	FALSE	73
2022-09-13	11:45:40	0.223473	0.994053	5.40218	1464.4	FALSE	73
2022-09-13	11:45:41	0.225763	1.00424	1.32574	1555.65	FALSE	73
2022-09-13	11:45:41	0.231616	1.03027	1.32574	1465.43	FALSE	73
2022-09-13	11:45:41	0.169326	0.753196	1.32574	1556.4	FALSE	73
2022-09-13	11:45:41	0.565458	2.51527	1.32574	1467.95	FALSE	73
2022-09-13	11:45:42	0.729377	3.24441	3.07607	1559.65	FALSE	73
2022-09-13	11:45:42	0.732277	3.25731	3.07607	1471.21	FALSE	73
2022-09-13	11:45:42	0.612939	2.72648	3.07607	1562.37	FALSE	73
2022-09-13	11:45:43	1.01055	4.49513	6.89494	1475.7	FALSE	73
2022-09-13	11:45:43	2.0421	9.08367	6.89494	1571.46	FALSE	73
2022-09-13	11:45:43	1.37808	6.12998	6.89494	1481.83	FALSE	73
2022-09-13	11:45:43	1.76948	7.871	6.89494	1579.33	FALSE	73
2022-09-13	11:45:44	2.51431	11.1842	13.9175	1493.02	FALSE	73
2022-09-13	11:45:44	2.45981	10.9417	13.9175	1590.27	FALSE	73
2022-09-13	11:45:44	1.69055	7.5199	13.9175	1500.54	FALSE	73
2022-09-13	11:45:44	5.85054	26.0244	13.9175	1616.29	1	74
2022-09-13	11:45:45	4.711	20.9555	22.7753	1521.49	1	75
2022-09-13	11:45:45	7.34388	32.667	22.7753	1648.96	1	76
2022-09-13	11:45:45	5.91212	26.2983	22.7753	1547.79	1	77
2022-09-13	11:45:45	2.5135	11.1806	22.7753	1660.14	FALSE	77
2022-09-13	11:45:46	2.16912	9.64868	5.52635	1557.44	FALSE	77
2022-09-13	11:45:46	1.08113	4.80908	5.52635	1664.95	FALSE	77
2022-09-13	11:45:46	0.817723	3.6374	5.52635	1561.07	FALSE	77
2022-09-13	11:45:46	0.901539	4.01023	5.52635	1668.96	FALSE	77
2022-09-13	11:45:47	0.68215	3.03434	3.19069	1564.11	FALSE	77
2022-09-13	11:45:47	0.816298	3.63106	3.19069	1672.59	FALSE	77
2022-09-13	11:45:47	0.653448	2.90667	3.19069	1567.02	FALSE	77
2022-09-13	11:45:48	0.720623	3.20548	6.36291	1675.8	FALSE	77
2022-09-13	11:45:48	1.07263	4.77127	6.36291	1571.79	FALSE	77
2022-09-13	11:45:48	1.46882	6.53361	6.36291	1682.33	FALSE	77
2022-09-13	11:45:48	2.45971	10.9413	6.36291	1582.73	FALSE	77
2022-09-13	11:45:49	1.54556	6.87496	6.74926	1689.21	FALSE	77
2022-09-13	11:45:49	1.98118	8.81268	6.74926	1591.54	FALSE	77
2022-09-13	11:45:49	1.28393	5.71118	6.74926	1694.92	FALSE	77
2022-09-13	11:45:49	1.25854	5.59824	6.74926	1597.14	FALSE	77
2022-09-13	11:45:50	1.54866	6.88875	6.32458	1701.81	FALSE	77
2022-09-13	11:45:50	1.32714	5.90338	6.32458	1603.04	FALSE	77
2022-09-13	11:45:50	1.32683	5.90201	6.32458	1707.71	FALSE	77
2022-09-13	11:45:50	1.48469	6.6042	6.32458	1609.65	FALSE	77
2022-09-13	11:45:51	1.37009	6.09443	8.94241	1713.8	FALSE	77
2022-09-13	11:45:51	2.58286	11.4891	8.94241	1621.14	FALSE	77
2022-09-13	11:45:51	2.07808	9.24372	8.94241	1723.05	FALSE	77
2022-09-13	11:45:52	2.46454	10.9628	7.859	1632.1	FALSE	77
2022-09-13	11:45:52	1.23477	5.4925	7.859	1728.54	FALSE	77
2022-09-13	11:45:52	1.33218	5.9258	7.859	1638.02	FALSE	77
2022-09-13	11:45:52	2.03564	9.05493	7.859	1737.59	FALSE	77
2022-09-13	11:45:53	1.68357	7.48886	5.24083	1645.51	FALSE	77
2022-09-13	11:45:53	1.18902	5.289	5.24083	1742.88	FALSE	77
2022-09-13	11:45:53	0.896501	3.98782	5.24083	1649.5	FALSE	77
2022-09-13	11:45:53	0.943677	4.19766	5.24083	1747.08	FALSE	77
2022-09-13	11:45:54	1.2881	5.72973	6.14628	1655.23	FALSE	77
2022-09-13	11:45:54	1.5733	6.99835	6.14628	1754.08	FALSE	77
2022-09-13	11:45:54	1.16597	5.18647	6.14628	1660.42	FALSE	77
2022-09-13	11:45:54	1.49961	6.67057	6.14628	1760.75	FALSE	77
2022-09-13	11:45:55	2.3106	10.278	10.1553	1670.7	FALSE	77
2022-09-13	11:45:55	2.26317	10.067	10.1553	1770.82	FALSE	77
2022-09-13	11:45:55	2.27528	10.1209	10.1553	1680.82	FALSE	77
2022-09-13	11:45:56	1.17085	5.20817	4.18351	1776.02	FALSE	77
2022-09-13	11:45:56	0.964389	4.2898	4.18351	1685.11	FALSE	77
2022-09-13	11:45:56	0.829733	3.69082	4.18351	1779.71	FALSE	77
2022-09-13	11:45:56	0.79701	3.54526	4.18351	1688.65	FALSE	77
2022-09-13	11:45:57	0.738588	3.28539	2.94385	1783	FALSE	77
2022-09-13	11:45:57	0.79813	3.55024	2.94385	1692.2	FALSE	77
2022-09-13	11:45:57	0.618231	2.75002	2.94385	1785.75	FALSE	77
2022-09-13	11:45:57	0.492277	2.18975	2.94385	1694.39	FALSE	77
2022-09-13	11:45:58	0.487443	2.16824	2.57922	1787.92	FALSE	77
2022-09-13	11:45:58	0.537112	2.38918	2.57922	1696.78	FALSE	77
2022-09-13	11:45:58	0.691667	3.07667	2.57922	1790.99	FALSE	77
2022-09-13	11:45:58	0.603117	2.68279	2.57922	1699.46	FALSE	77
2022-09-13	11:45:59	2.09879	9.33584	16.1689	1800.33	FALSE	77
2022-09-13	11:45:59	2.75192	12.2411	16.1689	1711.7	FALSE	77
2022-09-13	11:45:59	6.05411	26.9299	16.1689	1827.26	1	78
2022-09-13	11:46:00	3.08011	13.7009	14.8323	1725.41	1	79
2022-09-13	11:46:00	4.92551	21.9097	14.8323	1849.17	1	80
2022-09-13	11:46:00	3.94475	17.547	14.8323	1742.95	1	81
2022-09-13	11:46:00	1.38744	6.17161	14.8323	1855.34	FALSE	81
2022-09-13	11:46:01	1.16464	5.18055	8.29577	1748.13	FALSE	81
2022-09-13	11:46:01	2.17945	9.69463	8.29577	1865.04	FALSE	81
2022-09-13	11:46:01	1.14709	5.10249	8.29577	1753.24	FALSE	81
2022-09-13	11:46:01	2.96871	13.2054	8.29577	1878.24	FALSE	81
2022-09-13	11:46:02	1.6363	7.27859	9.97432	1760.51	FALSE	81
2022-09-13	11:46:02	3.0708	13.6595	9.97432	1891.9	1	82
2022-09-13	11:46:02	2.93243	13.044	9.97432	1773.56	FALSE	82
2022-09-13	11:46:02	1.32978	5.91513	9.97432	1897.82	FALSE	82
2022-09-13	11:46:03	5.64866	25.1264	27.3258	1798.68	1	83
2022-09-13	11:46:03	3.74159	16.6433	27.3258	1914.46	1	84
2022-09-13	11:46:03	9.03909	40.2077	27.3258	1838.89	1	85
2022-09-13	11:46:04	3.42719	15.2448	6.37722	1929.7	1	86
2022-09-13	11:46:04	1.43324	6.37534	6.37722	1845.27	FALSE	86
2022-09-13	11:46:04	0.577061	2.56688	6.37722	1932.27	FALSE	86
2022-09-13	11:46:04	0.297163	1.32184	6.37722	1846.59	FALSE	86
2022-09-13	11:46:05	0.194008	0.862986	0.90362	1933.13	FALSE	86
2022-09-13	11:46:05	0.052074	0.231636	0.90362	1846.82	FALSE	86
2022-09-13	11:46:05	0.264644	1.17719	0.90362	1934.31	FALSE	86
2022-09-13	11:46:05	0.301845	1.34267	0.90362	1848.16	FALSE	86
2022-09-13	11:46:06	0.693753	3.08595	2.58363	1937.4	FALSE	86
2022-09-13	11:46:06	0.709377	3.15545	2.58363	1851.32	FALSE	86
2022-09-13	11:46:06	0.547392	2.43491	2.58363	1939.83	FALSE	86
2022-09-13	11:46:06	0.372786	1.65823	2.58363	1852.98	FALSE	86
2022-09-13	11:46:07	0.383372	1.70532	1.6411	1941.54	FALSE	86
2022-09-13	11:46:07	0.350038	1.55704	1.6411	1854.53	FALSE	86
2022-09-13	11:46:07	0.373397	1.66094	1.6411	1943.2	FALSE	86
2022-09-13	11:46:08	0.391616	1.74199	1.69218	1856.28	FALSE	86
2022-09-13	11:46:08	0.400725	1.7825	1.69218	1944.98	FALSE	86
2022-09-13	11:46:08	0.373804	1.66275	1.69218	1857.94	FALSE	86
2022-09-13	11:46:08	0.355534	1.58149	1.69218	1946.56	FALSE	86
2022-09-13	11:46:09	0.346578	1.54165	2.46722	1859.48	FALSE	86
2022-09-13	11:46:09	0.397417	1.76779	2.46722	1948.33	FALSE	86
2022-09-13	11:46:09	0.737824	3.28199	2.46722	1862.76	FALSE	86
2022-09-13	11:46:09	0.736807	3.27746	2.46722	1951.61	FALSE	86
2022-09-13	11:46:10	0.735026	3.26954	3.91266	1866.03	FALSE	86
2022-09-13	11:46:10	2.00215	8.90596	3.91266	1960.51	FALSE	86
2022-09-13	11:46:10	0.518588	2.30678	3.91266	1868.34	FALSE	86
2022-09-13	11:46:10	0.262659	1.16836	3.91266	1961.68	FALSE	86
2022-09-13	11:46:11	0.292685	1.30192	1.1494	1869.64	FALSE	86
2022-09-13	11:46:11	0.317876	1.41398	1.1494	1963.1	FALSE	86
2022-09-13	11:46:11	0.224695	0.999488	1.1494	1870.64	FALSE	86
2022-09-13	11:46:11	0.198333	0.882225	1.1494	1963.98	FALSE	86
2022-09-13	11:46:12	0.251565	1.11901	1.22178	1871.76	FALSE	86
2022-09-13	11:46:12	0.244898	1.08936	1.22178	1965.07	FALSE	86
2022-09-13	11:46:12	0.327545	1.45699	1.22178	1873.22	FALSE	86
2022-09-13	11:46:13	0.443321	1.97198	4.54713	1967.04	FALSE	86
2022-09-13	11:46:13	1.02587	4.56327	4.54713	1877.78	FALSE	86
2022-09-13	11:46:13	1.50444	6.69205	4.54713	1973.73	FALSE	86
2022-09-13	11:46:13	1.11533	4.96121	4.54713	1882.74	FALSE	86
2022-09-13	11:46:14	1.22826	5.46355	6.30274	1979.2	FALSE	86
2022-09-13	11:46:14	1.59594	7.09906	6.30274	1889.84	FALSE	86
2022-09-13	11:46:14	1.0766	4.78893	6.30274	1983.98	FALSE	86
2022-09-13	11:46:14	1.76688	7.85944	6.30274	1897.7	FALSE	86
2022-09-13	11:46:15	0.515992	2.29524	6.22736	1986.28	FALSE	86
2022-09-13	11:46:15	2.1966	9.77092	6.22736	1907.47	FALSE	86
2022-09-13	11:46:15	0.80159	3.56563	6.22736	1989.85	FALSE	86
2022-09-13	11:46:15	2.08571	9.27766	6.22736	1916.75	FALSE	86
2022-09-13	11:46:16	3.25467	14.4774	9.74165	2004.32	1	87
2022-09-13	11:46:16	1.03472	4.60264	9.74165	1921.35	FALSE	87
2022-09-13	11:46:16	2.28067	10.1449	9.74165	2014.47	FALSE	87
2022-09-13	11:46:17	1.41599	6.29861	4.5984	1927.65	FALSE	87
2022-09-13	11:46:17	0.5793	2.57684	4.5984	2017.04	FALSE	87
2022-09-13	11:46:17	1.43335	6.37583	4.5984	1934.03	FALSE	87
2022-09-13	11:46:17	0.706425	3.14232	4.5984	2020.19	FALSE	87
2022-09-13	11:46:18	0.31701	1.41012	1.90808	1935.44	FALSE	87
2022-09-13	11:46:18	0.788053	3.50542	1.90808	2023.69	FALSE	87
2022-09-13	11:46:18	0.190547	0.847591	1.90808	1936.28	FALSE	87
2022-09-13	11:46:18	0.420216	1.8692	1.90808	2025.56	FALSE	87
2022-09-13	11:46:19	0.525	2.3353	2.04696	1938.62	FALSE	87
2022-09-13	11:46:19	0.0702928	0.312676	2.04696	2025.87	FALSE	87
2022-09-13	11:46:19	0.858537	3.81894	2.04696	1942.44	FALSE	87
2022-09-13	11:46:19	0.386883	1.72093	2.04696	2027.59	FALSE	87
2022-09-13	11:46:20	1.13716	5.05832	4.94733	1947.5	FALSE	87
2022-09-13	11:46:20	1.19971	5.33655	4.94733	2032.93	FALSE	87
2022-09-13	11:46:20	0.999758	4.44712	4.94733	1951.94	FALSE	87
2022-09-13	11:46:21	1.48846	6.62097	3.96071	2039.55	FALSE	87
2022-09-13	11:46:21	0.797265	3.54639	3.96071	1955.49	FALSE	87
2022-09-13	11:46:21	0.317824	1.41374	3.96071	2040.97	FALSE	87
2022-09-13	11:46:21	0.958079	4.26173	3.96071	1959.75	FALSE	87
2022-09-13	11:46:22	0.112023	0.498301	1.95262	2041.46	FALSE	87
2022-09-13	11:46:22	1.02011	4.53765	1.95262	1964.29	FALSE	87
2022-09-13	11:46:22	0.189733	0.84397	1.95262	2042.31	FALSE	87
2022-09-13	11:46:22	0.434008	1.93055	1.95262	1966.22	FALSE	87
2022-09-13	11:46:23	0.510852	2.27237	1.8743	2044.58	FALSE	87
2022-09-13	11:46:23	0.430344	1.91426	1.8743	1968.13	FALSE	87
2022-09-13	11:46:23	0.612939	2.72648	1.8743	2047.31	FALSE	87
2022-09-13	11:46:23	0.131311	0.584098	1.8743	1968.72	FALSE	87
2022-09-13	11:46:24	0.126883	0.564401	-0.413297	2047.87	FALSE	87
2022-09-13	11:46:24	-0.195	-0.867399	-0.413297	1968.72	FALSE	87
2022-09-13	11:46:24	-0.210623	-0.936893	-0.413297	2047.87	FALSE	87
2022-09-13	11:46:25	-0.200699	-0.892749	-0.838535	1968.72	FALSE	87
2022-09-13	11:46:25	-0.205178	-0.912673	-0.838535	2047.87	FALSE	87
2022-09-13	11:46:25	-0.155814	-0.693092	-0.838535	1968.72	FALSE	87
2022-09-13	11:46:25	-0.192353	-0.855625	-0.838535	2047.87	FALSE	87
2022-09-13	11:46:26	-0.188587	-0.838873	-0.922745	1968.72	FALSE	87
2022-09-13	11:46:26	-0.237646	-1.0571	-0.922745	2047.87	FALSE	87
2022-09-13	11:46:26	-0.199071	-0.885508	-0.922745	1968.72	FALSE	87
2022-09-13	11:46:26	-0.204465	-0.909501	-0.922745	2047.87	FALSE	87
2022-09-13	11:46:27	-0.194898	-0.866945	-0.697732	1968.72	FALSE	87
2022-09-13	11:46:27	-0.165178	-0.734745	-0.697732	2047.87	FALSE	87
2022-09-13	11:46:27	-0.15159	-0.674303	-0.697732	1968.72	FALSE	87
2022-09-13	11:46:27	-0.115763	-0.514937	-0.697732	2047.87	FALSE	87
2022-09-13	11:46:28	-0.087875	-0.390886	-0.321465	1968.72	FALSE	87
2022-09-13	11:46:28	-0.0715391	-0.31822	-0.321465	2047.87	FALSE	87
2022-09-13	11:46:28	-0.0573916	-0.255289	-0.321465	1968.72	FALSE	87
2022-09-13	11:46:29	-0.0533712	-0.237406	-0.225238	2047.87	FALSE	87
2022-09-13	11:46:29	-0.059071	-0.26276	-0.225238	1968.72	FALSE	87
2022-09-13	11:46:29	-0.0482313	-0.214542	-0.225238	2047.87	FALSE	87
2022-09-13	11:46:29	-0.0418699	-0.186246	-0.225238	1968.72	FALSE	87
2022-09-13	11:46:30	-0.0245163	-0.109053	0.00164222	2047.87	FALSE	87
2022-09-13	11:46:30	-0.0133204	-0.0592518	0.00164222	1968.72	FALSE	87
2022-09-13	11:46:30	0.00489845	0.0217893	0.00164222	2047.89	FALSE	87
2022-09-13	11:46:30	0.034415	0.153085	0.00164222	1968.87	FALSE	87
2022-09-13	11:46:31	0.040929	0.18206	0.124222	2048.08	FALSE	87
2022-09-13	11:46:31	0.036247	0.161234	0.124222	1969.03	FALSE	87
2022-09-13	11:46:31	0.0208272	0.0926436	0.124222	2048.17	FALSE	87
2022-09-13	11:46:31	0.0137025	0.0609515	0.124222	1969.09	FALSE	87
2022-09-13	11:46:32	0.0159926	0.0711383	0.0805704	2048.24	FALSE	87
2022-09-13	11:46:32	0.0201147	0.0894742	0.0805704	1969.18	FALSE	87
2022-09-13	11:46:32	0.0182318	0.0810987	0.0805704	2048.32	FALSE	87
2022-09-13	11:46:33	0.0125321	0.0557453	0.0366168	1969.24	FALSE	87
2022-09-13	11:46:33	0.0108018	0.0480486	0.0366168	2048.37	FALSE	87
2022-09-13	11:46:33	0.0068323	0.0303914	0.0366168	1969.27	FALSE	87
2022-09-13	11:46:33	0.00276106	0.0122817	0.0366168	2048.38	FALSE	87
2022-09-13	11:46:34	0.000878093	0.00390593	-0.165307	1969.27	FALSE	87
2022-09-13	11:46:34	-0.0205977	-0.0916227	-0.165307	2048.38	FALSE	87
2022-09-13	11:46:34	-0.0487402	-0.216806	-0.165307	1969.27	FALSE	87
2022-09-13	11:46:34	-0.0801905	-0.356703	-0.165307	2048.38	FALSE	87
2022-09-13	11:46:35	-0.0980023	-0.435934	0.874983	1969.27	FALSE	87
2022-09-13	11:46:35	-0.0638038	-0.283812	0.874983	2048.38	FALSE	87
2022-09-13	11:46:35	0.282354	1.25597	0.874983	1970.53	FALSE	87
2022-09-13	11:46:35	0.666272	2.96371	0.874983	2051.34	FALSE	87
2022-09-13	11:46:36	0.0467305	0.207867	-1.0626	1970.74	FALSE	87
2022-09-13	11:46:36	-0.408129	-1.81544	-1.0626	2051.34	FALSE	87
2022-09-13	11:46:36	-0.355254	-1.58024	-1.0626	1970.74	FALSE	87
2022-09-13	11:46:37	-0.595661	-2.64962	-3.51397	2051.34	FALSE	87
2022-09-13	11:46:37	-0.737595	-3.28097	-3.51397	1970.74	FALSE	87
2022-09-13	11:46:37	-0.820954	-3.65177	-3.51397	2051.34	FALSE	87
2022-09-13	11:46:37	-1.00569	-4.47351	-3.51397	1970.74	FALSE	87
2022-09-13	11:46:38	-1.10177	-4.90089	-4.59574	2051.34	FALSE	87
2022-09-13	11:46:38	-1.13607	-5.05347	-4.59574	1970.74	FALSE	87
2022-09-13	11:46:38	-1.13261	-5.03808	-4.59574	2051.34	FALSE	87
2022-09-13	11:46:38	-0.762226	-3.39053	-4.59574	1970.74	FALSE	87
2022-09-13	11:46:39	-0.318613	-1.41725	-2.03327	2051.34	FALSE	87
2022-09-13	11:46:39	-0.34131	-1.51822	-2.03327	1970.74	FALSE	87
2022-09-13	11:46:39	-0.239071	-1.06344	-2.03327	2051.34	FALSE	87
2022-09-13	11:46:39	-0.929401	-4.13416	-2.03327	1970.74	FALSE	87
2022-09-13	11:46:40	-0.919274	-4.08911	-5.79331	2051.34	FALSE	87
2022-09-13	11:46:40	-1.38533	-6.16222	-5.79331	1970.74	FALSE	87
2022-09-13	11:46:40	-1.50793	-6.70757	-5.79331	2051.34	FALSE	87
2022-09-13	11:46:40	-1.39704	-6.21431	-5.79331	1970.74	FALSE	87
2022-09-13	11:46:41	-1.57648	-7.0125	2.18997	2051.34	FALSE	87
2022-09-13	11:46:41	0.609122	2.7095	2.18997	1973.45	FALSE	87
2022-09-13	11:46:41	2.44434	10.8729	2.18997	2062.22	FALSE	87
2022-09-13	11:46:42	0.379911	1.68992	-3.0503	1975.14	FALSE	87
2022-09-13	11:46:42	-0.213371	-0.949117	-3.0503	2062.22	FALSE	87
2022-09-13	11:46:42	-1.56925	-6.98034	-3.0503	1975.14	FALSE	87
2022-09-13	11:46:42	-1.34024	-5.96166	-3.0503	2062.22	FALSE	87
2022-09-13	11:46:43	-1.7436	-7.75588	-2.38386	1975.14	FALSE	87
2022-09-13	11:46:43	-0.349605	-1.55511	-2.38386	2062.22	FALSE	87
2022-09-13	11:46:43	0.192125	0.85461	-2.38386	1975.99	FALSE	87
2022-09-13	11:46:43	-0.242582	-1.07905	-2.38386	2062.22	FALSE	87
2022-09-13	11:46:44	0.531819	2.36564	1.22705	1978.36	FALSE	87
2022-09-13	11:46:44	0.727901	3.23785	1.22705	2065.46	FALSE	87
2022-09-13	11:46:44	0.712837	3.17084	1.22705	1981.53	FALSE	87
2022-09-13	11:46:44	-0.869147	-3.86614	1.22705	2065.46	FALSE	87
2022-09-13	11:46:45	-1.20289	-5.3507	-2.38847	1981.53	FALSE	87
2022-09-13	11:46:45	-0.596068	-2.65143	-2.38847	2065.46	FALSE	87
2022-09-13	11:46:45	0.188105	0.836729	-2.38847	1982.36	FALSE	87
2022-09-13	11:46:46	0.234924	1.04499	-0.184831	2066.5	FALSE	87
2022-09-13	11:46:46	-0.00914732	-0.0406891	-0.184831	1982.36	FALSE	87
2022-09-13	11:46:46	-0.90589	-4.02958	-0.184831	2066.5	FALSE	87
2022-09-13	11:46:46	0.513906	2.28596	-0.184831	1984.65	FALSE	87
2022-09-13	11:46:47	0.73416	3.26569	3.26858	2069.77	FALSE	87
2022-09-13	11:46:47	0.732379	3.25777	3.26858	1987.91	FALSE	87
2022-09-13	11:46:47	0.738791	3.28629	3.26858	2073.05	FALSE	87
2022-09-13	11:46:47	0.733906	3.26456	3.26858	1991.17	FALSE	87
2022-09-13	11:46:48	0.733295	3.26184	3.25879	2076.31	FALSE	87
2022-09-13	11:46:48	0.734975	3.26932	3.25879	1994.44	FALSE	87
2022-09-13	11:46:48	0.73416	3.26569	3.25879	2079.58	FALSE	87
2022-09-13	11:46:48	0.728003	3.2383	3.25879	1997.68	FALSE	87
2022-09-13	11:46:49	0.735433	3.27135	3.28207	2082.85	FALSE	87
2022-09-13	11:46:49	0.737366	3.27995	3.28207	2000.96	FALSE	87
2022-09-13	11:46:49	0.740725	3.29489	3.28207	2086.15	FALSE	87
2022-09-13	11:46:50	0.73472	3.26818	3.28109	2004.23	FALSE	87
2022-09-13	11:46:50	0.740064	3.29195	3.28109	2089.44	FALSE	87
2022-09-13	11:46:50	0.737519	3.28063	3.28109	2007.51	FALSE	87
2022-09-13	11:46:50	0.738181	3.28358	3.28109	2092.72	FALSE	87
2022-09-13	11:46:51	0.737366	3.27995	3.26348	2010.79	FALSE	87
2022-09-13	11:46:51	0.733397	3.2623	3.26348	2095.98	FALSE	87
2022-09-13	11:46:51	0.732175	3.25686	3.26348	2014.04	FALSE	87
2022-09-13	11:46:51	0.731717	3.25482	3.26348	2099.24	FALSE	87
2022-09-13	11:46:52	0.731921	3.25573	3.27633	2017.3	FALSE	87
2022-09-13	11:46:52	0.735891	3.27339	3.27633	2102.51	FALSE	87
2022-09-13	11:46:52	0.738079	3.28312	3.27633	2020.58	FALSE	87
2022-09-13	11:46:52	0.740318	3.29308	3.27633	2105.81	FALSE	87
2022-09-13	11:46:53	0.732583	3.25868	3.10572	2023.84	FALSE	87
2022-09-13	11:46:53	0.730649	3.25007	3.10572	2109.06	FALSE	87
2022-09-13	11:46:53	0.631361	2.80842	3.10572	2026.65	FALSE	87
2022-09-13	11:46:54	-0.760444	-3.38261	-0.970849	2109.06	FALSE	87
2022-09-13	11:46:54	-0.883803	-3.93133	-0.970849	2026.65	FALSE	87
2022-09-13	11:46:54	-0.257799	-1.14674	-0.970849	2109.06	FALSE	87
2022-09-13	11:46:54	1.02902	4.57729	-0.970849	2031.23	FALSE	87
2022-09-13	11:46:55	2.76357	12.2929	6.23511	2121.35	FALSE	87
2022-09-13	11:46:55	1.90159	8.45865	6.23511	2039.69	FALSE	87
2022-09-13	11:46:55	0.809478	3.60072	6.23511	2124.95	FALSE	87
2022-09-13	11:46:55	0.132227	0.588172	6.23511	2040.27	FALSE	87
2022-09-13	11:46:56	0.0546185	0.242954	-0.420598	2125.19	FALSE	87
2022-09-13	11:46:56	-0.226552	-1.00775	-0.420598	2040.27	FALSE	87
2022-09-13	11:46:56	-0.246196	-1.09513	-0.420598	2125.19	FALSE	87
2022-09-13	11:46:56	0.0399112	0.177533	-0.420598	2040.45	FALSE	87
2022-09-13	11:46:57	-0.217544	-0.967679	-1.70656	2125.19	FALSE	87
2022-09-13	11:46:57	-0.332099	-1.47724	-1.70656	2040.45	FALSE	87
2022-09-13	11:46:57	-0.60131	-2.67475	-1.70656	2125.19	FALSE	87
2022-09-13	11:46:58	-0.737391	-3.28006	0.181834	2040.45	FALSE	87
2022-09-13	11:46:58	-0.764414	-3.40027	0.181834	2125.19	FALSE	87
2022-09-13	11:46:58	0.217977	0.969605	0.181834	2041.42	FALSE	87
2022-09-13	11:46:58	1.44734	6.43806	0.181834	2131.63	FALSE	87
2022-09-13	11:46:59	2.90749	12.9331	4.64508	2054.35	FALSE	87
2022-09-13	11:46:59	-0.193524	-0.860833	4.64508	2131.63	FALSE	87
2022-09-13	11:46:59	0.725458	3.22698	4.64508	2057.58	FALSE	87
2022-09-13	11:46:59	0.737621	3.28109	4.64508	2134.91	FALSE	87
2022-09-13	11:47:00	0.733397	3.2623	3.2653	2060.84	FALSE	87
2022-09-13	11:47:00	0.734771	3.26841	3.2653	2138.18	FALSE	87
2022-09-13	11:47:00	0.733041	3.26071	3.2653	2064.1	FALSE	87
2022-09-13	11:47:00	0.735076	3.26977	3.2653	2141.45	FALSE	87
2022-09-13	11:47:01	0.735636	3.27226	3.26654	2067.38	FALSE	87
2022-09-13	11:47:01	0.735076	3.26977	3.26654	2144.72	FALSE	87
2022-09-13	11:47:01	0.734771	3.26841	3.26654	2070.65	FALSE	87
2022-09-13	11:47:01	0.731921	3.25573	3.26654	2147.97	FALSE	87
2022-09-13	11:47:02	0.730293	3.24849	3.27844	2073.89	FALSE	87
2022-09-13	11:47:02	0.743778	3.30847	3.27844	2151.28	FALSE	87
2022-09-13	11:47:02	0.73701	3.27837	3.27844	2077.17	FALSE	87
2022-09-13	11:47:03	0.735382	3.27113	3.27367	2154.55	FALSE	87
2022-09-13	11:47:03	0.736043	3.27407	3.27367	2080.45	FALSE	87
2022-09-13	11:47:03	0.737519	3.28063	3.27367	2157.83	FALSE	87
2022-09-13	11:47:03	0.734873	3.26886	3.27367	2083.72	FALSE	87
2022-09-13	11:47:04	0.741081	3.29648	3.27757	2161.13	FALSE	87
2022-09-13	11:47:04	0.736908	3.27791	3.27757	2086.99	FALSE	87
2022-09-13	11:47:04	0.732277	3.25731	3.27757	2164.39	FALSE	87
2022-09-13	11:47:04	0.737061	3.27859	3.27757	2090.27	FALSE	87
2022-09-13	11:47:05	0.729529	3.24509	3.25528	2167.63	FALSE	87
2022-09-13	11:47:05	0.733193	3.26139	3.25528	2093.53	FALSE	87
2022-09-13	11:47:05	0.727087	3.23423	3.25528	2170.87	FALSE	87
2022-09-13	11:47:05	0.737468	3.28041	3.25528	2096.81	FALSE	87
2022-09-13	11:47:06	0.737621	3.28109	3.27784	2174.15	FALSE	87
2022-09-13	11:47:06	0.737468	3.28041	3.27784	2100.09	FALSE	87
2022-09-13	11:47:06	0.735585	3.27203	3.27784	2177.42	FALSE	87
2022-09-13	11:47:07	0.73528	3.27067	3.2726	2103.36	FALSE	87
2022-09-13	11:47:07	0.738282	3.28403	3.2726	2180.71	FALSE	87
2022-09-13	11:47:07	0.730343	3.24871	3.2726	2106.61	FALSE	87
2022-09-13	11:47:07	0.738944	3.28697	3.2726	2183.99	FALSE	87
2022-09-13	11:47:08	0.728562	3.24079	3.26586	2109.85	FALSE	87
2022-09-13	11:47:08	0.737519	3.28063	3.26586	2187.27	FALSE	87
2022-09-13	11:47:08	0.735738	3.27271	3.26586	2113.13	FALSE	87
2022-09-13	11:47:08	0.734975	3.26932	3.26586	2190.54	FALSE	87
2022-09-13	11:47:09	0.739351	3.28878	3.26501	2116.42	FALSE	87
2022-09-13	11:47:09	0.732277	3.25731	3.26501	2193.8	FALSE	87
2022-09-13	11:47:09	0.734059	3.26524	3.26501	2119.68	FALSE	87
2022-09-13	11:47:09	0.730343	3.24871	3.26501	2197.05	FALSE	87
2022-09-13	11:47:10	0.732837	3.25981	3.26909	2122.94	FALSE	87
2022-09-13	11:47:10	0.739962	3.2915	3.26909	2200.34	FALSE	87
2022-09-13	11:47:10	0.731972	3.25596	3.26909	2126.2	FALSE	87
2022-09-13	11:47:11	0.734008	3.26501	3.26943	2203.6	FALSE	87
2022-09-13	11:47:11	0.736654	3.27678	3.26943	2129.47	FALSE	87
2022-09-13	11:47:11	0.734975	3.26932	3.26943	2206.87	FALSE	87
2022-09-13	11:47:11	0.734364	3.2666	3.26943	2132.74	FALSE	87
2022-09-13	11:47:12	0.734771	3.26841	3.27565	2210.14	FALSE	87
2022-09-13	11:47:12	0.734109	3.26546	3.27565	2136.01	FALSE	87
2022-09-13	11:47:12	0.734059	3.26524	3.27565	2213.41	FALSE	87
2022-09-13	11:47:12	0.742659	3.3035	3.27565	2139.31	FALSE	87
2022-09-13	11:47:13	0.733601	3.2632	3.26829	2216.67	FALSE	87
2022-09-13	11:47:13	0.734618	3.26773	3.26829	2142.58	FALSE	87
2022-09-13	11:47:13	0.736552	3.27633	3.26829	2219.95	FALSE	87
2022-09-13	11:47:13	0.734211	3.26592	3.26829	2145.84	FALSE	87
2022-09-13	11:47:14	0.741031	3.29625	3.26041	2223.24	FALSE	87
2022-09-13	11:47:14	0.72958	3.24532	3.26041	2149.09	FALSE	87
2022-09-13	11:47:14	0.728308	3.23966	3.26041	2226.48	FALSE	87
2022-09-13	11:47:15	0.732277	3.25731	3.25534	2152.35	FALSE	87
2022-09-13	11:47:15	0.733651	3.26343	3.25534	2229.75	FALSE	87
2022-09-13	11:47:15	0.732939	3.26026	3.25534	2155.61	FALSE	87
2022-09-13	11:47:15	0.728461	3.24034	3.25534	2232.99	FALSE	87
2022-09-13	11:47:16	0.733346	3.26207	3.25183	2158.87	FALSE	87
2022-09-13	11:47:16	0.727901	3.23785	3.25183	2236.22	FALSE	87
2022-09-13	11:47:16	0.731361	3.25324	3.25183	2162.12	FALSE	87
2022-09-13	11:47:16	0.731565	3.25415	3.25183	2239.48	FALSE	87
2022-09-13	11:47:17	0.736247	3.27497	3.27147	2165.4	FALSE	87
2022-09-13	11:47:17	0.732634	3.2589	3.27147	2242.74	FALSE	87
2022-09-13	11:47:17	0.734873	3.26886	3.27147	2168.66	FALSE	87
2022-09-13	11:47:17	0.738079	3.28312	3.27147	2246.02	FALSE	87
2022-09-13	11:47:18	0.734262	3.26614	3.27392	2171.93	FALSE	87
2022-09-13	11:47:18	0.736654	3.27678	3.27392	2249.3	FALSE	87
2022-09-13	11:47:18	0.737112	3.27882	3.27392	2175.21	FALSE	87
2022-09-13	11:47:19	0.728461	3.24034	3.26354	2252.54	FALSE	87
2022-09-13	11:47:19	0.737672	3.28131	3.26354	2178.49	FALSE	87
2022-09-13	11:47:19	0.733346	3.26207	3.26354	2255.8	FALSE	87
2022-09-13	11:47:19	0.735229	3.27045	3.26354	2181.76	FALSE	87
2022-09-13	11:47:20	0.732023	3.25618	3.26977	2259.06	FALSE	87
2022-09-13	11:47:20	0.735789	3.27294	3.26977	2185.03	FALSE	87
2022-09-13	11:47:20	0.735687	3.27248	3.26977	2262.33	FALSE	87
2022-09-13	11:47:20	0.736807	3.27746	3.26977	2188.31	FALSE	87
2022-09-13	11:47:21	0.73584	3.27316	3.26501	2265.6	FALSE	87
2022-09-13	11:47:21	0.735636	3.27226	3.26501	2191.58	FALSE	87
2022-09-13	11:47:21	0.732583	3.25868	3.26501	2268.86	FALSE	87
2022-09-13	11:47:21	0.731972	3.25596	3.26501	2194.84	FALSE	87
2022-09-13	11:47:22	0.729275	3.24396	3.26622	2272.1	FALSE	87
2022-09-13	11:47:22	0.737773	3.28176	3.26622	2198.12	FALSE	87
2022-09-13	11:47:22	0.735789	3.27294	3.26622	2275.38	FALSE	87
2022-09-13	11:47:23	0.740318	3.29308	3.28318	2201.41	FALSE	87
2022-09-13	11:47:23	0.741896	3.3001	3.28318	2278.68	FALSE	87
2022-09-13	11:47:23	0.733448	3.26252	3.28318	2204.68	FALSE	87
2022-09-13	11:47:23	0.736705	3.27701	3.28318	2281.95	FALSE	87
2022-09-13	11:47:24	0.732532	3.25845	3.25664	2207.94	FALSE	87
2022-09-13	11:47:24	0.733092	3.26094	3.25664	2285.22	FALSE	87
2022-09-13	11:47:24	0.728562	3.24079	3.25664	2211.18	FALSE	87
2022-09-13	11:47:24	0.734313	3.26637	3.25664	2288.48	FALSE	87
2022-09-13	11:47:25	0.73874	3.28606	3.26852	2214.46	FALSE	87
2022-09-13	11:47:25	0.737519	3.28063	3.26852	2291.76	FALSE	87
2022-09-13	11:47:25	0.733753	3.26388	3.26852	2217.73	FALSE	87
2022-09-13	11:47:25	0.729173	3.24351	3.26852	2295.01	FALSE	87
2022-09-13	11:47:26	0.73187	3.2555	3.26473	2220.98	FALSE	87
2022-09-13	11:47:26	0.735331	3.2709	3.26473	2298.28	FALSE	87
2022-09-13	11:47:26	0.733957	3.26479	3.26473	2224.25	FALSE	87
2022-09-13	11:47:26	0.734618	3.26773	3.26473	2301.54	FALSE	87
2022-09-13	11:47:27	0.70556	3.13847	-2.36538	2227.39	FALSE	87
2022-09-13	11:47:27	-1.52966	-6.80423	-2.36538	2301.54	FALSE	87
2022-09-13	11:47:27	-0.771182	-3.43037	-2.36538	2227.39	FALSE	87
2022-09-13	11:47:28	-1.37398	-6.11174	-7.23058	2301.54	FALSE	87
2022-09-13	11:47:28	-1.50502	-6.69463	-7.23058	2227.39	FALSE	87
2022-09-13	11:47:28	-1.72986	-7.69476	-7.23058	2301.54	FALSE	87
2022-09-13	11:47:28	-1.89317	-8.4212	-7.23058	2227.39	FALSE	87
2022-09-13	11:47:29	-1.75159	-7.79142	-4.95351	2301.54	FALSE	87
2022-09-13	11:47:29	-1.69169	-7.52498	-4.95351	2227.39	FALSE	87
2022-09-13	11:47:29	-0.121157	-0.538931	-4.95351	2301.54	FALSE	87
2022-09-13	11:47:29	-0.889961	-3.95872	-4.95351	2227.39	FALSE	87
2022-09-13	11:47:30	-0.191743	-0.852911	-4.09867	2301.54	FALSE	87
2022-09-13	11:47:30	-0.76075	-3.38397	-4.09867	2227.39	FALSE	87
2022-09-13	11:47:30	-1.20192	-5.34638	-4.09867	2301.54	FALSE	87
2022-09-13	11:47:30	-1.53128	-6.81144	-4.09867	2227.39	FALSE	87
2022-09-13	11:47:31	-1.81006	-8.05151	-7.09351	2301.54	FALSE	87
2022-09-13	11:47:31	-1.10838	-4.9303	-7.09351	2227.39	FALSE	87
2022-09-13	11:47:31	-1.86564	-8.29874	-7.09351	2301.54	FALSE	87
2022-09-13	11:47:32	-1.19357	-5.30924	-6.64365	2227.39	FALSE	87
2022-09-13	11:47:32	-1.84813	-8.22085	-6.64365	2301.54	FALSE	87
2022-09-13	11:47:32	-1.11642	-4.96606	-6.64365	2227.39	FALSE	87
2022-09-13	11:47:32	-1.81612	-8.07846	-6.64365	2301.54	FALSE	87
2022-09-13	11:47:33	-1.72894	-7.69067	-5.90852	2227.39	FALSE	87
2022-09-13	11:47:33	-1.35276	-6.01735	-5.90852	2301.54	FALSE	87
2022-09-13	11:47:33	-1.45393	-6.46737	-5.90852	2227.39	FALSE	87
2022-09-13	11:47:33	-0.777544	-3.45867	-5.90852	2301.54	FALSE	87
2022-09-13	11:47:34	-1.76502	-7.85116	-1.48923	2227.39	FALSE	87
2022-09-13	11:47:34	0.0875448	0.389417	-1.48923	2301.93	FALSE	87
2022-09-13	11:47:34	0.583321	2.59473	-1.48923	2229.98	FALSE	87
2022-09-13	11:47:34	-0.245025	-1.08992	-1.48923	2301.93	FALSE	87
2022-09-13	11:47:35	0.125865	0.559873	-0.290604	2230.54	FALSE	87
2022-09-13	11:47:35	-0.0977478	-0.434802	-0.290604	2301.93	FALSE	87
2022-09-13	11:47:35	-0.224109	-0.996882	-0.290604	2230.54	FALSE	87
2022-09-13	11:47:36	-0.15673	-0.697166	0.397622	2301.93	FALSE	87
2022-09-13	11:47:36	0.0228628	0.101698	0.397622	2230.64	FALSE	87
2022-09-13	11:47:36	0.300878	1.33837	0.397622	2303.27	FALSE	87
2022-09-13	11:47:36	0.190547	0.847591	0.397622	2231.49	FALSE	87
2022-09-13	11:47:37	0.186222	0.828353	-0.536555	2304.1	FALSE	87
2022-09-13	11:47:37	0.112278	0.499435	-0.536555	2231.99	FALSE	87
2022-09-13	11:47:37	-0.534796	-2.37888	-0.536555	2304.1	FALSE	87
2022-09-13	11:47:37	-0.246196	-1.09513	-0.536555	2231.99	FALSE	87
2022-09-13	11:47:38	0.172328	0.766549	0.662873	2304.87	FALSE	87
2022-09-13	11:47:38	0.166018	0.738481	0.662873	2232.73	FALSE	87
2022-09-13	11:47:38	0.265967	1.18307	0.662873	2306.05	FALSE	87
2022-09-13	11:47:38	-0.00823129	-0.0366144	0.662873	2232.73	FALSE	87
2022-09-13	11:47:39	-0.0519972	-0.231294	-0.85955	2306.05	FALSE	87
2022-09-13	11:47:39	-0.43617	-1.94017	-0.85955	2232.73	FALSE	87
2022-09-13	11:47:39	-0.0915391	-0.407184	-0.85955	2306.05	FALSE	87
2022-09-13	11:47:40	-0.0438547	-0.195074	-0.953871	2232.73	FALSE	87
2022-09-13	11:47:40	-0.20818	-0.926026	-0.953871	2306.05	FALSE	87
2022-09-13	11:47:40	-0.245839	-1.09354	-0.953871	2232.73	FALSE	87
2022-09-13	11:47:40	-0.359885	-1.60084	-0.953871	2306.05	FALSE	87
2022-09-13	11:47:41	-0.478867	-2.1301	-1.54815	2232.73	FALSE	87
2022-09-13	11:47:41	0.424949	1.89026	-1.54815	2307.94	FALSE	87
2022-09-13	11:47:41	-0.519274	-2.30983	-1.54815	2232.73	FALSE	87
2022-09-13	11:47:41	-0.818969	-3.64294	-1.54815	2307.94	FALSE	87
2022-09-13	11:47:42	0.734669	3.26795	-0.884543	2236	FALSE	87
2022-09-13	11:47:42	0.733092	3.26094	-0.884543	2311.2	FALSE	87
2022-09-13	11:47:42	-0.0491473	-0.218617	-0.884543	2236	FALSE	87
2022-09-13	11:47:42	-2.21403	-9.84845	-0.884543	2311.2	FALSE	87
2022-09-13	11:47:43	-0.176832	-0.786584	1.92316	2236	FALSE	87
2022-09-13	11:47:43	0.735687	3.27248	1.92316	2314.47	FALSE	87
2022-09-13	11:47:43	0.738181	3.28358	1.92316	2239.28	FALSE	87
2022-09-13	11:47:44	0.733448	3.26252	2.2992	2317.74	FALSE	87
2022-09-13	11:47:44	0.439758	1.95613	2.2992	2241.23	FALSE	87
2022-09-13	11:47:44	0.156196	0.694791	2.2992	2318.43	FALSE	87
2022-09-13	11:47:44	0.73813	3.28335	2.2992	2244.52	FALSE	87
2022-09-13	11:47:45	0.731056	3.25188	3.28267	2321.68	FALSE	87
2022-09-13	11:47:45	0.737875	3.28222	3.28267	2247.8	FALSE	87
2022-09-13	11:47:45	0.745051	3.31414	3.28267	2325	FALSE	87
2022-09-13	11:47:45	0.737926	3.28244	3.28267	2251.08	FALSE	87
2022-09-13	11:47:46	0.745509	3.31617	3.28284	2328.31	FALSE	87
2022-09-13	11:47:46	0.733193	3.26139	3.28284	2254.34	FALSE	87
2022-09-13	11:47:46	0.738486	3.28493	3.28284	2331.6	FALSE	87
2022-09-13	11:47:46	0.734873	3.26886	3.28284	2257.61	FALSE	87
2022-09-13	11:47:47	0.739046	3.28742	3.26788	2334.89	FALSE	87
2022-09-13	11:47:47	0.732175	3.25686	3.26788	2260.87	FALSE	87
2022-09-13	11:47:47	0.732735	3.25935	3.26788	2338.15	FALSE	87
2022-09-13	11:47:48	0.736043	3.27407	3.26173	2264.14	FALSE	87
2022-09-13	11:47:48	0.726934	3.23355	3.26173	2341.38	FALSE	87
2022-09-13	11:47:48	0.73528	3.27067	3.26173	2267.41	FALSE	87
2022-09-13	11:47:48	0.734822	3.26864	3.26173	2344.65	FALSE	87
2022-09-13	11:47:49	0.737163	3.27905	3.2662	2270.69	FALSE	87
2022-09-13	11:47:49	0.731005	3.25166	3.2662	2347.9	FALSE	87
2022-09-13	11:47:49	0.733906	3.26456	3.2662	2273.96	FALSE	87
2022-09-13	11:47:49	0.735026	3.26954	3.2662	2351.17	FALSE	87
2022-09-13	11:47:50	0.730598	3.24985	3.26179	2277.21	FALSE	87
2022-09-13	11:47:50	0.731667	3.2546	3.26179	2354.42	FALSE	87
2022-09-13	11:47:50	0.736399	3.27565	3.26179	2280.48	FALSE	87
2022-09-13	11:47:50	0.734466	3.26705	3.26179	2357.69	FALSE	87
2022-09-13	11:47:51	0.72958	3.24532	2.45687	2283.73	FALSE	87
2022-09-13	11:47:51	0.732175	3.25686	2.45687	2360.95	FALSE	87
2022-09-13	11:47:51	0.0377738	0.168025	2.45687	2283.9	FALSE	87
2022-09-13	11:47:51	0.709784	3.15726	2.45687	2364.1	FALSE	87
2022-09-13	11:47:52	0.735331	3.2709	3.25596	2287.17	FALSE	87
2022-09-13	11:47:52	0.730751	3.25053	3.25596	2367.35	FALSE	87
2022-09-13	11:47:52	0.729835	3.24645	3.25596	2290.41	FALSE	87
2022-09-13	11:47:53	0.733855	3.26433	3.26626	2370.62	FALSE	87
2022-09-13	11:47:53	0.731107	3.25211	3.26626	2293.67	FALSE	87
2022-09-13	11:47:53	0.73645	3.27588	3.26626	2373.9	FALSE	87
2022-09-13	11:47:53	0.735738	3.27271	3.26626	2296.94	FALSE	87
2022-09-13	11:47:54	0.735026	3.26954	3.26807	2377.16	FALSE	87
2022-09-13	11:47:54	0.733295	3.26184	3.26807	2300.2	FALSE	87
2022-09-13	11:47:54	0.738639	3.28561	3.26807	2380.45	FALSE	87
2022-09-13	11:47:54	0.731819	3.25528	3.26807	2303.46	FALSE	87
2022-09-13	11:47:55	0.738231	3.2838	2.88211	2383.73	FALSE	87
2022-09-13	11:47:55	0.732939	3.26026	2.88211	2306.72	FALSE	87
2022-09-13	11:47:55	0.733092	3.26094	2.88211	2386.99	FALSE	87
2022-09-13	11:47:55	0.387443	1.72342	2.88211	2308.44	FALSE	87
2022-09-13	11:47:56	0.736654	3.27678	3.26343	2390.27	FALSE	87
2022-09-13	11:47:56	0.730242	3.24826	3.26343	2311.69	FALSE	87
2022-09-13	11:47:56	0.734059	3.26524	3.26343	2393.54	FALSE	87
2022-09-13	11:47:57	0.733601	3.2632	3.26818	2314.95	FALSE	87
2022-09-13	11:47:57	0.736603	3.27656	3.26818	2396.81	FALSE	87
2022-09-13	11:47:57	0.735585	3.27203	3.26818	2318.22	FALSE	87
2022-09-13	11:47:57	0.733092	3.26094	3.26818	2400.07	FALSE	87
2022-09-13	11:47:58	0.737163	3.27905	3.26445	2321.5	FALSE	87
2022-09-13	11:47:58	0.730242	3.24826	3.26445	2403.32	FALSE	87
2022-09-13	11:47:58	0.731056	3.25188	3.26445	2324.75	FALSE	87
2022-09-13	11:47:58	0.737061	3.27859	3.26445	2406.6	FALSE	87
2022-09-13	11:47:59	0.735534	3.2718	3.27616	2328.03	FALSE	87
2022-09-13	11:47:59	0.735534	3.2718	3.27616	2409.87	FALSE	87
2022-09-13	11:47:59	0.733753	3.26388	3.27616	2331.29	FALSE	87
2022-09-13	11:47:59	0.741234	3.29716	3.27616	2413.17	FALSE	87
2022-09-13	11:48:00	0.739097	3.28765	3.27603	2334.58	FALSE	87
2022-09-13	11:48:00	0.737672	3.28131	3.27603	2416.45	FALSE	87
2022-09-13	11:48:00	0.732684	3.25912	3.27603	2337.84	FALSE	87
2022-09-13	11:48:01	0.739351	3.28878	3.26688	2419.74	FALSE	87
2022-09-13	11:48:01	0.732634	3.2589	3.26688	2341.1	FALSE	87
2022-09-13	11:48:01	0.736908	3.27791	3.26688	2423.02	FALSE	87
2022-09-13	11:48:01	0.728817	3.24192	3.26688	2344.34	FALSE	87
2022-09-13	11:48:02	0.73243	3.258	2.94532	2426.28	FALSE	87
2022-09-13	11:48:02	0.734262	3.26614	2.94532	2347.6	FALSE	87
2022-09-13	11:48:02	0.490649	2.1825	2.94532	2428.46	FALSE	87
2022-09-13	11:48:02	0.691209	3.07464	2.94532	2350.68	FALSE	87
2022-09-13	11:48:03	0.714109	3.1765	3.05285	2431.64	FALSE	87
2022-09-13	11:48:03	0.705611	3.1387	3.05285	2353.82	FALSE	87
2022-09-13	11:48:03	0.660929	2.93994	3.05285	2434.58	FALSE	87
2022-09-13	11:48:03	0.664593	2.95624	3.05285	2356.77	FALSE	87
2022-09-13	11:48:04	0.677468	3.01351	2.99782	2437.59	FALSE	87
2022-09-13	11:48:04	0.672379	2.99088	2.99782	2359.76	FALSE	87
2022-09-13	11:48:04	0.671972	2.98907	2.99782	2440.58	FALSE	87
2022-09-13	11:48:05	0.641692	2.85437	2.60474	2362.62	FALSE	87
2022-09-13	11:48:05	0.615789	2.73915	2.60474	2443.32	FALSE	87
2022-09-13	11:48:05	0.535025	2.3799	2.60474	2365	FALSE	87
2022-09-13	11:48:05	0.549784	2.44555	2.60474	2445.76	FALSE	87
2022-09-13	11:48:06	0.543422	2.41725	2.33033	2367.42	FALSE	87
2022-09-13	11:48:06	0.597774	2.65902	2.33033	2448.42	FALSE	87
2022-09-13	11:48:06	0.46841	2.08358	2.33033	2369.5	FALSE	87
2022-09-13	11:48:06	0.485916	2.16145	2.33033	2450.58	FALSE	87
2022-09-13	11:48:07	0.466527	2.07521	2.03095	2371.57	FALSE	87
2022-09-13	11:48:07	0.461743	2.05393	2.03095	2452.64	FALSE	87
2022-09-13	11:48:07	0.461896	2.05461	2.03095	2373.63	FALSE	87
2022-09-13	11:48:07	0.436145	1.94006	2.03095	2454.58	FALSE	87
2022-09-13	11:48:08	0.465865	2.07226	1.95417	2375.7	FALSE	87
2022-09-13	11:48:08	0.450649	2.00458	1.95417	2456.58	FALSE	87
2022-09-13	11:48:08	0.401438	1.78568	1.95417	2377.49	FALSE	87
2022-09-13	11:48:09	0.464339	2.06547	1.87951	2458.65	FALSE	87
2022-09-13	11:48:09	0.461998	2.05506	1.87951	2379.54	FALSE	87
2022-09-13	11:48:09	0.424593	1.88867	1.87951	2460.54	FALSE	87
2022-09-13	11:48:09	0.339199	1.50882	1.87951	2381.05	FALSE	87
2022-09-13	11:48:10	0.386425	1.7189	1.80152	2462.25	FALSE	87
2022-09-13	11:48:10	0.425916	1.89456	1.80152	2382.95	FALSE	87
2022-09-13	11:48:10	0.397214	1.76689	1.80152	2464.02	FALSE	87
2022-09-13	11:48:10	0.410445	1.82574	1.80152	2384.77	FALSE	87
2022-09-13	11:48:11	0.386832	1.72071	1.86598	2465.74	FALSE	87
2022-09-13	11:48:11	0.433295	1.92738	1.86598	2386.7	FALSE	87
2022-09-13	11:48:11	0.508562	2.26219	1.86598	2468	FALSE	87
2022-09-13	11:48:11	0.349275	1.55365	1.86598	2388.25	FALSE	87
2022-09-13	11:48:12	0.361082	1.60616	1.60601	2469.61	FALSE	87
2022-09-13	11:48:12	0.395789	1.76055	1.60601	2390.01	FALSE	87
2022-09-13	11:48:12	0.326272	1.45132	1.60601	2471.06	FALSE	87
2022-09-13	11:48:13	0.344389	1.53191	1.373	2391.54	FALSE	87
2022-09-13	11:48:13	0.304898	1.35625	1.373	2472.42	FALSE	87
2022-09-13	11:48:13	0.302964	1.34764	1.373	2392.89	FALSE	87
2022-09-13	11:48:13	0.282405	1.25619	1.373	2473.67	FALSE	87
2022-09-13	11:48:14	0.250547	1.11448	0.993036	2394.01	FALSE	87
2022-09-13	11:48:14	0.286069	1.27249	0.993036	2474.95	FALSE	87
2022-09-13	11:48:14	0.159911	0.711316	0.993036	2394.72	FALSE	87
2022-09-13	11:48:14	0.196451	0.873853	0.993036	2475.82	FALSE	87
2022-09-13	11:48:15	0.284847	1.26706	0.902771	2395.99	FALSE	87
2022-09-13	11:48:15	0.26668	1.18625	0.902771	2477.01	FALSE	87
2022-09-13	11:48:15	0.217265	0.966438	0.902771	2396.95	FALSE	87
2022-09-13	11:48:15	0.0430155	0.191342	0.902771	2477.2	FALSE	87
2022-09-13	11:48:16	0.06556	0.291624	0.345727	2397.24	FALSE	87
2022-09-13	11:48:16	0.107138	0.476571	0.345727	2477.67	FALSE	87
2022-09-13	11:48:16	0.0604709	0.268987	0.345727	2397.51	FALSE	87
2022-09-13	11:48:17	0.0394023	0.175269	0.597226	2477.85	FALSE	87
2022-09-13	11:48:17	0.018588	0.0826831	0.597226	2397.6	FALSE	87
2022-09-13	11:48:17	0.0389443	0.173232	0.597226	2478.02	FALSE	87
2022-09-13	11:48:17	0.440115	1.95772	0.597226	2399.55	FALSE	87
2022-09-13	11:48:18	0.748155	3.32794	3.2722	2481.35	FALSE	87
2022-09-13	11:48:18	0.732735	3.25935	3.2722	2402.81	FALSE	87
2022-09-13	11:48:18	0.732532	3.25845	3.2722	2484.61	FALSE	87
2022-09-13	11:48:18	0.729071	3.24305	3.2722	2406.06	FALSE	87
2022-09-13	11:48:19	0.733448	3.26252	3.27514	2487.87	FALSE	87
2022-09-13	11:48:19	0.740165	3.2924	3.27514	2409.35	FALSE	87
2022-09-13	11:48:19	0.737824	3.28199	3.27514	2491.15	FALSE	87
2022-09-13	11:48:19	0.733702	3.26365	3.27514	2412.61	FALSE	87
2022-09-13	11:48:20	0.736247	3.27497	3.26643	2494.43	FALSE	87
2022-09-13	11:48:20	0.736298	3.2752	3.26643	2415.89	FALSE	87
2022-09-13	11:48:20	0.730445	3.24917	3.26643	2497.68	FALSE	87
2022-09-13	11:48:20	0.734313	3.26637	3.26643	2419.15	FALSE	87
2022-09-13	11:48:21	0.734262	3.26614	3.26705	2500.94	FALSE	87
2022-09-13	11:48:21	0.735891	3.27339	3.26705	2422.43	FALSE	87
2022-09-13	11:48:21	0.733244	3.26162	3.26705	2504.21	FALSE	87
2022-09-13	11:48:22	0.743982	3.30938	3.27367	2425.74	FALSE	87
2022-09-13	11:48:22	0.737875	3.28222	3.27367	2507.49	FALSE	87
2022-09-13	11:48:22	0.730598	3.24985	3.27367	2428.99	FALSE	87
2022-09-13	11:48:22	0.731361	3.25324	3.27367	2510.74	FALSE	87
2022-09-13	11:48:23	0.735534	3.2718	3.2718	2432.26	FALSE	87
2022-09-13	11:48:23	0.736908	3.27791	3.2718	2514.02	FALSE	87
2022-09-13	11:48:23	0.729478	3.24486	3.2718	2435.5	FALSE	87
2022-09-13	11:48:23	0.740216	3.29263	3.2718	2517.31	FALSE	87
2022-09-13	11:48:24	0.737824	3.28199	3.26399	2438.78	FALSE	87
2022-09-13	11:48:24	0.730649	3.25007	3.26399	2520.56	FALSE	87
2022-09-13	11:48:24	0.733346	3.26207	3.26399	2442.05	FALSE	87
2022-09-13	11:48:24	0.733295	3.26184	3.26399	2523.82	FALSE	87
2022-09-13	11:48:25	0.730801	3.25075	3.24139	2445.3	FALSE	87
2022-09-13	11:48:25	0.727799	3.2374	3.24139	2527.06	FALSE	87
2022-09-13	11:48:25	0.727494	3.23604	3.24139	2448.53	FALSE	87
2022-09-13	11:48:26	0.729529	3.24509	3.23898	2530.31	FALSE	87
2022-09-13	11:48:26	0.72958	3.24532	3.23898	2451.78	FALSE	87
2022-09-13	11:48:26	0.729122	3.24328	3.23898	2533.55	FALSE	87
2022-09-13	11:48:26	0.724389	3.22223	3.23898	2455	FALSE	87
2022-09-13	11:48:27	0.732328	3.25754	3.26852	2536.81	FALSE	87
2022-09-13	11:48:27	0.736247	3.27497	3.26852	2458.28	FALSE	87
2022-09-13	11:48:27	0.738537	3.28516	3.26852	2540.09	FALSE	87
2022-09-13	11:48:27	0.732074	3.25641	3.26852	2461.53	FALSE	87
2022-09-13	11:48:28	0.734466	3.26705	3.25743	2543.36	FALSE	87
2022-09-13	11:48:28	0.729071	3.24305	3.25743	2464.77	FALSE	87
2022-09-13	11:48:28	0.737061	3.27859	3.25743	2546.64	FALSE	87
2022-09-13	11:48:28	0.728613	3.24102	3.25743	2468.02	FALSE	87
2022-09-13	11:48:29	0.73187	3.2555	3.25724	2549.89	FALSE	87
2022-09-13	11:48:29	0.729886	3.24668	3.25724	2471.26	FALSE	87
2022-09-13	11:48:29	0.735026	3.26954	3.25724	2553.16	FALSE	87
2022-09-13	11:48:30	0.734517	3.26728	3.26037	2474.53	FALSE	87
2022-09-13	11:48:30	0.732532	3.25845	3.26037	2556.42	FALSE	87
2022-09-13	11:48:30	0.729173	3.24351	3.26037	2477.77	FALSE	87
2022-09-13	11:48:30	0.735636	3.27226	3.26037	2559.69	FALSE	87
2022-09-13	11:48:31	0.734364	3.2666	3.27135	2481.04	FALSE	87
2022-09-13	11:48:31	0.736145	3.27452	3.27135	2562.97	FALSE	87
2022-09-13	11:48:31	0.731412	3.25347	3.27135	2484.29	FALSE	87
2022-09-13	11:48:31	0.739809	3.29082	3.27135	2566.26	FALSE	87
2022-09-13	11:48:32	0.735331	3.2709	3.27446	2487.56	FALSE	87
2022-09-13	11:48:32	0.734618	3.26773	3.27446	2569.53	FALSE	87
2022-09-13	11:48:32	0.727443	3.23581	3.27446	2490.8	FALSE	87
2022-09-13	11:48:32	0.747137	3.32341	3.27446	2572.85	FALSE	87
2022-09-13	11:48:33	-0.0948979	-0.422125	-0.0984139	2490.8	FALSE	87
2022-09-13	11:48:33	0.0815905	0.362931	-0.0984139	2573.21	FALSE	87
2022-09-13	11:48:33	-0.0530659	-0.236048	-0.0984139	2490.8	FALSE	87
2022-09-13	11:48:34	0.0552801	0.245897	0.702827	2573.46	FALSE	87
2022-09-13	11:48:34	0.00810459	0.0360508	0.702827	2490.84	FALSE	87
2022-09-13	11:48:34	0.260471	1.15863	0.702827	2574.62	FALSE	87
2022-09-13	11:48:34	0.308155	1.37074	0.702827	2492.21	FALSE	87
2022-09-13	11:48:35	0.324847	1.44498	2.52212	2576.06	FALSE	87
2022-09-13	11:48:35	0.474059	2.10871	2.52212	2494.32	FALSE	87
2022-09-13	11:48:35	0.848562	3.77457	2.52212	2579.84	FALSE	87
2022-09-13	11:48:35	0.620522	2.76021	2.52212	2497.08	FALSE	87
2022-09-13	11:48:36	0.610954	2.71765	3.06162	2582.55	FALSE	87
2022-09-13	11:48:36	0.745763	3.3173	3.06162	2500.39	FALSE	87
2022-09-13	11:48:36	0.66098	2.94017	3.06162	2585.5	FALSE	87
2022-09-13	11:48:36	0.735433	3.27135	3.06162	2503.66	FALSE	87
2022-09-13	11:48:37	0.7107	3.16134	3.08927	2588.66	FALSE	87
2022-09-13	11:48:37	0.708511	3.1516	3.08927	2506.82	FALSE	87
2022-09-13	11:48:37	0.664287	2.95488	3.08927	2591.61	FALSE	87
2022-09-13	11:48:38	0.606578	2.69818	2.31001	2509.51	FALSE	87
2022-09-13	11:48:38	0.549071	2.44238	2.31001	2594.05	FALSE	87
2022-09-13	11:48:38	0.520013	2.31312	2.31001	2511.83	FALSE	87
2022-09-13	11:48:38	0.40159	1.78635	2.31001	2595.84	FALSE	87
2022-09-13	11:48:39	0.308868	1.37391	0.754271	2513.2	FALSE	87
2022-09-13	11:48:39	0.067901	0.302037	0.754271	2596.14	FALSE	87
2022-09-13	11:48:39	0.0791987	0.352292	0.754271	2513.55	FALSE	87
2022-09-13	11:48:39	0.222303	0.988848	0.754271	2597.13	FALSE	87
2022-09-13	11:48:40	0.13411	0.596548	0.398133	2514.15	FALSE	87
2022-09-13	11:48:40	0.135993	0.604924	0.398133	2597.74	FALSE	87
2022-09-13	11:48:40	-0.0663992	-0.295357	0.398133	2514.15	FALSE	87
2022-09-13	11:48:40	0.154313	0.686415	0.398133	2598.42	FALSE	87
2022-09-13	11:48:41	0.0326847	0.145388	1.19009	2514.3	FALSE	87
2022-09-13	11:48:41	0.204746	0.910751	1.19009	2599.33	FALSE	87
2022-09-13	11:48:41	0.11187	0.49762	1.19009	2514.79	FALSE	87
2022-09-13	11:48:41	0.720878	3.20661	1.19009	2602.54	FALSE	87
2022-09-13	11:48:42	2.14856	9.55722	10.1349	2524.35	FALSE	87
2022-09-13	11:48:42	2.31737	10.3081	10.1349	2612.85	FALSE	87
2022-09-13	11:48:42	2.36933	10.5393	10.1349	2534.89	FALSE	87
2022-09-13	11:48:43	1.28495	5.71571	9.95926	2618.56	FALSE	87
2022-09-13	11:48:43	2.85497	12.6995	9.95926	2547.59	FALSE	87
2022-09-13	11:48:43	1.17513	5.22721	9.95926	2623.79	FALSE	87
2022-09-13	11:48:43	3.64072	16.1947	9.95926	2563.78	1	88
2022-09-13	11:48:44	2.38393	10.6042	11.442	2634.39	FALSE	88
2022-09-13	11:48:44	1.78963	7.96063	11.442	2571.74	FALSE	88
2022-09-13	11:48:44	3.52729	15.6901	11.442	2650.09	1	89
2022-09-13	11:48:44	2.58826	11.5131	11.442	2583.26	FALSE	89
2022-09-13	11:48:45	2.68882	11.9604	11.7331	2662.05	FALSE	89
2022-09-13	11:48:45	3.27345	14.561	11.7331	2597.82	1	90
2022-09-13	11:48:45	1.27787	5.68422	11.7331	2667.73	FALSE	90
2022-09-13	11:48:45	3.3107	14.7267	11.7331	2612.55	1	91
2022-09-13	11:48:46	1.20688	5.36844	8.21031	2673.1	FALSE	91
2022-09-13	11:48:46	2.2109	9.83453	8.21031	2622.38	FALSE	91
2022-09-13	11:48:46	2.1195	9.42796	8.21031	2682.53	FALSE	91
2022-09-13	11:48:47	1.13854	5.06445	7.86635	2627.44	FALSE	91
2022-09-13	11:48:47	1.8794	8.35995	7.86635	2690.89	FALSE	91
2022-09-13	11:48:47	1.42805	6.35225	7.86635	2633.8	FALSE	91
2022-09-13	11:48:47	2.62775	11.6888	7.86635	2702.57	FALSE	91
2022-09-13	11:48:48	3.13681	13.9532	17.475	2647.75	1	92
2022-09-13	11:48:48	3.96734	17.6475	17.475	2720.22	1	93
2022-09-13	11:48:48	7.31808	32.5523	17.475	2680.3	1	94
2022-09-13	11:48:48	1.29202	5.74716	17.475	2725.97	FALSE	94
2022-09-13	11:48:49	4.21085	18.7307	15.05	2699.03	1	95
2022-09-13	11:48:49	2.07335	9.22268	15.05	2735.19	FALSE	95
2022-09-13	11:48:49	2.47421	11.0058	15.05	2710.04	FALSE	95
2022-09-13	11:48:49	4.77513	21.2407	15.05	2756.43	1	96
2022-09-13	11:48:50	2.64037	11.7449	15.7317	2721.78	FALSE	96
2022-09-13	11:48:50	5.71064	25.4021	15.7317	2781.83	1	97
2022-09-13	11:48:50	2.25889	10.048	15.7317	2731.83	FALSE	97
2022-09-13	11:48:51	2.26948	10.0951	8.48197	2791.93	FALSE	97
2022-09-13	11:48:51	3.50103	15.5733	8.48197	2747.4	1	98
2022-09-13	11:48:51	0.796705	3.5439	8.48197	2795.47	FALSE	98
2022-09-13	11:48:51	1.06011	4.71558	8.48197	2752.12	FALSE	98
2022-09-13	11:48:52	1.16062	5.16267	4.85096	2800.64	FALSE	98
2022-09-13	11:48:52	0.905814	4.02924	4.85096	2756.15	FALSE	98
2022-09-13	11:48:52	1.708	7.59753	4.85096	2808.23	FALSE	98
2022-09-13	11:48:52	0.587748	2.61442	4.85096	2758.76	FALSE	98
2022-09-13	11:48:53	2.14561	9.5441	6.16342	2817.78	FALSE	98
2022-09-13	11:48:53	0.947392	4.21419	6.16342	2762.98	FALSE	98
2022-09-13	11:48:53	1.28159	5.70077	6.16342	2823.48	FALSE	98
2022-09-13	11:48:53	1.1678	5.19461	6.16342	2768.17	FALSE	98
2022-09-13	11:48:54	1.21014	5.38294	4.34216	2828.86	FALSE	98
2022-09-13	11:48:54	0.744694	3.31255	4.34216	2771.49	FALSE	98
2022-09-13	11:48:54	0.973651	4.33099	4.34216	2833.19	FALSE	98
2022-09-13	11:48:55	1.33798	5.9516	6.26403	2777.44	FALSE	98
2022-09-13	11:48:55	1.54159	6.8573	6.26403	2840.05	FALSE	98
2022-09-13	11:48:55	1.64525	7.3184	6.26403	2784.76	FALSE	98
2022-09-13	11:48:55	1.10805	4.92883	6.26403	2844.98	FALSE	98
2022-09-13	11:48:56	1.85223	8.23909	3.5941	2792.99	FALSE	98
2022-09-13	11:48:56	0.435687	1.93802	3.5941	2846.92	FALSE	98
2022-09-13	11:48:56	0.649936	2.89105	3.5941	2795.89	FALSE	98
2022-09-13	11:48:56	0.294109	1.30826	3.5941	2848.23	FALSE	98
2022-09-13	11:48:57	0.430802	1.91629	2.31289	2797.8	FALSE	98
2022-09-13	11:48:57	0.537774	2.39213	2.31289	2850.62	FALSE	98
2022-09-13	11:48:57	0.544593	2.42246	2.31289	2800.22	FALSE	98
2022-09-13	11:48:57	0.566679	2.5207	2.31289	2853.14	FALSE	98
2022-09-13	11:48:58	1.24413	5.53414	4.1262	2805.76	FALSE	98
2022-09-13	11:48:58	0.82958	3.69014	4.1262	2856.83	FALSE	98
2022-09-13	11:48:58	0.709122	3.15432	4.1262	2808.91	FALSE	98
2022-09-13	11:48:59	0.831718	3.69965	4.87395	2860.53	FALSE	98
2022-09-13	11:48:59	1.13828	5.0633	4.87395	2813.98	FALSE	98
2022-09-13	11:48:59	1.15391	5.13282	4.87395	2865.66	FALSE	98
2022-09-13	11:48:59	1.25894	5.60002	4.87395	2819.58	FALSE	98
2022-09-13	11:49:00	1.18983	5.2926	4.12556	2870.95	FALSE	98
2022-09-13	11:49:00	0.938486	4.17457	4.12556	2823.75	FALSE	98
2022-09-13	11:49:00	0.792939	3.52715	4.12556	2874.48	FALSE	98
2022-09-13	11:49:00	0.788613	3.50791	4.12556	2827.26	FALSE	98
2022-09-13	11:49:01	0.79355	3.52987	3.52206	2878.01	FALSE	98
2022-09-13	11:49:01	0.749936	3.33587	3.52206	2830.59	FALSE	98
2022-09-13	11:49:01	0.746323	3.31979	3.52206	2881.33	FALSE	98
2022-09-13	11:49:01	0.877366	3.9027	3.52206	2834.5	FALSE	98
2022-09-13	11:49:02	1.1419	5.0794	5.08085	2886.41	FALSE	98
2022-09-13	11:49:02	1.46749	6.52769	5.08085	2841.02	FALSE	98
2022-09-13	11:49:02	1.08042	4.80592	5.08085	2891.22	FALSE	98
2022-09-13	11:49:02	0.879097	3.9104	5.08085	2844.93	FALSE	98
2022-09-13	11:49:03	0.759605	3.37887	3.00536	2894.59	FALSE	98
2022-09-13	11:49:03	0.678639	3.01872	3.00536	2847.95	FALSE	98
2022-09-13	11:49:03	0.588664	2.6185	3.00536	2897.21	FALSE	98
2022-09-13	11:49:04	0.659453	2.93338	2.52585	2850.89	FALSE	98
2022-09-13	11:49:04	0.619962	2.75771	2.52585	2899.97	FALSE	98
2022-09-13	11:49:04	0.471412	2.09693	2.52585	2852.98	FALSE	98
2022-09-13	11:49:04	0.520522	2.31539	2.52585	2902.29	FALSE	98
2022-09-13	11:49:05	0.556654	2.47611	2.91097	2855.46	FALSE	98
2022-09-13	11:49:05	0.681794	3.03276	2.91097	2905.32	FALSE	98
2022-09-13	11:49:05	0.749733	3.33496	2.91097	2858.8	FALSE	98
2022-09-13	11:49:05	0.629478	2.80004	2.91097	2908.12	FALSE	98
2022-09-13	11:49:06	0.410038	1.82393	1.66055	2860.62	FALSE	98
2022-09-13	11:49:06	0.334975	1.49004	1.66055	2909.61	FALSE	98
2022-09-13	11:49:06	0.328104	1.45947	1.66055	2862.08	FALSE	98
2022-09-13	11:49:06	0.420115	1.86876	1.66055	2911.48	FALSE	98
2022-09-13	11:49:07	0.396298	1.76281	1.6826	2863.84	FALSE	98
2022-09-13	11:49:07	0.412532	1.83502	1.6826	2913.31	FALSE	98
2022-09-13	11:49:07	0.325967	1.44997	1.6826	2865.29	FALSE	98
2022-09-13	11:49:08	0.243931	1.08505	0.470514	2914.4	FALSE	98
2022-09-13	11:49:08	0.113855	0.50645	0.470514	2865.8	FALSE	98
2022-09-13	11:49:08	-0.239834	-1.06683	0.470514	2914.4	FALSE	98
2022-09-13	11:49:08	0.305153	1.35738	0.470514	2867.16	FALSE	98
2022-09-13	11:49:09	0.122099	0.543121	0.553535	2914.94	FALSE	98
2022-09-13	11:49:09	0.0389443	0.173232	0.553535	2867.33	FALSE	98
2022-09-13	11:49:09	0.144033	0.640688	0.553535	2915.58	FALSE	98
2022-09-13	11:49:09	0.192685	0.857101	0.553535	2868.19	FALSE	98
2022-09-13	11:49:10	0.345356	1.53621	8.21371	2917.12	FALSE	98
2022-09-13	11:49:10	1.02098	4.54152	8.21371	2872.73	FALSE	98
2022-09-13	11:49:10	3.09563	13.77	8.21371	2930.89	1	99
2022-09-13	11:49:10	2.92413	13.0071	8.21371	2885.73	FALSE	99

## Sheet: Juju_prong_202291311448 (3)
Date	Time	Lbs	Newtons	Total force x time	total steps > 13.345		**GoPro Fitting: 1133
2022-09-13	11:44:10	1.01971	4.53587	4.53587	FALSE	0			Total force x time	2885.73
2022-09-13	11:44:10	1.45645	6.47858	6.47858	FALSE	0			Total steps	99
2022-09-13	11:44:10	1.49971	6.67101	11.2069	FALSE	0
2022-09-13	11:44:10	1.15431	5.1346	11.6132	FALSE	0
2022-09-13	11:44:11	1.00383	4.46524	15.6721	FALSE	0
2022-09-13	11:44:11	0.965967	4.29681	15.91	FALSE	0
2022-09-13	11:44:11	0.918995	4.08787	19.76	FALSE	0
2022-09-13	11:44:12	0.907036	4.03468	19.9447	FALSE	0
2022-09-13	11:44:12	0.833397	3.70712	23.4671	FALSE	0
2022-09-13	11:44:12	0.841896	3.74492	23.6896	FALSE	0
2022-09-13	11:44:12	0.819046	3.64328	27.1104	FALSE	0
2022-09-13	11:44:13	0.780623	3.47237	27.162	FALSE	0
2022-09-13	11:44:13	0.855433	3.80514	30.9155	FALSE	0
2022-09-13	11:44:13	0.873092	3.88369	31.0457	FALSE	0
2022-09-13	11:44:13	0.859911	3.82506	34.7406	FALSE	0
2022-09-13	11:44:14	0.685051	3.04724	34.0929	FALSE	0
2022-09-13	11:44:14	0.562964	2.50418	37.2448	FALSE	0
2022-09-13	11:44:14	0.452837	2.01431	36.1072	FALSE	0
2022-09-13	11:44:14	0.481845	2.14334	39.3881	FALSE	0
2022-09-13	11:44:15	0.424084	1.88641	37.9936	FALSE	0
2022-09-13	11:44:15	0.420318	1.86966	41.2578	FALSE	0
2022-09-13	11:44:15	0.329021	1.46355	39.4572	FALSE	0
2022-09-13	11:44:16	0.462507	2.05732	43.3151	FALSE	0
2022-09-13	11:44:16	0.427901	1.90339	41.3606	FALSE	0
2022-09-13	11:44:16	0.281998	1.25438	44.5695	FALSE	0
2022-09-13	11:44:16	0.268715	1.1953	42.5559	FALSE	0
2022-09-13	11:44:17	0.369479	1.64352	46.213	FALSE	0
2022-09-13	11:44:17	0.307545	1.36802	43.9239	FALSE	0
2022-09-13	11:44:17	0.381489	1.69694	47.9099	FALSE	0
2022-09-13	11:44:17	0.396043	1.76168	45.6856	FALSE	0
2022-09-13	11:44:18	0.482456	2.14606	50.056	FALSE	0
2022-09-13	11:44:18	0.335076	1.49049	47.176	FALSE	0
2022-09-13	11:44:18	0.424033	1.88618	51.9422	FALSE	0
2022-09-13	11:44:18	0.365763	1.62699	48.803	FALSE	0
2022-09-13	11:44:19	0.347392	1.54527	53.4874	FALSE	0
2022-09-13	11:44:19	0.363982	1.61906	50.4221	FALSE	0
2022-09-13	11:44:19	0.33701	1.49909	54.9865	FALSE	0
2022-09-13	11:44:20	0.33472	1.4889	51.911	FALSE	0
2022-09-13	11:44:20	0.347494	1.54572	56.5322	FALSE	0
2022-09-13	11:44:20	0.372125	1.65529	53.5663	FALSE	0
2022-09-13	11:44:20	0.324949	1.44544	57.9777	FALSE	0
2022-09-13	11:44:21	0.624847	2.77944	56.3457	FALSE	0
2022-09-13	11:44:21	1.07981	4.80321	62.7809	FALSE	0
2022-09-13	11:44:21	3.25238	14.4672	70.813	1	1
2022-09-13	11:44:21	2.63233	11.7091	74.49	FALSE	1
2022-09-13	11:44:22	1.84256	8.19608	79.009	FALSE	1
2022-09-13	11:44:22	1.27106	5.65393	80.144	FALSE	1
2022-09-13	11:44:22	0.985458	4.38351	83.3925	FALSE	1
2022-09-13	11:44:22	1.65167	7.34696	87.4909	FALSE	1
2022-09-13	11:44:23	4.205	18.7047	102.097	1	2
2022-09-13	11:44:23	3.67813	16.3611	103.852	1	3
2022-09-13	11:44:23	3.90968	17.391	119.488	1	4
2022-09-13	11:44:24	3.61105	16.0627	119.915	1	5
2022-09-13	11:44:24	2.71828	12.0915	131.58	FALSE	5
2022-09-13	11:44:24	0.502964	2.23728	122.152	FALSE	5
2022-09-13	11:44:24	0.659148	2.93202	134.512	FALSE	5
2022-09-13	11:44:25	0.226629	1.00809	123.16	FALSE	5
2022-09-13	11:44:25	0.139606	0.620995	135.133	FALSE	5
2022-09-13	11:44:25	-0.00131018	-0.00582794	123.16	FALSE	5
2022-09-13	11:44:25	-0.17785	-0.791112	135.133	FALSE	5
2022-09-13	11:44:26	-0.161921	-0.720257	123.16	FALSE	5
2022-09-13	11:44:26	4.5195	20.1036	155.236	1	6
2022-09-13	11:44:26	14.4645	64.341	187.501	1	7
2022-09-13	11:44:26	6.3024	28.0343	183.271	1	8
2022-09-13	11:44:27	4.21426	18.7459	206.247	1	9
2022-09-13	11:44:27	1.66744	7.41711	190.688	FALSE	9
2022-09-13	11:44:27	1.05055	4.67306	210.92	FALSE	9
2022-09-13	11:44:28	0.947595	4.21509	194.903	FALSE	9
2022-09-13	11:44:28	0.483931	2.15262	213.073	FALSE	9
2022-09-13	11:44:28	0.402099	1.78862	196.692	FALSE	9
2022-09-13	11:44:28	0.372074	1.65506	214.728	FALSE	9
2022-09-13	11:44:29	0.612939	2.72648	199.418	FALSE	9
2022-09-13	11:44:29	1.97421	8.78168	223.509	FALSE	9
2022-09-13	11:44:29	2.76714	12.3088	211.727	FALSE	9
2022-09-13	11:44:29	1.77793	7.90859	231.418	FALSE	9
2022-09-13	11:44:30	2.06978	9.2068	220.934	FALSE	9
2022-09-13	11:44:30	3.28144	14.5965	246.014	1	10
2022-09-13	11:44:30	3.54546	15.7709	236.705	1	11
2022-09-13	11:44:30	3.18586	14.1713	260.186	1	12
2022-09-13	11:44:31	5.40118	24.0255	260.73	1	13
2022-09-13	11:44:31	6.5279	29.0374	289.223	1	14
2022-09-13	11:44:31	5.60179	24.9179	285.648	1	15
2022-09-13	11:44:32	4.99538	22.2204	311.444	1	16
2022-09-13	11:44:32	4.48062	19.9307	305.579	1	17
2022-09-13	11:44:32	4.63675	20.6252	332.069	1	18
2022-09-13	11:44:32	6.08647	27.0738	332.652	1	19
2022-09-13	11:44:33	5.47858	24.3698	356.439	1	20
2022-09-13	11:44:33	8.03507	35.7416	368.394	1	21
2022-09-13	11:44:33	8.11415	36.0934	392.532	1	22
2022-09-13	11:44:33	6.11069	27.1816	395.576	1	23
2022-09-13	11:44:34	1.31095	5.83137	398.363	FALSE	23
2022-09-13	11:44:34	0.663982	2.95352	398.529	FALSE	23
2022-09-13	11:44:34	0.894211	3.97763	402.341	FALSE	23
2022-09-13	11:44:34	1.20734	5.37049	403.9	FALSE	23
2022-09-13	11:44:35	0.692735	3.08142	405.422	FALSE	23
2022-09-13	11:44:35	0.527544	2.34662	406.246	FALSE	23
2022-09-13	11:44:35	0.349478	1.55455	406.977	FALSE	23
2022-09-13	11:44:35	0.32444	1.44317	407.689	FALSE	23
2022-09-13	11:44:36	0.414109	1.84204	408.819	FALSE	23
2022-09-13	11:44:36	0.259708	1.15523	408.845	FALSE	23
2022-09-13	11:44:36	0.17411	0.774476	409.593	FALSE	23
2022-09-13	11:44:37	0.123982	0.551497	409.396	FALSE	23
2022-09-13	11:44:37	0.107799	0.479512	410.073	FALSE	23
2022-09-13	11:44:37	0.110293	0.490605	409.887	FALSE	23
2022-09-13	11:44:37	0.248766	1.10656	411.18	FALSE	23
2022-09-13	11:44:38	0.135993	0.604924	410.492	FALSE	23
2022-09-13	11:44:38	0.216247	0.96191	412.141	FALSE	23
2022-09-13	11:44:38	0.201336	0.895583	411.387	FALSE	23
2022-09-13	11:44:38	0.334517	1.488	413.629	FALSE	23
2022-09-13	11:44:39	0.912532	4.05912	415.446	FALSE	23
2022-09-13	11:44:39	1.09528	4.87202	418.501	FALSE	23
2022-09-13	11:44:39	0.999504	4.44599	419.892	FALSE	23
2022-09-13	11:44:39	1.40678	6.25764	424.759	FALSE	23
2022-09-13	11:44:40	1.53411	6.82403	426.716	FALSE	23
2022-09-13	11:44:40	1.53472	6.82674	431.586	FALSE	23
2022-09-13	11:44:40	1.28098	5.69806	432.414	FALSE	23
2022-09-13	11:44:41	0.699962	3.11357	434.699	FALSE	23
2022-09-13	11:44:41	0.632634	2.81408	435.229	FALSE	23
2022-09-13	11:44:41	0.423321	1.88302	436.582	FALSE	23
2022-09-13	11:44:41	0.29584	1.31596	436.545	FALSE	23
2022-09-13	11:44:42	0.380216	1.69128	438.274	FALSE	23
2022-09-13	11:44:42	0.157875	0.70226	437.247	FALSE	23
2022-09-13	11:44:42	0.354211	1.5756	439.849	FALSE	23
2022-09-13	11:44:42	0.0481046	0.213979	437.461	FALSE	23
2022-09-13	11:44:43	-0.266297	-1.18454	439.849	FALSE	23
2022-09-13	11:44:43	-0.194287	-0.864227	437.461	FALSE	23
2022-09-13	11:44:43	0.0635753	0.282796	440.132	FALSE	23
2022-09-13	11:44:43	0.0836262	0.371986	437.833	FALSE	23
2022-09-13	11:44:44	-0.417544	-1.85732	440.132	FALSE	23
2022-09-13	11:44:44	-0.715559	-3.18295	437.833	FALSE	23
2022-09-13	11:44:44	-0.294949	-1.31199	440.132	FALSE	23
2022-09-13	11:44:45	0.266781	1.1867	439.019	FALSE	23
2022-09-13	11:44:45	1.36515	6.07246	446.205	FALSE	23
2022-09-13	11:44:45	0.875229	3.89319	442.913	FALSE	23
2022-09-13	11:44:45	1.89966	8.45007	454.655	FALSE	23
2022-09-13	11:44:46	1.66744	7.41711	450.33	FALSE	23
2022-09-13	11:44:46	2.07655	9.23691	463.892	FALSE	23
2022-09-13	11:44:46	0.527748	2.34753	452.677	FALSE	23
2022-09-13	11:44:47	1.67457	7.44882	471.34	FALSE	23
2022-09-13	11:44:47	2.17467	9.67337	462.351	FALSE	23
2022-09-13	11:44:47	1.75625	7.81215	479.153	FALSE	23
2022-09-13	11:44:47	1.97009	8.76335	471.114	FALSE	23
2022-09-13	11:44:47	0.527494	2.3464	481.499	FALSE	23
2022-09-13	11:44:48	1.71065	7.60931	478.723	FALSE	23
2022-09-13	11:44:48	3.99569	17.7736	499.273	1	24
2022-09-13	11:44:48	7.63024	33.9408	512.664	1	25
2022-09-13	11:44:49	15.7746	70.1686	569.441	1	26
2022-09-13	11:44:49	2.868	12.7574	525.422	FALSE	26
2022-09-13	11:44:49	3.44698	15.3329	584.774	1	27
2022-09-13	11:44:49	3.41864	15.2068	540.628	1	28
2022-09-13	11:44:50	4.23309	18.8296	603.604	1	29
2022-09-13	11:44:50	6.14769	27.3462	567.975	1	30
2022-09-13	11:44:50	3.89798	17.339	620.943	1	31
2022-09-13	11:44:50	4.18118	18.5987	586.573	1	32
2022-09-13	11:44:51	1.47701	6.57004	627.513	FALSE	32
2022-09-13	11:44:51	1.43696	6.39189	592.965	FALSE	32
2022-09-13	11:44:51	0.664746	2.95692	630.47	FALSE	32
2022-09-13	11:44:51	0.275025	1.22337	594.188	FALSE	32
2022-09-13	11:44:52	0.545865	2.42812	632.898	FALSE	32
2022-09-13	11:44:52	0.168257	0.748441	594.937	FALSE	32
2022-09-13	11:44:52	0.580522	2.58228	635.48	FALSE	32
2022-09-13	11:44:53	0.312583	1.39043	596.327	FALSE	32
2022-09-13	11:44:53	0.459758	2.0451	637.525	FALSE	32
2022-09-13	11:44:53	0.780674	3.47259	599.8	FALSE	32
2022-09-13	11:44:53	0.383728	1.7069	639.232	FALSE	32
2022-09-13	11:44:54	0.59757	2.65811	602.458	FALSE	32
2022-09-13	11:44:54	0.14098	0.627107	639.859	FALSE	32
2022-09-13	11:44:54	0.465916	2.07249	604.531	FALSE	32
2022-09-13	11:44:54	0.225	1.00084	640.86	FALSE	32
2022-09-13	11:44:55	0.379046	1.68607	606.217	FALSE	32
2022-09-13	11:44:55	0.855992	3.80762	644.668	FALSE	32
2022-09-13	11:44:55	1.33335	5.93101	612.148	FALSE	32
2022-09-13	11:44:55	1.92169	8.54806	653.216	FALSE	32
2022-09-13	11:44:56	1.57289	6.99653	619.144	FALSE	32
2022-09-13	11:44:56	1.31274	5.83933	659.055	FALSE	32
2022-09-13	11:44:56	0.340216	1.51335	620.658	FALSE	32
2022-09-13	11:44:57	1.11116	4.94266	663.998	FALSE	32
2022-09-13	11:44:57	0.522404	2.32376	622.981	FALSE	32
2022-09-13	11:44:57	0.794058	3.53213	667.53	FALSE	32
2022-09-13	11:44:57	0.789834	3.51334	626.495	FALSE	32
2022-09-13	11:44:58	0.417672	1.85789	669.388	FALSE	32
2022-09-13	11:44:58	0.718588	3.19642	629.691	FALSE	32
2022-09-13	11:44:58	0.3793	1.6872	671.075	FALSE	32
2022-09-13	11:44:58	0.677163	3.01216	632.703	FALSE	32
2022-09-13	11:44:59	0.659708	2.93451	674.009	FALSE	32
2022-09-13	11:44:59	0.805611	3.58352	636.287	FALSE	32
2022-09-13	11:44:59	1.36352	6.06521	680.075	FALSE	32
2022-09-13	11:44:59	0.939656	4.17978	640.466	FALSE	32
2022-09-13	11:45:00	1.80989	8.05075	688.125	FALSE	32
2022-09-13	11:45:00	0.700318	3.11515	643.582	FALSE	32
2022-09-13	11:45:00	2.05782	9.15359	697.279	FALSE	32
2022-09-13	11:45:00	1.00541	4.47226	648.054	FALSE	32
2022-09-13	11:45:01	1.42912	6.35701	703.636	FALSE	32
2022-09-13	11:45:01	2.84749	12.6662	660.72	FALSE	32
2022-09-13	11:45:01	2.11457	9.40603	713.042	FALSE	32
2022-09-13	11:45:02	5.19451	23.1062	683.826	1	33
2022-09-13	11:45:02	2.73813	12.1797	725.222	FALSE	33
2022-09-13	11:45:02	7.01477	31.2031	715.029	1	34
2022-09-13	11:45:02	1.98968	8.85049	734.072	FALSE	34
2022-09-13	11:45:03	3.29772	14.6689	729.698	1	35
2022-09-13	11:45:03	2.87207	12.7755	746.848	FALSE	35
2022-09-13	11:45:03	1.31655	5.85628	735.555	FALSE	35
2022-09-13	11:45:03	1.22632	5.45492	752.303	FALSE	35
2022-09-13	11:45:04	0.895432	3.98306	739.538	FALSE	35
2022-09-13	11:45:04	0.734466	3.26705	755.57	FALSE	35
2022-09-13	11:45:04	1.23599	5.49793	745.036	FALSE	35
2022-09-13	11:45:04	0.965662	4.29546	759.865	FALSE	35
2022-09-13	11:45:05	2.61757	11.6435	756.679	FALSE	35
2022-09-13	11:45:05	1.88561	8.38757	768.253	FALSE	35
2022-09-13	11:45:05	2.51482	11.1864	767.866	FALSE	35
2022-09-13	11:45:06	4.30882	19.1665	787.419	1	36
2022-09-13	11:45:06	2.65421	11.8065	779.672	FALSE	36
2022-09-13	11:45:06	7.81986	34.7843	822.203	1	37
2022-09-13	11:45:06	1.32999	5.91606	785.588	FALSE	37
2022-09-13	11:45:07	4.65472	20.7051	842.909	1	38
2022-09-13	11:45:07	1.13106	5.03118	790.619	FALSE	38
2022-09-13	11:45:07	0.940013	4.18137	847.09	FALSE	38
2022-09-13	11:45:07	2.82856	12.582	803.201	FALSE	38
2022-09-13	11:45:08	1.88373	8.37921	855.469	FALSE	38
2022-09-13	11:45:08	3.51212	15.6226	818.824	1	39
2022-09-13	11:45:08	7.28551	32.4074	887.877	1	40
2022-09-13	11:45:08	4.36754	19.4277	838.252	1	41
2022-09-13	11:45:09	8.26571	36.7675	924.644	1	42
2022-09-13	11:45:09	1.94113	8.63453	846.886	FALSE	42
2022-09-13	11:45:09	4.84373	21.5459	946.19	1	43
2022-09-13	11:45:10	3.18831	14.1822	861.068	1	44
2022-09-13	11:45:10	3.33426	14.8315	961.021	1	45
2022-09-13	11:45:10	8.06591	35.8788	896.947	1	46
2022-09-13	11:45:10	2.9964	13.3286	974.35	FALSE	46
2022-09-13	11:45:11	5.02077	22.3334	919.28	1	47
2022-09-13	11:45:11	3.67263	16.3366	990.687	1	48
2022-09-13	11:45:11	1.87299	8.33143	927.612	FALSE	48
2022-09-13	11:45:11	6.04963	26.91	1017.6	1	49
2022-09-13	11:45:12	2.16439	9.62764	937.24	FALSE	49
2022-09-13	11:45:12	4.69497	20.8842	1038.48	1	50
2022-09-13	11:45:12	4.85604	21.6006	958.84	1	51
2022-09-13	11:45:12	2.71467	12.0754	1050.56	FALSE	51
2022-09-13	11:45:13	4.70149	20.9132	979.753	1	52
2022-09-13	11:45:13	2.92632	13.0169	1063.57	FALSE	52
2022-09-13	11:45:13	2.14363	9.53529	989.289	FALSE	52
2022-09-13	11:45:14	5.70459	25.3752	1088.95	1	53
2022-09-13	11:45:14	1.55024	6.89578	996.184	FALSE	53
2022-09-13	11:45:14	5.31665	23.6495	1112.6	1	54
2022-09-13	11:45:14	3.18434	14.1646	1010.35	1	55
2022-09-13	11:45:15	2.38301	10.6001	1123.2	FALSE	55
2022-09-13	11:45:15	3.0594	13.6088	1023.96	1	56
2022-09-13	11:45:15	1.67314	7.44246	1130.64	FALSE	56
2022-09-13	11:45:15	3.18006	14.1455	1038.1	1	57
2022-09-13	11:45:16	1.45574	6.47542	1137.12	FALSE	57
2022-09-13	11:45:16	1.77457	7.89364	1046	FALSE	57
2022-09-13	11:45:16	2.42546	10.7889	1147.9	FALSE	57
2022-09-13	11:45:16	1.0881	4.84009	1050.84	FALSE	57
2022-09-13	11:45:17	2.85594	12.7038	1160.61	FALSE	57
2022-09-13	11:45:17	1.09665	4.87812	1055.72	FALSE	57
2022-09-13	11:45:17	1.37503	6.11641	1166.72	FALSE	57
2022-09-13	11:45:18	0.578282	2.57231	1058.29	FALSE	57
2022-09-13	11:45:18	0.593906	2.64181	1169.37	FALSE	57
2022-09-13	11:45:18	2.16846	9.64574	1067.93	FALSE	57
2022-09-13	11:45:18	1.8733	8.33281	1177.7	FALSE	57
2022-09-13	11:45:19	3.40037	15.1255	1083.06	1	58
2022-09-13	11:45:19	1.11106	4.94222	1182.64	FALSE	58
2022-09-13	11:45:19	1.54373	6.86682	1089.93	FALSE	58
2022-09-13	11:45:19	0.982608	4.37084	1187.01	FALSE	58
2022-09-13	11:45:20	0.301641	1.34176	1091.27	FALSE	58
2022-09-13	11:45:20	0.733295	3.26184	1190.27	FALSE	58
2022-09-13	11:45:20	0.362863	1.61409	1092.88	FALSE	58
2022-09-13	11:45:20	0.882863	3.92715	1194.2	FALSE	58
2022-09-13	11:45:21	1.12495	5.004	1097.89	FALSE	58
2022-09-13	11:45:21	1.99676	8.88199	1203.08	FALSE	58
2022-09-13	11:45:21	2.24551	9.98848	1107.87	FALSE	58
2022-09-13	11:45:21	2.95991	13.1663	1216.25	FALSE	58
2022-09-13	11:45:22	5.28398	23.5042	1131.38	1	59
2022-09-13	11:45:22	2.55803	11.3786	1227.63	FALSE	59
2022-09-13	11:45:22	5.68953	25.3082	1156.69	1	60
2022-09-13	11:45:23	2.7681	12.3131	1239.94	FALSE	60
2022-09-13	11:45:23	4.23935	18.8575	1175.54	1	61
2022-09-13	11:45:23	2.34551	10.4333	1250.37	FALSE	61
2022-09-13	11:45:23	0.806018	3.58533	1179.13	FALSE	61
2022-09-13	11:45:24	1.50515	6.69521	1257.07	FALSE	61
2022-09-13	11:45:24	0.583626	2.59609	1181.73	FALSE	61
2022-09-13	11:45:24	0.803168	3.57265	1260.64	FALSE	61
2022-09-13	11:45:24	1.3734	6.10916	1187.83	FALSE	61
2022-09-13	11:45:25	2.01192	8.94942	1269.59	FALSE	61
2022-09-13	11:45:25	4.11894	18.3219	1206.16	1	62
2022-09-13	11:45:25	1.63716	7.28242	1276.87	FALSE	62
2022-09-13	11:45:25	2.63823	11.7354	1217.89	FALSE	62
2022-09-13	11:45:26	0.654109	2.90961	1279.78	FALSE	62
2022-09-13	11:45:26	0.76556	3.40536	1221.3	FALSE	62
2022-09-13	11:45:26	0.6793	3.02166	1282.81	FALSE	62
2022-09-13	11:45:27	0.506272	2.252	1223.55	FALSE	62
2022-09-13	11:45:27	0.290547	1.29241	1284.1	FALSE	62
2022-09-13	11:45:27	0.250242	1.11313	1224.66	FALSE	62
2022-09-13	11:45:27	0.439962	1.95704	1286.06	FALSE	62
2022-09-13	11:45:28	2.15635	9.59188	1234.25	FALSE	62
2022-09-13	11:45:28	2.76922	12.318	1298.37	FALSE	62
2022-09-13	11:45:28	2.98556	13.2804	1247.53	FALSE	62
2022-09-13	11:45:28	3.71482	16.5243	1314.9	1	63
2022-09-13	11:45:29	1.71737	7.63921	1255.17	FALSE	63
2022-09-13	11:45:29	2.7278	12.1338	1327.03	FALSE	63
2022-09-13	11:45:29	1.41223	6.28188	1261.46	FALSE	63
2022-09-13	11:45:29	2.47665	11.0166	1338.05	FALSE	63
2022-09-13	11:45:30	1.56184	6.94738	1268.4	FALSE	63
2022-09-13	11:45:30	2.40938	10.7174	1348.77	FALSE	63
2022-09-13	11:45:30	1.23894	5.51105	1273.91	FALSE	63
2022-09-13	11:45:31	1.80968	8.04982	1356.82	FALSE	63
2022-09-13	11:45:31	0.80617	3.58601	1277.5	FALSE	63
2022-09-13	11:45:31	1.31095	5.83137	1362.65	FALSE	63
2022-09-13	11:45:31	0.366578	1.63061	1279.13	FALSE	63
2022-09-13	11:45:32	0.122914	0.546746	1363.19	FALSE	63
2022-09-13	11:45:32	0.438333	1.94979	1281.08	FALSE	63
2022-09-13	11:45:32	1.08444	4.82381	1368.02	FALSE	63
2022-09-13	11:45:32	1.84561	8.20964	1289.29	FALSE	63
2022-09-13	11:45:33	1.17823	5.241	1373.26	FALSE	63
2022-09-13	11:45:33	1.81487	8.0729	1297.36	FALSE	63
2022-09-13	11:45:33	1.16775	5.19439	1378.45	FALSE	63
2022-09-13	11:45:33	1.57192	6.99221	1304.36	FALSE	63
2022-09-13	11:45:34	1.45609	6.47698	1384.93	FALSE	63
2022-09-13	11:45:34	1.90062	8.45434	1312.81	FALSE	63
2022-09-13	11:45:34	1.75233	7.79471	1392.72	FALSE	63
2022-09-13	11:45:35	6.25472	27.8222	1340.63	1	64
2022-09-13	11:45:35	8.94861	39.8052	1432.53	1	65
2022-09-13	11:45:35	3.56362	15.8517	1356.48	1	66
2022-09-13	11:45:35	4.77859	21.2561	1453.79	1	67
2022-09-13	11:45:36	3.8707	17.2176	1373.7	1	68
2022-09-13	11:45:36	5.66932	25.2183	1479	1	69
2022-09-13	11:45:36	5.25349	23.3686	1397.07	1	70
2022-09-13	11:45:36	2.97889	13.2507	1492.25	FALSE	70
2022-09-13	11:45:37	1.76505	7.8513	1404.92	FALSE	70
2022-09-13	11:45:37	1.3792	6.13496	1498.39	FALSE	70
2022-09-13	11:45:37	1.50525	6.69565	1411.62	FALSE	70
2022-09-13	11:45:37	1.21258	5.3938	1503.78	FALSE	70
2022-09-13	11:45:38	2.04373	9.09092	1420.71	FALSE	70
2022-09-13	11:45:38	3.91874	17.4313	1521.21	1	71
2022-09-13	11:45:38	4.39263	19.5393	1440.25	1	72
2022-09-13	11:45:39	3.02072	13.4368	1534.65	1	73
2022-09-13	11:45:39	2.21314	9.84449	1450.09	FALSE	73
2022-09-13	11:45:39	1.37843	6.13153	1540.78	FALSE	73
2022-09-13	11:45:39	1.47574	6.56439	1456.66	FALSE	73
2022-09-13	11:45:40	2.45889	10.9376	1551.72	FALSE	73
2022-09-13	11:45:40	1.51823	6.75339	1463.41	FALSE	73
2022-09-13	11:45:40	0.657265	2.92365	1554.64	FALSE	73
2022-09-13	11:45:40	0.223473	0.994053	1464.4	FALSE	73
2022-09-13	11:45:41	0.225763	1.00424	1555.65	FALSE	73
2022-09-13	11:45:41	0.231616	1.03027	1465.43	FALSE	73
2022-09-13	11:45:41	0.169326	0.753196	1556.4	FALSE	73
2022-09-13	11:45:41	0.565458	2.51527	1467.95	FALSE	73
2022-09-13	11:45:42	0.729377	3.24441	1559.65	FALSE	73
2022-09-13	11:45:42	0.732277	3.25731	1471.21	FALSE	73
2022-09-13	11:45:42	0.612939	2.72648	1562.37	FALSE	73
2022-09-13	11:45:43	1.01055	4.49513	1475.7	FALSE	73
2022-09-13	11:45:43	2.0421	9.08367	1571.46	FALSE	73
2022-09-13	11:45:43	1.37808	6.12998	1481.83	FALSE	73
2022-09-13	11:45:43	1.76948	7.871	1579.33	FALSE	73
2022-09-13	11:45:44	2.51431	11.1842	1493.02	FALSE	73
2022-09-13	11:45:44	2.45981	10.9417	1590.27	FALSE	73
2022-09-13	11:45:44	1.69055	7.5199	1500.54	FALSE	73
2022-09-13	11:45:44	5.85054	26.0244	1616.29	1	74
2022-09-13	11:45:45	4.711	20.9555	1521.49	1	75
2022-09-13	11:45:45	7.34388	32.667	1648.96	1	76
2022-09-13	11:45:45	5.91212	26.2983	1547.79	1	77
2022-09-13	11:45:45	2.5135	11.1806	1660.14	FALSE	77
2022-09-13	11:45:46	2.16912	9.64868	1557.44	FALSE	77
2022-09-13	11:45:46	1.08113	4.80908	1664.95	FALSE	77
2022-09-13	11:45:46	0.817723	3.6374	1561.07	FALSE	77
2022-09-13	11:45:46	0.901539	4.01023	1668.96	FALSE	77
2022-09-13	11:45:47	0.68215	3.03434	1564.11	FALSE	77
2022-09-13	11:45:47	0.816298	3.63106	1672.59	FALSE	77
2022-09-13	11:45:47	0.653448	2.90667	1567.02	FALSE	77
2022-09-13	11:45:48	0.720623	3.20548	1675.8	FALSE	77
2022-09-13	11:45:48	1.07263	4.77127	1571.79	FALSE	77
2022-09-13	11:45:48	1.46882	6.53361	1682.33	FALSE	77
2022-09-13	11:45:48	2.45971	10.9413	1582.73	FALSE	77
2022-09-13	11:45:49	1.54556	6.87496	1689.21	FALSE	77
2022-09-13	11:45:49	1.98118	8.81268	1591.54	FALSE	77
2022-09-13	11:45:49	1.28393	5.71118	1694.92	FALSE	77
2022-09-13	11:45:49	1.25854	5.59824	1597.14	FALSE	77
2022-09-13	11:45:50	1.54866	6.88875	1701.81	FALSE	77
2022-09-13	11:45:50	1.32714	5.90338	1603.04	FALSE	77
2022-09-13	11:45:50	1.32683	5.90201	1707.71	FALSE	77
2022-09-13	11:45:50	1.48469	6.6042	1609.65	FALSE	77
2022-09-13	11:45:51	1.37009	6.09443	1713.8	FALSE	77
2022-09-13	11:45:51	2.58286	11.4891	1621.14	FALSE	77
2022-09-13	11:45:51	2.07808	9.24372	1723.05	FALSE	77
2022-09-13	11:45:52	2.46454	10.9628	1632.1	FALSE	77
2022-09-13	11:45:52	1.23477	5.4925	1728.54	FALSE	77
2022-09-13	11:45:52	1.33218	5.9258	1638.02	FALSE	77
2022-09-13	11:45:52	2.03564	9.05493	1737.59	FALSE	77
2022-09-13	11:45:53	1.68357	7.48886	1645.51	FALSE	77
2022-09-13	11:45:53	1.18902	5.289	1742.88	FALSE	77
2022-09-13	11:45:53	0.896501	3.98782	1649.5	FALSE	77
2022-09-13	11:45:53	0.943677	4.19766	1747.08	FALSE	77
2022-09-13	11:45:54	1.2881	5.72973	1655.23	FALSE	77
2022-09-13	11:45:54	1.5733	6.99835	1754.08	FALSE	77
2022-09-13	11:45:54	1.16597	5.18647	1660.42	FALSE	77
2022-09-13	11:45:54	1.49961	6.67057	1760.75	FALSE	77
2022-09-13	11:45:55	2.3106	10.278	1670.7	FALSE	77
2022-09-13	11:45:55	2.26317	10.067	1770.82	FALSE	77
2022-09-13	11:45:55	2.27528	10.1209	1680.82	FALSE	77
2022-09-13	11:45:56	1.17085	5.20817	1776.02	FALSE	77
2022-09-13	11:45:56	0.964389	4.2898	1685.11	FALSE	77
2022-09-13	11:45:56	0.829733	3.69082	1779.71	FALSE	77
2022-09-13	11:45:56	0.79701	3.54526	1688.65	FALSE	77
2022-09-13	11:45:57	0.738588	3.28539	1783	FALSE	77
2022-09-13	11:45:57	0.79813	3.55024	1692.2	FALSE	77
2022-09-13	11:45:57	0.618231	2.75002	1785.75	FALSE	77
2022-09-13	11:45:57	0.492277	2.18975	1694.39	FALSE	77
2022-09-13	11:45:58	0.487443	2.16824	1787.92	FALSE	77
2022-09-13	11:45:58	0.537112	2.38918	1696.78	FALSE	77
2022-09-13	11:45:58	0.691667	3.07667	1790.99	FALSE	77
2022-09-13	11:45:58	0.603117	2.68279	1699.46	FALSE	77
2022-09-13	11:45:59	2.09879	9.33584	1800.33	FALSE	77
2022-09-13	11:45:59	2.75192	12.2411	1711.7	FALSE	77
2022-09-13	11:45:59	6.05411	26.9299	1827.26	1	78
2022-09-13	11:46:00	3.08011	13.7009	1725.41	1	79
2022-09-13	11:46:00	4.92551	21.9097	1849.17	1	80
2022-09-13	11:46:00	3.94475	17.547	1742.95	1	81
2022-09-13	11:46:00	1.38744	6.17161	1855.34	FALSE	81
2022-09-13	11:46:01	1.16464	5.18055	1748.13	FALSE	81
2022-09-13	11:46:01	2.17945	9.69463	1865.04	FALSE	81
2022-09-13	11:46:01	1.14709	5.10249	1753.24	FALSE	81
2022-09-13	11:46:01	2.96871	13.2054	1878.24	FALSE	81
2022-09-13	11:46:02	1.6363	7.27859	1760.51	FALSE	81
2022-09-13	11:46:02	3.0708	13.6595	1891.9	1	82
2022-09-13	11:46:02	2.93243	13.044	1773.56	FALSE	82
2022-09-13	11:46:02	1.32978	5.91513	1897.82	FALSE	82
2022-09-13	11:46:03	5.64866	25.1264	1798.68	1	83
2022-09-13	11:46:03	3.74159	16.6433	1914.46	1	84
2022-09-13	11:46:03	9.03909	40.2077	1838.89	1	85
2022-09-13	11:46:04	3.42719	15.2448	1929.7	1	86
2022-09-13	11:46:04	1.43324	6.37534	1845.27	FALSE	86
2022-09-13	11:46:04	0.577061	2.56688	1932.27	FALSE	86
2022-09-13	11:46:04	0.297163	1.32184	1846.59	FALSE	86
2022-09-13	11:46:05	0.194008	0.862986	1933.13	FALSE	86
2022-09-13	11:46:05	0.052074	0.231636	1846.82	FALSE	86
2022-09-13	11:46:05	0.264644	1.17719	1934.31	FALSE	86
2022-09-13	11:46:05	0.301845	1.34267	1848.16	FALSE	86
2022-09-13	11:46:06	0.693753	3.08595	1937.4	FALSE	86
2022-09-13	11:46:06	0.709377	3.15545	1851.32	FALSE	86
2022-09-13	11:46:06	0.547392	2.43491	1939.83	FALSE	86
2022-09-13	11:46:06	0.372786	1.65823	1852.98	FALSE	86
2022-09-13	11:46:07	0.383372	1.70532	1941.54	FALSE	86
2022-09-13	11:46:07	0.350038	1.55704	1854.53	FALSE	86
2022-09-13	11:46:07	0.373397	1.66094	1943.2	FALSE	86
2022-09-13	11:46:08	0.391616	1.74199	1856.28	FALSE	86
2022-09-13	11:46:08	0.400725	1.7825	1944.98	FALSE	86
2022-09-13	11:46:08	0.373804	1.66275	1857.94	FALSE	86
2022-09-13	11:46:08	0.355534	1.58149	1946.56	FALSE	86
2022-09-13	11:46:09	0.346578	1.54165	1859.48	FALSE	86
2022-09-13	11:46:09	0.397417	1.76779	1948.33	FALSE	86
2022-09-13	11:46:09	0.737824	3.28199	1862.76	FALSE	86
2022-09-13	11:46:09	0.736807	3.27746	1951.61	FALSE	86
2022-09-13	11:46:10	0.735026	3.26954	1866.03	FALSE	86
2022-09-13	11:46:10	2.00215	8.90596	1960.51	FALSE	86
2022-09-13	11:46:10	0.518588	2.30678	1868.34	FALSE	86
2022-09-13	11:46:10	0.262659	1.16836	1961.68	FALSE	86
2022-09-13	11:46:11	0.292685	1.30192	1869.64	FALSE	86
2022-09-13	11:46:11	0.317876	1.41398	1963.1	FALSE	86
2022-09-13	11:46:11	0.224695	0.999488	1870.64	FALSE	86
2022-09-13	11:46:11	0.198333	0.882225	1963.98	FALSE	86
2022-09-13	11:46:12	0.251565	1.11901	1871.76	FALSE	86
2022-09-13	11:46:12	0.244898	1.08936	1965.07	FALSE	86
2022-09-13	11:46:12	0.327545	1.45699	1873.22	FALSE	86
2022-09-13	11:46:13	0.443321	1.97198	1967.04	FALSE	86
2022-09-13	11:46:13	1.02587	4.56327	1877.78	FALSE	86
2022-09-13	11:46:13	1.50444	6.69205	1973.73	FALSE	86
2022-09-13	11:46:13	1.11533	4.96121	1882.74	FALSE	86
2022-09-13	11:46:14	1.22826	5.46355	1979.2	FALSE	86
2022-09-13	11:46:14	1.59594	7.09906	1889.84	FALSE	86
2022-09-13	11:46:14	1.0766	4.78893	1983.98	FALSE	86
2022-09-13	11:46:14	1.76688	7.85944	1897.7	FALSE	86
2022-09-13	11:46:15	0.515992	2.29524	1986.28	FALSE	86
2022-09-13	11:46:15	2.1966	9.77092	1907.47	FALSE	86
2022-09-13	11:46:15	0.80159	3.56563	1989.85	FALSE	86
2022-09-13	11:46:15	2.08571	9.27766	1916.75	FALSE	86
2022-09-13	11:46:16	3.25467	14.4774	2004.32	1	87
2022-09-13	11:46:16	1.03472	4.60264	1921.35	FALSE	87
2022-09-13	11:46:16	2.28067	10.1449	2014.47	FALSE	87
2022-09-13	11:46:17	1.41599	6.29861	1927.65	FALSE	87
2022-09-13	11:46:17	0.5793	2.57684	2017.04	FALSE	87
2022-09-13	11:46:17	1.43335	6.37583	1934.03	FALSE	87
2022-09-13	11:46:17	0.706425	3.14232	2020.19	FALSE	87
2022-09-13	11:46:18	0.31701	1.41012	1935.44	FALSE	87
2022-09-13	11:46:18	0.788053	3.50542	2023.69	FALSE	87
2022-09-13	11:46:18	0.190547	0.847591	1936.28	FALSE	87
2022-09-13	11:46:18	0.420216	1.8692	2025.56	FALSE	87
2022-09-13	11:46:19	0.525	2.3353	1938.62	FALSE	87
2022-09-13	11:46:19	0.0702928	0.312676	2025.87	FALSE	87
2022-09-13	11:46:19	0.858537	3.81894	1942.44	FALSE	87
2022-09-13	11:46:19	0.386883	1.72093	2027.59	FALSE	87
2022-09-13	11:46:20	1.13716	5.05832	1947.5	FALSE	87
2022-09-13	11:46:20	1.19971	5.33655	2032.93	FALSE	87
2022-09-13	11:46:20	0.999758	4.44712	1951.94	FALSE	87
2022-09-13	11:46:21	1.48846	6.62097	2039.55	FALSE	87
2022-09-13	11:46:21	0.797265	3.54639	1955.49	FALSE	87
2022-09-13	11:46:21	0.317824	1.41374	2040.97	FALSE	87
2022-09-13	11:46:21	0.958079	4.26173	1959.75	FALSE	87
2022-09-13	11:46:22	0.112023	0.498301	2041.46	FALSE	87
2022-09-13	11:46:22	1.02011	4.53765	1964.29	FALSE	87
2022-09-13	11:46:22	0.189733	0.84397	2042.31	FALSE	87
2022-09-13	11:46:22	0.434008	1.93055	1966.22	FALSE	87
2022-09-13	11:46:23	0.510852	2.27237	2044.58	FALSE	87
2022-09-13	11:46:23	0.430344	1.91426	1968.13	FALSE	87
2022-09-13	11:46:23	0.612939	2.72648	2047.31	FALSE	87
2022-09-13	11:46:23	0.131311	0.584098	1968.72	FALSE	87
2022-09-13	11:46:24	0.126883	0.564401	2047.87	FALSE	87
2022-09-13	11:46:24	-0.195	-0.867399	1968.72	FALSE	87
2022-09-13	11:46:24	-0.210623	-0.936893	2047.87	FALSE	87
2022-09-13	11:46:25	-0.200699	-0.892749	1968.72	FALSE	87
2022-09-13	11:46:25	-0.205178	-0.912673	2047.87	FALSE	87
2022-09-13	11:46:25	-0.155814	-0.693092	1968.72	FALSE	87
2022-09-13	11:46:25	-0.192353	-0.855625	2047.87	FALSE	87
2022-09-13	11:46:26	-0.188587	-0.838873	1968.72	FALSE	87
2022-09-13	11:46:26	-0.237646	-1.0571	2047.87	FALSE	87
2022-09-13	11:46:26	-0.199071	-0.885508	1968.72	FALSE	87
2022-09-13	11:46:26	-0.204465	-0.909501	2047.87	FALSE	87
2022-09-13	11:46:27	-0.194898	-0.866945	1968.72	FALSE	87
2022-09-13	11:46:27	-0.165178	-0.734745	2047.87	FALSE	87
2022-09-13	11:46:27	-0.15159	-0.674303	1968.72	FALSE	87
2022-09-13	11:46:27	-0.115763	-0.514937	2047.87	FALSE	87
2022-09-13	11:46:28	-0.087875	-0.390886	1968.72	FALSE	87
2022-09-13	11:46:28	-0.0715391	-0.31822	2047.87	FALSE	87
2022-09-13	11:46:28	-0.0573916	-0.255289	1968.72	FALSE	87
2022-09-13	11:46:29	-0.0533712	-0.237406	2047.87	FALSE	87
2022-09-13	11:46:29	-0.059071	-0.26276	1968.72	FALSE	87
2022-09-13	11:46:29	-0.0482313	-0.214542	2047.87	FALSE	87
2022-09-13	11:46:29	-0.0418699	-0.186246	1968.72	FALSE	87
2022-09-13	11:46:30	-0.0245163	-0.109053	2047.87	FALSE	87
2022-09-13	11:46:30	-0.0133204	-0.0592518	1968.72	FALSE	87
2022-09-13	11:46:30	0.00489845	0.0217893	2047.89	FALSE	87
2022-09-13	11:46:30	0.034415	0.153085	1968.87	FALSE	87
2022-09-13	11:46:31	0.040929	0.18206	2048.08	FALSE	87
2022-09-13	11:46:31	0.036247	0.161234	1969.03	FALSE	87
2022-09-13	11:46:31	0.0208272	0.0926436	2048.17	FALSE	87
2022-09-13	11:46:31	0.0137025	0.0609515	1969.09	FALSE	87
2022-09-13	11:46:32	0.0159926	0.0711383	2048.24	FALSE	87
2022-09-13	11:46:32	0.0201147	0.0894742	1969.18	FALSE	87
2022-09-13	11:46:32	0.0182318	0.0810987	2048.32	FALSE	87
2022-09-13	11:46:33	0.0125321	0.0557453	1969.24	FALSE	87
2022-09-13	11:46:33	0.0108018	0.0480486	2048.37	FALSE	87
2022-09-13	11:46:33	0.0068323	0.0303914	1969.27	FALSE	87
2022-09-13	11:46:33	0.00276106	0.0122817	2048.38	FALSE	87
2022-09-13	11:46:34	0.000878093	0.00390593	1969.27	FALSE	87
2022-09-13	11:46:34	-0.0205977	-0.0916227	2048.38	FALSE	87
2022-09-13	11:46:34	-0.0487402	-0.216806	1969.27	FALSE	87
2022-09-13	11:46:34	-0.0801905	-0.356703	2048.38	FALSE	87
2022-09-13	11:46:35	-0.0980023	-0.435934	1969.27	FALSE	87
2022-09-13	11:46:35	-0.0638038	-0.283812	2048.38	FALSE	87
2022-09-13	11:46:35	0.282354	1.25597	1970.53	FALSE	87
2022-09-13	11:46:35	0.666272	2.96371	2051.34	FALSE	87
2022-09-13	11:46:36	0.0467305	0.207867	1970.74	FALSE	87
2022-09-13	11:46:36	-0.408129	-1.81544	2051.34	FALSE	87
2022-09-13	11:46:36	-0.355254	-1.58024	1970.74	FALSE	87
2022-09-13	11:46:37	-0.595661	-2.64962	2051.34	FALSE	87
2022-09-13	11:46:37	-0.737595	-3.28097	1970.74	FALSE	87
2022-09-13	11:46:37	-0.820954	-3.65177	2051.34	FALSE	87
2022-09-13	11:46:37	-1.00569	-4.47351	1970.74	FALSE	87
2022-09-13	11:46:38	-1.10177	-4.90089	2051.34	FALSE	87
2022-09-13	11:46:38	-1.13607	-5.05347	1970.74	FALSE	87
2022-09-13	11:46:38	-1.13261	-5.03808	2051.34	FALSE	87
2022-09-13	11:46:38	-0.762226	-3.39053	1970.74	FALSE	87
2022-09-13	11:46:39	-0.318613	-1.41725	2051.34	FALSE	87
2022-09-13	11:46:39	-0.34131	-1.51822	1970.74	FALSE	87
2022-09-13	11:46:39	-0.239071	-1.06344	2051.34	FALSE	87
2022-09-13	11:46:39	-0.929401	-4.13416	1970.74	FALSE	87
2022-09-13	11:46:40	-0.919274	-4.08911	2051.34	FALSE	87
2022-09-13	11:46:40	-1.38533	-6.16222	1970.74	FALSE	87
2022-09-13	11:46:40	-1.50793	-6.70757	2051.34	FALSE	87
2022-09-13	11:46:40	-1.39704	-6.21431	1970.74	FALSE	87
2022-09-13	11:46:41	-1.57648	-7.0125	2051.34	FALSE	87
2022-09-13	11:46:41	0.609122	2.7095	1973.45	FALSE	87
2022-09-13	11:46:41	2.44434	10.8729	2062.22	FALSE	87
2022-09-13	11:46:42	0.379911	1.68992	1975.14	FALSE	87
2022-09-13	11:46:42	-0.213371	-0.949117	2062.22	FALSE	87
2022-09-13	11:46:42	-1.56925	-6.98034	1975.14	FALSE	87
2022-09-13	11:46:42	-1.34024	-5.96166	2062.22	FALSE	87
2022-09-13	11:46:43	-1.7436	-7.75588	1975.14	FALSE	87
2022-09-13	11:46:43	-0.349605	-1.55511	2062.22	FALSE	87
2022-09-13	11:46:43	0.192125	0.85461	1975.99	FALSE	87
2022-09-13	11:46:43	-0.242582	-1.07905	2062.22	FALSE	87
2022-09-13	11:46:44	0.531819	2.36564	1978.36	FALSE	87
2022-09-13	11:46:44	0.727901	3.23785	2065.46	FALSE	87
2022-09-13	11:46:44	0.712837	3.17084	1981.53	FALSE	87
2022-09-13	11:46:44	-0.869147	-3.86614	2065.46	FALSE	87
2022-09-13	11:46:45	-1.20289	-5.3507	1981.53	FALSE	87
2022-09-13	11:46:45	-0.596068	-2.65143	2065.46	FALSE	87
2022-09-13	11:46:45	0.188105	0.836729	1982.36	FALSE	87
2022-09-13	11:46:46	0.234924	1.04499	2066.5	FALSE	87
2022-09-13	11:46:46	-0.00914732	-0.0406891	1982.36	FALSE	87
2022-09-13	11:46:46	-0.90589	-4.02958	2066.5	FALSE	87
2022-09-13	11:46:46	0.513906	2.28596	1984.65	FALSE	87
2022-09-13	11:46:47	0.73416	3.26569	2069.77	FALSE	87
2022-09-13	11:46:47	0.732379	3.25777	1987.91	FALSE	87
2022-09-13	11:46:47	0.738791	3.28629	2073.05	FALSE	87
2022-09-13	11:46:47	0.733906	3.26456	1991.17	FALSE	87
2022-09-13	11:46:48	0.733295	3.26184	2076.31	FALSE	87
2022-09-13	11:46:48	0.734975	3.26932	1994.44	FALSE	87
2022-09-13	11:46:48	0.73416	3.26569	2079.58	FALSE	87
2022-09-13	11:46:48	0.728003	3.2383	1997.68	FALSE	87
2022-09-13	11:46:49	0.735433	3.27135	2082.85	FALSE	87
2022-09-13	11:46:49	0.737366	3.27995	2000.96	FALSE	87
2022-09-13	11:46:49	0.740725	3.29489	2086.15	FALSE	87
2022-09-13	11:46:50	0.73472	3.26818	2004.23	FALSE	87
2022-09-13	11:46:50	0.740064	3.29195	2089.44	FALSE	87
2022-09-13	11:46:50	0.737519	3.28063	2007.51	FALSE	87
2022-09-13	11:46:50	0.738181	3.28358	2092.72	FALSE	87
2022-09-13	11:46:51	0.737366	3.27995	2010.79	FALSE	87
2022-09-13	11:46:51	0.733397	3.2623	2095.98	FALSE	87
2022-09-13	11:46:51	0.732175	3.25686	2014.04	FALSE	87
2022-09-13	11:46:51	0.731717	3.25482	2099.24	FALSE	87
2022-09-13	11:46:52	0.731921	3.25573	2017.3	FALSE	87
2022-09-13	11:46:52	0.735891	3.27339	2102.51	FALSE	87
2022-09-13	11:46:52	0.738079	3.28312	2020.58	FALSE	87
2022-09-13	11:46:52	0.740318	3.29308	2105.81	FALSE	87
2022-09-13	11:46:53	0.732583	3.25868	2023.84	FALSE	87
2022-09-13	11:46:53	0.730649	3.25007	2109.06	FALSE	87
2022-09-13	11:46:53	0.631361	2.80842	2026.65	FALSE	87
2022-09-13	11:46:54	-0.760444	-3.38261	2109.06	FALSE	87
2022-09-13	11:46:54	-0.883803	-3.93133	2026.65	FALSE	87
2022-09-13	11:46:54	-0.257799	-1.14674	2109.06	FALSE	87
2022-09-13	11:46:54	1.02902	4.57729	2031.23	FALSE	87
2022-09-13	11:46:55	2.76357	12.2929	2121.35	FALSE	87
2022-09-13	11:46:55	1.90159	8.45865	2039.69	FALSE	87
2022-09-13	11:46:55	0.809478	3.60072	2124.95	FALSE	87
2022-09-13	11:46:55	0.132227	0.588172	2040.27	FALSE	87
2022-09-13	11:46:56	0.0546185	0.242954	2125.19	FALSE	87
2022-09-13	11:46:56	-0.226552	-1.00775	2040.27	FALSE	87
2022-09-13	11:46:56	-0.246196	-1.09513	2125.19	FALSE	87
2022-09-13	11:46:56	0.0399112	0.177533	2040.45	FALSE	87
2022-09-13	11:46:57	-0.217544	-0.967679	2125.19	FALSE	87
2022-09-13	11:46:57	-0.332099	-1.47724	2040.45	FALSE	87
2022-09-13	11:46:57	-0.60131	-2.67475	2125.19	FALSE	87
2022-09-13	11:46:58	-0.737391	-3.28006	2040.45	FALSE	87
2022-09-13	11:46:58	-0.764414	-3.40027	2125.19	FALSE	87
2022-09-13	11:46:58	0.217977	0.969605	2041.42	FALSE	87
2022-09-13	11:46:58	1.44734	6.43806	2131.63	FALSE	87
2022-09-13	11:46:59	2.90749	12.9331	2054.35	FALSE	87
2022-09-13	11:46:59	-0.193524	-0.860833	2131.63	FALSE	87
2022-09-13	11:46:59	0.725458	3.22698	2057.58	FALSE	87
2022-09-13	11:46:59	0.737621	3.28109	2134.91	FALSE	87
2022-09-13	11:47:00	0.733397	3.2623	2060.84	FALSE	87
2022-09-13	11:47:00	0.734771	3.26841	2138.18	FALSE	87
2022-09-13	11:47:00	0.733041	3.26071	2064.1	FALSE	87
2022-09-13	11:47:00	0.735076	3.26977	2141.45	FALSE	87
2022-09-13	11:47:01	0.735636	3.27226	2067.38	FALSE	87
2022-09-13	11:47:01	0.735076	3.26977	2144.72	FALSE	87
2022-09-13	11:47:01	0.734771	3.26841	2070.65	FALSE	87
2022-09-13	11:47:01	0.731921	3.25573	2147.97	FALSE	87
2022-09-13	11:47:02	0.730293	3.24849	2073.89	FALSE	87
2022-09-13	11:47:02	0.743778	3.30847	2151.28	FALSE	87
2022-09-13	11:47:02	0.73701	3.27837	2077.17	FALSE	87
2022-09-13	11:47:03	0.735382	3.27113	2154.55	FALSE	87
2022-09-13	11:47:03	0.736043	3.27407	2080.45	FALSE	87
2022-09-13	11:47:03	0.737519	3.28063	2157.83	FALSE	87
2022-09-13	11:47:03	0.734873	3.26886	2083.72	FALSE	87
2022-09-13	11:47:04	0.741081	3.29648	2161.13	FALSE	87
2022-09-13	11:47:04	0.736908	3.27791	2086.99	FALSE	87
2022-09-13	11:47:04	0.732277	3.25731	2164.39	FALSE	87
2022-09-13	11:47:04	0.737061	3.27859	2090.27	FALSE	87
2022-09-13	11:47:05	0.729529	3.24509	2167.63	FALSE	87
2022-09-13	11:47:05	0.733193	3.26139	2093.53	FALSE	87
2022-09-13	11:47:05	0.727087	3.23423	2170.87	FALSE	87
2022-09-13	11:47:05	0.737468	3.28041	2096.81	FALSE	87
2022-09-13	11:47:06	0.737621	3.28109	2174.15	FALSE	87
2022-09-13	11:47:06	0.737468	3.28041	2100.09	FALSE	87
2022-09-13	11:47:06	0.735585	3.27203	2177.42	FALSE	87
2022-09-13	11:47:07	0.73528	3.27067	2103.36	FALSE	87
2022-09-13	11:47:07	0.738282	3.28403	2180.71	FALSE	87
2022-09-13	11:47:07	0.730343	3.24871	2106.61	FALSE	87
2022-09-13	11:47:07	0.738944	3.28697	2183.99	FALSE	87
2022-09-13	11:47:08	0.728562	3.24079	2109.85	FALSE	87
2022-09-13	11:47:08	0.737519	3.28063	2187.27	FALSE	87
2022-09-13	11:47:08	0.735738	3.27271	2113.13	FALSE	87
2022-09-13	11:47:08	0.734975	3.26932	2190.54	FALSE	87
2022-09-13	11:47:09	0.739351	3.28878	2116.42	FALSE	87
2022-09-13	11:47:09	0.732277	3.25731	2193.8	FALSE	87
2022-09-13	11:47:09	0.734059	3.26524	2119.68	FALSE	87
2022-09-13	11:47:09	0.730343	3.24871	2197.05	FALSE	87
2022-09-13	11:47:10	0.732837	3.25981	2122.94	FALSE	87
2022-09-13	11:47:10	0.739962	3.2915	2200.34	FALSE	87
2022-09-13	11:47:10	0.731972	3.25596	2126.2	FALSE	87
2022-09-13	11:47:11	0.734008	3.26501	2203.6	FALSE	87
2022-09-13	11:47:11	0.736654	3.27678	2129.47	FALSE	87
2022-09-13	11:47:11	0.734975	3.26932	2206.87	FALSE	87
2022-09-13	11:47:11	0.734364	3.2666	2132.74	FALSE	87
2022-09-13	11:47:12	0.734771	3.26841	2210.14	FALSE	87
2022-09-13	11:47:12	0.734109	3.26546	2136.01	FALSE	87
2022-09-13	11:47:12	0.734059	3.26524	2213.41	FALSE	87
2022-09-13	11:47:12	0.742659	3.3035	2139.31	FALSE	87
2022-09-13	11:47:13	0.733601	3.2632	2216.67	FALSE	87
2022-09-13	11:47:13	0.734618	3.26773	2142.58	FALSE	87
2022-09-13	11:47:13	0.736552	3.27633	2219.95	FALSE	87
2022-09-13	11:47:13	0.734211	3.26592	2145.84	FALSE	87
2022-09-13	11:47:14	0.741031	3.29625	2223.24	FALSE	87
2022-09-13	11:47:14	0.72958	3.24532	2149.09	FALSE	87
2022-09-13	11:47:14	0.728308	3.23966	2226.48	FALSE	87
2022-09-13	11:47:15	0.732277	3.25731	2152.35	FALSE	87
2022-09-13	11:47:15	0.733651	3.26343	2229.75	FALSE	87
2022-09-13	11:47:15	0.732939	3.26026	2155.61	FALSE	87
2022-09-13	11:47:15	0.728461	3.24034	2232.99	FALSE	87
2022-09-13	11:47:16	0.733346	3.26207	2158.87	FALSE	87
2022-09-13	11:47:16	0.727901	3.23785	2236.22	FALSE	87
2022-09-13	11:47:16	0.731361	3.25324	2162.12	FALSE	87
2022-09-13	11:47:16	0.731565	3.25415	2239.48	FALSE	87
2022-09-13	11:47:17	0.736247	3.27497	2165.4	FALSE	87
2022-09-13	11:47:17	0.732634	3.2589	2242.74	FALSE	87
2022-09-13	11:47:17	0.734873	3.26886	2168.66	FALSE	87
2022-09-13	11:47:17	0.738079	3.28312	2246.02	FALSE	87
2022-09-13	11:47:18	0.734262	3.26614	2171.93	FALSE	87
2022-09-13	11:47:18	0.736654	3.27678	2249.3	FALSE	87
2022-09-13	11:47:18	0.737112	3.27882	2175.21	FALSE	87
2022-09-13	11:47:19	0.728461	3.24034	2252.54	FALSE	87
2022-09-13	11:47:19	0.737672	3.28131	2178.49	FALSE	87
2022-09-13	11:47:19	0.733346	3.26207	2255.8	FALSE	87
2022-09-13	11:47:19	0.735229	3.27045	2181.76	FALSE	87
2022-09-13	11:47:20	0.732023	3.25618	2259.06	FALSE	87
2022-09-13	11:47:20	0.735789	3.27294	2185.03	FALSE	87
2022-09-13	11:47:20	0.735687	3.27248	2262.33	FALSE	87
2022-09-13	11:47:20	0.736807	3.27746	2188.31	FALSE	87
2022-09-13	11:47:21	0.73584	3.27316	2265.6	FALSE	87
2022-09-13	11:47:21	0.735636	3.27226	2191.58	FALSE	87
2022-09-13	11:47:21	0.732583	3.25868	2268.86	FALSE	87
2022-09-13	11:47:21	0.731972	3.25596	2194.84	FALSE	87
2022-09-13	11:47:22	0.729275	3.24396	2272.1	FALSE	87
2022-09-13	11:47:22	0.737773	3.28176	2198.12	FALSE	87
2022-09-13	11:47:22	0.735789	3.27294	2275.38	FALSE	87
2022-09-13	11:47:23	0.740318	3.29308	2201.41	FALSE	87
2022-09-13	11:47:23	0.741896	3.3001	2278.68	FALSE	87
2022-09-13	11:47:23	0.733448	3.26252	2204.68	FALSE	87
2022-09-13	11:47:23	0.736705	3.27701	2281.95	FALSE	87
2022-09-13	11:47:24	0.732532	3.25845	2207.94	FALSE	87
2022-09-13	11:47:24	0.733092	3.26094	2285.22	FALSE	87
2022-09-13	11:47:24	0.728562	3.24079	2211.18	FALSE	87
2022-09-13	11:47:24	0.734313	3.26637	2288.48	FALSE	87
2022-09-13	11:47:25	0.73874	3.28606	2214.46	FALSE	87
2022-09-13	11:47:25	0.737519	3.28063	2291.76	FALSE	87
2022-09-13	11:47:25	0.733753	3.26388	2217.73	FALSE	87
2022-09-13	11:47:25	0.729173	3.24351	2295.01	FALSE	87
2022-09-13	11:47:26	0.73187	3.2555	2220.98	FALSE	87
2022-09-13	11:47:26	0.735331	3.2709	2298.28	FALSE	87
2022-09-13	11:47:26	0.733957	3.26479	2224.25	FALSE	87
2022-09-13	11:47:26	0.734618	3.26773	2301.54	FALSE	87
2022-09-13	11:47:27	0.70556	3.13847	2227.39	FALSE	87
2022-09-13	11:47:27	-1.52966	-6.80423	2301.54	FALSE	87
2022-09-13	11:47:27	-0.771182	-3.43037	2227.39	FALSE	87
2022-09-13	11:47:28	-1.37398	-6.11174	2301.54	FALSE	87
2022-09-13	11:47:28	-1.50502	-6.69463	2227.39	FALSE	87
2022-09-13	11:47:28	-1.72986	-7.69476	2301.54	FALSE	87
2022-09-13	11:47:28	-1.89317	-8.4212	2227.39	FALSE	87
2022-09-13	11:47:29	-1.75159	-7.79142	2301.54	FALSE	87
2022-09-13	11:47:29	-1.69169	-7.52498	2227.39	FALSE	87
2022-09-13	11:47:29	-0.121157	-0.538931	2301.54	FALSE	87
2022-09-13	11:47:29	-0.889961	-3.95872	2227.39	FALSE	87
2022-09-13	11:47:30	-0.191743	-0.852911	2301.54	FALSE	87
2022-09-13	11:47:30	-0.76075	-3.38397	2227.39	FALSE	87
2022-09-13	11:47:30	-1.20192	-5.34638	2301.54	FALSE	87
2022-09-13	11:47:30	-1.53128	-6.81144	2227.39	FALSE	87
2022-09-13	11:47:31	-1.81006	-8.05151	2301.54	FALSE	87
2022-09-13	11:47:31	-1.10838	-4.9303	2227.39	FALSE	87
2022-09-13	11:47:31	-1.86564	-8.29874	2301.54	FALSE	87
2022-09-13	11:47:32	-1.19357	-5.30924	2227.39	FALSE	87
2022-09-13	11:47:32	-1.84813	-8.22085	2301.54	FALSE	87
2022-09-13	11:47:32	-1.11642	-4.96606	2227.39	FALSE	87
2022-09-13	11:47:32	-1.81612	-8.07846	2301.54	FALSE	87
2022-09-13	11:47:33	-1.72894	-7.69067	2227.39	FALSE	87
2022-09-13	11:47:33	-1.35276	-6.01735	2301.54	FALSE	87
2022-09-13	11:47:33	-1.45393	-6.46737	2227.39	FALSE	87
2022-09-13	11:47:33	-0.777544	-3.45867	2301.54	FALSE	87
2022-09-13	11:47:34	-1.76502	-7.85116	2227.39	FALSE	87
2022-09-13	11:47:34	0.0875448	0.389417	2301.93	FALSE	87
2022-09-13	11:47:34	0.583321	2.59473	2229.98	FALSE	87
2022-09-13	11:47:34	-0.245025	-1.08992	2301.93	FALSE	87
2022-09-13	11:47:35	0.125865	0.559873	2230.54	FALSE	87
2022-09-13	11:47:35	-0.0977478	-0.434802	2301.93	FALSE	87
2022-09-13	11:47:35	-0.224109	-0.996882	2230.54	FALSE	87
2022-09-13	11:47:36	-0.15673	-0.697166	2301.93	FALSE	87
2022-09-13	11:47:36	0.0228628	0.101698	2230.64	FALSE	87
2022-09-13	11:47:36	0.300878	1.33837	2303.27	FALSE	87
2022-09-13	11:47:36	0.190547	0.847591	2231.49	FALSE	87
2022-09-13	11:47:37	0.186222	0.828353	2304.1	FALSE	87
2022-09-13	11:47:37	0.112278	0.499435	2231.99	FALSE	87
2022-09-13	11:47:37	-0.534796	-2.37888	2304.1	FALSE	87
2022-09-13	11:47:37	-0.246196	-1.09513	2231.99	FALSE	87
2022-09-13	11:47:38	0.172328	0.766549	2304.87	FALSE	87
2022-09-13	11:47:38	0.166018	0.738481	2232.73	FALSE	87
2022-09-13	11:47:38	0.265967	1.18307	2306.05	FALSE	87
2022-09-13	11:47:38	-0.00823129	-0.0366144	2232.73	FALSE	87
2022-09-13	11:47:39	-0.0519972	-0.231294	2306.05	FALSE	87
2022-09-13	11:47:39	-0.43617	-1.94017	2232.73	FALSE	87
2022-09-13	11:47:39	-0.0915391	-0.407184	2306.05	FALSE	87
2022-09-13	11:47:40	-0.0438547	-0.195074	2232.73	FALSE	87
2022-09-13	11:47:40	-0.20818	-0.926026	2306.05	FALSE	87
2022-09-13	11:47:40	-0.245839	-1.09354	2232.73	FALSE	87
2022-09-13	11:47:40	-0.359885	-1.60084	2306.05	FALSE	87
2022-09-13	11:47:41	-0.478867	-2.1301	2232.73	FALSE	87
2022-09-13	11:47:41	0.424949	1.89026	2307.94	FALSE	87
2022-09-13	11:47:41	-0.519274	-2.30983	2232.73	FALSE	87
2022-09-13	11:47:41	-0.818969	-3.64294	2307.94	FALSE	87
2022-09-13	11:47:42	0.734669	3.26795	2236	FALSE	87
2022-09-13	11:47:42	0.733092	3.26094	2311.2	FALSE	87
2022-09-13	11:47:42	-0.0491473	-0.218617	2236	FALSE	87
2022-09-13	11:47:42	-2.21403	-9.84845	2311.2	FALSE	87
2022-09-13	11:47:43	-0.176832	-0.786584	2236	FALSE	87
2022-09-13	11:47:43	0.735687	3.27248	2314.47	FALSE	87
2022-09-13	11:47:43	0.738181	3.28358	2239.28	FALSE	87
2022-09-13	11:47:44	0.733448	3.26252	2317.74	FALSE	87
2022-09-13	11:47:44	0.439758	1.95613	2241.23	FALSE	87
2022-09-13	11:47:44	0.156196	0.694791	2318.43	FALSE	87
2022-09-13	11:47:44	0.73813	3.28335	2244.52	FALSE	87
2022-09-13	11:47:45	0.731056	3.25188	2321.68	FALSE	87
2022-09-13	11:47:45	0.737875	3.28222	2247.8	FALSE	87
2022-09-13	11:47:45	0.745051	3.31414	2325	FALSE	87
2022-09-13	11:47:45	0.737926	3.28244	2251.08	FALSE	87
2022-09-13	11:47:46	0.745509	3.31617	2328.31	FALSE	87
2022-09-13	11:47:46	0.733193	3.26139	2254.34	FALSE	87
2022-09-13	11:47:46	0.738486	3.28493	2331.6	FALSE	87
2022-09-13	11:47:46	0.734873	3.26886	2257.61	FALSE	87
2022-09-13	11:47:47	0.739046	3.28742	2334.89	FALSE	87
2022-09-13	11:47:47	0.732175	3.25686	2260.87	FALSE	87
2022-09-13	11:47:47	0.732735	3.25935	2338.15	FALSE	87
2022-09-13	11:47:48	0.736043	3.27407	2264.14	FALSE	87
2022-09-13	11:47:48	0.726934	3.23355	2341.38	FALSE	87
2022-09-13	11:47:48	0.73528	3.27067	2267.41	FALSE	87
2022-09-13	11:47:48	0.734822	3.26864	2344.65	FALSE	87
2022-09-13	11:47:49	0.737163	3.27905	2270.69	FALSE	87
2022-09-13	11:47:49	0.731005	3.25166	2347.9	FALSE	87
2022-09-13	11:47:49	0.733906	3.26456	2273.96	FALSE	87
2022-09-13	11:47:49	0.735026	3.26954	2351.17	FALSE	87
2022-09-13	11:47:50	0.730598	3.24985	2277.21	FALSE	87
2022-09-13	11:47:50	0.731667	3.2546	2354.42	FALSE	87
2022-09-13	11:47:50	0.736399	3.27565	2280.48	FALSE	87
2022-09-13	11:47:50	0.734466	3.26705	2357.69	FALSE	87
2022-09-13	11:47:51	0.72958	3.24532	2283.73	FALSE	87
2022-09-13	11:47:51	0.732175	3.25686	2360.95	FALSE	87
2022-09-13	11:47:51	0.0377738	0.168025	2283.9	FALSE	87
2022-09-13	11:47:51	0.709784	3.15726	2364.1	FALSE	87
2022-09-13	11:47:52	0.735331	3.2709	2287.17	FALSE	87
2022-09-13	11:47:52	0.730751	3.25053	2367.35	FALSE	87
2022-09-13	11:47:52	0.729835	3.24645	2290.41	FALSE	87
2022-09-13	11:47:53	0.733855	3.26433	2370.62	FALSE	87
2022-09-13	11:47:53	0.731107	3.25211	2293.67	FALSE	87
2022-09-13	11:47:53	0.73645	3.27588	2373.9	FALSE	87
2022-09-13	11:47:53	0.735738	3.27271	2296.94	FALSE	87
2022-09-13	11:47:54	0.735026	3.26954	2377.16	FALSE	87
2022-09-13	11:47:54	0.733295	3.26184	2300.2	FALSE	87
2022-09-13	11:47:54	0.738639	3.28561	2380.45	FALSE	87
2022-09-13	11:47:54	0.731819	3.25528	2303.46	FALSE	87
2022-09-13	11:47:55	0.738231	3.2838	2383.73	FALSE	87
2022-09-13	11:47:55	0.732939	3.26026	2306.72	FALSE	87
2022-09-13	11:47:55	0.733092	3.26094	2386.99	FALSE	87
2022-09-13	11:47:55	0.387443	1.72342	2308.44	FALSE	87
2022-09-13	11:47:56	0.736654	3.27678	2390.27	FALSE	87
2022-09-13	11:47:56	0.730242	3.24826	2311.69	FALSE	87
2022-09-13	11:47:56	0.734059	3.26524	2393.54	FALSE	87
2022-09-13	11:47:57	0.733601	3.2632	2314.95	FALSE	87
2022-09-13	11:47:57	0.736603	3.27656	2396.81	FALSE	87
2022-09-13	11:47:57	0.735585	3.27203	2318.22	FALSE	87
2022-09-13	11:47:57	0.733092	3.26094	2400.07	FALSE	87
2022-09-13	11:47:58	0.737163	3.27905	2321.5	FALSE	87
2022-09-13	11:47:58	0.730242	3.24826	2403.32	FALSE	87
2022-09-13	11:47:58	0.731056	3.25188	2324.75	FALSE	87
2022-09-13	11:47:58	0.737061	3.27859	2406.6	FALSE	87
2022-09-13	11:47:59	0.735534	3.2718	2328.03	FALSE	87
2022-09-13	11:47:59	0.735534	3.2718	2409.87	FALSE	87
2022-09-13	11:47:59	0.733753	3.26388	2331.29	FALSE	87
2022-09-13	11:47:59	0.741234	3.29716	2413.17	FALSE	87
2022-09-13	11:48:00	0.739097	3.28765	2334.58	FALSE	87
2022-09-13	11:48:00	0.737672	3.28131	2416.45	FALSE	87
2022-09-13	11:48:00	0.732684	3.25912	2337.84	FALSE	87
2022-09-13	11:48:01	0.739351	3.28878	2419.74	FALSE	87
2022-09-13	11:48:01	0.732634	3.2589	2341.1	FALSE	87
2022-09-13	11:48:01	0.736908	3.27791	2423.02	FALSE	87
2022-09-13	11:48:01	0.728817	3.24192	2344.34	FALSE	87
2022-09-13	11:48:02	0.73243	3.258	2426.28	FALSE	87
2022-09-13	11:48:02	0.734262	3.26614	2347.6	FALSE	87
2022-09-13	11:48:02	0.490649	2.1825	2428.46	FALSE	87
2022-09-13	11:48:02	0.691209	3.07464	2350.68	FALSE	87
2022-09-13	11:48:03	0.714109	3.1765	2431.64	FALSE	87
2022-09-13	11:48:03	0.705611	3.1387	2353.82	FALSE	87
2022-09-13	11:48:03	0.660929	2.93994	2434.58	FALSE	87
2022-09-13	11:48:03	0.664593	2.95624	2356.77	FALSE	87
2022-09-13	11:48:04	0.677468	3.01351	2437.59	FALSE	87
2022-09-13	11:48:04	0.672379	2.99088	2359.76	FALSE	87
2022-09-13	11:48:04	0.671972	2.98907	2440.58	FALSE	87
2022-09-13	11:48:05	0.641692	2.85437	2362.62	FALSE	87
2022-09-13	11:48:05	0.615789	2.73915	2443.32	FALSE	87
2022-09-13	11:48:05	0.535025	2.3799	2365	FALSE	87
2022-09-13	11:48:05	0.549784	2.44555	2445.76	FALSE	87
2022-09-13	11:48:06	0.543422	2.41725	2367.42	FALSE	87
2022-09-13	11:48:06	0.597774	2.65902	2448.42	FALSE	87
2022-09-13	11:48:06	0.46841	2.08358	2369.5	FALSE	87
2022-09-13	11:48:06	0.485916	2.16145	2450.58	FALSE	87
2022-09-13	11:48:07	0.466527	2.07521	2371.57	FALSE	87
2022-09-13	11:48:07	0.461743	2.05393	2452.64	FALSE	87
2022-09-13	11:48:07	0.461896	2.05461	2373.63	FALSE	87
2022-09-13	11:48:07	0.436145	1.94006	2454.58	FALSE	87
2022-09-13	11:48:08	0.465865	2.07226	2375.7	FALSE	87
2022-09-13	11:48:08	0.450649	2.00458	2456.58	FALSE	87
2022-09-13	11:48:08	0.401438	1.78568	2377.49	FALSE	87
2022-09-13	11:48:09	0.464339	2.06547	2458.65	FALSE	87
2022-09-13	11:48:09	0.461998	2.05506	2379.54	FALSE	87
2022-09-13	11:48:09	0.424593	1.88867	2460.54	FALSE	87
2022-09-13	11:48:09	0.339199	1.50882	2381.05	FALSE	87
2022-09-13	11:48:10	0.386425	1.7189	2462.25	FALSE	87
2022-09-13	11:48:10	0.425916	1.89456	2382.95	FALSE	87
2022-09-13	11:48:10	0.397214	1.76689	2464.02	FALSE	87
2022-09-13	11:48:10	0.410445	1.82574	2384.77	FALSE	87
2022-09-13	11:48:11	0.386832	1.72071	2465.74	FALSE	87
2022-09-13	11:48:11	0.433295	1.92738	2386.7	FALSE	87
2022-09-13	11:48:11	0.508562	2.26219	2468	FALSE	87
2022-09-13	11:48:11	0.349275	1.55365	2388.25	FALSE	87
2022-09-13	11:48:12	0.361082	1.60616	2469.61	FALSE	87
2022-09-13	11:48:12	0.395789	1.76055	2390.01	FALSE	87
2022-09-13	11:48:12	0.326272	1.45132	2471.06	FALSE	87
2022-09-13	11:48:13	0.344389	1.53191	2391.54	FALSE	87
2022-09-13	11:48:13	0.304898	1.35625	2472.42	FALSE	87
2022-09-13	11:48:13	0.302964	1.34764	2392.89	FALSE	87
2022-09-13	11:48:13	0.282405	1.25619	2473.67	FALSE	87
2022-09-13	11:48:14	0.250547	1.11448	2394.01	FALSE	87
2022-09-13	11:48:14	0.286069	1.27249	2474.95	FALSE	87
2022-09-13	11:48:14	0.159911	0.711316	2394.72	FALSE	87
2022-09-13	11:48:14	0.196451	0.873853	2475.82	FALSE	87
2022-09-13	11:48:15	0.284847	1.26706	2395.99	FALSE	87
2022-09-13	11:48:15	0.26668	1.18625	2477.01	FALSE	87
2022-09-13	11:48:15	0.217265	0.966438	2396.95	FALSE	87
2022-09-13	11:48:15	0.0430155	0.191342	2477.2	FALSE	87
2022-09-13	11:48:16	0.06556	0.291624	2397.24	FALSE	87
2022-09-13	11:48:16	0.107138	0.476571	2477.67	FALSE	87
2022-09-13	11:48:16	0.0604709	0.268987	2397.51	FALSE	87
2022-09-13	11:48:17	0.0394023	0.175269	2477.85	FALSE	87
2022-09-13	11:48:17	0.018588	0.0826831	2397.6	FALSE	87
2022-09-13	11:48:17	0.0389443	0.173232	2478.02	FALSE	87
2022-09-13	11:48:17	0.440115	1.95772	2399.55	FALSE	87
2022-09-13	11:48:18	0.748155	3.32794	2481.35	FALSE	87
2022-09-13	11:48:18	0.732735	3.25935	2402.81	FALSE	87
2022-09-13	11:48:18	0.732532	3.25845	2484.61	FALSE	87
2022-09-13	11:48:18	0.729071	3.24305	2406.06	FALSE	87
2022-09-13	11:48:19	0.733448	3.26252	2487.87	FALSE	87
2022-09-13	11:48:19	0.740165	3.2924	2409.35	FALSE	87
2022-09-13	11:48:19	0.737824	3.28199	2491.15	FALSE	87
2022-09-13	11:48:19	0.733702	3.26365	2412.61	FALSE	87
2022-09-13	11:48:20	0.736247	3.27497	2494.43	FALSE	87
2022-09-13	11:48:20	0.736298	3.2752	2415.89	FALSE	87
2022-09-13	11:48:20	0.730445	3.24917	2497.68	FALSE	87
2022-09-13	11:48:20	0.734313	3.26637	2419.15	FALSE	87
2022-09-13	11:48:21	0.734262	3.26614	2500.94	FALSE	87
2022-09-13	11:48:21	0.735891	3.27339	2422.43	FALSE	87
2022-09-13	11:48:21	0.733244	3.26162	2504.21	FALSE	87
2022-09-13	11:48:22	0.743982	3.30938	2425.74	FALSE	87
2022-09-13	11:48:22	0.737875	3.28222	2507.49	FALSE	87
2022-09-13	11:48:22	0.730598	3.24985	2428.99	FALSE	87
2022-09-13	11:48:22	0.731361	3.25324	2510.74	FALSE	87
2022-09-13	11:48:23	0.735534	3.2718	2432.26	FALSE	87
2022-09-13	11:48:23	0.736908	3.27791	2514.02	FALSE	87
2022-09-13	11:48:23	0.729478	3.24486	2435.5	FALSE	87
2022-09-13	11:48:23	0.740216	3.29263	2517.31	FALSE	87
2022-09-13	11:48:24	0.737824	3.28199	2438.78	FALSE	87
2022-09-13	11:48:24	0.730649	3.25007	2520.56	FALSE	87
2022-09-13	11:48:24	0.733346	3.26207	2442.05	FALSE	87
2022-09-13	11:48:24	0.733295	3.26184	2523.82	FALSE	87
2022-09-13	11:48:25	0.730801	3.25075	2445.3	FALSE	87
2022-09-13	11:48:25	0.727799	3.2374	2527.06	FALSE	87
2022-09-13	11:48:25	0.727494	3.23604	2448.53	FALSE	87
2022-09-13	11:48:26	0.729529	3.24509	2530.31	FALSE	87
2022-09-13	11:48:26	0.72958	3.24532	2451.78	FALSE	87
2022-09-13	11:48:26	0.729122	3.24328	2533.55	FALSE	87
2022-09-13	11:48:26	0.724389	3.22223	2455	FALSE	87
2022-09-13	11:48:27	0.732328	3.25754	2536.81	FALSE	87
2022-09-13	11:48:27	0.736247	3.27497	2458.28	FALSE	87
2022-09-13	11:48:27	0.738537	3.28516	2540.09	FALSE	87
2022-09-13	11:48:27	0.732074	3.25641	2461.53	FALSE	87
2022-09-13	11:48:28	0.734466	3.26705	2543.36	FALSE	87
2022-09-13	11:48:28	0.729071	3.24305	2464.77	FALSE	87
2022-09-13	11:48:28	0.737061	3.27859	2546.64	FALSE	87
2022-09-13	11:48:28	0.728613	3.24102	2468.02	FALSE	87
2022-09-13	11:48:29	0.73187	3.2555	2549.89	FALSE	87
2022-09-13	11:48:29	0.729886	3.24668	2471.26	FALSE	87
2022-09-13	11:48:29	0.735026	3.26954	2553.16	FALSE	87
2022-09-13	11:48:30	0.734517	3.26728	2474.53	FALSE	87
2022-09-13	11:48:30	0.732532	3.25845	2556.42	FALSE	87
2022-09-13	11:48:30	0.729173	3.24351	2477.77	FALSE	87
2022-09-13	11:48:30	0.735636	3.27226	2559.69	FALSE	87
2022-09-13	11:48:31	0.734364	3.2666	2481.04	FALSE	87
2022-09-13	11:48:31	0.736145	3.27452	2562.97	FALSE	87
2022-09-13	11:48:31	0.731412	3.25347	2484.29	FALSE	87
2022-09-13	11:48:31	0.739809	3.29082	2566.26	FALSE	87
2022-09-13	11:48:32	0.735331	3.2709	2487.56	FALSE	87
2022-09-13	11:48:32	0.734618	3.26773	2569.53	FALSE	87
2022-09-13	11:48:32	0.727443	3.23581	2490.8	FALSE	87
2022-09-13	11:48:32	0.747137	3.32341	2572.85	FALSE	87
2022-09-13	11:48:33	-0.0948979	-0.422125	2490.8	FALSE	87
2022-09-13	11:48:33	0.0815905	0.362931	2573.21	FALSE	87
2022-09-13	11:48:33	-0.0530659	-0.236048	2490.8	FALSE	87
2022-09-13	11:48:34	0.0552801	0.245897	2573.46	FALSE	87
2022-09-13	11:48:34	0.00810459	0.0360508	2490.84	FALSE	87
2022-09-13	11:48:34	0.260471	1.15863	2574.62	FALSE	87
2022-09-13	11:48:34	0.308155	1.37074	2492.21	FALSE	87
2022-09-13	11:48:35	0.324847	1.44498	2576.06	FALSE	87
2022-09-13	11:48:35	0.474059	2.10871	2494.32	FALSE	87
2022-09-13	11:48:35	0.848562	3.77457	2579.84	FALSE	87
2022-09-13	11:48:35	0.620522	2.76021	2497.08	FALSE	87
2022-09-13	11:48:36	0.610954	2.71765	2582.55	FALSE	87
2022-09-13	11:48:36	0.745763	3.3173	2500.39	FALSE	87
2022-09-13	11:48:36	0.66098	2.94017	2585.5	FALSE	87
2022-09-13	11:48:36	0.735433	3.27135	2503.66	FALSE	87
2022-09-13	11:48:37	0.7107	3.16134	2588.66	FALSE	87
2022-09-13	11:48:37	0.708511	3.1516	2506.82	FALSE	87
2022-09-13	11:48:37	0.664287	2.95488	2591.61	FALSE	87
2022-09-13	11:48:38	0.606578	2.69818	2509.51	FALSE	87
2022-09-13	11:48:38	0.549071	2.44238	2594.05	FALSE	87
2022-09-13	11:48:38	0.520013	2.31312	2511.83	FALSE	87
2022-09-13	11:48:38	0.40159	1.78635	2595.84	FALSE	87
2022-09-13	11:48:39	0.308868	1.37391	2513.2	FALSE	87
2022-09-13	11:48:39	0.067901	0.302037	2596.14	FALSE	87
2022-09-13	11:48:39	0.0791987	0.352292	2513.55	FALSE	87
2022-09-13	11:48:39	0.222303	0.988848	2597.13	FALSE	87
2022-09-13	11:48:40	0.13411	0.596548	2514.15	FALSE	87
2022-09-13	11:48:40	0.135993	0.604924	2597.74	FALSE	87
2022-09-13	11:48:40	-0.0663992	-0.295357	2514.15	FALSE	87
2022-09-13	11:48:40	0.154313	0.686415	2598.42	FALSE	87
2022-09-13	11:48:41	0.0326847	0.145388	2514.3	FALSE	87
2022-09-13	11:48:41	0.204746	0.910751	2599.33	FALSE	87
2022-09-13	11:48:41	0.11187	0.49762	2514.79	FALSE	87
2022-09-13	11:48:41	0.720878	3.20661	2602.54	FALSE	87
2022-09-13	11:48:42	2.14856	9.55722	2524.35	FALSE	87
2022-09-13	11:48:42	2.31737	10.3081	2612.85	FALSE	87
2022-09-13	11:48:42	2.36933	10.5393	2534.89	FALSE	87
2022-09-13	11:48:43	1.28495	5.71571	2618.56	FALSE	87
2022-09-13	11:48:43	2.85497	12.6995	2547.59	FALSE	87
2022-09-13	11:48:43	1.17513	5.22721	2623.79	FALSE	87
2022-09-13	11:48:43	3.64072	16.1947	2563.78	1	88
2022-09-13	11:48:44	2.38393	10.6042	2634.39	FALSE	88
2022-09-13	11:48:44	1.78963	7.96063	2571.74	FALSE	88
2022-09-13	11:48:44	3.52729	15.6901	2650.09	1	89
2022-09-13	11:48:44	2.58826	11.5131	2583.26	FALSE	89
2022-09-13	11:48:45	2.68882	11.9604	2662.05	FALSE	89
2022-09-13	11:48:45	3.27345	14.561	2597.82	1	90
2022-09-13	11:48:45	1.27787	5.68422	2667.73	FALSE	90
2022-09-13	11:48:45	3.3107	14.7267	2612.55	1	91
2022-09-13	11:48:46	1.20688	5.36844	2673.1	FALSE	91
2022-09-13	11:48:46	2.2109	9.83453	2622.38	FALSE	91
2022-09-13	11:48:46	2.1195	9.42796	2682.53	FALSE	91
2022-09-13	11:48:47	1.13854	5.06445	2627.44	FALSE	91
2022-09-13	11:48:47	1.8794	8.35995	2690.89	FALSE	91
2022-09-13	11:48:47	1.42805	6.35225	2633.8	FALSE	91
2022-09-13	11:48:47	2.62775	11.6888	2702.57	FALSE	91
2022-09-13	11:48:48	3.13681	13.9532	2647.75	1	92
2022-09-13	11:48:48	3.96734	17.6475	2720.22	1	93
2022-09-13	11:48:48	7.31808	32.5523	2680.3	1	94
2022-09-13	11:48:48	1.29202	5.74716	2725.97	FALSE	94
2022-09-13	11:48:49	4.21085	18.7307	2699.03	1	95
2022-09-13	11:48:49	2.07335	9.22268	2735.19	FALSE	95
2022-09-13	11:48:49	2.47421	11.0058	2710.04	FALSE	95
2022-09-13	11:48:49	4.77513	21.2407	2756.43	1	96
2022-09-13	11:48:50	2.64037	11.7449	2721.78	FALSE	96
2022-09-13	11:48:50	5.71064	25.4021	2781.83	1	97
2022-09-13	11:48:50	2.25889	10.048	2731.83	FALSE	97
2022-09-13	11:48:51	2.26948	10.0951	2791.93	FALSE	97
2022-09-13	11:48:51	3.50103	15.5733	2747.4	1	98
2022-09-13	11:48:51	0.796705	3.5439	2795.47	FALSE	98
2022-09-13	11:48:51	1.06011	4.71558	2752.12	FALSE	98
2022-09-13	11:48:52	1.16062	5.16267	2800.64	FALSE	98
2022-09-13	11:48:52	0.905814	4.02924	2756.15	FALSE	98
2022-09-13	11:48:52	1.708	7.59753	2808.23	FALSE	98
2022-09-13	11:48:52	0.587748	2.61442	2758.76	FALSE	98
2022-09-13	11:48:53	2.14561	9.5441	2817.78	FALSE	98
2022-09-13	11:48:53	0.947392	4.21419	2762.98	FALSE	98
2022-09-13	11:48:53	1.28159	5.70077	2823.48	FALSE	98
2022-09-13	11:48:53	1.1678	5.19461	2768.17	FALSE	98
2022-09-13	11:48:54	1.21014	5.38294	2828.86	FALSE	98
2022-09-13	11:48:54	0.744694	3.31255	2771.49	FALSE	98
2022-09-13	11:48:54	0.973651	4.33099	2833.19	FALSE	98
2022-09-13	11:48:55	1.33798	5.9516	2777.44	FALSE	98
2022-09-13	11:48:55	1.54159	6.8573	2840.05	FALSE	98
2022-09-13	11:48:55	1.64525	7.3184	2784.76	FALSE	98
2022-09-13	11:48:55	1.10805	4.92883	2844.98	FALSE	98
2022-09-13	11:48:56	1.85223	8.23909	2792.99	FALSE	98
2022-09-13	11:48:56	0.435687	1.93802	2846.92	FALSE	98
2022-09-13	11:48:56	0.649936	2.89105	2795.89	FALSE	98
2022-09-13	11:48:56	0.294109	1.30826	2848.23	FALSE	98
2022-09-13	11:48:57	0.430802	1.91629	2797.8	FALSE	98
2022-09-13	11:48:57	0.537774	2.39213	2850.62	FALSE	98
2022-09-13	11:48:57	0.544593	2.42246	2800.22	FALSE	98
2022-09-13	11:48:57	0.566679	2.5207	2853.14	FALSE	98
2022-09-13	11:48:58	1.24413	5.53414	2805.76	FALSE	98
2022-09-13	11:48:58	0.82958	3.69014	2856.83	FALSE	98
2022-09-13	11:48:58	0.709122	3.15432	2808.91	FALSE	98
2022-09-13	11:48:59	0.831718	3.69965	2860.53	FALSE	98
2022-09-13	11:48:59	1.13828	5.0633	2813.98	FALSE	98
2022-09-13	11:48:59	1.15391	5.13282	2865.66	FALSE	98
2022-09-13	11:48:59	1.25894	5.60002	2819.58	FALSE	98
2022-09-13	11:49:00	1.18983	5.2926	2870.95	FALSE	98
2022-09-13	11:49:00	0.938486	4.17457	2823.75	FALSE	98
2022-09-13	11:49:00	0.792939	3.52715	2874.48	FALSE	98
2022-09-13	11:49:00	0.788613	3.50791	2827.26	FALSE	98
2022-09-13	11:49:01	0.79355	3.52987	2878.01	FALSE	98
2022-09-13	11:49:01	0.749936	3.33587	2830.59	FALSE	98
2022-09-13	11:49:01	0.746323	3.31979	2881.33	FALSE	98
2022-09-13	11:49:01	0.877366	3.9027	2834.5	FALSE	98
2022-09-13	11:49:02	1.1419	5.0794	2886.41	FALSE	98
2022-09-13	11:49:02	1.46749	6.52769	2841.02	FALSE	98
2022-09-13	11:49:02	1.08042	4.80592	2891.22	FALSE	98
2022-09-13	11:49:02	0.879097	3.9104	2844.93	FALSE	98
2022-09-13	11:49:03	0.759605	3.37887	2894.59	FALSE	98
2022-09-13	11:49:03	0.678639	3.01872	2847.95	FALSE	98
2022-09-13	11:49:03	0.588664	2.6185	2897.21	FALSE	98
2022-09-13	11:49:04	0.659453	2.93338	2850.89	FALSE	98
2022-09-13	11:49:04	0.619962	2.75771	2899.97	FALSE	98
2022-09-13	11:49:04	0.471412	2.09693	2852.98	FALSE	98
2022-09-13	11:49:04	0.520522	2.31539	2902.29	FALSE	98
2022-09-13	11:49:05	0.556654	2.47611	2855.46	FALSE	98
2022-09-13	11:49:05	0.681794	3.03276	2905.32	FALSE	98
2022-09-13	11:49:05	0.749733	3.33496	2858.8	FALSE	98
2022-09-13	11:49:05	0.629478	2.80004	2908.12	FALSE	98
2022-09-13	11:49:06	0.410038	1.82393	2860.62	FALSE	98
2022-09-13	11:49:06	0.334975	1.49004	2909.61	FALSE	98
2022-09-13	11:49:06	0.328104	1.45947	2862.08	FALSE	98
2022-09-13	11:49:06	0.420115	1.86876	2911.48	FALSE	98
2022-09-13	11:49:07	0.396298	1.76281	2863.84	FALSE	98
2022-09-13	11:49:07	0.412532	1.83502	2913.31	FALSE	98
2022-09-13	11:49:07	0.325967	1.44997	2865.29	FALSE	98
2022-09-13	11:49:08	0.243931	1.08505	2914.4	FALSE	98
2022-09-13	11:49:08	0.113855	0.50645	2865.8	FALSE	98
2022-09-13	11:49:08	-0.239834	-1.06683	2914.4	FALSE	98
2022-09-13	11:49:08	0.305153	1.35738	2867.16	FALSE	98
2022-09-13	11:49:09	0.122099	0.543121	2914.94	FALSE	98
2022-09-13	11:49:09	0.0389443	0.173232	2867.33	FALSE	98
2022-09-13	11:49:09	0.144033	0.640688	2915.58	FALSE	98
2022-09-13	11:49:09	0.192685	0.857101	2868.19	FALSE	98
2022-09-13	11:49:10	0.345356	1.53621	2917.12	FALSE	98
2022-09-13	11:49:10	1.02098	4.54152	2872.73	FALSE	98
2022-09-13	11:49:10	3.09563	13.77	2930.89	1	99
2022-09-13	11:49:10	2.92413	13.0071	2885.73	FALSE	99

## Sheet: Juju_prong_202291311448 (2)
Date	Time	Lbs	Total force x time			**GoPro Fitting: 1133
2022-09-13	11:44:10	1.01971	1.01971	FALSE	0			Total force x time	1307.63
2022-09-13	11:44:10	1.45645	2.47616	FALSE	0			Total steps	99
2022-09-13	11:44:10	1.49971	3.97587	FALSE	0
2022-09-13	11:44:10	1.15431	5.13018	FALSE	0
2022-09-13	11:44:11	1.00383	6.13401	FALSE	0
2022-09-13	11:44:11	0.965967	7.09998	FALSE	0
2022-09-13	11:44:11	0.918995	8.01897	FALSE	0
2022-09-13	11:44:12	0.907036	8.92601	FALSE	0
2022-09-13	11:44:12	0.833397	9.7594	FALSE	0
2022-09-13	11:44:12	0.841896	10.6013	FALSE	0
2022-09-13	11:44:12	0.819046	11.4203	FALSE	0
2022-09-13	11:44:13	0.780623	12.201	FALSE	0
2022-09-13	11:44:13	0.855433	13.0564	FALSE	0
2022-09-13	11:44:13	0.873092	13.9295	FALSE	0
2022-09-13	11:44:13	0.859911	14.7894	FALSE	0
2022-09-13	11:44:14	0.685051	15.4745	FALSE	0
2022-09-13	11:44:14	0.562964	16.0374	FALSE	0
2022-09-13	11:44:14	0.452837	16.4903	FALSE	0
2022-09-13	11:44:14	0.481845	16.9721	FALSE	0
2022-09-13	11:44:15	0.424084	17.3962	FALSE	0
2022-09-13	11:44:15	0.420318	17.8165	FALSE	0
2022-09-13	11:44:15	0.329021	18.1455	FALSE	0
2022-09-13	11:44:16	0.462507	18.608	FALSE	0
2022-09-13	11:44:16	0.427901	19.0359	FALSE	0
2022-09-13	11:44:16	0.281998	19.3179	FALSE	0
2022-09-13	11:44:16	0.268715	19.5866	FALSE	0
2022-09-13	11:44:17	0.369479	19.9561	FALSE	0
2022-09-13	11:44:17	0.307545	20.2637	FALSE	0
2022-09-13	11:44:17	0.381489	20.6452	FALSE	0
2022-09-13	11:44:17	0.396043	21.0412	FALSE	0
2022-09-13	11:44:18	0.482456	21.5237	FALSE	0
2022-09-13	11:44:18	0.335076	21.8587	FALSE	0
2022-09-13	11:44:18	0.424033	22.2828	FALSE	0
2022-09-13	11:44:18	0.365763	22.6485	FALSE	0
2022-09-13	11:44:19	0.347392	22.9959	FALSE	0
2022-09-13	11:44:19	0.363982	23.3599	FALSE	0
2022-09-13	11:44:19	0.33701	23.6969	FALSE	0
2022-09-13	11:44:20	0.33472	24.0316	FALSE	0
2022-09-13	11:44:20	0.347494	24.3791	FALSE	0
2022-09-13	11:44:20	0.372125	24.7513	FALSE	0
2022-09-13	11:44:20	0.324949	25.0762	FALSE	0
2022-09-13	11:44:21	0.624847	25.701	FALSE	0
2022-09-13	11:44:21	1.07981	26.7809	FALSE	0
2022-09-13	11:44:21	3.25238	30.0332	1	1
2022-09-13	11:44:21	2.63233	32.6656	FALSE	1
2022-09-13	11:44:22	1.84256	34.5081	FALSE	1
2022-09-13	11:44:22	1.27106	35.7792	FALSE	1
2022-09-13	11:44:22	0.985458	36.7646	FALSE	1
2022-09-13	11:44:22	1.65167	38.4163	FALSE	1
2022-09-13	11:44:23	4.205	42.6213	1	2
2022-09-13	11:44:23	3.67813	46.2994	1	3
2022-09-13	11:44:23	3.90968	50.2091	1	4
2022-09-13	11:44:24	3.61105	53.8202	1	5
2022-09-13	11:44:24	2.71828	56.5385	FALSE	5
2022-09-13	11:44:24	0.502964	57.0414	FALSE	5
2022-09-13	11:44:24	0.659148	57.7006	FALSE	5
2022-09-13	11:44:25	0.226629	57.9272	FALSE	5
2022-09-13	11:44:25	0.139606	58.0668	FALSE	5
2022-09-13	11:44:25	-0.00131018	58.0668	FALSE	5
2022-09-13	11:44:25	-0.17785	58.0668	FALSE	5
2022-09-13	11:44:26	-0.161921	58.0668	FALSE	5
2022-09-13	11:44:26	4.5195	62.5863	1	6
2022-09-13	11:44:26	14.4645	77.0508	1	7
2022-09-13	11:44:26	6.3024	83.3532	1	8
2022-09-13	11:44:27	4.21426	87.5675	1	9
2022-09-13	11:44:27	1.66744	89.2349	FALSE	9
2022-09-13	11:44:27	1.05055	90.2855	FALSE	9
2022-09-13	11:44:28	0.947595	91.2331	FALSE	9
2022-09-13	11:44:28	0.483931	91.717	FALSE	9
2022-09-13	11:44:28	0.402099	92.1191	FALSE	9
2022-09-13	11:44:28	0.372074	92.4912	FALSE	9
2022-09-13	11:44:29	0.612939	93.1041	FALSE	9
2022-09-13	11:44:29	1.97421	95.0783	FALSE	9
2022-09-13	11:44:29	2.76714	97.8454	FALSE	9
2022-09-13	11:44:29	1.77793	99.6234	FALSE	9
2022-09-13	11:44:30	2.06978	101.693	FALSE	9
2022-09-13	11:44:30	3.28144	104.975	1	10
2022-09-13	11:44:30	3.54546	108.52	1	11
2022-09-13	11:44:30	3.18586	111.706	1	12
2022-09-13	11:44:31	5.40118	117.107	1	13
2022-09-13	11:44:31	6.5279	123.635	1	14
2022-09-13	11:44:31	5.60179	129.237	1	15
2022-09-13	11:44:32	4.99538	134.232	1	16
2022-09-13	11:44:32	4.48062	138.713	1	17
2022-09-13	11:44:32	4.63675	143.35	1	18
2022-09-13	11:44:32	6.08647	149.436	1	19
2022-09-13	11:44:33	5.47858	154.915	1	20
2022-09-13	11:44:33	8.03507	162.95	1	21
2022-09-13	11:44:33	8.11415	171.064	1	22
2022-09-13	11:44:33	6.11069	177.174	1	23
2022-09-13	11:44:34	1.31095	178.485	FALSE	23
2022-09-13	11:44:34	0.663982	179.149	FALSE	23
2022-09-13	11:44:34	0.894211	180.044	FALSE	23
2022-09-13	11:44:34	1.20734	181.251	FALSE	23
2022-09-13	11:44:35	0.692735	181.944	FALSE	23
2022-09-13	11:44:35	0.527544	182.471	FALSE	23
2022-09-13	11:44:35	0.349478	182.821	FALSE	23
2022-09-13	11:44:35	0.32444	183.145	FALSE	23
2022-09-13	11:44:36	0.414109	183.559	FALSE	23
2022-09-13	11:44:36	0.259708	183.819	FALSE	23
2022-09-13	11:44:36	0.17411	183.993	FALSE	23
2022-09-13	11:44:37	0.123982	184.117	FALSE	23
2022-09-13	11:44:37	0.107799	184.225	FALSE	23
2022-09-13	11:44:37	0.110293	184.335	FALSE	23
2022-09-13	11:44:37	0.248766	184.584	FALSE	23
2022-09-13	11:44:38	0.135993	184.72	FALSE	23
2022-09-13	11:44:38	0.216247	184.936	FALSE	23
2022-09-13	11:44:38	0.201336	185.138	FALSE	23
2022-09-13	11:44:38	0.334517	185.472	FALSE	23
2022-09-13	11:44:39	0.912532	186.385	FALSE	23
2022-09-13	11:44:39	1.09528	187.48	FALSE	23
2022-09-13	11:44:39	0.999504	188.479	FALSE	23
2022-09-13	11:44:39	1.40678	189.886	FALSE	23
2022-09-13	11:44:40	1.53411	191.42	FALSE	23
2022-09-13	11:44:40	1.53472	192.955	FALSE	23
2022-09-13	11:44:40	1.28098	194.236	FALSE	23
2022-09-13	11:44:41	0.699962	194.936	FALSE	23
2022-09-13	11:44:41	0.632634	195.569	FALSE	23
2022-09-13	11:44:41	0.423321	195.992	FALSE	23
2022-09-13	11:44:41	0.29584	196.288	FALSE	23
2022-09-13	11:44:42	0.380216	196.668	FALSE	23
2022-09-13	11:44:42	0.157875	196.826	FALSE	23
2022-09-13	11:44:42	0.354211	197.18	FALSE	23
2022-09-13	11:44:42	0.0481046	197.228	FALSE	23
2022-09-13	11:44:43	-0.266297	197.228	FALSE	23
2022-09-13	11:44:43	-0.194287	197.228	FALSE	23
2022-09-13	11:44:43	0.0635753	197.292	FALSE	23
2022-09-13	11:44:43	0.0836262	197.375	FALSE	23
2022-09-13	11:44:44	-0.417544	197.375	FALSE	23
2022-09-13	11:44:44	-0.715559	197.375	FALSE	23
2022-09-13	11:44:44	-0.294949	197.375	FALSE	23
2022-09-13	11:44:45	0.266781	197.642	FALSE	23
2022-09-13	11:44:45	1.36515	199.007	FALSE	23
2022-09-13	11:44:45	0.875229	199.882	FALSE	23
2022-09-13	11:44:45	1.89966	201.782	FALSE	23
2022-09-13	11:44:46	1.66744	203.45	FALSE	23
2022-09-13	11:44:46	2.07655	205.526	FALSE	23
2022-09-13	11:44:46	0.527748	206.054	FALSE	23
2022-09-13	11:44:47	1.67457	207.728	FALSE	23
2022-09-13	11:44:47	2.17467	209.903	FALSE	23
2022-09-13	11:44:47	1.75625	211.659	FALSE	23
2022-09-13	11:44:47	1.97009	213.629	FALSE	23
2022-09-13	11:44:47	0.527494	214.157	FALSE	23
2022-09-13	11:44:48	1.71065	215.868	FALSE	23
2022-09-13	11:44:48	3.99569	219.863	1	24
2022-09-13	11:44:48	7.63024	227.494	1	25
2022-09-13	11:44:49	15.7746	243.268	1	26
2022-09-13	11:44:49	2.868	246.136	FALSE	26
2022-09-13	11:44:49	3.44698	249.583	1	27
2022-09-13	11:44:49	3.41864	253.002	1	28
2022-09-13	11:44:50	4.23309	257.235	1	29
2022-09-13	11:44:50	6.14769	263.383	1	30
2022-09-13	11:44:50	3.89798	267.28	1	31
2022-09-13	11:44:50	4.18118	271.462	1	32
2022-09-13	11:44:51	1.47701	272.939	FALSE	32
2022-09-13	11:44:51	1.43696	274.376	FALSE	32
2022-09-13	11:44:51	0.664746	275.04	FALSE	32
2022-09-13	11:44:51	0.275025	275.315	FALSE	32
2022-09-13	11:44:52	0.545865	275.861	FALSE	32
2022-09-13	11:44:52	0.168257	276.03	FALSE	32
2022-09-13	11:44:52	0.580522	276.61	FALSE	32
2022-09-13	11:44:53	0.312583	276.923	FALSE	32
2022-09-13	11:44:53	0.459758	277.382	FALSE	32
2022-09-13	11:44:53	0.780674	278.163	FALSE	32
2022-09-13	11:44:53	0.383728	278.547	FALSE	32
2022-09-13	11:44:54	0.59757	279.144	FALSE	32
2022-09-13	11:44:54	0.14098	279.285	FALSE	32
2022-09-13	11:44:54	0.465916	279.751	FALSE	32
2022-09-13	11:44:54	0.225	279.976	FALSE	32
2022-09-13	11:44:55	0.379046	280.355	FALSE	32
2022-09-13	11:44:55	0.855992	281.211	FALSE	32
2022-09-13	11:44:55	1.33335	282.545	FALSE	32
2022-09-13	11:44:55	1.92169	284.466	FALSE	32
2022-09-13	11:44:56	1.57289	286.039	FALSE	32
2022-09-13	11:44:56	1.31274	287.352	FALSE	32
2022-09-13	11:44:56	0.340216	287.692	FALSE	32
2022-09-13	11:44:57	1.11116	288.803	FALSE	32
2022-09-13	11:44:57	0.522404	289.326	FALSE	32
2022-09-13	11:44:57	0.794058	290.12	FALSE	32
2022-09-13	11:44:57	0.789834	290.91	FALSE	32
2022-09-13	11:44:58	0.417672	291.327	FALSE	32
2022-09-13	11:44:58	0.718588	292.046	FALSE	32
2022-09-13	11:44:58	0.3793	292.425	FALSE	32
2022-09-13	11:44:58	0.677163	293.102	FALSE	32
2022-09-13	11:44:59	0.659708	293.762	FALSE	32
2022-09-13	11:44:59	0.805611	294.568	FALSE	32
2022-09-13	11:44:59	1.36352	295.931	FALSE	32
2022-09-13	11:44:59	0.939656	296.871	FALSE	32
2022-09-13	11:45:00	1.80989	298.681	FALSE	32
2022-09-13	11:45:00	0.700318	299.381	FALSE	32
2022-09-13	11:45:00	2.05782	301.439	FALSE	32
2022-09-13	11:45:00	1.00541	302.444	FALSE	32
2022-09-13	11:45:01	1.42912	303.873	FALSE	32
2022-09-13	11:45:01	2.84749	306.721	FALSE	32
2022-09-13	11:45:01	2.11457	308.835	FALSE	32
2022-09-13	11:45:02	5.19451	314.03	1	33
2022-09-13	11:45:02	2.73813	316.768	FALSE	33
2022-09-13	11:45:02	7.01477	323.783	1	34
2022-09-13	11:45:02	1.98968	325.773	FALSE	34
2022-09-13	11:45:03	3.29772	329.07	1	35
2022-09-13	11:45:03	2.87207	331.942	FALSE	35
2022-09-13	11:45:03	1.31655	333.259	FALSE	35
2022-09-13	11:45:03	1.22632	334.485	FALSE	35
2022-09-13	11:45:04	0.895432	335.381	FALSE	35
2022-09-13	11:45:04	0.734466	336.115	FALSE	35
2022-09-13	11:45:04	1.23599	337.351	FALSE	35
2022-09-13	11:45:04	0.965662	338.317	FALSE	35
2022-09-13	11:45:05	2.61757	340.934	FALSE	35
2022-09-13	11:45:05	1.88561	342.82	FALSE	35
2022-09-13	11:45:05	2.51482	345.335	FALSE	35
2022-09-13	11:45:06	4.30882	349.644	1	36
2022-09-13	11:45:06	2.65421	352.298	FALSE	36
2022-09-13	11:45:06	7.81986	360.118	1	37
2022-09-13	11:45:06	1.32999	361.448	FALSE	37
2022-09-13	11:45:07	4.65472	366.102	1	38
2022-09-13	11:45:07	1.13106	367.233	FALSE	38
2022-09-13	11:45:07	0.940013	368.173	FALSE	38
2022-09-13	11:45:07	2.82856	371.002	FALSE	38
2022-09-13	11:45:08	1.88373	372.886	FALSE	38
2022-09-13	11:45:08	3.51212	376.398	1	39
2022-09-13	11:45:08	7.28551	383.683	1	40
2022-09-13	11:45:08	4.36754	388.051	1	41
2022-09-13	11:45:09	8.26571	396.317	1	42
2022-09-13	11:45:09	1.94113	398.258	FALSE	42
2022-09-13	11:45:09	4.84373	403.101	1	43
2022-09-13	11:45:10	3.18831	406.29	1	44
2022-09-13	11:45:10	3.33426	409.624	1	45
2022-09-13	11:45:10	8.06591	417.69	1	46
2022-09-13	11:45:10	2.9964	420.686	FALSE	46
2022-09-13	11:45:11	5.02077	425.707	1	47
2022-09-13	11:45:11	3.67263	429.38	1	48
2022-09-13	11:45:11	1.87299	431.253	FALSE	48
2022-09-13	11:45:11	6.04963	437.302	1	49
2022-09-13	11:45:12	2.16439	439.467	FALSE	49
2022-09-13	11:45:12	4.69497	444.162	1	50
2022-09-13	11:45:12	4.85604	449.018	1	51
2022-09-13	11:45:12	2.71467	451.732	FALSE	51
2022-09-13	11:45:13	4.70149	456.434	1	52
2022-09-13	11:45:13	2.92632	459.36	FALSE	52
2022-09-13	11:45:13	2.14363	461.504	FALSE	52
2022-09-13	11:45:14	5.70459	467.208	1	53
2022-09-13	11:45:14	1.55024	468.759	FALSE	53
2022-09-13	11:45:14	5.31665	474.075	1	54
2022-09-13	11:45:14	3.18434	477.26	1	55
2022-09-13	11:45:15	2.38301	479.643	FALSE	55
2022-09-13	11:45:15	3.0594	482.702	1	56
2022-09-13	11:45:15	1.67314	484.375	FALSE	56
2022-09-13	11:45:15	3.18006	487.555	1	57
2022-09-13	11:45:16	1.45574	489.011	FALSE	57
2022-09-13	11:45:16	1.77457	490.786	FALSE	57
2022-09-13	11:45:16	2.42546	493.211	FALSE	57
2022-09-13	11:45:16	1.0881	494.299	FALSE	57
2022-09-13	11:45:17	2.85594	497.155	FALSE	57
2022-09-13	11:45:17	1.09665	498.252	FALSE	57
2022-09-13	11:45:17	1.37503	499.627	FALSE	57
2022-09-13	11:45:18	0.578282	500.205	FALSE	57
2022-09-13	11:45:18	0.593906	500.799	FALSE	57
2022-09-13	11:45:18	2.16846	502.967	FALSE	57
2022-09-13	11:45:18	1.8733	504.841	FALSE	57
2022-09-13	11:45:19	3.40037	508.241	1	58
2022-09-13	11:45:19	1.11106	509.352	FALSE	58
2022-09-13	11:45:19	1.54373	510.896	FALSE	58
2022-09-13	11:45:19	0.982608	511.879	FALSE	58
2022-09-13	11:45:20	0.301641	512.18	FALSE	58
2022-09-13	11:45:20	0.733295	512.913	FALSE	58
2022-09-13	11:45:20	0.362863	513.276	FALSE	58
2022-09-13	11:45:20	0.882863	514.159	FALSE	58
2022-09-13	11:45:21	1.12495	515.284	FALSE	58
2022-09-13	11:45:21	1.99676	517.281	FALSE	58
2022-09-13	11:45:21	2.24551	519.526	FALSE	58
2022-09-13	11:45:21	2.95991	522.486	FALSE	58
2022-09-13	11:45:22	5.28398	527.77	1	59
2022-09-13	11:45:22	2.55803	530.328	FALSE	59
2022-09-13	11:45:22	5.68953	536.018	1	60
2022-09-13	11:45:23	2.7681	538.786	FALSE	60
2022-09-13	11:45:23	4.23935	543.025	1	61
2022-09-13	11:45:23	2.34551	545.371	FALSE	61
2022-09-13	11:45:23	0.806018	546.177	FALSE	61
2022-09-13	11:45:24	1.50515	547.682	FALSE	61
2022-09-13	11:45:24	0.583626	548.266	FALSE	61
2022-09-13	11:45:24	0.803168	549.069	FALSE	61
2022-09-13	11:45:24	1.3734	550.442	FALSE	61
2022-09-13	11:45:25	2.01192	552.454	FALSE	61
2022-09-13	11:45:25	4.11894	556.573	1	62
2022-09-13	11:45:25	1.63716	558.21	FALSE	62
2022-09-13	11:45:25	2.63823	560.848	FALSE	62
2022-09-13	11:45:26	0.654109	561.503	FALSE	62
2022-09-13	11:45:26	0.76556	562.268	FALSE	62
2022-09-13	11:45:26	0.6793	562.947	FALSE	62
2022-09-13	11:45:27	0.506272	563.454	FALSE	62
2022-09-13	11:45:27	0.290547	563.744	FALSE	62
2022-09-13	11:45:27	0.250242	563.994	FALSE	62
2022-09-13	11:45:27	0.439962	564.434	FALSE	62
2022-09-13	11:45:28	2.15635	566.591	FALSE	62
2022-09-13	11:45:28	2.76922	569.36	FALSE	62
2022-09-13	11:45:28	2.98556	572.346	FALSE	62
2022-09-13	11:45:28	3.71482	576.06	1	63
2022-09-13	11:45:29	1.71737	577.778	FALSE	63
2022-09-13	11:45:29	2.7278	580.506	FALSE	63
2022-09-13	11:45:29	1.41223	581.918	FALSE	63
2022-09-13	11:45:29	2.47665	584.394	FALSE	63
2022-09-13	11:45:30	1.56184	585.956	FALSE	63
2022-09-13	11:45:30	2.40938	588.366	FALSE	63
2022-09-13	11:45:30	1.23894	589.605	FALSE	63
2022-09-13	11:45:31	1.80968	591.414	FALSE	63
2022-09-13	11:45:31	0.80617	592.22	FALSE	63
2022-09-13	11:45:31	1.31095	593.531	FALSE	63
2022-09-13	11:45:31	0.366578	593.898	FALSE	63
2022-09-13	11:45:32	0.122914	594.021	FALSE	63
2022-09-13	11:45:32	0.438333	594.459	FALSE	63
2022-09-13	11:45:32	1.08444	595.544	FALSE	63
2022-09-13	11:45:32	1.84561	597.389	FALSE	63
2022-09-13	11:45:33	1.17823	598.567	FALSE	63
2022-09-13	11:45:33	1.81487	600.382	FALSE	63
2022-09-13	11:45:33	1.16775	601.55	FALSE	63
2022-09-13	11:45:33	1.57192	603.122	FALSE	63
2022-09-13	11:45:34	1.45609	604.578	FALSE	63
2022-09-13	11:45:34	1.90062	606.479	FALSE	63
2022-09-13	11:45:34	1.75233	608.231	FALSE	63
2022-09-13	11:45:35	6.25472	614.486	1	64
2022-09-13	11:45:35	8.94861	623.434	1	65
2022-09-13	11:45:35	3.56362	626.998	1	66
2022-09-13	11:45:35	4.77859	631.777	1	67
2022-09-13	11:45:36	3.8707	635.647	1	68
2022-09-13	11:45:36	5.66932	641.317	1	69
2022-09-13	11:45:36	5.25349	646.57	1	70
2022-09-13	11:45:36	2.97889	649.549	FALSE	70
2022-09-13	11:45:37	1.76505	651.314	FALSE	70
2022-09-13	11:45:37	1.3792	652.693	FALSE	70
2022-09-13	11:45:37	1.50525	654.199	FALSE	70
2022-09-13	11:45:37	1.21258	655.411	FALSE	70
2022-09-13	11:45:38	2.04373	657.455	FALSE	70
2022-09-13	11:45:38	3.91874	661.374	1	71
2022-09-13	11:45:38	4.39263	665.766	1	72
2022-09-13	11:45:39	3.02072	668.787	1	73
2022-09-13	11:45:39	2.21314	671	FALSE	73
2022-09-13	11:45:39	1.37843	672.378	FALSE	73
2022-09-13	11:45:39	1.47574	673.854	FALSE	73
2022-09-13	11:45:40	2.45889	676.313	FALSE	73
2022-09-13	11:45:40	1.51823	677.831	FALSE	73
2022-09-13	11:45:40	0.657265	678.489	FALSE	73
2022-09-13	11:45:40	0.223473	678.712	FALSE	73
2022-09-13	11:45:41	0.225763	678.938	FALSE	73
2022-09-13	11:45:41	0.231616	679.169	FALSE	73
2022-09-13	11:45:41	0.169326	679.339	FALSE	73
2022-09-13	11:45:41	0.565458	679.904	FALSE	73
2022-09-13	11:45:42	0.729377	680.634	FALSE	73
2022-09-13	11:45:42	0.732277	681.366	FALSE	73
2022-09-13	11:45:42	0.612939	681.979	FALSE	73
2022-09-13	11:45:43	1.01055	682.989	FALSE	73
2022-09-13	11:45:43	2.0421	685.031	FALSE	73
2022-09-13	11:45:43	1.37808	686.41	FALSE	73
2022-09-13	11:45:43	1.76948	688.179	FALSE	73
2022-09-13	11:45:44	2.51431	690.693	FALSE	73
2022-09-13	11:45:44	2.45981	693.153	FALSE	73
2022-09-13	11:45:44	1.69055	694.844	FALSE	73
2022-09-13	11:45:44	5.85054	700.694	1	74
2022-09-13	11:45:45	4.711	705.405	1	75
2022-09-13	11:45:45	7.34388	712.749	1	76
2022-09-13	11:45:45	5.91212	718.661	1	77
2022-09-13	11:45:45	2.5135	721.175	FALSE	77
2022-09-13	11:45:46	2.16912	723.344	FALSE	77
2022-09-13	11:45:46	1.08113	724.425	FALSE	77
2022-09-13	11:45:46	0.817723	725.243	FALSE	77
2022-09-13	11:45:46	0.901539	726.144	FALSE	77
2022-09-13	11:45:47	0.68215	726.826	FALSE	77
2022-09-13	11:45:47	0.816298	727.643	FALSE	77
2022-09-13	11:45:47	0.653448	728.296	FALSE	77
2022-09-13	11:45:48	0.720623	729.017	FALSE	77
2022-09-13	11:45:48	1.07263	730.089	FALSE	77
2022-09-13	11:45:48	1.46882	731.558	FALSE	77
2022-09-13	11:45:48	2.45971	734.018	FALSE	77
2022-09-13	11:45:49	1.54556	735.564	FALSE	77
2022-09-13	11:45:49	1.98118	737.545	FALSE	77
2022-09-13	11:45:49	1.28393	738.829	FALSE	77
2022-09-13	11:45:49	1.25854	740.087	FALSE	77
2022-09-13	11:45:50	1.54866	741.636	FALSE	77
2022-09-13	11:45:50	1.32714	742.963	FALSE	77
2022-09-13	11:45:50	1.32683	744.29	FALSE	77
2022-09-13	11:45:50	1.48469	745.774	FALSE	77
2022-09-13	11:45:51	1.37009	747.145	FALSE	77
2022-09-13	11:45:51	2.58286	749.727	FALSE	77
2022-09-13	11:45:51	2.07808	751.806	FALSE	77
2022-09-13	11:45:52	2.46454	754.27	FALSE	77
2022-09-13	11:45:52	1.23477	755.505	FALSE	77
2022-09-13	11:45:52	1.33218	756.837	FALSE	77
2022-09-13	11:45:52	2.03564	758.873	FALSE	77
2022-09-13	11:45:53	1.68357	760.556	FALSE	77
2022-09-13	11:45:53	1.18902	761.745	FALSE	77
2022-09-13	11:45:53	0.896501	762.642	FALSE	77
2022-09-13	11:45:53	0.943677	763.585	FALSE	77
2022-09-13	11:45:54	1.2881	764.874	FALSE	77
2022-09-13	11:45:54	1.5733	766.447	FALSE	77
2022-09-13	11:45:54	1.16597	767.613	FALSE	77
2022-09-13	11:45:54	1.49961	769.112	FALSE	77
2022-09-13	11:45:55	2.3106	771.423	FALSE	77
2022-09-13	11:45:55	2.26317	773.686	FALSE	77
2022-09-13	11:45:55	2.27528	775.961	FALSE	77
2022-09-13	11:45:56	1.17085	777.132	FALSE	77
2022-09-13	11:45:56	0.964389	778.097	FALSE	77
2022-09-13	11:45:56	0.829733	778.926	FALSE	77
2022-09-13	11:45:56	0.79701	779.723	FALSE	77
2022-09-13	11:45:57	0.738588	780.462	FALSE	77
2022-09-13	11:45:57	0.79813	781.26	FALSE	77
2022-09-13	11:45:57	0.618231	781.878	FALSE	77
2022-09-13	11:45:57	0.492277	782.371	FALSE	77
2022-09-13	11:45:58	0.487443	782.858	FALSE	77
2022-09-13	11:45:58	0.537112	783.395	FALSE	77
2022-09-13	11:45:58	0.691667	784.087	FALSE	77
2022-09-13	11:45:58	0.603117	784.69	FALSE	77
2022-09-13	11:45:59	2.09879	786.789	FALSE	77
2022-09-13	11:45:59	2.75192	789.541	FALSE	77
2022-09-13	11:45:59	6.05411	795.595	1	78
2022-09-13	11:46:00	3.08011	798.675	1	79
2022-09-13	11:46:00	4.92551	803.6	1	80
2022-09-13	11:46:00	3.94475	807.545	1	81
2022-09-13	11:46:00	1.38744	808.933	FALSE	81
2022-09-13	11:46:01	1.16464	810.097	FALSE	81
2022-09-13	11:46:01	2.17945	812.277	FALSE	81
2022-09-13	11:46:01	1.14709	813.424	FALSE	81
2022-09-13	11:46:01	2.96871	816.393	FALSE	81
2022-09-13	11:46:02	1.6363	818.029	FALSE	81
2022-09-13	11:46:02	3.0708	821.1	1	82
2022-09-13	11:46:02	2.93243	824.032	FALSE	82
2022-09-13	11:46:02	1.32978	825.362	FALSE	82
2022-09-13	11:46:03	5.64866	831.01	1	83
2022-09-13	11:46:03	3.74159	834.752	1	84
2022-09-13	11:46:03	9.03909	843.791	1	85
2022-09-13	11:46:04	3.42719	847.218	1	86
2022-09-13	11:46:04	1.43324	848.652	FALSE	86
2022-09-13	11:46:04	0.577061	849.229	FALSE	86
2022-09-13	11:46:04	0.297163	849.526	FALSE	86
2022-09-13	11:46:05	0.194008	849.72	FALSE	86
2022-09-13	11:46:05	0.052074	849.772	FALSE	86
2022-09-13	11:46:05	0.264644	850.037	FALSE	86
2022-09-13	11:46:05	0.301845	850.338	FALSE	86
2022-09-13	11:46:06	0.693753	851.032	FALSE	86
2022-09-13	11:46:06	0.709377	851.742	FALSE	86
2022-09-13	11:46:06	0.547392	852.289	FALSE	86
2022-09-13	11:46:06	0.372786	852.662	FALSE	86
2022-09-13	11:46:07	0.383372	853.045	FALSE	86
2022-09-13	11:46:07	0.350038	853.395	FALSE	86
2022-09-13	11:46:07	0.373397	853.768	FALSE	86
2022-09-13	11:46:08	0.391616	854.16	FALSE	86
2022-09-13	11:46:08	0.400725	854.561	FALSE	86
2022-09-13	11:46:08	0.373804	854.935	FALSE	86
2022-09-13	11:46:08	0.355534	855.29	FALSE	86
2022-09-13	11:46:09	0.346578	855.637	FALSE	86
2022-09-13	11:46:09	0.397417	856.034	FALSE	86
2022-09-13	11:46:09	0.737824	856.772	FALSE	86
2022-09-13	11:46:09	0.736807	857.509	FALSE	86
2022-09-13	11:46:10	0.735026	858.244	FALSE	86
2022-09-13	11:46:10	2.00215	860.246	FALSE	86
2022-09-13	11:46:10	0.518588	860.765	FALSE	86
2022-09-13	11:46:10	0.262659	861.027	FALSE	86
2022-09-13	11:46:11	0.292685	861.32	FALSE	86
2022-09-13	11:46:11	0.317876	861.638	FALSE	86
2022-09-13	11:46:11	0.224695	861.862	FALSE	86
2022-09-13	11:46:11	0.198333	862.061	FALSE	86
2022-09-13	11:46:12	0.251565	862.312	FALSE	86
2022-09-13	11:46:12	0.244898	862.557	FALSE	86
2022-09-13	11:46:12	0.327545	862.885	FALSE	86
2022-09-13	11:46:13	0.443321	863.328	FALSE	86
2022-09-13	11:46:13	1.02587	864.354	FALSE	86
2022-09-13	11:46:13	1.50444	865.858	FALSE	86
2022-09-13	11:46:13	1.11533	866.974	FALSE	86
2022-09-13	11:46:14	1.22826	868.202	FALSE	86
2022-09-13	11:46:14	1.59594	869.798	FALSE	86
2022-09-13	11:46:14	1.0766	870.875	FALSE	86
2022-09-13	11:46:14	1.76688	872.641	FALSE	86
2022-09-13	11:46:15	0.515992	873.157	FALSE	86
2022-09-13	11:46:15	2.1966	875.354	FALSE	86
2022-09-13	11:46:15	0.80159	876.156	FALSE	86
2022-09-13	11:46:15	2.08571	878.241	FALSE	86
2022-09-13	11:46:16	3.25467	881.496	1	87
2022-09-13	11:46:16	1.03472	882.531	FALSE	87
2022-09-13	11:46:16	2.28067	884.811	FALSE	87
2022-09-13	11:46:17	1.41599	886.227	FALSE	87
2022-09-13	11:46:17	0.5793	886.807	FALSE	87
2022-09-13	11:46:17	1.43335	888.24	FALSE	87
2022-09-13	11:46:17	0.706425	888.946	FALSE	87
2022-09-13	11:46:18	0.31701	889.263	FALSE	87
2022-09-13	11:46:18	0.788053	890.052	FALSE	87
2022-09-13	11:46:18	0.190547	890.242	FALSE	87
2022-09-13	11:46:18	0.420216	890.662	FALSE	87
2022-09-13	11:46:19	0.525	891.187	FALSE	87
2022-09-13	11:46:19	0.0702928	891.258	FALSE	87
2022-09-13	11:46:19	0.858537	892.116	FALSE	87
2022-09-13	11:46:19	0.386883	892.503	FALSE	87
2022-09-13	11:46:20	1.13716	893.64	FALSE	87
2022-09-13	11:46:20	1.19971	894.84	FALSE	87
2022-09-13	11:46:20	0.999758	895.84	FALSE	87
2022-09-13	11:46:21	1.48846	897.328	FALSE	87
2022-09-13	11:46:21	0.797265	898.125	FALSE	87
2022-09-13	11:46:21	0.317824	898.443	FALSE	87
2022-09-13	11:46:21	0.958079	899.401	FALSE	87
2022-09-13	11:46:22	0.112023	899.513	FALSE	87
2022-09-13	11:46:22	1.02011	900.533	FALSE	87
2022-09-13	11:46:22	0.189733	900.723	FALSE	87
2022-09-13	11:46:22	0.434008	901.157	FALSE	87
2022-09-13	11:46:23	0.510852	901.668	FALSE	87
2022-09-13	11:46:23	0.430344	902.098	FALSE	87
2022-09-13	11:46:23	0.612939	902.711	FALSE	87
2022-09-13	11:46:23	0.131311	902.843	FALSE	87
2022-09-13	11:46:24	0.126883	902.969	FALSE	87
2022-09-13	11:46:24	-0.195	902.969	FALSE	87
2022-09-13	11:46:24	-0.210623	902.969	FALSE	87
2022-09-13	11:46:25	-0.200699	902.969	FALSE	87
2022-09-13	11:46:25	-0.205178	902.969	FALSE	87
2022-09-13	11:46:25	-0.155814	902.969	FALSE	87
2022-09-13	11:46:25	-0.192353	902.969	FALSE	87
2022-09-13	11:46:26	-0.188587	902.969	FALSE	87
2022-09-13	11:46:26	-0.237646	902.969	FALSE	87
2022-09-13	11:46:26	-0.199071	902.969	FALSE	87
2022-09-13	11:46:26	-0.204465	902.969	FALSE	87
2022-09-13	11:46:27	-0.194898	902.969	FALSE	87
2022-09-13	11:46:27	-0.165178	902.969	FALSE	87
2022-09-13	11:46:27	-0.15159	902.969	FALSE	87
2022-09-13	11:46:27	-0.115763	902.969	FALSE	87
2022-09-13	11:46:28	-0.087875	902.969	FALSE	87
2022-09-13	11:46:28	-0.0715391	902.969	FALSE	87
2022-09-13	11:46:28	-0.0573916	902.969	FALSE	87
2022-09-13	11:46:29	-0.0533712	902.969	FALSE	87
2022-09-13	11:46:29	-0.059071	902.969	FALSE	87
2022-09-13	11:46:29	-0.0482313	902.969	FALSE	87
2022-09-13	11:46:29	-0.0418699	902.969	FALSE	87
2022-09-13	11:46:30	-0.0245163	902.969	FALSE	87
2022-09-13	11:46:30	-0.0133204	902.969	FALSE	87
2022-09-13	11:46:30	0.00489845	902.974	FALSE	87
2022-09-13	11:46:30	0.034415	903.009	FALSE	87
2022-09-13	11:46:31	0.040929	903.05	FALSE	87
2022-09-13	11:46:31	0.036247	903.086	FALSE	87
2022-09-13	11:46:31	0.0208272	903.107	FALSE	87
2022-09-13	11:46:31	0.0137025	903.12	FALSE	87
2022-09-13	11:46:32	0.0159926	903.136	FALSE	87
2022-09-13	11:46:32	0.0201147	903.157	FALSE	87
2022-09-13	11:46:32	0.0182318	903.175	FALSE	87
2022-09-13	11:46:33	0.0125321	903.187	FALSE	87
2022-09-13	11:46:33	0.0108018	903.198	FALSE	87
2022-09-13	11:46:33	0.0068323	903.205	FALSE	87
2022-09-13	11:46:33	0.00276106	903.208	FALSE	87
2022-09-13	11:46:34	0.000878093	903.209	FALSE	87
2022-09-13	11:46:34	-0.0205977	903.209	FALSE	87
2022-09-13	11:46:34	-0.0487402	903.209	FALSE	87
2022-09-13	11:46:34	-0.0801905	903.209	FALSE	87
2022-09-13	11:46:35	-0.0980023	903.209	FALSE	87
2022-09-13	11:46:35	-0.0638038	903.209	FALSE	87
2022-09-13	11:46:35	0.282354	903.491	FALSE	87
2022-09-13	11:46:35	0.666272	904.157	FALSE	87
2022-09-13	11:46:36	0.0467305	904.204	FALSE	87
2022-09-13	11:46:36	-0.408129	904.204	FALSE	87
2022-09-13	11:46:36	-0.355254	904.204	FALSE	87
2022-09-13	11:46:37	-0.595661	904.204	FALSE	87
2022-09-13	11:46:37	-0.737595	904.204	FALSE	87
2022-09-13	11:46:37	-0.820954	904.204	FALSE	87
2022-09-13	11:46:37	-1.00569	904.204	FALSE	87
2022-09-13	11:46:38	-1.10177	904.204	FALSE	87
2022-09-13	11:46:38	-1.13607	904.204	FALSE	87
2022-09-13	11:46:38	-1.13261	904.204	FALSE	87
2022-09-13	11:46:38	-0.762226	904.204	FALSE	87
2022-09-13	11:46:39	-0.318613	904.204	FALSE	87
2022-09-13	11:46:39	-0.34131	904.204	FALSE	87
2022-09-13	11:46:39	-0.239071	904.204	FALSE	87
2022-09-13	11:46:39	-0.929401	904.204	FALSE	87
2022-09-13	11:46:40	-0.919274	904.204	FALSE	87
2022-09-13	11:46:40	-1.38533	904.204	FALSE	87
2022-09-13	11:46:40	-1.50793	904.204	FALSE	87
2022-09-13	11:46:40	-1.39704	904.204	FALSE	87
2022-09-13	11:46:41	-1.57648	904.204	FALSE	87
2022-09-13	11:46:41	0.609122	904.813	FALSE	87
2022-09-13	11:46:41	2.44434	907.257	FALSE	87
2022-09-13	11:46:42	0.379911	907.637	FALSE	87
2022-09-13	11:46:42	-0.213371	907.637	FALSE	87
2022-09-13	11:46:42	-1.56925	907.637	FALSE	87
2022-09-13	11:46:42	-1.34024	907.637	FALSE	87
2022-09-13	11:46:43	-1.7436	907.637	FALSE	87
2022-09-13	11:46:43	-0.349605	907.637	FALSE	87
2022-09-13	11:46:43	0.192125	907.829	FALSE	87
2022-09-13	11:46:43	-0.242582	907.829	FALSE	87
2022-09-13	11:46:44	0.531819	908.361	FALSE	87
2022-09-13	11:46:44	0.727901	909.089	FALSE	87
2022-09-13	11:46:44	0.712837	909.802	FALSE	87
2022-09-13	11:46:44	-0.869147	909.802	FALSE	87
2022-09-13	11:46:45	-1.20289	909.802	FALSE	87
2022-09-13	11:46:45	-0.596068	909.802	FALSE	87
2022-09-13	11:46:45	0.188105	909.99	FALSE	87
2022-09-13	11:46:46	0.234924	910.225	FALSE	87
2022-09-13	11:46:46	-0.00914732	910.225	FALSE	87
2022-09-13	11:46:46	-0.90589	910.225	FALSE	87
2022-09-13	11:46:46	0.513906	910.739	FALSE	87
2022-09-13	11:46:47	0.73416	911.473	FALSE	87
2022-09-13	11:46:47	0.732379	912.206	FALSE	87
2022-09-13	11:46:47	0.738791	912.944	FALSE	87
2022-09-13	11:46:47	0.733906	913.678	FALSE	87
2022-09-13	11:46:48	0.733295	914.412	FALSE	87
2022-09-13	11:46:48	0.734975	915.146	FALSE	87
2022-09-13	11:46:48	0.73416	915.881	FALSE	87
2022-09-13	11:46:48	0.728003	916.609	FALSE	87
2022-09-13	11:46:49	0.735433	917.344	FALSE	87
2022-09-13	11:46:49	0.737366	918.081	FALSE	87
2022-09-13	11:46:49	0.740725	918.822	FALSE	87
2022-09-13	11:46:50	0.73472	919.557	FALSE	87
2022-09-13	11:46:50	0.740064	920.297	FALSE	87
2022-09-13	11:46:50	0.737519	921.034	FALSE	87
2022-09-13	11:46:50	0.738181	921.773	FALSE	87
2022-09-13	11:46:51	0.737366	922.51	FALSE	87
2022-09-13	11:46:51	0.733397	923.243	FALSE	87
2022-09-13	11:46:51	0.732175	923.976	FALSE	87
2022-09-13	11:46:51	0.731717	924.707	FALSE	87
2022-09-13	11:46:52	0.731921	925.439	FALSE	87
2022-09-13	11:46:52	0.735891	926.175	FALSE	87
2022-09-13	11:46:52	0.738079	926.913	FALSE	87
2022-09-13	11:46:52	0.740318	927.654	FALSE	87
2022-09-13	11:46:53	0.732583	928.386	FALSE	87
2022-09-13	11:46:53	0.730649	929.117	FALSE	87
2022-09-13	11:46:53	0.631361	929.748	FALSE	87
2022-09-13	11:46:54	-0.760444	929.748	FALSE	87
2022-09-13	11:46:54	-0.883803	929.748	FALSE	87
2022-09-13	11:46:54	-0.257799	929.748	FALSE	87
2022-09-13	11:46:54	1.02902	930.777	FALSE	87
2022-09-13	11:46:55	2.76357	933.541	FALSE	87
2022-09-13	11:46:55	1.90159	935.442	FALSE	87
2022-09-13	11:46:55	0.809478	936.252	FALSE	87
2022-09-13	11:46:55	0.132227	936.384	FALSE	87
2022-09-13	11:46:56	0.0546185	936.439	FALSE	87
2022-09-13	11:46:56	-0.226552	936.439	FALSE	87
2022-09-13	11:46:56	-0.246196	936.439	FALSE	87
2022-09-13	11:46:56	0.0399112	936.479	FALSE	87
2022-09-13	11:46:57	-0.217544	936.479	FALSE	87
2022-09-13	11:46:57	-0.332099	936.479	FALSE	87
2022-09-13	11:46:57	-0.60131	936.479	FALSE	87
2022-09-13	11:46:58	-0.737391	936.479	FALSE	87
2022-09-13	11:46:58	-0.764414	936.479	FALSE	87
2022-09-13	11:46:58	0.217977	936.697	FALSE	87
2022-09-13	11:46:58	1.44734	938.144	FALSE	87
2022-09-13	11:46:59	2.90749	941.051	FALSE	87
2022-09-13	11:46:59	-0.193524	941.051	FALSE	87
2022-09-13	11:46:59	0.725458	941.777	FALSE	87
2022-09-13	11:46:59	0.737621	942.514	FALSE	87
2022-09-13	11:47:00	0.733397	943.248	FALSE	87
2022-09-13	11:47:00	0.734771	943.983	FALSE	87
2022-09-13	11:47:00	0.733041	944.716	FALSE	87
2022-09-13	11:47:00	0.735076	945.451	FALSE	87
2022-09-13	11:47:01	0.735636	946.186	FALSE	87
2022-09-13	11:47:01	0.735076	946.921	FALSE	87
2022-09-13	11:47:01	0.734771	947.656	FALSE	87
2022-09-13	11:47:01	0.731921	948.388	FALSE	87
2022-09-13	11:47:02	0.730293	949.118	FALSE	87
2022-09-13	11:47:02	0.743778	949.862	FALSE	87
2022-09-13	11:47:02	0.73701	950.599	FALSE	87
2022-09-13	11:47:03	0.735382	951.335	FALSE	87
2022-09-13	11:47:03	0.736043	952.071	FALSE	87
2022-09-13	11:47:03	0.737519	952.808	FALSE	87
2022-09-13	11:47:03	0.734873	953.543	FALSE	87
2022-09-13	11:47:04	0.741081	954.284	FALSE	87
2022-09-13	11:47:04	0.736908	955.021	FALSE	87
2022-09-13	11:47:04	0.732277	955.753	FALSE	87
2022-09-13	11:47:04	0.737061	956.49	FALSE	87
2022-09-13	11:47:05	0.729529	957.22	FALSE	87
2022-09-13	11:47:05	0.733193	957.953	FALSE	87
2022-09-13	11:47:05	0.727087	958.68	FALSE	87
2022-09-13	11:47:05	0.737468	959.418	FALSE	87
2022-09-13	11:47:06	0.737621	960.155	FALSE	87
2022-09-13	11:47:06	0.737468	960.893	FALSE	87
2022-09-13	11:47:06	0.735585	961.628	FALSE	87
2022-09-13	11:47:07	0.73528	962.364	FALSE	87
2022-09-13	11:47:07	0.738282	963.102	FALSE	87
2022-09-13	11:47:07	0.730343	963.832	FALSE	87
2022-09-13	11:47:07	0.738944	964.571	FALSE	87
2022-09-13	11:47:08	0.728562	965.3	FALSE	87
2022-09-13	11:47:08	0.737519	966.037	FALSE	87
2022-09-13	11:47:08	0.735738	966.773	FALSE	87
2022-09-13	11:47:08	0.734975	967.508	FALSE	87
2022-09-13	11:47:09	0.739351	968.247	FALSE	87
2022-09-13	11:47:09	0.732277	968.98	FALSE	87
2022-09-13	11:47:09	0.734059	969.714	FALSE	87
2022-09-13	11:47:09	0.730343	970.444	FALSE	87
2022-09-13	11:47:10	0.732837	971.177	FALSE	87
2022-09-13	11:47:10	0.739962	971.917	FALSE	87
2022-09-13	11:47:10	0.731972	972.649	FALSE	87
2022-09-13	11:47:11	0.734008	973.383	FALSE	87
2022-09-13	11:47:11	0.736654	974.119	FALSE	87
2022-09-13	11:47:11	0.734975	974.854	FALSE	87
2022-09-13	11:47:11	0.734364	975.589	FALSE	87
2022-09-13	11:47:12	0.734771	976.324	FALSE	87
2022-09-13	11:47:12	0.734109	977.058	FALSE	87
2022-09-13	11:47:12	0.734059	977.792	FALSE	87
2022-09-13	11:47:12	0.742659	978.534	FALSE	87
2022-09-13	11:47:13	0.733601	979.268	FALSE	87
2022-09-13	11:47:13	0.734618	980.003	FALSE	87
2022-09-13	11:47:13	0.736552	980.739	FALSE	87
2022-09-13	11:47:13	0.734211	981.473	FALSE	87
2022-09-13	11:47:14	0.741031	982.214	FALSE	87
2022-09-13	11:47:14	0.72958	982.944	FALSE	87
2022-09-13	11:47:14	0.728308	983.672	FALSE	87
2022-09-13	11:47:15	0.732277	984.405	FALSE	87
2022-09-13	11:47:15	0.733651	985.138	FALSE	87
2022-09-13	11:47:15	0.732939	985.871	FALSE	87
2022-09-13	11:47:15	0.728461	986.6	FALSE	87
2022-09-13	11:47:16	0.733346	987.333	FALSE	87
2022-09-13	11:47:16	0.727901	988.061	FALSE	87
2022-09-13	11:47:16	0.731361	988.792	FALSE	87
2022-09-13	11:47:16	0.731565	989.524	FALSE	87
2022-09-13	11:47:17	0.736247	990.26	FALSE	87
2022-09-13	11:47:17	0.732634	990.993	FALSE	87
2022-09-13	11:47:17	0.734873	991.727	FALSE	87
2022-09-13	11:47:17	0.738079	992.466	FALSE	87
2022-09-13	11:47:18	0.734262	993.2	FALSE	87
2022-09-13	11:47:18	0.736654	993.936	FALSE	87
2022-09-13	11:47:18	0.737112	994.674	FALSE	87
2022-09-13	11:47:19	0.728461	995.402	FALSE	87
2022-09-13	11:47:19	0.737672	996.14	FALSE	87
2022-09-13	11:47:19	0.733346	996.873	FALSE	87
2022-09-13	11:47:19	0.735229	997.608	FALSE	87
2022-09-13	11:47:20	0.732023	998.34	FALSE	87
2022-09-13	11:47:20	0.735789	999.076	FALSE	87
2022-09-13	11:47:20	0.735687	999.812	FALSE	87
2022-09-13	11:47:20	0.736807	1000.55	FALSE	87
2022-09-13	11:47:21	0.73584	1001.28	FALSE	87
2022-09-13	11:47:21	0.735636	1002.02	FALSE	87
2022-09-13	11:47:21	0.732583	1002.75	FALSE	87
2022-09-13	11:47:21	0.731972	1003.48	FALSE	87
2022-09-13	11:47:22	0.729275	1004.21	FALSE	87
2022-09-13	11:47:22	0.737773	1004.95	FALSE	87
2022-09-13	11:47:22	0.735789	1005.69	FALSE	87
2022-09-13	11:47:23	0.740318	1006.43	FALSE	87
2022-09-13	11:47:23	0.741896	1007.17	FALSE	87
2022-09-13	11:47:23	0.733448	1007.9	FALSE	87
2022-09-13	11:47:23	0.736705	1008.64	FALSE	87
2022-09-13	11:47:24	0.732532	1009.37	FALSE	87
2022-09-13	11:47:24	0.733092	1010.11	FALSE	87
2022-09-13	11:47:24	0.728562	1010.83	FALSE	87
2022-09-13	11:47:24	0.734313	1011.57	FALSE	87
2022-09-13	11:47:25	0.73874	1012.31	FALSE	87
2022-09-13	11:47:25	0.737519	1013.04	FALSE	87
2022-09-13	11:47:25	0.733753	1013.78	FALSE	87
2022-09-13	11:47:25	0.729173	1014.51	FALSE	87
2022-09-13	11:47:26	0.73187	1015.24	FALSE	87
2022-09-13	11:47:26	0.735331	1015.97	FALSE	87
2022-09-13	11:47:26	0.733957	1016.71	FALSE	87
2022-09-13	11:47:26	0.734618	1017.44	FALSE	87
2022-09-13	11:47:27	0.70556	1018.15	FALSE	87
2022-09-13	11:47:27	-1.52966	1018.15	FALSE	87
2022-09-13	11:47:27	-0.771182	1018.15	FALSE	87
2022-09-13	11:47:28	-1.37398	1018.15	FALSE	87
2022-09-13	11:47:28	-1.50502	1018.15	FALSE	87
2022-09-13	11:47:28	-1.72986	1018.15	FALSE	87
2022-09-13	11:47:28	-1.89317	1018.15	FALSE	87
2022-09-13	11:47:29	-1.75159	1018.15	FALSE	87
2022-09-13	11:47:29	-1.69169	1018.15	FALSE	87
2022-09-13	11:47:29	-0.121157	1018.15	FALSE	87
2022-09-13	11:47:29	-0.889961	1018.15	FALSE	87
2022-09-13	11:47:30	-0.191743	1018.15	FALSE	87
2022-09-13	11:47:30	-0.76075	1018.15	FALSE	87
2022-09-13	11:47:30	-1.20192	1018.15	FALSE	87
2022-09-13	11:47:30	-1.53128	1018.15	FALSE	87
2022-09-13	11:47:31	-1.81006	1018.15	FALSE	87
2022-09-13	11:47:31	-1.10838	1018.15	FALSE	87
2022-09-13	11:47:31	-1.86564	1018.15	FALSE	87
2022-09-13	11:47:32	-1.19357	1018.15	FALSE	87
2022-09-13	11:47:32	-1.84813	1018.15	FALSE	87
2022-09-13	11:47:32	-1.11642	1018.15	FALSE	87
2022-09-13	11:47:32	-1.81612	1018.15	FALSE	87
2022-09-13	11:47:33	-1.72894	1018.15	FALSE	87
2022-09-13	11:47:33	-1.35276	1018.15	FALSE	87
2022-09-13	11:47:33	-1.45393	1018.15	FALSE	87
2022-09-13	11:47:33	-0.777544	1018.15	FALSE	87
2022-09-13	11:47:34	-1.76502	1018.15	FALSE	87
2022-09-13	11:47:34	0.0875448	1018.24	FALSE	87
2022-09-13	11:47:34	0.583321	1018.82	FALSE	87
2022-09-13	11:47:34	-0.245025	1018.82	FALSE	87
2022-09-13	11:47:35	0.125865	1018.95	FALSE	87
2022-09-13	11:47:35	-0.0977478	1018.95	FALSE	87
2022-09-13	11:47:35	-0.224109	1018.95	FALSE	87
2022-09-13	11:47:36	-0.15673	1018.95	FALSE	87
2022-09-13	11:47:36	0.0228628	1018.97	FALSE	87
2022-09-13	11:47:36	0.300878	1019.27	FALSE	87
2022-09-13	11:47:36	0.190547	1019.46	FALSE	87
2022-09-13	11:47:37	0.186222	1019.65	FALSE	87
2022-09-13	11:47:37	0.112278	1019.76	FALSE	87
2022-09-13	11:47:37	-0.534796	1019.76	FALSE	87
2022-09-13	11:47:37	-0.246196	1019.76	FALSE	87
2022-09-13	11:47:38	0.172328	1019.93	FALSE	87
2022-09-13	11:47:38	0.166018	1020.1	FALSE	87
2022-09-13	11:47:38	0.265967	1020.36	FALSE	87
2022-09-13	11:47:38	-0.00823129	1020.36	FALSE	87
2022-09-13	11:47:39	-0.0519972	1020.36	FALSE	87
2022-09-13	11:47:39	-0.43617	1020.36	FALSE	87
2022-09-13	11:47:39	-0.0915391	1020.36	FALSE	87
2022-09-13	11:47:40	-0.0438547	1020.36	FALSE	87
2022-09-13	11:47:40	-0.20818	1020.36	FALSE	87
2022-09-13	11:47:40	-0.245839	1020.36	FALSE	87
2022-09-13	11:47:40	-0.359885	1020.36	FALSE	87
2022-09-13	11:47:41	-0.478867	1020.36	FALSE	87
2022-09-13	11:47:41	0.424949	1020.79	FALSE	87
2022-09-13	11:47:41	-0.519274	1020.79	FALSE	87
2022-09-13	11:47:41	-0.818969	1020.79	FALSE	87
2022-09-13	11:47:42	0.734669	1021.52	FALSE	87
2022-09-13	11:47:42	0.733092	1022.26	FALSE	87
2022-09-13	11:47:42	-0.0491473	1022.26	FALSE	87
2022-09-13	11:47:42	-2.21403	1022.26	FALSE	87
2022-09-13	11:47:43	-0.176832	1022.26	FALSE	87
2022-09-13	11:47:43	0.735687	1022.99	FALSE	87
2022-09-13	11:47:43	0.738181	1023.73	FALSE	87
2022-09-13	11:47:44	0.733448	1024.46	FALSE	87
2022-09-13	11:47:44	0.439758	1024.9	FALSE	87
2022-09-13	11:47:44	0.156196	1025.06	FALSE	87
2022-09-13	11:47:44	0.73813	1025.8	FALSE	87
2022-09-13	11:47:45	0.731056	1026.53	FALSE	87
2022-09-13	11:47:45	0.737875	1027.27	FALSE	87
2022-09-13	11:47:45	0.745051	1028.01	FALSE	87
2022-09-13	11:47:45	0.737926	1028.75	FALSE	87
2022-09-13	11:47:46	0.745509	1029.49	FALSE	87
2022-09-13	11:47:46	0.733193	1030.23	FALSE	87
2022-09-13	11:47:46	0.738486	1030.97	FALSE	87
2022-09-13	11:47:46	0.734873	1031.7	FALSE	87
2022-09-13	11:47:47	0.739046	1032.44	FALSE	87
2022-09-13	11:47:47	0.732175	1033.17	FALSE	87
2022-09-13	11:47:47	0.732735	1033.9	FALSE	87
2022-09-13	11:47:48	0.736043	1034.64	FALSE	87
2022-09-13	11:47:48	0.726934	1035.37	FALSE	87
2022-09-13	11:47:48	0.73528	1036.1	FALSE	87
2022-09-13	11:47:48	0.734822	1036.84	FALSE	87
2022-09-13	11:47:49	0.737163	1037.57	FALSE	87
2022-09-13	11:47:49	0.731005	1038.31	FALSE	87
2022-09-13	11:47:49	0.733906	1039.04	FALSE	87
2022-09-13	11:47:49	0.735026	1039.77	FALSE	87
2022-09-13	11:47:50	0.730598	1040.51	FALSE	87
2022-09-13	11:47:50	0.731667	1041.24	FALSE	87
2022-09-13	11:47:50	0.736399	1041.97	FALSE	87
2022-09-13	11:47:50	0.734466	1042.71	FALSE	87
2022-09-13	11:47:51	0.72958	1043.44	FALSE	87
2022-09-13	11:47:51	0.732175	1044.17	FALSE	87
2022-09-13	11:47:51	0.0377738	1044.21	FALSE	87
2022-09-13	11:47:51	0.709784	1044.92	FALSE	87
2022-09-13	11:47:52	0.735331	1045.65	FALSE	87
2022-09-13	11:47:52	0.730751	1046.38	FALSE	87
2022-09-13	11:47:52	0.729835	1047.11	FALSE	87
2022-09-13	11:47:53	0.733855	1047.85	FALSE	87
2022-09-13	11:47:53	0.731107	1048.58	FALSE	87
2022-09-13	11:47:53	0.73645	1049.31	FALSE	87
2022-09-13	11:47:53	0.735738	1050.05	FALSE	87
2022-09-13	11:47:54	0.735026	1050.79	FALSE	87
2022-09-13	11:47:54	0.733295	1051.52	FALSE	87
2022-09-13	11:47:54	0.738639	1052.26	FALSE	87
2022-09-13	11:47:54	0.731819	1052.99	FALSE	87
2022-09-13	11:47:55	0.738231	1053.73	FALSE	87
2022-09-13	11:47:55	0.732939	1054.46	FALSE	87
2022-09-13	11:47:55	0.733092	1055.19	FALSE	87
2022-09-13	11:47:55	0.387443	1055.58	FALSE	87
2022-09-13	11:47:56	0.736654	1056.32	FALSE	87
2022-09-13	11:47:56	0.730242	1057.05	FALSE	87
2022-09-13	11:47:56	0.734059	1057.78	FALSE	87
2022-09-13	11:47:57	0.733601	1058.52	FALSE	87
2022-09-13	11:47:57	0.736603	1059.25	FALSE	87
2022-09-13	11:47:57	0.735585	1059.99	FALSE	87
2022-09-13	11:47:57	0.733092	1060.72	FALSE	87
2022-09-13	11:47:58	0.737163	1061.46	FALSE	87
2022-09-13	11:47:58	0.730242	1062.19	FALSE	87
2022-09-13	11:47:58	0.731056	1062.92	FALSE	87
2022-09-13	11:47:58	0.737061	1063.66	FALSE	87
2022-09-13	11:47:59	0.735534	1064.39	FALSE	87
2022-09-13	11:47:59	0.735534	1065.13	FALSE	87
2022-09-13	11:47:59	0.733753	1065.86	FALSE	87
2022-09-13	11:47:59	0.741234	1066.6	FALSE	87
2022-09-13	11:48:00	0.739097	1067.34	FALSE	87
2022-09-13	11:48:00	0.737672	1068.08	FALSE	87
2022-09-13	11:48:00	0.732684	1068.81	FALSE	87
2022-09-13	11:48:01	0.739351	1069.55	FALSE	87
2022-09-13	11:48:01	0.732634	1070.28	FALSE	87
2022-09-13	11:48:01	0.736908	1071.02	FALSE	87
2022-09-13	11:48:01	0.728817	1071.75	FALSE	87
2022-09-13	11:48:02	0.73243	1072.48	FALSE	87
2022-09-13	11:48:02	0.734262	1073.22	FALSE	87
2022-09-13	11:48:02	0.490649	1073.71	FALSE	87
2022-09-13	11:48:02	0.691209	1074.4	FALSE	87
2022-09-13	11:48:03	0.714109	1075.11	FALSE	87
2022-09-13	11:48:03	0.705611	1075.82	FALSE	87
2022-09-13	11:48:03	0.660929	1076.48	FALSE	87
2022-09-13	11:48:03	0.664593	1077.14	FALSE	87
2022-09-13	11:48:04	0.677468	1077.82	FALSE	87
2022-09-13	11:48:04	0.672379	1078.49	FALSE	87
2022-09-13	11:48:04	0.671972	1079.17	FALSE	87
2022-09-13	11:48:05	0.641692	1079.81	FALSE	87
2022-09-13	11:48:05	0.615789	1080.42	FALSE	87
2022-09-13	11:48:05	0.535025	1080.96	FALSE	87
2022-09-13	11:48:05	0.549784	1081.51	FALSE	87
2022-09-13	11:48:06	0.543422	1082.05	FALSE	87
2022-09-13	11:48:06	0.597774	1082.65	FALSE	87
2022-09-13	11:48:06	0.46841	1083.12	FALSE	87
2022-09-13	11:48:06	0.485916	1083.6	FALSE	87
2022-09-13	11:48:07	0.466527	1084.07	FALSE	87
2022-09-13	11:48:07	0.461743	1084.53	FALSE	87
2022-09-13	11:48:07	0.461896	1084.99	FALSE	87
2022-09-13	11:48:07	0.436145	1085.43	FALSE	87
2022-09-13	11:48:08	0.465865	1085.9	FALSE	87
2022-09-13	11:48:08	0.450649	1086.35	FALSE	87
2022-09-13	11:48:08	0.401438	1086.75	FALSE	87
2022-09-13	11:48:09	0.464339	1087.21	FALSE	87
2022-09-13	11:48:09	0.461998	1087.67	FALSE	87
2022-09-13	11:48:09	0.424593	1088.1	FALSE	87
2022-09-13	11:48:09	0.339199	1088.44	FALSE	87
2022-09-13	11:48:10	0.386425	1088.82	FALSE	87
2022-09-13	11:48:10	0.425916	1089.25	FALSE	87
2022-09-13	11:48:10	0.397214	1089.65	FALSE	87
2022-09-13	11:48:10	0.410445	1090.06	FALSE	87
2022-09-13	11:48:11	0.386832	1090.44	FALSE	87
2022-09-13	11:48:11	0.433295	1090.88	FALSE	87
2022-09-13	11:48:11	0.508562	1091.39	FALSE	87
2022-09-13	11:48:11	0.349275	1091.74	FALSE	87
2022-09-13	11:48:12	0.361082	1092.1	FALSE	87
2022-09-13	11:48:12	0.395789	1092.49	FALSE	87
2022-09-13	11:48:12	0.326272	1092.82	FALSE	87
2022-09-13	11:48:13	0.344389	1093.16	FALSE	87
2022-09-13	11:48:13	0.304898	1093.47	FALSE	87
2022-09-13	11:48:13	0.302964	1093.77	FALSE	87
2022-09-13	11:48:13	0.282405	1094.05	FALSE	87
2022-09-13	11:48:14	0.250547	1094.3	FALSE	87
2022-09-13	11:48:14	0.286069	1094.59	FALSE	87
2022-09-13	11:48:14	0.159911	1094.75	FALSE	87
2022-09-13	11:48:14	0.196451	1094.95	FALSE	87
2022-09-13	11:48:15	0.284847	1095.23	FALSE	87
2022-09-13	11:48:15	0.26668	1095.5	FALSE	87
2022-09-13	11:48:15	0.217265	1095.71	FALSE	87
2022-09-13	11:48:15	0.0430155	1095.76	FALSE	87
2022-09-13	11:48:16	0.06556	1095.82	FALSE	87
2022-09-13	11:48:16	0.107138	1095.93	FALSE	87
2022-09-13	11:48:16	0.0604709	1095.99	FALSE	87
2022-09-13	11:48:17	0.0394023	1096.03	FALSE	87
2022-09-13	11:48:17	0.018588	1096.05	FALSE	87
2022-09-13	11:48:17	0.0389443	1096.09	FALSE	87
2022-09-13	11:48:17	0.440115	1096.53	FALSE	87
2022-09-13	11:48:18	0.748155	1097.28	FALSE	87
2022-09-13	11:48:18	0.732735	1098.01	FALSE	87
2022-09-13	11:48:18	0.732532	1098.74	FALSE	87
2022-09-13	11:48:18	0.729071	1099.47	FALSE	87
2022-09-13	11:48:19	0.733448	1100.2	FALSE	87
2022-09-13	11:48:19	0.740165	1100.94	FALSE	87
2022-09-13	11:48:19	0.737824	1101.68	FALSE	87
2022-09-13	11:48:19	0.733702	1102.42	FALSE	87
2022-09-13	11:48:20	0.736247	1103.15	FALSE	87
2022-09-13	11:48:20	0.736298	1103.89	FALSE	87
2022-09-13	11:48:20	0.730445	1104.62	FALSE	87
2022-09-13	11:48:20	0.734313	1105.35	FALSE	87
2022-09-13	11:48:21	0.734262	1106.09	FALSE	87
2022-09-13	11:48:21	0.735891	1106.82	FALSE	87
2022-09-13	11:48:21	0.733244	1107.56	FALSE	87
2022-09-13	11:48:22	0.743982	1108.3	FALSE	87
2022-09-13	11:48:22	0.737875	1109.04	FALSE	87
2022-09-13	11:48:22	0.730598	1109.77	FALSE	87
2022-09-13	11:48:22	0.731361	1110.5	FALSE	87
2022-09-13	11:48:23	0.735534	1111.24	FALSE	87
2022-09-13	11:48:23	0.736908	1111.97	FALSE	87
2022-09-13	11:48:23	0.729478	1112.7	FALSE	87
2022-09-13	11:48:23	0.740216	1113.44	FALSE	87
2022-09-13	11:48:24	0.737824	1114.18	FALSE	87
2022-09-13	11:48:24	0.730649	1114.91	FALSE	87
2022-09-13	11:48:24	0.733346	1115.64	FALSE	87
2022-09-13	11:48:24	0.733295	1116.38	FALSE	87
2022-09-13	11:48:25	0.730801	1117.11	FALSE	87
2022-09-13	11:48:25	0.727799	1117.84	FALSE	87
2022-09-13	11:48:25	0.727494	1118.56	FALSE	87
2022-09-13	11:48:26	0.729529	1119.29	FALSE	87
2022-09-13	11:48:26	0.72958	1120.02	FALSE	87
2022-09-13	11:48:26	0.729122	1120.75	FALSE	87
2022-09-13	11:48:26	0.724389	1121.48	FALSE	87
2022-09-13	11:48:27	0.732328	1122.21	FALSE	87
2022-09-13	11:48:27	0.736247	1122.94	FALSE	87
2022-09-13	11:48:27	0.738537	1123.68	FALSE	87
2022-09-13	11:48:27	0.732074	1124.42	FALSE	87
2022-09-13	11:48:28	0.734466	1125.15	FALSE	87
2022-09-13	11:48:28	0.729071	1125.88	FALSE	87
2022-09-13	11:48:28	0.737061	1126.62	FALSE	87
2022-09-13	11:48:28	0.728613	1127.34	FALSE	87
2022-09-13	11:48:29	0.73187	1128.08	FALSE	87
2022-09-13	11:48:29	0.729886	1128.81	FALSE	87
2022-09-13	11:48:29	0.735026	1129.54	FALSE	87
2022-09-13	11:48:30	0.734517	1130.28	FALSE	87
2022-09-13	11:48:30	0.732532	1131.01	FALSE	87
2022-09-13	11:48:30	0.729173	1131.74	FALSE	87
2022-09-13	11:48:30	0.735636	1132.47	FALSE	87
2022-09-13	11:48:31	0.734364	1133.21	FALSE	87
2022-09-13	11:48:31	0.736145	1133.94	FALSE	87
2022-09-13	11:48:31	0.731412	1134.68	FALSE	87
2022-09-13	11:48:31	0.739809	1135.41	FALSE	87
2022-09-13	11:48:32	0.735331	1136.15	FALSE	87
2022-09-13	11:48:32	0.734618	1136.88	FALSE	87
2022-09-13	11:48:32	0.727443	1137.61	FALSE	87
2022-09-13	11:48:32	0.747137	1138.36	FALSE	87
2022-09-13	11:48:33	-0.0948979	1138.36	FALSE	87
2022-09-13	11:48:33	0.0815905	1138.44	FALSE	87
2022-09-13	11:48:33	-0.0530659	1138.44	FALSE	87
2022-09-13	11:48:34	0.0552801	1138.5	FALSE	87
2022-09-13	11:48:34	0.00810459	1138.5	FALSE	87
2022-09-13	11:48:34	0.260471	1138.76	FALSE	87
2022-09-13	11:48:34	0.308155	1139.07	FALSE	87
2022-09-13	11:48:35	0.324847	1139.4	FALSE	87
2022-09-13	11:48:35	0.474059	1139.87	FALSE	87
2022-09-13	11:48:35	0.848562	1140.72	FALSE	87
2022-09-13	11:48:35	0.620522	1141.34	FALSE	87
2022-09-13	11:48:36	0.610954	1141.95	FALSE	87
2022-09-13	11:48:36	0.745763	1142.7	FALSE	87
2022-09-13	11:48:36	0.66098	1143.36	FALSE	87
2022-09-13	11:48:36	0.735433	1144.09	FALSE	87
2022-09-13	11:48:37	0.7107	1144.8	FALSE	87
2022-09-13	11:48:37	0.708511	1145.51	FALSE	87
2022-09-13	11:48:37	0.664287	1146.18	FALSE	87
2022-09-13	11:48:38	0.606578	1146.78	FALSE	87
2022-09-13	11:48:38	0.549071	1147.33	FALSE	87
2022-09-13	11:48:38	0.520013	1147.85	FALSE	87
2022-09-13	11:48:38	0.40159	1148.25	FALSE	87
2022-09-13	11:48:39	0.308868	1148.56	FALSE	87
2022-09-13	11:48:39	0.067901	1148.63	FALSE	87
2022-09-13	11:48:39	0.0791987	1148.71	FALSE	87
2022-09-13	11:48:39	0.222303	1148.93	FALSE	87
2022-09-13	11:48:40	0.13411	1149.07	FALSE	87
2022-09-13	11:48:40	0.135993	1149.2	FALSE	87
2022-09-13	11:48:40	-0.0663992	1149.2	FALSE	87
2022-09-13	11:48:40	0.154313	1149.36	FALSE	87
2022-09-13	11:48:41	0.0326847	1149.39	FALSE	87
2022-09-13	11:48:41	0.204746	1149.6	FALSE	87
2022-09-13	11:48:41	0.11187	1149.71	FALSE	87
2022-09-13	11:48:41	0.720878	1150.43	FALSE	87
2022-09-13	11:48:42	2.14856	1152.58	FALSE	87
2022-09-13	11:48:42	2.31737	1154.89	FALSE	87
2022-09-13	11:48:42	2.36933	1157.26	FALSE	87
2022-09-13	11:48:43	1.28495	1158.55	FALSE	87
2022-09-13	11:48:43	2.85497	1161.4	FALSE	87
2022-09-13	11:48:43	1.17513	1162.58	FALSE	87
2022-09-13	11:48:43	3.64072	1166.22	1	88
2022-09-13	11:48:44	2.38393	1168.6	FALSE	88
2022-09-13	11:48:44	1.78963	1170.39	FALSE	88
2022-09-13	11:48:44	3.52729	1173.92	1	89
2022-09-13	11:48:44	2.58826	1176.51	FALSE	89
2022-09-13	11:48:45	2.68882	1179.2	FALSE	89
2022-09-13	11:48:45	3.27345	1182.47	1	90
2022-09-13	11:48:45	1.27787	1183.75	FALSE	90
2022-09-13	11:48:45	3.3107	1187.06	1	91
2022-09-13	11:48:46	1.20688	1188.27	FALSE	91
2022-09-13	11:48:46	2.2109	1190.48	FALSE	91
2022-09-13	11:48:46	2.1195	1192.6	FALSE	91
2022-09-13	11:48:47	1.13854	1193.73	FALSE	91
2022-09-13	11:48:47	1.8794	1195.61	FALSE	91
2022-09-13	11:48:47	1.42805	1197.04	FALSE	91
2022-09-13	11:48:47	2.62775	1199.67	FALSE	91
2022-09-13	11:48:48	3.13681	1202.81	1	92
2022-09-13	11:48:48	3.96734	1206.77	1	93
2022-09-13	11:48:48	7.31808	1214.09	1	94
2022-09-13	11:48:48	1.29202	1215.38	FALSE	94
2022-09-13	11:48:49	4.21085	1219.59	1	95
2022-09-13	11:48:49	2.07335	1221.67	FALSE	95
2022-09-13	11:48:49	2.47421	1224.14	FALSE	95
2022-09-13	11:48:49	4.77513	1228.92	1	96
2022-09-13	11:48:50	2.64037	1231.56	FALSE	96
2022-09-13	11:48:50	5.71064	1237.27	1	97
2022-09-13	11:48:50	2.25889	1239.53	FALSE	97
2022-09-13	11:48:51	2.26948	1241.8	FALSE	97
2022-09-13	11:48:51	3.50103	1245.3	1	98
2022-09-13	11:48:51	0.796705	1246.09	FALSE	98
2022-09-13	11:48:51	1.06011	1247.15	FALSE	98
2022-09-13	11:48:52	1.16062	1248.32	FALSE	98
2022-09-13	11:48:52	0.905814	1249.22	FALSE	98
2022-09-13	11:48:52	1.708	1250.93	FALSE	98
2022-09-13	11:48:52	0.587748	1251.52	FALSE	98
2022-09-13	11:48:53	2.14561	1253.66	FALSE	98
2022-09-13	11:48:53	0.947392	1254.61	FALSE	98
2022-09-13	11:48:53	1.28159	1255.89	FALSE	98
2022-09-13	11:48:53	1.1678	1257.06	FALSE	98
2022-09-13	11:48:54	1.21014	1258.27	FALSE	98
2022-09-13	11:48:54	0.744694	1259.01	FALSE	98
2022-09-13	11:48:54	0.973651	1259.99	FALSE	98
2022-09-13	11:48:55	1.33798	1261.33	FALSE	98
2022-09-13	11:48:55	1.54159	1262.87	FALSE	98
2022-09-13	11:48:55	1.64525	1264.51	FALSE	98
2022-09-13	11:48:55	1.10805	1265.62	FALSE	98
2022-09-13	11:48:56	1.85223	1267.47	FALSE	98
2022-09-13	11:48:56	0.435687	1267.91	FALSE	98
2022-09-13	11:48:56	0.649936	1268.56	FALSE	98
2022-09-13	11:48:56	0.294109	1268.85	FALSE	98
2022-09-13	11:48:57	0.430802	1269.28	FALSE	98
2022-09-13	11:48:57	0.537774	1269.82	FALSE	98
2022-09-13	11:48:57	0.544593	1270.37	FALSE	98
2022-09-13	11:48:57	0.566679	1270.93	FALSE	98
2022-09-13	11:48:58	1.24413	1272.18	FALSE	98
2022-09-13	11:48:58	0.82958	1273.01	FALSE	98
2022-09-13	11:48:58	0.709122	1273.72	FALSE	98
2022-09-13	11:48:59	0.831718	1274.55	FALSE	98
2022-09-13	11:48:59	1.13828	1275.69	FALSE	98
2022-09-13	11:48:59	1.15391	1276.84	FALSE	98
2022-09-13	11:48:59	1.25894	1278.1	FALSE	98
2022-09-13	11:49:00	1.18983	1279.29	FALSE	98
2022-09-13	11:49:00	0.938486	1280.23	FALSE	98
2022-09-13	11:49:00	0.792939	1281.02	FALSE	98
2022-09-13	11:49:00	0.788613	1281.81	FALSE	98
2022-09-13	11:49:01	0.79355	1282.6	FALSE	98
2022-09-13	11:49:01	0.749936	1283.35	FALSE	98
2022-09-13	11:49:01	0.746323	1284.1	FALSE	98
2022-09-13	11:49:01	0.877366	1284.98	FALSE	98
2022-09-13	11:49:02	1.1419	1286.12	FALSE	98
2022-09-13	11:49:02	1.46749	1287.58	FALSE	98
2022-09-13	11:49:02	1.08042	1288.67	FALSE	98
2022-09-13	11:49:02	0.879097	1289.54	FALSE	98
2022-09-13	11:49:03	0.759605	1290.3	FALSE	98
2022-09-13	11:49:03	0.678639	1290.98	FALSE	98
2022-09-13	11:49:03	0.588664	1291.57	FALSE	98
2022-09-13	11:49:04	0.659453	1292.23	FALSE	98
2022-09-13	11:49:04	0.619962	1292.85	FALSE	98
2022-09-13	11:49:04	0.471412	1293.32	FALSE	98
2022-09-13	11:49:04	0.520522	1293.84	FALSE	98
2022-09-13	11:49:05	0.556654	1294.4	FALSE	98
2022-09-13	11:49:05	0.681794	1295.08	FALSE	98
2022-09-13	11:49:05	0.749733	1295.83	FALSE	98
2022-09-13	11:49:05	0.629478	1296.46	FALSE	98
2022-09-13	11:49:06	0.410038	1296.87	FALSE	98
2022-09-13	11:49:06	0.334975	1297.21	FALSE	98
2022-09-13	11:49:06	0.328104	1297.53	FALSE	98
2022-09-13	11:49:06	0.420115	1297.95	FALSE	98
2022-09-13	11:49:07	0.396298	1298.35	FALSE	98
2022-09-13	11:49:07	0.412532	1298.76	FALSE	98
2022-09-13	11:49:07	0.325967	1299.09	FALSE	98
2022-09-13	11:49:08	0.243931	1299.33	FALSE	98
2022-09-13	11:49:08	0.113855	1299.45	FALSE	98
2022-09-13	11:49:08	-0.239834	1299.45	FALSE	98
2022-09-13	11:49:08	0.305153	1299.75	FALSE	98
2022-09-13	11:49:09	0.122099	1299.87	FALSE	98
2022-09-13	11:49:09	0.0389443	1299.91	FALSE	98
2022-09-13	11:49:09	0.144033	1300.06	FALSE	98
2022-09-13	11:49:09	0.192685	1300.25	FALSE	98
2022-09-13	11:49:10	0.345356	1300.59	FALSE	98
2022-09-13	11:49:10	1.02098	1301.62	FALSE	98
2022-09-13	11:49:10	3.09563	1304.71	1	99
2022-09-13	11:49:10	2.92413	1307.63	FALSE	99

## Sheet: Juju_prong_202291311448
						**GoPro Fitting: 1133
2022-09-13	11:44:09	0.151056
2022-09-13	11:44:09	0.228206
2022-09-13	11:44:09	0.268003
2022-09-13	11:44:09	0.796654
2022-09-13	11:44:10	1.01971
2022-09-13	11:44:10	1.45645
2022-09-13	11:44:10	1.49971
2022-09-13	11:44:10	1.15431
2022-09-13	11:44:11	1.00383
2022-09-13	11:44:11	0.965967
2022-09-13	11:44:11	0.918995
2022-09-13	11:44:12	0.907036
2022-09-13	11:44:12	0.833397
2022-09-13	11:44:12	0.841896
2022-09-13	11:44:12	0.819046
2022-09-13	11:44:13	0.780623
2022-09-13	11:44:13	0.855433
2022-09-13	11:44:13	0.873092
2022-09-13	11:44:13	0.859911
2022-09-13	11:44:14	0.685051
2022-09-13	11:44:14	0.562964
2022-09-13	11:44:14	0.452837
2022-09-13	11:44:14	0.481845
2022-09-13	11:44:15	0.424084
2022-09-13	11:44:15	0.420318
2022-09-13	11:44:15	0.329021
2022-09-13	11:44:16	0.462507
2022-09-13	11:44:16	0.427901
2022-09-13	11:44:16	0.281998
2022-09-13	11:44:16	0.268715
2022-09-13	11:44:17	0.369479
2022-09-13	11:44:17	0.307545
2022-09-13	11:44:17	0.381489
2022-09-13	11:44:17	0.396043
2022-09-13	11:44:18	0.482456
2022-09-13	11:44:18	0.335076
2022-09-13	11:44:18	0.424033
2022-09-13	11:44:18	0.365763
2022-09-13	11:44:19	0.347392
2022-09-13	11:44:19	0.363982
2022-09-13	11:44:19	0.33701
2022-09-13	11:44:20	0.33472
2022-09-13	11:44:20	0.347494
2022-09-13	11:44:20	0.372125
2022-09-13	11:44:20	0.324949
2022-09-13	11:44:21	0.624847
2022-09-13	11:44:21	1.07981
2022-09-13	11:44:21	3.25238
2022-09-13	11:44:21	2.63233
2022-09-13	11:44:22	1.84256
2022-09-13	11:44:22	1.27106
2022-09-13	11:44:22	0.985458
2022-09-13	11:44:22	1.65167
2022-09-13	11:44:23	4.205
2022-09-13	11:44:23	3.67813
2022-09-13	11:44:23	3.90968
2022-09-13	11:44:24	3.61105
2022-09-13	11:44:24	2.71828
2022-09-13	11:44:24	0.502964
2022-09-13	11:44:24	0.659148
2022-09-13	11:44:25	0.226629
2022-09-13	11:44:25	0.139606
2022-09-13	11:44:25	-0.00131018
2022-09-13	11:44:25	-0.17785
2022-09-13	11:44:26	-0.161921
2022-09-13	11:44:26	4.5195
2022-09-13	11:44:26	14.4645
2022-09-13	11:44:26	6.3024
2022-09-13	11:44:27	4.21426
2022-09-13	11:44:27	1.66744
2022-09-13	11:44:27	1.05055
2022-09-13	11:44:28	0.947595
2022-09-13	11:44:28	0.483931
2022-09-13	11:44:28	0.402099
2022-09-13	11:44:28	0.372074
2022-09-13	11:44:29	0.612939
2022-09-13	11:44:29	1.97421
2022-09-13	11:44:29	2.76714
2022-09-13	11:44:29	1.77793
2022-09-13	11:44:30	2.06978
2022-09-13	11:44:30	3.28144
2022-09-13	11:44:30	3.54546
2022-09-13	11:44:30	3.18586
2022-09-13	11:44:31	5.40118
2022-09-13	11:44:31	6.5279
2022-09-13	11:44:31	5.60179
2022-09-13	11:44:32	4.99538
2022-09-13	11:44:32	4.48062
2022-09-13	11:44:32	4.63675
2022-09-13	11:44:32	6.08647
2022-09-13	11:44:33	5.47858
2022-09-13	11:44:33	8.03507
2022-09-13	11:44:33	8.11415
2022-09-13	11:44:33	6.11069
2022-09-13	11:44:34	1.31095
2022-09-13	11:44:34	0.663982
2022-09-13	11:44:34	0.894211
2022-09-13	11:44:34	1.20734
2022-09-13	11:44:35	0.692735
2022-09-13	11:44:35	0.527544
2022-09-13	11:44:35	0.349478
2022-09-13	11:44:35	0.32444
2022-09-13	11:44:36	0.414109
2022-09-13	11:44:36	0.259708
2022-09-13	11:44:36	0.17411
2022-09-13	11:44:37	0.123982
2022-09-13	11:44:37	0.107799
2022-09-13	11:44:37	0.110293
2022-09-13	11:44:37	0.248766
2022-09-13	11:44:38	0.135993
2022-09-13	11:44:38	0.216247
2022-09-13	11:44:38	0.201336
2022-09-13	11:44:38	0.334517
2022-09-13	11:44:39	0.912532
2022-09-13	11:44:39	1.09528
2022-09-13	11:44:39	0.999504
2022-09-13	11:44:39	1.40678
2022-09-13	11:44:40	1.53411
2022-09-13	11:44:40	1.53472
2022-09-13	11:44:40	1.28098
2022-09-13	11:44:41	0.699962
2022-09-13	11:44:41	0.632634
2022-09-13	11:44:41	0.423321
2022-09-13	11:44:41	0.29584
2022-09-13	11:44:42	0.380216
2022-09-13	11:44:42	0.157875
2022-09-13	11:44:42	0.354211
2022-09-13	11:44:42	0.0481046
2022-09-13	11:44:43	-0.266297
2022-09-13	11:44:43	-0.194287
2022-09-13	11:44:43	0.0635753
2022-09-13	11:44:43	0.0836262
2022-09-13	11:44:44	-0.417544
2022-09-13	11:44:44	-0.715559
2022-09-13	11:44:44	-0.294949
2022-09-13	11:44:45	0.266781
2022-09-13	11:44:45	1.36515
2022-09-13	11:44:45	0.875229
2022-09-13	11:44:45	1.89966
2022-09-13	11:44:46	1.66744
2022-09-13	11:44:46	2.07655
2022-09-13	11:44:46	0.527748
2022-09-13	11:44:47	1.67457
2022-09-13	11:44:47	2.17467
2022-09-13	11:44:47	1.75625
2022-09-13	11:44:47	1.97009
2022-09-13	11:44:47	0.527494
2022-09-13	11:44:48	1.71065
2022-09-13	11:44:48	3.99569
2022-09-13	11:44:48	7.63024
2022-09-13	11:44:49	15.7746
2022-09-13	11:44:49	2.868
2022-09-13	11:44:49	3.44698
2022-09-13	11:44:49	3.41864
2022-09-13	11:44:50	4.23309
2022-09-13	11:44:50	6.14769
2022-09-13	11:44:50	3.89798
2022-09-13	11:44:50	4.18118
2022-09-13	11:44:51	1.47701
2022-09-13	11:44:51	1.43696
2022-09-13	11:44:51	0.664746
2022-09-13	11:44:51	0.275025
2022-09-13	11:44:52	0.545865
2022-09-13	11:44:52	0.168257
2022-09-13	11:44:52	0.580522
2022-09-13	11:44:53	0.312583
2022-09-13	11:44:53	0.459758
2022-09-13	11:44:53	0.780674
2022-09-13	11:44:53	0.383728
2022-09-13	11:44:54	0.59757
2022-09-13	11:44:54	0.14098
2022-09-13	11:44:54	0.465916
2022-09-13	11:44:54	0.225
2022-09-13	11:44:55	0.379046
2022-09-13	11:44:55	0.855992
2022-09-13	11:44:55	1.33335
2022-09-13	11:44:55	1.92169
2022-09-13	11:44:56	1.57289
2022-09-13	11:44:56	1.31274
2022-09-13	11:44:56	0.340216
2022-09-13	11:44:57	1.11116
2022-09-13	11:44:57	0.522404
2022-09-13	11:44:57	0.794058
2022-09-13	11:44:57	0.789834
2022-09-13	11:44:58	0.417672
2022-09-13	11:44:58	0.718588
2022-09-13	11:44:58	0.3793
2022-09-13	11:44:58	0.677163
2022-09-13	11:44:59	0.659708
2022-09-13	11:44:59	0.805611
2022-09-13	11:44:59	1.36352
2022-09-13	11:44:59	0.939656
2022-09-13	11:45:00	1.80989
2022-09-13	11:45:00	0.700318
2022-09-13	11:45:00	2.05782
2022-09-13	11:45:00	1.00541
2022-09-13	11:45:01	1.42912
2022-09-13	11:45:01	2.84749
2022-09-13	11:45:01	2.11457
2022-09-13	11:45:02	5.19451
2022-09-13	11:45:02	2.73813
2022-09-13	11:45:02	7.01477
2022-09-13	11:45:02	1.98968
2022-09-13	11:45:03	3.29772
2022-09-13	11:45:03	2.87207
2022-09-13	11:45:03	1.31655
2022-09-13	11:45:03	1.22632
2022-09-13	11:45:04	0.895432
2022-09-13	11:45:04	0.734466
2022-09-13	11:45:04	1.23599
2022-09-13	11:45:04	0.965662
2022-09-13	11:45:05	2.61757
2022-09-13	11:45:05	1.88561
2022-09-13	11:45:05	2.51482
2022-09-13	11:45:06	4.30882
2022-09-13	11:45:06	2.65421
2022-09-13	11:45:06	7.81986
2022-09-13	11:45:06	1.32999
2022-09-13	11:45:07	4.65472
2022-09-13	11:45:07	1.13106
2022-09-13	11:45:07	0.940013
2022-09-13	11:45:07	2.82856
2022-09-13	11:45:08	1.88373
2022-09-13	11:45:08	3.51212
2022-09-13	11:45:08	7.28551
2022-09-13	11:45:08	4.36754
2022-09-13	11:45:09	8.26571
2022-09-13	11:45:09	1.94113
2022-09-13	11:45:09	4.84373
2022-09-13	11:45:10	3.18831
2022-09-13	11:45:10	3.33426
2022-09-13	11:45:10	8.06591
2022-09-13	11:45:10	2.9964
2022-09-13	11:45:11	5.02077
2022-09-13	11:45:11	3.67263
2022-09-13	11:45:11	1.87299
2022-09-13	11:45:11	6.04963
2022-09-13	11:45:12	2.16439
2022-09-13	11:45:12	4.69497
2022-09-13	11:45:12	4.85604
2022-09-13	11:45:12	2.71467
2022-09-13	11:45:13	4.70149
2022-09-13	11:45:13	2.92632
2022-09-13	11:45:13	2.14363
2022-09-13	11:45:14	5.70459
2022-09-13	11:45:14	1.55024
2022-09-13	11:45:14	5.31665
2022-09-13	11:45:14	3.18434
2022-09-13	11:45:15	2.38301
2022-09-13	11:45:15	3.0594
2022-09-13	11:45:15	1.67314
2022-09-13	11:45:15	3.18006
2022-09-13	11:45:16	1.45574
2022-09-13	11:45:16	1.77457
2022-09-13	11:45:16	2.42546
2022-09-13	11:45:16	1.0881
2022-09-13	11:45:17	2.85594
2022-09-13	11:45:17	1.09665
2022-09-13	11:45:17	1.37503
2022-09-13	11:45:18	0.578282
2022-09-13	11:45:18	0.593906
2022-09-13	11:45:18	2.16846
2022-09-13	11:45:18	1.8733
2022-09-13	11:45:19	3.40037
2022-09-13	11:45:19	1.11106
2022-09-13	11:45:19	1.54373
2022-09-13	11:45:19	0.982608
2022-09-13	11:45:20	0.301641
2022-09-13	11:45:20	0.733295
2022-09-13	11:45:20	0.362863
2022-09-13	11:45:20	0.882863
2022-09-13	11:45:21	1.12495
2022-09-13	11:45:21	1.99676
2022-09-13	11:45:21	2.24551
2022-09-13	11:45:21	2.95991
2022-09-13	11:45:22	5.28398
2022-09-13	11:45:22	2.55803
2022-09-13	11:45:22	5.68953
2022-09-13	11:45:23	2.7681
2022-09-13	11:45:23	4.23935
2022-09-13	11:45:23	2.34551
2022-09-13	11:45:23	0.806018
2022-09-13	11:45:24	1.50515
2022-09-13	11:45:24	0.583626
2022-09-13	11:45:24	0.803168
2022-09-13	11:45:24	1.3734
2022-09-13	11:45:25	2.01192
2022-09-13	11:45:25	4.11894
2022-09-13	11:45:25	1.63716
2022-09-13	11:45:25	2.63823
2022-09-13	11:45:26	0.654109
2022-09-13	11:45:26	0.76556
2022-09-13	11:45:26	0.6793
2022-09-13	11:45:27	0.506272
2022-09-13	11:45:27	0.290547
2022-09-13	11:45:27	0.250242
2022-09-13	11:45:27	0.439962
2022-09-13	11:45:28	2.15635
2022-09-13	11:45:28	2.76922
2022-09-13	11:45:28	2.98556
2022-09-13	11:45:28	3.71482
2022-09-13	11:45:29	1.71737
2022-09-13	11:45:29	2.7278
2022-09-13	11:45:29	1.41223
2022-09-13	11:45:29	2.47665
2022-09-13	11:45:30	1.56184
2022-09-13	11:45:30	2.40938
2022-09-13	11:45:30	1.23894
2022-09-13	11:45:31	1.80968
2022-09-13	11:45:31	0.80617
2022-09-13	11:45:31	1.31095
2022-09-13	11:45:31	0.366578
2022-09-13	11:45:32	0.122914
2022-09-13	11:45:32	0.438333
2022-09-13	11:45:32	1.08444
2022-09-13	11:45:32	1.84561
2022-09-13	11:45:33	1.17823
2022-09-13	11:45:33	1.81487
2022-09-13	11:45:33	1.16775
2022-09-13	11:45:33	1.57192
2022-09-13	11:45:34	1.45609
2022-09-13	11:45:34	1.90062
2022-09-13	11:45:34	1.75233
2022-09-13	11:45:35	6.25472
2022-09-13	11:45:35	8.94861
2022-09-13	11:45:35	3.56362
2022-09-13	11:45:35	4.77859
2022-09-13	11:45:36	3.8707
2022-09-13	11:45:36	5.66932
2022-09-13	11:45:36	5.25349
2022-09-13	11:45:36	2.97889
2022-09-13	11:45:37	1.76505
2022-09-13	11:45:37	1.3792
2022-09-13	11:45:37	1.50525
2022-09-13	11:45:37	1.21258
2022-09-13	11:45:38	2.04373
2022-09-13	11:45:38	3.91874
2022-09-13	11:45:38	4.39263
2022-09-13	11:45:39	3.02072
2022-09-13	11:45:39	2.21314
2022-09-13	11:45:39	1.37843
2022-09-13	11:45:39	1.47574
2022-09-13	11:45:40	2.45889
2022-09-13	11:45:40	1.51823
2022-09-13	11:45:40	0.657265
2022-09-13	11:45:40	0.223473
2022-09-13	11:45:41	0.225763
2022-09-13	11:45:41	0.231616
2022-09-13	11:45:41	0.169326
2022-09-13	11:45:41	0.565458
2022-09-13	11:45:42	0.729377
2022-09-13	11:45:42	0.732277
2022-09-13	11:45:42	0.612939
2022-09-13	11:45:43	1.01055
2022-09-13	11:45:43	2.0421
2022-09-13	11:45:43	1.37808
2022-09-13	11:45:43	1.76948
2022-09-13	11:45:44	2.51431
2022-09-13	11:45:44	2.45981
2022-09-13	11:45:44	1.69055
2022-09-13	11:45:44	5.85054
2022-09-13	11:45:45	4.711
2022-09-13	11:45:45	7.34388
2022-09-13	11:45:45	5.91212
2022-09-13	11:45:45	2.5135
2022-09-13	11:45:46	2.16912
2022-09-13	11:45:46	1.08113
2022-09-13	11:45:46	0.817723
2022-09-13	11:45:46	0.901539
2022-09-13	11:45:47	0.68215
2022-09-13	11:45:47	0.816298
2022-09-13	11:45:47	0.653448
2022-09-13	11:45:48	0.720623
2022-09-13	11:45:48	1.07263
2022-09-13	11:45:48	1.46882
2022-09-13	11:45:48	2.45971
2022-09-13	11:45:49	1.54556
2022-09-13	11:45:49	1.98118
2022-09-13	11:45:49	1.28393
2022-09-13	11:45:49	1.25854
2022-09-13	11:45:50	1.54866
2022-09-13	11:45:50	1.32714
2022-09-13	11:45:50	1.32683
2022-09-13	11:45:50	1.48469
2022-09-13	11:45:51	1.37009
2022-09-13	11:45:51	2.58286
2022-09-13	11:45:51	2.07808
2022-09-13	11:45:52	2.46454
2022-09-13	11:45:52	1.23477
2022-09-13	11:45:52	1.33218
2022-09-13	11:45:52	2.03564
2022-09-13	11:45:53	1.68357
2022-09-13	11:45:53	1.18902
2022-09-13	11:45:53	0.896501
2022-09-13	11:45:53	0.943677
2022-09-13	11:45:54	1.2881
2022-09-13	11:45:54	1.5733
2022-09-13	11:45:54	1.16597
2022-09-13	11:45:54	1.49961
2022-09-13	11:45:55	2.3106
2022-09-13	11:45:55	2.26317
2022-09-13	11:45:55	2.27528
2022-09-13	11:45:56	1.17085
2022-09-13	11:45:56	0.964389
2022-09-13	11:45:56	0.829733
2022-09-13	11:45:56	0.79701
2022-09-13	11:45:57	0.738588
2022-09-13	11:45:57	0.79813
2022-09-13	11:45:57	0.618231
2022-09-13	11:45:57	0.492277
2022-09-13	11:45:58	0.487443
2022-09-13	11:45:58	0.537112
2022-09-13	11:45:58	0.691667
2022-09-13	11:45:58	0.603117
2022-09-13	11:45:59	2.09879
2022-09-13	11:45:59	2.75192
2022-09-13	11:45:59	6.05411
2022-09-13	11:46:00	3.08011
2022-09-13	11:46:00	4.92551
2022-09-13	11:46:00	3.94475
2022-09-13	11:46:00	1.38744
2022-09-13	11:46:01	1.16464
2022-09-13	11:46:01	2.17945
2022-09-13	11:46:01	1.14709
2022-09-13	11:46:01	2.96871
2022-09-13	11:46:02	1.6363
2022-09-13	11:46:02	3.0708
2022-09-13	11:46:02	2.93243
2022-09-13	11:46:02	1.32978
2022-09-13	11:46:03	5.64866
2022-09-13	11:46:03	3.74159
2022-09-13	11:46:03	9.03909
2022-09-13	11:46:04	3.42719
2022-09-13	11:46:04	1.43324
2022-09-13	11:46:04	0.577061
2022-09-13	11:46:04	0.297163
2022-09-13	11:46:05	0.194008
2022-09-13	11:46:05	0.052074
2022-09-13	11:46:05	0.264644
2022-09-13	11:46:05	0.301845
2022-09-13	11:46:06	0.693753
2022-09-13	11:46:06	0.709377
2022-09-13	11:46:06	0.547392
2022-09-13	11:46:06	0.372786
2022-09-13	11:46:07	0.383372
2022-09-13	11:46:07	0.350038
2022-09-13	11:46:07	0.373397
2022-09-13	11:46:08	0.391616
2022-09-13	11:46:08	0.400725
2022-09-13	11:46:08	0.373804
2022-09-13	11:46:08	0.355534
2022-09-13	11:46:09	0.346578
2022-09-13	11:46:09	0.397417
2022-09-13	11:46:09	0.737824
2022-09-13	11:46:09	0.736807
2022-09-13	11:46:10	0.735026
2022-09-13	11:46:10	2.00215
2022-09-13	11:46:10	0.518588
2022-09-13	11:46:10	0.262659
2022-09-13	11:46:11	0.292685
2022-09-13	11:46:11	0.317876
2022-09-13	11:46:11	0.224695
2022-09-13	11:46:11	0.198333
2022-09-13	11:46:12	0.251565
2022-09-13	11:46:12	0.244898
2022-09-13	11:46:12	0.327545
2022-09-13	11:46:13	0.443321
2022-09-13	11:46:13	1.02587
2022-09-13	11:46:13	1.50444
2022-09-13	11:46:13	1.11533
2022-09-13	11:46:14	1.22826
2022-09-13	11:46:14	1.59594
2022-09-13	11:46:14	1.0766
2022-09-13	11:46:14	1.76688
2022-09-13	11:46:15	0.515992
2022-09-13	11:46:15	2.1966
2022-09-13	11:46:15	0.80159
2022-09-13	11:46:15	2.08571
2022-09-13	11:46:16	3.25467
2022-09-13	11:46:16	1.03472
2022-09-13	11:46:16	2.28067
2022-09-13	11:46:17	1.41599
2022-09-13	11:46:17	0.5793
2022-09-13	11:46:17	1.43335
2022-09-13	11:46:17	0.706425
2022-09-13	11:46:18	0.31701
2022-09-13	11:46:18	0.788053
2022-09-13	11:46:18	0.190547
2022-09-13	11:46:18	0.420216
2022-09-13	11:46:19	0.525
2022-09-13	11:46:19	0.0702928
2022-09-13	11:46:19	0.858537
2022-09-13	11:46:19	0.386883
2022-09-13	11:46:20	1.13716
2022-09-13	11:46:20	1.19971
2022-09-13	11:46:20	0.999758
2022-09-13	11:46:21	1.48846
2022-09-13	11:46:21	0.797265
2022-09-13	11:46:21	0.317824
2022-09-13	11:46:21	0.958079
2022-09-13	11:46:22	0.112023
2022-09-13	11:46:22	1.02011
2022-09-13	11:46:22	0.189733
2022-09-13	11:46:22	0.434008
2022-09-13	11:46:23	0.510852
2022-09-13	11:46:23	0.430344
2022-09-13	11:46:23	0.612939
2022-09-13	11:46:23	0.131311
2022-09-13	11:46:24	0.126883
2022-09-13	11:46:24	-0.195
2022-09-13	11:46:24	-0.210623
2022-09-13	11:46:25	-0.200699
2022-09-13	11:46:25	-0.205178
2022-09-13	11:46:25	-0.155814
2022-09-13	11:46:25	-0.192353
2022-09-13	11:46:26	-0.188587
2022-09-13	11:46:26	-0.237646
2022-09-13	11:46:26	-0.199071
2022-09-13	11:46:26	-0.204465
2022-09-13	11:46:27	-0.194898
2022-09-13	11:46:27	-0.165178
2022-09-13	11:46:27	-0.15159
2022-09-13	11:46:27	-0.115763
2022-09-13	11:46:28	-0.087875
2022-09-13	11:46:28	-0.0715391
2022-09-13	11:46:28	-0.0573916
2022-09-13	11:46:29	-0.0533712
2022-09-13	11:46:29	-0.059071
2022-09-13	11:46:29	-0.0482313
2022-09-13	11:46:29	-0.0418699
2022-09-13	11:46:30	-0.0245163
2022-09-13	11:46:30	-0.0133204
2022-09-13	11:46:30	0.00489845
2022-09-13	11:46:30	0.034415
2022-09-13	11:46:31	0.040929
2022-09-13	11:46:31	0.036247
2022-09-13	11:46:31	0.0208272
2022-09-13	11:46:31	0.0137025
2022-09-13	11:46:32	0.0159926
2022-09-13	11:46:32	0.0201147
2022-09-13	11:46:32	0.0182318
2022-09-13	11:46:33	0.0125321
2022-09-13	11:46:33	0.0108018
2022-09-13	11:46:33	0.0068323
2022-09-13	11:46:33	0.00276106
2022-09-13	11:46:34	0.000878093
2022-09-13	11:46:34	-0.0205977
2022-09-13	11:46:34	-0.0487402
2022-09-13	11:46:34	-0.0801905
2022-09-13	11:46:35	-0.0980023
2022-09-13	11:46:35	-0.0638038
2022-09-13	11:46:35	0.282354
2022-09-13	11:46:35	0.666272
2022-09-13	11:46:36	0.0467305
2022-09-13	11:46:36	-0.408129
2022-09-13	11:46:36	-0.355254
2022-09-13	11:46:37	-0.595661
2022-09-13	11:46:37	-0.737595
2022-09-13	11:46:37	-0.820954
2022-09-13	11:46:37	-1.00569
2022-09-13	11:46:38	-1.10177
2022-09-13	11:46:38	-1.13607
2022-09-13	11:46:38	-1.13261
2022-09-13	11:46:38	-0.762226
2022-09-13	11:46:39	-0.318613
2022-09-13	11:46:39	-0.34131
2022-09-13	11:46:39	-0.239071
2022-09-13	11:46:39	-0.929401
2022-09-13	11:46:40	-0.919274
2022-09-13	11:46:40	-1.38533
2022-09-13	11:46:40	-1.50793
2022-09-13	11:46:40	-1.39704
2022-09-13	11:46:41	-1.57648
2022-09-13	11:46:41	0.609122
2022-09-13	11:46:41	2.44434
2022-09-13	11:46:42	0.379911
2022-09-13	11:46:42	-0.213371
2022-09-13	11:46:42	-1.56925
2022-09-13	11:46:42	-1.34024
2022-09-13	11:46:43	-1.7436
2022-09-13	11:46:43	-0.349605
2022-09-13	11:46:43	0.192125
2022-09-13	11:46:43	-0.242582
2022-09-13	11:46:44	0.531819
2022-09-13	11:46:44	0.727901
2022-09-13	11:46:44	0.712837
2022-09-13	11:46:44	-0.869147
2022-09-13	11:46:45	-1.20289
2022-09-13	11:46:45	-0.596068
2022-09-13	11:46:45	0.188105
2022-09-13	11:46:46	0.234924
2022-09-13	11:46:46	-0.00914732
2022-09-13	11:46:46	-0.90589
2022-09-13	11:46:46	0.513906
2022-09-13	11:46:47	0.73416
2022-09-13	11:46:47	0.732379
2022-09-13	11:46:47	0.738791
2022-09-13	11:46:47	0.733906
2022-09-13	11:46:48	0.733295
2022-09-13	11:46:48	0.734975
2022-09-13	11:46:48	0.73416
2022-09-13	11:46:48	0.728003
2022-09-13	11:46:49	0.735433
2022-09-13	11:46:49	0.737366
2022-09-13	11:46:49	0.740725
2022-09-13	11:46:50	0.73472
2022-09-13	11:46:50	0.740064
2022-09-13	11:46:50	0.737519
2022-09-13	11:46:50	0.738181
2022-09-13	11:46:51	0.737366
2022-09-13	11:46:51	0.733397
2022-09-13	11:46:51	0.732175
2022-09-13	11:46:51	0.731717
2022-09-13	11:46:52	0.731921
2022-09-13	11:46:52	0.735891
2022-09-13	11:46:52	0.738079
2022-09-13	11:46:52	0.740318
2022-09-13	11:46:53	0.732583
2022-09-13	11:46:53	0.730649
2022-09-13	11:46:53	0.631361
2022-09-13	11:46:54	-0.760444
2022-09-13	11:46:54	-0.883803
2022-09-13	11:46:54	-0.257799
2022-09-13	11:46:54	1.02902
2022-09-13	11:46:55	2.76357
2022-09-13	11:46:55	1.90159
2022-09-13	11:46:55	0.809478
2022-09-13	11:46:55	0.132227
2022-09-13	11:46:56	0.0546185
2022-09-13	11:46:56	-0.226552
2022-09-13	11:46:56	-0.246196
2022-09-13	11:46:56	0.0399112
2022-09-13	11:46:57	-0.217544
2022-09-13	11:46:57	-0.332099
2022-09-13	11:46:57	-0.60131
2022-09-13	11:46:58	-0.737391
2022-09-13	11:46:58	-0.764414
2022-09-13	11:46:58	0.217977
2022-09-13	11:46:58	1.44734
2022-09-13	11:46:59	2.90749
2022-09-13	11:46:59	-0.193524
2022-09-13	11:46:59	0.725458
2022-09-13	11:46:59	0.737621
2022-09-13	11:47:00	0.733397
2022-09-13	11:47:00	0.734771
2022-09-13	11:47:00	0.733041
2022-09-13	11:47:00	0.735076
2022-09-13	11:47:01	0.735636
2022-09-13	11:47:01	0.735076
2022-09-13	11:47:01	0.734771
2022-09-13	11:47:01	0.731921
2022-09-13	11:47:02	0.730293
2022-09-13	11:47:02	0.743778
2022-09-13	11:47:02	0.73701
2022-09-13	11:47:03	0.735382
2022-09-13	11:47:03	0.736043
2022-09-13	11:47:03	0.737519
2022-09-13	11:47:03	0.734873
2022-09-13	11:47:04	0.741081
2022-09-13	11:47:04	0.736908
2022-09-13	11:47:04	0.732277
2022-09-13	11:47:04	0.737061
2022-09-13	11:47:05	0.729529
2022-09-13	11:47:05	0.733193
2022-09-13	11:47:05	0.727087
2022-09-13	11:47:05	0.737468
2022-09-13	11:47:06	0.737621
2022-09-13	11:47:06	0.737468
2022-09-13	11:47:06	0.735585
2022-09-13	11:47:07	0.73528
2022-09-13	11:47:07	0.738282
2022-09-13	11:47:07	0.730343
2022-09-13	11:47:07	0.738944
2022-09-13	11:47:08	0.728562
2022-09-13	11:47:08	0.737519
2022-09-13	11:47:08	0.735738
2022-09-13	11:47:08	0.734975
2022-09-13	11:47:09	0.739351
2022-09-13	11:47:09	0.732277
2022-09-13	11:47:09	0.734059
2022-09-13	11:47:09	0.730343
2022-09-13	11:47:10	0.732837
2022-09-13	11:47:10	0.739962
2022-09-13	11:47:10	0.731972
2022-09-13	11:47:11	0.734008
2022-09-13	11:47:11	0.736654
2022-09-13	11:47:11	0.734975
2022-09-13	11:47:11	0.734364
2022-09-13	11:47:12	0.734771
2022-09-13	11:47:12	0.734109
2022-09-13	11:47:12	0.734059
2022-09-13	11:47:12	0.742659
2022-09-13	11:47:13	0.733601
2022-09-13	11:47:13	0.734618
2022-09-13	11:47:13	0.736552
2022-09-13	11:47:13	0.734211
2022-09-13	11:47:14	0.741031
2022-09-13	11:47:14	0.72958
2022-09-13	11:47:14	0.728308
2022-09-13	11:47:15	0.732277
2022-09-13	11:47:15	0.733651
2022-09-13	11:47:15	0.732939
2022-09-13	11:47:15	0.728461
2022-09-13	11:47:16	0.733346
2022-09-13	11:47:16	0.727901
2022-09-13	11:47:16	0.731361
2022-09-13	11:47:16	0.731565
2022-09-13	11:47:17	0.736247
2022-09-13	11:47:17	0.732634
2022-09-13	11:47:17	0.734873
2022-09-13	11:47:17	0.738079
2022-09-13	11:47:18	0.734262
2022-09-13	11:47:18	0.736654
2022-09-13	11:47:18	0.737112
2022-09-13	11:47:19	0.728461
2022-09-13	11:47:19	0.737672
2022-09-13	11:47:19	0.733346
2022-09-13	11:47:19	0.735229
2022-09-13	11:47:20	0.732023
2022-09-13	11:47:20	0.735789
2022-09-13	11:47:20	0.735687
2022-09-13	11:47:20	0.736807
2022-09-13	11:47:21	0.73584
2022-09-13	11:47:21	0.735636
2022-09-13	11:47:21	0.732583
2022-09-13	11:47:21	0.731972
2022-09-13	11:47:22	0.729275
2022-09-13	11:47:22	0.737773
2022-09-13	11:47:22	0.735789
2022-09-13	11:47:23	0.740318
2022-09-13	11:47:23	0.741896
2022-09-13	11:47:23	0.733448
2022-09-13	11:47:23	0.736705
2022-09-13	11:47:24	0.732532
2022-09-13	11:47:24	0.733092
2022-09-13	11:47:24	0.728562
2022-09-13	11:47:24	0.734313
2022-09-13	11:47:25	0.73874
2022-09-13	11:47:25	0.737519
2022-09-13	11:47:25	0.733753
2022-09-13	11:47:25	0.729173
2022-09-13	11:47:26	0.73187
2022-09-13	11:47:26	0.735331
2022-09-13	11:47:26	0.733957
2022-09-13	11:47:26	0.734618
2022-09-13	11:47:27	0.70556
2022-09-13	11:47:27	-1.52966
2022-09-13	11:47:27	-0.771182
2022-09-13	11:47:28	-1.37398
2022-09-13	11:47:28	-1.50502
2022-09-13	11:47:28	-1.72986
2022-09-13	11:47:28	-1.89317
2022-09-13	11:47:29	-1.75159
2022-09-13	11:47:29	-1.69169
2022-09-13	11:47:29	-0.121157
2022-09-13	11:47:29	-0.889961
2022-09-13	11:47:30	-0.191743
2022-09-13	11:47:30	-0.76075
2022-09-13	11:47:30	-1.20192
2022-09-13	11:47:30	-1.53128
2022-09-13	11:47:31	-1.81006
2022-09-13	11:47:31	-1.10838
2022-09-13	11:47:31	-1.86564
2022-09-13	11:47:32	-1.19357
2022-09-13	11:47:32	-1.84813
2022-09-13	11:47:32	-1.11642
2022-09-13	11:47:32	-1.81612
2022-09-13	11:47:33	-1.72894
2022-09-13	11:47:33	-1.35276
2022-09-13	11:47:33	-1.45393
2022-09-13	11:47:33	-0.777544
2022-09-13	11:47:34	-1.76502
2022-09-13	11:47:34	0.0875448
2022-09-13	11:47:34	0.583321
2022-09-13	11:47:34	-0.245025
2022-09-13	11:47:35	0.125865
2022-09-13	11:47:35	-0.0977478
2022-09-13	11:47:35	-0.224109
2022-09-13	11:47:36	-0.15673
2022-09-13	11:47:36	0.0228628
2022-09-13	11:47:36	0.300878
2022-09-13	11:47:36	0.190547
2022-09-13	11:47:37	0.186222
2022-09-13	11:47:37	0.112278
2022-09-13	11:47:37	-0.534796
2022-09-13	11:47:37	-0.246196
2022-09-13	11:47:38	0.172328
2022-09-13	11:47:38	0.166018
2022-09-13	11:47:38	0.265967
2022-09-13	11:47:38	-0.00823129
2022-09-13	11:47:39	-0.0519972
2022-09-13	11:47:39	-0.43617
2022-09-13	11:47:39	-0.0915391
2022-09-13	11:47:40	-0.0438547
2022-09-13	11:47:40	-0.20818
2022-09-13	11:47:40	-0.245839
2022-09-13	11:47:40	-0.359885
2022-09-13	11:47:41	-0.478867
2022-09-13	11:47:41	0.424949
2022-09-13	11:47:41	-0.519274
2022-09-13	11:47:41	-0.818969
2022-09-13	11:47:42	0.734669
2022-09-13	11:47:42	0.733092
2022-09-13	11:47:42	-0.0491473
2022-09-13	11:47:42	-2.21403
2022-09-13	11:47:43	-0.176832
2022-09-13	11:47:43	0.735687
2022-09-13	11:47:43	0.738181
2022-09-13	11:47:44	0.733448
2022-09-13	11:47:44	0.439758
2022-09-13	11:47:44	0.156196
2022-09-13	11:47:44	0.73813
2022-09-13	11:47:45	0.731056
2022-09-13	11:47:45	0.737875
2022-09-13	11:47:45	0.745051
2022-09-13	11:47:45	0.737926
2022-09-13	11:47:46	0.745509
2022-09-13	11:47:46	0.733193
2022-09-13	11:47:46	0.738486
2022-09-13	11:47:46	0.734873
2022-09-13	11:47:47	0.739046
2022-09-13	11:47:47	0.732175
2022-09-13	11:47:47	0.732735
2022-09-13	11:47:48	0.736043
2022-09-13	11:47:48	0.726934
2022-09-13	11:47:48	0.73528
2022-09-13	11:47:48	0.734822
2022-09-13	11:47:49	0.737163
2022-09-13	11:47:49	0.731005
2022-09-13	11:47:49	0.733906
2022-09-13	11:47:49	0.735026
2022-09-13	11:47:50	0.730598
2022-09-13	11:47:50	0.731667
2022-09-13	11:47:50	0.736399
2022-09-13	11:47:50	0.734466
2022-09-13	11:47:51	0.72958
2022-09-13	11:47:51	0.732175
2022-09-13	11:47:51	0.0377738
2022-09-13	11:47:51	0.709784
2022-09-13	11:47:52	0.735331
2022-09-13	11:47:52	0.730751
2022-09-13	11:47:52	0.729835
2022-09-13	11:47:53	0.733855
2022-09-13	11:47:53	0.731107
2022-09-13	11:47:53	0.73645
2022-09-13	11:47:53	0.735738
2022-09-13	11:47:54	0.735026
2022-09-13	11:47:54	0.733295
2022-09-13	11:47:54	0.738639
2022-09-13	11:47:54	0.731819
2022-09-13	11:47:55	0.738231
2022-09-13	11:47:55	0.732939
2022-09-13	11:47:55	0.733092
2022-09-13	11:47:55	0.387443
2022-09-13	11:47:56	0.736654
2022-09-13	11:47:56	0.730242
2022-09-13	11:47:56	0.734059
2022-09-13	11:47:57	0.733601
2022-09-13	11:47:57	0.736603
2022-09-13	11:47:57	0.735585
2022-09-13	11:47:57	0.733092
2022-09-13	11:47:58	0.737163
2022-09-13	11:47:58	0.730242
2022-09-13	11:47:58	0.731056
2022-09-13	11:47:58	0.737061
2022-09-13	11:47:59	0.735534
2022-09-13	11:47:59	0.735534
2022-09-13	11:47:59	0.733753
2022-09-13	11:47:59	0.741234
2022-09-13	11:48:00	0.739097
2022-09-13	11:48:00	0.737672
2022-09-13	11:48:00	0.732684
2022-09-13	11:48:01	0.739351
2022-09-13	11:48:01	0.732634
2022-09-13	11:48:01	0.736908
2022-09-13	11:48:01	0.728817
2022-09-13	11:48:02	0.73243
2022-09-13	11:48:02	0.734262
2022-09-13	11:48:02	0.490649
2022-09-13	11:48:02	0.691209
2022-09-13	11:48:03	0.714109
2022-09-13	11:48:03	0.705611
2022-09-13	11:48:03	0.660929
2022-09-13	11:48:03	0.664593
2022-09-13	11:48:04	0.677468
2022-09-13	11:48:04	0.672379
2022-09-13	11:48:04	0.671972
2022-09-13	11:48:05	0.641692
2022-09-13	11:48:05	0.615789
2022-09-13	11:48:05	0.535025
2022-09-13	11:48:05	0.549784
2022-09-13	11:48:06	0.543422
2022-09-13	11:48:06	0.597774
2022-09-13	11:48:06	0.46841
2022-09-13	11:48:06	0.485916
2022-09-13	11:48:07	0.466527
2022-09-13	11:48:07	0.461743
2022-09-13	11:48:07	0.461896
2022-09-13	11:48:07	0.436145
2022-09-13	11:48:08	0.465865
2022-09-13	11:48:08	0.450649
2022-09-13	11:48:08	0.401438
2022-09-13	11:48:09	0.464339
2022-09-13	11:48:09	0.461998
2022-09-13	11:48:09	0.424593
2022-09-13	11:48:09	0.339199
2022-09-13	11:48:10	0.386425
2022-09-13	11:48:10	0.425916
2022-09-13	11:48:10	0.397214
2022-09-13	11:48:10	0.410445
2022-09-13	11:48:11	0.386832
2022-09-13	11:48:11	0.433295
2022-09-13	11:48:11	0.508562
2022-09-13	11:48:11	0.349275
2022-09-13	11:48:12	0.361082
2022-09-13	11:48:12	0.395789
2022-09-13	11:48:12	0.326272
2022-09-13	11:48:13	0.344389
2022-09-13	11:48:13	0.304898
2022-09-13	11:48:13	0.302964
2022-09-13	11:48:13	0.282405
2022-09-13	11:48:14	0.250547
2022-09-13	11:48:14	0.286069
2022-09-13	11:48:14	0.159911
2022-09-13	11:48:14	0.196451
2022-09-13	11:48:15	0.284847
2022-09-13	11:48:15	0.26668
2022-09-13	11:48:15	0.217265
2022-09-13	11:48:15	0.0430155
2022-09-13	11:48:16	0.06556
2022-09-13	11:48:16	0.107138
2022-09-13	11:48:16	0.0604709
2022-09-13	11:48:17	0.0394023
2022-09-13	11:48:17	0.018588
2022-09-13	11:48:17	0.0389443
2022-09-13	11:48:17	0.440115
2022-09-13	11:48:18	0.748155
2022-09-13	11:48:18	0.732735
2022-09-13	11:48:18	0.732532
2022-09-13	11:48:18	0.729071
2022-09-13	11:48:19	0.733448
2022-09-13	11:48:19	0.740165
2022-09-13	11:48:19	0.737824
2022-09-13	11:48:19	0.733702
2022-09-13	11:48:20	0.736247
2022-09-13	11:48:20	0.736298
2022-09-13	11:48:20	0.730445
2022-09-13	11:48:20	0.734313
2022-09-13	11:48:21	0.734262
2022-09-13	11:48:21	0.735891
2022-09-13	11:48:21	0.733244
2022-09-13	11:48:22	0.743982
2022-09-13	11:48:22	0.737875
2022-09-13	11:48:22	0.730598
2022-09-13	11:48:22	0.731361
2022-09-13	11:48:23	0.735534
2022-09-13	11:48:23	0.736908
2022-09-13	11:48:23	0.729478
2022-09-13	11:48:23	0.740216
2022-09-13	11:48:24	0.737824
2022-09-13	11:48:24	0.730649
2022-09-13	11:48:24	0.733346
2022-09-13	11:48:24	0.733295
2022-09-13	11:48:25	0.730801
2022-09-13	11:48:25	0.727799
2022-09-13	11:48:25	0.727494
2022-09-13	11:48:26	0.729529
2022-09-13	11:48:26	0.72958
2022-09-13	11:48:26	0.729122
2022-09-13	11:48:26	0.724389
2022-09-13	11:48:27	0.732328
2022-09-13	11:48:27	0.736247
2022-09-13	11:48:27	0.738537
2022-09-13	11:48:27	0.732074
2022-09-13	11:48:28	0.734466
2022-09-13	11:48:28	0.729071
2022-09-13	11:48:28	0.737061
2022-09-13	11:48:28	0.728613
2022-09-13	11:48:29	0.73187
2022-09-13	11:48:29	0.729886
2022-09-13	11:48:29	0.735026
2022-09-13	11:48:30	0.734517
2022-09-13	11:48:30	0.732532
2022-09-13	11:48:30	0.729173
2022-09-13	11:48:30	0.735636
2022-09-13	11:48:31	0.734364
2022-09-13	11:48:31	0.736145
2022-09-13	11:48:31	0.731412
2022-09-13	11:48:31	0.739809
2022-09-13	11:48:32	0.735331
2022-09-13	11:48:32	0.734618
2022-09-13	11:48:32	0.727443
2022-09-13	11:48:32	0.747137
2022-09-13	11:48:33	-0.0948979
2022-09-13	11:48:33	0.0815905
2022-09-13	11:48:33	-0.0530659
2022-09-13	11:48:34	0.0552801
2022-09-13	11:48:34	0.00810459
2022-09-13	11:48:34	0.260471
2022-09-13	11:48:34	0.308155
2022-09-13	11:48:35	0.324847
2022-09-13	11:48:35	0.474059
2022-09-13	11:48:35	0.848562
2022-09-13	11:48:35	0.620522
2022-09-13	11:48:36	0.610954
2022-09-13	11:48:36	0.745763
2022-09-13	11:48:36	0.66098
2022-09-13	11:48:36	0.735433
2022-09-13	11:48:37	0.7107
2022-09-13	11:48:37	0.708511
2022-09-13	11:48:37	0.664287
2022-09-13	11:48:38	0.606578
2022-09-13	11:48:38	0.549071
2022-09-13	11:48:38	0.520013
2022-09-13	11:48:38	0.40159
2022-09-13	11:48:39	0.308868
2022-09-13	11:48:39	0.067901
2022-09-13	11:48:39	0.0791987
2022-09-13	11:48:39	0.222303
2022-09-13	11:48:40	0.13411
2022-09-13	11:48:40	0.135993
2022-09-13	11:48:40	-0.0663992
2022-09-13	11:48:40	0.154313
2022-09-13	11:48:41	0.0326847
2022-09-13	11:48:41	0.204746
2022-09-13	11:48:41	0.11187
2022-09-13	11:48:41	0.720878
2022-09-13	11:48:42	2.14856
2022-09-13	11:48:42	2.31737
2022-09-13	11:48:42	2.36933
2022-09-13	11:48:43	1.28495
2022-09-13	11:48:43	2.85497
2022-09-13	11:48:43	1.17513
2022-09-13	11:48:43	3.64072
2022-09-13	11:48:44	2.38393
2022-09-13	11:48:44	1.78963
2022-09-13	11:48:44	3.52729
2022-09-13	11:48:44	2.58826
2022-09-13	11:48:45	2.68882
2022-09-13	11:48:45	3.27345
2022-09-13	11:48:45	1.27787
2022-09-13	11:48:45	3.3107
2022-09-13	11:48:46	1.20688
2022-09-13	11:48:46	2.2109
2022-09-13	11:48:46	2.1195
2022-09-13	11:48:47	1.13854
2022-09-13	11:48:47	1.8794
2022-09-13	11:48:47	1.42805
2022-09-13	11:48:47	2.62775
2022-09-13	11:48:48	3.13681
2022-09-13	11:48:48	3.96734
2022-09-13	11:48:48	7.31808
2022-09-13	11:48:48	1.29202
2022-09-13	11:48:49	4.21085
2022-09-13	11:48:49	2.07335
2022-09-13	11:48:49	2.47421
2022-09-13	11:48:49	4.77513
2022-09-13	11:48:50	2.64037
2022-09-13	11:48:50	5.71064
2022-09-13	11:48:50	2.25889
2022-09-13	11:48:51	2.26948
2022-09-13	11:48:51	3.50103
2022-09-13	11:48:51	0.796705
2022-09-13	11:48:51	1.06011
2022-09-13	11:48:52	1.16062
2022-09-13	11:48:52	0.905814
2022-09-13	11:48:52	1.708
2022-09-13	11:48:52	0.587748
2022-09-13	11:48:53	2.14561
2022-09-13	11:48:53	0.947392
2022-09-13	11:48:53	1.28159
2022-09-13	11:48:53	1.1678
2022-09-13	11:48:54	1.21014
2022-09-13	11:48:54	0.744694
2022-09-13	11:48:54	0.973651
2022-09-13	11:48:55	1.33798
2022-09-13	11:48:55	1.54159
2022-09-13	11:48:55	1.64525
2022-09-13	11:48:55	1.10805
2022-09-13	11:48:56	1.85223
2022-09-13	11:48:56	0.435687
2022-09-13	11:48:56	0.649936
2022-09-13	11:48:56	0.294109
2022-09-13	11:48:57	0.430802
2022-09-13	11:48:57	0.537774
2022-09-13	11:48:57	0.544593
2022-09-13	11:48:57	0.566679
2022-09-13	11:48:58	1.24413
2022-09-13	11:48:58	0.82958
2022-09-13	11:48:58	0.709122
2022-09-13	11:48:59	0.831718
2022-09-13	11:48:59	1.13828
2022-09-13	11:48:59	1.15391
2022-09-13	11:48:59	1.25894
2022-09-13	11:49:00	1.18983
2022-09-13	11:49:00	0.938486
2022-09-13	11:49:00	0.792939
2022-09-13	11:49:00	0.788613
2022-09-13	11:49:01	0.79355
2022-09-13	11:49:01	0.749936
2022-09-13	11:49:01	0.746323
2022-09-13	11:49:01	0.877366
2022-09-13	11:49:02	1.1419
2022-09-13	11:49:02	1.46749
2022-09-13	11:49:02	1.08042
2022-09-13	11:49:02	0.879097
2022-09-13	11:49:03	0.759605
2022-09-13	11:49:03	0.678639
2022-09-13	11:49:03	0.588664
2022-09-13	11:49:04	0.659453
2022-09-13	11:49:04	0.619962
2022-09-13	11:49:04	0.471412
2022-09-13	11:49:04	0.520522
2022-09-13	11:49:05	0.556654
2022-09-13	11:49:05	0.681794
2022-09-13	11:49:05	0.749733
2022-09-13	11:49:05	0.629478
2022-09-13	11:49:06	0.410038
2022-09-13	11:49:06	0.334975
2022-09-13	11:49:06	0.328104
2022-09-13	11:49:06	0.420115
2022-09-13	11:49:07	0.396298
2022-09-13	11:49:07	0.412532
2022-09-13	11:49:07	0.325967
2022-09-13	11:49:08	0.243931
2022-09-13	11:49:08	0.113855
2022-09-13	11:49:08	-0.239834
2022-09-13	11:49:08	0.305153
2022-09-13	11:49:09	0.122099
2022-09-13	11:49:09	0.0389443
2022-09-13	11:49:09	0.144033
2022-09-13	11:49:09	0.192685
2022-09-13	11:49:10	0.345356
2022-09-13	11:49:10	1.02098
2022-09-13	11:49:10	3.09563
2022-09-13	11:49:10	2.92413
2022-09-13	11:49:11	3.89172
2022-09-13	11:49:11	0.601946
2022-09-13	11:49:11	0.768054
2022-09-13	11:49:12	1.21564
2022-09-13	11:49:12	0.596552
2022-09-13	11:49:12	1.35274
2022-09-13	11:49:12	1.30245
2022-09-13	11:49:13	4.0106
2022-09-13	11:49:13	4.08714
2022-09-13	11:49:13	7.90612
2022-09-13	11:49:13	4.76815
2022-09-13	11:49:14	4.54434
2022-09-13	11:49:14	4.42281
2022-09-13	11:49:14	2.20536
2022-09-13	11:49:14	3.58256
2022-09-13	11:49:15	2.86647
2022-09-13	11:49:15	1.82123
2022-09-13	11:49:15	2.37452
2022-09-13	11:49:16	3.80133
2022-09-13	11:49:16	3.59319
2022-09-13	11:49:16	4.65823
2022-09-13	11:49:16	3.84174
2022-09-13	11:49:17	4.45721
2022-09-13	11:49:17	1.84179
2022-09-13	11:49:17	2.25788
2022-09-13	11:49:17	4.53421
2022-09-13	11:49:18	3.2168
2022-09-13	11:49:18	1.64856
2022-09-13	11:49:18	1.12301
2022-09-13	11:49:18	0.703473
2022-09-13	11:49:19	0.811311
2022-09-13	11:49:19	0.425407
2022-09-13	11:49:19	0.466832
2022-09-13	11:49:20	0.468054
2022-09-13	11:49:20	0.424237
2022-09-13	11:49:20	0.412074
2022-09-13	11:49:20	0.442507
2022-09-13	11:49:21	0.397468
2022-09-13	11:49:21	0.408308
2022-09-13	11:49:21	0.424084
2022-09-13	11:49:21	0.416094
2022-09-13	11:49:22	0.388206
2022-09-13	11:49:22	0.433804
2022-09-13	11:49:22	0.432888
2022-09-13	11:49:22	0.418232
2022-09-13	11:49:23	0.371209
2022-09-13	11:49:23	0.472176
2022-09-13	11:49:23	0.384033
2022-09-13	11:49:24	0.120318
2022-09-13	11:49:24	0.288715
2022-09-13	11:49:24	0.123779
2022-09-13	11:49:24	0.18897
2022-09-13	11:49:25	0.0147204
2022-09-13	11:49:25	0.140827
2022-09-13	11:49:25	0.157977
2022-09-13	11:49:25	0.165204
2022-09-13	11:49:26	0.796756
2022-09-13	11:49:26	2.17986
2022-09-13	11:49:26	3.60276
2022-09-13	11:49:26	2.41966
2022-09-13	11:49:27	2.71365
2022-09-13	11:49:27	1.47009
2022-09-13	11:49:27	3.04826
2022-09-13	11:49:27	1.17309
2022-09-13	11:49:28	1.68983
2022-09-13	11:49:28	2.50205
2022-09-13	11:49:28	6.19813
2022-09-13	11:49:29	2.28744
2022-09-13	11:49:29	1.44286
2022-09-13	11:49:29	2.55563
2022-09-13	11:49:29	5.28576
2022-09-13	11:49:30	5.73268
2022-09-13	11:49:30	4.71986
2022-09-13	11:49:30	3.41579
2022-09-13	11:49:30	3.07141
2022-09-13	11:49:31	6.67268
2022-09-13	11:49:31	12.425
2022-09-13	11:49:31	4.27731
2022-09-13	11:49:31	1.45106
2022-09-13	11:49:32	0.551361
2022-09-13	11:49:32	0.396349
2022-09-13	11:49:32	0.703117
2022-09-13	11:49:33	5.96439
2022-09-13	11:49:33	4.48128
2022-09-13	11:49:33	3.29533
2022-09-13	11:49:33	3.1824
2022-09-13	11:49:34	4.08225
2022-09-13	11:49:34	1.29655
2022-09-13	11:49:34	0.429631
2022-09-13	11:49:34	0.381031
2022-09-13	11:49:35	0.385967
2022-09-13	11:49:35	0.267443
2022-09-13	11:49:35	0.260674
2022-09-13	11:49:35	0.110344
2022-09-13	11:49:36	0.423372
2022-09-13	11:49:36	0.347494
2022-09-13	11:49:36	0.338079
2022-09-13	11:49:37	0.322354
2022-09-13	11:49:37	0.344389
2022-09-13	11:49:37	0.344389
2022-09-13	11:49:37	0.34042
2022-09-13	11:49:38	0.320624
2022-09-13	11:49:38	0.316196
2022-09-13	11:49:38	0.264746
2022-09-13	11:49:38	0.275178
2022-09-13	11:49:39	0.242964
2022-09-13	11:49:39	0.272379
2022-09-13	11:49:39	0.288919
2022-09-13	11:49:39	0.298792
2022-09-13	11:49:40	0.292735
2022-09-13	11:49:40	0.263117
2022-09-13	11:49:40	0.228104
