# Supplementary material for: Comparing efficacy in reducing pulling and welfare impacts of four types of leash walking equipment
Source: PeerJ journal article supplement (doi:10.7717/peerj.18131), 2024-10-24
Supplement: Shelter1_Tension_files.zip [file Juju_star_202291310556 copy.xlsx]

## Sheet: Averaged Newtons
Date	Time	Averaged Newtons	Impulse	Total steps
2022-09-13	10:55:17	1.48443	1.48443	0		Impulse	2120.24
2022-09-13	10:55:18	6.50733	7.99176	0		Total steps	53
2022-09-13	10:55:19	0.0918511	8.08361	0		# > 5sec	3
2022-09-13	10:55:20	-2.09246	8.08361	0
2022-09-13	10:55:21	-0.547649	8.08361	0
2022-09-13	10:55:22	1.1378	9.22141	0
2022-09-13	10:55:23	-0.138879	9.22141	0
2022-09-13	10:55:24	40.2839	49.5053	1
2022-09-13	10:55:25	18.4983	68.0036	2
2022-09-13	10:55:26	19.8625	87.8661	3
2022-09-13	10:55:27	1.97387	89.8399	3
2022-09-13	10:55:28	1.32631	91.1663	3
2022-09-13	10:55:29	1.92201	93.0883	3
2022-09-13	10:55:30	2.01595	95.1042	3
2022-09-13	10:55:31	2.07898	97.1832	3
2022-09-13	10:55:32	1.80758	98.9908	3
2022-09-13	10:55:33	0.79066	99.7814	3
2022-09-13	10:55:34	1.15025	100.932	3
2022-09-13	10:55:35	4.20922	105.141	3
2022-09-13	10:55:36	7.46968	112.611	3
2022-09-13	10:55:37	12.2585	124.869	3
2022-09-13	10:55:38	11.6079	136.477	3
2022-09-13	10:55:39	13.8624	150.339	4
2022-09-13	10:55:40	7.81921	158.159	4
2022-09-13	10:55:41	10.8768	169.035	4
2022-09-13	10:55:42	14.0564	183.092	5
2022-09-13	10:55:43	10.5168	193.609	5
2022-09-13	10:55:44	10.3301	203.939	5
2022-09-13	10:55:45	16.6384	220.577	6
2022-09-13	10:55:46	16.2157	236.793	7
2022-09-13	10:55:47	5.30506	242.098	7
2022-09-13	10:55:48	7.95076	250.049	7
2022-09-13	10:55:49	16.5245	266.573	8
2022-09-13	10:55:50	22.1981	288.771	9
2022-09-13	10:55:51	16.2165	304.988	10
2022-09-13	10:55:52	15.5319	320.52	11
2022-09-13	10:55:53	25.9361	346.456	12
2022-09-13	10:55:54	19.6212	366.077	13
2022-09-13	10:55:55	23.8909	389.968	14
2022-09-13	10:55:56	17.376	407.344	15
2022-09-13	10:55:57	13.2021	420.546	16
2022-09-13	10:55:58	11.1315	431.677	16
2022-09-13	10:55:59	6.9161	438.594	16
2022-09-13	10:56:00	0.604752	439.198	16
2022-09-13	10:56:01	-1.11271	439.198	16
2022-09-13	10:56:02	-0.912276	439.198	16
2022-09-13	10:56:03	0.891792	440.09	16
2022-09-13	10:56:04	2.39196	442.482	16
2022-09-13	10:56:05	2.65811	445.14	16
2022-09-13	10:56:06	2.94928	448.089	16
2022-09-13	10:56:07	2.56236	450.652	16
2022-09-13	10:56:08	2.72325	453.375	16
2022-09-13	10:56:09	3.17276	456.548	16
2022-09-13	10:56:10	2.86411	459.412	16
2022-09-13	10:56:11	2.5516	461.964	16
2022-09-13	10:56:12	1.98409	463.948	16
2022-09-13	10:56:13	2.38941	466.337	16
2022-09-13	10:56:14	9.70898	476.046	16
2022-09-13	10:56:15	19.8122	495.858	17
2022-09-13	10:56:16	18.4772	514.335	18
2022-09-13	10:56:17	40.7951	555.13	19
2022-09-13	10:56:18	34.0281	589.159	20
2022-09-13	10:56:19	24.1074	613.266	21
2022-09-13	10:56:20	32.7922	646.058	22
2022-09-13	10:56:21	20.626	666.684	23
2022-09-13	10:56:22	25.328	692.012	24
2022-09-13	10:56:23	16.4533	708.465	25
2022-09-13	10:56:24	8.20614	716.672	25
2022-09-13	10:56:25	12.6677	729.339	25
2022-09-13	10:56:26	14.5353	743.875	26
2022-09-13	10:56:27	17.1703	761.045	27
2022-09-13	10:56:28	6.44015	767.485	27
2022-09-13	10:56:29	10.1542	777.639	27
2022-09-13	10:56:30	9.7367	787.376	27
2022-09-13	10:56:31	8.08755	795.463	27
2022-09-13	10:56:32	5.40739	800.871	27
2022-09-13	10:56:33	2.91385	803.785	27
2022-09-13	10:56:34	7.58581	811.371	27
2022-09-13	10:56:35	23.7373	835.108	28
2022-09-13	10:56:36	15.2753	850.383	29
2022-09-13	10:56:37	11.368	861.751	29
2022-09-13	10:56:38	16.6479	878.399	30
2022-09-13	10:56:39	12.5294	890.928	30
2022-09-13	10:56:40	9.4845	900.413	30
2022-09-13	10:56:41	4.39585	904.809	30
2022-09-13	10:56:42	10.9962	915.805	30
2022-09-13	10:56:43	9.73125	925.536	30
2022-09-13	10:56:44	13.3695	938.906	31
2022-09-13	10:56:45	30.4346	969.34	32
2022-09-13	10:56:46	17.9594	987.3	33
2022-09-13	10:56:47	16.9163	1004.22	34
2022-09-13	10:56:48	14.3519	1018.57	35
2022-09-13	10:56:49	28.243	1046.81	36
2022-09-13	10:56:50	25.7924	1072.6	37
2022-09-13	10:56:51	21.9476	1094.55	38
2022-09-13	10:56:52	21.1933	1115.74	39
2022-09-13	10:56:53	11.3595	1127.1	39
2022-09-13	10:56:54	22.908	1150.01	40
2022-09-13	10:56:55	7.39108	1157.4	40
2022-09-13	10:56:56	5.72221	1163.12	40
2022-09-13	10:56:57	15.1756	1178.3	41
2022-09-13	10:56:58	12.4905	1190.79	41
2022-09-13	10:56:59	8.49385	1199.28	41
2022-09-13	10:57:00	4.17333	1203.46	41
2022-09-13	10:57:01	2.59133	1206.05	41
2022-09-13	10:57:02	1.07775	1207.13	41
2022-09-13	10:57:03	1.96966	1209.1	41
2022-09-13	10:57:04	0.915844	1210.01	41
2022-09-13	10:57:05	1.18285	1211.2	41
2022-09-13	10:57:06	1.91046	1213.11	41
2022-09-13	10:57:07	3.21085	1216.32	41
2022-09-13	10:57:08	1.74442	1218.06	41
2022-09-13	10:57:09	1.37764	1219.44	41
2022-09-13	10:57:10	0.242954	1219.68	41
2022-09-13	10:57:11	0.356763	1220.04	41
2022-09-13	10:57:12	16.1156	1236.15	42
2022-09-13	10:57:13	12.6551	1248.81	42
2022-09-13	10:57:14	5.02029	1253.83	42
2022-09-13	10:57:15	7.05594	1260.89	42
2022-09-13	10:57:16	6.97048	1267.86	42
2022-09-13	10:57:17	12.6923	1280.55	42
2022-09-13	10:57:18	15.7381	1296.29	43
2022-09-13	10:57:19	7.41333	1303.7	43
2022-09-13	10:57:20	4.93043	1308.63	43
2022-09-13	10:57:21	4.1177	1312.75	43
2022-09-13	10:57:22	6.1643	1318.91	43
2022-09-13	10:57:23	3.87786	1322.79	43
2022-09-13	10:57:24	3.72585	1326.52	43
2022-09-13	10:57:25	0.980132	1327.5	43
2022-09-13	10:57:26	3.19863	1330.69	43
2022-09-13	10:57:27	2.69825	1333.39	43
2022-09-13	10:57:28	1.452	1334.85	43
2022-09-13	10:57:29	0.835538	1335.68	43
2022-09-13	10:57:30	0.11562	1335.8	43
2022-09-13	10:57:31	40.1677	1375.96	44
2022-09-13	10:57:32	22.4472	1398.41	45
2022-09-13	10:57:33	17.5204	1415.93	46
2022-09-13	10:57:34	6.98231	1422.91	46
2022-09-13	10:57:35	4.04939	1426.96	46
2022-09-13	10:57:36	2.88675	1429.85	46
2022-09-13	10:57:37	3.2447	1433.09	46
2022-09-13	10:57:38	3.27673	1436.37	46
2022-09-13	10:57:39	4.01233	1440.38	46
2022-09-13	10:57:40	4.13682	1444.52	46
2022-09-13	10:57:41	0.675379	1445.2	46
2022-09-13	10:57:42	0.973851	1446.17	46
2022-09-13	10:57:43	1.24074	1447.41	46
2022-09-13	10:57:44	2.5908	1450	46
2022-09-13	10:57:45	2.55789	1452.56	46
2022-09-13	10:57:46	2.27	1454.83	46
2022-09-13	10:57:47	3.0383	1457.87	46
2022-09-13	10:57:48	2.88373	1460.75	46
2022-09-13	10:57:49	1.31878	1462.07	46
2022-09-13	10:57:50	1.11477	1463.18	46
2022-09-13	10:57:51	1.85976	1465.04	46
2022-09-13	10:57:52	1.22639	1466.27	46
2022-09-13	10:57:53	1.14097	1467.41	46
2022-09-13	10:57:54	0.496207	1467.91	46
2022-09-13	10:57:55	13.6091	1481.52	47
2022-09-13	10:57:56	7.38821	1488.91	47
2022-09-13	10:57:57	2.49686	1491.4	47
2022-09-13	10:57:58	2.43185	1493.83	47
2022-09-13	10:57:59	3.27526	1497.11	47
2022-09-13	10:58:00	3.26309	1500.37	47
2022-09-13	10:58:01	3.2795	1503.65	47
2022-09-13	10:58:02	3.27899	1506.93	47
2022-09-13	10:58:03	3.26665	1510.2	47
2022-09-13	10:58:04	3.26897	1513.47	47
2022-09-13	10:58:05	3.26962	1516.74	47
2022-09-13	10:58:06	3.0829	1519.82	47
2022-09-13	10:58:07	3.41278	1523.23	47
2022-09-13	10:58:08	7.02866	1530.26	47
2022-09-13	10:58:09	3.92376	1534.18	47
2022-09-13	10:58:10	10.6898	1544.87	47
2022-09-13	10:58:11	13.305	1558.18	48
2022-09-13	10:58:12	11.0608	1569.24	48
2022-09-13	10:58:13	12.2356	1581.48	48
2022-09-13	10:58:14	8.68367	1590.16	48
2022-09-13	10:58:15	12.2972	1602.46	48
2022-09-13	10:58:16	2.40548	1604.86	48
2022-09-13	10:58:17	3.27276	1608.13	48
2022-09-13	10:58:18	3.27611	1611.41	48
2022-09-13	10:58:19	6.82079	1618.23	48
2022-09-13	10:58:20	6.06138	1624.29	48
2022-09-13	10:58:21	1.97039	1626.26	48
2022-09-13	10:58:22	2.18914	1628.45	48
2022-09-13	10:58:23	3.55692	1632.01	48
2022-09-13	10:58:24	7.21094	1639.22	48
2022-09-13	10:58:25	4.42398	1643.64	48
2022-09-13	10:58:26	1.7945	1645.44	48
2022-09-13	10:58:27	0.948327	1646.39	48
2022-09-13	10:58:28	1.04403	1647.43	48
2022-09-13	10:58:29	3.15506	1650.59	48
2022-09-13	10:58:30	9.54975	1660.14	48
2022-09-13	10:58:31	5.96427	1666.1	48
2022-09-13	10:58:32	4.68329	1670.78	48
2022-09-13	10:58:33	2.22948	1673.01	48
2022-09-13	10:58:34	10.6345	1683.65	48
2022-09-13	10:58:35	24.3336	1707.98	49
2022-09-13	10:58:36	32.2102	1740.19	50
2022-09-13	10:58:37	6.89443	1747.09	50
2022-09-13	10:58:38	4.81136	1751.9	50
2022-09-13	10:58:39	4.57728	1756.47	50
2022-09-13	10:58:40	0.958514	1757.43	50
2022-09-13	10:58:41	-0.0627039	1757.43	50
2022-09-13	10:58:42	-1.67866	1757.43	50
2022-09-13	10:58:43	-0.445139	1757.43	50
2022-09-13	10:58:44	6.80976	1764.24	50
2022-09-13	10:58:45	11.5358	1775.78	50
2022-09-13	10:58:46	9.43805	1785.22	50
2022-09-13	10:58:47	9.03976	1794.26	50
2022-09-13	10:58:48	1.80929	1796.07	50
2022-09-13	10:58:49	1.74906	1797.81	50
2022-09-13	10:58:50	3.17797	1800.99	50
2022-09-13	10:58:51	-0.761003	1800.99	50
2022-09-13	10:58:52	-0.563607	1800.99	50
2022-09-13	10:58:53	0.416807	1801.41	50
2022-09-13	10:58:54	0.357385	1801.77	50
2022-09-13	10:58:55	1.27266	1803.04	50
2022-09-13	10:58:56	1.91463	1804.95	50
2022-09-13	10:58:57	5.71158	1810.67	50
2022-09-13	10:58:58	14.7571	1825.42	51
2022-09-13	10:58:59	9.98123	1835.4	51
2022-09-13	10:59:00	7.35531	1842.76	51
2022-09-13	10:59:01	4.41558	1847.17	51
2022-09-13	10:59:02	3.27628	1850.45	51
2022-09-13	10:59:03	3.26632	1853.72	51
2022-09-13	10:59:04	3.28782	1857.01	51
2022-09-13	10:59:05	3.28146	1860.29	51
2022-09-13	10:59:06	3.26988	1863.56	51
2022-09-13	10:59:07	3.71515	1867.27	51
2022-09-13	10:59:08	3.26813	1870.54	51
2022-09-13	10:59:09	1.80024	1872.34	51
2022-09-13	10:59:10	3.4447	1875.78	51
2022-09-13	10:59:11	1.9863	1877.77	51
2022-09-13	10:59:12	1.48358	1879.25	51
2022-09-13	10:59:13	-2.412	1879.25	51
2022-09-13	10:59:14	-2.92008	1879.25	51
2022-09-13	10:59:15	-1.87582	1879.25	51
2022-09-13	10:59:16	-0.590545	1879.25	51
2022-09-13	10:59:17	0.532992	1879.79	51
2022-09-13	10:59:18	0.488643	1880.28	51
2022-09-13	10:59:19	0.475777	1880.75	51
2022-09-13	10:59:20	-2.13162	1880.75	51
2022-09-13	10:59:21	-1.22908	1880.75	51
2022-09-13	10:59:22	2.43083	1883.18	51
2022-09-13	10:59:23	8.93834	1892.12	51
2022-09-13	10:59:24	7.91859	1900.04	51
2022-09-13	10:59:25	4.60989	1904.65	51
2022-09-13	10:59:26	8.28752	1912.94	51
2022-09-13	10:59:27	12.5617	1925.5	51
2022-09-13	10:59:28	16.0487	1941.55	52
2022-09-13	10:59:29	14.1092	1955.66	53
2022-09-13	10:59:30	9.24952	1964.91	53
2022-09-13	10:59:31	3.60033	1968.51	53
2022-09-13	10:59:32	1.39558	1969.9	53
2022-09-13	10:59:33	-0.785111	1969.9	53
2022-09-13	10:59:34	0.181608	1970.08	53
2022-09-13	10:59:35	-0.064307	1970.08	53
2022-09-13	10:59:36	-0.143801	1970.08	53
2022-09-13	10:59:37	-0.0345213	1970.08	53
2022-09-13	10:59:38	1.91923	1972	53
2022-09-13	10:59:39	7.61526	1979.62	53
2022-09-13	10:59:40	12.9566	1992.57	53
2022-09-13	10:59:41	5.28476	1997.86	53
2022-09-13	10:59:42	2.24798	2000.11	53
2022-09-13	10:59:43	1.71882	2001.83	53
2022-09-13	10:59:44	2.86666	2004.69	53
2022-09-13	10:59:45	1.88913	2006.58	53
2022-09-13	10:59:46	3.80333	2010.39	53
2022-09-13	10:59:47	4.95012	2015.34	53
2022-09-13	10:59:48	2.35166	2017.69	53
2022-09-13	10:59:49	1.9168	2019.6	53
2022-09-13	10:59:50	1.68053	2021.28	53
2022-09-13	10:59:51	0.420429	2021.71	53
2022-09-13	10:59:52	0.486003	2022.19	53
2022-09-13	10:59:53	1.19564	2023.39	53
2022-09-13	10:59:54	11.8479	2035.23	53
2022-09-13	10:59:55	6.631	2041.87	53
2022-09-13	10:59:56	8.24843	2050.11	53
2022-09-13	10:59:57	12.5971	2062.71	53
2022-09-13	10:59:58	2.99263	2065.7	53
2022-09-13	10:59:59	2.35992	2068.06	53
2022-09-13	11:00:00	3.85297	2071.92	53
2022-09-13	11:00:01	2.28709	2074.2	53
2022-09-13	11:00:02	1.96451	2076.17	53
2022-09-13	11:00:03	3.99936	2080.17	53
2022-09-13	11:00:04	6.12923	2086.3	53
2022-09-13	11:00:05	4.09994	2090.4	53
2022-09-13	11:00:06	3.07328	2093.47	53
2022-09-13	11:00:07	3.14934	2096.62	53
2022-09-13	11:00:08	1.85455	2098.47	53
2022-09-13	11:00:09	1.40892	2099.88	53
2022-09-13	11:00:10	2.74142	2102.62	53
2022-09-13	11:00:11	2.8327	2105.46	53
2022-09-13	11:00:12	2.28482	2107.74	53
2022-09-13	11:00:13	3.35028	2111.09	53
2022-09-13	11:00:14	3.03881	2114.13	53
2022-09-13	11:00:15	2.90372	2117.03	53
2022-09-13	11:00:16	1.97305	2119.01	53
2022-09-13	11:00:17	1.23023	2120.24	53

## Sheet: Juju_star_202291310556 (4)
Date	Time	Lbs	Newtons	Averaged Newtons	Total force x time		total steps > 13.345	**GoPro Fitting: 1044
2022-09-13	10:55:17	0.178435	0.793715	1.48443	0.793715	FALSE	0			Total force x time	4061.89
2022-09-13	10:55:17	0.258384	1.14934	1.48443	1.14934	FALSE	0			Total steps	192
2022-09-13	10:55:17	0.446476	1.98601	1.48443	2.77973	FALSE	0
2022-09-13	10:55:17	0.451565	2.00865	1.48443	3.158	FALSE	0
2022-09-13	10:55:18	0.99472	4.42471	6.50733	7.20444	FALSE	0
2022-09-13	10:55:18	2.59426	11.5398	6.50733	14.6978	FALSE	0
2022-09-13	10:55:18	0.799758	3.55748	6.50733	10.7619	FALSE	0
2022-09-13	10:55:19	0.382964	1.7035	0.0918511	16.4013	FALSE	0
2022-09-13	10:55:19	0.00652696	0.0290332	0.0918511	10.791	FALSE	0
2022-09-13	10:55:19	0.0747712	0.332597	0.0918511	16.7339	FALSE	0
2022-09-13	10:55:19	-0.381666	-1.69773	0.0918511	10.791	FALSE	0
2022-09-13	10:55:20	-0.553931	-2.464	-2.09246	16.7339	FALSE	0
2022-09-13	10:55:20	-0.560445	-2.49297	-2.09246	10.791	FALSE	0
2022-09-13	10:55:20	-0.513829	-2.28561	-2.09246	16.7339	FALSE	0
2022-09-13	10:55:20	-0.253422	-1.12727	-2.09246	10.791	FALSE	0
2022-09-13	10:55:21	-0.0920481	-0.409448	-0.547649	16.7339	FALSE	0
2022-09-13	10:55:21	-0.171234	-0.761683	-0.547649	10.791	FALSE	0
2022-09-13	10:55:21	-0.256883	-1.14267	-0.547649	16.7339	FALSE	0
2022-09-13	10:55:21	0.0276974	0.123204	-0.547649	10.9142	FALSE	0
2022-09-13	10:55:22	0.232328	1.03344	1.1378	17.7673	FALSE	0
2022-09-13	10:55:22	0.251005	1.11652	1.1378	12.0307	FALSE	0
2022-09-13	10:55:22	0.284033	1.26344	1.1378	19.0308	FALSE	0
2022-09-13	10:55:23	0.0865778	0.385115	-0.138879	12.4158	FALSE	0
2022-09-13	10:55:23	0.182099	0.810013	-0.138879	19.8408	FALSE	0
2022-09-13	10:55:23	0.123117	0.547649	-0.138879	12.9634	FALSE	0
2022-09-13	10:55:23	-0.516679	-2.29829	-0.138879	19.8408	FALSE	0
2022-09-13	10:55:24	-0.513931	-2.28607	40.2839	12.9634	FALSE	0
2022-09-13	10:55:24	3.15233	14.0222	40.2839	33.863	1	1
2022-09-13	10:55:24	16.7846	74.6613	40.2839	87.6247	1	2
2022-09-13	10:55:24	16.8019	74.7382	40.2839	108.601	1	3
2022-09-13	10:55:25	4.66632	20.7567	18.4983	108.381	1	4
2022-09-13	10:55:25	3.86118	17.1753	18.4983	125.776	1	5
2022-09-13	10:55:25	5.05701	22.4946	18.4983	130.876	1	6
2022-09-13	10:55:25	3.04988	13.5665	18.4983	139.343	1	7
2022-09-13	10:55:26	6.21619	27.6509	19.8625	158.527	1	8
2022-09-13	10:55:26	6.27299	27.9035	19.8625	167.246	1	9
2022-09-13	10:55:26	2.64622	11.7709	19.8625	170.298	FALSE	9
2022-09-13	10:55:26	2.72576	12.1247	19.8625	179.371	FALSE	9
2022-09-13	10:55:27	0.469377	2.08788	1.97387	172.386	FALSE	9
2022-09-13	10:55:27	0.344593	1.53282	1.97387	180.904	FALSE	9
2022-09-13	10:55:27	0.517264	2.30089	1.97387	174.687	FALSE	9
2022-09-13	10:55:28	0.0845422	0.376061	1.32631	181.28	FALSE	9
2022-09-13	10:55:28	0.314517	1.39903	1.32631	176.086	FALSE	9
2022-09-13	10:55:28	0.302201	1.34425	1.32631	182.624	FALSE	9
2022-09-13	10:55:28	0.491412	2.1859	1.32631	178.272	FALSE	9
2022-09-13	10:55:29	0.381438	1.69671	1.92201	184.321	FALSE	9
2022-09-13	10:55:29	0.493448	2.19496	1.92201	180.466	FALSE	9
2022-09-13	10:55:29	0.415789	1.84951	1.92201	186.171	FALSE	9
2022-09-13	10:55:29	0.437672	1.94685	1.92201	182.413	FALSE	9
2022-09-13	10:55:30	0.45813	2.03785	2.01595	188.208	FALSE	9
2022-09-13	10:55:30	0.416043	1.85064	2.01595	184.264	FALSE	9
2022-09-13	10:55:30	0.49243	2.19043	2.01595	190.399	FALSE	9
2022-09-13	10:55:30	0.446221	1.98488	2.01595	186.249	FALSE	9
2022-09-13	10:55:31	0.44673	1.98714	2.07898	192.386	FALSE	9
2022-09-13	10:55:31	0.519504	2.31086	2.07898	188.56	FALSE	9
2022-09-13	10:55:31	0.435891	1.93893	2.07898	194.325	FALSE	9
2022-09-13	10:55:32	0.494109	2.1979	1.80758	190.758	FALSE	9
2022-09-13	10:55:32	0.277366	1.23378	1.80758	195.559	FALSE	9
2022-09-13	10:55:32	0.476756	2.12071	1.80758	192.878	FALSE	9
2022-09-13	10:55:32	0.377214	1.67792	1.80758	197.237	FALSE	9
2022-09-13	10:55:33	0.349173	1.55319	0.79066	194.431	FALSE	9
2022-09-13	10:55:33	0.0899875	0.400282	0.79066	197.637	FALSE	9
2022-09-13	10:55:33	0.226629	1.00809	0.79066	195.44	FALSE	9
2022-09-13	10:55:33	0.0452038	0.201076	0.79066	197.838	FALSE	9
2022-09-13	10:55:34	0.155636	0.6923	1.15025	196.132	FALSE	9
2022-09-13	10:55:34	0.118079	0.525239	1.15025	198.363	FALSE	9
2022-09-13	10:55:34	0.320318	1.42484	1.15025	197.557	FALSE	9
2022-09-13	10:55:34	0.440318	1.95862	1.15025	200.322	FALSE	9
2022-09-13	10:55:35	0.814822	3.62449	4.20922	201.181	FALSE	9
2022-09-13	10:55:35	0.87528	3.89342	4.20922	204.215	FALSE	9
2022-09-13	10:55:35	1.14872	5.10974	4.20922	206.291	FALSE	9
2022-09-13	10:55:36	2.86174	12.7296	7.46968	216.945	FALSE	9
2022-09-13	10:55:36	1.05767	4.70473	7.46968	210.996	FALSE	9
2022-09-13	10:55:36	1.73009	7.69579	7.46968	224.641	FALSE	9
2022-09-13	10:55:36	1.06754	4.74863	7.46968	215.744	FALSE	9
2022-09-13	10:55:37	2.03686	9.06036	12.2585	233.701	FALSE	9
2022-09-13	10:55:37	1.70312	7.57582	12.2585	223.32	FALSE	9
2022-09-13	10:55:37	3.12342	13.8936	12.2585	247.595	1	10
2022-09-13	10:55:37	4.15996	18.5043	12.2585	241.824	1	11
2022-09-13	10:55:38	2.31543	10.2995	11.6079	257.894	FALSE	11
2022-09-13	10:55:38	3.08678	13.7306	11.6079	255.555	1	12
2022-09-13	10:55:38	2.36887	10.5372	11.6079	268.431	FALSE	12
2022-09-13	10:55:38	2.66724	11.8644	11.6079	267.419	FALSE	12
2022-09-13	10:55:39	3.78245	16.8251	13.8624	285.256	1	13
2022-09-13	10:55:39	2.06271	9.17535	13.8624	276.595	FALSE	13
2022-09-13	10:55:39	3.50403	15.5866	13.8624	300.843	1	14
2022-09-13	10:55:40	1.89355	8.42289	7.81921	285.018	FALSE	14
2022-09-13	10:55:40	1.09991	4.89262	7.81921	305.736	FALSE	14
2022-09-13	10:55:40	3.09813	13.7811	7.81921	298.799	1	15
2022-09-13	10:55:40	0.939758	4.18023	7.81921	309.916	FALSE	15
2022-09-13	10:55:41	2.78535	12.3898	10.8768	311.189	FALSE	15
2022-09-13	10:55:41	1.81238	8.06183	10.8768	317.978	FALSE	15
2022-09-13	10:55:41	2.23823	9.95609	10.8768	321.145	FALSE	15
2022-09-13	10:55:41	2.9449	13.0995	10.8768	331.077	FALSE	15
2022-09-13	10:55:42	2.90861	12.9381	14.0564	334.083	FALSE	15
2022-09-13	10:55:42	4.14775	18.45	14.0564	349.527	1	16
2022-09-13	10:55:42	2.45233	10.9085	14.0564	344.991	FALSE	16
2022-09-13	10:55:42	3.13141	13.9291	14.0564	363.456	1	17
2022-09-13	10:55:43	3.78215	16.8238	10.5168	361.815	1	18
2022-09-13	10:55:43	1.49676	6.65789	10.5168	370.114	FALSE	18
2022-09-13	10:55:43	3.09676	13.775	10.5168	375.59	1	19
2022-09-13	10:55:43	1.08149	4.81068	10.5168	374.925	FALSE	19
2022-09-13	10:55:44	2.7563	12.2606	10.3301	387.851	FALSE	19
2022-09-13	10:55:44	1.70495	7.58396	10.3301	382.509	FALSE	19
2022-09-13	10:55:44	2.50566	11.1457	10.3301	398.996	FALSE	19
2022-09-13	10:55:45	3.87121	17.2199	16.6384	399.729	1	20
2022-09-13	10:55:45	2.71752	12.0881	16.6384	411.084	FALSE	20
2022-09-13	10:55:45	5.14825	22.9004	16.6384	422.629	1	21
2022-09-13	10:55:45	3.22495	14.3452	16.6384	425.43	1	22
2022-09-13	10:55:46	3.9653	17.6384	16.2157	440.268	1	23
2022-09-13	10:55:46	3.49426	15.5432	16.2157	440.973	1	24
2022-09-13	10:55:46	1.76658	7.8581	16.2157	448.126	FALSE	24
2022-09-13	10:55:46	5.35563	23.8229	16.2157	464.796	1	25
2022-09-13	10:55:47	0.685	3.04702	5.30506	451.173	FALSE	25
2022-09-13	10:55:47	1.85441	8.24879	5.30506	473.044	FALSE	25
2022-09-13	10:55:47	1.6053	7.1407	5.30506	458.314	FALSE	25
2022-09-13	10:55:47	0.625814	2.78375	5.30506	475.828	FALSE	25
2022-09-13	10:55:48	1.74383	7.7569	7.95076	466.07	FALSE	25
2022-09-13	10:55:48	1.33391	5.9335	7.95076	481.762	FALSE	25
2022-09-13	10:55:48	2.28449	10.1619	7.95076	476.232	FALSE	25
2022-09-13	10:55:49	2.44871	10.8924	16.5245	492.654	FALSE	25
2022-09-13	10:55:49	3.15085	14.0156	16.5245	490.248	1	26
2022-09-13	10:55:49	6.9654	30.9835	16.5245	523.638	1	27
2022-09-13	10:55:49	2.29457	10.2067	16.5245	500.455	FALSE	27
2022-09-13	10:55:50	7.11166	31.6341	22.1981	555.272	1	28
2022-09-13	10:55:50	3.30983	14.7228	22.1981	515.177	1	29
2022-09-13	10:55:50	3.42215	15.2224	22.1981	570.494	1	30
2022-09-13	10:55:50	6.11777	27.2131	22.1981	542.39	1	31
2022-09-13	10:55:51	3.78515	16.8371	16.2165	587.331	1	32
2022-09-13	10:55:51	4.84159	21.5364	16.2165	563.927	1	33
2022-09-13	10:55:51	4.41838	19.6538	16.2165	606.985	1	34
2022-09-13	10:55:51	1.53737	6.83853	16.2165	570.765	FALSE	34
2022-09-13	10:55:52	5.89853	26.2378	15.5319	633.223	1	35
2022-09-13	10:55:52	1.35945	6.04711	15.5319	576.812	FALSE	35
2022-09-13	10:55:52	3.21721	14.3108	15.5319	647.534	1	36
2022-09-13	10:55:53	4.83426	21.5038	25.9361	598.316	1	37
2022-09-13	10:55:53	3.14179	13.9753	25.9361	661.509	1	38
2022-09-13	10:55:53	7.25482	32.2709	25.9361	630.587	1	39
2022-09-13	10:55:53	8.09192	35.9945	25.9361	697.503	1	40
2022-09-13	10:55:54	2.97991	13.2552	19.6212	643.842	FALSE	40
2022-09-13	10:55:54	8.69141	38.6611	19.6212	736.165	1	41
2022-09-13	10:55:54	1.57452	7.00378	19.6212	650.846	FALSE	41
2022-09-13	10:55:54	4.39833	19.5647	19.6212	755.729	1	42
2022-09-13	10:55:55	5.14744	22.8968	23.8909	673.743	1	43
2022-09-13	10:55:55	2.84739	12.6658	23.8909	768.395	FALSE	43
2022-09-13	10:55:55	7.98464	35.5173	23.8909	709.26	1	44
2022-09-13	10:55:55	5.50423	24.4839	23.8909	792.879	1	45
2022-09-13	10:55:56	2.90851	12.9376	17.376	722.198	FALSE	45
2022-09-13	10:55:56	7.25385	32.2666	17.376	825.145	1	46
2022-09-13	10:55:56	1.22719	5.45879	17.376	727.657	FALSE	46
2022-09-13	10:55:56	4.23563	18.8409	17.376	843.986	1	47
2022-09-13	10:55:57	3.52836	15.6949	13.2021	743.351	1	48
2022-09-13	10:55:57	1.23238	5.48187	13.2021	849.468	FALSE	48
2022-09-13	10:55:57	4.14312	18.4294	13.2021	761.781	1	49
2022-09-13	10:55:58	2.34067	10.4118	11.1315	859.88	FALSE	49
2022-09-13	10:55:58	2.20729	9.81847	11.1315	771.599	FALSE	49
2022-09-13	10:55:58	4.12485	18.3482	11.1315	878.228	1	50
2022-09-13	10:55:58	1.33711	5.94773	11.1315	777.547	FALSE	50
2022-09-13	10:55:59	3.14795	14.0027	6.9161	892.231	1	51
2022-09-13	10:55:59	0.634466	2.82223	6.9161	780.369	FALSE	51
2022-09-13	10:55:59	1.13202	5.03545	6.9161	897.266	FALSE	51
2022-09-13	10:55:59	1.3048	5.80401	6.9161	786.173	FALSE	51
2022-09-13	10:56:00	0.323066	1.43706	0.604752	898.703	FALSE	51
2022-09-13	10:56:00	0.372328	1.65619	0.604752	787.83	FALSE	51
2022-09-13	10:56:00	-0.0671117	-0.298526	0.604752	898.703	FALSE	51
2022-09-13	10:56:00	-0.0844654	-0.375719	0.604752	787.83	FALSE	51
2022-09-13	10:56:01	-0.331132	-1.47294	-1.11271	898.703	FALSE	51
2022-09-13	10:56:01	-0.170827	-0.759873	-1.11271	787.83	FALSE	51
2022-09-13	10:56:01	-0.248486	-1.10532	-1.11271	898.703	FALSE	51
2022-09-13	10:56:02	-0.310572	-1.38149	-0.912276	787.83	FALSE	51
2022-09-13	10:56:02	-0.369351	-1.64295	-0.912276	898.703	FALSE	51
2022-09-13	10:56:02	-0.210776	-0.937574	-0.912276	787.83	FALSE	51
2022-09-13	10:56:02	0.0703438	0.312903	-0.912276	899.016	FALSE	51
2022-09-13	10:56:03	-0.12243	-0.544593	0.891792	787.83	FALSE	51
2022-09-13	10:56:03	0.191616	0.852346	0.891792	899.869	FALSE	51
2022-09-13	10:56:03	0.321947	1.43208	0.891792	789.262	FALSE	51
2022-09-13	10:56:03	0.410802	1.82733	0.891792	901.696	FALSE	51
2022-09-13	10:56:04	0.452583	2.01318	2.39196	791.275	FALSE	51
2022-09-13	10:56:04	0.322659	1.43525	2.39196	903.131	FALSE	51
2022-09-13	10:56:04	0.737163	3.27905	2.39196	794.554	FALSE	51
2022-09-13	10:56:04	0.638537	2.84034	2.39196	905.972	FALSE	51
2022-09-13	10:56:05	0.395433	1.75897	2.65811	796.313	FALSE	51
2022-09-13	10:56:05	0.405916	1.8056	2.65811	907.777	FALSE	51
2022-09-13	10:56:05	0.991361	4.40977	2.65811	800.723	FALSE	51
2022-09-13	10:56:06	0.799097	3.55454	2.94928	911.332	FALSE	51
2022-09-13	10:56:06	0.842201	3.74628	2.94928	804.469	FALSE	51
2022-09-13	10:56:06	0.455789	2.02744	2.94928	913.359	FALSE	51
2022-09-13	10:56:06	0.555025	2.46886	2.94928	806.938	FALSE	51
2022-09-13	10:56:07	0.521336	2.31901	2.56236	915.678	FALSE	51
2022-09-13	10:56:07	0.54042	2.4039	2.56236	809.342	FALSE	51
2022-09-13	10:56:07	0.628817	2.7971	2.56236	918.475	FALSE	51
2022-09-13	10:56:07	0.6136	2.72942	2.56236	812.071	FALSE	51
2022-09-13	10:56:08	0.637774	2.83695	2.72325	921.312	FALSE	51
2022-09-13	10:56:08	0.600623	2.67169	2.72325	814.743	FALSE	51
2022-09-13	10:56:08	0.541794	2.41001	2.72325	923.722	FALSE	51
2022-09-13	10:56:08	0.668664	2.97435	2.72325	817.717	FALSE	51
2022-09-13	10:56:09	0.662659	2.94764	3.17276	926.67	FALSE	51
2022-09-13	10:56:09	1.14342	5.08616	3.17276	822.803	FALSE	51
2022-09-13	10:56:09	0.408003	1.81488	3.17276	928.485	FALSE	51
2022-09-13	10:56:09	0.638995	2.84238	3.17276	825.646	FALSE	51
2022-09-13	10:56:10	0.6907	3.07237	2.86411	931.557	FALSE	51
2022-09-13	10:56:10	0.638842	2.8417	2.86411	828.487	FALSE	51
2022-09-13	10:56:10	0.602099	2.67826	2.86411	934.235	FALSE	51
2022-09-13	10:56:11	0.526221	2.34074	2.5516	830.828	FALSE	51
2022-09-13	10:56:11	0.580776	2.58341	2.5516	936.819	FALSE	51
2022-09-13	10:56:11	0.592023	2.63344	2.5516	833.462	FALSE	51
2022-09-13	10:56:11	0.595483	2.64883	2.5516	939.468	FALSE	51
2022-09-13	10:56:12	0.551666	2.45392	1.98409	835.915	FALSE	51
2022-09-13	10:56:12	0.508715	2.26287	1.98409	941.73	FALSE	51
2022-09-13	10:56:12	0.332328	1.47826	1.98409	837.394	FALSE	51
2022-09-13	10:56:12	0.391463	1.74131	1.98409	943.472	FALSE	51
2022-09-13	10:56:13	0.314517	1.39903	2.38941	838.793	FALSE	51
2022-09-13	10:56:13	0.685204	3.04792	2.38941	946.52	FALSE	51
2022-09-13	10:56:13	0.521183	2.31833	2.38941	841.111	FALSE	51
2022-09-13	10:56:13	0.627748	2.79235	2.38941	949.312	FALSE	51
2022-09-13	10:56:14	0.99584	4.4297	9.70898	845.541	FALSE	51
2022-09-13	10:56:14	2.2449	9.98576	9.70898	959.298	FALSE	51
2022-09-13	10:56:14	3.30729	14.7115	9.70898	860.252	1	52
2022-09-13	10:56:15	3.60301	16.0269	19.8122	975.325	1	53
2022-09-13	10:56:15	4.69553	20.8867	19.8122	881.139	1	54
2022-09-13	10:56:15	2.31594	10.3018	19.8122	985.626	FALSE	54
2022-09-13	10:56:15	7.20144	32.0334	19.8122	913.172	1	55
2022-09-13	10:56:16	3.09879	13.784	18.4772	999.41	1	56
2022-09-13	10:56:16	4.3994	19.5694	18.4772	932.742	1	57
2022-09-13	10:56:16	4.79767	21.341	18.4772	1020.75	1	58
2022-09-13	10:56:16	4.31955	19.2142	18.4772	951.956	1	59
2022-09-13	10:56:17	9.24784	41.1362	40.7951	1061.89	1	60
2022-09-13	10:56:17	6.95314	30.929	40.7951	982.885	1	61
2022-09-13	10:56:17	7.05701	31.391	40.7951	1093.28	1	62
2022-09-13	10:56:17	13.4266	59.7242	40.7951	1042.61	1	63
2022-09-13	10:56:18	4.43986	19.7494	34.0281	1113.03	1	64
2022-09-13	10:56:18	8.15924	36.2939	34.0281	1078.9	1	65
2022-09-13	10:56:18	10.3505	46.0411	34.0281	1159.07	1	66
2022-09-13	10:56:19	3.41472	15.1894	24.1074	1094.09	1	67
2022-09-13	10:56:19	8.44102	37.5473	24.1074	1196.62	1	68
2022-09-13	10:56:19	5.14866	22.9023	24.1074	1116.99	1	69
2022-09-13	10:56:19	4.67395	20.7907	24.1074	1217.41	1	70
2022-09-13	10:56:20	9.0166	40.1076	32.7922	1157.1	1	71
2022-09-13	10:56:20	5.91909	26.3293	32.7922	1243.74	1	72
2022-09-13	10:56:20	6.97833	31.041	32.7922	1188.14	1	73
2022-09-13	10:56:20	7.57406	33.6909	32.7922	1277.43	1	74
2022-09-13	10:56:21	3.33441	14.8321	20.626	1202.98	1	75
2022-09-13	10:56:21	10.2378	45.5398	20.626	1322.97	1	76
2022-09-13	10:56:21	1.8648	8.295	20.626	1211.27	FALSE	76
2022-09-13	10:56:21	3.1107	13.837	20.626	1336.8	1	77
2022-09-13	10:56:22	6.17695	27.4763	25.328	1238.75	1	78
2022-09-13	10:56:22	4.33609	19.2878	25.328	1356.09	1	79
2022-09-13	10:56:22	6.56891	29.2198	25.328	1267.97	1	80
2022-09-13	10:56:23	6.80327	30.2623	16.4533	1386.35	1	81
2022-09-13	10:56:23	2.06164	9.17059	16.4533	1277.14	FALSE	81
2022-09-13	10:56:23	4.94149	21.9807	16.4533	1408.34	1	82
2022-09-13	10:56:23	0.989071	4.39959	16.4533	1281.54	FALSE	82
2022-09-13	10:56:24	3.19457	14.2101	8.20614	1422.55	1	83
2022-09-13	10:56:24	0.77701	3.4563	8.20614	1284.99	FALSE	83
2022-09-13	10:56:24	0.951717	4.23343	8.20614	1426.78	FALSE	83
2022-09-13	10:56:24	2.45599	10.9247	8.20614	1295.92	FALSE	83
2022-09-13	10:56:25	0.781081	3.4744	12.6677	1430.25	FALSE	83
2022-09-13	10:56:25	3.95207	17.5796	12.6677	1313.5	1	84
2022-09-13	10:56:25	1.9765	8.79187	12.6677	1439.04	FALSE	84
2022-09-13	10:56:25	4.68164	20.8249	12.6677	1334.32	1	85
2022-09-13	10:56:26	1.56144	6.9456	14.5353	1445.99	FALSE	85
2022-09-13	10:56:26	2.4534	10.9132	14.5353	1345.24	FALSE	85
2022-09-13	10:56:26	4.73375	21.0567	14.5353	1467.05	1	86
2022-09-13	10:56:26	4.32215	19.2258	14.5353	1364.46	1	87
2022-09-13	10:56:27	6.48378	28.8412	17.1703	1495.89	1	88
2022-09-13	10:56:27	2.85543	12.7015	17.1703	1377.16	FALSE	88
2022-09-13	10:56:27	2.24093	9.9681	17.1703	1505.86	FALSE	88
2022-09-13	10:56:28	1.76281	7.84133	6.44015	1385	FALSE	88
2022-09-13	10:56:28	0.512837	2.2812	6.44015	1508.14	FALSE	88
2022-09-13	10:56:28	2.32576	10.3454	6.44015	1395.35	FALSE	88
2022-09-13	10:56:28	1.18983	5.2926	6.44015	1513.43	FALSE	88
2022-09-13	10:56:29	1.93986	8.62889	10.1542	1403.98	FALSE	88
2022-09-13	10:56:29	2.56144	11.3938	10.1542	1524.82	FALSE	88
2022-09-13	10:56:29	0.944644	4.20197	10.1542	1408.18	FALSE	88
2022-09-13	10:56:29	3.6851	16.3921	10.1542	1541.22	1	89
2022-09-13	10:56:30	0.84902	3.77661	9.7367	1411.96	FALSE	89
2022-09-13	10:56:30	4.182	18.6024	9.7367	1559.82	1	90
2022-09-13	10:56:30	1.35274	6.01726	9.7367	1417.97	FALSE	90
2022-09-13	10:56:30	2.37187	10.5506	9.7367	1570.37	FALSE	90
2022-09-13	10:56:31	2.96418	13.1853	8.08755	1431.16	FALSE	90
2022-09-13	10:56:31	0.97243	4.32556	8.08755	1574.69	FALSE	90
2022-09-13	10:56:31	1.51788	6.75183	8.08755	1437.91	FALSE	90
2022-09-13	10:56:32	1.56663	6.96868	5.40739	1581.66	FALSE	90
2022-09-13	10:56:32	1.12963	5.02482	5.40739	1442.94	FALSE	90
2022-09-13	10:56:32	1.76062	7.83159	5.40739	1589.49	FALSE	90
2022-09-13	10:56:32	0.405662	1.80447	5.40739	1444.74	FALSE	90
2022-09-13	10:56:33	1.14754	5.10449	2.91385	1594.6	FALSE	90
2022-09-13	10:56:33	0.504542	2.2443	2.91385	1446.98	FALSE	90
2022-09-13	10:56:33	0.380318	1.69173	2.91385	1596.29	FALSE	90
2022-09-13	10:56:33	0.58785	2.61487	2.91385	1449.6	FALSE	90
2022-09-13	10:56:34	0.728257	3.23943	7.58581	1599.53	FALSE	90
2022-09-13	10:56:34	1.39955	6.22548	7.58581	1455.83	FALSE	90
2022-09-13	10:56:34	1.66001	7.38406	7.58581	1606.91	FALSE	90
2022-09-13	10:56:34	3.03365	13.4943	7.58581	1469.32	1	91
2022-09-13	10:56:35	3.60525	16.0369	23.7373	1622.95	1	92
2022-09-13	10:56:35	4.05884	18.0545	23.7373	1487.37	1	93
2022-09-13	10:56:35	8.34505	37.1205	23.7373	1660.07	1	94
2022-09-13	10:56:36	1.25111	5.56519	15.2753	1492.94	FALSE	94
2022-09-13	10:56:36	7.67243	34.1285	15.2753	1694.2	1	95
2022-09-13	10:56:36	2.23665	9.94907	15.2753	1502.89	FALSE	95
2022-09-13	10:56:36	2.57594	11.4583	15.2753	1705.66	FALSE	95
2022-09-13	10:56:37	3.16749	14.0896	11.368	1516.98	1	96
2022-09-13	10:56:37	1.08342	4.81927	11.368	1710.48	FALSE	96
2022-09-13	10:56:37	3.8077	16.9374	11.368	1533.92	1	97
2022-09-13	10:56:37	2.16393	9.62559	11.368	1720.1	FALSE	97
2022-09-13	10:56:38	1.66968	7.42707	16.6479	1541.34	FALSE	97
2022-09-13	10:56:38	5.10469	22.7067	16.6479	1742.81	1	98
2022-09-13	10:56:38	1.21716	5.41417	16.6479	1546.76	FALSE	98
2022-09-13	10:56:38	6.97889	31.0435	16.6479	1773.85	1	99
2022-09-13	10:56:39	1.81889	8.09079	12.5294	1554.85	FALSE	99
2022-09-13	10:56:39	4.77243	21.2287	12.5294	1795.08	1	100
2022-09-13	10:56:39	2.79289	12.4233	12.5294	1567.27	FALSE	100
2022-09-13	10:56:39	1.88271	8.37467	12.5294	1803.46	FALSE	100
2022-09-13	10:56:40	3.68612	16.3966	9.4845	1583.67	1	101
2022-09-13	10:56:40	1.54449	6.8702	9.4845	1810.33	FALSE	101
2022-09-13	10:56:40	1.16602	5.18669	9.4845	1588.85	FALSE	101
2022-09-13	10:56:41	1.68449	7.49295	4.39585	1817.82	FALSE	101
2022-09-13	10:56:41	0.34729	1.54482	4.39585	1590.4	FALSE	101
2022-09-13	10:56:41	1.16037	5.16156	4.39585	1822.98	FALSE	101
2022-09-13	10:56:41	0.760776	3.38408	4.39585	1593.78	FALSE	101
2022-09-13	10:56:42	2.20164	9.79334	10.9962	1832.78	FALSE	101
2022-09-13	10:56:42	2.31253	10.2866	10.9962	1604.07	FALSE	101
2022-09-13	10:56:42	1.69426	7.53641	10.9962	1840.31	FALSE	101
2022-09-13	10:56:42	3.67981	16.3685	10.9962	1620.44	1	102
2022-09-13	10:56:43	1.23859	5.5095	9.73125	1845.82	FALSE	102
2022-09-13	10:56:43	3.52866	15.6962	9.73125	1636.13	1	103
2022-09-13	10:56:43	0.975382	4.33869	9.73125	1850.16	FALSE	103
2022-09-13	10:56:43	3.0081	13.3806	9.73125	1649.51	1	104
2022-09-13	10:56:44	1.76413	7.8472	13.3695	1858.01	FALSE	104
2022-09-13	10:56:44	2.89655	12.8844	13.3695	1662.4	FALSE	104
2022-09-13	10:56:44	4.35614	19.377	13.3695	1877.38	1	105
2022-09-13	10:56:45	3.80581	16.929	30.4346	1679.33	1	106
2022-09-13	10:56:45	8.77497	39.0328	30.4346	1916.42	1	107
2022-09-13	10:56:45	8.79309	39.1134	30.4346	1718.44	1	108
2022-09-13	10:56:45	5.99416	26.6632	30.4346	1943.08	1	109
2022-09-13	10:56:46	7.25136	32.2555	17.9594	1750.7	1	110
2022-09-13	10:56:46	1.36261	6.06116	17.9594	1949.14	FALSE	110
2022-09-13	10:56:46	5.96413	26.5296	17.9594	1777.23	1	111
2022-09-13	10:56:46	1.57167	6.9911	17.9594	1956.13	FALSE	111
2022-09-13	10:56:47	3.0336	13.4941	16.9163	1790.72	1	112
2022-09-13	10:56:47	4.70332	20.9213	16.9163	1977.05	1	113
2022-09-13	10:56:47	2.745	12.2103	16.9163	1802.93	FALSE	113
2022-09-13	10:56:47	4.72988	21.0395	16.9163	1998.09	1	114
2022-09-13	10:56:48	2.12281	9.44268	14.3519	1812.37	FALSE	114
2022-09-13	10:56:48	3.09619	13.7725	14.3519	2011.87	1	115
2022-09-13	10:56:48	4.46032	19.8404	14.3519	1832.21	1	116
2022-09-13	10:56:49	2.80103	12.4595	28.243	2024.32	FALSE	116
2022-09-13	10:56:49	10.4926	46.6732	28.243	1878.89	1	117
2022-09-13	10:56:49	2.97436	13.2305	28.243	2037.56	FALSE	117
2022-09-13	10:56:49	9.12922	40.6086	28.243	1919.5	1	118
2022-09-13	10:56:50	7.79177	34.6594	25.7924	2072.21	1	119
2022-09-13	10:56:50	3.34739	14.8899	25.7924	1934.39	1	120
2022-09-13	10:56:50	8.22225	36.5742	25.7924	2108.79	1	121
2022-09-13	10:56:50	3.83218	17.0463	25.7924	1951.43	1	122
2022-09-13	10:56:51	4.73233	21.0504	21.9476	2129.84	1	123
2022-09-13	10:56:51	6.21507	27.6459	21.9476	1979.08	1	124
2022-09-13	10:56:51	1.81121	8.05662	21.9476	2137.9	FALSE	124
2022-09-13	10:56:51	6.97751	31.0374	21.9476	2010.12	1	125
2022-09-13	10:56:52	2.88149	12.8174	21.1933	2150.71	FALSE	125
2022-09-13	10:56:52	3.87187	17.2229	21.1933	2027.34	1	126
2022-09-13	10:56:52	7.54006	33.5397	21.1933	2184.25	1	127
2022-09-13	10:56:53	1.27212	5.65864	11.3595	2033	FALSE	127
2022-09-13	10:56:53	3.94225	17.5359	11.3595	2201.79	1	128
2022-09-13	10:56:53	2.58663	11.5058	11.3595	2044.5	FALSE	128
2022-09-13	10:56:53	2.41396	10.7378	11.3595	2212.53	FALSE	128
2022-09-13	10:56:54	6.27823	27.9268	22.908	2072.43	1	129
2022-09-13	10:56:54	4.29492	19.1047	22.908	2231.63	1	130
2022-09-13	10:56:54	8.61747	38.3322	22.908	2110.76	1	131
2022-09-13	10:56:54	1.40917	6.26827	22.908	2237.9	FALSE	131
2022-09-13	10:56:55	2.1852	9.72021	7.39108	2120.48	FALSE	131
2022-09-13	10:56:55	2.39996	10.6755	7.39108	2248.58	FALSE	131
2022-09-13	10:56:55	0.507748	2.25856	7.39108	2122.74	FALSE	131
2022-09-13	10:56:55	1.55345	6.91006	7.39108	2255.49	FALSE	131
2022-09-13	10:56:56	0.869224	3.86648	5.72221	2126.61	FALSE	131
2022-09-13	10:56:56	1.43818	6.39731	5.72221	2261.88	FALSE	131
2022-09-13	10:56:56	1.3851	6.1612	5.72221	2132.77	FALSE	131
2022-09-13	10:56:56	1.45314	6.46386	5.72221	2268.35	FALSE	131
2022-09-13	10:56:57	3.10383	13.8065	15.1756	2146.57	1	132
2022-09-13	10:56:57	2.37401	10.5601	15.1756	2278.91	FALSE	132
2022-09-13	10:56:57	4.75706	21.1604	15.1756	2167.74	1	133
2022-09-13	10:56:58	1.66485	7.40559	12.4905	2286.31	FALSE	133
2022-09-13	10:56:58	5.23797	23.2995	12.4905	2191.03	1	134
2022-09-13	10:56:58	1.72016	7.65162	12.4905	2293.96	FALSE	134
2022-09-13	10:56:58	2.60902	11.6054	12.4905	2202.64	FALSE	134
2022-09-13	10:56:59	3.32276	14.7803	8.49385	2308.74	1	135
2022-09-13	10:56:59	1.09747	4.88177	8.49385	2207.52	FALSE	135
2022-09-13	10:56:59	1.66515	7.40692	8.49385	2316.15	FALSE	135
2022-09-13	10:56:59	1.55263	6.90641	8.49385	2214.43	FALSE	135
2022-09-13	10:57:00	1.56296	6.95236	4.17333	2323.1	FALSE	135
2022-09-13	10:57:00	0.72042	3.20457	4.17333	2217.63	FALSE	135
2022-09-13	10:57:00	1.16363	5.17606	4.17333	2328.28	FALSE	135
2022-09-13	10:57:00	0.305814	1.36032	4.17333	2218.99	FALSE	135
2022-09-13	10:57:01	0.644288	2.86592	2.59133	2331.15	FALSE	135
2022-09-13	10:57:01	0.519402	2.3104	2.59133	2221.3	FALSE	135
2022-09-13	10:57:01	0.583982	2.59767	2.59133	2333.74	FALSE	135
2022-09-13	10:57:02	0.352481	1.56791	1.07775	2222.87	FALSE	135
2022-09-13	10:57:02	0.235992	1.04974	1.07775	2334.79	FALSE	135
2022-09-13	10:57:02	0.231616	1.03027	1.07775	2223.9	FALSE	135
2022-09-13	10:57:02	0.149071	0.663098	1.07775	2335.46	FALSE	135
2022-09-13	10:57:03	0.206883	0.920257	1.96966	2224.82	FALSE	135
2022-09-13	10:57:03	0.162608	0.723313	1.96966	2336.18	FALSE	135
2022-09-13	10:57:03	0.714211	3.17695	1.96966	2228	FALSE	135
2022-09-13	10:57:03	0.687494	3.05811	1.96966	2339.24	FALSE	135
2022-09-13	10:57:04	0.547952	2.4374	0.915844	2230.44	FALSE	135
2022-09-13	10:57:04	0.0885116	0.393717	0.915844	2339.63	FALSE	135
2022-09-13	10:57:04	0.027901	0.124109	0.915844	2230.56	FALSE	135
2022-09-13	10:57:04	0.159199	0.708149	0.915844	2340.34	FALSE	135
2022-09-13	10:57:05	0.166323	0.739838	1.18285	2231.3	FALSE	135
2022-09-13	10:57:05	0.255993	1.13871	1.18285	2341.48	FALSE	135
2022-09-13	10:57:05	0.375433	1.67	1.18285	2232.97	FALSE	135
2022-09-13	10:57:06	0.464135	2.06457	1.91046	2343.54	FALSE	135
2022-09-13	10:57:06	0.458588	2.03989	1.91046	2235.01	FALSE	135
2022-09-13	10:57:06	0.257723	1.1464	1.91046	2344.69	FALSE	135
2022-09-13	10:57:06	0.537519	2.39099	1.91046	2237.4	FALSE	135
2022-09-13	10:57:07	0.610903	2.71742	3.21085	2347.41	FALSE	135
2022-09-13	10:57:07	0.821336	3.65347	3.21085	2241.05	FALSE	135
2022-09-13	10:57:07	0.856145	3.8083	3.21085	2351.21	FALSE	135
2022-09-13	10:57:07	0.598944	2.66422	3.21085	2243.72	FALSE	135
2022-09-13	10:57:08	0.570293	2.53678	1.74442	2353.75	FALSE	135
2022-09-13	10:57:08	0.402964	1.79246	1.74442	2245.51	FALSE	135
2022-09-13	10:57:08	0.319707	1.42212	1.74442	2355.17	FALSE	135
2022-09-13	10:57:08	0.275687	1.22631	1.74442	2246.74	FALSE	135
2022-09-13	10:57:09	0.429529	1.91063	1.37764	2357.08	FALSE	135
2022-09-13	10:57:09	0.330242	1.46898	1.37764	2248.21	FALSE	135
2022-09-13	10:57:09	0.304898	1.35625	1.37764	2358.44	FALSE	135
2022-09-13	10:57:09	0.17416	0.774699	1.37764	2248.98	FALSE	135
2022-09-13	10:57:10	0.2507	1.11516	0.242954	2359.56	FALSE	135
2022-09-13	10:57:10	-0.0131677	-0.0585726	0.242954	2248.98	FALSE	135
2022-09-13	10:57:10	-0.0736766	-0.327728	0.242954	2359.56	FALSE	135
2022-09-13	10:57:11	-0.048384	-0.215222	0.356763	2248.98	FALSE	135
2022-09-13	10:57:11	-0.0202415	-0.0900382	0.356763	2359.56	FALSE	135
2022-09-13	10:57:11	0.260573	1.15908	0.356763	2250.14	FALSE	135
2022-09-13	10:57:11	0.128868	0.573231	0.356763	2360.13	FALSE	135
2022-09-13	10:57:12	1.08795	4.83942	16.1156	2254.98	FALSE	135
2022-09-13	10:57:12	2.87462	12.7869	16.1156	2372.92	FALSE	135
2022-09-13	10:57:12	7.30103	32.4764	16.1156	2287.46	1	136
2022-09-13	10:57:12	3.22821	14.3597	16.1156	2387.28	1	137
2022-09-13	10:57:13	4.68596	20.8441	12.6551	2308.3	1	138
2022-09-13	10:57:13	1.70123	7.56741	12.6551	2394.84	FALSE	138
2022-09-13	10:57:13	2.87278	12.7787	12.6551	2321.08	FALSE	138
2022-09-13	10:57:13	2.12001	9.43023	12.6551	2404.27	FALSE	138
2022-09-13	10:57:14	0.928562	4.13043	5.02029	2325.21	FALSE	138
2022-09-13	10:57:14	1.5595	6.93697	5.02029	2411.21	FALSE	138
2022-09-13	10:57:14	0.897774	3.99348	5.02029	2329.2	FALSE	138
2022-09-13	10:57:15	2.01004	8.94106	7.05594	2420.15	FALSE	138
2022-09-13	10:57:15	2.63385	11.7159	7.05594	2340.92	FALSE	138
2022-09-13	10:57:15	0.846069	3.76348	7.05594	2423.91	FALSE	138
2022-09-13	10:57:15	0.855025	3.80332	7.05594	2344.72	FALSE	138
2022-09-13	10:57:16	0.713651	3.17446	6.97048	2427.09	FALSE	138
2022-09-13	10:57:16	0.624237	2.77673	6.97048	2347.5	FALSE	138
2022-09-13	10:57:16	2.68566	11.9464	6.97048	2439.04	FALSE	138
2022-09-13	10:57:16	2.24459	9.98439	6.97048	2357.48	FALSE	138
2022-09-13	10:57:17	3.80266	16.915	12.6923	2455.95	1	139
2022-09-13	10:57:17	1.74963	7.7827	12.6923	2365.27	FALSE	139
2022-09-13	10:57:17	3.5105	15.6154	12.6923	2471.57	1	140
2022-09-13	10:57:17	2.3506	10.4559	12.6923	2375.72	FALSE	140
2022-09-13	10:57:18	6.3394	28.1989	15.7381	2499.76	1	141
2022-09-13	10:57:18	1.20866	5.37636	15.7381	2381.1	FALSE	141
2022-09-13	10:57:18	3.06622	13.6392	15.7381	2513.4	1	142
2022-09-13	10:57:19	1.87767	8.35225	7.41333	2389.45	FALSE	142
2022-09-13	10:57:19	1.41335	6.28686	7.41333	2519.69	FALSE	142
2022-09-13	10:57:19	1.97955	8.80543	7.41333	2398.26	FALSE	142
2022-09-13	10:57:19	1.39579	6.20875	7.41333	2525.9	FALSE	142
2022-09-13	10:57:20	1.87111	8.32307	4.93043	2406.58	FALSE	142
2022-09-13	10:57:20	1.42795	6.35181	4.93043	2532.25	FALSE	142
2022-09-13	10:57:20	0.645407	2.8709	4.93043	2409.45	FALSE	142
2022-09-13	10:57:20	0.489173	2.17594	4.93043	2534.43	FALSE	142
2022-09-13	10:57:21	0.585203	2.6031	4.1177	2412.05	FALSE	142
2022-09-13	10:57:21	0.727392	3.23559	4.1177	2537.66	FALSE	142
2022-09-13	10:57:21	0.922506	4.10349	4.1177	2416.16	FALSE	142
2022-09-13	10:57:21	1.4677	6.52862	4.1177	2544.19	FALSE	142
2022-09-13	10:57:22	1.55609	6.9218	6.1643	2423.08	FALSE	142
2022-09-13	10:57:22	1.54841	6.88764	6.1643	2551.08	FALSE	142
2022-09-13	10:57:22	1.05289	4.68347	6.1643	2427.76	FALSE	142
2022-09-13	10:57:23	0.753397	3.35126	3.87786	2554.43	FALSE	142
2022-09-13	10:57:23	0.654822	2.91278	3.87786	2430.67	FALSE	142
2022-09-13	10:57:23	0.809478	3.60072	3.87786	2558.03	FALSE	142
2022-09-13	10:57:23	1.26943	5.64668	3.87786	2436.32	FALSE	142
2022-09-13	10:57:24	1.06902	4.75521	3.72585	2562.79	FALSE	142
2022-09-13	10:57:24	0.981743	4.36699	3.72585	2440.69	FALSE	142
2022-09-13	10:57:24	0.901997	4.01226	3.72585	2566.8	FALSE	142
2022-09-13	10:57:24	0.397672	1.76892	3.72585	2442.46	FALSE	142
2022-09-13	10:57:25	0.333753	1.4846	0.980132	2568.28	FALSE	142
2022-09-13	10:57:25	0.218944	0.973907	0.980132	2443.43	FALSE	142
2022-09-13	10:57:25	0.195433	0.869325	0.980132	2569.15	FALSE	142
2022-09-13	10:57:25	0.133244	0.592696	0.980132	2444.02	FALSE	142
2022-09-13	10:57:26	0.871463	3.87644	3.19863	2573.03	FALSE	142
2022-09-13	10:57:26	0.663982	2.95352	3.19863	2446.98	FALSE	142
2022-09-13	10:57:26	0.632125	2.81182	3.19863	2575.84	FALSE	142
2022-09-13	10:57:26	0.708766	3.15273	3.19863	2450.13	FALSE	142
2022-09-13	10:57:27	0.970089	4.31515	2.69825	2580.16	FALSE	142
2022-09-13	10:57:27	0.383982	1.70803	2.69825	2451.84	FALSE	142
2022-09-13	10:57:27	0.465713	2.07158	2.69825	2582.23	FALSE	142
2022-09-13	10:57:28	0.443015	1.97062	1.452	2453.81	FALSE	142
2022-09-13	10:57:28	0.322659	1.43525	1.452	2583.66	FALSE	142
2022-09-13	10:57:28	0.314211	1.39767	1.452	2455.21	FALSE	142
2022-09-13	10:57:28	0.225814	1.00447	1.452	2584.67	FALSE	142
2022-09-13	10:57:29	0.185662	0.825862	0.835538	2456.03	FALSE	142
2022-09-13	10:57:29	0.201794	0.89762	0.835538	2585.56	FALSE	142
2022-09-13	10:57:29	0.141692	0.630274	0.835538	2456.66	FALSE	142
2022-09-13	10:57:29	0.222201	0.988394	0.835538	2586.55	FALSE	142
2022-09-13	10:57:30	0.01584	0.0704595	0.11562	2456.73	FALSE	142
2022-09-13	10:57:30	-0.106094	-0.471927	0.11562	2586.55	FALSE	142
2022-09-13	10:57:30	-0.209453	-0.931689	0.11562	2456.73	FALSE	142
2022-09-13	10:57:30	0.403677	1.79564	0.11562	2588.35	FALSE	142
2022-09-13	10:57:31	5.85222	26.0318	40.1677	2482.76	1	143
2022-09-13	10:57:31	13.4543	59.8474	40.1677	2648.2	1	144
2022-09-13	10:57:31	7.78378	34.6238	40.1677	2517.39	1	145
2022-09-13	10:57:32	8.16199	36.3062	22.4472	2684.5	1	146
2022-09-13	10:57:32	3.27625	14.5734	22.4472	2531.96	1	147
2022-09-13	10:57:32	5.28031	23.4879	22.4472	2707.99	1	148
2022-09-13	10:57:32	3.46683	15.4212	22.4472	2547.38	1	149
2022-09-13	10:57:33	3.48139	15.4859	17.5204	2723.48	1	150
2022-09-13	10:57:33	4.08403	18.1666	17.5204	2565.55	1	151
2022-09-13	10:57:33	4.36612	19.4214	17.5204	2742.9	1	152
2022-09-13	10:57:33	3.82352	17.0078	17.5204	2582.56	1	153
2022-09-13	10:57:34	2.69721	11.9977	6.98231	2754.9	FALSE	153
2022-09-13	10:57:34	1.55757	6.92838	6.98231	2589.49	FALSE	153
2022-09-13	10:57:34	0.929122	4.13292	6.98231	2759.03	FALSE	153
2022-09-13	10:57:34	1.09487	4.8702	6.98231	2594.36	FALSE	153
2022-09-13	10:57:35	1.09976	4.89195	4.04939	2763.92	FALSE	153
2022-09-13	10:57:35	0.85182	3.78907	4.04939	2598.15	FALSE	153
2022-09-13	10:57:35	0.779453	3.46716	4.04939	2767.39	FALSE	153
2022-09-13	10:57:36	0.767035	3.41193	2.88675	2601.56	FALSE	153
2022-09-13	10:57:36	0.767697	3.41487	2.88675	2770.8	FALSE	153
2022-09-13	10:57:36	0.589784	2.62348	2.88675	2604.18	FALSE	153
2022-09-13	10:57:36	0.471361	2.09671	2.88675	2772.9	FALSE	153
2022-09-13	10:57:37	0.724949	3.22472	3.2447	2607.41	FALSE	153
2022-09-13	10:57:37	0.73131	3.25301	3.2447	2776.15	FALSE	153
2022-09-13	10:57:37	0.735585	3.27203	3.2447	2610.68	FALSE	153
2022-09-13	10:57:37	0.725916	3.22902	3.2447	2779.38	FALSE	153
2022-09-13	10:57:38	0.733804	3.26411	3.27673	2613.94	FALSE	153
2022-09-13	10:57:38	0.740776	3.29512	3.27673	2782.68	FALSE	153
2022-09-13	10:57:38	0.737519	3.28063	3.27673	2617.22	FALSE	153
2022-09-13	10:57:38	0.734466	3.26705	3.27673	2785.94	FALSE	153
2022-09-13	10:57:39	0.729733	3.246	4.01233	2620.47	FALSE	153
2022-09-13	10:57:39	0.733346	3.26207	4.01233	2789.21	FALSE	153
2022-09-13	10:57:39	1.24296	5.52893	4.01233	2626	FALSE	153
2022-09-13	10:57:40	1.16642	5.18847	4.13682	2794.39	FALSE	153
2022-09-13	10:57:40	1.31686	5.85766	4.13682	2631.85	FALSE	153
2022-09-13	10:57:40	0.881998	3.9233	4.13682	2798.32	FALSE	153
2022-09-13	10:57:40	0.35472	1.57787	4.13682	2633.43	FALSE	153
2022-09-13	10:57:41	0.21986	0.977981	0.675379	2799.29	FALSE	153
2022-09-13	10:57:41	0.207188	0.921614	0.675379	2634.35	FALSE	153
2022-09-13	10:57:41	0.103982	0.462533	0.675379	2799.76	FALSE	153
2022-09-13	10:57:41	0.0762979	0.339388	0.675379	2634.69	FALSE	153
2022-09-13	10:57:42	0.140369	0.624389	0.973851	2800.38	FALSE	153
2022-09-13	10:57:42	0.206629	0.919127	0.973851	2635.61	FALSE	153
2022-09-13	10:57:42	0.313957	1.39654	0.973851	2801.78	FALSE	153
2022-09-13	10:57:42	0.214771	0.955344	0.973851	2636.57	FALSE	153
2022-09-13	10:57:43	0.199148	0.88585	1.24074	2802.66	FALSE	153
2022-09-13	10:57:43	0.241998	1.07646	1.24074	2637.64	FALSE	153
2022-09-13	10:57:43	0.296043	1.31686	1.24074	2803.98	FALSE	153
2022-09-13	10:57:43	0.378537	1.68381	1.24074	2639.33	FALSE	153
2022-09-13	10:57:44	0.622863	2.77062	2.5908	2806.75	FALSE	153
2022-09-13	10:57:44	0.673957	2.9979	2.5908	2642.33	FALSE	153
2022-09-13	10:57:44	0.450496	2.0039	2.5908	2808.76	FALSE	153
2022-09-13	10:57:45	0.577112	2.56711	2.55789	2644.89	FALSE	153
2022-09-13	10:57:45	0.599046	2.66468	2.55789	2811.42	FALSE	153
2022-09-13	10:57:45	0.593957	2.64204	2.55789	2647.54	FALSE	153
2022-09-13	10:57:45	0.530038	2.35772	2.55789	2813.78	FALSE	153
2022-09-13	10:57:46	0.518079	2.30452	2.27	2649.84	FALSE	153
2022-09-13	10:57:46	0.481489	2.14176	2.27	2815.92	FALSE	153
2022-09-13	10:57:46	0.494313	2.1988	2.27	2652.04	FALSE	153
2022-09-13	10:57:46	0.547392	2.43491	2.27	2818.35	FALSE	153
2022-09-13	10:57:47	0.689682	3.06784	3.0383	2655.11	FALSE	153
2022-09-13	10:57:47	0.839046	3.73224	3.0383	2822.09	FALSE	153
2022-09-13	10:57:47	0.748002	3.32726	3.0383	2658.43	FALSE	153
2022-09-13	10:57:47	0.455433	2.02586	3.0383	2824.11	FALSE	153
2022-09-13	10:57:48	0.707545	3.1473	2.88373	2661.58	FALSE	153
2022-09-13	10:57:48	0.73584	3.27316	2.88373	2827.39	FALSE	153
2022-09-13	10:57:48	0.501488	2.23072	2.88373	2663.81	FALSE	153
2022-09-13	10:57:49	0.527952	2.34844	1.31878	2829.73	FALSE	153
2022-09-13	10:57:49	0.492176	2.1893	1.31878	2666	FALSE	153
2022-09-13	10:57:49	0.127799	0.568476	1.31878	2830.3	FALSE	153
2022-09-13	10:57:49	0.0379773	0.168931	1.31878	2666.17	FALSE	153
2022-09-13	10:57:50	0.210395	0.935879	1.11477	2831.24	FALSE	153
2022-09-13	10:57:50	0.142405	0.633446	1.11477	2666.8	FALSE	153
2022-09-13	10:57:50	0.269428	1.19847	1.11477	2832.44	FALSE	153
2022-09-13	10:57:50	0.380216	1.69128	1.11477	2668.49	FALSE	153
2022-09-13	10:57:51	0.440725	1.96043	1.85976	2834.4	FALSE	153
2022-09-13	10:57:51	0.372125	1.65529	1.85976	2670.15	FALSE	153
2022-09-13	10:57:51	0.403728	1.79586	1.85976	2836.19	FALSE	153
2022-09-13	10:57:51	0.455789	2.02744	1.85976	2672.18	FALSE	153
2022-09-13	10:57:52	0.269733	1.19983	1.22639	2837.39	FALSE	153
2022-09-13	10:57:52	0.215891	0.960326	1.22639	2673.14	FALSE	153
2022-09-13	10:57:52	0.341489	1.51901	1.22639	2838.91	FALSE	153
2022-09-13	10:57:53	0.154924	0.689133	1.14097	2673.83	FALSE	153
2022-09-13	10:57:53	0.235382	1.04703	1.14097	2839.96	FALSE	153
2022-09-13	10:57:53	0.220878	0.98251	1.14097	2674.81	FALSE	153
2022-09-13	10:57:53	0.414822	1.84521	1.14097	2841.8	FALSE	153
2022-09-13	10:57:54	0.0834226	0.37108	0.496207	2675.18	FALSE	153
2022-09-13	10:57:54	0.119657	0.532258	0.496207	2842.34	FALSE	153
2022-09-13	10:57:54	0.0405728	0.180476	0.496207	2675.36	FALSE	153
2022-09-13	10:57:54	0.202557	0.901014	0.496207	2843.24	FALSE	153
2022-09-13	10:57:55	0.0316669	0.140861	13.6091	2675.5	FALSE	153
2022-09-13	10:57:55	0.916349	4.0761	13.6091	2847.31	FALSE	153
2022-09-13	10:57:55	4.94892	22.0138	13.6091	2697.52	1	154
2022-09-13	10:57:55	6.34088	28.2055	13.6091	2875.52	1	155
2022-09-13	10:57:56	2.26368	10.0693	7.38821	2707.59	FALSE	155
2022-09-13	10:57:56	1.78251	7.92896	7.38821	2883.45	FALSE	155
2022-09-13	10:57:56	0.861997	3.83434	7.38821	2711.42	FALSE	155
2022-09-13	10:57:56	1.73559	7.72025	7.38821	2891.17	FALSE	155
2022-09-13	10:57:57	0.702405	3.12444	2.49686	2714.54	FALSE	155
2022-09-13	10:57:57	0.482608	2.14674	2.49686	2893.32	FALSE	155
2022-09-13	10:57:57	0.498944	2.2194	2.49686	2716.76	FALSE	155
2022-09-13	10:57:58	0.259046	1.15229	2.43185	2894.47	FALSE	155
2022-09-13	10:57:58	0.455534	2.02631	2.43185	2718.79	FALSE	155
2022-09-13	10:57:58	0.737926	3.28244	2.43185	2897.75	FALSE	155
2022-09-13	10:57:58	0.734313	3.26637	2.43185	2722.06	FALSE	155
2022-09-13	10:57:59	0.733346	3.26207	3.27526	2901.01	FALSE	155
2022-09-13	10:57:59	0.738944	3.28697	3.27526	2725.34	FALSE	155
2022-09-13	10:57:59	0.73416	3.26569	3.27526	2904.28	FALSE	155
2022-09-13	10:57:59	0.738791	3.28629	3.27526	2728.63	FALSE	155
2022-09-13	10:58:00	0.734313	3.26637	3.26309	2907.54	FALSE	155
2022-09-13	10:58:00	0.729428	3.24464	3.26309	2731.87	FALSE	155
2022-09-13	10:58:00	0.739249	3.28833	3.26309	2910.83	FALSE	155
2022-09-13	10:58:00	0.73131	3.25301	3.26309	2735.13	FALSE	155
2022-09-13	10:58:01	0.738893	3.28674	3.2795	2914.12	FALSE	155
2022-09-13	10:58:01	0.734466	3.26705	3.2795	2738.39	FALSE	155
2022-09-13	10:58:01	0.738435	3.28471	3.2795	2917.4	FALSE	155
2022-09-13	10:58:02	0.740013	3.29173	3.27899	2741.69	FALSE	155
2022-09-13	10:58:02	0.733804	3.26411	3.27899	2920.67	FALSE	155
2022-09-13	10:58:02	0.738231	3.2838	3.27899	2744.97	FALSE	155
2022-09-13	10:58:02	0.736552	3.27633	3.27899	2923.94	FALSE	155
2022-09-13	10:58:03	0.733244	3.26162	3.26665	2748.23	FALSE	155
2022-09-13	10:58:03	0.734313	3.26637	3.26665	2927.21	FALSE	155
2022-09-13	10:58:03	0.733499	3.26275	3.26665	2751.49	FALSE	155
2022-09-13	10:58:03	0.73645	3.27588	3.26665	2930.49	FALSE	155
2022-09-13	10:58:04	0.733448	3.26252	3.26897	2754.76	FALSE	155
2022-09-13	10:58:04	0.737621	3.28109	3.26897	2933.77	FALSE	155
2022-09-13	10:58:04	0.733702	3.26365	3.26897	2758.02	FALSE	155
2022-09-13	10:58:04	0.734822	3.26864	3.26897	2937.04	FALSE	155
2022-09-13	10:58:05	0.735534	3.2718	3.26962	2761.29	FALSE	155
2022-09-13	10:58:05	0.736196	3.27475	3.26962	2940.31	FALSE	155
2022-09-13	10:58:05	0.733397	3.2623	3.26962	2764.55	FALSE	155
2022-09-13	10:58:06	0.737926	3.28244	3.0829	2943.59	FALSE	155
2022-09-13	10:58:06	0.737672	3.28131	3.0829	2767.84	FALSE	155
2022-09-13	10:58:06	0.913397	4.06297	3.0829	2947.66	FALSE	155
2022-09-13	10:58:06	0.38327	1.70486	3.0829	2769.54	FALSE	155
2022-09-13	10:58:07	0.600369	2.67056	3.41278	2950.33	FALSE	155
2022-09-13	10:58:07	0.465611	2.07113	3.41278	2771.61	FALSE	155
2022-09-13	10:58:07	0.620776	2.76134	3.41278	2953.09	FALSE	155
2022-09-13	10:58:07	1.38215	6.14808	3.41278	2777.76	FALSE	155
2022-09-13	10:58:08	0.985865	4.38532	7.02866	2957.47	FALSE	155
2022-09-13	10:58:08	2.25726	10.0407	7.02866	2787.8	FALSE	155
2022-09-13	10:58:08	0.933702	4.15329	7.02866	2961.63	FALSE	155
2022-09-13	10:58:08	2.14363	9.53529	7.02866	2797.34	FALSE	155
2022-09-13	10:58:09	0.772277	3.43524	3.92376	2965.06	FALSE	155
2022-09-13	10:58:09	1.35116	6.01023	3.92376	2803.35	FALSE	155
2022-09-13	10:58:09	0.522862	2.32579	3.92376	2967.39	FALSE	155
2022-09-13	10:58:10	1.49859	6.66603	10.6898	2810.01	FALSE	155
2022-09-13	10:58:10	1.2534	5.57537	10.6898	2972.96	FALSE	155
2022-09-13	10:58:10	2.44729	10.886	10.6898	2820.9	FALSE	155
2022-09-13	10:58:10	4.41345	19.6319	10.6898	2992.6	1	156
2022-09-13	10:58:11	1.81869	8.0899	13.305	2828.99	FALSE	156
2022-09-13	10:58:11	3.45513	15.3691	13.305	3007.96	1	157
2022-09-13	10:58:11	2.08525	9.27561	13.305	2838.26	FALSE	157
2022-09-13	10:58:11	4.6053	20.4853	13.305	3028.45	1	158
2022-09-13	10:58:12	1.182	5.25777	11.0608	2843.52	FALSE	158
2022-09-13	10:58:12	3.06388	13.6288	11.0608	3042.08	1	159
2022-09-13	10:58:12	2.72261	12.1107	11.0608	2855.63	FALSE	159
2022-09-13	10:58:12	2.97782	13.2459	11.0608	3055.32	FALSE	159
2022-09-13	10:58:13	4.42032	19.6625	12.2356	2875.29	1	160
2022-09-13	10:58:13	2.15472	9.58463	12.2356	3064.91	FALSE	160
2022-09-13	10:58:13	3.55284	15.8037	12.2356	2891.1	1	161
2022-09-13	10:58:13	0.874873	3.89161	12.2356	3068.8	FALSE	161
2022-09-13	10:58:14	1.39874	6.22188	8.68367	2897.32	FALSE	161
2022-09-13	10:58:14	1.79925	8.00342	8.68367	3076.8	FALSE	161
2022-09-13	10:58:14	2.65854	11.8257	8.68367	2909.15	FALSE	161
2022-09-13	10:58:15	5.32647	23.6932	12.2972	3100.5	1	162
2022-09-13	10:58:15	4.04887	18.0102	12.2972	2927.16	1	163
2022-09-13	10:58:15	0.946934	4.21215	12.2972	3104.71	FALSE	163
2022-09-13	10:58:15	0.735891	3.27339	12.2972	2930.43	FALSE	163
2022-09-13	10:58:16	0.430853	1.91652	2.40548	3106.63	FALSE	163
2022-09-13	10:58:16	0.275229	1.22427	2.40548	2931.65	FALSE	163
2022-09-13	10:58:16	0.729936	3.2469	2.40548	3109.87	FALSE	163
2022-09-13	10:58:16	0.727087	3.23423	2.40548	2934.89	FALSE	163
2022-09-13	10:58:17	0.731463	3.25369	3.27276	3113.13	FALSE	163
2022-09-13	10:58:17	0.737773	3.28176	3.27276	2938.17	FALSE	163
2022-09-13	10:58:17	0.737722	3.28154	3.27276	3116.41	FALSE	163
2022-09-13	10:58:17	0.736043	3.27407	3.27276	2941.44	FALSE	163
2022-09-13	10:58:18	0.73528	3.27067	3.27611	3119.68	FALSE	163
2022-09-13	10:58:18	0.734771	3.26841	3.27611	2944.71	FALSE	163
2022-09-13	10:58:18	0.739453	3.28923	3.27611	3122.97	FALSE	163
2022-09-13	10:58:19	0.752532	3.34741	6.82079	2948.06	FALSE	163
2022-09-13	10:58:19	1.0651	4.73778	6.82079	3127.71	FALSE	163
2022-09-13	10:58:19	1.8336	8.15622	6.82079	2956.22	FALSE	163
2022-09-13	10:58:19	2.4823	11.0418	6.82079	3138.75	FALSE	163
2022-09-13	10:58:20	1.78663	7.94729	6.06138	2964.16	FALSE	163
2022-09-13	10:58:20	2.77177	12.3294	6.06138	3151.08	FALSE	163
2022-09-13	10:58:20	0.665713	2.96122	6.06138	2967.12	FALSE	163
2022-09-13	10:58:20	0.226527	1.00764	6.06138	3152.08	FALSE	163
2022-09-13	10:58:21	0.115789	0.515053	1.97039	2967.64	FALSE	163
2022-09-13	10:58:21	0.53986	2.40141	1.97039	3154.49	FALSE	163
2022-09-13	10:58:21	0.672786	2.99269	1.97039	2970.63	FALSE	163
2022-09-13	10:58:21	0.443422	1.97243	1.97039	3156.46	FALSE	163
2022-09-13	10:58:22	0.58215	2.58952	2.18914	2973.22	FALSE	163
2022-09-13	10:58:22	0.307494	1.36779	2.18914	3157.83	FALSE	163
2022-09-13	10:58:22	0.586781	2.61012	2.18914	2975.83	FALSE	163
2022-09-13	10:58:23	0.336043	1.49479	3.55692	3159.32	FALSE	163
2022-09-13	10:58:23	0.810191	3.60389	3.55692	2979.44	FALSE	163
2022-09-13	10:58:23	0.632023	2.81136	3.55692	3162.13	FALSE	163
2022-09-13	10:58:23	1.42027	6.31765	3.55692	2985.75	FALSE	163
2022-09-13	10:58:24	1.34184	5.96877	7.21094	3168.1	FALSE	163
2022-09-13	10:58:24	2.22134	9.88096	7.21094	2995.63	FALSE	163
2022-09-13	10:58:24	1.41655	6.3011	7.21094	3174.4	FALSE	163
2022-09-13	10:58:24	1.50464	6.69294	7.21094	3002.33	FALSE	163
2022-09-13	10:58:25	2.0848	9.27361	4.42398	3183.68	FALSE	163
2022-09-13	10:58:25	0.735076	3.26977	4.42398	3005.6	FALSE	163
2022-09-13	10:58:25	0.765661	3.40581	4.42398	3187.08	FALSE	163
2022-09-13	10:58:25	0.392685	1.74674	4.42398	3007.34	FALSE	163
2022-09-13	10:58:26	0.395687	1.76009	1.7945	3188.84	FALSE	163
2022-09-13	10:58:26	0.47584	2.11663	1.7945	3009.46	FALSE	163
2022-09-13	10:58:26	0.338741	1.50679	1.7945	3190.35	FALSE	163
2022-09-13	10:58:27	0.259657	1.15501	0.948327	3010.61	FALSE	163
2022-09-13	10:58:27	0.193804	0.862079	0.948327	3191.21	FALSE	163
2022-09-13	10:58:27	0.201132	0.894675	0.948327	3011.51	FALSE	163
2022-09-13	10:58:27	0.198181	0.881549	0.948327	3192.09	FALSE	163
2022-09-13	10:58:28	0.195942	0.871589	1.04403	3012.38	FALSE	163
2022-09-13	10:58:28	0.240064	1.06785	1.04403	3193.16	FALSE	163
2022-09-13	10:58:28	0.215891	0.960326	1.04403	3013.34	FALSE	163
2022-09-13	10:58:28	0.286934	1.27634	1.04403	3194.44	FALSE	163
2022-09-13	10:58:29	0.321845	1.43163	3.15506	3014.77	FALSE	163
2022-09-13	10:58:29	0.276145	1.22835	3.15506	3195.66	FALSE	163
2022-09-13	10:58:29	0.438333	1.94979	3.15506	3016.72	FALSE	163
2022-09-13	10:58:29	1.80083	8.01045	3.15506	3203.68	FALSE	163
2022-09-13	10:58:30	2.11273	9.39785	9.54975	3026.12	FALSE	163
2022-09-13	10:58:30	1.18678	5.27903	9.54975	3208.95	FALSE	163
2022-09-13	10:58:30	2.08642	9.28081	9.54975	3035.4	FALSE	163
2022-09-13	10:58:30	3.20159	14.2413	9.54975	3223.2	1	164
2022-09-13	10:58:31	1.08861	4.84236	5.96427	3040.24	FALSE	164
2022-09-13	10:58:31	1.50078	6.67577	5.96427	3229.87	FALSE	164
2022-09-13	10:58:31	1.43309	6.37467	5.96427	3046.62	FALSE	164
2022-09-13	10:58:32	0.971107	4.31968	4.68329	3234.19	FALSE	164
2022-09-13	10:58:32	0.956908	4.25652	4.68329	3050.88	FALSE	164
2022-09-13	10:58:32	0.632175	2.81204	4.68329	3237	FALSE	164
2022-09-13	10:58:32	1.65121	7.34491	4.68329	3058.22	FALSE	164
2022-09-13	10:58:33	0.449886	2.00118	2.22948	3239	FALSE	164
2022-09-13	10:58:33	0.446374	1.98556	2.22948	3060.21	FALSE	164
2022-09-13	10:58:33	0.389479	1.73248	2.22948	3240.74	FALSE	164
2022-09-13	10:58:33	0.719097	3.19869	2.22948	3063.4	FALSE	164
2022-09-13	10:58:34	1.65156	7.34647	10.6345	3248.08	FALSE	164
2022-09-13	10:58:34	2.01614	8.96819	10.6345	3072.37	FALSE	164
2022-09-13	10:58:34	4.0224	17.8924	10.6345	3265.98	1	165
2022-09-13	10:58:34	1.87289	8.33099	10.6345	3080.7	FALSE	165
2022-09-13	10:58:35	3.97991	17.7034	24.3336	3283.68	1	166
2022-09-13	10:58:35	4.86454	21.6384	24.3336	3102.34	1	167
2022-09-13	10:58:35	7.56683	33.6588	24.3336	3317.34	1	168
2022-09-13	10:58:36	7.63014	33.9404	32.2102	3136.28	1	169
2022-09-13	10:58:36	11.1699	49.6859	32.2102	3367.02	1	170
2022-09-13	10:58:36	5.87197	26.1197	32.2102	3162.4	1	171
2022-09-13	10:58:36	4.29268	19.0947	32.2102	3386.12	1	172
2022-09-13	10:58:37	2.45009	10.8985	6.89443	3173.3	FALSE	172
2022-09-13	10:58:37	1.53421	6.82447	6.89443	3392.94	FALSE	172
2022-09-13	10:58:37	1.39248	6.19403	6.89443	3179.49	FALSE	172
2022-09-13	10:58:37	0.822964	3.66071	6.89443	3396.6	FALSE	172
2022-09-13	10:58:38	0.640216	2.84781	4.81136	3182.34	FALSE	172
2022-09-13	10:58:38	1.0852	4.82719	4.81136	3401.43	FALSE	172
2022-09-13	10:58:38	1.25335	5.57515	4.81136	3187.92	FALSE	172
2022-09-13	10:58:38	1.3478	5.99528	4.81136	3407.43	FALSE	172
2022-09-13	10:58:39	1.52632	6.78938	4.57728	3194.71	FALSE	172
2022-09-13	10:58:39	1.02622	4.56483	4.57728	3411.99	FALSE	172
2022-09-13	10:58:39	0.534517	2.37764	4.57728	3197.08	FALSE	172
2022-09-13	10:58:40	0.249682	1.11064	0.958514	3413.1	FALSE	172
2022-09-13	10:58:40	0.260573	1.15908	0.958514	3198.24	FALSE	172
2022-09-13	10:58:40	0.163931	0.729198	0.958514	3413.83	FALSE	172
2022-09-13	10:58:40	0.187748	0.835141	0.958514	3199.08	FALSE	172
2022-09-13	10:58:41	0.138944	0.618051	-0.0627039	3414.45	FALSE	172
2022-09-13	10:58:41	0.0595549	0.264912	-0.0627039	3199.34	FALSE	172
2022-09-13	10:58:41	-0.0359158	-0.159761	-0.0627039	3414.45	FALSE	172
2022-09-13	10:58:41	-0.218969	-0.974018	-0.0627039	3199.34	FALSE	172
2022-09-13	10:58:42	-0.316832	-1.40933	-1.67866	3414.45	FALSE	172
2022-09-13	10:58:42	-0.421717	-1.87588	-1.67866	3199.34	FALSE	172
2022-09-13	10:58:42	-0.386246	-1.7181	-1.67866	3414.45	FALSE	172
2022-09-13	10:58:42	-0.38472	-1.71131	-1.67866	3199.34	FALSE	172
2022-09-13	10:58:43	-0.282022	-1.25449	-0.445139	3414.45	FALSE	172
2022-09-13	10:58:43	-0.1093	-0.486188	-0.445139	3199.34	FALSE	172
2022-09-13	10:58:43	0.0911071	0.405263	-0.445139	3414.85	FALSE	172
2022-09-13	10:58:44	0.587748	2.61442	6.80976	3201.96	FALSE	172
2022-09-13	10:58:44	1.07925	4.80072	6.80976	3419.65	FALSE	172
2022-09-13	10:58:44	1.7394	7.7372	6.80976	3209.7	FALSE	172
2022-09-13	10:58:44	2.71721	12.0867	6.80976	3431.74	FALSE	172
2022-09-13	10:58:45	1.73569	7.7207	11.5358	3217.42	FALSE	172
2022-09-13	10:58:45	3.25502	14.479	11.5358	3446.22	1	173
2022-09-13	10:58:45	1.46637	6.52271	11.5358	3223.94	FALSE	173
2022-09-13	10:58:45	3.91635	17.4207	11.5358	3463.64	1	174
2022-09-13	10:58:46	2.09508	9.31933	9.43805	3233.26	FALSE	174
2022-09-13	10:58:46	1.86958	8.31627	9.43805	3471.96	FALSE	174
2022-09-13	10:58:46	3.77436	16.7891	9.43805	3250.05	1	175
2022-09-13	10:58:46	0.748053	3.32749	9.43805	3475.28	FALSE	175
2022-09-13	10:58:47	3.63864	16.1854	9.03976	3266.23	1	176
2022-09-13	10:58:47	1.4019	6.23593	9.03976	3481.52	FALSE	176
2022-09-13	10:58:47	2.16729	9.64054	9.03976	3275.87	FALSE	176
2022-09-13	10:58:47	0.921082	4.09716	9.03976	3485.62	FALSE	176
2022-09-13	10:58:48	0.428104	1.90429	1.80929	3277.78	FALSE	176
2022-09-13	10:58:48	0.501336	2.23004	1.80929	3487.85	FALSE	176
2022-09-13	10:58:48	0.290802	1.29355	1.80929	3279.07	FALSE	176
2022-09-13	10:58:49	0.190598	0.847818	1.74906	3488.7	FALSE	176
2022-09-13	10:58:49	0.46327	2.06072	1.74906	3281.13	FALSE	176
2022-09-13	10:58:49	0.298334	1.32705	1.74906	3490.02	FALSE	176
2022-09-13	10:58:49	0.620624	2.76066	1.74906	3283.89	FALSE	176
2022-09-13	10:58:50	0.653702	2.9078	3.17797	3492.93	FALSE	176
2022-09-13	10:58:50	0.734669	3.26795	3.17797	3287.16	FALSE	176
2022-09-13	10:58:50	0.736959	3.27814	3.17797	3496.21	FALSE	176
2022-09-13	10:58:50	0.73243	3.258	3.17797	3290.42	FALSE	176
2022-09-13	10:58:51	0.0747203	0.332371	-0.761003	3496.54	FALSE	176
2022-09-13	10:58:51	-0.134185	-0.596882	-0.761003	3290.42	FALSE	176
2022-09-13	10:58:51	-0.24014	-1.06819	-0.761003	3496.54	FALSE	176
2022-09-13	10:58:51	-0.38472	-1.71131	-0.761003	3290.42	FALSE	176
2022-09-13	10:58:52	-0.300038	-1.33463	-0.563607	3496.54	FALSE	176
2022-09-13	10:58:52	-0.167264	-0.744024	-0.563607	3290.42	FALSE	176
2022-09-13	10:58:52	0.0871885	0.387832	-0.563607	3496.93	FALSE	176
2022-09-13	10:58:53	-0.0205468	-0.0913963	0.416807	3290.42	FALSE	176
2022-09-13	10:58:53	0.211412	0.940403	0.416807	3497.87	FALSE	176
2022-09-13	10:58:53	0.114059	0.507357	0.416807	3290.93	FALSE	176
2022-09-13	10:58:53	0.0698857	0.310866	0.416807	3498.18	FALSE	176
2022-09-13	10:58:54	0.0270358	0.120261	0.357385	3291.05	FALSE	176
2022-09-13	10:58:54	0.0650511	0.28936	0.357385	3498.47	FALSE	176
2022-09-13	10:58:54	0.271718	1.20866	0.357385	3292.25	FALSE	176
2022-09-13	10:58:54	-0.0424297	-0.188736	0.357385	3498.47	FALSE	176
2022-09-13	10:58:55	0.203372	0.904639	1.27266	3293.16	FALSE	176
2022-09-13	10:58:55	0.206883	0.920257	1.27266	3499.39	FALSE	176
2022-09-13	10:58:55	0.413651	1.84	1.27266	3295	FALSE	176
2022-09-13	10:58:55	0.320522	1.42575	1.27266	3500.82	FALSE	176
2022-09-13	10:58:56	0.355942	1.5833	1.91463	3296.58	FALSE	176
2022-09-13	10:58:56	0.440115	1.95772	1.91463	3502.77	FALSE	176
2022-09-13	10:58:56	0.495229	2.20288	1.91463	3298.79	FALSE	176
2022-09-13	10:58:57	1.17645	5.23308	5.71158	3508.01	FALSE	176
2022-09-13	10:58:57	0.81187	3.61136	5.71158	3302.4	FALSE	176
2022-09-13	10:58:57	1.73416	7.71389	5.71158	3515.72	FALSE	176
2022-09-13	10:58:57	1.4136	6.28798	5.71158	3308.68	FALSE	176
2022-09-13	10:58:58	2.59009	11.5212	14.7571	3527.24	FALSE	176
2022-09-13	10:58:58	3.37808	15.0264	14.7571	3323.71	1	177
2022-09-13	10:58:58	3.0168	13.4193	14.7571	3540.66	1	178
2022-09-13	10:58:58	4.28525	19.0616	14.7571	3342.77	1	179
2022-09-13	10:58:59	2.0048	8.91775	9.98123	3549.58	FALSE	179
2022-09-13	10:58:59	4.24149	18.867	9.98123	3361.64	1	180
2022-09-13	10:58:59	0.885153	3.93734	9.98123	3553.52	FALSE	180
2022-09-13	10:58:59	1.84408	8.20284	9.98123	3369.84	FALSE	180
2022-09-13	10:59:00	2.55446	11.3627	7.35531	3564.88	FALSE	180
2022-09-13	10:59:00	0.676399	3.00876	7.35531	3372.85	FALSE	180
2022-09-13	10:59:00	2.79558	12.4353	7.35531	3577.31	FALSE	180
2022-09-13	10:59:00	0.587748	2.61442	7.35531	3375.47	FALSE	180
2022-09-13	10:59:01	1.47818	6.57524	4.41558	3583.89	FALSE	180
2022-09-13	10:59:01	0.767443	3.41374	4.41558	3378.88	FALSE	180
2022-09-13	10:59:01	0.732379	3.25777	4.41558	3587.15	FALSE	180
2022-09-13	10:59:02	0.735585	3.27203	3.27628	3382.15	FALSE	180
2022-09-13	10:59:02	0.734568	3.26751	3.27628	3590.41	FALSE	180
2022-09-13	10:59:02	0.740114	3.29218	3.27628	3385.44	FALSE	180
2022-09-13	10:59:02	0.735891	3.27339	3.27628	3593.69	FALSE	180
2022-09-13	10:59:03	0.734415	3.26682	3.26632	3388.71	FALSE	180
2022-09-13	10:59:03	0.735382	3.27113	3.26632	3596.96	FALSE	180
2022-09-13	10:59:03	0.725916	3.22902	3.26632	3391.94	FALSE	180
2022-09-13	10:59:03	0.741489	3.29829	3.26632	3600.26	FALSE	180
2022-09-13	10:59:04	0.738384	3.28448	3.28782	3395.22	FALSE	180
2022-09-13	10:59:04	0.738231	3.2838	3.28782	3603.54	FALSE	180
2022-09-13	10:59:04	0.738791	3.28629	3.28782	3398.51	FALSE	180
2022-09-13	10:59:04	0.741132	3.2967	3.28782	3606.84	FALSE	180
2022-09-13	10:59:05	0.738893	3.28674	3.28146	3401.8	FALSE	180
2022-09-13	10:59:05	0.736349	3.27543	3.28146	3610.11	FALSE	180
2022-09-13	10:59:05	0.737875	3.28222	3.28146	3405.08	FALSE	180
2022-09-13	10:59:06	0.741743	3.29942	3.26988	3613.41	FALSE	180
2022-09-13	10:59:06	0.736857	3.27769	3.26988	3408.36	FALSE	180
2022-09-13	10:59:06	0.732226	3.25709	3.26988	3616.67	FALSE	180
2022-09-13	10:59:06	0.72958	3.24532	3.26988	3411.6	FALSE	180
2022-09-13	10:59:07	0.764135	3.39903	3.71515	3620.07	FALSE	180
2022-09-13	10:59:07	0.732481	3.25822	3.71515	3414.86	FALSE	180
2022-09-13	10:59:07	0.73416	3.26569	3.71515	3623.33	FALSE	180
2022-09-13	10:59:07	1.11004	4.93768	3.71515	3419.8	FALSE	180
2022-09-13	10:59:08	1.73345	7.71073	3.26813	3631.05	FALSE	180
2022-09-13	10:59:08	0.509987	2.26852	3.26813	3422.07	FALSE	180
2022-09-13	10:59:08	0.386629	1.7198	3.26813	3632.77	FALSE	180
2022-09-13	10:59:08	0.308766	1.37345	3.26813	3423.44	FALSE	180
2022-09-13	10:59:09	0.215942	0.960553	1.80024	3633.73	FALSE	180
2022-09-13	10:59:09	0.279606	1.24374	1.80024	3424.68	FALSE	180
2022-09-13	10:59:09	0.718588	3.19642	1.80024	3636.92	FALSE	180
2022-09-13	10:59:10	1.21116	5.38748	3.4447	3430.07	FALSE	180
2022-09-13	10:59:10	0.736399	3.27565	3.4447	3640.2	FALSE	180
2022-09-13	10:59:10	0.696298	3.09727	3.4447	3433.17	FALSE	180
2022-09-13	10:59:10	0.453753	2.01838	3.4447	3642.22	FALSE	180
2022-09-13	10:59:11	0.494466	2.19948	1.9863	3435.37	FALSE	180
2022-09-13	10:59:11	0.466832	2.07656	1.9863	3644.29	FALSE	180
2022-09-13	10:59:11	0.445458	1.98149	1.9863	3437.35	FALSE	180
2022-09-13	10:59:11	0.379402	1.68766	1.9863	3645.98	FALSE	180
2022-09-13	10:59:12	0.409733	1.82257	1.48358	3439.17	FALSE	180
2022-09-13	10:59:12	0.660318	2.93723	1.48358	3648.92	FALSE	180
2022-09-13	10:59:12	0.430751	1.91607	1.48358	3441.09	FALSE	180
2022-09-13	10:59:12	-0.166705	-0.741537	1.48358	3648.92	FALSE	180
2022-09-13	10:59:13	-0.38416	-1.70882	-2.412	3441.09	FALSE	180
2022-09-13	10:59:13	-0.550419	-2.44837	-2.412	3648.92	FALSE	180
2022-09-13	10:59:13	-0.692149	-3.07882	-2.412	3441.09	FALSE	180
2022-09-13	10:59:14	-0.650623	-2.8941	-2.92008	3648.92	FALSE	180
2022-09-13	10:59:14	-0.691844	-3.07746	-2.92008	3441.09	FALSE	180
2022-09-13	10:59:14	-0.665839	-2.96179	-2.92008	3648.92	FALSE	180
2022-09-13	10:59:14	-0.617544	-2.74696	-2.92008	3441.09	FALSE	180
2022-09-13	10:59:15	-0.457544	-2.03525	-1.87582	3648.92	FALSE	180
2022-09-13	10:59:15	-0.46874	-2.08505	-1.87582	3441.09	FALSE	180
2022-09-13	10:59:15	-0.380241	-1.69139	-1.87582	3648.92	FALSE	180
2022-09-13	10:59:15	-0.380292	-1.69161	-1.87582	3441.09	FALSE	180
2022-09-13	10:59:16	-0.365076	-1.62393	-0.590545	3648.92	FALSE	180
2022-09-13	10:59:16	-0.193727	-0.861736	-0.590545	3441.09	FALSE	180
2022-09-13	10:59:16	-0.092557	-0.411712	-0.590545	3648.92	FALSE	180
2022-09-13	10:59:16	0.120318	0.535199	-0.590545	3441.62	FALSE	180
2022-09-13	10:59:17	0.229326	1.02009	0.532992	3649.94	FALSE	180
2022-09-13	10:59:17	0.0444404	0.19768	0.532992	3441.82	FALSE	180
2022-09-13	10:59:17	0.106323	0.472946	0.532992	3650.41	FALSE	180
2022-09-13	10:59:17	0.0991987	0.441256	0.532992	3442.26	FALSE	180
2022-09-13	10:59:18	0.0472394	0.21013	0.488643	3650.62	FALSE	180
2022-09-13	10:59:18	0.125204	0.556932	0.488643	3442.82	FALSE	180
2022-09-13	10:59:18	0.157112	0.698866	0.488643	3651.32	FALSE	180
2022-09-13	10:59:19	0.136959	0.609221	0.475777	3443.43	FALSE	180
2022-09-13	10:59:19	0.184288	0.81975	0.475777	3652.14	FALSE	180
2022-09-13	10:59:19	0.172685	0.768137	0.475777	3444.2	FALSE	180
2022-09-13	10:59:19	-0.0660938	-0.293998	0.475777	3652.14	FALSE	180
2022-09-13	10:59:20	-0.343447	-1.52772	-2.13162	3444.2	FALSE	180
2022-09-13	10:59:20	-0.471335	-2.09659	-2.13162	3652.14	FALSE	180
2022-09-13	10:59:20	-0.53159	-2.36462	-2.13162	3444.2	FALSE	180
2022-09-13	10:59:20	-0.57047	-2.53756	-2.13162	3652.14	FALSE	180
2022-09-13	10:59:21	-0.554389	-2.46603	-1.22908	3444.2	FALSE	180
2022-09-13	10:59:21	-0.392862	-1.74753	-1.22908	3652.14	FALSE	180
2022-09-13	10:59:21	-0.142633	-0.63446	-1.22908	3444.2	FALSE	180
2022-09-13	10:59:21	-0.015356	-0.0683066	-1.22908	3652.14	FALSE	180
2022-09-13	10:59:22	0.00550917	0.0245059	2.43083	3444.22	FALSE	180
2022-09-13	10:59:22	0.248715	1.10633	2.43083	3653.25	FALSE	180
2022-09-13	10:59:22	1.3852	6.16165	2.43083	3450.38	FALSE	180
2022-09-13	10:59:23	1.3337	5.93256	8.93834	3659.18	FALSE	180
2022-09-13	10:59:23	2.25594	10.0349	8.93834	3460.42	FALSE	180
2022-09-13	10:59:23	2.03752	9.0633	8.93834	3668.24	FALSE	180
2022-09-13	10:59:23	2.41055	10.7226	8.93834	3471.14	FALSE	180
2022-09-13	10:59:24	2.23691	9.95022	7.91859	3678.19	FALSE	180
2022-09-13	10:59:24	1.75243	7.79516	7.91859	3478.94	FALSE	180
2022-09-13	10:59:24	2.1136	9.40172	7.91859	3687.59	FALSE	180
2022-09-13	10:59:24	1.01777	4.52724	7.91859	3483.46	FALSE	180
2022-09-13	10:59:25	0.449428	1.99915	4.60989	3689.59	FALSE	180
2022-09-13	10:59:25	1.72663	7.6804	4.60989	3491.14	FALSE	180
2022-09-13	10:59:25	0.626323	2.78601	4.60989	3692.38	FALSE	180
2022-09-13	10:59:25	1.34302	5.97402	4.60989	3497.12	FALSE	180
2022-09-13	10:59:26	1.3109	5.83115	8.28752	3698.21	FALSE	180
2022-09-13	10:59:26	1.37452	6.11414	8.28752	3503.23	FALSE	180
2022-09-13	10:59:26	2.90393	12.9173	8.28752	3711.13	FALSE	180
2022-09-13	10:59:27	1.65345	7.35488	12.5617	3510.59	FALSE	180
2022-09-13	10:59:27	4.22825	18.8081	12.5617	3729.94	1	181
2022-09-13	10:59:27	2.22291	9.88795	12.5617	3520.47	FALSE	181
2022-09-13	10:59:27	3.19136	14.1958	12.5617	3744.13	1	182
2022-09-13	10:59:28	6.12647	27.2518	16.0487	3547.73	1	183
2022-09-13	10:59:28	1.12795	5.01735	16.0487	3749.15	FALSE	183
2022-09-13	10:59:28	4.40184	19.5803	16.0487	3567.31	1	184
2022-09-13	10:59:28	2.77538	12.3454	16.0487	3761.49	FALSE	184
2022-09-13	10:59:29	2.0763	9.2358	14.1092	3576.54	FALSE	184
2022-09-13	10:59:29	4.59385	20.4344	14.1092	3781.93	1	185
2022-09-13	10:59:29	3.14993	14.0115	14.1092	3590.55	1	186
2022-09-13	10:59:29	2.86749	12.7552	14.1092	3794.68	FALSE	186
2022-09-13	10:59:30	3.40301	15.1373	9.24952	3605.69	1	187
2022-09-13	10:59:30	0.833702	3.70847	9.24952	3798.39	FALSE	187
2022-09-13	10:59:30	2.00144	8.90281	9.24952	3614.59	FALSE	187
2022-09-13	10:59:31	1.36083	6.05324	3.60033	3804.45	FALSE	187
2022-09-13	10:59:31	0.792379	3.52466	3.60033	3618.12	FALSE	187
2022-09-13	10:59:31	0.59014	2.62506	3.60033	3807.07	FALSE	187
2022-09-13	10:59:31	0.494211	2.19835	3.60033	3620.32	FALSE	187
2022-09-13	10:59:32	0.489733	2.17843	1.39558	3809.25	FALSE	187
2022-09-13	10:59:32	0.1707	0.759308	1.39558	3621.08	FALSE	187
2022-09-13	10:59:32	0.160878	0.715618	1.39558	3809.96	FALSE	187
2022-09-13	10:59:32	0.433651	1.92897	1.39558	3623	FALSE	187
2022-09-13	10:59:33	-0.0667554	-0.296941	-0.785111	3809.96	FALSE	187
2022-09-13	10:59:33	-0.0851269	-0.378661	-0.785111	3623	FALSE	187
2022-09-13	10:59:33	-0.214796	-0.955456	-0.785111	3809.96	FALSE	187
2022-09-13	10:59:33	-0.339325	-1.50939	-0.785111	3623	FALSE	187
2022-09-13	10:59:34	-0.342022	-1.52138	0.181608	3809.96	FALSE	187
2022-09-13	10:59:34	0.0737025	0.327843	0.181608	3623.33	FALSE	187
2022-09-13	10:59:34	0.376247	1.67362	0.181608	3811.64	FALSE	187
2022-09-13	10:59:34	0.0553819	0.24635	0.181608	3623.58	FALSE	187
2022-09-13	10:59:35	-0.066959	-0.297847	-0.064307	3811.64	FALSE	187
2022-09-13	10:59:35	0.0433718	0.192926	-0.064307	3623.77	FALSE	187
2022-09-13	10:59:35	-0.0197834	-0.0880005	-0.064307	3811.64	FALSE	187
2022-09-13	10:59:36	0.0459671	0.204471	-0.143801	3623.98	FALSE	187
2022-09-13	10:59:36	-0.0817173	-0.363495	-0.143801	3811.64	FALSE	187
2022-09-13	10:59:36	0.0101402	0.0451056	-0.143801	3624.02	FALSE	187
2022-09-13	10:59:36	-0.103702	-0.461287	-0.143801	3811.64	FALSE	187
2022-09-13	10:59:37	-0.0439565	-0.195527	-0.0345213	3624.02	FALSE	187
2022-09-13	10:59:37	0.0262216	0.116639	-0.0345213	3811.75	FALSE	187
2022-09-13	10:59:37	-0.115509	-0.513807	-0.0345213	3624.02	FALSE	187
2022-09-13	10:59:37	0.102201	0.45461	-0.0345213	3812.21	FALSE	187
2022-09-13	10:59:38	0.117621	0.523202	1.91923	3624.54	FALSE	187
2022-09-13	10:59:38	0.489428	2.17707	1.91923	3814.39	FALSE	187
2022-09-13	10:59:38	0.576043	2.56235	1.91923	3627.11	FALSE	187
2022-09-13	10:59:38	0.542761	2.41431	1.91923	3816.8	FALSE	187
2022-09-13	10:59:39	0.722862	3.21543	7.61526	3630.32	FALSE	187
2022-09-13	10:59:39	0.697621	3.10316	7.61526	3819.9	FALSE	187
2022-09-13	10:59:39	3.71548	16.5272	7.61526	3646.85	1	188
2022-09-13	10:59:40	2.46927	10.9838	12.9566	3830.89	FALSE	188
2022-09-13	10:59:40	4.54434	20.2141	12.9566	3667.06	1	189
2022-09-13	10:59:40	2.66194	11.8408	12.9566	3842.73	FALSE	189
2022-09-13	10:59:40	1.97553	8.78755	12.9566	3675.85	FALSE	189
2022-09-13	10:59:41	2.01574	8.96641	5.28476	3851.69	FALSE	189
2022-09-13	10:59:41	0.862812	3.83796	5.28476	3679.69	FALSE	189
2022-09-13	10:59:41	0.822099	3.65686	5.28476	3855.35	FALSE	189
2022-09-13	10:59:41	1.05162	4.67782	5.28476	3684.37	FALSE	189
2022-09-13	10:59:42	0.707137	3.14549	2.24798	3858.5	FALSE	189
2022-09-13	10:59:42	0.416298	1.85178	2.24798	3686.22	FALSE	189
2022-09-13	10:59:42	0.502761	2.23638	2.24798	3860.73	FALSE	189
2022-09-13	10:59:42	0.39528	1.75828	2.24798	3687.98	FALSE	189
2022-09-13	10:59:43	0.31187	1.38726	1.71882	3862.12	FALSE	189
2022-09-13	10:59:43	0.445916	1.98352	1.71882	3689.96	FALSE	189
2022-09-13	10:59:43	0.401438	1.78568	1.71882	3863.91	FALSE	189
2022-09-13	10:59:44	0.20958	0.932254	2.86666	3690.89	FALSE	189
2022-09-13	10:59:44	0.380624	1.69309	2.86666	3865.6	FALSE	189
2022-09-13	10:59:44	0.872888	3.88278	2.86666	3694.78	FALSE	189
2022-09-13	10:59:44	1.11472	4.9585	2.86666	3870.56	FALSE	189
2022-09-13	10:59:45	0.522404	2.32376	1.88913	3697.1	FALSE	189
2022-09-13	10:59:45	0.473397	2.10576	1.88913	3872.66	FALSE	189
2022-09-13	10:59:45	0.315484	1.40334	1.88913	3698.5	FALSE	189
2022-09-13	10:59:45	0.387494	1.72365	1.88913	3874.39	FALSE	189
2022-09-13	10:59:46	0.539147	2.39823	3.80333	3700.9	FALSE	189
2022-09-13	10:59:46	0.435789	1.93848	3.80333	3876.33	FALSE	189
2022-09-13	10:59:46	1.02602	4.56394	3.80333	3705.47	FALSE	189
2022-09-13	10:59:46	1.41915	6.31266	3.80333	3882.64	FALSE	189
2022-09-13	10:59:47	1.64169	7.30257	4.95012	3712.77	FALSE	189
2022-09-13	10:59:47	1.06327	4.72964	4.95012	3887.37	FALSE	189
2022-09-13	10:59:47	0.63355	2.81816	4.95012	3715.59	FALSE	189
2022-09-13	10:59:48	0.619504	2.75568	2.35166	3890.12	FALSE	189
2022-09-13	10:59:48	0.508715	2.26287	2.35166	3717.85	FALSE	189
2022-09-13	10:59:48	0.467748	2.08064	2.35166	3892.2	FALSE	189
2022-09-13	10:59:48	0.51874	2.30746	2.35166	3720.16	FALSE	189
2022-09-13	10:59:49	0.414415	1.8434	1.9168	3894.05	FALSE	189
2022-09-13	10:59:49	0.461845	2.05438	1.9168	3722.21	FALSE	189
2022-09-13	10:59:49	0.536705	2.38737	1.9168	3896.44	FALSE	189
2022-09-13	10:59:49	0.3107	1.38206	1.9168	3723.59	FALSE	189
2022-09-13	10:59:50	0.401031	1.78387	1.68053	3898.22	FALSE	189
2022-09-13	10:59:50	0.290598	1.29264	1.68053	3724.89	FALSE	189
2022-09-13	10:59:50	0.589733	2.62325	1.68053	3900.84	FALSE	189
2022-09-13	10:59:50	0.229835	1.02235	1.68053	3725.91	FALSE	189
2022-09-13	10:59:51	0.178028	0.791904	0.420429	3901.63	FALSE	189
2022-09-13	10:59:51	0.05813	0.258574	0.420429	3726.17	FALSE	189
2022-09-13	10:59:51	0.188664	0.839215	0.420429	3902.47	FALSE	189
2022-09-13	10:59:51	-0.0467554	-0.207977	0.420429	3726.17	FALSE	189
2022-09-13	10:59:52	0.2364	1.05155	0.486003	3903.52	FALSE	189
2022-09-13	10:59:52	-0.0501142	-0.222918	0.486003	3726.17	FALSE	189
2022-09-13	10:59:52	0.141489	0.629371	0.486003	3904.15	FALSE	189
2022-09-13	10:59:53	0.0634226	0.282116	1.19564	3726.45	FALSE	189
2022-09-13	10:59:53	0.104186	0.46344	1.19564	3904.62	FALSE	189
2022-09-13	10:59:53	0.540471	2.40412	1.19564	3728.85	FALSE	189
2022-09-13	10:59:53	0.367087	1.63288	1.19564	3906.25	FALSE	189
2022-09-13	10:59:54	1.38342	6.15373	11.8479	3735.01	FALSE	189
2022-09-13	10:59:54	2.21966	9.87349	11.8479	3916.12	FALSE	189
2022-09-13	10:59:54	5.71263	25.4109	11.8479	3760.42	1	190
2022-09-13	10:59:54	1.33838	5.95338	11.8479	3922.08	FALSE	190
2022-09-13	10:59:55	1.8134	8.06637	6.631	3768.48	FALSE	190
2022-09-13	10:59:55	1.53905	6.846	6.631	3928.92	FALSE	190
2022-09-13	10:59:55	0.920522	4.09467	6.631	3772.58	FALSE	190
2022-09-13	10:59:55	1.68989	7.51697	6.631	3936.44	FALSE	190
2022-09-13	10:59:56	1.23767	5.5054	8.24843	3778.08	FALSE	190
2022-09-13	10:59:56	1.6335	7.26613	8.24843	3943.71	FALSE	190
2022-09-13	10:59:56	2.69182	11.9738	8.24843	3790.06	FALSE	190
2022-09-13	10:59:57	1.46184	6.50256	12.5971	3950.21	FALSE	190
2022-09-13	10:59:57	5.67421	25.24	12.5971	3815.3	1	191
2022-09-13	10:59:57	0.945611	4.20627	12.5971	3954.42	FALSE	191
2022-09-13	10:59:57	3.24612	14.4394	12.5971	3829.74	1	192
2022-09-13	10:59:58	0.805356	3.58238	2.99263	3958	FALSE	192
2022-09-13	10:59:58	0.909631	4.04622	2.99263	3833.78	FALSE	192
2022-09-13	10:59:58	0.737773	3.28176	2.99263	3961.28	FALSE	192
2022-09-13	10:59:58	0.238333	1.06015	2.99263	3834.84	FALSE	192
2022-09-13	10:59:59	0.746119	3.31889	2.35992	3964.6	FALSE	192
2022-09-13	10:59:59	0.271412	1.20729	2.35992	3836.05	FALSE	192
2022-09-13	10:59:59	0.493702	2.19609	2.35992	3966.79	FALSE	192
2022-09-13	10:59:59	0.610903	2.71742	2.35992	3838.77	FALSE	192
2022-09-13	11:00:00	0.825814	3.67339	3.85297	3970.47	FALSE	192
2022-09-13	11:00:00	0.817723	3.6374	3.85297	3842.41	FALSE	192
2022-09-13	11:00:00	0.955025	4.24814	3.85297	3974.72	FALSE	192
2022-09-13	11:00:01	0.896807	3.98918	2.28709	3846.39	FALSE	192
2022-09-13	11:00:01	0.355229	1.58013	2.28709	3976.3	FALSE	192
2022-09-13	11:00:01	0.480725	2.13836	2.28709	3848.53	FALSE	192
2022-09-13	11:00:01	0.323881	1.44069	2.28709	3977.74	FALSE	192
2022-09-13	11:00:02	0.595382	2.64838	1.96451	3851.18	FALSE	192
2022-09-13	11:00:02	0.267748	1.191	1.96451	3978.93	FALSE	192
2022-09-13	11:00:02	0.200725	0.892865	1.96451	3852.07	FALSE	192
2022-09-13	11:00:02	0.70271	3.12579	1.96451	3982.05	FALSE	192
2022-09-13	11:00:03	0.873906	3.88731	3.99936	3855.96	FALSE	192
2022-09-13	11:00:03	0.539402	2.39937	3.99936	3984.45	FALSE	192
2022-09-13	11:00:03	1.02846	4.5748	3.99936	3860.54	FALSE	192
2022-09-13	11:00:03	1.15462	5.13598	3.99936	3989.59	FALSE	192
2022-09-13	11:00:04	2.04363	9.09047	6.12923	3869.63	FALSE	192
2022-09-13	11:00:04	1.22184	5.43499	6.12923	3995.02	FALSE	192
2022-09-13	11:00:04	1.12047	4.98407	6.12923	3874.61	FALSE	192
2022-09-13	11:00:04	1.12571	5.00738	6.12923	4000.03	FALSE	192
2022-09-13	11:00:05	1.09762	4.88243	4.09994	3879.49	FALSE	192
2022-09-13	11:00:05	0.955941	4.25222	4.09994	4004.28	FALSE	192
2022-09-13	11:00:05	0.711565	3.16518	4.09994	3882.66	FALSE	192
2022-09-13	11:00:06	0.711921	3.16677	3.07328	4007.45	FALSE	192
2022-09-13	11:00:06	0.727646	3.23671	3.07328	3885.89	FALSE	192
2022-09-13	11:00:06	0.735585	3.27203	3.07328	4010.72	FALSE	192
2022-09-13	11:00:06	0.588461	2.61759	3.07328	3888.51	FALSE	192
2022-09-13	11:00:07	0.649122	2.88742	3.14934	4013.61	FALSE	192
2022-09-13	11:00:07	0.775229	3.44837	3.14934	3891.96	FALSE	192
2022-09-13	11:00:07	0.822964	3.66071	3.14934	4017.27	FALSE	192
2022-09-13	11:00:07	0.584695	2.60084	3.14934	3894.56	FALSE	192
2022-09-13	11:00:08	0.420369	1.86989	1.85455	4019.14	FALSE	192
2022-09-13	11:00:08	0.453143	2.01567	1.85455	3896.58	FALSE	192
2022-09-13	11:00:08	0.438944	1.95251	1.85455	4021.09	FALSE	192
2022-09-13	11:00:08	0.355229	1.58013	1.85455	3898.16	FALSE	192
2022-09-13	11:00:09	0.332583	1.4794	1.40892	4022.57	FALSE	192
2022-09-13	11:00:09	0.351718	1.56451	1.40892	3899.72	FALSE	192
2022-09-13	11:00:09	0.265916	1.18285	1.40892	4023.76	FALSE	192
2022-09-13	11:00:10	0.267697	1.19077	2.74142	3900.91	FALSE	192
2022-09-13	11:00:10	0.378435	1.68335	2.74142	4025.44	FALSE	192
2022-09-13	11:00:10	0.748511	3.32953	2.74142	3904.24	FALSE	192
2022-09-13	11:00:10	1.07055	4.76202	2.74142	4030.2	FALSE	192
2022-09-13	11:00:11	0.818435	3.64056	2.8327	3907.88	FALSE	192
2022-09-13	11:00:11	0.591158	2.62959	2.8327	4032.83	FALSE	192
2022-09-13	11:00:11	0.64159	2.85392	2.8327	3910.74	FALSE	192
2022-09-13	11:00:11	0.496094	2.20673	2.8327	4035.04	FALSE	192
2022-09-13	11:00:12	0.562812	2.5035	2.28482	3913.24	FALSE	192
2022-09-13	11:00:12	0.501183	2.22936	2.28482	4037.27	FALSE	192
2022-09-13	11:00:12	0.465305	2.06977	2.28482	3915.31	FALSE	192
2022-09-13	11:00:12	0.525305	2.33666	2.28482	4039.6	FALSE	192
2022-09-13	11:00:13	0.52556	2.3378	3.35028	3917.65	FALSE	192
2022-09-13	11:00:13	0.777723	3.45947	3.35028	4043.06	FALSE	192
2022-09-13	11:00:13	0.956247	4.25358	3.35028	3921.9	FALSE	192
2022-09-13	11:00:14	0.723575	3.21861	3.03881	4046.28	FALSE	192
2022-09-13	11:00:14	0.617672	2.74753	3.03881	3924.65	FALSE	192
2022-09-13	11:00:14	0.616501	2.74232	3.03881	4049.02	FALSE	192
2022-09-13	11:00:14	0.774873	3.44679	3.03881	3928.1	FALSE	192
2022-09-13	11:00:15	0.989733	4.40253	2.90372	4053.43	FALSE	192
2022-09-13	11:00:15	0.640369	2.84849	2.90372	3930.94	FALSE	192
2022-09-13	11:00:15	0.524084	2.33123	2.90372	4055.76	FALSE	192
2022-09-13	11:00:15	0.456959	2.03265	2.90372	3932.98	FALSE	192
2022-09-13	11:00:16	0.533906	2.37492	1.97305	4058.13	FALSE	192
2022-09-13	11:00:16	0.464593	2.0666	1.97305	3935.04	FALSE	192
2022-09-13	11:00:16	0.446323	1.98533	1.97305	4060.12	FALSE	192
2022-09-13	11:00:16	0.329428	1.46536	1.97305	3936.51	FALSE	192
2022-09-13	11:00:17	0.303066	1.3481	1.23023	4061.47	FALSE	192
2022-09-13	11:00:17	0.430598	1.91539	1.23023	3938.42	FALSE	192
2022-09-13	11:00:17	0.0960434	0.42722	1.23023	4061.89	FALSE	192

## Sheet: Juju_star_202291310556 (3)
Date	Time	Lbs	Newtons	Total force x time		total steps > 13.345	**GoPro Fitting: 1044
2022-09-13	10:55:17	0.178435	0.793715	0.793715	FALSE	0			Total force x time	4061.89
2022-09-13	10:55:17	0.258384	1.14934	1.14934	FALSE	0			Total steps	192
2022-09-13	10:55:17	0.446476	1.98601	2.77973	FALSE	0
2022-09-13	10:55:17	0.451565	2.00865	3.158	FALSE	0
2022-09-13	10:55:18	0.99472	4.42471	7.20444	FALSE	0
2022-09-13	10:55:18	2.59426	11.5398	14.6978	FALSE	0
2022-09-13	10:55:18	0.799758	3.55748	10.7619	FALSE	0
2022-09-13	10:55:19	0.382964	1.7035	16.4013	FALSE	0
2022-09-13	10:55:19	0.00652696	0.0290332	10.791	FALSE	0
2022-09-13	10:55:19	0.0747712	0.332597	16.7339	FALSE	0
2022-09-13	10:55:19	-0.381666	-1.69773	10.791	FALSE	0
2022-09-13	10:55:20	-0.553931	-2.464	16.7339	FALSE	0
2022-09-13	10:55:20	-0.560445	-2.49297	10.791	FALSE	0
2022-09-13	10:55:20	-0.513829	-2.28561	16.7339	FALSE	0
2022-09-13	10:55:20	-0.253422	-1.12727	10.791	FALSE	0
2022-09-13	10:55:21	-0.0920481	-0.409448	16.7339	FALSE	0
2022-09-13	10:55:21	-0.171234	-0.761683	10.791	FALSE	0
2022-09-13	10:55:21	-0.256883	-1.14267	16.7339	FALSE	0
2022-09-13	10:55:21	0.0276974	0.123204	10.9142	FALSE	0
2022-09-13	10:55:22	0.232328	1.03344	17.7673	FALSE	0
2022-09-13	10:55:22	0.251005	1.11652	12.0307	FALSE	0
2022-09-13	10:55:22	0.284033	1.26344	19.0308	FALSE	0
2022-09-13	10:55:23	0.0865778	0.385115	12.4158	FALSE	0
2022-09-13	10:55:23	0.182099	0.810013	19.8408	FALSE	0
2022-09-13	10:55:23	0.123117	0.547649	12.9634	FALSE	0
2022-09-13	10:55:23	-0.516679	-2.29829	19.8408	FALSE	0
2022-09-13	10:55:24	-0.513931	-2.28607	12.9634	FALSE	0
2022-09-13	10:55:24	3.15233	14.0222	33.863	1	1
2022-09-13	10:55:24	16.7846	74.6613	87.6247	1	2
2022-09-13	10:55:24	16.8019	74.7382	108.601	1	3
2022-09-13	10:55:25	4.66632	20.7567	108.381	1	4
2022-09-13	10:55:25	3.86118	17.1753	125.776	1	5
2022-09-13	10:55:25	5.05701	22.4946	130.876	1	6
2022-09-13	10:55:25	3.04988	13.5665	139.343	1	7
2022-09-13	10:55:26	6.21619	27.6509	158.527	1	8
2022-09-13	10:55:26	6.27299	27.9035	167.246	1	9
2022-09-13	10:55:26	2.64622	11.7709	170.298	FALSE	9
2022-09-13	10:55:26	2.72576	12.1247	179.371	FALSE	9
2022-09-13	10:55:27	0.469377	2.08788	172.386	FALSE	9
2022-09-13	10:55:27	0.344593	1.53282	180.904	FALSE	9
2022-09-13	10:55:27	0.517264	2.30089	174.687	FALSE	9
2022-09-13	10:55:28	0.0845422	0.376061	181.28	FALSE	9
2022-09-13	10:55:28	0.314517	1.39903	176.086	FALSE	9
2022-09-13	10:55:28	0.302201	1.34425	182.624	FALSE	9
2022-09-13	10:55:28	0.491412	2.1859	178.272	FALSE	9
2022-09-13	10:55:29	0.381438	1.69671	184.321	FALSE	9
2022-09-13	10:55:29	0.493448	2.19496	180.466	FALSE	9
2022-09-13	10:55:29	0.415789	1.84951	186.171	FALSE	9
2022-09-13	10:55:29	0.437672	1.94685	182.413	FALSE	9
2022-09-13	10:55:30	0.45813	2.03785	188.208	FALSE	9
2022-09-13	10:55:30	0.416043	1.85064	184.264	FALSE	9
2022-09-13	10:55:30	0.49243	2.19043	190.399	FALSE	9
2022-09-13	10:55:30	0.446221	1.98488	186.249	FALSE	9
2022-09-13	10:55:31	0.44673	1.98714	192.386	FALSE	9
2022-09-13	10:55:31	0.519504	2.31086	188.56	FALSE	9
2022-09-13	10:55:31	0.435891	1.93893	194.325	FALSE	9
2022-09-13	10:55:32	0.494109	2.1979	190.758	FALSE	9
2022-09-13	10:55:32	0.277366	1.23378	195.559	FALSE	9
2022-09-13	10:55:32	0.476756	2.12071	192.878	FALSE	9
2022-09-13	10:55:32	0.377214	1.67792	197.237	FALSE	9
2022-09-13	10:55:33	0.349173	1.55319	194.431	FALSE	9
2022-09-13	10:55:33	0.0899875	0.400282	197.637	FALSE	9
2022-09-13	10:55:33	0.226629	1.00809	195.44	FALSE	9
2022-09-13	10:55:33	0.0452038	0.201076	197.838	FALSE	9
2022-09-13	10:55:34	0.155636	0.6923	196.132	FALSE	9
2022-09-13	10:55:34	0.118079	0.525239	198.363	FALSE	9
2022-09-13	10:55:34	0.320318	1.42484	197.557	FALSE	9
2022-09-13	10:55:34	0.440318	1.95862	200.322	FALSE	9
2022-09-13	10:55:35	0.814822	3.62449	201.181	FALSE	9
2022-09-13	10:55:35	0.87528	3.89342	204.215	FALSE	9
2022-09-13	10:55:35	1.14872	5.10974	206.291	FALSE	9
2022-09-13	10:55:36	2.86174	12.7296	216.945	FALSE	9
2022-09-13	10:55:36	1.05767	4.70473	210.996	FALSE	9
2022-09-13	10:55:36	1.73009	7.69579	224.641	FALSE	9
2022-09-13	10:55:36	1.06754	4.74863	215.744	FALSE	9
2022-09-13	10:55:37	2.03686	9.06036	233.701	FALSE	9
2022-09-13	10:55:37	1.70312	7.57582	223.32	FALSE	9
2022-09-13	10:55:37	3.12342	13.8936	247.595	1	10
2022-09-13	10:55:37	4.15996	18.5043	241.824	1	11
2022-09-13	10:55:38	2.31543	10.2995	257.894	FALSE	11
2022-09-13	10:55:38	3.08678	13.7306	255.555	1	12
2022-09-13	10:55:38	2.36887	10.5372	268.431	FALSE	12
2022-09-13	10:55:38	2.66724	11.8644	267.419	FALSE	12
2022-09-13	10:55:39	3.78245	16.8251	285.256	1	13
2022-09-13	10:55:39	2.06271	9.17535	276.595	FALSE	13
2022-09-13	10:55:39	3.50403	15.5866	300.843	1	14
2022-09-13	10:55:40	1.89355	8.42289	285.018	FALSE	14
2022-09-13	10:55:40	1.09991	4.89262	305.736	FALSE	14
2022-09-13	10:55:40	3.09813	13.7811	298.799	1	15
2022-09-13	10:55:40	0.939758	4.18023	309.916	FALSE	15
2022-09-13	10:55:41	2.78535	12.3898	311.189	FALSE	15
2022-09-13	10:55:41	1.81238	8.06183	317.978	FALSE	15
2022-09-13	10:55:41	2.23823	9.95609	321.145	FALSE	15
2022-09-13	10:55:41	2.9449	13.0995	331.077	FALSE	15
2022-09-13	10:55:42	2.90861	12.9381	334.083	FALSE	15
2022-09-13	10:55:42	4.14775	18.45	349.527	1	16
2022-09-13	10:55:42	2.45233	10.9085	344.991	FALSE	16
2022-09-13	10:55:42	3.13141	13.9291	363.456	1	17
2022-09-13	10:55:43	3.78215	16.8238	361.815	1	18
2022-09-13	10:55:43	1.49676	6.65789	370.114	FALSE	18
2022-09-13	10:55:43	3.09676	13.775	375.59	1	19
2022-09-13	10:55:43	1.08149	4.81068	374.925	FALSE	19
2022-09-13	10:55:44	2.7563	12.2606	387.851	FALSE	19
2022-09-13	10:55:44	1.70495	7.58396	382.509	FALSE	19
2022-09-13	10:55:44	2.50566	11.1457	398.996	FALSE	19
2022-09-13	10:55:45	3.87121	17.2199	399.729	1	20
2022-09-13	10:55:45	2.71752	12.0881	411.084	FALSE	20
2022-09-13	10:55:45	5.14825	22.9004	422.629	1	21
2022-09-13	10:55:45	3.22495	14.3452	425.43	1	22
2022-09-13	10:55:46	3.9653	17.6384	440.268	1	23
2022-09-13	10:55:46	3.49426	15.5432	440.973	1	24
2022-09-13	10:55:46	1.76658	7.8581	448.126	FALSE	24
2022-09-13	10:55:46	5.35563	23.8229	464.796	1	25
2022-09-13	10:55:47	0.685	3.04702	451.173	FALSE	25
2022-09-13	10:55:47	1.85441	8.24879	473.044	FALSE	25
2022-09-13	10:55:47	1.6053	7.1407	458.314	FALSE	25
2022-09-13	10:55:47	0.625814	2.78375	475.828	FALSE	25
2022-09-13	10:55:48	1.74383	7.7569	466.07	FALSE	25
2022-09-13	10:55:48	1.33391	5.9335	481.762	FALSE	25
2022-09-13	10:55:48	2.28449	10.1619	476.232	FALSE	25
2022-09-13	10:55:49	2.44871	10.8924	492.654	FALSE	25
2022-09-13	10:55:49	3.15085	14.0156	490.248	1	26
2022-09-13	10:55:49	6.9654	30.9835	523.638	1	27
2022-09-13	10:55:49	2.29457	10.2067	500.455	FALSE	27
2022-09-13	10:55:50	7.11166	31.6341	555.272	1	28
2022-09-13	10:55:50	3.30983	14.7228	515.177	1	29
2022-09-13	10:55:50	3.42215	15.2224	570.494	1	30
2022-09-13	10:55:50	6.11777	27.2131	542.39	1	31
2022-09-13	10:55:51	3.78515	16.8371	587.331	1	32
2022-09-13	10:55:51	4.84159	21.5364	563.927	1	33
2022-09-13	10:55:51	4.41838	19.6538	606.985	1	34
2022-09-13	10:55:51	1.53737	6.83853	570.765	FALSE	34
2022-09-13	10:55:52	5.89853	26.2378	633.223	1	35
2022-09-13	10:55:52	1.35945	6.04711	576.812	FALSE	35
2022-09-13	10:55:52	3.21721	14.3108	647.534	1	36
2022-09-13	10:55:53	4.83426	21.5038	598.316	1	37
2022-09-13	10:55:53	3.14179	13.9753	661.509	1	38
2022-09-13	10:55:53	7.25482	32.2709	630.587	1	39
2022-09-13	10:55:53	8.09192	35.9945	697.503	1	40
2022-09-13	10:55:54	2.97991	13.2552	643.842	FALSE	40
2022-09-13	10:55:54	8.69141	38.6611	736.165	1	41
2022-09-13	10:55:54	1.57452	7.00378	650.846	FALSE	41
2022-09-13	10:55:54	4.39833	19.5647	755.729	1	42
2022-09-13	10:55:55	5.14744	22.8968	673.743	1	43
2022-09-13	10:55:55	2.84739	12.6658	768.395	FALSE	43
2022-09-13	10:55:55	7.98464	35.5173	709.26	1	44
2022-09-13	10:55:55	5.50423	24.4839	792.879	1	45
2022-09-13	10:55:56	2.90851	12.9376	722.198	FALSE	45
2022-09-13	10:55:56	7.25385	32.2666	825.145	1	46
2022-09-13	10:55:56	1.22719	5.45879	727.657	FALSE	46
2022-09-13	10:55:56	4.23563	18.8409	843.986	1	47
2022-09-13	10:55:57	3.52836	15.6949	743.351	1	48
2022-09-13	10:55:57	1.23238	5.48187	849.468	FALSE	48
2022-09-13	10:55:57	4.14312	18.4294	761.781	1	49
2022-09-13	10:55:58	2.34067	10.4118	859.88	FALSE	49
2022-09-13	10:55:58	2.20729	9.81847	771.599	FALSE	49
2022-09-13	10:55:58	4.12485	18.3482	878.228	1	50
2022-09-13	10:55:58	1.33711	5.94773	777.547	FALSE	50
2022-09-13	10:55:59	3.14795	14.0027	892.231	1	51
2022-09-13	10:55:59	0.634466	2.82223	780.369	FALSE	51
2022-09-13	10:55:59	1.13202	5.03545	897.266	FALSE	51
2022-09-13	10:55:59	1.3048	5.80401	786.173	FALSE	51
2022-09-13	10:56:00	0.323066	1.43706	898.703	FALSE	51
2022-09-13	10:56:00	0.372328	1.65619	787.83	FALSE	51
2022-09-13	10:56:00	-0.0671117	-0.298526	898.703	FALSE	51
2022-09-13	10:56:00	-0.0844654	-0.375719	787.83	FALSE	51
2022-09-13	10:56:01	-0.331132	-1.47294	898.703	FALSE	51
2022-09-13	10:56:01	-0.170827	-0.759873	787.83	FALSE	51
2022-09-13	10:56:01	-0.248486	-1.10532	898.703	FALSE	51
2022-09-13	10:56:02	-0.310572	-1.38149	787.83	FALSE	51
2022-09-13	10:56:02	-0.369351	-1.64295	898.703	FALSE	51
2022-09-13	10:56:02	-0.210776	-0.937574	787.83	FALSE	51
2022-09-13	10:56:02	0.0703438	0.312903	899.016	FALSE	51
2022-09-13	10:56:03	-0.12243	-0.544593	787.83	FALSE	51
2022-09-13	10:56:03	0.191616	0.852346	899.869	FALSE	51
2022-09-13	10:56:03	0.321947	1.43208	789.262	FALSE	51
2022-09-13	10:56:03	0.410802	1.82733	901.696	FALSE	51
2022-09-13	10:56:04	0.452583	2.01318	791.275	FALSE	51
2022-09-13	10:56:04	0.322659	1.43525	903.131	FALSE	51
2022-09-13	10:56:04	0.737163	3.27905	794.554	FALSE	51
2022-09-13	10:56:04	0.638537	2.84034	905.972	FALSE	51
2022-09-13	10:56:05	0.395433	1.75897	796.313	FALSE	51
2022-09-13	10:56:05	0.405916	1.8056	907.777	FALSE	51
2022-09-13	10:56:05	0.991361	4.40977	800.723	FALSE	51
2022-09-13	10:56:06	0.799097	3.55454	911.332	FALSE	51
2022-09-13	10:56:06	0.842201	3.74628	804.469	FALSE	51
2022-09-13	10:56:06	0.455789	2.02744	913.359	FALSE	51
2022-09-13	10:56:06	0.555025	2.46886	806.938	FALSE	51
2022-09-13	10:56:07	0.521336	2.31901	915.678	FALSE	51
2022-09-13	10:56:07	0.54042	2.4039	809.342	FALSE	51
2022-09-13	10:56:07	0.628817	2.7971	918.475	FALSE	51
2022-09-13	10:56:07	0.6136	2.72942	812.071	FALSE	51
2022-09-13	10:56:08	0.637774	2.83695	921.312	FALSE	51
2022-09-13	10:56:08	0.600623	2.67169	814.743	FALSE	51
2022-09-13	10:56:08	0.541794	2.41001	923.722	FALSE	51
2022-09-13	10:56:08	0.668664	2.97435	817.717	FALSE	51
2022-09-13	10:56:09	0.662659	2.94764	926.67	FALSE	51
2022-09-13	10:56:09	1.14342	5.08616	822.803	FALSE	51
2022-09-13	10:56:09	0.408003	1.81488	928.485	FALSE	51
2022-09-13	10:56:09	0.638995	2.84238	825.646	FALSE	51
2022-09-13	10:56:10	0.6907	3.07237	931.557	FALSE	51
2022-09-13	10:56:10	0.638842	2.8417	828.487	FALSE	51
2022-09-13	10:56:10	0.602099	2.67826	934.235	FALSE	51
2022-09-13	10:56:11	0.526221	2.34074	830.828	FALSE	51
2022-09-13	10:56:11	0.580776	2.58341	936.819	FALSE	51
2022-09-13	10:56:11	0.592023	2.63344	833.462	FALSE	51
2022-09-13	10:56:11	0.595483	2.64883	939.468	FALSE	51
2022-09-13	10:56:12	0.551666	2.45392	835.915	FALSE	51
2022-09-13	10:56:12	0.508715	2.26287	941.73	FALSE	51
2022-09-13	10:56:12	0.332328	1.47826	837.394	FALSE	51
2022-09-13	10:56:12	0.391463	1.74131	943.472	FALSE	51
2022-09-13	10:56:13	0.314517	1.39903	838.793	FALSE	51
2022-09-13	10:56:13	0.685204	3.04792	946.52	FALSE	51
2022-09-13	10:56:13	0.521183	2.31833	841.111	FALSE	51
2022-09-13	10:56:13	0.627748	2.79235	949.312	FALSE	51
2022-09-13	10:56:14	0.99584	4.4297	845.541	FALSE	51
2022-09-13	10:56:14	2.2449	9.98576	959.298	FALSE	51
2022-09-13	10:56:14	3.30729	14.7115	860.252	1	52
2022-09-13	10:56:15	3.60301	16.0269	975.325	1	53
2022-09-13	10:56:15	4.69553	20.8867	881.139	1	54
2022-09-13	10:56:15	2.31594	10.3018	985.626	FALSE	54
2022-09-13	10:56:15	7.20144	32.0334	913.172	1	55
2022-09-13	10:56:16	3.09879	13.784	999.41	1	56
2022-09-13	10:56:16	4.3994	19.5694	932.742	1	57
2022-09-13	10:56:16	4.79767	21.341	1020.75	1	58
2022-09-13	10:56:16	4.31955	19.2142	951.956	1	59
2022-09-13	10:56:17	9.24784	41.1362	1061.89	1	60
2022-09-13	10:56:17	6.95314	30.929	982.885	1	61
2022-09-13	10:56:17	7.05701	31.391	1093.28	1	62
2022-09-13	10:56:17	13.4266	59.7242	1042.61	1	63
2022-09-13	10:56:18	4.43986	19.7494	1113.03	1	64
2022-09-13	10:56:18	8.15924	36.2939	1078.9	1	65
2022-09-13	10:56:18	10.3505	46.0411	1159.07	1	66
2022-09-13	10:56:19	3.41472	15.1894	1094.09	1	67
2022-09-13	10:56:19	8.44102	37.5473	1196.62	1	68
2022-09-13	10:56:19	5.14866	22.9023	1116.99	1	69
2022-09-13	10:56:19	4.67395	20.7907	1217.41	1	70
2022-09-13	10:56:20	9.0166	40.1076	1157.1	1	71
2022-09-13	10:56:20	5.91909	26.3293	1243.74	1	72
2022-09-13	10:56:20	6.97833	31.041	1188.14	1	73
2022-09-13	10:56:20	7.57406	33.6909	1277.43	1	74
2022-09-13	10:56:21	3.33441	14.8321	1202.98	1	75
2022-09-13	10:56:21	10.2378	45.5398	1322.97	1	76
2022-09-13	10:56:21	1.8648	8.295	1211.27	FALSE	76
2022-09-13	10:56:21	3.1107	13.837	1336.8	1	77
2022-09-13	10:56:22	6.17695	27.4763	1238.75	1	78
2022-09-13	10:56:22	4.33609	19.2878	1356.09	1	79
2022-09-13	10:56:22	6.56891	29.2198	1267.97	1	80
2022-09-13	10:56:23	6.80327	30.2623	1386.35	1	81
2022-09-13	10:56:23	2.06164	9.17059	1277.14	FALSE	81
2022-09-13	10:56:23	4.94149	21.9807	1408.34	1	82
2022-09-13	10:56:23	0.989071	4.39959	1281.54	FALSE	82
2022-09-13	10:56:24	3.19457	14.2101	1422.55	1	83
2022-09-13	10:56:24	0.77701	3.4563	1284.99	FALSE	83
2022-09-13	10:56:24	0.951717	4.23343	1426.78	FALSE	83
2022-09-13	10:56:24	2.45599	10.9247	1295.92	FALSE	83
2022-09-13	10:56:25	0.781081	3.4744	1430.25	FALSE	83
2022-09-13	10:56:25	3.95207	17.5796	1313.5	1	84
2022-09-13	10:56:25	1.9765	8.79187	1439.04	FALSE	84
2022-09-13	10:56:25	4.68164	20.8249	1334.32	1	85
2022-09-13	10:56:26	1.56144	6.9456	1445.99	FALSE	85
2022-09-13	10:56:26	2.4534	10.9132	1345.24	FALSE	85
2022-09-13	10:56:26	4.73375	21.0567	1467.05	1	86
2022-09-13	10:56:26	4.32215	19.2258	1364.46	1	87
2022-09-13	10:56:27	6.48378	28.8412	1495.89	1	88
2022-09-13	10:56:27	2.85543	12.7015	1377.16	FALSE	88
2022-09-13	10:56:27	2.24093	9.9681	1505.86	FALSE	88
2022-09-13	10:56:28	1.76281	7.84133	1385	FALSE	88
2022-09-13	10:56:28	0.512837	2.2812	1508.14	FALSE	88
2022-09-13	10:56:28	2.32576	10.3454	1395.35	FALSE	88
2022-09-13	10:56:28	1.18983	5.2926	1513.43	FALSE	88
2022-09-13	10:56:29	1.93986	8.62889	1403.98	FALSE	88
2022-09-13	10:56:29	2.56144	11.3938	1524.82	FALSE	88
2022-09-13	10:56:29	0.944644	4.20197	1408.18	FALSE	88
2022-09-13	10:56:29	3.6851	16.3921	1541.22	1	89
2022-09-13	10:56:30	0.84902	3.77661	1411.96	FALSE	89
2022-09-13	10:56:30	4.182	18.6024	1559.82	1	90
2022-09-13	10:56:30	1.35274	6.01726	1417.97	FALSE	90
2022-09-13	10:56:30	2.37187	10.5506	1570.37	FALSE	90
2022-09-13	10:56:31	2.96418	13.1853	1431.16	FALSE	90
2022-09-13	10:56:31	0.97243	4.32556	1574.69	FALSE	90
2022-09-13	10:56:31	1.51788	6.75183	1437.91	FALSE	90
2022-09-13	10:56:32	1.56663	6.96868	1581.66	FALSE	90
2022-09-13	10:56:32	1.12963	5.02482	1442.94	FALSE	90
2022-09-13	10:56:32	1.76062	7.83159	1589.49	FALSE	90
2022-09-13	10:56:32	0.405662	1.80447	1444.74	FALSE	90
2022-09-13	10:56:33	1.14754	5.10449	1594.6	FALSE	90
2022-09-13	10:56:33	0.504542	2.2443	1446.98	FALSE	90
2022-09-13	10:56:33	0.380318	1.69173	1596.29	FALSE	90
2022-09-13	10:56:33	0.58785	2.61487	1449.6	FALSE	90
2022-09-13	10:56:34	0.728257	3.23943	1599.53	FALSE	90
2022-09-13	10:56:34	1.39955	6.22548	1455.83	FALSE	90
2022-09-13	10:56:34	1.66001	7.38406	1606.91	FALSE	90
2022-09-13	10:56:34	3.03365	13.4943	1469.32	1	91
2022-09-13	10:56:35	3.60525	16.0369	1622.95	1	92
2022-09-13	10:56:35	4.05884	18.0545	1487.37	1	93
2022-09-13	10:56:35	8.34505	37.1205	1660.07	1	94
2022-09-13	10:56:36	1.25111	5.56519	1492.94	FALSE	94
2022-09-13	10:56:36	7.67243	34.1285	1694.2	1	95
2022-09-13	10:56:36	2.23665	9.94907	1502.89	FALSE	95
2022-09-13	10:56:36	2.57594	11.4583	1705.66	FALSE	95
2022-09-13	10:56:37	3.16749	14.0896	1516.98	1	96
2022-09-13	10:56:37	1.08342	4.81927	1710.48	FALSE	96
2022-09-13	10:56:37	3.8077	16.9374	1533.92	1	97
2022-09-13	10:56:37	2.16393	9.62559	1720.1	FALSE	97
2022-09-13	10:56:38	1.66968	7.42707	1541.34	FALSE	97
2022-09-13	10:56:38	5.10469	22.7067	1742.81	1	98
2022-09-13	10:56:38	1.21716	5.41417	1546.76	FALSE	98
2022-09-13	10:56:38	6.97889	31.0435	1773.85	1	99
2022-09-13	10:56:39	1.81889	8.09079	1554.85	FALSE	99
2022-09-13	10:56:39	4.77243	21.2287	1795.08	1	100
2022-09-13	10:56:39	2.79289	12.4233	1567.27	FALSE	100
2022-09-13	10:56:39	1.88271	8.37467	1803.46	FALSE	100
2022-09-13	10:56:40	3.68612	16.3966	1583.67	1	101
2022-09-13	10:56:40	1.54449	6.8702	1810.33	FALSE	101
2022-09-13	10:56:40	1.16602	5.18669	1588.85	FALSE	101
2022-09-13	10:56:41	1.68449	7.49295	1817.82	FALSE	101
2022-09-13	10:56:41	0.34729	1.54482	1590.4	FALSE	101
2022-09-13	10:56:41	1.16037	5.16156	1822.98	FALSE	101
2022-09-13	10:56:41	0.760776	3.38408	1593.78	FALSE	101
2022-09-13	10:56:42	2.20164	9.79334	1832.78	FALSE	101
2022-09-13	10:56:42	2.31253	10.2866	1604.07	FALSE	101
2022-09-13	10:56:42	1.69426	7.53641	1840.31	FALSE	101
2022-09-13	10:56:42	3.67981	16.3685	1620.44	1	102
2022-09-13	10:56:43	1.23859	5.5095	1845.82	FALSE	102
2022-09-13	10:56:43	3.52866	15.6962	1636.13	1	103
2022-09-13	10:56:43	0.975382	4.33869	1850.16	FALSE	103
2022-09-13	10:56:43	3.0081	13.3806	1649.51	1	104
2022-09-13	10:56:44	1.76413	7.8472	1858.01	FALSE	104
2022-09-13	10:56:44	2.89655	12.8844	1662.4	FALSE	104
2022-09-13	10:56:44	4.35614	19.377	1877.38	1	105
2022-09-13	10:56:45	3.80581	16.929	1679.33	1	106
2022-09-13	10:56:45	8.77497	39.0328	1916.42	1	107
2022-09-13	10:56:45	8.79309	39.1134	1718.44	1	108
2022-09-13	10:56:45	5.99416	26.6632	1943.08	1	109
2022-09-13	10:56:46	7.25136	32.2555	1750.7	1	110
2022-09-13	10:56:46	1.36261	6.06116	1949.14	FALSE	110
2022-09-13	10:56:46	5.96413	26.5296	1777.23	1	111
2022-09-13	10:56:46	1.57167	6.9911	1956.13	FALSE	111
2022-09-13	10:56:47	3.0336	13.4941	1790.72	1	112
2022-09-13	10:56:47	4.70332	20.9213	1977.05	1	113
2022-09-13	10:56:47	2.745	12.2103	1802.93	FALSE	113
2022-09-13	10:56:47	4.72988	21.0395	1998.09	1	114
2022-09-13	10:56:48	2.12281	9.44268	1812.37	FALSE	114
2022-09-13	10:56:48	3.09619	13.7725	2011.87	1	115
2022-09-13	10:56:48	4.46032	19.8404	1832.21	1	116
2022-09-13	10:56:49	2.80103	12.4595	2024.32	FALSE	116
2022-09-13	10:56:49	10.4926	46.6732	1878.89	1	117
2022-09-13	10:56:49	2.97436	13.2305	2037.56	FALSE	117
2022-09-13	10:56:49	9.12922	40.6086	1919.5	1	118
2022-09-13	10:56:50	7.79177	34.6594	2072.21	1	119
2022-09-13	10:56:50	3.34739	14.8899	1934.39	1	120
2022-09-13	10:56:50	8.22225	36.5742	2108.79	1	121
2022-09-13	10:56:50	3.83218	17.0463	1951.43	1	122
2022-09-13	10:56:51	4.73233	21.0504	2129.84	1	123
2022-09-13	10:56:51	6.21507	27.6459	1979.08	1	124
2022-09-13	10:56:51	1.81121	8.05662	2137.9	FALSE	124
2022-09-13	10:56:51	6.97751	31.0374	2010.12	1	125
2022-09-13	10:56:52	2.88149	12.8174	2150.71	FALSE	125
2022-09-13	10:56:52	3.87187	17.2229	2027.34	1	126
2022-09-13	10:56:52	7.54006	33.5397	2184.25	1	127
2022-09-13	10:56:53	1.27212	5.65864	2033	FALSE	127
2022-09-13	10:56:53	3.94225	17.5359	2201.79	1	128
2022-09-13	10:56:53	2.58663	11.5058	2044.5	FALSE	128
2022-09-13	10:56:53	2.41396	10.7378	2212.53	FALSE	128
2022-09-13	10:56:54	6.27823	27.9268	2072.43	1	129
2022-09-13	10:56:54	4.29492	19.1047	2231.63	1	130
2022-09-13	10:56:54	8.61747	38.3322	2110.76	1	131
2022-09-13	10:56:54	1.40917	6.26827	2237.9	FALSE	131
2022-09-13	10:56:55	2.1852	9.72021	2120.48	FALSE	131
2022-09-13	10:56:55	2.39996	10.6755	2248.58	FALSE	131
2022-09-13	10:56:55	0.507748	2.25856	2122.74	FALSE	131
2022-09-13	10:56:55	1.55345	6.91006	2255.49	FALSE	131
2022-09-13	10:56:56	0.869224	3.86648	2126.61	FALSE	131
2022-09-13	10:56:56	1.43818	6.39731	2261.88	FALSE	131
2022-09-13	10:56:56	1.3851	6.1612	2132.77	FALSE	131
2022-09-13	10:56:56	1.45314	6.46386	2268.35	FALSE	131
2022-09-13	10:56:57	3.10383	13.8065	2146.57	1	132
2022-09-13	10:56:57	2.37401	10.5601	2278.91	FALSE	132
2022-09-13	10:56:57	4.75706	21.1604	2167.74	1	133
2022-09-13	10:56:58	1.66485	7.40559	2286.31	FALSE	133
2022-09-13	10:56:58	5.23797	23.2995	2191.03	1	134
2022-09-13	10:56:58	1.72016	7.65162	2293.96	FALSE	134
2022-09-13	10:56:58	2.60902	11.6054	2202.64	FALSE	134
2022-09-13	10:56:59	3.32276	14.7803	2308.74	1	135
2022-09-13	10:56:59	1.09747	4.88177	2207.52	FALSE	135
2022-09-13	10:56:59	1.66515	7.40692	2316.15	FALSE	135
2022-09-13	10:56:59	1.55263	6.90641	2214.43	FALSE	135
2022-09-13	10:57:00	1.56296	6.95236	2323.1	FALSE	135
2022-09-13	10:57:00	0.72042	3.20457	2217.63	FALSE	135
2022-09-13	10:57:00	1.16363	5.17606	2328.28	FALSE	135
2022-09-13	10:57:00	0.305814	1.36032	2218.99	FALSE	135
2022-09-13	10:57:01	0.644288	2.86592	2331.15	FALSE	135
2022-09-13	10:57:01	0.519402	2.3104	2221.3	FALSE	135
2022-09-13	10:57:01	0.583982	2.59767	2333.74	FALSE	135
2022-09-13	10:57:02	0.352481	1.56791	2222.87	FALSE	135
2022-09-13	10:57:02	0.235992	1.04974	2334.79	FALSE	135
2022-09-13	10:57:02	0.231616	1.03027	2223.9	FALSE	135
2022-09-13	10:57:02	0.149071	0.663098	2335.46	FALSE	135
2022-09-13	10:57:03	0.206883	0.920257	2224.82	FALSE	135
2022-09-13	10:57:03	0.162608	0.723313	2336.18	FALSE	135
2022-09-13	10:57:03	0.714211	3.17695	2228	FALSE	135
2022-09-13	10:57:03	0.687494	3.05811	2339.24	FALSE	135
2022-09-13	10:57:04	0.547952	2.4374	2230.44	FALSE	135
2022-09-13	10:57:04	0.0885116	0.393717	2339.63	FALSE	135
2022-09-13	10:57:04	0.027901	0.124109	2230.56	FALSE	135
2022-09-13	10:57:04	0.159199	0.708149	2340.34	FALSE	135
2022-09-13	10:57:05	0.166323	0.739838	2231.3	FALSE	135
2022-09-13	10:57:05	0.255993	1.13871	2341.48	FALSE	135
2022-09-13	10:57:05	0.375433	1.67	2232.97	FALSE	135
2022-09-13	10:57:06	0.464135	2.06457	2343.54	FALSE	135
2022-09-13	10:57:06	0.458588	2.03989	2235.01	FALSE	135
2022-09-13	10:57:06	0.257723	1.1464	2344.69	FALSE	135
2022-09-13	10:57:06	0.537519	2.39099	2237.4	FALSE	135
2022-09-13	10:57:07	0.610903	2.71742	2347.41	FALSE	135
2022-09-13	10:57:07	0.821336	3.65347	2241.05	FALSE	135
2022-09-13	10:57:07	0.856145	3.8083	2351.21	FALSE	135
2022-09-13	10:57:07	0.598944	2.66422	2243.72	FALSE	135
2022-09-13	10:57:08	0.570293	2.53678	2353.75	FALSE	135
2022-09-13	10:57:08	0.402964	1.79246	2245.51	FALSE	135
2022-09-13	10:57:08	0.319707	1.42212	2355.17	FALSE	135
2022-09-13	10:57:08	0.275687	1.22631	2246.74	FALSE	135
2022-09-13	10:57:09	0.429529	1.91063	2357.08	FALSE	135
2022-09-13	10:57:09	0.330242	1.46898	2248.21	FALSE	135
2022-09-13	10:57:09	0.304898	1.35625	2358.44	FALSE	135
2022-09-13	10:57:09	0.17416	0.774699	2248.98	FALSE	135
2022-09-13	10:57:10	0.2507	1.11516	2359.56	FALSE	135
2022-09-13	10:57:10	-0.0131677	-0.0585726	2248.98	FALSE	135
2022-09-13	10:57:10	-0.0736766	-0.327728	2359.56	FALSE	135
2022-09-13	10:57:11	-0.048384	-0.215222	2248.98	FALSE	135
2022-09-13	10:57:11	-0.0202415	-0.0900382	2359.56	FALSE	135
2022-09-13	10:57:11	0.260573	1.15908	2250.14	FALSE	135
2022-09-13	10:57:11	0.128868	0.573231	2360.13	FALSE	135
2022-09-13	10:57:12	1.08795	4.83942	2254.98	FALSE	135
2022-09-13	10:57:12	2.87462	12.7869	2372.92	FALSE	135
2022-09-13	10:57:12	7.30103	32.4764	2287.46	1	136
2022-09-13	10:57:12	3.22821	14.3597	2387.28	1	137
2022-09-13	10:57:13	4.68596	20.8441	2308.3	1	138
2022-09-13	10:57:13	1.70123	7.56741	2394.84	FALSE	138
2022-09-13	10:57:13	2.87278	12.7787	2321.08	FALSE	138
2022-09-13	10:57:13	2.12001	9.43023	2404.27	FALSE	138
2022-09-13	10:57:14	0.928562	4.13043	2325.21	FALSE	138
2022-09-13	10:57:14	1.5595	6.93697	2411.21	FALSE	138
2022-09-13	10:57:14	0.897774	3.99348	2329.2	FALSE	138
2022-09-13	10:57:15	2.01004	8.94106	2420.15	FALSE	138
2022-09-13	10:57:15	2.63385	11.7159	2340.92	FALSE	138
2022-09-13	10:57:15	0.846069	3.76348	2423.91	FALSE	138
2022-09-13	10:57:15	0.855025	3.80332	2344.72	FALSE	138
2022-09-13	10:57:16	0.713651	3.17446	2427.09	FALSE	138
2022-09-13	10:57:16	0.624237	2.77673	2347.5	FALSE	138
2022-09-13	10:57:16	2.68566	11.9464	2439.04	FALSE	138
2022-09-13	10:57:16	2.24459	9.98439	2357.48	FALSE	138
2022-09-13	10:57:17	3.80266	16.915	2455.95	1	139
2022-09-13	10:57:17	1.74963	7.7827	2365.27	FALSE	139
2022-09-13	10:57:17	3.5105	15.6154	2471.57	1	140
2022-09-13	10:57:17	2.3506	10.4559	2375.72	FALSE	140
2022-09-13	10:57:18	6.3394	28.1989	2499.76	1	141
2022-09-13	10:57:18	1.20866	5.37636	2381.1	FALSE	141
2022-09-13	10:57:18	3.06622	13.6392	2513.4	1	142
2022-09-13	10:57:19	1.87767	8.35225	2389.45	FALSE	142
2022-09-13	10:57:19	1.41335	6.28686	2519.69	FALSE	142
2022-09-13	10:57:19	1.97955	8.80543	2398.26	FALSE	142
2022-09-13	10:57:19	1.39579	6.20875	2525.9	FALSE	142
2022-09-13	10:57:20	1.87111	8.32307	2406.58	FALSE	142
2022-09-13	10:57:20	1.42795	6.35181	2532.25	FALSE	142
2022-09-13	10:57:20	0.645407	2.8709	2409.45	FALSE	142
2022-09-13	10:57:20	0.489173	2.17594	2534.43	FALSE	142
2022-09-13	10:57:21	0.585203	2.6031	2412.05	FALSE	142
2022-09-13	10:57:21	0.727392	3.23559	2537.66	FALSE	142
2022-09-13	10:57:21	0.922506	4.10349	2416.16	FALSE	142
2022-09-13	10:57:21	1.4677	6.52862	2544.19	FALSE	142
2022-09-13	10:57:22	1.55609	6.9218	2423.08	FALSE	142
2022-09-13	10:57:22	1.54841	6.88764	2551.08	FALSE	142
2022-09-13	10:57:22	1.05289	4.68347	2427.76	FALSE	142
2022-09-13	10:57:23	0.753397	3.35126	2554.43	FALSE	142
2022-09-13	10:57:23	0.654822	2.91278	2430.67	FALSE	142
2022-09-13	10:57:23	0.809478	3.60072	2558.03	FALSE	142
2022-09-13	10:57:23	1.26943	5.64668	2436.32	FALSE	142
2022-09-13	10:57:24	1.06902	4.75521	2562.79	FALSE	142
2022-09-13	10:57:24	0.981743	4.36699	2440.69	FALSE	142
2022-09-13	10:57:24	0.901997	4.01226	2566.8	FALSE	142
2022-09-13	10:57:24	0.397672	1.76892	2442.46	FALSE	142
2022-09-13	10:57:25	0.333753	1.4846	2568.28	FALSE	142
2022-09-13	10:57:25	0.218944	0.973907	2443.43	FALSE	142
2022-09-13	10:57:25	0.195433	0.869325	2569.15	FALSE	142
2022-09-13	10:57:25	0.133244	0.592696	2444.02	FALSE	142
2022-09-13	10:57:26	0.871463	3.87644	2573.03	FALSE	142
2022-09-13	10:57:26	0.663982	2.95352	2446.98	FALSE	142
2022-09-13	10:57:26	0.632125	2.81182	2575.84	FALSE	142
2022-09-13	10:57:26	0.708766	3.15273	2450.13	FALSE	142
2022-09-13	10:57:27	0.970089	4.31515	2580.16	FALSE	142
2022-09-13	10:57:27	0.383982	1.70803	2451.84	FALSE	142
2022-09-13	10:57:27	0.465713	2.07158	2582.23	FALSE	142
2022-09-13	10:57:28	0.443015	1.97062	2453.81	FALSE	142
2022-09-13	10:57:28	0.322659	1.43525	2583.66	FALSE	142
2022-09-13	10:57:28	0.314211	1.39767	2455.21	FALSE	142
2022-09-13	10:57:28	0.225814	1.00447	2584.67	FALSE	142
2022-09-13	10:57:29	0.185662	0.825862	2456.03	FALSE	142
2022-09-13	10:57:29	0.201794	0.89762	2585.56	FALSE	142
2022-09-13	10:57:29	0.141692	0.630274	2456.66	FALSE	142
2022-09-13	10:57:29	0.222201	0.988394	2586.55	FALSE	142
2022-09-13	10:57:30	0.01584	0.0704595	2456.73	FALSE	142
2022-09-13	10:57:30	-0.106094	-0.471927	2586.55	FALSE	142
2022-09-13	10:57:30	-0.209453	-0.931689	2456.73	FALSE	142
2022-09-13	10:57:30	0.403677	1.79564	2588.35	FALSE	142
2022-09-13	10:57:31	5.85222	26.0318	2482.76	1	143
2022-09-13	10:57:31	13.4543	59.8474	2648.2	1	144
2022-09-13	10:57:31	7.78378	34.6238	2517.39	1	145
2022-09-13	10:57:32	8.16199	36.3062	2684.5	1	146
2022-09-13	10:57:32	3.27625	14.5734	2531.96	1	147
2022-09-13	10:57:32	5.28031	23.4879	2707.99	1	148
2022-09-13	10:57:32	3.46683	15.4212	2547.38	1	149
2022-09-13	10:57:33	3.48139	15.4859	2723.48	1	150
2022-09-13	10:57:33	4.08403	18.1666	2565.55	1	151
2022-09-13	10:57:33	4.36612	19.4214	2742.9	1	152
2022-09-13	10:57:33	3.82352	17.0078	2582.56	1	153
2022-09-13	10:57:34	2.69721	11.9977	2754.9	FALSE	153
2022-09-13	10:57:34	1.55757	6.92838	2589.49	FALSE	153
2022-09-13	10:57:34	0.929122	4.13292	2759.03	FALSE	153
2022-09-13	10:57:34	1.09487	4.8702	2594.36	FALSE	153
2022-09-13	10:57:35	1.09976	4.89195	2763.92	FALSE	153
2022-09-13	10:57:35	0.85182	3.78907	2598.15	FALSE	153
2022-09-13	10:57:35	0.779453	3.46716	2767.39	FALSE	153
2022-09-13	10:57:36	0.767035	3.41193	2601.56	FALSE	153
2022-09-13	10:57:36	0.767697	3.41487	2770.8	FALSE	153
2022-09-13	10:57:36	0.589784	2.62348	2604.18	FALSE	153
2022-09-13	10:57:36	0.471361	2.09671	2772.9	FALSE	153
2022-09-13	10:57:37	0.724949	3.22472	2607.41	FALSE	153
2022-09-13	10:57:37	0.73131	3.25301	2776.15	FALSE	153
2022-09-13	10:57:37	0.735585	3.27203	2610.68	FALSE	153
2022-09-13	10:57:37	0.725916	3.22902	2779.38	FALSE	153
2022-09-13	10:57:38	0.733804	3.26411	2613.94	FALSE	153
2022-09-13	10:57:38	0.740776	3.29512	2782.68	FALSE	153
2022-09-13	10:57:38	0.737519	3.28063	2617.22	FALSE	153
2022-09-13	10:57:38	0.734466	3.26705	2785.94	FALSE	153
2022-09-13	10:57:39	0.729733	3.246	2620.47	FALSE	153
2022-09-13	10:57:39	0.733346	3.26207	2789.21	FALSE	153
2022-09-13	10:57:39	1.24296	5.52893	2626	FALSE	153
2022-09-13	10:57:40	1.16642	5.18847	2794.39	FALSE	153
2022-09-13	10:57:40	1.31686	5.85766	2631.85	FALSE	153
2022-09-13	10:57:40	0.881998	3.9233	2798.32	FALSE	153
2022-09-13	10:57:40	0.35472	1.57787	2633.43	FALSE	153
2022-09-13	10:57:41	0.21986	0.977981	2799.29	FALSE	153
2022-09-13	10:57:41	0.207188	0.921614	2634.35	FALSE	153
2022-09-13	10:57:41	0.103982	0.462533	2799.76	FALSE	153
2022-09-13	10:57:41	0.0762979	0.339388	2634.69	FALSE	153
2022-09-13	10:57:42	0.140369	0.624389	2800.38	FALSE	153
2022-09-13	10:57:42	0.206629	0.919127	2635.61	FALSE	153
2022-09-13	10:57:42	0.313957	1.39654	2801.78	FALSE	153
2022-09-13	10:57:42	0.214771	0.955344	2636.57	FALSE	153
2022-09-13	10:57:43	0.199148	0.88585	2802.66	FALSE	153
2022-09-13	10:57:43	0.241998	1.07646	2637.64	FALSE	153
2022-09-13	10:57:43	0.296043	1.31686	2803.98	FALSE	153
2022-09-13	10:57:43	0.378537	1.68381	2639.33	FALSE	153
2022-09-13	10:57:44	0.622863	2.77062	2806.75	FALSE	153
2022-09-13	10:57:44	0.673957	2.9979	2642.33	FALSE	153
2022-09-13	10:57:44	0.450496	2.0039	2808.76	FALSE	153
2022-09-13	10:57:45	0.577112	2.56711	2644.89	FALSE	153
2022-09-13	10:57:45	0.599046	2.66468	2811.42	FALSE	153
2022-09-13	10:57:45	0.593957	2.64204	2647.54	FALSE	153
2022-09-13	10:57:45	0.530038	2.35772	2813.78	FALSE	153
2022-09-13	10:57:46	0.518079	2.30452	2649.84	FALSE	153
2022-09-13	10:57:46	0.481489	2.14176	2815.92	FALSE	153
2022-09-13	10:57:46	0.494313	2.1988	2652.04	FALSE	153
2022-09-13	10:57:46	0.547392	2.43491	2818.35	FALSE	153
2022-09-13	10:57:47	0.689682	3.06784	2655.11	FALSE	153
2022-09-13	10:57:47	0.839046	3.73224	2822.09	FALSE	153
2022-09-13	10:57:47	0.748002	3.32726	2658.43	FALSE	153
2022-09-13	10:57:47	0.455433	2.02586	2824.11	FALSE	153
2022-09-13	10:57:48	0.707545	3.1473	2661.58	FALSE	153
2022-09-13	10:57:48	0.73584	3.27316	2827.39	FALSE	153
2022-09-13	10:57:48	0.501488	2.23072	2663.81	FALSE	153
2022-09-13	10:57:49	0.527952	2.34844	2829.73	FALSE	153
2022-09-13	10:57:49	0.492176	2.1893	2666	FALSE	153
2022-09-13	10:57:49	0.127799	0.568476	2830.3	FALSE	153
2022-09-13	10:57:49	0.0379773	0.168931	2666.17	FALSE	153
2022-09-13	10:57:50	0.210395	0.935879	2831.24	FALSE	153
2022-09-13	10:57:50	0.142405	0.633446	2666.8	FALSE	153
2022-09-13	10:57:50	0.269428	1.19847	2832.44	FALSE	153
2022-09-13	10:57:50	0.380216	1.69128	2668.49	FALSE	153
2022-09-13	10:57:51	0.440725	1.96043	2834.4	FALSE	153
2022-09-13	10:57:51	0.372125	1.65529	2670.15	FALSE	153
2022-09-13	10:57:51	0.403728	1.79586	2836.19	FALSE	153
2022-09-13	10:57:51	0.455789	2.02744	2672.18	FALSE	153
2022-09-13	10:57:52	0.269733	1.19983	2837.39	FALSE	153
2022-09-13	10:57:52	0.215891	0.960326	2673.14	FALSE	153
2022-09-13	10:57:52	0.341489	1.51901	2838.91	FALSE	153
2022-09-13	10:57:53	0.154924	0.689133	2673.83	FALSE	153
2022-09-13	10:57:53	0.235382	1.04703	2839.96	FALSE	153
2022-09-13	10:57:53	0.220878	0.98251	2674.81	FALSE	153
2022-09-13	10:57:53	0.414822	1.84521	2841.8	FALSE	153
2022-09-13	10:57:54	0.0834226	0.37108	2675.18	FALSE	153
2022-09-13	10:57:54	0.119657	0.532258	2842.34	FALSE	153
2022-09-13	10:57:54	0.0405728	0.180476	2675.36	FALSE	153
2022-09-13	10:57:54	0.202557	0.901014	2843.24	FALSE	153
2022-09-13	10:57:55	0.0316669	0.140861	2675.5	FALSE	153
2022-09-13	10:57:55	0.916349	4.0761	2847.31	FALSE	153
2022-09-13	10:57:55	4.94892	22.0138	2697.52	1	154
2022-09-13	10:57:55	6.34088	28.2055	2875.52	1	155
2022-09-13	10:57:56	2.26368	10.0693	2707.59	FALSE	155
2022-09-13	10:57:56	1.78251	7.92896	2883.45	FALSE	155
2022-09-13	10:57:56	0.861997	3.83434	2711.42	FALSE	155
2022-09-13	10:57:56	1.73559	7.72025	2891.17	FALSE	155
2022-09-13	10:57:57	0.702405	3.12444	2714.54	FALSE	155
2022-09-13	10:57:57	0.482608	2.14674	2893.32	FALSE	155
2022-09-13	10:57:57	0.498944	2.2194	2716.76	FALSE	155
2022-09-13	10:57:58	0.259046	1.15229	2894.47	FALSE	155
2022-09-13	10:57:58	0.455534	2.02631	2718.79	FALSE	155
2022-09-13	10:57:58	0.737926	3.28244	2897.75	FALSE	155
2022-09-13	10:57:58	0.734313	3.26637	2722.06	FALSE	155
2022-09-13	10:57:59	0.733346	3.26207	2901.01	FALSE	155
2022-09-13	10:57:59	0.738944	3.28697	2725.34	FALSE	155
2022-09-13	10:57:59	0.73416	3.26569	2904.28	FALSE	155
2022-09-13	10:57:59	0.738791	3.28629	2728.63	FALSE	155
2022-09-13	10:58:00	0.734313	3.26637	2907.54	FALSE	155
2022-09-13	10:58:00	0.729428	3.24464	2731.87	FALSE	155
2022-09-13	10:58:00	0.739249	3.28833	2910.83	FALSE	155
2022-09-13	10:58:00	0.73131	3.25301	2735.13	FALSE	155
2022-09-13	10:58:01	0.738893	3.28674	2914.12	FALSE	155
2022-09-13	10:58:01	0.734466	3.26705	2738.39	FALSE	155
2022-09-13	10:58:01	0.738435	3.28471	2917.4	FALSE	155
2022-09-13	10:58:02	0.740013	3.29173	2741.69	FALSE	155
2022-09-13	10:58:02	0.733804	3.26411	2920.67	FALSE	155
2022-09-13	10:58:02	0.738231	3.2838	2744.97	FALSE	155
2022-09-13	10:58:02	0.736552	3.27633	2923.94	FALSE	155
2022-09-13	10:58:03	0.733244	3.26162	2748.23	FALSE	155
2022-09-13	10:58:03	0.734313	3.26637	2927.21	FALSE	155
2022-09-13	10:58:03	0.733499	3.26275	2751.49	FALSE	155
2022-09-13	10:58:03	0.73645	3.27588	2930.49	FALSE	155
2022-09-13	10:58:04	0.733448	3.26252	2754.76	FALSE	155
2022-09-13	10:58:04	0.737621	3.28109	2933.77	FALSE	155
2022-09-13	10:58:04	0.733702	3.26365	2758.02	FALSE	155
2022-09-13	10:58:04	0.734822	3.26864	2937.04	FALSE	155
2022-09-13	10:58:05	0.735534	3.2718	2761.29	FALSE	155
2022-09-13	10:58:05	0.736196	3.27475	2940.31	FALSE	155
2022-09-13	10:58:05	0.733397	3.2623	2764.55	FALSE	155
2022-09-13	10:58:06	0.737926	3.28244	2943.59	FALSE	155
2022-09-13	10:58:06	0.737672	3.28131	2767.84	FALSE	155
2022-09-13	10:58:06	0.913397	4.06297	2947.66	FALSE	155
2022-09-13	10:58:06	0.38327	1.70486	2769.54	FALSE	155
2022-09-13	10:58:07	0.600369	2.67056	2950.33	FALSE	155
2022-09-13	10:58:07	0.465611	2.07113	2771.61	FALSE	155
2022-09-13	10:58:07	0.620776	2.76134	2953.09	FALSE	155
2022-09-13	10:58:07	1.38215	6.14808	2777.76	FALSE	155
2022-09-13	10:58:08	0.985865	4.38532	2957.47	FALSE	155
2022-09-13	10:58:08	2.25726	10.0407	2787.8	FALSE	155
2022-09-13	10:58:08	0.933702	4.15329	2961.63	FALSE	155
2022-09-13	10:58:08	2.14363	9.53529	2797.34	FALSE	155
2022-09-13	10:58:09	0.772277	3.43524	2965.06	FALSE	155
2022-09-13	10:58:09	1.35116	6.01023	2803.35	FALSE	155
2022-09-13	10:58:09	0.522862	2.32579	2967.39	FALSE	155
2022-09-13	10:58:10	1.49859	6.66603	2810.01	FALSE	155
2022-09-13	10:58:10	1.2534	5.57537	2972.96	FALSE	155
2022-09-13	10:58:10	2.44729	10.886	2820.9	FALSE	155
2022-09-13	10:58:10	4.41345	19.6319	2992.6	1	156
2022-09-13	10:58:11	1.81869	8.0899	2828.99	FALSE	156
2022-09-13	10:58:11	3.45513	15.3691	3007.96	1	157
2022-09-13	10:58:11	2.08525	9.27561	2838.26	FALSE	157
2022-09-13	10:58:11	4.6053	20.4853	3028.45	1	158
2022-09-13	10:58:12	1.182	5.25777	2843.52	FALSE	158
2022-09-13	10:58:12	3.06388	13.6288	3042.08	1	159
2022-09-13	10:58:12	2.72261	12.1107	2855.63	FALSE	159
2022-09-13	10:58:12	2.97782	13.2459	3055.32	FALSE	159
2022-09-13	10:58:13	4.42032	19.6625	2875.29	1	160
2022-09-13	10:58:13	2.15472	9.58463	3064.91	FALSE	160
2022-09-13	10:58:13	3.55284	15.8037	2891.1	1	161
2022-09-13	10:58:13	0.874873	3.89161	3068.8	FALSE	161
2022-09-13	10:58:14	1.39874	6.22188	2897.32	FALSE	161
2022-09-13	10:58:14	1.79925	8.00342	3076.8	FALSE	161
2022-09-13	10:58:14	2.65854	11.8257	2909.15	FALSE	161
2022-09-13	10:58:15	5.32647	23.6932	3100.5	1	162
2022-09-13	10:58:15	4.04887	18.0102	2927.16	1	163
2022-09-13	10:58:15	0.946934	4.21215	3104.71	FALSE	163
2022-09-13	10:58:15	0.735891	3.27339	2930.43	FALSE	163
2022-09-13	10:58:16	0.430853	1.91652	3106.63	FALSE	163
2022-09-13	10:58:16	0.275229	1.22427	2931.65	FALSE	163
2022-09-13	10:58:16	0.729936	3.2469	3109.87	FALSE	163
2022-09-13	10:58:16	0.727087	3.23423	2934.89	FALSE	163
2022-09-13	10:58:17	0.731463	3.25369	3113.13	FALSE	163
2022-09-13	10:58:17	0.737773	3.28176	2938.17	FALSE	163
2022-09-13	10:58:17	0.737722	3.28154	3116.41	FALSE	163
2022-09-13	10:58:17	0.736043	3.27407	2941.44	FALSE	163
2022-09-13	10:58:18	0.73528	3.27067	3119.68	FALSE	163
2022-09-13	10:58:18	0.734771	3.26841	2944.71	FALSE	163
2022-09-13	10:58:18	0.739453	3.28923	3122.97	FALSE	163
2022-09-13	10:58:19	0.752532	3.34741	2948.06	FALSE	163
2022-09-13	10:58:19	1.0651	4.73778	3127.71	FALSE	163
2022-09-13	10:58:19	1.8336	8.15622	2956.22	FALSE	163
2022-09-13	10:58:19	2.4823	11.0418	3138.75	FALSE	163
2022-09-13	10:58:20	1.78663	7.94729	2964.16	FALSE	163
2022-09-13	10:58:20	2.77177	12.3294	3151.08	FALSE	163
2022-09-13	10:58:20	0.665713	2.96122	2967.12	FALSE	163
2022-09-13	10:58:20	0.226527	1.00764	3152.08	FALSE	163
2022-09-13	10:58:21	0.115789	0.515053	2967.64	FALSE	163
2022-09-13	10:58:21	0.53986	2.40141	3154.49	FALSE	163
2022-09-13	10:58:21	0.672786	2.99269	2970.63	FALSE	163
2022-09-13	10:58:21	0.443422	1.97243	3156.46	FALSE	163
2022-09-13	10:58:22	0.58215	2.58952	2973.22	FALSE	163
2022-09-13	10:58:22	0.307494	1.36779	3157.83	FALSE	163
2022-09-13	10:58:22	0.586781	2.61012	2975.83	FALSE	163
2022-09-13	10:58:23	0.336043	1.49479	3159.32	FALSE	163
2022-09-13	10:58:23	0.810191	3.60389	2979.44	FALSE	163
2022-09-13	10:58:23	0.632023	2.81136	3162.13	FALSE	163
2022-09-13	10:58:23	1.42027	6.31765	2985.75	FALSE	163
2022-09-13	10:58:24	1.34184	5.96877	3168.1	FALSE	163
2022-09-13	10:58:24	2.22134	9.88096	2995.63	FALSE	163
2022-09-13	10:58:24	1.41655	6.3011	3174.4	FALSE	163
2022-09-13	10:58:24	1.50464	6.69294	3002.33	FALSE	163
2022-09-13	10:58:25	2.0848	9.27361	3183.68	FALSE	163
2022-09-13	10:58:25	0.735076	3.26977	3005.6	FALSE	163
2022-09-13	10:58:25	0.765661	3.40581	3187.08	FALSE	163
2022-09-13	10:58:25	0.392685	1.74674	3007.34	FALSE	163
2022-09-13	10:58:26	0.395687	1.76009	3188.84	FALSE	163
2022-09-13	10:58:26	0.47584	2.11663	3009.46	FALSE	163
2022-09-13	10:58:26	0.338741	1.50679	3190.35	FALSE	163
2022-09-13	10:58:27	0.259657	1.15501	3010.61	FALSE	163
2022-09-13	10:58:27	0.193804	0.862079	3191.21	FALSE	163
2022-09-13	10:58:27	0.201132	0.894675	3011.51	FALSE	163
2022-09-13	10:58:27	0.198181	0.881549	3192.09	FALSE	163
2022-09-13	10:58:28	0.195942	0.871589	3012.38	FALSE	163
2022-09-13	10:58:28	0.240064	1.06785	3193.16	FALSE	163
2022-09-13	10:58:28	0.215891	0.960326	3013.34	FALSE	163
2022-09-13	10:58:28	0.286934	1.27634	3194.44	FALSE	163
2022-09-13	10:58:29	0.321845	1.43163	3014.77	FALSE	163
2022-09-13	10:58:29	0.276145	1.22835	3195.66	FALSE	163
2022-09-13	10:58:29	0.438333	1.94979	3016.72	FALSE	163
2022-09-13	10:58:29	1.80083	8.01045	3203.68	FALSE	163
2022-09-13	10:58:30	2.11273	9.39785	3026.12	FALSE	163
2022-09-13	10:58:30	1.18678	5.27903	3208.95	FALSE	163
2022-09-13	10:58:30	2.08642	9.28081	3035.4	FALSE	163
2022-09-13	10:58:30	3.20159	14.2413	3223.2	1	164
2022-09-13	10:58:31	1.08861	4.84236	3040.24	FALSE	164
2022-09-13	10:58:31	1.50078	6.67577	3229.87	FALSE	164
2022-09-13	10:58:31	1.43309	6.37467	3046.62	FALSE	164
2022-09-13	10:58:32	0.971107	4.31968	3234.19	FALSE	164
2022-09-13	10:58:32	0.956908	4.25652	3050.88	FALSE	164
2022-09-13	10:58:32	0.632175	2.81204	3237	FALSE	164
2022-09-13	10:58:32	1.65121	7.34491	3058.22	FALSE	164
2022-09-13	10:58:33	0.449886	2.00118	3239	FALSE	164
2022-09-13	10:58:33	0.446374	1.98556	3060.21	FALSE	164
2022-09-13	10:58:33	0.389479	1.73248	3240.74	FALSE	164
2022-09-13	10:58:33	0.719097	3.19869	3063.4	FALSE	164
2022-09-13	10:58:34	1.65156	7.34647	3248.08	FALSE	164
2022-09-13	10:58:34	2.01614	8.96819	3072.37	FALSE	164
2022-09-13	10:58:34	4.0224	17.8924	3265.98	1	165
2022-09-13	10:58:34	1.87289	8.33099	3080.7	FALSE	165
2022-09-13	10:58:35	3.97991	17.7034	3283.68	1	166
2022-09-13	10:58:35	4.86454	21.6384	3102.34	1	167
2022-09-13	10:58:35	7.56683	33.6588	3317.34	1	168
2022-09-13	10:58:36	7.63014	33.9404	3136.28	1	169
2022-09-13	10:58:36	11.1699	49.6859	3367.02	1	170
2022-09-13	10:58:36	5.87197	26.1197	3162.4	1	171
2022-09-13	10:58:36	4.29268	19.0947	3386.12	1	172
2022-09-13	10:58:37	2.45009	10.8985	3173.3	FALSE	172
2022-09-13	10:58:37	1.53421	6.82447	3392.94	FALSE	172
2022-09-13	10:58:37	1.39248	6.19403	3179.49	FALSE	172
2022-09-13	10:58:37	0.822964	3.66071	3396.6	FALSE	172
2022-09-13	10:58:38	0.640216	2.84781	3182.34	FALSE	172
2022-09-13	10:58:38	1.0852	4.82719	3401.43	FALSE	172
2022-09-13	10:58:38	1.25335	5.57515	3187.92	FALSE	172
2022-09-13	10:58:38	1.3478	5.99528	3407.43	FALSE	172
2022-09-13	10:58:39	1.52632	6.78938	3194.71	FALSE	172
2022-09-13	10:58:39	1.02622	4.56483	3411.99	FALSE	172
2022-09-13	10:58:39	0.534517	2.37764	3197.08	FALSE	172
2022-09-13	10:58:40	0.249682	1.11064	3413.1	FALSE	172
2022-09-13	10:58:40	0.260573	1.15908	3198.24	FALSE	172
2022-09-13	10:58:40	0.163931	0.729198	3413.83	FALSE	172
2022-09-13	10:58:40	0.187748	0.835141	3199.08	FALSE	172
2022-09-13	10:58:41	0.138944	0.618051	3414.45	FALSE	172
2022-09-13	10:58:41	0.0595549	0.264912	3199.34	FALSE	172
2022-09-13	10:58:41	-0.0359158	-0.159761	3414.45	FALSE	172
2022-09-13	10:58:41	-0.218969	-0.974018	3199.34	FALSE	172
2022-09-13	10:58:42	-0.316832	-1.40933	3414.45	FALSE	172
2022-09-13	10:58:42	-0.421717	-1.87588	3199.34	FALSE	172
2022-09-13	10:58:42	-0.386246	-1.7181	3414.45	FALSE	172
2022-09-13	10:58:42	-0.38472	-1.71131	3199.34	FALSE	172
2022-09-13	10:58:43	-0.282022	-1.25449	3414.45	FALSE	172
2022-09-13	10:58:43	-0.1093	-0.486188	3199.34	FALSE	172
2022-09-13	10:58:43	0.0911071	0.405263	3414.85	FALSE	172
2022-09-13	10:58:44	0.587748	2.61442	3201.96	FALSE	172
2022-09-13	10:58:44	1.07925	4.80072	3419.65	FALSE	172
2022-09-13	10:58:44	1.7394	7.7372	3209.7	FALSE	172
2022-09-13	10:58:44	2.71721	12.0867	3431.74	FALSE	172
2022-09-13	10:58:45	1.73569	7.7207	3217.42	FALSE	172
2022-09-13	10:58:45	3.25502	14.479	3446.22	1	173
2022-09-13	10:58:45	1.46637	6.52271	3223.94	FALSE	173
2022-09-13	10:58:45	3.91635	17.4207	3463.64	1	174
2022-09-13	10:58:46	2.09508	9.31933	3233.26	FALSE	174
2022-09-13	10:58:46	1.86958	8.31627	3471.96	FALSE	174
2022-09-13	10:58:46	3.77436	16.7891	3250.05	1	175
2022-09-13	10:58:46	0.748053	3.32749	3475.28	FALSE	175
2022-09-13	10:58:47	3.63864	16.1854	3266.23	1	176
2022-09-13	10:58:47	1.4019	6.23593	3481.52	FALSE	176
2022-09-13	10:58:47	2.16729	9.64054	3275.87	FALSE	176
2022-09-13	10:58:47	0.921082	4.09716	3485.62	FALSE	176
2022-09-13	10:58:48	0.428104	1.90429	3277.78	FALSE	176
2022-09-13	10:58:48	0.501336	2.23004	3487.85	FALSE	176
2022-09-13	10:58:48	0.290802	1.29355	3279.07	FALSE	176
2022-09-13	10:58:49	0.190598	0.847818	3488.7	FALSE	176
2022-09-13	10:58:49	0.46327	2.06072	3281.13	FALSE	176
2022-09-13	10:58:49	0.298334	1.32705	3490.02	FALSE	176
2022-09-13	10:58:49	0.620624	2.76066	3283.89	FALSE	176
2022-09-13	10:58:50	0.653702	2.9078	3492.93	FALSE	176
2022-09-13	10:58:50	0.734669	3.26795	3287.16	FALSE	176
2022-09-13	10:58:50	0.736959	3.27814	3496.21	FALSE	176
2022-09-13	10:58:50	0.73243	3.258	3290.42	FALSE	176
2022-09-13	10:58:51	0.0747203	0.332371	3496.54	FALSE	176
2022-09-13	10:58:51	-0.134185	-0.596882	3290.42	FALSE	176
2022-09-13	10:58:51	-0.24014	-1.06819	3496.54	FALSE	176
2022-09-13	10:58:51	-0.38472	-1.71131	3290.42	FALSE	176
2022-09-13	10:58:52	-0.300038	-1.33463	3496.54	FALSE	176
2022-09-13	10:58:52	-0.167264	-0.744024	3290.42	FALSE	176
2022-09-13	10:58:52	0.0871885	0.387832	3496.93	FALSE	176
2022-09-13	10:58:53	-0.0205468	-0.0913963	3290.42	FALSE	176
2022-09-13	10:58:53	0.211412	0.940403	3497.87	FALSE	176
2022-09-13	10:58:53	0.114059	0.507357	3290.93	FALSE	176
2022-09-13	10:58:53	0.0698857	0.310866	3498.18	FALSE	176
2022-09-13	10:58:54	0.0270358	0.120261	3291.05	FALSE	176
2022-09-13	10:58:54	0.0650511	0.28936	3498.47	FALSE	176
2022-09-13	10:58:54	0.271718	1.20866	3292.25	FALSE	176
2022-09-13	10:58:54	-0.0424297	-0.188736	3498.47	FALSE	176
2022-09-13	10:58:55	0.203372	0.904639	3293.16	FALSE	176
2022-09-13	10:58:55	0.206883	0.920257	3499.39	FALSE	176
2022-09-13	10:58:55	0.413651	1.84	3295	FALSE	176
2022-09-13	10:58:55	0.320522	1.42575	3500.82	FALSE	176
2022-09-13	10:58:56	0.355942	1.5833	3296.58	FALSE	176
2022-09-13	10:58:56	0.440115	1.95772	3502.77	FALSE	176
2022-09-13	10:58:56	0.495229	2.20288	3298.79	FALSE	176
2022-09-13	10:58:57	1.17645	5.23308	3508.01	FALSE	176
2022-09-13	10:58:57	0.81187	3.61136	3302.4	FALSE	176
2022-09-13	10:58:57	1.73416	7.71389	3515.72	FALSE	176
2022-09-13	10:58:57	1.4136	6.28798	3308.68	FALSE	176
2022-09-13	10:58:58	2.59009	11.5212	3527.24	FALSE	176
2022-09-13	10:58:58	3.37808	15.0264	3323.71	1	177
2022-09-13	10:58:58	3.0168	13.4193	3540.66	1	178
2022-09-13	10:58:58	4.28525	19.0616	3342.77	1	179
2022-09-13	10:58:59	2.0048	8.91775	3549.58	FALSE	179
2022-09-13	10:58:59	4.24149	18.867	3361.64	1	180
2022-09-13	10:58:59	0.885153	3.93734	3553.52	FALSE	180
2022-09-13	10:58:59	1.84408	8.20284	3369.84	FALSE	180
2022-09-13	10:59:00	2.55446	11.3627	3564.88	FALSE	180
2022-09-13	10:59:00	0.676399	3.00876	3372.85	FALSE	180
2022-09-13	10:59:00	2.79558	12.4353	3577.31	FALSE	180
2022-09-13	10:59:00	0.587748	2.61442	3375.47	FALSE	180
2022-09-13	10:59:01	1.47818	6.57524	3583.89	FALSE	180
2022-09-13	10:59:01	0.767443	3.41374	3378.88	FALSE	180
2022-09-13	10:59:01	0.732379	3.25777	3587.15	FALSE	180
2022-09-13	10:59:02	0.735585	3.27203	3382.15	FALSE	180
2022-09-13	10:59:02	0.734568	3.26751	3590.41	FALSE	180
2022-09-13	10:59:02	0.740114	3.29218	3385.44	FALSE	180
2022-09-13	10:59:02	0.735891	3.27339	3593.69	FALSE	180
2022-09-13	10:59:03	0.734415	3.26682	3388.71	FALSE	180
2022-09-13	10:59:03	0.735382	3.27113	3596.96	FALSE	180
2022-09-13	10:59:03	0.725916	3.22902	3391.94	FALSE	180
2022-09-13	10:59:03	0.741489	3.29829	3600.26	FALSE	180
2022-09-13	10:59:04	0.738384	3.28448	3395.22	FALSE	180
2022-09-13	10:59:04	0.738231	3.2838	3603.54	FALSE	180
2022-09-13	10:59:04	0.738791	3.28629	3398.51	FALSE	180
2022-09-13	10:59:04	0.741132	3.2967	3606.84	FALSE	180
2022-09-13	10:59:05	0.738893	3.28674	3401.8	FALSE	180
2022-09-13	10:59:05	0.736349	3.27543	3610.11	FALSE	180
2022-09-13	10:59:05	0.737875	3.28222	3405.08	FALSE	180
2022-09-13	10:59:06	0.741743	3.29942	3613.41	FALSE	180
2022-09-13	10:59:06	0.736857	3.27769	3408.36	FALSE	180
2022-09-13	10:59:06	0.732226	3.25709	3616.67	FALSE	180
2022-09-13	10:59:06	0.72958	3.24532	3411.6	FALSE	180
2022-09-13	10:59:07	0.764135	3.39903	3620.07	FALSE	180
2022-09-13	10:59:07	0.732481	3.25822	3414.86	FALSE	180
2022-09-13	10:59:07	0.73416	3.26569	3623.33	FALSE	180
2022-09-13	10:59:07	1.11004	4.93768	3419.8	FALSE	180
2022-09-13	10:59:08	1.73345	7.71073	3631.05	FALSE	180
2022-09-13	10:59:08	0.509987	2.26852	3422.07	FALSE	180
2022-09-13	10:59:08	0.386629	1.7198	3632.77	FALSE	180
2022-09-13	10:59:08	0.308766	1.37345	3423.44	FALSE	180
2022-09-13	10:59:09	0.215942	0.960553	3633.73	FALSE	180
2022-09-13	10:59:09	0.279606	1.24374	3424.68	FALSE	180
2022-09-13	10:59:09	0.718588	3.19642	3636.92	FALSE	180
2022-09-13	10:59:10	1.21116	5.38748	3430.07	FALSE	180
2022-09-13	10:59:10	0.736399	3.27565	3640.2	FALSE	180
2022-09-13	10:59:10	0.696298	3.09727	3433.17	FALSE	180
2022-09-13	10:59:10	0.453753	2.01838	3642.22	FALSE	180
2022-09-13	10:59:11	0.494466	2.19948	3435.37	FALSE	180
2022-09-13	10:59:11	0.466832	2.07656	3644.29	FALSE	180
2022-09-13	10:59:11	0.445458	1.98149	3437.35	FALSE	180
2022-09-13	10:59:11	0.379402	1.68766	3645.98	FALSE	180
2022-09-13	10:59:12	0.409733	1.82257	3439.17	FALSE	180
2022-09-13	10:59:12	0.660318	2.93723	3648.92	FALSE	180
2022-09-13	10:59:12	0.430751	1.91607	3441.09	FALSE	180
2022-09-13	10:59:12	-0.166705	-0.741537	3648.92	FALSE	180
2022-09-13	10:59:13	-0.38416	-1.70882	3441.09	FALSE	180
2022-09-13	10:59:13	-0.550419	-2.44837	3648.92	FALSE	180
2022-09-13	10:59:13	-0.692149	-3.07882	3441.09	FALSE	180
2022-09-13	10:59:14	-0.650623	-2.8941	3648.92	FALSE	180
2022-09-13	10:59:14	-0.691844	-3.07746	3441.09	FALSE	180
2022-09-13	10:59:14	-0.665839	-2.96179	3648.92	FALSE	180
2022-09-13	10:59:14	-0.617544	-2.74696	3441.09	FALSE	180
2022-09-13	10:59:15	-0.457544	-2.03525	3648.92	FALSE	180
2022-09-13	10:59:15	-0.46874	-2.08505	3441.09	FALSE	180
2022-09-13	10:59:15	-0.380241	-1.69139	3648.92	FALSE	180
2022-09-13	10:59:15	-0.380292	-1.69161	3441.09	FALSE	180
2022-09-13	10:59:16	-0.365076	-1.62393	3648.92	FALSE	180
2022-09-13	10:59:16	-0.193727	-0.861736	3441.09	FALSE	180
2022-09-13	10:59:16	-0.092557	-0.411712	3648.92	FALSE	180
2022-09-13	10:59:16	0.120318	0.535199	3441.62	FALSE	180
2022-09-13	10:59:17	0.229326	1.02009	3649.94	FALSE	180
2022-09-13	10:59:17	0.0444404	0.19768	3441.82	FALSE	180
2022-09-13	10:59:17	0.106323	0.472946	3650.41	FALSE	180
2022-09-13	10:59:17	0.0991987	0.441256	3442.26	FALSE	180
2022-09-13	10:59:18	0.0472394	0.21013	3650.62	FALSE	180
2022-09-13	10:59:18	0.125204	0.556932	3442.82	FALSE	180
2022-09-13	10:59:18	0.157112	0.698866	3651.32	FALSE	180
2022-09-13	10:59:19	0.136959	0.609221	3443.43	FALSE	180
2022-09-13	10:59:19	0.184288	0.81975	3652.14	FALSE	180
2022-09-13	10:59:19	0.172685	0.768137	3444.2	FALSE	180
2022-09-13	10:59:19	-0.0660938	-0.293998	3652.14	FALSE	180
2022-09-13	10:59:20	-0.343447	-1.52772	3444.2	FALSE	180
2022-09-13	10:59:20	-0.471335	-2.09659	3652.14	FALSE	180
2022-09-13	10:59:20	-0.53159	-2.36462	3444.2	FALSE	180
2022-09-13	10:59:20	-0.57047	-2.53756	3652.14	FALSE	180
2022-09-13	10:59:21	-0.554389	-2.46603	3444.2	FALSE	180
2022-09-13	10:59:21	-0.392862	-1.74753	3652.14	FALSE	180
2022-09-13	10:59:21	-0.142633	-0.63446	3444.2	FALSE	180
2022-09-13	10:59:21	-0.015356	-0.0683066	3652.14	FALSE	180
2022-09-13	10:59:22	0.00550917	0.0245059	3444.22	FALSE	180
2022-09-13	10:59:22	0.248715	1.10633	3653.25	FALSE	180
2022-09-13	10:59:22	1.3852	6.16165	3450.38	FALSE	180
2022-09-13	10:59:23	1.3337	5.93256	3659.18	FALSE	180
2022-09-13	10:59:23	2.25594	10.0349	3460.42	FALSE	180
2022-09-13	10:59:23	2.03752	9.0633	3668.24	FALSE	180
2022-09-13	10:59:23	2.41055	10.7226	3471.14	FALSE	180
2022-09-13	10:59:24	2.23691	9.95022	3678.19	FALSE	180
2022-09-13	10:59:24	1.75243	7.79516	3478.94	FALSE	180
2022-09-13	10:59:24	2.1136	9.40172	3687.59	FALSE	180
2022-09-13	10:59:24	1.01777	4.52724	3483.46	FALSE	180
2022-09-13	10:59:25	0.449428	1.99915	3689.59	FALSE	180
2022-09-13	10:59:25	1.72663	7.6804	3491.14	FALSE	180
2022-09-13	10:59:25	0.626323	2.78601	3692.38	FALSE	180
2022-09-13	10:59:25	1.34302	5.97402	3497.12	FALSE	180
2022-09-13	10:59:26	1.3109	5.83115	3698.21	FALSE	180
2022-09-13	10:59:26	1.37452	6.11414	3503.23	FALSE	180
2022-09-13	10:59:26	2.90393	12.9173	3711.13	FALSE	180
2022-09-13	10:59:27	1.65345	7.35488	3510.59	FALSE	180
2022-09-13	10:59:27	4.22825	18.8081	3729.94	1	181
2022-09-13	10:59:27	2.22291	9.88795	3520.47	FALSE	181
2022-09-13	10:59:27	3.19136	14.1958	3744.13	1	182
2022-09-13	10:59:28	6.12647	27.2518	3547.73	1	183
2022-09-13	10:59:28	1.12795	5.01735	3749.15	FALSE	183
2022-09-13	10:59:28	4.40184	19.5803	3567.31	1	184
2022-09-13	10:59:28	2.77538	12.3454	3761.49	FALSE	184
2022-09-13	10:59:29	2.0763	9.2358	3576.54	FALSE	184
2022-09-13	10:59:29	4.59385	20.4344	3781.93	1	185
2022-09-13	10:59:29	3.14993	14.0115	3590.55	1	186
2022-09-13	10:59:29	2.86749	12.7552	3794.68	FALSE	186
2022-09-13	10:59:30	3.40301	15.1373	3605.69	1	187
2022-09-13	10:59:30	0.833702	3.70847	3798.39	FALSE	187
2022-09-13	10:59:30	2.00144	8.90281	3614.59	FALSE	187
2022-09-13	10:59:31	1.36083	6.05324	3804.45	FALSE	187
2022-09-13	10:59:31	0.792379	3.52466	3618.12	FALSE	187
2022-09-13	10:59:31	0.59014	2.62506	3807.07	FALSE	187
2022-09-13	10:59:31	0.494211	2.19835	3620.32	FALSE	187
2022-09-13	10:59:32	0.489733	2.17843	3809.25	FALSE	187
2022-09-13	10:59:32	0.1707	0.759308	3621.08	FALSE	187
2022-09-13	10:59:32	0.160878	0.715618	3809.96	FALSE	187
2022-09-13	10:59:32	0.433651	1.92897	3623	FALSE	187
2022-09-13	10:59:33	-0.0667554	-0.296941	3809.96	FALSE	187
2022-09-13	10:59:33	-0.0851269	-0.378661	3623	FALSE	187
2022-09-13	10:59:33	-0.214796	-0.955456	3809.96	FALSE	187
2022-09-13	10:59:33	-0.339325	-1.50939	3623	FALSE	187
2022-09-13	10:59:34	-0.342022	-1.52138	3809.96	FALSE	187
2022-09-13	10:59:34	0.0737025	0.327843	3623.33	FALSE	187
2022-09-13	10:59:34	0.376247	1.67362	3811.64	FALSE	187
2022-09-13	10:59:34	0.0553819	0.24635	3623.58	FALSE	187
2022-09-13	10:59:35	-0.066959	-0.297847	3811.64	FALSE	187
2022-09-13	10:59:35	0.0433718	0.192926	3623.77	FALSE	187
2022-09-13	10:59:35	-0.0197834	-0.0880005	3811.64	FALSE	187
2022-09-13	10:59:36	0.0459671	0.204471	3623.98	FALSE	187
2022-09-13	10:59:36	-0.0817173	-0.363495	3811.64	FALSE	187
2022-09-13	10:59:36	0.0101402	0.0451056	3624.02	FALSE	187
2022-09-13	10:59:36	-0.103702	-0.461287	3811.64	FALSE	187
2022-09-13	10:59:37	-0.0439565	-0.195527	3624.02	FALSE	187
2022-09-13	10:59:37	0.0262216	0.116639	3811.75	FALSE	187
2022-09-13	10:59:37	-0.115509	-0.513807	3624.02	FALSE	187
2022-09-13	10:59:37	0.102201	0.45461	3812.21	FALSE	187
2022-09-13	10:59:38	0.117621	0.523202	3624.54	FALSE	187
2022-09-13	10:59:38	0.489428	2.17707	3814.39	FALSE	187
2022-09-13	10:59:38	0.576043	2.56235	3627.11	FALSE	187
2022-09-13	10:59:38	0.542761	2.41431	3816.8	FALSE	187
2022-09-13	10:59:39	0.722862	3.21543	3630.32	FALSE	187
2022-09-13	10:59:39	0.697621	3.10316	3819.9	FALSE	187
2022-09-13	10:59:39	3.71548	16.5272	3646.85	1	188
2022-09-13	10:59:40	2.46927	10.9838	3830.89	FALSE	188
2022-09-13	10:59:40	4.54434	20.2141	3667.06	1	189
2022-09-13	10:59:40	2.66194	11.8408	3842.73	FALSE	189
2022-09-13	10:59:40	1.97553	8.78755	3675.85	FALSE	189
2022-09-13	10:59:41	2.01574	8.96641	3851.69	FALSE	189
2022-09-13	10:59:41	0.862812	3.83796	3679.69	FALSE	189
2022-09-13	10:59:41	0.822099	3.65686	3855.35	FALSE	189
2022-09-13	10:59:41	1.05162	4.67782	3684.37	FALSE	189
2022-09-13	10:59:42	0.707137	3.14549	3858.5	FALSE	189
2022-09-13	10:59:42	0.416298	1.85178	3686.22	FALSE	189
2022-09-13	10:59:42	0.502761	2.23638	3860.73	FALSE	189
2022-09-13	10:59:42	0.39528	1.75828	3687.98	FALSE	189
2022-09-13	10:59:43	0.31187	1.38726	3862.12	FALSE	189
2022-09-13	10:59:43	0.445916	1.98352	3689.96	FALSE	189
2022-09-13	10:59:43	0.401438	1.78568	3863.91	FALSE	189
2022-09-13	10:59:44	0.20958	0.932254	3690.89	FALSE	189
2022-09-13	10:59:44	0.380624	1.69309	3865.6	FALSE	189
2022-09-13	10:59:44	0.872888	3.88278	3694.78	FALSE	189
2022-09-13	10:59:44	1.11472	4.9585	3870.56	FALSE	189
2022-09-13	10:59:45	0.522404	2.32376	3697.1	FALSE	189
2022-09-13	10:59:45	0.473397	2.10576	3872.66	FALSE	189
2022-09-13	10:59:45	0.315484	1.40334	3698.5	FALSE	189
2022-09-13	10:59:45	0.387494	1.72365	3874.39	FALSE	189
2022-09-13	10:59:46	0.539147	2.39823	3700.9	FALSE	189
2022-09-13	10:59:46	0.435789	1.93848	3876.33	FALSE	189
2022-09-13	10:59:46	1.02602	4.56394	3705.47	FALSE	189
2022-09-13	10:59:46	1.41915	6.31266	3882.64	FALSE	189
2022-09-13	10:59:47	1.64169	7.30257	3712.77	FALSE	189
2022-09-13	10:59:47	1.06327	4.72964	3887.37	FALSE	189
2022-09-13	10:59:47	0.63355	2.81816	3715.59	FALSE	189
2022-09-13	10:59:48	0.619504	2.75568	3890.12	FALSE	189
2022-09-13	10:59:48	0.508715	2.26287	3717.85	FALSE	189
2022-09-13	10:59:48	0.467748	2.08064	3892.2	FALSE	189
2022-09-13	10:59:48	0.51874	2.30746	3720.16	FALSE	189
2022-09-13	10:59:49	0.414415	1.8434	3894.05	FALSE	189
2022-09-13	10:59:49	0.461845	2.05438	3722.21	FALSE	189
2022-09-13	10:59:49	0.536705	2.38737	3896.44	FALSE	189
2022-09-13	10:59:49	0.3107	1.38206	3723.59	FALSE	189
2022-09-13	10:59:50	0.401031	1.78387	3898.22	FALSE	189
2022-09-13	10:59:50	0.290598	1.29264	3724.89	FALSE	189
2022-09-13	10:59:50	0.589733	2.62325	3900.84	FALSE	189
2022-09-13	10:59:50	0.229835	1.02235	3725.91	FALSE	189
2022-09-13	10:59:51	0.178028	0.791904	3901.63	FALSE	189
2022-09-13	10:59:51	0.05813	0.258574	3726.17	FALSE	189
2022-09-13	10:59:51	0.188664	0.839215	3902.47	FALSE	189
2022-09-13	10:59:51	-0.0467554	-0.207977	3726.17	FALSE	189
2022-09-13	10:59:52	0.2364	1.05155	3903.52	FALSE	189
2022-09-13	10:59:52	-0.0501142	-0.222918	3726.17	FALSE	189
2022-09-13	10:59:52	0.141489	0.629371	3904.15	FALSE	189
2022-09-13	10:59:53	0.0634226	0.282116	3726.45	FALSE	189
2022-09-13	10:59:53	0.104186	0.46344	3904.62	FALSE	189
2022-09-13	10:59:53	0.540471	2.40412	3728.85	FALSE	189
2022-09-13	10:59:53	0.367087	1.63288	3906.25	FALSE	189
2022-09-13	10:59:54	1.38342	6.15373	3735.01	FALSE	189
2022-09-13	10:59:54	2.21966	9.87349	3916.12	FALSE	189
2022-09-13	10:59:54	5.71263	25.4109	3760.42	1	190
2022-09-13	10:59:54	1.33838	5.95338	3922.08	FALSE	190
2022-09-13	10:59:55	1.8134	8.06637	3768.48	FALSE	190
2022-09-13	10:59:55	1.53905	6.846	3928.92	FALSE	190
2022-09-13	10:59:55	0.920522	4.09467	3772.58	FALSE	190
2022-09-13	10:59:55	1.68989	7.51697	3936.44	FALSE	190
2022-09-13	10:59:56	1.23767	5.5054	3778.08	FALSE	190
2022-09-13	10:59:56	1.6335	7.26613	3943.71	FALSE	190
2022-09-13	10:59:56	2.69182	11.9738	3790.06	FALSE	190
2022-09-13	10:59:57	1.46184	6.50256	3950.21	FALSE	190
2022-09-13	10:59:57	5.67421	25.24	3815.3	1	191
2022-09-13	10:59:57	0.945611	4.20627	3954.42	FALSE	191
2022-09-13	10:59:57	3.24612	14.4394	3829.74	1	192
2022-09-13	10:59:58	0.805356	3.58238	3958	FALSE	192
2022-09-13	10:59:58	0.909631	4.04622	3833.78	FALSE	192
2022-09-13	10:59:58	0.737773	3.28176	3961.28	FALSE	192
2022-09-13	10:59:58	0.238333	1.06015	3834.84	FALSE	192
2022-09-13	10:59:59	0.746119	3.31889	3964.6	FALSE	192
2022-09-13	10:59:59	0.271412	1.20729	3836.05	FALSE	192
2022-09-13	10:59:59	0.493702	2.19609	3966.79	FALSE	192
2022-09-13	10:59:59	0.610903	2.71742	3838.77	FALSE	192
2022-09-13	11:00:00	0.825814	3.67339	3970.47	FALSE	192
2022-09-13	11:00:00	0.817723	3.6374	3842.41	FALSE	192
2022-09-13	11:00:00	0.955025	4.24814	3974.72	FALSE	192
2022-09-13	11:00:01	0.896807	3.98918	3846.39	FALSE	192
2022-09-13	11:00:01	0.355229	1.58013	3976.3	FALSE	192
2022-09-13	11:00:01	0.480725	2.13836	3848.53	FALSE	192
2022-09-13	11:00:01	0.323881	1.44069	3977.74	FALSE	192
2022-09-13	11:00:02	0.595382	2.64838	3851.18	FALSE	192
2022-09-13	11:00:02	0.267748	1.191	3978.93	FALSE	192
2022-09-13	11:00:02	0.200725	0.892865	3852.07	FALSE	192
2022-09-13	11:00:02	0.70271	3.12579	3982.05	FALSE	192
2022-09-13	11:00:03	0.873906	3.88731	3855.96	FALSE	192
2022-09-13	11:00:03	0.539402	2.39937	3984.45	FALSE	192
2022-09-13	11:00:03	1.02846	4.5748	3860.54	FALSE	192
2022-09-13	11:00:03	1.15462	5.13598	3989.59	FALSE	192
2022-09-13	11:00:04	2.04363	9.09047	3869.63	FALSE	192
2022-09-13	11:00:04	1.22184	5.43499	3995.02	FALSE	192
2022-09-13	11:00:04	1.12047	4.98407	3874.61	FALSE	192
2022-09-13	11:00:04	1.12571	5.00738	4000.03	FALSE	192
2022-09-13	11:00:05	1.09762	4.88243	3879.49	FALSE	192
2022-09-13	11:00:05	0.955941	4.25222	4004.28	FALSE	192
2022-09-13	11:00:05	0.711565	3.16518	3882.66	FALSE	192
2022-09-13	11:00:06	0.711921	3.16677	4007.45	FALSE	192
2022-09-13	11:00:06	0.727646	3.23671	3885.89	FALSE	192
2022-09-13	11:00:06	0.735585	3.27203	4010.72	FALSE	192
2022-09-13	11:00:06	0.588461	2.61759	3888.51	FALSE	192
2022-09-13	11:00:07	0.649122	2.88742	4013.61	FALSE	192
2022-09-13	11:00:07	0.775229	3.44837	3891.96	FALSE	192
2022-09-13	11:00:07	0.822964	3.66071	4017.27	FALSE	192
2022-09-13	11:00:07	0.584695	2.60084	3894.56	FALSE	192
2022-09-13	11:00:08	0.420369	1.86989	4019.14	FALSE	192
2022-09-13	11:00:08	0.453143	2.01567	3896.58	FALSE	192
2022-09-13	11:00:08	0.438944	1.95251	4021.09	FALSE	192
2022-09-13	11:00:08	0.355229	1.58013	3898.16	FALSE	192
2022-09-13	11:00:09	0.332583	1.4794	4022.57	FALSE	192
2022-09-13	11:00:09	0.351718	1.56451	3899.72	FALSE	192
2022-09-13	11:00:09	0.265916	1.18285	4023.76	FALSE	192
2022-09-13	11:00:10	0.267697	1.19077	3900.91	FALSE	192
2022-09-13	11:00:10	0.378435	1.68335	4025.44	FALSE	192
2022-09-13	11:00:10	0.748511	3.32953	3904.24	FALSE	192
2022-09-13	11:00:10	1.07055	4.76202	4030.2	FALSE	192
2022-09-13	11:00:11	0.818435	3.64056	3907.88	FALSE	192
2022-09-13	11:00:11	0.591158	2.62959	4032.83	FALSE	192
2022-09-13	11:00:11	0.64159	2.85392	3910.74	FALSE	192
2022-09-13	11:00:11	0.496094	2.20673	4035.04	FALSE	192
2022-09-13	11:00:12	0.562812	2.5035	3913.24	FALSE	192
2022-09-13	11:00:12	0.501183	2.22936	4037.27	FALSE	192
2022-09-13	11:00:12	0.465305	2.06977	3915.31	FALSE	192
2022-09-13	11:00:12	0.525305	2.33666	4039.6	FALSE	192
2022-09-13	11:00:13	0.52556	2.3378	3917.65	FALSE	192
2022-09-13	11:00:13	0.777723	3.45947	4043.06	FALSE	192
2022-09-13	11:00:13	0.956247	4.25358	3921.9	FALSE	192
2022-09-13	11:00:14	0.723575	3.21861	4046.28	FALSE	192
2022-09-13	11:00:14	0.617672	2.74753	3924.65	FALSE	192
2022-09-13	11:00:14	0.616501	2.74232	4049.02	FALSE	192
2022-09-13	11:00:14	0.774873	3.44679	3928.1	FALSE	192
2022-09-13	11:00:15	0.989733	4.40253	4053.43	FALSE	192
2022-09-13	11:00:15	0.640369	2.84849	3930.94	FALSE	192
2022-09-13	11:00:15	0.524084	2.33123	4055.76	FALSE	192
2022-09-13	11:00:15	0.456959	2.03265	3932.98	FALSE	192
2022-09-13	11:00:16	0.533906	2.37492	4058.13	FALSE	192
2022-09-13	11:00:16	0.464593	2.0666	3935.04	FALSE	192
2022-09-13	11:00:16	0.446323	1.98533	4060.12	FALSE	192
2022-09-13	11:00:16	0.329428	1.46536	3936.51	FALSE	192
2022-09-13	11:00:17	0.303066	1.3481	4061.47	FALSE	192
2022-09-13	11:00:17	0.430598	1.91539	3938.42	FALSE	192
2022-09-13	11:00:17	0.0960434	0.42722	4061.89	FALSE	192

## Sheet: Juju_star_202291310556 (2)
Date	Time	Lbs	Total force x time			**GoPro Fitting: 1044
2022-09-13	10:55:17	0.178435	0.178435	FALSE	0			Total force x time	1798.55
2022-09-13	10:55:17	0.258384	0.436819	FALSE	0			Total steps	192
2022-09-13	10:55:17	0.446476	0.883295	FALSE	0
2022-09-13	10:55:17	0.451565	1.33486	FALSE	0
2022-09-13	10:55:18	0.99472	2.32958	FALSE	0
2022-09-13	10:55:18	2.59426	4.92384	FALSE	0
2022-09-13	10:55:18	0.799758	5.7236	FALSE	0
2022-09-13	10:55:19	0.382964	6.10656	FALSE	0
2022-09-13	10:55:19	0.00652696	6.11309	FALSE	0
2022-09-13	10:55:19	0.0747712	6.18786	FALSE	0
2022-09-13	10:55:19	-0.381666	6.18786	FALSE	0
2022-09-13	10:55:20	-0.553931	6.18786	FALSE	0
2022-09-13	10:55:20	-0.560445	6.18786	FALSE	0
2022-09-13	10:55:20	-0.513829	6.18786	FALSE	0
2022-09-13	10:55:20	-0.253422	6.18786	FALSE	0
2022-09-13	10:55:21	-0.0920481	6.18786	FALSE	0
2022-09-13	10:55:21	-0.171234	6.18786	FALSE	0
2022-09-13	10:55:21	-0.256883	6.18786	FALSE	0
2022-09-13	10:55:21	0.0276974	6.21556	FALSE	0
2022-09-13	10:55:22	0.232328	6.44789	FALSE	0
2022-09-13	10:55:22	0.251005	6.69889	FALSE	0
2022-09-13	10:55:22	0.284033	6.98292	FALSE	0
2022-09-13	10:55:23	0.0865778	7.0695	FALSE	0
2022-09-13	10:55:23	0.182099	7.2516	FALSE	0
2022-09-13	10:55:23	0.123117	7.37472	FALSE	0
2022-09-13	10:55:23	-0.516679	7.37472	FALSE	0
2022-09-13	10:55:24	-0.513931	7.37472	FALSE	0
2022-09-13	10:55:24	3.15233	10.527	1	1
2022-09-13	10:55:24	16.7846	27.3116	1	2
2022-09-13	10:55:24	16.8019	44.1135	1	3
2022-09-13	10:55:25	4.66632	48.7799	1	4
2022-09-13	10:55:25	3.86118	52.641	1	5
2022-09-13	10:55:25	5.05701	57.6981	1	6
2022-09-13	10:55:25	3.04988	60.7479	1	7
2022-09-13	10:55:26	6.21619	66.9641	1	8
2022-09-13	10:55:26	6.27299	73.2371	1	9
2022-09-13	10:55:26	2.64622	75.8833	FALSE	9
2022-09-13	10:55:26	2.72576	78.6091	FALSE	9
2022-09-13	10:55:27	0.469377	79.0785	FALSE	9
2022-09-13	10:55:27	0.344593	79.4231	FALSE	9
2022-09-13	10:55:27	0.517264	79.9403	FALSE	9
2022-09-13	10:55:28	0.0845422	80.0249	FALSE	9
2022-09-13	10:55:28	0.314517	80.3394	FALSE	9
2022-09-13	10:55:28	0.302201	80.6416	FALSE	9
2022-09-13	10:55:28	0.491412	81.133	FALSE	9
2022-09-13	10:55:29	0.381438	81.5144	FALSE	9
2022-09-13	10:55:29	0.493448	82.0079	FALSE	9
2022-09-13	10:55:29	0.415789	82.4237	FALSE	9
2022-09-13	10:55:29	0.437672	82.8614	FALSE	9
2022-09-13	10:55:30	0.45813	83.3195	FALSE	9
2022-09-13	10:55:30	0.416043	83.7355	FALSE	9
2022-09-13	10:55:30	0.49243	84.228	FALSE	9
2022-09-13	10:55:30	0.446221	84.6742	FALSE	9
2022-09-13	10:55:31	0.44673	85.1209	FALSE	9
2022-09-13	10:55:31	0.519504	85.6404	FALSE	9
2022-09-13	10:55:31	0.435891	86.0763	FALSE	9
2022-09-13	10:55:32	0.494109	86.5704	FALSE	9
2022-09-13	10:55:32	0.277366	86.8478	FALSE	9
2022-09-13	10:55:32	0.476756	87.3245	FALSE	9
2022-09-13	10:55:32	0.377214	87.7017	FALSE	9
2022-09-13	10:55:33	0.349173	88.0509	FALSE	9
2022-09-13	10:55:33	0.0899875	88.1409	FALSE	9
2022-09-13	10:55:33	0.226629	88.3675	FALSE	9
2022-09-13	10:55:33	0.0452038	88.4127	FALSE	9
2022-09-13	10:55:34	0.155636	88.5684	FALSE	9
2022-09-13	10:55:34	0.118079	88.6865	FALSE	9
2022-09-13	10:55:34	0.320318	89.0068	FALSE	9
2022-09-13	10:55:34	0.440318	89.4471	FALSE	9
2022-09-13	10:55:35	0.814822	90.2619	FALSE	9
2022-09-13	10:55:35	0.87528	91.1372	FALSE	9
2022-09-13	10:55:35	1.14872	92.2859	FALSE	9
2022-09-13	10:55:36	2.86174	95.1477	FALSE	9
2022-09-13	10:55:36	1.05767	96.2053	FALSE	9
2022-09-13	10:55:36	1.73009	97.9354	FALSE	9
2022-09-13	10:55:36	1.06754	99.003	FALSE	9
2022-09-13	10:55:37	2.03686	101.04	FALSE	9
2022-09-13	10:55:37	1.70312	102.743	FALSE	9
2022-09-13	10:55:37	3.12342	105.866	1	10
2022-09-13	10:55:37	4.15996	110.026	1	11
2022-09-13	10:55:38	2.31543	112.342	FALSE	11
2022-09-13	10:55:38	3.08678	115.429	1	12
2022-09-13	10:55:38	2.36887	117.797	FALSE	12
2022-09-13	10:55:38	2.66724	120.465	FALSE	12
2022-09-13	10:55:39	3.78245	124.247	1	13
2022-09-13	10:55:39	2.06271	126.31	FALSE	13
2022-09-13	10:55:39	3.50403	129.814	1	14
2022-09-13	10:55:40	1.89355	131.707	FALSE	14
2022-09-13	10:55:40	1.09991	132.807	FALSE	14
2022-09-13	10:55:40	3.09813	135.905	1	15
2022-09-13	10:55:40	0.939758	136.845	FALSE	15
2022-09-13	10:55:41	2.78535	139.631	FALSE	15
2022-09-13	10:55:41	1.81238	141.443	FALSE	15
2022-09-13	10:55:41	2.23823	143.681	FALSE	15
2022-09-13	10:55:41	2.9449	146.626	FALSE	15
2022-09-13	10:55:42	2.90861	149.535	FALSE	15
2022-09-13	10:55:42	4.14775	153.682	1	16
2022-09-13	10:55:42	2.45233	156.135	FALSE	16
2022-09-13	10:55:42	3.13141	159.266	1	17
2022-09-13	10:55:43	3.78215	163.048	1	18
2022-09-13	10:55:43	1.49676	164.545	FALSE	18
2022-09-13	10:55:43	3.09676	167.642	1	19
2022-09-13	10:55:43	1.08149	168.723	FALSE	19
2022-09-13	10:55:44	2.7563	171.48	FALSE	19
2022-09-13	10:55:44	1.70495	173.185	FALSE	19
2022-09-13	10:55:44	2.50566	175.69	FALSE	19
2022-09-13	10:55:45	3.87121	179.561	1	20
2022-09-13	10:55:45	2.71752	182.279	FALSE	20
2022-09-13	10:55:45	5.14825	187.427	1	21
2022-09-13	10:55:45	3.22495	190.652	1	22
2022-09-13	10:55:46	3.9653	194.617	1	23
2022-09-13	10:55:46	3.49426	198.112	1	24
2022-09-13	10:55:46	1.76658	199.878	FALSE	24
2022-09-13	10:55:46	5.35563	205.234	1	25
2022-09-13	10:55:47	0.685	205.919	FALSE	25
2022-09-13	10:55:47	1.85441	207.773	FALSE	25
2022-09-13	10:55:47	1.6053	209.379	FALSE	25
2022-09-13	10:55:47	0.625814	210.004	FALSE	25
2022-09-13	10:55:48	1.74383	211.748	FALSE	25
2022-09-13	10:55:48	1.33391	213.082	FALSE	25
2022-09-13	10:55:48	2.28449	215.367	FALSE	25
2022-09-13	10:55:49	2.44871	217.815	FALSE	25
2022-09-13	10:55:49	3.15085	220.966	1	26
2022-09-13	10:55:49	6.9654	227.932	1	27
2022-09-13	10:55:49	2.29457	230.226	FALSE	27
2022-09-13	10:55:50	7.11166	237.338	1	28
2022-09-13	10:55:50	3.30983	240.648	1	29
2022-09-13	10:55:50	3.42215	244.07	1	30
2022-09-13	10:55:50	6.11777	250.188	1	31
2022-09-13	10:55:51	3.78515	253.973	1	32
2022-09-13	10:55:51	4.84159	258.814	1	33
2022-09-13	10:55:51	4.41838	263.233	1	34
2022-09-13	10:55:51	1.53737	264.77	FALSE	34
2022-09-13	10:55:52	5.89853	270.669	1	35
2022-09-13	10:55:52	1.35945	272.028	FALSE	35
2022-09-13	10:55:52	3.21721	275.245	1	36
2022-09-13	10:55:53	4.83426	280.08	1	37
2022-09-13	10:55:53	3.14179	283.221	1	38
2022-09-13	10:55:53	7.25482	290.476	1	39
2022-09-13	10:55:53	8.09192	298.568	1	40
2022-09-13	10:55:54	2.97991	301.548	FALSE	40
2022-09-13	10:55:54	8.69141	310.239	1	41
2022-09-13	10:55:54	1.57452	311.814	FALSE	41
2022-09-13	10:55:54	4.39833	316.212	1	42
2022-09-13	10:55:55	5.14744	321.36	1	43
2022-09-13	10:55:55	2.84739	324.207	FALSE	43
2022-09-13	10:55:55	7.98464	332.192	1	44
2022-09-13	10:55:55	5.50423	337.696	1	45
2022-09-13	10:55:56	2.90851	340.604	FALSE	45
2022-09-13	10:55:56	7.25385	347.858	1	46
2022-09-13	10:55:56	1.22719	349.085	FALSE	46
2022-09-13	10:55:56	4.23563	353.321	1	47
2022-09-13	10:55:57	3.52836	356.849	1	48
2022-09-13	10:55:57	1.23238	358.082	FALSE	48
2022-09-13	10:55:57	4.14312	362.225	1	49
2022-09-13	10:55:58	2.34067	364.566	FALSE	49
2022-09-13	10:55:58	2.20729	366.773	FALSE	49
2022-09-13	10:55:58	4.12485	370.898	1	50
2022-09-13	10:55:58	1.33711	372.235	FALSE	50
2022-09-13	10:55:59	3.14795	375.383	1	51
2022-09-13	10:55:59	0.634466	376.017	FALSE	51
2022-09-13	10:55:59	1.13202	377.149	FALSE	51
2022-09-13	10:55:59	1.3048	378.454	FALSE	51
2022-09-13	10:56:00	0.323066	378.777	FALSE	51
2022-09-13	10:56:00	0.372328	379.15	FALSE	51
2022-09-13	10:56:00	-0.0671117	379.15	FALSE	51
2022-09-13	10:56:00	-0.0844654	379.15	FALSE	51
2022-09-13	10:56:01	-0.331132	379.15	FALSE	51
2022-09-13	10:56:01	-0.170827	379.15	FALSE	51
2022-09-13	10:56:01	-0.248486	379.15	FALSE	51
2022-09-13	10:56:02	-0.310572	379.15	FALSE	51
2022-09-13	10:56:02	-0.369351	379.15	FALSE	51
2022-09-13	10:56:02	-0.210776	379.15	FALSE	51
2022-09-13	10:56:02	0.0703438	379.22	FALSE	51
2022-09-13	10:56:03	-0.12243	379.22	FALSE	51
2022-09-13	10:56:03	0.191616	379.411	FALSE	51
2022-09-13	10:56:03	0.321947	379.733	FALSE	51
2022-09-13	10:56:03	0.410802	380.144	FALSE	51
2022-09-13	10:56:04	0.452583	380.597	FALSE	51
2022-09-13	10:56:04	0.322659	380.919	FALSE	51
2022-09-13	10:56:04	0.737163	381.657	FALSE	51
2022-09-13	10:56:04	0.638537	382.295	FALSE	51
2022-09-13	10:56:05	0.395433	382.691	FALSE	51
2022-09-13	10:56:05	0.405916	383.097	FALSE	51
2022-09-13	10:56:05	0.991361	384.088	FALSE	51
2022-09-13	10:56:06	0.799097	384.887	FALSE	51
2022-09-13	10:56:06	0.842201	385.729	FALSE	51
2022-09-13	10:56:06	0.455789	386.185	FALSE	51
2022-09-13	10:56:06	0.555025	386.74	FALSE	51
2022-09-13	10:56:07	0.521336	387.261	FALSE	51
2022-09-13	10:56:07	0.54042	387.802	FALSE	51
2022-09-13	10:56:07	0.628817	388.431	FALSE	51
2022-09-13	10:56:07	0.6136	389.044	FALSE	51
2022-09-13	10:56:08	0.637774	389.682	FALSE	51
2022-09-13	10:56:08	0.600623	390.283	FALSE	51
2022-09-13	10:56:08	0.541794	390.824	FALSE	51
2022-09-13	10:56:08	0.668664	391.493	FALSE	51
2022-09-13	10:56:09	0.662659	392.156	FALSE	51
2022-09-13	10:56:09	1.14342	393.299	FALSE	51
2022-09-13	10:56:09	0.408003	393.707	FALSE	51
2022-09-13	10:56:09	0.638995	394.346	FALSE	51
2022-09-13	10:56:10	0.6907	395.037	FALSE	51
2022-09-13	10:56:10	0.638842	395.676	FALSE	51
2022-09-13	10:56:10	0.602099	396.278	FALSE	51
2022-09-13	10:56:11	0.526221	396.804	FALSE	51
2022-09-13	10:56:11	0.580776	397.385	FALSE	51
2022-09-13	10:56:11	0.592023	397.977	FALSE	51
2022-09-13	10:56:11	0.595483	398.572	FALSE	51
2022-09-13	10:56:12	0.551666	399.124	FALSE	51
2022-09-13	10:56:12	0.508715	399.633	FALSE	51
2022-09-13	10:56:12	0.332328	399.965	FALSE	51
2022-09-13	10:56:12	0.391463	400.356	FALSE	51
2022-09-13	10:56:13	0.314517	400.671	FALSE	51
2022-09-13	10:56:13	0.685204	401.356	FALSE	51
2022-09-13	10:56:13	0.521183	401.877	FALSE	51
2022-09-13	10:56:13	0.627748	402.505	FALSE	51
2022-09-13	10:56:14	0.99584	403.501	FALSE	51
2022-09-13	10:56:14	2.2449	405.746	FALSE	51
2022-09-13	10:56:14	3.30729	409.053	1	52
2022-09-13	10:56:15	3.60301	412.656	1	53
2022-09-13	10:56:15	4.69553	417.352	1	54
2022-09-13	10:56:15	2.31594	419.668	FALSE	54
2022-09-13	10:56:15	7.20144	426.869	1	55
2022-09-13	10:56:16	3.09879	429.968	1	56
2022-09-13	10:56:16	4.3994	434.367	1	57
2022-09-13	10:56:16	4.79767	439.165	1	58
2022-09-13	10:56:16	4.31955	443.484	1	59
2022-09-13	10:56:17	9.24784	452.732	1	60
2022-09-13	10:56:17	6.95314	459.685	1	61
2022-09-13	10:56:17	7.05701	466.742	1	62
2022-09-13	10:56:17	13.4266	480.169	1	63
2022-09-13	10:56:18	4.43986	484.609	1	64
2022-09-13	10:56:18	8.15924	492.768	1	65
2022-09-13	10:56:18	10.3505	503.119	1	66
2022-09-13	10:56:19	3.41472	506.533	1	67
2022-09-13	10:56:19	8.44102	514.974	1	68
2022-09-13	10:56:19	5.14866	520.123	1	69
2022-09-13	10:56:19	4.67395	524.797	1	70
2022-09-13	10:56:20	9.0166	533.814	1	71
2022-09-13	10:56:20	5.91909	539.733	1	72
2022-09-13	10:56:20	6.97833	546.711	1	73
2022-09-13	10:56:20	7.57406	554.285	1	74
2022-09-13	10:56:21	3.33441	557.619	1	75
2022-09-13	10:56:21	10.2378	567.857	1	76
2022-09-13	10:56:21	1.8648	569.722	FALSE	76
2022-09-13	10:56:21	3.1107	572.833	1	77
2022-09-13	10:56:22	6.17695	579.01	1	78
2022-09-13	10:56:22	4.33609	583.346	1	79
2022-09-13	10:56:22	6.56891	589.915	1	80
2022-09-13	10:56:23	6.80327	596.718	1	81
2022-09-13	10:56:23	2.06164	598.78	FALSE	81
2022-09-13	10:56:23	4.94149	603.721	1	82
2022-09-13	10:56:23	0.989071	604.71	FALSE	82
2022-09-13	10:56:24	3.19457	607.905	1	83
2022-09-13	10:56:24	0.77701	608.682	FALSE	83
2022-09-13	10:56:24	0.951717	609.633	FALSE	83
2022-09-13	10:56:24	2.45599	612.089	FALSE	83
2022-09-13	10:56:25	0.781081	612.871	FALSE	83
2022-09-13	10:56:25	3.95207	616.823	1	84
2022-09-13	10:56:25	1.9765	618.799	FALSE	84
2022-09-13	10:56:25	4.68164	623.481	1	85
2022-09-13	10:56:26	1.56144	625.042	FALSE	85
2022-09-13	10:56:26	2.4534	627.496	FALSE	85
2022-09-13	10:56:26	4.73375	632.229	1	86
2022-09-13	10:56:26	4.32215	636.551	1	87
2022-09-13	10:56:27	6.48378	643.035	1	88
2022-09-13	10:56:27	2.85543	645.891	FALSE	88
2022-09-13	10:56:27	2.24093	648.132	FALSE	88
2022-09-13	10:56:28	1.76281	649.894	FALSE	88
2022-09-13	10:56:28	0.512837	650.407	FALSE	88
2022-09-13	10:56:28	2.32576	652.733	FALSE	88
2022-09-13	10:56:28	1.18983	653.923	FALSE	88
2022-09-13	10:56:29	1.93986	655.863	FALSE	88
2022-09-13	10:56:29	2.56144	658.424	FALSE	88
2022-09-13	10:56:29	0.944644	659.369	FALSE	88
2022-09-13	10:56:29	3.6851	663.054	1	89
2022-09-13	10:56:30	0.84902	663.903	FALSE	89
2022-09-13	10:56:30	4.182	668.085	1	90
2022-09-13	10:56:30	1.35274	669.438	FALSE	90
2022-09-13	10:56:30	2.37187	671.81	FALSE	90
2022-09-13	10:56:31	2.96418	674.774	FALSE	90
2022-09-13	10:56:31	0.97243	675.746	FALSE	90
2022-09-13	10:56:31	1.51788	677.264	FALSE	90
2022-09-13	10:56:32	1.56663	678.831	FALSE	90
2022-09-13	10:56:32	1.12963	679.96	FALSE	90
2022-09-13	10:56:32	1.76062	681.721	FALSE	90
2022-09-13	10:56:32	0.405662	682.127	FALSE	90
2022-09-13	10:56:33	1.14754	683.274	FALSE	90
2022-09-13	10:56:33	0.504542	683.779	FALSE	90
2022-09-13	10:56:33	0.380318	684.159	FALSE	90
2022-09-13	10:56:33	0.58785	684.747	FALSE	90
2022-09-13	10:56:34	0.728257	685.475	FALSE	90
2022-09-13	10:56:34	1.39955	686.875	FALSE	90
2022-09-13	10:56:34	1.66001	688.535	FALSE	90
2022-09-13	10:56:34	3.03365	691.568	1	91
2022-09-13	10:56:35	3.60525	695.174	1	92
2022-09-13	10:56:35	4.05884	699.232	1	93
2022-09-13	10:56:35	8.34505	707.577	1	94
2022-09-13	10:56:36	1.25111	708.829	FALSE	94
2022-09-13	10:56:36	7.67243	716.501	1	95
2022-09-13	10:56:36	2.23665	718.738	FALSE	95
2022-09-13	10:56:36	2.57594	721.314	FALSE	95
2022-09-13	10:56:37	3.16749	724.481	1	96
2022-09-13	10:56:37	1.08342	725.564	FALSE	96
2022-09-13	10:56:37	3.8077	729.372	1	97
2022-09-13	10:56:37	2.16393	731.536	FALSE	97
2022-09-13	10:56:38	1.66968	733.206	FALSE	97
2022-09-13	10:56:38	5.10469	738.31	1	98
2022-09-13	10:56:38	1.21716	739.528	FALSE	98
2022-09-13	10:56:38	6.97889	746.507	1	99
2022-09-13	10:56:39	1.81889	748.325	FALSE	99
2022-09-13	10:56:39	4.77243	753.098	1	100
2022-09-13	10:56:39	2.79289	755.891	FALSE	100
2022-09-13	10:56:39	1.88271	757.773	FALSE	100
2022-09-13	10:56:40	3.68612	761.46	1	101
2022-09-13	10:56:40	1.54449	763.004	FALSE	101
2022-09-13	10:56:40	1.16602	764.17	FALSE	101
2022-09-13	10:56:41	1.68449	765.855	FALSE	101
2022-09-13	10:56:41	0.34729	766.202	FALSE	101
2022-09-13	10:56:41	1.16037	767.362	FALSE	101
2022-09-13	10:56:41	0.760776	768.123	FALSE	101
2022-09-13	10:56:42	2.20164	770.325	FALSE	101
2022-09-13	10:56:42	2.31253	772.637	FALSE	101
2022-09-13	10:56:42	1.69426	774.331	FALSE	101
2022-09-13	10:56:42	3.67981	778.011	1	102
2022-09-13	10:56:43	1.23859	779.25	FALSE	102
2022-09-13	10:56:43	3.52866	782.778	1	103
2022-09-13	10:56:43	0.975382	783.754	FALSE	103
2022-09-13	10:56:43	3.0081	786.762	1	104
2022-09-13	10:56:44	1.76413	788.526	FALSE	104
2022-09-13	10:56:44	2.89655	791.423	FALSE	104
2022-09-13	10:56:44	4.35614	795.779	1	105
2022-09-13	10:56:45	3.80581	799.585	1	106
2022-09-13	10:56:45	8.77497	808.36	1	107
2022-09-13	10:56:45	8.79309	817.153	1	108
2022-09-13	10:56:45	5.99416	823.147	1	109
2022-09-13	10:56:46	7.25136	830.398	1	110
2022-09-13	10:56:46	1.36261	831.761	FALSE	110
2022-09-13	10:56:46	5.96413	837.725	1	111
2022-09-13	10:56:46	1.57167	839.297	FALSE	111
2022-09-13	10:56:47	3.0336	842.33	1	112
2022-09-13	10:56:47	4.70332	847.034	1	113
2022-09-13	10:56:47	2.745	849.779	FALSE	113
2022-09-13	10:56:47	4.72988	854.508	1	114
2022-09-13	10:56:48	2.12281	856.631	FALSE	114
2022-09-13	10:56:48	3.09619	859.727	1	115
2022-09-13	10:56:48	4.46032	864.188	1	116
2022-09-13	10:56:49	2.80103	866.989	FALSE	116
2022-09-13	10:56:49	10.4926	877.481	1	117
2022-09-13	10:56:49	2.97436	880.456	FALSE	117
2022-09-13	10:56:49	9.12922	889.585	1	118
2022-09-13	10:56:50	7.79177	897.377	1	119
2022-09-13	10:56:50	3.34739	900.724	1	120
2022-09-13	10:56:50	8.22225	908.946	1	121
2022-09-13	10:56:50	3.83218	912.779	1	122
2022-09-13	10:56:51	4.73233	917.511	1	123
2022-09-13	10:56:51	6.21507	923.726	1	124
2022-09-13	10:56:51	1.81121	925.537	FALSE	124
2022-09-13	10:56:51	6.97751	932.515	1	125
2022-09-13	10:56:52	2.88149	935.396	FALSE	125
2022-09-13	10:56:52	3.87187	939.268	1	126
2022-09-13	10:56:52	7.54006	946.808	1	127
2022-09-13	10:56:53	1.27212	948.08	FALSE	127
2022-09-13	10:56:53	3.94225	952.022	1	128
2022-09-13	10:56:53	2.58663	954.609	FALSE	128
2022-09-13	10:56:53	2.41396	957.023	FALSE	128
2022-09-13	10:56:54	6.27823	963.301	1	129
2022-09-13	10:56:54	4.29492	967.596	1	130
2022-09-13	10:56:54	8.61747	976.214	1	131
2022-09-13	10:56:54	1.40917	977.623	FALSE	131
2022-09-13	10:56:55	2.1852	979.808	FALSE	131
2022-09-13	10:56:55	2.39996	982.208	FALSE	131
2022-09-13	10:56:55	0.507748	982.716	FALSE	131
2022-09-13	10:56:55	1.55345	984.269	FALSE	131
2022-09-13	10:56:56	0.869224	985.138	FALSE	131
2022-09-13	10:56:56	1.43818	986.577	FALSE	131
2022-09-13	10:56:56	1.3851	987.962	FALSE	131
2022-09-13	10:56:56	1.45314	989.415	FALSE	131
2022-09-13	10:56:57	3.10383	992.519	1	132
2022-09-13	10:56:57	2.37401	994.893	FALSE	132
2022-09-13	10:56:57	4.75706	999.65	1	133
2022-09-13	10:56:58	1.66485	1001.31	FALSE	133
2022-09-13	10:56:58	5.23797	1006.55	1	134
2022-09-13	10:56:58	1.72016	1008.27	FALSE	134
2022-09-13	10:56:58	2.60902	1010.88	FALSE	134
2022-09-13	10:56:59	3.32276	1014.2	1	135
2022-09-13	10:56:59	1.09747	1015.3	FALSE	135
2022-09-13	10:56:59	1.66515	1016.97	FALSE	135
2022-09-13	10:56:59	1.55263	1018.52	FALSE	135
2022-09-13	10:57:00	1.56296	1020.08	FALSE	135
2022-09-13	10:57:00	0.72042	1020.8	FALSE	135
2022-09-13	10:57:00	1.16363	1021.97	FALSE	135
2022-09-13	10:57:00	0.305814	1022.27	FALSE	135
2022-09-13	10:57:01	0.644288	1022.92	FALSE	135
2022-09-13	10:57:01	0.519402	1023.44	FALSE	135
2022-09-13	10:57:01	0.583982	1024.02	FALSE	135
2022-09-13	10:57:02	0.352481	1024.37	FALSE	135
2022-09-13	10:57:02	0.235992	1024.61	FALSE	135
2022-09-13	10:57:02	0.231616	1024.84	FALSE	135
2022-09-13	10:57:02	0.149071	1024.99	FALSE	135
2022-09-13	10:57:03	0.206883	1025.2	FALSE	135
2022-09-13	10:57:03	0.162608	1025.36	FALSE	135
2022-09-13	10:57:03	0.714211	1026.07	FALSE	135
2022-09-13	10:57:03	0.687494	1026.76	FALSE	135
2022-09-13	10:57:04	0.547952	1027.31	FALSE	135
2022-09-13	10:57:04	0.0885116	1027.4	FALSE	135
2022-09-13	10:57:04	0.027901	1027.42	FALSE	135
2022-09-13	10:57:04	0.159199	1027.58	FALSE	135
2022-09-13	10:57:05	0.166323	1027.75	FALSE	135
2022-09-13	10:57:05	0.255993	1028.01	FALSE	135
2022-09-13	10:57:05	0.375433	1028.38	FALSE	135
2022-09-13	10:57:06	0.464135	1028.85	FALSE	135
2022-09-13	10:57:06	0.458588	1029.3	FALSE	135
2022-09-13	10:57:06	0.257723	1029.56	FALSE	135
2022-09-13	10:57:06	0.537519	1030.1	FALSE	135
2022-09-13	10:57:07	0.610903	1030.71	FALSE	135
2022-09-13	10:57:07	0.821336	1031.53	FALSE	135
2022-09-13	10:57:07	0.856145	1032.39	FALSE	135
2022-09-13	10:57:07	0.598944	1032.99	FALSE	135
2022-09-13	10:57:08	0.570293	1033.56	FALSE	135
2022-09-13	10:57:08	0.402964	1033.96	FALSE	135
2022-09-13	10:57:08	0.319707	1034.28	FALSE	135
2022-09-13	10:57:08	0.275687	1034.56	FALSE	135
2022-09-13	10:57:09	0.429529	1034.99	FALSE	135
2022-09-13	10:57:09	0.330242	1035.32	FALSE	135
2022-09-13	10:57:09	0.304898	1035.62	FALSE	135
2022-09-13	10:57:09	0.17416	1035.79	FALSE	135
2022-09-13	10:57:10	0.2507	1036.05	FALSE	135
2022-09-13	10:57:10	-0.0131677	1036.05	FALSE	135
2022-09-13	10:57:10	-0.0736766	1036.05	FALSE	135
2022-09-13	10:57:11	-0.048384	1036.05	FALSE	135
2022-09-13	10:57:11	-0.0202415	1036.05	FALSE	135
2022-09-13	10:57:11	0.260573	1036.31	FALSE	135
2022-09-13	10:57:11	0.128868	1036.43	FALSE	135
2022-09-13	10:57:12	1.08795	1037.52	FALSE	135
2022-09-13	10:57:12	2.87462	1040.4	FALSE	135
2022-09-13	10:57:12	7.30103	1047.7	1	136
2022-09-13	10:57:12	3.22821	1050.93	1	137
2022-09-13	10:57:13	4.68596	1055.61	1	138
2022-09-13	10:57:13	1.70123	1057.31	FALSE	138
2022-09-13	10:57:13	2.87278	1060.19	FALSE	138
2022-09-13	10:57:13	2.12001	1062.31	FALSE	138
2022-09-13	10:57:14	0.928562	1063.24	FALSE	138
2022-09-13	10:57:14	1.5595	1064.79	FALSE	138
2022-09-13	10:57:14	0.897774	1065.69	FALSE	138
2022-09-13	10:57:15	2.01004	1067.7	FALSE	138
2022-09-13	10:57:15	2.63385	1070.34	FALSE	138
2022-09-13	10:57:15	0.846069	1071.18	FALSE	138
2022-09-13	10:57:15	0.855025	1072.04	FALSE	138
2022-09-13	10:57:16	0.713651	1072.75	FALSE	138
2022-09-13	10:57:16	0.624237	1073.38	FALSE	138
2022-09-13	10:57:16	2.68566	1076.06	FALSE	138
2022-09-13	10:57:16	2.24459	1078.31	FALSE	138
2022-09-13	10:57:17	3.80266	1082.11	1	139
2022-09-13	10:57:17	1.74963	1083.86	FALSE	139
2022-09-13	10:57:17	3.5105	1087.37	1	140
2022-09-13	10:57:17	2.3506	1089.72	FALSE	140
2022-09-13	10:57:18	6.3394	1096.06	1	141
2022-09-13	10:57:18	1.20866	1097.27	FALSE	141
2022-09-13	10:57:18	3.06622	1100.33	1	142
2022-09-13	10:57:19	1.87767	1102.21	FALSE	142
2022-09-13	10:57:19	1.41335	1103.62	FALSE	142
2022-09-13	10:57:19	1.97955	1105.6	FALSE	142
2022-09-13	10:57:19	1.39579	1107	FALSE	142
2022-09-13	10:57:20	1.87111	1108.87	FALSE	142
2022-09-13	10:57:20	1.42795	1110.3	FALSE	142
2022-09-13	10:57:20	0.645407	1110.94	FALSE	142
2022-09-13	10:57:20	0.489173	1111.43	FALSE	142
2022-09-13	10:57:21	0.585203	1112.02	FALSE	142
2022-09-13	10:57:21	0.727392	1112.75	FALSE	142
2022-09-13	10:57:21	0.922506	1113.67	FALSE	142
2022-09-13	10:57:21	1.4677	1115.14	FALSE	142
2022-09-13	10:57:22	1.55609	1116.69	FALSE	142
2022-09-13	10:57:22	1.54841	1118.24	FALSE	142
2022-09-13	10:57:22	1.05289	1119.29	FALSE	142
2022-09-13	10:57:23	0.753397	1120.05	FALSE	142
2022-09-13	10:57:23	0.654822	1120.7	FALSE	142
2022-09-13	10:57:23	0.809478	1121.51	FALSE	142
2022-09-13	10:57:23	1.26943	1122.78	FALSE	142
2022-09-13	10:57:24	1.06902	1123.85	FALSE	142
2022-09-13	10:57:24	0.981743	1124.83	FALSE	142
2022-09-13	10:57:24	0.901997	1125.73	FALSE	142
2022-09-13	10:57:24	0.397672	1126.13	FALSE	142
2022-09-13	10:57:25	0.333753	1126.46	FALSE	142
2022-09-13	10:57:25	0.218944	1126.68	FALSE	142
2022-09-13	10:57:25	0.195433	1126.88	FALSE	142
2022-09-13	10:57:25	0.133244	1127.01	FALSE	142
2022-09-13	10:57:26	0.871463	1127.88	FALSE	142
2022-09-13	10:57:26	0.663982	1128.55	FALSE	142
2022-09-13	10:57:26	0.632125	1129.18	FALSE	142
2022-09-13	10:57:26	0.708766	1129.89	FALSE	142
2022-09-13	10:57:27	0.970089	1130.86	FALSE	142
2022-09-13	10:57:27	0.383982	1131.24	FALSE	142
2022-09-13	10:57:27	0.465713	1131.71	FALSE	142
2022-09-13	10:57:28	0.443015	1132.15	FALSE	142
2022-09-13	10:57:28	0.322659	1132.47	FALSE	142
2022-09-13	10:57:28	0.314211	1132.79	FALSE	142
2022-09-13	10:57:28	0.225814	1133.01	FALSE	142
2022-09-13	10:57:29	0.185662	1133.2	FALSE	142
2022-09-13	10:57:29	0.201794	1133.4	FALSE	142
2022-09-13	10:57:29	0.141692	1133.54	FALSE	142
2022-09-13	10:57:29	0.222201	1133.77	FALSE	142
2022-09-13	10:57:30	0.01584	1133.78	FALSE	142
2022-09-13	10:57:30	-0.106094	1133.78	FALSE	142
2022-09-13	10:57:30	-0.209453	1133.78	FALSE	142
2022-09-13	10:57:30	0.403677	1134.19	FALSE	142
2022-09-13	10:57:31	5.85222	1140.04	1	143
2022-09-13	10:57:31	13.4543	1153.49	1	144
2022-09-13	10:57:31	7.78378	1161.28	1	145
2022-09-13	10:57:32	8.16199	1169.44	1	146
2022-09-13	10:57:32	3.27625	1172.71	1	147
2022-09-13	10:57:32	5.28031	1177.99	1	148
2022-09-13	10:57:32	3.46683	1181.46	1	149
2022-09-13	10:57:33	3.48139	1184.94	1	150
2022-09-13	10:57:33	4.08403	1189.03	1	151
2022-09-13	10:57:33	4.36612	1193.39	1	152
2022-09-13	10:57:33	3.82352	1197.22	1	153
2022-09-13	10:57:34	2.69721	1199.91	FALSE	153
2022-09-13	10:57:34	1.55757	1201.47	FALSE	153
2022-09-13	10:57:34	0.929122	1202.4	FALSE	153
2022-09-13	10:57:34	1.09487	1203.49	FALSE	153
2022-09-13	10:57:35	1.09976	1204.59	FALSE	153
2022-09-13	10:57:35	0.85182	1205.45	FALSE	153
2022-09-13	10:57:35	0.779453	1206.23	FALSE	153
2022-09-13	10:57:36	0.767035	1206.99	FALSE	153
2022-09-13	10:57:36	0.767697	1207.76	FALSE	153
2022-09-13	10:57:36	0.589784	1208.35	FALSE	153
2022-09-13	10:57:36	0.471361	1208.82	FALSE	153
2022-09-13	10:57:37	0.724949	1209.55	FALSE	153
2022-09-13	10:57:37	0.73131	1210.28	FALSE	153
2022-09-13	10:57:37	0.735585	1211.01	FALSE	153
2022-09-13	10:57:37	0.725916	1211.74	FALSE	153
2022-09-13	10:57:38	0.733804	1212.47	FALSE	153
2022-09-13	10:57:38	0.740776	1213.21	FALSE	153
2022-09-13	10:57:38	0.737519	1213.95	FALSE	153
2022-09-13	10:57:38	0.734466	1214.69	FALSE	153
2022-09-13	10:57:39	0.729733	1215.42	FALSE	153
2022-09-13	10:57:39	0.733346	1216.15	FALSE	153
2022-09-13	10:57:39	1.24296	1217.39	FALSE	153
2022-09-13	10:57:40	1.16642	1218.56	FALSE	153
2022-09-13	10:57:40	1.31686	1219.88	FALSE	153
2022-09-13	10:57:40	0.881998	1220.76	FALSE	153
2022-09-13	10:57:40	0.35472	1221.11	FALSE	153
2022-09-13	10:57:41	0.21986	1221.33	FALSE	153
2022-09-13	10:57:41	0.207188	1221.54	FALSE	153
2022-09-13	10:57:41	0.103982	1221.64	FALSE	153
2022-09-13	10:57:41	0.0762979	1221.72	FALSE	153
2022-09-13	10:57:42	0.140369	1221.86	FALSE	153
2022-09-13	10:57:42	0.206629	1222.07	FALSE	153
2022-09-13	10:57:42	0.313957	1222.38	FALSE	153
2022-09-13	10:57:42	0.214771	1222.59	FALSE	153
2022-09-13	10:57:43	0.199148	1222.79	FALSE	153
2022-09-13	10:57:43	0.241998	1223.04	FALSE	153
2022-09-13	10:57:43	0.296043	1223.33	FALSE	153
2022-09-13	10:57:43	0.378537	1223.71	FALSE	153
2022-09-13	10:57:44	0.622863	1224.33	FALSE	153
2022-09-13	10:57:44	0.673957	1225.01	FALSE	153
2022-09-13	10:57:44	0.450496	1225.46	FALSE	153
2022-09-13	10:57:45	0.577112	1226.04	FALSE	153
2022-09-13	10:57:45	0.599046	1226.63	FALSE	153
2022-09-13	10:57:45	0.593957	1227.23	FALSE	153
2022-09-13	10:57:45	0.530038	1227.76	FALSE	153
2022-09-13	10:57:46	0.518079	1228.28	FALSE	153
2022-09-13	10:57:46	0.481489	1228.76	FALSE	153
2022-09-13	10:57:46	0.494313	1229.25	FALSE	153
2022-09-13	10:57:46	0.547392	1229.8	FALSE	153
2022-09-13	10:57:47	0.689682	1230.49	FALSE	153
2022-09-13	10:57:47	0.839046	1231.33	FALSE	153
2022-09-13	10:57:47	0.748002	1232.08	FALSE	153
2022-09-13	10:57:47	0.455433	1232.53	FALSE	153
2022-09-13	10:57:48	0.707545	1233.24	FALSE	153
2022-09-13	10:57:48	0.73584	1233.97	FALSE	153
2022-09-13	10:57:48	0.501488	1234.48	FALSE	153
2022-09-13	10:57:49	0.527952	1235	FALSE	153
2022-09-13	10:57:49	0.492176	1235.5	FALSE	153
2022-09-13	10:57:49	0.127799	1235.62	FALSE	153
2022-09-13	10:57:49	0.0379773	1235.66	FALSE	153
2022-09-13	10:57:50	0.210395	1235.87	FALSE	153
2022-09-13	10:57:50	0.142405	1236.02	FALSE	153
2022-09-13	10:57:50	0.269428	1236.28	FALSE	153
2022-09-13	10:57:50	0.380216	1236.66	FALSE	153
2022-09-13	10:57:51	0.440725	1237.11	FALSE	153
2022-09-13	10:57:51	0.372125	1237.48	FALSE	153
2022-09-13	10:57:51	0.403728	1237.88	FALSE	153
2022-09-13	10:57:51	0.455789	1238.34	FALSE	153
2022-09-13	10:57:52	0.269733	1238.61	FALSE	153
2022-09-13	10:57:52	0.215891	1238.82	FALSE	153
2022-09-13	10:57:52	0.341489	1239.16	FALSE	153
2022-09-13	10:57:53	0.154924	1239.32	FALSE	153
2022-09-13	10:57:53	0.235382	1239.55	FALSE	153
2022-09-13	10:57:53	0.220878	1239.78	FALSE	153
2022-09-13	10:57:53	0.414822	1240.19	FALSE	153
2022-09-13	10:57:54	0.0834226	1240.27	FALSE	153
2022-09-13	10:57:54	0.119657	1240.39	FALSE	153
2022-09-13	10:57:54	0.0405728	1240.43	FALSE	153
2022-09-13	10:57:54	0.202557	1240.64	FALSE	153
2022-09-13	10:57:55	0.0316669	1240.67	FALSE	153
2022-09-13	10:57:55	0.916349	1241.58	FALSE	153
2022-09-13	10:57:55	4.94892	1246.53	1	154
2022-09-13	10:57:55	6.34088	1252.87	1	155
2022-09-13	10:57:56	2.26368	1255.14	FALSE	155
2022-09-13	10:57:56	1.78251	1256.92	FALSE	155
2022-09-13	10:57:56	0.861997	1257.78	FALSE	155
2022-09-13	10:57:56	1.73559	1259.52	FALSE	155
2022-09-13	10:57:57	0.702405	1260.22	FALSE	155
2022-09-13	10:57:57	0.482608	1260.7	FALSE	155
2022-09-13	10:57:57	0.498944	1261.2	FALSE	155
2022-09-13	10:57:58	0.259046	1261.46	FALSE	155
2022-09-13	10:57:58	0.455534	1261.92	FALSE	155
2022-09-13	10:57:58	0.737926	1262.65	FALSE	155
2022-09-13	10:57:58	0.734313	1263.39	FALSE	155
2022-09-13	10:57:59	0.733346	1264.12	FALSE	155
2022-09-13	10:57:59	0.738944	1264.86	FALSE	155
2022-09-13	10:57:59	0.73416	1265.6	FALSE	155
2022-09-13	10:57:59	0.738791	1266.33	FALSE	155
2022-09-13	10:58:00	0.734313	1267.07	FALSE	155
2022-09-13	10:58:00	0.729428	1267.8	FALSE	155
2022-09-13	10:58:00	0.739249	1268.54	FALSE	155
2022-09-13	10:58:00	0.73131	1269.27	FALSE	155
2022-09-13	10:58:01	0.738893	1270.01	FALSE	155
2022-09-13	10:58:01	0.734466	1270.74	FALSE	155
2022-09-13	10:58:01	0.738435	1271.48	FALSE	155
2022-09-13	10:58:02	0.740013	1272.22	FALSE	155
2022-09-13	10:58:02	0.733804	1272.95	FALSE	155
2022-09-13	10:58:02	0.738231	1273.69	FALSE	155
2022-09-13	10:58:02	0.736552	1274.43	FALSE	155
2022-09-13	10:58:03	0.733244	1275.16	FALSE	155
2022-09-13	10:58:03	0.734313	1275.9	FALSE	155
2022-09-13	10:58:03	0.733499	1276.63	FALSE	155
2022-09-13	10:58:03	0.73645	1277.37	FALSE	155
2022-09-13	10:58:04	0.733448	1278.1	FALSE	155
2022-09-13	10:58:04	0.737621	1278.84	FALSE	155
2022-09-13	10:58:04	0.733702	1279.57	FALSE	155
2022-09-13	10:58:04	0.734822	1280.31	FALSE	155
2022-09-13	10:58:05	0.735534	1281.04	FALSE	155
2022-09-13	10:58:05	0.736196	1281.78	FALSE	155
2022-09-13	10:58:05	0.733397	1282.51	FALSE	155
2022-09-13	10:58:06	0.737926	1283.25	FALSE	155
2022-09-13	10:58:06	0.737672	1283.99	FALSE	155
2022-09-13	10:58:06	0.913397	1284.9	FALSE	155
2022-09-13	10:58:06	0.38327	1285.28	FALSE	155
2022-09-13	10:58:07	0.600369	1285.88	FALSE	155
2022-09-13	10:58:07	0.465611	1286.35	FALSE	155
2022-09-13	10:58:07	0.620776	1286.97	FALSE	155
2022-09-13	10:58:07	1.38215	1288.35	FALSE	155
2022-09-13	10:58:08	0.985865	1289.34	FALSE	155
2022-09-13	10:58:08	2.25726	1291.6	FALSE	155
2022-09-13	10:58:08	0.933702	1292.53	FALSE	155
2022-09-13	10:58:08	2.14363	1294.67	FALSE	155
2022-09-13	10:58:09	0.772277	1295.44	FALSE	155
2022-09-13	10:58:09	1.35116	1296.8	FALSE	155
2022-09-13	10:58:09	0.522862	1297.32	FALSE	155
2022-09-13	10:58:10	1.49859	1298.82	FALSE	155
2022-09-13	10:58:10	1.2534	1300.07	FALSE	155
2022-09-13	10:58:10	2.44729	1302.52	FALSE	155
2022-09-13	10:58:10	4.41345	1306.93	1	156
2022-09-13	10:58:11	1.81869	1308.75	FALSE	156
2022-09-13	10:58:11	3.45513	1312.21	1	157
2022-09-13	10:58:11	2.08525	1314.29	FALSE	157
2022-09-13	10:58:11	4.6053	1318.9	1	158
2022-09-13	10:58:12	1.182	1320.08	FALSE	158
2022-09-13	10:58:12	3.06388	1323.14	1	159
2022-09-13	10:58:12	2.72261	1325.86	FALSE	159
2022-09-13	10:58:12	2.97782	1328.84	FALSE	159
2022-09-13	10:58:13	4.42032	1333.26	1	160
2022-09-13	10:58:13	2.15472	1335.42	FALSE	160
2022-09-13	10:58:13	3.55284	1338.97	1	161
2022-09-13	10:58:13	0.874873	1339.85	FALSE	161
2022-09-13	10:58:14	1.39874	1341.24	FALSE	161
2022-09-13	10:58:14	1.79925	1343.04	FALSE	161
2022-09-13	10:58:14	2.65854	1345.7	FALSE	161
2022-09-13	10:58:15	5.32647	1351.03	1	162
2022-09-13	10:58:15	4.04887	1355.08	1	163
2022-09-13	10:58:15	0.946934	1356.02	FALSE	163
2022-09-13	10:58:15	0.735891	1356.76	FALSE	163
2022-09-13	10:58:16	0.430853	1357.19	FALSE	163
2022-09-13	10:58:16	0.275229	1357.47	FALSE	163
2022-09-13	10:58:16	0.729936	1358.2	FALSE	163
2022-09-13	10:58:16	0.727087	1358.92	FALSE	163
2022-09-13	10:58:17	0.731463	1359.65	FALSE	163
2022-09-13	10:58:17	0.737773	1360.39	FALSE	163
2022-09-13	10:58:17	0.737722	1361.13	FALSE	163
2022-09-13	10:58:17	0.736043	1361.87	FALSE	163
2022-09-13	10:58:18	0.73528	1362.6	FALSE	163
2022-09-13	10:58:18	0.734771	1363.34	FALSE	163
2022-09-13	10:58:18	0.739453	1364.08	FALSE	163
2022-09-13	10:58:19	0.752532	1364.83	FALSE	163
2022-09-13	10:58:19	1.0651	1365.89	FALSE	163
2022-09-13	10:58:19	1.8336	1367.73	FALSE	163
2022-09-13	10:58:19	2.4823	1370.21	FALSE	163
2022-09-13	10:58:20	1.78663	1372	FALSE	163
2022-09-13	10:58:20	2.77177	1374.77	FALSE	163
2022-09-13	10:58:20	0.665713	1375.43	FALSE	163
2022-09-13	10:58:20	0.226527	1375.66	FALSE	163
2022-09-13	10:58:21	0.115789	1375.78	FALSE	163
2022-09-13	10:58:21	0.53986	1376.32	FALSE	163
2022-09-13	10:58:21	0.672786	1376.99	FALSE	163
2022-09-13	10:58:21	0.443422	1377.43	FALSE	163
2022-09-13	10:58:22	0.58215	1378.01	FALSE	163
2022-09-13	10:58:22	0.307494	1378.32	FALSE	163
2022-09-13	10:58:22	0.586781	1378.91	FALSE	163
2022-09-13	10:58:23	0.336043	1379.24	FALSE	163
2022-09-13	10:58:23	0.810191	1380.05	FALSE	163
2022-09-13	10:58:23	0.632023	1380.69	FALSE	163
2022-09-13	10:58:23	1.42027	1382.11	FALSE	163
2022-09-13	10:58:24	1.34184	1383.45	FALSE	163
2022-09-13	10:58:24	2.22134	1385.67	FALSE	163
2022-09-13	10:58:24	1.41655	1387.09	FALSE	163
2022-09-13	10:58:24	1.50464	1388.59	FALSE	163
2022-09-13	10:58:25	2.0848	1390.68	FALSE	163
2022-09-13	10:58:25	0.735076	1391.41	FALSE	163
2022-09-13	10:58:25	0.765661	1392.18	FALSE	163
2022-09-13	10:58:25	0.392685	1392.57	FALSE	163
2022-09-13	10:58:26	0.395687	1392.96	FALSE	163
2022-09-13	10:58:26	0.47584	1393.44	FALSE	163
2022-09-13	10:58:26	0.338741	1393.78	FALSE	163
2022-09-13	10:58:27	0.259657	1394.04	FALSE	163
2022-09-13	10:58:27	0.193804	1394.23	FALSE	163
2022-09-13	10:58:27	0.201132	1394.43	FALSE	163
2022-09-13	10:58:27	0.198181	1394.63	FALSE	163
2022-09-13	10:58:28	0.195942	1394.83	FALSE	163
2022-09-13	10:58:28	0.240064	1395.07	FALSE	163
2022-09-13	10:58:28	0.215891	1395.28	FALSE	163
2022-09-13	10:58:28	0.286934	1395.57	FALSE	163
2022-09-13	10:58:29	0.321845	1395.89	FALSE	163
2022-09-13	10:58:29	0.276145	1396.17	FALSE	163
2022-09-13	10:58:29	0.438333	1396.61	FALSE	163
2022-09-13	10:58:29	1.80083	1398.41	FALSE	163
2022-09-13	10:58:30	2.11273	1400.52	FALSE	163
2022-09-13	10:58:30	1.18678	1401.71	FALSE	163
2022-09-13	10:58:30	2.08642	1403.79	FALSE	163
2022-09-13	10:58:30	3.20159	1407	1	164
2022-09-13	10:58:31	1.08861	1408.08	FALSE	164
2022-09-13	10:58:31	1.50078	1409.58	FALSE	164
2022-09-13	10:58:31	1.43309	1411.02	FALSE	164
2022-09-13	10:58:32	0.971107	1411.99	FALSE	164
2022-09-13	10:58:32	0.956908	1412.95	FALSE	164
2022-09-13	10:58:32	0.632175	1413.58	FALSE	164
2022-09-13	10:58:32	1.65121	1415.23	FALSE	164
2022-09-13	10:58:33	0.449886	1415.68	FALSE	164
2022-09-13	10:58:33	0.446374	1416.13	FALSE	164
2022-09-13	10:58:33	0.389479	1416.52	FALSE	164
2022-09-13	10:58:33	0.719097	1417.23	FALSE	164
2022-09-13	10:58:34	1.65156	1418.89	FALSE	164
2022-09-13	10:58:34	2.01614	1420.9	FALSE	164
2022-09-13	10:58:34	4.0224	1424.92	1	165
2022-09-13	10:58:34	1.87289	1426.8	FALSE	165
2022-09-13	10:58:35	3.97991	1430.78	1	166
2022-09-13	10:58:35	4.86454	1435.64	1	167
2022-09-13	10:58:35	7.56683	1443.21	1	168
2022-09-13	10:58:36	7.63014	1450.84	1	169
2022-09-13	10:58:36	11.1699	1462.01	1	170
2022-09-13	10:58:36	5.87197	1467.88	1	171
2022-09-13	10:58:36	4.29268	1472.17	1	172
2022-09-13	10:58:37	2.45009	1474.62	FALSE	172
2022-09-13	10:58:37	1.53421	1476.16	FALSE	172
2022-09-13	10:58:37	1.39248	1477.55	FALSE	172
2022-09-13	10:58:37	0.822964	1478.37	FALSE	172
2022-09-13	10:58:38	0.640216	1479.01	FALSE	172
2022-09-13	10:58:38	1.0852	1480.1	FALSE	172
2022-09-13	10:58:38	1.25335	1481.35	FALSE	172
2022-09-13	10:58:38	1.3478	1482.7	FALSE	172
2022-09-13	10:58:39	1.52632	1484.23	FALSE	172
2022-09-13	10:58:39	1.02622	1485.25	FALSE	172
2022-09-13	10:58:39	0.534517	1485.79	FALSE	172
2022-09-13	10:58:40	0.249682	1486.04	FALSE	172
2022-09-13	10:58:40	0.260573	1486.3	FALSE	172
2022-09-13	10:58:40	0.163931	1486.46	FALSE	172
2022-09-13	10:58:40	0.187748	1486.65	FALSE	172
2022-09-13	10:58:41	0.138944	1486.79	FALSE	172
2022-09-13	10:58:41	0.0595549	1486.85	FALSE	172
2022-09-13	10:58:41	-0.0359158	1486.85	FALSE	172
2022-09-13	10:58:41	-0.218969	1486.85	FALSE	172
2022-09-13	10:58:42	-0.316832	1486.85	FALSE	172
2022-09-13	10:58:42	-0.421717	1486.85	FALSE	172
2022-09-13	10:58:42	-0.386246	1486.85	FALSE	172
2022-09-13	10:58:42	-0.38472	1486.85	FALSE	172
2022-09-13	10:58:43	-0.282022	1486.85	FALSE	172
2022-09-13	10:58:43	-0.1093	1486.85	FALSE	172
2022-09-13	10:58:43	0.0911071	1486.94	FALSE	172
2022-09-13	10:58:44	0.587748	1487.53	FALSE	172
2022-09-13	10:58:44	1.07925	1488.61	FALSE	172
2022-09-13	10:58:44	1.7394	1490.34	FALSE	172
2022-09-13	10:58:44	2.71721	1493.06	FALSE	172
2022-09-13	10:58:45	1.73569	1494.8	FALSE	172
2022-09-13	10:58:45	3.25502	1498.05	1	173
2022-09-13	10:58:45	1.46637	1499.52	FALSE	173
2022-09-13	10:58:45	3.91635	1503.44	1	174
2022-09-13	10:58:46	2.09508	1505.53	FALSE	174
2022-09-13	10:58:46	1.86958	1507.4	FALSE	174
2022-09-13	10:58:46	3.77436	1511.17	1	175
2022-09-13	10:58:46	0.748053	1511.92	FALSE	175
2022-09-13	10:58:47	3.63864	1515.56	1	176
2022-09-13	10:58:47	1.4019	1516.96	FALSE	176
2022-09-13	10:58:47	2.16729	1519.13	FALSE	176
2022-09-13	10:58:47	0.921082	1520.05	FALSE	176
2022-09-13	10:58:48	0.428104	1520.48	FALSE	176
2022-09-13	10:58:48	0.501336	1520.98	FALSE	176
2022-09-13	10:58:48	0.290802	1521.27	FALSE	176
2022-09-13	10:58:49	0.190598	1521.46	FALSE	176
2022-09-13	10:58:49	0.46327	1521.93	FALSE	176
2022-09-13	10:58:49	0.298334	1522.22	FALSE	176
2022-09-13	10:58:49	0.620624	1522.84	FALSE	176
2022-09-13	10:58:50	0.653702	1523.5	FALSE	176
2022-09-13	10:58:50	0.734669	1524.23	FALSE	176
2022-09-13	10:58:50	0.736959	1524.97	FALSE	176
2022-09-13	10:58:50	0.73243	1525.7	FALSE	176
2022-09-13	10:58:51	0.0747203	1525.78	FALSE	176
2022-09-13	10:58:51	-0.134185	1525.78	FALSE	176
2022-09-13	10:58:51	-0.24014	1525.78	FALSE	176
2022-09-13	10:58:51	-0.38472	1525.78	FALSE	176
2022-09-13	10:58:52	-0.300038	1525.78	FALSE	176
2022-09-13	10:58:52	-0.167264	1525.78	FALSE	176
2022-09-13	10:58:52	0.0871885	1525.86	FALSE	176
2022-09-13	10:58:53	-0.0205468	1525.86	FALSE	176
2022-09-13	10:58:53	0.211412	1526.08	FALSE	176
2022-09-13	10:58:53	0.114059	1526.19	FALSE	176
2022-09-13	10:58:53	0.0698857	1526.26	FALSE	176
2022-09-13	10:58:54	0.0270358	1526.29	FALSE	176
2022-09-13	10:58:54	0.0650511	1526.35	FALSE	176
2022-09-13	10:58:54	0.271718	1526.62	FALSE	176
2022-09-13	10:58:54	-0.0424297	1526.62	FALSE	176
2022-09-13	10:58:55	0.203372	1526.83	FALSE	176
2022-09-13	10:58:55	0.206883	1527.03	FALSE	176
2022-09-13	10:58:55	0.413651	1527.45	FALSE	176
2022-09-13	10:58:55	0.320522	1527.77	FALSE	176
2022-09-13	10:58:56	0.355942	1528.12	FALSE	176
2022-09-13	10:58:56	0.440115	1528.56	FALSE	176
2022-09-13	10:58:56	0.495229	1529.06	FALSE	176
2022-09-13	10:58:57	1.17645	1530.24	FALSE	176
2022-09-13	10:58:57	0.81187	1531.05	FALSE	176
2022-09-13	10:58:57	1.73416	1532.78	FALSE	176
2022-09-13	10:58:57	1.4136	1534.19	FALSE	176
2022-09-13	10:58:58	2.59009	1536.78	FALSE	176
2022-09-13	10:58:58	3.37808	1540.16	1	177
2022-09-13	10:58:58	3.0168	1543.18	1	178
2022-09-13	10:58:58	4.28525	1547.46	1	179
2022-09-13	10:58:59	2.0048	1549.47	FALSE	179
2022-09-13	10:58:59	4.24149	1553.71	1	180
2022-09-13	10:58:59	0.885153	1554.6	FALSE	180
2022-09-13	10:58:59	1.84408	1556.44	FALSE	180
2022-09-13	10:59:00	2.55446	1558.99	FALSE	180
2022-09-13	10:59:00	0.676399	1559.67	FALSE	180
2022-09-13	10:59:00	2.79558	1562.47	FALSE	180
2022-09-13	10:59:00	0.587748	1563.05	FALSE	180
2022-09-13	10:59:01	1.47818	1564.53	FALSE	180
2022-09-13	10:59:01	0.767443	1565.3	FALSE	180
2022-09-13	10:59:01	0.732379	1566.03	FALSE	180
2022-09-13	10:59:02	0.735585	1566.77	FALSE	180
2022-09-13	10:59:02	0.734568	1567.5	FALSE	180
2022-09-13	10:59:02	0.740114	1568.24	FALSE	180
2022-09-13	10:59:02	0.735891	1568.98	FALSE	180
2022-09-13	10:59:03	0.734415	1569.71	FALSE	180
2022-09-13	10:59:03	0.735382	1570.45	FALSE	180
2022-09-13	10:59:03	0.725916	1571.17	FALSE	180
2022-09-13	10:59:03	0.741489	1571.92	FALSE	180
2022-09-13	10:59:04	0.738384	1572.65	FALSE	180
2022-09-13	10:59:04	0.738231	1573.39	FALSE	180
2022-09-13	10:59:04	0.738791	1574.13	FALSE	180
2022-09-13	10:59:04	0.741132	1574.87	FALSE	180
2022-09-13	10:59:05	0.738893	1575.61	FALSE	180
2022-09-13	10:59:05	0.736349	1576.35	FALSE	180
2022-09-13	10:59:05	0.737875	1577.09	FALSE	180
2022-09-13	10:59:06	0.741743	1577.83	FALSE	180
2022-09-13	10:59:06	0.736857	1578.56	FALSE	180
2022-09-13	10:59:06	0.732226	1579.3	FALSE	180
2022-09-13	10:59:06	0.72958	1580.03	FALSE	180
2022-09-13	10:59:07	0.764135	1580.79	FALSE	180
2022-09-13	10:59:07	0.732481	1581.52	FALSE	180
2022-09-13	10:59:07	0.73416	1582.26	FALSE	180
2022-09-13	10:59:07	1.11004	1583.37	FALSE	180
2022-09-13	10:59:08	1.73345	1585.1	FALSE	180
2022-09-13	10:59:08	0.509987	1585.61	FALSE	180
2022-09-13	10:59:08	0.386629	1586	FALSE	180
2022-09-13	10:59:08	0.308766	1586.31	FALSE	180
2022-09-13	10:59:09	0.215942	1586.52	FALSE	180
2022-09-13	10:59:09	0.279606	1586.8	FALSE	180
2022-09-13	10:59:09	0.718588	1587.52	FALSE	180
2022-09-13	10:59:10	1.21116	1588.73	FALSE	180
2022-09-13	10:59:10	0.736399	1589.47	FALSE	180
2022-09-13	10:59:10	0.696298	1590.16	FALSE	180
2022-09-13	10:59:10	0.453753	1590.62	FALSE	180
2022-09-13	10:59:11	0.494466	1591.11	FALSE	180
2022-09-13	10:59:11	0.466832	1591.58	FALSE	180
2022-09-13	10:59:11	0.445458	1592.02	FALSE	180
2022-09-13	10:59:11	0.379402	1592.4	FALSE	180
2022-09-13	10:59:12	0.409733	1592.81	FALSE	180
2022-09-13	10:59:12	0.660318	1593.47	FALSE	180
2022-09-13	10:59:12	0.430751	1593.9	FALSE	180
2022-09-13	10:59:12	-0.166705	1593.9	FALSE	180
2022-09-13	10:59:13	-0.38416	1593.9	FALSE	180
2022-09-13	10:59:13	-0.550419	1593.9	FALSE	180
2022-09-13	10:59:13	-0.692149	1593.9	FALSE	180
2022-09-13	10:59:14	-0.650623	1593.9	FALSE	180
2022-09-13	10:59:14	-0.691844	1593.9	FALSE	180
2022-09-13	10:59:14	-0.665839	1593.9	FALSE	180
2022-09-13	10:59:14	-0.617544	1593.9	FALSE	180
2022-09-13	10:59:15	-0.457544	1593.9	FALSE	180
2022-09-13	10:59:15	-0.46874	1593.9	FALSE	180
2022-09-13	10:59:15	-0.380241	1593.9	FALSE	180
2022-09-13	10:59:15	-0.380292	1593.9	FALSE	180
2022-09-13	10:59:16	-0.365076	1593.9	FALSE	180
2022-09-13	10:59:16	-0.193727	1593.9	FALSE	180
2022-09-13	10:59:16	-0.092557	1593.9	FALSE	180
2022-09-13	10:59:16	0.120318	1594.02	FALSE	180
2022-09-13	10:59:17	0.229326	1594.25	FALSE	180
2022-09-13	10:59:17	0.0444404	1594.3	FALSE	180
2022-09-13	10:59:17	0.106323	1594.4	FALSE	180
2022-09-13	10:59:17	0.0991987	1594.5	FALSE	180
2022-09-13	10:59:18	0.0472394	1594.55	FALSE	180
2022-09-13	10:59:18	0.125204	1594.68	FALSE	180
2022-09-13	10:59:18	0.157112	1594.83	FALSE	180
2022-09-13	10:59:19	0.136959	1594.97	FALSE	180
2022-09-13	10:59:19	0.184288	1595.15	FALSE	180
2022-09-13	10:59:19	0.172685	1595.33	FALSE	180
2022-09-13	10:59:19	-0.0660938	1595.33	FALSE	180
2022-09-13	10:59:20	-0.343447	1595.33	FALSE	180
2022-09-13	10:59:20	-0.471335	1595.33	FALSE	180
2022-09-13	10:59:20	-0.53159	1595.33	FALSE	180
2022-09-13	10:59:20	-0.57047	1595.33	FALSE	180
2022-09-13	10:59:21	-0.554389	1595.33	FALSE	180
2022-09-13	10:59:21	-0.392862	1595.33	FALSE	180
2022-09-13	10:59:21	-0.142633	1595.33	FALSE	180
2022-09-13	10:59:21	-0.015356	1595.33	FALSE	180
2022-09-13	10:59:22	0.00550917	1595.33	FALSE	180
2022-09-13	10:59:22	0.248715	1595.58	FALSE	180
2022-09-13	10:59:22	1.3852	1596.97	FALSE	180
2022-09-13	10:59:23	1.3337	1598.3	FALSE	180
2022-09-13	10:59:23	2.25594	1600.56	FALSE	180
2022-09-13	10:59:23	2.03752	1602.59	FALSE	180
2022-09-13	10:59:23	2.41055	1605	FALSE	180
2022-09-13	10:59:24	2.23691	1607.24	FALSE	180
2022-09-13	10:59:24	1.75243	1608.99	FALSE	180
2022-09-13	10:59:24	2.1136	1611.11	FALSE	180
2022-09-13	10:59:24	1.01777	1612.13	FALSE	180
2022-09-13	10:59:25	0.449428	1612.57	FALSE	180
2022-09-13	10:59:25	1.72663	1614.3	FALSE	180
2022-09-13	10:59:25	0.626323	1614.93	FALSE	180
2022-09-13	10:59:25	1.34302	1616.27	FALSE	180
2022-09-13	10:59:26	1.3109	1617.58	FALSE	180
2022-09-13	10:59:26	1.37452	1618.96	FALSE	180
2022-09-13	10:59:26	2.90393	1621.86	FALSE	180
2022-09-13	10:59:27	1.65345	1623.51	FALSE	180
2022-09-13	10:59:27	4.22825	1627.74	1	181
2022-09-13	10:59:27	2.22291	1629.96	FALSE	181
2022-09-13	10:59:27	3.19136	1633.16	1	182
2022-09-13	10:59:28	6.12647	1639.28	1	183
2022-09-13	10:59:28	1.12795	1640.41	FALSE	183
2022-09-13	10:59:28	4.40184	1644.81	1	184
2022-09-13	10:59:28	2.77538	1647.59	FALSE	184
2022-09-13	10:59:29	2.0763	1649.66	FALSE	184
2022-09-13	10:59:29	4.59385	1654.26	1	185
2022-09-13	10:59:29	3.14993	1657.41	1	186
2022-09-13	10:59:29	2.86749	1660.28	FALSE	186
2022-09-13	10:59:30	3.40301	1663.68	1	187
2022-09-13	10:59:30	0.833702	1664.51	FALSE	187
2022-09-13	10:59:30	2.00144	1666.51	FALSE	187
2022-09-13	10:59:31	1.36083	1667.87	FALSE	187
2022-09-13	10:59:31	0.792379	1668.67	FALSE	187
2022-09-13	10:59:31	0.59014	1669.26	FALSE	187
2022-09-13	10:59:31	0.494211	1669.75	FALSE	187
2022-09-13	10:59:32	0.489733	1670.24	FALSE	187
2022-09-13	10:59:32	0.1707	1670.41	FALSE	187
2022-09-13	10:59:32	0.160878	1670.57	FALSE	187
2022-09-13	10:59:32	0.433651	1671.01	FALSE	187
2022-09-13	10:59:33	-0.0667554	1671.01	FALSE	187
2022-09-13	10:59:33	-0.0851269	1671.01	FALSE	187
2022-09-13	10:59:33	-0.214796	1671.01	FALSE	187
2022-09-13	10:59:33	-0.339325	1671.01	FALSE	187
2022-09-13	10:59:34	-0.342022	1671.01	FALSE	187
2022-09-13	10:59:34	0.0737025	1671.08	FALSE	187
2022-09-13	10:59:34	0.376247	1671.46	FALSE	187
2022-09-13	10:59:34	0.0553819	1671.51	FALSE	187
2022-09-13	10:59:35	-0.066959	1671.51	FALSE	187
2022-09-13	10:59:35	0.0433718	1671.55	FALSE	187
2022-09-13	10:59:35	-0.0197834	1671.55	FALSE	187
2022-09-13	10:59:36	0.0459671	1671.6	FALSE	187
2022-09-13	10:59:36	-0.0817173	1671.6	FALSE	187
2022-09-13	10:59:36	0.0101402	1671.61	FALSE	187
2022-09-13	10:59:36	-0.103702	1671.61	FALSE	187
2022-09-13	10:59:37	-0.0439565	1671.61	FALSE	187
2022-09-13	10:59:37	0.0262216	1671.64	FALSE	187
2022-09-13	10:59:37	-0.115509	1671.64	FALSE	187
2022-09-13	10:59:37	0.102201	1671.74	FALSE	187
2022-09-13	10:59:38	0.117621	1671.86	FALSE	187
2022-09-13	10:59:38	0.489428	1672.35	FALSE	187
2022-09-13	10:59:38	0.576043	1672.92	FALSE	187
2022-09-13	10:59:38	0.542761	1673.47	FALSE	187
2022-09-13	10:59:39	0.722862	1674.19	FALSE	187
2022-09-13	10:59:39	0.697621	1674.89	FALSE	187
2022-09-13	10:59:39	3.71548	1678.6	1	188
2022-09-13	10:59:40	2.46927	1681.07	FALSE	188
2022-09-13	10:59:40	4.54434	1685.61	1	189
2022-09-13	10:59:40	2.66194	1688.28	FALSE	189
2022-09-13	10:59:40	1.97553	1690.25	FALSE	189
2022-09-13	10:59:41	2.01574	1692.27	FALSE	189
2022-09-13	10:59:41	0.862812	1693.13	FALSE	189
2022-09-13	10:59:41	0.822099	1693.95	FALSE	189
2022-09-13	10:59:41	1.05162	1695	FALSE	189
2022-09-13	10:59:42	0.707137	1695.71	FALSE	189
2022-09-13	10:59:42	0.416298	1696.13	FALSE	189
2022-09-13	10:59:42	0.502761	1696.63	FALSE	189
2022-09-13	10:59:42	0.39528	1697.03	FALSE	189
2022-09-13	10:59:43	0.31187	1697.34	FALSE	189
2022-09-13	10:59:43	0.445916	1697.78	FALSE	189
2022-09-13	10:59:43	0.401438	1698.19	FALSE	189
2022-09-13	10:59:44	0.20958	1698.39	FALSE	189
2022-09-13	10:59:44	0.380624	1698.78	FALSE	189
2022-09-13	10:59:44	0.872888	1699.65	FALSE	189
2022-09-13	10:59:44	1.11472	1700.76	FALSE	189
2022-09-13	10:59:45	0.522404	1701.29	FALSE	189
2022-09-13	10:59:45	0.473397	1701.76	FALSE	189
2022-09-13	10:59:45	0.315484	1702.07	FALSE	189
2022-09-13	10:59:45	0.387494	1702.46	FALSE	189
2022-09-13	10:59:46	0.539147	1703	FALSE	189
2022-09-13	10:59:46	0.435789	1703.44	FALSE	189
2022-09-13	10:59:46	1.02602	1704.46	FALSE	189
2022-09-13	10:59:46	1.41915	1705.88	FALSE	189
2022-09-13	10:59:47	1.64169	1707.52	FALSE	189
2022-09-13	10:59:47	1.06327	1708.59	FALSE	189
2022-09-13	10:59:47	0.63355	1709.22	FALSE	189
2022-09-13	10:59:48	0.619504	1709.84	FALSE	189
2022-09-13	10:59:48	0.508715	1710.35	FALSE	189
2022-09-13	10:59:48	0.467748	1710.82	FALSE	189
2022-09-13	10:59:48	0.51874	1711.34	FALSE	189
2022-09-13	10:59:49	0.414415	1711.75	FALSE	189
2022-09-13	10:59:49	0.461845	1712.21	FALSE	189
2022-09-13	10:59:49	0.536705	1712.75	FALSE	189
2022-09-13	10:59:49	0.3107	1713.06	FALSE	189
2022-09-13	10:59:50	0.401031	1713.46	FALSE	189
2022-09-13	10:59:50	0.290598	1713.75	FALSE	189
2022-09-13	10:59:50	0.589733	1714.34	FALSE	189
2022-09-13	10:59:50	0.229835	1714.57	FALSE	189
2022-09-13	10:59:51	0.178028	1714.75	FALSE	189
2022-09-13	10:59:51	0.05813	1714.81	FALSE	189
2022-09-13	10:59:51	0.188664	1714.99	FALSE	189
2022-09-13	10:59:51	-0.0467554	1714.99	FALSE	189
2022-09-13	10:59:52	0.2364	1715.23	FALSE	189
2022-09-13	10:59:52	-0.0501142	1715.23	FALSE	189
2022-09-13	10:59:52	0.141489	1715.37	FALSE	189
2022-09-13	10:59:53	0.0634226	1715.44	FALSE	189
2022-09-13	10:59:53	0.104186	1715.54	FALSE	189
2022-09-13	10:59:53	0.540471	1716.08	FALSE	189
2022-09-13	10:59:53	0.367087	1716.45	FALSE	189
2022-09-13	10:59:54	1.38342	1717.83	FALSE	189
2022-09-13	10:59:54	2.21966	1720.05	FALSE	189
2022-09-13	10:59:54	5.71263	1725.76	1	190
2022-09-13	10:59:54	1.33838	1727.1	FALSE	190
2022-09-13	10:59:55	1.8134	1728.92	FALSE	190
2022-09-13	10:59:55	1.53905	1730.45	FALSE	190
2022-09-13	10:59:55	0.920522	1731.37	FALSE	190
2022-09-13	10:59:55	1.68989	1733.06	FALSE	190
2022-09-13	10:59:56	1.23767	1734.3	FALSE	190
2022-09-13	10:59:56	1.6335	1735.94	FALSE	190
2022-09-13	10:59:56	2.69182	1738.63	FALSE	190
2022-09-13	10:59:57	1.46184	1740.09	FALSE	190
2022-09-13	10:59:57	5.67421	1745.76	1	191
2022-09-13	10:59:57	0.945611	1746.71	FALSE	191
2022-09-13	10:59:57	3.24612	1749.96	1	192
2022-09-13	10:59:58	0.805356	1750.76	FALSE	192
2022-09-13	10:59:58	0.909631	1751.67	FALSE	192
2022-09-13	10:59:58	0.737773	1752.41	FALSE	192
2022-09-13	10:59:58	0.238333	1752.65	FALSE	192
2022-09-13	10:59:59	0.746119	1753.39	FALSE	192
2022-09-13	10:59:59	0.271412	1753.66	FALSE	192
2022-09-13	10:59:59	0.493702	1754.16	FALSE	192
2022-09-13	10:59:59	0.610903	1754.77	FALSE	192
2022-09-13	11:00:00	0.825814	1755.59	FALSE	192
2022-09-13	11:00:00	0.817723	1756.41	FALSE	192
2022-09-13	11:00:00	0.955025	1757.37	FALSE	192
2022-09-13	11:00:01	0.896807	1758.26	FALSE	192
2022-09-13	11:00:01	0.355229	1758.62	FALSE	192
2022-09-13	11:00:01	0.480725	1759.1	FALSE	192
2022-09-13	11:00:01	0.323881	1759.42	FALSE	192
2022-09-13	11:00:02	0.595382	1760.02	FALSE	192
2022-09-13	11:00:02	0.267748	1760.29	FALSE	192
2022-09-13	11:00:02	0.200725	1760.49	FALSE	192
2022-09-13	11:00:02	0.70271	1761.19	FALSE	192
2022-09-13	11:00:03	0.873906	1762.06	FALSE	192
2022-09-13	11:00:03	0.539402	1762.6	FALSE	192
2022-09-13	11:00:03	1.02846	1763.63	FALSE	192
2022-09-13	11:00:03	1.15462	1764.79	FALSE	192
2022-09-13	11:00:04	2.04363	1766.83	FALSE	192
2022-09-13	11:00:04	1.22184	1768.05	FALSE	192
2022-09-13	11:00:04	1.12047	1769.17	FALSE	192
2022-09-13	11:00:04	1.12571	1770.3	FALSE	192
2022-09-13	11:00:05	1.09762	1771.4	FALSE	192
2022-09-13	11:00:05	0.955941	1772.35	FALSE	192
2022-09-13	11:00:05	0.711565	1773.06	FALSE	192
2022-09-13	11:00:06	0.711921	1773.78	FALSE	192
2022-09-13	11:00:06	0.727646	1774.5	FALSE	192
2022-09-13	11:00:06	0.735585	1775.24	FALSE	192
2022-09-13	11:00:06	0.588461	1775.83	FALSE	192
2022-09-13	11:00:07	0.649122	1776.48	FALSE	192
2022-09-13	11:00:07	0.775229	1777.25	FALSE	192
2022-09-13	11:00:07	0.822964	1778.07	FALSE	192
2022-09-13	11:00:07	0.584695	1778.66	FALSE	192
2022-09-13	11:00:08	0.420369	1779.08	FALSE	192
2022-09-13	11:00:08	0.453143	1779.53	FALSE	192
2022-09-13	11:00:08	0.438944	1779.97	FALSE	192
2022-09-13	11:00:08	0.355229	1780.33	FALSE	192
2022-09-13	11:00:09	0.332583	1780.66	FALSE	192
2022-09-13	11:00:09	0.351718	1781.01	FALSE	192
2022-09-13	11:00:09	0.265916	1781.28	FALSE	192
2022-09-13	11:00:10	0.267697	1781.54	FALSE	192
2022-09-13	11:00:10	0.378435	1781.92	FALSE	192
2022-09-13	11:00:10	0.748511	1782.67	FALSE	192
2022-09-13	11:00:10	1.07055	1783.74	FALSE	192
2022-09-13	11:00:11	0.818435	1784.56	FALSE	192
2022-09-13	11:00:11	0.591158	1785.15	FALSE	192
2022-09-13	11:00:11	0.64159	1785.79	FALSE	192
2022-09-13	11:00:11	0.496094	1786.29	FALSE	192
2022-09-13	11:00:12	0.562812	1786.85	FALSE	192
2022-09-13	11:00:12	0.501183	1787.35	FALSE	192
2022-09-13	11:00:12	0.465305	1787.82	FALSE	192
2022-09-13	11:00:12	0.525305	1788.34	FALSE	192
2022-09-13	11:00:13	0.52556	1788.87	FALSE	192
2022-09-13	11:00:13	0.777723	1789.65	FALSE	192
2022-09-13	11:00:13	0.956247	1790.6	FALSE	192
2022-09-13	11:00:14	0.723575	1791.33	FALSE	192
2022-09-13	11:00:14	0.617672	1791.95	FALSE	192
2022-09-13	11:00:14	0.616501	1792.56	FALSE	192
2022-09-13	11:00:14	0.774873	1793.34	FALSE	192
2022-09-13	11:00:15	0.989733	1794.33	FALSE	192
2022-09-13	11:00:15	0.640369	1794.97	FALSE	192
2022-09-13	11:00:15	0.524084	1795.49	FALSE	192
2022-09-13	11:00:15	0.456959	1795.95	FALSE	192
2022-09-13	11:00:16	0.533906	1796.48	FALSE	192
2022-09-13	11:00:16	0.464593	1796.95	FALSE	192
2022-09-13	11:00:16	0.446323	1797.39	FALSE	192
2022-09-13	11:00:16	0.329428	1797.72	FALSE	192
2022-09-13	11:00:17	0.303066	1798.02	FALSE	192
2022-09-13	11:00:17	0.430598	1798.46	FALSE	192
2022-09-13	11:00:17	0.0960434	1798.55	FALSE	192

## Sheet: Juju_star_202291310556
						**GoPro Fitting: 1044
2022-09-13	10:55:06	0.48271
2022-09-13	10:55:06	0.486934
2022-09-13	10:55:06	0.486221
2022-09-13	10:55:07	0.489377
2022-09-13	10:55:07	0.493753
2022-09-13	10:55:07	0.494211
2022-09-13	10:55:07	0.492379
2022-09-13	10:55:08	0.487901
2022-09-13	10:55:08	0.484593
2022-09-13	10:55:08	0.494873
2022-09-13	10:55:08	0.495942
2022-09-13	10:55:09	0.485305
2022-09-13	10:55:09	0.49472
2022-09-13	10:55:09	0.495127
2022-09-13	10:55:10	0.495331
2022-09-13	10:55:10	0.505661
2022-09-13	10:55:10	0.498232
2022-09-13	10:55:10	0.475127
2022-09-13	10:55:11	0.512939
2022-09-13	10:55:11	0.508817
2022-09-13	10:55:11	0.473041
2022-09-13	10:55:11	0.516756
2022-09-13	10:55:12	0.581845
2022-09-13	10:55:12	0.561183
2022-09-13	10:55:12	0.464898
2022-09-13	10:55:12	0.429936
2022-09-13	10:55:13	0.194059
2022-09-13	10:55:13	0.535484
2022-09-13	10:55:13	0.540063
2022-09-13	10:55:13	0.692175
2022-09-13	10:55:14	1.51706
2022-09-13	10:55:14	1.711
2022-09-13	10:55:14	1.17253
2022-09-13	10:55:15	0.865509
2022-09-13	10:55:15	0.768308
2022-09-13	10:55:15	0.564389
2022-09-13	10:55:15	0.397519
2022-09-13	10:55:16	0.618028
2022-09-13	10:55:16	-0.00904555
2022-09-13	10:55:16	0.466221
2022-09-13	10:55:16	0.457112
2022-09-13	10:55:17	0.178435
2022-09-13	10:55:17	0.258384
2022-09-13	10:55:17	0.446476
2022-09-13	10:55:17	0.451565
2022-09-13	10:55:18	0.99472
2022-09-13	10:55:18	2.59426
2022-09-13	10:55:18	0.799758
2022-09-13	10:55:19	0.382964
2022-09-13	10:55:19	0.00652696
2022-09-13	10:55:19	0.0747712
2022-09-13	10:55:19	-0.381666
2022-09-13	10:55:20	-0.553931
2022-09-13	10:55:20	-0.560445
2022-09-13	10:55:20	-0.513829
2022-09-13	10:55:20	-0.253422
2022-09-13	10:55:21	-0.0920481
2022-09-13	10:55:21	-0.171234
2022-09-13	10:55:21	-0.256883
2022-09-13	10:55:21	0.0276974
2022-09-13	10:55:22	0.232328
2022-09-13	10:55:22	0.251005
2022-09-13	10:55:22	0.284033
2022-09-13	10:55:23	0.0865778
2022-09-13	10:55:23	0.182099
2022-09-13	10:55:23	0.123117
2022-09-13	10:55:23	-0.516679
2022-09-13	10:55:24	-0.513931
2022-09-13	10:55:24	3.15233
2022-09-13	10:55:24	16.7846
2022-09-13	10:55:24	16.8019
2022-09-13	10:55:25	4.66632
2022-09-13	10:55:25	3.86118
2022-09-13	10:55:25	5.05701
2022-09-13	10:55:25	3.04988
2022-09-13	10:55:26	6.21619
2022-09-13	10:55:26	6.27299
2022-09-13	10:55:26	2.64622
2022-09-13	10:55:26	2.72576
2022-09-13	10:55:27	0.469377
2022-09-13	10:55:27	0.344593
2022-09-13	10:55:27	0.517264
2022-09-13	10:55:28	0.0845422
2022-09-13	10:55:28	0.314517
2022-09-13	10:55:28	0.302201
2022-09-13	10:55:28	0.491412
2022-09-13	10:55:29	0.381438
2022-09-13	10:55:29	0.493448
2022-09-13	10:55:29	0.415789
2022-09-13	10:55:29	0.437672
2022-09-13	10:55:30	0.45813
2022-09-13	10:55:30	0.416043
2022-09-13	10:55:30	0.49243
2022-09-13	10:55:30	0.446221
2022-09-13	10:55:31	0.44673
2022-09-13	10:55:31	0.519504
2022-09-13	10:55:31	0.435891
2022-09-13	10:55:32	0.494109
2022-09-13	10:55:32	0.277366
2022-09-13	10:55:32	0.476756
2022-09-13	10:55:32	0.377214
2022-09-13	10:55:33	0.349173
2022-09-13	10:55:33	0.0899875
2022-09-13	10:55:33	0.226629
2022-09-13	10:55:33	0.0452038
2022-09-13	10:55:34	0.155636
2022-09-13	10:55:34	0.118079
2022-09-13	10:55:34	0.320318
2022-09-13	10:55:34	0.440318
2022-09-13	10:55:35	0.814822
2022-09-13	10:55:35	0.87528
2022-09-13	10:55:35	1.14872
2022-09-13	10:55:36	2.86174
2022-09-13	10:55:36	1.05767
2022-09-13	10:55:36	1.73009
2022-09-13	10:55:36	1.06754
2022-09-13	10:55:37	2.03686
2022-09-13	10:55:37	1.70312
2022-09-13	10:55:37	3.12342
2022-09-13	10:55:37	4.15996
2022-09-13	10:55:38	2.31543
2022-09-13	10:55:38	3.08678
2022-09-13	10:55:38	2.36887
2022-09-13	10:55:38	2.66724
2022-09-13	10:55:39	3.78245
2022-09-13	10:55:39	2.06271
2022-09-13	10:55:39	3.50403
2022-09-13	10:55:40	1.89355
2022-09-13	10:55:40	1.09991
2022-09-13	10:55:40	3.09813
2022-09-13	10:55:40	0.939758
2022-09-13	10:55:41	2.78535
2022-09-13	10:55:41	1.81238
2022-09-13	10:55:41	2.23823
2022-09-13	10:55:41	2.9449
2022-09-13	10:55:42	2.90861
2022-09-13	10:55:42	4.14775
2022-09-13	10:55:42	2.45233
2022-09-13	10:55:42	3.13141
2022-09-13	10:55:43	3.78215
2022-09-13	10:55:43	1.49676
2022-09-13	10:55:43	3.09676
2022-09-13	10:55:43	1.08149
2022-09-13	10:55:44	2.7563
2022-09-13	10:55:44	1.70495
2022-09-13	10:55:44	2.50566
2022-09-13	10:55:45	3.87121
2022-09-13	10:55:45	2.71752
2022-09-13	10:55:45	5.14825
2022-09-13	10:55:45	3.22495
2022-09-13	10:55:46	3.9653
2022-09-13	10:55:46	3.49426
2022-09-13	10:55:46	1.76658
2022-09-13	10:55:46	5.35563
2022-09-13	10:55:47	0.685
2022-09-13	10:55:47	1.85441
2022-09-13	10:55:47	1.6053
2022-09-13	10:55:47	0.625814
2022-09-13	10:55:48	1.74383
2022-09-13	10:55:48	1.33391
2022-09-13	10:55:48	2.28449
2022-09-13	10:55:49	2.44871
2022-09-13	10:55:49	3.15085
2022-09-13	10:55:49	6.9654
2022-09-13	10:55:49	2.29457
2022-09-13	10:55:50	7.11166
2022-09-13	10:55:50	3.30983
2022-09-13	10:55:50	3.42215
2022-09-13	10:55:50	6.11777
2022-09-13	10:55:51	3.78515
2022-09-13	10:55:51	4.84159
2022-09-13	10:55:51	4.41838
2022-09-13	10:55:51	1.53737
2022-09-13	10:55:52	5.89853
2022-09-13	10:55:52	1.35945
2022-09-13	10:55:52	3.21721
2022-09-13	10:55:53	4.83426
2022-09-13	10:55:53	3.14179
2022-09-13	10:55:53	7.25482
2022-09-13	10:55:53	8.09192
2022-09-13	10:55:54	2.97991
2022-09-13	10:55:54	8.69141
2022-09-13	10:55:54	1.57452
2022-09-13	10:55:54	4.39833
2022-09-13	10:55:55	5.14744
2022-09-13	10:55:55	2.84739
2022-09-13	10:55:55	7.98464
2022-09-13	10:55:55	5.50423
2022-09-13	10:55:56	2.90851
2022-09-13	10:55:56	7.25385
2022-09-13	10:55:56	1.22719
2022-09-13	10:55:56	4.23563
2022-09-13	10:55:57	3.52836
2022-09-13	10:55:57	1.23238
2022-09-13	10:55:57	4.14312
2022-09-13	10:55:58	2.34067
2022-09-13	10:55:58	2.20729
2022-09-13	10:55:58	4.12485
2022-09-13	10:55:58	1.33711
2022-09-13	10:55:59	3.14795
2022-09-13	10:55:59	0.634466
2022-09-13	10:55:59	1.13202
2022-09-13	10:55:59	1.3048
2022-09-13	10:56:00	0.323066
2022-09-13	10:56:00	0.372328
2022-09-13	10:56:00	-0.0671117
2022-09-13	10:56:00	-0.0844654
2022-09-13	10:56:01	-0.331132
2022-09-13	10:56:01	-0.170827
2022-09-13	10:56:01	-0.248486
2022-09-13	10:56:02	-0.310572
2022-09-13	10:56:02	-0.369351
2022-09-13	10:56:02	-0.210776
2022-09-13	10:56:02	0.0703438
2022-09-13	10:56:03	-0.12243
2022-09-13	10:56:03	0.191616
2022-09-13	10:56:03	0.321947
2022-09-13	10:56:03	0.410802
2022-09-13	10:56:04	0.452583
2022-09-13	10:56:04	0.322659
2022-09-13	10:56:04	0.737163
2022-09-13	10:56:04	0.638537
2022-09-13	10:56:05	0.395433
2022-09-13	10:56:05	0.405916
2022-09-13	10:56:05	0.991361
2022-09-13	10:56:06	0.799097
2022-09-13	10:56:06	0.842201
2022-09-13	10:56:06	0.455789
2022-09-13	10:56:06	0.555025
2022-09-13	10:56:07	0.521336
2022-09-13	10:56:07	0.54042
2022-09-13	10:56:07	0.628817
2022-09-13	10:56:07	0.6136
2022-09-13	10:56:08	0.637774
2022-09-13	10:56:08	0.600623
2022-09-13	10:56:08	0.541794
2022-09-13	10:56:08	0.668664
2022-09-13	10:56:09	0.662659
2022-09-13	10:56:09	1.14342
2022-09-13	10:56:09	0.408003
2022-09-13	10:56:09	0.638995
2022-09-13	10:56:10	0.6907
2022-09-13	10:56:10	0.638842
2022-09-13	10:56:10	0.602099
2022-09-13	10:56:11	0.526221
2022-09-13	10:56:11	0.580776
2022-09-13	10:56:11	0.592023
2022-09-13	10:56:11	0.595483
2022-09-13	10:56:12	0.551666
2022-09-13	10:56:12	0.508715
2022-09-13	10:56:12	0.332328
2022-09-13	10:56:12	0.391463
2022-09-13	10:56:13	0.314517
2022-09-13	10:56:13	0.685204
2022-09-13	10:56:13	0.521183
2022-09-13	10:56:13	0.627748
2022-09-13	10:56:14	0.99584
2022-09-13	10:56:14	2.2449
2022-09-13	10:56:14	3.30729
2022-09-13	10:56:15	3.60301
2022-09-13	10:56:15	4.69553
2022-09-13	10:56:15	2.31594
2022-09-13	10:56:15	7.20144
2022-09-13	10:56:16	3.09879
2022-09-13	10:56:16	4.3994
2022-09-13	10:56:16	4.79767
2022-09-13	10:56:16	4.31955
2022-09-13	10:56:17	9.24784
2022-09-13	10:56:17	6.95314
2022-09-13	10:56:17	7.05701
2022-09-13	10:56:17	13.4266
2022-09-13	10:56:18	4.43986
2022-09-13	10:56:18	8.15924
2022-09-13	10:56:18	10.3505
2022-09-13	10:56:19	3.41472
2022-09-13	10:56:19	8.44102
2022-09-13	10:56:19	5.14866
2022-09-13	10:56:19	4.67395
2022-09-13	10:56:20	9.0166
2022-09-13	10:56:20	5.91909
2022-09-13	10:56:20	6.97833
2022-09-13	10:56:20	7.57406
2022-09-13	10:56:21	3.33441
2022-09-13	10:56:21	10.2378
2022-09-13	10:56:21	1.8648
2022-09-13	10:56:21	3.1107
2022-09-13	10:56:22	6.17695
2022-09-13	10:56:22	4.33609
2022-09-13	10:56:22	6.56891
2022-09-13	10:56:23	6.80327
2022-09-13	10:56:23	2.06164
2022-09-13	10:56:23	4.94149
2022-09-13	10:56:23	0.989071
2022-09-13	10:56:24	3.19457
2022-09-13	10:56:24	0.77701
2022-09-13	10:56:24	0.951717
2022-09-13	10:56:24	2.45599
2022-09-13	10:56:25	0.781081
2022-09-13	10:56:25	3.95207
2022-09-13	10:56:25	1.9765
2022-09-13	10:56:25	4.68164
2022-09-13	10:56:26	1.56144
2022-09-13	10:56:26	2.4534
2022-09-13	10:56:26	4.73375
2022-09-13	10:56:26	4.32215
2022-09-13	10:56:27	6.48378
2022-09-13	10:56:27	2.85543
2022-09-13	10:56:27	2.24093
2022-09-13	10:56:28	1.76281
2022-09-13	10:56:28	0.512837
2022-09-13	10:56:28	2.32576
2022-09-13	10:56:28	1.18983
2022-09-13	10:56:29	1.93986
2022-09-13	10:56:29	2.56144
2022-09-13	10:56:29	0.944644
2022-09-13	10:56:29	3.6851
2022-09-13	10:56:30	0.84902
2022-09-13	10:56:30	4.182
2022-09-13	10:56:30	1.35274
2022-09-13	10:56:30	2.37187
2022-09-13	10:56:31	2.96418
2022-09-13	10:56:31	0.97243
2022-09-13	10:56:31	1.51788
2022-09-13	10:56:32	1.56663
2022-09-13	10:56:32	1.12963
2022-09-13	10:56:32	1.76062
2022-09-13	10:56:32	0.405662
2022-09-13	10:56:33	1.14754
2022-09-13	10:56:33	0.504542
2022-09-13	10:56:33	0.380318
2022-09-13	10:56:33	0.58785
2022-09-13	10:56:34	0.728257
2022-09-13	10:56:34	1.39955
2022-09-13	10:56:34	1.66001
2022-09-13	10:56:34	3.03365
2022-09-13	10:56:35	3.60525
2022-09-13	10:56:35	4.05884
2022-09-13	10:56:35	8.34505
2022-09-13	10:56:36	1.25111
2022-09-13	10:56:36	7.67243
2022-09-13	10:56:36	2.23665
2022-09-13	10:56:36	2.57594
2022-09-13	10:56:37	3.16749
2022-09-13	10:56:37	1.08342
2022-09-13	10:56:37	3.8077
2022-09-13	10:56:37	2.16393
2022-09-13	10:56:38	1.66968
2022-09-13	10:56:38	5.10469
2022-09-13	10:56:38	1.21716
2022-09-13	10:56:38	6.97889
2022-09-13	10:56:39	1.81889
2022-09-13	10:56:39	4.77243
2022-09-13	10:56:39	2.79289
2022-09-13	10:56:39	1.88271
2022-09-13	10:56:40	3.68612
2022-09-13	10:56:40	1.54449
2022-09-13	10:56:40	1.16602
2022-09-13	10:56:41	1.68449
2022-09-13	10:56:41	0.34729
2022-09-13	10:56:41	1.16037
2022-09-13	10:56:41	0.760776
2022-09-13	10:56:42	2.20164
2022-09-13	10:56:42	2.31253
2022-09-13	10:56:42	1.69426
2022-09-13	10:56:42	3.67981
2022-09-13	10:56:43	1.23859
2022-09-13	10:56:43	3.52866
2022-09-13	10:56:43	0.975382
2022-09-13	10:56:43	3.0081
2022-09-13	10:56:44	1.76413
2022-09-13	10:56:44	2.89655
2022-09-13	10:56:44	4.35614
2022-09-13	10:56:45	3.80581
2022-09-13	10:56:45	8.77497
2022-09-13	10:56:45	8.79309
2022-09-13	10:56:45	5.99416
2022-09-13	10:56:46	7.25136
2022-09-13	10:56:46	1.36261
2022-09-13	10:56:46	5.96413
2022-09-13	10:56:46	1.57167
2022-09-13	10:56:47	3.0336
2022-09-13	10:56:47	4.70332
2022-09-13	10:56:47	2.745
2022-09-13	10:56:47	4.72988
2022-09-13	10:56:48	2.12281
2022-09-13	10:56:48	3.09619
2022-09-13	10:56:48	4.46032
2022-09-13	10:56:49	2.80103
2022-09-13	10:56:49	10.4926
2022-09-13	10:56:49	2.97436
2022-09-13	10:56:49	9.12922
2022-09-13	10:56:50	7.79177
2022-09-13	10:56:50	3.34739
2022-09-13	10:56:50	8.22225
2022-09-13	10:56:50	3.83218
2022-09-13	10:56:51	4.73233
2022-09-13	10:56:51	6.21507
2022-09-13	10:56:51	1.81121
2022-09-13	10:56:51	6.97751
2022-09-13	10:56:52	2.88149
2022-09-13	10:56:52	3.87187
2022-09-13	10:56:52	7.54006
2022-09-13	10:56:53	1.27212
2022-09-13	10:56:53	3.94225
2022-09-13	10:56:53	2.58663
2022-09-13	10:56:53	2.41396
2022-09-13	10:56:54	6.27823
2022-09-13	10:56:54	4.29492
2022-09-13	10:56:54	8.61747
2022-09-13	10:56:54	1.40917
2022-09-13	10:56:55	2.1852
2022-09-13	10:56:55	2.39996
2022-09-13	10:56:55	0.507748
2022-09-13	10:56:55	1.55345
2022-09-13	10:56:56	0.869224
2022-09-13	10:56:56	1.43818
2022-09-13	10:56:56	1.3851
2022-09-13	10:56:56	1.45314
2022-09-13	10:56:57	3.10383
2022-09-13	10:56:57	2.37401
2022-09-13	10:56:57	4.75706
2022-09-13	10:56:58	1.66485
2022-09-13	10:56:58	5.23797
2022-09-13	10:56:58	1.72016
2022-09-13	10:56:58	2.60902
2022-09-13	10:56:59	3.32276
2022-09-13	10:56:59	1.09747
2022-09-13	10:56:59	1.66515
2022-09-13	10:56:59	1.55263
2022-09-13	10:57:00	1.56296
2022-09-13	10:57:00	0.72042
2022-09-13	10:57:00	1.16363
2022-09-13	10:57:00	0.305814
2022-09-13	10:57:01	0.644288
2022-09-13	10:57:01	0.519402
2022-09-13	10:57:01	0.583982
2022-09-13	10:57:02	0.352481
2022-09-13	10:57:02	0.235992
2022-09-13	10:57:02	0.231616
2022-09-13	10:57:02	0.149071
2022-09-13	10:57:03	0.206883
2022-09-13	10:57:03	0.162608
2022-09-13	10:57:03	0.714211
2022-09-13	10:57:03	0.687494
2022-09-13	10:57:04	0.547952
2022-09-13	10:57:04	0.0885116
2022-09-13	10:57:04	0.027901
2022-09-13	10:57:04	0.159199
2022-09-13	10:57:05	0.166323
2022-09-13	10:57:05	0.255993
2022-09-13	10:57:05	0.375433
2022-09-13	10:57:06	0.464135
2022-09-13	10:57:06	0.458588
2022-09-13	10:57:06	0.257723
2022-09-13	10:57:06	0.537519
2022-09-13	10:57:07	0.610903
2022-09-13	10:57:07	0.821336
2022-09-13	10:57:07	0.856145
2022-09-13	10:57:07	0.598944
2022-09-13	10:57:08	0.570293
2022-09-13	10:57:08	0.402964
2022-09-13	10:57:08	0.319707
2022-09-13	10:57:08	0.275687
2022-09-13	10:57:09	0.429529
2022-09-13	10:57:09	0.330242
2022-09-13	10:57:09	0.304898
2022-09-13	10:57:09	0.17416
2022-09-13	10:57:10	0.2507
2022-09-13	10:57:10	-0.0131677
2022-09-13	10:57:10	-0.0736766
2022-09-13	10:57:11	-0.048384
2022-09-13	10:57:11	-0.0202415
2022-09-13	10:57:11	0.260573
2022-09-13	10:57:11	0.128868
2022-09-13	10:57:12	1.08795
2022-09-13	10:57:12	2.87462
2022-09-13	10:57:12	7.30103
2022-09-13	10:57:12	3.22821
2022-09-13	10:57:13	4.68596
2022-09-13	10:57:13	1.70123
2022-09-13	10:57:13	2.87278
2022-09-13	10:57:13	2.12001
2022-09-13	10:57:14	0.928562
2022-09-13	10:57:14	1.5595
2022-09-13	10:57:14	0.897774
2022-09-13	10:57:15	2.01004
2022-09-13	10:57:15	2.63385
2022-09-13	10:57:15	0.846069
2022-09-13	10:57:15	0.855025
2022-09-13	10:57:16	0.713651
2022-09-13	10:57:16	0.624237
2022-09-13	10:57:16	2.68566
2022-09-13	10:57:16	2.24459
2022-09-13	10:57:17	3.80266
2022-09-13	10:57:17	1.74963
2022-09-13	10:57:17	3.5105
2022-09-13	10:57:17	2.3506
2022-09-13	10:57:18	6.3394
2022-09-13	10:57:18	1.20866
2022-09-13	10:57:18	3.06622
2022-09-13	10:57:19	1.87767
2022-09-13	10:57:19	1.41335
2022-09-13	10:57:19	1.97955
2022-09-13	10:57:19	1.39579
2022-09-13	10:57:20	1.87111
2022-09-13	10:57:20	1.42795
2022-09-13	10:57:20	0.645407
2022-09-13	10:57:20	0.489173
2022-09-13	10:57:21	0.585203
2022-09-13	10:57:21	0.727392
2022-09-13	10:57:21	0.922506
2022-09-13	10:57:21	1.4677
2022-09-13	10:57:22	1.55609
2022-09-13	10:57:22	1.54841
2022-09-13	10:57:22	1.05289
2022-09-13	10:57:23	0.753397
2022-09-13	10:57:23	0.654822
2022-09-13	10:57:23	0.809478
2022-09-13	10:57:23	1.26943
2022-09-13	10:57:24	1.06902
2022-09-13	10:57:24	0.981743
2022-09-13	10:57:24	0.901997
2022-09-13	10:57:24	0.397672
2022-09-13	10:57:25	0.333753
2022-09-13	10:57:25	0.218944
2022-09-13	10:57:25	0.195433
2022-09-13	10:57:25	0.133244
2022-09-13	10:57:26	0.871463
2022-09-13	10:57:26	0.663982
2022-09-13	10:57:26	0.632125
2022-09-13	10:57:26	0.708766
2022-09-13	10:57:27	0.970089
2022-09-13	10:57:27	0.383982
2022-09-13	10:57:27	0.465713
2022-09-13	10:57:28	0.443015
2022-09-13	10:57:28	0.322659
2022-09-13	10:57:28	0.314211
2022-09-13	10:57:28	0.225814
2022-09-13	10:57:29	0.185662
2022-09-13	10:57:29	0.201794
2022-09-13	10:57:29	0.141692
2022-09-13	10:57:29	0.222201
2022-09-13	10:57:30	0.01584
2022-09-13	10:57:30	-0.106094
2022-09-13	10:57:30	-0.209453
2022-09-13	10:57:30	0.403677
2022-09-13	10:57:31	5.85222
2022-09-13	10:57:31	13.4543
2022-09-13	10:57:31	7.78378
2022-09-13	10:57:32	8.16199
2022-09-13	10:57:32	3.27625
2022-09-13	10:57:32	5.28031
2022-09-13	10:57:32	3.46683
2022-09-13	10:57:33	3.48139
2022-09-13	10:57:33	4.08403
2022-09-13	10:57:33	4.36612
2022-09-13	10:57:33	3.82352
2022-09-13	10:57:34	2.69721
2022-09-13	10:57:34	1.55757
2022-09-13	10:57:34	0.929122
2022-09-13	10:57:34	1.09487
2022-09-13	10:57:35	1.09976
2022-09-13	10:57:35	0.85182
2022-09-13	10:57:35	0.779453
2022-09-13	10:57:36	0.767035
2022-09-13	10:57:36	0.767697
2022-09-13	10:57:36	0.589784
2022-09-13	10:57:36	0.471361
2022-09-13	10:57:37	0.724949
2022-09-13	10:57:37	0.73131
2022-09-13	10:57:37	0.735585
2022-09-13	10:57:37	0.725916
2022-09-13	10:57:38	0.733804
2022-09-13	10:57:38	0.740776
2022-09-13	10:57:38	0.737519
2022-09-13	10:57:38	0.734466
2022-09-13	10:57:39	0.729733
2022-09-13	10:57:39	0.733346
2022-09-13	10:57:39	1.24296
2022-09-13	10:57:40	1.16642
2022-09-13	10:57:40	1.31686
2022-09-13	10:57:40	0.881998
2022-09-13	10:57:40	0.35472
2022-09-13	10:57:41	0.21986
2022-09-13	10:57:41	0.207188
2022-09-13	10:57:41	0.103982
2022-09-13	10:57:41	0.0762979
2022-09-13	10:57:42	0.140369
2022-09-13	10:57:42	0.206629
2022-09-13	10:57:42	0.313957
2022-09-13	10:57:42	0.214771
2022-09-13	10:57:43	0.199148
2022-09-13	10:57:43	0.241998
2022-09-13	10:57:43	0.296043
2022-09-13	10:57:43	0.378537
2022-09-13	10:57:44	0.622863
2022-09-13	10:57:44	0.673957
2022-09-13	10:57:44	0.450496
2022-09-13	10:57:45	0.577112
2022-09-13	10:57:45	0.599046
2022-09-13	10:57:45	0.593957
2022-09-13	10:57:45	0.530038
2022-09-13	10:57:46	0.518079
2022-09-13	10:57:46	0.481489
2022-09-13	10:57:46	0.494313
2022-09-13	10:57:46	0.547392
2022-09-13	10:57:47	0.689682
2022-09-13	10:57:47	0.839046
2022-09-13	10:57:47	0.748002
2022-09-13	10:57:47	0.455433
2022-09-13	10:57:48	0.707545
2022-09-13	10:57:48	0.73584
2022-09-13	10:57:48	0.501488
2022-09-13	10:57:49	0.527952
2022-09-13	10:57:49	0.492176
2022-09-13	10:57:49	0.127799
2022-09-13	10:57:49	0.0379773
2022-09-13	10:57:50	0.210395
2022-09-13	10:57:50	0.142405
2022-09-13	10:57:50	0.269428
2022-09-13	10:57:50	0.380216
2022-09-13	10:57:51	0.440725
2022-09-13	10:57:51	0.372125
2022-09-13	10:57:51	0.403728
2022-09-13	10:57:51	0.455789
2022-09-13	10:57:52	0.269733
2022-09-13	10:57:52	0.215891
2022-09-13	10:57:52	0.341489
2022-09-13	10:57:53	0.154924
2022-09-13	10:57:53	0.235382
2022-09-13	10:57:53	0.220878
2022-09-13	10:57:53	0.414822
2022-09-13	10:57:54	0.0834226
2022-09-13	10:57:54	0.119657
2022-09-13	10:57:54	0.0405728
2022-09-13	10:57:54	0.202557
2022-09-13	10:57:55	0.0316669
2022-09-13	10:57:55	0.916349
2022-09-13	10:57:55	4.94892
2022-09-13	10:57:55	6.34088
2022-09-13	10:57:56	2.26368
2022-09-13	10:57:56	1.78251
2022-09-13	10:57:56	0.861997
2022-09-13	10:57:56	1.73559
2022-09-13	10:57:57	0.702405
2022-09-13	10:57:57	0.482608
2022-09-13	10:57:57	0.498944
2022-09-13	10:57:58	0.259046
2022-09-13	10:57:58	0.455534
2022-09-13	10:57:58	0.737926
2022-09-13	10:57:58	0.734313
2022-09-13	10:57:59	0.733346
2022-09-13	10:57:59	0.738944
2022-09-13	10:57:59	0.73416
2022-09-13	10:57:59	0.738791
2022-09-13	10:58:00	0.734313
2022-09-13	10:58:00	0.729428
2022-09-13	10:58:00	0.739249
2022-09-13	10:58:00	0.73131
2022-09-13	10:58:01	0.738893
2022-09-13	10:58:01	0.734466
2022-09-13	10:58:01	0.738435
2022-09-13	10:58:02	0.740013
2022-09-13	10:58:02	0.733804
2022-09-13	10:58:02	0.738231
2022-09-13	10:58:02	0.736552
2022-09-13	10:58:03	0.733244
2022-09-13	10:58:03	0.734313
2022-09-13	10:58:03	0.733499
2022-09-13	10:58:03	0.73645
2022-09-13	10:58:04	0.733448
2022-09-13	10:58:04	0.737621
2022-09-13	10:58:04	0.733702
2022-09-13	10:58:04	0.734822
2022-09-13	10:58:05	0.735534
2022-09-13	10:58:05	0.736196
2022-09-13	10:58:05	0.733397
2022-09-13	10:58:06	0.737926
2022-09-13	10:58:06	0.737672
2022-09-13	10:58:06	0.913397
2022-09-13	10:58:06	0.38327
2022-09-13	10:58:07	0.600369
2022-09-13	10:58:07	0.465611
2022-09-13	10:58:07	0.620776
2022-09-13	10:58:07	1.38215
2022-09-13	10:58:08	0.985865
2022-09-13	10:58:08	2.25726
2022-09-13	10:58:08	0.933702
2022-09-13	10:58:08	2.14363
2022-09-13	10:58:09	0.772277
2022-09-13	10:58:09	1.35116
2022-09-13	10:58:09	0.522862
2022-09-13	10:58:10	1.49859
2022-09-13	10:58:10	1.2534
2022-09-13	10:58:10	2.44729
2022-09-13	10:58:10	4.41345
2022-09-13	10:58:11	1.81869
2022-09-13	10:58:11	3.45513
2022-09-13	10:58:11	2.08525
2022-09-13	10:58:11	4.6053
2022-09-13	10:58:12	1.182
2022-09-13	10:58:12	3.06388
2022-09-13	10:58:12	2.72261
2022-09-13	10:58:12	2.97782
2022-09-13	10:58:13	4.42032
2022-09-13	10:58:13	2.15472
2022-09-13	10:58:13	3.55284
2022-09-13	10:58:13	0.874873
2022-09-13	10:58:14	1.39874
2022-09-13	10:58:14	1.79925
2022-09-13	10:58:14	2.65854
2022-09-13	10:58:15	5.32647
2022-09-13	10:58:15	4.04887
2022-09-13	10:58:15	0.946934
2022-09-13	10:58:15	0.735891
2022-09-13	10:58:16	0.430853
2022-09-13	10:58:16	0.275229
2022-09-13	10:58:16	0.729936
2022-09-13	10:58:16	0.727087
2022-09-13	10:58:17	0.731463
2022-09-13	10:58:17	0.737773
2022-09-13	10:58:17	0.737722
2022-09-13	10:58:17	0.736043
2022-09-13	10:58:18	0.73528
2022-09-13	10:58:18	0.734771
2022-09-13	10:58:18	0.739453
2022-09-13	10:58:19	0.752532
2022-09-13	10:58:19	1.0651
2022-09-13	10:58:19	1.8336
2022-09-13	10:58:19	2.4823
2022-09-13	10:58:20	1.78663
2022-09-13	10:58:20	2.77177
2022-09-13	10:58:20	0.665713
2022-09-13	10:58:20	0.226527
2022-09-13	10:58:21	0.115789
2022-09-13	10:58:21	0.53986
2022-09-13	10:58:21	0.672786
2022-09-13	10:58:21	0.443422
2022-09-13	10:58:22	0.58215
2022-09-13	10:58:22	0.307494
2022-09-13	10:58:22	0.586781
2022-09-13	10:58:23	0.336043
2022-09-13	10:58:23	0.810191
2022-09-13	10:58:23	0.632023
2022-09-13	10:58:23	1.42027
2022-09-13	10:58:24	1.34184
2022-09-13	10:58:24	2.22134
2022-09-13	10:58:24	1.41655
2022-09-13	10:58:24	1.50464
2022-09-13	10:58:25	2.0848
2022-09-13	10:58:25	0.735076
2022-09-13	10:58:25	0.765661
2022-09-13	10:58:25	0.392685
2022-09-13	10:58:26	0.395687
2022-09-13	10:58:26	0.47584
2022-09-13	10:58:26	0.338741
2022-09-13	10:58:27	0.259657
2022-09-13	10:58:27	0.193804
2022-09-13	10:58:27	0.201132
2022-09-13	10:58:27	0.198181
2022-09-13	10:58:28	0.195942
2022-09-13	10:58:28	0.240064
2022-09-13	10:58:28	0.215891
2022-09-13	10:58:28	0.286934
2022-09-13	10:58:29	0.321845
2022-09-13	10:58:29	0.276145
2022-09-13	10:58:29	0.438333
2022-09-13	10:58:29	1.80083
2022-09-13	10:58:30	2.11273
2022-09-13	10:58:30	1.18678
2022-09-13	10:58:30	2.08642
2022-09-13	10:58:30	3.20159
2022-09-13	10:58:31	1.08861
2022-09-13	10:58:31	1.50078
2022-09-13	10:58:31	1.43309
2022-09-13	10:58:32	0.971107
2022-09-13	10:58:32	0.956908
2022-09-13	10:58:32	0.632175
2022-09-13	10:58:32	1.65121
2022-09-13	10:58:33	0.449886
2022-09-13	10:58:33	0.446374
2022-09-13	10:58:33	0.389479
2022-09-13	10:58:33	0.719097
2022-09-13	10:58:34	1.65156
2022-09-13	10:58:34	2.01614
2022-09-13	10:58:34	4.0224
2022-09-13	10:58:34	1.87289
2022-09-13	10:58:35	3.97991
2022-09-13	10:58:35	4.86454
2022-09-13	10:58:35	7.56683
2022-09-13	10:58:36	7.63014
2022-09-13	10:58:36	11.1699
2022-09-13	10:58:36	5.87197
2022-09-13	10:58:36	4.29268
2022-09-13	10:58:37	2.45009
2022-09-13	10:58:37	1.53421
2022-09-13	10:58:37	1.39248
2022-09-13	10:58:37	0.822964
2022-09-13	10:58:38	0.640216
2022-09-13	10:58:38	1.0852
2022-09-13	10:58:38	1.25335
2022-09-13	10:58:38	1.3478
2022-09-13	10:58:39	1.52632
2022-09-13	10:58:39	1.02622
2022-09-13	10:58:39	0.534517
2022-09-13	10:58:40	0.249682
2022-09-13	10:58:40	0.260573
2022-09-13	10:58:40	0.163931
2022-09-13	10:58:40	0.187748
2022-09-13	10:58:41	0.138944
2022-09-13	10:58:41	0.0595549
2022-09-13	10:58:41	-0.0359158
2022-09-13	10:58:41	-0.218969
2022-09-13	10:58:42	-0.316832
2022-09-13	10:58:42	-0.421717
2022-09-13	10:58:42	-0.386246
2022-09-13	10:58:42	-0.38472
2022-09-13	10:58:43	-0.282022
2022-09-13	10:58:43	-0.1093
2022-09-13	10:58:43	0.0911071
2022-09-13	10:58:44	0.587748
2022-09-13	10:58:44	1.07925
2022-09-13	10:58:44	1.7394
2022-09-13	10:58:44	2.71721
2022-09-13	10:58:45	1.73569
2022-09-13	10:58:45	3.25502
2022-09-13	10:58:45	1.46637
2022-09-13	10:58:45	3.91635
2022-09-13	10:58:46	2.09508
2022-09-13	10:58:46	1.86958
2022-09-13	10:58:46	3.77436
2022-09-13	10:58:46	0.748053
2022-09-13	10:58:47	3.63864
2022-09-13	10:58:47	1.4019
2022-09-13	10:58:47	2.16729
2022-09-13	10:58:47	0.921082
2022-09-13	10:58:48	0.428104
2022-09-13	10:58:48	0.501336
2022-09-13	10:58:48	0.290802
2022-09-13	10:58:49	0.190598
2022-09-13	10:58:49	0.46327
2022-09-13	10:58:49	0.298334
2022-09-13	10:58:49	0.620624
2022-09-13	10:58:50	0.653702
2022-09-13	10:58:50	0.734669
2022-09-13	10:58:50	0.736959
2022-09-13	10:58:50	0.73243
2022-09-13	10:58:51	0.0747203
2022-09-13	10:58:51	-0.134185
2022-09-13	10:58:51	-0.24014
2022-09-13	10:58:51	-0.38472
2022-09-13	10:58:52	-0.300038
2022-09-13	10:58:52	-0.167264
2022-09-13	10:58:52	0.0871885
2022-09-13	10:58:53	-0.0205468
2022-09-13	10:58:53	0.211412
2022-09-13	10:58:53	0.114059
2022-09-13	10:58:53	0.0698857
2022-09-13	10:58:54	0.0270358
2022-09-13	10:58:54	0.0650511
2022-09-13	10:58:54	0.271718
2022-09-13	10:58:54	-0.0424297
2022-09-13	10:58:55	0.203372
2022-09-13	10:58:55	0.206883
2022-09-13	10:58:55	0.413651
2022-09-13	10:58:55	0.320522
2022-09-13	10:58:56	0.355942
2022-09-13	10:58:56	0.440115
2022-09-13	10:58:56	0.495229
2022-09-13	10:58:57	1.17645
2022-09-13	10:58:57	0.81187
2022-09-13	10:58:57	1.73416
2022-09-13	10:58:57	1.4136
2022-09-13	10:58:58	2.59009
2022-09-13	10:58:58	3.37808
2022-09-13	10:58:58	3.0168
2022-09-13	10:58:58	4.28525
2022-09-13	10:58:59	2.0048
2022-09-13	10:58:59	4.24149
2022-09-13	10:58:59	0.885153
2022-09-13	10:58:59	1.84408
2022-09-13	10:59:00	2.55446
2022-09-13	10:59:00	0.676399
2022-09-13	10:59:00	2.79558
2022-09-13	10:59:00	0.587748
2022-09-13	10:59:01	1.47818
2022-09-13	10:59:01	0.767443
2022-09-13	10:59:01	0.732379
2022-09-13	10:59:02	0.735585
2022-09-13	10:59:02	0.734568
2022-09-13	10:59:02	0.740114
2022-09-13	10:59:02	0.735891
2022-09-13	10:59:03	0.734415
2022-09-13	10:59:03	0.735382
2022-09-13	10:59:03	0.725916
2022-09-13	10:59:03	0.741489
2022-09-13	10:59:04	0.738384
2022-09-13	10:59:04	0.738231
2022-09-13	10:59:04	0.738791
2022-09-13	10:59:04	0.741132
2022-09-13	10:59:05	0.738893
2022-09-13	10:59:05	0.736349
2022-09-13	10:59:05	0.737875
2022-09-13	10:59:06	0.741743
2022-09-13	10:59:06	0.736857
2022-09-13	10:59:06	0.732226
2022-09-13	10:59:06	0.72958
2022-09-13	10:59:07	0.764135
2022-09-13	10:59:07	0.732481
2022-09-13	10:59:07	0.73416
2022-09-13	10:59:07	1.11004
2022-09-13	10:59:08	1.73345
2022-09-13	10:59:08	0.509987
2022-09-13	10:59:08	0.386629
2022-09-13	10:59:08	0.308766
2022-09-13	10:59:09	0.215942
2022-09-13	10:59:09	0.279606
2022-09-13	10:59:09	0.718588
2022-09-13	10:59:10	1.21116
2022-09-13	10:59:10	0.736399
2022-09-13	10:59:10	0.696298
2022-09-13	10:59:10	0.453753
2022-09-13	10:59:11	0.494466
2022-09-13	10:59:11	0.466832
2022-09-13	10:59:11	0.445458
2022-09-13	10:59:11	0.379402
2022-09-13	10:59:12	0.409733
2022-09-13	10:59:12	0.660318
2022-09-13	10:59:12	0.430751
2022-09-13	10:59:12	-0.166705
2022-09-13	10:59:13	-0.38416
2022-09-13	10:59:13	-0.550419
2022-09-13	10:59:13	-0.692149
2022-09-13	10:59:14	-0.650623
2022-09-13	10:59:14	-0.691844
2022-09-13	10:59:14	-0.665839
2022-09-13	10:59:14	-0.617544
2022-09-13	10:59:15	-0.457544
2022-09-13	10:59:15	-0.46874
2022-09-13	10:59:15	-0.380241
2022-09-13	10:59:15	-0.380292
2022-09-13	10:59:16	-0.365076
2022-09-13	10:59:16	-0.193727
2022-09-13	10:59:16	-0.092557
2022-09-13	10:59:16	0.120318
2022-09-13	10:59:17	0.229326
2022-09-13	10:59:17	0.0444404
2022-09-13	10:59:17	0.106323
2022-09-13	10:59:17	0.0991987
2022-09-13	10:59:18	0.0472394
2022-09-13	10:59:18	0.125204
2022-09-13	10:59:18	0.157112
2022-09-13	10:59:19	0.136959
2022-09-13	10:59:19	0.184288
2022-09-13	10:59:19	0.172685
2022-09-13	10:59:19	-0.0660938
2022-09-13	10:59:20	-0.343447
2022-09-13	10:59:20	-0.471335
2022-09-13	10:59:20	-0.53159
2022-09-13	10:59:20	-0.57047
2022-09-13	10:59:21	-0.554389
2022-09-13	10:59:21	-0.392862
2022-09-13	10:59:21	-0.142633
2022-09-13	10:59:21	-0.015356
2022-09-13	10:59:22	0.00550917
2022-09-13	10:59:22	0.248715
2022-09-13	10:59:22	1.3852
2022-09-13	10:59:23	1.3337
2022-09-13	10:59:23	2.25594
2022-09-13	10:59:23	2.03752
2022-09-13	10:59:23	2.41055
2022-09-13	10:59:24	2.23691
2022-09-13	10:59:24	1.75243
2022-09-13	10:59:24	2.1136
2022-09-13	10:59:24	1.01777
2022-09-13	10:59:25	0.449428
2022-09-13	10:59:25	1.72663
2022-09-13	10:59:25	0.626323
2022-09-13	10:59:25	1.34302
2022-09-13	10:59:26	1.3109
2022-09-13	10:59:26	1.37452
2022-09-13	10:59:26	2.90393
2022-09-13	10:59:27	1.65345
2022-09-13	10:59:27	4.22825
2022-09-13	10:59:27	2.22291
2022-09-13	10:59:27	3.19136
2022-09-13	10:59:28	6.12647
2022-09-13	10:59:28	1.12795
2022-09-13	10:59:28	4.40184
2022-09-13	10:59:28	2.77538
2022-09-13	10:59:29	2.0763
2022-09-13	10:59:29	4.59385
2022-09-13	10:59:29	3.14993
2022-09-13	10:59:29	2.86749
2022-09-13	10:59:30	3.40301
2022-09-13	10:59:30	0.833702
2022-09-13	10:59:30	2.00144
2022-09-13	10:59:31	1.36083
2022-09-13	10:59:31	0.792379
2022-09-13	10:59:31	0.59014
2022-09-13	10:59:31	0.494211
2022-09-13	10:59:32	0.489733
2022-09-13	10:59:32	0.1707
2022-09-13	10:59:32	0.160878
2022-09-13	10:59:32	0.433651
2022-09-13	10:59:33	-0.0667554
2022-09-13	10:59:33	-0.0851269
2022-09-13	10:59:33	-0.214796
2022-09-13	10:59:33	-0.339325
2022-09-13	10:59:34	-0.342022
2022-09-13	10:59:34	0.0737025
2022-09-13	10:59:34	0.376247
2022-09-13	10:59:34	0.0553819
2022-09-13	10:59:35	-0.066959
2022-09-13	10:59:35	0.0433718
2022-09-13	10:59:35	-0.0197834
2022-09-13	10:59:36	0.0459671
2022-09-13	10:59:36	-0.0817173
2022-09-13	10:59:36	0.0101402
2022-09-13	10:59:36	-0.103702
2022-09-13	10:59:37	-0.0439565
2022-09-13	10:59:37	0.0262216
2022-09-13	10:59:37	-0.115509
2022-09-13	10:59:37	0.102201
2022-09-13	10:59:38	0.117621
2022-09-13	10:59:38	0.489428
2022-09-13	10:59:38	0.576043
2022-09-13	10:59:38	0.542761
2022-09-13	10:59:39	0.722862
2022-09-13	10:59:39	0.697621
2022-09-13	10:59:39	3.71548
2022-09-13	10:59:40	2.46927
2022-09-13	10:59:40	4.54434
2022-09-13	10:59:40	2.66194
2022-09-13	10:59:40	1.97553
2022-09-13	10:59:41	2.01574
2022-09-13	10:59:41	0.862812
2022-09-13	10:59:41	0.822099
2022-09-13	10:59:41	1.05162
2022-09-13	10:59:42	0.707137
2022-09-13	10:59:42	0.416298
2022-09-13	10:59:42	0.502761
2022-09-13	10:59:42	0.39528
2022-09-13	10:59:43	0.31187
2022-09-13	10:59:43	0.445916
2022-09-13	10:59:43	0.401438
2022-09-13	10:59:44	0.20958
2022-09-13	10:59:44	0.380624
2022-09-13	10:59:44	0.872888
2022-09-13	10:59:44	1.11472
2022-09-13	10:59:45	0.522404
2022-09-13	10:59:45	0.473397
2022-09-13	10:59:45	0.315484
2022-09-13	10:59:45	0.387494
2022-09-13	10:59:46	0.539147
2022-09-13	10:59:46	0.435789
2022-09-13	10:59:46	1.02602
2022-09-13	10:59:46	1.41915
2022-09-13	10:59:47	1.64169
2022-09-13	10:59:47	1.06327
2022-09-13	10:59:47	0.63355
2022-09-13	10:59:48	0.619504
2022-09-13	10:59:48	0.508715
2022-09-13	10:59:48	0.467748
2022-09-13	10:59:48	0.51874
2022-09-13	10:59:49	0.414415
2022-09-13	10:59:49	0.461845
2022-09-13	10:59:49	0.536705
2022-09-13	10:59:49	0.3107
2022-09-13	10:59:50	0.401031
2022-09-13	10:59:50	0.290598
2022-09-13	10:59:50	0.589733
2022-09-13	10:59:50	0.229835
2022-09-13	10:59:51	0.178028
2022-09-13	10:59:51	0.05813
2022-09-13	10:59:51	0.188664
2022-09-13	10:59:51	-0.0467554
2022-09-13	10:59:52	0.2364
2022-09-13	10:59:52	-0.0501142
2022-09-13	10:59:52	0.141489
2022-09-13	10:59:53	0.0634226
2022-09-13	10:59:53	0.104186
2022-09-13	10:59:53	0.540471
2022-09-13	10:59:53	0.367087
2022-09-13	10:59:54	1.38342
2022-09-13	10:59:54	2.21966
2022-09-13	10:59:54	5.71263
2022-09-13	10:59:54	1.33838
2022-09-13	10:59:55	1.8134
2022-09-13	10:59:55	1.53905
2022-09-13	10:59:55	0.920522
2022-09-13	10:59:55	1.68989
2022-09-13	10:59:56	1.23767
2022-09-13	10:59:56	1.6335
2022-09-13	10:59:56	2.69182
2022-09-13	10:59:57	1.46184
2022-09-13	10:59:57	5.67421
2022-09-13	10:59:57	0.945611
2022-09-13	10:59:57	3.24612
2022-09-13	10:59:58	0.805356
2022-09-13	10:59:58	0.909631
2022-09-13	10:59:58	0.737773
2022-09-13	10:59:58	0.238333
2022-09-13	10:59:59	0.746119
2022-09-13	10:59:59	0.271412
2022-09-13	10:59:59	0.493702
2022-09-13	10:59:59	0.610903
2022-09-13	11:00:00	0.825814
2022-09-13	11:00:00	0.817723
2022-09-13	11:00:00	0.955025
2022-09-13	11:00:01	0.896807
2022-09-13	11:00:01	0.355229
2022-09-13	11:00:01	0.480725
2022-09-13	11:00:01	0.323881
2022-09-13	11:00:02	0.595382
2022-09-13	11:00:02	0.267748
2022-09-13	11:00:02	0.200725
2022-09-13	11:00:02	0.70271
2022-09-13	11:00:03	0.873906
2022-09-13	11:00:03	0.539402
2022-09-13	11:00:03	1.02846
2022-09-13	11:00:03	1.15462
2022-09-13	11:00:04	2.04363
2022-09-13	11:00:04	1.22184
2022-09-13	11:00:04	1.12047
2022-09-13	11:00:04	1.12571
2022-09-13	11:00:05	1.09762
2022-09-13	11:00:05	0.955941
2022-09-13	11:00:05	0.711565
2022-09-13	11:00:06	0.711921
2022-09-13	11:00:06	0.727646
2022-09-13	11:00:06	0.735585
2022-09-13	11:00:06	0.588461
2022-09-13	11:00:07	0.649122
2022-09-13	11:00:07	0.775229
2022-09-13	11:00:07	0.822964
2022-09-13	11:00:07	0.584695
2022-09-13	11:00:08	0.420369
2022-09-13	11:00:08	0.453143
2022-09-13	11:00:08	0.438944
2022-09-13	11:00:08	0.355229
2022-09-13	11:00:09	0.332583
2022-09-13	11:00:09	0.351718
2022-09-13	11:00:09	0.265916
2022-09-13	11:00:10	0.267697
2022-09-13	11:00:10	0.378435
2022-09-13	11:00:10	0.748511
2022-09-13	11:00:10	1.07055
2022-09-13	11:00:11	0.818435
2022-09-13	11:00:11	0.591158
2022-09-13	11:00:11	0.64159
2022-09-13	11:00:11	0.496094
2022-09-13	11:00:12	0.562812
2022-09-13	11:00:12	0.501183
2022-09-13	11:00:12	0.465305
2022-09-13	11:00:12	0.525305
2022-09-13	11:00:13	0.52556
2022-09-13	11:00:13	0.777723
2022-09-13	11:00:13	0.956247
2022-09-13	11:00:14	0.723575
2022-09-13	11:00:14	0.617672
2022-09-13	11:00:14	0.616501
2022-09-13	11:00:14	0.774873
2022-09-13	11:00:15	0.989733
2022-09-13	11:00:15	0.640369
2022-09-13	11:00:15	0.524084
2022-09-13	11:00:15	0.456959
2022-09-13	11:00:16	0.533906
2022-09-13	11:00:16	0.464593
2022-09-13	11:00:16	0.446323
2022-09-13	11:00:16	0.329428
2022-09-13	11:00:17	0.303066
2022-09-13	11:00:17	0.430598
2022-09-13	11:00:17	0.0960434
2022-09-13	11:00:18	0.147138
2022-09-13	11:00:18	-0.195356
2022-09-13	11:00:18	-0.315101
2022-09-13	11:00:18	-0.438715
2022-09-13	11:00:19	0.219809
2022-09-13	11:00:19	0.959962
2022-09-13	11:00:19	2.12042
2022-09-13	11:00:19	0.558893
2022-09-13	11:00:20	0.911514
2022-09-13	11:00:20	0.701947
2022-09-13	11:00:20	1.0762
2022-09-13	11:00:20	0.983524
2022-09-13	11:00:21	0.248664
2022-09-13	11:00:21	0.286374
2022-09-13	11:00:21	0.165611
2022-09-13	11:00:21	-0.107163
2022-09-13	11:00:22	0.212685
2022-09-13	11:00:22	0.250496
2022-09-13	11:00:22	0.421132
2022-09-13	11:00:23	0.419708
2022-09-13	11:00:23	0.68215
2022-09-13	11:00:23	0.513804
2022-09-13	11:00:23	0.503371
2022-09-13	11:00:24	0.308766
2022-09-13	11:00:24	0.26612
2022-09-13	11:00:24	-0.275763
2022-09-13	11:00:24	0.355891
2022-09-13	11:00:25	0.328257
2022-09-13	11:00:25	0.258893
2022-09-13	11:00:25	0.714567
2022-09-13	11:00:25	0.735026
2022-09-13	11:00:26	0.734771
2022-09-13	11:00:26	0.73299
2022-09-13	11:00:26	0.740674
2022-09-13	11:00:27	0.641947
2022-09-13	11:00:27	-0.231539
2022-09-13	11:00:27	-0.353066
2022-09-13	11:00:27	-0.151692
2022-09-13	11:00:28	-0.0366791
2022-09-13	11:00:28	0.223677
2022-09-13	11:00:28	-0.0449234
2022-09-13	11:00:28	-0.0886384
2022-09-13	11:00:29	-0.142074
2022-09-13	11:00:29	-0.0250252
2022-09-13	11:00:29	-0.0639564
2022-09-13	11:00:29	0.0969595
2022-09-13	11:00:30	-0.115916
2022-09-13	11:00:30	-0.059529
2022-09-13	11:00:30	-0.0574934
2022-09-13	11:00:31	0.0606237
2022-09-13	11:00:31	0.142405
2022-09-13	11:00:31	0.0653056
2022-09-13	11:00:31	0.0686135
