# Supplementary material for: Comparing efficacy in reducing pulling and welfare impacts of four types of leash walking equipment
Source: PeerJ journal article supplement (doi:10.7717/peerj.18131), 2024-10-24
Supplement: Shelter1_Tension_files.zip [file Mars_harness_20229139286 copy.xlsx]

## Sheet: Averaged Newtons
Date	Time	averaged newtons	impulse	total steps
2022-09-13	09:28:16	2.26094	2.26094	0
2022-09-13	09:28:17	2.1932	4.45415	0		Impulse newtons	1323.21
2022-09-13	09:28:18	2.1481	6.60224	0		Total steps	16
2022-09-13	09:28:19	1.40305	8.00529	0		# > 5 sec	0
2022-09-13	09:28:20	19.8361	27.8414	1
2022-09-13	09:28:21	31.026	58.8675	2
2022-09-13	09:28:22	15.5514	74.4189	3
2022-09-13	09:28:23	5.82148	80.2403	3
2022-09-13	09:28:24	12.0229	92.2633	3
2022-09-13	09:28:25	4.00825	96.2715	3
2022-09-13	09:28:26	5.78187	102.053	3
2022-09-13	09:28:27	6.1385	108.192	3
2022-09-13	09:28:28	7.61983	115.812	3
2022-09-13	09:28:29	1.93553	117.747	3
2022-09-13	09:28:30	5.30665	123.054	3
2022-09-13	09:28:31	9.68588	132.74	3
2022-09-13	09:28:32	3.47435	136.214	3
2022-09-13	09:28:33	2.86003	139.074	3
2022-09-13	09:28:34	8.75735	147.832	3
2022-09-13	09:28:35	10.6406	158.472	3
2022-09-13	09:28:36	1.86083	160.333	3
2022-09-13	09:28:37	1.36304	161.696	3
2022-09-13	09:28:38	1.97883	163.675	3
2022-09-13	09:28:39	2.10656	165.781	3
2022-09-13	09:28:40	1.90331	167.685	3
2022-09-13	09:28:41	1.58901	169.274	3
2022-09-13	09:28:42	2.04849	171.322	3
2022-09-13	09:28:43	1.45732	172.78	3
2022-09-13	09:28:44	0.840971	173.621	3
2022-09-13	09:28:45	0.698942	174.319	3
2022-09-13	09:28:46	8.83182	183.151	3
2022-09-13	09:28:47	14.1608	197.312	4
2022-09-13	09:28:48	6.6354	203.947	4
2022-09-13	09:28:49	3.04671	206.994	4
2022-09-13	09:28:50	4.04419	211.038	4
2022-09-13	09:28:51	7.31169	218.35	4
2022-09-13	09:28:52	2.75217	221.102	4
2022-09-13	09:28:53	1.35489	222.457	4
2022-09-13	09:28:54	0.778623	223.236	4
2022-09-13	09:28:55	0.484775	223.72	4
2022-09-13	09:28:56	0.912052	224.633	4
2022-09-13	09:28:57	0.960835	225.593	4
2022-09-13	09:28:58	0.342558	225.936	4
2022-09-13	09:28:59	0.506508	226.442	4
2022-09-13	09:29:00	1.1374	227.58	4
2022-09-13	09:29:01	1.68992	229.27	4
2022-09-13	09:29:02	1.05178	230.322	4
2022-09-13	09:29:03	1.08641	231.408	4
2022-09-13	09:29:04	1.80543	233.213	4
2022-09-13	09:29:05	17.7531	250.966	5
2022-09-13	09:29:06	9.23232	260.199	5
2022-09-13	09:29:07	1.86027	262.059	5
2022-09-13	09:29:08	6.37824	268.437	5
2022-09-13	09:29:09	12.9013	281.339	5
2022-09-13	09:29:10	3.24203	284.581	5
2022-09-13	09:29:11	4.78856	289.369	5
2022-09-13	09:29:12	8.87419	298.243	5
2022-09-13	09:29:13	6.33744	304.581	5
2022-09-13	09:29:14	5.14775	309.728	5
2022-09-13	09:29:15	9.62023	319.349	5
2022-09-13	09:29:16	7.77924	327.128	5
2022-09-13	09:29:17	0.694055	327.822	5
2022-09-13	09:29:18	0.940461	328.762	5
2022-09-13	09:29:19	0.377305	329.14	5
2022-09-13	09:29:20	14.0701	343.21	6
2022-09-13	09:29:21	4.06077	347.271	6
2022-09-13	09:29:22	1.83287	349.104	6
2022-09-13	09:29:23	2.56966	351.673	6
2022-09-13	09:29:24	3.21119	354.884	6
2022-09-13	09:29:25	2.99442	357.879	6
2022-09-13	09:29:26	1.19105	359.07	6
2022-09-13	09:29:27	-1.10843	359.07	6
2022-09-13	09:29:28	0.161403	359.231	6
2022-09-13	09:29:29	3.51136	362.743	6
2022-09-13	09:29:30	1.92867	364.671	6
2022-09-13	09:29:31	1.73123	366.403	6
2022-09-13	09:29:32	0.480701	366.883	6
2022-09-13	09:29:33	-1.42518	366.883	6
2022-09-13	09:29:34	-1.65094	366.883	6
2022-09-13	09:29:35	2.83842	369.722	6
2022-09-13	09:29:36	5.39822	375.12	6
2022-09-13	09:29:37	1.92371	377.044	6
2022-09-13	09:29:38	2.34798	379.392	6
2022-09-13	09:29:39	3.87319	383.265	6
2022-09-13	09:29:40	9.92418	393.189	6
2022-09-13	09:29:41	11.1074	404.296	6
2022-09-13	09:29:42	4.92318	409.219	6
2022-09-13	09:29:43	2.63087	411.85	6
2022-09-13	09:29:44	4.54734	416.398	6
2022-09-13	09:29:45	10.5209	426.919	6
2022-09-13	09:29:46	9.16063	436.079	6
2022-09-13	09:29:47	10.3027	446.382	6
2022-09-13	09:29:48	3.59332	449.975	6
2022-09-13	09:29:49	10.1771	460.152	6
2022-09-13	09:29:50	14.3894	474.542	7
2022-09-13	09:29:51	1.90299	476.445	7
2022-09-13	09:29:52	1.6291	478.074	7
2022-09-13	09:29:53	2.81782	480.892	7
2022-09-13	09:29:54	2.43451	483.326	7
2022-09-13	09:29:55	2.98284	486.309	7
2022-09-13	09:29:56	18.4797	504.789	8
2022-09-13	09:29:57	15.9577	520.746	9
2022-09-13	09:29:58	23.6507	544.397	10
2022-09-13	09:29:59	9.78571	554.183	10
2022-09-13	09:30:00	5.7297	559.912	10
2022-09-13	09:30:01	2.13014	562.043	10
2022-09-13	09:30:02	2.10893	564.151	10
2022-09-13	09:30:03	2.249	566.401	10
2022-09-13	09:30:04	8.71016	575.111	10
2022-09-13	09:30:05	25.5388	600.649	11
2022-09-13	09:30:06	6.77754	607.427	11
2022-09-13	09:30:07	2.47056	609.898	11
2022-09-13	09:30:08	2.80406	612.702	11
2022-09-13	09:30:09	7.19369	619.895	11
2022-09-13	09:30:10	6.75143	626.647	11
2022-09-13	09:30:11	7.39618	634.043	11
2022-09-13	09:30:12	2.9851	637.028	11
2022-09-13	09:30:13	3.84673	640.875	11
2022-09-13	09:30:14	28.4179	669.293	12
2022-09-13	09:30:15	5.38053	674.673	12
2022-09-13	09:30:16	2.72506	677.398	12
2022-09-13	09:30:17	2.03548	679.434	12
2022-09-13	09:30:18	1.91539	681.349	12
2022-09-13	09:30:19	16.3313	697.68	13
2022-09-13	09:30:20	1.09558	698.776	13
2022-09-13	09:30:21	1.42099	700.197	13
2022-09-13	09:30:22	2.00203	702.199	13
2022-09-13	09:30:23	1.93112	704.13	13
2022-09-13	09:30:24	1.91659	706.047	13
2022-09-13	09:30:25	1.93123	707.978	13
2022-09-13	09:30:26	1.98975	709.968	13
2022-09-13	09:30:27	1.94985	711.918	13
2022-09-13	09:30:28	2.05325	713.971	13
2022-09-13	09:30:29	2.42104	716.392	13
2022-09-13	09:30:30	2.43978	718.832	13
2022-09-13	09:30:31	2.32314	721.155	13
2022-09-13	09:30:32	2.31986	723.475	13
2022-09-13	09:30:33	2.41355	725.888	13
2022-09-13	09:30:34	2.30299	728.191	13
2022-09-13	09:30:35	2.27005	730.461	13
2022-09-13	09:30:36	2.83723	733.298	13
2022-09-13	09:30:37	2.1484	735.447	13
2022-09-13	09:30:38	1.84153	737.288	13
2022-09-13	09:30:39	1.40616	738.695	13
2022-09-13	09:30:40	4.02415	742.719	13
2022-09-13	09:30:41	2.5696	745.288	13
2022-09-13	09:30:42	2.23314	747.521	13
2022-09-13	09:30:43	4.81367	752.335	13
2022-09-13	09:30:44	6.49476	758.83	13
2022-09-13	09:30:45	5.88776	764.718	13
2022-09-13	09:30:46	3.42385	768.141	13
2022-09-13	09:30:47	8.37834	776.52	13
2022-09-13	09:30:48	18.3398	794.86	14
2022-09-13	09:30:49	11.1349	805.995	14
2022-09-13	09:30:50	15.9335	821.928	15
2022-09-13	09:30:51	15.8661	837.794	16
2022-09-13	09:30:52	9.7737	847.568	16
2022-09-13	09:30:53	2.93581	850.504	16
2022-09-13	09:30:54	3.2799	853.784	16
2022-09-13	09:30:55	3.27135	857.055	16
2022-09-13	09:30:56	3.27271	860.328	16
2022-09-13	09:30:57	3.25726	863.585	16
2022-09-13	09:30:58	3.2795	866.864	16
2022-09-13	09:30:59	3.28033	870.145	16
2022-09-13	09:31:00	3.28222	873.427	16
2022-09-13	09:31:01	3.27424	876.701	16
2022-09-13	09:31:02	3.26286	879.964	16
2022-09-13	09:31:03	3.26779	883.232	16
2022-09-13	09:31:04	3.28033	886.512	16
2022-09-13	09:31:05	3.27916	889.791	16
2022-09-13	09:31:06	3.25624	893.048	16
2022-09-13	09:31:07	3.26756	896.315	16
2022-09-13	09:31:08	3.26897	899.584	16
2022-09-13	09:31:09	3.26811	902.852	16
2022-09-13	09:31:10	3.28391	906.136	16
2022-09-13	09:31:11	3.2769	909.413	16
2022-09-13	09:31:12	3.27814	912.691	16
2022-09-13	09:31:13	3.26667	915.958	16
2022-09-13	09:31:14	3.27113	919.229	16
2022-09-13	09:31:15	2.2597	921.489	16
2022-09-13	09:31:16	3.07973	924.568	16
2022-09-13	09:31:17	2.28511	926.853	16
2022-09-13	09:31:18	2.45362	929.307	16
2022-09-13	09:31:19	2.38222	931.689	16
2022-09-13	09:31:20	2.3739	934.063	16
2022-09-13	09:31:21	2.37271	936.436	16
2022-09-13	09:31:22	2.33719	938.773	16
2022-09-13	09:31:23	2.32942	941.103	16
2022-09-13	09:31:24	2.29082	943.393	16
2022-09-13	09:31:25	2.23983	945.633	16
2022-09-13	09:31:26	2.22585	947.859	16
2022-09-13	09:31:27	2.28037	950.139	16
2022-09-13	09:31:28	2.29173	952.431	16
2022-09-13	09:31:29	2.10893	954.54	16
2022-09-13	09:31:30	2.14396	956.684	16
2022-09-13	09:31:31	2.45574	959.14	16
2022-09-13	09:31:32	3.30016	962.44	16
2022-09-13	09:31:33	2.29043	964.73	16
2022-09-13	09:31:34	2.37571	967.106	16
2022-09-13	09:31:35	2.45166	969.558	16
2022-09-13	09:31:36	1.73572	971.293	16
2022-09-13	09:31:37	1.70492	972.998	16
2022-09-13	09:31:38	2.52778	975.526	16
2022-09-13	09:31:39	-0.192924	975.526	16
2022-09-13	09:31:40	-2.28433	975.526	16
2022-09-13	09:31:41	-0.347252	975.526	16
2022-09-13	09:31:42	3.55148	979.078	16
2022-09-13	09:31:43	1.50758	980.585	16
2022-09-13	09:31:44	4.08758	984.673	16
2022-09-13	09:31:45	9.53692	994.21	16
2022-09-13	09:31:46	5.56314	999.773	16
2022-09-13	09:31:47	4.31764	1004.09	16
2022-09-13	09:31:48	4.10422	1008.19	16
2022-09-13	09:31:49	4.39022	1012.58	16
2022-09-13	09:31:50	4.63744	1017.22	16
2022-09-13	09:31:51	7.28882	1024.51	16
2022-09-13	09:31:52	5.93303	1030.44	16
2022-09-13	09:31:53	9.25158	1039.7	16
2022-09-13	09:31:54	9.98364	1049.68	16
2022-09-13	09:31:55	7.24779	1056.93	16
2022-09-13	09:31:56	2.22427	1059.15	16
2022-09-13	09:31:57	1.83882	1060.99	16
2022-09-13	09:31:58	-0.442573	1060.99	16
2022-09-13	09:31:59	0.664232	1061.65	16
2022-09-13	09:32:00	1.38721	1063.04	16
2022-09-13	09:32:01	2.04906	1065.09	16
2022-09-13	09:32:02	-2.10548	1065.09	16
2022-09-13	09:32:03	-3.46124	1065.09	16
2022-09-13	09:32:04	-3.34226	1065.09	16
2022-09-13	09:32:05	-1.76739	1065.09	16
2022-09-13	09:32:06	1.16576	1066.26	16
2022-09-13	09:32:07	1.42265	1067.68	16
2022-09-13	09:32:08	1.36621	1069.05	16
2022-09-13	09:32:09	1.32269	1070.37	16
2022-09-13	09:32:10	1.34329	1071.71	16
2022-09-13	09:32:11	1.35133	1073.06	16
2022-09-13	09:32:12	1.36259	1074.43	16
2022-09-13	09:32:13	1.33887	1075.76	16
2022-09-13	09:32:14	1.35014	1077.11	16
2022-09-13	09:32:15	1.77792	1078.89	16
2022-09-13	09:32:16	1.9095	1080.8	16
2022-09-13	09:32:17	1.77113	1082.57	16
2022-09-13	09:32:18	1.43831	1084.01	16
2022-09-13	09:32:19	1.41929	1085.43	16
2022-09-13	09:32:20	1.39377	1086.82	16
2022-09-13	09:32:21	1.45736	1088.28	16
2022-09-13	09:32:22	3.25171	1091.53	16
2022-09-13	09:32:23	3.27622	1094.81	16
2022-09-13	09:32:24	3.0147	1097.82	16
2022-09-13	09:32:25	3.27105	1101.1	16
2022-09-13	09:32:26	2.86909	1103.96	16
2022-09-13	09:32:27	1.48947	1105.45	16
2022-09-13	09:32:28	1.46027	1106.91	16
2022-09-13	09:32:29	8.29357	1115.21	16
2022-09-13	09:32:30	2.17187	1117.38	16
2022-09-13	09:32:31	2.15449	1119.53	16
2022-09-13	09:32:32	1.98873	1121.52	16
2022-09-13	09:32:33	1.8773	1123.4	16
2022-09-13	09:32:34	1.83638	1125.24	16
2022-09-13	09:32:35	1.9915	1127.23	16
2022-09-13	09:32:36	2.0657	1129.29	16
2022-09-13	09:32:37	2.5224	1131.82	16
2022-09-13	09:32:38	3.51979	1135.34	16
2022-09-13	09:32:39	2.47211	1137.81	16
2022-09-13	09:32:40	2.18816	1140	16
2022-09-13	09:32:41	3.02342	1143.02	16
2022-09-13	09:32:42	3.17973	1146.2	16
2022-09-13	09:32:43	1.79179	1147.99	16
2022-09-13	09:32:44	2.42682	1150.42	16
2022-09-13	09:32:45	3.5044	1153.92	16
2022-09-13	09:32:46	4.48295	1158.41	16
2022-09-13	09:32:47	3.75052	1162.16	16
2022-09-13	09:32:48	2.41076	1164.57	16
2022-09-13	09:32:49	5.47378	1170.04	16
2022-09-13	09:32:50	9.00624	1179.05	16
2022-09-13	09:32:51	6.01837	1185.06	16
2022-09-13	09:32:52	5.66025	1190.73	16
2022-09-13	09:32:53	5.84491	1196.57	16
2022-09-13	09:32:54	4.35302	1200.92	16
2022-09-13	09:32:55	3.72234	1204.65	16
2022-09-13	09:32:56	2.91283	1207.56	16
2022-09-13	09:32:57	3.11108	1210.67	16
2022-09-13	09:32:58	1.66174	1212.33	16
2022-09-13	09:32:59	1.49807	1213.83	16
2022-09-13	09:33:00	2.0923	1215.92	16
2022-09-13	09:33:01	5.16586	1221.09	16
2022-09-13	09:33:02	9.29991	1230.39	16
2022-09-13	09:33:03	5.89036	1236.28	16
2022-09-13	09:33:04	3.60542	1239.88	16
2022-09-13	09:33:05	4.94582	1244.83	16
2022-09-13	09:33:06	10.127	1254.96	16
2022-09-13	09:33:07	12.6881	1267.64	16
2022-09-13	09:33:08	11.0502	1278.69	16
2022-09-13	09:33:09	10.3216	1289.02	16
2022-09-13	09:33:10	8.88657	1297.9	16
2022-09-13	09:33:11	3.91708	1301.82	16
2022-09-13	09:33:12	4.26212	1306.08	16
2022-09-13	09:33:13	7.38322	1313.46	16
2022-09-13	09:33:14	5.02341	1318.49	16
2022-09-13	09:33:15	1.61861	1320.11	16
2022-09-13	09:33:16	3.107	1323.21	16

## Sheet: Mars_harness_20229139286 (4)
Date	Time	Lbs	Newtons	averaged newtons	Total force x time	total steps > 13.345		**GoPro Fitting: 917
2022-09-13	09:28:16	0.507748	2.25856	2.26094	2.25856	FALSE	0			Total force	2522.15
2022-09-13	09:28:16	0.519148	2.30927	2.26094	2.30927	FALSE	0			Total steps	77
2022-09-13	09:28:16	0.517723	2.30294	2.26094	4.5615	FALSE	0
2022-09-13	09:28:16	0.488512	2.173	2.26094	4.48227	FALSE	0
2022-09-13	09:28:17	0.575382	2.55941	2.1932	7.12091	FALSE	0
2022-09-13	09:28:17	0.464542	2.06638	2.1932	6.54865	FALSE	0
2022-09-13	09:28:17	0.461947	2.05483	2.1932	9.17575	FALSE	0
2022-09-13	09:28:17	0.470344	2.09218	2.1932	8.64083	FALSE	0
2022-09-13	09:28:18	0.495636	2.20469	2.1481	11.3804	FALSE	0
2022-09-13	09:28:18	0.572074	2.5447	2.1481	11.1855	FALSE	0
2022-09-13	09:28:18	0.381031	1.6949	2.1481	13.0753	FALSE	0
2022-09-13	09:28:19	0.340573	1.51494	1.40305	12.7005	FALSE	0
2022-09-13	09:28:19	0.441641	1.96451	1.40305	15.0398	FALSE	0
2022-09-13	09:28:19	0.254313	1.13124	1.40305	13.8317	FALSE	0
2022-09-13	09:28:19	0.225153	1.00153	1.40305	16.0414	FALSE	0
2022-09-13	09:28:20	0.501183	2.22936	19.8361	16.0611	FALSE	0
2022-09-13	09:28:20	3.04403	13.5405	19.8361	29.5818	1	1
2022-09-13	09:28:20	7.96317	35.4218	19.8361	51.4828	1	2
2022-09-13	09:28:20	6.32907	28.153	19.8361	57.7348	1	3
2022-09-13	09:28:21	10.4899	46.6612	31.026	98.144	1	4
2022-09-13	09:28:21	3.32744	14.8011	31.026	72.5359	1	5
2022-09-13	09:28:21	5.83375	25.9497	31.026	124.094	1	6
2022-09-13	09:28:21	8.24876	36.6921	31.026	109.228	1	7
2022-09-13	09:28:22	5.09192	22.6499	15.5514	146.744	1	8
2022-09-13	09:28:22	3.98128	17.7095	15.5514	126.938	1	9
2022-09-13	09:28:22	1.41513	6.29478	15.5514	153.038	FALSE	9
2022-09-13	09:28:23	0.544033	2.41997	5.82148	129.358	FALSE	9
2022-09-13	09:28:23	0.990496	4.40592	5.82148	157.444	FALSE	9
2022-09-13	09:28:23	1.15258	5.12691	5.82148	134.484	FALSE	9
2022-09-13	09:28:23	2.5478	11.3331	5.82148	168.777	FALSE	9
2022-09-13	09:28:24	4.05726	18.0475	12.0229	152.532	1	10
2022-09-13	09:28:24	4.35665	19.3793	12.0229	188.157	1	11
2022-09-13	09:28:24	1.90978	8.49508	12.0229	161.027	FALSE	11
2022-09-13	09:28:24	0.487799	2.16983	12.0229	190.326	FALSE	11
2022-09-13	09:28:25	0.921082	4.09716	4.00825	165.124	FALSE	11
2022-09-13	09:28:25	0.680573	3.02732	4.00825	193.354	FALSE	11
2022-09-13	09:28:25	1.27859	5.68742	4.00825	170.812	FALSE	11
2022-09-13	09:28:25	0.724135	3.2211	4.00825	196.575	FALSE	11
2022-09-13	09:28:26	0.529682	2.35613	5.78187	173.168	FALSE	11
2022-09-13	09:28:26	2.27864	10.1358	5.78187	206.711	FALSE	11
2022-09-13	09:28:26	0.335331	1.49162	5.78187	174.659	FALSE	11
2022-09-13	09:28:26	2.05564	9.1439	5.78187	215.855	FALSE	11
2022-09-13	09:28:27	0.872379	3.88052	6.1385	178.54	FALSE	11
2022-09-13	09:28:27	0.996298	4.43173	6.1385	220.286	FALSE	11
2022-09-13	09:28:27	2.27131	10.1032	6.1385	188.643	FALSE	11
2022-09-13	09:28:28	0.732532	3.25845	7.61983	223.545	FALSE	11
2022-09-13	09:28:28	3.69726	16.4462	7.61983	205.089	1	12
2022-09-13	09:28:28	1.42734	6.34909	7.61983	229.894	FALSE	12
2022-09-13	09:28:28	0.994924	4.42562	7.61983	209.515	FALSE	12
2022-09-13	09:28:29	0.587799	2.61465	1.93553	232.509	FALSE	12
2022-09-13	09:28:29	0.221896	0.987038	1.93553	210.502	FALSE	12
2022-09-13	09:28:29	0.597316	2.65698	1.93553	235.166	FALSE	12
2022-09-13	09:28:29	0.333499	1.48347	1.93553	211.985	FALSE	12
2022-09-13	09:28:30	0.517315	2.30112	5.30665	237.467	FALSE	12
2022-09-13	09:28:30	1.07197	4.76834	5.30665	216.754	FALSE	12
2022-09-13	09:28:30	0.96841	4.30768	5.30665	241.774	FALSE	12
2022-09-13	09:28:30	2.21426	9.84947	5.30665	226.603	FALSE	12
2022-09-13	09:28:31	1.78139	7.92398	9.68588	249.698	FALSE	12
2022-09-13	09:28:31	1.07319	4.77376	9.68588	231.377	FALSE	12
2022-09-13	09:28:31	3.67787	16.3599	9.68588	266.058	1	13
2022-09-13	09:28:32	1.35421	6.0238	3.47435	237.401	FALSE	13
2022-09-13	09:28:32	0.553601	2.46253	3.47435	268.521	FALSE	13
2022-09-13	09:28:32	0.0549239	0.244312	3.47435	237.645	FALSE	13
2022-09-13	09:28:32	1.16154	5.16676	3.47435	273.688	FALSE	13
2022-09-13	09:28:33	0.270547	1.20345	2.86003	238.849	FALSE	13
2022-09-13	09:28:33	0.668817	2.97503	2.86003	276.663	FALSE	13
2022-09-13	09:28:33	0.545712	2.42744	2.86003	241.276	FALSE	13
2022-09-13	09:28:33	1.08678	4.83421	2.86003	281.497	FALSE	13
2022-09-13	09:28:34	0.82215	3.65709	8.75735	244.933	FALSE	13
2022-09-13	09:28:34	1.4449	6.4272	8.75735	287.924	FALSE	13
2022-09-13	09:28:34	2.44571	10.879	8.75735	255.812	FALSE	13
2022-09-13	09:28:34	3.1622	14.0661	8.75735	301.99	1	14
2022-09-13	09:28:35	4.86515	21.6412	10.6406	277.453	1	15
2022-09-13	09:28:35	3.49049	15.5264	10.6406	317.516	1	16
2022-09-13	09:28:35	0.829376	3.68923	10.6406	281.142	FALSE	16
2022-09-13	09:28:35	0.383473	1.70576	10.6406	319.222	FALSE	16
2022-09-13	09:28:36	0.476705	2.12048	1.86083	283.263	FALSE	16
2022-09-13	09:28:36	0.334415	1.48754	1.86083	320.71	FALSE	16
2022-09-13	09:28:36	0.44388	1.97447	1.86083	285.237	FALSE	16
2022-09-13	09:28:37	0.225204	1.00175	1.36304	321.712	FALSE	16
2022-09-13	09:28:37	0.521031	2.31765	1.36304	287.555	FALSE	16
2022-09-13	09:28:37	0.0493259	0.219411	1.36304	321.931	FALSE	16
2022-09-13	09:28:37	0.43014	1.91335	1.36304	289.468	FALSE	16
2022-09-13	09:28:38	0.281489	1.25212	1.97883	323.183	FALSE	16
2022-09-13	09:28:38	0.445102	1.9799	1.97883	291.448	FALSE	16
2022-09-13	09:28:38	0.68841	3.06219	1.97883	326.245	FALSE	16
2022-09-13	09:28:38	0.36444	1.6211	1.97883	293.069	FALSE	16
2022-09-13	09:28:39	0.546883	2.43264	2.10656	328.678	FALSE	16
2022-09-13	09:28:39	0.303321	1.34923	2.10656	294.419	FALSE	16
2022-09-13	09:28:39	0.601845	2.67713	2.10656	331.355	FALSE	16
2022-09-13	09:28:39	0.442252	1.96723	2.10656	296.386	FALSE	16
2022-09-13	09:28:40	0.507087	2.25562	1.90331	333.611	FALSE	16
2022-09-13	09:28:40	0.376908	1.67656	1.90331	298.062	FALSE	16
2022-09-13	09:28:40	0.399657	1.77775	1.90331	335.388	FALSE	16
2022-09-13	09:28:41	0.496858	2.21012	1.58901	300.273	FALSE	16
2022-09-13	09:28:41	0.062761	0.279173	1.58901	335.668	FALSE	16
2022-09-13	09:28:41	0.37187	1.65415	1.58901	301.927	FALSE	16
2022-09-13	09:28:41	0.497417	2.21261	1.58901	337.88	FALSE	16
2022-09-13	09:28:42	0.522201	2.32285	2.04849	304.25	FALSE	16
2022-09-13	09:28:42	0.391209	1.74018	2.04849	339.62	FALSE	16
2022-09-13	09:28:42	0.508715	2.26287	2.04849	306.512	FALSE	16
2022-09-13	09:28:42	0.419962	1.86807	2.04849	341.488	FALSE	16
2022-09-13	09:28:43	0.36556	1.62608	1.45732	308.139	FALSE	16
2022-09-13	09:28:43	0.304746	1.35557	1.45732	342.844	FALSE	16
2022-09-13	09:28:43	0.299351	1.33157	1.45732	309.47	FALSE	16
2022-09-13	09:28:43	0.340827	1.51607	1.45732	344.36	FALSE	16
2022-09-13	09:28:44	0.126171	0.561234	0.840971	310.031	FALSE	16
2022-09-13	09:28:44	0.206374	0.917993	0.840971	345.278	FALSE	16
2022-09-13	09:28:44	0.132227	0.588172	0.840971	310.619	FALSE	16
2022-09-13	09:28:44	0.291463	1.29649	0.840971	346.575	FALSE	16
2022-09-13	09:28:45	0.0537534	0.239106	0.698942	310.859	FALSE	16
2022-09-13	09:28:45	0.251667	1.11947	0.698942	347.694	FALSE	16
2022-09-13	09:28:45	0.165967	0.738254	0.698942	311.597	FALSE	16
2022-09-13	09:28:46	0.825	3.66976	8.83182	351.364	FALSE	16
2022-09-13	09:28:46	0.488664	2.17368	8.83182	313.771	FALSE	16
2022-09-13	09:28:46	2.92815	13.025	8.83182	364.389	FALSE	16
2022-09-13	09:28:46	3.70011	16.4588	8.83182	330.229	1	17
2022-09-13	09:28:47	1.69146	7.52395	14.1608	371.913	FALSE	17
2022-09-13	09:28:47	5.00332	22.2558	14.1608	352.485	1	18
2022-09-13	09:28:47	1.0363	4.60967	14.1608	376.522	FALSE	18
2022-09-13	09:28:47	5.00286	22.2537	14.1608	374.739	1	19
2022-09-13	09:28:48	0.867595	3.85924	6.6354	380.382	FALSE	19
2022-09-13	09:28:48	2.19833	9.77861	6.6354	384.517	FALSE	19
2022-09-13	09:28:48	1.14103	5.07553	6.6354	385.457	FALSE	19
2022-09-13	09:28:48	1.75986	7.82821	6.6354	392.346	FALSE	19
2022-09-13	09:28:49	0.635789	2.82812	3.04671	388.285	FALSE	19
2022-09-13	09:28:49	1.12118	4.98723	3.04671	397.333	FALSE	19
2022-09-13	09:28:49	0.297824	1.32478	3.04671	389.61	FALSE	19
2022-09-13	09:28:50	0.614873	2.73508	4.04419	400.068	FALSE	19
2022-09-13	09:28:50	0.35411	1.57515	4.04419	391.185	FALSE	19
2022-09-13	09:28:50	1.85793	8.26444	4.04419	408.332	FALSE	19
2022-09-13	09:28:50	0.809784	3.60208	4.04419	394.787	FALSE	19
2022-09-13	09:28:51	1.26042	5.6066	7.31169	413.939	FALSE	19
2022-09-13	09:28:51	2.72561	12.1241	7.31169	406.911	FALSE	19
2022-09-13	09:28:51	0.759351	3.37775	7.31169	417.317	FALSE	19
2022-09-13	09:28:51	1.82958	8.13834	7.31169	415.05	FALSE	19
2022-09-13	09:28:52	0.528003	2.34866	2.75217	419.665	FALSE	19
2022-09-13	09:28:52	1.32536	5.89547	2.75217	420.945	FALSE	19
2022-09-13	09:28:52	0.339453	1.50995	2.75217	421.175	FALSE	19
2022-09-13	09:28:52	0.282048	1.25461	2.75217	422.2	FALSE	19
2022-09-13	09:28:53	0.558282	2.48335	1.35489	423.659	FALSE	19
2022-09-13	09:28:53	0.0684608	0.304527	1.35489	422.504	FALSE	19
2022-09-13	09:28:53	0.354873	1.57855	1.35489	425.237	FALSE	19
2022-09-13	09:28:53	0.236756	1.05314	1.35489	423.557	FALSE	19
2022-09-13	09:28:54	0.282099	1.25483	0.778623	426.492	FALSE	19
2022-09-13	09:28:54	0.12444	0.553534	0.778623	424.111	FALSE	19
2022-09-13	09:28:54	0.118588	0.527503	0.778623	427.02	FALSE	19
2022-09-13	09:28:55	0.258028	1.14776	0.484775	425.259	FALSE	19
2022-09-13	09:28:55	0.00255749	0.0113762	0.484775	427.031	FALSE	19
2022-09-13	09:28:55	0.144644	0.643405	0.484775	425.902	FALSE	19
2022-09-13	09:28:55	0.0306999	0.136559	0.484775	427.168	FALSE	19
2022-09-13	09:28:56	0.331616	1.47509	0.912052	427.377	FALSE	19
2022-09-13	09:28:56	0.0503438	0.223939	0.912052	427.391	FALSE	19
2022-09-13	09:28:56	0.260827	1.16021	0.912052	428.537	FALSE	19
2022-09-13	09:28:56	0.177367	0.788964	0.912052	428.18	FALSE	19
2022-09-13	09:28:57	0.228868	1.01805	0.960835	429.555	FALSE	19
2022-09-13	09:28:57	0.124644	0.554441	0.960835	428.735	FALSE	19
2022-09-13	09:28:57	0.225865	1.00469	0.960835	430.56	FALSE	19
2022-09-13	09:28:57	0.284644	1.26615	0.960835	430.001	FALSE	19
2022-09-13	09:28:58	0.0188934	0.0840416	0.342558	430.644	FALSE	19
2022-09-13	09:28:58	0.226883	1.00922	0.342558	431.01	FALSE	19
2022-09-13	09:28:58	-0.0147453	-0.06559	0.342558	430.644	FALSE	19
2022-09-13	09:28:59	0.165204	0.73486	0.506508	431.745	FALSE	19
2022-09-13	09:28:59	-0.0180532	-0.0803042	0.506508	430.644	FALSE	19
2022-09-13	09:28:59	0.239606	1.06582	0.506508	432.811	FALSE	19
2022-09-13	09:28:59	0.0687152	0.305659	0.506508	430.95	FALSE	19
2022-09-13	09:29:00	0.210853	0.937916	1.1374	433.749	FALSE	19
2022-09-13	09:29:00	0.0489188	0.217601	1.1374	431.167	FALSE	19
2022-09-13	09:29:00	0.287697	1.27973	1.1374	435.029	FALSE	19
2022-09-13	09:29:00	0.475331	2.11437	1.1374	433.282	FALSE	19
2022-09-13	09:29:01	0.555738	2.47203	1.68992	437.501	FALSE	19
2022-09-13	09:29:01	0.374313	1.66502	1.68992	434.947	FALSE	19
2022-09-13	09:29:01	0.236756	1.05314	1.68992	438.554	FALSE	19
2022-09-13	09:29:01	0.352837	1.56949	1.68992	436.516	FALSE	19
2022-09-13	09:29:02	0.11355	0.505093	1.05178	439.059	FALSE	19
2022-09-13	09:29:02	0.378486	1.68358	1.05178	438.2	FALSE	19
2022-09-13	09:29:02	0.159606	0.709959	1.05178	439.769	FALSE	19
2022-09-13	09:29:02	0.29416	1.30848	1.05178	439.508	FALSE	19
2022-09-13	09:29:03	0.166018	0.738481	1.08641	440.507	FALSE	19
2022-09-13	09:29:03	0.279046	1.24125	1.08641	440.75	FALSE	19
2022-09-13	09:29:03	0.287646	1.27951	1.08641	441.787	FALSE	19
2022-09-13	09:29:04	0.272735	1.21318	1.80543	441.963	FALSE	19
2022-09-13	09:29:04	0.270802	1.20458	1.80543	442.991	FALSE	19
2022-09-13	09:29:04	0.263473	1.17198	1.80543	443.135	FALSE	19
2022-09-13	09:29:04	0.816501	3.63196	1.80543	446.623	FALSE	19
2022-09-13	09:29:05	3.11731	13.8664	17.7531	457.001	1	20
2022-09-13	09:29:05	2.34108	10.4136	17.7531	457.037	FALSE	20
2022-09-13	09:29:05	6.63716	29.5234	17.7531	486.525	1	21
2022-09-13	09:29:05	3.86871	17.2088	17.7531	474.246	1	22
2022-09-13	09:29:06	4.21859	18.7651	9.23232	505.29	1	23
2022-09-13	09:29:06	0.743117	3.30553	9.23232	477.551	FALSE	23
2022-09-13	09:29:06	1.26485	5.62631	9.23232	510.916	FALSE	23
2022-09-13	09:29:07	0.0711071	0.316299	1.86027	477.868	FALSE	23
2022-09-13	09:29:07	0.628003	2.79348	1.86027	513.71	FALSE	23
2022-09-13	09:29:07	0.54215	2.41159	1.86027	480.279	FALSE	23
2022-09-13	09:29:07	0.431565	1.91969	1.86027	515.629	FALSE	23
2022-09-13	09:29:08	1.1735	5.21996	6.37824	485.499	FALSE	23
2022-09-13	09:29:08	0.15355	0.683021	6.37824	516.312	FALSE	23
2022-09-13	09:29:08	3.40688	15.1545	6.37824	500.654	1	24
2022-09-13	09:29:08	1.00164	4.4555	6.37824	520.768	FALSE	24
2022-09-13	09:29:09	4.79859	21.3451	12.9013	521.999	1	25
2022-09-13	09:29:09	3.6424	16.2021	12.9013	536.97	1	26
2022-09-13	09:29:09	2.20139	9.79222	12.9013	531.791	FALSE	26
2022-09-13	09:29:09	0.958944	4.26557	12.9013	541.235	FALSE	26
2022-09-13	09:29:10	0.0612343	0.272382	3.24203	532.063	FALSE	26
2022-09-13	09:29:10	1.44892	6.44509	3.24203	547.681	FALSE	26
2022-09-13	09:29:10	0.132532	0.589529	3.24203	532.653	FALSE	26
2022-09-13	09:29:10	1.27268	5.66114	3.24203	553.342	FALSE	26
2022-09-13	09:29:11	0.507748	2.25856	4.78856	534.911	FALSE	26
2022-09-13	09:29:11	1.92419	8.55918	4.78856	561.901	FALSE	26
2022-09-13	09:29:11	0.823524	3.6632	4.78856	538.575	FALSE	26
2022-09-13	09:29:11	1.0506	4.67328	4.78856	566.574	FALSE	26
2022-09-13	09:29:12	2.21457	9.85085	8.87419	548.425	FALSE	26
2022-09-13	09:29:12	0.595433	2.64861	8.87419	569.223	FALSE	26
2022-09-13	09:29:12	3.17502	14.1231	8.87419	562.549	1	27
2022-09-13	09:29:13	0.308461	1.3721	6.33744	570.595	FALSE	27
2022-09-13	09:29:13	2.98999	13.3001	6.33744	575.849	FALSE	27
2022-09-13	09:29:13	0.335229	1.49117	6.33744	572.086	FALSE	27
2022-09-13	09:29:13	2.0652	9.18642	6.33744	585.035	FALSE	27
2022-09-13	09:29:14	1.1166	4.96686	5.14775	577.053	FALSE	27
2022-09-13	09:29:14	0.984542	4.37944	5.14775	589.415	FALSE	27
2022-09-13	09:29:14	1.60134	7.12308	5.14775	584.176	FALSE	27
2022-09-13	09:29:14	0.926578	4.1216	5.14775	593.536	FALSE	27
2022-09-13	09:29:15	3.62846	16.1401	9.62023	600.316	1	28
2022-09-13	09:29:15	0.682456	3.0357	9.62023	596.572	FALSE	28
2022-09-13	09:29:15	2.8135	12.515	9.62023	612.831	FALSE	28
2022-09-13	09:29:15	1.52648	6.79009	9.62023	603.362	FALSE	28
2022-09-13	09:29:16	3.13762	13.9568	7.77924	626.788	1	29
2022-09-13	09:29:16	0.903982	4.02109	7.77924	607.383	FALSE	29
2022-09-13	09:29:16	1.20495	5.35986	7.77924	632.148	FALSE	29
2022-09-13	09:29:17	-0.0134731	-0.059931	0.694055	607.383	FALSE	29
2022-09-13	09:29:17	0.35131	1.5627	0.694055	633.71	FALSE	29
2022-09-13	09:29:17	0.1193	0.53067	0.694055	607.914	FALSE	29
2022-09-13	09:29:17	0.166985	0.742783	0.694055	634.453	FALSE	29
2022-09-13	09:29:18	0.0606237	0.269666	0.940461	608.183	FALSE	29
2022-09-13	09:29:18	0.273855	1.21816	0.940461	635.671	FALSE	29
2022-09-13	09:29:18	0.0307509	0.136786	0.940461	608.32	FALSE	29
2022-09-13	09:29:18	0.480471	2.13723	0.940461	637.809	FALSE	29
2022-09-13	09:29:19	-0.188435	-0.838197	0.377305	608.32	FALSE	29
2022-09-13	09:29:19	0.419249	1.8649	0.377305	639.674	FALSE	29
2022-09-13	09:29:19	-0.0339819	-0.151158	0.377305	608.32	FALSE	29
2022-09-13	09:29:19	0.142456	0.633673	0.377305	640.307	FALSE	29
2022-09-13	09:29:20	1.65029	7.34082	14.0701	615.661	FALSE	29
2022-09-13	09:29:20	3.57233	15.8904	14.0701	656.198	1	30
2022-09-13	09:29:20	4.26668	18.979	14.0701	634.64	1	31
2022-09-13	09:29:21	2.91747	12.9775	4.06077	669.175	FALSE	31
2022-09-13	09:29:21	0.150445	0.669209	4.06077	635.309	FALSE	31
2022-09-13	09:29:21	0.289377	1.28721	4.06077	670.462	FALSE	31
2022-09-13	09:29:21	0.294313	1.30916	4.06077	636.618	FALSE	31
2022-09-13	09:29:22	0.325255	1.4468	1.83287	671.909	FALSE	31
2022-09-13	09:29:22	0.359758	1.60028	1.83287	638.219	FALSE	31
2022-09-13	09:29:22	0.492685	2.19156	1.83287	674.101	FALSE	31
2022-09-13	09:29:22	0.470496	2.09286	1.83287	640.311	FALSE	31
2022-09-13	09:29:23	0.498079	2.21556	2.56966	676.316	FALSE	31
2022-09-13	09:29:23	0.572634	2.54719	2.56966	642.859	FALSE	31
2022-09-13	09:29:23	0.629834	2.80163	2.56966	679.118	FALSE	31
2022-09-13	09:29:23	0.610191	2.71425	2.56966	645.573	FALSE	31
2022-09-13	09:29:24	0.727036	3.234	3.21119	682.352	FALSE	31
2022-09-13	09:29:24	0.712023	3.16722	3.21119	648.74	FALSE	31
2022-09-13	09:29:24	0.720318	3.20412	3.21119	685.556	FALSE	31
2022-09-13	09:29:24	0.728257	3.23943	3.21119	651.98	FALSE	31
2022-09-13	09:29:25	0.834669	3.71277	2.99442	689.269	FALSE	31
2022-09-13	09:29:25	0.754109	3.35443	2.99442	655.334	FALSE	31
2022-09-13	09:29:25	0.430751	1.91607	2.99442	691.185	FALSE	31
2022-09-13	09:29:26	0.315382	1.40288	1.19105	656.737	FALSE	31
2022-09-13	09:29:26	0.411514	1.8305	1.19105	693.015	FALSE	31
2022-09-13	09:29:26	0.232328	1.03344	1.19105	657.77	FALSE	31
2022-09-13	09:29:26	0.11182	0.497398	1.19105	693.513	FALSE	31
2022-09-13	09:29:27	-0.212302	-0.944362	-1.10843	657.77	FALSE	31
2022-09-13	09:29:27	-0.351539	-1.56372	-1.10843	693.513	FALSE	31
2022-09-13	09:29:27	-0.221768	-0.986468	-1.10843	657.77	FALSE	31
2022-09-13	09:29:27	-0.211132	-0.939157	-1.10843	693.513	FALSE	31
2022-09-13	09:29:28	-0.0968827	-0.430954	0.161403	657.77	FALSE	31
2022-09-13	09:29:28	-0.17729	-0.788621	0.161403	693.513	FALSE	31
2022-09-13	09:29:28	0.139504	0.620542	0.161403	658.391	FALSE	31
2022-09-13	09:29:28	0.279809	1.24465	0.161403	694.757	FALSE	31
2022-09-13	09:29:29	1.61762	7.1955	3.51136	665.586	FALSE	31
2022-09-13	09:29:29	0.414415	1.8434	3.51136	696.601	FALSE	31
2022-09-13	09:29:29	0.443168	1.9713	3.51136	667.558	FALSE	31
2022-09-13	09:29:29	0.682353	3.03524	3.51136	699.636	FALSE	31
2022-09-13	09:29:30	0.391463	1.74131	1.92867	669.299	FALSE	31
2022-09-13	09:29:30	0.610598	2.71606	1.92867	702.352	FALSE	31
2022-09-13	09:29:30	0.29869	1.32863	1.92867	670.628	FALSE	31
2022-09-13	09:29:31	0.540165	2.40276	1.73123	704.755	FALSE	31
2022-09-13	09:29:31	0.32271	1.43548	1.73123	672.063	FALSE	31
2022-09-13	09:29:31	0.431514	1.91946	1.73123	706.674	FALSE	31
2022-09-13	09:29:31	0.262405	1.16723	1.73123	673.23	FALSE	31
2022-09-13	09:29:32	0.20271	0.901695	0.480701	707.576	FALSE	31
2022-09-13	09:29:32	0.0924811	0.411374	0.480701	673.642	FALSE	31
2022-09-13	09:29:32	-0.0486384	-0.216353	0.480701	707.576	FALSE	31
2022-09-13	09:29:32	0.185713	0.826089	0.480701	674.468	FALSE	31
2022-09-13	09:29:33	-0.306552	-1.3636	-1.42518	707.576	FALSE	31
2022-09-13	09:29:33	-0.23561	-1.04804	-1.42518	674.468	FALSE	31
2022-09-13	09:29:33	-0.357493	-1.5902	-1.42518	707.576	FALSE	31
2022-09-13	09:29:33	-0.381921	-1.69886	-1.42518	674.468	FALSE	31
2022-09-13	09:29:34	-0.423244	-1.88267	-1.65094	707.576	FALSE	31
2022-09-13	09:29:34	-0.418511	-1.86162	-1.65094	674.468	FALSE	31
2022-09-13	09:29:34	-0.271692	-1.20854	-1.65094	707.576	FALSE	31
2022-09-13	09:29:35	0.0541605	0.240917	2.83842	674.709	FALSE	31
2022-09-13	09:29:35	0.26612	1.18375	2.83842	708.76	FALSE	31
2022-09-13	09:29:35	0.42271	1.8803	2.83842	676.589	FALSE	31
2022-09-13	09:29:35	1.80943	8.04871	2.83842	716.808	FALSE	31
2022-09-13	09:29:36	1.47721	6.57093	5.39822	683.16	FALSE	31
2022-09-13	09:29:36	1.49472	6.64881	5.39822	723.457	FALSE	31
2022-09-13	09:29:36	0.725865	3.22879	5.39822	686.389	FALSE	31
2022-09-13	09:29:36	1.1565	5.14434	5.39822	728.602	FALSE	31
2022-09-13	09:29:37	0.233499	1.03865	1.92371	687.427	FALSE	31
2022-09-13	09:29:37	0.664186	2.95443	1.92371	731.556	FALSE	31
2022-09-13	09:29:37	0.226527	1.00764	1.92371	688.435	FALSE	31
2022-09-13	09:29:37	0.605662	2.69411	1.92371	734.25	FALSE	31
2022-09-13	09:29:38	0.371565	1.6528	2.34798	690.088	FALSE	31
2022-09-13	09:29:38	0.568715	2.52976	2.34798	736.78	FALSE	31
2022-09-13	09:29:38	0.375178	1.66887	2.34798	691.757	FALSE	31
2022-09-13	09:29:38	0.795942	3.54051	2.34798	740.32	FALSE	31
2022-09-13	09:29:39	0.539198	2.39846	3.87319	694.155	FALSE	31
2022-09-13	09:29:39	1.29609	5.76527	3.87319	746.086	FALSE	31
2022-09-13	09:29:39	0.776908	3.45584	3.87319	697.611	FALSE	31
2022-09-13	09:29:40	1.72566	7.67608	9.92418	753.762	FALSE	31
2022-09-13	09:29:40	1.72016	7.65162	9.92418	705.263	FALSE	31
2022-09-13	09:29:40	2.41233	10.7305	9.92418	764.492	FALSE	31
2022-09-13	09:29:40	3.06607	13.6385	9.92418	718.901	1	32
2022-09-13	09:29:41	2.46673	10.9725	11.1074	775.465	FALSE	32
2022-09-13	09:29:41	3.74001	16.6363	11.1074	735.537	1	33
2022-09-13	09:29:41	1.3365	5.94502	11.1074	781.41	FALSE	33
2022-09-13	09:29:41	2.44495	10.8756	11.1074	746.413	FALSE	33
2022-09-13	09:29:42	0.908308	4.04034	4.92318	785.45	FALSE	33
2022-09-13	09:29:42	1.69365	7.53369	4.92318	753.947	FALSE	33
2022-09-13	09:29:42	1.05253	4.68186	4.92318	790.132	FALSE	33
2022-09-13	09:29:42	0.772634	3.43683	4.92318	757.384	FALSE	33
2022-09-13	09:29:43	0.656807	2.92161	2.63087	793.054	FALSE	33
2022-09-13	09:29:43	0.636298	2.83038	2.63087	760.214	FALSE	33
2022-09-13	09:29:43	0.481234	2.14063	2.63087	795.194	FALSE	33
2022-09-13	09:29:44	0.826679	3.67723	4.54734	763.891	FALSE	33
2022-09-13	09:29:44	0.715534	3.18284	4.54734	798.377	FALSE	33
2022-09-13	09:29:44	1.32067	5.8746	4.54734	769.766	FALSE	33
2022-09-13	09:29:44	1.22627	5.45469	4.54734	803.832	FALSE	33
2022-09-13	09:29:45	1.31085	5.83092	10.5209	775.597	FALSE	33
2022-09-13	09:29:45	4.09655	18.2223	10.5209	822.054	1	34
2022-09-13	09:29:45	1.45268	6.46181	10.5209	782.058	FALSE	34
2022-09-13	09:29:45	2.60072	11.5685	10.5209	833.623	FALSE	34
2022-09-13	09:29:46	1.47335	6.55376	9.16063	788.612	FALSE	34
2022-09-13	09:29:46	1.25553	5.58485	9.16063	839.207	FALSE	34
2022-09-13	09:29:46	1.7365	7.7243	9.16063	796.337	FALSE	34
2022-09-13	09:29:46	3.77223	16.7796	9.16063	855.987	1	35
2022-09-13	09:29:47	5.19238	23.0967	10.3027	819.433	1	36
2022-09-13	09:29:47	1.00337	4.46319	10.3027	860.45	FALSE	36
2022-09-13	09:29:47	1.89212	8.41653	10.3027	827.85	FALSE	36
2022-09-13	09:29:47	1.1767	5.2342	10.3027	865.684	FALSE	36
2022-09-13	09:29:48	0.534313	2.37673	3.59332	830.227	FALSE	36
2022-09-13	09:29:48	0.738282	3.28403	3.59332	868.968	FALSE	36
2022-09-13	09:29:48	1.15085	5.11921	3.59332	835.346	FALSE	36
2022-09-13	09:29:49	1.51971	6.75997	10.1771	875.728	FALSE	36
2022-09-13	09:29:49	1.31686	5.85766	10.1771	841.203	FALSE	36
2022-09-13	09:29:49	2.4707	10.9902	10.1771	886.719	FALSE	36
2022-09-13	09:29:49	3.84439	17.1006	10.1771	858.304	1	37
2022-09-13	09:29:50	5.73192	25.4967	14.3894	912.215	1	38
2022-09-13	09:29:50	4.66281	20.7411	14.3894	879.045	1	39
2022-09-13	09:29:50	2.17594	9.67902	14.3894	921.894	FALSE	39
2022-09-13	09:29:50	0.368868	1.6408	14.3894	880.686	FALSE	39
2022-09-13	09:29:51	0.360115	1.60186	1.90299	923.496	FALSE	39
2022-09-13	09:29:51	0.566679	2.5207	1.90299	883.207	FALSE	39
2022-09-13	09:29:51	0.321438	1.42982	1.90299	924.926	FALSE	39
2022-09-13	09:29:51	0.463015	2.05958	1.90299	885.266	FALSE	39
2022-09-13	09:29:52	0.291361	1.29603	1.6291	926.222	FALSE	39
2022-09-13	09:29:52	0.472684	2.10259	1.6291	887.369	FALSE	39
2022-09-13	09:29:52	0.334669	1.48867	1.6291	927.711	FALSE	39
2022-09-13	09:29:53	0.663321	2.95058	2.81782	890.319	FALSE	39
2022-09-13	09:29:53	0.645305	2.87045	2.81782	930.581	FALSE	39
2022-09-13	09:29:53	0.874109	3.88821	2.81782	894.208	FALSE	39
2022-09-13	09:29:53	0.351158	1.56202	2.81782	932.143	FALSE	39
2022-09-13	09:29:54	0.867443	3.85856	2.43451	898.066	FALSE	39
2022-09-13	09:29:54	0.319351	1.42054	2.43451	933.564	FALSE	39
2022-09-13	09:29:54	0.683066	3.03841	2.43451	901.105	FALSE	39
2022-09-13	09:29:54	0.319351	1.42054	2.43451	934.984	FALSE	39
2022-09-13	09:29:55	0.721641	3.21	2.98284	904.315	FALSE	39
2022-09-13	09:29:55	0.445356	1.98103	2.98284	936.965	FALSE	39
2022-09-13	09:29:55	1.12195	4.99066	2.98284	909.305	FALSE	39
2022-09-13	09:29:55	0.393346	1.74968	2.98284	938.715	FALSE	39
2022-09-13	09:29:56	4.35044	19.3516	18.4797	928.657	1	40
2022-09-13	09:29:56	0.467595	2.07996	18.4797	940.795	FALSE	40
2022-09-13	09:29:56	9.08169	40.3972	18.4797	969.054	1	41
2022-09-13	09:29:56	2.71793	12.0899	18.4797	952.885	FALSE	41
2022-09-13	09:29:57	6.07701	27.0318	15.9577	996.086	1	42
2022-09-13	09:29:57	2.36164	10.505	15.9577	963.39	FALSE	42
2022-09-13	09:29:57	2.32373	10.3364	15.9577	1006.42	FALSE	42
2022-09-13	09:29:58	6.23314	27.7263	23.6507	991.116	1	43
2022-09-13	09:29:58	2.81294	12.5125	23.6507	1018.93	FALSE	43
2022-09-13	09:29:58	7.88978	35.0953	23.6507	1026.21	1	44
2022-09-13	09:29:58	4.33177	19.2686	23.6507	1038.2	1	45
2022-09-13	09:29:59	4.01009	17.8377	9.78571	1044.05	1	46
2022-09-13	09:29:59	1.26719	5.63671	9.78571	1043.84	FALSE	46
2022-09-13	09:29:59	1.12485	5.00356	9.78571	1049.05	FALSE	46
2022-09-13	09:29:59	2.39757	10.6649	9.78571	1054.5	FALSE	46
2022-09-13	09:30:00	2.06948	9.20546	5.7297	1058.26	FALSE	46
2022-09-13	09:30:00	1.36022	6.05053	5.7297	1060.56	FALSE	46
2022-09-13	09:30:00	0.95416	4.24429	5.7297	1062.5	FALSE	46
2022-09-13	09:30:00	0.768512	3.4185	5.7297	1063.97	FALSE	46
2022-09-13	09:30:01	0.475178	2.11369	2.13014	1064.62	FALSE	46
2022-09-13	09:30:01	0.459249	2.04283	2.13014	1066.02	FALSE	46
2022-09-13	09:30:01	0.502201	2.23389	2.13014	1066.85	FALSE	46
2022-09-13	09:30:02	0.484084	2.1533	2.10893	1068.17	FALSE	46
2022-09-13	09:30:02	0.466425	2.07475	2.10893	1068.92	FALSE	46
2022-09-13	09:30:02	0.46098	2.05053	2.10893	1070.22	FALSE	46
2022-09-13	09:30:02	0.484949	2.15715	2.10893	1071.08	FALSE	46
2022-09-13	09:30:03	0.498588	2.21782	2.249	1072.44	FALSE	46
2022-09-13	09:30:03	0.51472	2.28958	2.249	1073.37	FALSE	46
2022-09-13	09:30:03	0.501438	2.2305	2.249	1074.67	FALSE	46
2022-09-13	09:30:03	0.507647	2.25812	2.249	1075.63	FALSE	46
2022-09-13	09:30:04	0.562812	2.5035	8.71016	1077.17	FALSE	46
2022-09-13	09:30:04	1.04302	4.63956	8.71016	1080.27	FALSE	46
2022-09-13	09:30:04	3.10688	13.82	8.71016	1090.99	1	47
2022-09-13	09:30:04	3.11981	13.8775	8.71016	1094.15	1	48
2022-09-13	09:30:05	5.74846	25.5703	25.5388	1116.56	1	49
2022-09-13	09:30:05	7.31726	32.5486	25.5388	1126.7	1	50
2022-09-13	09:30:05	2.64551	11.7678	25.5388	1128.33	FALSE	50
2022-09-13	09:30:05	7.25426	32.2684	25.5388	1158.96	1	51
2022-09-13	09:30:06	0.563728	2.50757	6.77754	1130.84	FALSE	51
2022-09-13	09:30:06	3.16047	14.0584	6.77754	1173.02	1	52
2022-09-13	09:30:06	0.846781	3.76665	6.77754	1134.6	FALSE	52
2022-09-13	09:30:07	0.801539	3.56541	2.47056	1176.59	FALSE	52
2022-09-13	09:30:07	0.532786	2.36994	2.47056	1136.97	FALSE	52
2022-09-13	09:30:07	0.409886	1.82325	2.47056	1178.41	FALSE	52
2022-09-13	09:30:07	0.477417	2.12365	2.47056	1139.1	FALSE	52
2022-09-13	09:30:08	0.404593	1.79971	2.80406	1180.21	FALSE	52
2022-09-13	09:30:08	0.537977	2.39303	2.80406	1141.49	FALSE	52
2022-09-13	09:30:08	0.66841	2.97322	2.80406	1183.18	FALSE	52
2022-09-13	09:30:08	0.910547	4.0503	2.80406	1145.54	FALSE	52
2022-09-13	09:30:09	0.967087	4.3018	7.19369	1187.49	FALSE	52
2022-09-13	09:30:09	1.08907	4.8444	7.19369	1150.39	FALSE	52
2022-09-13	09:30:09	1.93238	8.59561	7.19369	1196.08	FALSE	52
2022-09-13	09:30:09	2.48032	11.033	7.19369	1161.42	FALSE	52
2022-09-13	09:30:10	1.39655	6.21213	6.75143	1202.29	FALSE	52
2022-09-13	09:30:10	1.96663	8.74796	6.75143	1170.17	FALSE	52
2022-09-13	09:30:10	1.19019	5.2942	6.75143	1207.59	FALSE	52
2022-09-13	09:30:11	1.47706	6.57026	7.39618	1176.74	FALSE	52
2022-09-13	09:30:11	2.17477	9.67381	7.39618	1217.26	FALSE	52
2022-09-13	09:30:11	1.73874	7.73426	7.39618	1184.47	FALSE	52
2022-09-13	09:30:11	1.26037	5.60638	7.39618	1222.87	FALSE	52
2022-09-13	09:30:12	1.01324	4.50709	2.9851	1188.98	FALSE	52
2022-09-13	09:30:12	0.567341	2.52365	2.9851	1225.39	FALSE	52
2022-09-13	09:30:12	0.605153	2.69184	2.9851	1191.67	FALSE	52
2022-09-13	09:30:12	0.498588	2.21782	2.9851	1227.61	FALSE	52
2022-09-13	09:30:13	0.709936	3.15794	3.84673	1194.83	FALSE	52
2022-09-13	09:30:13	0.472379	2.10124	3.84673	1229.71	FALSE	52
2022-09-13	09:30:13	0.763066	3.39427	3.84673	1198.22	FALSE	52
2022-09-13	09:30:13	1.51375	6.73346	3.84673	1236.44	FALSE	52
2022-09-13	09:30:14	5.82927	25.9298	28.4179	1224.15	1	53
2022-09-13	09:30:14	6.18749	27.5232	28.4179	1263.97	1	54
2022-09-13	09:30:14	8.70958	38.742	28.4179	1262.89	1	55
2022-09-13	09:30:14	4.82821	21.4768	28.4179	1285.44	1	56
2022-09-13	09:30:15	2.42256	10.776	5.38053	1273.67	FALSE	56
2022-09-13	09:30:15	0.504796	2.24543	5.38053	1287.69	FALSE	56
2022-09-13	09:30:15	0.701438	3.12014	5.38053	1276.79	FALSE	56
2022-09-13	09:30:16	0.656908	2.92206	2.72506	1290.61	FALSE	56
2022-09-13	09:30:16	0.522862	2.32579	2.72506	1279.12	FALSE	56
2022-09-13	09:30:16	0.634974	2.82449	2.72506	1293.44	FALSE	56
2022-09-13	09:30:16	0.635738	2.82789	2.72506	1281.94	FALSE	56
2022-09-13	09:30:17	0.474211	2.10939	2.03548	1295.55	FALSE	56
2022-09-13	09:30:17	0.483372	2.15014	2.03548	1284.09	FALSE	56
2022-09-13	09:30:17	0.489428	2.17707	2.03548	1297.72	FALSE	56
2022-09-13	09:30:17	0.383372	1.70532	2.03548	1285.8	FALSE	56
2022-09-13	09:30:18	0.444186	1.97583	1.91539	1299.7	FALSE	56
2022-09-13	09:30:18	0.422201	1.87803	1.91539	1287.68	FALSE	56
2022-09-13	09:30:18	0.228817	1.01782	1.91539	1300.72	FALSE	56
2022-09-13	09:30:18	0.627188	2.78986	1.91539	1290.47	FALSE	56
2022-09-13	09:30:19	4.12362	18.3427	16.3313	1319.06	1	57
2022-09-13	09:30:19	3.74505	16.6587	16.3313	1307.13	1	58
2022-09-13	09:30:19	3.14566	13.9925	16.3313	1333.05	1	59
2022-09-13	09:30:20	0.200573	0.892189	1.09558	1308.02	FALSE	59
2022-09-13	09:30:20	0.232786	1.03548	1.09558	1334.09	FALSE	59
2022-09-13	09:30:20	0.334109	1.48618	1.09558	1309.5	FALSE	59
2022-09-13	09:30:20	0.217723	0.968475	1.09558	1335.06	FALSE	59
2022-09-13	09:30:21	0.253702	1.12852	1.42099	1310.63	FALSE	59
2022-09-13	09:30:21	0.237774	1.05767	1.42099	1336.11	FALSE	59
2022-09-13	09:30:21	0.362405	1.61205	1.42099	1312.25	FALSE	59
2022-09-13	09:30:21	0.423931	1.88573	1.42099	1338	FALSE	59
2022-09-13	09:30:22	0.444746	1.97832	2.00203	1314.22	FALSE	59
2022-09-13	09:30:22	0.462252	2.05619	2.00203	1340.05	FALSE	59
2022-09-13	09:30:22	0.453143	2.01567	2.00203	1316.24	FALSE	59
2022-09-13	09:30:22	0.440166	1.95795	2.00203	1342.01	FALSE	59
2022-09-13	09:30:23	0.432735	1.92489	1.93112	1318.16	FALSE	59
2022-09-13	09:30:23	0.430598	1.91539	1.93112	1343.93	FALSE	59
2022-09-13	09:30:23	0.431667	1.92014	1.93112	1320.08	FALSE	59
2022-09-13	09:30:23	0.44154	1.96406	1.93112	1345.89	FALSE	59
2022-09-13	09:30:24	0.424898	1.89003	1.91659	1321.97	FALSE	59
2022-09-13	09:30:24	0.433448	1.92806	1.91659	1347.82	FALSE	59
2022-09-13	09:30:24	0.434262	1.93168	1.91659	1323.91	FALSE	59
2022-09-13	09:30:25	0.430089	1.91312	1.93123	1349.73	FALSE	59
2022-09-13	09:30:25	0.439351	1.95432	1.93123	1325.86	FALSE	59
2022-09-13	09:30:25	0.432888	1.92557	1.93123	1351.66	FALSE	59
2022-09-13	09:30:25	0.434313	1.93191	1.93123	1327.79	FALSE	59
2022-09-13	09:30:26	0.442557	1.96858	1.98975	1353.63	FALSE	59
2022-09-13	09:30:26	0.461692	2.0537	1.98975	1329.85	FALSE	59
2022-09-13	09:30:26	0.409224	1.82031	1.98975	1355.45	FALSE	59
2022-09-13	09:30:26	0.475789	2.1164	1.98975	1331.96	FALSE	59
2022-09-13	09:30:27	0.444033	1.97515	1.94985	1357.42	FALSE	59
2022-09-13	09:30:27	0.451158	2.00684	1.94985	1333.97	FALSE	59
2022-09-13	09:30:27	0.447036	1.98851	1.94985	1359.41	FALSE	59
2022-09-13	09:30:27	0.411158	1.82891	1.94985	1335.8	FALSE	59
2022-09-13	09:30:28	0.445255	1.98058	2.05325	1361.39	FALSE	59
2022-09-13	09:30:28	0.45416	2.02019	2.05325	1337.82	FALSE	59
2022-09-13	09:30:28	0.485356	2.15896	2.05325	1363.55	FALSE	59
2022-09-13	09:30:29	0.506577	2.25336	2.42104	1340.07	FALSE	59
2022-09-13	09:30:29	0.550547	2.44894	2.42104	1366	FALSE	59
2022-09-13	09:30:29	0.572837	2.54809	2.42104	1342.62	FALSE	59
2022-09-13	09:30:29	0.547137	2.43377	2.42104	1368.43	FALSE	59
2022-09-13	09:30:30	0.552888	2.45936	2.43978	1345.08	FALSE	59
2022-09-13	09:30:30	0.560573	2.49354	2.43978	1370.93	FALSE	59
2022-09-13	09:30:30	0.544135	2.42042	2.43978	1347.5	FALSE	59
2022-09-13	09:30:30	0.536349	2.38579	2.43978	1373.31	FALSE	59
2022-09-13	09:30:31	0.532939	2.37062	2.32314	1349.87	FALSE	59
2022-09-13	09:30:31	0.529377	2.35477	2.32314	1375.67	FALSE	59
2022-09-13	09:30:31	0.514008	2.28641	2.32314	1352.16	FALSE	59
2022-09-13	09:30:31	0.512735	2.28075	2.32314	1377.95	FALSE	59
2022-09-13	09:30:32	0.507596	2.25789	2.31986	1354.41	FALSE	59
2022-09-13	09:30:32	0.513499	2.28415	2.31986	1380.23	FALSE	59
2022-09-13	09:30:32	0.526629	2.34255	2.31986	1356.76	FALSE	59
2022-09-13	09:30:32	0.538384	2.39484	2.31986	1382.63	FALSE	59
2022-09-13	09:30:33	0.551514	2.45324	2.41355	1359.21	FALSE	59
2022-09-13	09:30:33	0.542252	2.41205	2.41355	1385.04	FALSE	59
2022-09-13	09:30:33	0.534008	2.37537	2.41355	1361.59	FALSE	59
2022-09-13	09:30:34	0.508919	2.26377	2.30299	1387.3	FALSE	59
2022-09-13	09:30:34	0.518435	2.3061	2.30299	1363.89	FALSE	59
2022-09-13	09:30:34	0.526527	2.3421	2.30299	1389.65	FALSE	59
2022-09-13	09:30:34	0.517061	2.29999	2.30299	1366.19	FALSE	59
2022-09-13	09:30:35	0.509631	2.26694	2.27005	1391.91	FALSE	59
2022-09-13	09:30:35	0.502201	2.23389	2.27005	1368.43	FALSE	59
2022-09-13	09:30:35	0.497468	2.21284	2.27005	1394.13	FALSE	59
2022-09-13	09:30:35	0.532023	2.36654	2.27005	1370.79	FALSE	59
2022-09-13	09:30:36	0.626934	2.78873	2.83723	1396.91	FALSE	59
2022-09-13	09:30:36	0.660776	2.93926	2.83723	1373.73	FALSE	59
2022-09-13	09:30:36	0.636298	2.83038	2.83723	1399.74	FALSE	59
2022-09-13	09:30:36	0.627341	2.79054	2.83723	1376.52	FALSE	59
2022-09-13	09:30:37	0.544847	2.42359	2.1484	1402.17	FALSE	59
2022-09-13	09:30:37	0.477824	2.12546	2.1484	1378.65	FALSE	59
2022-09-13	09:30:37	0.426272	1.89614	2.1484	1404.06	FALSE	59
2022-09-13	09:30:38	0.426679	1.89795	1.84153	1380.55	FALSE	59
2022-09-13	09:30:38	0.618384	2.7507	1.84153	1406.81	FALSE	59
2022-09-13	09:30:38	0.275178	1.22405	1.84153	1381.77	FALSE	59
2022-09-13	09:30:38	0.335738	1.49343	1.84153	1408.31	FALSE	59
2022-09-13	09:30:39	0.341031	1.51697	1.40616	1383.29	FALSE	59
2022-09-13	09:30:39	0.307443	1.36757	1.40616	1409.68	FALSE	59
2022-09-13	09:30:39	0.278435	1.23853	1.40616	1384.52	FALSE	59
2022-09-13	09:30:39	0.33757	1.50158	1.40616	1411.18	FALSE	59
2022-09-13	09:30:40	0.454262	2.02065	4.02415	1386.55	FALSE	59
2022-09-13	09:30:40	1.58668	7.05787	4.02415	1418.24	FALSE	59
2022-09-13	09:30:40	0.949275	4.22257	4.02415	1390.77	FALSE	59
2022-09-13	09:30:40	0.628461	2.79552	4.02415	1421.03	FALSE	59
2022-09-13	09:30:41	0.58729	2.61238	2.5696	1393.38	FALSE	59
2022-09-13	09:30:41	0.684237	3.04362	2.5696	1424.07	FALSE	59
2022-09-13	09:30:41	0.572176	2.54515	2.5696	1395.93	FALSE	59
2022-09-13	09:30:41	0.466985	2.07724	2.5696	1426.15	FALSE	59
2022-09-13	09:30:42	0.490802	2.18319	2.23314	1398.11	FALSE	59
2022-09-13	09:30:42	0.488562	2.17322	2.23314	1428.32	FALSE	59
2022-09-13	09:30:42	0.52673	2.343	2.23314	1400.45	FALSE	59
2022-09-13	09:30:43	0.543728	2.41861	4.81367	1430.74	FALSE	59
2022-09-13	09:30:43	1.16724	5.19212	4.81367	1405.64	FALSE	59
2022-09-13	09:30:43	0.93813	4.17299	4.81367	1434.92	FALSE	59
2022-09-13	09:30:43	1.67955	7.47097	4.81367	1413.11	FALSE	59
2022-09-13	09:30:44	0.507799	2.25879	6.49476	1437.18	FALSE	59
2022-09-13	09:30:44	2.14037	9.52079	6.49476	1422.64	FALSE	59
2022-09-13	09:30:44	0.568563	2.52908	6.49476	1439.7	FALSE	59
2022-09-13	09:30:44	2.62362	11.6704	6.49476	1434.31	FALSE	59
2022-09-13	09:30:45	1.08887	4.84351	5.88776	1444.55	FALSE	59
2022-09-13	09:30:45	2.56317	11.4015	5.88776	1445.71	FALSE	59
2022-09-13	09:30:45	0.407697	1.81352	5.88776	1446.36	FALSE	59
2022-09-13	09:30:45	1.23477	5.4925	5.88776	1451.2	FALSE	59
2022-09-13	09:30:46	0.420115	1.86876	3.42385	1448.23	FALSE	59
2022-09-13	09:30:46	1.11248	4.94853	3.42385	1456.15	FALSE	59
2022-09-13	09:30:46	0.776552	3.45426	3.42385	1451.68	FALSE	59
2022-09-13	09:30:47	1.02408	4.55531	8.37834	1460.7	FALSE	59
2022-09-13	09:30:47	0.975687	4.34005	8.37834	1456.02	FALSE	59
2022-09-13	09:30:47	3.46749	15.4241	8.37834	1476.13	1	60
2022-09-13	09:30:47	2.06688	9.1939	8.37834	1465.22	FALSE	60
2022-09-13	09:30:48	4.15161	18.4672	18.3398	1494.6	1	61
2022-09-13	09:30:48	3.61329	16.0726	18.3398	1481.29	1	62
2022-09-13	09:30:48	4.60403	20.4796	18.3398	1515.07	1	63
2022-09-13	09:30:49	2.76571	12.3024	11.1349	1493.59	FALSE	63
2022-09-13	09:30:49	2.12286	9.44291	11.1349	1524.52	FALSE	63
2022-09-13	09:30:49	2.73019	12.1444	11.1349	1505.74	FALSE	63
2022-09-13	09:30:49	2.36363	10.5139	11.1349	1535.03	FALSE	63
2022-09-13	09:30:49	2.53375	11.2706	11.1349	1517.01	FALSE	63
2022-09-13	09:30:50	3.21136	14.2848	15.9335	1549.32	1	64
2022-09-13	09:30:50	3.19726	14.2221	15.9335	1531.23	1	65
2022-09-13	09:30:50	4.02362	17.8979	15.9335	1567.21	1	66
2022-09-13	09:30:50	3.89579	17.3293	15.9335	1548.56	1	67
2022-09-13	09:30:51	3.41218	15.1781	15.8661	1582.39	1	68
2022-09-13	09:30:51	4.21416	18.7454	15.8661	1567.31	1	69
2022-09-13	09:30:51	3.07426	13.6749	15.8661	1596.07	1	70
2022-09-13	09:30:52	3.67991	16.369	9.7737	1583.67	1	71
2022-09-13	09:30:52	2.76912	12.3176	9.7737	1608.38	FALSE	71
2022-09-13	09:30:52	1.21752	5.41577	9.7737	1589.09	FALSE	71
2022-09-13	09:30:52	1.12235	4.99244	9.7737	1613.38	FALSE	71
2022-09-13	09:30:53	0.457417	2.03468	2.93581	1591.12	FALSE	71
2022-09-13	09:30:53	0.708104	3.14979	2.93581	1616.53	FALSE	71
2022-09-13	09:30:53	0.739758	3.29059	2.93581	1594.42	FALSE	71
2022-09-13	09:30:53	0.73472	3.26818	2.93581	1619.8	FALSE	71
2022-09-13	09:30:54	0.737977	3.28267	3.2799	1597.7	FALSE	71
2022-09-13	09:30:54	0.739758	3.29059	3.2799	1623.09	FALSE	71
2022-09-13	09:30:54	0.737621	3.28109	3.2799	1600.98	FALSE	71
2022-09-13	09:30:54	0.734059	3.26524	3.2799	1626.35	FALSE	71
2022-09-13	09:30:55	0.739504	3.28946	3.27135	1604.27	FALSE	71
2022-09-13	09:30:55	0.733702	3.26365	3.27135	1629.61	FALSE	71
2022-09-13	09:30:55	0.733092	3.26094	3.27135	1607.53	FALSE	71
2022-09-13	09:30:56	0.735229	3.27045	3.27271	1632.89	FALSE	71
2022-09-13	09:30:56	0.733957	3.26479	3.27271	1610.79	FALSE	71
2022-09-13	09:30:56	0.738689	3.28584	3.27271	1636.17	FALSE	71
2022-09-13	09:30:56	0.735076	3.26977	3.27271	1614.06	FALSE	71
2022-09-13	09:30:57	0.731158	3.25234	3.25726	1639.42	FALSE	71
2022-09-13	09:30:57	0.7307	3.2503	3.25726	1617.31	FALSE	71
2022-09-13	09:30:57	0.731209	3.25256	3.25726	1642.68	FALSE	71
2022-09-13	09:30:57	0.735992	3.27384	3.25726	1620.59	FALSE	71
2022-09-13	09:30:58	0.736145	3.27452	3.2795	1645.95	FALSE	71
2022-09-13	09:30:58	0.734618	3.26773	3.2795	1623.86	FALSE	71
2022-09-13	09:30:58	0.738639	3.28561	3.2795	1649.24	FALSE	71
2022-09-13	09:30:58	0.739656	3.29014	3.2795	1627.15	FALSE	71
2022-09-13	09:30:59	0.732023	3.25618	3.28033	1652.49	FALSE	71
2022-09-13	09:30:59	0.741539	3.29851	3.28033	1630.44	FALSE	71
2022-09-13	09:30:59	0.738791	3.28629	3.28033	1655.78	FALSE	71
2022-09-13	09:31:00	0.739606	3.28992	3.28222	1633.73	FALSE	71
2022-09-13	09:31:00	0.738537	3.28516	3.28222	1659.06	FALSE	71
2022-09-13	09:31:00	0.738588	3.28539	3.28222	1637.02	FALSE	71
2022-09-13	09:31:00	0.734771	3.26841	3.28222	1662.33	FALSE	71
2022-09-13	09:31:01	0.734924	3.26909	3.27424	1640.29	FALSE	71
2022-09-13	09:31:01	0.737672	3.28131	3.27424	1665.61	FALSE	71
2022-09-13	09:31:01	0.73701	3.27837	3.27424	1643.57	FALSE	71
2022-09-13	09:31:01	0.73472	3.26818	3.27424	1668.88	FALSE	71
2022-09-13	09:31:02	0.732175	3.25686	3.26286	1646.82	FALSE	71
2022-09-13	09:31:02	0.73243	3.258	3.26286	1672.14	FALSE	71
2022-09-13	09:31:02	0.737468	3.28041	3.26286	1650.1	FALSE	71
2022-09-13	09:31:02	0.732023	3.25618	3.26286	1675.4	FALSE	71
2022-09-13	09:31:03	0.730751	3.25053	3.26779	1653.35	FALSE	71
2022-09-13	09:31:03	0.733651	3.26343	3.26779	1678.66	FALSE	71
2022-09-13	09:31:03	0.731616	3.25437	3.26779	1656.61	FALSE	71
2022-09-13	09:31:03	0.742506	3.30282	3.26779	1681.96	FALSE	71
2022-09-13	09:31:04	0.735687	3.27248	3.28033	1659.88	FALSE	71
2022-09-13	09:31:04	0.738791	3.28629	3.28033	1685.25	FALSE	71
2022-09-13	09:31:04	0.737875	3.28222	3.28033	1663.16	FALSE	71
2022-09-13	09:31:05	0.738435	3.28471	3.27916	1688.53	FALSE	71
2022-09-13	09:31:05	0.737265	3.2795	3.27916	1666.44	FALSE	71
2022-09-13	09:31:05	0.737112	3.27882	3.27916	1691.81	FALSE	71
2022-09-13	09:31:05	0.735941	3.27361	3.27916	1669.72	FALSE	71
2022-09-13	09:31:06	0.730394	3.24894	3.25624	1695.06	FALSE	71
2022-09-13	09:31:06	0.740267	3.29286	3.25624	1673.01	FALSE	71
2022-09-13	09:31:06	0.729377	3.24441	3.25624	1698.31	FALSE	71
2022-09-13	09:31:06	0.728104	3.23875	3.25624	1676.25	FALSE	71
2022-09-13	09:31:07	0.736654	3.27678	3.26756	1701.58	FALSE	71
2022-09-13	09:31:07	0.736094	3.27429	3.26756	1679.52	FALSE	71
2022-09-13	09:31:07	0.738384	3.28448	3.26756	1704.87	FALSE	71
2022-09-13	09:31:07	0.727188	3.23468	3.26756	1682.76	FALSE	71
2022-09-13	09:31:08	0.733346	3.26207	3.26897	1708.13	FALSE	71
2022-09-13	09:31:08	0.741183	3.29693	3.26897	1686.05	FALSE	71
2022-09-13	09:31:08	0.732684	3.25912	3.26897	1711.39	FALSE	71
2022-09-13	09:31:08	0.732379	3.25777	3.26897	1689.31	FALSE	71
2022-09-13	09:31:09	0.737926	3.28244	3.26811	1714.67	FALSE	71
2022-09-13	09:31:09	0.730191	3.24804	3.26811	1692.56	FALSE	71
2022-09-13	09:31:09	0.735992	3.27384	3.26811	1717.94	FALSE	71
2022-09-13	09:31:10	0.738333	3.28425	3.28391	1695.84	FALSE	71
2022-09-13	09:31:10	0.738333	3.28425	3.28391	1721.23	FALSE	71
2022-09-13	09:31:10	0.741539	3.29851	3.28391	1699.14	FALSE	71
2022-09-13	09:31:10	0.734822	3.26864	3.28391	1724.5	FALSE	71
2022-09-13	09:31:11	0.73813	3.28335	3.2769	1702.43	FALSE	71
2022-09-13	09:31:11	0.735941	3.27361	3.2769	1727.77	FALSE	71
2022-09-13	09:31:11	0.736247	3.27497	3.2769	1705.7	FALSE	71
2022-09-13	09:31:11	0.736399	3.27565	3.2769	1731.05	FALSE	71
2022-09-13	09:31:12	0.736094	3.27429	3.27814	1708.98	FALSE	71
2022-09-13	09:31:12	0.738231	3.2838	3.27814	1734.33	FALSE	71
2022-09-13	09:31:12	0.734669	3.26795	3.27814	1712.24	FALSE	71
2022-09-13	09:31:12	0.738842	3.28652	3.27814	1737.62	FALSE	71
2022-09-13	09:31:13	0.72785	3.23762	3.26667	1715.48	FALSE	71
2022-09-13	09:31:13	0.735789	3.27294	3.26667	1740.89	FALSE	71
2022-09-13	09:31:13	0.739504	3.28946	3.26667	1718.77	FALSE	71
2022-09-13	09:31:14	0.729173	3.24351	3.27113	1744.13	FALSE	71
2022-09-13	09:31:14	0.73014	3.24781	3.27113	1722.02	FALSE	71
2022-09-13	09:31:14	0.738079	3.28312	3.27113	1747.42	FALSE	71
2022-09-13	09:31:14	0.744135	3.31006	3.27113	1725.33	FALSE	71
2022-09-13	09:31:15	0.398435	1.77232	2.2597	1749.19	FALSE	71
2022-09-13	09:31:15	0.54327	2.41657	2.2597	1727.75	FALSE	71
2022-09-13	09:31:15	0.452735	2.01386	2.2597	1751.2	FALSE	71
2022-09-13	09:31:15	0.63757	2.83604	2.2597	1730.58	FALSE	71
2022-09-13	09:31:16	0.886629	3.9439	3.07973	1755.15	FALSE	71
2022-09-13	09:31:16	0.95645	4.25448	3.07973	1734.84	FALSE	71
2022-09-13	09:31:16	0.450598	2.00435	3.07973	1757.15	FALSE	71
2022-09-13	09:31:16	0.475738	2.11618	3.07973	1736.95	FALSE	71
2022-09-13	09:31:17	0.428817	1.90746	2.28511	1759.06	FALSE	71
2022-09-13	09:31:17	0.559504	2.48879	2.28511	1739.44	FALSE	71
2022-09-13	09:31:17	0.531005	2.36202	2.28511	1761.42	FALSE	71
2022-09-13	09:31:17	0.535534	2.38216	2.28511	1741.82	FALSE	71
2022-09-13	09:31:18	0.565662	2.51618	2.45362	1763.94	FALSE	71
2022-09-13	09:31:18	0.543677	2.41838	2.45362	1744.24	FALSE	71
2022-09-13	09:31:18	0.545458	2.42631	2.45362	1766.36	FALSE	71
2022-09-13	09:31:19	0.534313	2.37673	2.38222	1746.62	FALSE	71
2022-09-13	09:31:19	0.538995	2.39756	2.38222	1768.76	FALSE	71
2022-09-13	09:31:19	0.538944	2.39733	2.38222	1749.02	FALSE	71
2022-09-13	09:31:19	0.529937	2.35727	2.38222	1771.12	FALSE	71
2022-09-13	09:31:20	0.533499	2.37311	2.3739	1751.39	FALSE	71
2022-09-13	09:31:20	0.535992	2.3842	2.3739	1773.5	FALSE	71
2022-09-13	09:31:20	0.531158	2.3627	2.3739	1753.75	FALSE	71
2022-09-13	09:31:20	0.534058	2.3756	2.3739	1775.88	FALSE	71
2022-09-13	09:31:21	0.542456	2.41295	2.37271	1756.16	FALSE	71
2022-09-13	09:31:21	0.534211	2.37628	2.37271	1778.25	FALSE	71
2022-09-13	09:31:21	0.530496	2.35975	2.37271	1758.52	FALSE	71
2022-09-13	09:31:21	0.526476	2.34187	2.37271	1780.6	FALSE	71
2022-09-13	09:31:22	0.527901	2.34821	2.33719	1760.87	FALSE	71
2022-09-13	09:31:22	0.525967	2.33961	2.33719	1782.93	FALSE	71
2022-09-13	09:31:22	0.522404	2.32376	2.33719	1763.2	FALSE	71
2022-09-13	09:31:23	0.520623	2.31584	2.32942	1785.25	FALSE	71
2022-09-13	09:31:23	0.532125	2.367	2.32942	1765.56	FALSE	71
2022-09-13	09:31:23	0.51986	2.31244	2.32942	1787.56	FALSE	71
2022-09-13	09:31:23	0.522099	2.3224	2.32942	1767.89	FALSE	71
2022-09-13	09:31:24	0.516094	2.29569	2.29082	1789.86	FALSE	71
2022-09-13	09:31:24	0.516705	2.29841	2.29082	1770.18	FALSE	71
2022-09-13	09:31:24	0.516196	2.29614	2.29082	1792.15	FALSE	71
2022-09-13	09:31:24	0.511005	2.27305	2.29082	1772.46	FALSE	71
2022-09-13	09:31:25	0.506069	2.2511	2.23983	1794.41	FALSE	71
2022-09-13	09:31:25	0.507138	2.25585	2.23983	1774.71	FALSE	71
2022-09-13	09:31:25	0.499758	2.22302	2.23983	1796.63	FALSE	71
2022-09-13	09:31:25	0.501183	2.22936	2.23983	1776.94	FALSE	71
2022-09-13	09:31:26	0.496196	2.20718	2.22585	1798.84	FALSE	71
2022-09-13	09:31:26	0.501234	2.22959	2.22585	1779.17	FALSE	71
2022-09-13	09:31:26	0.50556	2.24883	2.22585	1801.08	FALSE	71
2022-09-13	09:31:26	0.498588	2.21782	2.22585	1781.39	FALSE	71
2022-09-13	09:31:27	0.504644	2.24476	2.28037	1803.33	FALSE	71
2022-09-13	09:31:27	0.512786	2.28097	2.28037	1783.67	FALSE	71
2022-09-13	09:31:27	0.520522	2.31539	2.28037	1805.65	FALSE	71
2022-09-13	09:31:28	0.524236	2.33191	2.29173	1786	FALSE	71
2022-09-13	09:31:28	0.517366	2.30135	2.29173	1807.95	FALSE	71
2022-09-13	09:31:28	0.555941	2.47294	2.29173	1788.48	FALSE	71
2022-09-13	09:31:28	0.46327	2.06072	2.29173	1810.01	FALSE	71
2022-09-13	09:31:29	0.449224	1.99824	2.10893	1790.47	FALSE	71
2022-09-13	09:31:29	0.469479	2.08834	2.10893	1812.1	FALSE	71
2022-09-13	09:31:29	0.500725	2.22732	2.10893	1792.7	FALSE	71
2022-09-13	09:31:29	0.47701	2.12184	2.10893	1814.22	FALSE	71
2022-09-13	09:31:30	0.477977	2.12614	2.14396	1794.83	FALSE	71
2022-09-13	09:31:30	0.46271	2.05823	2.14396	1816.28	FALSE	71
2022-09-13	09:31:30	0.474822	2.1121	2.14396	1796.94	FALSE	71
2022-09-13	09:31:30	0.51243	2.27939	2.14396	1818.55	FALSE	71
2022-09-13	09:31:31	0.459402	2.04351	2.45574	1798.98	FALSE	71
2022-09-13	09:31:31	0.659911	2.93542	2.45574	1821.49	FALSE	71
2022-09-13	09:31:31	0.536909	2.38828	2.45574	1801.37	FALSE	71
2022-09-13	09:31:32	0.418028	1.85947	3.30016	1823.35	FALSE	71
2022-09-13	09:31:32	0.861896	3.83389	3.30016	1805.2	FALSE	71
2022-09-13	09:31:32	0.472634	2.10237	3.30016	1825.45	FALSE	71
2022-09-13	09:31:32	1.21508	5.40492	3.30016	1810.61	FALSE	71
2022-09-13	09:31:33	0.389529	1.7327	2.29043	1827.18	FALSE	71
2022-09-13	09:31:33	0.524033	2.331	2.29043	1812.94	FALSE	71
2022-09-13	09:31:33	0.448206	1.99371	2.29043	1829.18	FALSE	71
2022-09-13	09:31:33	0.697875	3.10429	2.29043	1816.04	FALSE	71
2022-09-13	09:31:34	0.584745	2.60106	2.37571	1831.78	FALSE	71
2022-09-13	09:31:34	0.444796	1.97854	2.37571	1818.02	FALSE	71
2022-09-13	09:31:34	0.570445	2.53745	2.37571	1834.32	FALSE	71
2022-09-13	09:31:34	0.536349	2.38579	2.37571	1820.41	FALSE	71
2022-09-13	09:31:35	0.717519	3.19167	2.45166	1837.51	FALSE	71
2022-09-13	09:31:35	0.422201	1.87803	2.45166	1822.29	FALSE	71
2022-09-13	09:31:35	0.627596	2.79167	2.45166	1840.3	FALSE	71
2022-09-13	09:31:35	0.437316	1.94527	2.45166	1824.23	FALSE	71
2022-09-13	09:31:36	0.418741	1.86264	1.73572	1842.16	FALSE	71
2022-09-13	09:31:36	0.420471	1.87034	1.73572	1826.1	FALSE	71
2022-09-13	09:31:36	0.331412	1.47419	1.73572	1843.64	FALSE	71
2022-09-13	09:31:37	0.392837	1.74742	1.70492	1827.85	FALSE	71
2022-09-13	09:31:37	0.319555	1.42144	1.70492	1845.06	FALSE	71
2022-09-13	09:31:37	0.350852	1.56066	1.70492	1829.41	FALSE	71
2022-09-13	09:31:37	0.469886	2.09015	1.70492	1847.15	FALSE	71
2022-09-13	09:31:38	0.523422	2.32829	2.52778	1831.74	FALSE	71
2022-09-13	09:31:38	0.865662	3.85064	2.52778	1851	FALSE	71
2022-09-13	09:31:38	0.500471	2.2262	2.52778	1833.97	FALSE	71
2022-09-13	09:31:38	0.383524	1.70599	2.52778	1852.71	FALSE	71
2022-09-13	09:31:39	0.292685	1.30192	-0.192924	1835.27	FALSE	71
2022-09-13	09:31:39	0.159758	0.710636	-0.192924	1853.42	FALSE	71
2022-09-13	09:31:39	-0.144058	-0.640799	-0.192924	1835.27	FALSE	71
2022-09-13	09:31:39	-0.48187	-2.14345	-0.192924	1853.42	FALSE	71
2022-09-13	09:31:40	-0.469961	-2.09048	-2.28433	1835.27	FALSE	71
2022-09-13	09:31:40	-0.606552	-2.69806	-2.28433	1853.42	FALSE	71
2022-09-13	09:31:40	-0.464109	-2.06445	-2.28433	1835.27	FALSE	71
2022-09-13	09:31:41	-0.182684	-0.812615	-0.347252	1853.42	FALSE	71
2022-09-13	09:31:41	-0.21215	-0.943686	-0.347252	1835.27	FALSE	71
2022-09-13	09:31:41	-0.155152	-0.690147	-0.347252	1853.42	FALSE	71
2022-09-13	09:31:41	0.237723	1.05744	-0.347252	1836.32	FALSE	71
2022-09-13	09:31:42	0.456247	2.02948	3.55148	1855.45	FALSE	71
2022-09-13	09:31:42	1.30352	5.79832	3.55148	1842.12	FALSE	71
2022-09-13	09:31:42	0.257366	1.14482	3.55148	1856.59	FALSE	71
2022-09-13	09:31:42	1.1765	5.23331	3.55148	1847.36	FALSE	71
2022-09-13	09:31:43	0.196451	0.873853	1.50758	1857.46	FALSE	71
2022-09-13	09:31:43	0.217316	0.966665	1.50758	1848.32	FALSE	71
2022-09-13	09:31:43	0.675127	3.0031	1.50758	1860.47	FALSE	71
2022-09-13	09:31:43	0.266781	1.1867	1.50758	1849.51	FALSE	71
2022-09-13	09:31:44	0.740369	3.29331	4.08758	1863.76	FALSE	71
2022-09-13	09:31:44	0.452277	2.01182	4.08758	1851.52	FALSE	71
2022-09-13	09:31:44	1.56414	6.95761	4.08758	1870.72	FALSE	71
2022-09-13	09:31:45	1.77864	7.91175	9.53692	1859.43	FALSE	71
2022-09-13	09:31:45	4.72388	21.0128	9.53692	1891.73	1	72
2022-09-13	09:31:45	0.808308	3.59552	9.53692	1863.03	FALSE	72
2022-09-13	09:31:45	1.26515	5.62764	9.53692	1897.36	FALSE	72
2022-09-13	09:31:46	0.64729	2.87928	5.56314	1865.91	FALSE	72
2022-09-13	09:31:46	2.24393	9.98145	5.56314	1907.34	FALSE	72
2022-09-13	09:31:46	0.878588	3.90814	5.56314	1869.82	FALSE	72
2022-09-13	09:31:46	1.23279	5.4837	5.56314	1912.82	FALSE	72
2022-09-13	09:31:47	0.843524	3.75216	4.31764	1873.57	FALSE	72
2022-09-13	09:31:47	1.36887	6.08901	4.31764	1918.91	FALSE	72
2022-09-13	09:31:47	0.492532	2.19088	4.31764	1875.76	FALSE	72
2022-09-13	09:31:47	1.17767	5.23851	4.31764	1924.15	FALSE	72
2022-09-13	09:31:48	0.862048	3.83456	4.10422	1879.59	FALSE	72
2022-09-13	09:31:48	1.15609	5.14252	4.10422	1929.29	FALSE	72
2022-09-13	09:31:48	0.600471	2.67102	4.10422	1882.26	FALSE	72
2022-09-13	09:31:48	1.07207	4.76878	4.10422	1934.06	FALSE	72
2022-09-13	09:31:49	0.689529	3.06716	4.39022	1885.33	FALSE	72
2022-09-13	09:31:49	1.52866	6.79979	4.39022	1940.86	FALSE	72
2022-09-13	09:31:49	0.74271	3.30372	4.39022	1888.64	FALSE	72
2022-09-13	09:31:50	1.75024	7.78542	4.63744	1948.65	FALSE	72
2022-09-13	09:31:50	0.58673	2.60989	4.63744	1891.25	FALSE	72
2022-09-13	09:31:50	1.24067	5.51875	4.63744	1954.17	FALSE	72
2022-09-13	09:31:50	0.592532	2.6357	4.63744	1893.88	FALSE	72
2022-09-13	09:31:51	2.38566	10.6119	7.28882	1964.78	FALSE	72
2022-09-13	09:31:51	0.561692	2.49852	7.28882	1896.38	FALSE	72
2022-09-13	09:31:51	2.29518	10.2094	7.28882	1974.99	FALSE	72
2022-09-13	09:31:51	1.31187	5.83546	7.28882	1902.22	FALSE	72
2022-09-13	09:31:52	1.80017	8.00752	5.93303	1983	FALSE	72
2022-09-13	09:31:52	1.13615	5.05382	5.93303	1907.27	FALSE	72
2022-09-13	09:31:52	1.16067	5.16289	5.93303	1988.16	FALSE	72
2022-09-13	09:31:52	1.23823	5.50789	5.93303	1912.78	FALSE	72
2022-09-13	09:31:53	1.91706	8.52747	9.25158	1996.69	FALSE	72
2022-09-13	09:31:53	1.15818	5.15182	9.25158	1917.93	FALSE	72
2022-09-13	09:31:53	2.58958	11.519	9.25158	2008.2	FALSE	72
2022-09-13	09:31:53	2.65457	11.8081	9.25158	1929.74	FALSE	72
2022-09-13	09:31:54	1.99915	8.89262	9.98364	2017.1	FALSE	72
2022-09-13	09:31:54	2.9135	12.9598	9.98364	1942.7	FALSE	72
2022-09-13	09:31:54	1.82062	8.09848	9.98364	2025.2	FALSE	72
2022-09-13	09:31:55	2.33396	10.3819	7.24779	1953.08	FALSE	72
2022-09-13	09:31:55	0.796959	3.54503	7.24779	2028.74	FALSE	72
2022-09-13	09:31:55	3.27085	14.5494	7.24779	1967.63	1	73
2022-09-13	09:31:55	0.115738	0.514826	7.24779	2029.26	FALSE	73
2022-09-13	09:31:56	0.804593	3.57899	2.22427	1971.21	FALSE	73
2022-09-13	09:31:56	0.257316	1.14459	2.22427	2030.4	FALSE	73
2022-09-13	09:31:56	0.572125	2.54493	2.22427	1973.75	FALSE	73
2022-09-13	09:31:56	0.36612	1.62857	2.22427	2032.03	FALSE	73
2022-09-13	09:31:57	0.454008	2.01952	1.83882	1975.77	FALSE	73
2022-09-13	09:31:57	0.450242	2.00277	1.83882	2034.03	FALSE	73
2022-09-13	09:31:57	0.496145	2.20695	1.83882	1977.98	FALSE	73
2022-09-13	09:31:57	0.253143	1.12603	1.83882	2035.16	FALSE	73
2022-09-13	09:31:58	0.00576363	0.0256378	-0.442573	1978	FALSE	73
2022-09-13	09:31:58	-0.0877224	-0.390207	-0.442573	2035.16	FALSE	73
2022-09-13	09:31:58	-0.216526	-0.963151	-0.442573	1978	FALSE	73
2022-09-13	09:31:59	0.0584862	0.260158	0.664232	2035.42	FALSE	73
2022-09-13	09:31:59	0.121947	0.542445	0.664232	1978.55	FALSE	73
2022-09-13	09:31:59	0.175433	0.780361	0.664232	2036.2	FALSE	73
2022-09-13	09:31:59	0.241438	1.07396	0.664232	1979.62	FALSE	73
2022-09-13	09:32:00	0.295229	1.31324	1.38721	2037.51	FALSE	73
2022-09-13	09:32:00	0.223372	0.993603	1.38721	1980.61	FALSE	73
2022-09-13	09:32:00	0.266629	1.18602	1.38721	2038.7	FALSE	73
2022-09-13	09:32:00	0.462201	2.05596	1.38721	1982.67	FALSE	73
2022-09-13	09:32:01	0.492888	2.19246	2.04906	2040.89	FALSE	73
2022-09-13	09:32:01	0.59243	2.63525	2.04906	1985.31	FALSE	73
2022-09-13	09:32:01	0.50383	2.24114	2.04906	2043.13	FALSE	73
2022-09-13	09:32:01	0.253448	1.12739	2.04906	1986.43	FALSE	73
2022-09-13	09:32:02	-0.0670608	-0.2983	-2.10548	2043.13	FALSE	73
2022-09-13	09:32:02	-0.360343	-1.60288	-2.10548	1986.43	FALSE	73
2022-09-13	09:32:02	-0.705024	-3.13609	-2.10548	2043.13	FALSE	73
2022-09-13	09:32:02	-0.760902	-3.38464	-2.10548	1986.43	FALSE	73
2022-09-13	09:32:03	-0.77276	-3.43739	-3.46124	2043.13	FALSE	73
2022-09-13	09:32:03	-0.791081	-3.51889	-3.46124	1986.43	FALSE	73
2022-09-13	09:32:03	-0.770521	-3.42743	-3.46124	2043.13	FALSE	73
2022-09-13	09:32:04	-0.786093	-3.4967	-3.34226	1986.43	FALSE	73
2022-09-13	09:32:04	-0.757188	-3.36812	-3.34226	2043.13	FALSE	73
2022-09-13	09:32:04	-0.737645	-3.28119	-3.34226	1986.43	FALSE	73
2022-09-13	09:32:04	-0.724567	-3.22302	-3.34226	2043.13	FALSE	73
2022-09-13	09:32:05	-0.704261	-3.13269	-1.76739	1986.43	FALSE	73
2022-09-13	09:32:05	-0.555559	-2.47124	-1.76739	2043.13	FALSE	73
2022-09-13	09:32:05	-0.260852	-1.16032	-1.76739	1986.43	FALSE	73
2022-09-13	09:32:05	-0.0686384	-0.305317	-1.76739	2043.13	FALSE	73
2022-09-13	09:32:06	0.150598	0.66989	1.16576	1987.1	FALSE	73
2022-09-13	09:32:06	0.286934	1.27634	1.16576	2044.41	FALSE	73
2022-09-13	09:32:06	0.294567	1.31029	1.16576	1988.41	FALSE	73
2022-09-13	09:32:06	0.316196	1.4065	1.16576	2045.81	FALSE	73
2022-09-13	09:32:07	0.309377	1.37617	1.42265	1989.79	FALSE	73
2022-09-13	09:32:07	0.321641	1.43072	1.42265	2047.24	FALSE	73
2022-09-13	09:32:07	0.328461	1.46106	1.42265	1991.25	FALSE	73
2022-09-13	09:32:08	0.315026	1.4013	1.36621	2048.65	FALSE	73
2022-09-13	09:32:08	0.304491	1.35444	1.36621	1992.6	FALSE	73
2022-09-13	09:32:08	0.30729	1.36689	1.36621	2050.01	FALSE	73
2022-09-13	09:32:08	0.301743	1.34221	1.36621	1993.95	FALSE	73
2022-09-13	09:32:09	0.293448	1.30532	1.32269	2051.32	FALSE	73
2022-09-13	09:32:09	0.295738	1.3155	1.32269	1995.26	FALSE	73
2022-09-13	09:32:09	0.301641	1.34176	1.32269	2052.66	FALSE	73
2022-09-13	09:32:09	0.298588	1.32818	1.32269	1996.59	FALSE	73
2022-09-13	09:32:10	0.300369	1.3361	1.34329	2054	FALSE	73
2022-09-13	09:32:10	0.301234	1.33995	1.34329	1997.93	FALSE	73
2022-09-13	09:32:10	0.306832	1.36485	1.34329	2055.36	FALSE	73
2022-09-13	09:32:10	0.299504	1.33225	1.34329	1999.26	FALSE	73
2022-09-13	09:32:11	0.301285	1.34018	1.35133	2056.7	FALSE	73
2022-09-13	09:32:11	0.298232	1.3266	1.35133	2000.59	FALSE	73
2022-09-13	09:32:11	0.296298	1.31799	1.35133	2058.02	FALSE	73
2022-09-13	09:32:11	0.319351	1.42054	1.35133	2002.01	FALSE	73
2022-09-13	09:32:12	0.319148	1.41963	1.36259	2059.44	FALSE	73
2022-09-13	09:32:12	0.31014	1.37956	1.36259	2003.39	FALSE	73
2022-09-13	09:32:12	0.289682	1.28856	1.36259	2060.73	FALSE	73
2022-09-13	09:32:13	0.296247	1.31777	1.33887	2004.71	FALSE	73
2022-09-13	09:32:13	0.295687	1.31527	1.33887	2062.04	FALSE	73
2022-09-13	09:32:13	0.304949	1.35647	1.33887	2006.06	FALSE	73
2022-09-13	09:32:13	0.307087	1.36598	1.33887	2063.41	FALSE	73
2022-09-13	09:32:14	0.300115	1.33497	1.35014	2007.4	FALSE	73
2022-09-13	09:32:14	0.289631	1.28834	1.35014	2064.7	FALSE	73
2022-09-13	09:32:14	0.301438	1.34086	1.35014	2008.74	FALSE	73
2022-09-13	09:32:14	0.322914	1.43639	1.35014	2066.13	FALSE	73
2022-09-13	09:32:15	0.548868	2.44147	1.77792	2011.18	FALSE	73
2022-09-13	09:32:15	0.412176	1.83344	1.77792	2067.97	FALSE	73
2022-09-13	09:32:15	0.269682	1.1996	1.77792	2012.38	FALSE	73
2022-09-13	09:32:15	0.368053	1.63717	1.77792	2069.6	FALSE	73
2022-09-13	09:32:16	0.361183	1.60661	1.9095	2013.99	FALSE	73
2022-09-13	09:32:16	0.368053	1.63717	1.9095	2071.24	FALSE	73
2022-09-13	09:32:16	0.558588	2.48471	1.9095	2016.47	FALSE	73
2022-09-13	09:32:17	0.578232	2.57209	1.77113	2073.81	FALSE	73
2022-09-13	09:32:17	0.315687	1.40424	1.77113	2017.88	FALSE	73
2022-09-13	09:32:17	0.36785	1.63627	1.77113	2075.45	FALSE	73
2022-09-13	09:32:17	0.330903	1.47192	1.77113	2019.35	FALSE	73
2022-09-13	09:32:18	0.328003	1.45902	1.43831	2076.91	FALSE	73
2022-09-13	09:32:18	0.317214	1.41103	1.43831	2020.76	FALSE	73
2022-09-13	09:32:18	0.319097	1.41941	1.43831	2078.33	FALSE	73
2022-09-13	09:32:18	0.329071	1.46377	1.43831	2022.22	FALSE	73
2022-09-13	09:32:19	0.318995	1.41895	1.41929	2079.75	FALSE	73
2022-09-13	09:32:19	0.32327	1.43797	1.41929	2023.66	FALSE	73
2022-09-13	09:32:19	0.323321	1.4382	1.41929	2081.18	FALSE	73
2022-09-13	09:32:19	0.3107	1.38206	1.41929	2025.04	FALSE	73
2022-09-13	09:32:20	0.31243	1.38975	1.39377	2082.57	FALSE	73
2022-09-13	09:32:20	0.314059	1.397	1.39377	2026.44	FALSE	73
2022-09-13	09:32:20	0.314364	1.39835	1.39377	2083.97	FALSE	73
2022-09-13	09:32:20	0.312481	1.38998	1.39377	2027.83	FALSE	73
2022-09-13	09:32:21	0.299758	1.33338	1.45736	2085.31	FALSE	73
2022-09-13	09:32:21	0.338079	1.50384	1.45736	2029.33	FALSE	73
2022-09-13	09:32:21	0.345051	1.53486	1.45736	2086.84	FALSE	73
2022-09-13	09:32:22	0.704847	3.1353	3.25171	2032.47	FALSE	73
2022-09-13	09:32:22	0.742048	3.30078	3.25171	2090.14	FALSE	73
2022-09-13	09:32:22	0.736756	3.27724	3.25171	2035.75	FALSE	73
2022-09-13	09:32:22	0.74042	3.29354	3.25171	2093.44	FALSE	73
2022-09-13	09:32:23	0.73813	3.28335	3.27622	2039.03	FALSE	73
2022-09-13	09:32:23	0.736756	3.27724	3.27622	2096.71	FALSE	73
2022-09-13	09:32:23	0.734568	3.26751	3.27622	2042.3	FALSE	73
2022-09-13	09:32:23	0.736654	3.27678	3.27622	2099.99	FALSE	73
2022-09-13	09:32:24	0.726934	3.23355	3.0147	2045.53	FALSE	73
2022-09-13	09:32:24	0.506221	2.25177	3.0147	2102.24	FALSE	73
2022-09-13	09:32:24	0.734568	3.26751	3.0147	2048.8	FALSE	73
2022-09-13	09:32:24	0.743219	3.30599	3.0147	2105.55	FALSE	73
2022-09-13	09:32:25	0.728562	3.24079	3.27105	2052.04	FALSE	73
2022-09-13	09:32:25	0.741234	3.29716	3.27105	2108.84	FALSE	73
2022-09-13	09:32:25	0.736298	3.2752	3.27105	2055.31	FALSE	73
2022-09-13	09:32:26	0.740623	3.29444	2.86909	2112.14	FALSE	73
2022-09-13	09:32:26	0.745051	3.31414	2.86909	2058.63	FALSE	73
2022-09-13	09:32:26	0.726221	3.23038	2.86909	2115.37	FALSE	73
2022-09-13	09:32:26	0.368104	1.6374	2.86909	2060.27	FALSE	73
2022-09-13	09:32:27	0.325662	1.44861	1.48947	2116.82	FALSE	73
2022-09-13	09:32:27	0.4107	1.82688	1.48947	2062.09	FALSE	73
2022-09-13	09:32:27	0.327748	1.45789	1.48947	2118.28	FALSE	73
2022-09-13	09:32:27	0.27528	1.2245	1.48947	2063.32	FALSE	73
2022-09-13	09:32:28	0.281845	1.2537	1.46027	2119.53	FALSE	73
2022-09-13	09:32:28	0.27416	1.21952	1.46027	2064.54	FALSE	73
2022-09-13	09:32:28	0.481743	2.14289	1.46027	2121.67	FALSE	73
2022-09-13	09:32:28	0.275382	1.22495	1.46027	2065.76	FALSE	73
2022-09-13	09:32:29	1.72841	7.68831	8.29357	2129.36	FALSE	73
2022-09-13	09:32:29	2.84037	12.6345	8.29357	2078.4	FALSE	73
2022-09-13	09:32:29	2.37136	10.5483	8.29357	2139.91	FALSE	73
2022-09-13	09:32:29	0.517773	2.30316	8.29357	2080.7	FALSE	73
2022-09-13	09:32:30	0.47584	2.11663	2.17187	2142.03	FALSE	73
2022-09-13	09:32:30	0.559097	2.48698	2.17187	2083.19	FALSE	73
2022-09-13	09:32:30	0.429835	1.91199	2.17187	2143.94	FALSE	73
2022-09-13	09:32:31	0.425153	1.89117	2.15449	2085.08	FALSE	73
2022-09-13	09:32:31	0.539198	2.39846	2.15449	2146.34	FALSE	73
2022-09-13	09:32:31	0.44729	1.98964	2.15449	2087.07	FALSE	73
2022-09-13	09:32:31	0.525763	2.3387	2.15449	2148.67	FALSE	73
2022-09-13	09:32:32	0.317977	1.41443	1.98873	2088.48	FALSE	73
2022-09-13	09:32:32	0.567239	2.52319	1.98873	2151.2	FALSE	73
2022-09-13	09:32:32	0.332634	1.47962	1.98873	2089.96	FALSE	73
2022-09-13	09:32:32	0.570496	2.53768	1.98873	2153.74	FALSE	73
2022-09-13	09:32:33	0.331361	1.47396	1.8773	2091.43	FALSE	73
2022-09-13	09:32:33	0.555789	2.47226	1.8773	2156.21	FALSE	73
2022-09-13	09:32:33	0.439962	1.95704	1.8773	2093.39	FALSE	73
2022-09-13	09:32:33	0.361031	1.60594	1.8773	2157.81	FALSE	73
2022-09-13	09:32:34	0.407799	1.81397	1.83638	2095.21	FALSE	73
2022-09-13	09:32:34	0.473092	2.10441	1.83638	2159.92	FALSE	73
2022-09-13	09:32:34	0.357621	1.59077	1.83638	2096.8	FALSE	73
2022-09-13	09:32:35	0.401845	1.78749	1.9915	2161.71	FALSE	73
2022-09-13	09:32:35	0.44902	1.99733	1.9915	2098.79	FALSE	73
2022-09-13	09:32:35	0.406883	1.8099	1.9915	2163.52	FALSE	73
2022-09-13	09:32:35	0.533092	2.3713	1.9915	2101.17	FALSE	73
2022-09-13	09:32:36	0.404593	1.79971	2.0657	2165.32	FALSE	73
2022-09-13	09:32:36	0.515992	2.29524	2.0657	2103.46	FALSE	73
2022-09-13	09:32:36	0.385458	1.71459	2.0657	2167.03	FALSE	73
2022-09-13	09:32:36	0.551514	2.45324	2.0657	2105.91	FALSE	73
2022-09-13	09:32:37	0.417621	1.85766	2.5224	2168.89	FALSE	73
2022-09-13	09:32:37	0.651972	2.9001	2.5224	2108.81	FALSE	73
2022-09-13	09:32:37	0.317824	1.41374	2.5224	2170.3	FALSE	73
2022-09-13	09:32:37	0.880827	3.91809	2.5224	2112.73	FALSE	73
2022-09-13	09:32:38	0.494415	2.19926	3.51979	2172.5	FALSE	73
2022-09-13	09:32:38	1.35869	6.04372	3.51979	2118.78	FALSE	73
2022-09-13	09:32:38	0.505814	2.24996	3.51979	2174.75	FALSE	73
2022-09-13	09:32:38	0.806221	3.58623	3.51979	2122.36	FALSE	73
2022-09-13	09:32:39	0.685662	3.04996	2.47211	2177.8	FALSE	73
2022-09-13	09:32:39	0.650903	2.89535	2.47211	2125.26	FALSE	73
2022-09-13	09:32:39	0.3307	1.47102	2.47211	2179.27	FALSE	73
2022-09-13	09:32:40	0.51416	2.28709	2.18816	2127.54	FALSE	73
2022-09-13	09:32:40	0.740827	3.29535	2.18816	2182.57	FALSE	73
2022-09-13	09:32:40	0.338384	1.5052	2.18816	2129.05	FALSE	73
2022-09-13	09:32:40	0.374313	1.66502	2.18816	2184.23	FALSE	73
2022-09-13	09:32:41	0.561081	2.4958	3.02342	2131.55	FALSE	73
2022-09-13	09:32:41	0.448053	1.99303	3.02342	2186.23	FALSE	73
2022-09-13	09:32:41	0.975382	4.33869	3.02342	2135.88	FALSE	73
2022-09-13	09:32:41	0.734262	3.26614	3.02342	2189.49	FALSE	73
2022-09-13	09:32:42	0.682201	3.03457	3.17973	2138.92	FALSE	73
2022-09-13	09:32:42	0.904237	4.02223	3.17973	2193.51	FALSE	73
2022-09-13	09:32:42	0.498791	2.21872	3.17973	2141.14	FALSE	73
2022-09-13	09:32:42	0.77411	3.4434	3.17973	2196.96	FALSE	73
2022-09-13	09:32:43	0.28159	1.25257	1.79179	2142.39	FALSE	73
2022-09-13	09:32:43	0.660166	2.93655	1.79179	2199.89	FALSE	73
2022-09-13	09:32:43	0.26668	1.18625	1.79179	2143.58	FALSE	73
2022-09-13	09:32:44	0.314924	1.40084	2.42682	2201.29	FALSE	73
2022-09-13	09:32:44	0.216807	0.964401	2.42682	2144.54	FALSE	73
2022-09-13	09:32:44	0.76159	3.3877	2.42682	2204.68	FALSE	73
2022-09-13	09:32:44	0.888969	3.95431	2.42682	2148.49	FALSE	73
2022-09-13	09:32:45	0.511158	2.27373	3.5044	2206.96	FALSE	73
2022-09-13	09:32:45	0.685662	3.04996	3.5044	2151.54	FALSE	73
2022-09-13	09:32:45	0.63589	2.82857	3.5044	2209.78	FALSE	73
2022-09-13	09:32:45	1.31859	5.86535	3.5044	2157.41	FALSE	73
2022-09-13	09:32:46	1.44841	6.44282	4.48295	2216.23	FALSE	73
2022-09-13	09:32:46	0.714364	3.17763	4.48295	2160.59	FALSE	73
2022-09-13	09:32:46	1.02841	4.57457	4.48295	2220.8	FALSE	73
2022-09-13	09:32:46	0.840064	3.73677	4.48295	2164.32	FALSE	73
2022-09-13	09:32:47	0.682914	3.03774	3.75052	2223.84	FALSE	73
2022-09-13	09:32:47	1.09945	4.89057	3.75052	2169.22	FALSE	73
2022-09-13	09:32:47	0.774262	3.44407	3.75052	2227.28	FALSE	73
2022-09-13	09:32:47	0.815992	3.6297	3.75052	2172.84	FALSE	73
2022-09-13	09:32:48	0.381234	1.69581	2.41076	2228.98	FALSE	73
2022-09-13	09:32:48	0.864695	3.84634	2.41076	2176.69	FALSE	73
2022-09-13	09:32:48	0.379962	1.69015	2.41076	2230.67	FALSE	73
2022-09-13	09:32:49	1.01355	4.50847	5.47378	2181.2	FALSE	73
2022-09-13	09:32:49	0.613549	2.72919	5.47378	2233.4	FALSE	73
2022-09-13	09:32:49	1.3677	6.0838	5.47378	2187.28	FALSE	73
2022-09-13	09:32:49	1.92744	8.57364	5.47378	2241.97	FALSE	73
2022-09-13	09:32:50	1.6338	7.26747	9.00624	2194.55	FALSE	73
2022-09-13	09:32:50	2.52235	11.2199	9.00624	2253.19	FALSE	73
2022-09-13	09:32:50	2.08424	9.27112	9.00624	2203.82	FALSE	73
2022-09-13	09:32:50	1.85838	8.26645	9.00624	2261.46	FALSE	73
2022-09-13	09:32:51	1.34805	5.9964	6.01837	2209.82	FALSE	73
2022-09-13	09:32:51	1.44266	6.41724	6.01837	2267.88	FALSE	73
2022-09-13	09:32:51	1.22444	5.44655	6.01837	2215.27	FALSE	73
2022-09-13	09:32:51	1.39681	6.21329	6.01837	2274.09	FALSE	73
2022-09-13	09:32:52	0.938893	4.17638	5.66025	2219.44	FALSE	73
2022-09-13	09:32:52	1.96882	8.75771	5.66025	2282.85	FALSE	73
2022-09-13	09:32:52	0.909733	4.04667	5.66025	2223.49	FALSE	73
2022-09-13	09:32:53	1.23701	5.50247	5.84491	2288.35	FALSE	73
2022-09-13	09:32:53	1.16261	5.17152	5.84491	2228.66	FALSE	73
2022-09-13	09:32:53	0.878537	3.90791	5.84491	2292.26	FALSE	73
2022-09-13	09:32:53	1.97782	8.79774	5.84491	2237.46	FALSE	73
2022-09-13	09:32:54	0.550547	2.44894	4.35302	2294.71	FALSE	73
2022-09-13	09:32:54	1.6334	7.26569	4.35302	2244.72	FALSE	73
2022-09-13	09:32:54	0.633651	2.81861	4.35302	2297.52	FALSE	73
2022-09-13	09:32:54	1.09681	4.87883	4.35302	2249.6	FALSE	73
2022-09-13	09:32:55	0.725407	3.22676	3.72234	2300.75	FALSE	73
2022-09-13	09:32:55	1.19665	5.32294	3.72234	2254.92	FALSE	73
2022-09-13	09:32:55	0.680064	3.02506	3.72234	2303.78	FALSE	73
2022-09-13	09:32:55	0.745153	3.31459	3.72234	2258.24	FALSE	73
2022-09-13	09:32:56	-0.170928	-0.760322	2.91283	2303.78	FALSE	73
2022-09-13	09:32:56	0.36785	1.63627	2.91283	2259.88	FALSE	73
2022-09-13	09:32:56	0.172023	0.765193	2.91283	2304.54	FALSE	73
2022-09-13	09:32:56	2.25039	10.0102	2.91283	2269.89	FALSE	73
2022-09-13	09:32:57	0.528257	2.34979	3.11108	2306.89	FALSE	73
2022-09-13	09:32:57	1.34174	5.96833	3.11108	2275.85	FALSE	73
2022-09-13	09:32:57	0.228206	1.01511	3.11108	2307.91	FALSE	73
2022-09-13	09:32:58	0.41869	1.86242	1.66174	2277.72	FALSE	73
2022-09-13	09:32:58	0.368715	1.64012	1.66174	2309.55	FALSE	73
2022-09-13	09:32:58	0.37986	1.68969	1.66174	2279.41	FALSE	73
2022-09-13	09:32:58	0.327036	1.45472	1.66174	2311	FALSE	73
2022-09-13	09:32:59	0.349733	1.55568	1.49807	2280.96	FALSE	73
2022-09-13	09:32:59	0.311005	1.38341	1.49807	2312.38	FALSE	73
2022-09-13	09:32:59	0.32785	1.45834	1.49807	2282.42	FALSE	73
2022-09-13	09:32:59	0.358537	1.59484	1.49807	2313.98	FALSE	73
2022-09-13	09:33:00	0.396094	1.76191	2.0923	2284.18	FALSE	73
2022-09-13	09:33:00	0.233041	1.03661	2.0923	2315.02	FALSE	73
2022-09-13	09:33:00	0.957672	4.25992	2.0923	2288.44	FALSE	73
2022-09-13	09:33:00	0.294669	1.31075	2.0923	2316.33	FALSE	73
2022-09-13	09:33:01	0.861234	3.83094	5.16586	2292.27	FALSE	73
2022-09-13	09:33:01	0.872888	3.88278	5.16586	2320.21	FALSE	73
2022-09-13	09:33:01	1.74989	7.78386	5.16586	2300.06	FALSE	73
2022-09-13	09:33:02	2.1392	9.51559	9.29991	2329.73	FALSE	73
2022-09-13	09:33:02	1.1164	4.96597	9.29991	2305.02	FALSE	73
2022-09-13	09:33:02	4.2765	19.0227	9.29991	2348.75	1	74
2022-09-13	09:33:02	0.830751	3.69535	9.29991	2308.72	FALSE	74
2022-09-13	09:33:03	1.95559	8.69886	5.89036	2357.45	FALSE	74
2022-09-13	09:33:03	0.792532	3.52534	5.89036	2312.24	FALSE	74
2022-09-13	09:33:03	2.34948	10.451	5.89036	2367.9	FALSE	74
2022-09-13	09:33:03	0.19925	0.886304	5.89036	2313.13	FALSE	74
2022-09-13	09:33:04	1.27258	5.66069	3.60542	2373.56	FALSE	74
2022-09-13	09:33:04	0.373906	1.66321	3.60542	2314.79	FALSE	74
2022-09-13	09:33:04	0.77411	3.4434	3.60542	2377	FALSE	74
2022-09-13	09:33:04	0.821539	3.65437	3.60542	2318.45	FALSE	74
2022-09-13	09:33:05	0.649682	2.88992	4.94582	2379.89	FALSE	74
2022-09-13	09:33:05	1.3819	6.14697	4.94582	2324.59	FALSE	74
2022-09-13	09:33:05	1.39044	6.18496	4.94582	2386.08	FALSE	74
2022-09-13	09:33:05	1.02546	4.56145	4.94582	2329.16	FALSE	74
2022-09-13	09:33:06	1.48912	6.6239	10.127	2392.7	FALSE	74
2022-09-13	09:33:06	2.54693	11.3293	10.127	2340.49	FALSE	74
2022-09-13	09:33:06	2.79391	12.4279	10.127	2405.13	FALSE	74
2022-09-13	09:33:07	2.98831	13.2926	12.6881	2353.78	FALSE	74
2022-09-13	09:33:07	2.48052	11.0338	12.6881	2416.16	FALSE	74
2022-09-13	09:33:07	4.30459	19.1477	12.6881	2372.93	1	75
2022-09-13	09:33:07	1.63625	7.27837	12.6881	2423.44	FALSE	75
2022-09-13	09:33:08	2.87182	12.7744	11.0502	2385.7	FALSE	75
2022-09-13	09:33:08	1.90103	8.45616	11.0502	2431.9	FALSE	75
2022-09-13	09:33:08	1.76073	7.83208	11.0502	2393.53	FALSE	75
2022-09-13	09:33:08	3.40322	15.1382	11.0502	2447.04	1	76
2022-09-13	09:33:09	1.15085	5.11921	10.3216	2398.65	FALSE	76
2022-09-13	09:33:09	3.0938	13.7618	10.3216	2460.8	1	77
2022-09-13	09:33:09	2.40561	10.7006	10.3216	2409.35	FALSE	77
2022-09-13	09:33:09	2.63131	11.7046	10.3216	2472.5	FALSE	77
2022-09-13	09:33:10	2.6908	11.9692	8.88657	2421.32	FALSE	77
2022-09-13	09:33:10	2.09106	9.30145	8.88657	2481.8	FALSE	77
2022-09-13	09:33:10	1.21151	5.38904	8.88657	2426.71	FALSE	77
2022-09-13	09:33:11	1.12205	4.9911	3.91708	2486.79	FALSE	77
2022-09-13	09:33:11	0.83416	3.71051	3.91708	2430.42	FALSE	77
2022-09-13	09:33:11	0.848919	3.77616	3.91708	2490.57	FALSE	77
2022-09-13	09:33:11	0.717265	3.19054	3.91708	2433.61	FALSE	77
2022-09-13	09:33:12	0.565916	2.51731	4.26212	2493.09	FALSE	77
2022-09-13	09:33:12	0.937672	4.17095	4.26212	2437.78	FALSE	77
2022-09-13	09:33:12	0.907494	4.03671	4.26212	2497.12	FALSE	77
2022-09-13	09:33:12	1.42159	6.32352	4.26212	2444.11	FALSE	77
2022-09-13	09:33:13	0.793499	3.52964	7.38322	2500.65	FALSE	77
2022-09-13	09:33:13	1.83533	8.16391	7.38322	2452.27	FALSE	77
2022-09-13	09:33:13	1.36653	6.0786	7.38322	2506.73	FALSE	77
2022-09-13	09:33:13	2.64393	11.7607	7.38322	2464.03	FALSE	77
2022-09-13	09:33:14	0.902659	4.01521	5.02341	2510.75	FALSE	77
2022-09-13	09:33:14	2.40978	10.7192	5.02341	2474.75	FALSE	77
2022-09-13	09:33:14	0.381845	1.69852	5.02341	2512.45	FALSE	77
2022-09-13	09:33:14	0.822964	3.66071	5.02341	2478.41	FALSE	77
2022-09-13	09:33:15	0.408053	1.8151	1.61861	2514.26	FALSE	77
2022-09-13	09:33:15	0.493702	2.19609	1.61861	2480.61	FALSE	77
2022-09-13	09:33:15	0.189886	0.844651	1.61861	2515.11	FALSE	77
2022-09-13	09:33:16	0.554873	2.46819	3.107	2483.07	FALSE	77
2022-09-13	09:33:16	0.482049	2.14425	3.107	2517.25	FALSE	77
2022-09-13	09:33:16	0.65584	2.91731	3.107	2485.99	FALSE	77
2022-09-13	09:33:16	1.10118	4.89827	3.107	2522.15	FALSE	77

## Sheet: Mars_harness_20229139286 (3)
Date	Time	Lbs	Newtons	Total force x time	total steps > 13.345		**GoPro Fitting: 917
2022-09-13	09:28:16	0.507748	2.25856	2.25856	FALSE	0			Total force	2522.15
2022-09-13	09:28:16	0.519148	2.30927	2.30927	FALSE	0			Total steps	77
2022-09-13	09:28:16	0.517723	2.30294	4.5615	FALSE	0
2022-09-13	09:28:16	0.488512	2.173	4.48227	FALSE	0
2022-09-13	09:28:17	0.575382	2.55941	7.12091	FALSE	0
2022-09-13	09:28:17	0.464542	2.06638	6.54865	FALSE	0
2022-09-13	09:28:17	0.461947	2.05483	9.17575	FALSE	0
2022-09-13	09:28:17	0.470344	2.09218	8.64083	FALSE	0
2022-09-13	09:28:18	0.495636	2.20469	11.3804	FALSE	0
2022-09-13	09:28:18	0.572074	2.5447	11.1855	FALSE	0
2022-09-13	09:28:18	0.381031	1.6949	13.0753	FALSE	0
2022-09-13	09:28:19	0.340573	1.51494	12.7005	FALSE	0
2022-09-13	09:28:19	0.441641	1.96451	15.0398	FALSE	0
2022-09-13	09:28:19	0.254313	1.13124	13.8317	FALSE	0
2022-09-13	09:28:19	0.225153	1.00153	16.0414	FALSE	0
2022-09-13	09:28:20	0.501183	2.22936	16.0611	FALSE	0
2022-09-13	09:28:20	3.04403	13.5405	29.5818	1	1
2022-09-13	09:28:20	7.96317	35.4218	51.4828	1	2
2022-09-13	09:28:20	6.32907	28.153	57.7348	1	3
2022-09-13	09:28:21	10.4899	46.6612	98.144	1	4
2022-09-13	09:28:21	3.32744	14.8011	72.5359	1	5
2022-09-13	09:28:21	5.83375	25.9497	124.094	1	6
2022-09-13	09:28:21	8.24876	36.6921	109.228	1	7
2022-09-13	09:28:22	5.09192	22.6499	146.744	1	8
2022-09-13	09:28:22	3.98128	17.7095	126.938	1	9
2022-09-13	09:28:22	1.41513	6.29478	153.038	FALSE	9
2022-09-13	09:28:23	0.544033	2.41997	129.358	FALSE	9
2022-09-13	09:28:23	0.990496	4.40592	157.444	FALSE	9
2022-09-13	09:28:23	1.15258	5.12691	134.484	FALSE	9
2022-09-13	09:28:23	2.5478	11.3331	168.777	FALSE	9
2022-09-13	09:28:24	4.05726	18.0475	152.532	1	10
2022-09-13	09:28:24	4.35665	19.3793	188.157	1	11
2022-09-13	09:28:24	1.90978	8.49508	161.027	FALSE	11
2022-09-13	09:28:24	0.487799	2.16983	190.326	FALSE	11
2022-09-13	09:28:25	0.921082	4.09716	165.124	FALSE	11
2022-09-13	09:28:25	0.680573	3.02732	193.354	FALSE	11
2022-09-13	09:28:25	1.27859	5.68742	170.812	FALSE	11
2022-09-13	09:28:25	0.724135	3.2211	196.575	FALSE	11
2022-09-13	09:28:26	0.529682	2.35613	173.168	FALSE	11
2022-09-13	09:28:26	2.27864	10.1358	206.711	FALSE	11
2022-09-13	09:28:26	0.335331	1.49162	174.659	FALSE	11
2022-09-13	09:28:26	2.05564	9.1439	215.855	FALSE	11
2022-09-13	09:28:27	0.872379	3.88052	178.54	FALSE	11
2022-09-13	09:28:27	0.996298	4.43173	220.286	FALSE	11
2022-09-13	09:28:27	2.27131	10.1032	188.643	FALSE	11
2022-09-13	09:28:28	0.732532	3.25845	223.545	FALSE	11
2022-09-13	09:28:28	3.69726	16.4462	205.089	1	12
2022-09-13	09:28:28	1.42734	6.34909	229.894	FALSE	12
2022-09-13	09:28:28	0.994924	4.42562	209.515	FALSE	12
2022-09-13	09:28:29	0.587799	2.61465	232.509	FALSE	12
2022-09-13	09:28:29	0.221896	0.987038	210.502	FALSE	12
2022-09-13	09:28:29	0.597316	2.65698	235.166	FALSE	12
2022-09-13	09:28:29	0.333499	1.48347	211.985	FALSE	12
2022-09-13	09:28:30	0.517315	2.30112	237.467	FALSE	12
2022-09-13	09:28:30	1.07197	4.76834	216.754	FALSE	12
2022-09-13	09:28:30	0.96841	4.30768	241.774	FALSE	12
2022-09-13	09:28:30	2.21426	9.84947	226.603	FALSE	12
2022-09-13	09:28:31	1.78139	7.92398	249.698	FALSE	12
2022-09-13	09:28:31	1.07319	4.77376	231.377	FALSE	12
2022-09-13	09:28:31	3.67787	16.3599	266.058	1	13
2022-09-13	09:28:32	1.35421	6.0238	237.401	FALSE	13
2022-09-13	09:28:32	0.553601	2.46253	268.521	FALSE	13
2022-09-13	09:28:32	0.0549239	0.244312	237.645	FALSE	13
2022-09-13	09:28:32	1.16154	5.16676	273.688	FALSE	13
2022-09-13	09:28:33	0.270547	1.20345	238.849	FALSE	13
2022-09-13	09:28:33	0.668817	2.97503	276.663	FALSE	13
2022-09-13	09:28:33	0.545712	2.42744	241.276	FALSE	13
2022-09-13	09:28:33	1.08678	4.83421	281.497	FALSE	13
2022-09-13	09:28:34	0.82215	3.65709	244.933	FALSE	13
2022-09-13	09:28:34	1.4449	6.4272	287.924	FALSE	13
2022-09-13	09:28:34	2.44571	10.879	255.812	FALSE	13
2022-09-13	09:28:34	3.1622	14.0661	301.99	1	14
2022-09-13	09:28:35	4.86515	21.6412	277.453	1	15
2022-09-13	09:28:35	3.49049	15.5264	317.516	1	16
2022-09-13	09:28:35	0.829376	3.68923	281.142	FALSE	16
2022-09-13	09:28:35	0.383473	1.70576	319.222	FALSE	16
2022-09-13	09:28:36	0.476705	2.12048	283.263	FALSE	16
2022-09-13	09:28:36	0.334415	1.48754	320.71	FALSE	16
2022-09-13	09:28:36	0.44388	1.97447	285.237	FALSE	16
2022-09-13	09:28:37	0.225204	1.00175	321.712	FALSE	16
2022-09-13	09:28:37	0.521031	2.31765	287.555	FALSE	16
2022-09-13	09:28:37	0.0493259	0.219411	321.931	FALSE	16
2022-09-13	09:28:37	0.43014	1.91335	289.468	FALSE	16
2022-09-13	09:28:38	0.281489	1.25212	323.183	FALSE	16
2022-09-13	09:28:38	0.445102	1.9799	291.448	FALSE	16
2022-09-13	09:28:38	0.68841	3.06219	326.245	FALSE	16
2022-09-13	09:28:38	0.36444	1.6211	293.069	FALSE	16
2022-09-13	09:28:39	0.546883	2.43264	328.678	FALSE	16
2022-09-13	09:28:39	0.303321	1.34923	294.419	FALSE	16
2022-09-13	09:28:39	0.601845	2.67713	331.355	FALSE	16
2022-09-13	09:28:39	0.442252	1.96723	296.386	FALSE	16
2022-09-13	09:28:40	0.507087	2.25562	333.611	FALSE	16
2022-09-13	09:28:40	0.376908	1.67656	298.062	FALSE	16
2022-09-13	09:28:40	0.399657	1.77775	335.388	FALSE	16
2022-09-13	09:28:41	0.496858	2.21012	300.273	FALSE	16
2022-09-13	09:28:41	0.062761	0.279173	335.668	FALSE	16
2022-09-13	09:28:41	0.37187	1.65415	301.927	FALSE	16
2022-09-13	09:28:41	0.497417	2.21261	337.88	FALSE	16
2022-09-13	09:28:42	0.522201	2.32285	304.25	FALSE	16
2022-09-13	09:28:42	0.391209	1.74018	339.62	FALSE	16
2022-09-13	09:28:42	0.508715	2.26287	306.512	FALSE	16
2022-09-13	09:28:42	0.419962	1.86807	341.488	FALSE	16
2022-09-13	09:28:43	0.36556	1.62608	308.139	FALSE	16
2022-09-13	09:28:43	0.304746	1.35557	342.844	FALSE	16
2022-09-13	09:28:43	0.299351	1.33157	309.47	FALSE	16
2022-09-13	09:28:43	0.340827	1.51607	344.36	FALSE	16
2022-09-13	09:28:44	0.126171	0.561234	310.031	FALSE	16
2022-09-13	09:28:44	0.206374	0.917993	345.278	FALSE	16
2022-09-13	09:28:44	0.132227	0.588172	310.619	FALSE	16
2022-09-13	09:28:44	0.291463	1.29649	346.575	FALSE	16
2022-09-13	09:28:45	0.0537534	0.239106	310.859	FALSE	16
2022-09-13	09:28:45	0.251667	1.11947	347.694	FALSE	16
2022-09-13	09:28:45	0.165967	0.738254	311.597	FALSE	16
2022-09-13	09:28:46	0.825	3.66976	351.364	FALSE	16
2022-09-13	09:28:46	0.488664	2.17368	313.771	FALSE	16
2022-09-13	09:28:46	2.92815	13.025	364.389	FALSE	16
2022-09-13	09:28:46	3.70011	16.4588	330.229	1	17
2022-09-13	09:28:47	1.69146	7.52395	371.913	FALSE	17
2022-09-13	09:28:47	5.00332	22.2558	352.485	1	18
2022-09-13	09:28:47	1.0363	4.60967	376.522	FALSE	18
2022-09-13	09:28:47	5.00286	22.2537	374.739	1	19
2022-09-13	09:28:48	0.867595	3.85924	380.382	FALSE	19
2022-09-13	09:28:48	2.19833	9.77861	384.517	FALSE	19
2022-09-13	09:28:48	1.14103	5.07553	385.457	FALSE	19
2022-09-13	09:28:48	1.75986	7.82821	392.346	FALSE	19
2022-09-13	09:28:49	0.635789	2.82812	388.285	FALSE	19
2022-09-13	09:28:49	1.12118	4.98723	397.333	FALSE	19
2022-09-13	09:28:49	0.297824	1.32478	389.61	FALSE	19
2022-09-13	09:28:50	0.614873	2.73508	400.068	FALSE	19
2022-09-13	09:28:50	0.35411	1.57515	391.185	FALSE	19
2022-09-13	09:28:50	1.85793	8.26444	408.332	FALSE	19
2022-09-13	09:28:50	0.809784	3.60208	394.787	FALSE	19
2022-09-13	09:28:51	1.26042	5.6066	413.939	FALSE	19
2022-09-13	09:28:51	2.72561	12.1241	406.911	FALSE	19
2022-09-13	09:28:51	0.759351	3.37775	417.317	FALSE	19
2022-09-13	09:28:51	1.82958	8.13834	415.05	FALSE	19
2022-09-13	09:28:52	0.528003	2.34866	419.665	FALSE	19
2022-09-13	09:28:52	1.32536	5.89547	420.945	FALSE	19
2022-09-13	09:28:52	0.339453	1.50995	421.175	FALSE	19
2022-09-13	09:28:52	0.282048	1.25461	422.2	FALSE	19
2022-09-13	09:28:53	0.558282	2.48335	423.659	FALSE	19
2022-09-13	09:28:53	0.0684608	0.304527	422.504	FALSE	19
2022-09-13	09:28:53	0.354873	1.57855	425.237	FALSE	19
2022-09-13	09:28:53	0.236756	1.05314	423.557	FALSE	19
2022-09-13	09:28:54	0.282099	1.25483	426.492	FALSE	19
2022-09-13	09:28:54	0.12444	0.553534	424.111	FALSE	19
2022-09-13	09:28:54	0.118588	0.527503	427.02	FALSE	19
2022-09-13	09:28:55	0.258028	1.14776	425.259	FALSE	19
2022-09-13	09:28:55	0.00255749	0.0113762	427.031	FALSE	19
2022-09-13	09:28:55	0.144644	0.643405	425.902	FALSE	19
2022-09-13	09:28:55	0.0306999	0.136559	427.168	FALSE	19
2022-09-13	09:28:56	0.331616	1.47509	427.377	FALSE	19
2022-09-13	09:28:56	0.0503438	0.223939	427.391	FALSE	19
2022-09-13	09:28:56	0.260827	1.16021	428.537	FALSE	19
2022-09-13	09:28:56	0.177367	0.788964	428.18	FALSE	19
2022-09-13	09:28:57	0.228868	1.01805	429.555	FALSE	19
2022-09-13	09:28:57	0.124644	0.554441	428.735	FALSE	19
2022-09-13	09:28:57	0.225865	1.00469	430.56	FALSE	19
2022-09-13	09:28:57	0.284644	1.26615	430.001	FALSE	19
2022-09-13	09:28:58	0.0188934	0.0840416	430.644	FALSE	19
2022-09-13	09:28:58	0.226883	1.00922	431.01	FALSE	19
2022-09-13	09:28:58	-0.0147453	-0.06559	430.644	FALSE	19
2022-09-13	09:28:59	0.165204	0.73486	431.745	FALSE	19
2022-09-13	09:28:59	-0.0180532	-0.0803042	430.644	FALSE	19
2022-09-13	09:28:59	0.239606	1.06582	432.811	FALSE	19
2022-09-13	09:28:59	0.0687152	0.305659	430.95	FALSE	19
2022-09-13	09:29:00	0.210853	0.937916	433.749	FALSE	19
2022-09-13	09:29:00	0.0489188	0.217601	431.167	FALSE	19
2022-09-13	09:29:00	0.287697	1.27973	435.029	FALSE	19
2022-09-13	09:29:00	0.475331	2.11437	433.282	FALSE	19
2022-09-13	09:29:01	0.555738	2.47203	437.501	FALSE	19
2022-09-13	09:29:01	0.374313	1.66502	434.947	FALSE	19
2022-09-13	09:29:01	0.236756	1.05314	438.554	FALSE	19
2022-09-13	09:29:01	0.352837	1.56949	436.516	FALSE	19
2022-09-13	09:29:02	0.11355	0.505093	439.059	FALSE	19
2022-09-13	09:29:02	0.378486	1.68358	438.2	FALSE	19
2022-09-13	09:29:02	0.159606	0.709959	439.769	FALSE	19
2022-09-13	09:29:02	0.29416	1.30848	439.508	FALSE	19
2022-09-13	09:29:03	0.166018	0.738481	440.507	FALSE	19
2022-09-13	09:29:03	0.279046	1.24125	440.75	FALSE	19
2022-09-13	09:29:03	0.287646	1.27951	441.787	FALSE	19
2022-09-13	09:29:04	0.272735	1.21318	441.963	FALSE	19
2022-09-13	09:29:04	0.270802	1.20458	442.991	FALSE	19
2022-09-13	09:29:04	0.263473	1.17198	443.135	FALSE	19
2022-09-13	09:29:04	0.816501	3.63196	446.623	FALSE	19
2022-09-13	09:29:05	3.11731	13.8664	457.001	1	20
2022-09-13	09:29:05	2.34108	10.4136	457.037	FALSE	20
2022-09-13	09:29:05	6.63716	29.5234	486.525	1	21
2022-09-13	09:29:05	3.86871	17.2088	474.246	1	22
2022-09-13	09:29:06	4.21859	18.7651	505.29	1	23
2022-09-13	09:29:06	0.743117	3.30553	477.551	FALSE	23
2022-09-13	09:29:06	1.26485	5.62631	510.916	FALSE	23
2022-09-13	09:29:07	0.0711071	0.316299	477.868	FALSE	23
2022-09-13	09:29:07	0.628003	2.79348	513.71	FALSE	23
2022-09-13	09:29:07	0.54215	2.41159	480.279	FALSE	23
2022-09-13	09:29:07	0.431565	1.91969	515.629	FALSE	23
2022-09-13	09:29:08	1.1735	5.21996	485.499	FALSE	23
2022-09-13	09:29:08	0.15355	0.683021	516.312	FALSE	23
2022-09-13	09:29:08	3.40688	15.1545	500.654	1	24
2022-09-13	09:29:08	1.00164	4.4555	520.768	FALSE	24
2022-09-13	09:29:09	4.79859	21.3451	521.999	1	25
2022-09-13	09:29:09	3.6424	16.2021	536.97	1	26
2022-09-13	09:29:09	2.20139	9.79222	531.791	FALSE	26
2022-09-13	09:29:09	0.958944	4.26557	541.235	FALSE	26
2022-09-13	09:29:10	0.0612343	0.272382	532.063	FALSE	26
2022-09-13	09:29:10	1.44892	6.44509	547.681	FALSE	26
2022-09-13	09:29:10	0.132532	0.589529	532.653	FALSE	26
2022-09-13	09:29:10	1.27268	5.66114	553.342	FALSE	26
2022-09-13	09:29:11	0.507748	2.25856	534.911	FALSE	26
2022-09-13	09:29:11	1.92419	8.55918	561.901	FALSE	26
2022-09-13	09:29:11	0.823524	3.6632	538.575	FALSE	26
2022-09-13	09:29:11	1.0506	4.67328	566.574	FALSE	26
2022-09-13	09:29:12	2.21457	9.85085	548.425	FALSE	26
2022-09-13	09:29:12	0.595433	2.64861	569.223	FALSE	26
2022-09-13	09:29:12	3.17502	14.1231	562.549	1	27
2022-09-13	09:29:13	0.308461	1.3721	570.595	FALSE	27
2022-09-13	09:29:13	2.98999	13.3001	575.849	FALSE	27
2022-09-13	09:29:13	0.335229	1.49117	572.086	FALSE	27
2022-09-13	09:29:13	2.0652	9.18642	585.035	FALSE	27
2022-09-13	09:29:14	1.1166	4.96686	577.053	FALSE	27
2022-09-13	09:29:14	0.984542	4.37944	589.415	FALSE	27
2022-09-13	09:29:14	1.60134	7.12308	584.176	FALSE	27
2022-09-13	09:29:14	0.926578	4.1216	593.536	FALSE	27
2022-09-13	09:29:15	3.62846	16.1401	600.316	1	28
2022-09-13	09:29:15	0.682456	3.0357	596.572	FALSE	28
2022-09-13	09:29:15	2.8135	12.515	612.831	FALSE	28
2022-09-13	09:29:15	1.52648	6.79009	603.362	FALSE	28
2022-09-13	09:29:16	3.13762	13.9568	626.788	1	29
2022-09-13	09:29:16	0.903982	4.02109	607.383	FALSE	29
2022-09-13	09:29:16	1.20495	5.35986	632.148	FALSE	29
2022-09-13	09:29:17	-0.0134731	-0.059931	607.383	FALSE	29
2022-09-13	09:29:17	0.35131	1.5627	633.71	FALSE	29
2022-09-13	09:29:17	0.1193	0.53067	607.914	FALSE	29
2022-09-13	09:29:17	0.166985	0.742783	634.453	FALSE	29
2022-09-13	09:29:18	0.0606237	0.269666	608.183	FALSE	29
2022-09-13	09:29:18	0.273855	1.21816	635.671	FALSE	29
2022-09-13	09:29:18	0.0307509	0.136786	608.32	FALSE	29
2022-09-13	09:29:18	0.480471	2.13723	637.809	FALSE	29
2022-09-13	09:29:19	-0.188435	-0.838197	608.32	FALSE	29
2022-09-13	09:29:19	0.419249	1.8649	639.674	FALSE	29
2022-09-13	09:29:19	-0.0339819	-0.151158	608.32	FALSE	29
2022-09-13	09:29:19	0.142456	0.633673	640.307	FALSE	29
2022-09-13	09:29:20	1.65029	7.34082	615.661	FALSE	29
2022-09-13	09:29:20	3.57233	15.8904	656.198	1	30
2022-09-13	09:29:20	4.26668	18.979	634.64	1	31
2022-09-13	09:29:21	2.91747	12.9775	669.175	FALSE	31
2022-09-13	09:29:21	0.150445	0.669209	635.309	FALSE	31
2022-09-13	09:29:21	0.289377	1.28721	670.462	FALSE	31
2022-09-13	09:29:21	0.294313	1.30916	636.618	FALSE	31
2022-09-13	09:29:22	0.325255	1.4468	671.909	FALSE	31
2022-09-13	09:29:22	0.359758	1.60028	638.219	FALSE	31
2022-09-13	09:29:22	0.492685	2.19156	674.101	FALSE	31
2022-09-13	09:29:22	0.470496	2.09286	640.311	FALSE	31
2022-09-13	09:29:23	0.498079	2.21556	676.316	FALSE	31
2022-09-13	09:29:23	0.572634	2.54719	642.859	FALSE	31
2022-09-13	09:29:23	0.629834	2.80163	679.118	FALSE	31
2022-09-13	09:29:23	0.610191	2.71425	645.573	FALSE	31
2022-09-13	09:29:24	0.727036	3.234	682.352	FALSE	31
2022-09-13	09:29:24	0.712023	3.16722	648.74	FALSE	31
2022-09-13	09:29:24	0.720318	3.20412	685.556	FALSE	31
2022-09-13	09:29:24	0.728257	3.23943	651.98	FALSE	31
2022-09-13	09:29:25	0.834669	3.71277	689.269	FALSE	31
2022-09-13	09:29:25	0.754109	3.35443	655.334	FALSE	31
2022-09-13	09:29:25	0.430751	1.91607	691.185	FALSE	31
2022-09-13	09:29:26	0.315382	1.40288	656.737	FALSE	31
2022-09-13	09:29:26	0.411514	1.8305	693.015	FALSE	31
2022-09-13	09:29:26	0.232328	1.03344	657.77	FALSE	31
2022-09-13	09:29:26	0.11182	0.497398	693.513	FALSE	31
2022-09-13	09:29:27	-0.212302	-0.944362	657.77	FALSE	31
2022-09-13	09:29:27	-0.351539	-1.56372	693.513	FALSE	31
2022-09-13	09:29:27	-0.221768	-0.986468	657.77	FALSE	31
2022-09-13	09:29:27	-0.211132	-0.939157	693.513	FALSE	31
2022-09-13	09:29:28	-0.0968827	-0.430954	657.77	FALSE	31
2022-09-13	09:29:28	-0.17729	-0.788621	693.513	FALSE	31
2022-09-13	09:29:28	0.139504	0.620542	658.391	FALSE	31
2022-09-13	09:29:28	0.279809	1.24465	694.757	FALSE	31
2022-09-13	09:29:29	1.61762	7.1955	665.586	FALSE	31
2022-09-13	09:29:29	0.414415	1.8434	696.601	FALSE	31
2022-09-13	09:29:29	0.443168	1.9713	667.558	FALSE	31
2022-09-13	09:29:29	0.682353	3.03524	699.636	FALSE	31
2022-09-13	09:29:30	0.391463	1.74131	669.299	FALSE	31
2022-09-13	09:29:30	0.610598	2.71606	702.352	FALSE	31
2022-09-13	09:29:30	0.29869	1.32863	670.628	FALSE	31
2022-09-13	09:29:31	0.540165	2.40276	704.755	FALSE	31
2022-09-13	09:29:31	0.32271	1.43548	672.063	FALSE	31
2022-09-13	09:29:31	0.431514	1.91946	706.674	FALSE	31
2022-09-13	09:29:31	0.262405	1.16723	673.23	FALSE	31
2022-09-13	09:29:32	0.20271	0.901695	707.576	FALSE	31
2022-09-13	09:29:32	0.0924811	0.411374	673.642	FALSE	31
2022-09-13	09:29:32	-0.0486384	-0.216353	707.576	FALSE	31
2022-09-13	09:29:32	0.185713	0.826089	674.468	FALSE	31
2022-09-13	09:29:33	-0.306552	-1.3636	707.576	FALSE	31
2022-09-13	09:29:33	-0.23561	-1.04804	674.468	FALSE	31
2022-09-13	09:29:33	-0.357493	-1.5902	707.576	FALSE	31
2022-09-13	09:29:33	-0.381921	-1.69886	674.468	FALSE	31
2022-09-13	09:29:34	-0.423244	-1.88267	707.576	FALSE	31
2022-09-13	09:29:34	-0.418511	-1.86162	674.468	FALSE	31
2022-09-13	09:29:34	-0.271692	-1.20854	707.576	FALSE	31
2022-09-13	09:29:35	0.0541605	0.240917	674.709	FALSE	31
2022-09-13	09:29:35	0.26612	1.18375	708.76	FALSE	31
2022-09-13	09:29:35	0.42271	1.8803	676.589	FALSE	31
2022-09-13	09:29:35	1.80943	8.04871	716.808	FALSE	31
2022-09-13	09:29:36	1.47721	6.57093	683.16	FALSE	31
2022-09-13	09:29:36	1.49472	6.64881	723.457	FALSE	31
2022-09-13	09:29:36	0.725865	3.22879	686.389	FALSE	31
2022-09-13	09:29:36	1.1565	5.14434	728.602	FALSE	31
2022-09-13	09:29:37	0.233499	1.03865	687.427	FALSE	31
2022-09-13	09:29:37	0.664186	2.95443	731.556	FALSE	31
2022-09-13	09:29:37	0.226527	1.00764	688.435	FALSE	31
2022-09-13	09:29:37	0.605662	2.69411	734.25	FALSE	31
2022-09-13	09:29:38	0.371565	1.6528	690.088	FALSE	31
2022-09-13	09:29:38	0.568715	2.52976	736.78	FALSE	31
2022-09-13	09:29:38	0.375178	1.66887	691.757	FALSE	31
2022-09-13	09:29:38	0.795942	3.54051	740.32	FALSE	31
2022-09-13	09:29:39	0.539198	2.39846	694.155	FALSE	31
2022-09-13	09:29:39	1.29609	5.76527	746.086	FALSE	31
2022-09-13	09:29:39	0.776908	3.45584	697.611	FALSE	31
2022-09-13	09:29:40	1.72566	7.67608	753.762	FALSE	31
2022-09-13	09:29:40	1.72016	7.65162	705.263	FALSE	31
2022-09-13	09:29:40	2.41233	10.7305	764.492	FALSE	31
2022-09-13	09:29:40	3.06607	13.6385	718.901	1	32
2022-09-13	09:29:41	2.46673	10.9725	775.465	FALSE	32
2022-09-13	09:29:41	3.74001	16.6363	735.537	1	33
2022-09-13	09:29:41	1.3365	5.94502	781.41	FALSE	33
2022-09-13	09:29:41	2.44495	10.8756	746.413	FALSE	33
2022-09-13	09:29:42	0.908308	4.04034	785.45	FALSE	33
2022-09-13	09:29:42	1.69365	7.53369	753.947	FALSE	33
2022-09-13	09:29:42	1.05253	4.68186	790.132	FALSE	33
2022-09-13	09:29:42	0.772634	3.43683	757.384	FALSE	33
2022-09-13	09:29:43	0.656807	2.92161	793.054	FALSE	33
2022-09-13	09:29:43	0.636298	2.83038	760.214	FALSE	33
2022-09-13	09:29:43	0.481234	2.14063	795.194	FALSE	33
2022-09-13	09:29:44	0.826679	3.67723	763.891	FALSE	33
2022-09-13	09:29:44	0.715534	3.18284	798.377	FALSE	33
2022-09-13	09:29:44	1.32067	5.8746	769.766	FALSE	33
2022-09-13	09:29:44	1.22627	5.45469	803.832	FALSE	33
2022-09-13	09:29:45	1.31085	5.83092	775.597	FALSE	33
2022-09-13	09:29:45	4.09655	18.2223	822.054	1	34
2022-09-13	09:29:45	1.45268	6.46181	782.058	FALSE	34
2022-09-13	09:29:45	2.60072	11.5685	833.623	FALSE	34
2022-09-13	09:29:46	1.47335	6.55376	788.612	FALSE	34
2022-09-13	09:29:46	1.25553	5.58485	839.207	FALSE	34
2022-09-13	09:29:46	1.7365	7.7243	796.337	FALSE	34
2022-09-13	09:29:46	3.77223	16.7796	855.987	1	35
2022-09-13	09:29:47	5.19238	23.0967	819.433	1	36
2022-09-13	09:29:47	1.00337	4.46319	860.45	FALSE	36
2022-09-13	09:29:47	1.89212	8.41653	827.85	FALSE	36
2022-09-13	09:29:47	1.1767	5.2342	865.684	FALSE	36
2022-09-13	09:29:48	0.534313	2.37673	830.227	FALSE	36
2022-09-13	09:29:48	0.738282	3.28403	868.968	FALSE	36
2022-09-13	09:29:48	1.15085	5.11921	835.346	FALSE	36
2022-09-13	09:29:49	1.51971	6.75997	875.728	FALSE	36
2022-09-13	09:29:49	1.31686	5.85766	841.203	FALSE	36
2022-09-13	09:29:49	2.4707	10.9902	886.719	FALSE	36
2022-09-13	09:29:49	3.84439	17.1006	858.304	1	37
2022-09-13	09:29:50	5.73192	25.4967	912.215	1	38
2022-09-13	09:29:50	4.66281	20.7411	879.045	1	39
2022-09-13	09:29:50	2.17594	9.67902	921.894	FALSE	39
2022-09-13	09:29:50	0.368868	1.6408	880.686	FALSE	39
2022-09-13	09:29:51	0.360115	1.60186	923.496	FALSE	39
2022-09-13	09:29:51	0.566679	2.5207	883.207	FALSE	39
2022-09-13	09:29:51	0.321438	1.42982	924.926	FALSE	39
2022-09-13	09:29:51	0.463015	2.05958	885.266	FALSE	39
2022-09-13	09:29:52	0.291361	1.29603	926.222	FALSE	39
2022-09-13	09:29:52	0.472684	2.10259	887.369	FALSE	39
2022-09-13	09:29:52	0.334669	1.48867	927.711	FALSE	39
2022-09-13	09:29:53	0.663321	2.95058	890.319	FALSE	39
2022-09-13	09:29:53	0.645305	2.87045	930.581	FALSE	39
2022-09-13	09:29:53	0.874109	3.88821	894.208	FALSE	39
2022-09-13	09:29:53	0.351158	1.56202	932.143	FALSE	39
2022-09-13	09:29:54	0.867443	3.85856	898.066	FALSE	39
2022-09-13	09:29:54	0.319351	1.42054	933.564	FALSE	39
2022-09-13	09:29:54	0.683066	3.03841	901.105	FALSE	39
2022-09-13	09:29:54	0.319351	1.42054	934.984	FALSE	39
2022-09-13	09:29:55	0.721641	3.21	904.315	FALSE	39
2022-09-13	09:29:55	0.445356	1.98103	936.965	FALSE	39
2022-09-13	09:29:55	1.12195	4.99066	909.305	FALSE	39
2022-09-13	09:29:55	0.393346	1.74968	938.715	FALSE	39
2022-09-13	09:29:56	4.35044	19.3516	928.657	1	40
2022-09-13	09:29:56	0.467595	2.07996	940.795	FALSE	40
2022-09-13	09:29:56	9.08169	40.3972	969.054	1	41
2022-09-13	09:29:56	2.71793	12.0899	952.885	FALSE	41
2022-09-13	09:29:57	6.07701	27.0318	996.086	1	42
2022-09-13	09:29:57	2.36164	10.505	963.39	FALSE	42
2022-09-13	09:29:57	2.32373	10.3364	1006.42	FALSE	42
2022-09-13	09:29:58	6.23314	27.7263	991.116	1	43
2022-09-13	09:29:58	2.81294	12.5125	1018.93	FALSE	43
2022-09-13	09:29:58	7.88978	35.0953	1026.21	1	44
2022-09-13	09:29:58	4.33177	19.2686	1038.2	1	45
2022-09-13	09:29:59	4.01009	17.8377	1044.05	1	46
2022-09-13	09:29:59	1.26719	5.63671	1043.84	FALSE	46
2022-09-13	09:29:59	1.12485	5.00356	1049.05	FALSE	46
2022-09-13	09:29:59	2.39757	10.6649	1054.5	FALSE	46
2022-09-13	09:30:00	2.06948	9.20546	1058.26	FALSE	46
2022-09-13	09:30:00	1.36022	6.05053	1060.56	FALSE	46
2022-09-13	09:30:00	0.95416	4.24429	1062.5	FALSE	46
2022-09-13	09:30:00	0.768512	3.4185	1063.97	FALSE	46
2022-09-13	09:30:01	0.475178	2.11369	1064.62	FALSE	46
2022-09-13	09:30:01	0.459249	2.04283	1066.02	FALSE	46
2022-09-13	09:30:01	0.502201	2.23389	1066.85	FALSE	46
2022-09-13	09:30:02	0.484084	2.1533	1068.17	FALSE	46
2022-09-13	09:30:02	0.466425	2.07475	1068.92	FALSE	46
2022-09-13	09:30:02	0.46098	2.05053	1070.22	FALSE	46
2022-09-13	09:30:02	0.484949	2.15715	1071.08	FALSE	46
2022-09-13	09:30:03	0.498588	2.21782	1072.44	FALSE	46
2022-09-13	09:30:03	0.51472	2.28958	1073.37	FALSE	46
2022-09-13	09:30:03	0.501438	2.2305	1074.67	FALSE	46
2022-09-13	09:30:03	0.507647	2.25812	1075.63	FALSE	46
2022-09-13	09:30:04	0.562812	2.5035	1077.17	FALSE	46
2022-09-13	09:30:04	1.04302	4.63956	1080.27	FALSE	46
2022-09-13	09:30:04	3.10688	13.82	1090.99	1	47
2022-09-13	09:30:04	3.11981	13.8775	1094.15	1	48
2022-09-13	09:30:05	5.74846	25.5703	1116.56	1	49
2022-09-13	09:30:05	7.31726	32.5486	1126.7	1	50
2022-09-13	09:30:05	2.64551	11.7678	1128.33	FALSE	50
2022-09-13	09:30:05	7.25426	32.2684	1158.96	1	51
2022-09-13	09:30:06	0.563728	2.50757	1130.84	FALSE	51
2022-09-13	09:30:06	3.16047	14.0584	1173.02	1	52
2022-09-13	09:30:06	0.846781	3.76665	1134.6	FALSE	52
2022-09-13	09:30:07	0.801539	3.56541	1176.59	FALSE	52
2022-09-13	09:30:07	0.532786	2.36994	1136.97	FALSE	52
2022-09-13	09:30:07	0.409886	1.82325	1178.41	FALSE	52
2022-09-13	09:30:07	0.477417	2.12365	1139.1	FALSE	52
2022-09-13	09:30:08	0.404593	1.79971	1180.21	FALSE	52
2022-09-13	09:30:08	0.537977	2.39303	1141.49	FALSE	52
2022-09-13	09:30:08	0.66841	2.97322	1183.18	FALSE	52
2022-09-13	09:30:08	0.910547	4.0503	1145.54	FALSE	52
2022-09-13	09:30:09	0.967087	4.3018	1187.49	FALSE	52
2022-09-13	09:30:09	1.08907	4.8444	1150.39	FALSE	52
2022-09-13	09:30:09	1.93238	8.59561	1196.08	FALSE	52
2022-09-13	09:30:09	2.48032	11.033	1161.42	FALSE	52
2022-09-13	09:30:10	1.39655	6.21213	1202.29	FALSE	52
2022-09-13	09:30:10	1.96663	8.74796	1170.17	FALSE	52
2022-09-13	09:30:10	1.19019	5.2942	1207.59	FALSE	52
2022-09-13	09:30:11	1.47706	6.57026	1176.74	FALSE	52
2022-09-13	09:30:11	2.17477	9.67381	1217.26	FALSE	52
2022-09-13	09:30:11	1.73874	7.73426	1184.47	FALSE	52
2022-09-13	09:30:11	1.26037	5.60638	1222.87	FALSE	52
2022-09-13	09:30:12	1.01324	4.50709	1188.98	FALSE	52
2022-09-13	09:30:12	0.567341	2.52365	1225.39	FALSE	52
2022-09-13	09:30:12	0.605153	2.69184	1191.67	FALSE	52
2022-09-13	09:30:12	0.498588	2.21782	1227.61	FALSE	52
2022-09-13	09:30:13	0.709936	3.15794	1194.83	FALSE	52
2022-09-13	09:30:13	0.472379	2.10124	1229.71	FALSE	52
2022-09-13	09:30:13	0.763066	3.39427	1198.22	FALSE	52
2022-09-13	09:30:13	1.51375	6.73346	1236.44	FALSE	52
2022-09-13	09:30:14	5.82927	25.9298	1224.15	1	53
2022-09-13	09:30:14	6.18749	27.5232	1263.97	1	54
2022-09-13	09:30:14	8.70958	38.742	1262.89	1	55
2022-09-13	09:30:14	4.82821	21.4768	1285.44	1	56
2022-09-13	09:30:15	2.42256	10.776	1273.67	FALSE	56
2022-09-13	09:30:15	0.504796	2.24543	1287.69	FALSE	56
2022-09-13	09:30:15	0.701438	3.12014	1276.79	FALSE	56
2022-09-13	09:30:16	0.656908	2.92206	1290.61	FALSE	56
2022-09-13	09:30:16	0.522862	2.32579	1279.12	FALSE	56
2022-09-13	09:30:16	0.634974	2.82449	1293.44	FALSE	56
2022-09-13	09:30:16	0.635738	2.82789	1281.94	FALSE	56
2022-09-13	09:30:17	0.474211	2.10939	1295.55	FALSE	56
2022-09-13	09:30:17	0.483372	2.15014	1284.09	FALSE	56
2022-09-13	09:30:17	0.489428	2.17707	1297.72	FALSE	56
2022-09-13	09:30:17	0.383372	1.70532	1285.8	FALSE	56
2022-09-13	09:30:18	0.444186	1.97583	1299.7	FALSE	56
2022-09-13	09:30:18	0.422201	1.87803	1287.68	FALSE	56
2022-09-13	09:30:18	0.228817	1.01782	1300.72	FALSE	56
2022-09-13	09:30:18	0.627188	2.78986	1290.47	FALSE	56
2022-09-13	09:30:19	4.12362	18.3427	1319.06	1	57
2022-09-13	09:30:19	3.74505	16.6587	1307.13	1	58
2022-09-13	09:30:19	3.14566	13.9925	1333.05	1	59
2022-09-13	09:30:20	0.200573	0.892189	1308.02	FALSE	59
2022-09-13	09:30:20	0.232786	1.03548	1334.09	FALSE	59
2022-09-13	09:30:20	0.334109	1.48618	1309.5	FALSE	59
2022-09-13	09:30:20	0.217723	0.968475	1335.06	FALSE	59
2022-09-13	09:30:21	0.253702	1.12852	1310.63	FALSE	59
2022-09-13	09:30:21	0.237774	1.05767	1336.11	FALSE	59
2022-09-13	09:30:21	0.362405	1.61205	1312.25	FALSE	59
2022-09-13	09:30:21	0.423931	1.88573	1338	FALSE	59
2022-09-13	09:30:22	0.444746	1.97832	1314.22	FALSE	59
2022-09-13	09:30:22	0.462252	2.05619	1340.05	FALSE	59
2022-09-13	09:30:22	0.453143	2.01567	1316.24	FALSE	59
2022-09-13	09:30:22	0.440166	1.95795	1342.01	FALSE	59
2022-09-13	09:30:23	0.432735	1.92489	1318.16	FALSE	59
2022-09-13	09:30:23	0.430598	1.91539	1343.93	FALSE	59
2022-09-13	09:30:23	0.431667	1.92014	1320.08	FALSE	59
2022-09-13	09:30:23	0.44154	1.96406	1345.89	FALSE	59
2022-09-13	09:30:24	0.424898	1.89003	1321.97	FALSE	59
2022-09-13	09:30:24	0.433448	1.92806	1347.82	FALSE	59
2022-09-13	09:30:24	0.434262	1.93168	1323.91	FALSE	59
2022-09-13	09:30:25	0.430089	1.91312	1349.73	FALSE	59
2022-09-13	09:30:25	0.439351	1.95432	1325.86	FALSE	59
2022-09-13	09:30:25	0.432888	1.92557	1351.66	FALSE	59
2022-09-13	09:30:25	0.434313	1.93191	1327.79	FALSE	59
2022-09-13	09:30:26	0.442557	1.96858	1353.63	FALSE	59
2022-09-13	09:30:26	0.461692	2.0537	1329.85	FALSE	59
2022-09-13	09:30:26	0.409224	1.82031	1355.45	FALSE	59
2022-09-13	09:30:26	0.475789	2.1164	1331.96	FALSE	59
2022-09-13	09:30:27	0.444033	1.97515	1357.42	FALSE	59
2022-09-13	09:30:27	0.451158	2.00684	1333.97	FALSE	59
2022-09-13	09:30:27	0.447036	1.98851	1359.41	FALSE	59
2022-09-13	09:30:27	0.411158	1.82891	1335.8	FALSE	59
2022-09-13	09:30:28	0.445255	1.98058	1361.39	FALSE	59
2022-09-13	09:30:28	0.45416	2.02019	1337.82	FALSE	59
2022-09-13	09:30:28	0.485356	2.15896	1363.55	FALSE	59
2022-09-13	09:30:29	0.506577	2.25336	1340.07	FALSE	59
2022-09-13	09:30:29	0.550547	2.44894	1366	FALSE	59
2022-09-13	09:30:29	0.572837	2.54809	1342.62	FALSE	59
2022-09-13	09:30:29	0.547137	2.43377	1368.43	FALSE	59
2022-09-13	09:30:30	0.552888	2.45936	1345.08	FALSE	59
2022-09-13	09:30:30	0.560573	2.49354	1370.93	FALSE	59
2022-09-13	09:30:30	0.544135	2.42042	1347.5	FALSE	59
2022-09-13	09:30:30	0.536349	2.38579	1373.31	FALSE	59
2022-09-13	09:30:31	0.532939	2.37062	1349.87	FALSE	59
2022-09-13	09:30:31	0.529377	2.35477	1375.67	FALSE	59
2022-09-13	09:30:31	0.514008	2.28641	1352.16	FALSE	59
2022-09-13	09:30:31	0.512735	2.28075	1377.95	FALSE	59
2022-09-13	09:30:32	0.507596	2.25789	1354.41	FALSE	59
2022-09-13	09:30:32	0.513499	2.28415	1380.23	FALSE	59
2022-09-13	09:30:32	0.526629	2.34255	1356.76	FALSE	59
2022-09-13	09:30:32	0.538384	2.39484	1382.63	FALSE	59
2022-09-13	09:30:33	0.551514	2.45324	1359.21	FALSE	59
2022-09-13	09:30:33	0.542252	2.41205	1385.04	FALSE	59
2022-09-13	09:30:33	0.534008	2.37537	1361.59	FALSE	59
2022-09-13	09:30:34	0.508919	2.26377	1387.3	FALSE	59
2022-09-13	09:30:34	0.518435	2.3061	1363.89	FALSE	59
2022-09-13	09:30:34	0.526527	2.3421	1389.65	FALSE	59
2022-09-13	09:30:34	0.517061	2.29999	1366.19	FALSE	59
2022-09-13	09:30:35	0.509631	2.26694	1391.91	FALSE	59
2022-09-13	09:30:35	0.502201	2.23389	1368.43	FALSE	59
2022-09-13	09:30:35	0.497468	2.21284	1394.13	FALSE	59
2022-09-13	09:30:35	0.532023	2.36654	1370.79	FALSE	59
2022-09-13	09:30:36	0.626934	2.78873	1396.91	FALSE	59
2022-09-13	09:30:36	0.660776	2.93926	1373.73	FALSE	59
2022-09-13	09:30:36	0.636298	2.83038	1399.74	FALSE	59
2022-09-13	09:30:36	0.627341	2.79054	1376.52	FALSE	59
2022-09-13	09:30:37	0.544847	2.42359	1402.17	FALSE	59
2022-09-13	09:30:37	0.477824	2.12546	1378.65	FALSE	59
2022-09-13	09:30:37	0.426272	1.89614	1404.06	FALSE	59
2022-09-13	09:30:38	0.426679	1.89795	1380.55	FALSE	59
2022-09-13	09:30:38	0.618384	2.7507	1406.81	FALSE	59
2022-09-13	09:30:38	0.275178	1.22405	1381.77	FALSE	59
2022-09-13	09:30:38	0.335738	1.49343	1408.31	FALSE	59
2022-09-13	09:30:39	0.341031	1.51697	1383.29	FALSE	59
2022-09-13	09:30:39	0.307443	1.36757	1409.68	FALSE	59
2022-09-13	09:30:39	0.278435	1.23853	1384.52	FALSE	59
2022-09-13	09:30:39	0.33757	1.50158	1411.18	FALSE	59
2022-09-13	09:30:40	0.454262	2.02065	1386.55	FALSE	59
2022-09-13	09:30:40	1.58668	7.05787	1418.24	FALSE	59
2022-09-13	09:30:40	0.949275	4.22257	1390.77	FALSE	59
2022-09-13	09:30:40	0.628461	2.79552	1421.03	FALSE	59
2022-09-13	09:30:41	0.58729	2.61238	1393.38	FALSE	59
2022-09-13	09:30:41	0.684237	3.04362	1424.07	FALSE	59
2022-09-13	09:30:41	0.572176	2.54515	1395.93	FALSE	59
2022-09-13	09:30:41	0.466985	2.07724	1426.15	FALSE	59
2022-09-13	09:30:42	0.490802	2.18319	1398.11	FALSE	59
2022-09-13	09:30:42	0.488562	2.17322	1428.32	FALSE	59
2022-09-13	09:30:42	0.52673	2.343	1400.45	FALSE	59
2022-09-13	09:30:43	0.543728	2.41861	1430.74	FALSE	59
2022-09-13	09:30:43	1.16724	5.19212	1405.64	FALSE	59
2022-09-13	09:30:43	0.93813	4.17299	1434.92	FALSE	59
2022-09-13	09:30:43	1.67955	7.47097	1413.11	FALSE	59
2022-09-13	09:30:44	0.507799	2.25879	1437.18	FALSE	59
2022-09-13	09:30:44	2.14037	9.52079	1422.64	FALSE	59
2022-09-13	09:30:44	0.568563	2.52908	1439.7	FALSE	59
2022-09-13	09:30:44	2.62362	11.6704	1434.31	FALSE	59
2022-09-13	09:30:45	1.08887	4.84351	1444.55	FALSE	59
2022-09-13	09:30:45	2.56317	11.4015	1445.71	FALSE	59
2022-09-13	09:30:45	0.407697	1.81352	1446.36	FALSE	59
2022-09-13	09:30:45	1.23477	5.4925	1451.2	FALSE	59
2022-09-13	09:30:46	0.420115	1.86876	1448.23	FALSE	59
2022-09-13	09:30:46	1.11248	4.94853	1456.15	FALSE	59
2022-09-13	09:30:46	0.776552	3.45426	1451.68	FALSE	59
2022-09-13	09:30:47	1.02408	4.55531	1460.7	FALSE	59
2022-09-13	09:30:47	0.975687	4.34005	1456.02	FALSE	59
2022-09-13	09:30:47	3.46749	15.4241	1476.13	1	60
2022-09-13	09:30:47	2.06688	9.1939	1465.22	FALSE	60
2022-09-13	09:30:48	4.15161	18.4672	1494.6	1	61
2022-09-13	09:30:48	3.61329	16.0726	1481.29	1	62
2022-09-13	09:30:48	4.60403	20.4796	1515.07	1	63
2022-09-13	09:30:49	2.76571	12.3024	1493.59	FALSE	63
2022-09-13	09:30:49	2.12286	9.44291	1524.52	FALSE	63
2022-09-13	09:30:49	2.73019	12.1444	1505.74	FALSE	63
2022-09-13	09:30:49	2.36363	10.5139	1535.03	FALSE	63
2022-09-13	09:30:49	2.53375	11.2706	1517.01	FALSE	63
2022-09-13	09:30:50	3.21136	14.2848	1549.32	1	64
2022-09-13	09:30:50	3.19726	14.2221	1531.23	1	65
2022-09-13	09:30:50	4.02362	17.8979	1567.21	1	66
2022-09-13	09:30:50	3.89579	17.3293	1548.56	1	67
2022-09-13	09:30:51	3.41218	15.1781	1582.39	1	68
2022-09-13	09:30:51	4.21416	18.7454	1567.31	1	69
2022-09-13	09:30:51	3.07426	13.6749	1596.07	1	70
2022-09-13	09:30:52	3.67991	16.369	1583.67	1	71
2022-09-13	09:30:52	2.76912	12.3176	1608.38	FALSE	71
2022-09-13	09:30:52	1.21752	5.41577	1589.09	FALSE	71
2022-09-13	09:30:52	1.12235	4.99244	1613.38	FALSE	71
2022-09-13	09:30:53	0.457417	2.03468	1591.12	FALSE	71
2022-09-13	09:30:53	0.708104	3.14979	1616.53	FALSE	71
2022-09-13	09:30:53	0.739758	3.29059	1594.42	FALSE	71
2022-09-13	09:30:53	0.73472	3.26818	1619.8	FALSE	71
2022-09-13	09:30:54	0.737977	3.28267	1597.7	FALSE	71
2022-09-13	09:30:54	0.739758	3.29059	1623.09	FALSE	71
2022-09-13	09:30:54	0.737621	3.28109	1600.98	FALSE	71
2022-09-13	09:30:54	0.734059	3.26524	1626.35	FALSE	71
2022-09-13	09:30:55	0.739504	3.28946	1604.27	FALSE	71
2022-09-13	09:30:55	0.733702	3.26365	1629.61	FALSE	71
2022-09-13	09:30:55	0.733092	3.26094	1607.53	FALSE	71
2022-09-13	09:30:56	0.735229	3.27045	1632.89	FALSE	71
2022-09-13	09:30:56	0.733957	3.26479	1610.79	FALSE	71
2022-09-13	09:30:56	0.738689	3.28584	1636.17	FALSE	71
2022-09-13	09:30:56	0.735076	3.26977	1614.06	FALSE	71
2022-09-13	09:30:57	0.731158	3.25234	1639.42	FALSE	71
2022-09-13	09:30:57	0.7307	3.2503	1617.31	FALSE	71
2022-09-13	09:30:57	0.731209	3.25256	1642.68	FALSE	71
2022-09-13	09:30:57	0.735992	3.27384	1620.59	FALSE	71
2022-09-13	09:30:58	0.736145	3.27452	1645.95	FALSE	71
2022-09-13	09:30:58	0.734618	3.26773	1623.86	FALSE	71
2022-09-13	09:30:58	0.738639	3.28561	1649.24	FALSE	71
2022-09-13	09:30:58	0.739656	3.29014	1627.15	FALSE	71
2022-09-13	09:30:59	0.732023	3.25618	1652.49	FALSE	71
2022-09-13	09:30:59	0.741539	3.29851	1630.44	FALSE	71
2022-09-13	09:30:59	0.738791	3.28629	1655.78	FALSE	71
2022-09-13	09:31:00	0.739606	3.28992	1633.73	FALSE	71
2022-09-13	09:31:00	0.738537	3.28516	1659.06	FALSE	71
2022-09-13	09:31:00	0.738588	3.28539	1637.02	FALSE	71
2022-09-13	09:31:00	0.734771	3.26841	1662.33	FALSE	71
2022-09-13	09:31:01	0.734924	3.26909	1640.29	FALSE	71
2022-09-13	09:31:01	0.737672	3.28131	1665.61	FALSE	71
2022-09-13	09:31:01	0.73701	3.27837	1643.57	FALSE	71
2022-09-13	09:31:01	0.73472	3.26818	1668.88	FALSE	71
2022-09-13	09:31:02	0.732175	3.25686	1646.82	FALSE	71
2022-09-13	09:31:02	0.73243	3.258	1672.14	FALSE	71
2022-09-13	09:31:02	0.737468	3.28041	1650.1	FALSE	71
2022-09-13	09:31:02	0.732023	3.25618	1675.4	FALSE	71
2022-09-13	09:31:03	0.730751	3.25053	1653.35	FALSE	71
2022-09-13	09:31:03	0.733651	3.26343	1678.66	FALSE	71
2022-09-13	09:31:03	0.731616	3.25437	1656.61	FALSE	71
2022-09-13	09:31:03	0.742506	3.30282	1681.96	FALSE	71
2022-09-13	09:31:04	0.735687	3.27248	1659.88	FALSE	71
2022-09-13	09:31:04	0.738791	3.28629	1685.25	FALSE	71
2022-09-13	09:31:04	0.737875	3.28222	1663.16	FALSE	71
2022-09-13	09:31:05	0.738435	3.28471	1688.53	FALSE	71
2022-09-13	09:31:05	0.737265	3.2795	1666.44	FALSE	71
2022-09-13	09:31:05	0.737112	3.27882	1691.81	FALSE	71
2022-09-13	09:31:05	0.735941	3.27361	1669.72	FALSE	71
2022-09-13	09:31:06	0.730394	3.24894	1695.06	FALSE	71
2022-09-13	09:31:06	0.740267	3.29286	1673.01	FALSE	71
2022-09-13	09:31:06	0.729377	3.24441	1698.31	FALSE	71
2022-09-13	09:31:06	0.728104	3.23875	1676.25	FALSE	71
2022-09-13	09:31:07	0.736654	3.27678	1701.58	FALSE	71
2022-09-13	09:31:07	0.736094	3.27429	1679.52	FALSE	71
2022-09-13	09:31:07	0.738384	3.28448	1704.87	FALSE	71
2022-09-13	09:31:07	0.727188	3.23468	1682.76	FALSE	71
2022-09-13	09:31:08	0.733346	3.26207	1708.13	FALSE	71
2022-09-13	09:31:08	0.741183	3.29693	1686.05	FALSE	71
2022-09-13	09:31:08	0.732684	3.25912	1711.39	FALSE	71
2022-09-13	09:31:08	0.732379	3.25777	1689.31	FALSE	71
2022-09-13	09:31:09	0.737926	3.28244	1714.67	FALSE	71
2022-09-13	09:31:09	0.730191	3.24804	1692.56	FALSE	71
2022-09-13	09:31:09	0.735992	3.27384	1717.94	FALSE	71
2022-09-13	09:31:10	0.738333	3.28425	1695.84	FALSE	71
2022-09-13	09:31:10	0.738333	3.28425	1721.23	FALSE	71
2022-09-13	09:31:10	0.741539	3.29851	1699.14	FALSE	71
2022-09-13	09:31:10	0.734822	3.26864	1724.5	FALSE	71
2022-09-13	09:31:11	0.73813	3.28335	1702.43	FALSE	71
2022-09-13	09:31:11	0.735941	3.27361	1727.77	FALSE	71
2022-09-13	09:31:11	0.736247	3.27497	1705.7	FALSE	71
2022-09-13	09:31:11	0.736399	3.27565	1731.05	FALSE	71
2022-09-13	09:31:12	0.736094	3.27429	1708.98	FALSE	71
2022-09-13	09:31:12	0.738231	3.2838	1734.33	FALSE	71
2022-09-13	09:31:12	0.734669	3.26795	1712.24	FALSE	71
2022-09-13	09:31:12	0.738842	3.28652	1737.62	FALSE	71
2022-09-13	09:31:13	0.72785	3.23762	1715.48	FALSE	71
2022-09-13	09:31:13	0.735789	3.27294	1740.89	FALSE	71
2022-09-13	09:31:13	0.739504	3.28946	1718.77	FALSE	71
2022-09-13	09:31:14	0.729173	3.24351	1744.13	FALSE	71
2022-09-13	09:31:14	0.73014	3.24781	1722.02	FALSE	71
2022-09-13	09:31:14	0.738079	3.28312	1747.42	FALSE	71
2022-09-13	09:31:14	0.744135	3.31006	1725.33	FALSE	71
2022-09-13	09:31:15	0.398435	1.77232	1749.19	FALSE	71
2022-09-13	09:31:15	0.54327	2.41657	1727.75	FALSE	71
2022-09-13	09:31:15	0.452735	2.01386	1751.2	FALSE	71
2022-09-13	09:31:15	0.63757	2.83604	1730.58	FALSE	71
2022-09-13	09:31:16	0.886629	3.9439	1755.15	FALSE	71
2022-09-13	09:31:16	0.95645	4.25448	1734.84	FALSE	71
2022-09-13	09:31:16	0.450598	2.00435	1757.15	FALSE	71
2022-09-13	09:31:16	0.475738	2.11618	1736.95	FALSE	71
2022-09-13	09:31:17	0.428817	1.90746	1759.06	FALSE	71
2022-09-13	09:31:17	0.559504	2.48879	1739.44	FALSE	71
2022-09-13	09:31:17	0.531005	2.36202	1761.42	FALSE	71
2022-09-13	09:31:17	0.535534	2.38216	1741.82	FALSE	71
2022-09-13	09:31:18	0.565662	2.51618	1763.94	FALSE	71
2022-09-13	09:31:18	0.543677	2.41838	1744.24	FALSE	71
2022-09-13	09:31:18	0.545458	2.42631	1766.36	FALSE	71
2022-09-13	09:31:19	0.534313	2.37673	1746.62	FALSE	71
2022-09-13	09:31:19	0.538995	2.39756	1768.76	FALSE	71
2022-09-13	09:31:19	0.538944	2.39733	1749.02	FALSE	71
2022-09-13	09:31:19	0.529937	2.35727	1771.12	FALSE	71
2022-09-13	09:31:20	0.533499	2.37311	1751.39	FALSE	71
2022-09-13	09:31:20	0.535992	2.3842	1773.5	FALSE	71
2022-09-13	09:31:20	0.531158	2.3627	1753.75	FALSE	71
2022-09-13	09:31:20	0.534058	2.3756	1775.88	FALSE	71
2022-09-13	09:31:21	0.542456	2.41295	1756.16	FALSE	71
2022-09-13	09:31:21	0.534211	2.37628	1778.25	FALSE	71
2022-09-13	09:31:21	0.530496	2.35975	1758.52	FALSE	71
2022-09-13	09:31:21	0.526476	2.34187	1780.6	FALSE	71
2022-09-13	09:31:22	0.527901	2.34821	1760.87	FALSE	71
2022-09-13	09:31:22	0.525967	2.33961	1782.93	FALSE	71
2022-09-13	09:31:22	0.522404	2.32376	1763.2	FALSE	71
2022-09-13	09:31:23	0.520623	2.31584	1785.25	FALSE	71
2022-09-13	09:31:23	0.532125	2.367	1765.56	FALSE	71
2022-09-13	09:31:23	0.51986	2.31244	1787.56	FALSE	71
2022-09-13	09:31:23	0.522099	2.3224	1767.89	FALSE	71
2022-09-13	09:31:24	0.516094	2.29569	1789.86	FALSE	71
2022-09-13	09:31:24	0.516705	2.29841	1770.18	FALSE	71
2022-09-13	09:31:24	0.516196	2.29614	1792.15	FALSE	71
2022-09-13	09:31:24	0.511005	2.27305	1772.46	FALSE	71
2022-09-13	09:31:25	0.506069	2.2511	1794.41	FALSE	71
2022-09-13	09:31:25	0.507138	2.25585	1774.71	FALSE	71
2022-09-13	09:31:25	0.499758	2.22302	1796.63	FALSE	71
2022-09-13	09:31:25	0.501183	2.22936	1776.94	FALSE	71
2022-09-13	09:31:26	0.496196	2.20718	1798.84	FALSE	71
2022-09-13	09:31:26	0.501234	2.22959	1779.17	FALSE	71
2022-09-13	09:31:26	0.50556	2.24883	1801.08	FALSE	71
2022-09-13	09:31:26	0.498588	2.21782	1781.39	FALSE	71
2022-09-13	09:31:27	0.504644	2.24476	1803.33	FALSE	71
2022-09-13	09:31:27	0.512786	2.28097	1783.67	FALSE	71
2022-09-13	09:31:27	0.520522	2.31539	1805.65	FALSE	71
2022-09-13	09:31:28	0.524236	2.33191	1786	FALSE	71
2022-09-13	09:31:28	0.517366	2.30135	1807.95	FALSE	71
2022-09-13	09:31:28	0.555941	2.47294	1788.48	FALSE	71
2022-09-13	09:31:28	0.46327	2.06072	1810.01	FALSE	71
2022-09-13	09:31:29	0.449224	1.99824	1790.47	FALSE	71
2022-09-13	09:31:29	0.469479	2.08834	1812.1	FALSE	71
2022-09-13	09:31:29	0.500725	2.22732	1792.7	FALSE	71
2022-09-13	09:31:29	0.47701	2.12184	1814.22	FALSE	71
2022-09-13	09:31:30	0.477977	2.12614	1794.83	FALSE	71
2022-09-13	09:31:30	0.46271	2.05823	1816.28	FALSE	71
2022-09-13	09:31:30	0.474822	2.1121	1796.94	FALSE	71
2022-09-13	09:31:30	0.51243	2.27939	1818.55	FALSE	71
2022-09-13	09:31:31	0.459402	2.04351	1798.98	FALSE	71
2022-09-13	09:31:31	0.659911	2.93542	1821.49	FALSE	71
2022-09-13	09:31:31	0.536909	2.38828	1801.37	FALSE	71
2022-09-13	09:31:32	0.418028	1.85947	1823.35	FALSE	71
2022-09-13	09:31:32	0.861896	3.83389	1805.2	FALSE	71
2022-09-13	09:31:32	0.472634	2.10237	1825.45	FALSE	71
2022-09-13	09:31:32	1.21508	5.40492	1810.61	FALSE	71
2022-09-13	09:31:33	0.389529	1.7327	1827.18	FALSE	71
2022-09-13	09:31:33	0.524033	2.331	1812.94	FALSE	71
2022-09-13	09:31:33	0.448206	1.99371	1829.18	FALSE	71
2022-09-13	09:31:33	0.697875	3.10429	1816.04	FALSE	71
2022-09-13	09:31:34	0.584745	2.60106	1831.78	FALSE	71
2022-09-13	09:31:34	0.444796	1.97854	1818.02	FALSE	71
2022-09-13	09:31:34	0.570445	2.53745	1834.32	FALSE	71
2022-09-13	09:31:34	0.536349	2.38579	1820.41	FALSE	71
2022-09-13	09:31:35	0.717519	3.19167	1837.51	FALSE	71
2022-09-13	09:31:35	0.422201	1.87803	1822.29	FALSE	71
2022-09-13	09:31:35	0.627596	2.79167	1840.3	FALSE	71
2022-09-13	09:31:35	0.437316	1.94527	1824.23	FALSE	71
2022-09-13	09:31:36	0.418741	1.86264	1842.16	FALSE	71
2022-09-13	09:31:36	0.420471	1.87034	1826.1	FALSE	71
2022-09-13	09:31:36	0.331412	1.47419	1843.64	FALSE	71
2022-09-13	09:31:37	0.392837	1.74742	1827.85	FALSE	71
2022-09-13	09:31:37	0.319555	1.42144	1845.06	FALSE	71
2022-09-13	09:31:37	0.350852	1.56066	1829.41	FALSE	71
2022-09-13	09:31:37	0.469886	2.09015	1847.15	FALSE	71
2022-09-13	09:31:38	0.523422	2.32829	1831.74	FALSE	71
2022-09-13	09:31:38	0.865662	3.85064	1851	FALSE	71
2022-09-13	09:31:38	0.500471	2.2262	1833.97	FALSE	71
2022-09-13	09:31:38	0.383524	1.70599	1852.71	FALSE	71
2022-09-13	09:31:39	0.292685	1.30192	1835.27	FALSE	71
2022-09-13	09:31:39	0.159758	0.710636	1853.42	FALSE	71
2022-09-13	09:31:39	-0.144058	-0.640799	1835.27	FALSE	71
2022-09-13	09:31:39	-0.48187	-2.14345	1853.42	FALSE	71
2022-09-13	09:31:40	-0.469961	-2.09048	1835.27	FALSE	71
2022-09-13	09:31:40	-0.606552	-2.69806	1853.42	FALSE	71
2022-09-13	09:31:40	-0.464109	-2.06445	1835.27	FALSE	71
2022-09-13	09:31:41	-0.182684	-0.812615	1853.42	FALSE	71
2022-09-13	09:31:41	-0.21215	-0.943686	1835.27	FALSE	71
2022-09-13	09:31:41	-0.155152	-0.690147	1853.42	FALSE	71
2022-09-13	09:31:41	0.237723	1.05744	1836.32	FALSE	71
2022-09-13	09:31:42	0.456247	2.02948	1855.45	FALSE	71
2022-09-13	09:31:42	1.30352	5.79832	1842.12	FALSE	71
2022-09-13	09:31:42	0.257366	1.14482	1856.59	FALSE	71
2022-09-13	09:31:42	1.1765	5.23331	1847.36	FALSE	71
2022-09-13	09:31:43	0.196451	0.873853	1857.46	FALSE	71
2022-09-13	09:31:43	0.217316	0.966665	1848.32	FALSE	71
2022-09-13	09:31:43	0.675127	3.0031	1860.47	FALSE	71
2022-09-13	09:31:43	0.266781	1.1867	1849.51	FALSE	71
2022-09-13	09:31:44	0.740369	3.29331	1863.76	FALSE	71
2022-09-13	09:31:44	0.452277	2.01182	1851.52	FALSE	71
2022-09-13	09:31:44	1.56414	6.95761	1870.72	FALSE	71
2022-09-13	09:31:45	1.77864	7.91175	1859.43	FALSE	71
2022-09-13	09:31:45	4.72388	21.0128	1891.73	1	72
2022-09-13	09:31:45	0.808308	3.59552	1863.03	FALSE	72
2022-09-13	09:31:45	1.26515	5.62764	1897.36	FALSE	72
2022-09-13	09:31:46	0.64729	2.87928	1865.91	FALSE	72
2022-09-13	09:31:46	2.24393	9.98145	1907.34	FALSE	72
2022-09-13	09:31:46	0.878588	3.90814	1869.82	FALSE	72
2022-09-13	09:31:46	1.23279	5.4837	1912.82	FALSE	72
2022-09-13	09:31:47	0.843524	3.75216	1873.57	FALSE	72
2022-09-13	09:31:47	1.36887	6.08901	1918.91	FALSE	72
2022-09-13	09:31:47	0.492532	2.19088	1875.76	FALSE	72
2022-09-13	09:31:47	1.17767	5.23851	1924.15	FALSE	72
2022-09-13	09:31:48	0.862048	3.83456	1879.59	FALSE	72
2022-09-13	09:31:48	1.15609	5.14252	1929.29	FALSE	72
2022-09-13	09:31:48	0.600471	2.67102	1882.26	FALSE	72
2022-09-13	09:31:48	1.07207	4.76878	1934.06	FALSE	72
2022-09-13	09:31:49	0.689529	3.06716	1885.33	FALSE	72
2022-09-13	09:31:49	1.52866	6.79979	1940.86	FALSE	72
2022-09-13	09:31:49	0.74271	3.30372	1888.64	FALSE	72
2022-09-13	09:31:50	1.75024	7.78542	1948.65	FALSE	72
2022-09-13	09:31:50	0.58673	2.60989	1891.25	FALSE	72
2022-09-13	09:31:50	1.24067	5.51875	1954.17	FALSE	72
2022-09-13	09:31:50	0.592532	2.6357	1893.88	FALSE	72
2022-09-13	09:31:51	2.38566	10.6119	1964.78	FALSE	72
2022-09-13	09:31:51	0.561692	2.49852	1896.38	FALSE	72
2022-09-13	09:31:51	2.29518	10.2094	1974.99	FALSE	72
2022-09-13	09:31:51	1.31187	5.83546	1902.22	FALSE	72
2022-09-13	09:31:52	1.80017	8.00752	1983	FALSE	72
2022-09-13	09:31:52	1.13615	5.05382	1907.27	FALSE	72
2022-09-13	09:31:52	1.16067	5.16289	1988.16	FALSE	72
2022-09-13	09:31:52	1.23823	5.50789	1912.78	FALSE	72
2022-09-13	09:31:53	1.91706	8.52747	1996.69	FALSE	72
2022-09-13	09:31:53	1.15818	5.15182	1917.93	FALSE	72
2022-09-13	09:31:53	2.58958	11.519	2008.2	FALSE	72
2022-09-13	09:31:53	2.65457	11.8081	1929.74	FALSE	72
2022-09-13	09:31:54	1.99915	8.89262	2017.1	FALSE	72
2022-09-13	09:31:54	2.9135	12.9598	1942.7	FALSE	72
2022-09-13	09:31:54	1.82062	8.09848	2025.2	FALSE	72
2022-09-13	09:31:55	2.33396	10.3819	1953.08	FALSE	72
2022-09-13	09:31:55	0.796959	3.54503	2028.74	FALSE	72
2022-09-13	09:31:55	3.27085	14.5494	1967.63	1	73
2022-09-13	09:31:55	0.115738	0.514826	2029.26	FALSE	73
2022-09-13	09:31:56	0.804593	3.57899	1971.21	FALSE	73
2022-09-13	09:31:56	0.257316	1.14459	2030.4	FALSE	73
2022-09-13	09:31:56	0.572125	2.54493	1973.75	FALSE	73
2022-09-13	09:31:56	0.36612	1.62857	2032.03	FALSE	73
2022-09-13	09:31:57	0.454008	2.01952	1975.77	FALSE	73
2022-09-13	09:31:57	0.450242	2.00277	2034.03	FALSE	73
2022-09-13	09:31:57	0.496145	2.20695	1977.98	FALSE	73
2022-09-13	09:31:57	0.253143	1.12603	2035.16	FALSE	73
2022-09-13	09:31:58	0.00576363	0.0256378	1978	FALSE	73
2022-09-13	09:31:58	-0.0877224	-0.390207	2035.16	FALSE	73
2022-09-13	09:31:58	-0.216526	-0.963151	1978	FALSE	73
2022-09-13	09:31:59	0.0584862	0.260158	2035.42	FALSE	73
2022-09-13	09:31:59	0.121947	0.542445	1978.55	FALSE	73
2022-09-13	09:31:59	0.175433	0.780361	2036.2	FALSE	73
2022-09-13	09:31:59	0.241438	1.07396	1979.62	FALSE	73
2022-09-13	09:32:00	0.295229	1.31324	2037.51	FALSE	73
2022-09-13	09:32:00	0.223372	0.993603	1980.61	FALSE	73
2022-09-13	09:32:00	0.266629	1.18602	2038.7	FALSE	73
2022-09-13	09:32:00	0.462201	2.05596	1982.67	FALSE	73
2022-09-13	09:32:01	0.492888	2.19246	2040.89	FALSE	73
2022-09-13	09:32:01	0.59243	2.63525	1985.31	FALSE	73
2022-09-13	09:32:01	0.50383	2.24114	2043.13	FALSE	73
2022-09-13	09:32:01	0.253448	1.12739	1986.43	FALSE	73
2022-09-13	09:32:02	-0.0670608	-0.2983	2043.13	FALSE	73
2022-09-13	09:32:02	-0.360343	-1.60288	1986.43	FALSE	73
2022-09-13	09:32:02	-0.705024	-3.13609	2043.13	FALSE	73
2022-09-13	09:32:02	-0.760902	-3.38464	1986.43	FALSE	73
2022-09-13	09:32:03	-0.77276	-3.43739	2043.13	FALSE	73
2022-09-13	09:32:03	-0.791081	-3.51889	1986.43	FALSE	73
2022-09-13	09:32:03	-0.770521	-3.42743	2043.13	FALSE	73
2022-09-13	09:32:04	-0.786093	-3.4967	1986.43	FALSE	73
2022-09-13	09:32:04	-0.757188	-3.36812	2043.13	FALSE	73
2022-09-13	09:32:04	-0.737645	-3.28119	1986.43	FALSE	73
2022-09-13	09:32:04	-0.724567	-3.22302	2043.13	FALSE	73
2022-09-13	09:32:05	-0.704261	-3.13269	1986.43	FALSE	73
2022-09-13	09:32:05	-0.555559	-2.47124	2043.13	FALSE	73
2022-09-13	09:32:05	-0.260852	-1.16032	1986.43	FALSE	73
2022-09-13	09:32:05	-0.0686384	-0.305317	2043.13	FALSE	73
2022-09-13	09:32:06	0.150598	0.66989	1987.1	FALSE	73
2022-09-13	09:32:06	0.286934	1.27634	2044.41	FALSE	73
2022-09-13	09:32:06	0.294567	1.31029	1988.41	FALSE	73
2022-09-13	09:32:06	0.316196	1.4065	2045.81	FALSE	73
2022-09-13	09:32:07	0.309377	1.37617	1989.79	FALSE	73
2022-09-13	09:32:07	0.321641	1.43072	2047.24	FALSE	73
2022-09-13	09:32:07	0.328461	1.46106	1991.25	FALSE	73
2022-09-13	09:32:08	0.315026	1.4013	2048.65	FALSE	73
2022-09-13	09:32:08	0.304491	1.35444	1992.6	FALSE	73
2022-09-13	09:32:08	0.30729	1.36689	2050.01	FALSE	73
2022-09-13	09:32:08	0.301743	1.34221	1993.95	FALSE	73
2022-09-13	09:32:09	0.293448	1.30532	2051.32	FALSE	73
2022-09-13	09:32:09	0.295738	1.3155	1995.26	FALSE	73
2022-09-13	09:32:09	0.301641	1.34176	2052.66	FALSE	73
2022-09-13	09:32:09	0.298588	1.32818	1996.59	FALSE	73
2022-09-13	09:32:10	0.300369	1.3361	2054	FALSE	73
2022-09-13	09:32:10	0.301234	1.33995	1997.93	FALSE	73
2022-09-13	09:32:10	0.306832	1.36485	2055.36	FALSE	73
2022-09-13	09:32:10	0.299504	1.33225	1999.26	FALSE	73
2022-09-13	09:32:11	0.301285	1.34018	2056.7	FALSE	73
2022-09-13	09:32:11	0.298232	1.3266	2000.59	FALSE	73
2022-09-13	09:32:11	0.296298	1.31799	2058.02	FALSE	73
2022-09-13	09:32:11	0.319351	1.42054	2002.01	FALSE	73
2022-09-13	09:32:12	0.319148	1.41963	2059.44	FALSE	73
2022-09-13	09:32:12	0.31014	1.37956	2003.39	FALSE	73
2022-09-13	09:32:12	0.289682	1.28856	2060.73	FALSE	73
2022-09-13	09:32:13	0.296247	1.31777	2004.71	FALSE	73
2022-09-13	09:32:13	0.295687	1.31527	2062.04	FALSE	73
2022-09-13	09:32:13	0.304949	1.35647	2006.06	FALSE	73
2022-09-13	09:32:13	0.307087	1.36598	2063.41	FALSE	73
2022-09-13	09:32:14	0.300115	1.33497	2007.4	FALSE	73
2022-09-13	09:32:14	0.289631	1.28834	2064.7	FALSE	73
2022-09-13	09:32:14	0.301438	1.34086	2008.74	FALSE	73
2022-09-13	09:32:14	0.322914	1.43639	2066.13	FALSE	73
2022-09-13	09:32:15	0.548868	2.44147	2011.18	FALSE	73
2022-09-13	09:32:15	0.412176	1.83344	2067.97	FALSE	73
2022-09-13	09:32:15	0.269682	1.1996	2012.38	FALSE	73
2022-09-13	09:32:15	0.368053	1.63717	2069.6	FALSE	73
2022-09-13	09:32:16	0.361183	1.60661	2013.99	FALSE	73
2022-09-13	09:32:16	0.368053	1.63717	2071.24	FALSE	73
2022-09-13	09:32:16	0.558588	2.48471	2016.47	FALSE	73
2022-09-13	09:32:17	0.578232	2.57209	2073.81	FALSE	73
2022-09-13	09:32:17	0.315687	1.40424	2017.88	FALSE	73
2022-09-13	09:32:17	0.36785	1.63627	2075.45	FALSE	73
2022-09-13	09:32:17	0.330903	1.47192	2019.35	FALSE	73
2022-09-13	09:32:18	0.328003	1.45902	2076.91	FALSE	73
2022-09-13	09:32:18	0.317214	1.41103	2020.76	FALSE	73
2022-09-13	09:32:18	0.319097	1.41941	2078.33	FALSE	73
2022-09-13	09:32:18	0.329071	1.46377	2022.22	FALSE	73
2022-09-13	09:32:19	0.318995	1.41895	2079.75	FALSE	73
2022-09-13	09:32:19	0.32327	1.43797	2023.66	FALSE	73
2022-09-13	09:32:19	0.323321	1.4382	2081.18	FALSE	73
2022-09-13	09:32:19	0.3107	1.38206	2025.04	FALSE	73
2022-09-13	09:32:20	0.31243	1.38975	2082.57	FALSE	73
2022-09-13	09:32:20	0.314059	1.397	2026.44	FALSE	73
2022-09-13	09:32:20	0.314364	1.39835	2083.97	FALSE	73
2022-09-13	09:32:20	0.312481	1.38998	2027.83	FALSE	73
2022-09-13	09:32:21	0.299758	1.33338	2085.31	FALSE	73
2022-09-13	09:32:21	0.338079	1.50384	2029.33	FALSE	73
2022-09-13	09:32:21	0.345051	1.53486	2086.84	FALSE	73
2022-09-13	09:32:22	0.704847	3.1353	2032.47	FALSE	73
2022-09-13	09:32:22	0.742048	3.30078	2090.14	FALSE	73
2022-09-13	09:32:22	0.736756	3.27724	2035.75	FALSE	73
2022-09-13	09:32:22	0.74042	3.29354	2093.44	FALSE	73
2022-09-13	09:32:23	0.73813	3.28335	2039.03	FALSE	73
2022-09-13	09:32:23	0.736756	3.27724	2096.71	FALSE	73
2022-09-13	09:32:23	0.734568	3.26751	2042.3	FALSE	73
2022-09-13	09:32:23	0.736654	3.27678	2099.99	FALSE	73
2022-09-13	09:32:24	0.726934	3.23355	2045.53	FALSE	73
2022-09-13	09:32:24	0.506221	2.25177	2102.24	FALSE	73
2022-09-13	09:32:24	0.734568	3.26751	2048.8	FALSE	73
2022-09-13	09:32:24	0.743219	3.30599	2105.55	FALSE	73
2022-09-13	09:32:25	0.728562	3.24079	2052.04	FALSE	73
2022-09-13	09:32:25	0.741234	3.29716	2108.84	FALSE	73
2022-09-13	09:32:25	0.736298	3.2752	2055.31	FALSE	73
2022-09-13	09:32:26	0.740623	3.29444	2112.14	FALSE	73
2022-09-13	09:32:26	0.745051	3.31414	2058.63	FALSE	73
2022-09-13	09:32:26	0.726221	3.23038	2115.37	FALSE	73
2022-09-13	09:32:26	0.368104	1.6374	2060.27	FALSE	73
2022-09-13	09:32:27	0.325662	1.44861	2116.82	FALSE	73
2022-09-13	09:32:27	0.4107	1.82688	2062.09	FALSE	73
2022-09-13	09:32:27	0.327748	1.45789	2118.28	FALSE	73
2022-09-13	09:32:27	0.27528	1.2245	2063.32	FALSE	73
2022-09-13	09:32:28	0.281845	1.2537	2119.53	FALSE	73
2022-09-13	09:32:28	0.27416	1.21952	2064.54	FALSE	73
2022-09-13	09:32:28	0.481743	2.14289	2121.67	FALSE	73
2022-09-13	09:32:28	0.275382	1.22495	2065.76	FALSE	73
2022-09-13	09:32:29	1.72841	7.68831	2129.36	FALSE	73
2022-09-13	09:32:29	2.84037	12.6345	2078.4	FALSE	73
2022-09-13	09:32:29	2.37136	10.5483	2139.91	FALSE	73
2022-09-13	09:32:29	0.517773	2.30316	2080.7	FALSE	73
2022-09-13	09:32:30	0.47584	2.11663	2142.03	FALSE	73
2022-09-13	09:32:30	0.559097	2.48698	2083.19	FALSE	73
2022-09-13	09:32:30	0.429835	1.91199	2143.94	FALSE	73
2022-09-13	09:32:31	0.425153	1.89117	2085.08	FALSE	73
2022-09-13	09:32:31	0.539198	2.39846	2146.34	FALSE	73
2022-09-13	09:32:31	0.44729	1.98964	2087.07	FALSE	73
2022-09-13	09:32:31	0.525763	2.3387	2148.67	FALSE	73
2022-09-13	09:32:32	0.317977	1.41443	2088.48	FALSE	73
2022-09-13	09:32:32	0.567239	2.52319	2151.2	FALSE	73
2022-09-13	09:32:32	0.332634	1.47962	2089.96	FALSE	73
2022-09-13	09:32:32	0.570496	2.53768	2153.74	FALSE	73
2022-09-13	09:32:33	0.331361	1.47396	2091.43	FALSE	73
2022-09-13	09:32:33	0.555789	2.47226	2156.21	FALSE	73
2022-09-13	09:32:33	0.439962	1.95704	2093.39	FALSE	73
2022-09-13	09:32:33	0.361031	1.60594	2157.81	FALSE	73
2022-09-13	09:32:34	0.407799	1.81397	2095.21	FALSE	73
2022-09-13	09:32:34	0.473092	2.10441	2159.92	FALSE	73
2022-09-13	09:32:34	0.357621	1.59077	2096.8	FALSE	73
2022-09-13	09:32:35	0.401845	1.78749	2161.71	FALSE	73
2022-09-13	09:32:35	0.44902	1.99733	2098.79	FALSE	73
2022-09-13	09:32:35	0.406883	1.8099	2163.52	FALSE	73
2022-09-13	09:32:35	0.533092	2.3713	2101.17	FALSE	73
2022-09-13	09:32:36	0.404593	1.79971	2165.32	FALSE	73
2022-09-13	09:32:36	0.515992	2.29524	2103.46	FALSE	73
2022-09-13	09:32:36	0.385458	1.71459	2167.03	FALSE	73
2022-09-13	09:32:36	0.551514	2.45324	2105.91	FALSE	73
2022-09-13	09:32:37	0.417621	1.85766	2168.89	FALSE	73
2022-09-13	09:32:37	0.651972	2.9001	2108.81	FALSE	73
2022-09-13	09:32:37	0.317824	1.41374	2170.3	FALSE	73
2022-09-13	09:32:37	0.880827	3.91809	2112.73	FALSE	73
2022-09-13	09:32:38	0.494415	2.19926	2172.5	FALSE	73
2022-09-13	09:32:38	1.35869	6.04372	2118.78	FALSE	73
2022-09-13	09:32:38	0.505814	2.24996	2174.75	FALSE	73
2022-09-13	09:32:38	0.806221	3.58623	2122.36	FALSE	73
2022-09-13	09:32:39	0.685662	3.04996	2177.8	FALSE	73
2022-09-13	09:32:39	0.650903	2.89535	2125.26	FALSE	73
2022-09-13	09:32:39	0.3307	1.47102	2179.27	FALSE	73
2022-09-13	09:32:40	0.51416	2.28709	2127.54	FALSE	73
2022-09-13	09:32:40	0.740827	3.29535	2182.57	FALSE	73
2022-09-13	09:32:40	0.338384	1.5052	2129.05	FALSE	73
2022-09-13	09:32:40	0.374313	1.66502	2184.23	FALSE	73
2022-09-13	09:32:41	0.561081	2.4958	2131.55	FALSE	73
2022-09-13	09:32:41	0.448053	1.99303	2186.23	FALSE	73
2022-09-13	09:32:41	0.975382	4.33869	2135.88	FALSE	73
2022-09-13	09:32:41	0.734262	3.26614	2189.49	FALSE	73
2022-09-13	09:32:42	0.682201	3.03457	2138.92	FALSE	73
2022-09-13	09:32:42	0.904237	4.02223	2193.51	FALSE	73
2022-09-13	09:32:42	0.498791	2.21872	2141.14	FALSE	73
2022-09-13	09:32:42	0.77411	3.4434	2196.96	FALSE	73
2022-09-13	09:32:43	0.28159	1.25257	2142.39	FALSE	73
2022-09-13	09:32:43	0.660166	2.93655	2199.89	FALSE	73
2022-09-13	09:32:43	0.26668	1.18625	2143.58	FALSE	73
2022-09-13	09:32:44	0.314924	1.40084	2201.29	FALSE	73
2022-09-13	09:32:44	0.216807	0.964401	2144.54	FALSE	73
2022-09-13	09:32:44	0.76159	3.3877	2204.68	FALSE	73
2022-09-13	09:32:44	0.888969	3.95431	2148.49	FALSE	73
2022-09-13	09:32:45	0.511158	2.27373	2206.96	FALSE	73
2022-09-13	09:32:45	0.685662	3.04996	2151.54	FALSE	73
2022-09-13	09:32:45	0.63589	2.82857	2209.78	FALSE	73
2022-09-13	09:32:45	1.31859	5.86535	2157.41	FALSE	73
2022-09-13	09:32:46	1.44841	6.44282	2216.23	FALSE	73
2022-09-13	09:32:46	0.714364	3.17763	2160.59	FALSE	73
2022-09-13	09:32:46	1.02841	4.57457	2220.8	FALSE	73
2022-09-13	09:32:46	0.840064	3.73677	2164.32	FALSE	73
2022-09-13	09:32:47	0.682914	3.03774	2223.84	FALSE	73
2022-09-13	09:32:47	1.09945	4.89057	2169.22	FALSE	73
2022-09-13	09:32:47	0.774262	3.44407	2227.28	FALSE	73
2022-09-13	09:32:47	0.815992	3.6297	2172.84	FALSE	73
2022-09-13	09:32:48	0.381234	1.69581	2228.98	FALSE	73
2022-09-13	09:32:48	0.864695	3.84634	2176.69	FALSE	73
2022-09-13	09:32:48	0.379962	1.69015	2230.67	FALSE	73
2022-09-13	09:32:49	1.01355	4.50847	2181.2	FALSE	73
2022-09-13	09:32:49	0.613549	2.72919	2233.4	FALSE	73
2022-09-13	09:32:49	1.3677	6.0838	2187.28	FALSE	73
2022-09-13	09:32:49	1.92744	8.57364	2241.97	FALSE	73
2022-09-13	09:32:50	1.6338	7.26747	2194.55	FALSE	73
2022-09-13	09:32:50	2.52235	11.2199	2253.19	FALSE	73
2022-09-13	09:32:50	2.08424	9.27112	2203.82	FALSE	73
2022-09-13	09:32:50	1.85838	8.26645	2261.46	FALSE	73
2022-09-13	09:32:51	1.34805	5.9964	2209.82	FALSE	73
2022-09-13	09:32:51	1.44266	6.41724	2267.88	FALSE	73
2022-09-13	09:32:51	1.22444	5.44655	2215.27	FALSE	73
2022-09-13	09:32:51	1.39681	6.21329	2274.09	FALSE	73
2022-09-13	09:32:52	0.938893	4.17638	2219.44	FALSE	73
2022-09-13	09:32:52	1.96882	8.75771	2282.85	FALSE	73
2022-09-13	09:32:52	0.909733	4.04667	2223.49	FALSE	73
2022-09-13	09:32:53	1.23701	5.50247	2288.35	FALSE	73
2022-09-13	09:32:53	1.16261	5.17152	2228.66	FALSE	73
2022-09-13	09:32:53	0.878537	3.90791	2292.26	FALSE	73
2022-09-13	09:32:53	1.97782	8.79774	2237.46	FALSE	73
2022-09-13	09:32:54	0.550547	2.44894	2294.71	FALSE	73
2022-09-13	09:32:54	1.6334	7.26569	2244.72	FALSE	73
2022-09-13	09:32:54	0.633651	2.81861	2297.52	FALSE	73
2022-09-13	09:32:54	1.09681	4.87883	2249.6	FALSE	73
2022-09-13	09:32:55	0.725407	3.22676	2300.75	FALSE	73
2022-09-13	09:32:55	1.19665	5.32294	2254.92	FALSE	73
2022-09-13	09:32:55	0.680064	3.02506	2303.78	FALSE	73
2022-09-13	09:32:55	0.745153	3.31459	2258.24	FALSE	73
2022-09-13	09:32:56	-0.170928	-0.760322	2303.78	FALSE	73
2022-09-13	09:32:56	0.36785	1.63627	2259.88	FALSE	73
2022-09-13	09:32:56	0.172023	0.765193	2304.54	FALSE	73
2022-09-13	09:32:56	2.25039	10.0102	2269.89	FALSE	73
2022-09-13	09:32:57	0.528257	2.34979	2306.89	FALSE	73
2022-09-13	09:32:57	1.34174	5.96833	2275.85	FALSE	73
2022-09-13	09:32:57	0.228206	1.01511	2307.91	FALSE	73
2022-09-13	09:32:58	0.41869	1.86242	2277.72	FALSE	73
2022-09-13	09:32:58	0.368715	1.64012	2309.55	FALSE	73
2022-09-13	09:32:58	0.37986	1.68969	2279.41	FALSE	73
2022-09-13	09:32:58	0.327036	1.45472	2311	FALSE	73
2022-09-13	09:32:59	0.349733	1.55568	2280.96	FALSE	73
2022-09-13	09:32:59	0.311005	1.38341	2312.38	FALSE	73
2022-09-13	09:32:59	0.32785	1.45834	2282.42	FALSE	73
2022-09-13	09:32:59	0.358537	1.59484	2313.98	FALSE	73
2022-09-13	09:33:00	0.396094	1.76191	2284.18	FALSE	73
2022-09-13	09:33:00	0.233041	1.03661	2315.02	FALSE	73
2022-09-13	09:33:00	0.957672	4.25992	2288.44	FALSE	73
2022-09-13	09:33:00	0.294669	1.31075	2316.33	FALSE	73
2022-09-13	09:33:01	0.861234	3.83094	2292.27	FALSE	73
2022-09-13	09:33:01	0.872888	3.88278	2320.21	FALSE	73
2022-09-13	09:33:01	1.74989	7.78386	2300.06	FALSE	73
2022-09-13	09:33:02	2.1392	9.51559	2329.73	FALSE	73
2022-09-13	09:33:02	1.1164	4.96597	2305.02	FALSE	73
2022-09-13	09:33:02	4.2765	19.0227	2348.75	1	74
2022-09-13	09:33:02	0.830751	3.69535	2308.72	FALSE	74
2022-09-13	09:33:03	1.95559	8.69886	2357.45	FALSE	74
2022-09-13	09:33:03	0.792532	3.52534	2312.24	FALSE	74
2022-09-13	09:33:03	2.34948	10.451	2367.9	FALSE	74
2022-09-13	09:33:03	0.19925	0.886304	2313.13	FALSE	74
2022-09-13	09:33:04	1.27258	5.66069	2373.56	FALSE	74
2022-09-13	09:33:04	0.373906	1.66321	2314.79	FALSE	74
2022-09-13	09:33:04	0.77411	3.4434	2377	FALSE	74
2022-09-13	09:33:04	0.821539	3.65437	2318.45	FALSE	74
2022-09-13	09:33:05	0.649682	2.88992	2379.89	FALSE	74
2022-09-13	09:33:05	1.3819	6.14697	2324.59	FALSE	74
2022-09-13	09:33:05	1.39044	6.18496	2386.08	FALSE	74
2022-09-13	09:33:05	1.02546	4.56145	2329.16	FALSE	74
2022-09-13	09:33:06	1.48912	6.6239	2392.7	FALSE	74
2022-09-13	09:33:06	2.54693	11.3293	2340.49	FALSE	74
2022-09-13	09:33:06	2.79391	12.4279	2405.13	FALSE	74
2022-09-13	09:33:07	2.98831	13.2926	2353.78	FALSE	74
2022-09-13	09:33:07	2.48052	11.0338	2416.16	FALSE	74
2022-09-13	09:33:07	4.30459	19.1477	2372.93	1	75
2022-09-13	09:33:07	1.63625	7.27837	2423.44	FALSE	75
2022-09-13	09:33:08	2.87182	12.7744	2385.7	FALSE	75
2022-09-13	09:33:08	1.90103	8.45616	2431.9	FALSE	75
2022-09-13	09:33:08	1.76073	7.83208	2393.53	FALSE	75
2022-09-13	09:33:08	3.40322	15.1382	2447.04	1	76
2022-09-13	09:33:09	1.15085	5.11921	2398.65	FALSE	76
2022-09-13	09:33:09	3.0938	13.7618	2460.8	1	77
2022-09-13	09:33:09	2.40561	10.7006	2409.35	FALSE	77
2022-09-13	09:33:09	2.63131	11.7046	2472.5	FALSE	77
2022-09-13	09:33:10	2.6908	11.9692	2421.32	FALSE	77
2022-09-13	09:33:10	2.09106	9.30145	2481.8	FALSE	77
2022-09-13	09:33:10	1.21151	5.38904	2426.71	FALSE	77
2022-09-13	09:33:11	1.12205	4.9911	2486.79	FALSE	77
2022-09-13	09:33:11	0.83416	3.71051	2430.42	FALSE	77
2022-09-13	09:33:11	0.848919	3.77616	2490.57	FALSE	77
2022-09-13	09:33:11	0.717265	3.19054	2433.61	FALSE	77
2022-09-13	09:33:12	0.565916	2.51731	2493.09	FALSE	77
2022-09-13	09:33:12	0.937672	4.17095	2437.78	FALSE	77
2022-09-13	09:33:12	0.907494	4.03671	2497.12	FALSE	77
2022-09-13	09:33:12	1.42159	6.32352	2444.11	FALSE	77
2022-09-13	09:33:13	0.793499	3.52964	2500.65	FALSE	77
2022-09-13	09:33:13	1.83533	8.16391	2452.27	FALSE	77
2022-09-13	09:33:13	1.36653	6.0786	2506.73	FALSE	77
2022-09-13	09:33:13	2.64393	11.7607	2464.03	FALSE	77
2022-09-13	09:33:14	0.902659	4.01521	2510.75	FALSE	77
2022-09-13	09:33:14	2.40978	10.7192	2474.75	FALSE	77
2022-09-13	09:33:14	0.381845	1.69852	2512.45	FALSE	77
2022-09-13	09:33:14	0.822964	3.66071	2478.41	FALSE	77
2022-09-13	09:33:15	0.408053	1.8151	2514.26	FALSE	77
2022-09-13	09:33:15	0.493702	2.19609	2480.61	FALSE	77
2022-09-13	09:33:15	0.189886	0.844651	2515.11	FALSE	77
2022-09-13	09:33:16	0.554873	2.46819	2483.07	FALSE	77
2022-09-13	09:33:16	0.482049	2.14425	2517.25	FALSE	77
2022-09-13	09:33:16	0.65584	2.91731	2485.99	FALSE	77
2022-09-13	09:33:16	1.10118	4.89827	2522.15	FALSE	77

## Sheet: Mars_harness_20229139286 (2)
Date	Time	Lbs	Total force x time			**GoPro Fitting: 917
2022-09-13	09:28:16	0.507748	0.507748	FALSE	0			Total force	1125.88
2022-09-13	09:28:16	0.519148	1.0269	FALSE	0			Total steps	77
2022-09-13	09:28:16	0.517723	1.54462	FALSE	0
2022-09-13	09:28:16	0.488512	2.03313	FALSE	0
2022-09-13	09:28:17	0.575382	2.60851	FALSE	0
2022-09-13	09:28:17	0.464542	3.07306	FALSE	0
2022-09-13	09:28:17	0.461947	3.535	FALSE	0
2022-09-13	09:28:17	0.470344	4.00535	FALSE	0
2022-09-13	09:28:18	0.495636	4.50098	FALSE	0
2022-09-13	09:28:18	0.572074	5.07306	FALSE	0
2022-09-13	09:28:18	0.381031	5.45409	FALSE	0
2022-09-13	09:28:19	0.340573	5.79466	FALSE	0
2022-09-13	09:28:19	0.441641	6.2363	FALSE	0
2022-09-13	09:28:19	0.254313	6.49061	FALSE	0
2022-09-13	09:28:19	0.225153	6.71577	FALSE	0
2022-09-13	09:28:20	0.501183	7.21695	FALSE	0
2022-09-13	09:28:20	3.04403	10.261	1	1
2022-09-13	09:28:20	7.96317	18.2242	1	2
2022-09-13	09:28:20	6.32907	24.5532	1	3
2022-09-13	09:28:21	10.4899	35.0431	1	4
2022-09-13	09:28:21	3.32744	38.3706	1	5
2022-09-13	09:28:21	5.83375	44.2043	1	6
2022-09-13	09:28:21	8.24876	52.4531	1	7
2022-09-13	09:28:22	5.09192	57.545	1	8
2022-09-13	09:28:22	3.98128	61.5263	1	9
2022-09-13	09:28:22	1.41513	62.9414	FALSE	9
2022-09-13	09:28:23	0.544033	63.4854	FALSE	9
2022-09-13	09:28:23	0.990496	64.4759	FALSE	9
2022-09-13	09:28:23	1.15258	65.6285	FALSE	9
2022-09-13	09:28:23	2.5478	68.1763	FALSE	9
2022-09-13	09:28:24	4.05726	72.2336	1	10
2022-09-13	09:28:24	4.35665	76.5902	1	11
2022-09-13	09:28:24	1.90978	78.5	FALSE	11
2022-09-13	09:28:24	0.487799	78.9878	FALSE	11
2022-09-13	09:28:25	0.921082	79.9089	FALSE	11
2022-09-13	09:28:25	0.680573	80.5895	FALSE	11
2022-09-13	09:28:25	1.27859	81.868	FALSE	11
2022-09-13	09:28:25	0.724135	82.5922	FALSE	11
2022-09-13	09:28:26	0.529682	83.1219	FALSE	11
2022-09-13	09:28:26	2.27864	85.4005	FALSE	11
2022-09-13	09:28:26	0.335331	85.7358	FALSE	11
2022-09-13	09:28:26	2.05564	87.7915	FALSE	11
2022-09-13	09:28:27	0.872379	88.6638	FALSE	11
2022-09-13	09:28:27	0.996298	89.6601	FALSE	11
2022-09-13	09:28:27	2.27131	91.9315	FALSE	11
2022-09-13	09:28:28	0.732532	92.664	FALSE	11
2022-09-13	09:28:28	3.69726	96.3612	1	12
2022-09-13	09:28:28	1.42734	97.7886	FALSE	12
2022-09-13	09:28:28	0.994924	98.7835	FALSE	12
2022-09-13	09:28:29	0.587799	99.3713	FALSE	12
2022-09-13	09:28:29	0.221896	99.5932	FALSE	12
2022-09-13	09:28:29	0.597316	100.191	FALSE	12
2022-09-13	09:28:29	0.333499	100.524	FALSE	12
2022-09-13	09:28:30	0.517315	101.041	FALSE	12
2022-09-13	09:28:30	1.07197	102.113	FALSE	12
2022-09-13	09:28:30	0.96841	103.082	FALSE	12
2022-09-13	09:28:30	2.21426	105.296	FALSE	12
2022-09-13	09:28:31	1.78139	107.077	FALSE	12
2022-09-13	09:28:31	1.07319	108.151	FALSE	12
2022-09-13	09:28:31	3.67787	111.828	1	13
2022-09-13	09:28:32	1.35421	113.183	FALSE	13
2022-09-13	09:28:32	0.553601	113.736	FALSE	13
2022-09-13	09:28:32	0.0549239	113.791	FALSE	13
2022-09-13	09:28:32	1.16154	114.953	FALSE	13
2022-09-13	09:28:33	0.270547	115.223	FALSE	13
2022-09-13	09:28:33	0.668817	115.892	FALSE	13
2022-09-13	09:28:33	0.545712	116.438	FALSE	13
2022-09-13	09:28:33	1.08678	117.525	FALSE	13
2022-09-13	09:28:34	0.82215	118.347	FALSE	13
2022-09-13	09:28:34	1.4449	119.792	FALSE	13
2022-09-13	09:28:34	2.44571	122.237	FALSE	13
2022-09-13	09:28:34	3.1622	125.4	1	14
2022-09-13	09:28:35	4.86515	130.265	1	15
2022-09-13	09:28:35	3.49049	133.755	1	16
2022-09-13	09:28:35	0.829376	134.585	FALSE	16
2022-09-13	09:28:35	0.383473	134.968	FALSE	16
2022-09-13	09:28:36	0.476705	135.445	FALSE	16
2022-09-13	09:28:36	0.334415	135.779	FALSE	16
2022-09-13	09:28:36	0.44388	136.223	FALSE	16
2022-09-13	09:28:37	0.225204	136.448	FALSE	16
2022-09-13	09:28:37	0.521031	136.969	FALSE	16
2022-09-13	09:28:37	0.0493259	137.019	FALSE	16
2022-09-13	09:28:37	0.43014	137.449	FALSE	16
2022-09-13	09:28:38	0.281489	137.73	FALSE	16
2022-09-13	09:28:38	0.445102	138.175	FALSE	16
2022-09-13	09:28:38	0.68841	138.864	FALSE	16
2022-09-13	09:28:38	0.36444	139.228	FALSE	16
2022-09-13	09:28:39	0.546883	139.775	FALSE	16
2022-09-13	09:28:39	0.303321	140.078	FALSE	16
2022-09-13	09:28:39	0.601845	140.68	FALSE	16
2022-09-13	09:28:39	0.442252	141.122	FALSE	16
2022-09-13	09:28:40	0.507087	141.63	FALSE	16
2022-09-13	09:28:40	0.376908	142.006	FALSE	16
2022-09-13	09:28:40	0.399657	142.406	FALSE	16
2022-09-13	09:28:41	0.496858	142.903	FALSE	16
2022-09-13	09:28:41	0.062761	142.966	FALSE	16
2022-09-13	09:28:41	0.37187	143.338	FALSE	16
2022-09-13	09:28:41	0.497417	143.835	FALSE	16
2022-09-13	09:28:42	0.522201	144.357	FALSE	16
2022-09-13	09:28:42	0.391209	144.748	FALSE	16
2022-09-13	09:28:42	0.508715	145.257	FALSE	16
2022-09-13	09:28:42	0.419962	145.677	FALSE	16
2022-09-13	09:28:43	0.36556	146.043	FALSE	16
2022-09-13	09:28:43	0.304746	146.347	FALSE	16
2022-09-13	09:28:43	0.299351	146.647	FALSE	16
2022-09-13	09:28:43	0.340827	146.988	FALSE	16
2022-09-13	09:28:44	0.126171	147.114	FALSE	16
2022-09-13	09:28:44	0.206374	147.32	FALSE	16
2022-09-13	09:28:44	0.132227	147.452	FALSE	16
2022-09-13	09:28:44	0.291463	147.744	FALSE	16
2022-09-13	09:28:45	0.0537534	147.798	FALSE	16
2022-09-13	09:28:45	0.251667	148.049	FALSE	16
2022-09-13	09:28:45	0.165967	148.215	FALSE	16
2022-09-13	09:28:46	0.825	149.04	FALSE	16
2022-09-13	09:28:46	0.488664	149.529	FALSE	16
2022-09-13	09:28:46	2.92815	152.457	FALSE	16
2022-09-13	09:28:46	3.70011	156.157	1	17
2022-09-13	09:28:47	1.69146	157.849	FALSE	17
2022-09-13	09:28:47	5.00332	162.852	1	18
2022-09-13	09:28:47	1.0363	163.888	FALSE	18
2022-09-13	09:28:47	5.00286	168.891	1	19
2022-09-13	09:28:48	0.867595	169.759	FALSE	19
2022-09-13	09:28:48	2.19833	171.957	FALSE	19
2022-09-13	09:28:48	1.14103	173.098	FALSE	19
2022-09-13	09:28:48	1.75986	174.858	FALSE	19
2022-09-13	09:28:49	0.635789	175.494	FALSE	19
2022-09-13	09:28:49	1.12118	176.615	FALSE	19
2022-09-13	09:28:49	0.297824	176.913	FALSE	19
2022-09-13	09:28:50	0.614873	177.528	FALSE	19
2022-09-13	09:28:50	0.35411	177.882	FALSE	19
2022-09-13	09:28:50	1.85793	179.74	FALSE	19
2022-09-13	09:28:50	0.809784	180.549	FALSE	19
2022-09-13	09:28:51	1.26042	181.81	FALSE	19
2022-09-13	09:28:51	2.72561	184.535	FALSE	19
2022-09-13	09:28:51	0.759351	185.295	FALSE	19
2022-09-13	09:28:51	1.82958	187.124	FALSE	19
2022-09-13	09:28:52	0.528003	187.652	FALSE	19
2022-09-13	09:28:52	1.32536	188.978	FALSE	19
2022-09-13	09:28:52	0.339453	189.317	FALSE	19
2022-09-13	09:28:52	0.282048	189.599	FALSE	19
2022-09-13	09:28:53	0.558282	190.157	FALSE	19
2022-09-13	09:28:53	0.0684608	190.226	FALSE	19
2022-09-13	09:28:53	0.354873	190.581	FALSE	19
2022-09-13	09:28:53	0.236756	190.818	FALSE	19
2022-09-13	09:28:54	0.282099	191.1	FALSE	19
2022-09-13	09:28:54	0.12444	191.224	FALSE	19
2022-09-13	09:28:54	0.118588	191.343	FALSE	19
2022-09-13	09:28:55	0.258028	191.601	FALSE	19
2022-09-13	09:28:55	0.00255749	191.603	FALSE	19
2022-09-13	09:28:55	0.144644	191.748	FALSE	19
2022-09-13	09:28:55	0.0306999	191.779	FALSE	19
2022-09-13	09:28:56	0.331616	192.11	FALSE	19
2022-09-13	09:28:56	0.0503438	192.161	FALSE	19
2022-09-13	09:28:56	0.260827	192.421	FALSE	19
2022-09-13	09:28:56	0.177367	192.599	FALSE	19
2022-09-13	09:28:57	0.228868	192.828	FALSE	19
2022-09-13	09:28:57	0.124644	192.952	FALSE	19
2022-09-13	09:28:57	0.225865	193.178	FALSE	19
2022-09-13	09:28:57	0.284644	193.463	FALSE	19
2022-09-13	09:28:58	0.0188934	193.482	FALSE	19
2022-09-13	09:28:58	0.226883	193.709	FALSE	19
2022-09-13	09:28:58	-0.0147453	193.709	FALSE	19
2022-09-13	09:28:59	0.165204	193.874	FALSE	19
2022-09-13	09:28:59	-0.0180532	193.874	FALSE	19
2022-09-13	09:28:59	0.239606	194.113	FALSE	19
2022-09-13	09:28:59	0.0687152	194.182	FALSE	19
2022-09-13	09:29:00	0.210853	194.393	FALSE	19
2022-09-13	09:29:00	0.0489188	194.442	FALSE	19
2022-09-13	09:29:00	0.287697	194.73	FALSE	19
2022-09-13	09:29:00	0.475331	195.205	FALSE	19
2022-09-13	09:29:01	0.555738	195.761	FALSE	19
2022-09-13	09:29:01	0.374313	196.135	FALSE	19
2022-09-13	09:29:01	0.236756	196.372	FALSE	19
2022-09-13	09:29:01	0.352837	196.725	FALSE	19
2022-09-13	09:29:02	0.11355	196.838	FALSE	19
2022-09-13	09:29:02	0.378486	197.217	FALSE	19
2022-09-13	09:29:02	0.159606	197.376	FALSE	19
2022-09-13	09:29:02	0.29416	197.67	FALSE	19
2022-09-13	09:29:03	0.166018	197.836	FALSE	19
2022-09-13	09:29:03	0.279046	198.115	FALSE	19
2022-09-13	09:29:03	0.287646	198.403	FALSE	19
2022-09-13	09:29:04	0.272735	198.676	FALSE	19
2022-09-13	09:29:04	0.270802	198.947	FALSE	19
2022-09-13	09:29:04	0.263473	199.21	FALSE	19
2022-09-13	09:29:04	0.816501	200.027	FALSE	19
2022-09-13	09:29:05	3.11731	203.144	1	20
2022-09-13	09:29:05	2.34108	205.485	FALSE	20
2022-09-13	09:29:05	6.63716	212.122	1	21
2022-09-13	09:29:05	3.86871	215.991	1	22
2022-09-13	09:29:06	4.21859	220.209	1	23
2022-09-13	09:29:06	0.743117	220.953	FALSE	23
2022-09-13	09:29:06	1.26485	222.217	FALSE	23
2022-09-13	09:29:07	0.0711071	222.288	FALSE	23
2022-09-13	09:29:07	0.628003	222.916	FALSE	23
2022-09-13	09:29:07	0.54215	223.459	FALSE	23
2022-09-13	09:29:07	0.431565	223.89	FALSE	23
2022-09-13	09:29:08	1.1735	225.064	FALSE	23
2022-09-13	09:29:08	0.15355	225.217	FALSE	23
2022-09-13	09:29:08	3.40688	228.624	1	24
2022-09-13	09:29:08	1.00164	229.626	FALSE	24
2022-09-13	09:29:09	4.79859	234.424	1	25
2022-09-13	09:29:09	3.6424	238.067	1	26
2022-09-13	09:29:09	2.20139	240.268	FALSE	26
2022-09-13	09:29:09	0.958944	241.227	FALSE	26
2022-09-13	09:29:10	0.0612343	241.288	FALSE	26
2022-09-13	09:29:10	1.44892	242.737	FALSE	26
2022-09-13	09:29:10	0.132532	242.87	FALSE	26
2022-09-13	09:29:10	1.27268	244.142	FALSE	26
2022-09-13	09:29:11	0.507748	244.65	FALSE	26
2022-09-13	09:29:11	1.92419	246.574	FALSE	26
2022-09-13	09:29:11	0.823524	247.398	FALSE	26
2022-09-13	09:29:11	1.0506	248.449	FALSE	26
2022-09-13	09:29:12	2.21457	250.663	FALSE	26
2022-09-13	09:29:12	0.595433	251.259	FALSE	26
2022-09-13	09:29:12	3.17502	254.434	1	27
2022-09-13	09:29:13	0.308461	254.742	FALSE	27
2022-09-13	09:29:13	2.98999	257.732	FALSE	27
2022-09-13	09:29:13	0.335229	258.067	FALSE	27
2022-09-13	09:29:13	2.0652	260.132	FALSE	27
2022-09-13	09:29:14	1.1166	261.249	FALSE	27
2022-09-13	09:29:14	0.984542	262.234	FALSE	27
2022-09-13	09:29:14	1.60134	263.835	FALSE	27
2022-09-13	09:29:14	0.926578	264.761	FALSE	27
2022-09-13	09:29:15	3.62846	268.39	1	28
2022-09-13	09:29:15	0.682456	269.072	FALSE	28
2022-09-13	09:29:15	2.8135	271.886	FALSE	28
2022-09-13	09:29:15	1.52648	273.412	FALSE	28
2022-09-13	09:29:16	3.13762	276.55	1	29
2022-09-13	09:29:16	0.903982	277.454	FALSE	29
2022-09-13	09:29:16	1.20495	278.659	FALSE	29
2022-09-13	09:29:17	-0.0134731	278.659	FALSE	29
2022-09-13	09:29:17	0.35131	279.01	FALSE	29
2022-09-13	09:29:17	0.1193	279.13	FALSE	29
2022-09-13	09:29:17	0.166985	279.297	FALSE	29
2022-09-13	09:29:18	0.0606237	279.357	FALSE	29
2022-09-13	09:29:18	0.273855	279.631	FALSE	29
2022-09-13	09:29:18	0.0307509	279.662	FALSE	29
2022-09-13	09:29:18	0.480471	280.142	FALSE	29
2022-09-13	09:29:19	-0.188435	280.142	FALSE	29
2022-09-13	09:29:19	0.419249	280.561	FALSE	29
2022-09-13	09:29:19	-0.0339819	280.561	FALSE	29
2022-09-13	09:29:19	0.142456	280.704	FALSE	29
2022-09-13	09:29:20	1.65029	282.354	FALSE	29
2022-09-13	09:29:20	3.57233	285.927	1	30
2022-09-13	09:29:20	4.26668	290.193	1	31
2022-09-13	09:29:21	2.91747	293.111	FALSE	31
2022-09-13	09:29:21	0.150445	293.261	FALSE	31
2022-09-13	09:29:21	0.289377	293.551	FALSE	31
2022-09-13	09:29:21	0.294313	293.845	FALSE	31
2022-09-13	09:29:22	0.325255	294.17	FALSE	31
2022-09-13	09:29:22	0.359758	294.53	FALSE	31
2022-09-13	09:29:22	0.492685	295.023	FALSE	31
2022-09-13	09:29:22	0.470496	295.493	FALSE	31
2022-09-13	09:29:23	0.498079	295.991	FALSE	31
2022-09-13	09:29:23	0.572634	296.564	FALSE	31
2022-09-13	09:29:23	0.629834	297.194	FALSE	31
2022-09-13	09:29:23	0.610191	297.804	FALSE	31
2022-09-13	09:29:24	0.727036	298.531	FALSE	31
2022-09-13	09:29:24	0.712023	299.243	FALSE	31
2022-09-13	09:29:24	0.720318	299.963	FALSE	31
2022-09-13	09:29:24	0.728257	300.691	FALSE	31
2022-09-13	09:29:25	0.834669	301.526	FALSE	31
2022-09-13	09:29:25	0.754109	302.28	FALSE	31
2022-09-13	09:29:25	0.430751	302.711	FALSE	31
2022-09-13	09:29:26	0.315382	303.026	FALSE	31
2022-09-13	09:29:26	0.411514	303.438	FALSE	31
2022-09-13	09:29:26	0.232328	303.67	FALSE	31
2022-09-13	09:29:26	0.11182	303.782	FALSE	31
2022-09-13	09:29:27	-0.212302	303.782	FALSE	31
2022-09-13	09:29:27	-0.351539	303.782	FALSE	31
2022-09-13	09:29:27	-0.221768	303.782	FALSE	31
2022-09-13	09:29:27	-0.211132	303.782	FALSE	31
2022-09-13	09:29:28	-0.0968827	303.782	FALSE	31
2022-09-13	09:29:28	-0.17729	303.782	FALSE	31
2022-09-13	09:29:28	0.139504	303.921	FALSE	31
2022-09-13	09:29:28	0.279809	304.201	FALSE	31
2022-09-13	09:29:29	1.61762	305.819	FALSE	31
2022-09-13	09:29:29	0.414415	306.233	FALSE	31
2022-09-13	09:29:29	0.443168	306.677	FALSE	31
2022-09-13	09:29:29	0.682353	307.359	FALSE	31
2022-09-13	09:29:30	0.391463	307.75	FALSE	31
2022-09-13	09:29:30	0.610598	308.361	FALSE	31
2022-09-13	09:29:30	0.29869	308.66	FALSE	31
2022-09-13	09:29:31	0.540165	309.2	FALSE	31
2022-09-13	09:29:31	0.32271	309.522	FALSE	31
2022-09-13	09:29:31	0.431514	309.954	FALSE	31
2022-09-13	09:29:31	0.262405	310.216	FALSE	31
2022-09-13	09:29:32	0.20271	310.419	FALSE	31
2022-09-13	09:29:32	0.0924811	310.512	FALSE	31
2022-09-13	09:29:32	-0.0486384	310.512	FALSE	31
2022-09-13	09:29:32	0.185713	310.697	FALSE	31
2022-09-13	09:29:33	-0.306552	310.697	FALSE	31
2022-09-13	09:29:33	-0.23561	310.697	FALSE	31
2022-09-13	09:29:33	-0.357493	310.697	FALSE	31
2022-09-13	09:29:33	-0.381921	310.697	FALSE	31
2022-09-13	09:29:34	-0.423244	310.697	FALSE	31
2022-09-13	09:29:34	-0.418511	310.697	FALSE	31
2022-09-13	09:29:34	-0.271692	310.697	FALSE	31
2022-09-13	09:29:35	0.0541605	310.751	FALSE	31
2022-09-13	09:29:35	0.26612	311.018	FALSE	31
2022-09-13	09:29:35	0.42271	311.44	FALSE	31
2022-09-13	09:29:35	1.80943	313.25	FALSE	31
2022-09-13	09:29:36	1.47721	314.727	FALSE	31
2022-09-13	09:29:36	1.49472	316.222	FALSE	31
2022-09-13	09:29:36	0.725865	316.948	FALSE	31
2022-09-13	09:29:36	1.1565	318.104	FALSE	31
2022-09-13	09:29:37	0.233499	318.338	FALSE	31
2022-09-13	09:29:37	0.664186	319.002	FALSE	31
2022-09-13	09:29:37	0.226527	319.228	FALSE	31
2022-09-13	09:29:37	0.605662	319.834	FALSE	31
2022-09-13	09:29:38	0.371565	320.205	FALSE	31
2022-09-13	09:29:38	0.568715	320.774	FALSE	31
2022-09-13	09:29:38	0.375178	321.149	FALSE	31
2022-09-13	09:29:38	0.795942	321.945	FALSE	31
2022-09-13	09:29:39	0.539198	322.484	FALSE	31
2022-09-13	09:29:39	1.29609	323.781	FALSE	31
2022-09-13	09:29:39	0.776908	324.557	FALSE	31
2022-09-13	09:29:40	1.72566	326.283	FALSE	31
2022-09-13	09:29:40	1.72016	328.003	FALSE	31
2022-09-13	09:29:40	2.41233	330.416	FALSE	31
2022-09-13	09:29:40	3.06607	333.482	1	32
2022-09-13	09:29:41	2.46673	335.948	FALSE	32
2022-09-13	09:29:41	3.74001	339.688	1	33
2022-09-13	09:29:41	1.3365	341.025	FALSE	33
2022-09-13	09:29:41	2.44495	343.47	FALSE	33
2022-09-13	09:29:42	0.908308	344.378	FALSE	33
2022-09-13	09:29:42	1.69365	346.072	FALSE	33
2022-09-13	09:29:42	1.05253	347.124	FALSE	33
2022-09-13	09:29:42	0.772634	347.897	FALSE	33
2022-09-13	09:29:43	0.656807	348.554	FALSE	33
2022-09-13	09:29:43	0.636298	349.19	FALSE	33
2022-09-13	09:29:43	0.481234	349.671	FALSE	33
2022-09-13	09:29:44	0.826679	350.498	FALSE	33
2022-09-13	09:29:44	0.715534	351.214	FALSE	33
2022-09-13	09:29:44	1.32067	352.534	FALSE	33
2022-09-13	09:29:44	1.22627	353.761	FALSE	33
2022-09-13	09:29:45	1.31085	355.071	FALSE	33
2022-09-13	09:29:45	4.09655	359.168	1	34
2022-09-13	09:29:45	1.45268	360.621	FALSE	34
2022-09-13	09:29:45	2.60072	363.221	FALSE	34
2022-09-13	09:29:46	1.47335	364.695	FALSE	34
2022-09-13	09:29:46	1.25553	365.95	FALSE	34
2022-09-13	09:29:46	1.7365	367.687	FALSE	34
2022-09-13	09:29:46	3.77223	371.459	1	35
2022-09-13	09:29:47	5.19238	376.651	1	36
2022-09-13	09:29:47	1.00337	377.655	FALSE	36
2022-09-13	09:29:47	1.89212	379.547	FALSE	36
2022-09-13	09:29:47	1.1767	380.723	FALSE	36
2022-09-13	09:29:48	0.534313	381.258	FALSE	36
2022-09-13	09:29:48	0.738282	381.996	FALSE	36
2022-09-13	09:29:48	1.15085	383.147	FALSE	36
2022-09-13	09:29:49	1.51971	384.667	FALSE	36
2022-09-13	09:29:49	1.31686	385.984	FALSE	36
2022-09-13	09:29:49	2.4707	388.454	FALSE	36
2022-09-13	09:29:49	3.84439	392.299	1	37
2022-09-13	09:29:50	5.73192	398.031	1	38
2022-09-13	09:29:50	4.66281	402.693	1	39
2022-09-13	09:29:50	2.17594	404.869	FALSE	39
2022-09-13	09:29:50	0.368868	405.238	FALSE	39
2022-09-13	09:29:51	0.360115	405.598	FALSE	39
2022-09-13	09:29:51	0.566679	406.165	FALSE	39
2022-09-13	09:29:51	0.321438	406.486	FALSE	39
2022-09-13	09:29:51	0.463015	406.949	FALSE	39
2022-09-13	09:29:52	0.291361	407.241	FALSE	39
2022-09-13	09:29:52	0.472684	407.713	FALSE	39
2022-09-13	09:29:52	0.334669	408.048	FALSE	39
2022-09-13	09:29:53	0.663321	408.711	FALSE	39
2022-09-13	09:29:53	0.645305	409.357	FALSE	39
2022-09-13	09:29:53	0.874109	410.231	FALSE	39
2022-09-13	09:29:53	0.351158	410.582	FALSE	39
2022-09-13	09:29:54	0.867443	411.449	FALSE	39
2022-09-13	09:29:54	0.319351	411.769	FALSE	39
2022-09-13	09:29:54	0.683066	412.452	FALSE	39
2022-09-13	09:29:54	0.319351	412.771	FALSE	39
2022-09-13	09:29:55	0.721641	413.493	FALSE	39
2022-09-13	09:29:55	0.445356	413.938	FALSE	39
2022-09-13	09:29:55	1.12195	415.06	FALSE	39
2022-09-13	09:29:55	0.393346	415.453	FALSE	39
2022-09-13	09:29:56	4.35044	419.804	1	40
2022-09-13	09:29:56	0.467595	420.272	FALSE	40
2022-09-13	09:29:56	9.08169	429.353	1	41
2022-09-13	09:29:56	2.71793	432.071	FALSE	41
2022-09-13	09:29:57	6.07701	438.148	1	42
2022-09-13	09:29:57	2.36164	440.51	FALSE	42
2022-09-13	09:29:57	2.32373	442.834	FALSE	42
2022-09-13	09:29:58	6.23314	449.067	1	43
2022-09-13	09:29:58	2.81294	451.88	FALSE	43
2022-09-13	09:29:58	7.88978	459.769	1	44
2022-09-13	09:29:58	4.33177	464.101	1	45
2022-09-13	09:29:59	4.01009	468.111	1	46
2022-09-13	09:29:59	1.26719	469.378	FALSE	46
2022-09-13	09:29:59	1.12485	470.503	FALSE	46
2022-09-13	09:29:59	2.39757	472.901	FALSE	46
2022-09-13	09:30:00	2.06948	474.97	FALSE	46
2022-09-13	09:30:00	1.36022	476.331	FALSE	46
2022-09-13	09:30:00	0.95416	477.285	FALSE	46
2022-09-13	09:30:00	0.768512	478.053	FALSE	46
2022-09-13	09:30:01	0.475178	478.528	FALSE	46
2022-09-13	09:30:01	0.459249	478.988	FALSE	46
2022-09-13	09:30:01	0.502201	479.49	FALSE	46
2022-09-13	09:30:02	0.484084	479.974	FALSE	46
2022-09-13	09:30:02	0.466425	480.44	FALSE	46
2022-09-13	09:30:02	0.46098	480.901	FALSE	46
2022-09-13	09:30:02	0.484949	481.386	FALSE	46
2022-09-13	09:30:03	0.498588	481.885	FALSE	46
2022-09-13	09:30:03	0.51472	482.4	FALSE	46
2022-09-13	09:30:03	0.501438	482.901	FALSE	46
2022-09-13	09:30:03	0.507647	483.409	FALSE	46
2022-09-13	09:30:04	0.562812	483.972	FALSE	46
2022-09-13	09:30:04	1.04302	485.015	FALSE	46
2022-09-13	09:30:04	3.10688	488.121	1	47
2022-09-13	09:30:04	3.11981	491.241	1	48
2022-09-13	09:30:05	5.74846	496.99	1	49
2022-09-13	09:30:05	7.31726	504.307	1	50
2022-09-13	09:30:05	2.64551	506.952	FALSE	50
2022-09-13	09:30:05	7.25426	514.207	1	51
2022-09-13	09:30:06	0.563728	514.77	FALSE	51
2022-09-13	09:30:06	3.16047	517.931	1	52
2022-09-13	09:30:06	0.846781	518.778	FALSE	52
2022-09-13	09:30:07	0.801539	519.579	FALSE	52
2022-09-13	09:30:07	0.532786	520.112	FALSE	52
2022-09-13	09:30:07	0.409886	520.522	FALSE	52
2022-09-13	09:30:07	0.477417	520.999	FALSE	52
2022-09-13	09:30:08	0.404593	521.404	FALSE	52
2022-09-13	09:30:08	0.537977	521.942	FALSE	52
2022-09-13	09:30:08	0.66841	522.61	FALSE	52
2022-09-13	09:30:08	0.910547	523.521	FALSE	52
2022-09-13	09:30:09	0.967087	524.488	FALSE	52
2022-09-13	09:30:09	1.08907	525.577	FALSE	52
2022-09-13	09:30:09	1.93238	527.509	FALSE	52
2022-09-13	09:30:09	2.48032	529.99	FALSE	52
2022-09-13	09:30:10	1.39655	531.386	FALSE	52
2022-09-13	09:30:10	1.96663	533.353	FALSE	52
2022-09-13	09:30:10	1.19019	534.543	FALSE	52
2022-09-13	09:30:11	1.47706	536.02	FALSE	52
2022-09-13	09:30:11	2.17477	538.195	FALSE	52
2022-09-13	09:30:11	1.73874	539.934	FALSE	52
2022-09-13	09:30:11	1.26037	541.194	FALSE	52
2022-09-13	09:30:12	1.01324	542.207	FALSE	52
2022-09-13	09:30:12	0.567341	542.775	FALSE	52
2022-09-13	09:30:12	0.605153	543.38	FALSE	52
2022-09-13	09:30:12	0.498588	543.878	FALSE	52
2022-09-13	09:30:13	0.709936	544.588	FALSE	52
2022-09-13	09:30:13	0.472379	545.061	FALSE	52
2022-09-13	09:30:13	0.763066	545.824	FALSE	52
2022-09-13	09:30:13	1.51375	547.337	FALSE	52
2022-09-13	09:30:14	5.82927	553.167	1	53
2022-09-13	09:30:14	6.18749	559.354	1	54
2022-09-13	09:30:14	8.70958	568.064	1	55
2022-09-13	09:30:14	4.82821	572.892	1	56
2022-09-13	09:30:15	2.42256	575.315	FALSE	56
2022-09-13	09:30:15	0.504796	575.819	FALSE	56
2022-09-13	09:30:15	0.701438	576.521	FALSE	56
2022-09-13	09:30:16	0.656908	577.178	FALSE	56
2022-09-13	09:30:16	0.522862	577.701	FALSE	56
2022-09-13	09:30:16	0.634974	578.336	FALSE	56
2022-09-13	09:30:16	0.635738	578.971	FALSE	56
2022-09-13	09:30:17	0.474211	579.445	FALSE	56
2022-09-13	09:30:17	0.483372	579.929	FALSE	56
2022-09-13	09:30:17	0.489428	580.418	FALSE	56
2022-09-13	09:30:17	0.383372	580.802	FALSE	56
2022-09-13	09:30:18	0.444186	581.246	FALSE	56
2022-09-13	09:30:18	0.422201	581.668	FALSE	56
2022-09-13	09:30:18	0.228817	581.897	FALSE	56
2022-09-13	09:30:18	0.627188	582.524	FALSE	56
2022-09-13	09:30:19	4.12362	586.648	1	57
2022-09-13	09:30:19	3.74505	590.393	1	58
2022-09-13	09:30:19	3.14566	593.538	1	59
2022-09-13	09:30:20	0.200573	593.739	FALSE	59
2022-09-13	09:30:20	0.232786	593.972	FALSE	59
2022-09-13	09:30:20	0.334109	594.306	FALSE	59
2022-09-13	09:30:20	0.217723	594.524	FALSE	59
2022-09-13	09:30:21	0.253702	594.777	FALSE	59
2022-09-13	09:30:21	0.237774	595.015	FALSE	59
2022-09-13	09:30:21	0.362405	595.377	FALSE	59
2022-09-13	09:30:21	0.423931	595.801	FALSE	59
2022-09-13	09:30:22	0.444746	596.246	FALSE	59
2022-09-13	09:30:22	0.462252	596.708	FALSE	59
2022-09-13	09:30:22	0.453143	597.162	FALSE	59
2022-09-13	09:30:22	0.440166	597.602	FALSE	59
2022-09-13	09:30:23	0.432735	598.034	FALSE	59
2022-09-13	09:30:23	0.430598	598.465	FALSE	59
2022-09-13	09:30:23	0.431667	598.897	FALSE	59
2022-09-13	09:30:23	0.44154	599.338	FALSE	59
2022-09-13	09:30:24	0.424898	599.763	FALSE	59
2022-09-13	09:30:24	0.433448	600.197	FALSE	59
2022-09-13	09:30:24	0.434262	600.631	FALSE	59
2022-09-13	09:30:25	0.430089	601.061	FALSE	59
2022-09-13	09:30:25	0.439351	601.5	FALSE	59
2022-09-13	09:30:25	0.432888	601.933	FALSE	59
2022-09-13	09:30:25	0.434313	602.367	FALSE	59
2022-09-13	09:30:26	0.442557	602.81	FALSE	59
2022-09-13	09:30:26	0.461692	603.272	FALSE	59
2022-09-13	09:30:26	0.409224	603.681	FALSE	59
2022-09-13	09:30:26	0.475789	604.157	FALSE	59
2022-09-13	09:30:27	0.444033	604.601	FALSE	59
2022-09-13	09:30:27	0.451158	605.052	FALSE	59
2022-09-13	09:30:27	0.447036	605.499	FALSE	59
2022-09-13	09:30:27	0.411158	605.91	FALSE	59
2022-09-13	09:30:28	0.445255	606.355	FALSE	59
2022-09-13	09:30:28	0.45416	606.81	FALSE	59
2022-09-13	09:30:28	0.485356	607.295	FALSE	59
2022-09-13	09:30:29	0.506577	607.801	FALSE	59
2022-09-13	09:30:29	0.550547	608.352	FALSE	59
2022-09-13	09:30:29	0.572837	608.925	FALSE	59
2022-09-13	09:30:29	0.547137	609.472	FALSE	59
2022-09-13	09:30:30	0.552888	610.025	FALSE	59
2022-09-13	09:30:30	0.560573	610.585	FALSE	59
2022-09-13	09:30:30	0.544135	611.13	FALSE	59
2022-09-13	09:30:30	0.536349	611.666	FALSE	59
2022-09-13	09:30:31	0.532939	612.199	FALSE	59
2022-09-13	09:30:31	0.529377	612.728	FALSE	59
2022-09-13	09:30:31	0.514008	613.242	FALSE	59
2022-09-13	09:30:31	0.512735	613.755	FALSE	59
2022-09-13	09:30:32	0.507596	614.263	FALSE	59
2022-09-13	09:30:32	0.513499	614.776	FALSE	59
2022-09-13	09:30:32	0.526629	615.303	FALSE	59
2022-09-13	09:30:32	0.538384	615.841	FALSE	59
2022-09-13	09:30:33	0.551514	616.393	FALSE	59
2022-09-13	09:30:33	0.542252	616.935	FALSE	59
2022-09-13	09:30:33	0.534008	617.469	FALSE	59
2022-09-13	09:30:34	0.508919	617.978	FALSE	59
2022-09-13	09:30:34	0.518435	618.496	FALSE	59
2022-09-13	09:30:34	0.526527	619.023	FALSE	59
2022-09-13	09:30:34	0.517061	619.54	FALSE	59
2022-09-13	09:30:35	0.509631	620.049	FALSE	59
2022-09-13	09:30:35	0.502201	620.552	FALSE	59
2022-09-13	09:30:35	0.497468	621.049	FALSE	59
2022-09-13	09:30:35	0.532023	621.581	FALSE	59
2022-09-13	09:30:36	0.626934	622.208	FALSE	59
2022-09-13	09:30:36	0.660776	622.869	FALSE	59
2022-09-13	09:30:36	0.636298	623.505	FALSE	59
2022-09-13	09:30:36	0.627341	624.133	FALSE	59
2022-09-13	09:30:37	0.544847	624.677	FALSE	59
2022-09-13	09:30:37	0.477824	625.155	FALSE	59
2022-09-13	09:30:37	0.426272	625.581	FALSE	59
2022-09-13	09:30:38	0.426679	626.008	FALSE	59
2022-09-13	09:30:38	0.618384	626.627	FALSE	59
2022-09-13	09:30:38	0.275178	626.902	FALSE	59
2022-09-13	09:30:38	0.335738	627.237	FALSE	59
2022-09-13	09:30:39	0.341031	627.578	FALSE	59
2022-09-13	09:30:39	0.307443	627.886	FALSE	59
2022-09-13	09:30:39	0.278435	628.164	FALSE	59
2022-09-13	09:30:39	0.33757	628.502	FALSE	59
2022-09-13	09:30:40	0.454262	628.956	FALSE	59
2022-09-13	09:30:40	1.58668	630.543	FALSE	59
2022-09-13	09:30:40	0.949275	631.492	FALSE	59
2022-09-13	09:30:40	0.628461	632.121	FALSE	59
2022-09-13	09:30:41	0.58729	632.708	FALSE	59
2022-09-13	09:30:41	0.684237	633.392	FALSE	59
2022-09-13	09:30:41	0.572176	633.964	FALSE	59
2022-09-13	09:30:41	0.466985	634.431	FALSE	59
2022-09-13	09:30:42	0.490802	634.922	FALSE	59
2022-09-13	09:30:42	0.488562	635.411	FALSE	59
2022-09-13	09:30:42	0.52673	635.937	FALSE	59
2022-09-13	09:30:43	0.543728	636.481	FALSE	59
2022-09-13	09:30:43	1.16724	637.648	FALSE	59
2022-09-13	09:30:43	0.93813	638.586	FALSE	59
2022-09-13	09:30:43	1.67955	640.266	FALSE	59
2022-09-13	09:30:44	0.507799	640.774	FALSE	59
2022-09-13	09:30:44	2.14037	642.914	FALSE	59
2022-09-13	09:30:44	0.568563	643.483	FALSE	59
2022-09-13	09:30:44	2.62362	646.106	FALSE	59
2022-09-13	09:30:45	1.08887	647.195	FALSE	59
2022-09-13	09:30:45	2.56317	649.758	FALSE	59
2022-09-13	09:30:45	0.407697	650.166	FALSE	59
2022-09-13	09:30:45	1.23477	651.401	FALSE	59
2022-09-13	09:30:46	0.420115	651.821	FALSE	59
2022-09-13	09:30:46	1.11248	652.933	FALSE	59
2022-09-13	09:30:46	0.776552	653.71	FALSE	59
2022-09-13	09:30:47	1.02408	654.734	FALSE	59
2022-09-13	09:30:47	0.975687	655.71	FALSE	59
2022-09-13	09:30:47	3.46749	659.177	1	60
2022-09-13	09:30:47	2.06688	661.244	FALSE	60
2022-09-13	09:30:48	4.15161	665.396	1	61
2022-09-13	09:30:48	3.61329	669.009	1	62
2022-09-13	09:30:48	4.60403	673.613	1	63
2022-09-13	09:30:49	2.76571	676.379	FALSE	63
2022-09-13	09:30:49	2.12286	678.502	FALSE	63
2022-09-13	09:30:49	2.73019	681.232	FALSE	63
2022-09-13	09:30:49	2.36363	683.595	FALSE	63
2022-09-13	09:30:49	2.53375	686.129	FALSE	63
2022-09-13	09:30:50	3.21136	689.341	1	64
2022-09-13	09:30:50	3.19726	692.538	1	65
2022-09-13	09:30:50	4.02362	696.561	1	66
2022-09-13	09:30:50	3.89579	700.457	1	67
2022-09-13	09:30:51	3.41218	703.869	1	68
2022-09-13	09:30:51	4.21416	708.084	1	69
2022-09-13	09:30:51	3.07426	711.158	1	70
2022-09-13	09:30:52	3.67991	714.838	1	71
2022-09-13	09:30:52	2.76912	717.607	FALSE	71
2022-09-13	09:30:52	1.21752	718.824	FALSE	71
2022-09-13	09:30:52	1.12235	719.947	FALSE	71
2022-09-13	09:30:53	0.457417	720.404	FALSE	71
2022-09-13	09:30:53	0.708104	721.112	FALSE	71
2022-09-13	09:30:53	0.739758	721.852	FALSE	71
2022-09-13	09:30:53	0.73472	722.587	FALSE	71
2022-09-13	09:30:54	0.737977	723.325	FALSE	71
2022-09-13	09:30:54	0.739758	724.064	FALSE	71
2022-09-13	09:30:54	0.737621	724.802	FALSE	71
2022-09-13	09:30:54	0.734059	725.536	FALSE	71
2022-09-13	09:30:55	0.739504	726.276	FALSE	71
2022-09-13	09:30:55	0.733702	727.009	FALSE	71
2022-09-13	09:30:55	0.733092	727.742	FALSE	71
2022-09-13	09:30:56	0.735229	728.478	FALSE	71
2022-09-13	09:30:56	0.733957	729.212	FALSE	71
2022-09-13	09:30:56	0.738689	729.95	FALSE	71
2022-09-13	09:30:56	0.735076	730.685	FALSE	71
2022-09-13	09:30:57	0.731158	731.417	FALSE	71
2022-09-13	09:30:57	0.7307	732.147	FALSE	71
2022-09-13	09:30:57	0.731209	732.878	FALSE	71
2022-09-13	09:30:57	0.735992	733.614	FALSE	71
2022-09-13	09:30:58	0.736145	734.351	FALSE	71
2022-09-13	09:30:58	0.734618	735.085	FALSE	71
2022-09-13	09:30:58	0.738639	735.824	FALSE	71
2022-09-13	09:30:58	0.739656	736.564	FALSE	71
2022-09-13	09:30:59	0.732023	737.296	FALSE	71
2022-09-13	09:30:59	0.741539	738.037	FALSE	71
2022-09-13	09:30:59	0.738791	738.776	FALSE	71
2022-09-13	09:31:00	0.739606	739.515	FALSE	71
2022-09-13	09:31:00	0.738537	740.254	FALSE	71
2022-09-13	09:31:00	0.738588	740.993	FALSE	71
2022-09-13	09:31:00	0.734771	741.727	FALSE	71
2022-09-13	09:31:01	0.734924	742.462	FALSE	71
2022-09-13	09:31:01	0.737672	743.2	FALSE	71
2022-09-13	09:31:01	0.73701	743.937	FALSE	71
2022-09-13	09:31:01	0.73472	744.672	FALSE	71
2022-09-13	09:31:02	0.732175	745.404	FALSE	71
2022-09-13	09:31:02	0.73243	746.136	FALSE	71
2022-09-13	09:31:02	0.737468	746.874	FALSE	71
2022-09-13	09:31:02	0.732023	747.606	FALSE	71
2022-09-13	09:31:03	0.730751	748.337	FALSE	71
2022-09-13	09:31:03	0.733651	749.07	FALSE	71
2022-09-13	09:31:03	0.731616	749.802	FALSE	71
2022-09-13	09:31:03	0.742506	750.544	FALSE	71
2022-09-13	09:31:04	0.735687	751.28	FALSE	71
2022-09-13	09:31:04	0.738791	752.019	FALSE	71
2022-09-13	09:31:04	0.737875	752.757	FALSE	71
2022-09-13	09:31:05	0.738435	753.495	FALSE	71
2022-09-13	09:31:05	0.737265	754.232	FALSE	71
2022-09-13	09:31:05	0.737112	754.97	FALSE	71
2022-09-13	09:31:05	0.735941	755.705	FALSE	71
2022-09-13	09:31:06	0.730394	756.436	FALSE	71
2022-09-13	09:31:06	0.740267	757.176	FALSE	71
2022-09-13	09:31:06	0.729377	757.905	FALSE	71
2022-09-13	09:31:06	0.728104	758.634	FALSE	71
2022-09-13	09:31:07	0.736654	759.37	FALSE	71
2022-09-13	09:31:07	0.736094	760.106	FALSE	71
2022-09-13	09:31:07	0.738384	760.845	FALSE	71
2022-09-13	09:31:07	0.727188	761.572	FALSE	71
2022-09-13	09:31:08	0.733346	762.305	FALSE	71
2022-09-13	09:31:08	0.741183	763.046	FALSE	71
2022-09-13	09:31:08	0.732684	763.779	FALSE	71
2022-09-13	09:31:08	0.732379	764.511	FALSE	71
2022-09-13	09:31:09	0.737926	765.249	FALSE	71
2022-09-13	09:31:09	0.730191	765.98	FALSE	71
2022-09-13	09:31:09	0.735992	766.716	FALSE	71
2022-09-13	09:31:10	0.738333	767.454	FALSE	71
2022-09-13	09:31:10	0.738333	768.192	FALSE	71
2022-09-13	09:31:10	0.741539	768.934	FALSE	71
2022-09-13	09:31:10	0.734822	769.669	FALSE	71
2022-09-13	09:31:11	0.73813	770.407	FALSE	71
2022-09-13	09:31:11	0.735941	771.143	FALSE	71
2022-09-13	09:31:11	0.736247	771.879	FALSE	71
2022-09-13	09:31:11	0.736399	772.615	FALSE	71
2022-09-13	09:31:12	0.736094	773.351	FALSE	71
2022-09-13	09:31:12	0.738231	774.09	FALSE	71
2022-09-13	09:31:12	0.734669	774.824	FALSE	71
2022-09-13	09:31:12	0.738842	775.563	FALSE	71
2022-09-13	09:31:13	0.72785	776.291	FALSE	71
2022-09-13	09:31:13	0.735789	777.027	FALSE	71
2022-09-13	09:31:13	0.739504	777.766	FALSE	71
2022-09-13	09:31:14	0.729173	778.496	FALSE	71
2022-09-13	09:31:14	0.73014	779.226	FALSE	71
2022-09-13	09:31:14	0.738079	779.964	FALSE	71
2022-09-13	09:31:14	0.744135	780.708	FALSE	71
2022-09-13	09:31:15	0.398435	781.106	FALSE	71
2022-09-13	09:31:15	0.54327	781.65	FALSE	71
2022-09-13	09:31:15	0.452735	782.102	FALSE	71
2022-09-13	09:31:15	0.63757	782.74	FALSE	71
2022-09-13	09:31:16	0.886629	783.626	FALSE	71
2022-09-13	09:31:16	0.95645	784.583	FALSE	71
2022-09-13	09:31:16	0.450598	785.034	FALSE	71
2022-09-13	09:31:16	0.475738	785.509	FALSE	71
2022-09-13	09:31:17	0.428817	785.938	FALSE	71
2022-09-13	09:31:17	0.559504	786.498	FALSE	71
2022-09-13	09:31:17	0.531005	787.029	FALSE	71
2022-09-13	09:31:17	0.535534	787.564	FALSE	71
2022-09-13	09:31:18	0.565662	788.13	FALSE	71
2022-09-13	09:31:18	0.543677	788.673	FALSE	71
2022-09-13	09:31:18	0.545458	789.219	FALSE	71
2022-09-13	09:31:19	0.534313	789.753	FALSE	71
2022-09-13	09:31:19	0.538995	790.292	FALSE	71
2022-09-13	09:31:19	0.538944	790.831	FALSE	71
2022-09-13	09:31:19	0.529937	791.361	FALSE	71
2022-09-13	09:31:20	0.533499	791.895	FALSE	71
2022-09-13	09:31:20	0.535992	792.431	FALSE	71
2022-09-13	09:31:20	0.531158	792.962	FALSE	71
2022-09-13	09:31:20	0.534058	793.496	FALSE	71
2022-09-13	09:31:21	0.542456	794.038	FALSE	71
2022-09-13	09:31:21	0.534211	794.573	FALSE	71
2022-09-13	09:31:21	0.530496	795.103	FALSE	71
2022-09-13	09:31:21	0.526476	795.629	FALSE	71
2022-09-13	09:31:22	0.527901	796.157	FALSE	71
2022-09-13	09:31:22	0.525967	796.683	FALSE	71
2022-09-13	09:31:22	0.522404	797.206	FALSE	71
2022-09-13	09:31:23	0.520623	797.726	FALSE	71
2022-09-13	09:31:23	0.532125	798.258	FALSE	71
2022-09-13	09:31:23	0.51986	798.778	FALSE	71
2022-09-13	09:31:23	0.522099	799.3	FALSE	71
2022-09-13	09:31:24	0.516094	799.817	FALSE	71
2022-09-13	09:31:24	0.516705	800.333	FALSE	71
2022-09-13	09:31:24	0.516196	800.849	FALSE	71
2022-09-13	09:31:24	0.511005	801.36	FALSE	71
2022-09-13	09:31:25	0.506069	801.867	FALSE	71
2022-09-13	09:31:25	0.507138	802.374	FALSE	71
2022-09-13	09:31:25	0.499758	802.873	FALSE	71
2022-09-13	09:31:25	0.501183	803.375	FALSE	71
2022-09-13	09:31:26	0.496196	803.871	FALSE	71
2022-09-13	09:31:26	0.501234	804.372	FALSE	71
2022-09-13	09:31:26	0.50556	804.878	FALSE	71
2022-09-13	09:31:26	0.498588	805.376	FALSE	71
2022-09-13	09:31:27	0.504644	805.881	FALSE	71
2022-09-13	09:31:27	0.512786	806.394	FALSE	71
2022-09-13	09:31:27	0.520522	806.914	FALSE	71
2022-09-13	09:31:28	0.524236	807.438	FALSE	71
2022-09-13	09:31:28	0.517366	807.956	FALSE	71
2022-09-13	09:31:28	0.555941	808.512	FALSE	71
2022-09-13	09:31:28	0.46327	808.975	FALSE	71
2022-09-13	09:31:29	0.449224	809.424	FALSE	71
2022-09-13	09:31:29	0.469479	809.894	FALSE	71
2022-09-13	09:31:29	0.500725	810.394	FALSE	71
2022-09-13	09:31:29	0.47701	810.871	FALSE	71
2022-09-13	09:31:30	0.477977	811.349	FALSE	71
2022-09-13	09:31:30	0.46271	811.812	FALSE	71
2022-09-13	09:31:30	0.474822	812.287	FALSE	71
2022-09-13	09:31:30	0.51243	812.799	FALSE	71
2022-09-13	09:31:31	0.459402	813.259	FALSE	71
2022-09-13	09:31:31	0.659911	813.919	FALSE	71
2022-09-13	09:31:31	0.536909	814.456	FALSE	71
2022-09-13	09:31:32	0.418028	814.874	FALSE	71
2022-09-13	09:31:32	0.861896	815.735	FALSE	71
2022-09-13	09:31:32	0.472634	816.208	FALSE	71
2022-09-13	09:31:32	1.21508	817.423	FALSE	71
2022-09-13	09:31:33	0.389529	817.813	FALSE	71
2022-09-13	09:31:33	0.524033	818.337	FALSE	71
2022-09-13	09:31:33	0.448206	818.785	FALSE	71
2022-09-13	09:31:33	0.697875	819.483	FALSE	71
2022-09-13	09:31:34	0.584745	820.068	FALSE	71
2022-09-13	09:31:34	0.444796	820.512	FALSE	71
2022-09-13	09:31:34	0.570445	821.083	FALSE	71
2022-09-13	09:31:34	0.536349	821.619	FALSE	71
2022-09-13	09:31:35	0.717519	822.337	FALSE	71
2022-09-13	09:31:35	0.422201	822.759	FALSE	71
2022-09-13	09:31:35	0.627596	823.386	FALSE	71
2022-09-13	09:31:35	0.437316	823.824	FALSE	71
2022-09-13	09:31:36	0.418741	824.243	FALSE	71
2022-09-13	09:31:36	0.420471	824.663	FALSE	71
2022-09-13	09:31:36	0.331412	824.994	FALSE	71
2022-09-13	09:31:37	0.392837	825.387	FALSE	71
2022-09-13	09:31:37	0.319555	825.707	FALSE	71
2022-09-13	09:31:37	0.350852	826.058	FALSE	71
2022-09-13	09:31:37	0.469886	826.528	FALSE	71
2022-09-13	09:31:38	0.523422	827.051	FALSE	71
2022-09-13	09:31:38	0.865662	827.917	FALSE	71
2022-09-13	09:31:38	0.500471	828.417	FALSE	71
2022-09-13	09:31:38	0.383524	828.801	FALSE	71
2022-09-13	09:31:39	0.292685	829.093	FALSE	71
2022-09-13	09:31:39	0.159758	829.253	FALSE	71
2022-09-13	09:31:39	-0.144058	829.253	FALSE	71
2022-09-13	09:31:39	-0.48187	829.253	FALSE	71
2022-09-13	09:31:40	-0.469961	829.253	FALSE	71
2022-09-13	09:31:40	-0.606552	829.253	FALSE	71
2022-09-13	09:31:40	-0.464109	829.253	FALSE	71
2022-09-13	09:31:41	-0.182684	829.253	FALSE	71
2022-09-13	09:31:41	-0.21215	829.253	FALSE	71
2022-09-13	09:31:41	-0.155152	829.253	FALSE	71
2022-09-13	09:31:41	0.237723	829.491	FALSE	71
2022-09-13	09:31:42	0.456247	829.947	FALSE	71
2022-09-13	09:31:42	1.30352	831.251	FALSE	71
2022-09-13	09:31:42	0.257366	831.508	FALSE	71
2022-09-13	09:31:42	1.1765	832.684	FALSE	71
2022-09-13	09:31:43	0.196451	832.881	FALSE	71
2022-09-13	09:31:43	0.217316	833.098	FALSE	71
2022-09-13	09:31:43	0.675127	833.773	FALSE	71
2022-09-13	09:31:43	0.266781	834.04	FALSE	71
2022-09-13	09:31:44	0.740369	834.78	FALSE	71
2022-09-13	09:31:44	0.452277	835.233	FALSE	71
2022-09-13	09:31:44	1.56414	836.797	FALSE	71
2022-09-13	09:31:45	1.77864	838.576	FALSE	71
2022-09-13	09:31:45	4.72388	843.299	1	72
2022-09-13	09:31:45	0.808308	844.108	FALSE	72
2022-09-13	09:31:45	1.26515	845.373	FALSE	72
2022-09-13	09:31:46	0.64729	846.02	FALSE	72
2022-09-13	09:31:46	2.24393	848.264	FALSE	72
2022-09-13	09:31:46	0.878588	849.143	FALSE	72
2022-09-13	09:31:46	1.23279	850.375	FALSE	72
2022-09-13	09:31:47	0.843524	851.219	FALSE	72
2022-09-13	09:31:47	1.36887	852.588	FALSE	72
2022-09-13	09:31:47	0.492532	853.08	FALSE	72
2022-09-13	09:31:47	1.17767	854.258	FALSE	72
2022-09-13	09:31:48	0.862048	855.12	FALSE	72
2022-09-13	09:31:48	1.15609	856.276	FALSE	72
2022-09-13	09:31:48	0.600471	856.877	FALSE	72
2022-09-13	09:31:48	1.07207	857.949	FALSE	72
2022-09-13	09:31:49	0.689529	858.638	FALSE	72
2022-09-13	09:31:49	1.52866	860.167	FALSE	72
2022-09-13	09:31:49	0.74271	860.91	FALSE	72
2022-09-13	09:31:50	1.75024	862.66	FALSE	72
2022-09-13	09:31:50	0.58673	863.247	FALSE	72
2022-09-13	09:31:50	1.24067	864.487	FALSE	72
2022-09-13	09:31:50	0.592532	865.08	FALSE	72
2022-09-13	09:31:51	2.38566	867.465	FALSE	72
2022-09-13	09:31:51	0.561692	868.027	FALSE	72
2022-09-13	09:31:51	2.29518	870.322	FALSE	72
2022-09-13	09:31:51	1.31187	871.634	FALSE	72
2022-09-13	09:31:52	1.80017	873.434	FALSE	72
2022-09-13	09:31:52	1.13615	874.571	FALSE	72
2022-09-13	09:31:52	1.16067	875.731	FALSE	72
2022-09-13	09:31:52	1.23823	876.969	FALSE	72
2022-09-13	09:31:53	1.91706	878.886	FALSE	72
2022-09-13	09:31:53	1.15818	880.045	FALSE	72
2022-09-13	09:31:53	2.58958	882.634	FALSE	72
2022-09-13	09:31:53	2.65457	885.289	FALSE	72
2022-09-13	09:31:54	1.99915	887.288	FALSE	72
2022-09-13	09:31:54	2.9135	890.201	FALSE	72
2022-09-13	09:31:54	1.82062	892.022	FALSE	72
2022-09-13	09:31:55	2.33396	894.356	FALSE	72
2022-09-13	09:31:55	0.796959	895.153	FALSE	72
2022-09-13	09:31:55	3.27085	898.424	1	73
2022-09-13	09:31:55	0.115738	898.54	FALSE	73
2022-09-13	09:31:56	0.804593	899.344	FALSE	73
2022-09-13	09:31:56	0.257316	899.602	FALSE	73
2022-09-13	09:31:56	0.572125	900.174	FALSE	73
2022-09-13	09:31:56	0.36612	900.54	FALSE	73
2022-09-13	09:31:57	0.454008	900.994	FALSE	73
2022-09-13	09:31:57	0.450242	901.444	FALSE	73
2022-09-13	09:31:57	0.496145	901.94	FALSE	73
2022-09-13	09:31:57	0.253143	902.193	FALSE	73
2022-09-13	09:31:58	0.00576363	902.199	FALSE	73
2022-09-13	09:31:58	-0.0877224	902.199	FALSE	73
2022-09-13	09:31:58	-0.216526	902.199	FALSE	73
2022-09-13	09:31:59	0.0584862	902.258	FALSE	73
2022-09-13	09:31:59	0.121947	902.379	FALSE	73
2022-09-13	09:31:59	0.175433	902.555	FALSE	73
2022-09-13	09:31:59	0.241438	902.796	FALSE	73
2022-09-13	09:32:00	0.295229	903.092	FALSE	73
2022-09-13	09:32:00	0.223372	903.315	FALSE	73
2022-09-13	09:32:00	0.266629	903.582	FALSE	73
2022-09-13	09:32:00	0.462201	904.044	FALSE	73
2022-09-13	09:32:01	0.492888	904.537	FALSE	73
2022-09-13	09:32:01	0.59243	905.129	FALSE	73
2022-09-13	09:32:01	0.50383	905.633	FALSE	73
2022-09-13	09:32:01	0.253448	905.886	FALSE	73
2022-09-13	09:32:02	-0.0670608	905.886	FALSE	73
2022-09-13	09:32:02	-0.360343	905.886	FALSE	73
2022-09-13	09:32:02	-0.705024	905.886	FALSE	73
2022-09-13	09:32:02	-0.760902	905.886	FALSE	73
2022-09-13	09:32:03	-0.77276	905.886	FALSE	73
2022-09-13	09:32:03	-0.791081	905.886	FALSE	73
2022-09-13	09:32:03	-0.770521	905.886	FALSE	73
2022-09-13	09:32:04	-0.786093	905.886	FALSE	73
2022-09-13	09:32:04	-0.757188	905.886	FALSE	73
2022-09-13	09:32:04	-0.737645	905.886	FALSE	73
2022-09-13	09:32:04	-0.724567	905.886	FALSE	73
2022-09-13	09:32:05	-0.704261	905.886	FALSE	73
2022-09-13	09:32:05	-0.555559	905.886	FALSE	73
2022-09-13	09:32:05	-0.260852	905.886	FALSE	73
2022-09-13	09:32:05	-0.0686384	905.886	FALSE	73
2022-09-13	09:32:06	0.150598	906.037	FALSE	73
2022-09-13	09:32:06	0.286934	906.324	FALSE	73
2022-09-13	09:32:06	0.294567	906.618	FALSE	73
2022-09-13	09:32:06	0.316196	906.935	FALSE	73
2022-09-13	09:32:07	0.309377	907.244	FALSE	73
2022-09-13	09:32:07	0.321641	907.566	FALSE	73
2022-09-13	09:32:07	0.328461	907.894	FALSE	73
2022-09-13	09:32:08	0.315026	908.209	FALSE	73
2022-09-13	09:32:08	0.304491	908.514	FALSE	73
2022-09-13	09:32:08	0.30729	908.821	FALSE	73
2022-09-13	09:32:08	0.301743	909.123	FALSE	73
2022-09-13	09:32:09	0.293448	909.416	FALSE	73
2022-09-13	09:32:09	0.295738	909.712	FALSE	73
2022-09-13	09:32:09	0.301641	910.014	FALSE	73
2022-09-13	09:32:09	0.298588	910.312	FALSE	73
2022-09-13	09:32:10	0.300369	910.612	FALSE	73
2022-09-13	09:32:10	0.301234	910.914	FALSE	73
2022-09-13	09:32:10	0.306832	911.221	FALSE	73
2022-09-13	09:32:10	0.299504	911.52	FALSE	73
2022-09-13	09:32:11	0.301285	911.821	FALSE	73
2022-09-13	09:32:11	0.298232	912.12	FALSE	73
2022-09-13	09:32:11	0.296298	912.416	FALSE	73
2022-09-13	09:32:11	0.319351	912.735	FALSE	73
2022-09-13	09:32:12	0.319148	913.054	FALSE	73
2022-09-13	09:32:12	0.31014	913.365	FALSE	73
2022-09-13	09:32:12	0.289682	913.654	FALSE	73
2022-09-13	09:32:13	0.296247	913.95	FALSE	73
2022-09-13	09:32:13	0.295687	914.246	FALSE	73
2022-09-13	09:32:13	0.304949	914.551	FALSE	73
2022-09-13	09:32:13	0.307087	914.858	FALSE	73
2022-09-13	09:32:14	0.300115	915.158	FALSE	73
2022-09-13	09:32:14	0.289631	915.448	FALSE	73
2022-09-13	09:32:14	0.301438	915.749	FALSE	73
2022-09-13	09:32:14	0.322914	916.072	FALSE	73
2022-09-13	09:32:15	0.548868	916.621	FALSE	73
2022-09-13	09:32:15	0.412176	917.033	FALSE	73
2022-09-13	09:32:15	0.269682	917.303	FALSE	73
2022-09-13	09:32:15	0.368053	917.671	FALSE	73
2022-09-13	09:32:16	0.361183	918.032	FALSE	73
2022-09-13	09:32:16	0.368053	918.4	FALSE	73
2022-09-13	09:32:16	0.558588	918.959	FALSE	73
2022-09-13	09:32:17	0.578232	919.537	FALSE	73
2022-09-13	09:32:17	0.315687	919.853	FALSE	73
2022-09-13	09:32:17	0.36785	920.221	FALSE	73
2022-09-13	09:32:17	0.330903	920.552	FALSE	73
2022-09-13	09:32:18	0.328003	920.88	FALSE	73
2022-09-13	09:32:18	0.317214	921.197	FALSE	73
2022-09-13	09:32:18	0.319097	921.516	FALSE	73
2022-09-13	09:32:18	0.329071	921.845	FALSE	73
2022-09-13	09:32:19	0.318995	922.164	FALSE	73
2022-09-13	09:32:19	0.32327	922.487	FALSE	73
2022-09-13	09:32:19	0.323321	922.811	FALSE	73
2022-09-13	09:32:19	0.3107	923.121	FALSE	73
2022-09-13	09:32:20	0.31243	923.434	FALSE	73
2022-09-13	09:32:20	0.314059	923.748	FALSE	73
2022-09-13	09:32:20	0.314364	924.062	FALSE	73
2022-09-13	09:32:20	0.312481	924.375	FALSE	73
2022-09-13	09:32:21	0.299758	924.674	FALSE	73
2022-09-13	09:32:21	0.338079	925.012	FALSE	73
2022-09-13	09:32:21	0.345051	925.357	FALSE	73
2022-09-13	09:32:22	0.704847	926.062	FALSE	73
2022-09-13	09:32:22	0.742048	926.804	FALSE	73
2022-09-13	09:32:22	0.736756	927.541	FALSE	73
2022-09-13	09:32:22	0.74042	928.282	FALSE	73
2022-09-13	09:32:23	0.73813	929.02	FALSE	73
2022-09-13	09:32:23	0.736756	929.756	FALSE	73
2022-09-13	09:32:23	0.734568	930.491	FALSE	73
2022-09-13	09:32:23	0.736654	931.228	FALSE	73
2022-09-13	09:32:24	0.726934	931.955	FALSE	73
2022-09-13	09:32:24	0.506221	932.461	FALSE	73
2022-09-13	09:32:24	0.734568	933.195	FALSE	73
2022-09-13	09:32:24	0.743219	933.939	FALSE	73
2022-09-13	09:32:25	0.728562	934.667	FALSE	73
2022-09-13	09:32:25	0.741234	935.408	FALSE	73
2022-09-13	09:32:25	0.736298	936.145	FALSE	73
2022-09-13	09:32:26	0.740623	936.885	FALSE	73
2022-09-13	09:32:26	0.745051	937.63	FALSE	73
2022-09-13	09:32:26	0.726221	938.357	FALSE	73
2022-09-13	09:32:26	0.368104	938.725	FALSE	73
2022-09-13	09:32:27	0.325662	939.05	FALSE	73
2022-09-13	09:32:27	0.4107	939.461	FALSE	73
2022-09-13	09:32:27	0.327748	939.789	FALSE	73
2022-09-13	09:32:27	0.27528	940.064	FALSE	73
2022-09-13	09:32:28	0.281845	940.346	FALSE	73
2022-09-13	09:32:28	0.27416	940.62	FALSE	73
2022-09-13	09:32:28	0.481743	941.102	FALSE	73
2022-09-13	09:32:28	0.275382	941.377	FALSE	73
2022-09-13	09:32:29	1.72841	943.106	FALSE	73
2022-09-13	09:32:29	2.84037	945.946	FALSE	73
2022-09-13	09:32:29	2.37136	948.317	FALSE	73
2022-09-13	09:32:29	0.517773	948.835	FALSE	73
2022-09-13	09:32:30	0.47584	949.311	FALSE	73
2022-09-13	09:32:30	0.559097	949.87	FALSE	73
2022-09-13	09:32:30	0.429835	950.3	FALSE	73
2022-09-13	09:32:31	0.425153	950.725	FALSE	73
2022-09-13	09:32:31	0.539198	951.264	FALSE	73
2022-09-13	09:32:31	0.44729	951.711	FALSE	73
2022-09-13	09:32:31	0.525763	952.237	FALSE	73
2022-09-13	09:32:32	0.317977	952.555	FALSE	73
2022-09-13	09:32:32	0.567239	953.122	FALSE	73
2022-09-13	09:32:32	0.332634	953.455	FALSE	73
2022-09-13	09:32:32	0.570496	954.026	FALSE	73
2022-09-13	09:32:33	0.331361	954.357	FALSE	73
2022-09-13	09:32:33	0.555789	954.913	FALSE	73
2022-09-13	09:32:33	0.439962	955.353	FALSE	73
2022-09-13	09:32:33	0.361031	955.714	FALSE	73
2022-09-13	09:32:34	0.407799	956.122	FALSE	73
2022-09-13	09:32:34	0.473092	956.595	FALSE	73
2022-09-13	09:32:34	0.357621	956.952	FALSE	73
2022-09-13	09:32:35	0.401845	957.354	FALSE	73
2022-09-13	09:32:35	0.44902	957.803	FALSE	73
2022-09-13	09:32:35	0.406883	958.21	FALSE	73
2022-09-13	09:32:35	0.533092	958.743	FALSE	73
2022-09-13	09:32:36	0.404593	959.148	FALSE	73
2022-09-13	09:32:36	0.515992	959.664	FALSE	73
2022-09-13	09:32:36	0.385458	960.049	FALSE	73
2022-09-13	09:32:36	0.551514	960.601	FALSE	73
2022-09-13	09:32:37	0.417621	961.018	FALSE	73
2022-09-13	09:32:37	0.651972	961.67	FALSE	73
2022-09-13	09:32:37	0.317824	961.988	FALSE	73
2022-09-13	09:32:37	0.880827	962.869	FALSE	73
2022-09-13	09:32:38	0.494415	963.363	FALSE	73
2022-09-13	09:32:38	1.35869	964.722	FALSE	73
2022-09-13	09:32:38	0.505814	965.228	FALSE	73
2022-09-13	09:32:38	0.806221	966.034	FALSE	73
2022-09-13	09:32:39	0.685662	966.72	FALSE	73
2022-09-13	09:32:39	0.650903	967.371	FALSE	73
2022-09-13	09:32:39	0.3307	967.701	FALSE	73
2022-09-13	09:32:40	0.51416	968.215	FALSE	73
2022-09-13	09:32:40	0.740827	968.956	FALSE	73
2022-09-13	09:32:40	0.338384	969.295	FALSE	73
2022-09-13	09:32:40	0.374313	969.669	FALSE	73
2022-09-13	09:32:41	0.561081	970.23	FALSE	73
2022-09-13	09:32:41	0.448053	970.678	FALSE	73
2022-09-13	09:32:41	0.975382	971.654	FALSE	73
2022-09-13	09:32:41	0.734262	972.388	FALSE	73
2022-09-13	09:32:42	0.682201	973.07	FALSE	73
2022-09-13	09:32:42	0.904237	973.974	FALSE	73
2022-09-13	09:32:42	0.498791	974.473	FALSE	73
2022-09-13	09:32:42	0.77411	975.247	FALSE	73
2022-09-13	09:32:43	0.28159	975.529	FALSE	73
2022-09-13	09:32:43	0.660166	976.189	FALSE	73
2022-09-13	09:32:43	0.26668	976.456	FALSE	73
2022-09-13	09:32:44	0.314924	976.77	FALSE	73
2022-09-13	09:32:44	0.216807	976.987	FALSE	73
2022-09-13	09:32:44	0.76159	977.749	FALSE	73
2022-09-13	09:32:44	0.888969	978.638	FALSE	73
2022-09-13	09:32:45	0.511158	979.149	FALSE	73
2022-09-13	09:32:45	0.685662	979.835	FALSE	73
2022-09-13	09:32:45	0.63589	980.471	FALSE	73
2022-09-13	09:32:45	1.31859	981.789	FALSE	73
2022-09-13	09:32:46	1.44841	983.238	FALSE	73
2022-09-13	09:32:46	0.714364	983.952	FALSE	73
2022-09-13	09:32:46	1.02841	984.98	FALSE	73
2022-09-13	09:32:46	0.840064	985.82	FALSE	73
2022-09-13	09:32:47	0.682914	986.503	FALSE	73
2022-09-13	09:32:47	1.09945	987.603	FALSE	73
2022-09-13	09:32:47	0.774262	988.377	FALSE	73
2022-09-13	09:32:47	0.815992	989.193	FALSE	73
2022-09-13	09:32:48	0.381234	989.574	FALSE	73
2022-09-13	09:32:48	0.864695	990.439	FALSE	73
2022-09-13	09:32:48	0.379962	990.819	FALSE	73
2022-09-13	09:32:49	1.01355	991.832	FALSE	73
2022-09-13	09:32:49	0.613549	992.446	FALSE	73
2022-09-13	09:32:49	1.3677	993.814	FALSE	73
2022-09-13	09:32:49	1.92744	995.741	FALSE	73
2022-09-13	09:32:50	1.6338	997.375	FALSE	73
2022-09-13	09:32:50	2.52235	999.897	FALSE	73
2022-09-13	09:32:50	2.08424	1001.98	FALSE	73
2022-09-13	09:32:50	1.85838	1003.84	FALSE	73
2022-09-13	09:32:51	1.34805	1005.19	FALSE	73
2022-09-13	09:32:51	1.44266	1006.63	FALSE	73
2022-09-13	09:32:51	1.22444	1007.86	FALSE	73
2022-09-13	09:32:51	1.39681	1009.25	FALSE	73
2022-09-13	09:32:52	0.938893	1010.19	FALSE	73
2022-09-13	09:32:52	1.96882	1012.16	FALSE	73
2022-09-13	09:32:52	0.909733	1013.07	FALSE	73
2022-09-13	09:32:53	1.23701	1014.31	FALSE	73
2022-09-13	09:32:53	1.16261	1015.47	FALSE	73
2022-09-13	09:32:53	0.878537	1016.35	FALSE	73
2022-09-13	09:32:53	1.97782	1018.33	FALSE	73
2022-09-13	09:32:54	0.550547	1018.88	FALSE	73
2022-09-13	09:32:54	1.6334	1020.51	FALSE	73
2022-09-13	09:32:54	0.633651	1021.14	FALSE	73
2022-09-13	09:32:54	1.09681	1022.24	FALSE	73
2022-09-13	09:32:55	0.725407	1022.97	FALSE	73
2022-09-13	09:32:55	1.19665	1024.16	FALSE	73
2022-09-13	09:32:55	0.680064	1024.84	FALSE	73
2022-09-13	09:32:55	0.745153	1025.59	FALSE	73
2022-09-13	09:32:56	-0.170928	1025.59	FALSE	73
2022-09-13	09:32:56	0.36785	1025.95	FALSE	73
2022-09-13	09:32:56	0.172023	1026.13	FALSE	73
2022-09-13	09:32:56	2.25039	1028.38	FALSE	73
2022-09-13	09:32:57	0.528257	1028.91	FALSE	73
2022-09-13	09:32:57	1.34174	1030.25	FALSE	73
2022-09-13	09:32:57	0.228206	1030.48	FALSE	73
2022-09-13	09:32:58	0.41869	1030.89	FALSE	73
2022-09-13	09:32:58	0.368715	1031.26	FALSE	73
2022-09-13	09:32:58	0.37986	1031.64	FALSE	73
2022-09-13	09:32:58	0.327036	1031.97	FALSE	73
2022-09-13	09:32:59	0.349733	1032.32	FALSE	73
2022-09-13	09:32:59	0.311005	1032.63	FALSE	73
2022-09-13	09:32:59	0.32785	1032.96	FALSE	73
2022-09-13	09:32:59	0.358537	1033.32	FALSE	73
2022-09-13	09:33:00	0.396094	1033.71	FALSE	73
2022-09-13	09:33:00	0.233041	1033.95	FALSE	73
2022-09-13	09:33:00	0.957672	1034.9	FALSE	73
2022-09-13	09:33:00	0.294669	1035.2	FALSE	73
2022-09-13	09:33:01	0.861234	1036.06	FALSE	73
2022-09-13	09:33:01	0.872888	1036.93	FALSE	73
2022-09-13	09:33:01	1.74989	1038.68	FALSE	73
2022-09-13	09:33:02	2.1392	1040.82	FALSE	73
2022-09-13	09:33:02	1.1164	1041.94	FALSE	73
2022-09-13	09:33:02	4.2765	1046.21	1	74
2022-09-13	09:33:02	0.830751	1047.05	FALSE	74
2022-09-13	09:33:03	1.95559	1049	FALSE	74
2022-09-13	09:33:03	0.792532	1049.79	FALSE	74
2022-09-13	09:33:03	2.34948	1052.14	FALSE	74
2022-09-13	09:33:03	0.19925	1052.34	FALSE	74
2022-09-13	09:33:04	1.27258	1053.61	FALSE	74
2022-09-13	09:33:04	0.373906	1053.99	FALSE	74
2022-09-13	09:33:04	0.77411	1054.76	FALSE	74
2022-09-13	09:33:04	0.821539	1055.58	FALSE	74
2022-09-13	09:33:05	0.649682	1056.23	FALSE	74
2022-09-13	09:33:05	1.3819	1057.62	FALSE	74
2022-09-13	09:33:05	1.39044	1059.01	FALSE	74
2022-09-13	09:33:05	1.02546	1060.03	FALSE	74
2022-09-13	09:33:06	1.48912	1061.52	FALSE	74
2022-09-13	09:33:06	2.54693	1064.07	FALSE	74
2022-09-13	09:33:06	2.79391	1066.86	FALSE	74
2022-09-13	09:33:07	2.98831	1069.85	FALSE	74
2022-09-13	09:33:07	2.48052	1072.33	FALSE	74
2022-09-13	09:33:07	4.30459	1076.64	1	75
2022-09-13	09:33:07	1.63625	1078.27	FALSE	75
2022-09-13	09:33:08	2.87182	1081.14	FALSE	75
2022-09-13	09:33:08	1.90103	1083.04	FALSE	75
2022-09-13	09:33:08	1.76073	1084.8	FALSE	75
2022-09-13	09:33:08	3.40322	1088.21	1	76
2022-09-13	09:33:09	1.15085	1089.36	FALSE	76
2022-09-13	09:33:09	3.0938	1092.45	1	77
2022-09-13	09:33:09	2.40561	1094.86	FALSE	77
2022-09-13	09:33:09	2.63131	1097.49	FALSE	77
2022-09-13	09:33:10	2.6908	1100.18	FALSE	77
2022-09-13	09:33:10	2.09106	1102.27	FALSE	77
2022-09-13	09:33:10	1.21151	1103.48	FALSE	77
2022-09-13	09:33:11	1.12205	1104.61	FALSE	77
2022-09-13	09:33:11	0.83416	1105.44	FALSE	77
2022-09-13	09:33:11	0.848919	1106.29	FALSE	77
2022-09-13	09:33:11	0.717265	1107.01	FALSE	77
2022-09-13	09:33:12	0.565916	1107.57	FALSE	77
2022-09-13	09:33:12	0.937672	1108.51	FALSE	77
2022-09-13	09:33:12	0.907494	1109.42	FALSE	77
2022-09-13	09:33:12	1.42159	1110.84	FALSE	77
2022-09-13	09:33:13	0.793499	1111.63	FALSE	77
2022-09-13	09:33:13	1.83533	1113.47	FALSE	77
2022-09-13	09:33:13	1.36653	1114.83	FALSE	77
2022-09-13	09:33:13	2.64393	1117.48	FALSE	77
2022-09-13	09:33:14	0.902659	1118.38	FALSE	77
2022-09-13	09:33:14	2.40978	1120.79	FALSE	77
2022-09-13	09:33:14	0.381845	1121.17	FALSE	77
2022-09-13	09:33:14	0.822964	1121.99	FALSE	77
2022-09-13	09:33:15	0.408053	1122.4	FALSE	77
2022-09-13	09:33:15	0.493702	1122.9	FALSE	77
2022-09-13	09:33:15	0.189886	1123.09	FALSE	77
2022-09-13	09:33:16	0.554873	1123.64	FALSE	77
2022-09-13	09:33:16	0.482049	1124.12	FALSE	77
2022-09-13	09:33:16	0.65584	1124.78	FALSE	77
2022-09-13	09:33:16	1.10118	1125.88	FALSE	77

## Sheet: Mars_harness_20229139286
						**GoPro Fitting: 917
2022-09-13	09:28:07	0.501183
2022-09-13	09:28:07	0.786425
2022-09-13	09:28:07	1.52765
2022-09-13	09:28:07	1.3821
2022-09-13	09:28:08	0.922863
2022-09-13	09:28:08	0.839249
2022-09-13	09:28:08	1.37024
2022-09-13	09:28:08	1.28683
2022-09-13	09:28:09	0.840013
2022-09-13	09:28:09	0.575433
2022-09-13	09:28:09	0.553041
2022-09-13	09:28:10	0.492735
2022-09-13	09:28:10	0.529987
2022-09-13	09:28:10	0.489733
2022-09-13	09:28:10	0.522862
2022-09-13	09:28:11	0.620776
2022-09-13	09:28:11	0.906679
2022-09-13	09:28:11	0.813753
2022-09-13	09:28:11	0.79472
2022-09-13	09:28:12	0.625407
2022-09-13	09:28:12	0.602252
2022-09-13	09:28:12	0.688053
2022-09-13	09:28:12	0.519809
2022-09-13	09:28:13	0.557519
2022-09-13	09:28:13	0.501692
2022-09-13	09:28:13	0.521387
2022-09-13	09:28:14	0.491972
2022-09-13	09:28:14	0.50215
2022-09-13	09:28:14	0.528155
2022-09-13	09:28:14	0.522099
2022-09-13	09:28:15	0.507239
2022-09-13	09:28:15	0.501794
2022-09-13	09:28:15	0.502608
2022-09-13	09:28:15	0.525763
2022-09-13	09:28:16	0.507748
2022-09-13	09:28:16	0.519148
2022-09-13	09:28:16	0.517723
2022-09-13	09:28:16	0.488512
2022-09-13	09:28:17	0.575382
2022-09-13	09:28:17	0.464542
2022-09-13	09:28:17	0.461947
2022-09-13	09:28:17	0.470344
2022-09-13	09:28:18	0.495636
2022-09-13	09:28:18	0.572074
2022-09-13	09:28:18	0.381031
2022-09-13	09:28:19	0.340573
2022-09-13	09:28:19	0.441641
2022-09-13	09:28:19	0.254313
2022-09-13	09:28:19	0.225153
2022-09-13	09:28:20	0.501183
2022-09-13	09:28:20	3.04403
2022-09-13	09:28:20	7.96317
2022-09-13	09:28:20	6.32907
2022-09-13	09:28:21	10.4899
2022-09-13	09:28:21	3.32744
2022-09-13	09:28:21	5.83375
2022-09-13	09:28:21	8.24876
2022-09-13	09:28:22	5.09192
2022-09-13	09:28:22	3.98128
2022-09-13	09:28:22	1.41513
2022-09-13	09:28:23	0.544033
2022-09-13	09:28:23	0.990496
2022-09-13	09:28:23	1.15258
2022-09-13	09:28:23	2.5478
2022-09-13	09:28:24	4.05726
2022-09-13	09:28:24	4.35665
2022-09-13	09:28:24	1.90978
2022-09-13	09:28:24	0.487799
2022-09-13	09:28:25	0.921082
2022-09-13	09:28:25	0.680573
2022-09-13	09:28:25	1.27859
2022-09-13	09:28:25	0.724135
2022-09-13	09:28:26	0.529682
2022-09-13	09:28:26	2.27864
2022-09-13	09:28:26	0.335331
2022-09-13	09:28:26	2.05564
2022-09-13	09:28:27	0.872379
2022-09-13	09:28:27	0.996298
2022-09-13	09:28:27	2.27131
2022-09-13	09:28:28	0.732532
2022-09-13	09:28:28	3.69726
2022-09-13	09:28:28	1.42734
2022-09-13	09:28:28	0.994924
2022-09-13	09:28:29	0.587799
2022-09-13	09:28:29	0.221896
2022-09-13	09:28:29	0.597316
2022-09-13	09:28:29	0.333499
2022-09-13	09:28:30	0.517315
2022-09-13	09:28:30	1.07197
2022-09-13	09:28:30	0.96841
2022-09-13	09:28:30	2.21426
2022-09-13	09:28:31	1.78139
2022-09-13	09:28:31	1.07319
2022-09-13	09:28:31	3.67787
2022-09-13	09:28:32	1.35421
2022-09-13	09:28:32	0.553601
2022-09-13	09:28:32	0.0549239
2022-09-13	09:28:32	1.16154
2022-09-13	09:28:33	0.270547
2022-09-13	09:28:33	0.668817
2022-09-13	09:28:33	0.545712
2022-09-13	09:28:33	1.08678
2022-09-13	09:28:34	0.82215
2022-09-13	09:28:34	1.4449
2022-09-13	09:28:34	2.44571
2022-09-13	09:28:34	3.1622
2022-09-13	09:28:35	4.86515
2022-09-13	09:28:35	3.49049
2022-09-13	09:28:35	0.829376
2022-09-13	09:28:35	0.383473
2022-09-13	09:28:36	0.476705
2022-09-13	09:28:36	0.334415
2022-09-13	09:28:36	0.44388
2022-09-13	09:28:37	0.225204
2022-09-13	09:28:37	0.521031
2022-09-13	09:28:37	0.0493259
2022-09-13	09:28:37	0.43014
2022-09-13	09:28:38	0.281489
2022-09-13	09:28:38	0.445102
2022-09-13	09:28:38	0.68841
2022-09-13	09:28:38	0.36444
2022-09-13	09:28:39	0.546883
2022-09-13	09:28:39	0.303321
2022-09-13	09:28:39	0.601845
2022-09-13	09:28:39	0.442252
2022-09-13	09:28:40	0.507087
2022-09-13	09:28:40	0.376908
2022-09-13	09:28:40	0.399657
2022-09-13	09:28:41	0.496858
2022-09-13	09:28:41	0.062761
2022-09-13	09:28:41	0.37187
2022-09-13	09:28:41	0.497417
2022-09-13	09:28:42	0.522201
2022-09-13	09:28:42	0.391209
2022-09-13	09:28:42	0.508715
2022-09-13	09:28:42	0.419962
2022-09-13	09:28:43	0.36556
2022-09-13	09:28:43	0.304746
2022-09-13	09:28:43	0.299351
2022-09-13	09:28:43	0.340827
2022-09-13	09:28:44	0.126171
2022-09-13	09:28:44	0.206374
2022-09-13	09:28:44	0.132227
2022-09-13	09:28:44	0.291463
2022-09-13	09:28:45	0.0537534
2022-09-13	09:28:45	0.251667
2022-09-13	09:28:45	0.165967
2022-09-13	09:28:46	0.825
2022-09-13	09:28:46	0.488664
2022-09-13	09:28:46	2.92815
2022-09-13	09:28:46	3.70011
2022-09-13	09:28:47	1.69146
2022-09-13	09:28:47	5.00332
2022-09-13	09:28:47	1.0363
2022-09-13	09:28:47	5.00286
2022-09-13	09:28:48	0.867595
2022-09-13	09:28:48	2.19833
2022-09-13	09:28:48	1.14103
2022-09-13	09:28:48	1.75986
2022-09-13	09:28:49	0.635789
2022-09-13	09:28:49	1.12118
2022-09-13	09:28:49	0.297824
2022-09-13	09:28:50	0.614873
2022-09-13	09:28:50	0.35411
2022-09-13	09:28:50	1.85793
2022-09-13	09:28:50	0.809784
2022-09-13	09:28:51	1.26042
2022-09-13	09:28:51	2.72561
2022-09-13	09:28:51	0.759351
2022-09-13	09:28:51	1.82958
2022-09-13	09:28:52	0.528003
2022-09-13	09:28:52	1.32536
2022-09-13	09:28:52	0.339453
2022-09-13	09:28:52	0.282048
2022-09-13	09:28:53	0.558282
2022-09-13	09:28:53	0.0684608
2022-09-13	09:28:53	0.354873
2022-09-13	09:28:53	0.236756
2022-09-13	09:28:54	0.282099
2022-09-13	09:28:54	0.12444
2022-09-13	09:28:54	0.118588
2022-09-13	09:28:55	0.258028
2022-09-13	09:28:55	0.00255749
2022-09-13	09:28:55	0.144644
2022-09-13	09:28:55	0.0306999
2022-09-13	09:28:56	0.331616
2022-09-13	09:28:56	0.0503438
2022-09-13	09:28:56	0.260827
2022-09-13	09:28:56	0.177367
2022-09-13	09:28:57	0.228868
2022-09-13	09:28:57	0.124644
2022-09-13	09:28:57	0.225865
2022-09-13	09:28:57	0.284644
2022-09-13	09:28:58	0.0188934
2022-09-13	09:28:58	0.226883
2022-09-13	09:28:58	-0.0147453
2022-09-13	09:28:59	0.165204
2022-09-13	09:28:59	-0.0180532
2022-09-13	09:28:59	0.239606
2022-09-13	09:28:59	0.0687152
2022-09-13	09:29:00	0.210853
2022-09-13	09:29:00	0.0489188
2022-09-13	09:29:00	0.287697
2022-09-13	09:29:00	0.475331
2022-09-13	09:29:01	0.555738
2022-09-13	09:29:01	0.374313
2022-09-13	09:29:01	0.236756
2022-09-13	09:29:01	0.352837
2022-09-13	09:29:02	0.11355
2022-09-13	09:29:02	0.378486
2022-09-13	09:29:02	0.159606
2022-09-13	09:29:02	0.29416
2022-09-13	09:29:03	0.166018
2022-09-13	09:29:03	0.279046
2022-09-13	09:29:03	0.287646
2022-09-13	09:29:04	0.272735
2022-09-13	09:29:04	0.270802
2022-09-13	09:29:04	0.263473
2022-09-13	09:29:04	0.816501
2022-09-13	09:29:05	3.11731
2022-09-13	09:29:05	2.34108
2022-09-13	09:29:05	6.63716
2022-09-13	09:29:05	3.86871
2022-09-13	09:29:06	4.21859
2022-09-13	09:29:06	0.743117
2022-09-13	09:29:06	1.26485
2022-09-13	09:29:07	0.0711071
2022-09-13	09:29:07	0.628003
2022-09-13	09:29:07	0.54215
2022-09-13	09:29:07	0.431565
2022-09-13	09:29:08	1.1735
2022-09-13	09:29:08	0.15355
2022-09-13	09:29:08	3.40688
2022-09-13	09:29:08	1.00164
2022-09-13	09:29:09	4.79859
2022-09-13	09:29:09	3.6424
2022-09-13	09:29:09	2.20139
2022-09-13	09:29:09	0.958944
2022-09-13	09:29:10	0.0612343
2022-09-13	09:29:10	1.44892
2022-09-13	09:29:10	0.132532
2022-09-13	09:29:10	1.27268
2022-09-13	09:29:11	0.507748
2022-09-13	09:29:11	1.92419
2022-09-13	09:29:11	0.823524
2022-09-13	09:29:11	1.0506
2022-09-13	09:29:12	2.21457
2022-09-13	09:29:12	0.595433
2022-09-13	09:29:12	3.17502
2022-09-13	09:29:13	0.308461
2022-09-13	09:29:13	2.98999
2022-09-13	09:29:13	0.335229
2022-09-13	09:29:13	2.0652
2022-09-13	09:29:14	1.1166
2022-09-13	09:29:14	0.984542
2022-09-13	09:29:14	1.60134
2022-09-13	09:29:14	0.926578
2022-09-13	09:29:15	3.62846
2022-09-13	09:29:15	0.682456
2022-09-13	09:29:15	2.8135
2022-09-13	09:29:15	1.52648
2022-09-13	09:29:16	3.13762
2022-09-13	09:29:16	0.903982
2022-09-13	09:29:16	1.20495
2022-09-13	09:29:17	-0.0134731
2022-09-13	09:29:17	0.35131
2022-09-13	09:29:17	0.1193
2022-09-13	09:29:17	0.166985
2022-09-13	09:29:18	0.0606237
2022-09-13	09:29:18	0.273855
2022-09-13	09:29:18	0.0307509
2022-09-13	09:29:18	0.480471
2022-09-13	09:29:19	-0.188435
2022-09-13	09:29:19	0.419249
2022-09-13	09:29:19	-0.0339819
2022-09-13	09:29:19	0.142456
2022-09-13	09:29:20	1.65029
2022-09-13	09:29:20	3.57233
2022-09-13	09:29:20	4.26668
2022-09-13	09:29:21	2.91747
2022-09-13	09:29:21	0.150445
2022-09-13	09:29:21	0.289377
2022-09-13	09:29:21	0.294313
2022-09-13	09:29:22	0.325255
2022-09-13	09:29:22	0.359758
2022-09-13	09:29:22	0.492685
2022-09-13	09:29:22	0.470496
2022-09-13	09:29:23	0.498079
2022-09-13	09:29:23	0.572634
2022-09-13	09:29:23	0.629834
2022-09-13	09:29:23	0.610191
2022-09-13	09:29:24	0.727036
2022-09-13	09:29:24	0.712023
2022-09-13	09:29:24	0.720318
2022-09-13	09:29:24	0.728257
2022-09-13	09:29:25	0.834669
2022-09-13	09:29:25	0.754109
2022-09-13	09:29:25	0.430751
2022-09-13	09:29:26	0.315382
2022-09-13	09:29:26	0.411514
2022-09-13	09:29:26	0.232328
2022-09-13	09:29:26	0.11182
2022-09-13	09:29:27	-0.212302
2022-09-13	09:29:27	-0.351539
2022-09-13	09:29:27	-0.221768
2022-09-13	09:29:27	-0.211132
2022-09-13	09:29:28	-0.0968827
2022-09-13	09:29:28	-0.17729
2022-09-13	09:29:28	0.139504
2022-09-13	09:29:28	0.279809
2022-09-13	09:29:29	1.61762
2022-09-13	09:29:29	0.414415
2022-09-13	09:29:29	0.443168
2022-09-13	09:29:29	0.682353
2022-09-13	09:29:30	0.391463
2022-09-13	09:29:30	0.610598
2022-09-13	09:29:30	0.29869
2022-09-13	09:29:31	0.540165
2022-09-13	09:29:31	0.32271
2022-09-13	09:29:31	0.431514
2022-09-13	09:29:31	0.262405
2022-09-13	09:29:32	0.20271
2022-09-13	09:29:32	0.0924811
2022-09-13	09:29:32	-0.0486384
2022-09-13	09:29:32	0.185713
2022-09-13	09:29:33	-0.306552
2022-09-13	09:29:33	-0.23561
2022-09-13	09:29:33	-0.357493
2022-09-13	09:29:33	-0.381921
2022-09-13	09:29:34	-0.423244
2022-09-13	09:29:34	-0.418511
2022-09-13	09:29:34	-0.271692
2022-09-13	09:29:35	0.0541605
2022-09-13	09:29:35	0.26612
2022-09-13	09:29:35	0.42271
2022-09-13	09:29:35	1.80943
2022-09-13	09:29:36	1.47721
2022-09-13	09:29:36	1.49472
2022-09-13	09:29:36	0.725865
2022-09-13	09:29:36	1.1565
2022-09-13	09:29:37	0.233499
2022-09-13	09:29:37	0.664186
2022-09-13	09:29:37	0.226527
2022-09-13	09:29:37	0.605662
2022-09-13	09:29:38	0.371565
2022-09-13	09:29:38	0.568715
2022-09-13	09:29:38	0.375178
2022-09-13	09:29:38	0.795942
2022-09-13	09:29:39	0.539198
2022-09-13	09:29:39	1.29609
2022-09-13	09:29:39	0.776908
2022-09-13	09:29:40	1.72566
2022-09-13	09:29:40	1.72016
2022-09-13	09:29:40	2.41233
2022-09-13	09:29:40	3.06607
2022-09-13	09:29:41	2.46673
2022-09-13	09:29:41	3.74001
2022-09-13	09:29:41	1.3365
2022-09-13	09:29:41	2.44495
2022-09-13	09:29:42	0.908308
2022-09-13	09:29:42	1.69365
2022-09-13	09:29:42	1.05253
2022-09-13	09:29:42	0.772634
2022-09-13	09:29:43	0.656807
2022-09-13	09:29:43	0.636298
2022-09-13	09:29:43	0.481234
2022-09-13	09:29:44	0.826679
2022-09-13	09:29:44	0.715534
2022-09-13	09:29:44	1.32067
2022-09-13	09:29:44	1.22627
2022-09-13	09:29:45	1.31085
2022-09-13	09:29:45	4.09655
2022-09-13	09:29:45	1.45268
2022-09-13	09:29:45	2.60072
2022-09-13	09:29:46	1.47335
2022-09-13	09:29:46	1.25553
2022-09-13	09:29:46	1.7365
2022-09-13	09:29:46	3.77223
2022-09-13	09:29:47	5.19238
2022-09-13	09:29:47	1.00337
2022-09-13	09:29:47	1.89212
2022-09-13	09:29:47	1.1767
2022-09-13	09:29:48	0.534313
2022-09-13	09:29:48	0.738282
2022-09-13	09:29:48	1.15085
2022-09-13	09:29:49	1.51971
2022-09-13	09:29:49	1.31686
2022-09-13	09:29:49	2.4707
2022-09-13	09:29:49	3.84439
2022-09-13	09:29:50	5.73192
2022-09-13	09:29:50	4.66281
2022-09-13	09:29:50	2.17594
2022-09-13	09:29:50	0.368868
2022-09-13	09:29:51	0.360115
2022-09-13	09:29:51	0.566679
2022-09-13	09:29:51	0.321438
2022-09-13	09:29:51	0.463015
2022-09-13	09:29:52	0.291361
2022-09-13	09:29:52	0.472684
2022-09-13	09:29:52	0.334669
2022-09-13	09:29:53	0.663321
2022-09-13	09:29:53	0.645305
2022-09-13	09:29:53	0.874109
2022-09-13	09:29:53	0.351158
2022-09-13	09:29:54	0.867443
2022-09-13	09:29:54	0.319351
2022-09-13	09:29:54	0.683066
2022-09-13	09:29:54	0.319351
2022-09-13	09:29:55	0.721641
2022-09-13	09:29:55	0.445356
2022-09-13	09:29:55	1.12195
2022-09-13	09:29:55	0.393346
2022-09-13	09:29:56	4.35044
2022-09-13	09:29:56	0.467595
2022-09-13	09:29:56	9.08169
2022-09-13	09:29:56	2.71793
2022-09-13	09:29:57	6.07701
2022-09-13	09:29:57	2.36164
2022-09-13	09:29:57	2.32373
2022-09-13	09:29:58	6.23314
2022-09-13	09:29:58	2.81294
2022-09-13	09:29:58	7.88978
2022-09-13	09:29:58	4.33177
2022-09-13	09:29:59	4.01009
2022-09-13	09:29:59	1.26719
2022-09-13	09:29:59	1.12485
2022-09-13	09:29:59	2.39757
2022-09-13	09:30:00	2.06948
2022-09-13	09:30:00	1.36022
2022-09-13	09:30:00	0.95416
2022-09-13	09:30:00	0.768512
2022-09-13	09:30:01	0.475178
2022-09-13	09:30:01	0.459249
2022-09-13	09:30:01	0.502201
2022-09-13	09:30:02	0.484084
2022-09-13	09:30:02	0.466425
2022-09-13	09:30:02	0.46098
2022-09-13	09:30:02	0.484949
2022-09-13	09:30:03	0.498588
2022-09-13	09:30:03	0.51472
2022-09-13	09:30:03	0.501438
2022-09-13	09:30:03	0.507647
2022-09-13	09:30:04	0.562812
2022-09-13	09:30:04	1.04302
2022-09-13	09:30:04	3.10688
2022-09-13	09:30:04	3.11981
2022-09-13	09:30:05	5.74846
2022-09-13	09:30:05	7.31726
2022-09-13	09:30:05	2.64551
2022-09-13	09:30:05	7.25426
2022-09-13	09:30:06	0.563728
2022-09-13	09:30:06	3.16047
2022-09-13	09:30:06	0.846781
2022-09-13	09:30:07	0.801539
2022-09-13	09:30:07	0.532786
2022-09-13	09:30:07	0.409886
2022-09-13	09:30:07	0.477417
2022-09-13	09:30:08	0.404593
2022-09-13	09:30:08	0.537977
2022-09-13	09:30:08	0.66841
2022-09-13	09:30:08	0.910547
2022-09-13	09:30:09	0.967087
2022-09-13	09:30:09	1.08907
2022-09-13	09:30:09	1.93238
2022-09-13	09:30:09	2.48032
2022-09-13	09:30:10	1.39655
2022-09-13	09:30:10	1.96663
2022-09-13	09:30:10	1.19019
2022-09-13	09:30:11	1.47706
2022-09-13	09:30:11	2.17477
2022-09-13	09:30:11	1.73874
2022-09-13	09:30:11	1.26037
2022-09-13	09:30:12	1.01324
2022-09-13	09:30:12	0.567341
2022-09-13	09:30:12	0.605153
2022-09-13	09:30:12	0.498588
2022-09-13	09:30:13	0.709936
2022-09-13	09:30:13	0.472379
2022-09-13	09:30:13	0.763066
2022-09-13	09:30:13	1.51375
2022-09-13	09:30:14	5.82927
2022-09-13	09:30:14	6.18749
2022-09-13	09:30:14	8.70958
2022-09-13	09:30:14	4.82821
2022-09-13	09:30:15	2.42256
2022-09-13	09:30:15	0.504796
2022-09-13	09:30:15	0.701438
2022-09-13	09:30:16	0.656908
2022-09-13	09:30:16	0.522862
2022-09-13	09:30:16	0.634974
2022-09-13	09:30:16	0.635738
2022-09-13	09:30:17	0.474211
2022-09-13	09:30:17	0.483372
2022-09-13	09:30:17	0.489428
2022-09-13	09:30:17	0.383372
2022-09-13	09:30:18	0.444186
2022-09-13	09:30:18	0.422201
2022-09-13	09:30:18	0.228817
2022-09-13	09:30:18	0.627188
2022-09-13	09:30:19	4.12362
2022-09-13	09:30:19	3.74505
2022-09-13	09:30:19	3.14566
2022-09-13	09:30:20	0.200573
2022-09-13	09:30:20	0.232786
2022-09-13	09:30:20	0.334109
2022-09-13	09:30:20	0.217723
2022-09-13	09:30:21	0.253702
2022-09-13	09:30:21	0.237774
2022-09-13	09:30:21	0.362405
2022-09-13	09:30:21	0.423931
2022-09-13	09:30:22	0.444746
2022-09-13	09:30:22	0.462252
2022-09-13	09:30:22	0.453143
2022-09-13	09:30:22	0.440166
2022-09-13	09:30:23	0.432735
2022-09-13	09:30:23	0.430598
2022-09-13	09:30:23	0.431667
2022-09-13	09:30:23	0.44154
2022-09-13	09:30:24	0.424898
2022-09-13	09:30:24	0.433448
2022-09-13	09:30:24	0.434262
2022-09-13	09:30:25	0.430089
2022-09-13	09:30:25	0.439351
2022-09-13	09:30:25	0.432888
2022-09-13	09:30:25	0.434313
2022-09-13	09:30:26	0.442557
2022-09-13	09:30:26	0.461692
2022-09-13	09:30:26	0.409224
2022-09-13	09:30:26	0.475789
2022-09-13	09:30:27	0.444033
2022-09-13	09:30:27	0.451158
2022-09-13	09:30:27	0.447036
2022-09-13	09:30:27	0.411158
2022-09-13	09:30:28	0.445255
2022-09-13	09:30:28	0.45416
2022-09-13	09:30:28	0.485356
2022-09-13	09:30:29	0.506577
2022-09-13	09:30:29	0.550547
2022-09-13	09:30:29	0.572837
2022-09-13	09:30:29	0.547137
2022-09-13	09:30:30	0.552888
2022-09-13	09:30:30	0.560573
2022-09-13	09:30:30	0.544135
2022-09-13	09:30:30	0.536349
2022-09-13	09:30:31	0.532939
2022-09-13	09:30:31	0.529377
2022-09-13	09:30:31	0.514008
2022-09-13	09:30:31	0.512735
2022-09-13	09:30:32	0.507596
2022-09-13	09:30:32	0.513499
2022-09-13	09:30:32	0.526629
2022-09-13	09:30:32	0.538384
2022-09-13	09:30:33	0.551514
2022-09-13	09:30:33	0.542252
2022-09-13	09:30:33	0.534008
2022-09-13	09:30:34	0.508919
2022-09-13	09:30:34	0.518435
2022-09-13	09:30:34	0.526527
2022-09-13	09:30:34	0.517061
2022-09-13	09:30:35	0.509631
2022-09-13	09:30:35	0.502201
2022-09-13	09:30:35	0.497468
2022-09-13	09:30:35	0.532023
2022-09-13	09:30:36	0.626934
2022-09-13	09:30:36	0.660776
2022-09-13	09:30:36	0.636298
2022-09-13	09:30:36	0.627341
2022-09-13	09:30:37	0.544847
2022-09-13	09:30:37	0.477824
2022-09-13	09:30:37	0.426272
2022-09-13	09:30:38	0.426679
2022-09-13	09:30:38	0.618384
2022-09-13	09:30:38	0.275178
2022-09-13	09:30:38	0.335738
2022-09-13	09:30:39	0.341031
2022-09-13	09:30:39	0.307443
2022-09-13	09:30:39	0.278435
2022-09-13	09:30:39	0.33757
2022-09-13	09:30:40	0.454262
2022-09-13	09:30:40	1.58668
2022-09-13	09:30:40	0.949275
2022-09-13	09:30:40	0.628461
2022-09-13	09:30:41	0.58729
2022-09-13	09:30:41	0.684237
2022-09-13	09:30:41	0.572176
2022-09-13	09:30:41	0.466985
2022-09-13	09:30:42	0.490802
2022-09-13	09:30:42	0.488562
2022-09-13	09:30:42	0.52673
2022-09-13	09:30:43	0.543728
2022-09-13	09:30:43	1.16724
2022-09-13	09:30:43	0.93813
2022-09-13	09:30:43	1.67955
2022-09-13	09:30:44	0.507799
2022-09-13	09:30:44	2.14037
2022-09-13	09:30:44	0.568563
2022-09-13	09:30:44	2.62362
2022-09-13	09:30:45	1.08887
2022-09-13	09:30:45	2.56317
2022-09-13	09:30:45	0.407697
2022-09-13	09:30:45	1.23477
2022-09-13	09:30:46	0.420115
2022-09-13	09:30:46	1.11248
2022-09-13	09:30:46	0.776552
2022-09-13	09:30:47	1.02408
2022-09-13	09:30:47	0.975687
2022-09-13	09:30:47	3.46749
2022-09-13	09:30:47	2.06688
2022-09-13	09:30:48	4.15161
2022-09-13	09:30:48	3.61329
2022-09-13	09:30:48	4.60403
2022-09-13	09:30:49	2.76571
2022-09-13	09:30:49	2.12286
2022-09-13	09:30:49	2.73019
2022-09-13	09:30:49	2.36363
2022-09-13	09:30:49	2.53375
2022-09-13	09:30:50	3.21136
2022-09-13	09:30:50	3.19726
2022-09-13	09:30:50	4.02362
2022-09-13	09:30:50	3.89579
2022-09-13	09:30:51	3.41218
2022-09-13	09:30:51	4.21416
2022-09-13	09:30:51	3.07426
2022-09-13	09:30:52	3.67991
2022-09-13	09:30:52	2.76912
2022-09-13	09:30:52	1.21752
2022-09-13	09:30:52	1.12235
2022-09-13	09:30:53	0.457417
2022-09-13	09:30:53	0.708104
2022-09-13	09:30:53	0.739758
2022-09-13	09:30:53	0.73472
2022-09-13	09:30:54	0.737977
2022-09-13	09:30:54	0.739758
2022-09-13	09:30:54	0.737621
2022-09-13	09:30:54	0.734059
2022-09-13	09:30:55	0.739504
2022-09-13	09:30:55	0.733702
2022-09-13	09:30:55	0.733092
2022-09-13	09:30:56	0.735229
2022-09-13	09:30:56	0.733957
2022-09-13	09:30:56	0.738689
2022-09-13	09:30:56	0.735076
2022-09-13	09:30:57	0.731158
2022-09-13	09:30:57	0.7307
2022-09-13	09:30:57	0.731209
2022-09-13	09:30:57	0.735992
2022-09-13	09:30:58	0.736145
2022-09-13	09:30:58	0.734618
2022-09-13	09:30:58	0.738639
2022-09-13	09:30:58	0.739656
2022-09-13	09:30:59	0.732023
2022-09-13	09:30:59	0.741539
2022-09-13	09:30:59	0.738791
2022-09-13	09:31:00	0.739606
2022-09-13	09:31:00	0.738537
2022-09-13	09:31:00	0.738588
2022-09-13	09:31:00	0.734771
2022-09-13	09:31:01	0.734924
2022-09-13	09:31:01	0.737672
2022-09-13	09:31:01	0.73701
2022-09-13	09:31:01	0.73472
2022-09-13	09:31:02	0.732175
2022-09-13	09:31:02	0.73243
2022-09-13	09:31:02	0.737468
2022-09-13	09:31:02	0.732023
2022-09-13	09:31:03	0.730751
2022-09-13	09:31:03	0.733651
2022-09-13	09:31:03	0.731616
2022-09-13	09:31:03	0.742506
2022-09-13	09:31:04	0.735687
2022-09-13	09:31:04	0.738791
2022-09-13	09:31:04	0.737875
2022-09-13	09:31:05	0.738435
2022-09-13	09:31:05	0.737265
2022-09-13	09:31:05	0.737112
2022-09-13	09:31:05	0.735941
2022-09-13	09:31:06	0.730394
2022-09-13	09:31:06	0.740267
2022-09-13	09:31:06	0.729377
2022-09-13	09:31:06	0.728104
2022-09-13	09:31:07	0.736654
2022-09-13	09:31:07	0.736094
2022-09-13	09:31:07	0.738384
2022-09-13	09:31:07	0.727188
2022-09-13	09:31:08	0.733346
2022-09-13	09:31:08	0.741183
2022-09-13	09:31:08	0.732684
2022-09-13	09:31:08	0.732379
2022-09-13	09:31:09	0.737926
2022-09-13	09:31:09	0.730191
2022-09-13	09:31:09	0.735992
2022-09-13	09:31:10	0.738333
2022-09-13	09:31:10	0.738333
2022-09-13	09:31:10	0.741539
2022-09-13	09:31:10	0.734822
2022-09-13	09:31:11	0.73813
2022-09-13	09:31:11	0.735941
2022-09-13	09:31:11	0.736247
2022-09-13	09:31:11	0.736399
2022-09-13	09:31:12	0.736094
2022-09-13	09:31:12	0.738231
2022-09-13	09:31:12	0.734669
2022-09-13	09:31:12	0.738842
2022-09-13	09:31:13	0.72785
2022-09-13	09:31:13	0.735789
2022-09-13	09:31:13	0.739504
2022-09-13	09:31:14	0.729173
2022-09-13	09:31:14	0.73014
2022-09-13	09:31:14	0.738079
2022-09-13	09:31:14	0.744135
2022-09-13	09:31:15	0.398435
2022-09-13	09:31:15	0.54327
2022-09-13	09:31:15	0.452735
2022-09-13	09:31:15	0.63757
2022-09-13	09:31:16	0.886629
2022-09-13	09:31:16	0.95645
2022-09-13	09:31:16	0.450598
2022-09-13	09:31:16	0.475738
2022-09-13	09:31:17	0.428817
2022-09-13	09:31:17	0.559504
2022-09-13	09:31:17	0.531005
2022-09-13	09:31:17	0.535534
2022-09-13	09:31:18	0.565662
2022-09-13	09:31:18	0.543677
2022-09-13	09:31:18	0.545458
2022-09-13	09:31:19	0.534313
2022-09-13	09:31:19	0.538995
2022-09-13	09:31:19	0.538944
2022-09-13	09:31:19	0.529937
2022-09-13	09:31:20	0.533499
2022-09-13	09:31:20	0.535992
2022-09-13	09:31:20	0.531158
2022-09-13	09:31:20	0.534058
2022-09-13	09:31:21	0.542456
2022-09-13	09:31:21	0.534211
2022-09-13	09:31:21	0.530496
2022-09-13	09:31:21	0.526476
2022-09-13	09:31:22	0.527901
2022-09-13	09:31:22	0.525967
2022-09-13	09:31:22	0.522404
2022-09-13	09:31:23	0.520623
2022-09-13	09:31:23	0.532125
2022-09-13	09:31:23	0.51986
2022-09-13	09:31:23	0.522099
2022-09-13	09:31:24	0.516094
2022-09-13	09:31:24	0.516705
2022-09-13	09:31:24	0.516196
2022-09-13	09:31:24	0.511005
2022-09-13	09:31:25	0.506069
2022-09-13	09:31:25	0.507138
2022-09-13	09:31:25	0.499758
2022-09-13	09:31:25	0.501183
2022-09-13	09:31:26	0.496196
2022-09-13	09:31:26	0.501234
2022-09-13	09:31:26	0.50556
2022-09-13	09:31:26	0.498588
2022-09-13	09:31:27	0.504644
2022-09-13	09:31:27	0.512786
2022-09-13	09:31:27	0.520522
2022-09-13	09:31:28	0.524236
2022-09-13	09:31:28	0.517366
2022-09-13	09:31:28	0.555941
2022-09-13	09:31:28	0.46327
2022-09-13	09:31:29	0.449224
2022-09-13	09:31:29	0.469479
2022-09-13	09:31:29	0.500725
2022-09-13	09:31:29	0.47701
2022-09-13	09:31:30	0.477977
2022-09-13	09:31:30	0.46271
2022-09-13	09:31:30	0.474822
2022-09-13	09:31:30	0.51243
2022-09-13	09:31:31	0.459402
2022-09-13	09:31:31	0.659911
2022-09-13	09:31:31	0.536909
2022-09-13	09:31:32	0.418028
2022-09-13	09:31:32	0.861896
2022-09-13	09:31:32	0.472634
2022-09-13	09:31:32	1.21508
2022-09-13	09:31:33	0.389529
2022-09-13	09:31:33	0.524033
2022-09-13	09:31:33	0.448206
2022-09-13	09:31:33	0.697875
2022-09-13	09:31:34	0.584745
2022-09-13	09:31:34	0.444796
2022-09-13	09:31:34	0.570445
2022-09-13	09:31:34	0.536349
2022-09-13	09:31:35	0.717519
2022-09-13	09:31:35	0.422201
2022-09-13	09:31:35	0.627596
2022-09-13	09:31:35	0.437316
2022-09-13	09:31:36	0.418741
2022-09-13	09:31:36	0.420471
2022-09-13	09:31:36	0.331412
2022-09-13	09:31:37	0.392837
2022-09-13	09:31:37	0.319555
2022-09-13	09:31:37	0.350852
2022-09-13	09:31:37	0.469886
2022-09-13	09:31:38	0.523422
2022-09-13	09:31:38	0.865662
2022-09-13	09:31:38	0.500471
2022-09-13	09:31:38	0.383524
2022-09-13	09:31:39	0.292685
2022-09-13	09:31:39	0.159758
2022-09-13	09:31:39	-0.144058
2022-09-13	09:31:39	-0.48187
2022-09-13	09:31:40	-0.469961
2022-09-13	09:31:40	-0.606552
2022-09-13	09:31:40	-0.464109
2022-09-13	09:31:41	-0.182684
2022-09-13	09:31:41	-0.21215
2022-09-13	09:31:41	-0.155152
2022-09-13	09:31:41	0.237723
2022-09-13	09:31:42	0.456247
2022-09-13	09:31:42	1.30352
2022-09-13	09:31:42	0.257366
2022-09-13	09:31:42	1.1765
2022-09-13	09:31:43	0.196451
2022-09-13	09:31:43	0.217316
2022-09-13	09:31:43	0.675127
2022-09-13	09:31:43	0.266781
2022-09-13	09:31:44	0.740369
2022-09-13	09:31:44	0.452277
2022-09-13	09:31:44	1.56414
2022-09-13	09:31:45	1.77864
2022-09-13	09:31:45	4.72388
2022-09-13	09:31:45	0.808308
2022-09-13	09:31:45	1.26515
2022-09-13	09:31:46	0.64729
2022-09-13	09:31:46	2.24393
2022-09-13	09:31:46	0.878588
2022-09-13	09:31:46	1.23279
2022-09-13	09:31:47	0.843524
2022-09-13	09:31:47	1.36887
2022-09-13	09:31:47	0.492532
2022-09-13	09:31:47	1.17767
2022-09-13	09:31:48	0.862048
2022-09-13	09:31:48	1.15609
2022-09-13	09:31:48	0.600471
2022-09-13	09:31:48	1.07207
2022-09-13	09:31:49	0.689529
2022-09-13	09:31:49	1.52866
2022-09-13	09:31:49	0.74271
2022-09-13	09:31:50	1.75024
2022-09-13	09:31:50	0.58673
2022-09-13	09:31:50	1.24067
2022-09-13	09:31:50	0.592532
2022-09-13	09:31:51	2.38566
2022-09-13	09:31:51	0.561692
2022-09-13	09:31:51	2.29518
2022-09-13	09:31:51	1.31187
2022-09-13	09:31:52	1.80017
2022-09-13	09:31:52	1.13615
2022-09-13	09:31:52	1.16067
2022-09-13	09:31:52	1.23823
2022-09-13	09:31:53	1.91706
2022-09-13	09:31:53	1.15818
2022-09-13	09:31:53	2.58958
2022-09-13	09:31:53	2.65457
2022-09-13	09:31:54	1.99915
2022-09-13	09:31:54	2.9135
2022-09-13	09:31:54	1.82062
2022-09-13	09:31:55	2.33396
2022-09-13	09:31:55	0.796959
2022-09-13	09:31:55	3.27085
2022-09-13	09:31:55	0.115738
2022-09-13	09:31:56	0.804593
2022-09-13	09:31:56	0.257316
2022-09-13	09:31:56	0.572125
2022-09-13	09:31:56	0.36612
2022-09-13	09:31:57	0.454008
2022-09-13	09:31:57	0.450242
2022-09-13	09:31:57	0.496145
2022-09-13	09:31:57	0.253143
2022-09-13	09:31:58	0.00576363
2022-09-13	09:31:58	-0.0877224
2022-09-13	09:31:58	-0.216526
2022-09-13	09:31:59	0.0584862
2022-09-13	09:31:59	0.121947
2022-09-13	09:31:59	0.175433
2022-09-13	09:31:59	0.241438
2022-09-13	09:32:00	0.295229
2022-09-13	09:32:00	0.223372
2022-09-13	09:32:00	0.266629
2022-09-13	09:32:00	0.462201
2022-09-13	09:32:01	0.492888
2022-09-13	09:32:01	0.59243
2022-09-13	09:32:01	0.50383
2022-09-13	09:32:01	0.253448
2022-09-13	09:32:02	-0.0670608
2022-09-13	09:32:02	-0.360343
2022-09-13	09:32:02	-0.705024
2022-09-13	09:32:02	-0.760902
2022-09-13	09:32:03	-0.77276
2022-09-13	09:32:03	-0.791081
2022-09-13	09:32:03	-0.770521
2022-09-13	09:32:04	-0.786093
2022-09-13	09:32:04	-0.757188
2022-09-13	09:32:04	-0.737645
2022-09-13	09:32:04	-0.724567
2022-09-13	09:32:05	-0.704261
2022-09-13	09:32:05	-0.555559
2022-09-13	09:32:05	-0.260852
2022-09-13	09:32:05	-0.0686384
2022-09-13	09:32:06	0.150598
2022-09-13	09:32:06	0.286934
2022-09-13	09:32:06	0.294567
2022-09-13	09:32:06	0.316196
2022-09-13	09:32:07	0.309377
2022-09-13	09:32:07	0.321641
2022-09-13	09:32:07	0.328461
2022-09-13	09:32:08	0.315026
2022-09-13	09:32:08	0.304491
2022-09-13	09:32:08	0.30729
2022-09-13	09:32:08	0.301743
2022-09-13	09:32:09	0.293448
2022-09-13	09:32:09	0.295738
2022-09-13	09:32:09	0.301641
2022-09-13	09:32:09	0.298588
2022-09-13	09:32:10	0.300369
2022-09-13	09:32:10	0.301234
2022-09-13	09:32:10	0.306832
2022-09-13	09:32:10	0.299504
2022-09-13	09:32:11	0.301285
2022-09-13	09:32:11	0.298232
2022-09-13	09:32:11	0.296298
2022-09-13	09:32:11	0.319351
2022-09-13	09:32:12	0.319148
2022-09-13	09:32:12	0.31014
2022-09-13	09:32:12	0.289682
2022-09-13	09:32:13	0.296247
2022-09-13	09:32:13	0.295687
2022-09-13	09:32:13	0.304949
2022-09-13	09:32:13	0.307087
2022-09-13	09:32:14	0.300115
2022-09-13	09:32:14	0.289631
2022-09-13	09:32:14	0.301438
2022-09-13	09:32:14	0.322914
2022-09-13	09:32:15	0.548868
2022-09-13	09:32:15	0.412176
2022-09-13	09:32:15	0.269682
2022-09-13	09:32:15	0.368053
2022-09-13	09:32:16	0.361183
2022-09-13	09:32:16	0.368053
2022-09-13	09:32:16	0.558588
2022-09-13	09:32:17	0.578232
2022-09-13	09:32:17	0.315687
2022-09-13	09:32:17	0.36785
2022-09-13	09:32:17	0.330903
2022-09-13	09:32:18	0.328003
2022-09-13	09:32:18	0.317214
2022-09-13	09:32:18	0.319097
2022-09-13	09:32:18	0.329071
2022-09-13	09:32:19	0.318995
2022-09-13	09:32:19	0.32327
2022-09-13	09:32:19	0.323321
2022-09-13	09:32:19	0.3107
2022-09-13	09:32:20	0.31243
2022-09-13	09:32:20	0.314059
2022-09-13	09:32:20	0.314364
2022-09-13	09:32:20	0.312481
2022-09-13	09:32:21	0.299758
2022-09-13	09:32:21	0.338079
2022-09-13	09:32:21	0.345051
2022-09-13	09:32:22	0.704847
2022-09-13	09:32:22	0.742048
2022-09-13	09:32:22	0.736756
2022-09-13	09:32:22	0.74042
2022-09-13	09:32:23	0.73813
2022-09-13	09:32:23	0.736756
2022-09-13	09:32:23	0.734568
2022-09-13	09:32:23	0.736654
2022-09-13	09:32:24	0.726934
2022-09-13	09:32:24	0.506221
2022-09-13	09:32:24	0.734568
2022-09-13	09:32:24	0.743219
2022-09-13	09:32:25	0.728562
2022-09-13	09:32:25	0.741234
2022-09-13	09:32:25	0.736298
2022-09-13	09:32:26	0.740623
2022-09-13	09:32:26	0.745051
2022-09-13	09:32:26	0.726221
2022-09-13	09:32:26	0.368104
2022-09-13	09:32:27	0.325662
2022-09-13	09:32:27	0.4107
2022-09-13	09:32:27	0.327748
2022-09-13	09:32:27	0.27528
2022-09-13	09:32:28	0.281845
2022-09-13	09:32:28	0.27416
2022-09-13	09:32:28	0.481743
2022-09-13	09:32:28	0.275382
2022-09-13	09:32:29	1.72841
2022-09-13	09:32:29	2.84037
2022-09-13	09:32:29	2.37136
2022-09-13	09:32:29	0.517773
2022-09-13	09:32:30	0.47584
2022-09-13	09:32:30	0.559097
2022-09-13	09:32:30	0.429835
2022-09-13	09:32:31	0.425153
2022-09-13	09:32:31	0.539198
2022-09-13	09:32:31	0.44729
2022-09-13	09:32:31	0.525763
2022-09-13	09:32:32	0.317977
2022-09-13	09:32:32	0.567239
2022-09-13	09:32:32	0.332634
2022-09-13	09:32:32	0.570496
2022-09-13	09:32:33	0.331361
2022-09-13	09:32:33	0.555789
2022-09-13	09:32:33	0.439962
2022-09-13	09:32:33	0.361031
2022-09-13	09:32:34	0.407799
2022-09-13	09:32:34	0.473092
2022-09-13	09:32:34	0.357621
2022-09-13	09:32:35	0.401845
2022-09-13	09:32:35	0.44902
2022-09-13	09:32:35	0.406883
2022-09-13	09:32:35	0.533092
2022-09-13	09:32:36	0.404593
2022-09-13	09:32:36	0.515992
2022-09-13	09:32:36	0.385458
2022-09-13	09:32:36	0.551514
2022-09-13	09:32:37	0.417621
2022-09-13	09:32:37	0.651972
2022-09-13	09:32:37	0.317824
2022-09-13	09:32:37	0.880827
2022-09-13	09:32:38	0.494415
2022-09-13	09:32:38	1.35869
2022-09-13	09:32:38	0.505814
2022-09-13	09:32:38	0.806221
2022-09-13	09:32:39	0.685662
2022-09-13	09:32:39	0.650903
2022-09-13	09:32:39	0.3307
2022-09-13	09:32:40	0.51416
2022-09-13	09:32:40	0.740827
2022-09-13	09:32:40	0.338384
2022-09-13	09:32:40	0.374313
2022-09-13	09:32:41	0.561081
2022-09-13	09:32:41	0.448053
2022-09-13	09:32:41	0.975382
2022-09-13	09:32:41	0.734262
2022-09-13	09:32:42	0.682201
2022-09-13	09:32:42	0.904237
2022-09-13	09:32:42	0.498791
2022-09-13	09:32:42	0.77411
2022-09-13	09:32:43	0.28159
2022-09-13	09:32:43	0.660166
2022-09-13	09:32:43	0.26668
2022-09-13	09:32:44	0.314924
2022-09-13	09:32:44	0.216807
2022-09-13	09:32:44	0.76159
2022-09-13	09:32:44	0.888969
2022-09-13	09:32:45	0.511158
2022-09-13	09:32:45	0.685662
2022-09-13	09:32:45	0.63589
2022-09-13	09:32:45	1.31859
2022-09-13	09:32:46	1.44841
2022-09-13	09:32:46	0.714364
2022-09-13	09:32:46	1.02841
2022-09-13	09:32:46	0.840064
2022-09-13	09:32:47	0.682914
2022-09-13	09:32:47	1.09945
2022-09-13	09:32:47	0.774262
2022-09-13	09:32:47	0.815992
2022-09-13	09:32:48	0.381234
2022-09-13	09:32:48	0.864695
2022-09-13	09:32:48	0.379962
2022-09-13	09:32:49	1.01355
2022-09-13	09:32:49	0.613549
2022-09-13	09:32:49	1.3677
2022-09-13	09:32:49	1.92744
2022-09-13	09:32:50	1.6338
2022-09-13	09:32:50	2.52235
2022-09-13	09:32:50	2.08424
2022-09-13	09:32:50	1.85838
2022-09-13	09:32:51	1.34805
2022-09-13	09:32:51	1.44266
2022-09-13	09:32:51	1.22444
2022-09-13	09:32:51	1.39681
2022-09-13	09:32:52	0.938893
2022-09-13	09:32:52	1.96882
2022-09-13	09:32:52	0.909733
2022-09-13	09:32:53	1.23701
2022-09-13	09:32:53	1.16261
2022-09-13	09:32:53	0.878537
2022-09-13	09:32:53	1.97782
2022-09-13	09:32:54	0.550547
2022-09-13	09:32:54	1.6334
2022-09-13	09:32:54	0.633651
2022-09-13	09:32:54	1.09681
2022-09-13	09:32:55	0.725407
2022-09-13	09:32:55	1.19665
2022-09-13	09:32:55	0.680064
2022-09-13	09:32:55	0.745153
2022-09-13	09:32:56	-0.170928
2022-09-13	09:32:56	0.36785
2022-09-13	09:32:56	0.172023
2022-09-13	09:32:56	2.25039
2022-09-13	09:32:57	0.528257
2022-09-13	09:32:57	1.34174
2022-09-13	09:32:57	0.228206
2022-09-13	09:32:58	0.41869
2022-09-13	09:32:58	0.368715
2022-09-13	09:32:58	0.37986
2022-09-13	09:32:58	0.327036
2022-09-13	09:32:59	0.349733
2022-09-13	09:32:59	0.311005
2022-09-13	09:32:59	0.32785
2022-09-13	09:32:59	0.358537
2022-09-13	09:33:00	0.396094
2022-09-13	09:33:00	0.233041
2022-09-13	09:33:00	0.957672
2022-09-13	09:33:00	0.294669
2022-09-13	09:33:01	0.861234
2022-09-13	09:33:01	0.872888
2022-09-13	09:33:01	1.74989
2022-09-13	09:33:02	2.1392
2022-09-13	09:33:02	1.1164
2022-09-13	09:33:02	4.2765
2022-09-13	09:33:02	0.830751
2022-09-13	09:33:03	1.95559
2022-09-13	09:33:03	0.792532
2022-09-13	09:33:03	2.34948
2022-09-13	09:33:03	0.19925
2022-09-13	09:33:04	1.27258
2022-09-13	09:33:04	0.373906
2022-09-13	09:33:04	0.77411
2022-09-13	09:33:04	0.821539
2022-09-13	09:33:05	0.649682
2022-09-13	09:33:05	1.3819
2022-09-13	09:33:05	1.39044
2022-09-13	09:33:05	1.02546
2022-09-13	09:33:06	1.48912
2022-09-13	09:33:06	2.54693
2022-09-13	09:33:06	2.79391
2022-09-13	09:33:07	2.98831
2022-09-13	09:33:07	2.48052
2022-09-13	09:33:07	4.30459
2022-09-13	09:33:07	1.63625
2022-09-13	09:33:08	2.87182
2022-09-13	09:33:08	1.90103
2022-09-13	09:33:08	1.76073
2022-09-13	09:33:08	3.40322
2022-09-13	09:33:09	1.15085
2022-09-13	09:33:09	3.0938
2022-09-13	09:33:09	2.40561
2022-09-13	09:33:09	2.63131
2022-09-13	09:33:10	2.6908
2022-09-13	09:33:10	2.09106
2022-09-13	09:33:10	1.21151
2022-09-13	09:33:11	1.12205
2022-09-13	09:33:11	0.83416
2022-09-13	09:33:11	0.848919
2022-09-13	09:33:11	0.717265
2022-09-13	09:33:12	0.565916
2022-09-13	09:33:12	0.937672
2022-09-13	09:33:12	0.907494
2022-09-13	09:33:12	1.42159
2022-09-13	09:33:13	0.793499
2022-09-13	09:33:13	1.83533
2022-09-13	09:33:13	1.36653
2022-09-13	09:33:13	2.64393
2022-09-13	09:33:14	0.902659
2022-09-13	09:33:14	2.40978
2022-09-13	09:33:14	0.381845
2022-09-13	09:33:14	0.822964
2022-09-13	09:33:15	0.408053
2022-09-13	09:33:15	0.493702
2022-09-13	09:33:15	0.189886
2022-09-13	09:33:16	0.554873
2022-09-13	09:33:16	0.482049
2022-09-13	09:33:16	0.65584
2022-09-13	09:33:16	1.10118
2022-09-13	09:33:17	3.30983
2022-09-13	09:33:17	3.57075
2022-09-13	09:33:17	6.10174
2022-09-13	09:33:17	3.36754
2022-09-13	09:33:18	3.7338
2022-09-13	09:33:18	1.93497
2022-09-13	09:33:18	1.3424
2022-09-13	09:33:18	1.51279
2022-09-13	09:33:19	3.36072
2022-09-13	09:33:19	3.4564
2022-09-13	09:33:19	3.41095
2022-09-13	09:33:20	2.56327
2022-09-13	09:33:20	1.46714
2022-09-13	09:33:20	1.10398
2022-09-13	09:33:20	1.64123
2022-09-13	09:33:21	3.04739
2022-09-13	09:33:21	1.44815
2022-09-13	09:33:21	1.28139
2022-09-13	09:33:21	0.854415
2022-09-13	09:33:22	2.05884
2022-09-13	09:33:22	1.89905
2022-09-13	09:33:22	1.72836
2022-09-13	09:33:22	1.03721
2022-09-13	09:33:23	2.83233
2022-09-13	09:33:23	0.937214
2022-09-13	09:33:23	3.39502
2022-09-13	09:33:23	0.806985
2022-09-13	09:33:24	3.46118
2022-09-13	09:33:24	0.26897
2022-09-13	09:33:24	1.44113
2022-09-13	09:33:25	0.534058
2022-09-13	09:33:25	0.429733
2022-09-13	09:33:25	0.512735
2022-09-13	09:33:25	0.347341
2022-09-13	09:33:26	0.506934
2022-09-13	09:33:26	0.0257636
2022-09-13	09:33:26	-0.0984094
2022-09-13	09:33:26	0.725
2022-09-13	09:33:27	2.34653
2022-09-13	09:33:27	0.736399
2022-09-13	09:33:27	2.55014
2022-09-13	09:33:27	0.783626
2022-09-13	09:33:28	1.40469
2022-09-13	09:33:28	0.614415
2022-09-13	09:33:28	1.3994
2022-09-13	09:33:29	0.978791
2022-09-13	09:33:29	1.75253
2022-09-13	09:33:29	0.666578
2022-09-13	09:33:29	2.33675
2022-09-13	09:33:30	0.780318
2022-09-13	09:33:30	3.28698
2022-09-13	09:33:30	2.93818
2022-09-13	09:33:30	5.44657
2022-09-13	09:33:31	3.25355
2022-09-13	09:33:31	3.72943
2022-09-13	09:33:31	2.07284
2022-09-13	09:33:31	1.4938
2022-09-13	09:33:32	1.66836
2022-09-13	09:33:32	0.337366
2022-09-13	09:33:32	0.987392
2022-09-13	09:33:32	0.385764
2022-09-13	09:33:33	0.619606
2022-09-13	09:33:33	0.239148
2022-09-13	09:33:33	0.599555
2022-09-13	09:33:34	0.725051
2022-09-13	09:33:34	4.16637
2022-09-13	09:33:34	3.30403
2022-09-13	09:33:34	7.01451
2022-09-13	09:33:35	3.14495
2022-09-13	09:33:35	4.10088
2022-09-13	09:33:35	1.36378
