# Supplementary material for: Comparing efficacy in reducing pulling and welfare impacts of four types of leash walking equipment
Source: PeerJ journal article supplement (doi:10.7717/peerj.18131), 2024-10-24
Supplement: Shelter1_Tension_files.zip [file Mars_martin_20229138376 copy.xlsx]

## Sheet: Averaged Newtons
Date	Time	Averaged Newtons	Impulse	Total steps
2022-09-13	08:37:25	9.08649	9.08649	0
2022-09-13	08:37:26	15.2433	24.3298	1		Impulse Newton	4851.05
2022-09-13	08:37:27	19.2343	43.5641	2		Total steps	129
2022-09-13	08:37:28	30.705	74.2691	3		# > 5sec	9
2022-09-13	08:37:29	12.0479	86.317	3
2022-09-13	08:37:30	17.9213	104.238	4
2022-09-13	08:37:31	26.0036	130.242	5
2022-09-13	08:37:32	36.4181	166.66	6
2022-09-13	08:37:33	29.8904	196.55	7
2022-09-13	08:37:34	28.5165	225.067	8
2022-09-13	08:37:35	52.3728	277.44	9
2022-09-13	08:37:36	33.2135	310.653	10
2022-09-13	08:37:37	16.6781	327.331	11
2022-09-13	08:37:38	38.2073	365.539	12
2022-09-13	08:37:39	35.0304	400.569	13
2022-09-13	08:37:40	22.4723	423.041	14
2022-09-13	08:37:41	36.5477	459.589	15
2022-09-13	08:37:42	29.2933	488.882	16
2022-09-13	08:37:43	50.4615	539.344	17
2022-09-13	08:37:44	33.1766	572.52	18
2022-09-13	08:37:45	36.2552	608.776	19
2022-09-13	08:37:46	26.2427	635.018	20
2022-09-13	08:37:47	8.35764	643.376	20
2022-09-13	08:37:48	13.0872	656.463	21
2022-09-13	08:37:49	2.7055	659.169	21
2022-09-13	08:37:50	28.7787	687.947	22
2022-09-13	08:37:51	44.0399	731.987	23
2022-09-13	08:37:52	13.6162	745.603	24
2022-09-13	08:37:53	9.52314	755.127	24
2022-09-13	08:37:54	3.90866	759.035	24
2022-09-13	08:37:55	2.15562	761.191	24
2022-09-13	08:37:56	1.91403	763.105	24
2022-09-13	08:37:57	2.17249	765.277	24
2022-09-13	08:37:58	3.29844	768.576	24
2022-09-13	08:37:59	1.62959	770.205	24
2022-09-13	08:38:00	1.20805	771.413	24
2022-09-13	08:38:01	2.28868	773.702	24
2022-09-13	08:38:02	10.1751	783.877	24
2022-09-13	08:38:03	17.3621	801.239	25
2022-09-13	08:38:04	30.4822	831.721	26
2022-09-13	08:38:05	21.875	853.596	27
2022-09-13	08:38:06	20.8199	874.416	28
2022-09-13	08:38:07	16.9883	891.405	29
2022-09-13	08:38:08	15.1659	906.571	30
2022-09-13	08:38:09	3.15726	909.728	30
2022-09-13	08:38:10	1.71595	911.444	30
2022-09-13	08:38:11	1.61092	913.055	30
2022-09-13	08:38:12	2.21638	915.271	30
2022-09-13	08:38:13	2.59716	917.868	30
2022-09-13	08:38:14	3.46444	921.333	30
2022-09-13	08:38:15	44.5497	965.882	31
2022-09-13	08:38:16	32.2592	998.142	32
2022-09-13	08:38:17	36.0619	1034.2	33
2022-09-13	08:38:18	40.9297	1075.13	34
2022-09-13	08:38:19	51.6768	1126.81	35
2022-09-13	08:38:20	41.9101	1168.72	36
2022-09-13	08:38:21	27.2029	1195.92	37
2022-09-13	08:38:22	17.0857	1213.01	38
2022-09-13	08:38:23	13.0418	1226.05	39
2022-09-13	08:38:24	5.07854	1231.13	39
2022-09-13	08:38:25	1.66881	1232.8	39
2022-09-13	08:38:26	0.982886	1233.78	39
2022-09-13	08:38:27	0.965474	1234.75	39
2022-09-13	08:38:28	0.944479	1235.69	39
2022-09-13	08:38:29	0.931633	1236.62	39
2022-09-13	08:38:30	0.880416	1237.5	39
2022-09-13	08:38:31	0.930141	1238.43	39
2022-09-13	08:38:32	0.999488	1239.43	39
2022-09-13	08:38:33	1.40435	1240.84	39
2022-09-13	08:38:34	2.04244	1242.88	39
2022-09-13	08:38:35	1.76266	1244.64	39
2022-09-13	08:38:36	11.2297	1255.87	39
2022-09-13	08:38:37	30.6355	1286.51	40
2022-09-13	08:38:38	40.3108	1326.82	41
2022-09-13	08:38:39	36.5307	1363.35	42
2022-09-13	08:38:40	25.1904	1388.54	43
2022-09-13	08:38:41	39.4635	1428	44
2022-09-13	08:38:42	27.5	1455.5	45
2022-09-13	08:38:43	27.5991	1483.1	46
2022-09-13	08:38:44	5.75797	1488.86	46
2022-09-13	08:38:45	2.8091	1491.67	46
2022-09-13	08:38:46	10.9854	1502.65	46
2022-09-13	08:38:47	25.7893	1528.44	47
2022-09-13	08:38:48	7.47846	1535.92	47
2022-09-13	08:38:49	0.222656	1536.14	47
2022-09-13	08:38:50	0.214319	1536.36	47
2022-09-13	08:38:51	1.09066	1537.45	47
2022-09-13	08:38:52	0.55778	1538.01	47
2022-09-13	08:38:53	3.16286	1541.17	47
2022-09-13	08:38:54	3.91599	1545.09	47
2022-09-13	08:38:55	21.0012	1566.09	48
2022-09-13	08:38:56	8.84749	1574.93	48
2022-09-13	08:38:57	12.957	1587.89	48
2022-09-13	08:38:58	47.8222	1635.71	49
2022-09-13	08:38:59	69.7936	1705.51	50
2022-09-13	08:39:00	51.4133	1756.92	51
2022-09-13	08:39:01	39.4263	1796.35	52
2022-09-13	08:39:02	13.0489	1809.4	53
2022-09-13	08:39:03	41.9853	1851.38	54
2022-09-13	08:39:04	51.6332	1903.01	55
2022-09-13	08:39:05	36.048	1939.06	56
2022-09-13	08:39:06	12.1701	1951.23	56
2022-09-13	08:39:07	4.38616	1955.62	56
2022-09-13	08:39:08	22.7832	1978.4	57
2022-09-13	08:39:09	14.764	1993.17	58
2022-09-13	08:39:10	1.87917	1995.04	58
2022-09-13	08:39:11	3.04905	1998.09	58
2022-09-13	08:39:12	3.90693	2002	58
2022-09-13	08:39:13	2.58392	2004.58	58
2022-09-13	08:39:14	2.77651	2007.36	58
2022-09-13	08:39:15	3.34616	2010.71	58
2022-09-13	08:39:16	6.66618	2017.37	58
2022-09-13	08:39:17	4.4546	2021.83	58
2022-09-13	08:39:18	1.81657	2023.64	58
2022-09-13	08:39:19	1.53282	2025.18	58
2022-09-13	08:39:20	1.61918	2026.8	58
2022-09-13	08:39:21	4.11926	2030.92	58
2022-09-13	08:39:22	1.96157	2032.88	58
2022-09-13	08:39:23	1.91307	2034.79	58
2022-09-13	08:39:24	5.70851	2040.5	58
2022-09-13	08:39:25	18.0766	2058.58	59
2022-09-13	08:39:26	28.3696	2086.95	60
2022-09-13	08:39:27	22.2686	2109.21	61
2022-09-13	08:39:28	46.3891	2155.6	62
2022-09-13	08:39:29	30.2505	2185.85	63
2022-09-13	08:39:30	33.5764	2219.43	64
2022-09-13	08:39:31	28.3823	2247.81	65
2022-09-13	08:39:32	43.6333	2291.45	66
2022-09-13	08:39:33	57.8243	2349.27	67
2022-09-13	08:39:34	51.1284	2400.4	68
2022-09-13	08:39:35	13.9102	2414.31	69
2022-09-13	08:39:36	5.48396	2419.79	69
2022-09-13	08:39:37	7.21242	2427	69
2022-09-13	08:39:38	2.99987	2430	69
2022-09-13	08:39:39	0.448217	2430.45	69
2022-09-13	08:39:40	0.399754	2430.85	69
2022-09-13	08:39:41	-0.610522	2430.85	69
2022-09-13	08:39:42	5.68684	2436.54	69
2022-09-13	08:39:43	15.8559	2452.4	70
2022-09-13	08:39:44	2.0454	2454.44	70
2022-09-13	08:39:45	1.95947	2456.4	70
2022-09-13	08:39:46	1.36083	2457.76	70
2022-09-13	08:39:47	1.27753	2459.04	70
2022-09-13	08:39:48	1.38924	2460.43	70
2022-09-13	08:39:49	1.35693	2461.78	70
2022-09-13	08:39:50	1.35642	2463.14	70
2022-09-13	08:39:51	1.37458	2464.52	70
2022-09-13	08:39:52	1.37294	2465.89	70
2022-09-13	08:39:53	1.38138	2467.27	70
2022-09-13	08:39:54	1.39847	2468.67	70
2022-09-13	08:39:55	1.40633	2470.08	70
2022-09-13	08:39:56	1.40786	2471.48	70
2022-09-13	08:39:57	1.39428	2472.88	70
2022-09-13	08:39:58	1.40107	2474.28	70
2022-09-13	08:39:59	1.8481	2476.13	70
2022-09-13	08:40:00	2.0739	2478.2	70
2022-09-13	08:40:01	0.986753	2479.19	70
2022-09-13	08:40:02	55.4302	2534.62	71
2022-09-13	08:40:03	71.3168	2605.93	72
2022-09-13	08:40:04	58.6423	2664.58	73
2022-09-13	08:40:05	24.2477	2688.82	74
2022-09-13	08:40:06	12.6333	2701.46	74
2022-09-13	08:40:07	6.63553	2708.09	74
2022-09-13	08:40:08	2.8293	2710.92	74
2022-09-13	08:40:09	3.91956	2714.84	74
2022-09-13	08:40:10	2.33129	2717.17	74
2022-09-13	08:40:11	4.19931	2721.37	74
2022-09-13	08:40:12	5.09771	2726.47	74
2022-09-13	08:40:13	6.45012	2732.92	74
2022-09-13	08:40:14	3.48453	2736.4	74
2022-09-13	08:40:15	1.90876	2738.31	74
2022-09-13	08:40:16	3.69549	2742.01	74
2022-09-13	08:40:17	22.7113	2764.72	75
2022-09-13	08:40:18	26.9797	2791.7	76
2022-09-13	08:40:19	31.0063	2822.71	77
2022-09-13	08:40:20	5.52573	2828.23	77
2022-09-13	08:40:21	2.41786	2830.65	77
2022-09-13	08:40:22	-0.0322	2830.65	77
2022-09-13	08:40:23	1.24363	2831.89	77
2022-09-13	08:40:24	1.82784	2833.72	77
2022-09-13	08:40:25	1.98262	2835.7	77
2022-09-13	08:40:26	1.47517	2837.18	77
2022-09-13	08:40:27	29.4036	2866.58	78
2022-09-13	08:40:28	18.1168	2884.7	79
2022-09-13	08:40:29	1.8932	2886.59	79
2022-09-13	08:40:30	1.24789	2887.84	79
2022-09-13	08:40:31	22.5771	2910.42	80
2022-09-13	08:40:32	55.7375	2966.16	81
2022-09-13	08:40:33	26.0275	2992.18	82
2022-09-13	08:40:34	11.7577	3003.94	82
2022-09-13	08:40:35	5.67971	3009.62	82
2022-09-13	08:40:36	1.82427	3011.44	82
2022-09-13	08:40:37	1.25687	3012.7	82
2022-09-13	08:40:38	1.5189	3014.22	82
2022-09-13	08:40:39	1.62442	3015.84	82
2022-09-13	08:40:40	1.50803	3017.35	82
2022-09-13	08:40:41	1.30792	3018.66	82
2022-09-13	08:40:42	1.11081	3019.77	82
2022-09-13	08:40:43	1.04148	3020.81	82
2022-09-13	08:40:44	2.53519	3023.35	82
2022-09-13	08:40:45	6.17389	3029.52	82
2022-09-13	08:40:46	6.8337	3036.36	82
2022-09-13	08:40:47	7.66873	3044.02	82
2022-09-13	08:40:48	13.2765	3057.3	83
2022-09-13	08:40:49	14.5974	3071.9	84
2022-09-13	08:40:50	9.01728	3080.92	84
2022-09-13	08:40:51	0.170119	3081.09	84
2022-09-13	08:40:52	-0.199319	3081.09	84
2022-09-13	08:40:53	1.37602	3082.46	84
2022-09-13	08:40:54	1.38969	3083.85	84
2022-09-13	08:40:55	0.668703	3084.52	84
2022-09-13	08:40:56	0.860156	3085.38	84
2022-09-13	08:40:57	1.0309	3086.41	84
2022-09-13	08:40:58	1.61974	3088.03	84
2022-09-13	08:40:59	1.34963	3089.38	84
2022-09-13	08:41:00	45.8619	3135.24	85
2022-09-13	08:41:01	27.881	3163.12	86
2022-09-13	08:41:02	30.4373	3193.56	87
2022-09-13	08:41:03	23.0586	3216.62	88
2022-09-13	08:41:04	27.6646	3244.28	89
2022-09-13	08:41:05	22.2467	3266.53	90
2022-09-13	08:41:06	25.7187	3292.25	91
2022-09-13	08:41:07	32.085	3324.33	92
2022-09-13	08:41:08	38.0869	3362.42	93
2022-09-13	08:41:09	40.6122	3403.03	94
2022-09-13	08:41:10	30.3594	3433.39	95
2022-09-13	08:41:11	2.20393	3435.6	95
2022-09-13	08:41:12	2.28805	3437.88	95
2022-09-13	08:41:13	4.78815	3442.67	95
2022-09-13	08:41:14	4.17774	3446.85	95
2022-09-13	08:41:15	6.95215	3453.8	95
2022-09-13	08:41:16	2.99934	3456.8	95
2022-09-13	08:41:17	1.82189	3458.62	95
2022-09-13	08:41:18	31.906	3490.53	96
2022-09-13	08:41:19	30.4642	3520.99	97
2022-09-13	08:41:20	29.6436	3550.64	98
2022-09-13	08:41:21	65.6139	3616.25	99
2022-09-13	08:41:22	40.5388	3656.79	100
2022-09-13	08:41:23	45.7094	3702.5	101
2022-09-13	08:41:24	41.0619	3743.56	102
2022-09-13	08:41:25	26.3972	3769.96	103
2022-09-13	08:41:26	32.4259	3802.38	104
2022-09-13	08:41:27	8.88003	3811.26	104
2022-09-13	08:41:28	8.30324	3819.57	104
2022-09-13	08:41:29	14.6902	3834.26	105
2022-09-13	08:41:30	42.5908	3876.85	106
2022-09-13	08:41:31	31.8584	3908.71	107
2022-09-13	08:41:32	10.9189	3919.63	107
2022-09-13	08:41:33	6.27123	3925.9	107
2022-09-13	08:41:34	9.1033	3935	107
2022-09-13	08:41:35	2.07011	3937.07	107
2022-09-13	08:41:36	1.56559	3938.64	107
2022-09-13	08:41:37	-0.243801	3938.64	107
2022-09-13	08:41:38	0.85461	3939.49	107
2022-09-13	08:41:39	1.0305	3940.52	107
2022-09-13	08:41:40	1.79077	3942.31	107
2022-09-13	08:41:41	6.67988	3948.99	107
2022-09-13	08:41:42	15.9011	3964.89	108
2022-09-13	08:41:43	3.84651	3968.74	108
2022-09-13	08:41:44	16.9683	3985.71	109
2022-09-13	08:41:45	29.9032	4015.61	110
2022-09-13	08:41:46	44.3105	4059.92	111
2022-09-13	08:41:47	48.7079	4108.63	112
2022-09-13	08:41:48	35.2093	4143.84	113
2022-09-13	08:41:49	12.2719	4156.11	113
2022-09-13	08:41:50	1.57023	4157.68	113
2022-09-13	08:41:51	1.56977	4159.25	113
2022-09-13	08:41:52	2.54657	4161.8	113
2022-09-13	08:41:53	1.63604	4163.43	113
2022-09-13	08:41:54	1.57538	4165.01	113
2022-09-13	08:41:55	8.57365	4173.58	113
2022-09-13	08:41:56	2.42585	4176.01	113
2022-09-13	08:41:57	0.508186	4176.52	113
2022-09-13	08:41:58	1.12439	4177.64	113
2022-09-13	08:41:59	5.19042	4182.83	113
2022-09-13	08:42:00	78.0248	4260.86	114
2022-09-13	08:42:01	56.7608	4317.62	115
2022-09-13	08:42:02	38.2133	4355.83	116
2022-09-13	08:42:03	43.3451	4399.18	117
2022-09-13	08:42:04	34.252	4433.43	118
2022-09-13	08:42:05	30.192	4463.62	119
2022-09-13	08:42:06	22.586	4486.21	120
2022-09-13	08:42:07	15.9678	4502.17	121
2022-09-13	08:42:08	5.05912	4507.23	121
2022-09-13	08:42:09	10.542	4517.77	121
2022-09-13	08:42:10	36.354	4554.13	122
2022-09-13	08:42:11	80.6969	4634.83	123
2022-09-13	08:42:12	32.7898	4667.62	124
2022-09-13	08:42:13	12.1273	4679.74	124
2022-09-13	08:42:14	1.2803	4681.02	124
2022-09-13	08:42:15	40.7601	4721.78	125
2022-09-13	08:42:16	7.22712	4729.01	125
2022-09-13	08:42:17	8.28287	4737.29	125
2022-09-13	08:42:18	18.697	4755.99	126
2022-09-13	08:42:19	32.4646	4788.45	127
2022-09-13	08:42:20	27.7653	4816.22	128
2022-09-13	08:42:21	14.485	4830.7	129
2022-09-13	08:42:22	5.33117	4836.04	129
2022-09-13	08:42:23	1.93485	4837.97	129
2022-09-13	08:42:24	5.8268	4843.8	129
2022-09-13	08:42:25	7.25226	4851.05	129

## Sheet: Mars_martin_20229138376 (4)
Date	Time	Lbs	Newtons	Averaged Newtons	Total force x time	total steps > 13.345		**GoPro Fitting: 826
2022-09-13	08:37:25	0.102608	0.456421	9.08649	0.456421	FALSE	0			Total force x time	9192.64
2022-09-13	08:37:25	1.95024	8.67506	9.08649	8.67506	FALSE	0			Total steps	464
2022-09-13	08:37:25	3.14907	14.0077	9.08649	14.4641	1	1
2022-09-13	08:37:25	2.96902	13.2068	9.08649	21.8819	FALSE	1
2022-09-13	08:37:26	4.00953	17.8352	15.2433	32.2993	1	2
2022-09-13	08:37:26	2.33854	10.4023	15.2433	32.2841	FALSE	2
2022-09-13	08:37:26	3.93248	17.4925	15.2433	49.7918	1	3
2022-09-13	08:37:27	2.38301	10.6001	19.2343	42.8843	FALSE	3
2022-09-13	08:37:27	6.49965	28.9117	19.2343	78.7035	1	4
2022-09-13	08:37:27	3.5649	15.8574	19.2343	58.7416	1	5
2022-09-13	08:37:27	4.84866	21.5678	19.2343	100.271	1	6
2022-09-13	08:37:28	8.36383	37.204	30.705	95.9456	1	7
2022-09-13	08:37:28	5.15121	22.9136	30.705	123.185	1	8
2022-09-13	08:37:28	6.07405	27.0186	30.705	122.964	1	9
2022-09-13	08:37:28	8.02209	35.6839	30.705	158.869	1	10
2022-09-13	08:37:29	4.41477	19.6378	12.0479	142.602	1	11
2022-09-13	08:37:29	3.60866	16.052	12.0479	174.921	1	12
2022-09-13	08:37:29	1.81665	8.08082	12.0479	150.683	FALSE	12
2022-09-13	08:37:29	0.993906	4.42109	12.0479	179.342	FALSE	12
2022-09-13	08:37:30	1.66851	7.42187	17.9213	158.105	FALSE	12
2022-09-13	08:37:30	2.85034	12.6789	17.9213	192.021	FALSE	12
2022-09-13	08:37:30	5.41141	24.071	17.9213	182.176	1	13
2022-09-13	08:37:30	6.1853	27.5135	17.9213	219.534	1	14
2022-09-13	08:37:31	6.24103	27.7613	26.0036	209.937	1	15
2022-09-13	08:37:31	7.34149	32.6564	26.0036	252.191	1	16
2022-09-13	08:37:31	3.95508	17.593	26.0036	227.53	1	17
2022-09-13	08:37:32	8.02092	35.6787	36.4181	287.869	1	18
2022-09-13	08:37:32	7.67115	34.1228	36.4181	261.653	1	19
2022-09-13	08:37:32	8.76861	39.0045	36.4181	326.874	1	20
2022-09-13	08:37:32	8.2879	36.8662	36.4181	298.519	1	21
2022-09-13	08:37:33	4.25721	18.9369	29.8904	345.811	1	22
2022-09-13	08:37:33	7.928	35.2653	29.8904	333.784	1	23
2022-09-13	08:37:33	5.76688	25.6522	29.8904	371.463	1	24
2022-09-13	08:37:33	8.92657	39.7072	29.8904	373.492	1	25
2022-09-13	08:37:34	6.62627	29.475	28.5165	400.938	1	26
2022-09-13	08:37:34	4.12271	18.3386	28.5165	391.83	1	27
2022-09-13	08:37:34	7.44149	33.1012	28.5165	434.039	1	28
2022-09-13	08:37:34	7.45273	33.1512	28.5165	424.981	1	29
2022-09-13	08:37:35	13.1559	58.5201	52.3728	492.559	1	30
2022-09-13	08:37:35	13.5752	60.3852	52.3728	485.367	1	31
2022-09-13	08:37:35	8.5907	38.2132	52.3728	530.772	1	32
2022-09-13	08:37:36	16.8711	75.046	33.2135	560.413	1	33
2022-09-13	08:37:36	3.78373	16.8308	33.2135	547.603	1	34
2022-09-13	08:37:36	4.47808	19.9194	33.2135	580.332	1	35
2022-09-13	08:37:36	4.734	21.0578	33.2135	568.661	1	36
2022-09-13	08:37:37	3.30261	14.6907	16.6781	595.023	1	37
2022-09-13	08:37:37	4.39558	19.5524	16.6781	588.213	1	38
2022-09-13	08:37:37	2.31981	10.319	16.6781	605.342	FALSE	38
2022-09-13	08:37:37	4.97965	22.1505	16.6781	610.364	1	39
2022-09-13	08:37:38	7.13324	31.7301	38.2073	637.072	1	40
2022-09-13	08:37:38	8.04729	35.796	38.2073	646.16	1	41
2022-09-13	08:37:38	10.5876	47.0958	38.2073	684.168	1	42
2022-09-13	08:37:39	6.11161	27.1857	35.0304	673.346	1	43
2022-09-13	08:37:39	9.50907	42.2982	35.0304	726.466	1	44
2022-09-13	08:37:39	9.67619	43.0416	35.0304	716.387	1	45
2022-09-13	08:37:39	5.50306	24.4787	35.0304	750.945	1	46
2022-09-13	08:37:39	8.57599	38.1477	35.0304	754.535	1	47
2022-09-13	08:37:40	3.80602	16.9299	22.4723	767.874	1	48
2022-09-13	08:37:40	6.32301	28.126	22.4723	782.661	1	49
2022-09-13	08:37:40	5.02698	22.361	22.4723	790.235	1	50
2022-09-13	08:37:41	4.148	18.4511	36.5477	801.112	1	51
2022-09-13	08:37:41	13.466	59.8995	36.5477	850.135	1	52
2022-09-13	08:37:41	5.23665	23.2937	36.5477	824.406	1	53
2022-09-13	08:37:41	10.0145	44.5465	36.5477	894.681	1	54
2022-09-13	08:37:42	8.76566	38.9914	29.2933	863.397	1	55
2022-09-13	08:37:42	4.11055	18.2845	29.2933	912.966	1	56
2022-09-13	08:37:42	8.79691	39.1304	29.2933	902.528	1	57
2022-09-13	08:37:42	4.66856	20.7667	29.2933	933.733	1	58
2022-09-13	08:37:43	13.8508	61.6111	50.4615	964.139	1	59
2022-09-13	08:37:43	8.8882	39.5365	50.4615	973.269	1	60
2022-09-13	08:37:43	8.87507	39.4781	50.4615	1003.62	1	61
2022-09-13	08:37:43	13.7629	61.2201	50.4615	1034.49	1	62
2022-09-13	08:37:44	4.82189	21.4487	33.1766	1025.07	1	63
2022-09-13	08:37:44	8.94444	39.7867	33.1766	1074.28	1	64
2022-09-13	08:37:44	11.7653	52.3344	33.1766	1077.4	1	65
2022-09-13	08:37:44	4.3021	19.1366	33.1766	1093.41	1	66
2022-09-13	08:37:45	9.98622	44.4207	36.2552	1121.82	1	67
2022-09-13	08:37:45	9.94642	44.2437	36.2552	1137.66	1	68
2022-09-13	08:37:45	4.51894	20.1011	36.2552	1141.92	1	69
2022-09-13	08:37:46	11.7824	52.4105	26.2427	1190.07	1	70
2022-09-13	08:37:46	5.51406	24.5276	26.2427	1166.45	1	71
2022-09-13	08:37:46	4.57965	20.3712	26.2427	1210.44	1	72
2022-09-13	08:37:46	1.72235	7.66136	26.2427	1174.11	FALSE	72
2022-09-13	08:37:47	0.930852	4.14062	8.35764	1214.58	FALSE	72
2022-09-13	08:37:47	2.73955	12.1861	8.35764	1186.3	FALSE	72
2022-09-13	08:37:47	1.43859	6.39914	8.35764	1220.98	FALSE	72
2022-09-13	08:37:47	2.40653	10.7047	8.35764	1197	FALSE	72
2022-09-13	08:37:48	5.22296	23.2328	13.0872	1244.21	1	73
2022-09-13	08:37:48	4.3364	19.2892	13.0872	1216.29	1	74
2022-09-13	08:37:48	1.84754	8.21823	13.0872	1252.43	FALSE	74
2022-09-13	08:37:48	0.361641	1.60865	13.0872	1217.9	FALSE	74
2022-09-13	08:37:49	0.556705	2.47634	2.7055	1254.9	FALSE	74
2022-09-13	08:37:49	0.285713	1.27091	2.7055	1219.17	FALSE	74
2022-09-13	08:37:49	0.982252	4.36925	2.7055	1259.27	FALSE	74
2022-09-13	08:37:50	2.8367	12.6182	28.7787	1231.79	FALSE	74
2022-09-13	08:37:50	6.39049	28.4262	28.7787	1287.7	1	75
2022-09-13	08:37:50	9.11772	40.5574	28.7787	1272.35	1	76
2022-09-13	08:37:50	7.53406	33.513	28.7787	1321.21	1	77
2022-09-13	08:37:51	13.7803	61.2975	44.0399	1333.64	1	78
2022-09-13	08:37:51	8.00311	35.5994	44.0399	1356.81	1	79
2022-09-13	08:37:51	10.2052	45.3948	44.0399	1379.04	1	80
2022-09-13	08:37:51	7.61385	33.8679	44.0399	1390.68	1	81
2022-09-13	08:37:52	2.32683	10.3502	13.6162	1389.39	FALSE	81
2022-09-13	08:37:52	3.8792	17.2555	13.6162	1407.94	1	82
2022-09-13	08:37:52	2.97716	13.243	13.6162	1402.63	FALSE	82
2022-09-13	08:37:53	5.08596	22.6234	9.52314	1430.56	1	83
2022-09-13	08:37:53	1.27961	5.69196	9.52314	1408.32	FALSE	83
2022-09-13	08:37:53	1.39121	6.18838	9.52314	1436.75	FALSE	83
2022-09-13	08:37:53	2.19996	9.78586	9.52314	1418.11	FALSE	83
2022-09-13	08:37:53	0.747748	3.32613	9.52314	1440.07	FALSE	83
2022-09-13	08:37:54	1.20352	5.3535	3.90866	1423.46	FALSE	83
2022-09-13	08:37:54	0.388206	1.72682	3.90866	1441.8	FALSE	83
2022-09-13	08:37:54	1.04439	4.64566	3.90866	1428.11	FALSE	83
2022-09-13	08:37:55	0.567595	2.52478	2.15562	1444.33	FALSE	83
2022-09-13	08:37:55	0.502252	2.23412	2.15562	1430.34	FALSE	83
2022-09-13	08:37:55	0.456959	2.03265	2.15562	1446.36	FALSE	83
2022-09-13	08:37:55	0.411616	1.83095	2.15562	1432.17	FALSE	83
2022-09-13	08:37:56	0.579707	2.57865	1.91403	1448.94	FALSE	83
2022-09-13	08:37:56	0.373244	1.66026	1.91403	1433.83	FALSE	83
2022-09-13	08:37:56	0.401132	1.78432	1.91403	1450.72	FALSE	83
2022-09-13	08:37:56	0.367087	1.63288	1.91403	1435.47	FALSE	83
2022-09-13	08:37:57	0.463219	2.06049	2.17249	1452.78	FALSE	83
2022-09-13	08:37:57	0.507493	2.25743	2.17249	1437.72	FALSE	83
2022-09-13	08:37:57	0.388817	1.72954	2.17249	1454.51	FALSE	83
2022-09-13	08:37:57	0.594059	2.64249	2.17249	1440.37	FALSE	83
2022-09-13	08:37:58	0.806425	3.58714	3.29844	1458.1	FALSE	83
2022-09-13	08:37:58	0.752379	3.34673	3.29844	1443.71	FALSE	83
2022-09-13	08:37:58	0.665763	2.96145	3.29844	1461.06	FALSE	83
2022-09-13	08:37:59	0.370649	1.64872	1.62959	1445.36	FALSE	83
2022-09-13	08:37:59	0.544186	2.42065	1.62959	1463.48	FALSE	83
2022-09-13	08:37:59	0.360064	1.60164	1.62959	1446.96	FALSE	83
2022-09-13	08:37:59	0.190496	0.847364	1.62959	1464.33	FALSE	83
2022-09-13	08:38:00	0.16673	0.741648	1.20805	1447.71	FALSE	83
2022-09-13	08:38:00	0.220471	0.980699	1.20805	1465.31	FALSE	83
2022-09-13	08:38:00	0.427545	1.90181	1.20805	1449.61	FALSE	83
2022-09-13	08:38:01	0.270395	1.20277	2.28868	1466.51	FALSE	83
2022-09-13	08:38:01	0.332583	1.4794	2.28868	1451.09	FALSE	83
2022-09-13	08:38:01	0.31645	1.40763	2.28868	1467.92	FALSE	83
2022-09-13	08:38:01	0.24444	1.08732	2.28868	1452.17	FALSE	83
2022-09-13	08:38:01	1.40872	6.26627	2.28868	1474.19	FALSE	83
2022-09-13	08:38:02	2.74378	12.2049	10.1751	1464.38	FALSE	83
2022-09-13	08:38:02	2.37782	10.577	10.1751	1484.76	FALSE	83
2022-09-13	08:38:02	2.10174	9.34896	10.1751	1473.73	FALSE	83
2022-09-13	08:38:02	1.92648	8.56937	10.1751	1493.33	FALSE	83
2022-09-13	08:38:03	2.06668	9.19301	17.3621	1482.92	FALSE	83
2022-09-13	08:38:03	3.2591	14.4971	17.3621	1507.83	1	84
2022-09-13	08:38:03	6.38373	28.3961	17.3621	1511.32	1	85
2022-09-13	08:38:04	5.21243	23.1859	30.4822	1531.01	1	86
2022-09-13	08:38:04	11.2945	50.2402	30.4822	1561.56	1	87
2022-09-13	08:38:04	3.28688	14.6207	30.4822	1545.64	1	88
2022-09-13	08:38:04	7.61701	33.882	30.4822	1595.44	1	89
2022-09-13	08:38:05	2.72144	12.1055	21.875	1557.74	FALSE	89
2022-09-13	08:38:05	5.90144	26.2508	21.875	1621.69	1	90
2022-09-13	08:38:05	6.10591	27.1603	21.875	1584.9	1	91
2022-09-13	08:38:05	4.9421	21.9834	21.875	1643.67	1	92
2022-09-13	08:38:06	9.19085	40.8827	20.8199	1625.78	1	93
2022-09-13	08:38:06	1.10256	4.90441	20.8199	1648.58	FALSE	93
2022-09-13	08:38:06	5.76688	25.6522	20.8199	1651.44	1	94
2022-09-13	08:38:06	2.66184	11.8404	20.8199	1660.42	FALSE	94
2022-09-13	08:38:07	4.20698	18.7135	16.9883	1670.15	1	95
2022-09-13	08:38:07	3.53238	15.7127	16.9883	1676.13	1	96
2022-09-13	08:38:07	2.67446	11.8965	16.9883	1682.05	FALSE	96
2022-09-13	08:38:07	4.86271	21.6303	16.9883	1697.76	1	97
2022-09-13	08:38:08	3.73248	16.6028	15.1659	1698.65	1	98
2022-09-13	08:38:08	5.88785	26.1903	15.1659	1723.95	1	99
2022-09-13	08:38:08	0.608002	2.70451	15.1659	1701.35	FALSE	99
2022-09-13	08:38:09	0.742405	3.30237	3.15726	1727.25	FALSE	99
2022-09-13	08:38:09	0.331667	1.47532	3.15726	1702.83	FALSE	99
2022-09-13	08:38:09	0.567799	2.52568	3.15726	1729.78	FALSE	99
2022-09-13	08:38:09	1.19726	5.32565	3.15726	1708.15	FALSE	99
2022-09-13	08:38:10	0.472888	2.1035	1.71595	1731.88	FALSE	99
2022-09-13	08:38:10	0.343066	1.52603	1.71595	1709.68	FALSE	99
2022-09-13	08:38:10	0.380878	1.69422	1.71595	1733.58	FALSE	99
2022-09-13	08:38:10	0.346221	1.54006	1.71595	1711.22	FALSE	99
2022-09-13	08:38:11	0.36958	1.64397	1.61092	1735.22	FALSE	99
2022-09-13	08:38:11	0.450395	2.00345	1.61092	1713.22	FALSE	99
2022-09-13	08:38:11	0.404797	1.80062	1.61092	1737.02	FALSE	99
2022-09-13	08:38:11	0.22383	0.995641	1.61092	1714.22	FALSE	99
2022-09-13	08:38:12	0.383626	1.70645	2.21638	1738.73	FALSE	99
2022-09-13	08:38:12	0.452277	2.01182	2.21638	1716.23	FALSE	99
2022-09-13	08:38:12	0.658893	2.93089	2.21638	1741.66	FALSE	99
2022-09-13	08:38:13	0.612277	2.72353	2.59716	1718.96	FALSE	99
2022-09-13	08:38:13	0.691921	3.0778	2.59716	1744.74	FALSE	99
2022-09-13	08:38:13	0.591005	2.62891	2.59716	1721.58	FALSE	99
2022-09-13	08:38:13	0.440267	1.9584	2.59716	1746.7	FALSE	99
2022-09-13	08:38:14	0.355127	1.57968	3.46444	1723.16	FALSE	99
2022-09-13	08:38:14	0.339555	1.51041	3.46444	1748.21	FALSE	99
2022-09-13	08:38:14	0.824796	3.66886	3.46444	1726.83	FALSE	99
2022-09-13	08:38:14	1.59589	7.09884	3.46444	1755.3	FALSE	99
2022-09-13	08:38:15	5.17268	23.0091	44.5497	1749.84	1	100
2022-09-13	08:38:15	11.0577	49.1869	44.5497	1804.49	1	101
2022-09-13	08:38:15	11.7814	52.406	44.5497	1802.25	1	102
2022-09-13	08:38:15	12.0491	53.5968	44.5497	1858.09	1	103
2022-09-13	08:38:16	6.4168	28.5432	32.2592	1830.79	1	104
2022-09-13	08:38:16	7.69405	34.2247	32.2592	1892.31	1	105
2022-09-13	08:38:16	8.97009	39.9008	32.2592	1870.69	1	106
2022-09-13	08:38:16	5.92785	26.3683	32.2592	1918.68	1	107
2022-09-13	08:38:17	10.4751	46.5953	36.0619	1917.29	1	108
2022-09-13	08:38:17	8.2911	36.8805	36.0619	1955.56	1	109
2022-09-13	08:38:17	5.55502	24.7098	36.0619	1942	1	110
2022-09-13	08:38:18	10.7752	47.9302	40.9297	2003.49	1	111
2022-09-13	08:38:18	3.81289	16.9605	40.9297	1958.96	1	112
2022-09-13	08:38:18	7.86505	34.9853	40.9297	2038.48	1	113
2022-09-13	08:38:18	14.3525	63.8428	40.9297	2022.8	1	114
2022-09-13	08:38:19	7.75355	34.4893	51.6768	2072.97	1	115
2022-09-13	08:38:19	15.6622	69.6686	51.6768	2092.47	1	116
2022-09-13	08:38:19	16.3739	72.8344	51.6768	2145.8	1	117
2022-09-13	08:38:19	6.68021	29.7149	51.6768	2122.18	1	118
2022-09-13	08:38:20	8.95263	39.8231	41.9101	2185.62	1	119
2022-09-13	08:38:20	8.4341	37.5166	41.9101	2159.7	1	120
2022-09-13	08:38:20	7.78057	34.6095	41.9101	2220.23	1	121
2022-09-13	08:38:20	12.5199	55.691	41.9101	2215.39	1	122
2022-09-13	08:38:21	7.81039	34.7422	27.2029	2254.98	1	123
2022-09-13	08:38:21	6.59747	29.3469	27.2029	2244.74	1	124
2022-09-13	08:38:21	3.93859	17.5196	27.2029	2272.5	1	125
2022-09-13	08:38:22	6.81731	30.3248	17.0857	2275.06	1	126
2022-09-13	08:38:22	3.96622	17.6425	17.0857	2290.14	1	127
2022-09-13	08:38:22	1.68561	7.49793	17.0857	2282.56	FALSE	127
2022-09-13	08:38:22	2.89497	12.8774	17.0857	2303.02	FALSE	127
2022-09-13	08:38:23	2.02103	8.98995	13.0418	2291.55	FALSE	127
2022-09-13	08:38:23	3.32693	14.7989	13.0418	2317.81	1	128
2022-09-13	08:38:23	2.63161	11.7059	13.0418	2303.26	FALSE	128
2022-09-13	08:38:23	3.7481	16.6723	13.0418	2334.49	1	129
2022-09-13	08:38:24	1.21192	5.39086	5.07854	2308.65	FALSE	129
2022-09-13	08:38:24	0.811463	3.60955	5.07854	2338.1	FALSE	129
2022-09-13	08:38:24	1.30668	5.81237	5.07854	2314.46	FALSE	129
2022-09-13	08:38:24	1.23676	5.50136	5.07854	2343.6	FALSE	129
2022-09-13	08:38:25	0.499402	2.22144	1.66881	2316.68	FALSE	129
2022-09-13	08:38:25	0.375942	1.67227	1.66881	2345.27	FALSE	129
2022-09-13	08:38:25	0.339606	1.51064	1.66881	2318.19	FALSE	129
2022-09-13	08:38:25	0.285713	1.27091	1.66881	2346.54	FALSE	129
2022-09-13	08:38:26	0.225916	1.00492	0.982886	2319.2	FALSE	129
2022-09-13	08:38:26	0.223931	0.99609	0.982886	2347.54	FALSE	129
2022-09-13	08:38:26	0.213041	0.947649	0.982886	2320.14	FALSE	129
2022-09-13	08:38:27	0.225814	1.00447	0.965474	2348.54	FALSE	129
2022-09-13	08:38:27	0.217468	0.967341	0.965474	2321.11	FALSE	129
2022-09-13	08:38:27	0.214822	0.955571	0.965474	2349.5	FALSE	129
2022-09-13	08:38:27	0.210089	0.934518	0.965474	2322.05	FALSE	129
2022-09-13	08:38:28	0.206272	0.917539	0.944479	2350.41	FALSE	129
2022-09-13	08:38:28	0.21299	0.947422	0.944479	2322.99	FALSE	129
2022-09-13	08:38:28	0.212481	0.945158	0.944479	2351.36	FALSE	129
2022-09-13	08:38:28	0.21757	0.967795	0.944479	2323.96	FALSE	129
2022-09-13	08:38:29	0.219708	0.977305	0.931633	2352.34	FALSE	129
2022-09-13	08:38:29	0.211158	0.939273	0.931633	2324.9	FALSE	129
2022-09-13	08:38:29	0.207596	0.923429	0.931633	2353.26	FALSE	129
2022-09-13	08:38:29	0.1993	0.886526	0.931633	2325.79	FALSE	129
2022-09-13	08:38:30	0.194924	0.867061	0.880416	2354.13	FALSE	129
2022-09-13	08:38:30	0.197519	0.878604	0.880416	2326.67	FALSE	129
2022-09-13	08:38:30	0.200318	0.891055	0.880416	2355.02	FALSE	129
2022-09-13	08:38:30	0.198944	0.884943	0.880416	2327.55	FALSE	129
2022-09-13	08:38:31	0.198028	0.880868	0.930141	2355.9	FALSE	129
2022-09-13	08:38:31	0.207188	0.921614	0.930141	2328.47	FALSE	129
2022-09-13	08:38:31	0.222099	0.987941	0.930141	2356.89	FALSE	129
2022-09-13	08:38:32	0.209275	0.930897	0.999488	2329.4	FALSE	129
2022-09-13	08:38:32	0.215382	0.958062	0.999488	2357.84	FALSE	129
2022-09-13	08:38:32	0.234975	1.04522	0.999488	2330.45	FALSE	129
2022-09-13	08:38:32	0.239148	1.06378	0.999488	2358.91	FALSE	129
2022-09-13	08:38:33	0.232379	1.03367	1.40435	2331.48	FALSE	129
2022-09-13	08:38:33	0.268359	1.19371	1.40435	2360.1	FALSE	129
2022-09-13	08:38:33	0.355127	1.57968	1.40435	2333.06	FALSE	129
2022-09-13	08:38:33	0.406985	1.81035	1.40435	2361.91	FALSE	129
2022-09-13	08:38:34	0.355891	1.58307	2.04244	2334.65	FALSE	129
2022-09-13	08:38:34	0.456145	2.02902	2.04244	2363.94	FALSE	129
2022-09-13	08:38:34	0.626781	2.78805	2.04244	2337.43	FALSE	129
2022-09-13	08:38:34	0.397825	1.76961	2.04244	2365.71	FALSE	129
2022-09-13	08:38:35	0.616654	2.743	1.76266	2340.18	FALSE	129
2022-09-13	08:38:35	0.307545	1.36802	1.76266	2367.08	FALSE	129
2022-09-13	08:38:35	0.264593	1.17696	1.76266	2341.35	FALSE	129
2022-09-13	08:38:36	0.658741	2.93021	11.2297	2370.01	FALSE	129
2022-09-13	08:38:36	0.284542	1.2657	11.2297	2342.62	FALSE	129
2022-09-13	08:38:36	2.16719	9.64009	11.2297	2379.65	FALSE	129
2022-09-13	08:38:36	6.98769	31.0826	11.2297	2373.7	1	130
2022-09-13	08:38:37	9.22271	41.0245	30.6355	2420.67	1	131
2022-09-13	08:38:37	8.2883	36.868	30.6355	2410.57	1	132
2022-09-13	08:38:37	4.78057	21.2649	30.6355	2441.94	1	133
2022-09-13	08:38:37	5.25711	23.3847	30.6355	2433.95	1	134
2022-09-13	08:38:38	5.99324	26.6591	40.3108	2468.6	1	135
2022-09-13	08:38:38	12.1744	54.1542	40.3108	2488.11	1	136
2022-09-13	08:38:38	10.0201	44.5714	40.3108	2513.17	1	137
2022-09-13	08:38:38	8.06133	35.8584	40.3108	2523.97	1	138
2022-09-13	08:38:39	10.9965	48.9146	36.5307	2562.08	1	139
2022-09-13	08:38:39	6.91039	30.7388	36.5307	2554.71	1	140
2022-09-13	08:38:39	9.34276	41.5585	36.5307	2603.64	1	141
2022-09-13	08:38:39	5.60021	24.9109	36.5307	2579.62	1	142
2022-09-13	08:38:40	3.19299	14.2031	25.1904	2617.85	1	143
2022-09-13	08:38:40	8.6653	38.545	25.1904	2618.16	1	144
2022-09-13	08:38:40	5.1309	22.8233	25.1904	2640.67	1	145
2022-09-13	08:38:41	4.06052	18.062	39.4635	2636.22	1	146
2022-09-13	08:38:41	10.9991	48.9262	39.4635	2689.6	1	147
2022-09-13	08:38:41	7.94093	35.3228	39.4635	2671.55	1	148
2022-09-13	08:38:41	12.4866	55.5429	39.4635	2745.14	1	149
2022-09-13	08:38:42	8.94917	39.8077	27.5	2711.35	1	150
2022-09-13	08:38:42	4.27686	19.0243	27.5	2764.16	1	151
2022-09-13	08:38:42	8.49161	37.7724	27.5	2749.13	1	152
2022-09-13	08:38:42	3.01146	13.3956	27.5	2777.56	1	153
2022-09-13	08:38:43	6.44912	28.687	27.5991	2777.81	1	154
2022-09-13	08:38:43	6.86021	30.5156	27.5991	2808.07	1	155
2022-09-13	08:38:43	3.19401	14.2076	27.5991	2792.02	1	156
2022-09-13	08:38:43	8.31492	36.9864	27.5991	2845.06	1	157
2022-09-13	08:38:44	0.637774	2.83695	5.75797	2794.86	FALSE	157
2022-09-13	08:38:44	2.31823	10.312	5.75797	2855.37	FALSE	157
2022-09-13	08:38:44	0.927341	4.125	5.75797	2798.98	FALSE	157
2022-09-13	08:38:45	0.561845	2.4992	2.8091	2857.87	FALSE	157
2022-09-13	08:38:45	0.669784	2.97933	2.8091	2801.96	FALSE	157
2022-09-13	08:38:45	0.600267	2.67011	2.8091	2860.54	FALSE	157
2022-09-13	08:38:45	0.69416	3.08776	2.8091	2805.05	FALSE	157
2022-09-13	08:38:46	0.163575	0.727614	10.9854	2861.27	FALSE	157
2022-09-13	08:38:46	0.691819	3.07735	10.9854	2808.13	FALSE	157
2022-09-13	08:38:46	3.37136	14.9965	10.9854	2876.27	1	158
2022-09-13	08:38:46	5.65176	25.1402	10.9854	2833.27	1	159
2022-09-13	08:38:47	6.78668	30.1885	25.7893	2906.45	1	160
2022-09-13	08:38:47	6.57904	29.2649	25.7893	2862.53	1	161
2022-09-13	08:38:47	4.9165	21.8696	25.7893	2928.32	1	162
2022-09-13	08:38:47	4.90856	21.8343	25.7893	2884.37	1	163
2022-09-13	08:38:48	2.84917	12.6737	7.47846	2941	FALSE	163
2022-09-13	08:38:48	2.30011	10.2313	7.47846	2894.6	FALSE	163
2022-09-13	08:38:48	0.848104	3.77254	7.47846	2944.77	FALSE	163
2022-09-13	08:38:48	0.727545	3.23627	7.47846	2897.83	FALSE	163
2022-09-13	08:38:49	0.0938551	0.417486	0.222656	2945.19	FALSE	163
2022-09-13	08:38:49	0.152074	0.676456	0.222656	2898.51	FALSE	163
2022-09-13	08:38:49	-0.0957631	-0.425973	0.222656	2945.19	FALSE	163
2022-09-13	08:38:50	-0.258053	-1.14787	0.214319	2898.51	FALSE	163
2022-09-13	08:38:50	-0.184771	-0.821898	0.214319	2945.19	FALSE	163
2022-09-13	08:38:50	0.222507	0.989756	0.214319	2899.5	FALSE	163
2022-09-13	08:38:50	0.413041	1.83729	0.214319	2947.02	FALSE	163
2022-09-13	08:38:51	0.372888	1.65868	1.09066	2901.16	FALSE	163
2022-09-13	08:38:51	0.09813	0.436502	1.09066	2947.46	FALSE	163
2022-09-13	08:38:51	0.252888	1.1249	1.09066	2902.28	FALSE	163
2022-09-13	08:38:51	0.256858	1.14256	1.09066	2948.6	FALSE	163
2022-09-13	08:38:52	0.0861707	0.383305	0.55778	2902.67	FALSE	163
2022-09-13	08:38:52	-0.052557	-0.233784	0.55778	2948.6	FALSE	163
2022-09-13	08:38:52	0.0235753	0.104868	0.55778	2902.77	FALSE	163
2022-09-13	08:38:52	0.444389	1.97673	0.55778	2950.58	FALSE	163
2022-09-13	08:38:53	0.525611	2.33802	3.16286	2905.11	FALSE	163
2022-09-13	08:38:53	0.709631	3.15658	3.16286	2953.74	FALSE	163
2022-09-13	08:38:53	0.527137	2.34481	3.16286	2907.45	FALSE	163
2022-09-13	08:38:53	1.08179	4.81202	3.16286	2958.55	FALSE	163
2022-09-13	08:38:54	1.08821	4.84058	3.91599	2912.3	FALSE	163
2022-09-13	08:38:54	0.322099	1.43276	3.91599	2959.98	FALSE	163
2022-09-13	08:38:54	1.23075	5.47462	3.91599	2917.77	FALSE	163
2022-09-13	08:38:55	1.82556	8.12046	21.0012	2968.1	FALSE	163
2022-09-13	08:38:55	3.38805	15.0707	21.0012	2932.84	1	164
2022-09-13	08:38:55	5.96546	26.5356	21.0012	2994.64	1	165
2022-09-13	08:38:55	7.70601	34.2779	21.0012	2967.12	1	166
2022-09-13	08:38:56	3.42291	15.2258	8.84749	3009.86	1	167
2022-09-13	08:38:56	2.20561	9.81099	8.84749	2976.93	FALSE	167
2022-09-13	08:38:56	1.15034	5.11694	8.84749	3014.98	FALSE	167
2022-09-13	08:38:56	1.17716	5.23624	8.84749	2982.17	FALSE	167
2022-09-13	08:38:57	3.06836	13.6487	12.957	3028.63	1	168
2022-09-13	08:38:57	2.19497	9.76367	12.957	2991.93	FALSE	168
2022-09-13	08:38:57	2.47039	10.9888	12.957	3039.62	FALSE	168
2022-09-13	08:38:57	3.91777	17.427	12.957	3009.36	1	169
2022-09-13	08:38:58	7.23808	32.1964	47.8222	3071.81	1	170
2022-09-13	08:38:58	8.74154	38.8841	47.8222	3048.24	1	171
2022-09-13	08:38:58	16.2731	72.386	47.8222	3144.2	1	172
2022-09-13	08:38:59	19.0097	84.5589	69.7936	3132.8	1	173
2022-09-13	08:38:59	13.4744	59.9368	69.7936	3204.14	1	174
2022-09-13	08:38:59	18.7223	83.2805	69.7936	3216.08	1	175
2022-09-13	08:38:59	11.5548	51.3981	69.7936	3255.54	1	176
2022-09-13	08:39:00	7.58556	33.7421	51.4133	3249.82	1	177
2022-09-13	08:39:00	19.5342	86.892	51.4133	3342.43	1	178
2022-09-13	08:39:00	11.152	49.6063	51.4133	3299.43	1	179
2022-09-13	08:39:00	7.96113	35.4127	51.4133	3377.84	1	180
2022-09-13	08:39:01	13.2785	59.0654	39.4263	3358.49	1	181
2022-09-13	08:39:01	6.79899	30.2433	39.4263	3408.08	1	182
2022-09-13	08:39:01	6.0681	26.9921	39.4263	3385.49	1	183
2022-09-13	08:39:01	9.3081	41.4043	39.4263	3449.49	1	184
2022-09-13	08:39:02	5.43161	24.1609	13.0489	3409.65	1	185
2022-09-13	08:39:02	1.23615	5.49864	13.0489	3454.99	FALSE	185
2022-09-13	08:39:02	3.00093	13.3487	13.0489	3423	1	186
2022-09-13	08:39:02	2.06541	9.18736	13.0489	3464.17	FALSE	186
2022-09-13	08:39:03	8.11263	36.0866	41.9853	3459.08	1	187
2022-09-13	08:39:03	13.7634	61.2224	41.9853	3525.4	1	188
2022-09-13	08:39:03	6.44011	28.6469	41.9853	3487.73	1	189
2022-09-13	08:39:04	7.18128	31.9438	51.6332	3557.34	1	190
2022-09-13	08:39:04	14.4066	64.0834	51.6332	3551.81	1	191
2022-09-13	08:39:04	16.5568	73.648	51.6332	3630.99	1	192
2022-09-13	08:39:04	8.28596	36.8576	51.6332	3588.67	1	193
2022-09-13	08:39:05	15.2837	67.985	36.048	3698.97	1	194
2022-09-13	08:39:05	9.09975	40.4775	36.048	3629.15	1	195
2022-09-13	08:39:05	2.78337	12.381	36.048	3711.35	FALSE	195
2022-09-13	08:39:05	5.24902	23.3487	36.048	3652.5	1	196
2022-09-13	08:39:06	1.80734	8.03941	12.1701	3719.39	FALSE	196
2022-09-13	08:39:06	4.00892	17.8325	12.1701	3670.33	1	197
2022-09-13	08:39:06	2.51757	11.1987	12.1701	3730.59	FALSE	197
2022-09-13	08:39:06	2.60999	11.6098	12.1701	3681.94	FALSE	197
2022-09-13	08:39:07	2.04317	9.08843	4.38616	3739.68	FALSE	197
2022-09-13	08:39:07	0.376094	1.67294	4.38616	3683.61	FALSE	197
2022-09-13	08:39:07	0.538893	2.3971	4.38616	3742.08	FALSE	197
2022-09-13	08:39:08	1.05274	4.6828	22.7832	3688.29	FALSE	197
2022-09-13	08:39:08	3.87039	17.2163	22.7832	3759.29	1	198
2022-09-13	08:39:08	6.98866	31.087	22.7832	3719.38	1	199
2022-09-13	08:39:08	8.57579	38.1468	22.7832	3797.44	1	200
2022-09-13	08:39:09	6.38795	28.4149	14.764	3747.8	1	201
2022-09-13	08:39:09	3.72709	16.5788	14.764	3814.02	1	202
2022-09-13	08:39:09	1.09813	4.8847	14.764	3752.68	FALSE	202
2022-09-13	08:39:09	2.06322	9.17762	14.764	3823.2	FALSE	202
2022-09-13	08:39:10	0.261081	1.16134	1.87917	3753.84	FALSE	202
2022-09-13	08:39:10	0.671005	2.98476	1.87917	3826.18	FALSE	202
2022-09-13	08:39:10	0.331311	1.47374	1.87917	3755.32	FALSE	202
2022-09-13	08:39:10	0.426425	1.89682	1.87917	3828.08	FALSE	202
2022-09-13	08:39:11	0.499097	2.22008	3.04905	3757.54	FALSE	202
2022-09-13	08:39:11	0.800063	3.55884	3.04905	3831.64	FALSE	202
2022-09-13	08:39:11	0.739962	3.2915	3.04905	3760.83	FALSE	202
2022-09-13	08:39:11	0.70271	3.12579	3.04905	3834.76	FALSE	202
2022-09-13	08:39:12	0.772023	3.43411	3.90693	3764.26	FALSE	202
2022-09-13	08:39:12	0.910394	4.04961	3.90693	3838.81	FALSE	202
2022-09-13	08:39:12	0.952532	4.23705	3.90693	3768.5	FALSE	202
2022-09-13	08:39:13	0.855585	3.80581	2.58392	3842.62	FALSE	202
2022-09-13	08:39:13	0.663524	2.95149	2.58392	3771.45	FALSE	202
2022-09-13	08:39:13	0.511107	2.27351	2.58392	3844.89	FALSE	202
2022-09-13	08:39:13	0.293346	1.30486	2.58392	3772.76	FALSE	202
2022-09-13	08:39:14	0.32729	1.45585	2.77651	3846.35	FALSE	202
2022-09-13	08:39:14	0.395687	1.76009	2.77651	3774.52	FALSE	202
2022-09-13	08:39:14	0.599199	2.66536	2.77651	3849.01	FALSE	202
2022-09-13	08:39:14	1.17457	5.22472	2.77651	3779.74	FALSE	202
2022-09-13	08:39:15	0.852939	3.79404	3.34616	3852.81	FALSE	202
2022-09-13	08:39:15	0.469326	2.08766	3.34616	3781.83	FALSE	202
2022-09-13	08:39:15	0.63986	2.84623	3.34616	3855.65	FALSE	202
2022-09-13	08:39:15	1.04688	4.65673	3.34616	3786.48	FALSE	202
2022-09-13	08:39:16	1.53039	6.80748	6.66618	3862.46	FALSE	202
2022-09-13	08:39:16	1.73039	7.69712	6.66618	3794.18	FALSE	202
2022-09-13	08:39:16	1.48663	6.61283	6.66618	3869.07	FALSE	202
2022-09-13	08:39:16	1.24709	5.54731	6.66618	3799.73	FALSE	202
2022-09-13	08:39:17	1.47004	6.53903	4.4546	3875.61	FALSE	202
2022-09-13	08:39:17	0.958588	4.26399	4.4546	3803.99	FALSE	202
2022-09-13	08:39:17	0.575687	2.56077	4.4546	3878.17	FALSE	202
2022-09-13	08:39:18	0.408969	1.81918	1.81657	3805.81	FALSE	202
2022-09-13	08:39:18	0.45813	2.03785	1.81657	3880.21	FALSE	202
2022-09-13	08:39:18	0.43528	1.93621	1.81657	3807.75	FALSE	202
2022-09-13	08:39:18	0.331158	1.47306	1.81657	3881.68	FALSE	202
2022-09-13	08:39:19	0.427799	1.90294	1.53282	3809.65	FALSE	202
2022-09-13	08:39:19	0.275636	1.22608	1.53282	3882.91	FALSE	202
2022-09-13	08:39:19	0.318334	1.41601	1.53282	3811.07	FALSE	202
2022-09-13	08:39:19	0.356603	1.58624	1.53282	3884.5	FALSE	202
2022-09-13	08:39:20	0.339555	1.51041	1.61918	3812.58	FALSE	202
2022-09-13	08:39:20	0.387799	1.72501	1.61918	3886.22	FALSE	202
2022-09-13	08:39:20	0.360929	1.60548	1.61918	3814.18	FALSE	202
2022-09-13	08:39:20	0.367748	1.63582	1.61918	3887.86	FALSE	202
2022-09-13	08:39:21	1.26047	5.60682	4.11926	3819.79	FALSE	202
2022-09-13	08:39:21	0.643881	2.86411	4.11926	3890.72	FALSE	202
2022-09-13	08:39:21	0.873804	3.88685	4.11926	3823.68	FALSE	202
2022-09-13	08:39:22	0.332074	1.47713	1.96157	3892.2	FALSE	202
2022-09-13	08:39:22	0.760369	3.38227	1.96157	3827.06	FALSE	202
2022-09-13	08:39:22	0.335382	1.49185	1.96157	3893.69	FALSE	202
2022-09-13	08:39:22	0.336094	1.49501	1.96157	3828.55	FALSE	202
2022-09-13	08:39:23	0.26159	1.1636	1.91307	3894.85	FALSE	202
2022-09-13	08:39:23	0.633753	2.81906	1.91307	3831.37	FALSE	202
2022-09-13	08:39:23	0.198232	0.881776	1.91307	3895.74	FALSE	202
2022-09-13	08:39:23	0.62673	2.78782	1.91307	3834.16	FALSE	202
2022-09-13	08:39:24	0.801794	3.56654	5.70851	3899.3	FALSE	202
2022-09-13	08:39:24	1.70983	7.60567	5.70851	3841.77	FALSE	202
2022-09-13	08:39:24	1.49813	6.66398	5.70851	3905.97	FALSE	202
2022-09-13	08:39:24	1.12357	4.99786	5.70851	3846.76	FALSE	202
2022-09-13	08:39:25	2.32485	10.3414	18.0766	3916.31	FALSE	202
2022-09-13	08:39:25	3.74261	16.6479	18.0766	3863.41	1	203
2022-09-13	08:39:25	4.28938	19.08	18.0766	3935.39	1	204
2022-09-13	08:39:25	5.89833	26.237	18.0766	3889.65	1	205
2022-09-13	08:39:26	6.87487	30.5808	28.3696	3965.97	1	206
2022-09-13	08:39:26	6.29935	28.0208	28.3696	3917.67	1	207
2022-09-13	08:39:26	5.95909	26.5072	28.3696	3992.48	1	208
2022-09-13	08:39:27	3.00581	13.3704	22.2686	3931.04	1	209
2022-09-13	08:39:27	4.59904	20.4574	22.2686	4012.93	1	210
2022-09-13	08:39:27	3.9453	17.5495	22.2686	3948.59	1	211
2022-09-13	08:39:27	8.47467	37.697	22.2686	4050.63	1	212
2022-09-13	08:39:28	13.6968	60.9261	46.3891	4009.52	1	213
2022-09-13	08:39:28	8.09869	36.0246	46.3891	4086.66	1	214
2022-09-13	08:39:28	12.894	57.3551	46.3891	4066.87	1	215
2022-09-13	08:39:28	7.02546	31.2507	46.3891	4117.91	1	216
2022-09-13	08:39:29	7.13696	31.7466	30.2505	4098.62	1	217
2022-09-13	08:39:29	9.63243	42.847	30.2505	4160.75	1	218
2022-09-13	08:39:29	2.60536	11.5892	30.2505	4110.21	FALSE	218
2022-09-13	08:39:29	7.82775	34.8194	30.2505	4195.57	1	219
2022-09-13	08:39:30	7.36556	32.7635	33.5764	4142.97	1	220
2022-09-13	08:39:30	6.08556	27.0698	33.5764	4222.64	1	221
2022-09-13	08:39:30	9.1938	40.8959	33.5764	4183.87	1	222
2022-09-13	08:39:31	5.55003	24.6876	28.3823	4247.33	1	223
2022-09-13	08:39:31	8.26489	36.7639	28.3823	4220.63	1	224
2022-09-13	08:39:31	6.54357	29.1071	28.3823	4276.44	1	225
2022-09-13	08:39:31	5.16403	22.9706	28.3823	4243.6	1	226
2022-09-13	08:39:32	9.12922	40.6086	43.6333	4317.05	1	227
2022-09-13	08:39:32	3.88881	17.2982	43.6333	4260.9	1	228
2022-09-13	08:39:32	14.5403	64.6782	43.6333	4381.72	1	229
2022-09-13	08:39:32	11.6785	51.9483	43.6333	4312.85	1	230
2022-09-13	08:39:33	23.0941	102.727	57.8243	4484.45	1	231
2022-09-13	08:39:33	15.4348	68.6571	57.8243	4381.5	1	232
2022-09-13	08:39:33	5.00011	22.2415	57.8243	4506.69	1	233
2022-09-13	08:39:33	8.46891	37.6714	57.8243	4419.18	1	234
2022-09-13	08:39:34	15.3435	68.251	51.1284	4574.94	1	235
2022-09-13	08:39:34	14.0124	62.33	51.1284	4481.51	1	236
2022-09-13	08:39:34	7.53619	33.5225	51.1284	4608.47	1	237
2022-09-13	08:39:34	9.08464	40.4103	51.1284	4521.92	1	238
2022-09-13	08:39:35	3.69787	16.4489	13.9102	4624.91	1	239
2022-09-13	08:39:35	3.17228	14.1109	13.9102	4536.03	1	240
2022-09-13	08:39:35	2.51131	11.1708	13.9102	4636.09	FALSE	240
2022-09-13	08:39:36	0.388562	1.7284	5.48396	4537.76	FALSE	240
2022-09-13	08:39:36	0.480165	2.13587	5.48396	4638.22	FALSE	240
2022-09-13	08:39:36	0.510852	2.27237	5.48396	4540.03	FALSE	240
2022-09-13	08:39:36	3.55182	15.7992	5.48396	4654.02	1	241
2022-09-13	08:39:37	3.43787	15.2923	7.21242	4555.32	1	242
2022-09-13	08:39:37	1.96892	8.75815	7.21242	4662.78	FALSE	242
2022-09-13	08:39:37	0.779046	3.46535	7.21242	4558.79	FALSE	242
2022-09-13	08:39:37	0.29986	1.33384	7.21242	4664.11	FALSE	242
2022-09-13	08:39:38	0.504796	2.24543	2.99987	4561.03	FALSE	242
2022-09-13	08:39:38	0.420013	1.8683	2.99987	4665.98	FALSE	242
2022-09-13	08:39:38	0.805407	3.58261	2.99987	4564.61	FALSE	242
2022-09-13	08:39:38	0.967392	4.30315	2.99987	4670.28	FALSE	242
2022-09-13	08:39:39	0.178232	0.792812	0.448217	4565.41	FALSE	242
2022-09-13	08:39:39	0.204746	0.910751	0.448217	4671.19	FALSE	242
2022-09-13	08:39:39	-0.0100125	-0.0445376	0.448217	4565.41	FALSE	242
2022-09-13	08:39:39	0.0300893	0.133843	0.448217	4671.33	FALSE	242
2022-09-13	08:39:40	0.0130918	0.0582349	0.399754	4565.46	FALSE	242
2022-09-13	08:39:40	-0.0648216	-0.288339	0.399754	4671.33	FALSE	242
2022-09-13	08:39:40	0.321336	1.42937	0.399754	4566.89	FALSE	242
2022-09-13	08:39:41	-0.177239	-0.788395	-0.610522	4671.33	FALSE	242
2022-09-13	08:39:41	-0.138918	-0.617935	-0.610522	4566.89	FALSE	242
2022-09-13	08:39:41	-0.129045	-0.574018	-0.610522	4671.33	FALSE	242
2022-09-13	08:39:41	-0.103804	-0.461741	-0.610522	4566.89	FALSE	242
2022-09-13	08:39:42	-0.0542364	-0.241254	5.68684	4671.33	FALSE	242
2022-09-13	08:39:42	0.0258654	0.115054	5.68684	4567.01	FALSE	242
2022-09-13	08:39:42	1.18393	5.26636	5.68684	4676.59	FALSE	242
2022-09-13	08:39:42	3.95828	17.6072	5.68684	4584.62	1	243
2022-09-13	08:39:43	5.28688	23.5171	15.8559	4700.11	1	244
2022-09-13	08:39:43	3.87111	17.2195	15.8559	4601.84	1	245
2022-09-13	08:39:43	3.27314	14.5596	15.8559	4714.67	1	246
2022-09-13	08:39:43	1.82709	8.12726	15.8559	4609.96	FALSE	246
2022-09-13	08:39:44	0.657824	2.92613	2.0454	4717.6	FALSE	246
2022-09-13	08:39:44	0.408969	1.81918	2.0454	4611.78	FALSE	246
2022-09-13	08:39:44	0.312685	1.39089	2.0454	4718.99	FALSE	246
2022-09-13	08:39:45	0.37355	1.66163	1.95947	4613.44	FALSE	246
2022-09-13	08:39:45	0.397316	1.76734	1.95947	4720.76	FALSE	246
2022-09-13	08:39:45	0.607341	2.70157	1.95947	4616.15	FALSE	246
2022-09-13	08:39:45	0.38383	1.70735	1.95947	4722.46	FALSE	246
2022-09-13	08:39:46	0.302048	1.34357	1.36083	4617.49	FALSE	246
2022-09-13	08:39:46	0.311769	1.38681	1.36083	4723.85	FALSE	246
2022-09-13	08:39:46	0.282048	1.25461	1.36083	4618.74	FALSE	246
2022-09-13	08:39:46	0.32785	1.45834	1.36083	4725.31	FALSE	246
2022-09-13	08:39:47	0.332532	1.47917	1.27753	4620.22	FALSE	246
2022-09-13	08:39:47	0.276349	1.22926	1.27753	4726.54	FALSE	246
2022-09-13	08:39:47	0.26668	1.18625	1.27753	4621.41	FALSE	246
2022-09-13	08:39:47	0.273244	1.21544	1.27753	4727.75	FALSE	246
2022-09-13	08:39:48	0.318181	1.41533	1.38924	4622.82	FALSE	246
2022-09-13	08:39:48	0.314211	1.39767	1.38924	4729.15	FALSE	246
2022-09-13	08:39:48	0.308868	1.37391	1.38924	4624.2	FALSE	246
2022-09-13	08:39:48	0.308003	1.37006	1.38924	4730.52	FALSE	246
2022-09-13	08:39:49	0.302761	1.34674	1.35693	4625.54	FALSE	246
2022-09-13	08:39:49	0.301845	1.34267	1.35693	4731.86	FALSE	246
2022-09-13	08:39:49	0.310547	1.38138	1.35693	4626.93	FALSE	246
2022-09-13	08:39:50	0.306832	1.36485	1.35642	4733.23	FALSE	246
2022-09-13	08:39:50	0.300318	1.33587	1.35642	4628.26	FALSE	246
2022-09-13	08:39:50	0.307087	1.36598	1.35642	4734.59	FALSE	246
2022-09-13	08:39:50	0.305509	1.35897	1.35642	4629.62	FALSE	246
2022-09-13	08:39:51	0.31187	1.38726	1.37458	4735.98	FALSE	246
2022-09-13	08:39:51	0.306934	1.3653	1.37458	4630.99	FALSE	246
2022-09-13	08:39:51	0.309835	1.37821	1.37458	4737.36	FALSE	246
2022-09-13	08:39:51	0.307443	1.36757	1.37458	4632.35	FALSE	246
2022-09-13	08:39:52	0.312837	1.39156	1.37294	4738.75	FALSE	246
2022-09-13	08:39:52	0.310903	1.38296	1.37294	4633.74	FALSE	246
2022-09-13	08:39:52	0.305713	1.35987	1.37294	4740.11	FALSE	246
2022-09-13	08:39:52	0.305153	1.35738	1.37294	4635.09	FALSE	246
2022-09-13	08:39:53	0.311412	1.38522	1.38138	4741.5	FALSE	246
2022-09-13	08:39:53	0.304491	1.35444	1.38138	4636.45	FALSE	246
2022-09-13	08:39:53	0.315738	1.40447	1.38138	4742.9	FALSE	246
2022-09-13	08:39:54	0.313295	1.3936	1.39847	4637.84	FALSE	246
2022-09-13	08:39:54	0.313651	1.39518	1.39847	4744.3	FALSE	246
2022-09-13	08:39:54	0.314567	1.39926	1.39847	4639.24	FALSE	246
2022-09-13	08:39:54	0.316043	1.40582	1.39847	4745.7	FALSE	246
2022-09-13	08:39:55	0.316145	1.40628	1.40633	4640.65	FALSE	246
2022-09-13	08:39:55	0.316807	1.40922	1.40633	4747.11	FALSE	246
2022-09-13	08:39:55	0.316349	1.40718	1.40633	4642.06	FALSE	246
2022-09-13	08:39:55	0.315331	1.40266	1.40633	4748.51	FALSE	246
2022-09-13	08:39:56	0.318028	1.41465	1.40786	4643.47	FALSE	246
2022-09-13	08:39:56	0.315433	1.40311	1.40786	4749.92	FALSE	246
2022-09-13	08:39:56	0.316298	1.40696	1.40786	4644.88	FALSE	246
2022-09-13	08:39:56	0.316247	1.40673	1.40786	4751.32	FALSE	246
2022-09-13	08:39:57	0.31126	1.38455	1.39428	4646.26	FALSE	246
2022-09-13	08:39:57	0.316552	1.40809	1.39428	4752.73	FALSE	246
2022-09-13	08:39:57	0.313702	1.39541	1.39428	4647.66	FALSE	246
2022-09-13	08:39:57	0.312277	1.38907	1.39428	4754.12	FALSE	246
2022-09-13	08:39:58	0.310496	1.38115	1.40107	4649.04	FALSE	246
2022-09-13	08:39:58	0.315484	1.40334	1.40107	4755.52	FALSE	246
2022-09-13	08:39:58	0.318944	1.41873	1.40107	4650.46	FALSE	246
2022-09-13	08:39:59	0.314466	1.39881	1.8481	4756.92	FALSE	246
2022-09-13	08:39:59	0.318486	1.41669	1.8481	4651.87	FALSE	246
2022-09-13	08:39:59	0.317977	1.41443	1.8481	4758.34	FALSE	246
2022-09-13	08:39:59	0.710954	3.16247	1.8481	4655.04	FALSE	246
2022-09-13	08:40:00	0.734059	3.26524	2.0739	4761.6	FALSE	246
2022-09-13	08:40:00	0.50444	2.24385	2.0739	4657.28	FALSE	246
2022-09-13	08:40:00	0.322659	1.43525	2.0739	4763.04	FALSE	246
2022-09-13	08:40:00	0.303779	1.35127	2.0739	4658.63	FALSE	246
2022-09-13	08:40:01	0.258842	1.15138	0.986753	4764.19	FALSE	246
2022-09-13	08:40:01	0.249224	1.1086	0.986753	4659.74	FALSE	246
2022-09-13	08:40:01	0.16159	0.718785	0.986753	4764.91	FALSE	246
2022-09-13	08:40:01	0.217672	0.968249	0.986753	4660.71	FALSE	246
2022-09-13	08:40:02	2.35798	10.4888	55.4302	4775.4	FALSE	246
2022-09-13	08:40:02	13.7324	61.0845	55.4302	4721.79	1	247
2022-09-13	08:40:02	21.2934	94.7173	55.4302	4870.11	1	248
2022-09-13	08:40:03	9.45171	42.0431	71.3168	4763.84	1	249
2022-09-13	08:40:03	11.0767	49.2714	71.3168	4919.39	1	250
2022-09-13	08:40:03	32.2458	143.436	71.3168	4907.27	1	251
2022-09-13	08:40:03	11.3567	50.5169	71.3168	4969.9	1	252
2022-09-13	08:40:04	16.5751	73.7294	58.6423	4981	1	253
2022-09-13	08:40:04	16.7569	74.538	58.6423	5044.44	1	254
2022-09-13	08:40:04	15.5081	68.9831	58.6423	5049.98	1	255
2022-09-13	08:40:04	3.8934	17.3186	58.6423	5061.76	1	256
2022-09-13	08:40:05	8.72352	38.804	24.2477	5088.79	1	257
2022-09-13	08:40:05	5.86393	26.0839	24.2477	5087.84	1	258
2022-09-13	08:40:05	3.62149	16.1091	24.2477	5104.9	1	259
2022-09-13	08:40:05	3.59553	15.9936	24.2477	5103.84	1	260
2022-09-13	08:40:06	3.78057	16.8167	12.6333	5121.71	1	261
2022-09-13	08:40:06	4.04271	17.9828	12.6333	5121.82	1	262
2022-09-13	08:40:06	2.12215	9.43975	12.6333	5131.15	FALSE	262
2022-09-13	08:40:06	1.41497	6.29407	12.6333	5128.11	FALSE	262
2022-09-13	08:40:07	3.13441	13.9425	6.63553	5145.1	1	263
2022-09-13	08:40:07	0.603422	2.68414	6.63553	5130.8	FALSE	263
2022-09-13	08:40:07	0.737366	3.27995	6.63553	5148.38	FALSE	263
2022-09-13	08:40:08	0.732379	3.25777	2.8293	5134.06	FALSE	263
2022-09-13	08:40:08	0.582252	2.58997	2.8293	5150.97	FALSE	263
2022-09-13	08:40:08	0.242303	1.07781	2.8293	5135.13	FALSE	263
2022-09-13	08:40:08	0.98729	4.39166	2.8293	5155.36	FALSE	263
2022-09-13	08:40:09	1.50917	6.71309	3.91956	5141.85	FALSE	263
2022-09-13	08:40:09	0.959147	4.26648	3.91956	5159.62	FALSE	263
2022-09-13	08:40:09	0.477977	2.12614	3.91956	5143.97	FALSE	263
2022-09-13	08:40:09	0.578333	2.57254	3.91956	5162.2	FALSE	263
2022-09-13	08:40:10	0.579249	2.57662	2.33129	5146.55	FALSE	263
2022-09-13	08:40:10	0.529886	2.35704	2.33129	5164.55	FALSE	263
2022-09-13	08:40:10	0.498028	2.21533	2.33129	5148.76	FALSE	263
2022-09-13	08:40:10	0.489224	2.17617	2.33129	5166.73	FALSE	263
2022-09-13	08:40:11	0.834822	3.71346	4.19931	5152.48	FALSE	263
2022-09-13	08:40:11	1.03793	4.61692	4.19931	5171.35	FALSE	263
2022-09-13	08:40:11	0.703066	3.12738	4.19931	5155.6	FALSE	263
2022-09-13	08:40:11	1.20037	5.33949	4.19931	5176.69	FALSE	263
2022-09-13	08:40:12	0.82785	3.68244	5.09771	5159.29	FALSE	263
2022-09-13	08:40:12	1.42912	6.35701	5.09771	5183.04	FALSE	263
2022-09-13	08:40:12	1.18108	5.25368	5.09771	5164.54	FALSE	263
2022-09-13	08:40:13	0.814924	3.62494	6.45012	5186.67	FALSE	263
2022-09-13	08:40:13	1.27345	5.66456	6.45012	5170.21	FALSE	263
2022-09-13	08:40:13	1.42658	6.34571	6.45012	5193.01	FALSE	263
2022-09-13	08:40:13	2.28525	10.1652	6.45012	5180.37	FALSE	263
2022-09-13	08:40:14	0.828563	3.68561	3.48453	5196.7	FALSE	263
2022-09-13	08:40:14	1.13146	5.03296	3.48453	5185.4	FALSE	263
2022-09-13	08:40:14	0.802506	3.56971	3.48453	5200.27	FALSE	263
2022-09-13	08:40:14	0.370903	1.64985	3.48453	5187.05	FALSE	263
2022-09-13	08:40:15	0.429275	1.9095	1.90876	5202.18	FALSE	263
2022-09-13	08:40:15	0.332125	1.47736	1.90876	5188.53	FALSE	263
2022-09-13	08:40:15	0.512786	2.28097	1.90876	5204.46	FALSE	263
2022-09-13	08:40:15	0.442252	1.96723	1.90876	5190.5	FALSE	263
2022-09-13	08:40:16	0.607137	2.70067	3.69549	5207.16	FALSE	263
2022-09-13	08:40:16	0.768054	3.41646	3.69549	5193.91	FALSE	263
2022-09-13	08:40:16	1.11716	4.96935	3.69549	5212.13	FALSE	263
2022-09-13	08:40:17	2.72866	12.1376	22.7113	5206.05	FALSE	263
2022-09-13	08:40:17	5.64311	25.1017	22.7113	5237.23	1	264
2022-09-13	08:40:17	5.56836	24.7692	22.7113	5230.82	1	265
2022-09-13	08:40:17	6.48281	28.8368	22.7113	5266.07	1	266
2022-09-13	08:40:18	5.25349	23.3686	26.9797	5254.19	1	267
2022-09-13	08:40:18	5.4308	24.1573	26.9797	5290.23	1	268
2022-09-13	08:40:18	9.39273	41.7807	26.9797	5295.97	1	269
2022-09-13	08:40:18	4.18423	18.6123	26.9797	5308.84	1	270
2022-09-13	08:40:19	7.35787	32.7293	31.0063	5328.7	1	271
2022-09-13	08:40:19	10.393	46.2301	31.0063	5355.07	1	272
2022-09-13	08:40:19	2.48617	11.059	31.0063	5339.76	FALSE	272
2022-09-13	08:40:19	7.64505	34.0067	31.0063	5389.07	1	273
2022-09-13	08:40:20	1.35009	6.00547	5.52573	5345.76	FALSE	273
2022-09-13	08:40:20	2.29019	10.1872	5.52573	5399.26	FALSE	273
2022-09-13	08:40:20	0.647646	2.88086	5.52573	5348.65	FALSE	273
2022-09-13	08:40:20	0.681031	3.02936	5.52573	5402.29	FALSE	273
2022-09-13	08:40:21	0.756349	3.36439	2.41786	5352.01	FALSE	273
2022-09-13	08:40:21	0.436807	1.943	2.41786	5404.23	FALSE	273
2022-09-13	08:40:21	0.437519	1.94617	2.41786	5353.96	FALSE	273
2022-09-13	08:40:22	0.429733	1.91154	-0.0322	5406.15	FALSE	273
2022-09-13	08:40:22	-0.0713865	-0.317541	-0.0322	5353.96	FALSE	273
2022-09-13	08:40:22	-0.281412	-1.25178	-0.0322	5406.15	FALSE	273
2022-09-13	08:40:22	-0.10589	-0.47102	-0.0322	5353.96	FALSE	273
2022-09-13	08:40:23	0.0289188	0.128637	1.24363	5406.27	FALSE	273
2022-09-13	08:40:23	0.136858	0.608772	1.24363	5354.56	FALSE	273
2022-09-13	08:40:23	0.453295	2.01635	1.24363	5408.29	FALSE	273
2022-09-13	08:40:23	0.499249	2.22076	1.24363	5356.79	FALSE	273
2022-09-13	08:40:24	0.415789	1.84951	1.82784	5410.14	FALSE	273
2022-09-13	08:40:24	0.246476	1.09637	1.82784	5357.88	FALSE	273
2022-09-13	08:40:24	0.234618	1.04363	1.82784	5411.18	FALSE	273
2022-09-13	08:40:24	0.746781	3.32183	1.82784	5361.2	FALSE	273
2022-09-13	08:40:25	0.74215	3.30123	1.98262	5414.48	FALSE	273
2022-09-13	08:40:25	0.173448	0.771531	1.98262	5361.98	FALSE	273
2022-09-13	08:40:25	0.137723	0.612619	1.98262	5415.1	FALSE	273
2022-09-13	08:40:25	0.729529	3.24509	1.98262	5365.22	FALSE	273
2022-09-13	08:40:26	0.135738	0.60379	1.47517	5415.7	FALSE	273
2022-09-13	08:40:26	0.268766	1.19552	1.47517	5366.42	FALSE	273
2022-09-13	08:40:26	0.590394	2.62619	1.47517	5418.33	FALSE	273
2022-09-13	08:40:27	5.85721	26.054	29.4036	5392.47	1	274
2022-09-13	08:40:27	8.08637	35.9698	29.4036	5454.3	1	275
2022-09-13	08:40:27	8.92657	39.7072	29.4036	5432.18	1	276
2022-09-13	08:40:27	3.57075	15.8834	29.4036	5470.18	1	277
2022-09-13	08:40:28	6.58332	29.2839	18.1168	5461.46	1	278
2022-09-13	08:40:28	4.01691	17.868	18.1168	5488.05	1	279
2022-09-13	08:40:28	2.33319	10.3785	18.1168	5471.84	FALSE	279
2022-09-13	08:40:28	3.35792	14.9367	18.1168	5502.99	1	280
2022-09-13	08:40:29	0.566374	2.51934	1.8932	5474.36	FALSE	280
2022-09-13	08:40:29	0.72383	3.21974	1.8932	5506.2	FALSE	280
2022-09-13	08:40:29	0.268664	1.19507	1.8932	5475.55	FALSE	280
2022-09-13	08:40:29	0.143575	0.63865	1.8932	5506.84	FALSE	280
2022-09-13	08:40:30	0.262252	1.16655	1.24789	5476.72	FALSE	280
2022-09-13	08:40:30	0.192125	0.85461	1.24789	5507.7	FALSE	280
2022-09-13	08:40:30	0.387239	1.72252	1.24789	5478.44	FALSE	280
2022-09-13	08:40:31	0.292023	1.29898	22.5771	5509	FALSE	280
2022-09-13	08:40:31	1.85034	8.23068	22.5771	5486.67	FALSE	280
2022-09-13	08:40:31	7.77543	34.5867	22.5771	5543.58	1	281
2022-09-13	08:40:31	10.3844	46.1919	22.5771	5532.87	1	282
2022-09-13	08:40:32	14.4186	64.1368	55.7375	5607.72	1	283
2022-09-13	08:40:32	9.05558	40.281	55.7375	5573.15	1	284
2022-09-13	08:40:32	18.0323	80.2113	55.7375	5687.93	1	285
2022-09-13	08:40:32	8.61492	38.3209	55.7375	5611.47	1	286
2022-09-13	08:40:33	7.10948	31.6244	26.0275	5719.56	1	287
2022-09-13	08:40:33	8.56815	38.1128	26.0275	5649.58	1	288
2022-09-13	08:40:33	1.60958	7.15973	26.0275	5726.72	FALSE	288
2022-09-13	08:40:33	6.11772	27.2128	26.0275	5676.79	1	289
2022-09-13	08:40:34	4.04785	18.0056	11.7577	5744.72	1	290
2022-09-13	08:40:34	1.98648	8.83626	11.7577	5685.63	FALSE	290
2022-09-13	08:40:34	3.60887	16.053	11.7577	5760.77	1	291
2022-09-13	08:40:34	0.929784	4.13587	11.7577	5689.77	FALSE	291
2022-09-13	08:40:35	2.48006	11.0318	5.67971	5771.81	FALSE	291
2022-09-13	08:40:35	0.593957	2.64204	5.67971	5692.41	FALSE	291
2022-09-13	08:40:35	0.756552	3.36529	5.67971	5775.17	FALSE	291
2022-09-13	08:40:36	0.497417	2.21261	1.82427	5694.62	FALSE	291
2022-09-13	08:40:36	0.398028	1.77051	1.82427	5776.94	FALSE	291
2022-09-13	08:40:36	0.315229	1.4022	1.82427	5696.02	FALSE	291
2022-09-13	08:40:36	0.429784	1.91177	1.82427	5778.85	FALSE	291
2022-09-13	08:40:37	0.296756	1.32003	1.25687	5697.34	FALSE	291
2022-09-13	08:40:37	0.302456	1.34538	1.25687	5780.2	FALSE	291
2022-09-13	08:40:37	0.230496	1.02529	1.25687	5698.37	FALSE	291
2022-09-13	08:40:37	0.300522	1.33678	1.25687	5781.54	FALSE	291
2022-09-13	08:40:38	0.287443	1.2786	1.5189	5699.65	FALSE	291
2022-09-13	08:40:38	0.402557	1.79065	1.5189	5783.33	FALSE	291
2022-09-13	08:40:38	0.287239	1.2777	1.5189	5700.92	FALSE	291
2022-09-13	08:40:38	0.388613	1.72863	1.5189	5785.06	FALSE	291
2022-09-13	08:40:39	0.404847	1.80084	1.62442	5702.72	FALSE	291
2022-09-13	08:40:39	0.353143	1.57085	1.62442	5786.63	FALSE	291
2022-09-13	08:40:39	0.33757	1.50158	1.62442	5704.23	FALSE	291
2022-09-13	08:40:40	0.319504	1.42122	1.50803	5788.05	FALSE	291
2022-09-13	08:40:40	0.305	1.3567	1.50803	5705.58	FALSE	291
2022-09-13	08:40:40	0.38098	1.69468	1.50803	5789.74	FALSE	291
2022-09-13	08:40:40	0.350598	1.55953	1.50803	5707.14	FALSE	291
2022-09-13	08:40:41	0.391412	1.74108	1.30792	5791.48	FALSE	291
2022-09-13	08:40:41	0.23299	1.03639	1.30792	5708.18	FALSE	291
2022-09-13	08:40:41	0.265	1.17877	1.30792	5792.66	FALSE	291
2022-09-13	08:40:41	0.28673	1.27543	1.30792	5709.45	FALSE	291
2022-09-13	08:40:42	0.271107	1.20594	1.11081	5793.87	FALSE	291
2022-09-13	08:40:42	0.348664	1.55093	1.11081	5711.01	FALSE	291
2022-09-13	08:40:42	0.187392	0.833557	1.11081	5794.7	FALSE	291
2022-09-13	08:40:42	0.191718	0.8528	1.11081	5711.86	FALSE	291
2022-09-13	08:40:43	0.230903	1.0271	1.04148	5795.73	FALSE	291
2022-09-13	08:40:43	0.251616	1.11924	1.04148	5712.98	FALSE	291
2022-09-13	08:40:43	0.237265	1.0554	1.04148	5796.78	FALSE	291
2022-09-13	08:40:43	0.216756	0.964174	1.04148	5713.94	FALSE	291
2022-09-13	08:40:44	0.226425	1.00718	2.53519	5797.79	FALSE	291
2022-09-13	08:40:44	0.773193	3.43932	2.53519	5717.38	FALSE	291
2022-09-13	08:40:44	0.710191	3.15907	2.53519	5800.95	FALSE	291
2022-09-13	08:40:45	2.43762	10.843	6.17389	5728.22	FALSE	291
2022-09-13	08:40:45	1.01004	4.49286	6.17389	5805.44	FALSE	291
2022-09-13	08:40:45	1.14846	5.10858	6.17389	5733.33	FALSE	291
2022-09-13	08:40:45	0.955687	4.25109	6.17389	5809.69	FALSE	291
2022-09-13	08:40:46	2.62281	11.6668	6.8337	5745	FALSE	291
2022-09-13	08:40:46	1.52281	6.77376	6.8337	5816.47	FALSE	291
2022-09-13	08:40:46	1.05375	4.68729	6.8337	5749.69	FALSE	291
2022-09-13	08:40:46	0.945763	4.20694	6.8337	5820.68	FALSE	291
2022-09-13	08:40:47	1.54373	6.86682	7.66873	5756.55	FALSE	291
2022-09-13	08:40:47	1.30276	5.79494	7.66873	5826.47	FALSE	291
2022-09-13	08:40:47	1.77263	7.88501	7.66873	5764.44	FALSE	291
2022-09-13	08:40:47	2.27691	10.1282	7.66873	5836.6	FALSE	291
2022-09-13	08:40:48	2.22632	9.90312	13.2765	5774.34	FALSE	291
2022-09-13	08:40:48	3.55665	15.8207	13.2765	5852.42	1	292
2022-09-13	08:40:48	3.17111	14.1057	13.2765	5788.45	1	293
2022-09-13	08:40:49	5.37533	23.9105	14.5974	5876.33	1	294
2022-09-13	08:40:49	1.4481	6.44144	14.5974	5794.89	FALSE	294
2022-09-13	08:40:49	4.30892	19.1669	14.5974	5895.5	1	295
2022-09-13	08:40:49	1.99426	8.87087	14.5974	5803.76	FALSE	295
2022-09-13	08:40:50	4.33253	19.272	9.01728	5914.77	1	296
2022-09-13	08:40:50	2.09207	9.30595	9.01728	5813.07	FALSE	296
2022-09-13	08:40:50	0.930903	4.14084	9.01728	5918.91	FALSE	296
2022-09-13	08:40:50	0.753193	3.35035	9.01728	5816.42	FALSE	296
2022-09-13	08:40:51	0.546119	2.42925	0.170119	5921.34	FALSE	296
2022-09-13	08:40:51	0.293957	1.30758	0.170119	5817.72	FALSE	296
2022-09-13	08:40:51	-0.117544	-0.522859	0.170119	5921.34	FALSE	296
2022-09-13	08:40:51	-0.569554	-2.53349	0.170119	5817.72	FALSE	296
2022-09-13	08:40:52	-0.529249	-2.35421	-0.199319	5921.34	FALSE	296
2022-09-13	08:40:52	-0.00975804	-0.0434057	-0.199319	5817.72	FALSE	296
2022-09-13	08:40:52	0.126018	0.560553	-0.199319	5921.9	FALSE	296
2022-09-13	08:40:52	0.233753	1.03978	-0.199319	5818.76	FALSE	296
2022-09-13	08:40:53	0.240878	1.07147	1.37602	5922.97	FALSE	296
2022-09-13	08:40:53	0.366018	1.62812	1.37602	5820.39	FALSE	296
2022-09-13	08:40:53	0.321132	1.42846	1.37602	5924.4	FALSE	296
2022-09-13	08:40:54	0.521997	2.32195	1.38969	5822.71	FALSE	296
2022-09-13	08:40:54	0.344339	1.53169	1.38969	5925.93	FALSE	296
2022-09-13	08:40:54	0.195534	0.869774	1.38969	5823.58	FALSE	296
2022-09-13	08:40:54	0.187799	0.835368	1.38969	5926.77	FALSE	296
2022-09-13	08:40:55	0.166832	0.742102	0.668703	5824.32	FALSE	296
2022-09-13	08:40:55	0.182049	0.80979	0.668703	5927.58	FALSE	296
2022-09-13	08:40:55	0.115535	0.513923	0.668703	5824.84	FALSE	296
2022-09-13	08:40:55	0.136909	0.608999	0.668703	5928.18	FALSE	296
2022-09-13	08:40:56	0.281387	1.25167	0.860156	5826.09	FALSE	296
2022-09-13	08:40:56	0.148512	0.660611	0.860156	5928.85	FALSE	296
2022-09-13	08:40:56	0.211107	0.939046	0.860156	5827.03	FALSE	296
2022-09-13	08:40:56	0.132481	0.589302	0.860156	5929.43	FALSE	296
2022-09-13	08:40:57	0.180929	0.804808	1.0309	5827.83	FALSE	296
2022-09-13	08:40:57	0.277468	1.23423	1.0309	5930.67	FALSE	296
2022-09-13	08:40:57	0.267494	1.18987	1.0309	5829.02	FALSE	296
2022-09-13	08:40:57	0.201132	0.894675	1.0309	5931.56	FALSE	296
2022-09-13	08:40:58	0.289122	1.28607	1.61974	5830.31	FALSE	296
2022-09-13	08:40:58	0.382557	1.70169	1.61974	5933.27	FALSE	296
2022-09-13	08:40:58	0.420725	1.87147	1.61974	5832.18	FALSE	296
2022-09-13	08:40:59	0.376705	1.67566	1.34963	5934.94	FALSE	296
2022-09-13	08:40:59	0.327188	1.4554	1.34963	5833.64	FALSE	296
2022-09-13	08:40:59	0.158792	0.706339	1.34963	5935.65	FALSE	296
2022-09-13	08:40:59	0.350954	1.56111	1.34963	5835.2	FALSE	296
2022-09-13	08:41:00	0.496094	2.20673	45.8619	5937.85	FALSE	296
2022-09-13	08:41:00	5.11767	22.7644	45.8619	5857.96	1	297
2022-09-13	08:41:00	16.4316	73.091	45.8619	6010.94	1	298
2022-09-13	08:41:00	19.1955	85.3854	45.8619	5943.35	1	299
2022-09-13	08:41:01	4.81507	21.4184	27.881	6032.36	1	300
2022-09-13	08:41:01	7.3854	32.8517	27.881	5976.2	1	301
2022-09-13	08:41:01	8.50006	37.81	27.881	6070.17	1	302
2022-09-13	08:41:01	4.37115	19.4437	27.881	5995.64	1	303
2022-09-13	08:41:02	7.73609	34.4117	30.4373	6104.58	1	304
2022-09-13	08:41:02	9.74179	43.3334	30.4373	6038.98	1	305
2022-09-13	08:41:02	3.04994	13.5667	30.4373	6118.15	1	306
2022-09-13	08:41:03	7.99609	35.5682	23.0586	6074.55	1	307
2022-09-13	08:41:03	3.35757	14.9351	23.0586	6133.09	1	308
2022-09-13	08:41:03	3.86215	17.1796	23.0586	6091.72	1	309
2022-09-13	08:41:03	5.5194	24.5514	23.0586	6157.64	1	310
2022-09-13	08:41:04	3.82983	17.0358	27.6646	6108.76	1	311
2022-09-13	08:41:04	7.72601	34.3668	27.6646	6192.01	1	312
2022-09-13	08:41:04	8.89054	39.5469	27.6646	6148.31	1	313
2022-09-13	08:41:04	4.4307	19.7086	27.6646	6211.71	1	314
2022-09-13	08:41:05	9.79828	43.5847	22.2467	6191.89	1	315
2022-09-13	08:41:05	2.87848	12.8041	22.2467	6224.52	FALSE	315
2022-09-13	08:41:05	3.12011	13.8789	22.2467	6205.77	1	316
2022-09-13	08:41:05	4.20826	18.7192	22.2467	6243.24	1	317
2022-09-13	08:41:06	3.33686	14.843	25.7187	6220.61	1	318
2022-09-13	08:41:06	6.69853	29.7964	25.7187	6273.03	1	319
2022-09-13	08:41:06	5.37599	23.9135	25.7187	6244.53	1	320
2022-09-13	08:41:06	7.71594	34.322	25.7187	6307.36	1	321
2022-09-13	08:41:07	6.52459	29.0227	32.085	6273.55	1	322
2022-09-13	08:41:07	4.722	21.0044	32.085	6328.36	1	323
2022-09-13	08:41:07	10.3925	46.2279	32.085	6319.78	1	324
2022-09-13	08:41:08	3.33966	14.8555	38.0869	6343.22	1	325
2022-09-13	08:41:08	6.87543	30.5833	38.0869	6350.36	1	326
2022-09-13	08:41:08	11.1887	49.7696	38.0869	6392.98	1	327
2022-09-13	08:41:08	12.8455	57.1394	38.0869	6407.5	1	328
2022-09-13	08:41:09	9.89736	44.0254	40.6122	6437.01	1	329
2022-09-13	08:41:09	5.10266	22.6977	40.6122	6430.2	1	330
2022-09-13	08:41:09	11.4479	50.9225	40.6122	6487.93	1	331
2022-09-13	08:41:09	10.0722	44.8032	40.6122	6475	1	332
2022-09-13	08:41:10	13.2513	58.9444	30.3594	6546.88	1	333
2022-09-13	08:41:10	8.42958	37.4965	30.3594	6512.5	1	334
2022-09-13	08:41:10	3.24118	14.4174	30.3594	6561.29	1	335
2022-09-13	08:41:10	2.37833	10.5793	30.3594	6523.08	FALSE	335
2022-09-13	08:41:11	0.485	2.15738	2.20393	6563.45	FALSE	335
2022-09-13	08:41:11	0.474924	2.11256	2.20393	6525.19	FALSE	335
2022-09-13	08:41:11	0.526476	2.34187	2.20393	6565.79	FALSE	335
2022-09-13	08:41:12	0.255891	1.13825	2.28805	6526.33	FALSE	335
2022-09-13	08:41:12	0.445916	1.98352	2.28805	6567.78	FALSE	335
2022-09-13	08:41:12	0.552736	2.45868	2.28805	6528.79	FALSE	335
2022-09-13	08:41:12	0.802964	3.57174	2.28805	6571.35	FALSE	335
2022-09-13	08:41:13	0.770293	3.42642	4.78815	6532.21	FALSE	335
2022-09-13	08:41:13	1.05228	4.68075	4.78815	6576.03	FALSE	335
2022-09-13	08:41:13	1.58179	7.03612	4.78815	6539.25	FALSE	335
2022-09-13	08:41:13	0.901336	4.00932	4.78815	6580.04	FALSE	335
2022-09-13	08:41:14	0.817214	3.63513	4.17774	6542.88	FALSE	335
2022-09-13	08:41:14	0.644695	2.86773	4.17774	6582.91	FALSE	335
2022-09-13	08:41:14	1.08164	4.81135	4.17774	6547.7	FALSE	335
2022-09-13	08:41:14	1.21324	5.39673	4.17774	6588.3	FALSE	335
2022-09-13	08:41:15	1.55899	6.9347	6.95215	6554.63	FALSE	335
2022-09-13	08:41:15	1.72851	7.68876	6.95215	6595.99	FALSE	335
2022-09-13	08:41:15	1.68495	7.49499	6.95215	6562.13	FALSE	335
2022-09-13	08:41:15	1.2792	5.69014	6.95215	6601.68	FALSE	335
2022-09-13	08:41:16	1.16134	5.16587	2.99934	6567.29	FALSE	335
2022-09-13	08:41:16	0.416247	1.85155	2.99934	6603.53	FALSE	335
2022-09-13	08:41:16	0.445255	1.98058	2.99934	6569.27	FALSE	335
2022-09-13	08:41:17	0.457061	2.0331	1.82189	6605.57	FALSE	335
2022-09-13	08:41:17	0.817723	3.6374	1.82189	6572.91	FALSE	335
2022-09-13	08:41:17	0.119606	0.532031	1.82189	6606.1	FALSE	335
2022-09-13	08:41:17	0.243931	1.08505	1.82189	6573.99	FALSE	335
2022-09-13	08:41:18	1.07085	4.76335	31.906	6610.86	FALSE	335
2022-09-13	08:41:18	12.2865	54.6528	31.906	6628.65	1	336
2022-09-13	08:41:18	7.87009	35.0077	31.906	6645.87	1	337
2022-09-13	08:41:18	7.46372	33.2001	31.906	6661.85	1	338
2022-09-13	08:41:19	11.7855	52.4243	30.4642	6698.29	1	339
2022-09-13	08:41:19	5.21375	23.1918	30.4642	6685.04	1	340
2022-09-13	08:41:19	5.52301	24.5675	30.4642	6722.86	1	341
2022-09-13	08:41:19	4.87238	21.6733	30.4642	6706.71	1	342
2022-09-13	08:41:20	5.01446	22.3053	29.6436	6745.17	1	343
2022-09-13	08:41:20	6.02439	26.7977	29.6436	6733.51	1	344
2022-09-13	08:41:20	5.88632	26.1835	29.6436	6771.35	1	345
2022-09-13	08:41:20	9.73151	43.2877	29.6436	6776.8	1	346
2022-09-13	08:41:21	12.8369	57.1011	65.6139	6828.45	1	347
2022-09-13	08:41:21	16.745	74.4851	65.6139	6851.28	1	348
2022-09-13	08:41:21	14.6701	65.2555	65.6139	6893.71	1	349
2022-09-13	08:41:22	8.87177	39.4634	40.5388	6890.75	1	350
2022-09-13	08:41:22	12.8864	57.3213	40.5388	6951.03	1	351
2022-09-13	08:41:22	7.58825	33.7541	40.5388	6924.5	1	352
2022-09-13	08:41:22	7.10774	31.6166	40.5388	6982.65	1	353
2022-09-13	08:41:23	12.8258	57.0517	45.7094	6981.55	1	354
2022-09-13	08:41:23	6.03955	26.8651	45.7094	7009.51	1	355
2022-09-13	08:41:23	9.45614	42.0628	45.7094	7023.62	1	356
2022-09-13	08:41:23	12.7822	56.8578	45.7094	7066.37	1	357
2022-09-13	08:41:24	5.89711	26.2315	41.0619	7049.85	1	358
2022-09-13	08:41:24	10.4379	46.4299	41.0619	7112.8	1	359
2022-09-13	08:41:24	14.4223	64.1533	41.0619	7114	1	360
2022-09-13	08:41:24	6.16724	27.4331	41.0619	7140.23	1	361
2022-09-13	08:41:25	9.49726	42.2457	26.3972	7156.25	1	362
2022-09-13	08:41:25	5.13925	22.8604	26.3972	7163.09	1	363
2022-09-13	08:41:25	3.16658	14.0856	26.3972	7170.33	1	364
2022-09-13	08:41:26	8.3965	37.3493	32.4259	7200.44	1	365
2022-09-13	08:41:26	8.2654	36.7662	32.4259	7207.1	1	366
2022-09-13	08:41:26	9.48179	42.1769	32.4259	7242.62	1	367
2022-09-13	08:41:26	3.01497	13.4112	32.4259	7220.51	1	368
2022-09-13	08:41:27	2.91619	12.9718	8.88003	7255.59	FALSE	368
2022-09-13	08:41:27	1.88398	8.38032	8.88003	7228.89	FALSE	368
2022-09-13	08:41:27	1.24276	5.52805	8.88003	7261.12	FALSE	368
2022-09-13	08:41:27	1.94235	8.63996	8.88003	7237.53	FALSE	368
2022-09-13	08:41:28	0.751361	3.3422	8.30324	7264.46	FALSE	368
2022-09-13	08:41:28	1.67477	7.44971	8.30324	7244.98	FALSE	368
2022-09-13	08:41:28	1.50978	6.7158	8.30324	7271.18	FALSE	368
2022-09-13	08:41:28	3.5307	15.7053	8.30324	7260.68	1	369
2022-09-13	08:41:29	1.42307	6.3301	14.6902	7277.51	FALSE	369
2022-09-13	08:41:29	3.18083	14.149	14.6902	7274.83	1	370
2022-09-13	08:41:29	4.53523	20.1736	14.6902	7297.68	1	371
2022-09-13	08:41:29	4.0709	18.1082	14.6902	7292.94	1	372
2022-09-13	08:41:30	9.47772	42.1588	42.5908	7339.84	1	373
2022-09-13	08:41:30	6.38892	28.4192	42.5908	7321.36	1	374
2022-09-13	08:41:30	12.8579	57.1945	42.5908	7397.03	1	375
2022-09-13	08:41:31	8.81696	39.2196	31.8584	7360.58	1	376
2022-09-13	08:41:31	9.14724	40.6888	31.8584	7437.72	1	377
2022-09-13	08:41:31	6.58352	29.2848	31.8584	7389.86	1	378
2022-09-13	08:41:31	4.10067	18.2406	31.8584	7455.96	1	379
2022-09-13	08:41:32	6.33034	28.1586	10.9189	7418.02	1	380
2022-09-13	08:41:32	1.49782	6.6626	10.9189	7462.62	FALSE	380
2022-09-13	08:41:32	0.797163	3.54594	10.9189	7421.57	FALSE	380
2022-09-13	08:41:32	1.19335	5.30826	10.9189	7467.93	FALSE	380
2022-09-13	08:41:33	0.399402	1.77662	6.27123	7423.35	FALSE	380
2022-09-13	08:41:33	1.23131	5.47711	6.27123	7473.41	FALSE	380
2022-09-13	08:41:33	0.674058	2.99834	6.27123	7426.34	FALSE	380
2022-09-13	08:41:33	3.33457	14.8328	6.27123	7488.24	1	381
2022-09-13	08:41:34	1.65391	7.35692	9.1033	7433.7	FALSE	381
2022-09-13	08:41:34	3.58195	15.9332	9.1033	7504.18	1	382
2022-09-13	08:41:34	0.903677	4.01974	9.1033	7437.72	FALSE	382
2022-09-13	08:41:35	0.888817	3.95364	2.07011	7508.13	FALSE	382
2022-09-13	08:41:35	0.322252	1.43344	2.07011	7439.15	FALSE	382
2022-09-13	08:41:35	0.365407	1.6254	2.07011	7509.76	FALSE	382
2022-09-13	08:41:35	0.285051	1.26796	2.07011	7440.42	FALSE	382
2022-09-13	08:41:36	0.663066	2.94945	1.56559	7512.7	FALSE	382
2022-09-13	08:41:36	0.435687	1.93802	1.56559	7442.36	FALSE	382
2022-09-13	08:41:36	0.224746	0.999715	1.56559	7513.7	FALSE	382
2022-09-13	08:41:36	0.0843386	0.375155	1.56559	7442.74	FALSE	382
2022-09-13	08:41:37	0.0107	0.0475957	-0.243801	7513.75	FALSE	382
2022-09-13	08:41:37	-0.192252	-0.855175	-0.243801	7442.74	FALSE	382
2022-09-13	08:41:37	-0.0733712	-0.32637	-0.243801	7513.75	FALSE	382
2022-09-13	08:41:37	0.0356872	0.158744	-0.243801	7442.89	FALSE	382
2022-09-13	08:41:38	0.0165015	0.073402	0.85461	7513.83	FALSE	382
2022-09-13	08:41:38	0.346527	1.54142	0.85461	7444.44	FALSE	382
2022-09-13	08:41:38	0.308715	1.37323	0.85461	7515.2	FALSE	382
2022-09-13	08:41:38	0.096756	0.43039	0.85461	7444.87	FALSE	382
2022-09-13	08:41:39	0.208919	0.929313	1.0305	7516.13	FALSE	382
2022-09-13	08:41:39	0.268613	1.19484	1.0305	7446.06	FALSE	382
2022-09-13	08:41:39	0.217468	0.967341	1.0305	7517.1	FALSE	382
2022-09-13	08:41:40	0.318791	1.41805	1.79077	7447.48	FALSE	382
2022-09-13	08:41:40	0.442405	1.96791	1.79077	7519.06	FALSE	382
2022-09-13	08:41:40	0.479606	2.13338	1.79077	7449.61	FALSE	382
2022-09-13	08:41:40	0.369529	1.64374	1.79077	7520.71	FALSE	382
2022-09-13	08:41:41	0.339199	1.50882	6.67988	7451.12	FALSE	382
2022-09-13	08:41:41	0.320318	1.42484	6.67988	7522.13	FALSE	382
2022-09-13	08:41:41	2.48067	11.0345	6.67988	7462.16	FALSE	382
2022-09-13	08:41:41	2.86663	12.7513	6.67988	7534.88	FALSE	382
2022-09-13	08:41:42	2.0566	9.14817	15.9011	7471.3	FALSE	382
2022-09-13	08:41:42	2.91355	12.9601	15.9011	7547.84	FALSE	382
2022-09-13	08:41:42	5.06622	22.5356	15.9011	7493.84	1	383
2022-09-13	08:41:42	4.2625	18.9605	15.9011	7566.8	1	384
2022-09-13	08:41:43	1.92892	8.58022	3.84651	7502.42	FALSE	384
2022-09-13	08:41:43	0.498995	2.21963	3.84651	7569.02	FALSE	384
2022-09-13	08:41:43	0.75645	3.36484	3.84651	7505.78	FALSE	384
2022-09-13	08:41:43	0.274567	1.22133	3.84651	7570.24	FALSE	384
2022-09-13	08:41:44	0.842405	3.74719	16.9683	7509.53	FALSE	384
2022-09-13	08:41:44	1.60261	7.12873	16.9683	7577.37	FALSE	384
2022-09-13	08:41:44	8.99889	40.0289	16.9683	7549.56	1	385
2022-09-13	08:41:45	7.4479	33.1297	29.9032	7610.5	1	386
2022-09-13	08:41:45	5.5768	24.8067	29.9032	7574.37	1	387
2022-09-13	08:41:45	7.92179	35.2377	29.9032	7645.74	1	388
2022-09-13	08:41:45	5.94367	26.4386	29.9032	7600.81	1	389
2022-09-13	08:41:46	5.14881	22.9029	44.3105	7668.64	1	390
2022-09-13	08:41:46	15.3407	68.2385	44.3105	7669.04	1	391
2022-09-13	08:41:46	7.81894	34.7802	44.3105	7703.42	1	392
2022-09-13	08:41:46	11.5373	51.3202	44.3105	7720.36	1	393
2022-09-13	08:41:47	13.6742	60.8256	48.7079	7764.25	1	394
2022-09-13	08:41:47	7.9624	35.4183	48.7079	7755.78	1	395
2022-09-13	08:41:47	15.083	67.0922	48.7079	7831.34	1	396
2022-09-13	08:41:47	7.08052	31.4956	48.7079	7787.28	1	397
2022-09-13	08:41:48	9.79726	43.5802	35.2093	7874.92	1	398
2022-09-13	08:41:48	6.85421	30.4889	35.2093	7817.77	1	399
2022-09-13	08:41:48	7.09477	31.559	35.2093	7906.48	1	400
2022-09-13	08:41:49	4.22032	18.7728	12.2719	7836.54	1	401
2022-09-13	08:41:49	3.67579	16.3506	12.2719	7922.83	1	402
2022-09-13	08:41:49	2.49462	11.0966	12.2719	7847.64	FALSE	402
2022-09-13	08:41:49	0.644695	2.86773	12.2719	7925.7	FALSE	402
2022-09-13	08:41:50	0.443982	1.97492	1.57023	7849.61	FALSE	402
2022-09-13	08:41:50	0.402964	1.79246	1.57023	7927.49	FALSE	402
2022-09-13	08:41:50	0.266883	1.18715	1.57023	7850.8	FALSE	402
2022-09-13	08:41:50	0.298181	1.32637	1.57023	7928.82	FALSE	402
2022-09-13	08:41:51	0.275127	1.22382	1.56977	7852.02	FALSE	402
2022-09-13	08:41:51	0.264644	1.17719	1.56977	7930	FALSE	402
2022-09-13	08:41:51	0.338944	1.50769	1.56977	7853.53	FALSE	402
2022-09-13	08:41:51	0.532888	2.37039	1.56977	7932.37	FALSE	402
2022-09-13	08:41:52	0.500216	2.22506	2.54657	7855.76	FALSE	402
2022-09-13	08:41:52	0.749529	3.33405	2.54657	7935.7	FALSE	402
2022-09-13	08:41:52	0.587646	2.61397	2.54657	7858.37	FALSE	402
2022-09-13	08:41:52	0.452583	2.01318	2.54657	7937.71	FALSE	402
2022-09-13	08:41:53	0.376959	1.67679	1.63604	7860.05	FALSE	402
2022-09-13	08:41:53	0.36444	1.6211	1.63604	7939.33	FALSE	402
2022-09-13	08:41:53	0.361998	1.61024	1.63604	7861.66	FALSE	402
2022-09-13	08:41:54	0.357265	1.58919	1.57538	7940.92	FALSE	402
2022-09-13	08:41:54	0.359555	1.59937	1.57538	7863.26	FALSE	402
2022-09-13	08:41:54	0.352939	1.56994	1.57538	7942.49	FALSE	402
2022-09-13	08:41:54	0.346883	1.543	1.57538	7864.8	FALSE	402
2022-09-13	08:41:55	0.725153	3.22563	8.57365	7945.72	FALSE	402
2022-09-13	08:41:55	1.77299	7.88661	8.57365	7872.69	FALSE	402
2022-09-13	08:41:55	1.93024	8.58609	8.57365	7954.3	FALSE	402
2022-09-13	08:41:55	3.28139	14.5963	8.57365	7887.28	1	403
2022-09-13	08:41:56	0.993753	4.42041	2.42585	7958.73	FALSE	403
2022-09-13	08:41:56	0.665254	2.95918	2.42585	7890.24	FALSE	403
2022-09-13	08:41:56	0.396654	1.7644	2.42585	7960.49	FALSE	403
2022-09-13	08:41:56	0.125764	0.559423	2.42585	7890.8	FALSE	403
2022-09-13	08:41:57	0.0155855	0.0693274	0.508186	7960.56	FALSE	403
2022-09-13	08:41:57	0.0682572	0.303622	0.508186	7891.1	FALSE	403
2022-09-13	08:41:57	0.258893	1.15161	0.508186	7961.71	FALSE	403
2022-09-13	08:41:58	0.180776	0.804128	1.12439	7891.91	FALSE	403
2022-09-13	08:41:58	0.113194	0.50351	1.12439	7962.21	FALSE	403
2022-09-13	08:41:58	0.331667	1.47532	1.12439	7893.38	FALSE	403
2022-09-13	08:41:58	0.385458	1.71459	1.12439	7963.93	FALSE	403
2022-09-13	08:41:59	0.667595	2.9696	5.19042	7896.35	FALSE	403
2022-09-13	08:41:59	0.44154	1.96406	5.19042	7965.89	FALSE	403
2022-09-13	08:41:59	1.07177	4.76745	5.19042	7901.12	FALSE	403
2022-09-13	08:41:59	2.48653	11.0606	5.19042	7976.95	FALSE	403
2022-09-13	08:42:00	11.4444	50.907	78.0248	7952.03	1	404
2022-09-13	08:42:00	20.095	89.3866	78.0248	8066.34	1	405
2022-09-13	08:42:00	31.2127	138.84	78.0248	8090.87	1	406
2022-09-13	08:42:00	7.41095	32.9654	78.0248	8099.31	1	407
2022-09-13	08:42:01	18.0598	80.3336	56.7608	8171.2	1	408
2022-09-13	08:42:01	13.0754	58.162	56.7608	8157.47	1	409
2022-09-13	08:42:01	8.84851	39.3599	56.7608	8210.56	1	410
2022-09-13	08:42:01	11.0579	49.1878	56.7608	8206.66	1	411
2022-09-13	08:42:02	8.17894	36.3816	38.2133	8246.94	1	412
2022-09-13	08:42:02	8.9711	39.9052	38.2133	8246.56	1	413
2022-09-13	08:42:02	8.62215	38.353	38.2133	8285.3	1	414
2022-09-13	08:42:03	8.36673	37.2169	43.3451	8283.78	1	415
2022-09-13	08:42:03	10.3606	46.086	43.3451	8331.38	1	416
2022-09-13	08:42:03	11.1392	49.5494	43.3451	8333.33	1	417
2022-09-13	08:42:03	9.11115	40.5282	43.3451	8371.91	1	418
2022-09-13	08:42:04	8.30902	36.9602	34.252	8370.29	1	419
2022-09-13	08:42:04	8.82148	39.2397	34.252	8411.15	1	420
2022-09-13	08:42:04	7.05136	31.3659	34.252	8401.65	1	421
2022-09-13	08:42:04	6.61894	29.4424	34.252	8440.59	1	422
2022-09-13	08:42:05	7.5538	33.6008	30.192	8435.25	1	423
2022-09-13	08:42:05	6.29441	27.9988	30.192	8468.59	1	424
2022-09-13	08:42:05	9.5652	42.5479	30.192	8477.8	1	425
2022-09-13	08:42:05	3.73645	16.6205	30.192	8485.21	1	426
2022-09-13	08:42:06	10.4989	46.7012	22.586	8524.5	1	427
2022-09-13	08:42:06	4.55619	20.2668	22.586	8505.48	1	428
2022-09-13	08:42:06	3.50566	15.5939	22.586	8540.1	1	429
2022-09-13	08:42:06	1.74953	7.78226	22.586	8513.26	FALSE	429
2022-09-13	08:42:07	2.25111	10.0134	15.9678	8550.11	FALSE	429
2022-09-13	08:42:07	6.51517	28.9808	15.9678	8542.24	1	430
2022-09-13	08:42:07	2.00291	8.90934	15.9678	8559.02	FALSE	430
2022-09-13	08:42:08	2.15696	9.59459	5.05912	8551.84	FALSE	430
2022-09-13	08:42:08	0.796603	3.54345	5.05912	8562.56	FALSE	430
2022-09-13	08:42:08	0.782201	3.47939	5.05912	8555.32	FALSE	430
2022-09-13	08:42:08	0.813601	3.61906	5.05912	8566.18	FALSE	430
2022-09-13	08:42:09	0.570395	2.53723	10.542	8557.85	FALSE	430
2022-09-13	08:42:09	2.40149	10.6823	10.542	8576.86	FALSE	430
2022-09-13	08:42:09	2.97945	13.2532	10.542	8571.11	FALSE	430
2022-09-13	08:42:09	3.52846	15.6953	10.542	8592.56	1	431
2022-09-13	08:42:10	5.1683	22.9896	36.354	8594.1	1	432
2022-09-13	08:42:10	5.92286	26.3461	36.354	8618.91	1	433
2022-09-13	08:42:10	9.98256	44.4044	36.354	8638.5	1	434
2022-09-13	08:42:10	11.6173	51.6761	36.354	8670.58	1	435
2022-09-13	08:42:11	19.57	87.0513	80.6969	8725.55	1	436
2022-09-13	08:42:11	22.8496	101.64	80.6969	8772.22	1	437
2022-09-13	08:42:11	12.0048	53.3998	80.6969	8778.95	1	438
2022-09-13	08:42:12	9.72398	43.2542	32.7898	8815.48	1	439
2022-09-13	08:42:12	9.10571	40.504	32.7898	8819.45	1	440
2022-09-13	08:42:12	6.05904	26.9518	32.7898	8842.43	1	441
2022-09-13	08:42:12	4.59716	20.4491	32.7898	8839.9	1	442
2022-09-13	08:42:13	4.62663	20.5802	12.1273	8863.01	1	443
2022-09-13	08:42:13	4.39619	19.5551	12.1273	8859.46	1	444
2022-09-13	08:42:13	1.61085	7.16538	12.1273	8870.17	FALSE	444
2022-09-13	08:42:13	0.271667	1.20843	12.1273	8860.67	FALSE	444
2022-09-13	08:42:14	0.22159	0.985677	1.2803	8871.16	FALSE	444
2022-09-13	08:42:14	0.0903946	0.402093	1.2803	8861.07	FALSE	444
2022-09-13	08:42:14	0.216603	0.963493	1.2803	8872.12	FALSE	444
2022-09-13	08:42:14	0.62271	2.76994	1.2803	8863.84	FALSE	444
2022-09-13	08:42:15	7.6622	34.083	40.7601	8906.2	1	445
2022-09-13	08:42:15	13.7635	61.2228	40.7601	8925.06	1	446
2022-09-13	08:42:15	9.44535	42.0148	40.7601	8948.22	1	447
2022-09-13	08:42:15	5.78204	25.7197	40.7601	8950.78	1	448
2022-09-13	08:42:16	3.11513	13.8567	7.22712	8962.08	1	449
2022-09-13	08:42:16	0.930598	4.13949	7.22712	8954.92	FALSE	449
2022-09-13	08:42:16	0.828461	3.68516	7.22712	8965.76	FALSE	449
2022-09-13	08:42:17	0.982099	4.36857	8.28287	8959.29	FALSE	449
2022-09-13	08:42:17	0.492176	2.1893	8.28287	8967.95	FALSE	449
2022-09-13	08:42:17	1.5967	7.10244	8.28287	8966.39	FALSE	449
2022-09-13	08:42:17	4.37731	19.4712	8.28287	8987.42	1	450
2022-09-13	08:42:18	4.5052	20.04	18.697	8986.43	1	451
2022-09-13	08:42:18	3.1392	13.9638	18.697	9001.39	1	452
2022-09-13	08:42:18	4.04251	17.9819	18.697	9004.41	1	453
2022-09-13	08:42:18	5.12617	22.8022	18.697	9024.19	1	454
2022-09-13	08:42:19	5.06118	22.5131	32.4646	9026.93	1	455
2022-09-13	08:42:19	4.60128	20.4674	32.4646	9044.66	1	456
2022-09-13	08:42:19	9.49599	42.2401	32.4646	9069.17	1	457
2022-09-13	08:42:19	10.035	44.6377	32.4646	9089.29	1	458
2022-09-13	08:42:20	11.1206	49.4667	27.7653	9118.63	1	459
2022-09-13	08:42:20	4.3395	19.303	27.7653	9108.6	1	460
2022-09-13	08:42:20	4.85777	21.6083	27.7653	9140.24	1	461
2022-09-13	08:42:20	4.64978	20.6832	27.7653	9129.28	1	462
2022-09-13	08:42:21	3.84093	17.0852	14.485	9157.33	1	463
2022-09-13	08:42:21	4.95793	22.0539	14.485	9151.33	1	464
2022-09-13	08:42:21	0.970242	4.31583	14.485	9161.64	FALSE	464
2022-09-13	08:42:22	1.59803	7.10836	5.33117	9158.44	FALSE	464
2022-09-13	08:42:22	1.29915	5.77888	5.33117	9167.42	FALSE	464
2022-09-13	08:42:22	1.13757	5.06014	5.33117	9163.5	FALSE	464
2022-09-13	08:42:22	0.759249	3.37729	5.33117	9170.8	FALSE	464
2022-09-13	08:42:23	0.454618	2.02223	1.93485	9165.52	FALSE	464
2022-09-13	08:42:23	0.368919	1.64103	1.93485	9172.44	FALSE	464
2022-09-13	08:42:23	0.419708	1.86695	1.93485	9167.39	FALSE	464
2022-09-13	08:42:23	0.496654	2.20922	1.93485	9174.65	FALSE	464
2022-09-13	08:42:24	0.636755	2.83241	5.8268	9170.22	FALSE	464
2022-09-13	08:42:24	0.877366	3.9027	5.8268	9178.55	FALSE	464
2022-09-13	08:42:24	1.62846	7.24372	5.8268	9177.47	FALSE	464
2022-09-13	08:42:24	2.09711	9.32836	5.8268	9187.88	FALSE	464
2022-09-13	08:42:25	2.27905	10.1377	7.25226	9187.6	FALSE	464
2022-09-13	08:42:25	1.48083	6.58703	7.25226	9194.47	FALSE	464
2022-09-13	08:42:25	1.13126	5.03207	7.25226	9192.64	FALSE	464

## Sheet: Mars_martin_20229138376 (3)
Date	Time	Lbs	Newtons	Total force x time	total steps > 13.345		**GoPro Fitting: 826
2022-09-13	08:37:25	0.102608	0.456421	0.456421	FALSE	0			Total force x time	9192.64
2022-09-13	08:37:25	1.95024	8.67506	8.67506	FALSE	0			Total steps	464
2022-09-13	08:37:25	3.14907	14.0077	14.4641	1	1
2022-09-13	08:37:25	2.96902	13.2068	21.8819	FALSE	1
2022-09-13	08:37:26	4.00953	17.8352	32.2993	1	2
2022-09-13	08:37:26	2.33854	10.4023	32.2841	FALSE	2
2022-09-13	08:37:26	3.93248	17.4925	49.7918	1	3
2022-09-13	08:37:27	2.38301	10.6001	42.8843	FALSE	3
2022-09-13	08:37:27	6.49965	28.9117	78.7035	1	4
2022-09-13	08:37:27	3.5649	15.8574	58.7416	1	5
2022-09-13	08:37:27	4.84866	21.5678	100.271	1	6
2022-09-13	08:37:28	8.36383	37.204	95.9456	1	7
2022-09-13	08:37:28	5.15121	22.9136	123.185	1	8
2022-09-13	08:37:28	6.07405	27.0186	122.964	1	9
2022-09-13	08:37:28	8.02209	35.6839	158.869	1	10
2022-09-13	08:37:29	4.41477	19.6378	142.602	1	11
2022-09-13	08:37:29	3.60866	16.052	174.921	1	12
2022-09-13	08:37:29	1.81665	8.08082	150.683	FALSE	12
2022-09-13	08:37:29	0.993906	4.42109	179.342	FALSE	12
2022-09-13	08:37:30	1.66851	7.42187	158.105	FALSE	12
2022-09-13	08:37:30	2.85034	12.6789	192.021	FALSE	12
2022-09-13	08:37:30	5.41141	24.071	182.176	1	13
2022-09-13	08:37:30	6.1853	27.5135	219.534	1	14
2022-09-13	08:37:31	6.24103	27.7613	209.937	1	15
2022-09-13	08:37:31	7.34149	32.6564	252.191	1	16
2022-09-13	08:37:31	3.95508	17.593	227.53	1	17
2022-09-13	08:37:32	8.02092	35.6787	287.869	1	18
2022-09-13	08:37:32	7.67115	34.1228	261.653	1	19
2022-09-13	08:37:32	8.76861	39.0045	326.874	1	20
2022-09-13	08:37:32	8.2879	36.8662	298.519	1	21
2022-09-13	08:37:33	4.25721	18.9369	345.811	1	22
2022-09-13	08:37:33	7.928	35.2653	333.784	1	23
2022-09-13	08:37:33	5.76688	25.6522	371.463	1	24
2022-09-13	08:37:33	8.92657	39.7072	373.492	1	25
2022-09-13	08:37:34	6.62627	29.475	400.938	1	26
2022-09-13	08:37:34	4.12271	18.3386	391.83	1	27
2022-09-13	08:37:34	7.44149	33.1012	434.039	1	28
2022-09-13	08:37:34	7.45273	33.1512	424.981	1	29
2022-09-13	08:37:35	13.1559	58.5201	492.559	1	30
2022-09-13	08:37:35	13.5752	60.3852	485.367	1	31
2022-09-13	08:37:35	8.5907	38.2132	530.772	1	32
2022-09-13	08:37:36	16.8711	75.046	560.413	1	33
2022-09-13	08:37:36	3.78373	16.8308	547.603	1	34
2022-09-13	08:37:36	4.47808	19.9194	580.332	1	35
2022-09-13	08:37:36	4.734	21.0578	568.661	1	36
2022-09-13	08:37:37	3.30261	14.6907	595.023	1	37
2022-09-13	08:37:37	4.39558	19.5524	588.213	1	38
2022-09-13	08:37:37	2.31981	10.319	605.342	FALSE	38
2022-09-13	08:37:37	4.97965	22.1505	610.364	1	39
2022-09-13	08:37:38	7.13324	31.7301	637.072	1	40
2022-09-13	08:37:38	8.04729	35.796	646.16	1	41
2022-09-13	08:37:38	10.5876	47.0958	684.168	1	42
2022-09-13	08:37:39	6.11161	27.1857	673.346	1	43
2022-09-13	08:37:39	9.50907	42.2982	726.466	1	44
2022-09-13	08:37:39	9.67619	43.0416	716.387	1	45
2022-09-13	08:37:39	5.50306	24.4787	750.945	1	46
2022-09-13	08:37:39	8.57599	38.1477	754.535	1	47
2022-09-13	08:37:40	3.80602	16.9299	767.874	1	48
2022-09-13	08:37:40	6.32301	28.126	782.661	1	49
2022-09-13	08:37:40	5.02698	22.361	790.235	1	50
2022-09-13	08:37:41	4.148	18.4511	801.112	1	51
2022-09-13	08:37:41	13.466	59.8995	850.135	1	52
2022-09-13	08:37:41	5.23665	23.2937	824.406	1	53
2022-09-13	08:37:41	10.0145	44.5465	894.681	1	54
2022-09-13	08:37:42	8.76566	38.9914	863.397	1	55
2022-09-13	08:37:42	4.11055	18.2845	912.966	1	56
2022-09-13	08:37:42	8.79691	39.1304	902.528	1	57
2022-09-13	08:37:42	4.66856	20.7667	933.733	1	58
2022-09-13	08:37:43	13.8508	61.6111	964.139	1	59
2022-09-13	08:37:43	8.8882	39.5365	973.269	1	60
2022-09-13	08:37:43	8.87507	39.4781	1003.62	1	61
2022-09-13	08:37:43	13.7629	61.2201	1034.49	1	62
2022-09-13	08:37:44	4.82189	21.4487	1025.07	1	63
2022-09-13	08:37:44	8.94444	39.7867	1074.28	1	64
2022-09-13	08:37:44	11.7653	52.3344	1077.4	1	65
2022-09-13	08:37:44	4.3021	19.1366	1093.41	1	66
2022-09-13	08:37:45	9.98622	44.4207	1121.82	1	67
2022-09-13	08:37:45	9.94642	44.2437	1137.66	1	68
2022-09-13	08:37:45	4.51894	20.1011	1141.92	1	69
2022-09-13	08:37:46	11.7824	52.4105	1190.07	1	70
2022-09-13	08:37:46	5.51406	24.5276	1166.45	1	71
2022-09-13	08:37:46	4.57965	20.3712	1210.44	1	72
2022-09-13	08:37:46	1.72235	7.66136	1174.11	FALSE	72
2022-09-13	08:37:47	0.930852	4.14062	1214.58	FALSE	72
2022-09-13	08:37:47	2.73955	12.1861	1186.3	FALSE	72
2022-09-13	08:37:47	1.43859	6.39914	1220.98	FALSE	72
2022-09-13	08:37:47	2.40653	10.7047	1197	FALSE	72
2022-09-13	08:37:48	5.22296	23.2328	1244.21	1	73
2022-09-13	08:37:48	4.3364	19.2892	1216.29	1	74
2022-09-13	08:37:48	1.84754	8.21823	1252.43	FALSE	74
2022-09-13	08:37:48	0.361641	1.60865	1217.9	FALSE	74
2022-09-13	08:37:49	0.556705	2.47634	1254.9	FALSE	74
2022-09-13	08:37:49	0.285713	1.27091	1219.17	FALSE	74
2022-09-13	08:37:49	0.982252	4.36925	1259.27	FALSE	74
2022-09-13	08:37:50	2.8367	12.6182	1231.79	FALSE	74
2022-09-13	08:37:50	6.39049	28.4262	1287.7	1	75
2022-09-13	08:37:50	9.11772	40.5574	1272.35	1	76
2022-09-13	08:37:50	7.53406	33.513	1321.21	1	77
2022-09-13	08:37:51	13.7803	61.2975	1333.64	1	78
2022-09-13	08:37:51	8.00311	35.5994	1356.81	1	79
2022-09-13	08:37:51	10.2052	45.3948	1379.04	1	80
2022-09-13	08:37:51	7.61385	33.8679	1390.68	1	81
2022-09-13	08:37:52	2.32683	10.3502	1389.39	FALSE	81
2022-09-13	08:37:52	3.8792	17.2555	1407.94	1	82
2022-09-13	08:37:52	2.97716	13.243	1402.63	FALSE	82
2022-09-13	08:37:53	5.08596	22.6234	1430.56	1	83
2022-09-13	08:37:53	1.27961	5.69196	1408.32	FALSE	83
2022-09-13	08:37:53	1.39121	6.18838	1436.75	FALSE	83
2022-09-13	08:37:53	2.19996	9.78586	1418.11	FALSE	83
2022-09-13	08:37:53	0.747748	3.32613	1440.07	FALSE	83
2022-09-13	08:37:54	1.20352	5.3535	1423.46	FALSE	83
2022-09-13	08:37:54	0.388206	1.72682	1441.8	FALSE	83
2022-09-13	08:37:54	1.04439	4.64566	1428.11	FALSE	83
2022-09-13	08:37:55	0.567595	2.52478	1444.33	FALSE	83
2022-09-13	08:37:55	0.502252	2.23412	1430.34	FALSE	83
2022-09-13	08:37:55	0.456959	2.03265	1446.36	FALSE	83
2022-09-13	08:37:55	0.411616	1.83095	1432.17	FALSE	83
2022-09-13	08:37:56	0.579707	2.57865	1448.94	FALSE	83
2022-09-13	08:37:56	0.373244	1.66026	1433.83	FALSE	83
2022-09-13	08:37:56	0.401132	1.78432	1450.72	FALSE	83
2022-09-13	08:37:56	0.367087	1.63288	1435.47	FALSE	83
2022-09-13	08:37:57	0.463219	2.06049	1452.78	FALSE	83
2022-09-13	08:37:57	0.507493	2.25743	1437.72	FALSE	83
2022-09-13	08:37:57	0.388817	1.72954	1454.51	FALSE	83
2022-09-13	08:37:57	0.594059	2.64249	1440.37	FALSE	83
2022-09-13	08:37:58	0.806425	3.58714	1458.1	FALSE	83
2022-09-13	08:37:58	0.752379	3.34673	1443.71	FALSE	83
2022-09-13	08:37:58	0.665763	2.96145	1461.06	FALSE	83
2022-09-13	08:37:59	0.370649	1.64872	1445.36	FALSE	83
2022-09-13	08:37:59	0.544186	2.42065	1463.48	FALSE	83
2022-09-13	08:37:59	0.360064	1.60164	1446.96	FALSE	83
2022-09-13	08:37:59	0.190496	0.847364	1464.33	FALSE	83
2022-09-13	08:38:00	0.16673	0.741648	1447.71	FALSE	83
2022-09-13	08:38:00	0.220471	0.980699	1465.31	FALSE	83
2022-09-13	08:38:00	0.427545	1.90181	1449.61	FALSE	83
2022-09-13	08:38:01	0.270395	1.20277	1466.51	FALSE	83
2022-09-13	08:38:01	0.332583	1.4794	1451.09	FALSE	83
2022-09-13	08:38:01	0.31645	1.40763	1467.92	FALSE	83
2022-09-13	08:38:01	0.24444	1.08732	1452.17	FALSE	83
2022-09-13	08:38:01	1.40872	6.26627	1474.19	FALSE	83
2022-09-13	08:38:02	2.74378	12.2049	1464.38	FALSE	83
2022-09-13	08:38:02	2.37782	10.577	1484.76	FALSE	83
2022-09-13	08:38:02	2.10174	9.34896	1473.73	FALSE	83
2022-09-13	08:38:02	1.92648	8.56937	1493.33	FALSE	83
2022-09-13	08:38:03	2.06668	9.19301	1482.92	FALSE	83
2022-09-13	08:38:03	3.2591	14.4971	1507.83	1	84
2022-09-13	08:38:03	6.38373	28.3961	1511.32	1	85
2022-09-13	08:38:04	5.21243	23.1859	1531.01	1	86
2022-09-13	08:38:04	11.2945	50.2402	1561.56	1	87
2022-09-13	08:38:04	3.28688	14.6207	1545.64	1	88
2022-09-13	08:38:04	7.61701	33.882	1595.44	1	89
2022-09-13	08:38:05	2.72144	12.1055	1557.74	FALSE	89
2022-09-13	08:38:05	5.90144	26.2508	1621.69	1	90
2022-09-13	08:38:05	6.10591	27.1603	1584.9	1	91
2022-09-13	08:38:05	4.9421	21.9834	1643.67	1	92
2022-09-13	08:38:06	9.19085	40.8827	1625.78	1	93
2022-09-13	08:38:06	1.10256	4.90441	1648.58	FALSE	93
2022-09-13	08:38:06	5.76688	25.6522	1651.44	1	94
2022-09-13	08:38:06	2.66184	11.8404	1660.42	FALSE	94
2022-09-13	08:38:07	4.20698	18.7135	1670.15	1	95
2022-09-13	08:38:07	3.53238	15.7127	1676.13	1	96
2022-09-13	08:38:07	2.67446	11.8965	1682.05	FALSE	96
2022-09-13	08:38:07	4.86271	21.6303	1697.76	1	97
2022-09-13	08:38:08	3.73248	16.6028	1698.65	1	98
2022-09-13	08:38:08	5.88785	26.1903	1723.95	1	99
2022-09-13	08:38:08	0.608002	2.70451	1701.35	FALSE	99
2022-09-13	08:38:09	0.742405	3.30237	1727.25	FALSE	99
2022-09-13	08:38:09	0.331667	1.47532	1702.83	FALSE	99
2022-09-13	08:38:09	0.567799	2.52568	1729.78	FALSE	99
2022-09-13	08:38:09	1.19726	5.32565	1708.15	FALSE	99
2022-09-13	08:38:10	0.472888	2.1035	1731.88	FALSE	99
2022-09-13	08:38:10	0.343066	1.52603	1709.68	FALSE	99
2022-09-13	08:38:10	0.380878	1.69422	1733.58	FALSE	99
2022-09-13	08:38:10	0.346221	1.54006	1711.22	FALSE	99
2022-09-13	08:38:11	0.36958	1.64397	1735.22	FALSE	99
2022-09-13	08:38:11	0.450395	2.00345	1713.22	FALSE	99
2022-09-13	08:38:11	0.404797	1.80062	1737.02	FALSE	99
2022-09-13	08:38:11	0.22383	0.995641	1714.22	FALSE	99
2022-09-13	08:38:12	0.383626	1.70645	1738.73	FALSE	99
2022-09-13	08:38:12	0.452277	2.01182	1716.23	FALSE	99
2022-09-13	08:38:12	0.658893	2.93089	1741.66	FALSE	99
2022-09-13	08:38:13	0.612277	2.72353	1718.96	FALSE	99
2022-09-13	08:38:13	0.691921	3.0778	1744.74	FALSE	99
2022-09-13	08:38:13	0.591005	2.62891	1721.58	FALSE	99
2022-09-13	08:38:13	0.440267	1.9584	1746.7	FALSE	99
2022-09-13	08:38:14	0.355127	1.57968	1723.16	FALSE	99
2022-09-13	08:38:14	0.339555	1.51041	1748.21	FALSE	99
2022-09-13	08:38:14	0.824796	3.66886	1726.83	FALSE	99
2022-09-13	08:38:14	1.59589	7.09884	1755.3	FALSE	99
2022-09-13	08:38:15	5.17268	23.0091	1749.84	1	100
2022-09-13	08:38:15	11.0577	49.1869	1804.49	1	101
2022-09-13	08:38:15	11.7814	52.406	1802.25	1	102
2022-09-13	08:38:15	12.0491	53.5968	1858.09	1	103
2022-09-13	08:38:16	6.4168	28.5432	1830.79	1	104
2022-09-13	08:38:16	7.69405	34.2247	1892.31	1	105
2022-09-13	08:38:16	8.97009	39.9008	1870.69	1	106
2022-09-13	08:38:16	5.92785	26.3683	1918.68	1	107
2022-09-13	08:38:17	10.4751	46.5953	1917.29	1	108
2022-09-13	08:38:17	8.2911	36.8805	1955.56	1	109
2022-09-13	08:38:17	5.55502	24.7098	1942	1	110
2022-09-13	08:38:18	10.7752	47.9302	2003.49	1	111
2022-09-13	08:38:18	3.81289	16.9605	1958.96	1	112
2022-09-13	08:38:18	7.86505	34.9853	2038.48	1	113
2022-09-13	08:38:18	14.3525	63.8428	2022.8	1	114
2022-09-13	08:38:19	7.75355	34.4893	2072.97	1	115
2022-09-13	08:38:19	15.6622	69.6686	2092.47	1	116
2022-09-13	08:38:19	16.3739	72.8344	2145.8	1	117
2022-09-13	08:38:19	6.68021	29.7149	2122.18	1	118
2022-09-13	08:38:20	8.95263	39.8231	2185.62	1	119
2022-09-13	08:38:20	8.4341	37.5166	2159.7	1	120
2022-09-13	08:38:20	7.78057	34.6095	2220.23	1	121
2022-09-13	08:38:20	12.5199	55.691	2215.39	1	122
2022-09-13	08:38:21	7.81039	34.7422	2254.98	1	123
2022-09-13	08:38:21	6.59747	29.3469	2244.74	1	124
2022-09-13	08:38:21	3.93859	17.5196	2272.5	1	125
2022-09-13	08:38:22	6.81731	30.3248	2275.06	1	126
2022-09-13	08:38:22	3.96622	17.6425	2290.14	1	127
2022-09-13	08:38:22	1.68561	7.49793	2282.56	FALSE	127
2022-09-13	08:38:22	2.89497	12.8774	2303.02	FALSE	127
2022-09-13	08:38:23	2.02103	8.98995	2291.55	FALSE	127
2022-09-13	08:38:23	3.32693	14.7989	2317.81	1	128
2022-09-13	08:38:23	2.63161	11.7059	2303.26	FALSE	128
2022-09-13	08:38:23	3.7481	16.6723	2334.49	1	129
2022-09-13	08:38:24	1.21192	5.39086	2308.65	FALSE	129
2022-09-13	08:38:24	0.811463	3.60955	2338.1	FALSE	129
2022-09-13	08:38:24	1.30668	5.81237	2314.46	FALSE	129
2022-09-13	08:38:24	1.23676	5.50136	2343.6	FALSE	129
2022-09-13	08:38:25	0.499402	2.22144	2316.68	FALSE	129
2022-09-13	08:38:25	0.375942	1.67227	2345.27	FALSE	129
2022-09-13	08:38:25	0.339606	1.51064	2318.19	FALSE	129
2022-09-13	08:38:25	0.285713	1.27091	2346.54	FALSE	129
2022-09-13	08:38:26	0.225916	1.00492	2319.2	FALSE	129
2022-09-13	08:38:26	0.223931	0.99609	2347.54	FALSE	129
2022-09-13	08:38:26	0.213041	0.947649	2320.14	FALSE	129
2022-09-13	08:38:27	0.225814	1.00447	2348.54	FALSE	129
2022-09-13	08:38:27	0.217468	0.967341	2321.11	FALSE	129
2022-09-13	08:38:27	0.214822	0.955571	2349.5	FALSE	129
2022-09-13	08:38:27	0.210089	0.934518	2322.05	FALSE	129
2022-09-13	08:38:28	0.206272	0.917539	2350.41	FALSE	129
2022-09-13	08:38:28	0.21299	0.947422	2322.99	FALSE	129
2022-09-13	08:38:28	0.212481	0.945158	2351.36	FALSE	129
2022-09-13	08:38:28	0.21757	0.967795	2323.96	FALSE	129
2022-09-13	08:38:29	0.219708	0.977305	2352.34	FALSE	129
2022-09-13	08:38:29	0.211158	0.939273	2324.9	FALSE	129
2022-09-13	08:38:29	0.207596	0.923429	2353.26	FALSE	129
2022-09-13	08:38:29	0.1993	0.886526	2325.79	FALSE	129
2022-09-13	08:38:30	0.194924	0.867061	2354.13	FALSE	129
2022-09-13	08:38:30	0.197519	0.878604	2326.67	FALSE	129
2022-09-13	08:38:30	0.200318	0.891055	2355.02	FALSE	129
2022-09-13	08:38:30	0.198944	0.884943	2327.55	FALSE	129
2022-09-13	08:38:31	0.198028	0.880868	2355.9	FALSE	129
2022-09-13	08:38:31	0.207188	0.921614	2328.47	FALSE	129
2022-09-13	08:38:31	0.222099	0.987941	2356.89	FALSE	129
2022-09-13	08:38:32	0.209275	0.930897	2329.4	FALSE	129
2022-09-13	08:38:32	0.215382	0.958062	2357.84	FALSE	129
2022-09-13	08:38:32	0.234975	1.04522	2330.45	FALSE	129
2022-09-13	08:38:32	0.239148	1.06378	2358.91	FALSE	129
2022-09-13	08:38:33	0.232379	1.03367	2331.48	FALSE	129
2022-09-13	08:38:33	0.268359	1.19371	2360.1	FALSE	129
2022-09-13	08:38:33	0.355127	1.57968	2333.06	FALSE	129
2022-09-13	08:38:33	0.406985	1.81035	2361.91	FALSE	129
2022-09-13	08:38:34	0.355891	1.58307	2334.65	FALSE	129
2022-09-13	08:38:34	0.456145	2.02902	2363.94	FALSE	129
2022-09-13	08:38:34	0.626781	2.78805	2337.43	FALSE	129
2022-09-13	08:38:34	0.397825	1.76961	2365.71	FALSE	129
2022-09-13	08:38:35	0.616654	2.743	2340.18	FALSE	129
2022-09-13	08:38:35	0.307545	1.36802	2367.08	FALSE	129
2022-09-13	08:38:35	0.264593	1.17696	2341.35	FALSE	129
2022-09-13	08:38:36	0.658741	2.93021	2370.01	FALSE	129
2022-09-13	08:38:36	0.284542	1.2657	2342.62	FALSE	129
2022-09-13	08:38:36	2.16719	9.64009	2379.65	FALSE	129
2022-09-13	08:38:36	6.98769	31.0826	2373.7	1	130
2022-09-13	08:38:37	9.22271	41.0245	2420.67	1	131
2022-09-13	08:38:37	8.2883	36.868	2410.57	1	132
2022-09-13	08:38:37	4.78057	21.2649	2441.94	1	133
2022-09-13	08:38:37	5.25711	23.3847	2433.95	1	134
2022-09-13	08:38:38	5.99324	26.6591	2468.6	1	135
2022-09-13	08:38:38	12.1744	54.1542	2488.11	1	136
2022-09-13	08:38:38	10.0201	44.5714	2513.17	1	137
2022-09-13	08:38:38	8.06133	35.8584	2523.97	1	138
2022-09-13	08:38:39	10.9965	48.9146	2562.08	1	139
2022-09-13	08:38:39	6.91039	30.7388	2554.71	1	140
2022-09-13	08:38:39	9.34276	41.5585	2603.64	1	141
2022-09-13	08:38:39	5.60021	24.9109	2579.62	1	142
2022-09-13	08:38:40	3.19299	14.2031	2617.85	1	143
2022-09-13	08:38:40	8.6653	38.545	2618.16	1	144
2022-09-13	08:38:40	5.1309	22.8233	2640.67	1	145
2022-09-13	08:38:41	4.06052	18.062	2636.22	1	146
2022-09-13	08:38:41	10.9991	48.9262	2689.6	1	147
2022-09-13	08:38:41	7.94093	35.3228	2671.55	1	148
2022-09-13	08:38:41	12.4866	55.5429	2745.14	1	149
2022-09-13	08:38:42	8.94917	39.8077	2711.35	1	150
2022-09-13	08:38:42	4.27686	19.0243	2764.16	1	151
2022-09-13	08:38:42	8.49161	37.7724	2749.13	1	152
2022-09-13	08:38:42	3.01146	13.3956	2777.56	1	153
2022-09-13	08:38:43	6.44912	28.687	2777.81	1	154
2022-09-13	08:38:43	6.86021	30.5156	2808.07	1	155
2022-09-13	08:38:43	3.19401	14.2076	2792.02	1	156
2022-09-13	08:38:43	8.31492	36.9864	2845.06	1	157
2022-09-13	08:38:44	0.637774	2.83695	2794.86	FALSE	157
2022-09-13	08:38:44	2.31823	10.312	2855.37	FALSE	157
2022-09-13	08:38:44	0.927341	4.125	2798.98	FALSE	157
2022-09-13	08:38:45	0.561845	2.4992	2857.87	FALSE	157
2022-09-13	08:38:45	0.669784	2.97933	2801.96	FALSE	157
2022-09-13	08:38:45	0.600267	2.67011	2860.54	FALSE	157
2022-09-13	08:38:45	0.69416	3.08776	2805.05	FALSE	157
2022-09-13	08:38:46	0.163575	0.727614	2861.27	FALSE	157
2022-09-13	08:38:46	0.691819	3.07735	2808.13	FALSE	157
2022-09-13	08:38:46	3.37136	14.9965	2876.27	1	158
2022-09-13	08:38:46	5.65176	25.1402	2833.27	1	159
2022-09-13	08:38:47	6.78668	30.1885	2906.45	1	160
2022-09-13	08:38:47	6.57904	29.2649	2862.53	1	161
2022-09-13	08:38:47	4.9165	21.8696	2928.32	1	162
2022-09-13	08:38:47	4.90856	21.8343	2884.37	1	163
2022-09-13	08:38:48	2.84917	12.6737	2941	FALSE	163
2022-09-13	08:38:48	2.30011	10.2313	2894.6	FALSE	163
2022-09-13	08:38:48	0.848104	3.77254	2944.77	FALSE	163
2022-09-13	08:38:48	0.727545	3.23627	2897.83	FALSE	163
2022-09-13	08:38:49	0.0938551	0.417486	2945.19	FALSE	163
2022-09-13	08:38:49	0.152074	0.676456	2898.51	FALSE	163
2022-09-13	08:38:49	-0.0957631	-0.425973	2945.19	FALSE	163
2022-09-13	08:38:50	-0.258053	-1.14787	2898.51	FALSE	163
2022-09-13	08:38:50	-0.184771	-0.821898	2945.19	FALSE	163
2022-09-13	08:38:50	0.222507	0.989756	2899.5	FALSE	163
2022-09-13	08:38:50	0.413041	1.83729	2947.02	FALSE	163
2022-09-13	08:38:51	0.372888	1.65868	2901.16	FALSE	163
2022-09-13	08:38:51	0.09813	0.436502	2947.46	FALSE	163
2022-09-13	08:38:51	0.252888	1.1249	2902.28	FALSE	163
2022-09-13	08:38:51	0.256858	1.14256	2948.6	FALSE	163
2022-09-13	08:38:52	0.0861707	0.383305	2902.67	FALSE	163
2022-09-13	08:38:52	-0.052557	-0.233784	2948.6	FALSE	163
2022-09-13	08:38:52	0.0235753	0.104868	2902.77	FALSE	163
2022-09-13	08:38:52	0.444389	1.97673	2950.58	FALSE	163
2022-09-13	08:38:53	0.525611	2.33802	2905.11	FALSE	163
2022-09-13	08:38:53	0.709631	3.15658	2953.74	FALSE	163
2022-09-13	08:38:53	0.527137	2.34481	2907.45	FALSE	163
2022-09-13	08:38:53	1.08179	4.81202	2958.55	FALSE	163
2022-09-13	08:38:54	1.08821	4.84058	2912.3	FALSE	163
2022-09-13	08:38:54	0.322099	1.43276	2959.98	FALSE	163
2022-09-13	08:38:54	1.23075	5.47462	2917.77	FALSE	163
2022-09-13	08:38:55	1.82556	8.12046	2968.1	FALSE	163
2022-09-13	08:38:55	3.38805	15.0707	2932.84	1	164
2022-09-13	08:38:55	5.96546	26.5356	2994.64	1	165
2022-09-13	08:38:55	7.70601	34.2779	2967.12	1	166
2022-09-13	08:38:56	3.42291	15.2258	3009.86	1	167
2022-09-13	08:38:56	2.20561	9.81099	2976.93	FALSE	167
2022-09-13	08:38:56	1.15034	5.11694	3014.98	FALSE	167
2022-09-13	08:38:56	1.17716	5.23624	2982.17	FALSE	167
2022-09-13	08:38:57	3.06836	13.6487	3028.63	1	168
2022-09-13	08:38:57	2.19497	9.76367	2991.93	FALSE	168
2022-09-13	08:38:57	2.47039	10.9888	3039.62	FALSE	168
2022-09-13	08:38:57	3.91777	17.427	3009.36	1	169
2022-09-13	08:38:58	7.23808	32.1964	3071.81	1	170
2022-09-13	08:38:58	8.74154	38.8841	3048.24	1	171
2022-09-13	08:38:58	16.2731	72.386	3144.2	1	172
2022-09-13	08:38:59	19.0097	84.5589	3132.8	1	173
2022-09-13	08:38:59	13.4744	59.9368	3204.14	1	174
2022-09-13	08:38:59	18.7223	83.2805	3216.08	1	175
2022-09-13	08:38:59	11.5548	51.3981	3255.54	1	176
2022-09-13	08:39:00	7.58556	33.7421	3249.82	1	177
2022-09-13	08:39:00	19.5342	86.892	3342.43	1	178
2022-09-13	08:39:00	11.152	49.6063	3299.43	1	179
2022-09-13	08:39:00	7.96113	35.4127	3377.84	1	180
2022-09-13	08:39:01	13.2785	59.0654	3358.49	1	181
2022-09-13	08:39:01	6.79899	30.2433	3408.08	1	182
2022-09-13	08:39:01	6.0681	26.9921	3385.49	1	183
2022-09-13	08:39:01	9.3081	41.4043	3449.49	1	184
2022-09-13	08:39:02	5.43161	24.1609	3409.65	1	185
2022-09-13	08:39:02	1.23615	5.49864	3454.99	FALSE	185
2022-09-13	08:39:02	3.00093	13.3487	3423	1	186
2022-09-13	08:39:02	2.06541	9.18736	3464.17	FALSE	186
2022-09-13	08:39:03	8.11263	36.0866	3459.08	1	187
2022-09-13	08:39:03	13.7634	61.2224	3525.4	1	188
2022-09-13	08:39:03	6.44011	28.6469	3487.73	1	189
2022-09-13	08:39:04	7.18128	31.9438	3557.34	1	190
2022-09-13	08:39:04	14.4066	64.0834	3551.81	1	191
2022-09-13	08:39:04	16.5568	73.648	3630.99	1	192
2022-09-13	08:39:04	8.28596	36.8576	3588.67	1	193
2022-09-13	08:39:05	15.2837	67.985	3698.97	1	194
2022-09-13	08:39:05	9.09975	40.4775	3629.15	1	195
2022-09-13	08:39:05	2.78337	12.381	3711.35	FALSE	195
2022-09-13	08:39:05	5.24902	23.3487	3652.5	1	196
2022-09-13	08:39:06	1.80734	8.03941	3719.39	FALSE	196
2022-09-13	08:39:06	4.00892	17.8325	3670.33	1	197
2022-09-13	08:39:06	2.51757	11.1987	3730.59	FALSE	197
2022-09-13	08:39:06	2.60999	11.6098	3681.94	FALSE	197
2022-09-13	08:39:07	2.04317	9.08843	3739.68	FALSE	197
2022-09-13	08:39:07	0.376094	1.67294	3683.61	FALSE	197
2022-09-13	08:39:07	0.538893	2.3971	3742.08	FALSE	197
2022-09-13	08:39:08	1.05274	4.6828	3688.29	FALSE	197
2022-09-13	08:39:08	3.87039	17.2163	3759.29	1	198
2022-09-13	08:39:08	6.98866	31.087	3719.38	1	199
2022-09-13	08:39:08	8.57579	38.1468	3797.44	1	200
2022-09-13	08:39:09	6.38795	28.4149	3747.8	1	201
2022-09-13	08:39:09	3.72709	16.5788	3814.02	1	202
2022-09-13	08:39:09	1.09813	4.8847	3752.68	FALSE	202
2022-09-13	08:39:09	2.06322	9.17762	3823.2	FALSE	202
2022-09-13	08:39:10	0.261081	1.16134	3753.84	FALSE	202
2022-09-13	08:39:10	0.671005	2.98476	3826.18	FALSE	202
2022-09-13	08:39:10	0.331311	1.47374	3755.32	FALSE	202
2022-09-13	08:39:10	0.426425	1.89682	3828.08	FALSE	202
2022-09-13	08:39:11	0.499097	2.22008	3757.54	FALSE	202
2022-09-13	08:39:11	0.800063	3.55884	3831.64	FALSE	202
2022-09-13	08:39:11	0.739962	3.2915	3760.83	FALSE	202
2022-09-13	08:39:11	0.70271	3.12579	3834.76	FALSE	202
2022-09-13	08:39:12	0.772023	3.43411	3764.26	FALSE	202
2022-09-13	08:39:12	0.910394	4.04961	3838.81	FALSE	202
2022-09-13	08:39:12	0.952532	4.23705	3768.5	FALSE	202
2022-09-13	08:39:13	0.855585	3.80581	3842.62	FALSE	202
2022-09-13	08:39:13	0.663524	2.95149	3771.45	FALSE	202
2022-09-13	08:39:13	0.511107	2.27351	3844.89	FALSE	202
2022-09-13	08:39:13	0.293346	1.30486	3772.76	FALSE	202
2022-09-13	08:39:14	0.32729	1.45585	3846.35	FALSE	202
2022-09-13	08:39:14	0.395687	1.76009	3774.52	FALSE	202
2022-09-13	08:39:14	0.599199	2.66536	3849.01	FALSE	202
2022-09-13	08:39:14	1.17457	5.22472	3779.74	FALSE	202
2022-09-13	08:39:15	0.852939	3.79404	3852.81	FALSE	202
2022-09-13	08:39:15	0.469326	2.08766	3781.83	FALSE	202
2022-09-13	08:39:15	0.63986	2.84623	3855.65	FALSE	202
2022-09-13	08:39:15	1.04688	4.65673	3786.48	FALSE	202
2022-09-13	08:39:16	1.53039	6.80748	3862.46	FALSE	202
2022-09-13	08:39:16	1.73039	7.69712	3794.18	FALSE	202
2022-09-13	08:39:16	1.48663	6.61283	3869.07	FALSE	202
2022-09-13	08:39:16	1.24709	5.54731	3799.73	FALSE	202
2022-09-13	08:39:17	1.47004	6.53903	3875.61	FALSE	202
2022-09-13	08:39:17	0.958588	4.26399	3803.99	FALSE	202
2022-09-13	08:39:17	0.575687	2.56077	3878.17	FALSE	202
2022-09-13	08:39:18	0.408969	1.81918	3805.81	FALSE	202
2022-09-13	08:39:18	0.45813	2.03785	3880.21	FALSE	202
2022-09-13	08:39:18	0.43528	1.93621	3807.75	FALSE	202
2022-09-13	08:39:18	0.331158	1.47306	3881.68	FALSE	202
2022-09-13	08:39:19	0.427799	1.90294	3809.65	FALSE	202
2022-09-13	08:39:19	0.275636	1.22608	3882.91	FALSE	202
2022-09-13	08:39:19	0.318334	1.41601	3811.07	FALSE	202
2022-09-13	08:39:19	0.356603	1.58624	3884.5	FALSE	202
2022-09-13	08:39:20	0.339555	1.51041	3812.58	FALSE	202
2022-09-13	08:39:20	0.387799	1.72501	3886.22	FALSE	202
2022-09-13	08:39:20	0.360929	1.60548	3814.18	FALSE	202
2022-09-13	08:39:20	0.367748	1.63582	3887.86	FALSE	202
2022-09-13	08:39:21	1.26047	5.60682	3819.79	FALSE	202
2022-09-13	08:39:21	0.643881	2.86411	3890.72	FALSE	202
2022-09-13	08:39:21	0.873804	3.88685	3823.68	FALSE	202
2022-09-13	08:39:22	0.332074	1.47713	3892.2	FALSE	202
2022-09-13	08:39:22	0.760369	3.38227	3827.06	FALSE	202
2022-09-13	08:39:22	0.335382	1.49185	3893.69	FALSE	202
2022-09-13	08:39:22	0.336094	1.49501	3828.55	FALSE	202
2022-09-13	08:39:23	0.26159	1.1636	3894.85	FALSE	202
2022-09-13	08:39:23	0.633753	2.81906	3831.37	FALSE	202
2022-09-13	08:39:23	0.198232	0.881776	3895.74	FALSE	202
2022-09-13	08:39:23	0.62673	2.78782	3834.16	FALSE	202
2022-09-13	08:39:24	0.801794	3.56654	3899.3	FALSE	202
2022-09-13	08:39:24	1.70983	7.60567	3841.77	FALSE	202
2022-09-13	08:39:24	1.49813	6.66398	3905.97	FALSE	202
2022-09-13	08:39:24	1.12357	4.99786	3846.76	FALSE	202
2022-09-13	08:39:25	2.32485	10.3414	3916.31	FALSE	202
2022-09-13	08:39:25	3.74261	16.6479	3863.41	1	203
2022-09-13	08:39:25	4.28938	19.08	3935.39	1	204
2022-09-13	08:39:25	5.89833	26.237	3889.65	1	205
2022-09-13	08:39:26	6.87487	30.5808	3965.97	1	206
2022-09-13	08:39:26	6.29935	28.0208	3917.67	1	207
2022-09-13	08:39:26	5.95909	26.5072	3992.48	1	208
2022-09-13	08:39:27	3.00581	13.3704	3931.04	1	209
2022-09-13	08:39:27	4.59904	20.4574	4012.93	1	210
2022-09-13	08:39:27	3.9453	17.5495	3948.59	1	211
2022-09-13	08:39:27	8.47467	37.697	4050.63	1	212
2022-09-13	08:39:28	13.6968	60.9261	4009.52	1	213
2022-09-13	08:39:28	8.09869	36.0246	4086.66	1	214
2022-09-13	08:39:28	12.894	57.3551	4066.87	1	215
2022-09-13	08:39:28	7.02546	31.2507	4117.91	1	216
2022-09-13	08:39:29	7.13696	31.7466	4098.62	1	217
2022-09-13	08:39:29	9.63243	42.847	4160.75	1	218
2022-09-13	08:39:29	2.60536	11.5892	4110.21	FALSE	218
2022-09-13	08:39:29	7.82775	34.8194	4195.57	1	219
2022-09-13	08:39:30	7.36556	32.7635	4142.97	1	220
2022-09-13	08:39:30	6.08556	27.0698	4222.64	1	221
2022-09-13	08:39:30	9.1938	40.8959	4183.87	1	222
2022-09-13	08:39:31	5.55003	24.6876	4247.33	1	223
2022-09-13	08:39:31	8.26489	36.7639	4220.63	1	224
2022-09-13	08:39:31	6.54357	29.1071	4276.44	1	225
2022-09-13	08:39:31	5.16403	22.9706	4243.6	1	226
2022-09-13	08:39:32	9.12922	40.6086	4317.05	1	227
2022-09-13	08:39:32	3.88881	17.2982	4260.9	1	228
2022-09-13	08:39:32	14.5403	64.6782	4381.72	1	229
2022-09-13	08:39:32	11.6785	51.9483	4312.85	1	230
2022-09-13	08:39:33	23.0941	102.727	4484.45	1	231
2022-09-13	08:39:33	15.4348	68.6571	4381.5	1	232
2022-09-13	08:39:33	5.00011	22.2415	4506.69	1	233
2022-09-13	08:39:33	8.46891	37.6714	4419.18	1	234
2022-09-13	08:39:34	15.3435	68.251	4574.94	1	235
2022-09-13	08:39:34	14.0124	62.33	4481.51	1	236
2022-09-13	08:39:34	7.53619	33.5225	4608.47	1	237
2022-09-13	08:39:34	9.08464	40.4103	4521.92	1	238
2022-09-13	08:39:35	3.69787	16.4489	4624.91	1	239
2022-09-13	08:39:35	3.17228	14.1109	4536.03	1	240
2022-09-13	08:39:35	2.51131	11.1708	4636.09	FALSE	240
2022-09-13	08:39:36	0.388562	1.7284	4537.76	FALSE	240
2022-09-13	08:39:36	0.480165	2.13587	4638.22	FALSE	240
2022-09-13	08:39:36	0.510852	2.27237	4540.03	FALSE	240
2022-09-13	08:39:36	3.55182	15.7992	4654.02	1	241
2022-09-13	08:39:37	3.43787	15.2923	4555.32	1	242
2022-09-13	08:39:37	1.96892	8.75815	4662.78	FALSE	242
2022-09-13	08:39:37	0.779046	3.46535	4558.79	FALSE	242
2022-09-13	08:39:37	0.29986	1.33384	4664.11	FALSE	242
2022-09-13	08:39:38	0.504796	2.24543	4561.03	FALSE	242
2022-09-13	08:39:38	0.420013	1.8683	4665.98	FALSE	242
2022-09-13	08:39:38	0.805407	3.58261	4564.61	FALSE	242
2022-09-13	08:39:38	0.967392	4.30315	4670.28	FALSE	242
2022-09-13	08:39:39	0.178232	0.792812	4565.41	FALSE	242
2022-09-13	08:39:39	0.204746	0.910751	4671.19	FALSE	242
2022-09-13	08:39:39	-0.0100125	-0.0445376	4565.41	FALSE	242
2022-09-13	08:39:39	0.0300893	0.133843	4671.33	FALSE	242
2022-09-13	08:39:40	0.0130918	0.0582349	4565.46	FALSE	242
2022-09-13	08:39:40	-0.0648216	-0.288339	4671.33	FALSE	242
2022-09-13	08:39:40	0.321336	1.42937	4566.89	FALSE	242
2022-09-13	08:39:41	-0.177239	-0.788395	4671.33	FALSE	242
2022-09-13	08:39:41	-0.138918	-0.617935	4566.89	FALSE	242
2022-09-13	08:39:41	-0.129045	-0.574018	4671.33	FALSE	242
2022-09-13	08:39:41	-0.103804	-0.461741	4566.89	FALSE	242
2022-09-13	08:39:42	-0.0542364	-0.241254	4671.33	FALSE	242
2022-09-13	08:39:42	0.0258654	0.115054	4567.01	FALSE	242
2022-09-13	08:39:42	1.18393	5.26636	4676.59	FALSE	242
2022-09-13	08:39:42	3.95828	17.6072	4584.62	1	243
2022-09-13	08:39:43	5.28688	23.5171	4700.11	1	244
2022-09-13	08:39:43	3.87111	17.2195	4601.84	1	245
2022-09-13	08:39:43	3.27314	14.5596	4714.67	1	246
2022-09-13	08:39:43	1.82709	8.12726	4609.96	FALSE	246
2022-09-13	08:39:44	0.657824	2.92613	4717.6	FALSE	246
2022-09-13	08:39:44	0.408969	1.81918	4611.78	FALSE	246
2022-09-13	08:39:44	0.312685	1.39089	4718.99	FALSE	246
2022-09-13	08:39:45	0.37355	1.66163	4613.44	FALSE	246
2022-09-13	08:39:45	0.397316	1.76734	4720.76	FALSE	246
2022-09-13	08:39:45	0.607341	2.70157	4616.15	FALSE	246
2022-09-13	08:39:45	0.38383	1.70735	4722.46	FALSE	246
2022-09-13	08:39:46	0.302048	1.34357	4617.49	FALSE	246
2022-09-13	08:39:46	0.311769	1.38681	4723.85	FALSE	246
2022-09-13	08:39:46	0.282048	1.25461	4618.74	FALSE	246
2022-09-13	08:39:46	0.32785	1.45834	4725.31	FALSE	246
2022-09-13	08:39:47	0.332532	1.47917	4620.22	FALSE	246
2022-09-13	08:39:47	0.276349	1.22926	4726.54	FALSE	246
2022-09-13	08:39:47	0.26668	1.18625	4621.41	FALSE	246
2022-09-13	08:39:47	0.273244	1.21544	4727.75	FALSE	246
2022-09-13	08:39:48	0.318181	1.41533	4622.82	FALSE	246
2022-09-13	08:39:48	0.314211	1.39767	4729.15	FALSE	246
2022-09-13	08:39:48	0.308868	1.37391	4624.2	FALSE	246
2022-09-13	08:39:48	0.308003	1.37006	4730.52	FALSE	246
2022-09-13	08:39:49	0.302761	1.34674	4625.54	FALSE	246
2022-09-13	08:39:49	0.301845	1.34267	4731.86	FALSE	246
2022-09-13	08:39:49	0.310547	1.38138	4626.93	FALSE	246
2022-09-13	08:39:50	0.306832	1.36485	4733.23	FALSE	246
2022-09-13	08:39:50	0.300318	1.33587	4628.26	FALSE	246
2022-09-13	08:39:50	0.307087	1.36598	4734.59	FALSE	246
2022-09-13	08:39:50	0.305509	1.35897	4629.62	FALSE	246
2022-09-13	08:39:51	0.31187	1.38726	4735.98	FALSE	246
2022-09-13	08:39:51	0.306934	1.3653	4630.99	FALSE	246
2022-09-13	08:39:51	0.309835	1.37821	4737.36	FALSE	246
2022-09-13	08:39:51	0.307443	1.36757	4632.35	FALSE	246
2022-09-13	08:39:52	0.312837	1.39156	4738.75	FALSE	246
2022-09-13	08:39:52	0.310903	1.38296	4633.74	FALSE	246
2022-09-13	08:39:52	0.305713	1.35987	4740.11	FALSE	246
2022-09-13	08:39:52	0.305153	1.35738	4635.09	FALSE	246
2022-09-13	08:39:53	0.311412	1.38522	4741.5	FALSE	246
2022-09-13	08:39:53	0.304491	1.35444	4636.45	FALSE	246
2022-09-13	08:39:53	0.315738	1.40447	4742.9	FALSE	246
2022-09-13	08:39:54	0.313295	1.3936	4637.84	FALSE	246
2022-09-13	08:39:54	0.313651	1.39518	4744.3	FALSE	246
2022-09-13	08:39:54	0.314567	1.39926	4639.24	FALSE	246
2022-09-13	08:39:54	0.316043	1.40582	4745.7	FALSE	246
2022-09-13	08:39:55	0.316145	1.40628	4640.65	FALSE	246
2022-09-13	08:39:55	0.316807	1.40922	4747.11	FALSE	246
2022-09-13	08:39:55	0.316349	1.40718	4642.06	FALSE	246
2022-09-13	08:39:55	0.315331	1.40266	4748.51	FALSE	246
2022-09-13	08:39:56	0.318028	1.41465	4643.47	FALSE	246
2022-09-13	08:39:56	0.315433	1.40311	4749.92	FALSE	246
2022-09-13	08:39:56	0.316298	1.40696	4644.88	FALSE	246
2022-09-13	08:39:56	0.316247	1.40673	4751.32	FALSE	246
2022-09-13	08:39:57	0.31126	1.38455	4646.26	FALSE	246
2022-09-13	08:39:57	0.316552	1.40809	4752.73	FALSE	246
2022-09-13	08:39:57	0.313702	1.39541	4647.66	FALSE	246
2022-09-13	08:39:57	0.312277	1.38907	4754.12	FALSE	246
2022-09-13	08:39:58	0.310496	1.38115	4649.04	FALSE	246
2022-09-13	08:39:58	0.315484	1.40334	4755.52	FALSE	246
2022-09-13	08:39:58	0.318944	1.41873	4650.46	FALSE	246
2022-09-13	08:39:59	0.314466	1.39881	4756.92	FALSE	246
2022-09-13	08:39:59	0.318486	1.41669	4651.87	FALSE	246
2022-09-13	08:39:59	0.317977	1.41443	4758.34	FALSE	246
2022-09-13	08:39:59	0.710954	3.16247	4655.04	FALSE	246
2022-09-13	08:40:00	0.734059	3.26524	4761.6	FALSE	246
2022-09-13	08:40:00	0.50444	2.24385	4657.28	FALSE	246
2022-09-13	08:40:00	0.322659	1.43525	4763.04	FALSE	246
2022-09-13	08:40:00	0.303779	1.35127	4658.63	FALSE	246
2022-09-13	08:40:01	0.258842	1.15138	4764.19	FALSE	246
2022-09-13	08:40:01	0.249224	1.1086	4659.74	FALSE	246
2022-09-13	08:40:01	0.16159	0.718785	4764.91	FALSE	246
2022-09-13	08:40:01	0.217672	0.968249	4660.71	FALSE	246
2022-09-13	08:40:02	2.35798	10.4888	4775.4	FALSE	246
2022-09-13	08:40:02	13.7324	61.0845	4721.79	1	247
2022-09-13	08:40:02	21.2934	94.7173	4870.11	1	248
2022-09-13	08:40:03	9.45171	42.0431	4763.84	1	249
2022-09-13	08:40:03	11.0767	49.2714	4919.39	1	250
2022-09-13	08:40:03	32.2458	143.436	4907.27	1	251
2022-09-13	08:40:03	11.3567	50.5169	4969.9	1	252
2022-09-13	08:40:04	16.5751	73.7294	4981	1	253
2022-09-13	08:40:04	16.7569	74.538	5044.44	1	254
2022-09-13	08:40:04	15.5081	68.9831	5049.98	1	255
2022-09-13	08:40:04	3.8934	17.3186	5061.76	1	256
2022-09-13	08:40:05	8.72352	38.804	5088.79	1	257
2022-09-13	08:40:05	5.86393	26.0839	5087.84	1	258
2022-09-13	08:40:05	3.62149	16.1091	5104.9	1	259
2022-09-13	08:40:05	3.59553	15.9936	5103.84	1	260
2022-09-13	08:40:06	3.78057	16.8167	5121.71	1	261
2022-09-13	08:40:06	4.04271	17.9828	5121.82	1	262
2022-09-13	08:40:06	2.12215	9.43975	5131.15	FALSE	262
2022-09-13	08:40:06	1.41497	6.29407	5128.11	FALSE	262
2022-09-13	08:40:07	3.13441	13.9425	5145.1	1	263
2022-09-13	08:40:07	0.603422	2.68414	5130.8	FALSE	263
2022-09-13	08:40:07	0.737366	3.27995	5148.38	FALSE	263
2022-09-13	08:40:08	0.732379	3.25777	5134.06	FALSE	263
2022-09-13	08:40:08	0.582252	2.58997	5150.97	FALSE	263
2022-09-13	08:40:08	0.242303	1.07781	5135.13	FALSE	263
2022-09-13	08:40:08	0.98729	4.39166	5155.36	FALSE	263
2022-09-13	08:40:09	1.50917	6.71309	5141.85	FALSE	263
2022-09-13	08:40:09	0.959147	4.26648	5159.62	FALSE	263
2022-09-13	08:40:09	0.477977	2.12614	5143.97	FALSE	263
2022-09-13	08:40:09	0.578333	2.57254	5162.2	FALSE	263
2022-09-13	08:40:10	0.579249	2.57662	5146.55	FALSE	263
2022-09-13	08:40:10	0.529886	2.35704	5164.55	FALSE	263
2022-09-13	08:40:10	0.498028	2.21533	5148.76	FALSE	263
2022-09-13	08:40:10	0.489224	2.17617	5166.73	FALSE	263
2022-09-13	08:40:11	0.834822	3.71346	5152.48	FALSE	263
2022-09-13	08:40:11	1.03793	4.61692	5171.35	FALSE	263
2022-09-13	08:40:11	0.703066	3.12738	5155.6	FALSE	263
2022-09-13	08:40:11	1.20037	5.33949	5176.69	FALSE	263
2022-09-13	08:40:12	0.82785	3.68244	5159.29	FALSE	263
2022-09-13	08:40:12	1.42912	6.35701	5183.04	FALSE	263
2022-09-13	08:40:12	1.18108	5.25368	5164.54	FALSE	263
2022-09-13	08:40:13	0.814924	3.62494	5186.67	FALSE	263
2022-09-13	08:40:13	1.27345	5.66456	5170.21	FALSE	263
2022-09-13	08:40:13	1.42658	6.34571	5193.01	FALSE	263
2022-09-13	08:40:13	2.28525	10.1652	5180.37	FALSE	263
2022-09-13	08:40:14	0.828563	3.68561	5196.7	FALSE	263
2022-09-13	08:40:14	1.13146	5.03296	5185.4	FALSE	263
2022-09-13	08:40:14	0.802506	3.56971	5200.27	FALSE	263
2022-09-13	08:40:14	0.370903	1.64985	5187.05	FALSE	263
2022-09-13	08:40:15	0.429275	1.9095	5202.18	FALSE	263
2022-09-13	08:40:15	0.332125	1.47736	5188.53	FALSE	263
2022-09-13	08:40:15	0.512786	2.28097	5204.46	FALSE	263
2022-09-13	08:40:15	0.442252	1.96723	5190.5	FALSE	263
2022-09-13	08:40:16	0.607137	2.70067	5207.16	FALSE	263
2022-09-13	08:40:16	0.768054	3.41646	5193.91	FALSE	263
2022-09-13	08:40:16	1.11716	4.96935	5212.13	FALSE	263
2022-09-13	08:40:17	2.72866	12.1376	5206.05	FALSE	263
2022-09-13	08:40:17	5.64311	25.1017	5237.23	1	264
2022-09-13	08:40:17	5.56836	24.7692	5230.82	1	265
2022-09-13	08:40:17	6.48281	28.8368	5266.07	1	266
2022-09-13	08:40:18	5.25349	23.3686	5254.19	1	267
2022-09-13	08:40:18	5.4308	24.1573	5290.23	1	268
2022-09-13	08:40:18	9.39273	41.7807	5295.97	1	269
2022-09-13	08:40:18	4.18423	18.6123	5308.84	1	270
2022-09-13	08:40:19	7.35787	32.7293	5328.7	1	271
2022-09-13	08:40:19	10.393	46.2301	5355.07	1	272
2022-09-13	08:40:19	2.48617	11.059	5339.76	FALSE	272
2022-09-13	08:40:19	7.64505	34.0067	5389.07	1	273
2022-09-13	08:40:20	1.35009	6.00547	5345.76	FALSE	273
2022-09-13	08:40:20	2.29019	10.1872	5399.26	FALSE	273
2022-09-13	08:40:20	0.647646	2.88086	5348.65	FALSE	273
2022-09-13	08:40:20	0.681031	3.02936	5402.29	FALSE	273
2022-09-13	08:40:21	0.756349	3.36439	5352.01	FALSE	273
2022-09-13	08:40:21	0.436807	1.943	5404.23	FALSE	273
2022-09-13	08:40:21	0.437519	1.94617	5353.96	FALSE	273
2022-09-13	08:40:22	0.429733	1.91154	5406.15	FALSE	273
2022-09-13	08:40:22	-0.0713865	-0.317541	5353.96	FALSE	273
2022-09-13	08:40:22	-0.281412	-1.25178	5406.15	FALSE	273
2022-09-13	08:40:22	-0.10589	-0.47102	5353.96	FALSE	273
2022-09-13	08:40:23	0.0289188	0.128637	5406.27	FALSE	273
2022-09-13	08:40:23	0.136858	0.608772	5354.56	FALSE	273
2022-09-13	08:40:23	0.453295	2.01635	5408.29	FALSE	273
2022-09-13	08:40:23	0.499249	2.22076	5356.79	FALSE	273
2022-09-13	08:40:24	0.415789	1.84951	5410.14	FALSE	273
2022-09-13	08:40:24	0.246476	1.09637	5357.88	FALSE	273
2022-09-13	08:40:24	0.234618	1.04363	5411.18	FALSE	273
2022-09-13	08:40:24	0.746781	3.32183	5361.2	FALSE	273
2022-09-13	08:40:25	0.74215	3.30123	5414.48	FALSE	273
2022-09-13	08:40:25	0.173448	0.771531	5361.98	FALSE	273
2022-09-13	08:40:25	0.137723	0.612619	5415.1	FALSE	273
2022-09-13	08:40:25	0.729529	3.24509	5365.22	FALSE	273
2022-09-13	08:40:26	0.135738	0.60379	5415.7	FALSE	273
2022-09-13	08:40:26	0.268766	1.19552	5366.42	FALSE	273
2022-09-13	08:40:26	0.590394	2.62619	5418.33	FALSE	273
2022-09-13	08:40:27	5.85721	26.054	5392.47	1	274
2022-09-13	08:40:27	8.08637	35.9698	5454.3	1	275
2022-09-13	08:40:27	8.92657	39.7072	5432.18	1	276
2022-09-13	08:40:27	3.57075	15.8834	5470.18	1	277
2022-09-13	08:40:28	6.58332	29.2839	5461.46	1	278
2022-09-13	08:40:28	4.01691	17.868	5488.05	1	279
2022-09-13	08:40:28	2.33319	10.3785	5471.84	FALSE	279
2022-09-13	08:40:28	3.35792	14.9367	5502.99	1	280
2022-09-13	08:40:29	0.566374	2.51934	5474.36	FALSE	280
2022-09-13	08:40:29	0.72383	3.21974	5506.2	FALSE	280
2022-09-13	08:40:29	0.268664	1.19507	5475.55	FALSE	280
2022-09-13	08:40:29	0.143575	0.63865	5506.84	FALSE	280
2022-09-13	08:40:30	0.262252	1.16655	5476.72	FALSE	280
2022-09-13	08:40:30	0.192125	0.85461	5507.7	FALSE	280
2022-09-13	08:40:30	0.387239	1.72252	5478.44	FALSE	280
2022-09-13	08:40:31	0.292023	1.29898	5509	FALSE	280
2022-09-13	08:40:31	1.85034	8.23068	5486.67	FALSE	280
2022-09-13	08:40:31	7.77543	34.5867	5543.58	1	281
2022-09-13	08:40:31	10.3844	46.1919	5532.87	1	282
2022-09-13	08:40:32	14.4186	64.1368	5607.72	1	283
2022-09-13	08:40:32	9.05558	40.281	5573.15	1	284
2022-09-13	08:40:32	18.0323	80.2113	5687.93	1	285
2022-09-13	08:40:32	8.61492	38.3209	5611.47	1	286
2022-09-13	08:40:33	7.10948	31.6244	5719.56	1	287
2022-09-13	08:40:33	8.56815	38.1128	5649.58	1	288
2022-09-13	08:40:33	1.60958	7.15973	5726.72	FALSE	288
2022-09-13	08:40:33	6.11772	27.2128	5676.79	1	289
2022-09-13	08:40:34	4.04785	18.0056	5744.72	1	290
2022-09-13	08:40:34	1.98648	8.83626	5685.63	FALSE	290
2022-09-13	08:40:34	3.60887	16.053	5760.77	1	291
2022-09-13	08:40:34	0.929784	4.13587	5689.77	FALSE	291
2022-09-13	08:40:35	2.48006	11.0318	5771.81	FALSE	291
2022-09-13	08:40:35	0.593957	2.64204	5692.41	FALSE	291
2022-09-13	08:40:35	0.756552	3.36529	5775.17	FALSE	291
2022-09-13	08:40:36	0.497417	2.21261	5694.62	FALSE	291
2022-09-13	08:40:36	0.398028	1.77051	5776.94	FALSE	291
2022-09-13	08:40:36	0.315229	1.4022	5696.02	FALSE	291
2022-09-13	08:40:36	0.429784	1.91177	5778.85	FALSE	291
2022-09-13	08:40:37	0.296756	1.32003	5697.34	FALSE	291
2022-09-13	08:40:37	0.302456	1.34538	5780.2	FALSE	291
2022-09-13	08:40:37	0.230496	1.02529	5698.37	FALSE	291
2022-09-13	08:40:37	0.300522	1.33678	5781.54	FALSE	291
2022-09-13	08:40:38	0.287443	1.2786	5699.65	FALSE	291
2022-09-13	08:40:38	0.402557	1.79065	5783.33	FALSE	291
2022-09-13	08:40:38	0.287239	1.2777	5700.92	FALSE	291
2022-09-13	08:40:38	0.388613	1.72863	5785.06	FALSE	291
2022-09-13	08:40:39	0.404847	1.80084	5702.72	FALSE	291
2022-09-13	08:40:39	0.353143	1.57085	5786.63	FALSE	291
2022-09-13	08:40:39	0.33757	1.50158	5704.23	FALSE	291
2022-09-13	08:40:40	0.319504	1.42122	5788.05	FALSE	291
2022-09-13	08:40:40	0.305	1.3567	5705.58	FALSE	291
2022-09-13	08:40:40	0.38098	1.69468	5789.74	FALSE	291
2022-09-13	08:40:40	0.350598	1.55953	5707.14	FALSE	291
2022-09-13	08:40:41	0.391412	1.74108	5791.48	FALSE	291
2022-09-13	08:40:41	0.23299	1.03639	5708.18	FALSE	291
2022-09-13	08:40:41	0.265	1.17877	5792.66	FALSE	291
2022-09-13	08:40:41	0.28673	1.27543	5709.45	FALSE	291
2022-09-13	08:40:42	0.271107	1.20594	5793.87	FALSE	291
2022-09-13	08:40:42	0.348664	1.55093	5711.01	FALSE	291
2022-09-13	08:40:42	0.187392	0.833557	5794.7	FALSE	291
2022-09-13	08:40:42	0.191718	0.8528	5711.86	FALSE	291
2022-09-13	08:40:43	0.230903	1.0271	5795.73	FALSE	291
2022-09-13	08:40:43	0.251616	1.11924	5712.98	FALSE	291
2022-09-13	08:40:43	0.237265	1.0554	5796.78	FALSE	291
2022-09-13	08:40:43	0.216756	0.964174	5713.94	FALSE	291
2022-09-13	08:40:44	0.226425	1.00718	5797.79	FALSE	291
2022-09-13	08:40:44	0.773193	3.43932	5717.38	FALSE	291
2022-09-13	08:40:44	0.710191	3.15907	5800.95	FALSE	291
2022-09-13	08:40:45	2.43762	10.843	5728.22	FALSE	291
2022-09-13	08:40:45	1.01004	4.49286	5805.44	FALSE	291
2022-09-13	08:40:45	1.14846	5.10858	5733.33	FALSE	291
2022-09-13	08:40:45	0.955687	4.25109	5809.69	FALSE	291
2022-09-13	08:40:46	2.62281	11.6668	5745	FALSE	291
2022-09-13	08:40:46	1.52281	6.77376	5816.47	FALSE	291
2022-09-13	08:40:46	1.05375	4.68729	5749.69	FALSE	291
2022-09-13	08:40:46	0.945763	4.20694	5820.68	FALSE	291
2022-09-13	08:40:47	1.54373	6.86682	5756.55	FALSE	291
2022-09-13	08:40:47	1.30276	5.79494	5826.47	FALSE	291
2022-09-13	08:40:47	1.77263	7.88501	5764.44	FALSE	291
2022-09-13	08:40:47	2.27691	10.1282	5836.6	FALSE	291
2022-09-13	08:40:48	2.22632	9.90312	5774.34	FALSE	291
2022-09-13	08:40:48	3.55665	15.8207	5852.42	1	292
2022-09-13	08:40:48	3.17111	14.1057	5788.45	1	293
2022-09-13	08:40:49	5.37533	23.9105	5876.33	1	294
2022-09-13	08:40:49	1.4481	6.44144	5794.89	FALSE	294
2022-09-13	08:40:49	4.30892	19.1669	5895.5	1	295
2022-09-13	08:40:49	1.99426	8.87087	5803.76	FALSE	295
2022-09-13	08:40:50	4.33253	19.272	5914.77	1	296
2022-09-13	08:40:50	2.09207	9.30595	5813.07	FALSE	296
2022-09-13	08:40:50	0.930903	4.14084	5918.91	FALSE	296
2022-09-13	08:40:50	0.753193	3.35035	5816.42	FALSE	296
2022-09-13	08:40:51	0.546119	2.42925	5921.34	FALSE	296
2022-09-13	08:40:51	0.293957	1.30758	5817.72	FALSE	296
2022-09-13	08:40:51	-0.117544	-0.522859	5921.34	FALSE	296
2022-09-13	08:40:51	-0.569554	-2.53349	5817.72	FALSE	296
2022-09-13	08:40:52	-0.529249	-2.35421	5921.34	FALSE	296
2022-09-13	08:40:52	-0.00975804	-0.0434057	5817.72	FALSE	296
2022-09-13	08:40:52	0.126018	0.560553	5921.9	FALSE	296
2022-09-13	08:40:52	0.233753	1.03978	5818.76	FALSE	296
2022-09-13	08:40:53	0.240878	1.07147	5922.97	FALSE	296
2022-09-13	08:40:53	0.366018	1.62812	5820.39	FALSE	296
2022-09-13	08:40:53	0.321132	1.42846	5924.4	FALSE	296
2022-09-13	08:40:54	0.521997	2.32195	5822.71	FALSE	296
2022-09-13	08:40:54	0.344339	1.53169	5925.93	FALSE	296
2022-09-13	08:40:54	0.195534	0.869774	5823.58	FALSE	296
2022-09-13	08:40:54	0.187799	0.835368	5926.77	FALSE	296
2022-09-13	08:40:55	0.166832	0.742102	5824.32	FALSE	296
2022-09-13	08:40:55	0.182049	0.80979	5927.58	FALSE	296
2022-09-13	08:40:55	0.115535	0.513923	5824.84	FALSE	296
2022-09-13	08:40:55	0.136909	0.608999	5928.18	FALSE	296
2022-09-13	08:40:56	0.281387	1.25167	5826.09	FALSE	296
2022-09-13	08:40:56	0.148512	0.660611	5928.85	FALSE	296
2022-09-13	08:40:56	0.211107	0.939046	5827.03	FALSE	296
2022-09-13	08:40:56	0.132481	0.589302	5929.43	FALSE	296
2022-09-13	08:40:57	0.180929	0.804808	5827.83	FALSE	296
2022-09-13	08:40:57	0.277468	1.23423	5930.67	FALSE	296
2022-09-13	08:40:57	0.267494	1.18987	5829.02	FALSE	296
2022-09-13	08:40:57	0.201132	0.894675	5931.56	FALSE	296
2022-09-13	08:40:58	0.289122	1.28607	5830.31	FALSE	296
2022-09-13	08:40:58	0.382557	1.70169	5933.27	FALSE	296
2022-09-13	08:40:58	0.420725	1.87147	5832.18	FALSE	296
2022-09-13	08:40:59	0.376705	1.67566	5934.94	FALSE	296
2022-09-13	08:40:59	0.327188	1.4554	5833.64	FALSE	296
2022-09-13	08:40:59	0.158792	0.706339	5935.65	FALSE	296
2022-09-13	08:40:59	0.350954	1.56111	5835.2	FALSE	296
2022-09-13	08:41:00	0.496094	2.20673	5937.85	FALSE	296
2022-09-13	08:41:00	5.11767	22.7644	5857.96	1	297
2022-09-13	08:41:00	16.4316	73.091	6010.94	1	298
2022-09-13	08:41:00	19.1955	85.3854	5943.35	1	299
2022-09-13	08:41:01	4.81507	21.4184	6032.36	1	300
2022-09-13	08:41:01	7.3854	32.8517	5976.2	1	301
2022-09-13	08:41:01	8.50006	37.81	6070.17	1	302
2022-09-13	08:41:01	4.37115	19.4437	5995.64	1	303
2022-09-13	08:41:02	7.73609	34.4117	6104.58	1	304
2022-09-13	08:41:02	9.74179	43.3334	6038.98	1	305
2022-09-13	08:41:02	3.04994	13.5667	6118.15	1	306
2022-09-13	08:41:03	7.99609	35.5682	6074.55	1	307
2022-09-13	08:41:03	3.35757	14.9351	6133.09	1	308
2022-09-13	08:41:03	3.86215	17.1796	6091.72	1	309
2022-09-13	08:41:03	5.5194	24.5514	6157.64	1	310
2022-09-13	08:41:04	3.82983	17.0358	6108.76	1	311
2022-09-13	08:41:04	7.72601	34.3668	6192.01	1	312
2022-09-13	08:41:04	8.89054	39.5469	6148.31	1	313
2022-09-13	08:41:04	4.4307	19.7086	6211.71	1	314
2022-09-13	08:41:05	9.79828	43.5847	6191.89	1	315
2022-09-13	08:41:05	2.87848	12.8041	6224.52	FALSE	315
2022-09-13	08:41:05	3.12011	13.8789	6205.77	1	316
2022-09-13	08:41:05	4.20826	18.7192	6243.24	1	317
2022-09-13	08:41:06	3.33686	14.843	6220.61	1	318
2022-09-13	08:41:06	6.69853	29.7964	6273.03	1	319
2022-09-13	08:41:06	5.37599	23.9135	6244.53	1	320
2022-09-13	08:41:06	7.71594	34.322	6307.36	1	321
2022-09-13	08:41:07	6.52459	29.0227	6273.55	1	322
2022-09-13	08:41:07	4.722	21.0044	6328.36	1	323
2022-09-13	08:41:07	10.3925	46.2279	6319.78	1	324
2022-09-13	08:41:08	3.33966	14.8555	6343.22	1	325
2022-09-13	08:41:08	6.87543	30.5833	6350.36	1	326
2022-09-13	08:41:08	11.1887	49.7696	6392.98	1	327
2022-09-13	08:41:08	12.8455	57.1394	6407.5	1	328
2022-09-13	08:41:09	9.89736	44.0254	6437.01	1	329
2022-09-13	08:41:09	5.10266	22.6977	6430.2	1	330
2022-09-13	08:41:09	11.4479	50.9225	6487.93	1	331
2022-09-13	08:41:09	10.0722	44.8032	6475	1	332
2022-09-13	08:41:10	13.2513	58.9444	6546.88	1	333
2022-09-13	08:41:10	8.42958	37.4965	6512.5	1	334
2022-09-13	08:41:10	3.24118	14.4174	6561.29	1	335
2022-09-13	08:41:10	2.37833	10.5793	6523.08	FALSE	335
2022-09-13	08:41:11	0.485	2.15738	6563.45	FALSE	335
2022-09-13	08:41:11	0.474924	2.11256	6525.19	FALSE	335
2022-09-13	08:41:11	0.526476	2.34187	6565.79	FALSE	335
2022-09-13	08:41:12	0.255891	1.13825	6526.33	FALSE	335
2022-09-13	08:41:12	0.445916	1.98352	6567.78	FALSE	335
2022-09-13	08:41:12	0.552736	2.45868	6528.79	FALSE	335
2022-09-13	08:41:12	0.802964	3.57174	6571.35	FALSE	335
2022-09-13	08:41:13	0.770293	3.42642	6532.21	FALSE	335
2022-09-13	08:41:13	1.05228	4.68075	6576.03	FALSE	335
2022-09-13	08:41:13	1.58179	7.03612	6539.25	FALSE	335
2022-09-13	08:41:13	0.901336	4.00932	6580.04	FALSE	335
2022-09-13	08:41:14	0.817214	3.63513	6542.88	FALSE	335
2022-09-13	08:41:14	0.644695	2.86773	6582.91	FALSE	335
2022-09-13	08:41:14	1.08164	4.81135	6547.7	FALSE	335
2022-09-13	08:41:14	1.21324	5.39673	6588.3	FALSE	335
2022-09-13	08:41:15	1.55899	6.9347	6554.63	FALSE	335
2022-09-13	08:41:15	1.72851	7.68876	6595.99	FALSE	335
2022-09-13	08:41:15	1.68495	7.49499	6562.13	FALSE	335
2022-09-13	08:41:15	1.2792	5.69014	6601.68	FALSE	335
2022-09-13	08:41:16	1.16134	5.16587	6567.29	FALSE	335
2022-09-13	08:41:16	0.416247	1.85155	6603.53	FALSE	335
2022-09-13	08:41:16	0.445255	1.98058	6569.27	FALSE	335
2022-09-13	08:41:17	0.457061	2.0331	6605.57	FALSE	335
2022-09-13	08:41:17	0.817723	3.6374	6572.91	FALSE	335
2022-09-13	08:41:17	0.119606	0.532031	6606.1	FALSE	335
2022-09-13	08:41:17	0.243931	1.08505	6573.99	FALSE	335
2022-09-13	08:41:18	1.07085	4.76335	6610.86	FALSE	335
2022-09-13	08:41:18	12.2865	54.6528	6628.65	1	336
2022-09-13	08:41:18	7.87009	35.0077	6645.87	1	337
2022-09-13	08:41:18	7.46372	33.2001	6661.85	1	338
2022-09-13	08:41:19	11.7855	52.4243	6698.29	1	339
2022-09-13	08:41:19	5.21375	23.1918	6685.04	1	340
2022-09-13	08:41:19	5.52301	24.5675	6722.86	1	341
2022-09-13	08:41:19	4.87238	21.6733	6706.71	1	342
2022-09-13	08:41:20	5.01446	22.3053	6745.17	1	343
2022-09-13	08:41:20	6.02439	26.7977	6733.51	1	344
2022-09-13	08:41:20	5.88632	26.1835	6771.35	1	345
2022-09-13	08:41:20	9.73151	43.2877	6776.8	1	346
2022-09-13	08:41:21	12.8369	57.1011	6828.45	1	347
2022-09-13	08:41:21	16.745	74.4851	6851.28	1	348
2022-09-13	08:41:21	14.6701	65.2555	6893.71	1	349
2022-09-13	08:41:22	8.87177	39.4634	6890.75	1	350
2022-09-13	08:41:22	12.8864	57.3213	6951.03	1	351
2022-09-13	08:41:22	7.58825	33.7541	6924.5	1	352
2022-09-13	08:41:22	7.10774	31.6166	6982.65	1	353
2022-09-13	08:41:23	12.8258	57.0517	6981.55	1	354
2022-09-13	08:41:23	6.03955	26.8651	7009.51	1	355
2022-09-13	08:41:23	9.45614	42.0628	7023.62	1	356
2022-09-13	08:41:23	12.7822	56.8578	7066.37	1	357
2022-09-13	08:41:24	5.89711	26.2315	7049.85	1	358
2022-09-13	08:41:24	10.4379	46.4299	7112.8	1	359
2022-09-13	08:41:24	14.4223	64.1533	7114	1	360
2022-09-13	08:41:24	6.16724	27.4331	7140.23	1	361
2022-09-13	08:41:25	9.49726	42.2457	7156.25	1	362
2022-09-13	08:41:25	5.13925	22.8604	7163.09	1	363
2022-09-13	08:41:25	3.16658	14.0856	7170.33	1	364
2022-09-13	08:41:26	8.3965	37.3493	7200.44	1	365
2022-09-13	08:41:26	8.2654	36.7662	7207.1	1	366
2022-09-13	08:41:26	9.48179	42.1769	7242.62	1	367
2022-09-13	08:41:26	3.01497	13.4112	7220.51	1	368
2022-09-13	08:41:27	2.91619	12.9718	7255.59	FALSE	368
2022-09-13	08:41:27	1.88398	8.38032	7228.89	FALSE	368
2022-09-13	08:41:27	1.24276	5.52805	7261.12	FALSE	368
2022-09-13	08:41:27	1.94235	8.63996	7237.53	FALSE	368
2022-09-13	08:41:28	0.751361	3.3422	7264.46	FALSE	368
2022-09-13	08:41:28	1.67477	7.44971	7244.98	FALSE	368
2022-09-13	08:41:28	1.50978	6.7158	7271.18	FALSE	368
2022-09-13	08:41:28	3.5307	15.7053	7260.68	1	369
2022-09-13	08:41:29	1.42307	6.3301	7277.51	FALSE	369
2022-09-13	08:41:29	3.18083	14.149	7274.83	1	370
2022-09-13	08:41:29	4.53523	20.1736	7297.68	1	371
2022-09-13	08:41:29	4.0709	18.1082	7292.94	1	372
2022-09-13	08:41:30	9.47772	42.1588	7339.84	1	373
2022-09-13	08:41:30	6.38892	28.4192	7321.36	1	374
2022-09-13	08:41:30	12.8579	57.1945	7397.03	1	375
2022-09-13	08:41:31	8.81696	39.2196	7360.58	1	376
2022-09-13	08:41:31	9.14724	40.6888	7437.72	1	377
2022-09-13	08:41:31	6.58352	29.2848	7389.86	1	378
2022-09-13	08:41:31	4.10067	18.2406	7455.96	1	379
2022-09-13	08:41:32	6.33034	28.1586	7418.02	1	380
2022-09-13	08:41:32	1.49782	6.6626	7462.62	FALSE	380
2022-09-13	08:41:32	0.797163	3.54594	7421.57	FALSE	380
2022-09-13	08:41:32	1.19335	5.30826	7467.93	FALSE	380
2022-09-13	08:41:33	0.399402	1.77662	7423.35	FALSE	380
2022-09-13	08:41:33	1.23131	5.47711	7473.41	FALSE	380
2022-09-13	08:41:33	0.674058	2.99834	7426.34	FALSE	380
2022-09-13	08:41:33	3.33457	14.8328	7488.24	1	381
2022-09-13	08:41:34	1.65391	7.35692	7433.7	FALSE	381
2022-09-13	08:41:34	3.58195	15.9332	7504.18	1	382
2022-09-13	08:41:34	0.903677	4.01974	7437.72	FALSE	382
2022-09-13	08:41:35	0.888817	3.95364	7508.13	FALSE	382
2022-09-13	08:41:35	0.322252	1.43344	7439.15	FALSE	382
2022-09-13	08:41:35	0.365407	1.6254	7509.76	FALSE	382
2022-09-13	08:41:35	0.285051	1.26796	7440.42	FALSE	382
2022-09-13	08:41:36	0.663066	2.94945	7512.7	FALSE	382
2022-09-13	08:41:36	0.435687	1.93802	7442.36	FALSE	382
2022-09-13	08:41:36	0.224746	0.999715	7513.7	FALSE	382
2022-09-13	08:41:36	0.0843386	0.375155	7442.74	FALSE	382
2022-09-13	08:41:37	0.0107	0.0475957	7513.75	FALSE	382
2022-09-13	08:41:37	-0.192252	-0.855175	7442.74	FALSE	382
2022-09-13	08:41:37	-0.0733712	-0.32637	7513.75	FALSE	382
2022-09-13	08:41:37	0.0356872	0.158744	7442.89	FALSE	382
2022-09-13	08:41:38	0.0165015	0.073402	7513.83	FALSE	382
2022-09-13	08:41:38	0.346527	1.54142	7444.44	FALSE	382
2022-09-13	08:41:38	0.308715	1.37323	7515.2	FALSE	382
2022-09-13	08:41:38	0.096756	0.43039	7444.87	FALSE	382
2022-09-13	08:41:39	0.208919	0.929313	7516.13	FALSE	382
2022-09-13	08:41:39	0.268613	1.19484	7446.06	FALSE	382
2022-09-13	08:41:39	0.217468	0.967341	7517.1	FALSE	382
2022-09-13	08:41:40	0.318791	1.41805	7447.48	FALSE	382
2022-09-13	08:41:40	0.442405	1.96791	7519.06	FALSE	382
2022-09-13	08:41:40	0.479606	2.13338	7449.61	FALSE	382
2022-09-13	08:41:40	0.369529	1.64374	7520.71	FALSE	382
2022-09-13	08:41:41	0.339199	1.50882	7451.12	FALSE	382
2022-09-13	08:41:41	0.320318	1.42484	7522.13	FALSE	382
2022-09-13	08:41:41	2.48067	11.0345	7462.16	FALSE	382
2022-09-13	08:41:41	2.86663	12.7513	7534.88	FALSE	382
2022-09-13	08:41:42	2.0566	9.14817	7471.3	FALSE	382
2022-09-13	08:41:42	2.91355	12.9601	7547.84	FALSE	382
2022-09-13	08:41:42	5.06622	22.5356	7493.84	1	383
2022-09-13	08:41:42	4.2625	18.9605	7566.8	1	384
2022-09-13	08:41:43	1.92892	8.58022	7502.42	FALSE	384
2022-09-13	08:41:43	0.498995	2.21963	7569.02	FALSE	384
2022-09-13	08:41:43	0.75645	3.36484	7505.78	FALSE	384
2022-09-13	08:41:43	0.274567	1.22133	7570.24	FALSE	384
2022-09-13	08:41:44	0.842405	3.74719	7509.53	FALSE	384
2022-09-13	08:41:44	1.60261	7.12873	7577.37	FALSE	384
2022-09-13	08:41:44	8.99889	40.0289	7549.56	1	385
2022-09-13	08:41:45	7.4479	33.1297	7610.5	1	386
2022-09-13	08:41:45	5.5768	24.8067	7574.37	1	387
2022-09-13	08:41:45	7.92179	35.2377	7645.74	1	388
2022-09-13	08:41:45	5.94367	26.4386	7600.81	1	389
2022-09-13	08:41:46	5.14881	22.9029	7668.64	1	390
2022-09-13	08:41:46	15.3407	68.2385	7669.04	1	391
2022-09-13	08:41:46	7.81894	34.7802	7703.42	1	392
2022-09-13	08:41:46	11.5373	51.3202	7720.36	1	393
2022-09-13	08:41:47	13.6742	60.8256	7764.25	1	394
2022-09-13	08:41:47	7.9624	35.4183	7755.78	1	395
2022-09-13	08:41:47	15.083	67.0922	7831.34	1	396
2022-09-13	08:41:47	7.08052	31.4956	7787.28	1	397
2022-09-13	08:41:48	9.79726	43.5802	7874.92	1	398
2022-09-13	08:41:48	6.85421	30.4889	7817.77	1	399
2022-09-13	08:41:48	7.09477	31.559	7906.48	1	400
2022-09-13	08:41:49	4.22032	18.7728	7836.54	1	401
2022-09-13	08:41:49	3.67579	16.3506	7922.83	1	402
2022-09-13	08:41:49	2.49462	11.0966	7847.64	FALSE	402
2022-09-13	08:41:49	0.644695	2.86773	7925.7	FALSE	402
2022-09-13	08:41:50	0.443982	1.97492	7849.61	FALSE	402
2022-09-13	08:41:50	0.402964	1.79246	7927.49	FALSE	402
2022-09-13	08:41:50	0.266883	1.18715	7850.8	FALSE	402
2022-09-13	08:41:50	0.298181	1.32637	7928.82	FALSE	402
2022-09-13	08:41:51	0.275127	1.22382	7852.02	FALSE	402
2022-09-13	08:41:51	0.264644	1.17719	7930	FALSE	402
2022-09-13	08:41:51	0.338944	1.50769	7853.53	FALSE	402
2022-09-13	08:41:51	0.532888	2.37039	7932.37	FALSE	402
2022-09-13	08:41:52	0.500216	2.22506	7855.76	FALSE	402
2022-09-13	08:41:52	0.749529	3.33405	7935.7	FALSE	402
2022-09-13	08:41:52	0.587646	2.61397	7858.37	FALSE	402
2022-09-13	08:41:52	0.452583	2.01318	7937.71	FALSE	402
2022-09-13	08:41:53	0.376959	1.67679	7860.05	FALSE	402
2022-09-13	08:41:53	0.36444	1.6211	7939.33	FALSE	402
2022-09-13	08:41:53	0.361998	1.61024	7861.66	FALSE	402
2022-09-13	08:41:54	0.357265	1.58919	7940.92	FALSE	402
2022-09-13	08:41:54	0.359555	1.59937	7863.26	FALSE	402
2022-09-13	08:41:54	0.352939	1.56994	7942.49	FALSE	402
2022-09-13	08:41:54	0.346883	1.543	7864.8	FALSE	402
2022-09-13	08:41:55	0.725153	3.22563	7945.72	FALSE	402
2022-09-13	08:41:55	1.77299	7.88661	7872.69	FALSE	402
2022-09-13	08:41:55	1.93024	8.58609	7954.3	FALSE	402
2022-09-13	08:41:55	3.28139	14.5963	7887.28	1	403
2022-09-13	08:41:56	0.993753	4.42041	7958.73	FALSE	403
2022-09-13	08:41:56	0.665254	2.95918	7890.24	FALSE	403
2022-09-13	08:41:56	0.396654	1.7644	7960.49	FALSE	403
2022-09-13	08:41:56	0.125764	0.559423	7890.8	FALSE	403
2022-09-13	08:41:57	0.0155855	0.0693274	7960.56	FALSE	403
2022-09-13	08:41:57	0.0682572	0.303622	7891.1	FALSE	403
2022-09-13	08:41:57	0.258893	1.15161	7961.71	FALSE	403
2022-09-13	08:41:58	0.180776	0.804128	7891.91	FALSE	403
2022-09-13	08:41:58	0.113194	0.50351	7962.21	FALSE	403
2022-09-13	08:41:58	0.331667	1.47532	7893.38	FALSE	403
2022-09-13	08:41:58	0.385458	1.71459	7963.93	FALSE	403
2022-09-13	08:41:59	0.667595	2.9696	7896.35	FALSE	403
2022-09-13	08:41:59	0.44154	1.96406	7965.89	FALSE	403
2022-09-13	08:41:59	1.07177	4.76745	7901.12	FALSE	403
2022-09-13	08:41:59	2.48653	11.0606	7976.95	FALSE	403
2022-09-13	08:42:00	11.4444	50.907	7952.03	1	404
2022-09-13	08:42:00	20.095	89.3866	8066.34	1	405
2022-09-13	08:42:00	31.2127	138.84	8090.87	1	406
2022-09-13	08:42:00	7.41095	32.9654	8099.31	1	407
2022-09-13	08:42:01	18.0598	80.3336	8171.2	1	408
2022-09-13	08:42:01	13.0754	58.162	8157.47	1	409
2022-09-13	08:42:01	8.84851	39.3599	8210.56	1	410
2022-09-13	08:42:01	11.0579	49.1878	8206.66	1	411
2022-09-13	08:42:02	8.17894	36.3816	8246.94	1	412
2022-09-13	08:42:02	8.9711	39.9052	8246.56	1	413
2022-09-13	08:42:02	8.62215	38.353	8285.3	1	414
2022-09-13	08:42:03	8.36673	37.2169	8283.78	1	415
2022-09-13	08:42:03	10.3606	46.086	8331.38	1	416
2022-09-13	08:42:03	11.1392	49.5494	8333.33	1	417
2022-09-13	08:42:03	9.11115	40.5282	8371.91	1	418
2022-09-13	08:42:04	8.30902	36.9602	8370.29	1	419
2022-09-13	08:42:04	8.82148	39.2397	8411.15	1	420
2022-09-13	08:42:04	7.05136	31.3659	8401.65	1	421
2022-09-13	08:42:04	6.61894	29.4424	8440.59	1	422
2022-09-13	08:42:05	7.5538	33.6008	8435.25	1	423
2022-09-13	08:42:05	6.29441	27.9988	8468.59	1	424
2022-09-13	08:42:05	9.5652	42.5479	8477.8	1	425
2022-09-13	08:42:05	3.73645	16.6205	8485.21	1	426
2022-09-13	08:42:06	10.4989	46.7012	8524.5	1	427
2022-09-13	08:42:06	4.55619	20.2668	8505.48	1	428
2022-09-13	08:42:06	3.50566	15.5939	8540.1	1	429
2022-09-13	08:42:06	1.74953	7.78226	8513.26	FALSE	429
2022-09-13	08:42:07	2.25111	10.0134	8550.11	FALSE	429
2022-09-13	08:42:07	6.51517	28.9808	8542.24	1	430
2022-09-13	08:42:07	2.00291	8.90934	8559.02	FALSE	430
2022-09-13	08:42:08	2.15696	9.59459	8551.84	FALSE	430
2022-09-13	08:42:08	0.796603	3.54345	8562.56	FALSE	430
2022-09-13	08:42:08	0.782201	3.47939	8555.32	FALSE	430
2022-09-13	08:42:08	0.813601	3.61906	8566.18	FALSE	430
2022-09-13	08:42:09	0.570395	2.53723	8557.85	FALSE	430
2022-09-13	08:42:09	2.40149	10.6823	8576.86	FALSE	430
2022-09-13	08:42:09	2.97945	13.2532	8571.11	FALSE	430
2022-09-13	08:42:09	3.52846	15.6953	8592.56	1	431
2022-09-13	08:42:10	5.1683	22.9896	8594.1	1	432
2022-09-13	08:42:10	5.92286	26.3461	8618.91	1	433
2022-09-13	08:42:10	9.98256	44.4044	8638.5	1	434
2022-09-13	08:42:10	11.6173	51.6761	8670.58	1	435
2022-09-13	08:42:11	19.57	87.0513	8725.55	1	436
2022-09-13	08:42:11	22.8496	101.64	8772.22	1	437
2022-09-13	08:42:11	12.0048	53.3998	8778.95	1	438
2022-09-13	08:42:12	9.72398	43.2542	8815.48	1	439
2022-09-13	08:42:12	9.10571	40.504	8819.45	1	440
2022-09-13	08:42:12	6.05904	26.9518	8842.43	1	441
2022-09-13	08:42:12	4.59716	20.4491	8839.9	1	442
2022-09-13	08:42:13	4.62663	20.5802	8863.01	1	443
2022-09-13	08:42:13	4.39619	19.5551	8859.46	1	444
2022-09-13	08:42:13	1.61085	7.16538	8870.17	FALSE	444
2022-09-13	08:42:13	0.271667	1.20843	8860.67	FALSE	444
2022-09-13	08:42:14	0.22159	0.985677	8871.16	FALSE	444
2022-09-13	08:42:14	0.0903946	0.402093	8861.07	FALSE	444
2022-09-13	08:42:14	0.216603	0.963493	8872.12	FALSE	444
2022-09-13	08:42:14	0.62271	2.76994	8863.84	FALSE	444
2022-09-13	08:42:15	7.6622	34.083	8906.2	1	445
2022-09-13	08:42:15	13.7635	61.2228	8925.06	1	446
2022-09-13	08:42:15	9.44535	42.0148	8948.22	1	447
2022-09-13	08:42:15	5.78204	25.7197	8950.78	1	448
2022-09-13	08:42:16	3.11513	13.8567	8962.08	1	449
2022-09-13	08:42:16	0.930598	4.13949	8954.92	FALSE	449
2022-09-13	08:42:16	0.828461	3.68516	8965.76	FALSE	449
2022-09-13	08:42:17	0.982099	4.36857	8959.29	FALSE	449
2022-09-13	08:42:17	0.492176	2.1893	8967.95	FALSE	449
2022-09-13	08:42:17	1.5967	7.10244	8966.39	FALSE	449
2022-09-13	08:42:17	4.37731	19.4712	8987.42	1	450
2022-09-13	08:42:18	4.5052	20.04	8986.43	1	451
2022-09-13	08:42:18	3.1392	13.9638	9001.39	1	452
2022-09-13	08:42:18	4.04251	17.9819	9004.41	1	453
2022-09-13	08:42:18	5.12617	22.8022	9024.19	1	454
2022-09-13	08:42:19	5.06118	22.5131	9026.93	1	455
2022-09-13	08:42:19	4.60128	20.4674	9044.66	1	456
2022-09-13	08:42:19	9.49599	42.2401	9069.17	1	457
2022-09-13	08:42:19	10.035	44.6377	9089.29	1	458
2022-09-13	08:42:20	11.1206	49.4667	9118.63	1	459
2022-09-13	08:42:20	4.3395	19.303	9108.6	1	460
2022-09-13	08:42:20	4.85777	21.6083	9140.24	1	461
2022-09-13	08:42:20	4.64978	20.6832	9129.28	1	462
2022-09-13	08:42:21	3.84093	17.0852	9157.33	1	463
2022-09-13	08:42:21	4.95793	22.0539	9151.33	1	464
2022-09-13	08:42:21	0.970242	4.31583	9161.64	FALSE	464
2022-09-13	08:42:22	1.59803	7.10836	9158.44	FALSE	464
2022-09-13	08:42:22	1.29915	5.77888	9167.42	FALSE	464
2022-09-13	08:42:22	1.13757	5.06014	9163.5	FALSE	464
2022-09-13	08:42:22	0.759249	3.37729	9170.8	FALSE	464
2022-09-13	08:42:23	0.454618	2.02223	9165.52	FALSE	464
2022-09-13	08:42:23	0.368919	1.64103	9172.44	FALSE	464
2022-09-13	08:42:23	0.419708	1.86695	9167.39	FALSE	464
2022-09-13	08:42:23	0.496654	2.20922	9174.65	FALSE	464
2022-09-13	08:42:24	0.636755	2.83241	9170.22	FALSE	464
2022-09-13	08:42:24	0.877366	3.9027	9178.55	FALSE	464
2022-09-13	08:42:24	1.62846	7.24372	9177.47	FALSE	464
2022-09-13	08:42:24	2.09711	9.32836	9187.88	FALSE	464
2022-09-13	08:42:25	2.27905	10.1377	9187.6	FALSE	464
2022-09-13	08:42:25	1.48083	6.58703	9194.47	FALSE	464
2022-09-13	08:42:25	1.13126	5.03207	9192.64	FALSE	464

## Sheet: Mars_martin_20229138376 (2)
Date	Time	Lbs	Total force x time			**GoPro Fitting: 826
2022-09-13	08:37:25	0.102608	0.102608	FALSE	0			Total force x time	4133.61
2022-09-13	08:37:25	1.95024	2.05285	FALSE	0			Total steps	464
2022-09-13	08:37:25	3.14907	5.20192	1	1
2022-09-13	08:37:25	2.96902	8.17094	FALSE	1
2022-09-13	08:37:26	4.00953	12.1805	1	2
2022-09-13	08:37:26	2.33854	14.519	FALSE	2
2022-09-13	08:37:26	3.93248	18.4515	1	3
2022-09-13	08:37:27	2.38301	20.8345	FALSE	3
2022-09-13	08:37:27	6.49965	27.3341	1	4
2022-09-13	08:37:27	3.5649	30.899	1	5
2022-09-13	08:37:27	4.84866	35.7477	1	6
2022-09-13	08:37:28	8.36383	44.1115	1	7
2022-09-13	08:37:28	5.15121	49.2627	1	8
2022-09-13	08:37:28	6.07405	55.3368	1	9
2022-09-13	08:37:28	8.02209	63.3589	1	10
2022-09-13	08:37:29	4.41477	67.7737	1	11
2022-09-13	08:37:29	3.60866	71.3823	1	12
2022-09-13	08:37:29	1.81665	73.199	FALSE	12
2022-09-13	08:37:29	0.993906	74.1929	FALSE	12
2022-09-13	08:37:30	1.66851	75.8614	FALSE	12
2022-09-13	08:37:30	2.85034	78.7117	FALSE	12
2022-09-13	08:37:30	5.41141	84.1231	1	13
2022-09-13	08:37:30	6.1853	90.3084	1	14
2022-09-13	08:37:31	6.24103	96.5495	1	15
2022-09-13	08:37:31	7.34149	103.891	1	16
2022-09-13	08:37:31	3.95508	107.846	1	17
2022-09-13	08:37:32	8.02092	115.867	1	18
2022-09-13	08:37:32	7.67115	123.538	1	19
2022-09-13	08:37:32	8.76861	132.307	1	20
2022-09-13	08:37:32	8.2879	140.595	1	21
2022-09-13	08:37:33	4.25721	144.852	1	22
2022-09-13	08:37:33	7.928	152.78	1	23
2022-09-13	08:37:33	5.76688	158.547	1	24
2022-09-13	08:37:33	8.92657	167.473	1	25
2022-09-13	08:37:34	6.62627	174.1	1	26
2022-09-13	08:37:34	4.12271	178.222	1	27
2022-09-13	08:37:34	7.44149	185.664	1	28
2022-09-13	08:37:34	7.45273	193.116	1	29
2022-09-13	08:37:35	13.1559	206.272	1	30
2022-09-13	08:37:35	13.5752	219.848	1	31
2022-09-13	08:37:35	8.5907	228.438	1	32
2022-09-13	08:37:36	16.8711	245.309	1	33
2022-09-13	08:37:36	3.78373	249.093	1	34
2022-09-13	08:37:36	4.47808	253.571	1	35
2022-09-13	08:37:36	4.734	258.305	1	36
2022-09-13	08:37:37	3.30261	261.608	1	37
2022-09-13	08:37:37	4.39558	266.003	1	38
2022-09-13	08:37:37	2.31981	268.323	FALSE	38
2022-09-13	08:37:37	4.97965	273.303	1	39
2022-09-13	08:37:38	7.13324	280.436	1	40
2022-09-13	08:37:38	8.04729	288.483	1	41
2022-09-13	08:37:38	10.5876	299.071	1	42
2022-09-13	08:37:39	6.11161	305.183	1	43
2022-09-13	08:37:39	9.50907	314.692	1	44
2022-09-13	08:37:39	9.67619	324.368	1	45
2022-09-13	08:37:39	5.50306	329.871	1	46
2022-09-13	08:37:39	8.57599	338.447	1	47
2022-09-13	08:37:40	3.80602	342.253	1	48
2022-09-13	08:37:40	6.32301	348.576	1	49
2022-09-13	08:37:40	5.02698	353.603	1	50
2022-09-13	08:37:41	4.148	357.751	1	51
2022-09-13	08:37:41	13.466	371.217	1	52
2022-09-13	08:37:41	5.23665	376.454	1	53
2022-09-13	08:37:41	10.0145	386.468	1	54
2022-09-13	08:37:42	8.76566	395.234	1	55
2022-09-13	08:37:42	4.11055	399.344	1	56
2022-09-13	08:37:42	8.79691	408.141	1	57
2022-09-13	08:37:42	4.66856	412.81	1	58
2022-09-13	08:37:43	13.8508	426.661	1	59
2022-09-13	08:37:43	8.8882	435.549	1	60
2022-09-13	08:37:43	8.87507	444.424	1	61
2022-09-13	08:37:43	13.7629	458.187	1	62
2022-09-13	08:37:44	4.82189	463.009	1	63
2022-09-13	08:37:44	8.94444	471.953	1	64
2022-09-13	08:37:44	11.7653	483.718	1	65
2022-09-13	08:37:44	4.3021	488.02	1	66
2022-09-13	08:37:45	9.98622	498.007	1	67
2022-09-13	08:37:45	9.94642	507.953	1	68
2022-09-13	08:37:45	4.51894	512.472	1	69
2022-09-13	08:37:46	11.7824	524.254	1	70
2022-09-13	08:37:46	5.51406	529.768	1	71
2022-09-13	08:37:46	4.57965	534.348	1	72
2022-09-13	08:37:46	1.72235	536.07	FALSE	72
2022-09-13	08:37:47	0.930852	537.001	FALSE	72
2022-09-13	08:37:47	2.73955	539.741	FALSE	72
2022-09-13	08:37:47	1.43859	541.179	FALSE	72
2022-09-13	08:37:47	2.40653	543.586	FALSE	72
2022-09-13	08:37:48	5.22296	548.809	1	73
2022-09-13	08:37:48	4.3364	553.145	1	74
2022-09-13	08:37:48	1.84754	554.993	FALSE	74
2022-09-13	08:37:48	0.361641	555.355	FALSE	74
2022-09-13	08:37:49	0.556705	555.911	FALSE	74
2022-09-13	08:37:49	0.285713	556.197	FALSE	74
2022-09-13	08:37:49	0.982252	557.179	FALSE	74
2022-09-13	08:37:50	2.8367	560.016	FALSE	74
2022-09-13	08:37:50	6.39049	566.406	1	75
2022-09-13	08:37:50	9.11772	575.524	1	76
2022-09-13	08:37:50	7.53406	583.058	1	77
2022-09-13	08:37:51	13.7803	596.838	1	78
2022-09-13	08:37:51	8.00311	604.842	1	79
2022-09-13	08:37:51	10.2052	615.047	1	80
2022-09-13	08:37:51	7.61385	622.661	1	81
2022-09-13	08:37:52	2.32683	624.987	FALSE	81
2022-09-13	08:37:52	3.8792	628.867	1	82
2022-09-13	08:37:52	2.97716	631.844	FALSE	82
2022-09-13	08:37:53	5.08596	636.93	1	83
2022-09-13	08:37:53	1.27961	638.209	FALSE	83
2022-09-13	08:37:53	1.39121	639.601	FALSE	83
2022-09-13	08:37:53	2.19996	641.801	FALSE	83
2022-09-13	08:37:53	0.747748	642.548	FALSE	83
2022-09-13	08:37:54	1.20352	643.752	FALSE	83
2022-09-13	08:37:54	0.388206	644.14	FALSE	83
2022-09-13	08:37:54	1.04439	645.184	FALSE	83
2022-09-13	08:37:55	0.567595	645.752	FALSE	83
2022-09-13	08:37:55	0.502252	646.254	FALSE	83
2022-09-13	08:37:55	0.456959	646.711	FALSE	83
2022-09-13	08:37:55	0.411616	647.123	FALSE	83
2022-09-13	08:37:56	0.579707	647.703	FALSE	83
2022-09-13	08:37:56	0.373244	648.076	FALSE	83
2022-09-13	08:37:56	0.401132	648.477	FALSE	83
2022-09-13	08:37:56	0.367087	648.844	FALSE	83
2022-09-13	08:37:57	0.463219	649.307	FALSE	83
2022-09-13	08:37:57	0.507493	649.815	FALSE	83
2022-09-13	08:37:57	0.388817	650.204	FALSE	83
2022-09-13	08:37:57	0.594059	650.798	FALSE	83
2022-09-13	08:37:58	0.806425	651.604	FALSE	83
2022-09-13	08:37:58	0.752379	652.356	FALSE	83
2022-09-13	08:37:58	0.665763	653.022	FALSE	83
2022-09-13	08:37:59	0.370649	653.393	FALSE	83
2022-09-13	08:37:59	0.544186	653.937	FALSE	83
2022-09-13	08:37:59	0.360064	654.297	FALSE	83
2022-09-13	08:37:59	0.190496	654.488	FALSE	83
2022-09-13	08:38:00	0.16673	654.654	FALSE	83
2022-09-13	08:38:00	0.220471	654.875	FALSE	83
2022-09-13	08:38:00	0.427545	655.302	FALSE	83
2022-09-13	08:38:01	0.270395	655.573	FALSE	83
2022-09-13	08:38:01	0.332583	655.905	FALSE	83
2022-09-13	08:38:01	0.31645	656.222	FALSE	83
2022-09-13	08:38:01	0.24444	656.466	FALSE	83
2022-09-13	08:38:01	1.40872	657.875	FALSE	83
2022-09-13	08:38:02	2.74378	660.619	FALSE	83
2022-09-13	08:38:02	2.37782	662.996	FALSE	83
2022-09-13	08:38:02	2.10174	665.098	FALSE	83
2022-09-13	08:38:02	1.92648	667.025	FALSE	83
2022-09-13	08:38:03	2.06668	669.091	FALSE	83
2022-09-13	08:38:03	3.2591	672.35	1	84
2022-09-13	08:38:03	6.38373	678.734	1	85
2022-09-13	08:38:04	5.21243	683.947	1	86
2022-09-13	08:38:04	11.2945	695.241	1	87
2022-09-13	08:38:04	3.28688	698.528	1	88
2022-09-13	08:38:04	7.61701	706.145	1	89
2022-09-13	08:38:05	2.72144	708.866	FALSE	89
2022-09-13	08:38:05	5.90144	714.768	1	90
2022-09-13	08:38:05	6.10591	720.874	1	91
2022-09-13	08:38:05	4.9421	725.816	1	92
2022-09-13	08:38:06	9.19085	735.007	1	93
2022-09-13	08:38:06	1.10256	736.109	FALSE	93
2022-09-13	08:38:06	5.76688	741.876	1	94
2022-09-13	08:38:06	2.66184	744.538	FALSE	94
2022-09-13	08:38:07	4.20698	748.745	1	95
2022-09-13	08:38:07	3.53238	752.277	1	96
2022-09-13	08:38:07	2.67446	754.952	FALSE	96
2022-09-13	08:38:07	4.86271	759.815	1	97
2022-09-13	08:38:08	3.73248	763.547	1	98
2022-09-13	08:38:08	5.88785	769.435	1	99
2022-09-13	08:38:08	0.608002	770.043	FALSE	99
2022-09-13	08:38:09	0.742405	770.785	FALSE	99
2022-09-13	08:38:09	0.331667	771.117	FALSE	99
2022-09-13	08:38:09	0.567799	771.685	FALSE	99
2022-09-13	08:38:09	1.19726	772.882	FALSE	99
2022-09-13	08:38:10	0.472888	773.355	FALSE	99
2022-09-13	08:38:10	0.343066	773.698	FALSE	99
2022-09-13	08:38:10	0.380878	774.079	FALSE	99
2022-09-13	08:38:10	0.346221	774.425	FALSE	99
2022-09-13	08:38:11	0.36958	774.795	FALSE	99
2022-09-13	08:38:11	0.450395	775.245	FALSE	99
2022-09-13	08:38:11	0.404797	775.65	FALSE	99
2022-09-13	08:38:11	0.22383	775.874	FALSE	99
2022-09-13	08:38:12	0.383626	776.257	FALSE	99
2022-09-13	08:38:12	0.452277	776.71	FALSE	99
2022-09-13	08:38:12	0.658893	777.369	FALSE	99
2022-09-13	08:38:13	0.612277	777.981	FALSE	99
2022-09-13	08:38:13	0.691921	778.673	FALSE	99
2022-09-13	08:38:13	0.591005	779.264	FALSE	99
2022-09-13	08:38:13	0.440267	779.704	FALSE	99
2022-09-13	08:38:14	0.355127	780.059	FALSE	99
2022-09-13	08:38:14	0.339555	780.399	FALSE	99
2022-09-13	08:38:14	0.824796	781.223	FALSE	99
2022-09-13	08:38:14	1.59589	782.819	FALSE	99
2022-09-13	08:38:15	5.17268	787.992	1	100
2022-09-13	08:38:15	11.0577	799.05	1	101
2022-09-13	08:38:15	11.7814	810.831	1	102
2022-09-13	08:38:15	12.0491	822.88	1	103
2022-09-13	08:38:16	6.4168	829.297	1	104
2022-09-13	08:38:16	7.69405	836.991	1	105
2022-09-13	08:38:16	8.97009	845.961	1	106
2022-09-13	08:38:16	5.92785	851.889	1	107
2022-09-13	08:38:17	10.4751	862.364	1	108
2022-09-13	08:38:17	8.2911	870.655	1	109
2022-09-13	08:38:17	5.55502	876.21	1	110
2022-09-13	08:38:18	10.7752	886.985	1	111
2022-09-13	08:38:18	3.81289	890.798	1	112
2022-09-13	08:38:18	7.86505	898.663	1	113
2022-09-13	08:38:18	14.3525	913.016	1	114
2022-09-13	08:38:19	7.75355	920.769	1	115
2022-09-13	08:38:19	15.6622	936.432	1	116
2022-09-13	08:38:19	16.3739	952.806	1	117
2022-09-13	08:38:19	6.68021	959.486	1	118
2022-09-13	08:38:20	8.95263	968.438	1	119
2022-09-13	08:38:20	8.4341	976.872	1	120
2022-09-13	08:38:20	7.78057	984.653	1	121
2022-09-13	08:38:20	12.5199	997.173	1	122
2022-09-13	08:38:21	7.81039	1004.98	1	123
2022-09-13	08:38:21	6.59747	1011.58	1	124
2022-09-13	08:38:21	3.93859	1015.52	1	125
2022-09-13	08:38:22	6.81731	1022.34	1	126
2022-09-13	08:38:22	3.96622	1026.3	1	127
2022-09-13	08:38:22	1.68561	1027.99	FALSE	127
2022-09-13	08:38:22	2.89497	1030.88	FALSE	127
2022-09-13	08:38:23	2.02103	1032.9	FALSE	127
2022-09-13	08:38:23	3.32693	1036.23	1	128
2022-09-13	08:38:23	2.63161	1038.86	FALSE	128
2022-09-13	08:38:23	3.7481	1042.61	1	129
2022-09-13	08:38:24	1.21192	1043.82	FALSE	129
2022-09-13	08:38:24	0.811463	1044.63	FALSE	129
2022-09-13	08:38:24	1.30668	1045.94	FALSE	129
2022-09-13	08:38:24	1.23676	1047.18	FALSE	129
2022-09-13	08:38:25	0.499402	1047.68	FALSE	129
2022-09-13	08:38:25	0.375942	1048.05	FALSE	129
2022-09-13	08:38:25	0.339606	1048.39	FALSE	129
2022-09-13	08:38:25	0.285713	1048.68	FALSE	129
2022-09-13	08:38:26	0.225916	1048.9	FALSE	129
2022-09-13	08:38:26	0.223931	1049.13	FALSE	129
2022-09-13	08:38:26	0.213041	1049.34	FALSE	129
2022-09-13	08:38:27	0.225814	1049.57	FALSE	129
2022-09-13	08:38:27	0.217468	1049.78	FALSE	129
2022-09-13	08:38:27	0.214822	1050	FALSE	129
2022-09-13	08:38:27	0.210089	1050.21	FALSE	129
2022-09-13	08:38:28	0.206272	1050.42	FALSE	129
2022-09-13	08:38:28	0.21299	1050.63	FALSE	129
2022-09-13	08:38:28	0.212481	1050.84	FALSE	129
2022-09-13	08:38:28	0.21757	1051.06	FALSE	129
2022-09-13	08:38:29	0.219708	1051.28	FALSE	129
2022-09-13	08:38:29	0.211158	1051.49	FALSE	129
2022-09-13	08:38:29	0.207596	1051.7	FALSE	129
2022-09-13	08:38:29	0.1993	1051.9	FALSE	129
2022-09-13	08:38:30	0.194924	1052.09	FALSE	129
2022-09-13	08:38:30	0.197519	1052.29	FALSE	129
2022-09-13	08:38:30	0.200318	1052.49	FALSE	129
2022-09-13	08:38:30	0.198944	1052.69	FALSE	129
2022-09-13	08:38:31	0.198028	1052.89	FALSE	129
2022-09-13	08:38:31	0.207188	1053.09	FALSE	129
2022-09-13	08:38:31	0.222099	1053.32	FALSE	129
2022-09-13	08:38:32	0.209275	1053.53	FALSE	129
2022-09-13	08:38:32	0.215382	1053.74	FALSE	129
2022-09-13	08:38:32	0.234975	1053.98	FALSE	129
2022-09-13	08:38:32	0.239148	1054.21	FALSE	129
2022-09-13	08:38:33	0.232379	1054.45	FALSE	129
2022-09-13	08:38:33	0.268359	1054.72	FALSE	129
2022-09-13	08:38:33	0.355127	1055.07	FALSE	129
2022-09-13	08:38:33	0.406985	1055.48	FALSE	129
2022-09-13	08:38:34	0.355891	1055.83	FALSE	129
2022-09-13	08:38:34	0.456145	1056.29	FALSE	129
2022-09-13	08:38:34	0.626781	1056.92	FALSE	129
2022-09-13	08:38:34	0.397825	1057.31	FALSE	129
2022-09-13	08:38:35	0.616654	1057.93	FALSE	129
2022-09-13	08:38:35	0.307545	1058.24	FALSE	129
2022-09-13	08:38:35	0.264593	1058.5	FALSE	129
2022-09-13	08:38:36	0.658741	1059.16	FALSE	129
2022-09-13	08:38:36	0.284542	1059.45	FALSE	129
2022-09-13	08:38:36	2.16719	1061.61	FALSE	129
2022-09-13	08:38:36	6.98769	1068.6	1	130
2022-09-13	08:38:37	9.22271	1077.82	1	131
2022-09-13	08:38:37	8.2883	1086.11	1	132
2022-09-13	08:38:37	4.78057	1090.89	1	133
2022-09-13	08:38:37	5.25711	1096.15	1	134
2022-09-13	08:38:38	5.99324	1102.14	1	135
2022-09-13	08:38:38	12.1744	1114.32	1	136
2022-09-13	08:38:38	10.0201	1124.34	1	137
2022-09-13	08:38:38	8.06133	1132.4	1	138
2022-09-13	08:38:39	10.9965	1143.4	1	139
2022-09-13	08:38:39	6.91039	1150.31	1	140
2022-09-13	08:38:39	9.34276	1159.65	1	141
2022-09-13	08:38:39	5.60021	1165.25	1	142
2022-09-13	08:38:40	3.19299	1168.44	1	143
2022-09-13	08:38:40	8.6653	1177.11	1	144
2022-09-13	08:38:40	5.1309	1182.24	1	145
2022-09-13	08:38:41	4.06052	1186.3	1	146
2022-09-13	08:38:41	10.9991	1197.3	1	147
2022-09-13	08:38:41	7.94093	1205.24	1	148
2022-09-13	08:38:41	12.4866	1217.73	1	149
2022-09-13	08:38:42	8.94917	1226.67	1	150
2022-09-13	08:38:42	4.27686	1230.95	1	151
2022-09-13	08:38:42	8.49161	1239.44	1	152
2022-09-13	08:38:42	3.01146	1242.45	1	153
2022-09-13	08:38:43	6.44912	1248.9	1	154
2022-09-13	08:38:43	6.86021	1255.76	1	155
2022-09-13	08:38:43	3.19401	1258.96	1	156
2022-09-13	08:38:43	8.31492	1267.27	1	157
2022-09-13	08:38:44	0.637774	1267.91	FALSE	157
2022-09-13	08:38:44	2.31823	1270.23	FALSE	157
2022-09-13	08:38:44	0.927341	1271.16	FALSE	157
2022-09-13	08:38:45	0.561845	1271.72	FALSE	157
2022-09-13	08:38:45	0.669784	1272.39	FALSE	157
2022-09-13	08:38:45	0.600267	1272.99	FALSE	157
2022-09-13	08:38:45	0.69416	1273.68	FALSE	157
2022-09-13	08:38:46	0.163575	1273.85	FALSE	157
2022-09-13	08:38:46	0.691819	1274.54	FALSE	157
2022-09-13	08:38:46	3.37136	1277.91	1	158
2022-09-13	08:38:46	5.65176	1283.56	1	159
2022-09-13	08:38:47	6.78668	1290.35	1	160
2022-09-13	08:38:47	6.57904	1296.93	1	161
2022-09-13	08:38:47	4.9165	1301.84	1	162
2022-09-13	08:38:47	4.90856	1306.75	1	163
2022-09-13	08:38:48	2.84917	1309.6	FALSE	163
2022-09-13	08:38:48	2.30011	1311.9	FALSE	163
2022-09-13	08:38:48	0.848104	1312.75	FALSE	163
2022-09-13	08:38:48	0.727545	1313.48	FALSE	163
2022-09-13	08:38:49	0.0938551	1313.57	FALSE	163
2022-09-13	08:38:49	0.152074	1313.72	FALSE	163
2022-09-13	08:38:49	-0.0957631	1313.72	FALSE	163
2022-09-13	08:38:50	-0.258053	1313.72	FALSE	163
2022-09-13	08:38:50	-0.184771	1313.72	FALSE	163
2022-09-13	08:38:50	0.222507	1313.94	FALSE	163
2022-09-13	08:38:50	0.413041	1314.36	FALSE	163
2022-09-13	08:38:51	0.372888	1314.73	FALSE	163
2022-09-13	08:38:51	0.09813	1314.83	FALSE	163
2022-09-13	08:38:51	0.252888	1315.08	FALSE	163
2022-09-13	08:38:51	0.256858	1315.34	FALSE	163
2022-09-13	08:38:52	0.0861707	1315.42	FALSE	163
2022-09-13	08:38:52	-0.052557	1315.42	FALSE	163
2022-09-13	08:38:52	0.0235753	1315.45	FALSE	163
2022-09-13	08:38:52	0.444389	1315.89	FALSE	163
2022-09-13	08:38:53	0.525611	1316.42	FALSE	163
2022-09-13	08:38:53	0.709631	1317.13	FALSE	163
2022-09-13	08:38:53	0.527137	1317.65	FALSE	163
2022-09-13	08:38:53	1.08179	1318.74	FALSE	163
2022-09-13	08:38:54	1.08821	1319.82	FALSE	163
2022-09-13	08:38:54	0.322099	1320.15	FALSE	163
2022-09-13	08:38:54	1.23075	1321.38	FALSE	163
2022-09-13	08:38:55	1.82556	1323.2	FALSE	163
2022-09-13	08:38:55	3.38805	1326.59	1	164
2022-09-13	08:38:55	5.96546	1332.56	1	165
2022-09-13	08:38:55	7.70601	1340.26	1	166
2022-09-13	08:38:56	3.42291	1343.69	1	167
2022-09-13	08:38:56	2.20561	1345.89	FALSE	167
2022-09-13	08:38:56	1.15034	1347.04	FALSE	167
2022-09-13	08:38:56	1.17716	1348.22	FALSE	167
2022-09-13	08:38:57	3.06836	1351.29	1	168
2022-09-13	08:38:57	2.19497	1353.48	FALSE	168
2022-09-13	08:38:57	2.47039	1355.95	FALSE	168
2022-09-13	08:38:57	3.91777	1359.87	1	169
2022-09-13	08:38:58	7.23808	1367.11	1	170
2022-09-13	08:38:58	8.74154	1375.85	1	171
2022-09-13	08:38:58	16.2731	1392.12	1	172
2022-09-13	08:38:59	19.0097	1411.13	1	173
2022-09-13	08:38:59	13.4744	1424.61	1	174
2022-09-13	08:38:59	18.7223	1443.33	1	175
2022-09-13	08:38:59	11.5548	1454.88	1	176
2022-09-13	08:39:00	7.58556	1462.47	1	177
2022-09-13	08:39:00	19.5342	1482	1	178
2022-09-13	08:39:00	11.152	1493.16	1	179
2022-09-13	08:39:00	7.96113	1501.12	1	180
2022-09-13	08:39:01	13.2785	1514.4	1	181
2022-09-13	08:39:01	6.79899	1521.19	1	182
2022-09-13	08:39:01	6.0681	1527.26	1	183
2022-09-13	08:39:01	9.3081	1536.57	1	184
2022-09-13	08:39:02	5.43161	1542	1	185
2022-09-13	08:39:02	1.23615	1543.24	FALSE	185
2022-09-13	08:39:02	3.00093	1546.24	1	186
2022-09-13	08:39:02	2.06541	1548.3	FALSE	186
2022-09-13	08:39:03	8.11263	1556.42	1	187
2022-09-13	08:39:03	13.7634	1570.18	1	188
2022-09-13	08:39:03	6.44011	1576.62	1	189
2022-09-13	08:39:04	7.18128	1583.8	1	190
2022-09-13	08:39:04	14.4066	1598.21	1	191
2022-09-13	08:39:04	16.5568	1614.77	1	192
2022-09-13	08:39:04	8.28596	1623.05	1	193
2022-09-13	08:39:05	15.2837	1638.34	1	194
2022-09-13	08:39:05	9.09975	1647.44	1	195
2022-09-13	08:39:05	2.78337	1650.22	FALSE	195
2022-09-13	08:39:05	5.24902	1655.47	1	196
2022-09-13	08:39:06	1.80734	1657.27	FALSE	196
2022-09-13	08:39:06	4.00892	1661.28	1	197
2022-09-13	08:39:06	2.51757	1663.8	FALSE	197
2022-09-13	08:39:06	2.60999	1666.41	FALSE	197
2022-09-13	08:39:07	2.04317	1668.45	FALSE	197
2022-09-13	08:39:07	0.376094	1668.83	FALSE	197
2022-09-13	08:39:07	0.538893	1669.37	FALSE	197
2022-09-13	08:39:08	1.05274	1670.42	FALSE	197
2022-09-13	08:39:08	3.87039	1674.29	1	198
2022-09-13	08:39:08	6.98866	1681.28	1	199
2022-09-13	08:39:08	8.57579	1689.86	1	200
2022-09-13	08:39:09	6.38795	1696.24	1	201
2022-09-13	08:39:09	3.72709	1699.97	1	202
2022-09-13	08:39:09	1.09813	1701.07	FALSE	202
2022-09-13	08:39:09	2.06322	1703.13	FALSE	202
2022-09-13	08:39:10	0.261081	1703.39	FALSE	202
2022-09-13	08:39:10	0.671005	1704.07	FALSE	202
2022-09-13	08:39:10	0.331311	1704.4	FALSE	202
2022-09-13	08:39:10	0.426425	1704.82	FALSE	202
2022-09-13	08:39:11	0.499097	1705.32	FALSE	202
2022-09-13	08:39:11	0.800063	1706.12	FALSE	202
2022-09-13	08:39:11	0.739962	1706.86	FALSE	202
2022-09-13	08:39:11	0.70271	1707.57	FALSE	202
2022-09-13	08:39:12	0.772023	1708.34	FALSE	202
2022-09-13	08:39:12	0.910394	1709.25	FALSE	202
2022-09-13	08:39:12	0.952532	1710.2	FALSE	202
2022-09-13	08:39:13	0.855585	1711.06	FALSE	202
2022-09-13	08:39:13	0.663524	1711.72	FALSE	202
2022-09-13	08:39:13	0.511107	1712.23	FALSE	202
2022-09-13	08:39:13	0.293346	1712.52	FALSE	202
2022-09-13	08:39:14	0.32729	1712.85	FALSE	202
2022-09-13	08:39:14	0.395687	1713.25	FALSE	202
2022-09-13	08:39:14	0.599199	1713.85	FALSE	202
2022-09-13	08:39:14	1.17457	1715.02	FALSE	202
2022-09-13	08:39:15	0.852939	1715.87	FALSE	202
2022-09-13	08:39:15	0.469326	1716.34	FALSE	202
2022-09-13	08:39:15	0.63986	1716.98	FALSE	202
2022-09-13	08:39:15	1.04688	1718.03	FALSE	202
2022-09-13	08:39:16	1.53039	1719.56	FALSE	202
2022-09-13	08:39:16	1.73039	1721.29	FALSE	202
2022-09-13	08:39:16	1.48663	1722.78	FALSE	202
2022-09-13	08:39:16	1.24709	1724.02	FALSE	202
2022-09-13	08:39:17	1.47004	1725.49	FALSE	202
2022-09-13	08:39:17	0.958588	1726.45	FALSE	202
2022-09-13	08:39:17	0.575687	1727.03	FALSE	202
2022-09-13	08:39:18	0.408969	1727.44	FALSE	202
2022-09-13	08:39:18	0.45813	1727.9	FALSE	202
2022-09-13	08:39:18	0.43528	1728.33	FALSE	202
2022-09-13	08:39:18	0.331158	1728.66	FALSE	202
2022-09-13	08:39:19	0.427799	1729.09	FALSE	202
2022-09-13	08:39:19	0.275636	1729.37	FALSE	202
2022-09-13	08:39:19	0.318334	1729.68	FALSE	202
2022-09-13	08:39:19	0.356603	1730.04	FALSE	202
2022-09-13	08:39:20	0.339555	1730.38	FALSE	202
2022-09-13	08:39:20	0.387799	1730.77	FALSE	202
2022-09-13	08:39:20	0.360929	1731.13	FALSE	202
2022-09-13	08:39:20	0.367748	1731.5	FALSE	202
2022-09-13	08:39:21	1.26047	1732.76	FALSE	202
2022-09-13	08:39:21	0.643881	1733.4	FALSE	202
2022-09-13	08:39:21	0.873804	1734.27	FALSE	202
2022-09-13	08:39:22	0.332074	1734.61	FALSE	202
2022-09-13	08:39:22	0.760369	1735.37	FALSE	202
2022-09-13	08:39:22	0.335382	1735.7	FALSE	202
2022-09-13	08:39:22	0.336094	1736.04	FALSE	202
2022-09-13	08:39:23	0.26159	1736.3	FALSE	202
2022-09-13	08:39:23	0.633753	1736.93	FALSE	202
2022-09-13	08:39:23	0.198232	1737.13	FALSE	202
2022-09-13	08:39:23	0.62673	1737.76	FALSE	202
2022-09-13	08:39:24	0.801794	1738.56	FALSE	202
2022-09-13	08:39:24	1.70983	1740.27	FALSE	202
2022-09-13	08:39:24	1.49813	1741.77	FALSE	202
2022-09-13	08:39:24	1.12357	1742.89	FALSE	202
2022-09-13	08:39:25	2.32485	1745.22	FALSE	202
2022-09-13	08:39:25	3.74261	1748.96	1	203
2022-09-13	08:39:25	4.28938	1753.25	1	204
2022-09-13	08:39:25	5.89833	1759.15	1	205
2022-09-13	08:39:26	6.87487	1766.02	1	206
2022-09-13	08:39:26	6.29935	1772.32	1	207
2022-09-13	08:39:26	5.95909	1778.28	1	208
2022-09-13	08:39:27	3.00581	1781.29	1	209
2022-09-13	08:39:27	4.59904	1785.89	1	210
2022-09-13	08:39:27	3.9453	1789.83	1	211
2022-09-13	08:39:27	8.47467	1798.31	1	212
2022-09-13	08:39:28	13.6968	1812	1	213
2022-09-13	08:39:28	8.09869	1820.1	1	214
2022-09-13	08:39:28	12.894	1832.99	1	215
2022-09-13	08:39:28	7.02546	1840.02	1	216
2022-09-13	08:39:29	7.13696	1847.16	1	217
2022-09-13	08:39:29	9.63243	1856.79	1	218
2022-09-13	08:39:29	2.60536	1859.39	FALSE	218
2022-09-13	08:39:29	7.82775	1867.22	1	219
2022-09-13	08:39:30	7.36556	1874.59	1	220
2022-09-13	08:39:30	6.08556	1880.67	1	221
2022-09-13	08:39:30	9.1938	1889.87	1	222
2022-09-13	08:39:31	5.55003	1895.42	1	223
2022-09-13	08:39:31	8.26489	1903.68	1	224
2022-09-13	08:39:31	6.54357	1910.23	1	225
2022-09-13	08:39:31	5.16403	1915.39	1	226
2022-09-13	08:39:32	9.12922	1924.52	1	227
2022-09-13	08:39:32	3.88881	1928.41	1	228
2022-09-13	08:39:32	14.5403	1942.95	1	229
2022-09-13	08:39:32	11.6785	1954.63	1	230
2022-09-13	08:39:33	23.0941	1977.72	1	231
2022-09-13	08:39:33	15.4348	1993.16	1	232
2022-09-13	08:39:33	5.00011	1998.16	1	233
2022-09-13	08:39:33	8.46891	2006.62	1	234
2022-09-13	08:39:34	15.3435	2021.97	1	235
2022-09-13	08:39:34	14.0124	2035.98	1	236
2022-09-13	08:39:34	7.53619	2043.52	1	237
2022-09-13	08:39:34	9.08464	2052.6	1	238
2022-09-13	08:39:35	3.69787	2056.3	1	239
2022-09-13	08:39:35	3.17228	2059.47	1	240
2022-09-13	08:39:35	2.51131	2061.98	FALSE	240
2022-09-13	08:39:36	0.388562	2062.37	FALSE	240
2022-09-13	08:39:36	0.480165	2062.85	FALSE	240
2022-09-13	08:39:36	0.510852	2063.36	FALSE	240
2022-09-13	08:39:36	3.55182	2066.91	1	241
2022-09-13	08:39:37	3.43787	2070.35	1	242
2022-09-13	08:39:37	1.96892	2072.32	FALSE	242
2022-09-13	08:39:37	0.779046	2073.1	FALSE	242
2022-09-13	08:39:37	0.29986	2073.4	FALSE	242
2022-09-13	08:39:38	0.504796	2073.9	FALSE	242
2022-09-13	08:39:38	0.420013	2074.32	FALSE	242
2022-09-13	08:39:38	0.805407	2075.13	FALSE	242
2022-09-13	08:39:38	0.967392	2076.1	FALSE	242
2022-09-13	08:39:39	0.178232	2076.28	FALSE	242
2022-09-13	08:39:39	0.204746	2076.48	FALSE	242
2022-09-13	08:39:39	-0.0100125	2076.48	FALSE	242
2022-09-13	08:39:39	0.0300893	2076.51	FALSE	242
2022-09-13	08:39:40	0.0130918	2076.52	FALSE	242
2022-09-13	08:39:40	-0.0648216	2076.52	FALSE	242
2022-09-13	08:39:40	0.321336	2076.85	FALSE	242
2022-09-13	08:39:41	-0.177239	2076.85	FALSE	242
2022-09-13	08:39:41	-0.138918	2076.85	FALSE	242
2022-09-13	08:39:41	-0.129045	2076.85	FALSE	242
2022-09-13	08:39:41	-0.103804	2076.85	FALSE	242
2022-09-13	08:39:42	-0.0542364	2076.85	FALSE	242
2022-09-13	08:39:42	0.0258654	2076.87	FALSE	242
2022-09-13	08:39:42	1.18393	2078.05	FALSE	242
2022-09-13	08:39:42	3.95828	2082.01	1	243
2022-09-13	08:39:43	5.28688	2087.3	1	244
2022-09-13	08:39:43	3.87111	2091.17	1	245
2022-09-13	08:39:43	3.27314	2094.44	1	246
2022-09-13	08:39:43	1.82709	2096.27	FALSE	246
2022-09-13	08:39:44	0.657824	2096.93	FALSE	246
2022-09-13	08:39:44	0.408969	2097.34	FALSE	246
2022-09-13	08:39:44	0.312685	2097.65	FALSE	246
2022-09-13	08:39:45	0.37355	2098.02	FALSE	246
2022-09-13	08:39:45	0.397316	2098.42	FALSE	246
2022-09-13	08:39:45	0.607341	2099.03	FALSE	246
2022-09-13	08:39:45	0.38383	2099.41	FALSE	246
2022-09-13	08:39:46	0.302048	2099.71	FALSE	246
2022-09-13	08:39:46	0.311769	2100.03	FALSE	246
2022-09-13	08:39:46	0.282048	2100.31	FALSE	246
2022-09-13	08:39:46	0.32785	2100.64	FALSE	246
2022-09-13	08:39:47	0.332532	2100.97	FALSE	246
2022-09-13	08:39:47	0.276349	2101.25	FALSE	246
2022-09-13	08:39:47	0.26668	2101.51	FALSE	246
2022-09-13	08:39:47	0.273244	2101.79	FALSE	246
2022-09-13	08:39:48	0.318181	2102.1	FALSE	246
2022-09-13	08:39:48	0.314211	2102.42	FALSE	246
2022-09-13	08:39:48	0.308868	2102.73	FALSE	246
2022-09-13	08:39:48	0.308003	2103.03	FALSE	246
2022-09-13	08:39:49	0.302761	2103.34	FALSE	246
2022-09-13	08:39:49	0.301845	2103.64	FALSE	246
2022-09-13	08:39:49	0.310547	2103.95	FALSE	246
2022-09-13	08:39:50	0.306832	2104.26	FALSE	246
2022-09-13	08:39:50	0.300318	2104.56	FALSE	246
2022-09-13	08:39:50	0.307087	2104.86	FALSE	246
2022-09-13	08:39:50	0.305509	2105.17	FALSE	246
2022-09-13	08:39:51	0.31187	2105.48	FALSE	246
2022-09-13	08:39:51	0.306934	2105.79	FALSE	246
2022-09-13	08:39:51	0.309835	2106.1	FALSE	246
2022-09-13	08:39:51	0.307443	2106.41	FALSE	246
2022-09-13	08:39:52	0.312837	2106.72	FALSE	246
2022-09-13	08:39:52	0.310903	2107.03	FALSE	246
2022-09-13	08:39:52	0.305713	2107.34	FALSE	246
2022-09-13	08:39:52	0.305153	2107.64	FALSE	246
2022-09-13	08:39:53	0.311412	2107.95	FALSE	246
2022-09-13	08:39:53	0.304491	2108.26	FALSE	246
2022-09-13	08:39:53	0.315738	2108.57	FALSE	246
2022-09-13	08:39:54	0.313295	2108.89	FALSE	246
2022-09-13	08:39:54	0.313651	2109.2	FALSE	246
2022-09-13	08:39:54	0.314567	2109.51	FALSE	246
2022-09-13	08:39:54	0.316043	2109.83	FALSE	246
2022-09-13	08:39:55	0.316145	2110.15	FALSE	246
2022-09-13	08:39:55	0.316807	2110.46	FALSE	246
2022-09-13	08:39:55	0.316349	2110.78	FALSE	246
2022-09-13	08:39:55	0.315331	2111.09	FALSE	246
2022-09-13	08:39:56	0.318028	2111.41	FALSE	246
2022-09-13	08:39:56	0.315433	2111.73	FALSE	246
2022-09-13	08:39:56	0.316298	2112.04	FALSE	246
2022-09-13	08:39:56	0.316247	2112.36	FALSE	246
2022-09-13	08:39:57	0.31126	2112.67	FALSE	246
2022-09-13	08:39:57	0.316552	2112.99	FALSE	246
2022-09-13	08:39:57	0.313702	2113.3	FALSE	246
2022-09-13	08:39:57	0.312277	2113.61	FALSE	246
2022-09-13	08:39:58	0.310496	2113.92	FALSE	246
2022-09-13	08:39:58	0.315484	2114.24	FALSE	246
2022-09-13	08:39:58	0.318944	2114.56	FALSE	246
2022-09-13	08:39:59	0.314466	2114.87	FALSE	246
2022-09-13	08:39:59	0.318486	2115.19	FALSE	246
2022-09-13	08:39:59	0.317977	2115.51	FALSE	246
2022-09-13	08:39:59	0.710954	2116.22	FALSE	246
2022-09-13	08:40:00	0.734059	2116.95	FALSE	246
2022-09-13	08:40:00	0.50444	2117.46	FALSE	246
2022-09-13	08:40:00	0.322659	2117.78	FALSE	246
2022-09-13	08:40:00	0.303779	2118.09	FALSE	246
2022-09-13	08:40:01	0.258842	2118.34	FALSE	246
2022-09-13	08:40:01	0.249224	2118.59	FALSE	246
2022-09-13	08:40:01	0.16159	2118.76	FALSE	246
2022-09-13	08:40:01	0.217672	2118.97	FALSE	246
2022-09-13	08:40:02	2.35798	2121.33	FALSE	246
2022-09-13	08:40:02	13.7324	2135.06	1	247
2022-09-13	08:40:02	21.2934	2156.36	1	248
2022-09-13	08:40:03	9.45171	2165.81	1	249
2022-09-13	08:40:03	11.0767	2176.89	1	250
2022-09-13	08:40:03	32.2458	2209.13	1	251
2022-09-13	08:40:03	11.3567	2220.49	1	252
2022-09-13	08:40:04	16.5751	2237.06	1	253
2022-09-13	08:40:04	16.7569	2253.82	1	254
2022-09-13	08:40:04	15.5081	2269.33	1	255
2022-09-13	08:40:04	3.8934	2273.22	1	256
2022-09-13	08:40:05	8.72352	2281.94	1	257
2022-09-13	08:40:05	5.86393	2287.81	1	258
2022-09-13	08:40:05	3.62149	2291.43	1	259
2022-09-13	08:40:05	3.59553	2295.03	1	260
2022-09-13	08:40:06	3.78057	2298.81	1	261
2022-09-13	08:40:06	4.04271	2302.85	1	262
2022-09-13	08:40:06	2.12215	2304.97	FALSE	262
2022-09-13	08:40:06	1.41497	2306.39	FALSE	262
2022-09-13	08:40:07	3.13441	2309.52	1	263
2022-09-13	08:40:07	0.603422	2310.12	FALSE	263
2022-09-13	08:40:07	0.737366	2310.86	FALSE	263
2022-09-13	08:40:08	0.732379	2311.59	FALSE	263
2022-09-13	08:40:08	0.582252	2312.18	FALSE	263
2022-09-13	08:40:08	0.242303	2312.42	FALSE	263
2022-09-13	08:40:08	0.98729	2313.41	FALSE	263
2022-09-13	08:40:09	1.50917	2314.91	FALSE	263
2022-09-13	08:40:09	0.959147	2315.87	FALSE	263
2022-09-13	08:40:09	0.477977	2316.35	FALSE	263
2022-09-13	08:40:09	0.578333	2316.93	FALSE	263
2022-09-13	08:40:10	0.579249	2317.51	FALSE	263
2022-09-13	08:40:10	0.529886	2318.04	FALSE	263
2022-09-13	08:40:10	0.498028	2318.54	FALSE	263
2022-09-13	08:40:10	0.489224	2319.03	FALSE	263
2022-09-13	08:40:11	0.834822	2319.86	FALSE	263
2022-09-13	08:40:11	1.03793	2320.9	FALSE	263
2022-09-13	08:40:11	0.703066	2321.6	FALSE	263
2022-09-13	08:40:11	1.20037	2322.8	FALSE	263
2022-09-13	08:40:12	0.82785	2323.63	FALSE	263
2022-09-13	08:40:12	1.42912	2325.06	FALSE	263
2022-09-13	08:40:12	1.18108	2326.24	FALSE	263
2022-09-13	08:40:13	0.814924	2327.06	FALSE	263
2022-09-13	08:40:13	1.27345	2328.33	FALSE	263
2022-09-13	08:40:13	1.42658	2329.76	FALSE	263
2022-09-13	08:40:13	2.28525	2332.04	FALSE	263
2022-09-13	08:40:14	0.828563	2332.87	FALSE	263
2022-09-13	08:40:14	1.13146	2334	FALSE	263
2022-09-13	08:40:14	0.802506	2334.8	FALSE	263
2022-09-13	08:40:14	0.370903	2335.17	FALSE	263
2022-09-13	08:40:15	0.429275	2335.6	FALSE	263
2022-09-13	08:40:15	0.332125	2335.94	FALSE	263
2022-09-13	08:40:15	0.512786	2336.45	FALSE	263
2022-09-13	08:40:15	0.442252	2336.89	FALSE	263
2022-09-13	08:40:16	0.607137	2337.5	FALSE	263
2022-09-13	08:40:16	0.768054	2338.27	FALSE	263
2022-09-13	08:40:16	1.11716	2339.38	FALSE	263
2022-09-13	08:40:17	2.72866	2342.11	FALSE	263
2022-09-13	08:40:17	5.64311	2347.75	1	264
2022-09-13	08:40:17	5.56836	2353.32	1	265
2022-09-13	08:40:17	6.48281	2359.81	1	266
2022-09-13	08:40:18	5.25349	2365.06	1	267
2022-09-13	08:40:18	5.4308	2370.49	1	268
2022-09-13	08:40:18	9.39273	2379.88	1	269
2022-09-13	08:40:18	4.18423	2384.07	1	270
2022-09-13	08:40:19	7.35787	2391.43	1	271
2022-09-13	08:40:19	10.393	2401.82	1	272
2022-09-13	08:40:19	2.48617	2404.3	FALSE	272
2022-09-13	08:40:19	7.64505	2411.95	1	273
2022-09-13	08:40:20	1.35009	2413.3	FALSE	273
2022-09-13	08:40:20	2.29019	2415.59	FALSE	273
2022-09-13	08:40:20	0.647646	2416.24	FALSE	273
2022-09-13	08:40:20	0.681031	2416.92	FALSE	273
2022-09-13	08:40:21	0.756349	2417.67	FALSE	273
2022-09-13	08:40:21	0.436807	2418.11	FALSE	273
2022-09-13	08:40:21	0.437519	2418.55	FALSE	273
2022-09-13	08:40:22	0.429733	2418.98	FALSE	273
2022-09-13	08:40:22	-0.0713865	2418.98	FALSE	273
2022-09-13	08:40:22	-0.281412	2418.98	FALSE	273
2022-09-13	08:40:22	-0.10589	2418.98	FALSE	273
2022-09-13	08:40:23	0.0289188	2419.01	FALSE	273
2022-09-13	08:40:23	0.136858	2419.14	FALSE	273
2022-09-13	08:40:23	0.453295	2419.6	FALSE	273
2022-09-13	08:40:23	0.499249	2420.1	FALSE	273
2022-09-13	08:40:24	0.415789	2420.51	FALSE	273
2022-09-13	08:40:24	0.246476	2420.76	FALSE	273
2022-09-13	08:40:24	0.234618	2420.99	FALSE	273
2022-09-13	08:40:24	0.746781	2421.74	FALSE	273
2022-09-13	08:40:25	0.74215	2422.48	FALSE	273
2022-09-13	08:40:25	0.173448	2422.66	FALSE	273
2022-09-13	08:40:25	0.137723	2422.79	FALSE	273
2022-09-13	08:40:25	0.729529	2423.52	FALSE	273
2022-09-13	08:40:26	0.135738	2423.66	FALSE	273
2022-09-13	08:40:26	0.268766	2423.93	FALSE	273
2022-09-13	08:40:26	0.590394	2424.52	FALSE	273
2022-09-13	08:40:27	5.85721	2430.38	1	274
2022-09-13	08:40:27	8.08637	2438.46	1	275
2022-09-13	08:40:27	8.92657	2447.39	1	276
2022-09-13	08:40:27	3.57075	2450.96	1	277
2022-09-13	08:40:28	6.58332	2457.54	1	278
2022-09-13	08:40:28	4.01691	2461.56	1	279
2022-09-13	08:40:28	2.33319	2463.89	FALSE	279
2022-09-13	08:40:28	3.35792	2467.25	1	280
2022-09-13	08:40:29	0.566374	2467.82	FALSE	280
2022-09-13	08:40:29	0.72383	2468.54	FALSE	280
2022-09-13	08:40:29	0.268664	2468.81	FALSE	280
2022-09-13	08:40:29	0.143575	2468.95	FALSE	280
2022-09-13	08:40:30	0.262252	2469.22	FALSE	280
2022-09-13	08:40:30	0.192125	2469.41	FALSE	280
2022-09-13	08:40:30	0.387239	2469.79	FALSE	280
2022-09-13	08:40:31	0.292023	2470.09	FALSE	280
2022-09-13	08:40:31	1.85034	2471.94	FALSE	280
2022-09-13	08:40:31	7.77543	2479.71	1	281
2022-09-13	08:40:31	10.3844	2490.1	1	282
2022-09-13	08:40:32	14.4186	2504.52	1	283
2022-09-13	08:40:32	9.05558	2513.57	1	284
2022-09-13	08:40:32	18.0323	2531.6	1	285
2022-09-13	08:40:32	8.61492	2540.22	1	286
2022-09-13	08:40:33	7.10948	2547.33	1	287
2022-09-13	08:40:33	8.56815	2555.9	1	288
2022-09-13	08:40:33	1.60958	2557.51	FALSE	288
2022-09-13	08:40:33	6.11772	2563.62	1	289
2022-09-13	08:40:34	4.04785	2567.67	1	290
2022-09-13	08:40:34	1.98648	2569.66	FALSE	290
2022-09-13	08:40:34	3.60887	2573.27	1	291
2022-09-13	08:40:34	0.929784	2574.2	FALSE	291
2022-09-13	08:40:35	2.48006	2576.68	FALSE	291
2022-09-13	08:40:35	0.593957	2577.27	FALSE	291
2022-09-13	08:40:35	0.756552	2578.03	FALSE	291
2022-09-13	08:40:36	0.497417	2578.52	FALSE	291
2022-09-13	08:40:36	0.398028	2578.92	FALSE	291
2022-09-13	08:40:36	0.315229	2579.24	FALSE	291
2022-09-13	08:40:36	0.429784	2579.67	FALSE	291
2022-09-13	08:40:37	0.296756	2579.96	FALSE	291
2022-09-13	08:40:37	0.302456	2580.27	FALSE	291
2022-09-13	08:40:37	0.230496	2580.5	FALSE	291
2022-09-13	08:40:37	0.300522	2580.8	FALSE	291
2022-09-13	08:40:38	0.287443	2581.08	FALSE	291
2022-09-13	08:40:38	0.402557	2581.49	FALSE	291
2022-09-13	08:40:38	0.287239	2581.77	FALSE	291
2022-09-13	08:40:38	0.388613	2582.16	FALSE	291
2022-09-13	08:40:39	0.404847	2582.57	FALSE	291
2022-09-13	08:40:39	0.353143	2582.92	FALSE	291
2022-09-13	08:40:39	0.33757	2583.26	FALSE	291
2022-09-13	08:40:40	0.319504	2583.58	FALSE	291
2022-09-13	08:40:40	0.305	2583.88	FALSE	291
2022-09-13	08:40:40	0.38098	2584.26	FALSE	291
2022-09-13	08:40:40	0.350598	2584.62	FALSE	291
2022-09-13	08:40:41	0.391412	2585.01	FALSE	291
2022-09-13	08:40:41	0.23299	2585.24	FALSE	291
2022-09-13	08:40:41	0.265	2585.5	FALSE	291
2022-09-13	08:40:41	0.28673	2585.79	FALSE	291
2022-09-13	08:40:42	0.271107	2586.06	FALSE	291
2022-09-13	08:40:42	0.348664	2586.41	FALSE	291
2022-09-13	08:40:42	0.187392	2586.6	FALSE	291
2022-09-13	08:40:42	0.191718	2586.79	FALSE	291
2022-09-13	08:40:43	0.230903	2587.02	FALSE	291
2022-09-13	08:40:43	0.251616	2587.27	FALSE	291
2022-09-13	08:40:43	0.237265	2587.51	FALSE	291
2022-09-13	08:40:43	0.216756	2587.73	FALSE	291
2022-09-13	08:40:44	0.226425	2587.95	FALSE	291
2022-09-13	08:40:44	0.773193	2588.73	FALSE	291
2022-09-13	08:40:44	0.710191	2589.44	FALSE	291
2022-09-13	08:40:45	2.43762	2591.87	FALSE	291
2022-09-13	08:40:45	1.01004	2592.88	FALSE	291
2022-09-13	08:40:45	1.14846	2594.03	FALSE	291
2022-09-13	08:40:45	0.955687	2594.99	FALSE	291
2022-09-13	08:40:46	2.62281	2597.61	FALSE	291
2022-09-13	08:40:46	1.52281	2599.13	FALSE	291
2022-09-13	08:40:46	1.05375	2600.19	FALSE	291
2022-09-13	08:40:46	0.945763	2601.13	FALSE	291
2022-09-13	08:40:47	1.54373	2602.68	FALSE	291
2022-09-13	08:40:47	1.30276	2603.98	FALSE	291
2022-09-13	08:40:47	1.77263	2605.75	FALSE	291
2022-09-13	08:40:47	2.27691	2608.03	FALSE	291
2022-09-13	08:40:48	2.22632	2610.26	FALSE	291
2022-09-13	08:40:48	3.55665	2613.81	1	292
2022-09-13	08:40:48	3.17111	2616.98	1	293
2022-09-13	08:40:49	5.37533	2622.36	1	294
2022-09-13	08:40:49	1.4481	2623.81	FALSE	294
2022-09-13	08:40:49	4.30892	2628.12	1	295
2022-09-13	08:40:49	1.99426	2630.11	FALSE	295
2022-09-13	08:40:50	4.33253	2634.44	1	296
2022-09-13	08:40:50	2.09207	2636.53	FALSE	296
2022-09-13	08:40:50	0.930903	2637.47	FALSE	296
2022-09-13	08:40:50	0.753193	2638.22	FALSE	296
2022-09-13	08:40:51	0.546119	2638.76	FALSE	296
2022-09-13	08:40:51	0.293957	2639.06	FALSE	296
2022-09-13	08:40:51	-0.117544	2639.06	FALSE	296
2022-09-13	08:40:51	-0.569554	2639.06	FALSE	296
2022-09-13	08:40:52	-0.529249	2639.06	FALSE	296
2022-09-13	08:40:52	-0.00975804	2639.06	FALSE	296
2022-09-13	08:40:52	0.126018	2639.18	FALSE	296
2022-09-13	08:40:52	0.233753	2639.42	FALSE	296
2022-09-13	08:40:53	0.240878	2639.66	FALSE	296
2022-09-13	08:40:53	0.366018	2640.03	FALSE	296
2022-09-13	08:40:53	0.321132	2640.35	FALSE	296
2022-09-13	08:40:54	0.521997	2640.87	FALSE	296
2022-09-13	08:40:54	0.344339	2641.21	FALSE	296
2022-09-13	08:40:54	0.195534	2641.41	FALSE	296
2022-09-13	08:40:54	0.187799	2641.6	FALSE	296
2022-09-13	08:40:55	0.166832	2641.76	FALSE	296
2022-09-13	08:40:55	0.182049	2641.95	FALSE	296
2022-09-13	08:40:55	0.115535	2642.06	FALSE	296
2022-09-13	08:40:55	0.136909	2642.2	FALSE	296
2022-09-13	08:40:56	0.281387	2642.48	FALSE	296
2022-09-13	08:40:56	0.148512	2642.63	FALSE	296
2022-09-13	08:40:56	0.211107	2642.84	FALSE	296
2022-09-13	08:40:56	0.132481	2642.97	FALSE	296
2022-09-13	08:40:57	0.180929	2643.15	FALSE	296
2022-09-13	08:40:57	0.277468	2643.43	FALSE	296
2022-09-13	08:40:57	0.267494	2643.7	FALSE	296
2022-09-13	08:40:57	0.201132	2643.9	FALSE	296
2022-09-13	08:40:58	0.289122	2644.19	FALSE	296
2022-09-13	08:40:58	0.382557	2644.57	FALSE	296
2022-09-13	08:40:58	0.420725	2644.99	FALSE	296
2022-09-13	08:40:59	0.376705	2645.37	FALSE	296
2022-09-13	08:40:59	0.327188	2645.69	FALSE	296
2022-09-13	08:40:59	0.158792	2645.85	FALSE	296
2022-09-13	08:40:59	0.350954	2646.2	FALSE	296
2022-09-13	08:41:00	0.496094	2646.7	FALSE	296
2022-09-13	08:41:00	5.11767	2651.82	1	297
2022-09-13	08:41:00	16.4316	2668.25	1	298
2022-09-13	08:41:00	19.1955	2687.45	1	299
2022-09-13	08:41:01	4.81507	2692.26	1	300
2022-09-13	08:41:01	7.3854	2699.65	1	301
2022-09-13	08:41:01	8.50006	2708.15	1	302
2022-09-13	08:41:01	4.37115	2712.52	1	303
2022-09-13	08:41:02	7.73609	2720.25	1	304
2022-09-13	08:41:02	9.74179	2729.99	1	305
2022-09-13	08:41:02	3.04994	2733.04	1	306
2022-09-13	08:41:03	7.99609	2741.04	1	307
2022-09-13	08:41:03	3.35757	2744.4	1	308
2022-09-13	08:41:03	3.86215	2748.26	1	309
2022-09-13	08:41:03	5.5194	2753.78	1	310
2022-09-13	08:41:04	3.82983	2757.61	1	311
2022-09-13	08:41:04	7.72601	2765.34	1	312
2022-09-13	08:41:04	8.89054	2774.23	1	313
2022-09-13	08:41:04	4.4307	2778.66	1	314
2022-09-13	08:41:05	9.79828	2788.46	1	315
2022-09-13	08:41:05	2.87848	2791.33	FALSE	315
2022-09-13	08:41:05	3.12011	2794.45	1	316
2022-09-13	08:41:05	4.20826	2798.66	1	317
2022-09-13	08:41:06	3.33686	2802	1	318
2022-09-13	08:41:06	6.69853	2808.7	1	319
2022-09-13	08:41:06	5.37599	2814.07	1	320
2022-09-13	08:41:06	7.71594	2821.79	1	321
2022-09-13	08:41:07	6.52459	2828.31	1	322
2022-09-13	08:41:07	4.722	2833.04	1	323
2022-09-13	08:41:07	10.3925	2843.43	1	324
2022-09-13	08:41:08	3.33966	2846.77	1	325
2022-09-13	08:41:08	6.87543	2853.64	1	326
2022-09-13	08:41:08	11.1887	2864.83	1	327
2022-09-13	08:41:08	12.8455	2877.68	1	328
2022-09-13	08:41:09	9.89736	2887.58	1	329
2022-09-13	08:41:09	5.10266	2892.68	1	330
2022-09-13	08:41:09	11.4479	2904.13	1	331
2022-09-13	08:41:09	10.0722	2914.2	1	332
2022-09-13	08:41:10	13.2513	2927.45	1	333
2022-09-13	08:41:10	8.42958	2935.88	1	334
2022-09-13	08:41:10	3.24118	2939.12	1	335
2022-09-13	08:41:10	2.37833	2941.5	FALSE	335
2022-09-13	08:41:11	0.485	2941.98	FALSE	335
2022-09-13	08:41:11	0.474924	2942.46	FALSE	335
2022-09-13	08:41:11	0.526476	2942.98	FALSE	335
2022-09-13	08:41:12	0.255891	2943.24	FALSE	335
2022-09-13	08:41:12	0.445916	2943.69	FALSE	335
2022-09-13	08:41:12	0.552736	2944.24	FALSE	335
2022-09-13	08:41:12	0.802964	2945.04	FALSE	335
2022-09-13	08:41:13	0.770293	2945.81	FALSE	335
2022-09-13	08:41:13	1.05228	2946.86	FALSE	335
2022-09-13	08:41:13	1.58179	2948.45	FALSE	335
2022-09-13	08:41:13	0.901336	2949.35	FALSE	335
2022-09-13	08:41:14	0.817214	2950.16	FALSE	335
2022-09-13	08:41:14	0.644695	2950.81	FALSE	335
2022-09-13	08:41:14	1.08164	2951.89	FALSE	335
2022-09-13	08:41:14	1.21324	2953.1	FALSE	335
2022-09-13	08:41:15	1.55899	2954.66	FALSE	335
2022-09-13	08:41:15	1.72851	2956.39	FALSE	335
2022-09-13	08:41:15	1.68495	2958.08	FALSE	335
2022-09-13	08:41:15	1.2792	2959.36	FALSE	335
2022-09-13	08:41:16	1.16134	2960.52	FALSE	335
2022-09-13	08:41:16	0.416247	2960.93	FALSE	335
2022-09-13	08:41:16	0.445255	2961.38	FALSE	335
2022-09-13	08:41:17	0.457061	2961.84	FALSE	335
2022-09-13	08:41:17	0.817723	2962.65	FALSE	335
2022-09-13	08:41:17	0.119606	2962.77	FALSE	335
2022-09-13	08:41:17	0.243931	2963.02	FALSE	335
2022-09-13	08:41:18	1.07085	2964.09	FALSE	335
2022-09-13	08:41:18	12.2865	2976.37	1	336
2022-09-13	08:41:18	7.87009	2984.24	1	337
2022-09-13	08:41:18	7.46372	2991.71	1	338
2022-09-13	08:41:19	11.7855	3003.49	1	339
2022-09-13	08:41:19	5.21375	3008.71	1	340
2022-09-13	08:41:19	5.52301	3014.23	1	341
2022-09-13	08:41:19	4.87238	3019.1	1	342
2022-09-13	08:41:20	5.01446	3024.12	1	343
2022-09-13	08:41:20	6.02439	3030.14	1	344
2022-09-13	08:41:20	5.88632	3036.03	1	345
2022-09-13	08:41:20	9.73151	3045.76	1	346
2022-09-13	08:41:21	12.8369	3058.6	1	347
2022-09-13	08:41:21	16.745	3075.34	1	348
2022-09-13	08:41:21	14.6701	3090.01	1	349
2022-09-13	08:41:22	8.87177	3098.88	1	350
2022-09-13	08:41:22	12.8864	3111.77	1	351
2022-09-13	08:41:22	7.58825	3119.36	1	352
2022-09-13	08:41:22	7.10774	3126.47	1	353
2022-09-13	08:41:23	12.8258	3139.29	1	354
2022-09-13	08:41:23	6.03955	3145.33	1	355
2022-09-13	08:41:23	9.45614	3154.79	1	356
2022-09-13	08:41:23	12.7822	3167.57	1	357
2022-09-13	08:41:24	5.89711	3173.47	1	358
2022-09-13	08:41:24	10.4379	3183.9	1	359
2022-09-13	08:41:24	14.4223	3198.33	1	360
2022-09-13	08:41:24	6.16724	3204.49	1	361
2022-09-13	08:41:25	9.49726	3213.99	1	362
2022-09-13	08:41:25	5.13925	3219.13	1	363
2022-09-13	08:41:25	3.16658	3222.3	1	364
2022-09-13	08:41:26	8.3965	3230.69	1	365
2022-09-13	08:41:26	8.2654	3238.96	1	366
2022-09-13	08:41:26	9.48179	3248.44	1	367
2022-09-13	08:41:26	3.01497	3251.46	1	368
2022-09-13	08:41:27	2.91619	3254.37	FALSE	368
2022-09-13	08:41:27	1.88398	3256.26	FALSE	368
2022-09-13	08:41:27	1.24276	3257.5	FALSE	368
2022-09-13	08:41:27	1.94235	3259.44	FALSE	368
2022-09-13	08:41:28	0.751361	3260.19	FALSE	368
2022-09-13	08:41:28	1.67477	3261.87	FALSE	368
2022-09-13	08:41:28	1.50978	3263.38	FALSE	368
2022-09-13	08:41:28	3.5307	3266.91	1	369
2022-09-13	08:41:29	1.42307	3268.33	FALSE	369
2022-09-13	08:41:29	3.18083	3271.51	1	370
2022-09-13	08:41:29	4.53523	3276.05	1	371
2022-09-13	08:41:29	4.0709	3280.12	1	372
2022-09-13	08:41:30	9.47772	3289.6	1	373
2022-09-13	08:41:30	6.38892	3295.98	1	374
2022-09-13	08:41:30	12.8579	3308.84	1	375
2022-09-13	08:41:31	8.81696	3317.66	1	376
2022-09-13	08:41:31	9.14724	3326.81	1	377
2022-09-13	08:41:31	6.58352	3333.39	1	378
2022-09-13	08:41:31	4.10067	3337.49	1	379
2022-09-13	08:41:32	6.33034	3343.82	1	380
2022-09-13	08:41:32	1.49782	3345.32	FALSE	380
2022-09-13	08:41:32	0.797163	3346.12	FALSE	380
2022-09-13	08:41:32	1.19335	3347.31	FALSE	380
2022-09-13	08:41:33	0.399402	3347.71	FALSE	380
2022-09-13	08:41:33	1.23131	3348.94	FALSE	380
2022-09-13	08:41:33	0.674058	3349.61	FALSE	380
2022-09-13	08:41:33	3.33457	3352.95	1	381
2022-09-13	08:41:34	1.65391	3354.6	FALSE	381
2022-09-13	08:41:34	3.58195	3358.18	1	382
2022-09-13	08:41:34	0.903677	3359.09	FALSE	382
2022-09-13	08:41:35	0.888817	3359.98	FALSE	382
2022-09-13	08:41:35	0.322252	3360.3	FALSE	382
2022-09-13	08:41:35	0.365407	3360.66	FALSE	382
2022-09-13	08:41:35	0.285051	3360.95	FALSE	382
2022-09-13	08:41:36	0.663066	3361.61	FALSE	382
2022-09-13	08:41:36	0.435687	3362.05	FALSE	382
2022-09-13	08:41:36	0.224746	3362.27	FALSE	382
2022-09-13	08:41:36	0.0843386	3362.36	FALSE	382
2022-09-13	08:41:37	0.0107	3362.37	FALSE	382
2022-09-13	08:41:37	-0.192252	3362.37	FALSE	382
2022-09-13	08:41:37	-0.0733712	3362.37	FALSE	382
2022-09-13	08:41:37	0.0356872	3362.4	FALSE	382
2022-09-13	08:41:38	0.0165015	3362.42	FALSE	382
2022-09-13	08:41:38	0.346527	3362.77	FALSE	382
2022-09-13	08:41:38	0.308715	3363.08	FALSE	382
2022-09-13	08:41:38	0.096756	3363.17	FALSE	382
2022-09-13	08:41:39	0.208919	3363.38	FALSE	382
2022-09-13	08:41:39	0.268613	3363.65	FALSE	382
2022-09-13	08:41:39	0.217468	3363.87	FALSE	382
2022-09-13	08:41:40	0.318791	3364.19	FALSE	382
2022-09-13	08:41:40	0.442405	3364.63	FALSE	382
2022-09-13	08:41:40	0.479606	3365.11	FALSE	382
2022-09-13	08:41:40	0.369529	3365.48	FALSE	382
2022-09-13	08:41:41	0.339199	3365.82	FALSE	382
2022-09-13	08:41:41	0.320318	3366.14	FALSE	382
2022-09-13	08:41:41	2.48067	3368.62	FALSE	382
2022-09-13	08:41:41	2.86663	3371.48	FALSE	382
2022-09-13	08:41:42	2.0566	3373.54	FALSE	382
2022-09-13	08:41:42	2.91355	3376.45	FALSE	382
2022-09-13	08:41:42	5.06622	3381.52	1	383
2022-09-13	08:41:42	4.2625	3385.78	1	384
2022-09-13	08:41:43	1.92892	3387.71	FALSE	384
2022-09-13	08:41:43	0.498995	3388.21	FALSE	384
2022-09-13	08:41:43	0.75645	3388.97	FALSE	384
2022-09-13	08:41:43	0.274567	3389.24	FALSE	384
2022-09-13	08:41:44	0.842405	3390.09	FALSE	384
2022-09-13	08:41:44	1.60261	3391.69	FALSE	384
2022-09-13	08:41:44	8.99889	3400.69	1	385
2022-09-13	08:41:45	7.4479	3408.13	1	386
2022-09-13	08:41:45	5.5768	3413.71	1	387
2022-09-13	08:41:45	7.92179	3421.63	1	388
2022-09-13	08:41:45	5.94367	3427.58	1	389
2022-09-13	08:41:46	5.14881	3432.73	1	390
2022-09-13	08:41:46	15.3407	3448.07	1	391
2022-09-13	08:41:46	7.81894	3455.89	1	392
2022-09-13	08:41:46	11.5373	3467.42	1	393
2022-09-13	08:41:47	13.6742	3481.1	1	394
2022-09-13	08:41:47	7.9624	3489.06	1	395
2022-09-13	08:41:47	15.083	3504.14	1	396
2022-09-13	08:41:47	7.08052	3511.22	1	397
2022-09-13	08:41:48	9.79726	3521.02	1	398
2022-09-13	08:41:48	6.85421	3527.87	1	399
2022-09-13	08:41:48	7.09477	3534.97	1	400
2022-09-13	08:41:49	4.22032	3539.19	1	401
2022-09-13	08:41:49	3.67579	3542.86	1	402
2022-09-13	08:41:49	2.49462	3545.36	FALSE	402
2022-09-13	08:41:49	0.644695	3546	FALSE	402
2022-09-13	08:41:50	0.443982	3546.45	FALSE	402
2022-09-13	08:41:50	0.402964	3546.85	FALSE	402
2022-09-13	08:41:50	0.266883	3547.12	FALSE	402
2022-09-13	08:41:50	0.298181	3547.42	FALSE	402
2022-09-13	08:41:51	0.275127	3547.69	FALSE	402
2022-09-13	08:41:51	0.264644	3547.96	FALSE	402
2022-09-13	08:41:51	0.338944	3548.29	FALSE	402
2022-09-13	08:41:51	0.532888	3548.83	FALSE	402
2022-09-13	08:41:52	0.500216	3549.33	FALSE	402
2022-09-13	08:41:52	0.749529	3550.08	FALSE	402
2022-09-13	08:41:52	0.587646	3550.67	FALSE	402
2022-09-13	08:41:52	0.452583	3551.12	FALSE	402
2022-09-13	08:41:53	0.376959	3551.49	FALSE	402
2022-09-13	08:41:53	0.36444	3551.86	FALSE	402
2022-09-13	08:41:53	0.361998	3552.22	FALSE	402
2022-09-13	08:41:54	0.357265	3552.58	FALSE	402
2022-09-13	08:41:54	0.359555	3552.94	FALSE	402
2022-09-13	08:41:54	0.352939	3553.29	FALSE	402
2022-09-13	08:41:54	0.346883	3553.64	FALSE	402
2022-09-13	08:41:55	0.725153	3554.36	FALSE	402
2022-09-13	08:41:55	1.77299	3556.14	FALSE	402
2022-09-13	08:41:55	1.93024	3558.07	FALSE	402
2022-09-13	08:41:55	3.28139	3561.35	1	403
2022-09-13	08:41:56	0.993753	3562.34	FALSE	403
2022-09-13	08:41:56	0.665254	3563.01	FALSE	403
2022-09-13	08:41:56	0.396654	3563.4	FALSE	403
2022-09-13	08:41:56	0.125764	3563.53	FALSE	403
2022-09-13	08:41:57	0.0155855	3563.54	FALSE	403
2022-09-13	08:41:57	0.0682572	3563.61	FALSE	403
2022-09-13	08:41:57	0.258893	3563.87	FALSE	403
2022-09-13	08:41:58	0.180776	3564.05	FALSE	403
2022-09-13	08:41:58	0.113194	3564.17	FALSE	403
2022-09-13	08:41:58	0.331667	3564.5	FALSE	403
2022-09-13	08:41:58	0.385458	3564.88	FALSE	403
2022-09-13	08:41:59	0.667595	3565.55	FALSE	403
2022-09-13	08:41:59	0.44154	3565.99	FALSE	403
2022-09-13	08:41:59	1.07177	3567.06	FALSE	403
2022-09-13	08:41:59	2.48653	3569.55	FALSE	403
2022-09-13	08:42:00	11.4444	3580.99	1	404
2022-09-13	08:42:00	20.095	3601.09	1	405
2022-09-13	08:42:00	31.2127	3632.3	1	406
2022-09-13	08:42:00	7.41095	3639.71	1	407
2022-09-13	08:42:01	18.0598	3657.77	1	408
2022-09-13	08:42:01	13.0754	3670.85	1	409
2022-09-13	08:42:01	8.84851	3679.7	1	410
2022-09-13	08:42:01	11.0579	3690.75	1	411
2022-09-13	08:42:02	8.17894	3698.93	1	412
2022-09-13	08:42:02	8.9711	3707.91	1	413
2022-09-13	08:42:02	8.62215	3716.53	1	414
2022-09-13	08:42:03	8.36673	3724.89	1	415
2022-09-13	08:42:03	10.3606	3735.25	1	416
2022-09-13	08:42:03	11.1392	3746.39	1	417
2022-09-13	08:42:03	9.11115	3755.5	1	418
2022-09-13	08:42:04	8.30902	3763.81	1	419
2022-09-13	08:42:04	8.82148	3772.64	1	420
2022-09-13	08:42:04	7.05136	3779.69	1	421
2022-09-13	08:42:04	6.61894	3786.31	1	422
2022-09-13	08:42:05	7.5538	3793.86	1	423
2022-09-13	08:42:05	6.29441	3800.15	1	424
2022-09-13	08:42:05	9.5652	3809.72	1	425
2022-09-13	08:42:05	3.73645	3813.46	1	426
2022-09-13	08:42:06	10.4989	3823.95	1	427
2022-09-13	08:42:06	4.55619	3828.51	1	428
2022-09-13	08:42:06	3.50566	3832.02	1	429
2022-09-13	08:42:06	1.74953	3833.77	FALSE	429
2022-09-13	08:42:07	2.25111	3836.02	FALSE	429
2022-09-13	08:42:07	6.51517	3842.53	1	430
2022-09-13	08:42:07	2.00291	3844.53	FALSE	430
2022-09-13	08:42:08	2.15696	3846.69	FALSE	430
2022-09-13	08:42:08	0.796603	3847.49	FALSE	430
2022-09-13	08:42:08	0.782201	3848.27	FALSE	430
2022-09-13	08:42:08	0.813601	3849.08	FALSE	430
2022-09-13	08:42:09	0.570395	3849.65	FALSE	430
2022-09-13	08:42:09	2.40149	3852.06	FALSE	430
2022-09-13	08:42:09	2.97945	3855.04	FALSE	430
2022-09-13	08:42:09	3.52846	3858.56	1	431
2022-09-13	08:42:10	5.1683	3863.73	1	432
2022-09-13	08:42:10	5.92286	3869.66	1	433
2022-09-13	08:42:10	9.98256	3879.64	1	434
2022-09-13	08:42:10	11.6173	3891.26	1	435
2022-09-13	08:42:11	19.57	3910.83	1	436
2022-09-13	08:42:11	22.8496	3933.67	1	437
2022-09-13	08:42:11	12.0048	3945.68	1	438
2022-09-13	08:42:12	9.72398	3955.4	1	439
2022-09-13	08:42:12	9.10571	3964.51	1	440
2022-09-13	08:42:12	6.05904	3970.57	1	441
2022-09-13	08:42:12	4.59716	3975.17	1	442
2022-09-13	08:42:13	4.62663	3979.79	1	443
2022-09-13	08:42:13	4.39619	3984.19	1	444
2022-09-13	08:42:13	1.61085	3985.8	FALSE	444
2022-09-13	08:42:13	0.271667	3986.07	FALSE	444
2022-09-13	08:42:14	0.22159	3986.29	FALSE	444
2022-09-13	08:42:14	0.0903946	3986.38	FALSE	444
2022-09-13	08:42:14	0.216603	3986.6	FALSE	444
2022-09-13	08:42:14	0.62271	3987.22	FALSE	444
2022-09-13	08:42:15	7.6622	3994.88	1	445
2022-09-13	08:42:15	13.7635	4008.65	1	446
2022-09-13	08:42:15	9.44535	4018.09	1	447
2022-09-13	08:42:15	5.78204	4023.88	1	448
2022-09-13	08:42:16	3.11513	4026.99	1	449
2022-09-13	08:42:16	0.930598	4027.92	FALSE	449
2022-09-13	08:42:16	0.828461	4028.75	FALSE	449
2022-09-13	08:42:17	0.982099	4029.73	FALSE	449
2022-09-13	08:42:17	0.492176	4030.22	FALSE	449
2022-09-13	08:42:17	1.5967	4031.82	FALSE	449
2022-09-13	08:42:17	4.37731	4036.2	1	450
2022-09-13	08:42:18	4.5052	4040.7	1	451
2022-09-13	08:42:18	3.1392	4043.84	1	452
2022-09-13	08:42:18	4.04251	4047.88	1	453
2022-09-13	08:42:18	5.12617	4053.01	1	454
2022-09-13	08:42:19	5.06118	4058.07	1	455
2022-09-13	08:42:19	4.60128	4062.67	1	456
2022-09-13	08:42:19	9.49599	4072.17	1	457
2022-09-13	08:42:19	10.035	4082.2	1	458
2022-09-13	08:42:20	11.1206	4093.32	1	459
2022-09-13	08:42:20	4.3395	4097.66	1	460
2022-09-13	08:42:20	4.85777	4102.52	1	461
2022-09-13	08:42:20	4.64978	4107.17	1	462
2022-09-13	08:42:21	3.84093	4111.01	1	463
2022-09-13	08:42:21	4.95793	4115.97	1	464
2022-09-13	08:42:21	0.970242	4116.94	FALSE	464
2022-09-13	08:42:22	1.59803	4118.54	FALSE	464
2022-09-13	08:42:22	1.29915	4119.84	FALSE	464
2022-09-13	08:42:22	1.13757	4120.98	FALSE	464
2022-09-13	08:42:22	0.759249	4121.73	FALSE	464
2022-09-13	08:42:23	0.454618	4122.19	FALSE	464
2022-09-13	08:42:23	0.368919	4122.56	FALSE	464
2022-09-13	08:42:23	0.419708	4122.98	FALSE	464
2022-09-13	08:42:23	0.496654	4123.47	FALSE	464
2022-09-13	08:42:24	0.636755	4124.11	FALSE	464
2022-09-13	08:42:24	0.877366	4124.99	FALSE	464
2022-09-13	08:42:24	1.62846	4126.62	FALSE	464
2022-09-13	08:42:24	2.09711	4128.71	FALSE	464
2022-09-13	08:42:25	2.27905	4130.99	FALSE	464
2022-09-13	08:42:25	1.48083	4132.47	FALSE	464
2022-09-13	08:42:25	1.13126	4133.61	FALSE	464

## Sheet: Mars_martin_20229138376
						**GoPro Fitting: 826
2022-09-13	08:37:06	0.325102
2022-09-13	08:37:06	0.394873
2022-09-13	08:37:07	0.309173
2022-09-13	08:37:07	0.348003
2022-09-13	08:37:07	0.337468
2022-09-13	08:37:07	0.338741
2022-09-13	08:37:08	0.326781
2022-09-13	08:37:08	0.335585
2022-09-13	08:37:08	0.346985
2022-09-13	08:37:09	0.347188
2022-09-13	08:37:09	0.359046
2022-09-13	08:37:09	0.365051
2022-09-13	08:37:09	0.354415
2022-09-13	08:37:10	0.348308
2022-09-13	08:37:10	0.355077
2022-09-13	08:37:10	0.387646
2022-09-13	08:37:10	0.396451
2022-09-13	08:37:11	0.375891
2022-09-13	08:37:11	0.358232
2022-09-13	08:37:11	0.431463
2022-09-13	08:37:11	0.402354
2022-09-13	08:37:12	0.376654
2022-09-13	08:37:12	0.365967
2022-09-13	08:37:12	0.406629
2022-09-13	08:37:12	0.303422
2022-09-13	08:37:13	0.622761
2022-09-13	08:37:13	0.281031
2022-09-13	08:37:13	0.249224
2022-09-13	08:37:14	0.39131
2022-09-13	08:37:14	0.386272
2022-09-13	08:37:14	0.112379
2022-09-13	08:37:14	0.225713
2022-09-13	08:37:15	0.530649
2022-09-13	08:37:15	0.430903
2022-09-13	08:37:15	2.16632
2022-09-13	08:37:15	3.3364
2022-09-13	08:37:16	7.62657
2022-09-13	08:37:16	2.78734
2022-09-13	08:37:16	2.32826
2022-09-13	08:37:16	3.25935
2022-09-13	08:37:17	7.00332
2022-09-13	08:37:17	9.08886
2022-09-13	08:37:17	12.1793
2022-09-13	08:37:18	7.09843
2022-09-13	08:37:18	1.76882
2022-09-13	08:37:18	0.364542
2022-09-13	08:37:18	0.294924
2022-09-13	08:37:19	0.219708
2022-09-13	08:37:19	0.260216
2022-09-13	08:37:19	0.190649
2022-09-13	08:37:19	0.472277
2022-09-13	08:37:20	4.65161
2022-09-13	08:37:20	6.848
2022-09-13	08:37:20	6.75451
2022-09-13	08:37:20	1.70134
2022-09-13	08:37:21	2.9335
2022-09-13	08:37:21	1.95106
2022-09-13	08:37:21	4.19039
2022-09-13	08:37:21	2.40357
2022-09-13	08:37:22	3.02581
2022-09-13	08:37:22	3.16851
2022-09-13	08:37:22	0.231463
2022-09-13	08:37:23	0.107087
2022-09-13	08:37:23	0.000521868
2022-09-13	08:37:23	-0.458358
2022-09-13	08:37:23	-0.493422
2022-09-13	08:37:24	-0.234491
2022-09-13	08:37:24	-0.0398853
2022-09-13	08:37:24	-0.0955595
2022-09-13	08:37:24	-0.00828218
2022-09-13	08:37:25	0.102608
2022-09-13	08:37:25	1.95024
2022-09-13	08:37:25	3.14907
2022-09-13	08:37:25	2.96902
2022-09-13	08:37:26	4.00953
2022-09-13	08:37:26	2.33854
2022-09-13	08:37:26	3.93248
2022-09-13	08:37:27	2.38301
2022-09-13	08:37:27	6.49965
2022-09-13	08:37:27	3.5649
2022-09-13	08:37:27	4.84866
2022-09-13	08:37:28	8.36383
2022-09-13	08:37:28	5.15121
2022-09-13	08:37:28	6.07405
2022-09-13	08:37:28	8.02209
2022-09-13	08:37:29	4.41477
2022-09-13	08:37:29	3.60866
2022-09-13	08:37:29	1.81665
2022-09-13	08:37:29	0.993906
2022-09-13	08:37:30	1.66851
2022-09-13	08:37:30	2.85034
2022-09-13	08:37:30	5.41141
2022-09-13	08:37:30	6.1853
2022-09-13	08:37:31	6.24103
2022-09-13	08:37:31	7.34149
2022-09-13	08:37:31	3.95508
2022-09-13	08:37:32	8.02092
2022-09-13	08:37:32	7.67115
2022-09-13	08:37:32	8.76861
2022-09-13	08:37:32	8.2879
2022-09-13	08:37:33	4.25721
2022-09-13	08:37:33	7.928
2022-09-13	08:37:33	5.76688
2022-09-13	08:37:33	8.92657
2022-09-13	08:37:34	6.62627
2022-09-13	08:37:34	4.12271
2022-09-13	08:37:34	7.44149
2022-09-13	08:37:34	7.45273
2022-09-13	08:37:35	13.1559
2022-09-13	08:37:35	13.5752
2022-09-13	08:37:35	8.5907
2022-09-13	08:37:36	16.8711
2022-09-13	08:37:36	3.78373
2022-09-13	08:37:36	4.47808
2022-09-13	08:37:36	4.734
2022-09-13	08:37:37	3.30261
2022-09-13	08:37:37	4.39558
2022-09-13	08:37:37	2.31981
2022-09-13	08:37:37	4.97965
2022-09-13	08:37:38	7.13324
2022-09-13	08:37:38	8.04729
2022-09-13	08:37:38	10.5876
2022-09-13	08:37:39	6.11161
2022-09-13	08:37:39	9.50907
2022-09-13	08:37:39	9.67619
2022-09-13	08:37:39	5.50306
2022-09-13	08:37:39	8.57599
2022-09-13	08:37:40	3.80602
2022-09-13	08:37:40	6.32301
2022-09-13	08:37:40	5.02698
2022-09-13	08:37:41	4.148
2022-09-13	08:37:41	13.466
2022-09-13	08:37:41	5.23665
2022-09-13	08:37:41	10.0145
2022-09-13	08:37:42	8.76566
2022-09-13	08:37:42	4.11055
2022-09-13	08:37:42	8.79691
2022-09-13	08:37:42	4.66856
2022-09-13	08:37:43	13.8508
2022-09-13	08:37:43	8.8882
2022-09-13	08:37:43	8.87507
2022-09-13	08:37:43	13.7629
2022-09-13	08:37:44	4.82189
2022-09-13	08:37:44	8.94444
2022-09-13	08:37:44	11.7653
2022-09-13	08:37:44	4.3021
2022-09-13	08:37:45	9.98622
2022-09-13	08:37:45	9.94642
2022-09-13	08:37:45	4.51894
2022-09-13	08:37:46	11.7824
2022-09-13	08:37:46	5.51406
2022-09-13	08:37:46	4.57965
2022-09-13	08:37:46	1.72235
2022-09-13	08:37:47	0.930852
2022-09-13	08:37:47	2.73955
2022-09-13	08:37:47	1.43859
2022-09-13	08:37:47	2.40653
2022-09-13	08:37:48	5.22296
2022-09-13	08:37:48	4.3364
2022-09-13	08:37:48	1.84754
2022-09-13	08:37:48	0.361641
2022-09-13	08:37:49	0.556705
2022-09-13	08:37:49	0.285713
2022-09-13	08:37:49	0.982252
2022-09-13	08:37:50	2.8367
2022-09-13	08:37:50	6.39049
2022-09-13	08:37:50	9.11772
2022-09-13	08:37:50	7.53406
2022-09-13	08:37:51	13.7803
2022-09-13	08:37:51	8.00311
2022-09-13	08:37:51	10.2052
2022-09-13	08:37:51	7.61385
2022-09-13	08:37:52	2.32683
2022-09-13	08:37:52	3.8792
2022-09-13	08:37:52	2.97716
2022-09-13	08:37:53	5.08596
2022-09-13	08:37:53	1.27961
2022-09-13	08:37:53	1.39121
2022-09-13	08:37:53	2.19996
2022-09-13	08:37:53	0.747748
2022-09-13	08:37:54	1.20352
2022-09-13	08:37:54	0.388206
2022-09-13	08:37:54	1.04439
2022-09-13	08:37:55	0.567595
2022-09-13	08:37:55	0.502252
2022-09-13	08:37:55	0.456959
2022-09-13	08:37:55	0.411616
2022-09-13	08:37:56	0.579707
2022-09-13	08:37:56	0.373244
2022-09-13	08:37:56	0.401132
2022-09-13	08:37:56	0.367087
2022-09-13	08:37:57	0.463219
2022-09-13	08:37:57	0.507493
2022-09-13	08:37:57	0.388817
2022-09-13	08:37:57	0.594059
2022-09-13	08:37:58	0.806425
2022-09-13	08:37:58	0.752379
2022-09-13	08:37:58	0.665763
2022-09-13	08:37:59	0.370649
2022-09-13	08:37:59	0.544186
2022-09-13	08:37:59	0.360064
2022-09-13	08:37:59	0.190496
2022-09-13	08:38:00	0.16673
2022-09-13	08:38:00	0.220471
2022-09-13	08:38:00	0.427545
2022-09-13	08:38:01	0.270395
2022-09-13	08:38:01	0.332583
2022-09-13	08:38:01	0.31645
2022-09-13	08:38:01	0.24444
2022-09-13	08:38:01	1.40872
2022-09-13	08:38:02	2.74378
2022-09-13	08:38:02	2.37782
2022-09-13	08:38:02	2.10174
2022-09-13	08:38:02	1.92648
2022-09-13	08:38:03	2.06668
2022-09-13	08:38:03	3.2591
2022-09-13	08:38:03	6.38373
2022-09-13	08:38:04	5.21243
2022-09-13	08:38:04	11.2945
2022-09-13	08:38:04	3.28688
2022-09-13	08:38:04	7.61701
2022-09-13	08:38:05	2.72144
2022-09-13	08:38:05	5.90144
2022-09-13	08:38:05	6.10591
2022-09-13	08:38:05	4.9421
2022-09-13	08:38:06	9.19085
2022-09-13	08:38:06	1.10256
2022-09-13	08:38:06	5.76688
2022-09-13	08:38:06	2.66184
2022-09-13	08:38:07	4.20698
2022-09-13	08:38:07	3.53238
2022-09-13	08:38:07	2.67446
2022-09-13	08:38:07	4.86271
2022-09-13	08:38:08	3.73248
2022-09-13	08:38:08	5.88785
2022-09-13	08:38:08	0.608002
2022-09-13	08:38:09	0.742405
2022-09-13	08:38:09	0.331667
2022-09-13	08:38:09	0.567799
2022-09-13	08:38:09	1.19726
2022-09-13	08:38:10	0.472888
2022-09-13	08:38:10	0.343066
2022-09-13	08:38:10	0.380878
2022-09-13	08:38:10	0.346221
2022-09-13	08:38:11	0.36958
2022-09-13	08:38:11	0.450395
2022-09-13	08:38:11	0.404797
2022-09-13	08:38:11	0.22383
2022-09-13	08:38:12	0.383626
2022-09-13	08:38:12	0.452277
2022-09-13	08:38:12	0.658893
2022-09-13	08:38:13	0.612277
2022-09-13	08:38:13	0.691921
2022-09-13	08:38:13	0.591005
2022-09-13	08:38:13	0.440267
2022-09-13	08:38:14	0.355127
2022-09-13	08:38:14	0.339555
2022-09-13	08:38:14	0.824796
2022-09-13	08:38:14	1.59589
2022-09-13	08:38:15	5.17268
2022-09-13	08:38:15	11.0577
2022-09-13	08:38:15	11.7814
2022-09-13	08:38:15	12.0491
2022-09-13	08:38:16	6.4168
2022-09-13	08:38:16	7.69405
2022-09-13	08:38:16	8.97009
2022-09-13	08:38:16	5.92785
2022-09-13	08:38:17	10.4751
2022-09-13	08:38:17	8.2911
2022-09-13	08:38:17	5.55502
2022-09-13	08:38:18	10.7752
2022-09-13	08:38:18	3.81289
2022-09-13	08:38:18	7.86505
2022-09-13	08:38:18	14.3525
2022-09-13	08:38:19	7.75355
2022-09-13	08:38:19	15.6622
2022-09-13	08:38:19	16.3739
2022-09-13	08:38:19	6.68021
2022-09-13	08:38:20	8.95263
2022-09-13	08:38:20	8.4341
2022-09-13	08:38:20	7.78057
2022-09-13	08:38:20	12.5199
2022-09-13	08:38:21	7.81039
2022-09-13	08:38:21	6.59747
2022-09-13	08:38:21	3.93859
2022-09-13	08:38:22	6.81731
2022-09-13	08:38:22	3.96622
2022-09-13	08:38:22	1.68561
2022-09-13	08:38:22	2.89497
2022-09-13	08:38:23	2.02103
2022-09-13	08:38:23	3.32693
2022-09-13	08:38:23	2.63161
2022-09-13	08:38:23	3.7481
2022-09-13	08:38:24	1.21192
2022-09-13	08:38:24	0.811463
2022-09-13	08:38:24	1.30668
2022-09-13	08:38:24	1.23676
2022-09-13	08:38:25	0.499402
2022-09-13	08:38:25	0.375942
2022-09-13	08:38:25	0.339606
2022-09-13	08:38:25	0.285713
2022-09-13	08:38:26	0.225916
2022-09-13	08:38:26	0.223931
2022-09-13	08:38:26	0.213041
2022-09-13	08:38:27	0.225814
2022-09-13	08:38:27	0.217468
2022-09-13	08:38:27	0.214822
2022-09-13	08:38:27	0.210089
2022-09-13	08:38:28	0.206272
2022-09-13	08:38:28	0.21299
2022-09-13	08:38:28	0.212481
2022-09-13	08:38:28	0.21757
2022-09-13	08:38:29	0.219708
2022-09-13	08:38:29	0.211158
2022-09-13	08:38:29	0.207596
2022-09-13	08:38:29	0.1993
2022-09-13	08:38:30	0.194924
2022-09-13	08:38:30	0.197519
2022-09-13	08:38:30	0.200318
2022-09-13	08:38:30	0.198944
2022-09-13	08:38:31	0.198028
2022-09-13	08:38:31	0.207188
2022-09-13	08:38:31	0.222099
2022-09-13	08:38:32	0.209275
2022-09-13	08:38:32	0.215382
2022-09-13	08:38:32	0.234975
2022-09-13	08:38:32	0.239148
2022-09-13	08:38:33	0.232379
2022-09-13	08:38:33	0.268359
2022-09-13	08:38:33	0.355127
2022-09-13	08:38:33	0.406985
2022-09-13	08:38:34	0.355891
2022-09-13	08:38:34	0.456145
2022-09-13	08:38:34	0.626781
2022-09-13	08:38:34	0.397825
2022-09-13	08:38:35	0.616654
2022-09-13	08:38:35	0.307545
2022-09-13	08:38:35	0.264593
2022-09-13	08:38:36	0.658741
2022-09-13	08:38:36	0.284542
2022-09-13	08:38:36	2.16719
2022-09-13	08:38:36	6.98769
2022-09-13	08:38:37	9.22271
2022-09-13	08:38:37	8.2883
2022-09-13	08:38:37	4.78057
2022-09-13	08:38:37	5.25711
2022-09-13	08:38:38	5.99324
2022-09-13	08:38:38	12.1744
2022-09-13	08:38:38	10.0201
2022-09-13	08:38:38	8.06133
2022-09-13	08:38:39	10.9965
2022-09-13	08:38:39	6.91039
2022-09-13	08:38:39	9.34276
2022-09-13	08:38:39	5.60021
2022-09-13	08:38:40	3.19299
2022-09-13	08:38:40	8.6653
2022-09-13	08:38:40	5.1309
2022-09-13	08:38:41	4.06052
2022-09-13	08:38:41	10.9991
2022-09-13	08:38:41	7.94093
2022-09-13	08:38:41	12.4866
2022-09-13	08:38:42	8.94917
2022-09-13	08:38:42	4.27686
2022-09-13	08:38:42	8.49161
2022-09-13	08:38:42	3.01146
2022-09-13	08:38:43	6.44912
2022-09-13	08:38:43	6.86021
2022-09-13	08:38:43	3.19401
2022-09-13	08:38:43	8.31492
2022-09-13	08:38:44	0.637774
2022-09-13	08:38:44	2.31823
2022-09-13	08:38:44	0.927341
2022-09-13	08:38:45	0.561845
2022-09-13	08:38:45	0.669784
2022-09-13	08:38:45	0.600267
2022-09-13	08:38:45	0.69416
2022-09-13	08:38:46	0.163575
2022-09-13	08:38:46	0.691819
2022-09-13	08:38:46	3.37136
2022-09-13	08:38:46	5.65176
2022-09-13	08:38:47	6.78668
2022-09-13	08:38:47	6.57904
2022-09-13	08:38:47	4.9165
2022-09-13	08:38:47	4.90856
2022-09-13	08:38:48	2.84917
2022-09-13	08:38:48	2.30011
2022-09-13	08:38:48	0.848104
2022-09-13	08:38:48	0.727545
2022-09-13	08:38:49	0.0938551
2022-09-13	08:38:49	0.152074
2022-09-13	08:38:49	-0.0957631
2022-09-13	08:38:50	-0.258053
2022-09-13	08:38:50	-0.184771
2022-09-13	08:38:50	0.222507
2022-09-13	08:38:50	0.413041
2022-09-13	08:38:51	0.372888
2022-09-13	08:38:51	0.09813
2022-09-13	08:38:51	0.252888
2022-09-13	08:38:51	0.256858
2022-09-13	08:38:52	0.0861707
2022-09-13	08:38:52	-0.052557
2022-09-13	08:38:52	0.0235753
2022-09-13	08:38:52	0.444389
2022-09-13	08:38:53	0.525611
2022-09-13	08:38:53	0.709631
2022-09-13	08:38:53	0.527137
2022-09-13	08:38:53	1.08179
2022-09-13	08:38:54	1.08821
2022-09-13	08:38:54	0.322099
2022-09-13	08:38:54	1.23075
2022-09-13	08:38:55	1.82556
2022-09-13	08:38:55	3.38805
2022-09-13	08:38:55	5.96546
2022-09-13	08:38:55	7.70601
2022-09-13	08:38:56	3.42291
2022-09-13	08:38:56	2.20561
2022-09-13	08:38:56	1.15034
2022-09-13	08:38:56	1.17716
2022-09-13	08:38:57	3.06836
2022-09-13	08:38:57	2.19497
2022-09-13	08:38:57	2.47039
2022-09-13	08:38:57	3.91777
2022-09-13	08:38:58	7.23808
2022-09-13	08:38:58	8.74154
2022-09-13	08:38:58	16.2731
2022-09-13	08:38:59	19.0097
2022-09-13	08:38:59	13.4744
2022-09-13	08:38:59	18.7223
2022-09-13	08:38:59	11.5548
2022-09-13	08:39:00	7.58556
2022-09-13	08:39:00	19.5342
2022-09-13	08:39:00	11.152
2022-09-13	08:39:00	7.96113
2022-09-13	08:39:01	13.2785
2022-09-13	08:39:01	6.79899
2022-09-13	08:39:01	6.0681
2022-09-13	08:39:01	9.3081
2022-09-13	08:39:02	5.43161
2022-09-13	08:39:02	1.23615
2022-09-13	08:39:02	3.00093
2022-09-13	08:39:02	2.06541
2022-09-13	08:39:03	8.11263
2022-09-13	08:39:03	13.7634
2022-09-13	08:39:03	6.44011
2022-09-13	08:39:04	7.18128
2022-09-13	08:39:04	14.4066
2022-09-13	08:39:04	16.5568
2022-09-13	08:39:04	8.28596
2022-09-13	08:39:05	15.2837
2022-09-13	08:39:05	9.09975
2022-09-13	08:39:05	2.78337
2022-09-13	08:39:05	5.24902
2022-09-13	08:39:06	1.80734
2022-09-13	08:39:06	4.00892
2022-09-13	08:39:06	2.51757
2022-09-13	08:39:06	2.60999
2022-09-13	08:39:07	2.04317
2022-09-13	08:39:07	0.376094
2022-09-13	08:39:07	0.538893
2022-09-13	08:39:08	1.05274
2022-09-13	08:39:08	3.87039
2022-09-13	08:39:08	6.98866
2022-09-13	08:39:08	8.57579
2022-09-13	08:39:09	6.38795
2022-09-13	08:39:09	3.72709
2022-09-13	08:39:09	1.09813
2022-09-13	08:39:09	2.06322
2022-09-13	08:39:10	0.261081
2022-09-13	08:39:10	0.671005
2022-09-13	08:39:10	0.331311
2022-09-13	08:39:10	0.426425
2022-09-13	08:39:11	0.499097
2022-09-13	08:39:11	0.800063
2022-09-13	08:39:11	0.739962
2022-09-13	08:39:11	0.70271
2022-09-13	08:39:12	0.772023
2022-09-13	08:39:12	0.910394
2022-09-13	08:39:12	0.952532
2022-09-13	08:39:13	0.855585
2022-09-13	08:39:13	0.663524
2022-09-13	08:39:13	0.511107
2022-09-13	08:39:13	0.293346
2022-09-13	08:39:14	0.32729
2022-09-13	08:39:14	0.395687
2022-09-13	08:39:14	0.599199
2022-09-13	08:39:14	1.17457
2022-09-13	08:39:15	0.852939
2022-09-13	08:39:15	0.469326
2022-09-13	08:39:15	0.63986
2022-09-13	08:39:15	1.04688
2022-09-13	08:39:16	1.53039
2022-09-13	08:39:16	1.73039
2022-09-13	08:39:16	1.48663
2022-09-13	08:39:16	1.24709
2022-09-13	08:39:17	1.47004
2022-09-13	08:39:17	0.958588
2022-09-13	08:39:17	0.575687
2022-09-13	08:39:18	0.408969
2022-09-13	08:39:18	0.45813
2022-09-13	08:39:18	0.43528
2022-09-13	08:39:18	0.331158
2022-09-13	08:39:19	0.427799
2022-09-13	08:39:19	0.275636
2022-09-13	08:39:19	0.318334
2022-09-13	08:39:19	0.356603
2022-09-13	08:39:20	0.339555
2022-09-13	08:39:20	0.387799
2022-09-13	08:39:20	0.360929
2022-09-13	08:39:20	0.367748
2022-09-13	08:39:21	1.26047
2022-09-13	08:39:21	0.643881
2022-09-13	08:39:21	0.873804
2022-09-13	08:39:22	0.332074
2022-09-13	08:39:22	0.760369
2022-09-13	08:39:22	0.335382
2022-09-13	08:39:22	0.336094
2022-09-13	08:39:23	0.26159
2022-09-13	08:39:23	0.633753
2022-09-13	08:39:23	0.198232
2022-09-13	08:39:23	0.62673
2022-09-13	08:39:24	0.801794
2022-09-13	08:39:24	1.70983
2022-09-13	08:39:24	1.49813
2022-09-13	08:39:24	1.12357
2022-09-13	08:39:25	2.32485
2022-09-13	08:39:25	3.74261
2022-09-13	08:39:25	4.28938
2022-09-13	08:39:25	5.89833
2022-09-13	08:39:26	6.87487
2022-09-13	08:39:26	6.29935
2022-09-13	08:39:26	5.95909
2022-09-13	08:39:27	3.00581
2022-09-13	08:39:27	4.59904
2022-09-13	08:39:27	3.9453
2022-09-13	08:39:27	8.47467
2022-09-13	08:39:28	13.6968
2022-09-13	08:39:28	8.09869
2022-09-13	08:39:28	12.894
2022-09-13	08:39:28	7.02546
2022-09-13	08:39:29	7.13696
2022-09-13	08:39:29	9.63243
2022-09-13	08:39:29	2.60536
2022-09-13	08:39:29	7.82775
2022-09-13	08:39:30	7.36556
2022-09-13	08:39:30	6.08556
2022-09-13	08:39:30	9.1938
2022-09-13	08:39:31	5.55003
2022-09-13	08:39:31	8.26489
2022-09-13	08:39:31	6.54357
2022-09-13	08:39:31	5.16403
2022-09-13	08:39:32	9.12922
2022-09-13	08:39:32	3.88881
2022-09-13	08:39:32	14.5403
2022-09-13	08:39:32	11.6785
2022-09-13	08:39:33	23.0941
2022-09-13	08:39:33	15.4348
2022-09-13	08:39:33	5.00011
2022-09-13	08:39:33	8.46891
2022-09-13	08:39:34	15.3435
2022-09-13	08:39:34	14.0124
2022-09-13	08:39:34	7.53619
2022-09-13	08:39:34	9.08464
2022-09-13	08:39:35	3.69787
2022-09-13	08:39:35	3.17228
2022-09-13	08:39:35	2.51131
2022-09-13	08:39:36	0.388562
2022-09-13	08:39:36	0.480165
2022-09-13	08:39:36	0.510852
2022-09-13	08:39:36	3.55182
2022-09-13	08:39:37	3.43787
2022-09-13	08:39:37	1.96892
2022-09-13	08:39:37	0.779046
2022-09-13	08:39:37	0.29986
2022-09-13	08:39:38	0.504796
2022-09-13	08:39:38	0.420013
2022-09-13	08:39:38	0.805407
2022-09-13	08:39:38	0.967392
2022-09-13	08:39:39	0.178232
2022-09-13	08:39:39	0.204746
2022-09-13	08:39:39	-0.0100125
2022-09-13	08:39:39	0.0300893
2022-09-13	08:39:40	0.0130918
2022-09-13	08:39:40	-0.0648216
2022-09-13	08:39:40	0.321336
2022-09-13	08:39:41	-0.177239
2022-09-13	08:39:41	-0.138918
2022-09-13	08:39:41	-0.129045
2022-09-13	08:39:41	-0.103804
2022-09-13	08:39:42	-0.0542364
2022-09-13	08:39:42	0.0258654
2022-09-13	08:39:42	1.18393
2022-09-13	08:39:42	3.95828
2022-09-13	08:39:43	5.28688
2022-09-13	08:39:43	3.87111
2022-09-13	08:39:43	3.27314
2022-09-13	08:39:43	1.82709
2022-09-13	08:39:44	0.657824
2022-09-13	08:39:44	0.408969
2022-09-13	08:39:44	0.312685
2022-09-13	08:39:45	0.37355
2022-09-13	08:39:45	0.397316
2022-09-13	08:39:45	0.607341
2022-09-13	08:39:45	0.38383
2022-09-13	08:39:46	0.302048
2022-09-13	08:39:46	0.311769
2022-09-13	08:39:46	0.282048
2022-09-13	08:39:46	0.32785
2022-09-13	08:39:47	0.332532
2022-09-13	08:39:47	0.276349
2022-09-13	08:39:47	0.26668
2022-09-13	08:39:47	0.273244
2022-09-13	08:39:48	0.318181
2022-09-13	08:39:48	0.314211
2022-09-13	08:39:48	0.308868
2022-09-13	08:39:48	0.308003
2022-09-13	08:39:49	0.302761
2022-09-13	08:39:49	0.301845
2022-09-13	08:39:49	0.310547
2022-09-13	08:39:50	0.306832
2022-09-13	08:39:50	0.300318
2022-09-13	08:39:50	0.307087
2022-09-13	08:39:50	0.305509
2022-09-13	08:39:51	0.31187
2022-09-13	08:39:51	0.306934
2022-09-13	08:39:51	0.309835
2022-09-13	08:39:51	0.307443
2022-09-13	08:39:52	0.312837
2022-09-13	08:39:52	0.310903
2022-09-13	08:39:52	0.305713
2022-09-13	08:39:52	0.305153
2022-09-13	08:39:53	0.311412
2022-09-13	08:39:53	0.304491
2022-09-13	08:39:53	0.315738
2022-09-13	08:39:54	0.313295
2022-09-13	08:39:54	0.313651
2022-09-13	08:39:54	0.314567
2022-09-13	08:39:54	0.316043
2022-09-13	08:39:55	0.316145
2022-09-13	08:39:55	0.316807
2022-09-13	08:39:55	0.316349
2022-09-13	08:39:55	0.315331
2022-09-13	08:39:56	0.318028
2022-09-13	08:39:56	0.315433
2022-09-13	08:39:56	0.316298
2022-09-13	08:39:56	0.316247
2022-09-13	08:39:57	0.31126
2022-09-13	08:39:57	0.316552
2022-09-13	08:39:57	0.313702
2022-09-13	08:39:57	0.312277
2022-09-13	08:39:58	0.310496
2022-09-13	08:39:58	0.315484
2022-09-13	08:39:58	0.318944
2022-09-13	08:39:59	0.314466
2022-09-13	08:39:59	0.318486
2022-09-13	08:39:59	0.317977
2022-09-13	08:39:59	0.710954
2022-09-13	08:40:00	0.734059
2022-09-13	08:40:00	0.50444
2022-09-13	08:40:00	0.322659
2022-09-13	08:40:00	0.303779
2022-09-13	08:40:01	0.258842
2022-09-13	08:40:01	0.249224
2022-09-13	08:40:01	0.16159
2022-09-13	08:40:01	0.217672
2022-09-13	08:40:02	2.35798
2022-09-13	08:40:02	13.7324
2022-09-13	08:40:02	21.2934
2022-09-13	08:40:03	9.45171
2022-09-13	08:40:03	11.0767
2022-09-13	08:40:03	32.2458
2022-09-13	08:40:03	11.3567
2022-09-13	08:40:04	16.5751
2022-09-13	08:40:04	16.7569
2022-09-13	08:40:04	15.5081
2022-09-13	08:40:04	3.8934
2022-09-13	08:40:05	8.72352
2022-09-13	08:40:05	5.86393
2022-09-13	08:40:05	3.62149
2022-09-13	08:40:05	3.59553
2022-09-13	08:40:06	3.78057
2022-09-13	08:40:06	4.04271
2022-09-13	08:40:06	2.12215
2022-09-13	08:40:06	1.41497
2022-09-13	08:40:07	3.13441
2022-09-13	08:40:07	0.603422
2022-09-13	08:40:07	0.737366
2022-09-13	08:40:08	0.732379
2022-09-13	08:40:08	0.582252
2022-09-13	08:40:08	0.242303
2022-09-13	08:40:08	0.98729
2022-09-13	08:40:09	1.50917
2022-09-13	08:40:09	0.959147
2022-09-13	08:40:09	0.477977
2022-09-13	08:40:09	0.578333
2022-09-13	08:40:10	0.579249
2022-09-13	08:40:10	0.529886
2022-09-13	08:40:10	0.498028
2022-09-13	08:40:10	0.489224
2022-09-13	08:40:11	0.834822
2022-09-13	08:40:11	1.03793
2022-09-13	08:40:11	0.703066
2022-09-13	08:40:11	1.20037
2022-09-13	08:40:12	0.82785
2022-09-13	08:40:12	1.42912
2022-09-13	08:40:12	1.18108
2022-09-13	08:40:13	0.814924
2022-09-13	08:40:13	1.27345
2022-09-13	08:40:13	1.42658
2022-09-13	08:40:13	2.28525
2022-09-13	08:40:14	0.828563
2022-09-13	08:40:14	1.13146
2022-09-13	08:40:14	0.802506
2022-09-13	08:40:14	0.370903
2022-09-13	08:40:15	0.429275
2022-09-13	08:40:15	0.332125
2022-09-13	08:40:15	0.512786
2022-09-13	08:40:15	0.442252
2022-09-13	08:40:16	0.607137
2022-09-13	08:40:16	0.768054
2022-09-13	08:40:16	1.11716
2022-09-13	08:40:17	2.72866
2022-09-13	08:40:17	5.64311
2022-09-13	08:40:17	5.56836
2022-09-13	08:40:17	6.48281
2022-09-13	08:40:18	5.25349
2022-09-13	08:40:18	5.4308
2022-09-13	08:40:18	9.39273
2022-09-13	08:40:18	4.18423
2022-09-13	08:40:19	7.35787
2022-09-13	08:40:19	10.393
2022-09-13	08:40:19	2.48617
2022-09-13	08:40:19	7.64505
2022-09-13	08:40:20	1.35009
2022-09-13	08:40:20	2.29019
2022-09-13	08:40:20	0.647646
2022-09-13	08:40:20	0.681031
2022-09-13	08:40:21	0.756349
2022-09-13	08:40:21	0.436807
2022-09-13	08:40:21	0.437519
2022-09-13	08:40:22	0.429733
2022-09-13	08:40:22	-0.0713865
2022-09-13	08:40:22	-0.281412
2022-09-13	08:40:22	-0.10589
2022-09-13	08:40:23	0.0289188
2022-09-13	08:40:23	0.136858
2022-09-13	08:40:23	0.453295
2022-09-13	08:40:23	0.499249
2022-09-13	08:40:24	0.415789
2022-09-13	08:40:24	0.246476
2022-09-13	08:40:24	0.234618
2022-09-13	08:40:24	0.746781
2022-09-13	08:40:25	0.74215
2022-09-13	08:40:25	0.173448
2022-09-13	08:40:25	0.137723
2022-09-13	08:40:25	0.729529
2022-09-13	08:40:26	0.135738
2022-09-13	08:40:26	0.268766
2022-09-13	08:40:26	0.590394
2022-09-13	08:40:27	5.85721
2022-09-13	08:40:27	8.08637
2022-09-13	08:40:27	8.92657
2022-09-13	08:40:27	3.57075
2022-09-13	08:40:28	6.58332
2022-09-13	08:40:28	4.01691
2022-09-13	08:40:28	2.33319
2022-09-13	08:40:28	3.35792
2022-09-13	08:40:29	0.566374
2022-09-13	08:40:29	0.72383
2022-09-13	08:40:29	0.268664
2022-09-13	08:40:29	0.143575
2022-09-13	08:40:30	0.262252
2022-09-13	08:40:30	0.192125
2022-09-13	08:40:30	0.387239
2022-09-13	08:40:31	0.292023
2022-09-13	08:40:31	1.85034
2022-09-13	08:40:31	7.77543
2022-09-13	08:40:31	10.3844
2022-09-13	08:40:32	14.4186
2022-09-13	08:40:32	9.05558
2022-09-13	08:40:32	18.0323
2022-09-13	08:40:32	8.61492
2022-09-13	08:40:33	7.10948
2022-09-13	08:40:33	8.56815
2022-09-13	08:40:33	1.60958
2022-09-13	08:40:33	6.11772
2022-09-13	08:40:34	4.04785
2022-09-13	08:40:34	1.98648
2022-09-13	08:40:34	3.60887
2022-09-13	08:40:34	0.929784
2022-09-13	08:40:35	2.48006
2022-09-13	08:40:35	0.593957
2022-09-13	08:40:35	0.756552
2022-09-13	08:40:36	0.497417
2022-09-13	08:40:36	0.398028
2022-09-13	08:40:36	0.315229
2022-09-13	08:40:36	0.429784
2022-09-13	08:40:37	0.296756
2022-09-13	08:40:37	0.302456
2022-09-13	08:40:37	0.230496
2022-09-13	08:40:37	0.300522
2022-09-13	08:40:38	0.287443
2022-09-13	08:40:38	0.402557
2022-09-13	08:40:38	0.287239
2022-09-13	08:40:38	0.388613
2022-09-13	08:40:39	0.404847
2022-09-13	08:40:39	0.353143
2022-09-13	08:40:39	0.33757
2022-09-13	08:40:40	0.319504
2022-09-13	08:40:40	0.305
2022-09-13	08:40:40	0.38098
2022-09-13	08:40:40	0.350598
2022-09-13	08:40:41	0.391412
2022-09-13	08:40:41	0.23299
2022-09-13	08:40:41	0.265
2022-09-13	08:40:41	0.28673
2022-09-13	08:40:42	0.271107
2022-09-13	08:40:42	0.348664
2022-09-13	08:40:42	0.187392
2022-09-13	08:40:42	0.191718
2022-09-13	08:40:43	0.230903
2022-09-13	08:40:43	0.251616
2022-09-13	08:40:43	0.237265
2022-09-13	08:40:43	0.216756
2022-09-13	08:40:44	0.226425
2022-09-13	08:40:44	0.773193
2022-09-13	08:40:44	0.710191
2022-09-13	08:40:45	2.43762
2022-09-13	08:40:45	1.01004
2022-09-13	08:40:45	1.14846
2022-09-13	08:40:45	0.955687
2022-09-13	08:40:46	2.62281
2022-09-13	08:40:46	1.52281
2022-09-13	08:40:46	1.05375
2022-09-13	08:40:46	0.945763
2022-09-13	08:40:47	1.54373
2022-09-13	08:40:47	1.30276
2022-09-13	08:40:47	1.77263
2022-09-13	08:40:47	2.27691
2022-09-13	08:40:48	2.22632
2022-09-13	08:40:48	3.55665
2022-09-13	08:40:48	3.17111
2022-09-13	08:40:49	5.37533
2022-09-13	08:40:49	1.4481
2022-09-13	08:40:49	4.30892
2022-09-13	08:40:49	1.99426
2022-09-13	08:40:50	4.33253
2022-09-13	08:40:50	2.09207
2022-09-13	08:40:50	0.930903
2022-09-13	08:40:50	0.753193
2022-09-13	08:40:51	0.546119
2022-09-13	08:40:51	0.293957
2022-09-13	08:40:51	-0.117544
2022-09-13	08:40:51	-0.569554
2022-09-13	08:40:52	-0.529249
2022-09-13	08:40:52	-0.00975804
2022-09-13	08:40:52	0.126018
2022-09-13	08:40:52	0.233753
2022-09-13	08:40:53	0.240878
2022-09-13	08:40:53	0.366018
2022-09-13	08:40:53	0.321132
2022-09-13	08:40:54	0.521997
2022-09-13	08:40:54	0.344339
2022-09-13	08:40:54	0.195534
2022-09-13	08:40:54	0.187799
2022-09-13	08:40:55	0.166832
2022-09-13	08:40:55	0.182049
2022-09-13	08:40:55	0.115535
2022-09-13	08:40:55	0.136909
2022-09-13	08:40:56	0.281387
2022-09-13	08:40:56	0.148512
2022-09-13	08:40:56	0.211107
2022-09-13	08:40:56	0.132481
2022-09-13	08:40:57	0.180929
2022-09-13	08:40:57	0.277468
2022-09-13	08:40:57	0.267494
2022-09-13	08:40:57	0.201132
2022-09-13	08:40:58	0.289122
2022-09-13	08:40:58	0.382557
2022-09-13	08:40:58	0.420725
2022-09-13	08:40:59	0.376705
2022-09-13	08:40:59	0.327188
2022-09-13	08:40:59	0.158792
2022-09-13	08:40:59	0.350954
2022-09-13	08:41:00	0.496094
2022-09-13	08:41:00	5.11767
2022-09-13	08:41:00	16.4316
2022-09-13	08:41:00	19.1955
2022-09-13	08:41:01	4.81507
2022-09-13	08:41:01	7.3854
2022-09-13	08:41:01	8.50006
2022-09-13	08:41:01	4.37115
2022-09-13	08:41:02	7.73609
2022-09-13	08:41:02	9.74179
2022-09-13	08:41:02	3.04994
2022-09-13	08:41:03	7.99609
2022-09-13	08:41:03	3.35757
2022-09-13	08:41:03	3.86215
2022-09-13	08:41:03	5.5194
2022-09-13	08:41:04	3.82983
2022-09-13	08:41:04	7.72601
2022-09-13	08:41:04	8.89054
2022-09-13	08:41:04	4.4307
2022-09-13	08:41:05	9.79828
2022-09-13	08:41:05	2.87848
2022-09-13	08:41:05	3.12011
2022-09-13	08:41:05	4.20826
2022-09-13	08:41:06	3.33686
2022-09-13	08:41:06	6.69853
2022-09-13	08:41:06	5.37599
2022-09-13	08:41:06	7.71594
2022-09-13	08:41:07	6.52459
2022-09-13	08:41:07	4.722
2022-09-13	08:41:07	10.3925
2022-09-13	08:41:08	3.33966
2022-09-13	08:41:08	6.87543
2022-09-13	08:41:08	11.1887
2022-09-13	08:41:08	12.8455
2022-09-13	08:41:09	9.89736
2022-09-13	08:41:09	5.10266
2022-09-13	08:41:09	11.4479
2022-09-13	08:41:09	10.0722
2022-09-13	08:41:10	13.2513
2022-09-13	08:41:10	8.42958
2022-09-13	08:41:10	3.24118
2022-09-13	08:41:10	2.37833
2022-09-13	08:41:11	0.485
2022-09-13	08:41:11	0.474924
2022-09-13	08:41:11	0.526476
2022-09-13	08:41:12	0.255891
2022-09-13	08:41:12	0.445916
2022-09-13	08:41:12	0.552736
2022-09-13	08:41:12	0.802964
2022-09-13	08:41:13	0.770293
2022-09-13	08:41:13	1.05228
2022-09-13	08:41:13	1.58179
2022-09-13	08:41:13	0.901336
2022-09-13	08:41:14	0.817214
2022-09-13	08:41:14	0.644695
2022-09-13	08:41:14	1.08164
2022-09-13	08:41:14	1.21324
2022-09-13	08:41:15	1.55899
2022-09-13	08:41:15	1.72851
2022-09-13	08:41:15	1.68495
2022-09-13	08:41:15	1.2792
2022-09-13	08:41:16	1.16134
2022-09-13	08:41:16	0.416247
2022-09-13	08:41:16	0.445255
2022-09-13	08:41:17	0.457061
2022-09-13	08:41:17	0.817723
2022-09-13	08:41:17	0.119606
2022-09-13	08:41:17	0.243931
2022-09-13	08:41:18	1.07085
2022-09-13	08:41:18	12.2865
2022-09-13	08:41:18	7.87009
2022-09-13	08:41:18	7.46372
2022-09-13	08:41:19	11.7855
2022-09-13	08:41:19	5.21375
2022-09-13	08:41:19	5.52301
2022-09-13	08:41:19	4.87238
2022-09-13	08:41:20	5.01446
2022-09-13	08:41:20	6.02439
2022-09-13	08:41:20	5.88632
2022-09-13	08:41:20	9.73151
2022-09-13	08:41:21	12.8369
2022-09-13	08:41:21	16.745
2022-09-13	08:41:21	14.6701
2022-09-13	08:41:22	8.87177
2022-09-13	08:41:22	12.8864
2022-09-13	08:41:22	7.58825
2022-09-13	08:41:22	7.10774
2022-09-13	08:41:23	12.8258
2022-09-13	08:41:23	6.03955
2022-09-13	08:41:23	9.45614
2022-09-13	08:41:23	12.7822
2022-09-13	08:41:24	5.89711
2022-09-13	08:41:24	10.4379
2022-09-13	08:41:24	14.4223
2022-09-13	08:41:24	6.16724
2022-09-13	08:41:25	9.49726
2022-09-13	08:41:25	5.13925
2022-09-13	08:41:25	3.16658
2022-09-13	08:41:26	8.3965
2022-09-13	08:41:26	8.2654
2022-09-13	08:41:26	9.48179
2022-09-13	08:41:26	3.01497
2022-09-13	08:41:27	2.91619
2022-09-13	08:41:27	1.88398
2022-09-13	08:41:27	1.24276
2022-09-13	08:41:27	1.94235
2022-09-13	08:41:28	0.751361
2022-09-13	08:41:28	1.67477
2022-09-13	08:41:28	1.50978
2022-09-13	08:41:28	3.5307
2022-09-13	08:41:29	1.42307
2022-09-13	08:41:29	3.18083
2022-09-13	08:41:29	4.53523
2022-09-13	08:41:29	4.0709
2022-09-13	08:41:30	9.47772
2022-09-13	08:41:30	6.38892
2022-09-13	08:41:30	12.8579
2022-09-13	08:41:31	8.81696
2022-09-13	08:41:31	9.14724
2022-09-13	08:41:31	6.58352
2022-09-13	08:41:31	4.10067
2022-09-13	08:41:32	6.33034
2022-09-13	08:41:32	1.49782
2022-09-13	08:41:32	0.797163
2022-09-13	08:41:32	1.19335
2022-09-13	08:41:33	0.399402
2022-09-13	08:41:33	1.23131
2022-09-13	08:41:33	0.674058
2022-09-13	08:41:33	3.33457
2022-09-13	08:41:34	1.65391
2022-09-13	08:41:34	3.58195
2022-09-13	08:41:34	0.903677
2022-09-13	08:41:35	0.888817
2022-09-13	08:41:35	0.322252
2022-09-13	08:41:35	0.365407
2022-09-13	08:41:35	0.285051
2022-09-13	08:41:36	0.663066
2022-09-13	08:41:36	0.435687
2022-09-13	08:41:36	0.224746
2022-09-13	08:41:36	0.0843386
2022-09-13	08:41:37	0.0107
2022-09-13	08:41:37	-0.192252
2022-09-13	08:41:37	-0.0733712
2022-09-13	08:41:37	0.0356872
2022-09-13	08:41:38	0.0165015
2022-09-13	08:41:38	0.346527
2022-09-13	08:41:38	0.308715
2022-09-13	08:41:38	0.096756
2022-09-13	08:41:39	0.208919
2022-09-13	08:41:39	0.268613
2022-09-13	08:41:39	0.217468
2022-09-13	08:41:40	0.318791
2022-09-13	08:41:40	0.442405
2022-09-13	08:41:40	0.479606
2022-09-13	08:41:40	0.369529
2022-09-13	08:41:41	0.339199
2022-09-13	08:41:41	0.320318
2022-09-13	08:41:41	2.48067
2022-09-13	08:41:41	2.86663
2022-09-13	08:41:42	2.0566
2022-09-13	08:41:42	2.91355
2022-09-13	08:41:42	5.06622
2022-09-13	08:41:42	4.2625
2022-09-13	08:41:43	1.92892
2022-09-13	08:41:43	0.498995
2022-09-13	08:41:43	0.75645
2022-09-13	08:41:43	0.274567
2022-09-13	08:41:44	0.842405
2022-09-13	08:41:44	1.60261
2022-09-13	08:41:44	8.99889
2022-09-13	08:41:45	7.4479
2022-09-13	08:41:45	5.5768
2022-09-13	08:41:45	7.92179
2022-09-13	08:41:45	5.94367
2022-09-13	08:41:46	5.14881
2022-09-13	08:41:46	15.3407
2022-09-13	08:41:46	7.81894
2022-09-13	08:41:46	11.5373
2022-09-13	08:41:47	13.6742
2022-09-13	08:41:47	7.9624
2022-09-13	08:41:47	15.083
2022-09-13	08:41:47	7.08052
2022-09-13	08:41:48	9.79726
2022-09-13	08:41:48	6.85421
2022-09-13	08:41:48	7.09477
2022-09-13	08:41:49	4.22032
2022-09-13	08:41:49	3.67579
2022-09-13	08:41:49	2.49462
2022-09-13	08:41:49	0.644695
2022-09-13	08:41:50	0.443982
2022-09-13	08:41:50	0.402964
2022-09-13	08:41:50	0.266883
2022-09-13	08:41:50	0.298181
2022-09-13	08:41:51	0.275127
2022-09-13	08:41:51	0.264644
2022-09-13	08:41:51	0.338944
2022-09-13	08:41:51	0.532888
2022-09-13	08:41:52	0.500216
2022-09-13	08:41:52	0.749529
2022-09-13	08:41:52	0.587646
2022-09-13	08:41:52	0.452583
2022-09-13	08:41:53	0.376959
2022-09-13	08:41:53	0.36444
2022-09-13	08:41:53	0.361998
2022-09-13	08:41:54	0.357265
2022-09-13	08:41:54	0.359555
2022-09-13	08:41:54	0.352939
2022-09-13	08:41:54	0.346883
2022-09-13	08:41:55	0.725153
2022-09-13	08:41:55	1.77299
2022-09-13	08:41:55	1.93024
2022-09-13	08:41:55	3.28139
2022-09-13	08:41:56	0.993753
2022-09-13	08:41:56	0.665254
2022-09-13	08:41:56	0.396654
2022-09-13	08:41:56	0.125764
2022-09-13	08:41:57	0.0155855
2022-09-13	08:41:57	0.0682572
2022-09-13	08:41:57	0.258893
2022-09-13	08:41:58	0.180776
2022-09-13	08:41:58	0.113194
2022-09-13	08:41:58	0.331667
2022-09-13	08:41:58	0.385458
2022-09-13	08:41:59	0.667595
2022-09-13	08:41:59	0.44154
2022-09-13	08:41:59	1.07177
2022-09-13	08:41:59	2.48653
2022-09-13	08:42:00	11.4444
2022-09-13	08:42:00	20.095
2022-09-13	08:42:00	31.2127
2022-09-13	08:42:00	7.41095
2022-09-13	08:42:01	18.0598
2022-09-13	08:42:01	13.0754
2022-09-13	08:42:01	8.84851
2022-09-13	08:42:01	11.0579
2022-09-13	08:42:02	8.17894
2022-09-13	08:42:02	8.9711
2022-09-13	08:42:02	8.62215
2022-09-13	08:42:03	8.36673
2022-09-13	08:42:03	10.3606
2022-09-13	08:42:03	11.1392
2022-09-13	08:42:03	9.11115
2022-09-13	08:42:04	8.30902
2022-09-13	08:42:04	8.82148
2022-09-13	08:42:04	7.05136
2022-09-13	08:42:04	6.61894
2022-09-13	08:42:05	7.5538
2022-09-13	08:42:05	6.29441
2022-09-13	08:42:05	9.5652
2022-09-13	08:42:05	3.73645
2022-09-13	08:42:06	10.4989
2022-09-13	08:42:06	4.55619
2022-09-13	08:42:06	3.50566
2022-09-13	08:42:06	1.74953
2022-09-13	08:42:07	2.25111
2022-09-13	08:42:07	6.51517
2022-09-13	08:42:07	2.00291
2022-09-13	08:42:08	2.15696
2022-09-13	08:42:08	0.796603
2022-09-13	08:42:08	0.782201
2022-09-13	08:42:08	0.813601
2022-09-13	08:42:09	0.570395
2022-09-13	08:42:09	2.40149
2022-09-13	08:42:09	2.97945
2022-09-13	08:42:09	3.52846
2022-09-13	08:42:10	5.1683
2022-09-13	08:42:10	5.92286
2022-09-13	08:42:10	9.98256
2022-09-13	08:42:10	11.6173
2022-09-13	08:42:11	19.57
2022-09-13	08:42:11	22.8496
2022-09-13	08:42:11	12.0048
2022-09-13	08:42:12	9.72398
2022-09-13	08:42:12	9.10571
2022-09-13	08:42:12	6.05904
2022-09-13	08:42:12	4.59716
2022-09-13	08:42:13	4.62663
2022-09-13	08:42:13	4.39619
2022-09-13	08:42:13	1.61085
2022-09-13	08:42:13	0.271667
2022-09-13	08:42:14	0.22159
2022-09-13	08:42:14	0.0903946
2022-09-13	08:42:14	0.216603
2022-09-13	08:42:14	0.62271
2022-09-13	08:42:15	7.6622
2022-09-13	08:42:15	13.7635
2022-09-13	08:42:15	9.44535
2022-09-13	08:42:15	5.78204
2022-09-13	08:42:16	3.11513
2022-09-13	08:42:16	0.930598
2022-09-13	08:42:16	0.828461
2022-09-13	08:42:17	0.982099
2022-09-13	08:42:17	0.492176
2022-09-13	08:42:17	1.5967
2022-09-13	08:42:17	4.37731
2022-09-13	08:42:18	4.5052
2022-09-13	08:42:18	3.1392
2022-09-13	08:42:18	4.04251
2022-09-13	08:42:18	5.12617
2022-09-13	08:42:19	5.06118
2022-09-13	08:42:19	4.60128
2022-09-13	08:42:19	9.49599
2022-09-13	08:42:19	10.035
2022-09-13	08:42:20	11.1206
2022-09-13	08:42:20	4.3395
2022-09-13	08:42:20	4.85777
2022-09-13	08:42:20	4.64978
2022-09-13	08:42:21	3.84093
2022-09-13	08:42:21	4.95793
2022-09-13	08:42:21	0.970242
2022-09-13	08:42:22	1.59803
2022-09-13	08:42:22	1.29915
2022-09-13	08:42:22	1.13757
2022-09-13	08:42:22	0.759249
2022-09-13	08:42:23	0.454618
2022-09-13	08:42:23	0.368919
2022-09-13	08:42:23	0.419708
2022-09-13	08:42:23	0.496654
2022-09-13	08:42:24	0.636755
2022-09-13	08:42:24	0.877366
2022-09-13	08:42:24	1.62846
2022-09-13	08:42:24	2.09711
2022-09-13	08:42:25	2.27905
2022-09-13	08:42:25	1.48083
2022-09-13	08:42:25	1.13126
2022-09-13	08:42:26	1.14052
2022-09-13	08:42:26	1.06805
2022-09-13	08:42:26	1.07324
2022-09-13	08:42:26	1.09599
2022-09-13	08:42:27	1.36464
2022-09-13	08:42:27	1.05045
2022-09-13	08:42:27	1.11818
2022-09-13	08:42:27	2.87625
2022-09-13	08:42:28	3.54642
2022-09-13	08:42:28	4.22052
2022-09-13	08:42:28	1.1021
2022-09-13	08:42:28	0.546883
2022-09-13	08:42:29	0.249377
2022-09-13	08:42:29	0.0749239
2022-09-13	08:42:29	0.114008
2022-09-13	08:42:29	0.173346
2022-09-13	08:42:30	0.154008
2022-09-13	08:42:30	0.176858
2022-09-13	08:42:30	0.257977
2022-09-13	08:42:31	0.130903
2022-09-13	08:42:31	-0.0992745
2022-09-13	08:42:31	0.0715651
2022-09-13	08:42:31	0.0887153
2022-09-13	08:42:32	0.158537
2022-09-13	08:42:32	0.61584
2022-09-13	08:42:32	0.322456
2022-09-13	08:42:32	0.230446
2022-09-13	08:42:33	0.245204
2022-09-13	08:42:33	0.218995
2022-09-13	08:42:33	0.242303
2022-09-13	08:42:33	0.374822
2022-09-13	08:42:34	0.655636
2022-09-13	08:42:34	0.925153
2022-09-13	08:42:34	1.04378
2022-09-13	08:42:35	0.940623
2022-09-13	08:42:35	0.830445
2022-09-13	08:42:35	0.435229
2022-09-13	08:42:35	0.252125
2022-09-13	08:42:36	0.188206
