# Supplementary material for: Comparing efficacy in reducing pulling and welfare impacts of four types of leash walking equipment
Source: PeerJ journal article supplement (doi:10.7717/peerj.18131), 2024-10-24
Supplement: Shelter1_Tension_files.zip [file Mars_prong_2022913110714 copy.xlsx]

## Sheet: Averaged Newtons
Date	Time	Averaged Newtons
2022-09-13	11:07:15	1.16185	1.16185	0		Impulse	976.714
2022-09-13	11:07:16	-1.23721	1.16185	0		Total steps	11
2022-09-13	11:07:17	-4.18645	1.16185	0		# > 5 sec	0
2022-09-13	11:07:18	-0.642611	1.16185	0
2022-09-13	11:07:19	2.2434	3.40525	0
2022-09-13	11:07:20	-1.39575	3.40525	0
2022-09-13	11:07:21	5.11417	8.51942	0
2022-09-13	11:07:22	4.68239	13.2018	0
2022-09-13	11:07:23	7.26572	20.4675	0
2022-09-13	11:07:24	4.37706	24.8446	0
2022-09-13	11:07:25	2.83989	27.6845	0
2022-09-13	11:07:26	13.2956	40.9801	1
2022-09-13	11:07:27	1.57809	42.5582	1
2022-09-13	11:07:28	1.25059	43.8087	1
2022-09-13	11:07:29	-1.62121	43.8087	1
2022-09-13	11:07:30	-2.91	43.8087	1
2022-09-13	11:07:31	-3.08154	43.8087	1
2022-09-13	11:07:32	-3.23637	43.8087	1
2022-09-13	11:07:33	-3.30662	43.8087	1
2022-09-13	11:07:34	-2.32698	43.8087	1
2022-09-13	11:07:35	1.51216	45.3209	1
2022-09-13	11:07:36	1.5584	46.8793	1
2022-09-13	11:07:37	1.65863	48.5379	1
2022-09-13	11:07:38	-3.54967	48.5379	1
2022-09-13	11:07:39	1.09366	49.6316	1
2022-09-13	11:07:40	2.39931	52.0309	1
2022-09-13	11:07:41	2.50927	54.5402	1
2022-09-13	11:07:42	1.85517	56.3953	1
2022-09-13	11:07:43	1.53582	57.9312	1
2022-09-13	11:07:44	1.21024	59.1414	1
2022-09-13	11:07:45	1.08641	60.2278	1
2022-09-13	11:07:46	1.15402	61.3818	1
2022-09-13	11:07:47	1.09926	62.4811	1
2022-09-13	11:07:48	2.41171	64.8928	1
2022-09-13	11:07:49	4.1753	69.0681	1
2022-09-13	11:07:50	-1.44208	69.0681	1
2022-09-13	11:07:51	1.45331	70.5214	1
2022-09-13	11:07:52	2.34125	72.8627	1
2022-09-13	11:07:53	2.91555	75.7782	1
2022-09-13	11:07:54	2.5739	78.3521	1
2022-09-13	11:07:55	5.93468	84.2868	1
2022-09-13	11:07:56	4.87928	89.1661	1
2022-09-13	11:07:57	3.44605	92.6121	1
2022-09-13	11:07:58	4.16745	96.7796	1
2022-09-13	11:07:59	3.85305	100.633	1
2022-09-13	11:08:00	3.39518	104.028	1
2022-09-13	11:08:01	3.40927	107.437	1
2022-09-13	11:08:02	3.57605	111.013	1
2022-09-13	11:08:03	3.9842	114.997	1
2022-09-13	11:08:04	4.61788	119.615	1
2022-09-13	11:08:05	4.66891	124.284	1
2022-09-13	11:08:06	5.4066	129.691	1
2022-09-13	11:08:07	4.78917	134.48	1
2022-09-13	11:08:08	5.63128	140.111	1
2022-09-13	11:08:09	5.58617	145.697	1
2022-09-13	11:08:10	6.43914	152.136	1
2022-09-13	11:08:11	5.02041	157.157	1
2022-09-13	11:08:12	4.71273	161.87	1
2022-09-13	11:08:13	1.63593	163.506	1
2022-09-13	11:08:14	1.40571	164.911	1
2022-09-13	11:08:15	1.48958	166.401	1
2022-09-13	11:08:16	2.92395	169.325	1
2022-09-13	11:08:17	8.59939	177.924	1
2022-09-13	11:08:18	5.10547	183.03	1
2022-09-13	11:08:19	7.22776	190.257	1
2022-09-13	11:08:20	8.70056	198.958	1
2022-09-13	11:08:21	5.8281	204.786	1
2022-09-13	11:08:22	16.654	221.44	2
2022-09-13	11:08:23	27.4536	248.894	3
2022-09-13	11:08:24	21.0024	269.896	4
2022-09-13	11:08:25	14.1251	284.021	5
2022-09-13	11:08:26	5.85425	289.875	5
2022-09-13	11:08:27	15.1161	304.991	6
2022-09-13	11:08:28	9.214	314.205	6
2022-09-13	11:08:29	1.79111	315.997	6
2022-09-13	11:08:30	2.38579	318.382	6
2022-09-13	11:08:31	2.64323	321.026	6
2022-09-13	11:08:32	2.78352	323.809	6
2022-09-13	11:08:33	1.99582	325.805	6
2022-09-13	11:08:34	1.67583	327.481	6
2022-09-13	11:08:35	1.72869	329.209	6
2022-09-13	11:08:36	2.25364	331.463	6
2022-09-13	11:08:37	2.31214	333.775	6
2022-09-13	11:08:38	2.35698	336.132	6
2022-09-13	11:08:39	2.34894	338.481	6
2022-09-13	11:08:40	2.06496	340.546	6
2022-09-13	11:08:41	1.61258	342.159	6
2022-09-13	11:08:42	1.65359	343.812	6
2022-09-13	11:08:43	0.500962	344.313	6
2022-09-13	11:08:44	0.0347487	344.348	6
2022-09-13	11:08:45	1.46287	345.811	6
2022-09-13	11:08:46	0.783831	346.595	6
2022-09-13	11:08:47	-0.468984	346.595	6
2022-09-13	11:08:48	0.478437	347.073	6
2022-09-13	11:08:49	1.55993	348.633	6
2022-09-13	11:08:50	1.5215	350.155	6
2022-09-13	11:08:51	1.71035	351.865	6
2022-09-13	11:08:52	3.25092	355.116	6
2022-09-13	11:08:53	1.78715	356.903	6
2022-09-13	11:08:54	1.21039	358.113	6
2022-09-13	11:08:55	1.83123	359.945	6
2022-09-13	11:08:56	0.874983	360.82	6
2022-09-13	11:08:57	0.573514	361.393	6
2022-09-13	11:08:58	0.885247	362.278	6
2022-09-13	11:08:59	1.12592	363.404	6
2022-09-13	11:09:00	2.31244	365.717	6
2022-09-13	11:09:01	2.41029	368.127	6
2022-09-13	11:09:02	2.5971	370.724	6
2022-09-13	11:09:03	2.66339	373.387	6
2022-09-13	11:09:04	2.79699	376.184	6
2022-09-13	11:09:05	3.18618	379.371	6
2022-09-13	11:09:06	3.17899	382.55	6
2022-09-13	11:09:07	3.00544	385.555	6
2022-09-13	11:09:08	3.05947	388.615	6
2022-09-13	11:09:09	2.96411	391.579	6
2022-09-13	11:09:10	3.00231	394.581	6
2022-09-13	11:09:11	2.23223	396.813	6
2022-09-13	11:09:12	2.48579	399.299	6
2022-09-13	11:09:13	1.45116	400.75	6
2022-09-13	11:09:14	1.71188	402.462	6
2022-09-13	11:09:15	2.42691	404.889	6
2022-09-13	11:09:16	1.19122	406.08	6
2022-09-13	11:09:17	1.40062	407.481	6
2022-09-13	11:09:18	1.14884	408.63	6
2022-09-13	11:09:19	0.992865	409.622	6
2022-09-13	11:09:20	0.558517	410.181	6
2022-09-13	11:09:21	0.928125	411.109	6
2022-09-13	11:09:22	1.2434	412.353	6
2022-09-13	11:09:23	1.07781	413.43	6
2022-09-13	11:09:24	1.11909	414.549	6
2022-09-13	11:09:25	0.688624	415.238	6
2022-09-13	11:09:26	1.06021	416.298	6
2022-09-13	11:09:27	1.39553	417.694	6
2022-09-13	11:09:28	1.45517	419.149	6
2022-09-13	11:09:29	1.40503	420.554	6
2022-09-13	11:09:30	1.07968	421.634	6
2022-09-13	11:09:31	3.1718	424.805	6
2022-09-13	11:09:32	6.4893	431.295	6
2022-09-13	11:09:33	3.48431	434.779	6
2022-09-13	11:09:34	3.61238	438.391	6
2022-09-13	11:09:35	6.09545	444.487	6
2022-09-13	11:09:36	8.69136	453.178	6
2022-09-13	11:09:37	4.74043	457.919	6
2022-09-13	11:09:38	3.7087	461.627	6
2022-09-13	11:09:39	3.92313	465.551	6
2022-09-13	11:09:40	4.089	469.64	6
2022-09-13	11:09:41	4.07044	473.71	6
2022-09-13	11:09:42	4.02879	477.739	6
2022-09-13	11:09:43	4.06784	481.807	6
2022-09-13	11:09:44	4.0529	485.859	6
2022-09-13	11:09:45	2.91617	488.776	6
2022-09-13	11:09:46	2.78624	491.562	6
2022-09-13	11:09:47	3.1353	494.697	6
2022-09-13	11:09:48	2.84719	497.544	6
2022-09-13	11:09:49	2.72406	500.268	6
2022-09-13	11:09:50	2.68058	502.949	6
2022-09-13	11:09:51	2.81866	505.768	6
2022-09-13	11:09:52	1.70067	507.468	6
2022-09-13	11:09:53	1.10696	508.575	6
2022-09-13	11:09:54	1.98556	510.561	6
2022-09-13	11:09:55	1.68262	512.244	6
2022-09-13	11:09:56	1.83152	514.075	6
2022-09-13	11:09:57	1.8799	515.955	6
2022-09-13	11:09:58	2.12689	518.082	6
2022-09-13	11:09:59	1.99812	520.08	6
2022-09-13	11:10:00	1.95104	522.031	6
2022-09-13	11:10:01	1.83435	523.865	6
2022-09-13	11:10:02	1.74372	525.609	6
2022-09-13	11:10:03	0.840348	526.449	6
2022-09-13	11:10:04	2.943	529.392	6
2022-09-13	11:10:05	0.0104708	529.403	6
2022-09-13	11:10:06	0.0741565	529.477	6
2022-09-13	11:10:07	1.0262	530.503	6
2022-09-13	11:10:08	0.217431	530.721	6
2022-09-13	11:10:09	0.336219	531.057	6
2022-09-13	11:10:10	-0.236331	531.057	6
2022-09-13	11:10:11	-0.984582	531.057	6
2022-09-13	11:10:12	0.85427	531.911	6
2022-09-13	11:10:13	1.08568	532.997	6
2022-09-13	11:10:14	0.604752	533.602	6
2022-09-13	11:10:15	0.190738	533.792	6
2022-09-13	11:10:16	0.149689	533.942	6
2022-09-13	11:10:17	0.734973	534.677	6
2022-09-13	11:10:18	1.11477	535.792	6
2022-09-13	11:10:19	1.74297	537.535	6
2022-09-13	11:10:20	0.649686	538.184	6
2022-09-13	11:10:21	2.64362	540.828	6
2022-09-13	11:10:22	3.51555	544.344	6
2022-09-13	11:10:23	1.36176	545.705	6
2022-09-13	11:10:24	1.23904	546.944	6
2022-09-13	11:10:25	1.37255	548.317	6
2022-09-13	11:10:26	1.68766	550.005	6
2022-09-13	11:10:27	3.82313	553.828	6
2022-09-13	11:10:28	5.2487	559.076	6
2022-09-13	11:10:29	7.58038	566.657	6
2022-09-13	11:10:30	15.8397	582.496	7
2022-09-13	11:10:31	7.4479	589.944	7
2022-09-13	11:10:32	7.80188	597.746	7
2022-09-13	11:10:33	10.1816	607.928	7
2022-09-13	11:10:34	12.6227	620.551	7
2022-09-13	11:10:35	11.0904	631.641	7
2022-09-13	11:10:36	18.0154	649.656	8
2022-09-13	11:10:37	16.2435	665.9	9
2022-09-13	11:10:38	9.7171	675.617	9
2022-09-13	11:10:39	15.8196	691.437	10
2022-09-13	11:10:40	19.0531	710.49	11
2022-09-13	11:10:41	-0.090322	710.49	11
2022-09-13	11:10:42	1.26768	711.757	11
2022-09-13	11:10:43	12.5737	724.331	11
2022-09-13	11:10:44	11.4977	735.829	11
2022-09-13	11:10:45	-0.500902	735.829	11
2022-09-13	11:10:46	-0.968926	735.829	11
2022-09-13	11:10:47	0.813806	736.643	11
2022-09-13	11:10:48	1.24408	737.887	11
2022-09-13	11:10:49	2.52153	740.408	11
2022-09-13	11:10:50	3.23196	743.64	11
2022-09-13	11:10:51	3.65822	747.298	11
2022-09-13	11:10:52	11.2938	758.592	11
2022-09-13	11:10:53	11.9661	770.558	11
2022-09-13	11:10:54	6.97151	777.53	11
2022-09-13	11:10:55	5.00746	782.537	11
2022-09-13	11:10:56	5.03343	787.571	11
2022-09-13	11:10:57	3.59786	791.169	11
2022-09-13	11:10:58	7.45782	798.626	11
2022-09-13	11:10:59	2.58363	801.21	11
2022-09-13	11:11:00	2.17526	803.385	11
2022-09-13	11:11:01	1.77645	805.162	11
2022-09-13	11:11:02	2.64875	807.81	11
2022-09-13	11:11:03	3.10418	810.915	11
2022-09-13	11:11:04	2.99404	813.909	11
2022-09-13	11:11:05	3.0061	816.915	11
2022-09-13	11:11:06	9.87854	826.793	11
2022-09-13	11:11:07	2.94153	829.735	11
2022-09-13	11:11:08	1.54136	831.276	11
2022-09-13	11:11:09	-1.13186	831.276	11
2022-09-13	11:11:10	-3.58815	831.276	11
2022-09-13	11:11:11	2.49824	833.774	11
2022-09-13	11:11:12	1.49807	835.273	11
2022-09-13	11:11:13	1.29739	836.57	11
2022-09-13	11:11:14	1.24306	837.813	11
2022-09-13	11:11:15	1.28415	839.097	11
2022-09-13	11:11:16	2.1773	841.274	11
2022-09-13	11:11:17	2.3889	843.663	11
2022-09-13	11:11:18	1.54565	845.209	11
2022-09-13	11:11:19	1.49139	846.7	11
2022-09-13	11:11:20	1.50379	848.204	11
2022-09-13	11:11:21	1.63808	849.842	11
2022-09-13	11:11:22	1.47939	851.322	11
2022-09-13	11:11:23	1.66645	852.988	11
2022-09-13	11:11:24	1.77753	854.766	11
2022-09-13	11:11:25	2.02088	856.787	11
2022-09-13	11:11:26	2.15002	858.937	11
2022-09-13	11:11:27	2.14327	861.08	11
2022-09-13	11:11:28	2.11505	863.195	11
2022-09-13	11:11:29	2.09863	865.293	11
2022-09-13	11:11:30	1.4597	866.753	11
2022-09-13	11:11:31	1.46566	868.219	11
2022-09-13	11:11:32	1.54827	869.767	11
2022-09-13	11:11:33	1.5842	871.351	11
2022-09-13	11:11:34	1.68845	873.04	11
2022-09-13	11:11:35	1.69249	874.732	11
2022-09-13	11:11:36	1.66666	876.399	11
2022-09-13	11:11:37	2.96349	879.362	11
2022-09-13	11:11:38	3.14124	882.504	11
2022-09-13	11:11:39	1.68143	884.185	11
2022-09-13	11:11:40	1.37066	885.556	11
2022-09-13	11:11:41	0.448443	886.004	11
2022-09-13	11:11:42	0.23288	886.237	11
2022-09-13	11:11:43	0.487096	886.724	11
2022-09-13	11:11:44	1.98315	888.707	11
2022-09-13	11:11:45	2.6207	891.328	11
2022-09-13	11:11:46	1.43582	892.764	11
2022-09-13	11:11:47	1.16349	893.927	11
2022-09-13	11:11:48	1.21265	895.14	11
2022-09-13	11:11:49	1.15738	896.297	11
2022-09-13	11:11:50	1.6361	897.933	11
2022-09-13	11:11:51	1.36847	899.302	11
2022-09-13	11:11:52	1.68962	900.992	11
2022-09-13	11:11:53	2.10395	903.095	11
2022-09-13	11:11:54	1.50905	904.605	11
2022-09-13	11:11:55	1.56581	906.17	11
2022-09-13	11:11:56	1.25868	907.429	11
2022-09-13	11:11:57	0.930821	908.36	11
2022-09-13	11:11:58	0.859477	909.219	11
2022-09-13	11:11:59	0.673738	909.893	11
2022-09-13	11:12:00	0.729709	910.623	11
2022-09-13	11:12:01	1.00137	911.624	11
2022-09-13	11:12:02	2.42885	914.053	11
2022-09-13	11:12:03	1.29835	915.351	11
2022-09-13	11:12:04	1.75149	917.103	11
2022-09-13	11:12:05	4.50568	921.609	11
2022-09-13	11:12:06	3.70474	925.313	11
2022-09-13	11:12:07	4.207	929.52	11
2022-09-13	11:12:08	5.00961	934.53	11
2022-09-13	11:12:09	6.3042	940.834	11
2022-09-13	11:12:10	7.1341	947.968	11
2022-09-13	11:12:11	6.2469	954.215	11
2022-09-13	11:12:12	7.27298	961.488	11
2022-09-13	11:12:13	10.0898	971.578	11
2022-09-13	11:12:14	4.43982	976.018	11
2022-09-13	11:12:15	0.696263	976.714	11

## Sheet: Mars_prong_2022913110714 (4)
Date	Time	Lbs	Newtons	Averaged Newtons	Total force x time	total step > 13.345		**GoPro Fitting: 1056
2022-09-13	11:07:15	0.296247	1.31777	1.16185	1.31777	FALSE	0			Total force x time	1875.18
2022-09-13	11:07:15	0.287697	1.27973	1.16185	1.27973	FALSE	0			Total steps	43
2022-09-13	11:07:15	0.239962	1.0674	1.16185	2.38516	FALSE	0
2022-09-13	11:07:15	0.220878	0.98251	1.16185	2.26224	FALSE	0
2022-09-13	11:07:16	0.231718	1.03073	-1.23721	3.41589	FALSE	0
2022-09-13	11:07:16	-0.255203	-1.13519	-1.23721	2.26224	FALSE	0
2022-09-13	11:07:16	-0.810928	-3.60717	-1.23721	3.41589	FALSE	0
2022-09-13	11:07:17	-0.916119	-4.07508	-4.18645	2.26224	FALSE	0
2022-09-13	11:07:17	-0.98136	-4.36529	-4.18645	3.41589	FALSE	0
2022-09-13	11:07:17	-1.05388	-4.68787	-4.18645	2.26224	FALSE	0
2022-09-13	11:07:17	-0.813269	-3.61758	-4.18645	3.41589	FALSE	0
2022-09-13	11:07:18	-0.909809	-4.04701	-0.642611	2.26224	FALSE	0
2022-09-13	11:07:18	-0.60874	-2.7078	-0.642611	3.41589	FALSE	0
2022-09-13	11:07:18	0.0634735	0.282343	-0.642611	2.54459	FALSE	0
2022-09-13	11:07:18	0.877214	3.90202	-0.642611	7.31792	FALSE	0
2022-09-13	11:07:19	1.77813	7.90948	2.2434	10.4541	FALSE	0
2022-09-13	11:07:19	0.949377	4.22302	2.2434	11.5409	FALSE	0
2022-09-13	11:07:19	-0.341361	-1.51844	2.2434	10.4541	FALSE	0
2022-09-13	11:07:19	-0.368791	-1.64046	2.2434	11.5409	FALSE	0
2022-09-13	11:07:20	-0.739579	-3.2898	-1.39575	10.4541	FALSE	0
2022-09-13	11:07:20	-0.636526	-2.83139	-1.39575	11.5409	FALSE	0
2022-09-13	11:07:20	-0.265076	-1.17911	-1.39575	10.4541	FALSE	0
2022-09-13	11:07:20	0.386069	1.71731	-1.39575	13.2582	FALSE	0
2022-09-13	11:07:21	0.195331	0.868871	5.11417	11.3229	FALSE	0
2022-09-13	11:07:21	1.97513	8.78577	5.11417	22.044	FALSE	0
2022-09-13	11:07:21	1.27869	5.68787	5.11417	17.0108	FALSE	0
2022-09-13	11:07:22	1.24653	5.54481	4.68239	27.5888	FALSE	0
2022-09-13	11:07:22	0.453295	2.01635	4.68239	19.0272	FALSE	0
2022-09-13	11:07:22	1.97752	8.7964	4.68239	36.3852	FALSE	0
2022-09-13	11:07:22	0.533244	2.37198	4.68239	21.3991	FALSE	0
2022-09-13	11:07:23	1.28983	5.73742	7.26572	42.1227	FALSE	0
2022-09-13	11:07:23	3.54963	15.7895	7.26572	37.1886	1	1
2022-09-13	11:07:23	1.2223	5.43703	7.26572	47.5597	FALSE	1
2022-09-13	11:07:23	0.47187	2.09897	7.26572	39.2876	FALSE	1
2022-09-13	11:07:24	0.734975	3.26932	4.37706	50.829	FALSE	1
2022-09-13	11:07:24	0.639809	2.846	4.37706	42.1336	FALSE	1
2022-09-13	11:07:24	2.27843	10.1349	4.37706	60.9639	FALSE	1
2022-09-13	11:07:24	0.282812	1.258	4.37706	43.3916	FALSE	1
2022-09-13	11:07:25	0.733651	3.26343	2.83989	64.2274	FALSE	1
2022-09-13	11:07:25	0.228766	1.0176	2.83989	44.4092	FALSE	1
2022-09-13	11:07:25	0.952888	4.23864	2.83989	68.466	FALSE	1
2022-09-13	11:07:26	4.85258	21.5852	13.2956	65.9944	1	2
2022-09-13	11:07:26	4.83172	21.4925	13.2956	89.9584	1	3
2022-09-13	11:07:26	1.61202	7.17059	13.2956	73.165	FALSE	3
2022-09-13	11:07:26	0.659606	2.93406	13.2956	92.8925	FALSE	3
2022-09-13	11:07:27	0.441387	1.96338	1.57809	75.1284	FALSE	3
2022-09-13	11:07:27	0.337061	1.49931	1.57809	94.3918	FALSE	3
2022-09-13	11:07:27	0.321845	1.43163	1.57809	76.56	FALSE	3
2022-09-13	11:07:27	0.318791	1.41805	1.57809	95.8099	FALSE	3
2022-09-13	11:07:28	0.301031	1.33905	1.25059	77.8991	FALSE	3
2022-09-13	11:07:28	0.270598	1.20367	1.25059	97.0135	FALSE	3
2022-09-13	11:07:28	0.279657	1.24397	1.25059	79.143	FALSE	3
2022-09-13	11:07:28	0.273295	1.21567	1.25059	98.2292	FALSE	3
2022-09-13	11:07:29	0.260115	1.15704	-1.62121	80.3001	FALSE	3
2022-09-13	11:07:29	-0.636729	-2.8323	-1.62121	98.2292	FALSE	3
2022-09-13	11:07:29	-0.71678	-3.18838	-1.62121	80.3001	FALSE	3
2022-09-13	11:07:30	-0.699274	-3.11051	-2.91	98.2292	FALSE	3
2022-09-13	11:07:30	-0.669096	-2.97627	-2.91	80.3001	FALSE	3
2022-09-13	11:07:30	-0.640394	-2.8486	-2.91	98.2292	FALSE	3
2022-09-13	11:07:30	-0.608027	-2.70463	-2.91	80.3001	FALSE	3
2022-09-13	11:07:31	-0.659274	-2.93258	-3.08154	98.2292	FALSE	3
2022-09-13	11:07:31	-0.679274	-3.02155	-3.08154	80.3001	FALSE	3
2022-09-13	11:07:31	-0.713931	-3.17571	-3.08154	98.2292	FALSE	3
2022-09-13	11:07:31	-0.718562	-3.19631	-3.08154	80.3001	FALSE	3
2022-09-13	11:07:32	-0.719783	-3.20174	-3.23637	98.2292	FALSE	3
2022-09-13	11:07:32	-0.685279	-3.04826	-3.23637	80.3001	FALSE	3
2022-09-13	11:07:32	-0.738256	-3.28391	-3.23637	98.2292	FALSE	3
2022-09-13	11:07:32	-0.766958	-3.41158	-3.23637	80.3001	FALSE	3
2022-09-13	11:07:33	-0.765839	-3.40661	-3.30662	98.2292	FALSE	3
2022-09-13	11:07:33	-0.738969	-3.28708	-3.30662	80.3001	FALSE	3
2022-09-13	11:07:33	-0.725279	-3.22619	-3.30662	98.2292	FALSE	3
2022-09-13	11:07:34	-0.707875	-3.14877	-2.32698	80.3001	FALSE	3
2022-09-13	11:07:34	-0.71388	-3.17548	-2.32698	98.2292	FALSE	3
2022-09-13	11:07:34	-0.867366	-3.85822	-2.32698	80.3001	FALSE	3
2022-09-13	11:07:34	0.196603	0.874529	-2.32698	99.1037	FALSE	3
2022-09-13	11:07:35	0.33472	1.4889	1.51216	81.789	FALSE	3
2022-09-13	11:07:35	0.337214	1.5	1.51216	100.604	FALSE	3
2022-09-13	11:07:35	0.34098	1.51675	1.51216	83.3057	FALSE	3
2022-09-13	11:07:35	0.346883	1.543	1.51216	102.147	FALSE	3
2022-09-13	11:07:36	0.340013	1.51245	1.5584	84.8182	FALSE	3
2022-09-13	11:07:36	0.34154	1.51924	1.5584	103.666	FALSE	3
2022-09-13	11:07:36	0.345356	1.53621	1.5584	86.3544	FALSE	3
2022-09-13	11:07:36	0.374466	1.6657	1.5584	105.332	FALSE	3
2022-09-13	11:07:37	0.373957	1.66344	1.65863	88.0178	FALSE	3
2022-09-13	11:07:37	0.383881	1.70758	1.65863	107.039	FALSE	3
2022-09-13	11:07:37	0.380115	1.69083	1.65863	89.7086	FALSE	3
2022-09-13	11:07:37	0.35355	1.57266	1.65863	108.612	FALSE	3
2022-09-13	11:07:38	-0.774338	-3.44441	-3.54967	89.7086	FALSE	3
2022-09-13	11:07:38	-0.819783	-3.64656	-3.54967	108.612	FALSE	3
2022-09-13	11:07:38	-0.799885	-3.55805	-3.54967	89.7086	FALSE	3
2022-09-13	11:07:39	-0.635813	-2.82822	1.09366	108.612	FALSE	3
2022-09-13	11:07:39	0.722201	3.21249	1.09366	92.9211	FALSE	3
2022-09-13	11:07:39	0.706832	3.14413	1.09366	111.756	FALSE	3
2022-09-13	11:07:39	0.190242	0.846234	1.09366	93.7674	FALSE	3
2022-09-13	11:07:40	0.363066	1.61499	2.39931	113.371	FALSE	3
2022-09-13	11:07:40	0.548155	2.4383	2.39931	96.2057	FALSE	3
2022-09-13	11:07:40	0.496501	2.20854	2.39931	115.58	FALSE	3
2022-09-13	11:07:40	0.749835	3.33542	2.39931	99.5411	FALSE	3
2022-09-13	11:07:41	0.903423	4.01861	2.50927	119.598	FALSE	3
2022-09-13	11:07:41	0.461183	2.05143	2.50927	101.593	FALSE	3
2022-09-13	11:07:41	0.466018	2.07294	2.50927	121.671	FALSE	3
2022-09-13	11:07:41	0.425814	1.89411	2.50927	103.487	FALSE	3
2022-09-13	11:07:42	0.438283	1.94957	1.85517	123.621	FALSE	3
2022-09-13	11:07:42	0.365204	1.6245	1.85517	105.111	FALSE	3
2022-09-13	11:07:42	0.447697	1.99145	1.85517	125.612	FALSE	3
2022-09-13	11:07:43	0.364033	1.61929	1.53582	106.73	FALSE	3
2022-09-13	11:07:43	0.378028	1.68154	1.53582	127.294	FALSE	3
2022-09-13	11:07:43	0.331107	1.47283	1.53582	108.203	FALSE	3
2022-09-13	11:07:43	0.307901	1.36961	1.53582	128.663	FALSE	3
2022-09-13	11:07:44	0.28785	1.28041	1.21024	109.484	FALSE	3
2022-09-13	11:07:44	0.267341	1.18919	1.21024	129.852	FALSE	3
2022-09-13	11:07:44	0.27299	1.21431	1.21024	110.698	FALSE	3
2022-09-13	11:07:44	0.260115	1.15704	1.21024	131.01	FALSE	3
2022-09-13	11:07:45	0.23701	1.05427	1.08641	111.752	FALSE	3
2022-09-13	11:07:45	0.250445	1.11403	1.08641	132.124	FALSE	3
2022-09-13	11:07:45	0.235076	1.04567	1.08641	112.798	FALSE	3
2022-09-13	11:07:45	0.254415	1.13169	1.08641	133.255	FALSE	3
2022-09-13	11:07:46	0.256298	1.14006	1.15402	113.938	FALSE	3
2022-09-13	11:07:46	0.265865	1.18262	1.15402	134.438	FALSE	3
2022-09-13	11:07:46	0.256145	1.13938	1.15402	115.077	FALSE	3
2022-09-13	11:07:47	0.255229	1.13531	1.09926	135.573	FALSE	3
2022-09-13	11:07:47	0.249377	1.10928	1.09926	116.187	FALSE	3
2022-09-13	11:07:47	0.240115	1.06808	1.09926	136.641	FALSE	3
2022-09-13	11:07:47	0.243779	1.08438	1.09926	117.271	FALSE	3
2022-09-13	11:07:48	0.261336	1.16247	2.41171	137.804	FALSE	3
2022-09-13	11:07:48	0.375992	1.67249	2.41171	118.944	FALSE	3
2022-09-13	11:07:48	0.743931	3.30915	2.41171	141.113	FALSE	3
2022-09-13	11:07:48	0.787443	3.5027	2.41171	122.446	FALSE	3
2022-09-13	11:07:49	0.757977	3.37163	4.1753	144.485	FALSE	3
2022-09-13	11:07:49	0.816349	3.63128	4.1753	126.077	FALSE	3
2022-09-13	11:07:49	0.880115	3.91493	4.1753	148.399	FALSE	3
2022-09-13	11:07:49	1.30016	5.78337	4.1753	131.861	FALSE	3
2022-09-13	11:07:50	-0.218155	-0.970397	-1.44208	148.399	FALSE	3
2022-09-13	11:07:50	-0.471895	-2.09908	-1.44208	131.861	FALSE	3
2022-09-13	11:07:50	-0.282531	-1.25675	-1.44208	148.399	FALSE	3
2022-09-13	11:07:51	0.188715	0.839442	1.45331	132.7	FALSE	3
2022-09-13	11:07:51	0.817265	3.63536	1.45331	152.035	FALSE	3
2022-09-13	11:07:51	0.1707	0.759308	1.45331	133.46	FALSE	3
2022-09-13	11:07:51	0.130191	0.579116	1.45331	152.614	FALSE	3
2022-09-13	11:07:52	0.33813	1.50407	2.34125	134.964	FALSE	3
2022-09-13	11:07:52	0.529631	2.3559	2.34125	154.97	FALSE	3
2022-09-13	11:07:52	0.688664	3.06332	2.34125	138.027	FALSE	3
2022-09-13	11:07:52	0.548919	2.4417	2.34125	157.412	FALSE	3
2022-09-13	11:07:53	0.702099	3.12308	2.91555	141.15	FALSE	3
2022-09-13	11:07:53	0.584695	2.60084	2.91555	160.012	FALSE	3
2022-09-13	11:07:53	0.699605	3.11198	2.91555	144.262	FALSE	3
2022-09-13	11:07:53	0.635382	2.82631	2.91555	162.839	FALSE	3
2022-09-13	11:07:54	0.626934	2.78873	2.5739	147.051	FALSE	3
2022-09-13	11:07:54	0.504644	2.24476	2.5739	165.083	FALSE	3
2022-09-13	11:07:54	0.567036	2.52229	2.5739	149.573	FALSE	3
2022-09-13	11:07:54	0.615942	2.73983	2.5739	167.823	FALSE	3
2022-09-13	11:07:55	0.89813	3.99506	5.93468	153.568	FALSE	3
2022-09-13	11:07:55	1.60164	7.12442	5.93468	174.948	FALSE	3
2022-09-13	11:07:55	1.50276	6.68458	5.93468	160.253	FALSE	3
2022-09-13	11:07:56	1.18729	5.2813	4.87928	180.229	FALSE	3
2022-09-13	11:07:56	1.11732	4.97006	4.87928	165.223	FALSE	3
2022-09-13	11:07:56	1.10821	4.92954	4.87928	185.159	FALSE	3
2022-09-13	11:07:56	0.974822	4.3362	4.87928	169.559	FALSE	3
2022-09-13	11:07:57	0.867697	3.85969	3.44605	189.018	FALSE	3
2022-09-13	11:07:57	0.751667	3.34357	3.44605	172.903	FALSE	3
2022-09-13	11:07:57	0.744236	3.31051	3.44605	192.329	FALSE	3
2022-09-13	11:07:57	0.735229	3.27045	3.44605	176.173	FALSE	3
2022-09-13	11:07:58	0.909377	4.04509	4.16745	196.374	FALSE	3
2022-09-13	11:07:58	1.00139	4.45438	4.16745	180.627	FALSE	3
2022-09-13	11:07:58	0.920166	4.09308	4.16745	200.467	FALSE	3
2022-09-13	11:07:58	0.916603	4.07723	4.16745	184.705	FALSE	3
2022-09-13	11:07:59	0.886832	3.94481	3.85305	204.412	FALSE	3
2022-09-13	11:07:59	0.870242	3.87101	3.85305	188.576	FALSE	3
2022-09-13	11:07:59	0.84154	3.74334	3.85305	208.155	FALSE	3
2022-09-13	11:08:00	0.778588	3.46332	3.39518	192.039	FALSE	3
2022-09-13	11:08:00	0.74271	3.30372	3.39518	211.459	FALSE	3
2022-09-13	11:08:00	0.744694	3.31255	3.39518	195.351	FALSE	3
2022-09-13	11:08:00	0.787086	3.50112	3.39518	214.96	FALSE	3
2022-09-13	11:08:01	0.796858	3.54458	3.40927	198.896	FALSE	3
2022-09-13	11:08:01	0.728919	3.24238	3.40927	218.202	FALSE	3
2022-09-13	11:08:01	0.753651	3.35239	3.40927	202.248	FALSE	3
2022-09-13	11:08:01	0.786323	3.49772	3.40927	221.7	FALSE	3
2022-09-13	11:08:02	0.786069	3.49659	3.57605	205.745	FALSE	3
2022-09-13	11:08:02	0.792684	3.52602	3.57605	225.226	FALSE	3
2022-09-13	11:08:02	0.791311	3.51991	3.57605	209.265	FALSE	3
2022-09-13	11:08:02	0.845661	3.76167	3.57605	228.988	FALSE	3
2022-09-13	11:08:03	0.91925	4.08901	3.9842	213.354	FALSE	3
2022-09-13	11:08:03	0.927748	4.12681	3.9842	233.114	FALSE	3
2022-09-13	11:08:03	0.840064	3.73677	3.9842	217.091	FALSE	3
2022-09-13	11:08:04	0.802252	3.56858	4.61788	236.683	FALSE	3
2022-09-13	11:08:04	1.11625	4.9653	4.61788	222.056	FALSE	3
2022-09-13	11:08:04	1.06475	4.73622	4.61788	241.419	FALSE	3
2022-09-13	11:08:04	1.16933	5.20141	4.61788	227.257	FALSE	3
2022-09-13	11:08:05	1.19162	5.30056	4.66891	246.72	FALSE	3
2022-09-13	11:08:05	1.07955	4.80205	4.66891	232.06	FALSE	3
2022-09-13	11:08:05	1.02327	4.55171	4.66891	251.272	FALSE	3
2022-09-13	11:08:05	0.904033	4.02132	4.66891	236.081	FALSE	3
2022-09-13	11:08:06	1.2166	5.41168	5.4066	256.683	FALSE	3
2022-09-13	11:08:06	1.30327	5.79721	5.4066	241.878	FALSE	3
2022-09-13	11:08:06	1.33518	5.93915	5.4066	262.622	FALSE	3
2022-09-13	11:08:06	1.00678	4.47836	5.4066	246.356	FALSE	3
2022-09-13	11:08:07	1.04927	4.66736	4.78917	267.29	FALSE	3
2022-09-13	11:08:07	1.07986	4.80343	4.78917	251.16	FALSE	3
2022-09-13	11:08:07	1.10083	4.89671	4.78917	272.186	FALSE	3
2022-09-13	11:08:08	1.12312	4.99586	5.63128	256.156	FALSE	3
2022-09-13	11:08:08	1.29075	5.74151	5.63128	277.928	FALSE	3
2022-09-13	11:08:08	1.36088	6.05347	5.63128	262.209	FALSE	3
2022-09-13	11:08:08	1.28912	5.73426	5.63128	283.662	FALSE	3
2022-09-13	11:08:09	1.23106	5.476	5.58617	267.685	FALSE	3
2022-09-13	11:08:09	1.21696	5.41328	5.58617	289.075	FALSE	3
2022-09-13	11:08:09	1.24607	5.54277	5.58617	273.228	FALSE	3
2022-09-13	11:08:09	1.32922	5.91264	5.58617	294.988	FALSE	3
2022-09-13	11:08:10	1.40266	6.23931	6.43914	279.467	FALSE	3
2022-09-13	11:08:10	1.43772	6.39527	6.43914	301.383	FALSE	3
2022-09-13	11:08:10	1.50536	6.69614	6.43914	286.163	FALSE	3
2022-09-13	11:08:10	1.44459	6.42583	6.43914	307.809	FALSE	3
2022-09-13	11:08:11	1.18261	5.26049	5.02041	291.424	FALSE	3
2022-09-13	11:08:11	1.04927	4.66736	5.02041	312.477	FALSE	3
2022-09-13	11:08:11	1.12235	4.99244	5.02041	296.416	FALSE	3
2022-09-13	11:08:11	1.16032	5.16134	5.02041	317.638	FALSE	3
2022-09-13	11:08:12	1.13238	5.03705	4.71273	301.453	FALSE	3
2022-09-13	11:08:12	1.06118	4.72034	4.71273	322.358	FALSE	3
2022-09-13	11:08:12	0.984847	4.3808	4.71273	305.834	FALSE	3
2022-09-13	11:08:13	0.540929	2.40616	1.63593	324.764	FALSE	3
2022-09-13	11:08:13	0.318486	1.41669	1.63593	307.251	FALSE	3
2022-09-13	11:08:13	0.298893	1.32954	1.63593	326.094	FALSE	3
2022-09-13	11:08:13	0.312786	1.39133	1.63593	308.642	FALSE	3
2022-09-13	11:08:14	0.286781	1.27566	1.40571	327.37	FALSE	3
2022-09-13	11:08:14	0.377265	1.67815	1.40571	310.32	FALSE	3
2022-09-13	11:08:14	0.28785	1.28041	1.40571	328.65	FALSE	3
2022-09-13	11:08:14	0.312176	1.38862	1.40571	311.709	FALSE	3
2022-09-13	11:08:15	0.406883	1.8099	1.48958	330.46	FALSE	3
2022-09-13	11:08:15	0.285509	1.27	1.48958	312.979	FALSE	3
2022-09-13	11:08:15	0.509886	2.26807	1.48958	332.728	FALSE	3
2022-09-13	11:08:15	0.137214	0.610355	1.48958	313.589	FALSE	3
2022-09-13	11:08:16	0.244898	1.08936	2.92395	333.817	FALSE	3
2022-09-13	11:08:16	0.883473	3.92986	2.92395	317.519	FALSE	3
2022-09-13	11:08:16	0.843626	3.75262	2.92395	337.57	FALSE	3
2022-09-13	11:08:17	1.00592	4.47453	8.59939	321.994	FALSE	3
2022-09-13	11:08:17	1.53716	6.8376	8.59939	344.408	FALSE	3
2022-09-13	11:08:17	2.4024	10.6864	8.59939	332.68	FALSE	3
2022-09-13	11:08:17	2.78744	12.3991	8.59939	356.807	FALSE	3
2022-09-13	11:08:18	1.34327	5.97513	5.10547	338.655	FALSE	3
2022-09-13	11:08:18	2.2909	10.1904	5.10547	366.997	FALSE	3
2022-09-13	11:08:18	0.58271	2.59201	5.10547	341.247	FALSE	3
2022-09-13	11:08:18	0.37416	1.66434	5.10547	368.661	FALSE	3
2022-09-13	11:08:19	0.786679	3.49931	7.22776	344.747	FALSE	3
2022-09-13	11:08:19	1.43258	6.3724	7.22776	375.034	FALSE	3
2022-09-13	11:08:19	1.86505	8.29612	7.22776	353.043	FALSE	3
2022-09-13	11:08:19	2.41518	10.7432	7.22776	385.777	FALSE	3
2022-09-13	11:08:20	2.16144	9.61452	8.70056	362.657	FALSE	3
2022-09-13	11:08:20	2.31894	10.3151	8.70056	396.092	FALSE	3
2022-09-13	11:08:20	1.38754	6.17206	8.70056	368.829	FALSE	3
2022-09-13	11:08:21	1.33762	5.95	5.8281	402.042	FALSE	3
2022-09-13	11:08:21	1.45192	6.45843	5.8281	375.288	FALSE	3
2022-09-13	11:08:21	0.841081	3.7413	5.8281	405.783	FALSE	3
2022-09-13	11:08:21	1.61024	7.16267	5.8281	382.45	FALSE	3
2022-09-13	11:08:22	2.13044	9.47662	16.654	415.26	FALSE	3
2022-09-13	11:08:22	4.05202	18.0242	16.654	400.474	1	4
2022-09-13	11:08:22	3.31223	14.7335	16.654	429.993	1	5
2022-09-13	11:08:22	5.48128	24.3818	16.654	424.856	1	6
2022-09-13	11:08:23	4.02149	17.8884	27.4536	447.882	1	7
2022-09-13	11:08:23	7.0711	31.4537	27.4536	456.31	1	8
2022-09-13	11:08:23	7.15772	31.839	27.4536	479.721	1	9
2022-09-13	11:08:23	6.43706	28.6333	27.4536	484.943	1	10
2022-09-13	11:08:24	6.23049	27.7145	21.0024	507.435	1	11
2022-09-13	11:08:24	5.77986	25.71	21.0024	510.653	1	12
2022-09-13	11:08:24	2.15431	9.5828	21.0024	517.018	FALSE	12
2022-09-13	11:08:25	1.7849	7.93959	14.1251	518.593	FALSE	12
2022-09-13	11:08:25	1.38424	6.15738	14.1251	523.175	FALSE	12
2022-09-13	11:08:25	4.0934	18.2083	14.1251	536.801	1	13
2022-09-13	11:08:25	5.4393	24.1951	14.1251	547.371	1	14
2022-09-13	11:08:26	2.92943	13.0307	5.85425	549.832	FALSE	14
2022-09-13	11:08:26	1.52144	6.76767	5.85425	554.138	FALSE	14
2022-09-13	11:08:26	0.35131	1.5627	5.85425	551.395	FALSE	14
2022-09-13	11:08:26	0.462201	2.05596	5.85425	556.194	FALSE	14
2022-09-13	11:08:27	1.81472	8.07224	15.1161	559.467	FALSE	14
2022-09-13	11:08:27	8.26708	36.7736	15.1161	592.968	1	15
2022-09-13	11:08:27	0.21126	0.939727	15.1161	560.406	FALSE	15
2022-09-13	11:08:27	3.29991	14.6787	15.1161	607.646	1	16
2022-09-13	11:08:28	3.65538	16.2599	9.214	576.666	1	17
2022-09-13	11:08:28	3.87986	17.2584	9.214	624.905	1	18
2022-09-13	11:08:28	0.465967	2.07271	9.214	578.739	FALSE	18
2022-09-13	11:08:28	0.284389	1.26502	9.214	626.17	FALSE	18
2022-09-13	11:08:29	0.370649	1.64872	1.79111	580.388	FALSE	18
2022-09-13	11:08:29	0.380725	1.69354	1.79111	627.863	FALSE	18
2022-09-13	11:08:29	0.456603	2.03106	1.79111	582.419	FALSE	18
2022-09-13	11:08:30	0.473143	2.10463	2.38579	629.968	FALSE	18
2022-09-13	11:08:30	0.503117	2.23797	2.38579	584.657	FALSE	18
2022-09-13	11:08:30	0.662303	2.94606	2.38579	632.914	FALSE	18
2022-09-13	11:08:30	0.506832	2.25449	2.38579	586.911	FALSE	18
2022-09-13	11:08:31	0.547799	2.43672	2.64323	635.351	FALSE	18
2022-09-13	11:08:31	0.590903	2.62845	2.64323	589.54	FALSE	18
2022-09-13	11:08:31	0.628359	2.79507	2.64323	638.146	FALSE	18
2022-09-13	11:08:31	0.609835	2.71267	2.64323	592.252	FALSE	18
2022-09-13	11:08:32	0.64042	2.84872	2.78352	640.995	FALSE	18
2022-09-13	11:08:32	0.633957	2.81997	2.78352	595.072	FALSE	18
2022-09-13	11:08:32	0.614923	2.7353	2.78352	643.73	FALSE	18
2022-09-13	11:08:32	0.613753	2.7301	2.78352	597.802	FALSE	18
2022-09-13	11:08:33	0.57813	2.57164	1.99582	646.302	FALSE	18
2022-09-13	11:08:33	0.402303	1.78952	1.99582	599.592	FALSE	18
2022-09-13	11:08:33	0.365611	1.62631	1.99582	647.928	FALSE	18
2022-09-13	11:08:34	0.366527	1.63039	1.67583	601.222	FALSE	18
2022-09-13	11:08:34	0.370394	1.64759	1.67583	649.575	FALSE	18
2022-09-13	11:08:34	0.386374	1.71867	1.67583	602.941	FALSE	18
2022-09-13	11:08:34	0.383677	1.70667	1.67583	651.282	FALSE	18
2022-09-13	11:08:35	0.377875	1.68086	1.72869	604.622	FALSE	18
2022-09-13	11:08:35	0.379402	1.68766	1.72869	652.97	FALSE	18
2022-09-13	11:08:35	0.386069	1.71731	1.72869	606.339	FALSE	18
2022-09-13	11:08:35	0.411158	1.82891	1.72869	654.799	FALSE	18
2022-09-13	11:08:36	0.439962	1.95704	2.25364	608.296	FALSE	18
2022-09-13	11:08:36	0.513601	2.2846	2.25364	657.083	FALSE	18
2022-09-13	11:08:36	0.549784	2.44555	2.25364	610.742	FALSE	18
2022-09-13	11:08:36	0.523219	2.32738	2.25364	659.411	FALSE	18
2022-09-13	11:08:37	0.521081	2.31787	2.31214	613.06	FALSE	18
2022-09-13	11:08:37	0.541692	2.40955	2.31214	661.82	FALSE	18
2022-09-13	11:08:37	0.496603	2.20899	2.31214	615.269	FALSE	18
2022-09-13	11:08:38	0.534008	2.37537	2.35698	664.196	FALSE	18
2022-09-13	11:08:38	0.520267	2.31425	2.35698	617.583	FALSE	18
2022-09-13	11:08:38	0.538486	2.39529	2.35698	666.591	FALSE	18
2022-09-13	11:08:38	0.52673	2.343	2.35698	619.926	FALSE	18
2022-09-13	11:08:39	0.518079	2.30452	2.34894	668.895	FALSE	18
2022-09-13	11:08:39	0.538333	2.39461	2.34894	622.321	FALSE	18
2022-09-13	11:08:39	0.51757	2.30225	2.34894	671.198	FALSE	18
2022-09-13	11:08:39	0.538282	2.39439	2.34894	624.715	FALSE	18
2022-09-13	11:08:40	0.538588	2.39575	2.06496	673.593	FALSE	18
2022-09-13	11:08:40	0.522506	2.32421	2.06496	627.039	FALSE	18
2022-09-13	11:08:40	0.421234	1.87373	2.06496	675.467	FALSE	18
2022-09-13	11:08:40	0.374568	1.66615	2.06496	628.705	FALSE	18
2022-09-13	11:08:41	0.37472	1.66683	1.61258	677.134	FALSE	18
2022-09-13	11:08:41	0.372379	1.65642	1.61258	630.362	FALSE	18
2022-09-13	11:08:41	0.340471	1.51448	1.61258	678.648	FALSE	18
2022-09-13	11:08:42	0.32215	1.43299	1.65359	631.795	FALSE	18
2022-09-13	11:08:42	0.370598	1.64849	1.65359	680.297	FALSE	18
2022-09-13	11:08:42	0.334618	1.48845	1.65359	633.283	FALSE	18
2022-09-13	11:08:42	0.459606	2.04442	1.65359	682.341	FALSE	18
2022-09-13	11:08:43	0.725204	3.22585	0.500962	636.509	FALSE	18
2022-09-13	11:08:43	-0.132099	-0.587603	0.500962	682.341	FALSE	18
2022-09-13	11:08:43	-0.0706231	-0.314146	0.500962	636.509	FALSE	18
2022-09-13	11:08:43	-0.0719972	-0.320258	0.500962	682.341	FALSE	18
2022-09-13	11:08:44	-0.0531168	-0.236274	0.0347487	636.509	FALSE	18
2022-09-13	11:08:44	-0.0326588	-0.145273	0.0347487	682.341	FALSE	18
2022-09-13	11:08:44	-0.020445	-0.0909434	0.0347487	636.509	FALSE	18
2022-09-13	11:08:44	0.137468	0.611485	0.0347487	682.953	FALSE	18
2022-09-13	11:08:45	0.136858	0.608772	1.46287	637.118	FALSE	18
2022-09-13	11:08:45	0.568918	2.53066	1.46287	685.484	FALSE	18
2022-09-13	11:08:45	0.528766	2.35206	1.46287	639.47	FALSE	18
2022-09-13	11:08:45	0.080929	0.359988	1.46287	685.844	FALSE	18
2022-09-13	11:08:46	0.260929	1.16066	0.783831	640.631	FALSE	18
2022-09-13	11:08:46	0.166374	0.740065	0.783831	686.584	FALSE	18
2022-09-13	11:08:46	0.101336	0.450763	0.783831	641.081	FALSE	18
2022-09-13	11:08:47	-0.0730659	-0.325012	-0.468984	686.584	FALSE	18
2022-09-13	11:08:47	-0.207773	-0.924216	-0.468984	641.081	FALSE	18
2022-09-13	11:08:47	-0.138257	-0.614995	-0.468984	686.584	FALSE	18
2022-09-13	11:08:47	-0.00263335	-0.0117137	-0.468984	641.081	FALSE	18
2022-09-13	11:08:48	-0.00131018	-0.00582794	0.478437	686.584	FALSE	18
2022-09-13	11:08:48	0.0247967	0.110301	0.478437	641.192	FALSE	18
2022-09-13	11:08:48	0.142761	0.635029	0.478437	687.219	FALSE	18
2022-09-13	11:08:48	0.263982	1.17424	0.478437	642.366	FALSE	18
2022-09-13	11:08:49	0.361234	1.60684	1.55993	688.825	FALSE	18
2022-09-13	11:08:49	0.369682	1.64442	1.55993	644.01	FALSE	18
2022-09-13	11:08:49	0.331311	1.47374	1.55993	690.299	FALSE	18
2022-09-13	11:08:49	0.340522	1.51471	1.55993	645.525	FALSE	18
2022-09-13	11:08:50	0.343779	1.5292	1.5215	691.828	FALSE	18
2022-09-13	11:08:50	0.343473	1.52784	1.5215	647.053	FALSE	18
2022-09-13	11:08:50	0.338893	1.50746	1.5215	693.336	FALSE	18
2022-09-13	11:08:51	0.344644	1.53305	1.71035	648.586	FALSE	18
2022-09-13	11:08:51	0.342964	1.52557	1.71035	694.861	FALSE	18
2022-09-13	11:08:51	0.322099	1.43276	1.71035	650.019	FALSE	18
2022-09-13	11:08:51	0.528308	2.35002	1.71035	697.211	FALSE	18
2022-09-13	11:08:52	0.74042	3.29354	3.25092	653.312	FALSE	18
2022-09-13	11:08:52	0.739046	3.28742	3.25092	700.499	FALSE	18
2022-09-13	11:08:52	0.73187	3.2555	3.25092	656.568	FALSE	18
2022-09-13	11:08:52	0.712023	3.16722	3.25092	703.666	FALSE	18
2022-09-13	11:08:53	0.476756	2.12071	1.78715	658.688	FALSE	18
2022-09-13	11:08:53	0.363473	1.6168	1.78715	705.283	FALSE	18
2022-09-13	11:08:53	0.217621	0.968022	1.78715	659.656	FALSE	18
2022-09-13	11:08:53	0.549224	2.44306	1.78715	707.726	FALSE	18
2022-09-13	11:08:54	0.361082	1.60616	1.21039	661.263	FALSE	18
2022-09-13	11:08:54	0.252328	1.12241	1.21039	708.848	FALSE	18
2022-09-13	11:08:54	0.202914	0.902602	1.21039	662.165	FALSE	18
2022-09-13	11:08:55	0.388562	1.7284	1.83123	710.577	FALSE	18
2022-09-13	11:08:55	0.410344	1.82529	1.83123	663.99	FALSE	18
2022-09-13	11:08:55	0.428003	1.90384	1.83123	712.481	FALSE	18
2022-09-13	11:08:55	0.419809	1.86739	1.83123	665.858	FALSE	18
2022-09-13	11:08:56	0.418435	1.86128	0.874983	714.342	FALSE	18
2022-09-13	11:08:56	0.260369	1.15817	0.874983	667.016	FALSE	18
2022-09-13	11:08:56	0.0578756	0.257442	0.874983	714.599	FALSE	18
2022-09-13	11:08:56	0.0501401	0.223033	0.874983	667.239	FALSE	18
2022-09-13	11:08:57	0.108003	0.480419	0.573514	715.08	FALSE	18
2022-09-13	11:08:57	0.0940079	0.418166	0.573514	667.657	FALSE	18
2022-09-13	11:08:57	0.131209	0.583644	0.573514	715.663	FALSE	18
2022-09-13	11:08:57	0.182507	0.811828	0.573514	668.469	FALSE	18
2022-09-13	11:08:58	0.167596	0.745501	0.885247	716.409	FALSE	18
2022-09-13	11:08:58	0.259555	1.15455	0.885247	669.624	FALSE	18
2022-09-13	11:08:58	0.169886	0.755687	0.885247	717.165	FALSE	18
2022-09-13	11:08:59	0.142812	0.635256	1.12592	670.259	FALSE	18
2022-09-13	11:08:59	0.169733	0.755006	1.12592	717.92	FALSE	18
2022-09-13	11:08:59	0.299809	1.33361	1.12592	671.592	FALSE	18
2022-09-13	11:08:59	0.400115	1.77979	1.12592	719.699	FALSE	18
2022-09-13	11:09:00	0.684084	3.04294	2.31244	674.635	FALSE	18
2022-09-13	11:09:00	0.407494	1.81261	2.31244	721.512	FALSE	18
2022-09-13	11:09:00	0.601234	2.67441	2.31244	677.31	FALSE	18
2022-09-13	11:09:00	0.386629	1.7198	2.31244	723.232	FALSE	18
2022-09-13	11:09:01	0.580725	2.58318	2.41029	679.893	FALSE	18
2022-09-13	11:09:01	0.44327	1.97175	2.41029	725.204	FALSE	18
2022-09-13	11:09:01	0.56042	2.49286	2.41029	682.386	FALSE	18
2022-09-13	11:09:01	0.583015	2.59337	2.41029	727.797	FALSE	18
2022-09-13	11:09:02	0.582863	2.59269	2.5971	684.979	FALSE	18
2022-09-13	11:09:02	0.521743	2.32082	2.5971	730.118	FALSE	18
2022-09-13	11:09:02	0.613499	2.72897	2.5971	687.707	FALSE	18
2022-09-13	11:09:02	0.617316	2.74595	2.5971	732.864	FALSE	18
2022-09-13	11:09:03	0.583626	2.59609	2.66339	690.304	FALSE	18
2022-09-13	11:09:03	0.546272	2.42993	2.66339	735.294	FALSE	18
2022-09-13	11:09:03	0.666374	2.96416	2.66339	693.268	FALSE	18
2022-09-13	11:09:04	0.610445	2.71538	2.79699	738.009	FALSE	18
2022-09-13	11:09:04	0.670751	2.98363	2.79699	696.251	FALSE	18
2022-09-13	11:09:04	0.518435	2.3061	2.79699	740.315	FALSE	18
2022-09-13	11:09:04	0.715534	3.18284	2.79699	699.434	FALSE	18
2022-09-13	11:09:05	0.716807	3.1885	3.18618	743.504	FALSE	18
2022-09-13	11:09:05	0.701489	3.12036	3.18618	702.555	FALSE	18
2022-09-13	11:09:05	0.737926	3.28244	3.18618	746.786	FALSE	18
2022-09-13	11:09:05	0.708918	3.15341	3.18618	705.708	FALSE	18
2022-09-13	11:09:06	0.722812	3.21521	3.17899	750.001	FALSE	18
2022-09-13	11:09:06	0.709784	3.15726	3.17899	708.865	FALSE	18
2022-09-13	11:09:06	0.70327	3.12829	3.17899	753.13	FALSE	18
2022-09-13	11:09:06	0.722812	3.21521	3.17899	712.08	FALSE	18
2022-09-13	11:09:07	0.667443	2.96892	3.00544	756.098	FALSE	18
2022-09-13	11:09:07	0.68958	3.06739	3.00544	715.148	FALSE	18
2022-09-13	11:09:07	0.669936	2.98001	3.00544	759.078	FALSE	18
2022-09-13	11:09:08	0.685763	3.05041	3.05947	718.198	FALSE	18
2022-09-13	11:09:08	0.694109	3.08754	3.05947	762.166	FALSE	18
2022-09-13	11:09:08	0.686679	3.05449	3.05947	721.253	FALSE	18
2022-09-13	11:09:08	0.684644	3.04543	3.05947	765.211	FALSE	18
2022-09-13	11:09:09	0.650344	2.89286	2.96411	724.146	FALSE	18
2022-09-13	11:09:09	0.679249	3.02144	2.96411	768.233	FALSE	18
2022-09-13	11:09:09	0.652939	2.9044	2.96411	727.05	FALSE	18
2022-09-13	11:09:09	0.682914	3.03774	2.96411	771.271	FALSE	18
2022-09-13	11:09:10	0.672379	2.99088	3.00231	730.041	FALSE	18
2022-09-13	11:09:10	0.682863	3.03751	3.00231	774.308	FALSE	18
2022-09-13	11:09:10	0.684593	3.04521	3.00231	733.086	FALSE	18
2022-09-13	11:09:10	0.659962	2.93564	3.00231	777.244	FALSE	18
2022-09-13	11:09:11	0.672023	2.98929	2.23223	736.075	FALSE	18
2022-09-13	11:09:11	0.731158	3.25234	2.23223	780.496	FALSE	18
2022-09-13	11:09:11	0.102303	0.455064	2.23223	736.53	FALSE	18
2022-09-13	11:09:12	0.728715	3.24147	2.48579	783.738	FALSE	18
2022-09-13	11:09:12	0.585712	2.60536	2.48579	739.136	FALSE	18
2022-09-13	11:09:12	0.234568	1.04341	2.48579	784.781	FALSE	18
2022-09-13	11:09:12	0.686323	3.0529	2.48579	742.189	FALSE	18
2022-09-13	11:09:13	0.193041	0.858685	1.45116	785.64	FALSE	18
2022-09-13	11:09:13	0.306832	1.36485	1.45116	743.554	FALSE	18
2022-09-13	11:09:13	0.357977	1.59235	1.45116	787.232	FALSE	18
2022-09-13	11:09:13	0.447087	1.98873	1.45116	745.542	FALSE	18
2022-09-13	11:09:14	0.334618	1.48845	1.71188	788.72	FALSE	18
2022-09-13	11:09:14	0.397468	1.76802	1.71188	747.31	FALSE	18
2022-09-13	11:09:14	0.413397	1.83887	1.71188	790.559	FALSE	18
2022-09-13	11:09:14	0.393906	1.75217	1.71188	749.062	FALSE	18
2022-09-13	11:09:15	0.360064	1.60164	2.42691	792.161	FALSE	18
2022-09-13	11:09:15	0.540522	2.40435	2.42691	751.467	FALSE	18
2022-09-13	11:09:15	0.736196	3.27475	2.42691	795.436	FALSE	18
2022-09-13	11:09:16	0.295585	1.31482	1.19122	752.782	FALSE	18
2022-09-13	11:09:16	0.214517	0.954215	1.19122	796.39	FALSE	18
2022-09-13	11:09:16	0.242761	1.07985	1.19122	753.861	FALSE	18
2022-09-13	11:09:16	0.318334	1.41601	1.19122	797.806	FALSE	18
2022-09-13	11:09:17	0.342914	1.52535	1.40062	755.387	FALSE	18
2022-09-13	11:09:17	0.277621	1.23491	1.40062	799.041	FALSE	18
2022-09-13	11:09:17	0.301794	1.34244	1.40062	756.729	FALSE	18
2022-09-13	11:09:17	0.337163	1.49977	1.40062	800.541	FALSE	18
2022-09-13	11:09:18	0.325356	1.44725	1.14884	758.177	FALSE	18
2022-09-13	11:09:18	0.304746	1.35557	1.14884	801.896	FALSE	18
2022-09-13	11:09:18	0.202303	0.899884	1.14884	759.076	FALSE	18
2022-09-13	11:09:18	0.200674	0.892638	1.14884	802.789	FALSE	18
2022-09-13	11:09:19	0.23472	1.04408	0.992865	760.121	FALSE	18
2022-09-13	11:09:19	0.260165	1.15727	0.992865	803.946	FALSE	18
2022-09-13	11:09:19	0.164186	0.730332	0.992865	760.851	FALSE	18
2022-09-13	11:09:19	0.233753	1.03978	0.992865	804.986	FALSE	18
2022-09-13	11:09:20	0.137265	0.610582	0.558517	761.461	FALSE	18
2022-09-13	11:09:20	0.193143	0.859139	0.558517	805.845	FALSE	18
2022-09-13	11:09:20	0.0462725	0.205829	0.558517	761.667	FALSE	18
2022-09-13	11:09:21	0.114161	0.507811	0.928125	806.353	FALSE	18
2022-09-13	11:09:21	0.168868	0.751159	0.928125	762.418	FALSE	18
2022-09-13	11:09:21	0.187087	0.8322	0.928125	807.185	FALSE	18
2022-09-13	11:09:21	0.364491	1.62133	0.928125	764.04	FALSE	18
2022-09-13	11:09:22	0.311005	1.38341	1.2434	808.568	FALSE	18
2022-09-13	11:09:22	0.242405	1.07827	1.2434	765.118	FALSE	18
2022-09-13	11:09:22	0.249784	1.11109	1.2434	809.68	FALSE	18
2022-09-13	11:09:22	0.314924	1.40084	1.2434	766.519	FALSE	18
2022-09-13	11:09:23	0.246629	1.09706	1.07781	810.777	FALSE	18
2022-09-13	11:09:23	0.248155	1.10384	1.07781	767.623	FALSE	18
2022-09-13	11:09:23	0.235331	1.0468	1.07781	811.823	FALSE	18
2022-09-13	11:09:23	0.239097	1.06355	1.07781	768.686	FALSE	18
2022-09-13	11:09:24	0.230344	1.02462	1.11909	812.848	FALSE	18
2022-09-13	11:09:24	0.251107	1.11697	1.11909	769.803	FALSE	18
2022-09-13	11:09:24	0.273295	1.21567	1.11909	814.064	FALSE	18
2022-09-13	11:09:25	0.183728	0.817259	0.688624	770.62	FALSE	18
2022-09-13	11:09:25	0.158741	0.706112	0.688624	814.77	FALSE	18
2022-09-13	11:09:25	0.100522	0.447142	0.688624	771.068	FALSE	18
2022-09-13	11:09:25	0.176247	0.783982	0.688624	815.554	FALSE	18
2022-09-13	11:09:26	0.280013	1.24555	1.06021	772.313	FALSE	18
2022-09-13	11:09:26	0.142557	0.634122	1.06021	816.188	FALSE	18
2022-09-13	11:09:26	0.350649	1.55976	1.06021	773.873	FALSE	18
2022-09-13	11:09:26	0.180166	0.801414	1.06021	816.989	FALSE	18
2022-09-13	11:09:27	0.255433	1.13622	1.39553	775.009	FALSE	18
2022-09-13	11:09:27	0.181489	0.807299	1.39553	817.797	FALSE	18
2022-09-13	11:09:27	0.400624	1.78206	1.39553	776.791	FALSE	18
2022-09-13	11:09:27	0.417367	1.85653	1.39553	819.653	FALSE	18
2022-09-13	11:09:28	0.360573	1.6039	1.45517	778.395	FALSE	18
2022-09-13	11:09:28	0.348817	1.55161	1.45517	821.205	FALSE	18
2022-09-13	11:09:28	0.272023	1.21001	1.45517	779.605	FALSE	18
2022-09-13	11:09:29	0.309784	1.37798	1.40503	822.583	FALSE	18
2022-09-13	11:09:29	0.3707	1.64895	1.40503	781.254	FALSE	18
2022-09-13	11:09:29	0.306934	1.3653	1.40503	823.948	FALSE	18
2022-09-13	11:09:29	0.276043	1.22789	1.40503	782.482	FALSE	18
2022-09-13	11:09:30	0.194618	0.8657	1.07968	824.814	FALSE	18
2022-09-13	11:09:30	0.227443	1.01171	1.07968	783.494	FALSE	18
2022-09-13	11:09:30	0.255585	1.13689	1.07968	825.951	FALSE	18
2022-09-13	11:09:30	0.293244	1.30441	1.07968	784.798	FALSE	18
2022-09-13	11:09:31	0.615077	2.73599	3.1718	828.687	FALSE	18
2022-09-13	11:09:31	0.444237	1.97606	3.1718	786.774	FALSE	18
2022-09-13	11:09:31	0.49472	2.20061	3.1718	830.887	FALSE	18
2022-09-13	11:09:31	1.29818	5.77456	3.1718	792.549	FALSE	18
2022-09-13	11:09:32	1.76205	7.83795	6.4893	838.725	FALSE	18
2022-09-13	11:09:32	1.54826	6.88697	6.4893	799.436	FALSE	18
2022-09-13	11:09:32	1.06627	4.74298	6.4893	843.468	FALSE	18
2022-09-13	11:09:33	0.866425	3.85403	3.48431	803.29	FALSE	18
2022-09-13	11:09:33	0.945814	4.20717	3.48431	847.675	FALSE	18
2022-09-13	11:09:33	0.573041	2.549	3.48431	805.839	FALSE	18
2022-09-13	11:09:33	0.747952	3.32704	3.48431	851.002	FALSE	18
2022-09-13	11:09:34	0.673143	2.99427	3.61238	808.833	FALSE	18
2022-09-13	11:09:34	0.706476	3.14255	3.61238	854.145	FALSE	18
2022-09-13	11:09:34	1.00612	4.47542	3.61238	813.308	FALSE	18
2022-09-13	11:09:34	0.862659	3.83728	3.61238	857.982	FALSE	18
2022-09-13	11:09:35	0.980979	4.36359	6.09545	817.672	FALSE	18
2022-09-13	11:09:35	1.16286	5.17263	6.09545	863.155	FALSE	18
2022-09-13	11:09:35	1.38088	6.14243	6.09545	823.814	FALSE	18
2022-09-13	11:09:35	1.95655	8.70313	6.09545	871.858	FALSE	18
2022-09-13	11:09:36	2.01019	8.94173	8.69136	832.756	FALSE	18
2022-09-13	11:09:36	2.35971	10.4965	8.69136	882.354	FALSE	18
2022-09-13	11:09:36	1.98515	8.83034	8.69136	841.586	FALSE	18
2022-09-13	11:09:36	1.46057	6.49691	8.69136	888.851	FALSE	18
2022-09-13	11:09:37	1.67696	7.45945	4.74043	849.046	FALSE	18
2022-09-13	11:09:37	0.527494	2.3464	4.74043	891.198	FALSE	18
2022-09-13	11:09:37	0.992634	4.41543	4.74043	853.461	FALSE	18
2022-09-13	11:09:38	0.763372	3.39563	3.7087	894.593	FALSE	18
2022-09-13	11:09:38	0.804695	3.57944	3.7087	857.041	FALSE	18
2022-09-13	11:09:38	0.945662	4.20649	3.7087	898.8	FALSE	18
2022-09-13	11:09:38	0.821285	3.65324	3.7087	860.694	FALSE	18
2022-09-13	11:09:39	0.852023	3.78997	3.92313	902.59	FALSE	18
2022-09-13	11:09:39	0.858333	3.81804	3.92313	864.512	FALSE	18
2022-09-13	11:09:39	0.910802	4.05143	3.92313	906.641	FALSE	18
2022-09-13	11:09:39	0.906679	4.03309	3.92313	868.545	FALSE	18
2022-09-13	11:09:40	0.931819	4.14492	4.089	910.786	FALSE	18
2022-09-13	11:09:40	0.900623	4.00615	4.089	872.551	FALSE	18
2022-09-13	11:09:40	0.925458	4.11662	4.089	914.903	FALSE	18
2022-09-13	11:09:40	0.919096	4.08832	4.089	876.64	FALSE	18
2022-09-13	11:09:41	0.926679	4.12205	4.07044	919.025	FALSE	18
2022-09-13	11:09:41	0.912633	4.05957	4.07044	880.699	FALSE	18
2022-09-13	11:09:41	0.905916	4.0297	4.07044	923.055	FALSE	18
2022-09-13	11:09:42	0.905763	4.02901	4.02879	884.728	FALSE	18
2022-09-13	11:09:42	0.907595	4.03716	4.02879	927.092	FALSE	18
2022-09-13	11:09:42	0.908511	4.04124	4.02879	888.769	FALSE	18
2022-09-13	11:09:42	0.90098	4.00774	4.02879	931.099	FALSE	18
2022-09-13	11:09:43	0.870038	3.8701	4.06784	892.64	FALSE	18
2022-09-13	11:09:43	0.877621	3.90383	4.06784	935.003	FALSE	18
2022-09-13	11:09:43	0.848257	3.77322	4.06784	896.413	FALSE	18
2022-09-13	11:09:43	1.06205	4.72421	4.06784	939.727	FALSE	18
2022-09-13	11:09:44	1.00622	4.47587	4.0529	900.889	FALSE	18
2022-09-13	11:09:44	0.950598	4.22845	4.0529	943.956	FALSE	18
2022-09-13	11:09:44	0.922557	4.10372	4.0529	904.992	FALSE	18
2022-09-13	11:09:44	0.765153	3.40355	4.0529	947.359	FALSE	18
2022-09-13	11:09:45	0.634262	2.82132	2.91617	907.814	FALSE	18
2022-09-13	11:09:45	0.801641	3.56586	2.91617	950.925	FALSE	18
2022-09-13	11:09:45	0.530853	2.36134	2.91617	910.175	FALSE	18
2022-09-13	11:09:46	0.496654	2.20922	2.78624	953.135	FALSE	18
2022-09-13	11:09:46	0.645254	2.87022	2.78624	913.045	FALSE	18
2022-09-13	11:09:46	0.551921	2.45505	2.78624	955.59	FALSE	18
2022-09-13	11:09:46	0.811666	3.61045	2.78624	916.656	FALSE	18
2022-09-13	11:09:47	0.857519	3.81442	3.1353	959.404	FALSE	18
2022-09-13	11:09:47	0.669224	2.97684	3.1353	919.633	FALSE	18
2022-09-13	11:09:47	0.669733	2.97911	3.1353	962.383	FALSE	18
2022-09-13	11:09:47	0.622913	2.77084	3.1353	922.403	FALSE	18
2022-09-13	11:09:48	0.662761	2.94809	2.84719	965.331	FALSE	18
2022-09-13	11:09:48	0.625102	2.78058	2.84719	925.184	FALSE	18
2022-09-13	11:09:48	0.653549	2.90712	2.84719	968.238	FALSE	18
2022-09-13	11:09:48	0.618893	2.75296	2.84719	927.937	FALSE	18
2022-09-13	11:09:49	0.613244	2.72783	2.72406	970.966	FALSE	18
2022-09-13	11:09:49	0.610394	2.71515	2.72406	930.652	FALSE	18
2022-09-13	11:09:49	0.613549	2.72919	2.72406	973.695	FALSE	18
2022-09-13	11:09:50	0.605255	2.6923	2.68058	933.344	FALSE	18
2022-09-13	11:09:50	0.603117	2.68279	2.68058	976.378	FALSE	18
2022-09-13	11:09:50	0.602659	2.68075	2.68058	936.025	FALSE	18
2022-09-13	11:09:50	0.599453	2.66649	2.68058	979.045	FALSE	18
2022-09-13	11:09:51	0.63584	2.82834	2.81866	938.853	FALSE	18
2022-09-13	11:09:51	0.623829	2.77492	2.81866	981.82	FALSE	18
2022-09-13	11:09:51	0.644237	2.8657	2.81866	941.719	FALSE	18
2022-09-13	11:09:51	0.63075	2.8057	2.81866	984.625	FALSE	18
2022-09-13	11:09:52	0.484491	2.15511	1.70067	943.874	FALSE	18
2022-09-13	11:09:52	0.386069	1.71731	1.70067	986.343	FALSE	18
2022-09-13	11:09:52	0.313906	1.39632	1.70067	945.271	FALSE	18
2022-09-13	11:09:52	0.344847	1.53395	1.70067	987.877	FALSE	18
2022-09-13	11:09:53	0.237824	1.05789	1.10696	946.329	FALSE	18
2022-09-13	11:09:53	0.21416	0.952627	1.10696	988.829	FALSE	18
2022-09-13	11:09:53	0.246679	1.09728	1.10696	947.426	FALSE	18
2022-09-13	11:09:53	0.296756	1.32003	1.10696	990.149	FALSE	18
2022-09-13	11:09:54	0.649071	2.8872	1.98556	950.313	FALSE	18
2022-09-13	11:09:54	0.342201	1.52218	1.98556	991.671	FALSE	18
2022-09-13	11:09:54	0.34785	1.54731	1.98556	951.86	FALSE	18
2022-09-13	11:09:55	0.367138	1.6331	1.68262	993.304	FALSE	18
2022-09-13	11:09:55	0.364542	1.62156	1.68262	953.482	FALSE	18
2022-09-13	11:09:55	0.384491	1.71029	1.68262	995.015	FALSE	18
2022-09-13	11:09:55	0.396909	1.76553	1.68262	955.247	FALSE	18
2022-09-13	11:09:56	0.408206	1.81578	1.83152	996.831	FALSE	18
2022-09-13	11:09:56	0.406374	1.80763	1.83152	957.055	FALSE	18
2022-09-13	11:09:56	0.416756	1.85381	1.83152	998.684	FALSE	18
2022-09-13	11:09:56	0.415636	1.84883	1.83152	958.904	FALSE	18
2022-09-13	11:09:57	0.421743	1.876	1.8799	1000.56	FALSE	18
2022-09-13	11:09:57	0.420878	1.87215	1.8799	960.776	FALSE	18
2022-09-13	11:09:57	0.422506	1.87939	1.8799	1002.44	FALSE	18
2022-09-13	11:09:57	0.425356	1.89207	1.8799	962.668	FALSE	18
2022-09-13	11:09:58	0.463117	2.06004	2.12689	1004.5	FALSE	18
2022-09-13	11:09:58	0.496756	2.20967	2.12689	964.878	FALSE	18
2022-09-13	11:09:58	0.474568	2.11097	2.12689	1006.61	FALSE	18
2022-09-13	11:09:59	0.457417	2.03468	1.99812	966.912	FALSE	18
2022-09-13	11:09:59	0.441896	1.96564	1.99812	1008.58	FALSE	18
2022-09-13	11:09:59	0.448308	1.99416	1.99812	968.907	FALSE	18
2022-09-13	11:09:59	0.449173	1.99801	1.99812	1010.57	FALSE	18
2022-09-13	11:10:00	0.438028	1.94844	1.95104	970.855	FALSE	18
2022-09-13	11:10:00	0.434618	1.93327	1.95104	1012.51	FALSE	18
2022-09-13	11:10:00	0.440522	1.95953	1.95104	972.815	FALSE	18
2022-09-13	11:10:00	0.441285	1.96292	1.95104	1014.47	FALSE	18
2022-09-13	11:10:01	0.436247	1.94051	1.83435	974.755	FALSE	18
2022-09-13	11:10:01	0.432634	1.92444	1.83435	1016.4	FALSE	18
2022-09-13	11:10:01	0.409886	1.82325	1.83435	976.578	FALSE	18
2022-09-13	11:10:01	0.370751	1.64917	1.83435	1018.04	FALSE	18
2022-09-13	11:10:02	0.370751	1.64917	1.74372	978.227	FALSE	18
2022-09-13	11:10:02	0.358232	1.59349	1.74372	1019.64	FALSE	18
2022-09-13	11:10:02	0.447036	1.98851	1.74372	980.216	FALSE	18
2022-09-13	11:10:03	0.630038	2.80254	0.840348	1022.44	FALSE	18
2022-09-13	11:10:03	0.0414379	0.184324	0.840348	980.4	FALSE	18
2022-09-13	11:10:03	0.0440842	0.196095	0.840348	1022.64	FALSE	18
2022-09-13	11:10:03	0.0401147	0.178438	0.840348	980.579	FALSE	18
2022-09-13	11:10:04	0.821183	3.65279	2.943	1026.29	FALSE	18
2022-09-13	11:10:04	0.833957	3.70961	2.943	984.288	FALSE	18
2022-09-13	11:10:04	0.58729	2.61238	2.943	1028.9	FALSE	18
2022-09-13	11:10:04	0.404033	1.79722	2.943	986.086	FALSE	18
2022-09-13	11:10:05	-0.0102669	-0.0456692	0.0104708	1028.9	FALSE	18
2022-09-13	11:10:05	0.114415	0.508941	0.0104708	986.595	FALSE	18
2022-09-13	11:10:05	-0.025127	-0.11177	0.0104708	1028.9	FALSE	18
2022-09-13	11:10:05	-0.0696053	-0.309618	0.0104708	986.595	FALSE	18
2022-09-13	11:10:06	-0.0332186	-0.147763	0.0741565	1028.9	FALSE	18
2022-09-13	11:10:06	0.0483081	0.214884	0.0741565	986.809	FALSE	18
2022-09-13	11:10:06	0.0349239	0.155348	0.0741565	1029.06	FALSE	18
2022-09-13	11:10:07	0.0229137	0.101925	1.0262	986.911	FALSE	18
2022-09-13	11:10:07	0.0182318	0.0810987	1.0262	1029.14	FALSE	18
2022-09-13	11:10:07	0.552176	2.45619	1.0262	989.368	FALSE	18
2022-09-13	11:10:07	0.329479	1.46559	1.0262	1030.6	FALSE	18
2022-09-13	11:10:08	-0.018155	-0.0807571	0.217431	989.368	FALSE	18
2022-09-13	11:10:08	-0.0471117	-0.209562	0.217431	1030.6	FALSE	18
2022-09-13	11:10:08	-0.00629748	-0.0280125	0.217431	989.368	FALSE	18
2022-09-13	11:10:08	0.267087	1.18806	0.217431	1031.79	FALSE	18
2022-09-13	11:10:09	0.0842369	0.374703	0.336219	989.742	FALSE	18
2022-09-13	11:10:09	0.122252	0.543801	0.336219	1032.34	FALSE	18
2022-09-13	11:10:09	0.023219	0.103283	0.336219	989.845	FALSE	18
2022-09-13	11:10:09	0.0726338	0.32309	0.336219	1032.66	FALSE	18
2022-09-13	11:10:10	0.0597076	0.265591	-0.236331	990.111	FALSE	18
2022-09-13	11:10:10	-0.0128623	-0.0572141	-0.236331	1032.66	FALSE	18
2022-09-13	11:10:10	-0.0943382	-0.419635	-0.236331	990.111	FALSE	18
2022-09-13	11:10:10	-0.165025	-0.734064	-0.236331	1032.66	FALSE	18
2022-09-13	11:10:11	-0.220191	-0.979454	-0.984582	990.111	FALSE	18
2022-09-13	11:10:11	-0.221666	-0.986015	-0.984582	1032.66	FALSE	18
2022-09-13	11:10:11	-0.222175	-0.988279	-0.984582	990.111	FALSE	18
2022-09-13	11:10:12	0.141183	0.62801	0.85427	1033.29	FALSE	18
2022-09-13	11:10:12	0.328715	1.46219	0.85427	991.573	FALSE	18
2022-09-13	11:10:12	0.285255	1.26887	0.85427	1034.56	FALSE	18
2022-09-13	11:10:12	0.013041	0.058009	0.85427	991.631	FALSE	18
2022-09-13	11:10:13	0.0799111	0.355461	1.08568	1034.91	FALSE	18
2022-09-13	11:10:13	0.338232	1.50452	1.08568	993.136	FALSE	18
2022-09-13	11:10:13	0.244389	1.08709	1.08568	1036	FALSE	18
2022-09-13	11:10:13	0.313753	1.39564	1.08568	994.531	FALSE	18
2022-09-13	11:10:14	0.17813	0.792358	0.604752	1036.79	FALSE	18
2022-09-13	11:10:14	0.145204	0.645896	0.604752	995.177	FALSE	18
2022-09-13	11:10:14	0.117926	0.524558	0.604752	1037.31	FALSE	18
2022-09-13	11:10:14	0.102557	0.456194	0.604752	995.634	FALSE	18
2022-09-13	11:10:15	0.0888679	0.395302	0.190738	1037.71	FALSE	18
2022-09-13	11:10:15	0.069733	0.310186	0.190738	995.944	FALSE	18
2022-09-13	11:10:15	-0.0299616	-0.133275	0.190738	1037.71	FALSE	18
2022-09-13	11:10:16	-0.0658903	-0.293093	0.149689	995.944	FALSE	18
2022-09-13	11:10:16	-0.0299616	-0.133275	0.149689	1037.71	FALSE	18
2022-09-13	11:10:16	0.0821503	0.365421	0.149689	996.309	FALSE	18
2022-09-13	11:10:16	0.148308	0.659704	0.149689	1038.37	FALSE	18
2022-09-13	11:10:17	0.130547	0.580699	0.734973	996.89	FALSE	18
2022-09-13	11:10:17	0.152278	0.677363	0.734973	1039.05	FALSE	18
2022-09-13	11:10:17	0.166985	0.742783	0.734973	997.633	FALSE	18
2022-09-13	11:10:17	0.211107	0.939046	0.734973	1039.99	FALSE	18
2022-09-13	11:10:18	0.230344	1.02462	1.11477	998.657	FALSE	18
2022-09-13	11:10:18	0.193804	0.862079	1.11477	1040.85	FALSE	18
2022-09-13	11:10:18	0.142048	0.631858	1.11477	999.289	FALSE	18
2022-09-13	11:10:18	0.436247	1.94051	1.11477	1042.79	FALSE	18
2022-09-13	11:10:19	0.530802	2.36111	1.74297	1001.65	FALSE	18
2022-09-13	11:10:19	0.329377	1.46513	1.74297	1044.25	FALSE	18
2022-09-13	11:10:19	0.315331	1.40266	1.74297	1003.05	FALSE	18
2022-09-13	11:10:20	0.342557	1.52376	0.649686	1045.78	FALSE	18
2022-09-13	11:10:20	0.339504	1.51018	0.649686	1004.56	FALSE	18
2022-09-13	11:10:20	0.086934	0.3867	0.649686	1046.16	FALSE	18
2022-09-13	11:10:20	-0.184771	-0.821898	0.649686	1004.56	FALSE	18
2022-09-13	11:10:21	-0.0420226	-0.186925	2.64362	1046.16	FALSE	18
2022-09-13	11:10:21	0.109886	0.488795	2.64362	1005.05	FALSE	18
2022-09-13	11:10:21	0.615687	2.7387	2.64362	1048.9	FALSE	18
2022-09-13	11:10:21	1.6937	7.53392	2.64362	1012.59	FALSE	18
2022-09-13	11:10:22	1.75319	7.79854	3.51555	1056.7	FALSE	18
2022-09-13	11:10:22	0.82958	3.69014	3.51555	1016.28	FALSE	18
2022-09-13	11:10:22	0.305713	1.35987	3.51555	1058.06	FALSE	18
2022-09-13	11:10:22	0.272837	1.21363	3.51555	1017.49	FALSE	18
2022-09-13	11:10:23	0.173652	0.772439	1.36176	1058.83	FALSE	18
2022-09-13	11:10:23	0.385	1.71256	1.36176	1019.2	FALSE	18
2022-09-13	11:10:23	0.359758	1.60028	1.36176	1060.43	FALSE	18
2022-09-13	11:10:24	0.241387	1.07374	1.23904	1020.28	FALSE	18
2022-09-13	11:10:24	0.280318	1.24691	1.23904	1061.68	FALSE	18
2022-09-13	11:10:24	0.380318	1.69173	1.23904	1021.97	FALSE	18
2022-09-13	11:10:24	0.212176	0.943801	1.23904	1062.62	FALSE	18
2022-09-13	11:10:25	0.288512	1.28336	1.37255	1023.25	FALSE	18
2022-09-13	11:10:25	0.210802	0.937689	1.37255	1063.56	FALSE	18
2022-09-13	11:10:25	0.44958	1.99982	1.37255	1025.25	FALSE	18
2022-09-13	11:10:25	0.285356	1.26932	1.37255	1064.83	FALSE	18
2022-09-13	11:10:26	0.369886	1.64533	1.68766	1026.9	FALSE	18
2022-09-13	11:10:26	0.228359	1.01579	1.68766	1065.85	FALSE	18
2022-09-13	11:10:26	0.493397	2.19473	1.68766	1029.09	FALSE	18
2022-09-13	11:10:26	0.425967	1.89479	1.68766	1067.74	FALSE	18
2022-09-13	11:10:27	0.853906	3.79834	3.82313	1032.89	FALSE	18
2022-09-13	11:10:27	0.742354	3.30214	3.82313	1071.04	FALSE	18
2022-09-13	11:10:27	1.19833	5.33041	3.82313	1038.22	FALSE	18
2022-09-13	11:10:27	0.643321	2.86162	3.82313	1073.91	FALSE	18
2022-09-13	11:10:28	1.10566	4.9182	5.2487	1043.14	FALSE	18
2022-09-13	11:10:28	1.24067	5.51875	5.2487	1079.43	FALSE	18
2022-09-13	11:10:28	1.19355	5.30915	5.2487	1048.45	FALSE	18
2022-09-13	11:10:29	1.24403	5.53369	7.58038	1084.96	FALSE	18
2022-09-13	11:10:29	1.62566	7.23126	7.58038	1055.68	FALSE	18
2022-09-13	11:10:29	1.12698	5.01303	7.58038	1089.97	FALSE	18
2022-09-13	11:10:29	2.81991	12.5435	7.58038	1068.22	FALSE	18
2022-09-13	11:10:30	2.78953	12.4084	15.8397	1102.38	FALSE	18
2022-09-13	11:10:30	3.54332	15.7614	15.8397	1083.98	1	19
2022-09-13	11:10:30	3.5107	15.6163	15.8397	1118	1	20
2022-09-13	11:10:30	4.40016	19.5728	15.8397	1103.56	1	21
2022-09-13	11:10:31	2.70683	12.0405	7.4479	1130.04	FALSE	21
2022-09-13	11:10:31	1.79197	7.97104	7.4479	1111.53	FALSE	21
2022-09-13	11:10:31	1.31523	5.85041	7.4479	1135.89	FALSE	21
2022-09-13	11:10:31	0.883422	3.92964	7.4479	1115.46	FALSE	21
2022-09-13	11:10:32	2.24383	9.981	7.80188	1145.87	FALSE	21
2022-09-13	11:10:32	0.56215	2.50056	7.80188	1117.96	FALSE	21
2022-09-13	11:10:32	2.45584	10.9241	7.80188	1156.79	FALSE	21
2022-09-13	11:10:33	1.10785	4.92794	10.1816	1122.89	FALSE	21
2022-09-13	11:10:33	1.63167	7.25799	10.1816	1164.05	FALSE	21
2022-09-13	11:10:33	3.13665	13.9524	10.1816	1136.84	1	22
2022-09-13	11:10:33	3.2795	14.5879	10.1816	1178.64	1	23
2022-09-13	11:10:34	2.12052	9.4325	12.6227	1146.27	FALSE	23
2022-09-13	11:10:34	3.80413	16.9215	12.6227	1195.56	1	24
2022-09-13	11:10:34	3.65731	16.2684	12.6227	1162.54	1	25
2022-09-13	11:10:34	1.76892	7.86851	12.6227	1203.43	FALSE	25
2022-09-13	11:10:35	4.02495	17.9038	11.0904	1180.44	1	26
2022-09-13	11:10:35	2.34342	10.424	11.0904	1213.85	FALSE	26
2022-09-13	11:10:35	0.822201	3.65731	11.0904	1184.1	FALSE	26
2022-09-13	11:10:35	2.7824	12.3767	11.0904	1226.23	FALSE	26
2022-09-13	11:10:36	3.81111	16.9526	18.0154	1201.05	1	27
2022-09-13	11:10:36	4.51151	20.0681	18.0154	1246.3	1	28
2022-09-13	11:10:36	3.82749	17.0254	18.0154	1218.08	1	29
2022-09-13	11:10:37	5.52484	24.5756	16.2435	1270.87	1	30
2022-09-13	11:10:37	2.77457	12.3418	16.2435	1230.42	FALSE	30
2022-09-13	11:10:37	1.98017	8.80819	16.2435	1279.68	FALSE	30
2022-09-13	11:10:37	4.32724	19.2484	16.2435	1249.67	1	31
2022-09-13	11:10:38	1.4448	6.42676	9.7171	1286.11	FALSE	31
2022-09-13	11:10:38	2.27874	10.1363	9.7171	1259.8	FALSE	31
2022-09-13	11:10:38	3.14576	13.993	9.7171	1300.1	1	32
2022-09-13	11:10:38	1.86871	8.3124	9.7171	1268.12	FALSE	32
2022-09-13	11:10:39	3.24922	14.4532	15.8196	1314.55	1	33
2022-09-13	11:10:39	2.99263	13.3118	15.8196	1281.43	FALSE	33
2022-09-13	11:10:39	2.92846	13.0264	15.8196	1327.58	FALSE	33
2022-09-13	11:10:39	5.05528	22.4869	15.8196	1303.92	1	34
2022-09-13	11:10:40	5.66001	25.1769	19.0531	1352.76	1	35
2022-09-13	11:10:40	5.5453	24.6666	19.0531	1328.58	1	36
2022-09-13	11:10:40	1.64469	7.31591	19.0531	1360.07	FALSE	36
2022-09-13	11:10:41	0.0363997	0.161913	-0.090322	1328.74	FALSE	36
2022-09-13	11:10:41	0.357875	1.5919	-0.090322	1361.66	FALSE	36
2022-09-13	11:10:41	-0.0916919	-0.407864	-0.090322	1328.74	FALSE	36
2022-09-13	11:10:41	-0.383804	-1.70724	-0.090322	1361.66	FALSE	36
2022-09-13	11:10:42	-0.467875	-2.0812	1.26768	1328.74	FALSE	36
2022-09-13	11:10:42	-0.351132	-1.56191	1.26768	1361.66	FALSE	36
2022-09-13	11:10:42	0.424949	1.89026	1.26768	1330.63	FALSE	36
2022-09-13	11:10:42	1.53401	6.82358	1.26768	1368.49	FALSE	36
2022-09-13	11:10:43	0.907901	4.03853	12.5737	1334.67	FALSE	36
2022-09-13	11:10:43	1.83614	8.16752	12.5737	1376.66	FALSE	36
2022-09-13	11:10:43	2.00469	8.91726	12.5737	1343.59	FALSE	36
2022-09-13	11:10:43	6.55807	29.1716	12.5737	1405.83	1	37
2022-09-13	11:10:44	5.94622	26.45	11.4977	1370.04	1	38
2022-09-13	11:10:44	3.95009	17.5708	11.4977	1423.4	1	39
2022-09-13	11:10:44	0.318028	1.41465	11.4977	1371.45	FALSE	39
2022-09-13	11:10:44	0.124848	0.555349	11.4977	1423.95	FALSE	39
2022-09-13	11:10:45	-0.0239565	-0.106563	-0.500902	1371.45	FALSE	39
2022-09-13	11:10:45	-0.180954	-0.80492	-0.500902	1423.95	FALSE	39
2022-09-13	11:10:45	-0.132913	-0.591224	-0.500902	1371.45	FALSE	39
2022-09-13	11:10:46	-0.218715	-0.972888	-0.968926	1423.95	FALSE	39
2022-09-13	11:10:46	-0.210827	-0.937801	-0.968926	1371.45	FALSE	39
2022-09-13	11:10:46	-0.0690455	-0.307128	-0.968926	1423.95	FALSE	39
2022-09-13	11:10:46	-0.37271	-1.65789	-0.968926	1371.45	FALSE	39
2022-09-13	11:10:47	-0.0311829	-0.138708	0.813806	1423.95	FALSE	39
2022-09-13	11:10:47	0.159606	0.709959	0.813806	1372.16	FALSE	39
2022-09-13	11:10:47	0.377468	1.67905	0.813806	1425.63	FALSE	39
2022-09-13	11:10:47	0.225916	1.00492	0.813806	1373.17	FALSE	39
2022-09-13	11:10:48	0.302964	1.34764	1.24408	1426.98	FALSE	39
2022-09-13	11:10:48	0.232379	1.03367	1.24408	1374.2	FALSE	39
2022-09-13	11:10:48	0.228766	1.0176	1.24408	1428	FALSE	39
2022-09-13	11:10:48	0.354618	1.57741	1.24408	1375.78	FALSE	39
2022-09-13	11:10:49	0.422914	1.88121	2.52153	1429.88	FALSE	39
2022-09-13	11:10:49	0.357621	1.59077	2.52153	1377.37	FALSE	39
2022-09-13	11:10:49	0.920063	4.09262	2.52153	1433.97	FALSE	39
2022-09-13	11:10:50	0.570496	2.53768	3.23196	1379.91	FALSE	39
2022-09-13	11:10:50	0.864695	3.84634	3.23196	1437.82	FALSE	39
2022-09-13	11:10:50	0.738842	3.28652	3.23196	1383.2	FALSE	39
2022-09-13	11:10:50	0.732277	3.25731	3.23196	1441.08	FALSE	39
2022-09-13	11:10:51	0.734568	3.26751	3.65822	1386.46	FALSE	39
2022-09-13	11:10:51	0.73701	3.27837	3.65822	1444.35	FALSE	39
2022-09-13	11:10:51	0.723066	3.21634	3.65822	1389.68	FALSE	39
2022-09-13	11:10:51	1.09497	4.87065	3.65822	1449.22	FALSE	39
2022-09-13	11:10:52	1.39711	6.21462	11.2938	1395.89	FALSE	39
2022-09-13	11:10:52	1.8763	8.34616	11.2938	1457.57	FALSE	39
2022-09-13	11:10:52	3.06164	13.6188	11.2938	1409.51	1	40
2022-09-13	11:10:52	3.82083	16.9958	11.2938	1474.57	1	41
2022-09-13	11:10:53	2.64882	11.7825	11.9661	1421.3	FALSE	41
2022-09-13	11:10:53	3.15299	14.0251	11.9661	1488.59	1	42
2022-09-13	11:10:53	2.26846	10.0906	11.9661	1431.39	FALSE	42
2022-09-13	11:10:54	1.67594	7.45492	6.97151	1496.05	FALSE	42
2022-09-13	11:10:54	1.86286	8.28637	6.97151	1439.67	FALSE	42
2022-09-13	11:10:54	1.4249	6.33824	6.97151	1502.38	FALSE	42
2022-09-13	11:10:54	1.30536	5.8065	6.97151	1445.48	FALSE	42
2022-09-13	11:10:55	1.11223	4.94742	5.00746	1507.33	FALSE	42
2022-09-13	11:10:55	1.14078	5.07442	5.00746	1450.55	FALSE	42
2022-09-13	11:10:55	1.14459	5.09137	5.00746	1512.42	FALSE	42
2022-09-13	11:10:55	1.10531	4.91664	5.00746	1455.47	FALSE	42
2022-09-13	11:10:56	1.06653	4.74414	5.03343	1517.17	FALSE	42
2022-09-13	11:10:56	1.05039	4.67234	5.03343	1460.14	FALSE	42
2022-09-13	11:10:56	1.31111	5.83208	5.03343	1523	FALSE	42
2022-09-13	11:10:56	1.09823	4.88515	5.03343	1465.03	FALSE	42
2022-09-13	11:10:57	0.707188	3.14571	3.59786	1526.15	FALSE	42
2022-09-13	11:10:57	0.704797	3.13508	3.59786	1468.16	FALSE	42
2022-09-13	11:10:57	1.01452	4.51279	3.59786	1530.66	FALSE	42
2022-09-13	11:10:58	2.70037	12.0118	7.45782	1480.17	FALSE	42
2022-09-13	11:10:58	1.85915	8.26987	7.45782	1538.93	FALSE	42
2022-09-13	11:10:58	1.0791	4.80005	7.45782	1484.97	FALSE	42
2022-09-13	11:10:58	1.06775	4.74957	7.45782	1543.68	FALSE	42
2022-09-13	11:10:59	0.660318	2.93723	2.58363	1487.91	FALSE	42
2022-09-13	11:10:59	0.681031	3.02936	2.58363	1546.71	FALSE	42
2022-09-13	11:10:59	0.461336	2.05211	2.58363	1489.96	FALSE	42
2022-09-13	11:10:59	0.520623	2.31584	2.58363	1549.02	FALSE	42
2022-09-13	11:11:00	0.605153	2.69184	2.17526	1492.66	FALSE	42
2022-09-13	11:11:00	0.464593	2.0666	2.17526	1551.09	FALSE	42
2022-09-13	11:11:00	0.485051	2.1576	2.17526	1494.81	FALSE	42
2022-09-13	11:11:00	0.401285	1.785	2.17526	1552.87	FALSE	42
2022-09-13	11:11:01	0.337977	1.50339	1.77645	1496.32	FALSE	42
2022-09-13	11:11:01	0.436196	1.94029	1.77645	1554.81	FALSE	42
2022-09-13	11:11:01	0.357825	1.59168	1.77645	1497.91	FALSE	42
2022-09-13	11:11:01	0.465458	2.07045	1.77645	1556.89	FALSE	42
2022-09-13	11:11:02	0.489784	2.17866	2.64875	1500.09	FALSE	42
2022-09-13	11:11:02	0.605153	2.69184	2.64875	1559.58	FALSE	42
2022-09-13	11:11:02	0.691463	3.07577	2.64875	1503.16	FALSE	42
2022-09-13	11:11:03	0.591208	2.62981	3.10418	1562.21	FALSE	42
2022-09-13	11:11:03	0.936247	4.16461	3.10418	1507.33	FALSE	42
2022-09-13	11:11:03	0.631361	2.80842	3.10418	1565.02	FALSE	42
2022-09-13	11:11:03	0.632583	2.81386	3.10418	1510.14	FALSE	42
2022-09-13	11:11:04	0.613804	2.73032	2.99404	1567.75	FALSE	42
2022-09-13	11:11:04	0.670445	2.98227	2.99404	1513.12	FALSE	42
2022-09-13	11:11:04	0.681895	3.03321	2.99404	1570.78	FALSE	42
2022-09-13	11:11:04	0.726221	3.23038	2.99404	1516.35	FALSE	42
2022-09-13	11:11:05	0.771768	3.43298	3.0061	1574.21	FALSE	42
2022-09-13	11:11:05	0.794517	3.53417	3.0061	1519.89	FALSE	42
2022-09-13	11:11:05	0.747544	3.32523	3.0061	1577.54	FALSE	42
2022-09-13	11:11:05	0.389377	1.73203	3.0061	1521.62	FALSE	42
2022-09-13	11:11:06	2.62775	11.6888	9.87854	1589.23	FALSE	42
2022-09-13	11:11:06	3.31981	14.7672	9.87854	1536.39	1	43
2022-09-13	11:11:06	0.714822	3.17967	9.87854	1592.41	FALSE	43
2022-09-13	11:11:07	0.741947	3.30033	2.94153	1539.69	FALSE	43
2022-09-13	11:11:07	0.617214	2.74549	2.94153	1595.15	FALSE	43
2022-09-13	11:11:07	0.713804	3.17514	2.94153	1542.86	FALSE	43
2022-09-13	11:11:07	0.572176	2.54515	2.94153	1597.7	FALSE	43
2022-09-13	11:11:08	-0.362837	-1.61397	1.54136	1542.86	FALSE	43
2022-09-13	11:11:08	0.698435	3.10678	1.54136	1600.8	FALSE	43
2022-09-13	11:11:08	0.313601	1.39496	1.54136	1544.26	FALSE	43
2022-09-13	11:11:08	0.736857	3.27769	1.54136	1604.08	FALSE	43
2022-09-13	11:11:09	-0.0730659	-0.325012	-1.13186	1544.26	FALSE	43
2022-09-13	11:11:09	-0.308486	-1.37221	-1.13186	1604.08	FALSE	43
2022-09-13	11:11:09	-0.375101	-1.66852	-1.13186	1544.26	FALSE	43
2022-09-13	11:11:09	-0.261157	-1.16168	-1.13186	1604.08	FALSE	43
2022-09-13	11:11:10	-0.327111	-1.45506	-3.58815	1544.26	FALSE	43
2022-09-13	11:11:10	-0.908027	-4.03909	-3.58815	1604.08	FALSE	43
2022-09-13	11:11:10	-1.18482	-5.27032	-3.58815	1544.26	FALSE	43
2022-09-13	11:11:11	0.658741	2.93021	2.49824	1607.01	FALSE	43
2022-09-13	11:11:11	0.51411	2.28686	2.49824	1546.54	FALSE	43
2022-09-13	11:11:11	0.613549	2.72919	2.49824	1609.74	FALSE	43
2022-09-13	11:11:11	0.460115	2.04668	2.49824	1548.59	FALSE	43
2022-09-13	11:11:12	0.354008	1.5747	1.49807	1611.31	FALSE	43
2022-09-13	11:11:12	0.363626	1.61748	1.49807	1550.21	FALSE	43
2022-09-13	11:11:12	0.382659	1.70214	1.49807	1613.02	FALSE	43
2022-09-13	11:11:12	0.246832	1.09796	1.49807	1551.31	FALSE	43
2022-09-13	11:11:13	0.286171	1.27295	1.29739	1614.29	FALSE	43
2022-09-13	11:11:13	0.301896	1.34289	1.29739	1552.65	FALSE	43
2022-09-13	11:11:13	0.28902	1.28562	1.29739	1615.58	FALSE	43
2022-09-13	11:11:13	0.28958	1.28811	1.29739	1553.94	FALSE	43
2022-09-13	11:11:14	0.279046	1.24125	1.24306	1616.82	FALSE	43
2022-09-13	11:11:14	0.278283	1.23786	1.24306	1555.18	FALSE	43
2022-09-13	11:11:14	0.281031	1.25008	1.24306	1618.07	FALSE	43
2022-09-13	11:11:15	0.267138	1.18828	1.28415	1556.36	FALSE	43
2022-09-13	11:11:15	0.275585	1.22586	1.28415	1619.29	FALSE	43
2022-09-13	11:11:15	0.257112	1.14369	1.28415	1557.51	FALSE	43
2022-09-13	11:11:15	0.354924	1.57877	1.28415	1620.87	FALSE	43
2022-09-13	11:11:16	0.313041	1.39247	2.1773	1558.9	FALSE	43
2022-09-13	11:11:16	0.589478	2.62212	2.1773	1623.49	FALSE	43
2022-09-13	11:11:16	0.657366	2.9241	2.1773	1561.82	FALSE	43
2022-09-13	11:11:16	0.398028	1.77051	2.1773	1625.26	FALSE	43
2022-09-13	11:11:17	0.697875	3.10429	2.3889	1564.93	FALSE	43
2022-09-13	11:11:17	0.727596	3.23649	2.3889	1628.5	FALSE	43
2022-09-13	11:11:17	0.359046	1.59711	2.3889	1566.52	FALSE	43
2022-09-13	11:11:17	0.363677	1.61771	2.3889	1630.12	FALSE	43
2022-09-13	11:11:18	0.35131	1.5627	1.54565	1568.09	FALSE	43
2022-09-13	11:11:18	0.351514	1.5636	1.54565	1631.68	FALSE	43
2022-09-13	11:11:18	0.339606	1.51064	1.54565	1569.6	FALSE	43
2022-09-13	11:11:19	0.338283	1.50475	1.49139	1633.19	FALSE	43
2022-09-13	11:11:19	0.326018	1.45019	1.49139	1571.05	FALSE	43
2022-09-13	11:11:19	0.33813	1.50407	1.49139	1634.69	FALSE	43
2022-09-13	11:11:19	0.33869	1.50656	1.49139	1572.56	FALSE	43
2022-09-13	11:11:20	0.317265	1.41126	1.50379	1636.1	FALSE	43
2022-09-13	11:11:20	0.379046	1.68607	1.50379	1574.24	FALSE	43
2022-09-13	11:11:20	0.267596	1.19032	1.50379	1637.29	FALSE	43
2022-09-13	11:11:20	0.388359	1.7275	1.50379	1575.97	FALSE	43
2022-09-13	11:11:21	0.442201	1.967	1.63808	1639.26	FALSE	43
2022-09-13	11:11:21	0.294975	1.31211	1.63808	1577.28	FALSE	43
2022-09-13	11:11:21	0.368308	1.63831	1.63808	1640.9	FALSE	43
2022-09-13	11:11:21	0.367545	1.63491	1.63808	1578.92	FALSE	43
2022-09-13	11:11:22	0.394873	1.75647	1.47939	1642.65	FALSE	43
2022-09-13	11:11:22	0.27472	1.22201	1.47939	1580.14	FALSE	43
2022-09-13	11:11:22	0.279707	1.24419	1.47939	1643.9	FALSE	43
2022-09-13	11:11:22	0.381031	1.6949	1.47939	1581.83	FALSE	43
2022-09-13	11:11:23	0.292125	1.29943	1.66645	1645.2	FALSE	43
2022-09-13	11:11:23	0.419046	1.864	1.66645	1583.7	FALSE	43
2022-09-13	11:11:23	0.412735	1.83593	1.66645	1647.03	FALSE	43
2022-09-13	11:11:24	0.328054	1.45925	1.77753	1585.16	FALSE	43
2022-09-13	11:11:24	0.401997	1.78816	1.77753	1648.82	FALSE	43
2022-09-13	11:11:24	0.408664	1.81782	1.77753	1586.97	FALSE	43
2022-09-13	11:11:24	0.459707	2.04487	1.77753	1650.87	FALSE	43
2022-09-13	11:11:25	0.474618	2.1112	2.02088	1589.08	FALSE	43
2022-09-13	11:11:25	0.458537	2.03966	2.02088	1652.91	FALSE	43
2022-09-13	11:11:25	0.461998	2.05506	2.02088	1591.14	FALSE	43
2022-09-13	11:11:25	0.422099	1.87758	2.02088	1654.78	FALSE	43
2022-09-13	11:11:26	0.496094	2.20673	2.15002	1593.35	FALSE	43
2022-09-13	11:11:26	0.454618	2.02223	2.15002	1656.81	FALSE	43
2022-09-13	11:11:26	0.499198	2.22053	2.15002	1595.57	FALSE	43
2022-09-13	11:11:26	0.483473	2.15058	2.15002	1658.96	FALSE	43
2022-09-13	11:11:27	0.474262	2.10961	2.14327	1597.68	FALSE	43
2022-09-13	11:11:27	0.490547	2.18205	2.14327	1661.14	FALSE	43
2022-09-13	11:11:27	0.480674	2.13813	2.14327	1599.81	FALSE	43
2022-09-13	11:11:28	0.476094	2.11776	2.11505	1663.26	FALSE	43
2022-09-13	11:11:28	0.488003	2.17073	2.11505	1601.99	FALSE	43
2022-09-13	11:11:28	0.471514	2.09739	2.11505	1665.35	FALSE	43
2022-09-13	11:11:28	0.466323	2.0743	2.11505	1604.06	FALSE	43
2022-09-13	11:11:29	0.46902	2.08629	2.09863	1667.44	FALSE	43
2022-09-13	11:11:29	0.470802	2.09422	2.09863	1606.15	FALSE	43
2022-09-13	11:11:29	0.479046	2.13089	2.09863	1669.57	FALSE	43
2022-09-13	11:11:29	0.468308	2.08313	2.09863	1608.24	FALSE	43
2022-09-13	11:11:30	0.473804	2.10757	1.4597	1671.68	FALSE	43
2022-09-13	11:11:30	0.370649	1.64872	1.4597	1609.89	FALSE	43
2022-09-13	11:11:30	0.226527	1.00764	1.4597	1672.69	FALSE	43
2022-09-13	11:11:30	0.241641	1.07487	1.4597	1610.96	FALSE	43
2022-09-13	11:11:31	0.281641	1.2528	1.46566	1673.94	FALSE	43
2022-09-13	11:11:31	0.353295	1.57153	1.46566	1612.53	FALSE	43
2022-09-13	11:11:31	0.35355	1.57266	1.46566	1675.51	FALSE	43
2022-09-13	11:11:32	0.347392	1.54527	1.54827	1614.08	FALSE	43
2022-09-13	11:11:32	0.351718	1.56451	1.54827	1677.08	FALSE	43
2022-09-13	11:11:32	0.344491	1.53236	1.54827	1615.61	FALSE	43
2022-09-13	11:11:32	0.348664	1.55093	1.54827	1678.63	FALSE	43
2022-09-13	11:11:33	0.342099	1.52172	1.5842	1617.13	FALSE	43
2022-09-13	11:11:33	0.353193	1.57107	1.5842	1680.2	FALSE	43
2022-09-13	11:11:33	0.369682	1.64442	1.5842	1618.78	FALSE	43
2022-09-13	11:11:33	0.359606	1.5996	1.5842	1681.8	FALSE	43
2022-09-13	11:11:34	0.377112	1.67747	1.68845	1620.45	FALSE	43
2022-09-13	11:11:34	0.375331	1.66955	1.68845	1683.47	FALSE	43
2022-09-13	11:11:34	0.382252	1.70033	1.68845	1622.15	FALSE	43
2022-09-13	11:11:34	0.383626	1.70645	1.68845	1685.17	FALSE	43
2022-09-13	11:11:35	0.379657	1.68879	1.69249	1623.84	FALSE	43
2022-09-13	11:11:35	0.383677	1.70667	1.69249	1686.88	FALSE	43
2022-09-13	11:11:35	0.37813	1.682	1.69249	1625.52	FALSE	43
2022-09-13	11:11:36	0.395331	1.75851	1.66666	1688.64	FALSE	43
2022-09-13	11:11:36	0.376145	1.67317	1.66666	1627.2	FALSE	43
2022-09-13	11:11:36	0.361387	1.60752	1.66666	1690.25	FALSE	43
2022-09-13	11:11:36	0.365865	1.62744	1.66666	1628.83	FALSE	43
2022-09-13	11:11:37	0.43813	1.94889	2.96349	1692.2	FALSE	43
2022-09-13	11:11:37	0.738231	3.2838	2.96349	1632.11	FALSE	43
2022-09-13	11:11:37	0.73584	3.27316	2.96349	1695.47	FALSE	43
2022-09-13	11:11:37	0.752684	3.34809	2.96349	1635.46	FALSE	43
2022-09-13	11:11:38	0.746323	3.31979	3.14124	1698.79	FALSE	43
2022-09-13	11:11:38	0.749987	3.33609	3.14124	1638.79	FALSE	43
2022-09-13	11:11:38	0.768715	3.4194	3.14124	1702.21	FALSE	43
2022-09-13	11:11:38	0.559707	2.48969	3.14124	1641.28	FALSE	43
2022-09-13	11:11:39	0.537723	2.3919	1.68143	1704.6	FALSE	43
2022-09-13	11:11:39	0.427799	1.90294	1.68143	1643.19	FALSE	43
2022-09-13	11:11:39	0.340165	1.51312	1.68143	1706.11	FALSE	43
2022-09-13	11:11:39	0.206323	0.917766	1.68143	1644.1	FALSE	43
2022-09-13	11:11:40	0.289937	1.2897	1.37066	1707.4	FALSE	43
2022-09-13	11:11:40	0.311361	1.385	1.37066	1645.49	FALSE	43
2022-09-13	11:11:40	0.323117	1.43729	1.37066	1708.84	FALSE	43
2022-09-13	11:11:41	0.176501	0.785112	0.448443	1646.27	FALSE	43
2022-09-13	11:11:41	0.102812	0.457328	0.448443	1709.3	FALSE	43
2022-09-13	11:11:41	-0.000241466	-0.00107409	0.448443	1646.27	FALSE	43
2022-09-13	11:11:41	0.124186	0.552404	0.448443	1709.85	FALSE	43
2022-09-13	11:11:42	0.018588	0.0826831	0.23288	1646.36	FALSE	43
2022-09-13	11:11:42	0.0431681	0.19202	0.23288	1710.04	FALSE	43
2022-09-13	11:11:42	0.0222013	0.0987558	0.23288	1646.46	FALSE	43
2022-09-13	11:11:42	0.125458	0.558062	0.23288	1710.6	FALSE	43
2022-09-13	11:11:43	0.0264252	0.117545	0.487096	1646.57	FALSE	43
2022-09-13	11:11:43	0.034415	0.153085	0.487096	1710.75	FALSE	43
2022-09-13	11:11:43	0.0944149	0.419976	0.487096	1646.99	FALSE	43
2022-09-13	11:11:43	0.282761	1.25778	0.487096	1712.01	FALSE	43
2022-09-13	11:11:44	0.275687	1.22631	1.98315	1648.22	FALSE	43
2022-09-13	11:11:44	0.328359	1.46061	1.98315	1713.47	FALSE	43
2022-09-13	11:11:44	0.733448	3.26252	1.98315	1651.48	FALSE	43
2022-09-13	11:11:45	0.814771	3.62426	2.6207	1717.1	FALSE	43
2022-09-13	11:11:45	0.73986	3.29105	2.6207	1654.77	FALSE	43
2022-09-13	11:11:45	0.427137	1.89999	2.6207	1719	FALSE	43
2022-09-13	11:11:45	0.374873	1.66751	2.6207	1656.44	FALSE	43
2022-09-13	11:11:46	0.409631	1.82212	1.43582	1720.82	FALSE	43
2022-09-13	11:11:46	0.286272	1.2734	1.43582	1657.71	FALSE	43
2022-09-13	11:11:46	0.329326	1.46491	1.43582	1722.28	FALSE	43
2022-09-13	11:11:46	0.265916	1.18285	1.43582	1658.9	FALSE	43
2022-09-13	11:11:47	0.256451	1.14075	1.16349	1723.42	FALSE	43
2022-09-13	11:11:47	0.265967	1.18307	1.16349	1660.08	FALSE	43
2022-09-13	11:11:47	0.258486	1.1498	1.16349	1724.57	FALSE	43
2022-09-13	11:11:47	0.265356	1.18036	1.16349	1661.26	FALSE	43
2022-09-13	11:11:48	0.276807	1.23129	1.21265	1725.8	FALSE	43
2022-09-13	11:11:48	0.267036	1.18783	1.21265	1662.45	FALSE	43
2022-09-13	11:11:48	0.274008	1.21884	1.21265	1727.02	FALSE	43
2022-09-13	11:11:49	0.279758	1.24442	1.15738	1663.69	FALSE	43
2022-09-13	11:11:49	0.268817	1.19575	1.15738	1728.22	FALSE	43
2022-09-13	11:11:49	0.254618	1.13259	1.15738	1664.82	FALSE	43
2022-09-13	11:11:49	0.23757	1.05676	1.15738	1729.28	FALSE	43
2022-09-13	11:11:50	0.548359	2.43921	1.6361	1667.26	FALSE	43
2022-09-13	11:11:50	0.350598	1.55953	1.6361	1730.84	FALSE	43
2022-09-13	11:11:50	0.218944	0.973907	1.6361	1668.24	FALSE	43
2022-09-13	11:11:50	0.353346	1.57175	1.6361	1732.41	FALSE	43
2022-09-13	11:11:51	0.238944	1.06287	1.36847	1669.3	FALSE	43
2022-09-13	11:11:51	0.321438	1.42982	1.36847	1733.84	FALSE	43
2022-09-13	11:11:51	0.341082	1.5172	1.36847	1670.82	FALSE	43
2022-09-13	11:11:51	0.329122	1.464	1.36847	1735.3	FALSE	43
2022-09-13	11:11:52	0.332685	1.47985	1.68962	1672.3	FALSE	43
2022-09-13	11:11:52	0.372277	1.65596	1.68962	1736.96	FALSE	43
2022-09-13	11:11:52	0.434568	1.93305	1.68962	1674.23	FALSE	43
2022-09-13	11:11:53	0.688715	3.06354	2.10395	1740.02	FALSE	43
2022-09-13	11:11:53	0.400471	1.78138	2.10395	1676.01	FALSE	43
2022-09-13	11:11:53	0.320318	1.42484	2.10395	1741.44	FALSE	43
2022-09-13	11:11:53	0.482456	2.14606	2.10395	1678.16	FALSE	43
2022-09-13	11:11:54	0.355484	1.58126	1.50905	1743.03	FALSE	43
2022-09-13	11:11:54	0.349631	1.55523	1.50905	1679.71	FALSE	43
2022-09-13	11:11:54	0.341794	1.52037	1.50905	1744.55	FALSE	43
2022-09-13	11:11:54	0.310089	1.37934	1.50905	1681.09	FALSE	43
2022-09-13	11:11:55	0.350344	1.5584	1.56581	1746.1	FALSE	43
2022-09-13	11:11:55	0.380318	1.69173	1.56581	1682.78	FALSE	43
2022-09-13	11:11:55	0.325305	1.44702	1.56581	1747.55	FALSE	43
2022-09-13	11:11:55	0.352074	1.5661	1.56581	1684.35	FALSE	43
2022-09-13	11:11:56	0.378588	1.68404	1.25868	1749.24	FALSE	43
2022-09-13	11:11:56	0.316756	1.40899	1.25868	1685.76	FALSE	43
2022-09-13	11:11:56	0.236247	1.05087	1.25868	1750.29	FALSE	43
2022-09-13	11:11:56	0.200267	0.890828	1.25868	1686.65	FALSE	43
2022-09-13	11:11:57	0.20215	0.899204	0.930821	1751.19	FALSE	43
2022-09-13	11:11:57	0.22271	0.990659	0.930821	1687.64	FALSE	43
2022-09-13	11:11:57	0.202914	0.902602	0.930821	1752.09	FALSE	43
2022-09-13	11:11:58	0.203982	0.907353	0.859477	1688.55	FALSE	43
2022-09-13	11:11:58	0.189275	0.841933	0.859477	1752.93	FALSE	43
2022-09-13	11:11:58	0.19869	0.883813	0.859477	1689.43	FALSE	43
2022-09-13	11:11:58	0.180929	0.804808	0.859477	1753.74	FALSE	43
2022-09-13	11:11:59	0.204898	0.911427	0.673738	1690.34	FALSE	43
2022-09-13	11:11:59	0.143473	0.638197	0.673738	1754.37	FALSE	43
2022-09-13	11:11:59	0.104949	0.466834	0.673738	1690.81	FALSE	43
2022-09-13	11:11:59	0.152532	0.678493	0.673738	1755.05	FALSE	43
2022-09-13	11:12:00	0.176603	0.785565	0.729709	1691.6	FALSE	43
2022-09-13	11:12:00	0.111209	0.49468	0.729709	1755.55	FALSE	43
2022-09-13	11:12:00	0.195789	0.870909	0.729709	1692.47	FALSE	43
2022-09-13	11:12:00	0.172583	0.767684	0.729709	1756.31	FALSE	43
2022-09-13	11:12:01	0.245	1.08981	1.00137	1693.56	FALSE	43
2022-09-13	11:12:01	0.20841	0.927049	1.00137	1757.24	FALSE	43
2022-09-13	11:12:01	0.221947	0.987265	1.00137	1694.54	FALSE	43
2022-09-13	11:12:02	0.269987	1.20096	2.42885	1758.44	FALSE	43
2022-09-13	11:12:02	0.269122	1.19711	2.42885	1695.74	FALSE	43
2022-09-13	11:12:02	0.330089	1.4683	2.42885	1759.91	FALSE	43
2022-09-13	11:12:02	1.31492	5.84903	2.42885	1701.59	FALSE	43
2022-09-13	11:12:03	0.330038	1.46808	1.29835	1761.38	FALSE	43
2022-09-13	11:12:03	0.382048	1.69943	1.29835	1703.29	FALSE	43
2022-09-13	11:12:03	0.273041	1.21454	1.29835	1762.59	FALSE	43
2022-09-13	11:12:03	0.182405	0.811374	1.29835	1704.1	FALSE	43
2022-09-13	11:12:04	0.151209	0.672608	1.75149	1763.27	FALSE	43
2022-09-13	11:12:04	0.254669	1.13282	1.75149	1705.23	FALSE	43
2022-09-13	11:12:04	0.301896	1.34289	1.75149	1764.61	FALSE	43
2022-09-13	11:12:04	0.867239	3.85765	1.75149	1709.09	FALSE	43
2022-09-13	11:12:05	1.22139	5.43299	4.50568	1770.04	FALSE	43
2022-09-13	11:12:05	0.782659	3.48142	4.50568	1712.57	FALSE	43
2022-09-13	11:12:05	1.03472	4.60264	4.50568	1774.64	FALSE	43
2022-09-13	11:12:06	1.26266	5.61656	3.70474	1718.19	FALSE	43
2022-09-13	11:12:06	0.980063	4.35952	3.70474	1779	FALSE	43
2022-09-13	11:12:06	0.521539	2.31991	3.70474	1720.51	FALSE	43
2022-09-13	11:12:06	0.567188	2.52297	3.70474	1781.53	FALSE	43
2022-09-13	11:12:07	0.946119	4.20853	4.207	1724.72	FALSE	43
2022-09-13	11:12:07	1.44067	6.40839	4.207	1787.94	FALSE	43
2022-09-13	11:12:07	0.76388	3.39789	4.207	1728.12	FALSE	43
2022-09-13	11:12:07	0.63243	2.81318	4.207	1790.75	FALSE	43
2022-09-13	11:12:08	0.969784	4.31379	5.00961	1732.43	FALSE	43
2022-09-13	11:12:08	1.02195	4.54584	5.00961	1795.29	FALSE	43
2022-09-13	11:12:08	1.1277	5.01624	5.00961	1737.45	FALSE	43
2022-09-13	11:12:08	1.38541	6.16258	5.00961	1801.46	FALSE	43
2022-09-13	11:12:09	1.69543	7.54161	6.3042	1744.99	FALSE	43
2022-09-13	11:12:09	1.36785	6.08447	6.3042	1807.54	FALSE	43
2022-09-13	11:12:09	1.18846	5.28651	6.3042	1750.27	FALSE	43
2022-09-13	11:12:10	1.54892	6.88991	7.1341	1814.43	FALSE	43
2022-09-13	11:12:10	1.63976	7.29398	7.1341	1757.57	FALSE	43
2022-09-13	11:12:10	1.63289	7.26342	7.1341	1821.69	FALSE	43
2022-09-13	11:12:10	1.5937	7.0891	7.1341	1764.66	FALSE	43
2022-09-13	11:12:11	1.53686	6.83626	6.2469	1828.53	FALSE	43
2022-09-13	11:12:11	1.43935	6.40252	6.2469	1771.06	FALSE	43
2022-09-13	11:12:11	1.34933	6.00209	6.2469	1834.53	FALSE	43
2022-09-13	11:12:11	1.29192	5.74672	6.2469	1776.81	FALSE	43
2022-09-13	11:12:12	1.23116	5.47645	7.27298	1840.01	FALSE	43
2022-09-13	11:12:12	1.16989	5.2039	7.27298	1782.01	FALSE	43
2022-09-13	11:12:12	2.37838	10.5795	7.27298	1850.59	FALSE	43
2022-09-13	11:12:12	1.76073	7.83208	7.27298	1789.84	FALSE	43
2022-09-13	11:12:13	2.11752	9.41915	10.0898	1860.01	FALSE	43
2022-09-13	11:12:13	2.43543	10.8333	10.0898	1800.68	FALSE	43
2022-09-13	11:12:13	2.25192	10.017	10.0898	1870.03	FALSE	43
2022-09-13	11:12:14	2.83482	12.6098	4.43982	1813.29	FALSE	43
2022-09-13	11:12:14	0.708868	3.15319	4.43982	1873.18	FALSE	43
2022-09-13	11:12:14	0.277468	1.23423	4.43982	1814.52	FALSE	43
2022-09-13	11:12:14	0.171311	0.762026	4.43982	1873.94	FALSE	43
2022-09-13	11:12:15	0.1907	0.848272	0.696263	1815.37	FALSE	43
2022-09-13	11:12:15	0.207799	0.924332	0.696263	1874.86	FALSE	43
2022-09-13	11:12:15	0.157468	0.700449	0.696263	1816.07	FALSE	43
2022-09-13	11:12:15	0.0701402	0.311998	0.696263	1875.18	FALSE	43

## Sheet: Mars_prong_2022913110714 (3)
Date	Time	Lbs	Newtons	Total force x time	total step > 13.345		**GoPro Fitting: 1056
2022-09-13	11:07:15	0.296247	1.31777	1.31777	FALSE	0			Total force x time	1875.18
2022-09-13	11:07:15	0.287697	1.27973	1.27973	FALSE	0			Total steps	43
2022-09-13	11:07:15	0.239962	1.0674	2.38516	FALSE	0
2022-09-13	11:07:15	0.220878	0.98251	2.26224	FALSE	0
2022-09-13	11:07:16	0.231718	1.03073	3.41589	FALSE	0
2022-09-13	11:07:16	-0.255203	-1.13519	2.26224	FALSE	0
2022-09-13	11:07:16	-0.810928	-3.60717	3.41589	FALSE	0
2022-09-13	11:07:17	-0.916119	-4.07508	2.26224	FALSE	0
2022-09-13	11:07:17	-0.98136	-4.36529	3.41589	FALSE	0
2022-09-13	11:07:17	-1.05388	-4.68787	2.26224	FALSE	0
2022-09-13	11:07:17	-0.813269	-3.61758	3.41589	FALSE	0
2022-09-13	11:07:18	-0.909809	-4.04701	2.26224	FALSE	0
2022-09-13	11:07:18	-0.60874	-2.7078	3.41589	FALSE	0
2022-09-13	11:07:18	0.0634735	0.282343	2.54459	FALSE	0
2022-09-13	11:07:18	0.877214	3.90202	7.31792	FALSE	0
2022-09-13	11:07:19	1.77813	7.90948	10.4541	FALSE	0
2022-09-13	11:07:19	0.949377	4.22302	11.5409	FALSE	0
2022-09-13	11:07:19	-0.341361	-1.51844	10.4541	FALSE	0
2022-09-13	11:07:19	-0.368791	-1.64046	11.5409	FALSE	0
2022-09-13	11:07:20	-0.739579	-3.2898	10.4541	FALSE	0
2022-09-13	11:07:20	-0.636526	-2.83139	11.5409	FALSE	0
2022-09-13	11:07:20	-0.265076	-1.17911	10.4541	FALSE	0
2022-09-13	11:07:20	0.386069	1.71731	13.2582	FALSE	0
2022-09-13	11:07:21	0.195331	0.868871	11.3229	FALSE	0
2022-09-13	11:07:21	1.97513	8.78577	22.044	FALSE	0
2022-09-13	11:07:21	1.27869	5.68787	17.0108	FALSE	0
2022-09-13	11:07:22	1.24653	5.54481	27.5888	FALSE	0
2022-09-13	11:07:22	0.453295	2.01635	19.0272	FALSE	0
2022-09-13	11:07:22	1.97752	8.7964	36.3852	FALSE	0
2022-09-13	11:07:22	0.533244	2.37198	21.3991	FALSE	0
2022-09-13	11:07:23	1.28983	5.73742	42.1227	FALSE	0
2022-09-13	11:07:23	3.54963	15.7895	37.1886	1	1
2022-09-13	11:07:23	1.2223	5.43703	47.5597	FALSE	1
2022-09-13	11:07:23	0.47187	2.09897	39.2876	FALSE	1
2022-09-13	11:07:24	0.734975	3.26932	50.829	FALSE	1
2022-09-13	11:07:24	0.639809	2.846	42.1336	FALSE	1
2022-09-13	11:07:24	2.27843	10.1349	60.9639	FALSE	1
2022-09-13	11:07:24	0.282812	1.258	43.3916	FALSE	1
2022-09-13	11:07:25	0.733651	3.26343	64.2274	FALSE	1
2022-09-13	11:07:25	0.228766	1.0176	44.4092	FALSE	1
2022-09-13	11:07:25	0.952888	4.23864	68.466	FALSE	1
2022-09-13	11:07:26	4.85258	21.5852	65.9944	1	2
2022-09-13	11:07:26	4.83172	21.4925	89.9584	1	3
2022-09-13	11:07:26	1.61202	7.17059	73.165	FALSE	3
2022-09-13	11:07:26	0.659606	2.93406	92.8925	FALSE	3
2022-09-13	11:07:27	0.441387	1.96338	75.1284	FALSE	3
2022-09-13	11:07:27	0.337061	1.49931	94.3918	FALSE	3
2022-09-13	11:07:27	0.321845	1.43163	76.56	FALSE	3
2022-09-13	11:07:27	0.318791	1.41805	95.8099	FALSE	3
2022-09-13	11:07:28	0.301031	1.33905	77.8991	FALSE	3
2022-09-13	11:07:28	0.270598	1.20367	97.0135	FALSE	3
2022-09-13	11:07:28	0.279657	1.24397	79.143	FALSE	3
2022-09-13	11:07:28	0.273295	1.21567	98.2292	FALSE	3
2022-09-13	11:07:29	0.260115	1.15704	80.3001	FALSE	3
2022-09-13	11:07:29	-0.636729	-2.8323	98.2292	FALSE	3
2022-09-13	11:07:29	-0.71678	-3.18838	80.3001	FALSE	3
2022-09-13	11:07:30	-0.699274	-3.11051	98.2292	FALSE	3
2022-09-13	11:07:30	-0.669096	-2.97627	80.3001	FALSE	3
2022-09-13	11:07:30	-0.640394	-2.8486	98.2292	FALSE	3
2022-09-13	11:07:30	-0.608027	-2.70463	80.3001	FALSE	3
2022-09-13	11:07:31	-0.659274	-2.93258	98.2292	FALSE	3
2022-09-13	11:07:31	-0.679274	-3.02155	80.3001	FALSE	3
2022-09-13	11:07:31	-0.713931	-3.17571	98.2292	FALSE	3
2022-09-13	11:07:31	-0.718562	-3.19631	80.3001	FALSE	3
2022-09-13	11:07:32	-0.719783	-3.20174	98.2292	FALSE	3
2022-09-13	11:07:32	-0.685279	-3.04826	80.3001	FALSE	3
2022-09-13	11:07:32	-0.738256	-3.28391	98.2292	FALSE	3
2022-09-13	11:07:32	-0.766958	-3.41158	80.3001	FALSE	3
2022-09-13	11:07:33	-0.765839	-3.40661	98.2292	FALSE	3
2022-09-13	11:07:33	-0.738969	-3.28708	80.3001	FALSE	3
2022-09-13	11:07:33	-0.725279	-3.22619	98.2292	FALSE	3
2022-09-13	11:07:34	-0.707875	-3.14877	80.3001	FALSE	3
2022-09-13	11:07:34	-0.71388	-3.17548	98.2292	FALSE	3
2022-09-13	11:07:34	-0.867366	-3.85822	80.3001	FALSE	3
2022-09-13	11:07:34	0.196603	0.874529	99.1037	FALSE	3
2022-09-13	11:07:35	0.33472	1.4889	81.789	FALSE	3
2022-09-13	11:07:35	0.337214	1.5	100.604	FALSE	3
2022-09-13	11:07:35	0.34098	1.51675	83.3057	FALSE	3
2022-09-13	11:07:35	0.346883	1.543	102.147	FALSE	3
2022-09-13	11:07:36	0.340013	1.51245	84.8182	FALSE	3
2022-09-13	11:07:36	0.34154	1.51924	103.666	FALSE	3
2022-09-13	11:07:36	0.345356	1.53621	86.3544	FALSE	3
2022-09-13	11:07:36	0.374466	1.6657	105.332	FALSE	3
2022-09-13	11:07:37	0.373957	1.66344	88.0178	FALSE	3
2022-09-13	11:07:37	0.383881	1.70758	107.039	FALSE	3
2022-09-13	11:07:37	0.380115	1.69083	89.7086	FALSE	3
2022-09-13	11:07:37	0.35355	1.57266	108.612	FALSE	3
2022-09-13	11:07:38	-0.774338	-3.44441	89.7086	FALSE	3
2022-09-13	11:07:38	-0.819783	-3.64656	108.612	FALSE	3
2022-09-13	11:07:38	-0.799885	-3.55805	89.7086	FALSE	3
2022-09-13	11:07:39	-0.635813	-2.82822	108.612	FALSE	3
2022-09-13	11:07:39	0.722201	3.21249	92.9211	FALSE	3
2022-09-13	11:07:39	0.706832	3.14413	111.756	FALSE	3
2022-09-13	11:07:39	0.190242	0.846234	93.7674	FALSE	3
2022-09-13	11:07:40	0.363066	1.61499	113.371	FALSE	3
2022-09-13	11:07:40	0.548155	2.4383	96.2057	FALSE	3
2022-09-13	11:07:40	0.496501	2.20854	115.58	FALSE	3
2022-09-13	11:07:40	0.749835	3.33542	99.5411	FALSE	3
2022-09-13	11:07:41	0.903423	4.01861	119.598	FALSE	3
2022-09-13	11:07:41	0.461183	2.05143	101.593	FALSE	3
2022-09-13	11:07:41	0.466018	2.07294	121.671	FALSE	3
2022-09-13	11:07:41	0.425814	1.89411	103.487	FALSE	3
2022-09-13	11:07:42	0.438283	1.94957	123.621	FALSE	3
2022-09-13	11:07:42	0.365204	1.6245	105.111	FALSE	3
2022-09-13	11:07:42	0.447697	1.99145	125.612	FALSE	3
2022-09-13	11:07:43	0.364033	1.61929	106.73	FALSE	3
2022-09-13	11:07:43	0.378028	1.68154	127.294	FALSE	3
2022-09-13	11:07:43	0.331107	1.47283	108.203	FALSE	3
2022-09-13	11:07:43	0.307901	1.36961	128.663	FALSE	3
2022-09-13	11:07:44	0.28785	1.28041	109.484	FALSE	3
2022-09-13	11:07:44	0.267341	1.18919	129.852	FALSE	3
2022-09-13	11:07:44	0.27299	1.21431	110.698	FALSE	3
2022-09-13	11:07:44	0.260115	1.15704	131.01	FALSE	3
2022-09-13	11:07:45	0.23701	1.05427	111.752	FALSE	3
2022-09-13	11:07:45	0.250445	1.11403	132.124	FALSE	3
2022-09-13	11:07:45	0.235076	1.04567	112.798	FALSE	3
2022-09-13	11:07:45	0.254415	1.13169	133.255	FALSE	3
2022-09-13	11:07:46	0.256298	1.14006	113.938	FALSE	3
2022-09-13	11:07:46	0.265865	1.18262	134.438	FALSE	3
2022-09-13	11:07:46	0.256145	1.13938	115.077	FALSE	3
2022-09-13	11:07:47	0.255229	1.13531	135.573	FALSE	3
2022-09-13	11:07:47	0.249377	1.10928	116.187	FALSE	3
2022-09-13	11:07:47	0.240115	1.06808	136.641	FALSE	3
2022-09-13	11:07:47	0.243779	1.08438	117.271	FALSE	3
2022-09-13	11:07:48	0.261336	1.16247	137.804	FALSE	3
2022-09-13	11:07:48	0.375992	1.67249	118.944	FALSE	3
2022-09-13	11:07:48	0.743931	3.30915	141.113	FALSE	3
2022-09-13	11:07:48	0.787443	3.5027	122.446	FALSE	3
2022-09-13	11:07:49	0.757977	3.37163	144.485	FALSE	3
2022-09-13	11:07:49	0.816349	3.63128	126.077	FALSE	3
2022-09-13	11:07:49	0.880115	3.91493	148.399	FALSE	3
2022-09-13	11:07:49	1.30016	5.78337	131.861	FALSE	3
2022-09-13	11:07:50	-0.218155	-0.970397	148.399	FALSE	3
2022-09-13	11:07:50	-0.471895	-2.09908	131.861	FALSE	3
2022-09-13	11:07:50	-0.282531	-1.25675	148.399	FALSE	3
2022-09-13	11:07:51	0.188715	0.839442	132.7	FALSE	3
2022-09-13	11:07:51	0.817265	3.63536	152.035	FALSE	3
2022-09-13	11:07:51	0.1707	0.759308	133.46	FALSE	3
2022-09-13	11:07:51	0.130191	0.579116	152.614	FALSE	3
2022-09-13	11:07:52	0.33813	1.50407	134.964	FALSE	3
2022-09-13	11:07:52	0.529631	2.3559	154.97	FALSE	3
2022-09-13	11:07:52	0.688664	3.06332	138.027	FALSE	3
2022-09-13	11:07:52	0.548919	2.4417	157.412	FALSE	3
2022-09-13	11:07:53	0.702099	3.12308	141.15	FALSE	3
2022-09-13	11:07:53	0.584695	2.60084	160.012	FALSE	3
2022-09-13	11:07:53	0.699605	3.11198	144.262	FALSE	3
2022-09-13	11:07:53	0.635382	2.82631	162.839	FALSE	3
2022-09-13	11:07:54	0.626934	2.78873	147.051	FALSE	3
2022-09-13	11:07:54	0.504644	2.24476	165.083	FALSE	3
2022-09-13	11:07:54	0.567036	2.52229	149.573	FALSE	3
2022-09-13	11:07:54	0.615942	2.73983	167.823	FALSE	3
2022-09-13	11:07:55	0.89813	3.99506	153.568	FALSE	3
2022-09-13	11:07:55	1.60164	7.12442	174.948	FALSE	3
2022-09-13	11:07:55	1.50276	6.68458	160.253	FALSE	3
2022-09-13	11:07:56	1.18729	5.2813	180.229	FALSE	3
2022-09-13	11:07:56	1.11732	4.97006	165.223	FALSE	3
2022-09-13	11:07:56	1.10821	4.92954	185.159	FALSE	3
2022-09-13	11:07:56	0.974822	4.3362	169.559	FALSE	3
2022-09-13	11:07:57	0.867697	3.85969	189.018	FALSE	3
2022-09-13	11:07:57	0.751667	3.34357	172.903	FALSE	3
2022-09-13	11:07:57	0.744236	3.31051	192.329	FALSE	3
2022-09-13	11:07:57	0.735229	3.27045	176.173	FALSE	3
2022-09-13	11:07:58	0.909377	4.04509	196.374	FALSE	3
2022-09-13	11:07:58	1.00139	4.45438	180.627	FALSE	3
2022-09-13	11:07:58	0.920166	4.09308	200.467	FALSE	3
2022-09-13	11:07:58	0.916603	4.07723	184.705	FALSE	3
2022-09-13	11:07:59	0.886832	3.94481	204.412	FALSE	3
2022-09-13	11:07:59	0.870242	3.87101	188.576	FALSE	3
2022-09-13	11:07:59	0.84154	3.74334	208.155	FALSE	3
2022-09-13	11:08:00	0.778588	3.46332	192.039	FALSE	3
2022-09-13	11:08:00	0.74271	3.30372	211.459	FALSE	3
2022-09-13	11:08:00	0.744694	3.31255	195.351	FALSE	3
2022-09-13	11:08:00	0.787086	3.50112	214.96	FALSE	3
2022-09-13	11:08:01	0.796858	3.54458	198.896	FALSE	3
2022-09-13	11:08:01	0.728919	3.24238	218.202	FALSE	3
2022-09-13	11:08:01	0.753651	3.35239	202.248	FALSE	3
2022-09-13	11:08:01	0.786323	3.49772	221.7	FALSE	3
2022-09-13	11:08:02	0.786069	3.49659	205.745	FALSE	3
2022-09-13	11:08:02	0.792684	3.52602	225.226	FALSE	3
2022-09-13	11:08:02	0.791311	3.51991	209.265	FALSE	3
2022-09-13	11:08:02	0.845661	3.76167	228.988	FALSE	3
2022-09-13	11:08:03	0.91925	4.08901	213.354	FALSE	3
2022-09-13	11:08:03	0.927748	4.12681	233.114	FALSE	3
2022-09-13	11:08:03	0.840064	3.73677	217.091	FALSE	3
2022-09-13	11:08:04	0.802252	3.56858	236.683	FALSE	3
2022-09-13	11:08:04	1.11625	4.9653	222.056	FALSE	3
2022-09-13	11:08:04	1.06475	4.73622	241.419	FALSE	3
2022-09-13	11:08:04	1.16933	5.20141	227.257	FALSE	3
2022-09-13	11:08:05	1.19162	5.30056	246.72	FALSE	3
2022-09-13	11:08:05	1.07955	4.80205	232.06	FALSE	3
2022-09-13	11:08:05	1.02327	4.55171	251.272	FALSE	3
2022-09-13	11:08:05	0.904033	4.02132	236.081	FALSE	3
2022-09-13	11:08:06	1.2166	5.41168	256.683	FALSE	3
2022-09-13	11:08:06	1.30327	5.79721	241.878	FALSE	3
2022-09-13	11:08:06	1.33518	5.93915	262.622	FALSE	3
2022-09-13	11:08:06	1.00678	4.47836	246.356	FALSE	3
2022-09-13	11:08:07	1.04927	4.66736	267.29	FALSE	3
2022-09-13	11:08:07	1.07986	4.80343	251.16	FALSE	3
2022-09-13	11:08:07	1.10083	4.89671	272.186	FALSE	3
2022-09-13	11:08:08	1.12312	4.99586	256.156	FALSE	3
2022-09-13	11:08:08	1.29075	5.74151	277.928	FALSE	3
2022-09-13	11:08:08	1.36088	6.05347	262.209	FALSE	3
2022-09-13	11:08:08	1.28912	5.73426	283.662	FALSE	3
2022-09-13	11:08:09	1.23106	5.476	267.685	FALSE	3
2022-09-13	11:08:09	1.21696	5.41328	289.075	FALSE	3
2022-09-13	11:08:09	1.24607	5.54277	273.228	FALSE	3
2022-09-13	11:08:09	1.32922	5.91264	294.988	FALSE	3
2022-09-13	11:08:10	1.40266	6.23931	279.467	FALSE	3
2022-09-13	11:08:10	1.43772	6.39527	301.383	FALSE	3
2022-09-13	11:08:10	1.50536	6.69614	286.163	FALSE	3
2022-09-13	11:08:10	1.44459	6.42583	307.809	FALSE	3
2022-09-13	11:08:11	1.18261	5.26049	291.424	FALSE	3
2022-09-13	11:08:11	1.04927	4.66736	312.477	FALSE	3
2022-09-13	11:08:11	1.12235	4.99244	296.416	FALSE	3
2022-09-13	11:08:11	1.16032	5.16134	317.638	FALSE	3
2022-09-13	11:08:12	1.13238	5.03705	301.453	FALSE	3
2022-09-13	11:08:12	1.06118	4.72034	322.358	FALSE	3
2022-09-13	11:08:12	0.984847	4.3808	305.834	FALSE	3
2022-09-13	11:08:13	0.540929	2.40616	324.764	FALSE	3
2022-09-13	11:08:13	0.318486	1.41669	307.251	FALSE	3
2022-09-13	11:08:13	0.298893	1.32954	326.094	FALSE	3
2022-09-13	11:08:13	0.312786	1.39133	308.642	FALSE	3
2022-09-13	11:08:14	0.286781	1.27566	327.37	FALSE	3
2022-09-13	11:08:14	0.377265	1.67815	310.32	FALSE	3
2022-09-13	11:08:14	0.28785	1.28041	328.65	FALSE	3
2022-09-13	11:08:14	0.312176	1.38862	311.709	FALSE	3
2022-09-13	11:08:15	0.406883	1.8099	330.46	FALSE	3
2022-09-13	11:08:15	0.285509	1.27	312.979	FALSE	3
2022-09-13	11:08:15	0.509886	2.26807	332.728	FALSE	3
2022-09-13	11:08:15	0.137214	0.610355	313.589	FALSE	3
2022-09-13	11:08:16	0.244898	1.08936	333.817	FALSE	3
2022-09-13	11:08:16	0.883473	3.92986	317.519	FALSE	3
2022-09-13	11:08:16	0.843626	3.75262	337.57	FALSE	3
2022-09-13	11:08:17	1.00592	4.47453	321.994	FALSE	3
2022-09-13	11:08:17	1.53716	6.8376	344.408	FALSE	3
2022-09-13	11:08:17	2.4024	10.6864	332.68	FALSE	3
2022-09-13	11:08:17	2.78744	12.3991	356.807	FALSE	3
2022-09-13	11:08:18	1.34327	5.97513	338.655	FALSE	3
2022-09-13	11:08:18	2.2909	10.1904	366.997	FALSE	3
2022-09-13	11:08:18	0.58271	2.59201	341.247	FALSE	3
2022-09-13	11:08:18	0.37416	1.66434	368.661	FALSE	3
2022-09-13	11:08:19	0.786679	3.49931	344.747	FALSE	3
2022-09-13	11:08:19	1.43258	6.3724	375.034	FALSE	3
2022-09-13	11:08:19	1.86505	8.29612	353.043	FALSE	3
2022-09-13	11:08:19	2.41518	10.7432	385.777	FALSE	3
2022-09-13	11:08:20	2.16144	9.61452	362.657	FALSE	3
2022-09-13	11:08:20	2.31894	10.3151	396.092	FALSE	3
2022-09-13	11:08:20	1.38754	6.17206	368.829	FALSE	3
2022-09-13	11:08:21	1.33762	5.95	402.042	FALSE	3
2022-09-13	11:08:21	1.45192	6.45843	375.288	FALSE	3
2022-09-13	11:08:21	0.841081	3.7413	405.783	FALSE	3
2022-09-13	11:08:21	1.61024	7.16267	382.45	FALSE	3
2022-09-13	11:08:22	2.13044	9.47662	415.26	FALSE	3
2022-09-13	11:08:22	4.05202	18.0242	400.474	1	4
2022-09-13	11:08:22	3.31223	14.7335	429.993	1	5
2022-09-13	11:08:22	5.48128	24.3818	424.856	1	6
2022-09-13	11:08:23	4.02149	17.8884	447.882	1	7
2022-09-13	11:08:23	7.0711	31.4537	456.31	1	8
2022-09-13	11:08:23	7.15772	31.839	479.721	1	9
2022-09-13	11:08:23	6.43706	28.6333	484.943	1	10
2022-09-13	11:08:24	6.23049	27.7145	507.435	1	11
2022-09-13	11:08:24	5.77986	25.71	510.653	1	12
2022-09-13	11:08:24	2.15431	9.5828	517.018	FALSE	12
2022-09-13	11:08:25	1.7849	7.93959	518.593	FALSE	12
2022-09-13	11:08:25	1.38424	6.15738	523.175	FALSE	12
2022-09-13	11:08:25	4.0934	18.2083	536.801	1	13
2022-09-13	11:08:25	5.4393	24.1951	547.371	1	14
2022-09-13	11:08:26	2.92943	13.0307	549.832	FALSE	14
2022-09-13	11:08:26	1.52144	6.76767	554.138	FALSE	14
2022-09-13	11:08:26	0.35131	1.5627	551.395	FALSE	14
2022-09-13	11:08:26	0.462201	2.05596	556.194	FALSE	14
2022-09-13	11:08:27	1.81472	8.07224	559.467	FALSE	14
2022-09-13	11:08:27	8.26708	36.7736	592.968	1	15
2022-09-13	11:08:27	0.21126	0.939727	560.406	FALSE	15
2022-09-13	11:08:27	3.29991	14.6787	607.646	1	16
2022-09-13	11:08:28	3.65538	16.2599	576.666	1	17
2022-09-13	11:08:28	3.87986	17.2584	624.905	1	18
2022-09-13	11:08:28	0.465967	2.07271	578.739	FALSE	18
2022-09-13	11:08:28	0.284389	1.26502	626.17	FALSE	18
2022-09-13	11:08:29	0.370649	1.64872	580.388	FALSE	18
2022-09-13	11:08:29	0.380725	1.69354	627.863	FALSE	18
2022-09-13	11:08:29	0.456603	2.03106	582.419	FALSE	18
2022-09-13	11:08:30	0.473143	2.10463	629.968	FALSE	18
2022-09-13	11:08:30	0.503117	2.23797	584.657	FALSE	18
2022-09-13	11:08:30	0.662303	2.94606	632.914	FALSE	18
2022-09-13	11:08:30	0.506832	2.25449	586.911	FALSE	18
2022-09-13	11:08:31	0.547799	2.43672	635.351	FALSE	18
2022-09-13	11:08:31	0.590903	2.62845	589.54	FALSE	18
2022-09-13	11:08:31	0.628359	2.79507	638.146	FALSE	18
2022-09-13	11:08:31	0.609835	2.71267	592.252	FALSE	18
2022-09-13	11:08:32	0.64042	2.84872	640.995	FALSE	18
2022-09-13	11:08:32	0.633957	2.81997	595.072	FALSE	18
2022-09-13	11:08:32	0.614923	2.7353	643.73	FALSE	18
2022-09-13	11:08:32	0.613753	2.7301	597.802	FALSE	18
2022-09-13	11:08:33	0.57813	2.57164	646.302	FALSE	18
2022-09-13	11:08:33	0.402303	1.78952	599.592	FALSE	18
2022-09-13	11:08:33	0.365611	1.62631	647.928	FALSE	18
2022-09-13	11:08:34	0.366527	1.63039	601.222	FALSE	18
2022-09-13	11:08:34	0.370394	1.64759	649.575	FALSE	18
2022-09-13	11:08:34	0.386374	1.71867	602.941	FALSE	18
2022-09-13	11:08:34	0.383677	1.70667	651.282	FALSE	18
2022-09-13	11:08:35	0.377875	1.68086	604.622	FALSE	18
2022-09-13	11:08:35	0.379402	1.68766	652.97	FALSE	18
2022-09-13	11:08:35	0.386069	1.71731	606.339	FALSE	18
2022-09-13	11:08:35	0.411158	1.82891	654.799	FALSE	18
2022-09-13	11:08:36	0.439962	1.95704	608.296	FALSE	18
2022-09-13	11:08:36	0.513601	2.2846	657.083	FALSE	18
2022-09-13	11:08:36	0.549784	2.44555	610.742	FALSE	18
2022-09-13	11:08:36	0.523219	2.32738	659.411	FALSE	18
2022-09-13	11:08:37	0.521081	2.31787	613.06	FALSE	18
2022-09-13	11:08:37	0.541692	2.40955	661.82	FALSE	18
2022-09-13	11:08:37	0.496603	2.20899	615.269	FALSE	18
2022-09-13	11:08:38	0.534008	2.37537	664.196	FALSE	18
2022-09-13	11:08:38	0.520267	2.31425	617.583	FALSE	18
2022-09-13	11:08:38	0.538486	2.39529	666.591	FALSE	18
2022-09-13	11:08:38	0.52673	2.343	619.926	FALSE	18
2022-09-13	11:08:39	0.518079	2.30452	668.895	FALSE	18
2022-09-13	11:08:39	0.538333	2.39461	622.321	FALSE	18
2022-09-13	11:08:39	0.51757	2.30225	671.198	FALSE	18
2022-09-13	11:08:39	0.538282	2.39439	624.715	FALSE	18
2022-09-13	11:08:40	0.538588	2.39575	673.593	FALSE	18
2022-09-13	11:08:40	0.522506	2.32421	627.039	FALSE	18
2022-09-13	11:08:40	0.421234	1.87373	675.467	FALSE	18
2022-09-13	11:08:40	0.374568	1.66615	628.705	FALSE	18
2022-09-13	11:08:41	0.37472	1.66683	677.134	FALSE	18
2022-09-13	11:08:41	0.372379	1.65642	630.362	FALSE	18
2022-09-13	11:08:41	0.340471	1.51448	678.648	FALSE	18
2022-09-13	11:08:42	0.32215	1.43299	631.795	FALSE	18
2022-09-13	11:08:42	0.370598	1.64849	680.297	FALSE	18
2022-09-13	11:08:42	0.334618	1.48845	633.283	FALSE	18
2022-09-13	11:08:42	0.459606	2.04442	682.341	FALSE	18
2022-09-13	11:08:43	0.725204	3.22585	636.509	FALSE	18
2022-09-13	11:08:43	-0.132099	-0.587603	682.341	FALSE	18
2022-09-13	11:08:43	-0.0706231	-0.314146	636.509	FALSE	18
2022-09-13	11:08:43	-0.0719972	-0.320258	682.341	FALSE	18
2022-09-13	11:08:44	-0.0531168	-0.236274	636.509	FALSE	18
2022-09-13	11:08:44	-0.0326588	-0.145273	682.341	FALSE	18
2022-09-13	11:08:44	-0.020445	-0.0909434	636.509	FALSE	18
2022-09-13	11:08:44	0.137468	0.611485	682.953	FALSE	18
2022-09-13	11:08:45	0.136858	0.608772	637.118	FALSE	18
2022-09-13	11:08:45	0.568918	2.53066	685.484	FALSE	18
2022-09-13	11:08:45	0.528766	2.35206	639.47	FALSE	18
2022-09-13	11:08:45	0.080929	0.359988	685.844	FALSE	18
2022-09-13	11:08:46	0.260929	1.16066	640.631	FALSE	18
2022-09-13	11:08:46	0.166374	0.740065	686.584	FALSE	18
2022-09-13	11:08:46	0.101336	0.450763	641.081	FALSE	18
2022-09-13	11:08:47	-0.0730659	-0.325012	686.584	FALSE	18
2022-09-13	11:08:47	-0.207773	-0.924216	641.081	FALSE	18
2022-09-13	11:08:47	-0.138257	-0.614995	686.584	FALSE	18
2022-09-13	11:08:47	-0.00263335	-0.0117137	641.081	FALSE	18
2022-09-13	11:08:48	-0.00131018	-0.00582794	686.584	FALSE	18
2022-09-13	11:08:48	0.0247967	0.110301	641.192	FALSE	18
2022-09-13	11:08:48	0.142761	0.635029	687.219	FALSE	18
2022-09-13	11:08:48	0.263982	1.17424	642.366	FALSE	18
2022-09-13	11:08:49	0.361234	1.60684	688.825	FALSE	18
2022-09-13	11:08:49	0.369682	1.64442	644.01	FALSE	18
2022-09-13	11:08:49	0.331311	1.47374	690.299	FALSE	18
2022-09-13	11:08:49	0.340522	1.51471	645.525	FALSE	18
2022-09-13	11:08:50	0.343779	1.5292	691.828	FALSE	18
2022-09-13	11:08:50	0.343473	1.52784	647.053	FALSE	18
2022-09-13	11:08:50	0.338893	1.50746	693.336	FALSE	18
2022-09-13	11:08:51	0.344644	1.53305	648.586	FALSE	18
2022-09-13	11:08:51	0.342964	1.52557	694.861	FALSE	18
2022-09-13	11:08:51	0.322099	1.43276	650.019	FALSE	18
2022-09-13	11:08:51	0.528308	2.35002	697.211	FALSE	18
2022-09-13	11:08:52	0.74042	3.29354	653.312	FALSE	18
2022-09-13	11:08:52	0.739046	3.28742	700.499	FALSE	18
2022-09-13	11:08:52	0.73187	3.2555	656.568	FALSE	18
2022-09-13	11:08:52	0.712023	3.16722	703.666	FALSE	18
2022-09-13	11:08:53	0.476756	2.12071	658.688	FALSE	18
2022-09-13	11:08:53	0.363473	1.6168	705.283	FALSE	18
2022-09-13	11:08:53	0.217621	0.968022	659.656	FALSE	18
2022-09-13	11:08:53	0.549224	2.44306	707.726	FALSE	18
2022-09-13	11:08:54	0.361082	1.60616	661.263	FALSE	18
2022-09-13	11:08:54	0.252328	1.12241	708.848	FALSE	18
2022-09-13	11:08:54	0.202914	0.902602	662.165	FALSE	18
2022-09-13	11:08:55	0.388562	1.7284	710.577	FALSE	18
2022-09-13	11:08:55	0.410344	1.82529	663.99	FALSE	18
2022-09-13	11:08:55	0.428003	1.90384	712.481	FALSE	18
2022-09-13	11:08:55	0.419809	1.86739	665.858	FALSE	18
2022-09-13	11:08:56	0.418435	1.86128	714.342	FALSE	18
2022-09-13	11:08:56	0.260369	1.15817	667.016	FALSE	18
2022-09-13	11:08:56	0.0578756	0.257442	714.599	FALSE	18
2022-09-13	11:08:56	0.0501401	0.223033	667.239	FALSE	18
2022-09-13	11:08:57	0.108003	0.480419	715.08	FALSE	18
2022-09-13	11:08:57	0.0940079	0.418166	667.657	FALSE	18
2022-09-13	11:08:57	0.131209	0.583644	715.663	FALSE	18
2022-09-13	11:08:57	0.182507	0.811828	668.469	FALSE	18
2022-09-13	11:08:58	0.167596	0.745501	716.409	FALSE	18
2022-09-13	11:08:58	0.259555	1.15455	669.624	FALSE	18
2022-09-13	11:08:58	0.169886	0.755687	717.165	FALSE	18
2022-09-13	11:08:59	0.142812	0.635256	670.259	FALSE	18
2022-09-13	11:08:59	0.169733	0.755006	717.92	FALSE	18
2022-09-13	11:08:59	0.299809	1.33361	671.592	FALSE	18
2022-09-13	11:08:59	0.400115	1.77979	719.699	FALSE	18
2022-09-13	11:09:00	0.684084	3.04294	674.635	FALSE	18
2022-09-13	11:09:00	0.407494	1.81261	721.512	FALSE	18
2022-09-13	11:09:00	0.601234	2.67441	677.31	FALSE	18
2022-09-13	11:09:00	0.386629	1.7198	723.232	FALSE	18
2022-09-13	11:09:01	0.580725	2.58318	679.893	FALSE	18
2022-09-13	11:09:01	0.44327	1.97175	725.204	FALSE	18
2022-09-13	11:09:01	0.56042	2.49286	682.386	FALSE	18
2022-09-13	11:09:01	0.583015	2.59337	727.797	FALSE	18
2022-09-13	11:09:02	0.582863	2.59269	684.979	FALSE	18
2022-09-13	11:09:02	0.521743	2.32082	730.118	FALSE	18
2022-09-13	11:09:02	0.613499	2.72897	687.707	FALSE	18
2022-09-13	11:09:02	0.617316	2.74595	732.864	FALSE	18
2022-09-13	11:09:03	0.583626	2.59609	690.304	FALSE	18
2022-09-13	11:09:03	0.546272	2.42993	735.294	FALSE	18
2022-09-13	11:09:03	0.666374	2.96416	693.268	FALSE	18
2022-09-13	11:09:04	0.610445	2.71538	738.009	FALSE	18
2022-09-13	11:09:04	0.670751	2.98363	696.251	FALSE	18
2022-09-13	11:09:04	0.518435	2.3061	740.315	FALSE	18
2022-09-13	11:09:04	0.715534	3.18284	699.434	FALSE	18
2022-09-13	11:09:05	0.716807	3.1885	743.504	FALSE	18
2022-09-13	11:09:05	0.701489	3.12036	702.555	FALSE	18
2022-09-13	11:09:05	0.737926	3.28244	746.786	FALSE	18
2022-09-13	11:09:05	0.708918	3.15341	705.708	FALSE	18
2022-09-13	11:09:06	0.722812	3.21521	750.001	FALSE	18
2022-09-13	11:09:06	0.709784	3.15726	708.865	FALSE	18
2022-09-13	11:09:06	0.70327	3.12829	753.13	FALSE	18
2022-09-13	11:09:06	0.722812	3.21521	712.08	FALSE	18
2022-09-13	11:09:07	0.667443	2.96892	756.098	FALSE	18
2022-09-13	11:09:07	0.68958	3.06739	715.148	FALSE	18
2022-09-13	11:09:07	0.669936	2.98001	759.078	FALSE	18
2022-09-13	11:09:08	0.685763	3.05041	718.198	FALSE	18
2022-09-13	11:09:08	0.694109	3.08754	762.166	FALSE	18
2022-09-13	11:09:08	0.686679	3.05449	721.253	FALSE	18
2022-09-13	11:09:08	0.684644	3.04543	765.211	FALSE	18
2022-09-13	11:09:09	0.650344	2.89286	724.146	FALSE	18
2022-09-13	11:09:09	0.679249	3.02144	768.233	FALSE	18
2022-09-13	11:09:09	0.652939	2.9044	727.05	FALSE	18
2022-09-13	11:09:09	0.682914	3.03774	771.271	FALSE	18
2022-09-13	11:09:10	0.672379	2.99088	730.041	FALSE	18
2022-09-13	11:09:10	0.682863	3.03751	774.308	FALSE	18
2022-09-13	11:09:10	0.684593	3.04521	733.086	FALSE	18
2022-09-13	11:09:10	0.659962	2.93564	777.244	FALSE	18
2022-09-13	11:09:11	0.672023	2.98929	736.075	FALSE	18
2022-09-13	11:09:11	0.731158	3.25234	780.496	FALSE	18
2022-09-13	11:09:11	0.102303	0.455064	736.53	FALSE	18
2022-09-13	11:09:12	0.728715	3.24147	783.738	FALSE	18
2022-09-13	11:09:12	0.585712	2.60536	739.136	FALSE	18
2022-09-13	11:09:12	0.234568	1.04341	784.781	FALSE	18
2022-09-13	11:09:12	0.686323	3.0529	742.189	FALSE	18
2022-09-13	11:09:13	0.193041	0.858685	785.64	FALSE	18
2022-09-13	11:09:13	0.306832	1.36485	743.554	FALSE	18
2022-09-13	11:09:13	0.357977	1.59235	787.232	FALSE	18
2022-09-13	11:09:13	0.447087	1.98873	745.542	FALSE	18
2022-09-13	11:09:14	0.334618	1.48845	788.72	FALSE	18
2022-09-13	11:09:14	0.397468	1.76802	747.31	FALSE	18
2022-09-13	11:09:14	0.413397	1.83887	790.559	FALSE	18
2022-09-13	11:09:14	0.393906	1.75217	749.062	FALSE	18
2022-09-13	11:09:15	0.360064	1.60164	792.161	FALSE	18
2022-09-13	11:09:15	0.540522	2.40435	751.467	FALSE	18
2022-09-13	11:09:15	0.736196	3.27475	795.436	FALSE	18
2022-09-13	11:09:16	0.295585	1.31482	752.782	FALSE	18
2022-09-13	11:09:16	0.214517	0.954215	796.39	FALSE	18
2022-09-13	11:09:16	0.242761	1.07985	753.861	FALSE	18
2022-09-13	11:09:16	0.318334	1.41601	797.806	FALSE	18
2022-09-13	11:09:17	0.342914	1.52535	755.387	FALSE	18
2022-09-13	11:09:17	0.277621	1.23491	799.041	FALSE	18
2022-09-13	11:09:17	0.301794	1.34244	756.729	FALSE	18
2022-09-13	11:09:17	0.337163	1.49977	800.541	FALSE	18
2022-09-13	11:09:18	0.325356	1.44725	758.177	FALSE	18
2022-09-13	11:09:18	0.304746	1.35557	801.896	FALSE	18
2022-09-13	11:09:18	0.202303	0.899884	759.076	FALSE	18
2022-09-13	11:09:18	0.200674	0.892638	802.789	FALSE	18
2022-09-13	11:09:19	0.23472	1.04408	760.121	FALSE	18
2022-09-13	11:09:19	0.260165	1.15727	803.946	FALSE	18
2022-09-13	11:09:19	0.164186	0.730332	760.851	FALSE	18
2022-09-13	11:09:19	0.233753	1.03978	804.986	FALSE	18
2022-09-13	11:09:20	0.137265	0.610582	761.461	FALSE	18
2022-09-13	11:09:20	0.193143	0.859139	805.845	FALSE	18
2022-09-13	11:09:20	0.0462725	0.205829	761.667	FALSE	18
2022-09-13	11:09:21	0.114161	0.507811	806.353	FALSE	18
2022-09-13	11:09:21	0.168868	0.751159	762.418	FALSE	18
2022-09-13	11:09:21	0.187087	0.8322	807.185	FALSE	18
2022-09-13	11:09:21	0.364491	1.62133	764.04	FALSE	18
2022-09-13	11:09:22	0.311005	1.38341	808.568	FALSE	18
2022-09-13	11:09:22	0.242405	1.07827	765.118	FALSE	18
2022-09-13	11:09:22	0.249784	1.11109	809.68	FALSE	18
2022-09-13	11:09:22	0.314924	1.40084	766.519	FALSE	18
2022-09-13	11:09:23	0.246629	1.09706	810.777	FALSE	18
2022-09-13	11:09:23	0.248155	1.10384	767.623	FALSE	18
2022-09-13	11:09:23	0.235331	1.0468	811.823	FALSE	18
2022-09-13	11:09:23	0.239097	1.06355	768.686	FALSE	18
2022-09-13	11:09:24	0.230344	1.02462	812.848	FALSE	18
2022-09-13	11:09:24	0.251107	1.11697	769.803	FALSE	18
2022-09-13	11:09:24	0.273295	1.21567	814.064	FALSE	18
2022-09-13	11:09:25	0.183728	0.817259	770.62	FALSE	18
2022-09-13	11:09:25	0.158741	0.706112	814.77	FALSE	18
2022-09-13	11:09:25	0.100522	0.447142	771.068	FALSE	18
2022-09-13	11:09:25	0.176247	0.783982	815.554	FALSE	18
2022-09-13	11:09:26	0.280013	1.24555	772.313	FALSE	18
2022-09-13	11:09:26	0.142557	0.634122	816.188	FALSE	18
2022-09-13	11:09:26	0.350649	1.55976	773.873	FALSE	18
2022-09-13	11:09:26	0.180166	0.801414	816.989	FALSE	18
2022-09-13	11:09:27	0.255433	1.13622	775.009	FALSE	18
2022-09-13	11:09:27	0.181489	0.807299	817.797	FALSE	18
2022-09-13	11:09:27	0.400624	1.78206	776.791	FALSE	18
2022-09-13	11:09:27	0.417367	1.85653	819.653	FALSE	18
2022-09-13	11:09:28	0.360573	1.6039	778.395	FALSE	18
2022-09-13	11:09:28	0.348817	1.55161	821.205	FALSE	18
2022-09-13	11:09:28	0.272023	1.21001	779.605	FALSE	18
2022-09-13	11:09:29	0.309784	1.37798	822.583	FALSE	18
2022-09-13	11:09:29	0.3707	1.64895	781.254	FALSE	18
2022-09-13	11:09:29	0.306934	1.3653	823.948	FALSE	18
2022-09-13	11:09:29	0.276043	1.22789	782.482	FALSE	18
2022-09-13	11:09:30	0.194618	0.8657	824.814	FALSE	18
2022-09-13	11:09:30	0.227443	1.01171	783.494	FALSE	18
2022-09-13	11:09:30	0.255585	1.13689	825.951	FALSE	18
2022-09-13	11:09:30	0.293244	1.30441	784.798	FALSE	18
2022-09-13	11:09:31	0.615077	2.73599	828.687	FALSE	18
2022-09-13	11:09:31	0.444237	1.97606	786.774	FALSE	18
2022-09-13	11:09:31	0.49472	2.20061	830.887	FALSE	18
2022-09-13	11:09:31	1.29818	5.77456	792.549	FALSE	18
2022-09-13	11:09:32	1.76205	7.83795	838.725	FALSE	18
2022-09-13	11:09:32	1.54826	6.88697	799.436	FALSE	18
2022-09-13	11:09:32	1.06627	4.74298	843.468	FALSE	18
2022-09-13	11:09:33	0.866425	3.85403	803.29	FALSE	18
2022-09-13	11:09:33	0.945814	4.20717	847.675	FALSE	18
2022-09-13	11:09:33	0.573041	2.549	805.839	FALSE	18
2022-09-13	11:09:33	0.747952	3.32704	851.002	FALSE	18
2022-09-13	11:09:34	0.673143	2.99427	808.833	FALSE	18
2022-09-13	11:09:34	0.706476	3.14255	854.145	FALSE	18
2022-09-13	11:09:34	1.00612	4.47542	813.308	FALSE	18
2022-09-13	11:09:34	0.862659	3.83728	857.982	FALSE	18
2022-09-13	11:09:35	0.980979	4.36359	817.672	FALSE	18
2022-09-13	11:09:35	1.16286	5.17263	863.155	FALSE	18
2022-09-13	11:09:35	1.38088	6.14243	823.814	FALSE	18
2022-09-13	11:09:35	1.95655	8.70313	871.858	FALSE	18
2022-09-13	11:09:36	2.01019	8.94173	832.756	FALSE	18
2022-09-13	11:09:36	2.35971	10.4965	882.354	FALSE	18
2022-09-13	11:09:36	1.98515	8.83034	841.586	FALSE	18
2022-09-13	11:09:36	1.46057	6.49691	888.851	FALSE	18
2022-09-13	11:09:37	1.67696	7.45945	849.046	FALSE	18
2022-09-13	11:09:37	0.527494	2.3464	891.198	FALSE	18
2022-09-13	11:09:37	0.992634	4.41543	853.461	FALSE	18
2022-09-13	11:09:38	0.763372	3.39563	894.593	FALSE	18
2022-09-13	11:09:38	0.804695	3.57944	857.041	FALSE	18
2022-09-13	11:09:38	0.945662	4.20649	898.8	FALSE	18
2022-09-13	11:09:38	0.821285	3.65324	860.694	FALSE	18
2022-09-13	11:09:39	0.852023	3.78997	902.59	FALSE	18
2022-09-13	11:09:39	0.858333	3.81804	864.512	FALSE	18
2022-09-13	11:09:39	0.910802	4.05143	906.641	FALSE	18
2022-09-13	11:09:39	0.906679	4.03309	868.545	FALSE	18
2022-09-13	11:09:40	0.931819	4.14492	910.786	FALSE	18
2022-09-13	11:09:40	0.900623	4.00615	872.551	FALSE	18
2022-09-13	11:09:40	0.925458	4.11662	914.903	FALSE	18
2022-09-13	11:09:40	0.919096	4.08832	876.64	FALSE	18
2022-09-13	11:09:41	0.926679	4.12205	919.025	FALSE	18
2022-09-13	11:09:41	0.912633	4.05957	880.699	FALSE	18
2022-09-13	11:09:41	0.905916	4.0297	923.055	FALSE	18
2022-09-13	11:09:42	0.905763	4.02901	884.728	FALSE	18
2022-09-13	11:09:42	0.907595	4.03716	927.092	FALSE	18
2022-09-13	11:09:42	0.908511	4.04124	888.769	FALSE	18
2022-09-13	11:09:42	0.90098	4.00774	931.099	FALSE	18
2022-09-13	11:09:43	0.870038	3.8701	892.64	FALSE	18
2022-09-13	11:09:43	0.877621	3.90383	935.003	FALSE	18
2022-09-13	11:09:43	0.848257	3.77322	896.413	FALSE	18
2022-09-13	11:09:43	1.06205	4.72421	939.727	FALSE	18
2022-09-13	11:09:44	1.00622	4.47587	900.889	FALSE	18
2022-09-13	11:09:44	0.950598	4.22845	943.956	FALSE	18
2022-09-13	11:09:44	0.922557	4.10372	904.992	FALSE	18
2022-09-13	11:09:44	0.765153	3.40355	947.359	FALSE	18
2022-09-13	11:09:45	0.634262	2.82132	907.814	FALSE	18
2022-09-13	11:09:45	0.801641	3.56586	950.925	FALSE	18
2022-09-13	11:09:45	0.530853	2.36134	910.175	FALSE	18
2022-09-13	11:09:46	0.496654	2.20922	953.135	FALSE	18
2022-09-13	11:09:46	0.645254	2.87022	913.045	FALSE	18
2022-09-13	11:09:46	0.551921	2.45505	955.59	FALSE	18
2022-09-13	11:09:46	0.811666	3.61045	916.656	FALSE	18
2022-09-13	11:09:47	0.857519	3.81442	959.404	FALSE	18
2022-09-13	11:09:47	0.669224	2.97684	919.633	FALSE	18
2022-09-13	11:09:47	0.669733	2.97911	962.383	FALSE	18
2022-09-13	11:09:47	0.622913	2.77084	922.403	FALSE	18
2022-09-13	11:09:48	0.662761	2.94809	965.331	FALSE	18
2022-09-13	11:09:48	0.625102	2.78058	925.184	FALSE	18
2022-09-13	11:09:48	0.653549	2.90712	968.238	FALSE	18
2022-09-13	11:09:48	0.618893	2.75296	927.937	FALSE	18
2022-09-13	11:09:49	0.613244	2.72783	970.966	FALSE	18
2022-09-13	11:09:49	0.610394	2.71515	930.652	FALSE	18
2022-09-13	11:09:49	0.613549	2.72919	973.695	FALSE	18
2022-09-13	11:09:50	0.605255	2.6923	933.344	FALSE	18
2022-09-13	11:09:50	0.603117	2.68279	976.378	FALSE	18
2022-09-13	11:09:50	0.602659	2.68075	936.025	FALSE	18
2022-09-13	11:09:50	0.599453	2.66649	979.045	FALSE	18
2022-09-13	11:09:51	0.63584	2.82834	938.853	FALSE	18
2022-09-13	11:09:51	0.623829	2.77492	981.82	FALSE	18
2022-09-13	11:09:51	0.644237	2.8657	941.719	FALSE	18
2022-09-13	11:09:51	0.63075	2.8057	984.625	FALSE	18
2022-09-13	11:09:52	0.484491	2.15511	943.874	FALSE	18
2022-09-13	11:09:52	0.386069	1.71731	986.343	FALSE	18
2022-09-13	11:09:52	0.313906	1.39632	945.271	FALSE	18
2022-09-13	11:09:52	0.344847	1.53395	987.877	FALSE	18
2022-09-13	11:09:53	0.237824	1.05789	946.329	FALSE	18
2022-09-13	11:09:53	0.21416	0.952627	988.829	FALSE	18
2022-09-13	11:09:53	0.246679	1.09728	947.426	FALSE	18
2022-09-13	11:09:53	0.296756	1.32003	990.149	FALSE	18
2022-09-13	11:09:54	0.649071	2.8872	950.313	FALSE	18
2022-09-13	11:09:54	0.342201	1.52218	991.671	FALSE	18
2022-09-13	11:09:54	0.34785	1.54731	951.86	FALSE	18
2022-09-13	11:09:55	0.367138	1.6331	993.304	FALSE	18
2022-09-13	11:09:55	0.364542	1.62156	953.482	FALSE	18
2022-09-13	11:09:55	0.384491	1.71029	995.015	FALSE	18
2022-09-13	11:09:55	0.396909	1.76553	955.247	FALSE	18
2022-09-13	11:09:56	0.408206	1.81578	996.831	FALSE	18
2022-09-13	11:09:56	0.406374	1.80763	957.055	FALSE	18
2022-09-13	11:09:56	0.416756	1.85381	998.684	FALSE	18
2022-09-13	11:09:56	0.415636	1.84883	958.904	FALSE	18
2022-09-13	11:09:57	0.421743	1.876	1000.56	FALSE	18
2022-09-13	11:09:57	0.420878	1.87215	960.776	FALSE	18
2022-09-13	11:09:57	0.422506	1.87939	1002.44	FALSE	18
2022-09-13	11:09:57	0.425356	1.89207	962.668	FALSE	18
2022-09-13	11:09:58	0.463117	2.06004	1004.5	FALSE	18
2022-09-13	11:09:58	0.496756	2.20967	964.878	FALSE	18
2022-09-13	11:09:58	0.474568	2.11097	1006.61	FALSE	18
2022-09-13	11:09:59	0.457417	2.03468	966.912	FALSE	18
2022-09-13	11:09:59	0.441896	1.96564	1008.58	FALSE	18
2022-09-13	11:09:59	0.448308	1.99416	968.907	FALSE	18
2022-09-13	11:09:59	0.449173	1.99801	1010.57	FALSE	18
2022-09-13	11:10:00	0.438028	1.94844	970.855	FALSE	18
2022-09-13	11:10:00	0.434618	1.93327	1012.51	FALSE	18
2022-09-13	11:10:00	0.440522	1.95953	972.815	FALSE	18
2022-09-13	11:10:00	0.441285	1.96292	1014.47	FALSE	18
2022-09-13	11:10:01	0.436247	1.94051	974.755	FALSE	18
2022-09-13	11:10:01	0.432634	1.92444	1016.4	FALSE	18
2022-09-13	11:10:01	0.409886	1.82325	976.578	FALSE	18
2022-09-13	11:10:01	0.370751	1.64917	1018.04	FALSE	18
2022-09-13	11:10:02	0.370751	1.64917	978.227	FALSE	18
2022-09-13	11:10:02	0.358232	1.59349	1019.64	FALSE	18
2022-09-13	11:10:02	0.447036	1.98851	980.216	FALSE	18
2022-09-13	11:10:03	0.630038	2.80254	1022.44	FALSE	18
2022-09-13	11:10:03	0.0414379	0.184324	980.4	FALSE	18
2022-09-13	11:10:03	0.0440842	0.196095	1022.64	FALSE	18
2022-09-13	11:10:03	0.0401147	0.178438	980.579	FALSE	18
2022-09-13	11:10:04	0.821183	3.65279	1026.29	FALSE	18
2022-09-13	11:10:04	0.833957	3.70961	984.288	FALSE	18
2022-09-13	11:10:04	0.58729	2.61238	1028.9	FALSE	18
2022-09-13	11:10:04	0.404033	1.79722	986.086	FALSE	18
2022-09-13	11:10:05	-0.0102669	-0.0456692	1028.9	FALSE	18
2022-09-13	11:10:05	0.114415	0.508941	986.595	FALSE	18
2022-09-13	11:10:05	-0.025127	-0.11177	1028.9	FALSE	18
2022-09-13	11:10:05	-0.0696053	-0.309618	986.595	FALSE	18
2022-09-13	11:10:06	-0.0332186	-0.147763	1028.9	FALSE	18
2022-09-13	11:10:06	0.0483081	0.214884	986.809	FALSE	18
2022-09-13	11:10:06	0.0349239	0.155348	1029.06	FALSE	18
2022-09-13	11:10:07	0.0229137	0.101925	986.911	FALSE	18
2022-09-13	11:10:07	0.0182318	0.0810987	1029.14	FALSE	18
2022-09-13	11:10:07	0.552176	2.45619	989.368	FALSE	18
2022-09-13	11:10:07	0.329479	1.46559	1030.6	FALSE	18
2022-09-13	11:10:08	-0.018155	-0.0807571	989.368	FALSE	18
2022-09-13	11:10:08	-0.0471117	-0.209562	1030.6	FALSE	18
2022-09-13	11:10:08	-0.00629748	-0.0280125	989.368	FALSE	18
2022-09-13	11:10:08	0.267087	1.18806	1031.79	FALSE	18
2022-09-13	11:10:09	0.0842369	0.374703	989.742	FALSE	18
2022-09-13	11:10:09	0.122252	0.543801	1032.34	FALSE	18
2022-09-13	11:10:09	0.023219	0.103283	989.845	FALSE	18
2022-09-13	11:10:09	0.0726338	0.32309	1032.66	FALSE	18
2022-09-13	11:10:10	0.0597076	0.265591	990.111	FALSE	18
2022-09-13	11:10:10	-0.0128623	-0.0572141	1032.66	FALSE	18
2022-09-13	11:10:10	-0.0943382	-0.419635	990.111	FALSE	18
2022-09-13	11:10:10	-0.165025	-0.734064	1032.66	FALSE	18
2022-09-13	11:10:11	-0.220191	-0.979454	990.111	FALSE	18
2022-09-13	11:10:11	-0.221666	-0.986015	1032.66	FALSE	18
2022-09-13	11:10:11	-0.222175	-0.988279	990.111	FALSE	18
2022-09-13	11:10:12	0.141183	0.62801	1033.29	FALSE	18
2022-09-13	11:10:12	0.328715	1.46219	991.573	FALSE	18
2022-09-13	11:10:12	0.285255	1.26887	1034.56	FALSE	18
2022-09-13	11:10:12	0.013041	0.058009	991.631	FALSE	18
2022-09-13	11:10:13	0.0799111	0.355461	1034.91	FALSE	18
2022-09-13	11:10:13	0.338232	1.50452	993.136	FALSE	18
2022-09-13	11:10:13	0.244389	1.08709	1036	FALSE	18
2022-09-13	11:10:13	0.313753	1.39564	994.531	FALSE	18
2022-09-13	11:10:14	0.17813	0.792358	1036.79	FALSE	18
2022-09-13	11:10:14	0.145204	0.645896	995.177	FALSE	18
2022-09-13	11:10:14	0.117926	0.524558	1037.31	FALSE	18
2022-09-13	11:10:14	0.102557	0.456194	995.634	FALSE	18
2022-09-13	11:10:15	0.0888679	0.395302	1037.71	FALSE	18
2022-09-13	11:10:15	0.069733	0.310186	995.944	FALSE	18
2022-09-13	11:10:15	-0.0299616	-0.133275	1037.71	FALSE	18
2022-09-13	11:10:16	-0.0658903	-0.293093	995.944	FALSE	18
2022-09-13	11:10:16	-0.0299616	-0.133275	1037.71	FALSE	18
2022-09-13	11:10:16	0.0821503	0.365421	996.309	FALSE	18
2022-09-13	11:10:16	0.148308	0.659704	1038.37	FALSE	18
2022-09-13	11:10:17	0.130547	0.580699	996.89	FALSE	18
2022-09-13	11:10:17	0.152278	0.677363	1039.05	FALSE	18
2022-09-13	11:10:17	0.166985	0.742783	997.633	FALSE	18
2022-09-13	11:10:17	0.211107	0.939046	1039.99	FALSE	18
2022-09-13	11:10:18	0.230344	1.02462	998.657	FALSE	18
2022-09-13	11:10:18	0.193804	0.862079	1040.85	FALSE	18
2022-09-13	11:10:18	0.142048	0.631858	999.289	FALSE	18
2022-09-13	11:10:18	0.436247	1.94051	1042.79	FALSE	18
2022-09-13	11:10:19	0.530802	2.36111	1001.65	FALSE	18
2022-09-13	11:10:19	0.329377	1.46513	1044.25	FALSE	18
2022-09-13	11:10:19	0.315331	1.40266	1003.05	FALSE	18
2022-09-13	11:10:20	0.342557	1.52376	1045.78	FALSE	18
2022-09-13	11:10:20	0.339504	1.51018	1004.56	FALSE	18
2022-09-13	11:10:20	0.086934	0.3867	1046.16	FALSE	18
2022-09-13	11:10:20	-0.184771	-0.821898	1004.56	FALSE	18
2022-09-13	11:10:21	-0.0420226	-0.186925	1046.16	FALSE	18
2022-09-13	11:10:21	0.109886	0.488795	1005.05	FALSE	18
2022-09-13	11:10:21	0.615687	2.7387	1048.9	FALSE	18
2022-09-13	11:10:21	1.6937	7.53392	1012.59	FALSE	18
2022-09-13	11:10:22	1.75319	7.79854	1056.7	FALSE	18
2022-09-13	11:10:22	0.82958	3.69014	1016.28	FALSE	18
2022-09-13	11:10:22	0.305713	1.35987	1058.06	FALSE	18
2022-09-13	11:10:22	0.272837	1.21363	1017.49	FALSE	18
2022-09-13	11:10:23	0.173652	0.772439	1058.83	FALSE	18
2022-09-13	11:10:23	0.385	1.71256	1019.2	FALSE	18
2022-09-13	11:10:23	0.359758	1.60028	1060.43	FALSE	18
2022-09-13	11:10:24	0.241387	1.07374	1020.28	FALSE	18
2022-09-13	11:10:24	0.280318	1.24691	1061.68	FALSE	18
2022-09-13	11:10:24	0.380318	1.69173	1021.97	FALSE	18
2022-09-13	11:10:24	0.212176	0.943801	1062.62	FALSE	18
2022-09-13	11:10:25	0.288512	1.28336	1023.25	FALSE	18
2022-09-13	11:10:25	0.210802	0.937689	1063.56	FALSE	18
2022-09-13	11:10:25	0.44958	1.99982	1025.25	FALSE	18
2022-09-13	11:10:25	0.285356	1.26932	1064.83	FALSE	18
2022-09-13	11:10:26	0.369886	1.64533	1026.9	FALSE	18
2022-09-13	11:10:26	0.228359	1.01579	1065.85	FALSE	18
2022-09-13	11:10:26	0.493397	2.19473	1029.09	FALSE	18
2022-09-13	11:10:26	0.425967	1.89479	1067.74	FALSE	18
2022-09-13	11:10:27	0.853906	3.79834	1032.89	FALSE	18
2022-09-13	11:10:27	0.742354	3.30214	1071.04	FALSE	18
2022-09-13	11:10:27	1.19833	5.33041	1038.22	FALSE	18
2022-09-13	11:10:27	0.643321	2.86162	1073.91	FALSE	18
2022-09-13	11:10:28	1.10566	4.9182	1043.14	FALSE	18
2022-09-13	11:10:28	1.24067	5.51875	1079.43	FALSE	18
2022-09-13	11:10:28	1.19355	5.30915	1048.45	FALSE	18
2022-09-13	11:10:29	1.24403	5.53369	1084.96	FALSE	18
2022-09-13	11:10:29	1.62566	7.23126	1055.68	FALSE	18
2022-09-13	11:10:29	1.12698	5.01303	1089.97	FALSE	18
2022-09-13	11:10:29	2.81991	12.5435	1068.22	FALSE	18
2022-09-13	11:10:30	2.78953	12.4084	1102.38	FALSE	18
2022-09-13	11:10:30	3.54332	15.7614	1083.98	1	19
2022-09-13	11:10:30	3.5107	15.6163	1118	1	20
2022-09-13	11:10:30	4.40016	19.5728	1103.56	1	21
2022-09-13	11:10:31	2.70683	12.0405	1130.04	FALSE	21
2022-09-13	11:10:31	1.79197	7.97104	1111.53	FALSE	21
2022-09-13	11:10:31	1.31523	5.85041	1135.89	FALSE	21
2022-09-13	11:10:31	0.883422	3.92964	1115.46	FALSE	21
2022-09-13	11:10:32	2.24383	9.981	1145.87	FALSE	21
2022-09-13	11:10:32	0.56215	2.50056	1117.96	FALSE	21
2022-09-13	11:10:32	2.45584	10.9241	1156.79	FALSE	21
2022-09-13	11:10:33	1.10785	4.92794	1122.89	FALSE	21
2022-09-13	11:10:33	1.63167	7.25799	1164.05	FALSE	21
2022-09-13	11:10:33	3.13665	13.9524	1136.84	1	22
2022-09-13	11:10:33	3.2795	14.5879	1178.64	1	23
2022-09-13	11:10:34	2.12052	9.4325	1146.27	FALSE	23
2022-09-13	11:10:34	3.80413	16.9215	1195.56	1	24
2022-09-13	11:10:34	3.65731	16.2684	1162.54	1	25
2022-09-13	11:10:34	1.76892	7.86851	1203.43	FALSE	25
2022-09-13	11:10:35	4.02495	17.9038	1180.44	1	26
2022-09-13	11:10:35	2.34342	10.424	1213.85	FALSE	26
2022-09-13	11:10:35	0.822201	3.65731	1184.1	FALSE	26
2022-09-13	11:10:35	2.7824	12.3767	1226.23	FALSE	26
2022-09-13	11:10:36	3.81111	16.9526	1201.05	1	27
2022-09-13	11:10:36	4.51151	20.0681	1246.3	1	28
2022-09-13	11:10:36	3.82749	17.0254	1218.08	1	29
2022-09-13	11:10:37	5.52484	24.5756	1270.87	1	30
2022-09-13	11:10:37	2.77457	12.3418	1230.42	FALSE	30
2022-09-13	11:10:37	1.98017	8.80819	1279.68	FALSE	30
2022-09-13	11:10:37	4.32724	19.2484	1249.67	1	31
2022-09-13	11:10:38	1.4448	6.42676	1286.11	FALSE	31
2022-09-13	11:10:38	2.27874	10.1363	1259.8	FALSE	31
2022-09-13	11:10:38	3.14576	13.993	1300.1	1	32
2022-09-13	11:10:38	1.86871	8.3124	1268.12	FALSE	32
2022-09-13	11:10:39	3.24922	14.4532	1314.55	1	33
2022-09-13	11:10:39	2.99263	13.3118	1281.43	FALSE	33
2022-09-13	11:10:39	2.92846	13.0264	1327.58	FALSE	33
2022-09-13	11:10:39	5.05528	22.4869	1303.92	1	34
2022-09-13	11:10:40	5.66001	25.1769	1352.76	1	35
2022-09-13	11:10:40	5.5453	24.6666	1328.58	1	36
2022-09-13	11:10:40	1.64469	7.31591	1360.07	FALSE	36
2022-09-13	11:10:41	0.0363997	0.161913	1328.74	FALSE	36
2022-09-13	11:10:41	0.357875	1.5919	1361.66	FALSE	36
2022-09-13	11:10:41	-0.0916919	-0.407864	1328.74	FALSE	36
2022-09-13	11:10:41	-0.383804	-1.70724	1361.66	FALSE	36
2022-09-13	11:10:42	-0.467875	-2.0812	1328.74	FALSE	36
2022-09-13	11:10:42	-0.351132	-1.56191	1361.66	FALSE	36
2022-09-13	11:10:42	0.424949	1.89026	1330.63	FALSE	36
2022-09-13	11:10:42	1.53401	6.82358	1368.49	FALSE	36
2022-09-13	11:10:43	0.907901	4.03853	1334.67	FALSE	36
2022-09-13	11:10:43	1.83614	8.16752	1376.66	FALSE	36
2022-09-13	11:10:43	2.00469	8.91726	1343.59	FALSE	36
2022-09-13	11:10:43	6.55807	29.1716	1405.83	1	37
2022-09-13	11:10:44	5.94622	26.45	1370.04	1	38
2022-09-13	11:10:44	3.95009	17.5708	1423.4	1	39
2022-09-13	11:10:44	0.318028	1.41465	1371.45	FALSE	39
2022-09-13	11:10:44	0.124848	0.555349	1423.95	FALSE	39
2022-09-13	11:10:45	-0.0239565	-0.106563	1371.45	FALSE	39
2022-09-13	11:10:45	-0.180954	-0.80492	1423.95	FALSE	39
2022-09-13	11:10:45	-0.132913	-0.591224	1371.45	FALSE	39
2022-09-13	11:10:46	-0.218715	-0.972888	1423.95	FALSE	39
2022-09-13	11:10:46	-0.210827	-0.937801	1371.45	FALSE	39
2022-09-13	11:10:46	-0.0690455	-0.307128	1423.95	FALSE	39
2022-09-13	11:10:46	-0.37271	-1.65789	1371.45	FALSE	39
2022-09-13	11:10:47	-0.0311829	-0.138708	1423.95	FALSE	39
2022-09-13	11:10:47	0.159606	0.709959	1372.16	FALSE	39
2022-09-13	11:10:47	0.377468	1.67905	1425.63	FALSE	39
2022-09-13	11:10:47	0.225916	1.00492	1373.17	FALSE	39
2022-09-13	11:10:48	0.302964	1.34764	1426.98	FALSE	39
2022-09-13	11:10:48	0.232379	1.03367	1374.2	FALSE	39
2022-09-13	11:10:48	0.228766	1.0176	1428	FALSE	39
2022-09-13	11:10:48	0.354618	1.57741	1375.78	FALSE	39
2022-09-13	11:10:49	0.422914	1.88121	1429.88	FALSE	39
2022-09-13	11:10:49	0.357621	1.59077	1377.37	FALSE	39
2022-09-13	11:10:49	0.920063	4.09262	1433.97	FALSE	39
2022-09-13	11:10:50	0.570496	2.53768	1379.91	FALSE	39
2022-09-13	11:10:50	0.864695	3.84634	1437.82	FALSE	39
2022-09-13	11:10:50	0.738842	3.28652	1383.2	FALSE	39
2022-09-13	11:10:50	0.732277	3.25731	1441.08	FALSE	39
2022-09-13	11:10:51	0.734568	3.26751	1386.46	FALSE	39
2022-09-13	11:10:51	0.73701	3.27837	1444.35	FALSE	39
2022-09-13	11:10:51	0.723066	3.21634	1389.68	FALSE	39
2022-09-13	11:10:51	1.09497	4.87065	1449.22	FALSE	39
2022-09-13	11:10:52	1.39711	6.21462	1395.89	FALSE	39
2022-09-13	11:10:52	1.8763	8.34616	1457.57	FALSE	39
2022-09-13	11:10:52	3.06164	13.6188	1409.51	1	40
2022-09-13	11:10:52	3.82083	16.9958	1474.57	1	41
2022-09-13	11:10:53	2.64882	11.7825	1421.3	FALSE	41
2022-09-13	11:10:53	3.15299	14.0251	1488.59	1	42
2022-09-13	11:10:53	2.26846	10.0906	1431.39	FALSE	42
2022-09-13	11:10:54	1.67594	7.45492	1496.05	FALSE	42
2022-09-13	11:10:54	1.86286	8.28637	1439.67	FALSE	42
2022-09-13	11:10:54	1.4249	6.33824	1502.38	FALSE	42
2022-09-13	11:10:54	1.30536	5.8065	1445.48	FALSE	42
2022-09-13	11:10:55	1.11223	4.94742	1507.33	FALSE	42
2022-09-13	11:10:55	1.14078	5.07442	1450.55	FALSE	42
2022-09-13	11:10:55	1.14459	5.09137	1512.42	FALSE	42
2022-09-13	11:10:55	1.10531	4.91664	1455.47	FALSE	42
2022-09-13	11:10:56	1.06653	4.74414	1517.17	FALSE	42
2022-09-13	11:10:56	1.05039	4.67234	1460.14	FALSE	42
2022-09-13	11:10:56	1.31111	5.83208	1523	FALSE	42
2022-09-13	11:10:56	1.09823	4.88515	1465.03	FALSE	42
2022-09-13	11:10:57	0.707188	3.14571	1526.15	FALSE	42
2022-09-13	11:10:57	0.704797	3.13508	1468.16	FALSE	42
2022-09-13	11:10:57	1.01452	4.51279	1530.66	FALSE	42
2022-09-13	11:10:58	2.70037	12.0118	1480.17	FALSE	42
2022-09-13	11:10:58	1.85915	8.26987	1538.93	FALSE	42
2022-09-13	11:10:58	1.0791	4.80005	1484.97	FALSE	42
2022-09-13	11:10:58	1.06775	4.74957	1543.68	FALSE	42
2022-09-13	11:10:59	0.660318	2.93723	1487.91	FALSE	42
2022-09-13	11:10:59	0.681031	3.02936	1546.71	FALSE	42
2022-09-13	11:10:59	0.461336	2.05211	1489.96	FALSE	42
2022-09-13	11:10:59	0.520623	2.31584	1549.02	FALSE	42
2022-09-13	11:11:00	0.605153	2.69184	1492.66	FALSE	42
2022-09-13	11:11:00	0.464593	2.0666	1551.09	FALSE	42
2022-09-13	11:11:00	0.485051	2.1576	1494.81	FALSE	42
2022-09-13	11:11:00	0.401285	1.785	1552.87	FALSE	42
2022-09-13	11:11:01	0.337977	1.50339	1496.32	FALSE	42
2022-09-13	11:11:01	0.436196	1.94029	1554.81	FALSE	42
2022-09-13	11:11:01	0.357825	1.59168	1497.91	FALSE	42
2022-09-13	11:11:01	0.465458	2.07045	1556.89	FALSE	42
2022-09-13	11:11:02	0.489784	2.17866	1500.09	FALSE	42
2022-09-13	11:11:02	0.605153	2.69184	1559.58	FALSE	42
2022-09-13	11:11:02	0.691463	3.07577	1503.16	FALSE	42
2022-09-13	11:11:03	0.591208	2.62981	1562.21	FALSE	42
2022-09-13	11:11:03	0.936247	4.16461	1507.33	FALSE	42
2022-09-13	11:11:03	0.631361	2.80842	1565.02	FALSE	42
2022-09-13	11:11:03	0.632583	2.81386	1510.14	FALSE	42
2022-09-13	11:11:04	0.613804	2.73032	1567.75	FALSE	42
2022-09-13	11:11:04	0.670445	2.98227	1513.12	FALSE	42
2022-09-13	11:11:04	0.681895	3.03321	1570.78	FALSE	42
2022-09-13	11:11:04	0.726221	3.23038	1516.35	FALSE	42
2022-09-13	11:11:05	0.771768	3.43298	1574.21	FALSE	42
2022-09-13	11:11:05	0.794517	3.53417	1519.89	FALSE	42
2022-09-13	11:11:05	0.747544	3.32523	1577.54	FALSE	42
2022-09-13	11:11:05	0.389377	1.73203	1521.62	FALSE	42
2022-09-13	11:11:06	2.62775	11.6888	1589.23	FALSE	42
2022-09-13	11:11:06	3.31981	14.7672	1536.39	1	43
2022-09-13	11:11:06	0.714822	3.17967	1592.41	FALSE	43
2022-09-13	11:11:07	0.741947	3.30033	1539.69	FALSE	43
2022-09-13	11:11:07	0.617214	2.74549	1595.15	FALSE	43
2022-09-13	11:11:07	0.713804	3.17514	1542.86	FALSE	43
2022-09-13	11:11:07	0.572176	2.54515	1597.7	FALSE	43
2022-09-13	11:11:08	-0.362837	-1.61397	1542.86	FALSE	43
2022-09-13	11:11:08	0.698435	3.10678	1600.8	FALSE	43
2022-09-13	11:11:08	0.313601	1.39496	1544.26	FALSE	43
2022-09-13	11:11:08	0.736857	3.27769	1604.08	FALSE	43
2022-09-13	11:11:09	-0.0730659	-0.325012	1544.26	FALSE	43
2022-09-13	11:11:09	-0.308486	-1.37221	1604.08	FALSE	43
2022-09-13	11:11:09	-0.375101	-1.66852	1544.26	FALSE	43
2022-09-13	11:11:09	-0.261157	-1.16168	1604.08	FALSE	43
2022-09-13	11:11:10	-0.327111	-1.45506	1544.26	FALSE	43
2022-09-13	11:11:10	-0.908027	-4.03909	1604.08	FALSE	43
2022-09-13	11:11:10	-1.18482	-5.27032	1544.26	FALSE	43
2022-09-13	11:11:11	0.658741	2.93021	1607.01	FALSE	43
2022-09-13	11:11:11	0.51411	2.28686	1546.54	FALSE	43
2022-09-13	11:11:11	0.613549	2.72919	1609.74	FALSE	43
2022-09-13	11:11:11	0.460115	2.04668	1548.59	FALSE	43
2022-09-13	11:11:12	0.354008	1.5747	1611.31	FALSE	43
2022-09-13	11:11:12	0.363626	1.61748	1550.21	FALSE	43
2022-09-13	11:11:12	0.382659	1.70214	1613.02	FALSE	43
2022-09-13	11:11:12	0.246832	1.09796	1551.31	FALSE	43
2022-09-13	11:11:13	0.286171	1.27295	1614.29	FALSE	43
2022-09-13	11:11:13	0.301896	1.34289	1552.65	FALSE	43
2022-09-13	11:11:13	0.28902	1.28562	1615.58	FALSE	43
2022-09-13	11:11:13	0.28958	1.28811	1553.94	FALSE	43
2022-09-13	11:11:14	0.279046	1.24125	1616.82	FALSE	43
2022-09-13	11:11:14	0.278283	1.23786	1555.18	FALSE	43
2022-09-13	11:11:14	0.281031	1.25008	1618.07	FALSE	43
2022-09-13	11:11:15	0.267138	1.18828	1556.36	FALSE	43
2022-09-13	11:11:15	0.275585	1.22586	1619.29	FALSE	43
2022-09-13	11:11:15	0.257112	1.14369	1557.51	FALSE	43
2022-09-13	11:11:15	0.354924	1.57877	1620.87	FALSE	43
2022-09-13	11:11:16	0.313041	1.39247	1558.9	FALSE	43
2022-09-13	11:11:16	0.589478	2.62212	1623.49	FALSE	43
2022-09-13	11:11:16	0.657366	2.9241	1561.82	FALSE	43
2022-09-13	11:11:16	0.398028	1.77051	1625.26	FALSE	43
2022-09-13	11:11:17	0.697875	3.10429	1564.93	FALSE	43
2022-09-13	11:11:17	0.727596	3.23649	1628.5	FALSE	43
2022-09-13	11:11:17	0.359046	1.59711	1566.52	FALSE	43
2022-09-13	11:11:17	0.363677	1.61771	1630.12	FALSE	43
2022-09-13	11:11:18	0.35131	1.5627	1568.09	FALSE	43
2022-09-13	11:11:18	0.351514	1.5636	1631.68	FALSE	43
2022-09-13	11:11:18	0.339606	1.51064	1569.6	FALSE	43
2022-09-13	11:11:19	0.338283	1.50475	1633.19	FALSE	43
2022-09-13	11:11:19	0.326018	1.45019	1571.05	FALSE	43
2022-09-13	11:11:19	0.33813	1.50407	1634.69	FALSE	43
2022-09-13	11:11:19	0.33869	1.50656	1572.56	FALSE	43
2022-09-13	11:11:20	0.317265	1.41126	1636.1	FALSE	43
2022-09-13	11:11:20	0.379046	1.68607	1574.24	FALSE	43
2022-09-13	11:11:20	0.267596	1.19032	1637.29	FALSE	43
2022-09-13	11:11:20	0.388359	1.7275	1575.97	FALSE	43
2022-09-13	11:11:21	0.442201	1.967	1639.26	FALSE	43
2022-09-13	11:11:21	0.294975	1.31211	1577.28	FALSE	43
2022-09-13	11:11:21	0.368308	1.63831	1640.9	FALSE	43
2022-09-13	11:11:21	0.367545	1.63491	1578.92	FALSE	43
2022-09-13	11:11:22	0.394873	1.75647	1642.65	FALSE	43
2022-09-13	11:11:22	0.27472	1.22201	1580.14	FALSE	43
2022-09-13	11:11:22	0.279707	1.24419	1643.9	FALSE	43
2022-09-13	11:11:22	0.381031	1.6949	1581.83	FALSE	43
2022-09-13	11:11:23	0.292125	1.29943	1645.2	FALSE	43
2022-09-13	11:11:23	0.419046	1.864	1583.7	FALSE	43
2022-09-13	11:11:23	0.412735	1.83593	1647.03	FALSE	43
2022-09-13	11:11:24	0.328054	1.45925	1585.16	FALSE	43
2022-09-13	11:11:24	0.401997	1.78816	1648.82	FALSE	43
2022-09-13	11:11:24	0.408664	1.81782	1586.97	FALSE	43
2022-09-13	11:11:24	0.459707	2.04487	1650.87	FALSE	43
2022-09-13	11:11:25	0.474618	2.1112	1589.08	FALSE	43
2022-09-13	11:11:25	0.458537	2.03966	1652.91	FALSE	43
2022-09-13	11:11:25	0.461998	2.05506	1591.14	FALSE	43
2022-09-13	11:11:25	0.422099	1.87758	1654.78	FALSE	43
2022-09-13	11:11:26	0.496094	2.20673	1593.35	FALSE	43
2022-09-13	11:11:26	0.454618	2.02223	1656.81	FALSE	43
2022-09-13	11:11:26	0.499198	2.22053	1595.57	FALSE	43
2022-09-13	11:11:26	0.483473	2.15058	1658.96	FALSE	43
2022-09-13	11:11:27	0.474262	2.10961	1597.68	FALSE	43
2022-09-13	11:11:27	0.490547	2.18205	1661.14	FALSE	43
2022-09-13	11:11:27	0.480674	2.13813	1599.81	FALSE	43
2022-09-13	11:11:28	0.476094	2.11776	1663.26	FALSE	43
2022-09-13	11:11:28	0.488003	2.17073	1601.99	FALSE	43
2022-09-13	11:11:28	0.471514	2.09739	1665.35	FALSE	43
2022-09-13	11:11:28	0.466323	2.0743	1604.06	FALSE	43
2022-09-13	11:11:29	0.46902	2.08629	1667.44	FALSE	43
2022-09-13	11:11:29	0.470802	2.09422	1606.15	FALSE	43
2022-09-13	11:11:29	0.479046	2.13089	1669.57	FALSE	43
2022-09-13	11:11:29	0.468308	2.08313	1608.24	FALSE	43
2022-09-13	11:11:30	0.473804	2.10757	1671.68	FALSE	43
2022-09-13	11:11:30	0.370649	1.64872	1609.89	FALSE	43
2022-09-13	11:11:30	0.226527	1.00764	1672.69	FALSE	43
2022-09-13	11:11:30	0.241641	1.07487	1610.96	FALSE	43
2022-09-13	11:11:31	0.281641	1.2528	1673.94	FALSE	43
2022-09-13	11:11:31	0.353295	1.57153	1612.53	FALSE	43
2022-09-13	11:11:31	0.35355	1.57266	1675.51	FALSE	43
2022-09-13	11:11:32	0.347392	1.54527	1614.08	FALSE	43
2022-09-13	11:11:32	0.351718	1.56451	1677.08	FALSE	43
2022-09-13	11:11:32	0.344491	1.53236	1615.61	FALSE	43
2022-09-13	11:11:32	0.348664	1.55093	1678.63	FALSE	43
2022-09-13	11:11:33	0.342099	1.52172	1617.13	FALSE	43
2022-09-13	11:11:33	0.353193	1.57107	1680.2	FALSE	43
2022-09-13	11:11:33	0.369682	1.64442	1618.78	FALSE	43
2022-09-13	11:11:33	0.359606	1.5996	1681.8	FALSE	43
2022-09-13	11:11:34	0.377112	1.67747	1620.45	FALSE	43
2022-09-13	11:11:34	0.375331	1.66955	1683.47	FALSE	43
2022-09-13	11:11:34	0.382252	1.70033	1622.15	FALSE	43
2022-09-13	11:11:34	0.383626	1.70645	1685.17	FALSE	43
2022-09-13	11:11:35	0.379657	1.68879	1623.84	FALSE	43
2022-09-13	11:11:35	0.383677	1.70667	1686.88	FALSE	43
2022-09-13	11:11:35	0.37813	1.682	1625.52	FALSE	43
2022-09-13	11:11:36	0.395331	1.75851	1688.64	FALSE	43
2022-09-13	11:11:36	0.376145	1.67317	1627.2	FALSE	43
2022-09-13	11:11:36	0.361387	1.60752	1690.25	FALSE	43
2022-09-13	11:11:36	0.365865	1.62744	1628.83	FALSE	43
2022-09-13	11:11:37	0.43813	1.94889	1692.2	FALSE	43
2022-09-13	11:11:37	0.738231	3.2838	1632.11	FALSE	43
2022-09-13	11:11:37	0.73584	3.27316	1695.47	FALSE	43
2022-09-13	11:11:37	0.752684	3.34809	1635.46	FALSE	43
2022-09-13	11:11:38	0.746323	3.31979	1698.79	FALSE	43
2022-09-13	11:11:38	0.749987	3.33609	1638.79	FALSE	43
2022-09-13	11:11:38	0.768715	3.4194	1702.21	FALSE	43
2022-09-13	11:11:38	0.559707	2.48969	1641.28	FALSE	43
2022-09-13	11:11:39	0.537723	2.3919	1704.6	FALSE	43
2022-09-13	11:11:39	0.427799	1.90294	1643.19	FALSE	43
2022-09-13	11:11:39	0.340165	1.51312	1706.11	FALSE	43
2022-09-13	11:11:39	0.206323	0.917766	1644.1	FALSE	43
2022-09-13	11:11:40	0.289937	1.2897	1707.4	FALSE	43
2022-09-13	11:11:40	0.311361	1.385	1645.49	FALSE	43
2022-09-13	11:11:40	0.323117	1.43729	1708.84	FALSE	43
2022-09-13	11:11:41	0.176501	0.785112	1646.27	FALSE	43
2022-09-13	11:11:41	0.102812	0.457328	1709.3	FALSE	43
2022-09-13	11:11:41	-0.000241466	-0.00107409	1646.27	FALSE	43
2022-09-13	11:11:41	0.124186	0.552404	1709.85	FALSE	43
2022-09-13	11:11:42	0.018588	0.0826831	1646.36	FALSE	43
2022-09-13	11:11:42	0.0431681	0.19202	1710.04	FALSE	43
2022-09-13	11:11:42	0.0222013	0.0987558	1646.46	FALSE	43
2022-09-13	11:11:42	0.125458	0.558062	1710.6	FALSE	43
2022-09-13	11:11:43	0.0264252	0.117545	1646.57	FALSE	43
2022-09-13	11:11:43	0.034415	0.153085	1710.75	FALSE	43
2022-09-13	11:11:43	0.0944149	0.419976	1646.99	FALSE	43
2022-09-13	11:11:43	0.282761	1.25778	1712.01	FALSE	43
2022-09-13	11:11:44	0.275687	1.22631	1648.22	FALSE	43
2022-09-13	11:11:44	0.328359	1.46061	1713.47	FALSE	43
2022-09-13	11:11:44	0.733448	3.26252	1651.48	FALSE	43
2022-09-13	11:11:45	0.814771	3.62426	1717.1	FALSE	43
2022-09-13	11:11:45	0.73986	3.29105	1654.77	FALSE	43
2022-09-13	11:11:45	0.427137	1.89999	1719	FALSE	43
2022-09-13	11:11:45	0.374873	1.66751	1656.44	FALSE	43
2022-09-13	11:11:46	0.409631	1.82212	1720.82	FALSE	43
2022-09-13	11:11:46	0.286272	1.2734	1657.71	FALSE	43
2022-09-13	11:11:46	0.329326	1.46491	1722.28	FALSE	43
2022-09-13	11:11:46	0.265916	1.18285	1658.9	FALSE	43
2022-09-13	11:11:47	0.256451	1.14075	1723.42	FALSE	43
2022-09-13	11:11:47	0.265967	1.18307	1660.08	FALSE	43
2022-09-13	11:11:47	0.258486	1.1498	1724.57	FALSE	43
2022-09-13	11:11:47	0.265356	1.18036	1661.26	FALSE	43
2022-09-13	11:11:48	0.276807	1.23129	1725.8	FALSE	43
2022-09-13	11:11:48	0.267036	1.18783	1662.45	FALSE	43
2022-09-13	11:11:48	0.274008	1.21884	1727.02	FALSE	43
2022-09-13	11:11:49	0.279758	1.24442	1663.69	FALSE	43
2022-09-13	11:11:49	0.268817	1.19575	1728.22	FALSE	43
2022-09-13	11:11:49	0.254618	1.13259	1664.82	FALSE	43
2022-09-13	11:11:49	0.23757	1.05676	1729.28	FALSE	43
2022-09-13	11:11:50	0.548359	2.43921	1667.26	FALSE	43
2022-09-13	11:11:50	0.350598	1.55953	1730.84	FALSE	43
2022-09-13	11:11:50	0.218944	0.973907	1668.24	FALSE	43
2022-09-13	11:11:50	0.353346	1.57175	1732.41	FALSE	43
2022-09-13	11:11:51	0.238944	1.06287	1669.3	FALSE	43
2022-09-13	11:11:51	0.321438	1.42982	1733.84	FALSE	43
2022-09-13	11:11:51	0.341082	1.5172	1670.82	FALSE	43
2022-09-13	11:11:51	0.329122	1.464	1735.3	FALSE	43
2022-09-13	11:11:52	0.332685	1.47985	1672.3	FALSE	43
2022-09-13	11:11:52	0.372277	1.65596	1736.96	FALSE	43
2022-09-13	11:11:52	0.434568	1.93305	1674.23	FALSE	43
2022-09-13	11:11:53	0.688715	3.06354	1740.02	FALSE	43
2022-09-13	11:11:53	0.400471	1.78138	1676.01	FALSE	43
2022-09-13	11:11:53	0.320318	1.42484	1741.44	FALSE	43
2022-09-13	11:11:53	0.482456	2.14606	1678.16	FALSE	43
2022-09-13	11:11:54	0.355484	1.58126	1743.03	FALSE	43
2022-09-13	11:11:54	0.349631	1.55523	1679.71	FALSE	43
2022-09-13	11:11:54	0.341794	1.52037	1744.55	FALSE	43
2022-09-13	11:11:54	0.310089	1.37934	1681.09	FALSE	43
2022-09-13	11:11:55	0.350344	1.5584	1746.1	FALSE	43
2022-09-13	11:11:55	0.380318	1.69173	1682.78	FALSE	43
2022-09-13	11:11:55	0.325305	1.44702	1747.55	FALSE	43
2022-09-13	11:11:55	0.352074	1.5661	1684.35	FALSE	43
2022-09-13	11:11:56	0.378588	1.68404	1749.24	FALSE	43
2022-09-13	11:11:56	0.316756	1.40899	1685.76	FALSE	43
2022-09-13	11:11:56	0.236247	1.05087	1750.29	FALSE	43
2022-09-13	11:11:56	0.200267	0.890828	1686.65	FALSE	43
2022-09-13	11:11:57	0.20215	0.899204	1751.19	FALSE	43
2022-09-13	11:11:57	0.22271	0.990659	1687.64	FALSE	43
2022-09-13	11:11:57	0.202914	0.902602	1752.09	FALSE	43
2022-09-13	11:11:58	0.203982	0.907353	1688.55	FALSE	43
2022-09-13	11:11:58	0.189275	0.841933	1752.93	FALSE	43
2022-09-13	11:11:58	0.19869	0.883813	1689.43	FALSE	43
2022-09-13	11:11:58	0.180929	0.804808	1753.74	FALSE	43
2022-09-13	11:11:59	0.204898	0.911427	1690.34	FALSE	43
2022-09-13	11:11:59	0.143473	0.638197	1754.37	FALSE	43
2022-09-13	11:11:59	0.104949	0.466834	1690.81	FALSE	43
2022-09-13	11:11:59	0.152532	0.678493	1755.05	FALSE	43
2022-09-13	11:12:00	0.176603	0.785565	1691.6	FALSE	43
2022-09-13	11:12:00	0.111209	0.49468	1755.55	FALSE	43
2022-09-13	11:12:00	0.195789	0.870909	1692.47	FALSE	43
2022-09-13	11:12:00	0.172583	0.767684	1756.31	FALSE	43
2022-09-13	11:12:01	0.245	1.08981	1693.56	FALSE	43
2022-09-13	11:12:01	0.20841	0.927049	1757.24	FALSE	43
2022-09-13	11:12:01	0.221947	0.987265	1694.54	FALSE	43
2022-09-13	11:12:02	0.269987	1.20096	1758.44	FALSE	43
2022-09-13	11:12:02	0.269122	1.19711	1695.74	FALSE	43
2022-09-13	11:12:02	0.330089	1.4683	1759.91	FALSE	43
2022-09-13	11:12:02	1.31492	5.84903	1701.59	FALSE	43
2022-09-13	11:12:03	0.330038	1.46808	1761.38	FALSE	43
2022-09-13	11:12:03	0.382048	1.69943	1703.29	FALSE	43
2022-09-13	11:12:03	0.273041	1.21454	1762.59	FALSE	43
2022-09-13	11:12:03	0.182405	0.811374	1704.1	FALSE	43
2022-09-13	11:12:04	0.151209	0.672608	1763.27	FALSE	43
2022-09-13	11:12:04	0.254669	1.13282	1705.23	FALSE	43
2022-09-13	11:12:04	0.301896	1.34289	1764.61	FALSE	43
2022-09-13	11:12:04	0.867239	3.85765	1709.09	FALSE	43
2022-09-13	11:12:05	1.22139	5.43299	1770.04	FALSE	43
2022-09-13	11:12:05	0.782659	3.48142	1712.57	FALSE	43
2022-09-13	11:12:05	1.03472	4.60264	1774.64	FALSE	43
2022-09-13	11:12:06	1.26266	5.61656	1718.19	FALSE	43
2022-09-13	11:12:06	0.980063	4.35952	1779	FALSE	43
2022-09-13	11:12:06	0.521539	2.31991	1720.51	FALSE	43
2022-09-13	11:12:06	0.567188	2.52297	1781.53	FALSE	43
2022-09-13	11:12:07	0.946119	4.20853	1724.72	FALSE	43
2022-09-13	11:12:07	1.44067	6.40839	1787.94	FALSE	43
2022-09-13	11:12:07	0.76388	3.39789	1728.12	FALSE	43
2022-09-13	11:12:07	0.63243	2.81318	1790.75	FALSE	43
2022-09-13	11:12:08	0.969784	4.31379	1732.43	FALSE	43
2022-09-13	11:12:08	1.02195	4.54584	1795.29	FALSE	43
2022-09-13	11:12:08	1.1277	5.01624	1737.45	FALSE	43
2022-09-13	11:12:08	1.38541	6.16258	1801.46	FALSE	43
2022-09-13	11:12:09	1.69543	7.54161	1744.99	FALSE	43
2022-09-13	11:12:09	1.36785	6.08447	1807.54	FALSE	43
2022-09-13	11:12:09	1.18846	5.28651	1750.27	FALSE	43
2022-09-13	11:12:10	1.54892	6.88991	1814.43	FALSE	43
2022-09-13	11:12:10	1.63976	7.29398	1757.57	FALSE	43
2022-09-13	11:12:10	1.63289	7.26342	1821.69	FALSE	43
2022-09-13	11:12:10	1.5937	7.0891	1764.66	FALSE	43
2022-09-13	11:12:11	1.53686	6.83626	1828.53	FALSE	43
2022-09-13	11:12:11	1.43935	6.40252	1771.06	FALSE	43
2022-09-13	11:12:11	1.34933	6.00209	1834.53	FALSE	43
2022-09-13	11:12:11	1.29192	5.74672	1776.81	FALSE	43
2022-09-13	11:12:12	1.23116	5.47645	1840.01	FALSE	43
2022-09-13	11:12:12	1.16989	5.2039	1782.01	FALSE	43
2022-09-13	11:12:12	2.37838	10.5795	1850.59	FALSE	43
2022-09-13	11:12:12	1.76073	7.83208	1789.84	FALSE	43
2022-09-13	11:12:13	2.11752	9.41915	1860.01	FALSE	43
2022-09-13	11:12:13	2.43543	10.8333	1800.68	FALSE	43
2022-09-13	11:12:13	2.25192	10.017	1870.03	FALSE	43
2022-09-13	11:12:14	2.83482	12.6098	1813.29	FALSE	43
2022-09-13	11:12:14	0.708868	3.15319	1873.18	FALSE	43
2022-09-13	11:12:14	0.277468	1.23423	1814.52	FALSE	43
2022-09-13	11:12:14	0.171311	0.762026	1873.94	FALSE	43
2022-09-13	11:12:15	0.1907	0.848272	1815.37	FALSE	43
2022-09-13	11:12:15	0.207799	0.924332	1874.86	FALSE	43
2022-09-13	11:12:15	0.157468	0.700449	1816.07	FALSE	43
2022-09-13	11:12:15	0.0701402	0.311998	1875.18	FALSE	43

## Sheet: Mars_prong_2022913110714 (2)
Date	Time	Lbs	Total force x time			**GoPro Fitting: 1056
2022-09-13	11:07:15	0.296247	0.296247	FALSE	0			Total force x time	829.829
2022-09-13	11:07:15	0.287697	0.583944	FALSE	0			Total steps	43
2022-09-13	11:07:15	0.239962	0.823906	FALSE	0
2022-09-13	11:07:15	0.220878	1.04478	FALSE	0
2022-09-13	11:07:16	0.231718	1.2765	FALSE	0
2022-09-13	11:07:16	-0.255203	1.2765	FALSE	0
2022-09-13	11:07:16	-0.810928	1.2765	FALSE	0
2022-09-13	11:07:17	-0.916119	1.2765	FALSE	0
2022-09-13	11:07:17	-0.98136	1.2765	FALSE	0
2022-09-13	11:07:17	-1.05388	1.2765	FALSE	0
2022-09-13	11:07:17	-0.813269	1.2765	FALSE	0
2022-09-13	11:07:18	-0.909809	1.2765	FALSE	0
2022-09-13	11:07:18	-0.60874	1.2765	FALSE	0
2022-09-13	11:07:18	0.0634735	1.33998	FALSE	0
2022-09-13	11:07:18	0.877214	2.21719	FALSE	0
2022-09-13	11:07:19	1.77813	3.99532	FALSE	0
2022-09-13	11:07:19	0.949377	4.9447	FALSE	0
2022-09-13	11:07:19	-0.341361	4.9447	FALSE	0
2022-09-13	11:07:19	-0.368791	4.9447	FALSE	0
2022-09-13	11:07:20	-0.739579	4.9447	FALSE	0
2022-09-13	11:07:20	-0.636526	4.9447	FALSE	0
2022-09-13	11:07:20	-0.265076	4.9447	FALSE	0
2022-09-13	11:07:20	0.386069	5.33077	FALSE	0
2022-09-13	11:07:21	0.195331	5.5261	FALSE	0
2022-09-13	11:07:21	1.97513	7.50123	FALSE	0
2022-09-13	11:07:21	1.27869	8.77992	FALSE	0
2022-09-13	11:07:22	1.24653	10.0264	FALSE	0
2022-09-13	11:07:22	0.453295	10.4797	FALSE	0
2022-09-13	11:07:22	1.97752	12.4573	FALSE	0
2022-09-13	11:07:22	0.533244	12.9905	FALSE	0
2022-09-13	11:07:23	1.28983	14.2803	FALSE	0
2022-09-13	11:07:23	3.54963	17.83	1	1
2022-09-13	11:07:23	1.2223	19.0523	FALSE	1
2022-09-13	11:07:23	0.47187	19.5241	FALSE	1
2022-09-13	11:07:24	0.734975	20.2591	FALSE	1
2022-09-13	11:07:24	0.639809	20.8989	FALSE	1
2022-09-13	11:07:24	2.27843	23.1773	FALSE	1
2022-09-13	11:07:24	0.282812	23.4602	FALSE	1
2022-09-13	11:07:25	0.733651	24.1938	FALSE	1
2022-09-13	11:07:25	0.228766	24.4226	FALSE	1
2022-09-13	11:07:25	0.952888	25.3755	FALSE	1
2022-09-13	11:07:26	4.85258	30.228	1	2
2022-09-13	11:07:26	4.83172	35.0598	1	3
2022-09-13	11:07:26	1.61202	36.6718	FALSE	3
2022-09-13	11:07:26	0.659606	37.3314	FALSE	3
2022-09-13	11:07:27	0.441387	37.7728	FALSE	3
2022-09-13	11:07:27	0.337061	38.1098	FALSE	3
2022-09-13	11:07:27	0.321845	38.4317	FALSE	3
2022-09-13	11:07:27	0.318791	38.7505	FALSE	3
2022-09-13	11:07:28	0.301031	39.0515	FALSE	3
2022-09-13	11:07:28	0.270598	39.3221	FALSE	3
2022-09-13	11:07:28	0.279657	39.6018	FALSE	3
2022-09-13	11:07:28	0.273295	39.8751	FALSE	3
2022-09-13	11:07:29	0.260115	40.1352	FALSE	3
2022-09-13	11:07:29	-0.636729	40.1352	FALSE	3
2022-09-13	11:07:29	-0.71678	40.1352	FALSE	3
2022-09-13	11:07:30	-0.699274	40.1352	FALSE	3
2022-09-13	11:07:30	-0.669096	40.1352	FALSE	3
2022-09-13	11:07:30	-0.640394	40.1352	FALSE	3
2022-09-13	11:07:30	-0.608027	40.1352	FALSE	3
2022-09-13	11:07:31	-0.659274	40.1352	FALSE	3
2022-09-13	11:07:31	-0.679274	40.1352	FALSE	3
2022-09-13	11:07:31	-0.713931	40.1352	FALSE	3
2022-09-13	11:07:31	-0.718562	40.1352	FALSE	3
2022-09-13	11:07:32	-0.719783	40.1352	FALSE	3
2022-09-13	11:07:32	-0.685279	40.1352	FALSE	3
2022-09-13	11:07:32	-0.738256	40.1352	FALSE	3
2022-09-13	11:07:32	-0.766958	40.1352	FALSE	3
2022-09-13	11:07:33	-0.765839	40.1352	FALSE	3
2022-09-13	11:07:33	-0.738969	40.1352	FALSE	3
2022-09-13	11:07:33	-0.725279	40.1352	FALSE	3
2022-09-13	11:07:34	-0.707875	40.1352	FALSE	3
2022-09-13	11:07:34	-0.71388	40.1352	FALSE	3
2022-09-13	11:07:34	-0.867366	40.1352	FALSE	3
2022-09-13	11:07:34	0.196603	40.3318	FALSE	3
2022-09-13	11:07:35	0.33472	40.6665	FALSE	3
2022-09-13	11:07:35	0.337214	41.0037	FALSE	3
2022-09-13	11:07:35	0.34098	41.3447	FALSE	3
2022-09-13	11:07:35	0.346883	41.6916	FALSE	3
2022-09-13	11:07:36	0.340013	42.0316	FALSE	3
2022-09-13	11:07:36	0.34154	42.3731	FALSE	3
2022-09-13	11:07:36	0.345356	42.7185	FALSE	3
2022-09-13	11:07:36	0.374466	43.0929	FALSE	3
2022-09-13	11:07:37	0.373957	43.4669	FALSE	3
2022-09-13	11:07:37	0.383881	43.8508	FALSE	3
2022-09-13	11:07:37	0.380115	44.2309	FALSE	3
2022-09-13	11:07:37	0.35355	44.5845	FALSE	3
2022-09-13	11:07:38	-0.774338	44.5845	FALSE	3
2022-09-13	11:07:38	-0.819783	44.5845	FALSE	3
2022-09-13	11:07:38	-0.799885	44.5845	FALSE	3
2022-09-13	11:07:39	-0.635813	44.5845	FALSE	3
2022-09-13	11:07:39	0.722201	45.3067	FALSE	3
2022-09-13	11:07:39	0.706832	46.0135	FALSE	3
2022-09-13	11:07:39	0.190242	46.2037	FALSE	3
2022-09-13	11:07:40	0.363066	46.5668	FALSE	3
2022-09-13	11:07:40	0.548155	47.1149	FALSE	3
2022-09-13	11:07:40	0.496501	47.6114	FALSE	3
2022-09-13	11:07:40	0.749835	48.3613	FALSE	3
2022-09-13	11:07:41	0.903423	49.2647	FALSE	3
2022-09-13	11:07:41	0.461183	49.7259	FALSE	3
2022-09-13	11:07:41	0.466018	50.1919	FALSE	3
2022-09-13	11:07:41	0.425814	50.6177	FALSE	3
2022-09-13	11:07:42	0.438283	51.056	FALSE	3
2022-09-13	11:07:42	0.365204	51.4212	FALSE	3
2022-09-13	11:07:42	0.447697	51.8689	FALSE	3
2022-09-13	11:07:43	0.364033	52.2329	FALSE	3
2022-09-13	11:07:43	0.378028	52.611	FALSE	3
2022-09-13	11:07:43	0.331107	52.9421	FALSE	3
2022-09-13	11:07:43	0.307901	53.25	FALSE	3
2022-09-13	11:07:44	0.28785	53.5378	FALSE	3
2022-09-13	11:07:44	0.267341	53.8052	FALSE	3
2022-09-13	11:07:44	0.27299	54.0782	FALSE	3
2022-09-13	11:07:44	0.260115	54.3383	FALSE	3
2022-09-13	11:07:45	0.23701	54.5753	FALSE	3
2022-09-13	11:07:45	0.250445	54.8257	FALSE	3
2022-09-13	11:07:45	0.235076	55.0608	FALSE	3
2022-09-13	11:07:45	0.254415	55.3152	FALSE	3
2022-09-13	11:07:46	0.256298	55.5715	FALSE	3
2022-09-13	11:07:46	0.265865	55.8374	FALSE	3
2022-09-13	11:07:46	0.256145	56.0935	FALSE	3
2022-09-13	11:07:47	0.255229	56.3488	FALSE	3
2022-09-13	11:07:47	0.249377	56.5981	FALSE	3
2022-09-13	11:07:47	0.240115	56.8382	FALSE	3
2022-09-13	11:07:47	0.243779	57.082	FALSE	3
2022-09-13	11:07:48	0.261336	57.3434	FALSE	3
2022-09-13	11:07:48	0.375992	57.7194	FALSE	3
2022-09-13	11:07:48	0.743931	58.4633	FALSE	3
2022-09-13	11:07:48	0.787443	59.2507	FALSE	3
2022-09-13	11:07:49	0.757977	60.0087	FALSE	3
2022-09-13	11:07:49	0.816349	60.8251	FALSE	3
2022-09-13	11:07:49	0.880115	61.7052	FALSE	3
2022-09-13	11:07:49	1.30016	63.0053	FALSE	3
2022-09-13	11:07:50	-0.218155	63.0053	FALSE	3
2022-09-13	11:07:50	-0.471895	63.0053	FALSE	3
2022-09-13	11:07:50	-0.282531	63.0053	FALSE	3
2022-09-13	11:07:51	0.188715	63.194	FALSE	3
2022-09-13	11:07:51	0.817265	64.0113	FALSE	3
2022-09-13	11:07:51	0.1707	64.182	FALSE	3
2022-09-13	11:07:51	0.130191	64.3122	FALSE	3
2022-09-13	11:07:52	0.33813	64.6503	FALSE	3
2022-09-13	11:07:52	0.529631	65.18	FALSE	3
2022-09-13	11:07:52	0.688664	65.8686	FALSE	3
2022-09-13	11:07:52	0.548919	66.4175	FALSE	3
2022-09-13	11:07:53	0.702099	67.1196	FALSE	3
2022-09-13	11:07:53	0.584695	67.7043	FALSE	3
2022-09-13	11:07:53	0.699605	68.4039	FALSE	3
2022-09-13	11:07:53	0.635382	69.0393	FALSE	3
2022-09-13	11:07:54	0.626934	69.6663	FALSE	3
2022-09-13	11:07:54	0.504644	70.1709	FALSE	3
2022-09-13	11:07:54	0.567036	70.7379	FALSE	3
2022-09-13	11:07:54	0.615942	71.3539	FALSE	3
2022-09-13	11:07:55	0.89813	72.252	FALSE	3
2022-09-13	11:07:55	1.60164	73.8536	FALSE	3
2022-09-13	11:07:55	1.50276	75.3564	FALSE	3
2022-09-13	11:07:56	1.18729	76.5437	FALSE	3
2022-09-13	11:07:56	1.11732	77.661	FALSE	3
2022-09-13	11:07:56	1.10821	78.7692	FALSE	3
2022-09-13	11:07:56	0.974822	79.7441	FALSE	3
2022-09-13	11:07:57	0.867697	80.6117	FALSE	3
2022-09-13	11:07:57	0.751667	81.3634	FALSE	3
2022-09-13	11:07:57	0.744236	82.1077	FALSE	3
2022-09-13	11:07:57	0.735229	82.8429	FALSE	3
2022-09-13	11:07:58	0.909377	83.7523	FALSE	3
2022-09-13	11:07:58	1.00139	84.7536	FALSE	3
2022-09-13	11:07:58	0.920166	85.6738	FALSE	3
2022-09-13	11:07:58	0.916603	86.5904	FALSE	3
2022-09-13	11:07:59	0.886832	87.4772	FALSE	3
2022-09-13	11:07:59	0.870242	88.3475	FALSE	3
2022-09-13	11:07:59	0.84154	89.189	FALSE	3
2022-09-13	11:08:00	0.778588	89.9676	FALSE	3
2022-09-13	11:08:00	0.74271	90.7103	FALSE	3
2022-09-13	11:08:00	0.744694	91.455	FALSE	3
2022-09-13	11:08:00	0.787086	92.2421	FALSE	3
2022-09-13	11:08:01	0.796858	93.039	FALSE	3
2022-09-13	11:08:01	0.728919	93.7679	FALSE	3
2022-09-13	11:08:01	0.753651	94.5215	FALSE	3
2022-09-13	11:08:01	0.786323	95.3079	FALSE	3
2022-09-13	11:08:02	0.786069	96.0939	FALSE	3
2022-09-13	11:08:02	0.792684	96.8866	FALSE	3
2022-09-13	11:08:02	0.791311	97.6779	FALSE	3
2022-09-13	11:08:02	0.845661	98.5236	FALSE	3
2022-09-13	11:08:03	0.91925	99.4428	FALSE	3
2022-09-13	11:08:03	0.927748	100.371	FALSE	3
2022-09-13	11:08:03	0.840064	101.211	FALSE	3
2022-09-13	11:08:04	0.802252	102.013	FALSE	3
2022-09-13	11:08:04	1.11625	103.129	FALSE	3
2022-09-13	11:08:04	1.06475	104.194	FALSE	3
2022-09-13	11:08:04	1.16933	105.363	FALSE	3
2022-09-13	11:08:05	1.19162	106.555	FALSE	3
2022-09-13	11:08:05	1.07955	107.634	FALSE	3
2022-09-13	11:08:05	1.02327	108.658	FALSE	3
2022-09-13	11:08:05	0.904033	109.562	FALSE	3
2022-09-13	11:08:06	1.2166	110.778	FALSE	3
2022-09-13	11:08:06	1.30327	112.082	FALSE	3
2022-09-13	11:08:06	1.33518	113.417	FALSE	3
2022-09-13	11:08:06	1.00678	114.424	FALSE	3
2022-09-13	11:08:07	1.04927	115.473	FALSE	3
2022-09-13	11:08:07	1.07986	116.553	FALSE	3
2022-09-13	11:08:07	1.10083	117.653	FALSE	3
2022-09-13	11:08:08	1.12312	118.777	FALSE	3
2022-09-13	11:08:08	1.29075	120.067	FALSE	3
2022-09-13	11:08:08	1.36088	121.428	FALSE	3
2022-09-13	11:08:08	1.28912	122.717	FALSE	3
2022-09-13	11:08:09	1.23106	123.948	FALSE	3
2022-09-13	11:08:09	1.21696	125.165	FALSE	3
2022-09-13	11:08:09	1.24607	126.411	FALSE	3
2022-09-13	11:08:09	1.32922	127.741	FALSE	3
2022-09-13	11:08:10	1.40266	129.143	FALSE	3
2022-09-13	11:08:10	1.43772	130.581	FALSE	3
2022-09-13	11:08:10	1.50536	132.086	FALSE	3
2022-09-13	11:08:10	1.44459	133.531	FALSE	3
2022-09-13	11:08:11	1.18261	134.714	FALSE	3
2022-09-13	11:08:11	1.04927	135.763	FALSE	3
2022-09-13	11:08:11	1.12235	136.885	FALSE	3
2022-09-13	11:08:11	1.16032	138.046	FALSE	3
2022-09-13	11:08:12	1.13238	139.178	FALSE	3
2022-09-13	11:08:12	1.06118	140.239	FALSE	3
2022-09-13	11:08:12	0.984847	141.224	FALSE	3
2022-09-13	11:08:13	0.540929	141.765	FALSE	3
2022-09-13	11:08:13	0.318486	142.083	FALSE	3
2022-09-13	11:08:13	0.298893	142.382	FALSE	3
2022-09-13	11:08:13	0.312786	142.695	FALSE	3
2022-09-13	11:08:14	0.286781	142.982	FALSE	3
2022-09-13	11:08:14	0.377265	143.359	FALSE	3
2022-09-13	11:08:14	0.28785	143.647	FALSE	3
2022-09-13	11:08:14	0.312176	143.959	FALSE	3
2022-09-13	11:08:15	0.406883	144.366	FALSE	3
2022-09-13	11:08:15	0.285509	144.652	FALSE	3
2022-09-13	11:08:15	0.509886	145.161	FALSE	3
2022-09-13	11:08:15	0.137214	145.299	FALSE	3
2022-09-13	11:08:16	0.244898	145.544	FALSE	3
2022-09-13	11:08:16	0.883473	146.427	FALSE	3
2022-09-13	11:08:16	0.843626	147.271	FALSE	3
2022-09-13	11:08:17	1.00592	148.277	FALSE	3
2022-09-13	11:08:17	1.53716	149.814	FALSE	3
2022-09-13	11:08:17	2.4024	152.216	FALSE	3
2022-09-13	11:08:17	2.78744	155.004	FALSE	3
2022-09-13	11:08:18	1.34327	156.347	FALSE	3
2022-09-13	11:08:18	2.2909	158.638	FALSE	3
2022-09-13	11:08:18	0.58271	159.22	FALSE	3
2022-09-13	11:08:18	0.37416	159.595	FALSE	3
2022-09-13	11:08:19	0.786679	160.381	FALSE	3
2022-09-13	11:08:19	1.43258	161.814	FALSE	3
2022-09-13	11:08:19	1.86505	163.679	FALSE	3
2022-09-13	11:08:19	2.41518	166.094	FALSE	3
2022-09-13	11:08:20	2.16144	168.256	FALSE	3
2022-09-13	11:08:20	2.31894	170.574	FALSE	3
2022-09-13	11:08:20	1.38754	171.962	FALSE	3
2022-09-13	11:08:21	1.33762	173.3	FALSE	3
2022-09-13	11:08:21	1.45192	174.752	FALSE	3
2022-09-13	11:08:21	0.841081	175.593	FALSE	3
2022-09-13	11:08:21	1.61024	177.203	FALSE	3
2022-09-13	11:08:22	2.13044	179.333	FALSE	3
2022-09-13	11:08:22	4.05202	183.385	1	4
2022-09-13	11:08:22	3.31223	186.698	1	5
2022-09-13	11:08:22	5.48128	192.179	1	6
2022-09-13	11:08:23	4.02149	196.2	1	7
2022-09-13	11:08:23	7.0711	203.271	1	8
2022-09-13	11:08:23	7.15772	210.429	1	9
2022-09-13	11:08:23	6.43706	216.866	1	10
2022-09-13	11:08:24	6.23049	223.097	1	11
2022-09-13	11:08:24	5.77986	228.877	1	12
2022-09-13	11:08:24	2.15431	231.031	FALSE	12
2022-09-13	11:08:25	1.7849	232.816	FALSE	12
2022-09-13	11:08:25	1.38424	234.2	FALSE	12
2022-09-13	11:08:25	4.0934	238.293	1	13
2022-09-13	11:08:25	5.4393	243.733	1	14
2022-09-13	11:08:26	2.92943	246.662	FALSE	14
2022-09-13	11:08:26	1.52144	248.184	FALSE	14
2022-09-13	11:08:26	0.35131	248.535	FALSE	14
2022-09-13	11:08:26	0.462201	248.997	FALSE	14
2022-09-13	11:08:27	1.81472	250.812	FALSE	14
2022-09-13	11:08:27	8.26708	259.079	1	15
2022-09-13	11:08:27	0.21126	259.29	FALSE	15
2022-09-13	11:08:27	3.29991	262.59	1	16
2022-09-13	11:08:28	3.65538	266.245	1	17
2022-09-13	11:08:28	3.87986	270.125	1	18
2022-09-13	11:08:28	0.465967	270.591	FALSE	18
2022-09-13	11:08:28	0.284389	270.876	FALSE	18
2022-09-13	11:08:29	0.370649	271.246	FALSE	18
2022-09-13	11:08:29	0.380725	271.627	FALSE	18
2022-09-13	11:08:29	0.456603	272.084	FALSE	18
2022-09-13	11:08:30	0.473143	272.557	FALSE	18
2022-09-13	11:08:30	0.503117	273.06	FALSE	18
2022-09-13	11:08:30	0.662303	273.722	FALSE	18
2022-09-13	11:08:30	0.506832	274.229	FALSE	18
2022-09-13	11:08:31	0.547799	274.777	FALSE	18
2022-09-13	11:08:31	0.590903	275.368	FALSE	18
2022-09-13	11:08:31	0.628359	275.996	FALSE	18
2022-09-13	11:08:31	0.609835	276.606	FALSE	18
2022-09-13	11:08:32	0.64042	277.246	FALSE	18
2022-09-13	11:08:32	0.633957	277.88	FALSE	18
2022-09-13	11:08:32	0.614923	278.495	FALSE	18
2022-09-13	11:08:32	0.613753	279.109	FALSE	18
2022-09-13	11:08:33	0.57813	279.687	FALSE	18
2022-09-13	11:08:33	0.402303	280.089	FALSE	18
2022-09-13	11:08:33	0.365611	280.455	FALSE	18
2022-09-13	11:08:34	0.366527	280.822	FALSE	18
2022-09-13	11:08:34	0.370394	281.192	FALSE	18
2022-09-13	11:08:34	0.386374	281.578	FALSE	18
2022-09-13	11:08:34	0.383677	281.962	FALSE	18
2022-09-13	11:08:35	0.377875	282.34	FALSE	18
2022-09-13	11:08:35	0.379402	282.719	FALSE	18
2022-09-13	11:08:35	0.386069	283.105	FALSE	18
2022-09-13	11:08:35	0.411158	283.516	FALSE	18
2022-09-13	11:08:36	0.439962	283.956	FALSE	18
2022-09-13	11:08:36	0.513601	284.47	FALSE	18
2022-09-13	11:08:36	0.549784	285.02	FALSE	18
2022-09-13	11:08:36	0.523219	285.543	FALSE	18
2022-09-13	11:08:37	0.521081	286.064	FALSE	18
2022-09-13	11:08:37	0.541692	286.606	FALSE	18
2022-09-13	11:08:37	0.496603	287.102	FALSE	18
2022-09-13	11:08:38	0.534008	287.636	FALSE	18
2022-09-13	11:08:38	0.520267	288.157	FALSE	18
2022-09-13	11:08:38	0.538486	288.695	FALSE	18
2022-09-13	11:08:38	0.52673	289.222	FALSE	18
2022-09-13	11:08:39	0.518079	289.74	FALSE	18
2022-09-13	11:08:39	0.538333	290.278	FALSE	18
2022-09-13	11:08:39	0.51757	290.796	FALSE	18
2022-09-13	11:08:39	0.538282	291.334	FALSE	18
2022-09-13	11:08:40	0.538588	291.873	FALSE	18
2022-09-13	11:08:40	0.522506	292.395	FALSE	18
2022-09-13	11:08:40	0.421234	292.816	FALSE	18
2022-09-13	11:08:40	0.374568	293.191	FALSE	18
2022-09-13	11:08:41	0.37472	293.566	FALSE	18
2022-09-13	11:08:41	0.372379	293.938	FALSE	18
2022-09-13	11:08:41	0.340471	294.279	FALSE	18
2022-09-13	11:08:42	0.32215	294.601	FALSE	18
2022-09-13	11:08:42	0.370598	294.971	FALSE	18
2022-09-13	11:08:42	0.334618	295.306	FALSE	18
2022-09-13	11:08:42	0.459606	295.766	FALSE	18
2022-09-13	11:08:43	0.725204	296.491	FALSE	18
2022-09-13	11:08:43	-0.132099	296.491	FALSE	18
2022-09-13	11:08:43	-0.0706231	296.491	FALSE	18
2022-09-13	11:08:43	-0.0719972	296.491	FALSE	18
2022-09-13	11:08:44	-0.0531168	296.491	FALSE	18
2022-09-13	11:08:44	-0.0326588	296.491	FALSE	18
2022-09-13	11:08:44	-0.020445	296.491	FALSE	18
2022-09-13	11:08:44	0.137468	296.628	FALSE	18
2022-09-13	11:08:45	0.136858	296.765	FALSE	18
2022-09-13	11:08:45	0.568918	297.334	FALSE	18
2022-09-13	11:08:45	0.528766	297.863	FALSE	18
2022-09-13	11:08:45	0.080929	297.944	FALSE	18
2022-09-13	11:08:46	0.260929	298.205	FALSE	18
2022-09-13	11:08:46	0.166374	298.371	FALSE	18
2022-09-13	11:08:46	0.101336	298.472	FALSE	18
2022-09-13	11:08:47	-0.0730659	298.472	FALSE	18
2022-09-13	11:08:47	-0.207773	298.472	FALSE	18
2022-09-13	11:08:47	-0.138257	298.472	FALSE	18
2022-09-13	11:08:47	-0.00263335	298.472	FALSE	18
2022-09-13	11:08:48	-0.00131018	298.472	FALSE	18
2022-09-13	11:08:48	0.0247967	298.497	FALSE	18
2022-09-13	11:08:48	0.142761	298.64	FALSE	18
2022-09-13	11:08:48	0.263982	298.904	FALSE	18
2022-09-13	11:08:49	0.361234	299.265	FALSE	18
2022-09-13	11:08:49	0.369682	299.635	FALSE	18
2022-09-13	11:08:49	0.331311	299.966	FALSE	18
2022-09-13	11:08:49	0.340522	300.307	FALSE	18
2022-09-13	11:08:50	0.343779	300.65	FALSE	18
2022-09-13	11:08:50	0.343473	300.994	FALSE	18
2022-09-13	11:08:50	0.338893	301.333	FALSE	18
2022-09-13	11:08:51	0.344644	301.677	FALSE	18
2022-09-13	11:08:51	0.342964	302.02	FALSE	18
2022-09-13	11:08:51	0.322099	302.343	FALSE	18
2022-09-13	11:08:51	0.528308	302.871	FALSE	18
2022-09-13	11:08:52	0.74042	303.611	FALSE	18
2022-09-13	11:08:52	0.739046	304.35	FALSE	18
2022-09-13	11:08:52	0.73187	305.082	FALSE	18
2022-09-13	11:08:52	0.712023	305.794	FALSE	18
2022-09-13	11:08:53	0.476756	306.271	FALSE	18
2022-09-13	11:08:53	0.363473	306.634	FALSE	18
2022-09-13	11:08:53	0.217621	306.852	FALSE	18
2022-09-13	11:08:53	0.549224	307.401	FALSE	18
2022-09-13	11:08:54	0.361082	307.762	FALSE	18
2022-09-13	11:08:54	0.252328	308.015	FALSE	18
2022-09-13	11:08:54	0.202914	308.218	FALSE	18
2022-09-13	11:08:55	0.388562	308.606	FALSE	18
2022-09-13	11:08:55	0.410344	309.016	FALSE	18
2022-09-13	11:08:55	0.428003	309.445	FALSE	18
2022-09-13	11:08:55	0.419809	309.864	FALSE	18
2022-09-13	11:08:56	0.418435	310.283	FALSE	18
2022-09-13	11:08:56	0.260369	310.543	FALSE	18
2022-09-13	11:08:56	0.0578756	310.601	FALSE	18
2022-09-13	11:08:56	0.0501401	310.651	FALSE	18
2022-09-13	11:08:57	0.108003	310.759	FALSE	18
2022-09-13	11:08:57	0.0940079	310.853	FALSE	18
2022-09-13	11:08:57	0.131209	310.984	FALSE	18
2022-09-13	11:08:57	0.182507	311.167	FALSE	18
2022-09-13	11:08:58	0.167596	311.334	FALSE	18
2022-09-13	11:08:58	0.259555	311.594	FALSE	18
2022-09-13	11:08:58	0.169886	311.764	FALSE	18
2022-09-13	11:08:59	0.142812	311.907	FALSE	18
2022-09-13	11:08:59	0.169733	312.076	FALSE	18
2022-09-13	11:08:59	0.299809	312.376	FALSE	18
2022-09-13	11:08:59	0.400115	312.776	FALSE	18
2022-09-13	11:09:00	0.684084	313.46	FALSE	18
2022-09-13	11:09:00	0.407494	313.868	FALSE	18
2022-09-13	11:09:00	0.601234	314.469	FALSE	18
2022-09-13	11:09:00	0.386629	314.856	FALSE	18
2022-09-13	11:09:01	0.580725	315.437	FALSE	18
2022-09-13	11:09:01	0.44327	315.88	FALSE	18
2022-09-13	11:09:01	0.56042	316.44	FALSE	18
2022-09-13	11:09:01	0.583015	317.023	FALSE	18
2022-09-13	11:09:02	0.582863	317.606	FALSE	18
2022-09-13	11:09:02	0.521743	318.128	FALSE	18
2022-09-13	11:09:02	0.613499	318.741	FALSE	18
2022-09-13	11:09:02	0.617316	319.359	FALSE	18
2022-09-13	11:09:03	0.583626	319.942	FALSE	18
2022-09-13	11:09:03	0.546272	320.489	FALSE	18
2022-09-13	11:09:03	0.666374	321.155	FALSE	18
2022-09-13	11:09:04	0.610445	321.765	FALSE	18
2022-09-13	11:09:04	0.670751	322.436	FALSE	18
2022-09-13	11:09:04	0.518435	322.955	FALSE	18
2022-09-13	11:09:04	0.715534	323.67	FALSE	18
2022-09-13	11:09:05	0.716807	324.387	FALSE	18
2022-09-13	11:09:05	0.701489	325.088	FALSE	18
2022-09-13	11:09:05	0.737926	325.826	FALSE	18
2022-09-13	11:09:05	0.708918	326.535	FALSE	18
2022-09-13	11:09:06	0.722812	327.258	FALSE	18
2022-09-13	11:09:06	0.709784	327.968	FALSE	18
2022-09-13	11:09:06	0.70327	328.671	FALSE	18
2022-09-13	11:09:06	0.722812	329.394	FALSE	18
2022-09-13	11:09:07	0.667443	330.061	FALSE	18
2022-09-13	11:09:07	0.68958	330.751	FALSE	18
2022-09-13	11:09:07	0.669936	331.421	FALSE	18
2022-09-13	11:09:08	0.685763	332.107	FALSE	18
2022-09-13	11:09:08	0.694109	332.801	FALSE	18
2022-09-13	11:09:08	0.686679	333.487	FALSE	18
2022-09-13	11:09:08	0.684644	334.172	FALSE	18
2022-09-13	11:09:09	0.650344	334.822	FALSE	18
2022-09-13	11:09:09	0.679249	335.502	FALSE	18
2022-09-13	11:09:09	0.652939	336.155	FALSE	18
2022-09-13	11:09:09	0.682914	336.838	FALSE	18
2022-09-13	11:09:10	0.672379	337.51	FALSE	18
2022-09-13	11:09:10	0.682863	338.193	FALSE	18
2022-09-13	11:09:10	0.684593	338.877	FALSE	18
2022-09-13	11:09:10	0.659962	339.537	FALSE	18
2022-09-13	11:09:11	0.672023	340.209	FALSE	18
2022-09-13	11:09:11	0.731158	340.94	FALSE	18
2022-09-13	11:09:11	0.102303	341.043	FALSE	18
2022-09-13	11:09:12	0.728715	341.772	FALSE	18
2022-09-13	11:09:12	0.585712	342.357	FALSE	18
2022-09-13	11:09:12	0.234568	342.592	FALSE	18
2022-09-13	11:09:12	0.686323	343.278	FALSE	18
2022-09-13	11:09:13	0.193041	343.471	FALSE	18
2022-09-13	11:09:13	0.306832	343.778	FALSE	18
2022-09-13	11:09:13	0.357977	344.136	FALSE	18
2022-09-13	11:09:13	0.447087	344.583	FALSE	18
2022-09-13	11:09:14	0.334618	344.918	FALSE	18
2022-09-13	11:09:14	0.397468	345.315	FALSE	18
2022-09-13	11:09:14	0.413397	345.729	FALSE	18
2022-09-13	11:09:14	0.393906	346.122	FALSE	18
2022-09-13	11:09:15	0.360064	346.482	FALSE	18
2022-09-13	11:09:15	0.540522	347.023	FALSE	18
2022-09-13	11:09:15	0.736196	347.759	FALSE	18
2022-09-13	11:09:16	0.295585	348.055	FALSE	18
2022-09-13	11:09:16	0.214517	348.269	FALSE	18
2022-09-13	11:09:16	0.242761	348.512	FALSE	18
2022-09-13	11:09:16	0.318334	348.83	FALSE	18
2022-09-13	11:09:17	0.342914	349.173	FALSE	18
2022-09-13	11:09:17	0.277621	349.451	FALSE	18
2022-09-13	11:09:17	0.301794	349.753	FALSE	18
2022-09-13	11:09:17	0.337163	350.09	FALSE	18
2022-09-13	11:09:18	0.325356	350.415	FALSE	18
2022-09-13	11:09:18	0.304746	350.72	FALSE	18
2022-09-13	11:09:18	0.202303	350.922	FALSE	18
2022-09-13	11:09:18	0.200674	351.123	FALSE	18
2022-09-13	11:09:19	0.23472	351.358	FALSE	18
2022-09-13	11:09:19	0.260165	351.618	FALSE	18
2022-09-13	11:09:19	0.164186	351.782	FALSE	18
2022-09-13	11:09:19	0.233753	352.016	FALSE	18
2022-09-13	11:09:20	0.137265	352.153	FALSE	18
2022-09-13	11:09:20	0.193143	352.346	FALSE	18
2022-09-13	11:09:20	0.0462725	352.392	FALSE	18
2022-09-13	11:09:21	0.114161	352.507	FALSE	18
2022-09-13	11:09:21	0.168868	352.676	FALSE	18
2022-09-13	11:09:21	0.187087	352.863	FALSE	18
2022-09-13	11:09:21	0.364491	353.227	FALSE	18
2022-09-13	11:09:22	0.311005	353.538	FALSE	18
2022-09-13	11:09:22	0.242405	353.781	FALSE	18
2022-09-13	11:09:22	0.249784	354.03	FALSE	18
2022-09-13	11:09:22	0.314924	354.345	FALSE	18
2022-09-13	11:09:23	0.246629	354.592	FALSE	18
2022-09-13	11:09:23	0.248155	354.84	FALSE	18
2022-09-13	11:09:23	0.235331	355.075	FALSE	18
2022-09-13	11:09:23	0.239097	355.314	FALSE	18
2022-09-13	11:09:24	0.230344	355.545	FALSE	18
2022-09-13	11:09:24	0.251107	355.796	FALSE	18
2022-09-13	11:09:24	0.273295	356.069	FALSE	18
2022-09-13	11:09:25	0.183728	356.253	FALSE	18
2022-09-13	11:09:25	0.158741	356.412	FALSE	18
2022-09-13	11:09:25	0.100522	356.512	FALSE	18
2022-09-13	11:09:25	0.176247	356.688	FALSE	18
2022-09-13	11:09:26	0.280013	356.968	FALSE	18
2022-09-13	11:09:26	0.142557	357.111	FALSE	18
2022-09-13	11:09:26	0.350649	357.462	FALSE	18
2022-09-13	11:09:26	0.180166	357.642	FALSE	18
2022-09-13	11:09:27	0.255433	357.897	FALSE	18
2022-09-13	11:09:27	0.181489	358.079	FALSE	18
2022-09-13	11:09:27	0.400624	358.479	FALSE	18
2022-09-13	11:09:27	0.417367	358.897	FALSE	18
2022-09-13	11:09:28	0.360573	359.257	FALSE	18
2022-09-13	11:09:28	0.348817	359.606	FALSE	18
2022-09-13	11:09:28	0.272023	359.878	FALSE	18
2022-09-13	11:09:29	0.309784	360.188	FALSE	18
2022-09-13	11:09:29	0.3707	360.559	FALSE	18
2022-09-13	11:09:29	0.306934	360.866	FALSE	18
2022-09-13	11:09:29	0.276043	361.142	FALSE	18
2022-09-13	11:09:30	0.194618	361.336	FALSE	18
2022-09-13	11:09:30	0.227443	361.564	FALSE	18
2022-09-13	11:09:30	0.255585	361.819	FALSE	18
2022-09-13	11:09:30	0.293244	362.112	FALSE	18
2022-09-13	11:09:31	0.615077	362.728	FALSE	18
2022-09-13	11:09:31	0.444237	363.172	FALSE	18
2022-09-13	11:09:31	0.49472	363.667	FALSE	18
2022-09-13	11:09:31	1.29818	364.965	FALSE	18
2022-09-13	11:09:32	1.76205	366.727	FALSE	18
2022-09-13	11:09:32	1.54826	368.275	FALSE	18
2022-09-13	11:09:32	1.06627	369.341	FALSE	18
2022-09-13	11:09:33	0.866425	370.208	FALSE	18
2022-09-13	11:09:33	0.945814	371.154	FALSE	18
2022-09-13	11:09:33	0.573041	371.727	FALSE	18
2022-09-13	11:09:33	0.747952	372.474	FALSE	18
2022-09-13	11:09:34	0.673143	373.148	FALSE	18
2022-09-13	11:09:34	0.706476	373.854	FALSE	18
2022-09-13	11:09:34	1.00612	374.86	FALSE	18
2022-09-13	11:09:34	0.862659	375.723	FALSE	18
2022-09-13	11:09:35	0.980979	376.704	FALSE	18
2022-09-13	11:09:35	1.16286	377.867	FALSE	18
2022-09-13	11:09:35	1.38088	379.248	FALSE	18
2022-09-13	11:09:35	1.95655	381.204	FALSE	18
2022-09-13	11:09:36	2.01019	383.214	FALSE	18
2022-09-13	11:09:36	2.35971	385.574	FALSE	18
2022-09-13	11:09:36	1.98515	387.559	FALSE	18
2022-09-13	11:09:36	1.46057	389.02	FALSE	18
2022-09-13	11:09:37	1.67696	390.697	FALSE	18
2022-09-13	11:09:37	0.527494	391.224	FALSE	18
2022-09-13	11:09:37	0.992634	392.217	FALSE	18
2022-09-13	11:09:38	0.763372	392.98	FALSE	18
2022-09-13	11:09:38	0.804695	393.785	FALSE	18
2022-09-13	11:09:38	0.945662	394.731	FALSE	18
2022-09-13	11:09:38	0.821285	395.552	FALSE	18
2022-09-13	11:09:39	0.852023	396.404	FALSE	18
2022-09-13	11:09:39	0.858333	397.262	FALSE	18
2022-09-13	11:09:39	0.910802	398.173	FALSE	18
2022-09-13	11:09:39	0.906679	399.08	FALSE	18
2022-09-13	11:09:40	0.931819	400.012	FALSE	18
2022-09-13	11:09:40	0.900623	400.912	FALSE	18
2022-09-13	11:09:40	0.925458	401.838	FALSE	18
2022-09-13	11:09:40	0.919096	402.757	FALSE	18
2022-09-13	11:09:41	0.926679	403.683	FALSE	18
2022-09-13	11:09:41	0.912633	404.596	FALSE	18
2022-09-13	11:09:41	0.905916	405.502	FALSE	18
2022-09-13	11:09:42	0.905763	406.408	FALSE	18
2022-09-13	11:09:42	0.907595	407.315	FALSE	18
2022-09-13	11:09:42	0.908511	408.224	FALSE	18
2022-09-13	11:09:42	0.90098	409.125	FALSE	18
2022-09-13	11:09:43	0.870038	409.995	FALSE	18
2022-09-13	11:09:43	0.877621	410.872	FALSE	18
2022-09-13	11:09:43	0.848257	411.721	FALSE	18
2022-09-13	11:09:43	1.06205	412.783	FALSE	18
2022-09-13	11:09:44	1.00622	413.789	FALSE	18
2022-09-13	11:09:44	0.950598	414.74	FALSE	18
2022-09-13	11:09:44	0.922557	415.662	FALSE	18
2022-09-13	11:09:44	0.765153	416.427	FALSE	18
2022-09-13	11:09:45	0.634262	417.062	FALSE	18
2022-09-13	11:09:45	0.801641	417.863	FALSE	18
2022-09-13	11:09:45	0.530853	418.394	FALSE	18
2022-09-13	11:09:46	0.496654	418.891	FALSE	18
2022-09-13	11:09:46	0.645254	419.536	FALSE	18
2022-09-13	11:09:46	0.551921	420.088	FALSE	18
2022-09-13	11:09:46	0.811666	420.9	FALSE	18
2022-09-13	11:09:47	0.857519	421.757	FALSE	18
2022-09-13	11:09:47	0.669224	422.426	FALSE	18
2022-09-13	11:09:47	0.669733	423.096	FALSE	18
2022-09-13	11:09:47	0.622913	423.719	FALSE	18
2022-09-13	11:09:48	0.662761	424.382	FALSE	18
2022-09-13	11:09:48	0.625102	425.007	FALSE	18
2022-09-13	11:09:48	0.653549	425.66	FALSE	18
2022-09-13	11:09:48	0.618893	426.279	FALSE	18
2022-09-13	11:09:49	0.613244	426.892	FALSE	18
2022-09-13	11:09:49	0.610394	427.503	FALSE	18
2022-09-13	11:09:49	0.613549	428.116	FALSE	18
2022-09-13	11:09:50	0.605255	428.722	FALSE	18
2022-09-13	11:09:50	0.603117	429.325	FALSE	18
2022-09-13	11:09:50	0.602659	429.927	FALSE	18
2022-09-13	11:09:50	0.599453	430.527	FALSE	18
2022-09-13	11:09:51	0.63584	431.163	FALSE	18
2022-09-13	11:09:51	0.623829	431.787	FALSE	18
2022-09-13	11:09:51	0.644237	432.431	FALSE	18
2022-09-13	11:09:51	0.63075	433.062	FALSE	18
2022-09-13	11:09:52	0.484491	433.546	FALSE	18
2022-09-13	11:09:52	0.386069	433.932	FALSE	18
2022-09-13	11:09:52	0.313906	434.246	FALSE	18
2022-09-13	11:09:52	0.344847	434.591	FALSE	18
2022-09-13	11:09:53	0.237824	434.829	FALSE	18
2022-09-13	11:09:53	0.21416	435.043	FALSE	18
2022-09-13	11:09:53	0.246679	435.29	FALSE	18
2022-09-13	11:09:53	0.296756	435.586	FALSE	18
2022-09-13	11:09:54	0.649071	436.235	FALSE	18
2022-09-13	11:09:54	0.342201	436.578	FALSE	18
2022-09-13	11:09:54	0.34785	436.925	FALSE	18
2022-09-13	11:09:55	0.367138	437.293	FALSE	18
2022-09-13	11:09:55	0.364542	437.657	FALSE	18
2022-09-13	11:09:55	0.384491	438.042	FALSE	18
2022-09-13	11:09:55	0.396909	438.438	FALSE	18
2022-09-13	11:09:56	0.408206	438.847	FALSE	18
2022-09-13	11:09:56	0.406374	439.253	FALSE	18
2022-09-13	11:09:56	0.416756	439.67	FALSE	18
2022-09-13	11:09:56	0.415636	440.085	FALSE	18
2022-09-13	11:09:57	0.421743	440.507	FALSE	18
2022-09-13	11:09:57	0.420878	440.928	FALSE	18
2022-09-13	11:09:57	0.422506	441.351	FALSE	18
2022-09-13	11:09:57	0.425356	441.776	FALSE	18
2022-09-13	11:09:58	0.463117	442.239	FALSE	18
2022-09-13	11:09:58	0.496756	442.736	FALSE	18
2022-09-13	11:09:58	0.474568	443.21	FALSE	18
2022-09-13	11:09:59	0.457417	443.668	FALSE	18
2022-09-13	11:09:59	0.441896	444.11	FALSE	18
2022-09-13	11:09:59	0.448308	444.558	FALSE	18
2022-09-13	11:09:59	0.449173	445.007	FALSE	18
2022-09-13	11:10:00	0.438028	445.445	FALSE	18
2022-09-13	11:10:00	0.434618	445.88	FALSE	18
2022-09-13	11:10:00	0.440522	446.32	FALSE	18
2022-09-13	11:10:00	0.441285	446.762	FALSE	18
2022-09-13	11:10:01	0.436247	447.198	FALSE	18
2022-09-13	11:10:01	0.432634	447.631	FALSE	18
2022-09-13	11:10:01	0.409886	448.04	FALSE	18
2022-09-13	11:10:01	0.370751	448.411	FALSE	18
2022-09-13	11:10:02	0.370751	448.782	FALSE	18
2022-09-13	11:10:02	0.358232	449.14	FALSE	18
2022-09-13	11:10:02	0.447036	449.587	FALSE	18
2022-09-13	11:10:03	0.630038	450.217	FALSE	18
2022-09-13	11:10:03	0.0414379	450.259	FALSE	18
2022-09-13	11:10:03	0.0440842	450.303	FALSE	18
2022-09-13	11:10:03	0.0401147	450.343	FALSE	18
2022-09-13	11:10:04	0.821183	451.164	FALSE	18
2022-09-13	11:10:04	0.833957	451.998	FALSE	18
2022-09-13	11:10:04	0.58729	452.585	FALSE	18
2022-09-13	11:10:04	0.404033	452.989	FALSE	18
2022-09-13	11:10:05	-0.0102669	452.989	FALSE	18
2022-09-13	11:10:05	0.114415	453.104	FALSE	18
2022-09-13	11:10:05	-0.025127	453.104	FALSE	18
2022-09-13	11:10:05	-0.0696053	453.104	FALSE	18
2022-09-13	11:10:06	-0.0332186	453.104	FALSE	18
2022-09-13	11:10:06	0.0483081	453.152	FALSE	18
2022-09-13	11:10:06	0.0349239	453.187	FALSE	18
2022-09-13	11:10:07	0.0229137	453.21	FALSE	18
2022-09-13	11:10:07	0.0182318	453.228	FALSE	18
2022-09-13	11:10:07	0.552176	453.78	FALSE	18
2022-09-13	11:10:07	0.329479	454.11	FALSE	18
2022-09-13	11:10:08	-0.018155	454.11	FALSE	18
2022-09-13	11:10:08	-0.0471117	454.11	FALSE	18
2022-09-13	11:10:08	-0.00629748	454.11	FALSE	18
2022-09-13	11:10:08	0.267087	454.377	FALSE	18
2022-09-13	11:10:09	0.0842369	454.461	FALSE	18
2022-09-13	11:10:09	0.122252	454.583	FALSE	18
2022-09-13	11:10:09	0.023219	454.607	FALSE	18
2022-09-13	11:10:09	0.0726338	454.679	FALSE	18
2022-09-13	11:10:10	0.0597076	454.739	FALSE	18
2022-09-13	11:10:10	-0.0128623	454.739	FALSE	18
2022-09-13	11:10:10	-0.0943382	454.739	FALSE	18
2022-09-13	11:10:10	-0.165025	454.739	FALSE	18
2022-09-13	11:10:11	-0.220191	454.739	FALSE	18
2022-09-13	11:10:11	-0.221666	454.739	FALSE	18
2022-09-13	11:10:11	-0.222175	454.739	FALSE	18
2022-09-13	11:10:12	0.141183	454.88	FALSE	18
2022-09-13	11:10:12	0.328715	455.209	FALSE	18
2022-09-13	11:10:12	0.285255	455.494	FALSE	18
2022-09-13	11:10:12	0.013041	455.507	FALSE	18
2022-09-13	11:10:13	0.0799111	455.587	FALSE	18
2022-09-13	11:10:13	0.338232	455.925	FALSE	18
2022-09-13	11:10:13	0.244389	456.17	FALSE	18
2022-09-13	11:10:13	0.313753	456.483	FALSE	18
2022-09-13	11:10:14	0.17813	456.662	FALSE	18
2022-09-13	11:10:14	0.145204	456.807	FALSE	18
2022-09-13	11:10:14	0.117926	456.925	FALSE	18
2022-09-13	11:10:14	0.102557	457.027	FALSE	18
2022-09-13	11:10:15	0.0888679	457.116	FALSE	18
2022-09-13	11:10:15	0.069733	457.186	FALSE	18
2022-09-13	11:10:15	-0.0299616	457.186	FALSE	18
2022-09-13	11:10:16	-0.0658903	457.186	FALSE	18
2022-09-13	11:10:16	-0.0299616	457.186	FALSE	18
2022-09-13	11:10:16	0.0821503	457.268	FALSE	18
2022-09-13	11:10:16	0.148308	457.416	FALSE	18
2022-09-13	11:10:17	0.130547	457.547	FALSE	18
2022-09-13	11:10:17	0.152278	457.699	FALSE	18
2022-09-13	11:10:17	0.166985	457.866	FALSE	18
2022-09-13	11:10:17	0.211107	458.077	FALSE	18
2022-09-13	11:10:18	0.230344	458.308	FALSE	18
2022-09-13	11:10:18	0.193804	458.501	FALSE	18
2022-09-13	11:10:18	0.142048	458.643	FALSE	18
2022-09-13	11:10:18	0.436247	459.08	FALSE	18
2022-09-13	11:10:19	0.530802	459.61	FALSE	18
2022-09-13	11:10:19	0.329377	459.94	FALSE	18
2022-09-13	11:10:19	0.315331	460.255	FALSE	18
2022-09-13	11:10:20	0.342557	460.598	FALSE	18
2022-09-13	11:10:20	0.339504	460.937	FALSE	18
2022-09-13	11:10:20	0.086934	461.024	FALSE	18
2022-09-13	11:10:20	-0.184771	461.024	FALSE	18
2022-09-13	11:10:21	-0.0420226	461.024	FALSE	18
2022-09-13	11:10:21	0.109886	461.134	FALSE	18
2022-09-13	11:10:21	0.615687	461.75	FALSE	18
2022-09-13	11:10:21	1.6937	463.443	FALSE	18
2022-09-13	11:10:22	1.75319	465.197	FALSE	18
2022-09-13	11:10:22	0.82958	466.026	FALSE	18
2022-09-13	11:10:22	0.305713	466.332	FALSE	18
2022-09-13	11:10:22	0.272837	466.605	FALSE	18
2022-09-13	11:10:23	0.173652	466.778	FALSE	18
2022-09-13	11:10:23	0.385	467.163	FALSE	18
2022-09-13	11:10:23	0.359758	467.523	FALSE	18
2022-09-13	11:10:24	0.241387	467.765	FALSE	18
2022-09-13	11:10:24	0.280318	468.045	FALSE	18
2022-09-13	11:10:24	0.380318	468.425	FALSE	18
2022-09-13	11:10:24	0.212176	468.637	FALSE	18
2022-09-13	11:10:25	0.288512	468.926	FALSE	18
2022-09-13	11:10:25	0.210802	469.137	FALSE	18
2022-09-13	11:10:25	0.44958	469.586	FALSE	18
2022-09-13	11:10:25	0.285356	469.872	FALSE	18
2022-09-13	11:10:26	0.369886	470.241	FALSE	18
2022-09-13	11:10:26	0.228359	470.47	FALSE	18
2022-09-13	11:10:26	0.493397	470.963	FALSE	18
2022-09-13	11:10:26	0.425967	471.389	FALSE	18
2022-09-13	11:10:27	0.853906	472.243	FALSE	18
2022-09-13	11:10:27	0.742354	472.985	FALSE	18
2022-09-13	11:10:27	1.19833	474.184	FALSE	18
2022-09-13	11:10:27	0.643321	474.827	FALSE	18
2022-09-13	11:10:28	1.10566	475.933	FALSE	18
2022-09-13	11:10:28	1.24067	477.173	FALSE	18
2022-09-13	11:10:28	1.19355	478.367	FALSE	18
2022-09-13	11:10:29	1.24403	479.611	FALSE	18
2022-09-13	11:10:29	1.62566	481.237	FALSE	18
2022-09-13	11:10:29	1.12698	482.364	FALSE	18
2022-09-13	11:10:29	2.81991	485.184	FALSE	18
2022-09-13	11:10:30	2.78953	487.973	FALSE	18
2022-09-13	11:10:30	3.54332	491.516	1	19
2022-09-13	11:10:30	3.5107	495.027	1	20
2022-09-13	11:10:30	4.40016	499.427	1	21
2022-09-13	11:10:31	2.70683	502.134	FALSE	21
2022-09-13	11:10:31	1.79197	503.926	FALSE	21
2022-09-13	11:10:31	1.31523	505.241	FALSE	21
2022-09-13	11:10:31	0.883422	506.125	FALSE	21
2022-09-13	11:10:32	2.24383	508.369	FALSE	21
2022-09-13	11:10:32	0.56215	508.931	FALSE	21
2022-09-13	11:10:32	2.45584	511.387	FALSE	21
2022-09-13	11:10:33	1.10785	512.494	FALSE	21
2022-09-13	11:10:33	1.63167	514.126	FALSE	21
2022-09-13	11:10:33	3.13665	517.263	1	22
2022-09-13	11:10:33	3.2795	520.542	1	23
2022-09-13	11:10:34	2.12052	522.663	FALSE	23
2022-09-13	11:10:34	3.80413	526.467	1	24
2022-09-13	11:10:34	3.65731	530.124	1	25
2022-09-13	11:10:34	1.76892	531.893	FALSE	25
2022-09-13	11:10:35	4.02495	535.918	1	26
2022-09-13	11:10:35	2.34342	538.261	FALSE	26
2022-09-13	11:10:35	0.822201	539.084	FALSE	26
2022-09-13	11:10:35	2.7824	541.866	FALSE	26
2022-09-13	11:10:36	3.81111	545.677	1	27
2022-09-13	11:10:36	4.51151	550.189	1	28
2022-09-13	11:10:36	3.82749	554.016	1	29
2022-09-13	11:10:37	5.52484	559.541	1	30
2022-09-13	11:10:37	2.77457	562.316	FALSE	30
2022-09-13	11:10:37	1.98017	564.296	FALSE	30
2022-09-13	11:10:37	4.32724	568.623	1	31
2022-09-13	11:10:38	1.4448	570.068	FALSE	31
2022-09-13	11:10:38	2.27874	572.347	FALSE	31
2022-09-13	11:10:38	3.14576	575.492	1	32
2022-09-13	11:10:38	1.86871	577.361	FALSE	32
2022-09-13	11:10:39	3.24922	580.61	1	33
2022-09-13	11:10:39	2.99263	583.603	FALSE	33
2022-09-13	11:10:39	2.92846	586.531	FALSE	33
2022-09-13	11:10:39	5.05528	591.587	1	34
2022-09-13	11:10:40	5.66001	597.247	1	35
2022-09-13	11:10:40	5.5453	602.792	1	36
2022-09-13	11:10:40	1.64469	604.437	FALSE	36
2022-09-13	11:10:41	0.0363997	604.473	FALSE	36
2022-09-13	11:10:41	0.357875	604.831	FALSE	36
2022-09-13	11:10:41	-0.0916919	604.831	FALSE	36
2022-09-13	11:10:41	-0.383804	604.831	FALSE	36
2022-09-13	11:10:42	-0.467875	604.831	FALSE	36
2022-09-13	11:10:42	-0.351132	604.831	FALSE	36
2022-09-13	11:10:42	0.424949	605.256	FALSE	36
2022-09-13	11:10:42	1.53401	606.79	FALSE	36
2022-09-13	11:10:43	0.907901	607.698	FALSE	36
2022-09-13	11:10:43	1.83614	609.534	FALSE	36
2022-09-13	11:10:43	2.00469	611.539	FALSE	36
2022-09-13	11:10:43	6.55807	618.097	1	37
2022-09-13	11:10:44	5.94622	624.043	1	38
2022-09-13	11:10:44	3.95009	627.993	1	39
2022-09-13	11:10:44	0.318028	628.311	FALSE	39
2022-09-13	11:10:44	0.124848	628.436	FALSE	39
2022-09-13	11:10:45	-0.0239565	628.436	FALSE	39
2022-09-13	11:10:45	-0.180954	628.436	FALSE	39
2022-09-13	11:10:45	-0.132913	628.436	FALSE	39
2022-09-13	11:10:46	-0.218715	628.436	FALSE	39
2022-09-13	11:10:46	-0.210827	628.436	FALSE	39
2022-09-13	11:10:46	-0.0690455	628.436	FALSE	39
2022-09-13	11:10:46	-0.37271	628.436	FALSE	39
2022-09-13	11:10:47	-0.0311829	628.436	FALSE	39
2022-09-13	11:10:47	0.159606	628.595	FALSE	39
2022-09-13	11:10:47	0.377468	628.973	FALSE	39
2022-09-13	11:10:47	0.225916	629.199	FALSE	39
2022-09-13	11:10:48	0.302964	629.502	FALSE	39
2022-09-13	11:10:48	0.232379	629.734	FALSE	39
2022-09-13	11:10:48	0.228766	629.963	FALSE	39
2022-09-13	11:10:48	0.354618	630.318	FALSE	39
2022-09-13	11:10:49	0.422914	630.74	FALSE	39
2022-09-13	11:10:49	0.357621	631.098	FALSE	39
2022-09-13	11:10:49	0.920063	632.018	FALSE	39
2022-09-13	11:10:50	0.570496	632.589	FALSE	39
2022-09-13	11:10:50	0.864695	633.453	FALSE	39
2022-09-13	11:10:50	0.738842	634.192	FALSE	39
2022-09-13	11:10:50	0.732277	634.924	FALSE	39
2022-09-13	11:10:51	0.734568	635.659	FALSE	39
2022-09-13	11:10:51	0.73701	636.396	FALSE	39
2022-09-13	11:10:51	0.723066	637.119	FALSE	39
2022-09-13	11:10:51	1.09497	638.214	FALSE	39
2022-09-13	11:10:52	1.39711	639.611	FALSE	39
2022-09-13	11:10:52	1.8763	641.487	FALSE	39
2022-09-13	11:10:52	3.06164	644.549	1	40
2022-09-13	11:10:52	3.82083	648.37	1	41
2022-09-13	11:10:53	2.64882	651.019	FALSE	41
2022-09-13	11:10:53	3.15299	654.172	1	42
2022-09-13	11:10:53	2.26846	656.44	FALSE	42
2022-09-13	11:10:54	1.67594	658.116	FALSE	42
2022-09-13	11:10:54	1.86286	659.979	FALSE	42
2022-09-13	11:10:54	1.4249	661.404	FALSE	42
2022-09-13	11:10:54	1.30536	662.709	FALSE	42
2022-09-13	11:10:55	1.11223	663.821	FALSE	42
2022-09-13	11:10:55	1.14078	664.962	FALSE	42
2022-09-13	11:10:55	1.14459	666.107	FALSE	42
2022-09-13	11:10:55	1.10531	667.212	FALSE	42
2022-09-13	11:10:56	1.06653	668.279	FALSE	42
2022-09-13	11:10:56	1.05039	669.329	FALSE	42
2022-09-13	11:10:56	1.31111	670.64	FALSE	42
2022-09-13	11:10:56	1.09823	671.738	FALSE	42
2022-09-13	11:10:57	0.707188	672.446	FALSE	42
2022-09-13	11:10:57	0.704797	673.15	FALSE	42
2022-09-13	11:10:57	1.01452	674.165	FALSE	42
2022-09-13	11:10:58	2.70037	676.865	FALSE	42
2022-09-13	11:10:58	1.85915	678.724	FALSE	42
2022-09-13	11:10:58	1.0791	679.804	FALSE	42
2022-09-13	11:10:58	1.06775	680.871	FALSE	42
2022-09-13	11:10:59	0.660318	681.532	FALSE	42
2022-09-13	11:10:59	0.681031	682.213	FALSE	42
2022-09-13	11:10:59	0.461336	682.674	FALSE	42
2022-09-13	11:10:59	0.520623	683.195	FALSE	42
2022-09-13	11:11:00	0.605153	683.8	FALSE	42
2022-09-13	11:11:00	0.464593	684.264	FALSE	42
2022-09-13	11:11:00	0.485051	684.749	FALSE	42
2022-09-13	11:11:00	0.401285	685.151	FALSE	42
2022-09-13	11:11:01	0.337977	685.489	FALSE	42
2022-09-13	11:11:01	0.436196	685.925	FALSE	42
2022-09-13	11:11:01	0.357825	686.283	FALSE	42
2022-09-13	11:11:01	0.465458	686.748	FALSE	42
2022-09-13	11:11:02	0.489784	687.238	FALSE	42
2022-09-13	11:11:02	0.605153	687.843	FALSE	42
2022-09-13	11:11:02	0.691463	688.535	FALSE	42
2022-09-13	11:11:03	0.591208	689.126	FALSE	42
2022-09-13	11:11:03	0.936247	690.062	FALSE	42
2022-09-13	11:11:03	0.631361	690.693	FALSE	42
2022-09-13	11:11:03	0.632583	691.326	FALSE	42
2022-09-13	11:11:04	0.613804	691.94	FALSE	42
2022-09-13	11:11:04	0.670445	692.61	FALSE	42
2022-09-13	11:11:04	0.681895	693.292	FALSE	42
2022-09-13	11:11:04	0.726221	694.018	FALSE	42
2022-09-13	11:11:05	0.771768	694.79	FALSE	42
2022-09-13	11:11:05	0.794517	695.585	FALSE	42
2022-09-13	11:11:05	0.747544	696.332	FALSE	42
2022-09-13	11:11:05	0.389377	696.722	FALSE	42
2022-09-13	11:11:06	2.62775	699.349	FALSE	42
2022-09-13	11:11:06	3.31981	702.669	1	43
2022-09-13	11:11:06	0.714822	703.384	FALSE	43
2022-09-13	11:11:07	0.741947	704.126	FALSE	43
2022-09-13	11:11:07	0.617214	704.743	FALSE	43
2022-09-13	11:11:07	0.713804	705.457	FALSE	43
2022-09-13	11:11:07	0.572176	706.029	FALSE	43
2022-09-13	11:11:08	-0.362837	706.029	FALSE	43
2022-09-13	11:11:08	0.698435	706.727	FALSE	43
2022-09-13	11:11:08	0.313601	707.041	FALSE	43
2022-09-13	11:11:08	0.736857	707.778	FALSE	43
2022-09-13	11:11:09	-0.0730659	707.778	FALSE	43
2022-09-13	11:11:09	-0.308486	707.778	FALSE	43
2022-09-13	11:11:09	-0.375101	707.778	FALSE	43
2022-09-13	11:11:09	-0.261157	707.778	FALSE	43
2022-09-13	11:11:10	-0.327111	707.778	FALSE	43
2022-09-13	11:11:10	-0.908027	707.778	FALSE	43
2022-09-13	11:11:10	-1.18482	707.778	FALSE	43
2022-09-13	11:11:11	0.658741	708.437	FALSE	43
2022-09-13	11:11:11	0.51411	708.951	FALSE	43
2022-09-13	11:11:11	0.613549	709.564	FALSE	43
2022-09-13	11:11:11	0.460115	710.024	FALSE	43
2022-09-13	11:11:12	0.354008	710.378	FALSE	43
2022-09-13	11:11:12	0.363626	710.742	FALSE	43
2022-09-13	11:11:12	0.382659	711.125	FALSE	43
2022-09-13	11:11:12	0.246832	711.372	FALSE	43
2022-09-13	11:11:13	0.286171	711.658	FALSE	43
2022-09-13	11:11:13	0.301896	711.96	FALSE	43
2022-09-13	11:11:13	0.28902	712.249	FALSE	43
2022-09-13	11:11:13	0.28958	712.538	FALSE	43
2022-09-13	11:11:14	0.279046	712.817	FALSE	43
2022-09-13	11:11:14	0.278283	713.096	FALSE	43
2022-09-13	11:11:14	0.281031	713.377	FALSE	43
2022-09-13	11:11:15	0.267138	713.644	FALSE	43
2022-09-13	11:11:15	0.275585	713.919	FALSE	43
2022-09-13	11:11:15	0.257112	714.176	FALSE	43
2022-09-13	11:11:15	0.354924	714.531	FALSE	43
2022-09-13	11:11:16	0.313041	714.844	FALSE	43
2022-09-13	11:11:16	0.589478	715.434	FALSE	43
2022-09-13	11:11:16	0.657366	716.091	FALSE	43
2022-09-13	11:11:16	0.398028	716.489	FALSE	43
2022-09-13	11:11:17	0.697875	717.187	FALSE	43
2022-09-13	11:11:17	0.727596	717.915	FALSE	43
2022-09-13	11:11:17	0.359046	718.274	FALSE	43
2022-09-13	11:11:17	0.363677	718.637	FALSE	43
2022-09-13	11:11:18	0.35131	718.989	FALSE	43
2022-09-13	11:11:18	0.351514	719.34	FALSE	43
2022-09-13	11:11:18	0.339606	719.68	FALSE	43
2022-09-13	11:11:19	0.338283	720.018	FALSE	43
2022-09-13	11:11:19	0.326018	720.344	FALSE	43
2022-09-13	11:11:19	0.33813	720.682	FALSE	43
2022-09-13	11:11:19	0.33869	721.021	FALSE	43
2022-09-13	11:11:20	0.317265	721.338	FALSE	43
2022-09-13	11:11:20	0.379046	721.717	FALSE	43
2022-09-13	11:11:20	0.267596	721.985	FALSE	43
2022-09-13	11:11:20	0.388359	722.373	FALSE	43
2022-09-13	11:11:21	0.442201	722.815	FALSE	43
2022-09-13	11:11:21	0.294975	723.11	FALSE	43
2022-09-13	11:11:21	0.368308	723.479	FALSE	43
2022-09-13	11:11:21	0.367545	723.846	FALSE	43
2022-09-13	11:11:22	0.394873	724.241	FALSE	43
2022-09-13	11:11:22	0.27472	724.516	FALSE	43
2022-09-13	11:11:22	0.279707	724.796	FALSE	43
2022-09-13	11:11:22	0.381031	725.177	FALSE	43
2022-09-13	11:11:23	0.292125	725.469	FALSE	43
2022-09-13	11:11:23	0.419046	725.888	FALSE	43
2022-09-13	11:11:23	0.412735	726.301	FALSE	43
2022-09-13	11:11:24	0.328054	726.629	FALSE	43
2022-09-13	11:11:24	0.401997	727.031	FALSE	43
2022-09-13	11:11:24	0.408664	727.439	FALSE	43
2022-09-13	11:11:24	0.459707	727.899	FALSE	43
2022-09-13	11:11:25	0.474618	728.374	FALSE	43
2022-09-13	11:11:25	0.458537	728.832	FALSE	43
2022-09-13	11:11:25	0.461998	729.294	FALSE	43
2022-09-13	11:11:25	0.422099	729.716	FALSE	43
2022-09-13	11:11:26	0.496094	730.212	FALSE	43
2022-09-13	11:11:26	0.454618	730.667	FALSE	43
2022-09-13	11:11:26	0.499198	731.166	FALSE	43
2022-09-13	11:11:26	0.483473	731.65	FALSE	43
2022-09-13	11:11:27	0.474262	732.124	FALSE	43
2022-09-13	11:11:27	0.490547	732.614	FALSE	43
2022-09-13	11:11:27	0.480674	733.095	FALSE	43
2022-09-13	11:11:28	0.476094	733.571	FALSE	43
2022-09-13	11:11:28	0.488003	734.059	FALSE	43
2022-09-13	11:11:28	0.471514	734.531	FALSE	43
2022-09-13	11:11:28	0.466323	734.997	FALSE	43
2022-09-13	11:11:29	0.46902	735.466	FALSE	43
2022-09-13	11:11:29	0.470802	735.937	FALSE	43
2022-09-13	11:11:29	0.479046	736.416	FALSE	43
2022-09-13	11:11:29	0.468308	736.884	FALSE	43
2022-09-13	11:11:30	0.473804	737.358	FALSE	43
2022-09-13	11:11:30	0.370649	737.729	FALSE	43
2022-09-13	11:11:30	0.226527	737.955	FALSE	43
2022-09-13	11:11:30	0.241641	738.197	FALSE	43
2022-09-13	11:11:31	0.281641	738.478	FALSE	43
2022-09-13	11:11:31	0.353295	738.832	FALSE	43
2022-09-13	11:11:31	0.35355	739.185	FALSE	43
2022-09-13	11:11:32	0.347392	739.533	FALSE	43
2022-09-13	11:11:32	0.351718	739.884	FALSE	43
2022-09-13	11:11:32	0.344491	740.229	FALSE	43
2022-09-13	11:11:32	0.348664	740.578	FALSE	43
2022-09-13	11:11:33	0.342099	740.92	FALSE	43
2022-09-13	11:11:33	0.353193	741.273	FALSE	43
2022-09-13	11:11:33	0.369682	741.643	FALSE	43
2022-09-13	11:11:33	0.359606	742.002	FALSE	43
2022-09-13	11:11:34	0.377112	742.379	FALSE	43
2022-09-13	11:11:34	0.375331	742.755	FALSE	43
2022-09-13	11:11:34	0.382252	743.137	FALSE	43
2022-09-13	11:11:34	0.383626	743.52	FALSE	43
2022-09-13	11:11:35	0.379657	743.9	FALSE	43
2022-09-13	11:11:35	0.383677	744.284	FALSE	43
2022-09-13	11:11:35	0.37813	744.662	FALSE	43
2022-09-13	11:11:36	0.395331	745.057	FALSE	43
2022-09-13	11:11:36	0.376145	745.433	FALSE	43
2022-09-13	11:11:36	0.361387	745.795	FALSE	43
2022-09-13	11:11:36	0.365865	746.161	FALSE	43
2022-09-13	11:11:37	0.43813	746.599	FALSE	43
2022-09-13	11:11:37	0.738231	747.337	FALSE	43
2022-09-13	11:11:37	0.73584	748.073	FALSE	43
2022-09-13	11:11:37	0.752684	748.826	FALSE	43
2022-09-13	11:11:38	0.746323	749.572	FALSE	43
2022-09-13	11:11:38	0.749987	750.322	FALSE	43
2022-09-13	11:11:38	0.768715	751.091	FALSE	43
2022-09-13	11:11:38	0.559707	751.65	FALSE	43
2022-09-13	11:11:39	0.537723	752.188	FALSE	43
2022-09-13	11:11:39	0.427799	752.616	FALSE	43
2022-09-13	11:11:39	0.340165	752.956	FALSE	43
2022-09-13	11:11:39	0.206323	753.162	FALSE	43
2022-09-13	11:11:40	0.289937	753.452	FALSE	43
2022-09-13	11:11:40	0.311361	753.764	FALSE	43
2022-09-13	11:11:40	0.323117	754.087	FALSE	43
2022-09-13	11:11:41	0.176501	754.263	FALSE	43
2022-09-13	11:11:41	0.102812	754.366	FALSE	43
2022-09-13	11:11:41	-0.000241466	754.366	FALSE	43
2022-09-13	11:11:41	0.124186	754.49	FALSE	43
2022-09-13	11:11:42	0.018588	754.509	FALSE	43
2022-09-13	11:11:42	0.0431681	754.552	FALSE	43
2022-09-13	11:11:42	0.0222013	754.574	FALSE	43
2022-09-13	11:11:42	0.125458	754.7	FALSE	43
2022-09-13	11:11:43	0.0264252	754.726	FALSE	43
2022-09-13	11:11:43	0.034415	754.76	FALSE	43
2022-09-13	11:11:43	0.0944149	754.855	FALSE	43
2022-09-13	11:11:43	0.282761	755.138	FALSE	43
2022-09-13	11:11:44	0.275687	755.413	FALSE	43
2022-09-13	11:11:44	0.328359	755.742	FALSE	43
2022-09-13	11:11:44	0.733448	756.475	FALSE	43
2022-09-13	11:11:45	0.814771	757.29	FALSE	43
2022-09-13	11:11:45	0.73986	758.03	FALSE	43
2022-09-13	11:11:45	0.427137	758.457	FALSE	43
2022-09-13	11:11:45	0.374873	758.832	FALSE	43
2022-09-13	11:11:46	0.409631	759.241	FALSE	43
2022-09-13	11:11:46	0.286272	759.528	FALSE	43
2022-09-13	11:11:46	0.329326	759.857	FALSE	43
2022-09-13	11:11:46	0.265916	760.123	FALSE	43
2022-09-13	11:11:47	0.256451	760.379	FALSE	43
2022-09-13	11:11:47	0.265967	760.645	FALSE	43
2022-09-13	11:11:47	0.258486	760.904	FALSE	43
2022-09-13	11:11:47	0.265356	761.169	FALSE	43
2022-09-13	11:11:48	0.276807	761.446	FALSE	43
2022-09-13	11:11:48	0.267036	761.713	FALSE	43
2022-09-13	11:11:48	0.274008	761.987	FALSE	43
2022-09-13	11:11:49	0.279758	762.267	FALSE	43
2022-09-13	11:11:49	0.268817	762.536	FALSE	43
2022-09-13	11:11:49	0.254618	762.79	FALSE	43
2022-09-13	11:11:49	0.23757	763.028	FALSE	43
2022-09-13	11:11:50	0.548359	763.576	FALSE	43
2022-09-13	11:11:50	0.350598	763.927	FALSE	43
2022-09-13	11:11:50	0.218944	764.146	FALSE	43
2022-09-13	11:11:50	0.353346	764.499	FALSE	43
2022-09-13	11:11:51	0.238944	764.738	FALSE	43
2022-09-13	11:11:51	0.321438	765.059	FALSE	43
2022-09-13	11:11:51	0.341082	765.401	FALSE	43
2022-09-13	11:11:51	0.329122	765.73	FALSE	43
2022-09-13	11:11:52	0.332685	766.062	FALSE	43
2022-09-13	11:11:52	0.372277	766.435	FALSE	43
2022-09-13	11:11:52	0.434568	766.869	FALSE	43
2022-09-13	11:11:53	0.688715	767.558	FALSE	43
2022-09-13	11:11:53	0.400471	767.958	FALSE	43
2022-09-13	11:11:53	0.320318	768.279	FALSE	43
2022-09-13	11:11:53	0.482456	768.761	FALSE	43
2022-09-13	11:11:54	0.355484	769.117	FALSE	43
2022-09-13	11:11:54	0.349631	769.466	FALSE	43
2022-09-13	11:11:54	0.341794	769.808	FALSE	43
2022-09-13	11:11:54	0.310089	770.118	FALSE	43
2022-09-13	11:11:55	0.350344	770.468	FALSE	43
2022-09-13	11:11:55	0.380318	770.849	FALSE	43
2022-09-13	11:11:55	0.325305	771.174	FALSE	43
2022-09-13	11:11:55	0.352074	771.526	FALSE	43
2022-09-13	11:11:56	0.378588	771.905	FALSE	43
2022-09-13	11:11:56	0.316756	772.221	FALSE	43
2022-09-13	11:11:56	0.236247	772.458	FALSE	43
2022-09-13	11:11:56	0.200267	772.658	FALSE	43
2022-09-13	11:11:57	0.20215	772.86	FALSE	43
2022-09-13	11:11:57	0.22271	773.083	FALSE	43
2022-09-13	11:11:57	0.202914	773.286	FALSE	43
2022-09-13	11:11:58	0.203982	773.49	FALSE	43
2022-09-13	11:11:58	0.189275	773.679	FALSE	43
2022-09-13	11:11:58	0.19869	773.878	FALSE	43
2022-09-13	11:11:58	0.180929	774.059	FALSE	43
2022-09-13	11:11:59	0.204898	774.264	FALSE	43
2022-09-13	11:11:59	0.143473	774.407	FALSE	43
2022-09-13	11:11:59	0.104949	774.512	FALSE	43
2022-09-13	11:11:59	0.152532	774.665	FALSE	43
2022-09-13	11:12:00	0.176603	774.841	FALSE	43
2022-09-13	11:12:00	0.111209	774.952	FALSE	43
2022-09-13	11:12:00	0.195789	775.148	FALSE	43
2022-09-13	11:12:00	0.172583	775.321	FALSE	43
2022-09-13	11:12:01	0.245	775.566	FALSE	43
2022-09-13	11:12:01	0.20841	775.774	FALSE	43
2022-09-13	11:12:01	0.221947	775.996	FALSE	43
2022-09-13	11:12:02	0.269987	776.266	FALSE	43
2022-09-13	11:12:02	0.269122	776.535	FALSE	43
2022-09-13	11:12:02	0.330089	776.865	FALSE	43
2022-09-13	11:12:02	1.31492	778.18	FALSE	43
2022-09-13	11:12:03	0.330038	778.51	FALSE	43
2022-09-13	11:12:03	0.382048	778.892	FALSE	43
2022-09-13	11:12:03	0.273041	779.165	FALSE	43
2022-09-13	11:12:03	0.182405	779.348	FALSE	43
2022-09-13	11:12:04	0.151209	779.499	FALSE	43
2022-09-13	11:12:04	0.254669	779.754	FALSE	43
2022-09-13	11:12:04	0.301896	780.055	FALSE	43
2022-09-13	11:12:04	0.867239	780.923	FALSE	43
2022-09-13	11:12:05	1.22139	782.144	FALSE	43
2022-09-13	11:12:05	0.782659	782.927	FALSE	43
2022-09-13	11:12:05	1.03472	783.961	FALSE	43
2022-09-13	11:12:06	1.26266	785.224	FALSE	43
2022-09-13	11:12:06	0.980063	786.204	FALSE	43
2022-09-13	11:12:06	0.521539	786.726	FALSE	43
2022-09-13	11:12:06	0.567188	787.293	FALSE	43
2022-09-13	11:12:07	0.946119	788.239	FALSE	43
2022-09-13	11:12:07	1.44067	789.68	FALSE	43
2022-09-13	11:12:07	0.76388	790.444	FALSE	43
2022-09-13	11:12:07	0.63243	791.076	FALSE	43
2022-09-13	11:12:08	0.969784	792.046	FALSE	43
2022-09-13	11:12:08	1.02195	793.068	FALSE	43
2022-09-13	11:12:08	1.1277	794.195	FALSE	43
2022-09-13	11:12:08	1.38541	795.581	FALSE	43
2022-09-13	11:12:09	1.69543	797.276	FALSE	43
2022-09-13	11:12:09	1.36785	798.644	FALSE	43
2022-09-13	11:12:09	1.18846	799.833	FALSE	43
2022-09-13	11:12:10	1.54892	801.382	FALSE	43
2022-09-13	11:12:10	1.63976	803.021	FALSE	43
2022-09-13	11:12:10	1.63289	804.654	FALSE	43
2022-09-13	11:12:10	1.5937	806.248	FALSE	43
2022-09-13	11:12:11	1.53686	807.785	FALSE	43
2022-09-13	11:12:11	1.43935	809.224	FALSE	43
2022-09-13	11:12:11	1.34933	810.573	FALSE	43
2022-09-13	11:12:11	1.29192	811.865	FALSE	43
2022-09-13	11:12:12	1.23116	813.097	FALSE	43
2022-09-13	11:12:12	1.16989	814.266	FALSE	43
2022-09-13	11:12:12	2.37838	816.645	FALSE	43
2022-09-13	11:12:12	1.76073	818.406	FALSE	43
2022-09-13	11:12:13	2.11752	820.523	FALSE	43
2022-09-13	11:12:13	2.43543	822.958	FALSE	43
2022-09-13	11:12:13	2.25192	825.21	FALSE	43
2022-09-13	11:12:14	2.83482	828.045	FALSE	43
2022-09-13	11:12:14	0.708868	828.754	FALSE	43
2022-09-13	11:12:14	0.277468	829.032	FALSE	43
2022-09-13	11:12:14	0.171311	829.203	FALSE	43
2022-09-13	11:12:15	0.1907	829.394	FALSE	43
2022-09-13	11:12:15	0.207799	829.601	FALSE	43
2022-09-13	11:12:15	0.157468	829.759	FALSE	43
2022-09-13	11:12:15	0.0701402	829.829	FALSE	43

## Sheet: Mars_prong_2022913110714
						**GoPro Fitting: 1056
2022-09-13	11:07:15	0.296247
2022-09-13	11:07:15	0.287697
2022-09-13	11:07:15	0.239962
2022-09-13	11:07:15	0.220878
2022-09-13	11:07:16	0.231718
2022-09-13	11:07:16	-0.255203
2022-09-13	11:07:16	-0.810928
2022-09-13	11:07:17	-0.916119
2022-09-13	11:07:17	-0.98136
2022-09-13	11:07:17	-1.05388
2022-09-13	11:07:17	-0.813269
2022-09-13	11:07:18	-0.909809
2022-09-13	11:07:18	-0.60874
2022-09-13	11:07:18	0.0634735
2022-09-13	11:07:18	0.877214
2022-09-13	11:07:19	1.77813
2022-09-13	11:07:19	0.949377
2022-09-13	11:07:19	-0.341361
2022-09-13	11:07:19	-0.368791
2022-09-13	11:07:20	-0.739579
2022-09-13	11:07:20	-0.636526
2022-09-13	11:07:20	-0.265076
2022-09-13	11:07:20	0.386069
2022-09-13	11:07:21	0.195331
2022-09-13	11:07:21	1.97513
2022-09-13	11:07:21	1.27869
2022-09-13	11:07:22	1.24653
2022-09-13	11:07:22	0.453295
2022-09-13	11:07:22	1.97752
2022-09-13	11:07:22	0.533244
2022-09-13	11:07:23	1.28983
2022-09-13	11:07:23	3.54963
2022-09-13	11:07:23	1.2223
2022-09-13	11:07:23	0.47187
2022-09-13	11:07:24	0.734975
2022-09-13	11:07:24	0.639809
2022-09-13	11:07:24	2.27843
2022-09-13	11:07:24	0.282812
2022-09-13	11:07:25	0.733651
2022-09-13	11:07:25	0.228766
2022-09-13	11:07:25	0.952888
2022-09-13	11:07:26	4.85258
2022-09-13	11:07:26	4.83172
2022-09-13	11:07:26	1.61202
2022-09-13	11:07:26	0.659606
2022-09-13	11:07:27	0.441387
2022-09-13	11:07:27	0.337061
2022-09-13	11:07:27	0.321845
2022-09-13	11:07:27	0.318791
2022-09-13	11:07:28	0.301031
2022-09-13	11:07:28	0.270598
2022-09-13	11:07:28	0.279657
2022-09-13	11:07:28	0.273295
2022-09-13	11:07:29	0.260115
2022-09-13	11:07:29	-0.636729
2022-09-13	11:07:29	-0.71678
2022-09-13	11:07:30	-0.699274
2022-09-13	11:07:30	-0.669096
2022-09-13	11:07:30	-0.640394
2022-09-13	11:07:30	-0.608027
2022-09-13	11:07:31	-0.659274
2022-09-13	11:07:31	-0.679274
2022-09-13	11:07:31	-0.713931
2022-09-13	11:07:31	-0.718562
2022-09-13	11:07:32	-0.719783
2022-09-13	11:07:32	-0.685279
2022-09-13	11:07:32	-0.738256
2022-09-13	11:07:32	-0.766958
2022-09-13	11:07:33	-0.765839
2022-09-13	11:07:33	-0.738969
2022-09-13	11:07:33	-0.725279
2022-09-13	11:07:34	-0.707875
2022-09-13	11:07:34	-0.71388
2022-09-13	11:07:34	-0.867366
2022-09-13	11:07:34	0.196603
2022-09-13	11:07:35	0.33472
2022-09-13	11:07:35	0.337214
2022-09-13	11:07:35	0.34098
2022-09-13	11:07:35	0.346883
2022-09-13	11:07:36	0.340013
2022-09-13	11:07:36	0.34154
2022-09-13	11:07:36	0.345356
2022-09-13	11:07:36	0.374466
2022-09-13	11:07:37	0.373957
2022-09-13	11:07:37	0.383881
2022-09-13	11:07:37	0.380115
2022-09-13	11:07:37	0.35355
2022-09-13	11:07:38	-0.774338
2022-09-13	11:07:38	-0.819783
2022-09-13	11:07:38	-0.799885
2022-09-13	11:07:39	-0.635813
2022-09-13	11:07:39	0.722201
2022-09-13	11:07:39	0.706832
2022-09-13	11:07:39	0.190242
2022-09-13	11:07:40	0.363066
2022-09-13	11:07:40	0.548155
2022-09-13	11:07:40	0.496501
2022-09-13	11:07:40	0.749835
2022-09-13	11:07:41	0.903423
2022-09-13	11:07:41	0.461183
2022-09-13	11:07:41	0.466018
2022-09-13	11:07:41	0.425814
2022-09-13	11:07:42	0.438283
2022-09-13	11:07:42	0.365204
2022-09-13	11:07:42	0.447697
2022-09-13	11:07:43	0.364033
2022-09-13	11:07:43	0.378028
2022-09-13	11:07:43	0.331107
2022-09-13	11:07:43	0.307901
2022-09-13	11:07:44	0.28785
2022-09-13	11:07:44	0.267341
2022-09-13	11:07:44	0.27299
2022-09-13	11:07:44	0.260115
2022-09-13	11:07:45	0.23701
2022-09-13	11:07:45	0.250445
2022-09-13	11:07:45	0.235076
2022-09-13	11:07:45	0.254415
2022-09-13	11:07:46	0.256298
2022-09-13	11:07:46	0.265865
2022-09-13	11:07:46	0.256145
2022-09-13	11:07:47	0.255229
2022-09-13	11:07:47	0.249377
2022-09-13	11:07:47	0.240115
2022-09-13	11:07:47	0.243779
2022-09-13	11:07:48	0.261336
2022-09-13	11:07:48	0.375992
2022-09-13	11:07:48	0.743931
2022-09-13	11:07:48	0.787443
2022-09-13	11:07:49	0.757977
2022-09-13	11:07:49	0.816349
2022-09-13	11:07:49	0.880115
2022-09-13	11:07:49	1.30016
2022-09-13	11:07:50	-0.218155
2022-09-13	11:07:50	-0.471895
2022-09-13	11:07:50	-0.282531
2022-09-13	11:07:51	0.188715
2022-09-13	11:07:51	0.817265
2022-09-13	11:07:51	0.1707
2022-09-13	11:07:51	0.130191
2022-09-13	11:07:52	0.33813
2022-09-13	11:07:52	0.529631
2022-09-13	11:07:52	0.688664
2022-09-13	11:07:52	0.548919
2022-09-13	11:07:53	0.702099
2022-09-13	11:07:53	0.584695
2022-09-13	11:07:53	0.699605
2022-09-13	11:07:53	0.635382
2022-09-13	11:07:54	0.626934
2022-09-13	11:07:54	0.504644
2022-09-13	11:07:54	0.567036
2022-09-13	11:07:54	0.615942
2022-09-13	11:07:55	0.89813
2022-09-13	11:07:55	1.60164
2022-09-13	11:07:55	1.50276
2022-09-13	11:07:56	1.18729
2022-09-13	11:07:56	1.11732
2022-09-13	11:07:56	1.10821
2022-09-13	11:07:56	0.974822
2022-09-13	11:07:57	0.867697
2022-09-13	11:07:57	0.751667
2022-09-13	11:07:57	0.744236
2022-09-13	11:07:57	0.735229
2022-09-13	11:07:58	0.909377
2022-09-13	11:07:58	1.00139
2022-09-13	11:07:58	0.920166
2022-09-13	11:07:58	0.916603
2022-09-13	11:07:59	0.886832
2022-09-13	11:07:59	0.870242
2022-09-13	11:07:59	0.84154
2022-09-13	11:08:00	0.778588
2022-09-13	11:08:00	0.74271
2022-09-13	11:08:00	0.744694
2022-09-13	11:08:00	0.787086
2022-09-13	11:08:01	0.796858
2022-09-13	11:08:01	0.728919
2022-09-13	11:08:01	0.753651
2022-09-13	11:08:01	0.786323
2022-09-13	11:08:02	0.786069
2022-09-13	11:08:02	0.792684
2022-09-13	11:08:02	0.791311
2022-09-13	11:08:02	0.845661
2022-09-13	11:08:03	0.91925
2022-09-13	11:08:03	0.927748
2022-09-13	11:08:03	0.840064
2022-09-13	11:08:04	0.802252
2022-09-13	11:08:04	1.11625
2022-09-13	11:08:04	1.06475
2022-09-13	11:08:04	1.16933
2022-09-13	11:08:05	1.19162
2022-09-13	11:08:05	1.07955
2022-09-13	11:08:05	1.02327
2022-09-13	11:08:05	0.904033
2022-09-13	11:08:06	1.2166
2022-09-13	11:08:06	1.30327
2022-09-13	11:08:06	1.33518
2022-09-13	11:08:06	1.00678
2022-09-13	11:08:07	1.04927
2022-09-13	11:08:07	1.07986
2022-09-13	11:08:07	1.10083
2022-09-13	11:08:08	1.12312
2022-09-13	11:08:08	1.29075
2022-09-13	11:08:08	1.36088
2022-09-13	11:08:08	1.28912
2022-09-13	11:08:09	1.23106
2022-09-13	11:08:09	1.21696
2022-09-13	11:08:09	1.24607
2022-09-13	11:08:09	1.32922
2022-09-13	11:08:10	1.40266
2022-09-13	11:08:10	1.43772
2022-09-13	11:08:10	1.50536
2022-09-13	11:08:10	1.44459
2022-09-13	11:08:11	1.18261
2022-09-13	11:08:11	1.04927
2022-09-13	11:08:11	1.12235
2022-09-13	11:08:11	1.16032
2022-09-13	11:08:12	1.13238
2022-09-13	11:08:12	1.06118
2022-09-13	11:08:12	0.984847
2022-09-13	11:08:13	0.540929
2022-09-13	11:08:13	0.318486
2022-09-13	11:08:13	0.298893
2022-09-13	11:08:13	0.312786
2022-09-13	11:08:14	0.286781
2022-09-13	11:08:14	0.377265
2022-09-13	11:08:14	0.28785
2022-09-13	11:08:14	0.312176
2022-09-13	11:08:15	0.406883
2022-09-13	11:08:15	0.285509
2022-09-13	11:08:15	0.509886
2022-09-13	11:08:15	0.137214
2022-09-13	11:08:16	0.244898
2022-09-13	11:08:16	0.883473
2022-09-13	11:08:16	0.843626
2022-09-13	11:08:17	1.00592
2022-09-13	11:08:17	1.53716
2022-09-13	11:08:17	2.4024
2022-09-13	11:08:17	2.78744
2022-09-13	11:08:18	1.34327
2022-09-13	11:08:18	2.2909
2022-09-13	11:08:18	0.58271
2022-09-13	11:08:18	0.37416
2022-09-13	11:08:19	0.786679
2022-09-13	11:08:19	1.43258
2022-09-13	11:08:19	1.86505
2022-09-13	11:08:19	2.41518
2022-09-13	11:08:20	2.16144
2022-09-13	11:08:20	2.31894
2022-09-13	11:08:20	1.38754
2022-09-13	11:08:21	1.33762
2022-09-13	11:08:21	1.45192
2022-09-13	11:08:21	0.841081
2022-09-13	11:08:21	1.61024
2022-09-13	11:08:22	2.13044
2022-09-13	11:08:22	4.05202
2022-09-13	11:08:22	3.31223
2022-09-13	11:08:22	5.48128
2022-09-13	11:08:23	4.02149
2022-09-13	11:08:23	7.0711
2022-09-13	11:08:23	7.15772
2022-09-13	11:08:23	6.43706
2022-09-13	11:08:24	6.23049
2022-09-13	11:08:24	5.77986
2022-09-13	11:08:24	2.15431
2022-09-13	11:08:25	1.7849
2022-09-13	11:08:25	1.38424
2022-09-13	11:08:25	4.0934
2022-09-13	11:08:25	5.4393
2022-09-13	11:08:26	2.92943
2022-09-13	11:08:26	1.52144
2022-09-13	11:08:26	0.35131
2022-09-13	11:08:26	0.462201
2022-09-13	11:08:27	1.81472
2022-09-13	11:08:27	8.26708
2022-09-13	11:08:27	0.21126
2022-09-13	11:08:27	3.29991
2022-09-13	11:08:28	3.65538
2022-09-13	11:08:28	3.87986
2022-09-13	11:08:28	0.465967
2022-09-13	11:08:28	0.284389
2022-09-13	11:08:29	0.370649
2022-09-13	11:08:29	0.380725
2022-09-13	11:08:29	0.456603
2022-09-13	11:08:30	0.473143
2022-09-13	11:08:30	0.503117
2022-09-13	11:08:30	0.662303
2022-09-13	11:08:30	0.506832
2022-09-13	11:08:31	0.547799
2022-09-13	11:08:31	0.590903
2022-09-13	11:08:31	0.628359
2022-09-13	11:08:31	0.609835
2022-09-13	11:08:32	0.64042
2022-09-13	11:08:32	0.633957
2022-09-13	11:08:32	0.614923
2022-09-13	11:08:32	0.613753
2022-09-13	11:08:33	0.57813
2022-09-13	11:08:33	0.402303
2022-09-13	11:08:33	0.365611
2022-09-13	11:08:34	0.366527
2022-09-13	11:08:34	0.370394
2022-09-13	11:08:34	0.386374
2022-09-13	11:08:34	0.383677
2022-09-13	11:08:35	0.377875
2022-09-13	11:08:35	0.379402
2022-09-13	11:08:35	0.386069
2022-09-13	11:08:35	0.411158
2022-09-13	11:08:36	0.439962
2022-09-13	11:08:36	0.513601
2022-09-13	11:08:36	0.549784
2022-09-13	11:08:36	0.523219
2022-09-13	11:08:37	0.521081
2022-09-13	11:08:37	0.541692
2022-09-13	11:08:37	0.496603
2022-09-13	11:08:38	0.534008
2022-09-13	11:08:38	0.520267
2022-09-13	11:08:38	0.538486
2022-09-13	11:08:38	0.52673
2022-09-13	11:08:39	0.518079
2022-09-13	11:08:39	0.538333
2022-09-13	11:08:39	0.51757
2022-09-13	11:08:39	0.538282
2022-09-13	11:08:40	0.538588
2022-09-13	11:08:40	0.522506
2022-09-13	11:08:40	0.421234
2022-09-13	11:08:40	0.374568
2022-09-13	11:08:41	0.37472
2022-09-13	11:08:41	0.372379
2022-09-13	11:08:41	0.340471
2022-09-13	11:08:42	0.32215
2022-09-13	11:08:42	0.370598
2022-09-13	11:08:42	0.334618
2022-09-13	11:08:42	0.459606
2022-09-13	11:08:43	0.725204
2022-09-13	11:08:43	-0.132099
2022-09-13	11:08:43	-0.0706231
2022-09-13	11:08:43	-0.0719972
2022-09-13	11:08:44	-0.0531168
2022-09-13	11:08:44	-0.0326588
2022-09-13	11:08:44	-0.020445
2022-09-13	11:08:44	0.137468
2022-09-13	11:08:45	0.136858
2022-09-13	11:08:45	0.568918
2022-09-13	11:08:45	0.528766
2022-09-13	11:08:45	0.080929
2022-09-13	11:08:46	0.260929
2022-09-13	11:08:46	0.166374
2022-09-13	11:08:46	0.101336
2022-09-13	11:08:47	-0.0730659
2022-09-13	11:08:47	-0.207773
2022-09-13	11:08:47	-0.138257
2022-09-13	11:08:47	-0.00263335
2022-09-13	11:08:48	-0.00131018
2022-09-13	11:08:48	0.0247967
2022-09-13	11:08:48	0.142761
2022-09-13	11:08:48	0.263982
2022-09-13	11:08:49	0.361234
2022-09-13	11:08:49	0.369682
2022-09-13	11:08:49	0.331311
2022-09-13	11:08:49	0.340522
2022-09-13	11:08:50	0.343779
2022-09-13	11:08:50	0.343473
2022-09-13	11:08:50	0.338893
2022-09-13	11:08:51	0.344644
2022-09-13	11:08:51	0.342964
2022-09-13	11:08:51	0.322099
2022-09-13	11:08:51	0.528308
2022-09-13	11:08:52	0.74042
2022-09-13	11:08:52	0.739046
2022-09-13	11:08:52	0.73187
2022-09-13	11:08:52	0.712023
2022-09-13	11:08:53	0.476756
2022-09-13	11:08:53	0.363473
2022-09-13	11:08:53	0.217621
2022-09-13	11:08:53	0.549224
2022-09-13	11:08:54	0.361082
2022-09-13	11:08:54	0.252328
2022-09-13	11:08:54	0.202914
2022-09-13	11:08:55	0.388562
2022-09-13	11:08:55	0.410344
2022-09-13	11:08:55	0.428003
2022-09-13	11:08:55	0.419809
2022-09-13	11:08:56	0.418435
2022-09-13	11:08:56	0.260369
2022-09-13	11:08:56	0.0578756
2022-09-13	11:08:56	0.0501401
2022-09-13	11:08:57	0.108003
2022-09-13	11:08:57	0.0940079
2022-09-13	11:08:57	0.131209
2022-09-13	11:08:57	0.182507
2022-09-13	11:08:58	0.167596
2022-09-13	11:08:58	0.259555
2022-09-13	11:08:58	0.169886
2022-09-13	11:08:59	0.142812
2022-09-13	11:08:59	0.169733
2022-09-13	11:08:59	0.299809
2022-09-13	11:08:59	0.400115
2022-09-13	11:09:00	0.684084
2022-09-13	11:09:00	0.407494
2022-09-13	11:09:00	0.601234
2022-09-13	11:09:00	0.386629
2022-09-13	11:09:01	0.580725
2022-09-13	11:09:01	0.44327
2022-09-13	11:09:01	0.56042
2022-09-13	11:09:01	0.583015
2022-09-13	11:09:02	0.582863
2022-09-13	11:09:02	0.521743
2022-09-13	11:09:02	0.613499
2022-09-13	11:09:02	0.617316
2022-09-13	11:09:03	0.583626
2022-09-13	11:09:03	0.546272
2022-09-13	11:09:03	0.666374
2022-09-13	11:09:04	0.610445
2022-09-13	11:09:04	0.670751
2022-09-13	11:09:04	0.518435
2022-09-13	11:09:04	0.715534
2022-09-13	11:09:05	0.716807
2022-09-13	11:09:05	0.701489
2022-09-13	11:09:05	0.737926
2022-09-13	11:09:05	0.708918
2022-09-13	11:09:06	0.722812
2022-09-13	11:09:06	0.709784
2022-09-13	11:09:06	0.70327
2022-09-13	11:09:06	0.722812
2022-09-13	11:09:07	0.667443
2022-09-13	11:09:07	0.68958
2022-09-13	11:09:07	0.669936
2022-09-13	11:09:08	0.685763
2022-09-13	11:09:08	0.694109
2022-09-13	11:09:08	0.686679
2022-09-13	11:09:08	0.684644
2022-09-13	11:09:09	0.650344
2022-09-13	11:09:09	0.679249
2022-09-13	11:09:09	0.652939
2022-09-13	11:09:09	0.682914
2022-09-13	11:09:10	0.672379
2022-09-13	11:09:10	0.682863
2022-09-13	11:09:10	0.684593
2022-09-13	11:09:10	0.659962
2022-09-13	11:09:11	0.672023
2022-09-13	11:09:11	0.731158
2022-09-13	11:09:11	0.102303
2022-09-13	11:09:12	0.728715
2022-09-13	11:09:12	0.585712
2022-09-13	11:09:12	0.234568
2022-09-13	11:09:12	0.686323
2022-09-13	11:09:13	0.193041
2022-09-13	11:09:13	0.306832
2022-09-13	11:09:13	0.357977
2022-09-13	11:09:13	0.447087
2022-09-13	11:09:14	0.334618
2022-09-13	11:09:14	0.397468
2022-09-13	11:09:14	0.413397
2022-09-13	11:09:14	0.393906
2022-09-13	11:09:15	0.360064
2022-09-13	11:09:15	0.540522
2022-09-13	11:09:15	0.736196
2022-09-13	11:09:16	0.295585
2022-09-13	11:09:16	0.214517
2022-09-13	11:09:16	0.242761
2022-09-13	11:09:16	0.318334
2022-09-13	11:09:17	0.342914
2022-09-13	11:09:17	0.277621
2022-09-13	11:09:17	0.301794
2022-09-13	11:09:17	0.337163
2022-09-13	11:09:18	0.325356
2022-09-13	11:09:18	0.304746
2022-09-13	11:09:18	0.202303
2022-09-13	11:09:18	0.200674
2022-09-13	11:09:19	0.23472
2022-09-13	11:09:19	0.260165
2022-09-13	11:09:19	0.164186
2022-09-13	11:09:19	0.233753
2022-09-13	11:09:20	0.137265
2022-09-13	11:09:20	0.193143
2022-09-13	11:09:20	0.0462725
2022-09-13	11:09:21	0.114161
2022-09-13	11:09:21	0.168868
2022-09-13	11:09:21	0.187087
2022-09-13	11:09:21	0.364491
2022-09-13	11:09:22	0.311005
2022-09-13	11:09:22	0.242405
2022-09-13	11:09:22	0.249784
2022-09-13	11:09:22	0.314924
2022-09-13	11:09:23	0.246629
2022-09-13	11:09:23	0.248155
2022-09-13	11:09:23	0.235331
2022-09-13	11:09:23	0.239097
2022-09-13	11:09:24	0.230344
2022-09-13	11:09:24	0.251107
2022-09-13	11:09:24	0.273295
2022-09-13	11:09:25	0.183728
2022-09-13	11:09:25	0.158741
2022-09-13	11:09:25	0.100522
2022-09-13	11:09:25	0.176247
2022-09-13	11:09:26	0.280013
2022-09-13	11:09:26	0.142557
2022-09-13	11:09:26	0.350649
2022-09-13	11:09:26	0.180166
2022-09-13	11:09:27	0.255433
2022-09-13	11:09:27	0.181489
2022-09-13	11:09:27	0.400624
2022-09-13	11:09:27	0.417367
2022-09-13	11:09:28	0.360573
2022-09-13	11:09:28	0.348817
2022-09-13	11:09:28	0.272023
2022-09-13	11:09:29	0.309784
2022-09-13	11:09:29	0.3707
2022-09-13	11:09:29	0.306934
2022-09-13	11:09:29	0.276043
2022-09-13	11:09:30	0.194618
2022-09-13	11:09:30	0.227443
2022-09-13	11:09:30	0.255585
2022-09-13	11:09:30	0.293244
2022-09-13	11:09:31	0.615077
2022-09-13	11:09:31	0.444237
2022-09-13	11:09:31	0.49472
2022-09-13	11:09:31	1.29818
2022-09-13	11:09:32	1.76205
2022-09-13	11:09:32	1.54826
2022-09-13	11:09:32	1.06627
2022-09-13	11:09:33	0.866425
2022-09-13	11:09:33	0.945814
2022-09-13	11:09:33	0.573041
2022-09-13	11:09:33	0.747952
2022-09-13	11:09:34	0.673143
2022-09-13	11:09:34	0.706476
2022-09-13	11:09:34	1.00612
2022-09-13	11:09:34	0.862659
2022-09-13	11:09:35	0.980979
2022-09-13	11:09:35	1.16286
2022-09-13	11:09:35	1.38088
2022-09-13	11:09:35	1.95655
2022-09-13	11:09:36	2.01019
2022-09-13	11:09:36	2.35971
2022-09-13	11:09:36	1.98515
2022-09-13	11:09:36	1.46057
2022-09-13	11:09:37	1.67696
2022-09-13	11:09:37	0.527494
2022-09-13	11:09:37	0.992634
2022-09-13	11:09:38	0.763372
2022-09-13	11:09:38	0.804695
2022-09-13	11:09:38	0.945662
2022-09-13	11:09:38	0.821285
2022-09-13	11:09:39	0.852023
2022-09-13	11:09:39	0.858333
2022-09-13	11:09:39	0.910802
2022-09-13	11:09:39	0.906679
2022-09-13	11:09:40	0.931819
2022-09-13	11:09:40	0.900623
2022-09-13	11:09:40	0.925458
2022-09-13	11:09:40	0.919096
2022-09-13	11:09:41	0.926679
2022-09-13	11:09:41	0.912633
2022-09-13	11:09:41	0.905916
2022-09-13	11:09:42	0.905763
2022-09-13	11:09:42	0.907595
2022-09-13	11:09:42	0.908511
2022-09-13	11:09:42	0.90098
2022-09-13	11:09:43	0.870038
2022-09-13	11:09:43	0.877621
2022-09-13	11:09:43	0.848257
2022-09-13	11:09:43	1.06205
2022-09-13	11:09:44	1.00622
2022-09-13	11:09:44	0.950598
2022-09-13	11:09:44	0.922557
2022-09-13	11:09:44	0.765153
2022-09-13	11:09:45	0.634262
2022-09-13	11:09:45	0.801641
2022-09-13	11:09:45	0.530853
2022-09-13	11:09:46	0.496654
2022-09-13	11:09:46	0.645254
2022-09-13	11:09:46	0.551921
2022-09-13	11:09:46	0.811666
2022-09-13	11:09:47	0.857519
2022-09-13	11:09:47	0.669224
2022-09-13	11:09:47	0.669733
2022-09-13	11:09:47	0.622913
2022-09-13	11:09:48	0.662761
2022-09-13	11:09:48	0.625102
2022-09-13	11:09:48	0.653549
2022-09-13	11:09:48	0.618893
2022-09-13	11:09:49	0.613244
2022-09-13	11:09:49	0.610394
2022-09-13	11:09:49	0.613549
2022-09-13	11:09:50	0.605255
2022-09-13	11:09:50	0.603117
2022-09-13	11:09:50	0.602659
2022-09-13	11:09:50	0.599453
2022-09-13	11:09:51	0.63584
2022-09-13	11:09:51	0.623829
2022-09-13	11:09:51	0.644237
2022-09-13	11:09:51	0.63075
2022-09-13	11:09:52	0.484491
2022-09-13	11:09:52	0.386069
2022-09-13	11:09:52	0.313906
2022-09-13	11:09:52	0.344847
2022-09-13	11:09:53	0.237824
2022-09-13	11:09:53	0.21416
2022-09-13	11:09:53	0.246679
2022-09-13	11:09:53	0.296756
2022-09-13	11:09:54	0.649071
2022-09-13	11:09:54	0.342201
2022-09-13	11:09:54	0.34785
2022-09-13	11:09:55	0.367138
2022-09-13	11:09:55	0.364542
2022-09-13	11:09:55	0.384491
2022-09-13	11:09:55	0.396909
2022-09-13	11:09:56	0.408206
2022-09-13	11:09:56	0.406374
2022-09-13	11:09:56	0.416756
2022-09-13	11:09:56	0.415636
2022-09-13	11:09:57	0.421743
2022-09-13	11:09:57	0.420878
2022-09-13	11:09:57	0.422506
2022-09-13	11:09:57	0.425356
2022-09-13	11:09:58	0.463117
2022-09-13	11:09:58	0.496756
2022-09-13	11:09:58	0.474568
2022-09-13	11:09:59	0.457417
2022-09-13	11:09:59	0.441896
2022-09-13	11:09:59	0.448308
2022-09-13	11:09:59	0.449173
2022-09-13	11:10:00	0.438028
2022-09-13	11:10:00	0.434618
2022-09-13	11:10:00	0.440522
2022-09-13	11:10:00	0.441285
2022-09-13	11:10:01	0.436247
2022-09-13	11:10:01	0.432634
2022-09-13	11:10:01	0.409886
2022-09-13	11:10:01	0.370751
2022-09-13	11:10:02	0.370751
2022-09-13	11:10:02	0.358232
2022-09-13	11:10:02	0.447036
2022-09-13	11:10:03	0.630038
2022-09-13	11:10:03	0.0414379
2022-09-13	11:10:03	0.0440842
2022-09-13	11:10:03	0.0401147
2022-09-13	11:10:04	0.821183
2022-09-13	11:10:04	0.833957
2022-09-13	11:10:04	0.58729
2022-09-13	11:10:04	0.404033
2022-09-13	11:10:05	-0.0102669
2022-09-13	11:10:05	0.114415
2022-09-13	11:10:05	-0.025127
2022-09-13	11:10:05	-0.0696053
2022-09-13	11:10:06	-0.0332186
2022-09-13	11:10:06	0.0483081
2022-09-13	11:10:06	0.0349239
2022-09-13	11:10:07	0.0229137
2022-09-13	11:10:07	0.0182318
2022-09-13	11:10:07	0.552176
2022-09-13	11:10:07	0.329479
2022-09-13	11:10:08	-0.018155
2022-09-13	11:10:08	-0.0471117
2022-09-13	11:10:08	-0.00629748
2022-09-13	11:10:08	0.267087
2022-09-13	11:10:09	0.0842369
2022-09-13	11:10:09	0.122252
2022-09-13	11:10:09	0.023219
2022-09-13	11:10:09	0.0726338
2022-09-13	11:10:10	0.0597076
2022-09-13	11:10:10	-0.0128623
2022-09-13	11:10:10	-0.0943382
2022-09-13	11:10:10	-0.165025
2022-09-13	11:10:11	-0.220191
2022-09-13	11:10:11	-0.221666
2022-09-13	11:10:11	-0.222175
2022-09-13	11:10:12	0.141183
2022-09-13	11:10:12	0.328715
2022-09-13	11:10:12	0.285255
2022-09-13	11:10:12	0.013041
2022-09-13	11:10:13	0.0799111
2022-09-13	11:10:13	0.338232
2022-09-13	11:10:13	0.244389
2022-09-13	11:10:13	0.313753
2022-09-13	11:10:14	0.17813
2022-09-13	11:10:14	0.145204
2022-09-13	11:10:14	0.117926
2022-09-13	11:10:14	0.102557
2022-09-13	11:10:15	0.0888679
2022-09-13	11:10:15	0.069733
2022-09-13	11:10:15	-0.0299616
2022-09-13	11:10:16	-0.0658903
2022-09-13	11:10:16	-0.0299616
2022-09-13	11:10:16	0.0821503
2022-09-13	11:10:16	0.148308
2022-09-13	11:10:17	0.130547
2022-09-13	11:10:17	0.152278
2022-09-13	11:10:17	0.166985
2022-09-13	11:10:17	0.211107
2022-09-13	11:10:18	0.230344
2022-09-13	11:10:18	0.193804
2022-09-13	11:10:18	0.142048
2022-09-13	11:10:18	0.436247
2022-09-13	11:10:19	0.530802
2022-09-13	11:10:19	0.329377
2022-09-13	11:10:19	0.315331
2022-09-13	11:10:20	0.342557
2022-09-13	11:10:20	0.339504
2022-09-13	11:10:20	0.086934
2022-09-13	11:10:20	-0.184771
2022-09-13	11:10:21	-0.0420226
2022-09-13	11:10:21	0.109886
2022-09-13	11:10:21	0.615687
2022-09-13	11:10:21	1.6937
2022-09-13	11:10:22	1.75319
2022-09-13	11:10:22	0.82958
2022-09-13	11:10:22	0.305713
2022-09-13	11:10:22	0.272837
2022-09-13	11:10:23	0.173652
2022-09-13	11:10:23	0.385
2022-09-13	11:10:23	0.359758
2022-09-13	11:10:24	0.241387
2022-09-13	11:10:24	0.280318
2022-09-13	11:10:24	0.380318
2022-09-13	11:10:24	0.212176
2022-09-13	11:10:25	0.288512
2022-09-13	11:10:25	0.210802
2022-09-13	11:10:25	0.44958
2022-09-13	11:10:25	0.285356
2022-09-13	11:10:26	0.369886
2022-09-13	11:10:26	0.228359
2022-09-13	11:10:26	0.493397
2022-09-13	11:10:26	0.425967
2022-09-13	11:10:27	0.853906
2022-09-13	11:10:27	0.742354
2022-09-13	11:10:27	1.19833
2022-09-13	11:10:27	0.643321
2022-09-13	11:10:28	1.10566
2022-09-13	11:10:28	1.24067
2022-09-13	11:10:28	1.19355
2022-09-13	11:10:29	1.24403
2022-09-13	11:10:29	1.62566
2022-09-13	11:10:29	1.12698
2022-09-13	11:10:29	2.81991
2022-09-13	11:10:30	2.78953
2022-09-13	11:10:30	3.54332
2022-09-13	11:10:30	3.5107
2022-09-13	11:10:30	4.40016
2022-09-13	11:10:31	2.70683
2022-09-13	11:10:31	1.79197
2022-09-13	11:10:31	1.31523
2022-09-13	11:10:31	0.883422
2022-09-13	11:10:32	2.24383
2022-09-13	11:10:32	0.56215
2022-09-13	11:10:32	2.45584
2022-09-13	11:10:33	1.10785
2022-09-13	11:10:33	1.63167
2022-09-13	11:10:33	3.13665
2022-09-13	11:10:33	3.2795
2022-09-13	11:10:34	2.12052
2022-09-13	11:10:34	3.80413
2022-09-13	11:10:34	3.65731
2022-09-13	11:10:34	1.76892
2022-09-13	11:10:35	4.02495
2022-09-13	11:10:35	2.34342
2022-09-13	11:10:35	0.822201
2022-09-13	11:10:35	2.7824
2022-09-13	11:10:36	3.81111
2022-09-13	11:10:36	4.51151
2022-09-13	11:10:36	3.82749
2022-09-13	11:10:37	5.52484
2022-09-13	11:10:37	2.77457
2022-09-13	11:10:37	1.98017
2022-09-13	11:10:37	4.32724
2022-09-13	11:10:38	1.4448
2022-09-13	11:10:38	2.27874
2022-09-13	11:10:38	3.14576
2022-09-13	11:10:38	1.86871
2022-09-13	11:10:39	3.24922
2022-09-13	11:10:39	2.99263
2022-09-13	11:10:39	2.92846
2022-09-13	11:10:39	5.05528
2022-09-13	11:10:40	5.66001
2022-09-13	11:10:40	5.5453
2022-09-13	11:10:40	1.64469
2022-09-13	11:10:41	0.0363997
2022-09-13	11:10:41	0.357875
2022-09-13	11:10:41	-0.0916919
2022-09-13	11:10:41	-0.383804
2022-09-13	11:10:42	-0.467875
2022-09-13	11:10:42	-0.351132
2022-09-13	11:10:42	0.424949
2022-09-13	11:10:42	1.53401
2022-09-13	11:10:43	0.907901
2022-09-13	11:10:43	1.83614
2022-09-13	11:10:43	2.00469
2022-09-13	11:10:43	6.55807
2022-09-13	11:10:44	5.94622
2022-09-13	11:10:44	3.95009
2022-09-13	11:10:44	0.318028
2022-09-13	11:10:44	0.124848
2022-09-13	11:10:45	-0.0239565
2022-09-13	11:10:45	-0.180954
2022-09-13	11:10:45	-0.132913
2022-09-13	11:10:46	-0.218715
2022-09-13	11:10:46	-0.210827
2022-09-13	11:10:46	-0.0690455
2022-09-13	11:10:46	-0.37271
2022-09-13	11:10:47	-0.0311829
2022-09-13	11:10:47	0.159606
2022-09-13	11:10:47	0.377468
2022-09-13	11:10:47	0.225916
2022-09-13	11:10:48	0.302964
2022-09-13	11:10:48	0.232379
2022-09-13	11:10:48	0.228766
2022-09-13	11:10:48	0.354618
2022-09-13	11:10:49	0.422914
2022-09-13	11:10:49	0.357621
2022-09-13	11:10:49	0.920063
2022-09-13	11:10:50	0.570496
2022-09-13	11:10:50	0.864695
2022-09-13	11:10:50	0.738842
2022-09-13	11:10:50	0.732277
2022-09-13	11:10:51	0.734568
2022-09-13	11:10:51	0.73701
2022-09-13	11:10:51	0.723066
2022-09-13	11:10:51	1.09497
2022-09-13	11:10:52	1.39711
2022-09-13	11:10:52	1.8763
2022-09-13	11:10:52	3.06164
2022-09-13	11:10:52	3.82083
2022-09-13	11:10:53	2.64882
2022-09-13	11:10:53	3.15299
2022-09-13	11:10:53	2.26846
2022-09-13	11:10:54	1.67594
2022-09-13	11:10:54	1.86286
2022-09-13	11:10:54	1.4249
2022-09-13	11:10:54	1.30536
2022-09-13	11:10:55	1.11223
2022-09-13	11:10:55	1.14078
2022-09-13	11:10:55	1.14459
2022-09-13	11:10:55	1.10531
2022-09-13	11:10:56	1.06653
2022-09-13	11:10:56	1.05039
2022-09-13	11:10:56	1.31111
2022-09-13	11:10:56	1.09823
2022-09-13	11:10:57	0.707188
2022-09-13	11:10:57	0.704797
2022-09-13	11:10:57	1.01452
2022-09-13	11:10:58	2.70037
2022-09-13	11:10:58	1.85915
2022-09-13	11:10:58	1.0791
2022-09-13	11:10:58	1.06775
2022-09-13	11:10:59	0.660318
2022-09-13	11:10:59	0.681031
2022-09-13	11:10:59	0.461336
2022-09-13	11:10:59	0.520623
2022-09-13	11:11:00	0.605153
2022-09-13	11:11:00	0.464593
2022-09-13	11:11:00	0.485051
2022-09-13	11:11:00	0.401285
2022-09-13	11:11:01	0.337977
2022-09-13	11:11:01	0.436196
2022-09-13	11:11:01	0.357825
2022-09-13	11:11:01	0.465458
2022-09-13	11:11:02	0.489784
2022-09-13	11:11:02	0.605153
2022-09-13	11:11:02	0.691463
2022-09-13	11:11:03	0.591208
2022-09-13	11:11:03	0.936247
2022-09-13	11:11:03	0.631361
2022-09-13	11:11:03	0.632583
2022-09-13	11:11:04	0.613804
2022-09-13	11:11:04	0.670445
2022-09-13	11:11:04	0.681895
2022-09-13	11:11:04	0.726221
2022-09-13	11:11:05	0.771768
2022-09-13	11:11:05	0.794517
2022-09-13	11:11:05	0.747544
2022-09-13	11:11:05	0.389377
2022-09-13	11:11:06	2.62775
2022-09-13	11:11:06	3.31981
2022-09-13	11:11:06	0.714822
2022-09-13	11:11:07	0.741947
2022-09-13	11:11:07	0.617214
2022-09-13	11:11:07	0.713804
2022-09-13	11:11:07	0.572176
2022-09-13	11:11:08	-0.362837
2022-09-13	11:11:08	0.698435
2022-09-13	11:11:08	0.313601
2022-09-13	11:11:08	0.736857
2022-09-13	11:11:09	-0.0730659
2022-09-13	11:11:09	-0.308486
2022-09-13	11:11:09	-0.375101
2022-09-13	11:11:09	-0.261157
2022-09-13	11:11:10	-0.327111
2022-09-13	11:11:10	-0.908027
2022-09-13	11:11:10	-1.18482
2022-09-13	11:11:11	0.658741
2022-09-13	11:11:11	0.51411
2022-09-13	11:11:11	0.613549
2022-09-13	11:11:11	0.460115
2022-09-13	11:11:12	0.354008
2022-09-13	11:11:12	0.363626
2022-09-13	11:11:12	0.382659
2022-09-13	11:11:12	0.246832
2022-09-13	11:11:13	0.286171
2022-09-13	11:11:13	0.301896
2022-09-13	11:11:13	0.28902
2022-09-13	11:11:13	0.28958
2022-09-13	11:11:14	0.279046
2022-09-13	11:11:14	0.278283
2022-09-13	11:11:14	0.281031
2022-09-13	11:11:15	0.267138
2022-09-13	11:11:15	0.275585
2022-09-13	11:11:15	0.257112
2022-09-13	11:11:15	0.354924
2022-09-13	11:11:16	0.313041
2022-09-13	11:11:16	0.589478
2022-09-13	11:11:16	0.657366
2022-09-13	11:11:16	0.398028
2022-09-13	11:11:17	0.697875
2022-09-13	11:11:17	0.727596
2022-09-13	11:11:17	0.359046
2022-09-13	11:11:17	0.363677
2022-09-13	11:11:18	0.35131
2022-09-13	11:11:18	0.351514
2022-09-13	11:11:18	0.339606
2022-09-13	11:11:19	0.338283
2022-09-13	11:11:19	0.326018
2022-09-13	11:11:19	0.33813
2022-09-13	11:11:19	0.33869
2022-09-13	11:11:20	0.317265
2022-09-13	11:11:20	0.379046
2022-09-13	11:11:20	0.267596
2022-09-13	11:11:20	0.388359
2022-09-13	11:11:21	0.442201
2022-09-13	11:11:21	0.294975
2022-09-13	11:11:21	0.368308
2022-09-13	11:11:21	0.367545
2022-09-13	11:11:22	0.394873
2022-09-13	11:11:22	0.27472
2022-09-13	11:11:22	0.279707
2022-09-13	11:11:22	0.381031
2022-09-13	11:11:23	0.292125
2022-09-13	11:11:23	0.419046
2022-09-13	11:11:23	0.412735
2022-09-13	11:11:24	0.328054
2022-09-13	11:11:24	0.401997
2022-09-13	11:11:24	0.408664
2022-09-13	11:11:24	0.459707
2022-09-13	11:11:25	0.474618
2022-09-13	11:11:25	0.458537
2022-09-13	11:11:25	0.461998
2022-09-13	11:11:25	0.422099
2022-09-13	11:11:26	0.496094
2022-09-13	11:11:26	0.454618
2022-09-13	11:11:26	0.499198
2022-09-13	11:11:26	0.483473
2022-09-13	11:11:27	0.474262
2022-09-13	11:11:27	0.490547
2022-09-13	11:11:27	0.480674
2022-09-13	11:11:28	0.476094
2022-09-13	11:11:28	0.488003
2022-09-13	11:11:28	0.471514
2022-09-13	11:11:28	0.466323
2022-09-13	11:11:29	0.46902
2022-09-13	11:11:29	0.470802
2022-09-13	11:11:29	0.479046
2022-09-13	11:11:29	0.468308
2022-09-13	11:11:30	0.473804
2022-09-13	11:11:30	0.370649
2022-09-13	11:11:30	0.226527
2022-09-13	11:11:30	0.241641
2022-09-13	11:11:31	0.281641
2022-09-13	11:11:31	0.353295
2022-09-13	11:11:31	0.35355
2022-09-13	11:11:32	0.347392
2022-09-13	11:11:32	0.351718
2022-09-13	11:11:32	0.344491
2022-09-13	11:11:32	0.348664
2022-09-13	11:11:33	0.342099
2022-09-13	11:11:33	0.353193
2022-09-13	11:11:33	0.369682
2022-09-13	11:11:33	0.359606
2022-09-13	11:11:34	0.377112
2022-09-13	11:11:34	0.375331
2022-09-13	11:11:34	0.382252
2022-09-13	11:11:34	0.383626
2022-09-13	11:11:35	0.379657
2022-09-13	11:11:35	0.383677
2022-09-13	11:11:35	0.37813
2022-09-13	11:11:36	0.395331
2022-09-13	11:11:36	0.376145
2022-09-13	11:11:36	0.361387
2022-09-13	11:11:36	0.365865
2022-09-13	11:11:37	0.43813
2022-09-13	11:11:37	0.738231
2022-09-13	11:11:37	0.73584
2022-09-13	11:11:37	0.752684
2022-09-13	11:11:38	0.746323
2022-09-13	11:11:38	0.749987
2022-09-13	11:11:38	0.768715
2022-09-13	11:11:38	0.559707
2022-09-13	11:11:39	0.537723
2022-09-13	11:11:39	0.427799
2022-09-13	11:11:39	0.340165
2022-09-13	11:11:39	0.206323
2022-09-13	11:11:40	0.289937
2022-09-13	11:11:40	0.311361
2022-09-13	11:11:40	0.323117
2022-09-13	11:11:41	0.176501
2022-09-13	11:11:41	0.102812
2022-09-13	11:11:41	-0.000241466
2022-09-13	11:11:41	0.124186
2022-09-13	11:11:42	0.018588
2022-09-13	11:11:42	0.0431681
2022-09-13	11:11:42	0.0222013
2022-09-13	11:11:42	0.125458
2022-09-13	11:11:43	0.0264252
2022-09-13	11:11:43	0.034415
2022-09-13	11:11:43	0.0944149
2022-09-13	11:11:43	0.282761
2022-09-13	11:11:44	0.275687
2022-09-13	11:11:44	0.328359
2022-09-13	11:11:44	0.733448
2022-09-13	11:11:45	0.814771
2022-09-13	11:11:45	0.73986
2022-09-13	11:11:45	0.427137
2022-09-13	11:11:45	0.374873
2022-09-13	11:11:46	0.409631
2022-09-13	11:11:46	0.286272
2022-09-13	11:11:46	0.329326
2022-09-13	11:11:46	0.265916
2022-09-13	11:11:47	0.256451
2022-09-13	11:11:47	0.265967
2022-09-13	11:11:47	0.258486
2022-09-13	11:11:47	0.265356
2022-09-13	11:11:48	0.276807
2022-09-13	11:11:48	0.267036
2022-09-13	11:11:48	0.274008
2022-09-13	11:11:49	0.279758
2022-09-13	11:11:49	0.268817
2022-09-13	11:11:49	0.254618
2022-09-13	11:11:49	0.23757
2022-09-13	11:11:50	0.548359
2022-09-13	11:11:50	0.350598
2022-09-13	11:11:50	0.218944
2022-09-13	11:11:50	0.353346
2022-09-13	11:11:51	0.238944
2022-09-13	11:11:51	0.321438
2022-09-13	11:11:51	0.341082
2022-09-13	11:11:51	0.329122
2022-09-13	11:11:52	0.332685
2022-09-13	11:11:52	0.372277
2022-09-13	11:11:52	0.434568
2022-09-13	11:11:53	0.688715
2022-09-13	11:11:53	0.400471
2022-09-13	11:11:53	0.320318
2022-09-13	11:11:53	0.482456
2022-09-13	11:11:54	0.355484
2022-09-13	11:11:54	0.349631
2022-09-13	11:11:54	0.341794
2022-09-13	11:11:54	0.310089
2022-09-13	11:11:55	0.350344
2022-09-13	11:11:55	0.380318
2022-09-13	11:11:55	0.325305
2022-09-13	11:11:55	0.352074
2022-09-13	11:11:56	0.378588
2022-09-13	11:11:56	0.316756
2022-09-13	11:11:56	0.236247
2022-09-13	11:11:56	0.200267
2022-09-13	11:11:57	0.20215
2022-09-13	11:11:57	0.22271
2022-09-13	11:11:57	0.202914
2022-09-13	11:11:58	0.203982
2022-09-13	11:11:58	0.189275
2022-09-13	11:11:58	0.19869
2022-09-13	11:11:58	0.180929
2022-09-13	11:11:59	0.204898
2022-09-13	11:11:59	0.143473
2022-09-13	11:11:59	0.104949
2022-09-13	11:11:59	0.152532
2022-09-13	11:12:00	0.176603
2022-09-13	11:12:00	0.111209
2022-09-13	11:12:00	0.195789
2022-09-13	11:12:00	0.172583
2022-09-13	11:12:01	0.245
2022-09-13	11:12:01	0.20841
2022-09-13	11:12:01	0.221947
2022-09-13	11:12:02	0.269987
2022-09-13	11:12:02	0.269122
2022-09-13	11:12:02	0.330089
2022-09-13	11:12:02	1.31492
2022-09-13	11:12:03	0.330038
2022-09-13	11:12:03	0.382048
2022-09-13	11:12:03	0.273041
2022-09-13	11:12:03	0.182405
2022-09-13	11:12:04	0.151209
2022-09-13	11:12:04	0.254669
2022-09-13	11:12:04	0.301896
2022-09-13	11:12:04	0.867239
2022-09-13	11:12:05	1.22139
2022-09-13	11:12:05	0.782659
2022-09-13	11:12:05	1.03472
2022-09-13	11:12:06	1.26266
2022-09-13	11:12:06	0.980063
2022-09-13	11:12:06	0.521539
2022-09-13	11:12:06	0.567188
2022-09-13	11:12:07	0.946119
2022-09-13	11:12:07	1.44067
2022-09-13	11:12:07	0.76388
2022-09-13	11:12:07	0.63243
2022-09-13	11:12:08	0.969784
2022-09-13	11:12:08	1.02195
2022-09-13	11:12:08	1.1277
2022-09-13	11:12:08	1.38541
2022-09-13	11:12:09	1.69543
2022-09-13	11:12:09	1.36785
2022-09-13	11:12:09	1.18846
2022-09-13	11:12:10	1.54892
2022-09-13	11:12:10	1.63976
2022-09-13	11:12:10	1.63289
2022-09-13	11:12:10	1.5937
2022-09-13	11:12:11	1.53686
2022-09-13	11:12:11	1.43935
2022-09-13	11:12:11	1.34933
2022-09-13	11:12:11	1.29192
2022-09-13	11:12:12	1.23116
2022-09-13	11:12:12	1.16989
2022-09-13	11:12:12	2.37838
2022-09-13	11:12:12	1.76073
2022-09-13	11:12:13	2.11752
2022-09-13	11:12:13	2.43543
2022-09-13	11:12:13	2.25192
2022-09-13	11:12:14	2.83482
2022-09-13	11:12:14	0.708868
2022-09-13	11:12:14	0.277468
2022-09-13	11:12:14	0.171311
2022-09-13	11:12:15	0.1907
2022-09-13	11:12:15	0.207799
2022-09-13	11:12:15	0.157468
2022-09-13	11:12:15	0.0701402
2022-09-13	11:12:16	0.255229
2022-09-13	11:12:16	-0.0405977
2022-09-13	11:12:16	0.207952
2022-09-13	11:12:16	0.147901
2022-09-13	11:12:17	0.374364
2022-09-13	11:12:17	2.12749
2022-09-13	11:12:17	3.61228
2022-09-13	11:12:17	2.05986
2022-09-13	11:12:18	0.412685
2022-09-13	11:12:18	1.79508
2022-09-13	11:12:18	3.07146
2022-09-13	11:12:19	2.83202
2022-09-13	11:12:19	1.0449
2022-09-13	11:12:19	1.85014
2022-09-13	11:12:19	1.96449
2022-09-13	11:12:20	1.82739
2022-09-13	11:12:20	2.32831
2022-09-13	11:12:20	0.921387
2022-09-13	11:12:20	1.18383
2022-09-13	11:12:21	0.54444
2022-09-13	11:12:21	0.83701
2022-09-13	11:12:21	1.15401
2022-09-13	11:12:21	0.763779
2022-09-13	11:12:22	0.447901
2022-09-13	11:12:22	0.519097
2022-09-13	11:12:22	0.249428
2022-09-13	11:12:23	0.897417
2022-09-13	11:12:23	0.238028
2022-09-13	11:12:23	1.13635
2022-09-13	11:12:23	1.45482
2022-09-13	11:12:24	0.993499
2022-09-13	11:12:24	2.00836
2022-09-13	11:12:24	0.691107
2022-09-13	11:12:24	2.18495
2022-09-13	11:12:25	0.547748
2022-09-13	11:12:25	1.48871
2022-09-13	11:12:25	0.892023
2022-09-13	11:12:25	3.33111
2022-09-13	11:12:26	2.63584
2022-09-13	11:12:26	4.57772
2022-09-13	11:12:26	4.30062
2022-09-13	11:12:27	3.55451
2022-09-13	11:12:27	0.109122
2022-09-13	11:12:27	-0.227926
2022-09-13	11:12:27	-0.562073
2022-09-13	11:12:28	-0.568384
2022-09-13	11:12:28	-0.75505
2022-09-13	11:12:28	-0.621513
2022-09-13	11:12:28	-0.779274
2022-09-13	11:12:29	-0.560496
2022-09-13	11:12:29	-0.504058
2022-09-13	11:12:29	-0.176628
2022-09-13	11:12:29	0.120318
2022-09-13	11:12:30	4.02057
2022-09-13	11:12:30	5.59329
2022-09-13	11:12:30	4.12383
2022-09-13	11:12:31	6.21828
2022-09-13	11:12:31	1.46398
2022-09-13	11:12:31	2.95044
2022-09-13	11:12:31	1.34164
2022-09-13	11:12:32	1.68704
2022-09-13	11:12:32	0.505458
2022-09-13	11:12:32	0.579809
2022-09-13	11:12:32	0.705204
2022-09-13	11:12:33	0.531158
2022-09-13	11:12:33	1.23711
2022-09-13	11:12:33	1.12785
2022-09-13	11:12:33	0.974415
2022-09-13	11:12:34	0.983982
2022-09-13	11:12:34	2.19538
2022-09-13	11:12:34	3.87981
2022-09-13	11:12:35	7.98693
2022-09-13	11:12:35	5.12271
2022-09-13	11:12:35	10.5466
2022-09-13	11:12:35	7.73222
2022-09-13	11:12:36	11.0357
2022-09-13	11:12:36	4.73909
2022-09-13	11:12:36	12.1016
2022-09-13	11:12:36	8.69675
2022-09-13	11:12:37	5.24479
2022-09-13	11:12:37	4.32515
2022-09-13	11:12:37	0.970598
2022-09-13	11:12:37	0.422659
2022-09-13	11:12:38	0.243015
2022-09-13	11:12:38	1.64419
2022-09-13	11:12:38	2.3108
2022-09-13	11:12:38	4.23935
2022-09-13	11:12:39	5.27879
2022-09-13	11:12:39	1.3081
2022-09-13	11:12:39	1.03818
2022-09-13	11:12:40	0.601539
2022-09-13	11:12:40	1.40276
2022-09-13	11:12:40	0.7136
2022-09-13	11:12:40	0.52159
2022-09-13	11:12:41	0.211616
2022-09-13	11:12:41	0.228868
2022-09-13	11:12:41	0.535687
2022-09-13	11:12:41	10.0405
2022-09-13	11:12:42	15.5403
2022-09-13	11:12:42	5.03518
2022-09-13	11:12:42	1.42083
2022-09-13	11:12:42	0.599758
2022-09-13	11:12:43	0.406832
2022-09-13	11:12:43	0.193753
2022-09-13	11:12:43	0.0140078
2022-09-13	11:12:44	-0.0782058
2022-09-13	11:12:44	0.0980282
