# Supplementary material for: Comparing efficacy in reducing pulling and welfare impacts of four types of leash walking equipment
Source: PeerJ journal article supplement (doi:10.7717/peerj.18131), 2024-10-24
Supplement: Shelter1_Tension_files.zip [file Mars_star_2022913102246 copy.xlsx]

## Sheet: Averaged Newtons
Date	Time	averaged newtons	Impulse	Total steps
2022-09-13	10:22:57	6.54412	6.54412	0		Impulse	3889.59
2022-09-13	10:22:58	6.50841	13.0525	0		Total steps	112
2022-09-13	10:22:59	22.1957	35.2482	1		# > 5sec	4
2022-09-13	10:23:00	31.0005	66.2487	2
2022-09-13	10:23:01	22.1199	88.3686	3
2022-09-13	10:23:02	19.6746	108.043	4
2022-09-13	10:23:03	5.59256	113.636	4
2022-09-13	10:23:04	3.46688	117.103	4
2022-09-13	10:23:05	1.72297	118.826	4
2022-09-13	10:23:06	6.28566	125.111	4
2022-09-13	10:23:07	4.28725	129.399	4
2022-09-13	10:23:08	2.42118	131.82	4
2022-09-13	10:23:09	2.99399	134.814	4
2022-09-13	10:23:10	2.64617	137.46	4
2022-09-13	10:23:11	1.84855	139.308	4
2022-09-13	10:23:12	1.16549	140.474	4
2022-09-13	10:23:13	1.13016	141.604	4
2022-09-13	10:23:14	1.0421	142.646	4
2022-09-13	10:23:15	1.19518	143.841	4
2022-09-13	10:23:16	3.27859	147.12	4
2022-09-13	10:23:17	3.61861	150.739	4
2022-09-13	10:23:18	3.48556	154.224	4
2022-09-13	10:23:19	4.28867	158.513	4
2022-09-13	10:23:20	11.4332	169.946	4
2022-09-13	10:23:21	2.77665	172.723	4
2022-09-13	10:23:22	3.26411	175.987	4
2022-09-13	10:23:23	18.0674	194.054	5
2022-09-13	10:23:24	3.14209	197.196	5
2022-09-13	10:23:25	4.45799	201.654	5
2022-09-13	10:23:26	7.48123	209.135	5
2022-09-13	10:23:27	4.94707	214.082	5
2022-09-13	10:23:28	3.82981	217.912	5
2022-09-13	10:23:29	9.63986	227.552	5
2022-09-13	10:23:30	11.7719	239.324	5
2022-09-13	10:23:31	13.3791	252.703	6
2022-09-13	10:23:32	21.5971	274.3	7
2022-09-13	10:23:33	20.5062	294.806	8
2022-09-13	10:23:34	24.0458	318.852	9
2022-09-13	10:23:35	28.4495	347.302	10
2022-09-13	10:23:36	11.8784	359.18	10
2022-09-13	10:23:37	2.26836	361.449	10
2022-09-13	10:23:38	23.0386	384.487	11
2022-09-13	10:23:39	8.66171	393.149	11
2022-09-13	10:23:40	23.9852	417.134	12
2022-09-13	10:23:41	12.9297	430.064	12
2022-09-13	10:23:42	28.6479	458.712	13
2022-09-13	10:23:43	33.8808	492.592	14
2022-09-13	10:23:44	7.6491	500.242	14
2022-09-13	10:23:45	2.77537	503.017	14
2022-09-13	10:23:46	2.94368	505.961	14
2022-09-13	10:23:47	3.28229	509.243	14
2022-09-13	10:23:48	3.27831	512.521	14
2022-09-13	10:23:49	3.33502	515.856	14
2022-09-13	10:23:50	1.95404	517.81	14
2022-09-13	10:23:51	1.84272	519.653	14
2022-09-13	10:23:52	28.4574	548.11	15
2022-09-13	10:23:53	13.1083	561.219	16
2022-09-13	10:23:54	29.699	590.918	17
2022-09-13	10:23:55	21.7754	612.693	18
2022-09-13	10:23:56	2.26996	614.963	18
2022-09-13	10:23:57	23.3149	638.278	19
2022-09-13	10:23:58	7.39086	645.669	19
2022-09-13	10:23:59	35.2302	680.899	20
2022-09-13	10:24:00	3.56978	684.469	20
2022-09-13	10:24:01	5.48544	689.954	20
2022-09-13	10:24:02	2.61442	692.569	20
2022-09-13	10:24:03	6.98604	699.555	20
2022-09-13	10:24:04	2.88103	702.436	20
2022-09-13	10:24:05	3.78054	706.216	20
2022-09-13	10:24:06	7.71577	713.932	20
2022-09-13	10:24:07	9.36164	723.294	20
2022-09-13	10:24:08	8.08753	731.381	20
2022-09-13	10:24:09	15.5124	746.894	21
2022-09-13	10:24:10	15.7043	762.598	22
2022-09-13	10:24:11	6.7375	769.335	22
2022-09-13	10:24:12	2.22393	771.559	22
2022-09-13	10:24:13	1.3106	772.87	22
2022-09-13	10:24:14	0.946402	773.816	22
2022-09-13	10:24:15	0.556139	774.373	22
2022-09-13	10:24:16	1.46451	775.837	22
2022-09-13	10:24:17	1.79303	777.63	22
2022-09-13	10:24:18	1.6737	779.304	22
2022-09-13	10:24:19	1.85778	781.162	22
2022-09-13	10:24:20	1.72784	782.889	22
2022-09-13	10:24:21	1.64793	784.537	22
2022-09-13	10:24:22	1.62978	786.167	22
2022-09-13	10:24:23	1.64753	787.815	22
2022-09-13	10:24:24	1.67266	789.487	22
2022-09-13	10:24:25	1.68817	791.175	22
2022-09-13	10:24:26	1.67739	792.853	22
2022-09-13	10:24:27	1.68228	794.535	22
2022-09-13	10:24:28	1.73129	796.266	22
2022-09-13	10:24:29	1.76858	798.035	22
2022-09-13	10:24:30	1.77939	799.814	22
2022-09-13	10:24:31	1.84106	801.655	22
2022-09-13	10:24:32	2.02642	803.682	22
2022-09-13	10:24:33	1.51833	805.2	22
2022-09-13	10:24:34	1.61635	806.817	22
2022-09-13	10:24:35	3.6601	810.477	22
2022-09-13	10:24:36	31.943	842.42	23
2022-09-13	10:24:37	15.7894	858.209	24
2022-09-13	10:24:38	7.37128	865.58	24
2022-09-13	10:24:39	2.02195	867.602	24
2022-09-13	10:24:40	0.172325	867.775	24
2022-09-13	10:24:41	1.34634	869.121	24
2022-09-13	10:24:42	1.33723	870.458	24
2022-09-13	10:24:43	2.39331	872.851	24
2022-09-13	10:24:44	2.05204	874.904	24
2022-09-13	10:24:45	1.90124	876.805	24
2022-09-13	10:24:46	2.73876	879.544	24
2022-09-13	10:24:47	49.6805	929.224	25
2022-09-13	10:24:48	30.9616	960.186	26
2022-09-13	10:24:49	3.48798	963.674	26
2022-09-13	10:24:50	2.79173	966.465	26
2022-09-13	10:24:51	5.65131	972.117	26
2022-09-13	10:24:52	14.9243	987.041	27
2022-09-13	10:24:53	0.259103	987.3	27
2022-09-13	10:24:54	-0.815444	987.3	27
2022-09-13	10:24:55	0.70894	988.009	27
2022-09-13	10:24:56	4.74763	992.757	27
2022-09-13	10:24:57	2.29358	995.05	27
2022-09-13	10:24:58	1.59841	996.649	27
2022-09-13	10:24:59	0.996488	997.645	27
2022-09-13	10:25:00	0.513355	998.159	27
2022-09-13	10:25:01	-0.0447634	998.159	27
2022-09-13	10:25:02	-0.924821	998.159	27
2022-09-13	10:25:03	5.5873	1003.75	27
2022-09-13	10:25:04	3.91288	1007.66	27
2022-09-13	10:25:05	2.89875	1010.56	27
2022-09-13	10:25:06	2.46683	1013.02	27
2022-09-13	10:25:07	1.15585	1014.18	27
2022-09-13	10:25:08	1.22676	1015.41	27
2022-09-13	10:25:09	1.89762	1017.3	27
2022-09-13	10:25:10	11.3265	1028.63	27
2022-09-13	10:25:11	9.36877	1038	27
2022-09-13	10:25:12	2.47333	1040.47	27
2022-09-13	10:25:13	1.7254	1042.2	27
2022-09-13	10:25:14	3.27735	1045.48	27
2022-09-13	10:25:15	3.28916	1048.77	27
2022-09-13	10:25:16	-0.113467	1048.77	27
2022-09-13	10:25:17	3.51827	1052.28	27
2022-09-13	10:25:18	2.97073	1055.25	27
2022-09-13	10:25:19	1.32939	1056.58	27
2022-09-13	10:25:20	1.65574	1058.24	27
2022-09-13	10:25:21	2.8632	1061.1	27
2022-09-13	10:25:22	1.78188	1062.88	27
2022-09-13	10:25:23	0.939273	1063.82	27
2022-09-13	10:25:24	-0.293038	1063.82	27
2022-09-13	10:25:25	0.685793	1064.51	27
2022-09-13	10:25:26	8.03472	1072.54	27
2022-09-13	10:25:27	3.00865	1075.55	27
2022-09-13	10:25:28	1.71241	1077.27	27
2022-09-13	10:25:29	2.20022	1079.47	27
2022-09-13	10:25:30	1.54448	1081.01	27
2022-09-13	10:25:31	1.04255	1082.05	27
2022-09-13	10:25:32	2.89489	1084.95	27
2022-09-13	10:25:33	3.02444	1087.97	27
2022-09-13	10:25:34	1.53814	1089.51	27
2022-09-13	10:25:35	1.04776	1090.56	27
2022-09-13	10:25:36	2.43167	1092.99	27
2022-09-13	10:25:37	17.7825	1110.77	28
2022-09-13	10:25:38	11.8135	1122.59	28
2022-09-13	10:25:39	18.7541	1141.34	29
2022-09-13	10:25:40	12.0757	1153.41	29
2022-09-13	10:25:41	14.4057	1167.82	30
2022-09-13	10:25:42	11.7285	1179.55	30
2022-09-13	10:25:43	4.50559	1184.05	30
2022-09-13	10:25:44	3.18799	1187.24	30
2022-09-13	10:25:45	2.69629	1189.94	30
2022-09-13	10:25:46	2.59575	1192.53	30
2022-09-13	10:25:47	2.60174	1195.14	30
2022-09-13	10:25:48	2.67883	1197.82	30
2022-09-13	10:25:49	1.15304	1198.97	30
2022-09-13	10:25:50	0.911655	1199.88	30
2022-09-13	10:25:51	0.805657	1200.69	30
2022-09-13	10:25:52	1.03548	1201.72	30
2022-09-13	10:25:53	0.468647	1202.19	30
2022-09-13	10:25:54	1.27792	1203.47	30
2022-09-13	10:25:55	2.26796	1205.74	30
2022-09-13	10:25:56	3.29308	1209.03	30
2022-09-13	10:25:57	3.26388	1212.29	30
2022-09-13	10:25:58	3.27241	1215.57	30
2022-09-13	10:25:59	3.28092	1218.85	30
2022-09-13	10:26:00	3.27933	1222.13	30
2022-09-13	10:26:01	3.2791	1225.4	30
2022-09-13	10:26:02	3.28986	1228.69	30
2022-09-13	10:26:03	3.29723	1231.99	30
2022-09-13	10:26:04	3.28437	1235.28	30
2022-09-13	10:26:05	3.2722	1238.55	30
2022-09-13	10:26:06	3.28703	1241.84	30
2022-09-13	10:26:07	3.27897	1245.11	30
2022-09-13	10:26:08	3.28431	1248.4	30
2022-09-13	10:26:09	6.11933	1254.52	30
2022-09-13	10:26:10	56.3566	1310.87	31
2022-09-13	10:26:11	24.115	1334.99	32
2022-09-13	10:26:12	23.6642	1358.65	33
2022-09-13	10:26:13	32.3678	1391.02	34
2022-09-13	10:26:14	39.1016	1430.12	35
2022-09-13	10:26:15	18.4882	1448.61	36
2022-09-13	10:26:16	16.5234	1465.13	37
2022-09-13	10:26:17	17.0342	1482.17	38
2022-09-13	10:26:18	17.8	1499.97	39
2022-09-13	10:26:19	19.3292	1519.3	40
2022-09-13	10:26:20	14.1967	1533.49	41
2022-09-13	10:26:21	12.5622	1546.06	41
2022-09-13	10:26:22	13.7963	1559.85	42
2022-09-13	10:26:23	19.0286	1578.88	43
2022-09-13	10:26:24	12.931	1591.81	43
2022-09-13	10:26:25	16.8913	1608.7	44
2022-09-13	10:26:26	26.4851	1635.19	45
2022-09-13	10:26:27	23.0147	1658.2	46
2022-09-13	10:26:28	20.7432	1678.95	47
2022-09-13	10:26:29	13.0224	1691.97	48
2022-09-13	10:26:30	17.7935	1709.76	49
2022-09-13	10:26:31	19.1554	1728.92	50
2022-09-13	10:26:32	39.5984	1768.52	51
2022-09-13	10:26:33	26.9321	1795.45	52
2022-09-13	10:26:34	42.7588	1838.21	53
2022-09-13	10:26:35	64.8834	1903.09	54
2022-09-13	10:26:36	7.26975	1910.36	54
2022-09-13	10:26:37	2.62348	1912.98	54
2022-09-13	10:26:38	0.60164	1913.59	54
2022-09-13	10:26:39	0.837405	1914.42	54
2022-09-13	10:26:40	0.701979	1915.13	54
2022-09-13	10:26:41	0.829143	1915.95	54
2022-09-13	10:26:42	1.16149	1917.12	54
2022-09-13	10:26:43	3.44045	1920.56	54
2022-09-13	10:26:44	19.2474	1939.8	55
2022-09-13	10:26:45	35.012	1974.82	56
2022-09-13	10:26:46	19.7133	1994.53	57
2022-09-13	10:26:47	18.3637	2012.89	58
2022-09-13	10:26:48	17.4019	2030.29	59
2022-09-13	10:26:49	7.50992	2037.8	59
2022-09-13	10:26:50	8.99499	2046.8	59
2022-09-13	10:26:51	6.96234	2053.76	59
2022-09-13	10:26:52	2.74334	2056.51	59
2022-09-13	10:26:53	2.64362	2059.15	59
2022-09-13	10:26:54	2.39003	2061.54	59
2022-09-13	10:26:55	2.03619	2063.58	59
2022-09-13	10:26:56	1.66134	2065.24	59
2022-09-13	10:26:57	1.96185	2067.2	59
2022-09-13	10:26:58	2.08477	2069.28	59
2022-09-13	10:26:59	2.8918	2072.18	59
2022-09-13	10:27:00	3.3658	2075.54	59
2022-09-13	10:27:01	5.78793	2081.33	59
2022-09-13	10:27:02	26.1179	2107.45	60
2022-09-13	10:27:03	23.023	2130.47	61
2022-09-13	10:27:04	23.5994	2154.07	62
2022-09-13	10:27:05	20.8742	2174.94	63
2022-09-13	10:27:06	15.441	2190.38	64
2022-09-13	10:27:07	6.51367	2196.9	64
2022-09-13	10:27:08	17.419	2214.32	65
2022-09-13	10:27:09	26.4436	2240.76	66
2022-09-13	10:27:10	31.3138	2272.07	67
2022-09-13	10:27:11	30.4763	2302.55	68
2022-09-13	10:27:12	9.55573	2312.11	68
2022-09-13	10:27:13	23.7757	2335.88	69
2022-09-13	10:27:14	20.6768	2356.56	70
2022-09-13	10:27:15	10.6137	2367.17	70
2022-09-13	10:27:16	33.3962	2400.57	71
2022-09-13	10:27:17	43.7244	2444.29	72
2022-09-13	10:27:18	31.7637	2476.06	73
2022-09-13	10:27:19	29.3855	2505.44	74
2022-09-13	10:27:20	32.1348	2537.58	75
2022-09-13	10:27:21	28.6903	2566.27	76
2022-09-13	10:27:22	28.5457	2594.81	77
2022-09-13	10:27:23	30.1821	2625	78
2022-09-13	10:27:24	20.0732	2645.07	79
2022-09-13	10:27:25	24.3083	2669.38	80
2022-09-13	10:27:26	37.2221	2706.6	81
2022-09-13	10:27:27	29.8356	2736.43	82
2022-09-13	10:27:28	14.5686	2751	83
2022-09-13	10:27:29	34.3288	2785.33	84
2022-09-13	10:27:30	25.7503	2811.08	85
2022-09-13	10:27:31	35.506	2846.59	86
2022-09-13	10:27:32	40.8176	2887.41	87
2022-09-13	10:27:33	31.5354	2918.94	88
2022-09-13	10:27:34	41.1498	2960.09	89
2022-09-13	10:27:35	27.1808	2987.27	90
2022-09-13	10:27:36	39.8481	3027.12	91
2022-09-13	10:27:37	48.8658	3075.99	92
2022-09-13	10:27:38	43.0025	3118.99	93
2022-09-13	10:27:39	36.9181	3155.91	94
2022-09-13	10:27:40	48.7292	3204.64	95
2022-09-13	10:27:41	43.7818	3248.42	96
2022-09-13	10:27:42	39.2447	3287.66	97
2022-09-13	10:27:43	29.0604	3316.72	98
2022-09-13	10:27:44	36.2973	3353.02	99
2022-09-13	10:27:45	37.5017	3390.52	100
2022-09-13	10:27:46	39.2575	3429.78	101
2022-09-13	10:27:47	29.6275	3459.41	102
2022-09-13	10:27:48	57.2855	3516.69	103
2022-09-13	10:27:49	42.2	3558.89	104
2022-09-13	10:27:50	39.6595	3598.55	105
2022-09-13	10:27:51	38.7641	3637.32	106
2022-09-13	10:27:52	47.0053	3684.32	107
2022-09-13	10:27:53	47.0168	3731.34	108
2022-09-13	10:27:54	43.9267	3775.26	109
2022-09-13	10:27:55	52.4327	3827.7	110
2022-09-13	10:27:56	34.6655	3862.36	111
2022-09-13	10:27:57	27.2302	3889.59	112

## Sheet: Mars_star_2022913102246 (E) (3)
Date	Time	Lbs	Newtons	averaged newtons	Total force x time	total steps > 13.345		**GoPro Fitting: 1012
2022-09-13	10:22:57	0.486527	2.16417	6.54412	2.16417	FALSE	0				Total force	7362.2
2022-09-13	10:22:57	2.14322	9.53347	6.54412	9.53347	FALSE	0				Total steps	385
2022-09-13	10:22:57	1.14668	5.10066	6.54412	7.26483	FALSE	0
2022-09-13	10:22:57	2.10831	9.37818	6.54412	18.9117	FALSE	0
2022-09-13	10:22:58	1.67742	7.4615	6.50841	14.7263	FALSE	0
2022-09-13	10:22:58	1.61228	7.17174	6.50841	26.0834	FALSE	0
2022-09-13	10:22:58	0.774008	3.44294	6.50841	18.1693	FALSE	0
2022-09-13	10:22:58	1.78892	7.95747	6.50841	34.0409	FALSE	0
2022-09-13	10:22:59	3.32775	14.8025	22.1957	32.9718	1	1
2022-09-13	10:22:59	5.72322	25.458	22.1957	59.4989	1	2
2022-09-13	10:22:59	5.91848	26.3266	22.1957	59.2984	1	3
2022-09-13	10:23:00	7.90627	35.1687	31.0005	94.6676	1	4
2022-09-13	10:23:00	7.14937	31.8018	31.0005	91.1002	1	5
2022-09-13	10:23:00	5.48688	24.4067	31.0005	119.074	1	6
2022-09-13	10:23:00	7.33436	32.6247	31.0005	123.725	1	7
2022-09-13	10:23:01	3.08093	13.7046	22.1199	132.779	1	8
2022-09-13	10:23:01	6.71426	29.8664	22.1199	153.591	1	9
2022-09-13	10:23:01	5.12311	22.7886	22.1199	155.568	1	10
2022-09-13	10:23:02	4.82164	21.4476	19.6746	175.039	1	11
2022-09-13	10:23:02	5.13553	22.8439	19.6746	178.411	1	12
2022-09-13	10:23:02	2.94953	13.1201	19.6746	188.159	FALSE	12
2022-09-13	10:23:02	7.40505	32.9391	19.6746	211.351	1	13
2022-09-13	10:23:02	1.80352	8.02242	19.6746	196.181	FALSE	13
2022-09-13	10:23:03	1.46922	6.53538	5.59256	217.886	FALSE	13
2022-09-13	10:23:03	1.20215	5.3474	5.59256	201.529	FALSE	13
2022-09-13	10:23:03	1.10042	4.89489	5.59256	222.781	FALSE	13
2022-09-13	10:23:04	1.31793	5.86242	3.46688	207.391	FALSE	13
2022-09-13	10:23:04	0.470852	2.09444	3.46688	224.875	FALSE	13
2022-09-13	10:23:04	0.593295	2.63909	3.46688	210.03	FALSE	13
2022-09-13	10:23:04	0.735483	3.27158	3.46688	228.147	FALSE	13
2022-09-13	10:23:05	0.549173	2.44283	1.72297	212.473	FALSE	13
2022-09-13	10:23:05	0.445	1.97945	1.72297	230.126	FALSE	13
2022-09-13	10:23:05	0.109733	0.488114	1.72297	212.961	FALSE	13
2022-09-13	10:23:05	0.445458	1.98149	1.72297	232.108	FALSE	13
2022-09-13	10:23:06	0.871718	3.87758	6.28566	216.839	FALSE	13
2022-09-13	10:23:06	1.55335	6.90961	6.28566	239.017	FALSE	13
2022-09-13	10:23:06	1.4477	6.43966	6.28566	223.278	FALSE	13
2022-09-13	10:23:06	1.77955	7.91579	6.28566	246.933	FALSE	13
2022-09-13	10:23:07	1.82693	8.12655	4.28725	231.405	FALSE	13
2022-09-13	10:23:07	0.317112	1.41058	4.28725	248.344	FALSE	13
2022-09-13	10:23:07	0.804491	3.57854	4.28725	234.984	FALSE	13
2022-09-13	10:23:07	0.90673	4.03332	4.28725	252.377	FALSE	13
2022-09-13	10:23:08	0.61869	2.75206	2.42118	237.736	FALSE	13
2022-09-13	10:23:08	0.737621	3.28109	2.42118	255.658	FALSE	13
2022-09-13	10:23:08	0.276603	1.23039	2.42118	238.966	FALSE	13
2022-09-13	10:23:09	0.739147	3.28787	2.99399	258.946	FALSE	13
2022-09-13	10:23:09	0.734313	3.26637	2.99399	242.232	FALSE	13
2022-09-13	10:23:09	0.486425	2.16372	2.99399	261.11	FALSE	13
2022-09-13	10:23:09	0.73243	3.258	2.99399	245.49	FALSE	13
2022-09-13	10:23:10	0.736959	3.27814	2.64617	264.388	FALSE	13
2022-09-13	10:23:10	0.664491	2.95579	2.64617	248.446	FALSE	13
2022-09-13	10:23:10	0.23813	1.05925	2.64617	265.447	FALSE	13
2022-09-13	10:23:10	0.739962	3.2915	2.64617	251.738	FALSE	13
2022-09-13	10:23:11	0.245356	1.09139	1.84855	266.539	FALSE	13
2022-09-13	10:23:11	0.704084	3.13191	1.84855	254.87	FALSE	13
2022-09-13	10:23:11	0.449835	2.00096	1.84855	268.539	FALSE	13
2022-09-13	10:23:11	0.263015	1.16994	1.84855	256.04	FALSE	13
2022-09-13	10:23:12	0.155942	0.693661	1.16549	269.233	FALSE	13
2022-09-13	10:23:12	0.186934	0.83152	1.16549	256.871	FALSE	13
2022-09-13	10:23:12	0.443168	1.9713	1.16549	271.204	FALSE	13
2022-09-13	10:23:13	0.0945168	0.42043	1.13016	257.291	FALSE	13
2022-09-13	10:23:13	0.469682	2.08924	1.13016	273.294	FALSE	13
2022-09-13	10:23:13	0.177112	0.78783	1.13016	258.079	FALSE	13
2022-09-13	10:23:13	0.274975	1.22314	1.13016	274.517	FALSE	13
2022-09-13	10:23:14	0.161387	0.717882	1.0421	258.797	FALSE	13
2022-09-13	10:23:14	0.271107	1.20594	1.0421	275.723	FALSE	13
2022-09-13	10:23:14	0.227646	1.01261	1.0421	259.81	FALSE	13
2022-09-13	10:23:14	0.276959	1.23197	1.0421	276.955	FALSE	13
2022-09-13	10:23:15	0.273143	1.21499	1.19518	261.025	FALSE	13
2022-09-13	10:23:15	0.177926	0.79145	1.19518	277.746	FALSE	13
2022-09-13	10:23:15	0.454669	2.02246	1.19518	263.047	FALSE	13
2022-09-13	10:23:15	0.16902	0.751835	1.19518	278.498	FALSE	13
2022-09-13	10:23:16	0.737214	3.27928	3.27859	266.327	FALSE	13
2022-09-13	10:23:16	0.736857	3.27769	3.27859	281.776	FALSE	13
2022-09-13	10:23:16	0.737112	3.27882	3.27859	269.605	FALSE	13
2022-09-13	10:23:17	0.734109	3.26546	3.61861	285.041	FALSE	13
2022-09-13	10:23:17	0.738384	3.28448	3.61861	272.89	FALSE	13
2022-09-13	10:23:17	0.734415	3.26682	3.61861	288.308	FALSE	13
2022-09-13	10:23:17	1.04709	4.65767	3.61861	277.547	FALSE	13
2022-09-13	10:23:18	0.760267	3.38182	3.48556	291.69	FALSE	13
2022-09-13	10:23:18	1.19874	5.33224	3.48556	282.88	FALSE	13
2022-09-13	10:23:18	0.739046	3.28742	3.48556	294.977	FALSE	13
2022-09-13	10:23:18	0.436298	1.94074	3.48556	284.82	FALSE	13
2022-09-13	10:23:19	0.643015	2.86026	4.28867	297.837	FALSE	13
2022-09-13	10:23:19	0.692481	3.08029	4.28867	287.901	FALSE	13
2022-09-13	10:23:19	0.754364	3.35556	4.28867	301.193	FALSE	13
2022-09-13	10:23:19	1.76668	7.85855	4.28867	295.759	FALSE	13
2022-09-13	10:23:20	3.76836	16.7624	11.4332	317.955	1	14
2022-09-13	10:23:20	5.30729	23.6079	11.4332	319.367	1	15
2022-09-13	10:23:20	0.839962	3.73632	11.4332	321.692	FALSE	15
2022-09-13	10:23:20	0.36556	1.62608	11.4332	320.993	FALSE	15
2022-09-13	10:23:21	0.314109	1.39722	2.77665	323.089	FALSE	15
2022-09-13	10:23:21	0.219046	0.97436	2.77665	321.968	FALSE	15
2022-09-13	10:23:21	1.3395	5.95836	2.77665	329.047	FALSE	15
2022-09-13	10:23:22	0.622812	2.77039	3.26411	324.738	FALSE	15
2022-09-13	10:23:22	0.731463	3.25369	3.26411	332.301	FALSE	15
2022-09-13	10:23:22	0.707087	3.14526	3.26411	327.883	FALSE	15
2022-09-13	10:23:22	0.873855	3.88708	3.26411	336.188	FALSE	15
2022-09-13	10:23:23	3.1134	13.849	18.0674	341.732	1	16
2022-09-13	10:23:23	7.33294	32.6184	18.0674	368.807	1	17
2022-09-13	10:23:23	5.04301	22.4323	18.0674	364.165	1	18
2022-09-13	10:23:23	0.75757	3.36982	18.0674	372.176	FALSE	18
2022-09-13	10:23:24	1.10011	4.89351	3.14209	369.058	FALSE	18
2022-09-13	10:23:24	0.49243	2.19043	3.14209	374.367	FALSE	18
2022-09-13	10:23:24	0.596705	2.65426	3.14209	371.712	FALSE	18
2022-09-13	10:23:24	0.636247	2.83015	3.14209	377.197	FALSE	18
2022-09-13	10:23:25	0.503982	2.24181	4.45799	373.954	FALSE	18
2022-09-13	10:23:25	1.16846	5.19754	4.45799	382.394	FALSE	18
2022-09-13	10:23:25	1.33416	5.93461	4.45799	379.889	FALSE	18
2022-09-13	10:23:26	2.35884	10.4926	7.48123	392.887	FALSE	18
2022-09-13	10:23:26	1.26062	5.60749	7.48123	385.496	FALSE	18
2022-09-13	10:23:26	1.34561	5.98554	7.48123	398.873	FALSE	18
2022-09-13	10:23:26	1.76235	7.83929	7.48123	393.336	FALSE	18
2022-09-13	10:23:27	0.800063	3.55884	4.94707	402.431	FALSE	18
2022-09-13	10:23:27	1.66816	7.42031	4.94707	400.756	FALSE	18
2022-09-13	10:23:27	0.903372	4.01838	4.94707	406.45	FALSE	18
2022-09-13	10:23:27	1.07701	4.79076	4.94707	405.547	FALSE	18
2022-09-13	10:23:28	0.492685	2.19156	3.82981	408.641	FALSE	18
2022-09-13	10:23:28	0.17528	0.77968	3.82981	406.326	FALSE	18
2022-09-13	10:23:28	1.40072	6.23068	3.82981	414.872	FALSE	18
2022-09-13	10:23:28	1.37523	6.1173	3.82981	412.444	FALSE	18
2022-09-13	10:23:29	2.24658	9.99324	9.63986	424.865	FALSE	18
2022-09-13	10:23:29	2.30215	10.2404	9.63986	422.684	FALSE	18
2022-09-13	10:23:29	1.95268	8.68591	9.63986	433.551	FALSE	18
2022-09-13	10:23:30	2.61278	11.6222	11.7719	434.306	FALSE	18
2022-09-13	10:23:30	2.28566	10.1671	11.7719	443.718	FALSE	18
2022-09-13	10:23:30	3.2565	14.4856	11.7719	448.792	1	19
2022-09-13	10:23:30	2.43085	10.8129	11.7719	454.531	FALSE	19
2022-09-13	10:23:31	1.34057	5.96312	13.3791	454.755	FALSE	19
2022-09-13	10:23:31	2.69899	12.0056	13.3791	466.537	FALSE	19
2022-09-13	10:23:31	1.96775	8.75295	13.3791	463.508	FALSE	19
2022-09-13	10:23:31	6.02367	26.7945	13.3791	493.331	1	20
2022-09-13	10:23:32	4.37884	19.478	21.5971	482.986	1	21
2022-09-13	10:23:32	7.33609	32.6324	21.5971	525.964	1	22
2022-09-13	10:23:32	4.40479	19.5934	21.5971	502.579	1	23
2022-09-13	10:23:32	3.30128	14.6848	21.5971	540.648	1	24
2022-09-13	10:23:33	4.86052	21.6206	20.5062	524.2	1	25
2022-09-13	10:23:33	3.15879	14.0509	20.5062	554.699	1	26
2022-09-13	10:23:33	4.31166	19.1791	20.5062	543.379	1	27
2022-09-13	10:23:33	6.10907	27.1744	20.5062	581.874	1	28
2022-09-13	10:23:34	2.89548	12.8797	24.0458	556.259	FALSE	28
2022-09-13	10:23:34	7.47411	33.2463	24.0458	615.12	1	29
2022-09-13	10:23:34	5.84764	26.0115	24.0458	582.27	1	30
2022-09-13	10:23:35	10.4202	46.3511	28.4495	661.471	1	31
2022-09-13	10:23:35	4.43248	19.7166	28.4495	601.987	1	32
2022-09-13	10:23:35	4.10088	18.2415	28.4495	679.713	1	33
2022-09-13	10:23:35	6.62937	29.4888	28.4495	631.475	1	34
2022-09-13	10:23:36	3.41833	15.2054	11.8784	694.918	1	35
2022-09-13	10:23:36	4.52805	20.1417	11.8784	651.617	1	36
2022-09-13	10:23:36	2.30546	10.2551	11.8784	705.173	FALSE	36
2022-09-13	10:23:36	0.429682	1.91131	11.8784	653.528	FALSE	36
2022-09-13	10:23:37	0.293244	1.30441	2.26836	706.478	FALSE	36
2022-09-13	10:23:37	0.473855	2.1078	2.26836	655.636	FALSE	36
2022-09-13	10:23:37	0.740318	3.29308	2.26836	709.771	FALSE	36
2022-09-13	10:23:37	0.532379	2.36813	2.26836	658.004	FALSE	36
2022-09-13	10:23:38	0.824542	3.66773	23.0386	713.439	FALSE	36
2022-09-13	10:23:38	5.59935	24.907	23.0386	682.911	1	37
2022-09-13	10:23:38	9.11401	40.5409	23.0386	753.98	1	38
2022-09-13	10:23:39	4.0451	17.9934	8.66171	700.905	1	39
2022-09-13	10:23:39	0.591311	2.63027	8.66171	756.61	FALSE	39
2022-09-13	10:23:39	1.49518	6.65086	8.66171	707.556	FALSE	39
2022-09-13	10:23:39	1.65737	7.37231	8.66171	763.982	FALSE	39
2022-09-13	10:23:40	3.44459	15.3222	23.9852	722.878	1	40
2022-09-13	10:23:40	7.52678	33.4806	23.9852	797.463	1	41
2022-09-13	10:23:40	4.31731	19.2043	23.9852	742.082	1	42
2022-09-13	10:23:40	6.27981	27.9339	23.9852	825.397	1	43
2022-09-13	10:23:41	2.85487	12.699	12.9297	754.781	FALSE	43
2022-09-13	10:23:41	2.79737	12.4433	12.9297	837.84	FALSE	43
2022-09-13	10:23:41	4.01971	17.8805	12.9297	772.662	1	44
2022-09-13	10:23:41	1.95497	8.6961	12.9297	846.536	FALSE	44
2022-09-13	10:23:42	3.88225	17.269	28.6479	789.931	1	45
2022-09-13	10:23:42	3.83986	17.0805	28.6479	863.616	1	46
2022-09-13	10:23:42	6.55136	29.1418	28.6479	819.072	1	47
2022-09-13	10:23:42	11.4879	51.1005	28.6479	914.717	1	48
2022-09-13	10:23:43	8.9367	39.7522	33.8808	858.825	1	49
2022-09-13	10:23:43	9.46693	42.1108	33.8808	956.828	1	50
2022-09-13	10:23:43	4.44658	19.7793	33.8808	878.604	1	51
2022-09-13	10:23:44	2.02902	9.02549	7.6491	965.853	FALSE	51
2022-09-13	10:23:44	2.54368	11.3148	7.6491	889.919	FALSE	51
2022-09-13	10:23:44	1.84154	8.19154	7.6491	974.045	FALSE	51
2022-09-13	10:23:44	0.464135	2.06457	7.6491	891.983	FALSE	51
2022-09-13	10:23:45	1.13207	5.03567	2.77537	979.08	FALSE	51
2022-09-13	10:23:45	0.610394	2.71515	2.77537	894.698	FALSE	51
2022-09-13	10:23:45	0.300216	1.33542	2.77537	980.416	FALSE	51
2022-09-13	10:23:45	0.453041	2.01522	2.77537	896.714	FALSE	51
2022-09-13	10:23:46	0.661845	2.94402	2.94368	983.36	FALSE	51
2022-09-13	10:23:46	0.736349	3.27543	2.94368	899.989	FALSE	51
2022-09-13	10:23:46	0.489478	2.1773	2.94368	985.537	FALSE	51
2022-09-13	10:23:46	0.759402	3.37797	2.94368	903.367	FALSE	51
2022-09-13	10:23:47	0.735127	3.26999	3.28229	988.807	FALSE	51
2022-09-13	10:23:47	0.744236	3.31051	3.28229	906.678	FALSE	51
2022-09-13	10:23:47	0.734313	3.26637	3.28229	992.073	FALSE	51
2022-09-13	10:23:48	0.738944	3.28697	3.27831	909.964	FALSE	51
2022-09-13	10:23:48	0.735127	3.26999	3.27831	995.343	FALSE	51
2022-09-13	10:23:48	0.738079	3.28312	3.27831	913.248	FALSE	51
2022-09-13	10:23:48	0.73584	3.27316	3.27831	998.617	FALSE	51
2022-09-13	10:23:49	0.734873	3.26886	3.33502	916.516	FALSE	51
2022-09-13	10:23:49	0.568206	2.52749	3.33502	1001.14	FALSE	51
2022-09-13	10:23:49	0.644491	2.86682	3.33502	919.383	FALSE	51
2022-09-13	10:23:49	1.05141	4.67688	3.33502	1005.82	FALSE	51
2022-09-13	10:23:50	0.566018	2.51776	1.95404	921.901	FALSE	51
2022-09-13	10:23:50	0.681641	3.03208	1.95404	1008.85	FALSE	51
2022-09-13	10:23:50	0.314313	1.39813	1.95404	923.299	FALSE	51
2022-09-13	10:23:50	0.195178	0.868191	1.95404	1009.72	FALSE	51
2022-09-13	10:23:51	0.370852	1.64962	1.84272	924.949	FALSE	51
2022-09-13	10:23:51	0.208257	0.926369	1.84272	1010.65	FALSE	51
2022-09-13	10:23:51	0.663677	2.95217	1.84272	927.901	FALSE	51
2022-09-13	10:23:52	4.47253	19.8947	28.4574	1030.54	1	52
2022-09-13	10:23:52	9.81583	43.6628	28.4574	971.564	1	53
2022-09-13	10:23:52	5.30357	23.5913	28.4574	1054.13	1	54
2022-09-13	10:23:52	5.99813	26.6809	28.4574	998.245	1	55
2022-09-13	10:23:53	3.30831	14.716	13.1083	1068.85	1	56
2022-09-13	10:23:53	3.36067	14.9489	13.1083	1013.19	1	57
2022-09-13	10:23:53	2.81747	12.5327	13.1083	1081.38	FALSE	57
2022-09-13	10:23:53	2.30108	10.2357	13.1083	1023.43	FALSE	57
2022-09-13	10:23:54	5.77049	25.6683	29.699	1107.05	1	58
2022-09-13	10:23:54	4.17396	18.5666	29.699	1042	1	59
2022-09-13	10:23:54	10.1798	45.2818	29.699	1152.33	1	60
2022-09-13	10:23:54	6.5823	29.2794	29.699	1071.28	1	61
2022-09-13	10:23:55	6.86042	30.5165	21.7754	1182.85	1	62
2022-09-13	10:23:55	5.36958	23.885	21.7754	1095.16	1	63
2022-09-13	10:23:55	3.83904	17.0768	21.7754	1199.93	1	64
2022-09-13	10:23:55	3.51228	15.6233	21.7754	1110.78	1	65
2022-09-13	10:23:56	0.504593	2.24453	2.26996	1202.17	FALSE	65
2022-09-13	10:23:56	0.45584	2.02767	2.26996	1112.81	FALSE	65
2022-09-13	10:23:56	0.570496	2.53768	2.26996	1204.71	FALSE	65
2022-09-13	10:23:57	1.31543	5.8513	23.3149	1118.66	FALSE	65
2022-09-13	10:23:57	4.51833	20.0984	23.3149	1224.81	1	66
2022-09-13	10:23:57	8.79787	39.1347	23.3149	1157.8	1	67
2022-09-13	10:23:57	6.33405	28.1751	23.3149	1252.98	1	68
2022-09-13	10:23:58	1.79503	7.98465	7.39086	1165.78	FALSE	68
2022-09-13	10:23:58	1.73365	7.71162	7.39086	1260.69	FALSE	68
2022-09-13	10:23:58	0.875026	3.89229	7.39086	1169.67	FALSE	68
2022-09-13	10:23:58	2.24245	9.97487	7.39086	1270.67	FALSE	68
2022-09-13	10:23:59	6.11156	27.1854	35.2302	1196.86	1	69
2022-09-13	10:23:59	12.0624	53.656	35.2302	1324.32	1	70
2022-09-13	10:23:59	10.7818	47.9596	35.2302	1244.82	1	71
2022-09-13	10:23:59	2.72464	12.1197	35.2302	1336.44	FALSE	71
2022-09-13	10:24:00	1.66281	7.39651	3.56978	1252.22	FALSE	71
2022-09-13	10:24:00	0.633957	2.81997	3.56978	1339.26	FALSE	71
2022-09-13	10:24:00	0.110802	0.492869	3.56978	1252.71	FALSE	71
2022-09-13	10:24:01	0.401947	1.78794	5.48544	1341.05	FALSE	71
2022-09-13	10:24:01	1.48999	6.62777	5.48544	1259.34	FALSE	71
2022-09-13	10:24:01	2.00001	8.89644	5.48544	1349.95	FALSE	71
2022-09-13	10:24:01	1.04078	4.6296	5.48544	1263.97	FALSE	71
2022-09-13	10:24:02	0.805865	3.58465	2.61442	1353.53	FALSE	71
2022-09-13	10:24:02	0.801692	3.56609	2.61442	1267.53	FALSE	71
2022-09-13	10:24:02	0.530598	2.36021	2.61442	1355.89	FALSE	71
2022-09-13	10:24:02	0.212837	0.946742	2.61442	1268.48	FALSE	71
2022-09-13	10:24:03	1.31202	5.83613	6.98604	1361.73	FALSE	71
2022-09-13	10:24:03	2.49197	11.0848	6.98604	1279.56	FALSE	71
2022-09-13	10:24:03	1.37996	6.13834	6.98604	1367.87	FALSE	71
2022-09-13	10:24:03	1.09818	4.88492	6.98604	1284.45	FALSE	71
2022-09-13	10:24:04	1.05991	4.71469	2.88103	1372.58	FALSE	71
2022-09-13	10:24:04	0.591717	2.63208	2.88103	1287.08	FALSE	71
2022-09-13	10:24:04	0.679606	3.02302	2.88103	1375.61	FALSE	71
2022-09-13	10:24:04	0.259504	1.15433	2.88103	1288.23	FALSE	71
2022-09-13	10:24:05	0.79126	3.51968	3.78054	1379.12	FALSE	71
2022-09-13	10:24:05	0.523219	2.32738	3.78054	1290.56	FALSE	71
2022-09-13	10:24:05	1.23523	5.49455	3.78054	1384.62	FALSE	71
2022-09-13	10:24:06	1.15335	5.13033	7.71577	1295.69	FALSE	71
2022-09-13	10:24:06	1.66856	7.42209	7.71577	1392.04	FALSE	71
2022-09-13	10:24:06	2.23162	9.92669	7.71577	1305.62	FALSE	71
2022-09-13	10:24:06	1.8848	8.38397	7.71577	1400.43	FALSE	71
2022-09-13	10:24:07	3.1909	14.1938	9.36164	1319.81	1	72
2022-09-13	10:24:07	1.32871	5.91037	9.36164	1406.34	FALSE	72
2022-09-13	10:24:07	3.11869	13.8726	9.36164	1333.69	1	73
2022-09-13	10:24:07	0.780064	3.46988	9.36164	1409.81	FALSE	73
2022-09-13	10:24:08	1.87961	8.36088	8.08753	1342.05	FALSE	73
2022-09-13	10:24:08	1.30276	5.79494	8.08753	1415.6	FALSE	73
2022-09-13	10:24:08	2.18027	9.69828	8.08753	1351.74	FALSE	73
2022-09-13	10:24:08	1.90999	8.49602	8.08753	1424.1	FALSE	73
2022-09-13	10:24:09	2.80256	12.4663	15.5124	1364.21	FALSE	73
2022-09-13	10:24:09	2.98612	13.2829	15.5124	1437.38	FALSE	73
2022-09-13	10:24:09	4.67334	20.788	15.5124	1385	1	74
2022-09-13	10:24:10	3.86418	17.1886	15.7043	1454.57	1	75
2022-09-13	10:24:10	4.33859	19.2989	15.7043	1404.3	1	76
2022-09-13	10:24:10	3.42159	15.2199	15.7043	1469.79	1	77
2022-09-13	10:24:10	2.49757	11.1097	15.7043	1415.41	FALSE	77
2022-09-13	10:24:11	3.17141	14.1071	6.7375	1483.9	1	78
2022-09-13	10:24:11	1.05574	4.69614	6.7375	1420.1	FALSE	78
2022-09-13	10:24:11	1.28312	5.70757	6.7375	1489.6	FALSE	78
2022-09-13	10:24:11	0.548359	2.43921	6.7375	1422.54	FALSE	78
2022-09-13	10:24:12	0.601336	2.67486	2.22393	1492.28	FALSE	78
2022-09-13	10:24:12	0.248919	1.10724	2.22393	1423.65	FALSE	78
2022-09-13	10:24:12	0.677977	3.01578	2.22393	1495.29	FALSE	78
2022-09-13	10:24:12	0.471616	2.09784	2.22393	1425.75	FALSE	78
2022-09-13	10:24:13	0.532735	2.36971	1.3106	1497.66	FALSE	78
2022-09-13	10:24:13	0.332227	1.47781	1.3106	1427.23	FALSE	78
2022-09-13	10:24:13	0.0189442	0.0842676	1.3106	1497.75	FALSE	78
2022-09-13	10:24:14	0.106883	0.475437	0.946402	1427.7	FALSE	78
2022-09-13	10:24:14	0.358944	1.59665	0.946402	1499.34	FALSE	78
2022-09-13	10:24:14	0.159453	0.709279	0.946402	1428.41	FALSE	78
2022-09-13	10:24:14	0.225763	1.00424	0.946402	1500.35	FALSE	78
2022-09-13	10:24:15	-0.00558499	-0.0248432	0.556139	1428.41	FALSE	78
2022-09-13	10:24:15	0.0905473	0.402772	0.556139	1500.75	FALSE	78
2022-09-13	10:24:15	0.102303	0.455064	0.556139	1428.87	FALSE	78
2022-09-13	10:24:15	0.312837	1.39156	0.556139	1502.14	FALSE	78
2022-09-13	10:24:16	0.296654	1.31958	1.46451	1430.19	FALSE	78
2022-09-13	10:24:16	0.347596	1.54618	1.46451	1503.69	FALSE	78
2022-09-13	10:24:16	0.319402	1.42076	1.46451	1431.61	FALSE	78
2022-09-13	10:24:16	0.353295	1.57153	1.46451	1505.26	FALSE	78
2022-09-13	10:24:17	0.470089	2.09105	1.79303	1433.7	FALSE	78
2022-09-13	10:24:17	0.393193	1.749	1.79303	1507.01	FALSE	78
2022-09-13	10:24:17	0.390852	1.73859	1.79303	1435.44	FALSE	78
2022-09-13	10:24:17	0.358232	1.59349	1.79303	1508.6	FALSE	78
2022-09-13	10:24:18	0.362863	1.61409	1.6737	1437.05	FALSE	78
2022-09-13	10:24:18	0.365967	1.62789	1.6737	1510.23	FALSE	78
2022-09-13	10:24:18	0.399962	1.77911	1.6737	1438.83	FALSE	78
2022-09-13	10:24:19	0.424898	1.89003	1.85778	1512.12	FALSE	78
2022-09-13	10:24:19	0.433143	1.92671	1.85778	1440.76	FALSE	78
2022-09-13	10:24:19	0.418537	1.86174	1.85778	1513.98	FALSE	78
2022-09-13	10:24:19	0.394008	1.75263	1.85778	1442.51	FALSE	78
2022-09-13	10:24:20	0.388206	1.72682	1.72784	1515.71	FALSE	78
2022-09-13	10:24:20	0.389682	1.73338	1.72784	1444.24	FALSE	78
2022-09-13	10:24:20	0.38958	1.73293	1.72784	1517.44	FALSE	78
2022-09-13	10:24:20	0.386272	1.71822	1.72784	1445.96	FALSE	78
2022-09-13	10:24:21	0.377723	1.68019	1.64793	1519.12	FALSE	78
2022-09-13	10:24:21	0.372939	1.65891	1.64793	1447.62	FALSE	78
2022-09-13	10:24:21	0.366222	1.62903	1.64793	1520.75	FALSE	78
2022-09-13	10:24:21	0.365	1.62359	1.64793	1449.24	FALSE	78
2022-09-13	10:24:22	0.362761	1.61363	1.62978	1522.36	FALSE	78
2022-09-13	10:24:22	0.369631	1.64419	1.62978	1450.89	FALSE	78
2022-09-13	10:24:22	0.366781	1.63152	1.62978	1524	FALSE	78
2022-09-13	10:24:23	0.368562	1.63944	1.64753	1452.53	FALSE	78
2022-09-13	10:24:23	0.372074	1.65506	1.64753	1525.65	FALSE	78
2022-09-13	10:24:23	0.366832	1.63174	1.64753	1454.16	FALSE	78
2022-09-13	10:24:23	0.374059	1.66389	1.64753	1527.32	FALSE	78
2022-09-13	10:24:24	0.373143	1.65981	1.67266	1455.82	FALSE	78
2022-09-13	10:24:24	0.37416	1.66434	1.67266	1528.98	FALSE	78
2022-09-13	10:24:24	0.376705	1.67566	1.67266	1457.49	FALSE	78
2022-09-13	10:24:24	0.380115	1.69083	1.67266	1530.67	FALSE	78
2022-09-13	10:24:25	0.38159	1.69739	1.68817	1459.19	FALSE	78
2022-09-13	10:24:25	0.377265	1.67815	1.68817	1532.35	FALSE	78
2022-09-13	10:24:25	0.376247	1.67362	1.68817	1460.86	FALSE	78
2022-09-13	10:24:25	0.382964	1.7035	1.68817	1534.05	FALSE	78
2022-09-13	10:24:26	0.376094	1.67294	1.67739	1462.54	FALSE	78
2022-09-13	10:24:26	0.375382	1.66977	1.67739	1535.72	FALSE	78
2022-09-13	10:24:26	0.379809	1.68947	1.67739	1464.23	FALSE	78
2022-09-13	10:24:27	0.374669	1.6666	1.68228	1537.39	FALSE	78
2022-09-13	10:24:27	0.377417	1.67883	1.68228	1465.91	FALSE	78
2022-09-13	10:24:27	0.378588	1.68404	1.68228	1539.07	FALSE	78
2022-09-13	10:24:27	0.382099	1.69965	1.68228	1467.61	FALSE	78
2022-09-13	10:24:28	0.385662	1.7155	1.73129	1540.79	FALSE	78
2022-09-13	10:24:28	0.384389	1.70984	1.73129	1469.31	FALSE	78
2022-09-13	10:24:28	0.394771	1.75602	1.73129	1542.54	FALSE	78
2022-09-13	10:24:28	0.392023	1.7438	1.73129	1471.06	FALSE	78
2022-09-13	10:24:29	0.399809	1.77843	1.76858	1544.32	FALSE	78
2022-09-13	10:24:29	0.398181	1.77119	1.76858	1472.83	FALSE	78
2022-09-13	10:24:29	0.400369	1.78092	1.76858	1546.1	FALSE	78
2022-09-13	10:24:29	0.392023	1.7438	1.76858	1474.57	FALSE	78
2022-09-13	10:24:30	0.392634	1.74651	1.77939	1547.85	FALSE	78
2022-09-13	10:24:30	0.405764	1.80492	1.77939	1476.38	FALSE	78
2022-09-13	10:24:30	0.405	1.80152	1.77939	1549.65	FALSE	78
2022-09-13	10:24:30	0.396705	1.76462	1.77939	1478.14	FALSE	78
2022-09-13	10:24:31	0.403626	1.79541	1.84106	1551.45	FALSE	78
2022-09-13	10:24:31	0.421183	1.87351	1.84106	1480.02	FALSE	78
2022-09-13	10:24:31	0.416858	1.85427	1.84106	1553.3	FALSE	78
2022-09-13	10:24:32	0.418232	1.86038	2.02642	1481.88	FALSE	78
2022-09-13	10:24:32	0.412481	1.8348	2.02642	1555.14	FALSE	78
2022-09-13	10:24:32	0.454924	2.02359	2.02642	1483.9	FALSE	78
2022-09-13	10:24:32	0.536603	2.38692	2.02642	1557.52	FALSE	78
2022-09-13	10:24:33	0.59182	2.63253	1.51833	1486.53	FALSE	78
2022-09-13	10:24:33	0.37986	1.68969	1.51833	1559.21	FALSE	78
2022-09-13	10:24:33	0.254924	1.13395	1.51833	1487.67	FALSE	78
2022-09-13	10:24:33	0.138741	0.617148	1.51833	1559.83	FALSE	78
2022-09-13	10:24:34	0.212837	0.946742	1.61635	1488.61	FALSE	78
2022-09-13	10:24:34	0.274211	1.21975	1.61635	1561.05	FALSE	78
2022-09-13	10:24:34	0.328155	1.4597	1.61635	1490.07	FALSE	78
2022-09-13	10:24:34	0.638283	2.83921	1.61635	1563.89	FALSE	78
2022-09-13	10:24:35	0.739351	3.28878	3.6601	1493.36	FALSE	78
2022-09-13	10:24:35	0.732735	3.25935	3.6601	1567.15	FALSE	78
2022-09-13	10:24:35	0.996399	4.43218	3.6601	1497.79	FALSE	78
2022-09-13	10:24:36	5.7737	25.6826	31.943	1592.83	1	79
2022-09-13	10:24:36	8.28988	36.875	31.943	1534.67	1	80
2022-09-13	10:24:36	4.76271	21.1855	31.943	1614.02	1	81
2022-09-13	10:24:36	9.89818	44.0291	31.943	1578.7	1	82
2022-09-13	10:24:37	3.13747	13.9561	15.7894	1627.97	1	83
2022-09-13	10:24:37	5.81171	25.8516	15.7894	1604.55	1	84
2022-09-13	10:24:37	3.32668	14.7977	15.7894	1642.77	1	85
2022-09-13	10:24:37	1.92256	8.55193	15.7894	1613.1	FALSE	85
2022-09-13	10:24:38	3.88724	17.2912	7.37128	1660.06	1	86
2022-09-13	10:24:38	1.06495	4.73711	7.37128	1617.84	FALSE	86
2022-09-13	10:24:38	1.09426	4.86749	7.37128	1664.93	FALSE	86
2022-09-13	10:24:38	0.582099	2.58929	7.37128	1620.43	FALSE	86
2022-09-13	10:24:39	0.273957	1.21862	2.02195	1666.15	FALSE	86
2022-09-13	10:24:39	0.627697	2.79212	2.02195	1623.22	FALSE	86
2022-09-13	10:24:39	0.259046	1.15229	2.02195	1667.3	FALSE	86
2022-09-13	10:24:39	0.657519	2.92478	2.02195	1626.15	FALSE	86
2022-09-13	10:24:40	0.30617	1.36191	0.172325	1668.66	FALSE	86
2022-09-13	10:24:40	0.00835904	0.0371827	0.172325	1626.18	FALSE	86
2022-09-13	10:24:40	-0.198308	-0.882114	0.172325	1668.66	FALSE	86
2022-09-13	10:24:41	-0.0698089	-0.310524	1.34634	1626.18	FALSE	86
2022-09-13	10:24:41	0.76673	3.41057	1.34634	1672.07	FALSE	86
2022-09-13	10:24:41	0.220674	0.981602	1.34634	1627.16	FALSE	86
2022-09-13	10:24:41	0.293092	1.30373	1.34634	1673.38	FALSE	86
2022-09-13	10:24:42	0.0480028	0.213526	1.33723	1627.38	FALSE	86
2022-09-13	10:24:42	0.0881045	0.391906	1.33723	1673.77	FALSE	86
2022-09-13	10:24:42	0.368053	1.63717	1.33723	1629.02	FALSE	86
2022-09-13	10:24:42	0.698333	3.10632	1.33723	1676.87	FALSE	86
2022-09-13	10:24:43	0.548512	2.43989	2.39331	1631.45	FALSE	86
2022-09-13	10:24:43	0.693855	3.08641	2.39331	1679.96	FALSE	86
2022-09-13	10:24:43	0.490853	2.18341	2.39331	1633.64	FALSE	86
2022-09-13	10:24:43	0.418944	1.86355	2.39331	1681.82	FALSE	86
2022-09-13	10:24:44	0.442761	1.96949	2.05204	1635.61	FALSE	86
2022-09-13	10:24:44	0.462812	2.05868	2.05204	1683.88	FALSE	86
2022-09-13	10:24:44	0.478384	2.12795	2.05204	1637.74	FALSE	86
2022-09-13	10:24:45	0.417316	1.85631	1.90124	1685.74	FALSE	86
2022-09-13	10:24:45	0.43813	1.94889	1.90124	1639.68	FALSE	86
2022-09-13	10:24:45	0.445662	1.98239	1.90124	1687.72	FALSE	86
2022-09-13	10:24:45	0.408563	1.81737	1.90124	1641.5	FALSE	86
2022-09-13	10:24:46	0.450242	2.00277	2.73876	1689.72	FALSE	86
2022-09-13	10:24:46	0.4764	2.11912	2.73876	1643.62	FALSE	86
2022-09-13	10:24:46	0.657061	2.92274	2.73876	1692.65	FALSE	86
2022-09-13	10:24:46	0.879097	3.9104	2.73876	1647.53	FALSE	86
2022-09-13	10:24:47	1.77477	7.89453	49.6805	1700.54	FALSE	86
2022-09-13	10:24:47	7.09207	31.5469	49.6805	1679.08	1	87
2022-09-13	10:24:47	18.5276	82.4145	49.6805	1782.96	1	88
2022-09-13	10:24:47	17.2803	76.8662	49.6805	1755.94	1	89
2022-09-13	10:24:48	4.63665	20.6247	30.9616	1803.58	1	90
2022-09-13	10:24:48	8.16673	36.3272	30.9616	1792.27	1	91
2022-09-13	10:24:48	8.07808	35.9329	30.9616	1839.51	1	92
2022-09-13	10:24:49	1.66235	7.39447	3.48798	1799.67	FALSE	92
2022-09-13	10:24:49	0.950191	4.22664	3.48798	1843.74	FALSE	92
2022-09-13	10:24:49	0.180267	0.801864	3.48798	1800.47	FALSE	92
2022-09-13	10:24:49	0.343728	1.52897	3.48798	1845.27	FALSE	92
2022-09-13	10:24:50	0.29645	1.31867	2.79173	1801.79	FALSE	92
2022-09-13	10:24:50	0.738537	3.28516	2.79173	1848.55	FALSE	92
2022-09-13	10:24:50	0.739046	3.28742	2.79173	1805.07	FALSE	92
2022-09-13	10:24:50	0.736399	3.27565	2.79173	1851.83	FALSE	92
2022-09-13	10:24:51	0.735076	3.26977	5.65131	1808.34	FALSE	92
2022-09-13	10:24:51	0.467748	2.08064	5.65131	1853.91	FALSE	92
2022-09-13	10:24:51	0.276858	1.23152	5.65131	1809.58	FALSE	92
2022-09-13	10:24:51	3.6022	16.0233	5.65131	1869.93	1	93
2022-09-13	10:24:52	6.96667	30.9891	14.9243	1840.56	1	94
2022-09-13	10:24:52	5.92596	26.3599	14.9243	1896.29	1	95
2022-09-13	10:24:52	0.386832	1.72071	14.9243	1842.29	FALSE	95
2022-09-13	10:24:52	0.141082	0.627561	14.9243	1896.92	FALSE	95
2022-09-13	10:24:53	0.186171	0.828126	0.259103	1843.11	FALSE	95
2022-09-13	10:24:53	-0.0778496	-0.346291	0.259103	1896.92	FALSE	95
2022-09-13	10:24:53	0.0664252	0.295473	0.259103	1843.41	FALSE	95
2022-09-13	10:24:54	-0.169503	-0.753983	-0.815444	1896.92	FALSE	95
2022-09-13	10:24:54	-0.107977	-0.480303	-0.815444	1843.41	FALSE	95
2022-09-13	10:24:54	-0.269096	-1.19699	-0.815444	1896.92	FALSE	95
2022-09-13	10:24:54	-0.186704	-0.830497	-0.815444	1843.41	FALSE	95
2022-09-13	10:24:55	-0.246399	-1.09603	0.70894	1896.92	FALSE	95
2022-09-13	10:24:55	0.00963129	0.0428419	0.70894	1843.45	FALSE	95
2022-09-13	10:24:55	0.0359417	0.159876	0.70894	1897.08	FALSE	95
2022-09-13	10:24:55	0.838333	3.72907	0.70894	1847.18	FALSE	95
2022-09-13	10:24:56	1.38266	6.15035	4.74763	1903.23	FALSE	95
2022-09-13	10:24:56	2.15492	9.58552	4.74763	1856.77	FALSE	95
2022-09-13	10:24:56	0.345255	1.53576	4.74763	1904.77	FALSE	95
2022-09-13	10:24:56	0.386425	1.7189	4.74763	1858.49	FALSE	95
2022-09-13	10:24:57	0.459097	2.04216	2.29358	1906.81	FALSE	95
2022-09-13	10:24:57	0.714313	3.17741	2.29358	1861.66	FALSE	95
2022-09-13	10:24:57	0.373448	1.66117	2.29358	1908.47	FALSE	95
2022-09-13	10:24:58	0.40215	1.78884	1.59841	1863.45	FALSE	95
2022-09-13	10:24:58	0.3393	1.50927	1.59841	1909.98	FALSE	95
2022-09-13	10:24:58	0.269886	1.20051	1.59841	1864.65	FALSE	95
2022-09-13	10:24:58	0.426018	1.89501	1.59841	1911.87	FALSE	95
2022-09-13	10:24:59	0.215433	0.958289	0.996488	1865.61	FALSE	95
2022-09-13	10:24:59	0.30444	1.35421	0.996488	1913.23	FALSE	95
2022-09-13	10:24:59	0.212176	0.943801	0.996488	1866.55	FALSE	95
2022-09-13	10:24:59	0.164033	0.729652	0.996488	1913.96	FALSE	95
2022-09-13	10:25:00	0.257112	1.14369	0.513355	1867.7	FALSE	95
2022-09-13	10:25:00	0.172634	0.767911	0.513355	1914.73	FALSE	95
2022-09-13	10:25:00	0.00255749	0.0113762	0.513355	1867.71	FALSE	95
2022-09-13	10:25:00	0.0293259	0.130447	0.513355	1914.86	FALSE	95
2022-09-13	10:25:01	-0.120292	-0.535083	-0.0447634	1867.71	FALSE	95
2022-09-13	10:25:01	0.0296822	0.132032	-0.0447634	1914.99	FALSE	95
2022-09-13	10:25:01	-0.00471985	-0.0209948	-0.0447634	1867.71	FALSE	95
2022-09-13	10:25:01	0.0550766	0.244992	-0.0447634	1915.23	FALSE	95
2022-09-13	10:25:02	-0.0753559	-0.335198	-0.924821	1867.71	FALSE	95
2022-09-13	10:25:02	-0.245738	-1.09309	-0.924821	1915.23	FALSE	95
2022-09-13	10:25:02	-0.302633	-1.34617	-0.924821	1867.71	FALSE	95
2022-09-13	10:25:03	-0.491284	-2.18533	5.5873	1915.23	FALSE	95
2022-09-13	10:25:03	-0.277544	-1.23457	5.5873	1867.71	FALSE	95
2022-09-13	10:25:03	1.13309	5.04021	5.5873	1920.27	FALSE	95
2022-09-13	10:25:03	4.66006	20.7289	5.5873	1888.44	1	96
2022-09-13	10:25:04	2.28403	10.1598	3.91288	1930.43	FALSE	96
2022-09-13	10:25:04	0.532125	2.367	3.91288	1890.81	FALSE	96
2022-09-13	10:25:04	0.269071	1.19688	3.91288	1931.63	FALSE	96
2022-09-13	10:25:04	0.433397	1.92784	3.91288	1892.73	FALSE	96
2022-09-13	10:25:05	0.139199	0.619185	2.89875	1932.25	FALSE	96
2022-09-13	10:25:05	0.430598	1.91539	2.89875	1894.65	FALSE	96
2022-09-13	10:25:05	0.777061	3.45652	2.89875	1935.71	FALSE	96
2022-09-13	10:25:05	1.25981	5.60389	2.89875	1900.25	FALSE	96
2022-09-13	10:25:06	0.915178	4.07089	2.46683	1939.78	FALSE	96
2022-09-13	10:25:06	0.297163	1.32184	2.46683	1901.57	FALSE	96
2022-09-13	10:25:06	0.451361	2.00774	2.46683	1941.79	FALSE	96
2022-09-13	10:25:07	0.294873	1.31165	1.15585	1902.89	FALSE	96
2022-09-13	10:25:07	0.19757	0.878831	1.15585	1942.66	FALSE	96
2022-09-13	10:25:07	0.279097	1.24148	1.15585	1904.13	FALSE	96
2022-09-13	10:25:07	0.26785	1.19145	1.15585	1943.86	FALSE	96
2022-09-13	10:25:08	0.303066	1.3481	1.22676	1905.48	FALSE	96
2022-09-13	10:25:08	0.195636	0.870228	1.22676	1944.73	FALSE	96
2022-09-13	10:25:08	0.270191	1.20186	1.22676	1906.68	FALSE	96
2022-09-13	10:25:08	0.334262	1.48686	1.22676	1946.21	FALSE	96
2022-09-13	10:25:09	0.328868	1.46287	1.89762	1908.14	FALSE	96
2022-09-13	10:25:09	0.348461	1.55002	1.89762	1947.76	FALSE	96
2022-09-13	10:25:09	0.395992	1.76145	1.89762	1909.9	FALSE	96
2022-09-13	10:25:09	0.633092	2.81612	1.89762	1950.58	FALSE	96
2022-09-13	10:25:10	1.342	5.96948	11.3265	1915.87	FALSE	96
2022-09-13	10:25:10	2.25253	10.0197	11.3265	1960.6	FALSE	96
2022-09-13	10:25:10	4.04439	17.9903	11.3265	1933.86	1	97
2022-09-13	10:25:11	2.73258	12.1551	9.36877	1972.75	FALSE	97
2022-09-13	10:25:11	2.41899	10.7602	9.36877	1944.62	FALSE	97
2022-09-13	10:25:11	2.46296	10.9557	9.36877	1983.71	FALSE	97
2022-09-13	10:25:11	0.810242	3.60412	9.36877	1948.23	FALSE	97
2022-09-13	10:25:12	0.928715	4.13111	2.47333	1987.84	FALSE	97
2022-09-13	10:25:12	0.57645	2.56416	2.47333	1950.79	FALSE	97
2022-09-13	10:25:12	0.307392	1.36734	2.47333	1989.21	FALSE	97
2022-09-13	10:25:12	0.411565	1.83072	2.47333	1952.62	FALSE	97
2022-09-13	10:25:13	0.408461	1.81692	1.7254	1991.02	FALSE	97
2022-09-13	10:25:13	0.264949	1.17855	1.7254	1953.8	FALSE	97
2022-09-13	10:25:13	0.314771	1.40016	1.7254	1992.43	FALSE	97
2022-09-13	10:25:13	0.563371	2.50599	1.7254	1956.31	FALSE	97
2022-09-13	10:25:14	0.73874	3.28606	3.27735	1995.71	FALSE	97
2022-09-13	10:25:14	0.735178	3.27022	3.27735	1959.58	FALSE	97
2022-09-13	10:25:14	0.736094	3.27429	3.27735	1998.99	FALSE	97
2022-09-13	10:25:14	0.737112	3.27882	3.27735	1962.85	FALSE	97
2022-09-13	10:25:15	0.736145	3.27452	3.28916	2002.26	FALSE	97
2022-09-13	10:25:15	0.736094	3.27429	3.28916	1966.13	FALSE	97
2022-09-13	10:25:15	0.746069	3.31866	3.28916	2005.58	FALSE	97
2022-09-13	10:25:16	0.747748	3.32613	-0.113467	1969.45	FALSE	97
2022-09-13	10:25:16	-0.173524	-0.771869	-0.113467	2005.58	FALSE	97
2022-09-13	10:25:16	-0.423854	-1.88539	-0.113467	1969.45	FALSE	97
2022-09-13	10:25:16	-0.252404	-1.12274	-0.113467	2005.58	FALSE	97
2022-09-13	10:25:17	0.736247	3.27497	3.51827	1972.73	FALSE	97
2022-09-13	10:25:17	0.749224	3.3327	3.51827	2008.91	FALSE	97
2022-09-13	10:25:17	0.942761	4.19359	3.51827	1976.92	FALSE	97
2022-09-13	10:25:17	0.735534	3.2718	3.51827	2012.18	FALSE	97
2022-09-13	10:25:18	0.885102	3.93711	2.97073	1980.86	FALSE	97
2022-09-13	10:25:18	1.02459	4.55758	2.97073	2016.74	FALSE	97
2022-09-13	10:25:18	0.186883	0.831293	2.97073	1981.69	FALSE	97
2022-09-13	10:25:18	0.574822	2.55692	2.97073	2019.3	FALSE	97
2022-09-13	10:25:19	0.135331	0.601979	1.32939	1982.29	FALSE	97
2022-09-13	10:25:19	0.393957	1.7524	1.32939	2021.05	FALSE	97
2022-09-13	10:25:19	0.36729	1.63378	1.32939	1983.93	FALSE	97
2022-09-13	10:25:20	0.456807	2.03197	1.65574	2023.08	FALSE	97
2022-09-13	10:25:20	0.17411	0.774476	1.65574	1984.7	FALSE	97
2022-09-13	10:25:20	0.508512	2.26196	1.65574	2025.34	FALSE	97
2022-09-13	10:25:20	0.349478	1.55455	1.65574	1986.26	FALSE	97
2022-09-13	10:25:21	0.742354	3.30214	2.8632	2028.65	FALSE	97
2022-09-13	10:25:21	0.73528	3.27067	2.8632	1989.53	FALSE	97
2022-09-13	10:25:21	0.732888	3.26003	2.8632	2031.91	FALSE	97
2022-09-13	10:25:21	0.364186	1.61997	2.8632	1991.15	FALSE	97
2022-09-13	10:25:22	0.523575	2.32897	1.78188	2034.24	FALSE	97
2022-09-13	10:25:22	0.301896	1.34289	1.78188	1992.49	FALSE	97
2022-09-13	10:25:22	0.432888	1.92557	1.78188	2036.16	FALSE	97
2022-09-13	10:25:22	0.343982	1.5301	1.78188	1994.02	FALSE	97
2022-09-13	10:25:23	0.401743	1.78703	0.939273	2037.95	FALSE	97
2022-09-13	10:25:23	0.166069	0.738708	0.939273	1994.76	FALSE	97
2022-09-13	10:25:23	0.0656618	0.292077	0.939273	2038.24	FALSE	97
2022-09-13	10:25:24	0.119351	0.530897	-0.293038	1995.29	FALSE	97
2022-09-13	10:25:24	-0.0375443	-0.167005	-0.293038	2038.24	FALSE	97
2022-09-13	10:25:24	-0.167519	-0.745158	-0.293038	1995.29	FALSE	97
2022-09-13	10:25:24	-0.177799	-0.790886	-0.293038	2038.24	FALSE	97
2022-09-13	10:25:25	0.0219468	0.0976238	0.685793	1995.39	FALSE	97
2022-09-13	10:25:25	0.113652	0.505547	0.685793	2038.75	FALSE	97
2022-09-13	10:25:25	0.276094	1.22812	0.685793	1996.62	FALSE	97
2022-09-13	10:25:25	0.205	0.911881	0.685793	2039.66	FALSE	97
2022-09-13	10:25:26	1.06017	4.71585	8.03472	2001.33	FALSE	97
2022-09-13	10:25:26	1.5109	6.72079	8.03472	2046.38	FALSE	97
2022-09-13	10:25:26	1.91553	8.52066	8.03472	2009.85	FALSE	97
2022-09-13	10:25:26	2.73854	12.1816	8.03472	2058.56	FALSE	97
2022-09-13	10:25:27	1.31879	5.86624	3.00865	2015.72	FALSE	97
2022-09-13	10:25:27	0.758181	3.37254	3.00865	2061.93	FALSE	97
2022-09-13	10:25:27	0.291005	1.29445	3.00865	2017.01	FALSE	97
2022-09-13	10:25:27	0.337519	1.50135	3.00865	2063.43	FALSE	97
2022-09-13	10:25:28	0.314059	1.397	1.71241	2018.41	FALSE	97
2022-09-13	10:25:28	0.334568	1.48823	1.71241	2064.92	FALSE	97
2022-09-13	10:25:28	0.506272	2.252	1.71241	2020.66	FALSE	97
2022-09-13	10:25:29	0.456094	2.0288	2.20022	2066.95	FALSE	97
2022-09-13	10:25:29	0.458384	2.03898	2.20022	2022.7	FALSE	97
2022-09-13	10:25:29	0.609427	2.71085	2.20022	2069.66	FALSE	97
2022-09-13	10:25:29	0.454618	2.02223	2.20022	2024.72	FALSE	97
2022-09-13	10:25:30	0.294517	1.31007	1.54448	2070.97	FALSE	97
2022-09-13	10:25:30	0.285763	1.27113	1.54448	2025.99	FALSE	97
2022-09-13	10:25:30	0.3364	1.49637	1.54448	2072.47	FALSE	97
2022-09-13	10:25:30	0.472176	2.10033	1.54448	2028.09	FALSE	97
2022-09-13	10:25:31	0.254415	1.13169	1.04255	2073.6	FALSE	97
2022-09-13	10:25:31	0.215942	0.960553	1.04255	2029.05	FALSE	97
2022-09-13	10:25:31	0.205814	0.915502	1.04255	2074.51	FALSE	97
2022-09-13	10:25:31	0.261336	1.16247	1.04255	2030.22	FALSE	97
2022-09-13	10:25:32	0.326018	1.45019	2.89489	2075.97	FALSE	97
2022-09-13	10:25:32	0.502863	2.23684	2.89489	2032.45	FALSE	97
2022-09-13	10:25:32	1.12352	4.99764	2.89489	2080.96	FALSE	97
2022-09-13	10:25:33	0.487748	2.1696	3.02444	2034.62	FALSE	97
2022-09-13	10:25:33	1.64877	7.33406	3.02444	2088.3	FALSE	97
2022-09-13	10:25:33	0.407646	1.81329	3.02444	2036.44	FALSE	97
2022-09-13	10:25:33	0.175534	0.78081	3.02444	2089.08	FALSE	97
2022-09-13	10:25:34	0.510089	2.26898	1.53814	2038.71	FALSE	97
2022-09-13	10:25:34	0.409529	1.82167	1.53814	2090.9	FALSE	97
2022-09-13	10:25:34	0.297417	1.32297	1.53814	2040.03	FALSE	97
2022-09-13	10:25:34	0.16612	0.738935	1.53814	2091.64	FALSE	97
2022-09-13	10:25:35	0.352481	1.56791	1.04776	2041.6	FALSE	97
2022-09-13	10:25:35	0.205153	0.912562	1.04776	2092.55	FALSE	97
2022-09-13	10:25:35	0.291107	1.2949	1.04776	2042.89	FALSE	97
2022-09-13	10:25:35	0.093448	0.415675	1.04776	2092.97	FALSE	97
2022-09-13	10:25:36	0.296247	1.31777	2.43167	2044.21	FALSE	97
2022-09-13	10:25:36	0.281285	1.25121	2.43167	2094.22	FALSE	97
2022-09-13	10:25:36	1.06246	4.72603	2.43167	2048.94	FALSE	97
2022-09-13	10:25:37	3.40057	15.1264	17.7825	2109.34	1	98
2022-09-13	10:25:37	4.54082	20.1985	17.7825	2069.13	1	99
2022-09-13	10:25:37	5.15176	22.9161	17.7825	2132.26	1	100
2022-09-13	10:25:37	2.89757	12.889	17.7825	2082.02	FALSE	100
2022-09-13	10:25:38	3.59131	15.9749	11.8135	2148.24	1	101
2022-09-13	10:25:38	1.51686	6.7473	11.8135	2088.77	FALSE	101
2022-09-13	10:25:38	4.04179	17.9787	11.8135	2166.21	1	102
2022-09-13	10:25:38	1.47319	6.55304	11.8135	2095.32	FALSE	102
2022-09-13	10:25:39	2.42637	10.793	18.7541	2177.01	FALSE	102
2022-09-13	10:25:39	6.32561	28.1376	18.7541	2123.46	1	103
2022-09-13	10:25:39	1.45518	6.47293	18.7541	2183.48	FALSE	103
2022-09-13	10:25:39	6.65731	29.613	18.7541	2153.07	1	104
2022-09-13	10:25:40	1.32536	5.89547	12.0757	2189.38	FALSE	104
2022-09-13	10:25:40	4.74424	21.1033	12.0757	2174.18	1	105
2022-09-13	10:25:40	2.59874	11.5597	12.0757	2200.93	FALSE	105
2022-09-13	10:25:40	2.1906	9.74423	12.0757	2183.92	FALSE	105
2022-09-13	10:25:41	2.65019	11.7886	14.4057	2212.72	FALSE	105
2022-09-13	10:25:41	3.13665	13.9524	14.4057	2197.87	1	106
2022-09-13	10:25:41	3.92881	17.4761	14.4057	2230.2	1	107
2022-09-13	10:25:42	5.93859	26.416	11.7285	2224.29	1	108
2022-09-13	10:25:42	1.32251	5.88279	11.7285	2236.08	FALSE	108
2022-09-13	10:25:42	2.59482	11.5423	11.7285	2235.83	FALSE	108
2022-09-13	10:25:42	0.690852	3.07305	11.7285	2239.16	FALSE	108
2022-09-13	10:25:43	1.4763	6.56688	4.50559	2242.4	FALSE	108
2022-09-13	10:25:43	0.285916	1.27181	4.50559	2240.43	FALSE	108
2022-09-13	10:25:43	1.23609	5.49838	4.50559	2247.9	FALSE	108
2022-09-13	10:25:43	1.0533	4.68529	4.50559	2245.11	FALSE	108
2022-09-13	10:25:44	0.522761	2.32535	3.18799	2250.22	FALSE	108
2022-09-13	10:25:44	0.902812	4.01589	3.18799	2249.13	FALSE	108
2022-09-13	10:25:44	0.417367	1.85653	3.18799	2252.08	FALSE	108
2022-09-13	10:25:44	1.02383	4.5542	3.18799	2253.68	FALSE	108
2022-09-13	10:25:45	0.39701	1.76598	2.69629	2253.85	FALSE	108
2022-09-13	10:25:45	0.91645	4.07655	2.69629	2257.76	FALSE	108
2022-09-13	10:25:45	0.505	2.24634	2.69629	2256.09	FALSE	108
2022-09-13	10:25:46	0.397367	1.76757	2.59575	2259.53	FALSE	108
2022-09-13	10:25:46	0.481692	2.14266	2.59575	2258.23	FALSE	108
2022-09-13	10:25:46	0.719453	3.20027	2.59575	2262.73	FALSE	108
2022-09-13	10:25:46	0.735687	3.27248	2.59575	2261.51	FALSE	108
2022-09-13	10:25:47	0.659148	2.93202	2.60174	2265.66	FALSE	108
2022-09-13	10:25:47	0.486679	2.16485	2.60174	2263.67	FALSE	108
2022-09-13	10:25:47	0.265967	1.18307	2.60174	2266.84	FALSE	108
2022-09-13	10:25:47	0.927799	4.12704	2.60174	2267.8	FALSE	108
2022-09-13	10:25:48	0.345	1.53463	2.67883	2268.38	FALSE	108
2022-09-13	10:25:48	1.00989	4.49219	2.67883	2272.29	FALSE	108
2022-09-13	10:25:48	0.689173	3.06558	2.67883	2271.44	FALSE	108
2022-09-13	10:25:48	0.364847	1.62291	2.67883	2273.91	FALSE	108
2022-09-13	10:25:49	0.277875	1.23604	1.15304	2272.68	FALSE	108
2022-09-13	10:25:49	0.259097	1.15252	1.15304	2275.07	FALSE	108
2022-09-13	10:25:49	0.240674	1.07057	1.15304	2273.75	FALSE	108
2022-09-13	10:25:50	0.147901	0.657893	0.911655	2275.72	FALSE	108
2022-09-13	10:25:50	0.270547	1.20345	0.911655	2274.95	FALSE	108
2022-09-13	10:25:50	0.211209	0.9395	0.911655	2276.66	FALSE	108
2022-09-13	10:25:50	0.19014	0.845781	0.911655	2275.8	FALSE	108
2022-09-13	10:25:51	0.0988933	0.439897	0.805657	2277.1	FALSE	108
2022-09-13	10:25:51	0.124746	0.554895	0.805657	2276.35	FALSE	108
2022-09-13	10:25:51	0.242049	1.07668	0.805657	2278.18	FALSE	108
2022-09-13	10:25:51	0.258791	1.15115	0.805657	2277.5	FALSE	108
2022-09-13	10:25:52	0.289377	1.28721	1.03548	2279.47	FALSE	108
2022-09-13	10:25:52	0.24841	1.10498	1.03548	2278.61	FALSE	108
2022-09-13	10:25:52	0.298283	1.32682	1.03548	2280.79	FALSE	108
2022-09-13	10:25:52	0.0950766	0.42292	1.03548	2279.03	FALSE	108
2022-09-13	10:25:53	0.00922418	0.041031	0.468647	2280.84	FALSE	108
2022-09-13	10:25:53	0.0738043	0.328296	0.468647	2279.36	FALSE	108
2022-09-13	10:25:53	0.170853	0.759988	0.468647	2281.6	FALSE	108
2022-09-13	10:25:53	0.167545	0.745274	0.468647	2280.11	FALSE	108
2022-09-13	10:25:54	0.198792	0.884267	1.27792	2282.48	FALSE	108
2022-09-13	10:25:54	0.376807	1.67611	1.27792	2281.78	FALSE	108
2022-09-13	10:25:54	0.286272	1.2734	1.27792	2283.75	FALSE	108
2022-09-13	10:25:55	0.272125	1.21047	2.26796	2282.99	FALSE	108
2022-09-13	10:25:55	0.292685	1.30192	2.26796	2285.05	FALSE	108
2022-09-13	10:25:55	0.742405	3.30237	2.26796	2286.29	FALSE	108
2022-09-13	10:25:55	0.732226	3.25709	2.26796	2288.31	FALSE	108
2022-09-13	10:25:56	0.745661	3.31685	3.29308	2289.61	FALSE	108
2022-09-13	10:25:56	0.737468	3.28041	3.29308	2291.59	FALSE	108
2022-09-13	10:25:56	0.735026	3.26954	3.29308	2292.88	FALSE	108
2022-09-13	10:25:56	0.743117	3.30553	3.29308	2294.9	FALSE	108
2022-09-13	10:25:57	0.737926	3.28244	3.26388	2296.16	FALSE	108
2022-09-13	10:25:57	0.736908	3.27791	3.26388	2298.18	FALSE	108
2022-09-13	10:25:57	0.731667	3.2546	3.26388	2299.42	FALSE	108
2022-09-13	10:25:57	0.728512	3.24057	3.26388	2301.42	FALSE	108
2022-09-13	10:25:58	0.736603	3.27656	3.27241	2302.69	FALSE	108
2022-09-13	10:25:58	0.733448	3.26252	3.27241	2304.68	FALSE	108
2022-09-13	10:25:58	0.736959	3.27814	3.27241	2305.97	FALSE	108
2022-09-13	10:25:59	0.735891	3.27339	3.28092	2307.95	FALSE	108
2022-09-13	10:25:59	0.739962	3.2915	3.28092	2309.26	FALSE	108
2022-09-13	10:25:59	0.740878	3.29557	3.28092	2311.25	FALSE	108
2022-09-13	10:25:59	0.733601	3.2632	3.28092	2312.53	FALSE	108
2022-09-13	10:26:00	0.731412	3.25347	3.27933	2314.5	FALSE	108
2022-09-13	10:26:00	0.736145	3.27452	3.27933	2315.8	FALSE	108
2022-09-13	10:26:00	0.749987	3.33609	3.27933	2317.84	FALSE	108
2022-09-13	10:26:00	0.731361	3.25324	3.27933	2319.06	FALSE	108
2022-09-13	10:26:01	0.740878	3.29557	3.2791	2321.13	FALSE	108
2022-09-13	10:26:01	0.737417	3.28018	3.2791	2322.34	FALSE	108
2022-09-13	10:26:01	0.734008	3.26501	3.2791	2324.4	FALSE	108
2022-09-13	10:26:01	0.736399	3.27565	3.2791	2325.61	FALSE	108
2022-09-13	10:26:02	0.737672	3.28131	3.28986	2327.68	FALSE	108
2022-09-13	10:26:02	0.737621	3.28109	3.28986	2328.89	FALSE	108
2022-09-13	10:26:02	0.742812	3.30418	3.28986	2330.98	FALSE	108
2022-09-13	10:26:02	0.740267	3.29286	3.28986	2332.18	FALSE	108
2022-09-13	10:26:03	0.744491	3.31164	3.29723	2334.3	FALSE	108
2022-09-13	10:26:03	0.737265	3.2795	3.29723	2335.46	FALSE	108
2022-09-13	10:26:03	0.741997	3.30055	3.29723	2337.6	FALSE	108
2022-09-13	10:26:04	0.737366	3.27995	3.28437	2338.74	FALSE	108
2022-09-13	10:26:04	0.746171	3.31912	3.28437	2340.91	FALSE	108
2022-09-13	10:26:04	0.735891	3.27339	3.28437	2342.02	FALSE	108
2022-09-13	10:26:04	0.734008	3.26501	3.28437	2344.18	FALSE	108
2022-09-13	10:26:05	0.733702	3.26365	3.2722	2345.28	FALSE	108
2022-09-13	10:26:05	0.736399	3.27565	3.2722	2347.46	FALSE	108
2022-09-13	10:26:05	0.737061	3.27859	3.2722	2348.56	FALSE	108
2022-09-13	10:26:05	0.735331	3.2709	3.2722	2350.73	FALSE	108
2022-09-13	10:26:06	0.733702	3.26365	3.28703	2351.82	FALSE	108
2022-09-13	10:26:06	0.744542	3.31187	3.28703	2354.04	FALSE	108
2022-09-13	10:26:06	0.736908	3.27791	3.28703	2355.1	FALSE	108
2022-09-13	10:26:06	0.740674	3.29467	3.28703	2357.33	FALSE	108
2022-09-13	10:26:07	0.735687	3.27248	3.27897	2358.37	FALSE	108
2022-09-13	10:26:07	0.739249	3.28833	3.27897	2360.62	FALSE	108
2022-09-13	10:26:07	0.736501	3.2761	3.27897	2361.65	FALSE	108
2022-09-13	10:26:08	0.741031	3.29625	3.28431	2363.92	FALSE	108
2022-09-13	10:26:08	0.736705	3.27701	3.28431	2364.93	FALSE	108
2022-09-13	10:26:08	0.739147	3.28787	3.28431	2367.21	FALSE	108
2022-09-13	10:26:08	0.736501	3.2761	3.28431	2368.2	FALSE	108
2022-09-13	10:26:09	0.737315	3.27972	6.11933	2370.49	FALSE	108
2022-09-13	10:26:09	0.730038	3.24736	6.11933	2371.45	FALSE	108
2022-09-13	10:26:09	0.708206	3.15024	6.11933	2373.64	FALSE	108
2022-09-13	10:26:09	3.32719	14.8	6.11933	2386.25	1	109
2022-09-13	10:26:10	9.05797	40.2917	56.3566	2413.93	1	110
2022-09-13	10:26:10	16.1047	71.6369	56.3566	2457.89	1	111
2022-09-13	10:26:10	16.579	73.7467	56.3566	2487.67	1	112
2022-09-13	10:26:10	8.93645	39.7511	56.3566	2497.64	1	113
2022-09-13	10:26:11	10.2698	45.6821	24.115	2533.36	1	114
2022-09-13	10:26:11	3.03446	13.4979	24.115	2511.14	1	115
2022-09-13	10:26:11	2.95965	13.1651	24.115	2546.52	FALSE	115
2022-09-13	10:26:12	2.22897	9.9149	23.6642	2521.05	FALSE	115
2022-09-13	10:26:12	4.77563	21.243	23.6642	2567.76	1	116
2022-09-13	10:26:12	9.36108	41.64	23.6642	2562.69	1	117
2022-09-13	10:26:12	4.91416	21.8592	23.6642	2589.62	1	118
2022-09-13	10:26:13	9.28642	41.3079	32.3678	2604	1	119
2022-09-13	10:26:13	9.68881	43.0978	32.3678	2632.72	1	120
2022-09-13	10:26:13	4.7882	21.2989	32.3678	2625.3	1	121
2022-09-13	10:26:13	5.34296	23.7666	32.3678	2656.49	1	122
2022-09-13	10:26:14	9.60688	42.7333	39.1016	2668.03	1	123
2022-09-13	10:26:14	5.23487	23.2857	39.1016	2679.77	1	124
2022-09-13	10:26:14	7.59879	33.8009	39.1016	2701.83	1	125
2022-09-13	10:26:14	12.7212	56.5864	39.1016	2736.36	1	126
2022-09-13	10:26:15	2.92826	13.0255	18.4882	2714.86	FALSE	126
2022-09-13	10:26:15	6.63991	29.5356	18.4882	2765.9	1	127
2022-09-13	10:26:15	4.58887	20.4122	18.4882	2735.27	1	128
2022-09-13	10:26:15	2.46826	10.9793	18.4882	2776.87	FALSE	128
2022-09-13	10:26:16	4.14642	18.4441	16.5234	2753.71	1	129
2022-09-13	10:26:16	4.011	17.8417	16.5234	2794.72	1	130
2022-09-13	10:26:16	2.98647	13.2844	16.5234	2767	FALSE	130
2022-09-13	10:26:17	5.03665	22.404	17.0342	2817.12	1	131
2022-09-13	10:26:17	1.73691	7.72612	17.0342	2774.72	FALSE	131
2022-09-13	10:26:17	6.39869	28.4627	17.0342	2845.58	1	132
2022-09-13	10:26:17	2.14561	9.5441	17.0342	2784.27	FALSE	132
2022-09-13	10:26:18	5.14459	22.8842	17.8	2868.47	1	133
2022-09-13	10:26:18	5.66021	25.1777	17.8	2809.45	1	134
2022-09-13	10:26:18	1.93014	8.58565	17.8	2877.05	FALSE	134
2022-09-13	10:26:18	3.27156	14.5526	17.8	2824	1	135
2022-09-13	10:26:19	5.15055	22.9107	19.3292	2899.96	1	136
2022-09-13	10:26:19	2.41681	10.7505	19.3292	2834.75	FALSE	136
2022-09-13	10:26:19	7.60749	33.8396	19.3292	2933.8	1	137
2022-09-13	10:26:19	2.20673	9.81598	19.3292	2844.57	FALSE	137
2022-09-13	10:26:20	5.00775	22.2755	14.1967	2956.08	1	138
2022-09-13	10:26:20	2.02017	8.98612	14.1967	2853.55	FALSE	138
2022-09-13	10:26:20	2.54673	11.3284	14.1967	2967.41	FALSE	138
2022-09-13	10:26:21	3.38653	15.064	12.5622	2868.62	1	139
2022-09-13	10:26:21	1.52515	6.78417	12.5622	2974.19	FALSE	139
2022-09-13	10:26:21	3.39635	15.1076	12.5622	2883.72	1	140
2022-09-13	10:26:21	2.98841	13.293	12.5622	2987.48	FALSE	140
2022-09-13	10:26:22	2.73314	12.1576	13.7963	2895.88	FALSE	140
2022-09-13	10:26:22	2.89243	12.8661	13.7963	3000.35	FALSE	140
2022-09-13	10:26:22	2.22393	9.89249	13.7963	2905.77	FALSE	140
2022-09-13	10:26:22	4.55665	20.2689	13.7963	3020.62	1	141
2022-09-13	10:26:23	1.75294	7.79743	19.0286	2913.57	FALSE	141
2022-09-13	10:26:23	6.16581	27.4268	19.0286	3048.05	1	142
2022-09-13	10:26:23	2.48067	11.0345	19.0286	2924.61	FALSE	142
2022-09-13	10:26:23	6.71182	29.8555	19.0286	3077.9	1	143
2022-09-13	10:26:24	1.94057	8.63204	12.931	2933.24	FALSE	143
2022-09-13	10:26:24	3.37854	15.0284	12.931	3092.93	1	144
2022-09-13	10:26:24	3.40195	15.1326	12.931	2948.37	1	145
2022-09-13	10:26:25	1.98083	8.81113	16.8913	3101.74	FALSE	145
2022-09-13	10:26:25	3.65528	16.2594	16.8913	2964.63	1	146
2022-09-13	10:26:25	3.15574	14.0374	16.8913	3115.78	1	147
2022-09-13	10:26:25	6.39746	28.4572	16.8913	2993.09	1	148
2022-09-13	10:26:26	4.28668	19.068	26.4851	3134.85	1	149
2022-09-13	10:26:26	7.61136	33.8569	26.4851	3026.94	1	150
2022-09-13	10:26:26	5.64775	25.1223	26.4851	3159.97	1	151
2022-09-13	10:26:26	6.2707	27.8933	26.4851	3054.84	1	152
2022-09-13	10:26:27	5.41594	24.0912	23.0147	3184.06	1	153
2022-09-13	10:26:27	5.04642	22.4475	23.0147	3077.28	1	154
2022-09-13	10:26:27	6.4138	28.5299	23.0147	3212.59	1	155
2022-09-13	10:26:27	3.8196	16.9903	23.0147	3094.27	1	156
2022-09-13	10:26:28	5.18026	23.0428	20.7432	3235.63	1	157
2022-09-13	10:26:28	3.14637	13.9957	20.7432	3108.27	1	158
2022-09-13	10:26:28	6.46464	28.756	20.7432	3264.39	1	159
2022-09-13	10:26:28	3.86184	17.1782	20.7432	3125.45	1	160
2022-09-13	10:26:29	3.09217	13.7546	13.0224	3278.14	1	161
2022-09-13	10:26:29	3.2422	14.422	13.0224	3139.87	1	162
2022-09-13	10:26:29	2.44831	10.8906	13.0224	3289.03	FALSE	162
2022-09-13	10:26:30	3.23156	14.3746	17.7935	3154.24	1	163
2022-09-13	10:26:30	3.87747	17.2478	17.7935	3306.28	1	164
2022-09-13	10:26:30	4.851	21.5782	17.7935	3175.82	1	165
2022-09-13	10:26:30	4.04057	17.9733	17.7935	3324.25	1	166
2022-09-13	10:26:31	3.59411	15.9873	19.1554	3191.81	1	167
2022-09-13	10:26:31	4.23752	18.8493	19.1554	3343.1	1	168
2022-09-13	10:26:31	3.82195	17.0008	19.1554	3208.81	1	169
2022-09-13	10:26:31	5.57171	24.7841	19.1554	3367.89	1	170
2022-09-13	10:26:32	7.04617	31.3428	39.5984	3240.15	1	171
2022-09-13	10:26:32	11.5313	51.2935	39.5984	3419.18	1	172
2022-09-13	10:26:32	6.37599	28.3617	39.5984	3268.52	1	173
2022-09-13	10:26:32	10.655	47.3956	39.5984	3466.58	1	174
2022-09-13	10:26:33	6.03899	26.8626	26.9321	3295.38	1	175
2022-09-13	10:26:33	7.8051	34.7186	26.9321	3501.3	1	176
2022-09-13	10:26:33	4.31976	19.2152	26.9321	3314.59	1	177
2022-09-13	10:26:34	6.72902	29.932	42.7588	3531.23	1	178
2022-09-13	10:26:34	9.81517	43.6598	42.7588	3358.25	1	179
2022-09-13	10:26:34	6.67008	29.6698	42.7588	3560.9	1	180
2022-09-13	10:26:34	15.2362	67.7737	42.7588	3426.03	1	181
2022-09-13	10:26:35	10.809	48.0806	64.8834	3608.98	1	182
2022-09-13	10:26:35	18.8025	83.6373	64.8834	3509.66	1	183
2022-09-13	10:26:35	16.6394	74.0154	64.8834	3682.99	1	184
2022-09-13	10:26:35	12.0949	53.8005	64.8834	3563.46	1	185
2022-09-13	10:26:36	4.49192	19.981	7.26975	3702.97	1	186
2022-09-13	10:26:36	0.563728	2.50757	7.26975	3565.97	FALSE	186
2022-09-13	10:26:36	0.300929	1.33859	7.26975	3704.31	FALSE	186
2022-09-13	10:26:36	1.18067	5.25186	7.26975	3571.22	FALSE	186
2022-09-13	10:26:37	0.688359	3.06196	2.62348	3707.38	FALSE	186
2022-09-13	10:26:37	0.886883	3.94503	2.62348	3575.17	FALSE	186
2022-09-13	10:26:37	0.19411	0.86344	2.62348	3708.24	FALSE	186
2022-09-13	10:26:38	0.137672	0.612393	0.60164	3575.78	FALSE	186
2022-09-13	10:26:38	0.152227	0.677136	0.60164	3708.92	FALSE	186
2022-09-13	10:26:38	0.156654	0.696828	0.60164	3576.48	FALSE	186
2022-09-13	10:26:38	0.0944659	0.420203	0.60164	3709.34	FALSE	186
2022-09-13	10:26:39	0.0969595	0.431295	0.837405	3576.91	FALSE	186
2022-09-13	10:26:39	0.304288	1.35353	0.837405	3710.69	FALSE	186
2022-09-13	10:26:39	0.0845931	0.376287	0.837405	3577.29	FALSE	186
2022-09-13	10:26:39	0.267188	1.18851	0.837405	3711.88	FALSE	186
2022-09-13	10:26:40	0.0553819	0.24635	0.701979	3577.53	FALSE	186
2022-09-13	10:26:40	0.209529	0.932027	0.701979	3712.81	FALSE	186
2022-09-13	10:26:40	0.0885625	0.393944	0.701979	3577.93	FALSE	186
2022-09-13	10:26:40	0.277774	1.23559	0.701979	3714.05	FALSE	186
2022-09-13	10:26:41	0.30785	1.36938	0.829143	3579.3	FALSE	186
2022-09-13	10:26:41	0.156909	0.697963	0.829143	3714.74	FALSE	186
2022-09-13	10:26:41	0.123168	0.547876	0.829143	3579.84	FALSE	186
2022-09-13	10:26:41	0.157672	0.701357	0.829143	3715.45	FALSE	186
2022-09-13	10:26:42	0.355026	1.57923	1.16149	3581.42	FALSE	186
2022-09-13	10:26:42	0.158435	0.704751	1.16149	3716.15	FALSE	186
2022-09-13	10:26:42	0.269886	1.20051	1.16149	3582.62	FALSE	186
2022-09-13	10:26:43	0.382455	1.70124	3.44045	3717.85	FALSE	186
2022-09-13	10:26:43	0.742761	3.30395	3.44045	3585.93	FALSE	186
2022-09-13	10:26:43	0.925967	4.11889	3.44045	3721.97	FALSE	186
2022-09-13	10:26:43	1.04261	4.63774	3.44045	3590.57	FALSE	186
2022-09-13	10:26:44	0.907036	4.03468	19.2474	3726	FALSE	186
2022-09-13	10:26:44	2.87803	12.8021	19.2474	3603.37	FALSE	186
2022-09-13	10:26:44	4.37411	19.4569	19.2474	3745.46	1	187
2022-09-13	10:26:44	9.14886	40.696	19.2474	3644.06	1	188
2022-09-13	10:26:45	12.7495	56.7123	35.012	3802.17	1	189
2022-09-13	10:26:45	4.73762	21.0739	35.012	3665.14	1	190
2022-09-13	10:26:45	10.745	47.7959	35.012	3849.97	1	191
2022-09-13	10:26:45	3.25212	14.4661	35.012	3679.6	1	192
2022-09-13	10:26:46	8.05034	35.8095	19.7133	3885.78	1	193
2022-09-13	10:26:46	2.7307	12.1467	19.7133	3691.75	FALSE	193
2022-09-13	10:26:46	2.51421	11.1837	19.7133	3896.96	FALSE	193
2022-09-13	10:26:47	7.80703	34.7272	18.3637	3726.48	1	194
2022-09-13	10:26:47	1.15706	5.14683	18.3637	3902.11	FALSE	194
2022-09-13	10:26:47	5.75212	25.5866	18.3637	3752.06	1	195
2022-09-13	10:26:47	1.79716	7.99413	18.3637	3910.1	FALSE	195
2022-09-13	10:26:48	3.06464	13.6321	17.4019	3765.7	1	196
2022-09-13	10:26:48	3.17309	14.1145	17.4019	3924.22	1	197
2022-09-13	10:26:48	3.73065	16.5947	17.4019	3782.29	1	198
2022-09-13	10:26:48	5.68011	25.2663	17.4019	3949.48	1	199
2022-09-13	10:26:49	1.311	5.83159	7.50992	3788.12	FALSE	199
2022-09-13	10:26:49	1.55024	6.89578	7.50992	3956.38	FALSE	199
2022-09-13	10:26:49	1.5737	7.00013	7.50992	3795.12	FALSE	199
2022-09-13	10:26:49	2.31828	10.3122	7.50992	3966.69	FALSE	199
2022-09-13	10:26:50	1.58352	7.04381	8.99499	3802.17	FALSE	199
2022-09-13	10:26:50	2.50765	11.1545	8.99499	3977.85	FALSE	199
2022-09-13	10:26:50	1.57335	6.99858	8.99499	3809.16	FALSE	199
2022-09-13	10:26:50	2.42414	10.7831	8.99499	3988.63	FALSE	199
2022-09-13	10:26:51	1.17207	5.2136	6.96234	3814.38	FALSE	199
2022-09-13	10:26:51	1.99284	8.86455	6.96234	3997.49	FALSE	199
2022-09-13	10:26:51	1.5307	6.80886	6.96234	3821.19	FALSE	199
2022-09-13	10:26:52	0.740776	3.29512	2.74334	4000.79	FALSE	199
2022-09-13	10:26:52	0.724796	3.22404	2.74334	3824.41	FALSE	199
2022-09-13	10:26:52	0.501794	2.23208	2.74334	4003.02	FALSE	199
2022-09-13	10:26:52	0.499555	2.22212	2.74334	3826.63	FALSE	199
2022-09-13	10:26:53	0.472532	2.10192	2.64362	4005.12	FALSE	199
2022-09-13	10:26:53	0.595025	2.64679	2.64362	3829.28	FALSE	199
2022-09-13	10:26:53	0.653041	2.90486	2.64362	4008.03	FALSE	199
2022-09-13	10:26:53	0.656654	2.92093	2.64362	3832.2	FALSE	199
2022-09-13	10:26:54	0.676247	3.00808	2.39003	4011.04	FALSE	199
2022-09-13	10:26:54	0.515585	2.29343	2.39003	3834.49	FALSE	199
2022-09-13	10:26:54	0.494415	2.19926	2.39003	4013.24	FALSE	199
2022-09-13	10:26:54	0.462965	2.05936	2.39003	3836.55	FALSE	199
2022-09-13	10:26:55	0.453295	2.01635	2.03619	4015.25	FALSE	199
2022-09-13	10:26:55	0.474415	2.11029	2.03619	3838.66	FALSE	199
2022-09-13	10:26:55	0.44556	1.98194	2.03619	4017.23	FALSE	199
2022-09-13	10:26:56	0.39355	1.75059	1.66134	3840.41	FALSE	199
2022-09-13	10:26:56	0.342863	1.52512	1.66134	4018.76	FALSE	199
2022-09-13	10:26:56	0.410191	1.82461	1.66134	3842.24	FALSE	199
2022-09-13	10:26:56	0.347341	1.54504	1.66134	4020.3	FALSE	199
2022-09-13	10:26:57	0.411412	1.83004	1.96185	3844.07	FALSE	199
2022-09-13	10:26:57	0.474924	2.11256	1.96185	4022.42	FALSE	199
2022-09-13	10:26:57	0.438181	1.94912	1.96185	3846.02	FALSE	199
2022-09-13	10:26:57	0.439656	1.95568	1.96185	4024.37	FALSE	199
2022-09-13	10:26:58	0.429173	1.90905	2.08477	3847.93	FALSE	199
2022-09-13	10:26:58	0.478537	2.12863	2.08477	4026.5	FALSE	199
2022-09-13	10:26:58	0.395687	1.76009	2.08477	3849.69	FALSE	199
2022-09-13	10:26:58	0.57131	2.5413	2.08477	4029.04	FALSE	199
2022-09-13	10:26:59	0.563626	2.50712	2.8918	3852.19	FALSE	199
2022-09-13	10:26:59	0.750853	3.33994	2.8918	4032.38	FALSE	199
2022-09-13	10:26:59	0.63584	2.82834	2.8918	3855.02	FALSE	199
2022-09-13	10:27:00	0.740522	3.29399	3.3658	4035.68	FALSE	199
2022-09-13	10:27:00	0.67131	2.98612	3.3658	3858.01	FALSE	199
2022-09-13	10:27:00	0.630038	2.80254	3.3658	4038.48	FALSE	199
2022-09-13	10:27:00	0.984796	4.38057	3.3658	3862.39	FALSE	199
2022-09-13	10:27:01	0.731209	3.25256	5.78793	4041.73	FALSE	199
2022-09-13	10:27:01	1.32495	5.89364	5.78793	3868.28	FALSE	199
2022-09-13	10:27:01	0.646476	2.87565	5.78793	4044.61	FALSE	199
2022-09-13	10:27:01	2.5021	11.1298	5.78793	3879.41	FALSE	199
2022-09-13	10:27:02	1.28083	5.69739	26.1179	4050.3	FALSE	199
2022-09-13	10:27:02	5.73426	25.5071	26.1179	3904.92	1	200
2022-09-13	10:27:02	5.57853	24.8144	26.1179	4075.12	1	201
2022-09-13	10:27:02	10.8926	48.4525	26.1179	3953.37	1	202
2022-09-13	10:27:03	3.61752	16.0915	23.023	4091.21	1	203
2022-09-13	10:27:03	8.07482	35.9184	23.023	3989.29	1	204
2022-09-13	10:27:03	3.58439	15.9441	23.023	4107.15	1	205
2022-09-13	10:27:03	5.42647	24.138	23.023	4013.43	1	206
2022-09-13	10:27:04	3.99742	17.7813	23.5994	4124.94	1	207
2022-09-13	10:27:04	4.86388	21.6355	23.5994	4035.06	1	208
2022-09-13	10:27:04	7.05487	31.3815	23.5994	4156.32	1	209
2022-09-13	10:27:05	4.94291	21.9871	20.8742	4057.05	1	210
2022-09-13	10:27:05	6.09808	27.1255	20.8742	4183.44	1	211
2022-09-13	10:27:05	2.42215	10.7742	20.8742	4067.83	FALSE	211
2022-09-13	10:27:05	5.3078	23.6102	20.8742	4207.05	1	212
2022-09-13	10:27:06	1.08749	4.83737	15.441	4072.66	FALSE	212
2022-09-13	10:27:06	6.03548	26.847	15.441	4233.9	1	213
2022-09-13	10:27:06	2.79299	12.4238	15.441	4085.09	FALSE	213
2022-09-13	10:27:06	3.96922	17.6559	15.441	4251.56	1	214
2022-09-13	10:27:07	1.18281	5.26138	6.51367	4090.35	FALSE	214
2022-09-13	10:27:07	1.26144	5.61114	6.51367	4257.17	FALSE	214
2022-09-13	10:27:07	0.844135	3.75488	6.51367	4094.1	FALSE	214
2022-09-13	10:27:07	2.56897	11.4273	6.51367	4268.59	FALSE	214
2022-09-13	10:27:08	4.13686	18.4016	17.419	4112.5	1	215
2022-09-13	10:27:08	4.66846	20.7662	17.419	4289.36	1	216
2022-09-13	10:27:08	2.94261	13.0893	17.419	4125.59	FALSE	216
2022-09-13	10:27:09	5.17553	23.0218	26.4436	4312.38	1	217
2022-09-13	10:27:09	4.92383	21.9022	26.4436	4147.5	1	218
2022-09-13	10:27:09	4.92973	21.9284	26.4436	4334.31	1	219
2022-09-13	10:27:09	8.75003	38.9219	26.4436	4186.42	1	220
2022-09-13	10:27:10	6.18403	27.5078	31.3138	4361.82	1	221
2022-09-13	10:27:10	7.50561	33.3865	31.3138	4219.8	1	222
2022-09-13	10:27:10	10.545	46.9063	31.3138	4408.73	1	223
2022-09-13	10:27:10	3.92403	17.4549	31.3138	4237.26	1	224
2022-09-13	10:27:11	9.08108	40.3945	30.4763	4449.12	1	225
2022-09-13	10:27:11	9.30235	41.3787	30.4763	4278.64	1	226
2022-09-13	10:27:11	3.08973	13.7437	30.4763	4462.86	1	227
2022-09-13	10:27:11	5.93237	26.3884	30.4763	4305.03	1	228
2022-09-13	10:27:12	0.921743	4.1001	9.55573	4466.96	FALSE	228
2022-09-13	10:27:12	2.98658	13.2849	9.55573	4318.31	FALSE	228
2022-09-13	10:27:12	2.53635	11.2822	9.55573	4478.25	FALSE	228
2022-09-13	10:27:13	1.98958	8.85005	23.7757	4327.16	FALSE	228
2022-09-13	10:27:13	6.7795	30.1566	23.7757	4508.4	1	229
2022-09-13	10:27:13	3.49502	15.5465	23.7757	4342.71	1	230
2022-09-13	10:27:13	9.11594	40.5495	23.7757	4548.95	1	231
2022-09-13	10:27:14	8.88271	39.5121	20.6768	4382.22	1	232
2022-09-13	10:27:14	3.21879	14.3178	20.6768	4563.27	1	233
2022-09-13	10:27:14	4.53421	20.1691	20.6768	4402.39	1	234
2022-09-13	10:27:14	1.95767	8.70811	20.6768	4571.98	FALSE	234
2022-09-13	10:27:15	2.44785	10.8885	10.6137	4413.28	FALSE	234
2022-09-13	10:27:15	1.90581	8.47742	10.6137	4580.45	FALSE	234
2022-09-13	10:27:15	1.64871	7.33379	10.6137	4420.61	FALSE	234
2022-09-13	10:27:15	3.54189	15.755	10.6137	4596.21	1	235
2022-09-13	10:27:16	2.55752	11.3764	33.3962	4431.99	FALSE	235
2022-09-13	10:27:16	8.03864	35.7575	33.3962	4631.97	1	236
2022-09-13	10:27:16	6.61798	29.4381	33.3962	4461.43	1	237
2022-09-13	10:27:16	12.8171	57.013	33.3962	4688.98	1	238
2022-09-13	10:27:17	7.53828	33.5318	43.7244	4494.96	1	239
2022-09-13	10:27:17	11.9028	52.946	43.7244	4741.93	1	240
2022-09-13	10:27:17	10.048	44.6955	43.7244	4539.65	1	241
2022-09-13	10:27:18	4.75553	21.1535	31.7637	4763.08	1	242
2022-09-13	10:27:18	11.3521	50.4964	31.7637	4590.15	1	243
2022-09-13	10:27:18	7.49248	33.328	31.7637	4796.41	1	244
2022-09-13	10:27:18	4.96312	22.077	31.7637	4612.23	1	245
2022-09-13	10:27:19	6.83731	30.4137	29.3855	4826.82	1	246
2022-09-13	10:27:19	4.59075	20.4206	29.3855	4632.65	1	247
2022-09-13	10:27:19	10.2289	45.5002	29.3855	4872.32	1	248
2022-09-13	10:27:19	4.76769	21.2076	29.3855	4653.85	1	249
2022-09-13	10:27:20	5.01731	22.318	32.1348	4894.64	1	250
2022-09-13	10:27:20	10.0648	44.7702	32.1348	4698.63	1	251
2022-09-13	10:27:20	2.99965	13.343	32.1348	4907.98	FALSE	251
2022-09-13	10:27:20	10.8151	48.1077	32.1348	4746.73	1	252
2022-09-13	10:27:21	6.71853	29.8854	28.6903	4937.87	1	253
2022-09-13	10:27:21	5.33105	23.7136	28.6903	4770.45	1	254
2022-09-13	10:27:21	7.30001	32.4719	28.6903	4970.34	1	255
2022-09-13	10:27:22	5.56484	24.7535	28.5457	4795.2	1	256
2022-09-13	10:27:22	6.97706	31.0354	28.5457	5001.38	1	257
2022-09-13	10:27:22	8.73507	38.8553	28.5457	4834.06	1	258
2022-09-13	10:27:22	4.39248	19.5386	28.5457	5020.91	1	259
2022-09-13	10:27:23	12.8367	57.1002	30.1821	4891.16	1	260
2022-09-13	10:27:23	0.83874	3.73088	30.1821	5024.65	FALSE	260
2022-09-13	10:27:23	6.68027	29.7152	30.1821	4920.87	1	261
2022-09-13	10:27:24	2.28144	10.1483	20.0732	5034.79	FALSE	261
2022-09-13	10:27:24	5.05523	22.4867	20.0732	4943.36	1	262
2022-09-13	10:27:24	6.05014	26.9122	20.0732	5061.71	1	263
2022-09-13	10:27:24	3.30536	14.7029	20.0732	4958.06	1	264
2022-09-13	10:27:24	5.87111	26.1159	20.0732	5087.82	1	265
2022-09-13	10:27:25	4.33278	19.2731	24.3083	4977.33	1	266
2022-09-13	10:27:25	6.19044	27.5363	24.3083	5115.36	1	267
2022-09-13	10:27:25	5.871	26.1154	24.3083	5003.45	1	268
2022-09-13	10:27:26	3.41828	15.2052	37.2221	5130.56	1	269
2022-09-13	10:27:26	8.66113	38.5264	37.2221	5041.98	1	270
2022-09-13	10:27:26	3.74256	16.6477	37.2221	5147.21	1	271
2022-09-13	10:27:26	17.6496	78.509	37.2221	5120.48	1	272
2022-09-13	10:27:27	4.63696	20.6261	29.8356	5167.84	1	273
2022-09-13	10:27:27	15.7691	70.1441	29.8356	5190.63	1	274
2022-09-13	10:27:27	3.68261	16.381	29.8356	5184.22	1	275
2022-09-13	10:27:27	2.74072	12.1913	29.8356	5202.82	FALSE	275
2022-09-13	10:27:28	4.16841	18.5419	14.5686	5202.76	1	276
2022-09-13	10:27:28	1.29014	5.7388	14.5686	5208.56	FALSE	276
2022-09-13	10:27:28	5.59339	24.8805	14.5686	5227.64	1	277
2022-09-13	10:27:28	2.04877	9.11334	14.5686	5217.67	FALSE	277
2022-09-13	10:27:29	6.45212	28.7003	34.3288	5256.34	1	278
2022-09-13	10:27:29	8.92372	39.6945	34.3288	5257.37	1	279
2022-09-13	10:27:29	8.40596	37.3914	34.3288	5293.73	1	280
2022-09-13	10:27:29	7.08805	31.5291	34.3288	5288.9	1	281
2022-09-13	10:27:30	4.91065	21.8436	25.7503	5315.58	1	282
2022-09-13	10:27:30	8.88367	39.5163	25.7503	5328.41	1	283
2022-09-13	10:27:30	3.57248	15.8911	25.7503	5331.47	1	284
2022-09-13	10:27:31	8.83655	39.3067	35.506	5367.72	1	285
2022-09-13	10:27:31	7.43894	33.0899	35.506	5364.56	1	286
2022-09-13	10:27:31	9.08551	40.4142	35.506	5408.13	1	287
2022-09-13	10:27:31	6.56739	29.2131	35.506	5393.77	1	288
2022-09-13	10:27:32	10.7289	47.7243	40.8176	5455.86	1	289
2022-09-13	10:27:32	11.278	50.1668	40.8176	5443.94	1	290
2022-09-13	10:27:32	5.59975	24.9088	40.8176	5480.77	1	291
2022-09-13	10:27:32	9.09813	40.4703	40.8176	5484.41	1	292
2022-09-13	10:27:33	5.02683	22.3603	31.5354	5503.13	1	293
2022-09-13	10:27:33	9.49813	42.2496	31.5354	5526.66	1	294
2022-09-13	10:27:33	3.53726	15.7344	31.5354	5518.86	1	295
2022-09-13	10:27:33	10.2957	45.7973	31.5354	5572.45	1	296
2022-09-13	10:27:34	11.8937	52.9056	41.1498	5571.77	1	297
2022-09-13	10:27:34	11.5531	51.3905	41.1498	5623.84	1	298
2022-09-13	10:27:34	4.30586	19.1533	41.1498	5590.92	1	299
2022-09-13	10:27:35	2.77599	12.3482	27.1808	5636.19	FALSE	299
2022-09-13	10:27:35	9.13166	40.6195	27.1808	5631.54	1	300
2022-09-13	10:27:35	6.33268	28.169	27.1808	5664.36	1	301
2022-09-13	10:27:35	6.20174	27.5866	27.1808	5659.13	1	302
2022-09-13	10:27:36	5.4334	24.1688	39.8481	5688.53	1	303
2022-09-13	10:27:36	10.7401	47.7741	39.8481	5706.9	1	304
2022-09-13	10:27:36	8.89645	39.5732	39.8481	5728.1	1	305
2022-09-13	10:27:36	10.7631	47.8764	39.8481	5754.78	1	306
2022-09-13	10:27:37	11.991	53.3384	48.8658	5781.44	1	307
2022-09-13	10:27:37	16.217	72.1365	48.8658	5826.91	1	308
2022-09-13	10:27:37	6.13924	27.3086	48.8658	5808.75	1	309
2022-09-13	10:27:37	9.59487	42.6799	48.8658	5869.59	1	310
2022-09-13	10:27:38	9.94021	44.216	43.0025	5852.97	1	311
2022-09-13	10:27:38	6.45207	28.7001	43.0025	5898.29	1	312
2022-09-13	10:27:38	14.1755	63.0555	43.0025	5916.02	1	313
2022-09-13	10:27:38	8.10179	36.0384	43.0025	5934.33	1	314
2022-09-13	10:27:39	11.2599	50.0863	36.9181	5966.11	1	315
2022-09-13	10:27:39	3.93477	17.5026	36.9181	5951.83	1	316
2022-09-13	10:27:39	9.70403	43.1655	36.9181	6009.27	1	317
2022-09-13	10:27:40	13.8552	61.6307	48.7292	6013.46	1	318
2022-09-13	10:27:40	9.3167	41.4425	48.7292	6050.72	1	319
2022-09-13	10:27:40	11.3683	50.5685	48.7292	6064.03	1	320
2022-09-13	10:27:40	9.27904	41.275	48.7292	6091.99	1	321
2022-09-13	10:27:41	18.6167	82.8108	43.7818	6146.84	1	322
2022-09-13	10:27:41	6.01523	26.7569	43.7818	6118.75	1	323
2022-09-13	10:27:41	9.89731	44.0252	43.7818	6190.87	1	324
2022-09-13	10:27:41	4.84108	21.5341	43.7818	6140.28	1	325
2022-09-13	10:27:42	11.3394	50.4399	39.2447	6241.31	1	326
2022-09-13	10:27:42	7.44892	33.1343	39.2447	6173.42	1	327
2022-09-13	10:27:42	8.98276	39.9571	39.2447	6281.27	1	328
2022-09-13	10:27:42	7.51935	33.4476	39.2447	6206.86	1	329
2022-09-13	10:27:43	6.7596	30.0681	29.0604	6311.33	1	330
2022-09-13	10:27:43	6.72011	29.8924	29.0604	6236.76	1	331
2022-09-13	10:27:43	6.1195	27.2208	29.0604	6338.55	1	332
2022-09-13	10:27:44	7.84902	34.914	36.2973	6271.67	1	333
2022-09-13	10:27:44	7.83349	34.8449	36.2973	6373.4	1	334
2022-09-13	10:27:44	10.106	44.9535	36.2973	6316.62	1	335
2022-09-13	10:27:44	6.85146	30.4767	36.2973	6403.88	1	336
2022-09-13	10:27:45	10.3116	45.8681	37.5017	6362.49	1	337
2022-09-13	10:27:45	4.15838	18.4973	37.5017	6422.37	1	338
2022-09-13	10:27:45	10.8223	48.1398	37.5017	6410.63	1	339
2022-09-13	10:27:46	9.10922	40.5196	39.2575	6462.89	1	340
2022-09-13	10:27:46	8.81747	39.2219	39.2575	6449.85	1	341
2022-09-13	10:27:46	6.25864	27.8397	39.2575	6490.73	1	342
2022-09-13	10:27:46	7.73059	34.3872	39.2575	6484.24	1	343
2022-09-13	10:27:46	12.2115	54.3192	39.2575	6545.05	1	344
2022-09-13	10:27:47	5.98958	26.6428	29.6275	6510.88	1	345
2022-09-13	10:27:47	7.19207	31.9918	29.6275	6577.04	1	346
2022-09-13	10:27:47	6.80001	30.2478	29.6275	6541.13	1	347
2022-09-13	10:27:48	14.4725	64.3766	57.2855	6641.42	1	348
2022-09-13	10:27:48	9.54683	42.4662	57.2855	6583.6	1	349
2022-09-13	10:27:48	16.7016	74.2921	57.2855	6715.71	1	350
2022-09-13	10:27:48	10.7925	48.0072	57.2855	6631.6	1	351
2022-09-13	10:27:49	15.3434	68.2505	42.2	6783.96	1	352
2022-09-13	10:27:49	6.00922	26.7302	42.2	6658.34	1	353
2022-09-13	10:27:49	6.3395	28.1994	42.2	6812.16	1	354
2022-09-13	10:27:49	10.2558	45.6198	42.2	6703.96	1	355
2022-09-13	10:27:50	4.828	21.4759	39.6595	6833.64	1	356
2022-09-13	10:27:50	8.98108	39.9496	39.6595	6743.9	1	357
2022-09-13	10:27:50	7.7682	34.5545	39.6595	6868.19	1	358
2022-09-13	10:27:50	14.0861	62.6578	39.6595	6806.56	1	359
2022-09-13	10:27:51	4.58118	20.378	38.7641	6888.57	1	360
2022-09-13	10:27:51	12.9761	57.7203	38.7641	6864.28	1	361
2022-09-13	10:27:51	8.76942	39.0081	38.7641	6927.58	1	362
2022-09-13	10:27:51	8.53151	37.9499	38.7641	6902.23	1	363
2022-09-13	10:27:52	6.90576	30.7182	47.0053	6958.3	1	364
2022-09-13	10:27:52	9.40591	41.8394	47.0053	6944.07	1	365
2022-09-13	10:27:52	15.3901	68.4582	47.0053	7026.76	1	366
2022-09-13	10:27:53	6.2425	27.7679	47.0168	6971.84	1	367
2022-09-13	10:27:53	14.3026	63.6208	47.0168	7090.38	1	368
2022-09-13	10:27:53	13.593	60.4644	47.0168	7032.3	1	369
2022-09-13	10:27:53	8.14133	36.2143	47.0168	7126.59	1	370
2022-09-13	10:27:54	5.60439	24.9294	43.9267	7057.23	1	371
2022-09-13	10:27:54	5.69696	25.3412	43.9267	7151.93	1	372
2022-09-13	10:27:54	18.4117	81.8989	43.9267	7139.13	1	373
2022-09-13	10:27:54	9.78759	43.5372	43.9267	7195.47	1	374
2022-09-13	10:27:55	16.7874	74.6737	52.4327	7213.81	1	375
2022-09-13	10:27:55	11.8936	52.9051	52.4327	7248.37	1	376
2022-09-13	10:27:55	11.632	51.7415	52.4327	7265.55	1	377
2022-09-13	10:27:55	6.8366	30.4106	52.4327	7278.78	1	378
2022-09-13	10:27:56	8.80342	39.1594	34.6655	7304.71	1	379
2022-09-13	10:27:56	10.9599	48.7518	34.6655	7327.54	1	380
2022-09-13	10:27:56	3.61614	16.0853	34.6655	7320.79	1	381
2022-09-13	10:27:57	5.07121	22.5578	27.2302	7350.09	1	382
2022-09-13	10:27:57	3.62678	16.1326	27.2302	7336.93	1	383
2022-09-13	10:27:57	10.106	44.9535	27.2302	7395.05	1	384
2022-09-13	10:27:57	5.6825	25.2769	27.2302	7362.2	1	385

## Sheet: Mars_star_2022913102246 (E) (2)
Date	Time	Lbs	Newtons	Total force x time	total steps > 13.345		**GoPro Fitting: 1012
2022-09-13	10:22:57	0.486527	2.16417	2.16417	FALSE	0				Total force	7362.2
2022-09-13	10:22:57	2.14322	9.53347	9.53347	FALSE	0				Total steps	385
2022-09-13	10:22:57	1.14668	5.10066	7.26483	FALSE	0
2022-09-13	10:22:57	2.10831	9.37818	18.9117	FALSE	0
2022-09-13	10:22:58	1.67742	7.4615	14.7263	FALSE	0
2022-09-13	10:22:58	1.61228	7.17174	26.0834	FALSE	0
2022-09-13	10:22:58	0.774008	3.44294	18.1693	FALSE	0
2022-09-13	10:22:58	1.78892	7.95747	34.0409	FALSE	0
2022-09-13	10:22:59	3.32775	14.8025	32.9718	1	1
2022-09-13	10:22:59	5.72322	25.458	59.4989	1	2
2022-09-13	10:22:59	5.91848	26.3266	59.2984	1	3
2022-09-13	10:23:00	7.90627	35.1687	94.6676	1	4
2022-09-13	10:23:00	7.14937	31.8018	91.1002	1	5
2022-09-13	10:23:00	5.48688	24.4067	119.074	1	6
2022-09-13	10:23:00	7.33436	32.6247	123.725	1	7
2022-09-13	10:23:01	3.08093	13.7046	132.779	1	8
2022-09-13	10:23:01	6.71426	29.8664	153.591	1	9
2022-09-13	10:23:01	5.12311	22.7886	155.568	1	10
2022-09-13	10:23:02	4.82164	21.4476	175.039	1	11
2022-09-13	10:23:02	5.13553	22.8439	178.411	1	12
2022-09-13	10:23:02	2.94953	13.1201	188.159	FALSE	12
2022-09-13	10:23:02	7.40505	32.9391	211.351	1	13
2022-09-13	10:23:02	1.80352	8.02242	196.181	FALSE	13
2022-09-13	10:23:03	1.46922	6.53538	217.886	FALSE	13
2022-09-13	10:23:03	1.20215	5.3474	201.529	FALSE	13
2022-09-13	10:23:03	1.10042	4.89489	222.781	FALSE	13
2022-09-13	10:23:04	1.31793	5.86242	207.391	FALSE	13
2022-09-13	10:23:04	0.470852	2.09444	224.875	FALSE	13
2022-09-13	10:23:04	0.593295	2.63909	210.03	FALSE	13
2022-09-13	10:23:04	0.735483	3.27158	228.147	FALSE	13
2022-09-13	10:23:05	0.549173	2.44283	212.473	FALSE	13
2022-09-13	10:23:05	0.445	1.97945	230.126	FALSE	13
2022-09-13	10:23:05	0.109733	0.488114	212.961	FALSE	13
2022-09-13	10:23:05	0.445458	1.98149	232.108	FALSE	13
2022-09-13	10:23:06	0.871718	3.87758	216.839	FALSE	13
2022-09-13	10:23:06	1.55335	6.90961	239.017	FALSE	13
2022-09-13	10:23:06	1.4477	6.43966	223.278	FALSE	13
2022-09-13	10:23:06	1.77955	7.91579	246.933	FALSE	13
2022-09-13	10:23:07	1.82693	8.12655	231.405	FALSE	13
2022-09-13	10:23:07	0.317112	1.41058	248.344	FALSE	13
2022-09-13	10:23:07	0.804491	3.57854	234.984	FALSE	13
2022-09-13	10:23:07	0.90673	4.03332	252.377	FALSE	13
2022-09-13	10:23:08	0.61869	2.75206	237.736	FALSE	13
2022-09-13	10:23:08	0.737621	3.28109	255.658	FALSE	13
2022-09-13	10:23:08	0.276603	1.23039	238.966	FALSE	13
2022-09-13	10:23:09	0.739147	3.28787	258.946	FALSE	13
2022-09-13	10:23:09	0.734313	3.26637	242.232	FALSE	13
2022-09-13	10:23:09	0.486425	2.16372	261.11	FALSE	13
2022-09-13	10:23:09	0.73243	3.258	245.49	FALSE	13
2022-09-13	10:23:10	0.736959	3.27814	264.388	FALSE	13
2022-09-13	10:23:10	0.664491	2.95579	248.446	FALSE	13
2022-09-13	10:23:10	0.23813	1.05925	265.447	FALSE	13
2022-09-13	10:23:10	0.739962	3.2915	251.738	FALSE	13
2022-09-13	10:23:11	0.245356	1.09139	266.539	FALSE	13
2022-09-13	10:23:11	0.704084	3.13191	254.87	FALSE	13
2022-09-13	10:23:11	0.449835	2.00096	268.539	FALSE	13
2022-09-13	10:23:11	0.263015	1.16994	256.04	FALSE	13
2022-09-13	10:23:12	0.155942	0.693661	269.233	FALSE	13
2022-09-13	10:23:12	0.186934	0.83152	256.871	FALSE	13
2022-09-13	10:23:12	0.443168	1.9713	271.204	FALSE	13
2022-09-13	10:23:13	0.0945168	0.42043	257.291	FALSE	13
2022-09-13	10:23:13	0.469682	2.08924	273.294	FALSE	13
2022-09-13	10:23:13	0.177112	0.78783	258.079	FALSE	13
2022-09-13	10:23:13	0.274975	1.22314	274.517	FALSE	13
2022-09-13	10:23:14	0.161387	0.717882	258.797	FALSE	13
2022-09-13	10:23:14	0.271107	1.20594	275.723	FALSE	13
2022-09-13	10:23:14	0.227646	1.01261	259.81	FALSE	13
2022-09-13	10:23:14	0.276959	1.23197	276.955	FALSE	13
2022-09-13	10:23:15	0.273143	1.21499	261.025	FALSE	13
2022-09-13	10:23:15	0.177926	0.79145	277.746	FALSE	13
2022-09-13	10:23:15	0.454669	2.02246	263.047	FALSE	13
2022-09-13	10:23:15	0.16902	0.751835	278.498	FALSE	13
2022-09-13	10:23:16	0.737214	3.27928	266.327	FALSE	13
2022-09-13	10:23:16	0.736857	3.27769	281.776	FALSE	13
2022-09-13	10:23:16	0.737112	3.27882	269.605	FALSE	13
2022-09-13	10:23:17	0.734109	3.26546	285.041	FALSE	13
2022-09-13	10:23:17	0.738384	3.28448	272.89	FALSE	13
2022-09-13	10:23:17	0.734415	3.26682	288.308	FALSE	13
2022-09-13	10:23:17	1.04709	4.65767	277.547	FALSE	13
2022-09-13	10:23:18	0.760267	3.38182	291.69	FALSE	13
2022-09-13	10:23:18	1.19874	5.33224	282.88	FALSE	13
2022-09-13	10:23:18	0.739046	3.28742	294.977	FALSE	13
2022-09-13	10:23:18	0.436298	1.94074	284.82	FALSE	13
2022-09-13	10:23:19	0.643015	2.86026	297.837	FALSE	13
2022-09-13	10:23:19	0.692481	3.08029	287.901	FALSE	13
2022-09-13	10:23:19	0.754364	3.35556	301.193	FALSE	13
2022-09-13	10:23:19	1.76668	7.85855	295.759	FALSE	13
2022-09-13	10:23:20	3.76836	16.7624	317.955	1	14
2022-09-13	10:23:20	5.30729	23.6079	319.367	1	15
2022-09-13	10:23:20	0.839962	3.73632	321.692	FALSE	15
2022-09-13	10:23:20	0.36556	1.62608	320.993	FALSE	15
2022-09-13	10:23:21	0.314109	1.39722	323.089	FALSE	15
2022-09-13	10:23:21	0.219046	0.97436	321.968	FALSE	15
2022-09-13	10:23:21	1.3395	5.95836	329.047	FALSE	15
2022-09-13	10:23:22	0.622812	2.77039	324.738	FALSE	15
2022-09-13	10:23:22	0.731463	3.25369	332.301	FALSE	15
2022-09-13	10:23:22	0.707087	3.14526	327.883	FALSE	15
2022-09-13	10:23:22	0.873855	3.88708	336.188	FALSE	15
2022-09-13	10:23:23	3.1134	13.849	341.732	1	16
2022-09-13	10:23:23	7.33294	32.6184	368.807	1	17
2022-09-13	10:23:23	5.04301	22.4323	364.165	1	18
2022-09-13	10:23:23	0.75757	3.36982	372.176	FALSE	18
2022-09-13	10:23:24	1.10011	4.89351	369.058	FALSE	18
2022-09-13	10:23:24	0.49243	2.19043	374.367	FALSE	18
2022-09-13	10:23:24	0.596705	2.65426	371.712	FALSE	18
2022-09-13	10:23:24	0.636247	2.83015	377.197	FALSE	18
2022-09-13	10:23:25	0.503982	2.24181	373.954	FALSE	18
2022-09-13	10:23:25	1.16846	5.19754	382.394	FALSE	18
2022-09-13	10:23:25	1.33416	5.93461	379.889	FALSE	18
2022-09-13	10:23:26	2.35884	10.4926	392.887	FALSE	18
2022-09-13	10:23:26	1.26062	5.60749	385.496	FALSE	18
2022-09-13	10:23:26	1.34561	5.98554	398.873	FALSE	18
2022-09-13	10:23:26	1.76235	7.83929	393.336	FALSE	18
2022-09-13	10:23:27	0.800063	3.55884	402.431	FALSE	18
2022-09-13	10:23:27	1.66816	7.42031	400.756	FALSE	18
2022-09-13	10:23:27	0.903372	4.01838	406.45	FALSE	18
2022-09-13	10:23:27	1.07701	4.79076	405.547	FALSE	18
2022-09-13	10:23:28	0.492685	2.19156	408.641	FALSE	18
2022-09-13	10:23:28	0.17528	0.77968	406.326	FALSE	18
2022-09-13	10:23:28	1.40072	6.23068	414.872	FALSE	18
2022-09-13	10:23:28	1.37523	6.1173	412.444	FALSE	18
2022-09-13	10:23:29	2.24658	9.99324	424.865	FALSE	18
2022-09-13	10:23:29	2.30215	10.2404	422.684	FALSE	18
2022-09-13	10:23:29	1.95268	8.68591	433.551	FALSE	18
2022-09-13	10:23:30	2.61278	11.6222	434.306	FALSE	18
2022-09-13	10:23:30	2.28566	10.1671	443.718	FALSE	18
2022-09-13	10:23:30	3.2565	14.4856	448.792	1	19
2022-09-13	10:23:30	2.43085	10.8129	454.531	FALSE	19
2022-09-13	10:23:31	1.34057	5.96312	454.755	FALSE	19
2022-09-13	10:23:31	2.69899	12.0056	466.537	FALSE	19
2022-09-13	10:23:31	1.96775	8.75295	463.508	FALSE	19
2022-09-13	10:23:31	6.02367	26.7945	493.331	1	20
2022-09-13	10:23:32	4.37884	19.478	482.986	1	21
2022-09-13	10:23:32	7.33609	32.6324	525.964	1	22
2022-09-13	10:23:32	4.40479	19.5934	502.579	1	23
2022-09-13	10:23:32	3.30128	14.6848	540.648	1	24
2022-09-13	10:23:33	4.86052	21.6206	524.2	1	25
2022-09-13	10:23:33	3.15879	14.0509	554.699	1	26
2022-09-13	10:23:33	4.31166	19.1791	543.379	1	27
2022-09-13	10:23:33	6.10907	27.1744	581.874	1	28
2022-09-13	10:23:34	2.89548	12.8797	556.259	FALSE	28
2022-09-13	10:23:34	7.47411	33.2463	615.12	1	29
2022-09-13	10:23:34	5.84764	26.0115	582.27	1	30
2022-09-13	10:23:35	10.4202	46.3511	661.471	1	31
2022-09-13	10:23:35	4.43248	19.7166	601.987	1	32
2022-09-13	10:23:35	4.10088	18.2415	679.713	1	33
2022-09-13	10:23:35	6.62937	29.4888	631.475	1	34
2022-09-13	10:23:36	3.41833	15.2054	694.918	1	35
2022-09-13	10:23:36	4.52805	20.1417	651.617	1	36
2022-09-13	10:23:36	2.30546	10.2551	705.173	FALSE	36
2022-09-13	10:23:36	0.429682	1.91131	653.528	FALSE	36
2022-09-13	10:23:37	0.293244	1.30441	706.478	FALSE	36
2022-09-13	10:23:37	0.473855	2.1078	655.636	FALSE	36
2022-09-13	10:23:37	0.740318	3.29308	709.771	FALSE	36
2022-09-13	10:23:37	0.532379	2.36813	658.004	FALSE	36
2022-09-13	10:23:38	0.824542	3.66773	713.439	FALSE	36
2022-09-13	10:23:38	5.59935	24.907	682.911	1	37
2022-09-13	10:23:38	9.11401	40.5409	753.98	1	38
2022-09-13	10:23:39	4.0451	17.9934	700.905	1	39
2022-09-13	10:23:39	0.591311	2.63027	756.61	FALSE	39
2022-09-13	10:23:39	1.49518	6.65086	707.556	FALSE	39
2022-09-13	10:23:39	1.65737	7.37231	763.982	FALSE	39
2022-09-13	10:23:40	3.44459	15.3222	722.878	1	40
2022-09-13	10:23:40	7.52678	33.4806	797.463	1	41
2022-09-13	10:23:40	4.31731	19.2043	742.082	1	42
2022-09-13	10:23:40	6.27981	27.9339	825.397	1	43
2022-09-13	10:23:41	2.85487	12.699	754.781	FALSE	43
2022-09-13	10:23:41	2.79737	12.4433	837.84	FALSE	43
2022-09-13	10:23:41	4.01971	17.8805	772.662	1	44
2022-09-13	10:23:41	1.95497	8.6961	846.536	FALSE	44
2022-09-13	10:23:42	3.88225	17.269	789.931	1	45
2022-09-13	10:23:42	3.83986	17.0805	863.616	1	46
2022-09-13	10:23:42	6.55136	29.1418	819.072	1	47
2022-09-13	10:23:42	11.4879	51.1005	914.717	1	48
2022-09-13	10:23:43	8.9367	39.7522	858.825	1	49
2022-09-13	10:23:43	9.46693	42.1108	956.828	1	50
2022-09-13	10:23:43	4.44658	19.7793	878.604	1	51
2022-09-13	10:23:44	2.02902	9.02549	965.853	FALSE	51
2022-09-13	10:23:44	2.54368	11.3148	889.919	FALSE	51
2022-09-13	10:23:44	1.84154	8.19154	974.045	FALSE	51
2022-09-13	10:23:44	0.464135	2.06457	891.983	FALSE	51
2022-09-13	10:23:45	1.13207	5.03567	979.08	FALSE	51
2022-09-13	10:23:45	0.610394	2.71515	894.698	FALSE	51
2022-09-13	10:23:45	0.300216	1.33542	980.416	FALSE	51
2022-09-13	10:23:45	0.453041	2.01522	896.714	FALSE	51
2022-09-13	10:23:46	0.661845	2.94402	983.36	FALSE	51
2022-09-13	10:23:46	0.736349	3.27543	899.989	FALSE	51
2022-09-13	10:23:46	0.489478	2.1773	985.537	FALSE	51
2022-09-13	10:23:46	0.759402	3.37797	903.367	FALSE	51
2022-09-13	10:23:47	0.735127	3.26999	988.807	FALSE	51
2022-09-13	10:23:47	0.744236	3.31051	906.678	FALSE	51
2022-09-13	10:23:47	0.734313	3.26637	992.073	FALSE	51
2022-09-13	10:23:48	0.738944	3.28697	909.964	FALSE	51
2022-09-13	10:23:48	0.735127	3.26999	995.343	FALSE	51
2022-09-13	10:23:48	0.738079	3.28312	913.248	FALSE	51
2022-09-13	10:23:48	0.73584	3.27316	998.617	FALSE	51
2022-09-13	10:23:49	0.734873	3.26886	916.516	FALSE	51
2022-09-13	10:23:49	0.568206	2.52749	1001.14	FALSE	51
2022-09-13	10:23:49	0.644491	2.86682	919.383	FALSE	51
2022-09-13	10:23:49	1.05141	4.67688	1005.82	FALSE	51
2022-09-13	10:23:50	0.566018	2.51776	921.901	FALSE	51
2022-09-13	10:23:50	0.681641	3.03208	1008.85	FALSE	51
2022-09-13	10:23:50	0.314313	1.39813	923.299	FALSE	51
2022-09-13	10:23:50	0.195178	0.868191	1009.72	FALSE	51
2022-09-13	10:23:51	0.370852	1.64962	924.949	FALSE	51
2022-09-13	10:23:51	0.208257	0.926369	1010.65	FALSE	51
2022-09-13	10:23:51	0.663677	2.95217	927.901	FALSE	51
2022-09-13	10:23:52	4.47253	19.8947	1030.54	1	52
2022-09-13	10:23:52	9.81583	43.6628	971.564	1	53
2022-09-13	10:23:52	5.30357	23.5913	1054.13	1	54
2022-09-13	10:23:52	5.99813	26.6809	998.245	1	55
2022-09-13	10:23:53	3.30831	14.716	1068.85	1	56
2022-09-13	10:23:53	3.36067	14.9489	1013.19	1	57
2022-09-13	10:23:53	2.81747	12.5327	1081.38	FALSE	57
2022-09-13	10:23:53	2.30108	10.2357	1023.43	FALSE	57
2022-09-13	10:23:54	5.77049	25.6683	1107.05	1	58
2022-09-13	10:23:54	4.17396	18.5666	1042	1	59
2022-09-13	10:23:54	10.1798	45.2818	1152.33	1	60
2022-09-13	10:23:54	6.5823	29.2794	1071.28	1	61
2022-09-13	10:23:55	6.86042	30.5165	1182.85	1	62
2022-09-13	10:23:55	5.36958	23.885	1095.16	1	63
2022-09-13	10:23:55	3.83904	17.0768	1199.93	1	64
2022-09-13	10:23:55	3.51228	15.6233	1110.78	1	65
2022-09-13	10:23:56	0.504593	2.24453	1202.17	FALSE	65
2022-09-13	10:23:56	0.45584	2.02767	1112.81	FALSE	65
2022-09-13	10:23:56	0.570496	2.53768	1204.71	FALSE	65
2022-09-13	10:23:57	1.31543	5.8513	1118.66	FALSE	65
2022-09-13	10:23:57	4.51833	20.0984	1224.81	1	66
2022-09-13	10:23:57	8.79787	39.1347	1157.8	1	67
2022-09-13	10:23:57	6.33405	28.1751	1252.98	1	68
2022-09-13	10:23:58	1.79503	7.98465	1165.78	FALSE	68
2022-09-13	10:23:58	1.73365	7.71162	1260.69	FALSE	68
2022-09-13	10:23:58	0.875026	3.89229	1169.67	FALSE	68
2022-09-13	10:23:58	2.24245	9.97487	1270.67	FALSE	68
2022-09-13	10:23:59	6.11156	27.1854	1196.86	1	69
2022-09-13	10:23:59	12.0624	53.656	1324.32	1	70
2022-09-13	10:23:59	10.7818	47.9596	1244.82	1	71
2022-09-13	10:23:59	2.72464	12.1197	1336.44	FALSE	71
2022-09-13	10:24:00	1.66281	7.39651	1252.22	FALSE	71
2022-09-13	10:24:00	0.633957	2.81997	1339.26	FALSE	71
2022-09-13	10:24:00	0.110802	0.492869	1252.71	FALSE	71
2022-09-13	10:24:01	0.401947	1.78794	1341.05	FALSE	71
2022-09-13	10:24:01	1.48999	6.62777	1259.34	FALSE	71
2022-09-13	10:24:01	2.00001	8.89644	1349.95	FALSE	71
2022-09-13	10:24:01	1.04078	4.6296	1263.97	FALSE	71
2022-09-13	10:24:02	0.805865	3.58465	1353.53	FALSE	71
2022-09-13	10:24:02	0.801692	3.56609	1267.53	FALSE	71
2022-09-13	10:24:02	0.530598	2.36021	1355.89	FALSE	71
2022-09-13	10:24:02	0.212837	0.946742	1268.48	FALSE	71
2022-09-13	10:24:03	1.31202	5.83613	1361.73	FALSE	71
2022-09-13	10:24:03	2.49197	11.0848	1279.56	FALSE	71
2022-09-13	10:24:03	1.37996	6.13834	1367.87	FALSE	71
2022-09-13	10:24:03	1.09818	4.88492	1284.45	FALSE	71
2022-09-13	10:24:04	1.05991	4.71469	1372.58	FALSE	71
2022-09-13	10:24:04	0.591717	2.63208	1287.08	FALSE	71
2022-09-13	10:24:04	0.679606	3.02302	1375.61	FALSE	71
2022-09-13	10:24:04	0.259504	1.15433	1288.23	FALSE	71
2022-09-13	10:24:05	0.79126	3.51968	1379.12	FALSE	71
2022-09-13	10:24:05	0.523219	2.32738	1290.56	FALSE	71
2022-09-13	10:24:05	1.23523	5.49455	1384.62	FALSE	71
2022-09-13	10:24:06	1.15335	5.13033	1295.69	FALSE	71
2022-09-13	10:24:06	1.66856	7.42209	1392.04	FALSE	71
2022-09-13	10:24:06	2.23162	9.92669	1305.62	FALSE	71
2022-09-13	10:24:06	1.8848	8.38397	1400.43	FALSE	71
2022-09-13	10:24:07	3.1909	14.1938	1319.81	1	72
2022-09-13	10:24:07	1.32871	5.91037	1406.34	FALSE	72
2022-09-13	10:24:07	3.11869	13.8726	1333.69	1	73
2022-09-13	10:24:07	0.780064	3.46988	1409.81	FALSE	73
2022-09-13	10:24:08	1.87961	8.36088	1342.05	FALSE	73
2022-09-13	10:24:08	1.30276	5.79494	1415.6	FALSE	73
2022-09-13	10:24:08	2.18027	9.69828	1351.74	FALSE	73
2022-09-13	10:24:08	1.90999	8.49602	1424.1	FALSE	73
2022-09-13	10:24:09	2.80256	12.4663	1364.21	FALSE	73
2022-09-13	10:24:09	2.98612	13.2829	1437.38	FALSE	73
2022-09-13	10:24:09	4.67334	20.788	1385	1	74
2022-09-13	10:24:10	3.86418	17.1886	1454.57	1	75
2022-09-13	10:24:10	4.33859	19.2989	1404.3	1	76
2022-09-13	10:24:10	3.42159	15.2199	1469.79	1	77
2022-09-13	10:24:10	2.49757	11.1097	1415.41	FALSE	77
2022-09-13	10:24:11	3.17141	14.1071	1483.9	1	78
2022-09-13	10:24:11	1.05574	4.69614	1420.1	FALSE	78
2022-09-13	10:24:11	1.28312	5.70757	1489.6	FALSE	78
2022-09-13	10:24:11	0.548359	2.43921	1422.54	FALSE	78
2022-09-13	10:24:12	0.601336	2.67486	1492.28	FALSE	78
2022-09-13	10:24:12	0.248919	1.10724	1423.65	FALSE	78
2022-09-13	10:24:12	0.677977	3.01578	1495.29	FALSE	78
2022-09-13	10:24:12	0.471616	2.09784	1425.75	FALSE	78
2022-09-13	10:24:13	0.532735	2.36971	1497.66	FALSE	78
2022-09-13	10:24:13	0.332227	1.47781	1427.23	FALSE	78
2022-09-13	10:24:13	0.0189442	0.0842676	1497.75	FALSE	78
2022-09-13	10:24:14	0.106883	0.475437	1427.7	FALSE	78
2022-09-13	10:24:14	0.358944	1.59665	1499.34	FALSE	78
2022-09-13	10:24:14	0.159453	0.709279	1428.41	FALSE	78
2022-09-13	10:24:14	0.225763	1.00424	1500.35	FALSE	78
2022-09-13	10:24:15	-0.00558499	-0.0248432	1428.41	FALSE	78
2022-09-13	10:24:15	0.0905473	0.402772	1500.75	FALSE	78
2022-09-13	10:24:15	0.102303	0.455064	1428.87	FALSE	78
2022-09-13	10:24:15	0.312837	1.39156	1502.14	FALSE	78
2022-09-13	10:24:16	0.296654	1.31958	1430.19	FALSE	78
2022-09-13	10:24:16	0.347596	1.54618	1503.69	FALSE	78
2022-09-13	10:24:16	0.319402	1.42076	1431.61	FALSE	78
2022-09-13	10:24:16	0.353295	1.57153	1505.26	FALSE	78
2022-09-13	10:24:17	0.470089	2.09105	1433.7	FALSE	78
2022-09-13	10:24:17	0.393193	1.749	1507.01	FALSE	78
2022-09-13	10:24:17	0.390852	1.73859	1435.44	FALSE	78
2022-09-13	10:24:17	0.358232	1.59349	1508.6	FALSE	78
2022-09-13	10:24:18	0.362863	1.61409	1437.05	FALSE	78
2022-09-13	10:24:18	0.365967	1.62789	1510.23	FALSE	78
2022-09-13	10:24:18	0.399962	1.77911	1438.83	FALSE	78
2022-09-13	10:24:19	0.424898	1.89003	1512.12	FALSE	78
2022-09-13	10:24:19	0.433143	1.92671	1440.76	FALSE	78
2022-09-13	10:24:19	0.418537	1.86174	1513.98	FALSE	78
2022-09-13	10:24:19	0.394008	1.75263	1442.51	FALSE	78
2022-09-13	10:24:20	0.388206	1.72682	1515.71	FALSE	78
2022-09-13	10:24:20	0.389682	1.73338	1444.24	FALSE	78
2022-09-13	10:24:20	0.38958	1.73293	1517.44	FALSE	78
2022-09-13	10:24:20	0.386272	1.71822	1445.96	FALSE	78
2022-09-13	10:24:21	0.377723	1.68019	1519.12	FALSE	78
2022-09-13	10:24:21	0.372939	1.65891	1447.62	FALSE	78
2022-09-13	10:24:21	0.366222	1.62903	1520.75	FALSE	78
2022-09-13	10:24:21	0.365	1.62359	1449.24	FALSE	78
2022-09-13	10:24:22	0.362761	1.61363	1522.36	FALSE	78
2022-09-13	10:24:22	0.369631	1.64419	1450.89	FALSE	78
2022-09-13	10:24:22	0.366781	1.63152	1524	FALSE	78
2022-09-13	10:24:23	0.368562	1.63944	1452.53	FALSE	78
2022-09-13	10:24:23	0.372074	1.65506	1525.65	FALSE	78
2022-09-13	10:24:23	0.366832	1.63174	1454.16	FALSE	78
2022-09-13	10:24:23	0.374059	1.66389	1527.32	FALSE	78
2022-09-13	10:24:24	0.373143	1.65981	1455.82	FALSE	78
2022-09-13	10:24:24	0.37416	1.66434	1528.98	FALSE	78
2022-09-13	10:24:24	0.376705	1.67566	1457.49	FALSE	78
2022-09-13	10:24:24	0.380115	1.69083	1530.67	FALSE	78
2022-09-13	10:24:25	0.38159	1.69739	1459.19	FALSE	78
2022-09-13	10:24:25	0.377265	1.67815	1532.35	FALSE	78
2022-09-13	10:24:25	0.376247	1.67362	1460.86	FALSE	78
2022-09-13	10:24:25	0.382964	1.7035	1534.05	FALSE	78
2022-09-13	10:24:26	0.376094	1.67294	1462.54	FALSE	78
2022-09-13	10:24:26	0.375382	1.66977	1535.72	FALSE	78
2022-09-13	10:24:26	0.379809	1.68947	1464.23	FALSE	78
2022-09-13	10:24:27	0.374669	1.6666	1537.39	FALSE	78
2022-09-13	10:24:27	0.377417	1.67883	1465.91	FALSE	78
2022-09-13	10:24:27	0.378588	1.68404	1539.07	FALSE	78
2022-09-13	10:24:27	0.382099	1.69965	1467.61	FALSE	78
2022-09-13	10:24:28	0.385662	1.7155	1540.79	FALSE	78
2022-09-13	10:24:28	0.384389	1.70984	1469.31	FALSE	78
2022-09-13	10:24:28	0.394771	1.75602	1542.54	FALSE	78
2022-09-13	10:24:28	0.392023	1.7438	1471.06	FALSE	78
2022-09-13	10:24:29	0.399809	1.77843	1544.32	FALSE	78
2022-09-13	10:24:29	0.398181	1.77119	1472.83	FALSE	78
2022-09-13	10:24:29	0.400369	1.78092	1546.1	FALSE	78
2022-09-13	10:24:29	0.392023	1.7438	1474.57	FALSE	78
2022-09-13	10:24:30	0.392634	1.74651	1547.85	FALSE	78
2022-09-13	10:24:30	0.405764	1.80492	1476.38	FALSE	78
2022-09-13	10:24:30	0.405	1.80152	1549.65	FALSE	78
2022-09-13	10:24:30	0.396705	1.76462	1478.14	FALSE	78
2022-09-13	10:24:31	0.403626	1.79541	1551.45	FALSE	78
2022-09-13	10:24:31	0.421183	1.87351	1480.02	FALSE	78
2022-09-13	10:24:31	0.416858	1.85427	1553.3	FALSE	78
2022-09-13	10:24:32	0.418232	1.86038	1481.88	FALSE	78
2022-09-13	10:24:32	0.412481	1.8348	1555.14	FALSE	78
2022-09-13	10:24:32	0.454924	2.02359	1483.9	FALSE	78
2022-09-13	10:24:32	0.536603	2.38692	1557.52	FALSE	78
2022-09-13	10:24:33	0.59182	2.63253	1486.53	FALSE	78
2022-09-13	10:24:33	0.37986	1.68969	1559.21	FALSE	78
2022-09-13	10:24:33	0.254924	1.13395	1487.67	FALSE	78
2022-09-13	10:24:33	0.138741	0.617148	1559.83	FALSE	78
2022-09-13	10:24:34	0.212837	0.946742	1488.61	FALSE	78
2022-09-13	10:24:34	0.274211	1.21975	1561.05	FALSE	78
2022-09-13	10:24:34	0.328155	1.4597	1490.07	FALSE	78
2022-09-13	10:24:34	0.638283	2.83921	1563.89	FALSE	78
2022-09-13	10:24:35	0.739351	3.28878	1493.36	FALSE	78
2022-09-13	10:24:35	0.732735	3.25935	1567.15	FALSE	78
2022-09-13	10:24:35	0.996399	4.43218	1497.79	FALSE	78
2022-09-13	10:24:36	5.7737	25.6826	1592.83	1	79
2022-09-13	10:24:36	8.28988	36.875	1534.67	1	80
2022-09-13	10:24:36	4.76271	21.1855	1614.02	1	81
2022-09-13	10:24:36	9.89818	44.0291	1578.7	1	82
2022-09-13	10:24:37	3.13747	13.9561	1627.97	1	83
2022-09-13	10:24:37	5.81171	25.8516	1604.55	1	84
2022-09-13	10:24:37	3.32668	14.7977	1642.77	1	85
2022-09-13	10:24:37	1.92256	8.55193	1613.1	FALSE	85
2022-09-13	10:24:38	3.88724	17.2912	1660.06	1	86
2022-09-13	10:24:38	1.06495	4.73711	1617.84	FALSE	86
2022-09-13	10:24:38	1.09426	4.86749	1664.93	FALSE	86
2022-09-13	10:24:38	0.582099	2.58929	1620.43	FALSE	86
2022-09-13	10:24:39	0.273957	1.21862	1666.15	FALSE	86
2022-09-13	10:24:39	0.627697	2.79212	1623.22	FALSE	86
2022-09-13	10:24:39	0.259046	1.15229	1667.3	FALSE	86
2022-09-13	10:24:39	0.657519	2.92478	1626.15	FALSE	86
2022-09-13	10:24:40	0.30617	1.36191	1668.66	FALSE	86
2022-09-13	10:24:40	0.00835904	0.0371827	1626.18	FALSE	86
2022-09-13	10:24:40	-0.198308	-0.882114	1668.66	FALSE	86
2022-09-13	10:24:41	-0.0698089	-0.310524	1626.18	FALSE	86
2022-09-13	10:24:41	0.76673	3.41057	1672.07	FALSE	86
2022-09-13	10:24:41	0.220674	0.981602	1627.16	FALSE	86
2022-09-13	10:24:41	0.293092	1.30373	1673.38	FALSE	86
2022-09-13	10:24:42	0.0480028	0.213526	1627.38	FALSE	86
2022-09-13	10:24:42	0.0881045	0.391906	1673.77	FALSE	86
2022-09-13	10:24:42	0.368053	1.63717	1629.02	FALSE	86
2022-09-13	10:24:42	0.698333	3.10632	1676.87	FALSE	86
2022-09-13	10:24:43	0.548512	2.43989	1631.45	FALSE	86
2022-09-13	10:24:43	0.693855	3.08641	1679.96	FALSE	86
2022-09-13	10:24:43	0.490853	2.18341	1633.64	FALSE	86
2022-09-13	10:24:43	0.418944	1.86355	1681.82	FALSE	86
2022-09-13	10:24:44	0.442761	1.96949	1635.61	FALSE	86
2022-09-13	10:24:44	0.462812	2.05868	1683.88	FALSE	86
2022-09-13	10:24:44	0.478384	2.12795	1637.74	FALSE	86
2022-09-13	10:24:45	0.417316	1.85631	1685.74	FALSE	86
2022-09-13	10:24:45	0.43813	1.94889	1639.68	FALSE	86
2022-09-13	10:24:45	0.445662	1.98239	1687.72	FALSE	86
2022-09-13	10:24:45	0.408563	1.81737	1641.5	FALSE	86
2022-09-13	10:24:46	0.450242	2.00277	1689.72	FALSE	86
2022-09-13	10:24:46	0.4764	2.11912	1643.62	FALSE	86
2022-09-13	10:24:46	0.657061	2.92274	1692.65	FALSE	86
2022-09-13	10:24:46	0.879097	3.9104	1647.53	FALSE	86
2022-09-13	10:24:47	1.77477	7.89453	1700.54	FALSE	86
2022-09-13	10:24:47	7.09207	31.5469	1679.08	1	87
2022-09-13	10:24:47	18.5276	82.4145	1782.96	1	88
2022-09-13	10:24:47	17.2803	76.8662	1755.94	1	89
2022-09-13	10:24:48	4.63665	20.6247	1803.58	1	90
2022-09-13	10:24:48	8.16673	36.3272	1792.27	1	91
2022-09-13	10:24:48	8.07808	35.9329	1839.51	1	92
2022-09-13	10:24:49	1.66235	7.39447	1799.67	FALSE	92
2022-09-13	10:24:49	0.950191	4.22664	1843.74	FALSE	92
2022-09-13	10:24:49	0.180267	0.801864	1800.47	FALSE	92
2022-09-13	10:24:49	0.343728	1.52897	1845.27	FALSE	92
2022-09-13	10:24:50	0.29645	1.31867	1801.79	FALSE	92
2022-09-13	10:24:50	0.738537	3.28516	1848.55	FALSE	92
2022-09-13	10:24:50	0.739046	3.28742	1805.07	FALSE	92
2022-09-13	10:24:50	0.736399	3.27565	1851.83	FALSE	92
2022-09-13	10:24:51	0.735076	3.26977	1808.34	FALSE	92
2022-09-13	10:24:51	0.467748	2.08064	1853.91	FALSE	92
2022-09-13	10:24:51	0.276858	1.23152	1809.58	FALSE	92
2022-09-13	10:24:51	3.6022	16.0233	1869.93	1	93
2022-09-13	10:24:52	6.96667	30.9891	1840.56	1	94
2022-09-13	10:24:52	5.92596	26.3599	1896.29	1	95
2022-09-13	10:24:52	0.386832	1.72071	1842.29	FALSE	95
2022-09-13	10:24:52	0.141082	0.627561	1896.92	FALSE	95
2022-09-13	10:24:53	0.186171	0.828126	1843.11	FALSE	95
2022-09-13	10:24:53	-0.0778496	-0.346291	1896.92	FALSE	95
2022-09-13	10:24:53	0.0664252	0.295473	1843.41	FALSE	95
2022-09-13	10:24:54	-0.169503	-0.753983	1896.92	FALSE	95
2022-09-13	10:24:54	-0.107977	-0.480303	1843.41	FALSE	95
2022-09-13	10:24:54	-0.269096	-1.19699	1896.92	FALSE	95
2022-09-13	10:24:54	-0.186704	-0.830497	1843.41	FALSE	95
2022-09-13	10:24:55	-0.246399	-1.09603	1896.92	FALSE	95
2022-09-13	10:24:55	0.00963129	0.0428419	1843.45	FALSE	95
2022-09-13	10:24:55	0.0359417	0.159876	1897.08	FALSE	95
2022-09-13	10:24:55	0.838333	3.72907	1847.18	FALSE	95
2022-09-13	10:24:56	1.38266	6.15035	1903.23	FALSE	95
2022-09-13	10:24:56	2.15492	9.58552	1856.77	FALSE	95
2022-09-13	10:24:56	0.345255	1.53576	1904.77	FALSE	95
2022-09-13	10:24:56	0.386425	1.7189	1858.49	FALSE	95
2022-09-13	10:24:57	0.459097	2.04216	1906.81	FALSE	95
2022-09-13	10:24:57	0.714313	3.17741	1861.66	FALSE	95
2022-09-13	10:24:57	0.373448	1.66117	1908.47	FALSE	95
2022-09-13	10:24:58	0.40215	1.78884	1863.45	FALSE	95
2022-09-13	10:24:58	0.3393	1.50927	1909.98	FALSE	95
2022-09-13	10:24:58	0.269886	1.20051	1864.65	FALSE	95
2022-09-13	10:24:58	0.426018	1.89501	1911.87	FALSE	95
2022-09-13	10:24:59	0.215433	0.958289	1865.61	FALSE	95
2022-09-13	10:24:59	0.30444	1.35421	1913.23	FALSE	95
2022-09-13	10:24:59	0.212176	0.943801	1866.55	FALSE	95
2022-09-13	10:24:59	0.164033	0.729652	1913.96	FALSE	95
2022-09-13	10:25:00	0.257112	1.14369	1867.7	FALSE	95
2022-09-13	10:25:00	0.172634	0.767911	1914.73	FALSE	95
2022-09-13	10:25:00	0.00255749	0.0113762	1867.71	FALSE	95
2022-09-13	10:25:00	0.0293259	0.130447	1914.86	FALSE	95
2022-09-13	10:25:01	-0.120292	-0.535083	1867.71	FALSE	95
2022-09-13	10:25:01	0.0296822	0.132032	1914.99	FALSE	95
2022-09-13	10:25:01	-0.00471985	-0.0209948	1867.71	FALSE	95
2022-09-13	10:25:01	0.0550766	0.244992	1915.23	FALSE	95
2022-09-13	10:25:02	-0.0753559	-0.335198	1867.71	FALSE	95
2022-09-13	10:25:02	-0.245738	-1.09309	1915.23	FALSE	95
2022-09-13	10:25:02	-0.302633	-1.34617	1867.71	FALSE	95
2022-09-13	10:25:03	-0.491284	-2.18533	1915.23	FALSE	95
2022-09-13	10:25:03	-0.277544	-1.23457	1867.71	FALSE	95
2022-09-13	10:25:03	1.13309	5.04021	1920.27	FALSE	95
2022-09-13	10:25:03	4.66006	20.7289	1888.44	1	96
2022-09-13	10:25:04	2.28403	10.1598	1930.43	FALSE	96
2022-09-13	10:25:04	0.532125	2.367	1890.81	FALSE	96
2022-09-13	10:25:04	0.269071	1.19688	1931.63	FALSE	96
2022-09-13	10:25:04	0.433397	1.92784	1892.73	FALSE	96
2022-09-13	10:25:05	0.139199	0.619185	1932.25	FALSE	96
2022-09-13	10:25:05	0.430598	1.91539	1894.65	FALSE	96
2022-09-13	10:25:05	0.777061	3.45652	1935.71	FALSE	96
2022-09-13	10:25:05	1.25981	5.60389	1900.25	FALSE	96
2022-09-13	10:25:06	0.915178	4.07089	1939.78	FALSE	96
2022-09-13	10:25:06	0.297163	1.32184	1901.57	FALSE	96
2022-09-13	10:25:06	0.451361	2.00774	1941.79	FALSE	96
2022-09-13	10:25:07	0.294873	1.31165	1902.89	FALSE	96
2022-09-13	10:25:07	0.19757	0.878831	1942.66	FALSE	96
2022-09-13	10:25:07	0.279097	1.24148	1904.13	FALSE	96
2022-09-13	10:25:07	0.26785	1.19145	1943.86	FALSE	96
2022-09-13	10:25:08	0.303066	1.3481	1905.48	FALSE	96
2022-09-13	10:25:08	0.195636	0.870228	1944.73	FALSE	96
2022-09-13	10:25:08	0.270191	1.20186	1906.68	FALSE	96
2022-09-13	10:25:08	0.334262	1.48686	1946.21	FALSE	96
2022-09-13	10:25:09	0.328868	1.46287	1908.14	FALSE	96
2022-09-13	10:25:09	0.348461	1.55002	1947.76	FALSE	96
2022-09-13	10:25:09	0.395992	1.76145	1909.9	FALSE	96
2022-09-13	10:25:09	0.633092	2.81612	1950.58	FALSE	96
2022-09-13	10:25:10	1.342	5.96948	1915.87	FALSE	96
2022-09-13	10:25:10	2.25253	10.0197	1960.6	FALSE	96
2022-09-13	10:25:10	4.04439	17.9903	1933.86	1	97
2022-09-13	10:25:11	2.73258	12.1551	1972.75	FALSE	97
2022-09-13	10:25:11	2.41899	10.7602	1944.62	FALSE	97
2022-09-13	10:25:11	2.46296	10.9557	1983.71	FALSE	97
2022-09-13	10:25:11	0.810242	3.60412	1948.23	FALSE	97
2022-09-13	10:25:12	0.928715	4.13111	1987.84	FALSE	97
2022-09-13	10:25:12	0.57645	2.56416	1950.79	FALSE	97
2022-09-13	10:25:12	0.307392	1.36734	1989.21	FALSE	97
2022-09-13	10:25:12	0.411565	1.83072	1952.62	FALSE	97
2022-09-13	10:25:13	0.408461	1.81692	1991.02	FALSE	97
2022-09-13	10:25:13	0.264949	1.17855	1953.8	FALSE	97
2022-09-13	10:25:13	0.314771	1.40016	1992.43	FALSE	97
2022-09-13	10:25:13	0.563371	2.50599	1956.31	FALSE	97
2022-09-13	10:25:14	0.73874	3.28606	1995.71	FALSE	97
2022-09-13	10:25:14	0.735178	3.27022	1959.58	FALSE	97
2022-09-13	10:25:14	0.736094	3.27429	1998.99	FALSE	97
2022-09-13	10:25:14	0.737112	3.27882	1962.85	FALSE	97
2022-09-13	10:25:15	0.736145	3.27452	2002.26	FALSE	97
2022-09-13	10:25:15	0.736094	3.27429	1966.13	FALSE	97
2022-09-13	10:25:15	0.746069	3.31866	2005.58	FALSE	97
2022-09-13	10:25:16	0.747748	3.32613	1969.45	FALSE	97
2022-09-13	10:25:16	-0.173524	-0.771869	2005.58	FALSE	97
2022-09-13	10:25:16	-0.423854	-1.88539	1969.45	FALSE	97
2022-09-13	10:25:16	-0.252404	-1.12274	2005.58	FALSE	97
2022-09-13	10:25:17	0.736247	3.27497	1972.73	FALSE	97
2022-09-13	10:25:17	0.749224	3.3327	2008.91	FALSE	97
2022-09-13	10:25:17	0.942761	4.19359	1976.92	FALSE	97
2022-09-13	10:25:17	0.735534	3.2718	2012.18	FALSE	97
2022-09-13	10:25:18	0.885102	3.93711	1980.86	FALSE	97
2022-09-13	10:25:18	1.02459	4.55758	2016.74	FALSE	97
2022-09-13	10:25:18	0.186883	0.831293	1981.69	FALSE	97
2022-09-13	10:25:18	0.574822	2.55692	2019.3	FALSE	97
2022-09-13	10:25:19	0.135331	0.601979	1982.29	FALSE	97
2022-09-13	10:25:19	0.393957	1.7524	2021.05	FALSE	97
2022-09-13	10:25:19	0.36729	1.63378	1983.93	FALSE	97
2022-09-13	10:25:20	0.456807	2.03197	2023.08	FALSE	97
2022-09-13	10:25:20	0.17411	0.774476	1984.7	FALSE	97
2022-09-13	10:25:20	0.508512	2.26196	2025.34	FALSE	97
2022-09-13	10:25:20	0.349478	1.55455	1986.26	FALSE	97
2022-09-13	10:25:21	0.742354	3.30214	2028.65	FALSE	97
2022-09-13	10:25:21	0.73528	3.27067	1989.53	FALSE	97
2022-09-13	10:25:21	0.732888	3.26003	2031.91	FALSE	97
2022-09-13	10:25:21	0.364186	1.61997	1991.15	FALSE	97
2022-09-13	10:25:22	0.523575	2.32897	2034.24	FALSE	97
2022-09-13	10:25:22	0.301896	1.34289	1992.49	FALSE	97
2022-09-13	10:25:22	0.432888	1.92557	2036.16	FALSE	97
2022-09-13	10:25:22	0.343982	1.5301	1994.02	FALSE	97
2022-09-13	10:25:23	0.401743	1.78703	2037.95	FALSE	97
2022-09-13	10:25:23	0.166069	0.738708	1994.76	FALSE	97
2022-09-13	10:25:23	0.0656618	0.292077	2038.24	FALSE	97
2022-09-13	10:25:24	0.119351	0.530897	1995.29	FALSE	97
2022-09-13	10:25:24	-0.0375443	-0.167005	2038.24	FALSE	97
2022-09-13	10:25:24	-0.167519	-0.745158	1995.29	FALSE	97
2022-09-13	10:25:24	-0.177799	-0.790886	2038.24	FALSE	97
2022-09-13	10:25:25	0.0219468	0.0976238	1995.39	FALSE	97
2022-09-13	10:25:25	0.113652	0.505547	2038.75	FALSE	97
2022-09-13	10:25:25	0.276094	1.22812	1996.62	FALSE	97
2022-09-13	10:25:25	0.205	0.911881	2039.66	FALSE	97
2022-09-13	10:25:26	1.06017	4.71585	2001.33	FALSE	97
2022-09-13	10:25:26	1.5109	6.72079	2046.38	FALSE	97
2022-09-13	10:25:26	1.91553	8.52066	2009.85	FALSE	97
2022-09-13	10:25:26	2.73854	12.1816	2058.56	FALSE	97
2022-09-13	10:25:27	1.31879	5.86624	2015.72	FALSE	97
2022-09-13	10:25:27	0.758181	3.37254	2061.93	FALSE	97
2022-09-13	10:25:27	0.291005	1.29445	2017.01	FALSE	97
2022-09-13	10:25:27	0.337519	1.50135	2063.43	FALSE	97
2022-09-13	10:25:28	0.314059	1.397	2018.41	FALSE	97
2022-09-13	10:25:28	0.334568	1.48823	2064.92	FALSE	97
2022-09-13	10:25:28	0.506272	2.252	2020.66	FALSE	97
2022-09-13	10:25:29	0.456094	2.0288	2066.95	FALSE	97
2022-09-13	10:25:29	0.458384	2.03898	2022.7	FALSE	97
2022-09-13	10:25:29	0.609427	2.71085	2069.66	FALSE	97
2022-09-13	10:25:29	0.454618	2.02223	2024.72	FALSE	97
2022-09-13	10:25:30	0.294517	1.31007	2070.97	FALSE	97
2022-09-13	10:25:30	0.285763	1.27113	2025.99	FALSE	97
2022-09-13	10:25:30	0.3364	1.49637	2072.47	FALSE	97
2022-09-13	10:25:30	0.472176	2.10033	2028.09	FALSE	97
2022-09-13	10:25:31	0.254415	1.13169	2073.6	FALSE	97
2022-09-13	10:25:31	0.215942	0.960553	2029.05	FALSE	97
2022-09-13	10:25:31	0.205814	0.915502	2074.51	FALSE	97
2022-09-13	10:25:31	0.261336	1.16247	2030.22	FALSE	97
2022-09-13	10:25:32	0.326018	1.45019	2075.97	FALSE	97
2022-09-13	10:25:32	0.502863	2.23684	2032.45	FALSE	97
2022-09-13	10:25:32	1.12352	4.99764	2080.96	FALSE	97
2022-09-13	10:25:33	0.487748	2.1696	2034.62	FALSE	97
2022-09-13	10:25:33	1.64877	7.33406	2088.3	FALSE	97
2022-09-13	10:25:33	0.407646	1.81329	2036.44	FALSE	97
2022-09-13	10:25:33	0.175534	0.78081	2089.08	FALSE	97
2022-09-13	10:25:34	0.510089	2.26898	2038.71	FALSE	97
2022-09-13	10:25:34	0.409529	1.82167	2090.9	FALSE	97
2022-09-13	10:25:34	0.297417	1.32297	2040.03	FALSE	97
2022-09-13	10:25:34	0.16612	0.738935	2091.64	FALSE	97
2022-09-13	10:25:35	0.352481	1.56791	2041.6	FALSE	97
2022-09-13	10:25:35	0.205153	0.912562	2092.55	FALSE	97
2022-09-13	10:25:35	0.291107	1.2949	2042.89	FALSE	97
2022-09-13	10:25:35	0.093448	0.415675	2092.97	FALSE	97
2022-09-13	10:25:36	0.296247	1.31777	2044.21	FALSE	97
2022-09-13	10:25:36	0.281285	1.25121	2094.22	FALSE	97
2022-09-13	10:25:36	1.06246	4.72603	2048.94	FALSE	97
2022-09-13	10:25:37	3.40057	15.1264	2109.34	1	98
2022-09-13	10:25:37	4.54082	20.1985	2069.13	1	99
2022-09-13	10:25:37	5.15176	22.9161	2132.26	1	100
2022-09-13	10:25:37	2.89757	12.889	2082.02	FALSE	100
2022-09-13	10:25:38	3.59131	15.9749	2148.24	1	101
2022-09-13	10:25:38	1.51686	6.7473	2088.77	FALSE	101
2022-09-13	10:25:38	4.04179	17.9787	2166.21	1	102
2022-09-13	10:25:38	1.47319	6.55304	2095.32	FALSE	102
2022-09-13	10:25:39	2.42637	10.793	2177.01	FALSE	102
2022-09-13	10:25:39	6.32561	28.1376	2123.46	1	103
2022-09-13	10:25:39	1.45518	6.47293	2183.48	FALSE	103
2022-09-13	10:25:39	6.65731	29.613	2153.07	1	104
2022-09-13	10:25:40	1.32536	5.89547	2189.38	FALSE	104
2022-09-13	10:25:40	4.74424	21.1033	2174.18	1	105
2022-09-13	10:25:40	2.59874	11.5597	2200.93	FALSE	105
2022-09-13	10:25:40	2.1906	9.74423	2183.92	FALSE	105
2022-09-13	10:25:41	2.65019	11.7886	2212.72	FALSE	105
2022-09-13	10:25:41	3.13665	13.9524	2197.87	1	106
2022-09-13	10:25:41	3.92881	17.4761	2230.2	1	107
2022-09-13	10:25:42	5.93859	26.416	2224.29	1	108
2022-09-13	10:25:42	1.32251	5.88279	2236.08	FALSE	108
2022-09-13	10:25:42	2.59482	11.5423	2235.83	FALSE	108
2022-09-13	10:25:42	0.690852	3.07305	2239.16	FALSE	108
2022-09-13	10:25:43	1.4763	6.56688	2242.4	FALSE	108
2022-09-13	10:25:43	0.285916	1.27181	2240.43	FALSE	108
2022-09-13	10:25:43	1.23609	5.49838	2247.9	FALSE	108
2022-09-13	10:25:43	1.0533	4.68529	2245.11	FALSE	108
2022-09-13	10:25:44	0.522761	2.32535	2250.22	FALSE	108
2022-09-13	10:25:44	0.902812	4.01589	2249.13	FALSE	108
2022-09-13	10:25:44	0.417367	1.85653	2252.08	FALSE	108
2022-09-13	10:25:44	1.02383	4.5542	2253.68	FALSE	108
2022-09-13	10:25:45	0.39701	1.76598	2253.85	FALSE	108
2022-09-13	10:25:45	0.91645	4.07655	2257.76	FALSE	108
2022-09-13	10:25:45	0.505	2.24634	2256.09	FALSE	108
2022-09-13	10:25:46	0.397367	1.76757	2259.53	FALSE	108
2022-09-13	10:25:46	0.481692	2.14266	2258.23	FALSE	108
2022-09-13	10:25:46	0.719453	3.20027	2262.73	FALSE	108
2022-09-13	10:25:46	0.735687	3.27248	2261.51	FALSE	108
2022-09-13	10:25:47	0.659148	2.93202	2265.66	FALSE	108
2022-09-13	10:25:47	0.486679	2.16485	2263.67	FALSE	108
2022-09-13	10:25:47	0.265967	1.18307	2266.84	FALSE	108
2022-09-13	10:25:47	0.927799	4.12704	2267.8	FALSE	108
2022-09-13	10:25:48	0.345	1.53463	2268.38	FALSE	108
2022-09-13	10:25:48	1.00989	4.49219	2272.29	FALSE	108
2022-09-13	10:25:48	0.689173	3.06558	2271.44	FALSE	108
2022-09-13	10:25:48	0.364847	1.62291	2273.91	FALSE	108
2022-09-13	10:25:49	0.277875	1.23604	2272.68	FALSE	108
2022-09-13	10:25:49	0.259097	1.15252	2275.07	FALSE	108
2022-09-13	10:25:49	0.240674	1.07057	2273.75	FALSE	108
2022-09-13	10:25:50	0.147901	0.657893	2275.72	FALSE	108
2022-09-13	10:25:50	0.270547	1.20345	2274.95	FALSE	108
2022-09-13	10:25:50	0.211209	0.9395	2276.66	FALSE	108
2022-09-13	10:25:50	0.19014	0.845781	2275.8	FALSE	108
2022-09-13	10:25:51	0.0988933	0.439897	2277.1	FALSE	108
2022-09-13	10:25:51	0.124746	0.554895	2276.35	FALSE	108
2022-09-13	10:25:51	0.242049	1.07668	2278.18	FALSE	108
2022-09-13	10:25:51	0.258791	1.15115	2277.5	FALSE	108
2022-09-13	10:25:52	0.289377	1.28721	2279.47	FALSE	108
2022-09-13	10:25:52	0.24841	1.10498	2278.61	FALSE	108
2022-09-13	10:25:52	0.298283	1.32682	2280.79	FALSE	108
2022-09-13	10:25:52	0.0950766	0.42292	2279.03	FALSE	108
2022-09-13	10:25:53	0.00922418	0.041031	2280.84	FALSE	108
2022-09-13	10:25:53	0.0738043	0.328296	2279.36	FALSE	108
2022-09-13	10:25:53	0.170853	0.759988	2281.6	FALSE	108
2022-09-13	10:25:53	0.167545	0.745274	2280.11	FALSE	108
2022-09-13	10:25:54	0.198792	0.884267	2282.48	FALSE	108
2022-09-13	10:25:54	0.376807	1.67611	2281.78	FALSE	108
2022-09-13	10:25:54	0.286272	1.2734	2283.75	FALSE	108
2022-09-13	10:25:55	0.272125	1.21047	2282.99	FALSE	108
2022-09-13	10:25:55	0.292685	1.30192	2285.05	FALSE	108
2022-09-13	10:25:55	0.742405	3.30237	2286.29	FALSE	108
2022-09-13	10:25:55	0.732226	3.25709	2288.31	FALSE	108
2022-09-13	10:25:56	0.745661	3.31685	2289.61	FALSE	108
2022-09-13	10:25:56	0.737468	3.28041	2291.59	FALSE	108
2022-09-13	10:25:56	0.735026	3.26954	2292.88	FALSE	108
2022-09-13	10:25:56	0.743117	3.30553	2294.9	FALSE	108
2022-09-13	10:25:57	0.737926	3.28244	2296.16	FALSE	108
2022-09-13	10:25:57	0.736908	3.27791	2298.18	FALSE	108
2022-09-13	10:25:57	0.731667	3.2546	2299.42	FALSE	108
2022-09-13	10:25:57	0.728512	3.24057	2301.42	FALSE	108
2022-09-13	10:25:58	0.736603	3.27656	2302.69	FALSE	108
2022-09-13	10:25:58	0.733448	3.26252	2304.68	FALSE	108
2022-09-13	10:25:58	0.736959	3.27814	2305.97	FALSE	108
2022-09-13	10:25:59	0.735891	3.27339	2307.95	FALSE	108
2022-09-13	10:25:59	0.739962	3.2915	2309.26	FALSE	108
2022-09-13	10:25:59	0.740878	3.29557	2311.25	FALSE	108
2022-09-13	10:25:59	0.733601	3.2632	2312.53	FALSE	108
2022-09-13	10:26:00	0.731412	3.25347	2314.5	FALSE	108
2022-09-13	10:26:00	0.736145	3.27452	2315.8	FALSE	108
2022-09-13	10:26:00	0.749987	3.33609	2317.84	FALSE	108
2022-09-13	10:26:00	0.731361	3.25324	2319.06	FALSE	108
2022-09-13	10:26:01	0.740878	3.29557	2321.13	FALSE	108
2022-09-13	10:26:01	0.737417	3.28018	2322.34	FALSE	108
2022-09-13	10:26:01	0.734008	3.26501	2324.4	FALSE	108
2022-09-13	10:26:01	0.736399	3.27565	2325.61	FALSE	108
2022-09-13	10:26:02	0.737672	3.28131	2327.68	FALSE	108
2022-09-13	10:26:02	0.737621	3.28109	2328.89	FALSE	108
2022-09-13	10:26:02	0.742812	3.30418	2330.98	FALSE	108
2022-09-13	10:26:02	0.740267	3.29286	2332.18	FALSE	108
2022-09-13	10:26:03	0.744491	3.31164	2334.3	FALSE	108
2022-09-13	10:26:03	0.737265	3.2795	2335.46	FALSE	108
2022-09-13	10:26:03	0.741997	3.30055	2337.6	FALSE	108
2022-09-13	10:26:04	0.737366	3.27995	2338.74	FALSE	108
2022-09-13	10:26:04	0.746171	3.31912	2340.91	FALSE	108
2022-09-13	10:26:04	0.735891	3.27339	2342.02	FALSE	108
2022-09-13	10:26:04	0.734008	3.26501	2344.18	FALSE	108
2022-09-13	10:26:05	0.733702	3.26365	2345.28	FALSE	108
2022-09-13	10:26:05	0.736399	3.27565	2347.46	FALSE	108
2022-09-13	10:26:05	0.737061	3.27859	2348.56	FALSE	108
2022-09-13	10:26:05	0.735331	3.2709	2350.73	FALSE	108
2022-09-13	10:26:06	0.733702	3.26365	2351.82	FALSE	108
2022-09-13	10:26:06	0.744542	3.31187	2354.04	FALSE	108
2022-09-13	10:26:06	0.736908	3.27791	2355.1	FALSE	108
2022-09-13	10:26:06	0.740674	3.29467	2357.33	FALSE	108
2022-09-13	10:26:07	0.735687	3.27248	2358.37	FALSE	108
2022-09-13	10:26:07	0.739249	3.28833	2360.62	FALSE	108
2022-09-13	10:26:07	0.736501	3.2761	2361.65	FALSE	108
2022-09-13	10:26:08	0.741031	3.29625	2363.92	FALSE	108
2022-09-13	10:26:08	0.736705	3.27701	2364.93	FALSE	108
2022-09-13	10:26:08	0.739147	3.28787	2367.21	FALSE	108
2022-09-13	10:26:08	0.736501	3.2761	2368.2	FALSE	108
2022-09-13	10:26:09	0.737315	3.27972	2370.49	FALSE	108
2022-09-13	10:26:09	0.730038	3.24736	2371.45	FALSE	108
2022-09-13	10:26:09	0.708206	3.15024	2373.64	FALSE	108
2022-09-13	10:26:09	3.32719	14.8	2386.25	1	109
2022-09-13	10:26:10	9.05797	40.2917	2413.93	1	110
2022-09-13	10:26:10	16.1047	71.6369	2457.89	1	111
2022-09-13	10:26:10	16.579	73.7467	2487.67	1	112
2022-09-13	10:26:10	8.93645	39.7511	2497.64	1	113
2022-09-13	10:26:11	10.2698	45.6821	2533.36	1	114
2022-09-13	10:26:11	3.03446	13.4979	2511.14	1	115
2022-09-13	10:26:11	2.95965	13.1651	2546.52	FALSE	115
2022-09-13	10:26:12	2.22897	9.9149	2521.05	FALSE	115
2022-09-13	10:26:12	4.77563	21.243	2567.76	1	116
2022-09-13	10:26:12	9.36108	41.64	2562.69	1	117
2022-09-13	10:26:12	4.91416	21.8592	2589.62	1	118
2022-09-13	10:26:13	9.28642	41.3079	2604	1	119
2022-09-13	10:26:13	9.68881	43.0978	2632.72	1	120
2022-09-13	10:26:13	4.7882	21.2989	2625.3	1	121
2022-09-13	10:26:13	5.34296	23.7666	2656.49	1	122
2022-09-13	10:26:14	9.60688	42.7333	2668.03	1	123
2022-09-13	10:26:14	5.23487	23.2857	2679.77	1	124
2022-09-13	10:26:14	7.59879	33.8009	2701.83	1	125
2022-09-13	10:26:14	12.7212	56.5864	2736.36	1	126
2022-09-13	10:26:15	2.92826	13.0255	2714.86	FALSE	126
2022-09-13	10:26:15	6.63991	29.5356	2765.9	1	127
2022-09-13	10:26:15	4.58887	20.4122	2735.27	1	128
2022-09-13	10:26:15	2.46826	10.9793	2776.87	FALSE	128
2022-09-13	10:26:16	4.14642	18.4441	2753.71	1	129
2022-09-13	10:26:16	4.011	17.8417	2794.72	1	130
2022-09-13	10:26:16	2.98647	13.2844	2767	FALSE	130
2022-09-13	10:26:17	5.03665	22.404	2817.12	1	131
2022-09-13	10:26:17	1.73691	7.72612	2774.72	FALSE	131
2022-09-13	10:26:17	6.39869	28.4627	2845.58	1	132
2022-09-13	10:26:17	2.14561	9.5441	2784.27	FALSE	132
2022-09-13	10:26:18	5.14459	22.8842	2868.47	1	133
2022-09-13	10:26:18	5.66021	25.1777	2809.45	1	134
2022-09-13	10:26:18	1.93014	8.58565	2877.05	FALSE	134
2022-09-13	10:26:18	3.27156	14.5526	2824	1	135
2022-09-13	10:26:19	5.15055	22.9107	2899.96	1	136
2022-09-13	10:26:19	2.41681	10.7505	2834.75	FALSE	136
2022-09-13	10:26:19	7.60749	33.8396	2933.8	1	137
2022-09-13	10:26:19	2.20673	9.81598	2844.57	FALSE	137
2022-09-13	10:26:20	5.00775	22.2755	2956.08	1	138
2022-09-13	10:26:20	2.02017	8.98612	2853.55	FALSE	138
2022-09-13	10:26:20	2.54673	11.3284	2967.41	FALSE	138
2022-09-13	10:26:21	3.38653	15.064	2868.62	1	139
2022-09-13	10:26:21	1.52515	6.78417	2974.19	FALSE	139
2022-09-13	10:26:21	3.39635	15.1076	2883.72	1	140
2022-09-13	10:26:21	2.98841	13.293	2987.48	FALSE	140
2022-09-13	10:26:22	2.73314	12.1576	2895.88	FALSE	140
2022-09-13	10:26:22	2.89243	12.8661	3000.35	FALSE	140
2022-09-13	10:26:22	2.22393	9.89249	2905.77	FALSE	140
2022-09-13	10:26:22	4.55665	20.2689	3020.62	1	141
2022-09-13	10:26:23	1.75294	7.79743	2913.57	FALSE	141
2022-09-13	10:26:23	6.16581	27.4268	3048.05	1	142
2022-09-13	10:26:23	2.48067	11.0345	2924.61	FALSE	142
2022-09-13	10:26:23	6.71182	29.8555	3077.9	1	143
2022-09-13	10:26:24	1.94057	8.63204	2933.24	FALSE	143
2022-09-13	10:26:24	3.37854	15.0284	3092.93	1	144
2022-09-13	10:26:24	3.40195	15.1326	2948.37	1	145
2022-09-13	10:26:25	1.98083	8.81113	3101.74	FALSE	145
2022-09-13	10:26:25	3.65528	16.2594	2964.63	1	146
2022-09-13	10:26:25	3.15574	14.0374	3115.78	1	147
2022-09-13	10:26:25	6.39746	28.4572	2993.09	1	148
2022-09-13	10:26:26	4.28668	19.068	3134.85	1	149
2022-09-13	10:26:26	7.61136	33.8569	3026.94	1	150
2022-09-13	10:26:26	5.64775	25.1223	3159.97	1	151
2022-09-13	10:26:26	6.2707	27.8933	3054.84	1	152
2022-09-13	10:26:27	5.41594	24.0912	3184.06	1	153
2022-09-13	10:26:27	5.04642	22.4475	3077.28	1	154
2022-09-13	10:26:27	6.4138	28.5299	3212.59	1	155
2022-09-13	10:26:27	3.8196	16.9903	3094.27	1	156
2022-09-13	10:26:28	5.18026	23.0428	3235.63	1	157
2022-09-13	10:26:28	3.14637	13.9957	3108.27	1	158
2022-09-13	10:26:28	6.46464	28.756	3264.39	1	159
2022-09-13	10:26:28	3.86184	17.1782	3125.45	1	160
2022-09-13	10:26:29	3.09217	13.7546	3278.14	1	161
2022-09-13	10:26:29	3.2422	14.422	3139.87	1	162
2022-09-13	10:26:29	2.44831	10.8906	3289.03	FALSE	162
2022-09-13	10:26:30	3.23156	14.3746	3154.24	1	163
2022-09-13	10:26:30	3.87747	17.2478	3306.28	1	164
2022-09-13	10:26:30	4.851	21.5782	3175.82	1	165
2022-09-13	10:26:30	4.04057	17.9733	3324.25	1	166
2022-09-13	10:26:31	3.59411	15.9873	3191.81	1	167
2022-09-13	10:26:31	4.23752	18.8493	3343.1	1	168
2022-09-13	10:26:31	3.82195	17.0008	3208.81	1	169
2022-09-13	10:26:31	5.57171	24.7841	3367.89	1	170
2022-09-13	10:26:32	7.04617	31.3428	3240.15	1	171
2022-09-13	10:26:32	11.5313	51.2935	3419.18	1	172
2022-09-13	10:26:32	6.37599	28.3617	3268.52	1	173
2022-09-13	10:26:32	10.655	47.3956	3466.58	1	174
2022-09-13	10:26:33	6.03899	26.8626	3295.38	1	175
2022-09-13	10:26:33	7.8051	34.7186	3501.3	1	176
2022-09-13	10:26:33	4.31976	19.2152	3314.59	1	177
2022-09-13	10:26:34	6.72902	29.932	3531.23	1	178
2022-09-13	10:26:34	9.81517	43.6598	3358.25	1	179
2022-09-13	10:26:34	6.67008	29.6698	3560.9	1	180
2022-09-13	10:26:34	15.2362	67.7737	3426.03	1	181
2022-09-13	10:26:35	10.809	48.0806	3608.98	1	182
2022-09-13	10:26:35	18.8025	83.6373	3509.66	1	183
2022-09-13	10:26:35	16.6394	74.0154	3682.99	1	184
2022-09-13	10:26:35	12.0949	53.8005	3563.46	1	185
2022-09-13	10:26:36	4.49192	19.981	3702.97	1	186
2022-09-13	10:26:36	0.563728	2.50757	3565.97	FALSE	186
2022-09-13	10:26:36	0.300929	1.33859	3704.31	FALSE	186
2022-09-13	10:26:36	1.18067	5.25186	3571.22	FALSE	186
2022-09-13	10:26:37	0.688359	3.06196	3707.38	FALSE	186
2022-09-13	10:26:37	0.886883	3.94503	3575.17	FALSE	186
2022-09-13	10:26:37	0.19411	0.86344	3708.24	FALSE	186
2022-09-13	10:26:38	0.137672	0.612393	3575.78	FALSE	186
2022-09-13	10:26:38	0.152227	0.677136	3708.92	FALSE	186
2022-09-13	10:26:38	0.156654	0.696828	3576.48	FALSE	186
2022-09-13	10:26:38	0.0944659	0.420203	3709.34	FALSE	186
2022-09-13	10:26:39	0.0969595	0.431295	3576.91	FALSE	186
2022-09-13	10:26:39	0.304288	1.35353	3710.69	FALSE	186
2022-09-13	10:26:39	0.0845931	0.376287	3577.29	FALSE	186
2022-09-13	10:26:39	0.267188	1.18851	3711.88	FALSE	186
2022-09-13	10:26:40	0.0553819	0.24635	3577.53	FALSE	186
2022-09-13	10:26:40	0.209529	0.932027	3712.81	FALSE	186
2022-09-13	10:26:40	0.0885625	0.393944	3577.93	FALSE	186
2022-09-13	10:26:40	0.277774	1.23559	3714.05	FALSE	186
2022-09-13	10:26:41	0.30785	1.36938	3579.3	FALSE	186
2022-09-13	10:26:41	0.156909	0.697963	3714.74	FALSE	186
2022-09-13	10:26:41	0.123168	0.547876	3579.84	FALSE	186
2022-09-13	10:26:41	0.157672	0.701357	3715.45	FALSE	186
2022-09-13	10:26:42	0.355026	1.57923	3581.42	FALSE	186
2022-09-13	10:26:42	0.158435	0.704751	3716.15	FALSE	186
2022-09-13	10:26:42	0.269886	1.20051	3582.62	FALSE	186
2022-09-13	10:26:43	0.382455	1.70124	3717.85	FALSE	186
2022-09-13	10:26:43	0.742761	3.30395	3585.93	FALSE	186
2022-09-13	10:26:43	0.925967	4.11889	3721.97	FALSE	186
2022-09-13	10:26:43	1.04261	4.63774	3590.57	FALSE	186
2022-09-13	10:26:44	0.907036	4.03468	3726	FALSE	186
2022-09-13	10:26:44	2.87803	12.8021	3603.37	FALSE	186
2022-09-13	10:26:44	4.37411	19.4569	3745.46	1	187
2022-09-13	10:26:44	9.14886	40.696	3644.06	1	188
2022-09-13	10:26:45	12.7495	56.7123	3802.17	1	189
2022-09-13	10:26:45	4.73762	21.0739	3665.14	1	190
2022-09-13	10:26:45	10.745	47.7959	3849.97	1	191
2022-09-13	10:26:45	3.25212	14.4661	3679.6	1	192
2022-09-13	10:26:46	8.05034	35.8095	3885.78	1	193
2022-09-13	10:26:46	2.7307	12.1467	3691.75	FALSE	193
2022-09-13	10:26:46	2.51421	11.1837	3896.96	FALSE	193
2022-09-13	10:26:47	7.80703	34.7272	3726.48	1	194
2022-09-13	10:26:47	1.15706	5.14683	3902.11	FALSE	194
2022-09-13	10:26:47	5.75212	25.5866	3752.06	1	195
2022-09-13	10:26:47	1.79716	7.99413	3910.1	FALSE	195
2022-09-13	10:26:48	3.06464	13.6321	3765.7	1	196
2022-09-13	10:26:48	3.17309	14.1145	3924.22	1	197
2022-09-13	10:26:48	3.73065	16.5947	3782.29	1	198
2022-09-13	10:26:48	5.68011	25.2663	3949.48	1	199
2022-09-13	10:26:49	1.311	5.83159	3788.12	FALSE	199
2022-09-13	10:26:49	1.55024	6.89578	3956.38	FALSE	199
2022-09-13	10:26:49	1.5737	7.00013	3795.12	FALSE	199
2022-09-13	10:26:49	2.31828	10.3122	3966.69	FALSE	199
2022-09-13	10:26:50	1.58352	7.04381	3802.17	FALSE	199
2022-09-13	10:26:50	2.50765	11.1545	3977.85	FALSE	199
2022-09-13	10:26:50	1.57335	6.99858	3809.16	FALSE	199
2022-09-13	10:26:50	2.42414	10.7831	3988.63	FALSE	199
2022-09-13	10:26:51	1.17207	5.2136	3814.38	FALSE	199
2022-09-13	10:26:51	1.99284	8.86455	3997.49	FALSE	199
2022-09-13	10:26:51	1.5307	6.80886	3821.19	FALSE	199
2022-09-13	10:26:52	0.740776	3.29512	4000.79	FALSE	199
2022-09-13	10:26:52	0.724796	3.22404	3824.41	FALSE	199
2022-09-13	10:26:52	0.501794	2.23208	4003.02	FALSE	199
2022-09-13	10:26:52	0.499555	2.22212	3826.63	FALSE	199
2022-09-13	10:26:53	0.472532	2.10192	4005.12	FALSE	199
2022-09-13	10:26:53	0.595025	2.64679	3829.28	FALSE	199
2022-09-13	10:26:53	0.653041	2.90486	4008.03	FALSE	199
2022-09-13	10:26:53	0.656654	2.92093	3832.2	FALSE	199
2022-09-13	10:26:54	0.676247	3.00808	4011.04	FALSE	199
2022-09-13	10:26:54	0.515585	2.29343	3834.49	FALSE	199
2022-09-13	10:26:54	0.494415	2.19926	4013.24	FALSE	199
2022-09-13	10:26:54	0.462965	2.05936	3836.55	FALSE	199
2022-09-13	10:26:55	0.453295	2.01635	4015.25	FALSE	199
2022-09-13	10:26:55	0.474415	2.11029	3838.66	FALSE	199
2022-09-13	10:26:55	0.44556	1.98194	4017.23	FALSE	199
2022-09-13	10:26:56	0.39355	1.75059	3840.41	FALSE	199
2022-09-13	10:26:56	0.342863	1.52512	4018.76	FALSE	199
2022-09-13	10:26:56	0.410191	1.82461	3842.24	FALSE	199
2022-09-13	10:26:56	0.347341	1.54504	4020.3	FALSE	199
2022-09-13	10:26:57	0.411412	1.83004	3844.07	FALSE	199
2022-09-13	10:26:57	0.474924	2.11256	4022.42	FALSE	199
2022-09-13	10:26:57	0.438181	1.94912	3846.02	FALSE	199
2022-09-13	10:26:57	0.439656	1.95568	4024.37	FALSE	199
2022-09-13	10:26:58	0.429173	1.90905	3847.93	FALSE	199
2022-09-13	10:26:58	0.478537	2.12863	4026.5	FALSE	199
2022-09-13	10:26:58	0.395687	1.76009	3849.69	FALSE	199
2022-09-13	10:26:58	0.57131	2.5413	4029.04	FALSE	199
2022-09-13	10:26:59	0.563626	2.50712	3852.19	FALSE	199
2022-09-13	10:26:59	0.750853	3.33994	4032.38	FALSE	199
2022-09-13	10:26:59	0.63584	2.82834	3855.02	FALSE	199
2022-09-13	10:27:00	0.740522	3.29399	4035.68	FALSE	199
2022-09-13	10:27:00	0.67131	2.98612	3858.01	FALSE	199
2022-09-13	10:27:00	0.630038	2.80254	4038.48	FALSE	199
2022-09-13	10:27:00	0.984796	4.38057	3862.39	FALSE	199
2022-09-13	10:27:01	0.731209	3.25256	4041.73	FALSE	199
2022-09-13	10:27:01	1.32495	5.89364	3868.28	FALSE	199
2022-09-13	10:27:01	0.646476	2.87565	4044.61	FALSE	199
2022-09-13	10:27:01	2.5021	11.1298	3879.41	FALSE	199
2022-09-13	10:27:02	1.28083	5.69739	4050.3	FALSE	199
2022-09-13	10:27:02	5.73426	25.5071	3904.92	1	200
2022-09-13	10:27:02	5.57853	24.8144	4075.12	1	201
2022-09-13	10:27:02	10.8926	48.4525	3953.37	1	202
2022-09-13	10:27:03	3.61752	16.0915	4091.21	1	203
2022-09-13	10:27:03	8.07482	35.9184	3989.29	1	204
2022-09-13	10:27:03	3.58439	15.9441	4107.15	1	205
2022-09-13	10:27:03	5.42647	24.138	4013.43	1	206
2022-09-13	10:27:04	3.99742	17.7813	4124.94	1	207
2022-09-13	10:27:04	4.86388	21.6355	4035.06	1	208
2022-09-13	10:27:04	7.05487	31.3815	4156.32	1	209
2022-09-13	10:27:05	4.94291	21.9871	4057.05	1	210
2022-09-13	10:27:05	6.09808	27.1255	4183.44	1	211
2022-09-13	10:27:05	2.42215	10.7742	4067.83	FALSE	211
2022-09-13	10:27:05	5.3078	23.6102	4207.05	1	212
2022-09-13	10:27:06	1.08749	4.83737	4072.66	FALSE	212
2022-09-13	10:27:06	6.03548	26.847	4233.9	1	213
2022-09-13	10:27:06	2.79299	12.4238	4085.09	FALSE	213
2022-09-13	10:27:06	3.96922	17.6559	4251.56	1	214
2022-09-13	10:27:07	1.18281	5.26138	4090.35	FALSE	214
2022-09-13	10:27:07	1.26144	5.61114	4257.17	FALSE	214
2022-09-13	10:27:07	0.844135	3.75488	4094.1	FALSE	214
2022-09-13	10:27:07	2.56897	11.4273	4268.59	FALSE	214
2022-09-13	10:27:08	4.13686	18.4016	4112.5	1	215
2022-09-13	10:27:08	4.66846	20.7662	4289.36	1	216
2022-09-13	10:27:08	2.94261	13.0893	4125.59	FALSE	216
2022-09-13	10:27:09	5.17553	23.0218	4312.38	1	217
2022-09-13	10:27:09	4.92383	21.9022	4147.5	1	218
2022-09-13	10:27:09	4.92973	21.9284	4334.31	1	219
2022-09-13	10:27:09	8.75003	38.9219	4186.42	1	220
2022-09-13	10:27:10	6.18403	27.5078	4361.82	1	221
2022-09-13	10:27:10	7.50561	33.3865	4219.8	1	222
2022-09-13	10:27:10	10.545	46.9063	4408.73	1	223
2022-09-13	10:27:10	3.92403	17.4549	4237.26	1	224
2022-09-13	10:27:11	9.08108	40.3945	4449.12	1	225
2022-09-13	10:27:11	9.30235	41.3787	4278.64	1	226
2022-09-13	10:27:11	3.08973	13.7437	4462.86	1	227
2022-09-13	10:27:11	5.93237	26.3884	4305.03	1	228
2022-09-13	10:27:12	0.921743	4.1001	4466.96	FALSE	228
2022-09-13	10:27:12	2.98658	13.2849	4318.31	FALSE	228
2022-09-13	10:27:12	2.53635	11.2822	4478.25	FALSE	228
2022-09-13	10:27:13	1.98958	8.85005	4327.16	FALSE	228
2022-09-13	10:27:13	6.7795	30.1566	4508.4	1	229
2022-09-13	10:27:13	3.49502	15.5465	4342.71	1	230
2022-09-13	10:27:13	9.11594	40.5495	4548.95	1	231
2022-09-13	10:27:14	8.88271	39.5121	4382.22	1	232
2022-09-13	10:27:14	3.21879	14.3178	4563.27	1	233
2022-09-13	10:27:14	4.53421	20.1691	4402.39	1	234
2022-09-13	10:27:14	1.95767	8.70811	4571.98	FALSE	234
2022-09-13	10:27:15	2.44785	10.8885	4413.28	FALSE	234
2022-09-13	10:27:15	1.90581	8.47742	4580.45	FALSE	234
2022-09-13	10:27:15	1.64871	7.33379	4420.61	FALSE	234
2022-09-13	10:27:15	3.54189	15.755	4596.21	1	235
2022-09-13	10:27:16	2.55752	11.3764	4431.99	FALSE	235
2022-09-13	10:27:16	8.03864	35.7575	4631.97	1	236
2022-09-13	10:27:16	6.61798	29.4381	4461.43	1	237
2022-09-13	10:27:16	12.8171	57.013	4688.98	1	238
2022-09-13	10:27:17	7.53828	33.5318	4494.96	1	239
2022-09-13	10:27:17	11.9028	52.946	4741.93	1	240
2022-09-13	10:27:17	10.048	44.6955	4539.65	1	241
2022-09-13	10:27:18	4.75553	21.1535	4763.08	1	242
2022-09-13	10:27:18	11.3521	50.4964	4590.15	1	243
2022-09-13	10:27:18	7.49248	33.328	4796.41	1	244
2022-09-13	10:27:18	4.96312	22.077	4612.23	1	245
2022-09-13	10:27:19	6.83731	30.4137	4826.82	1	246
2022-09-13	10:27:19	4.59075	20.4206	4632.65	1	247
2022-09-13	10:27:19	10.2289	45.5002	4872.32	1	248
2022-09-13	10:27:19	4.76769	21.2076	4653.85	1	249
2022-09-13	10:27:20	5.01731	22.318	4894.64	1	250
2022-09-13	10:27:20	10.0648	44.7702	4698.63	1	251
2022-09-13	10:27:20	2.99965	13.343	4907.98	FALSE	251
2022-09-13	10:27:20	10.8151	48.1077	4746.73	1	252
2022-09-13	10:27:21	6.71853	29.8854	4937.87	1	253
2022-09-13	10:27:21	5.33105	23.7136	4770.45	1	254
2022-09-13	10:27:21	7.30001	32.4719	4970.34	1	255
2022-09-13	10:27:22	5.56484	24.7535	4795.2	1	256
2022-09-13	10:27:22	6.97706	31.0354	5001.38	1	257
2022-09-13	10:27:22	8.73507	38.8553	4834.06	1	258
2022-09-13	10:27:22	4.39248	19.5386	5020.91	1	259
2022-09-13	10:27:23	12.8367	57.1002	4891.16	1	260
2022-09-13	10:27:23	0.83874	3.73088	5024.65	FALSE	260
2022-09-13	10:27:23	6.68027	29.7152	4920.87	1	261
2022-09-13	10:27:24	2.28144	10.1483	5034.79	FALSE	261
2022-09-13	10:27:24	5.05523	22.4867	4943.36	1	262
2022-09-13	10:27:24	6.05014	26.9122	5061.71	1	263
2022-09-13	10:27:24	3.30536	14.7029	4958.06	1	264
2022-09-13	10:27:24	5.87111	26.1159	5087.82	1	265
2022-09-13	10:27:25	4.33278	19.2731	4977.33	1	266
2022-09-13	10:27:25	6.19044	27.5363	5115.36	1	267
2022-09-13	10:27:25	5.871	26.1154	5003.45	1	268
2022-09-13	10:27:26	3.41828	15.2052	5130.56	1	269
2022-09-13	10:27:26	8.66113	38.5264	5041.98	1	270
2022-09-13	10:27:26	3.74256	16.6477	5147.21	1	271
2022-09-13	10:27:26	17.6496	78.509	5120.48	1	272
2022-09-13	10:27:27	4.63696	20.6261	5167.84	1	273
2022-09-13	10:27:27	15.7691	70.1441	5190.63	1	274
2022-09-13	10:27:27	3.68261	16.381	5184.22	1	275
2022-09-13	10:27:27	2.74072	12.1913	5202.82	FALSE	275
2022-09-13	10:27:28	4.16841	18.5419	5202.76	1	276
2022-09-13	10:27:28	1.29014	5.7388	5208.56	FALSE	276
2022-09-13	10:27:28	5.59339	24.8805	5227.64	1	277
2022-09-13	10:27:28	2.04877	9.11334	5217.67	FALSE	277
2022-09-13	10:27:29	6.45212	28.7003	5256.34	1	278
2022-09-13	10:27:29	8.92372	39.6945	5257.37	1	279
2022-09-13	10:27:29	8.40596	37.3914	5293.73	1	280
2022-09-13	10:27:29	7.08805	31.5291	5288.9	1	281
2022-09-13	10:27:30	4.91065	21.8436	5315.58	1	282
2022-09-13	10:27:30	8.88367	39.5163	5328.41	1	283
2022-09-13	10:27:30	3.57248	15.8911	5331.47	1	284
2022-09-13	10:27:31	8.83655	39.3067	5367.72	1	285
2022-09-13	10:27:31	7.43894	33.0899	5364.56	1	286
2022-09-13	10:27:31	9.08551	40.4142	5408.13	1	287
2022-09-13	10:27:31	6.56739	29.2131	5393.77	1	288
2022-09-13	10:27:32	10.7289	47.7243	5455.86	1	289
2022-09-13	10:27:32	11.278	50.1668	5443.94	1	290
2022-09-13	10:27:32	5.59975	24.9088	5480.77	1	291
2022-09-13	10:27:32	9.09813	40.4703	5484.41	1	292
2022-09-13	10:27:33	5.02683	22.3603	5503.13	1	293
2022-09-13	10:27:33	9.49813	42.2496	5526.66	1	294
2022-09-13	10:27:33	3.53726	15.7344	5518.86	1	295
2022-09-13	10:27:33	10.2957	45.7973	5572.45	1	296
2022-09-13	10:27:34	11.8937	52.9056	5571.77	1	297
2022-09-13	10:27:34	11.5531	51.3905	5623.84	1	298
2022-09-13	10:27:34	4.30586	19.1533	5590.92	1	299
2022-09-13	10:27:35	2.77599	12.3482	5636.19	FALSE	299
2022-09-13	10:27:35	9.13166	40.6195	5631.54	1	300
2022-09-13	10:27:35	6.33268	28.169	5664.36	1	301
2022-09-13	10:27:35	6.20174	27.5866	5659.13	1	302
2022-09-13	10:27:36	5.4334	24.1688	5688.53	1	303
2022-09-13	10:27:36	10.7401	47.7741	5706.9	1	304
2022-09-13	10:27:36	8.89645	39.5732	5728.1	1	305
2022-09-13	10:27:36	10.7631	47.8764	5754.78	1	306
2022-09-13	10:27:37	11.991	53.3384	5781.44	1	307
2022-09-13	10:27:37	16.217	72.1365	5826.91	1	308
2022-09-13	10:27:37	6.13924	27.3086	5808.75	1	309
2022-09-13	10:27:37	9.59487	42.6799	5869.59	1	310
2022-09-13	10:27:38	9.94021	44.216	5852.97	1	311
2022-09-13	10:27:38	6.45207	28.7001	5898.29	1	312
2022-09-13	10:27:38	14.1755	63.0555	5916.02	1	313
2022-09-13	10:27:38	8.10179	36.0384	5934.33	1	314
2022-09-13	10:27:39	11.2599	50.0863	5966.11	1	315
2022-09-13	10:27:39	3.93477	17.5026	5951.83	1	316
2022-09-13	10:27:39	9.70403	43.1655	6009.27	1	317
2022-09-13	10:27:40	13.8552	61.6307	6013.46	1	318
2022-09-13	10:27:40	9.3167	41.4425	6050.72	1	319
2022-09-13	10:27:40	11.3683	50.5685	6064.03	1	320
2022-09-13	10:27:40	9.27904	41.275	6091.99	1	321
2022-09-13	10:27:41	18.6167	82.8108	6146.84	1	322
2022-09-13	10:27:41	6.01523	26.7569	6118.75	1	323
2022-09-13	10:27:41	9.89731	44.0252	6190.87	1	324
2022-09-13	10:27:41	4.84108	21.5341	6140.28	1	325
2022-09-13	10:27:42	11.3394	50.4399	6241.31	1	326
2022-09-13	10:27:42	7.44892	33.1343	6173.42	1	327
2022-09-13	10:27:42	8.98276	39.9571	6281.27	1	328
2022-09-13	10:27:42	7.51935	33.4476	6206.86	1	329
2022-09-13	10:27:43	6.7596	30.0681	6311.33	1	330
2022-09-13	10:27:43	6.72011	29.8924	6236.76	1	331
2022-09-13	10:27:43	6.1195	27.2208	6338.55	1	332
2022-09-13	10:27:44	7.84902	34.914	6271.67	1	333
2022-09-13	10:27:44	7.83349	34.8449	6373.4	1	334
2022-09-13	10:27:44	10.106	44.9535	6316.62	1	335
2022-09-13	10:27:44	6.85146	30.4767	6403.88	1	336
2022-09-13	10:27:45	10.3116	45.8681	6362.49	1	337
2022-09-13	10:27:45	4.15838	18.4973	6422.37	1	338
2022-09-13	10:27:45	10.8223	48.1398	6410.63	1	339
2022-09-13	10:27:46	9.10922	40.5196	6462.89	1	340
2022-09-13	10:27:46	8.81747	39.2219	6449.85	1	341
2022-09-13	10:27:46	6.25864	27.8397	6490.73	1	342
2022-09-13	10:27:46	7.73059	34.3872	6484.24	1	343
2022-09-13	10:27:46	12.2115	54.3192	6545.05	1	344
2022-09-13	10:27:47	5.98958	26.6428	6510.88	1	345
2022-09-13	10:27:47	7.19207	31.9918	6577.04	1	346
2022-09-13	10:27:47	6.80001	30.2478	6541.13	1	347
2022-09-13	10:27:48	14.4725	64.3766	6641.42	1	348
2022-09-13	10:27:48	9.54683	42.4662	6583.6	1	349
2022-09-13	10:27:48	16.7016	74.2921	6715.71	1	350
2022-09-13	10:27:48	10.7925	48.0072	6631.6	1	351
2022-09-13	10:27:49	15.3434	68.2505	6783.96	1	352
2022-09-13	10:27:49	6.00922	26.7302	6658.34	1	353
2022-09-13	10:27:49	6.3395	28.1994	6812.16	1	354
2022-09-13	10:27:49	10.2558	45.6198	6703.96	1	355
2022-09-13	10:27:50	4.828	21.4759	6833.64	1	356
2022-09-13	10:27:50	8.98108	39.9496	6743.9	1	357
2022-09-13	10:27:50	7.7682	34.5545	6868.19	1	358
2022-09-13	10:27:50	14.0861	62.6578	6806.56	1	359
2022-09-13	10:27:51	4.58118	20.378	6888.57	1	360
2022-09-13	10:27:51	12.9761	57.7203	6864.28	1	361
2022-09-13	10:27:51	8.76942	39.0081	6927.58	1	362
2022-09-13	10:27:51	8.53151	37.9499	6902.23	1	363
2022-09-13	10:27:52	6.90576	30.7182	6958.3	1	364
2022-09-13	10:27:52	9.40591	41.8394	6944.07	1	365
2022-09-13	10:27:52	15.3901	68.4582	7026.76	1	366
2022-09-13	10:27:53	6.2425	27.7679	6971.84	1	367
2022-09-13	10:27:53	14.3026	63.6208	7090.38	1	368
2022-09-13	10:27:53	13.593	60.4644	7032.3	1	369
2022-09-13	10:27:53	8.14133	36.2143	7126.59	1	370
2022-09-13	10:27:54	5.60439	24.9294	7057.23	1	371
2022-09-13	10:27:54	5.69696	25.3412	7151.93	1	372
2022-09-13	10:27:54	18.4117	81.8989	7139.13	1	373
2022-09-13	10:27:54	9.78759	43.5372	7195.47	1	374
2022-09-13	10:27:55	16.7874	74.6737	7213.81	1	375
2022-09-13	10:27:55	11.8936	52.9051	7248.37	1	376
2022-09-13	10:27:55	11.632	51.7415	7265.55	1	377
2022-09-13	10:27:55	6.8366	30.4106	7278.78	1	378
2022-09-13	10:27:56	8.80342	39.1594	7304.71	1	379
2022-09-13	10:27:56	10.9599	48.7518	7327.54	1	380
2022-09-13	10:27:56	3.61614	16.0853	7320.79	1	381
2022-09-13	10:27:57	5.07121	22.5578	7350.09	1	382
2022-09-13	10:27:57	3.62678	16.1326	7336.93	1	383
2022-09-13	10:27:57	10.106	44.9535	7395.05	1	384
2022-09-13	10:27:57	5.6825	25.2769	7362.2	1	385

## Sheet: Mars_star_2022913102246 (E)
Date	Time	Lbs	Total force x time			**GoPro Fitting: 1012
2022-09-13	10:22:57	0.486527	0.486527	FALSE	0				Total force	3317.58
2022-09-13	10:22:57	2.14322	2.62975	FALSE	0				Total steps	385
2022-09-13	10:22:57	1.14668	3.77643	FALSE	0
2022-09-13	10:22:57	2.10831	5.88474	FALSE	0
2022-09-13	10:22:58	1.67742	7.56216	FALSE	0
2022-09-13	10:22:58	1.61228	9.17444	FALSE	0
2022-09-13	10:22:58	0.774008	9.94844	FALSE	0
2022-09-13	10:22:58	1.78892	11.7374	FALSE	0
2022-09-13	10:22:59	3.32775	15.0651	1	1
2022-09-13	10:22:59	5.72322	20.7883	1	2
2022-09-13	10:22:59	5.91848	26.7068	1	3
2022-09-13	10:23:00	7.90627	34.6131	1	4
2022-09-13	10:23:00	7.14937	41.7625	1	5
2022-09-13	10:23:00	5.48688	47.2493	1	6
2022-09-13	10:23:00	7.33436	54.5837	1	7
2022-09-13	10:23:01	3.08093	57.6646	1	8
2022-09-13	10:23:01	6.71426	64.3789	1	9
2022-09-13	10:23:01	5.12311	69.502	1	10
2022-09-13	10:23:02	4.82164	74.3236	1	11
2022-09-13	10:23:02	5.13553	79.4592	1	12
2022-09-13	10:23:02	2.94953	82.4087	FALSE	12
2022-09-13	10:23:02	7.40505	89.8137	1	13
2022-09-13	10:23:02	1.80352	91.6173	FALSE	13
2022-09-13	10:23:03	1.46922	93.0865	FALSE	13
2022-09-13	10:23:03	1.20215	94.2886	FALSE	13
2022-09-13	10:23:03	1.10042	95.3891	FALSE	13
2022-09-13	10:23:04	1.31793	96.707	FALSE	13
2022-09-13	10:23:04	0.470852	97.1778	FALSE	13
2022-09-13	10:23:04	0.593295	97.7711	FALSE	13
2022-09-13	10:23:04	0.735483	98.5066	FALSE	13
2022-09-13	10:23:05	0.549173	99.0558	FALSE	13
2022-09-13	10:23:05	0.445	99.5008	FALSE	13
2022-09-13	10:23:05	0.109733	99.6105	FALSE	13
2022-09-13	10:23:05	0.445458	100.056	FALSE	13
2022-09-13	10:23:06	0.871718	100.928	FALSE	13
2022-09-13	10:23:06	1.55335	102.481	FALSE	13
2022-09-13	10:23:06	1.4477	103.929	FALSE	13
2022-09-13	10:23:06	1.77955	105.708	FALSE	13
2022-09-13	10:23:07	1.82693	107.535	FALSE	13
2022-09-13	10:23:07	0.317112	107.852	FALSE	13
2022-09-13	10:23:07	0.804491	108.657	FALSE	13
2022-09-13	10:23:07	0.90673	109.564	FALSE	13
2022-09-13	10:23:08	0.61869	110.182	FALSE	13
2022-09-13	10:23:08	0.737621	110.92	FALSE	13
2022-09-13	10:23:08	0.276603	111.196	FALSE	13
2022-09-13	10:23:09	0.739147	111.936	FALSE	13
2022-09-13	10:23:09	0.734313	112.67	FALSE	13
2022-09-13	10:23:09	0.486425	113.156	FALSE	13
2022-09-13	10:23:09	0.73243	113.889	FALSE	13
2022-09-13	10:23:10	0.736959	114.626	FALSE	13
2022-09-13	10:23:10	0.664491	115.29	FALSE	13
2022-09-13	10:23:10	0.23813	115.528	FALSE	13
2022-09-13	10:23:10	0.739962	116.268	FALSE	13
2022-09-13	10:23:11	0.245356	116.514	FALSE	13
2022-09-13	10:23:11	0.704084	117.218	FALSE	13
2022-09-13	10:23:11	0.449835	117.668	FALSE	13
2022-09-13	10:23:11	0.263015	117.931	FALSE	13
2022-09-13	10:23:12	0.155942	118.087	FALSE	13
2022-09-13	10:23:12	0.186934	118.273	FALSE	13
2022-09-13	10:23:12	0.443168	118.717	FALSE	13
2022-09-13	10:23:13	0.0945168	118.811	FALSE	13
2022-09-13	10:23:13	0.469682	119.281	FALSE	13
2022-09-13	10:23:13	0.177112	119.458	FALSE	13
2022-09-13	10:23:13	0.274975	119.733	FALSE	13
2022-09-13	10:23:14	0.161387	119.894	FALSE	13
2022-09-13	10:23:14	0.271107	120.165	FALSE	13
2022-09-13	10:23:14	0.227646	120.393	FALSE	13
2022-09-13	10:23:14	0.276959	120.67	FALSE	13
2022-09-13	10:23:15	0.273143	120.943	FALSE	13
2022-09-13	10:23:15	0.177926	121.121	FALSE	13
2022-09-13	10:23:15	0.454669	121.576	FALSE	13
2022-09-13	10:23:15	0.16902	121.745	FALSE	13
2022-09-13	10:23:16	0.737214	122.482	FALSE	13
2022-09-13	10:23:16	0.736857	123.219	FALSE	13
2022-09-13	10:23:16	0.737112	123.956	FALSE	13
2022-09-13	10:23:17	0.734109	124.69	FALSE	13
2022-09-13	10:23:17	0.738384	125.428	FALSE	13
2022-09-13	10:23:17	0.734415	126.163	FALSE	13
2022-09-13	10:23:17	1.04709	127.21	FALSE	13
2022-09-13	10:23:18	0.760267	127.97	FALSE	13
2022-09-13	10:23:18	1.19874	129.169	FALSE	13
2022-09-13	10:23:18	0.739046	129.908	FALSE	13
2022-09-13	10:23:18	0.436298	130.344	FALSE	13
2022-09-13	10:23:19	0.643015	130.987	FALSE	13
2022-09-13	10:23:19	0.692481	131.68	FALSE	13
2022-09-13	10:23:19	0.754364	132.434	FALSE	13
2022-09-13	10:23:19	1.76668	134.201	FALSE	13
2022-09-13	10:23:20	3.76836	137.969	1	14
2022-09-13	10:23:20	5.30729	143.277	1	15
2022-09-13	10:23:20	0.839962	144.116	FALSE	15
2022-09-13	10:23:20	0.36556	144.482	FALSE	15
2022-09-13	10:23:21	0.314109	144.796	FALSE	15
2022-09-13	10:23:21	0.219046	145.015	FALSE	15
2022-09-13	10:23:21	1.3395	146.355	FALSE	15
2022-09-13	10:23:22	0.622812	146.978	FALSE	15
2022-09-13	10:23:22	0.731463	147.709	FALSE	15
2022-09-13	10:23:22	0.707087	148.416	FALSE	15
2022-09-13	10:23:22	0.873855	149.29	FALSE	15
2022-09-13	10:23:23	3.1134	152.403	1	16
2022-09-13	10:23:23	7.33294	159.736	1	17
2022-09-13	10:23:23	5.04301	164.779	1	18
2022-09-13	10:23:23	0.75757	165.537	FALSE	18
2022-09-13	10:23:24	1.10011	166.637	FALSE	18
2022-09-13	10:23:24	0.49243	167.129	FALSE	18
2022-09-13	10:23:24	0.596705	167.726	FALSE	18
2022-09-13	10:23:24	0.636247	168.362	FALSE	18
2022-09-13	10:23:25	0.503982	168.866	FALSE	18
2022-09-13	10:23:25	1.16846	170.035	FALSE	18
2022-09-13	10:23:25	1.33416	171.369	FALSE	18
2022-09-13	10:23:26	2.35884	173.728	FALSE	18
2022-09-13	10:23:26	1.26062	174.988	FALSE	18
2022-09-13	10:23:26	1.34561	176.334	FALSE	18
2022-09-13	10:23:26	1.76235	178.096	FALSE	18
2022-09-13	10:23:27	0.800063	178.896	FALSE	18
2022-09-13	10:23:27	1.66816	180.565	FALSE	18
2022-09-13	10:23:27	0.903372	181.468	FALSE	18
2022-09-13	10:23:27	1.07701	182.545	FALSE	18
2022-09-13	10:23:28	0.492685	183.038	FALSE	18
2022-09-13	10:23:28	0.17528	183.213	FALSE	18
2022-09-13	10:23:28	1.40072	184.614	FALSE	18
2022-09-13	10:23:28	1.37523	185.989	FALSE	18
2022-09-13	10:23:29	2.24658	188.235	FALSE	18
2022-09-13	10:23:29	2.30215	190.538	FALSE	18
2022-09-13	10:23:29	1.95268	192.49	FALSE	18
2022-09-13	10:23:30	2.61278	195.103	FALSE	18
2022-09-13	10:23:30	2.28566	197.389	FALSE	18
2022-09-13	10:23:30	3.2565	200.645	1	19
2022-09-13	10:23:30	2.43085	203.076	FALSE	19
2022-09-13	10:23:31	1.34057	204.417	FALSE	19
2022-09-13	10:23:31	2.69899	207.116	FALSE	19
2022-09-13	10:23:31	1.96775	209.083	FALSE	19
2022-09-13	10:23:31	6.02367	215.107	1	20
2022-09-13	10:23:32	4.37884	219.486	1	21
2022-09-13	10:23:32	7.33609	226.822	1	22
2022-09-13	10:23:32	4.40479	231.227	1	23
2022-09-13	10:23:32	3.30128	234.528	1	24
2022-09-13	10:23:33	4.86052	239.389	1	25
2022-09-13	10:23:33	3.15879	242.547	1	26
2022-09-13	10:23:33	4.31166	246.859	1	27
2022-09-13	10:23:33	6.10907	252.968	1	28
2022-09-13	10:23:34	2.89548	255.864	FALSE	28
2022-09-13	10:23:34	7.47411	263.338	1	29
2022-09-13	10:23:34	5.84764	269.185	1	30
2022-09-13	10:23:35	10.4202	279.606	1	31
2022-09-13	10:23:35	4.43248	284.038	1	32
2022-09-13	10:23:35	4.10088	288.139	1	33
2022-09-13	10:23:35	6.62937	294.768	1	34
2022-09-13	10:23:36	3.41833	298.187	1	35
2022-09-13	10:23:36	4.52805	302.715	1	36
2022-09-13	10:23:36	2.30546	305.02	FALSE	36
2022-09-13	10:23:36	0.429682	305.45	FALSE	36
2022-09-13	10:23:37	0.293244	305.743	FALSE	36
2022-09-13	10:23:37	0.473855	306.217	FALSE	36
2022-09-13	10:23:37	0.740318	306.957	FALSE	36
2022-09-13	10:23:37	0.532379	307.49	FALSE	36
2022-09-13	10:23:38	0.824542	308.314	FALSE	36
2022-09-13	10:23:38	5.59935	313.913	1	37
2022-09-13	10:23:38	9.11401	323.027	1	38
2022-09-13	10:23:39	4.0451	327.073	1	39
2022-09-13	10:23:39	0.591311	327.664	FALSE	39
2022-09-13	10:23:39	1.49518	329.159	FALSE	39
2022-09-13	10:23:39	1.65737	330.816	FALSE	39
2022-09-13	10:23:40	3.44459	334.261	1	40
2022-09-13	10:23:40	7.52678	341.788	1	41
2022-09-13	10:23:40	4.31731	346.105	1	42
2022-09-13	10:23:40	6.27981	352.385	1	43
2022-09-13	10:23:41	2.85487	355.24	FALSE	43
2022-09-13	10:23:41	2.79737	358.037	FALSE	43
2022-09-13	10:23:41	4.01971	362.057	1	44
2022-09-13	10:23:41	1.95497	364.012	FALSE	44
2022-09-13	10:23:42	3.88225	367.894	1	45
2022-09-13	10:23:42	3.83986	371.734	1	46
2022-09-13	10:23:42	6.55136	378.285	1	47
2022-09-13	10:23:42	11.4879	389.773	1	48
2022-09-13	10:23:43	8.9367	398.71	1	49
2022-09-13	10:23:43	9.46693	408.177	1	50
2022-09-13	10:23:43	4.44658	412.623	1	51
2022-09-13	10:23:44	2.02902	414.652	FALSE	51
2022-09-13	10:23:44	2.54368	417.196	FALSE	51
2022-09-13	10:23:44	1.84154	419.038	FALSE	51
2022-09-13	10:23:44	0.464135	419.502	FALSE	51
2022-09-13	10:23:45	1.13207	420.634	FALSE	51
2022-09-13	10:23:45	0.610394	421.244	FALSE	51
2022-09-13	10:23:45	0.300216	421.544	FALSE	51
2022-09-13	10:23:45	0.453041	421.998	FALSE	51
2022-09-13	10:23:46	0.661845	422.659	FALSE	51
2022-09-13	10:23:46	0.736349	423.396	FALSE	51
2022-09-13	10:23:46	0.489478	423.885	FALSE	51
2022-09-13	10:23:46	0.759402	424.645	FALSE	51
2022-09-13	10:23:47	0.735127	425.38	FALSE	51
2022-09-13	10:23:47	0.744236	426.124	FALSE	51
2022-09-13	10:23:47	0.734313	426.858	FALSE	51
2022-09-13	10:23:48	0.738944	427.597	FALSE	51
2022-09-13	10:23:48	0.735127	428.332	FALSE	51
2022-09-13	10:23:48	0.738079	429.07	FALSE	51
2022-09-13	10:23:48	0.73584	429.806	FALSE	51
2022-09-13	10:23:49	0.734873	430.541	FALSE	51
2022-09-13	10:23:49	0.568206	431.109	FALSE	51
2022-09-13	10:23:49	0.644491	431.754	FALSE	51
2022-09-13	10:23:49	1.05141	432.805	FALSE	51
2022-09-13	10:23:50	0.566018	433.371	FALSE	51
2022-09-13	10:23:50	0.681641	434.053	FALSE	51
2022-09-13	10:23:50	0.314313	434.367	FALSE	51
2022-09-13	10:23:50	0.195178	434.562	FALSE	51
2022-09-13	10:23:51	0.370852	434.933	FALSE	51
2022-09-13	10:23:51	0.208257	435.142	FALSE	51
2022-09-13	10:23:51	0.663677	435.805	FALSE	51
2022-09-13	10:23:52	4.47253	440.278	1	52
2022-09-13	10:23:52	9.81583	450.094	1	53
2022-09-13	10:23:52	5.30357	455.397	1	54
2022-09-13	10:23:52	5.99813	461.395	1	55
2022-09-13	10:23:53	3.30831	464.704	1	56
2022-09-13	10:23:53	3.36067	468.064	1	57
2022-09-13	10:23:53	2.81747	470.882	FALSE	57
2022-09-13	10:23:53	2.30108	473.183	FALSE	57
2022-09-13	10:23:54	5.77049	478.953	1	58
2022-09-13	10:23:54	4.17396	483.127	1	59
2022-09-13	10:23:54	10.1798	493.307	1	60
2022-09-13	10:23:54	6.5823	499.889	1	61
2022-09-13	10:23:55	6.86042	506.75	1	62
2022-09-13	10:23:55	5.36958	512.119	1	63
2022-09-13	10:23:55	3.83904	515.958	1	64
2022-09-13	10:23:55	3.51228	519.471	1	65
2022-09-13	10:23:56	0.504593	519.975	FALSE	65
2022-09-13	10:23:56	0.45584	520.431	FALSE	65
2022-09-13	10:23:56	0.570496	521.002	FALSE	65
2022-09-13	10:23:57	1.31543	522.317	FALSE	65
2022-09-13	10:23:57	4.51833	526.835	1	66
2022-09-13	10:23:57	8.79787	535.633	1	67
2022-09-13	10:23:57	6.33405	541.967	1	68
2022-09-13	10:23:58	1.79503	543.762	FALSE	68
2022-09-13	10:23:58	1.73365	545.496	FALSE	68
2022-09-13	10:23:58	0.875026	546.371	FALSE	68
2022-09-13	10:23:58	2.24245	548.613	FALSE	68
2022-09-13	10:23:59	6.11156	554.725	1	69
2022-09-13	10:23:59	12.0624	566.787	1	70
2022-09-13	10:23:59	10.7818	577.569	1	71
2022-09-13	10:23:59	2.72464	580.294	FALSE	71
2022-09-13	10:24:00	1.66281	581.957	FALSE	71
2022-09-13	10:24:00	0.633957	582.591	FALSE	71
2022-09-13	10:24:00	0.110802	582.701	FALSE	71
2022-09-13	10:24:01	0.401947	583.103	FALSE	71
2022-09-13	10:24:01	1.48999	584.593	FALSE	71
2022-09-13	10:24:01	2.00001	586.593	FALSE	71
2022-09-13	10:24:01	1.04078	587.634	FALSE	71
2022-09-13	10:24:02	0.805865	588.44	FALSE	71
2022-09-13	10:24:02	0.801692	589.242	FALSE	71
2022-09-13	10:24:02	0.530598	589.772	FALSE	71
2022-09-13	10:24:02	0.212837	589.985	FALSE	71
2022-09-13	10:24:03	1.31202	591.297	FALSE	71
2022-09-13	10:24:03	2.49197	593.789	FALSE	71
2022-09-13	10:24:03	1.37996	595.169	FALSE	71
2022-09-13	10:24:03	1.09818	596.267	FALSE	71
2022-09-13	10:24:04	1.05991	597.327	FALSE	71
2022-09-13	10:24:04	0.591717	597.919	FALSE	71
2022-09-13	10:24:04	0.679606	598.598	FALSE	71
2022-09-13	10:24:04	0.259504	598.858	FALSE	71
2022-09-13	10:24:05	0.79126	599.649	FALSE	71
2022-09-13	10:24:05	0.523219	600.172	FALSE	71
2022-09-13	10:24:05	1.23523	601.408	FALSE	71
2022-09-13	10:24:06	1.15335	602.561	FALSE	71
2022-09-13	10:24:06	1.66856	604.23	FALSE	71
2022-09-13	10:24:06	2.23162	606.461	FALSE	71
2022-09-13	10:24:06	1.8848	608.346	FALSE	71
2022-09-13	10:24:07	3.1909	611.537	1	72
2022-09-13	10:24:07	1.32871	612.866	FALSE	72
2022-09-13	10:24:07	3.11869	615.984	1	73
2022-09-13	10:24:07	0.780064	616.764	FALSE	73
2022-09-13	10:24:08	1.87961	618.644	FALSE	73
2022-09-13	10:24:08	1.30276	619.947	FALSE	73
2022-09-13	10:24:08	2.18027	622.127	FALSE	73
2022-09-13	10:24:08	1.90999	624.037	FALSE	73
2022-09-13	10:24:09	2.80256	626.84	FALSE	73
2022-09-13	10:24:09	2.98612	629.826	FALSE	73
2022-09-13	10:24:09	4.67334	634.499	1	74
2022-09-13	10:24:10	3.86418	638.363	1	75
2022-09-13	10:24:10	4.33859	642.702	1	76
2022-09-13	10:24:10	3.42159	646.123	1	77
2022-09-13	10:24:10	2.49757	648.621	FALSE	77
2022-09-13	10:24:11	3.17141	651.792	1	78
2022-09-13	10:24:11	1.05574	652.848	FALSE	78
2022-09-13	10:24:11	1.28312	654.131	FALSE	78
2022-09-13	10:24:11	0.548359	654.68	FALSE	78
2022-09-13	10:24:12	0.601336	655.281	FALSE	78
2022-09-13	10:24:12	0.248919	655.53	FALSE	78
2022-09-13	10:24:12	0.677977	656.208	FALSE	78
2022-09-13	10:24:12	0.471616	656.679	FALSE	78
2022-09-13	10:24:13	0.532735	657.212	FALSE	78
2022-09-13	10:24:13	0.332227	657.544	FALSE	78
2022-09-13	10:24:13	0.0189442	657.563	FALSE	78
2022-09-13	10:24:14	0.106883	657.67	FALSE	78
2022-09-13	10:24:14	0.358944	658.029	FALSE	78
2022-09-13	10:24:14	0.159453	658.189	FALSE	78
2022-09-13	10:24:14	0.225763	658.414	FALSE	78
2022-09-13	10:24:15	-0.00558499	658.414	FALSE	78
2022-09-13	10:24:15	0.0905473	658.505	FALSE	78
2022-09-13	10:24:15	0.102303	658.607	FALSE	78
2022-09-13	10:24:15	0.312837	658.92	FALSE	78
2022-09-13	10:24:16	0.296654	659.217	FALSE	78
2022-09-13	10:24:16	0.347596	659.564	FALSE	78
2022-09-13	10:24:16	0.319402	659.884	FALSE	78
2022-09-13	10:24:16	0.353295	660.237	FALSE	78
2022-09-13	10:24:17	0.470089	660.707	FALSE	78
2022-09-13	10:24:17	0.393193	661.1	FALSE	78
2022-09-13	10:24:17	0.390852	661.491	FALSE	78
2022-09-13	10:24:17	0.358232	661.849	FALSE	78
2022-09-13	10:24:18	0.362863	662.212	FALSE	78
2022-09-13	10:24:18	0.365967	662.578	FALSE	78
2022-09-13	10:24:18	0.399962	662.978	FALSE	78
2022-09-13	10:24:19	0.424898	663.403	FALSE	78
2022-09-13	10:24:19	0.433143	663.836	FALSE	78
2022-09-13	10:24:19	0.418537	664.255	FALSE	78
2022-09-13	10:24:19	0.394008	664.649	FALSE	78
2022-09-13	10:24:20	0.388206	665.037	FALSE	78
2022-09-13	10:24:20	0.389682	665.427	FALSE	78
2022-09-13	10:24:20	0.38958	665.816	FALSE	78
2022-09-13	10:24:20	0.386272	666.202	FALSE	78
2022-09-13	10:24:21	0.377723	666.58	FALSE	78
2022-09-13	10:24:21	0.372939	666.953	FALSE	78
2022-09-13	10:24:21	0.366222	667.319	FALSE	78
2022-09-13	10:24:21	0.365	667.684	FALSE	78
2022-09-13	10:24:22	0.362761	668.047	FALSE	78
2022-09-13	10:24:22	0.369631	668.417	FALSE	78
2022-09-13	10:24:22	0.366781	668.784	FALSE	78
2022-09-13	10:24:23	0.368562	669.152	FALSE	78
2022-09-13	10:24:23	0.372074	669.524	FALSE	78
2022-09-13	10:24:23	0.366832	669.891	FALSE	78
2022-09-13	10:24:23	0.374059	670.265	FALSE	78
2022-09-13	10:24:24	0.373143	670.638	FALSE	78
2022-09-13	10:24:24	0.37416	671.012	FALSE	78
2022-09-13	10:24:24	0.376705	671.389	FALSE	78
2022-09-13	10:24:24	0.380115	671.769	FALSE	78
2022-09-13	10:24:25	0.38159	672.151	FALSE	78
2022-09-13	10:24:25	0.377265	672.528	FALSE	78
2022-09-13	10:24:25	0.376247	672.904	FALSE	78
2022-09-13	10:24:25	0.382964	673.287	FALSE	78
2022-09-13	10:24:26	0.376094	673.663	FALSE	78
2022-09-13	10:24:26	0.375382	674.039	FALSE	78
2022-09-13	10:24:26	0.379809	674.419	FALSE	78
2022-09-13	10:24:27	0.374669	674.793	FALSE	78
2022-09-13	10:24:27	0.377417	675.171	FALSE	78
2022-09-13	10:24:27	0.378588	675.549	FALSE	78
2022-09-13	10:24:27	0.382099	675.931	FALSE	78
2022-09-13	10:24:28	0.385662	676.317	FALSE	78
2022-09-13	10:24:28	0.384389	676.701	FALSE	78
2022-09-13	10:24:28	0.394771	677.096	FALSE	78
2022-09-13	10:24:28	0.392023	677.488	FALSE	78
2022-09-13	10:24:29	0.399809	677.888	FALSE	78
2022-09-13	10:24:29	0.398181	678.286	FALSE	78
2022-09-13	10:24:29	0.400369	678.687	FALSE	78
2022-09-13	10:24:29	0.392023	679.079	FALSE	78
2022-09-13	10:24:30	0.392634	679.471	FALSE	78
2022-09-13	10:24:30	0.405764	679.877	FALSE	78
2022-09-13	10:24:30	0.405	680.282	FALSE	78
2022-09-13	10:24:30	0.396705	680.679	FALSE	78
2022-09-13	10:24:31	0.403626	681.082	FALSE	78
2022-09-13	10:24:31	0.421183	681.503	FALSE	78
2022-09-13	10:24:31	0.416858	681.92	FALSE	78
2022-09-13	10:24:32	0.418232	682.339	FALSE	78
2022-09-13	10:24:32	0.412481	682.751	FALSE	78
2022-09-13	10:24:32	0.454924	683.206	FALSE	78
2022-09-13	10:24:32	0.536603	683.743	FALSE	78
2022-09-13	10:24:33	0.59182	684.334	FALSE	78
2022-09-13	10:24:33	0.37986	684.714	FALSE	78
2022-09-13	10:24:33	0.254924	684.969	FALSE	78
2022-09-13	10:24:33	0.138741	685.108	FALSE	78
2022-09-13	10:24:34	0.212837	685.321	FALSE	78
2022-09-13	10:24:34	0.274211	685.595	FALSE	78
2022-09-13	10:24:34	0.328155	685.923	FALSE	78
2022-09-13	10:24:34	0.638283	686.561	FALSE	78
2022-09-13	10:24:35	0.739351	687.301	FALSE	78
2022-09-13	10:24:35	0.732735	688.033	FALSE	78
2022-09-13	10:24:35	0.996399	689.03	FALSE	78
2022-09-13	10:24:36	5.7737	694.804	1	79
2022-09-13	10:24:36	8.28988	703.093	1	80
2022-09-13	10:24:36	4.76271	707.856	1	81
2022-09-13	10:24:36	9.89818	717.754	1	82
2022-09-13	10:24:37	3.13747	720.892	1	83
2022-09-13	10:24:37	5.81171	726.704	1	84
2022-09-13	10:24:37	3.32668	730.03	1	85
2022-09-13	10:24:37	1.92256	731.953	FALSE	85
2022-09-13	10:24:38	3.88724	735.84	1	86
2022-09-13	10:24:38	1.06495	736.905	FALSE	86
2022-09-13	10:24:38	1.09426	737.999	FALSE	86
2022-09-13	10:24:38	0.582099	738.581	FALSE	86
2022-09-13	10:24:39	0.273957	738.855	FALSE	86
2022-09-13	10:24:39	0.627697	739.483	FALSE	86
2022-09-13	10:24:39	0.259046	739.742	FALSE	86
2022-09-13	10:24:39	0.657519	740.4	FALSE	86
2022-09-13	10:24:40	0.30617	740.706	FALSE	86
2022-09-13	10:24:40	0.00835904	740.714	FALSE	86
2022-09-13	10:24:40	-0.198308	740.714	FALSE	86
2022-09-13	10:24:41	-0.0698089	740.714	FALSE	86
2022-09-13	10:24:41	0.76673	741.481	FALSE	86
2022-09-13	10:24:41	0.220674	741.701	FALSE	86
2022-09-13	10:24:41	0.293092	741.995	FALSE	86
2022-09-13	10:24:42	0.0480028	742.043	FALSE	86
2022-09-13	10:24:42	0.0881045	742.131	FALSE	86
2022-09-13	10:24:42	0.368053	742.499	FALSE	86
2022-09-13	10:24:42	0.698333	743.197	FALSE	86
2022-09-13	10:24:43	0.548512	743.746	FALSE	86
2022-09-13	10:24:43	0.693855	744.439	FALSE	86
2022-09-13	10:24:43	0.490853	744.93	FALSE	86
2022-09-13	10:24:43	0.418944	745.349	FALSE	86
2022-09-13	10:24:44	0.442761	745.792	FALSE	86
2022-09-13	10:24:44	0.462812	746.255	FALSE	86
2022-09-13	10:24:44	0.478384	746.733	FALSE	86
2022-09-13	10:24:45	0.417316	747.15	FALSE	86
2022-09-13	10:24:45	0.43813	747.589	FALSE	86
2022-09-13	10:24:45	0.445662	748.034	FALSE	86
2022-09-13	10:24:45	0.408563	748.443	FALSE	86
2022-09-13	10:24:46	0.450242	748.893	FALSE	86
2022-09-13	10:24:46	0.4764	749.369	FALSE	86
2022-09-13	10:24:46	0.657061	750.027	FALSE	86
2022-09-13	10:24:46	0.879097	750.906	FALSE	86
2022-09-13	10:24:47	1.77477	752.68	FALSE	86
2022-09-13	10:24:47	7.09207	759.772	1	87
2022-09-13	10:24:47	18.5276	778.3	1	88
2022-09-13	10:24:47	17.2803	795.58	1	89
2022-09-13	10:24:48	4.63665	800.217	1	90
2022-09-13	10:24:48	8.16673	808.384	1	91
2022-09-13	10:24:48	8.07808	816.462	1	92
2022-09-13	10:24:49	1.66235	818.124	FALSE	92
2022-09-13	10:24:49	0.950191	819.074	FALSE	92
2022-09-13	10:24:49	0.180267	819.255	FALSE	92
2022-09-13	10:24:49	0.343728	819.598	FALSE	92
2022-09-13	10:24:50	0.29645	819.895	FALSE	92
2022-09-13	10:24:50	0.738537	820.633	FALSE	92
2022-09-13	10:24:50	0.739046	821.372	FALSE	92
2022-09-13	10:24:50	0.736399	822.109	FALSE	92
2022-09-13	10:24:51	0.735076	822.844	FALSE	92
2022-09-13	10:24:51	0.467748	823.312	FALSE	92
2022-09-13	10:24:51	0.276858	823.588	FALSE	92
2022-09-13	10:24:51	3.6022	827.191	1	93
2022-09-13	10:24:52	6.96667	834.157	1	94
2022-09-13	10:24:52	5.92596	840.083	1	95
2022-09-13	10:24:52	0.386832	840.47	FALSE	95
2022-09-13	10:24:52	0.141082	840.611	FALSE	95
2022-09-13	10:24:53	0.186171	840.797	FALSE	95
2022-09-13	10:24:53	-0.0778496	840.797	FALSE	95
2022-09-13	10:24:53	0.0664252	840.864	FALSE	95
2022-09-13	10:24:54	-0.169503	840.864	FALSE	95
2022-09-13	10:24:54	-0.107977	840.864	FALSE	95
2022-09-13	10:24:54	-0.269096	840.864	FALSE	95
2022-09-13	10:24:54	-0.186704	840.864	FALSE	95
2022-09-13	10:24:55	-0.246399	840.864	FALSE	95
2022-09-13	10:24:55	0.00963129	840.873	FALSE	95
2022-09-13	10:24:55	0.0359417	840.909	FALSE	95
2022-09-13	10:24:55	0.838333	841.748	FALSE	95
2022-09-13	10:24:56	1.38266	843.13	FALSE	95
2022-09-13	10:24:56	2.15492	845.285	FALSE	95
2022-09-13	10:24:56	0.345255	845.631	FALSE	95
2022-09-13	10:24:56	0.386425	846.017	FALSE	95
2022-09-13	10:24:57	0.459097	846.476	FALSE	95
2022-09-13	10:24:57	0.714313	847.19	FALSE	95
2022-09-13	10:24:57	0.373448	847.564	FALSE	95
2022-09-13	10:24:58	0.40215	847.966	FALSE	95
2022-09-13	10:24:58	0.3393	848.305	FALSE	95
2022-09-13	10:24:58	0.269886	848.575	FALSE	95
2022-09-13	10:24:58	0.426018	849.001	FALSE	95
2022-09-13	10:24:59	0.215433	849.217	FALSE	95
2022-09-13	10:24:59	0.30444	849.521	FALSE	95
2022-09-13	10:24:59	0.212176	849.733	FALSE	95
2022-09-13	10:24:59	0.164033	849.897	FALSE	95
2022-09-13	10:25:00	0.257112	850.154	FALSE	95
2022-09-13	10:25:00	0.172634	850.327	FALSE	95
2022-09-13	10:25:00	0.00255749	850.33	FALSE	95
2022-09-13	10:25:00	0.0293259	850.359	FALSE	95
2022-09-13	10:25:01	-0.120292	850.359	FALSE	95
2022-09-13	10:25:01	0.0296822	850.389	FALSE	95
2022-09-13	10:25:01	-0.00471985	850.389	FALSE	95
2022-09-13	10:25:01	0.0550766	850.444	FALSE	95
2022-09-13	10:25:02	-0.0753559	850.444	FALSE	95
2022-09-13	10:25:02	-0.245738	850.444	FALSE	95
2022-09-13	10:25:02	-0.302633	850.444	FALSE	95
2022-09-13	10:25:03	-0.491284	850.444	FALSE	95
2022-09-13	10:25:03	-0.277544	850.444	FALSE	95
2022-09-13	10:25:03	1.13309	851.577	FALSE	95
2022-09-13	10:25:03	4.66006	856.237	1	96
2022-09-13	10:25:04	2.28403	858.521	FALSE	96
2022-09-13	10:25:04	0.532125	859.053	FALSE	96
2022-09-13	10:25:04	0.269071	859.322	FALSE	96
2022-09-13	10:25:04	0.433397	859.755	FALSE	96
2022-09-13	10:25:05	0.139199	859.895	FALSE	96
2022-09-13	10:25:05	0.430598	860.325	FALSE	96
2022-09-13	10:25:05	0.777061	861.102	FALSE	96
2022-09-13	10:25:05	1.25981	862.362	FALSE	96
2022-09-13	10:25:06	0.915178	863.277	FALSE	96
2022-09-13	10:25:06	0.297163	863.574	FALSE	96
2022-09-13	10:25:06	0.451361	864.026	FALSE	96
2022-09-13	10:25:07	0.294873	864.321	FALSE	96
2022-09-13	10:25:07	0.19757	864.518	FALSE	96
2022-09-13	10:25:07	0.279097	864.797	FALSE	96
2022-09-13	10:25:07	0.26785	865.065	FALSE	96
2022-09-13	10:25:08	0.303066	865.368	FALSE	96
2022-09-13	10:25:08	0.195636	865.564	FALSE	96
2022-09-13	10:25:08	0.270191	865.834	FALSE	96
2022-09-13	10:25:08	0.334262	866.168	FALSE	96
2022-09-13	10:25:09	0.328868	866.497	FALSE	96
2022-09-13	10:25:09	0.348461	866.846	FALSE	96
2022-09-13	10:25:09	0.395992	867.242	FALSE	96
2022-09-13	10:25:09	0.633092	867.875	FALSE	96
2022-09-13	10:25:10	1.342	869.217	FALSE	96
2022-09-13	10:25:10	2.25253	871.469	FALSE	96
2022-09-13	10:25:10	4.04439	875.514	1	97
2022-09-13	10:25:11	2.73258	878.246	FALSE	97
2022-09-13	10:25:11	2.41899	880.665	FALSE	97
2022-09-13	10:25:11	2.46296	883.128	FALSE	97
2022-09-13	10:25:11	0.810242	883.938	FALSE	97
2022-09-13	10:25:12	0.928715	884.867	FALSE	97
2022-09-13	10:25:12	0.57645	885.444	FALSE	97
2022-09-13	10:25:12	0.307392	885.751	FALSE	97
2022-09-13	10:25:12	0.411565	886.163	FALSE	97
2022-09-13	10:25:13	0.408461	886.571	FALSE	97
2022-09-13	10:25:13	0.264949	886.836	FALSE	97
2022-09-13	10:25:13	0.314771	887.151	FALSE	97
2022-09-13	10:25:13	0.563371	887.714	FALSE	97
2022-09-13	10:25:14	0.73874	888.453	FALSE	97
2022-09-13	10:25:14	0.735178	889.188	FALSE	97
2022-09-13	10:25:14	0.736094	889.924	FALSE	97
2022-09-13	10:25:14	0.737112	890.661	FALSE	97
2022-09-13	10:25:15	0.736145	891.397	FALSE	97
2022-09-13	10:25:15	0.736094	892.134	FALSE	97
2022-09-13	10:25:15	0.746069	892.88	FALSE	97
2022-09-13	10:25:16	0.747748	893.627	FALSE	97
2022-09-13	10:25:16	-0.173524	893.627	FALSE	97
2022-09-13	10:25:16	-0.423854	893.627	FALSE	97
2022-09-13	10:25:16	-0.252404	893.627	FALSE	97
2022-09-13	10:25:17	0.736247	894.364	FALSE	97
2022-09-13	10:25:17	0.749224	895.113	FALSE	97
2022-09-13	10:25:17	0.942761	896.056	FALSE	97
2022-09-13	10:25:17	0.735534	896.791	FALSE	97
2022-09-13	10:25:18	0.885102	897.676	FALSE	97
2022-09-13	10:25:18	1.02459	898.701	FALSE	97
2022-09-13	10:25:18	0.186883	898.888	FALSE	97
2022-09-13	10:25:18	0.574822	899.462	FALSE	97
2022-09-13	10:25:19	0.135331	899.598	FALSE	97
2022-09-13	10:25:19	0.393957	899.992	FALSE	97
2022-09-13	10:25:19	0.36729	900.359	FALSE	97
2022-09-13	10:25:20	0.456807	900.816	FALSE	97
2022-09-13	10:25:20	0.17411	900.99	FALSE	97
2022-09-13	10:25:20	0.508512	901.498	FALSE	97
2022-09-13	10:25:20	0.349478	901.848	FALSE	97
2022-09-13	10:25:21	0.742354	902.59	FALSE	97
2022-09-13	10:25:21	0.73528	903.326	FALSE	97
2022-09-13	10:25:21	0.732888	904.058	FALSE	97
2022-09-13	10:25:21	0.364186	904.423	FALSE	97
2022-09-13	10:25:22	0.523575	904.946	FALSE	97
2022-09-13	10:25:22	0.301896	905.248	FALSE	97
2022-09-13	10:25:22	0.432888	905.681	FALSE	97
2022-09-13	10:25:22	0.343982	906.025	FALSE	97
2022-09-13	10:25:23	0.401743	906.427	FALSE	97
2022-09-13	10:25:23	0.166069	906.593	FALSE	97
2022-09-13	10:25:23	0.0656618	906.658	FALSE	97
2022-09-13	10:25:24	0.119351	906.778	FALSE	97
2022-09-13	10:25:24	-0.0375443	906.778	FALSE	97
2022-09-13	10:25:24	-0.167519	906.778	FALSE	97
2022-09-13	10:25:24	-0.177799	906.778	FALSE	97
2022-09-13	10:25:25	0.0219468	906.8	FALSE	97
2022-09-13	10:25:25	0.113652	906.913	FALSE	97
2022-09-13	10:25:25	0.276094	907.19	FALSE	97
2022-09-13	10:25:25	0.205	907.395	FALSE	97
2022-09-13	10:25:26	1.06017	908.455	FALSE	97
2022-09-13	10:25:26	1.5109	909.966	FALSE	97
2022-09-13	10:25:26	1.91553	911.881	FALSE	97
2022-09-13	10:25:26	2.73854	914.62	FALSE	97
2022-09-13	10:25:27	1.31879	915.938	FALSE	97
2022-09-13	10:25:27	0.758181	916.697	FALSE	97
2022-09-13	10:25:27	0.291005	916.988	FALSE	97
2022-09-13	10:25:27	0.337519	917.325	FALSE	97
2022-09-13	10:25:28	0.314059	917.639	FALSE	97
2022-09-13	10:25:28	0.334568	917.974	FALSE	97
2022-09-13	10:25:28	0.506272	918.48	FALSE	97
2022-09-13	10:25:29	0.456094	918.936	FALSE	97
2022-09-13	10:25:29	0.458384	919.395	FALSE	97
2022-09-13	10:25:29	0.609427	920.004	FALSE	97
2022-09-13	10:25:29	0.454618	920.459	FALSE	97
2022-09-13	10:25:30	0.294517	920.753	FALSE	97
2022-09-13	10:25:30	0.285763	921.039	FALSE	97
2022-09-13	10:25:30	0.3364	921.375	FALSE	97
2022-09-13	10:25:30	0.472176	921.847	FALSE	97
2022-09-13	10:25:31	0.254415	922.102	FALSE	97
2022-09-13	10:25:31	0.215942	922.318	FALSE	97
2022-09-13	10:25:31	0.205814	922.524	FALSE	97
2022-09-13	10:25:31	0.261336	922.785	FALSE	97
2022-09-13	10:25:32	0.326018	923.111	FALSE	97
2022-09-13	10:25:32	0.502863	923.614	FALSE	97
2022-09-13	10:25:32	1.12352	924.737	FALSE	97
2022-09-13	10:25:33	0.487748	925.225	FALSE	97
2022-09-13	10:25:33	1.64877	926.874	FALSE	97
2022-09-13	10:25:33	0.407646	927.282	FALSE	97
2022-09-13	10:25:33	0.175534	927.457	FALSE	97
2022-09-13	10:25:34	0.510089	927.967	FALSE	97
2022-09-13	10:25:34	0.409529	928.377	FALSE	97
2022-09-13	10:25:34	0.297417	928.674	FALSE	97
2022-09-13	10:25:34	0.16612	928.84	FALSE	97
2022-09-13	10:25:35	0.352481	929.193	FALSE	97
2022-09-13	10:25:35	0.205153	929.398	FALSE	97
2022-09-13	10:25:35	0.291107	929.689	FALSE	97
2022-09-13	10:25:35	0.093448	929.782	FALSE	97
2022-09-13	10:25:36	0.296247	930.079	FALSE	97
2022-09-13	10:25:36	0.281285	930.36	FALSE	97
2022-09-13	10:25:36	1.06246	931.422	FALSE	97
2022-09-13	10:25:37	3.40057	934.823	1	98
2022-09-13	10:25:37	4.54082	939.364	1	99
2022-09-13	10:25:37	5.15176	944.516	1	100
2022-09-13	10:25:37	2.89757	947.413	FALSE	100
2022-09-13	10:25:38	3.59131	951.004	1	101
2022-09-13	10:25:38	1.51686	952.521	FALSE	101
2022-09-13	10:25:38	4.04179	956.563	1	102
2022-09-13	10:25:38	1.47319	958.036	FALSE	102
2022-09-13	10:25:39	2.42637	960.463	FALSE	102
2022-09-13	10:25:39	6.32561	966.788	1	103
2022-09-13	10:25:39	1.45518	968.243	FALSE	103
2022-09-13	10:25:39	6.65731	974.901	1	104
2022-09-13	10:25:40	1.32536	976.226	FALSE	104
2022-09-13	10:25:40	4.74424	980.97	1	105
2022-09-13	10:25:40	2.59874	983.569	FALSE	105
2022-09-13	10:25:40	2.1906	985.76	FALSE	105
2022-09-13	10:25:41	2.65019	988.41	FALSE	105
2022-09-13	10:25:41	3.13665	991.547	1	106
2022-09-13	10:25:41	3.92881	995.475	1	107
2022-09-13	10:25:42	5.93859	1001.41	1	108
2022-09-13	10:25:42	1.32251	1002.74	FALSE	108
2022-09-13	10:25:42	2.59482	1005.33	FALSE	108
2022-09-13	10:25:42	0.690852	1006.02	FALSE	108
2022-09-13	10:25:43	1.4763	1007.5	FALSE	108
2022-09-13	10:25:43	0.285916	1007.78	FALSE	108
2022-09-13	10:25:43	1.23609	1009.02	FALSE	108
2022-09-13	10:25:43	1.0533	1010.07	FALSE	108
2022-09-13	10:25:44	0.522761	1010.6	FALSE	108
2022-09-13	10:25:44	0.902812	1011.5	FALSE	108
2022-09-13	10:25:44	0.417367	1011.92	FALSE	108
2022-09-13	10:25:44	1.02383	1012.94	FALSE	108
2022-09-13	10:25:45	0.39701	1013.34	FALSE	108
2022-09-13	10:25:45	0.91645	1014.25	FALSE	108
2022-09-13	10:25:45	0.505	1014.76	FALSE	108
2022-09-13	10:25:46	0.397367	1015.16	FALSE	108
2022-09-13	10:25:46	0.481692	1015.64	FALSE	108
2022-09-13	10:25:46	0.719453	1016.36	FALSE	108
2022-09-13	10:25:46	0.735687	1017.09	FALSE	108
2022-09-13	10:25:47	0.659148	1017.75	FALSE	108
2022-09-13	10:25:47	0.486679	1018.24	FALSE	108
2022-09-13	10:25:47	0.265967	1018.5	FALSE	108
2022-09-13	10:25:47	0.927799	1019.43	FALSE	108
2022-09-13	10:25:48	0.345	1019.78	FALSE	108
2022-09-13	10:25:48	1.00989	1020.79	FALSE	108
2022-09-13	10:25:48	0.689173	1021.48	FALSE	108
2022-09-13	10:25:48	0.364847	1021.84	FALSE	108
2022-09-13	10:25:49	0.277875	1022.12	FALSE	108
2022-09-13	10:25:49	0.259097	1022.38	FALSE	108
2022-09-13	10:25:49	0.240674	1022.62	FALSE	108
2022-09-13	10:25:50	0.147901	1022.77	FALSE	108
2022-09-13	10:25:50	0.270547	1023.04	FALSE	108
2022-09-13	10:25:50	0.211209	1023.25	FALSE	108
2022-09-13	10:25:50	0.19014	1023.44	FALSE	108
2022-09-13	10:25:51	0.0988933	1023.54	FALSE	108
2022-09-13	10:25:51	0.124746	1023.66	FALSE	108
2022-09-13	10:25:51	0.242049	1023.9	FALSE	108
2022-09-13	10:25:51	0.258791	1024.16	FALSE	108
2022-09-13	10:25:52	0.289377	1024.45	FALSE	108
2022-09-13	10:25:52	0.24841	1024.7	FALSE	108
2022-09-13	10:25:52	0.298283	1025	FALSE	108
2022-09-13	10:25:52	0.0950766	1025.09	FALSE	108
2022-09-13	10:25:53	0.00922418	1025.1	FALSE	108
2022-09-13	10:25:53	0.0738043	1025.18	FALSE	108
2022-09-13	10:25:53	0.170853	1025.35	FALSE	108
2022-09-13	10:25:53	0.167545	1025.52	FALSE	108
2022-09-13	10:25:54	0.198792	1025.71	FALSE	108
2022-09-13	10:25:54	0.376807	1026.09	FALSE	108
2022-09-13	10:25:54	0.286272	1026.38	FALSE	108
2022-09-13	10:25:55	0.272125	1026.65	FALSE	108
2022-09-13	10:25:55	0.292685	1026.94	FALSE	108
2022-09-13	10:25:55	0.742405	1027.69	FALSE	108
2022-09-13	10:25:55	0.732226	1028.42	FALSE	108
2022-09-13	10:25:56	0.745661	1029.16	FALSE	108
2022-09-13	10:25:56	0.737468	1029.9	FALSE	108
2022-09-13	10:25:56	0.735026	1030.64	FALSE	108
2022-09-13	10:25:56	0.743117	1031.38	FALSE	108
2022-09-13	10:25:57	0.737926	1032.12	FALSE	108
2022-09-13	10:25:57	0.736908	1032.85	FALSE	108
2022-09-13	10:25:57	0.731667	1033.59	FALSE	108
2022-09-13	10:25:57	0.728512	1034.31	FALSE	108
2022-09-13	10:25:58	0.736603	1035.05	FALSE	108
2022-09-13	10:25:58	0.733448	1035.78	FALSE	108
2022-09-13	10:25:58	0.736959	1036.52	FALSE	108
2022-09-13	10:25:59	0.735891	1037.26	FALSE	108
2022-09-13	10:25:59	0.739962	1038	FALSE	108
2022-09-13	10:25:59	0.740878	1038.74	FALSE	108
2022-09-13	10:25:59	0.733601	1039.47	FALSE	108
2022-09-13	10:26:00	0.731412	1040.2	FALSE	108
2022-09-13	10:26:00	0.736145	1040.94	FALSE	108
2022-09-13	10:26:00	0.749987	1041.69	FALSE	108
2022-09-13	10:26:00	0.731361	1042.42	FALSE	108
2022-09-13	10:26:01	0.740878	1043.16	FALSE	108
2022-09-13	10:26:01	0.737417	1043.9	FALSE	108
2022-09-13	10:26:01	0.734008	1044.63	FALSE	108
2022-09-13	10:26:01	0.736399	1045.37	FALSE	108
2022-09-13	10:26:02	0.737672	1046.11	FALSE	108
2022-09-13	10:26:02	0.737621	1046.84	FALSE	108
2022-09-13	10:26:02	0.742812	1047.59	FALSE	108
2022-09-13	10:26:02	0.740267	1048.33	FALSE	108
2022-09-13	10:26:03	0.744491	1049.07	FALSE	108
2022-09-13	10:26:03	0.737265	1049.81	FALSE	108
2022-09-13	10:26:03	0.741997	1050.55	FALSE	108
2022-09-13	10:26:04	0.737366	1051.29	FALSE	108
2022-09-13	10:26:04	0.746171	1052.03	FALSE	108
2022-09-13	10:26:04	0.735891	1052.77	FALSE	108
2022-09-13	10:26:04	0.734008	1053.5	FALSE	108
2022-09-13	10:26:05	0.733702	1054.24	FALSE	108
2022-09-13	10:26:05	0.736399	1054.97	FALSE	108
2022-09-13	10:26:05	0.737061	1055.71	FALSE	108
2022-09-13	10:26:05	0.735331	1056.45	FALSE	108
2022-09-13	10:26:06	0.733702	1057.18	FALSE	108
2022-09-13	10:26:06	0.744542	1057.92	FALSE	108
2022-09-13	10:26:06	0.736908	1058.66	FALSE	108
2022-09-13	10:26:06	0.740674	1059.4	FALSE	108
2022-09-13	10:26:07	0.735687	1060.14	FALSE	108
2022-09-13	10:26:07	0.739249	1060.88	FALSE	108
2022-09-13	10:26:07	0.736501	1061.61	FALSE	108
2022-09-13	10:26:08	0.741031	1062.36	FALSE	108
2022-09-13	10:26:08	0.736705	1063.09	FALSE	108
2022-09-13	10:26:08	0.739147	1063.83	FALSE	108
2022-09-13	10:26:08	0.736501	1064.57	FALSE	108
2022-09-13	10:26:09	0.737315	1065.3	FALSE	108
2022-09-13	10:26:09	0.730038	1066.03	FALSE	108
2022-09-13	10:26:09	0.708206	1066.74	FALSE	108
2022-09-13	10:26:09	3.32719	1070.07	1	109
2022-09-13	10:26:10	9.05797	1079.13	1	110
2022-09-13	10:26:10	16.1047	1095.23	1	111
2022-09-13	10:26:10	16.579	1111.81	1	112
2022-09-13	10:26:10	8.93645	1120.75	1	113
2022-09-13	10:26:11	10.2698	1131.02	1	114
2022-09-13	10:26:11	3.03446	1134.05	1	115
2022-09-13	10:26:11	2.95965	1137.01	FALSE	115
2022-09-13	10:26:12	2.22897	1139.24	FALSE	115
2022-09-13	10:26:12	4.77563	1144.02	1	116
2022-09-13	10:26:12	9.36108	1153.38	1	117
2022-09-13	10:26:12	4.91416	1158.29	1	118
2022-09-13	10:26:13	9.28642	1167.58	1	119
2022-09-13	10:26:13	9.68881	1177.27	1	120
2022-09-13	10:26:13	4.7882	1182.06	1	121
2022-09-13	10:26:13	5.34296	1187.4	1	122
2022-09-13	10:26:14	9.60688	1197.01	1	123
2022-09-13	10:26:14	5.23487	1202.24	1	124
2022-09-13	10:26:14	7.59879	1209.84	1	125
2022-09-13	10:26:14	12.7212	1222.56	1	126
2022-09-13	10:26:15	2.92826	1225.49	FALSE	126
2022-09-13	10:26:15	6.63991	1232.13	1	127
2022-09-13	10:26:15	4.58887	1236.72	1	128
2022-09-13	10:26:15	2.46826	1239.19	FALSE	128
2022-09-13	10:26:16	4.14642	1243.33	1	129
2022-09-13	10:26:16	4.011	1247.34	1	130
2022-09-13	10:26:16	2.98647	1250.33	FALSE	130
2022-09-13	10:26:17	5.03665	1255.37	1	131
2022-09-13	10:26:17	1.73691	1257.1	FALSE	131
2022-09-13	10:26:17	6.39869	1263.5	1	132
2022-09-13	10:26:17	2.14561	1265.65	FALSE	132
2022-09-13	10:26:18	5.14459	1270.79	1	133
2022-09-13	10:26:18	5.66021	1276.45	1	134
2022-09-13	10:26:18	1.93014	1278.38	FALSE	134
2022-09-13	10:26:18	3.27156	1281.65	1	135
2022-09-13	10:26:19	5.15055	1286.8	1	136
2022-09-13	10:26:19	2.41681	1289.22	FALSE	136
2022-09-13	10:26:19	7.60749	1296.83	1	137
2022-09-13	10:26:19	2.20673	1299.04	FALSE	137
2022-09-13	10:26:20	5.00775	1304.04	1	138
2022-09-13	10:26:20	2.02017	1306.06	FALSE	138
2022-09-13	10:26:20	2.54673	1308.61	FALSE	138
2022-09-13	10:26:21	3.38653	1312	1	139
2022-09-13	10:26:21	1.52515	1313.52	FALSE	139
2022-09-13	10:26:21	3.39635	1316.92	1	140
2022-09-13	10:26:21	2.98841	1319.91	FALSE	140
2022-09-13	10:26:22	2.73314	1322.64	FALSE	140
2022-09-13	10:26:22	2.89243	1325.53	FALSE	140
2022-09-13	10:26:22	2.22393	1327.76	FALSE	140
2022-09-13	10:26:22	4.55665	1332.31	1	141
2022-09-13	10:26:23	1.75294	1334.07	FALSE	141
2022-09-13	10:26:23	6.16581	1340.23	1	142
2022-09-13	10:26:23	2.48067	1342.71	FALSE	142
2022-09-13	10:26:23	6.71182	1349.42	1	143
2022-09-13	10:26:24	1.94057	1351.36	FALSE	143
2022-09-13	10:26:24	3.37854	1354.74	1	144
2022-09-13	10:26:24	3.40195	1358.14	1	145
2022-09-13	10:26:25	1.98083	1360.13	FALSE	145
2022-09-13	10:26:25	3.65528	1363.78	1	146
2022-09-13	10:26:25	3.15574	1366.94	1	147
2022-09-13	10:26:25	6.39746	1373.33	1	148
2022-09-13	10:26:26	4.28668	1377.62	1	149
2022-09-13	10:26:26	7.61136	1385.23	1	150
2022-09-13	10:26:26	5.64775	1390.88	1	151
2022-09-13	10:26:26	6.2707	1397.15	1	152
2022-09-13	10:26:27	5.41594	1402.57	1	153
2022-09-13	10:26:27	5.04642	1407.61	1	154
2022-09-13	10:26:27	6.4138	1414.03	1	155
2022-09-13	10:26:27	3.8196	1417.85	1	156
2022-09-13	10:26:28	5.18026	1423.03	1	157
2022-09-13	10:26:28	3.14637	1426.17	1	158
2022-09-13	10:26:28	6.46464	1432.64	1	159
2022-09-13	10:26:28	3.86184	1436.5	1	160
2022-09-13	10:26:29	3.09217	1439.59	1	161
2022-09-13	10:26:29	3.2422	1442.83	1	162
2022-09-13	10:26:29	2.44831	1445.28	FALSE	162
2022-09-13	10:26:30	3.23156	1448.51	1	163
2022-09-13	10:26:30	3.87747	1452.39	1	164
2022-09-13	10:26:30	4.851	1457.24	1	165
2022-09-13	10:26:30	4.04057	1461.28	1	166
2022-09-13	10:26:31	3.59411	1464.88	1	167
2022-09-13	10:26:31	4.23752	1469.11	1	168
2022-09-13	10:26:31	3.82195	1472.94	1	169
2022-09-13	10:26:31	5.57171	1478.51	1	170
2022-09-13	10:26:32	7.04617	1485.55	1	171
2022-09-13	10:26:32	11.5313	1497.09	1	172
2022-09-13	10:26:32	6.37599	1503.46	1	173
2022-09-13	10:26:32	10.655	1514.12	1	174
2022-09-13	10:26:33	6.03899	1520.16	1	175
2022-09-13	10:26:33	7.8051	1527.96	1	176
2022-09-13	10:26:33	4.31976	1532.28	1	177
2022-09-13	10:26:34	6.72902	1539.01	1	178
2022-09-13	10:26:34	9.81517	1548.82	1	179
2022-09-13	10:26:34	6.67008	1555.49	1	180
2022-09-13	10:26:34	15.2362	1570.73	1	181
2022-09-13	10:26:35	10.809	1581.54	1	182
2022-09-13	10:26:35	18.8025	1600.34	1	183
2022-09-13	10:26:35	16.6394	1616.98	1	184
2022-09-13	10:26:35	12.0949	1629.08	1	185
2022-09-13	10:26:36	4.49192	1633.57	1	186
2022-09-13	10:26:36	0.563728	1634.13	FALSE	186
2022-09-13	10:26:36	0.300929	1634.43	FALSE	186
2022-09-13	10:26:36	1.18067	1635.61	FALSE	186
2022-09-13	10:26:37	0.688359	1636.3	FALSE	186
2022-09-13	10:26:37	0.886883	1637.19	FALSE	186
2022-09-13	10:26:37	0.19411	1637.38	FALSE	186
2022-09-13	10:26:38	0.137672	1637.52	FALSE	186
2022-09-13	10:26:38	0.152227	1637.67	FALSE	186
2022-09-13	10:26:38	0.156654	1637.83	FALSE	186
2022-09-13	10:26:38	0.0944659	1637.92	FALSE	186
2022-09-13	10:26:39	0.0969595	1638.02	FALSE	186
2022-09-13	10:26:39	0.304288	1638.33	FALSE	186
2022-09-13	10:26:39	0.0845931	1638.41	FALSE	186
2022-09-13	10:26:39	0.267188	1638.68	FALSE	186
2022-09-13	10:26:40	0.0553819	1638.73	FALSE	186
2022-09-13	10:26:40	0.209529	1638.94	FALSE	186
2022-09-13	10:26:40	0.0885625	1639.03	FALSE	186
2022-09-13	10:26:40	0.277774	1639.31	FALSE	186
2022-09-13	10:26:41	0.30785	1639.62	FALSE	186
2022-09-13	10:26:41	0.156909	1639.77	FALSE	186
2022-09-13	10:26:41	0.123168	1639.9	FALSE	186
2022-09-13	10:26:41	0.157672	1640.05	FALSE	186
2022-09-13	10:26:42	0.355026	1640.41	FALSE	186
2022-09-13	10:26:42	0.158435	1640.57	FALSE	186
2022-09-13	10:26:42	0.269886	1640.84	FALSE	186
2022-09-13	10:26:43	0.382455	1641.22	FALSE	186
2022-09-13	10:26:43	0.742761	1641.96	FALSE	186
2022-09-13	10:26:43	0.925967	1642.89	FALSE	186
2022-09-13	10:26:43	1.04261	1643.93	FALSE	186
2022-09-13	10:26:44	0.907036	1644.84	FALSE	186
2022-09-13	10:26:44	2.87803	1647.72	FALSE	186
2022-09-13	10:26:44	4.37411	1652.09	1	187
2022-09-13	10:26:44	9.14886	1661.24	1	188
2022-09-13	10:26:45	12.7495	1673.99	1	189
2022-09-13	10:26:45	4.73762	1678.73	1	190
2022-09-13	10:26:45	10.745	1689.47	1	191
2022-09-13	10:26:45	3.25212	1692.72	1	192
2022-09-13	10:26:46	8.05034	1700.77	1	193
2022-09-13	10:26:46	2.7307	1703.5	FALSE	193
2022-09-13	10:26:46	2.51421	1706.02	FALSE	193
2022-09-13	10:26:47	7.80703	1713.83	1	194
2022-09-13	10:26:47	1.15706	1714.98	FALSE	194
2022-09-13	10:26:47	5.75212	1720.73	1	195
2022-09-13	10:26:47	1.79716	1722.53	FALSE	195
2022-09-13	10:26:48	3.06464	1725.6	1	196
2022-09-13	10:26:48	3.17309	1728.77	1	197
2022-09-13	10:26:48	3.73065	1732.5	1	198
2022-09-13	10:26:48	5.68011	1738.18	1	199
2022-09-13	10:26:49	1.311	1739.49	FALSE	199
2022-09-13	10:26:49	1.55024	1741.04	FALSE	199
2022-09-13	10:26:49	1.5737	1742.62	FALSE	199
2022-09-13	10:26:49	2.31828	1744.93	FALSE	199
2022-09-13	10:26:50	1.58352	1746.52	FALSE	199
2022-09-13	10:26:50	2.50765	1749.03	FALSE	199
2022-09-13	10:26:50	1.57335	1750.6	FALSE	199
2022-09-13	10:26:50	2.42414	1753.02	FALSE	199
2022-09-13	10:26:51	1.17207	1754.19	FALSE	199
2022-09-13	10:26:51	1.99284	1756.19	FALSE	199
2022-09-13	10:26:51	1.5307	1757.72	FALSE	199
2022-09-13	10:26:52	0.740776	1758.46	FALSE	199
2022-09-13	10:26:52	0.724796	1759.18	FALSE	199
2022-09-13	10:26:52	0.501794	1759.69	FALSE	199
2022-09-13	10:26:52	0.499555	1760.19	FALSE	199
2022-09-13	10:26:53	0.472532	1760.66	FALSE	199
2022-09-13	10:26:53	0.595025	1761.25	FALSE	199
2022-09-13	10:26:53	0.653041	1761.91	FALSE	199
2022-09-13	10:26:53	0.656654	1762.56	FALSE	199
2022-09-13	10:26:54	0.676247	1763.24	FALSE	199
2022-09-13	10:26:54	0.515585	1763.75	FALSE	199
2022-09-13	10:26:54	0.494415	1764.25	FALSE	199
2022-09-13	10:26:54	0.462965	1764.71	FALSE	199
2022-09-13	10:26:55	0.453295	1765.16	FALSE	199
2022-09-13	10:26:55	0.474415	1765.64	FALSE	199
2022-09-13	10:26:55	0.44556	1766.08	FALSE	199
2022-09-13	10:26:56	0.39355	1766.48	FALSE	199
2022-09-13	10:26:56	0.342863	1766.82	FALSE	199
2022-09-13	10:26:56	0.410191	1767.23	FALSE	199
2022-09-13	10:26:56	0.347341	1767.58	FALSE	199
2022-09-13	10:26:57	0.411412	1767.99	FALSE	199
2022-09-13	10:26:57	0.474924	1768.47	FALSE	199
2022-09-13	10:26:57	0.438181	1768.9	FALSE	199
2022-09-13	10:26:57	0.439656	1769.34	FALSE	199
2022-09-13	10:26:58	0.429173	1769.77	FALSE	199
2022-09-13	10:26:58	0.478537	1770.25	FALSE	199
2022-09-13	10:26:58	0.395687	1770.65	FALSE	199
2022-09-13	10:26:58	0.57131	1771.22	FALSE	199
2022-09-13	10:26:59	0.563626	1771.78	FALSE	199
2022-09-13	10:26:59	0.750853	1772.53	FALSE	199
2022-09-13	10:26:59	0.63584	1773.17	FALSE	199
2022-09-13	10:27:00	0.740522	1773.91	FALSE	199
2022-09-13	10:27:00	0.67131	1774.58	FALSE	199
2022-09-13	10:27:00	0.630038	1775.21	FALSE	199
2022-09-13	10:27:00	0.984796	1776.19	FALSE	199
2022-09-13	10:27:01	0.731209	1776.93	FALSE	199
2022-09-13	10:27:01	1.32495	1778.25	FALSE	199
2022-09-13	10:27:01	0.646476	1778.9	FALSE	199
2022-09-13	10:27:01	2.5021	1781.4	FALSE	199
2022-09-13	10:27:02	1.28083	1782.68	FALSE	199
2022-09-13	10:27:02	5.73426	1788.41	1	200
2022-09-13	10:27:02	5.57853	1793.99	1	201
2022-09-13	10:27:02	10.8926	1804.89	1	202
2022-09-13	10:27:03	3.61752	1808.5	1	203
2022-09-13	10:27:03	8.07482	1816.58	1	204
2022-09-13	10:27:03	3.58439	1820.16	1	205
2022-09-13	10:27:03	5.42647	1825.59	1	206
2022-09-13	10:27:04	3.99742	1829.59	1	207
2022-09-13	10:27:04	4.86388	1834.45	1	208
2022-09-13	10:27:04	7.05487	1841.5	1	209
2022-09-13	10:27:05	4.94291	1846.45	1	210
2022-09-13	10:27:05	6.09808	1852.55	1	211
2022-09-13	10:27:05	2.42215	1854.97	FALSE	211
2022-09-13	10:27:05	5.3078	1860.28	1	212
2022-09-13	10:27:06	1.08749	1861.36	FALSE	212
2022-09-13	10:27:06	6.03548	1867.4	1	213
2022-09-13	10:27:06	2.79299	1870.19	FALSE	213
2022-09-13	10:27:06	3.96922	1874.16	1	214
2022-09-13	10:27:07	1.18281	1875.34	FALSE	214
2022-09-13	10:27:07	1.26144	1876.61	FALSE	214
2022-09-13	10:27:07	0.844135	1877.45	FALSE	214
2022-09-13	10:27:07	2.56897	1880.02	FALSE	214
2022-09-13	10:27:08	4.13686	1884.16	1	215
2022-09-13	10:27:08	4.66846	1888.82	1	216
2022-09-13	10:27:08	2.94261	1891.77	FALSE	216
2022-09-13	10:27:09	5.17553	1896.94	1	217
2022-09-13	10:27:09	4.92383	1901.87	1	218
2022-09-13	10:27:09	4.92973	1906.8	1	219
2022-09-13	10:27:09	8.75003	1915.55	1	220
2022-09-13	10:27:10	6.18403	1921.73	1	221
2022-09-13	10:27:10	7.50561	1929.24	1	222
2022-09-13	10:27:10	10.545	1939.78	1	223
2022-09-13	10:27:10	3.92403	1943.7	1	224
2022-09-13	10:27:11	9.08108	1952.79	1	225
2022-09-13	10:27:11	9.30235	1962.09	1	226
2022-09-13	10:27:11	3.08973	1965.18	1	227
2022-09-13	10:27:11	5.93237	1971.11	1	228
2022-09-13	10:27:12	0.921743	1972.03	FALSE	228
2022-09-13	10:27:12	2.98658	1975.02	FALSE	228
2022-09-13	10:27:12	2.53635	1977.55	FALSE	228
2022-09-13	10:27:13	1.98958	1979.54	FALSE	228
2022-09-13	10:27:13	6.7795	1986.32	1	229
2022-09-13	10:27:13	3.49502	1989.82	1	230
2022-09-13	10:27:13	9.11594	1998.93	1	231
2022-09-13	10:27:14	8.88271	2007.82	1	232
2022-09-13	10:27:14	3.21879	2011.04	1	233
2022-09-13	10:27:14	4.53421	2015.57	1	234
2022-09-13	10:27:14	1.95767	2017.53	FALSE	234
2022-09-13	10:27:15	2.44785	2019.98	FALSE	234
2022-09-13	10:27:15	1.90581	2021.88	FALSE	234
2022-09-13	10:27:15	1.64871	2023.53	FALSE	234
2022-09-13	10:27:15	3.54189	2027.07	1	235
2022-09-13	10:27:16	2.55752	2029.63	FALSE	235
2022-09-13	10:27:16	8.03864	2037.67	1	236
2022-09-13	10:27:16	6.61798	2044.29	1	237
2022-09-13	10:27:16	12.8171	2057.1	1	238
2022-09-13	10:27:17	7.53828	2064.64	1	239
2022-09-13	10:27:17	11.9028	2076.54	1	240
2022-09-13	10:27:17	10.048	2086.59	1	241
2022-09-13	10:27:18	4.75553	2091.35	1	242
2022-09-13	10:27:18	11.3521	2102.7	1	243
2022-09-13	10:27:18	7.49248	2110.19	1	244
2022-09-13	10:27:18	4.96312	2115.16	1	245
2022-09-13	10:27:19	6.83731	2121.99	1	246
2022-09-13	10:27:19	4.59075	2126.58	1	247
2022-09-13	10:27:19	10.2289	2136.81	1	248
2022-09-13	10:27:19	4.76769	2141.58	1	249
2022-09-13	10:27:20	5.01731	2146.6	1	250
2022-09-13	10:27:20	10.0648	2156.66	1	251
2022-09-13	10:27:20	2.99965	2159.66	FALSE	251
2022-09-13	10:27:20	10.8151	2170.48	1	252
2022-09-13	10:27:21	6.71853	2177.2	1	253
2022-09-13	10:27:21	5.33105	2182.53	1	254
2022-09-13	10:27:21	7.30001	2189.83	1	255
2022-09-13	10:27:22	5.56484	2195.39	1	256
2022-09-13	10:27:22	6.97706	2202.37	1	257
2022-09-13	10:27:22	8.73507	2211.1	1	258
2022-09-13	10:27:22	4.39248	2215.5	1	259
2022-09-13	10:27:23	12.8367	2228.33	1	260
2022-09-13	10:27:23	0.83874	2229.17	FALSE	260
2022-09-13	10:27:23	6.68027	2235.85	1	261
2022-09-13	10:27:24	2.28144	2238.13	FALSE	261
2022-09-13	10:27:24	5.05523	2243.19	1	262
2022-09-13	10:27:24	6.05014	2249.24	1	263
2022-09-13	10:27:24	3.30536	2252.54	1	264
2022-09-13	10:27:24	5.87111	2258.42	1	265
2022-09-13	10:27:25	4.33278	2262.75	1	266
2022-09-13	10:27:25	6.19044	2268.94	1	267
2022-09-13	10:27:25	5.871	2274.81	1	268
2022-09-13	10:27:26	3.41828	2278.23	1	269
2022-09-13	10:27:26	8.66113	2286.89	1	270
2022-09-13	10:27:26	3.74256	2290.63	1	271
2022-09-13	10:27:26	17.6496	2308.28	1	272
2022-09-13	10:27:27	4.63696	2312.92	1	273
2022-09-13	10:27:27	15.7691	2328.69	1	274
2022-09-13	10:27:27	3.68261	2332.37	1	275
2022-09-13	10:27:27	2.74072	2335.11	FALSE	275
2022-09-13	10:27:28	4.16841	2339.28	1	276
2022-09-13	10:27:28	1.29014	2340.57	FALSE	276
2022-09-13	10:27:28	5.59339	2346.16	1	277
2022-09-13	10:27:28	2.04877	2348.21	FALSE	277
2022-09-13	10:27:29	6.45212	2354.66	1	278
2022-09-13	10:27:29	8.92372	2363.59	1	279
2022-09-13	10:27:29	8.40596	2371.99	1	280
2022-09-13	10:27:29	7.08805	2379.08	1	281
2022-09-13	10:27:30	4.91065	2383.99	1	282
2022-09-13	10:27:30	8.88367	2392.88	1	283
2022-09-13	10:27:30	3.57248	2396.45	1	284
2022-09-13	10:27:31	8.83655	2405.28	1	285
2022-09-13	10:27:31	7.43894	2412.72	1	286
2022-09-13	10:27:31	9.08551	2421.81	1	287
2022-09-13	10:27:31	6.56739	2428.38	1	288
2022-09-13	10:27:32	10.7289	2439.1	1	289
2022-09-13	10:27:32	11.278	2450.38	1	290
2022-09-13	10:27:32	5.59975	2455.98	1	291
2022-09-13	10:27:32	9.09813	2465.08	1	292
2022-09-13	10:27:33	5.02683	2470.11	1	293
2022-09-13	10:27:33	9.49813	2479.61	1	294
2022-09-13	10:27:33	3.53726	2483.14	1	295
2022-09-13	10:27:33	10.2957	2493.44	1	296
2022-09-13	10:27:34	11.8937	2505.33	1	297
2022-09-13	10:27:34	11.5531	2516.89	1	298
2022-09-13	10:27:34	4.30586	2521.19	1	299
2022-09-13	10:27:35	2.77599	2523.97	FALSE	299
2022-09-13	10:27:35	9.13166	2533.1	1	300
2022-09-13	10:27:35	6.33268	2539.43	1	301
2022-09-13	10:27:35	6.20174	2545.63	1	302
2022-09-13	10:27:36	5.4334	2551.07	1	303
2022-09-13	10:27:36	10.7401	2561.81	1	304
2022-09-13	10:27:36	8.89645	2570.7	1	305
2022-09-13	10:27:36	10.7631	2581.47	1	306
2022-09-13	10:27:37	11.991	2593.46	1	307
2022-09-13	10:27:37	16.217	2609.67	1	308
2022-09-13	10:27:37	6.13924	2615.81	1	309
2022-09-13	10:27:37	9.59487	2625.41	1	310
2022-09-13	10:27:38	9.94021	2635.35	1	311
2022-09-13	10:27:38	6.45207	2641.8	1	312
2022-09-13	10:27:38	14.1755	2655.98	1	313
2022-09-13	10:27:38	8.10179	2664.08	1	314
2022-09-13	10:27:39	11.2599	2675.34	1	315
2022-09-13	10:27:39	3.93477	2679.27	1	316
2022-09-13	10:27:39	9.70403	2688.98	1	317
2022-09-13	10:27:40	13.8552	2702.83	1	318
2022-09-13	10:27:40	9.3167	2712.15	1	319
2022-09-13	10:27:40	11.3683	2723.52	1	320
2022-09-13	10:27:40	9.27904	2732.8	1	321
2022-09-13	10:27:41	18.6167	2751.41	1	322
2022-09-13	10:27:41	6.01523	2757.43	1	323
2022-09-13	10:27:41	9.89731	2767.33	1	324
2022-09-13	10:27:41	4.84108	2772.17	1	325
2022-09-13	10:27:42	11.3394	2783.51	1	326
2022-09-13	10:27:42	7.44892	2790.95	1	327
2022-09-13	10:27:42	8.98276	2799.94	1	328
2022-09-13	10:27:42	7.51935	2807.46	1	329
2022-09-13	10:27:43	6.7596	2814.22	1	330
2022-09-13	10:27:43	6.72011	2820.94	1	331
2022-09-13	10:27:43	6.1195	2827.06	1	332
2022-09-13	10:27:44	7.84902	2834.91	1	333
2022-09-13	10:27:44	7.83349	2842.74	1	334
2022-09-13	10:27:44	10.106	2852.84	1	335
2022-09-13	10:27:44	6.85146	2859.7	1	336
2022-09-13	10:27:45	10.3116	2870.01	1	337
2022-09-13	10:27:45	4.15838	2874.17	1	338
2022-09-13	10:27:45	10.8223	2884.99	1	339
2022-09-13	10:27:46	9.10922	2894.1	1	340
2022-09-13	10:27:46	8.81747	2902.92	1	341
2022-09-13	10:27:46	6.25864	2909.17	1	342
2022-09-13	10:27:46	7.73059	2916.9	1	343
2022-09-13	10:27:46	12.2115	2929.12	1	344
2022-09-13	10:27:47	5.98958	2935.11	1	345
2022-09-13	10:27:47	7.19207	2942.3	1	346
2022-09-13	10:27:47	6.80001	2949.1	1	347
2022-09-13	10:27:48	14.4725	2963.57	1	348
2022-09-13	10:27:48	9.54683	2973.12	1	349
2022-09-13	10:27:48	16.7016	2989.82	1	350
2022-09-13	10:27:48	10.7925	3000.61	1	351
2022-09-13	10:27:49	15.3434	3015.95	1	352
2022-09-13	10:27:49	6.00922	3021.96	1	353
2022-09-13	10:27:49	6.3395	3028.3	1	354
2022-09-13	10:27:49	10.2558	3038.56	1	355
2022-09-13	10:27:50	4.828	3043.39	1	356
2022-09-13	10:27:50	8.98108	3052.37	1	357
2022-09-13	10:27:50	7.7682	3060.14	1	358
2022-09-13	10:27:50	14.0861	3074.22	1	359
2022-09-13	10:27:51	4.58118	3078.8	1	360
2022-09-13	10:27:51	12.9761	3091.78	1	361
2022-09-13	10:27:51	8.76942	3100.55	1	362
2022-09-13	10:27:51	8.53151	3109.08	1	363
2022-09-13	10:27:52	6.90576	3115.99	1	364
2022-09-13	10:27:52	9.40591	3125.39	1	365
2022-09-13	10:27:52	15.3901	3140.78	1	366
2022-09-13	10:27:53	6.2425	3147.02	1	367
2022-09-13	10:27:53	14.3026	3161.33	1	368
2022-09-13	10:27:53	13.593	3174.92	1	369
2022-09-13	10:27:53	8.14133	3183.06	1	370
2022-09-13	10:27:54	5.60439	3188.67	1	371
2022-09-13	10:27:54	5.69696	3194.36	1	372
2022-09-13	10:27:54	18.4117	3212.77	1	373
2022-09-13	10:27:54	9.78759	3222.56	1	374
2022-09-13	10:27:55	16.7874	3239.35	1	375
2022-09-13	10:27:55	11.8936	3251.24	1	376
2022-09-13	10:27:55	11.632	3262.88	1	377
2022-09-13	10:27:55	6.8366	3269.71	1	378
2022-09-13	10:27:56	8.80342	3278.52	1	379
2022-09-13	10:27:56	10.9599	3289.48	1	380
2022-09-13	10:27:56	3.61614	3293.09	1	381
2022-09-13	10:27:57	5.07121	3298.16	1	382
2022-09-13	10:27:57	3.62678	3301.79	1	383
2022-09-13	10:27:57	10.106	3311.9	1	384
2022-09-13	10:27:57	5.6825	3317.58	1	385

## Sheet: Mars_star_2022913102246
2022-09-13	10:22:46	0.226323				**GoPro Fitting: 1012
2022-09-13	10:22:46	0.200929
2022-09-13	10:22:46	0.208868
2022-09-13	10:22:47	0.212583
2022-09-13	10:22:47	0.228003
2022-09-13	10:22:47	0.22215
2022-09-13	10:22:47	0.228003
2022-09-13	10:22:48	0.237265
2022-09-13	10:22:48	0.236756
2022-09-13	10:22:48	0.23299
2022-09-13	10:22:48	0.232227
2022-09-13	10:22:49	0.220471
2022-09-13	10:22:49	0.267138
2022-09-13	10:22:49	0.274567
2022-09-13	10:22:49	0.251565
2022-09-13	10:22:50	0.197519
2022-09-13	10:22:50	0.269936
2022-09-13	10:22:50	0.469987
2022-09-13	10:22:51	0.680573
2022-09-13	10:22:51	0.344084
2022-09-13	10:22:51	0.230853
2022-09-13	10:22:51	0.273804
2022-09-13	10:22:52	0.482252
2022-09-13	10:22:52	0.690903
2022-09-13	10:22:52	0.738689
2022-09-13	10:22:52	0.402354
2022-09-13	10:22:53	0.431769
2022-09-13	10:22:53	0.410954
2022-09-13	10:22:53	0.391769
2022-09-13	10:22:53	0.312328
2022-09-13	10:22:54	0.568206
2022-09-13	10:22:54	0.562099
2022-09-13	10:22:54	0.421794
2022-09-13	10:22:55	0.149529
2022-09-13	10:22:55	0.696298
2022-09-13	10:22:55	2.06337
2022-09-13	10:22:55	16.3802
2022-09-13	10:22:56	10.9963
2022-09-13	10:22:56	1.63111
2022-09-13	10:22:56	1.67126
2022-09-13	10:22:56	0.731361
2022-09-13	10:22:57	0.486527
2022-09-13	10:22:57	2.14322
2022-09-13	10:22:57	1.14668
2022-09-13	10:22:57	2.10831
2022-09-13	10:22:58	1.67742
2022-09-13	10:22:58	1.61228
2022-09-13	10:22:58	0.774008
2022-09-13	10:22:58	1.78892
2022-09-13	10:22:59	3.32775
2022-09-13	10:22:59	5.72322
2022-09-13	10:22:59	5.91848
2022-09-13	10:23:00	7.90627
2022-09-13	10:23:00	7.14937
2022-09-13	10:23:00	5.48688
2022-09-13	10:23:00	7.33436
2022-09-13	10:23:01	3.08093
2022-09-13	10:23:01	6.71426
2022-09-13	10:23:01	5.12311
2022-09-13	10:23:02	4.82164
2022-09-13	10:23:02	5.13553
2022-09-13	10:23:02	2.94953
2022-09-13	10:23:02	7.40505
2022-09-13	10:23:02	1.80352
2022-09-13	10:23:03	1.46922
2022-09-13	10:23:03	1.20215
2022-09-13	10:23:03	1.10042
2022-09-13	10:23:04	1.31793
2022-09-13	10:23:04	0.470852
2022-09-13	10:23:04	0.593295
2022-09-13	10:23:04	0.735483
2022-09-13	10:23:05	0.549173
2022-09-13	10:23:05	0.445
2022-09-13	10:23:05	0.109733
2022-09-13	10:23:05	0.445458
2022-09-13	10:23:06	0.871718
2022-09-13	10:23:06	1.55335
2022-09-13	10:23:06	1.4477
2022-09-13	10:23:06	1.77955
2022-09-13	10:23:07	1.82693
2022-09-13	10:23:07	0.317112
2022-09-13	10:23:07	0.804491
2022-09-13	10:23:07	0.90673
2022-09-13	10:23:08	0.61869
2022-09-13	10:23:08	0.737621
2022-09-13	10:23:08	0.276603
2022-09-13	10:23:09	0.739147
2022-09-13	10:23:09	0.734313
2022-09-13	10:23:09	0.486425
2022-09-13	10:23:09	0.73243
2022-09-13	10:23:10	0.736959
2022-09-13	10:23:10	0.664491
2022-09-13	10:23:10	0.23813
2022-09-13	10:23:10	0.739962
2022-09-13	10:23:11	0.245356
2022-09-13	10:23:11	0.704084
2022-09-13	10:23:11	0.449835
2022-09-13	10:23:11	0.263015
2022-09-13	10:23:12	0.155942
2022-09-13	10:23:12	0.186934
2022-09-13	10:23:12	0.443168
2022-09-13	10:23:13	0.0945168
2022-09-13	10:23:13	0.469682
2022-09-13	10:23:13	0.177112
2022-09-13	10:23:13	0.274975
2022-09-13	10:23:14	0.161387
2022-09-13	10:23:14	0.271107
2022-09-13	10:23:14	0.227646
2022-09-13	10:23:14	0.276959
2022-09-13	10:23:15	0.273143
2022-09-13	10:23:15	0.177926
2022-09-13	10:23:15	0.454669
2022-09-13	10:23:15	0.16902
2022-09-13	10:23:16	0.737214
2022-09-13	10:23:16	0.736857
2022-09-13	10:23:16	0.737112
2022-09-13	10:23:17	0.734109
2022-09-13	10:23:17	0.738384
2022-09-13	10:23:17	0.734415
2022-09-13	10:23:17	1.04709
2022-09-13	10:23:18	0.760267
2022-09-13	10:23:18	1.19874
2022-09-13	10:23:18	0.739046
2022-09-13	10:23:18	0.436298
2022-09-13	10:23:19	0.643015
2022-09-13	10:23:19	0.692481
2022-09-13	10:23:19	0.754364
2022-09-13	10:23:19	1.76668
2022-09-13	10:23:20	3.76836
2022-09-13	10:23:20	5.30729
2022-09-13	10:23:20	0.839962
2022-09-13	10:23:20	0.36556
2022-09-13	10:23:21	0.314109
2022-09-13	10:23:21	0.219046
2022-09-13	10:23:21	1.3395
2022-09-13	10:23:22	0.622812
2022-09-13	10:23:22	0.731463
2022-09-13	10:23:22	0.707087
2022-09-13	10:23:22	0.873855
2022-09-13	10:23:23	3.1134
2022-09-13	10:23:23	7.33294
2022-09-13	10:23:23	5.04301
2022-09-13	10:23:23	0.75757
2022-09-13	10:23:24	1.10011
2022-09-13	10:23:24	0.49243
2022-09-13	10:23:24	0.596705
2022-09-13	10:23:24	0.636247
2022-09-13	10:23:25	0.503982
2022-09-13	10:23:25	1.16846
2022-09-13	10:23:25	1.33416
2022-09-13	10:23:26	2.35884
2022-09-13	10:23:26	1.26062
2022-09-13	10:23:26	1.34561
2022-09-13	10:23:26	1.76235
2022-09-13	10:23:27	0.800063
2022-09-13	10:23:27	1.66816
2022-09-13	10:23:27	0.903372
2022-09-13	10:23:27	1.07701
2022-09-13	10:23:28	0.492685
2022-09-13	10:23:28	0.17528
2022-09-13	10:23:28	1.40072
2022-09-13	10:23:28	1.37523
2022-09-13	10:23:29	2.24658
2022-09-13	10:23:29	2.30215
2022-09-13	10:23:29	1.95268
2022-09-13	10:23:30	2.61278
2022-09-13	10:23:30	2.28566
2022-09-13	10:23:30	3.2565
2022-09-13	10:23:30	2.43085
2022-09-13	10:23:31	1.34057
2022-09-13	10:23:31	2.69899
2022-09-13	10:23:31	1.96775
2022-09-13	10:23:31	6.02367
2022-09-13	10:23:32	4.37884
2022-09-13	10:23:32	7.33609
2022-09-13	10:23:32	4.40479
2022-09-13	10:23:32	3.30128
2022-09-13	10:23:33	4.86052
2022-09-13	10:23:33	3.15879
2022-09-13	10:23:33	4.31166
2022-09-13	10:23:33	6.10907
2022-09-13	10:23:34	2.89548
2022-09-13	10:23:34	7.47411
2022-09-13	10:23:34	5.84764
2022-09-13	10:23:35	10.4202
2022-09-13	10:23:35	4.43248
2022-09-13	10:23:35	4.10088
2022-09-13	10:23:35	6.62937
2022-09-13	10:23:36	3.41833
2022-09-13	10:23:36	4.52805
2022-09-13	10:23:36	2.30546
2022-09-13	10:23:36	0.429682
2022-09-13	10:23:37	0.293244
2022-09-13	10:23:37	0.473855
2022-09-13	10:23:37	0.740318
2022-09-13	10:23:37	0.532379
2022-09-13	10:23:38	0.824542
2022-09-13	10:23:38	5.59935
2022-09-13	10:23:38	9.11401
2022-09-13	10:23:39	4.0451
2022-09-13	10:23:39	0.591311
2022-09-13	10:23:39	1.49518
2022-09-13	10:23:39	1.65737
2022-09-13	10:23:40	3.44459
2022-09-13	10:23:40	7.52678
2022-09-13	10:23:40	4.31731
2022-09-13	10:23:40	6.27981
2022-09-13	10:23:41	2.85487
2022-09-13	10:23:41	2.79737
2022-09-13	10:23:41	4.01971
2022-09-13	10:23:41	1.95497
2022-09-13	10:23:42	3.88225
2022-09-13	10:23:42	3.83986
2022-09-13	10:23:42	6.55136
2022-09-13	10:23:42	11.4879
2022-09-13	10:23:43	8.9367
2022-09-13	10:23:43	9.46693
2022-09-13	10:23:43	4.44658
2022-09-13	10:23:44	2.02902
2022-09-13	10:23:44	2.54368
2022-09-13	10:23:44	1.84154
2022-09-13	10:23:44	0.464135
2022-09-13	10:23:45	1.13207
2022-09-13	10:23:45	0.610394
2022-09-13	10:23:45	0.300216
2022-09-13	10:23:45	0.453041
2022-09-13	10:23:46	0.661845
2022-09-13	10:23:46	0.736349
2022-09-13	10:23:46	0.489478
2022-09-13	10:23:46	0.759402
2022-09-13	10:23:47	0.735127
2022-09-13	10:23:47	0.744236
2022-09-13	10:23:47	0.734313
2022-09-13	10:23:48	0.738944
2022-09-13	10:23:48	0.735127
2022-09-13	10:23:48	0.738079
2022-09-13	10:23:48	0.73584
2022-09-13	10:23:49	0.734873
2022-09-13	10:23:49	0.568206
2022-09-13	10:23:49	0.644491
2022-09-13	10:23:49	1.05141
2022-09-13	10:23:50	0.566018
2022-09-13	10:23:50	0.681641
2022-09-13	10:23:50	0.314313
2022-09-13	10:23:50	0.195178
2022-09-13	10:23:51	0.370852
2022-09-13	10:23:51	0.208257
2022-09-13	10:23:51	0.663677
2022-09-13	10:23:52	4.47253
2022-09-13	10:23:52	9.81583
2022-09-13	10:23:52	5.30357
2022-09-13	10:23:52	5.99813
2022-09-13	10:23:53	3.30831
2022-09-13	10:23:53	3.36067
2022-09-13	10:23:53	2.81747
2022-09-13	10:23:53	2.30108
2022-09-13	10:23:54	5.77049
2022-09-13	10:23:54	4.17396
2022-09-13	10:23:54	10.1798
2022-09-13	10:23:54	6.5823
2022-09-13	10:23:55	6.86042
2022-09-13	10:23:55	5.36958
2022-09-13	10:23:55	3.83904
2022-09-13	10:23:55	3.51228
2022-09-13	10:23:56	0.504593
2022-09-13	10:23:56	0.45584
2022-09-13	10:23:56	0.570496
2022-09-13	10:23:57	1.31543
2022-09-13	10:23:57	4.51833
2022-09-13	10:23:57	8.79787
2022-09-13	10:23:57	6.33405
2022-09-13	10:23:58	1.79503
2022-09-13	10:23:58	1.73365
2022-09-13	10:23:58	0.875026
2022-09-13	10:23:58	2.24245
2022-09-13	10:23:59	6.11156
2022-09-13	10:23:59	12.0624
2022-09-13	10:23:59	10.7818
2022-09-13	10:23:59	2.72464
2022-09-13	10:24:00	1.66281
2022-09-13	10:24:00	0.633957
2022-09-13	10:24:00	0.110802
2022-09-13	10:24:01	0.401947
2022-09-13	10:24:01	1.48999
2022-09-13	10:24:01	2.00001
2022-09-13	10:24:01	1.04078
2022-09-13	10:24:02	0.805865
2022-09-13	10:24:02	0.801692
2022-09-13	10:24:02	0.530598
2022-09-13	10:24:02	0.212837
2022-09-13	10:24:03	1.31202
2022-09-13	10:24:03	2.49197
2022-09-13	10:24:03	1.37996
2022-09-13	10:24:03	1.09818
2022-09-13	10:24:04	1.05991
2022-09-13	10:24:04	0.591717
2022-09-13	10:24:04	0.679606
2022-09-13	10:24:04	0.259504
2022-09-13	10:24:05	0.79126
2022-09-13	10:24:05	0.523219
2022-09-13	10:24:05	1.23523
2022-09-13	10:24:06	1.15335
2022-09-13	10:24:06	1.66856
2022-09-13	10:24:06	2.23162
2022-09-13	10:24:06	1.8848
2022-09-13	10:24:07	3.1909
2022-09-13	10:24:07	1.32871
2022-09-13	10:24:07	3.11869
2022-09-13	10:24:07	0.780064
2022-09-13	10:24:08	1.87961
2022-09-13	10:24:08	1.30276
2022-09-13	10:24:08	2.18027
2022-09-13	10:24:08	1.90999
2022-09-13	10:24:09	2.80256
2022-09-13	10:24:09	2.98612
2022-09-13	10:24:09	4.67334
2022-09-13	10:24:10	3.86418
2022-09-13	10:24:10	4.33859
2022-09-13	10:24:10	3.42159
2022-09-13	10:24:10	2.49757
2022-09-13	10:24:11	3.17141
2022-09-13	10:24:11	1.05574
2022-09-13	10:24:11	1.28312
2022-09-13	10:24:11	0.548359
2022-09-13	10:24:12	0.601336
2022-09-13	10:24:12	0.248919
2022-09-13	10:24:12	0.677977
2022-09-13	10:24:12	0.471616
2022-09-13	10:24:13	0.532735
2022-09-13	10:24:13	0.332227
2022-09-13	10:24:13	0.0189442
2022-09-13	10:24:14	0.106883
2022-09-13	10:24:14	0.358944
2022-09-13	10:24:14	0.159453
2022-09-13	10:24:14	0.225763
2022-09-13	10:24:15	-0.00558499
2022-09-13	10:24:15	0.0905473
2022-09-13	10:24:15	0.102303
2022-09-13	10:24:15	0.312837
2022-09-13	10:24:16	0.296654
2022-09-13	10:24:16	0.347596
2022-09-13	10:24:16	0.319402
2022-09-13	10:24:16	0.353295
2022-09-13	10:24:17	0.470089
2022-09-13	10:24:17	0.393193
2022-09-13	10:24:17	0.390852
2022-09-13	10:24:17	0.358232
2022-09-13	10:24:18	0.362863
2022-09-13	10:24:18	0.365967
2022-09-13	10:24:18	0.399962
2022-09-13	10:24:19	0.424898
2022-09-13	10:24:19	0.433143
2022-09-13	10:24:19	0.418537
2022-09-13	10:24:19	0.394008
2022-09-13	10:24:20	0.388206
2022-09-13	10:24:20	0.389682
2022-09-13	10:24:20	0.38958
2022-09-13	10:24:20	0.386272
2022-09-13	10:24:21	0.377723
2022-09-13	10:24:21	0.372939
2022-09-13	10:24:21	0.366222
2022-09-13	10:24:21	0.365
2022-09-13	10:24:22	0.362761
2022-09-13	10:24:22	0.369631
2022-09-13	10:24:22	0.366781
2022-09-13	10:24:23	0.368562
2022-09-13	10:24:23	0.372074
2022-09-13	10:24:23	0.366832
2022-09-13	10:24:23	0.374059
2022-09-13	10:24:24	0.373143
2022-09-13	10:24:24	0.37416
2022-09-13	10:24:24	0.376705
2022-09-13	10:24:24	0.380115
2022-09-13	10:24:25	0.38159
2022-09-13	10:24:25	0.377265
2022-09-13	10:24:25	0.376247
2022-09-13	10:24:25	0.382964
2022-09-13	10:24:26	0.376094
2022-09-13	10:24:26	0.375382
2022-09-13	10:24:26	0.379809
2022-09-13	10:24:27	0.374669
2022-09-13	10:24:27	0.377417
2022-09-13	10:24:27	0.378588
2022-09-13	10:24:27	0.382099
2022-09-13	10:24:28	0.385662
2022-09-13	10:24:28	0.384389
2022-09-13	10:24:28	0.394771
2022-09-13	10:24:28	0.392023
2022-09-13	10:24:29	0.399809
2022-09-13	10:24:29	0.398181
2022-09-13	10:24:29	0.400369
2022-09-13	10:24:29	0.392023
2022-09-13	10:24:30	0.392634
2022-09-13	10:24:30	0.405764
2022-09-13	10:24:30	0.405
2022-09-13	10:24:30	0.396705
2022-09-13	10:24:31	0.403626
2022-09-13	10:24:31	0.421183
2022-09-13	10:24:31	0.416858
2022-09-13	10:24:32	0.418232
2022-09-13	10:24:32	0.412481
2022-09-13	10:24:32	0.454924
2022-09-13	10:24:32	0.536603
2022-09-13	10:24:33	0.59182
2022-09-13	10:24:33	0.37986
2022-09-13	10:24:33	0.254924
2022-09-13	10:24:33	0.138741
2022-09-13	10:24:34	0.212837
2022-09-13	10:24:34	0.274211
2022-09-13	10:24:34	0.328155
2022-09-13	10:24:34	0.638283
2022-09-13	10:24:35	0.739351
2022-09-13	10:24:35	0.732735
2022-09-13	10:24:35	0.996399
2022-09-13	10:24:36	5.7737
2022-09-13	10:24:36	8.28988
2022-09-13	10:24:36	4.76271
2022-09-13	10:24:36	9.89818
2022-09-13	10:24:37	3.13747
2022-09-13	10:24:37	5.81171
2022-09-13	10:24:37	3.32668
2022-09-13	10:24:37	1.92256
2022-09-13	10:24:38	3.88724
2022-09-13	10:24:38	1.06495
2022-09-13	10:24:38	1.09426
2022-09-13	10:24:38	0.582099
2022-09-13	10:24:39	0.273957
2022-09-13	10:24:39	0.627697
2022-09-13	10:24:39	0.259046
2022-09-13	10:24:39	0.657519
2022-09-13	10:24:40	0.30617
2022-09-13	10:24:40	0.00835904
2022-09-13	10:24:40	-0.198308
2022-09-13	10:24:41	-0.0698089
2022-09-13	10:24:41	0.76673
2022-09-13	10:24:41	0.220674
2022-09-13	10:24:41	0.293092
2022-09-13	10:24:42	0.0480028
2022-09-13	10:24:42	0.0881045
2022-09-13	10:24:42	0.368053
2022-09-13	10:24:42	0.698333
2022-09-13	10:24:43	0.548512
2022-09-13	10:24:43	0.693855
2022-09-13	10:24:43	0.490853
2022-09-13	10:24:43	0.418944
2022-09-13	10:24:44	0.442761
2022-09-13	10:24:44	0.462812
2022-09-13	10:24:44	0.478384
2022-09-13	10:24:45	0.417316
2022-09-13	10:24:45	0.43813
2022-09-13	10:24:45	0.445662
2022-09-13	10:24:45	0.408563
2022-09-13	10:24:46	0.450242
2022-09-13	10:24:46	0.4764
2022-09-13	10:24:46	0.657061
2022-09-13	10:24:46	0.879097
2022-09-13	10:24:47	1.77477
2022-09-13	10:24:47	7.09207
2022-09-13	10:24:47	18.5276
2022-09-13	10:24:47	17.2803
2022-09-13	10:24:48	4.63665
2022-09-13	10:24:48	8.16673
2022-09-13	10:24:48	8.07808
2022-09-13	10:24:49	1.66235
2022-09-13	10:24:49	0.950191
2022-09-13	10:24:49	0.180267
2022-09-13	10:24:49	0.343728
2022-09-13	10:24:50	0.29645
2022-09-13	10:24:50	0.738537
2022-09-13	10:24:50	0.739046
2022-09-13	10:24:50	0.736399
2022-09-13	10:24:51	0.735076
2022-09-13	10:24:51	0.467748
2022-09-13	10:24:51	0.276858
2022-09-13	10:24:51	3.6022
2022-09-13	10:24:52	6.96667
2022-09-13	10:24:52	5.92596
2022-09-13	10:24:52	0.386832
2022-09-13	10:24:52	0.141082
2022-09-13	10:24:53	0.186171
2022-09-13	10:24:53	-0.0778496
2022-09-13	10:24:53	0.0664252
2022-09-13	10:24:54	-0.169503
2022-09-13	10:24:54	-0.107977
2022-09-13	10:24:54	-0.269096
2022-09-13	10:24:54	-0.186704
2022-09-13	10:24:55	-0.246399
2022-09-13	10:24:55	0.00963129
2022-09-13	10:24:55	0.0359417
2022-09-13	10:24:55	0.838333
2022-09-13	10:24:56	1.38266
2022-09-13	10:24:56	2.15492
2022-09-13	10:24:56	0.345255
2022-09-13	10:24:56	0.386425
2022-09-13	10:24:57	0.459097
2022-09-13	10:24:57	0.714313
2022-09-13	10:24:57	0.373448
2022-09-13	10:24:58	0.40215
2022-09-13	10:24:58	0.3393
2022-09-13	10:24:58	0.269886
2022-09-13	10:24:58	0.426018
2022-09-13	10:24:59	0.215433
2022-09-13	10:24:59	0.30444
2022-09-13	10:24:59	0.212176
2022-09-13	10:24:59	0.164033
2022-09-13	10:25:00	0.257112
2022-09-13	10:25:00	0.172634
2022-09-13	10:25:00	0.00255749
2022-09-13	10:25:00	0.0293259
2022-09-13	10:25:01	-0.120292
2022-09-13	10:25:01	0.0296822
2022-09-13	10:25:01	-0.00471985
2022-09-13	10:25:01	0.0550766
2022-09-13	10:25:02	-0.0753559
2022-09-13	10:25:02	-0.245738
2022-09-13	10:25:02	-0.302633
2022-09-13	10:25:03	-0.491284
2022-09-13	10:25:03	-0.277544
2022-09-13	10:25:03	1.13309
2022-09-13	10:25:03	4.66006
2022-09-13	10:25:04	2.28403
2022-09-13	10:25:04	0.532125
2022-09-13	10:25:04	0.269071
2022-09-13	10:25:04	0.433397
2022-09-13	10:25:05	0.139199
2022-09-13	10:25:05	0.430598
2022-09-13	10:25:05	0.777061
2022-09-13	10:25:05	1.25981
2022-09-13	10:25:06	0.915178
2022-09-13	10:25:06	0.297163
2022-09-13	10:25:06	0.451361
2022-09-13	10:25:07	0.294873
2022-09-13	10:25:07	0.19757
2022-09-13	10:25:07	0.279097
2022-09-13	10:25:07	0.26785
2022-09-13	10:25:08	0.303066
2022-09-13	10:25:08	0.195636
2022-09-13	10:25:08	0.270191
2022-09-13	10:25:08	0.334262
2022-09-13	10:25:09	0.328868
2022-09-13	10:25:09	0.348461
2022-09-13	10:25:09	0.395992
2022-09-13	10:25:09	0.633092
2022-09-13	10:25:10	1.342
2022-09-13	10:25:10	2.25253
2022-09-13	10:25:10	4.04439
2022-09-13	10:25:11	2.73258
2022-09-13	10:25:11	2.41899
2022-09-13	10:25:11	2.46296
2022-09-13	10:25:11	0.810242
2022-09-13	10:25:12	0.928715
2022-09-13	10:25:12	0.57645
2022-09-13	10:25:12	0.307392
2022-09-13	10:25:12	0.411565
2022-09-13	10:25:13	0.408461
2022-09-13	10:25:13	0.264949
2022-09-13	10:25:13	0.314771
2022-09-13	10:25:13	0.563371
2022-09-13	10:25:14	0.73874
2022-09-13	10:25:14	0.735178
2022-09-13	10:25:14	0.736094
2022-09-13	10:25:14	0.737112
2022-09-13	10:25:15	0.736145
2022-09-13	10:25:15	0.736094
2022-09-13	10:25:15	0.746069
2022-09-13	10:25:16	0.747748
2022-09-13	10:25:16	-0.173524
2022-09-13	10:25:16	-0.423854
2022-09-13	10:25:16	-0.252404
2022-09-13	10:25:17	0.736247
2022-09-13	10:25:17	0.749224
2022-09-13	10:25:17	0.942761
2022-09-13	10:25:17	0.735534
2022-09-13	10:25:18	0.885102
2022-09-13	10:25:18	1.02459
2022-09-13	10:25:18	0.186883
2022-09-13	10:25:18	0.574822
2022-09-13	10:25:19	0.135331
2022-09-13	10:25:19	0.393957
2022-09-13	10:25:19	0.36729
2022-09-13	10:25:20	0.456807
2022-09-13	10:25:20	0.17411
2022-09-13	10:25:20	0.508512
2022-09-13	10:25:20	0.349478
2022-09-13	10:25:21	0.742354
2022-09-13	10:25:21	0.73528
2022-09-13	10:25:21	0.732888
2022-09-13	10:25:21	0.364186
2022-09-13	10:25:22	0.523575
2022-09-13	10:25:22	0.301896
2022-09-13	10:25:22	0.432888
2022-09-13	10:25:22	0.343982
2022-09-13	10:25:23	0.401743
2022-09-13	10:25:23	0.166069
2022-09-13	10:25:23	0.0656618
2022-09-13	10:25:24	0.119351
2022-09-13	10:25:24	-0.0375443
2022-09-13	10:25:24	-0.167519
2022-09-13	10:25:24	-0.177799
2022-09-13	10:25:25	0.0219468
2022-09-13	10:25:25	0.113652
2022-09-13	10:25:25	0.276094
2022-09-13	10:25:25	0.205
2022-09-13	10:25:26	1.06017
2022-09-13	10:25:26	1.5109
2022-09-13	10:25:26	1.91553
2022-09-13	10:25:26	2.73854
2022-09-13	10:25:27	1.31879
2022-09-13	10:25:27	0.758181
2022-09-13	10:25:27	0.291005
2022-09-13	10:25:27	0.337519
2022-09-13	10:25:28	0.314059
2022-09-13	10:25:28	0.334568
2022-09-13	10:25:28	0.506272
2022-09-13	10:25:29	0.456094
2022-09-13	10:25:29	0.458384
2022-09-13	10:25:29	0.609427
2022-09-13	10:25:29	0.454618
2022-09-13	10:25:30	0.294517
2022-09-13	10:25:30	0.285763
2022-09-13	10:25:30	0.3364
2022-09-13	10:25:30	0.472176
2022-09-13	10:25:31	0.254415
2022-09-13	10:25:31	0.215942
2022-09-13	10:25:31	0.205814
2022-09-13	10:25:31	0.261336
2022-09-13	10:25:32	0.326018
2022-09-13	10:25:32	0.502863
2022-09-13	10:25:32	1.12352
2022-09-13	10:25:33	0.487748
2022-09-13	10:25:33	1.64877
2022-09-13	10:25:33	0.407646
2022-09-13	10:25:33	0.175534
2022-09-13	10:25:34	0.510089
2022-09-13	10:25:34	0.409529
2022-09-13	10:25:34	0.297417
2022-09-13	10:25:34	0.16612
2022-09-13	10:25:35	0.352481
2022-09-13	10:25:35	0.205153
2022-09-13	10:25:35	0.291107
2022-09-13	10:25:35	0.093448
2022-09-13	10:25:36	0.296247
2022-09-13	10:25:36	0.281285
2022-09-13	10:25:36	1.06246
2022-09-13	10:25:37	3.40057
2022-09-13	10:25:37	4.54082
2022-09-13	10:25:37	5.15176
2022-09-13	10:25:37	2.89757
2022-09-13	10:25:38	3.59131
2022-09-13	10:25:38	1.51686
2022-09-13	10:25:38	4.04179
2022-09-13	10:25:38	1.47319
2022-09-13	10:25:39	2.42637
2022-09-13	10:25:39	6.32561
2022-09-13	10:25:39	1.45518
2022-09-13	10:25:39	6.65731
2022-09-13	10:25:40	1.32536
2022-09-13	10:25:40	4.74424
2022-09-13	10:25:40	2.59874
2022-09-13	10:25:40	2.1906
2022-09-13	10:25:41	2.65019
2022-09-13	10:25:41	3.13665
2022-09-13	10:25:41	3.92881
2022-09-13	10:25:42	5.93859
2022-09-13	10:25:42	1.32251
2022-09-13	10:25:42	2.59482
2022-09-13	10:25:42	0.690852
2022-09-13	10:25:43	1.4763
2022-09-13	10:25:43	0.285916
2022-09-13	10:25:43	1.23609
2022-09-13	10:25:43	1.0533
2022-09-13	10:25:44	0.522761
2022-09-13	10:25:44	0.902812
2022-09-13	10:25:44	0.417367
2022-09-13	10:25:44	1.02383
2022-09-13	10:25:45	0.39701
2022-09-13	10:25:45	0.91645
2022-09-13	10:25:45	0.505
2022-09-13	10:25:46	0.397367
2022-09-13	10:25:46	0.481692
2022-09-13	10:25:46	0.719453
2022-09-13	10:25:46	0.735687
2022-09-13	10:25:47	0.659148
2022-09-13	10:25:47	0.486679
2022-09-13	10:25:47	0.265967
2022-09-13	10:25:47	0.927799
2022-09-13	10:25:48	0.345
2022-09-13	10:25:48	1.00989
2022-09-13	10:25:48	0.689173
2022-09-13	10:25:48	0.364847
2022-09-13	10:25:49	0.277875
2022-09-13	10:25:49	0.259097
2022-09-13	10:25:49	0.240674
2022-09-13	10:25:50	0.147901
2022-09-13	10:25:50	0.270547
2022-09-13	10:25:50	0.211209
2022-09-13	10:25:50	0.19014
2022-09-13	10:25:51	0.0988933
2022-09-13	10:25:51	0.124746
2022-09-13	10:25:51	0.242049
2022-09-13	10:25:51	0.258791
2022-09-13	10:25:52	0.289377
2022-09-13	10:25:52	0.24841
2022-09-13	10:25:52	0.298283
2022-09-13	10:25:52	0.0950766
2022-09-13	10:25:53	0.00922418
2022-09-13	10:25:53	0.0738043
2022-09-13	10:25:53	0.170853
2022-09-13	10:25:53	0.167545
2022-09-13	10:25:54	0.198792
2022-09-13	10:25:54	0.376807
2022-09-13	10:25:54	0.286272
2022-09-13	10:25:55	0.272125
2022-09-13	10:25:55	0.292685
2022-09-13	10:25:55	0.742405
2022-09-13	10:25:55	0.732226
2022-09-13	10:25:56	0.745661
2022-09-13	10:25:56	0.737468
2022-09-13	10:25:56	0.735026
2022-09-13	10:25:56	0.743117
2022-09-13	10:25:57	0.737926
2022-09-13	10:25:57	0.736908
2022-09-13	10:25:57	0.731667
2022-09-13	10:25:57	0.728512
2022-09-13	10:25:58	0.736603
2022-09-13	10:25:58	0.733448
2022-09-13	10:25:58	0.736959
2022-09-13	10:25:59	0.735891
2022-09-13	10:25:59	0.739962
2022-09-13	10:25:59	0.740878
2022-09-13	10:25:59	0.733601
2022-09-13	10:26:00	0.731412
2022-09-13	10:26:00	0.736145
2022-09-13	10:26:00	0.749987
2022-09-13	10:26:00	0.731361
2022-09-13	10:26:01	0.740878
2022-09-13	10:26:01	0.737417
2022-09-13	10:26:01	0.734008
2022-09-13	10:26:01	0.736399
2022-09-13	10:26:02	0.737672
2022-09-13	10:26:02	0.737621
2022-09-13	10:26:02	0.742812
2022-09-13	10:26:02	0.740267
2022-09-13	10:26:03	0.744491
2022-09-13	10:26:03	0.737265
2022-09-13	10:26:03	0.741997
2022-09-13	10:26:04	0.737366
2022-09-13	10:26:04	0.746171
2022-09-13	10:26:04	0.735891
2022-09-13	10:26:04	0.734008
2022-09-13	10:26:05	0.733702
2022-09-13	10:26:05	0.736399
2022-09-13	10:26:05	0.737061
2022-09-13	10:26:05	0.735331
2022-09-13	10:26:06	0.733702
2022-09-13	10:26:06	0.744542
2022-09-13	10:26:06	0.736908
2022-09-13	10:26:06	0.740674
2022-09-13	10:26:07	0.735687
2022-09-13	10:26:07	0.739249
2022-09-13	10:26:07	0.736501
2022-09-13	10:26:08	0.741031
2022-09-13	10:26:08	0.736705
2022-09-13	10:26:08	0.739147
2022-09-13	10:26:08	0.736501
2022-09-13	10:26:09	0.737315
2022-09-13	10:26:09	0.730038
2022-09-13	10:26:09	0.708206
2022-09-13	10:26:09	3.32719
2022-09-13	10:26:10	9.05797
2022-09-13	10:26:10	16.1047
2022-09-13	10:26:10	16.579
2022-09-13	10:26:10	8.93645
2022-09-13	10:26:11	10.2698
2022-09-13	10:26:11	3.03446
2022-09-13	10:26:11	2.95965
2022-09-13	10:26:12	2.22897
2022-09-13	10:26:12	4.77563
2022-09-13	10:26:12	9.36108
2022-09-13	10:26:12	4.91416
2022-09-13	10:26:13	9.28642
2022-09-13	10:26:13	9.68881
2022-09-13	10:26:13	4.7882
2022-09-13	10:26:13	5.34296
2022-09-13	10:26:14	9.60688
2022-09-13	10:26:14	5.23487
2022-09-13	10:26:14	7.59879
2022-09-13	10:26:14	12.7212
2022-09-13	10:26:15	2.92826
2022-09-13	10:26:15	6.63991
2022-09-13	10:26:15	4.58887
2022-09-13	10:26:15	2.46826
2022-09-13	10:26:16	4.14642
2022-09-13	10:26:16	4.011
2022-09-13	10:26:16	2.98647
2022-09-13	10:26:17	5.03665
2022-09-13	10:26:17	1.73691
2022-09-13	10:26:17	6.39869
2022-09-13	10:26:17	2.14561
2022-09-13	10:26:18	5.14459
2022-09-13	10:26:18	5.66021
2022-09-13	10:26:18	1.93014
2022-09-13	10:26:18	3.27156
2022-09-13	10:26:19	5.15055
2022-09-13	10:26:19	2.41681
2022-09-13	10:26:19	7.60749
2022-09-13	10:26:19	2.20673
2022-09-13	10:26:20	5.00775
2022-09-13	10:26:20	2.02017
2022-09-13	10:26:20	2.54673
2022-09-13	10:26:21	3.38653
2022-09-13	10:26:21	1.52515
2022-09-13	10:26:21	3.39635
2022-09-13	10:26:21	2.98841
2022-09-13	10:26:22	2.73314
2022-09-13	10:26:22	2.89243
2022-09-13	10:26:22	2.22393
2022-09-13	10:26:22	4.55665
2022-09-13	10:26:23	1.75294
2022-09-13	10:26:23	6.16581
2022-09-13	10:26:23	2.48067
2022-09-13	10:26:23	6.71182
2022-09-13	10:26:24	1.94057
2022-09-13	10:26:24	3.37854
2022-09-13	10:26:24	3.40195
2022-09-13	10:26:25	1.98083
2022-09-13	10:26:25	3.65528
2022-09-13	10:26:25	3.15574
2022-09-13	10:26:25	6.39746
2022-09-13	10:26:26	4.28668
2022-09-13	10:26:26	7.61136
2022-09-13	10:26:26	5.64775
2022-09-13	10:26:26	6.2707
2022-09-13	10:26:27	5.41594
2022-09-13	10:26:27	5.04642
2022-09-13	10:26:27	6.4138
2022-09-13	10:26:27	3.8196
2022-09-13	10:26:28	5.18026
2022-09-13	10:26:28	3.14637
2022-09-13	10:26:28	6.46464
2022-09-13	10:26:28	3.86184
2022-09-13	10:26:29	3.09217
2022-09-13	10:26:29	3.2422
2022-09-13	10:26:29	2.44831
2022-09-13	10:26:30	3.23156
2022-09-13	10:26:30	3.87747
2022-09-13	10:26:30	4.851
2022-09-13	10:26:30	4.04057
2022-09-13	10:26:31	3.59411
2022-09-13	10:26:31	4.23752
2022-09-13	10:26:31	3.82195
2022-09-13	10:26:31	5.57171
2022-09-13	10:26:32	7.04617
2022-09-13	10:26:32	11.5313
2022-09-13	10:26:32	6.37599
2022-09-13	10:26:32	10.655
2022-09-13	10:26:33	6.03899
2022-09-13	10:26:33	7.8051
2022-09-13	10:26:33	4.31976
2022-09-13	10:26:34	6.72902
2022-09-13	10:26:34	9.81517
2022-09-13	10:26:34	6.67008
2022-09-13	10:26:34	15.2362
2022-09-13	10:26:35	10.809
2022-09-13	10:26:35	18.8025
2022-09-13	10:26:35	16.6394
2022-09-13	10:26:35	12.0949
2022-09-13	10:26:36	4.49192
2022-09-13	10:26:36	0.563728
2022-09-13	10:26:36	0.300929
2022-09-13	10:26:36	1.18067
2022-09-13	10:26:37	0.688359
2022-09-13	10:26:37	0.886883
2022-09-13	10:26:37	0.19411
2022-09-13	10:26:38	0.137672
2022-09-13	10:26:38	0.152227
2022-09-13	10:26:38	0.156654
2022-09-13	10:26:38	0.0944659
2022-09-13	10:26:39	0.0969595
2022-09-13	10:26:39	0.304288
2022-09-13	10:26:39	0.0845931
2022-09-13	10:26:39	0.267188
2022-09-13	10:26:40	0.0553819
2022-09-13	10:26:40	0.209529
2022-09-13	10:26:40	0.0885625
2022-09-13	10:26:40	0.277774
2022-09-13	10:26:41	0.30785
2022-09-13	10:26:41	0.156909
2022-09-13	10:26:41	0.123168
2022-09-13	10:26:41	0.157672
2022-09-13	10:26:42	0.355026
2022-09-13	10:26:42	0.158435
2022-09-13	10:26:42	0.269886
2022-09-13	10:26:43	0.382455
2022-09-13	10:26:43	0.742761
2022-09-13	10:26:43	0.925967
2022-09-13	10:26:43	1.04261
2022-09-13	10:26:44	0.907036
2022-09-13	10:26:44	2.87803
2022-09-13	10:26:44	4.37411
2022-09-13	10:26:44	9.14886
2022-09-13	10:26:45	12.7495
2022-09-13	10:26:45	4.73762
2022-09-13	10:26:45	10.745
2022-09-13	10:26:45	3.25212
2022-09-13	10:26:46	8.05034
2022-09-13	10:26:46	2.7307
2022-09-13	10:26:46	2.51421
2022-09-13	10:26:47	7.80703
2022-09-13	10:26:47	1.15706
2022-09-13	10:26:47	5.75212
2022-09-13	10:26:47	1.79716
2022-09-13	10:26:48	3.06464
2022-09-13	10:26:48	3.17309
2022-09-13	10:26:48	3.73065
2022-09-13	10:26:48	5.68011
2022-09-13	10:26:49	1.311
2022-09-13	10:26:49	1.55024
2022-09-13	10:26:49	1.5737
2022-09-13	10:26:49	2.31828
2022-09-13	10:26:50	1.58352
2022-09-13	10:26:50	2.50765
2022-09-13	10:26:50	1.57335
2022-09-13	10:26:50	2.42414
2022-09-13	10:26:51	1.17207
2022-09-13	10:26:51	1.99284
2022-09-13	10:26:51	1.5307
2022-09-13	10:26:52	0.740776
2022-09-13	10:26:52	0.724796
2022-09-13	10:26:52	0.501794
2022-09-13	10:26:52	0.499555
2022-09-13	10:26:53	0.472532
2022-09-13	10:26:53	0.595025
2022-09-13	10:26:53	0.653041
2022-09-13	10:26:53	0.656654
2022-09-13	10:26:54	0.676247
2022-09-13	10:26:54	0.515585
2022-09-13	10:26:54	0.494415
2022-09-13	10:26:54	0.462965
2022-09-13	10:26:55	0.453295
2022-09-13	10:26:55	0.474415
2022-09-13	10:26:55	0.44556
2022-09-13	10:26:56	0.39355
2022-09-13	10:26:56	0.342863
2022-09-13	10:26:56	0.410191
2022-09-13	10:26:56	0.347341
2022-09-13	10:26:57	0.411412
2022-09-13	10:26:57	0.474924
2022-09-13	10:26:57	0.438181
2022-09-13	10:26:57	0.439656
2022-09-13	10:26:58	0.429173
2022-09-13	10:26:58	0.478537
2022-09-13	10:26:58	0.395687
2022-09-13	10:26:58	0.57131
2022-09-13	10:26:59	0.563626
2022-09-13	10:26:59	0.750853
2022-09-13	10:26:59	0.63584
2022-09-13	10:27:00	0.740522
2022-09-13	10:27:00	0.67131
2022-09-13	10:27:00	0.630038
2022-09-13	10:27:00	0.984796
2022-09-13	10:27:01	0.731209
2022-09-13	10:27:01	1.32495
2022-09-13	10:27:01	0.646476
2022-09-13	10:27:01	2.5021
2022-09-13	10:27:02	1.28083
2022-09-13	10:27:02	5.73426
2022-09-13	10:27:02	5.57853
2022-09-13	10:27:02	10.8926
2022-09-13	10:27:03	3.61752
2022-09-13	10:27:03	8.07482
2022-09-13	10:27:03	3.58439
2022-09-13	10:27:03	5.42647
2022-09-13	10:27:04	3.99742
2022-09-13	10:27:04	4.86388
2022-09-13	10:27:04	7.05487
2022-09-13	10:27:05	4.94291
2022-09-13	10:27:05	6.09808
2022-09-13	10:27:05	2.42215
2022-09-13	10:27:05	5.3078
2022-09-13	10:27:06	1.08749
2022-09-13	10:27:06	6.03548
2022-09-13	10:27:06	2.79299
2022-09-13	10:27:06	3.96922
2022-09-13	10:27:07	1.18281
2022-09-13	10:27:07	1.26144
2022-09-13	10:27:07	0.844135
2022-09-13	10:27:07	2.56897
2022-09-13	10:27:08	4.13686
2022-09-13	10:27:08	4.66846
2022-09-13	10:27:08	2.94261
2022-09-13	10:27:09	5.17553
2022-09-13	10:27:09	4.92383
2022-09-13	10:27:09	4.92973
2022-09-13	10:27:09	8.75003
2022-09-13	10:27:10	6.18403
2022-09-13	10:27:10	7.50561
2022-09-13	10:27:10	10.545
2022-09-13	10:27:10	3.92403
2022-09-13	10:27:11	9.08108
2022-09-13	10:27:11	9.30235
2022-09-13	10:27:11	3.08973
2022-09-13	10:27:11	5.93237
2022-09-13	10:27:12	0.921743
2022-09-13	10:27:12	2.98658
2022-09-13	10:27:12	2.53635
2022-09-13	10:27:13	1.98958
2022-09-13	10:27:13	6.7795
2022-09-13	10:27:13	3.49502
2022-09-13	10:27:13	9.11594
2022-09-13	10:27:14	8.88271
2022-09-13	10:27:14	3.21879
2022-09-13	10:27:14	4.53421
2022-09-13	10:27:14	1.95767
2022-09-13	10:27:15	2.44785
2022-09-13	10:27:15	1.90581
2022-09-13	10:27:15	1.64871
2022-09-13	10:27:15	3.54189
2022-09-13	10:27:16	2.55752
2022-09-13	10:27:16	8.03864
2022-09-13	10:27:16	6.61798
2022-09-13	10:27:16	12.8171
2022-09-13	10:27:17	7.53828
2022-09-13	10:27:17	11.9028
2022-09-13	10:27:17	10.048
2022-09-13	10:27:18	4.75553
2022-09-13	10:27:18	11.3521
2022-09-13	10:27:18	7.49248
2022-09-13	10:27:18	4.96312
2022-09-13	10:27:19	6.83731
2022-09-13	10:27:19	4.59075
2022-09-13	10:27:19	10.2289
2022-09-13	10:27:19	4.76769
2022-09-13	10:27:20	5.01731
2022-09-13	10:27:20	10.0648
2022-09-13	10:27:20	2.99965
2022-09-13	10:27:20	10.8151
2022-09-13	10:27:21	6.71853
2022-09-13	10:27:21	5.33105
2022-09-13	10:27:21	7.30001
2022-09-13	10:27:22	5.56484
2022-09-13	10:27:22	6.97706
2022-09-13	10:27:22	8.73507
2022-09-13	10:27:22	4.39248
2022-09-13	10:27:23	12.8367
2022-09-13	10:27:23	0.83874
2022-09-13	10:27:23	6.68027
2022-09-13	10:27:24	2.28144
2022-09-13	10:27:24	5.05523
2022-09-13	10:27:24	6.05014
2022-09-13	10:27:24	3.30536
2022-09-13	10:27:24	5.87111
2022-09-13	10:27:25	4.33278
2022-09-13	10:27:25	6.19044
2022-09-13	10:27:25	5.871
2022-09-13	10:27:26	3.41828
2022-09-13	10:27:26	8.66113
2022-09-13	10:27:26	3.74256
2022-09-13	10:27:26	17.6496
2022-09-13	10:27:27	4.63696
2022-09-13	10:27:27	15.7691
2022-09-13	10:27:27	3.68261
2022-09-13	10:27:27	2.74072
2022-09-13	10:27:28	4.16841
2022-09-13	10:27:28	1.29014
2022-09-13	10:27:28	5.59339
2022-09-13	10:27:28	2.04877
2022-09-13	10:27:29	6.45212
2022-09-13	10:27:29	8.92372
2022-09-13	10:27:29	8.40596
2022-09-13	10:27:29	7.08805
2022-09-13	10:27:30	4.91065
2022-09-13	10:27:30	8.88367
2022-09-13	10:27:30	3.57248
2022-09-13	10:27:31	8.83655
2022-09-13	10:27:31	7.43894
2022-09-13	10:27:31	9.08551
2022-09-13	10:27:31	6.56739
2022-09-13	10:27:32	10.7289
2022-09-13	10:27:32	11.278
2022-09-13	10:27:32	5.59975
2022-09-13	10:27:32	9.09813
2022-09-13	10:27:33	5.02683
2022-09-13	10:27:33	9.49813
2022-09-13	10:27:33	3.53726
2022-09-13	10:27:33	10.2957
2022-09-13	10:27:34	11.8937
2022-09-13	10:27:34	11.5531
2022-09-13	10:27:34	4.30586
2022-09-13	10:27:35	2.77599
2022-09-13	10:27:35	9.13166
2022-09-13	10:27:35	6.33268
2022-09-13	10:27:35	6.20174
2022-09-13	10:27:36	5.4334
2022-09-13	10:27:36	10.7401
2022-09-13	10:27:36	8.89645
2022-09-13	10:27:36	10.7631
2022-09-13	10:27:37	11.991
2022-09-13	10:27:37	16.217
2022-09-13	10:27:37	6.13924
2022-09-13	10:27:37	9.59487
2022-09-13	10:27:38	9.94021
2022-09-13	10:27:38	6.45207
2022-09-13	10:27:38	14.1755
2022-09-13	10:27:38	8.10179
2022-09-13	10:27:39	11.2599
2022-09-13	10:27:39	3.93477
2022-09-13	10:27:39	9.70403
2022-09-13	10:27:40	13.8552
2022-09-13	10:27:40	9.3167
2022-09-13	10:27:40	11.3683
2022-09-13	10:27:40	9.27904
2022-09-13	10:27:41	18.6167
2022-09-13	10:27:41	6.01523
2022-09-13	10:27:41	9.89731
2022-09-13	10:27:41	4.84108
2022-09-13	10:27:42	11.3394
2022-09-13	10:27:42	7.44892
2022-09-13	10:27:42	8.98276
2022-09-13	10:27:42	7.51935
2022-09-13	10:27:43	6.7596
2022-09-13	10:27:43	6.72011
2022-09-13	10:27:43	6.1195
2022-09-13	10:27:44	7.84902
2022-09-13	10:27:44	7.83349
2022-09-13	10:27:44	10.106
2022-09-13	10:27:44	6.85146
2022-09-13	10:27:45	10.3116
2022-09-13	10:27:45	4.15838
2022-09-13	10:27:45	10.8223
2022-09-13	10:27:46	9.10922
2022-09-13	10:27:46	8.81747
2022-09-13	10:27:46	6.25864
2022-09-13	10:27:46	7.73059
2022-09-13	10:27:46	12.2115
2022-09-13	10:27:47	5.98958
2022-09-13	10:27:47	7.19207
2022-09-13	10:27:47	6.80001
2022-09-13	10:27:48	14.4725
2022-09-13	10:27:48	9.54683
2022-09-13	10:27:48	16.7016
2022-09-13	10:27:48	10.7925
2022-09-13	10:27:49	15.3434
2022-09-13	10:27:49	6.00922
2022-09-13	10:27:49	6.3395
2022-09-13	10:27:49	10.2558
2022-09-13	10:27:50	4.828
2022-09-13	10:27:50	8.98108
2022-09-13	10:27:50	7.7682
2022-09-13	10:27:50	14.0861
2022-09-13	10:27:51	4.58118
2022-09-13	10:27:51	12.9761
2022-09-13	10:27:51	8.76942
2022-09-13	10:27:51	8.53151
2022-09-13	10:27:52	6.90576
2022-09-13	10:27:52	9.40591
2022-09-13	10:27:52	15.3901
2022-09-13	10:27:53	6.2425
2022-09-13	10:27:53	14.3026
2022-09-13	10:27:53	13.593
2022-09-13	10:27:53	8.14133
2022-09-13	10:27:54	5.60439
2022-09-13	10:27:54	5.69696
2022-09-13	10:27:54	18.4117
2022-09-13	10:27:54	9.78759
2022-09-13	10:27:55	16.7874
2022-09-13	10:27:55	11.8936
2022-09-13	10:27:55	11.632
2022-09-13	10:27:55	6.8366
2022-09-13	10:27:56	8.80342
2022-09-13	10:27:56	10.9599
2022-09-13	10:27:56	3.61614
2022-09-13	10:27:57	5.07121
2022-09-13	10:27:57	3.62678
2022-09-13	10:27:57	10.106
2022-09-13	10:27:57	5.6825
2022-09-13	10:27:58	12.7473
2022-09-13	10:27:58	12.4649
2022-09-13	10:27:58	11.0451
2022-09-13	10:27:58	15.2294
2022-09-13	10:27:59	8.6307
2022-09-13	10:27:59	18.6751
2022-09-13	10:27:59	11.5945
2022-09-13	10:27:59	17.6846
2022-09-13	10:28:00	10.0284
2022-09-13	10:28:00	6.67919
2022-09-13	10:28:00	4.97365
2022-09-13	10:28:01	5.31721
2022-09-13	10:28:01	13.3645
2022-09-13	10:28:01	4.79553
2022-09-13	10:28:01	8.79889
2022-09-13	10:28:02	14.7343
2022-09-13	10:28:02	19.2836
2022-09-13	10:28:02	22.4379
2022-09-13	10:28:02	23.346
2022-09-13	10:28:03	17.5492
2022-09-13	10:28:03	12.1741
2022-09-13	10:28:03	14.8248
2022-09-13	10:28:03	14.5712
2022-09-13	10:28:04	15.8683
2022-09-13	10:28:04	26.7053
2022-09-13	10:28:04	20.7188
2022-09-13	10:28:04	20.0844
2022-09-13	10:28:05	27.3901
2022-09-13	10:28:05	16.1464
2022-09-13	10:28:05	7.03899
2022-09-13	10:28:06	0.258232
2022-09-13	10:28:06	0.368512
2022-09-13	10:28:06	0.207341
2022-09-13	10:28:06	0.189071
2022-09-13	10:28:07	0.0102929
