# Supplementary material for: Comparing efficacy in reducing pulling and welfare impacts of four types of leash walking equipment
Source: PeerJ journal article supplement (doi:10.7717/peerj.18131), 2024-10-24
Supplement: Shelter1_Tension_files.zip [file MrFitz_harness_2022912142259 copy.xlsx]

## Sheet: Averaged Newtons
Date	Time	Averaged Newtons	Impulse	Total steps
2022-09-12	14:23:19	-1.56162	0	0
2022-09-12	14:23:20	0.445895	0.445895	0			Impulse	474.879
2022-09-12	14:23:21	-0.266683	0.445895	0			Total steps	2
2022-09-12	14:23:22	0.0462374	0.492133	0
2022-09-12	14:23:23	0.945215	1.43735	0
2022-09-12	14:23:24	2.02325	3.4606	0
2022-09-12	14:23:25	1.77881	5.23941	0
2022-09-12	14:23:26	2.16207	7.40148	0
2022-09-12	14:23:27	1.91986	9.32134	0
2022-09-12	14:23:28	2.00339	11.3247	0
2022-09-12	14:23:29	2.52327	13.848	0
2022-09-12	14:23:30	1.96462	15.8126	0
2022-09-12	14:23:31	1.99371	17.8063	0
2022-09-12	14:23:32	1.94538	19.7517	0
2022-09-12	14:23:33	1.82227	21.574	0
2022-09-12	14:23:34	2.0009	23.5749	0
2022-09-12	14:23:35	1.68279	25.2577	0
2022-09-12	14:23:36	1.73678	26.9944	0
2022-09-12	14:23:37	-0.738592	26.9944	0
2022-09-12	14:23:38	-1.68233	26.9944	0
2022-09-12	14:23:39	-0.420257	26.9944	0
2022-09-12	14:23:40	1.52767	28.5221	0
2022-09-12	14:23:41	-0.842799	28.5221	0
2022-09-12	14:23:42	-0.736668	28.5221	0
2022-09-12	14:23:43	-1.05546	28.5221	0
2022-09-12	14:23:44	-2.22268	28.5221	0
2022-09-12	14:23:45	1.16038	29.6825	0
2022-09-12	14:23:46	-0.379115	29.6825	0
2022-09-12	14:23:47	-1.70787	29.6825	0
2022-09-12	14:23:48	-2.37564	29.6825	0
2022-09-12	14:23:49	-2.36298	29.6825	0
2022-09-12	14:23:50	-1.60503	29.6825	0
2022-09-12	14:23:51	-1.41573	29.6825	0
2022-09-12	14:23:52	0.291096	29.9736	0
2022-09-12	14:23:53	1.2567	31.2303	0
2022-09-12	14:23:54	0.718616	31.9489	0
2022-09-12	14:23:55	0.369551	32.3185	0
2022-09-12	14:23:56	0.226807	32.5453	0
2022-09-12	14:23:57	-0.40045	32.5453	0
2022-09-12	14:23:58	-0.394903	32.5453	0
2022-09-12	14:23:59	-1.04663	32.5453	0
2022-09-12	14:24:00	-1.68928	32.5453	0
2022-09-12	14:24:01	-1.73163	32.5453	0
2022-09-12	14:24:02	-0.775378	32.5453	0
2022-09-12	14:24:03	-1.05478	32.5453	0
2022-09-12	14:24:04	-0.628425	32.5453	0
2022-09-12	14:24:05	1.79365	34.3389	0
2022-09-12	14:24:06	2.64668	36.9856	0
2022-09-12	14:24:07	1.05427	38.0399	0
2022-09-12	14:24:08	-0.278982	38.0399	0
2022-09-12	14:24:09	-1.80859	38.0399	0
2022-09-12	14:24:10	-1.7048	38.0399	0
2022-09-12	14:24:11	-1.66236	38.0399	0
2022-09-12	14:24:12	-1.89143	38.0399	0
2022-09-12	14:24:13	-1.68386	38.0399	0
2022-09-12	14:24:14	-1.32246	38.0399	0
2022-09-12	14:24:15	-0.704354	38.0399	0
2022-09-12	14:24:16	-0.136142	38.0399	0
2022-09-12	14:24:17	-0.482453	38.0399	0
2022-09-12	14:24:18	-0.63514	38.0399	0
2022-09-12	14:24:19	-0.689621	38.0399	0
2022-09-12	14:24:20	-0.919237	38.0399	0
2022-09-12	14:24:21	-0.570456	38.0399	0
2022-09-12	14:24:22	1.02122	39.0611	0
2022-09-12	14:24:23	1.04416	40.1052	0
2022-09-12	14:24:24	-0.457778	40.1052	0
2022-09-12	14:24:25	-1.27775	40.1052	0
2022-09-12	14:24:26	-1.26847	40.1052	0
2022-09-12	14:24:27	-1.69297	40.1052	0
2022-09-12	14:24:28	-1.52914	40.1052	0
2022-09-12	14:24:29	-1.92285	40.1052	0
2022-09-12	14:24:30	-1.23995	40.1052	0
2022-09-12	14:24:31	-1.41431	40.1052	0
2022-09-12	14:24:32	-1.62585	40.1052	0
2022-09-12	14:24:33	-1.37968	40.1052	0
2022-09-12	14:24:34	-1.28154	40.1052	0
2022-09-12	14:24:35	-1.6437	40.1052	0
2022-09-12	14:24:36	-1.23916	40.1052	0
2022-09-12	14:24:37	0.794962	40.9002	0
2022-09-12	14:24:38	-0.988393	40.9002	0
2022-09-12	14:24:39	-1.05114	40.9002	0
2022-09-12	14:24:40	-1.34148	40.9002	0
2022-09-12	14:24:41	-1.00056	40.9002	0
2022-09-12	14:24:42	-0.972943	40.9002	0
2022-09-12	14:24:43	-1.68098	40.9002	0
2022-09-12	14:24:44	-0.282228	40.9002	0
2022-09-12	14:24:45	1.52654	42.4267	0
2022-09-12	14:24:46	1.56791	43.9947	0
2022-09-12	14:24:47	1.73595	45.7306	0
2022-09-12	14:24:48	1.42846	47.1591	0
2022-09-12	14:24:49	0.477871	47.6369	0
2022-09-12	14:24:50	-0.466438	47.6369	0
2022-09-12	14:24:51	0.548254	48.1852	0
2022-09-12	14:24:52	1.68794	49.8731	0
2022-09-12	14:24:53	0.784434	50.6576	0
2022-09-12	14:24:54	1.61876	52.2763	0
2022-09-12	14:24:55	5.22759	57.5039	0
2022-09-12	14:24:56	1.83055	59.3345	0
2022-09-12	14:24:57	1.59281	60.9273	0
2022-09-12	14:24:58	1.23273	62.16	0
2022-09-12	14:24:59	2.25964	64.4196	0
2022-09-12	14:25:00	2.95822	67.3779	0
2022-09-12	14:25:01	2.11595	69.4938	0
2022-09-12	14:25:02	0.00684784	69.5007	0
2022-09-12	14:25:03	1.27996	70.7806	0
2022-09-12	14:25:04	0.592133	71.3728	0
2022-09-12	14:25:05	0.845668	72.2184	0
2022-09-12	14:25:06	1.66261	73.881	0
2022-09-12	14:25:07	0.419297	74.3003	0
2022-09-12	14:25:08	-0.916011	74.3003	0
2022-09-12	14:25:09	-2.80536	74.3003	0
2022-09-12	14:25:10	-2.15568	74.3003	0
2022-09-12	14:25:11	-0.469493	74.3003	0
2022-09-12	14:25:12	1.9327	76.233	0
2022-09-12	14:25:13	5.91973	82.1528	0
2022-09-12	14:25:14	4.85051	87.0033	0
2022-09-12	14:25:15	2.07639	89.0797	0
2022-09-12	14:25:16	2.57882	91.6585	0
2022-09-12	14:25:17	1.38126	93.0397	0
2022-09-12	14:25:18	1.41707	94.4568	0
2022-09-12	14:25:19	1.63457	96.0914	0
2022-09-12	14:25:20	1.76213	97.8535	0
2022-09-12	14:25:21	1.5009	99.3544	0
2022-09-12	14:25:22	6.30733	105.662	0
2022-09-12	14:25:23	20.8491	126.511	1
2022-09-12	14:25:24	2.41753	128.928	1
2022-09-12	14:25:25	2.2775	131.206	1
2022-09-12	14:25:26	-0.0561954	131.206	1
2022-09-12	14:25:27	1.01171	132.218	1
2022-09-12	14:25:28	0.841423	133.059	1
2022-09-12	14:25:29	1.95553	135.015	1
2022-09-12	14:25:30	1.64991	136.664	1
2022-09-12	14:25:31	1.52405	138.189	1
2022-09-12	14:25:32	1.28698	139.475	1
2022-09-12	14:25:33	1.08362	140.559	1
2022-09-12	14:25:34	1.39196	141.951	1
2022-09-12	14:25:35	1.17979	143.131	1
2022-09-12	14:25:36	1.11188	144.243	1
2022-09-12	14:25:37	1.3647	145.607	1
2022-09-12	14:25:38	1.47147	147.079	1
2022-09-12	14:25:39	1.51629	148.595	1
2022-09-12	14:25:40	3.47695	152.072	1
2022-09-12	14:25:41	3.24298	155.315	1
2022-09-12	14:25:42	8.08548	163.401	1
2022-09-12	14:25:43	9.03159	172.432	1
2022-09-12	14:25:44	3.94797	176.38	1
2022-09-12	14:25:45	1.80801	178.188	1
2022-09-12	14:25:46	1.02212	179.21	1
2022-09-12	14:25:47	0.617826	179.828	1
2022-09-12	14:25:48	-1.90169	179.828	1
2022-09-12	14:25:49	-1.21254	179.828	1
2022-09-12	14:25:50	-1.57458	179.828	1
2022-09-12	14:25:51	-2.05868	179.828	1
2022-09-12	14:25:52	1.48177	181.31	1
2022-09-12	14:25:53	1.77043	183.08	1
2022-09-12	14:25:54	1.37192	184.452	1
2022-09-12	14:25:55	1.31697	185.769	1
2022-09-12	14:25:56	3.7748	189.544	1
2022-09-12	14:25:57	9.71396	199.258	1
2022-09-12	14:25:58	1.42857	200.687	1
2022-09-12	14:25:59	1.81165	202.498	1
2022-09-12	14:26:00	1.82793	204.326	1
2022-09-12	14:26:01	1.88505	206.211	1
2022-09-12	14:26:02	1.91873	208.13	1
2022-09-12	14:26:03	2.14227	210.272	1
2022-09-12	14:26:04	14.6532	224.925	2
2022-09-12	14:26:05	6.68758	231.613	2
2022-09-12	14:26:06	2.29235	233.905	2
2022-09-12	14:26:07	-0.849967	233.905	2
2022-09-12	14:26:08	-2.57499	233.905	2
2022-09-12	14:26:09	0.177023	234.082	2
2022-09-12	14:26:10	-2.02048	234.082	2
2022-09-12	14:26:11	-0.352911	234.082	2
2022-09-12	14:26:12	-0.52135	234.082	2
2022-09-12	14:26:13	-0.0333321	234.082	2
2022-09-12	14:26:14	0.0658183	234.148	2
2022-09-12	14:26:15	2.49546	236.644	2
2022-09-12	14:26:16	2.24732	238.891	2
2022-09-12	14:26:17	1.11618	240.007	2
2022-09-12	14:26:18	0.959647	240.967	2
2022-09-12	14:26:19	0.491624	241.458	2
2022-09-12	14:26:20	1.40567	242.864	2
2022-09-12	14:26:21	2.54334	245.407	2
2022-09-12	14:26:22	1.59292	247	2
2022-09-12	14:26:23	2.11125	249.112	2
2022-09-12	14:26:24	1.56828	250.68	2
2022-09-12	14:26:25	1.44866	252.129	2
2022-09-12	14:26:26	0.873229	253.002	2
2022-09-12	14:26:27	0.709959	253.712	2
2022-09-12	14:26:28	0.28672	253.998	2
2022-09-12	14:26:29	1.12739	255.126	2
2022-09-12	14:26:30	1.61142	256.737	2
2022-09-12	14:26:31	1.34667	258.084	2
2022-09-12	14:26:32	1.01726	259.101	2
2022-09-12	14:26:33	0.42739	259.529	2
2022-09-12	14:26:34	0.662194	260.191	2
2022-09-12	14:26:35	0.42043	260.611	2
2022-09-12	14:26:36	0.212677	260.824	2
2022-09-12	14:26:37	0.020261	260.844	2
2022-09-12	14:26:38	-0.343178	260.844	2
2022-09-12	14:26:39	0.0538584	260.898	2
2022-09-12	14:26:40	0.843291	261.741	2
2022-09-12	14:26:41	-0.375832	261.741	2
2022-09-12	14:26:42	1.44385	263.185	2
2022-09-12	14:26:43	2.12606	265.311	2
2022-09-12	14:26:44	2.1108	267.422	2
2022-09-12	14:26:45	1.79677	269.219	2
2022-09-12	14:26:46	2.05262	271.271	2
2022-09-12	14:26:47	2.24551	273.517	2
2022-09-12	14:26:48	2.19778	275.715	2
2022-09-12	14:26:49	2.83655	278.551	2
2022-09-12	14:26:50	2.53655	281.088	2
2022-09-12	14:26:51	2.29675	283.384	2
2022-09-12	14:26:52	1.82874	285.213	2
2022-09-12	14:26:53	2.68075	287.894	2
2022-09-12	14:26:54	1.67249	289.566	2
2022-09-12	14:26:55	0.560705	290.127	2
2022-09-12	14:26:56	5.95538	296.083	2
2022-09-12	14:26:57	6.11317	302.196	2
2022-09-12	14:26:58	3.0157	305.211	2
2022-09-12	14:26:59	6.07406	311.285	2
2022-09-12	14:27:00	7.19606	318.482	2
2022-09-12	14:27:01	3.97633	322.458	2
2022-09-12	14:27:02	4.78435	327.242	2
2022-09-12	14:27:03	4.2701	331.512	2
2022-09-12	14:27:04	3.8143	335.327	2
2022-09-12	14:27:05	0.710863	336.038	2
2022-09-12	14:27:06	0.578285	336.616	2
2022-09-12	14:27:07	0.548838	337.165	2
2022-09-12	14:27:08	1.65313	338.818	2
2022-09-12	14:27:09	1.6108	340.429	2
2022-09-12	14:27:10	1.22865	341.657	2
2022-09-12	14:27:11	-1.16032	341.657	2
2022-09-12	14:27:12	0.0706285	341.728	2
2022-09-12	14:27:13	1.74872	343.477	2
2022-09-12	14:27:14	1.40673	344.883	2
2022-09-12	14:27:15	0.927105	345.81	2
2022-09-12	14:27:16	1.10017	346.911	2
2022-09-12	14:27:17	1.22722	348.138	2
2022-09-12	14:27:18	1.40892	349.547	2
2022-09-12	14:27:19	1.42303	350.97	2
2022-09-12	14:27:20	1.21612	352.186	2
2022-09-12	14:27:21	1.04312	353.229	2
2022-09-12	14:27:22	1.66366	354.893	2
2022-09-12	14:27:23	1.71748	356.61	2
2022-09-12	14:27:24	1.72835	358.338	2
2022-09-12	14:27:25	1.58386	359.922	2
2022-09-12	14:27:26	1.48883	361.411	2
2022-09-12	14:27:27	1.8125	363.224	2
2022-09-12	14:27:28	1.85642	365.08	2
2022-09-12	14:27:29	1.75406	366.834	2
2022-09-12	14:27:30	1.88268	368.717	2
2022-09-12	14:27:31	1.70407	370.421	2
2022-09-12	14:27:32	1.75778	372.179	2
2022-09-12	14:27:33	2.01695	374.196	2
2022-09-12	14:27:34	1.89094	376.087	2
2022-09-12	14:27:35	1.98483	378.071	2
2022-09-12	14:27:36	2.03966	380.111	2
2022-09-12	14:27:37	2.15851	382.27	2
2022-09-12	14:27:38	2.04861	384.318	2
2022-09-12	14:27:39	1.93519	386.253	2
2022-09-12	14:27:40	2.02314	388.276	2
2022-09-12	14:27:41	1.91018	390.187	2
2022-09-12	14:27:42	1.80792	391.995	2
2022-09-12	14:27:43	1.8584	393.853	2
2022-09-12	14:27:44	1.7494	395.602	2
2022-09-12	14:27:45	2.67275	398.275	2
2022-09-12	14:27:46	2.35936	400.634	2
2022-09-12	14:27:47	1.56383	402.198	2
2022-09-12	14:27:48	1.57266	403.771	2
2022-09-12	14:27:49	1.88332	405.654	2
2022-09-12	14:27:50	2.58573	408.24	2
2022-09-12	14:27:51	1.53916	409.779	2
2022-09-12	14:27:52	1.84589	411.625	2
2022-09-12	14:27:53	1.9636	413.589	2
2022-09-12	14:27:54	1.65868	415.247	2
2022-09-12	14:27:55	1.71912	416.966	2
2022-09-12	14:27:56	1.75828	418.725	2
2022-09-12	14:27:57	2.02105	420.746	2
2022-09-12	14:27:58	1.9344	422.68	2
2022-09-12	14:27:59	2.76213	425.442	2
2022-09-12	14:28:00	2.34089	427.783	2
2022-09-12	14:28:01	1.94606	429.729	2
2022-09-12	14:28:02	1.97747	431.707	2
2022-09-12	14:28:03	1.83372	433.54	2
2022-09-12	14:28:04	2.17466	435.715	2
2022-09-12	14:28:05	2.13661	437.852	2
2022-09-12	14:28:06	2.13944	439.991	2
2022-09-12	14:28:07	2.14719	442.138	2
2022-09-12	14:28:08	1.9553	444.094	2
2022-09-12	14:28:09	1.94646	446.04	2
2022-09-12	14:28:10	1.95647	447.997	2
2022-09-12	14:28:11	1.84108	449.838	2
2022-09-12	14:28:12	1.54693	451.385	2
2022-09-12	14:28:13	3.70299	455.088	2
2022-09-12	14:28:14	3.8714	458.959	2
2022-09-12	14:28:15	1.685	460.644	2
2022-09-12	14:28:16	1.36214	462.006	2
2022-09-12	14:28:17	1.31069	463.317	2
2022-09-12	14:28:18	4.50689	467.824	2
2022-09-12	14:28:19	7.0548	474.879	2

## Sheet: MrFitz_harness_202291214225 (3)
Date	Time	Lbs	Newtons	Averaged Newtons	Total Force x time	Total Time Steps Force >13.345		**GoPro Fitting: 1412
2022-09-12	14:23:19	-0.180292	-0.801975	-1.56162	0	FALSE	0			Total Force x time	930.448
2022-09-12	14:23:19	-0.427977	-1.90373	-1.56162	0	FALSE	0			Total Time Steps Force >3	7
2022-09-12	14:23:19	-0.743803	-3.30858	-1.56162	0	FALSE	0
2022-09-12	14:23:19	-0.0522007	-0.232199	-1.56162	0	FALSE	0
2022-09-12	14:23:20	0.211921	0.942667	0.445895	0.942667	FALSE	0
2022-09-12	14:23:20	0.125153	0.556706	0.445895	0.556706	FALSE	0
2022-09-12	14:23:20	0.165967	0.738254	0.445895	1.68092	FALSE	0
2022-09-12	14:23:20	-0.102074	-0.454046	0.445895	0.556706	FALSE	0
2022-09-12	14:23:21	-0.255712	-1.13746	-0.266683	1.68092	FALSE	0
2022-09-12	14:23:21	-0.0111321	-0.0495178	-0.266683	0.556706	FALSE	0
2022-09-12	14:23:21	0.086985	0.386927	-0.266683	2.06785	FALSE	0
2022-09-12	14:23:22	0.00276106	0.0122817	0.0462374	0.568987	FALSE	0
2022-09-12	14:23:22	-0.097188	-0.432312	0.0462374	2.06785	FALSE	0
2022-09-12	14:23:22	0.0418959	0.186361	0.0462374	0.755349	FALSE	0
2022-09-12	14:23:22	0.0941096	0.418618	0.0462374	2.48647	FALSE	0
2022-09-12	14:23:23	0.296043	1.31686	0.945215	2.07221	FALSE	0
2022-09-12	14:23:23	0.0513615	0.228466	0.945215	2.71493	FALSE	0
2022-09-12	14:23:23	0.274975	1.22314	0.945215	3.29535	FALSE	0
2022-09-12	14:23:23	0.227596	1.01239	0.945215	3.72733	FALSE	0
2022-09-12	14:23:24	0.473143	2.10463	2.02325	5.39999	FALSE	0
2022-09-12	14:23:24	0.410038	1.82393	2.02325	5.55126	FALSE	0
2022-09-12	14:23:24	0.528257	2.34979	2.02325	7.74978	FALSE	0
2022-09-12	14:23:24	0.407952	1.81465	2.02325	7.36591	FALSE	0
2022-09-12	14:23:25	0.37472	1.66683	1.77881	9.41661	FALSE	0
2022-09-12	14:23:25	0.522404	2.32376	1.77881	9.68967	FALSE	0
2022-09-12	14:23:25	0.302557	1.34583	1.77881	10.7624	FALSE	0
2022-09-12	14:23:26	0.501234	2.22959	2.16207	11.9193	FALSE	0
2022-09-12	14:23:26	0.345763	1.53802	2.16207	12.3005	FALSE	0
2022-09-12	14:23:26	0.555891	2.47271	2.16207	14.392	FALSE	0
2022-09-12	14:23:26	0.541336	2.40797	2.16207	14.7084	FALSE	0
2022-09-12	14:23:27	0.405407	1.80333	1.91986	16.1953	FALSE	0
2022-09-12	14:23:27	0.395433	1.75897	1.91986	16.4674	FALSE	0
2022-09-12	14:23:27	0.553804	2.46343	1.91986	18.6587	FALSE	0
2022-09-12	14:23:27	0.371768	1.6537	1.91986	18.1211	FALSE	0
2022-09-12	14:23:28	0.555229	2.46977	2.00339	21.1285	FALSE	0
2022-09-12	14:23:28	0.248664	1.10611	2.00339	19.2272	FALSE	0
2022-09-12	14:23:28	0.363168	1.61544	2.00339	22.7439	FALSE	0
2022-09-12	14:23:28	0.634466	2.82223	2.00339	22.0494	FALSE	0
2022-09-12	14:23:29	0.609631	2.71176	2.52327	25.4557	FALSE	0
2022-09-12	14:23:29	0.554008	2.46434	2.52327	24.5138	FALSE	0
2022-09-12	14:23:29	0.53813	2.39371	2.52327	27.8494	FALSE	0
2022-09-12	14:23:30	0.413702	1.84023	1.96462	26.354	FALSE	0
2022-09-12	14:23:30	0.461641	2.05347	1.96462	29.9029	FALSE	0
2022-09-12	14:23:30	0.405967	1.80582	1.96462	28.1598	FALSE	0
2022-09-12	14:23:30	0.485356	2.15896	1.96462	32.0618	FALSE	0
2022-09-12	14:23:31	0.481132	2.14017	1.99371	30.3	FALSE	0
2022-09-12	14:23:31	0.435941	1.93915	1.99371	34.001	FALSE	0
2022-09-12	14:23:31	0.417214	1.85585	1.99371	32.1559	FALSE	0
2022-09-12	14:23:31	0.458537	2.03966	1.99371	36.0407	FALSE	0
2022-09-12	14:23:32	0.470191	2.0915	1.94538	34.2474	FALSE	0
2022-09-12	14:23:32	0.433193	1.92693	1.94538	37.9676	FALSE	0
2022-09-12	14:23:32	0.445255	1.98058	1.94538	36.2279	FALSE	0
2022-09-12	14:23:32	0.400725	1.7825	1.94538	39.7501	FALSE	0
2022-09-12	14:23:33	0.392837	1.74742	1.82227	37.9754	FALSE	0
2022-09-12	14:23:33	0.422812	1.88075	1.82227	41.6309	FALSE	0
2022-09-12	14:23:33	0.413346	1.83865	1.82227	39.814	FALSE	0
2022-09-12	14:23:34	0.411056	1.82846	2.0009	43.4593	FALSE	0
2022-09-12	14:23:34	0.40785	1.8142	2.0009	41.6282	FALSE	0
2022-09-12	14:23:34	0.431616	1.91991	2.0009	45.3792	FALSE	0
2022-09-12	14:23:34	0.548766	2.44102	2.0009	44.0692	FALSE	0
2022-09-12	14:23:35	0.438333	1.94979	1.68279	47.329	FALSE	0
2022-09-12	14:23:35	0.476552	2.1198	1.68279	46.189	FALSE	0
2022-09-12	14:23:35	0.255076	1.13463	1.68279	48.4636	FALSE	0
2022-09-12	14:23:35	0.34327	1.52693	1.68279	47.716	FALSE	0
2022-09-12	14:23:36	0.314771	1.40016	1.73678	49.8638	FALSE	0
2022-09-12	14:23:36	0.379249	1.68698	1.73678	49.4029	FALSE	0
2022-09-12	14:23:36	0.312736	1.39111	1.73678	51.2549	FALSE	0
2022-09-12	14:23:36	0.555025	2.46886	1.73678	51.8718	FALSE	0
2022-09-12	14:23:37	0.175076	0.778773	-0.738592	52.0337	FALSE	0
2022-09-12	14:23:37	-0.225585	-1.00345	-0.738592	51.8718	FALSE	0
2022-09-12	14:23:37	-0.44762	-1.9911	-0.738592	52.0337	FALSE	0
2022-09-12	14:23:38	-0.559122	-2.48709	-1.68233	51.8718	FALSE	0
2022-09-12	14:23:38	-0.488536	-2.17311	-1.68233	52.0337	FALSE	0
2022-09-12	14:23:38	-0.283906	-1.26287	-1.68233	51.8718	FALSE	0
2022-09-12	14:23:38	-0.181259	-0.806276	-1.68233	52.0337	FALSE	0
2022-09-12	14:23:39	-0.189096	-0.841137	-0.420257	51.8718	FALSE	0
2022-09-12	14:23:39	-0.114796	-0.510636	-0.420257	52.0337	FALSE	0
2022-09-12	14:23:39	-0.0820226	-0.364853	-0.420257	51.8718	FALSE	0
2022-09-12	14:23:39	0.00800278	0.035598	-0.420257	52.0693	FALSE	0
2022-09-12	14:23:40	0.384542	1.71052	1.52767	53.5823	FALSE	0
2022-09-12	14:23:40	0.424288	1.88732	1.52767	53.9566	FALSE	0
2022-09-12	14:23:40	0.289478	1.28766	1.52767	54.87	FALSE	0
2022-09-12	14:23:40	0.275433	1.22518	1.52767	55.1818	FALSE	0
2022-09-12	14:23:41	0.00367708	0.0163564	-0.842799	54.8863	FALSE	0
2022-09-12	14:23:41	-0.218918	-0.973791	-0.842799	55.1818	FALSE	0
2022-09-12	14:23:41	-0.353168	-1.57096	-0.842799	54.8863	FALSE	0
2022-09-12	14:23:42	-0.184363	-0.820083	-0.736668	55.1818	FALSE	0
2022-09-12	14:23:42	-0.203142	-0.903616	-0.736668	54.8863	FALSE	0
2022-09-12	14:23:42	-0.159529	-0.709617	-0.736668	55.1818	FALSE	0
2022-09-12	14:23:42	-0.115407	-0.513353	-0.736668	54.8863	FALSE	0
2022-09-12	14:23:43	0.0333972	0.148557	-1.05546	55.3304	FALSE	0
2022-09-12	14:23:43	-0.202277	-0.899769	-1.05546	54.8863	FALSE	0
2022-09-12	14:23:43	-0.337239	-1.50011	-1.05546	55.3304	FALSE	0
2022-09-12	14:23:43	-0.442989	-1.9705	-1.05546	54.8863	FALSE	0
2022-09-12	14:23:44	-0.523905	-2.33043	-2.22268	55.3304	FALSE	0
2022-09-12	14:23:44	-0.511234	-2.27407	-2.22268	54.8863	FALSE	0
2022-09-12	14:23:44	-0.463905	-2.06354	-2.22268	55.3304	FALSE	0
2022-09-12	14:23:45	-0.120954	-0.538028	1.16038	54.8863	FALSE	0
2022-09-12	14:23:45	0.353041	1.5704	1.16038	56.9007	FALSE	0
2022-09-12	14:23:45	0.460573	2.04872	1.16038	56.935	FALSE	0
2022-09-12	14:23:45	0.350802	1.56044	1.16038	58.4612	FALSE	0
2022-09-12	14:23:46	-0.0202415	-0.0900382	-0.379115	56.935	FALSE	0
2022-09-12	14:23:46	-0.053931	-0.239896	-0.379115	58.4612	FALSE	0
2022-09-12	14:23:46	-0.181514	-0.807411	-0.379115	56.935	FALSE	0
2022-09-12	14:23:47	-0.257697	-1.14629	-1.70787	58.4612	FALSE	0
2022-09-12	14:23:47	-0.17561	-0.781148	-1.70787	56.935	FALSE	0
2022-09-12	14:23:47	-0.458715	-2.04046	-1.70787	58.4612	FALSE	0
2022-09-12	14:23:47	-0.521564	-2.32002	-1.70787	56.935	FALSE	0
2022-09-12	14:23:47	-0.506145	-2.25143	-1.70787	58.4612	FALSE	0
2022-09-12	14:23:48	-0.444872	-1.97888	-2.37564	56.935	FALSE	0
2022-09-12	14:23:48	-0.597341	-2.65709	-2.37564	58.4612	FALSE	0
2022-09-12	14:23:48	-0.559987	-2.49093	-2.37564	56.935	FALSE	0
2022-09-12	14:23:49	-0.518562	-2.30667	-2.36298	58.4612	FALSE	0
2022-09-12	14:23:49	-0.419681	-1.86683	-2.36298	56.935	FALSE	0
2022-09-12	14:23:49	-0.617544	-2.74696	-2.36298	58.4612	FALSE	0
2022-09-12	14:23:49	-0.569096	-2.53145	-2.36298	56.935	FALSE	0
2022-09-12	14:23:50	-0.461615	-2.05336	-1.60503	58.4612	FALSE	0
2022-09-12	14:23:50	-0.247671	-1.10169	-1.60503	56.935	FALSE	0
2022-09-12	14:23:50	-0.338918	-1.50758	-1.60503	58.4612	FALSE	0
2022-09-12	14:23:50	-0.395101	-1.75749	-1.60503	56.935	FALSE	0
2022-09-12	14:23:51	-0.433575	-1.92863	-1.41573	58.4612	FALSE	0
2022-09-12	14:23:51	-0.397391	-1.76767	-1.41573	56.935	FALSE	0
2022-09-12	14:23:51	-0.269707	-1.19971	-1.41573	58.4612	FALSE	0
2022-09-12	14:23:51	-0.172404	-0.766887	-1.41573	56.935	FALSE	0
2022-09-12	14:23:52	-0.0273153	-0.121504	0.291096	58.4612	FALSE	0
2022-09-12	14:23:52	0.0062725	0.0279013	0.291096	56.9629	FALSE	0
2022-09-12	14:23:52	0.217367	0.966892	0.291096	59.4281	FALSE	0
2022-09-12	14:23:53	0.23757	1.05676	1.2567	58.0197	FALSE	0
2022-09-12	14:23:53	0.356858	1.58738	1.2567	61.0155	FALSE	0
2022-09-12	14:23:53	0.147443	0.655856	1.2567	58.6756	FALSE	0
2022-09-12	14:23:53	0.388206	1.72682	1.2567	62.7423	FALSE	0
2022-09-12	14:23:54	0.251921	1.12059	0.718616	59.7962	FALSE	0
2022-09-12	14:23:54	0.335076	1.49049	0.718616	64.2328	FALSE	0
2022-09-12	14:23:54	0.0140588	0.0625364	0.718616	59.8587	FALSE	0
2022-09-12	14:23:54	0.0451529	0.200849	0.718616	64.4336	FALSE	0
2022-09-12	14:23:55	-0.0276715	-0.123088	0.369551	59.8587	FALSE	0
2022-09-12	14:23:55	0.128155	0.570059	0.369551	65.0037	FALSE	0
2022-09-12	14:23:55	-0.065585	-0.291735	0.369551	59.8587	FALSE	0
2022-09-12	14:23:55	0.297417	1.32297	0.369551	66.3266	FALSE	0
2022-09-12	14:23:56	0.00459311	0.0204311	0.226807	59.8791	FALSE	0
2022-09-12	14:23:56	0.215891	0.960326	0.226807	67.287	FALSE	0
2022-09-12	14:23:56	-0.0675188	-0.300337	0.226807	59.8791	FALSE	0
2022-09-12	14:23:57	0.136196	0.605827	-0.40045	67.8928	FALSE	0
2022-09-12	14:23:57	-0.0699615	-0.311203	-0.40045	59.8791	FALSE	0
2022-09-12	14:23:57	-0.143804	-0.639669	-0.40045	67.8928	FALSE	0
2022-09-12	14:23:57	-0.282531	-1.25675	-0.40045	59.8791	FALSE	0
2022-09-12	14:23:58	-0.0536766	-0.238764	-0.394903	67.8928	FALSE	0
2022-09-12	14:23:58	-0.0100125	-0.0445376	-0.394903	59.8791	FALSE	0
2022-09-12	14:23:58	-0.0535239	-0.238085	-0.394903	67.8928	FALSE	0
2022-09-12	14:23:58	-0.2379	-1.05823	-0.394903	59.8791	FALSE	0
2022-09-12	14:23:59	-0.145025	-0.6451	-1.04663	67.8928	FALSE	0
2022-09-12	14:23:59	-0.223448	-0.993941	-1.04663	59.8791	FALSE	0
2022-09-12	14:23:59	-0.233524	-1.03876	-1.04663	67.8928	FALSE	0
2022-09-12	14:23:59	-0.339172	-1.5087	-1.04663	59.8791	FALSE	0
2022-09-12	14:24:00	-0.337849	-1.50282	-1.68928	67.8928	FALSE	0
2022-09-12	14:24:00	-0.40187	-1.7876	-1.68928	59.8791	FALSE	0
2022-09-12	14:24:00	-0.39958	-1.77741	-1.68928	67.8928	FALSE	0
2022-09-12	14:24:01	-0.357697	-1.59111	-1.73163	59.8791	FALSE	0
2022-09-12	14:24:01	-0.331539	-1.47475	-1.73163	67.8928	FALSE	0
2022-09-12	14:24:01	-0.493117	-2.19348	-1.73163	59.8791	FALSE	0
2022-09-12	14:24:01	-0.374796	-1.66717	-1.73163	67.8928	FALSE	0
2022-09-12	14:24:02	-0.155458	-0.691508	-0.775378	59.8791	FALSE	0
2022-09-12	14:24:02	-0.108537	-0.482794	-0.775378	67.8928	FALSE	0
2022-09-12	14:24:02	-0.152048	-0.67634	-0.775378	59.8791	FALSE	0
2022-09-12	14:24:02	-0.281208	-1.25087	-0.775378	67.8928	FALSE	0
2022-09-12	14:24:03	-0.140394	-0.624501	-1.05478	59.8791	FALSE	0
2022-09-12	14:24:03	-0.209096	-0.930101	-1.05478	67.8928	FALSE	0
2022-09-12	14:24:03	-0.258715	-1.15082	-1.05478	59.8791	FALSE	0
2022-09-12	14:24:03	-0.340292	-1.51369	-1.05478	67.8928	FALSE	0
2022-09-12	14:24:04	-0.230267	-1.02427	-0.628425	59.8791	FALSE	0
2022-09-12	14:24:04	-0.219478	-0.976282	-0.628425	67.8928	FALSE	0
2022-09-12	14:24:04	0.0259162	0.11528	-0.628425	59.9944	FALSE	0
2022-09-12	14:24:05	0.233244	1.03752	1.79365	68.9303	FALSE	0
2022-09-12	14:24:05	0.350649	1.55976	1.79365	61.5542	FALSE	0
2022-09-12	14:24:05	0.553346	2.46139	1.79365	71.3917	FALSE	0
2022-09-12	14:24:05	0.475687	2.11595	1.79365	63.6701	FALSE	0
2022-09-12	14:24:06	0.976705	4.34458	2.64668	75.7363	FALSE	0
2022-09-12	14:24:06	0.40154	1.78613	2.64668	65.4562	FALSE	0
2022-09-12	14:24:06	0.715789	3.18397	2.64668	78.9202	FALSE	0
2022-09-12	14:24:06	0.285967	1.27204	2.64668	66.7283	FALSE	0
2022-09-12	14:24:07	0.687646	3.05879	1.05427	81.979	FALSE	0
2022-09-12	14:24:07	0.0652547	0.290266	1.05427	67.0185	FALSE	0
2022-09-12	14:24:07	0.184186	0.819296	1.05427	82.7983	FALSE	0
2022-09-12	14:24:07	0.0109545	0.0487278	1.05427	67.0673	FALSE	0
2022-09-12	14:24:08	0.124237	0.552631	-0.278982	83.351	FALSE	0
2022-09-12	14:24:08	-0.0716918	-0.318899	-0.278982	67.0673	FALSE	0
2022-09-12	14:24:08	-0.240699	-1.07068	-0.278982	83.351	FALSE	0
2022-09-12	14:24:09	-0.362786	-1.61374	-1.80859	67.0673	FALSE	0
2022-09-12	14:24:09	-0.422938	-1.88131	-1.80859	83.351	FALSE	0
2022-09-12	14:24:09	-0.378053	-1.68166	-1.80859	67.0673	FALSE	0
2022-09-12	14:24:09	-0.462582	-2.05766	-1.80859	83.351	FALSE	0
2022-09-12	14:24:10	-0.453269	-2.01623	-1.7048	67.0673	FALSE	0
2022-09-12	14:24:10	-0.405178	-1.80231	-1.7048	83.351	FALSE	0
2022-09-12	14:24:10	-0.304211	-1.35319	-1.7048	67.0673	FALSE	0
2022-09-12	14:24:10	-0.370368	-1.64747	-1.7048	83.351	FALSE	0
2022-09-12	14:24:11	-0.445025	-1.97956	-1.66236	67.0673	FALSE	0
2022-09-12	14:24:11	-0.305585	-1.3593	-1.66236	83.351	FALSE	0
2022-09-12	14:24:11	-0.258562	-1.15014	-1.66236	67.0673	FALSE	0
2022-09-12	14:24:11	-0.485687	-2.16043	-1.66236	83.351	FALSE	0
2022-09-12	14:24:12	-0.405737	-1.8048	-1.89143	67.0673	FALSE	0
2022-09-12	14:24:12	-0.464669	-2.06694	-1.89143	83.351	FALSE	0
2022-09-12	14:24:12	-0.405229	-1.80254	-1.89143	67.0673	FALSE	0
2022-09-12	14:24:13	-0.378307	-1.68279	-1.68386	83.351	FALSE	0
2022-09-12	14:24:13	-0.4093	-1.82065	-1.68386	67.0673	FALSE	0
2022-09-12	14:24:13	-0.426602	-1.89761	-1.68386	83.351	FALSE	0
2022-09-12	14:24:13	-0.299987	-1.3344	-1.68386	67.0673	FALSE	0
2022-09-12	14:24:14	-0.321972	-1.4322	-1.32246	83.351	FALSE	0
2022-09-12	14:24:14	-0.361106	-1.60627	-1.32246	67.0673	FALSE	0
2022-09-12	14:24:14	-0.332913	-1.48086	-1.32246	83.351	FALSE	0
2022-09-12	14:24:14	-0.173218	-0.770508	-1.32246	67.0673	FALSE	0
2022-09-12	14:24:15	-0.182633	-0.812388	-0.704354	83.351	FALSE	0
2022-09-12	14:24:15	-0.281819	-1.25359	-0.704354	67.0673	FALSE	0
2022-09-12	14:24:15	-0.125738	-0.559308	-0.704354	83.351	FALSE	0
2022-09-12	14:24:15	-0.0431931	-0.192132	-0.704354	67.0673	FALSE	0
2022-09-12	14:24:16	-0.0217682	-0.0968293	-0.136142	83.351	FALSE	0
2022-09-12	14:24:16	0.0824048	0.366553	-0.136142	67.4338	FALSE	0
2022-09-12	14:24:16	-0.152455	-0.67815	-0.136142	83.351	FALSE	0
2022-09-12	14:24:17	-0.0112339	-0.0499706	-0.482453	67.4338	FALSE	0
2022-09-12	14:24:17	-0.0282313	-0.125578	-0.482453	83.351	FALSE	0
2022-09-12	14:24:17	-0.164771	-0.732934	-0.482453	67.4338	FALSE	0
2022-09-12	14:24:17	-0.229605	-1.02133	-0.482453	83.351	FALSE	0
2022-09-12	14:24:18	-0.207722	-0.923989	-0.63514	67.4338	FALSE	0
2022-09-12	14:24:18	-0.11673	-0.519238	-0.63514	83.351	FALSE	0
2022-09-12	14:24:18	-0.124465	-0.553645	-0.63514	67.4338	FALSE	0
2022-09-12	14:24:18	-0.122226	-0.543686	-0.63514	83.351	FALSE	0
2022-09-12	14:24:19	-0.227468	-1.01182	-0.689621	67.4338	FALSE	0
2022-09-12	14:24:19	-0.0990709	-0.440687	-0.689621	83.351	FALSE	0
2022-09-12	14:24:19	-0.138562	-0.616351	-0.689621	67.4338	FALSE	0
2022-09-12	14:24:20	-0.0693509	-0.308487	-0.919237	83.351	FALSE	0
2022-09-12	14:24:20	-0.152557	-0.678604	-0.919237	67.4338	FALSE	0
2022-09-12	14:24:20	-0.229758	-1.02201	-0.919237	83.351	FALSE	0
2022-09-12	14:24:20	-0.374949	-1.66785	-0.919237	67.4338	FALSE	0
2022-09-12	14:24:21	-0.191743	-0.852911	-0.570456	83.351	FALSE	0
2022-09-12	14:24:21	-0.297341	-1.32263	-0.570456	67.4338	FALSE	0
2022-09-12	14:24:21	0.0662724	0.294793	-0.570456	83.6458	FALSE	0
2022-09-12	14:24:21	-0.0901651	-0.401072	-0.570456	67.4338	FALSE	0
2022-09-12	14:24:22	0.232227	1.03299	1.02122	84.6787	FALSE	0
2022-09-12	14:24:22	0.18271	0.812731	1.02122	68.2466	FALSE	0
2022-09-12	14:24:22	0.412125	1.83321	1.02122	86.512	FALSE	0
2022-09-12	14:24:22	0.0912597	0.405941	1.02122	68.6525	FALSE	0
2022-09-12	14:24:23	0.384288	1.70939	1.04416	88.2214	FALSE	0
2022-09-12	14:24:23	0.0693768	0.308602	1.04416	68.9611	FALSE	0
2022-09-12	14:24:23	0.250547	1.11448	1.04416	89.3358	FALSE	0
2022-09-12	14:24:24	0.0663743	0.295246	-0.457778	69.2563	FALSE	0
2022-09-12	14:24:24	0.0297331	0.132259	-0.457778	89.4681	FALSE	0
2022-09-12	14:24:24	-0.262379	-1.16711	-0.457778	69.2563	FALSE	0
2022-09-12	14:24:24	-0.245381	-1.0915	-0.457778	89.4681	FALSE	0
2022-09-12	14:24:25	-0.159682	-0.710297	-1.27775	69.2563	FALSE	0
2022-09-12	14:24:25	-0.257341	-1.1447	-1.27775	89.4681	FALSE	0
2022-09-12	14:24:25	-0.386857	-1.72082	-1.27775	69.2563	FALSE	0
2022-09-12	14:24:25	-0.345127	-1.53519	-1.27775	89.4681	FALSE	0
2022-09-12	14:24:26	-0.299783	-1.33349	-1.26847	69.2563	FALSE	0
2022-09-12	14:24:26	-0.216679	-0.963832	-1.26847	89.4681	FALSE	0
2022-09-12	14:24:26	-0.260038	-1.1567	-1.26847	69.2563	FALSE	0
2022-09-12	14:24:26	-0.36416	-1.61986	-1.26847	89.4681	FALSE	0
2022-09-12	14:24:27	-0.356628	-1.58635	-1.69297	69.2563	FALSE	0
2022-09-12	14:24:27	-0.375407	-1.66989	-1.69297	89.4681	FALSE	0
2022-09-12	14:24:27	-0.409758	-1.82269	-1.69297	69.2563	FALSE	0
2022-09-12	14:24:28	-0.336577	-1.49716	-1.52914	89.4681	FALSE	0
2022-09-12	14:24:28	-0.366501	-1.63027	-1.52914	69.2563	FALSE	0
2022-09-12	14:24:28	-0.350012	-1.55692	-1.52914	89.4681	FALSE	0
2022-09-12	14:24:28	-0.321972	-1.4322	-1.52914	69.2563	FALSE	0
2022-09-12	14:24:29	-0.341361	-1.51844	-1.92285	89.4681	FALSE	0
2022-09-12	14:24:29	-0.566755	-2.52104	-1.92285	69.2563	FALSE	0
2022-09-12	14:24:29	-0.517697	-2.30282	-1.92285	89.4681	FALSE	0
2022-09-12	14:24:29	-0.303295	-1.34912	-1.92285	69.2563	FALSE	0
2022-09-12	14:24:30	-0.294236	-1.30882	-1.23995	89.4681	FALSE	0
2022-09-12	14:24:30	-0.26986	-1.20039	-1.23995	69.2563	FALSE	0
2022-09-12	14:24:30	-0.26757	-1.1902	-1.23995	89.4681	FALSE	0
2022-09-12	14:24:30	-0.283346	-1.26038	-1.23995	69.2563	FALSE	0
2022-09-12	14:24:31	-0.28533	-1.2692	-1.41431	89.4681	FALSE	0
2022-09-12	14:24:31	-0.309758	-1.37787	-1.41431	69.2563	FALSE	0
2022-09-12	14:24:31	-0.358765	-1.59586	-1.41431	89.4681	FALSE	0
2022-09-12	14:24:32	-0.377188	-1.67781	-1.62585	69.2563	FALSE	0
2022-09-12	14:24:32	-0.374185	-1.66445	-1.62585	89.4681	FALSE	0
2022-09-12	14:24:32	-0.368028	-1.63706	-1.62585	69.2563	FALSE	0
2022-09-12	14:24:32	-0.342633	-1.5241	-1.62585	89.4681	FALSE	0
2022-09-12	14:24:33	-0.334185	-1.48652	-1.37968	69.2563	FALSE	0
2022-09-12	14:24:33	-0.321615	-1.43061	-1.37968	89.4681	FALSE	0
2022-09-12	14:24:33	-0.305687	-1.35976	-1.37968	69.2563	FALSE	0
2022-09-12	14:24:33	-0.279173	-1.24182	-1.37968	89.4681	FALSE	0
2022-09-12	14:24:34	-0.284465	-1.26536	-1.28154	69.2563	FALSE	0
2022-09-12	14:24:34	-0.291386	-1.29614	-1.28154	89.4681	FALSE	0
2022-09-12	14:24:34	-0.294796	-1.31131	-1.28154	69.2563	FALSE	0
2022-09-12	14:24:34	-0.281768	-1.25336	-1.28154	89.4681	FALSE	0
2022-09-12	14:24:35	-0.274084	-1.21918	-1.6437	69.2563	FALSE	0
2022-09-12	14:24:35	-0.307977	-1.36994	-1.6437	89.4681	FALSE	0
2022-09-12	14:24:35	-0.526501	-2.34198	-1.6437	69.2563	FALSE	0
2022-09-12	14:24:36	-0.470979	-2.09501	-1.23916	89.4681	FALSE	0
2022-09-12	14:24:36	-0.277239	-1.23321	-1.23916	69.2563	FALSE	0
2022-09-12	14:24:36	-0.278002	-1.23661	-1.23916	89.4681	FALSE	0
2022-09-12	14:24:36	-0.0880786	-0.391791	-1.23916	69.2563	FALSE	0
2022-09-12	14:24:37	-0.0532186	-0.236727	0.794962	89.4681	FALSE	0
2022-09-12	14:24:37	0.237316	1.05563	0.794962	70.312	FALSE	0
2022-09-12	14:24:37	0.171158	0.761345	0.794962	90.2294	FALSE	0
2022-09-12	14:24:37	0.359606	1.5996	0.794962	71.9116	FALSE	0
2022-09-12	14:24:38	-0.0769335	-0.342216	-0.988393	90.2294	FALSE	0
2022-09-12	14:24:38	-0.263295	-1.17119	-0.988393	71.9116	FALSE	0
2022-09-12	14:24:38	-0.284414	-1.26513	-0.988393	90.2294	FALSE	0
2022-09-12	14:24:38	-0.26416	-1.17504	-0.988393	71.9116	FALSE	0
2022-09-12	14:24:39	-0.19958	-0.887772	-1.05114	90.2294	FALSE	0
2022-09-12	14:24:39	-0.273117	-1.21488	-1.05114	71.9116	FALSE	0
2022-09-12	14:24:39	-0.236221	-1.05076	-1.05114	90.2294	FALSE	0
2022-09-12	14:24:40	-0.192913	-0.858116	-1.34148	71.9116	FALSE	0
2022-09-12	14:24:40	-0.284516	-1.26558	-1.34148	90.2294	FALSE	0
2022-09-12	14:24:40	-0.452048	-2.0108	-1.34148	71.9116	FALSE	0
2022-09-12	14:24:40	-0.276832	-1.2314	-1.34148	90.2294	FALSE	0
2022-09-12	14:24:41	-0.342888	-1.52523	-1.00056	71.9116	FALSE	0
2022-09-12	14:24:41	-0.257544	-1.14561	-1.00056	90.2294	FALSE	0
2022-09-12	14:24:41	-0.140954	-0.626992	-1.00056	71.9116	FALSE	0
2022-09-12	14:24:41	-0.158358	-0.704408	-1.00056	90.2294	FALSE	0
2022-09-12	14:24:42	-0.0425824	-0.189415	-0.972943	71.9116	FALSE	0
2022-09-12	14:24:42	-0.279478	-1.24317	-0.972943	90.2294	FALSE	0
2022-09-12	14:24:42	-0.224109	-0.996882	-0.972943	71.9116	FALSE	0
2022-09-12	14:24:42	-0.32874	-1.4623	-0.972943	90.2294	FALSE	0
2022-09-12	14:24:43	-0.373626	-1.66196	-1.68098	71.9116	FALSE	0
2022-09-12	14:24:43	-0.367977	-1.63684	-1.68098	90.2294	FALSE	0
2022-09-12	14:24:43	-0.392099	-1.74413	-1.68098	71.9116	FALSE	0
2022-09-12	14:24:44	-0.489758	-2.17854	-0.282228	90.2294	FALSE	0
2022-09-12	14:24:44	-0.148435	-0.660269	-0.282228	71.9116	FALSE	0
2022-09-12	14:24:44	0.0229137	0.101925	-0.282228	90.3314	FALSE	0
2022-09-12	14:24:44	0.361489	1.60798	-0.282228	73.5195	FALSE	0
2022-09-12	14:24:45	0.468359	2.08335	1.52654	92.4147	FALSE	0
2022-09-12	14:24:45	0.177875	0.791224	1.52654	74.3108	FALSE	0
2022-09-12	14:24:45	0.409631	1.82212	1.52654	94.2368	FALSE	0
2022-09-12	14:24:45	0.316858	1.40945	1.52654	75.7202	FALSE	0
2022-09-12	14:24:46	0.351209	1.56225	1.56791	95.7991	FALSE	0
2022-09-12	14:24:46	0.447443	1.99032	1.56791	77.7105	FALSE	0
2022-09-12	14:24:46	0.274008	1.21884	1.56791	97.0179	FALSE	0
2022-09-12	14:24:46	0.337265	1.50022	1.56791	79.2108	FALSE	0
2022-09-12	14:24:47	0.394975	1.75693	1.73595	98.7749	FALSE	0
2022-09-12	14:24:47	0.308257	1.37119	1.73595	80.5819	FALSE	0
2022-09-12	14:24:47	0.467545	2.07973	1.73595	100.855	FALSE	0
2022-09-12	14:24:48	0.401234	1.78477	1.42846	82.3667	FALSE	0
2022-09-12	14:24:48	0.275636	1.22608	1.42846	102.081	FALSE	0
2022-09-12	14:24:48	0.339809	1.51154	1.42846	83.8783	FALSE	0
2022-09-12	14:24:48	0.26785	1.19145	1.42846	103.272	FALSE	0
2022-09-12	14:24:49	0.351056	1.56157	0.477871	85.4398	FALSE	0
2022-09-12	14:24:49	0.127799	0.568476	0.477871	103.841	FALSE	0
2022-09-12	14:24:49	-0.0308776	-0.13735	0.477871	85.4398	FALSE	0
2022-09-12	14:24:49	-0.0182567	-0.0812095	0.477871	103.841	FALSE	0
2022-09-12	14:24:50	-0.0786638	-0.349912	-0.466438	85.4398	FALSE	0
2022-09-12	14:24:50	0.0347712	0.154669	-0.466438	103.995	FALSE	0
2022-09-12	14:24:50	-0.153168	-0.681322	-0.466438	85.4398	FALSE	0
2022-09-12	14:24:50	-0.222379	-0.989186	-0.466438	103.995	FALSE	0
2022-09-12	14:24:51	-0.0592745	-0.263665	0.548254	85.4398	FALSE	0
2022-09-12	14:24:51	0.358639	1.5953	0.548254	105.591	FALSE	0
2022-09-12	14:24:51	0.0703946	0.313129	0.548254	85.753	FALSE	0
2022-09-12	14:24:52	0.462812	2.05868	1.68794	107.649	FALSE	0
2022-09-12	14:24:52	0.353397	1.57198	1.68794	87.3249	FALSE	0
2022-09-12	14:24:52	0.272328	1.21137	1.68794	108.861	FALSE	0
2022-09-12	14:24:52	0.429326	1.90973	1.68794	89.2347	FALSE	0
2022-09-12	14:24:53	0.2393	1.06445	0.784434	109.925	FALSE	0
2022-09-12	14:24:53	0.327341	1.45608	0.784434	90.6907	FALSE	0
2022-09-12	14:24:53	0.132227	0.588172	0.784434	110.513	FALSE	0
2022-09-12	14:24:53	0.00652696	0.0290332	0.784434	90.7198	FALSE	0
2022-09-12	14:24:54	0.0737025	0.327843	1.61876	110.841	FALSE	0
2022-09-12	14:24:54	0.408919	1.81895	1.61876	92.5387	FALSE	0
2022-09-12	14:24:54	0.609122	2.7095	1.61876	113.551	FALSE	0
2022-09-12	14:24:55	0.875432	3.8941	5.22759	96.4328	FALSE	0
2022-09-12	14:24:55	2.88418	12.8294	5.22759	126.38	FALSE	0
2022-09-12	14:24:55	0.775687	3.45041	5.22759	99.8832	FALSE	0
2022-09-12	14:24:55	0.16556	0.736444	5.22759	127.116	FALSE	0
2022-09-12	14:24:56	0.636705	2.83219	1.83055	102.715	FALSE	0
2022-09-12	14:24:56	0.491209	2.185	1.83055	129.301	FALSE	0
2022-09-12	14:24:56	0.0703946	0.313129	1.83055	103.029	FALSE	0
2022-09-12	14:24:56	0.447799	1.9919	1.83055	131.293	FALSE	0
2022-09-12	14:24:57	0.490293	2.18092	1.59281	105.209	FALSE	0
2022-09-12	14:24:57	0.352226	1.56677	1.59281	132.86	FALSE	0
2022-09-12	14:24:57	0.268308	1.19349	1.59281	106.403	FALSE	0
2022-09-12	14:24:57	0.321489	1.43005	1.59281	134.29	FALSE	0
2022-09-12	14:24:58	0.1107	0.492416	1.23273	106.895	FALSE	0
2022-09-12	14:24:58	0.149224	0.663778	1.23273	134.954	FALSE	0
2022-09-12	14:24:58	0.571463	2.54198	1.23273	109.437	FALSE	0
2022-09-12	14:24:59	0.30327	1.34901	2.25964	136.303	FALSE	0
2022-09-12	14:24:59	0.318741	1.41782	2.25964	110.855	FALSE	0
2022-09-12	14:24:59	0.649835	2.8906	2.25964	139.194	FALSE	0
2022-09-12	14:24:59	0.760114	3.38114	2.25964	114.236	FALSE	0
2022-09-12	14:25:00	0.738791	3.28629	2.95822	142.48	FALSE	0
2022-09-12	14:25:00	0.76729	3.41306	2.95822	117.649	FALSE	0
2022-09-12	14:25:00	0.592124	2.63389	2.95822	145.114	FALSE	0
2022-09-12	14:25:00	0.561946	2.49965	2.95822	120.149	FALSE	0
2022-09-12	14:25:01	0.636603	2.83174	2.11595	147.945	FALSE	0
2022-09-12	14:25:01	0.878282	3.90677	2.11595	124.056	FALSE	0
2022-09-12	14:25:01	0.110344	0.490832	2.11595	148.436	FALSE	0
2022-09-12	14:25:01	0.277519	1.23446	2.11595	125.29	FALSE	0
2022-09-12	14:25:02	0.129071	0.574134	0.00684784	149.01	FALSE	0
2022-09-12	14:25:02	-0.123346	-0.548668	0.00684784	125.29	FALSE	0
2022-09-12	14:25:02	-0.00110661	-0.00492242	0.00684784	149.01	FALSE	0
2022-09-12	14:25:03	-0.00874021	-0.0388782	1.27996	125.29	FALSE	0
2022-09-12	14:25:03	0.430598	1.91539	1.27996	150.926	FALSE	0
2022-09-12	14:25:03	0.415026	1.84612	1.27996	127.136	FALSE	0
2022-09-12	14:25:03	0.314109	1.39722	1.27996	152.323	FALSE	0
2022-09-12	14:25:04	0.231667	1.0305	0.592133	128.167	FALSE	0
2022-09-12	14:25:04	0.11869	0.527957	0.592133	152.851	FALSE	0
2022-09-12	14:25:04	0.0831173	0.369722	0.592133	128.537	FALSE	0
2022-09-12	14:25:04	0.0989951	0.44035	0.592133	153.291	FALSE	0
2022-09-12	14:25:05	0.170649	0.759081	0.845668	129.296	FALSE	0
2022-09-12	14:25:05	0.272685	1.21296	0.845668	154.504	FALSE	0
2022-09-12	14:25:05	0.0898348	0.399603	0.845668	129.695	FALSE	0
2022-09-12	14:25:05	0.22729	1.01103	0.845668	155.515	FALSE	0
2022-09-12	14:25:06	0.346374	1.54074	1.66261	131.236	FALSE	0
2022-09-12	14:25:06	0.211158	0.939273	1.66261	156.455	FALSE	0
2022-09-12	14:25:06	0.563779	2.5078	1.66261	133.744	FALSE	0
2022-09-12	14:25:07	0.164593	0.732143	0.419297	157.187	FALSE	0
2022-09-12	14:25:07	0.0124303	0.0552925	0.419297	133.799	FALSE	0
2022-09-12	14:25:07	0.0765015	0.340294	0.419297	157.527	FALSE	0
2022-09-12	14:25:07	0.123524	0.549459	0.419297	134.349	FALSE	0
2022-09-12	14:25:08	0.0313107	0.139276	-0.916011	157.666	FALSE	0
2022-09-12	14:25:08	0.0222521	0.0989818	-0.916011	134.448	FALSE	0
2022-09-12	14:25:08	-0.218766	-0.973115	-0.916011	157.666	FALSE	0
2022-09-12	14:25:08	-0.658511	-2.92919	-0.916011	134.448	FALSE	0
2022-09-12	14:25:09	-0.600394	-2.67067	-2.80536	157.666	FALSE	0
2022-09-12	14:25:09	-0.764058	-3.39868	-2.80536	134.448	FALSE	0
2022-09-12	14:25:09	-0.508638	-2.26252	-2.80536	157.666	FALSE	0
2022-09-12	14:25:09	-0.649605	-2.88957	-2.80536	134.448	FALSE	0
2022-09-12	14:25:10	-0.459122	-2.04227	-2.15568	157.666	FALSE	0
2022-09-12	14:25:10	-0.529096	-2.35352	-2.15568	134.448	FALSE	0
2022-09-12	14:25:10	-0.465636	-2.07124	-2.15568	157.666	FALSE	0
2022-09-12	14:25:11	-0.411437	-1.83015	-0.469493	134.448	FALSE	0
2022-09-12	14:25:11	-0.119682	-0.532369	-0.469493	157.666	FALSE	0
2022-09-12	14:25:11	-0.169656	-0.754664	-0.469493	134.448	FALSE	0
2022-09-12	14:25:11	0.278588	1.23922	-0.469493	158.906	FALSE	0
2022-09-12	14:25:12	0.302456	1.34538	1.9327	135.793	FALSE	0
2022-09-12	14:25:12	0.526374	2.34142	1.9327	161.247	FALSE	0
2022-09-12	14:25:12	0.264186	1.17515	1.9327	136.968	FALSE	0
2022-09-12	14:25:12	0.644949	2.86886	1.9327	164.116	FALSE	0
2022-09-12	14:25:13	0.429784	1.91177	5.91973	138.88	FALSE	0
2022-09-12	14:25:13	1.65457	7.35986	5.91973	171.476	FALSE	0
2022-09-12	14:25:13	0.794211	3.53281	5.91973	142.413	FALSE	0
2022-09-12	14:25:13	2.44469	10.8745	5.91973	182.35	FALSE	0
2022-09-12	14:25:14	1.45894	6.48966	4.85051	148.902	FALSE	0
2022-09-12	14:25:14	1.2881	5.72973	4.85051	188.08	FALSE	0
2022-09-12	14:25:14	0.524287	2.33213	4.85051	151.234	FALSE	0
2022-09-12	14:25:15	0.651463	2.89784	2.07639	190.978	FALSE	0
2022-09-12	14:25:15	0.466425	2.07475	2.07639	153.309	FALSE	0
2022-09-12	14:25:15	0.337875	1.50294	2.07639	192.481	FALSE	0
2022-09-12	14:25:15	0.411412	1.83004	2.07639	155.139	FALSE	0
2022-09-12	14:25:16	0.336094	1.49501	2.57882	193.976	FALSE	0
2022-09-12	14:25:16	0.672583	2.99178	2.57882	158.131	FALSE	0
2022-09-12	14:25:16	0.678384	3.01759	2.57882	196.993	FALSE	0
2022-09-12	14:25:16	0.631921	2.81091	2.57882	160.942	FALSE	0
2022-09-12	14:25:17	0.310598	1.3816	1.38126	198.375	FALSE	0
2022-09-12	14:25:17	0.23925	1.06423	1.38126	162.006	FALSE	0
2022-09-12	14:25:17	0.288817	1.28472	1.38126	199.66	FALSE	0
2022-09-12	14:25:17	0.403423	1.79451	1.38126	163.801	FALSE	0
2022-09-12	14:25:18	0.294822	1.31143	1.41707	200.971	FALSE	0
2022-09-12	14:25:18	0.390954	1.73904	1.41707	165.54	FALSE	0
2022-09-12	14:25:18	0.269936	1.20073	1.41707	202.172	FALSE	0
2022-09-12	14:25:19	0.520725	2.31629	1.63457	167.856	FALSE	0
2022-09-12	14:25:19	0.241692	1.07509	1.63457	203.247	FALSE	0
2022-09-12	14:25:19	0.432735	1.92489	1.63457	169.781	FALSE	0
2022-09-12	14:25:19	0.27472	1.22201	1.63457	204.469	FALSE	0
2022-09-12	14:25:20	0.510954	2.27283	1.76213	172.054	FALSE	0
2022-09-12	14:25:20	0.281641	1.2528	1.76213	205.722	FALSE	0
2022-09-12	14:25:20	0.456756	2.03174	1.76213	174.085	FALSE	0
2022-09-12	14:25:20	0.335229	1.49117	1.76213	207.213	FALSE	0
2022-09-12	14:25:21	0.365356	1.62518	1.5009	175.711	FALSE	0
2022-09-12	14:25:21	0.318435	1.41646	1.5009	208.629	FALSE	0
2022-09-12	14:25:21	0.328461	1.46106	1.5009	177.172	FALSE	0
2022-09-12	14:25:22	0.281641	1.2528	6.30733	209.882	FALSE	0
2022-09-12	14:25:22	0.405	1.80152	6.30733	178.973	FALSE	0
2022-09-12	14:25:22	0.9193	4.08923	6.30733	213.971	FALSE	0
2022-09-12	14:25:22	4.06586	18.0858	6.30733	197.059	1	1
2022-09-12	14:25:23	10.0923	44.8926	20.8491	258.864	1	2
2022-09-12	14:25:23	3.35253	14.9127	20.8491	211.972	1	3
2022-09-12	14:25:23	2.93426	13.0522	20.8491	271.916	FALSE	3
2022-09-12	14:25:23	2.36927	10.539	20.8491	222.511	FALSE	3
2022-09-12	14:25:24	0.827952	3.6829	2.41753	275.599	FALSE	3
2022-09-12	14:25:24	0.540063	2.40231	2.41753	224.913	FALSE	3
2022-09-12	14:25:24	0.377621	1.67973	2.41753	277.279	FALSE	3
2022-09-12	14:25:24	0.428308	1.9052	2.41753	226.818	FALSE	3
2022-09-12	14:25:25	0.71589	3.18442	2.2775	280.463	FALSE	3
2022-09-12	14:25:25	0.481336	2.14108	2.2775	228.959	FALSE	3
2022-09-12	14:25:25	0.338791	1.50701	2.2775	281.97	FALSE	3
2022-09-12	14:25:26	0.0336008	0.149463	-0.0561954	229.109	FALSE	3
2022-09-12	14:25:26	-0.321259	-1.42902	-0.0561954	281.97	FALSE	3
2022-09-12	14:25:26	-0.101107	-0.449744	-0.0561954	229.109	FALSE	3
2022-09-12	14:25:26	0.338232	1.50452	-0.0561954	283.475	FALSE	3
2022-09-12	14:25:27	0.129173	0.574587	1.01171	229.683	FALSE	3
2022-09-12	14:25:27	0.221285	0.98432	1.01171	284.459	FALSE	3
2022-09-12	14:25:27	0.157672	0.701357	1.01171	230.385	FALSE	3
2022-09-12	14:25:27	0.401641	1.78658	1.01171	286.245	FALSE	3
2022-09-12	14:25:28	0.221081	0.983413	0.841423	231.368	FALSE	3
2022-09-12	14:25:28	0.18673	0.830612	0.841423	287.076	FALSE	3
2022-09-12	14:25:28	0.113601	0.50532	0.841423	231.873	FALSE	3
2022-09-12	14:25:28	0.235229	1.04635	0.841423	288.122	FALSE	3
2022-09-12	14:25:29	0.366985	1.63242	1.95553	233.506	FALSE	3
2022-09-12	14:25:29	0.483066	2.14877	1.95553	290.271	FALSE	3
2022-09-12	14:25:29	0.468817	2.08539	1.95553	235.591	FALSE	3
2022-09-12	14:25:30	0.35528	1.58036	1.64991	291.852	FALSE	3
2022-09-12	14:25:30	0.345	1.53463	1.64991	237.126	FALSE	3
2022-09-12	14:25:30	0.394059	1.75285	1.64991	293.604	FALSE	3
2022-09-12	14:25:30	0.389326	1.7318	1.64991	238.858	FALSE	3
2022-09-12	14:25:31	0.360013	1.60141	1.52405	295.206	FALSE	3
2022-09-12	14:25:31	0.369428	1.64329	1.52405	240.501	FALSE	3
2022-09-12	14:25:31	0.356959	1.58783	1.52405	296.794	FALSE	3
2022-09-12	14:25:31	0.284084	1.26366	1.52405	241.765	FALSE	3
2022-09-12	14:25:32	0.344186	1.53101	1.28698	298.325	FALSE	3
2022-09-12	14:25:32	0.271667	1.20843	1.28698	242.973	FALSE	3
2022-09-12	14:25:32	0.201081	0.894449	1.28698	299.219	FALSE	3
2022-09-12	14:25:32	0.340369	1.51403	1.28698	244.487	FALSE	3
2022-09-12	14:25:33	0.0985371	0.438313	1.08362	299.657	FALSE	3
2022-09-12	14:25:33	0.325204	1.44657	1.08362	245.934	FALSE	3
2022-09-12	14:25:33	0.307087	1.36598	1.08362	301.023	FALSE	3
2022-09-12	14:25:34	0.360522	1.60367	1.39196	247.537	FALSE	3
2022-09-12	14:25:34	0.286527	1.27453	1.39196	302.298	FALSE	3
2022-09-12	14:25:34	0.280522	1.24782	1.39196	248.785	FALSE	3
2022-09-12	14:25:34	0.324135	1.44182	1.39196	303.74	FALSE	3
2022-09-12	14:25:35	0.274517	1.22111	1.17979	250.006	FALSE	3
2022-09-12	14:25:35	0.346476	1.54119	1.17979	305.281	FALSE	3
2022-09-12	14:25:35	0.191565	0.852119	1.17979	250.858	FALSE	3
2022-09-12	14:25:35	0.248359	1.10475	1.17979	306.386	FALSE	3
2022-09-12	14:25:36	0.262608	1.16813	1.11188	252.027	FALSE	3
2022-09-12	14:25:36	0.225865	1.00469	1.11188	307.39	FALSE	3
2022-09-12	14:25:36	0.3364	1.49637	1.11188	253.523	FALSE	3
2022-09-12	14:25:36	0.174975	0.778324	1.11188	308.169	FALSE	3
2022-09-12	14:25:37	0.326018	1.45019	1.3647	254.973	FALSE	3
2022-09-12	14:25:37	0.338283	1.50475	1.3647	309.673	FALSE	3
2022-09-12	14:25:37	0.256094	1.13916	1.3647	256.112	FALSE	3
2022-09-12	14:25:38	0.408868	1.81873	1.47147	311.492	FALSE	3
2022-09-12	14:25:38	0.303931	1.35195	1.47147	257.464	FALSE	3
2022-09-12	14:25:38	0.384847	1.71188	1.47147	313.204	FALSE	3
2022-09-12	14:25:38	0.22556	1.00334	1.47147	258.468	FALSE	3
2022-09-12	14:25:39	0.256603	1.14142	1.51629	314.345	FALSE	3
2022-09-12	14:25:39	0.357875	1.5919	1.51629	260.059	FALSE	3
2022-09-12	14:25:39	0.271667	1.20843	1.51629	315.554	FALSE	3
2022-09-12	14:25:39	0.477367	2.12342	1.51629	262.183	FALSE	3
2022-09-12	14:25:40	1.25314	5.57422	3.47695	321.128	FALSE	3
2022-09-12	14:25:40	1.13146	5.03296	3.47695	267.216	FALSE	3
2022-09-12	14:25:40	0.228562	1.01669	3.47695	322.145	FALSE	3
2022-09-12	14:25:40	0.513448	2.28392	3.47695	269.5	FALSE	3
2022-09-12	14:25:41	0.844389	3.75601	3.24298	325.901	FALSE	3
2022-09-12	14:25:41	0.647137	2.87859	3.24298	272.378	FALSE	3
2022-09-12	14:25:41	0.695636	3.09433	3.24298	328.995	FALSE	3
2022-09-12	14:25:42	1.41594	6.29838	8.08548	278.677	FALSE	3
2022-09-12	14:25:42	0.816857	3.63354	8.08548	332.629	FALSE	3
2022-09-12	14:25:42	2.93034	13.0347	8.08548	291.711	FALSE	3
2022-09-12	14:25:42	2.10765	9.37525	8.08548	342.004	FALSE	3
2022-09-12	14:25:43	3.00317	13.3587	9.03159	305.07	1	4
2022-09-12	14:25:43	1.87212	8.32756	9.03159	350.332	FALSE	4
2022-09-12	14:25:43	1.94683	8.65989	9.03159	313.73	FALSE	4
2022-09-12	14:25:43	1.29945	5.78021	9.03159	356.112	FALSE	4
2022-09-12	14:25:44	1.01375	4.50936	3.94797	318.239	FALSE	4
2022-09-12	14:25:44	1.50154	6.67915	3.94797	362.791	FALSE	4
2022-09-12	14:25:44	0.493499	2.19518	3.94797	320.435	FALSE	4
2022-09-12	14:25:44	0.541387	2.4082	3.94797	365.199	FALSE	4
2022-09-12	14:25:45	0.563473	2.50644	1.80801	322.941	FALSE	4
2022-09-12	14:25:45	0.440827	1.96089	1.80801	367.16	FALSE	4
2022-09-12	14:25:45	0.215076	0.956701	1.80801	323.898	FALSE	4
2022-09-12	14:25:46	0.420878	1.87215	1.02212	369.032	FALSE	4
2022-09-12	14:25:46	0.181132	0.805711	1.02212	324.703	FALSE	4
2022-09-12	14:25:46	0.282506	1.25664	1.02212	370.289	FALSE	4
2022-09-12	14:25:46	0.0346185	0.15399	1.02212	324.857	FALSE	4
2022-09-12	14:25:47	0.305662	1.35965	0.617826	371.648	FALSE	4
2022-09-12	14:25:47	0.147138	0.654499	0.617826	325.512	FALSE	4
2022-09-12	14:25:47	0.171972	0.764966	0.617826	372.413	FALSE	4
2022-09-12	14:25:47	-0.0691982	-0.307807	0.617826	325.512	FALSE	4
2022-09-12	14:25:48	-0.374084	-1.664	-1.90169	372.413	FALSE	4
2022-09-12	14:25:48	-0.526196	-2.34063	-1.90169	325.512	FALSE	4
2022-09-12	14:25:48	-0.407417	-1.81227	-1.90169	372.413	FALSE	4
2022-09-12	14:25:48	-0.402379	-1.78986	-1.90169	325.512	FALSE	4
2022-09-12	14:25:49	-0.38991	-1.7344	-1.21254	372.413	FALSE	4
2022-09-12	14:25:49	-0.278715	-1.23978	-1.21254	325.512	FALSE	4
2022-09-12	14:25:49	-0.149147	-0.663436	-1.21254	372.413	FALSE	4
2022-09-12	14:25:50	-0.239733	-1.06638	-1.57458	325.512	FALSE	4
2022-09-12	14:25:50	-0.22243	-0.989413	-1.57458	372.413	FALSE	4
2022-09-12	14:25:50	-0.426297	-1.89625	-1.57458	325.512	FALSE	4
2022-09-12	14:25:50	-0.527468	-2.34628	-1.57458	372.413	FALSE	4
2022-09-12	14:25:51	-0.550776	-2.44996	-2.05868	325.512	FALSE	4
2022-09-12	14:25:51	-0.767773	-3.41521	-2.05868	372.413	FALSE	4
2022-09-12	14:25:51	-0.465636	-2.07124	-2.05868	325.512	FALSE	4
2022-09-12	14:25:51	-0.0670608	-0.2983	-2.05868	372.413	FALSE	4
2022-09-12	14:25:52	0.35131	1.5627	1.48177	327.075	FALSE	4
2022-09-12	14:25:52	0.382354	1.70079	1.48177	374.114	FALSE	4
2022-09-12	14:25:52	0.292888	1.30282	1.48177	328.377	FALSE	4
2022-09-12	14:25:52	0.305916	1.36078	1.48177	375.475	FALSE	4
2022-09-12	14:25:53	0.485509	2.15964	1.77043	330.537	FALSE	4
2022-09-12	14:25:53	0.354364	1.57628	1.77043	377.051	FALSE	4
2022-09-12	14:25:53	0.35416	1.57537	1.77043	332.112	FALSE	4
2022-09-12	14:25:54	0.323422	1.43865	1.37192	378.49	FALSE	4
2022-09-12	14:25:54	0.279199	1.24193	1.37192	333.354	FALSE	4
2022-09-12	14:25:54	0.359606	1.5996	1.37192	380.089	FALSE	4
2022-09-12	14:25:54	0.271463	1.20752	1.37192	334.562	FALSE	4
2022-09-12	14:25:55	0.237214	1.05518	1.31697	381.145	FALSE	4
2022-09-12	14:25:55	0.318842	1.41827	1.31697	335.98	FALSE	4
2022-09-12	14:25:55	0.299758	1.33338	1.31697	382.478	FALSE	4
2022-09-12	14:25:55	0.328461	1.46106	1.31697	337.441	FALSE	4
2022-09-12	14:25:56	0.358079	1.59281	3.7748	384.071	FALSE	4
2022-09-12	14:25:56	0.39243	1.74561	3.7748	339.187	FALSE	4
2022-09-12	14:25:56	0.597519	2.65788	3.7748	386.729	FALSE	4
2022-09-12	14:25:56	2.04642	9.10289	3.7748	348.29	FALSE	4
2022-09-12	14:25:57	2.64622	11.7709	9.71396	398.5	FALSE	4
2022-09-12	14:25:57	3.08938	13.7422	9.71396	362.032	1	5
2022-09-12	14:25:57	0.815789	3.62879	9.71396	402.128	FALSE	5
2022-09-12	14:25:58	0.390954	1.73904	1.42857	363.771	FALSE	5
2022-09-12	14:25:58	0.244898	1.08936	1.42857	403.218	FALSE	5
2022-09-12	14:25:58	0.383422	1.70554	1.42857	365.476	FALSE	5
2022-09-12	14:25:58	0.265356	1.18036	1.42857	404.398	FALSE	5
2022-09-12	14:25:59	0.146832	0.653138	1.81165	366.13	FALSE	5
2022-09-12	14:25:59	0.449886	2.00118	1.81165	406.399	FALSE	5
2022-09-12	14:25:59	0.615738	2.73893	1.81165	368.869	FALSE	5
2022-09-12	14:25:59	0.416654	1.85336	1.81165	408.253	FALSE	5
2022-09-12	14:26:00	0.36958	1.64397	1.82793	370.513	FALSE	5
2022-09-12	14:26:00	0.42383	1.88528	1.82793	410.138	FALSE	5
2022-09-12	14:26:00	0.439402	1.95455	1.82793	372.467	FALSE	5
2022-09-12	14:26:01	0.404746	1.80039	1.88505	411.938	FALSE	5
2022-09-12	14:26:01	0.473702	2.10712	1.88505	374.574	FALSE	5
2022-09-12	14:26:01	0.437214	1.94482	1.88505	413.883	FALSE	5
2022-09-12	14:26:01	0.379453	1.68788	1.88505	376.262	FALSE	5
2022-09-12	14:26:02	0.437774	1.94731	1.91873	415.83	FALSE	5
2022-09-12	14:26:02	0.429886	1.91222	1.91873	378.174	FALSE	5
2022-09-12	14:26:02	0.425916	1.89456	1.91873	417.725	FALSE	5
2022-09-12	14:26:02	0.431819	1.92082	1.91873	380.095	FALSE	5
2022-09-12	14:26:03	0.447036	1.98851	2.14227	419.714	FALSE	5
2022-09-12	14:26:03	0.448003	1.99281	2.14227	382.088	FALSE	5
2022-09-12	14:26:03	0.504389	2.24362	2.14227	421.957	FALSE	5
2022-09-12	14:26:03	0.526985	2.34413	2.14227	384.432	FALSE	5
2022-09-12	14:26:04	1.79701	7.99346	14.6532	429.951	FALSE	5
2022-09-12	14:26:04	1.71696	7.63738	14.6532	392.069	FALSE	5
2022-09-12	14:26:04	6.36856	28.3286	14.6532	458.279	1	6
2022-09-12	14:26:05	4.13401	18.3889	6.68758	410.458	1	7
2022-09-12	14:26:05	0.482201	2.14493	6.68758	460.424	FALSE	7
2022-09-12	14:26:05	1.04739	4.659	6.68758	415.117	FALSE	7
2022-09-12	14:26:05	0.35014	1.55749	6.68758	461.982	FALSE	7
2022-09-12	14:26:06	0.472227	2.10056	2.29235	417.218	FALSE	7
2022-09-12	14:26:06	0.646781	2.87701	2.29235	464.859	FALSE	7
2022-09-12	14:26:06	0.578079	2.57141	2.29235	419.789	FALSE	7
2022-09-12	14:26:06	0.364288	1.62043	2.29235	466.479	FALSE	7
2022-09-12	14:26:07	-0.0382568	-0.170174	-0.849967	419.789	FALSE	7
2022-09-12	14:26:07	-0.309503	-1.37673	-0.849967	466.479	FALSE	7
2022-09-12	14:26:07	-0.350623	-1.55964	-0.849967	419.789	FALSE	7
2022-09-12	14:26:07	-0.0659412	-0.29332	-0.849967	466.479	FALSE	7
2022-09-12	14:26:08	-0.370114	-1.64634	-2.57499	419.789	FALSE	7
2022-09-12	14:26:08	-0.922633	-4.10406	-2.57499	466.479	FALSE	7
2022-09-12	14:26:08	-0.443905	-1.97458	-2.57499	419.789	FALSE	7
2022-09-12	14:26:09	-0.0629895	-0.28019	0.177023	466.479	FALSE	7
2022-09-12	14:26:09	0.0627101	0.278947	0.177023	420.068	FALSE	7
2022-09-12	14:26:09	0.204898	0.911427	0.177023	467.391	FALSE	7
2022-09-12	14:26:09	-0.0454323	-0.202092	0.177023	420.068	FALSE	7
2022-09-12	14:26:10	-0.545686	-2.42732	-2.02048	467.391	FALSE	7
2022-09-12	14:26:10	-0.516933	-2.29942	-2.02048	420.068	FALSE	7
2022-09-12	14:26:10	-0.382786	-1.70271	-2.02048	467.391	FALSE	7
2022-09-12	14:26:10	-0.371488	-1.65245	-2.02048	420.068	FALSE	7
2022-09-12	14:26:11	-0.0586639	-0.260949	-0.352911	467.391	FALSE	7
2022-09-12	14:26:11	-0.00202267	-0.00899724	-0.352911	420.068	FALSE	7
2022-09-12	14:26:11	-0.0899106	-0.39994	-0.352911	467.391	FALSE	7
2022-09-12	14:26:11	-0.166755	-0.74176	-0.352911	420.068	FALSE	7
2022-09-12	14:26:12	-0.15388	-0.684489	-0.52135	467.391	FALSE	7
2022-09-12	14:26:12	-0.0696053	-0.309618	-0.52135	420.068	FALSE	7
2022-09-12	14:26:12	-0.128129	-0.569943	-0.52135	467.391	FALSE	7
2022-09-12	14:26:13	-0.13729	-0.610693	-0.0333321	420.068	FALSE	7
2022-09-12	14:26:13	0.0835244	0.371533	-0.0333321	467.762	FALSE	7
2022-09-12	14:26:13	-0.156272	-0.695129	-0.0333321	420.068	FALSE	7
2022-09-12	14:26:13	0.180064	0.800961	-0.0333321	468.563	FALSE	7
2022-09-12	14:26:14	0.112125	0.498754	0.0658183	420.567	FALSE	7
2022-09-12	14:26:14	0.0632699	0.281437	0.0658183	468.844	FALSE	7
2022-09-12	14:26:14	-0.118715	-0.528068	0.0658183	420.567	FALSE	7
2022-09-12	14:26:14	0.0025066	0.0111499	0.0658183	468.856	FALSE	7
2022-09-12	14:26:15	0.055331	0.246123	2.49546	420.813	FALSE	7
2022-09-12	14:26:15	0.164135	0.730105	2.49546	469.586	FALSE	7
2022-09-12	14:26:15	0.686985	3.05585	2.49546	423.869	FALSE	7
2022-09-12	14:26:15	1.33757	5.94978	2.49546	475.535	FALSE	7
2022-09-12	14:26:16	0.382812	1.70282	2.24732	425.572	FALSE	7
2022-09-12	14:26:16	0.386629	1.7198	2.24732	477.255	FALSE	7
2022-09-12	14:26:16	0.746221	3.31934	2.24732	428.891	FALSE	7
2022-09-12	14:26:17	0.52271	2.32512	1.11618	479.58	FALSE	7
2022-09-12	14:26:17	0.117214	0.521391	1.11618	429.413	FALSE	7
2022-09-12	14:26:17	0.350242	1.55795	1.11618	481.138	FALSE	7
2022-09-12	14:26:17	0.0135499	0.0602727	1.11618	429.473	FALSE	7
2022-09-12	14:26:18	0.315942	1.40537	0.959647	482.544	FALSE	7
2022-09-12	14:26:18	0.139708	0.621449	0.959647	430.094	FALSE	7
2022-09-12	14:26:18	0.212379	0.944704	0.959647	483.488	FALSE	7
2022-09-12	14:26:18	0.194924	0.867061	0.959647	430.961	FALSE	7
2022-09-12	14:26:19	0.140115	0.62326	0.491624	484.112	FALSE	7
2022-09-12	14:26:19	0.0666796	0.296604	0.491624	431.258	FALSE	7
2022-09-12	14:26:19	0.07299	0.324674	0.491624	484.436	FALSE	7
2022-09-12	14:26:19	0.162303	0.721956	0.491624	431.98	FALSE	7
2022-09-12	14:26:20	0.261438	1.16293	1.40567	485.599	FALSE	7
2022-09-12	14:26:20	0.311565	1.3859	1.40567	433.366	FALSE	7
2022-09-12	14:26:20	0.375026	1.66819	1.40567	487.267	FALSE	7
2022-09-12	14:26:21	0.492786	2.19201	2.54334	435.558	FALSE	7
2022-09-12	14:26:21	0.972634	4.32647	2.54334	491.594	FALSE	7
2022-09-12	14:26:21	0.50327	2.23865	2.54334	437.796	FALSE	7
2022-09-12	14:26:21	0.318384	1.41624	2.54334	493.01	FALSE	7
2022-09-12	14:26:22	0.358079	1.59281	1.59292	439.389	FALSE	7
2022-09-12	14:26:22	0.329682	1.46649	1.59292	494.477	FALSE	7
2022-09-12	14:26:22	0.394262	1.75376	1.59292	441.143	FALSE	7
2022-09-12	14:26:22	0.350394	1.55862	1.59292	496.035	FALSE	7
2022-09-12	14:26:23	0.571412	2.54175	2.11125	443.685	FALSE	7
2022-09-12	14:26:23	0.305	1.3567	2.11125	497.392	FALSE	7
2022-09-12	14:26:23	0.323779	1.44023	2.11125	445.125	FALSE	7
2022-09-12	14:26:23	0.698333	3.10632	2.11125	500.498	FALSE	7
2022-09-12	14:26:24	0.428104	1.90429	1.56828	447.029	FALSE	7
2022-09-12	14:26:24	0.310598	1.3816	1.56828	501.88	FALSE	7
2022-09-12	14:26:24	0.318995	1.41895	1.56828	448.448	FALSE	7
2022-09-12	14:26:25	0.43813	1.94889	1.44866	503.829	FALSE	7
2022-09-12	14:26:25	0.300725	1.33768	1.44866	449.786	FALSE	7
2022-09-12	14:26:25	0.165865	0.737801	1.44866	504.567	FALSE	7
2022-09-12	14:26:25	0.397977	1.77028	1.44866	451.556	FALSE	7
2022-09-12	14:26:26	0.141031	0.627334	0.873229	505.194	FALSE	7
2022-09-12	14:26:26	0.21925	0.975268	0.873229	452.531	FALSE	7
2022-09-12	14:26:26	0.209529	0.932027	0.873229	506.126	FALSE	7
2022-09-12	14:26:26	0.215433	0.958289	0.873229	453.49	FALSE	7
2022-09-12	14:26:27	0.200115	0.890152	0.709959	507.016	FALSE	7
2022-09-12	14:26:27	0.240573	1.07012	0.709959	454.56	FALSE	7
2022-09-12	14:26:27	0.261641	1.16383	0.709959	508.18	FALSE	7
2022-09-12	14:26:27	-0.0639056	-0.284265	0.709959	454.56	FALSE	7
2022-09-12	14:26:28	0.131209	0.583644	0.28672	508.764	FALSE	7
2022-09-12	14:26:28	0.0895295	0.398245	0.28672	454.958	FALSE	7
2022-09-12	14:26:28	-0.0273662	-0.12173	0.28672	508.764	FALSE	7
2022-09-12	14:26:29	0.30958	1.37707	1.12739	456.335	FALSE	7
2022-09-12	14:26:29	0.272328	1.21137	1.12739	509.975	FALSE	7
2022-09-12	14:26:29	0.287188	1.27747	1.12739	457.613	FALSE	7
2022-09-12	14:26:29	0.144695	0.643632	1.12739	510.619	FALSE	7
2022-09-12	14:26:30	0.585763	2.60559	1.61142	460.218	FALSE	7
2022-09-12	14:26:30	0.265662	1.18172	1.61142	511.8	FALSE	7
2022-09-12	14:26:30	0.20902	0.929763	1.61142	461.148	FALSE	7
2022-09-12	14:26:30	0.388613	1.72863	1.61142	513.529	FALSE	7
2022-09-12	14:26:31	0.289122	1.28607	1.34667	462.434	FALSE	7
2022-09-12	14:26:31	0.168461	0.749348	1.34667	514.278	FALSE	7
2022-09-12	14:26:31	0.450649	2.00458	1.34667	464.439	FALSE	7
2022-09-12	14:26:32	0.207341	0.922294	1.01726	515.201	FALSE	7
2022-09-12	14:26:32	0.279962	1.24533	1.01726	465.684	FALSE	7
2022-09-12	14:26:32	0.251463	1.11856	1.01726	516.319	FALSE	7
2022-09-12	14:26:32	0.175992	0.782848	1.01726	466.467	FALSE	7
2022-09-12	14:26:33	0.159046	0.707468	0.42739	517.027	FALSE	7
2022-09-12	14:26:33	0.0315651	0.140408	0.42739	466.607	FALSE	7
2022-09-12	14:26:33	0.126985	0.564855	0.42739	517.591	FALSE	7
2022-09-12	14:26:33	0.0667305	0.296831	0.42739	466.904	FALSE	7
2022-09-12	14:26:34	0.0994022	0.442161	0.662194	518.034	FALSE	7
2022-09-12	14:26:34	0.0436262	0.194058	0.662194	467.098	FALSE	7
2022-09-12	14:26:34	0.353957	1.57447	0.662194	519.608	FALSE	7
2022-09-12	14:26:34	0.0984862	0.438086	0.662194	467.536	FALSE	7
2022-09-12	14:26:35	0.226171	1.00605	0.42043	520.614	FALSE	7
2022-09-12	14:26:35	0.00393154	0.0174883	0.42043	467.554	FALSE	7
2022-09-12	14:26:35	0.0534481	0.237748	0.42043	520.852	FALSE	7
2022-09-12	14:26:36	-0.0779005	-0.346517	0.212677	467.554	FALSE	7
2022-09-12	14:26:36	0.0849493	0.377871	0.212677	521.23	FALSE	7
2022-09-12	14:26:36	0.0614888	0.273514	0.212677	467.827	FALSE	7
2022-09-12	14:26:36	0.12271	0.545839	0.212677	521.776	FALSE	7
2022-09-12	14:26:37	0.114262	0.50826	0.020261	468.335	FALSE	7
2022-09-12	14:26:37	-0.0213611	-0.0950184	0.020261	521.776	FALSE	7
2022-09-12	14:26:37	-0.00589033	-0.0262014	0.020261	468.335	FALSE	7
2022-09-12	14:26:37	-0.0687911	-0.305997	0.020261	521.776	FALSE	7
2022-09-12	14:26:38	-0.0910811	-0.405147	-0.343178	468.335	FALSE	7
2022-09-12	14:26:38	-0.0456868	-0.203224	-0.343178	521.776	FALSE	7
2022-09-12	14:26:38	-0.201412	-0.895921	-0.343178	468.335	FALSE	7
2022-09-12	14:26:38	0.0295804	0.13158	-0.343178	521.907	FALSE	7
2022-09-12	14:26:39	0.0424557	0.188851	0.0538584	468.524	FALSE	7
2022-09-12	14:26:39	-0.116832	-0.519692	0.0538584	521.907	FALSE	7
2022-09-12	14:26:39	0.1107	0.492416	0.0538584	469.017	FALSE	7
2022-09-12	14:26:40	0.102201	0.45461	0.843291	522.362	FALSE	7
2022-09-12	14:26:40	0.201438	0.896037	0.843291	469.913	FALSE	7
2022-09-12	14:26:40	0.260165	1.15727	0.843291	523.519	FALSE	7
2022-09-12	14:26:40	0.194517	0.865251	0.843291	470.778	FALSE	7
2022-09-12	14:26:41	-0.172099	-0.765531	-0.375832	523.519	FALSE	7
2022-09-12	14:26:41	-0.260598	-1.15919	-0.375832	470.778	FALSE	7
2022-09-12	14:26:41	-0.0672643	-0.299205	-0.375832	523.519	FALSE	7
2022-09-12	14:26:41	0.161998	0.7206	-0.375832	471.499	FALSE	7
2022-09-12	14:26:42	0.346272	1.54029	1.44385	525.059	FALSE	7
2022-09-12	14:26:42	0.3593	1.59824	1.44385	473.097	FALSE	7
2022-09-12	14:26:42	0.337112	1.49954	1.44385	526.559	FALSE	7
2022-09-12	14:26:42	0.255687	1.13735	1.44385	474.234	FALSE	7
2022-09-12	14:26:43	0.407239	1.81148	2.12606	528.37	FALSE	7
2022-09-12	14:26:43	0.535127	2.38035	2.12606	476.615	FALSE	7
2022-09-12	14:26:43	0.491514	2.18635	2.12606	530.557	FALSE	7
2022-09-12	14:26:44	0.378842	1.68516	2.1108	478.3	FALSE	7
2022-09-12	14:26:44	0.579147	2.57616	2.1108	533.133	FALSE	7
2022-09-12	14:26:44	0.414924	1.84566	2.1108	480.145	FALSE	7
2022-09-12	14:26:44	0.525203	2.33621	2.1108	535.469	FALSE	7
2022-09-12	14:26:45	0.286832	1.27589	1.79677	481.421	FALSE	7
2022-09-12	14:26:45	0.464186	2.06479	1.79677	537.534	FALSE	7
2022-09-12	14:26:45	0.427392	1.90113	1.79677	483.322	FALSE	7
2022-09-12	14:26:45	0.437316	1.94527	1.79677	539.479	FALSE	7
2022-09-12	14:26:46	0.493702	2.19609	2.05262	485.519	FALSE	7
2022-09-12	14:26:46	0.344542	1.53259	2.05262	541.012	FALSE	7
2022-09-12	14:26:46	0.4793	2.13202	2.05262	487.651	FALSE	7
2022-09-12	14:26:46	0.528257	2.34979	2.05262	543.362	FALSE	7
2022-09-12	14:26:47	0.447697	1.99145	2.24551	489.642	FALSE	7
2022-09-12	14:26:47	0.568002	2.52659	2.24551	545.888	FALSE	7
2022-09-12	14:26:47	0.49874	2.2185	2.24551	491.86	FALSE	7
2022-09-12	14:26:48	0.552888	2.45936	2.19778	548.348	FALSE	7
2022-09-12	14:26:48	0.442252	1.96723	2.19778	493.828	FALSE	7
2022-09-12	14:26:48	0.443982	1.97492	2.19778	550.322	FALSE	7
2022-09-12	14:26:48	0.537214	2.38964	2.19778	496.217	FALSE	7
2022-09-12	14:26:49	0.344949	1.5344	2.83655	551.857	FALSE	7
2022-09-12	14:26:49	0.445458	1.98149	2.83655	498.199	FALSE	7
2022-09-12	14:26:49	0.718384	3.19552	2.83655	555.052	FALSE	7
2022-09-12	14:26:49	1.04195	4.6348	2.83655	502.834	FALSE	7
2022-09-12	14:26:50	0.545	2.42427	2.53655	557.477	FALSE	7
2022-09-12	14:26:50	0.46902	2.08629	2.53655	504.92	FALSE	7
2022-09-12	14:26:50	0.493295	2.19427	2.53655	559.671	FALSE	7
2022-09-12	14:26:50	0.773652	3.44136	2.53655	508.361	FALSE	7
2022-09-12	14:26:51	0.851565	3.78793	2.29675	563.459	FALSE	7
2022-09-12	14:26:51	0.423321	1.88302	2.29675	510.244	FALSE	7
2022-09-12	14:26:51	0.27411	1.2193	2.29675	564.678	FALSE	7
2022-09-12	14:26:52	0.364389	1.62088	1.82874	511.865	FALSE	7
2022-09-12	14:26:52	0.523168	2.32716	1.82874	567.005	FALSE	7
2022-09-12	14:26:52	0.413651	1.84	1.82874	513.705	FALSE	7
2022-09-12	14:26:52	0.34327	1.52693	1.82874	568.532	FALSE	7
2022-09-12	14:26:53	0.357417	1.58986	2.68075	515.295	FALSE	7
2022-09-12	14:26:53	0.4736	2.10667	2.68075	570.639	FALSE	7
2022-09-12	14:26:53	1.27391	5.66661	2.68075	520.962	FALSE	7
2022-09-12	14:26:53	0.305713	1.35987	2.68075	571.999	FALSE	7
2022-09-12	14:26:54	0.466272	2.07407	1.67249	523.036	FALSE	7
2022-09-12	14:26:54	0.411361	1.82982	1.67249	573.829	FALSE	7
2022-09-12	14:26:54	0.186374	0.829029	1.67249	523.865	FALSE	7
2022-09-12	14:26:54	0.439962	1.95704	1.67249	575.786	FALSE	7
2022-09-12	14:26:55	0.159148	0.707922	0.560705	524.573	FALSE	7
2022-09-12	14:26:55	0.0626084	0.278495	0.560705	576.064	FALSE	7
2022-09-12	14:26:55	0.1564	0.695698	0.560705	525.268	FALSE	7
2022-09-12	14:26:56	0.320166	1.42416	5.95538	577.488	FALSE	7
2022-09-12	14:26:56	0.679198	3.02121	5.95538	528.29	FALSE	7
2022-09-12	14:26:56	2.34734	10.4414	5.95538	587.93	FALSE	7
2022-09-12	14:26:56	2.00861	8.9347	5.95538	537.224	FALSE	7
2022-09-12	14:26:57	1.40912	6.26805	6.11317	594.198	FALSE	7
2022-09-12	14:26:57	1.87676	8.3482	6.11317	545.572	FALSE	7
2022-09-12	14:26:57	1.46485	6.51595	6.11317	600.714	FALSE	7
2022-09-12	14:26:57	0.746476	3.32047	6.11317	548.893	FALSE	7
2022-09-12	14:26:58	0.466323	2.0743	3.0157	602.788	FALSE	7
2022-09-12	14:26:58	0.597265	2.65675	3.0157	551.55	FALSE	7
2022-09-12	14:26:58	0.970293	4.31606	3.0157	607.104	FALSE	7
2022-09-12	14:26:59	1.05024	4.67168	6.07406	556.221	FALSE	7
2022-09-12	14:26:59	1.02892	4.57684	6.07406	611.681	FALSE	7
2022-09-12	14:26:59	1.47391	6.55625	6.07406	562.778	FALSE	7
2022-09-12	14:26:59	1.90897	8.49148	6.07406	620.172	FALSE	7
2022-09-12	14:27:00	2.59345	11.5362	7.19606	574.314	FALSE	7
2022-09-12	14:27:00	1.70642	7.5905	7.19606	627.763	FALSE	7
2022-09-12	14:27:00	1.15696	5.14639	7.19606	579.46	FALSE	7
2022-09-12	14:27:00	1.01416	4.51119	7.19606	632.274	FALSE	7
2022-09-12	14:27:01	1.0049	4.47	3.97633	583.93	FALSE	7
2022-09-12	14:27:01	0.846679	3.7662	3.97633	636.04	FALSE	7
2022-09-12	14:27:01	0.912277	4.05799	3.97633	587.988	FALSE	7
2022-09-12	14:27:01	0.811819	3.61113	3.97633	639.651	FALSE	7
2022-09-12	14:27:02	1.02485	4.55874	4.78435	592.547	FALSE	7
2022-09-12	14:27:02	1.09111	4.85348	4.78435	644.505	FALSE	7
2022-09-12	14:27:02	1.11075	4.94084	4.78435	597.488	FALSE	7
2022-09-12	14:27:03	1.0278	4.57186	4.2701	649.077	FALSE	7
2022-09-12	14:27:03	0.998486	4.44147	4.2701	601.929	FALSE	7
2022-09-12	14:27:03	0.981285	4.36495	4.2701	653.442	FALSE	7
2022-09-12	14:27:03	0.832277	3.70213	4.2701	605.631	FALSE	7
2022-09-12	14:27:04	0.900522	4.0057	3.8143	657.447	FALSE	7
2022-09-12	14:27:04	0.946272	4.20921	3.8143	609.841	FALSE	7
2022-09-12	14:27:04	0.778639	3.46354	3.8143	660.911	FALSE	7
2022-09-12	14:27:04	0.804542	3.57876	3.8143	613.419	FALSE	7
2022-09-12	14:27:05	0.209173	0.930443	0.710863	661.841	FALSE	7
2022-09-12	14:27:05	0.231361	1.02914	0.710863	614.448	FALSE	7
2022-09-12	14:27:05	0.0787916	0.350481	0.710863	662.192	FALSE	7
2022-09-12	14:27:05	0.119911	0.533388	0.710863	614.982	FALSE	7
2022-09-12	14:27:06	-0.000394156	-0.00175328	0.578285	662.192	FALSE	7
2022-09-12	14:27:06	0.208104	0.925688	0.578285	615.908	FALSE	7
2022-09-12	14:27:06	0.182303	0.81092	0.578285	663.003	FALSE	7
2022-09-12	14:27:07	0.0875448	0.389417	0.548838	616.297	FALSE	7
2022-09-12	14:27:07	0.0389951	0.173458	0.548838	663.176	FALSE	7
2022-09-12	14:27:07	-0.0100634	-0.044764	0.548838	616.297	FALSE	7
2022-09-12	14:27:07	0.377061	1.67724	0.548838	664.853	FALSE	7
2022-09-12	14:27:08	0.492685	2.19156	1.65313	618.489	FALSE	7
2022-09-12	14:27:08	0.466781	2.07634	1.65313	666.93	FALSE	7
2022-09-12	14:27:08	0.145814	0.64861	1.65313	619.137	FALSE	7
2022-09-12	14:27:08	0.381285	1.69603	1.65313	668.626	FALSE	7
2022-09-12	14:27:09	0.433499	1.92829	1.6108	621.065	FALSE	7
2022-09-12	14:27:09	0.399504	1.77707	1.6108	670.403	FALSE	7
2022-09-12	14:27:09	0.310293	1.38025	1.6108	622.446	FALSE	7
2022-09-12	14:27:09	0.305204	1.35761	1.6108	671.761	FALSE	7
2022-09-12	14:27:10	0.41584	1.84974	1.22865	624.295	FALSE	7
2022-09-12	14:27:10	0.230903	1.0271	1.22865	672.788	FALSE	7
2022-09-12	14:27:10	0.181896	0.80911	1.22865	625.105	FALSE	7
2022-09-12	14:27:11	-0.215509	-0.958627	-1.16032	672.788	FALSE	7
2022-09-12	14:27:11	-0.310674	-1.38194	-1.16032	625.105	FALSE	7
2022-09-12	14:27:11	-0.276526	-1.23004	-1.16032	672.788	FALSE	7
2022-09-12	14:27:11	-0.240699	-1.07068	-1.16032	625.105	FALSE	7
2022-09-12	14:27:12	-0.0314374	-0.13984	0.0706285	672.788	FALSE	7
2022-09-12	14:27:12	-0.0822262	-0.365759	0.0706285	625.105	FALSE	7
2022-09-12	14:27:12	0.0527356	0.234578	0.0706285	673.022	FALSE	7
2022-09-12	14:27:12	0.12444	0.553534	0.0706285	625.658	FALSE	7
2022-09-12	14:27:13	0.356552	1.58601	1.74872	674.608	FALSE	7
2022-09-12	14:27:13	0.254211	1.13078	1.74872	626.789	FALSE	7
2022-09-12	14:27:13	0.477468	2.12387	1.74872	676.732	FALSE	7
2022-09-12	14:27:13	0.484288	2.15421	1.74872	628.943	FALSE	7
2022-09-12	14:27:14	0.382354	1.70079	1.40673	678.433	FALSE	7
2022-09-12	14:27:14	0.372786	1.65823	1.40673	630.601	FALSE	7
2022-09-12	14:27:14	0.193601	0.861176	1.40673	679.294	FALSE	7
2022-09-12	14:27:15	0.17813	0.792358	0.927105	631.394	FALSE	7
2022-09-12	14:27:15	0.227443	1.01171	0.927105	680.306	FALSE	7
2022-09-12	14:27:15	0.235738	1.04861	0.927105	632.442	FALSE	7
2022-09-12	14:27:15	0.192379	0.85574	0.927105	681.161	FALSE	7
2022-09-12	14:27:16	0.234059	1.04114	1.10017	633.483	FALSE	7
2022-09-12	14:27:16	0.311565	1.3859	1.10017	682.547	FALSE	7
2022-09-12	14:27:16	0.210242	0.935198	1.10017	634.419	FALSE	7
2022-09-12	14:27:16	0.233448	1.03842	1.10017	683.586	FALSE	7
2022-09-12	14:27:17	0.224288	0.997678	1.22722	635.416	FALSE	7
2022-09-12	14:27:17	0.273193	1.21522	1.22722	684.801	FALSE	7
2022-09-12	14:27:17	0.3364	1.49637	1.22722	636.913	FALSE	7
2022-09-12	14:27:17	0.269682	1.1996	1.22722	686.001	FALSE	7
2022-09-12	14:27:18	0.300267	1.33565	1.40892	638.248	FALSE	7
2022-09-12	14:27:18	0.356247	1.58466	1.40892	687.585	FALSE	7
2022-09-12	14:27:18	0.293702	1.30645	1.40892	639.555	FALSE	7
2022-09-12	14:27:19	0.330547	1.47034	1.42303	689.056	FALSE	7
2022-09-12	14:27:19	0.320573	1.42597	1.42303	640.981	FALSE	7
2022-09-12	14:27:19	0.278181	1.2374	1.42303	690.293	FALSE	7
2022-09-12	14:27:19	0.350344	1.5584	1.42303	642.539	FALSE	7
2022-09-12	14:27:20	0.313244	1.39337	1.21612	691.686	FALSE	7
2022-09-12	14:27:20	0.261387	1.1627	1.21612	643.702	FALSE	7
2022-09-12	14:27:20	0.260878	1.16044	1.21612	692.847	FALSE	7
2022-09-12	14:27:20	0.258079	1.14799	1.21612	644.85	FALSE	7
2022-09-12	14:27:21	0.192277	0.855287	1.04312	693.702	FALSE	7
2022-09-12	14:27:21	0.377316	1.67838	1.04312	646.528	FALSE	7
2022-09-12	14:27:21	0.147494	0.656083	1.04312	694.358	FALSE	7
2022-09-12	14:27:21	0.220929	0.982736	1.04312	647.511	FALSE	7
2022-09-12	14:27:22	0.381336	1.69626	1.66366	696.054	FALSE	7
2022-09-12	14:27:22	0.359758	1.60028	1.66366	649.111	FALSE	7
2022-09-12	14:27:22	0.380929	1.69445	1.66366	697.749	FALSE	7
2022-09-12	14:27:23	0.394822	1.75625	1.71748	650.867	FALSE	7
2022-09-12	14:27:23	0.385764	1.71596	1.71748	699.465	FALSE	7
2022-09-12	14:27:23	0.37757	1.67951	1.71748	652.547	FALSE	7
2022-09-12	14:27:23	0.386272	1.71822	1.71748	701.183	FALSE	7
2022-09-12	14:27:24	0.391972	1.74357	1.72835	654.29	FALSE	7
2022-09-12	14:27:24	0.387239	1.72252	1.72835	702.906	FALSE	7
2022-09-12	14:27:24	0.390445	1.73678	1.72835	656.027	FALSE	7
2022-09-12	14:27:24	0.384542	1.71052	1.72835	704.616	FALSE	7
2022-09-12	14:27:25	0.38958	1.73293	1.58386	657.76	FALSE	7
2022-09-12	14:27:25	0.451005	2.00616	1.58386	706.622	FALSE	7
2022-09-12	14:27:25	0.294567	1.31029	1.58386	659.07	FALSE	7
2022-09-12	14:27:25	0.289122	1.28607	1.58386	707.908	FALSE	7
2022-09-12	14:27:26	0.34556	1.53712	1.48883	660.608	FALSE	7
2022-09-12	14:27:26	0.294415	1.30962	1.48883	709.218	FALSE	7
2022-09-12	14:27:26	0.364135	1.61975	1.48883	662.227	FALSE	7
2022-09-12	14:27:27	0.368003	1.63695	1.8125	710.855	FALSE	7
2022-09-12	14:27:27	0.415484	1.84816	1.8125	664.076	FALSE	7
2022-09-12	14:27:27	0.45355	2.01748	1.8125	712.872	FALSE	7
2022-09-12	14:27:27	0.392837	1.74742	1.8125	665.823	FALSE	7
2022-09-12	14:27:28	0.42841	1.90565	1.85642	714.778	FALSE	7
2022-09-12	14:27:28	0.455891	2.02789	1.85642	667.851	FALSE	7
2022-09-12	14:27:28	0.455229	2.02495	1.85642	716.803	FALSE	7
2022-09-12	14:27:28	0.329835	1.46717	1.85642	669.318	FALSE	7
2022-09-12	14:27:29	0.438486	1.95047	1.75406	718.753	FALSE	7
2022-09-12	14:27:29	0.3907	1.73791	1.75406	671.056	FALSE	7
2022-09-12	14:27:29	0.353804	1.57379	1.75406	720.327	FALSE	7
2022-09-12	14:27:30	0.439148	1.95342	1.88268	673.009	FALSE	7
2022-09-12	14:27:30	0.351361	1.56292	1.88268	721.89	FALSE	7
2022-09-12	14:27:30	0.397825	1.76961	1.88268	674.779	FALSE	7
2022-09-12	14:27:30	0.504644	2.24476	1.88268	724.135	FALSE	7
2022-09-12	14:27:31	0.45187	2.01001	1.70407	676.789	FALSE	7
2022-09-12	14:27:31	0.367901	1.6365	1.70407	725.771	FALSE	7
2022-09-12	14:27:31	0.343779	1.5292	1.70407	678.318	FALSE	7
2022-09-12	14:27:31	0.368817	1.64057	1.70407	727.412	FALSE	7
2022-09-12	14:27:32	0.359351	1.59847	1.75778	679.917	FALSE	7
2022-09-12	14:27:32	0.458893	2.04125	1.75778	729.453	FALSE	7
2022-09-12	14:27:32	0.406985	1.81035	1.75778	681.727	FALSE	7
2022-09-12	14:27:32	0.355433	1.58104	1.75778	731.034	FALSE	7
2022-09-12	14:27:33	0.40327	1.79383	2.01695	683.521	FALSE	7
2022-09-12	14:27:33	0.55757	2.48018	2.01695	733.515	FALSE	7
2022-09-12	14:27:33	0.399453	1.77685	2.01695	685.298	FALSE	7
2022-09-12	14:27:34	0.390954	1.73904	1.89094	735.254	FALSE	7
2022-09-12	14:27:34	0.440725	1.96043	1.89094	687.258	FALSE	7
2022-09-12	14:27:34	0.479911	2.13474	1.89094	737.388	FALSE	7
2022-09-12	14:27:34	0.388817	1.72954	1.89094	688.988	FALSE	7
2022-09-12	14:27:35	0.554415	2.46615	1.98483	739.854	FALSE	7
2022-09-12	14:27:35	0.421947	1.8769	1.98483	690.865	FALSE	7
2022-09-12	14:27:35	0.432227	1.92263	1.98483	741.777	FALSE	7
2022-09-12	14:27:35	0.376247	1.67362	1.98483	692.538	FALSE	7
2022-09-12	14:27:36	0.433041	1.92625	2.03966	743.703	FALSE	7
2022-09-12	14:27:36	0.488664	2.17368	2.03966	694.712	FALSE	7
2022-09-12	14:27:36	0.358028	1.59258	2.03966	745.296	FALSE	7
2022-09-12	14:27:36	0.554415	2.46615	2.03966	697.178	FALSE	7
2022-09-12	14:27:37	0.570038	2.53564	2.15851	747.832	FALSE	7
2022-09-12	14:27:37	0.490649	2.1825	2.15851	699.36	FALSE	7
2022-09-12	14:27:37	0.395076	1.75738	2.15851	749.589	FALSE	7
2022-09-12	14:27:38	0.461947	2.05483	2.04861	701.415	FALSE	7
2022-09-12	14:27:38	0.376603	1.67521	2.04861	751.264	FALSE	7
2022-09-12	14:27:38	0.416349	1.852	2.04861	703.267	FALSE	7
2022-09-12	14:27:38	0.58729	2.61238	2.04861	753.877	FALSE	7
2022-09-12	14:27:39	0.358893	1.59643	1.93519	704.864	FALSE	7
2022-09-12	14:27:39	0.552074	2.45574	1.93519	756.332	FALSE	7
2022-09-12	14:27:39	0.469835	2.08992	1.93519	706.954	FALSE	7
2022-09-12	14:27:39	0.359402	1.59869	1.93519	757.931	FALSE	7
2022-09-12	14:27:40	0.470954	2.0949	2.02314	709.049	FALSE	7
2022-09-12	14:27:40	0.382252	1.70033	2.02314	759.631	FALSE	7
2022-09-12	14:27:40	0.531005	2.36202	2.02314	711.411	FALSE	7
2022-09-12	14:27:40	0.435076	1.93531	2.02314	761.567	FALSE	7
2022-09-12	14:27:41	0.437214	1.94482	1.91018	713.355	FALSE	7
2022-09-12	14:27:41	0.478537	2.12863	1.91018	763.695	FALSE	7
2022-09-12	14:27:41	0.372532	1.6571	1.91018	715.012	FALSE	7
2022-09-12	14:27:42	0.504796	2.24543	1.80792	765.941	FALSE	7
2022-09-12	14:27:42	0.344389	1.53191	1.80792	716.544	FALSE	7
2022-09-12	14:27:42	0.424186	1.88686	1.80792	767.828	FALSE	7
2022-09-12	14:27:42	0.352379	1.56745	1.80792	718.112	FALSE	7
2022-09-12	14:27:43	0.359809	1.6005	1.8584	769.428	FALSE	7
2022-09-12	14:27:43	0.450395	2.00345	1.8584	720.115	FALSE	7
2022-09-12	14:27:43	0.361743	1.60911	1.8584	771.037	FALSE	7
2022-09-12	14:27:43	0.499198	2.22053	1.8584	722.336	FALSE	7
2022-09-12	14:27:44	0.352481	1.56791	1.7494	772.605	FALSE	7
2022-09-12	14:27:44	0.440725	1.96043	1.7494	724.296	FALSE	7
2022-09-12	14:27:44	0.392685	1.74674	1.7494	774.352	FALSE	7
2022-09-12	14:27:44	0.387239	1.72252	1.7494	726.019	FALSE	7
2022-09-12	14:27:45	0.615636	2.73847	2.67275	777.09	FALSE	7
2022-09-12	14:27:45	0.653142	2.90531	2.67275	728.924	FALSE	7
2022-09-12	14:27:45	0.533804	2.37447	2.67275	779.465	FALSE	7
2022-09-12	14:27:46	0.644593	2.86728	2.35936	731.791	FALSE	7
2022-09-12	14:27:46	0.668206	2.97231	2.35936	782.437	FALSE	7
2022-09-12	14:27:46	0.363524	1.61703	2.35936	733.408	FALSE	7
2022-09-12	14:27:46	0.445305	1.98081	2.35936	784.418	FALSE	7
2022-09-12	14:27:47	0.308359	1.37164	1.56383	734.78	FALSE	7
2022-09-12	14:27:47	0.377926	1.68109	1.56383	786.099	FALSE	7
2022-09-12	14:27:47	0.351565	1.56383	1.56383	736.344	FALSE	7
2022-09-12	14:27:47	0.36841	1.63876	1.56383	787.738	FALSE	7
2022-09-12	14:27:48	0.344797	1.53373	1.57266	737.878	FALSE	7
2022-09-12	14:27:48	0.31126	1.38455	1.57266	789.122	FALSE	7
2022-09-12	14:27:48	0.376552	1.67498	1.57266	739.553	FALSE	7
2022-09-12	14:27:48	0.38159	1.69739	1.57266	790.82	FALSE	7
2022-09-12	14:27:49	0.39187	1.74312	1.88332	741.296	FALSE	7
2022-09-12	14:27:49	0.409936	1.82348	1.88332	792.643	FALSE	7
2022-09-12	14:27:49	0.468359	2.08335	1.88332	743.379	FALSE	7
2022-09-12	14:27:50	0.766577	3.40989	2.58573	796.053	FALSE	7
2022-09-12	14:27:50	0.634669	2.82313	2.58573	746.202	FALSE	7
2022-09-12	14:27:50	0.547544	2.43559	2.58573	798.489	FALSE	7
2022-09-12	14:27:50	0.3764	1.6743	2.58573	747.876	FALSE	7
2022-09-12	14:27:51	0.422659	1.88007	1.53916	800.369	FALSE	7
2022-09-12	14:27:51	0.323219	1.43774	1.53916	749.314	FALSE	7
2022-09-12	14:27:51	0.436298	1.94074	1.53916	802.309	FALSE	7
2022-09-12	14:27:51	0.201896	0.898074	1.53916	750.212	FALSE	7
2022-09-12	14:27:52	0.468766	2.08516	1.84589	804.395	FALSE	7
2022-09-12	14:27:52	0.334669	1.48867	1.84589	751.701	FALSE	7
2022-09-12	14:27:52	0.630852	2.80616	1.84589	807.201	FALSE	7
2022-09-12	14:27:52	0.225611	1.00356	1.84589	752.705	FALSE	7
2022-09-12	14:27:53	0.528155	2.34934	1.9636	809.55	FALSE	7
2022-09-12	14:27:53	0.296807	1.32026	1.9636	754.025	FALSE	7
2022-09-12	14:27:53	0.499351	2.22121	1.9636	811.771	FALSE	7
2022-09-12	14:27:54	0.277519	1.23446	1.65868	755.259	FALSE	7
2022-09-12	14:27:54	0.44215	1.96677	1.65868	813.738	FALSE	7
2022-09-12	14:27:54	0.257366	1.14482	1.65868	756.404	FALSE	7
2022-09-12	14:27:54	0.514517	2.28867	1.65868	816.027	FALSE	7
2022-09-12	14:27:55	0.262201	1.16632	1.71912	757.57	FALSE	7
2022-09-12	14:27:55	0.474364	2.11007	1.71912	818.137	FALSE	7
2022-09-12	14:27:55	0.311056	1.38364	1.71912	758.954	FALSE	7
2022-09-12	14:27:55	0.498282	2.21646	1.71912	820.353	FALSE	7
2022-09-12	14:27:56	0.291667	1.29739	1.75828	760.251	FALSE	7
2022-09-12	14:27:56	0.509224	2.26513	1.75828	822.618	FALSE	7
2022-09-12	14:27:56	0.384949	1.71233	1.75828	761.964	FALSE	7
2022-09-12	14:27:57	0.528868	2.35251	2.02105	824.971	FALSE	7
2022-09-12	14:27:57	0.41416	1.84227	2.02105	763.806	FALSE	7
2022-09-12	14:27:57	0.526934	2.34391	2.02105	827.315	FALSE	7
2022-09-12	14:27:57	0.347443	1.5455	2.02105	765.351	FALSE	7
2022-09-12	14:27:58	0.442048	1.96632	1.9344	829.281	FALSE	7
2022-09-12	14:27:58	0.477926	2.12591	1.9344	767.477	FALSE	7
2022-09-12	14:27:58	0.439148	1.95342	1.9344	831.234	FALSE	7
2022-09-12	14:27:58	0.380369	1.69196	1.9344	769.169	FALSE	7
2022-09-12	14:27:59	0.470751	2.09399	2.76213	833.328	FALSE	7
2022-09-12	14:27:59	0.79472	3.53507	2.76213	772.704	FALSE	7
2022-09-12	14:27:59	0.578486	2.57322	2.76213	835.902	FALSE	7
2022-09-12	14:27:59	0.63986	2.84623	2.76213	775.551	FALSE	7
2022-09-12	14:28:00	0.665204	2.95896	2.34089	838.861	FALSE	7
2022-09-12	14:28:00	0.538232	2.39416	2.34089	777.945	FALSE	7
2022-09-12	14:28:00	0.375331	1.66955	2.34089	840.53	FALSE	7
2022-09-12	14:28:01	0.382405	1.70101	1.94606	779.646	FALSE	7
2022-09-12	14:28:01	0.434313	1.93191	1.94606	842.462	FALSE	7
2022-09-12	14:28:01	0.427748	1.90271	1.94606	781.549	FALSE	7
2022-09-12	14:28:01	0.505509	2.24861	1.94606	844.711	FALSE	7
2022-09-12	14:28:02	0.311361	1.385	1.97747	782.934	FALSE	7
2022-09-12	14:28:02	0.499758	2.22302	1.97747	846.934	FALSE	7
2022-09-12	14:28:02	0.392837	1.74742	1.97747	784.681	FALSE	7
2022-09-12	14:28:02	0.574262	2.55443	1.97747	849.488	FALSE	7
2022-09-12	14:28:03	0.448766	1.9962	1.83372	786.677	FALSE	7
2022-09-12	14:28:03	0.393601	1.75082	1.83372	851.239	FALSE	7
2022-09-12	14:28:03	0.383473	1.70576	1.83372	788.383	FALSE	7
2022-09-12	14:28:03	0.423117	1.88211	1.83372	853.121	FALSE	7
2022-09-12	14:28:04	0.513957	2.28618	2.17466	790.669	FALSE	7
2022-09-12	14:28:04	0.472888	2.1035	2.17466	855.225	FALSE	7
2022-09-12	14:28:04	0.479809	2.13429	2.17466	792.803	FALSE	7
2022-09-12	14:28:05	0.498435	2.21714	2.13661	857.442	FALSE	7
2022-09-12	14:28:05	0.484695	2.15602	2.13661	794.959	FALSE	7
2022-09-12	14:28:05	0.463168	2.06026	2.13661	859.502	FALSE	7
2022-09-12	14:28:05	0.475026	2.11301	2.13661	797.072	FALSE	7
2022-09-12	14:28:06	0.488461	2.17277	2.13944	861.675	FALSE	7
2022-09-12	14:28:06	0.478588	2.12886	2.13944	799.201	FALSE	7
2022-09-12	14:28:06	0.481285	2.14085	2.13944	863.816	FALSE	7
2022-09-12	14:28:06	0.475534	2.11527	2.13944	801.317	FALSE	7
2022-09-12	14:28:07	0.480522	2.13746	2.14719	865.953	FALSE	7
2022-09-12	14:28:07	0.474771	2.11188	2.14719	803.428	FALSE	7
2022-09-12	14:28:07	0.48958	2.17775	2.14719	868.131	FALSE	7
2022-09-12	14:28:07	0.485967	2.16168	2.14719	805.59	FALSE	7
2022-09-12	14:28:08	0.482608	2.14674	1.9553	870.278	FALSE	7
2022-09-12	14:28:08	0.52271	2.32512	1.9553	807.915	FALSE	7
2022-09-12	14:28:08	0.313397	1.39405	1.9553	871.672	FALSE	7
2022-09-12	14:28:09	0.471514	2.09739	1.94646	810.013	FALSE	7
2022-09-12	14:28:09	0.513804	2.2855	1.94646	873.957	FALSE	7
2022-09-12	14:28:09	0.36042	1.60322	1.94646	811.616	FALSE	7
2022-09-12	14:28:09	0.404593	1.79971	1.94646	875.757	FALSE	7
2022-09-12	14:28:10	0.483066	2.14877	1.95647	813.765	FALSE	7
2022-09-12	14:28:10	0.406629	1.80877	1.95647	877.566	FALSE	7
2022-09-12	14:28:10	0.475687	2.11595	1.95647	815.881	FALSE	7
2022-09-12	14:28:10	0.393957	1.7524	1.95647	879.318	FALSE	7
2022-09-12	14:28:11	0.452481	2.01273	1.84108	817.893	FALSE	7
2022-09-12	14:28:11	0.336552	1.49705	1.84108	880.815	FALSE	7
2022-09-12	14:28:11	0.389631	1.73316	1.84108	819.626	FALSE	7
2022-09-12	14:28:11	0.476909	2.12139	1.84108	882.936	FALSE	7
2022-09-12	14:28:12	0.337214	1.5	1.54693	821.126	FALSE	7
2022-09-12	14:28:12	0.421641	1.87554	1.54693	884.812	FALSE	7
2022-09-12	14:28:12	0.28444	1.26525	1.54693	822.392	FALSE	7
2022-09-12	14:28:13	0.50042	2.22597	3.70299	887.038	FALSE	7
2022-09-12	14:28:13	0.398639	1.77323	3.70299	824.165	FALSE	7
2022-09-12	14:28:13	1.0049	4.47	3.70299	891.508	FALSE	7
2022-09-12	14:28:13	1.42592	6.34278	3.70299	830.508	FALSE	7
2022-09-12	14:28:14	1.20515	5.36075	3.8714	896.869	FALSE	7
2022-09-12	14:28:14	0.959453	4.26784	3.8714	834.776	FALSE	7
2022-09-12	14:28:14	0.875738	3.89546	3.8714	900.764	FALSE	7
2022-09-12	14:28:14	0.44098	1.96157	3.8714	836.737	FALSE	7
2022-09-12	14:28:15	0.390649	1.73768	1.685	902.502	FALSE	7
2022-09-12	14:28:15	0.417977	1.85925	1.685	838.596	FALSE	7
2022-09-12	14:28:15	0.303015	1.34787	1.685	903.85	FALSE	7
2022-09-12	14:28:15	0.403575	1.79518	1.685	840.392	FALSE	7
2022-09-12	14:28:16	0.239046	1.06332	1.36214	904.913	FALSE	7
2022-09-12	14:28:16	0.458588	2.03989	1.36214	842.431	FALSE	7
2022-09-12	14:28:16	0.221031	0.98319	1.36214	905.896	FALSE	7
2022-09-12	14:28:17	0.350191	1.55772	1.31069	843.989	FALSE	7
2022-09-12	14:28:17	0.220013	0.978662	1.31069	906.875	FALSE	7
2022-09-12	14:28:17	0.432023	1.92172	1.31069	845.911	FALSE	7
2022-09-12	14:28:17	0.1764	0.784662	1.31069	907.66	FALSE	7
2022-09-12	14:28:18	0.457367	2.03446	4.50689	847.945	FALSE	7
2022-09-12	14:28:18	0.469428	2.08811	4.50689	909.748	FALSE	7
2022-09-12	14:28:18	1.09401	4.86638	4.50689	852.812	FALSE	7
2022-09-12	14:28:18	2.03197	9.03861	4.50689	918.786	FALSE	7
2022-09-12	14:28:19	2.13192	9.48321	7.0548	862.295	FALSE	7
2022-09-12	14:28:19	1.76347	7.84427	7.0548	926.631	FALSE	7
2022-09-12	14:28:19	1.59039	7.07437	7.0548	869.369	FALSE	7
2022-09-12	14:28:19	0.858181	3.81736	7.0548	930.448	FALSE	7

## Sheet: MrFitz_harness_202291214225 (2)
Date	Time	Lbs	Newtons	Total Force x time	Total Time Steps Force >13.345		**GoPro Fitting: 1412
2022-09-12	14:23:19	-0.180292	-0.801975	0	FALSE	0			Total Force x time	930.448
2022-09-12	14:23:19	-0.427977	-1.90373	0	FALSE	0			Total Time Steps Force >3	7
2022-09-12	14:23:19	-0.743803	-3.30858	0	FALSE	0
2022-09-12	14:23:19	-0.0522007	-0.232199	0	FALSE	0
2022-09-12	14:23:20	0.211921	0.942667	0.942667	FALSE	0
2022-09-12	14:23:20	0.125153	0.556706	0.556706	FALSE	0
2022-09-12	14:23:20	0.165967	0.738254	1.68092	FALSE	0
2022-09-12	14:23:20	-0.102074	-0.454046	0.556706	FALSE	0
2022-09-12	14:23:21	-0.255712	-1.13746	1.68092	FALSE	0
2022-09-12	14:23:21	-0.0111321	-0.0495178	0.556706	FALSE	0
2022-09-12	14:23:21	0.086985	0.386927	2.06785	FALSE	0
2022-09-12	14:23:22	0.00276106	0.0122817	0.568987	FALSE	0
2022-09-12	14:23:22	-0.097188	-0.432312	2.06785	FALSE	0
2022-09-12	14:23:22	0.0418959	0.186361	0.755349	FALSE	0
2022-09-12	14:23:22	0.0941096	0.418618	2.48647	FALSE	0
2022-09-12	14:23:23	0.296043	1.31686	2.07221	FALSE	0
2022-09-12	14:23:23	0.0513615	0.228466	2.71493	FALSE	0
2022-09-12	14:23:23	0.274975	1.22314	3.29535	FALSE	0
2022-09-12	14:23:23	0.227596	1.01239	3.72733	FALSE	0
2022-09-12	14:23:24	0.473143	2.10463	5.39999	FALSE	0
2022-09-12	14:23:24	0.410038	1.82393	5.55126	FALSE	0
2022-09-12	14:23:24	0.528257	2.34979	7.74978	FALSE	0
2022-09-12	14:23:24	0.407952	1.81465	7.36591	FALSE	0
2022-09-12	14:23:25	0.37472	1.66683	9.41661	FALSE	0
2022-09-12	14:23:25	0.522404	2.32376	9.68967	FALSE	0
2022-09-12	14:23:25	0.302557	1.34583	10.7624	FALSE	0
2022-09-12	14:23:26	0.501234	2.22959	11.9193	FALSE	0
2022-09-12	14:23:26	0.345763	1.53802	12.3005	FALSE	0
2022-09-12	14:23:26	0.555891	2.47271	14.392	FALSE	0
2022-09-12	14:23:26	0.541336	2.40797	14.7084	FALSE	0
2022-09-12	14:23:27	0.405407	1.80333	16.1953	FALSE	0
2022-09-12	14:23:27	0.395433	1.75897	16.4674	FALSE	0
2022-09-12	14:23:27	0.553804	2.46343	18.6587	FALSE	0
2022-09-12	14:23:27	0.371768	1.6537	18.1211	FALSE	0
2022-09-12	14:23:28	0.555229	2.46977	21.1285	FALSE	0
2022-09-12	14:23:28	0.248664	1.10611	19.2272	FALSE	0
2022-09-12	14:23:28	0.363168	1.61544	22.7439	FALSE	0
2022-09-12	14:23:28	0.634466	2.82223	22.0494	FALSE	0
2022-09-12	14:23:29	0.609631	2.71176	25.4557	FALSE	0
2022-09-12	14:23:29	0.554008	2.46434	24.5138	FALSE	0
2022-09-12	14:23:29	0.53813	2.39371	27.8494	FALSE	0
2022-09-12	14:23:30	0.413702	1.84023	26.354	FALSE	0
2022-09-12	14:23:30	0.461641	2.05347	29.9029	FALSE	0
2022-09-12	14:23:30	0.405967	1.80582	28.1598	FALSE	0
2022-09-12	14:23:30	0.485356	2.15896	32.0618	FALSE	0
2022-09-12	14:23:31	0.481132	2.14017	30.3	FALSE	0
2022-09-12	14:23:31	0.435941	1.93915	34.001	FALSE	0
2022-09-12	14:23:31	0.417214	1.85585	32.1559	FALSE	0
2022-09-12	14:23:31	0.458537	2.03966	36.0407	FALSE	0
2022-09-12	14:23:32	0.470191	2.0915	34.2474	FALSE	0
2022-09-12	14:23:32	0.433193	1.92693	37.9676	FALSE	0
2022-09-12	14:23:32	0.445255	1.98058	36.2279	FALSE	0
2022-09-12	14:23:32	0.400725	1.7825	39.7501	FALSE	0
2022-09-12	14:23:33	0.392837	1.74742	37.9754	FALSE	0
2022-09-12	14:23:33	0.422812	1.88075	41.6309	FALSE	0
2022-09-12	14:23:33	0.413346	1.83865	39.814	FALSE	0
2022-09-12	14:23:34	0.411056	1.82846	43.4593	FALSE	0
2022-09-12	14:23:34	0.40785	1.8142	41.6282	FALSE	0
2022-09-12	14:23:34	0.431616	1.91991	45.3792	FALSE	0
2022-09-12	14:23:34	0.548766	2.44102	44.0692	FALSE	0
2022-09-12	14:23:35	0.438333	1.94979	47.329	FALSE	0
2022-09-12	14:23:35	0.476552	2.1198	46.189	FALSE	0
2022-09-12	14:23:35	0.255076	1.13463	48.4636	FALSE	0
2022-09-12	14:23:35	0.34327	1.52693	47.716	FALSE	0
2022-09-12	14:23:36	0.314771	1.40016	49.8638	FALSE	0
2022-09-12	14:23:36	0.379249	1.68698	49.4029	FALSE	0
2022-09-12	14:23:36	0.312736	1.39111	51.2549	FALSE	0
2022-09-12	14:23:36	0.555025	2.46886	51.8718	FALSE	0
2022-09-12	14:23:37	0.175076	0.778773	52.0337	FALSE	0
2022-09-12	14:23:37	-0.225585	-1.00345	51.8718	FALSE	0
2022-09-12	14:23:37	-0.44762	-1.9911	52.0337	FALSE	0
2022-09-12	14:23:38	-0.559122	-2.48709	51.8718	FALSE	0
2022-09-12	14:23:38	-0.488536	-2.17311	52.0337	FALSE	0
2022-09-12	14:23:38	-0.283906	-1.26287	51.8718	FALSE	0
2022-09-12	14:23:38	-0.181259	-0.806276	52.0337	FALSE	0
2022-09-12	14:23:39	-0.189096	-0.841137	51.8718	FALSE	0
2022-09-12	14:23:39	-0.114796	-0.510636	52.0337	FALSE	0
2022-09-12	14:23:39	-0.0820226	-0.364853	51.8718	FALSE	0
2022-09-12	14:23:39	0.00800278	0.035598	52.0693	FALSE	0
2022-09-12	14:23:40	0.384542	1.71052	53.5823	FALSE	0
2022-09-12	14:23:40	0.424288	1.88732	53.9566	FALSE	0
2022-09-12	14:23:40	0.289478	1.28766	54.87	FALSE	0
2022-09-12	14:23:40	0.275433	1.22518	55.1818	FALSE	0
2022-09-12	14:23:41	0.00367708	0.0163564	54.8863	FALSE	0
2022-09-12	14:23:41	-0.218918	-0.973791	55.1818	FALSE	0
2022-09-12	14:23:41	-0.353168	-1.57096	54.8863	FALSE	0
2022-09-12	14:23:42	-0.184363	-0.820083	55.1818	FALSE	0
2022-09-12	14:23:42	-0.203142	-0.903616	54.8863	FALSE	0
2022-09-12	14:23:42	-0.159529	-0.709617	55.1818	FALSE	0
2022-09-12	14:23:42	-0.115407	-0.513353	54.8863	FALSE	0
2022-09-12	14:23:43	0.0333972	0.148557	55.3304	FALSE	0
2022-09-12	14:23:43	-0.202277	-0.899769	54.8863	FALSE	0
2022-09-12	14:23:43	-0.337239	-1.50011	55.3304	FALSE	0
2022-09-12	14:23:43	-0.442989	-1.9705	54.8863	FALSE	0
2022-09-12	14:23:44	-0.523905	-2.33043	55.3304	FALSE	0
2022-09-12	14:23:44	-0.511234	-2.27407	54.8863	FALSE	0
2022-09-12	14:23:44	-0.463905	-2.06354	55.3304	FALSE	0
2022-09-12	14:23:45	-0.120954	-0.538028	54.8863	FALSE	0
2022-09-12	14:23:45	0.353041	1.5704	56.9007	FALSE	0
2022-09-12	14:23:45	0.460573	2.04872	56.935	FALSE	0
2022-09-12	14:23:45	0.350802	1.56044	58.4612	FALSE	0
2022-09-12	14:23:46	-0.0202415	-0.0900382	56.935	FALSE	0
2022-09-12	14:23:46	-0.053931	-0.239896	58.4612	FALSE	0
2022-09-12	14:23:46	-0.181514	-0.807411	56.935	FALSE	0
2022-09-12	14:23:47	-0.257697	-1.14629	58.4612	FALSE	0
2022-09-12	14:23:47	-0.17561	-0.781148	56.935	FALSE	0
2022-09-12	14:23:47	-0.458715	-2.04046	58.4612	FALSE	0
2022-09-12	14:23:47	-0.521564	-2.32002	56.935	FALSE	0
2022-09-12	14:23:47	-0.506145	-2.25143	58.4612	FALSE	0
2022-09-12	14:23:48	-0.444872	-1.97888	56.935	FALSE	0
2022-09-12	14:23:48	-0.597341	-2.65709	58.4612	FALSE	0
2022-09-12	14:23:48	-0.559987	-2.49093	56.935	FALSE	0
2022-09-12	14:23:49	-0.518562	-2.30667	58.4612	FALSE	0
2022-09-12	14:23:49	-0.419681	-1.86683	56.935	FALSE	0
2022-09-12	14:23:49	-0.617544	-2.74696	58.4612	FALSE	0
2022-09-12	14:23:49	-0.569096	-2.53145	56.935	FALSE	0
2022-09-12	14:23:50	-0.461615	-2.05336	58.4612	FALSE	0
2022-09-12	14:23:50	-0.247671	-1.10169	56.935	FALSE	0
2022-09-12	14:23:50	-0.338918	-1.50758	58.4612	FALSE	0
2022-09-12	14:23:50	-0.395101	-1.75749	56.935	FALSE	0
2022-09-12	14:23:51	-0.433575	-1.92863	58.4612	FALSE	0
2022-09-12	14:23:51	-0.397391	-1.76767	56.935	FALSE	0
2022-09-12	14:23:51	-0.269707	-1.19971	58.4612	FALSE	0
2022-09-12	14:23:51	-0.172404	-0.766887	56.935	FALSE	0
2022-09-12	14:23:52	-0.0273153	-0.121504	58.4612	FALSE	0
2022-09-12	14:23:52	0.0062725	0.0279013	56.9629	FALSE	0
2022-09-12	14:23:52	0.217367	0.966892	59.4281	FALSE	0
2022-09-12	14:23:53	0.23757	1.05676	58.0197	FALSE	0
2022-09-12	14:23:53	0.356858	1.58738	61.0155	FALSE	0
2022-09-12	14:23:53	0.147443	0.655856	58.6756	FALSE	0
2022-09-12	14:23:53	0.388206	1.72682	62.7423	FALSE	0
2022-09-12	14:23:54	0.251921	1.12059	59.7962	FALSE	0
2022-09-12	14:23:54	0.335076	1.49049	64.2328	FALSE	0
2022-09-12	14:23:54	0.0140588	0.0625364	59.8587	FALSE	0
2022-09-12	14:23:54	0.0451529	0.200849	64.4336	FALSE	0
2022-09-12	14:23:55	-0.0276715	-0.123088	59.8587	FALSE	0
2022-09-12	14:23:55	0.128155	0.570059	65.0037	FALSE	0
2022-09-12	14:23:55	-0.065585	-0.291735	59.8587	FALSE	0
2022-09-12	14:23:55	0.297417	1.32297	66.3266	FALSE	0
2022-09-12	14:23:56	0.00459311	0.0204311	59.8791	FALSE	0
2022-09-12	14:23:56	0.215891	0.960326	67.287	FALSE	0
2022-09-12	14:23:56	-0.0675188	-0.300337	59.8791	FALSE	0
2022-09-12	14:23:57	0.136196	0.605827	67.8928	FALSE	0
2022-09-12	14:23:57	-0.0699615	-0.311203	59.8791	FALSE	0
2022-09-12	14:23:57	-0.143804	-0.639669	67.8928	FALSE	0
2022-09-12	14:23:57	-0.282531	-1.25675	59.8791	FALSE	0
2022-09-12	14:23:58	-0.0536766	-0.238764	67.8928	FALSE	0
2022-09-12	14:23:58	-0.0100125	-0.0445376	59.8791	FALSE	0
2022-09-12	14:23:58	-0.0535239	-0.238085	67.8928	FALSE	0
2022-09-12	14:23:58	-0.2379	-1.05823	59.8791	FALSE	0
2022-09-12	14:23:59	-0.145025	-0.6451	67.8928	FALSE	0
2022-09-12	14:23:59	-0.223448	-0.993941	59.8791	FALSE	0
2022-09-12	14:23:59	-0.233524	-1.03876	67.8928	FALSE	0
2022-09-12	14:23:59	-0.339172	-1.5087	59.8791	FALSE	0
2022-09-12	14:24:00	-0.337849	-1.50282	67.8928	FALSE	0
2022-09-12	14:24:00	-0.40187	-1.7876	59.8791	FALSE	0
2022-09-12	14:24:00	-0.39958	-1.77741	67.8928	FALSE	0
2022-09-12	14:24:01	-0.357697	-1.59111	59.8791	FALSE	0
2022-09-12	14:24:01	-0.331539	-1.47475	67.8928	FALSE	0
2022-09-12	14:24:01	-0.493117	-2.19348	59.8791	FALSE	0
2022-09-12	14:24:01	-0.374796	-1.66717	67.8928	FALSE	0
2022-09-12	14:24:02	-0.155458	-0.691508	59.8791	FALSE	0
2022-09-12	14:24:02	-0.108537	-0.482794	67.8928	FALSE	0
2022-09-12	14:24:02	-0.152048	-0.67634	59.8791	FALSE	0
2022-09-12	14:24:02	-0.281208	-1.25087	67.8928	FALSE	0
2022-09-12	14:24:03	-0.140394	-0.624501	59.8791	FALSE	0
2022-09-12	14:24:03	-0.209096	-0.930101	67.8928	FALSE	0
2022-09-12	14:24:03	-0.258715	-1.15082	59.8791	FALSE	0
2022-09-12	14:24:03	-0.340292	-1.51369	67.8928	FALSE	0
2022-09-12	14:24:04	-0.230267	-1.02427	59.8791	FALSE	0
2022-09-12	14:24:04	-0.219478	-0.976282	67.8928	FALSE	0
2022-09-12	14:24:04	0.0259162	0.11528	59.9944	FALSE	0
2022-09-12	14:24:05	0.233244	1.03752	68.9303	FALSE	0
2022-09-12	14:24:05	0.350649	1.55976	61.5542	FALSE	0
2022-09-12	14:24:05	0.553346	2.46139	71.3917	FALSE	0
2022-09-12	14:24:05	0.475687	2.11595	63.6701	FALSE	0
2022-09-12	14:24:06	0.976705	4.34458	75.7363	FALSE	0
2022-09-12	14:24:06	0.40154	1.78613	65.4562	FALSE	0
2022-09-12	14:24:06	0.715789	3.18397	78.9202	FALSE	0
2022-09-12	14:24:06	0.285967	1.27204	66.7283	FALSE	0
2022-09-12	14:24:07	0.687646	3.05879	81.979	FALSE	0
2022-09-12	14:24:07	0.0652547	0.290266	67.0185	FALSE	0
2022-09-12	14:24:07	0.184186	0.819296	82.7983	FALSE	0
2022-09-12	14:24:07	0.0109545	0.0487278	67.0673	FALSE	0
2022-09-12	14:24:08	0.124237	0.552631	83.351	FALSE	0
2022-09-12	14:24:08	-0.0716918	-0.318899	67.0673	FALSE	0
2022-09-12	14:24:08	-0.240699	-1.07068	83.351	FALSE	0
2022-09-12	14:24:09	-0.362786	-1.61374	67.0673	FALSE	0
2022-09-12	14:24:09	-0.422938	-1.88131	83.351	FALSE	0
2022-09-12	14:24:09	-0.378053	-1.68166	67.0673	FALSE	0
2022-09-12	14:24:09	-0.462582	-2.05766	83.351	FALSE	0
2022-09-12	14:24:10	-0.453269	-2.01623	67.0673	FALSE	0
2022-09-12	14:24:10	-0.405178	-1.80231	83.351	FALSE	0
2022-09-12	14:24:10	-0.304211	-1.35319	67.0673	FALSE	0
2022-09-12	14:24:10	-0.370368	-1.64747	83.351	FALSE	0
2022-09-12	14:24:11	-0.445025	-1.97956	67.0673	FALSE	0
2022-09-12	14:24:11	-0.305585	-1.3593	83.351	FALSE	0
2022-09-12	14:24:11	-0.258562	-1.15014	67.0673	FALSE	0
2022-09-12	14:24:11	-0.485687	-2.16043	83.351	FALSE	0
2022-09-12	14:24:12	-0.405737	-1.8048	67.0673	FALSE	0
2022-09-12	14:24:12	-0.464669	-2.06694	83.351	FALSE	0
2022-09-12	14:24:12	-0.405229	-1.80254	67.0673	FALSE	0
2022-09-12	14:24:13	-0.378307	-1.68279	83.351	FALSE	0
2022-09-12	14:24:13	-0.4093	-1.82065	67.0673	FALSE	0
2022-09-12	14:24:13	-0.426602	-1.89761	83.351	FALSE	0
2022-09-12	14:24:13	-0.299987	-1.3344	67.0673	FALSE	0
2022-09-12	14:24:14	-0.321972	-1.4322	83.351	FALSE	0
2022-09-12	14:24:14	-0.361106	-1.60627	67.0673	FALSE	0
2022-09-12	14:24:14	-0.332913	-1.48086	83.351	FALSE	0
2022-09-12	14:24:14	-0.173218	-0.770508	67.0673	FALSE	0
2022-09-12	14:24:15	-0.182633	-0.812388	83.351	FALSE	0
2022-09-12	14:24:15	-0.281819	-1.25359	67.0673	FALSE	0
2022-09-12	14:24:15	-0.125738	-0.559308	83.351	FALSE	0
2022-09-12	14:24:15	-0.0431931	-0.192132	67.0673	FALSE	0
2022-09-12	14:24:16	-0.0217682	-0.0968293	83.351	FALSE	0
2022-09-12	14:24:16	0.0824048	0.366553	67.4338	FALSE	0
2022-09-12	14:24:16	-0.152455	-0.67815	83.351	FALSE	0
2022-09-12	14:24:17	-0.0112339	-0.0499706	67.4338	FALSE	0
2022-09-12	14:24:17	-0.0282313	-0.125578	83.351	FALSE	0
2022-09-12	14:24:17	-0.164771	-0.732934	67.4338	FALSE	0
2022-09-12	14:24:17	-0.229605	-1.02133	83.351	FALSE	0
2022-09-12	14:24:18	-0.207722	-0.923989	67.4338	FALSE	0
2022-09-12	14:24:18	-0.11673	-0.519238	83.351	FALSE	0
2022-09-12	14:24:18	-0.124465	-0.553645	67.4338	FALSE	0
2022-09-12	14:24:18	-0.122226	-0.543686	83.351	FALSE	0
2022-09-12	14:24:19	-0.227468	-1.01182	67.4338	FALSE	0
2022-09-12	14:24:19	-0.0990709	-0.440687	83.351	FALSE	0
2022-09-12	14:24:19	-0.138562	-0.616351	67.4338	FALSE	0
2022-09-12	14:24:20	-0.0693509	-0.308487	83.351	FALSE	0
2022-09-12	14:24:20	-0.152557	-0.678604	67.4338	FALSE	0
2022-09-12	14:24:20	-0.229758	-1.02201	83.351	FALSE	0
2022-09-12	14:24:20	-0.374949	-1.66785	67.4338	FALSE	0
2022-09-12	14:24:21	-0.191743	-0.852911	83.351	FALSE	0
2022-09-12	14:24:21	-0.297341	-1.32263	67.4338	FALSE	0
2022-09-12	14:24:21	0.0662724	0.294793	83.6458	FALSE	0
2022-09-12	14:24:21	-0.0901651	-0.401072	67.4338	FALSE	0
2022-09-12	14:24:22	0.232227	1.03299	84.6787	FALSE	0
2022-09-12	14:24:22	0.18271	0.812731	68.2466	FALSE	0
2022-09-12	14:24:22	0.412125	1.83321	86.512	FALSE	0
2022-09-12	14:24:22	0.0912597	0.405941	68.6525	FALSE	0
2022-09-12	14:24:23	0.384288	1.70939	88.2214	FALSE	0
2022-09-12	14:24:23	0.0693768	0.308602	68.9611	FALSE	0
2022-09-12	14:24:23	0.250547	1.11448	89.3358	FALSE	0
2022-09-12	14:24:24	0.0663743	0.295246	69.2563	FALSE	0
2022-09-12	14:24:24	0.0297331	0.132259	89.4681	FALSE	0
2022-09-12	14:24:24	-0.262379	-1.16711	69.2563	FALSE	0
2022-09-12	14:24:24	-0.245381	-1.0915	89.4681	FALSE	0
2022-09-12	14:24:25	-0.159682	-0.710297	69.2563	FALSE	0
2022-09-12	14:24:25	-0.257341	-1.1447	89.4681	FALSE	0
2022-09-12	14:24:25	-0.386857	-1.72082	69.2563	FALSE	0
2022-09-12	14:24:25	-0.345127	-1.53519	89.4681	FALSE	0
2022-09-12	14:24:26	-0.299783	-1.33349	69.2563	FALSE	0
2022-09-12	14:24:26	-0.216679	-0.963832	89.4681	FALSE	0
2022-09-12	14:24:26	-0.260038	-1.1567	69.2563	FALSE	0
2022-09-12	14:24:26	-0.36416	-1.61986	89.4681	FALSE	0
2022-09-12	14:24:27	-0.356628	-1.58635	69.2563	FALSE	0
2022-09-12	14:24:27	-0.375407	-1.66989	89.4681	FALSE	0
2022-09-12	14:24:27	-0.409758	-1.82269	69.2563	FALSE	0
2022-09-12	14:24:28	-0.336577	-1.49716	89.4681	FALSE	0
2022-09-12	14:24:28	-0.366501	-1.63027	69.2563	FALSE	0
2022-09-12	14:24:28	-0.350012	-1.55692	89.4681	FALSE	0
2022-09-12	14:24:28	-0.321972	-1.4322	69.2563	FALSE	0
2022-09-12	14:24:29	-0.341361	-1.51844	89.4681	FALSE	0
2022-09-12	14:24:29	-0.566755	-2.52104	69.2563	FALSE	0
2022-09-12	14:24:29	-0.517697	-2.30282	89.4681	FALSE	0
2022-09-12	14:24:29	-0.303295	-1.34912	69.2563	FALSE	0
2022-09-12	14:24:30	-0.294236	-1.30882	89.4681	FALSE	0
2022-09-12	14:24:30	-0.26986	-1.20039	69.2563	FALSE	0
2022-09-12	14:24:30	-0.26757	-1.1902	89.4681	FALSE	0
2022-09-12	14:24:30	-0.283346	-1.26038	69.2563	FALSE	0
2022-09-12	14:24:31	-0.28533	-1.2692	89.4681	FALSE	0
2022-09-12	14:24:31	-0.309758	-1.37787	69.2563	FALSE	0
2022-09-12	14:24:31	-0.358765	-1.59586	89.4681	FALSE	0
2022-09-12	14:24:32	-0.377188	-1.67781	69.2563	FALSE	0
2022-09-12	14:24:32	-0.374185	-1.66445	89.4681	FALSE	0
2022-09-12	14:24:32	-0.368028	-1.63706	69.2563	FALSE	0
2022-09-12	14:24:32	-0.342633	-1.5241	89.4681	FALSE	0
2022-09-12	14:24:33	-0.334185	-1.48652	69.2563	FALSE	0
2022-09-12	14:24:33	-0.321615	-1.43061	89.4681	FALSE	0
2022-09-12	14:24:33	-0.305687	-1.35976	69.2563	FALSE	0
2022-09-12	14:24:33	-0.279173	-1.24182	89.4681	FALSE	0
2022-09-12	14:24:34	-0.284465	-1.26536	69.2563	FALSE	0
2022-09-12	14:24:34	-0.291386	-1.29614	89.4681	FALSE	0
2022-09-12	14:24:34	-0.294796	-1.31131	69.2563	FALSE	0
2022-09-12	14:24:34	-0.281768	-1.25336	89.4681	FALSE	0
2022-09-12	14:24:35	-0.274084	-1.21918	69.2563	FALSE	0
2022-09-12	14:24:35	-0.307977	-1.36994	89.4681	FALSE	0
2022-09-12	14:24:35	-0.526501	-2.34198	69.2563	FALSE	0
2022-09-12	14:24:36	-0.470979	-2.09501	89.4681	FALSE	0
2022-09-12	14:24:36	-0.277239	-1.23321	69.2563	FALSE	0
2022-09-12	14:24:36	-0.278002	-1.23661	89.4681	FALSE	0
2022-09-12	14:24:36	-0.0880786	-0.391791	69.2563	FALSE	0
2022-09-12	14:24:37	-0.0532186	-0.236727	89.4681	FALSE	0
2022-09-12	14:24:37	0.237316	1.05563	70.312	FALSE	0
2022-09-12	14:24:37	0.171158	0.761345	90.2294	FALSE	0
2022-09-12	14:24:37	0.359606	1.5996	71.9116	FALSE	0
2022-09-12	14:24:38	-0.0769335	-0.342216	90.2294	FALSE	0
2022-09-12	14:24:38	-0.263295	-1.17119	71.9116	FALSE	0
2022-09-12	14:24:38	-0.284414	-1.26513	90.2294	FALSE	0
2022-09-12	14:24:38	-0.26416	-1.17504	71.9116	FALSE	0
2022-09-12	14:24:39	-0.19958	-0.887772	90.2294	FALSE	0
2022-09-12	14:24:39	-0.273117	-1.21488	71.9116	FALSE	0
2022-09-12	14:24:39	-0.236221	-1.05076	90.2294	FALSE	0
2022-09-12	14:24:40	-0.192913	-0.858116	71.9116	FALSE	0
2022-09-12	14:24:40	-0.284516	-1.26558	90.2294	FALSE	0
2022-09-12	14:24:40	-0.452048	-2.0108	71.9116	FALSE	0
2022-09-12	14:24:40	-0.276832	-1.2314	90.2294	FALSE	0
2022-09-12	14:24:41	-0.342888	-1.52523	71.9116	FALSE	0
2022-09-12	14:24:41	-0.257544	-1.14561	90.2294	FALSE	0
2022-09-12	14:24:41	-0.140954	-0.626992	71.9116	FALSE	0
2022-09-12	14:24:41	-0.158358	-0.704408	90.2294	FALSE	0
2022-09-12	14:24:42	-0.0425824	-0.189415	71.9116	FALSE	0
2022-09-12	14:24:42	-0.279478	-1.24317	90.2294	FALSE	0
2022-09-12	14:24:42	-0.224109	-0.996882	71.9116	FALSE	0
2022-09-12	14:24:42	-0.32874	-1.4623	90.2294	FALSE	0
2022-09-12	14:24:43	-0.373626	-1.66196	71.9116	FALSE	0
2022-09-12	14:24:43	-0.367977	-1.63684	90.2294	FALSE	0
2022-09-12	14:24:43	-0.392099	-1.74413	71.9116	FALSE	0
2022-09-12	14:24:44	-0.489758	-2.17854	90.2294	FALSE	0
2022-09-12	14:24:44	-0.148435	-0.660269	71.9116	FALSE	0
2022-09-12	14:24:44	0.0229137	0.101925	90.3314	FALSE	0
2022-09-12	14:24:44	0.361489	1.60798	73.5195	FALSE	0
2022-09-12	14:24:45	0.468359	2.08335	92.4147	FALSE	0
2022-09-12	14:24:45	0.177875	0.791224	74.3108	FALSE	0
2022-09-12	14:24:45	0.409631	1.82212	94.2368	FALSE	0
2022-09-12	14:24:45	0.316858	1.40945	75.7202	FALSE	0
2022-09-12	14:24:46	0.351209	1.56225	95.7991	FALSE	0
2022-09-12	14:24:46	0.447443	1.99032	77.7105	FALSE	0
2022-09-12	14:24:46	0.274008	1.21884	97.0179	FALSE	0
2022-09-12	14:24:46	0.337265	1.50022	79.2108	FALSE	0
2022-09-12	14:24:47	0.394975	1.75693	98.7749	FALSE	0
2022-09-12	14:24:47	0.308257	1.37119	80.5819	FALSE	0
2022-09-12	14:24:47	0.467545	2.07973	100.855	FALSE	0
2022-09-12	14:24:48	0.401234	1.78477	82.3667	FALSE	0
2022-09-12	14:24:48	0.275636	1.22608	102.081	FALSE	0
2022-09-12	14:24:48	0.339809	1.51154	83.8783	FALSE	0
2022-09-12	14:24:48	0.26785	1.19145	103.272	FALSE	0
2022-09-12	14:24:49	0.351056	1.56157	85.4398	FALSE	0
2022-09-12	14:24:49	0.127799	0.568476	103.841	FALSE	0
2022-09-12	14:24:49	-0.0308776	-0.13735	85.4398	FALSE	0
2022-09-12	14:24:49	-0.0182567	-0.0812095	103.841	FALSE	0
2022-09-12	14:24:50	-0.0786638	-0.349912	85.4398	FALSE	0
2022-09-12	14:24:50	0.0347712	0.154669	103.995	FALSE	0
2022-09-12	14:24:50	-0.153168	-0.681322	85.4398	FALSE	0
2022-09-12	14:24:50	-0.222379	-0.989186	103.995	FALSE	0
2022-09-12	14:24:51	-0.0592745	-0.263665	85.4398	FALSE	0
2022-09-12	14:24:51	0.358639	1.5953	105.591	FALSE	0
2022-09-12	14:24:51	0.0703946	0.313129	85.753	FALSE	0
2022-09-12	14:24:52	0.462812	2.05868	107.649	FALSE	0
2022-09-12	14:24:52	0.353397	1.57198	87.3249	FALSE	0
2022-09-12	14:24:52	0.272328	1.21137	108.861	FALSE	0
2022-09-12	14:24:52	0.429326	1.90973	89.2347	FALSE	0
2022-09-12	14:24:53	0.2393	1.06445	109.925	FALSE	0
2022-09-12	14:24:53	0.327341	1.45608	90.6907	FALSE	0
2022-09-12	14:24:53	0.132227	0.588172	110.513	FALSE	0
2022-09-12	14:24:53	0.00652696	0.0290332	90.7198	FALSE	0
2022-09-12	14:24:54	0.0737025	0.327843	110.841	FALSE	0
2022-09-12	14:24:54	0.408919	1.81895	92.5387	FALSE	0
2022-09-12	14:24:54	0.609122	2.7095	113.551	FALSE	0
2022-09-12	14:24:55	0.875432	3.8941	96.4328	FALSE	0
2022-09-12	14:24:55	2.88418	12.8294	126.38	FALSE	0
2022-09-12	14:24:55	0.775687	3.45041	99.8832	FALSE	0
2022-09-12	14:24:55	0.16556	0.736444	127.116	FALSE	0
2022-09-12	14:24:56	0.636705	2.83219	102.715	FALSE	0
2022-09-12	14:24:56	0.491209	2.185	129.301	FALSE	0
2022-09-12	14:24:56	0.0703946	0.313129	103.029	FALSE	0
2022-09-12	14:24:56	0.447799	1.9919	131.293	FALSE	0
2022-09-12	14:24:57	0.490293	2.18092	105.209	FALSE	0
2022-09-12	14:24:57	0.352226	1.56677	132.86	FALSE	0
2022-09-12	14:24:57	0.268308	1.19349	106.403	FALSE	0
2022-09-12	14:24:57	0.321489	1.43005	134.29	FALSE	0
2022-09-12	14:24:58	0.1107	0.492416	106.895	FALSE	0
2022-09-12	14:24:58	0.149224	0.663778	134.954	FALSE	0
2022-09-12	14:24:58	0.571463	2.54198	109.437	FALSE	0
2022-09-12	14:24:59	0.30327	1.34901	136.303	FALSE	0
2022-09-12	14:24:59	0.318741	1.41782	110.855	FALSE	0
2022-09-12	14:24:59	0.649835	2.8906	139.194	FALSE	0
2022-09-12	14:24:59	0.760114	3.38114	114.236	FALSE	0
2022-09-12	14:25:00	0.738791	3.28629	142.48	FALSE	0
2022-09-12	14:25:00	0.76729	3.41306	117.649	FALSE	0
2022-09-12	14:25:00	0.592124	2.63389	145.114	FALSE	0
2022-09-12	14:25:00	0.561946	2.49965	120.149	FALSE	0
2022-09-12	14:25:01	0.636603	2.83174	147.945	FALSE	0
2022-09-12	14:25:01	0.878282	3.90677	124.056	FALSE	0
2022-09-12	14:25:01	0.110344	0.490832	148.436	FALSE	0
2022-09-12	14:25:01	0.277519	1.23446	125.29	FALSE	0
2022-09-12	14:25:02	0.129071	0.574134	149.01	FALSE	0
2022-09-12	14:25:02	-0.123346	-0.548668	125.29	FALSE	0
2022-09-12	14:25:02	-0.00110661	-0.00492242	149.01	FALSE	0
2022-09-12	14:25:03	-0.00874021	-0.0388782	125.29	FALSE	0
2022-09-12	14:25:03	0.430598	1.91539	150.926	FALSE	0
2022-09-12	14:25:03	0.415026	1.84612	127.136	FALSE	0
2022-09-12	14:25:03	0.314109	1.39722	152.323	FALSE	0
2022-09-12	14:25:04	0.231667	1.0305	128.167	FALSE	0
2022-09-12	14:25:04	0.11869	0.527957	152.851	FALSE	0
2022-09-12	14:25:04	0.0831173	0.369722	128.537	FALSE	0
2022-09-12	14:25:04	0.0989951	0.44035	153.291	FALSE	0
2022-09-12	14:25:05	0.170649	0.759081	129.296	FALSE	0
2022-09-12	14:25:05	0.272685	1.21296	154.504	FALSE	0
2022-09-12	14:25:05	0.0898348	0.399603	129.695	FALSE	0
2022-09-12	14:25:05	0.22729	1.01103	155.515	FALSE	0
2022-09-12	14:25:06	0.346374	1.54074	131.236	FALSE	0
2022-09-12	14:25:06	0.211158	0.939273	156.455	FALSE	0
2022-09-12	14:25:06	0.563779	2.5078	133.744	FALSE	0
2022-09-12	14:25:07	0.164593	0.732143	157.187	FALSE	0
2022-09-12	14:25:07	0.0124303	0.0552925	133.799	FALSE	0
2022-09-12	14:25:07	0.0765015	0.340294	157.527	FALSE	0
2022-09-12	14:25:07	0.123524	0.549459	134.349	FALSE	0
2022-09-12	14:25:08	0.0313107	0.139276	157.666	FALSE	0
2022-09-12	14:25:08	0.0222521	0.0989818	134.448	FALSE	0
2022-09-12	14:25:08	-0.218766	-0.973115	157.666	FALSE	0
2022-09-12	14:25:08	-0.658511	-2.92919	134.448	FALSE	0
2022-09-12	14:25:09	-0.600394	-2.67067	157.666	FALSE	0
2022-09-12	14:25:09	-0.764058	-3.39868	134.448	FALSE	0
2022-09-12	14:25:09	-0.508638	-2.26252	157.666	FALSE	0
2022-09-12	14:25:09	-0.649605	-2.88957	134.448	FALSE	0
2022-09-12	14:25:10	-0.459122	-2.04227	157.666	FALSE	0
2022-09-12	14:25:10	-0.529096	-2.35352	134.448	FALSE	0
2022-09-12	14:25:10	-0.465636	-2.07124	157.666	FALSE	0
2022-09-12	14:25:11	-0.411437	-1.83015	134.448	FALSE	0
2022-09-12	14:25:11	-0.119682	-0.532369	157.666	FALSE	0
2022-09-12	14:25:11	-0.169656	-0.754664	134.448	FALSE	0
2022-09-12	14:25:11	0.278588	1.23922	158.906	FALSE	0
2022-09-12	14:25:12	0.302456	1.34538	135.793	FALSE	0
2022-09-12	14:25:12	0.526374	2.34142	161.247	FALSE	0
2022-09-12	14:25:12	0.264186	1.17515	136.968	FALSE	0
2022-09-12	14:25:12	0.644949	2.86886	164.116	FALSE	0
2022-09-12	14:25:13	0.429784	1.91177	138.88	FALSE	0
2022-09-12	14:25:13	1.65457	7.35986	171.476	FALSE	0
2022-09-12	14:25:13	0.794211	3.53281	142.413	FALSE	0
2022-09-12	14:25:13	2.44469	10.8745	182.35	FALSE	0
2022-09-12	14:25:14	1.45894	6.48966	148.902	FALSE	0
2022-09-12	14:25:14	1.2881	5.72973	188.08	FALSE	0
2022-09-12	14:25:14	0.524287	2.33213	151.234	FALSE	0
2022-09-12	14:25:15	0.651463	2.89784	190.978	FALSE	0
2022-09-12	14:25:15	0.466425	2.07475	153.309	FALSE	0
2022-09-12	14:25:15	0.337875	1.50294	192.481	FALSE	0
2022-09-12	14:25:15	0.411412	1.83004	155.139	FALSE	0
2022-09-12	14:25:16	0.336094	1.49501	193.976	FALSE	0
2022-09-12	14:25:16	0.672583	2.99178	158.131	FALSE	0
2022-09-12	14:25:16	0.678384	3.01759	196.993	FALSE	0
2022-09-12	14:25:16	0.631921	2.81091	160.942	FALSE	0
2022-09-12	14:25:17	0.310598	1.3816	198.375	FALSE	0
2022-09-12	14:25:17	0.23925	1.06423	162.006	FALSE	0
2022-09-12	14:25:17	0.288817	1.28472	199.66	FALSE	0
2022-09-12	14:25:17	0.403423	1.79451	163.801	FALSE	0
2022-09-12	14:25:18	0.294822	1.31143	200.971	FALSE	0
2022-09-12	14:25:18	0.390954	1.73904	165.54	FALSE	0
2022-09-12	14:25:18	0.269936	1.20073	202.172	FALSE	0
2022-09-12	14:25:19	0.520725	2.31629	167.856	FALSE	0
2022-09-12	14:25:19	0.241692	1.07509	203.247	FALSE	0
2022-09-12	14:25:19	0.432735	1.92489	169.781	FALSE	0
2022-09-12	14:25:19	0.27472	1.22201	204.469	FALSE	0
2022-09-12	14:25:20	0.510954	2.27283	172.054	FALSE	0
2022-09-12	14:25:20	0.281641	1.2528	205.722	FALSE	0
2022-09-12	14:25:20	0.456756	2.03174	174.085	FALSE	0
2022-09-12	14:25:20	0.335229	1.49117	207.213	FALSE	0
2022-09-12	14:25:21	0.365356	1.62518	175.711	FALSE	0
2022-09-12	14:25:21	0.318435	1.41646	208.629	FALSE	0
2022-09-12	14:25:21	0.328461	1.46106	177.172	FALSE	0
2022-09-12	14:25:22	0.281641	1.2528	209.882	FALSE	0
2022-09-12	14:25:22	0.405	1.80152	178.973	FALSE	0
2022-09-12	14:25:22	0.9193	4.08923	213.971	FALSE	0
2022-09-12	14:25:22	4.06586	18.0858	197.059	1	1
2022-09-12	14:25:23	10.0923	44.8926	258.864	1	2
2022-09-12	14:25:23	3.35253	14.9127	211.972	1	3
2022-09-12	14:25:23	2.93426	13.0522	271.916	FALSE	3
2022-09-12	14:25:23	2.36927	10.539	222.511	FALSE	3
2022-09-12	14:25:24	0.827952	3.6829	275.599	FALSE	3
2022-09-12	14:25:24	0.540063	2.40231	224.913	FALSE	3
2022-09-12	14:25:24	0.377621	1.67973	277.279	FALSE	3
2022-09-12	14:25:24	0.428308	1.9052	226.818	FALSE	3
2022-09-12	14:25:25	0.71589	3.18442	280.463	FALSE	3
2022-09-12	14:25:25	0.481336	2.14108	228.959	FALSE	3
2022-09-12	14:25:25	0.338791	1.50701	281.97	FALSE	3
2022-09-12	14:25:26	0.0336008	0.149463	229.109	FALSE	3
2022-09-12	14:25:26	-0.321259	-1.42902	281.97	FALSE	3
2022-09-12	14:25:26	-0.101107	-0.449744	229.109	FALSE	3
2022-09-12	14:25:26	0.338232	1.50452	283.475	FALSE	3
2022-09-12	14:25:27	0.129173	0.574587	229.683	FALSE	3
2022-09-12	14:25:27	0.221285	0.98432	284.459	FALSE	3
2022-09-12	14:25:27	0.157672	0.701357	230.385	FALSE	3
2022-09-12	14:25:27	0.401641	1.78658	286.245	FALSE	3
2022-09-12	14:25:28	0.221081	0.983413	231.368	FALSE	3
2022-09-12	14:25:28	0.18673	0.830612	287.076	FALSE	3
2022-09-12	14:25:28	0.113601	0.50532	231.873	FALSE	3
2022-09-12	14:25:28	0.235229	1.04635	288.122	FALSE	3
2022-09-12	14:25:29	0.366985	1.63242	233.506	FALSE	3
2022-09-12	14:25:29	0.483066	2.14877	290.271	FALSE	3
2022-09-12	14:25:29	0.468817	2.08539	235.591	FALSE	3
2022-09-12	14:25:30	0.35528	1.58036	291.852	FALSE	3
2022-09-12	14:25:30	0.345	1.53463	237.126	FALSE	3
2022-09-12	14:25:30	0.394059	1.75285	293.604	FALSE	3
2022-09-12	14:25:30	0.389326	1.7318	238.858	FALSE	3
2022-09-12	14:25:31	0.360013	1.60141	295.206	FALSE	3
2022-09-12	14:25:31	0.369428	1.64329	240.501	FALSE	3
2022-09-12	14:25:31	0.356959	1.58783	296.794	FALSE	3
2022-09-12	14:25:31	0.284084	1.26366	241.765	FALSE	3
2022-09-12	14:25:32	0.344186	1.53101	298.325	FALSE	3
2022-09-12	14:25:32	0.271667	1.20843	242.973	FALSE	3
2022-09-12	14:25:32	0.201081	0.894449	299.219	FALSE	3
2022-09-12	14:25:32	0.340369	1.51403	244.487	FALSE	3
2022-09-12	14:25:33	0.0985371	0.438313	299.657	FALSE	3
2022-09-12	14:25:33	0.325204	1.44657	245.934	FALSE	3
2022-09-12	14:25:33	0.307087	1.36598	301.023	FALSE	3
2022-09-12	14:25:34	0.360522	1.60367	247.537	FALSE	3
2022-09-12	14:25:34	0.286527	1.27453	302.298	FALSE	3
2022-09-12	14:25:34	0.280522	1.24782	248.785	FALSE	3
2022-09-12	14:25:34	0.324135	1.44182	303.74	FALSE	3
2022-09-12	14:25:35	0.274517	1.22111	250.006	FALSE	3
2022-09-12	14:25:35	0.346476	1.54119	305.281	FALSE	3
2022-09-12	14:25:35	0.191565	0.852119	250.858	FALSE	3
2022-09-12	14:25:35	0.248359	1.10475	306.386	FALSE	3
2022-09-12	14:25:36	0.262608	1.16813	252.027	FALSE	3
2022-09-12	14:25:36	0.225865	1.00469	307.39	FALSE	3
2022-09-12	14:25:36	0.3364	1.49637	253.523	FALSE	3
2022-09-12	14:25:36	0.174975	0.778324	308.169	FALSE	3
2022-09-12	14:25:37	0.326018	1.45019	254.973	FALSE	3
2022-09-12	14:25:37	0.338283	1.50475	309.673	FALSE	3
2022-09-12	14:25:37	0.256094	1.13916	256.112	FALSE	3
2022-09-12	14:25:38	0.408868	1.81873	311.492	FALSE	3
2022-09-12	14:25:38	0.303931	1.35195	257.464	FALSE	3
2022-09-12	14:25:38	0.384847	1.71188	313.204	FALSE	3
2022-09-12	14:25:38	0.22556	1.00334	258.468	FALSE	3
2022-09-12	14:25:39	0.256603	1.14142	314.345	FALSE	3
2022-09-12	14:25:39	0.357875	1.5919	260.059	FALSE	3
2022-09-12	14:25:39	0.271667	1.20843	315.554	FALSE	3
2022-09-12	14:25:39	0.477367	2.12342	262.183	FALSE	3
2022-09-12	14:25:40	1.25314	5.57422	321.128	FALSE	3
2022-09-12	14:25:40	1.13146	5.03296	267.216	FALSE	3
2022-09-12	14:25:40	0.228562	1.01669	322.145	FALSE	3
2022-09-12	14:25:40	0.513448	2.28392	269.5	FALSE	3
2022-09-12	14:25:41	0.844389	3.75601	325.901	FALSE	3
2022-09-12	14:25:41	0.647137	2.87859	272.378	FALSE	3
2022-09-12	14:25:41	0.695636	3.09433	328.995	FALSE	3
2022-09-12	14:25:42	1.41594	6.29838	278.677	FALSE	3
2022-09-12	14:25:42	0.816857	3.63354	332.629	FALSE	3
2022-09-12	14:25:42	2.93034	13.0347	291.711	FALSE	3
2022-09-12	14:25:42	2.10765	9.37525	342.004	FALSE	3
2022-09-12	14:25:43	3.00317	13.3587	305.07	1	4
2022-09-12	14:25:43	1.87212	8.32756	350.332	FALSE	4
2022-09-12	14:25:43	1.94683	8.65989	313.73	FALSE	4
2022-09-12	14:25:43	1.29945	5.78021	356.112	FALSE	4
2022-09-12	14:25:44	1.01375	4.50936	318.239	FALSE	4
2022-09-12	14:25:44	1.50154	6.67915	362.791	FALSE	4
2022-09-12	14:25:44	0.493499	2.19518	320.435	FALSE	4
2022-09-12	14:25:44	0.541387	2.4082	365.199	FALSE	4
2022-09-12	14:25:45	0.563473	2.50644	322.941	FALSE	4
2022-09-12	14:25:45	0.440827	1.96089	367.16	FALSE	4
2022-09-12	14:25:45	0.215076	0.956701	323.898	FALSE	4
2022-09-12	14:25:46	0.420878	1.87215	369.032	FALSE	4
2022-09-12	14:25:46	0.181132	0.805711	324.703	FALSE	4
2022-09-12	14:25:46	0.282506	1.25664	370.289	FALSE	4
2022-09-12	14:25:46	0.0346185	0.15399	324.857	FALSE	4
2022-09-12	14:25:47	0.305662	1.35965	371.648	FALSE	4
2022-09-12	14:25:47	0.147138	0.654499	325.512	FALSE	4
2022-09-12	14:25:47	0.171972	0.764966	372.413	FALSE	4
2022-09-12	14:25:47	-0.0691982	-0.307807	325.512	FALSE	4
2022-09-12	14:25:48	-0.374084	-1.664	372.413	FALSE	4
2022-09-12	14:25:48	-0.526196	-2.34063	325.512	FALSE	4
2022-09-12	14:25:48	-0.407417	-1.81227	372.413	FALSE	4
2022-09-12	14:25:48	-0.402379	-1.78986	325.512	FALSE	4
2022-09-12	14:25:49	-0.38991	-1.7344	372.413	FALSE	4
2022-09-12	14:25:49	-0.278715	-1.23978	325.512	FALSE	4
2022-09-12	14:25:49	-0.149147	-0.663436	372.413	FALSE	4
2022-09-12	14:25:50	-0.239733	-1.06638	325.512	FALSE	4
2022-09-12	14:25:50	-0.22243	-0.989413	372.413	FALSE	4
2022-09-12	14:25:50	-0.426297	-1.89625	325.512	FALSE	4
2022-09-12	14:25:50	-0.527468	-2.34628	372.413	FALSE	4
2022-09-12	14:25:51	-0.550776	-2.44996	325.512	FALSE	4
2022-09-12	14:25:51	-0.767773	-3.41521	372.413	FALSE	4
2022-09-12	14:25:51	-0.465636	-2.07124	325.512	FALSE	4
2022-09-12	14:25:51	-0.0670608	-0.2983	372.413	FALSE	4
2022-09-12	14:25:52	0.35131	1.5627	327.075	FALSE	4
2022-09-12	14:25:52	0.382354	1.70079	374.114	FALSE	4
2022-09-12	14:25:52	0.292888	1.30282	328.377	FALSE	4
2022-09-12	14:25:52	0.305916	1.36078	375.475	FALSE	4
2022-09-12	14:25:53	0.485509	2.15964	330.537	FALSE	4
2022-09-12	14:25:53	0.354364	1.57628	377.051	FALSE	4
2022-09-12	14:25:53	0.35416	1.57537	332.112	FALSE	4
2022-09-12	14:25:54	0.323422	1.43865	378.49	FALSE	4
2022-09-12	14:25:54	0.279199	1.24193	333.354	FALSE	4
2022-09-12	14:25:54	0.359606	1.5996	380.089	FALSE	4
2022-09-12	14:25:54	0.271463	1.20752	334.562	FALSE	4
2022-09-12	14:25:55	0.237214	1.05518	381.145	FALSE	4
2022-09-12	14:25:55	0.318842	1.41827	335.98	FALSE	4
2022-09-12	14:25:55	0.299758	1.33338	382.478	FALSE	4
2022-09-12	14:25:55	0.328461	1.46106	337.441	FALSE	4
2022-09-12	14:25:56	0.358079	1.59281	384.071	FALSE	4
2022-09-12	14:25:56	0.39243	1.74561	339.187	FALSE	4
2022-09-12	14:25:56	0.597519	2.65788	386.729	FALSE	4
2022-09-12	14:25:56	2.04642	9.10289	348.29	FALSE	4
2022-09-12	14:25:57	2.64622	11.7709	398.5	FALSE	4
2022-09-12	14:25:57	3.08938	13.7422	362.032	1	5
2022-09-12	14:25:57	0.815789	3.62879	402.128	FALSE	5
2022-09-12	14:25:58	0.390954	1.73904	363.771	FALSE	5
2022-09-12	14:25:58	0.244898	1.08936	403.218	FALSE	5
2022-09-12	14:25:58	0.383422	1.70554	365.476	FALSE	5
2022-09-12	14:25:58	0.265356	1.18036	404.398	FALSE	5
2022-09-12	14:25:59	0.146832	0.653138	366.13	FALSE	5
2022-09-12	14:25:59	0.449886	2.00118	406.399	FALSE	5
2022-09-12	14:25:59	0.615738	2.73893	368.869	FALSE	5
2022-09-12	14:25:59	0.416654	1.85336	408.253	FALSE	5
2022-09-12	14:26:00	0.36958	1.64397	370.513	FALSE	5
2022-09-12	14:26:00	0.42383	1.88528	410.138	FALSE	5
2022-09-12	14:26:00	0.439402	1.95455	372.467	FALSE	5
2022-09-12	14:26:01	0.404746	1.80039	411.938	FALSE	5
2022-09-12	14:26:01	0.473702	2.10712	374.574	FALSE	5
2022-09-12	14:26:01	0.437214	1.94482	413.883	FALSE	5
2022-09-12	14:26:01	0.379453	1.68788	376.262	FALSE	5
2022-09-12	14:26:02	0.437774	1.94731	415.83	FALSE	5
2022-09-12	14:26:02	0.429886	1.91222	378.174	FALSE	5
2022-09-12	14:26:02	0.425916	1.89456	417.725	FALSE	5
2022-09-12	14:26:02	0.431819	1.92082	380.095	FALSE	5
2022-09-12	14:26:03	0.447036	1.98851	419.714	FALSE	5
2022-09-12	14:26:03	0.448003	1.99281	382.088	FALSE	5
2022-09-12	14:26:03	0.504389	2.24362	421.957	FALSE	5
2022-09-12	14:26:03	0.526985	2.34413	384.432	FALSE	5
2022-09-12	14:26:04	1.79701	7.99346	429.951	FALSE	5
2022-09-12	14:26:04	1.71696	7.63738	392.069	FALSE	5
2022-09-12	14:26:04	6.36856	28.3286	458.279	1	6
2022-09-12	14:26:05	4.13401	18.3889	410.458	1	7
2022-09-12	14:26:05	0.482201	2.14493	460.424	FALSE	7
2022-09-12	14:26:05	1.04739	4.659	415.117	FALSE	7
2022-09-12	14:26:05	0.35014	1.55749	461.982	FALSE	7
2022-09-12	14:26:06	0.472227	2.10056	417.218	FALSE	7
2022-09-12	14:26:06	0.646781	2.87701	464.859	FALSE	7
2022-09-12	14:26:06	0.578079	2.57141	419.789	FALSE	7
2022-09-12	14:26:06	0.364288	1.62043	466.479	FALSE	7
2022-09-12	14:26:07	-0.0382568	-0.170174	419.789	FALSE	7
2022-09-12	14:26:07	-0.309503	-1.37673	466.479	FALSE	7
2022-09-12	14:26:07	-0.350623	-1.55964	419.789	FALSE	7
2022-09-12	14:26:07	-0.0659412	-0.29332	466.479	FALSE	7
2022-09-12	14:26:08	-0.370114	-1.64634	419.789	FALSE	7
2022-09-12	14:26:08	-0.922633	-4.10406	466.479	FALSE	7
2022-09-12	14:26:08	-0.443905	-1.97458	419.789	FALSE	7
2022-09-12	14:26:09	-0.0629895	-0.28019	466.479	FALSE	7
2022-09-12	14:26:09	0.0627101	0.278947	420.068	FALSE	7
2022-09-12	14:26:09	0.204898	0.911427	467.391	FALSE	7
2022-09-12	14:26:09	-0.0454323	-0.202092	420.068	FALSE	7
2022-09-12	14:26:10	-0.545686	-2.42732	467.391	FALSE	7
2022-09-12	14:26:10	-0.516933	-2.29942	420.068	FALSE	7
2022-09-12	14:26:10	-0.382786	-1.70271	467.391	FALSE	7
2022-09-12	14:26:10	-0.371488	-1.65245	420.068	FALSE	7
2022-09-12	14:26:11	-0.0586639	-0.260949	467.391	FALSE	7
2022-09-12	14:26:11	-0.00202267	-0.00899724	420.068	FALSE	7
2022-09-12	14:26:11	-0.0899106	-0.39994	467.391	FALSE	7
2022-09-12	14:26:11	-0.166755	-0.74176	420.068	FALSE	7
2022-09-12	14:26:12	-0.15388	-0.684489	467.391	FALSE	7
2022-09-12	14:26:12	-0.0696053	-0.309618	420.068	FALSE	7
2022-09-12	14:26:12	-0.128129	-0.569943	467.391	FALSE	7
2022-09-12	14:26:13	-0.13729	-0.610693	420.068	FALSE	7
2022-09-12	14:26:13	0.0835244	0.371533	467.762	FALSE	7
2022-09-12	14:26:13	-0.156272	-0.695129	420.068	FALSE	7
2022-09-12	14:26:13	0.180064	0.800961	468.563	FALSE	7
2022-09-12	14:26:14	0.112125	0.498754	420.567	FALSE	7
2022-09-12	14:26:14	0.0632699	0.281437	468.844	FALSE	7
2022-09-12	14:26:14	-0.118715	-0.528068	420.567	FALSE	7
2022-09-12	14:26:14	0.0025066	0.0111499	468.856	FALSE	7
2022-09-12	14:26:15	0.055331	0.246123	420.813	FALSE	7
2022-09-12	14:26:15	0.164135	0.730105	469.586	FALSE	7
2022-09-12	14:26:15	0.686985	3.05585	423.869	FALSE	7
2022-09-12	14:26:15	1.33757	5.94978	475.535	FALSE	7
2022-09-12	14:26:16	0.382812	1.70282	425.572	FALSE	7
2022-09-12	14:26:16	0.386629	1.7198	477.255	FALSE	7
2022-09-12	14:26:16	0.746221	3.31934	428.891	FALSE	7
2022-09-12	14:26:17	0.52271	2.32512	479.58	FALSE	7
2022-09-12	14:26:17	0.117214	0.521391	429.413	FALSE	7
2022-09-12	14:26:17	0.350242	1.55795	481.138	FALSE	7
2022-09-12	14:26:17	0.0135499	0.0602727	429.473	FALSE	7
2022-09-12	14:26:18	0.315942	1.40537	482.544	FALSE	7
2022-09-12	14:26:18	0.139708	0.621449	430.094	FALSE	7
2022-09-12	14:26:18	0.212379	0.944704	483.488	FALSE	7
2022-09-12	14:26:18	0.194924	0.867061	430.961	FALSE	7
2022-09-12	14:26:19	0.140115	0.62326	484.112	FALSE	7
2022-09-12	14:26:19	0.0666796	0.296604	431.258	FALSE	7
2022-09-12	14:26:19	0.07299	0.324674	484.436	FALSE	7
2022-09-12	14:26:19	0.162303	0.721956	431.98	FALSE	7
2022-09-12	14:26:20	0.261438	1.16293	485.599	FALSE	7
2022-09-12	14:26:20	0.311565	1.3859	433.366	FALSE	7
2022-09-12	14:26:20	0.375026	1.66819	487.267	FALSE	7
2022-09-12	14:26:21	0.492786	2.19201	435.558	FALSE	7
2022-09-12	14:26:21	0.972634	4.32647	491.594	FALSE	7
2022-09-12	14:26:21	0.50327	2.23865	437.796	FALSE	7
2022-09-12	14:26:21	0.318384	1.41624	493.01	FALSE	7
2022-09-12	14:26:22	0.358079	1.59281	439.389	FALSE	7
2022-09-12	14:26:22	0.329682	1.46649	494.477	FALSE	7
2022-09-12	14:26:22	0.394262	1.75376	441.143	FALSE	7
2022-09-12	14:26:22	0.350394	1.55862	496.035	FALSE	7
2022-09-12	14:26:23	0.571412	2.54175	443.685	FALSE	7
2022-09-12	14:26:23	0.305	1.3567	497.392	FALSE	7
2022-09-12	14:26:23	0.323779	1.44023	445.125	FALSE	7
2022-09-12	14:26:23	0.698333	3.10632	500.498	FALSE	7
2022-09-12	14:26:24	0.428104	1.90429	447.029	FALSE	7
2022-09-12	14:26:24	0.310598	1.3816	501.88	FALSE	7
2022-09-12	14:26:24	0.318995	1.41895	448.448	FALSE	7
2022-09-12	14:26:25	0.43813	1.94889	503.829	FALSE	7
2022-09-12	14:26:25	0.300725	1.33768	449.786	FALSE	7
2022-09-12	14:26:25	0.165865	0.737801	504.567	FALSE	7
2022-09-12	14:26:25	0.397977	1.77028	451.556	FALSE	7
2022-09-12	14:26:26	0.141031	0.627334	505.194	FALSE	7
2022-09-12	14:26:26	0.21925	0.975268	452.531	FALSE	7
2022-09-12	14:26:26	0.209529	0.932027	506.126	FALSE	7
2022-09-12	14:26:26	0.215433	0.958289	453.49	FALSE	7
2022-09-12	14:26:27	0.200115	0.890152	507.016	FALSE	7
2022-09-12	14:26:27	0.240573	1.07012	454.56	FALSE	7
2022-09-12	14:26:27	0.261641	1.16383	508.18	FALSE	7
2022-09-12	14:26:27	-0.0639056	-0.284265	454.56	FALSE	7
2022-09-12	14:26:28	0.131209	0.583644	508.764	FALSE	7
2022-09-12	14:26:28	0.0895295	0.398245	454.958	FALSE	7
2022-09-12	14:26:28	-0.0273662	-0.12173	508.764	FALSE	7
2022-09-12	14:26:29	0.30958	1.37707	456.335	FALSE	7
2022-09-12	14:26:29	0.272328	1.21137	509.975	FALSE	7
2022-09-12	14:26:29	0.287188	1.27747	457.613	FALSE	7
2022-09-12	14:26:29	0.144695	0.643632	510.619	FALSE	7
2022-09-12	14:26:30	0.585763	2.60559	460.218	FALSE	7
2022-09-12	14:26:30	0.265662	1.18172	511.8	FALSE	7
2022-09-12	14:26:30	0.20902	0.929763	461.148	FALSE	7
2022-09-12	14:26:30	0.388613	1.72863	513.529	FALSE	7
2022-09-12	14:26:31	0.289122	1.28607	462.434	FALSE	7
2022-09-12	14:26:31	0.168461	0.749348	514.278	FALSE	7
2022-09-12	14:26:31	0.450649	2.00458	464.439	FALSE	7
2022-09-12	14:26:32	0.207341	0.922294	515.201	FALSE	7
2022-09-12	14:26:32	0.279962	1.24533	465.684	FALSE	7
2022-09-12	14:26:32	0.251463	1.11856	516.319	FALSE	7
2022-09-12	14:26:32	0.175992	0.782848	466.467	FALSE	7
2022-09-12	14:26:33	0.159046	0.707468	517.027	FALSE	7
2022-09-12	14:26:33	0.0315651	0.140408	466.607	FALSE	7
2022-09-12	14:26:33	0.126985	0.564855	517.591	FALSE	7
2022-09-12	14:26:33	0.0667305	0.296831	466.904	FALSE	7
2022-09-12	14:26:34	0.0994022	0.442161	518.034	FALSE	7
2022-09-12	14:26:34	0.0436262	0.194058	467.098	FALSE	7
2022-09-12	14:26:34	0.353957	1.57447	519.608	FALSE	7
2022-09-12	14:26:34	0.0984862	0.438086	467.536	FALSE	7
2022-09-12	14:26:35	0.226171	1.00605	520.614	FALSE	7
2022-09-12	14:26:35	0.00393154	0.0174883	467.554	FALSE	7
2022-09-12	14:26:35	0.0534481	0.237748	520.852	FALSE	7
2022-09-12	14:26:36	-0.0779005	-0.346517	467.554	FALSE	7
2022-09-12	14:26:36	0.0849493	0.377871	521.23	FALSE	7
2022-09-12	14:26:36	0.0614888	0.273514	467.827	FALSE	7
2022-09-12	14:26:36	0.12271	0.545839	521.776	FALSE	7
2022-09-12	14:26:37	0.114262	0.50826	468.335	FALSE	7
2022-09-12	14:26:37	-0.0213611	-0.0950184	521.776	FALSE	7
2022-09-12	14:26:37	-0.00589033	-0.0262014	468.335	FALSE	7
2022-09-12	14:26:37	-0.0687911	-0.305997	521.776	FALSE	7
2022-09-12	14:26:38	-0.0910811	-0.405147	468.335	FALSE	7
2022-09-12	14:26:38	-0.0456868	-0.203224	521.776	FALSE	7
2022-09-12	14:26:38	-0.201412	-0.895921	468.335	FALSE	7
2022-09-12	14:26:38	0.0295804	0.13158	521.907	FALSE	7
2022-09-12	14:26:39	0.0424557	0.188851	468.524	FALSE	7
2022-09-12	14:26:39	-0.116832	-0.519692	521.907	FALSE	7
2022-09-12	14:26:39	0.1107	0.492416	469.017	FALSE	7
2022-09-12	14:26:40	0.102201	0.45461	522.362	FALSE	7
2022-09-12	14:26:40	0.201438	0.896037	469.913	FALSE	7
2022-09-12	14:26:40	0.260165	1.15727	523.519	FALSE	7
2022-09-12	14:26:40	0.194517	0.865251	470.778	FALSE	7
2022-09-12	14:26:41	-0.172099	-0.765531	523.519	FALSE	7
2022-09-12	14:26:41	-0.260598	-1.15919	470.778	FALSE	7
2022-09-12	14:26:41	-0.0672643	-0.299205	523.519	FALSE	7
2022-09-12	14:26:41	0.161998	0.7206	471.499	FALSE	7
2022-09-12	14:26:42	0.346272	1.54029	525.059	FALSE	7
2022-09-12	14:26:42	0.3593	1.59824	473.097	FALSE	7
2022-09-12	14:26:42	0.337112	1.49954	526.559	FALSE	7
2022-09-12	14:26:42	0.255687	1.13735	474.234	FALSE	7
2022-09-12	14:26:43	0.407239	1.81148	528.37	FALSE	7
2022-09-12	14:26:43	0.535127	2.38035	476.615	FALSE	7
2022-09-12	14:26:43	0.491514	2.18635	530.557	FALSE	7
2022-09-12	14:26:44	0.378842	1.68516	478.3	FALSE	7
2022-09-12	14:26:44	0.579147	2.57616	533.133	FALSE	7
2022-09-12	14:26:44	0.414924	1.84566	480.145	FALSE	7
2022-09-12	14:26:44	0.525203	2.33621	535.469	FALSE	7
2022-09-12	14:26:45	0.286832	1.27589	481.421	FALSE	7
2022-09-12	14:26:45	0.464186	2.06479	537.534	FALSE	7
2022-09-12	14:26:45	0.427392	1.90113	483.322	FALSE	7
2022-09-12	14:26:45	0.437316	1.94527	539.479	FALSE	7
2022-09-12	14:26:46	0.493702	2.19609	485.519	FALSE	7
2022-09-12	14:26:46	0.344542	1.53259	541.012	FALSE	7
2022-09-12	14:26:46	0.4793	2.13202	487.651	FALSE	7
2022-09-12	14:26:46	0.528257	2.34979	543.362	FALSE	7
2022-09-12	14:26:47	0.447697	1.99145	489.642	FALSE	7
2022-09-12	14:26:47	0.568002	2.52659	545.888	FALSE	7
2022-09-12	14:26:47	0.49874	2.2185	491.86	FALSE	7
2022-09-12	14:26:48	0.552888	2.45936	548.348	FALSE	7
2022-09-12	14:26:48	0.442252	1.96723	493.828	FALSE	7
2022-09-12	14:26:48	0.443982	1.97492	550.322	FALSE	7
2022-09-12	14:26:48	0.537214	2.38964	496.217	FALSE	7
2022-09-12	14:26:49	0.344949	1.5344	551.857	FALSE	7
2022-09-12	14:26:49	0.445458	1.98149	498.199	FALSE	7
2022-09-12	14:26:49	0.718384	3.19552	555.052	FALSE	7
2022-09-12	14:26:49	1.04195	4.6348	502.834	FALSE	7
2022-09-12	14:26:50	0.545	2.42427	557.477	FALSE	7
2022-09-12	14:26:50	0.46902	2.08629	504.92	FALSE	7
2022-09-12	14:26:50	0.493295	2.19427	559.671	FALSE	7
2022-09-12	14:26:50	0.773652	3.44136	508.361	FALSE	7
2022-09-12	14:26:51	0.851565	3.78793	563.459	FALSE	7
2022-09-12	14:26:51	0.423321	1.88302	510.244	FALSE	7
2022-09-12	14:26:51	0.27411	1.2193	564.678	FALSE	7
2022-09-12	14:26:52	0.364389	1.62088	511.865	FALSE	7
2022-09-12	14:26:52	0.523168	2.32716	567.005	FALSE	7
2022-09-12	14:26:52	0.413651	1.84	513.705	FALSE	7
2022-09-12	14:26:52	0.34327	1.52693	568.532	FALSE	7
2022-09-12	14:26:53	0.357417	1.58986	515.295	FALSE	7
2022-09-12	14:26:53	0.4736	2.10667	570.639	FALSE	7
2022-09-12	14:26:53	1.27391	5.66661	520.962	FALSE	7
2022-09-12	14:26:53	0.305713	1.35987	571.999	FALSE	7
2022-09-12	14:26:54	0.466272	2.07407	523.036	FALSE	7
2022-09-12	14:26:54	0.411361	1.82982	573.829	FALSE	7
2022-09-12	14:26:54	0.186374	0.829029	523.865	FALSE	7
2022-09-12	14:26:54	0.439962	1.95704	575.786	FALSE	7
2022-09-12	14:26:55	0.159148	0.707922	524.573	FALSE	7
2022-09-12	14:26:55	0.0626084	0.278495	576.064	FALSE	7
2022-09-12	14:26:55	0.1564	0.695698	525.268	FALSE	7
2022-09-12	14:26:56	0.320166	1.42416	577.488	FALSE	7
2022-09-12	14:26:56	0.679198	3.02121	528.29	FALSE	7
2022-09-12	14:26:56	2.34734	10.4414	587.93	FALSE	7
2022-09-12	14:26:56	2.00861	8.9347	537.224	FALSE	7
2022-09-12	14:26:57	1.40912	6.26805	594.198	FALSE	7
2022-09-12	14:26:57	1.87676	8.3482	545.572	FALSE	7
2022-09-12	14:26:57	1.46485	6.51595	600.714	FALSE	7
2022-09-12	14:26:57	0.746476	3.32047	548.893	FALSE	7
2022-09-12	14:26:58	0.466323	2.0743	602.788	FALSE	7
2022-09-12	14:26:58	0.597265	2.65675	551.55	FALSE	7
2022-09-12	14:26:58	0.970293	4.31606	607.104	FALSE	7
2022-09-12	14:26:59	1.05024	4.67168	556.221	FALSE	7
2022-09-12	14:26:59	1.02892	4.57684	611.681	FALSE	7
2022-09-12	14:26:59	1.47391	6.55625	562.778	FALSE	7
2022-09-12	14:26:59	1.90897	8.49148	620.172	FALSE	7
2022-09-12	14:27:00	2.59345	11.5362	574.314	FALSE	7
2022-09-12	14:27:00	1.70642	7.5905	627.763	FALSE	7
2022-09-12	14:27:00	1.15696	5.14639	579.46	FALSE	7
2022-09-12	14:27:00	1.01416	4.51119	632.274	FALSE	7
2022-09-12	14:27:01	1.0049	4.47	583.93	FALSE	7
2022-09-12	14:27:01	0.846679	3.7662	636.04	FALSE	7
2022-09-12	14:27:01	0.912277	4.05799	587.988	FALSE	7
2022-09-12	14:27:01	0.811819	3.61113	639.651	FALSE	7
2022-09-12	14:27:02	1.02485	4.55874	592.547	FALSE	7
2022-09-12	14:27:02	1.09111	4.85348	644.505	FALSE	7
2022-09-12	14:27:02	1.11075	4.94084	597.488	FALSE	7
2022-09-12	14:27:03	1.0278	4.57186	649.077	FALSE	7
2022-09-12	14:27:03	0.998486	4.44147	601.929	FALSE	7
2022-09-12	14:27:03	0.981285	4.36495	653.442	FALSE	7
2022-09-12	14:27:03	0.832277	3.70213	605.631	FALSE	7
2022-09-12	14:27:04	0.900522	4.0057	657.447	FALSE	7
2022-09-12	14:27:04	0.946272	4.20921	609.841	FALSE	7
2022-09-12	14:27:04	0.778639	3.46354	660.911	FALSE	7
2022-09-12	14:27:04	0.804542	3.57876	613.419	FALSE	7
2022-09-12	14:27:05	0.209173	0.930443	661.841	FALSE	7
2022-09-12	14:27:05	0.231361	1.02914	614.448	FALSE	7
2022-09-12	14:27:05	0.0787916	0.350481	662.192	FALSE	7
2022-09-12	14:27:05	0.119911	0.533388	614.982	FALSE	7
2022-09-12	14:27:06	-0.000394156	-0.00175328	662.192	FALSE	7
2022-09-12	14:27:06	0.208104	0.925688	615.908	FALSE	7
2022-09-12	14:27:06	0.182303	0.81092	663.003	FALSE	7
2022-09-12	14:27:07	0.0875448	0.389417	616.297	FALSE	7
2022-09-12	14:27:07	0.0389951	0.173458	663.176	FALSE	7
2022-09-12	14:27:07	-0.0100634	-0.044764	616.297	FALSE	7
2022-09-12	14:27:07	0.377061	1.67724	664.853	FALSE	7
2022-09-12	14:27:08	0.492685	2.19156	618.489	FALSE	7
2022-09-12	14:27:08	0.466781	2.07634	666.93	FALSE	7
2022-09-12	14:27:08	0.145814	0.64861	619.137	FALSE	7
2022-09-12	14:27:08	0.381285	1.69603	668.626	FALSE	7
2022-09-12	14:27:09	0.433499	1.92829	621.065	FALSE	7
2022-09-12	14:27:09	0.399504	1.77707	670.403	FALSE	7
2022-09-12	14:27:09	0.310293	1.38025	622.446	FALSE	7
2022-09-12	14:27:09	0.305204	1.35761	671.761	FALSE	7
2022-09-12	14:27:10	0.41584	1.84974	624.295	FALSE	7
2022-09-12	14:27:10	0.230903	1.0271	672.788	FALSE	7
2022-09-12	14:27:10	0.181896	0.80911	625.105	FALSE	7
2022-09-12	14:27:11	-0.215509	-0.958627	672.788	FALSE	7
2022-09-12	14:27:11	-0.310674	-1.38194	625.105	FALSE	7
2022-09-12	14:27:11	-0.276526	-1.23004	672.788	FALSE	7
2022-09-12	14:27:11	-0.240699	-1.07068	625.105	FALSE	7
2022-09-12	14:27:12	-0.0314374	-0.13984	672.788	FALSE	7
2022-09-12	14:27:12	-0.0822262	-0.365759	625.105	FALSE	7
2022-09-12	14:27:12	0.0527356	0.234578	673.022	FALSE	7
2022-09-12	14:27:12	0.12444	0.553534	625.658	FALSE	7
2022-09-12	14:27:13	0.356552	1.58601	674.608	FALSE	7
2022-09-12	14:27:13	0.254211	1.13078	626.789	FALSE	7
2022-09-12	14:27:13	0.477468	2.12387	676.732	FALSE	7
2022-09-12	14:27:13	0.484288	2.15421	628.943	FALSE	7
2022-09-12	14:27:14	0.382354	1.70079	678.433	FALSE	7
2022-09-12	14:27:14	0.372786	1.65823	630.601	FALSE	7
2022-09-12	14:27:14	0.193601	0.861176	679.294	FALSE	7
2022-09-12	14:27:15	0.17813	0.792358	631.394	FALSE	7
2022-09-12	14:27:15	0.227443	1.01171	680.306	FALSE	7
2022-09-12	14:27:15	0.235738	1.04861	632.442	FALSE	7
2022-09-12	14:27:15	0.192379	0.85574	681.161	FALSE	7
2022-09-12	14:27:16	0.234059	1.04114	633.483	FALSE	7
2022-09-12	14:27:16	0.311565	1.3859	682.547	FALSE	7
2022-09-12	14:27:16	0.210242	0.935198	634.419	FALSE	7
2022-09-12	14:27:16	0.233448	1.03842	683.586	FALSE	7
2022-09-12	14:27:17	0.224288	0.997678	635.416	FALSE	7
2022-09-12	14:27:17	0.273193	1.21522	684.801	FALSE	7
2022-09-12	14:27:17	0.3364	1.49637	636.913	FALSE	7
2022-09-12	14:27:17	0.269682	1.1996	686.001	FALSE	7
2022-09-12	14:27:18	0.300267	1.33565	638.248	FALSE	7
2022-09-12	14:27:18	0.356247	1.58466	687.585	FALSE	7
2022-09-12	14:27:18	0.293702	1.30645	639.555	FALSE	7
2022-09-12	14:27:19	0.330547	1.47034	689.056	FALSE	7
2022-09-12	14:27:19	0.320573	1.42597	640.981	FALSE	7
2022-09-12	14:27:19	0.278181	1.2374	690.293	FALSE	7
2022-09-12	14:27:19	0.350344	1.5584	642.539	FALSE	7
2022-09-12	14:27:20	0.313244	1.39337	691.686	FALSE	7
2022-09-12	14:27:20	0.261387	1.1627	643.702	FALSE	7
2022-09-12	14:27:20	0.260878	1.16044	692.847	FALSE	7
2022-09-12	14:27:20	0.258079	1.14799	644.85	FALSE	7
2022-09-12	14:27:21	0.192277	0.855287	693.702	FALSE	7
2022-09-12	14:27:21	0.377316	1.67838	646.528	FALSE	7
2022-09-12	14:27:21	0.147494	0.656083	694.358	FALSE	7
2022-09-12	14:27:21	0.220929	0.982736	647.511	FALSE	7
2022-09-12	14:27:22	0.381336	1.69626	696.054	FALSE	7
2022-09-12	14:27:22	0.359758	1.60028	649.111	FALSE	7
2022-09-12	14:27:22	0.380929	1.69445	697.749	FALSE	7
2022-09-12	14:27:23	0.394822	1.75625	650.867	FALSE	7
2022-09-12	14:27:23	0.385764	1.71596	699.465	FALSE	7
2022-09-12	14:27:23	0.37757	1.67951	652.547	FALSE	7
2022-09-12	14:27:23	0.386272	1.71822	701.183	FALSE	7
2022-09-12	14:27:24	0.391972	1.74357	654.29	FALSE	7
2022-09-12	14:27:24	0.387239	1.72252	702.906	FALSE	7
2022-09-12	14:27:24	0.390445	1.73678	656.027	FALSE	7
2022-09-12	14:27:24	0.384542	1.71052	704.616	FALSE	7
2022-09-12	14:27:25	0.38958	1.73293	657.76	FALSE	7
2022-09-12	14:27:25	0.451005	2.00616	706.622	FALSE	7
2022-09-12	14:27:25	0.294567	1.31029	659.07	FALSE	7
2022-09-12	14:27:25	0.289122	1.28607	707.908	FALSE	7
2022-09-12	14:27:26	0.34556	1.53712	660.608	FALSE	7
2022-09-12	14:27:26	0.294415	1.30962	709.218	FALSE	7
2022-09-12	14:27:26	0.364135	1.61975	662.227	FALSE	7
2022-09-12	14:27:27	0.368003	1.63695	710.855	FALSE	7
2022-09-12	14:27:27	0.415484	1.84816	664.076	FALSE	7
2022-09-12	14:27:27	0.45355	2.01748	712.872	FALSE	7
2022-09-12	14:27:27	0.392837	1.74742	665.823	FALSE	7
2022-09-12	14:27:28	0.42841	1.90565	714.778	FALSE	7
2022-09-12	14:27:28	0.455891	2.02789	667.851	FALSE	7
2022-09-12	14:27:28	0.455229	2.02495	716.803	FALSE	7
2022-09-12	14:27:28	0.329835	1.46717	669.318	FALSE	7
2022-09-12	14:27:29	0.438486	1.95047	718.753	FALSE	7
2022-09-12	14:27:29	0.3907	1.73791	671.056	FALSE	7
2022-09-12	14:27:29	0.353804	1.57379	720.327	FALSE	7
2022-09-12	14:27:30	0.439148	1.95342	673.009	FALSE	7
2022-09-12	14:27:30	0.351361	1.56292	721.89	FALSE	7
2022-09-12	14:27:30	0.397825	1.76961	674.779	FALSE	7
2022-09-12	14:27:30	0.504644	2.24476	724.135	FALSE	7
2022-09-12	14:27:31	0.45187	2.01001	676.789	FALSE	7
2022-09-12	14:27:31	0.367901	1.6365	725.771	FALSE	7
2022-09-12	14:27:31	0.343779	1.5292	678.318	FALSE	7
2022-09-12	14:27:31	0.368817	1.64057	727.412	FALSE	7
2022-09-12	14:27:32	0.359351	1.59847	679.917	FALSE	7
2022-09-12	14:27:32	0.458893	2.04125	729.453	FALSE	7
2022-09-12	14:27:32	0.406985	1.81035	681.727	FALSE	7
2022-09-12	14:27:32	0.355433	1.58104	731.034	FALSE	7
2022-09-12	14:27:33	0.40327	1.79383	683.521	FALSE	7
2022-09-12	14:27:33	0.55757	2.48018	733.515	FALSE	7
2022-09-12	14:27:33	0.399453	1.77685	685.298	FALSE	7
2022-09-12	14:27:34	0.390954	1.73904	735.254	FALSE	7
2022-09-12	14:27:34	0.440725	1.96043	687.258	FALSE	7
2022-09-12	14:27:34	0.479911	2.13474	737.388	FALSE	7
2022-09-12	14:27:34	0.388817	1.72954	688.988	FALSE	7
2022-09-12	14:27:35	0.554415	2.46615	739.854	FALSE	7
2022-09-12	14:27:35	0.421947	1.8769	690.865	FALSE	7
2022-09-12	14:27:35	0.432227	1.92263	741.777	FALSE	7
2022-09-12	14:27:35	0.376247	1.67362	692.538	FALSE	7
2022-09-12	14:27:36	0.433041	1.92625	743.703	FALSE	7
2022-09-12	14:27:36	0.488664	2.17368	694.712	FALSE	7
2022-09-12	14:27:36	0.358028	1.59258	745.296	FALSE	7
2022-09-12	14:27:36	0.554415	2.46615	697.178	FALSE	7
2022-09-12	14:27:37	0.570038	2.53564	747.832	FALSE	7
2022-09-12	14:27:37	0.490649	2.1825	699.36	FALSE	7
2022-09-12	14:27:37	0.395076	1.75738	749.589	FALSE	7
2022-09-12	14:27:38	0.461947	2.05483	701.415	FALSE	7
2022-09-12	14:27:38	0.376603	1.67521	751.264	FALSE	7
2022-09-12	14:27:38	0.416349	1.852	703.267	FALSE	7
2022-09-12	14:27:38	0.58729	2.61238	753.877	FALSE	7
2022-09-12	14:27:39	0.358893	1.59643	704.864	FALSE	7
2022-09-12	14:27:39	0.552074	2.45574	756.332	FALSE	7
2022-09-12	14:27:39	0.469835	2.08992	706.954	FALSE	7
2022-09-12	14:27:39	0.359402	1.59869	757.931	FALSE	7
2022-09-12	14:27:40	0.470954	2.0949	709.049	FALSE	7
2022-09-12	14:27:40	0.382252	1.70033	759.631	FALSE	7
2022-09-12	14:27:40	0.531005	2.36202	711.411	FALSE	7
2022-09-12	14:27:40	0.435076	1.93531	761.567	FALSE	7
2022-09-12	14:27:41	0.437214	1.94482	713.355	FALSE	7
2022-09-12	14:27:41	0.478537	2.12863	763.695	FALSE	7
2022-09-12	14:27:41	0.372532	1.6571	715.012	FALSE	7
2022-09-12	14:27:42	0.504796	2.24543	765.941	FALSE	7
2022-09-12	14:27:42	0.344389	1.53191	716.544	FALSE	7
2022-09-12	14:27:42	0.424186	1.88686	767.828	FALSE	7
2022-09-12	14:27:42	0.352379	1.56745	718.112	FALSE	7
2022-09-12	14:27:43	0.359809	1.6005	769.428	FALSE	7
2022-09-12	14:27:43	0.450395	2.00345	720.115	FALSE	7
2022-09-12	14:27:43	0.361743	1.60911	771.037	FALSE	7
2022-09-12	14:27:43	0.499198	2.22053	722.336	FALSE	7
2022-09-12	14:27:44	0.352481	1.56791	772.605	FALSE	7
2022-09-12	14:27:44	0.440725	1.96043	724.296	FALSE	7
2022-09-12	14:27:44	0.392685	1.74674	774.352	FALSE	7
2022-09-12	14:27:44	0.387239	1.72252	726.019	FALSE	7
2022-09-12	14:27:45	0.615636	2.73847	777.09	FALSE	7
2022-09-12	14:27:45	0.653142	2.90531	728.924	FALSE	7
2022-09-12	14:27:45	0.533804	2.37447	779.465	FALSE	7
2022-09-12	14:27:46	0.644593	2.86728	731.791	FALSE	7
2022-09-12	14:27:46	0.668206	2.97231	782.437	FALSE	7
2022-09-12	14:27:46	0.363524	1.61703	733.408	FALSE	7
2022-09-12	14:27:46	0.445305	1.98081	784.418	FALSE	7
2022-09-12	14:27:47	0.308359	1.37164	734.78	FALSE	7
2022-09-12	14:27:47	0.377926	1.68109	786.099	FALSE	7
2022-09-12	14:27:47	0.351565	1.56383	736.344	FALSE	7
2022-09-12	14:27:47	0.36841	1.63876	787.738	FALSE	7
2022-09-12	14:27:48	0.344797	1.53373	737.878	FALSE	7
2022-09-12	14:27:48	0.31126	1.38455	789.122	FALSE	7
2022-09-12	14:27:48	0.376552	1.67498	739.553	FALSE	7
2022-09-12	14:27:48	0.38159	1.69739	790.82	FALSE	7
2022-09-12	14:27:49	0.39187	1.74312	741.296	FALSE	7
2022-09-12	14:27:49	0.409936	1.82348	792.643	FALSE	7
2022-09-12	14:27:49	0.468359	2.08335	743.379	FALSE	7
2022-09-12	14:27:50	0.766577	3.40989	796.053	FALSE	7
2022-09-12	14:27:50	0.634669	2.82313	746.202	FALSE	7
2022-09-12	14:27:50	0.547544	2.43559	798.489	FALSE	7
2022-09-12	14:27:50	0.3764	1.6743	747.876	FALSE	7
2022-09-12	14:27:51	0.422659	1.88007	800.369	FALSE	7
2022-09-12	14:27:51	0.323219	1.43774	749.314	FALSE	7
2022-09-12	14:27:51	0.436298	1.94074	802.309	FALSE	7
2022-09-12	14:27:51	0.201896	0.898074	750.212	FALSE	7
2022-09-12	14:27:52	0.468766	2.08516	804.395	FALSE	7
2022-09-12	14:27:52	0.334669	1.48867	751.701	FALSE	7
2022-09-12	14:27:52	0.630852	2.80616	807.201	FALSE	7
2022-09-12	14:27:52	0.225611	1.00356	752.705	FALSE	7
2022-09-12	14:27:53	0.528155	2.34934	809.55	FALSE	7
2022-09-12	14:27:53	0.296807	1.32026	754.025	FALSE	7
2022-09-12	14:27:53	0.499351	2.22121	811.771	FALSE	7
2022-09-12	14:27:54	0.277519	1.23446	755.259	FALSE	7
2022-09-12	14:27:54	0.44215	1.96677	813.738	FALSE	7
2022-09-12	14:27:54	0.257366	1.14482	756.404	FALSE	7
2022-09-12	14:27:54	0.514517	2.28867	816.027	FALSE	7
2022-09-12	14:27:55	0.262201	1.16632	757.57	FALSE	7
2022-09-12	14:27:55	0.474364	2.11007	818.137	FALSE	7
2022-09-12	14:27:55	0.311056	1.38364	758.954	FALSE	7
2022-09-12	14:27:55	0.498282	2.21646	820.353	FALSE	7
2022-09-12	14:27:56	0.291667	1.29739	760.251	FALSE	7
2022-09-12	14:27:56	0.509224	2.26513	822.618	FALSE	7
2022-09-12	14:27:56	0.384949	1.71233	761.964	FALSE	7
2022-09-12	14:27:57	0.528868	2.35251	824.971	FALSE	7
2022-09-12	14:27:57	0.41416	1.84227	763.806	FALSE	7
2022-09-12	14:27:57	0.526934	2.34391	827.315	FALSE	7
2022-09-12	14:27:57	0.347443	1.5455	765.351	FALSE	7
2022-09-12	14:27:58	0.442048	1.96632	829.281	FALSE	7
2022-09-12	14:27:58	0.477926	2.12591	767.477	FALSE	7
2022-09-12	14:27:58	0.439148	1.95342	831.234	FALSE	7
2022-09-12	14:27:58	0.380369	1.69196	769.169	FALSE	7
2022-09-12	14:27:59	0.470751	2.09399	833.328	FALSE	7
2022-09-12	14:27:59	0.79472	3.53507	772.704	FALSE	7
2022-09-12	14:27:59	0.578486	2.57322	835.902	FALSE	7
2022-09-12	14:27:59	0.63986	2.84623	775.551	FALSE	7
2022-09-12	14:28:00	0.665204	2.95896	838.861	FALSE	7
2022-09-12	14:28:00	0.538232	2.39416	777.945	FALSE	7
2022-09-12	14:28:00	0.375331	1.66955	840.53	FALSE	7
2022-09-12	14:28:01	0.382405	1.70101	779.646	FALSE	7
2022-09-12	14:28:01	0.434313	1.93191	842.462	FALSE	7
2022-09-12	14:28:01	0.427748	1.90271	781.549	FALSE	7
2022-09-12	14:28:01	0.505509	2.24861	844.711	FALSE	7
2022-09-12	14:28:02	0.311361	1.385	782.934	FALSE	7
2022-09-12	14:28:02	0.499758	2.22302	846.934	FALSE	7
2022-09-12	14:28:02	0.392837	1.74742	784.681	FALSE	7
2022-09-12	14:28:02	0.574262	2.55443	849.488	FALSE	7
2022-09-12	14:28:03	0.448766	1.9962	786.677	FALSE	7
2022-09-12	14:28:03	0.393601	1.75082	851.239	FALSE	7
2022-09-12	14:28:03	0.383473	1.70576	788.383	FALSE	7
2022-09-12	14:28:03	0.423117	1.88211	853.121	FALSE	7
2022-09-12	14:28:04	0.513957	2.28618	790.669	FALSE	7
2022-09-12	14:28:04	0.472888	2.1035	855.225	FALSE	7
2022-09-12	14:28:04	0.479809	2.13429	792.803	FALSE	7
2022-09-12	14:28:05	0.498435	2.21714	857.442	FALSE	7
2022-09-12	14:28:05	0.484695	2.15602	794.959	FALSE	7
2022-09-12	14:28:05	0.463168	2.06026	859.502	FALSE	7
2022-09-12	14:28:05	0.475026	2.11301	797.072	FALSE	7
2022-09-12	14:28:06	0.488461	2.17277	861.675	FALSE	7
2022-09-12	14:28:06	0.478588	2.12886	799.201	FALSE	7
2022-09-12	14:28:06	0.481285	2.14085	863.816	FALSE	7
2022-09-12	14:28:06	0.475534	2.11527	801.317	FALSE	7
2022-09-12	14:28:07	0.480522	2.13746	865.953	FALSE	7
2022-09-12	14:28:07	0.474771	2.11188	803.428	FALSE	7
2022-09-12	14:28:07	0.48958	2.17775	868.131	FALSE	7
2022-09-12	14:28:07	0.485967	2.16168	805.59	FALSE	7
2022-09-12	14:28:08	0.482608	2.14674	870.278	FALSE	7
2022-09-12	14:28:08	0.52271	2.32512	807.915	FALSE	7
2022-09-12	14:28:08	0.313397	1.39405	871.672	FALSE	7
2022-09-12	14:28:09	0.471514	2.09739	810.013	FALSE	7
2022-09-12	14:28:09	0.513804	2.2855	873.957	FALSE	7
2022-09-12	14:28:09	0.36042	1.60322	811.616	FALSE	7
2022-09-12	14:28:09	0.404593	1.79971	875.757	FALSE	7
2022-09-12	14:28:10	0.483066	2.14877	813.765	FALSE	7
2022-09-12	14:28:10	0.406629	1.80877	877.566	FALSE	7
2022-09-12	14:28:10	0.475687	2.11595	815.881	FALSE	7
2022-09-12	14:28:10	0.393957	1.7524	879.318	FALSE	7
2022-09-12	14:28:11	0.452481	2.01273	817.893	FALSE	7
2022-09-12	14:28:11	0.336552	1.49705	880.815	FALSE	7
2022-09-12	14:28:11	0.389631	1.73316	819.626	FALSE	7
2022-09-12	14:28:11	0.476909	2.12139	882.936	FALSE	7
2022-09-12	14:28:12	0.337214	1.5	821.126	FALSE	7
2022-09-12	14:28:12	0.421641	1.87554	884.812	FALSE	7
2022-09-12	14:28:12	0.28444	1.26525	822.392	FALSE	7
2022-09-12	14:28:13	0.50042	2.22597	887.038	FALSE	7
2022-09-12	14:28:13	0.398639	1.77323	824.165	FALSE	7
2022-09-12	14:28:13	1.0049	4.47	891.508	FALSE	7
2022-09-12	14:28:13	1.42592	6.34278	830.508	FALSE	7
2022-09-12	14:28:14	1.20515	5.36075	896.869	FALSE	7
2022-09-12	14:28:14	0.959453	4.26784	834.776	FALSE	7
2022-09-12	14:28:14	0.875738	3.89546	900.764	FALSE	7
2022-09-12	14:28:14	0.44098	1.96157	836.737	FALSE	7
2022-09-12	14:28:15	0.390649	1.73768	902.502	FALSE	7
2022-09-12	14:28:15	0.417977	1.85925	838.596	FALSE	7
2022-09-12	14:28:15	0.303015	1.34787	903.85	FALSE	7
2022-09-12	14:28:15	0.403575	1.79518	840.392	FALSE	7
2022-09-12	14:28:16	0.239046	1.06332	904.913	FALSE	7
2022-09-12	14:28:16	0.458588	2.03989	842.431	FALSE	7
2022-09-12	14:28:16	0.221031	0.98319	905.896	FALSE	7
2022-09-12	14:28:17	0.350191	1.55772	843.989	FALSE	7
2022-09-12	14:28:17	0.220013	0.978662	906.875	FALSE	7
2022-09-12	14:28:17	0.432023	1.92172	845.911	FALSE	7
2022-09-12	14:28:17	0.1764	0.784662	907.66	FALSE	7
2022-09-12	14:28:18	0.457367	2.03446	847.945	FALSE	7
2022-09-12	14:28:18	0.469428	2.08811	909.748	FALSE	7
2022-09-12	14:28:18	1.09401	4.86638	852.812	FALSE	7
2022-09-12	14:28:18	2.03197	9.03861	918.786	FALSE	7
2022-09-12	14:28:19	2.13192	9.48321	862.295	FALSE	7
2022-09-12	14:28:19	1.76347	7.84427	926.631	FALSE	7
2022-09-12	14:28:19	1.59039	7.07437	869.369	FALSE	7
2022-09-12	14:28:19	0.858181	3.81736	930.448	FALSE	7

## Sheet: MrFitz_harness_202291214225 (E)
Date	Time	Lbs	Total Force x time	Total Time Steps Force >3		**GoPro Fitting: 1412
2022-09-12	14:23:19	-0.180292	0	FALSE	0			Total Force x time	404.617
2022-09-12	14:23:19	-0.427977	0	FALSE	0			Total Time Steps Force >3	7
2022-09-12	14:23:19	-0.743803	0	FALSE	0
2022-09-12	14:23:19	-0.0522007	0	FALSE	0
2022-09-12	14:23:20	0.211921	0.211921	FALSE	0
2022-09-12	14:23:20	0.125153	0.337074	FALSE	0
2022-09-12	14:23:20	0.165967	0.503041	FALSE	0
2022-09-12	14:23:20	-0.102074	0.503041	FALSE	0
2022-09-12	14:23:21	-0.255712	0.503041	FALSE	0
2022-09-12	14:23:21	-0.0111321	0.503041	FALSE	0
2022-09-12	14:23:21	0.086985	0.590026	FALSE	0
2022-09-12	14:23:22	0.00276106	0.592787	FALSE	0
2022-09-12	14:23:22	-0.097188	0.592787	FALSE	0
2022-09-12	14:23:22	0.0418959	0.634683	FALSE	0
2022-09-12	14:23:22	0.0941096	0.728793	FALSE	0
2022-09-12	14:23:23	0.296043	1.02484	FALSE	0
2022-09-12	14:23:23	0.0513615	1.0762	FALSE	0
2022-09-12	14:23:23	0.274975	1.35117	FALSE	0
2022-09-12	14:23:23	0.227596	1.57877	FALSE	0
2022-09-12	14:23:24	0.473143	2.05191	FALSE	0
2022-09-12	14:23:24	0.410038	2.46195	FALSE	0
2022-09-12	14:23:24	0.528257	2.99021	FALSE	0
2022-09-12	14:23:24	0.407952	3.39816	FALSE	0
2022-09-12	14:23:25	0.37472	3.77288	FALSE	0
2022-09-12	14:23:25	0.522404	4.29528	FALSE	0
2022-09-12	14:23:25	0.302557	4.59784	FALSE	0
2022-09-12	14:23:26	0.501234	5.09907	FALSE	0
2022-09-12	14:23:26	0.345763	5.44484	FALSE	0
2022-09-12	14:23:26	0.555891	6.00073	FALSE	0
2022-09-12	14:23:26	0.541336	6.54206	FALSE	0
2022-09-12	14:23:27	0.405407	6.94747	FALSE	0
2022-09-12	14:23:27	0.395433	7.3429	FALSE	0
2022-09-12	14:23:27	0.553804	7.89671	FALSE	0
2022-09-12	14:23:27	0.371768	8.26848	FALSE	0
2022-09-12	14:23:28	0.555229	8.8237	FALSE	0
2022-09-12	14:23:28	0.248664	9.07237	FALSE	0
2022-09-12	14:23:28	0.363168	9.43554	FALSE	0
2022-09-12	14:23:28	0.634466	10.07	FALSE	0
2022-09-12	14:23:29	0.609631	10.6796	FALSE	0
2022-09-12	14:23:29	0.554008	11.2336	FALSE	0
2022-09-12	14:23:29	0.53813	11.7718	FALSE	0
2022-09-12	14:23:30	0.413702	12.1855	FALSE	0
2022-09-12	14:23:30	0.461641	12.6471	FALSE	0
2022-09-12	14:23:30	0.405967	13.0531	FALSE	0
2022-09-12	14:23:30	0.485356	13.5384	FALSE	0
2022-09-12	14:23:31	0.481132	14.0196	FALSE	0
2022-09-12	14:23:31	0.435941	14.4555	FALSE	0
2022-09-12	14:23:31	0.417214	14.8727	FALSE	0
2022-09-12	14:23:31	0.458537	15.3313	FALSE	0
2022-09-12	14:23:32	0.470191	15.8015	FALSE	0
2022-09-12	14:23:32	0.433193	16.2346	FALSE	0
2022-09-12	14:23:32	0.445255	16.6799	FALSE	0
2022-09-12	14:23:32	0.400725	17.0806	FALSE	0
2022-09-12	14:23:33	0.392837	17.4735	FALSE	0
2022-09-12	14:23:33	0.422812	17.8963	FALSE	0
2022-09-12	14:23:33	0.413346	18.3096	FALSE	0
2022-09-12	14:23:34	0.411056	18.7207	FALSE	0
2022-09-12	14:23:34	0.40785	19.1285	FALSE	0
2022-09-12	14:23:34	0.431616	19.5601	FALSE	0
2022-09-12	14:23:34	0.548766	20.1089	FALSE	0
2022-09-12	14:23:35	0.438333	20.5472	FALSE	0
2022-09-12	14:23:35	0.476552	21.0238	FALSE	0
2022-09-12	14:23:35	0.255076	21.2789	FALSE	0
2022-09-12	14:23:35	0.34327	21.6221	FALSE	0
2022-09-12	14:23:36	0.314771	21.9369	FALSE	0
2022-09-12	14:23:36	0.379249	22.3162	FALSE	0
2022-09-12	14:23:36	0.312736	22.6289	FALSE	0
2022-09-12	14:23:36	0.555025	23.1839	FALSE	0
2022-09-12	14:23:37	0.175076	23.359	FALSE	0
2022-09-12	14:23:37	-0.225585	23.359	FALSE	0
2022-09-12	14:23:37	-0.44762	23.359	FALSE	0
2022-09-12	14:23:38	-0.559122	23.359	FALSE	0
2022-09-12	14:23:38	-0.488536	23.359	FALSE	0
2022-09-12	14:23:38	-0.283906	23.359	FALSE	0
2022-09-12	14:23:38	-0.181259	23.359	FALSE	0
2022-09-12	14:23:39	-0.189096	23.359	FALSE	0
2022-09-12	14:23:39	-0.114796	23.359	FALSE	0
2022-09-12	14:23:39	-0.0820226	23.359	FALSE	0
2022-09-12	14:23:39	0.00800278	23.367	FALSE	0
2022-09-12	14:23:40	0.384542	23.7515	FALSE	0
2022-09-12	14:23:40	0.424288	24.1758	FALSE	0
2022-09-12	14:23:40	0.289478	24.4653	FALSE	0
2022-09-12	14:23:40	0.275433	24.7407	FALSE	0
2022-09-12	14:23:41	0.00367708	24.7444	FALSE	0
2022-09-12	14:23:41	-0.218918	24.7444	FALSE	0
2022-09-12	14:23:41	-0.353168	24.7444	FALSE	0
2022-09-12	14:23:42	-0.184363	24.7444	FALSE	0
2022-09-12	14:23:42	-0.203142	24.7444	FALSE	0
2022-09-12	14:23:42	-0.159529	24.7444	FALSE	0
2022-09-12	14:23:42	-0.115407	24.7444	FALSE	0
2022-09-12	14:23:43	0.0333972	24.7778	FALSE	0
2022-09-12	14:23:43	-0.202277	24.7778	FALSE	0
2022-09-12	14:23:43	-0.337239	24.7778	FALSE	0
2022-09-12	14:23:43	-0.442989	24.7778	FALSE	0
2022-09-12	14:23:44	-0.523905	24.7778	FALSE	0
2022-09-12	14:23:44	-0.511234	24.7778	FALSE	0
2022-09-12	14:23:44	-0.463905	24.7778	FALSE	0
2022-09-12	14:23:45	-0.120954	24.7778	FALSE	0
2022-09-12	14:23:45	0.353041	25.1309	FALSE	0
2022-09-12	14:23:45	0.460573	25.5914	FALSE	0
2022-09-12	14:23:45	0.350802	25.9422	FALSE	0
2022-09-12	14:23:46	-0.0202415	25.9422	FALSE	0
2022-09-12	14:23:46	-0.053931	25.9422	FALSE	0
2022-09-12	14:23:46	-0.181514	25.9422	FALSE	0
2022-09-12	14:23:47	-0.257697	25.9422	FALSE	0
2022-09-12	14:23:47	-0.17561	25.9422	FALSE	0
2022-09-12	14:23:47	-0.458715	25.9422	FALSE	0
2022-09-12	14:23:47	-0.521564	25.9422	FALSE	0
2022-09-12	14:23:47	-0.506145	25.9422	FALSE	0
2022-09-12	14:23:48	-0.444872	25.9422	FALSE	0
2022-09-12	14:23:48	-0.597341	25.9422	FALSE	0
2022-09-12	14:23:48	-0.559987	25.9422	FALSE	0
2022-09-12	14:23:49	-0.518562	25.9422	FALSE	0
2022-09-12	14:23:49	-0.419681	25.9422	FALSE	0
2022-09-12	14:23:49	-0.617544	25.9422	FALSE	0
2022-09-12	14:23:49	-0.569096	25.9422	FALSE	0
2022-09-12	14:23:50	-0.461615	25.9422	FALSE	0
2022-09-12	14:23:50	-0.247671	25.9422	FALSE	0
2022-09-12	14:23:50	-0.338918	25.9422	FALSE	0
2022-09-12	14:23:50	-0.395101	25.9422	FALSE	0
2022-09-12	14:23:51	-0.433575	25.9422	FALSE	0
2022-09-12	14:23:51	-0.397391	25.9422	FALSE	0
2022-09-12	14:23:51	-0.269707	25.9422	FALSE	0
2022-09-12	14:23:51	-0.172404	25.9422	FALSE	0
2022-09-12	14:23:52	-0.0273153	25.9422	FALSE	0
2022-09-12	14:23:52	0.0062725	25.9485	FALSE	0
2022-09-12	14:23:52	0.217367	26.1659	FALSE	0
2022-09-12	14:23:53	0.23757	26.4034	FALSE	0
2022-09-12	14:23:53	0.356858	26.7603	FALSE	0
2022-09-12	14:23:53	0.147443	26.9077	FALSE	0
2022-09-12	14:23:53	0.388206	27.2959	FALSE	0
2022-09-12	14:23:54	0.251921	27.5479	FALSE	0
2022-09-12	14:23:54	0.335076	27.8829	FALSE	0
2022-09-12	14:23:54	0.0140588	27.897	FALSE	0
2022-09-12	14:23:54	0.0451529	27.9422	FALSE	0
2022-09-12	14:23:55	-0.0276715	27.9422	FALSE	0
2022-09-12	14:23:55	0.128155	28.0703	FALSE	0
2022-09-12	14:23:55	-0.065585	28.0703	FALSE	0
2022-09-12	14:23:55	0.297417	28.3677	FALSE	0
2022-09-12	14:23:56	0.00459311	28.3723	FALSE	0
2022-09-12	14:23:56	0.215891	28.5882	FALSE	0
2022-09-12	14:23:56	-0.0675188	28.5882	FALSE	0
2022-09-12	14:23:57	0.136196	28.7244	FALSE	0
2022-09-12	14:23:57	-0.0699615	28.7244	FALSE	0
2022-09-12	14:23:57	-0.143804	28.7244	FALSE	0
2022-09-12	14:23:57	-0.282531	28.7244	FALSE	0
2022-09-12	14:23:58	-0.0536766	28.7244	FALSE	0
2022-09-12	14:23:58	-0.0100125	28.7244	FALSE	0
2022-09-12	14:23:58	-0.0535239	28.7244	FALSE	0
2022-09-12	14:23:58	-0.2379	28.7244	FALSE	0
2022-09-12	14:23:59	-0.145025	28.7244	FALSE	0
2022-09-12	14:23:59	-0.223448	28.7244	FALSE	0
2022-09-12	14:23:59	-0.233524	28.7244	FALSE	0
2022-09-12	14:23:59	-0.339172	28.7244	FALSE	0
2022-09-12	14:24:00	-0.337849	28.7244	FALSE	0
2022-09-12	14:24:00	-0.40187	28.7244	FALSE	0
2022-09-12	14:24:00	-0.39958	28.7244	FALSE	0
2022-09-12	14:24:01	-0.357697	28.7244	FALSE	0
2022-09-12	14:24:01	-0.331539	28.7244	FALSE	0
2022-09-12	14:24:01	-0.493117	28.7244	FALSE	0
2022-09-12	14:24:01	-0.374796	28.7244	FALSE	0
2022-09-12	14:24:02	-0.155458	28.7244	FALSE	0
2022-09-12	14:24:02	-0.108537	28.7244	FALSE	0
2022-09-12	14:24:02	-0.152048	28.7244	FALSE	0
2022-09-12	14:24:02	-0.281208	28.7244	FALSE	0
2022-09-12	14:24:03	-0.140394	28.7244	FALSE	0
2022-09-12	14:24:03	-0.209096	28.7244	FALSE	0
2022-09-12	14:24:03	-0.258715	28.7244	FALSE	0
2022-09-12	14:24:03	-0.340292	28.7244	FALSE	0
2022-09-12	14:24:04	-0.230267	28.7244	FALSE	0
2022-09-12	14:24:04	-0.219478	28.7244	FALSE	0
2022-09-12	14:24:04	0.0259162	28.7503	FALSE	0
2022-09-12	14:24:05	0.233244	28.9836	FALSE	0
2022-09-12	14:24:05	0.350649	29.3342	FALSE	0
2022-09-12	14:24:05	0.553346	29.8876	FALSE	0
2022-09-12	14:24:05	0.475687	30.3632	FALSE	0
2022-09-12	14:24:06	0.976705	31.34	FALSE	0
2022-09-12	14:24:06	0.40154	31.7415	FALSE	0
2022-09-12	14:24:06	0.715789	32.4573	FALSE	0
2022-09-12	14:24:06	0.285967	32.7433	FALSE	0
2022-09-12	14:24:07	0.687646	33.4309	FALSE	0
2022-09-12	14:24:07	0.0652547	33.4962	FALSE	0
2022-09-12	14:24:07	0.184186	33.6803	FALSE	0
2022-09-12	14:24:07	0.0109545	33.6913	FALSE	0
2022-09-12	14:24:08	0.124237	33.8155	FALSE	0
2022-09-12	14:24:08	-0.0716918	33.8155	FALSE	0
2022-09-12	14:24:08	-0.240699	33.8155	FALSE	0
2022-09-12	14:24:09	-0.362786	33.8155	FALSE	0
2022-09-12	14:24:09	-0.422938	33.8155	FALSE	0
2022-09-12	14:24:09	-0.378053	33.8155	FALSE	0
2022-09-12	14:24:09	-0.462582	33.8155	FALSE	0
2022-09-12	14:24:10	-0.453269	33.8155	FALSE	0
2022-09-12	14:24:10	-0.405178	33.8155	FALSE	0
2022-09-12	14:24:10	-0.304211	33.8155	FALSE	0
2022-09-12	14:24:10	-0.370368	33.8155	FALSE	0
2022-09-12	14:24:11	-0.445025	33.8155	FALSE	0
2022-09-12	14:24:11	-0.305585	33.8155	FALSE	0
2022-09-12	14:24:11	-0.258562	33.8155	FALSE	0
2022-09-12	14:24:11	-0.485687	33.8155	FALSE	0
2022-09-12	14:24:12	-0.405737	33.8155	FALSE	0
2022-09-12	14:24:12	-0.464669	33.8155	FALSE	0
2022-09-12	14:24:12	-0.405229	33.8155	FALSE	0
2022-09-12	14:24:13	-0.378307	33.8155	FALSE	0
2022-09-12	14:24:13	-0.4093	33.8155	FALSE	0
2022-09-12	14:24:13	-0.426602	33.8155	FALSE	0
2022-09-12	14:24:13	-0.299987	33.8155	FALSE	0
2022-09-12	14:24:14	-0.321972	33.8155	FALSE	0
2022-09-12	14:24:14	-0.361106	33.8155	FALSE	0
2022-09-12	14:24:14	-0.332913	33.8155	FALSE	0
2022-09-12	14:24:14	-0.173218	33.8155	FALSE	0
2022-09-12	14:24:15	-0.182633	33.8155	FALSE	0
2022-09-12	14:24:15	-0.281819	33.8155	FALSE	0
2022-09-12	14:24:15	-0.125738	33.8155	FALSE	0
2022-09-12	14:24:15	-0.0431931	33.8155	FALSE	0
2022-09-12	14:24:16	-0.0217682	33.8155	FALSE	0
2022-09-12	14:24:16	0.0824048	33.8979	FALSE	0
2022-09-12	14:24:16	-0.152455	33.8979	FALSE	0
2022-09-12	14:24:17	-0.0112339	33.8979	FALSE	0
2022-09-12	14:24:17	-0.0282313	33.8979	FALSE	0
2022-09-12	14:24:17	-0.164771	33.8979	FALSE	0
2022-09-12	14:24:17	-0.229605	33.8979	FALSE	0
2022-09-12	14:24:18	-0.207722	33.8979	FALSE	0
2022-09-12	14:24:18	-0.11673	33.8979	FALSE	0
2022-09-12	14:24:18	-0.124465	33.8979	FALSE	0
2022-09-12	14:24:18	-0.122226	33.8979	FALSE	0
2022-09-12	14:24:19	-0.227468	33.8979	FALSE	0
2022-09-12	14:24:19	-0.0990709	33.8979	FALSE	0
2022-09-12	14:24:19	-0.138562	33.8979	FALSE	0
2022-09-12	14:24:20	-0.0693509	33.8979	FALSE	0
2022-09-12	14:24:20	-0.152557	33.8979	FALSE	0
2022-09-12	14:24:20	-0.229758	33.8979	FALSE	0
2022-09-12	14:24:20	-0.374949	33.8979	FALSE	0
2022-09-12	14:24:21	-0.191743	33.8979	FALSE	0
2022-09-12	14:24:21	-0.297341	33.8979	FALSE	0
2022-09-12	14:24:21	0.0662724	33.9642	FALSE	0
2022-09-12	14:24:21	-0.0901651	33.9642	FALSE	0
2022-09-12	14:24:22	0.232227	34.1964	FALSE	0
2022-09-12	14:24:22	0.18271	34.3791	FALSE	0
2022-09-12	14:24:22	0.412125	34.7913	FALSE	0
2022-09-12	14:24:22	0.0912597	34.8825	FALSE	0
2022-09-12	14:24:23	0.384288	35.2668	FALSE	0
2022-09-12	14:24:23	0.0693768	35.3362	FALSE	0
2022-09-12	14:24:23	0.250547	35.5867	FALSE	0
2022-09-12	14:24:24	0.0663743	35.6531	FALSE	0
2022-09-12	14:24:24	0.0297331	35.6828	FALSE	0
2022-09-12	14:24:24	-0.262379	35.6828	FALSE	0
2022-09-12	14:24:24	-0.245381	35.6828	FALSE	0
2022-09-12	14:24:25	-0.159682	35.6828	FALSE	0
2022-09-12	14:24:25	-0.257341	35.6828	FALSE	0
2022-09-12	14:24:25	-0.386857	35.6828	FALSE	0
2022-09-12	14:24:25	-0.345127	35.6828	FALSE	0
2022-09-12	14:24:26	-0.299783	35.6828	FALSE	0
2022-09-12	14:24:26	-0.216679	35.6828	FALSE	0
2022-09-12	14:24:26	-0.260038	35.6828	FALSE	0
2022-09-12	14:24:26	-0.36416	35.6828	FALSE	0
2022-09-12	14:24:27	-0.356628	35.6828	FALSE	0
2022-09-12	14:24:27	-0.375407	35.6828	FALSE	0
2022-09-12	14:24:27	-0.409758	35.6828	FALSE	0
2022-09-12	14:24:28	-0.336577	35.6828	FALSE	0
2022-09-12	14:24:28	-0.366501	35.6828	FALSE	0
2022-09-12	14:24:28	-0.350012	35.6828	FALSE	0
2022-09-12	14:24:28	-0.321972	35.6828	FALSE	0
2022-09-12	14:24:29	-0.341361	35.6828	FALSE	0
2022-09-12	14:24:29	-0.566755	35.6828	FALSE	0
2022-09-12	14:24:29	-0.517697	35.6828	FALSE	0
2022-09-12	14:24:29	-0.303295	35.6828	FALSE	0
2022-09-12	14:24:30	-0.294236	35.6828	FALSE	0
2022-09-12	14:24:30	-0.26986	35.6828	FALSE	0
2022-09-12	14:24:30	-0.26757	35.6828	FALSE	0
2022-09-12	14:24:30	-0.283346	35.6828	FALSE	0
2022-09-12	14:24:31	-0.28533	35.6828	FALSE	0
2022-09-12	14:24:31	-0.309758	35.6828	FALSE	0
2022-09-12	14:24:31	-0.358765	35.6828	FALSE	0
2022-09-12	14:24:32	-0.377188	35.6828	FALSE	0
2022-09-12	14:24:32	-0.374185	35.6828	FALSE	0
2022-09-12	14:24:32	-0.368028	35.6828	FALSE	0
2022-09-12	14:24:32	-0.342633	35.6828	FALSE	0
2022-09-12	14:24:33	-0.334185	35.6828	FALSE	0
2022-09-12	14:24:33	-0.321615	35.6828	FALSE	0
2022-09-12	14:24:33	-0.305687	35.6828	FALSE	0
2022-09-12	14:24:33	-0.279173	35.6828	FALSE	0
2022-09-12	14:24:34	-0.284465	35.6828	FALSE	0
2022-09-12	14:24:34	-0.291386	35.6828	FALSE	0
2022-09-12	14:24:34	-0.294796	35.6828	FALSE	0
2022-09-12	14:24:34	-0.281768	35.6828	FALSE	0
2022-09-12	14:24:35	-0.274084	35.6828	FALSE	0
2022-09-12	14:24:35	-0.307977	35.6828	FALSE	0
2022-09-12	14:24:35	-0.526501	35.6828	FALSE	0
2022-09-12	14:24:36	-0.470979	35.6828	FALSE	0
2022-09-12	14:24:36	-0.277239	35.6828	FALSE	0
2022-09-12	14:24:36	-0.278002	35.6828	FALSE	0
2022-09-12	14:24:36	-0.0880786	35.6828	FALSE	0
2022-09-12	14:24:37	-0.0532186	35.6828	FALSE	0
2022-09-12	14:24:37	0.237316	35.9202	FALSE	0
2022-09-12	14:24:37	0.171158	36.0913	FALSE	0
2022-09-12	14:24:37	0.359606	36.4509	FALSE	0
2022-09-12	14:24:38	-0.0769335	36.4509	FALSE	0
2022-09-12	14:24:38	-0.263295	36.4509	FALSE	0
2022-09-12	14:24:38	-0.284414	36.4509	FALSE	0
2022-09-12	14:24:38	-0.26416	36.4509	FALSE	0
2022-09-12	14:24:39	-0.19958	36.4509	FALSE	0
2022-09-12	14:24:39	-0.273117	36.4509	FALSE	0
2022-09-12	14:24:39	-0.236221	36.4509	FALSE	0
2022-09-12	14:24:40	-0.192913	36.4509	FALSE	0
2022-09-12	14:24:40	-0.284516	36.4509	FALSE	0
2022-09-12	14:24:40	-0.452048	36.4509	FALSE	0
2022-09-12	14:24:40	-0.276832	36.4509	FALSE	0
2022-09-12	14:24:41	-0.342888	36.4509	FALSE	0
2022-09-12	14:24:41	-0.257544	36.4509	FALSE	0
2022-09-12	14:24:41	-0.140954	36.4509	FALSE	0
2022-09-12	14:24:41	-0.158358	36.4509	FALSE	0
2022-09-12	14:24:42	-0.0425824	36.4509	FALSE	0
2022-09-12	14:24:42	-0.279478	36.4509	FALSE	0
2022-09-12	14:24:42	-0.224109	36.4509	FALSE	0
2022-09-12	14:24:42	-0.32874	36.4509	FALSE	0
2022-09-12	14:24:43	-0.373626	36.4509	FALSE	0
2022-09-12	14:24:43	-0.367977	36.4509	FALSE	0
2022-09-12	14:24:43	-0.392099	36.4509	FALSE	0
2022-09-12	14:24:44	-0.489758	36.4509	FALSE	0
2022-09-12	14:24:44	-0.148435	36.4509	FALSE	0
2022-09-12	14:24:44	0.0229137	36.4738	FALSE	0
2022-09-12	14:24:44	0.361489	36.8353	FALSE	0
2022-09-12	14:24:45	0.468359	37.3037	FALSE	0
2022-09-12	14:24:45	0.177875	37.4816	FALSE	0
2022-09-12	14:24:45	0.409631	37.8912	FALSE	0
2022-09-12	14:24:45	0.316858	38.2081	FALSE	0
2022-09-12	14:24:46	0.351209	38.5593	FALSE	0
2022-09-12	14:24:46	0.447443	39.0067	FALSE	0
2022-09-12	14:24:46	0.274008	39.2807	FALSE	0
2022-09-12	14:24:46	0.337265	39.618	FALSE	0
2022-09-12	14:24:47	0.394975	40.013	FALSE	0
2022-09-12	14:24:47	0.308257	40.3212	FALSE	0
2022-09-12	14:24:47	0.467545	40.7888	FALSE	0
2022-09-12	14:24:48	0.401234	41.19	FALSE	0
2022-09-12	14:24:48	0.275636	41.4656	FALSE	0
2022-09-12	14:24:48	0.339809	41.8054	FALSE	0
2022-09-12	14:24:48	0.26785	42.0733	FALSE	0
2022-09-12	14:24:49	0.351056	42.4243	FALSE	0
2022-09-12	14:24:49	0.127799	42.5521	FALSE	0
2022-09-12	14:24:49	-0.0308776	42.5521	FALSE	0
2022-09-12	14:24:49	-0.0182567	42.5521	FALSE	0
2022-09-12	14:24:50	-0.0786638	42.5521	FALSE	0
2022-09-12	14:24:50	0.0347712	42.5869	FALSE	0
2022-09-12	14:24:50	-0.153168	42.5869	FALSE	0
2022-09-12	14:24:50	-0.222379	42.5869	FALSE	0
2022-09-12	14:24:51	-0.0592745	42.5869	FALSE	0
2022-09-12	14:24:51	0.358639	42.9455	FALSE	0
2022-09-12	14:24:51	0.0703946	43.0159	FALSE	0
2022-09-12	14:24:52	0.462812	43.4788	FALSE	0
2022-09-12	14:24:52	0.353397	43.8322	FALSE	0
2022-09-12	14:24:52	0.272328	44.1045	FALSE	0
2022-09-12	14:24:52	0.429326	44.5338	FALSE	0
2022-09-12	14:24:53	0.2393	44.7731	FALSE	0
2022-09-12	14:24:53	0.327341	45.1004	FALSE	0
2022-09-12	14:24:53	0.132227	45.2327	FALSE	0
2022-09-12	14:24:53	0.00652696	45.2392	FALSE	0
2022-09-12	14:24:54	0.0737025	45.3129	FALSE	0
2022-09-12	14:24:54	0.408919	45.7218	FALSE	0
2022-09-12	14:24:54	0.609122	46.3309	FALSE	0
2022-09-12	14:24:55	0.875432	47.2064	FALSE	0
2022-09-12	14:24:55	2.88418	50.0906	FALSE	0
2022-09-12	14:24:55	0.775687	50.8662	FALSE	0
2022-09-12	14:24:55	0.16556	51.0318	FALSE	0
2022-09-12	14:24:56	0.636705	51.6685	FALSE	0
2022-09-12	14:24:56	0.491209	52.1597	FALSE	0
2022-09-12	14:24:56	0.0703946	52.2301	FALSE	0
2022-09-12	14:24:56	0.447799	52.6779	FALSE	0
2022-09-12	14:24:57	0.490293	53.1682	FALSE	0
2022-09-12	14:24:57	0.352226	53.5204	FALSE	0
2022-09-12	14:24:57	0.268308	53.7887	FALSE	0
2022-09-12	14:24:57	0.321489	54.1102	FALSE	0
2022-09-12	14:24:58	0.1107	54.2209	FALSE	0
2022-09-12	14:24:58	0.149224	54.3702	FALSE	0
2022-09-12	14:24:58	0.571463	54.9416	FALSE	0
2022-09-12	14:24:59	0.30327	55.2449	FALSE	0
2022-09-12	14:24:59	0.318741	55.5636	FALSE	0
2022-09-12	14:24:59	0.649835	56.2135	FALSE	0
2022-09-12	14:24:59	0.760114	56.9736	FALSE	0
2022-09-12	14:25:00	0.738791	57.7124	FALSE	0
2022-09-12	14:25:00	0.76729	58.4797	FALSE	0
2022-09-12	14:25:00	0.592124	59.0718	FALSE	0
2022-09-12	14:25:00	0.561946	59.6337	FALSE	0
2022-09-12	14:25:01	0.636603	60.2703	FALSE	0
2022-09-12	14:25:01	0.878282	61.1486	FALSE	0
2022-09-12	14:25:01	0.110344	61.259	FALSE	0
2022-09-12	14:25:01	0.277519	61.5365	FALSE	0
2022-09-12	14:25:02	0.129071	61.6655	FALSE	0
2022-09-12	14:25:02	-0.123346	61.6655	FALSE	0
2022-09-12	14:25:02	-0.00110661	61.6655	FALSE	0
2022-09-12	14:25:03	-0.00874021	61.6655	FALSE	0
2022-09-12	14:25:03	0.430598	62.0961	FALSE	0
2022-09-12	14:25:03	0.415026	62.5112	FALSE	0
2022-09-12	14:25:03	0.314109	62.8253	FALSE	0
2022-09-12	14:25:04	0.231667	63.0569	FALSE	0
2022-09-12	14:25:04	0.11869	63.1756	FALSE	0
2022-09-12	14:25:04	0.0831173	63.2588	FALSE	0
2022-09-12	14:25:04	0.0989951	63.3577	FALSE	0
2022-09-12	14:25:05	0.170649	63.5284	FALSE	0
2022-09-12	14:25:05	0.272685	63.8011	FALSE	0
2022-09-12	14:25:05	0.0898348	63.8909	FALSE	0
2022-09-12	14:25:05	0.22729	64.1182	FALSE	0
2022-09-12	14:25:06	0.346374	64.4646	FALSE	0
2022-09-12	14:25:06	0.211158	64.6757	FALSE	0
2022-09-12	14:25:06	0.563779	65.2395	FALSE	0
2022-09-12	14:25:07	0.164593	65.4041	FALSE	0
2022-09-12	14:25:07	0.0124303	65.4165	FALSE	0
2022-09-12	14:25:07	0.0765015	65.493	FALSE	0
2022-09-12	14:25:07	0.123524	65.6166	FALSE	0
2022-09-12	14:25:08	0.0313107	65.6479	FALSE	0
2022-09-12	14:25:08	0.0222521	65.6701	FALSE	0
2022-09-12	14:25:08	-0.218766	65.6701	FALSE	0
2022-09-12	14:25:08	-0.658511	65.6701	FALSE	0
2022-09-12	14:25:09	-0.600394	65.6701	FALSE	0
2022-09-12	14:25:09	-0.764058	65.6701	FALSE	0
2022-09-12	14:25:09	-0.508638	65.6701	FALSE	0
2022-09-12	14:25:09	-0.649605	65.6701	FALSE	0
2022-09-12	14:25:10	-0.459122	65.6701	FALSE	0
2022-09-12	14:25:10	-0.529096	65.6701	FALSE	0
2022-09-12	14:25:10	-0.465636	65.6701	FALSE	0
2022-09-12	14:25:11	-0.411437	65.6701	FALSE	0
2022-09-12	14:25:11	-0.119682	65.6701	FALSE	0
2022-09-12	14:25:11	-0.169656	65.6701	FALSE	0
2022-09-12	14:25:11	0.278588	65.9487	FALSE	0
2022-09-12	14:25:12	0.302456	66.2512	FALSE	0
2022-09-12	14:25:12	0.526374	66.7775	FALSE	0
2022-09-12	14:25:12	0.264186	67.0417	FALSE	0
2022-09-12	14:25:12	0.644949	67.6867	FALSE	0
2022-09-12	14:25:13	0.429784	68.1165	FALSE	0
2022-09-12	14:25:13	1.65457	69.771	FALSE	0
2022-09-12	14:25:13	0.794211	70.5652	FALSE	0
2022-09-12	14:25:13	2.44469	73.0099	FALSE	0
2022-09-12	14:25:14	1.45894	74.4689	FALSE	0
2022-09-12	14:25:14	1.2881	75.757	FALSE	0
2022-09-12	14:25:14	0.524287	76.2813	FALSE	0
2022-09-12	14:25:15	0.651463	76.9327	FALSE	0
2022-09-12	14:25:15	0.466425	77.3992	FALSE	0
2022-09-12	14:25:15	0.337875	77.737	FALSE	0
2022-09-12	14:25:15	0.411412	78.1484	FALSE	0
2022-09-12	14:25:16	0.336094	78.4845	FALSE	0
2022-09-12	14:25:16	0.672583	79.1571	FALSE	0
2022-09-12	14:25:16	0.678384	79.8355	FALSE	0
2022-09-12	14:25:16	0.631921	80.4674	FALSE	0
2022-09-12	14:25:17	0.310598	80.778	FALSE	0
2022-09-12	14:25:17	0.23925	81.0173	FALSE	0
2022-09-12	14:25:17	0.288817	81.3061	FALSE	0
2022-09-12	14:25:17	0.403423	81.7095	FALSE	0
2022-09-12	14:25:18	0.294822	82.0043	FALSE	0
2022-09-12	14:25:18	0.390954	82.3953	FALSE	0
2022-09-12	14:25:18	0.269936	82.6652	FALSE	0
2022-09-12	14:25:19	0.520725	83.1859	FALSE	0
2022-09-12	14:25:19	0.241692	83.4276	FALSE	0
2022-09-12	14:25:19	0.432735	83.8604	FALSE	0
2022-09-12	14:25:19	0.27472	84.1351	FALSE	0
2022-09-12	14:25:20	0.510954	84.646	FALSE	0
2022-09-12	14:25:20	0.281641	84.9277	FALSE	0
2022-09-12	14:25:20	0.456756	85.3844	FALSE	0
2022-09-12	14:25:20	0.335229	85.7197	FALSE	0
2022-09-12	14:25:21	0.365356	86.085	FALSE	0
2022-09-12	14:25:21	0.318435	86.4035	FALSE	0
2022-09-12	14:25:21	0.328461	86.7319	FALSE	0
2022-09-12	14:25:22	0.281641	87.0136	FALSE	0
2022-09-12	14:25:22	0.405	87.4186	FALSE	0
2022-09-12	14:25:22	0.9193	88.3379	FALSE	0
2022-09-12	14:25:22	4.06586	92.4037	1	1
2022-09-12	14:25:23	10.0923	102.496	1	2
2022-09-12	14:25:23	3.35253	105.849	1	3
2022-09-12	14:25:23	2.93426	108.783	FALSE	3
2022-09-12	14:25:23	2.36927	111.152	FALSE	3
2022-09-12	14:25:24	0.827952	111.98	FALSE	3
2022-09-12	14:25:24	0.540063	112.52	FALSE	3
2022-09-12	14:25:24	0.377621	112.898	FALSE	3
2022-09-12	14:25:24	0.428308	113.326	FALSE	3
2022-09-12	14:25:25	0.71589	114.042	FALSE	3
2022-09-12	14:25:25	0.481336	114.523	FALSE	3
2022-09-12	14:25:25	0.338791	114.862	FALSE	3
2022-09-12	14:25:26	0.0336008	114.896	FALSE	3
2022-09-12	14:25:26	-0.321259	114.896	FALSE	3
2022-09-12	14:25:26	-0.101107	114.896	FALSE	3
2022-09-12	14:25:26	0.338232	115.234	FALSE	3
2022-09-12	14:25:27	0.129173	115.363	FALSE	3
2022-09-12	14:25:27	0.221285	115.584	FALSE	3
2022-09-12	14:25:27	0.157672	115.742	FALSE	3
2022-09-12	14:25:27	0.401641	116.144	FALSE	3
2022-09-12	14:25:28	0.221081	116.365	FALSE	3
2022-09-12	14:25:28	0.18673	116.551	FALSE	3
2022-09-12	14:25:28	0.113601	116.665	FALSE	3
2022-09-12	14:25:28	0.235229	116.9	FALSE	3
2022-09-12	14:25:29	0.366985	117.267	FALSE	3
2022-09-12	14:25:29	0.483066	117.75	FALSE	3
2022-09-12	14:25:29	0.468817	118.219	FALSE	3
2022-09-12	14:25:30	0.35528	118.574	FALSE	3
2022-09-12	14:25:30	0.345	118.919	FALSE	3
2022-09-12	14:25:30	0.394059	119.313	FALSE	3
2022-09-12	14:25:30	0.389326	119.703	FALSE	3
2022-09-12	14:25:31	0.360013	120.063	FALSE	3
2022-09-12	14:25:31	0.369428	120.432	FALSE	3
2022-09-12	14:25:31	0.356959	120.789	FALSE	3
2022-09-12	14:25:31	0.284084	121.073	FALSE	3
2022-09-12	14:25:32	0.344186	121.417	FALSE	3
2022-09-12	14:25:32	0.271667	121.689	FALSE	3
2022-09-12	14:25:32	0.201081	121.89	FALSE	3
2022-09-12	14:25:32	0.340369	122.231	FALSE	3
2022-09-12	14:25:33	0.0985371	122.329	FALSE	3
2022-09-12	14:25:33	0.325204	122.654	FALSE	3
2022-09-12	14:25:33	0.307087	122.961	FALSE	3
2022-09-12	14:25:34	0.360522	123.322	FALSE	3
2022-09-12	14:25:34	0.286527	123.608	FALSE	3
2022-09-12	14:25:34	0.280522	123.889	FALSE	3
2022-09-12	14:25:34	0.324135	124.213	FALSE	3
2022-09-12	14:25:35	0.274517	124.488	FALSE	3
2022-09-12	14:25:35	0.346476	124.834	FALSE	3
2022-09-12	14:25:35	0.191565	125.026	FALSE	3
2022-09-12	14:25:35	0.248359	125.274	FALSE	3
2022-09-12	14:25:36	0.262608	125.537	FALSE	3
2022-09-12	14:25:36	0.225865	125.763	FALSE	3
2022-09-12	14:25:36	0.3364	126.099	FALSE	3
2022-09-12	14:25:36	0.174975	126.274	FALSE	3
2022-09-12	14:25:37	0.326018	126.6	FALSE	3
2022-09-12	14:25:37	0.338283	126.938	FALSE	3
2022-09-12	14:25:37	0.256094	127.194	FALSE	3
2022-09-12	14:25:38	0.408868	127.603	FALSE	3
2022-09-12	14:25:38	0.303931	127.907	FALSE	3
2022-09-12	14:25:38	0.384847	128.292	FALSE	3
2022-09-12	14:25:38	0.22556	128.518	FALSE	3
2022-09-12	14:25:39	0.256603	128.774	FALSE	3
2022-09-12	14:25:39	0.357875	129.132	FALSE	3
2022-09-12	14:25:39	0.271667	129.404	FALSE	3
2022-09-12	14:25:39	0.477367	129.881	FALSE	3
2022-09-12	14:25:40	1.25314	131.134	FALSE	3
2022-09-12	14:25:40	1.13146	132.266	FALSE	3
2022-09-12	14:25:40	0.228562	132.494	FALSE	3
2022-09-12	14:25:40	0.513448	133.008	FALSE	3
2022-09-12	14:25:41	0.844389	133.852	FALSE	3
2022-09-12	14:25:41	0.647137	134.499	FALSE	3
2022-09-12	14:25:41	0.695636	135.195	FALSE	3
2022-09-12	14:25:42	1.41594	136.611	FALSE	3
2022-09-12	14:25:42	0.816857	137.428	FALSE	3
2022-09-12	14:25:42	2.93034	140.358	FALSE	3
2022-09-12	14:25:42	2.10765	142.466	FALSE	3
2022-09-12	14:25:43	3.00317	145.469	1	4
2022-09-12	14:25:43	1.87212	147.341	FALSE	4
2022-09-12	14:25:43	1.94683	149.288	FALSE	4
2022-09-12	14:25:43	1.29945	150.587	FALSE	4
2022-09-12	14:25:44	1.01375	151.601	FALSE	4
2022-09-12	14:25:44	1.50154	153.102	FALSE	4
2022-09-12	14:25:44	0.493499	153.596	FALSE	4
2022-09-12	14:25:44	0.541387	154.137	FALSE	4
2022-09-12	14:25:45	0.563473	154.701	FALSE	4
2022-09-12	14:25:45	0.440827	155.142	FALSE	4
2022-09-12	14:25:45	0.215076	155.357	FALSE	4
2022-09-12	14:25:46	0.420878	155.778	FALSE	4
2022-09-12	14:25:46	0.181132	155.959	FALSE	4
2022-09-12	14:25:46	0.282506	156.241	FALSE	4
2022-09-12	14:25:46	0.0346185	156.276	FALSE	4
2022-09-12	14:25:47	0.305662	156.582	FALSE	4
2022-09-12	14:25:47	0.147138	156.729	FALSE	4
2022-09-12	14:25:47	0.171972	156.901	FALSE	4
2022-09-12	14:25:47	-0.0691982	156.901	FALSE	4
2022-09-12	14:25:48	-0.374084	156.901	FALSE	4
2022-09-12	14:25:48	-0.526196	156.901	FALSE	4
2022-09-12	14:25:48	-0.407417	156.901	FALSE	4
2022-09-12	14:25:48	-0.402379	156.901	FALSE	4
2022-09-12	14:25:49	-0.38991	156.901	FALSE	4
2022-09-12	14:25:49	-0.278715	156.901	FALSE	4
2022-09-12	14:25:49	-0.149147	156.901	FALSE	4
2022-09-12	14:25:50	-0.239733	156.901	FALSE	4
2022-09-12	14:25:50	-0.22243	156.901	FALSE	4
2022-09-12	14:25:50	-0.426297	156.901	FALSE	4
2022-09-12	14:25:50	-0.527468	156.901	FALSE	4
2022-09-12	14:25:51	-0.550776	156.901	FALSE	4
2022-09-12	14:25:51	-0.767773	156.901	FALSE	4
2022-09-12	14:25:51	-0.465636	156.901	FALSE	4
2022-09-12	14:25:51	-0.0670608	156.901	FALSE	4
2022-09-12	14:25:52	0.35131	157.252	FALSE	4
2022-09-12	14:25:52	0.382354	157.634	FALSE	4
2022-09-12	14:25:52	0.292888	157.927	FALSE	4
2022-09-12	14:25:52	0.305916	158.233	FALSE	4
2022-09-12	14:25:53	0.485509	158.719	FALSE	4
2022-09-12	14:25:53	0.354364	159.073	FALSE	4
2022-09-12	14:25:53	0.35416	159.427	FALSE	4
2022-09-12	14:25:54	0.323422	159.751	FALSE	4
2022-09-12	14:25:54	0.279199	160.03	FALSE	4
2022-09-12	14:25:54	0.359606	160.389	FALSE	4
2022-09-12	14:25:54	0.271463	160.661	FALSE	4
2022-09-12	14:25:55	0.237214	160.898	FALSE	4
2022-09-12	14:25:55	0.318842	161.217	FALSE	4
2022-09-12	14:25:55	0.299758	161.517	FALSE	4
2022-09-12	14:25:55	0.328461	161.845	FALSE	4
2022-09-12	14:25:56	0.358079	162.203	FALSE	4
2022-09-12	14:25:56	0.39243	162.596	FALSE	4
2022-09-12	14:25:56	0.597519	163.193	FALSE	4
2022-09-12	14:25:56	2.04642	165.24	FALSE	4
2022-09-12	14:25:57	2.64622	167.886	FALSE	4
2022-09-12	14:25:57	3.08938	170.975	1	5
2022-09-12	14:25:57	0.815789	171.791	FALSE	5
2022-09-12	14:25:58	0.390954	172.182	FALSE	5
2022-09-12	14:25:58	0.244898	172.427	FALSE	5
2022-09-12	14:25:58	0.383422	172.81	FALSE	5
2022-09-12	14:25:58	0.265356	173.076	FALSE	5
2022-09-12	14:25:59	0.146832	173.222	FALSE	5
2022-09-12	14:25:59	0.449886	173.672	FALSE	5
2022-09-12	14:25:59	0.615738	174.288	FALSE	5
2022-09-12	14:25:59	0.416654	174.705	FALSE	5
2022-09-12	14:26:00	0.36958	175.074	FALSE	5
2022-09-12	14:26:00	0.42383	175.498	FALSE	5
2022-09-12	14:26:00	0.439402	175.937	FALSE	5
2022-09-12	14:26:01	0.404746	176.342	FALSE	5
2022-09-12	14:26:01	0.473702	176.816	FALSE	5
2022-09-12	14:26:01	0.437214	177.253	FALSE	5
2022-09-12	14:26:01	0.379453	177.633	FALSE	5
2022-09-12	14:26:02	0.437774	178.07	FALSE	5
2022-09-12	14:26:02	0.429886	178.5	FALSE	5
2022-09-12	14:26:02	0.425916	178.926	FALSE	5
2022-09-12	14:26:02	0.431819	179.358	FALSE	5
2022-09-12	14:26:03	0.447036	179.805	FALSE	5
2022-09-12	14:26:03	0.448003	180.253	FALSE	5
2022-09-12	14:26:03	0.504389	180.757	FALSE	5
2022-09-12	14:26:03	0.526985	181.284	FALSE	5
2022-09-12	14:26:04	1.79701	183.081	FALSE	5
2022-09-12	14:26:04	1.71696	184.798	FALSE	5
2022-09-12	14:26:04	6.36856	191.167	1	6
2022-09-12	14:26:05	4.13401	195.301	1	7
2022-09-12	14:26:05	0.482201	195.783	FALSE	7
2022-09-12	14:26:05	1.04739	196.831	FALSE	7
2022-09-12	14:26:05	0.35014	197.181	FALSE	7
2022-09-12	14:26:06	0.472227	197.653	FALSE	7
2022-09-12	14:26:06	0.646781	198.3	FALSE	7
2022-09-12	14:26:06	0.578079	198.878	FALSE	7
2022-09-12	14:26:06	0.364288	199.242	FALSE	7
2022-09-12	14:26:07	-0.0382568	199.242	FALSE	7
2022-09-12	14:26:07	-0.309503	199.242	FALSE	7
2022-09-12	14:26:07	-0.350623	199.242	FALSE	7
2022-09-12	14:26:07	-0.0659412	199.242	FALSE	7
2022-09-12	14:26:08	-0.370114	199.242	FALSE	7
2022-09-12	14:26:08	-0.922633	199.242	FALSE	7
2022-09-12	14:26:08	-0.443905	199.242	FALSE	7
2022-09-12	14:26:09	-0.0629895	199.242	FALSE	7
2022-09-12	14:26:09	0.0627101	199.305	FALSE	7
2022-09-12	14:26:09	0.204898	199.51	FALSE	7
2022-09-12	14:26:09	-0.0454323	199.51	FALSE	7
2022-09-12	14:26:10	-0.545686	199.51	FALSE	7
2022-09-12	14:26:10	-0.516933	199.51	FALSE	7
2022-09-12	14:26:10	-0.382786	199.51	FALSE	7
2022-09-12	14:26:10	-0.371488	199.51	FALSE	7
2022-09-12	14:26:11	-0.0586639	199.51	FALSE	7
2022-09-12	14:26:11	-0.00202267	199.51	FALSE	7
2022-09-12	14:26:11	-0.0899106	199.51	FALSE	7
2022-09-12	14:26:11	-0.166755	199.51	FALSE	7
2022-09-12	14:26:12	-0.15388	199.51	FALSE	7
2022-09-12	14:26:12	-0.0696053	199.51	FALSE	7
2022-09-12	14:26:12	-0.128129	199.51	FALSE	7
2022-09-12	14:26:13	-0.13729	199.51	FALSE	7
2022-09-12	14:26:13	0.0835244	199.593	FALSE	7
2022-09-12	14:26:13	-0.156272	199.593	FALSE	7
2022-09-12	14:26:13	0.180064	199.773	FALSE	7
2022-09-12	14:26:14	0.112125	199.885	FALSE	7
2022-09-12	14:26:14	0.0632699	199.949	FALSE	7
2022-09-12	14:26:14	-0.118715	199.949	FALSE	7
2022-09-12	14:26:14	0.0025066	199.951	FALSE	7
2022-09-12	14:26:15	0.055331	200.006	FALSE	7
2022-09-12	14:26:15	0.164135	200.171	FALSE	7
2022-09-12	14:26:15	0.686985	200.858	FALSE	7
2022-09-12	14:26:15	1.33757	202.195	FALSE	7
2022-09-12	14:26:16	0.382812	202.578	FALSE	7
2022-09-12	14:26:16	0.386629	202.965	FALSE	7
2022-09-12	14:26:16	0.746221	203.711	FALSE	7
2022-09-12	14:26:17	0.52271	204.234	FALSE	7
2022-09-12	14:26:17	0.117214	204.351	FALSE	7
2022-09-12	14:26:17	0.350242	204.701	FALSE	7
2022-09-12	14:26:17	0.0135499	204.715	FALSE	7
2022-09-12	14:26:18	0.315942	205.03	FALSE	7
2022-09-12	14:26:18	0.139708	205.17	FALSE	7
2022-09-12	14:26:18	0.212379	205.383	FALSE	7
2022-09-12	14:26:18	0.194924	205.577	FALSE	7
2022-09-12	14:26:19	0.140115	205.718	FALSE	7
2022-09-12	14:26:19	0.0666796	205.784	FALSE	7
2022-09-12	14:26:19	0.07299	205.857	FALSE	7
2022-09-12	14:26:19	0.162303	206.02	FALSE	7
2022-09-12	14:26:20	0.261438	206.281	FALSE	7
2022-09-12	14:26:20	0.311565	206.593	FALSE	7
2022-09-12	14:26:20	0.375026	206.968	FALSE	7
2022-09-12	14:26:21	0.492786	207.46	FALSE	7
2022-09-12	14:26:21	0.972634	208.433	FALSE	7
2022-09-12	14:26:21	0.50327	208.936	FALSE	7
2022-09-12	14:26:21	0.318384	209.255	FALSE	7
2022-09-12	14:26:22	0.358079	209.613	FALSE	7
2022-09-12	14:26:22	0.329682	209.942	FALSE	7
2022-09-12	14:26:22	0.394262	210.337	FALSE	7
2022-09-12	14:26:22	0.350394	210.687	FALSE	7
2022-09-12	14:26:23	0.571412	211.259	FALSE	7
2022-09-12	14:26:23	0.305	211.564	FALSE	7
2022-09-12	14:26:23	0.323779	211.887	FALSE	7
2022-09-12	14:26:23	0.698333	212.586	FALSE	7
2022-09-12	14:26:24	0.428104	213.014	FALSE	7
2022-09-12	14:26:24	0.310598	213.324	FALSE	7
2022-09-12	14:26:24	0.318995	213.643	FALSE	7
2022-09-12	14:26:25	0.43813	214.081	FALSE	7
2022-09-12	14:26:25	0.300725	214.382	FALSE	7
2022-09-12	14:26:25	0.165865	214.548	FALSE	7
2022-09-12	14:26:25	0.397977	214.946	FALSE	7
2022-09-12	14:26:26	0.141031	215.087	FALSE	7
2022-09-12	14:26:26	0.21925	215.306	FALSE	7
2022-09-12	14:26:26	0.209529	215.516	FALSE	7
2022-09-12	14:26:26	0.215433	215.731	FALSE	7
2022-09-12	14:26:27	0.200115	215.931	FALSE	7
2022-09-12	14:26:27	0.240573	216.172	FALSE	7
2022-09-12	14:26:27	0.261641	216.434	FALSE	7
2022-09-12	14:26:27	-0.0639056	216.434	FALSE	7
2022-09-12	14:26:28	0.131209	216.565	FALSE	7
2022-09-12	14:26:28	0.0895295	216.654	FALSE	7
2022-09-12	14:26:28	-0.0273662	216.654	FALSE	7
2022-09-12	14:26:29	0.30958	216.964	FALSE	7
2022-09-12	14:26:29	0.272328	217.236	FALSE	7
2022-09-12	14:26:29	0.287188	217.523	FALSE	7
2022-09-12	14:26:29	0.144695	217.668	FALSE	7
2022-09-12	14:26:30	0.585763	218.254	FALSE	7
2022-09-12	14:26:30	0.265662	218.52	FALSE	7
2022-09-12	14:26:30	0.20902	218.729	FALSE	7
2022-09-12	14:26:30	0.388613	219.117	FALSE	7
2022-09-12	14:26:31	0.289122	219.406	FALSE	7
2022-09-12	14:26:31	0.168461	219.575	FALSE	7
2022-09-12	14:26:31	0.450649	220.025	FALSE	7
2022-09-12	14:26:32	0.207341	220.233	FALSE	7
2022-09-12	14:26:32	0.279962	220.513	FALSE	7
2022-09-12	14:26:32	0.251463	220.764	FALSE	7
2022-09-12	14:26:32	0.175992	220.94	FALSE	7
2022-09-12	14:26:33	0.159046	221.099	FALSE	7
2022-09-12	14:26:33	0.0315651	221.131	FALSE	7
2022-09-12	14:26:33	0.126985	221.258	FALSE	7
2022-09-12	14:26:33	0.0667305	221.324	FALSE	7
2022-09-12	14:26:34	0.0994022	221.424	FALSE	7
2022-09-12	14:26:34	0.0436262	221.468	FALSE	7
2022-09-12	14:26:34	0.353957	221.821	FALSE	7
2022-09-12	14:26:34	0.0984862	221.92	FALSE	7
2022-09-12	14:26:35	0.226171	222.146	FALSE	7
2022-09-12	14:26:35	0.00393154	222.15	FALSE	7
2022-09-12	14:26:35	0.0534481	222.204	FALSE	7
2022-09-12	14:26:36	-0.0779005	222.204	FALSE	7
2022-09-12	14:26:36	0.0849493	222.288	FALSE	7
2022-09-12	14:26:36	0.0614888	222.35	FALSE	7
2022-09-12	14:26:36	0.12271	222.473	FALSE	7
2022-09-12	14:26:37	0.114262	222.587	FALSE	7
2022-09-12	14:26:37	-0.0213611	222.587	FALSE	7
2022-09-12	14:26:37	-0.00589033	222.587	FALSE	7
2022-09-12	14:26:37	-0.0687911	222.587	FALSE	7
2022-09-12	14:26:38	-0.0910811	222.587	FALSE	7
2022-09-12	14:26:38	-0.0456868	222.587	FALSE	7
2022-09-12	14:26:38	-0.201412	222.587	FALSE	7
2022-09-12	14:26:38	0.0295804	222.616	FALSE	7
2022-09-12	14:26:39	0.0424557	222.659	FALSE	7
2022-09-12	14:26:39	-0.116832	222.659	FALSE	7
2022-09-12	14:26:39	0.1107	222.77	FALSE	7
2022-09-12	14:26:40	0.102201	222.872	FALSE	7
2022-09-12	14:26:40	0.201438	223.073	FALSE	7
2022-09-12	14:26:40	0.260165	223.333	FALSE	7
2022-09-12	14:26:40	0.194517	223.528	FALSE	7
2022-09-12	14:26:41	-0.172099	223.528	FALSE	7
2022-09-12	14:26:41	-0.260598	223.528	FALSE	7
2022-09-12	14:26:41	-0.0672643	223.528	FALSE	7
2022-09-12	14:26:41	0.161998	223.69	FALSE	7
2022-09-12	14:26:42	0.346272	224.036	FALSE	7
2022-09-12	14:26:42	0.3593	224.396	FALSE	7
2022-09-12	14:26:42	0.337112	224.733	FALSE	7
2022-09-12	14:26:42	0.255687	224.988	FALSE	7
2022-09-12	14:26:43	0.407239	225.396	FALSE	7
2022-09-12	14:26:43	0.535127	225.931	FALSE	7
2022-09-12	14:26:43	0.491514	226.422	FALSE	7
2022-09-12	14:26:44	0.378842	226.801	FALSE	7
2022-09-12	14:26:44	0.579147	227.38	FALSE	7
2022-09-12	14:26:44	0.414924	227.795	FALSE	7
2022-09-12	14:26:44	0.525203	228.32	FALSE	7
2022-09-12	14:26:45	0.286832	228.607	FALSE	7
2022-09-12	14:26:45	0.464186	229.071	FALSE	7
2022-09-12	14:26:45	0.427392	229.499	FALSE	7
2022-09-12	14:26:45	0.437316	229.936	FALSE	7
2022-09-12	14:26:46	0.493702	230.43	FALSE	7
2022-09-12	14:26:46	0.344542	230.774	FALSE	7
2022-09-12	14:26:46	0.4793	231.254	FALSE	7
2022-09-12	14:26:46	0.528257	231.782	FALSE	7
2022-09-12	14:26:47	0.447697	232.23	FALSE	7
2022-09-12	14:26:47	0.568002	232.798	FALSE	7
2022-09-12	14:26:47	0.49874	233.296	FALSE	7
2022-09-12	14:26:48	0.552888	233.849	FALSE	7
2022-09-12	14:26:48	0.442252	234.291	FALSE	7
2022-09-12	14:26:48	0.443982	234.735	FALSE	7
2022-09-12	14:26:48	0.537214	235.273	FALSE	7
2022-09-12	14:26:49	0.344949	235.618	FALSE	7
2022-09-12	14:26:49	0.445458	236.063	FALSE	7
2022-09-12	14:26:49	0.718384	236.781	FALSE	7
2022-09-12	14:26:49	1.04195	237.823	FALSE	7
2022-09-12	14:26:50	0.545	238.368	FALSE	7
2022-09-12	14:26:50	0.46902	238.837	FALSE	7
2022-09-12	14:26:50	0.493295	239.331	FALSE	7
2022-09-12	14:26:50	0.773652	240.104	FALSE	7
2022-09-12	14:26:51	0.851565	240.956	FALSE	7
2022-09-12	14:26:51	0.423321	241.379	FALSE	7
2022-09-12	14:26:51	0.27411	241.653	FALSE	7
2022-09-12	14:26:52	0.364389	242.018	FALSE	7
2022-09-12	14:26:52	0.523168	242.541	FALSE	7
2022-09-12	14:26:52	0.413651	242.955	FALSE	7
2022-09-12	14:26:52	0.34327	243.298	FALSE	7
2022-09-12	14:26:53	0.357417	243.655	FALSE	7
2022-09-12	14:26:53	0.4736	244.129	FALSE	7
2022-09-12	14:26:53	1.27391	245.403	FALSE	7
2022-09-12	14:26:53	0.305713	245.708	FALSE	7
2022-09-12	14:26:54	0.466272	246.175	FALSE	7
2022-09-12	14:26:54	0.411361	246.586	FALSE	7
2022-09-12	14:26:54	0.186374	246.772	FALSE	7
2022-09-12	14:26:54	0.439962	247.212	FALSE	7
2022-09-12	14:26:55	0.159148	247.372	FALSE	7
2022-09-12	14:26:55	0.0626084	247.434	FALSE	7
2022-09-12	14:26:55	0.1564	247.591	FALSE	7
2022-09-12	14:26:56	0.320166	247.911	FALSE	7
2022-09-12	14:26:56	0.679198	248.59	FALSE	7
2022-09-12	14:26:56	2.34734	250.937	FALSE	7
2022-09-12	14:26:56	2.00861	252.946	FALSE	7
2022-09-12	14:26:57	1.40912	254.355	FALSE	7
2022-09-12	14:26:57	1.87676	256.232	FALSE	7
2022-09-12	14:26:57	1.46485	257.697	FALSE	7
2022-09-12	14:26:57	0.746476	258.443	FALSE	7
2022-09-12	14:26:58	0.466323	258.909	FALSE	7
2022-09-12	14:26:58	0.597265	259.507	FALSE	7
2022-09-12	14:26:58	0.970293	260.477	FALSE	7
2022-09-12	14:26:59	1.05024	261.527	FALSE	7
2022-09-12	14:26:59	1.02892	262.556	FALSE	7
2022-09-12	14:26:59	1.47391	264.03	FALSE	7
2022-09-12	14:26:59	1.90897	265.939	FALSE	7
2022-09-12	14:27:00	2.59345	268.532	FALSE	7
2022-09-12	14:27:00	1.70642	270.239	FALSE	7
2022-09-12	14:27:00	1.15696	271.396	FALSE	7
2022-09-12	14:27:00	1.01416	272.41	FALSE	7
2022-09-12	14:27:01	1.0049	273.415	FALSE	7
2022-09-12	14:27:01	0.846679	274.262	FALSE	7
2022-09-12	14:27:01	0.912277	275.174	FALSE	7
2022-09-12	14:27:01	0.811819	275.986	FALSE	7
2022-09-12	14:27:02	1.02485	277.011	FALSE	7
2022-09-12	14:27:02	1.09111	278.102	FALSE	7
2022-09-12	14:27:02	1.11075	279.212	FALSE	7
2022-09-12	14:27:03	1.0278	280.24	FALSE	7
2022-09-12	14:27:03	0.998486	281.239	FALSE	7
2022-09-12	14:27:03	0.981285	282.22	FALSE	7
2022-09-12	14:27:03	0.832277	283.052	FALSE	7
2022-09-12	14:27:04	0.900522	283.953	FALSE	7
2022-09-12	14:27:04	0.946272	284.899	FALSE	7
2022-09-12	14:27:04	0.778639	285.678	FALSE	7
2022-09-12	14:27:04	0.804542	286.482	FALSE	7
2022-09-12	14:27:05	0.209173	286.691	FALSE	7
2022-09-12	14:27:05	0.231361	286.923	FALSE	7
2022-09-12	14:27:05	0.0787916	287.002	FALSE	7
2022-09-12	14:27:05	0.119911	287.121	FALSE	7
2022-09-12	14:27:06	-0.000394156	287.121	FALSE	7
2022-09-12	14:27:06	0.208104	287.33	FALSE	7
2022-09-12	14:27:06	0.182303	287.512	FALSE	7
2022-09-12	14:27:07	0.0875448	287.599	FALSE	7
2022-09-12	14:27:07	0.0389951	287.638	FALSE	7
2022-09-12	14:27:07	-0.0100634	287.638	FALSE	7
2022-09-12	14:27:07	0.377061	288.015	FALSE	7
2022-09-12	14:27:08	0.492685	288.508	FALSE	7
2022-09-12	14:27:08	0.466781	288.975	FALSE	7
2022-09-12	14:27:08	0.145814	289.121	FALSE	7
2022-09-12	14:27:08	0.381285	289.502	FALSE	7
2022-09-12	14:27:09	0.433499	289.936	FALSE	7
2022-09-12	14:27:09	0.399504	290.335	FALSE	7
2022-09-12	14:27:09	0.310293	290.645	FALSE	7
2022-09-12	14:27:09	0.305204	290.951	FALSE	7
2022-09-12	14:27:10	0.41584	291.366	FALSE	7
2022-09-12	14:27:10	0.230903	291.597	FALSE	7
2022-09-12	14:27:10	0.181896	291.779	FALSE	7
2022-09-12	14:27:11	-0.215509	291.779	FALSE	7
2022-09-12	14:27:11	-0.310674	291.779	FALSE	7
2022-09-12	14:27:11	-0.276526	291.779	FALSE	7
2022-09-12	14:27:11	-0.240699	291.779	FALSE	7
2022-09-12	14:27:12	-0.0314374	291.779	FALSE	7
2022-09-12	14:27:12	-0.0822262	291.779	FALSE	7
2022-09-12	14:27:12	0.0527356	291.832	FALSE	7
2022-09-12	14:27:12	0.12444	291.956	FALSE	7
2022-09-12	14:27:13	0.356552	292.313	FALSE	7
2022-09-12	14:27:13	0.254211	292.567	FALSE	7
2022-09-12	14:27:13	0.477468	293.045	FALSE	7
2022-09-12	14:27:13	0.484288	293.529	FALSE	7
2022-09-12	14:27:14	0.382354	293.911	FALSE	7
2022-09-12	14:27:14	0.372786	294.284	FALSE	7
2022-09-12	14:27:14	0.193601	294.478	FALSE	7
2022-09-12	14:27:15	0.17813	294.656	FALSE	7
2022-09-12	14:27:15	0.227443	294.883	FALSE	7
2022-09-12	14:27:15	0.235738	295.119	FALSE	7
2022-09-12	14:27:15	0.192379	295.311	FALSE	7
2022-09-12	14:27:16	0.234059	295.545	FALSE	7
2022-09-12	14:27:16	0.311565	295.857	FALSE	7
2022-09-12	14:27:16	0.210242	296.067	FALSE	7
2022-09-12	14:27:16	0.233448	296.301	FALSE	7
2022-09-12	14:27:17	0.224288	296.525	FALSE	7
2022-09-12	14:27:17	0.273193	296.798	FALSE	7
2022-09-12	14:27:17	0.3364	297.134	FALSE	7
2022-09-12	14:27:17	0.269682	297.404	FALSE	7
2022-09-12	14:27:18	0.300267	297.704	FALSE	7
2022-09-12	14:27:18	0.356247	298.061	FALSE	7
2022-09-12	14:27:18	0.293702	298.354	FALSE	7
2022-09-12	14:27:19	0.330547	298.685	FALSE	7
2022-09-12	14:27:19	0.320573	299.006	FALSE	7
2022-09-12	14:27:19	0.278181	299.284	FALSE	7
2022-09-12	14:27:19	0.350344	299.634	FALSE	7
2022-09-12	14:27:20	0.313244	299.947	FALSE	7
2022-09-12	14:27:20	0.261387	300.209	FALSE	7
2022-09-12	14:27:20	0.260878	300.47	FALSE	7
2022-09-12	14:27:20	0.258079	300.728	FALSE	7
2022-09-12	14:27:21	0.192277	300.92	FALSE	7
2022-09-12	14:27:21	0.377316	301.297	FALSE	7
2022-09-12	14:27:21	0.147494	301.445	FALSE	7
2022-09-12	14:27:21	0.220929	301.666	FALSE	7
2022-09-12	14:27:22	0.381336	302.047	FALSE	7
2022-09-12	14:27:22	0.359758	302.407	FALSE	7
2022-09-12	14:27:22	0.380929	302.788	FALSE	7
2022-09-12	14:27:23	0.394822	303.182	FALSE	7
2022-09-12	14:27:23	0.385764	303.568	FALSE	7
2022-09-12	14:27:23	0.37757	303.946	FALSE	7
2022-09-12	14:27:23	0.386272	304.332	FALSE	7
2022-09-12	14:27:24	0.391972	304.724	FALSE	7
2022-09-12	14:27:24	0.387239	305.111	FALSE	7
2022-09-12	14:27:24	0.390445	305.502	FALSE	7
2022-09-12	14:27:24	0.384542	305.886	FALSE	7
2022-09-12	14:27:25	0.38958	306.276	FALSE	7
2022-09-12	14:27:25	0.451005	306.727	FALSE	7
2022-09-12	14:27:25	0.294567	307.021	FALSE	7
2022-09-12	14:27:25	0.289122	307.311	FALSE	7
2022-09-12	14:27:26	0.34556	307.656	FALSE	7
2022-09-12	14:27:26	0.294415	307.951	FALSE	7
2022-09-12	14:27:26	0.364135	308.315	FALSE	7
2022-09-12	14:27:27	0.368003	308.683	FALSE	7
2022-09-12	14:27:27	0.415484	309.098	FALSE	7
2022-09-12	14:27:27	0.45355	309.552	FALSE	7
2022-09-12	14:27:27	0.392837	309.945	FALSE	7
2022-09-12	14:27:28	0.42841	310.373	FALSE	7
2022-09-12	14:27:28	0.455891	310.829	FALSE	7
2022-09-12	14:27:28	0.455229	311.284	FALSE	7
2022-09-12	14:27:28	0.329835	311.614	FALSE	7
2022-09-12	14:27:29	0.438486	312.052	FALSE	7
2022-09-12	14:27:29	0.3907	312.443	FALSE	7
2022-09-12	14:27:29	0.353804	312.797	FALSE	7
2022-09-12	14:27:30	0.439148	313.236	FALSE	7
2022-09-12	14:27:30	0.351361	313.587	FALSE	7
2022-09-12	14:27:30	0.397825	313.985	FALSE	7
2022-09-12	14:27:30	0.504644	314.49	FALSE	7
2022-09-12	14:27:31	0.45187	314.942	FALSE	7
2022-09-12	14:27:31	0.367901	315.31	FALSE	7
2022-09-12	14:27:31	0.343779	315.653	FALSE	7
2022-09-12	14:27:31	0.368817	316.022	FALSE	7
2022-09-12	14:27:32	0.359351	316.382	FALSE	7
2022-09-12	14:27:32	0.458893	316.84	FALSE	7
2022-09-12	14:27:32	0.406985	317.247	FALSE	7
2022-09-12	14:27:32	0.355433	317.603	FALSE	7
2022-09-12	14:27:33	0.40327	318.006	FALSE	7
2022-09-12	14:27:33	0.55757	318.564	FALSE	7
2022-09-12	14:27:33	0.399453	318.963	FALSE	7
2022-09-12	14:27:34	0.390954	319.354	FALSE	7
2022-09-12	14:27:34	0.440725	319.795	FALSE	7
2022-09-12	14:27:34	0.479911	320.275	FALSE	7
2022-09-12	14:27:34	0.388817	320.664	FALSE	7
2022-09-12	14:27:35	0.554415	321.218	FALSE	7
2022-09-12	14:27:35	0.421947	321.64	FALSE	7
2022-09-12	14:27:35	0.432227	322.072	FALSE	7
2022-09-12	14:27:35	0.376247	322.448	FALSE	7
2022-09-12	14:27:36	0.433041	322.881	FALSE	7
2022-09-12	14:27:36	0.488664	323.37	FALSE	7
2022-09-12	14:27:36	0.358028	323.728	FALSE	7
2022-09-12	14:27:36	0.554415	324.283	FALSE	7
2022-09-12	14:27:37	0.570038	324.853	FALSE	7
2022-09-12	14:27:37	0.490649	325.343	FALSE	7
2022-09-12	14:27:37	0.395076	325.738	FALSE	7
2022-09-12	14:27:38	0.461947	326.2	FALSE	7
2022-09-12	14:27:38	0.376603	326.577	FALSE	7
2022-09-12	14:27:38	0.416349	326.993	FALSE	7
2022-09-12	14:27:38	0.58729	327.581	FALSE	7
2022-09-12	14:27:39	0.358893	327.939	FALSE	7
2022-09-12	14:27:39	0.552074	328.492	FALSE	7
2022-09-12	14:27:39	0.469835	328.961	FALSE	7
2022-09-12	14:27:39	0.359402	329.321	FALSE	7
2022-09-12	14:27:40	0.470954	329.792	FALSE	7
2022-09-12	14:27:40	0.382252	330.174	FALSE	7
2022-09-12	14:27:40	0.531005	330.705	FALSE	7
2022-09-12	14:27:40	0.435076	331.14	FALSE	7
2022-09-12	14:27:41	0.437214	331.577	FALSE	7
2022-09-12	14:27:41	0.478537	332.056	FALSE	7
2022-09-12	14:27:41	0.372532	332.428	FALSE	7
2022-09-12	14:27:42	0.504796	332.933	FALSE	7
2022-09-12	14:27:42	0.344389	333.278	FALSE	7
2022-09-12	14:27:42	0.424186	333.702	FALSE	7
2022-09-12	14:27:42	0.352379	334.054	FALSE	7
2022-09-12	14:27:43	0.359809	334.414	FALSE	7
2022-09-12	14:27:43	0.450395	334.864	FALSE	7
2022-09-12	14:27:43	0.361743	335.226	FALSE	7
2022-09-12	14:27:43	0.499198	335.725	FALSE	7
2022-09-12	14:27:44	0.352481	336.078	FALSE	7
2022-09-12	14:27:44	0.440725	336.518	FALSE	7
2022-09-12	14:27:44	0.392685	336.911	FALSE	7
2022-09-12	14:27:44	0.387239	337.298	FALSE	7
2022-09-12	14:27:45	0.615636	337.914	FALSE	7
2022-09-12	14:27:45	0.653142	338.567	FALSE	7
2022-09-12	14:27:45	0.533804	339.101	FALSE	7
2022-09-12	14:27:46	0.644593	339.746	FALSE	7
2022-09-12	14:27:46	0.668206	340.414	FALSE	7
2022-09-12	14:27:46	0.363524	340.777	FALSE	7
2022-09-12	14:27:46	0.445305	341.223	FALSE	7
2022-09-12	14:27:47	0.308359	341.531	FALSE	7
2022-09-12	14:27:47	0.377926	341.909	FALSE	7
2022-09-12	14:27:47	0.351565	342.26	FALSE	7
2022-09-12	14:27:47	0.36841	342.629	FALSE	7
2022-09-12	14:27:48	0.344797	342.974	FALSE	7
2022-09-12	14:27:48	0.31126	343.285	FALSE	7
2022-09-12	14:27:48	0.376552	343.661	FALSE	7
2022-09-12	14:27:48	0.38159	344.043	FALSE	7
2022-09-12	14:27:49	0.39187	344.435	FALSE	7
2022-09-12	14:27:49	0.409936	344.845	FALSE	7
2022-09-12	14:27:49	0.468359	345.313	FALSE	7
2022-09-12	14:27:50	0.766577	346.08	FALSE	7
2022-09-12	14:27:50	0.634669	346.714	FALSE	7
2022-09-12	14:27:50	0.547544	347.262	FALSE	7
2022-09-12	14:27:50	0.3764	347.638	FALSE	7
2022-09-12	14:27:51	0.422659	348.061	FALSE	7
2022-09-12	14:27:51	0.323219	348.384	FALSE	7
2022-09-12	14:27:51	0.436298	348.821	FALSE	7
2022-09-12	14:27:51	0.201896	349.022	FALSE	7
2022-09-12	14:27:52	0.468766	349.491	FALSE	7
2022-09-12	14:27:52	0.334669	349.826	FALSE	7
2022-09-12	14:27:52	0.630852	350.457	FALSE	7
2022-09-12	14:27:52	0.225611	350.682	FALSE	7
2022-09-12	14:27:53	0.528155	351.21	FALSE	7
2022-09-12	14:27:53	0.296807	351.507	FALSE	7
2022-09-12	14:27:53	0.499351	352.007	FALSE	7
2022-09-12	14:27:54	0.277519	352.284	FALSE	7
2022-09-12	14:27:54	0.44215	352.726	FALSE	7
2022-09-12	14:27:54	0.257366	352.984	FALSE	7
2022-09-12	14:27:54	0.514517	353.498	FALSE	7
2022-09-12	14:27:55	0.262201	353.76	FALSE	7
2022-09-12	14:27:55	0.474364	354.235	FALSE	7
2022-09-12	14:27:55	0.311056	354.546	FALSE	7
2022-09-12	14:27:55	0.498282	355.044	FALSE	7
2022-09-12	14:27:56	0.291667	355.336	FALSE	7
2022-09-12	14:27:56	0.509224	355.845	FALSE	7
2022-09-12	14:27:56	0.384949	356.23	FALSE	7
2022-09-12	14:27:57	0.528868	356.759	FALSE	7
2022-09-12	14:27:57	0.41416	357.173	FALSE	7
2022-09-12	14:27:57	0.526934	357.7	FALSE	7
2022-09-12	14:27:57	0.347443	358.047	FALSE	7
2022-09-12	14:27:58	0.442048	358.489	FALSE	7
2022-09-12	14:27:58	0.477926	358.967	FALSE	7
2022-09-12	14:27:58	0.439148	359.406	FALSE	7
2022-09-12	14:27:58	0.380369	359.787	FALSE	7
2022-09-12	14:27:59	0.470751	360.258	FALSE	7
2022-09-12	14:27:59	0.79472	361.052	FALSE	7
2022-09-12	14:27:59	0.578486	361.631	FALSE	7
2022-09-12	14:27:59	0.63986	362.271	FALSE	7
2022-09-12	14:28:00	0.665204	362.936	FALSE	7
2022-09-12	14:28:00	0.538232	363.474	FALSE	7
2022-09-12	14:28:00	0.375331	363.849	FALSE	7
2022-09-12	14:28:01	0.382405	364.232	FALSE	7
2022-09-12	14:28:01	0.434313	364.666	FALSE	7
2022-09-12	14:28:01	0.427748	365.094	FALSE	7
2022-09-12	14:28:01	0.505509	365.599	FALSE	7
2022-09-12	14:28:02	0.311361	365.911	FALSE	7
2022-09-12	14:28:02	0.499758	366.411	FALSE	7
2022-09-12	14:28:02	0.392837	366.803	FALSE	7
2022-09-12	14:28:02	0.574262	367.378	FALSE	7
2022-09-12	14:28:03	0.448766	367.826	FALSE	7
2022-09-12	14:28:03	0.393601	368.22	FALSE	7
2022-09-12	14:28:03	0.383473	368.603	FALSE	7
2022-09-12	14:28:03	0.423117	369.027	FALSE	7
2022-09-12	14:28:04	0.513957	369.541	FALSE	7
2022-09-12	14:28:04	0.472888	370.013	FALSE	7
2022-09-12	14:28:04	0.479809	370.493	FALSE	7
2022-09-12	14:28:05	0.498435	370.992	FALSE	7
2022-09-12	14:28:05	0.484695	371.476	FALSE	7
2022-09-12	14:28:05	0.463168	371.94	FALSE	7
2022-09-12	14:28:05	0.475026	372.415	FALSE	7
2022-09-12	14:28:06	0.488461	372.903	FALSE	7
2022-09-12	14:28:06	0.478588	373.382	FALSE	7
2022-09-12	14:28:06	0.481285	373.863	FALSE	7
2022-09-12	14:28:06	0.475534	374.338	FALSE	7
2022-09-12	14:28:07	0.480522	374.819	FALSE	7
2022-09-12	14:28:07	0.474771	375.294	FALSE	7
2022-09-12	14:28:07	0.48958	375.783	FALSE	7
2022-09-12	14:28:07	0.485967	376.269	FALSE	7
2022-09-12	14:28:08	0.482608	376.752	FALSE	7
2022-09-12	14:28:08	0.52271	377.275	FALSE	7
2022-09-12	14:28:08	0.313397	377.588	FALSE	7
2022-09-12	14:28:09	0.471514	378.059	FALSE	7
2022-09-12	14:28:09	0.513804	378.573	FALSE	7
2022-09-12	14:28:09	0.36042	378.934	FALSE	7
2022-09-12	14:28:09	0.404593	379.338	FALSE	7
2022-09-12	14:28:10	0.483066	379.821	FALSE	7
2022-09-12	14:28:10	0.406629	380.228	FALSE	7
2022-09-12	14:28:10	0.475687	380.704	FALSE	7
2022-09-12	14:28:10	0.393957	381.098	FALSE	7
2022-09-12	14:28:11	0.452481	381.55	FALSE	7
2022-09-12	14:28:11	0.336552	381.887	FALSE	7
2022-09-12	14:28:11	0.389631	382.276	FALSE	7
2022-09-12	14:28:11	0.476909	382.753	FALSE	7
2022-09-12	14:28:12	0.337214	383.09	FALSE	7
2022-09-12	14:28:12	0.421641	383.512	FALSE	7
2022-09-12	14:28:12	0.28444	383.797	FALSE	7
2022-09-12	14:28:13	0.50042	384.297	FALSE	7
2022-09-12	14:28:13	0.398639	384.696	FALSE	7
2022-09-12	14:28:13	1.0049	385.7	FALSE	7
2022-09-12	14:28:13	1.42592	387.126	FALSE	7
2022-09-12	14:28:14	1.20515	388.332	FALSE	7
2022-09-12	14:28:14	0.959453	389.291	FALSE	7
2022-09-12	14:28:14	0.875738	390.167	FALSE	7
2022-09-12	14:28:14	0.44098	390.608	FALSE	7
2022-09-12	14:28:15	0.390649	390.998	FALSE	7
2022-09-12	14:28:15	0.417977	391.416	FALSE	7
2022-09-12	14:28:15	0.303015	391.719	FALSE	7
2022-09-12	14:28:15	0.403575	392.123	FALSE	7
2022-09-12	14:28:16	0.239046	392.362	FALSE	7
2022-09-12	14:28:16	0.458588	392.821	FALSE	7
2022-09-12	14:28:16	0.221031	393.042	FALSE	7
2022-09-12	14:28:17	0.350191	393.392	FALSE	7
2022-09-12	14:28:17	0.220013	393.612	FALSE	7
2022-09-12	14:28:17	0.432023	394.044	FALSE	7
2022-09-12	14:28:17	0.1764	394.22	FALSE	7
2022-09-12	14:28:18	0.457367	394.678	FALSE	7
2022-09-12	14:28:18	0.469428	395.147	FALSE	7
2022-09-12	14:28:18	1.09401	396.241	FALSE	7
2022-09-12	14:28:18	2.03197	398.273	FALSE	7
2022-09-12	14:28:19	2.13192	400.405	FALSE	7
2022-09-12	14:28:19	1.76347	402.168	FALSE	7
2022-09-12	14:28:19	1.59039	403.759	FALSE	7
2022-09-12	14:28:19	0.858181	404.617	FALSE	7

## Sheet: MrFitz_harness_2022912142259
						**GoPro Fitting: 1412
2022-09-12	14:22:59	0.41986
2022-09-12	14:22:59	0.422099
2022-09-12	14:23:00	0.419249
2022-09-12	14:23:00	0.421438
2022-09-12	14:23:00	0.427239
2022-09-12	14:23:00	0.427799
2022-09-12	14:23:01	0.421285
2022-09-12	14:23:01	0.431718
2022-09-12	14:23:01	0.437468
2022-09-12	14:23:01	0.427952
2022-09-12	14:23:02	0.404542
2022-09-12	14:23:02	0.422099
2022-09-12	14:23:02	0.436501
2022-09-12	14:23:03	0.401285
2022-09-12	14:23:03	0.479453
2022-09-12	14:23:03	0.426679
2022-09-12	14:23:03	0.423982
2022-09-12	14:23:04	0.433346
2022-09-12	14:23:04	0.426323
2022-09-12	14:23:04	0.571005
2022-09-12	14:23:04	0.500979
2022-09-12	14:23:05	0.536959
2022-09-12	14:23:05	0.40785
2022-09-12	14:23:05	0.702506
2022-09-12	14:23:05	-0.00487254
2022-09-12	14:23:06	-0.213168
2022-09-12	14:23:06	-0.201921
2022-09-12	14:23:06	0.17813
2022-09-12	14:23:07	0.25014
2022-09-12	14:23:07	1.60475
2022-09-12	14:23:07	0.353448
2022-09-12	14:23:07	0.384491
2022-09-12	14:23:08	-0.188893
2022-09-12	14:23:08	-0.103753
2022-09-12	14:23:08	-0.333727
2022-09-12	14:23:08	-0.192913
2022-09-12	14:23:09	0.149071
2022-09-12	14:23:09	0.211921
2022-09-12	14:23:09	0.191107
2022-09-12	14:23:10	0.589427
2022-09-12	14:23:10	0.0377229
2022-09-12	14:23:10	0.195382
2022-09-12	14:23:10	0.386934
2022-09-12	14:23:11	0.0366033
2022-09-12	14:23:11	0.185407
2022-09-12	14:23:11	0.258181
2022-09-12	14:23:11	0.325051
2022-09-12	14:23:12	0.317824
2022-09-12	14:23:12	0.811616
2022-09-12	14:23:12	0.562557
2022-09-12	14:23:12	0.539911
2022-09-12	14:23:13	1.54673
2022-09-12	14:23:13	0.288715
2022-09-12	14:23:13	0.178283
2022-09-12	14:23:14	0.242456
2022-09-12	14:23:14	0.19584
2022-09-12	14:23:14	0.0846439
2022-09-12	14:23:14	-0.0540328
2022-09-12	14:23:15	-0.0100634
2022-09-12	14:23:15	-0.0406486
2022-09-12	14:23:15	-0.0930659
2022-09-12	14:23:15	-0.176781
2022-09-12	14:23:16	-0.0575951
2022-09-12	14:23:16	0.254669
2022-09-12	14:23:16	0.371616
2022-09-12	14:23:16	0.22897
2022-09-12	14:23:17	0.109987
2022-09-12	14:23:17	0.157265
2022-09-12	14:23:17	0.307188
2022-09-12	14:23:18	0.291056
2022-09-12	14:23:18	0.544695
2022-09-12	14:23:18	0.287901
2022-09-12	14:23:18	0.392023
2022-09-12	14:23:19	-0.180292
2022-09-12	14:23:19	-0.427977
2022-09-12	14:23:19	-0.743803
2022-09-12	14:23:19	-0.0522007
2022-09-12	14:23:20	0.211921
2022-09-12	14:23:20	0.125153
2022-09-12	14:23:20	0.165967
2022-09-12	14:23:20	-0.102074
2022-09-12	14:23:21	-0.255712
2022-09-12	14:23:21	-0.0111321
2022-09-12	14:23:21	0.086985
2022-09-12	14:23:22	0.00276106
2022-09-12	14:23:22	-0.097188
2022-09-12	14:23:22	0.0418959
2022-09-12	14:23:22	0.0941096
2022-09-12	14:23:23	0.296043
2022-09-12	14:23:23	0.0513615
2022-09-12	14:23:23	0.274975
2022-09-12	14:23:23	0.227596
2022-09-12	14:23:24	0.473143
2022-09-12	14:23:24	0.410038
2022-09-12	14:23:24	0.528257
2022-09-12	14:23:24	0.407952
2022-09-12	14:23:25	0.37472
2022-09-12	14:23:25	0.522404
2022-09-12	14:23:25	0.302557
2022-09-12	14:23:26	0.501234
2022-09-12	14:23:26	0.345763
2022-09-12	14:23:26	0.555891
2022-09-12	14:23:26	0.541336
2022-09-12	14:23:27	0.405407
2022-09-12	14:23:27	0.395433
2022-09-12	14:23:27	0.553804
2022-09-12	14:23:27	0.371768
2022-09-12	14:23:28	0.555229
2022-09-12	14:23:28	0.248664
2022-09-12	14:23:28	0.363168
2022-09-12	14:23:28	0.634466
2022-09-12	14:23:29	0.609631
2022-09-12	14:23:29	0.554008
2022-09-12	14:23:29	0.53813
2022-09-12	14:23:30	0.413702
2022-09-12	14:23:30	0.461641
2022-09-12	14:23:30	0.405967
2022-09-12	14:23:30	0.485356
2022-09-12	14:23:31	0.481132
2022-09-12	14:23:31	0.435941
2022-09-12	14:23:31	0.417214
2022-09-12	14:23:31	0.458537
2022-09-12	14:23:32	0.470191
2022-09-12	14:23:32	0.433193
2022-09-12	14:23:32	0.445255
2022-09-12	14:23:32	0.400725
2022-09-12	14:23:33	0.392837
2022-09-12	14:23:33	0.422812
2022-09-12	14:23:33	0.413346
2022-09-12	14:23:34	0.411056
2022-09-12	14:23:34	0.40785
2022-09-12	14:23:34	0.431616
2022-09-12	14:23:34	0.548766
2022-09-12	14:23:35	0.438333
2022-09-12	14:23:35	0.476552
2022-09-12	14:23:35	0.255076
2022-09-12	14:23:35	0.34327
2022-09-12	14:23:36	0.314771
2022-09-12	14:23:36	0.379249
2022-09-12	14:23:36	0.312736
2022-09-12	14:23:36	0.555025
2022-09-12	14:23:37	0.175076
2022-09-12	14:23:37	-0.225585
2022-09-12	14:23:37	-0.44762
2022-09-12	14:23:38	-0.559122
2022-09-12	14:23:38	-0.488536
2022-09-12	14:23:38	-0.283906
2022-09-12	14:23:38	-0.181259
2022-09-12	14:23:39	-0.189096
2022-09-12	14:23:39	-0.114796
2022-09-12	14:23:39	-0.0820226
2022-09-12	14:23:39	0.00800278
2022-09-12	14:23:40	0.384542
2022-09-12	14:23:40	0.424288
2022-09-12	14:23:40	0.289478
2022-09-12	14:23:40	0.275433
2022-09-12	14:23:41	0.00367708
2022-09-12	14:23:41	-0.218918
2022-09-12	14:23:41	-0.353168
2022-09-12	14:23:42	-0.184363
2022-09-12	14:23:42	-0.203142
2022-09-12	14:23:42	-0.159529
2022-09-12	14:23:42	-0.115407
2022-09-12	14:23:43	0.0333972
2022-09-12	14:23:43	-0.202277
2022-09-12	14:23:43	-0.337239
2022-09-12	14:23:43	-0.442989
2022-09-12	14:23:44	-0.523905
2022-09-12	14:23:44	-0.511234
2022-09-12	14:23:44	-0.463905
2022-09-12	14:23:45	-0.120954
2022-09-12	14:23:45	0.353041
2022-09-12	14:23:45	0.460573
2022-09-12	14:23:45	0.350802
2022-09-12	14:23:46	-0.0202415
2022-09-12	14:23:46	-0.053931
2022-09-12	14:23:46	-0.181514
2022-09-12	14:23:47	-0.257697
2022-09-12	14:23:47	-0.17561
2022-09-12	14:23:47	-0.458715
2022-09-12	14:23:47	-0.521564
2022-09-12	14:23:47	-0.506145
2022-09-12	14:23:48	-0.444872
2022-09-12	14:23:48	-0.597341
2022-09-12	14:23:48	-0.559987
2022-09-12	14:23:49	-0.518562
2022-09-12	14:23:49	-0.419681
2022-09-12	14:23:49	-0.617544
2022-09-12	14:23:49	-0.569096
2022-09-12	14:23:50	-0.461615
2022-09-12	14:23:50	-0.247671
2022-09-12	14:23:50	-0.338918
2022-09-12	14:23:50	-0.395101
2022-09-12	14:23:51	-0.433575
2022-09-12	14:23:51	-0.397391
2022-09-12	14:23:51	-0.269707
2022-09-12	14:23:51	-0.172404
2022-09-12	14:23:52	-0.0273153
2022-09-12	14:23:52	0.0062725
2022-09-12	14:23:52	0.217367
2022-09-12	14:23:53	0.23757
2022-09-12	14:23:53	0.356858
2022-09-12	14:23:53	0.147443
2022-09-12	14:23:53	0.388206
2022-09-12	14:23:54	0.251921
2022-09-12	14:23:54	0.335076
2022-09-12	14:23:54	0.0140588
2022-09-12	14:23:54	0.0451529
2022-09-12	14:23:55	-0.0276715
2022-09-12	14:23:55	0.128155
2022-09-12	14:23:55	-0.065585
2022-09-12	14:23:55	0.297417
2022-09-12	14:23:56	0.00459311
2022-09-12	14:23:56	0.215891
2022-09-12	14:23:56	-0.0675188
2022-09-12	14:23:57	0.136196
2022-09-12	14:23:57	-0.0699615
2022-09-12	14:23:57	-0.143804
2022-09-12	14:23:57	-0.282531
2022-09-12	14:23:58	-0.0536766
2022-09-12	14:23:58	-0.0100125
2022-09-12	14:23:58	-0.0535239
2022-09-12	14:23:58	-0.2379
2022-09-12	14:23:59	-0.145025
2022-09-12	14:23:59	-0.223448
2022-09-12	14:23:59	-0.233524
2022-09-12	14:23:59	-0.339172
2022-09-12	14:24:00	-0.337849
2022-09-12	14:24:00	-0.40187
2022-09-12	14:24:00	-0.39958
2022-09-12	14:24:01	-0.357697
2022-09-12	14:24:01	-0.331539
2022-09-12	14:24:01	-0.493117
2022-09-12	14:24:01	-0.374796
2022-09-12	14:24:02	-0.155458
2022-09-12	14:24:02	-0.108537
2022-09-12	14:24:02	-0.152048
2022-09-12	14:24:02	-0.281208
2022-09-12	14:24:03	-0.140394
2022-09-12	14:24:03	-0.209096
2022-09-12	14:24:03	-0.258715
2022-09-12	14:24:03	-0.340292
2022-09-12	14:24:04	-0.230267
2022-09-12	14:24:04	-0.219478
2022-09-12	14:24:04	0.0259162
2022-09-12	14:24:05	0.233244
2022-09-12	14:24:05	0.350649
2022-09-12	14:24:05	0.553346
2022-09-12	14:24:05	0.475687
2022-09-12	14:24:06	0.976705
2022-09-12	14:24:06	0.40154
2022-09-12	14:24:06	0.715789
2022-09-12	14:24:06	0.285967
2022-09-12	14:24:07	0.687646
2022-09-12	14:24:07	0.0652547
2022-09-12	14:24:07	0.184186
2022-09-12	14:24:07	0.0109545
2022-09-12	14:24:08	0.124237
2022-09-12	14:24:08	-0.0716918
2022-09-12	14:24:08	-0.240699
2022-09-12	14:24:09	-0.362786
2022-09-12	14:24:09	-0.422938
2022-09-12	14:24:09	-0.378053
2022-09-12	14:24:09	-0.462582
2022-09-12	14:24:10	-0.453269
2022-09-12	14:24:10	-0.405178
2022-09-12	14:24:10	-0.304211
2022-09-12	14:24:10	-0.370368
2022-09-12	14:24:11	-0.445025
2022-09-12	14:24:11	-0.305585
2022-09-12	14:24:11	-0.258562
2022-09-12	14:24:11	-0.485687
2022-09-12	14:24:12	-0.405737
2022-09-12	14:24:12	-0.464669
2022-09-12	14:24:12	-0.405229
2022-09-12	14:24:13	-0.378307
2022-09-12	14:24:13	-0.4093
2022-09-12	14:24:13	-0.426602
2022-09-12	14:24:13	-0.299987
2022-09-12	14:24:14	-0.321972
2022-09-12	14:24:14	-0.361106
2022-09-12	14:24:14	-0.332913
2022-09-12	14:24:14	-0.173218
2022-09-12	14:24:15	-0.182633
2022-09-12	14:24:15	-0.281819
2022-09-12	14:24:15	-0.125738
2022-09-12	14:24:15	-0.0431931
2022-09-12	14:24:16	-0.0217682
2022-09-12	14:24:16	0.0824048
2022-09-12	14:24:16	-0.152455
2022-09-12	14:24:17	-0.0112339
2022-09-12	14:24:17	-0.0282313
2022-09-12	14:24:17	-0.164771
2022-09-12	14:24:17	-0.229605
2022-09-12	14:24:18	-0.207722
2022-09-12	14:24:18	-0.11673
2022-09-12	14:24:18	-0.124465
2022-09-12	14:24:18	-0.122226
2022-09-12	14:24:19	-0.227468
2022-09-12	14:24:19	-0.0990709
2022-09-12	14:24:19	-0.138562
2022-09-12	14:24:20	-0.0693509
2022-09-12	14:24:20	-0.152557
2022-09-12	14:24:20	-0.229758
2022-09-12	14:24:20	-0.374949
2022-09-12	14:24:21	-0.191743
2022-09-12	14:24:21	-0.297341
2022-09-12	14:24:21	0.0662724
2022-09-12	14:24:21	-0.0901651
2022-09-12	14:24:22	0.232227
2022-09-12	14:24:22	0.18271
2022-09-12	14:24:22	0.412125
2022-09-12	14:24:22	0.0912597
2022-09-12	14:24:23	0.384288
2022-09-12	14:24:23	0.0693768
2022-09-12	14:24:23	0.250547
2022-09-12	14:24:24	0.0663743
2022-09-12	14:24:24	0.0297331
2022-09-12	14:24:24	-0.262379
2022-09-12	14:24:24	-0.245381
2022-09-12	14:24:25	-0.159682
2022-09-12	14:24:25	-0.257341
2022-09-12	14:24:25	-0.386857
2022-09-12	14:24:25	-0.345127
2022-09-12	14:24:26	-0.299783
2022-09-12	14:24:26	-0.216679
2022-09-12	14:24:26	-0.260038
2022-09-12	14:24:26	-0.36416
2022-09-12	14:24:27	-0.356628
2022-09-12	14:24:27	-0.375407
2022-09-12	14:24:27	-0.409758
2022-09-12	14:24:28	-0.336577
2022-09-12	14:24:28	-0.366501
2022-09-12	14:24:28	-0.350012
2022-09-12	14:24:28	-0.321972
2022-09-12	14:24:29	-0.341361
2022-09-12	14:24:29	-0.566755
2022-09-12	14:24:29	-0.517697
2022-09-12	14:24:29	-0.303295
2022-09-12	14:24:30	-0.294236
2022-09-12	14:24:30	-0.26986
2022-09-12	14:24:30	-0.26757
2022-09-12	14:24:30	-0.283346
2022-09-12	14:24:31	-0.28533
2022-09-12	14:24:31	-0.309758
2022-09-12	14:24:31	-0.358765
2022-09-12	14:24:32	-0.377188
2022-09-12	14:24:32	-0.374185
2022-09-12	14:24:32	-0.368028
2022-09-12	14:24:32	-0.342633
2022-09-12	14:24:33	-0.334185
2022-09-12	14:24:33	-0.321615
2022-09-12	14:24:33	-0.305687
2022-09-12	14:24:33	-0.279173
2022-09-12	14:24:34	-0.284465
2022-09-12	14:24:34	-0.291386
2022-09-12	14:24:34	-0.294796
2022-09-12	14:24:34	-0.281768
2022-09-12	14:24:35	-0.274084
2022-09-12	14:24:35	-0.307977
2022-09-12	14:24:35	-0.526501
2022-09-12	14:24:36	-0.470979
2022-09-12	14:24:36	-0.277239
2022-09-12	14:24:36	-0.278002
2022-09-12	14:24:36	-0.0880786
2022-09-12	14:24:37	-0.0532186
2022-09-12	14:24:37	0.237316
2022-09-12	14:24:37	0.171158
2022-09-12	14:24:37	0.359606
2022-09-12	14:24:38	-0.0769335
2022-09-12	14:24:38	-0.263295
2022-09-12	14:24:38	-0.284414
2022-09-12	14:24:38	-0.26416
2022-09-12	14:24:39	-0.19958
2022-09-12	14:24:39	-0.273117
2022-09-12	14:24:39	-0.236221
2022-09-12	14:24:40	-0.192913
2022-09-12	14:24:40	-0.284516
2022-09-12	14:24:40	-0.452048
2022-09-12	14:24:40	-0.276832
2022-09-12	14:24:41	-0.342888
2022-09-12	14:24:41	-0.257544
2022-09-12	14:24:41	-0.140954
2022-09-12	14:24:41	-0.158358
2022-09-12	14:24:42	-0.0425824
2022-09-12	14:24:42	-0.279478
2022-09-12	14:24:42	-0.224109
2022-09-12	14:24:42	-0.32874
2022-09-12	14:24:43	-0.373626
2022-09-12	14:24:43	-0.367977
2022-09-12	14:24:43	-0.392099
2022-09-12	14:24:44	-0.489758
2022-09-12	14:24:44	-0.148435
2022-09-12	14:24:44	0.0229137
2022-09-12	14:24:44	0.361489
2022-09-12	14:24:45	0.468359
2022-09-12	14:24:45	0.177875
2022-09-12	14:24:45	0.409631
2022-09-12	14:24:45	0.316858
2022-09-12	14:24:46	0.351209
2022-09-12	14:24:46	0.447443
2022-09-12	14:24:46	0.274008
2022-09-12	14:24:46	0.337265
2022-09-12	14:24:47	0.394975
2022-09-12	14:24:47	0.308257
2022-09-12	14:24:47	0.467545
2022-09-12	14:24:48	0.401234
2022-09-12	14:24:48	0.275636
2022-09-12	14:24:48	0.339809
2022-09-12	14:24:48	0.26785
2022-09-12	14:24:49	0.351056
2022-09-12	14:24:49	0.127799
2022-09-12	14:24:49	-0.0308776
2022-09-12	14:24:49	-0.0182567
2022-09-12	14:24:50	-0.0786638
2022-09-12	14:24:50	0.0347712
2022-09-12	14:24:50	-0.153168
2022-09-12	14:24:50	-0.222379
2022-09-12	14:24:51	-0.0592745
2022-09-12	14:24:51	0.358639
2022-09-12	14:24:51	0.0703946
2022-09-12	14:24:52	0.462812
2022-09-12	14:24:52	0.353397
2022-09-12	14:24:52	0.272328
2022-09-12	14:24:52	0.429326
2022-09-12	14:24:53	0.2393
2022-09-12	14:24:53	0.327341
2022-09-12	14:24:53	0.132227
2022-09-12	14:24:53	0.00652696
2022-09-12	14:24:54	0.0737025
2022-09-12	14:24:54	0.408919
2022-09-12	14:24:54	0.609122
2022-09-12	14:24:55	0.875432
2022-09-12	14:24:55	2.88418
2022-09-12	14:24:55	0.775687
2022-09-12	14:24:55	0.16556
2022-09-12	14:24:56	0.636705
2022-09-12	14:24:56	0.491209
2022-09-12	14:24:56	0.0703946
2022-09-12	14:24:56	0.447799
2022-09-12	14:24:57	0.490293
2022-09-12	14:24:57	0.352226
2022-09-12	14:24:57	0.268308
2022-09-12	14:24:57	0.321489
2022-09-12	14:24:58	0.1107
2022-09-12	14:24:58	0.149224
2022-09-12	14:24:58	0.571463
2022-09-12	14:24:59	0.30327
2022-09-12	14:24:59	0.318741
2022-09-12	14:24:59	0.649835
2022-09-12	14:24:59	0.760114
2022-09-12	14:25:00	0.738791
2022-09-12	14:25:00	0.76729
2022-09-12	14:25:00	0.592124
2022-09-12	14:25:00	0.561946
2022-09-12	14:25:01	0.636603
2022-09-12	14:25:01	0.878282
2022-09-12	14:25:01	0.110344
2022-09-12	14:25:01	0.277519
2022-09-12	14:25:02	0.129071
2022-09-12	14:25:02	-0.123346
2022-09-12	14:25:02	-0.00110661
2022-09-12	14:25:03	-0.00874021
2022-09-12	14:25:03	0.430598
2022-09-12	14:25:03	0.415026
2022-09-12	14:25:03	0.314109
2022-09-12	14:25:04	0.231667
2022-09-12	14:25:04	0.11869
2022-09-12	14:25:04	0.0831173
2022-09-12	14:25:04	0.0989951
2022-09-12	14:25:05	0.170649
2022-09-12	14:25:05	0.272685
2022-09-12	14:25:05	0.0898348
2022-09-12	14:25:05	0.22729
2022-09-12	14:25:06	0.346374
2022-09-12	14:25:06	0.211158
2022-09-12	14:25:06	0.563779
2022-09-12	14:25:07	0.164593
2022-09-12	14:25:07	0.0124303
2022-09-12	14:25:07	0.0765015
2022-09-12	14:25:07	0.123524
2022-09-12	14:25:08	0.0313107
2022-09-12	14:25:08	0.0222521
2022-09-12	14:25:08	-0.218766
2022-09-12	14:25:08	-0.658511
2022-09-12	14:25:09	-0.600394
2022-09-12	14:25:09	-0.764058
2022-09-12	14:25:09	-0.508638
2022-09-12	14:25:09	-0.649605
2022-09-12	14:25:10	-0.459122
2022-09-12	14:25:10	-0.529096
2022-09-12	14:25:10	-0.465636
2022-09-12	14:25:11	-0.411437
2022-09-12	14:25:11	-0.119682
2022-09-12	14:25:11	-0.169656
2022-09-12	14:25:11	0.278588
2022-09-12	14:25:12	0.302456
2022-09-12	14:25:12	0.526374
2022-09-12	14:25:12	0.264186
2022-09-12	14:25:12	0.644949
2022-09-12	14:25:13	0.429784
2022-09-12	14:25:13	1.65457
2022-09-12	14:25:13	0.794211
2022-09-12	14:25:13	2.44469
2022-09-12	14:25:14	1.45894
2022-09-12	14:25:14	1.2881
2022-09-12	14:25:14	0.524287
2022-09-12	14:25:15	0.651463
2022-09-12	14:25:15	0.466425
2022-09-12	14:25:15	0.337875
2022-09-12	14:25:15	0.411412
2022-09-12	14:25:16	0.336094
2022-09-12	14:25:16	0.672583
2022-09-12	14:25:16	0.678384
2022-09-12	14:25:16	0.631921
2022-09-12	14:25:17	0.310598
2022-09-12	14:25:17	0.23925
2022-09-12	14:25:17	0.288817
2022-09-12	14:25:17	0.403423
2022-09-12	14:25:18	0.294822
2022-09-12	14:25:18	0.390954
2022-09-12	14:25:18	0.269936
2022-09-12	14:25:19	0.520725
2022-09-12	14:25:19	0.241692
2022-09-12	14:25:19	0.432735
2022-09-12	14:25:19	0.27472
2022-09-12	14:25:20	0.510954
2022-09-12	14:25:20	0.281641
2022-09-12	14:25:20	0.456756
2022-09-12	14:25:20	0.335229
2022-09-12	14:25:21	0.365356
2022-09-12	14:25:21	0.318435
2022-09-12	14:25:21	0.328461
2022-09-12	14:25:22	0.281641
2022-09-12	14:25:22	0.405
2022-09-12	14:25:22	0.9193
2022-09-12	14:25:22	4.06586
2022-09-12	14:25:23	10.0923
2022-09-12	14:25:23	3.35253
2022-09-12	14:25:23	2.93426
2022-09-12	14:25:23	2.36927
2022-09-12	14:25:24	0.827952
2022-09-12	14:25:24	0.540063
2022-09-12	14:25:24	0.377621
2022-09-12	14:25:24	0.428308
2022-09-12	14:25:25	0.71589
2022-09-12	14:25:25	0.481336
2022-09-12	14:25:25	0.338791
2022-09-12	14:25:26	0.0336008
2022-09-12	14:25:26	-0.321259
2022-09-12	14:25:26	-0.101107
2022-09-12	14:25:26	0.338232
2022-09-12	14:25:27	0.129173
2022-09-12	14:25:27	0.221285
2022-09-12	14:25:27	0.157672
2022-09-12	14:25:27	0.401641
2022-09-12	14:25:28	0.221081
2022-09-12	14:25:28	0.18673
2022-09-12	14:25:28	0.113601
2022-09-12	14:25:28	0.235229
2022-09-12	14:25:29	0.366985
2022-09-12	14:25:29	0.483066
2022-09-12	14:25:29	0.468817
2022-09-12	14:25:30	0.35528
2022-09-12	14:25:30	0.345
2022-09-12	14:25:30	0.394059
2022-09-12	14:25:30	0.389326
2022-09-12	14:25:31	0.360013
2022-09-12	14:25:31	0.369428
2022-09-12	14:25:31	0.356959
2022-09-12	14:25:31	0.284084
2022-09-12	14:25:32	0.344186
2022-09-12	14:25:32	0.271667
2022-09-12	14:25:32	0.201081
2022-09-12	14:25:32	0.340369
2022-09-12	14:25:33	0.0985371
2022-09-12	14:25:33	0.325204
2022-09-12	14:25:33	0.307087
2022-09-12	14:25:34	0.360522
2022-09-12	14:25:34	0.286527
2022-09-12	14:25:34	0.280522
2022-09-12	14:25:34	0.324135
2022-09-12	14:25:35	0.274517
2022-09-12	14:25:35	0.346476
2022-09-12	14:25:35	0.191565
2022-09-12	14:25:35	0.248359
2022-09-12	14:25:36	0.262608
2022-09-12	14:25:36	0.225865
2022-09-12	14:25:36	0.3364
2022-09-12	14:25:36	0.174975
2022-09-12	14:25:37	0.326018
2022-09-12	14:25:37	0.338283
2022-09-12	14:25:37	0.256094
2022-09-12	14:25:38	0.408868
2022-09-12	14:25:38	0.303931
2022-09-12	14:25:38	0.384847
2022-09-12	14:25:38	0.22556
2022-09-12	14:25:39	0.256603
2022-09-12	14:25:39	0.357875
2022-09-12	14:25:39	0.271667
2022-09-12	14:25:39	0.477367
2022-09-12	14:25:40	1.25314
2022-09-12	14:25:40	1.13146
2022-09-12	14:25:40	0.228562
2022-09-12	14:25:40	0.513448
2022-09-12	14:25:41	0.844389
2022-09-12	14:25:41	0.647137
2022-09-12	14:25:41	0.695636
2022-09-12	14:25:42	1.41594
2022-09-12	14:25:42	0.816857
2022-09-12	14:25:42	2.93034
2022-09-12	14:25:42	2.10765
2022-09-12	14:25:43	3.00317
2022-09-12	14:25:43	1.87212
2022-09-12	14:25:43	1.94683
2022-09-12	14:25:43	1.29945
2022-09-12	14:25:44	1.01375
2022-09-12	14:25:44	1.50154
2022-09-12	14:25:44	0.493499
2022-09-12	14:25:44	0.541387
2022-09-12	14:25:45	0.563473
2022-09-12	14:25:45	0.440827
2022-09-12	14:25:45	0.215076
2022-09-12	14:25:46	0.420878
2022-09-12	14:25:46	0.181132
2022-09-12	14:25:46	0.282506
2022-09-12	14:25:46	0.0346185
2022-09-12	14:25:47	0.305662
2022-09-12	14:25:47	0.147138
2022-09-12	14:25:47	0.171972
2022-09-12	14:25:47	-0.0691982
2022-09-12	14:25:48	-0.374084
2022-09-12	14:25:48	-0.526196
2022-09-12	14:25:48	-0.407417
2022-09-12	14:25:48	-0.402379
2022-09-12	14:25:49	-0.38991
2022-09-12	14:25:49	-0.278715
2022-09-12	14:25:49	-0.149147
2022-09-12	14:25:50	-0.239733
2022-09-12	14:25:50	-0.22243
2022-09-12	14:25:50	-0.426297
2022-09-12	14:25:50	-0.527468
2022-09-12	14:25:51	-0.550776
2022-09-12	14:25:51	-0.767773
2022-09-12	14:25:51	-0.465636
2022-09-12	14:25:51	-0.0670608
2022-09-12	14:25:52	0.35131
2022-09-12	14:25:52	0.382354
2022-09-12	14:25:52	0.292888
2022-09-12	14:25:52	0.305916
2022-09-12	14:25:53	0.485509
2022-09-12	14:25:53	0.354364
2022-09-12	14:25:53	0.35416
2022-09-12	14:25:54	0.323422
2022-09-12	14:25:54	0.279199
2022-09-12	14:25:54	0.359606
2022-09-12	14:25:54	0.271463
2022-09-12	14:25:55	0.237214
2022-09-12	14:25:55	0.318842
2022-09-12	14:25:55	0.299758
2022-09-12	14:25:55	0.328461
2022-09-12	14:25:56	0.358079
2022-09-12	14:25:56	0.39243
2022-09-12	14:25:56	0.597519
2022-09-12	14:25:56	2.04642
2022-09-12	14:25:57	2.64622
2022-09-12	14:25:57	3.08938
2022-09-12	14:25:57	0.815789
2022-09-12	14:25:58	0.390954
2022-09-12	14:25:58	0.244898
2022-09-12	14:25:58	0.383422
2022-09-12	14:25:58	0.265356
2022-09-12	14:25:59	0.146832
2022-09-12	14:25:59	0.449886
2022-09-12	14:25:59	0.615738
2022-09-12	14:25:59	0.416654
2022-09-12	14:26:00	0.36958
2022-09-12	14:26:00	0.42383
2022-09-12	14:26:00	0.439402
2022-09-12	14:26:01	0.404746
2022-09-12	14:26:01	0.473702
2022-09-12	14:26:01	0.437214
2022-09-12	14:26:01	0.379453
2022-09-12	14:26:02	0.437774
2022-09-12	14:26:02	0.429886
2022-09-12	14:26:02	0.425916
2022-09-12	14:26:02	0.431819
2022-09-12	14:26:03	0.447036
2022-09-12	14:26:03	0.448003
2022-09-12	14:26:03	0.504389
2022-09-12	14:26:03	0.526985
2022-09-12	14:26:04	1.79701
2022-09-12	14:26:04	1.71696
2022-09-12	14:26:04	6.36856
2022-09-12	14:26:05	4.13401
2022-09-12	14:26:05	0.482201
2022-09-12	14:26:05	1.04739
2022-09-12	14:26:05	0.35014
2022-09-12	14:26:06	0.472227
2022-09-12	14:26:06	0.646781
2022-09-12	14:26:06	0.578079
2022-09-12	14:26:06	0.364288
2022-09-12	14:26:07	-0.0382568
2022-09-12	14:26:07	-0.309503
2022-09-12	14:26:07	-0.350623
2022-09-12	14:26:07	-0.0659412
2022-09-12	14:26:08	-0.370114
2022-09-12	14:26:08	-0.922633
2022-09-12	14:26:08	-0.443905
2022-09-12	14:26:09	-0.0629895
2022-09-12	14:26:09	0.0627101
2022-09-12	14:26:09	0.204898
2022-09-12	14:26:09	-0.0454323
2022-09-12	14:26:10	-0.545686
2022-09-12	14:26:10	-0.516933
2022-09-12	14:26:10	-0.382786
2022-09-12	14:26:10	-0.371488
2022-09-12	14:26:11	-0.0586639
2022-09-12	14:26:11	-0.00202267
2022-09-12	14:26:11	-0.0899106
2022-09-12	14:26:11	-0.166755
2022-09-12	14:26:12	-0.15388
2022-09-12	14:26:12	-0.0696053
2022-09-12	14:26:12	-0.128129
2022-09-12	14:26:13	-0.13729
2022-09-12	14:26:13	0.0835244
2022-09-12	14:26:13	-0.156272
2022-09-12	14:26:13	0.180064
2022-09-12	14:26:14	0.112125
2022-09-12	14:26:14	0.0632699
2022-09-12	14:26:14	-0.118715
2022-09-12	14:26:14	0.0025066
2022-09-12	14:26:15	0.055331
2022-09-12	14:26:15	0.164135
2022-09-12	14:26:15	0.686985
2022-09-12	14:26:15	1.33757
2022-09-12	14:26:16	0.382812
2022-09-12	14:26:16	0.386629
2022-09-12	14:26:16	0.746221
2022-09-12	14:26:17	0.52271
2022-09-12	14:26:17	0.117214
2022-09-12	14:26:17	0.350242
2022-09-12	14:26:17	0.0135499
2022-09-12	14:26:18	0.315942
2022-09-12	14:26:18	0.139708
2022-09-12	14:26:18	0.212379
2022-09-12	14:26:18	0.194924
2022-09-12	14:26:19	0.140115
2022-09-12	14:26:19	0.0666796
2022-09-12	14:26:19	0.07299
2022-09-12	14:26:19	0.162303
2022-09-12	14:26:20	0.261438
2022-09-12	14:26:20	0.311565
2022-09-12	14:26:20	0.375026
2022-09-12	14:26:21	0.492786
2022-09-12	14:26:21	0.972634
2022-09-12	14:26:21	0.50327
2022-09-12	14:26:21	0.318384
2022-09-12	14:26:22	0.358079
2022-09-12	14:26:22	0.329682
2022-09-12	14:26:22	0.394262
2022-09-12	14:26:22	0.350394
2022-09-12	14:26:23	0.571412
2022-09-12	14:26:23	0.305
2022-09-12	14:26:23	0.323779
2022-09-12	14:26:23	0.698333
2022-09-12	14:26:24	0.428104
2022-09-12	14:26:24	0.310598
2022-09-12	14:26:24	0.318995
2022-09-12	14:26:25	0.43813
2022-09-12	14:26:25	0.300725
2022-09-12	14:26:25	0.165865
2022-09-12	14:26:25	0.397977
2022-09-12	14:26:26	0.141031
2022-09-12	14:26:26	0.21925
2022-09-12	14:26:26	0.209529
2022-09-12	14:26:26	0.215433
2022-09-12	14:26:27	0.200115
2022-09-12	14:26:27	0.240573
2022-09-12	14:26:27	0.261641
2022-09-12	14:26:27	-0.0639056
2022-09-12	14:26:28	0.131209
2022-09-12	14:26:28	0.0895295
2022-09-12	14:26:28	-0.0273662
2022-09-12	14:26:29	0.30958
2022-09-12	14:26:29	0.272328
2022-09-12	14:26:29	0.287188
2022-09-12	14:26:29	0.144695
2022-09-12	14:26:30	0.585763
2022-09-12	14:26:30	0.265662
2022-09-12	14:26:30	0.20902
2022-09-12	14:26:30	0.388613
2022-09-12	14:26:31	0.289122
2022-09-12	14:26:31	0.168461
2022-09-12	14:26:31	0.450649
2022-09-12	14:26:32	0.207341
2022-09-12	14:26:32	0.279962
2022-09-12	14:26:32	0.251463
2022-09-12	14:26:32	0.175992
2022-09-12	14:26:33	0.159046
2022-09-12	14:26:33	0.0315651
2022-09-12	14:26:33	0.126985
2022-09-12	14:26:33	0.0667305
2022-09-12	14:26:34	0.0994022
2022-09-12	14:26:34	0.0436262
2022-09-12	14:26:34	0.353957
2022-09-12	14:26:34	0.0984862
2022-09-12	14:26:35	0.226171
2022-09-12	14:26:35	0.00393154
2022-09-12	14:26:35	0.0534481
2022-09-12	14:26:36	-0.0779005
2022-09-12	14:26:36	0.0849493
2022-09-12	14:26:36	0.0614888
2022-09-12	14:26:36	0.12271
2022-09-12	14:26:37	0.114262
2022-09-12	14:26:37	-0.0213611
2022-09-12	14:26:37	-0.00589033
2022-09-12	14:26:37	-0.0687911
2022-09-12	14:26:38	-0.0910811
2022-09-12	14:26:38	-0.0456868
2022-09-12	14:26:38	-0.201412
2022-09-12	14:26:38	0.0295804
2022-09-12	14:26:39	0.0424557
2022-09-12	14:26:39	-0.116832
2022-09-12	14:26:39	0.1107
2022-09-12	14:26:40	0.102201
2022-09-12	14:26:40	0.201438
2022-09-12	14:26:40	0.260165
2022-09-12	14:26:40	0.194517
2022-09-12	14:26:41	-0.172099
2022-09-12	14:26:41	-0.260598
2022-09-12	14:26:41	-0.0672643
2022-09-12	14:26:41	0.161998
2022-09-12	14:26:42	0.346272
2022-09-12	14:26:42	0.3593
2022-09-12	14:26:42	0.337112
2022-09-12	14:26:42	0.255687
2022-09-12	14:26:43	0.407239
2022-09-12	14:26:43	0.535127
2022-09-12	14:26:43	0.491514
2022-09-12	14:26:44	0.378842
2022-09-12	14:26:44	0.579147
2022-09-12	14:26:44	0.414924
2022-09-12	14:26:44	0.525203
2022-09-12	14:26:45	0.286832
2022-09-12	14:26:45	0.464186
2022-09-12	14:26:45	0.427392
2022-09-12	14:26:45	0.437316
2022-09-12	14:26:46	0.493702
2022-09-12	14:26:46	0.344542
2022-09-12	14:26:46	0.4793
2022-09-12	14:26:46	0.528257
2022-09-12	14:26:47	0.447697
2022-09-12	14:26:47	0.568002
2022-09-12	14:26:47	0.49874
2022-09-12	14:26:48	0.552888
2022-09-12	14:26:48	0.442252
2022-09-12	14:26:48	0.443982
2022-09-12	14:26:48	0.537214
2022-09-12	14:26:49	0.344949
2022-09-12	14:26:49	0.445458
2022-09-12	14:26:49	0.718384
2022-09-12	14:26:49	1.04195
2022-09-12	14:26:50	0.545
2022-09-12	14:26:50	0.46902
2022-09-12	14:26:50	0.493295
2022-09-12	14:26:50	0.773652
2022-09-12	14:26:51	0.851565
2022-09-12	14:26:51	0.423321
2022-09-12	14:26:51	0.27411
2022-09-12	14:26:52	0.364389
2022-09-12	14:26:52	0.523168
2022-09-12	14:26:52	0.413651
2022-09-12	14:26:52	0.34327
2022-09-12	14:26:53	0.357417
2022-09-12	14:26:53	0.4736
2022-09-12	14:26:53	1.27391
2022-09-12	14:26:53	0.305713
2022-09-12	14:26:54	0.466272
2022-09-12	14:26:54	0.411361
2022-09-12	14:26:54	0.186374
2022-09-12	14:26:54	0.439962
2022-09-12	14:26:55	0.159148
2022-09-12	14:26:55	0.0626084
2022-09-12	14:26:55	0.1564
2022-09-12	14:26:56	0.320166
2022-09-12	14:26:56	0.679198
2022-09-12	14:26:56	2.34734
2022-09-12	14:26:56	2.00861
2022-09-12	14:26:57	1.40912
2022-09-12	14:26:57	1.87676
2022-09-12	14:26:57	1.46485
2022-09-12	14:26:57	0.746476
2022-09-12	14:26:58	0.466323
2022-09-12	14:26:58	0.597265
2022-09-12	14:26:58	0.970293
2022-09-12	14:26:59	1.05024
2022-09-12	14:26:59	1.02892
2022-09-12	14:26:59	1.47391
2022-09-12	14:26:59	1.90897
2022-09-12	14:27:00	2.59345
2022-09-12	14:27:00	1.70642
2022-09-12	14:27:00	1.15696
2022-09-12	14:27:00	1.01416
2022-09-12	14:27:01	1.0049
2022-09-12	14:27:01	0.846679
2022-09-12	14:27:01	0.912277
2022-09-12	14:27:01	0.811819
2022-09-12	14:27:02	1.02485
2022-09-12	14:27:02	1.09111
2022-09-12	14:27:02	1.11075
2022-09-12	14:27:03	1.0278
2022-09-12	14:27:03	0.998486
2022-09-12	14:27:03	0.981285
2022-09-12	14:27:03	0.832277
2022-09-12	14:27:04	0.900522
2022-09-12	14:27:04	0.946272
2022-09-12	14:27:04	0.778639
2022-09-12	14:27:04	0.804542
2022-09-12	14:27:05	0.209173
2022-09-12	14:27:05	0.231361
2022-09-12	14:27:05	0.0787916
2022-09-12	14:27:05	0.119911
2022-09-12	14:27:06	-0.000394156
2022-09-12	14:27:06	0.208104
2022-09-12	14:27:06	0.182303
2022-09-12	14:27:07	0.0875448
2022-09-12	14:27:07	0.0389951
2022-09-12	14:27:07	-0.0100634
2022-09-12	14:27:07	0.377061
2022-09-12	14:27:08	0.492685
2022-09-12	14:27:08	0.466781
2022-09-12	14:27:08	0.145814
2022-09-12	14:27:08	0.381285
2022-09-12	14:27:09	0.433499
2022-09-12	14:27:09	0.399504
2022-09-12	14:27:09	0.310293
2022-09-12	14:27:09	0.305204
2022-09-12	14:27:10	0.41584
2022-09-12	14:27:10	0.230903
2022-09-12	14:27:10	0.181896
2022-09-12	14:27:11	-0.215509
2022-09-12	14:27:11	-0.310674
2022-09-12	14:27:11	-0.276526
2022-09-12	14:27:11	-0.240699
2022-09-12	14:27:12	-0.0314374
2022-09-12	14:27:12	-0.0822262
2022-09-12	14:27:12	0.0527356
2022-09-12	14:27:12	0.12444
2022-09-12	14:27:13	0.356552
2022-09-12	14:27:13	0.254211
2022-09-12	14:27:13	0.477468
2022-09-12	14:27:13	0.484288
2022-09-12	14:27:14	0.382354
2022-09-12	14:27:14	0.372786
2022-09-12	14:27:14	0.193601
2022-09-12	14:27:15	0.17813
2022-09-12	14:27:15	0.227443
2022-09-12	14:27:15	0.235738
2022-09-12	14:27:15	0.192379
2022-09-12	14:27:16	0.234059
2022-09-12	14:27:16	0.311565
2022-09-12	14:27:16	0.210242
2022-09-12	14:27:16	0.233448
2022-09-12	14:27:17	0.224288
2022-09-12	14:27:17	0.273193
2022-09-12	14:27:17	0.3364
2022-09-12	14:27:17	0.269682
2022-09-12	14:27:18	0.300267
2022-09-12	14:27:18	0.356247
2022-09-12	14:27:18	0.293702
2022-09-12	14:27:19	0.330547
2022-09-12	14:27:19	0.320573
2022-09-12	14:27:19	0.278181
2022-09-12	14:27:19	0.350344
2022-09-12	14:27:20	0.313244
2022-09-12	14:27:20	0.261387
2022-09-12	14:27:20	0.260878
2022-09-12	14:27:20	0.258079
2022-09-12	14:27:21	0.192277
2022-09-12	14:27:21	0.377316
2022-09-12	14:27:21	0.147494
2022-09-12	14:27:21	0.220929
2022-09-12	14:27:22	0.381336
2022-09-12	14:27:22	0.359758
2022-09-12	14:27:22	0.380929
2022-09-12	14:27:23	0.394822
2022-09-12	14:27:23	0.385764
2022-09-12	14:27:23	0.37757
2022-09-12	14:27:23	0.386272
2022-09-12	14:27:24	0.391972
2022-09-12	14:27:24	0.387239
2022-09-12	14:27:24	0.390445
2022-09-12	14:27:24	0.384542
2022-09-12	14:27:25	0.38958
2022-09-12	14:27:25	0.451005
2022-09-12	14:27:25	0.294567
2022-09-12	14:27:25	0.289122
2022-09-12	14:27:26	0.34556
2022-09-12	14:27:26	0.294415
2022-09-12	14:27:26	0.364135
2022-09-12	14:27:27	0.368003
2022-09-12	14:27:27	0.415484
2022-09-12	14:27:27	0.45355
2022-09-12	14:27:27	0.392837
2022-09-12	14:27:28	0.42841
2022-09-12	14:27:28	0.455891
2022-09-12	14:27:28	0.455229
2022-09-12	14:27:28	0.329835
2022-09-12	14:27:29	0.438486
2022-09-12	14:27:29	0.3907
2022-09-12	14:27:29	0.353804
2022-09-12	14:27:30	0.439148
2022-09-12	14:27:30	0.351361
2022-09-12	14:27:30	0.397825
2022-09-12	14:27:30	0.504644
2022-09-12	14:27:31	0.45187
2022-09-12	14:27:31	0.367901
2022-09-12	14:27:31	0.343779
2022-09-12	14:27:31	0.368817
2022-09-12	14:27:32	0.359351
2022-09-12	14:27:32	0.458893
2022-09-12	14:27:32	0.406985
2022-09-12	14:27:32	0.355433
2022-09-12	14:27:33	0.40327
2022-09-12	14:27:33	0.55757
2022-09-12	14:27:33	0.399453
2022-09-12	14:27:34	0.390954
2022-09-12	14:27:34	0.440725
2022-09-12	14:27:34	0.479911
2022-09-12	14:27:34	0.388817
2022-09-12	14:27:35	0.554415
2022-09-12	14:27:35	0.421947
2022-09-12	14:27:35	0.432227
2022-09-12	14:27:35	0.376247
2022-09-12	14:27:36	0.433041
2022-09-12	14:27:36	0.488664
2022-09-12	14:27:36	0.358028
2022-09-12	14:27:36	0.554415
2022-09-12	14:27:37	0.570038
2022-09-12	14:27:37	0.490649
2022-09-12	14:27:37	0.395076
2022-09-12	14:27:38	0.461947
2022-09-12	14:27:38	0.376603
2022-09-12	14:27:38	0.416349
2022-09-12	14:27:38	0.58729
2022-09-12	14:27:39	0.358893
2022-09-12	14:27:39	0.552074
2022-09-12	14:27:39	0.469835
2022-09-12	14:27:39	0.359402
2022-09-12	14:27:40	0.470954
2022-09-12	14:27:40	0.382252
2022-09-12	14:27:40	0.531005
2022-09-12	14:27:40	0.435076
2022-09-12	14:27:41	0.437214
2022-09-12	14:27:41	0.478537
2022-09-12	14:27:41	0.372532
2022-09-12	14:27:42	0.504796
2022-09-12	14:27:42	0.344389
2022-09-12	14:27:42	0.424186
2022-09-12	14:27:42	0.352379
2022-09-12	14:27:43	0.359809
2022-09-12	14:27:43	0.450395
2022-09-12	14:27:43	0.361743
2022-09-12	14:27:43	0.499198
2022-09-12	14:27:44	0.352481
2022-09-12	14:27:44	0.440725
2022-09-12	14:27:44	0.392685
2022-09-12	14:27:44	0.387239
2022-09-12	14:27:45	0.615636
2022-09-12	14:27:45	0.653142
2022-09-12	14:27:45	0.533804
2022-09-12	14:27:46	0.644593
2022-09-12	14:27:46	0.668206
2022-09-12	14:27:46	0.363524
2022-09-12	14:27:46	0.445305
2022-09-12	14:27:47	0.308359
2022-09-12	14:27:47	0.377926
2022-09-12	14:27:47	0.351565
2022-09-12	14:27:47	0.36841
2022-09-12	14:27:48	0.344797
2022-09-12	14:27:48	0.31126
2022-09-12	14:27:48	0.376552
2022-09-12	14:27:48	0.38159
2022-09-12	14:27:49	0.39187
2022-09-12	14:27:49	0.409936
2022-09-12	14:27:49	0.468359
2022-09-12	14:27:50	0.766577
2022-09-12	14:27:50	0.634669
2022-09-12	14:27:50	0.547544
2022-09-12	14:27:50	0.3764
2022-09-12	14:27:51	0.422659
2022-09-12	14:27:51	0.323219
2022-09-12	14:27:51	0.436298
2022-09-12	14:27:51	0.201896
2022-09-12	14:27:52	0.468766
2022-09-12	14:27:52	0.334669
2022-09-12	14:27:52	0.630852
2022-09-12	14:27:52	0.225611
2022-09-12	14:27:53	0.528155
2022-09-12	14:27:53	0.296807
2022-09-12	14:27:53	0.499351
2022-09-12	14:27:54	0.277519
2022-09-12	14:27:54	0.44215
2022-09-12	14:27:54	0.257366
2022-09-12	14:27:54	0.514517
2022-09-12	14:27:55	0.262201
2022-09-12	14:27:55	0.474364
2022-09-12	14:27:55	0.311056
2022-09-12	14:27:55	0.498282
2022-09-12	14:27:56	0.291667
2022-09-12	14:27:56	0.509224
2022-09-12	14:27:56	0.384949
2022-09-12	14:27:57	0.528868
2022-09-12	14:27:57	0.41416
2022-09-12	14:27:57	0.526934
2022-09-12	14:27:57	0.347443
2022-09-12	14:27:58	0.442048
2022-09-12	14:27:58	0.477926
2022-09-12	14:27:58	0.439148
2022-09-12	14:27:58	0.380369
2022-09-12	14:27:59	0.470751
2022-09-12	14:27:59	0.79472
2022-09-12	14:27:59	0.578486
2022-09-12	14:27:59	0.63986
2022-09-12	14:28:00	0.665204
2022-09-12	14:28:00	0.538232
2022-09-12	14:28:00	0.375331
2022-09-12	14:28:01	0.382405
2022-09-12	14:28:01	0.434313
2022-09-12	14:28:01	0.427748
2022-09-12	14:28:01	0.505509
2022-09-12	14:28:02	0.311361
2022-09-12	14:28:02	0.499758
2022-09-12	14:28:02	0.392837
2022-09-12	14:28:02	0.574262
2022-09-12	14:28:03	0.448766
2022-09-12	14:28:03	0.393601
2022-09-12	14:28:03	0.383473
2022-09-12	14:28:03	0.423117
2022-09-12	14:28:04	0.513957
2022-09-12	14:28:04	0.472888
2022-09-12	14:28:04	0.479809
2022-09-12	14:28:05	0.498435
2022-09-12	14:28:05	0.484695
2022-09-12	14:28:05	0.463168
2022-09-12	14:28:05	0.475026
2022-09-12	14:28:06	0.488461
2022-09-12	14:28:06	0.478588
2022-09-12	14:28:06	0.481285
2022-09-12	14:28:06	0.475534
2022-09-12	14:28:07	0.480522
2022-09-12	14:28:07	0.474771
2022-09-12	14:28:07	0.48958
2022-09-12	14:28:07	0.485967
2022-09-12	14:28:08	0.482608
2022-09-12	14:28:08	0.52271
2022-09-12	14:28:08	0.313397
2022-09-12	14:28:09	0.471514
2022-09-12	14:28:09	0.513804
2022-09-12	14:28:09	0.36042
2022-09-12	14:28:09	0.404593
2022-09-12	14:28:10	0.483066
2022-09-12	14:28:10	0.406629
2022-09-12	14:28:10	0.475687
2022-09-12	14:28:10	0.393957
2022-09-12	14:28:11	0.452481
2022-09-12	14:28:11	0.336552
2022-09-12	14:28:11	0.389631
2022-09-12	14:28:11	0.476909
2022-09-12	14:28:12	0.337214
2022-09-12	14:28:12	0.421641
2022-09-12	14:28:12	0.28444
2022-09-12	14:28:13	0.50042
2022-09-12	14:28:13	0.398639
2022-09-12	14:28:13	1.0049
2022-09-12	14:28:13	1.42592
2022-09-12	14:28:14	1.20515
2022-09-12	14:28:14	0.959453
2022-09-12	14:28:14	0.875738
2022-09-12	14:28:14	0.44098
2022-09-12	14:28:15	0.390649
2022-09-12	14:28:15	0.417977
2022-09-12	14:28:15	0.303015
2022-09-12	14:28:15	0.403575
2022-09-12	14:28:16	0.239046
2022-09-12	14:28:16	0.458588
2022-09-12	14:28:16	0.221031
2022-09-12	14:28:17	0.350191
2022-09-12	14:28:17	0.220013
2022-09-12	14:28:17	0.432023
2022-09-12	14:28:17	0.1764
2022-09-12	14:28:18	0.457367
2022-09-12	14:28:18	0.469428
2022-09-12	14:28:18	1.09401
2022-09-12	14:28:18	2.03197
2022-09-12	14:28:19	2.13192
2022-09-12	14:28:19	1.76347
2022-09-12	14:28:19	1.59039
2022-09-12	14:28:19	0.858181
2022-09-12	14:28:20	1.57192
2022-09-12	14:28:20	1.03421
2022-09-12	14:28:20	1.80312
2022-09-12	14:28:21	1.49462
2022-09-12	14:28:21	1.48632
2022-09-12	14:28:21	2.46169
2022-09-12	14:28:21	2.24429
2022-09-12	14:28:22	1.24235
2022-09-12	14:28:22	0.28556
2022-09-12	14:28:22	-0.00232801
2022-09-12	14:28:22	0.248766
2022-09-12	14:28:23	-0.0106741
2022-09-12	14:28:23	0.226578
2022-09-12	14:28:23	0.14327
2022-09-12	14:28:23	0.435789
2022-09-12	14:28:24	0.478486
2022-09-12	14:28:24	0.518842
2022-09-12	14:28:24	0.128155
2022-09-12	14:28:25	0.248919
2022-09-12	14:28:25	0.0961961
2022-09-12	14:28:25	0.307545
