# Supplementary material for: Comparing efficacy in reducing pulling and welfare impacts of four types of leash walking equipment
Source: PeerJ journal article supplement (doi:10.7717/peerj.18131), 2024-10-24
Supplement: Shelter1_Tension_files.zip [file MrFitz_martin_2022912130731 copy.xlsx]

## Sheet: Averaged newtons
Date	Time	averaged newtons
2022-09-12	13:08:00	3.83699	3.83699	0		Impulse	1463.91
2022-09-12	13:08:01	8.9878	12.8248	0		Total steps	18
2022-09-12	13:08:02	17.3107	30.1355	1
2022-09-12	13:08:03	12.8112	42.9466	1
2022-09-12	13:08:04	17.2714	60.2181	2
2022-09-12	13:08:05	6.63778	66.8558	2
2022-09-12	13:08:06	1.48602	68.3418	2
2022-09-12	13:08:07	2.96771	71.3096	2
2022-09-12	13:08:08	3.29105	74.6006	2
2022-09-12	13:08:09	1.68205	76.2827	2
2022-09-12	13:08:10	4.30671	80.5894	2
2022-09-12	13:08:11	5.34975	85.9391	2
2022-09-12	13:08:12	0.862193	86.8013	2
2022-09-12	13:08:13	1.12863	87.9299	2
2022-09-12	13:08:14	1.56123	89.4912	2
2022-09-12	13:08:15	1.11335	90.6045	2
2022-09-12	13:08:16	8.65073	99.2552	2
2022-09-12	13:08:17	3.03944	102.295	2
2022-09-12	13:08:18	2.06609	104.361	2
2022-09-12	13:08:19	4.90236	109.263	2
2022-09-12	13:08:20	9.18581	118.449	2
2022-09-12	13:08:21	3.51634	121.965	2
2022-09-12	13:08:22	12.3525	134.318	2
2022-09-12	13:08:23	10.2283	144.546	2
2022-09-12	13:08:24	6.3886	150.935	2
2022-09-12	13:08:25	4.88034	155.815	2
2022-09-12	13:08:26	9.33366	165.149	2
2022-09-12	13:08:27	4.29868	169.447	2
2022-09-12	13:08:28	2.71572	172.163	2
2022-09-12	13:08:29	1.81946	173.982	2
2022-09-12	13:08:30	1.58684	175.569	2
2022-09-12	13:08:31	2.29235	177.862	2
2022-09-12	13:08:32	0.595696	178.457	2
2022-09-12	13:08:33	0.959363	179.417	2
2022-09-12	13:08:34	1.20994	180.627	2
2022-09-12	13:08:35	-0.986243	180.627	2
2022-09-12	13:08:36	-1.57277	180.627	2
2022-09-12	13:08:37	1.22212	181.849	2
2022-09-12	13:08:38	0.955722	182.805	2
2022-09-12	13:08:39	3.82958	186.634	2
2022-09-12	13:08:40	5.16992	191.804	2
2022-09-12	13:08:41	3.54927	195.353	2
2022-09-12	13:08:42	9.93262	205.286	2
2022-09-12	13:08:43	10.5471	215.833	2
2022-09-12	13:08:44	4.85838	220.691	2
2022-09-12	13:08:45	4.50853	225.2	2
2022-09-12	13:08:46	7.7431	232.943	2
2022-09-12	13:08:47	10.4777	243.421	2
2022-09-12	13:08:48	4.14056	247.561	2
2022-09-12	13:08:49	1.88318	249.444	2
2022-09-12	13:08:50	5.91922	255.364	2
2022-09-12	13:08:51	7.08106	262.445	2
2022-09-12	13:08:52	2.76372	265.208	2
2022-09-12	13:08:53	1.71454	266.923	2
2022-09-12	13:08:54	1.60247	268.525	2
2022-09-12	13:08:55	2.30616	270.832	2
2022-09-12	13:08:56	2.78561	273.617	2
2022-09-12	13:08:57	3.32893	276.946	2
2022-09-12	13:08:58	3.61719	280.563	2
2022-09-12	13:08:59	3.65273	284.216	2
2022-09-12	13:09:00	20.2137	304.43	3
2022-09-12	13:09:01	10.5169	314.947	3
2022-09-12	13:09:02	11.1981	326.145	3
2022-09-12	13:09:03	12.6212	338.766	3
2022-09-12	13:09:04	3.23355	341.999	3
2022-09-12	13:09:05	2.40684	344.406	3
2022-09-12	13:09:06	3.64843	348.055	3
2022-09-12	13:09:07	2.42261	350.477	3
2022-09-12	13:09:08	1.10244	351.58	3
2022-09-12	13:09:09	0.990131	352.57	3
2022-09-12	13:09:10	0.260441	352.83	3
2022-09-12	13:09:11	1.06366	353.894	3
2022-09-12	13:09:12	0.845666	354.74	3
2022-09-12	13:09:13	0.547197	355.287	3
2022-09-12	13:09:14	1.70973	356.997	3
2022-09-12	13:09:15	1.7082	358.705	3
2022-09-12	13:09:16	2.38358	361.088	3
2022-09-12	13:09:17	1.5341	362.622	3
2022-09-12	13:09:18	3.349	365.971	3
2022-09-12	13:09:19	2.95856	368.93	3
2022-09-12	13:09:20	1.30673	370.237	3
2022-09-12	13:09:21	0.853326	371.09	3
2022-09-12	13:09:22	1.49151	372.582	3
2022-09-12	13:09:23	1.28896	373.871	3
2022-09-12	13:09:24	1.3086	375.179	3
2022-09-12	13:09:25	0.620316	375.799	3
2022-09-12	13:09:26	-0.0541019	375.799	3
2022-09-12	13:09:27	-0.15795	375.799	3
2022-09-12	13:09:28	1.27945	377.079	3
2022-09-12	13:09:29	7.86768	384.947	3
2022-09-12	13:09:30	5.79834	390.745	3
2022-09-12	13:09:31	1.76134	392.506	3
2022-09-12	13:09:32	1.87434	394.381	3
2022-09-12	13:09:33	1.45585	395.836	3
2022-09-12	13:09:34	1.26961	397.106	3
2022-09-12	13:09:35	1.00147	398.108	3
2022-09-12	13:09:36	8.86258	406.97	3
2022-09-12	13:09:37	7.0565	414.027	3
2022-09-12	13:09:38	8.61853	422.645	3
2022-09-12	13:09:39	12.1929	434.838	3
2022-09-12	13:09:40	10.5951	445.433	3
2022-09-12	13:09:41	14.5304	459.964	4
2022-09-12	13:09:42	3.99308	463.957	4
2022-09-12	13:09:43	3.37588	467.333	4
2022-09-12	13:09:44	4.9803	472.313	4
2022-09-12	13:09:45	7.39374	479.707	4
2022-09-12	13:09:46	3.6958	483.402	4
2022-09-12	13:09:47	2.7666	486.169	4
2022-09-12	13:09:48	2.39876	488.568	4
2022-09-12	13:09:49	0.0658745	488.634	4
2022-09-12	13:09:50	1.76711	490.401	4
2022-09-12	13:09:51	1.06774	491.468	4
2022-09-12	13:09:52	0.388812	491.857	4
2022-09-12	13:09:53	-0.650307	491.857	4
2022-09-12	13:09:54	0.0568211	491.914	4
2022-09-12	13:09:55	0.288171	492.202	4
2022-09-12	13:09:56	-0.618992	492.202	4
2022-09-12	13:09:57	1.01941	493.222	4
2022-09-12	13:09:58	1.37481	494.597	4
2022-09-12	13:09:59	1.74402	496.341	4
2022-09-12	13:10:00	1.99846	498.339	4
2022-09-12	13:10:01	1.65387	499.993	4
2022-09-12	13:10:02	1.66689	501.66	4
2022-09-12	13:10:03	1.66858	503.328	4
2022-09-12	13:10:04	1.87841	505.207	4
2022-09-12	13:10:05	4.03864	509.245	4
2022-09-12	13:10:06	-0.0709666	509.245	4
2022-09-12	13:10:07	1.16293	510.408	4
2022-09-12	13:10:08	-0.030276	510.408	4
2022-09-12	13:10:09	-1.12473	510.408	4
2022-09-12	13:10:10	0.400621	510.809	4
2022-09-12	13:10:11	1.2955	512.104	4
2022-09-12	13:10:12	5.27769	517.382	4
2022-09-12	13:10:13	6.44434	523.826	4
2022-09-12	13:10:14	1.83236	525.659	4
2022-09-12	13:10:15	2.11761	527.776	4
2022-09-12	13:10:16	1.58579	529.362	4
2022-09-12	13:10:17	6.8067	536.169	4
2022-09-12	13:10:18	8.71599	544.885	4
2022-09-12	13:10:19	7.67051	552.555	4
2022-09-12	13:10:20	2.92602	555.481	4
2022-09-12	13:10:21	4.02387	559.505	4
2022-09-12	13:10:22	1.53701	561.042	4
2022-09-12	13:10:23	2.34247	563.385	4
2022-09-12	13:10:24	3.74402	567.129	4
2022-09-12	13:10:25	1.79818	568.927	4
2022-09-12	13:10:26	1.21658	570.144	4
2022-09-12	13:10:27	1.12686	571.27	4
2022-09-12	13:10:28	0.801866	572.072	4
2022-09-12	13:10:29	0.866437	572.939	4
2022-09-12	13:10:30	1.85104	574.79	4
2022-09-12	13:10:31	2.72655	577.516	4
2022-09-12	13:10:32	3.18335	580.7	4
2022-09-12	13:10:33	8.10348	588.803	4
2022-09-12	13:10:34	4.67468	593.478	4
2022-09-12	13:10:35	4.70232	598.18	4
2022-09-12	13:10:36	1.24482	599.425	4
2022-09-12	13:10:37	-1.73038	599.425	4
2022-09-12	13:10:38	1.01522	600.44	4
2022-09-12	13:10:39	2.27335	602.714	4
2022-09-12	13:10:40	1.77464	604.488	4
2022-09-12	13:10:41	1.87979	606.368	4
2022-09-12	13:10:42	1.97817	608.346	4
2022-09-12	13:10:43	2.14583	610.492	4
2022-09-12	13:10:44	1.68675	612.179	4
2022-09-12	13:10:45	3.76139	615.94	4
2022-09-12	13:10:46	3.12232	619.062	4
2022-09-12	13:10:47	4.68386	623.746	4
2022-09-12	13:10:48	11.5888	635.335	4
2022-09-12	13:10:49	3.55369	638.889	4
2022-09-12	13:10:50	4.989	643.878	4
2022-09-12	13:10:51	5.35419	649.232	4
2022-09-12	13:10:52	12.7251	661.957	4
2022-09-12	13:10:53	3.17288	665.13	4
2022-09-12	13:10:54	3.1968	668.327	4
2022-09-12	13:10:55	8.08175	676.408	4
2022-09-12	13:10:56	11.3207	687.729	4
2022-09-12	13:10:57	6.00914	693.738	4
2022-09-12	13:10:58	4.41445	698.153	4
2022-09-12	13:10:59	9.02345	707.176	4
2022-09-12	13:11:00	7.36595	714.542	4
2022-09-12	13:11:01	5.64711	720.189	4
2022-09-12	13:11:02	3.50987	723.699	4
2022-09-12	13:11:03	2.69167	726.391	4
2022-09-12	13:11:04	1.29988	727.691	4
2022-09-12	13:11:05	1.01607	728.707	4
2022-09-12	13:11:06	1.05284	729.76	4
2022-09-12	13:11:07	1.05593	730.816	4
2022-09-12	13:11:08	1.84526	732.661	4
2022-09-12	13:11:09	2.2074	734.868	4
2022-09-12	13:11:10	1.17938	736.048	4
2022-09-12	13:11:11	1.0382	737.086	4
2022-09-12	13:11:12	3.68589	740.772	4
2022-09-12	13:11:13	1.18715	741.959	4
2022-09-12	13:11:14	0.0693265	742.028	4
2022-09-12	13:11:15	1.50814	743.536	4
2022-09-12	13:11:16	2.43417	745.97	4
2022-09-12	13:11:17	3.37609	749.347	4
2022-09-12	13:11:18	12.0029	761.349	4
2022-09-12	13:11:19	16.208	777.557	5
2022-09-12	13:11:20	8.95316	786.511	5
2022-09-12	13:11:21	8.92431	795.435	5
2022-09-12	13:11:22	9.56244	804.997	5
2022-09-12	13:11:23	3.95533	808.953	5
2022-09-12	13:11:24	1.38307	810.336	5
2022-09-12	13:11:25	1.70071	812.036	5
2022-09-12	13:11:26	6.75367	818.79	5
2022-09-12	13:11:27	22.2651	841.055	6
2022-09-12	13:11:28	10.2748	851.33	6
2022-09-12	13:11:29	4.93858	856.269	6
2022-09-12	13:11:30	2.68742	858.956	6
2022-09-12	13:11:31	1.30831	860.264	6
2022-09-12	13:11:32	5.34996	865.614	6
2022-09-12	13:11:33	14.3444	879.959	7
2022-09-12	13:11:34	12.706	892.665	7
2022-09-12	13:11:35	3.06281	895.728	7
2022-09-12	13:11:36	2.95738	898.685	7
2022-09-12	13:11:37	3.20555	901.89	7
2022-09-12	13:11:38	2.02682	903.917	7
2022-09-12	13:11:39	2.89829	906.816	7
2022-09-12	13:11:40	6.74632	913.562	7
2022-09-12	13:11:41	5.49997	919.062	7
2022-09-12	13:11:42	7.86703	926.929	7
2022-09-12	13:11:43	5.44265	932.372	7
2022-09-12	13:11:44	5.54305	937.915	7
2022-09-12	13:11:45	3.1228	941.037	7
2022-09-12	13:11:46	3.3602	944.398	7
2022-09-12	13:11:47	1.45138	945.849	7
2022-09-12	13:11:48	3.63097	949.48	7
2022-09-12	13:11:49	0.96938	950.449	7
2022-09-12	13:11:50	0.204923	950.654	7
2022-09-12	13:11:51	2.57973	953.234	7
2022-09-12	13:11:52	9.96659	963.201	7
2022-09-12	13:11:53	9.16919	972.37	7
2022-09-12	13:11:54	3.18787	975.558	7
2022-09-12	13:11:55	9.44608	985.004	7
2022-09-12	13:11:56	10.574	995.578	7
2022-09-12	13:11:57	5.48187	1001.06	7
2022-09-12	13:11:58	1.21788	1002.28	7
2022-09-12	13:11:59	1.68692	1003.96	7
2022-09-12	13:12:00	1.49283	1005.46	7
2022-09-12	13:12:01	1.488	1006.95	7
2022-09-12	13:12:02	12.2791	1019.22	7
2022-09-12	13:12:03	4.7722	1024	7
2022-09-12	13:12:04	2.87174	1026.87	7
2022-09-12	13:12:05	6.45385	1033.32	7
2022-09-12	13:12:06	9.47856	1042.8	7
2022-09-12	13:12:07	4.04197	1046.84	7
2022-09-12	13:12:08	2.81755	1049.66	7
2022-09-12	13:12:09	4.26609	1053.93	7
2022-09-12	13:12:10	10.243	1064.17	7
2022-09-12	13:12:11	15.6509	1079.82	8
2022-09-12	13:12:12	13.6358	1093.46	9
2022-09-12	13:12:13	4.09534	1097.55	9
2022-09-12	13:12:14	0.503734	1098.06	9
2022-09-12	13:12:15	0.750931	1098.81	9
2022-09-12	13:12:16	10.8548	1109.66	9
2022-09-12	13:12:17	14.7573	1124.42	10
2022-09-12	13:12:18	7.39857	1131.82	10
2022-09-12	13:12:19	4.69636	1136.51	10
2022-09-12	13:12:20	1.62484	1138.14	10
2022-09-12	13:12:21	2.0928	1140.23	10
2022-09-12	13:12:22	11.8316	1152.06	10
2022-09-12	13:12:23	23.9735	1176.04	11
2022-09-12	13:12:24	6.57954	1182.62	11
2022-09-12	13:12:25	1.98568	1184.6	11
2022-09-12	13:12:26	7.81716	1192.42	11
2022-09-12	13:12:27	19.4813	1211.9	12
2022-09-12	13:12:28	5.3139	1217.21	12
2022-09-12	13:12:29	4.41962	1221.63	12
2022-09-12	13:12:30	10.6084	1232.24	12
2022-09-12	13:12:31	9.04852	1241.29	12
2022-09-12	13:12:32	7.7149	1249	12
2022-09-12	13:12:33	3.51153	1252.52	12
2022-09-12	13:12:34	16.33	1268.85	13
2022-09-12	13:12:35	24.8858	1293.73	14
2022-09-12	13:12:36	3.25205	1296.98	14
2022-09-12	13:12:37	1.46366	1298.45	14
2022-09-12	13:12:38	1.50067	1299.95	14
2022-09-12	13:12:39	4.10372	1304.05	14
2022-09-12	13:12:40	4.66365	1308.72	14
2022-09-12	13:12:41	10.1019	1318.82	14
2022-09-12	13:12:42	11.1457	1329.96	14
2022-09-12	13:12:43	6.924	1336.89	14
2022-09-12	13:12:44	5.48453	1342.37	14
2022-09-12	13:12:45	7.18605	1349.56	14
2022-09-12	13:12:46	13.5141	1363.07	15
2022-09-12	13:12:47	9.61738	1372.69	15
2022-09-12	13:12:48	2.84538	1375.53	15
2022-09-12	13:12:49	7.49086	1383.03	15
2022-09-12	13:12:50	2.53036	1385.56	15
2022-09-12	13:12:51	1.32088	1386.88	15
2022-09-12	13:12:52	1.42852	1388.31	15
2022-09-12	13:12:53	8.02629	1396.33	15
2022-09-12	13:12:54	6.49926	1402.83	15
2022-09-12	13:12:55	2.43972	1405.27	15
2022-09-12	13:12:56	7.3294	1412.6	15
2022-09-12	13:12:57	14.1148	1426.71	16
2022-09-12	13:12:58	13.9319	1440.65	17
2022-09-12	13:12:59	8.83917	1449.49	17
2022-09-12	13:13:00	14.4214	1463.91	18

## Sheet: MrFitz_martin_2022912130731 (3)
Date	Time	Lbs	Newtons	averaged newtons	Total Force x time	Total Time Steps Force >13.345		**GoPro Fitting: 1257
2022-09-12	13:08:00	0.781081	3.4744	3.83699	3.4744	FALSE	0			Total Force x time	2732.14
2022-09-12	13:08:00	1.59146	7.07913	3.83699	7.07913	FALSE	0			Total Time Steps Force >3	86
2022-09-12	13:08:00	0.640216	2.84781	3.83699	6.32221	FALSE	0
2022-09-12	13:08:00	0.437621	1.94663	3.83699	9.02576	FALSE	0
2022-09-12	13:08:01	0.903321	4.01815	8.9878	10.3404	FALSE	0
2022-09-12	13:08:01	0.630191	2.80322	8.9878	11.829	FALSE	0
2022-09-12	13:08:01	1.41045	6.27396	8.9878	16.6143	FALSE	0
2022-09-12	13:08:01	5.13823	22.8559	8.9878	34.6848	1	1
2022-09-12	13:08:02	4.55558	20.2641	17.3107	36.8785	1	2
2022-09-12	13:08:02	6.87253	30.5704	17.3107	65.2552	1	3
2022-09-12	13:08:02	2.28027	10.1431	17.3107	47.0216	FALSE	3
2022-09-12	13:08:02	1.85808	8.26511	17.3107	73.5203	FALSE	3
2022-09-12	13:08:03	2.18505	9.71954	12.8112	56.7411	FALSE	3
2022-09-12	13:08:03	2.03864	9.06828	12.8112	82.5886	FALSE	3
2022-09-12	13:08:03	4.41655	19.6457	12.8112	76.3868	1	4
2022-09-12	13:08:04	2.40719	10.7077	17.2714	93.2963	FALSE	4
2022-09-12	13:08:04	4.00566	17.818	17.2714	94.2048	1	5
2022-09-12	13:08:04	5.4339	24.1711	17.2714	117.467	1	6
2022-09-12	13:08:04	3.68439	16.3889	17.2714	110.594	1	7
2022-09-12	13:08:05	3.12042	13.8803	6.63778	131.348	1	8
2022-09-12	13:08:05	1.53253	6.817	6.63778	117.411	FALSE	8
2022-09-12	13:08:05	0.879046	3.91017	6.63778	135.258	FALSE	8
2022-09-12	13:08:05	0.436959	1.94368	6.63778	119.354	FALSE	8
2022-09-12	13:08:06	0.105153	0.467742	1.48602	135.726	FALSE	8
2022-09-12	13:08:06	0.520115	2.31358	1.48602	121.668	FALSE	8
2022-09-12	13:08:06	0.127952	0.569156	1.48602	136.295	FALSE	8
2022-09-12	13:08:06	0.583066	2.59359	1.48602	124.262	FALSE	8
2022-09-12	13:08:07	0.432328	1.92308	2.96771	138.218	FALSE	8
2022-09-12	13:08:07	0.786527	3.49863	2.96771	127.76	FALSE	8
2022-09-12	13:08:07	0.782659	3.48142	2.96771	141.699	FALSE	8
2022-09-12	13:08:08	0.55187	2.45483	3.29105	130.215	FALSE	8
2022-09-12	13:08:08	0.75416	3.35465	3.29105	145.054	FALSE	8
2022-09-12	13:08:08	0.723168	3.2168	3.29105	133.432	FALSE	8
2022-09-12	13:08:08	0.930242	4.1379	3.29105	149.192	FALSE	8
2022-09-12	13:08:09	0.834873	3.71368	1.68205	137.145	FALSE	8
2022-09-12	13:08:09	0.19813	0.881322	1.68205	150.073	FALSE	8
2022-09-12	13:08:09	0.474262	2.10961	1.68205	139.255	FALSE	8
2022-09-12	13:08:09	0.00530559	0.0236003	1.68205	150.097	FALSE	8
2022-09-12	13:08:10	0.90902	4.0435	4.30671	143.299	FALSE	8
2022-09-12	13:08:10	0.587188	2.61193	4.30671	152.709	FALSE	8
2022-09-12	13:08:10	1.60866	7.15564	4.30671	150.454	FALSE	8
2022-09-12	13:08:10	0.767901	3.41578	4.30671	156.124	FALSE	8
2022-09-12	13:08:11	1.24531	5.53939	5.34975	155.994	FALSE	8
2022-09-12	13:08:11	1.06103	4.71967	5.34975	160.844	FALSE	8
2022-09-12	13:08:11	1.30169	5.79018	5.34975	161.784	FALSE	8
2022-09-12	13:08:12	0.271361	1.20707	0.862193	162.051	FALSE	8
2022-09-12	13:08:12	0.273041	1.21454	0.862193	162.998	FALSE	8
2022-09-12	13:08:12	0.145458	0.647026	0.862193	162.698	FALSE	8
2022-09-12	13:08:12	0.0854582	0.380135	0.862193	163.378	FALSE	8
2022-09-12	13:08:13	0.0579264	0.257668	1.12863	162.956	FALSE	8
2022-09-12	13:08:13	0.288003	1.28109	1.12863	164.66	FALSE	8
2022-09-12	13:08:13	0.195433	0.869325	1.12863	163.825	FALSE	8
2022-09-12	13:08:13	0.47355	2.10645	1.12863	166.766	FALSE	8
2022-09-12	13:08:14	0.270751	1.20435	1.56123	165.029	FALSE	8
2022-09-12	13:08:14	0.44154	1.96406	1.56123	168.73	FALSE	8
2022-09-12	13:08:14	0.309784	1.37798	1.56123	166.407	FALSE	8
2022-09-12	13:08:14	0.381845	1.69852	1.56123	170.429	FALSE	8
2022-09-12	13:08:15	0.158079	0.703167	1.11335	167.111	FALSE	8
2022-09-12	13:08:15	0.18902	0.840799	1.11335	171.269	FALSE	8
2022-09-12	13:08:15	0.403779	1.79609	1.11335	168.907	FALSE	8
2022-09-12	13:08:16	1.85385	8.2463	8.65073	179.516	FALSE	8
2022-09-12	13:08:16	1.72419	7.66954	8.65073	176.576	FALSE	8
2022-09-12	13:08:16	1.87009	8.31853	8.65073	187.834	FALSE	8
2022-09-12	13:08:16	2.33095	10.3685	8.65073	186.945	FALSE	8
2022-09-12	13:08:17	0.955025	4.24814	3.03944	192.082	FALSE	8
2022-09-12	13:08:17	0.535127	2.38035	3.03944	189.325	FALSE	8
2022-09-12	13:08:17	1.07905	4.79983	3.03944	196.882	FALSE	8
2022-09-12	13:08:17	0.163982	0.729425	3.03944	190.055	FALSE	8
2022-09-12	13:08:18	0.379148	1.68653	2.06609	198.569	FALSE	8
2022-09-12	13:08:18	0.386527	1.71935	2.06609	191.774	FALSE	8
2022-09-12	13:08:18	0.553092	2.46026	2.06609	201.029	FALSE	8
2022-09-12	13:08:18	0.539147	2.39823	2.06609	194.172	FALSE	8
2022-09-12	13:08:19	0.644542	2.86705	4.90236	203.896	FALSE	8
2022-09-12	13:08:19	0.833855	3.70915	4.90236	197.881	FALSE	8
2022-09-12	13:08:19	1.8279	8.13086	4.90236	212.027	FALSE	8
2022-09-12	13:08:20	1.34719	5.99257	9.18581	203.874	FALSE	8
2022-09-12	13:08:20	3.10464	13.8101	9.18581	225.837	1	9
2022-09-12	13:08:20	1.5992	7.11356	9.18581	210.987	FALSE	9
2022-09-12	13:08:20	2.20922	9.82705	9.18581	235.664	FALSE	9
2022-09-12	13:08:21	0.429275	1.9095	3.51634	212.897	FALSE	9
2022-09-12	13:08:21	0.105356	0.468645	3.51634	236.133	FALSE	9
2022-09-12	13:08:21	0.945051	4.20378	3.51634	217.101	FALSE	9
2022-09-12	13:08:21	1.68235	7.48343	3.51634	243.616	FALSE	9
2022-09-12	13:08:22	2.51121	11.1704	12.3525	228.271	FALSE	9
2022-09-12	13:08:22	2.58077	11.4798	12.3525	255.096	FALSE	9
2022-09-12	13:08:22	3.23889	14.4072	12.3525	242.678	1	10
2022-09-12	13:08:23	0.893295	3.97355	10.2283	259.069	FALSE	10
2022-09-12	13:08:23	2.98464	13.2763	10.2283	255.955	FALSE	10
2022-09-12	13:08:23	1.97335	8.77786	10.2283	267.847	FALSE	10
2022-09-12	13:08:23	3.34637	14.8853	10.2283	270.84	1	11
2022-09-12	13:08:24	2.2766	10.1268	6.3886	277.974	FALSE	11
2022-09-12	13:08:24	2.43055	10.8116	6.3886	281.651	FALSE	11
2022-09-12	13:08:24	0.745051	3.31414	6.3886	281.288	FALSE	11
2022-09-12	13:08:24	0.292685	1.30192	6.3886	282.953	FALSE	11
2022-09-12	13:08:25	0.144186	0.641368	4.88034	281.93	FALSE	11
2022-09-12	13:08:25	0.436552	1.94187	4.88034	284.895	FALSE	11
2022-09-12	13:08:25	0.669224	2.97684	4.88034	284.906	FALSE	11
2022-09-12	13:08:25	3.13864	13.9613	4.88034	298.857	1	12
2022-09-12	13:08:26	2.08373	9.26885	9.33366	294.175	FALSE	12
2022-09-12	13:08:26	3.70663	16.4878	9.33366	315.344	1	13
2022-09-12	13:08:26	0.504542	2.2443	9.33366	296.42	FALSE	13
2022-09-12	13:08:27	1.87228	8.32828	4.29868	323.673	FALSE	13
2022-09-12	13:08:27	0.371005	1.6503	4.29868	298.07	FALSE	13
2022-09-12	13:08:27	0.92215	4.10191	4.29868	327.775	FALSE	13
2022-09-12	13:08:27	0.700114	3.11425	4.29868	301.184	FALSE	13
2022-09-12	13:08:28	0.537061	2.38895	2.71572	330.164	FALSE	13
2022-09-12	13:08:28	0.849885	3.78046	2.71572	304.965	FALSE	13
2022-09-12	13:08:28	0.100318	0.446235	2.71572	330.61	FALSE	13
2022-09-12	13:08:28	0.954822	4.24724	2.71572	309.212	FALSE	13
2022-09-12	13:08:29	0.372786	1.65823	1.81946	332.268	FALSE	13
2022-09-12	13:08:29	0.41299	1.83706	1.81946	311.049	FALSE	13
2022-09-12	13:08:29	0.430395	1.91448	1.81946	334.182	FALSE	13
2022-09-12	13:08:29	0.419962	1.86807	1.81946	312.917	FALSE	13
2022-09-12	13:08:30	0.362557	1.61273	1.58684	335.795	FALSE	13
2022-09-12	13:08:30	0.22327	0.99315	1.58684	313.91	FALSE	13
2022-09-12	13:08:30	0.484389	2.15466	1.58684	337.95	FALSE	13
2022-09-12	13:08:31	0.489122	2.17571	2.29235	316.086	FALSE	13
2022-09-12	13:08:31	1.1334	5.04159	2.29235	342.991	FALSE	13
2022-09-12	13:08:31	0.276094	1.22812	2.29235	317.314	FALSE	13
2022-09-12	13:08:31	0.162761	0.723993	2.29235	343.715	FALSE	13
2022-09-12	13:08:32	0.358333	1.59394	0.595696	318.908	FALSE	13
2022-09-12	13:08:32	-0.0839565	-0.373455	0.595696	343.715	FALSE	13
2022-09-12	13:08:32	0.187137	0.832423	0.595696	319.74	FALSE	13
2022-09-12	13:08:32	0.0741605	0.329881	0.595696	344.045	FALSE	13
2022-09-12	13:08:33	0.357265	1.58919	0.959363	321.329	FALSE	13
2022-09-12	13:08:33	0.114313	0.508487	0.959363	344.554	FALSE	13
2022-09-12	13:08:33	0.279962	1.24533	0.959363	322.575	FALSE	13
2022-09-12	13:08:33	0.111158	0.494453	0.959363	345.048	FALSE	13
2022-09-12	13:08:34	0.285356	1.26932	1.20994	323.844	FALSE	13
2022-09-12	13:08:34	0.0894786	0.398019	1.20994	345.446	FALSE	13
2022-09-12	13:08:34	0.441183	1.96247	1.20994	325.807	FALSE	13
2022-09-12	13:08:35	0.0132954	0.0591406	-0.986243	345.505	FALSE	13
2022-09-12	13:08:35	-0.0716409	-0.318673	-0.986243	325.807	FALSE	13
2022-09-12	13:08:35	-0.31215	-1.38851	-0.986243	345.505	FALSE	13
2022-09-12	13:08:35	-0.516374	-2.29693	-0.986243	325.807	FALSE	13
2022-09-12	13:08:36	-0.482684	-2.14707	-1.57277	345.505	FALSE	13
2022-09-12	13:08:36	-0.431692	-1.92025	-1.57277	325.807	FALSE	13
2022-09-12	13:08:36	-0.343295	-1.52704	-1.57277	345.505	FALSE	13
2022-09-12	13:08:36	-0.156628	-0.696713	-1.57277	325.807	FALSE	13
2022-09-12	13:08:37	0.344288	1.53146	1.22212	347.037	FALSE	13
2022-09-12	13:08:37	0.295178	1.31301	1.22212	327.12	FALSE	13
2022-09-12	13:08:37	0.217367	0.966892	1.22212	348.004	FALSE	13
2022-09-12	13:08:37	0.24215	1.07713	1.22212	328.197	FALSE	13
2022-09-12	13:08:38	0.165916	0.738028	0.955722	348.742	FALSE	13
2022-09-12	13:08:38	0.316654	1.40854	0.955722	329.605	FALSE	13
2022-09-12	13:08:38	0.161998	0.7206	0.955722	349.462	FALSE	13
2022-09-12	13:08:39	0.83126	3.69761	3.82958	333.303	FALSE	13
2022-09-12	13:08:39	1.22042	5.42867	3.82958	354.891	FALSE	13
2022-09-12	13:08:39	1.01151	4.4994	3.82958	337.802	FALSE	13
2022-09-12	13:08:39	0.380522	1.69264	3.82958	356.584	FALSE	13
2022-09-12	13:08:40	0.430903	1.91674	5.16992	339.719	FALSE	13
2022-09-12	13:08:40	0.91243	4.05867	5.16992	360.642	FALSE	13
2022-09-12	13:08:40	1.20057	5.34038	5.16992	345.059	FALSE	13
2022-09-12	13:08:40	2.1051	9.36391	5.16992	370.006	FALSE	13
2022-09-12	13:08:41	0.498486	2.21737	3.54927	347.277	FALSE	13
2022-09-12	13:08:41	0.777519	3.45856	3.54927	373.465	FALSE	13
2022-09-12	13:08:41	0.362405	1.61205	3.54927	348.889	FALSE	13
2022-09-12	13:08:41	1.55324	6.90912	3.54927	380.374	FALSE	13
2022-09-12	13:08:42	1.3649	6.07135	9.93262	354.96	FALSE	13
2022-09-12	13:08:42	2.73782	12.1784	9.93262	392.552	FALSE	13
2022-09-12	13:08:42	2.59614	11.5481	9.93262	366.508	FALSE	13
2022-09-12	13:08:43	1.49299	6.64112	10.5471	399.193	FALSE	13
2022-09-12	13:08:43	1.99055	8.85436	10.5471	375.363	FALSE	13
2022-09-12	13:08:43	2.30637	10.2592	10.5471	409.453	FALSE	13
2022-09-12	13:08:43	3.69446	16.4337	10.5471	391.796	1	14
2022-09-12	13:08:44	2.21314	9.84449	4.85838	419.297	FALSE	14
2022-09-12	13:08:44	0.892125	3.96835	4.85838	395.765	FALSE	14
2022-09-12	13:08:44	0.939198	4.17774	4.85838	423.475	FALSE	14
2022-09-12	13:08:44	0.324389	1.44295	4.85838	397.208	FALSE	14
2022-09-12	13:08:45	0.712023	3.16722	4.50853	426.642	FALSE	14
2022-09-12	13:08:45	0.763117	3.3945	4.50853	400.602	FALSE	14
2022-09-12	13:08:45	1.38648	6.16734	4.50853	432.809	FALSE	14
2022-09-12	13:08:45	1.19263	5.30506	4.50853	405.907	FALSE	14
2022-09-12	13:08:46	1.63986	7.29443	7.7431	440.104	FALSE	14
2022-09-12	13:08:46	1.56704	6.97051	7.7431	412.878	FALSE	14
2022-09-12	13:08:46	2.01528	8.96437	7.7431	449.068	FALSE	14
2022-09-12	13:08:47	4.31441	19.1914	10.4777	432.069	1	15
2022-09-12	13:08:47	1.90587	8.47769	10.4777	457.546	FALSE	15
2022-09-12	13:08:47	1.64444	7.3148	10.4777	439.384	FALSE	15
2022-09-12	13:08:47	1.55721	6.92678	10.4777	464.473	FALSE	15
2022-09-12	13:08:48	0.88271	3.92647	4.14056	443.31	FALSE	15
2022-09-12	13:08:48	1.2649	5.62653	4.14056	470.099	FALSE	15
2022-09-12	13:08:48	0.737112	3.27882	4.14056	446.589	FALSE	15
2022-09-12	13:08:48	0.838639	3.73043	4.14056	473.83	FALSE	15
2022-09-12	13:08:49	0.392786	1.74719	1.88318	448.336	FALSE	15
2022-09-12	13:08:49	0.305305	1.35806	1.88318	475.188	FALSE	15
2022-09-12	13:08:49	0.571005	2.53994	1.88318	450.876	FALSE	15
2022-09-12	13:08:49	0.424338	1.88754	1.88318	477.075	FALSE	15
2022-09-12	13:08:50	0.722303	3.21295	5.91922	454.089	FALSE	15
2022-09-12	13:08:50	1.45416	6.46839	5.91922	483.544	FALSE	15
2022-09-12	13:08:50	1.81564	8.07633	5.91922	462.166	FALSE	15
2022-09-12	13:08:51	2.18067	9.70006	7.08106	493.244	FALSE	15
2022-09-12	13:08:51	1.20836	5.37503	7.08106	467.541	FALSE	15
2022-09-12	13:08:51	2.51553	11.1896	7.08106	504.433	FALSE	15
2022-09-12	13:08:51	0.463015	2.05958	7.08106	469.6	FALSE	15
2022-09-12	13:08:52	1.02419	4.5558	2.76372	508.989	FALSE	15
2022-09-12	13:08:52	0.549377	2.44374	2.76372	472.044	FALSE	15
2022-09-12	13:08:52	0.255026	1.13441	2.76372	510.124	FALSE	15
2022-09-12	13:08:52	0.656654	2.92093	2.76372	474.965	FALSE	15
2022-09-12	13:08:53	0.199708	0.888341	1.71454	511.012	FALSE	15
2022-09-12	13:08:53	0.608308	2.70588	1.71454	477.671	FALSE	15
2022-09-12	13:08:53	0.187494	0.834011	1.71454	511.846	FALSE	15
2022-09-12	13:08:53	0.546272	2.42993	1.71454	480.101	FALSE	15
2022-09-12	13:08:54	0.299046	1.33022	1.60247	513.176	FALSE	15
2022-09-12	13:08:54	0.402506	1.79043	1.60247	481.891	FALSE	15
2022-09-12	13:08:54	0.379199	1.68675	1.60247	514.863	FALSE	15
2022-09-12	13:08:55	0.350089	1.55727	2.30616	483.448	FALSE	15
2022-09-12	13:08:55	0.601081	2.67373	2.30616	517.537	FALSE	15
2022-09-12	13:08:55	0.384593	1.71075	2.30616	485.159	FALSE	15
2022-09-12	13:08:55	0.738028	3.2829	2.30616	520.819	FALSE	15
2022-09-12	13:08:56	0.229835	1.02235	2.78561	486.181	FALSE	15
2022-09-12	13:08:56	0.790954	3.51832	2.78561	524.338	FALSE	15
2022-09-12	13:08:56	0.454313	2.02088	2.78561	488.202	FALSE	15
2022-09-12	13:08:56	1.02983	4.58089	2.78561	528.919	FALSE	15
2022-09-12	13:08:57	0.477672	2.12478	3.32893	490.327	FALSE	15
2022-09-12	13:08:57	1.13564	5.05155	3.32893	533.97	FALSE	15
2022-09-12	13:08:57	0.631819	2.81046	3.32893	493.138	FALSE	15
2022-09-12	13:08:58	0.860165	3.82619	3.61719	537.796	FALSE	15
2022-09-12	13:08:58	0.65584	2.91731	3.61719	496.055	FALSE	15
2022-09-12	13:08:58	0.672583	2.99178	3.61719	540.788	FALSE	15
2022-09-12	13:08:58	1.06413	4.73346	3.61719	500.788	FALSE	15
2022-09-12	13:08:59	0.381183	1.69558	3.65273	542.484	FALSE	15
2022-09-12	13:08:59	0.87126	3.87554	3.65273	504.664	FALSE	15
2022-09-12	13:08:59	0.567799	2.52568	3.65273	545.009	FALSE	15
2022-09-12	13:08:59	1.46444	6.51412	3.65273	511.178	FALSE	15
2022-09-12	13:09:00	2.15446	9.58347	20.2137	554.593	FALSE	15
2022-09-12	13:09:00	4.2366	18.8452	20.2137	530.023	1	16
2022-09-12	13:09:00	5.64291	25.1008	20.2137	579.694	1	17
2022-09-12	13:09:00	6.14296	27.3251	20.2137	557.348	1	18
2022-09-12	13:09:01	2.90591	12.9261	10.5169	592.62	FALSE	18
2022-09-12	13:09:01	2.3133	10.29	10.5169	567.638	FALSE	18
2022-09-12	13:09:01	1.8737	8.33459	10.5169	600.954	FALSE	18
2022-09-12	13:09:02	1.26561	5.62969	11.1981	573.268	FALSE	18
2022-09-12	13:09:02	2.72403	12.117	11.1981	613.071	FALSE	18
2022-09-12	13:09:02	2.03375	9.04653	11.1981	582.315	FALSE	18
2022-09-12	13:09:02	4.04637	17.9991	11.1981	631.07	1	19
2022-09-12	13:09:03	3.83482	17.058	12.6212	599.373	1	20
2022-09-12	13:09:03	4.00948	17.835	12.6212	648.905	1	21
2022-09-12	13:09:03	2.7023	12.0204	12.6212	611.393	FALSE	21
2022-09-12	13:09:03	0.802914	3.57152	12.6212	652.477	FALSE	21
2022-09-12	13:09:04	1.342	5.96948	3.23355	617.362	FALSE	21
2022-09-12	13:09:04	0.405764	1.80492	3.23355	654.282	FALSE	21
2022-09-12	13:09:04	0.512583	2.28007	3.23355	619.643	FALSE	21
2022-09-12	13:09:04	0.647392	2.87973	3.23355	657.162	FALSE	21
2022-09-12	13:09:05	0.543372	2.41703	2.40684	622.06	FALSE	21
2022-09-12	13:09:05	0.610751	2.71674	2.40684	659.878	FALSE	21
2022-09-12	13:09:05	0.469122	2.08675	2.40684	624.146	FALSE	21
2022-09-12	13:09:06	0.772481	3.43615	3.64843	663.315	FALSE	21
2022-09-12	13:09:06	0.918028	4.08357	3.64843	628.23	FALSE	21
2022-09-12	13:09:06	0.614058	2.73145	3.64843	666.046	FALSE	21
2022-09-12	13:09:06	0.976247	4.34254	3.64843	632.572	FALSE	21
2022-09-12	13:09:07	0.920216	4.0933	2.42261	670.139	FALSE	21
2022-09-12	13:09:07	0.389071	1.73067	2.42261	634.303	FALSE	21
2022-09-12	13:09:07	0.324593	1.44385	2.42261	671.583	FALSE	21
2022-09-12	13:09:08	0.531209	2.36292	1.10244	636.666	FALSE	21
2022-09-12	13:09:08	0.140624	0.625524	1.10244	672.209	FALSE	21
2022-09-12	13:09:08	0.210853	0.937916	1.10244	637.604	FALSE	21
2022-09-12	13:09:08	0.110496	0.491508	1.10244	672.7	FALSE	21
2022-09-12	13:09:08	0.246018	1.09434	1.10244	638.698	FALSE	21
2022-09-12	13:09:09	0.191361	0.851212	0.990131	673.551	FALSE	21
2022-09-12	13:09:09	0.194975	0.867288	0.990131	639.566	FALSE	21
2022-09-12	13:09:09	0.281438	1.25189	0.990131	674.803	FALSE	21
2022-09-12	13:09:10	0.0160435	0.0713647	0.260441	639.637	FALSE	21
2022-09-12	13:09:10	0.16673	0.741648	0.260441	675.545	FALSE	21
2022-09-12	13:09:10	-0.0712338	-0.316862	0.260441	639.637	FALSE	21
2022-09-12	13:09:10	0.122659	0.545612	0.260441	676.091	FALSE	21
2022-09-12	13:09:11	0.111412	0.495583	1.06366	640.133	FALSE	21
2022-09-12	13:09:11	0.245204	1.09072	1.06366	677.181	FALSE	21
2022-09-12	13:09:11	0.287087	1.27702	1.06366	641.41	FALSE	21
2022-09-12	13:09:11	0.312786	1.39133	1.06366	678.573	FALSE	21
2022-09-12	13:09:12	0.225916	1.00492	0.845666	642.414	FALSE	21
2022-09-12	13:09:12	0.175992	0.782848	0.845666	679.355	FALSE	21
2022-09-12	13:09:12	0.101183	0.450082	0.845666	642.865	FALSE	21
2022-09-12	13:09:12	0.257366	1.14482	0.845666	680.5	FALSE	21
2022-09-12	13:09:13	0.059046	0.262648	0.547197	643.127	FALSE	21
2022-09-12	13:09:13	0.268664	1.19507	0.547197	681.695	FALSE	21
2022-09-12	13:09:13	0.0413361	0.183871	0.547197	643.311	FALSE	21
2022-09-12	13:09:14	0.473041	2.10418	1.70973	683.8	FALSE	21
2022-09-12	13:09:14	0.216247	0.96191	1.70973	644.273	FALSE	21
2022-09-12	13:09:14	0.486221	2.16281	1.70973	685.962	FALSE	21
2022-09-12	13:09:14	0.361947	1.61001	1.70973	645.883	FALSE	21
2022-09-12	13:09:15	0.413397	1.83887	1.7082	687.801	FALSE	21
2022-09-12	13:09:15	0.380267	1.6915	1.7082	647.574	FALSE	21
2022-09-12	13:09:15	0.260827	1.16021	1.7082	688.961	FALSE	21
2022-09-12	13:09:15	0.481591	2.14221	1.7082	649.717	FALSE	21
2022-09-12	13:09:16	0.518791	2.30769	2.38358	691.269	FALSE	21
2022-09-12	13:09:16	0.775789	3.45086	2.38358	653.168	FALSE	21
2022-09-12	13:09:16	0.466018	2.07294	2.38358	693.342	FALSE	21
2022-09-12	13:09:16	0.382812	1.70282	2.38358	654.87	FALSE	21
2022-09-12	13:09:17	0.52897	2.35296	1.5341	695.695	FALSE	21
2022-09-12	13:09:17	0.287545	1.27906	1.5341	656.149	FALSE	21
2022-09-12	13:09:17	0.21813	0.970286	1.5341	696.665	FALSE	21
2022-09-12	13:09:18	0.852278	3.7911	3.349	659.941	FALSE	21
2022-09-12	13:09:18	0.72388	3.21996	3.349	699.885	FALSE	21
2022-09-12	13:09:18	0.718435	3.19574	3.349	663.136	FALSE	21
2022-09-12	13:09:18	0.716959	3.18918	3.349	703.074	FALSE	21
2022-09-12	13:09:19	0.719351	3.19982	2.95856	666.336	FALSE	21
2022-09-12	13:09:19	0.722354	3.21318	2.95856	706.288	FALSE	21
2022-09-12	13:09:19	0.717468	3.19144	2.95856	669.528	FALSE	21
2022-09-12	13:09:19	0.501285	2.22982	2.95856	708.517	FALSE	21
2022-09-12	13:09:20	0.234466	1.04295	1.30673	670.571	FALSE	21
2022-09-12	13:09:20	0.232532	1.03435	1.30673	709.552	FALSE	21
2022-09-12	13:09:20	0.526527	2.3421	1.30673	672.913	FALSE	21
2022-09-12	13:09:20	0.181539	0.807522	1.30673	710.359	FALSE	21
2022-09-12	13:09:21	0.161845	0.719919	0.853326	673.633	FALSE	21
2022-09-12	13:09:21	0.189173	0.841479	0.853326	711.201	FALSE	21
2022-09-12	13:09:21	0.224491	0.998581	0.853326	674.631	FALSE	21
2022-09-12	13:09:22	0.214059	0.952177	1.49151	712.153	FALSE	21
2022-09-12	13:09:22	0.224186	0.997224	1.49151	675.628	FALSE	21
2022-09-12	13:09:22	0.25986	1.15591	1.49151	713.309	FALSE	21
2022-09-12	13:09:22	0.643117	2.86071	1.49151	678.489	FALSE	21
2022-09-12	13:09:23	0.528359	2.35025	1.28896	715.659	FALSE	21
2022-09-12	13:09:23	0.255229	1.13531	1.28896	679.624	FALSE	21
2022-09-12	13:09:23	0.216705	0.963947	1.28896	716.623	FALSE	21
2022-09-12	13:09:23	0.158792	0.706339	1.28896	680.331	FALSE	21
2022-09-12	13:09:24	0.174618	0.776736	1.3086	717.4	FALSE	21
2022-09-12	13:09:24	0.16729	0.744139	1.3086	681.075	FALSE	21
2022-09-12	13:09:24	0.170598	0.758854	1.3086	718.159	FALSE	21
2022-09-12	13:09:24	0.664237	2.95466	1.3086	684.029	FALSE	21
2022-09-12	13:09:25	0.432634	1.92444	0.620316	720.083	FALSE	21
2022-09-12	13:09:25	-0.0469081	-0.208657	0.620316	684.029	FALSE	21
2022-09-12	13:09:25	0.0326338	0.145162	0.620316	720.228	FALSE	21
2022-09-12	13:09:26	-0.153575	-0.683132	-0.0541019	684.029	FALSE	21
2022-09-12	13:09:26	-0.00324403	-0.0144301	-0.0541019	720.228	FALSE	21
2022-09-12	13:09:26	0.0543132	0.241596	-0.0541019	684.271	FALSE	21
2022-09-12	13:09:26	0.0538552	0.239559	-0.0541019	720.468	FALSE	21
2022-09-12	13:09:27	-0.130674	-0.581264	-0.15795	684.271	FALSE	21
2022-09-12	13:09:27	-0.0634985	-0.282454	-0.15795	720.468	FALSE	21
2022-09-12	13:09:27	0.0144659	0.0643472	-0.15795	684.335	FALSE	21
2022-09-12	13:09:27	0.037672	0.167573	-0.15795	720.635	FALSE	21
2022-09-12	13:09:28	0.0163489	0.0727232	1.27945	684.408	FALSE	21
2022-09-12	13:09:28	0.173855	0.773342	1.27945	721.409	FALSE	21
2022-09-12	13:09:28	0.371768	1.6537	1.27945	686.062	FALSE	21
2022-09-12	13:09:28	0.588562	2.61804	1.27945	724.027	FALSE	21
2022-09-12	13:09:29	0.950547	4.22822	7.86768	690.29	FALSE	21
2022-09-12	13:09:29	1.74948	7.78204	7.86768	731.809	FALSE	21
2022-09-12	13:09:29	2.60617	11.5928	7.86768	701.883	FALSE	21
2022-09-12	13:09:30	1.48846	6.62097	5.79834	738.43	FALSE	21
2022-09-12	13:09:30	2.605	11.5876	5.79834	713.47	FALSE	21
2022-09-12	13:09:30	0.469224	2.0872	5.79834	740.517	FALSE	21
2022-09-12	13:09:30	0.651412	2.89761	5.79834	716.368	FALSE	21
2022-09-12	13:09:31	0.528512	2.35093	1.76134	742.868	FALSE	21
2022-09-12	13:09:31	0.279046	1.24125	1.76134	717.609	FALSE	21
2022-09-12	13:09:31	0.41355	1.83955	1.76134	744.707	FALSE	21
2022-09-12	13:09:31	0.362761	1.61363	1.76134	719.223	FALSE	21
2022-09-12	13:09:32	0.578639	2.5739	1.87434	747.281	FALSE	21
2022-09-12	13:09:32	0.204491	0.909617	1.87434	720.133	FALSE	21
2022-09-12	13:09:32	0.48098	2.1395	1.87434	749.421	FALSE	21
2022-09-12	13:09:33	0.199097	0.885623	1.45585	721.018	FALSE	21
2022-09-12	13:09:33	0.341845	1.52059	1.45585	750.941	FALSE	21
2022-09-12	13:09:33	0.294211	1.30871	1.45585	722.327	FALSE	21
2022-09-12	13:09:33	0.474008	2.10848	1.45585	753.05	FALSE	21
2022-09-12	13:09:34	0.247392	1.10045	1.26961	723.427	FALSE	21
2022-09-12	13:09:34	0.307036	1.36576	1.26961	754.416	FALSE	21
2022-09-12	13:09:34	0.218639	0.97255	1.26961	724.4	FALSE	21
2022-09-12	13:09:34	0.368613	1.63966	1.26961	756.055	FALSE	21
2022-09-12	13:09:35	0.118893	0.52886	1.00147	724.929	FALSE	21
2022-09-12	13:09:35	0.408766	1.81827	1.00147	757.874	FALSE	21
2022-09-12	13:09:35	0.0602165	0.267855	1.00147	725.197	FALSE	21
2022-09-12	13:09:35	0.312685	1.39089	1.00147	759.264	FALSE	21
2022-09-12	13:09:36	1.0365	4.61056	8.86258	729.807	FALSE	21
2022-09-12	13:09:36	2.6593	11.8291	8.86258	771.094	FALSE	21
2022-09-12	13:09:36	2.28139	10.1481	8.86258	739.955	FALSE	21
2022-09-12	13:09:37	2.84072	12.6361	7.0565	783.73	FALSE	21
2022-09-12	13:09:37	1.75747	7.81758	7.0565	747.773	FALSE	21
2022-09-12	13:09:37	0.97645	4.34344	7.0565	788.073	FALSE	21
2022-09-12	13:09:37	0.770852	3.4289	7.0565	751.202	FALSE	21
2022-09-12	13:09:38	0.722099	3.21204	8.61853	791.285	FALSE	21
2022-09-12	13:09:38	1.56821	6.97571	8.61853	758.177	FALSE	21
2022-09-12	13:09:38	1.69436	7.53685	8.61853	798.822	FALSE	21
2022-09-12	13:09:38	3.76546	16.7495	8.61853	774.927	1	22
2022-09-12	13:09:39	3.7334	16.6069	12.1929	815.429	1	23
2022-09-12	13:09:39	4.15273	18.4722	12.1929	793.399	1	24
2022-09-12	13:09:39	2.04342	9.08954	12.1929	824.518	FALSE	24
2022-09-12	13:09:39	1.03477	4.60286	12.1929	798.002	FALSE	24
2022-09-12	13:09:40	1.75228	7.79449	10.5951	832.313	FALSE	24
2022-09-12	13:09:40	2.53441	11.2736	10.5951	809.276	FALSE	24
2022-09-12	13:09:40	2.85899	12.7174	10.5951	845.03	FALSE	24
2022-09-12	13:09:41	5.96561	26.5362	14.5304	835.812	1	25
2022-09-12	13:09:41	2.44108	10.8584	14.5304	855.889	FALSE	25
2022-09-12	13:09:41	3.83884	17.0759	14.5304	852.888	1	26
2022-09-12	13:09:41	0.820827	3.6512	14.5304	859.54	FALSE	26
2022-09-12	13:09:42	1.06607	4.74209	3.99308	857.63	FALSE	26
2022-09-12	13:09:42	0.88556	3.93915	3.99308	863.479	FALSE	26
2022-09-12	13:09:42	0.604186	2.68754	3.99308	860.317	FALSE	26
2022-09-12	13:09:42	1.03492	4.60353	3.99308	868.083	FALSE	26
2022-09-12	13:09:43	1.20225	5.34785	3.37588	865.665	FALSE	26
2022-09-12	13:09:43	0.757774	3.37073	3.37588	871.453	FALSE	26
2022-09-12	13:09:43	0.709326	3.15522	3.37588	868.82	FALSE	26
2022-09-12	13:09:43	0.366374	1.6297	3.37588	873.083	FALSE	26
2022-09-12	13:09:44	0.974415	4.33439	4.9803	873.155	FALSE	26
2022-09-12	13:09:44	0.692888	3.0821	4.9803	876.165	FALSE	26
2022-09-12	13:09:44	1.69156	7.5244	4.9803	880.679	FALSE	26
2022-09-12	13:09:45	1.36108	6.05436	7.39374	882.22	FALSE	26
2022-09-12	13:09:45	1.68057	7.47551	7.39374	888.155	FALSE	26
2022-09-12	13:09:45	1.74739	7.77274	7.39374	889.992	FALSE	26
2022-09-12	13:09:45	1.85971	8.27236	7.39374	896.427	FALSE	26
2022-09-12	13:09:46	1.18449	5.26885	3.6958	895.261	FALSE	26
2022-09-12	13:09:46	0.447087	1.98873	3.6958	898.416	FALSE	26
2022-09-12	13:09:46	1.33818	5.95249	3.6958	901.214	FALSE	26
2022-09-12	13:09:46	0.353651	1.57311	3.6958	899.989	FALSE	26
2022-09-12	13:09:47	1.08861	4.84236	2.7666	906.056	FALSE	26
2022-09-12	13:09:47	0.0640333	0.284833	2.7666	900.274	FALSE	26
2022-09-12	13:09:47	0.385967	1.71686	2.7666	907.773	FALSE	26
2022-09-12	13:09:47	0.949224	4.22234	2.7666	904.496	FALSE	26
2022-09-12	13:09:48	0.907595	4.03716	2.39876	911.81	FALSE	26
2022-09-12	13:09:48	0.355789	1.58262	2.39876	906.079	FALSE	26
2022-09-12	13:09:48	0.354415	1.57651	2.39876	913.386	FALSE	26
2022-09-12	13:09:49	0.401997	1.78816	0.0658745	907.867	FALSE	26
2022-09-12	13:09:49	0.154211	0.685961	0.0658745	914.072	FALSE	26
2022-09-12	13:09:49	-0.1979	-0.880299	0.0658745	907.867	FALSE	26
2022-09-12	13:09:49	-0.299071	-1.33033	0.0658745	914.072	FALSE	26
2022-09-12	13:09:50	-0.127417	-0.566776	1.76711	907.867	FALSE	26
2022-09-12	13:09:50	0.29701	1.32116	1.76711	915.394	FALSE	26
2022-09-12	13:09:50	0.869936	3.86965	1.76711	911.736	FALSE	26
2022-09-12	13:09:50	0.549529	2.44441	1.76711	917.838	FALSE	26
2022-09-12	13:09:51	0.0713106	0.317204	1.06774	912.054	FALSE	26
2022-09-12	13:09:51	0.328257	1.46015	1.06774	919.298	FALSE	26
2022-09-12	13:09:51	0.326272	1.45132	1.06774	913.505	FALSE	26
2022-09-12	13:09:51	0.234313	1.04227	1.06774	920.34	FALSE	26
2022-09-12	13:09:52	0.0836262	0.371986	0.388812	913.877	FALSE	26
2022-09-12	13:09:52	0.0462216	0.205603	0.388812	920.546	FALSE	26
2022-09-12	13:09:52	0.132379	0.588848	0.388812	914.466	FALSE	26
2022-09-12	13:09:53	0.0438806	0.19519	-0.650307	920.741	FALSE	26
2022-09-12	13:09:53	-0.109402	-0.486642	-0.650307	914.466	FALSE	26
2022-09-12	13:09:53	-0.278969	-1.24091	-0.650307	920.741	FALSE	26
2022-09-12	13:09:53	-0.240292	-1.06887	-0.650307	914.466	FALSE	26
2022-09-12	13:09:54	-0.182277	-0.810805	0.0568211	920.741	FALSE	26
2022-09-12	13:09:54	-0.124872	-0.555456	0.0568211	914.466	FALSE	26
2022-09-12	13:09:54	-0.0445672	-0.198244	0.0568211	920.741	FALSE	26
2022-09-12	13:09:54	0.402812	1.79179	0.0568211	916.258	FALSE	26
2022-09-12	13:09:55	0.102608	0.456421	0.288171	921.198	FALSE	26
2022-09-12	13:09:55	0.18271	0.812731	0.288171	917.07	FALSE	26
2022-09-12	13:09:55	-0.0504705	-0.224503	0.288171	921.198	FALSE	26
2022-09-12	13:09:55	0.0242877	0.108037	0.288171	917.178	FALSE	26
2022-09-12	13:09:56	-0.130521	-0.580584	-0.618992	921.198	FALSE	26
2022-09-12	13:09:56	-0.201921	-0.898185	-0.618992	917.178	FALSE	26
2022-09-12	13:09:56	-0.0850251	-0.378209	-0.618992	921.198	FALSE	26
2022-09-12	13:09:57	0.167494	0.745047	1.01941	917.923	FALSE	26
2022-09-12	13:09:57	0.1993	0.886526	1.01941	922.084	FALSE	26
2022-09-12	13:09:57	0.224593	0.999035	1.01941	918.922	FALSE	26
2022-09-12	13:09:57	0.325305	1.44702	1.01941	923.531	FALSE	26
2022-09-12	13:09:58	0.266323	1.18466	1.37481	920.107	FALSE	26
2022-09-12	13:09:58	0.284338	1.26479	1.37481	924.796	FALSE	26
2022-09-12	13:09:58	0.268512	1.1944	1.37481	921.302	FALSE	26
2022-09-12	13:09:58	0.417112	1.8554	1.37481	926.651	FALSE	26
2022-09-12	13:09:59	0.393041	1.74832	1.74402	923.05	FALSE	26
2022-09-12	13:09:59	0.326171	1.45087	1.74402	928.102	FALSE	26
2022-09-12	13:09:59	0.385254	1.71369	1.74402	924.764	FALSE	26
2022-09-12	13:09:59	0.46383	2.06321	1.74402	930.165	FALSE	26
2022-09-12	13:10:00	0.517468	2.3018	1.99846	927.065	FALSE	26
2022-09-12	13:10:00	0.453855	2.01884	1.99846	932.184	FALSE	26
2022-09-12	13:10:00	0.376501	1.67475	1.99846	928.74	FALSE	26
2022-09-12	13:10:01	0.37986	1.68969	1.65387	933.874	FALSE	26
2022-09-12	13:10:01	0.371565	1.6528	1.65387	930.393	FALSE	26
2022-09-12	13:10:01	0.36668	1.63107	1.65387	935.505	FALSE	26
2022-09-12	13:10:01	0.369122	1.64193	1.65387	932.035	FALSE	26
2022-09-12	13:10:02	0.384797	1.71165	1.66689	937.217	FALSE	26
2022-09-12	13:10:02	0.371056	1.65053	1.66689	933.685	FALSE	26
2022-09-12	13:10:02	0.370242	1.64691	1.66689	938.864	FALSE	26
2022-09-12	13:10:02	0.372837	1.65845	1.66689	935.344	FALSE	26
2022-09-12	13:10:03	0.370598	1.64849	1.66858	940.512	FALSE	26
2022-09-12	13:10:03	0.372939	1.65891	1.66858	937.003	FALSE	26
2022-09-12	13:10:03	0.37416	1.66434	1.66858	942.176	FALSE	26
2022-09-12	13:10:03	0.382761	1.7026	1.66858	938.705	FALSE	26
2022-09-12	13:10:04	0.373601	1.66185	1.87841	943.838	FALSE	26
2022-09-12	13:10:04	0.356807	1.58715	1.87841	940.292	FALSE	26
2022-09-12	13:10:04	0.53645	2.38624	1.87841	946.225	FALSE	26
2022-09-12	13:10:05	0.527646	2.34707	4.03864	942.64	FALSE	26
2022-09-12	13:10:05	0.976247	4.34254	4.03864	950.567	FALSE	26
2022-09-12	13:10:05	2.14851	9.557	4.03864	952.197	FALSE	26
2022-09-12	13:10:05	-0.0206995	-0.0920755	4.03864	950.567	FALSE	26
2022-09-12	13:10:06	-0.131743	-0.586019	-0.0709666	952.197	FALSE	26
2022-09-12	13:10:06	-0.0410048	-0.182398	-0.0709666	950.567	FALSE	26
2022-09-12	13:10:06	0.0905982	0.402999	-0.0709666	952.6	FALSE	26
2022-09-12	13:10:06	0.0183336	0.0815515	-0.0709666	950.649	FALSE	26
2022-09-12	13:10:07	0.0286644	0.127505	1.16293	952.727	FALSE	26
2022-09-12	13:10:07	0.296908	1.32071	1.16293	951.969	FALSE	26
2022-09-12	13:10:07	0.45874	2.04057	1.16293	954.768	FALSE	26
2022-09-12	13:10:08	0.0344659	0.153311	-0.030276	952.123	FALSE	26
2022-09-12	13:10:08	-0.013015	-0.0578933	-0.030276	954.768	FALSE	26
2022-09-12	13:10:08	0.0132954	0.0591406	-0.030276	952.182	FALSE	26
2022-09-12	13:10:08	-0.0619717	-0.275663	-0.030276	954.768	FALSE	26
2022-09-12	13:10:09	-0.0635493	-0.28268	-1.12473	952.182	FALSE	26
2022-09-12	13:10:09	-0.271641	-1.20831	-1.12473	954.768	FALSE	26
2022-09-12	13:10:09	-0.396425	-1.76338	-1.12473	952.182	FALSE	26
2022-09-12	13:10:09	-0.279783	-1.24453	-1.12473	954.768	FALSE	26
2022-09-12	13:10:10	-0.177239	-0.788395	0.400621	952.182	FALSE	26
2022-09-12	13:10:10	0.0704964	0.313582	0.400621	955.081	FALSE	26
2022-09-12	13:10:10	0.36958	1.64397	0.400621	953.826	FALSE	26
2022-09-12	13:10:10	0.0974175	0.433333	0.400621	955.515	FALSE	26
2022-09-12	13:10:11	0.331463	1.47441	1.2955	955.3	FALSE	26
2022-09-12	13:10:11	0.192786	0.857551	1.2955	956.372	FALSE	26
2022-09-12	13:10:11	0.349478	1.55455	1.2955	956.855	FALSE	26
2022-09-12	13:10:12	0.268359	1.19371	5.27769	957.566	FALSE	26
2022-09-12	13:10:12	0.650649	2.89422	5.27769	959.749	FALSE	26
2022-09-12	13:10:12	1.51976	6.7602	5.27769	964.326	FALSE	26
2022-09-12	13:10:12	2.30714	10.2626	5.27769	970.012	FALSE	26
2022-09-12	13:10:13	2.11665	9.41528	6.44434	973.741	FALSE	26
2022-09-12	13:10:13	1.93635	8.61327	6.44434	978.625	FALSE	26
2022-09-12	13:10:13	1.20037	5.33949	6.44434	979.081	FALSE	26
2022-09-12	13:10:13	0.541641	2.40933	6.44434	981.034	FALSE	26
2022-09-12	13:10:14	0.501845	2.23231	1.83236	981.313	FALSE	26
2022-09-12	13:10:14	0.405764	1.80492	1.83236	982.839	FALSE	26
2022-09-12	13:10:14	0.344593	1.53282	1.83236	982.846	FALSE	26
2022-09-12	13:10:14	0.395534	1.75941	1.83236	984.598	FALSE	26
2022-09-12	13:10:15	0.212481	0.945158	2.11761	983.791	FALSE	26
2022-09-12	13:10:15	0.535585	2.38239	2.11761	986.981	FALSE	26
2022-09-12	13:10:15	0.680114	3.02528	2.11761	986.816	FALSE	26
2022-09-12	13:10:16	0.33584	1.49388	1.58579	988.475	FALSE	26
2022-09-12	13:10:16	0.426679	1.89795	1.58579	988.714	FALSE	26
2022-09-12	13:10:16	0.14958	0.665362	1.58579	989.14	FALSE	26
2022-09-12	13:10:16	0.513906	2.28596	1.58579	991	FALSE	26
2022-09-12	13:10:17	0.457112	2.03333	6.8067	991.173	FALSE	26
2022-09-12	13:10:17	2.3705	10.5445	6.8067	1001.54	FALSE	26
2022-09-12	13:10:17	1.01487	4.51434	6.8067	995.688	FALSE	26
2022-09-12	13:10:17	2.27838	10.1347	6.8067	1011.68	FALSE	26
2022-09-12	13:10:18	1.78597	7.94435	8.71599	1003.63	FALSE	26
2022-09-12	13:10:18	2.10536	9.36506	8.71599	1021.04	FALSE	26
2022-09-12	13:10:18	1.46444	6.51412	8.71599	1010.15	FALSE	26
2022-09-12	13:10:18	2.482	11.0404	8.71599	1032.08	FALSE	26
2022-09-12	13:10:19	1.74882	7.7791	7.67051	1017.93	FALSE	26
2022-09-12	13:10:19	2.19767	9.77568	7.67051	1041.86	FALSE	26
2022-09-12	13:10:19	1.22673	5.45674	7.67051	1023.38	FALSE	26
2022-09-12	13:10:20	0.971463	4.32126	2.92602	1046.18	FALSE	26
2022-09-12	13:10:20	0.340725	1.51561	2.92602	1024.9	FALSE	26
2022-09-12	13:10:20	0.507392	2.25698	2.92602	1048.44	FALSE	26
2022-09-12	13:10:20	0.811616	3.61023	2.92602	1028.51	FALSE	26
2022-09-12	13:10:21	1.61426	7.18055	4.02387	1055.62	FALSE	26
2022-09-12	13:10:21	0.879148	3.91063	4.02387	1032.42	FALSE	26
2022-09-12	13:10:21	0.349835	1.55614	4.02387	1057.18	FALSE	26
2022-09-12	13:10:21	0.775178	3.44815	4.02387	1035.87	FALSE	26
2022-09-12	13:10:22	0.456756	2.03174	1.53701	1059.21	FALSE	26
2022-09-12	13:10:22	0.257824	1.14685	1.53701	1037.01	FALSE	26
2022-09-12	13:10:22	0.405764	1.80492	1.53701	1061.01	FALSE	26
2022-09-12	13:10:22	0.261794	1.16451	1.53701	1038.18	FALSE	26
2022-09-12	13:10:23	0.628461	2.79552	2.34247	1063.81	FALSE	26
2022-09-12	13:10:23	0.407646	1.81329	2.34247	1039.99	FALSE	26
2022-09-12	13:10:23	0.543728	2.41861	2.34247	1066.23	FALSE	26
2022-09-12	13:10:24	0.970293	4.31606	3.74402	1044.31	FALSE	26
2022-09-12	13:10:24	0.829885	3.69149	3.74402	1069.92	FALSE	26
2022-09-12	13:10:24	0.939148	4.17752	3.74402	1048.48	FALSE	26
2022-09-12	13:10:24	0.627443	2.79099	3.74402	1072.71	FALSE	26
2022-09-12	13:10:25	0.440725	1.96043	1.79818	1050.45	FALSE	26
2022-09-12	13:10:25	0.413651	1.84	1.79818	1074.55	FALSE	26
2022-09-12	13:10:25	0.45187	2.01001	1.79818	1052.46	FALSE	26
2022-09-12	13:10:25	0.310751	1.38228	1.79818	1075.93	FALSE	26
2022-09-12	13:10:26	0.284746	1.26661	1.21658	1053.72	FALSE	26
2022-09-12	13:10:26	0.360013	1.60141	1.21658	1077.53	FALSE	26
2022-09-12	13:10:26	0.249835	1.11132	1.21658	1054.83	FALSE	26
2022-09-12	13:10:26	0.199402	0.88698	1.21658	1078.42	FALSE	26
2022-09-12	13:10:27	0.30215	1.34402	1.12686	1056.18	FALSE	26
2022-09-12	13:10:27	0.211107	0.939046	1.12686	1079.36	FALSE	26
2022-09-12	13:10:27	0.24673	1.0975	1.12686	1057.27	FALSE	26
2022-09-12	13:10:28	0.185713	0.826089	0.801866	1080.18	FALSE	26
2022-09-12	13:10:28	0.187646	0.834687	0.801866	1058.11	FALSE	26
2022-09-12	13:10:28	0.246629	1.09706	0.801866	1081.28	FALSE	26
2022-09-12	13:10:28	0.101082	0.449633	0.801866	1058.56	FALSE	26
2022-09-12	13:10:29	0.152583	0.67872	0.866437	1081.96	FALSE	26
2022-09-12	13:10:29	0.149173	0.663551	0.866437	1059.22	FALSE	26
2022-09-12	13:10:29	0.275229	1.22427	0.866437	1083.18	FALSE	26
2022-09-12	13:10:29	0.20215	0.899204	0.866437	1060.12	FALSE	26
2022-09-12	13:10:30	0.257824	1.14685	1.85104	1084.33	FALSE	26
2022-09-12	13:10:30	0.310903	1.38296	1.85104	1061.5	FALSE	26
2022-09-12	13:10:30	0.531769	2.36541	1.85104	1086.7	FALSE	26
2022-09-12	13:10:30	0.564033	2.50893	1.85104	1064.01	FALSE	26
2022-09-12	13:10:31	0.380522	1.69264	2.72655	1088.39	FALSE	26
2022-09-12	13:10:31	0.546069	2.42902	2.72655	1066.44	FALSE	26
2022-09-12	13:10:31	0.912277	4.05799	2.72655	1092.45	FALSE	26
2022-09-12	13:10:32	0.365305	1.62495	3.18335	1068.07	FALSE	26
2022-09-12	13:10:32	0.55757	2.48018	3.18335	1094.93	FALSE	26
2022-09-12	13:10:32	0.366629	1.63084	3.18335	1069.7	FALSE	26
2022-09-12	13:10:32	1.57309	6.99742	3.18335	1101.93	FALSE	26
2022-09-12	13:10:33	0.877672	3.90406	8.10348	1073.6	FALSE	26
2022-09-12	13:10:33	2.49976	11.1194	8.10348	1113.04	FALSE	26
2022-09-12	13:10:33	1.13772	5.06081	8.10348	1078.66	FALSE	26
2022-09-12	13:10:33	2.77182	12.3296	8.10348	1125.37	FALSE	26
2022-09-12	13:10:34	1.0138	4.50959	4.67468	1083.17	FALSE	26
2022-09-12	13:10:34	1.25126	5.56585	4.67468	1130.94	FALSE	26
2022-09-12	13:10:34	1.0336	4.59766	4.67468	1087.77	FALSE	26
2022-09-12	13:10:34	0.905	4.02562	4.67468	1134.97	FALSE	26
2022-09-12	13:10:35	2.02836	9.02255	4.70232	1096.79	FALSE	26
2022-09-12	13:10:35	0.708155	3.15002	4.70232	1138.12	FALSE	26
2022-09-12	13:10:35	0.434873	1.9344	4.70232	1098.73	FALSE	26
2022-09-12	13:10:36	0.410852	1.82755	1.24482	1139.94	FALSE	26
2022-09-12	13:10:36	0.125814	0.559646	1.24482	1099.29	FALSE	26
2022-09-12	13:10:36	0.45869	2.04034	1.24482	1141.98	FALSE	26
2022-09-12	13:10:36	0.124033	0.551724	1.24482	1099.84	FALSE	26
2022-09-12	13:10:37	-0.180343	-0.802202	-1.73038	1141.98	FALSE	26
2022-09-12	13:10:37	-0.470063	-2.09093	-1.73038	1099.84	FALSE	26
2022-09-12	13:10:37	-0.512302	-2.27882	-1.73038	1141.98	FALSE	26
2022-09-12	13:10:37	-0.39332	-1.74957	-1.73038	1099.84	FALSE	26
2022-09-12	13:10:38	-0.175152	-0.779111	1.01522	1141.98	FALSE	26
2022-09-12	13:10:38	0.25528	1.13554	1.01522	1100.97	FALSE	26
2022-09-12	13:10:38	0.360827	1.60503	1.01522	1143.59	FALSE	26
2022-09-12	13:10:38	0.471972	2.09943	1.01522	1103.07	FALSE	26
2022-09-12	13:10:39	0.581081	2.58476	2.27335	1146.17	FALSE	26
2022-09-12	13:10:39	0.500114	2.22461	2.27335	1105.3	FALSE	26
2022-09-12	13:10:39	0.452023	2.01069	2.27335	1148.18	FALSE	26
2022-09-12	13:10:40	0.470038	2.09082	1.77464	1107.39	FALSE	26
2022-09-12	13:10:40	0.393906	1.75217	1.77464	1149.94	FALSE	26
2022-09-12	13:10:40	0.420725	1.87147	1.77464	1109.26	FALSE	26
2022-09-12	13:10:40	0.311158	1.38409	1.77464	1151.32	FALSE	26
2022-09-12	13:10:41	0.486323	2.16326	1.87979	1111.42	FALSE	26
2022-09-12	13:10:41	0.391921	1.74334	1.87979	1153.06	FALSE	26
2022-09-12	13:10:41	0.430344	1.91426	1.87979	1113.34	FALSE	26
2022-09-12	13:10:41	0.381794	1.6983	1.87979	1154.76	FALSE	26
2022-09-12	13:10:42	0.431107	1.91765	1.97817	1115.26	FALSE	26
2022-09-12	13:10:42	0.494109	2.1979	1.97817	1156.96	FALSE	26
2022-09-12	13:10:42	0.408919	1.81895	1.97817	1117.08	FALSE	26
2022-09-12	13:10:43	0.532532	2.36881	2.14583	1159.33	FALSE	26
2022-09-12	13:10:43	0.523168	2.32716	2.14583	1119.4	FALSE	26
2022-09-12	13:10:43	0.322608	1.43502	2.14583	1160.76	FALSE	26
2022-09-12	13:10:43	0.55131	2.45234	2.14583	1121.85	FALSE	26
2022-09-12	13:10:44	0.19813	0.881322	1.68675	1161.64	FALSE	26
2022-09-12	13:10:44	0.456247	2.02948	1.68675	1123.88	FALSE	26
2022-09-12	13:10:44	0.278792	1.24012	1.68675	1162.89	FALSE	26
2022-09-12	13:10:44	0.583626	2.59609	1.68675	1126.48	FALSE	26
2022-09-12	13:10:45	0.439402	1.95455	3.76139	1164.84	FALSE	26
2022-09-12	13:10:45	0.847646	3.7705	3.76139	1130.25	FALSE	26
2022-09-12	13:10:45	1.12902	5.02211	3.76139	1169.86	FALSE	26
2022-09-12	13:10:45	0.966323	4.2984	3.76139	1134.55	FALSE	26
2022-09-12	13:10:46	1.02698	4.56821	3.12232	1174.43	FALSE	26
2022-09-12	13:10:46	0.463117	2.06004	3.12232	1136.61	FALSE	26
2022-09-12	13:10:46	0.615687	2.7387	3.12232	1177.17	FALSE	26
2022-09-12	13:10:47	0.43813	1.94889	4.68386	1138.56	FALSE	26
2022-09-12	13:10:47	0.587901	2.6151	4.68386	1179.78	FALSE	26
2022-09-12	13:10:47	1.1735	5.21996	4.68386	1143.78	FALSE	26
2022-09-12	13:10:47	2.01238	8.95147	4.68386	1188.74	FALSE	26
2022-09-12	13:10:48	3.11263	13.8456	11.5888	1157.62	1	27
2022-09-12	13:10:48	2.69406	11.9837	11.5888	1200.72	FALSE	27
2022-09-12	13:10:48	3.41976	15.2118	11.5888	1172.84	1	28
2022-09-12	13:10:48	1.19462	5.31391	11.5888	1206.03	FALSE	28
2022-09-12	13:10:49	1.14622	5.09862	3.55369	1177.93	FALSE	28
2022-09-12	13:10:49	0.92902	4.13247	3.55369	1210.17	FALSE	28
2022-09-12	13:10:49	0.44897	1.99711	3.55369	1179.93	FALSE	28
2022-09-12	13:10:49	0.671412	2.98657	3.55369	1213.15	FALSE	28
2022-09-12	13:10:50	0.691209	3.07464	4.989	1183.01	FALSE	28
2022-09-12	13:10:50	1.17162	5.2116	4.989	1218.36	FALSE	28
2022-09-12	13:10:50	1.5019	6.68075	4.989	1189.69	FALSE	28
2022-09-12	13:10:51	1.12902	5.02211	5.35419	1223.39	FALSE	28
2022-09-12	13:10:51	1.63833	7.28762	5.35419	1196.97	FALSE	28
2022-09-12	13:10:51	0.654313	2.91052	5.35419	1226.3	FALSE	28
2022-09-12	13:10:51	1.39304	6.19652	5.35419	1203.17	FALSE	28
2022-09-12	13:10:52	0.840165	3.73722	12.7251	1230.03	FALSE	28
2022-09-12	13:10:52	3.26342	14.5163	12.7251	1217.69	1	29
2022-09-12	13:10:52	1.98439	8.82696	12.7251	1238.86	FALSE	29
2022-09-12	13:10:52	5.35497	23.82	12.7251	1241.51	1	30
2022-09-12	13:10:53	1.24775	5.55024	3.17288	1244.41	FALSE	30
2022-09-12	13:10:53	0.663779	2.95262	3.17288	1244.46	FALSE	30
2022-09-12	13:10:53	0.587239	2.61216	3.17288	1247.02	FALSE	30
2022-09-12	13:10:53	0.354415	1.57651	3.17288	1246.04	FALSE	30
2022-09-12	13:10:54	0.821539	3.65437	3.1968	1250.68	FALSE	30
2022-09-12	13:10:54	0.606883	2.69954	3.1968	1248.74	FALSE	30
2022-09-12	13:10:54	0.727596	3.23649	3.1968	1253.91	FALSE	30
2022-09-12	13:10:55	1.1993	5.33473	8.08175	1254.07	FALSE	30
2022-09-12	13:10:55	1.14836	5.10813	8.08175	1259.02	FALSE	30
2022-09-12	13:10:55	1.56174	6.94693	8.08175	1261.02	FALSE	30
2022-09-12	13:10:55	3.35803	14.9372	8.08175	1273.96	1	31
2022-09-12	13:10:56	1.99345	8.86726	11.3207	1269.88	FALSE	31
2022-09-12	13:10:56	3.72836	16.5845	11.3207	1290.54	1	32
2022-09-12	13:10:56	1.7992	8.0032	11.3207	1277.89	FALSE	32
2022-09-12	13:10:56	2.65905	11.828	11.3207	1302.37	FALSE	32
2022-09-12	13:10:57	2.16704	9.63943	6.00914	1287.53	FALSE	32
2022-09-12	13:10:57	1.49614	6.65513	6.00914	1309.03	FALSE	32
2022-09-12	13:10:57	1.18154	5.25573	6.00914	1292.78	FALSE	32
2022-09-12	13:10:57	0.558944	2.48629	6.00914	1311.51	FALSE	32
2022-09-12	13:10:58	1.13467	5.04724	4.41445	1297.83	FALSE	32
2022-09-12	13:10:58	0.916654	4.07746	4.41445	1315.59	FALSE	32
2022-09-12	13:10:58	0.925916	4.11866	4.41445	1301.95	FALSE	32
2022-09-12	13:10:59	1.38368	6.15489	9.02345	1321.75	FALSE	32
2022-09-12	13:10:59	2.41747	10.7534	9.02345	1312.7	FALSE	32
2022-09-12	13:10:59	2.05818	9.1552	9.02345	1330.9	FALSE	32
2022-09-12	13:10:59	2.25492	10.0303	9.02345	1322.73	FALSE	32
2022-09-12	13:11:00	2.04062	9.07709	7.36595	1339.98	FALSE	32
2022-09-12	13:11:00	2.48642	11.0601	7.36595	1333.79	FALSE	32
2022-09-12	13:11:00	0.53126	2.36315	7.36595	1342.34	FALSE	32
2022-09-12	13:11:00	1.56546	6.96348	7.36595	1340.76	FALSE	32
2022-09-12	13:11:01	1.06276	4.72737	5.64711	1347.07	FALSE	32
2022-09-12	13:11:01	1.93665	8.61461	5.64711	1349.37	FALSE	32
2022-09-12	13:11:01	1.19838	5.33063	5.64711	1352.4	FALSE	32
2022-09-12	13:11:01	0.880318	3.91583	5.64711	1353.29	FALSE	32
2022-09-12	13:11:02	1.10897	4.93292	3.50987	1357.33	FALSE	32
2022-09-12	13:11:02	0.283931	1.26298	3.50987	1354.55	FALSE	32
2022-09-12	13:11:02	0.974262	4.33371	3.50987	1361.67	FALSE	32
2022-09-12	13:11:03	0.498588	2.21782	2.69167	1356.77	FALSE	32
2022-09-12	13:11:03	1.41686	6.30248	2.69167	1367.97	FALSE	32
2022-09-12	13:11:03	0.230853	1.02688	2.69167	1357.79	FALSE	32
2022-09-12	13:11:03	0.27416	1.21952	2.69167	1369.19	FALSE	32
2022-09-12	13:11:04	0.21584	0.960099	1.29988	1358.75	FALSE	32
2022-09-12	13:11:04	0.402964	1.79246	1.29988	1370.98	FALSE	32
2022-09-12	13:11:04	0.175229	0.779454	1.29988	1359.53	FALSE	32
2022-09-12	13:11:04	0.374873	1.66751	1.29988	1372.65	FALSE	32
2022-09-12	13:11:05	0.250751	1.11539	1.01607	1360.65	FALSE	32
2022-09-12	13:11:05	0.224237	0.997451	1.01607	1373.64	FALSE	32
2022-09-12	13:11:05	0.216451	0.962817	1.01607	1361.61	FALSE	32
2022-09-12	13:11:05	0.222252	0.988621	1.01607	1374.63	FALSE	32
2022-09-12	13:11:06	0.232074	1.03231	1.05284	1362.64	FALSE	32
2022-09-12	13:11:06	0.238282	1.05993	1.05284	1375.69	FALSE	32
2022-09-12	13:11:06	0.239708	1.06627	1.05284	1363.71	FALSE	32
2022-09-12	13:11:07	0.238639	1.06151	1.05593	1376.75	FALSE	32
2022-09-12	13:11:07	0.238842	1.06242	1.05593	1364.77	FALSE	32
2022-09-12	13:11:07	0.234669	1.04385	1.05593	1377.8	FALSE	32
2022-09-12	13:11:08	0.22902	1.01873	1.84526	1365.79	FALSE	32
2022-09-12	13:11:08	0.185458	0.824954	1.84526	1378.62	FALSE	32
2022-09-12	13:11:08	0.307545	1.36802	1.84526	1367.16	FALSE	32
2022-09-12	13:11:08	0.420318	1.86966	1.84526	1380.49	FALSE	32
2022-09-12	13:11:08	0.931819	4.14492	1.84526	1371.3	FALSE	32
2022-09-12	13:11:09	0.684847	3.04634	2.2074	1383.54	FALSE	32
2022-09-12	13:11:09	0.531311	2.36338	2.2074	1373.67	FALSE	32
2022-09-12	13:11:09	0.348613	1.5507	2.2074	1385.09	FALSE	32
2022-09-12	13:11:09	0.420216	1.8692	2.2074	1375.54	FALSE	32
2022-09-12	13:11:10	0.381489	1.69694	1.17938	1386.79	FALSE	32
2022-09-12	13:11:10	0.256909	1.14278	1.17938	1376.68	FALSE	32
2022-09-12	13:11:10	0.15701	0.698412	1.17938	1387.49	FALSE	32
2022-09-12	13:11:11	0.145967	0.64929	1.0382	1377.33	FALSE	32
2022-09-12	13:11:11	0.148308	0.659704	1.0382	1388.15	FALSE	32
2022-09-12	13:11:11	0.10785	0.479738	1.0382	1377.81	FALSE	32
2022-09-12	13:11:11	0.531463	2.36405	1.0382	1390.51	FALSE	32
2022-09-12	13:11:12	0.329886	1.4674	3.68589	1379.28	FALSE	32
2022-09-12	13:11:12	1.99487	8.87358	3.68589	1399.38	FALSE	32
2022-09-12	13:11:12	0.403219	1.7936	3.68589	1381.07	FALSE	32
2022-09-12	13:11:12	0.586527	2.60899	3.68589	1401.99	FALSE	32
2022-09-12	13:11:13	0.207392	0.922521	1.18715	1381.99	FALSE	32
2022-09-12	13:11:13	0.393397	1.74991	1.18715	1403.74	FALSE	32
2022-09-12	13:11:13	0.19986	0.889017	1.18715	1382.88	FALSE	32
2022-09-12	13:11:14	0.237061	1.05449	0.0693265	1404.8	FALSE	32
2022-09-12	13:11:14	-0.127163	-0.565646	0.0693265	1382.88	FALSE	32
2022-09-12	13:11:14	-0.0963229	-0.428464	0.0693265	1404.8	FALSE	32
2022-09-12	13:11:14	0.0487661	0.216921	0.0693265	1383.1	FALSE	32
2022-09-12	13:11:15	0.139097	0.618731	1.50814	1405.42	FALSE	32
2022-09-12	13:11:15	0.384644	1.71097	1.50814	1384.81	FALSE	32
2022-09-12	13:11:15	0.49757	2.21329	1.50814	1407.63	FALSE	32
2022-09-12	13:11:15	0.334873	1.48958	1.50814	1386.3	FALSE	32
2022-09-12	13:11:16	0.450903	2.00571	2.43417	1409.63	FALSE	32
2022-09-12	13:11:16	0.461285	2.05189	2.43417	1388.35	FALSE	32
2022-09-12	13:11:16	0.654567	2.91164	2.43417	1412.55	FALSE	32
2022-09-12	13:11:16	0.62215	2.76745	2.43417	1391.12	FALSE	32
2022-09-12	13:11:17	0.444084	1.97537	3.37609	1414.52	FALSE	32
2022-09-12	13:11:17	0.980878	4.36314	3.37609	1395.48	FALSE	32
2022-09-12	13:11:17	0.851972	3.78974	3.37609	1418.31	FALSE	32
2022-09-12	13:11:18	1.58378	7.04497	12.0029	1402.53	FALSE	32
2022-09-12	13:11:18	2.58205	11.4855	12.0029	1429.8	FALSE	32
2022-09-12	13:11:18	3.59533	15.9927	12.0029	1418.52	1	33
2022-09-12	13:11:18	3.03233	13.4884	12.0029	1443.28	1	34
2022-09-12	13:11:19	3.84836	17.1183	16.208	1435.64	1	35
2022-09-12	13:11:19	5.08744	22.63	16.208	1465.91	1	36
2022-09-12	13:11:19	2.48169	11.0391	16.208	1446.68	FALSE	36
2022-09-12	13:11:19	3.15736	14.0446	16.208	1479.96	1	37
2022-09-12	13:11:20	1.62016	7.2068	8.95316	1453.88	FALSE	37
2022-09-12	13:11:20	2.57284	11.4445	8.95316	1491.4	FALSE	37
2022-09-12	13:11:20	2.2648	10.0743	8.95316	1463.96	FALSE	37
2022-09-12	13:11:20	1.59324	7.08705	8.95316	1498.49	FALSE	37
2022-09-12	13:11:21	1.96195	8.72715	8.92431	1472.68	FALSE	37
2022-09-12	13:11:21	2.3508	10.4568	8.92431	1508.95	FALSE	37
2022-09-12	13:11:21	1.70607	7.58894	8.92431	1480.27	FALSE	37
2022-09-12	13:11:22	2.7681	12.3131	9.56244	1521.26	FALSE	37
2022-09-12	13:11:22	1.50429	6.69138	9.56244	1486.97	FALSE	37
2022-09-12	13:11:22	1.78994	7.96201	9.56244	1529.22	FALSE	37
2022-09-12	13:11:22	2.5366	11.2833	9.56244	1498.25	FALSE	37
2022-09-12	13:11:23	0.809987	3.60298	3.95533	1532.83	FALSE	37
2022-09-12	13:11:23	1.53182	6.81384	3.95533	1505.06	FALSE	37
2022-09-12	13:11:23	0.78042	3.47146	3.95533	1536.3	FALSE	37
2022-09-12	13:11:23	0.434568	1.93305	3.95533	1507	FALSE	37
2022-09-12	13:11:24	0.402099	1.78862	1.38307	1538.09	FALSE	37
2022-09-12	13:11:24	0.301998	1.34335	1.38307	1508.34	FALSE	37
2022-09-12	13:11:24	0.382099	1.69965	1.38307	1539.79	FALSE	37
2022-09-12	13:11:24	0.157519	0.700676	1.38307	1509.04	FALSE	37
2022-09-12	13:11:25	0.220776	0.982056	1.70071	1540.77	FALSE	37
2022-09-12	13:11:25	0.224797	0.999942	1.70071	1510.04	FALSE	37
2022-09-12	13:11:25	0.701438	3.12014	1.70071	1543.89	FALSE	37
2022-09-12	13:11:26	1.73034	7.6969	6.75367	1517.74	FALSE	37
2022-09-12	13:11:26	0.515025	2.29093	6.75367	1546.18	FALSE	37
2022-09-12	13:11:26	2.7481	12.2241	6.75367	1529.96	FALSE	37
2022-09-12	13:11:26	1.07971	4.80277	6.75367	1550.98	FALSE	37
2022-09-12	13:11:27	2.74205	12.1972	22.2651	1542.16	FALSE	37
2022-09-12	13:11:27	3.64271	16.2035	22.2651	1567.18	1	38
2022-09-12	13:11:27	4.39492	19.5495	22.2651	1561.71	1	39
2022-09-12	13:11:27	9.24199	41.1102	22.2651	1608.29	1	40
2022-09-12	13:11:28	3.94795	17.5613	10.2748	1579.27	1	41
2022-09-12	13:11:28	1.03915	4.62235	10.2748	1612.92	FALSE	41
2022-09-12	13:11:28	2.12312	9.44406	10.2748	1588.71	FALSE	41
2022-09-12	13:11:28	2.12932	9.47164	10.2748	1622.39	FALSE	41
2022-09-12	13:11:29	1.83472	8.1612	4.93858	1596.87	FALSE	41
2022-09-12	13:11:29	0.669682	2.97888	4.93858	1625.37	FALSE	41
2022-09-12	13:11:29	0.826323	3.67565	4.93858	1600.55	FALSE	41
2022-09-12	13:11:30	1.11828	4.97433	2.68742	1630.34	FALSE	41
2022-09-12	13:11:30	0.456654	2.03129	2.68742	1602.58	FALSE	41
2022-09-12	13:11:30	0.343982	1.5301	2.68742	1631.87	FALSE	41
2022-09-12	13:11:30	0.497723	2.21397	2.68742	1604.79	FALSE	41
2022-09-12	13:11:31	0.290649	1.29286	1.30831	1633.17	FALSE	41
2022-09-12	13:11:31	0.42215	1.87781	1.30831	1606.67	FALSE	41
2022-09-12	13:11:31	0.248562	1.10565	1.30831	1634.27	FALSE	41
2022-09-12	13:11:31	0.215127	0.956928	1.30831	1607.63	FALSE	41
2022-09-12	13:11:32	0.335076	1.49049	5.34996	1635.76	FALSE	41
2022-09-12	13:11:32	1.20485	5.35941	5.34996	1612.99	FALSE	41
2022-09-12	13:11:32	1.4336	6.37694	5.34996	1642.14	FALSE	41
2022-09-12	13:11:32	1.83737	8.17299	5.34996	1621.16	FALSE	41
2022-09-12	13:11:33	2.50235	11.131	14.3444	1653.27	FALSE	41
2022-09-12	13:11:33	3.20703	14.2655	14.3444	1635.43	1	42
2022-09-12	13:11:33	3.9649	17.6367	14.3444	1670.91	1	43
2022-09-12	13:11:34	3.29441	14.6542	12.706	1650.08	1	44
2022-09-12	13:11:34	5.91182	26.297	12.706	1697.2	1	45
2022-09-12	13:11:34	1.69309	7.5312	12.706	1657.61	FALSE	45
2022-09-12	13:11:34	0.526425	2.34164	12.706	1699.54	FALSE	45
2022-09-12	13:11:35	0.604237	2.68777	3.06281	1660.3	FALSE	45
2022-09-12	13:11:35	0.717316	3.19077	3.06281	1702.74	FALSE	45
2022-09-12	13:11:35	0.714211	3.17695	3.06281	1663.48	FALSE	45
2022-09-12	13:11:35	0.718435	3.19574	3.06281	1705.93	FALSE	45
2022-09-12	13:11:36	0.716807	3.1885	2.95738	1666.67	FALSE	45
2022-09-12	13:11:36	0.724186	3.22132	2.95738	1709.15	FALSE	45
2022-09-12	13:11:36	0.52439	2.33259	2.95738	1669	FALSE	45
2022-09-12	13:11:36	0.694008	3.08709	2.95738	1712.24	FALSE	45
2022-09-12	13:11:37	0.715738	3.18375	3.20555	1672.18	FALSE	45
2022-09-12	13:11:37	0.727087	3.23423	3.20555	1715.47	FALSE	45
2022-09-12	13:11:37	0.719097	3.19869	3.20555	1675.38	FALSE	45
2022-09-12	13:11:38	0.71813	3.19439	2.02682	1718.67	FALSE	45
2022-09-12	13:11:38	0.628664	2.79642	2.02682	1678.18	FALSE	45
2022-09-12	13:11:38	0.241489	1.07419	2.02682	1719.74	FALSE	45
2022-09-12	13:11:38	0.234313	1.04227	2.02682	1679.22	FALSE	45
2022-09-12	13:11:39	1.15696	5.14639	2.89829	1724.89	FALSE	45
2022-09-12	13:11:39	0.681285	3.03049	2.89829	1682.25	FALSE	45
2022-09-12	13:11:39	0.249886	1.11154	2.89829	1726	FALSE	45
2022-09-12	13:11:39	0.51813	2.30475	2.89829	1684.55	FALSE	45
2022-09-12	13:11:40	2.19111	9.7465	6.74632	1735.75	FALSE	45
2022-09-12	13:11:40	1.27701	5.6804	6.74632	1690.23	FALSE	45
2022-09-12	13:11:40	1.77894	7.91308	6.74632	1743.66	FALSE	45
2022-09-12	13:11:40	0.819504	3.64532	6.74632	1693.88	FALSE	45
2022-09-12	13:11:41	1.56408	6.95734	5.49997	1750.62	FALSE	45
2022-09-12	13:11:41	0.759555	3.37865	5.49997	1697.26	FALSE	45
2022-09-12	13:11:41	1.38571	6.16392	5.49997	1756.78	FALSE	45
2022-09-12	13:11:42	0.941947	4.18997	7.86703	1701.45	FALSE	45
2022-09-12	13:11:42	1.60291	7.13006	7.86703	1763.91	FALSE	45
2022-09-12	13:11:42	2.83782	12.6232	7.86703	1714.07	FALSE	45
2022-09-12	13:11:42	1.69167	7.52489	7.86703	1771.44	FALSE	45
2022-09-12	13:11:43	1.00001	4.44824	5.44265	1718.52	FALSE	45
2022-09-12	13:11:43	1.20449	5.35781	5.44265	1776.79	FALSE	45
2022-09-12	13:11:43	1.67055	7.43094	5.44265	1725.95	FALSE	45
2022-09-12	13:11:43	1.0192	4.53361	5.44265	1781.33	FALSE	45
2022-09-12	13:11:44	1.47207	6.54806	5.54305	1732.5	FALSE	45
2022-09-12	13:11:44	1.3966	6.21236	5.54305	1787.54	FALSE	45
2022-09-12	13:11:44	0.869733	3.86875	5.54305	1736.37	FALSE	45
2022-09-12	13:11:45	0.619097	2.75387	3.1228	1790.29	FALSE	45
2022-09-12	13:11:45	0.744797	3.31301	3.1228	1739.68	FALSE	45
2022-09-12	13:11:45	0.726781	3.23287	3.1228	1793.53	FALSE	45
2022-09-12	13:11:45	0.717468	3.19144	3.1228	1742.87	FALSE	45
2022-09-12	13:11:46	0.395534	1.75941	3.3602	1795.29	FALSE	45
2022-09-12	13:11:46	0.708053	3.14956	3.3602	1746.02	FALSE	45
2022-09-12	13:11:46	1.511	6.72123	3.3602	1802.01	FALSE	45
2022-09-12	13:11:46	0.407036	1.81058	3.3602	1747.83	FALSE	45
2022-09-12	13:11:47	0.223575	0.994506	1.45138	1803	FALSE	45
2022-09-12	13:11:47	0.302099	1.3438	1.45138	1749.18	FALSE	45
2022-09-12	13:11:47	0.229071	1.01895	1.45138	1804.02	FALSE	45
2022-09-12	13:11:47	0.550394	2.44826	1.45138	1751.62	FALSE	45
2022-09-12	13:11:48	1.46983	6.5381	3.63097	1810.56	FALSE	45
2022-09-12	13:11:48	0.805916	3.58488	3.63097	1755.21	FALSE	45
2022-09-12	13:11:48	0.173092	0.769948	3.63097	1811.33	FALSE	45
2022-09-12	13:11:49	0.352074	1.5661	0.96938	1756.78	FALSE	45
2022-09-12	13:11:49	0.168308	0.748668	0.96938	1812.08	FALSE	45
2022-09-12	13:11:49	0.226272	1.0065	0.96938	1757.78	FALSE	45
2022-09-12	13:11:49	0.125051	0.556252	0.96938	1812.63	FALSE	45
2022-09-12	13:11:50	0.304135	1.35285	0.204923	1759.13	FALSE	45
2022-09-12	13:11:50	0.120216	0.534745	0.204923	1813.17	FALSE	45
2022-09-12	13:11:50	-0.0507249	-0.225635	0.204923	1759.13	FALSE	45
2022-09-12	13:11:50	-0.189351	-0.842271	0.204923	1813.17	FALSE	45
2022-09-12	13:11:51	0.0116669	0.0518967	2.57973	1759.19	FALSE	45
2022-09-12	13:11:51	-0.0491473	-0.218617	2.57973	1813.17	FALSE	45
2022-09-12	13:11:51	0.338079	1.50384	2.57973	1760.69	FALSE	45
2022-09-12	13:11:51	2.0192	8.98181	2.57973	1822.15	FALSE	45
2022-09-12	13:11:52	2.59121	11.5262	9.96659	1772.22	FALSE	45
2022-09-12	13:11:52	2.4135	10.7357	9.96659	1832.89	FALSE	45
2022-09-12	13:11:52	1.71706	7.63783	9.96659	1779.85	FALSE	45
2022-09-12	13:11:53	2.02943	9.02731	9.16919	1841.91	FALSE	45
2022-09-12	13:11:53	2.04622	9.102	9.16919	1788.96	FALSE	45
2022-09-12	13:11:53	2.35976	10.4967	9.16919	1852.41	FALSE	45
2022-09-12	13:11:53	1.80989	8.05075	9.16919	1797.01	FALSE	45
2022-09-12	13:11:54	1.29772	5.77252	3.18787	1858.18	FALSE	45
2022-09-12	13:11:54	0.862303	3.8357	3.18787	1800.84	FALSE	45
2022-09-12	13:11:54	0.183219	0.814995	3.18787	1859	FALSE	45
2022-09-12	13:11:54	0.523422	2.32829	3.18787	1803.17	FALSE	45
2022-09-12	13:11:55	0.701743	3.12149	9.44608	1862.12	FALSE	45
2022-09-12	13:11:55	1.80439	8.02629	9.44608	1811.2	FALSE	45
2022-09-12	13:11:55	2.60113	11.5703	9.44608	1873.69	FALSE	45
2022-09-12	13:11:55	3.38703	15.0662	9.44608	1826.26	1	46
2022-09-12	13:11:56	3.03116	13.4832	10.574	1887.17	1	47
2022-09-12	13:11:56	1.35004	6.00525	10.574	1832.27	FALSE	47
2022-09-12	13:11:56	2.75024	12.2336	10.574	1899.41	FALSE	47
2022-09-12	13:11:57	0.502557	2.23547	5.48187	1834.5	FALSE	47
2022-09-12	13:11:57	2.14088	9.52306	5.48187	1908.93	FALSE	47
2022-09-12	13:11:57	1.34352	5.97625	5.48187	1840.48	FALSE	47
2022-09-12	13:11:57	0.942557	4.19268	5.48187	1913.12	FALSE	47
2022-09-12	13:11:58	1.06576	4.74071	1.21788	1845.22	FALSE	47
2022-09-12	13:11:58	0.239555	1.06559	1.21788	1914.19	FALSE	47
2022-09-12	13:11:58	-0.0917427	-0.40809	1.21788	1845.22	FALSE	47
2022-09-12	13:11:58	-0.118409	-0.526707	1.21788	1914.19	FALSE	47
2022-09-12	13:11:59	0.17243	0.767003	1.68692	1845.99	FALSE	47
2022-09-12	13:11:59	0.470446	2.09264	1.68692	1916.28	FALSE	47
2022-09-12	13:11:59	0.547137	2.43377	1.68692	1848.42	FALSE	47
2022-09-12	13:11:59	0.326934	1.45427	1.68692	1917.73	FALSE	47
2022-09-12	13:12:00	0.470395	2.09241	1.49283	1850.51	FALSE	47
2022-09-12	13:12:00	0.248003	1.10317	1.49283	1918.84	FALSE	47
2022-09-12	13:12:00	0.28841	1.28291	1.49283	1851.8	FALSE	47
2022-09-12	13:12:01	0.265662	1.18172	1.488	1920.02	FALSE	47
2022-09-12	13:12:01	0.115484	0.513696	1.488	1852.31	FALSE	47
2022-09-12	13:12:01	0.469122	2.08675	1.488	1922.11	FALSE	47
2022-09-12	13:12:01	0.487799	2.16983	1.488	1854.48	FALSE	47
2022-09-12	13:12:02	1.14434	5.09025	12.2791	1927.2	FALSE	47
2022-09-12	13:12:02	3.41981	15.212	12.2791	1869.69	1	48
2022-09-12	13:12:02	2.55625	11.3707	12.2791	1938.57	FALSE	48
2022-09-12	13:12:02	3.92149	17.4436	12.2791	1887.14	1	49
2022-09-12	13:12:03	1.03472	4.60264	4.7722	1943.17	FALSE	49
2022-09-12	13:12:03	1.9735	8.77852	4.7722	1895.92	FALSE	49
2022-09-12	13:12:03	0.654415	2.91097	4.7722	1946.08	FALSE	49
2022-09-12	13:12:03	0.628715	2.79665	4.7722	1898.71	FALSE	49
2022-09-12	13:12:04	0.470293	2.09196	2.87174	1948.17	FALSE	49
2022-09-12	13:12:04	0.299402	1.3318	2.87174	1900.04	FALSE	49
2022-09-12	13:12:04	1.16709	5.19145	2.87174	1953.36	FALSE	49
2022-09-12	13:12:05	1.05223	4.68053	6.45385	1904.72	FALSE	49
2022-09-12	13:12:05	1.37762	6.12793	6.45385	1959.49	FALSE	49
2022-09-12	13:12:05	1.08001	4.8041	6.45385	1909.53	FALSE	49
2022-09-12	13:12:05	2.2937	10.2028	6.45385	1969.69	FALSE	49
2022-09-12	13:12:06	2.00739	8.92927	9.47856	1918.46	FALSE	49
2022-09-12	13:12:06	3.25604	14.4835	9.47856	1984.18	1	50
2022-09-12	13:12:06	2.28678	10.1721	9.47856	1928.63	FALSE	50
2022-09-12	13:12:06	0.973295	4.32941	9.47856	1988.51	FALSE	50
2022-09-12	13:12:07	1.42525	6.3398	4.04197	1934.97	FALSE	50
2022-09-12	13:12:07	0.511768	2.27645	4.04197	1990.78	FALSE	50
2022-09-12	13:12:07	1.13034	5.02798	4.04197	1940	FALSE	50
2022-09-12	13:12:07	0.567341	2.52365	4.04197	1993.31	FALSE	50
2022-09-12	13:12:08	0.875891	3.89614	2.81755	1943.89	FALSE	50
2022-09-12	13:12:08	0.684186	3.0434	2.81755	1996.35	FALSE	50
2022-09-12	13:12:08	0.340165	1.51312	2.81755	1945.41	FALSE	50
2022-09-12	13:12:09	0.722862	3.21543	4.26609	1999.57	FALSE	50
2022-09-12	13:12:09	0.290547	1.29241	4.26609	1946.7	FALSE	50
2022-09-12	13:12:09	1.35752	6.03852	4.26609	2005.6	FALSE	50
2022-09-12	13:12:09	1.46531	6.51799	4.26609	1953.22	FALSE	50
2022-09-12	13:12:10	2.9449	13.0995	10.243	2018.7	FALSE	50
2022-09-12	13:12:10	1.42235	6.3269	10.243	1959.54	FALSE	50
2022-09-12	13:12:10	2.89884	12.8946	10.243	2031.6	FALSE	50
2022-09-12	13:12:10	1.9448	8.65086	10.243	1968.19	FALSE	50
2022-09-12	13:12:11	3.23273	14.3798	15.6509	2045.98	1	51
2022-09-12	13:12:11	4.39151	19.5343	15.6509	1987.73	1	52
2022-09-12	13:12:11	2.18632	9.72519	15.6509	2055.7	FALSE	52
2022-09-12	13:12:11	4.26337	18.9643	15.6509	2006.69	1	53
2022-09-12	13:12:12	2.5737	11.4483	13.6358	2067.15	FALSE	53
2022-09-12	13:12:12	4.35497	19.3718	13.6358	2026.07	1	54
2022-09-12	13:12:12	2.26775	10.0874	13.6358	2077.24	FALSE	54
2022-09-12	13:12:13	1.60296	7.13029	4.09534	2033.2	FALSE	54
2022-09-12	13:12:13	0.87986	3.91379	4.09534	2081.15	FALSE	54
2022-09-12	13:12:13	0.296196	1.31754	4.09534	2034.51	FALSE	54
2022-09-12	13:12:13	0.903677	4.01974	4.09534	2085.17	FALSE	54
2022-09-12	13:12:14	0.302048	1.34357	0.503734	2035.86	FALSE	54
2022-09-12	13:12:14	0.247494	1.1009	0.503734	2086.27	FALSE	54
2022-09-12	13:12:14	0.0963488	0.428579	0.503734	2036.29	FALSE	54
2022-09-12	13:12:14	-0.192913	-0.858116	0.503734	2086.27	FALSE	54
2022-09-12	13:12:15	-0.0787656	-0.350365	0.750931	2036.29	FALSE	54
2022-09-12	13:12:15	0.188257	0.837405	0.750931	2087.11	FALSE	54
2022-09-12	13:12:15	0.396959	1.76575	0.750931	2038.05	FALSE	54
2022-09-12	13:12:16	0.652379	2.90191	10.8548	2090.01	FALSE	54
2022-09-12	13:12:16	1.71701	7.6376	10.8548	2045.69	FALSE	54
2022-09-12	13:12:16	2.11492	9.40759	10.8548	2099.42	FALSE	54
2022-09-12	13:12:16	5.27675	23.472	10.8548	2069.16	1	55
2022-09-12	13:12:17	5.21319	23.1893	14.7573	2122.61	1	56
2022-09-12	13:12:17	4.24052	18.8627	14.7573	2088.02	1	57
2022-09-12	13:12:17	1.58337	7.04315	14.7573	2129.65	FALSE	57
2022-09-12	13:12:17	2.23329	9.93412	14.7573	2097.96	FALSE	57
2022-09-12	13:12:18	2.04022	9.07531	7.39857	2138.73	FALSE	57
2022-09-12	13:12:18	1.52032	6.76269	7.39857	2104.72	FALSE	57
2022-09-12	13:12:18	1.22948	5.46897	7.39857	2144.2	FALSE	57
2022-09-12	13:12:18	1.86307	8.28731	7.39857	2113.01	FALSE	57
2022-09-12	13:12:19	0.786272	3.4975	4.69636	2147.7	FALSE	57
2022-09-12	13:12:19	1.88683	8.393	4.69636	2121.4	FALSE	57
2022-09-12	13:12:19	0.494262	2.19858	4.69636	2149.89	FALSE	57
2022-09-12	13:12:20	0.374211	1.66457	1.62484	2123.07	FALSE	57
2022-09-12	13:12:20	0.608206	2.70542	1.62484	2152.6	FALSE	57
2022-09-12	13:12:20	0.150395	0.668987	1.62484	2123.73	FALSE	57
2022-09-12	13:12:20	0.328308	1.46038	1.62484	2154.06	FALSE	57
2022-09-12	13:12:21	0.521947	2.32172	2.0928	2126.06	FALSE	57
2022-09-12	13:12:21	0.511972	2.27735	2.0928	2156.34	FALSE	57
2022-09-12	13:12:21	0.394771	1.75602	2.0928	2127.81	FALSE	57
2022-09-12	13:12:21	0.453244	2.01612	2.0928	2158.35	FALSE	57
2022-09-12	13:12:22	1.17365	5.22063	11.8316	2133.03	FALSE	57
2022-09-12	13:12:22	1.73935	7.73698	11.8316	2166.09	FALSE	57
2022-09-12	13:12:22	3.77986	16.8136	11.8316	2149.85	1	58
2022-09-12	13:12:22	3.94663	17.5554	11.8316	2183.65	1	59
2022-09-12	13:12:23	8.1083	36.0673	23.9735	2185.91	1	60
2022-09-12	13:12:23	4.55334	20.2542	23.9735	2203.9	1	61
2022-09-12	13:12:23	3.50678	15.5989	23.9735	2201.51	1	62
2022-09-12	13:12:24	2.02866	9.02389	6.57954	2212.92	FALSE	62
2022-09-12	13:12:24	2.11207	9.39491	6.57954	2210.91	FALSE	62
2022-09-12	13:12:24	0.860623	3.82822	6.57954	2216.75	FALSE	62
2022-09-12	13:12:24	0.915229	4.07112	6.57954	2214.98	FALSE	62
2022-09-12	13:12:25	0.669224	2.97684	1.98568	2219.73	FALSE	62
2022-09-12	13:12:25	0.361845	1.60956	1.98568	2216.59	FALSE	62
2022-09-12	13:12:25	0.585611	2.60491	1.98568	2222.33	FALSE	62
2022-09-12	13:12:25	0.168919	0.751385	1.98568	2217.34	FALSE	62
2022-09-12	13:12:26	0.632888	2.81521	7.81716	2225.15	FALSE	62
2022-09-12	13:12:26	1.00281	4.4607	7.81716	2221.8	FALSE	62
2022-09-12	13:12:26	1.46169	6.50189	7.81716	2231.65	FALSE	62
2022-09-12	13:12:26	3.93212	17.4909	7.81716	2239.29	1	63
2022-09-12	13:12:27	5.22734	23.2523	19.4813	2254.9	1	64
2022-09-12	13:12:27	4.4279	19.6962	19.4813	2258.99	1	65
2022-09-12	13:12:27	3.48352	15.4954	19.4813	2270.4	1	66
2022-09-12	13:12:28	2.35884	10.4926	5.3139	2269.48	FALSE	66
2022-09-12	13:12:28	0.739962	3.2915	5.3139	2273.69	FALSE	66
2022-09-12	13:12:28	1.19752	5.32681	5.3139	2274.81	FALSE	66
2022-09-12	13:12:28	0.48215	2.1447	5.3139	2275.83	FALSE	66
2022-09-12	13:12:29	0.682761	3.03706	4.41962	2277.84	FALSE	66
2022-09-12	13:12:29	0.743677	3.30802	4.41962	2279.14	FALSE	66
2022-09-12	13:12:29	0.868053	3.86127	4.41962	2281.7	FALSE	66
2022-09-12	13:12:29	1.67981	7.47213	4.41962	2286.61	FALSE	66
2022-09-12	13:12:30	2.3364	10.3928	10.6084	2292.1	FALSE	66
2022-09-12	13:12:30	3.03289	13.4909	10.6084	2300.11	1	67
2022-09-12	13:12:30	1.78531	7.94142	10.6084	2300.04	FALSE	67
2022-09-12	13:12:31	2.61813	11.646	9.04852	2311.75	FALSE	67
2022-09-12	13:12:31	2.27976	10.1408	9.04852	2310.18	FALSE	67
2022-09-12	13:12:31	2.09197	9.3055	9.04852	2321.06	FALSE	67
2022-09-12	13:12:31	1.14693	5.10177	9.04852	2315.28	FALSE	67
2022-09-12	13:12:32	1.32459	5.89204	7.7149	2326.95	FALSE	67
2022-09-12	13:12:32	1.5308	6.8093	7.7149	2322.09	FALSE	67
2022-09-12	13:12:32	1.87604	8.345	7.7149	2335.29	FALSE	67
2022-09-12	13:12:32	2.20612	9.81326	7.7149	2331.9	FALSE	67
2022-09-12	13:12:33	0.715025	3.18057	3.51153	2338.47	FALSE	67
2022-09-12	13:12:33	0.795331	3.53779	3.51153	2335.44	FALSE	67
2022-09-12	13:12:33	0.672328	2.99065	3.51153	2341.47	FALSE	67
2022-09-12	13:12:33	0.975025	4.33711	3.51153	2339.78	FALSE	67
2022-09-12	13:12:34	2.23833	9.95654	16.33	2351.42	FALSE	67
2022-09-12	13:12:34	2.77009	12.3219	16.33	2352.1	FALSE	67
2022-09-12	13:12:34	4.76327	21.188	16.33	2372.61	1	68
2022-09-12	13:12:34	4.91294	21.8537	16.33	2373.95	1	69
2022-09-12	13:12:35	6.27314	27.9042	24.8858	2400.51	1	70
2022-09-12	13:12:35	4.68484	20.8391	24.8858	2394.79	1	71
2022-09-12	13:12:35	5.82576	25.9141	24.8858	2426.43	1	72
2022-09-12	13:12:36	0.941336	4.18725	3.25205	2398.98	FALSE	72
2022-09-12	13:12:36	1.02612	4.56439	3.25205	2430.99	FALSE	72
2022-09-12	13:12:36	0.722252	3.21272	3.25205	2402.19	FALSE	72
2022-09-12	13:12:36	0.234669	1.04385	3.25205	2432.04	FALSE	72
2022-09-12	13:12:37	0.538791	2.39665	1.46366	2404.59	FALSE	72
2022-09-12	13:12:37	0.209428	0.931578	1.46366	2432.97	FALSE	72
2022-09-12	13:12:37	0.364695	1.62224	1.46366	2406.21	FALSE	72
2022-09-12	13:12:37	0.20327	0.904186	1.46366	2433.87	FALSE	72
2022-09-12	13:12:38	0.267087	1.18806	1.50067	2407.4	FALSE	72
2022-09-12	13:12:38	0.35528	1.58036	1.50067	2435.45	FALSE	72
2022-09-12	13:12:38	0.284084	1.26366	1.50067	2408.66	FALSE	72
2022-09-12	13:12:38	0.443015	1.97062	1.50067	2437.42	FALSE	72
2022-09-12	13:12:39	0.815636	3.62811	4.10372	2412.29	FALSE	72
2022-09-12	13:12:39	0.689377	3.06649	4.10372	2440.49	FALSE	72
2022-09-12	13:12:39	1.26266	5.61656	4.10372	2417.91	FALSE	72
2022-09-12	13:12:40	0.772939	3.43819	4.66365	2443.93	FALSE	72
2022-09-12	13:12:40	1.30683	5.81304	4.66365	2423.72	FALSE	72
2022-09-12	13:12:40	0.82556	3.67226	4.66365	2447.6	FALSE	72
2022-09-12	13:12:40	1.28841	5.73111	4.66365	2429.45	FALSE	72
2022-09-12	13:12:41	2.10983	9.38495	10.1019	2456.99	FALSE	72
2022-09-12	13:12:41	1.55818	6.9311	10.1019	2436.38	FALSE	72
2022-09-12	13:12:41	3.60759	16.0473	10.1019	2473.03	1	73
2022-09-12	13:12:41	1.80841	8.04417	10.1019	2444.43	FALSE	73
2022-09-12	13:12:42	3.3364	14.841	11.1457	2487.87	1	74
2022-09-12	13:12:42	2.40719	10.7077	11.1457	2455.14	FALSE	74
2022-09-12	13:12:42	1.20592	5.36417	11.1457	2493.24	FALSE	74
2022-09-12	13:12:42	3.07314	13.6699	11.1457	2468.81	1	75
2022-09-12	13:12:43	0.801947	3.56722	6.924	2496.8	FALSE	75
2022-09-12	13:12:43	2.47299	11.0004	6.924	2479.81	FALSE	75
2022-09-12	13:12:43	1.39482	6.20444	6.924	2503.01	FALSE	75
2022-09-12	13:12:44	1.24332	5.53054	5.48453	2485.34	FALSE	75
2022-09-12	13:12:44	1.35187	6.01339	5.48453	2509.02	FALSE	75
2022-09-12	13:12:44	0.663168	2.9499	5.48453	2488.29	FALSE	75
2022-09-12	13:12:44	1.67355	7.44429	5.48453	2516.47	FALSE	75
2022-09-12	13:12:45	0.675534	3.00491	7.18605	2491.29	FALSE	75
2022-09-12	13:12:45	1.75594	7.81077	7.18605	2524.28	FALSE	75
2022-09-12	13:12:45	1.87986	8.36199	7.18605	2499.65	FALSE	75
2022-09-12	13:12:45	2.15065	9.56652	7.18605	2533.84	FALSE	75
2022-09-12	13:12:46	3.40027	15.1251	13.5141	2514.78	1	76
2022-09-12	13:12:46	1.91889	8.53561	13.5141	2542.38	FALSE	76
2022-09-12	13:12:46	5.10301	22.6992	13.5141	2537.48	1	77
2022-09-12	13:12:46	1.73024	7.69645	13.5141	2550.08	FALSE	77
2022-09-12	13:12:47	4.01864	17.8757	9.61738	2555.35	1	78
2022-09-12	13:12:47	1.40195	6.23615	9.61738	2556.31	FALSE	78
2022-09-12	13:12:47	1.06566	4.74027	9.61738	2560.09	FALSE	78
2022-09-12	13:12:48	0.965102	4.29297	2.84538	2560.61	FALSE	78
2022-09-12	13:12:48	0.419402	1.86558	2.84538	2561.96	FALSE	78
2022-09-12	13:12:48	0.531463	2.36405	2.84538	2562.97	FALSE	78
2022-09-12	13:12:48	0.64271	2.8589	2.84538	2564.82	FALSE	78
2022-09-12	13:12:49	0.986832	4.38963	7.49086	2567.36	FALSE	78
2022-09-12	13:12:49	1.77487	7.89498	7.49086	2572.71	FALSE	78
2022-09-12	13:12:49	2.60673	11.5953	7.49086	2578.95	FALSE	78
2022-09-12	13:12:49	1.36765	6.08358	7.49086	2578.8	FALSE	78
2022-09-12	13:12:50	0.976807	4.34503	2.53036	2583.3	FALSE	78
2022-09-12	13:12:50	0.439198	1.95364	2.53036	2580.75	FALSE	78
2022-09-12	13:12:50	0.290547	1.29241	2.53036	2584.59	FALSE	78
2022-09-12	13:12:51	0.269835	1.20028	1.32088	2581.95	FALSE	78
2022-09-12	13:12:51	0.383219	1.70463	1.32088	2586.3	FALSE	78
2022-09-12	13:12:51	0.363524	1.61703	1.32088	2583.57	FALSE	78
2022-09-12	13:12:51	0.171209	0.761572	1.32088	2587.06	FALSE	78
2022-09-12	13:12:52	0.36098	1.60571	1.42852	2585.17	FALSE	78
2022-09-12	13:12:52	0.169682	0.754779	1.42852	2587.81	FALSE	78
2022-09-12	13:12:52	0.539758	2.40095	1.42852	2587.57	FALSE	78
2022-09-12	13:12:52	0.21416	0.952627	1.42852	2588.77	FALSE	78
2022-09-12	13:12:53	0.459758	2.0451	8.02629	2589.62	FALSE	78
2022-09-12	13:12:53	2.37599	10.5689	8.02629	2599.33	FALSE	78
2022-09-12	13:12:53	2.83645	12.6171	8.02629	2602.24	FALSE	78
2022-09-12	13:12:53	1.54536	6.87407	8.02629	2606.21	FALSE	78
2022-09-12	13:12:54	2.32648	10.3486	6.49926	2612.59	FALSE	78
2022-09-12	13:12:54	1.51029	6.71807	6.49926	2612.93	FALSE	78
2022-09-12	13:12:54	0.546527	2.43106	6.49926	2615.02	FALSE	78
2022-09-12	13:12:55	0.765356	3.40446	2.43972	2616.33	FALSE	78
2022-09-12	13:12:55	0.317417	1.41193	2.43972	2616.43	FALSE	78
2022-09-12	13:12:55	0.703219	3.12806	2.43972	2619.46	FALSE	78
2022-09-12	13:12:55	0.407901	1.81443	2.43972	2618.24	FALSE	78
2022-09-12	13:12:56	1.04139	4.63231	7.3294	2624.09	FALSE	78
2022-09-12	13:12:56	0.876043	3.89681	7.3294	2622.14	FALSE	78
2022-09-12	13:12:56	2.57894	11.4716	7.3294	2635.56	FALSE	78
2022-09-12	13:12:56	2.09452	9.31684	7.3294	2631.46	FALSE	78
2022-09-12	13:12:57	3.21014	14.2793	14.1148	2649.84	1	79
2022-09-12	13:12:57	3.07009	13.6564	14.1148	2645.11	1	80
2022-09-12	13:12:57	2.47431	11.0062	14.1148	2660.85	FALSE	80
2022-09-12	13:12:57	3.93808	17.5174	14.1148	2662.63	1	81
2022-09-12	13:12:58	3.10515	13.8123	13.9319	2674.66	1	82
2022-09-12	13:12:58	4.04861	18.009	13.9319	2680.64	1	83
2022-09-12	13:12:58	2.24235	9.97442	13.9319	2684.64	FALSE	83
2022-09-12	13:12:59	2.67558	11.9015	8.83917	2692.54	FALSE	83
2022-09-12	13:12:59	1.29492	5.76006	8.83917	2690.4	FALSE	83
2022-09-12	13:12:59	1.91961	8.53881	8.83917	2701.08	FALSE	83
2022-09-12	13:12:59	2.05843	9.15631	8.83917	2699.55	FALSE	83
2022-09-12	13:13:00	3.21711	14.3103	14.4214	2715.39	1	84
2022-09-12	13:13:00	3.2424	14.4228	14.4214	2713.97	1	85
2022-09-12	13:13:00	2.42393	10.7821	14.4214	2726.17	FALSE	85
2022-09-12	13:13:00	4.0849	18.1705	14.4214	2732.14	1	86

## Sheet: MrFitz_martin_2022912130731 (2)
Date	Time	Lbs	Newtons	Total Force x time	Total Time Steps Force >13.345		**GoPro Fitting: 1257
2022-09-12	13:08:00	0.781081	3.4744	3.4744	FALSE	0			Total Force x time	2732.14
2022-09-12	13:08:00	1.59146	7.07913	7.07913	FALSE	0			Total Time Steps Force >3	86
2022-09-12	13:08:00	0.640216	2.84781	6.32221	FALSE	0
2022-09-12	13:08:00	0.437621	1.94663	9.02576	FALSE	0
2022-09-12	13:08:01	0.903321	4.01815	10.3404	FALSE	0
2022-09-12	13:08:01	0.630191	2.80322	11.829	FALSE	0
2022-09-12	13:08:01	1.41045	6.27396	16.6143	FALSE	0
2022-09-12	13:08:01	5.13823	22.8559	34.6848	1	1
2022-09-12	13:08:02	4.55558	20.2641	36.8785	1	2
2022-09-12	13:08:02	6.87253	30.5704	65.2552	1	3
2022-09-12	13:08:02	2.28027	10.1431	47.0216	FALSE	3
2022-09-12	13:08:02	1.85808	8.26511	73.5203	FALSE	3
2022-09-12	13:08:03	2.18505	9.71954	56.7411	FALSE	3
2022-09-12	13:08:03	2.03864	9.06828	82.5886	FALSE	3
2022-09-12	13:08:03	4.41655	19.6457	76.3868	1	4
2022-09-12	13:08:04	2.40719	10.7077	93.2963	FALSE	4
2022-09-12	13:08:04	4.00566	17.818	94.2048	1	5
2022-09-12	13:08:04	5.4339	24.1711	117.467	1	6
2022-09-12	13:08:04	3.68439	16.3889	110.594	1	7
2022-09-12	13:08:05	3.12042	13.8803	131.348	1	8
2022-09-12	13:08:05	1.53253	6.817	117.411	FALSE	8
2022-09-12	13:08:05	0.879046	3.91017	135.258	FALSE	8
2022-09-12	13:08:05	0.436959	1.94368	119.354	FALSE	8
2022-09-12	13:08:06	0.105153	0.467742	135.726	FALSE	8
2022-09-12	13:08:06	0.520115	2.31358	121.668	FALSE	8
2022-09-12	13:08:06	0.127952	0.569156	136.295	FALSE	8
2022-09-12	13:08:06	0.583066	2.59359	124.262	FALSE	8
2022-09-12	13:08:07	0.432328	1.92308	138.218	FALSE	8
2022-09-12	13:08:07	0.786527	3.49863	127.76	FALSE	8
2022-09-12	13:08:07	0.782659	3.48142	141.699	FALSE	8
2022-09-12	13:08:08	0.55187	2.45483	130.215	FALSE	8
2022-09-12	13:08:08	0.75416	3.35465	145.054	FALSE	8
2022-09-12	13:08:08	0.723168	3.2168	133.432	FALSE	8
2022-09-12	13:08:08	0.930242	4.1379	149.192	FALSE	8
2022-09-12	13:08:09	0.834873	3.71368	137.145	FALSE	8
2022-09-12	13:08:09	0.19813	0.881322	150.073	FALSE	8
2022-09-12	13:08:09	0.474262	2.10961	139.255	FALSE	8
2022-09-12	13:08:09	0.00530559	0.0236003	150.097	FALSE	8
2022-09-12	13:08:10	0.90902	4.0435	143.299	FALSE	8
2022-09-12	13:08:10	0.587188	2.61193	152.709	FALSE	8
2022-09-12	13:08:10	1.60866	7.15564	150.454	FALSE	8
2022-09-12	13:08:10	0.767901	3.41578	156.124	FALSE	8
2022-09-12	13:08:11	1.24531	5.53939	155.994	FALSE	8
2022-09-12	13:08:11	1.06103	4.71967	160.844	FALSE	8
2022-09-12	13:08:11	1.30169	5.79018	161.784	FALSE	8
2022-09-12	13:08:12	0.271361	1.20707	162.051	FALSE	8
2022-09-12	13:08:12	0.273041	1.21454	162.998	FALSE	8
2022-09-12	13:08:12	0.145458	0.647026	162.698	FALSE	8
2022-09-12	13:08:12	0.0854582	0.380135	163.378	FALSE	8
2022-09-12	13:08:13	0.0579264	0.257668	162.956	FALSE	8
2022-09-12	13:08:13	0.288003	1.28109	164.66	FALSE	8
2022-09-12	13:08:13	0.195433	0.869325	163.825	FALSE	8
2022-09-12	13:08:13	0.47355	2.10645	166.766	FALSE	8
2022-09-12	13:08:14	0.270751	1.20435	165.029	FALSE	8
2022-09-12	13:08:14	0.44154	1.96406	168.73	FALSE	8
2022-09-12	13:08:14	0.309784	1.37798	166.407	FALSE	8
2022-09-12	13:08:14	0.381845	1.69852	170.429	FALSE	8
2022-09-12	13:08:15	0.158079	0.703167	167.111	FALSE	8
2022-09-12	13:08:15	0.18902	0.840799	171.269	FALSE	8
2022-09-12	13:08:15	0.403779	1.79609	168.907	FALSE	8
2022-09-12	13:08:16	1.85385	8.2463	179.516	FALSE	8
2022-09-12	13:08:16	1.72419	7.66954	176.576	FALSE	8
2022-09-12	13:08:16	1.87009	8.31853	187.834	FALSE	8
2022-09-12	13:08:16	2.33095	10.3685	186.945	FALSE	8
2022-09-12	13:08:17	0.955025	4.24814	192.082	FALSE	8
2022-09-12	13:08:17	0.535127	2.38035	189.325	FALSE	8
2022-09-12	13:08:17	1.07905	4.79983	196.882	FALSE	8
2022-09-12	13:08:17	0.163982	0.729425	190.055	FALSE	8
2022-09-12	13:08:18	0.379148	1.68653	198.569	FALSE	8
2022-09-12	13:08:18	0.386527	1.71935	191.774	FALSE	8
2022-09-12	13:08:18	0.553092	2.46026	201.029	FALSE	8
2022-09-12	13:08:18	0.539147	2.39823	194.172	FALSE	8
2022-09-12	13:08:19	0.644542	2.86705	203.896	FALSE	8
2022-09-12	13:08:19	0.833855	3.70915	197.881	FALSE	8
2022-09-12	13:08:19	1.8279	8.13086	212.027	FALSE	8
2022-09-12	13:08:20	1.34719	5.99257	203.874	FALSE	8
2022-09-12	13:08:20	3.10464	13.8101	225.837	1	9
2022-09-12	13:08:20	1.5992	7.11356	210.987	FALSE	9
2022-09-12	13:08:20	2.20922	9.82705	235.664	FALSE	9
2022-09-12	13:08:21	0.429275	1.9095	212.897	FALSE	9
2022-09-12	13:08:21	0.105356	0.468645	236.133	FALSE	9
2022-09-12	13:08:21	0.945051	4.20378	217.101	FALSE	9
2022-09-12	13:08:21	1.68235	7.48343	243.616	FALSE	9
2022-09-12	13:08:22	2.51121	11.1704	228.271	FALSE	9
2022-09-12	13:08:22	2.58077	11.4798	255.096	FALSE	9
2022-09-12	13:08:22	3.23889	14.4072	242.678	1	10
2022-09-12	13:08:23	0.893295	3.97355	259.069	FALSE	10
2022-09-12	13:08:23	2.98464	13.2763	255.955	FALSE	10
2022-09-12	13:08:23	1.97335	8.77786	267.847	FALSE	10
2022-09-12	13:08:23	3.34637	14.8853	270.84	1	11
2022-09-12	13:08:24	2.2766	10.1268	277.974	FALSE	11
2022-09-12	13:08:24	2.43055	10.8116	281.651	FALSE	11
2022-09-12	13:08:24	0.745051	3.31414	281.288	FALSE	11
2022-09-12	13:08:24	0.292685	1.30192	282.953	FALSE	11
2022-09-12	13:08:25	0.144186	0.641368	281.93	FALSE	11
2022-09-12	13:08:25	0.436552	1.94187	284.895	FALSE	11
2022-09-12	13:08:25	0.669224	2.97684	284.906	FALSE	11
2022-09-12	13:08:25	3.13864	13.9613	298.857	1	12
2022-09-12	13:08:26	2.08373	9.26885	294.175	FALSE	12
2022-09-12	13:08:26	3.70663	16.4878	315.344	1	13
2022-09-12	13:08:26	0.504542	2.2443	296.42	FALSE	13
2022-09-12	13:08:27	1.87228	8.32828	323.673	FALSE	13
2022-09-12	13:08:27	0.371005	1.6503	298.07	FALSE	13
2022-09-12	13:08:27	0.92215	4.10191	327.775	FALSE	13
2022-09-12	13:08:27	0.700114	3.11425	301.184	FALSE	13
2022-09-12	13:08:28	0.537061	2.38895	330.164	FALSE	13
2022-09-12	13:08:28	0.849885	3.78046	304.965	FALSE	13
2022-09-12	13:08:28	0.100318	0.446235	330.61	FALSE	13
2022-09-12	13:08:28	0.954822	4.24724	309.212	FALSE	13
2022-09-12	13:08:29	0.372786	1.65823	332.268	FALSE	13
2022-09-12	13:08:29	0.41299	1.83706	311.049	FALSE	13
2022-09-12	13:08:29	0.430395	1.91448	334.182	FALSE	13
2022-09-12	13:08:29	0.419962	1.86807	312.917	FALSE	13
2022-09-12	13:08:30	0.362557	1.61273	335.795	FALSE	13
2022-09-12	13:08:30	0.22327	0.99315	313.91	FALSE	13
2022-09-12	13:08:30	0.484389	2.15466	337.95	FALSE	13
2022-09-12	13:08:31	0.489122	2.17571	316.086	FALSE	13
2022-09-12	13:08:31	1.1334	5.04159	342.991	FALSE	13
2022-09-12	13:08:31	0.276094	1.22812	317.314	FALSE	13
2022-09-12	13:08:31	0.162761	0.723993	343.715	FALSE	13
2022-09-12	13:08:32	0.358333	1.59394	318.908	FALSE	13
2022-09-12	13:08:32	-0.0839565	-0.373455	343.715	FALSE	13
2022-09-12	13:08:32	0.187137	0.832423	319.74	FALSE	13
2022-09-12	13:08:32	0.0741605	0.329881	344.045	FALSE	13
2022-09-12	13:08:33	0.357265	1.58919	321.329	FALSE	13
2022-09-12	13:08:33	0.114313	0.508487	344.554	FALSE	13
2022-09-12	13:08:33	0.279962	1.24533	322.575	FALSE	13
2022-09-12	13:08:33	0.111158	0.494453	345.048	FALSE	13
2022-09-12	13:08:34	0.285356	1.26932	323.844	FALSE	13
2022-09-12	13:08:34	0.0894786	0.398019	345.446	FALSE	13
2022-09-12	13:08:34	0.441183	1.96247	325.807	FALSE	13
2022-09-12	13:08:35	0.0132954	0.0591406	345.505	FALSE	13
2022-09-12	13:08:35	-0.0716409	-0.318673	325.807	FALSE	13
2022-09-12	13:08:35	-0.31215	-1.38851	345.505	FALSE	13
2022-09-12	13:08:35	-0.516374	-2.29693	325.807	FALSE	13
2022-09-12	13:08:36	-0.482684	-2.14707	345.505	FALSE	13
2022-09-12	13:08:36	-0.431692	-1.92025	325.807	FALSE	13
2022-09-12	13:08:36	-0.343295	-1.52704	345.505	FALSE	13
2022-09-12	13:08:36	-0.156628	-0.696713	325.807	FALSE	13
2022-09-12	13:08:37	0.344288	1.53146	347.037	FALSE	13
2022-09-12	13:08:37	0.295178	1.31301	327.12	FALSE	13
2022-09-12	13:08:37	0.217367	0.966892	348.004	FALSE	13
2022-09-12	13:08:37	0.24215	1.07713	328.197	FALSE	13
2022-09-12	13:08:38	0.165916	0.738028	348.742	FALSE	13
2022-09-12	13:08:38	0.316654	1.40854	329.605	FALSE	13
2022-09-12	13:08:38	0.161998	0.7206	349.462	FALSE	13
2022-09-12	13:08:39	0.83126	3.69761	333.303	FALSE	13
2022-09-12	13:08:39	1.22042	5.42867	354.891	FALSE	13
2022-09-12	13:08:39	1.01151	4.4994	337.802	FALSE	13
2022-09-12	13:08:39	0.380522	1.69264	356.584	FALSE	13
2022-09-12	13:08:40	0.430903	1.91674	339.719	FALSE	13
2022-09-12	13:08:40	0.91243	4.05867	360.642	FALSE	13
2022-09-12	13:08:40	1.20057	5.34038	345.059	FALSE	13
2022-09-12	13:08:40	2.1051	9.36391	370.006	FALSE	13
2022-09-12	13:08:41	0.498486	2.21737	347.277	FALSE	13
2022-09-12	13:08:41	0.777519	3.45856	373.465	FALSE	13
2022-09-12	13:08:41	0.362405	1.61205	348.889	FALSE	13
2022-09-12	13:08:41	1.55324	6.90912	380.374	FALSE	13
2022-09-12	13:08:42	1.3649	6.07135	354.96	FALSE	13
2022-09-12	13:08:42	2.73782	12.1784	392.552	FALSE	13
2022-09-12	13:08:42	2.59614	11.5481	366.508	FALSE	13
2022-09-12	13:08:43	1.49299	6.64112	399.193	FALSE	13
2022-09-12	13:08:43	1.99055	8.85436	375.363	FALSE	13
2022-09-12	13:08:43	2.30637	10.2592	409.453	FALSE	13
2022-09-12	13:08:43	3.69446	16.4337	391.796	1	14
2022-09-12	13:08:44	2.21314	9.84449	419.297	FALSE	14
2022-09-12	13:08:44	0.892125	3.96835	395.765	FALSE	14
2022-09-12	13:08:44	0.939198	4.17774	423.475	FALSE	14
2022-09-12	13:08:44	0.324389	1.44295	397.208	FALSE	14
2022-09-12	13:08:45	0.712023	3.16722	426.642	FALSE	14
2022-09-12	13:08:45	0.763117	3.3945	400.602	FALSE	14
2022-09-12	13:08:45	1.38648	6.16734	432.809	FALSE	14
2022-09-12	13:08:45	1.19263	5.30506	405.907	FALSE	14
2022-09-12	13:08:46	1.63986	7.29443	440.104	FALSE	14
2022-09-12	13:08:46	1.56704	6.97051	412.878	FALSE	14
2022-09-12	13:08:46	2.01528	8.96437	449.068	FALSE	14
2022-09-12	13:08:47	4.31441	19.1914	432.069	1	15
2022-09-12	13:08:47	1.90587	8.47769	457.546	FALSE	15
2022-09-12	13:08:47	1.64444	7.3148	439.384	FALSE	15
2022-09-12	13:08:47	1.55721	6.92678	464.473	FALSE	15
2022-09-12	13:08:48	0.88271	3.92647	443.31	FALSE	15
2022-09-12	13:08:48	1.2649	5.62653	470.099	FALSE	15
2022-09-12	13:08:48	0.737112	3.27882	446.589	FALSE	15
2022-09-12	13:08:48	0.838639	3.73043	473.83	FALSE	15
2022-09-12	13:08:49	0.392786	1.74719	448.336	FALSE	15
2022-09-12	13:08:49	0.305305	1.35806	475.188	FALSE	15
2022-09-12	13:08:49	0.571005	2.53994	450.876	FALSE	15
2022-09-12	13:08:49	0.424338	1.88754	477.075	FALSE	15
2022-09-12	13:08:50	0.722303	3.21295	454.089	FALSE	15
2022-09-12	13:08:50	1.45416	6.46839	483.544	FALSE	15
2022-09-12	13:08:50	1.81564	8.07633	462.166	FALSE	15
2022-09-12	13:08:51	2.18067	9.70006	493.244	FALSE	15
2022-09-12	13:08:51	1.20836	5.37503	467.541	FALSE	15
2022-09-12	13:08:51	2.51553	11.1896	504.433	FALSE	15
2022-09-12	13:08:51	0.463015	2.05958	469.6	FALSE	15
2022-09-12	13:08:52	1.02419	4.5558	508.989	FALSE	15
2022-09-12	13:08:52	0.549377	2.44374	472.044	FALSE	15
2022-09-12	13:08:52	0.255026	1.13441	510.124	FALSE	15
2022-09-12	13:08:52	0.656654	2.92093	474.965	FALSE	15
2022-09-12	13:08:53	0.199708	0.888341	511.012	FALSE	15
2022-09-12	13:08:53	0.608308	2.70588	477.671	FALSE	15
2022-09-12	13:08:53	0.187494	0.834011	511.846	FALSE	15
2022-09-12	13:08:53	0.546272	2.42993	480.101	FALSE	15
2022-09-12	13:08:54	0.299046	1.33022	513.176	FALSE	15
2022-09-12	13:08:54	0.402506	1.79043	481.891	FALSE	15
2022-09-12	13:08:54	0.379199	1.68675	514.863	FALSE	15
2022-09-12	13:08:55	0.350089	1.55727	483.448	FALSE	15
2022-09-12	13:08:55	0.601081	2.67373	517.537	FALSE	15
2022-09-12	13:08:55	0.384593	1.71075	485.159	FALSE	15
2022-09-12	13:08:55	0.738028	3.2829	520.819	FALSE	15
2022-09-12	13:08:56	0.229835	1.02235	486.181	FALSE	15
2022-09-12	13:08:56	0.790954	3.51832	524.338	FALSE	15
2022-09-12	13:08:56	0.454313	2.02088	488.202	FALSE	15
2022-09-12	13:08:56	1.02983	4.58089	528.919	FALSE	15
2022-09-12	13:08:57	0.477672	2.12478	490.327	FALSE	15
2022-09-12	13:08:57	1.13564	5.05155	533.97	FALSE	15
2022-09-12	13:08:57	0.631819	2.81046	493.138	FALSE	15
2022-09-12	13:08:58	0.860165	3.82619	537.796	FALSE	15
2022-09-12	13:08:58	0.65584	2.91731	496.055	FALSE	15
2022-09-12	13:08:58	0.672583	2.99178	540.788	FALSE	15
2022-09-12	13:08:58	1.06413	4.73346	500.788	FALSE	15
2022-09-12	13:08:59	0.381183	1.69558	542.484	FALSE	15
2022-09-12	13:08:59	0.87126	3.87554	504.664	FALSE	15
2022-09-12	13:08:59	0.567799	2.52568	545.009	FALSE	15
2022-09-12	13:08:59	1.46444	6.51412	511.178	FALSE	15
2022-09-12	13:09:00	2.15446	9.58347	554.593	FALSE	15
2022-09-12	13:09:00	4.2366	18.8452	530.023	1	16
2022-09-12	13:09:00	5.64291	25.1008	579.694	1	17
2022-09-12	13:09:00	6.14296	27.3251	557.348	1	18
2022-09-12	13:09:01	2.90591	12.9261	592.62	FALSE	18
2022-09-12	13:09:01	2.3133	10.29	567.638	FALSE	18
2022-09-12	13:09:01	1.8737	8.33459	600.954	FALSE	18
2022-09-12	13:09:02	1.26561	5.62969	573.268	FALSE	18
2022-09-12	13:09:02	2.72403	12.117	613.071	FALSE	18
2022-09-12	13:09:02	2.03375	9.04653	582.315	FALSE	18
2022-09-12	13:09:02	4.04637	17.9991	631.07	1	19
2022-09-12	13:09:03	3.83482	17.058	599.373	1	20
2022-09-12	13:09:03	4.00948	17.835	648.905	1	21
2022-09-12	13:09:03	2.7023	12.0204	611.393	FALSE	21
2022-09-12	13:09:03	0.802914	3.57152	652.477	FALSE	21
2022-09-12	13:09:04	1.342	5.96948	617.362	FALSE	21
2022-09-12	13:09:04	0.405764	1.80492	654.282	FALSE	21
2022-09-12	13:09:04	0.512583	2.28007	619.643	FALSE	21
2022-09-12	13:09:04	0.647392	2.87973	657.162	FALSE	21
2022-09-12	13:09:05	0.543372	2.41703	622.06	FALSE	21
2022-09-12	13:09:05	0.610751	2.71674	659.878	FALSE	21
2022-09-12	13:09:05	0.469122	2.08675	624.146	FALSE	21
2022-09-12	13:09:06	0.772481	3.43615	663.315	FALSE	21
2022-09-12	13:09:06	0.918028	4.08357	628.23	FALSE	21
2022-09-12	13:09:06	0.614058	2.73145	666.046	FALSE	21
2022-09-12	13:09:06	0.976247	4.34254	632.572	FALSE	21
2022-09-12	13:09:07	0.920216	4.0933	670.139	FALSE	21
2022-09-12	13:09:07	0.389071	1.73067	634.303	FALSE	21
2022-09-12	13:09:07	0.324593	1.44385	671.583	FALSE	21
2022-09-12	13:09:08	0.531209	2.36292	636.666	FALSE	21
2022-09-12	13:09:08	0.140624	0.625524	672.209	FALSE	21
2022-09-12	13:09:08	0.210853	0.937916	637.604	FALSE	21
2022-09-12	13:09:08	0.110496	0.491508	672.7	FALSE	21
2022-09-12	13:09:08	0.246018	1.09434	638.698	FALSE	21
2022-09-12	13:09:09	0.191361	0.851212	673.551	FALSE	21
2022-09-12	13:09:09	0.194975	0.867288	639.566	FALSE	21
2022-09-12	13:09:09	0.281438	1.25189	674.803	FALSE	21
2022-09-12	13:09:10	0.0160435	0.0713647	639.637	FALSE	21
2022-09-12	13:09:10	0.16673	0.741648	675.545	FALSE	21
2022-09-12	13:09:10	-0.0712338	-0.316862	639.637	FALSE	21
2022-09-12	13:09:10	0.122659	0.545612	676.091	FALSE	21
2022-09-12	13:09:11	0.111412	0.495583	640.133	FALSE	21
2022-09-12	13:09:11	0.245204	1.09072	677.181	FALSE	21
2022-09-12	13:09:11	0.287087	1.27702	641.41	FALSE	21
2022-09-12	13:09:11	0.312786	1.39133	678.573	FALSE	21
2022-09-12	13:09:12	0.225916	1.00492	642.414	FALSE	21
2022-09-12	13:09:12	0.175992	0.782848	679.355	FALSE	21
2022-09-12	13:09:12	0.101183	0.450082	642.865	FALSE	21
2022-09-12	13:09:12	0.257366	1.14482	680.5	FALSE	21
2022-09-12	13:09:13	0.059046	0.262648	643.127	FALSE	21
2022-09-12	13:09:13	0.268664	1.19507	681.695	FALSE	21
2022-09-12	13:09:13	0.0413361	0.183871	643.311	FALSE	21
2022-09-12	13:09:14	0.473041	2.10418	683.8	FALSE	21
2022-09-12	13:09:14	0.216247	0.96191	644.273	FALSE	21
2022-09-12	13:09:14	0.486221	2.16281	685.962	FALSE	21
2022-09-12	13:09:14	0.361947	1.61001	645.883	FALSE	21
2022-09-12	13:09:15	0.413397	1.83887	687.801	FALSE	21
2022-09-12	13:09:15	0.380267	1.6915	647.574	FALSE	21
2022-09-12	13:09:15	0.260827	1.16021	688.961	FALSE	21
2022-09-12	13:09:15	0.481591	2.14221	649.717	FALSE	21
2022-09-12	13:09:16	0.518791	2.30769	691.269	FALSE	21
2022-09-12	13:09:16	0.775789	3.45086	653.168	FALSE	21
2022-09-12	13:09:16	0.466018	2.07294	693.342	FALSE	21
2022-09-12	13:09:16	0.382812	1.70282	654.87	FALSE	21
2022-09-12	13:09:17	0.52897	2.35296	695.695	FALSE	21
2022-09-12	13:09:17	0.287545	1.27906	656.149	FALSE	21
2022-09-12	13:09:17	0.21813	0.970286	696.665	FALSE	21
2022-09-12	13:09:18	0.852278	3.7911	659.941	FALSE	21
2022-09-12	13:09:18	0.72388	3.21996	699.885	FALSE	21
2022-09-12	13:09:18	0.718435	3.19574	663.136	FALSE	21
2022-09-12	13:09:18	0.716959	3.18918	703.074	FALSE	21
2022-09-12	13:09:19	0.719351	3.19982	666.336	FALSE	21
2022-09-12	13:09:19	0.722354	3.21318	706.288	FALSE	21
2022-09-12	13:09:19	0.717468	3.19144	669.528	FALSE	21
2022-09-12	13:09:19	0.501285	2.22982	708.517	FALSE	21
2022-09-12	13:09:20	0.234466	1.04295	670.571	FALSE	21
2022-09-12	13:09:20	0.232532	1.03435	709.552	FALSE	21
2022-09-12	13:09:20	0.526527	2.3421	672.913	FALSE	21
2022-09-12	13:09:20	0.181539	0.807522	710.359	FALSE	21
2022-09-12	13:09:21	0.161845	0.719919	673.633	FALSE	21
2022-09-12	13:09:21	0.189173	0.841479	711.201	FALSE	21
2022-09-12	13:09:21	0.224491	0.998581	674.631	FALSE	21
2022-09-12	13:09:22	0.214059	0.952177	712.153	FALSE	21
2022-09-12	13:09:22	0.224186	0.997224	675.628	FALSE	21
2022-09-12	13:09:22	0.25986	1.15591	713.309	FALSE	21
2022-09-12	13:09:22	0.643117	2.86071	678.489	FALSE	21
2022-09-12	13:09:23	0.528359	2.35025	715.659	FALSE	21
2022-09-12	13:09:23	0.255229	1.13531	679.624	FALSE	21
2022-09-12	13:09:23	0.216705	0.963947	716.623	FALSE	21
2022-09-12	13:09:23	0.158792	0.706339	680.331	FALSE	21
2022-09-12	13:09:24	0.174618	0.776736	717.4	FALSE	21
2022-09-12	13:09:24	0.16729	0.744139	681.075	FALSE	21
2022-09-12	13:09:24	0.170598	0.758854	718.159	FALSE	21
2022-09-12	13:09:24	0.664237	2.95466	684.029	FALSE	21
2022-09-12	13:09:25	0.432634	1.92444	720.083	FALSE	21
2022-09-12	13:09:25	-0.0469081	-0.208657	684.029	FALSE	21
2022-09-12	13:09:25	0.0326338	0.145162	720.228	FALSE	21
2022-09-12	13:09:26	-0.153575	-0.683132	684.029	FALSE	21
2022-09-12	13:09:26	-0.00324403	-0.0144301	720.228	FALSE	21
2022-09-12	13:09:26	0.0543132	0.241596	684.271	FALSE	21
2022-09-12	13:09:26	0.0538552	0.239559	720.468	FALSE	21
2022-09-12	13:09:27	-0.130674	-0.581264	684.271	FALSE	21
2022-09-12	13:09:27	-0.0634985	-0.282454	720.468	FALSE	21
2022-09-12	13:09:27	0.0144659	0.0643472	684.335	FALSE	21
2022-09-12	13:09:27	0.037672	0.167573	720.635	FALSE	21
2022-09-12	13:09:28	0.0163489	0.0727232	684.408	FALSE	21
2022-09-12	13:09:28	0.173855	0.773342	721.409	FALSE	21
2022-09-12	13:09:28	0.371768	1.6537	686.062	FALSE	21
2022-09-12	13:09:28	0.588562	2.61804	724.027	FALSE	21
2022-09-12	13:09:29	0.950547	4.22822	690.29	FALSE	21
2022-09-12	13:09:29	1.74948	7.78204	731.809	FALSE	21
2022-09-12	13:09:29	2.60617	11.5928	701.883	FALSE	21
2022-09-12	13:09:30	1.48846	6.62097	738.43	FALSE	21
2022-09-12	13:09:30	2.605	11.5876	713.47	FALSE	21
2022-09-12	13:09:30	0.469224	2.0872	740.517	FALSE	21
2022-09-12	13:09:30	0.651412	2.89761	716.368	FALSE	21
2022-09-12	13:09:31	0.528512	2.35093	742.868	FALSE	21
2022-09-12	13:09:31	0.279046	1.24125	717.609	FALSE	21
2022-09-12	13:09:31	0.41355	1.83955	744.707	FALSE	21
2022-09-12	13:09:31	0.362761	1.61363	719.223	FALSE	21
2022-09-12	13:09:32	0.578639	2.5739	747.281	FALSE	21
2022-09-12	13:09:32	0.204491	0.909617	720.133	FALSE	21
2022-09-12	13:09:32	0.48098	2.1395	749.421	FALSE	21
2022-09-12	13:09:33	0.199097	0.885623	721.018	FALSE	21
2022-09-12	13:09:33	0.341845	1.52059	750.941	FALSE	21
2022-09-12	13:09:33	0.294211	1.30871	722.327	FALSE	21
2022-09-12	13:09:33	0.474008	2.10848	753.05	FALSE	21
2022-09-12	13:09:34	0.247392	1.10045	723.427	FALSE	21
2022-09-12	13:09:34	0.307036	1.36576	754.416	FALSE	21
2022-09-12	13:09:34	0.218639	0.97255	724.4	FALSE	21
2022-09-12	13:09:34	0.368613	1.63966	756.055	FALSE	21
2022-09-12	13:09:35	0.118893	0.52886	724.929	FALSE	21
2022-09-12	13:09:35	0.408766	1.81827	757.874	FALSE	21
2022-09-12	13:09:35	0.0602165	0.267855	725.197	FALSE	21
2022-09-12	13:09:35	0.312685	1.39089	759.264	FALSE	21
2022-09-12	13:09:36	1.0365	4.61056	729.807	FALSE	21
2022-09-12	13:09:36	2.6593	11.8291	771.094	FALSE	21
2022-09-12	13:09:36	2.28139	10.1481	739.955	FALSE	21
2022-09-12	13:09:37	2.84072	12.6361	783.73	FALSE	21
2022-09-12	13:09:37	1.75747	7.81758	747.773	FALSE	21
2022-09-12	13:09:37	0.97645	4.34344	788.073	FALSE	21
2022-09-12	13:09:37	0.770852	3.4289	751.202	FALSE	21
2022-09-12	13:09:38	0.722099	3.21204	791.285	FALSE	21
2022-09-12	13:09:38	1.56821	6.97571	758.177	FALSE	21
2022-09-12	13:09:38	1.69436	7.53685	798.822	FALSE	21
2022-09-12	13:09:38	3.76546	16.7495	774.927	1	22
2022-09-12	13:09:39	3.7334	16.6069	815.429	1	23
2022-09-12	13:09:39	4.15273	18.4722	793.399	1	24
2022-09-12	13:09:39	2.04342	9.08954	824.518	FALSE	24
2022-09-12	13:09:39	1.03477	4.60286	798.002	FALSE	24
2022-09-12	13:09:40	1.75228	7.79449	832.313	FALSE	24
2022-09-12	13:09:40	2.53441	11.2736	809.276	FALSE	24
2022-09-12	13:09:40	2.85899	12.7174	845.03	FALSE	24
2022-09-12	13:09:41	5.96561	26.5362	835.812	1	25
2022-09-12	13:09:41	2.44108	10.8584	855.889	FALSE	25
2022-09-12	13:09:41	3.83884	17.0759	852.888	1	26
2022-09-12	13:09:41	0.820827	3.6512	859.54	FALSE	26
2022-09-12	13:09:42	1.06607	4.74209	857.63	FALSE	26
2022-09-12	13:09:42	0.88556	3.93915	863.479	FALSE	26
2022-09-12	13:09:42	0.604186	2.68754	860.317	FALSE	26
2022-09-12	13:09:42	1.03492	4.60353	868.083	FALSE	26
2022-09-12	13:09:43	1.20225	5.34785	865.665	FALSE	26
2022-09-12	13:09:43	0.757774	3.37073	871.453	FALSE	26
2022-09-12	13:09:43	0.709326	3.15522	868.82	FALSE	26
2022-09-12	13:09:43	0.366374	1.6297	873.083	FALSE	26
2022-09-12	13:09:44	0.974415	4.33439	873.155	FALSE	26
2022-09-12	13:09:44	0.692888	3.0821	876.165	FALSE	26
2022-09-12	13:09:44	1.69156	7.5244	880.679	FALSE	26
2022-09-12	13:09:45	1.36108	6.05436	882.22	FALSE	26
2022-09-12	13:09:45	1.68057	7.47551	888.155	FALSE	26
2022-09-12	13:09:45	1.74739	7.77274	889.992	FALSE	26
2022-09-12	13:09:45	1.85971	8.27236	896.427	FALSE	26
2022-09-12	13:09:46	1.18449	5.26885	895.261	FALSE	26
2022-09-12	13:09:46	0.447087	1.98873	898.416	FALSE	26
2022-09-12	13:09:46	1.33818	5.95249	901.214	FALSE	26
2022-09-12	13:09:46	0.353651	1.57311	899.989	FALSE	26
2022-09-12	13:09:47	1.08861	4.84236	906.056	FALSE	26
2022-09-12	13:09:47	0.0640333	0.284833	900.274	FALSE	26
2022-09-12	13:09:47	0.385967	1.71686	907.773	FALSE	26
2022-09-12	13:09:47	0.949224	4.22234	904.496	FALSE	26
2022-09-12	13:09:48	0.907595	4.03716	911.81	FALSE	26
2022-09-12	13:09:48	0.355789	1.58262	906.079	FALSE	26
2022-09-12	13:09:48	0.354415	1.57651	913.386	FALSE	26
2022-09-12	13:09:49	0.401997	1.78816	907.867	FALSE	26
2022-09-12	13:09:49	0.154211	0.685961	914.072	FALSE	26
2022-09-12	13:09:49	-0.1979	-0.880299	907.867	FALSE	26
2022-09-12	13:09:49	-0.299071	-1.33033	914.072	FALSE	26
2022-09-12	13:09:50	-0.127417	-0.566776	907.867	FALSE	26
2022-09-12	13:09:50	0.29701	1.32116	915.394	FALSE	26
2022-09-12	13:09:50	0.869936	3.86965	911.736	FALSE	26
2022-09-12	13:09:50	0.549529	2.44441	917.838	FALSE	26
2022-09-12	13:09:51	0.0713106	0.317204	912.054	FALSE	26
2022-09-12	13:09:51	0.328257	1.46015	919.298	FALSE	26
2022-09-12	13:09:51	0.326272	1.45132	913.505	FALSE	26
2022-09-12	13:09:51	0.234313	1.04227	920.34	FALSE	26
2022-09-12	13:09:52	0.0836262	0.371986	913.877	FALSE	26
2022-09-12	13:09:52	0.0462216	0.205603	920.546	FALSE	26
2022-09-12	13:09:52	0.132379	0.588848	914.466	FALSE	26
2022-09-12	13:09:53	0.0438806	0.19519	920.741	FALSE	26
2022-09-12	13:09:53	-0.109402	-0.486642	914.466	FALSE	26
2022-09-12	13:09:53	-0.278969	-1.24091	920.741	FALSE	26
2022-09-12	13:09:53	-0.240292	-1.06887	914.466	FALSE	26
2022-09-12	13:09:54	-0.182277	-0.810805	920.741	FALSE	26
2022-09-12	13:09:54	-0.124872	-0.555456	914.466	FALSE	26
2022-09-12	13:09:54	-0.0445672	-0.198244	920.741	FALSE	26
2022-09-12	13:09:54	0.402812	1.79179	916.258	FALSE	26
2022-09-12	13:09:55	0.102608	0.456421	921.198	FALSE	26
2022-09-12	13:09:55	0.18271	0.812731	917.07	FALSE	26
2022-09-12	13:09:55	-0.0504705	-0.224503	921.198	FALSE	26
2022-09-12	13:09:55	0.0242877	0.108037	917.178	FALSE	26
2022-09-12	13:09:56	-0.130521	-0.580584	921.198	FALSE	26
2022-09-12	13:09:56	-0.201921	-0.898185	917.178	FALSE	26
2022-09-12	13:09:56	-0.0850251	-0.378209	921.198	FALSE	26
2022-09-12	13:09:57	0.167494	0.745047	917.923	FALSE	26
2022-09-12	13:09:57	0.1993	0.886526	922.084	FALSE	26
2022-09-12	13:09:57	0.224593	0.999035	918.922	FALSE	26
2022-09-12	13:09:57	0.325305	1.44702	923.531	FALSE	26
2022-09-12	13:09:58	0.266323	1.18466	920.107	FALSE	26
2022-09-12	13:09:58	0.284338	1.26479	924.796	FALSE	26
2022-09-12	13:09:58	0.268512	1.1944	921.302	FALSE	26
2022-09-12	13:09:58	0.417112	1.8554	926.651	FALSE	26
2022-09-12	13:09:59	0.393041	1.74832	923.05	FALSE	26
2022-09-12	13:09:59	0.326171	1.45087	928.102	FALSE	26
2022-09-12	13:09:59	0.385254	1.71369	924.764	FALSE	26
2022-09-12	13:09:59	0.46383	2.06321	930.165	FALSE	26
2022-09-12	13:10:00	0.517468	2.3018	927.065	FALSE	26
2022-09-12	13:10:00	0.453855	2.01884	932.184	FALSE	26
2022-09-12	13:10:00	0.376501	1.67475	928.74	FALSE	26
2022-09-12	13:10:01	0.37986	1.68969	933.874	FALSE	26
2022-09-12	13:10:01	0.371565	1.6528	930.393	FALSE	26
2022-09-12	13:10:01	0.36668	1.63107	935.505	FALSE	26
2022-09-12	13:10:01	0.369122	1.64193	932.035	FALSE	26
2022-09-12	13:10:02	0.384797	1.71165	937.217	FALSE	26
2022-09-12	13:10:02	0.371056	1.65053	933.685	FALSE	26
2022-09-12	13:10:02	0.370242	1.64691	938.864	FALSE	26
2022-09-12	13:10:02	0.372837	1.65845	935.344	FALSE	26
2022-09-12	13:10:03	0.370598	1.64849	940.512	FALSE	26
2022-09-12	13:10:03	0.372939	1.65891	937.003	FALSE	26
2022-09-12	13:10:03	0.37416	1.66434	942.176	FALSE	26
2022-09-12	13:10:03	0.382761	1.7026	938.705	FALSE	26
2022-09-12	13:10:04	0.373601	1.66185	943.838	FALSE	26
2022-09-12	13:10:04	0.356807	1.58715	940.292	FALSE	26
2022-09-12	13:10:04	0.53645	2.38624	946.225	FALSE	26
2022-09-12	13:10:05	0.527646	2.34707	942.64	FALSE	26
2022-09-12	13:10:05	0.976247	4.34254	950.567	FALSE	26
2022-09-12	13:10:05	2.14851	9.557	952.197	FALSE	26
2022-09-12	13:10:05	-0.0206995	-0.0920755	950.567	FALSE	26
2022-09-12	13:10:06	-0.131743	-0.586019	952.197	FALSE	26
2022-09-12	13:10:06	-0.0410048	-0.182398	950.567	FALSE	26
2022-09-12	13:10:06	0.0905982	0.402999	952.6	FALSE	26
2022-09-12	13:10:06	0.0183336	0.0815515	950.649	FALSE	26
2022-09-12	13:10:07	0.0286644	0.127505	952.727	FALSE	26
2022-09-12	13:10:07	0.296908	1.32071	951.969	FALSE	26
2022-09-12	13:10:07	0.45874	2.04057	954.768	FALSE	26
2022-09-12	13:10:08	0.0344659	0.153311	952.123	FALSE	26
2022-09-12	13:10:08	-0.013015	-0.0578933	954.768	FALSE	26
2022-09-12	13:10:08	0.0132954	0.0591406	952.182	FALSE	26
2022-09-12	13:10:08	-0.0619717	-0.275663	954.768	FALSE	26
2022-09-12	13:10:09	-0.0635493	-0.28268	952.182	FALSE	26
2022-09-12	13:10:09	-0.271641	-1.20831	954.768	FALSE	26
2022-09-12	13:10:09	-0.396425	-1.76338	952.182	FALSE	26
2022-09-12	13:10:09	-0.279783	-1.24453	954.768	FALSE	26
2022-09-12	13:10:10	-0.177239	-0.788395	952.182	FALSE	26
2022-09-12	13:10:10	0.0704964	0.313582	955.081	FALSE	26
2022-09-12	13:10:10	0.36958	1.64397	953.826	FALSE	26
2022-09-12	13:10:10	0.0974175	0.433333	955.515	FALSE	26
2022-09-12	13:10:11	0.331463	1.47441	955.3	FALSE	26
2022-09-12	13:10:11	0.192786	0.857551	956.372	FALSE	26
2022-09-12	13:10:11	0.349478	1.55455	956.855	FALSE	26
2022-09-12	13:10:12	0.268359	1.19371	957.566	FALSE	26
2022-09-12	13:10:12	0.650649	2.89422	959.749	FALSE	26
2022-09-12	13:10:12	1.51976	6.7602	964.326	FALSE	26
2022-09-12	13:10:12	2.30714	10.2626	970.012	FALSE	26
2022-09-12	13:10:13	2.11665	9.41528	973.741	FALSE	26
2022-09-12	13:10:13	1.93635	8.61327	978.625	FALSE	26
2022-09-12	13:10:13	1.20037	5.33949	979.081	FALSE	26
2022-09-12	13:10:13	0.541641	2.40933	981.034	FALSE	26
2022-09-12	13:10:14	0.501845	2.23231	981.313	FALSE	26
2022-09-12	13:10:14	0.405764	1.80492	982.839	FALSE	26
2022-09-12	13:10:14	0.344593	1.53282	982.846	FALSE	26
2022-09-12	13:10:14	0.395534	1.75941	984.598	FALSE	26
2022-09-12	13:10:15	0.212481	0.945158	983.791	FALSE	26
2022-09-12	13:10:15	0.535585	2.38239	986.981	FALSE	26
2022-09-12	13:10:15	0.680114	3.02528	986.816	FALSE	26
2022-09-12	13:10:16	0.33584	1.49388	988.475	FALSE	26
2022-09-12	13:10:16	0.426679	1.89795	988.714	FALSE	26
2022-09-12	13:10:16	0.14958	0.665362	989.14	FALSE	26
2022-09-12	13:10:16	0.513906	2.28596	991	FALSE	26
2022-09-12	13:10:17	0.457112	2.03333	991.173	FALSE	26
2022-09-12	13:10:17	2.3705	10.5445	1001.54	FALSE	26
2022-09-12	13:10:17	1.01487	4.51434	995.688	FALSE	26
2022-09-12	13:10:17	2.27838	10.1347	1011.68	FALSE	26
2022-09-12	13:10:18	1.78597	7.94435	1003.63	FALSE	26
2022-09-12	13:10:18	2.10536	9.36506	1021.04	FALSE	26
2022-09-12	13:10:18	1.46444	6.51412	1010.15	FALSE	26
2022-09-12	13:10:18	2.482	11.0404	1032.08	FALSE	26
2022-09-12	13:10:19	1.74882	7.7791	1017.93	FALSE	26
2022-09-12	13:10:19	2.19767	9.77568	1041.86	FALSE	26
2022-09-12	13:10:19	1.22673	5.45674	1023.38	FALSE	26
2022-09-12	13:10:20	0.971463	4.32126	1046.18	FALSE	26
2022-09-12	13:10:20	0.340725	1.51561	1024.9	FALSE	26
2022-09-12	13:10:20	0.507392	2.25698	1048.44	FALSE	26
2022-09-12	13:10:20	0.811616	3.61023	1028.51	FALSE	26
2022-09-12	13:10:21	1.61426	7.18055	1055.62	FALSE	26
2022-09-12	13:10:21	0.879148	3.91063	1032.42	FALSE	26
2022-09-12	13:10:21	0.349835	1.55614	1057.18	FALSE	26
2022-09-12	13:10:21	0.775178	3.44815	1035.87	FALSE	26
2022-09-12	13:10:22	0.456756	2.03174	1059.21	FALSE	26
2022-09-12	13:10:22	0.257824	1.14685	1037.01	FALSE	26
2022-09-12	13:10:22	0.405764	1.80492	1061.01	FALSE	26
2022-09-12	13:10:22	0.261794	1.16451	1038.18	FALSE	26
2022-09-12	13:10:23	0.628461	2.79552	1063.81	FALSE	26
2022-09-12	13:10:23	0.407646	1.81329	1039.99	FALSE	26
2022-09-12	13:10:23	0.543728	2.41861	1066.23	FALSE	26
2022-09-12	13:10:24	0.970293	4.31606	1044.31	FALSE	26
2022-09-12	13:10:24	0.829885	3.69149	1069.92	FALSE	26
2022-09-12	13:10:24	0.939148	4.17752	1048.48	FALSE	26
2022-09-12	13:10:24	0.627443	2.79099	1072.71	FALSE	26
2022-09-12	13:10:25	0.440725	1.96043	1050.45	FALSE	26
2022-09-12	13:10:25	0.413651	1.84	1074.55	FALSE	26
2022-09-12	13:10:25	0.45187	2.01001	1052.46	FALSE	26
2022-09-12	13:10:25	0.310751	1.38228	1075.93	FALSE	26
2022-09-12	13:10:26	0.284746	1.26661	1053.72	FALSE	26
2022-09-12	13:10:26	0.360013	1.60141	1077.53	FALSE	26
2022-09-12	13:10:26	0.249835	1.11132	1054.83	FALSE	26
2022-09-12	13:10:26	0.199402	0.88698	1078.42	FALSE	26
2022-09-12	13:10:27	0.30215	1.34402	1056.18	FALSE	26
2022-09-12	13:10:27	0.211107	0.939046	1079.36	FALSE	26
2022-09-12	13:10:27	0.24673	1.0975	1057.27	FALSE	26
2022-09-12	13:10:28	0.185713	0.826089	1080.18	FALSE	26
2022-09-12	13:10:28	0.187646	0.834687	1058.11	FALSE	26
2022-09-12	13:10:28	0.246629	1.09706	1081.28	FALSE	26
2022-09-12	13:10:28	0.101082	0.449633	1058.56	FALSE	26
2022-09-12	13:10:29	0.152583	0.67872	1081.96	FALSE	26
2022-09-12	13:10:29	0.149173	0.663551	1059.22	FALSE	26
2022-09-12	13:10:29	0.275229	1.22427	1083.18	FALSE	26
2022-09-12	13:10:29	0.20215	0.899204	1060.12	FALSE	26
2022-09-12	13:10:30	0.257824	1.14685	1084.33	FALSE	26
2022-09-12	13:10:30	0.310903	1.38296	1061.5	FALSE	26
2022-09-12	13:10:30	0.531769	2.36541	1086.7	FALSE	26
2022-09-12	13:10:30	0.564033	2.50893	1064.01	FALSE	26
2022-09-12	13:10:31	0.380522	1.69264	1088.39	FALSE	26
2022-09-12	13:10:31	0.546069	2.42902	1066.44	FALSE	26
2022-09-12	13:10:31	0.912277	4.05799	1092.45	FALSE	26
2022-09-12	13:10:32	0.365305	1.62495	1068.07	FALSE	26
2022-09-12	13:10:32	0.55757	2.48018	1094.93	FALSE	26
2022-09-12	13:10:32	0.366629	1.63084	1069.7	FALSE	26
2022-09-12	13:10:32	1.57309	6.99742	1101.93	FALSE	26
2022-09-12	13:10:33	0.877672	3.90406	1073.6	FALSE	26
2022-09-12	13:10:33	2.49976	11.1194	1113.04	FALSE	26
2022-09-12	13:10:33	1.13772	5.06081	1078.66	FALSE	26
2022-09-12	13:10:33	2.77182	12.3296	1125.37	FALSE	26
2022-09-12	13:10:34	1.0138	4.50959	1083.17	FALSE	26
2022-09-12	13:10:34	1.25126	5.56585	1130.94	FALSE	26
2022-09-12	13:10:34	1.0336	4.59766	1087.77	FALSE	26
2022-09-12	13:10:34	0.905	4.02562	1134.97	FALSE	26
2022-09-12	13:10:35	2.02836	9.02255	1096.79	FALSE	26
2022-09-12	13:10:35	0.708155	3.15002	1138.12	FALSE	26
2022-09-12	13:10:35	0.434873	1.9344	1098.73	FALSE	26
2022-09-12	13:10:36	0.410852	1.82755	1139.94	FALSE	26
2022-09-12	13:10:36	0.125814	0.559646	1099.29	FALSE	26
2022-09-12	13:10:36	0.45869	2.04034	1141.98	FALSE	26
2022-09-12	13:10:36	0.124033	0.551724	1099.84	FALSE	26
2022-09-12	13:10:37	-0.180343	-0.802202	1141.98	FALSE	26
2022-09-12	13:10:37	-0.470063	-2.09093	1099.84	FALSE	26
2022-09-12	13:10:37	-0.512302	-2.27882	1141.98	FALSE	26
2022-09-12	13:10:37	-0.39332	-1.74957	1099.84	FALSE	26
2022-09-12	13:10:38	-0.175152	-0.779111	1141.98	FALSE	26
2022-09-12	13:10:38	0.25528	1.13554	1100.97	FALSE	26
2022-09-12	13:10:38	0.360827	1.60503	1143.59	FALSE	26
2022-09-12	13:10:38	0.471972	2.09943	1103.07	FALSE	26
2022-09-12	13:10:39	0.581081	2.58476	1146.17	FALSE	26
2022-09-12	13:10:39	0.500114	2.22461	1105.3	FALSE	26
2022-09-12	13:10:39	0.452023	2.01069	1148.18	FALSE	26
2022-09-12	13:10:40	0.470038	2.09082	1107.39	FALSE	26
2022-09-12	13:10:40	0.393906	1.75217	1149.94	FALSE	26
2022-09-12	13:10:40	0.420725	1.87147	1109.26	FALSE	26
2022-09-12	13:10:40	0.311158	1.38409	1151.32	FALSE	26
2022-09-12	13:10:41	0.486323	2.16326	1111.42	FALSE	26
2022-09-12	13:10:41	0.391921	1.74334	1153.06	FALSE	26
2022-09-12	13:10:41	0.430344	1.91426	1113.34	FALSE	26
2022-09-12	13:10:41	0.381794	1.6983	1154.76	FALSE	26
2022-09-12	13:10:42	0.431107	1.91765	1115.26	FALSE	26
2022-09-12	13:10:42	0.494109	2.1979	1156.96	FALSE	26
2022-09-12	13:10:42	0.408919	1.81895	1117.08	FALSE	26
2022-09-12	13:10:43	0.532532	2.36881	1159.33	FALSE	26
2022-09-12	13:10:43	0.523168	2.32716	1119.4	FALSE	26
2022-09-12	13:10:43	0.322608	1.43502	1160.76	FALSE	26
2022-09-12	13:10:43	0.55131	2.45234	1121.85	FALSE	26
2022-09-12	13:10:44	0.19813	0.881322	1161.64	FALSE	26
2022-09-12	13:10:44	0.456247	2.02948	1123.88	FALSE	26
2022-09-12	13:10:44	0.278792	1.24012	1162.89	FALSE	26
2022-09-12	13:10:44	0.583626	2.59609	1126.48	FALSE	26
2022-09-12	13:10:45	0.439402	1.95455	1164.84	FALSE	26
2022-09-12	13:10:45	0.847646	3.7705	1130.25	FALSE	26
2022-09-12	13:10:45	1.12902	5.02211	1169.86	FALSE	26
2022-09-12	13:10:45	0.966323	4.2984	1134.55	FALSE	26
2022-09-12	13:10:46	1.02698	4.56821	1174.43	FALSE	26
2022-09-12	13:10:46	0.463117	2.06004	1136.61	FALSE	26
2022-09-12	13:10:46	0.615687	2.7387	1177.17	FALSE	26
2022-09-12	13:10:47	0.43813	1.94889	1138.56	FALSE	26
2022-09-12	13:10:47	0.587901	2.6151	1179.78	FALSE	26
2022-09-12	13:10:47	1.1735	5.21996	1143.78	FALSE	26
2022-09-12	13:10:47	2.01238	8.95147	1188.74	FALSE	26
2022-09-12	13:10:48	3.11263	13.8456	1157.62	1	27
2022-09-12	13:10:48	2.69406	11.9837	1200.72	FALSE	27
2022-09-12	13:10:48	3.41976	15.2118	1172.84	1	28
2022-09-12	13:10:48	1.19462	5.31391	1206.03	FALSE	28
2022-09-12	13:10:49	1.14622	5.09862	1177.93	FALSE	28
2022-09-12	13:10:49	0.92902	4.13247	1210.17	FALSE	28
2022-09-12	13:10:49	0.44897	1.99711	1179.93	FALSE	28
2022-09-12	13:10:49	0.671412	2.98657	1213.15	FALSE	28
2022-09-12	13:10:50	0.691209	3.07464	1183.01	FALSE	28
2022-09-12	13:10:50	1.17162	5.2116	1218.36	FALSE	28
2022-09-12	13:10:50	1.5019	6.68075	1189.69	FALSE	28
2022-09-12	13:10:51	1.12902	5.02211	1223.39	FALSE	28
2022-09-12	13:10:51	1.63833	7.28762	1196.97	FALSE	28
2022-09-12	13:10:51	0.654313	2.91052	1226.3	FALSE	28
2022-09-12	13:10:51	1.39304	6.19652	1203.17	FALSE	28
2022-09-12	13:10:52	0.840165	3.73722	1230.03	FALSE	28
2022-09-12	13:10:52	3.26342	14.5163	1217.69	1	29
2022-09-12	13:10:52	1.98439	8.82696	1238.86	FALSE	29
2022-09-12	13:10:52	5.35497	23.82	1241.51	1	30
2022-09-12	13:10:53	1.24775	5.55024	1244.41	FALSE	30
2022-09-12	13:10:53	0.663779	2.95262	1244.46	FALSE	30
2022-09-12	13:10:53	0.587239	2.61216	1247.02	FALSE	30
2022-09-12	13:10:53	0.354415	1.57651	1246.04	FALSE	30
2022-09-12	13:10:54	0.821539	3.65437	1250.68	FALSE	30
2022-09-12	13:10:54	0.606883	2.69954	1248.74	FALSE	30
2022-09-12	13:10:54	0.727596	3.23649	1253.91	FALSE	30
2022-09-12	13:10:55	1.1993	5.33473	1254.07	FALSE	30
2022-09-12	13:10:55	1.14836	5.10813	1259.02	FALSE	30
2022-09-12	13:10:55	1.56174	6.94693	1261.02	FALSE	30
2022-09-12	13:10:55	3.35803	14.9372	1273.96	1	31
2022-09-12	13:10:56	1.99345	8.86726	1269.88	FALSE	31
2022-09-12	13:10:56	3.72836	16.5845	1290.54	1	32
2022-09-12	13:10:56	1.7992	8.0032	1277.89	FALSE	32
2022-09-12	13:10:56	2.65905	11.828	1302.37	FALSE	32
2022-09-12	13:10:57	2.16704	9.63943	1287.53	FALSE	32
2022-09-12	13:10:57	1.49614	6.65513	1309.03	FALSE	32
2022-09-12	13:10:57	1.18154	5.25573	1292.78	FALSE	32
2022-09-12	13:10:57	0.558944	2.48629	1311.51	FALSE	32
2022-09-12	13:10:58	1.13467	5.04724	1297.83	FALSE	32
2022-09-12	13:10:58	0.916654	4.07746	1315.59	FALSE	32
2022-09-12	13:10:58	0.925916	4.11866	1301.95	FALSE	32
2022-09-12	13:10:59	1.38368	6.15489	1321.75	FALSE	32
2022-09-12	13:10:59	2.41747	10.7534	1312.7	FALSE	32
2022-09-12	13:10:59	2.05818	9.1552	1330.9	FALSE	32
2022-09-12	13:10:59	2.25492	10.0303	1322.73	FALSE	32
2022-09-12	13:11:00	2.04062	9.07709	1339.98	FALSE	32
2022-09-12	13:11:00	2.48642	11.0601	1333.79	FALSE	32
2022-09-12	13:11:00	0.53126	2.36315	1342.34	FALSE	32
2022-09-12	13:11:00	1.56546	6.96348	1340.76	FALSE	32
2022-09-12	13:11:01	1.06276	4.72737	1347.07	FALSE	32
2022-09-12	13:11:01	1.93665	8.61461	1349.37	FALSE	32
2022-09-12	13:11:01	1.19838	5.33063	1352.4	FALSE	32
2022-09-12	13:11:01	0.880318	3.91583	1353.29	FALSE	32
2022-09-12	13:11:02	1.10897	4.93292	1357.33	FALSE	32
2022-09-12	13:11:02	0.283931	1.26298	1354.55	FALSE	32
2022-09-12	13:11:02	0.974262	4.33371	1361.67	FALSE	32
2022-09-12	13:11:03	0.498588	2.21782	1356.77	FALSE	32
2022-09-12	13:11:03	1.41686	6.30248	1367.97	FALSE	32
2022-09-12	13:11:03	0.230853	1.02688	1357.79	FALSE	32
2022-09-12	13:11:03	0.27416	1.21952	1369.19	FALSE	32
2022-09-12	13:11:04	0.21584	0.960099	1358.75	FALSE	32
2022-09-12	13:11:04	0.402964	1.79246	1370.98	FALSE	32
2022-09-12	13:11:04	0.175229	0.779454	1359.53	FALSE	32
2022-09-12	13:11:04	0.374873	1.66751	1372.65	FALSE	32
2022-09-12	13:11:05	0.250751	1.11539	1360.65	FALSE	32
2022-09-12	13:11:05	0.224237	0.997451	1373.64	FALSE	32
2022-09-12	13:11:05	0.216451	0.962817	1361.61	FALSE	32
2022-09-12	13:11:05	0.222252	0.988621	1374.63	FALSE	32
2022-09-12	13:11:06	0.232074	1.03231	1362.64	FALSE	32
2022-09-12	13:11:06	0.238282	1.05993	1375.69	FALSE	32
2022-09-12	13:11:06	0.239708	1.06627	1363.71	FALSE	32
2022-09-12	13:11:07	0.238639	1.06151	1376.75	FALSE	32
2022-09-12	13:11:07	0.238842	1.06242	1364.77	FALSE	32
2022-09-12	13:11:07	0.234669	1.04385	1377.8	FALSE	32
2022-09-12	13:11:08	0.22902	1.01873	1365.79	FALSE	32
2022-09-12	13:11:08	0.185458	0.824954	1378.62	FALSE	32
2022-09-12	13:11:08	0.307545	1.36802	1367.16	FALSE	32
2022-09-12	13:11:08	0.420318	1.86966	1380.49	FALSE	32
2022-09-12	13:11:08	0.931819	4.14492	1371.3	FALSE	32
2022-09-12	13:11:09	0.684847	3.04634	1383.54	FALSE	32
2022-09-12	13:11:09	0.531311	2.36338	1373.67	FALSE	32
2022-09-12	13:11:09	0.348613	1.5507	1385.09	FALSE	32
2022-09-12	13:11:09	0.420216	1.8692	1375.54	FALSE	32
2022-09-12	13:11:10	0.381489	1.69694	1386.79	FALSE	32
2022-09-12	13:11:10	0.256909	1.14278	1376.68	FALSE	32
2022-09-12	13:11:10	0.15701	0.698412	1387.49	FALSE	32
2022-09-12	13:11:11	0.145967	0.64929	1377.33	FALSE	32
2022-09-12	13:11:11	0.148308	0.659704	1388.15	FALSE	32
2022-09-12	13:11:11	0.10785	0.479738	1377.81	FALSE	32
2022-09-12	13:11:11	0.531463	2.36405	1390.51	FALSE	32
2022-09-12	13:11:12	0.329886	1.4674	1379.28	FALSE	32
2022-09-12	13:11:12	1.99487	8.87358	1399.38	FALSE	32
2022-09-12	13:11:12	0.403219	1.7936	1381.07	FALSE	32
2022-09-12	13:11:12	0.586527	2.60899	1401.99	FALSE	32
2022-09-12	13:11:13	0.207392	0.922521	1381.99	FALSE	32
2022-09-12	13:11:13	0.393397	1.74991	1403.74	FALSE	32
2022-09-12	13:11:13	0.19986	0.889017	1382.88	FALSE	32
2022-09-12	13:11:14	0.237061	1.05449	1404.8	FALSE	32
2022-09-12	13:11:14	-0.127163	-0.565646	1382.88	FALSE	32
2022-09-12	13:11:14	-0.0963229	-0.428464	1404.8	FALSE	32
2022-09-12	13:11:14	0.0487661	0.216921	1383.1	FALSE	32
2022-09-12	13:11:15	0.139097	0.618731	1405.42	FALSE	32
2022-09-12	13:11:15	0.384644	1.71097	1384.81	FALSE	32
2022-09-12	13:11:15	0.49757	2.21329	1407.63	FALSE	32
2022-09-12	13:11:15	0.334873	1.48958	1386.3	FALSE	32
2022-09-12	13:11:16	0.450903	2.00571	1409.63	FALSE	32
2022-09-12	13:11:16	0.461285	2.05189	1388.35	FALSE	32
2022-09-12	13:11:16	0.654567	2.91164	1412.55	FALSE	32
2022-09-12	13:11:16	0.62215	2.76745	1391.12	FALSE	32
2022-09-12	13:11:17	0.444084	1.97537	1414.52	FALSE	32
2022-09-12	13:11:17	0.980878	4.36314	1395.48	FALSE	32
2022-09-12	13:11:17	0.851972	3.78974	1418.31	FALSE	32
2022-09-12	13:11:18	1.58378	7.04497	1402.53	FALSE	32
2022-09-12	13:11:18	2.58205	11.4855	1429.8	FALSE	32
2022-09-12	13:11:18	3.59533	15.9927	1418.52	1	33
2022-09-12	13:11:18	3.03233	13.4884	1443.28	1	34
2022-09-12	13:11:19	3.84836	17.1183	1435.64	1	35
2022-09-12	13:11:19	5.08744	22.63	1465.91	1	36
2022-09-12	13:11:19	2.48169	11.0391	1446.68	FALSE	36
2022-09-12	13:11:19	3.15736	14.0446	1479.96	1	37
2022-09-12	13:11:20	1.62016	7.2068	1453.88	FALSE	37
2022-09-12	13:11:20	2.57284	11.4445	1491.4	FALSE	37
2022-09-12	13:11:20	2.2648	10.0743	1463.96	FALSE	37
2022-09-12	13:11:20	1.59324	7.08705	1498.49	FALSE	37
2022-09-12	13:11:21	1.96195	8.72715	1472.68	FALSE	37
2022-09-12	13:11:21	2.3508	10.4568	1508.95	FALSE	37
2022-09-12	13:11:21	1.70607	7.58894	1480.27	FALSE	37
2022-09-12	13:11:22	2.7681	12.3131	1521.26	FALSE	37
2022-09-12	13:11:22	1.50429	6.69138	1486.97	FALSE	37
2022-09-12	13:11:22	1.78994	7.96201	1529.22	FALSE	37
2022-09-12	13:11:22	2.5366	11.2833	1498.25	FALSE	37
2022-09-12	13:11:23	0.809987	3.60298	1532.83	FALSE	37
2022-09-12	13:11:23	1.53182	6.81384	1505.06	FALSE	37
2022-09-12	13:11:23	0.78042	3.47146	1536.3	FALSE	37
2022-09-12	13:11:23	0.434568	1.93305	1507	FALSE	37
2022-09-12	13:11:24	0.402099	1.78862	1538.09	FALSE	37
2022-09-12	13:11:24	0.301998	1.34335	1508.34	FALSE	37
2022-09-12	13:11:24	0.382099	1.69965	1539.79	FALSE	37
2022-09-12	13:11:24	0.157519	0.700676	1509.04	FALSE	37
2022-09-12	13:11:25	0.220776	0.982056	1540.77	FALSE	37
2022-09-12	13:11:25	0.224797	0.999942	1510.04	FALSE	37
2022-09-12	13:11:25	0.701438	3.12014	1543.89	FALSE	37
2022-09-12	13:11:26	1.73034	7.6969	1517.74	FALSE	37
2022-09-12	13:11:26	0.515025	2.29093	1546.18	FALSE	37
2022-09-12	13:11:26	2.7481	12.2241	1529.96	FALSE	37
2022-09-12	13:11:26	1.07971	4.80277	1550.98	FALSE	37
2022-09-12	13:11:27	2.74205	12.1972	1542.16	FALSE	37
2022-09-12	13:11:27	3.64271	16.2035	1567.18	1	38
2022-09-12	13:11:27	4.39492	19.5495	1561.71	1	39
2022-09-12	13:11:27	9.24199	41.1102	1608.29	1	40
2022-09-12	13:11:28	3.94795	17.5613	1579.27	1	41
2022-09-12	13:11:28	1.03915	4.62235	1612.92	FALSE	41
2022-09-12	13:11:28	2.12312	9.44406	1588.71	FALSE	41
2022-09-12	13:11:28	2.12932	9.47164	1622.39	FALSE	41
2022-09-12	13:11:29	1.83472	8.1612	1596.87	FALSE	41
2022-09-12	13:11:29	0.669682	2.97888	1625.37	FALSE	41
2022-09-12	13:11:29	0.826323	3.67565	1600.55	FALSE	41
2022-09-12	13:11:30	1.11828	4.97433	1630.34	FALSE	41
2022-09-12	13:11:30	0.456654	2.03129	1602.58	FALSE	41
2022-09-12	13:11:30	0.343982	1.5301	1631.87	FALSE	41
2022-09-12	13:11:30	0.497723	2.21397	1604.79	FALSE	41
2022-09-12	13:11:31	0.290649	1.29286	1633.17	FALSE	41
2022-09-12	13:11:31	0.42215	1.87781	1606.67	FALSE	41
2022-09-12	13:11:31	0.248562	1.10565	1634.27	FALSE	41
2022-09-12	13:11:31	0.215127	0.956928	1607.63	FALSE	41
2022-09-12	13:11:32	0.335076	1.49049	1635.76	FALSE	41
2022-09-12	13:11:32	1.20485	5.35941	1612.99	FALSE	41
2022-09-12	13:11:32	1.4336	6.37694	1642.14	FALSE	41
2022-09-12	13:11:32	1.83737	8.17299	1621.16	FALSE	41
2022-09-12	13:11:33	2.50235	11.131	1653.27	FALSE	41
2022-09-12	13:11:33	3.20703	14.2655	1635.43	1	42
2022-09-12	13:11:33	3.9649	17.6367	1670.91	1	43
2022-09-12	13:11:34	3.29441	14.6542	1650.08	1	44
2022-09-12	13:11:34	5.91182	26.297	1697.2	1	45
2022-09-12	13:11:34	1.69309	7.5312	1657.61	FALSE	45
2022-09-12	13:11:34	0.526425	2.34164	1699.54	FALSE	45
2022-09-12	13:11:35	0.604237	2.68777	1660.3	FALSE	45
2022-09-12	13:11:35	0.717316	3.19077	1702.74	FALSE	45
2022-09-12	13:11:35	0.714211	3.17695	1663.48	FALSE	45
2022-09-12	13:11:35	0.718435	3.19574	1705.93	FALSE	45
2022-09-12	13:11:36	0.716807	3.1885	1666.67	FALSE	45
2022-09-12	13:11:36	0.724186	3.22132	1709.15	FALSE	45
2022-09-12	13:11:36	0.52439	2.33259	1669	FALSE	45
2022-09-12	13:11:36	0.694008	3.08709	1712.24	FALSE	45
2022-09-12	13:11:37	0.715738	3.18375	1672.18	FALSE	45
2022-09-12	13:11:37	0.727087	3.23423	1715.47	FALSE	45
2022-09-12	13:11:37	0.719097	3.19869	1675.38	FALSE	45
2022-09-12	13:11:38	0.71813	3.19439	1718.67	FALSE	45
2022-09-12	13:11:38	0.628664	2.79642	1678.18	FALSE	45
2022-09-12	13:11:38	0.241489	1.07419	1719.74	FALSE	45
2022-09-12	13:11:38	0.234313	1.04227	1679.22	FALSE	45
2022-09-12	13:11:39	1.15696	5.14639	1724.89	FALSE	45
2022-09-12	13:11:39	0.681285	3.03049	1682.25	FALSE	45
2022-09-12	13:11:39	0.249886	1.11154	1726	FALSE	45
2022-09-12	13:11:39	0.51813	2.30475	1684.55	FALSE	45
2022-09-12	13:11:40	2.19111	9.7465	1735.75	FALSE	45
2022-09-12	13:11:40	1.27701	5.6804	1690.23	FALSE	45
2022-09-12	13:11:40	1.77894	7.91308	1743.66	FALSE	45
2022-09-12	13:11:40	0.819504	3.64532	1693.88	FALSE	45
2022-09-12	13:11:41	1.56408	6.95734	1750.62	FALSE	45
2022-09-12	13:11:41	0.759555	3.37865	1697.26	FALSE	45
2022-09-12	13:11:41	1.38571	6.16392	1756.78	FALSE	45
2022-09-12	13:11:42	0.941947	4.18997	1701.45	FALSE	45
2022-09-12	13:11:42	1.60291	7.13006	1763.91	FALSE	45
2022-09-12	13:11:42	2.83782	12.6232	1714.07	FALSE	45
2022-09-12	13:11:42	1.69167	7.52489	1771.44	FALSE	45
2022-09-12	13:11:43	1.00001	4.44824	1718.52	FALSE	45
2022-09-12	13:11:43	1.20449	5.35781	1776.79	FALSE	45
2022-09-12	13:11:43	1.67055	7.43094	1725.95	FALSE	45
2022-09-12	13:11:43	1.0192	4.53361	1781.33	FALSE	45
2022-09-12	13:11:44	1.47207	6.54806	1732.5	FALSE	45
2022-09-12	13:11:44	1.3966	6.21236	1787.54	FALSE	45
2022-09-12	13:11:44	0.869733	3.86875	1736.37	FALSE	45
2022-09-12	13:11:45	0.619097	2.75387	1790.29	FALSE	45
2022-09-12	13:11:45	0.744797	3.31301	1739.68	FALSE	45
2022-09-12	13:11:45	0.726781	3.23287	1793.53	FALSE	45
2022-09-12	13:11:45	0.717468	3.19144	1742.87	FALSE	45
2022-09-12	13:11:46	0.395534	1.75941	1795.29	FALSE	45
2022-09-12	13:11:46	0.708053	3.14956	1746.02	FALSE	45
2022-09-12	13:11:46	1.511	6.72123	1802.01	FALSE	45
2022-09-12	13:11:46	0.407036	1.81058	1747.83	FALSE	45
2022-09-12	13:11:47	0.223575	0.994506	1803	FALSE	45
2022-09-12	13:11:47	0.302099	1.3438	1749.18	FALSE	45
2022-09-12	13:11:47	0.229071	1.01895	1804.02	FALSE	45
2022-09-12	13:11:47	0.550394	2.44826	1751.62	FALSE	45
2022-09-12	13:11:48	1.46983	6.5381	1810.56	FALSE	45
2022-09-12	13:11:48	0.805916	3.58488	1755.21	FALSE	45
2022-09-12	13:11:48	0.173092	0.769948	1811.33	FALSE	45
2022-09-12	13:11:49	0.352074	1.5661	1756.78	FALSE	45
2022-09-12	13:11:49	0.168308	0.748668	1812.08	FALSE	45
2022-09-12	13:11:49	0.226272	1.0065	1757.78	FALSE	45
2022-09-12	13:11:49	0.125051	0.556252	1812.63	FALSE	45
2022-09-12	13:11:50	0.304135	1.35285	1759.13	FALSE	45
2022-09-12	13:11:50	0.120216	0.534745	1813.17	FALSE	45
2022-09-12	13:11:50	-0.0507249	-0.225635	1759.13	FALSE	45
2022-09-12	13:11:50	-0.189351	-0.842271	1813.17	FALSE	45
2022-09-12	13:11:51	0.0116669	0.0518967	1759.19	FALSE	45
2022-09-12	13:11:51	-0.0491473	-0.218617	1813.17	FALSE	45
2022-09-12	13:11:51	0.338079	1.50384	1760.69	FALSE	45
2022-09-12	13:11:51	2.0192	8.98181	1822.15	FALSE	45
2022-09-12	13:11:52	2.59121	11.5262	1772.22	FALSE	45
2022-09-12	13:11:52	2.4135	10.7357	1832.89	FALSE	45
2022-09-12	13:11:52	1.71706	7.63783	1779.85	FALSE	45
2022-09-12	13:11:53	2.02943	9.02731	1841.91	FALSE	45
2022-09-12	13:11:53	2.04622	9.102	1788.96	FALSE	45
2022-09-12	13:11:53	2.35976	10.4967	1852.41	FALSE	45
2022-09-12	13:11:53	1.80989	8.05075	1797.01	FALSE	45
2022-09-12	13:11:54	1.29772	5.77252	1858.18	FALSE	45
2022-09-12	13:11:54	0.862303	3.8357	1800.84	FALSE	45
2022-09-12	13:11:54	0.183219	0.814995	1859	FALSE	45
2022-09-12	13:11:54	0.523422	2.32829	1803.17	FALSE	45
2022-09-12	13:11:55	0.701743	3.12149	1862.12	FALSE	45
2022-09-12	13:11:55	1.80439	8.02629	1811.2	FALSE	45
2022-09-12	13:11:55	2.60113	11.5703	1873.69	FALSE	45
2022-09-12	13:11:55	3.38703	15.0662	1826.26	1	46
2022-09-12	13:11:56	3.03116	13.4832	1887.17	1	47
2022-09-12	13:11:56	1.35004	6.00525	1832.27	FALSE	47
2022-09-12	13:11:56	2.75024	12.2336	1899.41	FALSE	47
2022-09-12	13:11:57	0.502557	2.23547	1834.5	FALSE	47
2022-09-12	13:11:57	2.14088	9.52306	1908.93	FALSE	47
2022-09-12	13:11:57	1.34352	5.97625	1840.48	FALSE	47
2022-09-12	13:11:57	0.942557	4.19268	1913.12	FALSE	47
2022-09-12	13:11:58	1.06576	4.74071	1845.22	FALSE	47
2022-09-12	13:11:58	0.239555	1.06559	1914.19	FALSE	47
2022-09-12	13:11:58	-0.0917427	-0.40809	1845.22	FALSE	47
2022-09-12	13:11:58	-0.118409	-0.526707	1914.19	FALSE	47
2022-09-12	13:11:59	0.17243	0.767003	1845.99	FALSE	47
2022-09-12	13:11:59	0.470446	2.09264	1916.28	FALSE	47
2022-09-12	13:11:59	0.547137	2.43377	1848.42	FALSE	47
2022-09-12	13:11:59	0.326934	1.45427	1917.73	FALSE	47
2022-09-12	13:12:00	0.470395	2.09241	1850.51	FALSE	47
2022-09-12	13:12:00	0.248003	1.10317	1918.84	FALSE	47
2022-09-12	13:12:00	0.28841	1.28291	1851.8	FALSE	47
2022-09-12	13:12:01	0.265662	1.18172	1920.02	FALSE	47
2022-09-12	13:12:01	0.115484	0.513696	1852.31	FALSE	47
2022-09-12	13:12:01	0.469122	2.08675	1922.11	FALSE	47
2022-09-12	13:12:01	0.487799	2.16983	1854.48	FALSE	47
2022-09-12	13:12:02	1.14434	5.09025	1927.2	FALSE	47
2022-09-12	13:12:02	3.41981	15.212	1869.69	1	48
2022-09-12	13:12:02	2.55625	11.3707	1938.57	FALSE	48
2022-09-12	13:12:02	3.92149	17.4436	1887.14	1	49
2022-09-12	13:12:03	1.03472	4.60264	1943.17	FALSE	49
2022-09-12	13:12:03	1.9735	8.77852	1895.92	FALSE	49
2022-09-12	13:12:03	0.654415	2.91097	1946.08	FALSE	49
2022-09-12	13:12:03	0.628715	2.79665	1898.71	FALSE	49
2022-09-12	13:12:04	0.470293	2.09196	1948.17	FALSE	49
2022-09-12	13:12:04	0.299402	1.3318	1900.04	FALSE	49
2022-09-12	13:12:04	1.16709	5.19145	1953.36	FALSE	49
2022-09-12	13:12:05	1.05223	4.68053	1904.72	FALSE	49
2022-09-12	13:12:05	1.37762	6.12793	1959.49	FALSE	49
2022-09-12	13:12:05	1.08001	4.8041	1909.53	FALSE	49
2022-09-12	13:12:05	2.2937	10.2028	1969.69	FALSE	49
2022-09-12	13:12:06	2.00739	8.92927	1918.46	FALSE	49
2022-09-12	13:12:06	3.25604	14.4835	1984.18	1	50
2022-09-12	13:12:06	2.28678	10.1721	1928.63	FALSE	50
2022-09-12	13:12:06	0.973295	4.32941	1988.51	FALSE	50
2022-09-12	13:12:07	1.42525	6.3398	1934.97	FALSE	50
2022-09-12	13:12:07	0.511768	2.27645	1990.78	FALSE	50
2022-09-12	13:12:07	1.13034	5.02798	1940	FALSE	50
2022-09-12	13:12:07	0.567341	2.52365	1993.31	FALSE	50
2022-09-12	13:12:08	0.875891	3.89614	1943.89	FALSE	50
2022-09-12	13:12:08	0.684186	3.0434	1996.35	FALSE	50
2022-09-12	13:12:08	0.340165	1.51312	1945.41	FALSE	50
2022-09-12	13:12:09	0.722862	3.21543	1999.57	FALSE	50
2022-09-12	13:12:09	0.290547	1.29241	1946.7	FALSE	50
2022-09-12	13:12:09	1.35752	6.03852	2005.6	FALSE	50
2022-09-12	13:12:09	1.46531	6.51799	1953.22	FALSE	50
2022-09-12	13:12:10	2.9449	13.0995	2018.7	FALSE	50
2022-09-12	13:12:10	1.42235	6.3269	1959.54	FALSE	50
2022-09-12	13:12:10	2.89884	12.8946	2031.6	FALSE	50
2022-09-12	13:12:10	1.9448	8.65086	1968.19	FALSE	50
2022-09-12	13:12:11	3.23273	14.3798	2045.98	1	51
2022-09-12	13:12:11	4.39151	19.5343	1987.73	1	52
2022-09-12	13:12:11	2.18632	9.72519	2055.7	FALSE	52
2022-09-12	13:12:11	4.26337	18.9643	2006.69	1	53
2022-09-12	13:12:12	2.5737	11.4483	2067.15	FALSE	53
2022-09-12	13:12:12	4.35497	19.3718	2026.07	1	54
2022-09-12	13:12:12	2.26775	10.0874	2077.24	FALSE	54
2022-09-12	13:12:13	1.60296	7.13029	2033.2	FALSE	54
2022-09-12	13:12:13	0.87986	3.91379	2081.15	FALSE	54
2022-09-12	13:12:13	0.296196	1.31754	2034.51	FALSE	54
2022-09-12	13:12:13	0.903677	4.01974	2085.17	FALSE	54
2022-09-12	13:12:14	0.302048	1.34357	2035.86	FALSE	54
2022-09-12	13:12:14	0.247494	1.1009	2086.27	FALSE	54
2022-09-12	13:12:14	0.0963488	0.428579	2036.29	FALSE	54
2022-09-12	13:12:14	-0.192913	-0.858116	2086.27	FALSE	54
2022-09-12	13:12:15	-0.0787656	-0.350365	2036.29	FALSE	54
2022-09-12	13:12:15	0.188257	0.837405	2087.11	FALSE	54
2022-09-12	13:12:15	0.396959	1.76575	2038.05	FALSE	54
2022-09-12	13:12:16	0.652379	2.90191	2090.01	FALSE	54
2022-09-12	13:12:16	1.71701	7.6376	2045.69	FALSE	54
2022-09-12	13:12:16	2.11492	9.40759	2099.42	FALSE	54
2022-09-12	13:12:16	5.27675	23.472	2069.16	1	55
2022-09-12	13:12:17	5.21319	23.1893	2122.61	1	56
2022-09-12	13:12:17	4.24052	18.8627	2088.02	1	57
2022-09-12	13:12:17	1.58337	7.04315	2129.65	FALSE	57
2022-09-12	13:12:17	2.23329	9.93412	2097.96	FALSE	57
2022-09-12	13:12:18	2.04022	9.07531	2138.73	FALSE	57
2022-09-12	13:12:18	1.52032	6.76269	2104.72	FALSE	57
2022-09-12	13:12:18	1.22948	5.46897	2144.2	FALSE	57
2022-09-12	13:12:18	1.86307	8.28731	2113.01	FALSE	57
2022-09-12	13:12:19	0.786272	3.4975	2147.7	FALSE	57
2022-09-12	13:12:19	1.88683	8.393	2121.4	FALSE	57
2022-09-12	13:12:19	0.494262	2.19858	2149.89	FALSE	57
2022-09-12	13:12:20	0.374211	1.66457	2123.07	FALSE	57
2022-09-12	13:12:20	0.608206	2.70542	2152.6	FALSE	57
2022-09-12	13:12:20	0.150395	0.668987	2123.73	FALSE	57
2022-09-12	13:12:20	0.328308	1.46038	2154.06	FALSE	57
2022-09-12	13:12:21	0.521947	2.32172	2126.06	FALSE	57
2022-09-12	13:12:21	0.511972	2.27735	2156.34	FALSE	57
2022-09-12	13:12:21	0.394771	1.75602	2127.81	FALSE	57
2022-09-12	13:12:21	0.453244	2.01612	2158.35	FALSE	57
2022-09-12	13:12:22	1.17365	5.22063	2133.03	FALSE	57
2022-09-12	13:12:22	1.73935	7.73698	2166.09	FALSE	57
2022-09-12	13:12:22	3.77986	16.8136	2149.85	1	58
2022-09-12	13:12:22	3.94663	17.5554	2183.65	1	59
2022-09-12	13:12:23	8.1083	36.0673	2185.91	1	60
2022-09-12	13:12:23	4.55334	20.2542	2203.9	1	61
2022-09-12	13:12:23	3.50678	15.5989	2201.51	1	62
2022-09-12	13:12:24	2.02866	9.02389	2212.92	FALSE	62
2022-09-12	13:12:24	2.11207	9.39491	2210.91	FALSE	62
2022-09-12	13:12:24	0.860623	3.82822	2216.75	FALSE	62
2022-09-12	13:12:24	0.915229	4.07112	2214.98	FALSE	62
2022-09-12	13:12:25	0.669224	2.97684	2219.73	FALSE	62
2022-09-12	13:12:25	0.361845	1.60956	2216.59	FALSE	62
2022-09-12	13:12:25	0.585611	2.60491	2222.33	FALSE	62
2022-09-12	13:12:25	0.168919	0.751385	2217.34	FALSE	62
2022-09-12	13:12:26	0.632888	2.81521	2225.15	FALSE	62
2022-09-12	13:12:26	1.00281	4.4607	2221.8	FALSE	62
2022-09-12	13:12:26	1.46169	6.50189	2231.65	FALSE	62
2022-09-12	13:12:26	3.93212	17.4909	2239.29	1	63
2022-09-12	13:12:27	5.22734	23.2523	2254.9	1	64
2022-09-12	13:12:27	4.4279	19.6962	2258.99	1	65
2022-09-12	13:12:27	3.48352	15.4954	2270.4	1	66
2022-09-12	13:12:28	2.35884	10.4926	2269.48	FALSE	66
2022-09-12	13:12:28	0.739962	3.2915	2273.69	FALSE	66
2022-09-12	13:12:28	1.19752	5.32681	2274.81	FALSE	66
2022-09-12	13:12:28	0.48215	2.1447	2275.83	FALSE	66
2022-09-12	13:12:29	0.682761	3.03706	2277.84	FALSE	66
2022-09-12	13:12:29	0.743677	3.30802	2279.14	FALSE	66
2022-09-12	13:12:29	0.868053	3.86127	2281.7	FALSE	66
2022-09-12	13:12:29	1.67981	7.47213	2286.61	FALSE	66
2022-09-12	13:12:30	2.3364	10.3928	2292.1	FALSE	66
2022-09-12	13:12:30	3.03289	13.4909	2300.11	1	67
2022-09-12	13:12:30	1.78531	7.94142	2300.04	FALSE	67
2022-09-12	13:12:31	2.61813	11.646	2311.75	FALSE	67
2022-09-12	13:12:31	2.27976	10.1408	2310.18	FALSE	67
2022-09-12	13:12:31	2.09197	9.3055	2321.06	FALSE	67
2022-09-12	13:12:31	1.14693	5.10177	2315.28	FALSE	67
2022-09-12	13:12:32	1.32459	5.89204	2326.95	FALSE	67
2022-09-12	13:12:32	1.5308	6.8093	2322.09	FALSE	67
2022-09-12	13:12:32	1.87604	8.345	2335.29	FALSE	67
2022-09-12	13:12:32	2.20612	9.81326	2331.9	FALSE	67
2022-09-12	13:12:33	0.715025	3.18057	2338.47	FALSE	67
2022-09-12	13:12:33	0.795331	3.53779	2335.44	FALSE	67
2022-09-12	13:12:33	0.672328	2.99065	2341.47	FALSE	67
2022-09-12	13:12:33	0.975025	4.33711	2339.78	FALSE	67
2022-09-12	13:12:34	2.23833	9.95654	2351.42	FALSE	67
2022-09-12	13:12:34	2.77009	12.3219	2352.1	FALSE	67
2022-09-12	13:12:34	4.76327	21.188	2372.61	1	68
2022-09-12	13:12:34	4.91294	21.8537	2373.95	1	69
2022-09-12	13:12:35	6.27314	27.9042	2400.51	1	70
2022-09-12	13:12:35	4.68484	20.8391	2394.79	1	71
2022-09-12	13:12:35	5.82576	25.9141	2426.43	1	72
2022-09-12	13:12:36	0.941336	4.18725	2398.98	FALSE	72
2022-09-12	13:12:36	1.02612	4.56439	2430.99	FALSE	72
2022-09-12	13:12:36	0.722252	3.21272	2402.19	FALSE	72
2022-09-12	13:12:36	0.234669	1.04385	2432.04	FALSE	72
2022-09-12	13:12:37	0.538791	2.39665	2404.59	FALSE	72
2022-09-12	13:12:37	0.209428	0.931578	2432.97	FALSE	72
2022-09-12	13:12:37	0.364695	1.62224	2406.21	FALSE	72
2022-09-12	13:12:37	0.20327	0.904186	2433.87	FALSE	72
2022-09-12	13:12:38	0.267087	1.18806	2407.4	FALSE	72
2022-09-12	13:12:38	0.35528	1.58036	2435.45	FALSE	72
2022-09-12	13:12:38	0.284084	1.26366	2408.66	FALSE	72
2022-09-12	13:12:38	0.443015	1.97062	2437.42	FALSE	72
2022-09-12	13:12:39	0.815636	3.62811	2412.29	FALSE	72
2022-09-12	13:12:39	0.689377	3.06649	2440.49	FALSE	72
2022-09-12	13:12:39	1.26266	5.61656	2417.91	FALSE	72
2022-09-12	13:12:40	0.772939	3.43819	2443.93	FALSE	72
2022-09-12	13:12:40	1.30683	5.81304	2423.72	FALSE	72
2022-09-12	13:12:40	0.82556	3.67226	2447.6	FALSE	72
2022-09-12	13:12:40	1.28841	5.73111	2429.45	FALSE	72
2022-09-12	13:12:41	2.10983	9.38495	2456.99	FALSE	72
2022-09-12	13:12:41	1.55818	6.9311	2436.38	FALSE	72
2022-09-12	13:12:41	3.60759	16.0473	2473.03	1	73
2022-09-12	13:12:41	1.80841	8.04417	2444.43	FALSE	73
2022-09-12	13:12:42	3.3364	14.841	2487.87	1	74
2022-09-12	13:12:42	2.40719	10.7077	2455.14	FALSE	74
2022-09-12	13:12:42	1.20592	5.36417	2493.24	FALSE	74
2022-09-12	13:12:42	3.07314	13.6699	2468.81	1	75
2022-09-12	13:12:43	0.801947	3.56722	2496.8	FALSE	75
2022-09-12	13:12:43	2.47299	11.0004	2479.81	FALSE	75
2022-09-12	13:12:43	1.39482	6.20444	2503.01	FALSE	75
2022-09-12	13:12:44	1.24332	5.53054	2485.34	FALSE	75
2022-09-12	13:12:44	1.35187	6.01339	2509.02	FALSE	75
2022-09-12	13:12:44	0.663168	2.9499	2488.29	FALSE	75
2022-09-12	13:12:44	1.67355	7.44429	2516.47	FALSE	75
2022-09-12	13:12:45	0.675534	3.00491	2491.29	FALSE	75
2022-09-12	13:12:45	1.75594	7.81077	2524.28	FALSE	75
2022-09-12	13:12:45	1.87986	8.36199	2499.65	FALSE	75
2022-09-12	13:12:45	2.15065	9.56652	2533.84	FALSE	75
2022-09-12	13:12:46	3.40027	15.1251	2514.78	1	76
2022-09-12	13:12:46	1.91889	8.53561	2542.38	FALSE	76
2022-09-12	13:12:46	5.10301	22.6992	2537.48	1	77
2022-09-12	13:12:46	1.73024	7.69645	2550.08	FALSE	77
2022-09-12	13:12:47	4.01864	17.8757	2555.35	1	78
2022-09-12	13:12:47	1.40195	6.23615	2556.31	FALSE	78
2022-09-12	13:12:47	1.06566	4.74027	2560.09	FALSE	78
2022-09-12	13:12:48	0.965102	4.29297	2560.61	FALSE	78
2022-09-12	13:12:48	0.419402	1.86558	2561.96	FALSE	78
2022-09-12	13:12:48	0.531463	2.36405	2562.97	FALSE	78
2022-09-12	13:12:48	0.64271	2.8589	2564.82	FALSE	78
2022-09-12	13:12:49	0.986832	4.38963	2567.36	FALSE	78
2022-09-12	13:12:49	1.77487	7.89498	2572.71	FALSE	78
2022-09-12	13:12:49	2.60673	11.5953	2578.95	FALSE	78
2022-09-12	13:12:49	1.36765	6.08358	2578.8	FALSE	78
2022-09-12	13:12:50	0.976807	4.34503	2583.3	FALSE	78
2022-09-12	13:12:50	0.439198	1.95364	2580.75	FALSE	78
2022-09-12	13:12:50	0.290547	1.29241	2584.59	FALSE	78
2022-09-12	13:12:51	0.269835	1.20028	2581.95	FALSE	78
2022-09-12	13:12:51	0.383219	1.70463	2586.3	FALSE	78
2022-09-12	13:12:51	0.363524	1.61703	2583.57	FALSE	78
2022-09-12	13:12:51	0.171209	0.761572	2587.06	FALSE	78
2022-09-12	13:12:52	0.36098	1.60571	2585.17	FALSE	78
2022-09-12	13:12:52	0.169682	0.754779	2587.81	FALSE	78
2022-09-12	13:12:52	0.539758	2.40095	2587.57	FALSE	78
2022-09-12	13:12:52	0.21416	0.952627	2588.77	FALSE	78
2022-09-12	13:12:53	0.459758	2.0451	2589.62	FALSE	78
2022-09-12	13:12:53	2.37599	10.5689	2599.33	FALSE	78
2022-09-12	13:12:53	2.83645	12.6171	2602.24	FALSE	78
2022-09-12	13:12:53	1.54536	6.87407	2606.21	FALSE	78
2022-09-12	13:12:54	2.32648	10.3486	2612.59	FALSE	78
2022-09-12	13:12:54	1.51029	6.71807	2612.93	FALSE	78
2022-09-12	13:12:54	0.546527	2.43106	2615.02	FALSE	78
2022-09-12	13:12:55	0.765356	3.40446	2616.33	FALSE	78
2022-09-12	13:12:55	0.317417	1.41193	2616.43	FALSE	78
2022-09-12	13:12:55	0.703219	3.12806	2619.46	FALSE	78
2022-09-12	13:12:55	0.407901	1.81443	2618.24	FALSE	78
2022-09-12	13:12:56	1.04139	4.63231	2624.09	FALSE	78
2022-09-12	13:12:56	0.876043	3.89681	2622.14	FALSE	78
2022-09-12	13:12:56	2.57894	11.4716	2635.56	FALSE	78
2022-09-12	13:12:56	2.09452	9.31684	2631.46	FALSE	78
2022-09-12	13:12:57	3.21014	14.2793	2649.84	1	79
2022-09-12	13:12:57	3.07009	13.6564	2645.11	1	80
2022-09-12	13:12:57	2.47431	11.0062	2660.85	FALSE	80
2022-09-12	13:12:57	3.93808	17.5174	2662.63	1	81
2022-09-12	13:12:58	3.10515	13.8123	2674.66	1	82
2022-09-12	13:12:58	4.04861	18.009	2680.64	1	83
2022-09-12	13:12:58	2.24235	9.97442	2684.64	FALSE	83
2022-09-12	13:12:59	2.67558	11.9015	2692.54	FALSE	83
2022-09-12	13:12:59	1.29492	5.76006	2690.4	FALSE	83
2022-09-12	13:12:59	1.91961	8.53881	2701.08	FALSE	83
2022-09-12	13:12:59	2.05843	9.15631	2699.55	FALSE	83
2022-09-12	13:13:00	3.21711	14.3103	2715.39	1	84
2022-09-12	13:13:00	3.2424	14.4228	2713.97	1	85
2022-09-12	13:13:00	2.42393	10.7821	2726.17	FALSE	85
2022-09-12	13:13:00	4.0849	18.1705	2732.14	1	86

## Sheet: MrFitz_martin_2022912130731 (E)
Date	Time	Lbs	Total Force x time	Total Time Steps Force >3		**GoPro Fitting: 1257
2022-09-12	13:08:00	0.781081	0.781081	FALSE	0			Total Force x time	1227.08
2022-09-12	13:08:00	1.59146	2.37254	FALSE	0			Total Time Steps Force >3	86
2022-09-12	13:08:00	0.640216	3.01276	FALSE	0
2022-09-12	13:08:00	0.437621	3.45038	FALSE	0
2022-09-12	13:08:01	0.903321	4.3537	FALSE	0
2022-09-12	13:08:01	0.630191	4.98389	FALSE	0
2022-09-12	13:08:01	1.41045	6.39434	FALSE	0
2022-09-12	13:08:01	5.13823	11.5326	1	1
2022-09-12	13:08:02	4.55558	16.0881	1	2
2022-09-12	13:08:02	6.87253	22.9607	1	3
2022-09-12	13:08:02	2.28027	25.2409	FALSE	3
2022-09-12	13:08:02	1.85808	27.099	FALSE	3
2022-09-12	13:08:03	2.18505	29.2841	FALSE	3
2022-09-12	13:08:03	2.03864	31.3227	FALSE	3
2022-09-12	13:08:03	4.41655	35.7393	1	4
2022-09-12	13:08:04	2.40719	38.1465	FALSE	4
2022-09-12	13:08:04	4.00566	42.1521	1	5
2022-09-12	13:08:04	5.4339	47.586	1	6
2022-09-12	13:08:04	3.68439	51.2704	1	7
2022-09-12	13:08:05	3.12042	54.3908	1	8
2022-09-12	13:08:05	1.53253	55.9234	FALSE	8
2022-09-12	13:08:05	0.879046	56.8024	FALSE	8
2022-09-12	13:08:05	0.436959	57.2394	FALSE	8
2022-09-12	13:08:06	0.105153	57.3445	FALSE	8
2022-09-12	13:08:06	0.520115	57.8646	FALSE	8
2022-09-12	13:08:06	0.127952	57.9926	FALSE	8
2022-09-12	13:08:06	0.583066	58.5757	FALSE	8
2022-09-12	13:08:07	0.432328	59.008	FALSE	8
2022-09-12	13:08:07	0.786527	59.7945	FALSE	8
2022-09-12	13:08:07	0.782659	60.5772	FALSE	8
2022-09-12	13:08:08	0.55187	61.129	FALSE	8
2022-09-12	13:08:08	0.75416	61.8832	FALSE	8
2022-09-12	13:08:08	0.723168	62.6064	FALSE	8
2022-09-12	13:08:08	0.930242	63.5366	FALSE	8
2022-09-12	13:08:09	0.834873	64.3715	FALSE	8
2022-09-12	13:08:09	0.19813	64.5696	FALSE	8
2022-09-12	13:08:09	0.474262	65.0439	FALSE	8
2022-09-12	13:08:09	0.00530559	65.0492	FALSE	8
2022-09-12	13:08:10	0.90902	65.9582	FALSE	8
2022-09-12	13:08:10	0.587188	66.5454	FALSE	8
2022-09-12	13:08:10	1.60866	68.154	FALSE	8
2022-09-12	13:08:10	0.767901	68.9219	FALSE	8
2022-09-12	13:08:11	1.24531	70.1673	FALSE	8
2022-09-12	13:08:11	1.06103	71.2283	FALSE	8
2022-09-12	13:08:11	1.30169	72.53	FALSE	8
2022-09-12	13:08:12	0.271361	72.8013	FALSE	8
2022-09-12	13:08:12	0.273041	73.0744	FALSE	8
2022-09-12	13:08:12	0.145458	73.2198	FALSE	8
2022-09-12	13:08:12	0.0854582	73.3053	FALSE	8
2022-09-12	13:08:13	0.0579264	73.3632	FALSE	8
2022-09-12	13:08:13	0.288003	73.6512	FALSE	8
2022-09-12	13:08:13	0.195433	73.8467	FALSE	8
2022-09-12	13:08:13	0.47355	74.3202	FALSE	8
2022-09-12	13:08:14	0.270751	74.591	FALSE	8
2022-09-12	13:08:14	0.44154	75.0325	FALSE	8
2022-09-12	13:08:14	0.309784	75.3423	FALSE	8
2022-09-12	13:08:14	0.381845	75.7241	FALSE	8
2022-09-12	13:08:15	0.158079	75.8822	FALSE	8
2022-09-12	13:08:15	0.18902	76.0712	FALSE	8
2022-09-12	13:08:15	0.403779	76.475	FALSE	8
2022-09-12	13:08:16	1.85385	78.3289	FALSE	8
2022-09-12	13:08:16	1.72419	80.053	FALSE	8
2022-09-12	13:08:16	1.87009	81.9231	FALSE	8
2022-09-12	13:08:16	2.33095	84.2541	FALSE	8
2022-09-12	13:08:17	0.955025	85.2091	FALSE	8
2022-09-12	13:08:17	0.535127	85.7442	FALSE	8
2022-09-12	13:08:17	1.07905	86.8233	FALSE	8
2022-09-12	13:08:17	0.163982	86.9873	FALSE	8
2022-09-12	13:08:18	0.379148	87.3664	FALSE	8
2022-09-12	13:08:18	0.386527	87.7529	FALSE	8
2022-09-12	13:08:18	0.553092	88.306	FALSE	8
2022-09-12	13:08:18	0.539147	88.8452	FALSE	8
2022-09-12	13:08:19	0.644542	89.4897	FALSE	8
2022-09-12	13:08:19	0.833855	90.3236	FALSE	8
2022-09-12	13:08:19	1.8279	92.1515	FALSE	8
2022-09-12	13:08:20	1.34719	93.4987	FALSE	8
2022-09-12	13:08:20	3.10464	96.6033	1	9
2022-09-12	13:08:20	1.5992	98.2025	FALSE	9
2022-09-12	13:08:20	2.20922	100.412	FALSE	9
2022-09-12	13:08:21	0.429275	100.841	FALSE	9
2022-09-12	13:08:21	0.105356	100.946	FALSE	9
2022-09-12	13:08:21	0.945051	101.891	FALSE	9
2022-09-12	13:08:21	1.68235	103.574	FALSE	9
2022-09-12	13:08:22	2.51121	106.085	FALSE	9
2022-09-12	13:08:22	2.58077	108.666	FALSE	9
2022-09-12	13:08:22	3.23889	111.905	1	10
2022-09-12	13:08:23	0.893295	112.798	FALSE	10
2022-09-12	13:08:23	2.98464	115.783	FALSE	10
2022-09-12	13:08:23	1.97335	117.756	FALSE	10
2022-09-12	13:08:23	3.34637	121.102	1	11
2022-09-12	13:08:24	2.2766	123.379	FALSE	11
2022-09-12	13:08:24	2.43055	125.809	FALSE	11
2022-09-12	13:08:24	0.745051	126.554	FALSE	11
2022-09-12	13:08:24	0.292685	126.847	FALSE	11
2022-09-12	13:08:25	0.144186	126.991	FALSE	11
2022-09-12	13:08:25	0.436552	127.428	FALSE	11
2022-09-12	13:08:25	0.669224	128.097	FALSE	11
2022-09-12	13:08:25	3.13864	131.236	1	12
2022-09-12	13:08:26	2.08373	133.32	FALSE	12
2022-09-12	13:08:26	3.70663	137.026	1	13
2022-09-12	13:08:26	0.504542	137.531	FALSE	13
2022-09-12	13:08:27	1.87228	139.403	FALSE	13
2022-09-12	13:08:27	0.371005	139.774	FALSE	13
2022-09-12	13:08:27	0.92215	140.696	FALSE	13
2022-09-12	13:08:27	0.700114	141.396	FALSE	13
2022-09-12	13:08:28	0.537061	141.933	FALSE	13
2022-09-12	13:08:28	0.849885	142.783	FALSE	13
2022-09-12	13:08:28	0.100318	142.883	FALSE	13
2022-09-12	13:08:28	0.954822	143.838	FALSE	13
2022-09-12	13:08:29	0.372786	144.211	FALSE	13
2022-09-12	13:08:29	0.41299	144.624	FALSE	13
2022-09-12	13:08:29	0.430395	145.054	FALSE	13
2022-09-12	13:08:29	0.419962	145.474	FALSE	13
2022-09-12	13:08:30	0.362557	145.837	FALSE	13
2022-09-12	13:08:30	0.22327	146.06	FALSE	13
2022-09-12	13:08:30	0.484389	146.545	FALSE	13
2022-09-12	13:08:31	0.489122	147.034	FALSE	13
2022-09-12	13:08:31	1.1334	148.167	FALSE	13
2022-09-12	13:08:31	0.276094	148.443	FALSE	13
2022-09-12	13:08:31	0.162761	148.606	FALSE	13
2022-09-12	13:08:32	0.358333	148.964	FALSE	13
2022-09-12	13:08:32	-0.0839565	148.964	FALSE	13
2022-09-12	13:08:32	0.187137	149.152	FALSE	13
2022-09-12	13:08:32	0.0741605	149.226	FALSE	13
2022-09-12	13:08:33	0.357265	149.583	FALSE	13
2022-09-12	13:08:33	0.114313	149.697	FALSE	13
2022-09-12	13:08:33	0.279962	149.977	FALSE	13
2022-09-12	13:08:33	0.111158	150.088	FALSE	13
2022-09-12	13:08:34	0.285356	150.374	FALSE	13
2022-09-12	13:08:34	0.0894786	150.463	FALSE	13
2022-09-12	13:08:34	0.441183	150.904	FALSE	13
2022-09-12	13:08:35	0.0132954	150.918	FALSE	13
2022-09-12	13:08:35	-0.0716409	150.918	FALSE	13
2022-09-12	13:08:35	-0.31215	150.918	FALSE	13
2022-09-12	13:08:35	-0.516374	150.918	FALSE	13
2022-09-12	13:08:36	-0.482684	150.918	FALSE	13
2022-09-12	13:08:36	-0.431692	150.918	FALSE	13
2022-09-12	13:08:36	-0.343295	150.918	FALSE	13
2022-09-12	13:08:36	-0.156628	150.918	FALSE	13
2022-09-12	13:08:37	0.344288	151.262	FALSE	13
2022-09-12	13:08:37	0.295178	151.557	FALSE	13
2022-09-12	13:08:37	0.217367	151.775	FALSE	13
2022-09-12	13:08:37	0.24215	152.017	FALSE	13
2022-09-12	13:08:38	0.165916	152.183	FALSE	13
2022-09-12	13:08:38	0.316654	152.499	FALSE	13
2022-09-12	13:08:38	0.161998	152.661	FALSE	13
2022-09-12	13:08:39	0.83126	153.492	FALSE	13
2022-09-12	13:08:39	1.22042	154.713	FALSE	13
2022-09-12	13:08:39	1.01151	155.724	FALSE	13
2022-09-12	13:08:39	0.380522	156.105	FALSE	13
2022-09-12	13:08:40	0.430903	156.536	FALSE	13
2022-09-12	13:08:40	0.91243	157.448	FALSE	13
2022-09-12	13:08:40	1.20057	158.649	FALSE	13
2022-09-12	13:08:40	2.1051	160.754	FALSE	13
2022-09-12	13:08:41	0.498486	161.252	FALSE	13
2022-09-12	13:08:41	0.777519	162.03	FALSE	13
2022-09-12	13:08:41	0.362405	162.392	FALSE	13
2022-09-12	13:08:41	1.55324	163.946	FALSE	13
2022-09-12	13:08:42	1.3649	165.31	FALSE	13
2022-09-12	13:08:42	2.73782	168.048	FALSE	13
2022-09-12	13:08:42	2.59614	170.644	FALSE	13
2022-09-12	13:08:43	1.49299	172.137	FALSE	13
2022-09-12	13:08:43	1.99055	174.128	FALSE	13
2022-09-12	13:08:43	2.30637	176.434	FALSE	13
2022-09-12	13:08:43	3.69446	180.129	1	14
2022-09-12	13:08:44	2.21314	182.342	FALSE	14
2022-09-12	13:08:44	0.892125	183.234	FALSE	14
2022-09-12	13:08:44	0.939198	184.173	FALSE	14
2022-09-12	13:08:44	0.324389	184.498	FALSE	14
2022-09-12	13:08:45	0.712023	185.21	FALSE	14
2022-09-12	13:08:45	0.763117	185.973	FALSE	14
2022-09-12	13:08:45	1.38648	187.359	FALSE	14
2022-09-12	13:08:45	1.19263	188.552	FALSE	14
2022-09-12	13:08:46	1.63986	190.192	FALSE	14
2022-09-12	13:08:46	1.56704	191.759	FALSE	14
2022-09-12	13:08:46	2.01528	193.774	FALSE	14
2022-09-12	13:08:47	4.31441	198.089	1	15
2022-09-12	13:08:47	1.90587	199.994	FALSE	15
2022-09-12	13:08:47	1.64444	201.639	FALSE	15
2022-09-12	13:08:47	1.55721	203.196	FALSE	15
2022-09-12	13:08:48	0.88271	204.079	FALSE	15
2022-09-12	13:08:48	1.2649	205.344	FALSE	15
2022-09-12	13:08:48	0.737112	206.081	FALSE	15
2022-09-12	13:08:48	0.838639	206.919	FALSE	15
2022-09-12	13:08:49	0.392786	207.312	FALSE	15
2022-09-12	13:08:49	0.305305	207.617	FALSE	15
2022-09-12	13:08:49	0.571005	208.188	FALSE	15
2022-09-12	13:08:49	0.424338	208.613	FALSE	15
2022-09-12	13:08:50	0.722303	209.335	FALSE	15
2022-09-12	13:08:50	1.45416	210.789	FALSE	15
2022-09-12	13:08:50	1.81564	212.605	FALSE	15
2022-09-12	13:08:51	2.18067	214.786	FALSE	15
2022-09-12	13:08:51	1.20836	215.994	FALSE	15
2022-09-12	13:08:51	2.51553	218.509	FALSE	15
2022-09-12	13:08:51	0.463015	218.973	FALSE	15
2022-09-12	13:08:52	1.02419	219.997	FALSE	15
2022-09-12	13:08:52	0.549377	220.546	FALSE	15
2022-09-12	13:08:52	0.255026	220.801	FALSE	15
2022-09-12	13:08:52	0.656654	221.458	FALSE	15
2022-09-12	13:08:53	0.199708	221.657	FALSE	15
2022-09-12	13:08:53	0.608308	222.266	FALSE	15
2022-09-12	13:08:53	0.187494	222.453	FALSE	15
2022-09-12	13:08:53	0.546272	223	FALSE	15
2022-09-12	13:08:54	0.299046	223.299	FALSE	15
2022-09-12	13:08:54	0.402506	223.701	FALSE	15
2022-09-12	13:08:54	0.379199	224.08	FALSE	15
2022-09-12	13:08:55	0.350089	224.43	FALSE	15
2022-09-12	13:08:55	0.601081	225.031	FALSE	15
2022-09-12	13:08:55	0.384593	225.416	FALSE	15
2022-09-12	13:08:55	0.738028	226.154	FALSE	15
2022-09-12	13:08:56	0.229835	226.384	FALSE	15
2022-09-12	13:08:56	0.790954	227.175	FALSE	15
2022-09-12	13:08:56	0.454313	227.629	FALSE	15
2022-09-12	13:08:56	1.02983	228.659	FALSE	15
2022-09-12	13:08:57	0.477672	229.137	FALSE	15
2022-09-12	13:08:57	1.13564	230.272	FALSE	15
2022-09-12	13:08:57	0.631819	230.904	FALSE	15
2022-09-12	13:08:58	0.860165	231.764	FALSE	15
2022-09-12	13:08:58	0.65584	232.42	FALSE	15
2022-09-12	13:08:58	0.672583	233.093	FALSE	15
2022-09-12	13:08:58	1.06413	234.157	FALSE	15
2022-09-12	13:08:59	0.381183	234.538	FALSE	15
2022-09-12	13:08:59	0.87126	235.409	FALSE	15
2022-09-12	13:08:59	0.567799	235.977	FALSE	15
2022-09-12	13:08:59	1.46444	237.442	FALSE	15
2022-09-12	13:09:00	2.15446	239.596	FALSE	15
2022-09-12	13:09:00	4.2366	243.833	1	16
2022-09-12	13:09:00	5.64291	249.476	1	17
2022-09-12	13:09:00	6.14296	255.618	1	18
2022-09-12	13:09:01	2.90591	258.524	FALSE	18
2022-09-12	13:09:01	2.3133	260.838	FALSE	18
2022-09-12	13:09:01	1.8737	262.711	FALSE	18
2022-09-12	13:09:02	1.26561	263.977	FALSE	18
2022-09-12	13:09:02	2.72403	266.701	FALSE	18
2022-09-12	13:09:02	2.03375	268.735	FALSE	18
2022-09-12	13:09:02	4.04637	272.781	1	19
2022-09-12	13:09:03	3.83482	276.616	1	20
2022-09-12	13:09:03	4.00948	280.625	1	21
2022-09-12	13:09:03	2.7023	283.328	FALSE	21
2022-09-12	13:09:03	0.802914	284.131	FALSE	21
2022-09-12	13:09:04	1.342	285.473	FALSE	21
2022-09-12	13:09:04	0.405764	285.878	FALSE	21
2022-09-12	13:09:04	0.512583	286.391	FALSE	21
2022-09-12	13:09:04	0.647392	287.038	FALSE	21
2022-09-12	13:09:05	0.543372	287.582	FALSE	21
2022-09-12	13:09:05	0.610751	288.193	FALSE	21
2022-09-12	13:09:05	0.469122	288.662	FALSE	21
2022-09-12	13:09:06	0.772481	289.434	FALSE	21
2022-09-12	13:09:06	0.918028	290.352	FALSE	21
2022-09-12	13:09:06	0.614058	290.966	FALSE	21
2022-09-12	13:09:06	0.976247	291.942	FALSE	21
2022-09-12	13:09:07	0.920216	292.863	FALSE	21
2022-09-12	13:09:07	0.389071	293.252	FALSE	21
2022-09-12	13:09:07	0.324593	293.576	FALSE	21
2022-09-12	13:09:08	0.531209	294.108	FALSE	21
2022-09-12	13:09:08	0.140624	294.248	FALSE	21
2022-09-12	13:09:08	0.210853	294.459	FALSE	21
2022-09-12	13:09:08	0.110496	294.57	FALSE	21
2022-09-12	13:09:08	0.246018	294.816	FALSE	21
2022-09-12	13:09:09	0.191361	295.007	FALSE	21
2022-09-12	13:09:09	0.194975	295.202	FALSE	21
2022-09-12	13:09:09	0.281438	295.483	FALSE	21
2022-09-12	13:09:10	0.0160435	295.499	FALSE	21
2022-09-12	13:09:10	0.16673	295.666	FALSE	21
2022-09-12	13:09:10	-0.0712338	295.666	FALSE	21
2022-09-12	13:09:10	0.122659	295.789	FALSE	21
2022-09-12	13:09:11	0.111412	295.9	FALSE	21
2022-09-12	13:09:11	0.245204	296.145	FALSE	21
2022-09-12	13:09:11	0.287087	296.432	FALSE	21
2022-09-12	13:09:11	0.312786	296.745	FALSE	21
2022-09-12	13:09:12	0.225916	296.971	FALSE	21
2022-09-12	13:09:12	0.175992	297.147	FALSE	21
2022-09-12	13:09:12	0.101183	297.248	FALSE	21
2022-09-12	13:09:12	0.257366	297.506	FALSE	21
2022-09-12	13:09:13	0.059046	297.565	FALSE	21
2022-09-12	13:09:13	0.268664	297.833	FALSE	21
2022-09-12	13:09:13	0.0413361	297.875	FALSE	21
2022-09-12	13:09:14	0.473041	298.348	FALSE	21
2022-09-12	13:09:14	0.216247	298.564	FALSE	21
2022-09-12	13:09:14	0.486221	299.05	FALSE	21
2022-09-12	13:09:14	0.361947	299.412	FALSE	21
2022-09-12	13:09:15	0.413397	299.826	FALSE	21
2022-09-12	13:09:15	0.380267	300.206	FALSE	21
2022-09-12	13:09:15	0.260827	300.467	FALSE	21
2022-09-12	13:09:15	0.481591	300.948	FALSE	21
2022-09-12	13:09:16	0.518791	301.467	FALSE	21
2022-09-12	13:09:16	0.775789	302.243	FALSE	21
2022-09-12	13:09:16	0.466018	302.709	FALSE	21
2022-09-12	13:09:16	0.382812	303.092	FALSE	21
2022-09-12	13:09:17	0.52897	303.621	FALSE	21
2022-09-12	13:09:17	0.287545	303.908	FALSE	21
2022-09-12	13:09:17	0.21813	304.126	FALSE	21
2022-09-12	13:09:18	0.852278	304.979	FALSE	21
2022-09-12	13:09:18	0.72388	305.702	FALSE	21
2022-09-12	13:09:18	0.718435	306.421	FALSE	21
2022-09-12	13:09:18	0.716959	307.138	FALSE	21
2022-09-12	13:09:19	0.719351	307.857	FALSE	21
2022-09-12	13:09:19	0.722354	308.58	FALSE	21
2022-09-12	13:09:19	0.717468	309.297	FALSE	21
2022-09-12	13:09:19	0.501285	309.798	FALSE	21
2022-09-12	13:09:20	0.234466	310.033	FALSE	21
2022-09-12	13:09:20	0.232532	310.265	FALSE	21
2022-09-12	13:09:20	0.526527	310.792	FALSE	21
2022-09-12	13:09:20	0.181539	310.973	FALSE	21
2022-09-12	13:09:21	0.161845	311.135	FALSE	21
2022-09-12	13:09:21	0.189173	311.324	FALSE	21
2022-09-12	13:09:21	0.224491	311.549	FALSE	21
2022-09-12	13:09:22	0.214059	311.763	FALSE	21
2022-09-12	13:09:22	0.224186	311.987	FALSE	21
2022-09-12	13:09:22	0.25986	312.247	FALSE	21
2022-09-12	13:09:22	0.643117	312.89	FALSE	21
2022-09-12	13:09:23	0.528359	313.418	FALSE	21
2022-09-12	13:09:23	0.255229	313.674	FALSE	21
2022-09-12	13:09:23	0.216705	313.89	FALSE	21
2022-09-12	13:09:23	0.158792	314.049	FALSE	21
2022-09-12	13:09:24	0.174618	314.224	FALSE	21
2022-09-12	13:09:24	0.16729	314.391	FALSE	21
2022-09-12	13:09:24	0.170598	314.562	FALSE	21
2022-09-12	13:09:24	0.664237	315.226	FALSE	21
2022-09-12	13:09:25	0.432634	315.659	FALSE	21
2022-09-12	13:09:25	-0.0469081	315.659	FALSE	21
2022-09-12	13:09:25	0.0326338	315.691	FALSE	21
2022-09-12	13:09:26	-0.153575	315.691	FALSE	21
2022-09-12	13:09:26	-0.00324403	315.691	FALSE	21
2022-09-12	13:09:26	0.0543132	315.746	FALSE	21
2022-09-12	13:09:26	0.0538552	315.799	FALSE	21
2022-09-12	13:09:27	-0.130674	315.799	FALSE	21
2022-09-12	13:09:27	-0.0634985	315.799	FALSE	21
2022-09-12	13:09:27	0.0144659	315.814	FALSE	21
2022-09-12	13:09:27	0.037672	315.852	FALSE	21
2022-09-12	13:09:28	0.0163489	315.868	FALSE	21
2022-09-12	13:09:28	0.173855	316.042	FALSE	21
2022-09-12	13:09:28	0.371768	316.414	FALSE	21
2022-09-12	13:09:28	0.588562	317.002	FALSE	21
2022-09-12	13:09:29	0.950547	317.953	FALSE	21
2022-09-12	13:09:29	1.74948	319.702	FALSE	21
2022-09-12	13:09:29	2.60617	322.308	FALSE	21
2022-09-12	13:09:30	1.48846	323.797	FALSE	21
2022-09-12	13:09:30	2.605	326.402	FALSE	21
2022-09-12	13:09:30	0.469224	326.871	FALSE	21
2022-09-12	13:09:30	0.651412	327.522	FALSE	21
2022-09-12	13:09:31	0.528512	328.051	FALSE	21
2022-09-12	13:09:31	0.279046	328.33	FALSE	21
2022-09-12	13:09:31	0.41355	328.743	FALSE	21
2022-09-12	13:09:31	0.362761	329.106	FALSE	21
2022-09-12	13:09:32	0.578639	329.685	FALSE	21
2022-09-12	13:09:32	0.204491	329.889	FALSE	21
2022-09-12	13:09:32	0.48098	330.37	FALSE	21
2022-09-12	13:09:33	0.199097	330.569	FALSE	21
2022-09-12	13:09:33	0.341845	330.911	FALSE	21
2022-09-12	13:09:33	0.294211	331.205	FALSE	21
2022-09-12	13:09:33	0.474008	331.68	FALSE	21
2022-09-12	13:09:34	0.247392	331.927	FALSE	21
2022-09-12	13:09:34	0.307036	332.234	FALSE	21
2022-09-12	13:09:34	0.218639	332.453	FALSE	21
2022-09-12	13:09:34	0.368613	332.821	FALSE	21
2022-09-12	13:09:35	0.118893	332.94	FALSE	21
2022-09-12	13:09:35	0.408766	333.349	FALSE	21
2022-09-12	13:09:35	0.0602165	333.409	FALSE	21
2022-09-12	13:09:35	0.312685	333.722	FALSE	21
2022-09-12	13:09:36	1.0365	334.758	FALSE	21
2022-09-12	13:09:36	2.6593	337.418	FALSE	21
2022-09-12	13:09:36	2.28139	339.699	FALSE	21
2022-09-12	13:09:37	2.84072	342.54	FALSE	21
2022-09-12	13:09:37	1.75747	344.297	FALSE	21
2022-09-12	13:09:37	0.97645	345.274	FALSE	21
2022-09-12	13:09:37	0.770852	346.044	FALSE	21
2022-09-12	13:09:38	0.722099	346.767	FALSE	21
2022-09-12	13:09:38	1.56821	348.335	FALSE	21
2022-09-12	13:09:38	1.69436	350.029	FALSE	21
2022-09-12	13:09:38	3.76546	353.795	1	22
2022-09-12	13:09:39	3.7334	357.528	1	23
2022-09-12	13:09:39	4.15273	361.681	1	24
2022-09-12	13:09:39	2.04342	363.724	FALSE	24
2022-09-12	13:09:39	1.03477	364.759	FALSE	24
2022-09-12	13:09:40	1.75228	366.511	FALSE	24
2022-09-12	13:09:40	2.53441	369.046	FALSE	24
2022-09-12	13:09:40	2.85899	371.905	FALSE	24
2022-09-12	13:09:41	5.96561	377.87	1	25
2022-09-12	13:09:41	2.44108	380.311	FALSE	25
2022-09-12	13:09:41	3.83884	384.15	1	26
2022-09-12	13:09:41	0.820827	384.971	FALSE	26
2022-09-12	13:09:42	1.06607	386.037	FALSE	26
2022-09-12	13:09:42	0.88556	386.923	FALSE	26
2022-09-12	13:09:42	0.604186	387.527	FALSE	26
2022-09-12	13:09:42	1.03492	388.562	FALSE	26
2022-09-12	13:09:43	1.20225	389.764	FALSE	26
2022-09-12	13:09:43	0.757774	390.522	FALSE	26
2022-09-12	13:09:43	0.709326	391.231	FALSE	26
2022-09-12	13:09:43	0.366374	391.597	FALSE	26
2022-09-12	13:09:44	0.974415	392.572	FALSE	26
2022-09-12	13:09:44	0.692888	393.265	FALSE	26
2022-09-12	13:09:44	1.69156	394.956	FALSE	26
2022-09-12	13:09:45	1.36108	396.317	FALSE	26
2022-09-12	13:09:45	1.68057	397.998	FALSE	26
2022-09-12	13:09:45	1.74739	399.745	FALSE	26
2022-09-12	13:09:45	1.85971	401.605	FALSE	26
2022-09-12	13:09:46	1.18449	402.789	FALSE	26
2022-09-12	13:09:46	0.447087	403.237	FALSE	26
2022-09-12	13:09:46	1.33818	404.575	FALSE	26
2022-09-12	13:09:46	0.353651	404.928	FALSE	26
2022-09-12	13:09:47	1.08861	406.017	FALSE	26
2022-09-12	13:09:47	0.0640333	406.081	FALSE	26
2022-09-12	13:09:47	0.385967	406.467	FALSE	26
2022-09-12	13:09:47	0.949224	407.416	FALSE	26
2022-09-12	13:09:48	0.907595	408.324	FALSE	26
2022-09-12	13:09:48	0.355789	408.68	FALSE	26
2022-09-12	13:09:48	0.354415	409.034	FALSE	26
2022-09-12	13:09:49	0.401997	409.436	FALSE	26
2022-09-12	13:09:49	0.154211	409.59	FALSE	26
2022-09-12	13:09:49	-0.1979	409.59	FALSE	26
2022-09-12	13:09:49	-0.299071	409.59	FALSE	26
2022-09-12	13:09:50	-0.127417	409.59	FALSE	26
2022-09-12	13:09:50	0.29701	409.887	FALSE	26
2022-09-12	13:09:50	0.869936	410.757	FALSE	26
2022-09-12	13:09:50	0.549529	411.307	FALSE	26
2022-09-12	13:09:51	0.0713106	411.378	FALSE	26
2022-09-12	13:09:51	0.328257	411.706	FALSE	26
2022-09-12	13:09:51	0.326272	412.033	FALSE	26
2022-09-12	13:09:51	0.234313	412.267	FALSE	26
2022-09-12	13:09:52	0.0836262	412.35	FALSE	26
2022-09-12	13:09:52	0.0462216	412.397	FALSE	26
2022-09-12	13:09:52	0.132379	412.529	FALSE	26
2022-09-12	13:09:53	0.0438806	412.573	FALSE	26
2022-09-12	13:09:53	-0.109402	412.573	FALSE	26
2022-09-12	13:09:53	-0.278969	412.573	FALSE	26
2022-09-12	13:09:53	-0.240292	412.573	FALSE	26
2022-09-12	13:09:54	-0.182277	412.573	FALSE	26
2022-09-12	13:09:54	-0.124872	412.573	FALSE	26
2022-09-12	13:09:54	-0.0445672	412.573	FALSE	26
2022-09-12	13:09:54	0.402812	412.976	FALSE	26
2022-09-12	13:09:55	0.102608	413.078	FALSE	26
2022-09-12	13:09:55	0.18271	413.261	FALSE	26
2022-09-12	13:09:55	-0.0504705	413.261	FALSE	26
2022-09-12	13:09:55	0.0242877	413.285	FALSE	26
2022-09-12	13:09:56	-0.130521	413.285	FALSE	26
2022-09-12	13:09:56	-0.201921	413.285	FALSE	26
2022-09-12	13:09:56	-0.0850251	413.285	FALSE	26
2022-09-12	13:09:57	0.167494	413.453	FALSE	26
2022-09-12	13:09:57	0.1993	413.652	FALSE	26
2022-09-12	13:09:57	0.224593	413.877	FALSE	26
2022-09-12	13:09:57	0.325305	414.202	FALSE	26
2022-09-12	13:09:58	0.266323	414.468	FALSE	26
2022-09-12	13:09:58	0.284338	414.753	FALSE	26
2022-09-12	13:09:58	0.268512	415.021	FALSE	26
2022-09-12	13:09:58	0.417112	415.438	FALSE	26
2022-09-12	13:09:59	0.393041	415.831	FALSE	26
2022-09-12	13:09:59	0.326171	416.158	FALSE	26
2022-09-12	13:09:59	0.385254	416.543	FALSE	26
2022-09-12	13:09:59	0.46383	417.007	FALSE	26
2022-09-12	13:10:00	0.517468	417.524	FALSE	26
2022-09-12	13:10:00	0.453855	417.978	FALSE	26
2022-09-12	13:10:00	0.376501	418.354	FALSE	26
2022-09-12	13:10:01	0.37986	418.734	FALSE	26
2022-09-12	13:10:01	0.371565	419.106	FALSE	26
2022-09-12	13:10:01	0.36668	419.473	FALSE	26
2022-09-12	13:10:01	0.369122	419.842	FALSE	26
2022-09-12	13:10:02	0.384797	420.227	FALSE	26
2022-09-12	13:10:02	0.371056	420.598	FALSE	26
2022-09-12	13:10:02	0.370242	420.968	FALSE	26
2022-09-12	13:10:02	0.372837	421.341	FALSE	26
2022-09-12	13:10:03	0.370598	421.711	FALSE	26
2022-09-12	13:10:03	0.372939	422.084	FALSE	26
2022-09-12	13:10:03	0.37416	422.458	FALSE	26
2022-09-12	13:10:03	0.382761	422.841	FALSE	26
2022-09-12	13:10:04	0.373601	423.215	FALSE	26
2022-09-12	13:10:04	0.356807	423.572	FALSE	26
2022-09-12	13:10:04	0.53645	424.108	FALSE	26
2022-09-12	13:10:05	0.527646	424.636	FALSE	26
2022-09-12	13:10:05	0.976247	425.612	FALSE	26
2022-09-12	13:10:05	2.14851	427.76	FALSE	26
2022-09-12	13:10:05	-0.0206995	427.76	FALSE	26
2022-09-12	13:10:06	-0.131743	427.76	FALSE	26
2022-09-12	13:10:06	-0.0410048	427.76	FALSE	26
2022-09-12	13:10:06	0.0905982	427.851	FALSE	26
2022-09-12	13:10:06	0.0183336	427.869	FALSE	26
2022-09-12	13:10:07	0.0286644	427.898	FALSE	26
2022-09-12	13:10:07	0.296908	428.195	FALSE	26
2022-09-12	13:10:07	0.45874	428.654	FALSE	26
2022-09-12	13:10:08	0.0344659	428.688	FALSE	26
2022-09-12	13:10:08	-0.013015	428.688	FALSE	26
2022-09-12	13:10:08	0.0132954	428.701	FALSE	26
2022-09-12	13:10:08	-0.0619717	428.701	FALSE	26
2022-09-12	13:10:09	-0.0635493	428.701	FALSE	26
2022-09-12	13:10:09	-0.271641	428.701	FALSE	26
2022-09-12	13:10:09	-0.396425	428.701	FALSE	26
2022-09-12	13:10:09	-0.279783	428.701	FALSE	26
2022-09-12	13:10:10	-0.177239	428.701	FALSE	26
2022-09-12	13:10:10	0.0704964	428.772	FALSE	26
2022-09-12	13:10:10	0.36958	429.141	FALSE	26
2022-09-12	13:10:10	0.0974175	429.239	FALSE	26
2022-09-12	13:10:11	0.331463	429.57	FALSE	26
2022-09-12	13:10:11	0.192786	429.763	FALSE	26
2022-09-12	13:10:11	0.349478	430.113	FALSE	26
2022-09-12	13:10:12	0.268359	430.381	FALSE	26
2022-09-12	13:10:12	0.650649	431.032	FALSE	26
2022-09-12	13:10:12	1.51976	432.551	FALSE	26
2022-09-12	13:10:12	2.30714	434.858	FALSE	26
2022-09-12	13:10:13	2.11665	436.975	FALSE	26
2022-09-12	13:10:13	1.93635	438.911	FALSE	26
2022-09-12	13:10:13	1.20037	440.112	FALSE	26
2022-09-12	13:10:13	0.541641	440.654	FALSE	26
2022-09-12	13:10:14	0.501845	441.155	FALSE	26
2022-09-12	13:10:14	0.405764	441.561	FALSE	26
2022-09-12	13:10:14	0.344593	441.906	FALSE	26
2022-09-12	13:10:14	0.395534	442.301	FALSE	26
2022-09-12	13:10:15	0.212481	442.514	FALSE	26
2022-09-12	13:10:15	0.535585	443.049	FALSE	26
2022-09-12	13:10:15	0.680114	443.729	FALSE	26
2022-09-12	13:10:16	0.33584	444.065	FALSE	26
2022-09-12	13:10:16	0.426679	444.492	FALSE	26
2022-09-12	13:10:16	0.14958	444.642	FALSE	26
2022-09-12	13:10:16	0.513906	445.155	FALSE	26
2022-09-12	13:10:17	0.457112	445.613	FALSE	26
2022-09-12	13:10:17	2.3705	447.983	FALSE	26
2022-09-12	13:10:17	1.01487	448.998	FALSE	26
2022-09-12	13:10:17	2.27838	451.276	FALSE	26
2022-09-12	13:10:18	1.78597	453.062	FALSE	26
2022-09-12	13:10:18	2.10536	455.168	FALSE	26
2022-09-12	13:10:18	1.46444	456.632	FALSE	26
2022-09-12	13:10:18	2.482	459.114	FALSE	26
2022-09-12	13:10:19	1.74882	460.863	FALSE	26
2022-09-12	13:10:19	2.19767	463.061	FALSE	26
2022-09-12	13:10:19	1.22673	464.287	FALSE	26
2022-09-12	13:10:20	0.971463	465.259	FALSE	26
2022-09-12	13:10:20	0.340725	465.599	FALSE	26
2022-09-12	13:10:20	0.507392	466.107	FALSE	26
2022-09-12	13:10:20	0.811616	466.918	FALSE	26
2022-09-12	13:10:21	1.61426	468.533	FALSE	26
2022-09-12	13:10:21	0.879148	469.412	FALSE	26
2022-09-12	13:10:21	0.349835	469.762	FALSE	26
2022-09-12	13:10:21	0.775178	470.537	FALSE	26
2022-09-12	13:10:22	0.456756	470.994	FALSE	26
2022-09-12	13:10:22	0.257824	471.251	FALSE	26
2022-09-12	13:10:22	0.405764	471.657	FALSE	26
2022-09-12	13:10:22	0.261794	471.919	FALSE	26
2022-09-12	13:10:23	0.628461	472.547	FALSE	26
2022-09-12	13:10:23	0.407646	472.955	FALSE	26
2022-09-12	13:10:23	0.543728	473.499	FALSE	26
2022-09-12	13:10:24	0.970293	474.469	FALSE	26
2022-09-12	13:10:24	0.829885	475.299	FALSE	26
2022-09-12	13:10:24	0.939148	476.238	FALSE	26
2022-09-12	13:10:24	0.627443	476.866	FALSE	26
2022-09-12	13:10:25	0.440725	477.306	FALSE	26
2022-09-12	13:10:25	0.413651	477.72	FALSE	26
2022-09-12	13:10:25	0.45187	478.172	FALSE	26
2022-09-12	13:10:25	0.310751	478.483	FALSE	26
2022-09-12	13:10:26	0.284746	478.767	FALSE	26
2022-09-12	13:10:26	0.360013	479.127	FALSE	26
2022-09-12	13:10:26	0.249835	479.377	FALSE	26
2022-09-12	13:10:26	0.199402	479.577	FALSE	26
2022-09-12	13:10:27	0.30215	479.879	FALSE	26
2022-09-12	13:10:27	0.211107	480.09	FALSE	26
2022-09-12	13:10:27	0.24673	480.337	FALSE	26
2022-09-12	13:10:28	0.185713	480.522	FALSE	26
2022-09-12	13:10:28	0.187646	480.71	FALSE	26
2022-09-12	13:10:28	0.246629	480.957	FALSE	26
2022-09-12	13:10:28	0.101082	481.058	FALSE	26
2022-09-12	13:10:29	0.152583	481.21	FALSE	26
2022-09-12	13:10:29	0.149173	481.359	FALSE	26
2022-09-12	13:10:29	0.275229	481.635	FALSE	26
2022-09-12	13:10:29	0.20215	481.837	FALSE	26
2022-09-12	13:10:30	0.257824	482.095	FALSE	26
2022-09-12	13:10:30	0.310903	482.406	FALSE	26
2022-09-12	13:10:30	0.531769	482.937	FALSE	26
2022-09-12	13:10:30	0.564033	483.501	FALSE	26
2022-09-12	13:10:31	0.380522	483.882	FALSE	26
2022-09-12	13:10:31	0.546069	484.428	FALSE	26
2022-09-12	13:10:31	0.912277	485.34	FALSE	26
2022-09-12	13:10:32	0.365305	485.706	FALSE	26
2022-09-12	13:10:32	0.55757	486.263	FALSE	26
2022-09-12	13:10:32	0.366629	486.63	FALSE	26
2022-09-12	13:10:32	1.57309	488.203	FALSE	26
2022-09-12	13:10:33	0.877672	489.08	FALSE	26
2022-09-12	13:10:33	2.49976	491.58	FALSE	26
2022-09-12	13:10:33	1.13772	492.718	FALSE	26
2022-09-12	13:10:33	2.77182	495.49	FALSE	26
2022-09-12	13:10:34	1.0138	496.504	FALSE	26
2022-09-12	13:10:34	1.25126	497.755	FALSE	26
2022-09-12	13:10:34	1.0336	498.788	FALSE	26
2022-09-12	13:10:34	0.905	499.693	FALSE	26
2022-09-12	13:10:35	2.02836	501.722	FALSE	26
2022-09-12	13:10:35	0.708155	502.43	FALSE	26
2022-09-12	13:10:35	0.434873	502.865	FALSE	26
2022-09-12	13:10:36	0.410852	503.276	FALSE	26
2022-09-12	13:10:36	0.125814	503.401	FALSE	26
2022-09-12	13:10:36	0.45869	503.86	FALSE	26
2022-09-12	13:10:36	0.124033	503.984	FALSE	26
2022-09-12	13:10:37	-0.180343	503.984	FALSE	26
2022-09-12	13:10:37	-0.470063	503.984	FALSE	26
2022-09-12	13:10:37	-0.512302	503.984	FALSE	26
2022-09-12	13:10:37	-0.39332	503.984	FALSE	26
2022-09-12	13:10:38	-0.175152	503.984	FALSE	26
2022-09-12	13:10:38	0.25528	504.24	FALSE	26
2022-09-12	13:10:38	0.360827	504.6	FALSE	26
2022-09-12	13:10:38	0.471972	505.072	FALSE	26
2022-09-12	13:10:39	0.581081	505.653	FALSE	26
2022-09-12	13:10:39	0.500114	506.153	FALSE	26
2022-09-12	13:10:39	0.452023	506.606	FALSE	26
2022-09-12	13:10:40	0.470038	507.076	FALSE	26
2022-09-12	13:10:40	0.393906	507.469	FALSE	26
2022-09-12	13:10:40	0.420725	507.89	FALSE	26
2022-09-12	13:10:40	0.311158	508.201	FALSE	26
2022-09-12	13:10:41	0.486323	508.688	FALSE	26
2022-09-12	13:10:41	0.391921	509.08	FALSE	26
2022-09-12	13:10:41	0.430344	509.51	FALSE	26
2022-09-12	13:10:41	0.381794	509.892	FALSE	26
2022-09-12	13:10:42	0.431107	510.323	FALSE	26
2022-09-12	13:10:42	0.494109	510.817	FALSE	26
2022-09-12	13:10:42	0.408919	511.226	FALSE	26
2022-09-12	13:10:43	0.532532	511.758	FALSE	26
2022-09-12	13:10:43	0.523168	512.282	FALSE	26
2022-09-12	13:10:43	0.322608	512.604	FALSE	26
2022-09-12	13:10:43	0.55131	513.155	FALSE	26
2022-09-12	13:10:44	0.19813	513.354	FALSE	26
2022-09-12	13:10:44	0.456247	513.81	FALSE	26
2022-09-12	13:10:44	0.278792	514.089	FALSE	26
2022-09-12	13:10:44	0.583626	514.672	FALSE	26
2022-09-12	13:10:45	0.439402	515.112	FALSE	26
2022-09-12	13:10:45	0.847646	515.959	FALSE	26
2022-09-12	13:10:45	1.12902	517.088	FALSE	26
2022-09-12	13:10:45	0.966323	518.055	FALSE	26
2022-09-12	13:10:46	1.02698	519.082	FALSE	26
2022-09-12	13:10:46	0.463117	519.545	FALSE	26
2022-09-12	13:10:46	0.615687	520.16	FALSE	26
2022-09-12	13:10:47	0.43813	520.599	FALSE	26
2022-09-12	13:10:47	0.587901	521.186	FALSE	26
2022-09-12	13:10:47	1.1735	522.36	FALSE	26
2022-09-12	13:10:47	2.01238	524.372	FALSE	26
2022-09-12	13:10:48	3.11263	527.485	1	27
2022-09-12	13:10:48	2.69406	530.179	FALSE	27
2022-09-12	13:10:48	3.41976	533.599	1	28
2022-09-12	13:10:48	1.19462	534.793	FALSE	28
2022-09-12	13:10:49	1.14622	535.94	FALSE	28
2022-09-12	13:10:49	0.92902	536.869	FALSE	28
2022-09-12	13:10:49	0.44897	537.318	FALSE	28
2022-09-12	13:10:49	0.671412	537.989	FALSE	28
2022-09-12	13:10:50	0.691209	538.68	FALSE	28
2022-09-12	13:10:50	1.17162	539.852	FALSE	28
2022-09-12	13:10:50	1.5019	541.354	FALSE	28
2022-09-12	13:10:51	1.12902	542.483	FALSE	28
2022-09-12	13:10:51	1.63833	544.121	FALSE	28
2022-09-12	13:10:51	0.654313	544.775	FALSE	28
2022-09-12	13:10:51	1.39304	546.168	FALSE	28
2022-09-12	13:10:52	0.840165	547.009	FALSE	28
2022-09-12	13:10:52	3.26342	550.272	1	29
2022-09-12	13:10:52	1.98439	552.256	FALSE	29
2022-09-12	13:10:52	5.35497	557.611	1	30
2022-09-12	13:10:53	1.24775	558.859	FALSE	30
2022-09-12	13:10:53	0.663779	559.523	FALSE	30
2022-09-12	13:10:53	0.587239	560.11	FALSE	30
2022-09-12	13:10:53	0.354415	560.465	FALSE	30
2022-09-12	13:10:54	0.821539	561.286	FALSE	30
2022-09-12	13:10:54	0.606883	561.893	FALSE	30
2022-09-12	13:10:54	0.727596	562.621	FALSE	30
2022-09-12	13:10:55	1.1993	563.82	FALSE	30
2022-09-12	13:10:55	1.14836	564.968	FALSE	30
2022-09-12	13:10:55	1.56174	566.53	FALSE	30
2022-09-12	13:10:55	3.35803	569.888	1	31
2022-09-12	13:10:56	1.99345	571.882	FALSE	31
2022-09-12	13:10:56	3.72836	575.61	1	32
2022-09-12	13:10:56	1.7992	577.409	FALSE	32
2022-09-12	13:10:56	2.65905	580.068	FALSE	32
2022-09-12	13:10:57	2.16704	582.235	FALSE	32
2022-09-12	13:10:57	1.49614	583.731	FALSE	32
2022-09-12	13:10:57	1.18154	584.913	FALSE	32
2022-09-12	13:10:57	0.558944	585.472	FALSE	32
2022-09-12	13:10:58	1.13467	586.606	FALSE	32
2022-09-12	13:10:58	0.916654	587.523	FALSE	32
2022-09-12	13:10:58	0.925916	588.449	FALSE	32
2022-09-12	13:10:59	1.38368	589.833	FALSE	32
2022-09-12	13:10:59	2.41747	592.25	FALSE	32
2022-09-12	13:10:59	2.05818	594.308	FALSE	32
2022-09-12	13:10:59	2.25492	596.563	FALSE	32
2022-09-12	13:11:00	2.04062	598.604	FALSE	32
2022-09-12	13:11:00	2.48642	601.09	FALSE	32
2022-09-12	13:11:00	0.53126	601.622	FALSE	32
2022-09-12	13:11:00	1.56546	603.187	FALSE	32
2022-09-12	13:11:01	1.06276	604.25	FALSE	32
2022-09-12	13:11:01	1.93665	606.186	FALSE	32
2022-09-12	13:11:01	1.19838	607.385	FALSE	32
2022-09-12	13:11:01	0.880318	608.265	FALSE	32
2022-09-12	13:11:02	1.10897	609.374	FALSE	32
2022-09-12	13:11:02	0.283931	609.658	FALSE	32
2022-09-12	13:11:02	0.974262	610.632	FALSE	32
2022-09-12	13:11:03	0.498588	611.131	FALSE	32
2022-09-12	13:11:03	1.41686	612.548	FALSE	32
2022-09-12	13:11:03	0.230853	612.779	FALSE	32
2022-09-12	13:11:03	0.27416	613.053	FALSE	32
2022-09-12	13:11:04	0.21584	613.269	FALSE	32
2022-09-12	13:11:04	0.402964	613.672	FALSE	32
2022-09-12	13:11:04	0.175229	613.847	FALSE	32
2022-09-12	13:11:04	0.374873	614.222	FALSE	32
2022-09-12	13:11:05	0.250751	614.472	FALSE	32
2022-09-12	13:11:05	0.224237	614.697	FALSE	32
2022-09-12	13:11:05	0.216451	614.913	FALSE	32
2022-09-12	13:11:05	0.222252	615.135	FALSE	32
2022-09-12	13:11:06	0.232074	615.367	FALSE	32
2022-09-12	13:11:06	0.238282	615.606	FALSE	32
2022-09-12	13:11:06	0.239708	615.845	FALSE	32
2022-09-12	13:11:07	0.238639	616.084	FALSE	32
2022-09-12	13:11:07	0.238842	616.323	FALSE	32
2022-09-12	13:11:07	0.234669	616.558	FALSE	32
2022-09-12	13:11:08	0.22902	616.787	FALSE	32
2022-09-12	13:11:08	0.185458	616.972	FALSE	32
2022-09-12	13:11:08	0.307545	617.28	FALSE	32
2022-09-12	13:11:08	0.420318	617.7	FALSE	32
2022-09-12	13:11:08	0.931819	618.632	FALSE	32
2022-09-12	13:11:09	0.684847	619.317	FALSE	32
2022-09-12	13:11:09	0.531311	619.848	FALSE	32
2022-09-12	13:11:09	0.348613	620.197	FALSE	32
2022-09-12	13:11:09	0.420216	620.617	FALSE	32
2022-09-12	13:11:10	0.381489	620.998	FALSE	32
2022-09-12	13:11:10	0.256909	621.255	FALSE	32
2022-09-12	13:11:10	0.15701	621.412	FALSE	32
2022-09-12	13:11:11	0.145967	621.558	FALSE	32
2022-09-12	13:11:11	0.148308	621.706	FALSE	32
2022-09-12	13:11:11	0.10785	621.814	FALSE	32
2022-09-12	13:11:11	0.531463	622.346	FALSE	32
2022-09-12	13:11:12	0.329886	622.676	FALSE	32
2022-09-12	13:11:12	1.99487	624.67	FALSE	32
2022-09-12	13:11:12	0.403219	625.074	FALSE	32
2022-09-12	13:11:12	0.586527	625.66	FALSE	32
2022-09-12	13:11:13	0.207392	625.868	FALSE	32
2022-09-12	13:11:13	0.393397	626.261	FALSE	32
2022-09-12	13:11:13	0.19986	626.461	FALSE	32
2022-09-12	13:11:14	0.237061	626.698	FALSE	32
2022-09-12	13:11:14	-0.127163	626.698	FALSE	32
2022-09-12	13:11:14	-0.0963229	626.698	FALSE	32
2022-09-12	13:11:14	0.0487661	626.747	FALSE	32
2022-09-12	13:11:15	0.139097	626.886	FALSE	32
2022-09-12	13:11:15	0.384644	627.27	FALSE	32
2022-09-12	13:11:15	0.49757	627.768	FALSE	32
2022-09-12	13:11:15	0.334873	628.103	FALSE	32
2022-09-12	13:11:16	0.450903	628.554	FALSE	32
2022-09-12	13:11:16	0.461285	629.015	FALSE	32
2022-09-12	13:11:16	0.654567	629.67	FALSE	32
2022-09-12	13:11:16	0.62215	630.292	FALSE	32
2022-09-12	13:11:17	0.444084	630.736	FALSE	32
2022-09-12	13:11:17	0.980878	631.717	FALSE	32
2022-09-12	13:11:17	0.851972	632.569	FALSE	32
2022-09-12	13:11:18	1.58378	634.153	FALSE	32
2022-09-12	13:11:18	2.58205	636.735	FALSE	32
2022-09-12	13:11:18	3.59533	640.33	1	33
2022-09-12	13:11:18	3.03233	643.362	1	34
2022-09-12	13:11:19	3.84836	647.211	1	35
2022-09-12	13:11:19	5.08744	652.298	1	36
2022-09-12	13:11:19	2.48169	654.78	FALSE	36
2022-09-12	13:11:19	3.15736	657.937	1	37
2022-09-12	13:11:20	1.62016	659.557	FALSE	37
2022-09-12	13:11:20	2.57284	662.13	FALSE	37
2022-09-12	13:11:20	2.2648	664.395	FALSE	37
2022-09-12	13:11:20	1.59324	665.988	FALSE	37
2022-09-12	13:11:21	1.96195	667.95	FALSE	37
2022-09-12	13:11:21	2.3508	670.301	FALSE	37
2022-09-12	13:11:21	1.70607	672.007	FALSE	37
2022-09-12	13:11:22	2.7681	674.775	FALSE	37
2022-09-12	13:11:22	1.50429	676.279	FALSE	37
2022-09-12	13:11:22	1.78994	678.069	FALSE	37
2022-09-12	13:11:22	2.5366	680.606	FALSE	37
2022-09-12	13:11:23	0.809987	681.416	FALSE	37
2022-09-12	13:11:23	1.53182	682.948	FALSE	37
2022-09-12	13:11:23	0.78042	683.728	FALSE	37
2022-09-12	13:11:23	0.434568	684.163	FALSE	37
2022-09-12	13:11:24	0.402099	684.565	FALSE	37
2022-09-12	13:11:24	0.301998	684.867	FALSE	37
2022-09-12	13:11:24	0.382099	685.249	FALSE	37
2022-09-12	13:11:24	0.157519	685.406	FALSE	37
2022-09-12	13:11:25	0.220776	685.627	FALSE	37
2022-09-12	13:11:25	0.224797	685.852	FALSE	37
2022-09-12	13:11:25	0.701438	686.553	FALSE	37
2022-09-12	13:11:26	1.73034	688.284	FALSE	37
2022-09-12	13:11:26	0.515025	688.799	FALSE	37
2022-09-12	13:11:26	2.7481	691.547	FALSE	37
2022-09-12	13:11:26	1.07971	692.627	FALSE	37
2022-09-12	13:11:27	2.74205	695.369	FALSE	37
2022-09-12	13:11:27	3.64271	699.011	1	38
2022-09-12	13:11:27	4.39492	703.406	1	39
2022-09-12	13:11:27	9.24199	712.648	1	40
2022-09-12	13:11:28	3.94795	716.596	1	41
2022-09-12	13:11:28	1.03915	717.635	FALSE	41
2022-09-12	13:11:28	2.12312	719.758	FALSE	41
2022-09-12	13:11:28	2.12932	721.888	FALSE	41
2022-09-12	13:11:29	1.83472	723.722	FALSE	41
2022-09-12	13:11:29	0.669682	724.392	FALSE	41
2022-09-12	13:11:29	0.826323	725.218	FALSE	41
2022-09-12	13:11:30	1.11828	726.337	FALSE	41
2022-09-12	13:11:30	0.456654	726.793	FALSE	41
2022-09-12	13:11:30	0.343982	727.137	FALSE	41
2022-09-12	13:11:30	0.497723	727.635	FALSE	41
2022-09-12	13:11:31	0.290649	727.926	FALSE	41
2022-09-12	13:11:31	0.42215	728.348	FALSE	41
2022-09-12	13:11:31	0.248562	728.596	FALSE	41
2022-09-12	13:11:31	0.215127	728.812	FALSE	41
2022-09-12	13:11:32	0.335076	729.147	FALSE	41
2022-09-12	13:11:32	1.20485	730.352	FALSE	41
2022-09-12	13:11:32	1.4336	731.785	FALSE	41
2022-09-12	13:11:32	1.83737	733.623	FALSE	41
2022-09-12	13:11:33	2.50235	736.125	FALSE	41
2022-09-12	13:11:33	3.20703	739.332	1	42
2022-09-12	13:11:33	3.9649	743.297	1	43
2022-09-12	13:11:34	3.29441	746.591	1	44
2022-09-12	13:11:34	5.91182	752.503	1	45
2022-09-12	13:11:34	1.69309	754.196	FALSE	45
2022-09-12	13:11:34	0.526425	754.723	FALSE	45
2022-09-12	13:11:35	0.604237	755.327	FALSE	45
2022-09-12	13:11:35	0.717316	756.044	FALSE	45
2022-09-12	13:11:35	0.714211	756.758	FALSE	45
2022-09-12	13:11:35	0.718435	757.477	FALSE	45
2022-09-12	13:11:36	0.716807	758.194	FALSE	45
2022-09-12	13:11:36	0.724186	758.918	FALSE	45
2022-09-12	13:11:36	0.52439	759.442	FALSE	45
2022-09-12	13:11:36	0.694008	760.136	FALSE	45
2022-09-12	13:11:37	0.715738	760.852	FALSE	45
2022-09-12	13:11:37	0.727087	761.579	FALSE	45
2022-09-12	13:11:37	0.719097	762.298	FALSE	45
2022-09-12	13:11:38	0.71813	763.016	FALSE	45
2022-09-12	13:11:38	0.628664	763.645	FALSE	45
2022-09-12	13:11:38	0.241489	763.886	FALSE	45
2022-09-12	13:11:38	0.234313	764.121	FALSE	45
2022-09-12	13:11:39	1.15696	765.278	FALSE	45
2022-09-12	13:11:39	0.681285	765.959	FALSE	45
2022-09-12	13:11:39	0.249886	766.209	FALSE	45
2022-09-12	13:11:39	0.51813	766.727	FALSE	45
2022-09-12	13:11:40	2.19111	768.918	FALSE	45
2022-09-12	13:11:40	1.27701	770.195	FALSE	45
2022-09-12	13:11:40	1.77894	771.974	FALSE	45
2022-09-12	13:11:40	0.819504	772.793	FALSE	45
2022-09-12	13:11:41	1.56408	774.358	FALSE	45
2022-09-12	13:11:41	0.759555	775.117	FALSE	45
2022-09-12	13:11:41	1.38571	776.503	FALSE	45
2022-09-12	13:11:42	0.941947	777.445	FALSE	45
2022-09-12	13:11:42	1.60291	779.048	FALSE	45
2022-09-12	13:11:42	2.83782	781.885	FALSE	45
2022-09-12	13:11:42	1.69167	783.577	FALSE	45
2022-09-12	13:11:43	1.00001	784.577	FALSE	45
2022-09-12	13:11:43	1.20449	785.782	FALSE	45
2022-09-12	13:11:43	1.67055	787.452	FALSE	45
2022-09-12	13:11:43	1.0192	788.471	FALSE	45
2022-09-12	13:11:44	1.47207	789.943	FALSE	45
2022-09-12	13:11:44	1.3966	791.34	FALSE	45
2022-09-12	13:11:44	0.869733	792.21	FALSE	45
2022-09-12	13:11:45	0.619097	792.829	FALSE	45
2022-09-12	13:11:45	0.744797	793.574	FALSE	45
2022-09-12	13:11:45	0.726781	794.3	FALSE	45
2022-09-12	13:11:45	0.717468	795.018	FALSE	45
2022-09-12	13:11:46	0.395534	795.413	FALSE	45
2022-09-12	13:11:46	0.708053	796.122	FALSE	45
2022-09-12	13:11:46	1.511	797.633	FALSE	45
2022-09-12	13:11:46	0.407036	798.04	FALSE	45
2022-09-12	13:11:47	0.223575	798.263	FALSE	45
2022-09-12	13:11:47	0.302099	798.565	FALSE	45
2022-09-12	13:11:47	0.229071	798.794	FALSE	45
2022-09-12	13:11:47	0.550394	799.345	FALSE	45
2022-09-12	13:11:48	1.46983	800.815	FALSE	45
2022-09-12	13:11:48	0.805916	801.62	FALSE	45
2022-09-12	13:11:48	0.173092	801.794	FALSE	45
2022-09-12	13:11:49	0.352074	802.146	FALSE	45
2022-09-12	13:11:49	0.168308	802.314	FALSE	45
2022-09-12	13:11:49	0.226272	802.54	FALSE	45
2022-09-12	13:11:49	0.125051	802.665	FALSE	45
2022-09-12	13:11:50	0.304135	802.969	FALSE	45
2022-09-12	13:11:50	0.120216	803.09	FALSE	45
2022-09-12	13:11:50	-0.0507249	803.09	FALSE	45
2022-09-12	13:11:50	-0.189351	803.09	FALSE	45
2022-09-12	13:11:51	0.0116669	803.101	FALSE	45
2022-09-12	13:11:51	-0.0491473	803.101	FALSE	45
2022-09-12	13:11:51	0.338079	803.439	FALSE	45
2022-09-12	13:11:51	2.0192	805.459	FALSE	45
2022-09-12	13:11:52	2.59121	808.05	FALSE	45
2022-09-12	13:11:52	2.4135	810.463	FALSE	45
2022-09-12	13:11:52	1.71706	812.18	FALSE	45
2022-09-12	13:11:53	2.02943	814.21	FALSE	45
2022-09-12	13:11:53	2.04622	816.256	FALSE	45
2022-09-12	13:11:53	2.35976	818.616	FALSE	45
2022-09-12	13:11:53	1.80989	820.426	FALSE	45
2022-09-12	13:11:54	1.29772	821.723	FALSE	45
2022-09-12	13:11:54	0.862303	822.586	FALSE	45
2022-09-12	13:11:54	0.183219	822.769	FALSE	45
2022-09-12	13:11:54	0.523422	823.292	FALSE	45
2022-09-12	13:11:55	0.701743	823.994	FALSE	45
2022-09-12	13:11:55	1.80439	825.798	FALSE	45
2022-09-12	13:11:55	2.60113	828.4	FALSE	45
2022-09-12	13:11:55	3.38703	831.787	1	46
2022-09-12	13:11:56	3.03116	834.818	1	47
2022-09-12	13:11:56	1.35004	836.168	FALSE	47
2022-09-12	13:11:56	2.75024	838.918	FALSE	47
2022-09-12	13:11:57	0.502557	839.421	FALSE	47
2022-09-12	13:11:57	2.14088	841.561	FALSE	47
2022-09-12	13:11:57	1.34352	842.905	FALSE	47
2022-09-12	13:11:57	0.942557	843.848	FALSE	47
2022-09-12	13:11:58	1.06576	844.913	FALSE	47
2022-09-12	13:11:58	0.239555	845.153	FALSE	47
2022-09-12	13:11:58	-0.0917427	845.153	FALSE	47
2022-09-12	13:11:58	-0.118409	845.153	FALSE	47
2022-09-12	13:11:59	0.17243	845.325	FALSE	47
2022-09-12	13:11:59	0.470446	845.796	FALSE	47
2022-09-12	13:11:59	0.547137	846.343	FALSE	47
2022-09-12	13:11:59	0.326934	846.67	FALSE	47
2022-09-12	13:12:00	0.470395	847.14	FALSE	47
2022-09-12	13:12:00	0.248003	847.388	FALSE	47
2022-09-12	13:12:00	0.28841	847.677	FALSE	47
2022-09-12	13:12:01	0.265662	847.942	FALSE	47
2022-09-12	13:12:01	0.115484	848.058	FALSE	47
2022-09-12	13:12:01	0.469122	848.527	FALSE	47
2022-09-12	13:12:01	0.487799	849.015	FALSE	47
2022-09-12	13:12:02	1.14434	850.159	FALSE	47
2022-09-12	13:12:02	3.41981	853.579	1	48
2022-09-12	13:12:02	2.55625	856.135	FALSE	48
2022-09-12	13:12:02	3.92149	860.057	1	49
2022-09-12	13:12:03	1.03472	861.091	FALSE	49
2022-09-12	13:12:03	1.9735	863.065	FALSE	49
2022-09-12	13:12:03	0.654415	863.719	FALSE	49
2022-09-12	13:12:03	0.628715	864.348	FALSE	49
2022-09-12	13:12:04	0.470293	864.818	FALSE	49
2022-09-12	13:12:04	0.299402	865.118	FALSE	49
2022-09-12	13:12:04	1.16709	866.285	FALSE	49
2022-09-12	13:12:05	1.05223	867.337	FALSE	49
2022-09-12	13:12:05	1.37762	868.715	FALSE	49
2022-09-12	13:12:05	1.08001	869.795	FALSE	49
2022-09-12	13:12:05	2.2937	872.088	FALSE	49
2022-09-12	13:12:06	2.00739	874.096	FALSE	49
2022-09-12	13:12:06	3.25604	877.352	1	50
2022-09-12	13:12:06	2.28678	879.638	FALSE	50
2022-09-12	13:12:06	0.973295	880.612	FALSE	50
2022-09-12	13:12:07	1.42525	882.037	FALSE	50
2022-09-12	13:12:07	0.511768	882.549	FALSE	50
2022-09-12	13:12:07	1.13034	883.679	FALSE	50
2022-09-12	13:12:07	0.567341	884.246	FALSE	50
2022-09-12	13:12:08	0.875891	885.122	FALSE	50
2022-09-12	13:12:08	0.684186	885.807	FALSE	50
2022-09-12	13:12:08	0.340165	886.147	FALSE	50
2022-09-12	13:12:09	0.722862	886.87	FALSE	50
2022-09-12	13:12:09	0.290547	887.16	FALSE	50
2022-09-12	13:12:09	1.35752	888.518	FALSE	50
2022-09-12	13:12:09	1.46531	889.983	FALSE	50
2022-09-12	13:12:10	2.9449	892.928	FALSE	50
2022-09-12	13:12:10	1.42235	894.35	FALSE	50
2022-09-12	13:12:10	2.89884	897.249	FALSE	50
2022-09-12	13:12:10	1.9448	899.194	FALSE	50
2022-09-12	13:12:11	3.23273	902.427	1	51
2022-09-12	13:12:11	4.39151	906.818	1	52
2022-09-12	13:12:11	2.18632	909.004	FALSE	52
2022-09-12	13:12:11	4.26337	913.268	1	53
2022-09-12	13:12:12	2.5737	915.841	FALSE	53
2022-09-12	13:12:12	4.35497	920.196	1	54
2022-09-12	13:12:12	2.26775	922.464	FALSE	54
2022-09-12	13:12:13	1.60296	924.067	FALSE	54
2022-09-12	13:12:13	0.87986	924.947	FALSE	54
2022-09-12	13:12:13	0.296196	925.243	FALSE	54
2022-09-12	13:12:13	0.903677	926.147	FALSE	54
2022-09-12	13:12:14	0.302048	926.449	FALSE	54
2022-09-12	13:12:14	0.247494	926.696	FALSE	54
2022-09-12	13:12:14	0.0963488	926.793	FALSE	54
2022-09-12	13:12:14	-0.192913	926.793	FALSE	54
2022-09-12	13:12:15	-0.0787656	926.793	FALSE	54
2022-09-12	13:12:15	0.188257	926.981	FALSE	54
2022-09-12	13:12:15	0.396959	927.378	FALSE	54
2022-09-12	13:12:16	0.652379	928.03	FALSE	54
2022-09-12	13:12:16	1.71701	929.747	FALSE	54
2022-09-12	13:12:16	2.11492	931.862	FALSE	54
2022-09-12	13:12:16	5.27675	937.139	1	55
2022-09-12	13:12:17	5.21319	942.352	1	56
2022-09-12	13:12:17	4.24052	946.593	1	57
2022-09-12	13:12:17	1.58337	948.176	FALSE	57
2022-09-12	13:12:17	2.23329	950.409	FALSE	57
2022-09-12	13:12:18	2.04022	952.45	FALSE	57
2022-09-12	13:12:18	1.52032	953.97	FALSE	57
2022-09-12	13:12:18	1.22948	955.199	FALSE	57
2022-09-12	13:12:18	1.86307	957.063	FALSE	57
2022-09-12	13:12:19	0.786272	957.849	FALSE	57
2022-09-12	13:12:19	1.88683	959.736	FALSE	57
2022-09-12	13:12:19	0.494262	960.23	FALSE	57
2022-09-12	13:12:20	0.374211	960.604	FALSE	57
2022-09-12	13:12:20	0.608206	961.212	FALSE	57
2022-09-12	13:12:20	0.150395	961.363	FALSE	57
2022-09-12	13:12:20	0.328308	961.691	FALSE	57
2022-09-12	13:12:21	0.521947	962.213	FALSE	57
2022-09-12	13:12:21	0.511972	962.725	FALSE	57
2022-09-12	13:12:21	0.394771	963.12	FALSE	57
2022-09-12	13:12:21	0.453244	963.573	FALSE	57
2022-09-12	13:12:22	1.17365	964.747	FALSE	57
2022-09-12	13:12:22	1.73935	966.486	FALSE	57
2022-09-12	13:12:22	3.77986	970.266	1	58
2022-09-12	13:12:22	3.94663	974.212	1	59
2022-09-12	13:12:23	8.1083	982.321	1	60
2022-09-12	13:12:23	4.55334	986.874	1	61
2022-09-12	13:12:23	3.50678	990.381	1	62
2022-09-12	13:12:24	2.02866	992.409	FALSE	62
2022-09-12	13:12:24	2.11207	994.522	FALSE	62
2022-09-12	13:12:24	0.860623	995.382	FALSE	62
2022-09-12	13:12:24	0.915229	996.297	FALSE	62
2022-09-12	13:12:25	0.669224	996.967	FALSE	62
2022-09-12	13:12:25	0.361845	997.328	FALSE	62
2022-09-12	13:12:25	0.585611	997.914	FALSE	62
2022-09-12	13:12:25	0.168919	998.083	FALSE	62
2022-09-12	13:12:26	0.632888	998.716	FALSE	62
2022-09-12	13:12:26	1.00281	999.719	FALSE	62
2022-09-12	13:12:26	1.46169	1001.18	FALSE	62
2022-09-12	13:12:26	3.93212	1005.11	1	63
2022-09-12	13:12:27	5.22734	1010.34	1	64
2022-09-12	13:12:27	4.4279	1014.77	1	65
2022-09-12	13:12:27	3.48352	1018.25	1	66
2022-09-12	13:12:28	2.35884	1020.61	FALSE	66
2022-09-12	13:12:28	0.739962	1021.35	FALSE	66
2022-09-12	13:12:28	1.19752	1022.55	FALSE	66
2022-09-12	13:12:28	0.48215	1023.03	FALSE	66
2022-09-12	13:12:29	0.682761	1023.71	FALSE	66
2022-09-12	13:12:29	0.743677	1024.46	FALSE	66
2022-09-12	13:12:29	0.868053	1025.32	FALSE	66
2022-09-12	13:12:29	1.67981	1027	FALSE	66
2022-09-12	13:12:30	2.3364	1029.34	FALSE	66
2022-09-12	13:12:30	3.03289	1032.37	1	67
2022-09-12	13:12:30	1.78531	1034.16	FALSE	67
2022-09-12	13:12:31	2.61813	1036.78	FALSE	67
2022-09-12	13:12:31	2.27976	1039.06	FALSE	67
2022-09-12	13:12:31	2.09197	1041.15	FALSE	67
2022-09-12	13:12:31	1.14693	1042.3	FALSE	67
2022-09-12	13:12:32	1.32459	1043.62	FALSE	67
2022-09-12	13:12:32	1.5308	1045.15	FALSE	67
2022-09-12	13:12:32	1.87604	1047.03	FALSE	67
2022-09-12	13:12:32	2.20612	1049.23	FALSE	67
2022-09-12	13:12:33	0.715025	1049.95	FALSE	67
2022-09-12	13:12:33	0.795331	1050.74	FALSE	67
2022-09-12	13:12:33	0.672328	1051.42	FALSE	67
2022-09-12	13:12:33	0.975025	1052.39	FALSE	67
2022-09-12	13:12:34	2.23833	1054.63	FALSE	67
2022-09-12	13:12:34	2.77009	1057.4	FALSE	67
2022-09-12	13:12:34	4.76327	1062.16	1	68
2022-09-12	13:12:34	4.91294	1067.08	1	69
2022-09-12	13:12:35	6.27314	1073.35	1	70
2022-09-12	13:12:35	4.68484	1078.03	1	71
2022-09-12	13:12:35	5.82576	1083.86	1	72
2022-09-12	13:12:36	0.941336	1084.8	FALSE	72
2022-09-12	13:12:36	1.02612	1085.83	FALSE	72
2022-09-12	13:12:36	0.722252	1086.55	FALSE	72
2022-09-12	13:12:36	0.234669	1086.78	FALSE	72
2022-09-12	13:12:37	0.538791	1087.32	FALSE	72
2022-09-12	13:12:37	0.209428	1087.53	FALSE	72
2022-09-12	13:12:37	0.364695	1087.9	FALSE	72
2022-09-12	13:12:37	0.20327	1088.1	FALSE	72
2022-09-12	13:12:38	0.267087	1088.37	FALSE	72
2022-09-12	13:12:38	0.35528	1088.72	FALSE	72
2022-09-12	13:12:38	0.284084	1089.01	FALSE	72
2022-09-12	13:12:38	0.443015	1089.45	FALSE	72
2022-09-12	13:12:39	0.815636	1090.26	FALSE	72
2022-09-12	13:12:39	0.689377	1090.95	FALSE	72
2022-09-12	13:12:39	1.26266	1092.22	FALSE	72
2022-09-12	13:12:40	0.772939	1092.99	FALSE	72
2022-09-12	13:12:40	1.30683	1094.3	FALSE	72
2022-09-12	13:12:40	0.82556	1095.12	FALSE	72
2022-09-12	13:12:40	1.28841	1096.41	FALSE	72
2022-09-12	13:12:41	2.10983	1098.52	FALSE	72
2022-09-12	13:12:41	1.55818	1100.08	FALSE	72
2022-09-12	13:12:41	3.60759	1103.69	1	73
2022-09-12	13:12:41	1.80841	1105.49	FALSE	73
2022-09-12	13:12:42	3.3364	1108.83	1	74
2022-09-12	13:12:42	2.40719	1111.24	FALSE	74
2022-09-12	13:12:42	1.20592	1112.44	FALSE	74
2022-09-12	13:12:42	3.07314	1115.52	1	75
2022-09-12	13:12:43	0.801947	1116.32	FALSE	75
2022-09-12	13:12:43	2.47299	1118.79	FALSE	75
2022-09-12	13:12:43	1.39482	1120.19	FALSE	75
2022-09-12	13:12:44	1.24332	1121.43	FALSE	75
2022-09-12	13:12:44	1.35187	1122.78	FALSE	75
2022-09-12	13:12:44	0.663168	1123.45	FALSE	75
2022-09-12	13:12:44	1.67355	1125.12	FALSE	75
2022-09-12	13:12:45	0.675534	1125.79	FALSE	75
2022-09-12	13:12:45	1.75594	1127.55	FALSE	75
2022-09-12	13:12:45	1.87986	1129.43	FALSE	75
2022-09-12	13:12:45	2.15065	1131.58	FALSE	75
2022-09-12	13:12:46	3.40027	1134.98	1	76
2022-09-12	13:12:46	1.91889	1136.9	FALSE	76
2022-09-12	13:12:46	5.10301	1142	1	77
2022-09-12	13:12:46	1.73024	1143.73	FALSE	77
2022-09-12	13:12:47	4.01864	1147.75	1	78
2022-09-12	13:12:47	1.40195	1149.15	FALSE	78
2022-09-12	13:12:47	1.06566	1150.22	FALSE	78
2022-09-12	13:12:48	0.965102	1151.18	FALSE	78
2022-09-12	13:12:48	0.419402	1151.6	FALSE	78
2022-09-12	13:12:48	0.531463	1152.14	FALSE	78
2022-09-12	13:12:48	0.64271	1152.78	FALSE	78
2022-09-12	13:12:49	0.986832	1153.76	FALSE	78
2022-09-12	13:12:49	1.77487	1155.54	FALSE	78
2022-09-12	13:12:49	2.60673	1158.15	FALSE	78
2022-09-12	13:12:49	1.36765	1159.51	FALSE	78
2022-09-12	13:12:50	0.976807	1160.49	FALSE	78
2022-09-12	13:12:50	0.439198	1160.93	FALSE	78
2022-09-12	13:12:50	0.290547	1161.22	FALSE	78
2022-09-12	13:12:51	0.269835	1161.49	FALSE	78
2022-09-12	13:12:51	0.383219	1161.87	FALSE	78
2022-09-12	13:12:51	0.363524	1162.24	FALSE	78
2022-09-12	13:12:51	0.171209	1162.41	FALSE	78
2022-09-12	13:12:52	0.36098	1162.77	FALSE	78
2022-09-12	13:12:52	0.169682	1162.94	FALSE	78
2022-09-12	13:12:52	0.539758	1163.48	FALSE	78
2022-09-12	13:12:52	0.21416	1163.69	FALSE	78
2022-09-12	13:12:53	0.459758	1164.15	FALSE	78
2022-09-12	13:12:53	2.37599	1166.53	FALSE	78
2022-09-12	13:12:53	2.83645	1169.37	FALSE	78
2022-09-12	13:12:53	1.54536	1170.91	FALSE	78
2022-09-12	13:12:54	2.32648	1173.24	FALSE	78
2022-09-12	13:12:54	1.51029	1174.75	FALSE	78
2022-09-12	13:12:54	0.546527	1175.29	FALSE	78
2022-09-12	13:12:55	0.765356	1176.06	FALSE	78
2022-09-12	13:12:55	0.317417	1176.38	FALSE	78
2022-09-12	13:12:55	0.703219	1177.08	FALSE	78
2022-09-12	13:12:55	0.407901	1177.49	FALSE	78
2022-09-12	13:12:56	1.04139	1178.53	FALSE	78
2022-09-12	13:12:56	0.876043	1179.41	FALSE	78
2022-09-12	13:12:56	2.57894	1181.98	FALSE	78
2022-09-12	13:12:56	2.09452	1184.08	FALSE	78
2022-09-12	13:12:57	3.21014	1187.29	1	79
2022-09-12	13:12:57	3.07009	1190.36	1	80
2022-09-12	13:12:57	2.47431	1192.83	FALSE	80
2022-09-12	13:12:57	3.93808	1196.77	1	81
2022-09-12	13:12:58	3.10515	1199.88	1	82
2022-09-12	13:12:58	4.04861	1203.93	1	83
2022-09-12	13:12:58	2.24235	1206.17	FALSE	83
2022-09-12	13:12:59	2.67558	1208.84	FALSE	83
2022-09-12	13:12:59	1.29492	1210.14	FALSE	83
2022-09-12	13:12:59	1.91961	1212.06	FALSE	83
2022-09-12	13:12:59	2.05843	1214.12	FALSE	83
2022-09-12	13:13:00	3.21711	1217.33	1	84
2022-09-12	13:13:00	3.2424	1220.58	1	85
2022-09-12	13:13:00	2.42393	1223	FALSE	85
2022-09-12	13:13:00	4.0849	1227.08	1	86

## Sheet: MrFitz_martin_2022912130731
						**GoPro Fitting: 1257
2022-09-12	13:07:31	0.45472
2022-09-12	13:07:31	0.373041
2022-09-12	13:07:31	0.421896
2022-09-12	13:07:31	0.441234
2022-09-12	13:07:32	0.423779
2022-09-12	13:07:32	0.408155
2022-09-12	13:07:32	0.421438
2022-09-12	13:07:33	0.431311
2022-09-12	13:07:33	0.420318
2022-09-12	13:07:33	0.446985
2022-09-12	13:07:33	0.369428
2022-09-12	13:07:34	0.420267
2022-09-12	13:07:34	0.464237
2022-09-12	13:07:34	0.417265
2022-09-12	13:07:34	0.453804
2022-09-12	13:07:35	0.44388
2022-09-12	13:07:35	0.465407
2022-09-12	13:07:35	0.386018
2022-09-12	13:07:35	0.357163
2022-09-12	13:07:36	0.229733
2022-09-12	13:07:36	0.19126
2022-09-12	13:07:36	0.256094
2022-09-12	13:07:37	0.28556
2022-09-12	13:07:37	0.261489
2022-09-12	13:07:37	0.329326
2022-09-12	13:07:37	0.35472
2022-09-12	13:07:38	0.361132
2022-09-12	13:07:38	0.329021
2022-09-12	13:07:38	0.500623
2022-09-12	13:07:38	0.684135
2022-09-12	13:07:39	0.516807
2022-09-12	13:07:39	0.494822
2022-09-12	13:07:39	0.475127
2022-09-12	13:07:39	0.512379
2022-09-12	13:07:40	0.482405
2022-09-12	13:07:40	0.486323
2022-09-12	13:07:40	0.45645
2022-09-12	13:07:41	0.493499
2022-09-12	13:07:41	0.49701
2022-09-12	13:07:41	0.40159
2022-09-12	13:07:41	0.436654
2022-09-12	13:07:42	0.516501
2022-09-12	13:07:42	0.351616
2022-09-12	13:07:42	0.481794
2022-09-12	13:07:42	0.438842
2022-09-12	13:07:43	0.510445
2022-09-12	13:07:43	0.590598
2022-09-12	13:07:43	0.439809
2022-09-12	13:07:43	0.370445
2022-09-12	13:07:44	0.946272
2022-09-12	13:07:44	0.491718
2022-09-12	13:07:44	0.529733
2022-09-12	13:07:45	0.46154
2022-09-12	13:07:45	0.52332
2022-09-12	13:07:45	0.396807
2022-09-12	13:07:45	0.443728
2022-09-12	13:07:46	0.38098
2022-09-12	13:07:46	0.434262
2022-09-12	13:07:46	0.518028
2022-09-12	13:07:46	0.392481
2022-09-12	13:07:47	0.441489
2022-09-12	13:07:47	0.398435
2022-09-12	13:07:47	1.43818
2022-09-12	13:07:47	0.637163
2022-09-12	13:07:48	0.489835
2022-09-12	13:07:48	0.58958
2022-09-12	13:07:48	0.384237
2022-09-12	13:07:49	1.00052
2022-09-12	13:07:49	1.84434
2022-09-12	13:07:49	4.98128
2022-09-12	13:07:49	5.02021
2022-09-12	13:07:50	2.35136
2022-09-12	13:07:50	0.379809
2022-09-12	13:07:50	0.0934989
2022-09-12	13:07:50	0.175484
2022-09-12	13:07:51	-0.048384
2022-09-12	13:07:51	0.247392
2022-09-12	13:07:51	-0.203855
2022-09-12	13:07:52	-0.27276
2022-09-12	13:07:52	-0.256374
2022-09-12	13:07:52	-0.104262
2022-09-12	13:07:52	0.491463
2022-09-12	13:07:53	0.88902
2022-09-12	13:07:53	0.455229
2022-09-12	13:07:53	0.11869
2022-09-12	13:07:53	0.233397
2022-09-12	13:07:54	0.39757
2022-09-12	13:07:54	-0.146348
2022-09-12	13:07:54	-0.20075
2022-09-12	13:07:54	-0.269453
2022-09-12	13:07:55	-0.449605
2022-09-12	13:07:55	-0.417239
2022-09-12	13:07:55	-0.474796
2022-09-12	13:07:56	-0.563702
2022-09-12	13:07:56	-0.50533
2022-09-12	13:07:56	-0.447671
2022-09-12	13:07:56	-0.347315
2022-09-12	13:07:57	-0.159682
2022-09-12	13:07:57	-0.0444145
2022-09-12	13:07:57	0.335636
2022-09-12	13:07:57	1.29569
2022-09-12	13:07:58	2.00709
2022-09-12	13:07:58	0.274364
2022-09-12	13:07:58	1.26027
2022-09-12	13:07:58	1.01212
2022-09-12	13:07:59	0.552583
2022-09-12	13:07:59	0.650547
2022-09-12	13:07:59	0.290395
2022-09-12	13:08:00	0.781081
2022-09-12	13:08:00	1.59146
2022-09-12	13:08:00	0.640216
2022-09-12	13:08:00	0.437621
2022-09-12	13:08:01	0.903321
2022-09-12	13:08:01	0.630191
2022-09-12	13:08:01	1.41045
2022-09-12	13:08:01	5.13823
2022-09-12	13:08:02	4.55558
2022-09-12	13:08:02	6.87253
2022-09-12	13:08:02	2.28027
2022-09-12	13:08:02	1.85808
2022-09-12	13:08:03	2.18505
2022-09-12	13:08:03	2.03864
2022-09-12	13:08:03	4.41655
2022-09-12	13:08:04	2.40719
2022-09-12	13:08:04	4.00566
2022-09-12	13:08:04	5.4339
2022-09-12	13:08:04	3.68439
2022-09-12	13:08:05	3.12042
2022-09-12	13:08:05	1.53253
2022-09-12	13:08:05	0.879046
2022-09-12	13:08:05	0.436959
2022-09-12	13:08:06	0.105153
2022-09-12	13:08:06	0.520115
2022-09-12	13:08:06	0.127952
2022-09-12	13:08:06	0.583066
2022-09-12	13:08:07	0.432328
2022-09-12	13:08:07	0.786527
2022-09-12	13:08:07	0.782659
2022-09-12	13:08:08	0.55187
2022-09-12	13:08:08	0.75416
2022-09-12	13:08:08	0.723168
2022-09-12	13:08:08	0.930242
2022-09-12	13:08:09	0.834873
2022-09-12	13:08:09	0.19813
2022-09-12	13:08:09	0.474262
2022-09-12	13:08:09	0.00530559
2022-09-12	13:08:10	0.90902
2022-09-12	13:08:10	0.587188
2022-09-12	13:08:10	1.60866
2022-09-12	13:08:10	0.767901
2022-09-12	13:08:11	1.24531
2022-09-12	13:08:11	1.06103
2022-09-12	13:08:11	1.30169
2022-09-12	13:08:12	0.271361
2022-09-12	13:08:12	0.273041
2022-09-12	13:08:12	0.145458
2022-09-12	13:08:12	0.0854582
2022-09-12	13:08:13	0.0579264
2022-09-12	13:08:13	0.288003
2022-09-12	13:08:13	0.195433
2022-09-12	13:08:13	0.47355
2022-09-12	13:08:14	0.270751
2022-09-12	13:08:14	0.44154
2022-09-12	13:08:14	0.309784
2022-09-12	13:08:14	0.381845
2022-09-12	13:08:15	0.158079
2022-09-12	13:08:15	0.18902
2022-09-12	13:08:15	0.403779
2022-09-12	13:08:16	1.85385
2022-09-12	13:08:16	1.72419
2022-09-12	13:08:16	1.87009
2022-09-12	13:08:16	2.33095
2022-09-12	13:08:17	0.955025
2022-09-12	13:08:17	0.535127
2022-09-12	13:08:17	1.07905
2022-09-12	13:08:17	0.163982
2022-09-12	13:08:18	0.379148
2022-09-12	13:08:18	0.386527
2022-09-12	13:08:18	0.553092
2022-09-12	13:08:18	0.539147
2022-09-12	13:08:19	0.644542
2022-09-12	13:08:19	0.833855
2022-09-12	13:08:19	1.8279
2022-09-12	13:08:20	1.34719
2022-09-12	13:08:20	3.10464
2022-09-12	13:08:20	1.5992
2022-09-12	13:08:20	2.20922
2022-09-12	13:08:21	0.429275
2022-09-12	13:08:21	0.105356
2022-09-12	13:08:21	0.945051
2022-09-12	13:08:21	1.68235
2022-09-12	13:08:22	2.51121
2022-09-12	13:08:22	2.58077
2022-09-12	13:08:22	3.23889
2022-09-12	13:08:23	0.893295
2022-09-12	13:08:23	2.98464
2022-09-12	13:08:23	1.97335
2022-09-12	13:08:23	3.34637
2022-09-12	13:08:24	2.2766
2022-09-12	13:08:24	2.43055
2022-09-12	13:08:24	0.745051
2022-09-12	13:08:24	0.292685
2022-09-12	13:08:25	0.144186
2022-09-12	13:08:25	0.436552
2022-09-12	13:08:25	0.669224
2022-09-12	13:08:25	3.13864
2022-09-12	13:08:26	2.08373
2022-09-12	13:08:26	3.70663
2022-09-12	13:08:26	0.504542
2022-09-12	13:08:27	1.87228
2022-09-12	13:08:27	0.371005
2022-09-12	13:08:27	0.92215
2022-09-12	13:08:27	0.700114
2022-09-12	13:08:28	0.537061
2022-09-12	13:08:28	0.849885
2022-09-12	13:08:28	0.100318
2022-09-12	13:08:28	0.954822
2022-09-12	13:08:29	0.372786
2022-09-12	13:08:29	0.41299
2022-09-12	13:08:29	0.430395
2022-09-12	13:08:29	0.419962
2022-09-12	13:08:30	0.362557
2022-09-12	13:08:30	0.22327
2022-09-12	13:08:30	0.484389
2022-09-12	13:08:31	0.489122
2022-09-12	13:08:31	1.1334
2022-09-12	13:08:31	0.276094
2022-09-12	13:08:31	0.162761
2022-09-12	13:08:32	0.358333
2022-09-12	13:08:32	-0.0839565
2022-09-12	13:08:32	0.187137
2022-09-12	13:08:32	0.0741605
2022-09-12	13:08:33	0.357265
2022-09-12	13:08:33	0.114313
2022-09-12	13:08:33	0.279962
2022-09-12	13:08:33	0.111158
2022-09-12	13:08:34	0.285356
2022-09-12	13:08:34	0.0894786
2022-09-12	13:08:34	0.441183
2022-09-12	13:08:35	0.0132954
2022-09-12	13:08:35	-0.0716409
2022-09-12	13:08:35	-0.31215
2022-09-12	13:08:35	-0.516374
2022-09-12	13:08:36	-0.482684
2022-09-12	13:08:36	-0.431692
2022-09-12	13:08:36	-0.343295
2022-09-12	13:08:36	-0.156628
2022-09-12	13:08:37	0.344288
2022-09-12	13:08:37	0.295178
2022-09-12	13:08:37	0.217367
2022-09-12	13:08:37	0.24215
2022-09-12	13:08:38	0.165916
2022-09-12	13:08:38	0.316654
2022-09-12	13:08:38	0.161998
2022-09-12	13:08:39	0.83126
2022-09-12	13:08:39	1.22042
2022-09-12	13:08:39	1.01151
2022-09-12	13:08:39	0.380522
2022-09-12	13:08:40	0.430903
2022-09-12	13:08:40	0.91243
2022-09-12	13:08:40	1.20057
2022-09-12	13:08:40	2.1051
2022-09-12	13:08:41	0.498486
2022-09-12	13:08:41	0.777519
2022-09-12	13:08:41	0.362405
2022-09-12	13:08:41	1.55324
2022-09-12	13:08:42	1.3649
2022-09-12	13:08:42	2.73782
2022-09-12	13:08:42	2.59614
2022-09-12	13:08:43	1.49299
2022-09-12	13:08:43	1.99055
2022-09-12	13:08:43	2.30637
2022-09-12	13:08:43	3.69446
2022-09-12	13:08:44	2.21314
2022-09-12	13:08:44	0.892125
2022-09-12	13:08:44	0.939198
2022-09-12	13:08:44	0.324389
2022-09-12	13:08:45	0.712023
2022-09-12	13:08:45	0.763117
2022-09-12	13:08:45	1.38648
2022-09-12	13:08:45	1.19263
2022-09-12	13:08:46	1.63986
2022-09-12	13:08:46	1.56704
2022-09-12	13:08:46	2.01528
2022-09-12	13:08:47	4.31441
2022-09-12	13:08:47	1.90587
2022-09-12	13:08:47	1.64444
2022-09-12	13:08:47	1.55721
2022-09-12	13:08:48	0.88271
2022-09-12	13:08:48	1.2649
2022-09-12	13:08:48	0.737112
2022-09-12	13:08:48	0.838639
2022-09-12	13:08:49	0.392786
2022-09-12	13:08:49	0.305305
2022-09-12	13:08:49	0.571005
2022-09-12	13:08:49	0.424338
2022-09-12	13:08:50	0.722303
2022-09-12	13:08:50	1.45416
2022-09-12	13:08:50	1.81564
2022-09-12	13:08:51	2.18067
2022-09-12	13:08:51	1.20836
2022-09-12	13:08:51	2.51553
2022-09-12	13:08:51	0.463015
2022-09-12	13:08:52	1.02419
2022-09-12	13:08:52	0.549377
2022-09-12	13:08:52	0.255026
2022-09-12	13:08:52	0.656654
2022-09-12	13:08:53	0.199708
2022-09-12	13:08:53	0.608308
2022-09-12	13:08:53	0.187494
2022-09-12	13:08:53	0.546272
2022-09-12	13:08:54	0.299046
2022-09-12	13:08:54	0.402506
2022-09-12	13:08:54	0.379199
2022-09-12	13:08:55	0.350089
2022-09-12	13:08:55	0.601081
2022-09-12	13:08:55	0.384593
2022-09-12	13:08:55	0.738028
2022-09-12	13:08:56	0.229835
2022-09-12	13:08:56	0.790954
2022-09-12	13:08:56	0.454313
2022-09-12	13:08:56	1.02983
2022-09-12	13:08:57	0.477672
2022-09-12	13:08:57	1.13564
2022-09-12	13:08:57	0.631819
2022-09-12	13:08:58	0.860165
2022-09-12	13:08:58	0.65584
2022-09-12	13:08:58	0.672583
2022-09-12	13:08:58	1.06413
2022-09-12	13:08:59	0.381183
2022-09-12	13:08:59	0.87126
2022-09-12	13:08:59	0.567799
2022-09-12	13:08:59	1.46444
2022-09-12	13:09:00	2.15446
2022-09-12	13:09:00	4.2366
2022-09-12	13:09:00	5.64291
2022-09-12	13:09:00	6.14296
2022-09-12	13:09:01	2.90591
2022-09-12	13:09:01	2.3133
2022-09-12	13:09:01	1.8737
2022-09-12	13:09:02	1.26561
2022-09-12	13:09:02	2.72403
2022-09-12	13:09:02	2.03375
2022-09-12	13:09:02	4.04637
2022-09-12	13:09:03	3.83482
2022-09-12	13:09:03	4.00948
2022-09-12	13:09:03	2.7023
2022-09-12	13:09:03	0.802914
2022-09-12	13:09:04	1.342
2022-09-12	13:09:04	0.405764
2022-09-12	13:09:04	0.512583
2022-09-12	13:09:04	0.647392
2022-09-12	13:09:05	0.543372
2022-09-12	13:09:05	0.610751
2022-09-12	13:09:05	0.469122
2022-09-12	13:09:06	0.772481
2022-09-12	13:09:06	0.918028
2022-09-12	13:09:06	0.614058
2022-09-12	13:09:06	0.976247
2022-09-12	13:09:07	0.920216
2022-09-12	13:09:07	0.389071
2022-09-12	13:09:07	0.324593
2022-09-12	13:09:08	0.531209
2022-09-12	13:09:08	0.140624
2022-09-12	13:09:08	0.210853
2022-09-12	13:09:08	0.110496
2022-09-12	13:09:08	0.246018
2022-09-12	13:09:09	0.191361
2022-09-12	13:09:09	0.194975
2022-09-12	13:09:09	0.281438
2022-09-12	13:09:10	0.0160435
2022-09-12	13:09:10	0.16673
2022-09-12	13:09:10	-0.0712338
2022-09-12	13:09:10	0.122659
2022-09-12	13:09:11	0.111412
2022-09-12	13:09:11	0.245204
2022-09-12	13:09:11	0.287087
2022-09-12	13:09:11	0.312786
2022-09-12	13:09:12	0.225916
2022-09-12	13:09:12	0.175992
2022-09-12	13:09:12	0.101183
2022-09-12	13:09:12	0.257366
2022-09-12	13:09:13	0.059046
2022-09-12	13:09:13	0.268664
2022-09-12	13:09:13	0.0413361
2022-09-12	13:09:14	0.473041
2022-09-12	13:09:14	0.216247
2022-09-12	13:09:14	0.486221
2022-09-12	13:09:14	0.361947
2022-09-12	13:09:15	0.413397
2022-09-12	13:09:15	0.380267
2022-09-12	13:09:15	0.260827
2022-09-12	13:09:15	0.481591
2022-09-12	13:09:16	0.518791
2022-09-12	13:09:16	0.775789
2022-09-12	13:09:16	0.466018
2022-09-12	13:09:16	0.382812
2022-09-12	13:09:17	0.52897
2022-09-12	13:09:17	0.287545
2022-09-12	13:09:17	0.21813
2022-09-12	13:09:18	0.852278
2022-09-12	13:09:18	0.72388
2022-09-12	13:09:18	0.718435
2022-09-12	13:09:18	0.716959
2022-09-12	13:09:19	0.719351
2022-09-12	13:09:19	0.722354
2022-09-12	13:09:19	0.717468
2022-09-12	13:09:19	0.501285
2022-09-12	13:09:20	0.234466
2022-09-12	13:09:20	0.232532
2022-09-12	13:09:20	0.526527
2022-09-12	13:09:20	0.181539
2022-09-12	13:09:21	0.161845
2022-09-12	13:09:21	0.189173
2022-09-12	13:09:21	0.224491
2022-09-12	13:09:22	0.214059
2022-09-12	13:09:22	0.224186
2022-09-12	13:09:22	0.25986
2022-09-12	13:09:22	0.643117
2022-09-12	13:09:23	0.528359
2022-09-12	13:09:23	0.255229
2022-09-12	13:09:23	0.216705
2022-09-12	13:09:23	0.158792
2022-09-12	13:09:24	0.174618
2022-09-12	13:09:24	0.16729
2022-09-12	13:09:24	0.170598
2022-09-12	13:09:24	0.664237
2022-09-12	13:09:25	0.432634
2022-09-12	13:09:25	-0.0469081
2022-09-12	13:09:25	0.0326338
2022-09-12	13:09:26	-0.153575
2022-09-12	13:09:26	-0.00324403
2022-09-12	13:09:26	0.0543132
2022-09-12	13:09:26	0.0538552
2022-09-12	13:09:27	-0.130674
2022-09-12	13:09:27	-0.0634985
2022-09-12	13:09:27	0.0144659
2022-09-12	13:09:27	0.037672
2022-09-12	13:09:28	0.0163489
2022-09-12	13:09:28	0.173855
2022-09-12	13:09:28	0.371768
2022-09-12	13:09:28	0.588562
2022-09-12	13:09:29	0.950547
2022-09-12	13:09:29	1.74948
2022-09-12	13:09:29	2.60617
2022-09-12	13:09:30	1.48846
2022-09-12	13:09:30	2.605
2022-09-12	13:09:30	0.469224
2022-09-12	13:09:30	0.651412
2022-09-12	13:09:31	0.528512
2022-09-12	13:09:31	0.279046
2022-09-12	13:09:31	0.41355
2022-09-12	13:09:31	0.362761
2022-09-12	13:09:32	0.578639
2022-09-12	13:09:32	0.204491
2022-09-12	13:09:32	0.48098
2022-09-12	13:09:33	0.199097
2022-09-12	13:09:33	0.341845
2022-09-12	13:09:33	0.294211
2022-09-12	13:09:33	0.474008
2022-09-12	13:09:34	0.247392
2022-09-12	13:09:34	0.307036
2022-09-12	13:09:34	0.218639
2022-09-12	13:09:34	0.368613
2022-09-12	13:09:35	0.118893
2022-09-12	13:09:35	0.408766
2022-09-12	13:09:35	0.0602165
2022-09-12	13:09:35	0.312685
2022-09-12	13:09:36	1.0365
2022-09-12	13:09:36	2.6593
2022-09-12	13:09:36	2.28139
2022-09-12	13:09:37	2.84072
2022-09-12	13:09:37	1.75747
2022-09-12	13:09:37	0.97645
2022-09-12	13:09:37	0.770852
2022-09-12	13:09:38	0.722099
2022-09-12	13:09:38	1.56821
2022-09-12	13:09:38	1.69436
2022-09-12	13:09:38	3.76546
2022-09-12	13:09:39	3.7334
2022-09-12	13:09:39	4.15273
2022-09-12	13:09:39	2.04342
2022-09-12	13:09:39	1.03477
2022-09-12	13:09:40	1.75228
2022-09-12	13:09:40	2.53441
2022-09-12	13:09:40	2.85899
2022-09-12	13:09:41	5.96561
2022-09-12	13:09:41	2.44108
2022-09-12	13:09:41	3.83884
2022-09-12	13:09:41	0.820827
2022-09-12	13:09:42	1.06607
2022-09-12	13:09:42	0.88556
2022-09-12	13:09:42	0.604186
2022-09-12	13:09:42	1.03492
2022-09-12	13:09:43	1.20225
2022-09-12	13:09:43	0.757774
2022-09-12	13:09:43	0.709326
2022-09-12	13:09:43	0.366374
2022-09-12	13:09:44	0.974415
2022-09-12	13:09:44	0.692888
2022-09-12	13:09:44	1.69156
2022-09-12	13:09:45	1.36108
2022-09-12	13:09:45	1.68057
2022-09-12	13:09:45	1.74739
2022-09-12	13:09:45	1.85971
2022-09-12	13:09:46	1.18449
2022-09-12	13:09:46	0.447087
2022-09-12	13:09:46	1.33818
2022-09-12	13:09:46	0.353651
2022-09-12	13:09:47	1.08861
2022-09-12	13:09:47	0.0640333
2022-09-12	13:09:47	0.385967
2022-09-12	13:09:47	0.949224
2022-09-12	13:09:48	0.907595
2022-09-12	13:09:48	0.355789
2022-09-12	13:09:48	0.354415
2022-09-12	13:09:49	0.401997
2022-09-12	13:09:49	0.154211
2022-09-12	13:09:49	-0.1979
2022-09-12	13:09:49	-0.299071
2022-09-12	13:09:50	-0.127417
2022-09-12	13:09:50	0.29701
2022-09-12	13:09:50	0.869936
2022-09-12	13:09:50	0.549529
2022-09-12	13:09:51	0.0713106
2022-09-12	13:09:51	0.328257
2022-09-12	13:09:51	0.326272
2022-09-12	13:09:51	0.234313
2022-09-12	13:09:52	0.0836262
2022-09-12	13:09:52	0.0462216
2022-09-12	13:09:52	0.132379
2022-09-12	13:09:53	0.0438806
2022-09-12	13:09:53	-0.109402
2022-09-12	13:09:53	-0.278969
2022-09-12	13:09:53	-0.240292
2022-09-12	13:09:54	-0.182277
2022-09-12	13:09:54	-0.124872
2022-09-12	13:09:54	-0.0445672
2022-09-12	13:09:54	0.402812
2022-09-12	13:09:55	0.102608
2022-09-12	13:09:55	0.18271
2022-09-12	13:09:55	-0.0504705
2022-09-12	13:09:55	0.0242877
2022-09-12	13:09:56	-0.130521
2022-09-12	13:09:56	-0.201921
2022-09-12	13:09:56	-0.0850251
2022-09-12	13:09:57	0.167494
2022-09-12	13:09:57	0.1993
2022-09-12	13:09:57	0.224593
2022-09-12	13:09:57	0.325305
2022-09-12	13:09:58	0.266323
2022-09-12	13:09:58	0.284338
2022-09-12	13:09:58	0.268512
2022-09-12	13:09:58	0.417112
2022-09-12	13:09:59	0.393041
2022-09-12	13:09:59	0.326171
2022-09-12	13:09:59	0.385254
2022-09-12	13:09:59	0.46383
2022-09-12	13:10:00	0.517468
2022-09-12	13:10:00	0.453855
2022-09-12	13:10:00	0.376501
2022-09-12	13:10:01	0.37986
2022-09-12	13:10:01	0.371565
2022-09-12	13:10:01	0.36668
2022-09-12	13:10:01	0.369122
2022-09-12	13:10:02	0.384797
2022-09-12	13:10:02	0.371056
2022-09-12	13:10:02	0.370242
2022-09-12	13:10:02	0.372837
2022-09-12	13:10:03	0.370598
2022-09-12	13:10:03	0.372939
2022-09-12	13:10:03	0.37416
2022-09-12	13:10:03	0.382761
2022-09-12	13:10:04	0.373601
2022-09-12	13:10:04	0.356807
2022-09-12	13:10:04	0.53645
2022-09-12	13:10:05	0.527646
2022-09-12	13:10:05	0.976247
2022-09-12	13:10:05	2.14851
2022-09-12	13:10:05	-0.0206995
2022-09-12	13:10:06	-0.131743
2022-09-12	13:10:06	-0.0410048
2022-09-12	13:10:06	0.0905982
2022-09-12	13:10:06	0.0183336
2022-09-12	13:10:07	0.0286644
2022-09-12	13:10:07	0.296908
2022-09-12	13:10:07	0.45874
2022-09-12	13:10:08	0.0344659
2022-09-12	13:10:08	-0.013015
2022-09-12	13:10:08	0.0132954
2022-09-12	13:10:08	-0.0619717
2022-09-12	13:10:09	-0.0635493
2022-09-12	13:10:09	-0.271641
2022-09-12	13:10:09	-0.396425
2022-09-12	13:10:09	-0.279783
2022-09-12	13:10:10	-0.177239
2022-09-12	13:10:10	0.0704964
2022-09-12	13:10:10	0.36958
2022-09-12	13:10:10	0.0974175
2022-09-12	13:10:11	0.331463
2022-09-12	13:10:11	0.192786
2022-09-12	13:10:11	0.349478
2022-09-12	13:10:12	0.268359
2022-09-12	13:10:12	0.650649
2022-09-12	13:10:12	1.51976
2022-09-12	13:10:12	2.30714
2022-09-12	13:10:13	2.11665
2022-09-12	13:10:13	1.93635
2022-09-12	13:10:13	1.20037
2022-09-12	13:10:13	0.541641
2022-09-12	13:10:14	0.501845
2022-09-12	13:10:14	0.405764
2022-09-12	13:10:14	0.344593
2022-09-12	13:10:14	0.395534
2022-09-12	13:10:15	0.212481
2022-09-12	13:10:15	0.535585
2022-09-12	13:10:15	0.680114
2022-09-12	13:10:16	0.33584
2022-09-12	13:10:16	0.426679
2022-09-12	13:10:16	0.14958
2022-09-12	13:10:16	0.513906
2022-09-12	13:10:17	0.457112
2022-09-12	13:10:17	2.3705
2022-09-12	13:10:17	1.01487
2022-09-12	13:10:17	2.27838
2022-09-12	13:10:18	1.78597
2022-09-12	13:10:18	2.10536
2022-09-12	13:10:18	1.46444
2022-09-12	13:10:18	2.482
2022-09-12	13:10:19	1.74882
2022-09-12	13:10:19	2.19767
2022-09-12	13:10:19	1.22673
2022-09-12	13:10:20	0.971463
2022-09-12	13:10:20	0.340725
2022-09-12	13:10:20	0.507392
2022-09-12	13:10:20	0.811616
2022-09-12	13:10:21	1.61426
2022-09-12	13:10:21	0.879148
2022-09-12	13:10:21	0.349835
2022-09-12	13:10:21	0.775178
2022-09-12	13:10:22	0.456756
2022-09-12	13:10:22	0.257824
2022-09-12	13:10:22	0.405764
2022-09-12	13:10:22	0.261794
2022-09-12	13:10:23	0.628461
2022-09-12	13:10:23	0.407646
2022-09-12	13:10:23	0.543728
2022-09-12	13:10:24	0.970293
2022-09-12	13:10:24	0.829885
2022-09-12	13:10:24	0.939148
2022-09-12	13:10:24	0.627443
2022-09-12	13:10:25	0.440725
2022-09-12	13:10:25	0.413651
2022-09-12	13:10:25	0.45187
2022-09-12	13:10:25	0.310751
2022-09-12	13:10:26	0.284746
2022-09-12	13:10:26	0.360013
2022-09-12	13:10:26	0.249835
2022-09-12	13:10:26	0.199402
2022-09-12	13:10:27	0.30215
2022-09-12	13:10:27	0.211107
2022-09-12	13:10:27	0.24673
2022-09-12	13:10:28	0.185713
2022-09-12	13:10:28	0.187646
2022-09-12	13:10:28	0.246629
2022-09-12	13:10:28	0.101082
2022-09-12	13:10:29	0.152583
2022-09-12	13:10:29	0.149173
2022-09-12	13:10:29	0.275229
2022-09-12	13:10:29	0.20215
2022-09-12	13:10:30	0.257824
2022-09-12	13:10:30	0.310903
2022-09-12	13:10:30	0.531769
2022-09-12	13:10:30	0.564033
2022-09-12	13:10:31	0.380522
2022-09-12	13:10:31	0.546069
2022-09-12	13:10:31	0.912277
2022-09-12	13:10:32	0.365305
2022-09-12	13:10:32	0.55757
2022-09-12	13:10:32	0.366629
2022-09-12	13:10:32	1.57309
2022-09-12	13:10:33	0.877672
2022-09-12	13:10:33	2.49976
2022-09-12	13:10:33	1.13772
2022-09-12	13:10:33	2.77182
2022-09-12	13:10:34	1.0138
2022-09-12	13:10:34	1.25126
2022-09-12	13:10:34	1.0336
2022-09-12	13:10:34	0.905
2022-09-12	13:10:35	2.02836
2022-09-12	13:10:35	0.708155
2022-09-12	13:10:35	0.434873
2022-09-12	13:10:36	0.410852
2022-09-12	13:10:36	0.125814
2022-09-12	13:10:36	0.45869
2022-09-12	13:10:36	0.124033
2022-09-12	13:10:37	-0.180343
2022-09-12	13:10:37	-0.470063
2022-09-12	13:10:37	-0.512302
2022-09-12	13:10:37	-0.39332
2022-09-12	13:10:38	-0.175152
2022-09-12	13:10:38	0.25528
2022-09-12	13:10:38	0.360827
2022-09-12	13:10:38	0.471972
2022-09-12	13:10:39	0.581081
2022-09-12	13:10:39	0.500114
2022-09-12	13:10:39	0.452023
2022-09-12	13:10:40	0.470038
2022-09-12	13:10:40	0.393906
2022-09-12	13:10:40	0.420725
2022-09-12	13:10:40	0.311158
2022-09-12	13:10:41	0.486323
2022-09-12	13:10:41	0.391921
2022-09-12	13:10:41	0.430344
2022-09-12	13:10:41	0.381794
2022-09-12	13:10:42	0.431107
2022-09-12	13:10:42	0.494109
2022-09-12	13:10:42	0.408919
2022-09-12	13:10:43	0.532532
2022-09-12	13:10:43	0.523168
2022-09-12	13:10:43	0.322608
2022-09-12	13:10:43	0.55131
2022-09-12	13:10:44	0.19813
2022-09-12	13:10:44	0.456247
2022-09-12	13:10:44	0.278792
2022-09-12	13:10:44	0.583626
2022-09-12	13:10:45	0.439402
2022-09-12	13:10:45	0.847646
2022-09-12	13:10:45	1.12902
2022-09-12	13:10:45	0.966323
2022-09-12	13:10:46	1.02698
2022-09-12	13:10:46	0.463117
2022-09-12	13:10:46	0.615687
2022-09-12	13:10:47	0.43813
2022-09-12	13:10:47	0.587901
2022-09-12	13:10:47	1.1735
2022-09-12	13:10:47	2.01238
2022-09-12	13:10:48	3.11263
2022-09-12	13:10:48	2.69406
2022-09-12	13:10:48	3.41976
2022-09-12	13:10:48	1.19462
2022-09-12	13:10:49	1.14622
2022-09-12	13:10:49	0.92902
2022-09-12	13:10:49	0.44897
2022-09-12	13:10:49	0.671412
2022-09-12	13:10:50	0.691209
2022-09-12	13:10:50	1.17162
2022-09-12	13:10:50	1.5019
2022-09-12	13:10:51	1.12902
2022-09-12	13:10:51	1.63833
2022-09-12	13:10:51	0.654313
2022-09-12	13:10:51	1.39304
2022-09-12	13:10:52	0.840165
2022-09-12	13:10:52	3.26342
2022-09-12	13:10:52	1.98439
2022-09-12	13:10:52	5.35497
2022-09-12	13:10:53	1.24775
2022-09-12	13:10:53	0.663779
2022-09-12	13:10:53	0.587239
2022-09-12	13:10:53	0.354415
2022-09-12	13:10:54	0.821539
2022-09-12	13:10:54	0.606883
2022-09-12	13:10:54	0.727596
2022-09-12	13:10:55	1.1993
2022-09-12	13:10:55	1.14836
2022-09-12	13:10:55	1.56174
2022-09-12	13:10:55	3.35803
2022-09-12	13:10:56	1.99345
2022-09-12	13:10:56	3.72836
2022-09-12	13:10:56	1.7992
2022-09-12	13:10:56	2.65905
2022-09-12	13:10:57	2.16704
2022-09-12	13:10:57	1.49614
2022-09-12	13:10:57	1.18154
2022-09-12	13:10:57	0.558944
2022-09-12	13:10:58	1.13467
2022-09-12	13:10:58	0.916654
2022-09-12	13:10:58	0.925916
2022-09-12	13:10:59	1.38368
2022-09-12	13:10:59	2.41747
2022-09-12	13:10:59	2.05818
2022-09-12	13:10:59	2.25492
2022-09-12	13:11:00	2.04062
2022-09-12	13:11:00	2.48642
2022-09-12	13:11:00	0.53126
2022-09-12	13:11:00	1.56546
2022-09-12	13:11:01	1.06276
2022-09-12	13:11:01	1.93665
2022-09-12	13:11:01	1.19838
2022-09-12	13:11:01	0.880318
2022-09-12	13:11:02	1.10897
2022-09-12	13:11:02	0.283931
2022-09-12	13:11:02	0.974262
2022-09-12	13:11:03	0.498588
2022-09-12	13:11:03	1.41686
2022-09-12	13:11:03	0.230853
2022-09-12	13:11:03	0.27416
2022-09-12	13:11:04	0.21584
2022-09-12	13:11:04	0.402964
2022-09-12	13:11:04	0.175229
2022-09-12	13:11:04	0.374873
2022-09-12	13:11:05	0.250751
2022-09-12	13:11:05	0.224237
2022-09-12	13:11:05	0.216451
2022-09-12	13:11:05	0.222252
2022-09-12	13:11:06	0.232074
2022-09-12	13:11:06	0.238282
2022-09-12	13:11:06	0.239708
2022-09-12	13:11:07	0.238639
2022-09-12	13:11:07	0.238842
2022-09-12	13:11:07	0.234669
2022-09-12	13:11:08	0.22902
2022-09-12	13:11:08	0.185458
2022-09-12	13:11:08	0.307545
2022-09-12	13:11:08	0.420318
2022-09-12	13:11:08	0.931819
2022-09-12	13:11:09	0.684847
2022-09-12	13:11:09	0.531311
2022-09-12	13:11:09	0.348613
2022-09-12	13:11:09	0.420216
2022-09-12	13:11:10	0.381489
2022-09-12	13:11:10	0.256909
2022-09-12	13:11:10	0.15701
2022-09-12	13:11:11	0.145967
2022-09-12	13:11:11	0.148308
2022-09-12	13:11:11	0.10785
2022-09-12	13:11:11	0.531463
2022-09-12	13:11:12	0.329886
2022-09-12	13:11:12	1.99487
2022-09-12	13:11:12	0.403219
2022-09-12	13:11:12	0.586527
2022-09-12	13:11:13	0.207392
2022-09-12	13:11:13	0.393397
2022-09-12	13:11:13	0.19986
2022-09-12	13:11:14	0.237061
2022-09-12	13:11:14	-0.127163
2022-09-12	13:11:14	-0.0963229
2022-09-12	13:11:14	0.0487661
2022-09-12	13:11:15	0.139097
2022-09-12	13:11:15	0.384644
2022-09-12	13:11:15	0.49757
2022-09-12	13:11:15	0.334873
2022-09-12	13:11:16	0.450903
2022-09-12	13:11:16	0.461285
2022-09-12	13:11:16	0.654567
2022-09-12	13:11:16	0.62215
2022-09-12	13:11:17	0.444084
2022-09-12	13:11:17	0.980878
2022-09-12	13:11:17	0.851972
2022-09-12	13:11:18	1.58378
2022-09-12	13:11:18	2.58205
2022-09-12	13:11:18	3.59533
2022-09-12	13:11:18	3.03233
2022-09-12	13:11:19	3.84836
2022-09-12	13:11:19	5.08744
2022-09-12	13:11:19	2.48169
2022-09-12	13:11:19	3.15736
2022-09-12	13:11:20	1.62016
2022-09-12	13:11:20	2.57284
2022-09-12	13:11:20	2.2648
2022-09-12	13:11:20	1.59324
2022-09-12	13:11:21	1.96195
2022-09-12	13:11:21	2.3508
2022-09-12	13:11:21	1.70607
2022-09-12	13:11:22	2.7681
2022-09-12	13:11:22	1.50429
2022-09-12	13:11:22	1.78994
2022-09-12	13:11:22	2.5366
2022-09-12	13:11:23	0.809987
2022-09-12	13:11:23	1.53182
2022-09-12	13:11:23	0.78042
2022-09-12	13:11:23	0.434568
2022-09-12	13:11:24	0.402099
2022-09-12	13:11:24	0.301998
2022-09-12	13:11:24	0.382099
2022-09-12	13:11:24	0.157519
2022-09-12	13:11:25	0.220776
2022-09-12	13:11:25	0.224797
2022-09-12	13:11:25	0.701438
2022-09-12	13:11:26	1.73034
2022-09-12	13:11:26	0.515025
2022-09-12	13:11:26	2.7481
2022-09-12	13:11:26	1.07971
2022-09-12	13:11:27	2.74205
2022-09-12	13:11:27	3.64271
2022-09-12	13:11:27	4.39492
2022-09-12	13:11:27	9.24199
2022-09-12	13:11:28	3.94795
2022-09-12	13:11:28	1.03915
2022-09-12	13:11:28	2.12312
2022-09-12	13:11:28	2.12932
2022-09-12	13:11:29	1.83472
2022-09-12	13:11:29	0.669682
2022-09-12	13:11:29	0.826323
2022-09-12	13:11:30	1.11828
2022-09-12	13:11:30	0.456654
2022-09-12	13:11:30	0.343982
2022-09-12	13:11:30	0.497723
2022-09-12	13:11:31	0.290649
2022-09-12	13:11:31	0.42215
2022-09-12	13:11:31	0.248562
2022-09-12	13:11:31	0.215127
2022-09-12	13:11:32	0.335076
2022-09-12	13:11:32	1.20485
2022-09-12	13:11:32	1.4336
2022-09-12	13:11:32	1.83737
2022-09-12	13:11:33	2.50235
2022-09-12	13:11:33	3.20703
2022-09-12	13:11:33	3.9649
2022-09-12	13:11:34	3.29441
2022-09-12	13:11:34	5.91182
2022-09-12	13:11:34	1.69309
2022-09-12	13:11:34	0.526425
2022-09-12	13:11:35	0.604237
2022-09-12	13:11:35	0.717316
2022-09-12	13:11:35	0.714211
2022-09-12	13:11:35	0.718435
2022-09-12	13:11:36	0.716807
2022-09-12	13:11:36	0.724186
2022-09-12	13:11:36	0.52439
2022-09-12	13:11:36	0.694008
2022-09-12	13:11:37	0.715738
2022-09-12	13:11:37	0.727087
2022-09-12	13:11:37	0.719097
2022-09-12	13:11:38	0.71813
2022-09-12	13:11:38	0.628664
2022-09-12	13:11:38	0.241489
2022-09-12	13:11:38	0.234313
2022-09-12	13:11:39	1.15696
2022-09-12	13:11:39	0.681285
2022-09-12	13:11:39	0.249886
2022-09-12	13:11:39	0.51813
2022-09-12	13:11:40	2.19111
2022-09-12	13:11:40	1.27701
2022-09-12	13:11:40	1.77894
2022-09-12	13:11:40	0.819504
2022-09-12	13:11:41	1.56408
2022-09-12	13:11:41	0.759555
2022-09-12	13:11:41	1.38571
2022-09-12	13:11:42	0.941947
2022-09-12	13:11:42	1.60291
2022-09-12	13:11:42	2.83782
2022-09-12	13:11:42	1.69167
2022-09-12	13:11:43	1.00001
2022-09-12	13:11:43	1.20449
2022-09-12	13:11:43	1.67055
2022-09-12	13:11:43	1.0192
2022-09-12	13:11:44	1.47207
2022-09-12	13:11:44	1.3966
2022-09-12	13:11:44	0.869733
2022-09-12	13:11:45	0.619097
2022-09-12	13:11:45	0.744797
2022-09-12	13:11:45	0.726781
2022-09-12	13:11:45	0.717468
2022-09-12	13:11:46	0.395534
2022-09-12	13:11:46	0.708053
2022-09-12	13:11:46	1.511
2022-09-12	13:11:46	0.407036
2022-09-12	13:11:47	0.223575
2022-09-12	13:11:47	0.302099
2022-09-12	13:11:47	0.229071
2022-09-12	13:11:47	0.550394
2022-09-12	13:11:48	1.46983
2022-09-12	13:11:48	0.805916
2022-09-12	13:11:48	0.173092
2022-09-12	13:11:49	0.352074
2022-09-12	13:11:49	0.168308
2022-09-12	13:11:49	0.226272
2022-09-12	13:11:49	0.125051
2022-09-12	13:11:50	0.304135
2022-09-12	13:11:50	0.120216
2022-09-12	13:11:50	-0.0507249
2022-09-12	13:11:50	-0.189351
2022-09-12	13:11:51	0.0116669
2022-09-12	13:11:51	-0.0491473
2022-09-12	13:11:51	0.338079
2022-09-12	13:11:51	2.0192
2022-09-12	13:11:52	2.59121
2022-09-12	13:11:52	2.4135
2022-09-12	13:11:52	1.71706
2022-09-12	13:11:53	2.02943
2022-09-12	13:11:53	2.04622
2022-09-12	13:11:53	2.35976
2022-09-12	13:11:53	1.80989
2022-09-12	13:11:54	1.29772
2022-09-12	13:11:54	0.862303
2022-09-12	13:11:54	0.183219
2022-09-12	13:11:54	0.523422
2022-09-12	13:11:55	0.701743
2022-09-12	13:11:55	1.80439
2022-09-12	13:11:55	2.60113
2022-09-12	13:11:55	3.38703
2022-09-12	13:11:56	3.03116
2022-09-12	13:11:56	1.35004
2022-09-12	13:11:56	2.75024
2022-09-12	13:11:57	0.502557
2022-09-12	13:11:57	2.14088
2022-09-12	13:11:57	1.34352
2022-09-12	13:11:57	0.942557
2022-09-12	13:11:58	1.06576
2022-09-12	13:11:58	0.239555
2022-09-12	13:11:58	-0.0917427
2022-09-12	13:11:58	-0.118409
2022-09-12	13:11:59	0.17243
2022-09-12	13:11:59	0.470446
2022-09-12	13:11:59	0.547137
2022-09-12	13:11:59	0.326934
2022-09-12	13:12:00	0.470395
2022-09-12	13:12:00	0.248003
2022-09-12	13:12:00	0.28841
2022-09-12	13:12:01	0.265662
2022-09-12	13:12:01	0.115484
2022-09-12	13:12:01	0.469122
2022-09-12	13:12:01	0.487799
2022-09-12	13:12:02	1.14434
2022-09-12	13:12:02	3.41981
2022-09-12	13:12:02	2.55625
2022-09-12	13:12:02	3.92149
2022-09-12	13:12:03	1.03472
2022-09-12	13:12:03	1.9735
2022-09-12	13:12:03	0.654415
2022-09-12	13:12:03	0.628715
2022-09-12	13:12:04	0.470293
2022-09-12	13:12:04	0.299402
2022-09-12	13:12:04	1.16709
2022-09-12	13:12:05	1.05223
2022-09-12	13:12:05	1.37762
2022-09-12	13:12:05	1.08001
2022-09-12	13:12:05	2.2937
2022-09-12	13:12:06	2.00739
2022-09-12	13:12:06	3.25604
2022-09-12	13:12:06	2.28678
2022-09-12	13:12:06	0.973295
2022-09-12	13:12:07	1.42525
2022-09-12	13:12:07	0.511768
2022-09-12	13:12:07	1.13034
2022-09-12	13:12:07	0.567341
2022-09-12	13:12:08	0.875891
2022-09-12	13:12:08	0.684186
2022-09-12	13:12:08	0.340165
2022-09-12	13:12:09	0.722862
2022-09-12	13:12:09	0.290547
2022-09-12	13:12:09	1.35752
2022-09-12	13:12:09	1.46531
2022-09-12	13:12:10	2.9449
2022-09-12	13:12:10	1.42235
2022-09-12	13:12:10	2.89884
2022-09-12	13:12:10	1.9448
2022-09-12	13:12:11	3.23273
2022-09-12	13:12:11	4.39151
2022-09-12	13:12:11	2.18632
2022-09-12	13:12:11	4.26337
2022-09-12	13:12:12	2.5737
2022-09-12	13:12:12	4.35497
2022-09-12	13:12:12	2.26775
2022-09-12	13:12:13	1.60296
2022-09-12	13:12:13	0.87986
2022-09-12	13:12:13	0.296196
2022-09-12	13:12:13	0.903677
2022-09-12	13:12:14	0.302048
2022-09-12	13:12:14	0.247494
2022-09-12	13:12:14	0.0963488
2022-09-12	13:12:14	-0.192913
2022-09-12	13:12:15	-0.0787656
2022-09-12	13:12:15	0.188257
2022-09-12	13:12:15	0.396959
2022-09-12	13:12:16	0.652379
2022-09-12	13:12:16	1.71701
2022-09-12	13:12:16	2.11492
2022-09-12	13:12:16	5.27675
2022-09-12	13:12:17	5.21319
2022-09-12	13:12:17	4.24052
2022-09-12	13:12:17	1.58337
2022-09-12	13:12:17	2.23329
2022-09-12	13:12:18	2.04022
2022-09-12	13:12:18	1.52032
2022-09-12	13:12:18	1.22948
2022-09-12	13:12:18	1.86307
2022-09-12	13:12:19	0.786272
2022-09-12	13:12:19	1.88683
2022-09-12	13:12:19	0.494262
2022-09-12	13:12:20	0.374211
2022-09-12	13:12:20	0.608206
2022-09-12	13:12:20	0.150395
2022-09-12	13:12:20	0.328308
2022-09-12	13:12:21	0.521947
2022-09-12	13:12:21	0.511972
2022-09-12	13:12:21	0.394771
2022-09-12	13:12:21	0.453244
2022-09-12	13:12:22	1.17365
2022-09-12	13:12:22	1.73935
2022-09-12	13:12:22	3.77986
2022-09-12	13:12:22	3.94663
2022-09-12	13:12:23	8.1083
2022-09-12	13:12:23	4.55334
2022-09-12	13:12:23	3.50678
2022-09-12	13:12:24	2.02866
2022-09-12	13:12:24	2.11207
2022-09-12	13:12:24	0.860623
2022-09-12	13:12:24	0.915229
2022-09-12	13:12:25	0.669224
2022-09-12	13:12:25	0.361845
2022-09-12	13:12:25	0.585611
2022-09-12	13:12:25	0.168919
2022-09-12	13:12:26	0.632888
2022-09-12	13:12:26	1.00281
2022-09-12	13:12:26	1.46169
2022-09-12	13:12:26	3.93212
2022-09-12	13:12:27	5.22734
2022-09-12	13:12:27	4.4279
2022-09-12	13:12:27	3.48352
2022-09-12	13:12:28	2.35884
2022-09-12	13:12:28	0.739962
2022-09-12	13:12:28	1.19752
2022-09-12	13:12:28	0.48215
2022-09-12	13:12:29	0.682761
2022-09-12	13:12:29	0.743677
2022-09-12	13:12:29	0.868053
2022-09-12	13:12:29	1.67981
2022-09-12	13:12:30	2.3364
2022-09-12	13:12:30	3.03289
2022-09-12	13:12:30	1.78531
2022-09-12	13:12:31	2.61813
2022-09-12	13:12:31	2.27976
2022-09-12	13:12:31	2.09197
2022-09-12	13:12:31	1.14693
2022-09-12	13:12:32	1.32459
2022-09-12	13:12:32	1.5308
2022-09-12	13:12:32	1.87604
2022-09-12	13:12:32	2.20612
2022-09-12	13:12:33	0.715025
2022-09-12	13:12:33	0.795331
2022-09-12	13:12:33	0.672328
2022-09-12	13:12:33	0.975025
2022-09-12	13:12:34	2.23833
2022-09-12	13:12:34	2.77009
2022-09-12	13:12:34	4.76327
2022-09-12	13:12:34	4.91294
2022-09-12	13:12:35	6.27314
2022-09-12	13:12:35	4.68484
2022-09-12	13:12:35	5.82576
2022-09-12	13:12:36	0.941336
2022-09-12	13:12:36	1.02612
2022-09-12	13:12:36	0.722252
2022-09-12	13:12:36	0.234669
2022-09-12	13:12:37	0.538791
2022-09-12	13:12:37	0.209428
2022-09-12	13:12:37	0.364695
2022-09-12	13:12:37	0.20327
2022-09-12	13:12:38	0.267087
2022-09-12	13:12:38	0.35528
2022-09-12	13:12:38	0.284084
2022-09-12	13:12:38	0.443015
2022-09-12	13:12:39	0.815636
2022-09-12	13:12:39	0.689377
2022-09-12	13:12:39	1.26266
2022-09-12	13:12:40	0.772939
2022-09-12	13:12:40	1.30683
2022-09-12	13:12:40	0.82556
2022-09-12	13:12:40	1.28841
2022-09-12	13:12:41	2.10983
2022-09-12	13:12:41	1.55818
2022-09-12	13:12:41	3.60759
2022-09-12	13:12:41	1.80841
2022-09-12	13:12:42	3.3364
2022-09-12	13:12:42	2.40719
2022-09-12	13:12:42	1.20592
2022-09-12	13:12:42	3.07314
2022-09-12	13:12:43	0.801947
2022-09-12	13:12:43	2.47299
2022-09-12	13:12:43	1.39482
2022-09-12	13:12:44	1.24332
2022-09-12	13:12:44	1.35187
2022-09-12	13:12:44	0.663168
2022-09-12	13:12:44	1.67355
2022-09-12	13:12:45	0.675534
2022-09-12	13:12:45	1.75594
2022-09-12	13:12:45	1.87986
2022-09-12	13:12:45	2.15065
2022-09-12	13:12:46	3.40027
2022-09-12	13:12:46	1.91889
2022-09-12	13:12:46	5.10301
2022-09-12	13:12:46	1.73024
2022-09-12	13:12:47	4.01864
2022-09-12	13:12:47	1.40195
2022-09-12	13:12:47	1.06566
2022-09-12	13:12:48	0.965102
2022-09-12	13:12:48	0.419402
2022-09-12	13:12:48	0.531463
2022-09-12	13:12:48	0.64271
2022-09-12	13:12:49	0.986832
2022-09-12	13:12:49	1.77487
2022-09-12	13:12:49	2.60673
2022-09-12	13:12:49	1.36765
2022-09-12	13:12:50	0.976807
2022-09-12	13:12:50	0.439198
2022-09-12	13:12:50	0.290547
2022-09-12	13:12:51	0.269835
2022-09-12	13:12:51	0.383219
2022-09-12	13:12:51	0.363524
2022-09-12	13:12:51	0.171209
2022-09-12	13:12:52	0.36098
2022-09-12	13:12:52	0.169682
2022-09-12	13:12:52	0.539758
2022-09-12	13:12:52	0.21416
2022-09-12	13:12:53	0.459758
2022-09-12	13:12:53	2.37599
2022-09-12	13:12:53	2.83645
2022-09-12	13:12:53	1.54536
2022-09-12	13:12:54	2.32648
2022-09-12	13:12:54	1.51029
2022-09-12	13:12:54	0.546527
2022-09-12	13:12:55	0.765356
2022-09-12	13:12:55	0.317417
2022-09-12	13:12:55	0.703219
2022-09-12	13:12:55	0.407901
2022-09-12	13:12:56	1.04139
2022-09-12	13:12:56	0.876043
2022-09-12	13:12:56	2.57894
2022-09-12	13:12:56	2.09452
2022-09-12	13:12:57	3.21014
2022-09-12	13:12:57	3.07009
2022-09-12	13:12:57	2.47431
2022-09-12	13:12:57	3.93808
2022-09-12	13:12:58	3.10515
2022-09-12	13:12:58	4.04861
2022-09-12	13:12:58	2.24235
2022-09-12	13:12:59	2.67558
2022-09-12	13:12:59	1.29492
2022-09-12	13:12:59	1.91961
2022-09-12	13:12:59	2.05843
2022-09-12	13:13:00	3.21711
2022-09-12	13:13:00	3.2424
2022-09-12	13:13:00	2.42393
2022-09-12	13:13:00	4.0849
2022-09-12	13:13:01	2.29126
2022-09-12	13:13:01	2.26749
2022-09-12	13:13:01	1.6994
2022-09-12	13:13:01	0.832888
2022-09-12	13:13:02	0.361438
2022-09-12	13:13:02	0.134618
2022-09-12	13:13:02	0.128105
2022-09-12	13:13:03	0.172023
2022-09-12	13:13:03	0.0690714
2022-09-12	13:13:03	-0.0363738
2022-09-12	13:13:03	-0.0663483
