# Supplementary material for: Comparing efficacy in reducing pulling and welfare impacts of four types of leash walking equipment
Source: PeerJ journal article supplement (doi:10.7717/peerj.18131), 2024-10-24
Supplement: Shelter1_Tension_files.zip [file MrFitz_prong_2022912154521 copy.xlsx]

## Sheet: averaged newtons
Date	time	averaged newtons
2022-09-12	15:45:39	1.80916	1.80916	0		impulse	449.462
2022-09-12	15:45:40	1.87343	3.68259	0		total steps	0
2022-09-12	15:45:41	1.46887	5.15146	0
2022-09-12	15:45:42	1.55868	6.71014	0
2022-09-12	15:45:43	0.295416	7.00556	0
2022-09-12	15:45:44	1.23808	8.24364	0
2022-09-12	15:45:45	0.985509	9.22915	0
2022-09-12	15:45:46	1.79133	11.0205	0
2022-09-12	15:45:47	2.01759	13.0381	0
2022-09-12	15:45:48	1.44249	14.4806	0
2022-09-12	15:45:49	1.26027	15.7408	0
2022-09-12	15:45:50	0.932595	16.6734	0
2022-09-12	15:45:51	0.740216	17.4137	0
2022-09-12	15:45:52	0.614712	18.0284	0
2022-09-12	15:45:53	0.504809	18.5332	0
2022-09-12	15:45:54	0.744989	19.2782	0
2022-09-12	15:45:55	0.717051	19.9952	0
2022-09-12	15:45:56	0.821787	20.817	0
2022-09-12	15:45:57	0.679058	21.4961	0
2022-09-12	15:45:58	0.583134	22.0792	0
2022-09-12	15:45:59	1.33822	23.4174	0
2022-09-12	15:46:00	0.550311	23.9677	0
2022-09-12	15:46:01	-1.4301	23.9677	0
2022-09-12	15:46:02	-1.05783	23.9677	0
2022-09-12	15:46:03	0.216242	24.184	0
2022-09-12	15:46:04	-0.330954	24.184	0
2022-09-12	15:46:05	-0.311203	24.184	0
2022-09-12	15:46:06	-0.24972	24.184	0
2022-09-12	15:46:07	1.38409	25.5681	0
2022-09-12	15:46:08	1.02116	26.5892	0
2022-09-12	15:46:09	1.17917	27.7684	0
2022-09-12	15:46:10	1.49105	29.2594	0
2022-09-12	15:46:11	2.33251	31.592	0
2022-09-12	15:46:12	2.05715	33.6491	0
2022-09-12	15:46:13	1.95851	35.6076	0
2022-09-12	15:46:14	1.93591	37.5435	0
2022-09-12	15:46:15	2.10327	39.6468	0
2022-09-12	15:46:16	1.51471	41.1615	0
2022-09-12	15:46:17	1.74844	42.9099	0
2022-09-12	15:46:18	4.29033	47.2003	0
2022-09-12	15:46:19	1.54617	48.7464	0
2022-09-12	15:46:20	0.756818	49.5033	0
2022-09-12	15:46:21	0.559241	50.0625	0
2022-09-12	15:46:22	-1.74013	50.0625	0
2022-09-12	15:46:23	-2.32002	50.0625	0
2022-09-12	15:46:24	-1.73361	50.0625	0
2022-09-12	15:46:25	-1.19326	50.0625	0
2022-09-12	15:46:26	-1.78337	50.0625	0
2022-09-12	15:46:27	-1.36757	50.0625	0
2022-09-12	15:46:28	-1.56156	50.0625	0
2022-09-12	15:46:29	1.90113	51.9636	0
2022-09-12	15:46:30	3.28772	55.2514	0
2022-09-12	15:46:31	1.95268	57.204	0
2022-09-12	15:46:32	1.42739	58.6314	0
2022-09-12	15:46:33	1.92789	60.5593	0
2022-09-12	15:46:34	1.91433	62.4736	0
2022-09-12	15:46:35	2.19744	64.6711	0
2022-09-12	15:46:36	4.47825	69.1493	0
2022-09-12	15:46:37	2.53783	71.6872	0
2022-09-12	15:46:38	2.22071	73.9079	0
2022-09-12	15:46:39	2.59382	76.5017	0
2022-09-12	15:46:40	2.01063	78.5123	0
2022-09-12	15:46:41	2.27252	80.7849	0
2022-09-12	15:46:42	2.16377	82.9486	0
2022-09-12	15:46:43	2.04838	84.997	0
2022-09-12	15:46:44	2.12218	87.1192	0
2022-09-12	15:46:45	2.78941	89.9086	0
2022-09-12	15:46:46	3.3301	93.2387	0
2022-09-12	15:46:47	2.73757	95.9763	0
2022-09-12	15:46:48	4.58295	100.559	0
2022-09-12	15:46:49	2.10659	102.666	0
2022-09-12	15:46:50	2.30661	104.972	0
2022-09-12	15:46:51	2.01075	106.983	0
2022-09-12	15:46:52	2.01063	108.994	0
2022-09-12	15:46:53	2.01906	111.013	0
2022-09-12	15:46:54	2.0065	113.019	0
2022-09-12	15:46:55	2.03129	115.051	0
2022-09-12	15:46:56	1.456	116.507	0
2022-09-12	15:46:57	-1.83463	116.507	0
2022-09-12	15:46:58	-3.14101	116.507	0
2022-09-12	15:46:59	-3.01232	116.507	0
2022-09-12	15:47:00	-1.49233	116.507	0
2022-09-12	15:47:01	-0.694562	116.507	0
2022-09-12	15:47:02	0.373741	116.88	0
2022-09-12	15:47:03	0.962136	117.843	0
2022-09-12	15:47:04	3.34673	121.189	0
2022-09-12	15:47:05	4.7138	125.903	0
2022-09-12	15:47:06	4.35091	130.254	0
2022-09-12	15:47:07	2.38437	132.638	0
2022-09-12	15:47:08	-1.69018	132.638	0
2022-09-12	15:47:09	-3.73371	132.638	0
2022-09-12	15:47:10	-3.58725	132.638	0
2022-09-12	15:47:11	-0.443347	132.638	0
2022-09-12	15:47:12	0.654648	133.293	0
2022-09-12	15:47:13	1.54555	134.839	0
2022-09-12	15:47:14	0.145218	134.984	0
2022-09-12	15:47:15	0.431748	135.415	0
2022-09-12	15:47:16	0.538067	135.954	0
2022-09-12	15:47:17	1.73717	137.691	0
2022-09-12	15:47:18	1.69462	139.385	0
2022-09-12	15:47:19	1.67792	141.063	0
2022-09-12	15:47:20	1.27996	142.343	0
2022-09-12	15:47:21	0.358065	142.701	0
2022-09-12	15:47:22	-2.78244	142.701	0
2022-09-12	15:47:23	1.11298	143.814	0
2022-09-12	15:47:24	2.99489	146.809	0
2022-09-12	15:47:25	1.40707	148.216	0
2022-09-12	15:47:26	2.0035	150.22	0
2022-09-12	15:47:27	1.64306	151.863	0
2022-09-12	15:47:28	-1.2636	151.863	0
2022-09-12	15:47:29	-2.96173	151.863	0
2022-09-12	15:47:30	-2.60768	151.863	0
2022-09-12	15:47:31	-2.2961	151.863	0
2022-09-12	15:47:32	0.412053	152.275	0
2022-09-12	15:47:33	-2.55488	152.275	0
2022-09-12	15:47:34	-2.07107	152.275	0
2022-09-12	15:47:35	-1.55028	152.275	0
2022-09-12	15:47:36	0.368477	152.643	0
2022-09-12	15:47:37	0.365703	153.009	0
2022-09-12	15:47:38	0.0870974	153.096	0
2022-09-12	15:47:39	0.101623	153.198	0
2022-09-12	15:47:40	0.293775	153.492	0
2022-09-12	15:47:41	0.375155	153.867	0
2022-09-12	15:47:42	1.8345	155.701	0
2022-09-12	15:47:43	2.0052	157.706	0
2022-09-12	15:47:44	1.34318	159.05	0
2022-09-12	15:47:45	3.02563	162.075	0
2022-09-12	15:47:46	2.27788	164.353	0
2022-09-12	15:47:47	-0.144423	164.353	0
2022-09-12	15:47:48	1.95721	166.31	0
2022-09-12	15:47:49	3.24363	169.554	0
2022-09-12	15:47:50	2.15926	171.713	0
2022-09-12	15:47:51	2.29603	174.009	0
2022-09-12	15:47:52	2.33712	176.346	0
2022-09-12	15:47:53	1.23735	177.584	0
2022-09-12	15:47:54	0.973305	178.557	0
2022-09-12	15:47:55	-0.668473	178.557	0
2022-09-12	15:47:56	-0.156082	178.557	0
2022-09-12	15:47:57	1.60639	180.163	0
2022-09-12	15:47:58	1.28864	181.452	0
2022-09-12	15:47:59	0.363328	181.815	0
2022-09-12	15:48:00	-0.428521	181.815	0
2022-09-12	15:48:01	-1.9733	181.815	0
2022-09-12	15:48:02	-3.68668	181.815	0
2022-09-12	15:48:03	-5.69273	181.815	0
2022-09-12	15:48:04	-6.78117	181.815	0
2022-09-12	15:48:05	-7.24346	181.815	0
2022-09-12	15:48:06	-6.94898	181.815	0
2022-09-12	15:48:07	-6.19556	181.815	0
2022-09-12	15:48:08	-5.35951	181.815	0
2022-09-12	15:48:09	-4.62049	181.815	0
2022-09-12	15:48:10	-2.89269	181.815	0
2022-09-12	15:48:11	-2.23644	181.815	0
2022-09-12	15:48:12	0.944988	182.76	0
2022-09-12	15:48:13	1.48354	184.244	0
2022-09-12	15:48:14	0.915674	185.16	0
2022-09-12	15:48:15	1.28817	186.448	0
2022-09-12	15:48:16	1.63389	188.082	0
2022-09-12	15:48:17	0.173005	188.255	0
2022-09-12	15:48:18	-0.676849	188.255	0
2022-09-12	15:48:19	-0.458684	188.255	0
2022-09-12	15:48:20	-1.02057	188.255	0
2022-09-12	15:48:21	-1.45613	188.255	0
2022-09-12	15:48:22	-1.95862	188.255	0
2022-09-12	15:48:23	-2.27333	188.255	0
2022-09-12	15:48:24	-2.26071	188.255	0
2022-09-12	15:48:25	-2.4636	188.255	0
2022-09-12	15:48:26	-2.51176	188.255	0
2022-09-12	15:48:27	-0.704297	188.255	0
2022-09-12	15:48:28	2.46841	190.723	0
2022-09-12	15:48:29	1.83287	192.556	0
2022-09-12	15:48:30	1.40447	193.96	0
2022-09-12	15:48:31	1.43565	195.396	0
2022-09-12	15:48:32	0.755006	196.151	0
2022-09-12	15:48:33	1.77803	197.929	0
2022-09-12	15:48:34	2.65754	200.587	0
2022-09-12	15:48:35	1.92478	202.511	0
2022-09-12	15:48:36	2.15345	204.665	0
2022-09-12	15:48:37	1.88143	206.546	0
2022-09-12	15:48:38	2.0872	208.633	0
2022-09-12	15:48:39	2.01869	210.652	0
2022-09-12	15:48:40	1.89439	212.547	0
2022-09-12	15:48:41	1.96864	214.515	0
2022-09-12	15:48:42	2.02999	216.545	0
2022-09-12	15:48:43	1.76447	218.31	0
2022-09-12	15:48:44	1.66887	219.978	0
2022-09-12	15:48:45	1.67	221.648	0
2022-09-12	15:48:46	1.79643	223.445	0
2022-09-12	15:48:47	1.10618	224.551	0
2022-09-12	15:48:48	1.97696	226.528	0
2022-09-12	15:48:49	1.00334	227.531	0
2022-09-12	15:48:50	1.45936	228.991	0
2022-09-12	15:48:51	1.07125	230.062	0
2022-09-12	15:48:52	1.81007	231.872	0
2022-09-12	15:48:53	1.61731	233.489	0
2022-09-12	15:48:54	2.66818	236.158	0
2022-09-12	15:48:55	3.23174	239.389	0
2022-09-12	15:48:56	4.41294	243.802	0
2022-09-12	15:48:57	5.06652	248.869	0
2022-09-12	15:48:58	3.43132	252.3	0
2022-09-12	15:48:59	2.26943	254.57	0
2022-09-12	15:49:00	0.0627058	254.632	0
2022-09-12	15:49:01	0.0350886	254.667	0
2022-09-12	15:49:02	0.839217	255.507	0
2022-09-12	15:49:03	1.6009	257.107	0
2022-09-12	15:49:04	-0.104017	257.107	0
2022-09-12	15:49:05	0.48353	257.591	0
2022-09-12	15:49:06	0.316676	257.908	0
2022-09-12	15:49:07	0.758402	258.666	0
2022-09-12	15:49:08	1.20713	259.873	0
2022-09-12	15:49:09	2.38001	262.253	0
2022-09-12	15:49:10	4.03972	266.293	0
2022-09-12	15:49:11	2.37899	268.672	0
2022-09-12	15:49:12	3.14571	271.818	0
2022-09-12	15:49:13	2.449	274.267	0
2022-09-12	15:49:14	2.2892	276.556	0
2022-09-12	15:49:15	3.2542	279.81	0
2022-09-12	15:49:16	4.48397	284.294	0
2022-09-12	15:49:17	2.54074	286.835	0
2022-09-12	15:49:18	2.22378	289.058	0
2022-09-12	15:49:19	2.08188	291.14	0
2022-09-12	15:49:20	3.07696	294.217	0
2022-09-12	15:49:21	1.57258	295.79	0
2022-09-12	15:49:22	1.96247	297.752	0
2022-09-12	15:49:23	1.76196	299.514	0
2022-09-12	15:49:24	1.75415	301.268	0
2022-09-12	15:49:25	1.23378	302.502	0
2022-09-12	15:49:26	1.20181	303.704	0
2022-09-12	15:49:27	1.57368	305.278	0
2022-09-12	15:49:28	3.51238	308.79	0
2022-09-12	15:49:29	4.09428	312.884	0
2022-09-12	15:49:30	4.34164	317.226	0
2022-09-12	15:49:31	2.27396	319.5	0
2022-09-12	15:49:32	1.57792	321.078	0
2022-09-12	15:49:33	1.11614	322.194	0
2022-09-12	15:49:34	0.467174	322.661	0
2022-09-12	15:49:35	0.472324	323.134	0
2022-09-12	15:49:36	0.846971	323.981	0
2022-09-12	15:49:37	0.410091	324.391	0
2022-09-12	15:49:38	0.950252	325.341	0
2022-09-12	15:49:39	2.43061	327.772	0
2022-09-12	15:49:40	2.65064	330.422	0
2022-09-12	15:49:41	2.11527	332.537	0
2022-09-12	15:49:42	3.01634	335.554	0
2022-09-12	15:49:43	2.2803	337.834	0
2022-09-12	15:49:44	2.52961	340.364	0
2022-09-12	15:49:45	1.62744	341.991	0
2022-09-12	15:49:46	-3.14345	341.991	0
2022-09-12	15:49:47	-4.04673	341.991	0
2022-09-12	15:49:48	-3.79785	341.991	0
2022-09-12	15:49:49	-0.759475	341.991	0
2022-09-12	15:49:50	0.955063	342.946	0
2022-09-12	15:49:51	1.17843	344.125	0
2022-09-12	15:49:52	1.23091	345.356	0
2022-09-12	15:49:53	1.2215	346.577	0
2022-09-12	15:49:54	1.31533	347.892	0
2022-09-12	15:49:55	0.931802	348.824	0
2022-09-12	15:49:56	0.464647	349.289	0
2022-09-12	15:49:57	0.394736	349.684	0
2022-09-12	15:49:58	0.113639	349.797	0
2022-09-12	15:49:59	1.21409	351.011	0
2022-09-12	15:50:00	4.03785	355.049	0
2022-09-12	15:50:01	4.59523	359.644	0
2022-09-12	15:50:02	2.0181	361.662	0
2022-09-12	15:50:03	1.62163	363.284	0
2022-09-12	15:50:04	2.44187	365.726	0
2022-09-12	15:50:05	3.10276	368.829	0
2022-09-12	15:50:06	1.81941	370.648	0
2022-09-12	15:50:07	1.82167	372.47	0
2022-09-12	15:50:08	1.97045	374.44	0
2022-09-12	15:50:09	1.42484	375.865	0
2022-09-12	15:50:10	3.70813	379.573	0
2022-09-12	15:50:11	4.19978	383.773	0
2022-09-12	15:50:12	2.71278	386.486	0
2022-09-12	15:50:13	2.65636	389.142	0
2022-09-12	15:50:14	1.72586	390.868	0
2022-09-12	15:50:15	0.813938	391.682	0
2022-09-12	15:50:16	0.965136	392.647	0
2022-09-12	15:50:17	1.87108	394.518	0
2022-09-12	15:50:18	1.82071	396.339	0
2022-09-12	15:50:19	2.27426	398.613	0
2022-09-12	15:50:20	2.45228	401.065	0
2022-09-12	15:50:21	2.03734	403.103	0
2022-09-12	15:50:22	2.84389	405.947	0
2022-09-12	15:50:23	4.20887	410.155	0
2022-09-12	15:50:24	3.35466	413.51	0
2022-09-12	15:50:25	5.20366	418.714	0
2022-09-12	15:50:26	3.10972	421.824	0
2022-09-12	15:50:27	3.50797	425.331	0
2022-09-12	15:50:28	2.98239	428.314	0
2022-09-12	15:50:29	2.3516	430.665	0
2022-09-12	15:50:30	1.65861	432.324	0
2022-09-12	15:50:31	2.26383	434.588	0
2022-09-12	15:50:32	2.38024	436.968	0
2022-09-12	15:50:33	1.66157	438.63	0
2022-09-12	15:50:34	1.21016	439.84	0
2022-09-12	15:50:35	1.6923	441.532	0
2022-09-12	15:50:36	3.87798	445.41	0
2022-09-12	15:50:37	1.67877	447.089	0
2022-09-12	15:50:38	1.12361	448.213	0
2022-09-12	15:50:39	1.24929	449.462	0

## Sheet: MrFitz_prong_2022912154521 (4)
Date	time	Lbs	Newtons	aveaged newtons	Total Force x time	Total Time Steps Force >13.345		**GoPro Fitting: 1535
2022-09-12	15:45:39	0.409428	1.82122	1.80916	1.82122	FALSE	0			Total force x time	858.839
2022-09-12	15:45:39	0.363117	1.61522	1.80916	1.61522	FALSE	0			Total Time Steps Force >3	0
2022-09-12	15:45:39	0.315738	1.40447	1.80916	3.22568	FALSE	0
2022-09-12	15:45:39	0.538588	2.39575	1.80916	4.01096	FALSE	0
2022-09-12	15:45:40	0.376145	1.67317	1.87343	4.89885	FALSE	0
2022-09-12	15:45:40	0.588817	2.61918	1.87343	6.63014	FALSE	0
2022-09-12	15:45:40	0.298537	1.32795	1.87343	6.2268	FALSE	0
2022-09-12	15:45:41	0.408461	1.81692	1.46887	8.44706	FALSE	0
2022-09-12	15:45:41	0.288308	1.28245	1.46887	7.50926	FALSE	0
2022-09-12	15:45:41	0.498333	2.21668	1.46887	10.6637	FALSE	0
2022-09-12	15:45:41	0.125764	0.559423	1.46887	8.06868	FALSE	0
2022-09-12	15:45:42	0.526476	2.34187	1.55868	13.0056	FALSE	0
2022-09-12	15:45:42	0.32154	1.43027	1.55868	9.49895	FALSE	0
2022-09-12	15:45:42	0.394313	1.75398	1.55868	14.7596	FALSE	0
2022-09-12	15:45:42	0.1593	0.708598	1.55868	10.2076	FALSE	0
2022-09-12	15:45:43	0.308817	1.37368	0.295416	16.1333	FALSE	0
2022-09-12	15:45:43	0.0228628	0.101698	0.295416	10.3092	FALSE	0
2022-09-12	15:45:43	-0.0506231	-0.225182	0.295416	16.1333	FALSE	0
2022-09-12	15:45:43	-0.0154069	-0.068533	0.295416	10.3092	FALSE	0
2022-09-12	15:45:44	0.189886	0.844651	1.23808	16.9779	FALSE	0
2022-09-12	15:45:44	0.371667	1.65325	1.23808	11.9625	FALSE	0
2022-09-12	15:45:44	0.273448	1.21635	1.23808	18.1943	FALSE	0
2022-09-12	15:45:45	0.35131	1.5627	0.985509	13.5252	FALSE	0
2022-09-12	15:45:45	0.28556	1.27023	0.985509	19.4645	FALSE	0
2022-09-12	15:45:45	0.350751	1.56021	0.985509	15.0854	FALSE	0
2022-09-12	15:45:45	-0.101412	-0.451101	0.985509	19.4645	FALSE	0
2022-09-12	15:45:46	0.152939	0.680303	1.79133	15.7657	FALSE	0
2022-09-12	15:45:46	0.182914	0.813638	1.79133	20.2781	FALSE	0
2022-09-12	15:45:46	0.443473	1.97266	1.79133	17.7384	FALSE	0
2022-09-12	15:45:46	0.831514	3.69874	1.79133	23.9769	FALSE	0
2022-09-12	15:45:47	0.689682	3.06784	2.01759	20.8062	FALSE	0
2022-09-12	15:45:47	0.540522	2.40435	2.01759	26.3812	FALSE	0
2022-09-12	15:45:47	0.312583	1.39043	2.01759	22.1966	FALSE	0
2022-09-12	15:45:47	0.271514	1.20775	2.01759	27.589	FALSE	0
2022-09-12	15:45:48	0.302252	1.34448	1.44249	23.5411	FALSE	0
2022-09-12	15:45:48	0.269936	1.20073	1.44249	28.7897	FALSE	0
2022-09-12	15:45:48	0.400674	1.78228	1.44249	25.3234	FALSE	0
2022-09-12	15:45:49	0.287545	1.27906	1.26027	30.0688	FALSE	0
2022-09-12	15:45:49	0.332634	1.47962	1.26027	26.803	FALSE	0
2022-09-12	15:45:49	0.336552	1.49705	1.26027	31.5658	FALSE	0
2022-09-12	15:45:49	0.176552	0.785339	1.26027	27.5884	FALSE	0
2022-09-12	15:45:50	0.148715	0.661514	0.932595	32.2273	FALSE	0
2022-09-12	15:45:50	0.238741	1.06197	0.932595	28.6503	FALSE	0
2022-09-12	15:45:50	0.1964	0.873626	0.932595	33.101	FALSE	0
2022-09-12	15:45:50	0.254771	1.13327	0.932595	29.7836	FALSE	0
2022-09-12	15:45:51	0.0935498	0.416128	0.740216	33.5171	FALSE	0
2022-09-12	15:45:51	0.161234	0.717201	0.740216	30.5008	FALSE	0
2022-09-12	15:45:51	0.24444	1.08732	0.740216	34.6044	FALSE	0
2022-09-12	15:45:52	0.0158908	0.0706855	0.614712	30.5715	FALSE	0
2022-09-12	15:45:52	0.188308	0.837632	0.614712	35.442	FALSE	0
2022-09-12	15:45:52	0.103982	0.462533	0.614712	31.034	FALSE	0
2022-09-12	15:45:52	0.244593	1.088	0.614712	36.53	FALSE	0
2022-09-12	15:45:53	-0.000241466	-0.00107409	0.504809	31.034	FALSE	0
2022-09-12	15:45:53	0.246679	1.09728	0.504809	37.6273	FALSE	0
2022-09-12	15:45:53	0.0298348	0.132711	0.504809	31.1667	FALSE	0
2022-09-12	15:45:53	0.177672	0.790321	0.504809	38.4176	FALSE	0
2022-09-12	15:45:54	-0.0769844	-0.342442	0.744989	31.1667	FALSE	0
2022-09-12	15:45:54	0.262048	1.16564	0.744989	39.5833	FALSE	0
2022-09-12	15:45:54	0.208766	0.928633	0.744989	32.0954	FALSE	0
2022-09-12	15:45:54	0.276094	1.22812	0.744989	40.8114	FALSE	0
2022-09-12	15:45:55	0.145	0.644989	0.717051	32.7404	FALSE	0
2022-09-12	15:45:55	0.194669	0.865927	0.717051	41.6773	FALSE	0
2022-09-12	15:45:55	0.143932	0.640238	0.717051	33.3806	FALSE	0
2022-09-12	15:45:56	0.26439	1.17606	0.821787	42.8534	FALSE	0
2022-09-12	15:45:56	0.149224	0.663778	0.821787	34.0444	FALSE	0
2022-09-12	15:45:56	0.189428	0.842614	0.821787	43.696	FALSE	0
2022-09-12	15:45:56	0.135942	0.604697	0.821787	34.6491	FALSE	0
2022-09-12	15:45:57	-0.0476715	-0.212052	0.679058	43.696	FALSE	0
2022-09-12	15:45:57	0.0628628	0.279626	0.679058	34.9287	FALSE	0
2022-09-12	15:45:57	0.356552	1.58601	0.679058	45.282	FALSE	0
2022-09-12	15:45:57	0.238893	1.06264	0.679058	35.9913	FALSE	0
2022-09-12	15:45:58	0.504389	2.24362	0.583134	47.5256	FALSE	0
2022-09-12	15:45:58	-0.23276	-1.03536	0.583134	35.9913	FALSE	0
2022-09-12	15:45:58	0.236451	1.05178	0.583134	48.5774	FALSE	0
2022-09-12	15:45:58	0.0162979	0.0724963	0.583134	36.0638	FALSE	0
2022-09-12	15:45:59	0.38612	1.71754	1.33822	50.295	FALSE	0
2022-09-12	15:45:59	0.275535	1.22563	1.33822	37.2895	FALSE	0
2022-09-12	15:45:59	0.240878	1.07147	1.33822	51.3664	FALSE	0
2022-09-12	15:46:00	0.180522	0.802998	0.550311	38.0925	FALSE	0
2022-09-12	15:46:00	-0.0888929	-0.395413	0.550311	51.3664	FALSE	0
2022-09-12	15:46:00	0.375891	1.67204	0.550311	39.7645	FALSE	0
2022-09-12	15:46:00	0.0273412	0.121619	0.550311	51.488	FALSE	0
2022-09-12	15:46:01	-0.0933712	-0.415334	-1.4301	39.7645	FALSE	0
2022-09-12	15:46:01	-0.24187	-1.07589	-1.4301	51.488	FALSE	0
2022-09-12	15:46:01	-0.475865	-2.11674	-1.4301	39.7645	FALSE	0
2022-09-12	15:46:01	-0.474898	-2.11244	-1.4301	51.488	FALSE	0
2022-09-12	15:46:02	-0.325432	-1.44759	-1.05783	39.7645	FALSE	0
2022-09-12	15:46:02	-0.311081	-1.38375	-1.05783	51.488	FALSE	0
2022-09-12	15:46:02	-0.129351	-0.575379	-1.05783	39.7645	FALSE	0
2022-09-12	15:46:02	-0.185381	-0.824612	-1.05783	51.488	FALSE	0
2022-09-12	15:46:03	0.127646	0.567795	0.216242	40.3323	FALSE	0
2022-09-12	15:46:03	0.0252547	0.112338	0.216242	51.6004	FALSE	0
2022-09-12	15:46:03	-0.00706081	-0.0314079	0.216242	40.3323	FALSE	0
2022-09-12	15:46:04	-0.210114	-0.934629	-0.330954	51.6004	FALSE	0
2022-09-12	15:46:04	0.00810459	0.0360508	-0.330954	40.3683	FALSE	0
2022-09-12	15:46:04	-0.0496053	-0.220654	-0.330954	51.6004	FALSE	0
2022-09-12	15:46:04	-0.0459921	-0.204582	-0.330954	40.3683	FALSE	0
2022-09-12	15:46:05	-0.178002	-0.791788	-0.311203	51.6004	FALSE	0
2022-09-12	15:46:05	-0.0369845	-0.164514	-0.311203	40.3683	FALSE	0
2022-09-12	15:46:05	0.00510202	0.0226948	-0.311203	51.6231	FALSE	0
2022-09-12	15:46:06	-0.0820226	-0.364853	-0.24972	40.3683	FALSE	0
2022-09-12	15:46:06	-0.111539	-0.496148	-0.24972	51.6231	FALSE	0
2022-09-12	15:46:06	-0.0216155	-0.0961501	-0.24972	40.3683	FALSE	0
2022-09-12	15:46:06	-0.00884198	-0.0393309	-0.24972	51.6231	FALSE	0
2022-09-12	15:46:06	-0.0566791	-0.25212	-0.24972	40.3683	FALSE	0
2022-09-12	15:46:07	0.175534	0.78081	1.38409	52.4039	FALSE	0
2022-09-12	15:46:07	0.502812	2.23661	1.38409	42.605	FALSE	0
2022-09-12	15:46:07	0.255127	1.13486	1.38409	53.5387	FALSE	0
2022-09-12	15:46:08	0.13355	0.594057	1.02116	43.199	FALSE	0
2022-09-12	15:46:08	0.317316	1.41149	1.02116	54.9502	FALSE	0
2022-09-12	15:46:08	0.172583	0.767684	1.02116	43.9667	FALSE	0
2022-09-12	15:46:08	0.294822	1.31143	1.02116	56.2617	FALSE	0
2022-09-12	15:46:09	0.158283	0.704074	1.17917	44.6708	FALSE	0
2022-09-12	15:46:09	0.193092	0.858912	1.17917	57.1206	FALSE	0
2022-09-12	15:46:09	0.352939	1.56994	1.17917	46.2407	FALSE	0
2022-09-12	15:46:09	0.356043	1.58375	1.17917	58.7043	FALSE	0
2022-09-12	15:46:10	0.223728	0.995187	1.49105	47.2359	FALSE	0
2022-09-12	15:46:10	0.335636	1.49298	1.49105	60.1973	FALSE	0
2022-09-12	15:46:10	0.239555	1.06559	1.49105	48.3015	FALSE	0
2022-09-12	15:46:10	0.541896	2.41046	1.49105	62.6078	FALSE	0
2022-09-12	15:46:11	0.748562	3.32975	2.33251	51.6312	FALSE	0
2022-09-12	15:46:11	0.383473	1.70576	2.33251	64.3135	FALSE	0
2022-09-12	15:46:11	0.441081	1.96202	2.33251	53.5933	FALSE	0
2022-09-12	15:46:12	0.412176	1.83344	2.05715	66.147	FALSE	0
2022-09-12	15:46:12	0.550903	2.45053	2.05715	56.0438	FALSE	0
2022-09-12	15:46:12	0.426171	1.89569	2.05715	68.0427	FALSE	0
2022-09-12	15:46:12	0.460623	2.04894	2.05715	58.0927	FALSE	0
2022-09-12	15:46:13	0.44785	1.99213	1.95851	70.0348	FALSE	0
2022-09-12	15:46:13	0.385254	1.71369	1.95851	59.8064	FALSE	0
2022-09-12	15:46:13	0.477774	2.12523	1.95851	72.16	FALSE	0
2022-09-12	15:46:13	0.450293	2.00299	1.95851	61.8094	FALSE	0
2022-09-12	15:46:14	0.451921	2.01023	1.93591	74.1703	FALSE	0
2022-09-12	15:46:14	0.47472	2.11165	1.93591	63.9211	FALSE	0
2022-09-12	15:46:14	0.378995	1.68585	1.93591	75.8561	FALSE	0
2022-09-12	15:46:15	0.459555	2.04419	2.10327	65.9653	FALSE	0
2022-09-12	15:46:15	0.433092	1.92648	2.10327	77.7826	FALSE	0
2022-09-12	15:46:15	0.476094	2.11776	2.10327	68.083	FALSE	0
2022-09-12	15:46:15	0.522608	2.32466	2.10327	80.1072	FALSE	0
2022-09-12	15:46:16	0.338028	1.50362	1.51471	69.5866	FALSE	0
2022-09-12	15:46:16	0.485305	2.15873	1.51471	82.266	FALSE	0
2022-09-12	15:46:16	0.265356	1.18036	1.51471	70.767	FALSE	0
2022-09-12	15:46:16	0.273397	1.21612	1.51471	83.4821	FALSE	0
2022-09-12	15:46:17	0.362608	1.61295	1.74844	72.3799	FALSE	0
2022-09-12	15:46:17	0.480929	2.13927	1.74844	85.6214	FALSE	0
2022-09-12	15:46:17	0.405356	1.8031	1.74844	74.183	FALSE	0
2022-09-12	15:46:17	0.323372	1.43842	1.74844	87.0598	FALSE	0
2022-09-12	15:46:18	0.421031	1.87283	4.29033	76.0559	FALSE	0
2022-09-12	15:46:18	2.14205	9.52827	4.29033	96.5881	FALSE	0
2022-09-12	15:46:18	0.330445	1.46989	4.29033	77.5258	FALSE	0
2022-09-12	15:46:19	0.34958	1.555	1.54617	98.1431	FALSE	0
2022-09-12	15:46:19	0.260827	1.16021	1.54617	78.686	FALSE	0
2022-09-12	15:46:19	0.358537	1.59484	1.54617	99.7379	FALSE	0
2022-09-12	15:46:19	0.421438	1.87464	1.54617	80.5606	FALSE	0
2022-09-12	15:46:20	0.18897	0.840576	0.756818	100.578	FALSE	0
2022-09-12	15:46:20	0.214822	0.955571	0.756818	81.5162	FALSE	0
2022-09-12	15:46:20	0.106629	0.474307	0.756818	101.053	FALSE	0
2022-09-12	15:46:21	0.310802	1.38251	0.559241	82.8987	FALSE	0
2022-09-12	15:46:21	0.247392	1.10045	0.559241	102.153	FALSE	0
2022-09-12	15:46:21	0.258537	1.15002	0.559241	84.0487	FALSE	0
2022-09-12	15:46:21	0.00108167	0.00481148	0.559241	102.158	FALSE	0
2022-09-12	15:46:21	-0.189198	-0.841591	0.559241	84.0487	FALSE	0
2022-09-12	15:46:22	-0.215712	-0.95953	-1.74013	102.158	FALSE	0
2022-09-12	15:46:22	-0.328893	-1.46298	-1.74013	84.0487	FALSE	0
2022-09-12	15:46:22	-0.628994	-2.79789	-1.74013	102.158	FALSE	0
2022-09-12	15:46:23	-0.602226	-2.67882	-2.32002	84.0487	FALSE	0
2022-09-12	15:46:23	-0.604567	-2.68923	-2.32002	102.158	FALSE	0
2022-09-12	15:46:23	-0.409758	-1.82269	-2.32002	84.0487	FALSE	0
2022-09-12	15:46:23	-0.469707	-2.08935	-2.32002	102.158	FALSE	0
2022-09-12	15:46:24	-0.428944	-1.90803	-1.73361	84.0487	FALSE	0
2022-09-12	15:46:24	-0.450368	-2.00333	-1.73361	102.158	FALSE	0
2022-09-12	15:46:24	-0.438053	-1.94855	-1.73361	84.0487	FALSE	0
2022-09-12	15:46:24	-0.241565	-1.07453	-1.73361	102.158	FALSE	0
2022-09-12	15:46:25	-0.299427	-1.33191	-1.19326	84.0487	FALSE	0
2022-09-12	15:46:25	-0.30243	-1.34527	-1.19326	102.158	FALSE	0
2022-09-12	15:46:25	-0.249554	-1.11007	-1.19326	84.0487	FALSE	0
2022-09-12	15:46:25	-0.221615	-0.985788	-1.19326	102.158	FALSE	0
2022-09-12	15:46:26	-0.362938	-1.61442	-1.78337	84.0487	FALSE	0
2022-09-12	15:46:26	-0.363142	-1.61533	-1.78337	102.158	FALSE	0
2022-09-12	15:46:26	-0.476679	-2.12036	-1.78337	84.0487	FALSE	0
2022-09-12	15:46:27	-0.307824	-1.36926	-1.36757	102.158	FALSE	0
2022-09-12	15:46:27	-0.161056	-0.716409	-1.36757	84.0487	FALSE	0
2022-09-12	15:46:27	-0.253371	-1.12704	-1.36757	102.158	FALSE	0
2022-09-12	15:46:27	-0.507519	-2.25755	-1.36757	84.0487	FALSE	0
2022-09-12	15:46:28	-0.653523	-2.907	-1.56156	102.158	FALSE	0
2022-09-12	15:46:28	-0.328435	-1.46094	-1.56156	84.0487	FALSE	0
2022-09-12	15:46:28	-0.247671	-1.10169	-1.56156	102.158	FALSE	0
2022-09-12	15:46:28	-0.174592	-0.77662	-1.56156	84.0487	FALSE	0
2022-09-12	15:46:29	0.189173	0.841479	1.90113	103	FALSE	0
2022-09-12	15:46:29	0.404746	1.80039	1.90113	85.8491	FALSE	0
2022-09-12	15:46:29	0.663575	2.95171	1.90113	105.951	FALSE	0
2022-09-12	15:46:29	0.452074	2.01092	1.90113	87.86	FALSE	0
2022-09-12	15:46:30	0.492074	2.18884	3.28772	108.14	FALSE	0
2022-09-12	15:46:30	1.23431	5.49046	3.28772	93.3505	FALSE	0
2022-09-12	15:46:30	0.490954	2.18386	3.28772	110.324	FALSE	0
2022-09-12	15:46:31	0.618435	2.75092	1.95268	96.1014	FALSE	0
2022-09-12	15:46:31	0.51355	2.28437	1.95268	112.608	FALSE	0
2022-09-12	15:46:31	0.213753	0.950816	1.95268	97.0522	FALSE	0
2022-09-12	15:46:31	0.410191	1.82461	1.95268	114.433	FALSE	0
2022-09-12	15:46:32	0.23299	1.03639	1.42739	98.0886	FALSE	0
2022-09-12	15:46:32	0.35014	1.55749	1.42739	115.99	FALSE	0
2022-09-12	15:46:32	0.315687	1.40424	1.42739	99.4928	FALSE	0
2022-09-12	15:46:32	0.384746	1.71143	1.42739	117.702	FALSE	0
2022-09-12	15:46:33	0.326323	1.45155	1.92789	100.944	FALSE	0
2022-09-12	15:46:33	0.401183	1.78454	1.92789	119.486	FALSE	0
2022-09-12	15:46:33	0.46612	2.07339	1.92789	103.018	FALSE	0
2022-09-12	15:46:33	0.540013	2.40209	1.92789	121.888	FALSE	0
2022-09-12	15:46:34	0.44271	1.96926	1.91433	104.987	FALSE	0
2022-09-12	15:46:34	0.471616	2.09784	1.91433	123.986	FALSE	0
2022-09-12	15:46:34	0.376756	1.67589	1.91433	106.663	FALSE	0
2022-09-12	15:46:35	0.537366	2.39031	2.19744	126.377	FALSE	0
2022-09-12	15:46:35	0.375585	1.67068	2.19744	108.334	FALSE	0
2022-09-12	15:46:35	0.600725	2.67214	2.19744	129.049	FALSE	0
2022-09-12	15:46:35	0.462354	2.05664	2.19744	110.39	FALSE	0
2022-09-12	15:46:36	0.84841	3.7739	4.47825	132.823	FALSE	0
2022-09-12	15:46:36	0.925916	4.11866	4.47825	114.509	FALSE	0
2022-09-12	15:46:36	1.53823	6.84235	4.47825	139.665	FALSE	0
2022-09-12	15:46:36	0.714466	3.17809	4.47825	117.687	FALSE	0
2022-09-12	15:46:37	0.693448	3.0846	2.53783	142.75	FALSE	0
2022-09-12	15:46:37	0.482659	2.14696	2.53783	119.834	FALSE	0
2022-09-12	15:46:37	0.535484	2.38194	2.53783	145.132	FALSE	0
2022-09-12	15:46:38	0.472074	2.09988	2.22071	121.934	FALSE	0
2022-09-12	15:46:38	0.421438	1.87464	2.22071	147.006	FALSE	0
2022-09-12	15:46:38	0.597825	2.65925	2.22071	124.593	FALSE	0
2022-09-12	15:46:38	0.505611	2.24906	2.22071	149.255	FALSE	0
2022-09-12	15:46:39	0.518028	2.30429	2.59382	126.897	FALSE	0
2022-09-12	15:46:39	0.6107	2.71652	2.59382	151.972	FALSE	0
2022-09-12	15:46:39	0.66388	2.95307	2.59382	129.85	FALSE	0
2022-09-12	15:46:39	0.53986	2.40141	2.59382	154.373	FALSE	0
2022-09-12	15:46:40	0.377265	1.67815	2.01063	131.529	FALSE	0
2022-09-12	15:46:40	0.480267	2.13632	2.01063	156.51	FALSE	0
2022-09-12	15:46:40	0.483219	2.14945	2.01063	133.678	FALSE	0
2022-09-12	15:46:40	0.46729	2.0786	2.01063	158.588	FALSE	0
2022-09-12	15:46:41	0.617366	2.74617	2.27252	136.424	FALSE	0
2022-09-12	15:46:41	0.448868	1.99665	2.27252	160.585	FALSE	0
2022-09-12	15:46:41	0.466425	2.07475	2.27252	138.499	FALSE	0
2022-09-12	15:46:42	0.456349	2.02993	2.16377	162.615	FALSE	0
2022-09-12	15:46:42	0.482761	2.14742	2.16377	140.646	FALSE	0
2022-09-12	15:46:42	0.518842	2.30791	2.16377	164.923	FALSE	0
2022-09-12	15:46:42	0.487799	2.16983	2.16377	142.816	FALSE	0
2022-09-12	15:46:43	0.444542	1.97741	2.04838	166.9	FALSE	0
2022-09-12	15:46:43	0.449784	2.00073	2.04838	144.817	FALSE	0
2022-09-12	15:46:43	0.473957	2.10826	2.04838	169.008	FALSE	0
2022-09-12	15:46:43	0.473702	2.10712	2.04838	146.924	FALSE	0
2022-09-12	15:46:44	0.477519	2.1241	2.12218	171.132	FALSE	0
2022-09-12	15:46:44	0.475738	2.11618	2.12218	149.04	FALSE	0
2022-09-12	15:46:44	0.478639	2.12908	2.12218	173.261	FALSE	0
2022-09-12	15:46:44	0.476451	2.11935	2.12218	151.16	FALSE	0
2022-09-12	15:46:45	0.483728	2.15172	2.78941	175.413	FALSE	0
2022-09-12	15:46:45	0.540114	2.40254	2.78941	153.562	FALSE	0
2022-09-12	15:46:45	0.857417	3.81396	2.78941	179.227	FALSE	0
2022-09-12	15:46:46	1.14999	5.11539	3.3301	158.678	FALSE	0
2022-09-12	15:46:46	0.85299	3.79427	3.3301	183.021	FALSE	0
2022-09-12	15:46:46	0.512176	2.27826	3.3301	160.956	FALSE	0
2022-09-12	15:46:46	0.479402	2.13248	3.3301	185.154	FALSE	0
2022-09-12	15:46:47	0.523524	2.32874	2.73757	163.285	FALSE	0
2022-09-12	15:46:47	0.568613	2.5293	2.73757	187.683	FALSE	0
2022-09-12	15:46:47	0.751056	3.34085	2.73757	166.625	FALSE	0
2022-09-12	15:46:47	0.618537	2.75138	2.73757	190.435	FALSE	0
2022-09-12	15:46:48	0.710191	3.15907	4.58295	169.784	FALSE	0
2022-09-12	15:46:48	1.51447	6.73667	4.58295	197.171	FALSE	0
2022-09-12	15:46:48	1.24917	5.55656	4.58295	175.341	FALSE	0
2022-09-12	15:46:48	0.647341	2.8795	4.58295	200.051	FALSE	0
2022-09-12	15:46:49	0.4393	1.95409	2.10659	177.295	FALSE	0
2022-09-12	15:46:49	0.422354	1.87872	2.10659	201.929	FALSE	0
2022-09-12	15:46:49	0.559097	2.48698	2.10659	179.782	FALSE	0
2022-09-12	15:46:50	0.421234	1.87373	2.30661	203.803	FALSE	0
2022-09-12	15:46:50	0.668053	2.97163	2.30661	182.754	FALSE	0
2022-09-12	15:46:50	0.483015	2.14855	2.30661	205.952	FALSE	0
2022-09-12	15:46:50	0.501896	2.23253	2.30661	184.986	FALSE	0
2022-09-12	15:46:51	0.525662	2.33825	2.01075	208.29	FALSE	0
2022-09-12	15:46:51	0.376094	1.67294	2.01075	186.659	FALSE	0
2022-09-12	15:46:51	0.434466	1.93259	2.01075	210.223	FALSE	0
2022-09-12	15:46:51	0.471921	2.0992	2.01075	188.758	FALSE	0
2022-09-12	15:46:52	0.461947	2.05483	2.01063	212.277	FALSE	0
2022-09-12	15:46:52	0.455331	2.0254	2.01063	190.784	FALSE	0
2022-09-12	15:46:52	0.446221	1.98488	2.01063	214.262	FALSE	0
2022-09-12	15:46:52	0.444542	1.97741	2.01063	192.761	FALSE	0
2022-09-12	15:46:53	0.449631	2.00005	2.01906	216.262	FALSE	0
2022-09-12	15:46:53	0.439402	1.95455	2.01906	194.716	FALSE	0
2022-09-12	15:46:53	0.472684	2.10259	2.01906	218.365	FALSE	0
2022-09-12	15:46:54	0.454059	2.01975	2.0065	196.735	FALSE	0
2022-09-12	15:46:54	0.455942	2.02812	2.0065	220.393	FALSE	0
2022-09-12	15:46:54	0.44042	1.95908	2.0065	198.695	FALSE	0
2022-09-12	15:46:54	0.453906	2.01906	2.0065	222.412	FALSE	0
2022-09-12	15:46:55	0.448664	1.99575	2.03129	200.69	FALSE	0
2022-09-12	15:46:55	0.460878	2.05008	2.03129	224.462	FALSE	0
2022-09-12	15:46:55	0.467952	2.08154	2.03129	202.772	FALSE	0
2022-09-12	15:46:55	0.449122	1.99778	2.03129	226.46	FALSE	0
2022-09-12	15:46:56	0.704135	3.13213	1.456	205.904	FALSE	0
2022-09-12	15:46:56	0.359402	1.59869	1.456	228.059	FALSE	0
2022-09-12	15:46:56	-0.0815646	-0.362816	1.456	205.904	FALSE	0
2022-09-12	15:46:57	-0.202124	-0.899088	-1.83463	228.059	FALSE	0
2022-09-12	15:46:57	-0.200089	-0.890036	-1.83463	205.904	FALSE	0
2022-09-12	15:46:57	-0.487264	-2.16745	-1.83463	228.059	FALSE	0
2022-09-12	15:46:57	-0.760292	-3.38193	-1.83463	205.904	FALSE	0
2022-09-12	15:46:58	-0.596577	-2.65369	-3.14101	228.059	FALSE	0
2022-09-12	15:46:58	-0.636831	-2.83275	-3.14101	205.904	FALSE	0
2022-09-12	15:46:58	-0.758663	-3.37468	-3.14101	228.059	FALSE	0
2022-09-12	15:46:58	-0.832455	-3.70293	-3.14101	205.904	FALSE	0
2022-09-12	15:46:59	-0.864567	-3.84577	-3.01232	228.059	FALSE	0
2022-09-12	15:46:59	-0.713218	-3.17254	-3.01232	205.904	FALSE	0
2022-09-12	15:46:59	-0.655203	-2.91447	-3.01232	228.059	FALSE	0
2022-09-12	15:46:59	-0.475814	-2.11652	-3.01232	205.904	FALSE	0
2022-09-12	15:47:00	-0.305992	-1.36111	-1.49233	228.059	FALSE	0
2022-09-12	15:47:00	-0.343498	-1.52795	-1.49233	205.904	FALSE	0
2022-09-12	15:47:00	-0.356984	-1.58794	-1.49233	228.059	FALSE	0
2022-09-12	15:47:01	-0.287773	-1.28007	-0.694562	205.904	FALSE	0
2022-09-12	15:47:01	-0.272862	-1.21374	-0.694562	228.059	FALSE	0
2022-09-12	15:47:01	-0.13617	-0.605711	-0.694562	205.904	FALSE	0
2022-09-12	15:47:01	0.0722267	0.321279	-0.694562	228.38	FALSE	0
2022-09-12	15:47:02	0.120115	0.534296	0.373741	206.438	FALSE	0
2022-09-12	15:47:02	-0.0309794	-0.137803	0.373741	228.38	FALSE	0
2022-09-12	15:47:02	0.0511071	0.227335	0.373741	206.666	FALSE	0
2022-09-12	15:47:02	0.19584	0.871135	0.373741	229.251	FALSE	0
2022-09-12	15:47:03	0.0870867	0.387379	0.962136	207.053	FALSE	0
2022-09-12	15:47:03	0.338333	1.50497	0.962136	230.756	FALSE	0
2022-09-12	15:47:03	0.128512	0.571647	0.962136	207.625	FALSE	0
2022-09-12	15:47:03	0.31126	1.38455	0.962136	232.141	FALSE	0
2022-09-12	15:47:04	0.167697	0.74595	3.34673	208.371	FALSE	0
2022-09-12	15:47:04	0.031158	0.138597	3.34673	232.279	FALSE	0
2022-09-12	15:47:04	2.05828	9.15564	3.34673	217.526	FALSE	0
2022-09-12	15:47:05	0.895178	3.98193	4.7138	236.261	FALSE	0
2022-09-12	15:47:05	0.378486	1.68358	4.7138	219.21	FALSE	0
2022-09-12	15:47:05	1.322	5.88052	4.7138	242.142	FALSE	0
2022-09-12	15:47:05	1.64317	7.30915	4.7138	226.519	FALSE	0
2022-09-12	15:47:06	0.894924	3.9808	4.35091	246.122	FALSE	0
2022-09-12	15:47:06	1.04291	4.63907	4.35091	231.158	FALSE	0
2022-09-12	15:47:06	1.2165	5.41124	4.35091	251.534	FALSE	0
2022-09-12	15:47:06	0.758181	3.37254	4.35091	234.531	FALSE	0
2022-09-12	15:47:07	0.648766	2.88584	2.38437	254.42	FALSE	0
2022-09-12	15:47:07	0.709631	3.15658	2.38437	237.687	FALSE	0
2022-09-12	15:47:07	0.493244	2.19405	2.38437	256.614	FALSE	0
2022-09-12	15:47:07	0.292481	1.30101	2.38437	238.988	FALSE	0
2022-09-12	15:47:08	-0.153575	-0.683132	-1.69018	256.614	FALSE	0
2022-09-12	15:47:08	-0.408587	-1.81748	-1.69018	238.988	FALSE	0
2022-09-12	15:47:08	-0.577748	-2.56994	-1.69018	256.614	FALSE	0
2022-09-12	15:47:09	-0.655508	-2.91583	-3.73371	238.988	FALSE	0
2022-09-12	15:47:09	-0.807773	-3.59314	-3.73371	256.614	FALSE	0
2022-09-12	15:47:09	-0.818104	-3.63909	-3.73371	238.988	FALSE	0
2022-09-12	15:47:09	-1.07612	-4.7868	-3.73371	256.614	FALSE	0
2022-09-12	15:47:10	-0.901717	-4.01102	-3.58725	238.988	FALSE	0
2022-09-12	15:47:10	-1.00747	-4.48143	-3.58725	256.614	FALSE	0
2022-09-12	15:47:10	-0.780139	-3.47021	-3.58725	238.988	FALSE	0
2022-09-12	15:47:10	-0.536475	-2.38635	-3.58725	256.614	FALSE	0
2022-09-12	15:47:11	-0.436119	-1.93994	-0.443347	238.988	FALSE	0
2022-09-12	15:47:11	-0.0389692	-0.173343	-0.443347	256.614	FALSE	0
2022-09-12	15:47:11	0.0359926	0.160102	-0.443347	239.148	FALSE	0
2022-09-12	15:47:11	0.04042	0.179796	-0.443347	256.793	FALSE	0
2022-09-12	15:47:12	0.0106491	0.0473693	0.654648	239.196	FALSE	0
2022-09-12	15:47:12	0.177621	0.790094	0.654648	257.583	FALSE	0
2022-09-12	15:47:12	0.253244	1.12648	0.654648	240.322	FALSE	0
2022-09-12	15:47:13	0.381082	1.69513	1.54555	259.279	FALSE	0
2022-09-12	15:47:13	0.407392	1.81216	1.54555	242.134	FALSE	0
2022-09-12	15:47:13	0.147087	0.654272	1.54555	259.933	FALSE	0
2022-09-12	15:47:13	0.454262	2.02065	1.54555	244.155	FALSE	0
2022-09-12	15:47:14	-0.0150506	-0.0669481	0.145218	259.933	FALSE	0
2022-09-12	15:47:14	0.121387	0.539954	0.145218	244.695	FALSE	0
2022-09-12	15:47:14	0.0847967	0.377193	0.145218	260.31	FALSE	0
2022-09-12	15:47:14	-0.0605468	-0.269324	0.145218	244.695	FALSE	0
2022-09-12	15:47:15	-0.092557	-0.411712	0.431748	260.31	FALSE	0
2022-09-12	15:47:15	0.319606	1.42167	0.431748	246.117	FALSE	0
2022-09-12	15:47:15	0.0593005	0.26378	0.431748	260.574	FALSE	0
2022-09-12	15:47:15	0.101896	0.453254	0.431748	246.57	FALSE	0
2022-09-12	15:47:16	-0.0215646	-0.0959237	0.538067	260.574	FALSE	0
2022-09-12	15:47:16	0.198893	0.884716	0.538067	247.455	FALSE	0
2022-09-12	15:47:16	0.18556	0.825408	0.538067	261.399	FALSE	0
2022-09-12	15:47:17	0.152837	0.67985	1.73717	248.134	FALSE	0
2022-09-12	15:47:17	0.164593	0.732143	1.73717	262.131	FALSE	0
2022-09-12	15:47:17	0.826221	3.6752	1.73717	251.81	FALSE	0
2022-09-12	15:47:17	0.418486	1.86151	1.73717	263.993	FALSE	0
2022-09-12	15:47:18	0.478282	2.12749	1.69462	253.937	FALSE	0
2022-09-12	15:47:18	0.285611	1.27045	1.69462	265.263	FALSE	0
2022-09-12	15:47:18	0.548613	2.44034	1.69462	256.377	FALSE	0
2022-09-12	15:47:18	0.211361	0.940176	1.69462	266.204	FALSE	0
2022-09-12	15:47:19	0.518639	2.30701	1.67792	258.684	FALSE	0
2022-09-12	15:47:19	0.14154	0.629598	1.67792	266.833	FALSE	0
2022-09-12	15:47:19	0.471463	2.09716	1.67792	260.782	FALSE	0
2022-09-12	15:47:20	0.143677	0.639104	1.27996	267.472	FALSE	0
2022-09-12	15:47:20	0.465458	2.07045	1.27996	262.852	FALSE	0
2022-09-12	15:47:20	0.0984862	0.438086	1.27996	267.91	FALSE	0
2022-09-12	15:47:20	0.443372	1.97221	1.27996	264.824	FALSE	0
2022-09-12	15:47:21	0.151463	0.673738	0.358065	268.584	FALSE	0
2022-09-12	15:47:21	0.39584	1.76078	0.358065	266.585	FALSE	0
2022-09-12	15:47:21	0.070191	0.312224	0.358065	268.896	FALSE	0
2022-09-12	15:47:21	-0.295508	-1.31448	0.358065	266.585	FALSE	0
2022-09-12	15:47:22	-0.55902	-2.48663	-2.78244	268.896	FALSE	0
2022-09-12	15:47:22	-0.86192	-3.83399	-2.78244	266.585	FALSE	0
2022-09-12	15:47:22	-0.6979	-3.1044	-2.78244	268.896	FALSE	0
2022-09-12	15:47:22	-0.383244	-1.70475	-2.78244	266.585	FALSE	0
2022-09-12	15:47:23	0.240573	1.07012	1.11298	269.966	FALSE	0
2022-09-12	15:47:23	0.11243	0.500111	1.11298	267.085	FALSE	0
2022-09-12	15:47:23	0.397621	1.7687	1.11298	271.735	FALSE	0
2022-09-12	15:47:24	0.715789	3.18397	2.99489	270.269	FALSE	0
2022-09-12	15:47:24	1.34449	5.98056	2.99489	277.716	FALSE	0
2022-09-12	15:47:24	0.311005	1.38341	2.99489	271.653	FALSE	0
2022-09-12	15:47:24	0.321845	1.43163	2.99489	279.147	FALSE	0
2022-09-12	15:47:25	0.178741	0.795076	1.40707	272.448	FALSE	0
2022-09-12	15:47:25	0.459402	2.04351	1.40707	281.191	FALSE	0
2022-09-12	15:47:25	0.258079	1.14799	1.40707	273.596	FALSE	0
2022-09-12	15:47:25	0.369071	1.6417	1.40707	282.833	FALSE	0
2022-09-12	15:47:26	0.52673	2.343	2.0035	275.939	FALSE	0
2022-09-12	15:47:26	0.47813	2.12682	2.0035	284.959	FALSE	0
2022-09-12	15:47:26	0.516552	2.29773	2.0035	278.236	FALSE	0
2022-09-12	15:47:26	0.280216	1.24646	2.0035	286.206	FALSE	0
2022-09-12	15:47:27	0.440624	1.95998	1.64306	280.196	FALSE	0
2022-09-12	15:47:27	0.253397	1.12716	1.64306	287.333	FALSE	0
2022-09-12	15:47:27	0.414109	1.84204	1.64306	282.038	FALSE	0
2022-09-12	15:47:28	0.258486	1.1498	-1.2636	288.483	FALSE	0
2022-09-12	15:47:28	0.391412	1.74108	-1.2636	283.779	FALSE	0
2022-09-12	15:47:28	-1.02268	-4.54909	-1.2636	288.483	FALSE	0
2022-09-12	15:47:28	-0.763498	-3.39619	-1.2636	283.779	FALSE	0
2022-09-12	15:47:29	-0.826093	-3.67463	-2.96173	288.483	FALSE	0
2022-09-12	15:47:29	-0.613829	-2.73043	-2.96173	283.779	FALSE	0
2022-09-12	15:47:29	-0.767061	-3.41204	-2.96173	288.483	FALSE	0
2022-09-12	15:47:29	-0.456323	-2.02982	-2.96173	283.779	FALSE	0
2022-09-12	15:47:30	-0.761259	-3.38623	-2.60768	288.483	FALSE	0
2022-09-12	15:47:30	-0.447875	-1.99224	-2.60768	283.779	FALSE	0
2022-09-12	15:47:30	-0.700343	-3.11527	-2.60768	288.483	FALSE	0
2022-09-12	15:47:30	-0.435458	-1.937	-2.60768	283.779	FALSE	0
2022-09-12	15:47:31	-0.817188	-3.63502	-2.2961	288.483	FALSE	0
2022-09-12	15:47:31	-0.465585	-2.07102	-2.2961	283.779	FALSE	0
2022-09-12	15:47:31	-0.265788	-1.18228	-2.2961	288.483	FALSE	0
2022-09-12	15:47:32	0.291768	1.29784	0.412053	285.077	FALSE	0
2022-09-12	15:47:32	0.345051	1.53486	0.412053	290.018	FALSE	0
2022-09-12	15:47:32	0.0812343	0.361346	0.412053	285.439	FALSE	0
2022-09-12	15:47:32	-0.347519	-1.54583	0.412053	290.018	FALSE	0
2022-09-12	15:47:33	-0.530216	-2.35851	-2.55488	285.439	FALSE	0
2022-09-12	15:47:33	-0.593931	-2.64192	-2.55488	290.018	FALSE	0
2022-09-12	15:47:33	-0.541513	-2.40876	-2.55488	285.439	FALSE	0
2022-09-12	15:47:33	-0.631793	-2.81034	-2.55488	290.018	FALSE	0
2022-09-12	15:47:34	-0.416679	-1.85347	-2.07107	285.439	FALSE	0
2022-09-12	15:47:34	-0.561005	-2.49546	-2.07107	290.018	FALSE	0
2022-09-12	15:47:34	-0.417137	-1.85551	-2.07107	285.439	FALSE	0
2022-09-12	15:47:34	-0.46757	-2.07984	-2.07107	290.018	FALSE	0
2022-09-12	15:47:35	-0.276984	-1.23208	-1.55028	285.439	FALSE	0
2022-09-12	15:47:35	-0.441208	-1.96258	-1.55028	290.018	FALSE	0
2022-09-12	15:47:35	-0.327366	-1.45619	-1.55028	285.439	FALSE	0
2022-09-12	15:47:36	-0.132404	-0.588959	0.368477	290.018	FALSE	0
2022-09-12	15:47:36	0.0931936	0.414544	0.368477	285.853	FALSE	0
2022-09-12	15:47:36	0.258181	1.14844	0.368477	291.166	FALSE	0
2022-09-12	15:47:36	0.112379	0.499884	0.368477	286.353	FALSE	0
2022-09-12	15:47:37	0.0159926	0.0711383	0.365703	291.237	FALSE	0
2022-09-12	15:47:37	0.132328	0.588621	0.365703	286.942	FALSE	0
2022-09-12	15:47:37	0.137468	0.611485	0.365703	291.849	FALSE	0
2022-09-12	15:47:37	0.0430664	0.191568	0.365703	287.133	FALSE	0
2022-09-12	15:47:38	0.0224048	0.099661	0.0870974	291.948	FALSE	0
2022-09-12	15:47:38	0.0847458	0.376966	0.0870974	287.51	FALSE	0
2022-09-12	15:47:38	0.0351783	0.15648	0.0870974	292.105	FALSE	0
2022-09-12	15:47:38	-0.0640074	-0.284718	0.0870974	287.51	FALSE	0
2022-09-12	15:47:39	-0.00502519	-0.0223531	0.101623	292.105	FALSE	0
2022-09-12	15:47:39	0.0946694	0.421108	0.101623	287.931	FALSE	0
2022-09-12	15:47:39	-0.0211066	-0.0938864	0.101623	292.105	FALSE	0
2022-09-12	15:47:40	-0.0733203	-0.326143	0.293775	287.931	FALSE	0
2022-09-12	15:47:40	-0.0806994	-0.358967	0.293775	292.105	FALSE	0
2022-09-12	15:47:40	0.173397	0.771305	0.293775	288.703	FALSE	0
2022-09-12	15:47:40	0.244797	1.08891	0.293775	293.194	FALSE	0
2022-09-12	15:47:41	0.164237	0.730559	0.375155	289.433	FALSE	0
2022-09-12	15:47:41	-0.0470099	-0.209109	0.375155	293.194	FALSE	0
2022-09-12	15:47:41	0.12785	0.568702	0.375155	290.002	FALSE	0
2022-09-12	15:47:41	0.0922776	0.410469	0.375155	293.604	FALSE	0
2022-09-12	15:47:42	0.198384	0.882452	1.8345	290.884	FALSE	0
2022-09-12	15:47:42	0.372888	1.65868	1.8345	295.263	FALSE	0
2022-09-12	15:47:42	0.665967	2.96235	1.8345	293.847	FALSE	0
2022-09-12	15:47:43	0.531158	2.3627	2.0052	297.626	FALSE	0
2022-09-12	15:47:43	0.475534	2.11527	2.0052	295.962	FALSE	0
2022-09-12	15:47:43	0.401947	1.78794	2.0052	299.413	FALSE	0
2022-09-12	15:47:43	0.394517	1.75489	2.0052	297.717	FALSE	0
2022-09-12	15:47:44	0.211921	0.942667	1.34318	300.356	FALSE	0
2022-09-12	15:47:44	0.371361	1.65189	1.34318	299.369	FALSE	0
2022-09-12	15:47:44	0.271819	1.20911	1.34318	301.565	FALSE	0
2022-09-12	15:47:44	0.352736	1.56904	1.34318	300.938	FALSE	0
2022-09-12	15:47:45	0.168206	0.748214	3.02563	302.313	FALSE	0
2022-09-12	15:47:45	0.25187	1.12037	3.02563	302.058	FALSE	0
2022-09-12	15:47:45	1.58373	7.04475	3.02563	309.358	FALSE	0
2022-09-12	15:47:45	0.716959	3.18918	3.02563	305.247	FALSE	0
2022-09-12	15:47:46	0.565356	2.51482	2.27788	311.873	FALSE	0
2022-09-12	15:47:46	0.267596	1.19032	2.27788	306.438	FALSE	0
2022-09-12	15:47:46	0.703321	3.12851	2.27788	315.002	FALSE	0
2022-09-12	15:47:47	0.378893	1.68539	-0.144423	308.123	FALSE	0
2022-09-12	15:47:47	0.488868	2.17458	-0.144423	317.176	FALSE	0
2022-09-12	15:47:47	-0.270012	-1.20107	-0.144423	308.123	FALSE	0
2022-09-12	15:47:47	-0.72762	-3.2366	-0.144423	317.176	FALSE	0
2022-09-12	15:47:48	0.425051	1.89071	1.95721	310.014	FALSE	0
2022-09-12	15:47:48	0.294059	1.30803	1.95721	318.484	FALSE	0
2022-09-12	15:47:48	0.500929	2.22823	1.95721	312.242	FALSE	0
2022-09-12	15:47:48	0.539962	2.40186	1.95721	320.886	FALSE	0
2022-09-12	15:47:49	1.01452	4.51279	3.24363	316.755	FALSE	0
2022-09-12	15:47:49	0.592939	2.63751	3.24363	323.524	FALSE	0
2022-09-12	15:47:49	0.698079	3.1052	3.24363	319.86	FALSE	0
2022-09-12	15:47:49	0.61126	2.71901	3.24363	326.243	FALSE	0
2022-09-12	15:47:50	0.512074	2.27781	2.15926	322.138	FALSE	0
2022-09-12	15:47:50	0.399809	1.77843	2.15926	328.021	FALSE	0
2022-09-12	15:47:50	0.544389	2.42155	2.15926	324.559	FALSE	0
2022-09-12	15:47:51	0.537061	2.38895	2.29603	330.41	FALSE	0
2022-09-12	15:47:51	0.481285	2.14085	2.29603	326.7	FALSE	0
2022-09-12	15:47:51	0.48612	2.16236	2.29603	332.572	FALSE	0
2022-09-12	15:47:51	0.560216	2.49195	2.29603	329.192	FALSE	0
2022-09-12	15:47:52	0.45243	2.0125	2.33712	334.585	FALSE	0
2022-09-12	15:47:52	0.632175	2.81204	2.33712	332.004	FALSE	0
2022-09-12	15:47:52	0.542099	2.41136	2.33712	336.996	FALSE	0
2022-09-12	15:47:52	0.474924	2.11256	2.33712	334.117	FALSE	0
2022-09-12	15:47:53	0.472074	2.09988	1.23735	339.096	FALSE	0
2022-09-12	15:47:53	0.589478	2.62212	1.23735	336.739	FALSE	0
2022-09-12	15:47:53	-0.159631	-0.710071	1.23735	339.096	FALSE	0
2022-09-12	15:47:53	0.210751	0.937463	1.23735	337.676	FALSE	0
2022-09-12	15:47:54	0.223779	0.995414	0.973305	340.091	FALSE	0
2022-09-12	15:47:54	0.341947	1.52105	0.973305	339.197	FALSE	0
2022-09-12	15:47:54	0.0906999	0.403451	0.973305	340.495	FALSE	0
2022-09-12	15:47:55	0.188054	0.836502	-0.668473	340.034	FALSE	0
2022-09-12	15:47:55	-0.829656	-3.69048	-0.668473	340.495	FALSE	0
2022-09-12	15:47:55	-0.322989	-1.43672	-0.668473	340.034	FALSE	0
2022-09-12	15:47:55	0.363473	1.6168	-0.668473	342.112	FALSE	0
2022-09-12	15:47:56	0.0635244	0.282569	-0.156082	340.316	FALSE	0
2022-09-12	15:47:56	-0.0150506	-0.0669481	-0.156082	342.112	FALSE	0
2022-09-12	15:47:56	-0.066501	-0.29581	-0.156082	340.316	FALSE	0
2022-09-12	15:47:56	-0.122328	-0.544139	-0.156082	342.112	FALSE	0
2022-09-12	15:47:57	0.223931	0.99609	1.60639	341.312	FALSE	0
2022-09-12	15:47:57	0.347188	1.54436	1.60639	343.656	FALSE	0
2022-09-12	15:47:57	0.669936	2.98001	1.60639	344.292	FALSE	0
2022-09-12	15:47:57	0.203473	0.905089	1.60639	344.561	FALSE	0
2022-09-12	15:47:58	0.336654	1.4975	1.28864	345.79	FALSE	0
2022-09-12	15:47:58	0.334568	1.48823	1.28864	346.049	FALSE	0
2022-09-12	15:47:58	0.197875	0.880188	1.28864	346.67	FALSE	0
2022-09-12	15:47:59	0.184797	0.822014	0.363328	346.871	FALSE	0
2022-09-12	15:47:59	0.444084	1.97537	0.363328	348.646	FALSE	0
2022-09-12	15:47:59	0.116654	0.5189	0.363328	347.39	FALSE	0
2022-09-12	15:47:59	-0.418816	-1.86298	0.363328	348.646	FALSE	0
2022-09-12	15:48:00	-0.293473	-1.30543	-0.428521	347.39	FALSE	0
2022-09-12	15:48:00	0.148664	0.661287	-0.428521	349.307	FALSE	0
2022-09-12	15:48:00	-0.0557631	-0.248045	-0.428521	347.39	FALSE	0
2022-09-12	15:48:00	-0.184771	-0.821898	-0.428521	349.307	FALSE	0
2022-09-12	15:48:01	-0.431844	-1.92093	-1.9733	347.39	FALSE	0
2022-09-12	15:48:01	-0.519427	-2.31052	-1.9733	349.307	FALSE	0
2022-09-12	15:48:01	-0.37958	-1.68845	-1.9733	347.39	FALSE	0
2022-09-12	15:48:02	-0.634847	-2.82393	-3.68668	349.307	FALSE	0
2022-09-12	15:48:02	-0.714745	-3.17933	-3.68668	347.39	FALSE	0
2022-09-12	15:48:02	-0.856831	-3.81136	-3.68668	349.307	FALSE	0
2022-09-12	15:48:02	-1.10879	-4.93212	-3.68668	347.39	FALSE	0
2022-09-12	15:48:03	-1.16726	-5.19221	-5.69273	349.307	FALSE	0
2022-09-12	15:48:03	-1.34355	-5.97638	-5.69273	347.39	FALSE	0
2022-09-12	15:48:03	-1.28553	-5.71829	-5.69273	349.307	FALSE	0
2022-09-12	15:48:03	-1.32279	-5.88403	-5.69273	347.39	FALSE	0
2022-09-12	15:48:04	-1.37871	-6.13278	-6.78117	349.307	FALSE	0
2022-09-12	15:48:04	-1.51408	-6.73493	-6.78117	347.39	FALSE	0
2022-09-12	15:48:04	-1.57332	-6.99844	-6.78117	349.307	FALSE	0
2022-09-12	15:48:04	-1.63179	-7.25853	-6.78117	347.39	FALSE	0
2022-09-12	15:48:05	-1.5748	-7.00503	-7.24346	349.307	FALSE	0
2022-09-12	15:48:05	-1.71892	-7.6461	-7.24346	347.39	FALSE	0
2022-09-12	15:48:05	-1.59149	-7.07927	-7.24346	349.307	FALSE	0
2022-09-12	15:48:06	-1.67373	-7.44509	-6.94898	347.39	FALSE	0
2022-09-12	15:48:06	-1.55169	-6.90223	-6.94898	349.307	FALSE	0
2022-09-12	15:48:06	-1.62446	-7.22592	-6.94898	347.39	FALSE	0
2022-09-12	15:48:06	-1.39892	-6.22268	-6.94898	349.307	FALSE	0
2022-09-12	15:48:07	-1.46558	-6.51919	-6.19556	347.39	FALSE	0
2022-09-12	15:48:07	-1.41266	-6.28379	-6.19556	349.307	FALSE	0
2022-09-12	15:48:07	-1.42447	-6.33633	-6.19556	347.39	FALSE	0
2022-09-12	15:48:07	-1.26859	-5.64294	-6.19556	349.307	FALSE	0
2022-09-12	15:48:08	-1.22457	-5.44713	-5.35951	347.39	FALSE	0
2022-09-12	15:48:08	-1.16884	-5.19923	-5.35951	349.307	FALSE	0
2022-09-12	15:48:08	-1.30324	-5.79707	-5.35951	347.39	FALSE	0
2022-09-12	15:48:08	-1.12284	-4.99462	-5.35951	349.307	FALSE	0
2022-09-12	15:48:09	-1.15571	-5.14083	-4.62049	347.39	FALSE	0
2022-09-12	15:48:09	-1.03256	-4.59303	-4.62049	349.307	FALSE	0
2022-09-12	15:48:09	-0.927926	-4.1276	-4.62049	347.39	FALSE	0
2022-09-12	15:48:10	-0.787976	-3.50507	-2.89269	349.307	FALSE	0
2022-09-12	15:48:10	-0.61846	-2.75103	-2.89269	347.39	FALSE	0
2022-09-12	15:48:10	-0.580598	-2.58262	-2.89269	349.307	FALSE	0
2022-09-12	15:48:10	-0.614185	-2.73202	-2.89269	347.39	FALSE	0
2022-09-12	15:48:11	-0.605178	-2.69195	-2.23644	349.307	FALSE	0
2022-09-12	15:48:11	-0.438155	-1.949	-2.23644	347.39	FALSE	0
2022-09-12	15:48:11	-0.51047	-2.27067	-2.23644	349.307	FALSE	0
2022-09-12	15:48:11	-0.45729	-2.03412	-2.23644	347.39	FALSE	0
2022-09-12	15:48:12	0.119606	0.532031	0.944988	349.839	FALSE	0
2022-09-12	15:48:12	0.246425	1.09615	0.944988	348.486	FALSE	0
2022-09-12	15:48:12	0.297468	1.3232	0.944988	351.162	FALSE	0
2022-09-12	15:48:12	0.186272	0.828575	0.944988	349.315	FALSE	0
2022-09-12	15:48:13	0.312125	1.38839	1.48354	352.55	FALSE	0
2022-09-12	15:48:13	0.314211	1.39767	1.48354	350.713	FALSE	0
2022-09-12	15:48:13	0.374211	1.66457	1.48354	354.215	FALSE	0
2022-09-12	15:48:14	-0.00161552	-0.00718616	0.915674	350.713	FALSE	0
2022-09-12	15:48:14	0.363321	1.61612	0.915674	355.831	FALSE	0
2022-09-12	15:48:14	0.179555	0.798697	0.915674	351.511	FALSE	0
2022-09-12	15:48:14	0.28215	1.25506	0.915674	357.086	FALSE	0
2022-09-12	15:48:15	0.169122	0.752288	1.28817	352.264	FALSE	0
2022-09-12	15:48:15	0.308359	1.37164	1.28817	358.458	FALSE	0
2022-09-12	15:48:15	0.30215	1.34402	1.28817	353.608	FALSE	0
2022-09-12	15:48:15	0.378741	1.68472	1.28817	360.143	FALSE	0
2022-09-12	15:48:16	0.189784	0.844197	1.63389	354.452	FALSE	0
2022-09-12	15:48:16	0.546476	2.43083	1.63389	362.573	FALSE	0
2022-09-12	15:48:16	0.265458	1.18081	1.63389	355.633	FALSE	0
2022-09-12	15:48:16	0.467545	2.07973	1.63389	364.653	FALSE	0
2022-09-12	15:48:17	0.317366	1.41171	0.173005	357.044	FALSE	0
2022-09-12	15:48:17	0.102761	0.457101	0.173005	365.11	FALSE	0
2022-09-12	15:48:17	-0.303447	-1.34979	0.173005	357.044	FALSE	0
2022-09-12	15:48:18	-0.114593	-0.509733	-0.676849	365.11	FALSE	0
2022-09-12	15:48:18	-0.186297	-0.828686	-0.676849	357.044	FALSE	0
2022-09-12	15:48:18	-0.205381	-0.913576	-0.676849	365.11	FALSE	0
2022-09-12	15:48:18	-0.102379	-0.455402	-0.676849	357.044	FALSE	0
2022-09-12	15:48:19	-0.160394	-0.713465	-0.458684	365.11	FALSE	0
2022-09-12	15:48:19	-0.0900633	-0.40062	-0.458684	357.044	FALSE	0
2022-09-12	15:48:19	-0.204262	-0.908598	-0.458684	365.11	FALSE	0
2022-09-12	15:48:19	0.0422522	0.187946	-0.458684	357.232	FALSE	0
2022-09-12	15:48:20	-0.314592	-1.39937	-1.02057	365.11	FALSE	0
2022-09-12	15:48:20	-0.235559	-1.04781	-1.02057	357.232	FALSE	0
2022-09-12	15:48:20	-0.138155	-0.614541	-1.02057	365.11	FALSE	0
2022-09-12	15:48:21	-0.327417	-1.45642	-1.45613	357.232	FALSE	0
2022-09-12	15:48:21	-0.32075	-1.42676	-1.45613	365.11	FALSE	0
2022-09-12	15:48:21	-0.313575	-1.39484	-1.45613	357.232	FALSE	0
2022-09-12	15:48:21	-0.347671	-1.54651	-1.45613	365.11	FALSE	0
2022-09-12	15:48:22	-0.467722	-2.08052	-1.95862	357.232	FALSE	0
2022-09-12	15:48:22	-0.414134	-1.84215	-1.95862	365.11	FALSE	0
2022-09-12	15:48:22	-0.237392	-1.05597	-1.95862	357.232	FALSE	0
2022-09-12	15:48:22	-0.642022	-2.85584	-1.95862	365.11	FALSE	0
2022-09-12	15:48:23	-0.532608	-2.36915	-2.27333	357.232	FALSE	0
2022-09-12	15:48:23	-0.497849	-2.21453	-2.27333	365.11	FALSE	0
2022-09-12	15:48:23	-0.527213	-2.34515	-2.27333	357.232	FALSE	0
2022-09-12	15:48:23	-0.486603	-2.16451	-2.27333	365.11	FALSE	0
2022-09-12	15:48:24	-0.562073	-2.50021	-2.26071	357.232	FALSE	0
2022-09-12	15:48:24	-0.425687	-1.89354	-2.26071	365.11	FALSE	0
2022-09-12	15:48:24	-0.536933	-2.38839	-2.26071	357.232	FALSE	0
2022-09-12	15:48:25	-0.504363	-2.24351	-2.4636	365.11	FALSE	0
2022-09-12	15:48:25	-0.505432	-2.24826	-2.4636	357.232	FALSE	0
2022-09-12	15:48:25	-0.587569	-2.61362	-2.4636	365.11	FALSE	0
2022-09-12	15:48:25	-0.618002	-2.749	-2.4636	357.232	FALSE	0
2022-09-12	15:48:26	-0.557595	-2.48029	-2.51176	365.11	FALSE	0
2022-09-12	15:48:26	-0.461921	-2.05472	-2.51176	357.232	FALSE	0
2022-09-12	15:48:26	-0.648587	-2.88504	-2.51176	365.11	FALSE	0
2022-09-12	15:48:26	-0.590572	-2.62698	-2.51176	357.232	FALSE	0
2022-09-12	15:48:27	-0.438969	-1.95262	-0.704297	365.11	FALSE	0
2022-09-12	15:48:27	-0.433117	-1.92659	-0.704297	357.232	FALSE	0
2022-09-12	15:48:27	0.0187407	0.0833624	-0.704297	365.194	FALSE	0
2022-09-12	15:48:27	0.220013	0.978662	-0.704297	358.211	FALSE	0
2022-09-12	15:48:28	0.350394	1.55862	2.46841	366.752	FALSE	0
2022-09-12	15:48:28	0.866934	3.8563	2.46841	362.067	FALSE	0
2022-09-12	15:48:28	0.447443	1.99032	2.46841	368.743	FALSE	0
2022-09-12	15:48:29	0.475534	2.11527	1.83287	364.183	FALSE	0
2022-09-12	15:48:29	0.477875	2.12568	1.83287	370.868	FALSE	0
2022-09-12	15:48:29	0.347239	1.54459	1.83287	365.727	FALSE	0
2022-09-12	15:48:29	0.347545	1.54595	1.83287	372.414	FALSE	0
2022-09-12	15:48:30	0.216501	0.96304	1.40447	366.69	FALSE	0
2022-09-12	15:48:30	0.469377	2.08788	1.40447	374.502	FALSE	0
2022-09-12	15:48:30	0.267494	1.18987	1.40447	367.88	FALSE	0
2022-09-12	15:48:30	0.30958	1.37707	1.40447	375.879	FALSE	0
2022-09-12	15:48:31	0.339809	1.51154	1.43565	369.392	FALSE	0
2022-09-12	15:48:31	0.260064	1.15682	1.43565	377.036	FALSE	0
2022-09-12	15:48:31	0.45986	2.04555	1.43565	371.437	FALSE	0
2022-09-12	15:48:31	0.23126	1.02869	1.43565	378.065	FALSE	0
2022-09-12	15:48:32	-0.24131	-1.0734	0.755006	371.437	FALSE	0
2022-09-12	15:48:32	0.412685	1.83571	0.755006	379.9	FALSE	0
2022-09-12	15:48:32	0.337824	1.50271	0.755006	372.94	FALSE	0
2022-09-12	15:48:33	0.544287	2.4211	1.77803	382.321	FALSE	0
2022-09-12	15:48:33	0.217214	0.966211	1.77803	373.906	FALSE	0
2022-09-12	15:48:33	0.383168	1.70441	1.77803	384.026	FALSE	0
2022-09-12	15:48:33	0.454211	2.02042	1.77803	375.927	FALSE	0
2022-09-12	15:48:34	0.64327	2.86139	2.65754	386.887	FALSE	0
2022-09-12	15:48:34	0.440878	1.96111	2.65754	377.888	FALSE	0
2022-09-12	15:48:34	0.548155	2.4383	2.65754	389.326	FALSE	0
2022-09-12	15:48:34	0.757468	3.36937	2.65754	381.257	FALSE	0
2022-09-12	15:48:35	0.356298	1.58488	1.92478	390.91	FALSE	0
2022-09-12	15:48:35	0.528512	2.35093	1.92478	383.608	FALSE	0
2022-09-12	15:48:35	0.405153	1.8022	1.92478	392.713	FALSE	0
2022-09-12	15:48:35	0.440878	1.96111	1.92478	385.569	FALSE	0
2022-09-12	15:48:36	0.499809	2.22325	2.15345	394.936	FALSE	0
2022-09-12	15:48:36	0.458232	2.03831	2.15345	387.607	FALSE	0
2022-09-12	15:48:36	0.494313	2.1988	2.15345	397.135	FALSE	0
2022-09-12	15:48:37	0.415789	1.84951	1.88143	389.457	FALSE	0
2022-09-12	15:48:37	0.419199	1.86468	1.88143	398.999	FALSE	0
2022-09-12	15:48:37	0.429987	1.91267	1.88143	391.37	FALSE	0
2022-09-12	15:48:37	0.426883	1.89886	1.88143	400.898	FALSE	0
2022-09-12	15:48:38	0.433143	1.92671	2.0872	393.296	FALSE	0
2022-09-12	15:48:38	0.434364	1.93214	2.0872	402.83	FALSE	0
2022-09-12	15:48:38	0.474924	2.11256	2.0872	395.409	FALSE	0
2022-09-12	15:48:38	0.534466	2.37741	2.0872	405.208	FALSE	0
2022-09-12	15:48:39	0.564084	2.50916	2.01869	397.918	FALSE	0
2022-09-12	15:48:39	0.403015	1.79269	2.01869	407	FALSE	0
2022-09-12	15:48:39	0.394364	1.75421	2.01869	399.672	FALSE	0
2022-09-12	15:48:40	0.391769	1.74267	1.89439	408.743	FALSE	0
2022-09-12	15:48:40	0.425356	1.89207	1.89439	401.564	FALSE	0
2022-09-12	15:48:40	0.442812	1.96972	1.89439	410.713	FALSE	0
2022-09-12	15:48:40	0.443575	1.97311	1.89439	403.537	FALSE	0
2022-09-12	15:48:41	0.453702	2.01816	1.96864	412.731	FALSE	0
2022-09-12	15:48:41	0.406781	1.80944	1.96864	405.347	FALSE	0
2022-09-12	15:48:41	0.457977	2.03717	1.96864	414.768	FALSE	0
2022-09-12	15:48:41	0.451819	2.00978	1.96864	407.357	FALSE	0
2022-09-12	15:48:42	0.414109	1.84204	2.02999	416.61	FALSE	0
2022-09-12	15:48:42	0.415178	1.84679	2.02999	409.203	FALSE	0
2022-09-12	15:48:42	0.523219	2.32738	2.02999	418.938	FALSE	0
2022-09-12	15:48:42	0.472939	2.10373	2.02999	411.307	FALSE	0
2022-09-12	15:48:43	0.406679	1.80899	1.76447	420.747	FALSE	0
2022-09-12	15:48:43	0.299097	1.33044	1.76447	412.638	FALSE	0
2022-09-12	15:48:43	0.484237	2.15398	1.76447	422.901	FALSE	0
2022-09-12	15:48:44	0.357468	1.59009	1.66887	414.228	FALSE	0
2022-09-12	15:48:44	0.404644	1.79994	1.66887	424.701	FALSE	0
2022-09-12	15:48:44	0.308766	1.37345	1.66887	415.601	FALSE	0
2022-09-12	15:48:44	0.429835	1.91199	1.66887	426.613	FALSE	0
2022-09-12	15:48:45	0.415331	1.84748	1.67	417.449	FALSE	0
2022-09-12	15:48:45	0.359097	1.59734	1.67	428.21	FALSE	0
2022-09-12	15:48:45	0.370242	1.64691	1.67	419.095	FALSE	0
2022-09-12	15:48:45	0.357061	1.58828	1.67	429.798	FALSE	0
2022-09-12	15:48:46	0.39813	1.77096	1.79643	420.866	FALSE	0
2022-09-12	15:48:46	0.380216	1.69128	1.79643	431.489	FALSE	0
2022-09-12	15:48:46	0.309427	1.37639	1.79643	422.243	FALSE	0
2022-09-12	15:48:46	0.527646	2.34707	1.79643	433.836	FALSE	0
2022-09-12	15:48:47	0.273906	1.21839	1.10618	423.461	FALSE	0
2022-09-12	15:48:47	0.34154	1.51924	1.10618	435.356	FALSE	0
2022-09-12	15:48:47	0.130598	0.580926	1.10618	424.042	FALSE	0
2022-09-12	15:48:48	0.528359	2.35025	1.97696	437.706	FALSE	0
2022-09-12	15:48:48	0.365763	1.62699	1.97696	425.669	FALSE	0
2022-09-12	15:48:48	0.351921	1.56541	1.97696	439.271	FALSE	0
2022-09-12	15:48:48	0.531718	2.36519	1.97696	428.034	FALSE	0
2022-09-12	15:48:49	0.143372	0.637747	1.00334	439.909	FALSE	0
2022-09-12	15:48:49	0.301641	1.34176	1.00334	429.376	FALSE	0
2022-09-12	15:48:49	0.261947	1.16519	1.00334	441.074	FALSE	0
2022-09-12	15:48:49	0.19528	0.868644	1.00334	430.245	FALSE	0
2022-09-12	15:48:50	0.228766	1.0176	1.45936	442.092	FALSE	0
2022-09-12	15:48:50	0.23355	1.03888	1.45936	431.284	FALSE	0
2022-09-12	15:48:50	0.41187	1.83208	1.45936	443.924	FALSE	0
2022-09-12	15:48:50	0.43813	1.94889	1.45936	433.232	FALSE	0
2022-09-12	15:48:51	0.502506	2.23525	1.07125	446.159	FALSE	0
2022-09-12	15:48:51	0.0379264	0.168704	1.07125	433.401	FALSE	0
2022-09-12	15:48:51	0.182049	0.80979	1.07125	446.969	FALSE	0
2022-09-12	15:48:52	0.400522	1.7816	1.81007	435.183	FALSE	0
2022-09-12	15:48:52	0.542303	2.41227	1.81007	449.381	FALSE	0
2022-09-12	15:48:52	0.329224	1.46445	1.81007	436.647	FALSE	0
2022-09-12	15:48:52	0.355636	1.58194	1.81007	450.963	FALSE	0
2022-09-12	15:48:53	0.450649	2.00458	1.61731	438.652	FALSE	0
2022-09-12	15:48:53	0.318384	1.41624	1.61731	452.379	FALSE	0
2022-09-12	15:48:53	0.360369	1.60299	1.61731	440.255	FALSE	0
2022-09-12	15:48:53	0.324949	1.44544	1.61731	453.825	FALSE	0
2022-09-12	15:48:54	0.413295	1.83842	2.66818	442.093	FALSE	0
2022-09-12	15:48:54	0.714669	3.17899	2.66818	457.004	FALSE	0
2022-09-12	15:48:54	0.610802	2.71697	2.66818	444.81	FALSE	0
2022-09-12	15:48:54	0.660573	2.93836	2.66818	459.942	FALSE	0
2022-09-12	15:48:55	0.503779	2.24091	3.23174	447.051	FALSE	0
2022-09-12	15:48:55	0.688308	3.06173	3.23174	463.004	FALSE	0
2022-09-12	15:48:55	0.987494	4.39257	3.23174	451.444	FALSE	0
2022-09-12	15:48:56	1.0624	4.72577	4.41294	467.73	FALSE	0
2022-09-12	15:48:56	0.900114	4.00389	4.41294	455.448	FALSE	0
2022-09-12	15:48:56	0.937315	4.16936	4.41294	471.899	FALSE	0
2022-09-12	15:48:56	1.06846	4.75272	4.41294	460.2	FALSE	0
2022-09-12	15:48:57	1.1909	5.29736	5.06652	477.196	FALSE	0
2022-09-12	15:48:57	1.11319	4.95169	5.06652	465.152	FALSE	0
2022-09-12	15:48:57	1.11009	4.9379	5.06652	482.134	FALSE	0
2022-09-12	15:48:57	1.14184	5.07913	5.06652	470.231	FALSE	0
2022-09-12	15:48:58	0.974822	4.3362	3.43132	486.471	FALSE	0
2022-09-12	15:48:58	0.774211	3.44385	3.43132	473.675	FALSE	0
2022-09-12	15:48:58	0.565153	2.51391	3.43132	488.985	FALSE	0
2022-09-12	15:48:59	0.329529	1.46581	2.26943	475.141	FALSE	0
2022-09-12	15:48:59	1.08123	4.80953	2.26943	493.794	FALSE	0
2022-09-12	15:48:59	0.57131	2.5413	2.26943	477.682	FALSE	0
2022-09-12	15:48:59	0.0586898	0.261064	2.26943	494.055	FALSE	0
2022-09-12	15:49:00	0.108104	0.480868	0.0627058	478.163	FALSE	0
2022-09-12	15:49:00	0.119911	0.533388	0.0627058	494.588	FALSE	0
2022-09-12	15:49:00	0.00530559	0.0236003	0.0627058	478.187	FALSE	0
2022-09-12	15:49:00	-0.176933	-0.787033	0.0627058	494.588	FALSE	0
2022-09-12	15:49:01	-0.1293	-0.575152	0.0350886	478.187	FALSE	0
2022-09-12	15:49:01	0.0564506	0.251104	0.0350886	494.84	FALSE	0
2022-09-12	15:49:01	0.0843895	0.375381	0.0350886	478.562	FALSE	0
2022-09-12	15:49:01	0.020013	0.0890218	0.0350886	494.929	FALSE	0
2022-09-12	15:49:02	0.168308	0.748668	0.839217	479.311	FALSE	0
2022-09-12	15:49:02	0.152634	0.678947	0.839217	495.608	FALSE	0
2022-09-12	15:49:02	0.245051	1.09004	0.839217	480.401	FALSE	0
2022-09-12	15:49:03	0.697061	3.10067	1.6009	498.708	FALSE	0
2022-09-12	15:49:03	0.239555	1.06559	1.6009	481.466	FALSE	0
2022-09-12	15:49:03	0.320471	1.42552	1.6009	500.134	FALSE	0
2022-09-12	15:49:03	0.182507	0.811828	1.6009	482.278	FALSE	0
2022-09-12	15:49:04	0.0665778	0.296151	-0.104017	500.43	FALSE	0
2022-09-12	15:49:04	-0.0331168	-0.14731	-0.104017	482.278	FALSE	0
2022-09-12	15:49:04	-0.12187	-0.542102	-0.104017	500.43	FALSE	0
2022-09-12	15:49:04	-0.00512696	-0.0228057	-0.104017	482.278	FALSE	0
2022-09-12	15:49:05	-0.0862974	-0.383868	0.48353	500.43	FALSE	0
2022-09-12	15:49:05	0.00316817	0.0140927	0.48353	482.292	FALSE	0
2022-09-12	15:49:05	0.28388	1.26276	0.48353	501.693	FALSE	0
2022-09-12	15:49:05	0.234059	1.04114	0.48353	483.333	FALSE	0
2022-09-12	15:49:06	0.0310562	0.138144	0.316676	501.831	FALSE	0
2022-09-12	15:49:06	0.10327	0.459366	0.316676	483.793	FALSE	0
2022-09-12	15:49:06	0.0792496	0.352518	0.316676	502.183	FALSE	0
2022-09-12	15:49:07	0.095331	0.424051	0.758402	484.217	FALSE	0
2022-09-12	15:49:07	0.268715	1.1953	0.758402	503.379	FALSE	0
2022-09-12	15:49:07	0.0444404	0.19768	0.758402	484.414	FALSE	0
2022-09-12	15:49:07	0.273499	1.21658	0.758402	504.595	FALSE	0
2022-09-12	15:49:08	0.149886	0.666723	1.20713	485.081	FALSE	0
2022-09-12	15:49:08	0.169377	0.753423	1.20713	505.349	FALSE	0
2022-09-12	15:49:08	0.357417	1.58986	1.20713	486.671	FALSE	0
2022-09-12	15:49:08	0.408817	1.8185	1.20713	507.167	FALSE	0
2022-09-12	15:49:09	0.359504	1.59915	2.38001	488.27	FALSE	0
2022-09-12	15:49:09	0.425305	1.89184	2.38001	509.059	FALSE	0
2022-09-12	15:49:09	0.903372	4.01838	2.38001	492.288	FALSE	0
2022-09-12	15:49:09	0.452023	2.01069	2.38001	511.07	FALSE	0
2022-09-12	15:49:10	0.859758	3.82438	4.03972	496.113	FALSE	0
2022-09-12	15:49:10	1.34179	5.96855	4.03972	517.038	FALSE	0
2022-09-12	15:49:10	0.522964	2.32625	4.03972	498.439	FALSE	0
2022-09-12	15:49:11	0.592124	2.63389	2.37899	519.672	FALSE	0
2022-09-12	15:49:11	0.60556	2.69365	2.37899	501.133	FALSE	0
2022-09-12	15:49:11	0.386018	1.71709	2.37899	521.389	FALSE	0
2022-09-12	15:49:11	0.555585	2.47135	2.37899	503.604	FALSE	0
2022-09-12	15:49:12	0.882761	3.9267	3.14571	525.316	FALSE	0
2022-09-12	15:49:12	0.562608	2.50259	3.14571	506.107	FALSE	0
2022-09-12	15:49:12	0.374771	1.66706	3.14571	526.983	FALSE	0
2022-09-12	15:49:12	1.00861	4.4865	3.14571	510.593	FALSE	0
2022-09-12	15:49:13	0.365967	1.62789	2.449	528.611	FALSE	0
2022-09-12	15:49:13	0.822201	3.65731	2.449	514.25	FALSE	0
2022-09-12	15:49:13	0.534008	2.37537	2.449	530.986	FALSE	0
2022-09-12	15:49:13	0.480064	2.13542	2.449	516.386	FALSE	0
2022-09-12	15:49:14	0.732226	3.25709	2.2892	534.243	FALSE	0
2022-09-12	15:49:14	0.401285	1.785	2.2892	518.171	FALSE	0
2022-09-12	15:49:14	0.410394	1.82551	2.2892	536.069	FALSE	0
2022-09-12	15:49:15	0.600216	2.66988	3.2542	520.841	FALSE	0
2022-09-12	15:49:15	0.614923	2.7353	3.2542	538.804	FALSE	0
2022-09-12	15:49:15	0.712227	3.16813	3.2542	524.009	FALSE	0
2022-09-12	15:49:15	0.998944	4.4435	3.2542	543.248	FALSE	0
2022-09-12	15:49:16	0.468868	2.08562	4.48397	526.095	FALSE	0
2022-09-12	15:49:16	1.18017	5.24963	4.48397	548.497	FALSE	0
2022-09-12	15:49:16	1.14256	5.08234	4.48397	531.177	FALSE	0
2022-09-12	15:49:16	1.24057	5.5183	4.48397	554.016	FALSE	0
2022-09-12	15:49:17	0.576959	2.56643	2.54074	533.743	FALSE	0
2022-09-12	15:49:17	0.401183	1.78454	2.54074	555.8	FALSE	0
2022-09-12	15:49:17	0.767493	3.41396	2.54074	537.157	FALSE	0
2022-09-12	15:49:17	0.539097	2.39801	2.54074	558.198	FALSE	0
2022-09-12	15:49:18	0.345	1.53463	2.22378	538.692	FALSE	0
2022-09-12	15:49:18	0.471514	2.09739	2.22378	560.295	FALSE	0
2022-09-12	15:49:18	0.68327	3.03932	2.22378	541.731	FALSE	0
2022-09-12	15:49:19	0.297723	1.32433	2.08188	561.62	FALSE	0
2022-09-12	15:49:19	0.541387	2.4082	2.08188	544.139	FALSE	0
2022-09-12	15:49:19	0.526425	2.34164	2.08188	563.961	FALSE	0
2022-09-12	15:49:19	0.506577	2.25336	2.08188	546.393	FALSE	0
2022-09-12	15:49:20	0.360827	1.60503	3.07696	565.566	FALSE	0
2022-09-12	15:49:20	0.530598	2.36021	3.07696	548.753	FALSE	0
2022-09-12	15:49:20	0.775891	3.45132	3.07696	569.018	FALSE	0
2022-09-12	15:49:20	1.09961	4.89129	3.07696	553.644	FALSE	0
2022-09-12	15:49:21	0.400369	1.78092	1.57258	570.799	FALSE	0
2022-09-12	15:49:21	0.361234	1.60684	1.57258	555.251	FALSE	0
2022-09-12	15:49:21	0.298995	1.32999	1.57258	572.129	FALSE	0
2022-09-12	15:49:22	0.30388	1.35172	1.96247	556.603	FALSE	0
2022-09-12	15:49:22	0.439809	1.95636	1.96247	574.085	FALSE	0
2022-09-12	15:49:22	0.605458	2.6932	1.96247	559.296	FALSE	0
2022-09-12	15:49:22	0.415585	1.84861	1.96247	575.934	FALSE	0
2022-09-12	15:49:23	0.587239	2.61216	1.76196	561.908	FALSE	0
2022-09-12	15:49:23	0.44612	1.98443	1.76196	577.918	FALSE	0
2022-09-12	15:49:23	0.355433	1.58104	1.76196	563.489	FALSE	0
2022-09-12	15:49:23	0.195636	0.870228	1.76196	578.788	FALSE	0
2022-09-12	15:49:24	0.442557	1.96858	1.75415	565.458	FALSE	0
2022-09-12	15:49:24	0.382914	1.70328	1.75415	580.492	FALSE	0
2022-09-12	15:49:24	0.332685	1.47985	1.75415	566.938	FALSE	0
2022-09-12	15:49:24	0.419249	1.8649	1.75415	582.357	FALSE	0
2022-09-12	15:49:25	0.273041	1.21454	1.23378	568.152	FALSE	0
2022-09-12	15:49:25	0.2307	1.0262	1.23378	583.383	FALSE	0
2022-09-12	15:49:25	0.328359	1.46061	1.23378	569.613	FALSE	0
2022-09-12	15:49:26	0.266018	1.1833	1.20181	584.566	FALSE	0
2022-09-12	15:49:26	0.229478	1.02076	1.20181	570.634	FALSE	0
2022-09-12	15:49:26	0.179758	0.7996	1.20181	585.366	FALSE	0
2022-09-12	15:49:26	0.405458	1.80356	1.20181	572.437	FALSE	0
2022-09-12	15:49:27	0.260929	1.16066	1.57368	586.526	FALSE	0
2022-09-12	15:49:27	0.454466	2.02156	1.57368	574.459	FALSE	0
2022-09-12	15:49:27	0.46841	2.08358	1.57368	588.61	FALSE	0
2022-09-12	15:49:27	0.231311	1.02892	1.57368	575.488	FALSE	0
2022-09-12	15:49:28	0.337824	1.50271	3.51238	590.113	FALSE	0
2022-09-12	15:49:28	0.327443	1.45653	3.51238	576.944	FALSE	0
2022-09-12	15:49:28	0.46215	2.05574	3.51238	592.168	FALSE	0
2022-09-12	15:49:28	2.03106	9.03456	3.51238	585.979	FALSE	0
2022-09-12	15:49:29	1.60576	7.14274	4.09428	599.311	FALSE	0
2022-09-12	15:49:29	0.867137	3.8572	4.09428	589.836	FALSE	0
2022-09-12	15:49:29	0.28841	1.28291	4.09428	600.594	FALSE	0
2022-09-12	15:49:30	0.714211	3.17695	4.34164	593.013	FALSE	0
2022-09-12	15:49:30	0.723219	3.21702	4.34164	603.811	FALSE	0
2022-09-12	15:49:30	1.75172	7.792	4.34164	600.805	FALSE	0
2022-09-12	15:49:30	0.715025	3.18057	4.34164	606.992	FALSE	0
2022-09-12	15:49:31	0.728512	3.24057	2.27396	604.045	FALSE	0
2022-09-12	15:49:31	0.716043	3.1851	2.27396	610.177	FALSE	0
2022-09-12	15:49:31	0.263575	1.17243	2.27396	605.218	FALSE	0
2022-09-12	15:49:31	0.336705	1.49773	2.27396	611.674	FALSE	0
2022-09-12	15:49:32	0.427188	1.90022	1.57792	607.118	FALSE	0
2022-09-12	15:49:32	0.358639	1.5953	1.57792	613.27	FALSE	0
2022-09-12	15:49:32	0.331667	1.47532	1.57792	608.593	FALSE	0
2022-09-12	15:49:32	0.301438	1.34086	1.57792	614.611	FALSE	0
2022-09-12	15:49:33	0.48673	2.16507	1.11614	610.758	FALSE	0
2022-09-12	15:49:33	0.198333	0.882225	1.11614	615.493	FALSE	0
2022-09-12	15:49:33	0.0676974	0.301132	1.11614	611.06	FALSE	0
2022-09-12	15:49:34	0.129733	0.577078	0.467174	616.07	FALSE	0
2022-09-12	15:49:34	0.123473	0.549233	0.467174	611.609	FALSE	0
2022-09-12	15:49:34	0.12729	0.566211	0.467174	616.636	FALSE	0
2022-09-12	15:49:34	0.0396058	0.176175	0.467174	611.785	FALSE	0
2022-09-12	15:49:35	0.132786	0.590659	0.472324	617.227	FALSE	0
2022-09-12	15:49:35	0.0825575	0.367232	0.472324	612.152	FALSE	0
2022-09-12	15:49:35	0.17528	0.77968	0.472324	618.006	FALSE	0
2022-09-12	15:49:35	0.0341096	0.151726	0.472324	612.304	FALSE	0
2022-09-12	15:49:36	0.309886	1.37843	0.846971	619.385	FALSE	0
2022-09-12	15:49:36	0.181947	0.809337	0.846971	613.113	FALSE	0
2022-09-12	15:49:36	0.0817941	0.363837	0.846971	619.749	FALSE	0
2022-09-12	15:49:36	0.188003	0.836275	0.846971	613.95	FALSE	0
2022-09-12	15:49:37	0.00393154	0.0174883	0.410091	619.766	FALSE	0
2022-09-12	15:49:37	0.211005	0.938592	0.410091	614.888	FALSE	0
2022-09-12	15:49:37	0.0616414	0.274193	0.410091	620.04	FALSE	0
2022-09-12	15:49:38	0.11472	0.510298	0.950252	615.398	FALSE	0
2022-09-12	15:49:38	0.0919722	0.409111	0.950252	620.449	FALSE	0
2022-09-12	15:49:38	0.0778756	0.346406	0.950252	615.745	FALSE	0
2022-09-12	15:49:38	0.569937	2.53519	0.950252	622.985	FALSE	0
2022-09-12	15:49:39	0.455127	2.0245	2.43061	617.769	FALSE	0
2022-09-12	15:49:39	0.638791	2.84147	2.43061	625.826	FALSE	0
2022-09-12	15:49:39	0.298486	1.32773	2.43061	619.097	FALSE	0
2022-09-12	15:49:39	0.793295	3.52873	2.43061	629.355	FALSE	0
2022-09-12	15:49:40	0.656857	2.92183	2.65064	622.019	FALSE	0
2022-09-12	15:49:40	0.697824	3.10406	2.65064	632.459	FALSE	0
2022-09-12	15:49:40	0.43299	1.92603	2.65064	623.945	FALSE	0
2022-09-12	15:49:41	0.483168	2.14923	2.11527	634.608	FALSE	0
2022-09-12	15:49:41	0.280471	1.24759	2.11527	625.193	FALSE	0
2022-09-12	15:49:41	0.384135	1.70871	2.11527	636.317	FALSE	0
2022-09-12	15:49:41	0.754364	3.35556	2.11527	628.548	FALSE	0
2022-09-12	15:49:42	0.842303	3.74673	3.01634	640.064	FALSE	0
2022-09-12	15:49:42	0.578384	2.57277	3.01634	631.121	FALSE	0
2022-09-12	15:49:42	0.973295	4.32941	3.01634	644.393	FALSE	0
2022-09-12	15:49:42	0.318435	1.41646	3.01634	632.537	FALSE	0
2022-09-12	15:49:43	0.523524	2.32874	2.2803	646.722	FALSE	0
2022-09-12	15:49:43	0.410852	1.82755	2.2803	634.365	FALSE	0
2022-09-12	15:49:43	0.753855	3.3533	2.2803	650.075	FALSE	0
2022-09-12	15:49:43	0.362303	1.6116	2.2803	635.976	FALSE	0
2022-09-12	15:49:44	0.359148	1.59756	2.52961	651.673	FALSE	0
2022-09-12	15:49:44	0.694415	3.0889	2.52961	639.065	FALSE	0
2022-09-12	15:49:44	0.652481	2.90237	2.52961	654.575	FALSE	0
2022-09-12	15:49:45	0.562964	2.50418	1.62744	641.57	FALSE	0
2022-09-12	15:49:45	0.374466	1.6657	1.62744	656.241	FALSE	0
2022-09-12	15:49:45	0.299606	1.33271	1.62744	642.902	FALSE	0
2022-09-12	15:49:45	0.226425	1.00718	1.62744	657.248	FALSE	0
2022-09-12	15:49:46	-0.324872	-1.4451	-3.14345	642.902	FALSE	0
2022-09-12	15:49:46	-0.746348	-3.31991	-3.14345	657.248	FALSE	0
2022-09-12	15:49:46	-0.858154	-3.81724	-3.14345	642.902	FALSE	0
2022-09-12	15:49:46	-0.89734	-3.99155	-3.14345	657.248	FALSE	0
2022-09-12	15:49:47	-0.914439	-4.06761	-4.04673	642.902	FALSE	0
2022-09-12	15:49:47	-0.902531	-4.01464	-4.04673	657.248	FALSE	0
2022-09-12	15:49:47	-0.948485	-4.21905	-4.04673	642.902	FALSE	0
2022-09-12	15:49:47	-0.873524	-3.88561	-4.04673	657.248	FALSE	0
2022-09-12	15:49:48	-0.843549	-3.75227	-3.79785	642.902	FALSE	0
2022-09-12	15:49:48	-0.883447	-3.92975	-3.79785	657.248	FALSE	0
2022-09-12	15:49:48	-0.834389	-3.71153	-3.79785	642.902	FALSE	0
2022-09-12	15:49:49	-0.475814	-2.11652	-0.759475	657.248	FALSE	0
2022-09-12	15:49:49	-0.345687	-1.53768	-0.759475	642.902	FALSE	0
2022-09-12	15:49:49	-0.0299616	-0.133275	-0.759475	657.248	FALSE	0
2022-09-12	15:49:49	0.168512	0.749575	-0.759475	643.652	FALSE	0
2022-09-12	15:49:50	0.197316	0.877701	0.955063	658.126	FALSE	0
2022-09-12	15:49:50	0.191565	0.852119	0.955063	644.504	FALSE	0
2022-09-12	15:49:50	0.222507	0.989756	0.955063	659.115	FALSE	0
2022-09-12	15:49:50	0.247443	1.10068	0.955063	645.605	FALSE	0
2022-09-12	15:49:51	0.253601	1.12807	1.17843	660.243	FALSE	0
2022-09-12	15:49:51	0.261336	1.16247	1.17843	646.767	FALSE	0
2022-09-12	15:49:51	0.275585	1.22586	1.17843	661.469	FALSE	0
2022-09-12	15:49:51	0.269173	1.19734	1.17843	647.964	FALSE	0
2022-09-12	15:49:52	0.278944	1.2408	1.23091	662.71	FALSE	0
2022-09-12	15:49:52	0.276451	1.22971	1.23091	649.194	FALSE	0
2022-09-12	15:49:52	0.274771	1.22224	1.23091	663.932	FALSE	0
2022-09-12	15:49:53	0.275941	1.22744	1.2215	650.422	FALSE	0
2022-09-12	15:49:53	0.274313	1.2202	1.2215	665.152	FALSE	0
2022-09-12	15:49:53	0.27187	1.20933	1.2215	651.631	FALSE	0
2022-09-12	15:49:53	0.276298	1.22903	1.2215	666.381	FALSE	0
2022-09-12	15:49:54	0.283626	1.26163	1.31533	652.893	FALSE	0
2022-09-12	15:49:54	0.286985	1.27657	1.31533	667.658	FALSE	0
2022-09-12	15:49:54	0.275382	1.22495	1.31533	654.117	FALSE	0
2022-09-12	15:49:54	0.336807	1.49818	1.31533	669.156	FALSE	0
2022-09-12	15:49:55	0.263931	1.17402	0.931802	655.292	FALSE	0
2022-09-12	15:49:55	0.248817	1.10679	0.931802	670.263	FALSE	0
2022-09-12	15:49:55	0.202761	0.901921	0.931802	656.193	FALSE	0
2022-09-12	15:49:55	0.122405	0.544482	0.931802	670.808	FALSE	0
2022-09-12	15:49:56	0.140267	0.623936	0.464647	656.817	FALSE	0
2022-09-12	15:49:56	0.0774684	0.344595	0.464647	671.152	FALSE	0
2022-09-12	15:49:56	0.0956364	0.42541	0.464647	657.243	FALSE	0
2022-09-12	15:49:57	0.0865269	0.384889	0.394736	671.537	FALSE	0
2022-09-12	15:49:57	0.0859671	0.382399	0.394736	657.625	FALSE	0
2022-09-12	15:49:57	0.0861198	0.383078	0.394736	671.92	FALSE	0
2022-09-12	15:49:57	0.0963488	0.428579	0.394736	658.054	FALSE	0
2022-09-12	15:49:58	0.102354	0.455291	0.113639	672.375	FALSE	0
2022-09-12	15:49:58	0.049275	0.219185	0.113639	658.273	FALSE	0
2022-09-12	15:49:58	-0.169402	-0.753534	0.113639	672.375	FALSE	0
2022-09-12	15:49:58	0.119962	0.533615	0.113639	658.807	FALSE	0
2022-09-12	15:49:59	0.197926	0.880414	1.21409	673.256	FALSE	0
2022-09-12	15:49:59	0.199097	0.885623	1.21409	659.692	FALSE	0
2022-09-12	15:49:59	0.329733	1.46672	1.21409	674.722	FALSE	0
2022-09-12	15:49:59	0.365	1.62359	1.21409	661.316	FALSE	0
2022-09-12	15:50:00	0.72556	3.22744	4.03785	677.95	FALSE	0
2022-09-12	15:50:00	1.1507	5.11854	4.03785	666.434	FALSE	0
2022-09-12	15:50:00	0.846985	3.76756	4.03785	681.717	FALSE	0
2022-09-12	15:50:01	1.06368	4.73146	4.59523	671.166	FALSE	0
2022-09-12	15:50:01	1.15986	5.15929	4.59523	686.877	FALSE	0
2022-09-12	15:50:01	0.609987	2.71334	4.59523	673.879	FALSE	0
2022-09-12	15:50:01	1.29869	5.77683	4.59523	692.654	FALSE	0
2022-09-12	15:50:02	0.343881	1.52965	2.0181	675.409	FALSE	0
2022-09-12	15:50:02	0.548359	2.43921	2.0181	695.093	FALSE	0
2022-09-12	15:50:02	0.432176	1.92241	2.0181	677.331	FALSE	0
2022-09-12	15:50:02	0.490344	2.18115	2.0181	697.274	FALSE	0
2022-09-12	15:50:03	0.371819	1.65393	1.62163	678.985	FALSE	0
2022-09-12	15:50:03	0.402252	1.7893	1.62163	699.063	FALSE	0
2022-09-12	15:50:03	0.319606	1.42167	1.62163	680.407	FALSE	0
2022-09-12	15:50:04	0.456807	2.03197	2.44187	701.095	FALSE	0
2022-09-12	15:50:04	0.508308	2.26106	2.44187	682.668	FALSE	0
2022-09-12	15:50:04	0.481845	2.14334	2.44187	703.239	FALSE	0
2022-09-12	15:50:04	0.748868	3.33111	2.44187	685.999	FALSE	0
2022-09-12	15:50:05	0.601336	2.67486	3.10276	705.913	FALSE	0
2022-09-12	15:50:05	1.16154	5.16676	3.10276	691.166	FALSE	0
2022-09-12	15:50:05	0.544186	2.42065	3.10276	708.334	FALSE	0
2022-09-12	15:50:05	0.483066	2.14877	3.10276	693.314	FALSE	0
2022-09-12	15:50:06	0.453499	2.01725	1.81941	710.351	FALSE	0
2022-09-12	15:50:06	0.344695	1.53327	1.81941	694.848	FALSE	0
2022-09-12	15:50:06	0.367494	1.63469	1.81941	711.986	FALSE	0
2022-09-12	15:50:06	0.470395	2.09241	1.81941	696.94	FALSE	0
2022-09-12	15:50:07	0.442456	1.96813	1.82167	713.954	FALSE	0
2022-09-12	15:50:07	0.188715	0.839442	1.82167	697.78	FALSE	0
2022-09-12	15:50:07	0.597417	2.65743	1.82167	716.612	FALSE	0
2022-09-12	15:50:08	0.426629	1.89773	1.97045	699.677	FALSE	0
2022-09-12	15:50:08	0.428613	1.90656	1.97045	718.518	FALSE	0
2022-09-12	15:50:08	0.520929	2.3172	1.97045	701.995	FALSE	0
2022-09-12	15:50:08	0.395738	1.76032	1.97045	720.278	FALSE	0
2022-09-12	15:50:09	0.389479	1.73248	1.42484	703.727	FALSE	0
2022-09-12	15:50:09	0.335789	1.49366	1.42484	721.772	FALSE	0
2022-09-12	15:50:09	0.297723	1.32433	1.42484	705.051	FALSE	0
2022-09-12	15:50:09	0.258283	1.14889	1.42484	722.921	FALSE	0
2022-09-12	15:50:10	0.427036	1.89954	3.70813	706.951	FALSE	0
2022-09-12	15:50:10	0.529478	2.35522	3.70813	725.276	FALSE	0
2022-09-12	15:50:10	0.978995	4.35477	3.70813	711.306	FALSE	0
2022-09-12	15:50:10	1.39899	6.22299	3.70813	731.499	FALSE	0
2022-09-12	15:50:11	1.00592	4.47453	4.19978	715.78	FALSE	0
2022-09-12	15:50:11	0.744491	3.31164	4.19978	734.811	FALSE	0
2022-09-12	15:50:11	1.08205	4.81317	4.19978	720.593	FALSE	0
2022-09-12	15:50:12	0.733244	3.26162	2.71278	738.072	FALSE	0
2022-09-12	15:50:12	0.588766	2.61895	2.71278	723.212	FALSE	0
2022-09-12	15:50:12	0.483422	2.15036	2.71278	740.223	FALSE	0
2022-09-12	15:50:12	0.634008	2.82019	2.71278	726.033	FALSE	0
2022-09-12	15:50:13	0.593651	2.64068	2.65636	742.864	FALSE	0
2022-09-12	15:50:13	0.715382	3.18216	2.65636	729.215	FALSE	0
2022-09-12	15:50:13	0.585916	2.60627	2.65636	745.47	FALSE	0
2022-09-12	15:50:13	0.493753	2.19631	2.65636	731.411	FALSE	0
2022-09-12	15:50:14	0.505153	2.24702	1.72586	747.717	FALSE	0
2022-09-12	15:50:14	0.28785	1.28041	1.72586	732.691	FALSE	0
2022-09-12	15:50:14	0.293804	1.3069	1.72586	749.024	FALSE	0
2022-09-12	15:50:14	0.465153	2.06909	1.72586	734.76	FALSE	0
2022-09-12	15:50:15	0.326527	1.45246	0.813938	750.476	FALSE	0
2022-09-12	15:50:15	0.117061	0.520711	0.813938	735.281	FALSE	0
2022-09-12	15:50:15	0.105356	0.468645	0.813938	750.945	FALSE	0
2022-09-12	15:50:16	0.106171	0.47227	0.965136	735.753	FALSE	0
2022-09-12	15:50:16	0.0908017	0.403904	0.965136	751.349	FALSE	0
2022-09-12	15:50:16	0.252074	1.12128	0.965136	736.875	FALSE	0
2022-09-12	15:50:16	0.418842	1.86309	0.965136	753.212	FALSE	0
2022-09-12	15:50:17	0.507748	2.25856	1.87108	739.133	FALSE	0
2022-09-12	15:50:17	0.352685	1.56881	1.87108	754.781	FALSE	0
2022-09-12	15:50:17	0.422456	1.87917	1.87108	741.012	FALSE	0
2022-09-12	15:50:17	0.399657	1.77775	1.87108	756.558	FALSE	0
2022-09-12	15:50:18	0.379351	1.68743	1.82071	742.7	FALSE	0
2022-09-12	15:50:18	0.566832	2.52138	1.82071	759.08	FALSE	0
2022-09-12	15:50:18	0.259809	1.15568	1.82071	743.856	FALSE	0
2022-09-12	15:50:18	0.43126	1.91833	1.82071	760.998	FALSE	0
2022-09-12	15:50:19	0.518435	2.3061	2.27426	746.162	FALSE	0
2022-09-12	15:50:19	0.379402	1.68766	2.27426	762.686	FALSE	0
2022-09-12	15:50:19	0.635992	2.82902	2.27426	748.991	FALSE	0
2022-09-12	15:50:20	0.469326	2.08766	2.45228	764.773	FALSE	0
2022-09-12	15:50:20	0.773092	3.43887	2.45228	752.43	FALSE	0
2022-09-12	15:50:20	0.480165	2.13587	2.45228	766.909	FALSE	0
2022-09-12	15:50:20	0.482608	2.14674	2.45228	754.576	FALSE	0
2022-09-12	15:50:21	0.589173	2.62076	2.03734	769.53	FALSE	0
2022-09-12	15:50:21	0.370903	1.64985	2.03734	756.226	FALSE	0
2022-09-12	15:50:21	0.454517	2.02178	2.03734	771.552	FALSE	0
2022-09-12	15:50:21	0.417468	1.85698	2.03734	758.083	FALSE	0
2022-09-12	15:50:22	0.517264	2.30089	2.84389	773.853	FALSE	0
2022-09-12	15:50:22	0.459555	2.04419	2.84389	760.127	FALSE	0
2022-09-12	15:50:22	0.941183	4.18657	2.84389	778.039	FALSE	0
2022-09-12	15:50:23	1.14576	5.09657	4.20887	765.224	FALSE	0
2022-09-12	15:50:23	0.896959	3.98985	4.20887	782.029	FALSE	0
2022-09-12	15:50:23	1.07182	4.76767	4.20887	769.992	FALSE	0
2022-09-12	15:50:23	0.670242	2.98137	4.20887	785.011	FALSE	0
2022-09-12	15:50:24	0.757824	3.37095	3.35466	773.363	FALSE	0
2022-09-12	15:50:24	0.740573	3.29422	3.35466	788.305	FALSE	0
2022-09-12	15:50:24	0.554771	2.46773	3.35466	775.83	FALSE	0
2022-09-12	15:50:24	0.963473	4.28572	3.35466	792.59	FALSE	0
2022-09-12	15:50:25	1.39879	6.2221	5.20366	782.052	FALSE	0
2022-09-12	15:50:25	1.4277	6.3507	5.20366	798.941	FALSE	0
2022-09-12	15:50:25	1.0563	4.69863	5.20366	786.751	FALSE	0
2022-09-12	15:50:25	0.796552	3.54322	5.20366	802.484	FALSE	0
2022-09-12	15:50:26	0.879555	3.91244	3.10972	790.663	FALSE	0
2022-09-12	15:50:26	0.52617	2.34051	3.10972	804.825	FALSE	0
2022-09-12	15:50:26	0.691565	3.07622	3.10972	793.74	FALSE	0
2022-09-12	15:50:27	0.782048	3.47871	3.50797	808.304	FALSE	0
2022-09-12	15:50:27	0.796247	3.54187	3.50797	797.282	FALSE	0
2022-09-12	15:50:27	0.764237	3.39948	3.50797	811.703	FALSE	0
2022-09-12	15:50:27	0.811972	3.61181	3.50797	800.893	FALSE	0
2022-09-12	15:50:28	0.806781	3.58872	2.98239	815.292	FALSE	0
2022-09-12	15:50:28	0.566374	2.51934	2.98239	803.413	FALSE	0
2022-09-12	15:50:28	0.647646	2.88086	2.98239	818.173	FALSE	0
2022-09-12	15:50:28	0.661082	2.94062	2.98239	806.353	FALSE	0
2022-09-12	15:50:29	0.804949	3.58057	2.3516	821.753	FALSE	0
2022-09-12	15:50:29	0.658842	2.93066	2.3516	809.284	FALSE	0
2022-09-12	15:50:29	0.33299	1.48121	2.3516	823.234	FALSE	0
2022-09-12	15:50:29	0.317876	1.41398	2.3516	810.698	FALSE	0
2022-09-12	15:50:30	0.399402	1.77662	1.65861	825.011	FALSE	0
2022-09-12	15:50:30	0.315942	1.40537	1.65861	812.103	FALSE	0
2022-09-12	15:50:30	0.40327	1.79383	1.65861	826.805	FALSE	0
2022-09-12	15:50:31	0.700522	3.11606	2.26383	815.219	FALSE	0
2022-09-12	15:50:31	0.466476	2.07498	2.26383	828.88	FALSE	0
2022-09-12	15:50:31	0.475127	2.11346	2.26383	817.333	FALSE	0
2022-09-12	15:50:31	0.393601	1.75082	2.26383	830.631	FALSE	0
2022-09-12	15:50:32	0.409987	1.8237	2.38024	819.157	FALSE	0
2022-09-12	15:50:32	0.439504	1.955	2.38024	832.586	FALSE	0
2022-09-12	15:50:32	0.589529	2.62234	2.38024	821.779	FALSE	0
2022-09-12	15:50:32	0.701387	3.11991	2.38024	835.706	FALSE	0
2022-09-12	15:50:33	0.574109	2.55375	1.66157	824.333	FALSE	0
2022-09-12	15:50:33	0.36098	1.60571	1.66157	837.311	FALSE	0
2022-09-12	15:50:33	0.268461	1.19417	1.66157	825.527	FALSE	0
2022-09-12	15:50:33	0.290598	1.29264	1.66157	838.604	FALSE	0
2022-09-12	15:50:34	0.290853	1.29377	1.21016	826.821	FALSE	0
2022-09-12	15:50:34	0.278181	1.2374	1.21016	839.841	FALSE	0
2022-09-12	15:50:34	0.247137	1.09931	1.21016	827.92	FALSE	0
2022-09-12	15:50:35	0.245865	1.09366	1.6923	840.935	FALSE	0
2022-09-12	15:50:35	0.264898	1.17832	1.6923	829.098	FALSE	0
2022-09-12	15:50:35	0.369784	1.64487	1.6923	842.58	FALSE	0
2022-09-12	15:50:35	0.641234	2.85234	1.6923	831.951	FALSE	0
2022-09-12	15:50:36	1.02485	4.55874	3.87798	847.139	FALSE	0
2022-09-12	15:50:36	1.06831	4.75206	3.87798	836.703	FALSE	0
2022-09-12	15:50:36	0.784796	3.49093	3.87798	850.63	FALSE	0
2022-09-12	15:50:36	0.609275	2.71018	3.87798	839.413	FALSE	0
2022-09-12	15:50:37	0.427137	1.89999	1.67877	852.53	FALSE	0
2022-09-12	15:50:37	0.407443	1.81239	1.67877	841.225	FALSE	0
2022-09-12	15:50:37	0.379199	1.68675	1.67877	854.216	FALSE	0
2022-09-12	15:50:37	0.29584	1.31596	1.67877	842.541	FALSE	0
2022-09-12	15:50:38	0.284644	1.26615	1.12361	855.482	FALSE	0
2022-09-12	15:50:38	0.314262	1.3979	1.12361	843.939	FALSE	0
2022-09-12	15:50:38	0.158893	0.706788	1.12361	856.189	FALSE	0
2022-09-12	15:50:39	0.216603	0.963493	1.24929	844.903	FALSE	0
2022-09-12	15:50:39	0.27584	1.22699	1.24929	857.416	FALSE	0
2022-09-12	15:50:39	0.311209	1.38432	1.24929	846.287	FALSE	0
2022-09-12	15:50:39	0.319758	1.42235	1.24929	858.839	FALSE	0

## Sheet: MrFitz_prong_2022912154521 (3)
Date	time	Lbs	Newtons	Total Force x time	Total Time Steps Force >13.345		**GoPro Fitting: 1535
2022-09-12	15:45:39	0.409428	1.82122	1.82122	FALSE	0			Total force x time	858.839
2022-09-12	15:45:39	0.363117	1.61522	1.61522	FALSE	0			Total Time Steps Force >3	0
2022-09-12	15:45:39	0.315738	1.40447	3.22568	FALSE	0
2022-09-12	15:45:39	0.538588	2.39575	4.01096	FALSE	0
2022-09-12	15:45:40	0.376145	1.67317	4.89885	FALSE	0
2022-09-12	15:45:40	0.588817	2.61918	6.63014	FALSE	0
2022-09-12	15:45:40	0.298537	1.32795	6.2268	FALSE	0
2022-09-12	15:45:41	0.408461	1.81692	8.44706	FALSE	0
2022-09-12	15:45:41	0.288308	1.28245	7.50926	FALSE	0
2022-09-12	15:45:41	0.498333	2.21668	10.6637	FALSE	0
2022-09-12	15:45:41	0.125764	0.559423	8.06868	FALSE	0
2022-09-12	15:45:42	0.526476	2.34187	13.0056	FALSE	0
2022-09-12	15:45:42	0.32154	1.43027	9.49895	FALSE	0
2022-09-12	15:45:42	0.394313	1.75398	14.7596	FALSE	0
2022-09-12	15:45:42	0.1593	0.708598	10.2076	FALSE	0
2022-09-12	15:45:43	0.308817	1.37368	16.1333	FALSE	0
2022-09-12	15:45:43	0.0228628	0.101698	10.3092	FALSE	0
2022-09-12	15:45:43	-0.0506231	-0.225182	16.1333	FALSE	0
2022-09-12	15:45:43	-0.0154069	-0.068533	10.3092	FALSE	0
2022-09-12	15:45:44	0.189886	0.844651	16.9779	FALSE	0
2022-09-12	15:45:44	0.371667	1.65325	11.9625	FALSE	0
2022-09-12	15:45:44	0.273448	1.21635	18.1943	FALSE	0
2022-09-12	15:45:45	0.35131	1.5627	13.5252	FALSE	0
2022-09-12	15:45:45	0.28556	1.27023	19.4645	FALSE	0
2022-09-12	15:45:45	0.350751	1.56021	15.0854	FALSE	0
2022-09-12	15:45:45	-0.101412	-0.451101	19.4645	FALSE	0
2022-09-12	15:45:46	0.152939	0.680303	15.7657	FALSE	0
2022-09-12	15:45:46	0.182914	0.813638	20.2781	FALSE	0
2022-09-12	15:45:46	0.443473	1.97266	17.7384	FALSE	0
2022-09-12	15:45:46	0.831514	3.69874	23.9769	FALSE	0
2022-09-12	15:45:47	0.689682	3.06784	20.8062	FALSE	0
2022-09-12	15:45:47	0.540522	2.40435	26.3812	FALSE	0
2022-09-12	15:45:47	0.312583	1.39043	22.1966	FALSE	0
2022-09-12	15:45:47	0.271514	1.20775	27.589	FALSE	0
2022-09-12	15:45:48	0.302252	1.34448	23.5411	FALSE	0
2022-09-12	15:45:48	0.269936	1.20073	28.7897	FALSE	0
2022-09-12	15:45:48	0.400674	1.78228	25.3234	FALSE	0
2022-09-12	15:45:49	0.287545	1.27906	30.0688	FALSE	0
2022-09-12	15:45:49	0.332634	1.47962	26.803	FALSE	0
2022-09-12	15:45:49	0.336552	1.49705	31.5658	FALSE	0
2022-09-12	15:45:49	0.176552	0.785339	27.5884	FALSE	0
2022-09-12	15:45:50	0.148715	0.661514	32.2273	FALSE	0
2022-09-12	15:45:50	0.238741	1.06197	28.6503	FALSE	0
2022-09-12	15:45:50	0.1964	0.873626	33.101	FALSE	0
2022-09-12	15:45:50	0.254771	1.13327	29.7836	FALSE	0
2022-09-12	15:45:51	0.0935498	0.416128	33.5171	FALSE	0
2022-09-12	15:45:51	0.161234	0.717201	30.5008	FALSE	0
2022-09-12	15:45:51	0.24444	1.08732	34.6044	FALSE	0
2022-09-12	15:45:52	0.0158908	0.0706855	30.5715	FALSE	0
2022-09-12	15:45:52	0.188308	0.837632	35.442	FALSE	0
2022-09-12	15:45:52	0.103982	0.462533	31.034	FALSE	0
2022-09-12	15:45:52	0.244593	1.088	36.53	FALSE	0
2022-09-12	15:45:53	-0.000241466	-0.00107409	31.034	FALSE	0
2022-09-12	15:45:53	0.246679	1.09728	37.6273	FALSE	0
2022-09-12	15:45:53	0.0298348	0.132711	31.1667	FALSE	0
2022-09-12	15:45:53	0.177672	0.790321	38.4176	FALSE	0
2022-09-12	15:45:54	-0.0769844	-0.342442	31.1667	FALSE	0
2022-09-12	15:45:54	0.262048	1.16564	39.5833	FALSE	0
2022-09-12	15:45:54	0.208766	0.928633	32.0954	FALSE	0
2022-09-12	15:45:54	0.276094	1.22812	40.8114	FALSE	0
2022-09-12	15:45:55	0.145	0.644989	32.7404	FALSE	0
2022-09-12	15:45:55	0.194669	0.865927	41.6773	FALSE	0
2022-09-12	15:45:55	0.143932	0.640238	33.3806	FALSE	0
2022-09-12	15:45:56	0.26439	1.17606	42.8534	FALSE	0
2022-09-12	15:45:56	0.149224	0.663778	34.0444	FALSE	0
2022-09-12	15:45:56	0.189428	0.842614	43.696	FALSE	0
2022-09-12	15:45:56	0.135942	0.604697	34.6491	FALSE	0
2022-09-12	15:45:57	-0.0476715	-0.212052	43.696	FALSE	0
2022-09-12	15:45:57	0.0628628	0.279626	34.9287	FALSE	0
2022-09-12	15:45:57	0.356552	1.58601	45.282	FALSE	0
2022-09-12	15:45:57	0.238893	1.06264	35.9913	FALSE	0
2022-09-12	15:45:58	0.504389	2.24362	47.5256	FALSE	0
2022-09-12	15:45:58	-0.23276	-1.03536	35.9913	FALSE	0
2022-09-12	15:45:58	0.236451	1.05178	48.5774	FALSE	0
2022-09-12	15:45:58	0.0162979	0.0724963	36.0638	FALSE	0
2022-09-12	15:45:59	0.38612	1.71754	50.295	FALSE	0
2022-09-12	15:45:59	0.275535	1.22563	37.2895	FALSE	0
2022-09-12	15:45:59	0.240878	1.07147	51.3664	FALSE	0
2022-09-12	15:46:00	0.180522	0.802998	38.0925	FALSE	0
2022-09-12	15:46:00	-0.0888929	-0.395413	51.3664	FALSE	0
2022-09-12	15:46:00	0.375891	1.67204	39.7645	FALSE	0
2022-09-12	15:46:00	0.0273412	0.121619	51.488	FALSE	0
2022-09-12	15:46:01	-0.0933712	-0.415334	39.7645	FALSE	0
2022-09-12	15:46:01	-0.24187	-1.07589	51.488	FALSE	0
2022-09-12	15:46:01	-0.475865	-2.11674	39.7645	FALSE	0
2022-09-12	15:46:01	-0.474898	-2.11244	51.488	FALSE	0
2022-09-12	15:46:02	-0.325432	-1.44759	39.7645	FALSE	0
2022-09-12	15:46:02	-0.311081	-1.38375	51.488	FALSE	0
2022-09-12	15:46:02	-0.129351	-0.575379	39.7645	FALSE	0
2022-09-12	15:46:02	-0.185381	-0.824612	51.488	FALSE	0
2022-09-12	15:46:03	0.127646	0.567795	40.3323	FALSE	0
2022-09-12	15:46:03	0.0252547	0.112338	51.6004	FALSE	0
2022-09-12	15:46:03	-0.00706081	-0.0314079	40.3323	FALSE	0
2022-09-12	15:46:04	-0.210114	-0.934629	51.6004	FALSE	0
2022-09-12	15:46:04	0.00810459	0.0360508	40.3683	FALSE	0
2022-09-12	15:46:04	-0.0496053	-0.220654	51.6004	FALSE	0
2022-09-12	15:46:04	-0.0459921	-0.204582	40.3683	FALSE	0
2022-09-12	15:46:05	-0.178002	-0.791788	51.6004	FALSE	0
2022-09-12	15:46:05	-0.0369845	-0.164514	40.3683	FALSE	0
2022-09-12	15:46:05	0.00510202	0.0226948	51.6231	FALSE	0
2022-09-12	15:46:06	-0.0820226	-0.364853	40.3683	FALSE	0
2022-09-12	15:46:06	-0.111539	-0.496148	51.6231	FALSE	0
2022-09-12	15:46:06	-0.0216155	-0.0961501	40.3683	FALSE	0
2022-09-12	15:46:06	-0.00884198	-0.0393309	51.6231	FALSE	0
2022-09-12	15:46:06	-0.0566791	-0.25212	40.3683	FALSE	0
2022-09-12	15:46:07	0.175534	0.78081	52.4039	FALSE	0
2022-09-12	15:46:07	0.502812	2.23661	42.605	FALSE	0
2022-09-12	15:46:07	0.255127	1.13486	53.5387	FALSE	0
2022-09-12	15:46:08	0.13355	0.594057	43.199	FALSE	0
2022-09-12	15:46:08	0.317316	1.41149	54.9502	FALSE	0
2022-09-12	15:46:08	0.172583	0.767684	43.9667	FALSE	0
2022-09-12	15:46:08	0.294822	1.31143	56.2617	FALSE	0
2022-09-12	15:46:09	0.158283	0.704074	44.6708	FALSE	0
2022-09-12	15:46:09	0.193092	0.858912	57.1206	FALSE	0
2022-09-12	15:46:09	0.352939	1.56994	46.2407	FALSE	0
2022-09-12	15:46:09	0.356043	1.58375	58.7043	FALSE	0
2022-09-12	15:46:10	0.223728	0.995187	47.2359	FALSE	0
2022-09-12	15:46:10	0.335636	1.49298	60.1973	FALSE	0
2022-09-12	15:46:10	0.239555	1.06559	48.3015	FALSE	0
2022-09-12	15:46:10	0.541896	2.41046	62.6078	FALSE	0
2022-09-12	15:46:11	0.748562	3.32975	51.6312	FALSE	0
2022-09-12	15:46:11	0.383473	1.70576	64.3135	FALSE	0
2022-09-12	15:46:11	0.441081	1.96202	53.5933	FALSE	0
2022-09-12	15:46:12	0.412176	1.83344	66.147	FALSE	0
2022-09-12	15:46:12	0.550903	2.45053	56.0438	FALSE	0
2022-09-12	15:46:12	0.426171	1.89569	68.0427	FALSE	0
2022-09-12	15:46:12	0.460623	2.04894	58.0927	FALSE	0
2022-09-12	15:46:13	0.44785	1.99213	70.0348	FALSE	0
2022-09-12	15:46:13	0.385254	1.71369	59.8064	FALSE	0
2022-09-12	15:46:13	0.477774	2.12523	72.16	FALSE	0
2022-09-12	15:46:13	0.450293	2.00299	61.8094	FALSE	0
2022-09-12	15:46:14	0.451921	2.01023	74.1703	FALSE	0
2022-09-12	15:46:14	0.47472	2.11165	63.9211	FALSE	0
2022-09-12	15:46:14	0.378995	1.68585	75.8561	FALSE	0
2022-09-12	15:46:15	0.459555	2.04419	65.9653	FALSE	0
2022-09-12	15:46:15	0.433092	1.92648	77.7826	FALSE	0
2022-09-12	15:46:15	0.476094	2.11776	68.083	FALSE	0
2022-09-12	15:46:15	0.522608	2.32466	80.1072	FALSE	0
2022-09-12	15:46:16	0.338028	1.50362	69.5866	FALSE	0
2022-09-12	15:46:16	0.485305	2.15873	82.266	FALSE	0
2022-09-12	15:46:16	0.265356	1.18036	70.767	FALSE	0
2022-09-12	15:46:16	0.273397	1.21612	83.4821	FALSE	0
2022-09-12	15:46:17	0.362608	1.61295	72.3799	FALSE	0
2022-09-12	15:46:17	0.480929	2.13927	85.6214	FALSE	0
2022-09-12	15:46:17	0.405356	1.8031	74.183	FALSE	0
2022-09-12	15:46:17	0.323372	1.43842	87.0598	FALSE	0
2022-09-12	15:46:18	0.421031	1.87283	76.0559	FALSE	0
2022-09-12	15:46:18	2.14205	9.52827	96.5881	FALSE	0
2022-09-12	15:46:18	0.330445	1.46989	77.5258	FALSE	0
2022-09-12	15:46:19	0.34958	1.555	98.1431	FALSE	0
2022-09-12	15:46:19	0.260827	1.16021	78.686	FALSE	0
2022-09-12	15:46:19	0.358537	1.59484	99.7379	FALSE	0
2022-09-12	15:46:19	0.421438	1.87464	80.5606	FALSE	0
2022-09-12	15:46:20	0.18897	0.840576	100.578	FALSE	0
2022-09-12	15:46:20	0.214822	0.955571	81.5162	FALSE	0
2022-09-12	15:46:20	0.106629	0.474307	101.053	FALSE	0
2022-09-12	15:46:21	0.310802	1.38251	82.8987	FALSE	0
2022-09-12	15:46:21	0.247392	1.10045	102.153	FALSE	0
2022-09-12	15:46:21	0.258537	1.15002	84.0487	FALSE	0
2022-09-12	15:46:21	0.00108167	0.00481148	102.158	FALSE	0
2022-09-12	15:46:21	-0.189198	-0.841591	84.0487	FALSE	0
2022-09-12	15:46:22	-0.215712	-0.95953	102.158	FALSE	0
2022-09-12	15:46:22	-0.328893	-1.46298	84.0487	FALSE	0
2022-09-12	15:46:22	-0.628994	-2.79789	102.158	FALSE	0
2022-09-12	15:46:23	-0.602226	-2.67882	84.0487	FALSE	0
2022-09-12	15:46:23	-0.604567	-2.68923	102.158	FALSE	0
2022-09-12	15:46:23	-0.409758	-1.82269	84.0487	FALSE	0
2022-09-12	15:46:23	-0.469707	-2.08935	102.158	FALSE	0
2022-09-12	15:46:24	-0.428944	-1.90803	84.0487	FALSE	0
2022-09-12	15:46:24	-0.450368	-2.00333	102.158	FALSE	0
2022-09-12	15:46:24	-0.438053	-1.94855	84.0487	FALSE	0
2022-09-12	15:46:24	-0.241565	-1.07453	102.158	FALSE	0
2022-09-12	15:46:25	-0.299427	-1.33191	84.0487	FALSE	0
2022-09-12	15:46:25	-0.30243	-1.34527	102.158	FALSE	0
2022-09-12	15:46:25	-0.249554	-1.11007	84.0487	FALSE	0
2022-09-12	15:46:25	-0.221615	-0.985788	102.158	FALSE	0
2022-09-12	15:46:26	-0.362938	-1.61442	84.0487	FALSE	0
2022-09-12	15:46:26	-0.363142	-1.61533	102.158	FALSE	0
2022-09-12	15:46:26	-0.476679	-2.12036	84.0487	FALSE	0
2022-09-12	15:46:27	-0.307824	-1.36926	102.158	FALSE	0
2022-09-12	15:46:27	-0.161056	-0.716409	84.0487	FALSE	0
2022-09-12	15:46:27	-0.253371	-1.12704	102.158	FALSE	0
2022-09-12	15:46:27	-0.507519	-2.25755	84.0487	FALSE	0
2022-09-12	15:46:28	-0.653523	-2.907	102.158	FALSE	0
2022-09-12	15:46:28	-0.328435	-1.46094	84.0487	FALSE	0
2022-09-12	15:46:28	-0.247671	-1.10169	102.158	FALSE	0
2022-09-12	15:46:28	-0.174592	-0.77662	84.0487	FALSE	0
2022-09-12	15:46:29	0.189173	0.841479	103	FALSE	0
2022-09-12	15:46:29	0.404746	1.80039	85.8491	FALSE	0
2022-09-12	15:46:29	0.663575	2.95171	105.951	FALSE	0
2022-09-12	15:46:29	0.452074	2.01092	87.86	FALSE	0
2022-09-12	15:46:30	0.492074	2.18884	108.14	FALSE	0
2022-09-12	15:46:30	1.23431	5.49046	93.3505	FALSE	0
2022-09-12	15:46:30	0.490954	2.18386	110.324	FALSE	0
2022-09-12	15:46:31	0.618435	2.75092	96.1014	FALSE	0
2022-09-12	15:46:31	0.51355	2.28437	112.608	FALSE	0
2022-09-12	15:46:31	0.213753	0.950816	97.0522	FALSE	0
2022-09-12	15:46:31	0.410191	1.82461	114.433	FALSE	0
2022-09-12	15:46:32	0.23299	1.03639	98.0886	FALSE	0
2022-09-12	15:46:32	0.35014	1.55749	115.99	FALSE	0
2022-09-12	15:46:32	0.315687	1.40424	99.4928	FALSE	0
2022-09-12	15:46:32	0.384746	1.71143	117.702	FALSE	0
2022-09-12	15:46:33	0.326323	1.45155	100.944	FALSE	0
2022-09-12	15:46:33	0.401183	1.78454	119.486	FALSE	0
2022-09-12	15:46:33	0.46612	2.07339	103.018	FALSE	0
2022-09-12	15:46:33	0.540013	2.40209	121.888	FALSE	0
2022-09-12	15:46:34	0.44271	1.96926	104.987	FALSE	0
2022-09-12	15:46:34	0.471616	2.09784	123.986	FALSE	0
2022-09-12	15:46:34	0.376756	1.67589	106.663	FALSE	0
2022-09-12	15:46:35	0.537366	2.39031	126.377	FALSE	0
2022-09-12	15:46:35	0.375585	1.67068	108.334	FALSE	0
2022-09-12	15:46:35	0.600725	2.67214	129.049	FALSE	0
2022-09-12	15:46:35	0.462354	2.05664	110.39	FALSE	0
2022-09-12	15:46:36	0.84841	3.7739	132.823	FALSE	0
2022-09-12	15:46:36	0.925916	4.11866	114.509	FALSE	0
2022-09-12	15:46:36	1.53823	6.84235	139.665	FALSE	0
2022-09-12	15:46:36	0.714466	3.17809	117.687	FALSE	0
2022-09-12	15:46:37	0.693448	3.0846	142.75	FALSE	0
2022-09-12	15:46:37	0.482659	2.14696	119.834	FALSE	0
2022-09-12	15:46:37	0.535484	2.38194	145.132	FALSE	0
2022-09-12	15:46:38	0.472074	2.09988	121.934	FALSE	0
2022-09-12	15:46:38	0.421438	1.87464	147.006	FALSE	0
2022-09-12	15:46:38	0.597825	2.65925	124.593	FALSE	0
2022-09-12	15:46:38	0.505611	2.24906	149.255	FALSE	0
2022-09-12	15:46:39	0.518028	2.30429	126.897	FALSE	0
2022-09-12	15:46:39	0.6107	2.71652	151.972	FALSE	0
2022-09-12	15:46:39	0.66388	2.95307	129.85	FALSE	0
2022-09-12	15:46:39	0.53986	2.40141	154.373	FALSE	0
2022-09-12	15:46:40	0.377265	1.67815	131.529	FALSE	0
2022-09-12	15:46:40	0.480267	2.13632	156.51	FALSE	0
2022-09-12	15:46:40	0.483219	2.14945	133.678	FALSE	0
2022-09-12	15:46:40	0.46729	2.0786	158.588	FALSE	0
2022-09-12	15:46:41	0.617366	2.74617	136.424	FALSE	0
2022-09-12	15:46:41	0.448868	1.99665	160.585	FALSE	0
2022-09-12	15:46:41	0.466425	2.07475	138.499	FALSE	0
2022-09-12	15:46:42	0.456349	2.02993	162.615	FALSE	0
2022-09-12	15:46:42	0.482761	2.14742	140.646	FALSE	0
2022-09-12	15:46:42	0.518842	2.30791	164.923	FALSE	0
2022-09-12	15:46:42	0.487799	2.16983	142.816	FALSE	0
2022-09-12	15:46:43	0.444542	1.97741	166.9	FALSE	0
2022-09-12	15:46:43	0.449784	2.00073	144.817	FALSE	0
2022-09-12	15:46:43	0.473957	2.10826	169.008	FALSE	0
2022-09-12	15:46:43	0.473702	2.10712	146.924	FALSE	0
2022-09-12	15:46:44	0.477519	2.1241	171.132	FALSE	0
2022-09-12	15:46:44	0.475738	2.11618	149.04	FALSE	0
2022-09-12	15:46:44	0.478639	2.12908	173.261	FALSE	0
2022-09-12	15:46:44	0.476451	2.11935	151.16	FALSE	0
2022-09-12	15:46:45	0.483728	2.15172	175.413	FALSE	0
2022-09-12	15:46:45	0.540114	2.40254	153.562	FALSE	0
2022-09-12	15:46:45	0.857417	3.81396	179.227	FALSE	0
2022-09-12	15:46:46	1.14999	5.11539	158.678	FALSE	0
2022-09-12	15:46:46	0.85299	3.79427	183.021	FALSE	0
2022-09-12	15:46:46	0.512176	2.27826	160.956	FALSE	0
2022-09-12	15:46:46	0.479402	2.13248	185.154	FALSE	0
2022-09-12	15:46:47	0.523524	2.32874	163.285	FALSE	0
2022-09-12	15:46:47	0.568613	2.5293	187.683	FALSE	0
2022-09-12	15:46:47	0.751056	3.34085	166.625	FALSE	0
2022-09-12	15:46:47	0.618537	2.75138	190.435	FALSE	0
2022-09-12	15:46:48	0.710191	3.15907	169.784	FALSE	0
2022-09-12	15:46:48	1.51447	6.73667	197.171	FALSE	0
2022-09-12	15:46:48	1.24917	5.55656	175.341	FALSE	0
2022-09-12	15:46:48	0.647341	2.8795	200.051	FALSE	0
2022-09-12	15:46:49	0.4393	1.95409	177.295	FALSE	0
2022-09-12	15:46:49	0.422354	1.87872	201.929	FALSE	0
2022-09-12	15:46:49	0.559097	2.48698	179.782	FALSE	0
2022-09-12	15:46:50	0.421234	1.87373	203.803	FALSE	0
2022-09-12	15:46:50	0.668053	2.97163	182.754	FALSE	0
2022-09-12	15:46:50	0.483015	2.14855	205.952	FALSE	0
2022-09-12	15:46:50	0.501896	2.23253	184.986	FALSE	0
2022-09-12	15:46:51	0.525662	2.33825	208.29	FALSE	0
2022-09-12	15:46:51	0.376094	1.67294	186.659	FALSE	0
2022-09-12	15:46:51	0.434466	1.93259	210.223	FALSE	0
2022-09-12	15:46:51	0.471921	2.0992	188.758	FALSE	0
2022-09-12	15:46:52	0.461947	2.05483	212.277	FALSE	0
2022-09-12	15:46:52	0.455331	2.0254	190.784	FALSE	0
2022-09-12	15:46:52	0.446221	1.98488	214.262	FALSE	0
2022-09-12	15:46:52	0.444542	1.97741	192.761	FALSE	0
2022-09-12	15:46:53	0.449631	2.00005	216.262	FALSE	0
2022-09-12	15:46:53	0.439402	1.95455	194.716	FALSE	0
2022-09-12	15:46:53	0.472684	2.10259	218.365	FALSE	0
2022-09-12	15:46:54	0.454059	2.01975	196.735	FALSE	0
2022-09-12	15:46:54	0.455942	2.02812	220.393	FALSE	0
2022-09-12	15:46:54	0.44042	1.95908	198.695	FALSE	0
2022-09-12	15:46:54	0.453906	2.01906	222.412	FALSE	0
2022-09-12	15:46:55	0.448664	1.99575	200.69	FALSE	0
2022-09-12	15:46:55	0.460878	2.05008	224.462	FALSE	0
2022-09-12	15:46:55	0.467952	2.08154	202.772	FALSE	0
2022-09-12	15:46:55	0.449122	1.99778	226.46	FALSE	0
2022-09-12	15:46:56	0.704135	3.13213	205.904	FALSE	0
2022-09-12	15:46:56	0.359402	1.59869	228.059	FALSE	0
2022-09-12	15:46:56	-0.0815646	-0.362816	205.904	FALSE	0
2022-09-12	15:46:57	-0.202124	-0.899088	228.059	FALSE	0
2022-09-12	15:46:57	-0.200089	-0.890036	205.904	FALSE	0
2022-09-12	15:46:57	-0.487264	-2.16745	228.059	FALSE	0
2022-09-12	15:46:57	-0.760292	-3.38193	205.904	FALSE	0
2022-09-12	15:46:58	-0.596577	-2.65369	228.059	FALSE	0
2022-09-12	15:46:58	-0.636831	-2.83275	205.904	FALSE	0
2022-09-12	15:46:58	-0.758663	-3.37468	228.059	FALSE	0
2022-09-12	15:46:58	-0.832455	-3.70293	205.904	FALSE	0
2022-09-12	15:46:59	-0.864567	-3.84577	228.059	FALSE	0
2022-09-12	15:46:59	-0.713218	-3.17254	205.904	FALSE	0
2022-09-12	15:46:59	-0.655203	-2.91447	228.059	FALSE	0
2022-09-12	15:46:59	-0.475814	-2.11652	205.904	FALSE	0
2022-09-12	15:47:00	-0.305992	-1.36111	228.059	FALSE	0
2022-09-12	15:47:00	-0.343498	-1.52795	205.904	FALSE	0
2022-09-12	15:47:00	-0.356984	-1.58794	228.059	FALSE	0
2022-09-12	15:47:01	-0.287773	-1.28007	205.904	FALSE	0
2022-09-12	15:47:01	-0.272862	-1.21374	228.059	FALSE	0
2022-09-12	15:47:01	-0.13617	-0.605711	205.904	FALSE	0
2022-09-12	15:47:01	0.0722267	0.321279	228.38	FALSE	0
2022-09-12	15:47:02	0.120115	0.534296	206.438	FALSE	0
2022-09-12	15:47:02	-0.0309794	-0.137803	228.38	FALSE	0
2022-09-12	15:47:02	0.0511071	0.227335	206.666	FALSE	0
2022-09-12	15:47:02	0.19584	0.871135	229.251	FALSE	0
2022-09-12	15:47:03	0.0870867	0.387379	207.053	FALSE	0
2022-09-12	15:47:03	0.338333	1.50497	230.756	FALSE	0
2022-09-12	15:47:03	0.128512	0.571647	207.625	FALSE	0
2022-09-12	15:47:03	0.31126	1.38455	232.141	FALSE	0
2022-09-12	15:47:04	0.167697	0.74595	208.371	FALSE	0
2022-09-12	15:47:04	0.031158	0.138597	232.279	FALSE	0
2022-09-12	15:47:04	2.05828	9.15564	217.526	FALSE	0
2022-09-12	15:47:05	0.895178	3.98193	236.261	FALSE	0
2022-09-12	15:47:05	0.378486	1.68358	219.21	FALSE	0
2022-09-12	15:47:05	1.322	5.88052	242.142	FALSE	0
2022-09-12	15:47:05	1.64317	7.30915	226.519	FALSE	0
2022-09-12	15:47:06	0.894924	3.9808	246.122	FALSE	0
2022-09-12	15:47:06	1.04291	4.63907	231.158	FALSE	0
2022-09-12	15:47:06	1.2165	5.41124	251.534	FALSE	0
2022-09-12	15:47:06	0.758181	3.37254	234.531	FALSE	0
2022-09-12	15:47:07	0.648766	2.88584	254.42	FALSE	0
2022-09-12	15:47:07	0.709631	3.15658	237.687	FALSE	0
2022-09-12	15:47:07	0.493244	2.19405	256.614	FALSE	0
2022-09-12	15:47:07	0.292481	1.30101	238.988	FALSE	0
2022-09-12	15:47:08	-0.153575	-0.683132	256.614	FALSE	0
2022-09-12	15:47:08	-0.408587	-1.81748	238.988	FALSE	0
2022-09-12	15:47:08	-0.577748	-2.56994	256.614	FALSE	0
2022-09-12	15:47:09	-0.655508	-2.91583	238.988	FALSE	0
2022-09-12	15:47:09	-0.807773	-3.59314	256.614	FALSE	0
2022-09-12	15:47:09	-0.818104	-3.63909	238.988	FALSE	0
2022-09-12	15:47:09	-1.07612	-4.7868	256.614	FALSE	0
2022-09-12	15:47:10	-0.901717	-4.01102	238.988	FALSE	0
2022-09-12	15:47:10	-1.00747	-4.48143	256.614	FALSE	0
2022-09-12	15:47:10	-0.780139	-3.47021	238.988	FALSE	0
2022-09-12	15:47:10	-0.536475	-2.38635	256.614	FALSE	0
2022-09-12	15:47:11	-0.436119	-1.93994	238.988	FALSE	0
2022-09-12	15:47:11	-0.0389692	-0.173343	256.614	FALSE	0
2022-09-12	15:47:11	0.0359926	0.160102	239.148	FALSE	0
2022-09-12	15:47:11	0.04042	0.179796	256.793	FALSE	0
2022-09-12	15:47:12	0.0106491	0.0473693	239.196	FALSE	0
2022-09-12	15:47:12	0.177621	0.790094	257.583	FALSE	0
2022-09-12	15:47:12	0.253244	1.12648	240.322	FALSE	0
2022-09-12	15:47:13	0.381082	1.69513	259.279	FALSE	0
2022-09-12	15:47:13	0.407392	1.81216	242.134	FALSE	0
2022-09-12	15:47:13	0.147087	0.654272	259.933	FALSE	0
2022-09-12	15:47:13	0.454262	2.02065	244.155	FALSE	0
2022-09-12	15:47:14	-0.0150506	-0.0669481	259.933	FALSE	0
2022-09-12	15:47:14	0.121387	0.539954	244.695	FALSE	0
2022-09-12	15:47:14	0.0847967	0.377193	260.31	FALSE	0
2022-09-12	15:47:14	-0.0605468	-0.269324	244.695	FALSE	0
2022-09-12	15:47:15	-0.092557	-0.411712	260.31	FALSE	0
2022-09-12	15:47:15	0.319606	1.42167	246.117	FALSE	0
2022-09-12	15:47:15	0.0593005	0.26378	260.574	FALSE	0
2022-09-12	15:47:15	0.101896	0.453254	246.57	FALSE	0
2022-09-12	15:47:16	-0.0215646	-0.0959237	260.574	FALSE	0
2022-09-12	15:47:16	0.198893	0.884716	247.455	FALSE	0
2022-09-12	15:47:16	0.18556	0.825408	261.399	FALSE	0
2022-09-12	15:47:17	0.152837	0.67985	248.134	FALSE	0
2022-09-12	15:47:17	0.164593	0.732143	262.131	FALSE	0
2022-09-12	15:47:17	0.826221	3.6752	251.81	FALSE	0
2022-09-12	15:47:17	0.418486	1.86151	263.993	FALSE	0
2022-09-12	15:47:18	0.478282	2.12749	253.937	FALSE	0
2022-09-12	15:47:18	0.285611	1.27045	265.263	FALSE	0
2022-09-12	15:47:18	0.548613	2.44034	256.377	FALSE	0
2022-09-12	15:47:18	0.211361	0.940176	266.204	FALSE	0
2022-09-12	15:47:19	0.518639	2.30701	258.684	FALSE	0
2022-09-12	15:47:19	0.14154	0.629598	266.833	FALSE	0
2022-09-12	15:47:19	0.471463	2.09716	260.782	FALSE	0
2022-09-12	15:47:20	0.143677	0.639104	267.472	FALSE	0
2022-09-12	15:47:20	0.465458	2.07045	262.852	FALSE	0
2022-09-12	15:47:20	0.0984862	0.438086	267.91	FALSE	0
2022-09-12	15:47:20	0.443372	1.97221	264.824	FALSE	0
2022-09-12	15:47:21	0.151463	0.673738	268.584	FALSE	0
2022-09-12	15:47:21	0.39584	1.76078	266.585	FALSE	0
2022-09-12	15:47:21	0.070191	0.312224	268.896	FALSE	0
2022-09-12	15:47:21	-0.295508	-1.31448	266.585	FALSE	0
2022-09-12	15:47:22	-0.55902	-2.48663	268.896	FALSE	0
2022-09-12	15:47:22	-0.86192	-3.83399	266.585	FALSE	0
2022-09-12	15:47:22	-0.6979	-3.1044	268.896	FALSE	0
2022-09-12	15:47:22	-0.383244	-1.70475	266.585	FALSE	0
2022-09-12	15:47:23	0.240573	1.07012	269.966	FALSE	0
2022-09-12	15:47:23	0.11243	0.500111	267.085	FALSE	0
2022-09-12	15:47:23	0.397621	1.7687	271.735	FALSE	0
2022-09-12	15:47:24	0.715789	3.18397	270.269	FALSE	0
2022-09-12	15:47:24	1.34449	5.98056	277.716	FALSE	0
2022-09-12	15:47:24	0.311005	1.38341	271.653	FALSE	0
2022-09-12	15:47:24	0.321845	1.43163	279.147	FALSE	0
2022-09-12	15:47:25	0.178741	0.795076	272.448	FALSE	0
2022-09-12	15:47:25	0.459402	2.04351	281.191	FALSE	0
2022-09-12	15:47:25	0.258079	1.14799	273.596	FALSE	0
2022-09-12	15:47:25	0.369071	1.6417	282.833	FALSE	0
2022-09-12	15:47:26	0.52673	2.343	275.939	FALSE	0
2022-09-12	15:47:26	0.47813	2.12682	284.959	FALSE	0
2022-09-12	15:47:26	0.516552	2.29773	278.236	FALSE	0
2022-09-12	15:47:26	0.280216	1.24646	286.206	FALSE	0
2022-09-12	15:47:27	0.440624	1.95998	280.196	FALSE	0
2022-09-12	15:47:27	0.253397	1.12716	287.333	FALSE	0
2022-09-12	15:47:27	0.414109	1.84204	282.038	FALSE	0
2022-09-12	15:47:28	0.258486	1.1498	288.483	FALSE	0
2022-09-12	15:47:28	0.391412	1.74108	283.779	FALSE	0
2022-09-12	15:47:28	-1.02268	-4.54909	288.483	FALSE	0
2022-09-12	15:47:28	-0.763498	-3.39619	283.779	FALSE	0
2022-09-12	15:47:29	-0.826093	-3.67463	288.483	FALSE	0
2022-09-12	15:47:29	-0.613829	-2.73043	283.779	FALSE	0
2022-09-12	15:47:29	-0.767061	-3.41204	288.483	FALSE	0
2022-09-12	15:47:29	-0.456323	-2.02982	283.779	FALSE	0
2022-09-12	15:47:30	-0.761259	-3.38623	288.483	FALSE	0
2022-09-12	15:47:30	-0.447875	-1.99224	283.779	FALSE	0
2022-09-12	15:47:30	-0.700343	-3.11527	288.483	FALSE	0
2022-09-12	15:47:30	-0.435458	-1.937	283.779	FALSE	0
2022-09-12	15:47:31	-0.817188	-3.63502	288.483	FALSE	0
2022-09-12	15:47:31	-0.465585	-2.07102	283.779	FALSE	0
2022-09-12	15:47:31	-0.265788	-1.18228	288.483	FALSE	0
2022-09-12	15:47:32	0.291768	1.29784	285.077	FALSE	0
2022-09-12	15:47:32	0.345051	1.53486	290.018	FALSE	0
2022-09-12	15:47:32	0.0812343	0.361346	285.439	FALSE	0
2022-09-12	15:47:32	-0.347519	-1.54583	290.018	FALSE	0
2022-09-12	15:47:33	-0.530216	-2.35851	285.439	FALSE	0
2022-09-12	15:47:33	-0.593931	-2.64192	290.018	FALSE	0
2022-09-12	15:47:33	-0.541513	-2.40876	285.439	FALSE	0
2022-09-12	15:47:33	-0.631793	-2.81034	290.018	FALSE	0
2022-09-12	15:47:34	-0.416679	-1.85347	285.439	FALSE	0
2022-09-12	15:47:34	-0.561005	-2.49546	290.018	FALSE	0
2022-09-12	15:47:34	-0.417137	-1.85551	285.439	FALSE	0
2022-09-12	15:47:34	-0.46757	-2.07984	290.018	FALSE	0
2022-09-12	15:47:35	-0.276984	-1.23208	285.439	FALSE	0
2022-09-12	15:47:35	-0.441208	-1.96258	290.018	FALSE	0
2022-09-12	15:47:35	-0.327366	-1.45619	285.439	FALSE	0
2022-09-12	15:47:36	-0.132404	-0.588959	290.018	FALSE	0
2022-09-12	15:47:36	0.0931936	0.414544	285.853	FALSE	0
2022-09-12	15:47:36	0.258181	1.14844	291.166	FALSE	0
2022-09-12	15:47:36	0.112379	0.499884	286.353	FALSE	0
2022-09-12	15:47:37	0.0159926	0.0711383	291.237	FALSE	0
2022-09-12	15:47:37	0.132328	0.588621	286.942	FALSE	0
2022-09-12	15:47:37	0.137468	0.611485	291.849	FALSE	0
2022-09-12	15:47:37	0.0430664	0.191568	287.133	FALSE	0
2022-09-12	15:47:38	0.0224048	0.099661	291.948	FALSE	0
2022-09-12	15:47:38	0.0847458	0.376966	287.51	FALSE	0
2022-09-12	15:47:38	0.0351783	0.15648	292.105	FALSE	0
2022-09-12	15:47:38	-0.0640074	-0.284718	287.51	FALSE	0
2022-09-12	15:47:39	-0.00502519	-0.0223531	292.105	FALSE	0
2022-09-12	15:47:39	0.0946694	0.421108	287.931	FALSE	0
2022-09-12	15:47:39	-0.0211066	-0.0938864	292.105	FALSE	0
2022-09-12	15:47:40	-0.0733203	-0.326143	287.931	FALSE	0
2022-09-12	15:47:40	-0.0806994	-0.358967	292.105	FALSE	0
2022-09-12	15:47:40	0.173397	0.771305	288.703	FALSE	0
2022-09-12	15:47:40	0.244797	1.08891	293.194	FALSE	0
2022-09-12	15:47:41	0.164237	0.730559	289.433	FALSE	0
2022-09-12	15:47:41	-0.0470099	-0.209109	293.194	FALSE	0
2022-09-12	15:47:41	0.12785	0.568702	290.002	FALSE	0
2022-09-12	15:47:41	0.0922776	0.410469	293.604	FALSE	0
2022-09-12	15:47:42	0.198384	0.882452	290.884	FALSE	0
2022-09-12	15:47:42	0.372888	1.65868	295.263	FALSE	0
2022-09-12	15:47:42	0.665967	2.96235	293.847	FALSE	0
2022-09-12	15:47:43	0.531158	2.3627	297.626	FALSE	0
2022-09-12	15:47:43	0.475534	2.11527	295.962	FALSE	0
2022-09-12	15:47:43	0.401947	1.78794	299.413	FALSE	0
2022-09-12	15:47:43	0.394517	1.75489	297.717	FALSE	0
2022-09-12	15:47:44	0.211921	0.942667	300.356	FALSE	0
2022-09-12	15:47:44	0.371361	1.65189	299.369	FALSE	0
2022-09-12	15:47:44	0.271819	1.20911	301.565	FALSE	0
2022-09-12	15:47:44	0.352736	1.56904	300.938	FALSE	0
2022-09-12	15:47:45	0.168206	0.748214	302.313	FALSE	0
2022-09-12	15:47:45	0.25187	1.12037	302.058	FALSE	0
2022-09-12	15:47:45	1.58373	7.04475	309.358	FALSE	0
2022-09-12	15:47:45	0.716959	3.18918	305.247	FALSE	0
2022-09-12	15:47:46	0.565356	2.51482	311.873	FALSE	0
2022-09-12	15:47:46	0.267596	1.19032	306.438	FALSE	0
2022-09-12	15:47:46	0.703321	3.12851	315.002	FALSE	0
2022-09-12	15:47:47	0.378893	1.68539	308.123	FALSE	0
2022-09-12	15:47:47	0.488868	2.17458	317.176	FALSE	0
2022-09-12	15:47:47	-0.270012	-1.20107	308.123	FALSE	0
2022-09-12	15:47:47	-0.72762	-3.2366	317.176	FALSE	0
2022-09-12	15:47:48	0.425051	1.89071	310.014	FALSE	0
2022-09-12	15:47:48	0.294059	1.30803	318.484	FALSE	0
2022-09-12	15:47:48	0.500929	2.22823	312.242	FALSE	0
2022-09-12	15:47:48	0.539962	2.40186	320.886	FALSE	0
2022-09-12	15:47:49	1.01452	4.51279	316.755	FALSE	0
2022-09-12	15:47:49	0.592939	2.63751	323.524	FALSE	0
2022-09-12	15:47:49	0.698079	3.1052	319.86	FALSE	0
2022-09-12	15:47:49	0.61126	2.71901	326.243	FALSE	0
2022-09-12	15:47:50	0.512074	2.27781	322.138	FALSE	0
2022-09-12	15:47:50	0.399809	1.77843	328.021	FALSE	0
2022-09-12	15:47:50	0.544389	2.42155	324.559	FALSE	0
2022-09-12	15:47:51	0.537061	2.38895	330.41	FALSE	0
2022-09-12	15:47:51	0.481285	2.14085	326.7	FALSE	0
2022-09-12	15:47:51	0.48612	2.16236	332.572	FALSE	0
2022-09-12	15:47:51	0.560216	2.49195	329.192	FALSE	0
2022-09-12	15:47:52	0.45243	2.0125	334.585	FALSE	0
2022-09-12	15:47:52	0.632175	2.81204	332.004	FALSE	0
2022-09-12	15:47:52	0.542099	2.41136	336.996	FALSE	0
2022-09-12	15:47:52	0.474924	2.11256	334.117	FALSE	0
2022-09-12	15:47:53	0.472074	2.09988	339.096	FALSE	0
2022-09-12	15:47:53	0.589478	2.62212	336.739	FALSE	0
2022-09-12	15:47:53	-0.159631	-0.710071	339.096	FALSE	0
2022-09-12	15:47:53	0.210751	0.937463	337.676	FALSE	0
2022-09-12	15:47:54	0.223779	0.995414	340.091	FALSE	0
2022-09-12	15:47:54	0.341947	1.52105	339.197	FALSE	0
2022-09-12	15:47:54	0.0906999	0.403451	340.495	FALSE	0
2022-09-12	15:47:55	0.188054	0.836502	340.034	FALSE	0
2022-09-12	15:47:55	-0.829656	-3.69048	340.495	FALSE	0
2022-09-12	15:47:55	-0.322989	-1.43672	340.034	FALSE	0
2022-09-12	15:47:55	0.363473	1.6168	342.112	FALSE	0
2022-09-12	15:47:56	0.0635244	0.282569	340.316	FALSE	0
2022-09-12	15:47:56	-0.0150506	-0.0669481	342.112	FALSE	0
2022-09-12	15:47:56	-0.066501	-0.29581	340.316	FALSE	0
2022-09-12	15:47:56	-0.122328	-0.544139	342.112	FALSE	0
2022-09-12	15:47:57	0.223931	0.99609	341.312	FALSE	0
2022-09-12	15:47:57	0.347188	1.54436	343.656	FALSE	0
2022-09-12	15:47:57	0.669936	2.98001	344.292	FALSE	0
2022-09-12	15:47:57	0.203473	0.905089	344.561	FALSE	0
2022-09-12	15:47:58	0.336654	1.4975	345.79	FALSE	0
2022-09-12	15:47:58	0.334568	1.48823	346.049	FALSE	0
2022-09-12	15:47:58	0.197875	0.880188	346.67	FALSE	0
2022-09-12	15:47:59	0.184797	0.822014	346.871	FALSE	0
2022-09-12	15:47:59	0.444084	1.97537	348.646	FALSE	0
2022-09-12	15:47:59	0.116654	0.5189	347.39	FALSE	0
2022-09-12	15:47:59	-0.418816	-1.86298	348.646	FALSE	0
2022-09-12	15:48:00	-0.293473	-1.30543	347.39	FALSE	0
2022-09-12	15:48:00	0.148664	0.661287	349.307	FALSE	0
2022-09-12	15:48:00	-0.0557631	-0.248045	347.39	FALSE	0
2022-09-12	15:48:00	-0.184771	-0.821898	349.307	FALSE	0
2022-09-12	15:48:01	-0.431844	-1.92093	347.39	FALSE	0
2022-09-12	15:48:01	-0.519427	-2.31052	349.307	FALSE	0
2022-09-12	15:48:01	-0.37958	-1.68845	347.39	FALSE	0
2022-09-12	15:48:02	-0.634847	-2.82393	349.307	FALSE	0
2022-09-12	15:48:02	-0.714745	-3.17933	347.39	FALSE	0
2022-09-12	15:48:02	-0.856831	-3.81136	349.307	FALSE	0
2022-09-12	15:48:02	-1.10879	-4.93212	347.39	FALSE	0
2022-09-12	15:48:03	-1.16726	-5.19221	349.307	FALSE	0
2022-09-12	15:48:03	-1.34355	-5.97638	347.39	FALSE	0
2022-09-12	15:48:03	-1.28553	-5.71829	349.307	FALSE	0
2022-09-12	15:48:03	-1.32279	-5.88403	347.39	FALSE	0
2022-09-12	15:48:04	-1.37871	-6.13278	349.307	FALSE	0
2022-09-12	15:48:04	-1.51408	-6.73493	347.39	FALSE	0
2022-09-12	15:48:04	-1.57332	-6.99844	349.307	FALSE	0
2022-09-12	15:48:04	-1.63179	-7.25853	347.39	FALSE	0
2022-09-12	15:48:05	-1.5748	-7.00503	349.307	FALSE	0
2022-09-12	15:48:05	-1.71892	-7.6461	347.39	FALSE	0
2022-09-12	15:48:05	-1.59149	-7.07927	349.307	FALSE	0
2022-09-12	15:48:06	-1.67373	-7.44509	347.39	FALSE	0
2022-09-12	15:48:06	-1.55169	-6.90223	349.307	FALSE	0
2022-09-12	15:48:06	-1.62446	-7.22592	347.39	FALSE	0
2022-09-12	15:48:06	-1.39892	-6.22268	349.307	FALSE	0
2022-09-12	15:48:07	-1.46558	-6.51919	347.39	FALSE	0
2022-09-12	15:48:07	-1.41266	-6.28379	349.307	FALSE	0
2022-09-12	15:48:07	-1.42447	-6.33633	347.39	FALSE	0
2022-09-12	15:48:07	-1.26859	-5.64294	349.307	FALSE	0
2022-09-12	15:48:08	-1.22457	-5.44713	347.39	FALSE	0
2022-09-12	15:48:08	-1.16884	-5.19923	349.307	FALSE	0
2022-09-12	15:48:08	-1.30324	-5.79707	347.39	FALSE	0
2022-09-12	15:48:08	-1.12284	-4.99462	349.307	FALSE	0
2022-09-12	15:48:09	-1.15571	-5.14083	347.39	FALSE	0
2022-09-12	15:48:09	-1.03256	-4.59303	349.307	FALSE	0
2022-09-12	15:48:09	-0.927926	-4.1276	347.39	FALSE	0
2022-09-12	15:48:10	-0.787976	-3.50507	349.307	FALSE	0
2022-09-12	15:48:10	-0.61846	-2.75103	347.39	FALSE	0
2022-09-12	15:48:10	-0.580598	-2.58262	349.307	FALSE	0
2022-09-12	15:48:10	-0.614185	-2.73202	347.39	FALSE	0
2022-09-12	15:48:11	-0.605178	-2.69195	349.307	FALSE	0
2022-09-12	15:48:11	-0.438155	-1.949	347.39	FALSE	0
2022-09-12	15:48:11	-0.51047	-2.27067	349.307	FALSE	0
2022-09-12	15:48:11	-0.45729	-2.03412	347.39	FALSE	0
2022-09-12	15:48:12	0.119606	0.532031	349.839	FALSE	0
2022-09-12	15:48:12	0.246425	1.09615	348.486	FALSE	0
2022-09-12	15:48:12	0.297468	1.3232	351.162	FALSE	0
2022-09-12	15:48:12	0.186272	0.828575	349.315	FALSE	0
2022-09-12	15:48:13	0.312125	1.38839	352.55	FALSE	0
2022-09-12	15:48:13	0.314211	1.39767	350.713	FALSE	0
2022-09-12	15:48:13	0.374211	1.66457	354.215	FALSE	0
2022-09-12	15:48:14	-0.00161552	-0.00718616	350.713	FALSE	0
2022-09-12	15:48:14	0.363321	1.61612	355.831	FALSE	0
2022-09-12	15:48:14	0.179555	0.798697	351.511	FALSE	0
2022-09-12	15:48:14	0.28215	1.25506	357.086	FALSE	0
2022-09-12	15:48:15	0.169122	0.752288	352.264	FALSE	0
2022-09-12	15:48:15	0.308359	1.37164	358.458	FALSE	0
2022-09-12	15:48:15	0.30215	1.34402	353.608	FALSE	0
2022-09-12	15:48:15	0.378741	1.68472	360.143	FALSE	0
2022-09-12	15:48:16	0.189784	0.844197	354.452	FALSE	0
2022-09-12	15:48:16	0.546476	2.43083	362.573	FALSE	0
2022-09-12	15:48:16	0.265458	1.18081	355.633	FALSE	0
2022-09-12	15:48:16	0.467545	2.07973	364.653	FALSE	0
2022-09-12	15:48:17	0.317366	1.41171	357.044	FALSE	0
2022-09-12	15:48:17	0.102761	0.457101	365.11	FALSE	0
2022-09-12	15:48:17	-0.303447	-1.34979	357.044	FALSE	0
2022-09-12	15:48:18	-0.114593	-0.509733	365.11	FALSE	0
2022-09-12	15:48:18	-0.186297	-0.828686	357.044	FALSE	0
2022-09-12	15:48:18	-0.205381	-0.913576	365.11	FALSE	0
2022-09-12	15:48:18	-0.102379	-0.455402	357.044	FALSE	0
2022-09-12	15:48:19	-0.160394	-0.713465	365.11	FALSE	0
2022-09-12	15:48:19	-0.0900633	-0.40062	357.044	FALSE	0
2022-09-12	15:48:19	-0.204262	-0.908598	365.11	FALSE	0
2022-09-12	15:48:19	0.0422522	0.187946	357.232	FALSE	0
2022-09-12	15:48:20	-0.314592	-1.39937	365.11	FALSE	0
2022-09-12	15:48:20	-0.235559	-1.04781	357.232	FALSE	0
2022-09-12	15:48:20	-0.138155	-0.614541	365.11	FALSE	0
2022-09-12	15:48:21	-0.327417	-1.45642	357.232	FALSE	0
2022-09-12	15:48:21	-0.32075	-1.42676	365.11	FALSE	0
2022-09-12	15:48:21	-0.313575	-1.39484	357.232	FALSE	0
2022-09-12	15:48:21	-0.347671	-1.54651	365.11	FALSE	0
2022-09-12	15:48:22	-0.467722	-2.08052	357.232	FALSE	0
2022-09-12	15:48:22	-0.414134	-1.84215	365.11	FALSE	0
2022-09-12	15:48:22	-0.237392	-1.05597	357.232	FALSE	0
2022-09-12	15:48:22	-0.642022	-2.85584	365.11	FALSE	0
2022-09-12	15:48:23	-0.532608	-2.36915	357.232	FALSE	0
2022-09-12	15:48:23	-0.497849	-2.21453	365.11	FALSE	0
2022-09-12	15:48:23	-0.527213	-2.34515	357.232	FALSE	0
2022-09-12	15:48:23	-0.486603	-2.16451	365.11	FALSE	0
2022-09-12	15:48:24	-0.562073	-2.50021	357.232	FALSE	0
2022-09-12	15:48:24	-0.425687	-1.89354	365.11	FALSE	0
2022-09-12	15:48:24	-0.536933	-2.38839	357.232	FALSE	0
2022-09-12	15:48:25	-0.504363	-2.24351	365.11	FALSE	0
2022-09-12	15:48:25	-0.505432	-2.24826	357.232	FALSE	0
2022-09-12	15:48:25	-0.587569	-2.61362	365.11	FALSE	0
2022-09-12	15:48:25	-0.618002	-2.749	357.232	FALSE	0
2022-09-12	15:48:26	-0.557595	-2.48029	365.11	FALSE	0
2022-09-12	15:48:26	-0.461921	-2.05472	357.232	FALSE	0
2022-09-12	15:48:26	-0.648587	-2.88504	365.11	FALSE	0
2022-09-12	15:48:26	-0.590572	-2.62698	357.232	FALSE	0
2022-09-12	15:48:27	-0.438969	-1.95262	365.11	FALSE	0
2022-09-12	15:48:27	-0.433117	-1.92659	357.232	FALSE	0
2022-09-12	15:48:27	0.0187407	0.0833624	365.194	FALSE	0
2022-09-12	15:48:27	0.220013	0.978662	358.211	FALSE	0
2022-09-12	15:48:28	0.350394	1.55862	366.752	FALSE	0
2022-09-12	15:48:28	0.866934	3.8563	362.067	FALSE	0
2022-09-12	15:48:28	0.447443	1.99032	368.743	FALSE	0
2022-09-12	15:48:29	0.475534	2.11527	364.183	FALSE	0
2022-09-12	15:48:29	0.477875	2.12568	370.868	FALSE	0
2022-09-12	15:48:29	0.347239	1.54459	365.727	FALSE	0
2022-09-12	15:48:29	0.347545	1.54595	372.414	FALSE	0
2022-09-12	15:48:30	0.216501	0.96304	366.69	FALSE	0
2022-09-12	15:48:30	0.469377	2.08788	374.502	FALSE	0
2022-09-12	15:48:30	0.267494	1.18987	367.88	FALSE	0
2022-09-12	15:48:30	0.30958	1.37707	375.879	FALSE	0
2022-09-12	15:48:31	0.339809	1.51154	369.392	FALSE	0
2022-09-12	15:48:31	0.260064	1.15682	377.036	FALSE	0
2022-09-12	15:48:31	0.45986	2.04555	371.437	FALSE	0
2022-09-12	15:48:31	0.23126	1.02869	378.065	FALSE	0
2022-09-12	15:48:32	-0.24131	-1.0734	371.437	FALSE	0
2022-09-12	15:48:32	0.412685	1.83571	379.9	FALSE	0
2022-09-12	15:48:32	0.337824	1.50271	372.94	FALSE	0
2022-09-12	15:48:33	0.544287	2.4211	382.321	FALSE	0
2022-09-12	15:48:33	0.217214	0.966211	373.906	FALSE	0
2022-09-12	15:48:33	0.383168	1.70441	384.026	FALSE	0
2022-09-12	15:48:33	0.454211	2.02042	375.927	FALSE	0
2022-09-12	15:48:34	0.64327	2.86139	386.887	FALSE	0
2022-09-12	15:48:34	0.440878	1.96111	377.888	FALSE	0
2022-09-12	15:48:34	0.548155	2.4383	389.326	FALSE	0
2022-09-12	15:48:34	0.757468	3.36937	381.257	FALSE	0
2022-09-12	15:48:35	0.356298	1.58488	390.91	FALSE	0
2022-09-12	15:48:35	0.528512	2.35093	383.608	FALSE	0
2022-09-12	15:48:35	0.405153	1.8022	392.713	FALSE	0
2022-09-12	15:48:35	0.440878	1.96111	385.569	FALSE	0
2022-09-12	15:48:36	0.499809	2.22325	394.936	FALSE	0
2022-09-12	15:48:36	0.458232	2.03831	387.607	FALSE	0
2022-09-12	15:48:36	0.494313	2.1988	397.135	FALSE	0
2022-09-12	15:48:37	0.415789	1.84951	389.457	FALSE	0
2022-09-12	15:48:37	0.419199	1.86468	398.999	FALSE	0
2022-09-12	15:48:37	0.429987	1.91267	391.37	FALSE	0
2022-09-12	15:48:37	0.426883	1.89886	400.898	FALSE	0
2022-09-12	15:48:38	0.433143	1.92671	393.296	FALSE	0
2022-09-12	15:48:38	0.434364	1.93214	402.83	FALSE	0
2022-09-12	15:48:38	0.474924	2.11256	395.409	FALSE	0
2022-09-12	15:48:38	0.534466	2.37741	405.208	FALSE	0
2022-09-12	15:48:39	0.564084	2.50916	397.918	FALSE	0
2022-09-12	15:48:39	0.403015	1.79269	407	FALSE	0
2022-09-12	15:48:39	0.394364	1.75421	399.672	FALSE	0
2022-09-12	15:48:40	0.391769	1.74267	408.743	FALSE	0
2022-09-12	15:48:40	0.425356	1.89207	401.564	FALSE	0
2022-09-12	15:48:40	0.442812	1.96972	410.713	FALSE	0
2022-09-12	15:48:40	0.443575	1.97311	403.537	FALSE	0
2022-09-12	15:48:41	0.453702	2.01816	412.731	FALSE	0
2022-09-12	15:48:41	0.406781	1.80944	405.347	FALSE	0
2022-09-12	15:48:41	0.457977	2.03717	414.768	FALSE	0
2022-09-12	15:48:41	0.451819	2.00978	407.357	FALSE	0
2022-09-12	15:48:42	0.414109	1.84204	416.61	FALSE	0
2022-09-12	15:48:42	0.415178	1.84679	409.203	FALSE	0
2022-09-12	15:48:42	0.523219	2.32738	418.938	FALSE	0
2022-09-12	15:48:42	0.472939	2.10373	411.307	FALSE	0
2022-09-12	15:48:43	0.406679	1.80899	420.747	FALSE	0
2022-09-12	15:48:43	0.299097	1.33044	412.638	FALSE	0
2022-09-12	15:48:43	0.484237	2.15398	422.901	FALSE	0
2022-09-12	15:48:44	0.357468	1.59009	414.228	FALSE	0
2022-09-12	15:48:44	0.404644	1.79994	424.701	FALSE	0
2022-09-12	15:48:44	0.308766	1.37345	415.601	FALSE	0
2022-09-12	15:48:44	0.429835	1.91199	426.613	FALSE	0
2022-09-12	15:48:45	0.415331	1.84748	417.449	FALSE	0
2022-09-12	15:48:45	0.359097	1.59734	428.21	FALSE	0
2022-09-12	15:48:45	0.370242	1.64691	419.095	FALSE	0
2022-09-12	15:48:45	0.357061	1.58828	429.798	FALSE	0
2022-09-12	15:48:46	0.39813	1.77096	420.866	FALSE	0
2022-09-12	15:48:46	0.380216	1.69128	431.489	FALSE	0
2022-09-12	15:48:46	0.309427	1.37639	422.243	FALSE	0
2022-09-12	15:48:46	0.527646	2.34707	433.836	FALSE	0
2022-09-12	15:48:47	0.273906	1.21839	423.461	FALSE	0
2022-09-12	15:48:47	0.34154	1.51924	435.356	FALSE	0
2022-09-12	15:48:47	0.130598	0.580926	424.042	FALSE	0
2022-09-12	15:48:48	0.528359	2.35025	437.706	FALSE	0
2022-09-12	15:48:48	0.365763	1.62699	425.669	FALSE	0
2022-09-12	15:48:48	0.351921	1.56541	439.271	FALSE	0
2022-09-12	15:48:48	0.531718	2.36519	428.034	FALSE	0
2022-09-12	15:48:49	0.143372	0.637747	439.909	FALSE	0
2022-09-12	15:48:49	0.301641	1.34176	429.376	FALSE	0
2022-09-12	15:48:49	0.261947	1.16519	441.074	FALSE	0
2022-09-12	15:48:49	0.19528	0.868644	430.245	FALSE	0
2022-09-12	15:48:50	0.228766	1.0176	442.092	FALSE	0
2022-09-12	15:48:50	0.23355	1.03888	431.284	FALSE	0
2022-09-12	15:48:50	0.41187	1.83208	443.924	FALSE	0
2022-09-12	15:48:50	0.43813	1.94889	433.232	FALSE	0
2022-09-12	15:48:51	0.502506	2.23525	446.159	FALSE	0
2022-09-12	15:48:51	0.0379264	0.168704	433.401	FALSE	0
2022-09-12	15:48:51	0.182049	0.80979	446.969	FALSE	0
2022-09-12	15:48:52	0.400522	1.7816	435.183	FALSE	0
2022-09-12	15:48:52	0.542303	2.41227	449.381	FALSE	0
2022-09-12	15:48:52	0.329224	1.46445	436.647	FALSE	0
2022-09-12	15:48:52	0.355636	1.58194	450.963	FALSE	0
2022-09-12	15:48:53	0.450649	2.00458	438.652	FALSE	0
2022-09-12	15:48:53	0.318384	1.41624	452.379	FALSE	0
2022-09-12	15:48:53	0.360369	1.60299	440.255	FALSE	0
2022-09-12	15:48:53	0.324949	1.44544	453.825	FALSE	0
2022-09-12	15:48:54	0.413295	1.83842	442.093	FALSE	0
2022-09-12	15:48:54	0.714669	3.17899	457.004	FALSE	0
2022-09-12	15:48:54	0.610802	2.71697	444.81	FALSE	0
2022-09-12	15:48:54	0.660573	2.93836	459.942	FALSE	0
2022-09-12	15:48:55	0.503779	2.24091	447.051	FALSE	0
2022-09-12	15:48:55	0.688308	3.06173	463.004	FALSE	0
2022-09-12	15:48:55	0.987494	4.39257	451.444	FALSE	0
2022-09-12	15:48:56	1.0624	4.72577	467.73	FALSE	0
2022-09-12	15:48:56	0.900114	4.00389	455.448	FALSE	0
2022-09-12	15:48:56	0.937315	4.16936	471.899	FALSE	0
2022-09-12	15:48:56	1.06846	4.75272	460.2	FALSE	0
2022-09-12	15:48:57	1.1909	5.29736	477.196	FALSE	0
2022-09-12	15:48:57	1.11319	4.95169	465.152	FALSE	0
2022-09-12	15:48:57	1.11009	4.9379	482.134	FALSE	0
2022-09-12	15:48:57	1.14184	5.07913	470.231	FALSE	0
2022-09-12	15:48:58	0.974822	4.3362	486.471	FALSE	0
2022-09-12	15:48:58	0.774211	3.44385	473.675	FALSE	0
2022-09-12	15:48:58	0.565153	2.51391	488.985	FALSE	0
2022-09-12	15:48:59	0.329529	1.46581	475.141	FALSE	0
2022-09-12	15:48:59	1.08123	4.80953	493.794	FALSE	0
2022-09-12	15:48:59	0.57131	2.5413	477.682	FALSE	0
2022-09-12	15:48:59	0.0586898	0.261064	494.055	FALSE	0
2022-09-12	15:49:00	0.108104	0.480868	478.163	FALSE	0
2022-09-12	15:49:00	0.119911	0.533388	494.588	FALSE	0
2022-09-12	15:49:00	0.00530559	0.0236003	478.187	FALSE	0
2022-09-12	15:49:00	-0.176933	-0.787033	494.588	FALSE	0
2022-09-12	15:49:01	-0.1293	-0.575152	478.187	FALSE	0
2022-09-12	15:49:01	0.0564506	0.251104	494.84	FALSE	0
2022-09-12	15:49:01	0.0843895	0.375381	478.562	FALSE	0
2022-09-12	15:49:01	0.020013	0.0890218	494.929	FALSE	0
2022-09-12	15:49:02	0.168308	0.748668	479.311	FALSE	0
2022-09-12	15:49:02	0.152634	0.678947	495.608	FALSE	0
2022-09-12	15:49:02	0.245051	1.09004	480.401	FALSE	0
2022-09-12	15:49:03	0.697061	3.10067	498.708	FALSE	0
2022-09-12	15:49:03	0.239555	1.06559	481.466	FALSE	0
2022-09-12	15:49:03	0.320471	1.42552	500.134	FALSE	0
2022-09-12	15:49:03	0.182507	0.811828	482.278	FALSE	0
2022-09-12	15:49:04	0.0665778	0.296151	500.43	FALSE	0
2022-09-12	15:49:04	-0.0331168	-0.14731	482.278	FALSE	0
2022-09-12	15:49:04	-0.12187	-0.542102	500.43	FALSE	0
2022-09-12	15:49:04	-0.00512696	-0.0228057	482.278	FALSE	0
2022-09-12	15:49:05	-0.0862974	-0.383868	500.43	FALSE	0
2022-09-12	15:49:05	0.00316817	0.0140927	482.292	FALSE	0
2022-09-12	15:49:05	0.28388	1.26276	501.693	FALSE	0
2022-09-12	15:49:05	0.234059	1.04114	483.333	FALSE	0
2022-09-12	15:49:06	0.0310562	0.138144	501.831	FALSE	0
2022-09-12	15:49:06	0.10327	0.459366	483.793	FALSE	0
2022-09-12	15:49:06	0.0792496	0.352518	502.183	FALSE	0
2022-09-12	15:49:07	0.095331	0.424051	484.217	FALSE	0
2022-09-12	15:49:07	0.268715	1.1953	503.379	FALSE	0
2022-09-12	15:49:07	0.0444404	0.19768	484.414	FALSE	0
2022-09-12	15:49:07	0.273499	1.21658	504.595	FALSE	0
2022-09-12	15:49:08	0.149886	0.666723	485.081	FALSE	0
2022-09-12	15:49:08	0.169377	0.753423	505.349	FALSE	0
2022-09-12	15:49:08	0.357417	1.58986	486.671	FALSE	0
2022-09-12	15:49:08	0.408817	1.8185	507.167	FALSE	0
2022-09-12	15:49:09	0.359504	1.59915	488.27	FALSE	0
2022-09-12	15:49:09	0.425305	1.89184	509.059	FALSE	0
2022-09-12	15:49:09	0.903372	4.01838	492.288	FALSE	0
2022-09-12	15:49:09	0.452023	2.01069	511.07	FALSE	0
2022-09-12	15:49:10	0.859758	3.82438	496.113	FALSE	0
2022-09-12	15:49:10	1.34179	5.96855	517.038	FALSE	0
2022-09-12	15:49:10	0.522964	2.32625	498.439	FALSE	0
2022-09-12	15:49:11	0.592124	2.63389	519.672	FALSE	0
2022-09-12	15:49:11	0.60556	2.69365	501.133	FALSE	0
2022-09-12	15:49:11	0.386018	1.71709	521.389	FALSE	0
2022-09-12	15:49:11	0.555585	2.47135	503.604	FALSE	0
2022-09-12	15:49:12	0.882761	3.9267	525.316	FALSE	0
2022-09-12	15:49:12	0.562608	2.50259	506.107	FALSE	0
2022-09-12	15:49:12	0.374771	1.66706	526.983	FALSE	0
2022-09-12	15:49:12	1.00861	4.4865	510.593	FALSE	0
2022-09-12	15:49:13	0.365967	1.62789	528.611	FALSE	0
2022-09-12	15:49:13	0.822201	3.65731	514.25	FALSE	0
2022-09-12	15:49:13	0.534008	2.37537	530.986	FALSE	0
2022-09-12	15:49:13	0.480064	2.13542	516.386	FALSE	0
2022-09-12	15:49:14	0.732226	3.25709	534.243	FALSE	0
2022-09-12	15:49:14	0.401285	1.785	518.171	FALSE	0
2022-09-12	15:49:14	0.410394	1.82551	536.069	FALSE	0
2022-09-12	15:49:15	0.600216	2.66988	520.841	FALSE	0
2022-09-12	15:49:15	0.614923	2.7353	538.804	FALSE	0
2022-09-12	15:49:15	0.712227	3.16813	524.009	FALSE	0
2022-09-12	15:49:15	0.998944	4.4435	543.248	FALSE	0
2022-09-12	15:49:16	0.468868	2.08562	526.095	FALSE	0
2022-09-12	15:49:16	1.18017	5.24963	548.497	FALSE	0
2022-09-12	15:49:16	1.14256	5.08234	531.177	FALSE	0
2022-09-12	15:49:16	1.24057	5.5183	554.016	FALSE	0
2022-09-12	15:49:17	0.576959	2.56643	533.743	FALSE	0
2022-09-12	15:49:17	0.401183	1.78454	555.8	FALSE	0
2022-09-12	15:49:17	0.767493	3.41396	537.157	FALSE	0
2022-09-12	15:49:17	0.539097	2.39801	558.198	FALSE	0
2022-09-12	15:49:18	0.345	1.53463	538.692	FALSE	0
2022-09-12	15:49:18	0.471514	2.09739	560.295	FALSE	0
2022-09-12	15:49:18	0.68327	3.03932	541.731	FALSE	0
2022-09-12	15:49:19	0.297723	1.32433	561.62	FALSE	0
2022-09-12	15:49:19	0.541387	2.4082	544.139	FALSE	0
2022-09-12	15:49:19	0.526425	2.34164	563.961	FALSE	0
2022-09-12	15:49:19	0.506577	2.25336	546.393	FALSE	0
2022-09-12	15:49:20	0.360827	1.60503	565.566	FALSE	0
2022-09-12	15:49:20	0.530598	2.36021	548.753	FALSE	0
2022-09-12	15:49:20	0.775891	3.45132	569.018	FALSE	0
2022-09-12	15:49:20	1.09961	4.89129	553.644	FALSE	0
2022-09-12	15:49:21	0.400369	1.78092	570.799	FALSE	0
2022-09-12	15:49:21	0.361234	1.60684	555.251	FALSE	0
2022-09-12	15:49:21	0.298995	1.32999	572.129	FALSE	0
2022-09-12	15:49:22	0.30388	1.35172	556.603	FALSE	0
2022-09-12	15:49:22	0.439809	1.95636	574.085	FALSE	0
2022-09-12	15:49:22	0.605458	2.6932	559.296	FALSE	0
2022-09-12	15:49:22	0.415585	1.84861	575.934	FALSE	0
2022-09-12	15:49:23	0.587239	2.61216	561.908	FALSE	0
2022-09-12	15:49:23	0.44612	1.98443	577.918	FALSE	0
2022-09-12	15:49:23	0.355433	1.58104	563.489	FALSE	0
2022-09-12	15:49:23	0.195636	0.870228	578.788	FALSE	0
2022-09-12	15:49:24	0.442557	1.96858	565.458	FALSE	0
2022-09-12	15:49:24	0.382914	1.70328	580.492	FALSE	0
2022-09-12	15:49:24	0.332685	1.47985	566.938	FALSE	0
2022-09-12	15:49:24	0.419249	1.8649	582.357	FALSE	0
2022-09-12	15:49:25	0.273041	1.21454	568.152	FALSE	0
2022-09-12	15:49:25	0.2307	1.0262	583.383	FALSE	0
2022-09-12	15:49:25	0.328359	1.46061	569.613	FALSE	0
2022-09-12	15:49:26	0.266018	1.1833	584.566	FALSE	0
2022-09-12	15:49:26	0.229478	1.02076	570.634	FALSE	0
2022-09-12	15:49:26	0.179758	0.7996	585.366	FALSE	0
2022-09-12	15:49:26	0.405458	1.80356	572.437	FALSE	0
2022-09-12	15:49:27	0.260929	1.16066	586.526	FALSE	0
2022-09-12	15:49:27	0.454466	2.02156	574.459	FALSE	0
2022-09-12	15:49:27	0.46841	2.08358	588.61	FALSE	0
2022-09-12	15:49:27	0.231311	1.02892	575.488	FALSE	0
2022-09-12	15:49:28	0.337824	1.50271	590.113	FALSE	0
2022-09-12	15:49:28	0.327443	1.45653	576.944	FALSE	0
2022-09-12	15:49:28	0.46215	2.05574	592.168	FALSE	0
2022-09-12	15:49:28	2.03106	9.03456	585.979	FALSE	0
2022-09-12	15:49:29	1.60576	7.14274	599.311	FALSE	0
2022-09-12	15:49:29	0.867137	3.8572	589.836	FALSE	0
2022-09-12	15:49:29	0.28841	1.28291	600.594	FALSE	0
2022-09-12	15:49:30	0.714211	3.17695	593.013	FALSE	0
2022-09-12	15:49:30	0.723219	3.21702	603.811	FALSE	0
2022-09-12	15:49:30	1.75172	7.792	600.805	FALSE	0
2022-09-12	15:49:30	0.715025	3.18057	606.992	FALSE	0
2022-09-12	15:49:31	0.728512	3.24057	604.045	FALSE	0
2022-09-12	15:49:31	0.716043	3.1851	610.177	FALSE	0
2022-09-12	15:49:31	0.263575	1.17243	605.218	FALSE	0
2022-09-12	15:49:31	0.336705	1.49773	611.674	FALSE	0
2022-09-12	15:49:32	0.427188	1.90022	607.118	FALSE	0
2022-09-12	15:49:32	0.358639	1.5953	613.27	FALSE	0
2022-09-12	15:49:32	0.331667	1.47532	608.593	FALSE	0
2022-09-12	15:49:32	0.301438	1.34086	614.611	FALSE	0
2022-09-12	15:49:33	0.48673	2.16507	610.758	FALSE	0
2022-09-12	15:49:33	0.198333	0.882225	615.493	FALSE	0
2022-09-12	15:49:33	0.0676974	0.301132	611.06	FALSE	0
2022-09-12	15:49:34	0.129733	0.577078	616.07	FALSE	0
2022-09-12	15:49:34	0.123473	0.549233	611.609	FALSE	0
2022-09-12	15:49:34	0.12729	0.566211	616.636	FALSE	0
2022-09-12	15:49:34	0.0396058	0.176175	611.785	FALSE	0
2022-09-12	15:49:35	0.132786	0.590659	617.227	FALSE	0
2022-09-12	15:49:35	0.0825575	0.367232	612.152	FALSE	0
2022-09-12	15:49:35	0.17528	0.77968	618.006	FALSE	0
2022-09-12	15:49:35	0.0341096	0.151726	612.304	FALSE	0
2022-09-12	15:49:36	0.309886	1.37843	619.385	FALSE	0
2022-09-12	15:49:36	0.181947	0.809337	613.113	FALSE	0
2022-09-12	15:49:36	0.0817941	0.363837	619.749	FALSE	0
2022-09-12	15:49:36	0.188003	0.836275	613.95	FALSE	0
2022-09-12	15:49:37	0.00393154	0.0174883	619.766	FALSE	0
2022-09-12	15:49:37	0.211005	0.938592	614.888	FALSE	0
2022-09-12	15:49:37	0.0616414	0.274193	620.04	FALSE	0
2022-09-12	15:49:38	0.11472	0.510298	615.398	FALSE	0
2022-09-12	15:49:38	0.0919722	0.409111	620.449	FALSE	0
2022-09-12	15:49:38	0.0778756	0.346406	615.745	FALSE	0
2022-09-12	15:49:38	0.569937	2.53519	622.985	FALSE	0
2022-09-12	15:49:39	0.455127	2.0245	617.769	FALSE	0
2022-09-12	15:49:39	0.638791	2.84147	625.826	FALSE	0
2022-09-12	15:49:39	0.298486	1.32773	619.097	FALSE	0
2022-09-12	15:49:39	0.793295	3.52873	629.355	FALSE	0
2022-09-12	15:49:40	0.656857	2.92183	622.019	FALSE	0
2022-09-12	15:49:40	0.697824	3.10406	632.459	FALSE	0
2022-09-12	15:49:40	0.43299	1.92603	623.945	FALSE	0
2022-09-12	15:49:41	0.483168	2.14923	634.608	FALSE	0
2022-09-12	15:49:41	0.280471	1.24759	625.193	FALSE	0
2022-09-12	15:49:41	0.384135	1.70871	636.317	FALSE	0
2022-09-12	15:49:41	0.754364	3.35556	628.548	FALSE	0
2022-09-12	15:49:42	0.842303	3.74673	640.064	FALSE	0
2022-09-12	15:49:42	0.578384	2.57277	631.121	FALSE	0
2022-09-12	15:49:42	0.973295	4.32941	644.393	FALSE	0
2022-09-12	15:49:42	0.318435	1.41646	632.537	FALSE	0
2022-09-12	15:49:43	0.523524	2.32874	646.722	FALSE	0
2022-09-12	15:49:43	0.410852	1.82755	634.365	FALSE	0
2022-09-12	15:49:43	0.753855	3.3533	650.075	FALSE	0
2022-09-12	15:49:43	0.362303	1.6116	635.976	FALSE	0
2022-09-12	15:49:44	0.359148	1.59756	651.673	FALSE	0
2022-09-12	15:49:44	0.694415	3.0889	639.065	FALSE	0
2022-09-12	15:49:44	0.652481	2.90237	654.575	FALSE	0
2022-09-12	15:49:45	0.562964	2.50418	641.57	FALSE	0
2022-09-12	15:49:45	0.374466	1.6657	656.241	FALSE	0
2022-09-12	15:49:45	0.299606	1.33271	642.902	FALSE	0
2022-09-12	15:49:45	0.226425	1.00718	657.248	FALSE	0
2022-09-12	15:49:46	-0.324872	-1.4451	642.902	FALSE	0
2022-09-12	15:49:46	-0.746348	-3.31991	657.248	FALSE	0
2022-09-12	15:49:46	-0.858154	-3.81724	642.902	FALSE	0
2022-09-12	15:49:46	-0.89734	-3.99155	657.248	FALSE	0
2022-09-12	15:49:47	-0.914439	-4.06761	642.902	FALSE	0
2022-09-12	15:49:47	-0.902531	-4.01464	657.248	FALSE	0
2022-09-12	15:49:47	-0.948485	-4.21905	642.902	FALSE	0
2022-09-12	15:49:47	-0.873524	-3.88561	657.248	FALSE	0
2022-09-12	15:49:48	-0.843549	-3.75227	642.902	FALSE	0
2022-09-12	15:49:48	-0.883447	-3.92975	657.248	FALSE	0
2022-09-12	15:49:48	-0.834389	-3.71153	642.902	FALSE	0
2022-09-12	15:49:49	-0.475814	-2.11652	657.248	FALSE	0
2022-09-12	15:49:49	-0.345687	-1.53768	642.902	FALSE	0
2022-09-12	15:49:49	-0.0299616	-0.133275	657.248	FALSE	0
2022-09-12	15:49:49	0.168512	0.749575	643.652	FALSE	0
2022-09-12	15:49:50	0.197316	0.877701	658.126	FALSE	0
2022-09-12	15:49:50	0.191565	0.852119	644.504	FALSE	0
2022-09-12	15:49:50	0.222507	0.989756	659.115	FALSE	0
2022-09-12	15:49:50	0.247443	1.10068	645.605	FALSE	0
2022-09-12	15:49:51	0.253601	1.12807	660.243	FALSE	0
2022-09-12	15:49:51	0.261336	1.16247	646.767	FALSE	0
2022-09-12	15:49:51	0.275585	1.22586	661.469	FALSE	0
2022-09-12	15:49:51	0.269173	1.19734	647.964	FALSE	0
2022-09-12	15:49:52	0.278944	1.2408	662.71	FALSE	0
2022-09-12	15:49:52	0.276451	1.22971	649.194	FALSE	0
2022-09-12	15:49:52	0.274771	1.22224	663.932	FALSE	0
2022-09-12	15:49:53	0.275941	1.22744	650.422	FALSE	0
2022-09-12	15:49:53	0.274313	1.2202	665.152	FALSE	0
2022-09-12	15:49:53	0.27187	1.20933	651.631	FALSE	0
2022-09-12	15:49:53	0.276298	1.22903	666.381	FALSE	0
2022-09-12	15:49:54	0.283626	1.26163	652.893	FALSE	0
2022-09-12	15:49:54	0.286985	1.27657	667.658	FALSE	0
2022-09-12	15:49:54	0.275382	1.22495	654.117	FALSE	0
2022-09-12	15:49:54	0.336807	1.49818	669.156	FALSE	0
2022-09-12	15:49:55	0.263931	1.17402	655.292	FALSE	0
2022-09-12	15:49:55	0.248817	1.10679	670.263	FALSE	0
2022-09-12	15:49:55	0.202761	0.901921	656.193	FALSE	0
2022-09-12	15:49:55	0.122405	0.544482	670.808	FALSE	0
2022-09-12	15:49:56	0.140267	0.623936	656.817	FALSE	0
2022-09-12	15:49:56	0.0774684	0.344595	671.152	FALSE	0
2022-09-12	15:49:56	0.0956364	0.42541	657.243	FALSE	0
2022-09-12	15:49:57	0.0865269	0.384889	671.537	FALSE	0
2022-09-12	15:49:57	0.0859671	0.382399	657.625	FALSE	0
2022-09-12	15:49:57	0.0861198	0.383078	671.92	FALSE	0
2022-09-12	15:49:57	0.0963488	0.428579	658.054	FALSE	0
2022-09-12	15:49:58	0.102354	0.455291	672.375	FALSE	0
2022-09-12	15:49:58	0.049275	0.219185	658.273	FALSE	0
2022-09-12	15:49:58	-0.169402	-0.753534	672.375	FALSE	0
2022-09-12	15:49:58	0.119962	0.533615	658.807	FALSE	0
2022-09-12	15:49:59	0.197926	0.880414	673.256	FALSE	0
2022-09-12	15:49:59	0.199097	0.885623	659.692	FALSE	0
2022-09-12	15:49:59	0.329733	1.46672	674.722	FALSE	0
2022-09-12	15:49:59	0.365	1.62359	661.316	FALSE	0
2022-09-12	15:50:00	0.72556	3.22744	677.95	FALSE	0
2022-09-12	15:50:00	1.1507	5.11854	666.434	FALSE	0
2022-09-12	15:50:00	0.846985	3.76756	681.717	FALSE	0
2022-09-12	15:50:01	1.06368	4.73146	671.166	FALSE	0
2022-09-12	15:50:01	1.15986	5.15929	686.877	FALSE	0
2022-09-12	15:50:01	0.609987	2.71334	673.879	FALSE	0
2022-09-12	15:50:01	1.29869	5.77683	692.654	FALSE	0
2022-09-12	15:50:02	0.343881	1.52965	675.409	FALSE	0
2022-09-12	15:50:02	0.548359	2.43921	695.093	FALSE	0
2022-09-12	15:50:02	0.432176	1.92241	677.331	FALSE	0
2022-09-12	15:50:02	0.490344	2.18115	697.274	FALSE	0
2022-09-12	15:50:03	0.371819	1.65393	678.985	FALSE	0
2022-09-12	15:50:03	0.402252	1.7893	699.063	FALSE	0
2022-09-12	15:50:03	0.319606	1.42167	680.407	FALSE	0
2022-09-12	15:50:04	0.456807	2.03197	701.095	FALSE	0
2022-09-12	15:50:04	0.508308	2.26106	682.668	FALSE	0
2022-09-12	15:50:04	0.481845	2.14334	703.239	FALSE	0
2022-09-12	15:50:04	0.748868	3.33111	685.999	FALSE	0
2022-09-12	15:50:05	0.601336	2.67486	705.913	FALSE	0
2022-09-12	15:50:05	1.16154	5.16676	691.166	FALSE	0
2022-09-12	15:50:05	0.544186	2.42065	708.334	FALSE	0
2022-09-12	15:50:05	0.483066	2.14877	693.314	FALSE	0
2022-09-12	15:50:06	0.453499	2.01725	710.351	FALSE	0
2022-09-12	15:50:06	0.344695	1.53327	694.848	FALSE	0
2022-09-12	15:50:06	0.367494	1.63469	711.986	FALSE	0
2022-09-12	15:50:06	0.470395	2.09241	696.94	FALSE	0
2022-09-12	15:50:07	0.442456	1.96813	713.954	FALSE	0
2022-09-12	15:50:07	0.188715	0.839442	697.78	FALSE	0
2022-09-12	15:50:07	0.597417	2.65743	716.612	FALSE	0
2022-09-12	15:50:08	0.426629	1.89773	699.677	FALSE	0
2022-09-12	15:50:08	0.428613	1.90656	718.518	FALSE	0
2022-09-12	15:50:08	0.520929	2.3172	701.995	FALSE	0
2022-09-12	15:50:08	0.395738	1.76032	720.278	FALSE	0
2022-09-12	15:50:09	0.389479	1.73248	703.727	FALSE	0
2022-09-12	15:50:09	0.335789	1.49366	721.772	FALSE	0
2022-09-12	15:50:09	0.297723	1.32433	705.051	FALSE	0
2022-09-12	15:50:09	0.258283	1.14889	722.921	FALSE	0
2022-09-12	15:50:10	0.427036	1.89954	706.951	FALSE	0
2022-09-12	15:50:10	0.529478	2.35522	725.276	FALSE	0
2022-09-12	15:50:10	0.978995	4.35477	711.306	FALSE	0
2022-09-12	15:50:10	1.39899	6.22299	731.499	FALSE	0
2022-09-12	15:50:11	1.00592	4.47453	715.78	FALSE	0
2022-09-12	15:50:11	0.744491	3.31164	734.811	FALSE	0
2022-09-12	15:50:11	1.08205	4.81317	720.593	FALSE	0
2022-09-12	15:50:12	0.733244	3.26162	738.072	FALSE	0
2022-09-12	15:50:12	0.588766	2.61895	723.212	FALSE	0
2022-09-12	15:50:12	0.483422	2.15036	740.223	FALSE	0
2022-09-12	15:50:12	0.634008	2.82019	726.033	FALSE	0
2022-09-12	15:50:13	0.593651	2.64068	742.864	FALSE	0
2022-09-12	15:50:13	0.715382	3.18216	729.215	FALSE	0
2022-09-12	15:50:13	0.585916	2.60627	745.47	FALSE	0
2022-09-12	15:50:13	0.493753	2.19631	731.411	FALSE	0
2022-09-12	15:50:14	0.505153	2.24702	747.717	FALSE	0
2022-09-12	15:50:14	0.28785	1.28041	732.691	FALSE	0
2022-09-12	15:50:14	0.293804	1.3069	749.024	FALSE	0
2022-09-12	15:50:14	0.465153	2.06909	734.76	FALSE	0
2022-09-12	15:50:15	0.326527	1.45246	750.476	FALSE	0
2022-09-12	15:50:15	0.117061	0.520711	735.281	FALSE	0
2022-09-12	15:50:15	0.105356	0.468645	750.945	FALSE	0
2022-09-12	15:50:16	0.106171	0.47227	735.753	FALSE	0
2022-09-12	15:50:16	0.0908017	0.403904	751.349	FALSE	0
2022-09-12	15:50:16	0.252074	1.12128	736.875	FALSE	0
2022-09-12	15:50:16	0.418842	1.86309	753.212	FALSE	0
2022-09-12	15:50:17	0.507748	2.25856	739.133	FALSE	0
2022-09-12	15:50:17	0.352685	1.56881	754.781	FALSE	0
2022-09-12	15:50:17	0.422456	1.87917	741.012	FALSE	0
2022-09-12	15:50:17	0.399657	1.77775	756.558	FALSE	0
2022-09-12	15:50:18	0.379351	1.68743	742.7	FALSE	0
2022-09-12	15:50:18	0.566832	2.52138	759.08	FALSE	0
2022-09-12	15:50:18	0.259809	1.15568	743.856	FALSE	0
2022-09-12	15:50:18	0.43126	1.91833	760.998	FALSE	0
2022-09-12	15:50:19	0.518435	2.3061	746.162	FALSE	0
2022-09-12	15:50:19	0.379402	1.68766	762.686	FALSE	0
2022-09-12	15:50:19	0.635992	2.82902	748.991	FALSE	0
2022-09-12	15:50:20	0.469326	2.08766	764.773	FALSE	0
2022-09-12	15:50:20	0.773092	3.43887	752.43	FALSE	0
2022-09-12	15:50:20	0.480165	2.13587	766.909	FALSE	0
2022-09-12	15:50:20	0.482608	2.14674	754.576	FALSE	0
2022-09-12	15:50:21	0.589173	2.62076	769.53	FALSE	0
2022-09-12	15:50:21	0.370903	1.64985	756.226	FALSE	0
2022-09-12	15:50:21	0.454517	2.02178	771.552	FALSE	0
2022-09-12	15:50:21	0.417468	1.85698	758.083	FALSE	0
2022-09-12	15:50:22	0.517264	2.30089	773.853	FALSE	0
2022-09-12	15:50:22	0.459555	2.04419	760.127	FALSE	0
2022-09-12	15:50:22	0.941183	4.18657	778.039	FALSE	0
2022-09-12	15:50:23	1.14576	5.09657	765.224	FALSE	0
2022-09-12	15:50:23	0.896959	3.98985	782.029	FALSE	0
2022-09-12	15:50:23	1.07182	4.76767	769.992	FALSE	0
2022-09-12	15:50:23	0.670242	2.98137	785.011	FALSE	0
2022-09-12	15:50:24	0.757824	3.37095	773.363	FALSE	0
2022-09-12	15:50:24	0.740573	3.29422	788.305	FALSE	0
2022-09-12	15:50:24	0.554771	2.46773	775.83	FALSE	0
2022-09-12	15:50:24	0.963473	4.28572	792.59	FALSE	0
2022-09-12	15:50:25	1.39879	6.2221	782.052	FALSE	0
2022-09-12	15:50:25	1.4277	6.3507	798.941	FALSE	0
2022-09-12	15:50:25	1.0563	4.69863	786.751	FALSE	0
2022-09-12	15:50:25	0.796552	3.54322	802.484	FALSE	0
2022-09-12	15:50:26	0.879555	3.91244	790.663	FALSE	0
2022-09-12	15:50:26	0.52617	2.34051	804.825	FALSE	0
2022-09-12	15:50:26	0.691565	3.07622	793.74	FALSE	0
2022-09-12	15:50:27	0.782048	3.47871	808.304	FALSE	0
2022-09-12	15:50:27	0.796247	3.54187	797.282	FALSE	0
2022-09-12	15:50:27	0.764237	3.39948	811.703	FALSE	0
2022-09-12	15:50:27	0.811972	3.61181	800.893	FALSE	0
2022-09-12	15:50:28	0.806781	3.58872	815.292	FALSE	0
2022-09-12	15:50:28	0.566374	2.51934	803.413	FALSE	0
2022-09-12	15:50:28	0.647646	2.88086	818.173	FALSE	0
2022-09-12	15:50:28	0.661082	2.94062	806.353	FALSE	0
2022-09-12	15:50:29	0.804949	3.58057	821.753	FALSE	0
2022-09-12	15:50:29	0.658842	2.93066	809.284	FALSE	0
2022-09-12	15:50:29	0.33299	1.48121	823.234	FALSE	0
2022-09-12	15:50:29	0.317876	1.41398	810.698	FALSE	0
2022-09-12	15:50:30	0.399402	1.77662	825.011	FALSE	0
2022-09-12	15:50:30	0.315942	1.40537	812.103	FALSE	0
2022-09-12	15:50:30	0.40327	1.79383	826.805	FALSE	0
2022-09-12	15:50:31	0.700522	3.11606	815.219	FALSE	0
2022-09-12	15:50:31	0.466476	2.07498	828.88	FALSE	0
2022-09-12	15:50:31	0.475127	2.11346	817.333	FALSE	0
2022-09-12	15:50:31	0.393601	1.75082	830.631	FALSE	0
2022-09-12	15:50:32	0.409987	1.8237	819.157	FALSE	0
2022-09-12	15:50:32	0.439504	1.955	832.586	FALSE	0
2022-09-12	15:50:32	0.589529	2.62234	821.779	FALSE	0
2022-09-12	15:50:32	0.701387	3.11991	835.706	FALSE	0
2022-09-12	15:50:33	0.574109	2.55375	824.333	FALSE	0
2022-09-12	15:50:33	0.36098	1.60571	837.311	FALSE	0
2022-09-12	15:50:33	0.268461	1.19417	825.527	FALSE	0
2022-09-12	15:50:33	0.290598	1.29264	838.604	FALSE	0
2022-09-12	15:50:34	0.290853	1.29377	826.821	FALSE	0
2022-09-12	15:50:34	0.278181	1.2374	839.841	FALSE	0
2022-09-12	15:50:34	0.247137	1.09931	827.92	FALSE	0
2022-09-12	15:50:35	0.245865	1.09366	840.935	FALSE	0
2022-09-12	15:50:35	0.264898	1.17832	829.098	FALSE	0
2022-09-12	15:50:35	0.369784	1.64487	842.58	FALSE	0
2022-09-12	15:50:35	0.641234	2.85234	831.951	FALSE	0
2022-09-12	15:50:36	1.02485	4.55874	847.139	FALSE	0
2022-09-12	15:50:36	1.06831	4.75206	836.703	FALSE	0
2022-09-12	15:50:36	0.784796	3.49093	850.63	FALSE	0
2022-09-12	15:50:36	0.609275	2.71018	839.413	FALSE	0
2022-09-12	15:50:37	0.427137	1.89999	852.53	FALSE	0
2022-09-12	15:50:37	0.407443	1.81239	841.225	FALSE	0
2022-09-12	15:50:37	0.379199	1.68675	854.216	FALSE	0
2022-09-12	15:50:37	0.29584	1.31596	842.541	FALSE	0
2022-09-12	15:50:38	0.284644	1.26615	855.482	FALSE	0
2022-09-12	15:50:38	0.314262	1.3979	843.939	FALSE	0
2022-09-12	15:50:38	0.158893	0.706788	856.189	FALSE	0
2022-09-12	15:50:39	0.216603	0.963493	844.903	FALSE	0
2022-09-12	15:50:39	0.27584	1.22699	857.416	FALSE	0
2022-09-12	15:50:39	0.311209	1.38432	846.287	FALSE	0
2022-09-12	15:50:39	0.319758	1.42235	858.839	FALSE	0

## Sheet: MrFitz_prong_2022912154521 (2)
Date			Total Force x time	Total Time Steps Force >3		**GoPro Fitting: 1535
2022-09-12	15:45:39	0.409428	0.409428	FALSE	0			Total force x time	383.329
2022-09-12	15:45:39	0.363117	0.772545	FALSE	0			Total Time Steps Force >3	0
2022-09-12	15:45:39	0.315738	1.08828	FALSE	0
2022-09-12	15:45:39	0.538588	1.62687	FALSE	0
2022-09-12	15:45:40	0.376145	2.00302	FALSE	0
2022-09-12	15:45:40	0.588817	2.59183	FALSE	0
2022-09-12	15:45:40	0.298537	2.89037	FALSE	0
2022-09-12	15:45:41	0.408461	3.29883	FALSE	0
2022-09-12	15:45:41	0.288308	3.58714	FALSE	0
2022-09-12	15:45:41	0.498333	4.08547	FALSE	0
2022-09-12	15:45:41	0.125764	4.21124	FALSE	0
2022-09-12	15:45:42	0.526476	4.73771	FALSE	0
2022-09-12	15:45:42	0.32154	5.05925	FALSE	0
2022-09-12	15:45:42	0.394313	5.45357	FALSE	0
2022-09-12	15:45:42	0.1593	5.61287	FALSE	0
2022-09-12	15:45:43	0.308817	5.92168	FALSE	0
2022-09-12	15:45:43	0.0228628	5.94454	FALSE	0
2022-09-12	15:45:43	-0.0506231	5.94454	FALSE	0
2022-09-12	15:45:43	-0.0154069	5.94454	FALSE	0
2022-09-12	15:45:44	0.189886	6.13443	FALSE	0
2022-09-12	15:45:44	0.371667	6.5061	FALSE	0
2022-09-12	15:45:44	0.273448	6.77955	FALSE	0
2022-09-12	15:45:45	0.35131	7.13086	FALSE	0
2022-09-12	15:45:45	0.28556	7.41642	FALSE	0
2022-09-12	15:45:45	0.350751	7.76717	FALSE	0
2022-09-12	15:45:45	-0.101412	7.76717	FALSE	0
2022-09-12	15:45:46	0.152939	7.92011	FALSE	0
2022-09-12	15:45:46	0.182914	8.10302	FALSE	0
2022-09-12	15:45:46	0.443473	8.54649	FALSE	0
2022-09-12	15:45:46	0.831514	9.37801	FALSE	0
2022-09-12	15:45:47	0.689682	10.0677	FALSE	0
2022-09-12	15:45:47	0.540522	10.6082	FALSE	0
2022-09-12	15:45:47	0.312583	10.9208	FALSE	0
2022-09-12	15:45:47	0.271514	11.1923	FALSE	0
2022-09-12	15:45:48	0.302252	11.4946	FALSE	0
2022-09-12	15:45:48	0.269936	11.7645	FALSE	0
2022-09-12	15:45:48	0.400674	12.1652	FALSE	0
2022-09-12	15:45:49	0.287545	12.4527	FALSE	0
2022-09-12	15:45:49	0.332634	12.7853	FALSE	0
2022-09-12	15:45:49	0.336552	13.1219	FALSE	0
2022-09-12	15:45:49	0.176552	13.2985	FALSE	0
2022-09-12	15:45:50	0.148715	13.4472	FALSE	0
2022-09-12	15:45:50	0.238741	13.6859	FALSE	0
2022-09-12	15:45:50	0.1964	13.8823	FALSE	0
2022-09-12	15:45:50	0.254771	14.1371	FALSE	0
2022-09-12	15:45:51	0.0935498	14.2306	FALSE	0
2022-09-12	15:45:51	0.161234	14.3919	FALSE	0
2022-09-12	15:45:51	0.24444	14.6363	FALSE	0
2022-09-12	15:45:52	0.0158908	14.6522	FALSE	0
2022-09-12	15:45:52	0.188308	14.8405	FALSE	0
2022-09-12	15:45:52	0.103982	14.9445	FALSE	0
2022-09-12	15:45:52	0.244593	15.1891	FALSE	0
2022-09-12	15:45:53	-0.000241466	15.1891	FALSE	0
2022-09-12	15:45:53	0.246679	15.4358	FALSE	0
2022-09-12	15:45:53	0.0298348	15.4656	FALSE	0
2022-09-12	15:45:53	0.177672	15.6433	FALSE	0
2022-09-12	15:45:54	-0.0769844	15.6433	FALSE	0
2022-09-12	15:45:54	0.262048	15.9053	FALSE	0
2022-09-12	15:45:54	0.208766	16.1141	FALSE	0
2022-09-12	15:45:54	0.276094	16.3902	FALSE	0
2022-09-12	15:45:55	0.145	16.5352	FALSE	0
2022-09-12	15:45:55	0.194669	16.7298	FALSE	0
2022-09-12	15:45:55	0.143932	16.8738	FALSE	0
2022-09-12	15:45:56	0.26439	17.1382	FALSE	0
2022-09-12	15:45:56	0.149224	17.2874	FALSE	0
2022-09-12	15:45:56	0.189428	17.4768	FALSE	0
2022-09-12	15:45:56	0.135942	17.6128	FALSE	0
2022-09-12	15:45:57	-0.0476715	17.6128	FALSE	0
2022-09-12	15:45:57	0.0628628	17.6756	FALSE	0
2022-09-12	15:45:57	0.356552	18.0322	FALSE	0
2022-09-12	15:45:57	0.238893	18.2711	FALSE	0
2022-09-12	15:45:58	0.504389	18.7755	FALSE	0
2022-09-12	15:45:58	-0.23276	18.7755	FALSE	0
2022-09-12	15:45:58	0.236451	19.0119	FALSE	0
2022-09-12	15:45:58	0.0162979	19.0282	FALSE	0
2022-09-12	15:45:59	0.38612	19.4143	FALSE	0
2022-09-12	15:45:59	0.275535	19.6899	FALSE	0
2022-09-12	15:45:59	0.240878	19.9307	FALSE	0
2022-09-12	15:46:00	0.180522	20.1113	FALSE	0
2022-09-12	15:46:00	-0.0888929	20.1113	FALSE	0
2022-09-12	15:46:00	0.375891	20.4871	FALSE	0
2022-09-12	15:46:00	0.0273412	20.5145	FALSE	0
2022-09-12	15:46:01	-0.0933712	20.5145	FALSE	0
2022-09-12	15:46:01	-0.24187	20.5145	FALSE	0
2022-09-12	15:46:01	-0.475865	20.5145	FALSE	0
2022-09-12	15:46:01	-0.474898	20.5145	FALSE	0
2022-09-12	15:46:02	-0.325432	20.5145	FALSE	0
2022-09-12	15:46:02	-0.311081	20.5145	FALSE	0
2022-09-12	15:46:02	-0.129351	20.5145	FALSE	0
2022-09-12	15:46:02	-0.185381	20.5145	FALSE	0
2022-09-12	15:46:03	0.127646	20.6421	FALSE	0
2022-09-12	15:46:03	0.0252547	20.6674	FALSE	0
2022-09-12	15:46:03	-0.00706081	20.6674	FALSE	0
2022-09-12	15:46:04	-0.210114	20.6674	FALSE	0
2022-09-12	15:46:04	0.00810459	20.6755	FALSE	0
2022-09-12	15:46:04	-0.0496053	20.6755	FALSE	0
2022-09-12	15:46:04	-0.0459921	20.6755	FALSE	0
2022-09-12	15:46:05	-0.178002	20.6755	FALSE	0
2022-09-12	15:46:05	-0.0369845	20.6755	FALSE	0
2022-09-12	15:46:05	0.00510202	20.6806	FALSE	0
2022-09-12	15:46:06	-0.0820226	20.6806	FALSE	0
2022-09-12	15:46:06	-0.111539	20.6806	FALSE	0
2022-09-12	15:46:06	-0.0216155	20.6806	FALSE	0
2022-09-12	15:46:06	-0.00884198	20.6806	FALSE	0
2022-09-12	15:46:06	-0.0566791	20.6806	FALSE	0
2022-09-12	15:46:07	0.175534	20.8561	FALSE	0
2022-09-12	15:46:07	0.502812	21.3589	FALSE	0
2022-09-12	15:46:07	0.255127	21.6141	FALSE	0
2022-09-12	15:46:08	0.13355	21.7476	FALSE	0
2022-09-12	15:46:08	0.317316	22.0649	FALSE	0
2022-09-12	15:46:08	0.172583	22.2375	FALSE	0
2022-09-12	15:46:08	0.294822	22.5323	FALSE	0
2022-09-12	15:46:09	0.158283	22.6906	FALSE	0
2022-09-12	15:46:09	0.193092	22.8837	FALSE	0
2022-09-12	15:46:09	0.352939	23.2367	FALSE	0
2022-09-12	15:46:09	0.356043	23.5927	FALSE	0
2022-09-12	15:46:10	0.223728	23.8164	FALSE	0
2022-09-12	15:46:10	0.335636	24.1521	FALSE	0
2022-09-12	15:46:10	0.239555	24.3916	FALSE	0
2022-09-12	15:46:10	0.541896	24.9335	FALSE	0
2022-09-12	15:46:11	0.748562	25.6821	FALSE	0
2022-09-12	15:46:11	0.383473	26.0655	FALSE	0
2022-09-12	15:46:11	0.441081	26.5066	FALSE	0
2022-09-12	15:46:12	0.412176	26.9188	FALSE	0
2022-09-12	15:46:12	0.550903	27.4697	FALSE	0
2022-09-12	15:46:12	0.426171	27.8959	FALSE	0
2022-09-12	15:46:12	0.460623	28.3565	FALSE	0
2022-09-12	15:46:13	0.44785	28.8044	FALSE	0
2022-09-12	15:46:13	0.385254	29.1896	FALSE	0
2022-09-12	15:46:13	0.477774	29.6674	FALSE	0
2022-09-12	15:46:13	0.450293	30.1177	FALSE	0
2022-09-12	15:46:14	0.451921	30.5696	FALSE	0
2022-09-12	15:46:14	0.47472	31.0443	FALSE	0
2022-09-12	15:46:14	0.378995	31.4233	FALSE	0
2022-09-12	15:46:15	0.459555	31.8829	FALSE	0
2022-09-12	15:46:15	0.433092	32.316	FALSE	0
2022-09-12	15:46:15	0.476094	32.792	FALSE	0
2022-09-12	15:46:15	0.522608	33.3147	FALSE	0
2022-09-12	15:46:16	0.338028	33.6527	FALSE	0
2022-09-12	15:46:16	0.485305	34.138	FALSE	0
2022-09-12	15:46:16	0.265356	34.4033	FALSE	0
2022-09-12	15:46:16	0.273397	34.6767	FALSE	0
2022-09-12	15:46:17	0.362608	35.0394	FALSE	0
2022-09-12	15:46:17	0.480929	35.5203	FALSE	0
2022-09-12	15:46:17	0.405356	35.9256	FALSE	0
2022-09-12	15:46:17	0.323372	36.249	FALSE	0
2022-09-12	15:46:18	0.421031	36.67	FALSE	0
2022-09-12	15:46:18	2.14205	38.8121	FALSE	0
2022-09-12	15:46:18	0.330445	39.1425	FALSE	0
2022-09-12	15:46:19	0.34958	39.4921	FALSE	0
2022-09-12	15:46:19	0.260827	39.7529	FALSE	0
2022-09-12	15:46:19	0.358537	40.1115	FALSE	0
2022-09-12	15:46:19	0.421438	40.5329	FALSE	0
2022-09-12	15:46:20	0.18897	40.7219	FALSE	0
2022-09-12	15:46:20	0.214822	40.9367	FALSE	0
2022-09-12	15:46:20	0.106629	41.0433	FALSE	0
2022-09-12	15:46:21	0.310802	41.3541	FALSE	0
2022-09-12	15:46:21	0.247392	41.6015	FALSE	0
2022-09-12	15:46:21	0.258537	41.8601	FALSE	0
2022-09-12	15:46:21	0.00108167	41.8612	FALSE	0
2022-09-12	15:46:21	-0.189198	41.8612	FALSE	0
2022-09-12	15:46:22	-0.215712	41.8612	FALSE	0
2022-09-12	15:46:22	-0.328893	41.8612	FALSE	0
2022-09-12	15:46:22	-0.628994	41.8612	FALSE	0
2022-09-12	15:46:23	-0.602226	41.8612	FALSE	0
2022-09-12	15:46:23	-0.604567	41.8612	FALSE	0
2022-09-12	15:46:23	-0.409758	41.8612	FALSE	0
2022-09-12	15:46:23	-0.469707	41.8612	FALSE	0
2022-09-12	15:46:24	-0.428944	41.8612	FALSE	0
2022-09-12	15:46:24	-0.450368	41.8612	FALSE	0
2022-09-12	15:46:24	-0.438053	41.8612	FALSE	0
2022-09-12	15:46:24	-0.241565	41.8612	FALSE	0
2022-09-12	15:46:25	-0.299427	41.8612	FALSE	0
2022-09-12	15:46:25	-0.30243	41.8612	FALSE	0
2022-09-12	15:46:25	-0.249554	41.8612	FALSE	0
2022-09-12	15:46:25	-0.221615	41.8612	FALSE	0
2022-09-12	15:46:26	-0.362938	41.8612	FALSE	0
2022-09-12	15:46:26	-0.363142	41.8612	FALSE	0
2022-09-12	15:46:26	-0.476679	41.8612	FALSE	0
2022-09-12	15:46:27	-0.307824	41.8612	FALSE	0
2022-09-12	15:46:27	-0.161056	41.8612	FALSE	0
2022-09-12	15:46:27	-0.253371	41.8612	FALSE	0
2022-09-12	15:46:27	-0.507519	41.8612	FALSE	0
2022-09-12	15:46:28	-0.653523	41.8612	FALSE	0
2022-09-12	15:46:28	-0.328435	41.8612	FALSE	0
2022-09-12	15:46:28	-0.247671	41.8612	FALSE	0
2022-09-12	15:46:28	-0.174592	41.8612	FALSE	0
2022-09-12	15:46:29	0.189173	42.0503	FALSE	0
2022-09-12	15:46:29	0.404746	42.4551	FALSE	0
2022-09-12	15:46:29	0.663575	43.1186	FALSE	0
2022-09-12	15:46:29	0.452074	43.5707	FALSE	0
2022-09-12	15:46:30	0.492074	44.0628	FALSE	0
2022-09-12	15:46:30	1.23431	45.2971	FALSE	0
2022-09-12	15:46:30	0.490954	45.7881	FALSE	0
2022-09-12	15:46:31	0.618435	46.4065	FALSE	0
2022-09-12	15:46:31	0.51355	46.92	FALSE	0
2022-09-12	15:46:31	0.213753	47.1338	FALSE	0
2022-09-12	15:46:31	0.410191	47.544	FALSE	0
2022-09-12	15:46:32	0.23299	47.777	FALSE	0
2022-09-12	15:46:32	0.35014	48.1271	FALSE	0
2022-09-12	15:46:32	0.315687	48.4428	FALSE	0
2022-09-12	15:46:32	0.384746	48.8275	FALSE	0
2022-09-12	15:46:33	0.326323	49.1539	FALSE	0
2022-09-12	15:46:33	0.401183	49.5551	FALSE	0
2022-09-12	15:46:33	0.46612	50.0212	FALSE	0
2022-09-12	15:46:33	0.540013	50.5612	FALSE	0
2022-09-12	15:46:34	0.44271	51.0039	FALSE	0
2022-09-12	15:46:34	0.471616	51.4755	FALSE	0
2022-09-12	15:46:34	0.376756	51.8523	FALSE	0
2022-09-12	15:46:35	0.537366	52.3896	FALSE	0
2022-09-12	15:46:35	0.375585	52.7652	FALSE	0
2022-09-12	15:46:35	0.600725	53.3659	FALSE	0
2022-09-12	15:46:35	0.462354	53.8283	FALSE	0
2022-09-12	15:46:36	0.84841	54.6767	FALSE	0
2022-09-12	15:46:36	0.925916	55.6026	FALSE	0
2022-09-12	15:46:36	1.53823	57.1409	FALSE	0
2022-09-12	15:46:36	0.714466	57.8553	FALSE	0
2022-09-12	15:46:37	0.693448	58.5488	FALSE	0
2022-09-12	15:46:37	0.482659	59.0314	FALSE	0
2022-09-12	15:46:37	0.535484	59.5669	FALSE	0
2022-09-12	15:46:38	0.472074	60.039	FALSE	0
2022-09-12	15:46:38	0.421438	60.4604	FALSE	0
2022-09-12	15:46:38	0.597825	61.0582	FALSE	0
2022-09-12	15:46:38	0.505611	61.5639	FALSE	0
2022-09-12	15:46:39	0.518028	62.0819	FALSE	0
2022-09-12	15:46:39	0.6107	62.6926	FALSE	0
2022-09-12	15:46:39	0.66388	63.3565	FALSE	0
2022-09-12	15:46:39	0.53986	63.8963	FALSE	0
2022-09-12	15:46:40	0.377265	64.2736	FALSE	0
2022-09-12	15:46:40	0.480267	64.7539	FALSE	0
2022-09-12	15:46:40	0.483219	65.2371	FALSE	0
2022-09-12	15:46:40	0.46729	65.7044	FALSE	0
2022-09-12	15:46:41	0.617366	66.3217	FALSE	0
2022-09-12	15:46:41	0.448868	66.7706	FALSE	0
2022-09-12	15:46:41	0.466425	67.237	FALSE	0
2022-09-12	15:46:42	0.456349	67.6934	FALSE	0
2022-09-12	15:46:42	0.482761	68.1761	FALSE	0
2022-09-12	15:46:42	0.518842	68.695	FALSE	0
2022-09-12	15:46:42	0.487799	69.1828	FALSE	0
2022-09-12	15:46:43	0.444542	69.6273	FALSE	0
2022-09-12	15:46:43	0.449784	70.0771	FALSE	0
2022-09-12	15:46:43	0.473957	70.5511	FALSE	0
2022-09-12	15:46:43	0.473702	71.0248	FALSE	0
2022-09-12	15:46:44	0.477519	71.5023	FALSE	0
2022-09-12	15:46:44	0.475738	71.978	FALSE	0
2022-09-12	15:46:44	0.478639	72.4567	FALSE	0
2022-09-12	15:46:44	0.476451	72.9331	FALSE	0
2022-09-12	15:46:45	0.483728	73.4168	FALSE	0
2022-09-12	15:46:45	0.540114	73.957	FALSE	0
2022-09-12	15:46:45	0.857417	74.8144	FALSE	0
2022-09-12	15:46:46	1.14999	75.9644	FALSE	0
2022-09-12	15:46:46	0.85299	76.8174	FALSE	0
2022-09-12	15:46:46	0.512176	77.3295	FALSE	0
2022-09-12	15:46:46	0.479402	77.8089	FALSE	0
2022-09-12	15:46:47	0.523524	78.3325	FALSE	0
2022-09-12	15:46:47	0.568613	78.9011	FALSE	0
2022-09-12	15:46:47	0.751056	79.6521	FALSE	0
2022-09-12	15:46:47	0.618537	80.2707	FALSE	0
2022-09-12	15:46:48	0.710191	80.9808	FALSE	0
2022-09-12	15:46:48	1.51447	82.4953	FALSE	0
2022-09-12	15:46:48	1.24917	83.7445	FALSE	0
2022-09-12	15:46:48	0.647341	84.3918	FALSE	0
2022-09-12	15:46:49	0.4393	84.8311	FALSE	0
2022-09-12	15:46:49	0.422354	85.2535	FALSE	0
2022-09-12	15:46:49	0.559097	85.8126	FALSE	0
2022-09-12	15:46:50	0.421234	86.2338	FALSE	0
2022-09-12	15:46:50	0.668053	86.9019	FALSE	0
2022-09-12	15:46:50	0.483015	87.3849	FALSE	0
2022-09-12	15:46:50	0.501896	87.8868	FALSE	0
2022-09-12	15:46:51	0.525662	88.4124	FALSE	0
2022-09-12	15:46:51	0.376094	88.7885	FALSE	0
2022-09-12	15:46:51	0.434466	89.223	FALSE	0
2022-09-12	15:46:51	0.471921	89.6949	FALSE	0
2022-09-12	15:46:52	0.461947	90.1569	FALSE	0
2022-09-12	15:46:52	0.455331	90.6122	FALSE	0
2022-09-12	15:46:52	0.446221	91.0584	FALSE	0
2022-09-12	15:46:52	0.444542	91.503	FALSE	0
2022-09-12	15:46:53	0.449631	91.9526	FALSE	0
2022-09-12	15:46:53	0.439402	92.392	FALSE	0
2022-09-12	15:46:53	0.472684	92.8647	FALSE	0
2022-09-12	15:46:54	0.454059	93.3187	FALSE	0
2022-09-12	15:46:54	0.455942	93.7747	FALSE	0
2022-09-12	15:46:54	0.44042	94.2151	FALSE	0
2022-09-12	15:46:54	0.453906	94.669	FALSE	0
2022-09-12	15:46:55	0.448664	95.1177	FALSE	0
2022-09-12	15:46:55	0.460878	95.5785	FALSE	0
2022-09-12	15:46:55	0.467952	96.0465	FALSE	0
2022-09-12	15:46:55	0.449122	96.4956	FALSE	0
2022-09-12	15:46:56	0.704135	97.1998	FALSE	0
2022-09-12	15:46:56	0.359402	97.5592	FALSE	0
2022-09-12	15:46:56	-0.0815646	97.5592	FALSE	0
2022-09-12	15:46:57	-0.202124	97.5592	FALSE	0
2022-09-12	15:46:57	-0.200089	97.5592	FALSE	0
2022-09-12	15:46:57	-0.487264	97.5592	FALSE	0
2022-09-12	15:46:57	-0.760292	97.5592	FALSE	0
2022-09-12	15:46:58	-0.596577	97.5592	FALSE	0
2022-09-12	15:46:58	-0.636831	97.5592	FALSE	0
2022-09-12	15:46:58	-0.758663	97.5592	FALSE	0
2022-09-12	15:46:58	-0.832455	97.5592	FALSE	0
2022-09-12	15:46:59	-0.864567	97.5592	FALSE	0
2022-09-12	15:46:59	-0.713218	97.5592	FALSE	0
2022-09-12	15:46:59	-0.655203	97.5592	FALSE	0
2022-09-12	15:46:59	-0.475814	97.5592	FALSE	0
2022-09-12	15:47:00	-0.305992	97.5592	FALSE	0
2022-09-12	15:47:00	-0.343498	97.5592	FALSE	0
2022-09-12	15:47:00	-0.356984	97.5592	FALSE	0
2022-09-12	15:47:01	-0.287773	97.5592	FALSE	0
2022-09-12	15:47:01	-0.272862	97.5592	FALSE	0
2022-09-12	15:47:01	-0.13617	97.5592	FALSE	0
2022-09-12	15:47:01	0.0722267	97.6314	FALSE	0
2022-09-12	15:47:02	0.120115	97.7515	FALSE	0
2022-09-12	15:47:02	-0.0309794	97.7515	FALSE	0
2022-09-12	15:47:02	0.0511071	97.8026	FALSE	0
2022-09-12	15:47:02	0.19584	97.9984	FALSE	0
2022-09-12	15:47:03	0.0870867	98.0855	FALSE	0
2022-09-12	15:47:03	0.338333	98.4239	FALSE	0
2022-09-12	15:47:03	0.128512	98.5524	FALSE	0
2022-09-12	15:47:03	0.31126	98.8636	FALSE	0
2022-09-12	15:47:04	0.167697	99.0313	FALSE	0
2022-09-12	15:47:04	0.031158	99.0625	FALSE	0
2022-09-12	15:47:04	2.05828	101.121	FALSE	0
2022-09-12	15:47:05	0.895178	102.016	FALSE	0
2022-09-12	15:47:05	0.378486	102.394	FALSE	0
2022-09-12	15:47:05	1.322	103.716	FALSE	0
2022-09-12	15:47:05	1.64317	105.36	FALSE	0
2022-09-12	15:47:06	0.894924	106.255	FALSE	0
2022-09-12	15:47:06	1.04291	107.297	FALSE	0
2022-09-12	15:47:06	1.2165	108.514	FALSE	0
2022-09-12	15:47:06	0.758181	109.272	FALSE	0
2022-09-12	15:47:07	0.648766	109.921	FALSE	0
2022-09-12	15:47:07	0.709631	110.631	FALSE	0
2022-09-12	15:47:07	0.493244	111.124	FALSE	0
2022-09-12	15:47:07	0.292481	111.416	FALSE	0
2022-09-12	15:47:08	-0.153575	111.416	FALSE	0
2022-09-12	15:47:08	-0.408587	111.416	FALSE	0
2022-09-12	15:47:08	-0.577748	111.416	FALSE	0
2022-09-12	15:47:09	-0.655508	111.416	FALSE	0
2022-09-12	15:47:09	-0.807773	111.416	FALSE	0
2022-09-12	15:47:09	-0.818104	111.416	FALSE	0
2022-09-12	15:47:09	-1.07612	111.416	FALSE	0
2022-09-12	15:47:10	-0.901717	111.416	FALSE	0
2022-09-12	15:47:10	-1.00747	111.416	FALSE	0
2022-09-12	15:47:10	-0.780139	111.416	FALSE	0
2022-09-12	15:47:10	-0.536475	111.416	FALSE	0
2022-09-12	15:47:11	-0.436119	111.416	FALSE	0
2022-09-12	15:47:11	-0.0389692	111.416	FALSE	0
2022-09-12	15:47:11	0.0359926	111.452	FALSE	0
2022-09-12	15:47:11	0.04042	111.493	FALSE	0
2022-09-12	15:47:12	0.0106491	111.503	FALSE	0
2022-09-12	15:47:12	0.177621	111.681	FALSE	0
2022-09-12	15:47:12	0.253244	111.934	FALSE	0
2022-09-12	15:47:13	0.381082	112.315	FALSE	0
2022-09-12	15:47:13	0.407392	112.723	FALSE	0
2022-09-12	15:47:13	0.147087	112.87	FALSE	0
2022-09-12	15:47:13	0.454262	113.324	FALSE	0
2022-09-12	15:47:14	-0.0150506	113.324	FALSE	0
2022-09-12	15:47:14	0.121387	113.445	FALSE	0
2022-09-12	15:47:14	0.0847967	113.53	FALSE	0
2022-09-12	15:47:14	-0.0605468	113.53	FALSE	0
2022-09-12	15:47:15	-0.092557	113.53	FALSE	0
2022-09-12	15:47:15	0.319606	113.85	FALSE	0
2022-09-12	15:47:15	0.0593005	113.909	FALSE	0
2022-09-12	15:47:15	0.101896	114.011	FALSE	0
2022-09-12	15:47:16	-0.0215646	114.011	FALSE	0
2022-09-12	15:47:16	0.198893	114.21	FALSE	0
2022-09-12	15:47:16	0.18556	114.395	FALSE	0
2022-09-12	15:47:17	0.152837	114.548	FALSE	0
2022-09-12	15:47:17	0.164593	114.713	FALSE	0
2022-09-12	15:47:17	0.826221	115.539	FALSE	0
2022-09-12	15:47:17	0.418486	115.958	FALSE	0
2022-09-12	15:47:18	0.478282	116.436	FALSE	0
2022-09-12	15:47:18	0.285611	116.721	FALSE	0
2022-09-12	15:47:18	0.548613	117.27	FALSE	0
2022-09-12	15:47:18	0.211361	117.481	FALSE	0
2022-09-12	15:47:19	0.518639	118	FALSE	0
2022-09-12	15:47:19	0.14154	118.142	FALSE	0
2022-09-12	15:47:19	0.471463	118.613	FALSE	0
2022-09-12	15:47:20	0.143677	118.757	FALSE	0
2022-09-12	15:47:20	0.465458	119.222	FALSE	0
2022-09-12	15:47:20	0.0984862	119.321	FALSE	0
2022-09-12	15:47:20	0.443372	119.764	FALSE	0
2022-09-12	15:47:21	0.151463	119.916	FALSE	0
2022-09-12	15:47:21	0.39584	120.311	FALSE	0
2022-09-12	15:47:21	0.070191	120.382	FALSE	0
2022-09-12	15:47:21	-0.295508	120.382	FALSE	0
2022-09-12	15:47:22	-0.55902	120.382	FALSE	0
2022-09-12	15:47:22	-0.86192	120.382	FALSE	0
2022-09-12	15:47:22	-0.6979	120.382	FALSE	0
2022-09-12	15:47:22	-0.383244	120.382	FALSE	0
2022-09-12	15:47:23	0.240573	120.622	FALSE	0
2022-09-12	15:47:23	0.11243	120.735	FALSE	0
2022-09-12	15:47:23	0.397621	121.132	FALSE	0
2022-09-12	15:47:24	0.715789	121.848	FALSE	0
2022-09-12	15:47:24	1.34449	123.192	FALSE	0
2022-09-12	15:47:24	0.311005	123.503	FALSE	0
2022-09-12	15:47:24	0.321845	123.825	FALSE	0
2022-09-12	15:47:25	0.178741	124.004	FALSE	0
2022-09-12	15:47:25	0.459402	124.463	FALSE	0
2022-09-12	15:47:25	0.258079	124.722	FALSE	0
2022-09-12	15:47:25	0.369071	125.091	FALSE	0
2022-09-12	15:47:26	0.52673	125.617	FALSE	0
2022-09-12	15:47:26	0.47813	126.095	FALSE	0
2022-09-12	15:47:26	0.516552	126.612	FALSE	0
2022-09-12	15:47:26	0.280216	126.892	FALSE	0
2022-09-12	15:47:27	0.440624	127.333	FALSE	0
2022-09-12	15:47:27	0.253397	127.586	FALSE	0
2022-09-12	15:47:27	0.414109	128	FALSE	0
2022-09-12	15:47:28	0.258486	128.259	FALSE	0
2022-09-12	15:47:28	0.391412	128.65	FALSE	0
2022-09-12	15:47:28	-1.02268	128.65	FALSE	0
2022-09-12	15:47:28	-0.763498	128.65	FALSE	0
2022-09-12	15:47:29	-0.826093	128.65	FALSE	0
2022-09-12	15:47:29	-0.613829	128.65	FALSE	0
2022-09-12	15:47:29	-0.767061	128.65	FALSE	0
2022-09-12	15:47:29	-0.456323	128.65	FALSE	0
2022-09-12	15:47:30	-0.761259	128.65	FALSE	0
2022-09-12	15:47:30	-0.447875	128.65	FALSE	0
2022-09-12	15:47:30	-0.700343	128.65	FALSE	0
2022-09-12	15:47:30	-0.435458	128.65	FALSE	0
2022-09-12	15:47:31	-0.817188	128.65	FALSE	0
2022-09-12	15:47:31	-0.465585	128.65	FALSE	0
2022-09-12	15:47:31	-0.265788	128.65	FALSE	0
2022-09-12	15:47:32	0.291768	128.942	FALSE	0
2022-09-12	15:47:32	0.345051	129.287	FALSE	0
2022-09-12	15:47:32	0.0812343	129.368	FALSE	0
2022-09-12	15:47:32	-0.347519	129.368	FALSE	0
2022-09-12	15:47:33	-0.530216	129.368	FALSE	0
2022-09-12	15:47:33	-0.593931	129.368	FALSE	0
2022-09-12	15:47:33	-0.541513	129.368	FALSE	0
2022-09-12	15:47:33	-0.631793	129.368	FALSE	0
2022-09-12	15:47:34	-0.416679	129.368	FALSE	0
2022-09-12	15:47:34	-0.561005	129.368	FALSE	0
2022-09-12	15:47:34	-0.417137	129.368	FALSE	0
2022-09-12	15:47:34	-0.46757	129.368	FALSE	0
2022-09-12	15:47:35	-0.276984	129.368	FALSE	0
2022-09-12	15:47:35	-0.441208	129.368	FALSE	0
2022-09-12	15:47:35	-0.327366	129.368	FALSE	0
2022-09-12	15:47:36	-0.132404	129.368	FALSE	0
2022-09-12	15:47:36	0.0931936	129.462	FALSE	0
2022-09-12	15:47:36	0.258181	129.72	FALSE	0
2022-09-12	15:47:36	0.112379	129.832	FALSE	0
2022-09-12	15:47:37	0.0159926	129.848	FALSE	0
2022-09-12	15:47:37	0.132328	129.98	FALSE	0
2022-09-12	15:47:37	0.137468	130.118	FALSE	0
2022-09-12	15:47:37	0.0430664	130.161	FALSE	0
2022-09-12	15:47:38	0.0224048	130.183	FALSE	0
2022-09-12	15:47:38	0.0847458	130.268	FALSE	0
2022-09-12	15:47:38	0.0351783	130.303	FALSE	0
2022-09-12	15:47:38	-0.0640074	130.303	FALSE	0
2022-09-12	15:47:39	-0.00502519	130.303	FALSE	0
2022-09-12	15:47:39	0.0946694	130.398	FALSE	0
2022-09-12	15:47:39	-0.0211066	130.398	FALSE	0
2022-09-12	15:47:40	-0.0733203	130.398	FALSE	0
2022-09-12	15:47:40	-0.0806994	130.398	FALSE	0
2022-09-12	15:47:40	0.173397	130.571	FALSE	0
2022-09-12	15:47:40	0.244797	130.816	FALSE	0
2022-09-12	15:47:41	0.164237	130.98	FALSE	0
2022-09-12	15:47:41	-0.0470099	130.98	FALSE	0
2022-09-12	15:47:41	0.12785	131.108	FALSE	0
2022-09-12	15:47:41	0.0922776	131.2	FALSE	0
2022-09-12	15:47:42	0.198384	131.399	FALSE	0
2022-09-12	15:47:42	0.372888	131.772	FALSE	0
2022-09-12	15:47:42	0.665967	132.438	FALSE	0
2022-09-12	15:47:43	0.531158	132.969	FALSE	0
2022-09-12	15:47:43	0.475534	133.444	FALSE	0
2022-09-12	15:47:43	0.401947	133.846	FALSE	0
2022-09-12	15:47:43	0.394517	134.241	FALSE	0
2022-09-12	15:47:44	0.211921	134.453	FALSE	0
2022-09-12	15:47:44	0.371361	134.824	FALSE	0
2022-09-12	15:47:44	0.271819	135.096	FALSE	0
2022-09-12	15:47:44	0.352736	135.449	FALSE	0
2022-09-12	15:47:45	0.168206	135.617	FALSE	0
2022-09-12	15:47:45	0.25187	135.869	FALSE	0
2022-09-12	15:47:45	1.58373	137.453	FALSE	0
2022-09-12	15:47:45	0.716959	138.169	FALSE	0
2022-09-12	15:47:46	0.565356	138.735	FALSE	0
2022-09-12	15:47:46	0.267596	139.002	FALSE	0
2022-09-12	15:47:46	0.703321	139.706	FALSE	0
2022-09-12	15:47:47	0.378893	140.085	FALSE	0
2022-09-12	15:47:47	0.488868	140.574	FALSE	0
2022-09-12	15:47:47	-0.270012	140.574	FALSE	0
2022-09-12	15:47:47	-0.72762	140.574	FALSE	0
2022-09-12	15:47:48	0.425051	140.999	FALSE	0
2022-09-12	15:47:48	0.294059	141.293	FALSE	0
2022-09-12	15:47:48	0.500929	141.794	FALSE	0
2022-09-12	15:47:48	0.539962	142.334	FALSE	0
2022-09-12	15:47:49	1.01452	143.348	FALSE	0
2022-09-12	15:47:49	0.592939	143.941	FALSE	0
2022-09-12	15:47:49	0.698079	144.639	FALSE	0
2022-09-12	15:47:49	0.61126	145.25	FALSE	0
2022-09-12	15:47:50	0.512074	145.762	FALSE	0
2022-09-12	15:47:50	0.399809	146.162	FALSE	0
2022-09-12	15:47:50	0.544389	146.707	FALSE	0
2022-09-12	15:47:51	0.537061	147.244	FALSE	0
2022-09-12	15:47:51	0.481285	147.725	FALSE	0
2022-09-12	15:47:51	0.48612	148.211	FALSE	0
2022-09-12	15:47:51	0.560216	148.771	FALSE	0
2022-09-12	15:47:52	0.45243	149.224	FALSE	0
2022-09-12	15:47:52	0.632175	149.856	FALSE	0
2022-09-12	15:47:52	0.542099	150.398	FALSE	0
2022-09-12	15:47:52	0.474924	150.873	FALSE	0
2022-09-12	15:47:53	0.472074	151.345	FALSE	0
2022-09-12	15:47:53	0.589478	151.934	FALSE	0
2022-09-12	15:47:53	-0.159631	151.934	FALSE	0
2022-09-12	15:47:53	0.210751	152.145	FALSE	0
2022-09-12	15:47:54	0.223779	152.369	FALSE	0
2022-09-12	15:47:54	0.341947	152.711	FALSE	0
2022-09-12	15:47:54	0.0906999	152.802	FALSE	0
2022-09-12	15:47:55	0.188054	152.99	FALSE	0
2022-09-12	15:47:55	-0.829656	152.99	FALSE	0
2022-09-12	15:47:55	-0.322989	152.99	FALSE	0
2022-09-12	15:47:55	0.363473	153.353	FALSE	0
2022-09-12	15:47:56	0.0635244	153.417	FALSE	0
2022-09-12	15:47:56	-0.0150506	153.417	FALSE	0
2022-09-12	15:47:56	-0.066501	153.417	FALSE	0
2022-09-12	15:47:56	-0.122328	153.417	FALSE	0
2022-09-12	15:47:57	0.223931	153.641	FALSE	0
2022-09-12	15:47:57	0.347188	153.988	FALSE	0
2022-09-12	15:47:57	0.669936	154.658	FALSE	0
2022-09-12	15:47:57	0.203473	154.861	FALSE	0
2022-09-12	15:47:58	0.336654	155.198	FALSE	0
2022-09-12	15:47:58	0.334568	155.532	FALSE	0
2022-09-12	15:47:58	0.197875	155.73	FALSE	0
2022-09-12	15:47:59	0.184797	155.915	FALSE	0
2022-09-12	15:47:59	0.444084	156.359	FALSE	0
2022-09-12	15:47:59	0.116654	156.476	FALSE	0
2022-09-12	15:47:59	-0.418816	156.476	FALSE	0
2022-09-12	15:48:00	-0.293473	156.476	FALSE	0
2022-09-12	15:48:00	0.148664	156.625	FALSE	0
2022-09-12	15:48:00	-0.0557631	156.625	FALSE	0
2022-09-12	15:48:00	-0.184771	156.625	FALSE	0
2022-09-12	15:48:01	-0.431844	156.625	FALSE	0
2022-09-12	15:48:01	-0.519427	156.625	FALSE	0
2022-09-12	15:48:01	-0.37958	156.625	FALSE	0
2022-09-12	15:48:02	-0.634847	156.625	FALSE	0
2022-09-12	15:48:02	-0.714745	156.625	FALSE	0
2022-09-12	15:48:02	-0.856831	156.625	FALSE	0
2022-09-12	15:48:02	-1.10879	156.625	FALSE	0
2022-09-12	15:48:03	-1.16726	156.625	FALSE	0
2022-09-12	15:48:03	-1.34355	156.625	FALSE	0
2022-09-12	15:48:03	-1.28553	156.625	FALSE	0
2022-09-12	15:48:03	-1.32279	156.625	FALSE	0
2022-09-12	15:48:04	-1.37871	156.625	FALSE	0
2022-09-12	15:48:04	-1.51408	156.625	FALSE	0
2022-09-12	15:48:04	-1.57332	156.625	FALSE	0
2022-09-12	15:48:04	-1.63179	156.625	FALSE	0
2022-09-12	15:48:05	-1.5748	156.625	FALSE	0
2022-09-12	15:48:05	-1.71892	156.625	FALSE	0
2022-09-12	15:48:05	-1.59149	156.625	FALSE	0
2022-09-12	15:48:06	-1.67373	156.625	FALSE	0
2022-09-12	15:48:06	-1.55169	156.625	FALSE	0
2022-09-12	15:48:06	-1.62446	156.625	FALSE	0
2022-09-12	15:48:06	-1.39892	156.625	FALSE	0
2022-09-12	15:48:07	-1.46558	156.625	FALSE	0
2022-09-12	15:48:07	-1.41266	156.625	FALSE	0
2022-09-12	15:48:07	-1.42447	156.625	FALSE	0
2022-09-12	15:48:07	-1.26859	156.625	FALSE	0
2022-09-12	15:48:08	-1.22457	156.625	FALSE	0
2022-09-12	15:48:08	-1.16884	156.625	FALSE	0
2022-09-12	15:48:08	-1.30324	156.625	FALSE	0
2022-09-12	15:48:08	-1.12284	156.625	FALSE	0
2022-09-12	15:48:09	-1.15571	156.625	FALSE	0
2022-09-12	15:48:09	-1.03256	156.625	FALSE	0
2022-09-12	15:48:09	-0.927926	156.625	FALSE	0
2022-09-12	15:48:10	-0.787976	156.625	FALSE	0
2022-09-12	15:48:10	-0.61846	156.625	FALSE	0
2022-09-12	15:48:10	-0.580598	156.625	FALSE	0
2022-09-12	15:48:10	-0.614185	156.625	FALSE	0
2022-09-12	15:48:11	-0.605178	156.625	FALSE	0
2022-09-12	15:48:11	-0.438155	156.625	FALSE	0
2022-09-12	15:48:11	-0.51047	156.625	FALSE	0
2022-09-12	15:48:11	-0.45729	156.625	FALSE	0
2022-09-12	15:48:12	0.119606	156.744	FALSE	0
2022-09-12	15:48:12	0.246425	156.991	FALSE	0
2022-09-12	15:48:12	0.297468	157.288	FALSE	0
2022-09-12	15:48:12	0.186272	157.474	FALSE	0
2022-09-12	15:48:13	0.312125	157.786	FALSE	0
2022-09-12	15:48:13	0.314211	158.101	FALSE	0
2022-09-12	15:48:13	0.374211	158.475	FALSE	0
2022-09-12	15:48:14	-0.00161552	158.475	FALSE	0
2022-09-12	15:48:14	0.363321	158.838	FALSE	0
2022-09-12	15:48:14	0.179555	159.018	FALSE	0
2022-09-12	15:48:14	0.28215	159.3	FALSE	0
2022-09-12	15:48:15	0.169122	159.469	FALSE	0
2022-09-12	15:48:15	0.308359	159.777	FALSE	0
2022-09-12	15:48:15	0.30215	160.079	FALSE	0
2022-09-12	15:48:15	0.378741	160.458	FALSE	0
2022-09-12	15:48:16	0.189784	160.648	FALSE	0
2022-09-12	15:48:16	0.546476	161.194	FALSE	0
2022-09-12	15:48:16	0.265458	161.46	FALSE	0
2022-09-12	15:48:16	0.467545	161.927	FALSE	0
2022-09-12	15:48:17	0.317366	162.245	FALSE	0
2022-09-12	15:48:17	0.102761	162.348	FALSE	0
2022-09-12	15:48:17	-0.303447	162.348	FALSE	0
2022-09-12	15:48:18	-0.114593	162.348	FALSE	0
2022-09-12	15:48:18	-0.186297	162.348	FALSE	0
2022-09-12	15:48:18	-0.205381	162.348	FALSE	0
2022-09-12	15:48:18	-0.102379	162.348	FALSE	0
2022-09-12	15:48:19	-0.160394	162.348	FALSE	0
2022-09-12	15:48:19	-0.0900633	162.348	FALSE	0
2022-09-12	15:48:19	-0.204262	162.348	FALSE	0
2022-09-12	15:48:19	0.0422522	162.39	FALSE	0
2022-09-12	15:48:20	-0.314592	162.39	FALSE	0
2022-09-12	15:48:20	-0.235559	162.39	FALSE	0
2022-09-12	15:48:20	-0.138155	162.39	FALSE	0
2022-09-12	15:48:21	-0.327417	162.39	FALSE	0
2022-09-12	15:48:21	-0.32075	162.39	FALSE	0
2022-09-12	15:48:21	-0.313575	162.39	FALSE	0
2022-09-12	15:48:21	-0.347671	162.39	FALSE	0
2022-09-12	15:48:22	-0.467722	162.39	FALSE	0
2022-09-12	15:48:22	-0.414134	162.39	FALSE	0
2022-09-12	15:48:22	-0.237392	162.39	FALSE	0
2022-09-12	15:48:22	-0.642022	162.39	FALSE	0
2022-09-12	15:48:23	-0.532608	162.39	FALSE	0
2022-09-12	15:48:23	-0.497849	162.39	FALSE	0
2022-09-12	15:48:23	-0.527213	162.39	FALSE	0
2022-09-12	15:48:23	-0.486603	162.39	FALSE	0
2022-09-12	15:48:24	-0.562073	162.39	FALSE	0
2022-09-12	15:48:24	-0.425687	162.39	FALSE	0
2022-09-12	15:48:24	-0.536933	162.39	FALSE	0
2022-09-12	15:48:25	-0.504363	162.39	FALSE	0
2022-09-12	15:48:25	-0.505432	162.39	FALSE	0
2022-09-12	15:48:25	-0.587569	162.39	FALSE	0
2022-09-12	15:48:25	-0.618002	162.39	FALSE	0
2022-09-12	15:48:26	-0.557595	162.39	FALSE	0
2022-09-12	15:48:26	-0.461921	162.39	FALSE	0
2022-09-12	15:48:26	-0.648587	162.39	FALSE	0
2022-09-12	15:48:26	-0.590572	162.39	FALSE	0
2022-09-12	15:48:27	-0.438969	162.39	FALSE	0
2022-09-12	15:48:27	-0.433117	162.39	FALSE	0
2022-09-12	15:48:27	0.0187407	162.409	FALSE	0
2022-09-12	15:48:27	0.220013	162.629	FALSE	0
2022-09-12	15:48:28	0.350394	162.979	FALSE	0
2022-09-12	15:48:28	0.866934	163.846	FALSE	0
2022-09-12	15:48:28	0.447443	164.293	FALSE	0
2022-09-12	15:48:29	0.475534	164.769	FALSE	0
2022-09-12	15:48:29	0.477875	165.247	FALSE	0
2022-09-12	15:48:29	0.347239	165.594	FALSE	0
2022-09-12	15:48:29	0.347545	165.942	FALSE	0
2022-09-12	15:48:30	0.216501	166.158	FALSE	0
2022-09-12	15:48:30	0.469377	166.627	FALSE	0
2022-09-12	15:48:30	0.267494	166.895	FALSE	0
2022-09-12	15:48:30	0.30958	167.205	FALSE	0
2022-09-12	15:48:31	0.339809	167.544	FALSE	0
2022-09-12	15:48:31	0.260064	167.804	FALSE	0
2022-09-12	15:48:31	0.45986	168.264	FALSE	0
2022-09-12	15:48:31	0.23126	168.496	FALSE	0
2022-09-12	15:48:32	-0.24131	168.496	FALSE	0
2022-09-12	15:48:32	0.412685	168.908	FALSE	0
2022-09-12	15:48:32	0.337824	169.246	FALSE	0
2022-09-12	15:48:33	0.544287	169.79	FALSE	0
2022-09-12	15:48:33	0.217214	170.008	FALSE	0
2022-09-12	15:48:33	0.383168	170.391	FALSE	0
2022-09-12	15:48:33	0.454211	170.845	FALSE	0
2022-09-12	15:48:34	0.64327	171.488	FALSE	0
2022-09-12	15:48:34	0.440878	171.929	FALSE	0
2022-09-12	15:48:34	0.548155	172.477	FALSE	0
2022-09-12	15:48:34	0.757468	173.235	FALSE	0
2022-09-12	15:48:35	0.356298	173.591	FALSE	0
2022-09-12	15:48:35	0.528512	174.119	FALSE	0
2022-09-12	15:48:35	0.405153	174.525	FALSE	0
2022-09-12	15:48:35	0.440878	174.966	FALSE	0
2022-09-12	15:48:36	0.499809	175.465	FALSE	0
2022-09-12	15:48:36	0.458232	175.924	FALSE	0
2022-09-12	15:48:36	0.494313	176.418	FALSE	0
2022-09-12	15:48:37	0.415789	176.834	FALSE	0
2022-09-12	15:48:37	0.419199	177.253	FALSE	0
2022-09-12	15:48:37	0.429987	177.683	FALSE	0
2022-09-12	15:48:37	0.426883	178.11	FALSE	0
2022-09-12	15:48:38	0.433143	178.543	FALSE	0
2022-09-12	15:48:38	0.434364	178.977	FALSE	0
2022-09-12	15:48:38	0.474924	179.452	FALSE	0
2022-09-12	15:48:38	0.534466	179.987	FALSE	0
2022-09-12	15:48:39	0.564084	180.551	FALSE	0
2022-09-12	15:48:39	0.403015	180.954	FALSE	0
2022-09-12	15:48:39	0.394364	181.348	FALSE	0
2022-09-12	15:48:40	0.391769	181.74	FALSE	0
2022-09-12	15:48:40	0.425356	182.165	FALSE	0
2022-09-12	15:48:40	0.442812	182.608	FALSE	0
2022-09-12	15:48:40	0.443575	183.052	FALSE	0
2022-09-12	15:48:41	0.453702	183.505	FALSE	0
2022-09-12	15:48:41	0.406781	183.912	FALSE	0
2022-09-12	15:48:41	0.457977	184.37	FALSE	0
2022-09-12	15:48:41	0.451819	184.822	FALSE	0
2022-09-12	15:48:42	0.414109	185.236	FALSE	0
2022-09-12	15:48:42	0.415178	185.651	FALSE	0
2022-09-12	15:48:42	0.523219	186.174	FALSE	0
2022-09-12	15:48:42	0.472939	186.647	FALSE	0
2022-09-12	15:48:43	0.406679	187.054	FALSE	0
2022-09-12	15:48:43	0.299097	187.353	FALSE	0
2022-09-12	15:48:43	0.484237	187.837	FALSE	0
2022-09-12	15:48:44	0.357468	188.195	FALSE	0
2022-09-12	15:48:44	0.404644	188.599	FALSE	0
2022-09-12	15:48:44	0.308766	188.908	FALSE	0
2022-09-12	15:48:44	0.429835	189.338	FALSE	0
2022-09-12	15:48:45	0.415331	189.753	FALSE	0
2022-09-12	15:48:45	0.359097	190.112	FALSE	0
2022-09-12	15:48:45	0.370242	190.483	FALSE	0
2022-09-12	15:48:45	0.357061	190.84	FALSE	0
2022-09-12	15:48:46	0.39813	191.238	FALSE	0
2022-09-12	15:48:46	0.380216	191.618	FALSE	0
2022-09-12	15:48:46	0.309427	191.928	FALSE	0
2022-09-12	15:48:46	0.527646	192.455	FALSE	0
2022-09-12	15:48:47	0.273906	192.729	FALSE	0
2022-09-12	15:48:47	0.34154	193.071	FALSE	0
2022-09-12	15:48:47	0.130598	193.201	FALSE	0
2022-09-12	15:48:48	0.528359	193.73	FALSE	0
2022-09-12	15:48:48	0.365763	194.095	FALSE	0
2022-09-12	15:48:48	0.351921	194.447	FALSE	0
2022-09-12	15:48:48	0.531718	194.979	FALSE	0
2022-09-12	15:48:49	0.143372	195.122	FALSE	0
2022-09-12	15:48:49	0.301641	195.424	FALSE	0
2022-09-12	15:48:49	0.261947	195.686	FALSE	0
2022-09-12	15:48:49	0.19528	195.881	FALSE	0
2022-09-12	15:48:50	0.228766	196.11	FALSE	0
2022-09-12	15:48:50	0.23355	196.344	FALSE	0
2022-09-12	15:48:50	0.41187	196.755	FALSE	0
2022-09-12	15:48:50	0.43813	197.194	FALSE	0
2022-09-12	15:48:51	0.502506	197.696	FALSE	0
2022-09-12	15:48:51	0.0379264	197.734	FALSE	0
2022-09-12	15:48:51	0.182049	197.916	FALSE	0
2022-09-12	15:48:52	0.400522	198.317	FALSE	0
2022-09-12	15:48:52	0.542303	198.859	FALSE	0
2022-09-12	15:48:52	0.329224	199.188	FALSE	0
2022-09-12	15:48:52	0.355636	199.544	FALSE	0
2022-09-12	15:48:53	0.450649	199.994	FALSE	0
2022-09-12	15:48:53	0.318384	200.313	FALSE	0
2022-09-12	15:48:53	0.360369	200.673	FALSE	0
2022-09-12	15:48:53	0.324949	200.998	FALSE	0
2022-09-12	15:48:54	0.413295	201.411	FALSE	0
2022-09-12	15:48:54	0.714669	202.126	FALSE	0
2022-09-12	15:48:54	0.610802	202.737	FALSE	0
2022-09-12	15:48:54	0.660573	203.397	FALSE	0
2022-09-12	15:48:55	0.503779	203.901	FALSE	0
2022-09-12	15:48:55	0.688308	204.59	FALSE	0
2022-09-12	15:48:55	0.987494	205.577	FALSE	0
2022-09-12	15:48:56	1.0624	206.639	FALSE	0
2022-09-12	15:48:56	0.900114	207.54	FALSE	0
2022-09-12	15:48:56	0.937315	208.477	FALSE	0
2022-09-12	15:48:56	1.06846	209.545	FALSE	0
2022-09-12	15:48:57	1.1909	210.736	FALSE	0
2022-09-12	15:48:57	1.11319	211.849	FALSE	0
2022-09-12	15:48:57	1.11009	212.959	FALSE	0
2022-09-12	15:48:57	1.14184	214.101	FALSE	0
2022-09-12	15:48:58	0.974822	215.076	FALSE	0
2022-09-12	15:48:58	0.774211	215.85	FALSE	0
2022-09-12	15:48:58	0.565153	216.416	FALSE	0
2022-09-12	15:48:59	0.329529	216.745	FALSE	0
2022-09-12	15:48:59	1.08123	217.826	FALSE	0
2022-09-12	15:48:59	0.57131	218.398	FALSE	0
2022-09-12	15:48:59	0.0586898	218.456	FALSE	0
2022-09-12	15:49:00	0.108104	218.564	FALSE	0
2022-09-12	15:49:00	0.119911	218.684	FALSE	0
2022-09-12	15:49:00	0.00530559	218.69	FALSE	0
2022-09-12	15:49:00	-0.176933	218.69	FALSE	0
2022-09-12	15:49:01	-0.1293	218.69	FALSE	0
2022-09-12	15:49:01	0.0564506	218.746	FALSE	0
2022-09-12	15:49:01	0.0843895	218.83	FALSE	0
2022-09-12	15:49:01	0.020013	218.85	FALSE	0
2022-09-12	15:49:02	0.168308	219.019	FALSE	0
2022-09-12	15:49:02	0.152634	219.171	FALSE	0
2022-09-12	15:49:02	0.245051	219.416	FALSE	0
2022-09-12	15:49:03	0.697061	220.113	FALSE	0
2022-09-12	15:49:03	0.239555	220.353	FALSE	0
2022-09-12	15:49:03	0.320471	220.674	FALSE	0
2022-09-12	15:49:03	0.182507	220.856	FALSE	0
2022-09-12	15:49:04	0.0665778	220.923	FALSE	0
2022-09-12	15:49:04	-0.0331168	220.923	FALSE	0
2022-09-12	15:49:04	-0.12187	220.923	FALSE	0
2022-09-12	15:49:04	-0.00512696	220.923	FALSE	0
2022-09-12	15:49:05	-0.0862974	220.923	FALSE	0
2022-09-12	15:49:05	0.00316817	220.926	FALSE	0
2022-09-12	15:49:05	0.28388	221.21	FALSE	0
2022-09-12	15:49:05	0.234059	221.444	FALSE	0
2022-09-12	15:49:06	0.0310562	221.475	FALSE	0
2022-09-12	15:49:06	0.10327	221.578	FALSE	0
2022-09-12	15:49:06	0.0792496	221.657	FALSE	0
2022-09-12	15:49:07	0.095331	221.753	FALSE	0
2022-09-12	15:49:07	0.268715	222.021	FALSE	0
2022-09-12	15:49:07	0.0444404	222.066	FALSE	0
2022-09-12	15:49:07	0.273499	222.339	FALSE	0
2022-09-12	15:49:08	0.149886	222.489	FALSE	0
2022-09-12	15:49:08	0.169377	222.659	FALSE	0
2022-09-12	15:49:08	0.357417	223.016	FALSE	0
2022-09-12	15:49:08	0.408817	223.425	FALSE	0
2022-09-12	15:49:09	0.359504	223.784	FALSE	0
2022-09-12	15:49:09	0.425305	224.21	FALSE	0
2022-09-12	15:49:09	0.903372	225.113	FALSE	0
2022-09-12	15:49:09	0.452023	225.565	FALSE	0
2022-09-12	15:49:10	0.859758	226.425	FALSE	0
2022-09-12	15:49:10	1.34179	227.767	FALSE	0
2022-09-12	15:49:10	0.522964	228.289	FALSE	0
2022-09-12	15:49:11	0.592124	228.882	FALSE	0
2022-09-12	15:49:11	0.60556	229.487	FALSE	0
2022-09-12	15:49:11	0.386018	229.873	FALSE	0
2022-09-12	15:49:11	0.555585	230.429	FALSE	0
2022-09-12	15:49:12	0.882761	231.312	FALSE	0
2022-09-12	15:49:12	0.562608	231.874	FALSE	0
2022-09-12	15:49:12	0.374771	232.249	FALSE	0
2022-09-12	15:49:12	1.00861	233.258	FALSE	0
2022-09-12	15:49:13	0.365967	233.623	FALSE	0
2022-09-12	15:49:13	0.822201	234.446	FALSE	0
2022-09-12	15:49:13	0.534008	234.98	FALSE	0
2022-09-12	15:49:13	0.480064	235.46	FALSE	0
2022-09-12	15:49:14	0.732226	236.192	FALSE	0
2022-09-12	15:49:14	0.401285	236.593	FALSE	0
2022-09-12	15:49:14	0.410394	237.004	FALSE	0
2022-09-12	15:49:15	0.600216	237.604	FALSE	0
2022-09-12	15:49:15	0.614923	238.219	FALSE	0
2022-09-12	15:49:15	0.712227	238.931	FALSE	0
2022-09-12	15:49:15	0.998944	239.93	FALSE	0
2022-09-12	15:49:16	0.468868	240.399	FALSE	0
2022-09-12	15:49:16	1.18017	241.579	FALSE	0
2022-09-12	15:49:16	1.14256	242.722	FALSE	0
2022-09-12	15:49:16	1.24057	243.962	FALSE	0
2022-09-12	15:49:17	0.576959	244.539	FALSE	0
2022-09-12	15:49:17	0.401183	244.94	FALSE	0
2022-09-12	15:49:17	0.767493	245.708	FALSE	0
2022-09-12	15:49:17	0.539097	246.247	FALSE	0
2022-09-12	15:49:18	0.345	246.592	FALSE	0
2022-09-12	15:49:18	0.471514	247.063	FALSE	0
2022-09-12	15:49:18	0.68327	247.747	FALSE	0
2022-09-12	15:49:19	0.297723	248.044	FALSE	0
2022-09-12	15:49:19	0.541387	248.586	FALSE	0
2022-09-12	15:49:19	0.526425	249.112	FALSE	0
2022-09-12	15:49:19	0.506577	249.619	FALSE	0
2022-09-12	15:49:20	0.360827	249.98	FALSE	0
2022-09-12	15:49:20	0.530598	250.51	FALSE	0
2022-09-12	15:49:20	0.775891	251.286	FALSE	0
2022-09-12	15:49:20	1.09961	252.386	FALSE	0
2022-09-12	15:49:21	0.400369	252.786	FALSE	0
2022-09-12	15:49:21	0.361234	253.147	FALSE	0
2022-09-12	15:49:21	0.298995	253.446	FALSE	0
2022-09-12	15:49:22	0.30388	253.75	FALSE	0
2022-09-12	15:49:22	0.439809	254.19	FALSE	0
2022-09-12	15:49:22	0.605458	254.795	FALSE	0
2022-09-12	15:49:22	0.415585	255.211	FALSE	0
2022-09-12	15:49:23	0.587239	255.798	FALSE	0
2022-09-12	15:49:23	0.44612	256.244	FALSE	0
2022-09-12	15:49:23	0.355433	256.6	FALSE	0
2022-09-12	15:49:23	0.195636	256.795	FALSE	0
2022-09-12	15:49:24	0.442557	257.238	FALSE	0
2022-09-12	15:49:24	0.382914	257.621	FALSE	0
2022-09-12	15:49:24	0.332685	257.954	FALSE	0
2022-09-12	15:49:24	0.419249	258.373	FALSE	0
2022-09-12	15:49:25	0.273041	258.646	FALSE	0
2022-09-12	15:49:25	0.2307	258.877	FALSE	0
2022-09-12	15:49:25	0.328359	259.205	FALSE	0
2022-09-12	15:49:26	0.266018	259.471	FALSE	0
2022-09-12	15:49:26	0.229478	259.7	FALSE	0
2022-09-12	15:49:26	0.179758	259.88	FALSE	0
2022-09-12	15:49:26	0.405458	260.286	FALSE	0
2022-09-12	15:49:27	0.260929	260.547	FALSE	0
2022-09-12	15:49:27	0.454466	261.001	FALSE	0
2022-09-12	15:49:27	0.46841	261.469	FALSE	0
2022-09-12	15:49:27	0.231311	261.701	FALSE	0
2022-09-12	15:49:28	0.337824	262.039	FALSE	0
2022-09-12	15:49:28	0.327443	262.366	FALSE	0
2022-09-12	15:49:28	0.46215	262.828	FALSE	0
2022-09-12	15:49:28	2.03106	264.859	FALSE	0
2022-09-12	15:49:29	1.60576	266.465	FALSE	0
2022-09-12	15:49:29	0.867137	267.332	FALSE	0
2022-09-12	15:49:29	0.28841	267.621	FALSE	0
2022-09-12	15:49:30	0.714211	268.335	FALSE	0
2022-09-12	15:49:30	0.723219	269.058	FALSE	0
2022-09-12	15:49:30	1.75172	270.81	FALSE	0
2022-09-12	15:49:30	0.715025	271.525	FALSE	0
2022-09-12	15:49:31	0.728512	272.253	FALSE	0
2022-09-12	15:49:31	0.716043	272.969	FALSE	0
2022-09-12	15:49:31	0.263575	273.233	FALSE	0
2022-09-12	15:49:31	0.336705	273.57	FALSE	0
2022-09-12	15:49:32	0.427188	273.997	FALSE	0
2022-09-12	15:49:32	0.358639	274.355	FALSE	0
2022-09-12	15:49:32	0.331667	274.687	FALSE	0
2022-09-12	15:49:32	0.301438	274.989	FALSE	0
2022-09-12	15:49:33	0.48673	275.475	FALSE	0
2022-09-12	15:49:33	0.198333	275.674	FALSE	0
2022-09-12	15:49:33	0.0676974	275.741	FALSE	0
2022-09-12	15:49:34	0.129733	275.871	FALSE	0
2022-09-12	15:49:34	0.123473	275.994	FALSE	0
2022-09-12	15:49:34	0.12729	276.122	FALSE	0
2022-09-12	15:49:34	0.0396058	276.161	FALSE	0
2022-09-12	15:49:35	0.132786	276.294	FALSE	0
2022-09-12	15:49:35	0.0825575	276.377	FALSE	0
2022-09-12	15:49:35	0.17528	276.552	FALSE	0
2022-09-12	15:49:35	0.0341096	276.586	FALSE	0
2022-09-12	15:49:36	0.309886	276.896	FALSE	0
2022-09-12	15:49:36	0.181947	277.078	FALSE	0
2022-09-12	15:49:36	0.0817941	277.16	FALSE	0
2022-09-12	15:49:36	0.188003	277.348	FALSE	0
2022-09-12	15:49:37	0.00393154	277.352	FALSE	0
2022-09-12	15:49:37	0.211005	277.563	FALSE	0
2022-09-12	15:49:37	0.0616414	277.624	FALSE	0
2022-09-12	15:49:38	0.11472	277.739	FALSE	0
2022-09-12	15:49:38	0.0919722	277.831	FALSE	0
2022-09-12	15:49:38	0.0778756	277.909	FALSE	0
2022-09-12	15:49:38	0.569937	278.479	FALSE	0
2022-09-12	15:49:39	0.455127	278.934	FALSE	0
2022-09-12	15:49:39	0.638791	279.573	FALSE	0
2022-09-12	15:49:39	0.298486	279.871	FALSE	0
2022-09-12	15:49:39	0.793295	280.665	FALSE	0
2022-09-12	15:49:40	0.656857	281.321	FALSE	0
2022-09-12	15:49:40	0.697824	282.019	FALSE	0
2022-09-12	15:49:40	0.43299	282.452	FALSE	0
2022-09-12	15:49:41	0.483168	282.935	FALSE	0
2022-09-12	15:49:41	0.280471	283.216	FALSE	0
2022-09-12	15:49:41	0.384135	283.6	FALSE	0
2022-09-12	15:49:41	0.754364	284.354	FALSE	0
2022-09-12	15:49:42	0.842303	285.197	FALSE	0
2022-09-12	15:49:42	0.578384	285.775	FALSE	0
2022-09-12	15:49:42	0.973295	286.748	FALSE	0
2022-09-12	15:49:42	0.318435	287.067	FALSE	0
2022-09-12	15:49:43	0.523524	287.59	FALSE	0
2022-09-12	15:49:43	0.410852	288.001	FALSE	0
2022-09-12	15:49:43	0.753855	288.755	FALSE	0
2022-09-12	15:49:43	0.362303	289.117	FALSE	0
2022-09-12	15:49:44	0.359148	289.476	FALSE	0
2022-09-12	15:49:44	0.694415	290.171	FALSE	0
2022-09-12	15:49:44	0.652481	290.823	FALSE	0
2022-09-12	15:49:45	0.562964	291.386	FALSE	0
2022-09-12	15:49:45	0.374466	291.761	FALSE	0
2022-09-12	15:49:45	0.299606	292.06	FALSE	0
2022-09-12	15:49:45	0.226425	292.287	FALSE	0
2022-09-12	15:49:46	-0.324872	292.287	FALSE	0
2022-09-12	15:49:46	-0.746348	292.287	FALSE	0
2022-09-12	15:49:46	-0.858154	292.287	FALSE	0
2022-09-12	15:49:46	-0.89734	292.287	FALSE	0
2022-09-12	15:49:47	-0.914439	292.287	FALSE	0
2022-09-12	15:49:47	-0.902531	292.287	FALSE	0
2022-09-12	15:49:47	-0.948485	292.287	FALSE	0
2022-09-12	15:49:47	-0.873524	292.287	FALSE	0
2022-09-12	15:49:48	-0.843549	292.287	FALSE	0
2022-09-12	15:49:48	-0.883447	292.287	FALSE	0
2022-09-12	15:49:48	-0.834389	292.287	FALSE	0
2022-09-12	15:49:49	-0.475814	292.287	FALSE	0
2022-09-12	15:49:49	-0.345687	292.287	FALSE	0
2022-09-12	15:49:49	-0.0299616	292.287	FALSE	0
2022-09-12	15:49:49	0.168512	292.455	FALSE	0
2022-09-12	15:49:50	0.197316	292.653	FALSE	0
2022-09-12	15:49:50	0.191565	292.844	FALSE	0
2022-09-12	15:49:50	0.222507	293.067	FALSE	0
2022-09-12	15:49:50	0.247443	293.314	FALSE	0
2022-09-12	15:49:51	0.253601	293.568	FALSE	0
2022-09-12	15:49:51	0.261336	293.829	FALSE	0
2022-09-12	15:49:51	0.275585	294.105	FALSE	0
2022-09-12	15:49:51	0.269173	294.374	FALSE	0
2022-09-12	15:49:52	0.278944	294.653	FALSE	0
2022-09-12	15:49:52	0.276451	294.929	FALSE	0
2022-09-12	15:49:52	0.274771	295.204	FALSE	0
2022-09-12	15:49:53	0.275941	295.48	FALSE	0
2022-09-12	15:49:53	0.274313	295.754	FALSE	0
2022-09-12	15:49:53	0.27187	296.026	FALSE	0
2022-09-12	15:49:53	0.276298	296.302	FALSE	0
2022-09-12	15:49:54	0.283626	296.586	FALSE	0
2022-09-12	15:49:54	0.286985	296.873	FALSE	0
2022-09-12	15:49:54	0.275382	297.148	FALSE	0
2022-09-12	15:49:54	0.336807	297.485	FALSE	0
2022-09-12	15:49:55	0.263931	297.749	FALSE	0
2022-09-12	15:49:55	0.248817	297.998	FALSE	0
2022-09-12	15:49:55	0.202761	298.201	FALSE	0
2022-09-12	15:49:55	0.122405	298.323	FALSE	0
2022-09-12	15:49:56	0.140267	298.463	FALSE	0
2022-09-12	15:49:56	0.0774684	298.541	FALSE	0
2022-09-12	15:49:56	0.0956364	298.636	FALSE	0
2022-09-12	15:49:57	0.0865269	298.723	FALSE	0
2022-09-12	15:49:57	0.0859671	298.809	FALSE	0
2022-09-12	15:49:57	0.0861198	298.895	FALSE	0
2022-09-12	15:49:57	0.0963488	298.991	FALSE	0
2022-09-12	15:49:58	0.102354	299.094	FALSE	0
2022-09-12	15:49:58	0.049275	299.143	FALSE	0
2022-09-12	15:49:58	-0.169402	299.143	FALSE	0
2022-09-12	15:49:58	0.119962	299.263	FALSE	0
2022-09-12	15:49:59	0.197926	299.461	FALSE	0
2022-09-12	15:49:59	0.199097	299.66	FALSE	0
2022-09-12	15:49:59	0.329733	299.99	FALSE	0
2022-09-12	15:49:59	0.365	300.355	FALSE	0
2022-09-12	15:50:00	0.72556	301.08	FALSE	0
2022-09-12	15:50:00	1.1507	302.231	FALSE	0
2022-09-12	15:50:00	0.846985	303.078	FALSE	0
2022-09-12	15:50:01	1.06368	304.142	FALSE	0
2022-09-12	15:50:01	1.15986	305.302	FALSE	0
2022-09-12	15:50:01	0.609987	305.912	FALSE	0
2022-09-12	15:50:01	1.29869	307.21	FALSE	0
2022-09-12	15:50:02	0.343881	307.554	FALSE	0
2022-09-12	15:50:02	0.548359	308.103	FALSE	0
2022-09-12	15:50:02	0.432176	308.535	FALSE	0
2022-09-12	15:50:02	0.490344	309.025	FALSE	0
2022-09-12	15:50:03	0.371819	309.397	FALSE	0
2022-09-12	15:50:03	0.402252	309.799	FALSE	0
2022-09-12	15:50:03	0.319606	310.119	FALSE	0
2022-09-12	15:50:04	0.456807	310.576	FALSE	0
2022-09-12	15:50:04	0.508308	311.084	FALSE	0
2022-09-12	15:50:04	0.481845	311.566	FALSE	0
2022-09-12	15:50:04	0.748868	312.315	FALSE	0
2022-09-12	15:50:05	0.601336	312.916	FALSE	0
2022-09-12	15:50:05	1.16154	314.077	FALSE	0
2022-09-12	15:50:05	0.544186	314.622	FALSE	0
2022-09-12	15:50:05	0.483066	315.105	FALSE	0
2022-09-12	15:50:06	0.453499	315.558	FALSE	0
2022-09-12	15:50:06	0.344695	315.903	FALSE	0
2022-09-12	15:50:06	0.367494	316.27	FALSE	0
2022-09-12	15:50:06	0.470395	316.741	FALSE	0
2022-09-12	15:50:07	0.442456	317.183	FALSE	0
2022-09-12	15:50:07	0.188715	317.372	FALSE	0
2022-09-12	15:50:07	0.597417	317.969	FALSE	0
2022-09-12	15:50:08	0.426629	318.396	FALSE	0
2022-09-12	15:50:08	0.428613	318.825	FALSE	0
2022-09-12	15:50:08	0.520929	319.346	FALSE	0
2022-09-12	15:50:08	0.395738	319.741	FALSE	0
2022-09-12	15:50:09	0.389479	320.131	FALSE	0
2022-09-12	15:50:09	0.335789	320.467	FALSE	0
2022-09-12	15:50:09	0.297723	320.764	FALSE	0
2022-09-12	15:50:09	0.258283	321.023	FALSE	0
2022-09-12	15:50:10	0.427036	321.45	FALSE	0
2022-09-12	15:50:10	0.529478	321.979	FALSE	0
2022-09-12	15:50:10	0.978995	322.958	FALSE	0
2022-09-12	15:50:10	1.39899	324.357	FALSE	0
2022-09-12	15:50:11	1.00592	325.363	FALSE	0
2022-09-12	15:50:11	0.744491	326.107	FALSE	0
2022-09-12	15:50:11	1.08205	327.189	FALSE	0
2022-09-12	15:50:12	0.733244	327.923	FALSE	0
2022-09-12	15:50:12	0.588766	328.511	FALSE	0
2022-09-12	15:50:12	0.483422	328.995	FALSE	0
2022-09-12	15:50:12	0.634008	329.629	FALSE	0
2022-09-12	15:50:13	0.593651	330.223	FALSE	0
2022-09-12	15:50:13	0.715382	330.938	FALSE	0
2022-09-12	15:50:13	0.585916	331.524	FALSE	0
2022-09-12	15:50:13	0.493753	332.018	FALSE	0
2022-09-12	15:50:14	0.505153	332.523	FALSE	0
2022-09-12	15:50:14	0.28785	332.811	FALSE	0
2022-09-12	15:50:14	0.293804	333.104	FALSE	0
2022-09-12	15:50:14	0.465153	333.57	FALSE	0
2022-09-12	15:50:15	0.326527	333.896	FALSE	0
2022-09-12	15:50:15	0.117061	334.013	FALSE	0
2022-09-12	15:50:15	0.105356	334.119	FALSE	0
2022-09-12	15:50:16	0.106171	334.225	FALSE	0
2022-09-12	15:50:16	0.0908017	334.315	FALSE	0
2022-09-12	15:50:16	0.252074	334.568	FALSE	0
2022-09-12	15:50:16	0.418842	334.986	FALSE	0
2022-09-12	15:50:17	0.507748	335.494	FALSE	0
2022-09-12	15:50:17	0.352685	335.847	FALSE	0
2022-09-12	15:50:17	0.422456	336.269	FALSE	0
2022-09-12	15:50:17	0.399657	336.669	FALSE	0
2022-09-12	15:50:18	0.379351	337.048	FALSE	0
2022-09-12	15:50:18	0.566832	337.615	FALSE	0
2022-09-12	15:50:18	0.259809	337.875	FALSE	0
2022-09-12	15:50:18	0.43126	338.306	FALSE	0
2022-09-12	15:50:19	0.518435	338.825	FALSE	0
2022-09-12	15:50:19	0.379402	339.204	FALSE	0
2022-09-12	15:50:19	0.635992	339.84	FALSE	0
2022-09-12	15:50:20	0.469326	340.309	FALSE	0
2022-09-12	15:50:20	0.773092	341.082	FALSE	0
2022-09-12	15:50:20	0.480165	341.563	FALSE	0
2022-09-12	15:50:20	0.482608	342.045	FALSE	0
2022-09-12	15:50:21	0.589173	342.634	FALSE	0
2022-09-12	15:50:21	0.370903	343.005	FALSE	0
2022-09-12	15:50:21	0.454517	343.46	FALSE	0
2022-09-12	15:50:21	0.417468	343.877	FALSE	0
2022-09-12	15:50:22	0.517264	344.395	FALSE	0
2022-09-12	15:50:22	0.459555	344.854	FALSE	0
2022-09-12	15:50:22	0.941183	345.795	FALSE	0
2022-09-12	15:50:23	1.14576	346.941	FALSE	0
2022-09-12	15:50:23	0.896959	347.838	FALSE	0
2022-09-12	15:50:23	1.07182	348.91	FALSE	0
2022-09-12	15:50:23	0.670242	349.58	FALSE	0
2022-09-12	15:50:24	0.757824	350.338	FALSE	0
2022-09-12	15:50:24	0.740573	351.078	FALSE	0
2022-09-12	15:50:24	0.554771	351.633	FALSE	0
2022-09-12	15:50:24	0.963473	352.597	FALSE	0
2022-09-12	15:50:25	1.39879	353.996	FALSE	0
2022-09-12	15:50:25	1.4277	355.423	FALSE	0
2022-09-12	15:50:25	1.0563	356.48	FALSE	0
2022-09-12	15:50:25	0.796552	357.276	FALSE	0
2022-09-12	15:50:26	0.879555	358.156	FALSE	0
2022-09-12	15:50:26	0.52617	358.682	FALSE	0
2022-09-12	15:50:26	0.691565	359.373	FALSE	0
2022-09-12	15:50:27	0.782048	360.155	FALSE	0
2022-09-12	15:50:27	0.796247	360.952	FALSE	0
2022-09-12	15:50:27	0.764237	361.716	FALSE	0
2022-09-12	15:50:27	0.811972	362.528	FALSE	0
2022-09-12	15:50:28	0.806781	363.335	FALSE	0
2022-09-12	15:50:28	0.566374	363.901	FALSE	0
2022-09-12	15:50:28	0.647646	364.549	FALSE	0
2022-09-12	15:50:28	0.661082	365.21	FALSE	0
2022-09-12	15:50:29	0.804949	366.015	FALSE	0
2022-09-12	15:50:29	0.658842	366.674	FALSE	0
2022-09-12	15:50:29	0.33299	367.007	FALSE	0
2022-09-12	15:50:29	0.317876	367.324	FALSE	0
2022-09-12	15:50:30	0.399402	367.724	FALSE	0
2022-09-12	15:50:30	0.315942	368.04	FALSE	0
2022-09-12	15:50:30	0.40327	368.443	FALSE	0
2022-09-12	15:50:31	0.700522	369.144	FALSE	0
2022-09-12	15:50:31	0.466476	369.61	FALSE	0
2022-09-12	15:50:31	0.475127	370.085	FALSE	0
2022-09-12	15:50:31	0.393601	370.479	FALSE	0
2022-09-12	15:50:32	0.409987	370.889	FALSE	0
2022-09-12	15:50:32	0.439504	371.328	FALSE	0
2022-09-12	15:50:32	0.589529	371.918	FALSE	0
2022-09-12	15:50:32	0.701387	372.619	FALSE	0
2022-09-12	15:50:33	0.574109	373.193	FALSE	0
2022-09-12	15:50:33	0.36098	373.554	FALSE	0
2022-09-12	15:50:33	0.268461	373.823	FALSE	0
2022-09-12	15:50:33	0.290598	374.113	FALSE	0
2022-09-12	15:50:34	0.290853	374.404	FALSE	0
2022-09-12	15:50:34	0.278181	374.682	FALSE	0
2022-09-12	15:50:34	0.247137	374.929	FALSE	0
2022-09-12	15:50:35	0.245865	375.175	FALSE	0
2022-09-12	15:50:35	0.264898	375.44	FALSE	0
2022-09-12	15:50:35	0.369784	375.81	FALSE	0
2022-09-12	15:50:35	0.641234	376.451	FALSE	0
2022-09-12	15:50:36	1.02485	377.476	FALSE	0
2022-09-12	15:50:36	1.06831	378.544	FALSE	0
2022-09-12	15:50:36	0.784796	379.329	FALSE	0
2022-09-12	15:50:36	0.609275	379.938	FALSE	0
2022-09-12	15:50:37	0.427137	380.366	FALSE	0
2022-09-12	15:50:37	0.407443	380.773	FALSE	0
2022-09-12	15:50:37	0.379199	381.152	FALSE	0
2022-09-12	15:50:37	0.29584	381.448	FALSE	0
2022-09-12	15:50:38	0.284644	381.733	FALSE	0
2022-09-12	15:50:38	0.314262	382.047	FALSE	0
2022-09-12	15:50:38	0.158893	382.206	FALSE	0
2022-09-12	15:50:39	0.216603	382.422	FALSE	0
2022-09-12	15:50:39	0.27584	382.698	FALSE	0
2022-09-12	15:50:39	0.311209	383.01	FALSE	0
2022-09-12	15:50:39	0.319758	383.329	FALSE	0

## Sheet: MrFitz_prong_2022912154521
						**GoPro Fitting: 1535
2022-09-12	15:45:22	0.34729
2022-09-12	15:45:22	0.342557
2022-09-12	15:45:22	0.378232
2022-09-12	15:45:22	0.371361
2022-09-12	15:45:23	0.376552
2022-09-12	15:45:23	0.399911
2022-09-12	15:45:23	0.39701
2022-09-12	15:45:23	0.368817
2022-09-12	15:45:24	0.37355
2022-09-12	15:45:24	0.424389
2022-09-12	15:45:24	0.416959
2022-09-12	15:45:24	0.409275
2022-09-12	15:45:25	0.418283
2022-09-12	15:45:25	0.340776
2022-09-12	15:45:25	0.391667
2022-09-12	15:45:26	0.498791
2022-09-12	15:45:26	0.221285
2022-09-12	15:45:26	-0.131895
2022-09-12	15:45:26	0.303015
2022-09-12	15:45:27	0.590496
2022-09-12	15:45:27	0.62042
2022-09-12	15:45:27	0.191361
2022-09-12	15:45:27	0.289071
2022-09-12	15:45:28	0.627646
2022-09-12	15:45:28	4.08591
2022-09-12	15:45:28	1.86047
2022-09-12	15:45:28	0.634873
2022-09-12	15:45:29	1.69294
2022-09-12	15:45:29	1.09192
2022-09-12	15:45:29	0.273092
2022-09-12	15:45:30	0.389071
2022-09-12	15:45:30	0.34673
2022-09-12	15:45:30	0.486934
2022-09-12	15:45:30	0.639351
2022-09-12	15:45:31	0.288919
2022-09-12	15:45:31	0.28612
2022-09-12	15:45:31	0.446527
2022-09-12	15:45:31	0.268104
2022-09-12	15:45:32	0.0410307
2022-09-12	15:45:32	-0.262023
2022-09-12	15:45:32	-0.704669
2022-09-12	15:45:33	-1.21047
2022-09-12	15:45:33	-0.874592
2022-09-12	15:45:33	-0.741259
2022-09-12	15:45:33	-0.661157
2022-09-12	15:45:34	-0.398307
2022-09-12	15:45:34	-0.128028
2022-09-12	15:45:34	0.0296313
2022-09-12	15:45:34	0.203524
2022-09-12	15:45:35	0.326425
2022-09-12	15:45:35	0.338486
2022-09-12	15:45:35	0.27813
2022-09-12	15:45:35	0.339097
2022-09-12	15:45:36	0.220216
2022-09-12	15:45:36	0.491819
2022-09-12	15:45:36	0.124797
2022-09-12	15:45:37	0.477316
2022-09-12	15:45:37	0.200064
2022-09-12	15:45:37	0.505916
2022-09-12	15:45:37	0.247443
2022-09-12	15:45:38	0.582863
2022-09-12	15:45:38	0.215229
2022-09-12	15:45:38	0.532379
2022-09-12	15:45:38	0.372277
2022-09-12	15:45:39	0.409428
2022-09-12	15:45:39	0.363117
2022-09-12	15:45:39	0.315738
2022-09-12	15:45:39	0.538588
2022-09-12	15:45:40	0.376145
2022-09-12	15:45:40	0.588817
2022-09-12	15:45:40	0.298537
2022-09-12	15:45:41	0.408461
2022-09-12	15:45:41	0.288308
2022-09-12	15:45:41	0.498333
2022-09-12	15:45:41	0.125764
2022-09-12	15:45:42	0.526476
2022-09-12	15:45:42	0.32154
2022-09-12	15:45:42	0.394313
2022-09-12	15:45:42	0.1593
2022-09-12	15:45:43	0.308817
2022-09-12	15:45:43	0.0228628
2022-09-12	15:45:43	-0.0506231
2022-09-12	15:45:43	-0.0154069
2022-09-12	15:45:44	0.189886
2022-09-12	15:45:44	0.371667
2022-09-12	15:45:44	0.273448
2022-09-12	15:45:45	0.35131
2022-09-12	15:45:45	0.28556
2022-09-12	15:45:45	0.350751
2022-09-12	15:45:45	-0.101412
2022-09-12	15:45:46	0.152939
2022-09-12	15:45:46	0.182914
2022-09-12	15:45:46	0.443473
2022-09-12	15:45:46	0.831514
2022-09-12	15:45:47	0.689682
2022-09-12	15:45:47	0.540522
2022-09-12	15:45:47	0.312583
2022-09-12	15:45:47	0.271514
2022-09-12	15:45:48	0.302252
2022-09-12	15:45:48	0.269936
2022-09-12	15:45:48	0.400674
2022-09-12	15:45:49	0.287545
2022-09-12	15:45:49	0.332634
2022-09-12	15:45:49	0.336552
2022-09-12	15:45:49	0.176552
2022-09-12	15:45:50	0.148715
2022-09-12	15:45:50	0.238741
2022-09-12	15:45:50	0.1964
2022-09-12	15:45:50	0.254771
2022-09-12	15:45:51	0.0935498
2022-09-12	15:45:51	0.161234
2022-09-12	15:45:51	0.24444
2022-09-12	15:45:52	0.0158908
2022-09-12	15:45:52	0.188308
2022-09-12	15:45:52	0.103982
2022-09-12	15:45:52	0.244593
2022-09-12	15:45:53	-0.000241466
2022-09-12	15:45:53	0.246679
2022-09-12	15:45:53	0.0298348
2022-09-12	15:45:53	0.177672
2022-09-12	15:45:54	-0.0769844
2022-09-12	15:45:54	0.262048
2022-09-12	15:45:54	0.208766
2022-09-12	15:45:54	0.276094
2022-09-12	15:45:55	0.145
2022-09-12	15:45:55	0.194669
2022-09-12	15:45:55	0.143932
2022-09-12	15:45:56	0.26439
2022-09-12	15:45:56	0.149224
2022-09-12	15:45:56	0.189428
2022-09-12	15:45:56	0.135942
2022-09-12	15:45:57	-0.0476715
2022-09-12	15:45:57	0.0628628
2022-09-12	15:45:57	0.356552
2022-09-12	15:45:57	0.238893
2022-09-12	15:45:58	0.504389
2022-09-12	15:45:58	-0.23276
2022-09-12	15:45:58	0.236451
2022-09-12	15:45:58	0.0162979
2022-09-12	15:45:59	0.38612
2022-09-12	15:45:59	0.275535
2022-09-12	15:45:59	0.240878
2022-09-12	15:46:00	0.180522
2022-09-12	15:46:00	-0.0888929
2022-09-12	15:46:00	0.375891
2022-09-12	15:46:00	0.0273412
2022-09-12	15:46:01	-0.0933712
2022-09-12	15:46:01	-0.24187
2022-09-12	15:46:01	-0.475865
2022-09-12	15:46:01	-0.474898
2022-09-12	15:46:02	-0.325432
2022-09-12	15:46:02	-0.311081
2022-09-12	15:46:02	-0.129351
2022-09-12	15:46:02	-0.185381
2022-09-12	15:46:03	0.127646
2022-09-12	15:46:03	0.0252547
2022-09-12	15:46:03	-0.00706081
2022-09-12	15:46:04	-0.210114
2022-09-12	15:46:04	0.00810459
2022-09-12	15:46:04	-0.0496053
2022-09-12	15:46:04	-0.0459921
2022-09-12	15:46:05	-0.178002
2022-09-12	15:46:05	-0.0369845
2022-09-12	15:46:05	0.00510202
2022-09-12	15:46:06	-0.0820226
2022-09-12	15:46:06	-0.111539
2022-09-12	15:46:06	-0.0216155
2022-09-12	15:46:06	-0.00884198
2022-09-12	15:46:06	-0.0566791
2022-09-12	15:46:07	0.175534
2022-09-12	15:46:07	0.502812
2022-09-12	15:46:07	0.255127
2022-09-12	15:46:08	0.13355
2022-09-12	15:46:08	0.317316
2022-09-12	15:46:08	0.172583
2022-09-12	15:46:08	0.294822
2022-09-12	15:46:09	0.158283
2022-09-12	15:46:09	0.193092
2022-09-12	15:46:09	0.352939
2022-09-12	15:46:09	0.356043
2022-09-12	15:46:10	0.223728
2022-09-12	15:46:10	0.335636
2022-09-12	15:46:10	0.239555
2022-09-12	15:46:10	0.541896
2022-09-12	15:46:11	0.748562
2022-09-12	15:46:11	0.383473
2022-09-12	15:46:11	0.441081
2022-09-12	15:46:12	0.412176
2022-09-12	15:46:12	0.550903
2022-09-12	15:46:12	0.426171
2022-09-12	15:46:12	0.460623
2022-09-12	15:46:13	0.44785
2022-09-12	15:46:13	0.385254
2022-09-12	15:46:13	0.477774
2022-09-12	15:46:13	0.450293
2022-09-12	15:46:14	0.451921
2022-09-12	15:46:14	0.47472
2022-09-12	15:46:14	0.378995
2022-09-12	15:46:15	0.459555
2022-09-12	15:46:15	0.433092
2022-09-12	15:46:15	0.476094
2022-09-12	15:46:15	0.522608
2022-09-12	15:46:16	0.338028
2022-09-12	15:46:16	0.485305
2022-09-12	15:46:16	0.265356
2022-09-12	15:46:16	0.273397
2022-09-12	15:46:17	0.362608
2022-09-12	15:46:17	0.480929
2022-09-12	15:46:17	0.405356
2022-09-12	15:46:17	0.323372
2022-09-12	15:46:18	0.421031
2022-09-12	15:46:18	2.14205
2022-09-12	15:46:18	0.330445
2022-09-12	15:46:19	0.34958
2022-09-12	15:46:19	0.260827
2022-09-12	15:46:19	0.358537
2022-09-12	15:46:19	0.421438
2022-09-12	15:46:20	0.18897
2022-09-12	15:46:20	0.214822
2022-09-12	15:46:20	0.106629
2022-09-12	15:46:21	0.310802
2022-09-12	15:46:21	0.247392
2022-09-12	15:46:21	0.258537
2022-09-12	15:46:21	0.00108167
2022-09-12	15:46:21	-0.189198
2022-09-12	15:46:22	-0.215712
2022-09-12	15:46:22	-0.328893
2022-09-12	15:46:22	-0.628994
2022-09-12	15:46:23	-0.602226
2022-09-12	15:46:23	-0.604567
2022-09-12	15:46:23	-0.409758
2022-09-12	15:46:23	-0.469707
2022-09-12	15:46:24	-0.428944
2022-09-12	15:46:24	-0.450368
2022-09-12	15:46:24	-0.438053
2022-09-12	15:46:24	-0.241565
2022-09-12	15:46:25	-0.299427
2022-09-12	15:46:25	-0.30243
2022-09-12	15:46:25	-0.249554
2022-09-12	15:46:25	-0.221615
2022-09-12	15:46:26	-0.362938
2022-09-12	15:46:26	-0.363142
2022-09-12	15:46:26	-0.476679
2022-09-12	15:46:27	-0.307824
2022-09-12	15:46:27	-0.161056
2022-09-12	15:46:27	-0.253371
2022-09-12	15:46:27	-0.507519
2022-09-12	15:46:28	-0.653523
2022-09-12	15:46:28	-0.328435
2022-09-12	15:46:28	-0.247671
2022-09-12	15:46:28	-0.174592
2022-09-12	15:46:29	0.189173
2022-09-12	15:46:29	0.404746
2022-09-12	15:46:29	0.663575
2022-09-12	15:46:29	0.452074
2022-09-12	15:46:30	0.492074
2022-09-12	15:46:30	1.23431
2022-09-12	15:46:30	0.490954
2022-09-12	15:46:31	0.618435
2022-09-12	15:46:31	0.51355
2022-09-12	15:46:31	0.213753
2022-09-12	15:46:31	0.410191
2022-09-12	15:46:32	0.23299
2022-09-12	15:46:32	0.35014
2022-09-12	15:46:32	0.315687
2022-09-12	15:46:32	0.384746
2022-09-12	15:46:33	0.326323
2022-09-12	15:46:33	0.401183
2022-09-12	15:46:33	0.46612
2022-09-12	15:46:33	0.540013
2022-09-12	15:46:34	0.44271
2022-09-12	15:46:34	0.471616
2022-09-12	15:46:34	0.376756
2022-09-12	15:46:35	0.537366
2022-09-12	15:46:35	0.375585
2022-09-12	15:46:35	0.600725
2022-09-12	15:46:35	0.462354
2022-09-12	15:46:36	0.84841
2022-09-12	15:46:36	0.925916
2022-09-12	15:46:36	1.53823
2022-09-12	15:46:36	0.714466
2022-09-12	15:46:37	0.693448
2022-09-12	15:46:37	0.482659
2022-09-12	15:46:37	0.535484
2022-09-12	15:46:38	0.472074
2022-09-12	15:46:38	0.421438
2022-09-12	15:46:38	0.597825
2022-09-12	15:46:38	0.505611
2022-09-12	15:46:39	0.518028
2022-09-12	15:46:39	0.6107
2022-09-12	15:46:39	0.66388
2022-09-12	15:46:39	0.53986
2022-09-12	15:46:40	0.377265
2022-09-12	15:46:40	0.480267
2022-09-12	15:46:40	0.483219
2022-09-12	15:46:40	0.46729
2022-09-12	15:46:41	0.617366
2022-09-12	15:46:41	0.448868
2022-09-12	15:46:41	0.466425
2022-09-12	15:46:42	0.456349
2022-09-12	15:46:42	0.482761
2022-09-12	15:46:42	0.518842
2022-09-12	15:46:42	0.487799
2022-09-12	15:46:43	0.444542
2022-09-12	15:46:43	0.449784
2022-09-12	15:46:43	0.473957
2022-09-12	15:46:43	0.473702
2022-09-12	15:46:44	0.477519
2022-09-12	15:46:44	0.475738
2022-09-12	15:46:44	0.478639
2022-09-12	15:46:44	0.476451
2022-09-12	15:46:45	0.483728
2022-09-12	15:46:45	0.540114
2022-09-12	15:46:45	0.857417
2022-09-12	15:46:46	1.14999
2022-09-12	15:46:46	0.85299
2022-09-12	15:46:46	0.512176
2022-09-12	15:46:46	0.479402
2022-09-12	15:46:47	0.523524
2022-09-12	15:46:47	0.568613
2022-09-12	15:46:47	0.751056
2022-09-12	15:46:47	0.618537
2022-09-12	15:46:48	0.710191
2022-09-12	15:46:48	1.51447
2022-09-12	15:46:48	1.24917
2022-09-12	15:46:48	0.647341
2022-09-12	15:46:49	0.4393
2022-09-12	15:46:49	0.422354
2022-09-12	15:46:49	0.559097
2022-09-12	15:46:50	0.421234
2022-09-12	15:46:50	0.668053
2022-09-12	15:46:50	0.483015
2022-09-12	15:46:50	0.501896
2022-09-12	15:46:51	0.525662
2022-09-12	15:46:51	0.376094
2022-09-12	15:46:51	0.434466
2022-09-12	15:46:51	0.471921
2022-09-12	15:46:52	0.461947
2022-09-12	15:46:52	0.455331
2022-09-12	15:46:52	0.446221
2022-09-12	15:46:52	0.444542
2022-09-12	15:46:53	0.449631
2022-09-12	15:46:53	0.439402
2022-09-12	15:46:53	0.472684
2022-09-12	15:46:54	0.454059
2022-09-12	15:46:54	0.455942
2022-09-12	15:46:54	0.44042
2022-09-12	15:46:54	0.453906
2022-09-12	15:46:55	0.448664
2022-09-12	15:46:55	0.460878
2022-09-12	15:46:55	0.467952
2022-09-12	15:46:55	0.449122
2022-09-12	15:46:56	0.704135
2022-09-12	15:46:56	0.359402
2022-09-12	15:46:56	-0.0815646
2022-09-12	15:46:57	-0.202124
2022-09-12	15:46:57	-0.200089
2022-09-12	15:46:57	-0.487264
2022-09-12	15:46:57	-0.760292
2022-09-12	15:46:58	-0.596577
2022-09-12	15:46:58	-0.636831
2022-09-12	15:46:58	-0.758663
2022-09-12	15:46:58	-0.832455
2022-09-12	15:46:59	-0.864567
2022-09-12	15:46:59	-0.713218
2022-09-12	15:46:59	-0.655203
2022-09-12	15:46:59	-0.475814
2022-09-12	15:47:00	-0.305992
2022-09-12	15:47:00	-0.343498
2022-09-12	15:47:00	-0.356984
2022-09-12	15:47:01	-0.287773
2022-09-12	15:47:01	-0.272862
2022-09-12	15:47:01	-0.13617
2022-09-12	15:47:01	0.0722267
2022-09-12	15:47:02	0.120115
2022-09-12	15:47:02	-0.0309794
2022-09-12	15:47:02	0.0511071
2022-09-12	15:47:02	0.19584
2022-09-12	15:47:03	0.0870867
2022-09-12	15:47:03	0.338333
2022-09-12	15:47:03	0.128512
2022-09-12	15:47:03	0.31126
2022-09-12	15:47:04	0.167697
2022-09-12	15:47:04	0.031158
2022-09-12	15:47:04	2.05828
2022-09-12	15:47:05	0.895178
2022-09-12	15:47:05	0.378486
2022-09-12	15:47:05	1.322
2022-09-12	15:47:05	1.64317
2022-09-12	15:47:06	0.894924
2022-09-12	15:47:06	1.04291
2022-09-12	15:47:06	1.2165
2022-09-12	15:47:06	0.758181
2022-09-12	15:47:07	0.648766
2022-09-12	15:47:07	0.709631
2022-09-12	15:47:07	0.493244
2022-09-12	15:47:07	0.292481
2022-09-12	15:47:08	-0.153575
2022-09-12	15:47:08	-0.408587
2022-09-12	15:47:08	-0.577748
2022-09-12	15:47:09	-0.655508
2022-09-12	15:47:09	-0.807773
2022-09-12	15:47:09	-0.818104
2022-09-12	15:47:09	-1.07612
2022-09-12	15:47:10	-0.901717
2022-09-12	15:47:10	-1.00747
2022-09-12	15:47:10	-0.780139
2022-09-12	15:47:10	-0.536475
2022-09-12	15:47:11	-0.436119
2022-09-12	15:47:11	-0.0389692
2022-09-12	15:47:11	0.0359926
2022-09-12	15:47:11	0.04042
2022-09-12	15:47:12	0.0106491
2022-09-12	15:47:12	0.177621
2022-09-12	15:47:12	0.253244
2022-09-12	15:47:13	0.381082
2022-09-12	15:47:13	0.407392
2022-09-12	15:47:13	0.147087
2022-09-12	15:47:13	0.454262
2022-09-12	15:47:14	-0.0150506
2022-09-12	15:47:14	0.121387
2022-09-12	15:47:14	0.0847967
2022-09-12	15:47:14	-0.0605468
2022-09-12	15:47:15	-0.092557
2022-09-12	15:47:15	0.319606
2022-09-12	15:47:15	0.0593005
2022-09-12	15:47:15	0.101896
2022-09-12	15:47:16	-0.0215646
2022-09-12	15:47:16	0.198893
2022-09-12	15:47:16	0.18556
2022-09-12	15:47:17	0.152837
2022-09-12	15:47:17	0.164593
2022-09-12	15:47:17	0.826221
2022-09-12	15:47:17	0.418486
2022-09-12	15:47:18	0.478282
2022-09-12	15:47:18	0.285611
2022-09-12	15:47:18	0.548613
2022-09-12	15:47:18	0.211361
2022-09-12	15:47:19	0.518639
2022-09-12	15:47:19	0.14154
2022-09-12	15:47:19	0.471463
2022-09-12	15:47:20	0.143677
2022-09-12	15:47:20	0.465458
2022-09-12	15:47:20	0.0984862
2022-09-12	15:47:20	0.443372
2022-09-12	15:47:21	0.151463
2022-09-12	15:47:21	0.39584
2022-09-12	15:47:21	0.070191
2022-09-12	15:47:21	-0.295508
2022-09-12	15:47:22	-0.55902
2022-09-12	15:47:22	-0.86192
2022-09-12	15:47:22	-0.6979
2022-09-12	15:47:22	-0.383244
2022-09-12	15:47:23	0.240573
2022-09-12	15:47:23	0.11243
2022-09-12	15:47:23	0.397621
2022-09-12	15:47:24	0.715789
2022-09-12	15:47:24	1.34449
2022-09-12	15:47:24	0.311005
2022-09-12	15:47:24	0.321845
2022-09-12	15:47:25	0.178741
2022-09-12	15:47:25	0.459402
2022-09-12	15:47:25	0.258079
2022-09-12	15:47:25	0.369071
2022-09-12	15:47:26	0.52673
2022-09-12	15:47:26	0.47813
2022-09-12	15:47:26	0.516552
2022-09-12	15:47:26	0.280216
2022-09-12	15:47:27	0.440624
2022-09-12	15:47:27	0.253397
2022-09-12	15:47:27	0.414109
2022-09-12	15:47:28	0.258486
2022-09-12	15:47:28	0.391412
2022-09-12	15:47:28	-1.02268
2022-09-12	15:47:28	-0.763498
2022-09-12	15:47:29	-0.826093
2022-09-12	15:47:29	-0.613829
2022-09-12	15:47:29	-0.767061
2022-09-12	15:47:29	-0.456323
2022-09-12	15:47:30	-0.761259
2022-09-12	15:47:30	-0.447875
2022-09-12	15:47:30	-0.700343
2022-09-12	15:47:30	-0.435458
2022-09-12	15:47:31	-0.817188
2022-09-12	15:47:31	-0.465585
2022-09-12	15:47:31	-0.265788
2022-09-12	15:47:32	0.291768
2022-09-12	15:47:32	0.345051
2022-09-12	15:47:32	0.0812343
2022-09-12	15:47:32	-0.347519
2022-09-12	15:47:33	-0.530216
2022-09-12	15:47:33	-0.593931
2022-09-12	15:47:33	-0.541513
2022-09-12	15:47:33	-0.631793
2022-09-12	15:47:34	-0.416679
2022-09-12	15:47:34	-0.561005
2022-09-12	15:47:34	-0.417137
2022-09-12	15:47:34	-0.46757
2022-09-12	15:47:35	-0.276984
2022-09-12	15:47:35	-0.441208
2022-09-12	15:47:35	-0.327366
2022-09-12	15:47:36	-0.132404
2022-09-12	15:47:36	0.0931936
2022-09-12	15:47:36	0.258181
2022-09-12	15:47:36	0.112379
2022-09-12	15:47:37	0.0159926
2022-09-12	15:47:37	0.132328
2022-09-12	15:47:37	0.137468
2022-09-12	15:47:37	0.0430664
2022-09-12	15:47:38	0.0224048
2022-09-12	15:47:38	0.0847458
2022-09-12	15:47:38	0.0351783
2022-09-12	15:47:38	-0.0640074
2022-09-12	15:47:39	-0.00502519
2022-09-12	15:47:39	0.0946694
2022-09-12	15:47:39	-0.0211066
2022-09-12	15:47:40	-0.0733203
2022-09-12	15:47:40	-0.0806994
2022-09-12	15:47:40	0.173397
2022-09-12	15:47:40	0.244797
2022-09-12	15:47:41	0.164237
2022-09-12	15:47:41	-0.0470099
2022-09-12	15:47:41	0.12785
2022-09-12	15:47:41	0.0922776
2022-09-12	15:47:42	0.198384
2022-09-12	15:47:42	0.372888
2022-09-12	15:47:42	0.665967
2022-09-12	15:47:43	0.531158
2022-09-12	15:47:43	0.475534
2022-09-12	15:47:43	0.401947
2022-09-12	15:47:43	0.394517
2022-09-12	15:47:44	0.211921
2022-09-12	15:47:44	0.371361
2022-09-12	15:47:44	0.271819
2022-09-12	15:47:44	0.352736
2022-09-12	15:47:45	0.168206
2022-09-12	15:47:45	0.25187
2022-09-12	15:47:45	1.58373
2022-09-12	15:47:45	0.716959
2022-09-12	15:47:46	0.565356
2022-09-12	15:47:46	0.267596
2022-09-12	15:47:46	0.703321
2022-09-12	15:47:47	0.378893
2022-09-12	15:47:47	0.488868
2022-09-12	15:47:47	-0.270012
2022-09-12	15:47:47	-0.72762
2022-09-12	15:47:48	0.425051
2022-09-12	15:47:48	0.294059
2022-09-12	15:47:48	0.500929
2022-09-12	15:47:48	0.539962
2022-09-12	15:47:49	1.01452
2022-09-12	15:47:49	0.592939
2022-09-12	15:47:49	0.698079
2022-09-12	15:47:49	0.61126
2022-09-12	15:47:50	0.512074
2022-09-12	15:47:50	0.399809
2022-09-12	15:47:50	0.544389
2022-09-12	15:47:51	0.537061
2022-09-12	15:47:51	0.481285
2022-09-12	15:47:51	0.48612
2022-09-12	15:47:51	0.560216
2022-09-12	15:47:52	0.45243
2022-09-12	15:47:52	0.632175
2022-09-12	15:47:52	0.542099
2022-09-12	15:47:52	0.474924
2022-09-12	15:47:53	0.472074
2022-09-12	15:47:53	0.589478
2022-09-12	15:47:53	-0.159631
2022-09-12	15:47:53	0.210751
2022-09-12	15:47:54	0.223779
2022-09-12	15:47:54	0.341947
2022-09-12	15:47:54	0.0906999
2022-09-12	15:47:55	0.188054
2022-09-12	15:47:55	-0.829656
2022-09-12	15:47:55	-0.322989
2022-09-12	15:47:55	0.363473
2022-09-12	15:47:56	0.0635244
2022-09-12	15:47:56	-0.0150506
2022-09-12	15:47:56	-0.066501
2022-09-12	15:47:56	-0.122328
2022-09-12	15:47:57	0.223931
2022-09-12	15:47:57	0.347188
2022-09-12	15:47:57	0.669936
2022-09-12	15:47:57	0.203473
2022-09-12	15:47:58	0.336654
2022-09-12	15:47:58	0.334568
2022-09-12	15:47:58	0.197875
2022-09-12	15:47:59	0.184797
2022-09-12	15:47:59	0.444084
2022-09-12	15:47:59	0.116654
2022-09-12	15:47:59	-0.418816
2022-09-12	15:48:00	-0.293473
2022-09-12	15:48:00	0.148664
2022-09-12	15:48:00	-0.0557631
2022-09-12	15:48:00	-0.184771
2022-09-12	15:48:01	-0.431844
2022-09-12	15:48:01	-0.519427
2022-09-12	15:48:01	-0.37958
2022-09-12	15:48:02	-0.634847
2022-09-12	15:48:02	-0.714745
2022-09-12	15:48:02	-0.856831
2022-09-12	15:48:02	-1.10879
2022-09-12	15:48:03	-1.16726
2022-09-12	15:48:03	-1.34355
2022-09-12	15:48:03	-1.28553
2022-09-12	15:48:03	-1.32279
2022-09-12	15:48:04	-1.37871
2022-09-12	15:48:04	-1.51408
2022-09-12	15:48:04	-1.57332
2022-09-12	15:48:04	-1.63179
2022-09-12	15:48:05	-1.5748
2022-09-12	15:48:05	-1.71892
2022-09-12	15:48:05	-1.59149
2022-09-12	15:48:06	-1.67373
2022-09-12	15:48:06	-1.55169
2022-09-12	15:48:06	-1.62446
2022-09-12	15:48:06	-1.39892
2022-09-12	15:48:07	-1.46558
2022-09-12	15:48:07	-1.41266
2022-09-12	15:48:07	-1.42447
2022-09-12	15:48:07	-1.26859
2022-09-12	15:48:08	-1.22457
2022-09-12	15:48:08	-1.16884
2022-09-12	15:48:08	-1.30324
2022-09-12	15:48:08	-1.12284
2022-09-12	15:48:09	-1.15571
2022-09-12	15:48:09	-1.03256
2022-09-12	15:48:09	-0.927926
2022-09-12	15:48:10	-0.787976
2022-09-12	15:48:10	-0.61846
2022-09-12	15:48:10	-0.580598
2022-09-12	15:48:10	-0.614185
2022-09-12	15:48:11	-0.605178
2022-09-12	15:48:11	-0.438155
2022-09-12	15:48:11	-0.51047
2022-09-12	15:48:11	-0.45729
2022-09-12	15:48:12	0.119606
2022-09-12	15:48:12	0.246425
2022-09-12	15:48:12	0.297468
2022-09-12	15:48:12	0.186272
2022-09-12	15:48:13	0.312125
2022-09-12	15:48:13	0.314211
2022-09-12	15:48:13	0.374211
2022-09-12	15:48:14	-0.00161552
2022-09-12	15:48:14	0.363321
2022-09-12	15:48:14	0.179555
2022-09-12	15:48:14	0.28215
2022-09-12	15:48:15	0.169122
2022-09-12	15:48:15	0.308359
2022-09-12	15:48:15	0.30215
2022-09-12	15:48:15	0.378741
2022-09-12	15:48:16	0.189784
2022-09-12	15:48:16	0.546476
2022-09-12	15:48:16	0.265458
2022-09-12	15:48:16	0.467545
2022-09-12	15:48:17	0.317366
2022-09-12	15:48:17	0.102761
2022-09-12	15:48:17	-0.303447
2022-09-12	15:48:18	-0.114593
2022-09-12	15:48:18	-0.186297
2022-09-12	15:48:18	-0.205381
2022-09-12	15:48:18	-0.102379
2022-09-12	15:48:19	-0.160394
2022-09-12	15:48:19	-0.0900633
2022-09-12	15:48:19	-0.204262
2022-09-12	15:48:19	0.0422522
2022-09-12	15:48:20	-0.314592
2022-09-12	15:48:20	-0.235559
2022-09-12	15:48:20	-0.138155
2022-09-12	15:48:21	-0.327417
2022-09-12	15:48:21	-0.32075
2022-09-12	15:48:21	-0.313575
2022-09-12	15:48:21	-0.347671
2022-09-12	15:48:22	-0.467722
2022-09-12	15:48:22	-0.414134
2022-09-12	15:48:22	-0.237392
2022-09-12	15:48:22	-0.642022
2022-09-12	15:48:23	-0.532608
2022-09-12	15:48:23	-0.497849
2022-09-12	15:48:23	-0.527213
2022-09-12	15:48:23	-0.486603
2022-09-12	15:48:24	-0.562073
2022-09-12	15:48:24	-0.425687
2022-09-12	15:48:24	-0.536933
2022-09-12	15:48:25	-0.504363
2022-09-12	15:48:25	-0.505432
2022-09-12	15:48:25	-0.587569
2022-09-12	15:48:25	-0.618002
2022-09-12	15:48:26	-0.557595
2022-09-12	15:48:26	-0.461921
2022-09-12	15:48:26	-0.648587
2022-09-12	15:48:26	-0.590572
2022-09-12	15:48:27	-0.438969
2022-09-12	15:48:27	-0.433117
2022-09-12	15:48:27	0.0187407
2022-09-12	15:48:27	0.220013
2022-09-12	15:48:28	0.350394
2022-09-12	15:48:28	0.866934
2022-09-12	15:48:28	0.447443
2022-09-12	15:48:29	0.475534
2022-09-12	15:48:29	0.477875
2022-09-12	15:48:29	0.347239
2022-09-12	15:48:29	0.347545
2022-09-12	15:48:30	0.216501
2022-09-12	15:48:30	0.469377
2022-09-12	15:48:30	0.267494
2022-09-12	15:48:30	0.30958
2022-09-12	15:48:31	0.339809
2022-09-12	15:48:31	0.260064
2022-09-12	15:48:31	0.45986
2022-09-12	15:48:31	0.23126
2022-09-12	15:48:32	-0.24131
2022-09-12	15:48:32	0.412685
2022-09-12	15:48:32	0.337824
2022-09-12	15:48:33	0.544287
2022-09-12	15:48:33	0.217214
2022-09-12	15:48:33	0.383168
2022-09-12	15:48:33	0.454211
2022-09-12	15:48:34	0.64327
2022-09-12	15:48:34	0.440878
2022-09-12	15:48:34	0.548155
2022-09-12	15:48:34	0.757468
2022-09-12	15:48:35	0.356298
2022-09-12	15:48:35	0.528512
2022-09-12	15:48:35	0.405153
2022-09-12	15:48:35	0.440878
2022-09-12	15:48:36	0.499809
2022-09-12	15:48:36	0.458232
2022-09-12	15:48:36	0.494313
2022-09-12	15:48:37	0.415789
2022-09-12	15:48:37	0.419199
2022-09-12	15:48:37	0.429987
2022-09-12	15:48:37	0.426883
2022-09-12	15:48:38	0.433143
2022-09-12	15:48:38	0.434364
2022-09-12	15:48:38	0.474924
2022-09-12	15:48:38	0.534466
2022-09-12	15:48:39	0.564084
2022-09-12	15:48:39	0.403015
2022-09-12	15:48:39	0.394364
2022-09-12	15:48:40	0.391769
2022-09-12	15:48:40	0.425356
2022-09-12	15:48:40	0.442812
2022-09-12	15:48:40	0.443575
2022-09-12	15:48:41	0.453702
2022-09-12	15:48:41	0.406781
2022-09-12	15:48:41	0.457977
2022-09-12	15:48:41	0.451819
2022-09-12	15:48:42	0.414109
2022-09-12	15:48:42	0.415178
2022-09-12	15:48:42	0.523219
2022-09-12	15:48:42	0.472939
2022-09-12	15:48:43	0.406679
2022-09-12	15:48:43	0.299097
2022-09-12	15:48:43	0.484237
2022-09-12	15:48:44	0.357468
2022-09-12	15:48:44	0.404644
2022-09-12	15:48:44	0.308766
2022-09-12	15:48:44	0.429835
2022-09-12	15:48:45	0.415331
2022-09-12	15:48:45	0.359097
2022-09-12	15:48:45	0.370242
2022-09-12	15:48:45	0.357061
2022-09-12	15:48:46	0.39813
2022-09-12	15:48:46	0.380216
2022-09-12	15:48:46	0.309427
2022-09-12	15:48:46	0.527646
2022-09-12	15:48:47	0.273906
2022-09-12	15:48:47	0.34154
2022-09-12	15:48:47	0.130598
2022-09-12	15:48:48	0.528359
2022-09-12	15:48:48	0.365763
2022-09-12	15:48:48	0.351921
2022-09-12	15:48:48	0.531718
2022-09-12	15:48:49	0.143372
2022-09-12	15:48:49	0.301641
2022-09-12	15:48:49	0.261947
2022-09-12	15:48:49	0.19528
2022-09-12	15:48:50	0.228766
2022-09-12	15:48:50	0.23355
2022-09-12	15:48:50	0.41187
2022-09-12	15:48:50	0.43813
2022-09-12	15:48:51	0.502506
2022-09-12	15:48:51	0.0379264
2022-09-12	15:48:51	0.182049
2022-09-12	15:48:52	0.400522
2022-09-12	15:48:52	0.542303
2022-09-12	15:48:52	0.329224
2022-09-12	15:48:52	0.355636
2022-09-12	15:48:53	0.450649
2022-09-12	15:48:53	0.318384
2022-09-12	15:48:53	0.360369
2022-09-12	15:48:53	0.324949
2022-09-12	15:48:54	0.413295
2022-09-12	15:48:54	0.714669
2022-09-12	15:48:54	0.610802
2022-09-12	15:48:54	0.660573
2022-09-12	15:48:55	0.503779
2022-09-12	15:48:55	0.688308
2022-09-12	15:48:55	0.987494
2022-09-12	15:48:56	1.0624
2022-09-12	15:48:56	0.900114
2022-09-12	15:48:56	0.937315
2022-09-12	15:48:56	1.06846
2022-09-12	15:48:57	1.1909
2022-09-12	15:48:57	1.11319
2022-09-12	15:48:57	1.11009
2022-09-12	15:48:57	1.14184
2022-09-12	15:48:58	0.974822
2022-09-12	15:48:58	0.774211
2022-09-12	15:48:58	0.565153
2022-09-12	15:48:59	0.329529
2022-09-12	15:48:59	1.08123
2022-09-12	15:48:59	0.57131
2022-09-12	15:48:59	0.0586898
2022-09-12	15:49:00	0.108104
2022-09-12	15:49:00	0.119911
2022-09-12	15:49:00	0.00530559
2022-09-12	15:49:00	-0.176933
2022-09-12	15:49:01	-0.1293
2022-09-12	15:49:01	0.0564506
2022-09-12	15:49:01	0.0843895
2022-09-12	15:49:01	0.020013
2022-09-12	15:49:02	0.168308
2022-09-12	15:49:02	0.152634
2022-09-12	15:49:02	0.245051
2022-09-12	15:49:03	0.697061
2022-09-12	15:49:03	0.239555
2022-09-12	15:49:03	0.320471
2022-09-12	15:49:03	0.182507
2022-09-12	15:49:04	0.0665778
2022-09-12	15:49:04	-0.0331168
2022-09-12	15:49:04	-0.12187
2022-09-12	15:49:04	-0.00512696
2022-09-12	15:49:05	-0.0862974
2022-09-12	15:49:05	0.00316817
2022-09-12	15:49:05	0.28388
2022-09-12	15:49:05	0.234059
2022-09-12	15:49:06	0.0310562
2022-09-12	15:49:06	0.10327
2022-09-12	15:49:06	0.0792496
2022-09-12	15:49:07	0.095331
2022-09-12	15:49:07	0.268715
2022-09-12	15:49:07	0.0444404
2022-09-12	15:49:07	0.273499
2022-09-12	15:49:08	0.149886
2022-09-12	15:49:08	0.169377
2022-09-12	15:49:08	0.357417
2022-09-12	15:49:08	0.408817
2022-09-12	15:49:09	0.359504
2022-09-12	15:49:09	0.425305
2022-09-12	15:49:09	0.903372
2022-09-12	15:49:09	0.452023
2022-09-12	15:49:10	0.859758
2022-09-12	15:49:10	1.34179
2022-09-12	15:49:10	0.522964
2022-09-12	15:49:11	0.592124
2022-09-12	15:49:11	0.60556
2022-09-12	15:49:11	0.386018
2022-09-12	15:49:11	0.555585
2022-09-12	15:49:12	0.882761
2022-09-12	15:49:12	0.562608
2022-09-12	15:49:12	0.374771
2022-09-12	15:49:12	1.00861
2022-09-12	15:49:13	0.365967
2022-09-12	15:49:13	0.822201
2022-09-12	15:49:13	0.534008
2022-09-12	15:49:13	0.480064
2022-09-12	15:49:14	0.732226
2022-09-12	15:49:14	0.401285
2022-09-12	15:49:14	0.410394
2022-09-12	15:49:15	0.600216
2022-09-12	15:49:15	0.614923
2022-09-12	15:49:15	0.712227
2022-09-12	15:49:15	0.998944
2022-09-12	15:49:16	0.468868
2022-09-12	15:49:16	1.18017
2022-09-12	15:49:16	1.14256
2022-09-12	15:49:16	1.24057
2022-09-12	15:49:17	0.576959
2022-09-12	15:49:17	0.401183
2022-09-12	15:49:17	0.767493
2022-09-12	15:49:17	0.539097
2022-09-12	15:49:18	0.345
2022-09-12	15:49:18	0.471514
2022-09-12	15:49:18	0.68327
2022-09-12	15:49:19	0.297723
2022-09-12	15:49:19	0.541387
2022-09-12	15:49:19	0.526425
2022-09-12	15:49:19	0.506577
2022-09-12	15:49:20	0.360827
2022-09-12	15:49:20	0.530598
2022-09-12	15:49:20	0.775891
2022-09-12	15:49:20	1.09961
2022-09-12	15:49:21	0.400369
2022-09-12	15:49:21	0.361234
2022-09-12	15:49:21	0.298995
2022-09-12	15:49:22	0.30388
2022-09-12	15:49:22	0.439809
2022-09-12	15:49:22	0.605458
2022-09-12	15:49:22	0.415585
2022-09-12	15:49:23	0.587239
2022-09-12	15:49:23	0.44612
2022-09-12	15:49:23	0.355433
2022-09-12	15:49:23	0.195636
2022-09-12	15:49:24	0.442557
2022-09-12	15:49:24	0.382914
2022-09-12	15:49:24	0.332685
2022-09-12	15:49:24	0.419249
2022-09-12	15:49:25	0.273041
2022-09-12	15:49:25	0.2307
2022-09-12	15:49:25	0.328359
2022-09-12	15:49:26	0.266018
2022-09-12	15:49:26	0.229478
2022-09-12	15:49:26	0.179758
2022-09-12	15:49:26	0.405458
2022-09-12	15:49:27	0.260929
2022-09-12	15:49:27	0.454466
2022-09-12	15:49:27	0.46841
2022-09-12	15:49:27	0.231311
2022-09-12	15:49:28	0.337824
2022-09-12	15:49:28	0.327443
2022-09-12	15:49:28	0.46215
2022-09-12	15:49:28	2.03106
2022-09-12	15:49:29	1.60576
2022-09-12	15:49:29	0.867137
2022-09-12	15:49:29	0.28841
2022-09-12	15:49:30	0.714211
2022-09-12	15:49:30	0.723219
2022-09-12	15:49:30	1.75172
2022-09-12	15:49:30	0.715025
2022-09-12	15:49:31	0.728512
2022-09-12	15:49:31	0.716043
2022-09-12	15:49:31	0.263575
2022-09-12	15:49:31	0.336705
2022-09-12	15:49:32	0.427188
2022-09-12	15:49:32	0.358639
2022-09-12	15:49:32	0.331667
2022-09-12	15:49:32	0.301438
2022-09-12	15:49:33	0.48673
2022-09-12	15:49:33	0.198333
2022-09-12	15:49:33	0.0676974
2022-09-12	15:49:34	0.129733
2022-09-12	15:49:34	0.123473
2022-09-12	15:49:34	0.12729
2022-09-12	15:49:34	0.0396058
2022-09-12	15:49:35	0.132786
2022-09-12	15:49:35	0.0825575
2022-09-12	15:49:35	0.17528
2022-09-12	15:49:35	0.0341096
2022-09-12	15:49:36	0.309886
2022-09-12	15:49:36	0.181947
2022-09-12	15:49:36	0.0817941
2022-09-12	15:49:36	0.188003
2022-09-12	15:49:37	0.00393154
2022-09-12	15:49:37	0.211005
2022-09-12	15:49:37	0.0616414
2022-09-12	15:49:38	0.11472
2022-09-12	15:49:38	0.0919722
2022-09-12	15:49:38	0.0778756
2022-09-12	15:49:38	0.569937
2022-09-12	15:49:39	0.455127
2022-09-12	15:49:39	0.638791
2022-09-12	15:49:39	0.298486
2022-09-12	15:49:39	0.793295
2022-09-12	15:49:40	0.656857
2022-09-12	15:49:40	0.697824
2022-09-12	15:49:40	0.43299
2022-09-12	15:49:41	0.483168
2022-09-12	15:49:41	0.280471
2022-09-12	15:49:41	0.384135
2022-09-12	15:49:41	0.754364
2022-09-12	15:49:42	0.842303
2022-09-12	15:49:42	0.578384
2022-09-12	15:49:42	0.973295
2022-09-12	15:49:42	0.318435
2022-09-12	15:49:43	0.523524
2022-09-12	15:49:43	0.410852
2022-09-12	15:49:43	0.753855
2022-09-12	15:49:43	0.362303
2022-09-12	15:49:44	0.359148
2022-09-12	15:49:44	0.694415
2022-09-12	15:49:44	0.652481
2022-09-12	15:49:45	0.562964
2022-09-12	15:49:45	0.374466
2022-09-12	15:49:45	0.299606
2022-09-12	15:49:45	0.226425
2022-09-12	15:49:46	-0.324872
2022-09-12	15:49:46	-0.746348
2022-09-12	15:49:46	-0.858154
2022-09-12	15:49:46	-0.89734
2022-09-12	15:49:47	-0.914439
2022-09-12	15:49:47	-0.902531
2022-09-12	15:49:47	-0.948485
2022-09-12	15:49:47	-0.873524
2022-09-12	15:49:48	-0.843549
2022-09-12	15:49:48	-0.883447
2022-09-12	15:49:48	-0.834389
2022-09-12	15:49:49	-0.475814
2022-09-12	15:49:49	-0.345687
2022-09-12	15:49:49	-0.0299616
2022-09-12	15:49:49	0.168512
2022-09-12	15:49:50	0.197316
2022-09-12	15:49:50	0.191565
2022-09-12	15:49:50	0.222507
2022-09-12	15:49:50	0.247443
2022-09-12	15:49:51	0.253601
2022-09-12	15:49:51	0.261336
2022-09-12	15:49:51	0.275585
2022-09-12	15:49:51	0.269173
2022-09-12	15:49:52	0.278944
2022-09-12	15:49:52	0.276451
2022-09-12	15:49:52	0.274771
2022-09-12	15:49:53	0.275941
2022-09-12	15:49:53	0.274313
2022-09-12	15:49:53	0.27187
2022-09-12	15:49:53	0.276298
2022-09-12	15:49:54	0.283626
2022-09-12	15:49:54	0.286985
2022-09-12	15:49:54	0.275382
2022-09-12	15:49:54	0.336807
2022-09-12	15:49:55	0.263931
2022-09-12	15:49:55	0.248817
2022-09-12	15:49:55	0.202761
2022-09-12	15:49:55	0.122405
2022-09-12	15:49:56	0.140267
2022-09-12	15:49:56	0.0774684
2022-09-12	15:49:56	0.0956364
2022-09-12	15:49:57	0.0865269
2022-09-12	15:49:57	0.0859671
2022-09-12	15:49:57	0.0861198
2022-09-12	15:49:57	0.0963488
2022-09-12	15:49:58	0.102354
2022-09-12	15:49:58	0.049275
2022-09-12	15:49:58	-0.169402
2022-09-12	15:49:58	0.119962
2022-09-12	15:49:59	0.197926
2022-09-12	15:49:59	0.199097
2022-09-12	15:49:59	0.329733
2022-09-12	15:49:59	0.365
2022-09-12	15:50:00	0.72556
2022-09-12	15:50:00	1.1507
2022-09-12	15:50:00	0.846985
2022-09-12	15:50:01	1.06368
2022-09-12	15:50:01	1.15986
2022-09-12	15:50:01	0.609987
2022-09-12	15:50:01	1.29869
2022-09-12	15:50:02	0.343881
2022-09-12	15:50:02	0.548359
2022-09-12	15:50:02	0.432176
2022-09-12	15:50:02	0.490344
2022-09-12	15:50:03	0.371819
2022-09-12	15:50:03	0.402252
2022-09-12	15:50:03	0.319606
2022-09-12	15:50:04	0.456807
2022-09-12	15:50:04	0.508308
2022-09-12	15:50:04	0.481845
2022-09-12	15:50:04	0.748868
2022-09-12	15:50:05	0.601336
2022-09-12	15:50:05	1.16154
2022-09-12	15:50:05	0.544186
2022-09-12	15:50:05	0.483066
2022-09-12	15:50:06	0.453499
2022-09-12	15:50:06	0.344695
2022-09-12	15:50:06	0.367494
2022-09-12	15:50:06	0.470395
2022-09-12	15:50:07	0.442456
2022-09-12	15:50:07	0.188715
2022-09-12	15:50:07	0.597417
2022-09-12	15:50:08	0.426629
2022-09-12	15:50:08	0.428613
2022-09-12	15:50:08	0.520929
2022-09-12	15:50:08	0.395738
2022-09-12	15:50:09	0.389479
2022-09-12	15:50:09	0.335789
2022-09-12	15:50:09	0.297723
2022-09-12	15:50:09	0.258283
2022-09-12	15:50:10	0.427036
2022-09-12	15:50:10	0.529478
2022-09-12	15:50:10	0.978995
2022-09-12	15:50:10	1.39899
2022-09-12	15:50:11	1.00592
2022-09-12	15:50:11	0.744491
2022-09-12	15:50:11	1.08205
2022-09-12	15:50:12	0.733244
2022-09-12	15:50:12	0.588766
2022-09-12	15:50:12	0.483422
2022-09-12	15:50:12	0.634008
2022-09-12	15:50:13	0.593651
2022-09-12	15:50:13	0.715382
2022-09-12	15:50:13	0.585916
2022-09-12	15:50:13	0.493753
2022-09-12	15:50:14	0.505153
2022-09-12	15:50:14	0.28785
2022-09-12	15:50:14	0.293804
2022-09-12	15:50:14	0.465153
2022-09-12	15:50:15	0.326527
2022-09-12	15:50:15	0.117061
2022-09-12	15:50:15	0.105356
2022-09-12	15:50:16	0.106171
2022-09-12	15:50:16	0.0908017
2022-09-12	15:50:16	0.252074
2022-09-12	15:50:16	0.418842
2022-09-12	15:50:17	0.507748
2022-09-12	15:50:17	0.352685
2022-09-12	15:50:17	0.422456
2022-09-12	15:50:17	0.399657
2022-09-12	15:50:18	0.379351
2022-09-12	15:50:18	0.566832
2022-09-12	15:50:18	0.259809
2022-09-12	15:50:18	0.43126
2022-09-12	15:50:19	0.518435
2022-09-12	15:50:19	0.379402
2022-09-12	15:50:19	0.635992
2022-09-12	15:50:20	0.469326
2022-09-12	15:50:20	0.773092
2022-09-12	15:50:20	0.480165
2022-09-12	15:50:20	0.482608
2022-09-12	15:50:21	0.589173
2022-09-12	15:50:21	0.370903
2022-09-12	15:50:21	0.454517
2022-09-12	15:50:21	0.417468
2022-09-12	15:50:22	0.517264
2022-09-12	15:50:22	0.459555
2022-09-12	15:50:22	0.941183
2022-09-12	15:50:23	1.14576
2022-09-12	15:50:23	0.896959
2022-09-12	15:50:23	1.07182
2022-09-12	15:50:23	0.670242
2022-09-12	15:50:24	0.757824
2022-09-12	15:50:24	0.740573
2022-09-12	15:50:24	0.554771
2022-09-12	15:50:24	0.963473
2022-09-12	15:50:25	1.39879
2022-09-12	15:50:25	1.4277
2022-09-12	15:50:25	1.0563
2022-09-12	15:50:25	0.796552
2022-09-12	15:50:26	0.879555
2022-09-12	15:50:26	0.52617
2022-09-12	15:50:26	0.691565
2022-09-12	15:50:27	0.782048
2022-09-12	15:50:27	0.796247
2022-09-12	15:50:27	0.764237
2022-09-12	15:50:27	0.811972
2022-09-12	15:50:28	0.806781
2022-09-12	15:50:28	0.566374
2022-09-12	15:50:28	0.647646
2022-09-12	15:50:28	0.661082
2022-09-12	15:50:29	0.804949
2022-09-12	15:50:29	0.658842
2022-09-12	15:50:29	0.33299
2022-09-12	15:50:29	0.317876
2022-09-12	15:50:30	0.399402
2022-09-12	15:50:30	0.315942
2022-09-12	15:50:30	0.40327
2022-09-12	15:50:31	0.700522
2022-09-12	15:50:31	0.466476
2022-09-12	15:50:31	0.475127
2022-09-12	15:50:31	0.393601
2022-09-12	15:50:32	0.409987
2022-09-12	15:50:32	0.439504
2022-09-12	15:50:32	0.589529
2022-09-12	15:50:32	0.701387
2022-09-12	15:50:33	0.574109
2022-09-12	15:50:33	0.36098
2022-09-12	15:50:33	0.268461
2022-09-12	15:50:33	0.290598
2022-09-12	15:50:34	0.290853
2022-09-12	15:50:34	0.278181
2022-09-12	15:50:34	0.247137
2022-09-12	15:50:35	0.245865
2022-09-12	15:50:35	0.264898
2022-09-12	15:50:35	0.369784
2022-09-12	15:50:35	0.641234
2022-09-12	15:50:36	1.02485
2022-09-12	15:50:36	1.06831
2022-09-12	15:50:36	0.784796
2022-09-12	15:50:36	0.609275
2022-09-12	15:50:37	0.427137
2022-09-12	15:50:37	0.407443
2022-09-12	15:50:37	0.379199
2022-09-12	15:50:37	0.29584
2022-09-12	15:50:38	0.284644
2022-09-12	15:50:38	0.314262
2022-09-12	15:50:38	0.158893
2022-09-12	15:50:39	0.216603
2022-09-12	15:50:39	0.27584
2022-09-12	15:50:39	0.311209
2022-09-12	15:50:39	0.319758
2022-09-12	15:50:40	0.262608
2022-09-12	15:50:40	0.157417
2022-09-12	15:50:40	0.145255
2022-09-12	15:50:40	0.081387
2022-09-12	15:50:41	0.0950766
2022-09-12	15:50:41	0.103881
2022-09-12	15:50:41	0.0467305
2022-09-12	15:50:42	-0.0197834
2022-09-12	15:50:42	0.00952952
2022-09-12	15:50:42	0.014873
2022-09-12	15:50:42	-0.0168318
2022-09-12	15:50:43	-0.0104196
