# Supplementary material for: Comparing efficacy in reducing pulling and welfare impacts of four types of leash walking equipment
Source: PeerJ journal article supplement (doi:10.7717/peerj.18131), 2024-10-24
Supplement: Shelter1_Tension_files.zip [file MrFitz_star_2022912151021 copy.xlsx]

## Sheet: Averaged Newtons
Date	Time	Averaged Newtons	Impulse	Total steps
2022-09-12	15:10:39	1.86117	1.86117	0		Impulse Newtons	926.894
2022-09-12	15:10:40	4.04864	5.90981	0		Total steps	5
2022-09-12	15:10:41	12.5166	18.4264	0
2022-09-12	15:10:42	-0.492866	18.4264	0
2022-09-12	15:10:43	0.124676	18.5511	0
2022-09-12	15:10:44	1.10664	19.6577	0
2022-09-12	15:10:45	0.601074	20.2588	0
2022-09-12	15:10:46	0.428918	20.6877	0
2022-09-12	15:10:47	1.2365	21.9242	0
2022-09-12	15:10:48	1.71218	23.6364	0
2022-09-12	15:10:49	7.15328	30.7897	0
2022-09-12	15:10:50	4.28335	35.073	0
2022-09-12	15:10:51	4.16105	39.2341	0
2022-09-12	15:10:52	10.7531	49.9871	0
2022-09-12	15:10:53	10.9759	60.963	0
2022-09-12	15:10:54	11.2841	72.2471	0
2022-09-12	15:10:55	7.9442	80.1913	0
2022-09-12	15:10:56	1.37577	81.5671	0
2022-09-12	15:10:57	-1.18839	81.5671	0
2022-09-12	15:10:58	3.7589	85.326	0
2022-09-12	15:10:59	2.76918	88.0952	0
2022-09-12	15:11:00	2.2078	90.303	0
2022-09-12	15:11:01	3.55998	93.863	0
2022-09-12	15:11:02	4.11493	97.9779	0
2022-09-12	15:11:03	8.57471	106.553	0
2022-09-12	15:11:04	8.65214	115.205	0
2022-09-12	15:11:05	8.40629	123.611	0
2022-09-12	15:11:06	16.8888	140.5	1
2022-09-12	15:11:07	14.1525	154.652	2
2022-09-12	15:11:08	6.39296	161.045	2
2022-09-12	15:11:09	2.2825	163.328	2
2022-09-12	15:11:10	2.1657	165.493	2
2022-09-12	15:11:11	4.08953	169.583	2
2022-09-12	15:11:12	2.16309	171.746	2
2022-09-12	15:11:13	-0.531632	171.746	2
2022-09-12	15:11:14	-1.50135	171.746	2
2022-09-12	15:11:15	14.7685	186.515	3
2022-09-12	15:11:16	8.52696	195.042	3
2022-09-12	15:11:17	3.79914	198.841	3
2022-09-12	15:11:18	-0.734744	198.841	3
2022-09-12	15:11:19	3.29224	202.133	3
2022-09-12	15:11:20	3.27384	205.407	3
2022-09-12	15:11:21	5.69499	211.102	3
2022-09-12	15:11:22	4.57767	215.679	3
2022-09-12	15:11:23	8.56794	224.247	3
2022-09-12	15:11:24	2.14295	226.39	3
2022-09-12	15:11:25	1.98415	228.375	3
2022-09-12	15:11:26	4.70066	233.075	3
2022-09-12	15:11:27	4.30802	237.383	3
2022-09-12	15:11:28	2.96037	240.344	3
2022-09-12	15:11:29	1.9876	242.331	3
2022-09-12	15:11:30	2.0617	244.393	3
2022-09-12	15:11:31	1.33723	245.73	3
2022-09-12	15:11:32	1.07408	246.804	3
2022-09-12	15:11:33	1.18274	247.987	3
2022-09-12	15:11:34	1.38123	249.368	3
2022-09-12	15:11:35	1.3666	250.735	3
2022-09-12	15:11:36	1.43916	252.174	3
2022-09-12	15:11:37	1.68522	253.859	3
2022-09-12	15:11:38	1.4188	255.278	3
2022-09-12	15:11:39	1.19105	256.469	3
2022-09-12	15:11:40	1.04895	257.518	3
2022-09-12	15:11:41	0.912335	258.43	3
2022-09-12	15:11:42	5.01306	263.443	3
2022-09-12	15:11:43	3.99767	267.441	3
2022-09-12	15:11:44	1.64867	269.09	3
2022-09-12	15:11:45	1.21296	270.303	3
2022-09-12	15:11:46	1.72665	272.029	3
2022-09-12	15:11:47	1.86491	273.894	3
2022-09-12	15:11:48	9.97092	283.865	3
2022-09-12	15:11:49	42.1591	326.024	4
2022-09-12	15:11:50	9.48372	335.508	4
2022-09-12	15:11:51	1.80158	337.309	4
2022-09-12	15:11:52	1.67764	338.987	4
2022-09-12	15:11:53	0.949761	339.937	4
2022-09-12	15:11:54	-1.33231	339.937	4
2022-09-12	15:11:55	-2.15047	339.937	4
2022-09-12	15:11:56	-3.16309	339.937	4
2022-09-12	15:11:57	-1.49663	339.937	4
2022-09-12	15:11:58	1.71301	341.65	4
2022-09-12	15:11:59	6.60377	348.254	4
2022-09-12	15:12:00	6.59306	354.847	4
2022-09-12	15:12:01	1.50829	356.355	4
2022-09-12	15:12:02	1.1421	357.497	4
2022-09-12	15:12:03	0.615731	358.113	4
2022-09-12	15:12:04	-0.217258	358.113	4
2022-09-12	15:12:05	0.681135	358.794	4
2022-09-12	15:12:06	2.40757	361.202	4
2022-09-12	15:12:07	2.44481	363.646	4
2022-09-12	15:12:08	6.29861	369.945	4
2022-09-12	15:12:09	5.8315	375.776	4
2022-09-12	15:12:10	1.85494	377.631	4
2022-09-12	15:12:11	1.64583	379.277	4
2022-09-12	15:12:12	5.30697	384.584	4
2022-09-12	15:12:13	11.1822	395.766	4
2022-09-12	15:12:14	18.0376	413.804	5
2022-09-12	15:12:15	4.91532	418.719	5
2022-09-12	15:12:16	2.29878	421.018	5
2022-09-12	15:12:17	-0.060892	421.018	5
2022-09-12	15:12:18	-1.01499	421.018	5
2022-09-12	15:12:19	-3.38448	421.018	5
2022-09-12	15:12:20	-4.07342	421.018	5
2022-09-12	15:12:21	-3.78781	421.018	5
2022-09-12	15:12:22	-1.55913	421.018	5
2022-09-12	15:12:23	0.0859653	421.104	5
2022-09-12	15:12:24	0.838236	421.942	5
2022-09-12	15:12:25	1.84102	423.783	5
2022-09-12	15:12:26	2.72534	426.509	5
2022-09-12	15:12:27	0.972888	427.482	5
2022-09-12	15:12:28	0.808882	428.29	5
2022-09-12	15:12:29	1.09524	429.386	5
2022-09-12	15:12:30	1.02133	430.407	5
2022-09-12	15:12:31	1.40167	431.809	5
2022-09-12	15:12:32	2.41244	434.221	5
2022-09-12	15:12:33	2.76054	436.982	5
2022-09-12	15:12:34	2.45613	439.438	5
2022-09-12	15:12:35	3.82392	443.262	5
2022-09-12	15:12:36	1.89625	445.158	5
2022-09-12	15:12:37	1.6812	446.839	5
2022-09-12	15:12:38	2.84741	449.687	5
2022-09-12	15:12:39	1.86075	451.547	5
2022-09-12	15:12:40	2.09954	453.647	5
2022-09-12	15:12:41	3.38652	457.033	5
2022-09-12	15:12:42	2.89042	459.924	5
2022-09-12	15:12:43	1.5956	461.519	5
2022-09-12	15:12:44	1.36151	462.881	5
2022-09-12	15:12:45	0.799261	463.68	5
2022-09-12	15:12:46	1.63752	465.318	5
2022-09-12	15:12:47	1.74697	467.065	5
2022-09-12	15:12:48	1.30503	468.37	5
2022-09-12	15:12:49	0.554781	468.924	5
2022-09-12	15:12:50	-0.511259	468.924	5
2022-09-12	15:12:51	-0.454723	468.924	5
2022-09-12	15:12:52	-2.14911	468.924	5
2022-09-12	15:12:53	-2.19801	468.924	5
2022-09-12	15:12:54	0.591792	469.516	5
2022-09-12	15:12:55	1.07883	470.595	5
2022-09-12	15:12:56	0.968869	471.564	5
2022-09-12	15:12:57	3.39631	474.96	5
2022-09-12	15:12:58	3.57838	478.539	5
2022-09-12	15:12:59	2.20135	480.74	5
2022-09-12	15:13:00	8.56046	489.3	5
2022-09-12	15:13:01	2.99908	492.3	5
2022-09-12	15:13:02	1.96768	494.267	5
2022-09-12	15:13:03	0.685057	494.952	5
2022-09-12	15:13:04	-1.48194	494.952	5
2022-09-12	15:13:05	-4.31956	494.952	5
2022-09-12	15:13:06	-3.51308	494.952	5
2022-09-12	15:13:07	-0.590602	494.952	5
2022-09-12	15:13:08	1.24233	496.195	5
2022-09-12	15:13:09	4.28764	500.482	5
2022-09-12	15:13:10	3.2672	503.749	5
2022-09-12	15:13:11	2.24413	505.994	5
2022-09-12	15:13:12	2.58137	508.575	5
2022-09-12	15:13:13	2.28601	510.861	5
2022-09-12	15:13:14	2.0872	512.948	5
2022-09-12	15:13:15	1.78019	514.728	5
2022-09-12	15:13:16	1.4631	516.191	5
2022-09-12	15:13:17	1.35549	517.547	5
2022-09-12	15:13:18	0.41194	517.959	5
2022-09-12	15:13:19	-1.80078	517.959	5
2022-09-12	15:13:20	-2.89942	517.959	5
2022-09-12	15:13:21	-2.86558	517.959	5
2022-09-12	15:13:22	-1.44781	517.959	5
2022-09-12	15:13:23	-0.762531	517.959	5
2022-09-12	15:13:24	1.9979	519.957	5
2022-09-12	15:13:25	3.57688	523.534	5
2022-09-12	15:13:26	2.54957	526.083	5
2022-09-12	15:13:27	2.30446	528.388	5
2022-09-12	15:13:28	4.91804	533.306	5
2022-09-12	15:13:29	2.24672	535.552	5
2022-09-12	15:13:30	1.9825	537.535	5
2022-09-12	15:13:31	2.13955	539.675	5
2022-09-12	15:13:32	1.70226	541.377	5
2022-09-12	15:13:33	0.950288	542.327	5
2022-09-12	15:13:34	0.498696	542.826	5
2022-09-12	15:13:35	0.599036	543.425	5
2022-09-12	15:13:36	0.424278	543.849	5
2022-09-12	15:13:37	0.628975	544.478	5
2022-09-12	15:13:38	0.713636	545.192	5
2022-09-12	15:13:39	0.981661	546.173	5
2022-09-12	15:13:40	0.809261	546.983	5
2022-09-12	15:13:41	0.839726	547.822	5
2022-09-12	15:13:42	0.619806	548.442	5
2022-09-12	15:13:43	0.201981	548.644	5
2022-09-12	15:13:44	0.152406	548.797	5
2022-09-12	15:13:45	1.13146	549.928	5
2022-09-12	15:13:46	3.0645	552.992	5
2022-09-12	15:13:47	0.0238838	553.016	5
2022-09-12	15:13:48	0.2628	553.279	5
2022-09-12	15:13:49	0.252632	553.532	5
2022-09-12	15:13:50	0.234012	553.766	5
2022-09-12	15:13:51	0.191228	553.957	5
2022-09-12	15:13:52	0.217223	554.174	5
2022-09-12	15:13:53	0.122298	554.297	5
2022-09-12	15:13:54	-2.23502	554.297	5
2022-09-12	15:13:55	-3.53484	554.297	5
2022-09-12	15:13:56	-1.90901	554.297	5
2022-09-12	15:13:57	1.20828	555.505	5
2022-09-12	15:13:58	3.05027	558.555	5
2022-09-12	15:13:59	2.32059	560.876	5
2022-09-12	15:14:00	2.60191	563.478	5
2022-09-12	15:14:01	2.6211	566.099	5
2022-09-12	15:14:02	7.73176	573.83	5
2022-09-12	15:14:03	3.54873	577.379	5
2022-09-12	15:14:04	3.82721	581.206	5
2022-09-12	15:14:05	3.50718	584.714	5
2022-09-12	15:14:06	7.7053	592.419	5
2022-09-12	15:14:07	6.49104	598.91	5
2022-09-12	15:14:08	5.15872	604.069	5
2022-09-12	15:14:09	1.43825	605.507	5
2022-09-12	15:14:10	1.88952	607.396	5
2022-09-12	15:14:11	6.31108	613.707	5
2022-09-12	15:14:12	8.72034	622.428	5
2022-09-12	15:14:13	6.74554	629.173	5
2022-09-12	15:14:14	3.13592	632.309	5
2022-09-12	15:14:15	6.03911	638.348	5
2022-09-12	15:14:16	7.01372	645.362	5
2022-09-12	15:14:17	5.5839	650.946	5
2022-09-12	15:14:18	4.73681	655.683	5
2022-09-12	15:14:19	6.79567	662.479	5
2022-09-12	15:14:20	6.49052	668.969	5
2022-09-12	15:14:21	7.31321	676.282	5
2022-09-12	15:14:22	5.32652	681.609	5
2022-09-12	15:14:23	2.9773	684.586	5
2022-09-12	15:14:24	2.75896	687.345	5
2022-09-12	15:14:25	3.9121	691.257	5
2022-09-12	15:14:26	2.4466	693.704	5
2022-09-12	15:14:27	1.25297	694.957	5
2022-09-12	15:14:28	1.26621	696.223	5
2022-09-12	15:14:29	2.45975	698.683	5
2022-09-12	15:14:30	4.59019	703.273	5
2022-09-12	15:14:31	9.0424	712.315	5
2022-09-12	15:14:32	1.94023	714.255	5
2022-09-12	15:14:33	1.81369	716.069	5
2022-09-12	15:14:34	12.3494	728.419	5
2022-09-12	15:14:35	10.5818	739	5
2022-09-12	15:14:36	4.60949	743.61	5
2022-09-12	15:14:37	7.99889	751.609	5
2022-09-12	15:14:38	9.53392	761.143	5
2022-09-12	15:14:39	9.10861	770.251	5
2022-09-12	15:14:40	12.8715	783.123	5
2022-09-12	15:14:41	6.69492	789.818	5
2022-09-12	15:14:42	2.35082	792.169	5
2022-09-12	15:14:43	2.12619	794.295	5
2022-09-12	15:14:44	4.29098	798.586	5
2022-09-12	15:14:45	11.3966	809.982	5
2022-09-12	15:14:46	2.1387	812.121	5
2022-09-12	15:14:47	1.14074	813.262	5
2022-09-12	15:14:48	1.48681	814.749	5
2022-09-12	15:14:49	3.93311	818.682	5
2022-09-12	15:14:50	2.04102	820.723	5
2022-09-12	15:14:51	1.93265	822.655	5
2022-09-12	15:14:52	2.16677	824.822	5
2022-09-12	15:14:53	2.20356	827.026	5
2022-09-12	15:14:54	2.14906	829.175	5
2022-09-12	15:14:55	2.06304	831.238	5
2022-09-12	15:14:56	1.7158	832.954	5
2022-09-12	15:14:57	0.802204	833.756	5
2022-09-12	15:14:58	-0.334689	833.756	5
2022-09-12	15:14:59	0.181268	833.937	5
2022-09-12	15:15:00	3.01283	836.95	5
2022-09-12	15:15:01	3.50921	840.459	5
2022-09-12	15:15:02	1.7842	842.243	5
2022-09-12	15:15:03	2.87096	845.114	5
2022-09-12	15:15:04	1.70494	846.819	5
2022-09-12	15:15:05	1.11403	847.933	5
2022-09-12	15:15:06	2.70933	850.642	5
2022-09-12	15:15:07	3.95522	854.598	5
2022-09-12	15:15:08	2.41197	857.01	5
2022-09-12	15:15:09	4.12335	861.133	5
2022-09-12	15:15:10	4.11238	865.245	5
2022-09-12	15:15:11	2.01969	867.265	5
2022-09-12	15:15:12	0.562667	867.828	5
2022-09-12	15:15:13	1.35608	869.184	5
2022-09-12	15:15:14	0.938594	870.122	5
2022-09-12	15:15:15	0.936178	871.059	5
2022-09-12	15:15:16	2.2906	873.349	5
2022-09-12	15:15:17	2.45013	875.799	5
2022-09-12	15:15:18	2.32874	878.128	5
2022-09-12	15:15:19	2.07845	880.207	5
2022-09-12	15:15:20	2.03627	882.243	5
2022-09-12	15:15:21	2.77594	885.019	5
2022-09-12	15:15:22	2.30746	887.326	5
2022-09-12	15:15:23	2.78525	890.111	5
2022-09-12	15:15:24	2.22455	892.336	5
2022-09-12	15:15:25	0.210866	892.547	5
2022-09-12	15:15:26	1.02858	893.575	5
2022-09-12	15:15:27	1.53802	895.113	5
2022-09-12	15:15:28	2.35155	897.465	5
2022-09-12	15:15:29	2.30701	899.772	5
2022-09-12	15:15:30	2.042	901.814	5
2022-09-12	15:15:31	2.12314	903.937	5
2022-09-12	15:15:32	2.65188	906.589	5
2022-09-12	15:15:33	5.49663	912.086	5
2022-09-12	15:15:34	3.5765	915.662	5
2022-09-12	15:15:35	2.56886	918.231	5
2022-09-12	15:15:36	2.51889	920.75	5
2022-09-12	15:15:37	2.25138	923.001	5
2022-09-12	15:15:38	1.82476	924.826	5
2022-09-12	15:15:39	2.06808	926.894	5

## Sheet: MrFitz_star_2022912151021 (4)
Date	Time	Lbs	Newtons	Averaged Newtons	Total Force x time			**GoPro Fitting: 1500
2022-09-12	15:10:39	0.667748	2.97028	1.86117	2.97028	FALSE	0
2022-09-12	15:10:39	0.352023	1.56587	1.86117	1.56587	FALSE	0
2022-09-12	15:10:39	0.473652	2.1069	1.86117	5.07718	FALSE	0
2022-09-12	15:10:39	0.180216	0.801637	1.86117	2.36751	FALSE	0
2022-09-12	15:10:40	0.411107	1.82869	4.04864	6.90586	FALSE	0
2022-09-12	15:10:40	0.251667	1.11947	4.04864	3.48697	FALSE	0
2022-09-12	15:10:40	2.06775	9.19777	4.04864	16.1036	FALSE	0
2022-09-12	15:10:41	2.9765	13.2401	12.5166	16.727	FALSE	0
2022-09-12	15:10:41	4.73696	21.0709	12.5166	37.1746	1	1
2022-09-12	15:10:41	2.12383	9.44722	12.5166	26.1743	FALSE	1
2022-09-12	15:10:41	1.41813	6.30813	12.5166	43.4827	FALSE	1
2022-09-12	15:10:42	-0.0264501	-0.117655	-0.492866	26.1743	FALSE	1
2022-09-12	15:10:42	-0.0848725	-0.37753	-0.492866	43.4827	FALSE	1
2022-09-12	15:10:42	-0.255356	-1.13587	-0.492866	26.1743	FALSE	1
2022-09-12	15:10:42	-0.0765264	-0.340405	-0.492866	43.4827	FALSE	1
2022-09-12	15:10:43	-0.00726439	-0.0323135	0.124676	26.1743	FALSE	1
2022-09-12	15:10:43	-0.0756613	-0.336557	0.124676	43.4827	FALSE	1
2022-09-12	15:10:43	0.218283	0.970966	0.124676	27.1452	FALSE	1
2022-09-12	15:10:43	-0.023244	-0.103394	0.124676	43.4827	FALSE	1
2022-09-12	15:10:44	0.38042	1.69218	1.10664	28.8374	FALSE	1
2022-09-12	15:10:44	0.164339	0.731013	1.10664	44.2137	FALSE	1
2022-09-12	15:10:44	0.20159	0.896713	1.10664	29.7341	FALSE	1
2022-09-12	15:10:45	0.120318	0.535199	0.601074	44.7489	FALSE	1
2022-09-12	15:10:45	0.155993	0.693888	0.601074	30.428	FALSE	1
2022-09-12	15:10:45	0.109326	0.486304	0.601074	45.2352	FALSE	1
2022-09-12	15:10:45	0.154873	0.688906	0.601074	31.1169	FALSE	1
2022-09-12	15:10:46	0.258741	1.15093	0.428918	46.3861	FALSE	1
2022-09-12	15:10:46	0.263422	1.17175	0.428918	32.2887	FALSE	1
2022-09-12	15:10:46	-0.0847198	-0.376851	0.428918	46.3861	FALSE	1
2022-09-12	15:10:46	-0.0517427	-0.230162	0.428918	32.2887	FALSE	1
2022-09-12	15:10:47	0.217214	0.966211	1.2365	47.3524	FALSE	1
2022-09-12	15:10:47	0.165458	0.73599	1.2365	33.0247	FALSE	1
2022-09-12	15:10:47	0.485865	2.16122	1.2365	49.5136	FALSE	1
2022-09-12	15:10:47	0.243372	1.08257	1.2365	34.1072	FALSE	1
2022-09-12	15:10:48	0.370751	1.64917	1.71218	51.1628	FALSE	1
2022-09-12	15:10:48	0.206578	0.9189	1.71218	35.0261	FALSE	1
2022-09-12	15:10:48	0.577417	2.56847	1.71218	53.7312	FALSE	1
2022-09-12	15:10:49	1.35029	6.00636	7.15328	41.0325	FALSE	1
2022-09-12	15:10:49	1.6963	7.54548	7.15328	61.2767	FALSE	1
2022-09-12	15:10:49	1.74729	7.7723	7.15328	48.8048	FALSE	1
2022-09-12	15:10:49	1.63864	7.289	7.15328	68.5657	FALSE	1
2022-09-12	15:10:50	2.26816	10.0892	4.28335	58.894	FALSE	1
2022-09-12	15:10:50	0.732684	3.25912	4.28335	71.8248	FALSE	1
2022-09-12	15:10:50	0.397316	1.76734	4.28335	60.6614	FALSE	1
2022-09-12	15:10:50	0.453601	2.01771	4.28335	73.8425	FALSE	1
2022-09-12	15:10:51	0.640522	2.84917	4.16105	63.5105	FALSE	1
2022-09-12	15:10:51	1.17742	5.2374	4.16105	79.0799	FALSE	1
2022-09-12	15:10:51	0.696654	3.09886	4.16105	66.6094	FALSE	1
2022-09-12	15:10:51	1.22719	5.45879	4.16105	84.5387	FALSE	1
2022-09-12	15:10:52	1.93406	8.60309	10.7531	75.2125	FALSE	1
2022-09-12	15:10:52	2.02586	9.01143	10.7531	93.5502	FALSE	1
2022-09-12	15:10:52	3.29228	14.6447	10.7531	89.8572	1	2
2022-09-12	15:10:53	1.95421	8.69272	10.9759	102.243	FALSE	2
2022-09-12	15:10:53	2.25289	10.0213	10.9759	99.8785	FALSE	2
2022-09-12	15:10:53	2.15233	9.57399	10.9759	111.817	FALSE	2
2022-09-12	15:10:53	3.5105	15.6154	10.9759	115.494	1	3
2022-09-12	15:10:54	2.01391	8.95827	11.2841	120.775	FALSE	3
2022-09-12	15:10:54	2.95085	13.126	11.2841	128.62	FALSE	3
2022-09-12	15:10:54	2.47589	11.0133	11.2841	131.788	FALSE	3
2022-09-12	15:10:54	2.70648	12.039	11.2841	140.659	FALSE	3
2022-09-12	15:10:55	2.94765	13.1117	7.9442	144.9	FALSE	3
2022-09-12	15:10:55	2.21676	9.86059	7.9442	150.519	FALSE	3
2022-09-12	15:10:55	0.193397	0.860269	7.9442	145.76	FALSE	3
2022-09-12	15:10:56	0.115738	0.514826	1.37577	151.034	FALSE	3
2022-09-12	15:10:56	0.44958	1.99982	1.37577	147.76	FALSE	3
2022-09-12	15:10:56	0.220573	0.981153	1.37577	152.015	FALSE	3
2022-09-12	15:10:56	0.45126	2.00729	1.37577	149.768	FALSE	3
2022-09-12	15:10:57	-0.0462466	-0.205714	-1.18839	152.015	FALSE	3
2022-09-12	15:10:57	-0.315203	-1.40209	-1.18839	149.768	FALSE	3
2022-09-12	15:10:57	-0.368944	-1.64114	-1.18839	152.015	FALSE	3
2022-09-12	15:10:57	-0.338256	-1.50463	-1.18839	149.768	FALSE	3
2022-09-12	15:10:58	-0.156781	-0.697393	3.7589	152.015	FALSE	3
2022-09-12	15:10:58	0.0574684	0.255631	3.7589	150.023	FALSE	3
2022-09-12	15:10:58	1.73961	7.73813	3.7589	159.754	FALSE	3
2022-09-12	15:10:58	1.73986	7.73925	3.7589	157.762	FALSE	3
2022-09-12	15:10:59	0.944949	4.20332	2.76918	163.957	FALSE	3
2022-09-12	15:10:59	0.516654	2.29818	2.76918	160.061	FALSE	3
2022-09-12	15:10:59	0.406018	1.80605	2.76918	165.763	FALSE	3
2022-09-12	15:11:00	0.519351	2.31018	2.2078	162.371	FALSE	3
2022-09-12	15:11:00	0.397926	1.77005	2.2078	167.533	FALSE	3
2022-09-12	15:11:00	0.569326	2.53248	2.2078	164.903	FALSE	3
2022-09-12	15:11:00	0.49874	2.2185	2.2078	169.751	FALSE	3
2022-09-12	15:11:01	0.805305	3.58216	3.55998	168.485	FALSE	3
2022-09-12	15:11:01	0.661336	2.94175	3.55998	172.693	FALSE	3
2022-09-12	15:11:01	0.620013	2.75794	3.55998	171.243	FALSE	3
2022-09-12	15:11:01	1.11462	4.95805	3.55998	177.651	FALSE	3
2022-09-12	15:11:02	0.732837	3.25981	4.11493	174.503	FALSE	3
2022-09-12	15:11:02	1.02597	4.56372	4.11493	182.215	FALSE	3
2022-09-12	15:11:02	0.637264	2.83468	4.11493	177.338	FALSE	3
2022-09-12	15:11:02	1.30424	5.80152	4.11493	188.017	FALSE	3
2022-09-12	15:11:03	1.15065	5.11832	8.57471	182.456	FALSE	3
2022-09-12	15:11:03	1.97182	8.77105	8.57471	196.788	FALSE	3
2022-09-12	15:11:03	2.66057	11.8347	8.57471	194.291	FALSE	3
2022-09-12	15:11:04	1.68983	7.5167	8.65214	204.304	FALSE	3
2022-09-12	15:11:04	1.99854	8.88991	8.65214	203.181	FALSE	3
2022-09-12	15:11:04	1.52622	6.78893	8.65214	211.093	FALSE	3
2022-09-12	15:11:04	2.56576	11.413	8.65214	214.594	FALSE	3
2022-09-12	15:11:05	0.650547	2.89376	8.40629	213.987	FALSE	3
2022-09-12	15:11:05	1.62922	7.2471	8.40629	221.841	FALSE	3
2022-09-12	15:11:05	1.69212	7.52689	8.40629	221.514	FALSE	3
2022-09-12	15:11:05	3.58739	15.9574	8.40629	237.798	1	4
2022-09-12	15:11:06	2.65935	11.8293	16.8888	233.343	FALSE	4
2022-09-12	15:11:06	4.19996	18.6823	16.8888	256.481	1	5
2022-09-12	15:11:06	3.27258	14.5571	16.8888	247.9	1	6
2022-09-12	15:11:06	5.05518	22.4865	16.8888	278.967	1	7
2022-09-12	15:11:07	2.65966	11.8307	14.1525	259.731	FALSE	7
2022-09-12	15:11:07	3.16403	14.0742	14.1525	293.041	1	8
2022-09-12	15:11:07	3.72118	16.5526	14.1525	276.284	1	9
2022-09-12	15:11:08	1.6678	7.41871	6.39296	300.46	FALSE	9
2022-09-12	15:11:08	2.32653	10.3489	6.39296	286.632	FALSE	9
2022-09-12	15:11:08	1.29635	5.76642	6.39296	306.226	FALSE	9
2022-09-12	15:11:08	0.45813	2.03785	6.39296	288.67	FALSE	9
2022-09-12	15:11:09	0.459606	2.04442	2.2825	308.271	FALSE	9
2022-09-12	15:11:09	0.489784	2.17866	2.2825	290.849	FALSE	9
2022-09-12	15:11:09	0.594517	2.64453	2.2825	310.915	FALSE	9
2022-09-12	15:11:09	0.508613	2.26241	2.2825	293.111	FALSE	9
2022-09-12	15:11:10	0.56332	2.50576	2.1657	313.421	FALSE	9
2022-09-12	15:11:10	0.57243	2.54628	2.1657	295.658	FALSE	9
2022-09-12	15:11:10	0.813041	3.61657	2.1657	317.038	FALSE	9
2022-09-12	15:11:10	-0.00131018	-0.00582794	2.1657	295.658	FALSE	9
2022-09-12	15:11:11	0.093957	0.41794	4.08953	317.456	FALSE	9
2022-09-12	15:11:11	0.935636	4.1619	4.08953	299.819	FALSE	9
2022-09-12	15:11:11	1.72851	7.68876	4.08953	325.144	FALSE	9
2022-09-12	15:11:12	0.962405	4.28097	2.16309	304.1	FALSE	9
2022-09-12	15:11:12	0.36215	1.61092	2.16309	326.755	FALSE	9
2022-09-12	15:11:12	0.318741	1.41782	2.16309	305.518	FALSE	9
2022-09-12	15:11:12	0.301845	1.34267	2.16309	328.098	FALSE	9
2022-09-12	15:11:13	-0.0452287	-0.201186	-0.531632	305.518	FALSE	9
2022-09-12	15:11:13	0.0334989	0.14901	-0.531632	328.247	FALSE	9
2022-09-12	15:11:13	-0.16701	-0.742894	-0.531632	305.518	FALSE	9
2022-09-12	15:11:13	-0.299325	-1.33146	-0.531632	328.247	FALSE	9
2022-09-12	15:11:14	-0.543295	-2.41668	-1.50135	305.518	FALSE	9
2022-09-12	15:11:14	-0.575152	-2.55839	-1.50135	328.247	FALSE	9
2022-09-12	15:11:14	-0.36014	-1.60197	-1.50135	305.518	FALSE	9
2022-09-12	15:11:14	0.128512	0.571647	-1.50135	328.819	FALSE	9
2022-09-12	15:11:15	0.770852	3.4289	14.7685	308.947	FALSE	9
2022-09-12	15:11:15	4.52113	20.1109	14.7685	348.93	1	10
2022-09-12	15:11:15	4.66836	20.7658	14.7685	329.713	1	11
2022-09-12	15:11:16	3.30841	14.7165	8.52696	363.646	1	12
2022-09-12	15:11:16	1.32673	5.90156	8.52696	335.615	FALSE	12
2022-09-12	15:11:16	0.470852	2.09444	8.52696	365.74	FALSE	12
2022-09-12	15:11:16	2.56179	11.3954	8.52696	347.01	FALSE	12
2022-09-12	15:11:17	1.9134	8.51119	3.79914	374.252	FALSE	12
2022-09-12	15:11:17	1.5105	6.71901	3.79914	353.729	FALSE	12
2022-09-12	15:11:17	-0.0676206	-0.30079	3.79914	374.252	FALSE	12
2022-09-12	15:11:17	0.0600639	0.267176	3.79914	353.996	FALSE	12
2022-09-12	15:11:18	-0.0857885	-0.381604	-0.734744	374.252	FALSE	12
2022-09-12	15:11:18	-0.236679	-1.0528	-0.734744	353.996	FALSE	12
2022-09-12	15:11:18	-0.173066	-0.769832	-0.734744	374.252	FALSE	12
2022-09-12	15:11:19	0.0895804	0.398472	3.29224	354.395	FALSE	12
2022-09-12	15:11:19	0.601743	2.67667	3.29224	376.928	FALSE	12
2022-09-12	15:11:19	1.87625	8.34594	3.29224	362.74	FALSE	12
2022-09-12	15:11:19	0.392939	1.74787	3.29224	378.676	FALSE	12
2022-09-12	15:11:20	0.0828628	0.36859	3.27384	363.109	FALSE	12
2022-09-12	15:11:20	0.21299	0.947422	3.27384	379.624	FALSE	12
2022-09-12	15:11:20	0.771667	3.43253	3.27384	366.542	FALSE	12
2022-09-12	15:11:20	1.87645	8.34682	3.27384	387.97	FALSE	12
2022-09-12	15:11:21	3.77212	16.7791	5.69499	383.321	1	13
2022-09-12	15:11:21	0.27986	1.24487	5.69499	389.215	FALSE	13
2022-09-12	15:11:21	0.935738	4.16235	5.69499	387.483	FALSE	13
2022-09-12	15:11:21	0.133448	0.593603	5.69499	389.809	FALSE	13
2022-09-12	15:11:22	0.0913106	0.406168	4.57767	387.889	FALSE	13
2022-09-12	15:11:22	1.66022	7.38499	4.57767	397.194	FALSE	13
2022-09-12	15:11:22	1.33579	5.94186	4.57767	393.831	FALSE	13
2022-09-12	15:11:23	3.30052	14.6814	8.56794	411.875	1	14
2022-09-12	15:11:23	1.44302	6.41884	8.56794	400.25	FALSE	14
2022-09-12	15:11:23	2.02042	8.98723	8.56794	420.862	FALSE	14
2022-09-12	15:11:23	0.940674	4.18431	8.56794	404.434	FALSE	14
2022-09-12	15:11:24	0.886629	3.9439	2.14295	424.806	FALSE	14
2022-09-12	15:11:24	0.635229	2.82563	2.14295	407.26	FALSE	14
2022-09-12	15:11:24	0.229631	1.02144	2.14295	425.828	FALSE	14
2022-09-12	15:11:24	0.175534	0.78081	2.14295	408.041	FALSE	14
2022-09-12	15:11:25	0.757061	3.36756	1.98415	429.195	FALSE	14
2022-09-12	15:11:25	0.14841	0.660157	1.98415	408.701	FALSE	14
2022-09-12	15:11:25	0.341336	1.51833	1.98415	430.714	FALSE	14
2022-09-12	15:11:25	0.537417	2.39054	1.98415	411.091	FALSE	14
2022-09-12	15:11:26	1.36765	6.08358	4.70066	436.797	FALSE	14
2022-09-12	15:11:26	0.785916	3.49591	4.70066	414.587	FALSE	14
2022-09-12	15:11:26	1.0167	4.52248	4.70066	441.32	FALSE	14
2022-09-12	15:11:27	1.39207	6.19221	4.30802	420.78	FALSE	14
2022-09-12	15:11:27	1.13228	5.03661	4.30802	446.356	FALSE	14
2022-09-12	15:11:27	0.682811	3.03728	4.30802	423.817	FALSE	14
2022-09-12	15:11:27	0.666781	2.96598	4.30802	449.322	FALSE	14
2022-09-12	15:11:28	0.778181	3.4615	2.96037	427.278	FALSE	14
2022-09-12	15:11:28	0.403066	1.79292	2.96037	451.115	FALSE	14
2022-09-12	15:11:28	0.87528	3.89342	2.96037	431.172	FALSE	14
2022-09-12	15:11:28	0.60556	2.69365	2.96037	453.809	FALSE	14
2022-09-12	15:11:29	0.701997	3.12262	1.9876	434.294	FALSE	14
2022-09-12	15:11:29	0.361285	1.60707	1.9876	455.416	FALSE	14
2022-09-12	15:11:29	0.474975	2.11278	1.9876	436.407	FALSE	14
2022-09-12	15:11:29	0.249071	1.10792	1.9876	456.524	FALSE	14
2022-09-12	15:11:30	0.430598	1.91539	2.0617	438.323	FALSE	14
2022-09-12	15:11:30	0.273753	1.21771	2.0617	457.742	FALSE	14
2022-09-12	15:11:30	0.686119	3.05199	2.0617	441.375	FALSE	14
2022-09-12	15:11:31	0.296603	1.31935	1.33723	459.061	FALSE	14
2022-09-12	15:11:31	0.70098	3.1181	1.33723	444.493	FALSE	14
2022-09-12	15:11:31	0.0506491	0.225297	1.33723	459.286	FALSE	14
2022-09-12	15:11:31	0.154262	0.686188	1.33723	445.179	FALSE	14
2022-09-12	15:11:32	0.261387	1.1627	1.07408	460.449	FALSE	14
2022-09-12	15:11:32	0.194059	0.863213	1.07408	446.042	FALSE	14
2022-09-12	15:11:32	0.330496	1.47011	1.07408	461.919	FALSE	14
2022-09-12	15:11:32	0.179911	0.80028	1.07408	446.842	FALSE	14
2022-09-12	15:11:33	0.374211	1.66457	1.18274	463.584	FALSE	14
2022-09-12	15:11:33	0.181947	0.809337	1.18274	447.652	FALSE	14
2022-09-12	15:11:33	0.339657	1.51086	1.18274	465.095	FALSE	14
2022-09-12	15:11:33	0.167748	0.746177	1.18274	448.398	FALSE	14
2022-09-12	15:11:34	0.264847	1.17809	1.38123	466.273	FALSE	14
2022-09-12	15:11:34	0.267952	1.1919	1.38123	449.59	FALSE	14
2022-09-12	15:11:34	0.398741	1.77368	1.38123	468.046	FALSE	14
2022-09-12	15:11:35	0.367239	1.63355	1.3666	451.223	FALSE	14
2022-09-12	15:11:35	0.208715	0.928406	1.3666	468.975	FALSE	14
2022-09-12	15:11:35	0.382761	1.7026	1.3666	452.926	FALSE	14
2022-09-12	15:11:35	0.270191	1.20186	1.3666	470.177	FALSE	14
2022-09-12	15:11:36	0.434059	1.93078	1.43916	454.857	FALSE	14
2022-09-12	15:11:36	0.154873	0.688906	1.43916	470.865	FALSE	14
2022-09-12	15:11:36	0.385662	1.7155	1.43916	456.572	FALSE	14
2022-09-12	15:11:36	0.319555	1.42144	1.43916	472.287	FALSE	14
2022-09-12	15:11:37	0.471107	2.09558	1.68522	458.668	FALSE	14
2022-09-12	15:11:37	0.346476	1.54119	1.68522	473.828	FALSE	14
2022-09-12	15:11:37	0.455331	2.0254	1.68522	460.693	FALSE	14
2022-09-12	15:11:37	0.242507	1.07872	1.68522	474.907	FALSE	14
2022-09-12	15:11:38	0.420522	1.87057	1.4188	462.564	FALSE	14
2022-09-12	15:11:38	0.242303	1.07781	1.4188	475.985	FALSE	14
2022-09-12	15:11:38	0.294059	1.30803	1.4188	463.872	FALSE	14
2022-09-12	15:11:39	0.278537	1.23899	1.19105	477.224	FALSE	14
2022-09-12	15:11:39	0.36841	1.63876	1.19105	465.51	FALSE	14
2022-09-12	15:11:39	0.25299	1.12535	1.19105	478.349	FALSE	14
2022-09-12	15:11:39	0.171107	0.761118	1.19105	466.272	FALSE	14
2022-09-12	15:11:40	0.313194	1.39315	1.04895	479.742	FALSE	14
2022-09-12	15:11:40	0.217723	0.968475	1.04895	467.24	FALSE	14
2022-09-12	15:11:40	0.208868	0.929087	1.04895	480.671	FALSE	14
2022-09-12	15:11:40	0.203473	0.905089	1.04895	468.145	FALSE	14
2022-09-12	15:11:41	0.192379	0.85574	0.912335	481.527	FALSE	14
2022-09-12	15:11:41	0.178283	0.793038	0.912335	468.938	FALSE	14
2022-09-12	15:11:41	0.244644	1.08823	0.912335	482.615	FALSE	14
2022-09-12	15:11:42	0.289275	1.28675	5.01306	470.225	FALSE	14
2022-09-12	15:11:42	0.920827	4.09602	5.01306	486.711	FALSE	14
2022-09-12	15:11:42	1.21131	5.38815	5.01306	475.613	FALSE	14
2022-09-12	15:11:42	2.08653	9.2813	5.01306	495.992	FALSE	14
2022-09-12	15:11:43	0.667443	2.96892	3.99767	478.582	FALSE	14
2022-09-12	15:11:43	1.60434	7.13643	3.99767	503.129	FALSE	14
2022-09-12	15:11:43	0.642506	2.858	3.99767	481.44	FALSE	14
2022-09-12	15:11:43	0.680573	3.02732	3.99767	506.156	FALSE	14
2022-09-12	15:11:44	0.388359	1.7275	1.64867	483.168	FALSE	14
2022-09-12	15:11:44	0.381896	1.69875	1.64867	507.855	FALSE	14
2022-09-12	15:11:44	0.418232	1.86038	1.64867	485.028	FALSE	14
2022-09-12	15:11:44	0.294059	1.30803	1.64867	509.163	FALSE	14
2022-09-12	15:11:45	0.201438	0.896037	1.21296	485.924	FALSE	14
2022-09-12	15:11:45	0.278181	1.2374	1.21296	510.4	FALSE	14
2022-09-12	15:11:45	0.338435	1.50543	1.21296	487.429	FALSE	14
2022-09-12	15:11:46	0.300165	1.33519	1.72665	511.736	FALSE	14
2022-09-12	15:11:46	0.428563	1.90633	1.72665	489.336	FALSE	14
2022-09-12	15:11:46	0.396705	1.76462	1.72665	513.5	FALSE	14
2022-09-12	15:11:46	0.427239	1.90044	1.72665	491.236	FALSE	14
2022-09-12	15:11:47	0.455433	2.02586	1.86491	515.526	FALSE	14
2022-09-12	15:11:47	0.475331	2.11437	1.86491	493.351	FALSE	14
2022-09-12	15:11:47	0.411463	1.83027	1.86491	517.356	FALSE	14
2022-09-12	15:11:47	0.334771	1.48913	1.86491	494.84	FALSE	14
2022-09-12	15:11:48	0.348104	1.54844	9.97092	518.905	FALSE	14
2022-09-12	15:11:48	0.503015	2.23751	9.97092	497.077	FALSE	14
2022-09-12	15:11:48	3.98469	17.7247	9.97092	536.63	1	15
2022-09-12	15:11:48	4.13044	18.373	9.97092	515.45	1	16
2022-09-12	15:11:49	6.67075	29.6728	42.1591	566.302	1	17
2022-09-12	15:11:49	10.9915	48.8924	42.1591	564.343	1	18
2022-09-12	15:11:49	10.7711	47.912	42.1591	614.214	1	19
2022-09-12	15:11:50	6.04617	26.8946	9.48372	591.237	1	20
2022-09-12	15:11:50	1.35803	6.04079	9.48372	620.255	FALSE	20
2022-09-12	15:11:50	0.515534	2.2932	9.48372	593.53	FALSE	20
2022-09-12	15:11:50	0.60841	2.70633	9.48372	622.961	FALSE	20
2022-09-12	15:11:51	0.38444	1.71007	1.80158	595.24	FALSE	20
2022-09-12	15:11:51	0.58271	2.59201	1.80158	625.553	FALSE	20
2022-09-12	15:11:51	0.184847	0.822236	1.80158	596.063	FALSE	20
2022-09-12	15:11:51	0.468054	2.082	1.80158	627.635	FALSE	20
2022-09-12	15:11:52	0.961794	4.27825	1.67764	600.341	FALSE	20
2022-09-12	15:11:52	0.265102	1.17923	1.67764	628.815	FALSE	20
2022-09-12	15:11:52	0.0220995	0.098303	1.67764	600.439	FALSE	20
2022-09-12	15:11:52	0.259606	1.15478	1.67764	629.969	FALSE	20
2022-09-12	15:11:53	0.377875	1.68086	0.949761	602.12	FALSE	20
2022-09-12	15:11:53	0.198283	0.882002	0.949761	630.851	FALSE	20
2022-09-12	15:11:53	0.0643895	0.286417	0.949761	602.406	FALSE	20
2022-09-12	15:11:54	-0.019529	-0.0868689	-1.33231	630.851	FALSE	20
2022-09-12	15:11:54	-0.405381	-1.80322	-1.33231	602.406	FALSE	20
2022-09-12	15:11:54	-0.444313	-1.97639	-1.33231	630.851	FALSE	20
2022-09-12	15:11:54	-0.328842	-1.46275	-1.33231	602.406	FALSE	20
2022-09-12	15:11:55	-0.412251	-1.83377	-2.15047	630.851	FALSE	20
2022-09-12	15:11:55	-0.484363	-2.15454	-2.15047	602.406	FALSE	20
2022-09-12	15:11:55	-0.622684	-2.76982	-2.15047	630.851	FALSE	20
2022-09-12	15:11:55	-0.414491	-1.84374	-2.15047	602.406	FALSE	20
2022-09-12	15:11:56	-0.721157	-3.20785	-3.16309	630.851	FALSE	20
2022-09-12	15:11:56	-0.788638	-3.50802	-3.16309	602.406	FALSE	20
2022-09-12	15:11:56	-0.814083	-3.6212	-3.16309	630.851	FALSE	20
2022-09-12	15:11:56	-0.520496	-2.31527	-3.16309	602.406	FALSE	20
2022-09-12	15:11:57	-0.509147	-2.26479	-1.49663	630.851	FALSE	20
2022-09-12	15:11:57	-0.332099	-1.47724	-1.49663	602.406	FALSE	20
2022-09-12	15:11:57	-0.168129	-0.747871	-1.49663	630.851	FALSE	20
2022-09-12	15:11:58	0.0328882	0.146293	1.71301	602.553	FALSE	20
2022-09-12	15:11:58	0.219962	0.978435	1.71301	631.83	FALSE	20
2022-09-12	15:11:58	0.515636	2.29365	1.71301	604.846	FALSE	20
2022-09-12	15:11:58	0.771921	3.43366	1.71301	635.264	FALSE	20
2022-09-12	15:11:59	0.586425	2.60854	6.60377	607.455	FALSE	20
2022-09-12	15:11:59	1.07452	4.77968	6.60377	640.043	FALSE	20
2022-09-12	15:11:59	2.62999	11.6987	6.60377	619.154	FALSE	20
2022-09-12	15:11:59	1.64744	7.32814	6.60377	647.371	FALSE	20
2022-09-12	15:12:00	2.32118	10.3251	6.59306	629.479	FALSE	20
2022-09-12	15:12:00	2.66006	11.8325	6.59306	659.204	FALSE	20
2022-09-12	15:12:00	0.674618	3.00084	6.59306	632.48	FALSE	20
2022-09-12	15:12:00	0.272888	1.21386	6.59306	660.418	FALSE	20
2022-09-12	15:12:01	0.270598	1.20367	1.50829	633.683	FALSE	20
2022-09-12	15:12:01	0.363015	1.61476	1.50829	662.033	FALSE	20
2022-09-12	15:12:01	0.383626	1.70645	1.50829	635.39	FALSE	20
2022-09-12	15:12:02	0.302761	1.34674	1.1421	663.379	FALSE	20
2022-09-12	15:12:02	0.276552	1.23016	1.1421	636.62	FALSE	20
2022-09-12	15:12:02	0.195076	0.867737	1.1421	664.247	FALSE	20
2022-09-12	15:12:02	0.252634	1.12377	1.1421	637.744	FALSE	20
2022-09-12	15:12:03	0.161285	0.717428	0.615731	664.964	FALSE	20
2022-09-12	15:12:03	0.158995	0.707242	0.615731	638.451	FALSE	20
2022-09-12	15:12:03	0.163117	0.725577	0.615731	665.69	FALSE	20
2022-09-12	15:12:03	0.0702928	0.312676	0.615731	638.764	FALSE	20
2022-09-12	15:12:04	-0.330877	-1.47181	-0.217258	665.69	FALSE	20
2022-09-12	15:12:04	-0.0323534	-0.143914	-0.217258	638.764	FALSE	20
2022-09-12	15:12:04	0.0968577	0.430842	-0.217258	666.121	FALSE	20
2022-09-12	15:12:04	0.0710053	0.315846	-0.217258	639.079	FALSE	20
2022-09-12	15:12:05	0.0926338	0.412054	0.681135	666.533	FALSE	20
2022-09-12	15:12:05	0.112634	0.501019	0.681135	639.58	FALSE	20
2022-09-12	15:12:05	0.25411	1.13033	0.681135	667.663	FALSE	20
2022-09-12	15:12:06	0.439962	1.95704	2.40757	641.537	FALSE	20
2022-09-12	15:12:06	0.499555	2.22212	2.40757	669.885	FALSE	20
2022-09-12	15:12:06	0.589733	2.62325	2.40757	644.161	FALSE	20
2022-09-12	15:12:06	0.635738	2.82789	2.40757	672.713	FALSE	20
2022-09-12	15:12:07	0.57528	2.55896	2.44481	646.72	FALSE	20
2022-09-12	15:12:07	0.525254	2.33643	2.44481	675.05	FALSE	20
2022-09-12	15:12:07	0.548206	2.43853	2.44481	649.158	FALSE	20
2022-09-12	15:12:07	0.549733	2.44532	2.44481	677.495	FALSE	20
2022-09-12	15:12:08	0.722252	3.21272	6.29861	652.371	FALSE	20
2022-09-12	15:12:08	1.27787	5.68422	6.29861	683.179	FALSE	20
2022-09-12	15:12:08	2.24785	9.99889	6.29861	662.37	FALSE	20
2022-09-12	15:12:09	2.09426	9.31569	5.8315	692.495	FALSE	20
2022-09-12	15:12:09	1.9105	8.49829	5.8315	670.868	FALSE	20
2022-09-12	15:12:09	0.688104	3.06082	5.8315	695.556	FALSE	20
2022-09-12	15:12:09	0.551056	2.45121	5.8315	673.319	FALSE	20
2022-09-12	15:12:10	0.524033	2.331	1.85494	697.887	FALSE	20
2022-09-12	15:12:10	0.377061	1.67724	1.85494	674.997	FALSE	20
2022-09-12	15:12:10	0.436908	1.94345	1.85494	699.83	FALSE	20
2022-09-12	15:12:10	0.330038	1.46808	1.85494	676.465	FALSE	20
2022-09-12	15:12:11	0.40785	1.8142	1.64583	701.644	FALSE	20
2022-09-12	15:12:11	0.336908	1.49863	1.64583	677.963	FALSE	20
2022-09-12	15:12:11	0.392939	1.74787	1.64583	703.392	FALSE	20
2022-09-12	15:12:11	0.342303	1.52263	1.64583	679.486	FALSE	20
2022-09-12	15:12:12	0.333143	1.48189	5.30697	704.874	FALSE	20
2022-09-12	15:12:12	0.497774	2.2142	5.30697	681.7	FALSE	20
2022-09-12	15:12:12	2.74826	12.2248	5.30697	717.099	FALSE	20
2022-09-12	15:12:13	3.2136	14.2947	11.1822	695.995	1	21
2022-09-12	15:12:13	2.82749	12.5772	11.1822	729.676	FALSE	21
2022-09-12	15:12:13	2.27416	10.1159	11.1822	706.111	FALSE	21
2022-09-12	15:12:13	1.74027	7.74107	11.1822	737.417	FALSE	21
2022-09-12	15:12:14	0.934058	4.15488	18.0376	710.266	FALSE	21
2022-09-12	15:12:14	2.64775	11.7777	18.0376	749.195	FALSE	21
2022-09-12	15:12:14	6.30698	28.0547	18.0376	738.32	1	22
2022-09-12	15:12:14	6.33131	28.1629	18.0376	777.358	1	23
2022-09-12	15:12:15	2.19426	9.76051	4.91532	748.081	FALSE	23
2022-09-12	15:12:15	0.630089	2.80276	4.91532	780.161	FALSE	23
2022-09-12	15:12:15	0.899351	4.00049	4.91532	752.081	FALSE	23
2022-09-12	15:12:15	0.696349	3.0975	4.91532	783.258	FALSE	23
2022-09-12	15:12:16	0.818893	3.6426	2.29878	755.724	FALSE	23
2022-09-12	15:12:16	0.329835	1.46717	2.29878	784.725	FALSE	23
2022-09-12	15:12:16	0.401641	1.78658	2.29878	757.51	FALSE	23
2022-09-12	15:12:17	0.0226592	0.100793	-0.060892	784.826	FALSE	23
2022-09-12	15:12:17	0.100166	0.445558	-0.060892	757.956	FALSE	23
2022-09-12	15:12:17	-0.000139698	-0.000621405	-0.060892	784.826	FALSE	23
2022-09-12	15:12:17	-0.177442	-0.789298	-0.060892	757.956	FALSE	23
2022-09-12	15:12:18	-0.178257	-0.792923	-1.01499	784.826	FALSE	23
2022-09-12	15:12:18	-0.105381	-0.468756	-1.01499	757.956	FALSE	23
2022-09-12	15:12:18	-0.215763	-0.959757	-1.01499	784.826	FALSE	23
2022-09-12	15:12:18	-0.41332	-1.83853	-1.01499	757.956	FALSE	23
2022-09-12	15:12:19	-0.725025	-3.22506	-3.38448	784.826	FALSE	23
2022-09-12	15:12:19	-0.691895	-3.07769	-3.38448	757.956	FALSE	23
2022-09-12	15:12:19	-0.850877	-3.78487	-3.38448	784.826	FALSE	23
2022-09-12	15:12:19	-0.775661	-3.4503	-3.38448	757.956	FALSE	23
2022-09-12	15:12:20	-0.973625	-4.33088	-4.07342	784.826	FALSE	23
2022-09-12	15:12:20	-0.780241	-3.47067	-4.07342	757.956	FALSE	23
2022-09-12	15:12:20	-0.993371	-4.41871	-4.07342	784.826	FALSE	23
2022-09-12	15:12:21	-0.820394	-3.64928	-3.78781	757.956	FALSE	23
2022-09-12	15:12:21	-0.975355	-4.33857	-3.78781	784.826	FALSE	23
2022-09-12	15:12:21	-0.744108	-3.30994	-3.78781	757.956	FALSE	23
2022-09-12	15:12:21	-0.866297	-3.85346	-3.78781	784.826	FALSE	23
2022-09-12	15:12:22	-0.960394	-4.27202	-1.55913	757.956	FALSE	23
2022-09-12	15:12:22	-0.444007	-1.97503	-1.55913	784.826	FALSE	23
2022-09-12	15:12:22	-0.0208013	-0.0925283	-1.55913	757.956	FALSE	23
2022-09-12	15:12:22	0.0231681	0.103056	-1.55913	784.929	FALSE	23
2022-09-12	15:12:23	-0.12874	-0.572661	0.0859653	757.956	FALSE	23
2022-09-12	15:12:23	0.0383336	0.170516	0.0859653	785.1	FALSE	23
2022-09-12	15:12:23	0.17416	0.774699	0.0859653	758.731	FALSE	23
2022-09-12	15:12:23	-0.00645013	-0.0286915	0.0859653	785.1	FALSE	23
2022-09-12	15:12:24	0.18215	0.81024	0.838236	759.541	FALSE	23
2022-09-12	15:12:24	0.0407254	0.181155	0.838236	785.281	FALSE	23
2022-09-12	15:12:24	0.342456	1.52331	0.838236	761.064	FALSE	23
2022-09-12	15:12:25	-0.0492491	-0.21907	1.84102	785.281	FALSE	23
2022-09-12	15:12:25	0.416959	1.85472	1.84102	762.919	FALSE	23
2022-09-12	15:12:25	0.272888	1.21386	1.84102	786.495	FALSE	23
2022-09-12	15:12:25	1.01492	4.51457	1.84102	767.434	FALSE	23
2022-09-12	15:12:26	1.06617	4.74254	2.72534	791.237	FALSE	23
2022-09-12	15:12:26	0.560573	2.49354	2.72534	769.927	FALSE	23
2022-09-12	15:12:26	0.397774	1.76938	2.72534	793.007	FALSE	23
2022-09-12	15:12:26	0.426221	1.89592	2.72534	771.823	FALSE	23
2022-09-12	15:12:27	0.215687	0.959419	0.972888	793.966	FALSE	23
2022-09-12	15:12:27	0.302964	1.34764	0.972888	773.171	FALSE	23
2022-09-12	15:12:27	0.281183	1.25076	0.972888	795.217	FALSE	23
2022-09-12	15:12:27	0.0750257	0.333729	0.972888	773.504	FALSE	23
2022-09-12	15:12:28	0.176959	0.787149	0.808882	796.004	FALSE	23
2022-09-12	15:12:28	0.0782826	0.348217	0.808882	773.853	FALSE	23
2022-09-12	15:12:28	0.290293	1.29128	0.808882	797.295	FALSE	23
2022-09-12	15:12:29	0.0810307	0.360441	1.09524	774.213	FALSE	23
2022-09-12	15:12:29	0.277723	1.23537	1.09524	798.531	FALSE	23
2022-09-12	15:12:29	0.148359	0.659931	1.09524	774.873	FALSE	23
2022-09-12	15:12:29	0.477774	2.12523	1.09524	800.656	FALSE	23
2022-09-12	15:12:30	0.0141606	0.0629892	1.02133	774.936	FALSE	23
2022-09-12	15:12:30	0.412786	1.83615	1.02133	802.492	FALSE	23
2022-09-12	15:12:30	0.199809	0.88879	1.02133	775.825	FALSE	23
2022-09-12	15:12:30	0.291667	1.29739	1.02133	803.789	FALSE	23
2022-09-12	15:12:31	0.160267	0.7129	1.40167	776.538	FALSE	23
2022-09-12	15:12:31	0.44673	1.98714	1.40167	805.777	FALSE	23
2022-09-12	15:12:31	0.338333	1.50497	1.40167	778.043	FALSE	23
2022-09-12	15:12:32	0.891158	3.96405	2.41244	809.741	FALSE	23
2022-09-12	15:12:32	0.298893	1.32954	2.41244	779.372	FALSE	23
2022-09-12	15:12:32	0.484542	2.15534	2.41244	811.896	FALSE	23
2022-09-12	15:12:32	0.494771	2.20084	2.41244	781.573	FALSE	23
2022-09-12	15:12:33	0.575891	2.56168	2.76054	814.458	FALSE	23
2022-09-12	15:12:33	0.503117	2.23797	2.76054	783.811	FALSE	23
2022-09-12	15:12:33	0.587341	2.61261	2.76054	817.07	FALSE	23
2022-09-12	15:12:33	0.816043	3.62992	2.76054	787.441	FALSE	23
2022-09-12	15:12:34	0.450598	2.00435	2.45613	819.075	FALSE	23
2022-09-12	15:12:34	0.537366	2.39031	2.45613	789.831	FALSE	23
2022-09-12	15:12:34	0.610344	2.71493	2.45613	821.789	FALSE	23
2022-09-12	15:12:34	0.610344	2.71493	2.45613	792.546	FALSE	23
2022-09-12	15:12:35	1.14001	5.07099	3.82392	826.86	FALSE	23
2022-09-12	15:12:35	0.709173	3.15454	3.82392	795.701	FALSE	23
2022-09-12	15:12:35	0.729784	3.24623	3.82392	830.107	FALSE	23
2022-09-12	15:12:36	1.0138	4.50959	1.89625	800.21	FALSE	23
2022-09-12	15:12:36	0.39813	1.77096	1.89625	831.878	FALSE	23
2022-09-12	15:12:36	0.12042	0.535652	1.89625	800.746	FALSE	23
2022-09-12	15:12:36	0.172837	0.768814	1.89625	832.646	FALSE	23
2022-09-12	15:12:37	0.0680537	0.302716	1.6812	801.049	FALSE	23
2022-09-12	15:12:37	0.207036	0.920938	1.6812	833.567	FALSE	23
2022-09-12	15:12:37	0.256959	1.14301	1.6812	802.192	FALSE	23
2022-09-12	15:12:37	0.979758	4.35816	1.6812	837.926	FALSE	23
2022-09-12	15:12:38	1.19665	5.32294	2.84741	807.515	FALSE	23
2022-09-12	15:12:38	0.54556	2.42676	2.84741	840.352	FALSE	23
2022-09-12	15:12:38	0.344186	1.53101	2.84741	809.046	FALSE	23
2022-09-12	15:12:38	0.47411	2.10894	2.84741	842.461	FALSE	23
2022-09-12	15:12:39	0.39187	1.74312	1.86075	810.789	FALSE	23
2022-09-12	15:12:39	0.517977	2.30407	1.86075	844.765	FALSE	23
2022-09-12	15:12:39	0.345102	1.53508	1.86075	812.324	FALSE	23
2022-09-12	15:12:40	0.451565	2.00865	2.09954	846.774	FALSE	23
2022-09-12	15:12:40	0.456094	2.0288	2.09954	814.353	FALSE	23
2022-09-12	15:12:40	0.407952	1.81465	2.09954	848.589	FALSE	23
2022-09-12	15:12:40	0.572379	2.54606	2.09954	816.899	FALSE	23
2022-09-12	15:12:41	2.01528	8.96437	3.38652	857.553	FALSE	23
2022-09-12	15:12:41	0.348003	1.54799	3.38652	818.447	FALSE	23
2022-09-12	15:12:41	0.357774	1.59145	3.38652	859.144	FALSE	23
2022-09-12	15:12:41	0.324237	1.44227	3.38652	819.889	FALSE	23
2022-09-12	15:12:42	0.699962	3.11357	2.89042	862.258	FALSE	23
2022-09-12	15:12:42	0.294059	1.30803	2.89042	821.197	FALSE	23
2022-09-12	15:12:42	0.448664	1.99575	2.89042	864.254	FALSE	23
2022-09-12	15:12:42	1.1565	5.14434	2.89042	826.341	FALSE	23
2022-09-12	15:12:43	0.380369	1.69196	1.5956	865.946	FALSE	23
2022-09-12	15:12:43	0.24383	1.0846	1.5956	827.426	FALSE	23
2022-09-12	15:12:43	0.451921	2.01023	1.5956	867.956	FALSE	23
2022-09-12	15:12:44	0.294008	1.30781	1.36151	828.734	FALSE	23
2022-09-12	15:12:44	0.36159	1.60842	1.36151	869.564	FALSE	23
2022-09-12	15:12:44	0.262812	1.16904	1.36151	829.903	FALSE	23
2022-09-12	15:12:44	0.305916	1.36078	1.36151	870.925	FALSE	23
2022-09-12	15:12:45	0.30098	1.33882	0.799261	831.242	FALSE	23
2022-09-12	15:12:45	0.165967	0.738254	0.799261	871.663	FALSE	23
2022-09-12	15:12:45	0.101641	0.452119	0.799261	831.694	FALSE	23
2022-09-12	15:12:45	0.15014	0.667853	0.799261	872.331	FALSE	23
2022-09-12	15:12:46	0.207596	0.923429	1.63752	832.617	FALSE	23
2022-09-12	15:12:46	0.292532	1.30124	1.63752	873.633	FALSE	23
2022-09-12	15:12:46	0.482303	2.14538	1.63752	834.762	FALSE	23
2022-09-12	15:12:46	0.490089	2.18001	1.63752	875.813	FALSE	23
2022-09-12	15:12:47	0.444033	1.97515	1.74697	836.738	FALSE	23
2022-09-12	15:12:47	0.208054	0.925466	1.74697	876.738	FALSE	23
2022-09-12	15:12:47	0.52612	2.34029	1.74697	839.078	FALSE	23
2022-09-12	15:12:48	0.283626	1.26163	1.30503	878	FALSE	23
2022-09-12	15:12:48	0.382099	1.69965	1.30503	840.778	FALSE	23
2022-09-12	15:12:48	0.200573	0.892189	1.30503	878.892	FALSE	23
2022-09-12	15:12:48	0.307239	1.36666	1.30503	842.144	FALSE	23
2022-09-12	15:12:49	0.294822	1.31143	0.554781	880.203	FALSE	23
2022-09-12	15:12:49	0.26841	1.19394	0.554781	843.338	FALSE	23
2022-09-12	15:12:49	0.0105982	0.0471429	0.554781	880.25	FALSE	23
2022-09-12	15:12:49	-0.0749488	-0.333387	0.554781	843.338	FALSE	23
2022-09-12	15:12:50	-0.0170354	-0.0757769	-0.511259	880.25	FALSE	23
2022-09-12	15:12:50	-0.116323	-0.517428	-0.511259	843.338	FALSE	23
2022-09-12	15:12:50	-0.206908	-0.920368	-0.511259	880.25	FALSE	23
2022-09-12	15:12:50	-0.119478	-0.531462	-0.511259	843.338	FALSE	23
2022-09-12	15:12:51	-0.106247	-0.472608	-0.454723	880.25	FALSE	23
2022-09-12	15:12:51	-0.0866537	-0.385453	-0.454723	843.338	FALSE	23
2022-09-12	15:12:51	-0.113778	-0.506107	-0.454723	880.25	FALSE	23
2022-09-12	15:12:52	-0.224465	-0.998465	-2.14911	843.338	FALSE	23
2022-09-12	15:12:52	-0.534491	-2.37752	-2.14911	880.25	FALSE	23
2022-09-12	15:12:52	-0.532862	-2.37028	-2.14911	843.338	FALSE	23
2022-09-12	15:12:52	-0.64075	-2.85018	-2.14911	880.25	FALSE	23
2022-09-12	15:12:53	-0.562837	-2.50361	-2.19801	843.338	FALSE	23
2022-09-12	15:12:53	-0.57729	-2.5679	-2.19801	880.25	FALSE	23
2022-09-12	15:12:53	-0.766449	-3.40932	-2.19801	843.338	FALSE	23
2022-09-12	15:12:53	-0.0699615	-0.311203	-2.19801	880.25	FALSE	23
2022-09-12	15:12:54	0.191005	0.849628	0.591792	844.188	FALSE	23
2022-09-12	15:12:54	0.00723945	0.0322025	0.591792	880.283	FALSE	23
2022-09-12	15:12:54	0.200878	0.893546	0.591792	845.081	FALSE	23
2022-09-12	15:12:55	0.259657	1.15501	1.07883	881.438	FALSE	23
2022-09-12	15:12:55	0.476807	2.12093	1.07883	847.202	FALSE	23
2022-09-12	15:12:55	0.125306	0.557386	1.07883	881.995	FALSE	23
2022-09-12	15:12:55	0.108359	0.482003	1.07883	847.684	FALSE	23
2022-09-12	15:12:56	-0.00375294	-0.0166938	0.968869	881.995	FALSE	23
2022-09-12	15:12:56	0.302964	1.34764	0.968869	849.032	FALSE	23
2022-09-12	15:12:56	0.215127	0.956928	0.968869	882.952	FALSE	23
2022-09-12	15:12:56	0.356908	1.5876	0.968869	850.62	FALSE	23
2022-09-12	15:12:57	0.16958	0.754326	3.39631	883.706	FALSE	23
2022-09-12	15:12:57	0.193346	0.860042	3.39631	851.48	FALSE	23
2022-09-12	15:12:57	0.813091	3.61679	3.39631	887.323	FALSE	23
2022-09-12	15:12:57	1.87808	8.35408	3.39631	859.834	FALSE	23
2022-09-12	15:12:58	1.30301	5.79605	3.57838	893.119	FALSE	23
2022-09-12	15:12:58	0.73528	3.27067	3.57838	863.104	FALSE	23
2022-09-12	15:12:58	0.375076	1.66841	3.57838	894.787	FALSE	23
2022-09-12	15:12:59	0.512176	2.27826	2.20135	865.383	FALSE	23
2022-09-12	15:12:59	0.349835	1.55614	2.20135	896.344	FALSE	23
2022-09-12	15:12:59	0.435026	1.93508	2.20135	867.318	FALSE	23
2022-09-12	15:12:59	0.682507	3.03593	2.20135	899.38	FALSE	23
2022-09-12	15:13:00	1.10378	4.90983	8.56046	872.228	FALSE	23
2022-09-12	15:13:00	2.51558	11.1898	8.56046	910.569	FALSE	23
2022-09-12	15:13:00	2.30449	10.2508	8.56046	882.478	FALSE	23
2022-09-12	15:13:00	1.77406	7.89137	8.56046	918.461	FALSE	23
2022-09-12	15:13:01	1.2024	5.34852	2.99908	887.827	FALSE	23
2022-09-12	15:13:01	0.570649	2.53836	2.99908	920.999	FALSE	23
2022-09-12	15:13:01	0.380929	1.69445	2.99908	889.521	FALSE	23
2022-09-12	15:13:01	0.542914	2.41499	2.99908	923.414	FALSE	23
2022-09-12	15:13:02	0.590954	2.62868	1.96768	892.15	FALSE	23
2022-09-12	15:13:02	0.432939	1.9258	1.96768	925.34	FALSE	23
2022-09-12	15:13:02	0.303168	1.34855	1.96768	893.499	FALSE	23
2022-09-12	15:13:03	0.350445	1.55885	0.685057	926.899	FALSE	23
2022-09-12	15:13:03	0.231463	1.02959	0.685057	894.528	FALSE	23
2022-09-12	15:13:03	0.0675957	0.300679	0.685057	927.199	FALSE	23
2022-09-12	15:13:03	-0.033473	-0.148895	0.685057	894.528	FALSE	23
2022-09-12	15:13:04	-0.223956	-0.996201	-1.48194	927.199	FALSE	23
2022-09-12	15:13:04	-0.296425	-1.31856	-1.48194	894.528	FALSE	23
2022-09-12	15:13:04	-0.302837	-1.34708	-1.48194	927.199	FALSE	23
2022-09-12	15:13:04	-0.509402	-2.26592	-1.48194	894.528	FALSE	23
2022-09-12	15:13:05	-0.676119	-3.00751	-4.31956	927.199	FALSE	23
2022-09-12	15:13:05	-0.989554	-4.40173	-4.31956	894.528	FALSE	23
2022-09-12	15:13:05	-1.19602	-5.32014	-4.31956	927.199	FALSE	23
2022-09-12	15:13:05	-1.02263	-4.54886	-4.31956	894.528	FALSE	23
2022-09-12	15:13:06	-1.10014	-4.89364	-3.51308	927.199	FALSE	23
2022-09-12	15:13:06	-0.730877	-3.25109	-3.51308	894.528	FALSE	23
2022-09-12	15:13:06	-0.538307	-2.3945	-3.51308	927.199	FALSE	23
2022-09-12	15:13:07	-0.245585	-1.09241	-0.590602	894.528	FALSE	23
2022-09-12	15:13:07	-0.176628	-0.785677	-0.590602	927.199	FALSE	23
2022-09-12	15:13:07	-0.127112	-0.56542	-0.590602	894.528	FALSE	23
2022-09-12	15:13:07	0.0182318	0.0810987	-0.590602	927.281	FALSE	23
2022-09-12	15:13:08	0.228054	1.01443	1.24233	895.543	FALSE	23
2022-09-12	15:13:08	0.166222	0.739389	1.24233	928.02	FALSE	23
2022-09-12	15:13:08	0.176094	0.783301	1.24233	896.326	FALSE	23
2022-09-12	15:13:08	0.546781	2.43219	1.24233	930.452	FALSE	23
2022-09-12	15:13:09	0.498639	2.21805	4.28764	898.544	FALSE	23
2022-09-12	15:13:09	0.527544	2.34662	4.28764	932.799	FALSE	23
2022-09-12	15:13:09	2.21823	9.86713	4.28764	908.411	FALSE	23
2022-09-12	15:13:09	0.611209	2.71878	4.28764	935.517	FALSE	23
2022-09-12	15:13:10	0.703168	3.12783	3.2672	911.539	FALSE	23
2022-09-12	15:13:10	0.906374	4.03173	3.2672	939.549	FALSE	23
2022-09-12	15:13:10	0.593957	2.64204	3.2672	914.181	FALSE	23
2022-09-12	15:13:11	0.503168	2.23819	2.24413	941.787	FALSE	23
2022-09-12	15:13:11	0.349936	1.55659	2.24413	915.737	FALSE	23
2022-09-12	15:13:11	0.579555	2.57798	2.24413	944.365	FALSE	23
2022-09-12	15:13:11	0.585356	2.60378	2.24413	918.341	FALSE	23
2022-09-12	15:13:12	0.452176	2.01137	2.58137	946.377	FALSE	23
2022-09-12	15:13:12	0.686069	3.05177	2.58137	921.393	FALSE	23
2022-09-12	15:13:12	0.599402	2.66626	2.58137	949.043	FALSE	23
2022-09-12	15:13:12	0.583626	2.59609	2.58137	923.989	FALSE	23
2022-09-12	15:13:13	0.470649	2.09354	2.28601	951.137	FALSE	23
2022-09-12	15:13:13	0.827799	3.68222	2.28601	927.671	FALSE	23
2022-09-12	15:13:13	0.407341	1.81193	2.28601	952.948	FALSE	23
2022-09-12	15:13:13	0.349886	1.55636	2.28601	929.228	FALSE	23
2022-09-12	15:13:14	0.430547	1.91516	2.0872	954.864	FALSE	23
2022-09-12	15:13:14	0.517468	2.3018	2.0872	931.53	FALSE	23
2022-09-12	15:13:14	0.459657	2.04465	2.0872	956.908	FALSE	23
2022-09-12	15:13:15	0.601285	2.67464	1.78019	934.204	FALSE	23
2022-09-12	15:13:15	0.65472	2.91233	1.78019	959.821	FALSE	23
2022-09-12	15:13:15	0.304847	1.35602	1.78019	935.56	FALSE	23
2022-09-12	15:13:15	0.0399621	0.177759	1.78019	959.998	FALSE	23
2022-09-12	15:13:16	0.443931	1.97469	1.4631	937.535	FALSE	23
2022-09-12	15:13:16	0.45986	2.04555	1.4631	962.044	FALSE	23
2022-09-12	15:13:16	0.169835	0.75546	1.4631	938.29	FALSE	23
2022-09-12	15:13:16	0.242049	1.07668	1.4631	963.121	FALSE	23
2022-09-12	15:13:17	0.249275	1.10883	1.35549	939.399	FALSE	23
2022-09-12	15:13:17	0.352939	1.56994	1.35549	964.691	FALSE	23
2022-09-12	15:13:17	0.311972	1.38771	1.35549	940.787	FALSE	23
2022-09-12	15:13:18	0.313957	1.39654	0.41194	966.087	FALSE	23
2022-09-12	15:13:18	0.110547	0.491735	0.41194	941.279	FALSE	23
2022-09-12	15:13:18	-0.0112339	-0.0499706	0.41194	966.087	FALSE	23
2022-09-12	15:13:18	-0.0428369	-0.190547	0.41194	941.279	FALSE	23
2022-09-12	15:13:19	-0.325483	-1.44781	-1.80078	966.087	FALSE	23
2022-09-12	15:13:19	-0.425178	-1.89128	-1.80078	941.279	FALSE	23
2022-09-12	15:13:19	-0.515559	-2.29331	-1.80078	966.087	FALSE	23
2022-09-12	15:13:19	-0.353117	-1.57074	-1.80078	941.279	FALSE	23
2022-09-12	15:13:20	-0.540597	-2.40468	-2.89942	966.087	FALSE	23
2022-09-12	15:13:20	-0.698816	-3.10847	-2.89942	941.279	FALSE	23
2022-09-12	15:13:20	-0.783803	-3.48651	-2.89942	966.087	FALSE	23
2022-09-12	15:13:20	-0.584058	-2.59801	-2.89942	941.279	FALSE	23
2022-09-12	15:13:21	-0.607875	-2.70395	-2.86558	966.087	FALSE	23
2022-09-12	15:13:21	-0.681971	-3.03354	-2.86558	941.279	FALSE	23
2022-09-12	15:13:21	-0.642786	-2.85924	-2.86558	966.087	FALSE	23
2022-09-12	15:13:22	-0.4636	-2.06219	-1.44781	941.279	FALSE	23
2022-09-12	15:13:22	-0.346603	-1.54176	-1.44781	966.087	FALSE	23
2022-09-12	15:13:22	-0.33103	-1.47249	-1.44781	941.279	FALSE	23
2022-09-12	15:13:22	-0.160699	-0.714821	-1.44781	966.087	FALSE	23
2022-09-12	15:13:23	-0.264262	-1.17549	-0.762531	941.279	FALSE	23
2022-09-12	15:13:23	-0.185381	-0.824612	-0.762531	966.087	FALSE	23
2022-09-12	15:13:23	-0.230878	-1.02699	-0.762531	941.279	FALSE	23
2022-09-12	15:13:23	-0.00517788	-0.0230322	-0.762531	966.087	FALSE	23
2022-09-12	15:13:24	0.0667814	0.297057	1.9979	941.576	FALSE	23
2022-09-12	15:13:24	0.099504	0.442614	1.9979	966.53	FALSE	23
2022-09-12	15:13:24	0.484898	2.15692	1.9979	943.733	FALSE	23
2022-09-12	15:13:24	1.14541	5.09501	1.9979	971.625	FALSE	23
2022-09-12	15:13:25	0.955992	4.25244	3.57688	947.985	FALSE	23
2022-09-12	15:13:25	0.79299	3.52738	3.57688	975.152	FALSE	23
2022-09-12	15:13:25	0.663371	2.95081	3.57688	950.936	FALSE	23
2022-09-12	15:13:26	0.682965	3.03796	2.54957	978.19	FALSE	23
2022-09-12	15:13:26	0.55187	2.45483	2.54957	953.391	FALSE	23
2022-09-12	15:13:26	0.465	2.06841	2.54957	980.258	FALSE	23
2022-09-12	15:13:26	0.592837	2.63706	2.54957	956.028	FALSE	23
2022-09-12	15:13:27	0.27757	1.23469	2.30446	981.493	FALSE	23
2022-09-12	15:13:27	0.701794	3.12172	2.30446	959.149	FALSE	23
2022-09-12	15:13:27	0.273753	1.21771	2.30446	982.711	FALSE	23
2022-09-12	15:13:27	0.819148	3.64373	2.30446	962.793	FALSE	23
2022-09-12	15:13:28	1.50709	6.70384	4.91804	989.415	FALSE	23
2022-09-12	15:13:28	0.313906	1.39632	4.91804	964.189	FALSE	23
2022-09-12	15:13:28	0.887494	3.94775	4.91804	993.362	FALSE	23
2022-09-12	15:13:28	1.71401	7.62426	4.91804	971.814	FALSE	23
2022-09-12	15:13:29	0.314618	1.39948	2.24672	994.762	FALSE	23
2022-09-12	15:13:29	0.81589	3.62924	2.24672	975.443	FALSE	23
2022-09-12	15:13:29	0.384746	1.71143	2.24672	996.473	FALSE	23
2022-09-12	15:13:30	0.321947	1.43208	1.9825	976.875	FALSE	23
2022-09-12	15:13:30	0.612735	2.72557	1.9825	999.199	FALSE	23
2022-09-12	15:13:30	0.400878	1.78319	1.9825	978.658	FALSE	23
2022-09-12	15:13:30	0.447188	1.98918	1.9825	1001.19	FALSE	23
2022-09-12	15:13:31	0.490954	2.18386	2.13955	980.842	FALSE	23
2022-09-12	15:13:31	0.281336	1.25144	2.13955	1002.44	FALSE	23
2022-09-12	15:13:31	0.741489	3.29829	2.13955	984.14	FALSE	23
2022-09-12	15:13:31	0.410191	1.82461	2.13955	1004.26	FALSE	23
2022-09-12	15:13:32	0.326221	1.4511	1.70226	985.592	FALSE	23
2022-09-12	15:13:32	0.55869	2.48516	1.70226	1006.75	FALSE	23
2022-09-12	15:13:32	0.342761	1.52467	1.70226	987.116	FALSE	23
2022-09-12	15:13:32	0.303066	1.3481	1.70226	1008.1	FALSE	23
2022-09-12	15:13:33	0.219809	0.977754	0.950288	988.094	FALSE	23
2022-09-12	15:13:33	0.316908	1.40967	0.950288	1009.51	FALSE	23
2022-09-12	15:13:33	0.104186	0.46344	0.950288	988.557	FALSE	23
2022-09-12	15:13:34	0.153804	0.684151	0.498696	1010.19	FALSE	23
2022-09-12	15:13:34	0.103117	0.458685	0.498696	989.016	FALSE	23
2022-09-12	15:13:34	0.121641	0.541083	0.498696	1010.73	FALSE	23
2022-09-12	15:13:34	0.0698857	0.310866	0.498696	989.327	FALSE	23
2022-09-12	15:13:35	0.212786	0.946515	0.599036	1011.68	FALSE	23
2022-09-12	15:13:35	0.157214	0.699319	0.599036	990.026	FALSE	23
2022-09-12	15:13:35	0.0551783	0.245444	0.599036	1011.92	FALSE	23
2022-09-12	15:13:35	0.113499	0.504866	0.599036	990.531	FALSE	23
2022-09-12	15:13:36	0.0905982	0.402999	0.424278	1012.33	FALSE	23
2022-09-12	15:13:36	0.12271	0.545839	0.424278	991.077	FALSE	23
2022-09-12	15:13:36	0.0728374	0.323995	0.424278	1012.65	FALSE	23
2022-09-12	15:13:37	-0.0666536	-0.296489	0.628975	991.077	FALSE	23
2022-09-12	15:13:37	-0.114236	-0.508145	0.628975	1012.65	FALSE	23
2022-09-12	15:13:37	0.398995	1.77481	0.628975	992.852	FALSE	23
2022-09-12	15:13:37	0.347494	1.54572	0.628975	1014.2	FALSE	23
2022-09-12	15:13:38	0.236654	1.05268	0.713636	993.904	FALSE	23
2022-09-12	15:13:38	0.15416	0.685735	0.713636	1014.88	FALSE	23
2022-09-12	15:13:38	0.166476	0.740519	0.713636	994.645	FALSE	23
2022-09-12	15:13:38	0.0844404	0.375608	0.713636	1015.26	FALSE	23
2022-09-12	15:13:39	0.251616	1.11924	0.981661	995.764	FALSE	23
2022-09-12	15:13:39	0.22439	0.998132	0.981661	1016.26	FALSE	23
2022-09-12	15:13:39	0.210191	0.934972	0.981661	996.699	FALSE	23
2022-09-12	15:13:39	0.196552	0.874303	0.981661	1017.13	FALSE	23
2022-09-12	15:13:40	0.224288	0.997678	0.809261	997.697	FALSE	23
2022-09-12	15:13:40	0.213957	0.951724	0.809261	1018.08	FALSE	23
2022-09-12	15:13:40	0.107545	0.478382	0.809261	998.175	FALSE	23
2022-09-12	15:13:41	0.218486	0.971869	0.839726	1019.05	FALSE	23
2022-09-12	15:13:41	0.180929	0.804808	0.839726	998.98	FALSE	23
2022-09-12	15:13:41	0.165509	0.736217	0.839726	1019.79	FALSE	23
2022-09-12	15:13:41	0.190191	0.846008	0.839726	999.826	FALSE	23
2022-09-12	15:13:42	0.15472	0.688226	0.619806	1020.48	FALSE	23
2022-09-12	15:13:42	0.208308	0.926596	0.619806	1000.75	FALSE	23
2022-09-12	15:13:42	0.134364	0.597678	0.619806	1021.08	FALSE	23
2022-09-12	15:13:42	0.059962	0.266723	0.619806	1001.02	FALSE	23
2022-09-12	15:13:43	0.00500025	0.0222421	0.201981	1021.1	FALSE	23
2022-09-12	15:13:43	-0.0600379	-0.267061	0.201981	1001.02	FALSE	23
2022-09-12	15:13:43	0.0199112	0.088569	0.201981	1021.19	FALSE	23
2022-09-12	15:13:43	0.216756	0.964174	0.201981	1001.98	FALSE	23
2022-09-12	15:13:44	-0.0458903	-0.204129	0.152406	1021.19	FALSE	23
2022-09-12	15:13:44	0.0521249	0.231862	0.152406	1002.22	FALSE	23
2022-09-12	15:13:44	0.0965523	0.429484	0.152406	1021.62	FALSE	23
2022-09-12	15:13:45	0.0868831	0.386473	1.13146	1002.6	FALSE	23
2022-09-12	15:13:45	0.0987915	0.439444	1.13146	1022.06	FALSE	23
2022-09-12	15:13:45	0.299351	1.33157	1.13146	1003.93	FALSE	23
2022-09-12	15:13:45	0.53243	2.36836	1.13146	1024.42	FALSE	23
2022-09-12	15:13:46	1.77324	7.88773	3.0645	1011.82	FALSE	23
2022-09-12	15:13:46	0.698486	3.10701	3.0645	1027.53	FALSE	23
2022-09-12	15:13:46	0.218028	0.969832	3.0645	1012.79	FALSE	23
2022-09-12	15:13:46	0.0659671	0.293435	3.0645	1027.83	FALSE	23
2022-09-12	15:13:47	-0.159376	-0.708936	0.0238838	1012.79	FALSE	23
2022-09-12	15:13:47	-0.162531	-0.72297	0.0238838	1027.83	FALSE	23
2022-09-12	15:13:47	0.245865	1.09366	0.0238838	1013.88	FALSE	23
2022-09-12	15:13:47	0.0975193	0.433785	0.0238838	1028.26	FALSE	23
2022-09-12	15:13:48	0.0261707	0.116413	0.2628	1014	FALSE	23
2022-09-12	15:13:48	0.0807254	0.359083	0.2628	1028.62	FALSE	23
2022-09-12	15:13:48	0.0703438	0.312903	0.2628	1014.31	FALSE	23
2022-09-12	15:13:49	0.0461707	0.205377	0.252632	1028.82	FALSE	23
2022-09-12	15:13:49	0.0742623	0.330334	0.252632	1014.64	FALSE	23
2022-09-12	15:13:49	0.0493259	0.219411	0.252632	1029.04	FALSE	23
2022-09-12	15:13:49	0.0574175	0.255405	0.252632	1014.9	FALSE	23
2022-09-12	15:13:50	0.0612852	0.272609	0.234012	1029.32	FALSE	23
2022-09-12	15:13:50	0.0515142	0.229145	0.234012	1015.13	FALSE	23
2022-09-12	15:13:50	0.0476465	0.211941	0.234012	1029.53	FALSE	23
2022-09-12	15:13:50	0.0499875	0.222354	0.234012	1015.35	FALSE	23
2022-09-12	15:13:51	0.041387	0.184098	0.191228	1029.71	FALSE	23
2022-09-12	15:13:51	0.0378247	0.168252	0.191228	1015.52	FALSE	23
2022-09-12	15:13:51	0.0465778	0.207187	0.191228	1029.92	FALSE	23
2022-09-12	15:13:51	0.0461707	0.205377	0.191228	1015.72	FALSE	23
2022-09-12	15:13:52	0.0490205	0.218053	0.217223	1030.14	FALSE	23
2022-09-12	15:13:52	0.0468323	0.208319	0.217223	1015.93	FALSE	23
2022-09-12	15:13:52	0.0506491	0.225297	0.217223	1030.36	FALSE	23
2022-09-12	15:13:53	0.0601147	0.267402	0.122298	1016.2	FALSE	23
2022-09-12	15:13:53	0.0593513	0.264006	0.122298	1030.63	FALSE	23
2022-09-12	15:13:53	0.0381809	0.169836	0.122298	1016.37	FALSE	23
2022-09-12	15:13:53	-0.0476715	-0.212052	0.122298	1030.63	FALSE	23
2022-09-12	15:13:54	-0.0437529	-0.194622	-2.23502	1016.37	FALSE	23
2022-09-12	15:13:54	-0.580139	-2.58057	-2.23502	1030.63	FALSE	23
2022-09-12	15:13:54	-0.617341	-2.74606	-2.23502	1016.37	FALSE	23
2022-09-12	15:13:54	-0.768587	-3.41883	-2.23502	1030.63	FALSE	23
2022-09-12	15:13:55	-0.74874	-3.33055	-3.53484	1016.37	FALSE	23
2022-09-12	15:13:55	-0.726755	-3.23275	-3.53484	1030.63	FALSE	23
2022-09-12	15:13:55	-0.923498	-4.1079	-3.53484	1016.37	FALSE	23
2022-09-12	15:13:55	-0.779681	-3.46818	-3.53484	1030.63	FALSE	23
2022-09-12	15:13:56	-0.636119	-2.82958	-1.90901	1016.37	FALSE	23
2022-09-12	15:13:56	-0.478002	-2.12625	-1.90901	1030.63	FALSE	23
2022-09-12	15:13:56	-0.173371	-0.771189	-1.90901	1016.37	FALSE	23
2022-09-12	15:13:57	0.458588	2.03989	1.20828	1032.67	FALSE	23
2022-09-12	15:13:57	0.174822	0.777643	1.20828	1017.15	FALSE	23
2022-09-12	15:13:57	0.181489	0.807299	1.20828	1033.47	FALSE	23
2022-09-12	15:13:58	0.172685	0.768137	3.05027	1017.92	FALSE	23
2022-09-12	15:13:58	0.802252	3.56858	3.05027	1037.04	FALSE	23
2022-09-12	15:13:58	1.41716	6.30381	3.05027	1024.22	FALSE	23
2022-09-12	15:13:58	0.684898	3.04656	3.05027	1040.09	FALSE	23
2022-09-12	15:13:58	0.351667	1.56429	3.05027	1025.78	FALSE	23
2022-09-12	15:13:59	0.820623	3.6503	2.32059	1043.74	FALSE	23
2022-09-12	15:13:59	0.174517	0.776287	2.32059	1026.56	FALSE	23
2022-09-12	15:13:59	0.569937	2.53519	2.32059	1046.27	FALSE	23
2022-09-12	15:14:00	0.59075	2.62777	2.60191	1029.19	FALSE	23
2022-09-12	15:14:00	0.685763	3.05041	2.60191	1049.32	FALSE	23
2022-09-12	15:14:00	0.56098	2.49535	2.60191	1031.68	FALSE	23
2022-09-12	15:14:00	0.502252	2.23412	2.60191	1051.56	FALSE	23
2022-09-12	15:14:01	0.976247	4.34254	2.6211	1036.03	FALSE	23
2022-09-12	15:14:01	0.482049	2.14425	2.6211	1053.7	FALSE	23
2022-09-12	15:14:01	0.489987	2.17956	2.6211	1038.21	FALSE	23
2022-09-12	15:14:01	0.408715	1.81805	2.6211	1055.52	FALSE	23
2022-09-12	15:14:02	1.58571	7.05356	7.73176	1045.26	FALSE	23
2022-09-12	15:14:02	1.27889	5.68876	7.73176	1061.21	FALSE	23
2022-09-12	15:14:02	3.068	13.6471	7.73176	1058.91	1	24
2022-09-12	15:14:02	1.02011	4.53765	7.73176	1065.75	FALSE	24
2022-09-12	15:14:03	1.04159	4.6332	3.54873	1063.54	FALSE	24
2022-09-12	15:14:03	0.588919	2.61963	3.54873	1068.37	FALSE	24
2022-09-12	15:14:03	0.762863	3.39337	3.54873	1066.93	FALSE	24
2022-09-12	15:14:04	1.43406	6.37899	3.82721	1074.75	FALSE	24
2022-09-12	15:14:04	0.509733	2.26739	3.82721	1069.2	FALSE	24
2022-09-12	15:14:04	0.624745	2.77899	3.82721	1077.52	FALSE	24
2022-09-12	15:14:04	0.873041	3.88346	3.82721	1073.08	FALSE	24
2022-09-12	15:14:05	0.398283	1.77164	3.50718	1079.3	FALSE	24
2022-09-12	15:14:05	0.704389	3.13326	3.50718	1076.22	FALSE	24
2022-09-12	15:14:05	0.409682	1.82235	3.50718	1081.12	FALSE	24
2022-09-12	15:14:05	1.64144	7.30145	3.50718	1083.52	FALSE	24
2022-09-12	15:14:06	0.770394	3.42687	7.7053	1084.55	FALSE	24
2022-09-12	15:14:06	1.95218	8.68369	7.7053	1092.2	FALSE	24
2022-09-12	15:14:06	1.52877	6.80027	7.7053	1091.35	FALSE	24
2022-09-12	15:14:06	2.67757	11.9104	7.7053	1104.11	FALSE	24
2022-09-12	15:14:07	1.75615	7.81171	6.49104	1099.16	FALSE	24
2022-09-12	15:14:07	1.29823	5.77479	6.49104	1109.89	FALSE	24
2022-09-12	15:14:07	1.32337	5.88661	6.49104	1105.04	FALSE	24
2022-09-12	15:14:08	0.566578	2.52025	5.15872	1112.41	FALSE	24
2022-09-12	15:14:08	2.8939	12.8726	5.15872	1117.92	FALSE	24
2022-09-12	15:14:08	0.515941	2.29501	5.15872	1114.7	FALSE	24
2022-09-12	15:14:08	0.662506	2.94696	5.15872	1120.86	FALSE	24
2022-09-12	15:14:09	0.281285	1.25121	1.43825	1115.95	FALSE	24
2022-09-12	15:14:09	0.223372	0.993603	1.43825	1121.86	FALSE	24
2022-09-12	15:14:09	0.323321	1.4382	1.43825	1117.39	FALSE	24
2022-09-12	15:14:09	0.465356	2.07	1.43825	1123.93	FALSE	24
2022-09-12	15:14:10	0.298028	1.32569	1.88952	1118.72	FALSE	24
2022-09-12	15:14:10	0.404135	1.79767	1.88952	1125.72	FALSE	24
2022-09-12	15:14:10	0.436756	1.94278	1.88952	1120.66	FALSE	24
2022-09-12	15:14:10	0.560216	2.49195	1.88952	1128.22	FALSE	24
2022-09-12	15:14:11	1.12017	4.98274	6.31108	1125.64	FALSE	24
2022-09-12	15:14:11	1.00154	4.45505	6.31108	1132.67	FALSE	24
2022-09-12	15:14:11	2.13467	9.49544	6.31108	1135.14	FALSE	24
2022-09-12	15:14:12	1.97136	8.769	8.72034	1141.44	FALSE	24
2022-09-12	15:14:12	2.21472	9.85152	8.72034	1144.99	FALSE	24
2022-09-12	15:14:12	1.70032	7.56336	8.72034	1149	FALSE	24
2022-09-12	15:14:12	1.95528	8.69748	8.72034	1153.69	FALSE	24
2022-09-12	15:14:13	1.33808	5.95205	6.74554	1154.96	FALSE	24
2022-09-12	15:14:13	1.05849	4.70838	6.74554	1158.4	FALSE	24
2022-09-12	15:14:13	1.75131	7.79018	6.74554	1162.75	FALSE	24
2022-09-12	15:14:13	1.91798	8.53156	6.74554	1166.93	FALSE	24
2022-09-12	15:14:14	0.426374	1.8966	3.13592	1164.64	FALSE	24
2022-09-12	15:14:14	1.20388	5.3551	3.13592	1172.28	FALSE	24
2022-09-12	15:14:14	0.401743	1.78703	3.13592	1166.43	FALSE	24
2022-09-12	15:14:14	0.787952	3.50497	3.13592	1175.79	FALSE	24
2022-09-12	15:14:15	1.34907	6.00093	6.03911	1172.43	FALSE	24
2022-09-12	15:14:15	1.30322	5.79698	6.03911	1181.58	FALSE	24
2022-09-12	15:14:15	1.42067	6.31942	6.03911	1178.75	FALSE	24
2022-09-12	15:14:16	1.36312	6.06343	7.01372	1187.65	FALSE	24
2022-09-12	15:14:16	1.60846	7.15475	7.01372	1185.91	FALSE	24
2022-09-12	15:14:16	0.875331	3.89365	7.01372	1191.54	FALSE	24
2022-09-12	15:14:16	2.46011	10.9431	7.01372	1196.85	FALSE	24
2022-09-12	15:14:17	0.439148	1.95342	5.5839	1193.5	FALSE	24
2022-09-12	15:14:17	2.2337	9.93594	5.5839	1206.78	FALSE	24
2022-09-12	15:14:17	0.539758	2.40095	5.5839	1195.9	FALSE	24
2022-09-12	15:14:17	1.80866	8.04528	5.5839	1214.83	FALSE	24
2022-09-12	15:14:18	0.753397	3.35126	4.73681	1199.25	FALSE	24
2022-09-12	15:14:18	1.18948	5.29104	4.73681	1220.12	FALSE	24
2022-09-12	15:14:18	1.25177	5.56812	4.73681	1204.82	FALSE	24
2022-09-12	15:14:19	1.72561	7.67586	6.79567	1227.8	FALSE	24
2022-09-12	15:14:19	1.37309	6.10778	6.79567	1210.92	FALSE	24
2022-09-12	15:14:19	1.95136	8.68004	6.79567	1236.48	FALSE	24
2022-09-12	15:14:19	1.06088	4.71901	6.79567	1215.64	FALSE	24
2022-09-12	15:14:20	2.1022	9.35101	6.49052	1245.83	FALSE	24
2022-09-12	15:14:20	0.629784	2.80141	6.49052	1218.44	FALSE	24
2022-09-12	15:14:20	2.65187	11.796	6.49052	1257.62	FALSE	24
2022-09-12	15:14:20	0.452685	2.01363	6.49052	1220.46	FALSE	24
2022-09-12	15:14:21	2.41543	10.7443	7.31321	1268.37	FALSE	24
2022-09-12	15:14:21	0.802048	3.56767	7.31321	1224.03	FALSE	24
2022-09-12	15:14:21	1.71477	7.62764	7.31321	1276	FALSE	24
2022-09-12	15:14:22	1.44815	6.44166	5.32652	1230.47	FALSE	24
2022-09-12	15:14:22	1.11925	4.97865	5.32652	1280.97	FALSE	24
2022-09-12	15:14:22	1.6536	7.35554	5.32652	1237.82	FALSE	24
2022-09-12	15:14:22	0.568817	2.53021	5.32652	1283.5	FALSE	24
2022-09-12	15:14:23	1.42266	6.32828	2.9773	1244.15	FALSE	24
2022-09-12	15:14:23	0.270496	1.20322	2.9773	1284.71	FALSE	24
2022-09-12	15:14:23	0.650089	2.89173	2.9773	1247.04	FALSE	24
2022-09-12	15:14:23	0.334059	1.48596	2.9773	1286.19	FALSE	24
2022-09-12	15:14:24	0.360318	1.60277	2.75896	1248.64	FALSE	24
2022-09-12	15:14:24	0.363423	1.61658	2.75896	1287.81	FALSE	24
2022-09-12	15:14:24	0.49243	2.19043	2.75896	1250.84	FALSE	24
2022-09-12	15:14:24	1.2648	5.62608	2.75896	1293.44	FALSE	24
2022-09-12	15:14:25	1.77849	7.91108	3.9121	1258.75	FALSE	24
2022-09-12	15:14:25	0.884135	3.93281	3.9121	1297.37	FALSE	24
2022-09-12	15:14:25	0.456298	2.0297	3.9121	1260.78	FALSE	24
2022-09-12	15:14:25	0.398995	1.77481	3.9121	1299.14	FALSE	24
2022-09-12	15:14:26	0.284542	1.2657	2.4466	1262.04	FALSE	24
2022-09-12	15:14:26	0.723524	3.21838	2.4466	1302.36	FALSE	24
2022-09-12	15:14:26	0.641997	2.85573	2.4466	1264.9	FALSE	24
2022-09-12	15:14:27	0.25584	1.13803	1.25297	1303.5	FALSE	24
2022-09-12	15:14:27	0.31757	1.41261	1.25297	1266.31	FALSE	24
2022-09-12	15:14:27	0.220674	0.981602	1.25297	1304.48	FALSE	24
2022-09-12	15:14:27	0.332634	1.47962	1.25297	1267.79	FALSE	24
2022-09-12	15:14:28	0.247087	1.09909	1.26621	1305.58	FALSE	24
2022-09-12	15:14:28	0.253397	1.12716	1.26621	1268.92	FALSE	24
2022-09-12	15:14:28	0.251056	1.11675	1.26621	1306.7	FALSE	24
2022-09-12	15:14:28	0.387087	1.72184	1.26621	1270.64	FALSE	24
2022-09-12	15:14:29	0.395636	1.75987	2.45975	1308.46	FALSE	24
2022-09-12	15:14:29	0.561896	2.49943	2.45975	1273.14	FALSE	24
2022-09-12	15:14:29	0.67355	2.99609	2.45975	1311.45	FALSE	24
2022-09-12	15:14:29	0.580827	2.58363	2.45975	1275.72	FALSE	24
2022-09-12	15:14:30	0.754313	3.35534	4.59019	1314.81	FALSE	24
2022-09-12	15:14:30	1.01889	4.53223	4.59019	1280.25	FALSE	24
2022-09-12	15:14:30	1.32256	5.88301	4.59019	1320.69	FALSE	24
2022-09-12	15:14:31	2.72301	12.1125	9.0424	1292.37	FALSE	24
2022-09-12	15:14:31	1.42205	6.32556	9.0424	1327.02	FALSE	24
2022-09-12	15:14:31	1.4338	6.37783	9.0424	1298.74	FALSE	24
2022-09-12	15:14:31	2.55243	11.3537	9.0424	1338.37	FALSE	24
2022-09-12	15:14:32	0.430445	1.91471	1.94023	1300.66	FALSE	24
2022-09-12	15:14:32	0.552023	2.45551	1.94023	1340.83	FALSE	24
2022-09-12	15:14:32	0.36098	1.60571	1.94023	1302.26	FALSE	24
2022-09-12	15:14:32	0.401285	1.785	1.94023	1342.61	FALSE	24
2022-09-12	15:14:33	0.365713	1.62676	1.81369	1303.89	FALSE	24
2022-09-12	15:14:33	0.43925	1.95387	1.81369	1344.57	FALSE	24
2022-09-12	15:14:33	0.358639	1.5953	1.81369	1305.49	FALSE	24
2022-09-12	15:14:33	0.467341	2.07883	1.81369	1346.64	FALSE	24
2022-09-12	15:14:34	2.39217	10.6409	12.3494	1316.13	FALSE	24
2022-09-12	15:14:34	2.32042	10.3217	12.3494	1356.97	FALSE	24
2022-09-12	15:14:34	3.61619	16.0855	12.3494	1332.21	1	25
2022-09-12	15:14:35	2.03497	9.05195	10.5818	1366.02	FALSE	25
2022-09-12	15:14:35	3.87533	17.2382	10.5818	1349.45	1	26
2022-09-12	15:14:35	1.08729	4.83648	10.5818	1370.85	FALSE	26
2022-09-12	15:14:35	2.51803	11.2007	10.5818	1360.65	FALSE	26
2022-09-12	15:14:36	0.691514	3.07599	4.60949	1373.93	FALSE	26
2022-09-12	15:14:36	1.83004	8.14038	4.60949	1368.79	FALSE	26
2022-09-12	15:14:36	0.713499	3.17379	4.60949	1377.1	FALSE	26
2022-09-12	15:14:36	0.909987	4.0478	4.60949	1372.84	FALSE	26
2022-09-12	15:14:37	1.46927	6.53561	7.99889	1383.64	FALSE	26
2022-09-12	15:14:37	1.43284	6.37356	7.99889	1379.21	FALSE	26
2022-09-12	15:14:37	2.49258	11.0875	7.99889	1394.73	FALSE	26
2022-09-12	15:14:38	1.27116	5.65437	9.53392	1384.87	FALSE	26
2022-09-12	15:14:38	2.94276	13.09	9.53392	1407.82	FALSE	26
2022-09-12	15:14:38	0.984491	4.37921	9.53392	1389.25	FALSE	26
2022-09-12	15:14:38	3.37487	15.0121	9.53392	1422.83	1	27
2022-09-12	15:14:39	0.957061	4.2572	9.10861	1393.5	FALSE	27
2022-09-12	15:14:39	3.38815	15.0712	9.10861	1437.9	1	28
2022-09-12	15:14:39	1.72632	7.67902	9.10861	1401.18	FALSE	28
2022-09-12	15:14:39	2.1193	9.42707	9.10861	1447.33	FALSE	28
2022-09-12	15:14:40	1.66556	7.40874	12.8715	1408.59	FALSE	28
2022-09-12	15:14:40	2.7907	12.4136	12.8715	1459.74	FALSE	28
2022-09-12	15:14:40	3.71335	16.5177	12.8715	1425.11	1	29
2022-09-12	15:14:40	3.40495	15.1459	12.8715	1474.89	1	30
2022-09-12	15:14:41	2.40439	10.6952	6.69492	1435.81	FALSE	30
2022-09-12	15:14:41	0.723677	3.21906	6.69492	1478.11	FALSE	30
2022-09-12	15:14:41	1.38719	6.1705	6.69492	1441.98	FALSE	30
2022-09-12	15:14:42	0.140624	0.625524	2.35082	1478.73	FALSE	30
2022-09-12	15:14:42	0.610191	2.71425	2.35082	1444.69	FALSE	30
2022-09-12	15:14:42	1.09513	4.87136	2.35082	1483.6	FALSE	30
2022-09-12	15:14:42	0.268003	1.19213	2.35082	1445.88	FALSE	30
2022-09-12	15:14:43	0.436603	1.9421	2.12619	1485.55	FALSE	30
2022-09-12	15:14:43	0.437825	1.94753	2.12619	1447.83	FALSE	30
2022-09-12	15:14:43	0.449936	2.00141	2.12619	1487.55	FALSE	30
2022-09-12	15:14:43	0.587595	2.61374	2.12619	1450.44	FALSE	30
2022-09-12	15:14:44	0.766425	3.40921	4.29098	1490.96	FALSE	30
2022-09-12	15:14:44	0.541285	2.40774	4.29098	1452.85	FALSE	30
2022-09-12	15:14:44	0.986832	4.38963	4.29098	1495.35	FALSE	30
2022-09-12	15:14:44	1.56408	6.95734	4.29098	1459.81	FALSE	30
2022-09-12	15:14:45	3.29777	14.6691	11.3966	1510.01	1	31
2022-09-12	15:14:45	2.92276	13.001	11.3966	1472.81	FALSE	31
2022-09-12	15:14:45	1.46566	6.51955	11.3966	1516.53	FALSE	31
2022-09-12	15:14:46	1.01319	4.50687	2.1387	1477.32	FALSE	31
2022-09-12	15:14:46	0.444237	1.97606	2.1387	1518.51	FALSE	31
2022-09-12	15:14:46	0.256603	1.14142	2.1387	1478.46	FALSE	31
2022-09-12	15:14:46	0.209173	0.930443	2.1387	1519.44	FALSE	31
2022-09-12	15:14:47	0.164389	0.731235	1.14074	1479.19	FALSE	31
2022-09-12	15:14:47	0.28729	1.27792	1.14074	1520.72	FALSE	31
2022-09-12	15:14:47	0.268104	1.19258	1.14074	1480.38	FALSE	31
2022-09-12	15:14:47	0.306018	1.36123	1.14074	1522.08	FALSE	31
2022-09-12	15:14:48	0.313295	1.3936	1.48681	1481.78	FALSE	31
2022-09-12	15:14:48	0.355077	1.57945	1.48681	1523.66	FALSE	31
2022-09-12	15:14:48	0.37355	1.66163	1.48681	1483.44	FALSE	31
2022-09-12	15:14:48	0.295076	1.31256	1.48681	1524.97	FALSE	31
2022-09-12	15:14:49	0.38159	1.69739	3.93311	1485.13	FALSE	31
2022-09-12	15:14:49	1.69986	7.56132	3.93311	1532.53	FALSE	31
2022-09-12	15:14:49	0.571158	2.54063	3.93311	1487.68	FALSE	31
2022-09-12	15:14:50	0.459453	2.04374	2.04102	1534.58	FALSE	31
2022-09-12	15:14:50	0.268715	1.1953	2.04102	1488.87	FALSE	31
2022-09-12	15:14:50	0.472023	2.09965	2.04102	1536.68	FALSE	31
2022-09-12	15:14:50	0.635178	2.8254	2.04102	1491.7	FALSE	31
2022-09-12	15:14:51	0.390954	1.73904	1.93265	1538.42	FALSE	31
2022-09-12	15:14:51	0.40215	1.78884	1.93265	1493.48	FALSE	31
2022-09-12	15:14:51	0.433346	1.92761	1.93265	1540.34	FALSE	31
2022-09-12	15:14:51	0.511463	2.27509	1.93265	1495.76	FALSE	31
2022-09-12	15:14:52	0.506883	2.25472	2.16677	1542.6	FALSE	31
2022-09-12	15:14:52	0.47014	2.09128	2.16677	1497.85	FALSE	31
2022-09-12	15:14:52	0.479046	2.13089	2.16677	1544.73	FALSE	31
2022-09-12	15:14:52	0.492379	2.1902	2.16677	1500.04	FALSE	31
2022-09-12	15:14:53	0.499656	2.22257	2.20356	1546.95	FALSE	31
2022-09-12	15:14:53	0.498384	2.21691	2.20356	1502.26	FALSE	31
2022-09-12	15:14:53	0.488104	2.17118	2.20356	1549.12	FALSE	31
2022-09-12	15:14:54	0.485713	2.16055	2.14906	1504.42	FALSE	31
2022-09-12	15:14:54	0.482914	2.1481	2.14906	1551.27	FALSE	31
2022-09-12	15:14:54	0.476858	2.12116	2.14906	1506.54	FALSE	31
2022-09-12	15:14:54	0.487036	2.16643	2.14906	1553.44	FALSE	31
2022-09-12	15:14:55	0.471667	2.09807	2.06304	1508.64	FALSE	31
2022-09-12	15:14:55	0.466323	2.0743	2.06304	1555.51	FALSE	31
2022-09-12	15:14:55	0.454262	2.02065	2.06304	1510.66	FALSE	31
2022-09-12	15:14:55	0.462914	2.05913	2.06304	1557.57	FALSE	31
2022-09-12	15:14:56	0.434466	1.93259	1.7158	1512.59	FALSE	31
2022-09-12	15:14:56	0.462049	2.05529	1.7158	1559.63	FALSE	31
2022-09-12	15:14:56	0.260674	1.15953	1.7158	1513.75	FALSE	31
2022-09-12	15:14:57	0.637264	2.83468	0.802204	1562.46	FALSE	31
2022-09-12	15:14:57	0.0259671	0.115507	0.802204	1513.87	FALSE	31
2022-09-12	15:14:57	-0.0149998	-0.0667221	0.802204	1562.46	FALSE	31
2022-09-12	15:14:57	0.0731427	0.325353	0.802204	1514.19	FALSE	31
2022-09-12	15:14:58	-0.0899616	-0.400167	-0.334689	1562.46	FALSE	31
2022-09-12	15:14:58	0.000623673	0.00277422	-0.334689	1514.19	FALSE	31
2022-09-12	15:14:58	-0.179376	-0.7979	-0.334689	1562.46	FALSE	31
2022-09-12	15:14:58	-0.0322517	-0.143462	-0.334689	1514.19	FALSE	31
2022-09-12	15:14:59	-0.0662465	-0.294678	0.181268	1562.46	FALSE	31
2022-09-12	15:14:59	0.0368577	0.16395	0.181268	1514.36	FALSE	31
2022-09-12	15:14:59	-0.0532694	-0.236953	0.181268	1562.46	FALSE	31
2022-09-12	15:14:59	0.245662	1.09275	0.181268	1515.45	FALSE	31
2022-09-12	15:15:00	0.246069	1.09456	3.01283	1563.56	FALSE	31
2022-09-12	15:15:00	1.03543	4.6058	3.01283	1520.06	FALSE	31
2022-09-12	15:15:00	0.750445	3.33813	3.01283	1566.89	FALSE	31
2022-09-12	15:15:01	0.761132	3.38567	3.50921	1523.44	FALSE	31
2022-09-12	15:15:01	0.781845	3.4778	3.50921	1570.37	FALSE	31
2022-09-12	15:15:01	0.922201	4.10213	3.50921	1527.54	FALSE	31
2022-09-12	15:15:01	0.690445	3.07124	3.50921	1573.44	FALSE	31
2022-09-12	15:15:02	0.37014	1.64646	1.7842	1529.19	FALSE	31
2022-09-12	15:15:02	0.441743	1.96496	1.7842	1575.41	FALSE	31
2022-09-12	15:15:02	0.391667	1.74221	1.7842	1530.93	FALSE	31
2022-09-12	15:15:02	0.400878	1.78319	1.7842	1577.19	FALSE	31
2022-09-12	15:15:03	0.537214	2.38964	2.87096	1533.32	FALSE	31
2022-09-12	15:15:03	0.435127	1.93553	2.87096	1579.13	FALSE	31
2022-09-12	15:15:03	1.08393	4.82154	2.87096	1538.14	FALSE	31
2022-09-12	15:15:03	0.525407	2.33712	2.87096	1581.46	FALSE	31
2022-09-12	15:15:04	0.35126	1.56247	1.70494	1539.71	FALSE	31
2022-09-12	15:15:04	0.333906	1.48528	1.70494	1582.95	FALSE	31
2022-09-12	15:15:04	0.464695	2.06706	1.70494	1541.77	FALSE	31
2022-09-12	15:15:05	0.23757	1.05676	1.11403	1584.01	FALSE	31
2022-09-12	15:15:05	0.298181	1.32637	1.11403	1543.1	FALSE	31
2022-09-12	15:15:05	0.204288	0.908714	1.11403	1584.91	FALSE	31
2022-09-12	15:15:05	0.261743	1.16429	1.11403	1544.26	FALSE	31
2022-09-12	15:15:06	0.261183	1.16179	2.70933	1586.08	FALSE	31
2022-09-12	15:15:06	0.325662	1.44861	2.70933	1545.71	FALSE	31
2022-09-12	15:15:06	0.733092	3.26094	2.70933	1589.34	FALSE	31
2022-09-12	15:15:06	1.1164	4.96597	2.70933	1550.68	FALSE	31
2022-09-12	15:15:07	0.99874	4.4426	3.95522	1593.78	FALSE	31
2022-09-12	15:15:07	1.15742	5.14844	3.95522	1555.83	FALSE	31
2022-09-12	15:15:07	0.552481	2.45755	3.95522	1596.24	FALSE	31
2022-09-12	15:15:07	0.848053	3.77231	3.95522	1559.6	FALSE	31
2022-09-12	15:15:08	0.675636	3.00536	2.41197	1599.24	FALSE	31
2022-09-12	15:15:08	0.333651	1.48415	2.41197	1561.08	FALSE	31
2022-09-12	15:15:08	0.617417	2.74639	2.41197	1601.99	FALSE	31
2022-09-12	15:15:09	0.561183	2.49625	4.12335	1563.58	FALSE	31
2022-09-12	15:15:09	1.22622	5.45447	4.12335	1607.44	FALSE	31
2022-09-12	15:15:09	0.801641	3.56586	4.12335	1567.15	FALSE	31
2022-09-12	15:15:09	1.11884	4.97682	4.12335	1612.42	FALSE	31
2022-09-12	15:15:10	0.774568	3.44543	4.11238	1570.59	FALSE	31
2022-09-12	15:15:10	0.771361	3.43117	4.11238	1615.85	FALSE	31
2022-09-12	15:15:10	1.10164	4.90032	4.11238	1575.49	FALSE	31
2022-09-12	15:15:10	1.05045	4.67261	4.11238	1620.52	FALSE	31
2022-09-12	15:15:11	0.924389	4.11187	2.01969	1579.6	FALSE	31
2022-09-12	15:15:11	0.390852	1.73859	2.01969	1622.26	FALSE	31
2022-09-12	15:15:11	0.158995	0.707242	2.01969	1580.31	FALSE	31
2022-09-12	15:15:11	0.341947	1.52105	2.01969	1623.78	FALSE	31
2022-09-12	15:15:12	0.0198603	0.0883426	0.562667	1580.4	FALSE	31
2022-09-12	15:15:12	0.189326	0.84216	0.562667	1624.63	FALSE	31
2022-09-12	15:15:12	0.170293	0.757497	0.562667	1581.16	FALSE	31
2022-09-12	15:15:13	0.188308	0.837632	1.35608	1625.46	FALSE	31
2022-09-12	15:15:13	0.25986	1.15591	1.35608	1582.31	FALSE	31
2022-09-12	15:15:13	0.22383	0.995641	1.35608	1626.46	FALSE	31
2022-09-12	15:15:13	0.547443	2.43514	1.35608	1584.75	FALSE	31
2022-09-12	15:15:14	0.101947	0.453481	0.938594	1626.91	FALSE	31
2022-09-12	15:15:14	0.37813	1.682	0.938594	1586.43	FALSE	31
2022-09-12	15:15:14	0.0582317	0.259026	0.938594	1627.17	FALSE	31
2022-09-12	15:15:14	0.305713	1.35987	0.938594	1587.79	FALSE	31
2022-09-12	15:15:15	0.0865778	0.385115	0.936178	1627.56	FALSE	31
2022-09-12	15:15:15	0.360878	1.60526	0.936178	1589.4	FALSE	31
2022-09-12	15:15:15	0.183931	0.818162	0.936178	1628.37	FALSE	31
2022-09-12	15:15:16	0.700267	3.11493	2.2906	1592.51	FALSE	31
2022-09-12	15:15:16	0.379758	1.68924	2.2906	1630.06	FALSE	31
2022-09-12	15:15:16	0.485763	2.16077	2.2906	1594.67	FALSE	31
2022-09-12	15:15:16	0.494008	2.19745	2.2906	1632.26	FALSE	31
2022-09-12	15:15:17	0.681132	3.02981	2.45013	1597.7	FALSE	31
2022-09-12	15:15:17	0.740471	3.29376	2.45013	1635.55	FALSE	31
2022-09-12	15:15:17	0.299199	1.3309	2.45013	1599.03	FALSE	31
2022-09-12	15:15:17	0.482456	2.14606	2.45013	1637.7	FALSE	31
2022-09-12	15:15:18	0.387646	1.72433	2.32874	1600.76	FALSE	31
2022-09-12	15:15:18	0.441947	1.96587	2.32874	1639.67	FALSE	31
2022-09-12	15:15:18	0.716857	3.18872	2.32874	1603.94	FALSE	31
2022-09-12	15:15:18	0.547646	2.43604	2.32874	1642.1	FALSE	31
2022-09-12	15:15:19	0.405916	1.8056	2.07845	1605.75	FALSE	31
2022-09-12	15:15:19	0.512277	2.27871	2.07845	1644.38	FALSE	31
2022-09-12	15:15:19	0.483575	2.15104	2.07845	1607.9	FALSE	31
2022-09-12	15:15:20	0.334415	1.48754	2.03627	1645.87	FALSE	31
2022-09-12	15:15:20	0.334924	1.48981	2.03627	1609.39	FALSE	31
2022-09-12	15:15:20	0.575076	2.55805	2.03627	1648.43	FALSE	31
2022-09-12	15:15:20	0.586679	2.60967	2.03627	1612	FALSE	31
2022-09-12	15:15:21	0.636501	2.83128	2.77594	1651.26	FALSE	31
2022-09-12	15:15:21	0.571158	2.54063	2.77594	1614.54	FALSE	31
2022-09-12	15:15:21	0.63986	2.84623	2.77594	1654.1	FALSE	31
2022-09-12	15:15:21	0.648715	2.88561	2.77594	1617.43	FALSE	31
2022-09-12	15:15:22	1.27365	5.66545	2.30746	1659.77	FALSE	31
2022-09-12	15:15:22	0.291768	1.29784	2.30746	1618.72	FALSE	31
2022-09-12	15:15:22	0.121947	0.542445	2.30746	1660.31	FALSE	31
2022-09-12	15:15:22	0.387595	1.7241	2.30746	1620.45	FALSE	31
2022-09-12	15:15:23	0.215585	0.958965	2.78525	1661.27	FALSE	31
2022-09-12	15:15:23	0.570343	2.537	2.78525	1622.99	FALSE	31
2022-09-12	15:15:23	1.09253	4.85979	2.78525	1666.13	FALSE	31
2022-09-12	15:15:24	0.568359	2.52817	2.22455	1625.51	FALSE	31
2022-09-12	15:15:24	0.573244	2.5499	2.22455	1668.68	FALSE	31
2022-09-12	15:15:24	0.573957	2.55308	2.22455	1628.07	FALSE	31
2022-09-12	15:15:24	0.284847	1.26706	2.22455	1669.95	FALSE	31
2022-09-12	15:15:25	0.124746	0.554895	0.210866	1628.62	FALSE	31
2022-09-12	15:15:25	0.0914124	0.406621	0.210866	1670.35	FALSE	31
2022-09-12	15:15:25	-0.0113865	-0.0506494	0.210866	1628.62	FALSE	31
2022-09-12	15:15:25	-0.0151524	-0.0674009	0.210866	1670.35	FALSE	31
2022-09-12	15:15:26	0.0805727	0.358403	1.02858	1628.98	FALSE	31
2022-09-12	15:15:26	0.126171	0.561234	1.02858	1670.92	FALSE	31
2022-09-12	15:15:26	0.342354	1.52286	1.02858	1630.5	FALSE	31
2022-09-12	15:15:26	0.37584	1.67181	1.02858	1672.59	FALSE	31
2022-09-12	15:15:27	0.263219	1.17085	1.53802	1631.67	FALSE	31
2022-09-12	15:15:27	0.425458	1.89252	1.53802	1674.48	FALSE	31
2022-09-12	15:15:27	0.348613	1.5507	1.53802	1633.22	FALSE	31
2022-09-12	15:15:28	0.486832	2.16553	2.35155	1676.65	FALSE	31
2022-09-12	15:15:28	0.414771	1.84498	2.35155	1635.07	FALSE	31
2022-09-12	15:15:28	0.616247	2.74119	2.35155	1679.39	FALSE	31
2022-09-12	15:15:28	0.596756	2.65449	2.35155	1637.72	FALSE	31
2022-09-12	15:15:29	0.562099	2.50033	2.30701	1681.89	FALSE	31
2022-09-12	15:15:29	0.458995	2.0417	2.30701	1639.77	FALSE	31
2022-09-12	15:15:29	0.574211	2.55421	2.30701	1684.44	FALSE	31
2022-09-12	15:15:29	0.479249	2.1318	2.30701	1641.9	FALSE	31
2022-09-12	15:15:30	0.435941	1.93915	2.042	1686.38	FALSE	31
2022-09-12	15:15:30	0.506018	2.25087	2.042	1644.15	FALSE	31
2022-09-12	15:15:30	0.435229	1.93599	2.042	1688.32	FALSE	31
2022-09-12	15:15:31	0.552685	2.45845	2.12314	1646.61	FALSE	31
2022-09-12	15:15:31	0.399199	1.77572	2.12314	1690.09	FALSE	31
2022-09-12	15:15:31	0.564287	2.51006	2.12314	1649.12	FALSE	31
2022-09-12	15:15:31	0.393041	1.74832	2.12314	1691.84	FALSE	31
2022-09-12	15:15:32	0.56388	2.50825	2.65188	1651.63	FALSE	31
2022-09-12	15:15:32	0.528257	2.34979	2.65188	1694.19	FALSE	31
2022-09-12	15:15:32	0.584745	2.60106	2.65188	1654.23	FALSE	31
2022-09-12	15:15:32	0.707799	3.14843	2.65188	1697.34	FALSE	31
2022-09-12	15:15:33	1.26352	5.62039	5.49663	1659.85	FALSE	31
2022-09-12	15:15:33	1.05655	4.69975	5.49663	1702.04	FALSE	31
2022-09-12	15:15:33	1.69289	7.53031	5.49663	1667.38	FALSE	31
2022-09-12	15:15:33	0.929834	4.13609	5.49663	1706.17	FALSE	31
2022-09-12	15:15:34	0.769987	3.42506	3.5765	1670.8	FALSE	31
2022-09-12	15:15:34	0.809275	3.59982	3.5765	1709.77	FALSE	31
2022-09-12	15:15:34	0.832837	3.70463	3.5765	1674.51	FALSE	31
2022-09-12	15:15:35	0.715941	3.18465	2.56886	1712.96	FALSE	31
2022-09-12	15:15:35	0.414364	1.84317	2.56886	1676.35	FALSE	31
2022-09-12	15:15:35	0.69131	3.07509	2.56886	1716.03	FALSE	31
2022-09-12	15:15:35	0.48841	2.17255	2.56886	1678.52	FALSE	31
2022-09-12	15:15:36	0.733753	3.26388	2.51889	1719.3	FALSE	31
2022-09-12	15:15:36	0.566578	2.52025	2.51889	1681.04	FALSE	31
2022-09-12	15:15:36	0.539147	2.39823	2.51889	1721.7	FALSE	31
2022-09-12	15:15:36	0.425611	1.8932	2.51889	1682.94	FALSE	31
2022-09-12	15:15:37	0.71874	3.1971	2.25138	1724.89	FALSE	31
2022-09-12	15:15:37	0.622099	2.76722	2.25138	1685.7	FALSE	31
2022-09-12	15:15:37	0.328817	1.46264	2.25138	1726.36	FALSE	31
2022-09-12	15:15:37	0.354873	1.57855	2.25138	1687.28	FALSE	31
2022-09-12	15:15:38	0.450395	2.00345	1.82476	1728.36	FALSE	31
2022-09-12	15:15:38	0.376247	1.67362	1.82476	1688.96	FALSE	31
2022-09-12	15:15:38	0.404033	1.79722	1.82476	1730.16	FALSE	31
2022-09-12	15:15:39	1.13447	5.04635	2.06808	1694	FALSE	31
2022-09-12	15:15:39	0.504338	2.2434	2.06808	1732.4	FALSE	31
2022-09-12	15:15:39	0.214211	0.952853	2.06808	1694.95	FALSE	31
2022-09-12	15:15:39	0.00667965	0.0297124	2.06808	1732.43	FALSE	31

## Sheet: MrFitz_star_2022912151021 (3)
Date	Time	Lbs	Newtons	Total Force x time			**GoPro Fitting: 1500
2022-09-12	15:10:39	0.667748	2.97028	2.97028	FALSE	0
2022-09-12	15:10:39	0.352023	1.56587	1.56587	FALSE	0
2022-09-12	15:10:39	0.473652	2.1069	5.07718	FALSE	0
2022-09-12	15:10:39	0.180216	0.801637	2.36751	FALSE	0
2022-09-12	15:10:40	0.411107	1.82869	6.90586	FALSE	0
2022-09-12	15:10:40	0.251667	1.11947	3.48697	FALSE	0
2022-09-12	15:10:40	2.06775	9.19777	16.1036	FALSE	0
2022-09-12	15:10:41	2.9765	13.2401	16.727	FALSE	0
2022-09-12	15:10:41	4.73696	21.0709	37.1746	1	1
2022-09-12	15:10:41	2.12383	9.44722	26.1743	FALSE	1
2022-09-12	15:10:41	1.41813	6.30813	43.4827	FALSE	1
2022-09-12	15:10:42	-0.0264501	-0.117655	26.1743	FALSE	1
2022-09-12	15:10:42	-0.0848725	-0.37753	43.4827	FALSE	1
2022-09-12	15:10:42	-0.255356	-1.13587	26.1743	FALSE	1
2022-09-12	15:10:42	-0.0765264	-0.340405	43.4827	FALSE	1
2022-09-12	15:10:43	-0.00726439	-0.0323135	26.1743	FALSE	1
2022-09-12	15:10:43	-0.0756613	-0.336557	43.4827	FALSE	1
2022-09-12	15:10:43	0.218283	0.970966	27.1452	FALSE	1
2022-09-12	15:10:43	-0.023244	-0.103394	43.4827	FALSE	1
2022-09-12	15:10:44	0.38042	1.69218	28.8374	FALSE	1
2022-09-12	15:10:44	0.164339	0.731013	44.2137	FALSE	1
2022-09-12	15:10:44	0.20159	0.896713	29.7341	FALSE	1
2022-09-12	15:10:45	0.120318	0.535199	44.7489	FALSE	1
2022-09-12	15:10:45	0.155993	0.693888	30.428	FALSE	1
2022-09-12	15:10:45	0.109326	0.486304	45.2352	FALSE	1
2022-09-12	15:10:45	0.154873	0.688906	31.1169	FALSE	1
2022-09-12	15:10:46	0.258741	1.15093	46.3861	FALSE	1
2022-09-12	15:10:46	0.263422	1.17175	32.2887	FALSE	1
2022-09-12	15:10:46	-0.0847198	-0.376851	46.3861	FALSE	1
2022-09-12	15:10:46	-0.0517427	-0.230162	32.2887	FALSE	1
2022-09-12	15:10:47	0.217214	0.966211	47.3524	FALSE	1
2022-09-12	15:10:47	0.165458	0.73599	33.0247	FALSE	1
2022-09-12	15:10:47	0.485865	2.16122	49.5136	FALSE	1
2022-09-12	15:10:47	0.243372	1.08257	34.1072	FALSE	1
2022-09-12	15:10:48	0.370751	1.64917	51.1628	FALSE	1
2022-09-12	15:10:48	0.206578	0.9189	35.0261	FALSE	1
2022-09-12	15:10:48	0.577417	2.56847	53.7312	FALSE	1
2022-09-12	15:10:49	1.35029	6.00636	41.0325	FALSE	1
2022-09-12	15:10:49	1.6963	7.54548	61.2767	FALSE	1
2022-09-12	15:10:49	1.74729	7.7723	48.8048	FALSE	1
2022-09-12	15:10:49	1.63864	7.289	68.5657	FALSE	1
2022-09-12	15:10:50	2.26816	10.0892	58.894	FALSE	1
2022-09-12	15:10:50	0.732684	3.25912	71.8248	FALSE	1
2022-09-12	15:10:50	0.397316	1.76734	60.6614	FALSE	1
2022-09-12	15:10:50	0.453601	2.01771	73.8425	FALSE	1
2022-09-12	15:10:51	0.640522	2.84917	63.5105	FALSE	1
2022-09-12	15:10:51	1.17742	5.2374	79.0799	FALSE	1
2022-09-12	15:10:51	0.696654	3.09886	66.6094	FALSE	1
2022-09-12	15:10:51	1.22719	5.45879	84.5387	FALSE	1
2022-09-12	15:10:52	1.93406	8.60309	75.2125	FALSE	1
2022-09-12	15:10:52	2.02586	9.01143	93.5502	FALSE	1
2022-09-12	15:10:52	3.29228	14.6447	89.8572	1	2
2022-09-12	15:10:53	1.95421	8.69272	102.243	FALSE	2
2022-09-12	15:10:53	2.25289	10.0213	99.8785	FALSE	2
2022-09-12	15:10:53	2.15233	9.57399	111.817	FALSE	2
2022-09-12	15:10:53	3.5105	15.6154	115.494	1	3
2022-09-12	15:10:54	2.01391	8.95827	120.775	FALSE	3
2022-09-12	15:10:54	2.95085	13.126	128.62	FALSE	3
2022-09-12	15:10:54	2.47589	11.0133	131.788	FALSE	3
2022-09-12	15:10:54	2.70648	12.039	140.659	FALSE	3
2022-09-12	15:10:55	2.94765	13.1117	144.9	FALSE	3
2022-09-12	15:10:55	2.21676	9.86059	150.519	FALSE	3
2022-09-12	15:10:55	0.193397	0.860269	145.76	FALSE	3
2022-09-12	15:10:56	0.115738	0.514826	151.034	FALSE	3
2022-09-12	15:10:56	0.44958	1.99982	147.76	FALSE	3
2022-09-12	15:10:56	0.220573	0.981153	152.015	FALSE	3
2022-09-12	15:10:56	0.45126	2.00729	149.768	FALSE	3
2022-09-12	15:10:57	-0.0462466	-0.205714	152.015	FALSE	3
2022-09-12	15:10:57	-0.315203	-1.40209	149.768	FALSE	3
2022-09-12	15:10:57	-0.368944	-1.64114	152.015	FALSE	3
2022-09-12	15:10:57	-0.338256	-1.50463	149.768	FALSE	3
2022-09-12	15:10:58	-0.156781	-0.697393	152.015	FALSE	3
2022-09-12	15:10:58	0.0574684	0.255631	150.023	FALSE	3
2022-09-12	15:10:58	1.73961	7.73813	159.754	FALSE	3
2022-09-12	15:10:58	1.73986	7.73925	157.762	FALSE	3
2022-09-12	15:10:59	0.944949	4.20332	163.957	FALSE	3
2022-09-12	15:10:59	0.516654	2.29818	160.061	FALSE	3
2022-09-12	15:10:59	0.406018	1.80605	165.763	FALSE	3
2022-09-12	15:11:00	0.519351	2.31018	162.371	FALSE	3
2022-09-12	15:11:00	0.397926	1.77005	167.533	FALSE	3
2022-09-12	15:11:00	0.569326	2.53248	164.903	FALSE	3
2022-09-12	15:11:00	0.49874	2.2185	169.751	FALSE	3
2022-09-12	15:11:01	0.805305	3.58216	168.485	FALSE	3
2022-09-12	15:11:01	0.661336	2.94175	172.693	FALSE	3
2022-09-12	15:11:01	0.620013	2.75794	171.243	FALSE	3
2022-09-12	15:11:01	1.11462	4.95805	177.651	FALSE	3
2022-09-12	15:11:02	0.732837	3.25981	174.503	FALSE	3
2022-09-12	15:11:02	1.02597	4.56372	182.215	FALSE	3
2022-09-12	15:11:02	0.637264	2.83468	177.338	FALSE	3
2022-09-12	15:11:02	1.30424	5.80152	188.017	FALSE	3
2022-09-12	15:11:03	1.15065	5.11832	182.456	FALSE	3
2022-09-12	15:11:03	1.97182	8.77105	196.788	FALSE	3
2022-09-12	15:11:03	2.66057	11.8347	194.291	FALSE	3
2022-09-12	15:11:04	1.68983	7.5167	204.304	FALSE	3
2022-09-12	15:11:04	1.99854	8.88991	203.181	FALSE	3
2022-09-12	15:11:04	1.52622	6.78893	211.093	FALSE	3
2022-09-12	15:11:04	2.56576	11.413	214.594	FALSE	3
2022-09-12	15:11:05	0.650547	2.89376	213.987	FALSE	3
2022-09-12	15:11:05	1.62922	7.2471	221.841	FALSE	3
2022-09-12	15:11:05	1.69212	7.52689	221.514	FALSE	3
2022-09-12	15:11:05	3.58739	15.9574	237.798	1	4
2022-09-12	15:11:06	2.65935	11.8293	233.343	FALSE	4
2022-09-12	15:11:06	4.19996	18.6823	256.481	1	5
2022-09-12	15:11:06	3.27258	14.5571	247.9	1	6
2022-09-12	15:11:06	5.05518	22.4865	278.967	1	7
2022-09-12	15:11:07	2.65966	11.8307	259.731	FALSE	7
2022-09-12	15:11:07	3.16403	14.0742	293.041	1	8
2022-09-12	15:11:07	3.72118	16.5526	276.284	1	9
2022-09-12	15:11:08	1.6678	7.41871	300.46	FALSE	9
2022-09-12	15:11:08	2.32653	10.3489	286.632	FALSE	9
2022-09-12	15:11:08	1.29635	5.76642	306.226	FALSE	9
2022-09-12	15:11:08	0.45813	2.03785	288.67	FALSE	9
2022-09-12	15:11:09	0.459606	2.04442	308.271	FALSE	9
2022-09-12	15:11:09	0.489784	2.17866	290.849	FALSE	9
2022-09-12	15:11:09	0.594517	2.64453	310.915	FALSE	9
2022-09-12	15:11:09	0.508613	2.26241	293.111	FALSE	9
2022-09-12	15:11:10	0.56332	2.50576	313.421	FALSE	9
2022-09-12	15:11:10	0.57243	2.54628	295.658	FALSE	9
2022-09-12	15:11:10	0.813041	3.61657	317.038	FALSE	9
2022-09-12	15:11:10	-0.00131018	-0.00582794	295.658	FALSE	9
2022-09-12	15:11:11	0.093957	0.41794	317.456	FALSE	9
2022-09-12	15:11:11	0.935636	4.1619	299.819	FALSE	9
2022-09-12	15:11:11	1.72851	7.68876	325.144	FALSE	9
2022-09-12	15:11:12	0.962405	4.28097	304.1	FALSE	9
2022-09-12	15:11:12	0.36215	1.61092	326.755	FALSE	9
2022-09-12	15:11:12	0.318741	1.41782	305.518	FALSE	9
2022-09-12	15:11:12	0.301845	1.34267	328.098	FALSE	9
2022-09-12	15:11:13	-0.0452287	-0.201186	305.518	FALSE	9
2022-09-12	15:11:13	0.0334989	0.14901	328.247	FALSE	9
2022-09-12	15:11:13	-0.16701	-0.742894	305.518	FALSE	9
2022-09-12	15:11:13	-0.299325	-1.33146	328.247	FALSE	9
2022-09-12	15:11:14	-0.543295	-2.41668	305.518	FALSE	9
2022-09-12	15:11:14	-0.575152	-2.55839	328.247	FALSE	9
2022-09-12	15:11:14	-0.36014	-1.60197	305.518	FALSE	9
2022-09-12	15:11:14	0.128512	0.571647	328.819	FALSE	9
2022-09-12	15:11:15	0.770852	3.4289	308.947	FALSE	9
2022-09-12	15:11:15	4.52113	20.1109	348.93	1	10
2022-09-12	15:11:15	4.66836	20.7658	329.713	1	11
2022-09-12	15:11:16	3.30841	14.7165	363.646	1	12
2022-09-12	15:11:16	1.32673	5.90156	335.615	FALSE	12
2022-09-12	15:11:16	0.470852	2.09444	365.74	FALSE	12
2022-09-12	15:11:16	2.56179	11.3954	347.01	FALSE	12
2022-09-12	15:11:17	1.9134	8.51119	374.252	FALSE	12
2022-09-12	15:11:17	1.5105	6.71901	353.729	FALSE	12
2022-09-12	15:11:17	-0.0676206	-0.30079	374.252	FALSE	12
2022-09-12	15:11:17	0.0600639	0.267176	353.996	FALSE	12
2022-09-12	15:11:18	-0.0857885	-0.381604	374.252	FALSE	12
2022-09-12	15:11:18	-0.236679	-1.0528	353.996	FALSE	12
2022-09-12	15:11:18	-0.173066	-0.769832	374.252	FALSE	12
2022-09-12	15:11:19	0.0895804	0.398472	354.395	FALSE	12
2022-09-12	15:11:19	0.601743	2.67667	376.928	FALSE	12
2022-09-12	15:11:19	1.87625	8.34594	362.74	FALSE	12
2022-09-12	15:11:19	0.392939	1.74787	378.676	FALSE	12
2022-09-12	15:11:20	0.0828628	0.36859	363.109	FALSE	12
2022-09-12	15:11:20	0.21299	0.947422	379.624	FALSE	12
2022-09-12	15:11:20	0.771667	3.43253	366.542	FALSE	12
2022-09-12	15:11:20	1.87645	8.34682	387.97	FALSE	12
2022-09-12	15:11:21	3.77212	16.7791	383.321	1	13
2022-09-12	15:11:21	0.27986	1.24487	389.215	FALSE	13
2022-09-12	15:11:21	0.935738	4.16235	387.483	FALSE	13
2022-09-12	15:11:21	0.133448	0.593603	389.809	FALSE	13
2022-09-12	15:11:22	0.0913106	0.406168	387.889	FALSE	13
2022-09-12	15:11:22	1.66022	7.38499	397.194	FALSE	13
2022-09-12	15:11:22	1.33579	5.94186	393.831	FALSE	13
2022-09-12	15:11:23	3.30052	14.6814	411.875	1	14
2022-09-12	15:11:23	1.44302	6.41884	400.25	FALSE	14
2022-09-12	15:11:23	2.02042	8.98723	420.862	FALSE	14
2022-09-12	15:11:23	0.940674	4.18431	404.434	FALSE	14
2022-09-12	15:11:24	0.886629	3.9439	424.806	FALSE	14
2022-09-12	15:11:24	0.635229	2.82563	407.26	FALSE	14
2022-09-12	15:11:24	0.229631	1.02144	425.828	FALSE	14
2022-09-12	15:11:24	0.175534	0.78081	408.041	FALSE	14
2022-09-12	15:11:25	0.757061	3.36756	429.195	FALSE	14
2022-09-12	15:11:25	0.14841	0.660157	408.701	FALSE	14
2022-09-12	15:11:25	0.341336	1.51833	430.714	FALSE	14
2022-09-12	15:11:25	0.537417	2.39054	411.091	FALSE	14
2022-09-12	15:11:26	1.36765	6.08358	436.797	FALSE	14
2022-09-12	15:11:26	0.785916	3.49591	414.587	FALSE	14
2022-09-12	15:11:26	1.0167	4.52248	441.32	FALSE	14
2022-09-12	15:11:27	1.39207	6.19221	420.78	FALSE	14
2022-09-12	15:11:27	1.13228	5.03661	446.356	FALSE	14
2022-09-12	15:11:27	0.682811	3.03728	423.817	FALSE	14
2022-09-12	15:11:27	0.666781	2.96598	449.322	FALSE	14
2022-09-12	15:11:28	0.778181	3.4615	427.278	FALSE	14
2022-09-12	15:11:28	0.403066	1.79292	451.115	FALSE	14
2022-09-12	15:11:28	0.87528	3.89342	431.172	FALSE	14
2022-09-12	15:11:28	0.60556	2.69365	453.809	FALSE	14
2022-09-12	15:11:29	0.701997	3.12262	434.294	FALSE	14
2022-09-12	15:11:29	0.361285	1.60707	455.416	FALSE	14
2022-09-12	15:11:29	0.474975	2.11278	436.407	FALSE	14
2022-09-12	15:11:29	0.249071	1.10792	456.524	FALSE	14
2022-09-12	15:11:30	0.430598	1.91539	438.323	FALSE	14
2022-09-12	15:11:30	0.273753	1.21771	457.742	FALSE	14
2022-09-12	15:11:30	0.686119	3.05199	441.375	FALSE	14
2022-09-12	15:11:31	0.296603	1.31935	459.061	FALSE	14
2022-09-12	15:11:31	0.70098	3.1181	444.493	FALSE	14
2022-09-12	15:11:31	0.0506491	0.225297	459.286	FALSE	14
2022-09-12	15:11:31	0.154262	0.686188	445.179	FALSE	14
2022-09-12	15:11:32	0.261387	1.1627	460.449	FALSE	14
2022-09-12	15:11:32	0.194059	0.863213	446.042	FALSE	14
2022-09-12	15:11:32	0.330496	1.47011	461.919	FALSE	14
2022-09-12	15:11:32	0.179911	0.80028	446.842	FALSE	14
2022-09-12	15:11:33	0.374211	1.66457	463.584	FALSE	14
2022-09-12	15:11:33	0.181947	0.809337	447.652	FALSE	14
2022-09-12	15:11:33	0.339657	1.51086	465.095	FALSE	14
2022-09-12	15:11:33	0.167748	0.746177	448.398	FALSE	14
2022-09-12	15:11:34	0.264847	1.17809	466.273	FALSE	14
2022-09-12	15:11:34	0.267952	1.1919	449.59	FALSE	14
2022-09-12	15:11:34	0.398741	1.77368	468.046	FALSE	14
2022-09-12	15:11:35	0.367239	1.63355	451.223	FALSE	14
2022-09-12	15:11:35	0.208715	0.928406	468.975	FALSE	14
2022-09-12	15:11:35	0.382761	1.7026	452.926	FALSE	14
2022-09-12	15:11:35	0.270191	1.20186	470.177	FALSE	14
2022-09-12	15:11:36	0.434059	1.93078	454.857	FALSE	14
2022-09-12	15:11:36	0.154873	0.688906	470.865	FALSE	14
2022-09-12	15:11:36	0.385662	1.7155	456.572	FALSE	14
2022-09-12	15:11:36	0.319555	1.42144	472.287	FALSE	14
2022-09-12	15:11:37	0.471107	2.09558	458.668	FALSE	14
2022-09-12	15:11:37	0.346476	1.54119	473.828	FALSE	14
2022-09-12	15:11:37	0.455331	2.0254	460.693	FALSE	14
2022-09-12	15:11:37	0.242507	1.07872	474.907	FALSE	14
2022-09-12	15:11:38	0.420522	1.87057	462.564	FALSE	14
2022-09-12	15:11:38	0.242303	1.07781	475.985	FALSE	14
2022-09-12	15:11:38	0.294059	1.30803	463.872	FALSE	14
2022-09-12	15:11:39	0.278537	1.23899	477.224	FALSE	14
2022-09-12	15:11:39	0.36841	1.63876	465.51	FALSE	14
2022-09-12	15:11:39	0.25299	1.12535	478.349	FALSE	14
2022-09-12	15:11:39	0.171107	0.761118	466.272	FALSE	14
2022-09-12	15:11:40	0.313194	1.39315	479.742	FALSE	14
2022-09-12	15:11:40	0.217723	0.968475	467.24	FALSE	14
2022-09-12	15:11:40	0.208868	0.929087	480.671	FALSE	14
2022-09-12	15:11:40	0.203473	0.905089	468.145	FALSE	14
2022-09-12	15:11:41	0.192379	0.85574	481.527	FALSE	14
2022-09-12	15:11:41	0.178283	0.793038	468.938	FALSE	14
2022-09-12	15:11:41	0.244644	1.08823	482.615	FALSE	14
2022-09-12	15:11:42	0.289275	1.28675	470.225	FALSE	14
2022-09-12	15:11:42	0.920827	4.09602	486.711	FALSE	14
2022-09-12	15:11:42	1.21131	5.38815	475.613	FALSE	14
2022-09-12	15:11:42	2.08653	9.2813	495.992	FALSE	14
2022-09-12	15:11:43	0.667443	2.96892	478.582	FALSE	14
2022-09-12	15:11:43	1.60434	7.13643	503.129	FALSE	14
2022-09-12	15:11:43	0.642506	2.858	481.44	FALSE	14
2022-09-12	15:11:43	0.680573	3.02732	506.156	FALSE	14
2022-09-12	15:11:44	0.388359	1.7275	483.168	FALSE	14
2022-09-12	15:11:44	0.381896	1.69875	507.855	FALSE	14
2022-09-12	15:11:44	0.418232	1.86038	485.028	FALSE	14
2022-09-12	15:11:44	0.294059	1.30803	509.163	FALSE	14
2022-09-12	15:11:45	0.201438	0.896037	485.924	FALSE	14
2022-09-12	15:11:45	0.278181	1.2374	510.4	FALSE	14
2022-09-12	15:11:45	0.338435	1.50543	487.429	FALSE	14
2022-09-12	15:11:46	0.300165	1.33519	511.736	FALSE	14
2022-09-12	15:11:46	0.428563	1.90633	489.336	FALSE	14
2022-09-12	15:11:46	0.396705	1.76462	513.5	FALSE	14
2022-09-12	15:11:46	0.427239	1.90044	491.236	FALSE	14
2022-09-12	15:11:47	0.455433	2.02586	515.526	FALSE	14
2022-09-12	15:11:47	0.475331	2.11437	493.351	FALSE	14
2022-09-12	15:11:47	0.411463	1.83027	517.356	FALSE	14
2022-09-12	15:11:47	0.334771	1.48913	494.84	FALSE	14
2022-09-12	15:11:48	0.348104	1.54844	518.905	FALSE	14
2022-09-12	15:11:48	0.503015	2.23751	497.077	FALSE	14
2022-09-12	15:11:48	3.98469	17.7247	536.63	1	15
2022-09-12	15:11:48	4.13044	18.373	515.45	1	16
2022-09-12	15:11:49	6.67075	29.6728	566.302	1	17
2022-09-12	15:11:49	10.9915	48.8924	564.343	1	18
2022-09-12	15:11:49	10.7711	47.912	614.214	1	19
2022-09-12	15:11:50	6.04617	26.8946	591.237	1	20
2022-09-12	15:11:50	1.35803	6.04079	620.255	FALSE	20
2022-09-12	15:11:50	0.515534	2.2932	593.53	FALSE	20
2022-09-12	15:11:50	0.60841	2.70633	622.961	FALSE	20
2022-09-12	15:11:51	0.38444	1.71007	595.24	FALSE	20
2022-09-12	15:11:51	0.58271	2.59201	625.553	FALSE	20
2022-09-12	15:11:51	0.184847	0.822236	596.063	FALSE	20
2022-09-12	15:11:51	0.468054	2.082	627.635	FALSE	20
2022-09-12	15:11:52	0.961794	4.27825	600.341	FALSE	20
2022-09-12	15:11:52	0.265102	1.17923	628.815	FALSE	20
2022-09-12	15:11:52	0.0220995	0.098303	600.439	FALSE	20
2022-09-12	15:11:52	0.259606	1.15478	629.969	FALSE	20
2022-09-12	15:11:53	0.377875	1.68086	602.12	FALSE	20
2022-09-12	15:11:53	0.198283	0.882002	630.851	FALSE	20
2022-09-12	15:11:53	0.0643895	0.286417	602.406	FALSE	20
2022-09-12	15:11:54	-0.019529	-0.0868689	630.851	FALSE	20
2022-09-12	15:11:54	-0.405381	-1.80322	602.406	FALSE	20
2022-09-12	15:11:54	-0.444313	-1.97639	630.851	FALSE	20
2022-09-12	15:11:54	-0.328842	-1.46275	602.406	FALSE	20
2022-09-12	15:11:55	-0.412251	-1.83377	630.851	FALSE	20
2022-09-12	15:11:55	-0.484363	-2.15454	602.406	FALSE	20
2022-09-12	15:11:55	-0.622684	-2.76982	630.851	FALSE	20
2022-09-12	15:11:55	-0.414491	-1.84374	602.406	FALSE	20
2022-09-12	15:11:56	-0.721157	-3.20785	630.851	FALSE	20
2022-09-12	15:11:56	-0.788638	-3.50802	602.406	FALSE	20
2022-09-12	15:11:56	-0.814083	-3.6212	630.851	FALSE	20
2022-09-12	15:11:56	-0.520496	-2.31527	602.406	FALSE	20
2022-09-12	15:11:57	-0.509147	-2.26479	630.851	FALSE	20
2022-09-12	15:11:57	-0.332099	-1.47724	602.406	FALSE	20
2022-09-12	15:11:57	-0.168129	-0.747871	630.851	FALSE	20
2022-09-12	15:11:58	0.0328882	0.146293	602.553	FALSE	20
2022-09-12	15:11:58	0.219962	0.978435	631.83	FALSE	20
2022-09-12	15:11:58	0.515636	2.29365	604.846	FALSE	20
2022-09-12	15:11:58	0.771921	3.43366	635.264	FALSE	20
2022-09-12	15:11:59	0.586425	2.60854	607.455	FALSE	20
2022-09-12	15:11:59	1.07452	4.77968	640.043	FALSE	20
2022-09-12	15:11:59	2.62999	11.6987	619.154	FALSE	20
2022-09-12	15:11:59	1.64744	7.32814	647.371	FALSE	20
2022-09-12	15:12:00	2.32118	10.3251	629.479	FALSE	20
2022-09-12	15:12:00	2.66006	11.8325	659.204	FALSE	20
2022-09-12	15:12:00	0.674618	3.00084	632.48	FALSE	20
2022-09-12	15:12:00	0.272888	1.21386	660.418	FALSE	20
2022-09-12	15:12:01	0.270598	1.20367	633.683	FALSE	20
2022-09-12	15:12:01	0.363015	1.61476	662.033	FALSE	20
2022-09-12	15:12:01	0.383626	1.70645	635.39	FALSE	20
2022-09-12	15:12:02	0.302761	1.34674	663.379	FALSE	20
2022-09-12	15:12:02	0.276552	1.23016	636.62	FALSE	20
2022-09-12	15:12:02	0.195076	0.867737	664.247	FALSE	20
2022-09-12	15:12:02	0.252634	1.12377	637.744	FALSE	20
2022-09-12	15:12:03	0.161285	0.717428	664.964	FALSE	20
2022-09-12	15:12:03	0.158995	0.707242	638.451	FALSE	20
2022-09-12	15:12:03	0.163117	0.725577	665.69	FALSE	20
2022-09-12	15:12:03	0.0702928	0.312676	638.764	FALSE	20
2022-09-12	15:12:04	-0.330877	-1.47181	665.69	FALSE	20
2022-09-12	15:12:04	-0.0323534	-0.143914	638.764	FALSE	20
2022-09-12	15:12:04	0.0968577	0.430842	666.121	FALSE	20
2022-09-12	15:12:04	0.0710053	0.315846	639.079	FALSE	20
2022-09-12	15:12:05	0.0926338	0.412054	666.533	FALSE	20
2022-09-12	15:12:05	0.112634	0.501019	639.58	FALSE	20
2022-09-12	15:12:05	0.25411	1.13033	667.663	FALSE	20
2022-09-12	15:12:06	0.439962	1.95704	641.537	FALSE	20
2022-09-12	15:12:06	0.499555	2.22212	669.885	FALSE	20
2022-09-12	15:12:06	0.589733	2.62325	644.161	FALSE	20
2022-09-12	15:12:06	0.635738	2.82789	672.713	FALSE	20
2022-09-12	15:12:07	0.57528	2.55896	646.72	FALSE	20
2022-09-12	15:12:07	0.525254	2.33643	675.05	FALSE	20
2022-09-12	15:12:07	0.548206	2.43853	649.158	FALSE	20
2022-09-12	15:12:07	0.549733	2.44532	677.495	FALSE	20
2022-09-12	15:12:08	0.722252	3.21272	652.371	FALSE	20
2022-09-12	15:12:08	1.27787	5.68422	683.179	FALSE	20
2022-09-12	15:12:08	2.24785	9.99889	662.37	FALSE	20
2022-09-12	15:12:09	2.09426	9.31569	692.495	FALSE	20
2022-09-12	15:12:09	1.9105	8.49829	670.868	FALSE	20
2022-09-12	15:12:09	0.688104	3.06082	695.556	FALSE	20
2022-09-12	15:12:09	0.551056	2.45121	673.319	FALSE	20
2022-09-12	15:12:10	0.524033	2.331	697.887	FALSE	20
2022-09-12	15:12:10	0.377061	1.67724	674.997	FALSE	20
2022-09-12	15:12:10	0.436908	1.94345	699.83	FALSE	20
2022-09-12	15:12:10	0.330038	1.46808	676.465	FALSE	20
2022-09-12	15:12:11	0.40785	1.8142	701.644	FALSE	20
2022-09-12	15:12:11	0.336908	1.49863	677.963	FALSE	20
2022-09-12	15:12:11	0.392939	1.74787	703.392	FALSE	20
2022-09-12	15:12:11	0.342303	1.52263	679.486	FALSE	20
2022-09-12	15:12:12	0.333143	1.48189	704.874	FALSE	20
2022-09-12	15:12:12	0.497774	2.2142	681.7	FALSE	20
2022-09-12	15:12:12	2.74826	12.2248	717.099	FALSE	20
2022-09-12	15:12:13	3.2136	14.2947	695.995	1	21
2022-09-12	15:12:13	2.82749	12.5772	729.676	FALSE	21
2022-09-12	15:12:13	2.27416	10.1159	706.111	FALSE	21
2022-09-12	15:12:13	1.74027	7.74107	737.417	FALSE	21
2022-09-12	15:12:14	0.934058	4.15488	710.266	FALSE	21
2022-09-12	15:12:14	2.64775	11.7777	749.195	FALSE	21
2022-09-12	15:12:14	6.30698	28.0547	738.32	1	22
2022-09-12	15:12:14	6.33131	28.1629	777.358	1	23
2022-09-12	15:12:15	2.19426	9.76051	748.081	FALSE	23
2022-09-12	15:12:15	0.630089	2.80276	780.161	FALSE	23
2022-09-12	15:12:15	0.899351	4.00049	752.081	FALSE	23
2022-09-12	15:12:15	0.696349	3.0975	783.258	FALSE	23
2022-09-12	15:12:16	0.818893	3.6426	755.724	FALSE	23
2022-09-12	15:12:16	0.329835	1.46717	784.725	FALSE	23
2022-09-12	15:12:16	0.401641	1.78658	757.51	FALSE	23
2022-09-12	15:12:17	0.0226592	0.100793	784.826	FALSE	23
2022-09-12	15:12:17	0.100166	0.445558	757.956	FALSE	23
2022-09-12	15:12:17	-0.000139698	-0.000621405	784.826	FALSE	23
2022-09-12	15:12:17	-0.177442	-0.789298	757.956	FALSE	23
2022-09-12	15:12:18	-0.178257	-0.792923	784.826	FALSE	23
2022-09-12	15:12:18	-0.105381	-0.468756	757.956	FALSE	23
2022-09-12	15:12:18	-0.215763	-0.959757	784.826	FALSE	23
2022-09-12	15:12:18	-0.41332	-1.83853	757.956	FALSE	23
2022-09-12	15:12:19	-0.725025	-3.22506	784.826	FALSE	23
2022-09-12	15:12:19	-0.691895	-3.07769	757.956	FALSE	23
2022-09-12	15:12:19	-0.850877	-3.78487	784.826	FALSE	23
2022-09-12	15:12:19	-0.775661	-3.4503	757.956	FALSE	23
2022-09-12	15:12:20	-0.973625	-4.33088	784.826	FALSE	23
2022-09-12	15:12:20	-0.780241	-3.47067	757.956	FALSE	23
2022-09-12	15:12:20	-0.993371	-4.41871	784.826	FALSE	23
2022-09-12	15:12:21	-0.820394	-3.64928	757.956	FALSE	23
2022-09-12	15:12:21	-0.975355	-4.33857	784.826	FALSE	23
2022-09-12	15:12:21	-0.744108	-3.30994	757.956	FALSE	23
2022-09-12	15:12:21	-0.866297	-3.85346	784.826	FALSE	23
2022-09-12	15:12:22	-0.960394	-4.27202	757.956	FALSE	23
2022-09-12	15:12:22	-0.444007	-1.97503	784.826	FALSE	23
2022-09-12	15:12:22	-0.0208013	-0.0925283	757.956	FALSE	23
2022-09-12	15:12:22	0.0231681	0.103056	784.929	FALSE	23
2022-09-12	15:12:23	-0.12874	-0.572661	757.956	FALSE	23
2022-09-12	15:12:23	0.0383336	0.170516	785.1	FALSE	23
2022-09-12	15:12:23	0.17416	0.774699	758.731	FALSE	23
2022-09-12	15:12:23	-0.00645013	-0.0286915	785.1	FALSE	23
2022-09-12	15:12:24	0.18215	0.81024	759.541	FALSE	23
2022-09-12	15:12:24	0.0407254	0.181155	785.281	FALSE	23
2022-09-12	15:12:24	0.342456	1.52331	761.064	FALSE	23
2022-09-12	15:12:25	-0.0492491	-0.21907	785.281	FALSE	23
2022-09-12	15:12:25	0.416959	1.85472	762.919	FALSE	23
2022-09-12	15:12:25	0.272888	1.21386	786.495	FALSE	23
2022-09-12	15:12:25	1.01492	4.51457	767.434	FALSE	23
2022-09-12	15:12:26	1.06617	4.74254	791.237	FALSE	23
2022-09-12	15:12:26	0.560573	2.49354	769.927	FALSE	23
2022-09-12	15:12:26	0.397774	1.76938	793.007	FALSE	23
2022-09-12	15:12:26	0.426221	1.89592	771.823	FALSE	23
2022-09-12	15:12:27	0.215687	0.959419	793.966	FALSE	23
2022-09-12	15:12:27	0.302964	1.34764	773.171	FALSE	23
2022-09-12	15:12:27	0.281183	1.25076	795.217	FALSE	23
2022-09-12	15:12:27	0.0750257	0.333729	773.504	FALSE	23
2022-09-12	15:12:28	0.176959	0.787149	796.004	FALSE	23
2022-09-12	15:12:28	0.0782826	0.348217	773.853	FALSE	23
2022-09-12	15:12:28	0.290293	1.29128	797.295	FALSE	23
2022-09-12	15:12:29	0.0810307	0.360441	774.213	FALSE	23
2022-09-12	15:12:29	0.277723	1.23537	798.531	FALSE	23
2022-09-12	15:12:29	0.148359	0.659931	774.873	FALSE	23
2022-09-12	15:12:29	0.477774	2.12523	800.656	FALSE	23
2022-09-12	15:12:30	0.0141606	0.0629892	774.936	FALSE	23
2022-09-12	15:12:30	0.412786	1.83615	802.492	FALSE	23
2022-09-12	15:12:30	0.199809	0.88879	775.825	FALSE	23
2022-09-12	15:12:30	0.291667	1.29739	803.789	FALSE	23
2022-09-12	15:12:31	0.160267	0.7129	776.538	FALSE	23
2022-09-12	15:12:31	0.44673	1.98714	805.777	FALSE	23
2022-09-12	15:12:31	0.338333	1.50497	778.043	FALSE	23
2022-09-12	15:12:32	0.891158	3.96405	809.741	FALSE	23
2022-09-12	15:12:32	0.298893	1.32954	779.372	FALSE	23
2022-09-12	15:12:32	0.484542	2.15534	811.896	FALSE	23
2022-09-12	15:12:32	0.494771	2.20084	781.573	FALSE	23
2022-09-12	15:12:33	0.575891	2.56168	814.458	FALSE	23
2022-09-12	15:12:33	0.503117	2.23797	783.811	FALSE	23
2022-09-12	15:12:33	0.587341	2.61261	817.07	FALSE	23
2022-09-12	15:12:33	0.816043	3.62992	787.441	FALSE	23
2022-09-12	15:12:34	0.450598	2.00435	819.075	FALSE	23
2022-09-12	15:12:34	0.537366	2.39031	789.831	FALSE	23
2022-09-12	15:12:34	0.610344	2.71493	821.789	FALSE	23
2022-09-12	15:12:34	0.610344	2.71493	792.546	FALSE	23
2022-09-12	15:12:35	1.14001	5.07099	826.86	FALSE	23
2022-09-12	15:12:35	0.709173	3.15454	795.701	FALSE	23
2022-09-12	15:12:35	0.729784	3.24623	830.107	FALSE	23
2022-09-12	15:12:36	1.0138	4.50959	800.21	FALSE	23
2022-09-12	15:12:36	0.39813	1.77096	831.878	FALSE	23
2022-09-12	15:12:36	0.12042	0.535652	800.746	FALSE	23
2022-09-12	15:12:36	0.172837	0.768814	832.646	FALSE	23
2022-09-12	15:12:37	0.0680537	0.302716	801.049	FALSE	23
2022-09-12	15:12:37	0.207036	0.920938	833.567	FALSE	23
2022-09-12	15:12:37	0.256959	1.14301	802.192	FALSE	23
2022-09-12	15:12:37	0.979758	4.35816	837.926	FALSE	23
2022-09-12	15:12:38	1.19665	5.32294	807.515	FALSE	23
2022-09-12	15:12:38	0.54556	2.42676	840.352	FALSE	23
2022-09-12	15:12:38	0.344186	1.53101	809.046	FALSE	23
2022-09-12	15:12:38	0.47411	2.10894	842.461	FALSE	23
2022-09-12	15:12:39	0.39187	1.74312	810.789	FALSE	23
2022-09-12	15:12:39	0.517977	2.30407	844.765	FALSE	23
2022-09-12	15:12:39	0.345102	1.53508	812.324	FALSE	23
2022-09-12	15:12:40	0.451565	2.00865	846.774	FALSE	23
2022-09-12	15:12:40	0.456094	2.0288	814.353	FALSE	23
2022-09-12	15:12:40	0.407952	1.81465	848.589	FALSE	23
2022-09-12	15:12:40	0.572379	2.54606	816.899	FALSE	23
2022-09-12	15:12:41	2.01528	8.96437	857.553	FALSE	23
2022-09-12	15:12:41	0.348003	1.54799	818.447	FALSE	23
2022-09-12	15:12:41	0.357774	1.59145	859.144	FALSE	23
2022-09-12	15:12:41	0.324237	1.44227	819.889	FALSE	23
2022-09-12	15:12:42	0.699962	3.11357	862.258	FALSE	23
2022-09-12	15:12:42	0.294059	1.30803	821.197	FALSE	23
2022-09-12	15:12:42	0.448664	1.99575	864.254	FALSE	23
2022-09-12	15:12:42	1.1565	5.14434	826.341	FALSE	23
2022-09-12	15:12:43	0.380369	1.69196	865.946	FALSE	23
2022-09-12	15:12:43	0.24383	1.0846	827.426	FALSE	23
2022-09-12	15:12:43	0.451921	2.01023	867.956	FALSE	23
2022-09-12	15:12:44	0.294008	1.30781	828.734	FALSE	23
2022-09-12	15:12:44	0.36159	1.60842	869.564	FALSE	23
2022-09-12	15:12:44	0.262812	1.16904	829.903	FALSE	23
2022-09-12	15:12:44	0.305916	1.36078	870.925	FALSE	23
2022-09-12	15:12:45	0.30098	1.33882	831.242	FALSE	23
2022-09-12	15:12:45	0.165967	0.738254	871.663	FALSE	23
2022-09-12	15:12:45	0.101641	0.452119	831.694	FALSE	23
2022-09-12	15:12:45	0.15014	0.667853	872.331	FALSE	23
2022-09-12	15:12:46	0.207596	0.923429	832.617	FALSE	23
2022-09-12	15:12:46	0.292532	1.30124	873.633	FALSE	23
2022-09-12	15:12:46	0.482303	2.14538	834.762	FALSE	23
2022-09-12	15:12:46	0.490089	2.18001	875.813	FALSE	23
2022-09-12	15:12:47	0.444033	1.97515	836.738	FALSE	23
2022-09-12	15:12:47	0.208054	0.925466	876.738	FALSE	23
2022-09-12	15:12:47	0.52612	2.34029	839.078	FALSE	23
2022-09-12	15:12:48	0.283626	1.26163	878	FALSE	23
2022-09-12	15:12:48	0.382099	1.69965	840.778	FALSE	23
2022-09-12	15:12:48	0.200573	0.892189	878.892	FALSE	23
2022-09-12	15:12:48	0.307239	1.36666	842.144	FALSE	23
2022-09-12	15:12:49	0.294822	1.31143	880.203	FALSE	23
2022-09-12	15:12:49	0.26841	1.19394	843.338	FALSE	23
2022-09-12	15:12:49	0.0105982	0.0471429	880.25	FALSE	23
2022-09-12	15:12:49	-0.0749488	-0.333387	843.338	FALSE	23
2022-09-12	15:12:50	-0.0170354	-0.0757769	880.25	FALSE	23
2022-09-12	15:12:50	-0.116323	-0.517428	843.338	FALSE	23
2022-09-12	15:12:50	-0.206908	-0.920368	880.25	FALSE	23
2022-09-12	15:12:50	-0.119478	-0.531462	843.338	FALSE	23
2022-09-12	15:12:51	-0.106247	-0.472608	880.25	FALSE	23
2022-09-12	15:12:51	-0.0866537	-0.385453	843.338	FALSE	23
2022-09-12	15:12:51	-0.113778	-0.506107	880.25	FALSE	23
2022-09-12	15:12:52	-0.224465	-0.998465	843.338	FALSE	23
2022-09-12	15:12:52	-0.534491	-2.37752	880.25	FALSE	23
2022-09-12	15:12:52	-0.532862	-2.37028	843.338	FALSE	23
2022-09-12	15:12:52	-0.64075	-2.85018	880.25	FALSE	23
2022-09-12	15:12:53	-0.562837	-2.50361	843.338	FALSE	23
2022-09-12	15:12:53	-0.57729	-2.5679	880.25	FALSE	23
2022-09-12	15:12:53	-0.766449	-3.40932	843.338	FALSE	23
2022-09-12	15:12:53	-0.0699615	-0.311203	880.25	FALSE	23
2022-09-12	15:12:54	0.191005	0.849628	844.188	FALSE	23
2022-09-12	15:12:54	0.00723945	0.0322025	880.283	FALSE	23
2022-09-12	15:12:54	0.200878	0.893546	845.081	FALSE	23
2022-09-12	15:12:55	0.259657	1.15501	881.438	FALSE	23
2022-09-12	15:12:55	0.476807	2.12093	847.202	FALSE	23
2022-09-12	15:12:55	0.125306	0.557386	881.995	FALSE	23
2022-09-12	15:12:55	0.108359	0.482003	847.684	FALSE	23
2022-09-12	15:12:56	-0.00375294	-0.0166938	881.995	FALSE	23
2022-09-12	15:12:56	0.302964	1.34764	849.032	FALSE	23
2022-09-12	15:12:56	0.215127	0.956928	882.952	FALSE	23
2022-09-12	15:12:56	0.356908	1.5876	850.62	FALSE	23
2022-09-12	15:12:57	0.16958	0.754326	883.706	FALSE	23
2022-09-12	15:12:57	0.193346	0.860042	851.48	FALSE	23
2022-09-12	15:12:57	0.813091	3.61679	887.323	FALSE	23
2022-09-12	15:12:57	1.87808	8.35408	859.834	FALSE	23
2022-09-12	15:12:58	1.30301	5.79605	893.119	FALSE	23
2022-09-12	15:12:58	0.73528	3.27067	863.104	FALSE	23
2022-09-12	15:12:58	0.375076	1.66841	894.787	FALSE	23
2022-09-12	15:12:59	0.512176	2.27826	865.383	FALSE	23
2022-09-12	15:12:59	0.349835	1.55614	896.344	FALSE	23
2022-09-12	15:12:59	0.435026	1.93508	867.318	FALSE	23
2022-09-12	15:12:59	0.682507	3.03593	899.38	FALSE	23
2022-09-12	15:13:00	1.10378	4.90983	872.228	FALSE	23
2022-09-12	15:13:00	2.51558	11.1898	910.569	FALSE	23
2022-09-12	15:13:00	2.30449	10.2508	882.478	FALSE	23
2022-09-12	15:13:00	1.77406	7.89137	918.461	FALSE	23
2022-09-12	15:13:01	1.2024	5.34852	887.827	FALSE	23
2022-09-12	15:13:01	0.570649	2.53836	920.999	FALSE	23
2022-09-12	15:13:01	0.380929	1.69445	889.521	FALSE	23
2022-09-12	15:13:01	0.542914	2.41499	923.414	FALSE	23
2022-09-12	15:13:02	0.590954	2.62868	892.15	FALSE	23
2022-09-12	15:13:02	0.432939	1.9258	925.34	FALSE	23
2022-09-12	15:13:02	0.303168	1.34855	893.499	FALSE	23
2022-09-12	15:13:03	0.350445	1.55885	926.899	FALSE	23
2022-09-12	15:13:03	0.231463	1.02959	894.528	FALSE	23
2022-09-12	15:13:03	0.0675957	0.300679	927.199	FALSE	23
2022-09-12	15:13:03	-0.033473	-0.148895	894.528	FALSE	23
2022-09-12	15:13:04	-0.223956	-0.996201	927.199	FALSE	23
2022-09-12	15:13:04	-0.296425	-1.31856	894.528	FALSE	23
2022-09-12	15:13:04	-0.302837	-1.34708	927.199	FALSE	23
2022-09-12	15:13:04	-0.509402	-2.26592	894.528	FALSE	23
2022-09-12	15:13:05	-0.676119	-3.00751	927.199	FALSE	23
2022-09-12	15:13:05	-0.989554	-4.40173	894.528	FALSE	23
2022-09-12	15:13:05	-1.19602	-5.32014	927.199	FALSE	23
2022-09-12	15:13:05	-1.02263	-4.54886	894.528	FALSE	23
2022-09-12	15:13:06	-1.10014	-4.89364	927.199	FALSE	23
2022-09-12	15:13:06	-0.730877	-3.25109	894.528	FALSE	23
2022-09-12	15:13:06	-0.538307	-2.3945	927.199	FALSE	23
2022-09-12	15:13:07	-0.245585	-1.09241	894.528	FALSE	23
2022-09-12	15:13:07	-0.176628	-0.785677	927.199	FALSE	23
2022-09-12	15:13:07	-0.127112	-0.56542	894.528	FALSE	23
2022-09-12	15:13:07	0.0182318	0.0810987	927.281	FALSE	23
2022-09-12	15:13:08	0.228054	1.01443	895.543	FALSE	23
2022-09-12	15:13:08	0.166222	0.739389	928.02	FALSE	23
2022-09-12	15:13:08	0.176094	0.783301	896.326	FALSE	23
2022-09-12	15:13:08	0.546781	2.43219	930.452	FALSE	23
2022-09-12	15:13:09	0.498639	2.21805	898.544	FALSE	23
2022-09-12	15:13:09	0.527544	2.34662	932.799	FALSE	23
2022-09-12	15:13:09	2.21823	9.86713	908.411	FALSE	23
2022-09-12	15:13:09	0.611209	2.71878	935.517	FALSE	23
2022-09-12	15:13:10	0.703168	3.12783	911.539	FALSE	23
2022-09-12	15:13:10	0.906374	4.03173	939.549	FALSE	23
2022-09-12	15:13:10	0.593957	2.64204	914.181	FALSE	23
2022-09-12	15:13:11	0.503168	2.23819	941.787	FALSE	23
2022-09-12	15:13:11	0.349936	1.55659	915.737	FALSE	23
2022-09-12	15:13:11	0.579555	2.57798	944.365	FALSE	23
2022-09-12	15:13:11	0.585356	2.60378	918.341	FALSE	23
2022-09-12	15:13:12	0.452176	2.01137	946.377	FALSE	23
2022-09-12	15:13:12	0.686069	3.05177	921.393	FALSE	23
2022-09-12	15:13:12	0.599402	2.66626	949.043	FALSE	23
2022-09-12	15:13:12	0.583626	2.59609	923.989	FALSE	23
2022-09-12	15:13:13	0.470649	2.09354	951.137	FALSE	23
2022-09-12	15:13:13	0.827799	3.68222	927.671	FALSE	23
2022-09-12	15:13:13	0.407341	1.81193	952.948	FALSE	23
2022-09-12	15:13:13	0.349886	1.55636	929.228	FALSE	23
2022-09-12	15:13:14	0.430547	1.91516	954.864	FALSE	23
2022-09-12	15:13:14	0.517468	2.3018	931.53	FALSE	23
2022-09-12	15:13:14	0.459657	2.04465	956.908	FALSE	23
2022-09-12	15:13:15	0.601285	2.67464	934.204	FALSE	23
2022-09-12	15:13:15	0.65472	2.91233	959.821	FALSE	23
2022-09-12	15:13:15	0.304847	1.35602	935.56	FALSE	23
2022-09-12	15:13:15	0.0399621	0.177759	959.998	FALSE	23
2022-09-12	15:13:16	0.443931	1.97469	937.535	FALSE	23
2022-09-12	15:13:16	0.45986	2.04555	962.044	FALSE	23
2022-09-12	15:13:16	0.169835	0.75546	938.29	FALSE	23
2022-09-12	15:13:16	0.242049	1.07668	963.121	FALSE	23
2022-09-12	15:13:17	0.249275	1.10883	939.399	FALSE	23
2022-09-12	15:13:17	0.352939	1.56994	964.691	FALSE	23
2022-09-12	15:13:17	0.311972	1.38771	940.787	FALSE	23
2022-09-12	15:13:18	0.313957	1.39654	966.087	FALSE	23
2022-09-12	15:13:18	0.110547	0.491735	941.279	FALSE	23
2022-09-12	15:13:18	-0.0112339	-0.0499706	966.087	FALSE	23
2022-09-12	15:13:18	-0.0428369	-0.190547	941.279	FALSE	23
2022-09-12	15:13:19	-0.325483	-1.44781	966.087	FALSE	23
2022-09-12	15:13:19	-0.425178	-1.89128	941.279	FALSE	23
2022-09-12	15:13:19	-0.515559	-2.29331	966.087	FALSE	23
2022-09-12	15:13:19	-0.353117	-1.57074	941.279	FALSE	23
2022-09-12	15:13:20	-0.540597	-2.40468	966.087	FALSE	23
2022-09-12	15:13:20	-0.698816	-3.10847	941.279	FALSE	23
2022-09-12	15:13:20	-0.783803	-3.48651	966.087	FALSE	23
2022-09-12	15:13:20	-0.584058	-2.59801	941.279	FALSE	23
2022-09-12	15:13:21	-0.607875	-2.70395	966.087	FALSE	23
2022-09-12	15:13:21	-0.681971	-3.03354	941.279	FALSE	23
2022-09-12	15:13:21	-0.642786	-2.85924	966.087	FALSE	23
2022-09-12	15:13:22	-0.4636	-2.06219	941.279	FALSE	23
2022-09-12	15:13:22	-0.346603	-1.54176	966.087	FALSE	23
2022-09-12	15:13:22	-0.33103	-1.47249	941.279	FALSE	23
2022-09-12	15:13:22	-0.160699	-0.714821	966.087	FALSE	23
2022-09-12	15:13:23	-0.264262	-1.17549	941.279	FALSE	23
2022-09-12	15:13:23	-0.185381	-0.824612	966.087	FALSE	23
2022-09-12	15:13:23	-0.230878	-1.02699	941.279	FALSE	23
2022-09-12	15:13:23	-0.00517788	-0.0230322	966.087	FALSE	23
2022-09-12	15:13:24	0.0667814	0.297057	941.576	FALSE	23
2022-09-12	15:13:24	0.099504	0.442614	966.53	FALSE	23
2022-09-12	15:13:24	0.484898	2.15692	943.733	FALSE	23
2022-09-12	15:13:24	1.14541	5.09501	971.625	FALSE	23
2022-09-12	15:13:25	0.955992	4.25244	947.985	FALSE	23
2022-09-12	15:13:25	0.79299	3.52738	975.152	FALSE	23
2022-09-12	15:13:25	0.663371	2.95081	950.936	FALSE	23
2022-09-12	15:13:26	0.682965	3.03796	978.19	FALSE	23
2022-09-12	15:13:26	0.55187	2.45483	953.391	FALSE	23
2022-09-12	15:13:26	0.465	2.06841	980.258	FALSE	23
2022-09-12	15:13:26	0.592837	2.63706	956.028	FALSE	23
2022-09-12	15:13:27	0.27757	1.23469	981.493	FALSE	23
2022-09-12	15:13:27	0.701794	3.12172	959.149	FALSE	23
2022-09-12	15:13:27	0.273753	1.21771	982.711	FALSE	23
2022-09-12	15:13:27	0.819148	3.64373	962.793	FALSE	23
2022-09-12	15:13:28	1.50709	6.70384	989.415	FALSE	23
2022-09-12	15:13:28	0.313906	1.39632	964.189	FALSE	23
2022-09-12	15:13:28	0.887494	3.94775	993.362	FALSE	23
2022-09-12	15:13:28	1.71401	7.62426	971.814	FALSE	23
2022-09-12	15:13:29	0.314618	1.39948	994.762	FALSE	23
2022-09-12	15:13:29	0.81589	3.62924	975.443	FALSE	23
2022-09-12	15:13:29	0.384746	1.71143	996.473	FALSE	23
2022-09-12	15:13:30	0.321947	1.43208	976.875	FALSE	23
2022-09-12	15:13:30	0.612735	2.72557	999.199	FALSE	23
2022-09-12	15:13:30	0.400878	1.78319	978.658	FALSE	23
2022-09-12	15:13:30	0.447188	1.98918	1001.19	FALSE	23
2022-09-12	15:13:31	0.490954	2.18386	980.842	FALSE	23
2022-09-12	15:13:31	0.281336	1.25144	1002.44	FALSE	23
2022-09-12	15:13:31	0.741489	3.29829	984.14	FALSE	23
2022-09-12	15:13:31	0.410191	1.82461	1004.26	FALSE	23
2022-09-12	15:13:32	0.326221	1.4511	985.592	FALSE	23
2022-09-12	15:13:32	0.55869	2.48516	1006.75	FALSE	23
2022-09-12	15:13:32	0.342761	1.52467	987.116	FALSE	23
2022-09-12	15:13:32	0.303066	1.3481	1008.1	FALSE	23
2022-09-12	15:13:33	0.219809	0.977754	988.094	FALSE	23
2022-09-12	15:13:33	0.316908	1.40967	1009.51	FALSE	23
2022-09-12	15:13:33	0.104186	0.46344	988.557	FALSE	23
2022-09-12	15:13:34	0.153804	0.684151	1010.19	FALSE	23
2022-09-12	15:13:34	0.103117	0.458685	989.016	FALSE	23
2022-09-12	15:13:34	0.121641	0.541083	1010.73	FALSE	23
2022-09-12	15:13:34	0.0698857	0.310866	989.327	FALSE	23
2022-09-12	15:13:35	0.212786	0.946515	1011.68	FALSE	23
2022-09-12	15:13:35	0.157214	0.699319	990.026	FALSE	23
2022-09-12	15:13:35	0.0551783	0.245444	1011.92	FALSE	23
2022-09-12	15:13:35	0.113499	0.504866	990.531	FALSE	23
2022-09-12	15:13:36	0.0905982	0.402999	1012.33	FALSE	23
2022-09-12	15:13:36	0.12271	0.545839	991.077	FALSE	23
2022-09-12	15:13:36	0.0728374	0.323995	1012.65	FALSE	23
2022-09-12	15:13:37	-0.0666536	-0.296489	991.077	FALSE	23
2022-09-12	15:13:37	-0.114236	-0.508145	1012.65	FALSE	23
2022-09-12	15:13:37	0.398995	1.77481	992.852	FALSE	23
2022-09-12	15:13:37	0.347494	1.54572	1014.2	FALSE	23
2022-09-12	15:13:38	0.236654	1.05268	993.904	FALSE	23
2022-09-12	15:13:38	0.15416	0.685735	1014.88	FALSE	23
2022-09-12	15:13:38	0.166476	0.740519	994.645	FALSE	23
2022-09-12	15:13:38	0.0844404	0.375608	1015.26	FALSE	23
2022-09-12	15:13:39	0.251616	1.11924	995.764	FALSE	23
2022-09-12	15:13:39	0.22439	0.998132	1016.26	FALSE	23
2022-09-12	15:13:39	0.210191	0.934972	996.699	FALSE	23
2022-09-12	15:13:39	0.196552	0.874303	1017.13	FALSE	23
2022-09-12	15:13:40	0.224288	0.997678	997.697	FALSE	23
2022-09-12	15:13:40	0.213957	0.951724	1018.08	FALSE	23
2022-09-12	15:13:40	0.107545	0.478382	998.175	FALSE	23
2022-09-12	15:13:41	0.218486	0.971869	1019.05	FALSE	23
2022-09-12	15:13:41	0.180929	0.804808	998.98	FALSE	23
2022-09-12	15:13:41	0.165509	0.736217	1019.79	FALSE	23
2022-09-12	15:13:41	0.190191	0.846008	999.826	FALSE	23
2022-09-12	15:13:42	0.15472	0.688226	1020.48	FALSE	23
2022-09-12	15:13:42	0.208308	0.926596	1000.75	FALSE	23
2022-09-12	15:13:42	0.134364	0.597678	1021.08	FALSE	23
2022-09-12	15:13:42	0.059962	0.266723	1001.02	FALSE	23
2022-09-12	15:13:43	0.00500025	0.0222421	1021.1	FALSE	23
2022-09-12	15:13:43	-0.0600379	-0.267061	1001.02	FALSE	23
2022-09-12	15:13:43	0.0199112	0.088569	1021.19	FALSE	23
2022-09-12	15:13:43	0.216756	0.964174	1001.98	FALSE	23
2022-09-12	15:13:44	-0.0458903	-0.204129	1021.19	FALSE	23
2022-09-12	15:13:44	0.0521249	0.231862	1002.22	FALSE	23
2022-09-12	15:13:44	0.0965523	0.429484	1021.62	FALSE	23
2022-09-12	15:13:45	0.0868831	0.386473	1002.6	FALSE	23
2022-09-12	15:13:45	0.0987915	0.439444	1022.06	FALSE	23
2022-09-12	15:13:45	0.299351	1.33157	1003.93	FALSE	23
2022-09-12	15:13:45	0.53243	2.36836	1024.42	FALSE	23
2022-09-12	15:13:46	1.77324	7.88773	1011.82	FALSE	23
2022-09-12	15:13:46	0.698486	3.10701	1027.53	FALSE	23
2022-09-12	15:13:46	0.218028	0.969832	1012.79	FALSE	23
2022-09-12	15:13:46	0.0659671	0.293435	1027.83	FALSE	23
2022-09-12	15:13:47	-0.159376	-0.708936	1012.79	FALSE	23
2022-09-12	15:13:47	-0.162531	-0.72297	1027.83	FALSE	23
2022-09-12	15:13:47	0.245865	1.09366	1013.88	FALSE	23
2022-09-12	15:13:47	0.0975193	0.433785	1028.26	FALSE	23
2022-09-12	15:13:48	0.0261707	0.116413	1014	FALSE	23
2022-09-12	15:13:48	0.0807254	0.359083	1028.62	FALSE	23
2022-09-12	15:13:48	0.0703438	0.312903	1014.31	FALSE	23
2022-09-12	15:13:49	0.0461707	0.205377	1028.82	FALSE	23
2022-09-12	15:13:49	0.0742623	0.330334	1014.64	FALSE	23
2022-09-12	15:13:49	0.0493259	0.219411	1029.04	FALSE	23
2022-09-12	15:13:49	0.0574175	0.255405	1014.9	FALSE	23
2022-09-12	15:13:50	0.0612852	0.272609	1029.32	FALSE	23
2022-09-12	15:13:50	0.0515142	0.229145	1015.13	FALSE	23
2022-09-12	15:13:50	0.0476465	0.211941	1029.53	FALSE	23
2022-09-12	15:13:50	0.0499875	0.222354	1015.35	FALSE	23
2022-09-12	15:13:51	0.041387	0.184098	1029.71	FALSE	23
2022-09-12	15:13:51	0.0378247	0.168252	1015.52	FALSE	23
2022-09-12	15:13:51	0.0465778	0.207187	1029.92	FALSE	23
2022-09-12	15:13:51	0.0461707	0.205377	1015.72	FALSE	23
2022-09-12	15:13:52	0.0490205	0.218053	1030.14	FALSE	23
2022-09-12	15:13:52	0.0468323	0.208319	1015.93	FALSE	23
2022-09-12	15:13:52	0.0506491	0.225297	1030.36	FALSE	23
2022-09-12	15:13:53	0.0601147	0.267402	1016.2	FALSE	23
2022-09-12	15:13:53	0.0593513	0.264006	1030.63	FALSE	23
2022-09-12	15:13:53	0.0381809	0.169836	1016.37	FALSE	23
2022-09-12	15:13:53	-0.0476715	-0.212052	1030.63	FALSE	23
2022-09-12	15:13:54	-0.0437529	-0.194622	1016.37	FALSE	23
2022-09-12	15:13:54	-0.580139	-2.58057	1030.63	FALSE	23
2022-09-12	15:13:54	-0.617341	-2.74606	1016.37	FALSE	23
2022-09-12	15:13:54	-0.768587	-3.41883	1030.63	FALSE	23
2022-09-12	15:13:55	-0.74874	-3.33055	1016.37	FALSE	23
2022-09-12	15:13:55	-0.726755	-3.23275	1030.63	FALSE	23
2022-09-12	15:13:55	-0.923498	-4.1079	1016.37	FALSE	23
2022-09-12	15:13:55	-0.779681	-3.46818	1030.63	FALSE	23
2022-09-12	15:13:56	-0.636119	-2.82958	1016.37	FALSE	23
2022-09-12	15:13:56	-0.478002	-2.12625	1030.63	FALSE	23
2022-09-12	15:13:56	-0.173371	-0.771189	1016.37	FALSE	23
2022-09-12	15:13:57	0.458588	2.03989	1032.67	FALSE	23
2022-09-12	15:13:57	0.174822	0.777643	1017.15	FALSE	23
2022-09-12	15:13:57	0.181489	0.807299	1033.47	FALSE	23
2022-09-12	15:13:58	0.172685	0.768137	1017.92	FALSE	23
2022-09-12	15:13:58	0.802252	3.56858	1037.04	FALSE	23
2022-09-12	15:13:58	1.41716	6.30381	1024.22	FALSE	23
2022-09-12	15:13:58	0.684898	3.04656	1040.09	FALSE	23
2022-09-12	15:13:58	0.351667	1.56429	1025.78	FALSE	23
2022-09-12	15:13:59	0.820623	3.6503	1043.74	FALSE	23
2022-09-12	15:13:59	0.174517	0.776287	1026.56	FALSE	23
2022-09-12	15:13:59	0.569937	2.53519	1046.27	FALSE	23
2022-09-12	15:14:00	0.59075	2.62777	1029.19	FALSE	23
2022-09-12	15:14:00	0.685763	3.05041	1049.32	FALSE	23
2022-09-12	15:14:00	0.56098	2.49535	1031.68	FALSE	23
2022-09-12	15:14:00	0.502252	2.23412	1051.56	FALSE	23
2022-09-12	15:14:01	0.976247	4.34254	1036.03	FALSE	23
2022-09-12	15:14:01	0.482049	2.14425	1053.7	FALSE	23
2022-09-12	15:14:01	0.489987	2.17956	1038.21	FALSE	23
2022-09-12	15:14:01	0.408715	1.81805	1055.52	FALSE	23
2022-09-12	15:14:02	1.58571	7.05356	1045.26	FALSE	23
2022-09-12	15:14:02	1.27889	5.68876	1061.21	FALSE	23
2022-09-12	15:14:02	3.068	13.6471	1058.91	1	24
2022-09-12	15:14:02	1.02011	4.53765	1065.75	FALSE	24
2022-09-12	15:14:03	1.04159	4.6332	1063.54	FALSE	24
2022-09-12	15:14:03	0.588919	2.61963	1068.37	FALSE	24
2022-09-12	15:14:03	0.762863	3.39337	1066.93	FALSE	24
2022-09-12	15:14:04	1.43406	6.37899	1074.75	FALSE	24
2022-09-12	15:14:04	0.509733	2.26739	1069.2	FALSE	24
2022-09-12	15:14:04	0.624745	2.77899	1077.52	FALSE	24
2022-09-12	15:14:04	0.873041	3.88346	1073.08	FALSE	24
2022-09-12	15:14:05	0.398283	1.77164	1079.3	FALSE	24
2022-09-12	15:14:05	0.704389	3.13326	1076.22	FALSE	24
2022-09-12	15:14:05	0.409682	1.82235	1081.12	FALSE	24
2022-09-12	15:14:05	1.64144	7.30145	1083.52	FALSE	24
2022-09-12	15:14:06	0.770394	3.42687	1084.55	FALSE	24
2022-09-12	15:14:06	1.95218	8.68369	1092.2	FALSE	24
2022-09-12	15:14:06	1.52877	6.80027	1091.35	FALSE	24
2022-09-12	15:14:06	2.67757	11.9104	1104.11	FALSE	24
2022-09-12	15:14:07	1.75615	7.81171	1099.16	FALSE	24
2022-09-12	15:14:07	1.29823	5.77479	1109.89	FALSE	24
2022-09-12	15:14:07	1.32337	5.88661	1105.04	FALSE	24
2022-09-12	15:14:08	0.566578	2.52025	1112.41	FALSE	24
2022-09-12	15:14:08	2.8939	12.8726	1117.92	FALSE	24
2022-09-12	15:14:08	0.515941	2.29501	1114.7	FALSE	24
2022-09-12	15:14:08	0.662506	2.94696	1120.86	FALSE	24
2022-09-12	15:14:09	0.281285	1.25121	1115.95	FALSE	24
2022-09-12	15:14:09	0.223372	0.993603	1121.86	FALSE	24
2022-09-12	15:14:09	0.323321	1.4382	1117.39	FALSE	24
2022-09-12	15:14:09	0.465356	2.07	1123.93	FALSE	24
2022-09-12	15:14:10	0.298028	1.32569	1118.72	FALSE	24
2022-09-12	15:14:10	0.404135	1.79767	1125.72	FALSE	24
2022-09-12	15:14:10	0.436756	1.94278	1120.66	FALSE	24
2022-09-12	15:14:10	0.560216	2.49195	1128.22	FALSE	24
2022-09-12	15:14:11	1.12017	4.98274	1125.64	FALSE	24
2022-09-12	15:14:11	1.00154	4.45505	1132.67	FALSE	24
2022-09-12	15:14:11	2.13467	9.49544	1135.14	FALSE	24
2022-09-12	15:14:12	1.97136	8.769	1141.44	FALSE	24
2022-09-12	15:14:12	2.21472	9.85152	1144.99	FALSE	24
2022-09-12	15:14:12	1.70032	7.56336	1149	FALSE	24
2022-09-12	15:14:12	1.95528	8.69748	1153.69	FALSE	24
2022-09-12	15:14:13	1.33808	5.95205	1154.96	FALSE	24
2022-09-12	15:14:13	1.05849	4.70838	1158.4	FALSE	24
2022-09-12	15:14:13	1.75131	7.79018	1162.75	FALSE	24
2022-09-12	15:14:13	1.91798	8.53156	1166.93	FALSE	24
2022-09-12	15:14:14	0.426374	1.8966	1164.64	FALSE	24
2022-09-12	15:14:14	1.20388	5.3551	1172.28	FALSE	24
2022-09-12	15:14:14	0.401743	1.78703	1166.43	FALSE	24
2022-09-12	15:14:14	0.787952	3.50497	1175.79	FALSE	24
2022-09-12	15:14:15	1.34907	6.00093	1172.43	FALSE	24
2022-09-12	15:14:15	1.30322	5.79698	1181.58	FALSE	24
2022-09-12	15:14:15	1.42067	6.31942	1178.75	FALSE	24
2022-09-12	15:14:16	1.36312	6.06343	1187.65	FALSE	24
2022-09-12	15:14:16	1.60846	7.15475	1185.91	FALSE	24
2022-09-12	15:14:16	0.875331	3.89365	1191.54	FALSE	24
2022-09-12	15:14:16	2.46011	10.9431	1196.85	FALSE	24
2022-09-12	15:14:17	0.439148	1.95342	1193.5	FALSE	24
2022-09-12	15:14:17	2.2337	9.93594	1206.78	FALSE	24
2022-09-12	15:14:17	0.539758	2.40095	1195.9	FALSE	24
2022-09-12	15:14:17	1.80866	8.04528	1214.83	FALSE	24
2022-09-12	15:14:18	0.753397	3.35126	1199.25	FALSE	24
2022-09-12	15:14:18	1.18948	5.29104	1220.12	FALSE	24
2022-09-12	15:14:18	1.25177	5.56812	1204.82	FALSE	24
2022-09-12	15:14:19	1.72561	7.67586	1227.8	FALSE	24
2022-09-12	15:14:19	1.37309	6.10778	1210.92	FALSE	24
2022-09-12	15:14:19	1.95136	8.68004	1236.48	FALSE	24
2022-09-12	15:14:19	1.06088	4.71901	1215.64	FALSE	24
2022-09-12	15:14:20	2.1022	9.35101	1245.83	FALSE	24
2022-09-12	15:14:20	0.629784	2.80141	1218.44	FALSE	24
2022-09-12	15:14:20	2.65187	11.796	1257.62	FALSE	24
2022-09-12	15:14:20	0.452685	2.01363	1220.46	FALSE	24
2022-09-12	15:14:21	2.41543	10.7443	1268.37	FALSE	24
2022-09-12	15:14:21	0.802048	3.56767	1224.03	FALSE	24
2022-09-12	15:14:21	1.71477	7.62764	1276	FALSE	24
2022-09-12	15:14:22	1.44815	6.44166	1230.47	FALSE	24
2022-09-12	15:14:22	1.11925	4.97865	1280.97	FALSE	24
2022-09-12	15:14:22	1.6536	7.35554	1237.82	FALSE	24
2022-09-12	15:14:22	0.568817	2.53021	1283.5	FALSE	24
2022-09-12	15:14:23	1.42266	6.32828	1244.15	FALSE	24
2022-09-12	15:14:23	0.270496	1.20322	1284.71	FALSE	24
2022-09-12	15:14:23	0.650089	2.89173	1247.04	FALSE	24
2022-09-12	15:14:23	0.334059	1.48596	1286.19	FALSE	24
2022-09-12	15:14:24	0.360318	1.60277	1248.64	FALSE	24
2022-09-12	15:14:24	0.363423	1.61658	1287.81	FALSE	24
2022-09-12	15:14:24	0.49243	2.19043	1250.84	FALSE	24
2022-09-12	15:14:24	1.2648	5.62608	1293.44	FALSE	24
2022-09-12	15:14:25	1.77849	7.91108	1258.75	FALSE	24
2022-09-12	15:14:25	0.884135	3.93281	1297.37	FALSE	24
2022-09-12	15:14:25	0.456298	2.0297	1260.78	FALSE	24
2022-09-12	15:14:25	0.398995	1.77481	1299.14	FALSE	24
2022-09-12	15:14:26	0.284542	1.2657	1262.04	FALSE	24
2022-09-12	15:14:26	0.723524	3.21838	1302.36	FALSE	24
2022-09-12	15:14:26	0.641997	2.85573	1264.9	FALSE	24
2022-09-12	15:14:27	0.25584	1.13803	1303.5	FALSE	24
2022-09-12	15:14:27	0.31757	1.41261	1266.31	FALSE	24
2022-09-12	15:14:27	0.220674	0.981602	1304.48	FALSE	24
2022-09-12	15:14:27	0.332634	1.47962	1267.79	FALSE	24
2022-09-12	15:14:28	0.247087	1.09909	1305.58	FALSE	24
2022-09-12	15:14:28	0.253397	1.12716	1268.92	FALSE	24
2022-09-12	15:14:28	0.251056	1.11675	1306.7	FALSE	24
2022-09-12	15:14:28	0.387087	1.72184	1270.64	FALSE	24
2022-09-12	15:14:29	0.395636	1.75987	1308.46	FALSE	24
2022-09-12	15:14:29	0.561896	2.49943	1273.14	FALSE	24
2022-09-12	15:14:29	0.67355	2.99609	1311.45	FALSE	24
2022-09-12	15:14:29	0.580827	2.58363	1275.72	FALSE	24
2022-09-12	15:14:30	0.754313	3.35534	1314.81	FALSE	24
2022-09-12	15:14:30	1.01889	4.53223	1280.25	FALSE	24
2022-09-12	15:14:30	1.32256	5.88301	1320.69	FALSE	24
2022-09-12	15:14:31	2.72301	12.1125	1292.37	FALSE	24
2022-09-12	15:14:31	1.42205	6.32556	1327.02	FALSE	24
2022-09-12	15:14:31	1.4338	6.37783	1298.74	FALSE	24
2022-09-12	15:14:31	2.55243	11.3537	1338.37	FALSE	24
2022-09-12	15:14:32	0.430445	1.91471	1300.66	FALSE	24
2022-09-12	15:14:32	0.552023	2.45551	1340.83	FALSE	24
2022-09-12	15:14:32	0.36098	1.60571	1302.26	FALSE	24
2022-09-12	15:14:32	0.401285	1.785	1342.61	FALSE	24
2022-09-12	15:14:33	0.365713	1.62676	1303.89	FALSE	24
2022-09-12	15:14:33	0.43925	1.95387	1344.57	FALSE	24
2022-09-12	15:14:33	0.358639	1.5953	1305.49	FALSE	24
2022-09-12	15:14:33	0.467341	2.07883	1346.64	FALSE	24
2022-09-12	15:14:34	2.39217	10.6409	1316.13	FALSE	24
2022-09-12	15:14:34	2.32042	10.3217	1356.97	FALSE	24
2022-09-12	15:14:34	3.61619	16.0855	1332.21	1	25
2022-09-12	15:14:35	2.03497	9.05195	1366.02	FALSE	25
2022-09-12	15:14:35	3.87533	17.2382	1349.45	1	26
2022-09-12	15:14:35	1.08729	4.83648	1370.85	FALSE	26
2022-09-12	15:14:35	2.51803	11.2007	1360.65	FALSE	26
2022-09-12	15:14:36	0.691514	3.07599	1373.93	FALSE	26
2022-09-12	15:14:36	1.83004	8.14038	1368.79	FALSE	26
2022-09-12	15:14:36	0.713499	3.17379	1377.1	FALSE	26
2022-09-12	15:14:36	0.909987	4.0478	1372.84	FALSE	26
2022-09-12	15:14:37	1.46927	6.53561	1383.64	FALSE	26
2022-09-12	15:14:37	1.43284	6.37356	1379.21	FALSE	26
2022-09-12	15:14:37	2.49258	11.0875	1394.73	FALSE	26
2022-09-12	15:14:38	1.27116	5.65437	1384.87	FALSE	26
2022-09-12	15:14:38	2.94276	13.09	1407.82	FALSE	26
2022-09-12	15:14:38	0.984491	4.37921	1389.25	FALSE	26
2022-09-12	15:14:38	3.37487	15.0121	1422.83	1	27
2022-09-12	15:14:39	0.957061	4.2572	1393.5	FALSE	27
2022-09-12	15:14:39	3.38815	15.0712	1437.9	1	28
2022-09-12	15:14:39	1.72632	7.67902	1401.18	FALSE	28
2022-09-12	15:14:39	2.1193	9.42707	1447.33	FALSE	28
2022-09-12	15:14:40	1.66556	7.40874	1408.59	FALSE	28
2022-09-12	15:14:40	2.7907	12.4136	1459.74	FALSE	28
2022-09-12	15:14:40	3.71335	16.5177	1425.11	1	29
2022-09-12	15:14:40	3.40495	15.1459	1474.89	1	30
2022-09-12	15:14:41	2.40439	10.6952	1435.81	FALSE	30
2022-09-12	15:14:41	0.723677	3.21906	1478.11	FALSE	30
2022-09-12	15:14:41	1.38719	6.1705	1441.98	FALSE	30
2022-09-12	15:14:42	0.140624	0.625524	1478.73	FALSE	30
2022-09-12	15:14:42	0.610191	2.71425	1444.69	FALSE	30
2022-09-12	15:14:42	1.09513	4.87136	1483.6	FALSE	30
2022-09-12	15:14:42	0.268003	1.19213	1445.88	FALSE	30
2022-09-12	15:14:43	0.436603	1.9421	1485.55	FALSE	30
2022-09-12	15:14:43	0.437825	1.94753	1447.83	FALSE	30
2022-09-12	15:14:43	0.449936	2.00141	1487.55	FALSE	30
2022-09-12	15:14:43	0.587595	2.61374	1450.44	FALSE	30
2022-09-12	15:14:44	0.766425	3.40921	1490.96	FALSE	30
2022-09-12	15:14:44	0.541285	2.40774	1452.85	FALSE	30
2022-09-12	15:14:44	0.986832	4.38963	1495.35	FALSE	30
2022-09-12	15:14:44	1.56408	6.95734	1459.81	FALSE	30
2022-09-12	15:14:45	3.29777	14.6691	1510.01	1	31
2022-09-12	15:14:45	2.92276	13.001	1472.81	FALSE	31
2022-09-12	15:14:45	1.46566	6.51955	1516.53	FALSE	31
2022-09-12	15:14:46	1.01319	4.50687	1477.32	FALSE	31
2022-09-12	15:14:46	0.444237	1.97606	1518.51	FALSE	31
2022-09-12	15:14:46	0.256603	1.14142	1478.46	FALSE	31
2022-09-12	15:14:46	0.209173	0.930443	1519.44	FALSE	31
2022-09-12	15:14:47	0.164389	0.731235	1479.19	FALSE	31
2022-09-12	15:14:47	0.28729	1.27792	1520.72	FALSE	31
2022-09-12	15:14:47	0.268104	1.19258	1480.38	FALSE	31
2022-09-12	15:14:47	0.306018	1.36123	1522.08	FALSE	31
2022-09-12	15:14:48	0.313295	1.3936	1481.78	FALSE	31
2022-09-12	15:14:48	0.355077	1.57945	1523.66	FALSE	31
2022-09-12	15:14:48	0.37355	1.66163	1483.44	FALSE	31
2022-09-12	15:14:48	0.295076	1.31256	1524.97	FALSE	31
2022-09-12	15:14:49	0.38159	1.69739	1485.13	FALSE	31
2022-09-12	15:14:49	1.69986	7.56132	1532.53	FALSE	31
2022-09-12	15:14:49	0.571158	2.54063	1487.68	FALSE	31
2022-09-12	15:14:50	0.459453	2.04374	1534.58	FALSE	31
2022-09-12	15:14:50	0.268715	1.1953	1488.87	FALSE	31
2022-09-12	15:14:50	0.472023	2.09965	1536.68	FALSE	31
2022-09-12	15:14:50	0.635178	2.8254	1491.7	FALSE	31
2022-09-12	15:14:51	0.390954	1.73904	1538.42	FALSE	31
2022-09-12	15:14:51	0.40215	1.78884	1493.48	FALSE	31
2022-09-12	15:14:51	0.433346	1.92761	1540.34	FALSE	31
2022-09-12	15:14:51	0.511463	2.27509	1495.76	FALSE	31
2022-09-12	15:14:52	0.506883	2.25472	1542.6	FALSE	31
2022-09-12	15:14:52	0.47014	2.09128	1497.85	FALSE	31
2022-09-12	15:14:52	0.479046	2.13089	1544.73	FALSE	31
2022-09-12	15:14:52	0.492379	2.1902	1500.04	FALSE	31
2022-09-12	15:14:53	0.499656	2.22257	1546.95	FALSE	31
2022-09-12	15:14:53	0.498384	2.21691	1502.26	FALSE	31
2022-09-12	15:14:53	0.488104	2.17118	1549.12	FALSE	31
2022-09-12	15:14:54	0.485713	2.16055	1504.42	FALSE	31
2022-09-12	15:14:54	0.482914	2.1481	1551.27	FALSE	31
2022-09-12	15:14:54	0.476858	2.12116	1506.54	FALSE	31
2022-09-12	15:14:54	0.487036	2.16643	1553.44	FALSE	31
2022-09-12	15:14:55	0.471667	2.09807	1508.64	FALSE	31
2022-09-12	15:14:55	0.466323	2.0743	1555.51	FALSE	31
2022-09-12	15:14:55	0.454262	2.02065	1510.66	FALSE	31
2022-09-12	15:14:55	0.462914	2.05913	1557.57	FALSE	31
2022-09-12	15:14:56	0.434466	1.93259	1512.59	FALSE	31
2022-09-12	15:14:56	0.462049	2.05529	1559.63	FALSE	31
2022-09-12	15:14:56	0.260674	1.15953	1513.75	FALSE	31
2022-09-12	15:14:57	0.637264	2.83468	1562.46	FALSE	31
2022-09-12	15:14:57	0.0259671	0.115507	1513.87	FALSE	31
2022-09-12	15:14:57	-0.0149998	-0.0667221	1562.46	FALSE	31
2022-09-12	15:14:57	0.0731427	0.325353	1514.19	FALSE	31
2022-09-12	15:14:58	-0.0899616	-0.400167	1562.46	FALSE	31
2022-09-12	15:14:58	0.000623673	0.00277422	1514.19	FALSE	31
2022-09-12	15:14:58	-0.179376	-0.7979	1562.46	FALSE	31
2022-09-12	15:14:58	-0.0322517	-0.143462	1514.19	FALSE	31
2022-09-12	15:14:59	-0.0662465	-0.294678	1562.46	FALSE	31
2022-09-12	15:14:59	0.0368577	0.16395	1514.36	FALSE	31
2022-09-12	15:14:59	-0.0532694	-0.236953	1562.46	FALSE	31
2022-09-12	15:14:59	0.245662	1.09275	1515.45	FALSE	31
2022-09-12	15:15:00	0.246069	1.09456	1563.56	FALSE	31
2022-09-12	15:15:00	1.03543	4.6058	1520.06	FALSE	31
2022-09-12	15:15:00	0.750445	3.33813	1566.89	FALSE	31
2022-09-12	15:15:01	0.761132	3.38567	1523.44	FALSE	31
2022-09-12	15:15:01	0.781845	3.4778	1570.37	FALSE	31
2022-09-12	15:15:01	0.922201	4.10213	1527.54	FALSE	31
2022-09-12	15:15:01	0.690445	3.07124	1573.44	FALSE	31
2022-09-12	15:15:02	0.37014	1.64646	1529.19	FALSE	31
2022-09-12	15:15:02	0.441743	1.96496	1575.41	FALSE	31
2022-09-12	15:15:02	0.391667	1.74221	1530.93	FALSE	31
2022-09-12	15:15:02	0.400878	1.78319	1577.19	FALSE	31
2022-09-12	15:15:03	0.537214	2.38964	1533.32	FALSE	31
2022-09-12	15:15:03	0.435127	1.93553	1579.13	FALSE	31
2022-09-12	15:15:03	1.08393	4.82154	1538.14	FALSE	31
2022-09-12	15:15:03	0.525407	2.33712	1581.46	FALSE	31
2022-09-12	15:15:04	0.35126	1.56247	1539.71	FALSE	31
2022-09-12	15:15:04	0.333906	1.48528	1582.95	FALSE	31
2022-09-12	15:15:04	0.464695	2.06706	1541.77	FALSE	31
2022-09-12	15:15:05	0.23757	1.05676	1584.01	FALSE	31
2022-09-12	15:15:05	0.298181	1.32637	1543.1	FALSE	31
2022-09-12	15:15:05	0.204288	0.908714	1584.91	FALSE	31
2022-09-12	15:15:05	0.261743	1.16429	1544.26	FALSE	31
2022-09-12	15:15:06	0.261183	1.16179	1586.08	FALSE	31
2022-09-12	15:15:06	0.325662	1.44861	1545.71	FALSE	31
2022-09-12	15:15:06	0.733092	3.26094	1589.34	FALSE	31
2022-09-12	15:15:06	1.1164	4.96597	1550.68	FALSE	31
2022-09-12	15:15:07	0.99874	4.4426	1593.78	FALSE	31
2022-09-12	15:15:07	1.15742	5.14844	1555.83	FALSE	31
2022-09-12	15:15:07	0.552481	2.45755	1596.24	FALSE	31
2022-09-12	15:15:07	0.848053	3.77231	1559.6	FALSE	31
2022-09-12	15:15:08	0.675636	3.00536	1599.24	FALSE	31
2022-09-12	15:15:08	0.333651	1.48415	1561.08	FALSE	31
2022-09-12	15:15:08	0.617417	2.74639	1601.99	FALSE	31
2022-09-12	15:15:09	0.561183	2.49625	1563.58	FALSE	31
2022-09-12	15:15:09	1.22622	5.45447	1607.44	FALSE	31
2022-09-12	15:15:09	0.801641	3.56586	1567.15	FALSE	31
2022-09-12	15:15:09	1.11884	4.97682	1612.42	FALSE	31
2022-09-12	15:15:10	0.774568	3.44543	1570.59	FALSE	31
2022-09-12	15:15:10	0.771361	3.43117	1615.85	FALSE	31
2022-09-12	15:15:10	1.10164	4.90032	1575.49	FALSE	31
2022-09-12	15:15:10	1.05045	4.67261	1620.52	FALSE	31
2022-09-12	15:15:11	0.924389	4.11187	1579.6	FALSE	31
2022-09-12	15:15:11	0.390852	1.73859	1622.26	FALSE	31
2022-09-12	15:15:11	0.158995	0.707242	1580.31	FALSE	31
2022-09-12	15:15:11	0.341947	1.52105	1623.78	FALSE	31
2022-09-12	15:15:12	0.0198603	0.0883426	1580.4	FALSE	31
2022-09-12	15:15:12	0.189326	0.84216	1624.63	FALSE	31
2022-09-12	15:15:12	0.170293	0.757497	1581.16	FALSE	31
2022-09-12	15:15:13	0.188308	0.837632	1625.46	FALSE	31
2022-09-12	15:15:13	0.25986	1.15591	1582.31	FALSE	31
2022-09-12	15:15:13	0.22383	0.995641	1626.46	FALSE	31
2022-09-12	15:15:13	0.547443	2.43514	1584.75	FALSE	31
2022-09-12	15:15:14	0.101947	0.453481	1626.91	FALSE	31
2022-09-12	15:15:14	0.37813	1.682	1586.43	FALSE	31
2022-09-12	15:15:14	0.0582317	0.259026	1627.17	FALSE	31
2022-09-12	15:15:14	0.305713	1.35987	1587.79	FALSE	31
2022-09-12	15:15:15	0.0865778	0.385115	1627.56	FALSE	31
2022-09-12	15:15:15	0.360878	1.60526	1589.4	FALSE	31
2022-09-12	15:15:15	0.183931	0.818162	1628.37	FALSE	31
2022-09-12	15:15:16	0.700267	3.11493	1592.51	FALSE	31
2022-09-12	15:15:16	0.379758	1.68924	1630.06	FALSE	31
2022-09-12	15:15:16	0.485763	2.16077	1594.67	FALSE	31
2022-09-12	15:15:16	0.494008	2.19745	1632.26	FALSE	31
2022-09-12	15:15:17	0.681132	3.02981	1597.7	FALSE	31
2022-09-12	15:15:17	0.740471	3.29376	1635.55	FALSE	31
2022-09-12	15:15:17	0.299199	1.3309	1599.03	FALSE	31
2022-09-12	15:15:17	0.482456	2.14606	1637.7	FALSE	31
2022-09-12	15:15:18	0.387646	1.72433	1600.76	FALSE	31
2022-09-12	15:15:18	0.441947	1.96587	1639.67	FALSE	31
2022-09-12	15:15:18	0.716857	3.18872	1603.94	FALSE	31
2022-09-12	15:15:18	0.547646	2.43604	1642.1	FALSE	31
2022-09-12	15:15:19	0.405916	1.8056	1605.75	FALSE	31
2022-09-12	15:15:19	0.512277	2.27871	1644.38	FALSE	31
2022-09-12	15:15:19	0.483575	2.15104	1607.9	FALSE	31
2022-09-12	15:15:20	0.334415	1.48754	1645.87	FALSE	31
2022-09-12	15:15:20	0.334924	1.48981	1609.39	FALSE	31
2022-09-12	15:15:20	0.575076	2.55805	1648.43	FALSE	31
2022-09-12	15:15:20	0.586679	2.60967	1612	FALSE	31
2022-09-12	15:15:21	0.636501	2.83128	1651.26	FALSE	31
2022-09-12	15:15:21	0.571158	2.54063	1614.54	FALSE	31
2022-09-12	15:15:21	0.63986	2.84623	1654.1	FALSE	31
2022-09-12	15:15:21	0.648715	2.88561	1617.43	FALSE	31
2022-09-12	15:15:22	1.27365	5.66545	1659.77	FALSE	31
2022-09-12	15:15:22	0.291768	1.29784	1618.72	FALSE	31
2022-09-12	15:15:22	0.121947	0.542445	1660.31	FALSE	31
2022-09-12	15:15:22	0.387595	1.7241	1620.45	FALSE	31
2022-09-12	15:15:23	0.215585	0.958965	1661.27	FALSE	31
2022-09-12	15:15:23	0.570343	2.537	1622.99	FALSE	31
2022-09-12	15:15:23	1.09253	4.85979	1666.13	FALSE	31
2022-09-12	15:15:24	0.568359	2.52817	1625.51	FALSE	31
2022-09-12	15:15:24	0.573244	2.5499	1668.68	FALSE	31
2022-09-12	15:15:24	0.573957	2.55308	1628.07	FALSE	31
2022-09-12	15:15:24	0.284847	1.26706	1669.95	FALSE	31
2022-09-12	15:15:25	0.124746	0.554895	1628.62	FALSE	31
2022-09-12	15:15:25	0.0914124	0.406621	1670.35	FALSE	31
2022-09-12	15:15:25	-0.0113865	-0.0506494	1628.62	FALSE	31
2022-09-12	15:15:25	-0.0151524	-0.0674009	1670.35	FALSE	31
2022-09-12	15:15:26	0.0805727	0.358403	1628.98	FALSE	31
2022-09-12	15:15:26	0.126171	0.561234	1670.92	FALSE	31
2022-09-12	15:15:26	0.342354	1.52286	1630.5	FALSE	31
2022-09-12	15:15:26	0.37584	1.67181	1672.59	FALSE	31
2022-09-12	15:15:27	0.263219	1.17085	1631.67	FALSE	31
2022-09-12	15:15:27	0.425458	1.89252	1674.48	FALSE	31
2022-09-12	15:15:27	0.348613	1.5507	1633.22	FALSE	31
2022-09-12	15:15:28	0.486832	2.16553	1676.65	FALSE	31
2022-09-12	15:15:28	0.414771	1.84498	1635.07	FALSE	31
2022-09-12	15:15:28	0.616247	2.74119	1679.39	FALSE	31
2022-09-12	15:15:28	0.596756	2.65449	1637.72	FALSE	31
2022-09-12	15:15:29	0.562099	2.50033	1681.89	FALSE	31
2022-09-12	15:15:29	0.458995	2.0417	1639.77	FALSE	31
2022-09-12	15:15:29	0.574211	2.55421	1684.44	FALSE	31
2022-09-12	15:15:29	0.479249	2.1318	1641.9	FALSE	31
2022-09-12	15:15:30	0.435941	1.93915	1686.38	FALSE	31
2022-09-12	15:15:30	0.506018	2.25087	1644.15	FALSE	31
2022-09-12	15:15:30	0.435229	1.93599	1688.32	FALSE	31
2022-09-12	15:15:31	0.552685	2.45845	1646.61	FALSE	31
2022-09-12	15:15:31	0.399199	1.77572	1690.09	FALSE	31
2022-09-12	15:15:31	0.564287	2.51006	1649.12	FALSE	31
2022-09-12	15:15:31	0.393041	1.74832	1691.84	FALSE	31
2022-09-12	15:15:32	0.56388	2.50825	1651.63	FALSE	31
2022-09-12	15:15:32	0.528257	2.34979	1694.19	FALSE	31
2022-09-12	15:15:32	0.584745	2.60106	1654.23	FALSE	31
2022-09-12	15:15:32	0.707799	3.14843	1697.34	FALSE	31
2022-09-12	15:15:33	1.26352	5.62039	1659.85	FALSE	31
2022-09-12	15:15:33	1.05655	4.69975	1702.04	FALSE	31
2022-09-12	15:15:33	1.69289	7.53031	1667.38	FALSE	31
2022-09-12	15:15:33	0.929834	4.13609	1706.17	FALSE	31
2022-09-12	15:15:34	0.769987	3.42506	1670.8	FALSE	31
2022-09-12	15:15:34	0.809275	3.59982	1709.77	FALSE	31
2022-09-12	15:15:34	0.832837	3.70463	1674.51	FALSE	31
2022-09-12	15:15:35	0.715941	3.18465	1712.96	FALSE	31
2022-09-12	15:15:35	0.414364	1.84317	1676.35	FALSE	31
2022-09-12	15:15:35	0.69131	3.07509	1716.03	FALSE	31
2022-09-12	15:15:35	0.48841	2.17255	1678.52	FALSE	31
2022-09-12	15:15:36	0.733753	3.26388	1719.3	FALSE	31
2022-09-12	15:15:36	0.566578	2.52025	1681.04	FALSE	31
2022-09-12	15:15:36	0.539147	2.39823	1721.7	FALSE	31
2022-09-12	15:15:36	0.425611	1.8932	1682.94	FALSE	31
2022-09-12	15:15:37	0.71874	3.1971	1724.89	FALSE	31
2022-09-12	15:15:37	0.622099	2.76722	1685.7	FALSE	31
2022-09-12	15:15:37	0.328817	1.46264	1726.36	FALSE	31
2022-09-12	15:15:37	0.354873	1.57855	1687.28	FALSE	31
2022-09-12	15:15:38	0.450395	2.00345	1728.36	FALSE	31
2022-09-12	15:15:38	0.376247	1.67362	1688.96	FALSE	31
2022-09-12	15:15:38	0.404033	1.79722	1730.16	FALSE	31
2022-09-12	15:15:39	1.13447	5.04635	1694	FALSE	31
2022-09-12	15:15:39	0.504338	2.2434	1732.4	FALSE	31
2022-09-12	15:15:39	0.214211	0.952853	1694.95	FALSE	31
2022-09-12	15:15:39	0.00667965	0.0297124	1732.43	FALSE	31

## Sheet: MrFitz_star_2022912151021 (2)
Date	Time	Lbs	Total Force x time			**GoPro Fitting: 1500
2022-09-12	15:10:22	0.409682	0.409682	FALSE	0
2022-09-12	15:10:22	0.405865	0.815547	FALSE	0
2022-09-12	15:10:22	0.403881	1.21943	FALSE	0
2022-09-12	15:10:22	0.417265	1.63669	FALSE	0
2022-09-12	15:10:23	0.420115	2.05681	FALSE	0
2022-09-12	15:10:23	0.426069	2.48288	FALSE	0
2022-09-12	15:10:23	0.463066	2.94594	FALSE	0
2022-09-12	15:10:23	0.422914	3.36886	FALSE	0
2022-09-12	15:10:24	0.409529	3.77839	FALSE	0
2022-09-12	15:10:24	0.446374	4.22476	FALSE	0
2022-09-12	15:10:24	0.43584	4.6606	FALSE	0
2022-09-12	15:10:24	0.474364	5.13496	FALSE	0
2022-09-12	15:10:25	0.516247	5.65121	FALSE	0
2022-09-12	15:10:25	0.433906	6.08512	FALSE	0
2022-09-12	15:10:25	0.387087	6.4722	FALSE	0
2022-09-12	15:10:26	0.539504	7.01171	FALSE	0
2022-09-12	15:10:26	0.454008	7.46572	FALSE	0
2022-09-12	15:10:26	0.416349	7.88207	FALSE	0
2022-09-12	15:10:26	0.45757	8.33964	FALSE	0
2022-09-12	15:10:27	0.442099	8.78173	FALSE	0
2022-09-12	15:10:27	0.515941	9.29768	FALSE	0
2022-09-12	15:10:27	0.457519	9.75519	FALSE	0
2022-09-12	15:10:27	0.709377	10.4646	FALSE	0
2022-09-12	15:10:28	0.990343	11.4549	FALSE	0
2022-09-12	15:10:28	0.697315	12.1522	FALSE	0
2022-09-12	15:10:28	0.445407	12.5976	FALSE	0
2022-09-12	15:10:28	0.553194	13.1508	FALSE	0
2022-09-12	15:10:29	0.462303	13.6131	FALSE	0
2022-09-12	15:10:29	0.55014	14.1633	FALSE	0
2022-09-12	15:10:29	0.432481	14.5958	FALSE	0
2022-09-12	15:10:30	0.440267	15.036	FALSE	0
2022-09-12	15:10:30	0.576807	15.6128	FALSE	0
2022-09-12	15:10:30	1.06011	16.6729	FALSE	0
2022-09-12	15:10:31	1.25121	17.9241	FALSE	0
2022-09-12	15:10:31	1.2019	19.126	FALSE	0
2022-09-12	15:10:31	2.13477	21.2608	FALSE	0
2022-09-12	15:10:31	3.16892	24.4297	1	1
2022-09-12	15:10:31	1.76444	26.1942	FALSE	1
2022-09-12	15:10:32	0.427697	26.6219	FALSE	1
2022-09-12	15:10:32	0.279453	26.9013	FALSE	1
2022-09-12	15:10:32	0.494415	27.3957	FALSE	1
2022-09-12	15:10:33	0.403015	27.7988	FALSE	1
2022-09-12	15:10:33	0.441896	28.2407	FALSE	1
2022-09-12	15:10:33	0.727901	28.9686	FALSE	1
2022-09-12	15:10:33	0.432125	29.4007	FALSE	1
2022-09-12	15:10:34	0.342557	29.7432	FALSE	1
2022-09-12	15:10:34	0.265051	30.0083	FALSE	1
2022-09-12	15:10:34	0.890343	30.8986	FALSE	1
2022-09-12	15:10:34	0.451667	31.3503	FALSE	1
2022-09-12	15:10:35	0.127646	31.4779	FALSE	1
2022-09-12	15:10:35	0.0734989	31.5514	FALSE	1
2022-09-12	15:10:35	0.0334989	31.5849	FALSE	1
2022-09-12	15:10:35	-0.0929132	31.5849	FALSE	1
2022-09-12	15:10:36	-0.349707	31.5849	FALSE	1
2022-09-12	15:10:36	-0.404567	31.5849	FALSE	1
2022-09-12	15:10:36	-0.419936	31.5849	FALSE	1
2022-09-12	15:10:37	0.0452547	31.6302	FALSE	1
2022-09-12	15:10:37	0.377621	32.0078	FALSE	1
2022-09-12	15:10:37	0.400216	32.408	FALSE	1
2022-09-12	15:10:37	1.05716	33.4652	FALSE	1
2022-09-12	15:10:38	0.543677	34.0089	FALSE	1
2022-09-12	15:10:38	0.337316	34.3462	FALSE	1
2022-09-12	15:10:38	0.495331	34.8415	FALSE	1
2022-09-12	15:10:38	1.23701	36.0785	FALSE	1
2022-09-12	15:10:39	0.667748	36.7463	FALSE	1
2022-09-12	15:10:39	0.352023	37.0983	FALSE	1
2022-09-12	15:10:39	0.473652	37.572	FALSE	1
2022-09-12	15:10:39	0.180216	37.7522	FALSE	1
2022-09-12	15:10:40	0.411107	38.1633	FALSE	1
2022-09-12	15:10:40	0.251667	38.4149	FALSE	1
2022-09-12	15:10:40	2.06775	40.4827	FALSE	1
2022-09-12	15:10:41	2.9765	43.4592	FALSE	1
2022-09-12	15:10:41	4.73696	48.1962	1	2
2022-09-12	15:10:41	2.12383	50.32	FALSE	2
2022-09-12	15:10:41	1.41813	51.7381	FALSE	2
2022-09-12	15:10:42	-0.0264501	51.7381	FALSE	2
2022-09-12	15:10:42	-0.0848725	51.7381	FALSE	2
2022-09-12	15:10:42	-0.255356	51.7381	FALSE	2
2022-09-12	15:10:42	-0.0765264	51.7381	FALSE	2
2022-09-12	15:10:43	-0.00726439	51.7381	FALSE	2
2022-09-12	15:10:43	-0.0756613	51.7381	FALSE	2
2022-09-12	15:10:43	0.218283	51.9564	FALSE	2
2022-09-12	15:10:43	-0.023244	51.9564	FALSE	2
2022-09-12	15:10:44	0.38042	52.3368	FALSE	2
2022-09-12	15:10:44	0.164339	52.5012	FALSE	2
2022-09-12	15:10:44	0.20159	52.7027	FALSE	2
2022-09-12	15:10:45	0.120318	52.8231	FALSE	2
2022-09-12	15:10:45	0.155993	52.9791	FALSE	2
2022-09-12	15:10:45	0.109326	53.0884	FALSE	2
2022-09-12	15:10:45	0.154873	53.2433	FALSE	2
2022-09-12	15:10:46	0.258741	53.502	FALSE	2
2022-09-12	15:10:46	0.263422	53.7654	FALSE	2
2022-09-12	15:10:46	-0.0847198	53.7654	FALSE	2
2022-09-12	15:10:46	-0.0517427	53.7654	FALSE	2
2022-09-12	15:10:47	0.217214	53.9826	FALSE	2
2022-09-12	15:10:47	0.165458	54.1481	FALSE	2
2022-09-12	15:10:47	0.485865	54.634	FALSE	2
2022-09-12	15:10:47	0.243372	54.8773	FALSE	2
2022-09-12	15:10:48	0.370751	55.2481	FALSE	2
2022-09-12	15:10:48	0.206578	55.4547	FALSE	2
2022-09-12	15:10:48	0.577417	56.0321	FALSE	2
2022-09-12	15:10:49	1.35029	57.3824	FALSE	2
2022-09-12	15:10:49	1.6963	59.0787	FALSE	2
2022-09-12	15:10:49	1.74729	60.826	FALSE	2
2022-09-12	15:10:49	1.63864	62.4646	FALSE	2
2022-09-12	15:10:50	2.26816	64.7328	FALSE	2
2022-09-12	15:10:50	0.732684	65.4654	FALSE	2
2022-09-12	15:10:50	0.397316	65.8628	FALSE	2
2022-09-12	15:10:50	0.453601	66.3164	FALSE	2
2022-09-12	15:10:51	0.640522	66.9569	FALSE	2
2022-09-12	15:10:51	1.17742	68.1343	FALSE	2
2022-09-12	15:10:51	0.696654	68.8309	FALSE	2
2022-09-12	15:10:51	1.22719	70.0581	FALSE	2
2022-09-12	15:10:52	1.93406	71.9922	FALSE	2
2022-09-12	15:10:52	2.02586	74.0181	FALSE	2
2022-09-12	15:10:52	3.29228	77.3103	1	3
2022-09-12	15:10:53	1.95421	79.2645	FALSE	3
2022-09-12	15:10:53	2.25289	81.5174	FALSE	3
2022-09-12	15:10:53	2.15233	83.6698	FALSE	3
2022-09-12	15:10:53	3.5105	87.1803	1	4
2022-09-12	15:10:54	2.01391	89.1942	FALSE	4
2022-09-12	15:10:54	2.95085	92.145	FALSE	4
2022-09-12	15:10:54	2.47589	94.6209	FALSE	4
2022-09-12	15:10:54	2.70648	97.3274	FALSE	4
2022-09-12	15:10:55	2.94765	100.275	FALSE	4
2022-09-12	15:10:55	2.21676	102.492	FALSE	4
2022-09-12	15:10:55	0.193397	102.685	FALSE	4
2022-09-12	15:10:56	0.115738	102.801	FALSE	4
2022-09-12	15:10:56	0.44958	103.251	FALSE	4
2022-09-12	15:10:56	0.220573	103.471	FALSE	4
2022-09-12	15:10:56	0.45126	103.922	FALSE	4
2022-09-12	15:10:57	-0.0462466	103.922	FALSE	4
2022-09-12	15:10:57	-0.315203	103.922	FALSE	4
2022-09-12	15:10:57	-0.368944	103.922	FALSE	4
2022-09-12	15:10:57	-0.338256	103.922	FALSE	4
2022-09-12	15:10:58	-0.156781	103.922	FALSE	4
2022-09-12	15:10:58	0.0574684	103.98	FALSE	4
2022-09-12	15:10:58	1.73961	105.719	FALSE	4
2022-09-12	15:10:58	1.73986	107.459	FALSE	4
2022-09-12	15:10:59	0.944949	108.404	FALSE	4
2022-09-12	15:10:59	0.516654	108.921	FALSE	4
2022-09-12	15:10:59	0.406018	109.327	FALSE	4
2022-09-12	15:11:00	0.519351	109.846	FALSE	4
2022-09-12	15:11:00	0.397926	110.244	FALSE	4
2022-09-12	15:11:00	0.569326	110.814	FALSE	4
2022-09-12	15:11:00	0.49874	111.312	FALSE	4
2022-09-12	15:11:01	0.805305	112.118	FALSE	4
2022-09-12	15:11:01	0.661336	112.779	FALSE	4
2022-09-12	15:11:01	0.620013	113.399	FALSE	4
2022-09-12	15:11:01	1.11462	114.514	FALSE	4
2022-09-12	15:11:02	0.732837	115.246	FALSE	4
2022-09-12	15:11:02	1.02597	116.272	FALSE	4
2022-09-12	15:11:02	0.637264	116.91	FALSE	4
2022-09-12	15:11:02	1.30424	118.214	FALSE	4
2022-09-12	15:11:03	1.15065	119.364	FALSE	4
2022-09-12	15:11:03	1.97182	121.336	FALSE	4
2022-09-12	15:11:03	2.66057	123.997	FALSE	4
2022-09-12	15:11:04	1.68983	125.687	FALSE	4
2022-09-12	15:11:04	1.99854	127.685	FALSE	4
2022-09-12	15:11:04	1.52622	129.211	FALSE	4
2022-09-12	15:11:04	2.56576	131.777	FALSE	4
2022-09-12	15:11:05	0.650547	132.428	FALSE	4
2022-09-12	15:11:05	1.62922	134.057	FALSE	4
2022-09-12	15:11:05	1.69212	135.749	FALSE	4
2022-09-12	15:11:05	3.58739	139.337	1	5
2022-09-12	15:11:06	2.65935	141.996	FALSE	5
2022-09-12	15:11:06	4.19996	146.196	1	6
2022-09-12	15:11:06	3.27258	149.468	1	7
2022-09-12	15:11:06	5.05518	154.524	1	8
2022-09-12	15:11:07	2.65966	157.183	FALSE	8
2022-09-12	15:11:07	3.16403	160.347	1	9
2022-09-12	15:11:07	3.72118	164.068	1	10
2022-09-12	15:11:08	1.6678	165.736	FALSE	10
2022-09-12	15:11:08	2.32653	168.063	FALSE	10
2022-09-12	15:11:08	1.29635	169.359	FALSE	10
2022-09-12	15:11:08	0.45813	169.817	FALSE	10
2022-09-12	15:11:09	0.459606	170.277	FALSE	10
2022-09-12	15:11:09	0.489784	170.767	FALSE	10
2022-09-12	15:11:09	0.594517	171.361	FALSE	10
2022-09-12	15:11:09	0.508613	171.87	FALSE	10
2022-09-12	15:11:10	0.56332	172.433	FALSE	10
2022-09-12	15:11:10	0.57243	173.006	FALSE	10
2022-09-12	15:11:10	0.813041	173.819	FALSE	10
2022-09-12	15:11:10	-0.00131018	173.819	FALSE	10
2022-09-12	15:11:11	0.093957	173.913	FALSE	10
2022-09-12	15:11:11	0.935636	174.848	FALSE	10
2022-09-12	15:11:11	1.72851	176.577	FALSE	10
2022-09-12	15:11:12	0.962405	177.539	FALSE	10
2022-09-12	15:11:12	0.36215	177.901	FALSE	10
2022-09-12	15:11:12	0.318741	178.22	FALSE	10
2022-09-12	15:11:12	0.301845	178.522	FALSE	10
2022-09-12	15:11:13	-0.0452287	178.522	FALSE	10
2022-09-12	15:11:13	0.0334989	178.555	FALSE	10
2022-09-12	15:11:13	-0.16701	178.555	FALSE	10
2022-09-12	15:11:13	-0.299325	178.555	FALSE	10
2022-09-12	15:11:14	-0.543295	178.555	FALSE	10
2022-09-12	15:11:14	-0.575152	178.555	FALSE	10
2022-09-12	15:11:14	-0.36014	178.555	FALSE	10
2022-09-12	15:11:14	0.128512	178.684	FALSE	10
2022-09-12	15:11:15	0.770852	179.455	FALSE	10
2022-09-12	15:11:15	4.52113	183.976	1	11
2022-09-12	15:11:15	4.66836	188.644	1	12
2022-09-12	15:11:16	3.30841	191.953	1	13
2022-09-12	15:11:16	1.32673	193.279	FALSE	13
2022-09-12	15:11:16	0.470852	193.75	FALSE	13
2022-09-12	15:11:16	2.56179	196.312	FALSE	13
2022-09-12	15:11:17	1.9134	198.225	FALSE	13
2022-09-12	15:11:17	1.5105	199.736	FALSE	13
2022-09-12	15:11:17	-0.0676206	199.736	FALSE	13
2022-09-12	15:11:17	0.0600639	199.796	FALSE	13
2022-09-12	15:11:18	-0.0857885	199.796	FALSE	13
2022-09-12	15:11:18	-0.236679	199.796	FALSE	13
2022-09-12	15:11:18	-0.173066	199.796	FALSE	13
2022-09-12	15:11:19	0.0895804	199.885	FALSE	13
2022-09-12	15:11:19	0.601743	200.487	FALSE	13
2022-09-12	15:11:19	1.87625	202.363	FALSE	13
2022-09-12	15:11:19	0.392939	202.756	FALSE	13
2022-09-12	15:11:20	0.0828628	202.839	FALSE	13
2022-09-12	15:11:20	0.21299	203.052	FALSE	13
2022-09-12	15:11:20	0.771667	203.824	FALSE	13
2022-09-12	15:11:20	1.87645	205.7	FALSE	13
2022-09-12	15:11:21	3.77212	209.473	1	14
2022-09-12	15:11:21	0.27986	209.752	FALSE	14
2022-09-12	15:11:21	0.935738	210.688	FALSE	14
2022-09-12	15:11:21	0.133448	210.822	FALSE	14
2022-09-12	15:11:22	0.0913106	210.913	FALSE	14
2022-09-12	15:11:22	1.66022	212.573	FALSE	14
2022-09-12	15:11:22	1.33579	213.909	FALSE	14
2022-09-12	15:11:23	3.30052	217.209	1	15
2022-09-12	15:11:23	1.44302	218.652	FALSE	15
2022-09-12	15:11:23	2.02042	220.673	FALSE	15
2022-09-12	15:11:23	0.940674	221.614	FALSE	15
2022-09-12	15:11:24	0.886629	222.5	FALSE	15
2022-09-12	15:11:24	0.635229	223.135	FALSE	15
2022-09-12	15:11:24	0.229631	223.365	FALSE	15
2022-09-12	15:11:24	0.175534	223.541	FALSE	15
2022-09-12	15:11:25	0.757061	224.298	FALSE	15
2022-09-12	15:11:25	0.14841	224.446	FALSE	15
2022-09-12	15:11:25	0.341336	224.787	FALSE	15
2022-09-12	15:11:25	0.537417	225.325	FALSE	15
2022-09-12	15:11:26	1.36765	226.692	FALSE	15
2022-09-12	15:11:26	0.785916	227.478	FALSE	15
2022-09-12	15:11:26	1.0167	228.495	FALSE	15
2022-09-12	15:11:27	1.39207	229.887	FALSE	15
2022-09-12	15:11:27	1.13228	231.019	FALSE	15
2022-09-12	15:11:27	0.682811	231.702	FALSE	15
2022-09-12	15:11:27	0.666781	232.369	FALSE	15
2022-09-12	15:11:28	0.778181	233.147	FALSE	15
2022-09-12	15:11:28	0.403066	233.55	FALSE	15
2022-09-12	15:11:28	0.87528	234.425	FALSE	15
2022-09-12	15:11:28	0.60556	235.031	FALSE	15
2022-09-12	15:11:29	0.701997	235.733	FALSE	15
2022-09-12	15:11:29	0.361285	236.094	FALSE	15
2022-09-12	15:11:29	0.474975	236.569	FALSE	15
2022-09-12	15:11:29	0.249071	236.818	FALSE	15
2022-09-12	15:11:30	0.430598	237.249	FALSE	15
2022-09-12	15:11:30	0.273753	237.523	FALSE	15
2022-09-12	15:11:30	0.686119	238.209	FALSE	15
2022-09-12	15:11:31	0.296603	238.505	FALSE	15
2022-09-12	15:11:31	0.70098	239.206	FALSE	15
2022-09-12	15:11:31	0.0506491	239.257	FALSE	15
2022-09-12	15:11:31	0.154262	239.411	FALSE	15
2022-09-12	15:11:32	0.261387	239.673	FALSE	15
2022-09-12	15:11:32	0.194059	239.867	FALSE	15
2022-09-12	15:11:32	0.330496	240.197	FALSE	15
2022-09-12	15:11:32	0.179911	240.377	FALSE	15
2022-09-12	15:11:33	0.374211	240.751	FALSE	15
2022-09-12	15:11:33	0.181947	240.933	FALSE	15
2022-09-12	15:11:33	0.339657	241.273	FALSE	15
2022-09-12	15:11:33	0.167748	241.441	FALSE	15
2022-09-12	15:11:34	0.264847	241.706	FALSE	15
2022-09-12	15:11:34	0.267952	241.974	FALSE	15
2022-09-12	15:11:34	0.398741	242.372	FALSE	15
2022-09-12	15:11:35	0.367239	242.74	FALSE	15
2022-09-12	15:11:35	0.208715	242.948	FALSE	15
2022-09-12	15:11:35	0.382761	243.331	FALSE	15
2022-09-12	15:11:35	0.270191	243.601	FALSE	15
2022-09-12	15:11:36	0.434059	244.035	FALSE	15
2022-09-12	15:11:36	0.154873	244.19	FALSE	15
2022-09-12	15:11:36	0.385662	244.576	FALSE	15
2022-09-12	15:11:36	0.319555	244.895	FALSE	15
2022-09-12	15:11:37	0.471107	245.366	FALSE	15
2022-09-12	15:11:37	0.346476	245.713	FALSE	15
2022-09-12	15:11:37	0.455331	246.168	FALSE	15
2022-09-12	15:11:37	0.242507	246.411	FALSE	15
2022-09-12	15:11:38	0.420522	246.831	FALSE	15
2022-09-12	15:11:38	0.242303	247.074	FALSE	15
2022-09-12	15:11:38	0.294059	247.368	FALSE	15
2022-09-12	15:11:39	0.278537	247.646	FALSE	15
2022-09-12	15:11:39	0.36841	248.015	FALSE	15
2022-09-12	15:11:39	0.25299	248.268	FALSE	15
2022-09-12	15:11:39	0.171107	248.439	FALSE	15
2022-09-12	15:11:40	0.313194	248.752	FALSE	15
2022-09-12	15:11:40	0.217723	248.97	FALSE	15
2022-09-12	15:11:40	0.208868	249.178	FALSE	15
2022-09-12	15:11:40	0.203473	249.382	FALSE	15
2022-09-12	15:11:41	0.192379	249.574	FALSE	15
2022-09-12	15:11:41	0.178283	249.753	FALSE	15
2022-09-12	15:11:41	0.244644	249.997	FALSE	15
2022-09-12	15:11:42	0.289275	250.287	FALSE	15
2022-09-12	15:11:42	0.920827	251.207	FALSE	15
2022-09-12	15:11:42	1.21131	252.419	FALSE	15
2022-09-12	15:11:42	2.08653	254.505	FALSE	15
2022-09-12	15:11:43	0.667443	255.173	FALSE	15
2022-09-12	15:11:43	1.60434	256.777	FALSE	15
2022-09-12	15:11:43	0.642506	257.42	FALSE	15
2022-09-12	15:11:43	0.680573	258.1	FALSE	15
2022-09-12	15:11:44	0.388359	258.488	FALSE	15
2022-09-12	15:11:44	0.381896	258.87	FALSE	15
2022-09-12	15:11:44	0.418232	259.289	FALSE	15
2022-09-12	15:11:44	0.294059	259.583	FALSE	15
2022-09-12	15:11:45	0.201438	259.784	FALSE	15
2022-09-12	15:11:45	0.278181	260.062	FALSE	15
2022-09-12	15:11:45	0.338435	260.401	FALSE	15
2022-09-12	15:11:46	0.300165	260.701	FALSE	15
2022-09-12	15:11:46	0.428563	261.129	FALSE	15
2022-09-12	15:11:46	0.396705	261.526	FALSE	15
2022-09-12	15:11:46	0.427239	261.953	FALSE	15
2022-09-12	15:11:47	0.455433	262.409	FALSE	15
2022-09-12	15:11:47	0.475331	262.884	FALSE	15
2022-09-12	15:11:47	0.411463	263.296	FALSE	15
2022-09-12	15:11:47	0.334771	263.63	FALSE	15
2022-09-12	15:11:48	0.348104	263.978	FALSE	15
2022-09-12	15:11:48	0.503015	264.481	FALSE	15
2022-09-12	15:11:48	3.98469	268.466	1	16
2022-09-12	15:11:48	4.13044	272.597	1	17
2022-09-12	15:11:49	6.67075	279.267	1	18
2022-09-12	15:11:49	10.9915	290.259	1	19
2022-09-12	15:11:49	10.7711	301.03	1	20
2022-09-12	15:11:50	6.04617	307.076	1	21
2022-09-12	15:11:50	1.35803	308.434	FALSE	21
2022-09-12	15:11:50	0.515534	308.95	FALSE	21
2022-09-12	15:11:50	0.60841	309.558	FALSE	21
2022-09-12	15:11:51	0.38444	309.943	FALSE	21
2022-09-12	15:11:51	0.58271	310.525	FALSE	21
2022-09-12	15:11:51	0.184847	310.71	FALSE	21
2022-09-12	15:11:51	0.468054	311.178	FALSE	21
2022-09-12	15:11:52	0.961794	312.14	FALSE	21
2022-09-12	15:11:52	0.265102	312.405	FALSE	21
2022-09-12	15:11:52	0.0220995	312.427	FALSE	21
2022-09-12	15:11:52	0.259606	312.687	FALSE	21
2022-09-12	15:11:53	0.377875	313.065	FALSE	21
2022-09-12	15:11:53	0.198283	313.263	FALSE	21
2022-09-12	15:11:53	0.0643895	313.327	FALSE	21
2022-09-12	15:11:54	-0.019529	313.327	FALSE	21
2022-09-12	15:11:54	-0.405381	313.327	FALSE	21
2022-09-12	15:11:54	-0.444313	313.327	FALSE	21
2022-09-12	15:11:54	-0.328842	313.327	FALSE	21
2022-09-12	15:11:55	-0.412251	313.327	FALSE	21
2022-09-12	15:11:55	-0.484363	313.327	FALSE	21
2022-09-12	15:11:55	-0.622684	313.327	FALSE	21
2022-09-12	15:11:55	-0.414491	313.327	FALSE	21
2022-09-12	15:11:56	-0.721157	313.327	FALSE	21
2022-09-12	15:11:56	-0.788638	313.327	FALSE	21
2022-09-12	15:11:56	-0.814083	313.327	FALSE	21
2022-09-12	15:11:56	-0.520496	313.327	FALSE	21
2022-09-12	15:11:57	-0.509147	313.327	FALSE	21
2022-09-12	15:11:57	-0.332099	313.327	FALSE	21
2022-09-12	15:11:57	-0.168129	313.327	FALSE	21
2022-09-12	15:11:58	0.0328882	313.36	FALSE	21
2022-09-12	15:11:58	0.219962	313.58	FALSE	21
2022-09-12	15:11:58	0.515636	314.096	FALSE	21
2022-09-12	15:11:58	0.771921	314.868	FALSE	21
2022-09-12	15:11:59	0.586425	315.454	FALSE	21
2022-09-12	15:11:59	1.07452	316.529	FALSE	21
2022-09-12	15:11:59	2.62999	319.159	FALSE	21
2022-09-12	15:11:59	1.64744	320.806	FALSE	21
2022-09-12	15:12:00	2.32118	323.127	FALSE	21
2022-09-12	15:12:00	2.66006	325.787	FALSE	21
2022-09-12	15:12:00	0.674618	326.462	FALSE	21
2022-09-12	15:12:00	0.272888	326.735	FALSE	21
2022-09-12	15:12:01	0.270598	327.005	FALSE	21
2022-09-12	15:12:01	0.363015	327.368	FALSE	21
2022-09-12	15:12:01	0.383626	327.752	FALSE	21
2022-09-12	15:12:02	0.302761	328.055	FALSE	21
2022-09-12	15:12:02	0.276552	328.331	FALSE	21
2022-09-12	15:12:02	0.195076	328.526	FALSE	21
2022-09-12	15:12:02	0.252634	328.779	FALSE	21
2022-09-12	15:12:03	0.161285	328.94	FALSE	21
2022-09-12	15:12:03	0.158995	329.099	FALSE	21
2022-09-12	15:12:03	0.163117	329.262	FALSE	21
2022-09-12	15:12:03	0.0702928	329.333	FALSE	21
2022-09-12	15:12:04	-0.330877	329.333	FALSE	21
2022-09-12	15:12:04	-0.0323534	329.333	FALSE	21
2022-09-12	15:12:04	0.0968577	329.43	FALSE	21
2022-09-12	15:12:04	0.0710053	329.501	FALSE	21
2022-09-12	15:12:05	0.0926338	329.593	FALSE	21
2022-09-12	15:12:05	0.112634	329.706	FALSE	21
2022-09-12	15:12:05	0.25411	329.96	FALSE	21
2022-09-12	15:12:06	0.439962	330.4	FALSE	21
2022-09-12	15:12:06	0.499555	330.9	FALSE	21
2022-09-12	15:12:06	0.589733	331.489	FALSE	21
2022-09-12	15:12:06	0.635738	332.125	FALSE	21
2022-09-12	15:12:07	0.57528	332.7	FALSE	21
2022-09-12	15:12:07	0.525254	333.226	FALSE	21
2022-09-12	15:12:07	0.548206	333.774	FALSE	21
2022-09-12	15:12:07	0.549733	334.323	FALSE	21
2022-09-12	15:12:08	0.722252	335.046	FALSE	21
2022-09-12	15:12:08	1.27787	336.324	FALSE	21
2022-09-12	15:12:08	2.24785	338.571	FALSE	21
2022-09-12	15:12:09	2.09426	340.666	FALSE	21
2022-09-12	15:12:09	1.9105	342.576	FALSE	21
2022-09-12	15:12:09	0.688104	343.264	FALSE	21
2022-09-12	15:12:09	0.551056	343.815	FALSE	21
2022-09-12	15:12:10	0.524033	344.339	FALSE	21
2022-09-12	15:12:10	0.377061	344.716	FALSE	21
2022-09-12	15:12:10	0.436908	345.153	FALSE	21
2022-09-12	15:12:10	0.330038	345.483	FALSE	21
2022-09-12	15:12:11	0.40785	345.891	FALSE	21
2022-09-12	15:12:11	0.336908	346.228	FALSE	21
2022-09-12	15:12:11	0.392939	346.621	FALSE	21
2022-09-12	15:12:11	0.342303	346.963	FALSE	21
2022-09-12	15:12:12	0.333143	347.297	FALSE	21
2022-09-12	15:12:12	0.497774	347.794	FALSE	21
2022-09-12	15:12:12	2.74826	350.543	FALSE	21
2022-09-12	15:12:13	3.2136	353.756	1	22
2022-09-12	15:12:13	2.82749	356.584	FALSE	22
2022-09-12	15:12:13	2.27416	358.858	FALSE	22
2022-09-12	15:12:13	1.74027	360.598	FALSE	22
2022-09-12	15:12:14	0.934058	361.532	FALSE	22
2022-09-12	15:12:14	2.64775	364.18	FALSE	22
2022-09-12	15:12:14	6.30698	370.487	1	23
2022-09-12	15:12:14	6.33131	376.818	1	24
2022-09-12	15:12:15	2.19426	379.012	FALSE	24
2022-09-12	15:12:15	0.630089	379.643	FALSE	24
2022-09-12	15:12:15	0.899351	380.542	FALSE	24
2022-09-12	15:12:15	0.696349	381.238	FALSE	24
2022-09-12	15:12:16	0.818893	382.057	FALSE	24
2022-09-12	15:12:16	0.329835	382.387	FALSE	24
2022-09-12	15:12:16	0.401641	382.789	FALSE	24
2022-09-12	15:12:17	0.0226592	382.811	FALSE	24
2022-09-12	15:12:17	0.100166	382.911	FALSE	24
2022-09-12	15:12:17	-0.000139698	382.911	FALSE	24
2022-09-12	15:12:17	-0.177442	382.911	FALSE	24
2022-09-12	15:12:18	-0.178257	382.911	FALSE	24
2022-09-12	15:12:18	-0.105381	382.911	FALSE	24
2022-09-12	15:12:18	-0.215763	382.911	FALSE	24
2022-09-12	15:12:18	-0.41332	382.911	FALSE	24
2022-09-12	15:12:19	-0.725025	382.911	FALSE	24
2022-09-12	15:12:19	-0.691895	382.911	FALSE	24
2022-09-12	15:12:19	-0.850877	382.911	FALSE	24
2022-09-12	15:12:19	-0.775661	382.911	FALSE	24
2022-09-12	15:12:20	-0.973625	382.911	FALSE	24
2022-09-12	15:12:20	-0.780241	382.911	FALSE	24
2022-09-12	15:12:20	-0.993371	382.911	FALSE	24
2022-09-12	15:12:21	-0.820394	382.911	FALSE	24
2022-09-12	15:12:21	-0.975355	382.911	FALSE	24
2022-09-12	15:12:21	-0.744108	382.911	FALSE	24
2022-09-12	15:12:21	-0.866297	382.911	FALSE	24
2022-09-12	15:12:22	-0.960394	382.911	FALSE	24
2022-09-12	15:12:22	-0.444007	382.911	FALSE	24
2022-09-12	15:12:22	-0.0208013	382.911	FALSE	24
2022-09-12	15:12:22	0.0231681	382.935	FALSE	24
2022-09-12	15:12:23	-0.12874	382.935	FALSE	24
2022-09-12	15:12:23	0.0383336	382.973	FALSE	24
2022-09-12	15:12:23	0.17416	383.147	FALSE	24
2022-09-12	15:12:23	-0.00645013	383.147	FALSE	24
2022-09-12	15:12:24	0.18215	383.329	FALSE	24
2022-09-12	15:12:24	0.0407254	383.37	FALSE	24
2022-09-12	15:12:24	0.342456	383.712	FALSE	24
2022-09-12	15:12:25	-0.0492491	383.712	FALSE	24
2022-09-12	15:12:25	0.416959	384.129	FALSE	24
2022-09-12	15:12:25	0.272888	384.402	FALSE	24
2022-09-12	15:12:25	1.01492	385.417	FALSE	24
2022-09-12	15:12:26	1.06617	386.483	FALSE	24
2022-09-12	15:12:26	0.560573	387.044	FALSE	24
2022-09-12	15:12:26	0.397774	387.442	FALSE	24
2022-09-12	15:12:26	0.426221	387.868	FALSE	24
2022-09-12	15:12:27	0.215687	388.084	FALSE	24
2022-09-12	15:12:27	0.302964	388.387	FALSE	24
2022-09-12	15:12:27	0.281183	388.668	FALSE	24
2022-09-12	15:12:27	0.0750257	388.743	FALSE	24
2022-09-12	15:12:28	0.176959	388.92	FALSE	24
2022-09-12	15:12:28	0.0782826	388.998	FALSE	24
2022-09-12	15:12:28	0.290293	389.288	FALSE	24
2022-09-12	15:12:29	0.0810307	389.369	FALSE	24
2022-09-12	15:12:29	0.277723	389.647	FALSE	24
2022-09-12	15:12:29	0.148359	389.795	FALSE	24
2022-09-12	15:12:29	0.477774	390.273	FALSE	24
2022-09-12	15:12:30	0.0141606	390.287	FALSE	24
2022-09-12	15:12:30	0.412786	390.7	FALSE	24
2022-09-12	15:12:30	0.199809	390.9	FALSE	24
2022-09-12	15:12:30	0.291667	391.192	FALSE	24
2022-09-12	15:12:31	0.160267	391.352	FALSE	24
2022-09-12	15:12:31	0.44673	391.799	FALSE	24
2022-09-12	15:12:31	0.338333	392.137	FALSE	24
2022-09-12	15:12:32	0.891158	393.028	FALSE	24
2022-09-12	15:12:32	0.298893	393.327	FALSE	24
2022-09-12	15:12:32	0.484542	393.812	FALSE	24
2022-09-12	15:12:32	0.494771	394.306	FALSE	24
2022-09-12	15:12:33	0.575891	394.882	FALSE	24
2022-09-12	15:12:33	0.503117	395.385	FALSE	24
2022-09-12	15:12:33	0.587341	395.973	FALSE	24
2022-09-12	15:12:33	0.816043	396.789	FALSE	24
2022-09-12	15:12:34	0.450598	397.239	FALSE	24
2022-09-12	15:12:34	0.537366	397.777	FALSE	24
2022-09-12	15:12:34	0.610344	398.387	FALSE	24
2022-09-12	15:12:34	0.610344	398.997	FALSE	24
2022-09-12	15:12:35	1.14001	400.137	FALSE	24
2022-09-12	15:12:35	0.709173	400.847	FALSE	24
2022-09-12	15:12:35	0.729784	401.576	FALSE	24
2022-09-12	15:12:36	1.0138	402.59	FALSE	24
2022-09-12	15:12:36	0.39813	402.988	FALSE	24
2022-09-12	15:12:36	0.12042	403.109	FALSE	24
2022-09-12	15:12:36	0.172837	403.282	FALSE	24
2022-09-12	15:12:37	0.0680537	403.35	FALSE	24
2022-09-12	15:12:37	0.207036	403.557	FALSE	24
2022-09-12	15:12:37	0.256959	403.814	FALSE	24
2022-09-12	15:12:37	0.979758	404.793	FALSE	24
2022-09-12	15:12:38	1.19665	405.99	FALSE	24
2022-09-12	15:12:38	0.54556	406.536	FALSE	24
2022-09-12	15:12:38	0.344186	406.88	FALSE	24
2022-09-12	15:12:38	0.47411	407.354	FALSE	24
2022-09-12	15:12:39	0.39187	407.746	FALSE	24
2022-09-12	15:12:39	0.517977	408.264	FALSE	24
2022-09-12	15:12:39	0.345102	408.609	FALSE	24
2022-09-12	15:12:40	0.451565	409.06	FALSE	24
2022-09-12	15:12:40	0.456094	409.516	FALSE	24
2022-09-12	15:12:40	0.407952	409.924	FALSE	24
2022-09-12	15:12:40	0.572379	410.497	FALSE	24
2022-09-12	15:12:41	2.01528	412.512	FALSE	24
2022-09-12	15:12:41	0.348003	412.86	FALSE	24
2022-09-12	15:12:41	0.357774	413.218	FALSE	24
2022-09-12	15:12:41	0.324237	413.542	FALSE	24
2022-09-12	15:12:42	0.699962	414.242	FALSE	24
2022-09-12	15:12:42	0.294059	414.536	FALSE	24
2022-09-12	15:12:42	0.448664	414.985	FALSE	24
2022-09-12	15:12:42	1.1565	416.141	FALSE	24
2022-09-12	15:12:43	0.380369	416.522	FALSE	24
2022-09-12	15:12:43	0.24383	416.765	FALSE	24
2022-09-12	15:12:43	0.451921	417.217	FALSE	24
2022-09-12	15:12:44	0.294008	417.511	FALSE	24
2022-09-12	15:12:44	0.36159	417.873	FALSE	24
2022-09-12	15:12:44	0.262812	418.136	FALSE	24
2022-09-12	15:12:44	0.305916	418.442	FALSE	24
2022-09-12	15:12:45	0.30098	418.743	FALSE	24
2022-09-12	15:12:45	0.165967	418.909	FALSE	24
2022-09-12	15:12:45	0.101641	419.01	FALSE	24
2022-09-12	15:12:45	0.15014	419.16	FALSE	24
2022-09-12	15:12:46	0.207596	419.368	FALSE	24
2022-09-12	15:12:46	0.292532	419.661	FALSE	24
2022-09-12	15:12:46	0.482303	420.143	FALSE	24
2022-09-12	15:12:46	0.490089	420.633	FALSE	24
2022-09-12	15:12:47	0.444033	421.077	FALSE	24
2022-09-12	15:12:47	0.208054	421.285	FALSE	24
2022-09-12	15:12:47	0.52612	421.811	FALSE	24
2022-09-12	15:12:48	0.283626	422.095	FALSE	24
2022-09-12	15:12:48	0.382099	422.477	FALSE	24
2022-09-12	15:12:48	0.200573	422.677	FALSE	24
2022-09-12	15:12:48	0.307239	422.985	FALSE	24
2022-09-12	15:12:49	0.294822	423.28	FALSE	24
2022-09-12	15:12:49	0.26841	423.548	FALSE	24
2022-09-12	15:12:49	0.0105982	423.559	FALSE	24
2022-09-12	15:12:49	-0.0749488	423.559	FALSE	24
2022-09-12	15:12:50	-0.0170354	423.559	FALSE	24
2022-09-12	15:12:50	-0.116323	423.559	FALSE	24
2022-09-12	15:12:50	-0.206908	423.559	FALSE	24
2022-09-12	15:12:50	-0.119478	423.559	FALSE	24
2022-09-12	15:12:51	-0.106247	423.559	FALSE	24
2022-09-12	15:12:51	-0.0866537	423.559	FALSE	24
2022-09-12	15:12:51	-0.113778	423.559	FALSE	24
2022-09-12	15:12:52	-0.224465	423.559	FALSE	24
2022-09-12	15:12:52	-0.534491	423.559	FALSE	24
2022-09-12	15:12:52	-0.532862	423.559	FALSE	24
2022-09-12	15:12:52	-0.64075	423.559	FALSE	24
2022-09-12	15:12:53	-0.562837	423.559	FALSE	24
2022-09-12	15:12:53	-0.57729	423.559	FALSE	24
2022-09-12	15:12:53	-0.766449	423.559	FALSE	24
2022-09-12	15:12:53	-0.0699615	423.559	FALSE	24
2022-09-12	15:12:54	0.191005	423.75	FALSE	24
2022-09-12	15:12:54	0.00723945	423.757	FALSE	24
2022-09-12	15:12:54	0.200878	423.958	FALSE	24
2022-09-12	15:12:55	0.259657	424.217	FALSE	24
2022-09-12	15:12:55	0.476807	424.694	FALSE	24
2022-09-12	15:12:55	0.125306	424.819	FALSE	24
2022-09-12	15:12:55	0.108359	424.928	FALSE	24
2022-09-12	15:12:56	-0.00375294	424.928	FALSE	24
2022-09-12	15:12:56	0.302964	425.231	FALSE	24
2022-09-12	15:12:56	0.215127	425.446	FALSE	24
2022-09-12	15:12:56	0.356908	425.803	FALSE	24
2022-09-12	15:12:57	0.16958	425.972	FALSE	24
2022-09-12	15:12:57	0.193346	426.166	FALSE	24
2022-09-12	15:12:57	0.813091	426.979	FALSE	24
2022-09-12	15:12:57	1.87808	428.857	FALSE	24
2022-09-12	15:12:58	1.30301	430.16	FALSE	24
2022-09-12	15:12:58	0.73528	430.895	FALSE	24
2022-09-12	15:12:58	0.375076	431.27	FALSE	24
2022-09-12	15:12:59	0.512176	431.782	FALSE	24
2022-09-12	15:12:59	0.349835	432.132	FALSE	24
2022-09-12	15:12:59	0.435026	432.567	FALSE	24
2022-09-12	15:12:59	0.682507	433.25	FALSE	24
2022-09-12	15:13:00	1.10378	434.354	FALSE	24
2022-09-12	15:13:00	2.51558	436.869	FALSE	24
2022-09-12	15:13:00	2.30449	439.174	FALSE	24
2022-09-12	15:13:00	1.77406	440.948	FALSE	24
2022-09-12	15:13:01	1.2024	442.15	FALSE	24
2022-09-12	15:13:01	0.570649	442.721	FALSE	24
2022-09-12	15:13:01	0.380929	443.102	FALSE	24
2022-09-12	15:13:01	0.542914	443.645	FALSE	24
2022-09-12	15:13:02	0.590954	444.236	FALSE	24
2022-09-12	15:13:02	0.432939	444.668	FALSE	24
2022-09-12	15:13:02	0.303168	444.972	FALSE	24
2022-09-12	15:13:03	0.350445	445.322	FALSE	24
2022-09-12	15:13:03	0.231463	445.554	FALSE	24
2022-09-12	15:13:03	0.0675957	445.621	FALSE	24
2022-09-12	15:13:03	-0.033473	445.621	FALSE	24
2022-09-12	15:13:04	-0.223956	445.621	FALSE	24
2022-09-12	15:13:04	-0.296425	445.621	FALSE	24
2022-09-12	15:13:04	-0.302837	445.621	FALSE	24
2022-09-12	15:13:04	-0.509402	445.621	FALSE	24
2022-09-12	15:13:05	-0.676119	445.621	FALSE	24
2022-09-12	15:13:05	-0.989554	445.621	FALSE	24
2022-09-12	15:13:05	-1.19602	445.621	FALSE	24
2022-09-12	15:13:05	-1.02263	445.621	FALSE	24
2022-09-12	15:13:06	-1.10014	445.621	FALSE	24
2022-09-12	15:13:06	-0.730877	445.621	FALSE	24
2022-09-12	15:13:06	-0.538307	445.621	FALSE	24
2022-09-12	15:13:07	-0.245585	445.621	FALSE	24
2022-09-12	15:13:07	-0.176628	445.621	FALSE	24
2022-09-12	15:13:07	-0.127112	445.621	FALSE	24
2022-09-12	15:13:07	0.0182318	445.639	FALSE	24
2022-09-12	15:13:08	0.228054	445.867	FALSE	24
2022-09-12	15:13:08	0.166222	446.034	FALSE	24
2022-09-12	15:13:08	0.176094	446.21	FALSE	24
2022-09-12	15:13:08	0.546781	446.757	FALSE	24
2022-09-12	15:13:09	0.498639	447.255	FALSE	24
2022-09-12	15:13:09	0.527544	447.783	FALSE	24
2022-09-12	15:13:09	2.21823	450.001	FALSE	24
2022-09-12	15:13:09	0.611209	450.612	FALSE	24
2022-09-12	15:13:10	0.703168	451.315	FALSE	24
2022-09-12	15:13:10	0.906374	452.222	FALSE	24
2022-09-12	15:13:10	0.593957	452.816	FALSE	24
2022-09-12	15:13:11	0.503168	453.319	FALSE	24
2022-09-12	15:13:11	0.349936	453.669	FALSE	24
2022-09-12	15:13:11	0.579555	454.248	FALSE	24
2022-09-12	15:13:11	0.585356	454.834	FALSE	24
2022-09-12	15:13:12	0.452176	455.286	FALSE	24
2022-09-12	15:13:12	0.686069	455.972	FALSE	24
2022-09-12	15:13:12	0.599402	456.571	FALSE	24
2022-09-12	15:13:12	0.583626	457.155	FALSE	24
2022-09-12	15:13:13	0.470649	457.626	FALSE	24
2022-09-12	15:13:13	0.827799	458.453	FALSE	24
2022-09-12	15:13:13	0.407341	458.861	FALSE	24
2022-09-12	15:13:13	0.349886	459.211	FALSE	24
2022-09-12	15:13:14	0.430547	459.641	FALSE	24
2022-09-12	15:13:14	0.517468	460.159	FALSE	24
2022-09-12	15:13:14	0.459657	460.618	FALSE	24
2022-09-12	15:13:15	0.601285	461.22	FALSE	24
2022-09-12	15:13:15	0.65472	461.874	FALSE	24
2022-09-12	15:13:15	0.304847	462.179	FALSE	24
2022-09-12	15:13:15	0.0399621	462.219	FALSE	24
2022-09-12	15:13:16	0.443931	462.663	FALSE	24
2022-09-12	15:13:16	0.45986	463.123	FALSE	24
2022-09-12	15:13:16	0.169835	463.293	FALSE	24
2022-09-12	15:13:16	0.242049	463.535	FALSE	24
2022-09-12	15:13:17	0.249275	463.784	FALSE	24
2022-09-12	15:13:17	0.352939	464.137	FALSE	24
2022-09-12	15:13:17	0.311972	464.449	FALSE	24
2022-09-12	15:13:18	0.313957	464.763	FALSE	24
2022-09-12	15:13:18	0.110547	464.873	FALSE	24
2022-09-12	15:13:18	-0.0112339	464.873	FALSE	24
2022-09-12	15:13:18	-0.0428369	464.873	FALSE	24
2022-09-12	15:13:19	-0.325483	464.873	FALSE	24
2022-09-12	15:13:19	-0.425178	464.873	FALSE	24
2022-09-12	15:13:19	-0.515559	464.873	FALSE	24
2022-09-12	15:13:19	-0.353117	464.873	FALSE	24
2022-09-12	15:13:20	-0.540597	464.873	FALSE	24
2022-09-12	15:13:20	-0.698816	464.873	FALSE	24
2022-09-12	15:13:20	-0.783803	464.873	FALSE	24
2022-09-12	15:13:20	-0.584058	464.873	FALSE	24
2022-09-12	15:13:21	-0.607875	464.873	FALSE	24
2022-09-12	15:13:21	-0.681971	464.873	FALSE	24
2022-09-12	15:13:21	-0.642786	464.873	FALSE	24
2022-09-12	15:13:22	-0.4636	464.873	FALSE	24
2022-09-12	15:13:22	-0.346603	464.873	FALSE	24
2022-09-12	15:13:22	-0.33103	464.873	FALSE	24
2022-09-12	15:13:22	-0.160699	464.873	FALSE	24
2022-09-12	15:13:23	-0.264262	464.873	FALSE	24
2022-09-12	15:13:23	-0.185381	464.873	FALSE	24
2022-09-12	15:13:23	-0.230878	464.873	FALSE	24
2022-09-12	15:13:23	-0.00517788	464.873	FALSE	24
2022-09-12	15:13:24	0.0667814	464.94	FALSE	24
2022-09-12	15:13:24	0.099504	465.04	FALSE	24
2022-09-12	15:13:24	0.484898	465.525	FALSE	24
2022-09-12	15:13:24	1.14541	466.67	FALSE	24
2022-09-12	15:13:25	0.955992	467.626	FALSE	24
2022-09-12	15:13:25	0.79299	468.419	FALSE	24
2022-09-12	15:13:25	0.663371	469.082	FALSE	24
2022-09-12	15:13:26	0.682965	469.765	FALSE	24
2022-09-12	15:13:26	0.55187	470.317	FALSE	24
2022-09-12	15:13:26	0.465	470.782	FALSE	24
2022-09-12	15:13:26	0.592837	471.375	FALSE	24
2022-09-12	15:13:27	0.27757	471.653	FALSE	24
2022-09-12	15:13:27	0.701794	472.354	FALSE	24
2022-09-12	15:13:27	0.273753	472.628	FALSE	24
2022-09-12	15:13:27	0.819148	473.447	FALSE	24
2022-09-12	15:13:28	1.50709	474.954	FALSE	24
2022-09-12	15:13:28	0.313906	475.268	FALSE	24
2022-09-12	15:13:28	0.887494	476.156	FALSE	24
2022-09-12	15:13:28	1.71401	477.87	FALSE	24
2022-09-12	15:13:29	0.314618	478.184	FALSE	24
2022-09-12	15:13:29	0.81589	479	FALSE	24
2022-09-12	15:13:29	0.384746	479.385	FALSE	24
2022-09-12	15:13:30	0.321947	479.707	FALSE	24
2022-09-12	15:13:30	0.612735	480.32	FALSE	24
2022-09-12	15:13:30	0.400878	480.721	FALSE	24
2022-09-12	15:13:30	0.447188	481.168	FALSE	24
2022-09-12	15:13:31	0.490954	481.659	FALSE	24
2022-09-12	15:13:31	0.281336	481.94	FALSE	24
2022-09-12	15:13:31	0.741489	482.682	FALSE	24
2022-09-12	15:13:31	0.410191	483.092	FALSE	24
2022-09-12	15:13:32	0.326221	483.418	FALSE	24
2022-09-12	15:13:32	0.55869	483.977	FALSE	24
2022-09-12	15:13:32	0.342761	484.32	FALSE	24
2022-09-12	15:13:32	0.303066	484.623	FALSE	24
2022-09-12	15:13:33	0.219809	484.842	FALSE	24
2022-09-12	15:13:33	0.316908	485.159	FALSE	24
2022-09-12	15:13:33	0.104186	485.263	FALSE	24
2022-09-12	15:13:34	0.153804	485.417	FALSE	24
2022-09-12	15:13:34	0.103117	485.52	FALSE	24
2022-09-12	15:13:34	0.121641	485.642	FALSE	24
2022-09-12	15:13:34	0.0698857	485.712	FALSE	24
2022-09-12	15:13:35	0.212786	485.925	FALSE	24
2022-09-12	15:13:35	0.157214	486.082	FALSE	24
2022-09-12	15:13:35	0.0551783	486.137	FALSE	24
2022-09-12	15:13:35	0.113499	486.251	FALSE	24
2022-09-12	15:13:36	0.0905982	486.341	FALSE	24
2022-09-12	15:13:36	0.12271	486.464	FALSE	24
2022-09-12	15:13:36	0.0728374	486.537	FALSE	24
2022-09-12	15:13:37	-0.0666536	486.537	FALSE	24
2022-09-12	15:13:37	-0.114236	486.537	FALSE	24
2022-09-12	15:13:37	0.398995	486.936	FALSE	24
2022-09-12	15:13:37	0.347494	487.283	FALSE	24
2022-09-12	15:13:38	0.236654	487.52	FALSE	24
2022-09-12	15:13:38	0.15416	487.674	FALSE	24
2022-09-12	15:13:38	0.166476	487.841	FALSE	24
2022-09-12	15:13:38	0.0844404	487.925	FALSE	24
2022-09-12	15:13:39	0.251616	488.177	FALSE	24
2022-09-12	15:13:39	0.22439	488.401	FALSE	24
2022-09-12	15:13:39	0.210191	488.611	FALSE	24
2022-09-12	15:13:39	0.196552	488.808	FALSE	24
2022-09-12	15:13:40	0.224288	489.032	FALSE	24
2022-09-12	15:13:40	0.213957	489.246	FALSE	24
2022-09-12	15:13:40	0.107545	489.354	FALSE	24
2022-09-12	15:13:41	0.218486	489.572	FALSE	24
2022-09-12	15:13:41	0.180929	489.753	FALSE	24
2022-09-12	15:13:41	0.165509	489.918	FALSE	24
2022-09-12	15:13:41	0.190191	490.109	FALSE	24
2022-09-12	15:13:42	0.15472	490.263	FALSE	24
2022-09-12	15:13:42	0.208308	490.472	FALSE	24
2022-09-12	15:13:42	0.134364	490.606	FALSE	24
2022-09-12	15:13:42	0.059962	490.666	FALSE	24
2022-09-12	15:13:43	0.00500025	490.671	FALSE	24
2022-09-12	15:13:43	-0.0600379	490.671	FALSE	24
2022-09-12	15:13:43	0.0199112	490.691	FALSE	24
2022-09-12	15:13:43	0.216756	490.908	FALSE	24
2022-09-12	15:13:44	-0.0458903	490.908	FALSE	24
2022-09-12	15:13:44	0.0521249	490.96	FALSE	24
2022-09-12	15:13:44	0.0965523	491.056	FALSE	24
2022-09-12	15:13:45	0.0868831	491.143	FALSE	24
2022-09-12	15:13:45	0.0987915	491.242	FALSE	24
2022-09-12	15:13:45	0.299351	491.541	FALSE	24
2022-09-12	15:13:45	0.53243	492.074	FALSE	24
2022-09-12	15:13:46	1.77324	493.847	FALSE	24
2022-09-12	15:13:46	0.698486	494.545	FALSE	24
2022-09-12	15:13:46	0.218028	494.764	FALSE	24
2022-09-12	15:13:46	0.0659671	494.829	FALSE	24
2022-09-12	15:13:47	-0.159376	494.829	FALSE	24
2022-09-12	15:13:47	-0.162531	494.829	FALSE	24
2022-09-12	15:13:47	0.245865	495.075	FALSE	24
2022-09-12	15:13:47	0.0975193	495.173	FALSE	24
2022-09-12	15:13:48	0.0261707	495.199	FALSE	24
2022-09-12	15:13:48	0.0807254	495.28	FALSE	24
2022-09-12	15:13:48	0.0703438	495.35	FALSE	24
2022-09-12	15:13:49	0.0461707	495.396	FALSE	24
2022-09-12	15:13:49	0.0742623	495.471	FALSE	24
2022-09-12	15:13:49	0.0493259	495.52	FALSE	24
2022-09-12	15:13:49	0.0574175	495.577	FALSE	24
2022-09-12	15:13:50	0.0612852	495.639	FALSE	24
2022-09-12	15:13:50	0.0515142	495.69	FALSE	24
2022-09-12	15:13:50	0.0476465	495.738	FALSE	24
2022-09-12	15:13:50	0.0499875	495.788	FALSE	24
2022-09-12	15:13:51	0.041387	495.829	FALSE	24
2022-09-12	15:13:51	0.0378247	495.867	FALSE	24
2022-09-12	15:13:51	0.0465778	495.914	FALSE	24
2022-09-12	15:13:51	0.0461707	495.96	FALSE	24
2022-09-12	15:13:52	0.0490205	496.009	FALSE	24
2022-09-12	15:13:52	0.0468323	496.056	FALSE	24
2022-09-12	15:13:52	0.0506491	496.106	FALSE	24
2022-09-12	15:13:53	0.0601147	496.166	FALSE	24
2022-09-12	15:13:53	0.0593513	496.226	FALSE	24
2022-09-12	15:13:53	0.0381809	496.264	FALSE	24
2022-09-12	15:13:53	-0.0476715	496.264	FALSE	24
2022-09-12	15:13:54	-0.0437529	496.264	FALSE	24
2022-09-12	15:13:54	-0.580139	496.264	FALSE	24
2022-09-12	15:13:54	-0.617341	496.264	FALSE	24
2022-09-12	15:13:54	-0.768587	496.264	FALSE	24
2022-09-12	15:13:55	-0.74874	496.264	FALSE	24
2022-09-12	15:13:55	-0.726755	496.264	FALSE	24
2022-09-12	15:13:55	-0.923498	496.264	FALSE	24
2022-09-12	15:13:55	-0.779681	496.264	FALSE	24
2022-09-12	15:13:56	-0.636119	496.264	FALSE	24
2022-09-12	15:13:56	-0.478002	496.264	FALSE	24
2022-09-12	15:13:56	-0.173371	496.264	FALSE	24
2022-09-12	15:13:57	0.458588	496.722	FALSE	24
2022-09-12	15:13:57	0.174822	496.897	FALSE	24
2022-09-12	15:13:57	0.181489	497.079	FALSE	24
2022-09-12	15:13:58	0.172685	497.251	FALSE	24
2022-09-12	15:13:58	0.802252	498.054	FALSE	24
2022-09-12	15:13:58	1.41716	499.471	FALSE	24
2022-09-12	15:13:58	0.684898	500.156	FALSE	24
2022-09-12	15:13:58	0.351667	500.507	FALSE	24
2022-09-12	15:13:59	0.820623	501.328	FALSE	24
2022-09-12	15:13:59	0.174517	501.503	FALSE	24
2022-09-12	15:13:59	0.569937	502.072	FALSE	24
2022-09-12	15:14:00	0.59075	502.663	FALSE	24
2022-09-12	15:14:00	0.685763	503.349	FALSE	24
2022-09-12	15:14:00	0.56098	503.91	FALSE	24
2022-09-12	15:14:00	0.502252	504.412	FALSE	24
2022-09-12	15:14:01	0.976247	505.388	FALSE	24
2022-09-12	15:14:01	0.482049	505.871	FALSE	24
2022-09-12	15:14:01	0.489987	506.361	FALSE	24
2022-09-12	15:14:01	0.408715	506.769	FALSE	24
2022-09-12	15:14:02	1.58571	508.355	FALSE	24
2022-09-12	15:14:02	1.27889	509.634	FALSE	24
2022-09-12	15:14:02	3.068	512.702	1	25
2022-09-12	15:14:02	1.02011	513.722	FALSE	25
2022-09-12	15:14:03	1.04159	514.764	FALSE	25
2022-09-12	15:14:03	0.588919	515.352	FALSE	25
2022-09-12	15:14:03	0.762863	516.115	FALSE	25
2022-09-12	15:14:04	1.43406	517.549	FALSE	25
2022-09-12	15:14:04	0.509733	518.059	FALSE	25
2022-09-12	15:14:04	0.624745	518.684	FALSE	25
2022-09-12	15:14:04	0.873041	519.557	FALSE	25
2022-09-12	15:14:05	0.398283	519.955	FALSE	25
2022-09-12	15:14:05	0.704389	520.66	FALSE	25
2022-09-12	15:14:05	0.409682	521.069	FALSE	25
2022-09-12	15:14:05	1.64144	522.711	FALSE	25
2022-09-12	15:14:06	0.770394	523.481	FALSE	25
2022-09-12	15:14:06	1.95218	525.433	FALSE	25
2022-09-12	15:14:06	1.52877	526.962	FALSE	25
2022-09-12	15:14:06	2.67757	529.64	FALSE	25
2022-09-12	15:14:07	1.75615	531.396	FALSE	25
2022-09-12	15:14:07	1.29823	532.694	FALSE	25
2022-09-12	15:14:07	1.32337	534.017	FALSE	25
2022-09-12	15:14:08	0.566578	534.584	FALSE	25
2022-09-12	15:14:08	2.8939	537.478	FALSE	25
2022-09-12	15:14:08	0.515941	537.994	FALSE	25
2022-09-12	15:14:08	0.662506	538.656	FALSE	25
2022-09-12	15:14:09	0.281285	538.938	FALSE	25
2022-09-12	15:14:09	0.223372	539.161	FALSE	25
2022-09-12	15:14:09	0.323321	539.484	FALSE	25
2022-09-12	15:14:09	0.465356	539.95	FALSE	25
2022-09-12	15:14:10	0.298028	540.248	FALSE	25
2022-09-12	15:14:10	0.404135	540.652	FALSE	25
2022-09-12	15:14:10	0.436756	541.089	FALSE	25
2022-09-12	15:14:10	0.560216	541.649	FALSE	25
2022-09-12	15:14:11	1.12017	542.769	FALSE	25
2022-09-12	15:14:11	1.00154	543.77	FALSE	25
2022-09-12	15:14:11	2.13467	545.905	FALSE	25
2022-09-12	15:14:12	1.97136	547.876	FALSE	25
2022-09-12	15:14:12	2.21472	550.091	FALSE	25
2022-09-12	15:14:12	1.70032	551.792	FALSE	25
2022-09-12	15:14:12	1.95528	553.747	FALSE	25
2022-09-12	15:14:13	1.33808	555.085	FALSE	25
2022-09-12	15:14:13	1.05849	556.143	FALSE	25
2022-09-12	15:14:13	1.75131	557.895	FALSE	25
2022-09-12	15:14:13	1.91798	559.813	FALSE	25
2022-09-12	15:14:14	0.426374	560.239	FALSE	25
2022-09-12	15:14:14	1.20388	561.443	FALSE	25
2022-09-12	15:14:14	0.401743	561.845	FALSE	25
2022-09-12	15:14:14	0.787952	562.633	FALSE	25
2022-09-12	15:14:15	1.34907	563.982	FALSE	25
2022-09-12	15:14:15	1.30322	565.285	FALSE	25
2022-09-12	15:14:15	1.42067	566.706	FALSE	25
2022-09-12	15:14:16	1.36312	568.069	FALSE	25
2022-09-12	15:14:16	1.60846	569.677	FALSE	25
2022-09-12	15:14:16	0.875331	570.552	FALSE	25
2022-09-12	15:14:16	2.46011	573.013	FALSE	25
2022-09-12	15:14:17	0.439148	573.452	FALSE	25
2022-09-12	15:14:17	2.2337	575.685	FALSE	25
2022-09-12	15:14:17	0.539758	576.225	FALSE	25
2022-09-12	15:14:17	1.80866	578.034	FALSE	25
2022-09-12	15:14:18	0.753397	578.787	FALSE	25
2022-09-12	15:14:18	1.18948	579.977	FALSE	25
2022-09-12	15:14:18	1.25177	581.228	FALSE	25
2022-09-12	15:14:19	1.72561	582.954	FALSE	25
2022-09-12	15:14:19	1.37309	584.327	FALSE	25
2022-09-12	15:14:19	1.95136	586.279	FALSE	25
2022-09-12	15:14:19	1.06088	587.339	FALSE	25
2022-09-12	15:14:20	2.1022	589.442	FALSE	25
2022-09-12	15:14:20	0.629784	590.071	FALSE	25
2022-09-12	15:14:20	2.65187	592.723	FALSE	25
2022-09-12	15:14:20	0.452685	593.176	FALSE	25
2022-09-12	15:14:21	2.41543	595.591	FALSE	25
2022-09-12	15:14:21	0.802048	596.393	FALSE	25
2022-09-12	15:14:21	1.71477	598.108	FALSE	25
2022-09-12	15:14:22	1.44815	599.556	FALSE	25
2022-09-12	15:14:22	1.11925	600.676	FALSE	25
2022-09-12	15:14:22	1.6536	602.329	FALSE	25
2022-09-12	15:14:22	0.568817	602.898	FALSE	25
2022-09-12	15:14:23	1.42266	604.321	FALSE	25
2022-09-12	15:14:23	0.270496	604.591	FALSE	25
2022-09-12	15:14:23	0.650089	605.241	FALSE	25
2022-09-12	15:14:23	0.334059	605.575	FALSE	25
2022-09-12	15:14:24	0.360318	605.936	FALSE	25
2022-09-12	15:14:24	0.363423	606.299	FALSE	25
2022-09-12	15:14:24	0.49243	606.792	FALSE	25
2022-09-12	15:14:24	1.2648	608.056	FALSE	25
2022-09-12	15:14:25	1.77849	609.835	FALSE	25
2022-09-12	15:14:25	0.884135	610.719	FALSE	25
2022-09-12	15:14:25	0.456298	611.175	FALSE	25
2022-09-12	15:14:25	0.398995	611.574	FALSE	25
2022-09-12	15:14:26	0.284542	611.859	FALSE	25
2022-09-12	15:14:26	0.723524	612.582	FALSE	25
2022-09-12	15:14:26	0.641997	613.224	FALSE	25
2022-09-12	15:14:27	0.25584	613.48	FALSE	25
2022-09-12	15:14:27	0.31757	613.798	FALSE	25
2022-09-12	15:14:27	0.220674	614.018	FALSE	25
2022-09-12	15:14:27	0.332634	614.351	FALSE	25
2022-09-12	15:14:28	0.247087	614.598	FALSE	25
2022-09-12	15:14:28	0.253397	614.851	FALSE	25
2022-09-12	15:14:28	0.251056	615.103	FALSE	25
2022-09-12	15:14:28	0.387087	615.49	FALSE	25
2022-09-12	15:14:29	0.395636	615.885	FALSE	25
2022-09-12	15:14:29	0.561896	616.447	FALSE	25
2022-09-12	15:14:29	0.67355	617.121	FALSE	25
2022-09-12	15:14:29	0.580827	617.702	FALSE	25
2022-09-12	15:14:30	0.754313	618.456	FALSE	25
2022-09-12	15:14:30	1.01889	619.475	FALSE	25
2022-09-12	15:14:30	1.32256	620.797	FALSE	25
2022-09-12	15:14:31	2.72301	623.52	FALSE	25
2022-09-12	15:14:31	1.42205	624.942	FALSE	25
2022-09-12	15:14:31	1.4338	626.376	FALSE	25
2022-09-12	15:14:31	2.55243	628.929	FALSE	25
2022-09-12	15:14:32	0.430445	629.359	FALSE	25
2022-09-12	15:14:32	0.552023	629.911	FALSE	25
2022-09-12	15:14:32	0.36098	630.272	FALSE	25
2022-09-12	15:14:32	0.401285	630.673	FALSE	25
2022-09-12	15:14:33	0.365713	631.039	FALSE	25
2022-09-12	15:14:33	0.43925	631.478	FALSE	25
2022-09-12	15:14:33	0.358639	631.837	FALSE	25
2022-09-12	15:14:33	0.467341	632.304	FALSE	25
2022-09-12	15:14:34	2.39217	634.696	FALSE	25
2022-09-12	15:14:34	2.32042	637.017	FALSE	25
2022-09-12	15:14:34	3.61619	640.633	1	26
2022-09-12	15:14:35	2.03497	642.668	FALSE	26
2022-09-12	15:14:35	3.87533	646.543	1	27
2022-09-12	15:14:35	1.08729	647.631	FALSE	27
2022-09-12	15:14:35	2.51803	650.149	FALSE	27
2022-09-12	15:14:36	0.691514	650.84	FALSE	27
2022-09-12	15:14:36	1.83004	652.67	FALSE	27
2022-09-12	15:14:36	0.713499	653.384	FALSE	27
2022-09-12	15:14:36	0.909987	654.294	FALSE	27
2022-09-12	15:14:37	1.46927	655.763	FALSE	27
2022-09-12	15:14:37	1.43284	657.196	FALSE	27
2022-09-12	15:14:37	2.49258	659.688	FALSE	27
2022-09-12	15:14:38	1.27116	660.96	FALSE	27
2022-09-12	15:14:38	2.94276	663.902	FALSE	27
2022-09-12	15:14:38	0.984491	664.887	FALSE	27
2022-09-12	15:14:38	3.37487	668.262	1	28
2022-09-12	15:14:39	0.957061	669.219	FALSE	28
2022-09-12	15:14:39	3.38815	672.607	1	29
2022-09-12	15:14:39	1.72632	674.333	FALSE	29
2022-09-12	15:14:39	2.1193	676.453	FALSE	29
2022-09-12	15:14:40	1.66556	678.118	FALSE	29
2022-09-12	15:14:40	2.7907	680.909	FALSE	29
2022-09-12	15:14:40	3.71335	684.622	1	30
2022-09-12	15:14:40	3.40495	688.027	1	31
2022-09-12	15:14:41	2.40439	690.431	FALSE	31
2022-09-12	15:14:41	0.723677	691.155	FALSE	31
2022-09-12	15:14:41	1.38719	692.542	FALSE	31
2022-09-12	15:14:42	0.140624	692.683	FALSE	31
2022-09-12	15:14:42	0.610191	693.293	FALSE	31
2022-09-12	15:14:42	1.09513	694.388	FALSE	31
2022-09-12	15:14:42	0.268003	694.656	FALSE	31
2022-09-12	15:14:43	0.436603	695.093	FALSE	31
2022-09-12	15:14:43	0.437825	695.531	FALSE	31
2022-09-12	15:14:43	0.449936	695.981	FALSE	31
2022-09-12	15:14:43	0.587595	696.568	FALSE	31
2022-09-12	15:14:44	0.766425	697.335	FALSE	31
2022-09-12	15:14:44	0.541285	697.876	FALSE	31
2022-09-12	15:14:44	0.986832	698.863	FALSE	31
2022-09-12	15:14:44	1.56408	700.427	FALSE	31
2022-09-12	15:14:45	3.29777	703.725	1	32
2022-09-12	15:14:45	2.92276	706.647	FALSE	32
2022-09-12	15:14:45	1.46566	708.113	FALSE	32
2022-09-12	15:14:46	1.01319	709.126	FALSE	32
2022-09-12	15:14:46	0.444237	709.57	FALSE	32
2022-09-12	15:14:46	0.256603	709.827	FALSE	32
2022-09-12	15:14:46	0.209173	710.036	FALSE	32
2022-09-12	15:14:47	0.164389	710.201	FALSE	32
2022-09-12	15:14:47	0.28729	710.488	FALSE	32
2022-09-12	15:14:47	0.268104	710.756	FALSE	32
2022-09-12	15:14:47	0.306018	711.062	FALSE	32
2022-09-12	15:14:48	0.313295	711.375	FALSE	32
2022-09-12	15:14:48	0.355077	711.73	FALSE	32
2022-09-12	15:14:48	0.37355	712.104	FALSE	32
2022-09-12	15:14:48	0.295076	712.399	FALSE	32
2022-09-12	15:14:49	0.38159	712.781	FALSE	32
2022-09-12	15:14:49	1.69986	714.481	FALSE	32
2022-09-12	15:14:49	0.571158	715.052	FALSE	32
2022-09-12	15:14:50	0.459453	715.511	FALSE	32
2022-09-12	15:14:50	0.268715	715.78	FALSE	32
2022-09-12	15:14:50	0.472023	716.252	FALSE	32
2022-09-12	15:14:50	0.635178	716.887	FALSE	32
2022-09-12	15:14:51	0.390954	717.278	FALSE	32
2022-09-12	15:14:51	0.40215	717.68	FALSE	32
2022-09-12	15:14:51	0.433346	718.113	FALSE	32
2022-09-12	15:14:51	0.511463	718.625	FALSE	32
2022-09-12	15:14:52	0.506883	719.132	FALSE	32
2022-09-12	15:14:52	0.47014	719.602	FALSE	32
2022-09-12	15:14:52	0.479046	720.081	FALSE	32
2022-09-12	15:14:52	0.492379	720.573	FALSE	32
2022-09-12	15:14:53	0.499656	721.073	FALSE	32
2022-09-12	15:14:53	0.498384	721.571	FALSE	32
2022-09-12	15:14:53	0.488104	722.06	FALSE	32
2022-09-12	15:14:54	0.485713	722.545	FALSE	32
2022-09-12	15:14:54	0.482914	723.028	FALSE	32
2022-09-12	15:14:54	0.476858	723.505	FALSE	32
2022-09-12	15:14:54	0.487036	723.992	FALSE	32
2022-09-12	15:14:55	0.471667	724.464	FALSE	32
2022-09-12	15:14:55	0.466323	724.93	FALSE	32
2022-09-12	15:14:55	0.454262	725.384	FALSE	32
2022-09-12	15:14:55	0.462914	725.847	FALSE	32
2022-09-12	15:14:56	0.434466	726.282	FALSE	32
2022-09-12	15:14:56	0.462049	726.744	FALSE	32
2022-09-12	15:14:56	0.260674	727.004	FALSE	32
2022-09-12	15:14:57	0.637264	727.642	FALSE	32
2022-09-12	15:14:57	0.0259671	727.668	FALSE	32
2022-09-12	15:14:57	-0.0149998	727.668	FALSE	32
2022-09-12	15:14:57	0.0731427	727.741	FALSE	32
2022-09-12	15:14:58	-0.0899616	727.741	FALSE	32
2022-09-12	15:14:58	0.000623673	727.741	FALSE	32
2022-09-12	15:14:58	-0.179376	727.741	FALSE	32
2022-09-12	15:14:58	-0.0322517	727.741	FALSE	32
2022-09-12	15:14:59	-0.0662465	727.741	FALSE	32
2022-09-12	15:14:59	0.0368577	727.778	FALSE	32
2022-09-12	15:14:59	-0.0532694	727.778	FALSE	32
2022-09-12	15:14:59	0.245662	728.024	FALSE	32
2022-09-12	15:15:00	0.246069	728.27	FALSE	32
2022-09-12	15:15:00	1.03543	729.305	FALSE	32
2022-09-12	15:15:00	0.750445	730.056	FALSE	32
2022-09-12	15:15:01	0.761132	730.817	FALSE	32
2022-09-12	15:15:01	0.781845	731.599	FALSE	32
2022-09-12	15:15:01	0.922201	732.521	FALSE	32
2022-09-12	15:15:01	0.690445	733.211	FALSE	32
2022-09-12	15:15:02	0.37014	733.582	FALSE	32
2022-09-12	15:15:02	0.441743	734.023	FALSE	32
2022-09-12	15:15:02	0.391667	734.415	FALSE	32
2022-09-12	15:15:02	0.400878	734.816	FALSE	32
2022-09-12	15:15:03	0.537214	735.353	FALSE	32
2022-09-12	15:15:03	0.435127	735.788	FALSE	32
2022-09-12	15:15:03	1.08393	736.872	FALSE	32
2022-09-12	15:15:03	0.525407	737.398	FALSE	32
2022-09-12	15:15:04	0.35126	737.749	FALSE	32
2022-09-12	15:15:04	0.333906	738.083	FALSE	32
2022-09-12	15:15:04	0.464695	738.547	FALSE	32
2022-09-12	15:15:05	0.23757	738.785	FALSE	32
2022-09-12	15:15:05	0.298181	739.083	FALSE	32
2022-09-12	15:15:05	0.204288	739.288	FALSE	32
2022-09-12	15:15:05	0.261743	739.549	FALSE	32
2022-09-12	15:15:06	0.261183	739.81	FALSE	32
2022-09-12	15:15:06	0.325662	740.136	FALSE	32
2022-09-12	15:15:06	0.733092	740.869	FALSE	32
2022-09-12	15:15:06	1.1164	741.986	FALSE	32
2022-09-12	15:15:07	0.99874	742.984	FALSE	32
2022-09-12	15:15:07	1.15742	744.142	FALSE	32
2022-09-12	15:15:07	0.552481	744.694	FALSE	32
2022-09-12	15:15:07	0.848053	745.542	FALSE	32
2022-09-12	15:15:08	0.675636	746.218	FALSE	32
2022-09-12	15:15:08	0.333651	746.552	FALSE	32
2022-09-12	15:15:08	0.617417	747.169	FALSE	32
2022-09-12	15:15:09	0.561183	747.73	FALSE	32
2022-09-12	15:15:09	1.22622	748.956	FALSE	32
2022-09-12	15:15:09	0.801641	749.758	FALSE	32
2022-09-12	15:15:09	1.11884	750.877	FALSE	32
2022-09-12	15:15:10	0.774568	751.651	FALSE	32
2022-09-12	15:15:10	0.771361	752.423	FALSE	32
2022-09-12	15:15:10	1.10164	753.524	FALSE	32
2022-09-12	15:15:10	1.05045	754.575	FALSE	32
2022-09-12	15:15:11	0.924389	755.499	FALSE	32
2022-09-12	15:15:11	0.390852	755.89	FALSE	32
2022-09-12	15:15:11	0.158995	756.049	FALSE	32
2022-09-12	15:15:11	0.341947	756.391	FALSE	32
2022-09-12	15:15:12	0.0198603	756.411	FALSE	32
2022-09-12	15:15:12	0.189326	756.6	FALSE	32
2022-09-12	15:15:12	0.170293	756.771	FALSE	32
2022-09-12	15:15:13	0.188308	756.959	FALSE	32
2022-09-12	15:15:13	0.25986	757.219	FALSE	32
2022-09-12	15:15:13	0.22383	757.443	FALSE	32
2022-09-12	15:15:13	0.547443	757.99	FALSE	32
2022-09-12	15:15:14	0.101947	758.092	FALSE	32
2022-09-12	15:15:14	0.37813	758.47	FALSE	32
2022-09-12	15:15:14	0.0582317	758.528	FALSE	32
2022-09-12	15:15:14	0.305713	758.834	FALSE	32
2022-09-12	15:15:15	0.0865778	758.921	FALSE	32
2022-09-12	15:15:15	0.360878	759.281	FALSE	32
2022-09-12	15:15:15	0.183931	759.465	FALSE	32
2022-09-12	15:15:16	0.700267	760.166	FALSE	32
2022-09-12	15:15:16	0.379758	760.545	FALSE	32
2022-09-12	15:15:16	0.485763	761.031	FALSE	32
2022-09-12	15:15:16	0.494008	761.525	FALSE	32
2022-09-12	15:15:17	0.681132	762.206	FALSE	32
2022-09-12	15:15:17	0.740471	762.947	FALSE	32
2022-09-12	15:15:17	0.299199	763.246	FALSE	32
2022-09-12	15:15:17	0.482456	763.728	FALSE	32
2022-09-12	15:15:18	0.387646	764.116	FALSE	32
2022-09-12	15:15:18	0.441947	764.558	FALSE	32
2022-09-12	15:15:18	0.716857	765.275	FALSE	32
2022-09-12	15:15:18	0.547646	765.823	FALSE	32
2022-09-12	15:15:19	0.405916	766.228	FALSE	32
2022-09-12	15:15:19	0.512277	766.741	FALSE	32
2022-09-12	15:15:19	0.483575	767.224	FALSE	32
2022-09-12	15:15:20	0.334415	767.559	FALSE	32
2022-09-12	15:15:20	0.334924	767.894	FALSE	32
2022-09-12	15:15:20	0.575076	768.469	FALSE	32
2022-09-12	15:15:20	0.586679	769.055	FALSE	32
2022-09-12	15:15:21	0.636501	769.692	FALSE	32
2022-09-12	15:15:21	0.571158	770.263	FALSE	32
2022-09-12	15:15:21	0.63986	770.903	FALSE	32
2022-09-12	15:15:21	0.648715	771.552	FALSE	32
2022-09-12	15:15:22	1.27365	772.825	FALSE	32
2022-09-12	15:15:22	0.291768	773.117	FALSE	32
2022-09-12	15:15:22	0.121947	773.239	FALSE	32
2022-09-12	15:15:22	0.387595	773.627	FALSE	32
2022-09-12	15:15:23	0.215585	773.842	FALSE	32
2022-09-12	15:15:23	0.570343	774.413	FALSE	32
2022-09-12	15:15:23	1.09253	775.505	FALSE	32
2022-09-12	15:15:24	0.568359	776.073	FALSE	32
2022-09-12	15:15:24	0.573244	776.647	FALSE	32
2022-09-12	15:15:24	0.573957	777.221	FALSE	32
2022-09-12	15:15:24	0.284847	777.505	FALSE	32
2022-09-12	15:15:25	0.124746	777.63	FALSE	32
2022-09-12	15:15:25	0.0914124	777.722	FALSE	32
2022-09-12	15:15:25	-0.0113865	777.722	FALSE	32
2022-09-12	15:15:25	-0.0151524	777.722	FALSE	32
2022-09-12	15:15:26	0.0805727	777.802	FALSE	32
2022-09-12	15:15:26	0.126171	777.928	FALSE	32
2022-09-12	15:15:26	0.342354	778.271	FALSE	32
2022-09-12	15:15:26	0.37584	778.647	FALSE	32
2022-09-12	15:15:27	0.263219	778.91	FALSE	32
2022-09-12	15:15:27	0.425458	779.335	FALSE	32
2022-09-12	15:15:27	0.348613	779.684	FALSE	32
2022-09-12	15:15:28	0.486832	780.171	FALSE	32
2022-09-12	15:15:28	0.414771	780.585	FALSE	32
2022-09-12	15:15:28	0.616247	781.202	FALSE	32
2022-09-12	15:15:28	0.596756	781.798	FALSE	32
2022-09-12	15:15:29	0.562099	782.361	FALSE	32
2022-09-12	15:15:29	0.458995	782.82	FALSE	32
2022-09-12	15:15:29	0.574211	783.394	FALSE	32
2022-09-12	15:15:29	0.479249	783.873	FALSE	32
2022-09-12	15:15:30	0.435941	784.309	FALSE	32
2022-09-12	15:15:30	0.506018	784.815	FALSE	32
2022-09-12	15:15:30	0.435229	785.25	FALSE	32
2022-09-12	15:15:31	0.552685	785.803	FALSE	32
2022-09-12	15:15:31	0.399199	786.202	FALSE	32
2022-09-12	15:15:31	0.564287	786.766	FALSE	32
2022-09-12	15:15:31	0.393041	787.159	FALSE	32
2022-09-12	15:15:32	0.56388	787.723	FALSE	32
2022-09-12	15:15:32	0.528257	788.252	FALSE	32
2022-09-12	15:15:32	0.584745	788.836	FALSE	32
2022-09-12	15:15:32	0.707799	789.544	FALSE	32
2022-09-12	15:15:33	1.26352	790.808	FALSE	32
2022-09-12	15:15:33	1.05655	791.864	FALSE	32
2022-09-12	15:15:33	1.69289	793.557	FALSE	32
2022-09-12	15:15:33	0.929834	794.487	FALSE	32
2022-09-12	15:15:34	0.769987	795.257	FALSE	32
2022-09-12	15:15:34	0.809275	796.066	FALSE	32
2022-09-12	15:15:34	0.832837	796.899	FALSE	32
2022-09-12	15:15:35	0.715941	797.615	FALSE	32
2022-09-12	15:15:35	0.414364	798.029	FALSE	32
2022-09-12	15:15:35	0.69131	798.721	FALSE	32
2022-09-12	15:15:35	0.48841	799.209	FALSE	32
2022-09-12	15:15:36	0.733753	799.943	FALSE	32
2022-09-12	15:15:36	0.566578	800.509	FALSE	32
2022-09-12	15:15:36	0.539147	801.048	FALSE	32
2022-09-12	15:15:36	0.425611	801.474	FALSE	32
2022-09-12	15:15:37	0.71874	802.193	FALSE	32
2022-09-12	15:15:37	0.622099	802.815	FALSE	32
2022-09-12	15:15:37	0.328817	803.144	FALSE	32
2022-09-12	15:15:37	0.354873	803.499	FALSE	32
2022-09-12	15:15:38	0.450395	803.949	FALSE	32
2022-09-12	15:15:38	0.376247	804.325	FALSE	32
2022-09-12	15:15:38	0.404033	804.729	FALSE	32
2022-09-12	15:15:39	1.13447	805.864	FALSE	32
2022-09-12	15:15:39	0.504338	806.368	FALSE	32
2022-09-12	15:15:39	0.214211	806.582	FALSE	32
2022-09-12	15:15:39	0.00667965	806.589	FALSE	32
2022-09-12	15:15:40	0.0664252	806.655	FALSE	32
2022-09-12	15:15:40	-0.129911	806.655	FALSE	32
2022-09-12	15:15:40	-0.266857	806.655	FALSE	32
2022-09-12	15:15:40	-0.435254	806.655	FALSE	32
2022-09-12	15:15:41	-0.491539	806.655	FALSE	32
2022-09-12	15:15:41	-0.294389	806.655	FALSE	32
2022-09-12	15:15:41	-0.243193	806.655	FALSE	32
2022-09-12	15:15:41	-0.0434985	806.655	FALSE	32
2022-09-12	15:15:42	0.140064	806.795	FALSE	32
2022-09-12	15:15:42	0.376908	807.172	FALSE	32
2022-09-12	15:15:42	0.176858	807.349	FALSE	32
2022-09-12	15:15:43	0.24327	807.593	FALSE	32
2022-09-12	15:15:43	0.311616	807.904	FALSE	32
2022-09-12	15:15:43	0.235178	808.139	FALSE	32
2022-09-12	15:15:43	0.25411	808.393	FALSE	32
2022-09-12	15:15:44	0.292837	808.686	FALSE	32
2022-09-12	15:15:44	0.261132	808.947	FALSE	32
2022-09-12	15:15:44	0.255636	809.203	FALSE	32
2022-09-12	15:15:44	0.273601	809.477	FALSE	32
2022-09-12	15:15:45	0.269428	809.746	FALSE	32
2022-09-12	15:15:45	0.218028	809.964	FALSE	32
2022-09-12	15:15:45	0.187901	810.152	FALSE	32
2022-09-12	15:15:45	0.195636	810.348	FALSE	32

## Sheet: MrFitz_star_2022912151021
Date	Time	Lbs	Total Force x time			**GoPro Fitting: 1500
2022-09-12	15:10:22	0.409682	0.409682
2022-09-12	15:10:22	0.405865	0.815547
2022-09-12	15:10:22	0.403881	1.21943
2022-09-12	15:10:22	0.417265	1.63669
2022-09-12	15:10:23	0.420115	2.05681
2022-09-12	15:10:23	0.426069	2.48288
2022-09-12	15:10:23	0.463066	2.94594
2022-09-12	15:10:23	0.422914	3.36886
2022-09-12	15:10:24	0.409529	3.77839
2022-09-12	15:10:24	0.446374	4.22476
2022-09-12	15:10:24	0.43584	4.6606
2022-09-12	15:10:24	0.474364	5.13496
2022-09-12	15:10:25	0.516247	5.65121
2022-09-12	15:10:25	0.433906	6.08512
2022-09-12	15:10:25	0.387087	6.4722
2022-09-12	15:10:26	0.539504	7.01171
2022-09-12	15:10:26	0.454008	7.46572
2022-09-12	15:10:26	0.416349	7.88207
2022-09-12	15:10:26	0.45757	8.33964
2022-09-12	15:10:27	0.442099	8.78173
2022-09-12	15:10:27	0.515941	9.29768
2022-09-12	15:10:27	0.457519	9.75519
2022-09-12	15:10:27	0.709377	10.4646
2022-09-12	15:10:28	0.990343	11.4549
2022-09-12	15:10:28	0.697315	12.1522
2022-09-12	15:10:28	0.445407	12.5976
2022-09-12	15:10:28	0.553194	13.1508
2022-09-12	15:10:29	0.462303	13.6131
2022-09-12	15:10:29	0.55014	14.1633
2022-09-12	15:10:29	0.432481	14.5958
2022-09-12	15:10:30	0.440267	15.036
2022-09-12	15:10:30	0.576807	15.6128
2022-09-12	15:10:30	1.06011	16.6729
2022-09-12	15:10:31	1.25121	17.9241
2022-09-12	15:10:31	1.2019	19.126
2022-09-12	15:10:31	2.13477	21.2608
2022-09-12	15:10:31	3.16892	24.4297
2022-09-12	15:10:31	1.76444	26.1942
2022-09-12	15:10:32	0.427697	26.6219
2022-09-12	15:10:32	0.279453	26.9013
2022-09-12	15:10:32	0.494415	27.3957
2022-09-12	15:10:33	0.403015	27.7988
2022-09-12	15:10:33	0.441896	28.2407
2022-09-12	15:10:33	0.727901	28.9686
2022-09-12	15:10:33	0.432125	29.4007
2022-09-12	15:10:34	0.342557	29.7432
2022-09-12	15:10:34	0.265051	30.0083
2022-09-12	15:10:34	0.890343	30.8986
2022-09-12	15:10:34	0.451667	31.3503
2022-09-12	15:10:35	0.127646	31.4779
2022-09-12	15:10:35	0.0734989	31.5514
2022-09-12	15:10:35	0.0334989	31.5849
2022-09-12	15:10:35	-0.0929132	31.5849
2022-09-12	15:10:36	-0.349707	31.5849
2022-09-12	15:10:36	-0.404567	31.5849
2022-09-12	15:10:36	-0.419936	31.5849
2022-09-12	15:10:37	0.0452547	31.6302
2022-09-12	15:10:37	0.377621	32.0078
2022-09-12	15:10:37	0.400216	32.408
2022-09-12	15:10:37	1.05716	33.4652
2022-09-12	15:10:38	0.543677	34.0089
2022-09-12	15:10:38	0.337316	34.3462
2022-09-12	15:10:38	0.495331	34.8415
2022-09-12	15:10:38	1.23701	36.0785
2022-09-12	15:10:39	0.667748	36.7463
2022-09-12	15:10:39	0.352023	37.0983
2022-09-12	15:10:39	0.473652	37.572
2022-09-12	15:10:39	0.180216	37.7522
2022-09-12	15:10:40	0.411107	38.1633
2022-09-12	15:10:40	0.251667	38.4149
2022-09-12	15:10:40	2.06775	40.4827
2022-09-12	15:10:41	2.9765	43.4592
2022-09-12	15:10:41	4.73696	48.1962
2022-09-12	15:10:41	2.12383	50.32
2022-09-12	15:10:41	1.41813	51.7381
2022-09-12	15:10:42	-0.0264501	51.7381
2022-09-12	15:10:42	-0.0848725	51.7381
2022-09-12	15:10:42	-0.255356	51.7381
2022-09-12	15:10:42	-0.0765264	51.7381
2022-09-12	15:10:43	-0.00726439	51.7381
2022-09-12	15:10:43	-0.0756613	51.7381
2022-09-12	15:10:43	0.218283	51.9564
2022-09-12	15:10:43	-0.023244	51.9564
2022-09-12	15:10:44	0.38042	52.3368
2022-09-12	15:10:44	0.164339	52.5012
2022-09-12	15:10:44	0.20159	52.7027
2022-09-12	15:10:45	0.120318	52.8231
2022-09-12	15:10:45	0.155993	52.9791
2022-09-12	15:10:45	0.109326	53.0884
2022-09-12	15:10:45	0.154873	53.2433
2022-09-12	15:10:46	0.258741	53.502
2022-09-12	15:10:46	0.263422	53.7654
2022-09-12	15:10:46	-0.0847198	53.7654
2022-09-12	15:10:46	-0.0517427	53.7654
2022-09-12	15:10:47	0.217214	53.9826
2022-09-12	15:10:47	0.165458	54.1481
2022-09-12	15:10:47	0.485865	54.634
2022-09-12	15:10:47	0.243372	54.8773
2022-09-12	15:10:48	0.370751	55.2481
2022-09-12	15:10:48	0.206578	55.4547
2022-09-12	15:10:48	0.577417	56.0321
2022-09-12	15:10:49	1.35029	57.3824
2022-09-12	15:10:49	1.6963	59.0787
2022-09-12	15:10:49	1.74729	60.826
2022-09-12	15:10:49	1.63864	62.4646
2022-09-12	15:10:50	2.26816	64.7328
2022-09-12	15:10:50	0.732684	65.4654
2022-09-12	15:10:50	0.397316	65.8628
2022-09-12	15:10:50	0.453601	66.3164
2022-09-12	15:10:51	0.640522	66.9569
2022-09-12	15:10:51	1.17742	68.1343
2022-09-12	15:10:51	0.696654	68.8309
2022-09-12	15:10:51	1.22719	70.0581
2022-09-12	15:10:52	1.93406	71.9922
2022-09-12	15:10:52	2.02586	74.0181
2022-09-12	15:10:52	3.29228	77.3103
2022-09-12	15:10:53	1.95421	79.2645
2022-09-12	15:10:53	2.25289	81.5174
2022-09-12	15:10:53	2.15233	83.6698
2022-09-12	15:10:53	3.5105	87.1803
2022-09-12	15:10:54	2.01391	89.1942
2022-09-12	15:10:54	2.95085	92.145
2022-09-12	15:10:54	2.47589	94.6209
2022-09-12	15:10:54	2.70648	97.3274
2022-09-12	15:10:55	2.94765	100.275
2022-09-12	15:10:55	2.21676	102.492
2022-09-12	15:10:55	0.193397	102.685
2022-09-12	15:10:56	0.115738	102.801
2022-09-12	15:10:56	0.44958	103.251
2022-09-12	15:10:56	0.220573	103.471
2022-09-12	15:10:56	0.45126	103.922
2022-09-12	15:10:57	-0.0462466	103.922
2022-09-12	15:10:57	-0.315203	103.922
2022-09-12	15:10:57	-0.368944	103.922
2022-09-12	15:10:57	-0.338256	103.922
2022-09-12	15:10:58	-0.156781	103.922
2022-09-12	15:10:58	0.0574684	103.98
2022-09-12	15:10:58	1.73961	105.719
2022-09-12	15:10:58	1.73986	107.459
2022-09-12	15:10:59	0.944949	108.404
2022-09-12	15:10:59	0.516654	108.921
2022-09-12	15:10:59	0.406018	109.327
2022-09-12	15:11:00	0.519351	109.846
2022-09-12	15:11:00	0.397926	110.244
2022-09-12	15:11:00	0.569326	110.814
2022-09-12	15:11:00	0.49874	111.312
2022-09-12	15:11:01	0.805305	112.118
2022-09-12	15:11:01	0.661336	112.779
2022-09-12	15:11:01	0.620013	113.399
2022-09-12	15:11:01	1.11462	114.514
2022-09-12	15:11:02	0.732837	115.246
2022-09-12	15:11:02	1.02597	116.272
2022-09-12	15:11:02	0.637264	116.91
2022-09-12	15:11:02	1.30424	118.214
2022-09-12	15:11:03	1.15065	119.364
2022-09-12	15:11:03	1.97182	121.336
2022-09-12	15:11:03	2.66057	123.997
2022-09-12	15:11:04	1.68983	125.687
2022-09-12	15:11:04	1.99854	127.685
2022-09-12	15:11:04	1.52622	129.211
2022-09-12	15:11:04	2.56576	131.777
2022-09-12	15:11:05	0.650547	132.428
2022-09-12	15:11:05	1.62922	134.057
2022-09-12	15:11:05	1.69212	135.749
2022-09-12	15:11:05	3.58739	139.337
2022-09-12	15:11:06	2.65935	141.996
2022-09-12	15:11:06	4.19996	146.196
2022-09-12	15:11:06	3.27258	149.468
2022-09-12	15:11:06	5.05518	154.524
2022-09-12	15:11:07	2.65966	157.183
2022-09-12	15:11:07	3.16403	160.347
2022-09-12	15:11:07	3.72118	164.068
2022-09-12	15:11:08	1.6678	165.736
2022-09-12	15:11:08	2.32653	168.063
2022-09-12	15:11:08	1.29635	169.359
2022-09-12	15:11:08	0.45813	169.817
2022-09-12	15:11:09	0.459606	170.277
2022-09-12	15:11:09	0.489784	170.767
2022-09-12	15:11:09	0.594517	171.361
2022-09-12	15:11:09	0.508613	171.87
2022-09-12	15:11:10	0.56332	172.433
2022-09-12	15:11:10	0.57243	173.006
2022-09-12	15:11:10	0.813041	173.819
2022-09-12	15:11:10	-0.00131018	173.819
2022-09-12	15:11:11	0.093957	173.913
2022-09-12	15:11:11	0.935636	174.848
2022-09-12	15:11:11	1.72851	176.577
2022-09-12	15:11:12	0.962405	177.539
2022-09-12	15:11:12	0.36215	177.901
2022-09-12	15:11:12	0.318741	178.22
2022-09-12	15:11:12	0.301845	178.522
2022-09-12	15:11:13	-0.0452287	178.522
2022-09-12	15:11:13	0.0334989	178.555
2022-09-12	15:11:13	-0.16701	178.555
2022-09-12	15:11:13	-0.299325	178.555
2022-09-12	15:11:14	-0.543295	178.555
2022-09-12	15:11:14	-0.575152	178.555
2022-09-12	15:11:14	-0.36014	178.555
2022-09-12	15:11:14	0.128512	178.684
2022-09-12	15:11:15	0.770852	179.455
2022-09-12	15:11:15	4.52113	183.976
2022-09-12	15:11:15	4.66836	188.644
2022-09-12	15:11:16	3.30841	191.953
2022-09-12	15:11:16	1.32673	193.279
2022-09-12	15:11:16	0.470852	193.75
2022-09-12	15:11:16	2.56179	196.312
2022-09-12	15:11:17	1.9134	198.225
2022-09-12	15:11:17	1.5105	199.736
2022-09-12	15:11:17	-0.0676206	199.736
2022-09-12	15:11:17	0.0600639	199.796
2022-09-12	15:11:18	-0.0857885	199.796
2022-09-12	15:11:18	-0.236679	199.796
2022-09-12	15:11:18	-0.173066	199.796
2022-09-12	15:11:19	0.0895804	199.885
2022-09-12	15:11:19	0.601743	200.487
2022-09-12	15:11:19	1.87625	202.363
2022-09-12	15:11:19	0.392939	202.756
2022-09-12	15:11:20	0.0828628	202.839
2022-09-12	15:11:20	0.21299	203.052
2022-09-12	15:11:20	0.771667	203.824
2022-09-12	15:11:20	1.87645	205.7
2022-09-12	15:11:21	3.77212	209.473
2022-09-12	15:11:21	0.27986	209.752
2022-09-12	15:11:21	0.935738	210.688
2022-09-12	15:11:21	0.133448	210.822
2022-09-12	15:11:22	0.0913106	210.913
2022-09-12	15:11:22	1.66022	212.573
2022-09-12	15:11:22	1.33579	213.909
2022-09-12	15:11:23	3.30052	217.209
2022-09-12	15:11:23	1.44302	218.652
2022-09-12	15:11:23	2.02042	220.673
2022-09-12	15:11:23	0.940674	221.614
2022-09-12	15:11:24	0.886629	222.5
2022-09-12	15:11:24	0.635229	223.135
2022-09-12	15:11:24	0.229631	223.365
2022-09-12	15:11:24	0.175534	223.541
2022-09-12	15:11:25	0.757061	224.298
2022-09-12	15:11:25	0.14841	224.446
2022-09-12	15:11:25	0.341336	224.787
2022-09-12	15:11:25	0.537417	225.325
2022-09-12	15:11:26	1.36765	226.692
2022-09-12	15:11:26	0.785916	227.478
2022-09-12	15:11:26	1.0167	228.495
2022-09-12	15:11:27	1.39207	229.887
2022-09-12	15:11:27	1.13228	231.019
2022-09-12	15:11:27	0.682811	231.702
2022-09-12	15:11:27	0.666781	232.369
2022-09-12	15:11:28	0.778181	233.147
2022-09-12	15:11:28	0.403066	233.55
2022-09-12	15:11:28	0.87528	234.425
2022-09-12	15:11:28	0.60556	235.031
2022-09-12	15:11:29	0.701997	235.733
2022-09-12	15:11:29	0.361285	236.094
2022-09-12	15:11:29	0.474975	236.569
2022-09-12	15:11:29	0.249071	236.818
2022-09-12	15:11:30	0.430598	237.249
2022-09-12	15:11:30	0.273753	237.523
2022-09-12	15:11:30	0.686119	238.209
2022-09-12	15:11:31	0.296603	238.505
2022-09-12	15:11:31	0.70098	239.206
2022-09-12	15:11:31	0.0506491	239.257
2022-09-12	15:11:31	0.154262	239.411
2022-09-12	15:11:32	0.261387	239.673
2022-09-12	15:11:32	0.194059	239.867
2022-09-12	15:11:32	0.330496	240.197
2022-09-12	15:11:32	0.179911	240.377
2022-09-12	15:11:33	0.374211	240.751
2022-09-12	15:11:33	0.181947	240.933
2022-09-12	15:11:33	0.339657	241.273
2022-09-12	15:11:33	0.167748	241.441
2022-09-12	15:11:34	0.264847	241.706
2022-09-12	15:11:34	0.267952	241.974
2022-09-12	15:11:34	0.398741	242.372
2022-09-12	15:11:35	0.367239	242.74
2022-09-12	15:11:35	0.208715	242.948
2022-09-12	15:11:35	0.382761	243.331
2022-09-12	15:11:35	0.270191	243.601
2022-09-12	15:11:36	0.434059	244.035
2022-09-12	15:11:36	0.154873	244.19
2022-09-12	15:11:36	0.385662	244.576
2022-09-12	15:11:36	0.319555	244.895
2022-09-12	15:11:37	0.471107	245.366
2022-09-12	15:11:37	0.346476	245.713
2022-09-12	15:11:37	0.455331	246.168
2022-09-12	15:11:37	0.242507	246.411
2022-09-12	15:11:38	0.420522	246.831
2022-09-12	15:11:38	0.242303	247.074
2022-09-12	15:11:38	0.294059	247.368
2022-09-12	15:11:39	0.278537	247.646
2022-09-12	15:11:39	0.36841	248.015
2022-09-12	15:11:39	0.25299	248.268
2022-09-12	15:11:39	0.171107	248.439
2022-09-12	15:11:40	0.313194	248.752
2022-09-12	15:11:40	0.217723	248.97
2022-09-12	15:11:40	0.208868	249.178
2022-09-12	15:11:40	0.203473	249.382
2022-09-12	15:11:41	0.192379	249.574
2022-09-12	15:11:41	0.178283	249.753
2022-09-12	15:11:41	0.244644	249.997
2022-09-12	15:11:42	0.289275	250.287
2022-09-12	15:11:42	0.920827	251.207
2022-09-12	15:11:42	1.21131	252.419
2022-09-12	15:11:42	2.08653	254.505
2022-09-12	15:11:43	0.667443	255.173
2022-09-12	15:11:43	1.60434	256.777
2022-09-12	15:11:43	0.642506	257.42
2022-09-12	15:11:43	0.680573	258.1
2022-09-12	15:11:44	0.388359	258.488
2022-09-12	15:11:44	0.381896	258.87
2022-09-12	15:11:44	0.418232	259.289
2022-09-12	15:11:44	0.294059	259.583
2022-09-12	15:11:45	0.201438	259.784
2022-09-12	15:11:45	0.278181	260.062
2022-09-12	15:11:45	0.338435	260.401
2022-09-12	15:11:46	0.300165	260.701
2022-09-12	15:11:46	0.428563	261.129
2022-09-12	15:11:46	0.396705	261.526
2022-09-12	15:11:46	0.427239	261.953
2022-09-12	15:11:47	0.455433	262.409
2022-09-12	15:11:47	0.475331	262.884
2022-09-12	15:11:47	0.411463	263.296
2022-09-12	15:11:47	0.334771	263.63
2022-09-12	15:11:48	0.348104	263.978
2022-09-12	15:11:48	0.503015	264.481
2022-09-12	15:11:48	3.98469	268.466
2022-09-12	15:11:48	4.13044	272.597
2022-09-12	15:11:49	6.67075	279.267
2022-09-12	15:11:49	10.9915	290.259
2022-09-12	15:11:49	10.7711	301.03
2022-09-12	15:11:50	6.04617	307.076
2022-09-12	15:11:50	1.35803	308.434
2022-09-12	15:11:50	0.515534	308.95
2022-09-12	15:11:50	0.60841	309.558
2022-09-12	15:11:51	0.38444	309.943
2022-09-12	15:11:51	0.58271	310.525
2022-09-12	15:11:51	0.184847	310.71
2022-09-12	15:11:51	0.468054	311.178
2022-09-12	15:11:52	0.961794	312.14
2022-09-12	15:11:52	0.265102	312.405
2022-09-12	15:11:52	0.0220995	312.427
2022-09-12	15:11:52	0.259606	312.687
2022-09-12	15:11:53	0.377875	313.065
2022-09-12	15:11:53	0.198283	313.263
2022-09-12	15:11:53	0.0643895	313.327
2022-09-12	15:11:54	-0.019529	313.327
2022-09-12	15:11:54	-0.405381	313.327
2022-09-12	15:11:54	-0.444313	313.327
2022-09-12	15:11:54	-0.328842	313.327
2022-09-12	15:11:55	-0.412251	313.327
2022-09-12	15:11:55	-0.484363	313.327
2022-09-12	15:11:55	-0.622684	313.327
2022-09-12	15:11:55	-0.414491	313.327
2022-09-12	15:11:56	-0.721157	313.327
2022-09-12	15:11:56	-0.788638	313.327
2022-09-12	15:11:56	-0.814083	313.327
2022-09-12	15:11:56	-0.520496	313.327
2022-09-12	15:11:57	-0.509147	313.327
2022-09-12	15:11:57	-0.332099	313.327
2022-09-12	15:11:57	-0.168129	313.327
2022-09-12	15:11:58	0.0328882	313.36
2022-09-12	15:11:58	0.219962	313.58
2022-09-12	15:11:58	0.515636	314.096
2022-09-12	15:11:58	0.771921	314.868
2022-09-12	15:11:59	0.586425	315.454
2022-09-12	15:11:59	1.07452	316.529
2022-09-12	15:11:59	2.62999	319.159
2022-09-12	15:11:59	1.64744	320.806
2022-09-12	15:12:00	2.32118	323.127
2022-09-12	15:12:00	2.66006	325.787
2022-09-12	15:12:00	0.674618	326.462
2022-09-12	15:12:00	0.272888	326.735
2022-09-12	15:12:01	0.270598	327.005
2022-09-12	15:12:01	0.363015	327.368
2022-09-12	15:12:01	0.383626	327.752
2022-09-12	15:12:02	0.302761	328.055
2022-09-12	15:12:02	0.276552	328.331
2022-09-12	15:12:02	0.195076	328.526
2022-09-12	15:12:02	0.252634	328.779
2022-09-12	15:12:03	0.161285	328.94
2022-09-12	15:12:03	0.158995	329.099
2022-09-12	15:12:03	0.163117	329.262
2022-09-12	15:12:03	0.0702928	329.333
2022-09-12	15:12:04	-0.330877	329.333
2022-09-12	15:12:04	-0.0323534	329.333
2022-09-12	15:12:04	0.0968577	329.43
2022-09-12	15:12:04	0.0710053	329.501
2022-09-12	15:12:05	0.0926338	329.593
2022-09-12	15:12:05	0.112634	329.706
2022-09-12	15:12:05	0.25411	329.96
2022-09-12	15:12:06	0.439962	330.4
2022-09-12	15:12:06	0.499555	330.9
2022-09-12	15:12:06	0.589733	331.489
2022-09-12	15:12:06	0.635738	332.125
2022-09-12	15:12:07	0.57528	332.7
2022-09-12	15:12:07	0.525254	333.226
2022-09-12	15:12:07	0.548206	333.774
2022-09-12	15:12:07	0.549733	334.323
2022-09-12	15:12:08	0.722252	335.046
2022-09-12	15:12:08	1.27787	336.324
2022-09-12	15:12:08	2.24785	338.571
2022-09-12	15:12:09	2.09426	340.666
2022-09-12	15:12:09	1.9105	342.576
2022-09-12	15:12:09	0.688104	343.264
2022-09-12	15:12:09	0.551056	343.815
2022-09-12	15:12:10	0.524033	344.339
2022-09-12	15:12:10	0.377061	344.716
2022-09-12	15:12:10	0.436908	345.153
2022-09-12	15:12:10	0.330038	345.483
2022-09-12	15:12:11	0.40785	345.891
2022-09-12	15:12:11	0.336908	346.228
2022-09-12	15:12:11	0.392939	346.621
2022-09-12	15:12:11	0.342303	346.963
2022-09-12	15:12:12	0.333143	347.297
2022-09-12	15:12:12	0.497774	347.794
2022-09-12	15:12:12	2.74826	350.543
2022-09-12	15:12:13	3.2136	353.756
2022-09-12	15:12:13	2.82749	356.584
2022-09-12	15:12:13	2.27416	358.858
2022-09-12	15:12:13	1.74027	360.598
2022-09-12	15:12:14	0.934058	361.532
2022-09-12	15:12:14	2.64775	364.18
2022-09-12	15:12:14	6.30698	370.487
2022-09-12	15:12:14	6.33131	376.818
2022-09-12	15:12:15	2.19426	379.012
2022-09-12	15:12:15	0.630089	379.643
2022-09-12	15:12:15	0.899351	380.542
2022-09-12	15:12:15	0.696349	381.238
2022-09-12	15:12:16	0.818893	382.057
2022-09-12	15:12:16	0.329835	382.387
2022-09-12	15:12:16	0.401641	382.789
2022-09-12	15:12:17	0.0226592	382.811
2022-09-12	15:12:17	0.100166	382.911
2022-09-12	15:12:17	-0.000139698	382.911
2022-09-12	15:12:17	-0.177442	382.911
2022-09-12	15:12:18	-0.178257	382.911
2022-09-12	15:12:18	-0.105381	382.911
2022-09-12	15:12:18	-0.215763	382.911
2022-09-12	15:12:18	-0.41332	382.911
2022-09-12	15:12:19	-0.725025	382.911
2022-09-12	15:12:19	-0.691895	382.911
2022-09-12	15:12:19	-0.850877	382.911
2022-09-12	15:12:19	-0.775661	382.911
2022-09-12	15:12:20	-0.973625	382.911
2022-09-12	15:12:20	-0.780241	382.911
2022-09-12	15:12:20	-0.993371	382.911
2022-09-12	15:12:21	-0.820394	382.911
2022-09-12	15:12:21	-0.975355	382.911
2022-09-12	15:12:21	-0.744108	382.911
2022-09-12	15:12:21	-0.866297	382.911
2022-09-12	15:12:22	-0.960394	382.911
2022-09-12	15:12:22	-0.444007	382.911
2022-09-12	15:12:22	-0.0208013	382.911
2022-09-12	15:12:22	0.0231681	382.935
2022-09-12	15:12:23	-0.12874	382.935
2022-09-12	15:12:23	0.0383336	382.973
2022-09-12	15:12:23	0.17416	383.147
2022-09-12	15:12:23	-0.00645013	383.147
2022-09-12	15:12:24	0.18215	383.329
2022-09-12	15:12:24	0.0407254	383.37
2022-09-12	15:12:24	0.342456	383.712
2022-09-12	15:12:25	-0.0492491	383.712
2022-09-12	15:12:25	0.416959	384.129
2022-09-12	15:12:25	0.272888	384.402
2022-09-12	15:12:25	1.01492	385.417
2022-09-12	15:12:26	1.06617	386.483
2022-09-12	15:12:26	0.560573	387.044
2022-09-12	15:12:26	0.397774	387.442
2022-09-12	15:12:26	0.426221	387.868
2022-09-12	15:12:27	0.215687	388.084
2022-09-12	15:12:27	0.302964	388.387
2022-09-12	15:12:27	0.281183	388.668
2022-09-12	15:12:27	0.0750257	388.743
2022-09-12	15:12:28	0.176959	388.92
2022-09-12	15:12:28	0.0782826	388.998
2022-09-12	15:12:28	0.290293	389.288
2022-09-12	15:12:29	0.0810307	389.369
2022-09-12	15:12:29	0.277723	389.647
2022-09-12	15:12:29	0.148359	389.795
2022-09-12	15:12:29	0.477774	390.273
2022-09-12	15:12:30	0.0141606	390.287
2022-09-12	15:12:30	0.412786	390.7
2022-09-12	15:12:30	0.199809	390.9
2022-09-12	15:12:30	0.291667	391.192
2022-09-12	15:12:31	0.160267	391.352
2022-09-12	15:12:31	0.44673	391.799
2022-09-12	15:12:31	0.338333	392.137
2022-09-12	15:12:32	0.891158	393.028
2022-09-12	15:12:32	0.298893	393.327
2022-09-12	15:12:32	0.484542	393.812
2022-09-12	15:12:32	0.494771	394.306
2022-09-12	15:12:33	0.575891	394.882
2022-09-12	15:12:33	0.503117	395.385
2022-09-12	15:12:33	0.587341	395.973
2022-09-12	15:12:33	0.816043	396.789
2022-09-12	15:12:34	0.450598	397.239
2022-09-12	15:12:34	0.537366	397.777
2022-09-12	15:12:34	0.610344	398.387
2022-09-12	15:12:34	0.610344	398.997
2022-09-12	15:12:35	1.14001	400.137
2022-09-12	15:12:35	0.709173	400.847
2022-09-12	15:12:35	0.729784	401.576
2022-09-12	15:12:36	1.0138	402.59
2022-09-12	15:12:36	0.39813	402.988
2022-09-12	15:12:36	0.12042	403.109
2022-09-12	15:12:36	0.172837	403.282
2022-09-12	15:12:37	0.0680537	403.35
2022-09-12	15:12:37	0.207036	403.557
2022-09-12	15:12:37	0.256959	403.814
2022-09-12	15:12:37	0.979758	404.793
2022-09-12	15:12:38	1.19665	405.99
2022-09-12	15:12:38	0.54556	406.536
2022-09-12	15:12:38	0.344186	406.88
2022-09-12	15:12:38	0.47411	407.354
2022-09-12	15:12:39	0.39187	407.746
2022-09-12	15:12:39	0.517977	408.264
2022-09-12	15:12:39	0.345102	408.609
2022-09-12	15:12:40	0.451565	409.06
2022-09-12	15:12:40	0.456094	409.516
2022-09-12	15:12:40	0.407952	409.924
2022-09-12	15:12:40	0.572379	410.497
2022-09-12	15:12:41	2.01528	412.512
2022-09-12	15:12:41	0.348003	412.86
2022-09-12	15:12:41	0.357774	413.218
2022-09-12	15:12:41	0.324237	413.542
2022-09-12	15:12:42	0.699962	414.242
2022-09-12	15:12:42	0.294059	414.536
2022-09-12	15:12:42	0.448664	414.985
2022-09-12	15:12:42	1.1565	416.141
2022-09-12	15:12:43	0.380369	416.522
2022-09-12	15:12:43	0.24383	416.765
2022-09-12	15:12:43	0.451921	417.217
2022-09-12	15:12:44	0.294008	417.511
2022-09-12	15:12:44	0.36159	417.873
2022-09-12	15:12:44	0.262812	418.136
2022-09-12	15:12:44	0.305916	418.442
2022-09-12	15:12:45	0.30098	418.743
2022-09-12	15:12:45	0.165967	418.909
2022-09-12	15:12:45	0.101641	419.01
2022-09-12	15:12:45	0.15014	419.16
2022-09-12	15:12:46	0.207596	419.368
2022-09-12	15:12:46	0.292532	419.661
2022-09-12	15:12:46	0.482303	420.143
2022-09-12	15:12:46	0.490089	420.633
2022-09-12	15:12:47	0.444033	421.077
2022-09-12	15:12:47	0.208054	421.285
2022-09-12	15:12:47	0.52612	421.811
2022-09-12	15:12:48	0.283626	422.095
2022-09-12	15:12:48	0.382099	422.477
2022-09-12	15:12:48	0.200573	422.677
2022-09-12	15:12:48	0.307239	422.985
2022-09-12	15:12:49	0.294822	423.28
2022-09-12	15:12:49	0.26841	423.548
2022-09-12	15:12:49	0.0105982	423.559
2022-09-12	15:12:49	-0.0749488	423.559
2022-09-12	15:12:50	-0.0170354	423.559
2022-09-12	15:12:50	-0.116323	423.559
2022-09-12	15:12:50	-0.206908	423.559
2022-09-12	15:12:50	-0.119478	423.559
2022-09-12	15:12:51	-0.106247	423.559
2022-09-12	15:12:51	-0.0866537	423.559
2022-09-12	15:12:51	-0.113778	423.559
2022-09-12	15:12:52	-0.224465	423.559
2022-09-12	15:12:52	-0.534491	423.559
2022-09-12	15:12:52	-0.532862	423.559
2022-09-12	15:12:52	-0.64075	423.559
2022-09-12	15:12:53	-0.562837	423.559
2022-09-12	15:12:53	-0.57729	423.559
2022-09-12	15:12:53	-0.766449	423.559
2022-09-12	15:12:53	-0.0699615	423.559
2022-09-12	15:12:54	0.191005	423.75
2022-09-12	15:12:54	0.00723945	423.757
2022-09-12	15:12:54	0.200878	423.958
2022-09-12	15:12:55	0.259657	424.217
2022-09-12	15:12:55	0.476807	424.694
2022-09-12	15:12:55	0.125306	424.819
2022-09-12	15:12:55	0.108359	424.928
2022-09-12	15:12:56	-0.00375294	424.928
2022-09-12	15:12:56	0.302964	425.231
2022-09-12	15:12:56	0.215127	425.446
2022-09-12	15:12:56	0.356908	425.803
2022-09-12	15:12:57	0.16958	425.972
2022-09-12	15:12:57	0.193346	426.166
2022-09-12	15:12:57	0.813091	426.979
2022-09-12	15:12:57	1.87808	428.857
2022-09-12	15:12:58	1.30301	430.16
2022-09-12	15:12:58	0.73528	430.895
2022-09-12	15:12:58	0.375076	431.27
2022-09-12	15:12:59	0.512176	431.782
2022-09-12	15:12:59	0.349835	432.132
2022-09-12	15:12:59	0.435026	432.567
2022-09-12	15:12:59	0.682507	433.25
2022-09-12	15:13:00	1.10378	434.354
2022-09-12	15:13:00	2.51558	436.869
2022-09-12	15:13:00	2.30449	439.174
2022-09-12	15:13:00	1.77406	440.948
2022-09-12	15:13:01	1.2024	442.15
2022-09-12	15:13:01	0.570649	442.721
2022-09-12	15:13:01	0.380929	443.102
2022-09-12	15:13:01	0.542914	443.645
2022-09-12	15:13:02	0.590954	444.236
2022-09-12	15:13:02	0.432939	444.668
2022-09-12	15:13:02	0.303168	444.972
2022-09-12	15:13:03	0.350445	445.322
2022-09-12	15:13:03	0.231463	445.554
2022-09-12	15:13:03	0.0675957	445.621
2022-09-12	15:13:03	-0.033473	445.621
2022-09-12	15:13:04	-0.223956	445.621
2022-09-12	15:13:04	-0.296425	445.621
2022-09-12	15:13:04	-0.302837	445.621
2022-09-12	15:13:04	-0.509402	445.621
2022-09-12	15:13:05	-0.676119	445.621
2022-09-12	15:13:05	-0.989554	445.621
2022-09-12	15:13:05	-1.19602	445.621
2022-09-12	15:13:05	-1.02263	445.621
2022-09-12	15:13:06	-1.10014	445.621
2022-09-12	15:13:06	-0.730877	445.621
2022-09-12	15:13:06	-0.538307	445.621
2022-09-12	15:13:07	-0.245585	445.621
2022-09-12	15:13:07	-0.176628	445.621
2022-09-12	15:13:07	-0.127112	445.621
2022-09-12	15:13:07	0.0182318	445.639
2022-09-12	15:13:08	0.228054	445.867
2022-09-12	15:13:08	0.166222	446.034
2022-09-12	15:13:08	0.176094	446.21
2022-09-12	15:13:08	0.546781	446.757
2022-09-12	15:13:09	0.498639	447.255
2022-09-12	15:13:09	0.527544	447.783
2022-09-12	15:13:09	2.21823	450.001
2022-09-12	15:13:09	0.611209	450.612
2022-09-12	15:13:10	0.703168	451.315
2022-09-12	15:13:10	0.906374	452.222
2022-09-12	15:13:10	0.593957	452.816
2022-09-12	15:13:11	0.503168	453.319
2022-09-12	15:13:11	0.349936	453.669
2022-09-12	15:13:11	0.579555	454.248
2022-09-12	15:13:11	0.585356	454.834
2022-09-12	15:13:12	0.452176	455.286
2022-09-12	15:13:12	0.686069	455.972
2022-09-12	15:13:12	0.599402	456.571
2022-09-12	15:13:12	0.583626	457.155
2022-09-12	15:13:13	0.470649	457.626
2022-09-12	15:13:13	0.827799	458.453
2022-09-12	15:13:13	0.407341	458.861
2022-09-12	15:13:13	0.349886	459.211
2022-09-12	15:13:14	0.430547	459.641
2022-09-12	15:13:14	0.517468	460.159
2022-09-12	15:13:14	0.459657	460.618
2022-09-12	15:13:15	0.601285	461.22
2022-09-12	15:13:15	0.65472	461.874
2022-09-12	15:13:15	0.304847	462.179
2022-09-12	15:13:15	0.0399621	462.219
2022-09-12	15:13:16	0.443931	462.663
2022-09-12	15:13:16	0.45986	463.123
2022-09-12	15:13:16	0.169835	463.293
2022-09-12	15:13:16	0.242049	463.535
2022-09-12	15:13:17	0.249275	463.784
2022-09-12	15:13:17	0.352939	464.137
2022-09-12	15:13:17	0.311972	464.449
2022-09-12	15:13:18	0.313957	464.763
2022-09-12	15:13:18	0.110547	464.873
2022-09-12	15:13:18	-0.0112339	464.873
2022-09-12	15:13:18	-0.0428369	464.873
2022-09-12	15:13:19	-0.325483	464.873
2022-09-12	15:13:19	-0.425178	464.873
2022-09-12	15:13:19	-0.515559	464.873
2022-09-12	15:13:19	-0.353117	464.873
2022-09-12	15:13:20	-0.540597	464.873
2022-09-12	15:13:20	-0.698816	464.873
2022-09-12	15:13:20	-0.783803	464.873
2022-09-12	15:13:20	-0.584058	464.873
2022-09-12	15:13:21	-0.607875	464.873
2022-09-12	15:13:21	-0.681971	464.873
2022-09-12	15:13:21	-0.642786	464.873
2022-09-12	15:13:22	-0.4636	464.873
2022-09-12	15:13:22	-0.346603	464.873
2022-09-12	15:13:22	-0.33103	464.873
2022-09-12	15:13:22	-0.160699	464.873
2022-09-12	15:13:23	-0.264262	464.873
2022-09-12	15:13:23	-0.185381	464.873
2022-09-12	15:13:23	-0.230878	464.873
2022-09-12	15:13:23	-0.00517788	464.873
2022-09-12	15:13:24	0.0667814	464.94
2022-09-12	15:13:24	0.099504	465.04
2022-09-12	15:13:24	0.484898	465.525
2022-09-12	15:13:24	1.14541	466.67
2022-09-12	15:13:25	0.955992	467.626
2022-09-12	15:13:25	0.79299	468.419
2022-09-12	15:13:25	0.663371	469.082
2022-09-12	15:13:26	0.682965	469.765
2022-09-12	15:13:26	0.55187	470.317
2022-09-12	15:13:26	0.465	470.782
2022-09-12	15:13:26	0.592837	471.375
2022-09-12	15:13:27	0.27757	471.653
2022-09-12	15:13:27	0.701794	472.354
2022-09-12	15:13:27	0.273753	472.628
2022-09-12	15:13:27	0.819148	473.447
2022-09-12	15:13:28	1.50709	474.954
2022-09-12	15:13:28	0.313906	475.268
2022-09-12	15:13:28	0.887494	476.156
2022-09-12	15:13:28	1.71401	477.87
2022-09-12	15:13:29	0.314618	478.184
2022-09-12	15:13:29	0.81589	479
2022-09-12	15:13:29	0.384746	479.385
2022-09-12	15:13:30	0.321947	479.707
2022-09-12	15:13:30	0.612735	480.32
2022-09-12	15:13:30	0.400878	480.721
2022-09-12	15:13:30	0.447188	481.168
2022-09-12	15:13:31	0.490954	481.659
2022-09-12	15:13:31	0.281336	481.94
2022-09-12	15:13:31	0.741489	482.682
2022-09-12	15:13:31	0.410191	483.092
2022-09-12	15:13:32	0.326221	483.418
2022-09-12	15:13:32	0.55869	483.977
2022-09-12	15:13:32	0.342761	484.32
2022-09-12	15:13:32	0.303066	484.623
2022-09-12	15:13:33	0.219809	484.842
2022-09-12	15:13:33	0.316908	485.159
2022-09-12	15:13:33	0.104186	485.263
2022-09-12	15:13:34	0.153804	485.417
2022-09-12	15:13:34	0.103117	485.52
2022-09-12	15:13:34	0.121641	485.642
2022-09-12	15:13:34	0.0698857	485.712
2022-09-12	15:13:35	0.212786	485.925
2022-09-12	15:13:35	0.157214	486.082
2022-09-12	15:13:35	0.0551783	486.137
2022-09-12	15:13:35	0.113499	486.251
2022-09-12	15:13:36	0.0905982	486.341
2022-09-12	15:13:36	0.12271	486.464
2022-09-12	15:13:36	0.0728374	486.537
2022-09-12	15:13:37	-0.0666536	486.537
2022-09-12	15:13:37	-0.114236	486.537
2022-09-12	15:13:37	0.398995	486.936
2022-09-12	15:13:37	0.347494	487.283
2022-09-12	15:13:38	0.236654	487.52
2022-09-12	15:13:38	0.15416	487.674
2022-09-12	15:13:38	0.166476	487.841
2022-09-12	15:13:38	0.0844404	487.925
2022-09-12	15:13:39	0.251616	488.177
2022-09-12	15:13:39	0.22439	488.401
2022-09-12	15:13:39	0.210191	488.611
2022-09-12	15:13:39	0.196552	488.808
2022-09-12	15:13:40	0.224288	489.032
2022-09-12	15:13:40	0.213957	489.246
2022-09-12	15:13:40	0.107545	489.354
2022-09-12	15:13:41	0.218486	489.572
2022-09-12	15:13:41	0.180929	489.753
2022-09-12	15:13:41	0.165509	489.918
2022-09-12	15:13:41	0.190191	490.109
2022-09-12	15:13:42	0.15472	490.263
2022-09-12	15:13:42	0.208308	490.472
2022-09-12	15:13:42	0.134364	490.606
2022-09-12	15:13:42	0.059962	490.666
2022-09-12	15:13:43	0.00500025	490.671
2022-09-12	15:13:43	-0.0600379	490.671
2022-09-12	15:13:43	0.0199112	490.691
2022-09-12	15:13:43	0.216756	490.908
2022-09-12	15:13:44	-0.0458903	490.908
2022-09-12	15:13:44	0.0521249	490.96
2022-09-12	15:13:44	0.0965523	491.056
2022-09-12	15:13:45	0.0868831	491.143
2022-09-12	15:13:45	0.0987915	491.242
2022-09-12	15:13:45	0.299351	491.541
2022-09-12	15:13:45	0.53243	492.074
2022-09-12	15:13:46	1.77324	493.847
2022-09-12	15:13:46	0.698486	494.545
2022-09-12	15:13:46	0.218028	494.764
2022-09-12	15:13:46	0.0659671	494.829
2022-09-12	15:13:47	-0.159376	494.829
2022-09-12	15:13:47	-0.162531	494.829
2022-09-12	15:13:47	0.245865	495.075
2022-09-12	15:13:47	0.0975193	495.173
2022-09-12	15:13:48	0.0261707	495.199
2022-09-12	15:13:48	0.0807254	495.28
2022-09-12	15:13:48	0.0703438	495.35
2022-09-12	15:13:49	0.0461707	495.396
2022-09-12	15:13:49	0.0742623	495.471
2022-09-12	15:13:49	0.0493259	495.52
2022-09-12	15:13:49	0.0574175	495.577
2022-09-12	15:13:50	0.0612852	495.639
2022-09-12	15:13:50	0.0515142	495.69
2022-09-12	15:13:50	0.0476465	495.738
2022-09-12	15:13:50	0.0499875	495.788
2022-09-12	15:13:51	0.041387	495.829
2022-09-12	15:13:51	0.0378247	495.867
2022-09-12	15:13:51	0.0465778	495.914
2022-09-12	15:13:51	0.0461707	495.96
2022-09-12	15:13:52	0.0490205	496.009
2022-09-12	15:13:52	0.0468323	496.056
2022-09-12	15:13:52	0.0506491	496.106
2022-09-12	15:13:53	0.0601147	496.166
2022-09-12	15:13:53	0.0593513	496.226
2022-09-12	15:13:53	0.0381809	496.264
2022-09-12	15:13:53	-0.0476715	496.264
2022-09-12	15:13:54	-0.0437529	496.264
2022-09-12	15:13:54	-0.580139	496.264
2022-09-12	15:13:54	-0.617341	496.264
2022-09-12	15:13:54	-0.768587	496.264
2022-09-12	15:13:55	-0.74874	496.264
2022-09-12	15:13:55	-0.726755	496.264
2022-09-12	15:13:55	-0.923498	496.264
2022-09-12	15:13:55	-0.779681	496.264
2022-09-12	15:13:56	-0.636119	496.264
2022-09-12	15:13:56	-0.478002	496.264
2022-09-12	15:13:56	-0.173371	496.264
2022-09-12	15:13:57	0.458588	496.722
2022-09-12	15:13:57	0.174822	496.897
2022-09-12	15:13:57	0.181489	497.079
2022-09-12	15:13:58	0.172685	497.251
2022-09-12	15:13:58	0.802252	498.054
2022-09-12	15:13:58	1.41716	499.471
2022-09-12	15:13:58	0.684898	500.156
2022-09-12	15:13:58	0.351667	500.507
2022-09-12	15:13:59	0.820623	501.328
2022-09-12	15:13:59	0.174517	501.503
2022-09-12	15:13:59	0.569937	502.072
2022-09-12	15:14:00	0.59075	502.663
2022-09-12	15:14:00	0.685763	503.349
2022-09-12	15:14:00	0.56098	503.91
2022-09-12	15:14:00	0.502252	504.412
2022-09-12	15:14:01	0.976247	505.388
2022-09-12	15:14:01	0.482049	505.871
2022-09-12	15:14:01	0.489987	506.361
2022-09-12	15:14:01	0.408715	506.769
2022-09-12	15:14:02	1.58571	508.355
2022-09-12	15:14:02	1.27889	509.634
2022-09-12	15:14:02	3.068	512.702
2022-09-12	15:14:02	1.02011	513.722
2022-09-12	15:14:03	1.04159	514.764
2022-09-12	15:14:03	0.588919	515.352
2022-09-12	15:14:03	0.762863	516.115
2022-09-12	15:14:04	1.43406	517.549
2022-09-12	15:14:04	0.509733	518.059
2022-09-12	15:14:04	0.624745	518.684
2022-09-12	15:14:04	0.873041	519.557
2022-09-12	15:14:05	0.398283	519.955
2022-09-12	15:14:05	0.704389	520.66
2022-09-12	15:14:05	0.409682	521.069
2022-09-12	15:14:05	1.64144	522.711
2022-09-12	15:14:06	0.770394	523.481
2022-09-12	15:14:06	1.95218	525.433
2022-09-12	15:14:06	1.52877	526.962
2022-09-12	15:14:06	2.67757	529.64
2022-09-12	15:14:07	1.75615	531.396
2022-09-12	15:14:07	1.29823	532.694
2022-09-12	15:14:07	1.32337	534.017
2022-09-12	15:14:08	0.566578	534.584
2022-09-12	15:14:08	2.8939	537.478
2022-09-12	15:14:08	0.515941	537.994
2022-09-12	15:14:08	0.662506	538.656
2022-09-12	15:14:09	0.281285	538.938
2022-09-12	15:14:09	0.223372	539.161
2022-09-12	15:14:09	0.323321	539.484
2022-09-12	15:14:09	0.465356	539.95
2022-09-12	15:14:10	0.298028	540.248
2022-09-12	15:14:10	0.404135	540.652
2022-09-12	15:14:10	0.436756	541.089
2022-09-12	15:14:10	0.560216	541.649
2022-09-12	15:14:11	1.12017	542.769
2022-09-12	15:14:11	1.00154	543.77
2022-09-12	15:14:11	2.13467	545.905
2022-09-12	15:14:12	1.97136	547.876
2022-09-12	15:14:12	2.21472	550.091
2022-09-12	15:14:12	1.70032	551.792
2022-09-12	15:14:12	1.95528	553.747
2022-09-12	15:14:13	1.33808	555.085
2022-09-12	15:14:13	1.05849	556.143
2022-09-12	15:14:13	1.75131	557.895
2022-09-12	15:14:13	1.91798	559.813
2022-09-12	15:14:14	0.426374	560.239
2022-09-12	15:14:14	1.20388	561.443
2022-09-12	15:14:14	0.401743	561.845
2022-09-12	15:14:14	0.787952	562.633
2022-09-12	15:14:15	1.34907	563.982
2022-09-12	15:14:15	1.30322	565.285
2022-09-12	15:14:15	1.42067	566.706
2022-09-12	15:14:16	1.36312	568.069
2022-09-12	15:14:16	1.60846	569.677
2022-09-12	15:14:16	0.875331	570.552
2022-09-12	15:14:16	2.46011	573.013
2022-09-12	15:14:17	0.439148	573.452
2022-09-12	15:14:17	2.2337	575.685
2022-09-12	15:14:17	0.539758	576.225
2022-09-12	15:14:17	1.80866	578.034
2022-09-12	15:14:18	0.753397	578.787
2022-09-12	15:14:18	1.18948	579.977
2022-09-12	15:14:18	1.25177	581.228
2022-09-12	15:14:19	1.72561	582.954
2022-09-12	15:14:19	1.37309	584.327
2022-09-12	15:14:19	1.95136	586.279
2022-09-12	15:14:19	1.06088	587.339
2022-09-12	15:14:20	2.1022	589.442
2022-09-12	15:14:20	0.629784	590.071
2022-09-12	15:14:20	2.65187	592.723
2022-09-12	15:14:20	0.452685	593.176
2022-09-12	15:14:21	2.41543	595.591
2022-09-12	15:14:21	0.802048	596.393
2022-09-12	15:14:21	1.71477	598.108
2022-09-12	15:14:22	1.44815	599.556
2022-09-12	15:14:22	1.11925	600.676
2022-09-12	15:14:22	1.6536	602.329
2022-09-12	15:14:22	0.568817	602.898
2022-09-12	15:14:23	1.42266	604.321
2022-09-12	15:14:23	0.270496	604.591
2022-09-12	15:14:23	0.650089	605.241
2022-09-12	15:14:23	0.334059	605.575
2022-09-12	15:14:24	0.360318	605.936
2022-09-12	15:14:24	0.363423	606.299
2022-09-12	15:14:24	0.49243	606.792
2022-09-12	15:14:24	1.2648	608.056
2022-09-12	15:14:25	1.77849	609.835
2022-09-12	15:14:25	0.884135	610.719
2022-09-12	15:14:25	0.456298	611.175
2022-09-12	15:14:25	0.398995	611.574
2022-09-12	15:14:26	0.284542	611.859
2022-09-12	15:14:26	0.723524	612.582
2022-09-12	15:14:26	0.641997	613.224
2022-09-12	15:14:27	0.25584	613.48
2022-09-12	15:14:27	0.31757	613.798
2022-09-12	15:14:27	0.220674	614.018
2022-09-12	15:14:27	0.332634	614.351
2022-09-12	15:14:28	0.247087	614.598
2022-09-12	15:14:28	0.253397	614.851
2022-09-12	15:14:28	0.251056	615.103
2022-09-12	15:14:28	0.387087	615.49
2022-09-12	15:14:29	0.395636	615.885
2022-09-12	15:14:29	0.561896	616.447
2022-09-12	15:14:29	0.67355	617.121
2022-09-12	15:14:29	0.580827	617.702
2022-09-12	15:14:30	0.754313	618.456
2022-09-12	15:14:30	1.01889	619.475
2022-09-12	15:14:30	1.32256	620.797
2022-09-12	15:14:31	2.72301	623.52
2022-09-12	15:14:31	1.42205	624.942
2022-09-12	15:14:31	1.4338	626.376
2022-09-12	15:14:31	2.55243	628.929
2022-09-12	15:14:32	0.430445	629.359
2022-09-12	15:14:32	0.552023	629.911
2022-09-12	15:14:32	0.36098	630.272
2022-09-12	15:14:32	0.401285	630.673
2022-09-12	15:14:33	0.365713	631.039
2022-09-12	15:14:33	0.43925	631.478
2022-09-12	15:14:33	0.358639	631.837
2022-09-12	15:14:33	0.467341	632.304
2022-09-12	15:14:34	2.39217	634.696
2022-09-12	15:14:34	2.32042	637.017
2022-09-12	15:14:34	3.61619	640.633
2022-09-12	15:14:35	2.03497	642.668
2022-09-12	15:14:35	3.87533	646.543
2022-09-12	15:14:35	1.08729	647.631
2022-09-12	15:14:35	2.51803	650.149
2022-09-12	15:14:36	0.691514	650.84
2022-09-12	15:14:36	1.83004	652.67
2022-09-12	15:14:36	0.713499	653.384
2022-09-12	15:14:36	0.909987	654.294
2022-09-12	15:14:37	1.46927	655.763
2022-09-12	15:14:37	1.43284	657.196
2022-09-12	15:14:37	2.49258	659.688
2022-09-12	15:14:38	1.27116	660.96
2022-09-12	15:14:38	2.94276	663.902
2022-09-12	15:14:38	0.984491	664.887
2022-09-12	15:14:38	3.37487	668.262
2022-09-12	15:14:39	0.957061	669.219
2022-09-12	15:14:39	3.38815	672.607
2022-09-12	15:14:39	1.72632	674.333
2022-09-12	15:14:39	2.1193	676.453
2022-09-12	15:14:40	1.66556	678.118
2022-09-12	15:14:40	2.7907	680.909
2022-09-12	15:14:40	3.71335	684.622
2022-09-12	15:14:40	3.40495	688.027
2022-09-12	15:14:41	2.40439	690.431
2022-09-12	15:14:41	0.723677	691.155
2022-09-12	15:14:41	1.38719	692.542
2022-09-12	15:14:42	0.140624	692.683
2022-09-12	15:14:42	0.610191	693.293
2022-09-12	15:14:42	1.09513	694.388
2022-09-12	15:14:42	0.268003	694.656
2022-09-12	15:14:43	0.436603	695.093
2022-09-12	15:14:43	0.437825	695.531
2022-09-12	15:14:43	0.449936	695.981
2022-09-12	15:14:43	0.587595	696.568
2022-09-12	15:14:44	0.766425	697.335
2022-09-12	15:14:44	0.541285	697.876
2022-09-12	15:14:44	0.986832	698.863
2022-09-12	15:14:44	1.56408	700.427
2022-09-12	15:14:45	3.29777	703.725
2022-09-12	15:14:45	2.92276	706.647
2022-09-12	15:14:45	1.46566	708.113
2022-09-12	15:14:46	1.01319	709.126
2022-09-12	15:14:46	0.444237	709.57
2022-09-12	15:14:46	0.256603	709.827
2022-09-12	15:14:46	0.209173	710.036
2022-09-12	15:14:47	0.164389	710.201
2022-09-12	15:14:47	0.28729	710.488
2022-09-12	15:14:47	0.268104	710.756
2022-09-12	15:14:47	0.306018	711.062
2022-09-12	15:14:48	0.313295	711.375
2022-09-12	15:14:48	0.355077	711.73
2022-09-12	15:14:48	0.37355	712.104
2022-09-12	15:14:48	0.295076	712.399
2022-09-12	15:14:49	0.38159	712.781
2022-09-12	15:14:49	1.69986	714.481
2022-09-12	15:14:49	0.571158	715.052
2022-09-12	15:14:50	0.459453	715.511
2022-09-12	15:14:50	0.268715	715.78
2022-09-12	15:14:50	0.472023	716.252
2022-09-12	15:14:50	0.635178	716.887
2022-09-12	15:14:51	0.390954	717.278
2022-09-12	15:14:51	0.40215	717.68
2022-09-12	15:14:51	0.433346	718.113
2022-09-12	15:14:51	0.511463	718.625
2022-09-12	15:14:52	0.506883	719.132
2022-09-12	15:14:52	0.47014	719.602
2022-09-12	15:14:52	0.479046	720.081
2022-09-12	15:14:52	0.492379	720.573
2022-09-12	15:14:53	0.499656	721.073
2022-09-12	15:14:53	0.498384	721.571
2022-09-12	15:14:53	0.488104	722.06
2022-09-12	15:14:54	0.485713	722.545
2022-09-12	15:14:54	0.482914	723.028
2022-09-12	15:14:54	0.476858	723.505
2022-09-12	15:14:54	0.487036	723.992
2022-09-12	15:14:55	0.471667	724.464
2022-09-12	15:14:55	0.466323	724.93
2022-09-12	15:14:55	0.454262	725.384
2022-09-12	15:14:55	0.462914	725.847
2022-09-12	15:14:56	0.434466	726.282
2022-09-12	15:14:56	0.462049	726.744
2022-09-12	15:14:56	0.260674	727.004
2022-09-12	15:14:57	0.637264	727.642
2022-09-12	15:14:57	0.0259671	727.668
2022-09-12	15:14:57	-0.0149998	727.668
2022-09-12	15:14:57	0.0731427	727.741
2022-09-12	15:14:58	-0.0899616	727.741
2022-09-12	15:14:58	0.000623673	727.741
2022-09-12	15:14:58	-0.179376	727.741
2022-09-12	15:14:58	-0.0322517	727.741
2022-09-12	15:14:59	-0.0662465	727.741
2022-09-12	15:14:59	0.0368577	727.778
2022-09-12	15:14:59	-0.0532694	727.778
2022-09-12	15:14:59	0.245662	728.024
2022-09-12	15:15:00	0.246069	728.27
2022-09-12	15:15:00	1.03543	729.305
2022-09-12	15:15:00	0.750445	730.056
2022-09-12	15:15:01	0.761132	730.817
2022-09-12	15:15:01	0.781845	731.599
2022-09-12	15:15:01	0.922201	732.521
2022-09-12	15:15:01	0.690445	733.211
2022-09-12	15:15:02	0.37014	733.582
2022-09-12	15:15:02	0.441743	734.023
2022-09-12	15:15:02	0.391667	734.415
2022-09-12	15:15:02	0.400878	734.816
2022-09-12	15:15:03	0.537214	735.353
2022-09-12	15:15:03	0.435127	735.788
2022-09-12	15:15:03	1.08393	736.872
2022-09-12	15:15:03	0.525407	737.398
2022-09-12	15:15:04	0.35126	737.749
2022-09-12	15:15:04	0.333906	738.083
2022-09-12	15:15:04	0.464695	738.547
2022-09-12	15:15:05	0.23757	738.785
2022-09-12	15:15:05	0.298181	739.083
2022-09-12	15:15:05	0.204288	739.288
2022-09-12	15:15:05	0.261743	739.549
2022-09-12	15:15:06	0.261183	739.81
2022-09-12	15:15:06	0.325662	740.136
2022-09-12	15:15:06	0.733092	740.869
2022-09-12	15:15:06	1.1164	741.986
2022-09-12	15:15:07	0.99874	742.984
2022-09-12	15:15:07	1.15742	744.142
2022-09-12	15:15:07	0.552481	744.694
2022-09-12	15:15:07	0.848053	745.542
2022-09-12	15:15:08	0.675636	746.218
2022-09-12	15:15:08	0.333651	746.552
2022-09-12	15:15:08	0.617417	747.169
2022-09-12	15:15:09	0.561183	747.73
2022-09-12	15:15:09	1.22622	748.956
2022-09-12	15:15:09	0.801641	749.758
2022-09-12	15:15:09	1.11884	750.877
2022-09-12	15:15:10	0.774568	751.651
2022-09-12	15:15:10	0.771361	752.423
2022-09-12	15:15:10	1.10164	753.524
2022-09-12	15:15:10	1.05045	754.575
2022-09-12	15:15:11	0.924389	755.499
2022-09-12	15:15:11	0.390852	755.89
2022-09-12	15:15:11	0.158995	756.049
2022-09-12	15:15:11	0.341947	756.391
2022-09-12	15:15:12	0.0198603	756.411
2022-09-12	15:15:12	0.189326	756.6
2022-09-12	15:15:12	0.170293	756.771
2022-09-12	15:15:13	0.188308	756.959
2022-09-12	15:15:13	0.25986	757.219
2022-09-12	15:15:13	0.22383	757.443
2022-09-12	15:15:13	0.547443	757.99
2022-09-12	15:15:14	0.101947	758.092
2022-09-12	15:15:14	0.37813	758.47
2022-09-12	15:15:14	0.0582317	758.528
2022-09-12	15:15:14	0.305713	758.834
2022-09-12	15:15:15	0.0865778	758.921
2022-09-12	15:15:15	0.360878	759.281
2022-09-12	15:15:15	0.183931	759.465
2022-09-12	15:15:16	0.700267	760.166
2022-09-12	15:15:16	0.379758	760.545
2022-09-12	15:15:16	0.485763	761.031
2022-09-12	15:15:16	0.494008	761.525
2022-09-12	15:15:17	0.681132	762.206
2022-09-12	15:15:17	0.740471	762.947
2022-09-12	15:15:17	0.299199	763.246
2022-09-12	15:15:17	0.482456	763.728
2022-09-12	15:15:18	0.387646	764.116
2022-09-12	15:15:18	0.441947	764.558
2022-09-12	15:15:18	0.716857	765.275
2022-09-12	15:15:18	0.547646	765.823
2022-09-12	15:15:19	0.405916	766.228
2022-09-12	15:15:19	0.512277	766.741
2022-09-12	15:15:19	0.483575	767.224
2022-09-12	15:15:20	0.334415	767.559
2022-09-12	15:15:20	0.334924	767.894
2022-09-12	15:15:20	0.575076	768.469
2022-09-12	15:15:20	0.586679	769.055
2022-09-12	15:15:21	0.636501	769.692
2022-09-12	15:15:21	0.571158	770.263
2022-09-12	15:15:21	0.63986	770.903
2022-09-12	15:15:21	0.648715	771.552
2022-09-12	15:15:22	1.27365	772.825
2022-09-12	15:15:22	0.291768	773.117
2022-09-12	15:15:22	0.121947	773.239
2022-09-12	15:15:22	0.387595	773.627
2022-09-12	15:15:23	0.215585	773.842
2022-09-12	15:15:23	0.570343	774.413
2022-09-12	15:15:23	1.09253	775.505
2022-09-12	15:15:24	0.568359	776.073
2022-09-12	15:15:24	0.573244	776.647
2022-09-12	15:15:24	0.573957	777.221
2022-09-12	15:15:24	0.284847	777.505
2022-09-12	15:15:25	0.124746	777.63
2022-09-12	15:15:25	0.0914124	777.722
2022-09-12	15:15:25	-0.0113865	777.722
2022-09-12	15:15:25	-0.0151524	777.722
2022-09-12	15:15:26	0.0805727	777.802
2022-09-12	15:15:26	0.126171	777.928
2022-09-12	15:15:26	0.342354	778.271
2022-09-12	15:15:26	0.37584	778.647
2022-09-12	15:15:27	0.263219	778.91
2022-09-12	15:15:27	0.425458	779.335
2022-09-12	15:15:27	0.348613	779.684
2022-09-12	15:15:28	0.486832	780.171
2022-09-12	15:15:28	0.414771	780.585
2022-09-12	15:15:28	0.616247	781.202
2022-09-12	15:15:28	0.596756	781.798
2022-09-12	15:15:29	0.562099	782.361
2022-09-12	15:15:29	0.458995	782.82
2022-09-12	15:15:29	0.574211	783.394
2022-09-12	15:15:29	0.479249	783.873
2022-09-12	15:15:30	0.435941	784.309
2022-09-12	15:15:30	0.506018	784.815
2022-09-12	15:15:30	0.435229	785.25
2022-09-12	15:15:31	0.552685	785.803
2022-09-12	15:15:31	0.399199	786.202
2022-09-12	15:15:31	0.564287	786.766
2022-09-12	15:15:31	0.393041	787.159
2022-09-12	15:15:32	0.56388	787.723
2022-09-12	15:15:32	0.528257	788.252
2022-09-12	15:15:32	0.584745	788.836
2022-09-12	15:15:32	0.707799	789.544
2022-09-12	15:15:33	1.26352	790.808
2022-09-12	15:15:33	1.05655	791.864
2022-09-12	15:15:33	1.69289	793.557
2022-09-12	15:15:33	0.929834	794.487
2022-09-12	15:15:34	0.769987	795.257
2022-09-12	15:15:34	0.809275	796.066
2022-09-12	15:15:34	0.832837	796.899
2022-09-12	15:15:35	0.715941	797.615
2022-09-12	15:15:35	0.414364	798.029
2022-09-12	15:15:35	0.69131	798.721
2022-09-12	15:15:35	0.48841	799.209
2022-09-12	15:15:36	0.733753	799.943
2022-09-12	15:15:36	0.566578	800.509
2022-09-12	15:15:36	0.539147	801.048
2022-09-12	15:15:36	0.425611	801.474
2022-09-12	15:15:37	0.71874	802.193
2022-09-12	15:15:37	0.622099	802.815
2022-09-12	15:15:37	0.328817	803.144
2022-09-12	15:15:37	0.354873	803.499
2022-09-12	15:15:38	0.450395	803.949
2022-09-12	15:15:38	0.376247	804.325
2022-09-12	15:15:38	0.404033	804.729
2022-09-12	15:15:39	1.13447	805.864
2022-09-12	15:15:39	0.504338	806.368
2022-09-12	15:15:39	0.214211	806.582
2022-09-12	15:15:39	0.00667965	806.589
2022-09-12	15:15:40	0.0664252	806.655
2022-09-12	15:15:40	-0.129911	806.655
2022-09-12	15:15:40	-0.266857	806.655
2022-09-12	15:15:40	-0.435254	806.655
2022-09-12	15:15:41	-0.491539	806.655
2022-09-12	15:15:41	-0.294389	806.655
2022-09-12	15:15:41	-0.243193	806.655
2022-09-12	15:15:41	-0.0434985	806.655
2022-09-12	15:15:42	0.140064	806.795
2022-09-12	15:15:42	0.376908	807.172
2022-09-12	15:15:42	0.176858	807.349
2022-09-12	15:15:43	0.24327	807.593
2022-09-12	15:15:43	0.311616	807.904
2022-09-12	15:15:43	0.235178	808.139
2022-09-12	15:15:43	0.25411	808.393
2022-09-12	15:15:44	0.292837	808.686
2022-09-12	15:15:44	0.261132	808.947
2022-09-12	15:15:44	0.255636	809.203
2022-09-12	15:15:44	0.273601	809.477
2022-09-12	15:15:45	0.269428	809.746
2022-09-12	15:15:45	0.218028	809.964
2022-09-12	15:15:45	0.187901	810.152
2022-09-12	15:15:45	0.195636	810.348
