# Supplementary material for: Comparing efficacy in reducing pulling and welfare impacts of four types of leash walking equipment
Source: PeerJ journal article supplement (doi:10.7717/peerj.18131), 2024-10-24
Supplement: Shelter1_Tension_files.zip [file Ranger_harness_2022912143430 copy.xlsx]

## Sheet: Averaged Newtons
Date	Time	averaged newtons	impulse	total steps
2022-09-12	14:34:52	2.05212	2.05212	0		impulse	904.553
2022-09-12	14:34:53	2.53734	4.58946	0		total steps	6
2022-09-12	14:34:54	2.20712	6.79658	0		#>5	0
2022-09-12	14:34:55	3.0981	9.89469	0
2022-09-12	14:34:56	4.23535	14.13	0
2022-09-12	14:34:57	1.8009	15.9309	0
2022-09-12	14:34:58	6.42934	22.3603	0
2022-09-12	14:34:59	7.64402	30.0043	0
2022-09-12	14:35:00	4.99743	35.0017	0
2022-09-12	14:35:01	1.32648	36.3282	0
2022-09-12	14:35:02	3.36303	39.6912	0
2022-09-12	14:35:03	7.90963	47.6009	0
2022-09-12	14:35:04	4.44611	52.047	0
2022-09-12	14:35:05	6.63257	58.6796	0
2022-09-12	14:35:06	4.78091	63.4605	0
2022-09-12	14:35:07	2.56681	66.0273	0
2022-09-12	14:35:08	4.8414	70.8687	0
2022-09-12	14:35:09	5.9817	76.8504	0
2022-09-12	14:35:10	4.08578	80.9362	0
2022-09-12	14:35:11	4.46147	85.3976	0
2022-09-12	14:35:12	1.26989	86.6675	0
2022-09-12	14:35:13	1.18579	87.8533	0
2022-09-12	14:35:14	2.04198	89.8953	0
2022-09-12	14:35:15	3.693	93.5883	0
2022-09-12	14:35:16	5.5787	99.167	0
2022-09-12	14:35:17	1.80107	100.968	0
2022-09-12	14:35:18	2.39694	103.365	0
2022-09-12	14:35:19	4.34888	107.714	0
2022-09-12	14:35:20	11.6187	119.333	0
2022-09-12	14:35:21	2.93162	122.264	0
2022-09-12	14:35:22	3.52413	125.788	0
2022-09-12	14:35:23	5.78378	131.572	0
2022-09-12	14:35:24	3.07837	134.65	0
2022-09-12	14:35:25	10.8818	145.532	0
2022-09-12	14:35:26	1.53018	147.062	0
2022-09-12	14:35:27	1.35551	148.418	0
2022-09-12	14:35:28	3.06915	151.487	0
2022-09-12	14:35:29	2.91012	154.397	0
2022-09-12	14:35:30	4.44486	158.842	0
2022-09-12	14:35:31	11.8527	170.695	0
2022-09-12	14:35:32	6.03846	176.733	0
2022-09-12	14:35:33	1.68166	178.415	0
2022-09-12	14:35:34	2.75975	181.175	0
2022-09-12	14:35:35	3.08573	184.26	0
2022-09-12	14:35:36	3.12042	187.381	0
2022-09-12	14:35:37	-0.950477	187.381	0
2022-09-12	14:35:38	-0.978169	187.381	0
2022-09-12	14:35:39	1.9906	189.371	0
2022-09-12	14:35:40	1.25099	190.622	0
2022-09-12	14:35:41	1.46542	192.088	0
2022-09-12	14:35:42	0.821333	192.909	0
2022-09-12	14:35:43	0.373232	193.282	0
2022-09-12	14:35:44	0.681039	193.963	0
2022-09-12	14:35:45	0.100057	194.063	0
2022-09-12	14:35:46	0.0112253	194.075	0
2022-09-12	14:35:47	-0.0301058	194.075	0
2022-09-12	14:35:48	-0.346064	194.075	0
2022-09-12	14:35:49	-0.0443115	194.075	0
2022-09-12	14:35:50	0.845328	194.92	0
2022-09-12	14:35:51	0.672889	195.593	0
2022-09-12	14:35:52	2.82228	198.415	0
2022-09-12	14:35:53	3.15018	201.565	0
2022-09-12	14:35:54	3.67474	205.24	0
2022-09-12	14:35:55	4.81329	210.053	0
2022-09-12	14:35:56	1.30486	211.358	0
2022-09-12	14:35:57	1.32275	212.681	0
2022-09-12	14:35:58	1.67347	214.354	0
2022-09-12	14:35:59	1.66972	216.024	0
2022-09-12	14:36:00	0.991111	217.015	0
2022-09-12	14:36:01	2.68285	219.698	0
2022-09-12	14:36:02	1.39534	221.093	0
2022-09-12	14:36:03	-0.718333	221.093	0
2022-09-12	14:36:04	-1.75126	221.093	0
2022-09-12	14:36:05	-0.899768	221.093	0
2022-09-12	14:36:06	1.6073	222.701	0
2022-09-12	14:36:07	1.6361	224.337	0
2022-09-12	14:36:08	2.27124	226.608	0
2022-09-12	14:36:09	0.634067	227.242	0
2022-09-12	14:36:10	0.121846	227.364	0
2022-09-12	14:36:11	-0.782734	227.364	0
2022-09-12	14:36:12	-1.69637	227.364	0
2022-09-12	14:36:13	-1.38375	227.364	0
2022-09-12	14:36:14	-1.20684	227.364	0
2022-09-12	14:36:15	-0.360665	227.364	0
2022-09-12	14:36:16	-0.475492	227.364	0
2022-09-12	14:36:17	-0.231671	227.364	0
2022-09-12	14:36:18	-0.322635	227.364	0
2022-09-12	14:36:19	0.849177	228.213	0
2022-09-12	14:36:20	2.33582	230.549	0
2022-09-12	14:36:21	2.00676	232.556	0
2022-09-12	14:36:22	1.78256	234.338	0
2022-09-12	14:36:23	1.08885	235.427	0
2022-09-12	14:36:24	1.36587	236.793	0
2022-09-12	14:36:25	1.00341	237.796	0
2022-09-12	14:36:26	1.33853	239.135	0
2022-09-12	14:36:27	1.15127	240.286	0
2022-09-12	14:36:28	1.34906	241.635	0
2022-09-12	14:36:29	1.5387	243.174	0
2022-09-12	14:36:30	1.66479	244.839	0
2022-09-12	14:36:31	2.88527	247.724	0
2022-09-12	14:36:32	2.59807	250.322	0
2022-09-12	14:36:33	6.97765	257.3	0
2022-09-12	14:36:34	2.24436	259.544	0
2022-09-12	14:36:35	1.45998	261.004	0
2022-09-12	14:36:36	0.647707	261.652	0
2022-09-12	14:36:37	0.97021	262.622	0
2022-09-12	14:36:38	1.35925	263.981	0
2022-09-12	14:36:39	2.54362	266.525	0
2022-09-12	14:36:40	3.01363	269.539	0
2022-09-12	14:36:41	3.85472	273.393	0
2022-09-12	14:36:42	3.3318	276.725	0
2022-09-12	14:36:43	1.45444	278.18	0
2022-09-12	14:36:44	1.42071	279.6	0
2022-09-12	14:36:45	1.4013	281.002	0
2022-09-12	14:36:46	1.52252	282.524	0
2022-09-12	14:36:47	1.90554	284.43	0
2022-09-12	14:36:48	2.46513	286.895	0
2022-09-12	14:36:49	1.76296	288.658	0
2022-09-12	14:36:50	2.48347	291.141	0
2022-09-12	14:36:51	1.952	293.093	0
2022-09-12	14:36:52	1.88268	294.976	0
2022-09-12	14:36:53	1.65083	296.627	0
2022-09-12	14:36:54	1.67577	298.302	0
2022-09-12	14:36:55	1.27306	299.575	0
2022-09-12	14:36:56	0.723201	300.299	0
2022-09-12	14:36:57	0.303547	300.602	0
2022-09-12	14:36:58	-1.80774	300.602	0
2022-09-12	14:36:59	-2.25856	300.602	0
2022-09-12	14:37:00	-1.45581	300.602	0
2022-09-12	14:37:01	0.54533	301.148	0
2022-09-12	14:37:02	1.53412	302.682	0
2022-09-12	14:37:03	1.44804	304.13	0
2022-09-12	14:37:04	1.99213	306.122	0
2022-09-12	14:37:05	2.7383	308.86	0
2022-09-12	14:37:06	2.35353	311.214	0
2022-09-12	14:37:07	2.09524	313.309	0
2022-09-12	14:37:08	2.11044	315.419	0
2022-09-12	14:37:09	0.232938	315.652	0
2022-09-12	14:37:10	-0.879281	315.652	0
2022-09-12	14:37:11	0.42507	316.077	0
2022-09-12	14:37:12	1.15161	317.229	0
2022-09-12	14:37:13	1.30667	318.536	0
2022-09-12	14:37:14	1.51414	320.05	0
2022-09-12	14:37:15	2.17628	322.226	0
2022-09-12	14:37:16	2.19707	324.423	0
2022-09-12	14:37:17	0.704469	325.128	0
2022-09-12	14:37:18	0.569381	325.697	0
2022-09-12	14:37:19	2.0005	327.698	0
2022-09-12	14:37:20	3.50135	331.199	0
2022-09-12	14:37:21	2.2473	333.446	0
2022-09-12	14:37:22	3.28544	336.732	0
2022-09-12	14:37:23	2.6992	339.431	0
2022-09-12	14:37:24	2.4872	341.918	0
2022-09-12	14:37:25	2.01159	343.93	0
2022-09-12	14:37:26	2.58363	346.513	0
2022-09-12	14:37:27	2.91425	349.427	0
2022-09-12	14:37:28	2.59699	352.024	0
2022-09-12	14:37:29	7.13279	359.157	0
2022-09-12	14:37:30	9.8072	368.964	0
2022-09-12	14:37:31	8.65712	377.622	0
2022-09-12	14:37:32	4.22996	381.852	0
2022-09-12	14:37:33	2.46094	384.312	0
2022-09-12	14:37:34	1.75042	386.063	0
2022-09-12	14:37:35	1.91437	387.977	0
2022-09-12	14:37:36	2.63721	390.614	0
2022-09-12	14:37:37	2.6323	393.247	0
2022-09-12	14:37:38	1.22586	394.473	0
2022-09-12	14:37:39	0.655687	395.128	0
2022-09-12	14:37:40	0.883057	396.011	0
2022-09-12	14:37:41	4.37182	400.383	0
2022-09-12	14:37:42	6.80084	407.184	0
2022-09-12	14:37:43	4.55068	411.735	0
2022-09-12	14:37:44	1.38877	413.124	0
2022-09-12	14:37:45	1.18307	414.307	0
2022-09-12	14:37:46	0.170176	414.477	0
2022-09-12	14:37:47	0.102661	414.579	0
2022-09-12	14:37:48	1.11131	415.691	0
2022-09-12	14:37:49	0.81443	416.505	0
2022-09-12	14:37:50	1.13401	417.639	0
2022-09-12	14:37:51	0.534446	418.174	0
2022-09-12	14:37:52	0.778039	418.952	0
2022-09-12	14:37:53	1.23972	420.191	0
2022-09-12	14:37:54	1.86983	422.061	0
2022-09-12	14:37:55	1.54255	423.604	0
2022-09-12	14:37:56	2.42636	426.03	0
2022-09-12	14:37:57	2.66428	428.694	0
2022-09-12	14:37:58	1.87645	430.571	0
2022-09-12	14:37:59	1.92678	432.498	0
2022-09-12	14:38:00	4.83705	437.335	0
2022-09-12	14:38:01	2.17645	439.511	0
2022-09-12	14:38:02	2.21974	441.731	0
2022-09-12	14:38:03	2.19314	443.924	0
2022-09-12	14:38:04	2.51918	446.443	0
2022-09-12	14:38:05	2.60644	449.05	0
2022-09-12	14:38:06	2.20169	451.251	0
2022-09-12	14:38:07	1.96587	453.217	0
2022-09-12	14:38:08	3.26394	456.481	0
2022-09-12	14:38:09	16.9097	473.391	1
2022-09-12	14:38:10	5.76222	479.153	1
2022-09-12	14:38:11	1.54844	480.702	1
2022-09-12	14:38:12	0.715052	481.417	1
2022-09-12	14:38:13	2.07311	483.49	1
2022-09-12	14:38:14	2.30282	485.792	1
2022-09-12	14:38:15	2.43212	488.225	1
2022-09-12	14:38:16	2.18799	490.413	1
2022-09-12	14:38:17	2.19427	492.607	1
2022-09-12	14:38:18	2.15987	494.767	1
2022-09-12	14:38:19	3.63263	498.399	1
2022-09-12	14:38:20	4.36394	502.763	1
2022-09-12	14:38:21	2.90214	505.665	1
2022-09-12	14:38:22	3.20689	508.872	1
2022-09-12	14:38:23	3.19152	512.064	1
2022-09-12	14:38:24	2.40163	514.466	1
2022-09-12	14:38:25	2.3546	516.82	1
2022-09-12	14:38:26	6.04519	522.865	1
2022-09-12	14:38:27	12.3128	535.178	1
2022-09-12	14:38:28	9.21043	544.389	1
2022-09-12	14:38:29	4.60495	548.993	1
2022-09-12	14:38:30	1.69241	550.686	1
2022-09-12	14:38:31	2.3215	553.007	1
2022-09-12	14:38:32	4.44135	557.449	1
2022-09-12	14:38:33	9.93702	567.386	1
2022-09-12	14:38:34	11.0632	578.449	1
2022-09-12	14:38:35	3.61755	582.066	1
2022-09-12	14:38:36	3.3409	585.407	1
2022-09-12	14:38:37	5.65351	591.061	1
2022-09-12	14:38:38	5.30405	596.365	1
2022-09-12	14:38:39	0.0715904	596.437	1
2022-09-12	14:38:40	0.722805	597.159	1
2022-09-12	14:38:41	1.55381	598.713	1
2022-09-12	14:38:42	1.60631	600.319	1
2022-09-12	14:38:43	1.24725	601.567	1
2022-09-12	14:38:44	1.46049	603.027	1
2022-09-12	14:38:45	1.49937	604.527	1
2022-09-12	14:38:46	1.42205	605.949	1
2022-09-12	14:38:47	1.40396	607.353	1
2022-09-12	14:38:48	0.9498	608.302	1
2022-09-12	14:38:49	-0.326823	608.302	1
2022-09-12	14:38:50	-0.455703	608.302	1
2022-09-12	14:38:51	0.716636	609.019	1
2022-09-12	14:38:52	3.77412	612.793	1
2022-09-12	14:38:53	2.55585	615.349	1
2022-09-12	14:38:54	2.17247	617.521	1
2022-09-12	14:38:55	2.49122	620.013	1
2022-09-12	14:38:56	2.12478	622.137	1
2022-09-12	14:38:57	2.99048	625.128	1
2022-09-12	14:38:58	2.58642	627.714	1
2022-09-12	14:38:59	2.31901	630.033	1
2022-09-12	14:39:00	5.52006	635.553	1
2022-09-12	14:39:01	4.81073	640.364	1
2022-09-12	14:39:02	2.145	642.509	1
2022-09-12	14:39:03	2.63066	645.14	1
2022-09-12	14:39:04	5.10031	650.24	1
2022-09-12	14:39:05	7.48361	657.724	1
2022-09-12	14:39:06	4.72745	662.451	1
2022-09-12	14:39:07	5.16676	667.618	1
2022-09-12	14:39:08	5.69936	673.317	1
2022-09-12	14:39:09	6.63998	679.957	1
2022-09-12	14:39:10	2.01439	681.972	1
2022-09-12	14:39:11	1.2288	683.2	1
2022-09-12	14:39:12	1.44125	684.642	1
2022-09-12	14:39:13	1.63253	686.274	1
2022-09-12	14:39:14	4.06313	690.337	1
2022-09-12	14:39:15	6.55266	696.89	1
2022-09-12	14:39:16	2.02376	698.914	1
2022-09-12	14:39:17	2.11674	701.031	1
2022-09-12	14:39:18	1.85887	702.889	1
2022-09-12	14:39:19	3.17339	706.063	1
2022-09-12	14:39:20	8.29759	714.36	1
2022-09-12	14:39:21	5.22647	719.587	1
2022-09-12	14:39:22	17.5506	737.137	2
2022-09-12	14:39:23	24.1306	761.268	3
2022-09-12	14:39:24	15.4681	776.736	4
2022-09-12	14:39:25	6.23065	782.967	4
2022-09-12	14:39:26	2.06155	785.028	4
2022-09-12	14:39:27	2.7065	787.735	4
2022-09-12	14:39:28	7.25419	794.989	4
2022-09-12	14:39:29	8.322	803.311	4
2022-09-12	14:39:30	2.86099	806.172	4
2022-09-12	14:39:31	1.14533	807.317	4
2022-09-12	14:39:32	2.90746	810.225	4
2022-09-12	14:39:33	8.06499	818.29	4
2022-09-12	14:39:34	7.96675	826.257	4
2022-09-12	14:39:35	20.9454	847.202	5
2022-09-12	14:39:36	23.1526	870.355	6
2022-09-12	14:39:37	4.22558	874.58	6
2022-09-12	14:39:38	3.0786	877.659	6
2022-09-12	14:39:39	2.40582	880.064	6
2022-09-12	14:39:40	2.08279	882.147	6
2022-09-12	14:39:41	2.04638	884.194	6
2022-09-12	14:39:42	2.01001	886.204	6
2022-09-12	14:39:43	1.85268	888.056	6
2022-09-12	14:39:44	1.25942	889.316	6
2022-09-12	14:39:45	5.67143	894.987	6
2022-09-12	14:39:46	2.20831	897.196	6
2022-09-12	14:39:47	1.3807	898.576	6
2022-09-12	14:39:48	1.25121	899.827	6
2022-09-12	14:39:49	1.25174	901.079	6
2022-09-12	14:39:50	1.22501	902.304	6
2022-09-12	14:39:51	1.23582	903.54	6
2022-09-12	14:39:52	1.01307	904.553	6

## Sheet: Ranger_harness_202291214343 (3)
Date	Time	Lbs	Newtons	averaged newtons	Total Force x time	Total force steps > 13.345		**GoPro Fitting: 1424
2022-09-12	14:34:52	0.617316	2.74595	2.05212	2.74595	FALSE	0			Total Force x time	1745.43
2022-09-12	14:34:52	0.39014	1.73542	2.05212	1.73542	FALSE	0			Total Time Steps Force >3	27
2022-09-12	14:34:52	0.232685	1.03503	2.05212	3.78097	FALSE	0
2022-09-12	14:34:52	0.605204	2.69207	2.05212	4.42749	FALSE	0
2022-09-12	14:34:53	0.333092	1.48166	2.53734	5.26263	FALSE	0
2022-09-12	14:34:53	0.667239	2.96801	2.53734	7.3955	FALSE	0
2022-09-12	14:34:53	0.464135	2.06457	2.53734	7.3272	FALSE	0
2022-09-12	14:34:53	0.817214	3.63513	2.53734	11.0306	FALSE	0
2022-09-12	14:34:54	0.521539	2.31991	2.20712	9.64711	FALSE	0
2022-09-12	14:34:54	0.321031	1.42801	2.20712	12.4586	FALSE	0
2022-09-12	14:34:54	0.369224	1.64238	2.20712	11.2895	FALSE	0
2022-09-12	14:34:54	0.772939	3.43819	2.20712	15.8968	FALSE	0
2022-09-12	14:34:55	0.362048	1.61046	3.0981	12.9	FALSE	0
2022-09-12	14:34:55	1.32546	5.89591	3.0981	21.7927	FALSE	0
2022-09-12	14:34:55	0.401947	1.78794	3.0981	14.6879	FALSE	0
2022-09-12	14:34:56	1.93497	8.60713	4.23535	30.3999	FALSE	0
2022-09-12	14:34:56	0.202507	0.900792	4.23535	15.5887	FALSE	0
2022-09-12	14:34:56	0.521031	2.31765	4.23535	32.7175	FALSE	0
2022-09-12	14:34:56	1.15009	5.11583	4.23535	20.7045	FALSE	0
2022-09-12	14:34:57	0.328868	1.46287	1.8009	34.1804	FALSE	0
2022-09-12	14:34:57	0.358639	1.5953	1.8009	22.2998	FALSE	0
2022-09-12	14:34:57	0.200725	0.892865	1.8009	35.0733	FALSE	0
2022-09-12	14:34:57	0.731209	3.25256	1.8009	25.5524	FALSE	0
2022-09-12	14:34:58	0.175891	0.782398	6.42934	35.8557	FALSE	0
2022-09-12	14:34:58	1.91441	8.51568	6.42934	34.0681	FALSE	0
2022-09-12	14:34:58	0.610852	2.71719	6.42934	38.5729	FALSE	0
2022-09-12	14:34:58	3.08037	13.7021	6.42934	47.7702	1	1
2022-09-12	14:34:59	0.682608	3.03638	7.64402	41.6092	FALSE	1
2022-09-12	14:34:59	2.94103	13.0823	7.64402	60.8524	FALSE	1
2022-09-12	14:34:59	1.53172	6.8134	7.64402	48.4226	FALSE	1
2022-09-12	14:35:00	2.5251	11.2321	4.99743	72.0846	FALSE	1
2022-09-12	14:35:00	0.874415	3.88957	4.99743	52.3122	FALSE	1
2022-09-12	14:35:00	0.801794	3.56654	4.99743	75.6511	FALSE	1
2022-09-12	14:35:00	0.292583	1.30147	4.99743	53.6137	FALSE	1
2022-09-12	14:35:01	0.24673	1.0975	1.32648	76.7486	FALSE	1
2022-09-12	14:35:01	0.184186	0.819296	1.32648	54.433	FALSE	1
2022-09-12	14:35:01	0.698028	3.10497	1.32648	79.8536	FALSE	1
2022-09-12	14:35:01	0.0638806	0.284154	1.32648	54.7171	FALSE	1
2022-09-12	14:35:02	0.33645	1.4966	3.36303	81.3502	FALSE	1
2022-09-12	14:35:02	0.158435	0.704751	3.36303	55.4219	FALSE	1
2022-09-12	14:35:02	0.622761	2.77017	3.36303	84.1204	FALSE	1
2022-09-12	14:35:02	1.90653	8.48063	3.36303	63.9025	FALSE	1
2022-09-12	14:35:03	1.65452	7.35964	7.90963	91.48	FALSE	1
2022-09-12	14:35:03	2.29075	10.1897	7.90963	74.0922	FALSE	1
2022-09-12	14:35:03	1.38922	6.17953	7.90963	97.6595	FALSE	1
2022-09-12	14:35:04	1.45752	6.48334	4.44611	80.5755	FALSE	1
2022-09-12	14:35:04	0.449835	2.00096	4.44611	99.6605	FALSE	1
2022-09-12	14:35:04	1.87513	8.34095	4.44611	88.9165	FALSE	1
2022-09-12	14:35:04	0.215636	0.959192	4.44611	100.62	FALSE	1
2022-09-12	14:35:05	1.85833	8.26622	6.63257	97.1827	FALSE	1
2022-09-12	14:35:05	0.548766	2.44102	6.63257	103.061	FALSE	1
2022-09-12	14:35:05	2.66251	11.8434	6.63257	109.026	FALSE	1
2022-09-12	14:35:05	0.894669	3.97967	6.63257	107.04	FALSE	1
2022-09-12	14:35:06	1.6593	7.3809	4.78091	116.407	FALSE	1
2022-09-12	14:35:06	1.09961	4.89129	4.78091	111.932	FALSE	1
2022-09-12	14:35:06	0.977417	4.34775	4.78091	120.755	FALSE	1
2022-09-12	14:35:06	0.562862	2.50372	4.78091	114.435	FALSE	1
2022-09-12	14:35:07	0.710038	3.15839	2.56681	123.913	FALSE	1
2022-09-12	14:35:07	0.240013	1.06763	2.56681	115.503	FALSE	1
2022-09-12	14:35:07	0.781081	3.4744	2.56681	127.388	FALSE	1
2022-09-12	14:35:08	0.190496	0.847364	4.8414	116.35	FALSE	1
2022-09-12	14:35:08	1.19864	5.33179	4.8414	132.719	FALSE	1
2022-09-12	14:35:08	0.299758	1.33338	4.8414	117.684	FALSE	1
2022-09-12	14:35:08	2.66469	11.8531	4.8414	144.572	FALSE	1
2022-09-12	14:35:09	0.46444	2.06592	5.9817	119.75	FALSE	1
2022-09-12	14:35:09	2.76256	12.2884	5.9817	156.861	FALSE	1
2022-09-12	14:35:09	0.544338	2.42132	5.9817	122.171	FALSE	1
2022-09-12	14:35:09	1.60765	7.15115	5.9817	164.012	FALSE	1
2022-09-12	14:35:10	0.714924	3.18012	4.08578	125.351	FALSE	1
2022-09-12	14:35:10	0.967341	4.30293	4.08578	168.315	FALSE	1
2022-09-12	14:35:10	0.750496	3.33836	4.08578	128.689	FALSE	1
2022-09-12	14:35:10	1.24134	5.52173	4.08578	173.837	FALSE	1
2022-09-12	14:35:11	1.17335	5.2193	4.46147	133.909	FALSE	1
2022-09-12	14:35:11	0.909936	4.04758	4.46147	177.884	FALSE	1
2022-09-12	14:35:11	0.925662	4.11753	4.46147	138.026	FALSE	1
2022-09-12	14:35:12	0.408766	1.81827	1.26989	179.702	FALSE	1
2022-09-12	14:35:12	0.203575	0.905542	1.26989	138.932	FALSE	1
2022-09-12	14:35:12	0.404084	1.79745	1.26989	181.5	FALSE	1
2022-09-12	14:35:12	0.125509	0.558289	1.26989	139.49	FALSE	1
2022-09-12	14:35:13	0.361132	1.60639	1.18579	183.106	FALSE	1
2022-09-12	14:35:13	0.171463	0.762702	1.18579	140.253	FALSE	1
2022-09-12	14:35:13	0.383931	1.7078	1.18579	184.814	FALSE	1
2022-09-12	14:35:13	0.149784	0.666269	1.18579	140.919	FALSE	1
2022-09-12	14:35:14	0.309529	1.37685	2.04198	186.191	FALSE	1
2022-09-12	14:35:14	0.432277	1.92285	2.04198	142.842	FALSE	1
2022-09-12	14:35:14	0.540827	2.40571	2.04198	188.597	FALSE	1
2022-09-12	14:35:14	0.553601	2.46253	2.04198	145.304	FALSE	1
2022-09-12	14:35:15	0.385254	1.71369	3.693	190.31	FALSE	1
2022-09-12	14:35:15	1.72459	7.67132	3.693	152.976	FALSE	1
2022-09-12	14:35:15	0.380827	1.69399	3.693	192.004	FALSE	1
2022-09-12	14:35:16	2.14047	9.52124	5.5787	162.497	FALSE	1
2022-09-12	14:35:16	0.372277	1.65596	5.5787	193.66	FALSE	1
2022-09-12	14:35:16	1.96169	8.72599	5.5787	171.223	FALSE	1
2022-09-12	14:35:16	0.54215	2.41159	5.5787	196.072	FALSE	1
2022-09-12	14:35:17	0.392328	1.74515	1.80107	172.968	FALSE	1
2022-09-12	14:35:17	0.608715	2.70769	1.80107	198.78	FALSE	1
2022-09-12	14:35:17	0.255789	1.1378	1.80107	174.106	FALSE	1
2022-09-12	14:35:17	0.362761	1.61363	1.80107	200.393	FALSE	1
2022-09-12	14:35:18	0.209529	0.932027	2.39694	175.038	FALSE	1
2022-09-12	14:35:18	0.48897	2.17504	2.39694	202.568	FALSE	1
2022-09-12	14:35:18	0.226374	1.00696	2.39694	176.045	FALSE	1
2022-09-12	14:35:18	1.23055	5.47373	2.39694	208.042	FALSE	1
2022-09-12	14:35:19	0.410954	1.82801	4.34888	177.873	FALSE	1
2022-09-12	14:35:19	1.3592	6.04599	4.34888	214.088	FALSE	1
2022-09-12	14:35:19	1.16286	5.17263	4.34888	183.046	FALSE	1
2022-09-12	14:35:20	1.0565	4.69952	11.6187	218.788	FALSE	1
2022-09-12	14:35:20	3.06642	13.64	11.6187	196.686	1	2
2022-09-12	14:35:20	2.76098	12.2814	11.6187	231.069	FALSE	2
2022-09-12	14:35:20	3.56408	15.8537	11.6187	212.539	1	3
2022-09-12	14:35:21	0.858384	3.81826	2.93162	234.887	FALSE	3
2022-09-12	14:35:21	0.759555	3.37865	2.93162	215.918	FALSE	3
2022-09-12	14:35:21	0.274008	1.21884	2.93162	236.106	FALSE	3
2022-09-12	14:35:21	0.744287	3.31074	2.93162	219.229	FALSE	3
2022-09-12	14:35:22	0.666476	2.96462	3.52413	239.071	FALSE	3
2022-09-12	14:35:22	0.982303	4.36948	3.52413	223.598	FALSE	3
2022-09-12	14:35:22	0.728003	3.2383	3.52413	242.309	FALSE	3
2022-09-12	14:35:23	1.82291	8.10867	5.78378	231.707	FALSE	3
2022-09-12	14:35:23	0.79126	3.51968	5.78378	245.829	FALSE	3
2022-09-12	14:35:23	1.55151	6.90143	5.78378	238.608	FALSE	3
2022-09-12	14:35:23	1.03533	4.60535	5.78378	250.434	FALSE	3
2022-09-12	14:35:24	1.0278	4.57186	3.07837	243.18	FALSE	3
2022-09-12	14:35:24	0.483372	2.15014	3.07837	252.584	FALSE	3
2022-09-12	14:35:24	0.323422	1.43865	3.07837	244.619	FALSE	3
2022-09-12	14:35:24	0.933601	4.15284	3.07837	256.737	FALSE	3
2022-09-12	14:35:25	2.1394	9.51648	10.8818	254.135	FALSE	3
2022-09-12	14:35:25	3.80118	16.9084	10.8818	273.645	1	4
2022-09-12	14:35:25	2.61009	11.6102	10.8818	265.746	FALSE	4
2022-09-12	14:35:25	1.23467	5.49206	10.8818	279.137	FALSE	4
2022-09-12	14:35:26	0.359249	1.59801	1.53018	267.344	FALSE	4
2022-09-12	14:35:26	0.0901401	0.400961	1.53018	279.538	FALSE	4
2022-09-12	14:35:26	0.582608	2.59156	1.53018	269.935	FALSE	4
2022-09-12	14:35:27	0.112583	0.500792	1.35551	280.039	FALSE	4
2022-09-12	14:35:27	0.362863	1.61409	1.35551	271.549	FALSE	4
2022-09-12	14:35:27	0.218741	0.973004	1.35551	281.012	FALSE	4
2022-09-12	14:35:27	0.524745	2.33417	1.35551	273.883	FALSE	4
2022-09-12	14:35:28	0.402608	1.79088	3.06915	282.803	FALSE	4
2022-09-12	14:35:28	0.573092	2.54923	3.06915	276.433	FALSE	4
2022-09-12	14:35:28	0.985153	4.38216	3.06915	287.185	FALSE	4
2022-09-12	14:35:28	0.799046	3.55432	3.06915	279.987	FALSE	4
2022-09-12	14:35:29	0.207443	0.922748	2.91012	288.108	FALSE	4
2022-09-12	14:35:29	0.530241	2.35862	2.91012	282.346	FALSE	4
2022-09-12	14:35:29	1.23299	5.48459	2.91012	293.593	FALSE	4
2022-09-12	14:35:29	0.646221	2.87452	2.91012	285.22	FALSE	4
2022-09-12	14:35:30	1.28307	5.70735	4.44486	299.3	FALSE	4
2022-09-12	14:35:30	0.436959	1.94368	4.44486	287.164	FALSE	4
2022-09-12	14:35:30	1.27772	5.68355	4.44486	304.983	FALSE	4
2022-09-12	14:35:31	0.43243	1.92354	11.8527	289.087	FALSE	4
2022-09-12	14:35:31	3.06683	13.6419	11.8527	318.625	1	5
2022-09-12	14:35:31	0.831768	3.69987	11.8527	292.787	FALSE	5
2022-09-12	14:35:31	6.32739	28.1455	11.8527	346.771	1	6
2022-09-12	14:35:32	1.25146	5.56674	6.03846	298.354	FALSE	6
2022-09-12	14:35:32	2.87009	12.7667	6.03846	359.538	FALSE	6
2022-09-12	14:35:32	0.350903	1.56089	6.03846	299.915	FALSE	6
2022-09-12	14:35:32	0.95757	4.25946	6.03846	363.797	FALSE	6
2022-09-12	14:35:33	0.423626	1.88437	1.68166	301.799	FALSE	6
2022-09-12	14:35:33	0.287188	1.27747	1.68166	365.074	FALSE	6
2022-09-12	14:35:33	0.54617	2.42947	1.68166	304.229	FALSE	6
2022-09-12	14:35:33	0.255229	1.13531	1.68166	366.21	FALSE	6
2022-09-12	14:35:34	0.853906	3.79834	2.75975	308.027	FALSE	6
2022-09-12	14:35:34	0.248257	1.1043	2.75975	367.314	FALSE	6
2022-09-12	14:35:34	0.759097	3.37662	2.75975	311.404	FALSE	6
2022-09-12	14:35:35	0.320166	1.42416	3.08573	368.738	FALSE	6
2022-09-12	14:35:35	0.929173	4.13315	3.08573	315.537	FALSE	6
2022-09-12	14:35:35	0.260623	1.1593	3.08573	369.898	FALSE	6
2022-09-12	14:35:35	1.26485	5.62631	3.08573	321.163	FALSE	6
2022-09-12	14:35:36	0.432888	1.92557	3.12042	371.823	FALSE	6
2022-09-12	14:35:36	1.88856	8.40069	3.12042	329.564	FALSE	6
2022-09-12	14:35:36	0.426171	1.89569	3.12042	373.719	FALSE	6
2022-09-12	14:35:36	0.0583845	0.259706	3.12042	329.823	FALSE	6
2022-09-12	14:35:37	0.0920739	0.409563	-0.950477	374.128	FALSE	6
2022-09-12	14:35:37	-0.237748	-1.05755	-0.950477	329.823	FALSE	6
2022-09-12	14:35:37	-0.329351	-1.46502	-0.950477	374.128	FALSE	6
2022-09-12	14:35:37	-0.379682	-1.6889	-0.950477	329.823	FALSE	6
2022-09-12	14:35:38	-0.441768	-1.96507	-0.978169	374.128	FALSE	6
2022-09-12	14:35:38	-0.206094	-0.916747	-0.978169	329.823	FALSE	6
2022-09-12	14:35:38	-0.0118445	-0.0526867	-0.978169	374.128	FALSE	6
2022-09-12	14:35:39	0.245102	1.09026	1.9906	330.914	FALSE	6
2022-09-12	14:35:39	1.28022	5.69467	1.9906	379.823	FALSE	6
2022-09-12	14:35:39	0.113346	0.504186	1.9906	331.418	FALSE	6
2022-09-12	14:35:39	0.151362	0.673288	1.9906	380.496	FALSE	6
2022-09-12	14:35:40	0.594262	2.6434	1.25099	334.061	FALSE	6
2022-09-12	14:35:40	0.201641	0.896939	1.25099	381.393	FALSE	6
2022-09-12	14:35:40	0.118995	0.529314	1.25099	334.591	FALSE	6
2022-09-12	14:35:40	0.210038	0.934291	1.25099	382.328	FALSE	6
2022-09-12	14:35:41	0.403779	1.79609	1.46542	336.387	FALSE	6
2022-09-12	14:35:41	0.343219	1.52671	1.46542	383.854	FALSE	6
2022-09-12	14:35:41	0.456756	2.03174	1.46542	338.418	FALSE	6
2022-09-12	14:35:41	0.114008	0.50713	1.46542	384.361	FALSE	6
2022-09-12	14:35:42	0.240573	1.07012	0.821333	339.489	FALSE	6
2022-09-12	14:35:42	0.104542	0.465024	0.821333	384.826	FALSE	6
2022-09-12	14:35:42	0.208817	0.92886	0.821333	340.417	FALSE	6
2022-09-12	14:35:43	0.0198603	0.0883426	0.373232	384.915	FALSE	6
2022-09-12	14:35:43	0.139606	0.620995	0.373232	341.038	FALSE	6
2022-09-12	14:35:43	-0.0513865	-0.228577	0.373232	384.915	FALSE	6
2022-09-12	14:35:43	0.227545	1.01217	0.373232	342.051	FALSE	6
2022-09-12	14:35:44	0.177214	0.788283	0.681039	385.703	FALSE	6
2022-09-12	14:35:44	0.164084	0.729878	0.681039	342.78	FALSE	6
2022-09-12	14:35:44	0.0309035	0.137465	0.681039	385.841	FALSE	6
2022-09-12	14:35:44	0.240216	1.06853	0.681039	343.849	FALSE	6
2022-09-12	14:35:45	0.00978398	0.0435211	0.100057	385.884	FALSE	6
2022-09-12	14:35:45	0.0782318	0.347991	0.100057	344.197	FALSE	6
2022-09-12	14:35:45	-0.0607504	-0.27023	0.100057	385.884	FALSE	6
2022-09-12	14:35:45	0.0627101	0.278947	0.100057	344.476	FALSE	6
2022-09-12	14:35:46	-0.0511321	-0.227446	0.0112253	385.884	FALSE	6
2022-09-12	14:35:46	0.100471	0.446915	0.0112253	344.923	FALSE	6
2022-09-12	14:35:46	-0.0417682	-0.185793	0.0112253	385.884	FALSE	6
2022-09-12	14:35:47	0.0567051	0.252236	-0.0301058	345.175	FALSE	6
2022-09-12	14:35:47	-0.0156613	-0.0696646	-0.0301058	385.884	FALSE	6
2022-09-12	14:35:47	0.0479519	0.2133	-0.0301058	345.388	FALSE	6
2022-09-12	14:35:47	-0.116068	-0.516294	-0.0301058	385.884	FALSE	6
2022-09-12	14:35:48	0.037214	0.165535	-0.346064	345.554	FALSE	6
2022-09-12	14:35:48	-0.074389	-0.330897	-0.346064	385.884	FALSE	6
2022-09-12	14:35:48	-0.05673	-0.252346	-0.346064	345.554	FALSE	6
2022-09-12	14:35:48	-0.21729	-0.966549	-0.346064	385.884	FALSE	6
2022-09-12	14:35:49	-0.0477224	-0.212279	-0.0443115	345.554	FALSE	6
2022-09-12	14:35:49	-0.0389183	-0.173116	-0.0443115	385.884	FALSE	6
2022-09-12	14:35:49	0.104898	0.466607	-0.0443115	346.021	FALSE	6
2022-09-12	14:35:49	-0.058104	-0.258458	-0.0443115	385.884	FALSE	6
2022-09-12	14:35:50	0.0534989	0.237974	0.845328	346.258	FALSE	6
2022-09-12	14:35:50	0.294313	1.30916	0.845328	387.193	FALSE	6
2022-09-12	14:35:50	0.222303	0.988848	0.845328	347.247	FALSE	6
2022-09-12	14:35:51	0.0624048	0.277589	0.672889	387.471	FALSE	6
2022-09-12	14:35:51	0.182099	0.810013	0.672889	348.057	FALSE	6
2022-09-12	14:35:51	0.0733972	0.326485	0.672889	387.797	FALSE	6
2022-09-12	14:35:51	0.287188	1.27747	0.672889	349.335	FALSE	6
2022-09-12	14:35:52	0.0408781	0.181834	2.82228	387.979	FALSE	6
2022-09-12	14:35:52	1.4024	6.23816	2.82228	355.573	FALSE	6
2022-09-12	14:35:52	0.201031	0.894226	2.82228	388.873	FALSE	6
2022-09-12	14:35:52	0.893601	3.97492	2.82228	359.548	FALSE	6
2022-09-12	14:35:53	0.400624	1.78206	3.15018	390.655	FALSE	6
2022-09-12	14:35:53	0.468206	2.08267	3.15018	361.631	FALSE	6
2022-09-12	14:35:53	1.44454	6.4256	3.15018	397.081	FALSE	6
2022-09-12	14:35:53	0.519402	2.3104	3.15018	363.941	FALSE	6
2022-09-12	14:35:54	0.548664	2.44057	3.67474	399.522	FALSE	6
2022-09-12	14:35:54	0.586374	2.60831	3.67474	366.549	FALSE	6
2022-09-12	14:35:54	1.34332	5.97536	3.67474	405.497	FALSE	6
2022-09-12	14:35:55	1.23126	5.47689	4.81329	372.026	FALSE	6
2022-09-12	14:35:55	1.71681	7.63671	4.81329	413.134	FALSE	6
2022-09-12	14:35:55	1.18093	5.25301	4.81329	377.279	FALSE	6
2022-09-12	14:35:55	0.1993	0.886526	4.81329	414.02	FALSE	6
2022-09-12	14:35:56	0.339657	1.51086	1.30486	378.79	FALSE	6
2022-09-12	14:35:56	0.334618	1.48845	1.30486	415.509	FALSE	6
2022-09-12	14:35:56	0.321489	1.43005	1.30486	380.22	FALSE	6
2022-09-12	14:35:56	0.177621	0.790094	1.30486	416.299	FALSE	6
2022-09-12	14:35:57	0.362354	1.61182	1.32275	381.832	FALSE	6
2022-09-12	14:35:57	0.215433	0.958289	1.32275	417.257	FALSE	6
2022-09-12	14:35:57	0.331718	1.47555	1.32275	383.307	FALSE	6
2022-09-12	14:35:57	0.279962	1.24533	1.32275	418.502	FALSE	6
2022-09-12	14:35:58	0.382557	1.70169	1.67347	385.009	FALSE	6
2022-09-12	14:35:58	0.419351	1.86536	1.67347	420.368	FALSE	6
2022-09-12	14:35:58	0.32673	1.45336	1.67347	386.463	FALSE	6
2022-09-12	14:35:59	0.169428	0.75365	1.66972	421.121	FALSE	6
2022-09-12	14:35:59	0.725509	3.22721	1.66972	389.69	FALSE	6
2022-09-12	14:35:59	0.525865	2.33915	1.66972	423.46	FALSE	6
2022-09-12	14:35:59	0.0806745	0.358856	1.66972	390.049	FALSE	6
2022-09-12	14:36:00	0.27701	1.2322	0.991111	424.693	FALSE	6
2022-09-12	14:36:00	0.150598	0.66989	0.991111	390.718	FALSE	6
2022-09-12	14:36:00	0.202812	0.902148	0.991111	425.595	FALSE	6
2022-09-12	14:36:00	0.260827	1.16021	0.991111	391.879	FALSE	6
2022-09-12	14:36:01	1.07737	4.79236	2.68285	430.387	FALSE	6
2022-09-12	14:36:01	0.220522	0.980926	2.68285	392.86	FALSE	6
2022-09-12	14:36:01	0.386883	1.72093	2.68285	432.108	FALSE	6
2022-09-12	14:36:01	0.727748	3.23717	2.68285	396.097	FALSE	6
2022-09-12	14:36:02	0.687545	3.05834	1.39534	435.166	FALSE	6
2022-09-12	14:36:02	0.248054	1.10339	1.39534	397.2	FALSE	6
2022-09-12	14:36:02	0.00545825	0.0242794	1.39534	435.191	FALSE	6
2022-09-12	14:36:03	-0.147468	-0.655967	-0.718333	397.2	FALSE	6
2022-09-12	14:36:03	-0.18243	-0.811485	-0.718333	435.191	FALSE	6
2022-09-12	14:36:03	-0.138715	-0.617032	-0.718333	397.2	FALSE	6
2022-09-12	14:36:03	-0.177341	-0.788848	-0.718333	435.191	FALSE	6
2022-09-12	14:36:04	-0.326704	-1.45324	-1.75126	397.2	FALSE	6
2022-09-12	14:36:04	-0.467824	-2.08097	-1.75126	435.191	FALSE	6
2022-09-12	14:36:04	-0.38243	-1.70113	-1.75126	397.2	FALSE	6
2022-09-12	14:36:04	-0.397849	-1.76971	-1.75126	435.191	FALSE	6
2022-09-12	14:36:05	-0.26416	-1.17504	-0.899768	397.2	FALSE	6
2022-09-12	14:36:05	-0.36416	-1.61986	-0.899768	435.191	FALSE	6
2022-09-12	14:36:05	-0.186704	-0.830497	-0.899768	397.2	FALSE	6
2022-09-12	14:36:05	0.00591628	0.0263168	-0.899768	435.217	FALSE	6
2022-09-12	14:36:06	0.41869	1.86242	1.6073	399.063	FALSE	6
2022-09-12	14:36:06	0.406629	1.80877	1.6073	437.026	FALSE	6
2022-09-12	14:36:06	0.25869	1.1507	1.6073	400.213	FALSE	6
2022-09-12	14:36:07	0.256349	1.14029	1.6361	438.166	FALSE	6
2022-09-12	14:36:07	0.274669	1.22178	1.6361	401.435	FALSE	6
2022-09-12	14:36:07	0.483881	2.1524	1.6361	440.319	FALSE	6
2022-09-12	14:36:07	0.456349	2.02993	1.6361	403.465	FALSE	6
2022-09-12	14:36:08	0.623168	2.77198	2.27124	443.09	FALSE	6
2022-09-12	14:36:08	0.272532	1.21228	2.27124	404.677	FALSE	6
2022-09-12	14:36:08	0.569885	2.53496	2.27124	445.625	FALSE	6
2022-09-12	14:36:08	0.576807	2.56575	2.27124	407.243	FALSE	6
2022-09-12	14:36:09	0.342506	1.52354	0.634067	447.149	FALSE	6
2022-09-12	14:36:09	0.0605728	0.26944	0.634067	407.512	FALSE	6
2022-09-12	14:36:09	0.209326	0.931124	0.634067	448.08	FALSE	6
2022-09-12	14:36:09	-0.0422262	-0.187831	0.634067	407.512	FALSE	6
2022-09-12	14:36:10	0.144288	0.641822	0.121846	448.722	FALSE	6
2022-09-12	14:36:10	-0.125636	-0.558854	0.121846	407.512	FALSE	6
2022-09-12	14:36:10	0.0635244	0.282569	0.121846	449.005	FALSE	6
2022-09-12	14:36:11	-0.184872	-0.822348	-0.782734	407.512	FALSE	6
2022-09-12	14:36:11	-0.0826842	-0.367796	-0.782734	449.005	FALSE	6
2022-09-12	14:36:11	-0.216425	-0.962702	-0.782734	407.512	FALSE	6
2022-09-12	14:36:11	-0.219885	-0.978092	-0.782734	449.005	FALSE	6
2022-09-12	14:36:12	-0.312506	-1.39009	-1.69637	407.512	FALSE	6
2022-09-12	14:36:12	-0.463193	-2.06038	-1.69637	449.005	FALSE	6
2022-09-12	14:36:12	-0.306908	-1.36519	-1.69637	407.512	FALSE	6
2022-09-12	14:36:12	-0.442837	-1.96983	-1.69637	449.005	FALSE	6
2022-09-12	14:36:13	-0.34701	-1.54357	-1.38375	407.512	FALSE	6
2022-09-12	14:36:13	-0.36701	-1.63253	-1.38375	449.005	FALSE	6
2022-09-12	14:36:13	-0.219224	-0.975152	-1.38375	407.512	FALSE	6
2022-09-12	14:36:14	-0.300699	-1.33757	-1.20684	449.005	FALSE	6
2022-09-12	14:36:14	-0.310216	-1.3799	-1.20684	407.512	FALSE	6
2022-09-12	14:36:14	-0.328587	-1.46162	-1.20684	449.005	FALSE	6
2022-09-12	14:36:14	-0.145738	-0.648272	-1.20684	407.512	FALSE	6
2022-09-12	14:36:15	-0.119936	-0.533499	-0.360665	449.005	FALSE	6
2022-09-12	14:36:15	-0.0210048	-0.0934336	-0.360665	407.512	FALSE	6
2022-09-12	14:36:15	-0.173422	-0.771416	-0.360665	449.005	FALSE	6
2022-09-12	14:36:15	-0.00996157	-0.0443111	-0.360665	407.512	FALSE	6
2022-09-12	14:36:16	0.0246949	0.109848	-0.475492	449.114	FALSE	6
2022-09-12	14:36:16	-0.199427	-0.887091	-0.475492	407.512	FALSE	6
2022-09-12	14:36:16	-0.191132	-0.850193	-0.475492	449.114	FALSE	6
2022-09-12	14:36:16	-0.0617173	-0.274531	-0.475492	407.512	FALSE	6
2022-09-12	14:36:17	0.0153819	0.0684218	-0.231671	449.183	FALSE	6
2022-09-12	14:36:17	-0.0401397	-0.178549	-0.231671	407.512	FALSE	6
2022-09-12	14:36:17	-0.131488	-0.584885	-0.231671	449.183	FALSE	6
2022-09-12	14:36:18	-0.11159	-0.496375	-0.322635	407.512	FALSE	6
2022-09-12	14:36:18	-0.0460939	-0.205035	-0.322635	449.183	FALSE	6
2022-09-12	14:36:18	-0.209962	-0.933953	-0.322635	407.512	FALSE	6
2022-09-12	14:36:18	0.0775193	0.344821	-0.322635	449.528	FALSE	6
2022-09-12	14:36:19	-0.0205468	-0.0913963	0.849177	407.512	FALSE	6
2022-09-12	14:36:19	0.152583	0.67872	0.849177	450.206	FALSE	6
2022-09-12	14:36:19	0.373041	1.65936	0.849177	409.172	FALSE	6
2022-09-12	14:36:19	0.258537	1.15002	0.849177	451.356	FALSE	6
2022-09-12	14:36:20	1.25116	5.56541	2.33582	414.737	FALSE	6
2022-09-12	14:36:20	0.150547	0.669663	2.33582	452.026	FALSE	6
2022-09-12	14:36:20	0.136654	0.607864	2.33582	415.345	FALSE	6
2022-09-12	14:36:20	0.562099	2.50033	2.33582	454.526	FALSE	6
2022-09-12	14:36:21	0.395534	1.75941	2.00676	417.105	FALSE	6
2022-09-12	14:36:21	0.415636	1.84883	2.00676	456.375	FALSE	6
2022-09-12	14:36:21	0.542252	2.41205	2.00676	419.517	FALSE	6
2022-09-12	14:36:22	0.556247	2.4743	1.78256	458.849	FALSE	6
2022-09-12	14:36:22	0.66159	2.94288	1.78256	422.459	FALSE	6
2022-09-12	14:36:22	0.174669	0.776963	1.78256	459.626	FALSE	6
2022-09-12	14:36:22	0.210445	0.936101	1.78256	423.396	FALSE	6
2022-09-12	14:36:23	0.217417	0.967114	1.08885	460.594	FALSE	6
2022-09-12	14:36:23	0.182099	0.810013	1.08885	424.206	FALSE	6
2022-09-12	14:36:23	0.154211	0.685961	1.08885	461.279	FALSE	6
2022-09-12	14:36:23	0.425407	1.8923	1.08885	426.098	FALSE	6
2022-09-12	14:36:24	0.394517	1.75489	1.36587	463.034	FALSE	6
2022-09-12	14:36:24	0.400674	1.78228	1.36587	427.88	FALSE	6
2022-09-12	14:36:24	0.121489	0.540407	1.36587	463.575	FALSE	6
2022-09-12	14:36:24	0.311565	1.3859	1.36587	429.266	FALSE	6
2022-09-12	14:36:25	0.216807	0.964401	1.00341	464.539	FALSE	6
2022-09-12	14:36:25	0.337316	1.50045	1.00341	430.766	FALSE	6
2022-09-12	14:36:25	0.122608	0.545385	1.00341	465.085	FALSE	6
2022-09-12	14:36:26	0.437875	1.94776	1.33853	432.714	FALSE	6
2022-09-12	14:36:26	0.281641	1.2528	1.33853	466.337	FALSE	6
2022-09-12	14:36:26	0.281947	1.25416	1.33853	433.968	FALSE	6
2022-09-12	14:36:26	0.202201	0.89943	1.33853	467.237	FALSE	6
2022-09-12	14:36:27	0.156807	0.697509	1.15127	434.666	FALSE	6
2022-09-12	14:36:27	0.25701	1.14323	1.15127	468.38	FALSE	6
2022-09-12	14:36:27	0.26958	1.19915	1.15127	435.865	FALSE	6
2022-09-12	14:36:27	0.35187	1.56519	1.15127	469.945	FALSE	6
2022-09-12	14:36:28	0.181285	0.806392	1.34906	436.671	FALSE	6
2022-09-12	14:36:28	0.392481	1.74583	1.34906	471.691	FALSE	6
2022-09-12	14:36:28	0.320827	1.4271	1.34906	438.099	FALSE	6
2022-09-12	14:36:28	0.318537	1.41692	1.34906	473.108	FALSE	6
2022-09-12	14:36:29	0.317468	1.41216	1.5387	439.511	FALSE	6
2022-09-12	14:36:29	0.264847	1.17809	1.5387	474.286	FALSE	6
2022-09-12	14:36:29	0.455433	2.02586	1.5387	441.537	FALSE	6
2022-09-12	14:36:30	0.293753	1.30667	1.66479	475.593	FALSE	6
2022-09-12	14:36:30	0.490496	2.18182	1.66479	443.718	FALSE	6
2022-09-12	14:36:30	0.258588	1.15025	1.66479	476.743	FALSE	6
2022-09-12	14:36:30	0.454211	2.02042	1.66479	445.739	FALSE	6
2022-09-12	14:36:31	0.935483	4.16122	2.88527	480.904	FALSE	6
2022-09-12	14:36:31	0.40612	1.8065	2.88527	447.545	FALSE	6
2022-09-12	14:36:31	0.326679	1.45313	2.88527	482.357	FALSE	6
2022-09-12	14:36:31	0.926272	4.12024	2.88527	451.666	FALSE	6
2022-09-12	14:36:32	0.37299	1.65913	2.59807	484.016	FALSE	6
2022-09-12	14:36:32	0.936094	4.16393	2.59807	455.829	FALSE	6
2022-09-12	14:36:32	0.362608	1.61295	2.59807	485.629	FALSE	6
2022-09-12	14:36:32	0.664593	2.95624	2.59807	458.786	FALSE	6
2022-09-12	14:36:33	2.06016	9.164	6.97765	494.793	FALSE	6
2022-09-12	14:36:33	0.608817	2.70814	6.97765	461.494	FALSE	6
2022-09-12	14:36:33	2.03696	9.06081	6.97765	503.854	FALSE	6
2022-09-12	14:36:34	0.301336	1.3404	2.24436	462.834	FALSE	6
2022-09-12	14:36:34	0.307901	1.36961	2.24436	505.224	FALSE	6
2022-09-12	14:36:34	1.01207	4.50189	2.24436	467.336	FALSE	6
2022-09-12	14:36:34	0.396909	1.76553	2.24436	506.989	FALSE	6
2022-09-12	14:36:35	0.2993	1.33135	1.45998	468.668	FALSE	6
2022-09-12	14:36:35	0.451616	2.00888	1.45998	508.998	FALSE	6
2022-09-12	14:36:35	0.289173	1.2863	1.45998	469.954	FALSE	6
2022-09-12	14:36:35	0.272786	1.21341	1.45998	510.212	FALSE	6
2022-09-12	14:36:36	0.0089188	0.0396726	0.647707	469.993	FALSE	6
2022-09-12	14:36:36	0.183372	0.815675	0.647707	511.027	FALSE	6
2022-09-12	14:36:36	0.152278	0.677363	0.647707	470.671	FALSE	6
2022-09-12	14:36:36	0.237875	1.05812	0.647707	512.085	FALSE	6
2022-09-12	14:36:37	0.156705	0.697055	0.97021	471.368	FALSE	6
2022-09-12	14:36:37	0.372888	1.65868	0.97021	513.744	FALSE	6
2022-09-12	14:36:37	0.124746	0.554895	0.97021	471.923	FALSE	6
2022-09-12	14:36:38	0.313346	1.39383	1.35925	515.138	FALSE	6
2022-09-12	14:36:38	0.317926	1.4142	1.35925	473.337	FALSE	6
2022-09-12	14:36:38	0.345	1.53463	1.35925	516.673	FALSE	6
2022-09-12	14:36:38	0.246018	1.09434	1.35925	474.431	FALSE	6
2022-09-12	14:36:39	0.331158	1.47306	2.54362	518.146	FALSE	6
2022-09-12	14:36:39	0.314466	1.39881	2.54362	475.83	FALSE	6
2022-09-12	14:36:39	1.33421	5.93483	2.54362	524.08	FALSE	6
2022-09-12	14:36:39	0.307494	1.36779	2.54362	477.198	FALSE	6
2022-09-12	14:36:40	0.408003	1.81488	3.01363	525.895	FALSE	6
2022-09-12	14:36:40	0.585356	2.60378	3.01363	479.802	FALSE	6
2022-09-12	14:36:40	0.474669	2.11142	3.01363	528.007	FALSE	6
2022-09-12	14:36:40	1.24195	5.52444	3.01363	485.326	FALSE	6
2022-09-12	14:36:41	0.4793	2.13202	3.85472	530.139	FALSE	6
2022-09-12	14:36:41	1.00826	4.48494	3.85472	489.811	FALSE	6
2022-09-12	14:36:41	1.11218	4.9472	3.85472	535.086	FALSE	6
2022-09-12	14:36:42	0.666425	2.96439	3.3318	492.775	FALSE	6
2022-09-12	14:36:42	1.62821	7.2426	3.3318	542.329	FALSE	6
2022-09-12	14:36:42	0.237316	1.05563	3.3318	493.831	FALSE	6
2022-09-12	14:36:42	0.464135	2.06457	3.3318	544.393	FALSE	6
2022-09-12	14:36:43	0.267036	1.18783	1.45444	495.019	FALSE	6
2022-09-12	14:36:43	0.416909	1.85449	1.45444	546.248	FALSE	6
2022-09-12	14:36:43	0.132328	0.588621	1.45444	495.608	FALSE	6
2022-09-12	14:36:43	0.491616	2.18681	1.45444	548.434	FALSE	6
2022-09-12	14:36:44	0.171361	0.762248	1.42071	496.37	FALSE	6
2022-09-12	14:36:44	0.410852	1.82755	1.42071	550.262	FALSE	6
2022-09-12	14:36:44	0.398741	1.77368	1.42071	498.144	FALSE	6
2022-09-12	14:36:44	0.296603	1.31935	1.42071	551.581	FALSE	6
2022-09-12	14:36:45	0.335942	1.49434	1.4013	499.638	FALSE	6
2022-09-12	14:36:45	0.306527	1.36349	1.4013	552.945	FALSE	6
2022-09-12	14:36:45	0.302608	1.34606	1.4013	500.984	FALSE	6
2022-09-12	14:36:46	0.194822	0.866607	1.52252	553.811	FALSE	6
2022-09-12	14:36:46	0.409224	1.82031	1.52252	502.804	FALSE	6
2022-09-12	14:36:46	0.338588	1.50611	1.52252	555.318	FALSE	6
2022-09-12	14:36:46	0.426476	1.89705	1.52252	504.701	FALSE	6
2022-09-12	14:36:47	0.243168	1.08166	1.90554	556.399	FALSE	6
2022-09-12	14:36:47	0.408563	1.81737	1.90554	506.519	FALSE	6
2022-09-12	14:36:47	0.379402	1.68766	1.90554	558.087	FALSE	6
2022-09-12	14:36:47	0.682405	3.03547	1.90554	509.554	FALSE	6
2022-09-12	14:36:48	0.581845	2.58816	2.46513	560.675	FALSE	6
2022-09-12	14:36:48	0.52439	2.33259	2.46513	511.887	FALSE	6
2022-09-12	14:36:48	0.596858	2.65494	2.46513	563.33	FALSE	6
2022-09-12	14:36:48	0.513652	2.28483	2.46513	514.172	FALSE	6
2022-09-12	14:36:49	0.397621	1.7687	1.76296	565.099	FALSE	6
2022-09-12	14:36:49	0.385509	1.71482	1.76296	515.886	FALSE	6
2022-09-12	14:36:49	0.405865	1.80537	1.76296	566.904	FALSE	6
2022-09-12	14:36:50	0.405764	1.80492	2.48347	517.691	FALSE	6
2022-09-12	14:36:50	0.536959	2.3885	2.48347	569.293	FALSE	6
2022-09-12	14:36:50	0.722557	3.21408	2.48347	520.905	FALSE	6
2022-09-12	14:36:50	0.567952	2.52636	2.48347	571.819	FALSE	6
2022-09-12	14:36:51	0.346018	1.53916	1.952	522.444	FALSE	6
2022-09-12	14:36:51	0.386629	1.7198	1.952	573.539	FALSE	6
2022-09-12	14:36:51	0.491514	2.18635	1.952	524.631	FALSE	6
2022-09-12	14:36:51	0.531158	2.3627	1.952	575.901	FALSE	6
2022-09-12	14:36:52	0.492837	2.19224	1.88268	526.823	FALSE	6
2022-09-12	14:36:52	0.402456	1.7902	1.88268	577.692	FALSE	6
2022-09-12	14:36:52	0.398639	1.77323	1.88268	528.596	FALSE	6
2022-09-12	14:36:52	0.399046	1.77504	1.88268	579.467	FALSE	6
2022-09-12	14:36:53	0.38159	1.69739	1.65083	530.294	FALSE	6
2022-09-12	14:36:53	0.352176	1.56655	1.65083	581.033	FALSE	6
2022-09-12	14:36:53	0.379606	1.68856	1.65083	531.982	FALSE	6
2022-09-12	14:36:54	0.344339	1.53169	1.67577	582.565	FALSE	6
2022-09-12	14:36:54	0.419962	1.86807	1.67577	533.85	FALSE	6
2022-09-12	14:36:54	0.37701	1.67702	1.67577	584.242	FALSE	6
2022-09-12	14:36:54	0.365611	1.62631	1.67577	535.477	FALSE	6
2022-09-12	14:36:55	0.359351	1.59847	1.27306	585.84	FALSE	6
2022-09-12	14:36:55	0.392735	1.74696	1.27306	537.224	FALSE	6
2022-09-12	14:36:55	0.178995	0.796206	1.27306	586.637	FALSE	6
2022-09-12	14:36:55	0.213702	0.950589	1.27306	538.174	FALSE	6
2022-09-12	14:36:56	0.193041	0.858685	0.723201	587.495	FALSE	6
2022-09-12	14:36:56	0.147748	0.657213	0.723201	538.831	FALSE	6
2022-09-12	14:36:56	0.228512	1.01647	0.723201	588.512	FALSE	6
2022-09-12	14:36:56	0.0810307	0.360441	0.723201	539.192	FALSE	6
2022-09-12	14:36:57	0.0509036	0.226429	0.303547	588.738	FALSE	6
2022-09-12	14:36:57	0.101082	0.449633	0.303547	539.641	FALSE	6
2022-09-12	14:36:57	0.0527356	0.234578	0.303547	588.973	FALSE	6
2022-09-12	14:36:58	-0.00823129	-0.0366144	-1.80774	539.641	FALSE	6
2022-09-12	14:36:58	-0.297748	-1.32444	-1.80774	588.973	FALSE	6
2022-09-12	14:36:58	-0.671793	-2.98827	-1.80774	539.641	FALSE	6
2022-09-12	14:36:58	-0.647824	-2.88165	-1.80774	588.973	FALSE	6
2022-09-12	14:36:59	-0.74187	-3.29999	-2.25856	539.641	FALSE	6
2022-09-12	14:36:59	-0.532099	-2.36688	-2.25856	588.973	FALSE	6
2022-09-12	14:36:59	-0.362531	-1.61261	-2.25856	539.641	FALSE	6
2022-09-12	14:36:59	-0.394491	-1.75477	-2.25856	588.973	FALSE	6
2022-09-12	14:37:00	-0.513015	-2.28199	-1.45581	539.641	FALSE	6
2022-09-12	14:37:00	-0.368638	-1.63978	-1.45581	588.973	FALSE	6
2022-09-12	14:37:00	-0.100191	-0.44567	-1.45581	539.641	FALSE	6
2022-09-12	14:37:01	-0.175203	-0.779338	0.54533	588.973	FALSE	6
2022-09-12	14:37:01	0.182405	0.811374	0.54533	540.453	FALSE	6
2022-09-12	14:37:01	0.146323	0.650874	0.54533	589.624	FALSE	6
2022-09-12	14:37:01	0.336858	1.49841	0.54533	541.951	FALSE	6
2022-09-12	14:37:02	0.206985	0.920711	1.53412	590.544	FALSE	6
2022-09-12	14:37:02	0.448766	1.9962	1.53412	543.947	FALSE	6
2022-09-12	14:37:02	0.220318	0.980019	1.53412	591.524	FALSE	6
2022-09-12	14:37:02	0.503473	2.23955	1.53412	546.187	FALSE	6
2022-09-12	14:37:03	0.244389	1.08709	1.44804	592.611	FALSE	6
2022-09-12	14:37:03	0.383117	1.70418	1.44804	547.891	FALSE	6
2022-09-12	14:37:03	0.330344	1.46944	1.44804	594.081	FALSE	6
2022-09-12	14:37:03	0.344288	1.53146	1.44804	549.423	FALSE	6
2022-09-12	14:37:04	0.5593	2.48788	1.99213	596.569	FALSE	6
2022-09-12	14:37:04	0.471311	2.09649	1.99213	551.519	FALSE	6
2022-09-12	14:37:04	0.312939	1.39202	1.99213	597.961	FALSE	6
2022-09-12	14:37:05	0.487952	2.17051	2.7383	553.69	FALSE	6
2022-09-12	14:37:05	0.608766	2.70791	2.7383	600.669	FALSE	6
2022-09-12	14:37:05	0.847036	3.76779	2.7383	557.457	FALSE	6
2022-09-12	14:37:05	0.518639	2.30701	2.7383	602.976	FALSE	6
2022-09-12	14:37:06	0.6536	2.90734	2.35353	560.365	FALSE	6
2022-09-12	14:37:06	0.392176	1.74448	2.35353	604.72	FALSE	6
2022-09-12	14:37:06	0.558791	2.48561	2.35353	562.85	FALSE	6
2022-09-12	14:37:06	0.511819	2.27667	2.35353	606.997	FALSE	6
2022-09-12	14:37:07	0.45416	2.02019	2.09524	564.871	FALSE	6
2022-09-12	14:37:07	0.484491	2.15511	2.09524	609.152	FALSE	6
2022-09-12	14:37:07	0.45355	2.01748	2.09524	566.888	FALSE	6
2022-09-12	14:37:07	0.491921	2.18816	2.09524	611.34	FALSE	6
2022-09-12	14:37:08	0.485865	2.16122	2.11044	569.049	FALSE	6
2022-09-12	14:37:08	0.511209	2.27396	2.11044	613.614	FALSE	6
2022-09-12	14:37:08	0.426272	1.89614	2.11044	570.945	FALSE	6
2022-09-12	14:37:09	0.300624	1.33724	0.232938	614.951	FALSE	6
2022-09-12	14:37:09	0.278639	1.23944	0.232938	572.185	FALSE	6
2022-09-12	14:37:09	-0.15215	-0.676794	0.232938	614.951	FALSE	6
2022-09-12	14:37:09	-0.217646	-0.968133	0.232938	572.185	FALSE	6
2022-09-12	14:37:10	-0.134135	-0.596659	-0.879281	614.951	FALSE	6
2022-09-12	14:37:10	-0.209045	-0.929874	-0.879281	572.185	FALSE	6
2022-09-12	14:37:10	-0.23561	-1.04804	-0.879281	614.951	FALSE	6
2022-09-12	14:37:10	-0.211895	-0.942551	-0.879281	572.185	FALSE	6
2022-09-12	14:37:11	-0.153066	-0.680868	0.42507	614.951	FALSE	6
2022-09-12	14:37:11	0.03813	0.16961	0.42507	572.355	FALSE	6
2022-09-12	14:37:11	0.165407	0.735763	0.42507	615.687	FALSE	6
2022-09-12	14:37:11	0.331769	1.47577	0.42507	573.83	FALSE	6
2022-09-12	14:37:12	0.33243	1.47872	1.15161	617.166	FALSE	6
2022-09-12	14:37:12	0.259453	1.1541	1.15161	574.984	FALSE	6
2022-09-12	14:37:12	0.184797	0.822014	1.15161	617.988	FALSE	6
2022-09-12	14:37:13	0.27355	1.21681	1.30667	576.201	FALSE	6
2022-09-12	14:37:13	0.334618	1.48845	1.30667	619.476	FALSE	6
2022-09-12	14:37:13	0.2707	1.20413	1.30667	577.405	FALSE	6
2022-09-12	14:37:13	0.296145	1.31731	1.30667	620.794	FALSE	6
2022-09-12	14:37:14	0.31416	1.39745	1.51414	578.803	FALSE	6
2022-09-12	14:37:14	0.287087	1.27702	1.51414	622.071	FALSE	6
2022-09-12	14:37:14	0.244644	1.08823	1.51414	579.891	FALSE	6
2022-09-12	14:37:14	0.515687	2.29388	1.51414	624.364	FALSE	6
2022-09-12	14:37:15	0.35411	1.57515	2.17628	581.466	FALSE	6
2022-09-12	14:37:15	0.626679	2.78759	2.17628	627.152	FALSE	6
2022-09-12	14:37:15	0.55528	2.47	2.17628	583.936	FALSE	6
2022-09-12	14:37:15	0.420929	1.87238	2.17628	629.024	FALSE	6
2022-09-12	14:37:16	0.479911	2.13474	2.19707	586.071	FALSE	6
2022-09-12	14:37:16	0.562354	2.50146	2.19707	631.526	FALSE	6
2022-09-12	14:37:16	0.439504	1.955	2.19707	588.026	FALSE	6
2022-09-12	14:37:17	0.18444	0.820426	0.704469	632.346	FALSE	6
2022-09-12	14:37:17	0.151311	0.673062	0.704469	588.699	FALSE	6
2022-09-12	14:37:17	0.268155	1.19281	0.704469	633.539	FALSE	6
2022-09-12	14:37:17	0.0295804	0.13158	0.704469	588.831	FALSE	6
2022-09-12	14:37:18	0.137468	0.611485	0.569381	634.151	FALSE	6
2022-09-12	14:37:18	-0.00726439	-0.0323135	0.569381	588.831	FALSE	6
2022-09-12	14:37:18	0.142659	0.634576	0.569381	634.785	FALSE	6
2022-09-12	14:37:18	0.239148	1.06378	0.569381	589.894	FALSE	6
2022-09-12	14:37:19	0.445255	1.98058	2.0005	636.766	FALSE	6
2022-09-12	14:37:19	0.33126	1.47351	2.0005	591.368	FALSE	6
2022-09-12	14:37:19	0.747646	3.32568	2.0005	640.091	FALSE	6
2022-09-12	14:37:19	0.274771	1.22224	2.0005	592.59	FALSE	6
2022-09-12	14:37:20	1.0106	4.49535	3.50135	644.587	FALSE	6
2022-09-12	14:37:20	0.311769	1.38681	3.50135	593.977	FALSE	6
2022-09-12	14:37:20	1.03905	4.6219	3.50135	649.209	FALSE	6
2022-09-12	14:37:21	0.289224	1.28653	2.2473	595.263	FALSE	6
2022-09-12	14:37:21	0.525407	2.33712	2.2473	651.546	FALSE	6
2022-09-12	14:37:21	0.58556	2.60469	2.2473	597.868	FALSE	6
2022-09-12	14:37:21	0.620674	2.76088	2.2473	654.307	FALSE	6
2022-09-12	14:37:22	0.940674	4.18431	3.28544	602.052	FALSE	6
2022-09-12	14:37:22	0.510954	2.27283	3.28544	656.58	FALSE	6
2022-09-12	14:37:22	0.861183	3.83071	3.28544	605.883	FALSE	6
2022-09-12	14:37:22	0.64159	2.85392	3.28544	659.433	FALSE	6
2022-09-12	14:37:23	0.741336	3.29761	2.6992	609.181	FALSE	6
2022-09-12	14:37:23	0.882405	3.92511	2.6992	663.359	FALSE	6
2022-09-12	14:37:23	0.586578	2.60922	2.6992	611.79	FALSE	6
2022-09-12	14:37:23	0.216909	0.964855	2.6992	664.323	FALSE	6
2022-09-12	14:37:24	0.652328	2.90169	2.4872	614.692	FALSE	6
2022-09-12	14:37:24	0.269835	1.20028	2.4872	665.524	FALSE	6
2022-09-12	14:37:24	0.75528	3.35964	2.4872	618.051	FALSE	6
2022-09-12	14:37:25	0.282354	1.25597	2.01159	666.78	FALSE	6
2022-09-12	14:37:25	0.588257	2.61668	2.01159	620.668	FALSE	6
2022-09-12	14:37:25	0.266069	1.18353	2.01159	667.963	FALSE	6
2022-09-12	14:37:25	0.672226	2.9902	2.01159	623.658	FALSE	6
2022-09-12	14:37:26	0.316858	1.40945	2.58363	669.373	FALSE	6
2022-09-12	14:37:26	0.626374	2.78624	2.58363	626.444	FALSE	6
2022-09-12	14:37:26	0.704084	3.13191	2.58363	672.505	FALSE	6
2022-09-12	14:37:26	0.675992	3.00695	2.58363	629.451	FALSE	6
2022-09-12	14:37:27	0.279758	1.24442	2.91425	673.749	FALSE	6
2022-09-12	14:37:27	0.724135	3.2211	2.91425	632.672	FALSE	6
2022-09-12	14:37:27	0.24098	1.07193	2.91425	674.821	FALSE	6
2022-09-12	14:37:27	1.37574	6.11957	2.91425	638.792	FALSE	6
2022-09-12	14:37:28	0.313194	1.39315	2.59699	676.214	FALSE	6
2022-09-12	14:37:28	1.2138	5.39923	2.59699	644.191	FALSE	6
2022-09-12	14:37:28	0.224491	0.998581	2.59699	677.213	FALSE	6
2022-09-12	14:37:29	1.26322	5.61906	7.13279	649.81	FALSE	6
2022-09-12	14:37:29	0.822252	3.65754	7.13279	680.87	FALSE	6
2022-09-12	14:37:29	1.83477	8.16142	7.13279	657.972	FALSE	6
2022-09-12	14:37:29	2.49385	11.0931	7.13279	691.963	FALSE	6
2022-09-12	14:37:30	1.86317	8.28775	9.8072	666.259	FALSE	6
2022-09-12	14:37:30	2.43136	10.8152	9.8072	702.779	FALSE	6
2022-09-12	14:37:30	1.48169	6.59085	9.8072	672.85	FALSE	6
2022-09-12	14:37:30	3.04281	13.535	9.8072	716.314	1	7
2022-09-12	14:37:31	3.32841	14.8054	8.65712	687.656	1	8
2022-09-12	14:37:31	2.0252	9.00849	8.65712	725.322	FALSE	8
2022-09-12	14:37:31	0.987442	4.39234	8.65712	692.048	FALSE	8
2022-09-12	14:37:31	1.44378	6.42222	8.65712	731.744	FALSE	8
2022-09-12	14:37:32	1.05869	4.70926	4.22996	696.757	FALSE	8
2022-09-12	14:37:32	1.56108	6.944	4.22996	738.688	FALSE	8
2022-09-12	14:37:32	0.233041	1.03661	4.22996	697.794	FALSE	8
2022-09-12	14:37:33	0.514415	2.28822	2.46094	740.976	FALSE	8
2022-09-12	14:37:33	0.988257	4.39596	2.46094	702.19	FALSE	8
2022-09-12	14:37:33	0.507087	2.25562	2.46094	743.232	FALSE	8
2022-09-12	14:37:33	0.203219	0.903959	2.46094	703.094	FALSE	8
2022-09-12	14:37:34	0.398232	1.77142	1.75042	745.004	FALSE	8
2022-09-12	14:37:34	0.357265	1.58919	1.75042	704.683	FALSE	8
2022-09-12	14:37:34	0.39869	1.77345	1.75042	746.777	FALSE	8
2022-09-12	14:37:34	0.41986	1.86762	1.75042	706.551	FALSE	8
2022-09-12	14:37:35	0.380522	1.69264	1.91437	748.47	FALSE	8
2022-09-12	14:37:35	0.537672	2.39167	1.91437	708.942	FALSE	8
2022-09-12	14:37:35	0.39187	1.74312	1.91437	750.213	FALSE	8
2022-09-12	14:37:35	0.411412	1.83004	1.91437	710.772	FALSE	8
2022-09-12	14:37:36	0.571819	2.54357	2.63721	752.756	FALSE	8
2022-09-12	14:37:36	0.613397	2.72851	2.63721	713.501	FALSE	8
2022-09-12	14:37:36	0.593397	2.63955	2.63721	755.396	FALSE	8
2022-09-12	14:37:37	0.649529	2.88923	2.6323	716.39	FALSE	8
2022-09-12	14:37:37	0.616756	2.74345	2.6323	758.139	FALSE	8
2022-09-12	14:37:37	0.598741	2.66332	2.6323	719.053	FALSE	8
2022-09-12	14:37:37	0.502048	2.23321	2.6323	760.372	FALSE	8
2022-09-12	14:37:38	0.524084	2.33123	1.22586	721.385	FALSE	8
2022-09-12	14:37:38	0.468054	2.082	1.22586	762.454	FALSE	8
2022-09-12	14:37:38	0.132888	0.591112	1.22586	721.976	FALSE	8
2022-09-12	14:37:38	-0.0226842	-0.100904	1.22586	762.454	FALSE	8
2022-09-12	14:37:39	0.0117178	0.0521231	0.655687	722.028	FALSE	8
2022-09-12	14:37:39	0.124593	0.554215	0.655687	763.009	FALSE	8
2022-09-12	14:37:39	0.217367	0.966892	0.655687	722.995	FALSE	8
2022-09-12	14:37:39	0.235942	1.04952	0.655687	764.058	FALSE	8
2022-09-12	14:37:40	0.199351	0.886753	0.883057	723.882	FALSE	8
2022-09-12	14:37:40	0.248817	1.10679	0.883057	765.165	FALSE	8
2022-09-12	14:37:40	0.147392	0.655629	0.883057	724.537	FALSE	8
2022-09-12	14:37:41	0.867799	3.86014	4.37182	769.025	FALSE	8
2022-09-12	14:37:41	1.73589	7.72159	4.37182	732.259	FALSE	8
2022-09-12	14:37:41	0.344797	1.53373	4.37182	770.559	FALSE	8
2022-09-12	14:37:42	1.03294	4.59472	6.80084	736.853	FALSE	8
2022-09-12	14:37:42	2.02322	8.99969	6.80084	779.559	FALSE	8
2022-09-12	14:37:42	0.776247	3.4529	6.80084	740.306	FALSE	8
2022-09-12	14:37:42	1.56342	6.9544	6.80084	786.513	FALSE	8
2022-09-12	14:37:42	2.24866	10.0025	6.80084	750.309	FALSE	8
2022-09-12	14:37:43	2.1166	9.41506	4.55068	795.928	FALSE	8
2022-09-12	14:37:43	1.31996	5.87145	4.55068	756.18	FALSE	8
2022-09-12	14:37:43	0.407901	1.81443	4.55068	797.742	FALSE	8
2022-09-12	14:37:43	0.247697	1.10181	4.55068	757.282	FALSE	8
2022-09-12	14:37:44	-0.0611066	-0.271814	1.38877	797.742	FALSE	8
2022-09-12	14:37:44	0.0317687	0.141314	1.38877	757.423	FALSE	8
2022-09-12	14:37:44	0.965967	4.29681	1.38877	802.039	FALSE	8
2022-09-12	14:37:45	0.680216	3.02574	1.18307	760.449	FALSE	8
2022-09-12	14:37:45	-0.0172898	-0.0769085	1.18307	802.039	FALSE	8
2022-09-12	14:37:45	0.0136516	0.060725	1.18307	760.51	FALSE	8
2022-09-12	14:37:45	0.38729	1.72274	1.18307	803.762	FALSE	8
2022-09-12	14:37:46	0.0104455	0.0464637	0.170176	760.556	FALSE	8
2022-09-12	14:37:46	0.0248475	0.110527	0.170176	803.873	FALSE	8
2022-09-12	14:37:46	0.00550917	0.0245059	0.170176	760.581	FALSE	8
2022-09-12	14:37:46	0.112227	0.499208	0.170176	804.372	FALSE	8
2022-09-12	14:37:47	0.0459163	0.204245	0.102661	760.785	FALSE	8
2022-09-12	14:37:47	0.0129392	0.0575561	0.102661	804.429	FALSE	8
2022-09-12	14:37:47	0.0554837	0.246803	0.102661	761.032	FALSE	8
2022-09-12	14:37:47	-0.0220226	-0.0979609	0.102661	804.429	FALSE	8
2022-09-12	14:37:48	0.218791	0.973226	1.11131	762.005	FALSE	8
2022-09-12	14:37:48	0.210547	0.936555	1.11131	805.366	FALSE	8
2022-09-12	14:37:48	0.320166	1.42416	1.11131	763.429	FALSE	8
2022-09-12	14:37:49	0.158792	0.706339	0.81443	806.072	FALSE	8
2022-09-12	14:37:49	0.238792	1.06219	0.81443	764.492	FALSE	8
2022-09-12	14:37:49	0.0660689	0.293888	0.81443	806.366	FALSE	8
2022-09-12	14:37:49	0.268715	1.1953	0.81443	765.687	FALSE	8
2022-09-12	14:37:50	0.154975	0.68936	1.13401	807.055	FALSE	8
2022-09-12	14:37:50	0.332379	1.47849	1.13401	767.165	FALSE	8
2022-09-12	14:37:50	0.150954	0.671474	1.13401	807.727	FALSE	8
2022-09-12	14:37:50	0.381438	1.69671	1.13401	768.862	FALSE	8
2022-09-12	14:37:51	0.0274939	0.122298	0.534446	807.849	FALSE	8
2022-09-12	14:37:51	0.296349	1.31822	0.534446	770.18	FALSE	8
2022-09-12	14:37:51	0.0366033	0.162819	0.534446	808.012	FALSE	8
2022-09-12	14:37:52	0.176654	0.785792	0.778039	770.966	FALSE	8
2022-09-12	14:37:52	0.152736	0.6794	0.778039	808.691	FALSE	8
2022-09-12	14:37:52	0.170496	0.7584	0.778039	771.724	FALSE	8
2022-09-12	14:37:52	0.199758	0.888564	0.778039	809.58	FALSE	8
2022-09-12	14:37:53	0.238639	1.06151	1.23972	772.786	FALSE	8
2022-09-12	14:37:53	0.297723	1.32433	1.23972	810.904	FALSE	8
2022-09-12	14:37:53	0.283117	1.25936	1.23972	774.045	FALSE	8
2022-09-12	14:37:53	0.295331	1.31369	1.23972	812.218	FALSE	8
2022-09-12	14:37:54	0.454924	2.02359	1.86983	776.069	FALSE	8
2022-09-12	14:37:54	0.4593	2.04306	1.86983	814.261	FALSE	8
2022-09-12	14:37:54	0.394161	1.75331	1.86983	777.822	FALSE	8
2022-09-12	14:37:54	0.373041	1.65936	1.86983	815.92	FALSE	8
2022-09-12	14:37:55	0.260827	1.16021	1.54255	778.982	FALSE	8
2022-09-12	14:37:55	0.494059	2.19767	1.54255	818.118	FALSE	8
2022-09-12	14:37:55	0.285458	1.26977	1.54255	780.252	FALSE	8
2022-09-12	14:37:56	0.350394	1.55862	2.42636	819.677	FALSE	8
2022-09-12	14:37:56	0.524796	2.3344	2.42636	782.587	FALSE	8
2022-09-12	14:37:56	0.63187	2.81068	2.42636	822.487	FALSE	8
2022-09-12	14:37:56	0.674822	3.00174	2.42636	785.588	FALSE	8
2022-09-12	14:37:57	0.685458	3.04905	2.66428	825.536	FALSE	8
2022-09-12	14:37:57	0.82444	3.66727	2.66428	789.256	FALSE	8
2022-09-12	14:37:57	0.491056	2.18432	2.66428	827.721	FALSE	8
2022-09-12	14:37:57	0.394873	1.75647	2.66428	791.012	FALSE	8
2022-09-12	14:37:58	0.44154	1.96406	1.87645	829.685	FALSE	8
2022-09-12	14:37:58	0.647901	2.88199	1.87645	793.894	FALSE	8
2022-09-12	14:37:58	0.459758	2.0451	1.87645	831.73	FALSE	8
2022-09-12	14:37:58	0.138181	0.614657	1.87645	794.509	FALSE	8
2022-09-12	14:37:59	0.103473	0.460269	1.92678	832.19	FALSE	8
2022-09-12	14:37:59	0.378384	1.68313	1.92678	796.192	FALSE	8
2022-09-12	14:37:59	0.817621	3.63694	1.92678	835.827	FALSE	8
2022-09-12	14:38:00	1.22999	5.47124	4.83705	801.663	FALSE	8
2022-09-12	14:38:00	0.808817	3.59778	4.83705	839.425	FALSE	8
2022-09-12	14:38:00	0.917417	4.08085	4.83705	805.744	FALSE	8
2022-09-12	14:38:00	1.39345	6.19834	4.83705	845.623	FALSE	8
2022-09-12	14:38:01	0.178995	0.796206	2.17645	806.54	FALSE	8
2022-09-12	14:38:01	0.58617	2.6074	2.17645	848.231	FALSE	8
2022-09-12	14:38:01	0.547035	2.43332	2.17645	808.973	FALSE	8
2022-09-12	14:38:01	0.644949	2.86886	2.17645	851.1	FALSE	8
2022-09-12	14:38:02	0.405	1.80152	2.21974	810.775	FALSE	8
2022-09-12	14:38:02	0.472532	2.10192	2.21974	853.201	FALSE	8
2022-09-12	14:38:02	0.400878	1.78319	2.21974	812.558	FALSE	8
2022-09-12	14:38:02	0.717672	3.19235	2.21974	856.394	FALSE	8
2022-09-12	14:38:03	0.44841	1.99462	2.19314	814.553	FALSE	8
2022-09-12	14:38:03	0.741132	3.2967	2.19314	859.691	FALSE	8
2022-09-12	14:38:03	0.28958	1.28811	2.19314	815.841	FALSE	8
2022-09-12	14:38:04	0.517366	2.30135	2.51918	861.992	FALSE	8
2022-09-12	14:38:04	0.41355	1.83955	2.51918	817.68	FALSE	8
2022-09-12	14:38:04	0.440522	1.95953	2.51918	863.951	FALSE	8
2022-09-12	14:38:04	0.893906	3.97627	2.51918	821.657	FALSE	8
2022-09-12	14:38:05	0.507545	2.25766	2.60644	866.209	FALSE	8
2022-09-12	14:38:05	0.832532	3.70327	2.60644	825.36	FALSE	8
2022-09-12	14:38:05	0.494618	2.20016	2.60644	868.409	FALSE	8
2022-09-12	14:38:05	0.509122	2.26468	2.60644	827.625	FALSE	8
2022-09-12	14:38:06	0.619555	2.7559	2.20169	871.165	FALSE	8
2022-09-12	14:38:06	0.35182	1.56497	2.20169	829.19	FALSE	8
2022-09-12	14:38:06	0.60785	2.70384	2.20169	873.869	FALSE	8
2022-09-12	14:38:06	0.400624	1.78206	2.20169	830.972	FALSE	8
2022-09-12	14:38:07	0.554822	2.46796	1.96587	876.337	FALSE	8
2022-09-12	14:38:07	0.394517	1.75489	1.96587	832.727	FALSE	8
2022-09-12	14:38:07	0.376501	1.67475	1.96587	878.012	FALSE	8
2022-09-12	14:38:08	1.14963	5.11378	3.26394	837.84	FALSE	8
2022-09-12	14:38:08	0.487545	2.1687	3.26394	880.18	FALSE	8
2022-09-12	14:38:08	0.753499	3.35171	3.26394	841.192	FALSE	8
2022-09-12	14:38:08	0.544389	2.42155	3.26394	882.602	FALSE	8
2022-09-12	14:38:09	1.90983	8.49531	16.9097	849.687	FALSE	8
2022-09-12	14:38:09	3.6248	16.1238	16.9097	898.726	1	9
2022-09-12	14:38:09	3.84495	17.1031	16.9097	866.79	1	10
2022-09-12	14:38:09	5.82632	25.9166	16.9097	924.642	1	11
2022-09-12	14:38:10	1.551	6.89916	5.76222	873.69	FALSE	11
2022-09-12	14:38:10	1.52001	6.76131	5.76222	931.404	FALSE	11
2022-09-12	14:38:10	1.68688	7.50358	5.76222	881.193	FALSE	11
2022-09-12	14:38:10	0.423728	1.88483	5.76222	933.289	FALSE	11
2022-09-12	14:38:11	0.670801	2.98386	1.54844	884.177	FALSE	11
2022-09-12	14:38:11	0.152888	0.680076	1.54844	933.969	FALSE	11
2022-09-12	14:38:11	0.220623	0.981375	1.54844	885.158	FALSE	11
2022-09-12	14:38:12	-0.0491982	-0.218843	0.715052	933.969	FALSE	11
2022-09-12	14:38:12	0.0796567	0.354329	0.715052	885.513	FALSE	11
2022-09-12	14:38:12	0.229224	1.01963	0.715052	934.988	FALSE	11
2022-09-12	14:38:12	0.383321	1.70509	0.715052	887.218	FALSE	11
2022-09-12	14:38:13	0.368461	1.63899	2.07311	936.627	FALSE	11
2022-09-12	14:38:13	0.512328	2.27894	2.07311	889.497	FALSE	11
2022-09-12	14:38:13	0.535992	2.3842	2.07311	939.011	FALSE	11
2022-09-12	14:38:13	0.447443	1.99032	2.07311	891.487	FALSE	11
2022-09-12	14:38:14	0.522252	2.32308	2.30282	941.334	FALSE	11
2022-09-12	14:38:14	0.461947	2.05483	2.30282	893.542	FALSE	11
2022-09-12	14:38:14	0.521743	2.32082	2.30282	943.655	FALSE	11
2022-09-12	14:38:14	0.564847	2.51255	2.30282	896.055	FALSE	11
2022-09-12	14:38:15	0.670903	2.98431	2.43212	946.64	FALSE	11
2022-09-12	14:38:15	0.527137	2.34481	2.43212	898.399	FALSE	11
2022-09-12	14:38:15	0.442252	1.96723	2.43212	948.607	FALSE	11
2022-09-12	14:38:16	0.492481	2.19065	2.18799	900.59	FALSE	11
2022-09-12	14:38:16	0.499911	2.2237	2.18799	950.831	FALSE	11
2022-09-12	14:38:16	0.484746	2.15625	2.18799	902.746	FALSE	11
2022-09-12	14:38:16	0.490394	2.18137	2.18799	953.012	FALSE	11
2022-09-12	14:38:17	0.471616	2.09784	2.19427	904.844	FALSE	11
2022-09-12	14:38:17	0.493193	2.19382	2.19427	955.206	FALSE	11
2022-09-12	14:38:17	0.504338	2.2434	2.19427	907.087	FALSE	11
2022-09-12	14:38:17	0.504033	2.24204	2.19427	957.448	FALSE	11
2022-09-12	14:38:18	0.363321	1.61612	2.15987	908.704	FALSE	11
2022-09-12	14:38:18	0.456959	2.03265	2.15987	959.48	FALSE	11
2022-09-12	14:38:18	0.489886	2.17911	2.15987	910.883	FALSE	11
2022-09-12	14:38:18	0.632074	2.81159	2.15987	962.292	FALSE	11
2022-09-12	14:38:19	0.571514	2.54221	3.63263	913.425	FALSE	11
2022-09-12	14:38:19	0.783473	3.48504	3.63263	965.777	FALSE	11
2022-09-12	14:38:19	1.09497	4.87065	3.63263	918.296	FALSE	11
2022-09-12	14:38:20	0.43126	1.91833	4.36394	967.695	FALSE	11
2022-09-12	14:38:20	0.76159	3.3877	4.36394	921.683	FALSE	11
2022-09-12	14:38:20	2.11966	9.42867	4.36394	977.124	FALSE	11
2022-09-12	14:38:20	0.611718	2.72104	4.36394	924.404	FALSE	11
2022-09-12	14:38:21	0.836908	3.72273	2.90214	980.847	FALSE	11
2022-09-12	14:38:21	0.82215	3.65709	2.90214	928.061	FALSE	11
2022-09-12	14:38:21	0.667799	2.9705	2.90214	983.817	FALSE	11
2022-09-12	14:38:21	0.282863	1.25823	2.90214	929.32	FALSE	11
2022-09-12	14:38:22	1.10943	4.93497	3.20689	988.752	FALSE	11
2022-09-12	14:38:22	0.291412	1.29626	3.20689	930.616	FALSE	11
2022-09-12	14:38:22	0.735941	3.27361	3.20689	992.026	FALSE	11
2022-09-12	14:38:22	0.746985	3.32274	3.20689	933.939	FALSE	11
2022-09-12	14:38:23	0.745916	3.31798	3.19152	995.344	FALSE	11
2022-09-12	14:38:23	0.493702	2.19609	3.19152	936.135	FALSE	11
2022-09-12	14:38:23	0.912837	4.06048	3.19152	999.404	FALSE	11
2022-09-12	14:38:24	0.30444	1.35421	2.40163	937.489	FALSE	11
2022-09-12	14:38:24	0.649224	2.88788	2.40163	1002.29	FALSE	11
2022-09-12	14:38:24	0.591208	2.62981	2.40163	940.119	FALSE	11
2022-09-12	14:38:24	0.614771	2.73462	2.40163	1005.03	FALSE	11
2022-09-12	14:38:25	0.374771	1.66706	2.3546	941.786	FALSE	11
2022-09-12	14:38:25	0.742201	3.30146	2.3546	1008.33	FALSE	11
2022-09-12	14:38:25	0.413295	1.83842	2.3546	943.624	FALSE	11
2022-09-12	14:38:25	0.587086	2.61148	2.3546	1010.94	FALSE	11
2022-09-12	14:38:26	1.28607	5.7207	6.04519	949.345	FALSE	11
2022-09-12	14:38:26	1.01569	4.51799	6.04519	1015.46	FALSE	11
2022-09-12	14:38:26	2.39441	10.6508	6.04519	959.996	FALSE	11
2022-09-12	14:38:26	0.739911	3.29127	6.04519	1018.75	FALSE	11
2022-09-12	14:38:27	2.32938	10.3615	12.3128	970.357	FALSE	11
2022-09-12	14:38:27	3.14037	13.969	12.3128	1032.72	1	12
2022-09-12	14:38:27	2.83436	12.6078	12.3128	982.965	FALSE	12
2022-09-12	14:38:28	2.78734	12.3986	9.21043	1045.12	FALSE	12
2022-09-12	14:38:28	0.84154	3.74334	9.21043	986.708	FALSE	12
2022-09-12	14:38:28	1.92434	8.55985	9.21043	1053.68	FALSE	12
2022-09-12	14:38:28	2.72917	12.1399	9.21043	998.848	FALSE	12
2022-09-12	14:38:29	1.85156	8.23611	4.60495	1061.91	FALSE	12
2022-09-12	14:38:29	1.32393	5.88911	4.60495	1004.74	FALSE	12
2022-09-12	14:38:29	0.700114	3.11425	4.60495	1065.03	FALSE	12
2022-09-12	14:38:29	0.265356	1.18036	4.60495	1005.92	FALSE	12
2022-09-12	14:38:30	0.532837	2.37017	1.69241	1067.4	FALSE	12
2022-09-12	14:38:30	0.135433	0.602433	1.69241	1006.52	FALSE	12
2022-09-12	14:38:30	0.493041	2.19314	1.69241	1069.59	FALSE	12
2022-09-12	14:38:30	0.360573	1.6039	1.69241	1008.12	FALSE	12
2022-09-12	14:38:31	0.582863	2.59269	2.3215	1072.18	FALSE	12
2022-09-12	14:38:31	0.170242	0.75727	2.3215	1008.88	FALSE	12
2022-09-12	14:38:31	0.812582	3.61453	2.3215	1075.8	FALSE	12
2022-09-12	14:38:32	0.344949	1.5344	4.44135	1010.42	FALSE	12
2022-09-12	14:38:32	0.915382	4.0718	4.44135	1079.87	FALSE	12
2022-09-12	14:38:32	0.70103	3.11832	4.44135	1013.53	FALSE	12
2022-09-12	14:38:32	2.03248	9.04088	4.44135	1088.91	FALSE	12
2022-09-12	14:38:33	2.14973	9.56243	9.93702	1023.1	FALSE	12
2022-09-12	14:38:33	1.83391	8.1576	9.93702	1097.07	FALSE	12
2022-09-12	14:38:33	2.88006	12.8111	9.93702	1035.91	FALSE	12
2022-09-12	14:38:33	2.07207	9.21698	9.93702	1106.28	FALSE	12
2022-09-12	14:38:34	2.7677	12.3113	11.0632	1048.22	FALSE	12
2022-09-12	14:38:34	5.0997	22.6845	11.0632	1128.97	1	13
2022-09-12	14:38:34	0.654466	2.9112	11.0632	1051.13	FALSE	13
2022-09-12	14:38:34	1.42658	6.34571	11.0632	1135.31	FALSE	13
2022-09-12	14:38:35	0.965102	4.29297	3.61755	1055.42	FALSE	13
2022-09-12	14:38:35	1.10215	4.90258	3.61755	1140.22	FALSE	13
2022-09-12	14:38:35	0.372532	1.6571	3.61755	1057.08	FALSE	13
2022-09-12	14:38:36	0.393295	1.74945	3.3409	1141.97	FALSE	13
2022-09-12	14:38:36	0.468308	2.08313	3.3409	1059.16	FALSE	13
2022-09-12	14:38:36	0.910598	4.05052	3.3409	1146.02	FALSE	13
2022-09-12	14:38:36	1.23207	5.48049	3.3409	1064.64	FALSE	13
2022-09-12	14:38:37	1.80322	8.02108	5.65351	1154.04	FALSE	13
2022-09-12	14:38:37	1.57558	7.00849	5.65351	1071.65	FALSE	13
2022-09-12	14:38:37	0.913651	4.0641	5.65351	1158.1	FALSE	13
2022-09-12	14:38:37	0.791412	3.52036	5.65351	1075.17	FALSE	13
2022-09-12	14:38:38	1.01609	4.51977	5.30405	1162.62	FALSE	13
2022-09-12	14:38:38	1.88719	8.3946	5.30405	1083.57	FALSE	13
2022-09-12	14:38:38	1.54556	6.87496	5.30405	1169.5	FALSE	13
2022-09-12	14:38:38	0.320776	1.42688	5.30405	1084.99	FALSE	13
2022-09-12	14:38:39	-0.0751015	-0.334066	0.0715904	1169.5	FALSE	13
2022-09-12	14:38:39	-0.0322008	-0.143236	0.0715904	1084.99	FALSE	13
2022-09-12	14:38:39	0.155585	0.692073	0.0715904	1170.19	FALSE	13
2022-09-12	14:38:40	0.0969086	0.431069	0.722805	1085.43	FALSE	13
2022-09-12	14:38:40	0.0279519	0.124336	0.722805	1170.31	FALSE	13
2022-09-12	14:38:40	0.121336	0.539727	0.722805	1085.96	FALSE	13
2022-09-12	14:38:40	0.403779	1.79609	0.722805	1172.11	FALSE	13
2022-09-12	14:38:41	0.243015	1.08098	1.55381	1087.05	FALSE	13
2022-09-12	14:38:41	0.0919722	0.409111	1.55381	1172.52	FALSE	13
2022-09-12	14:38:41	0.533142	2.37152	1.55381	1089.42	FALSE	13
2022-09-12	14:38:41	0.529122	2.35364	1.55381	1174.87	FALSE	13
2022-09-12	14:38:42	0.375229	1.66909	1.60631	1091.09	FALSE	13
2022-09-12	14:38:42	0.325611	1.44838	1.60631	1176.32	FALSE	13
2022-09-12	14:38:42	0.382506	1.70146	1.60631	1092.79	FALSE	13
2022-09-12	14:38:43	0.302252	1.34448	1.24725	1177.67	FALSE	13
2022-09-12	14:38:43	0.302914	1.34742	1.24725	1094.14	FALSE	13
2022-09-12	14:38:43	0.220064	0.978889	1.24725	1178.64	FALSE	13
2022-09-12	14:38:43	0.296349	1.31822	1.24725	1095.45	FALSE	13
2022-09-12	14:38:44	0.368613	1.63966	1.46049	1180.28	FALSE	13
2022-09-12	14:38:44	0.408919	1.81895	1.46049	1097.27	FALSE	13
2022-09-12	14:38:44	0.200827	0.893319	1.46049	1181.18	FALSE	13
2022-09-12	14:38:44	0.334975	1.49004	1.46049	1098.76	FALSE	13
2022-09-12	14:38:45	0.309784	1.37798	1.49937	1182.56	FALSE	13
2022-09-12	14:38:45	0.316756	1.40899	1.49937	1100.17	FALSE	13
2022-09-12	14:38:45	0.396654	1.7644	1.49937	1184.32	FALSE	13
2022-09-12	14:38:45	0.325102	1.44612	1.49937	1101.62	FALSE	13
2022-09-12	14:38:46	0.376705	1.67566	1.42205	1186	FALSE	13
2022-09-12	14:38:46	0.263168	1.17062	1.42205	1102.79	FALSE	13
2022-09-12	14:38:46	0.319199	1.41986	1.42205	1187.42	FALSE	13
2022-09-12	14:38:47	0.3107	1.38206	1.40396	1104.17	FALSE	13
2022-09-12	14:38:47	0.270242	1.20209	1.40396	1188.62	FALSE	13
2022-09-12	14:38:47	0.308512	1.37232	1.40396	1105.54	FALSE	13
2022-09-12	14:38:47	0.373041	1.65936	1.40396	1190.28	FALSE	13
2022-09-12	14:38:48	0.108003	0.480419	0.9498	1106.02	FALSE	13
2022-09-12	14:38:48	0.250191	1.1129	0.9498	1191.39	FALSE	13
2022-09-12	14:38:48	0.245255	1.09094	0.9498	1107.11	FALSE	13
2022-09-12	14:38:48	0.250649	1.11494	0.9498	1192.5	FALSE	13
2022-09-12	14:38:49	0.0578247	0.257216	-0.326823	1107.37	FALSE	13
2022-09-12	14:38:49	-0.0860938	-0.382962	-0.326823	1192.5	FALSE	13
2022-09-12	14:38:49	-0.233168	-1.03718	-0.326823	1107.37	FALSE	13
2022-09-12	14:38:49	-0.0324552	-0.144367	-0.326823	1192.5	FALSE	13
2022-09-12	14:38:50	-0.134236	-0.597109	-0.455703	1107.37	FALSE	13
2022-09-12	14:38:50	-0.115356	-0.513127	-0.455703	1192.5	FALSE	13
2022-09-12	14:38:50	-0.0577478	-0.256874	-0.455703	1107.37	FALSE	13
2022-09-12	14:38:51	-0.106297	-0.47283	0.716636	1192.5	FALSE	13
2022-09-12	14:38:51	0.20673	0.919576	0.716636	1108.29	FALSE	13
2022-09-12	14:38:51	0.0882572	0.392586	0.716636	1192.9	FALSE	13
2022-09-12	14:38:51	0.455738	2.02721	0.716636	1110.32	FALSE	13
2022-09-12	14:38:52	0.909835	4.04713	3.77412	1196.94	FALSE	13
2022-09-12	14:38:52	0.965509	4.29478	3.77412	1114.61	FALSE	13
2022-09-12	14:38:52	0.834262	3.71096	3.77412	1200.66	FALSE	13
2022-09-12	14:38:52	0.684237	3.04362	3.77412	1117.66	FALSE	13
2022-09-12	14:38:53	0.602455	2.67984	2.55585	1203.34	FALSE	13
2022-09-12	14:38:53	0.777773	3.45969	2.55585	1121.12	FALSE	13
2022-09-12	14:38:53	0.443626	1.97334	2.55585	1205.31	FALSE	13
2022-09-12	14:38:53	0.474466	2.11052	2.55585	1123.23	FALSE	13
2022-09-12	14:38:54	0.548461	2.43966	2.17247	1207.75	FALSE	13
2022-09-12	14:38:54	0.269326	1.19802	2.17247	1124.42	FALSE	13
2022-09-12	14:38:54	0.647392	2.87973	2.17247	1210.63	FALSE	13
2022-09-12	14:38:55	0.317519	1.41239	2.49122	1125.84	FALSE	13
2022-09-12	14:38:55	0.694567	3.08957	2.49122	1213.72	FALSE	13
2022-09-12	14:38:55	0.343168	1.52648	2.49122	1127.36	FALSE	13
2022-09-12	14:38:55	0.884949	3.93643	2.49122	1217.65	FALSE	13
2022-09-12	14:38:56	0.25014	1.11267	2.12478	1128.48	FALSE	13
2022-09-12	14:38:56	0.641387	2.85302	2.12478	1220.51	FALSE	13
2022-09-12	14:38:56	0.299148	1.33067	2.12478	1129.81	FALSE	13
2022-09-12	14:38:56	0.720013	3.20276	2.12478	1223.71	FALSE	13
2022-09-12	14:38:57	0.791412	3.52036	2.99048	1133.33	FALSE	13
2022-09-12	14:38:57	0.736501	3.2761	2.99048	1226.99	FALSE	13
2022-09-12	14:38:57	0.502812	2.23661	2.99048	1135.56	FALSE	13
2022-09-12	14:38:57	0.658435	2.92885	2.99048	1229.91	FALSE	13
2022-09-12	14:38:58	0.257774	1.14663	2.58642	1136.71	FALSE	13
2022-09-12	14:38:58	1.18459	5.26929	2.58642	1235.18	FALSE	13
2022-09-12	14:38:58	0.301998	1.34335	2.58642	1138.05	FALSE	13
2022-09-12	14:38:59	0.713346	3.17311	2.31901	1238.36	FALSE	13
2022-09-12	14:38:59	0.288868	1.28494	2.31901	1139.34	FALSE	13
2022-09-12	14:38:59	0.51874	2.30746	2.31901	1240.66	FALSE	13
2022-09-12	14:38:59	0.564389	2.51052	2.31901	1141.85	FALSE	13
2022-09-12	14:39:00	0.773397	3.44022	5.52006	1244.1	FALSE	13
2022-09-12	14:39:00	1.0651	4.73778	5.52006	1146.59	FALSE	13
2022-09-12	14:39:00	0.975534	4.33937	5.52006	1248.44	FALSE	13
2022-09-12	14:39:00	2.14983	9.56287	5.52006	1156.15	FALSE	13
2022-09-12	14:39:01	1.17945	5.24643	4.81073	1253.69	FALSE	13
2022-09-12	14:39:01	2.06312	9.17717	4.81073	1165.33	FALSE	13
2022-09-12	14:39:01	0.16383	0.728749	4.81073	1254.42	FALSE	13
2022-09-12	14:39:01	0.919605	4.09059	4.81073	1169.42	FALSE	13
2022-09-12	14:39:02	0.407901	1.81443	2.145	1256.23	FALSE	13
2022-09-12	14:39:02	0.639555	2.84487	2.145	1172.26	FALSE	13
2022-09-12	14:39:02	0.399199	1.77572	2.145	1258.01	FALSE	13
2022-09-12	14:39:03	0.489886	2.17911	2.63066	1174.44	FALSE	13
2022-09-12	14:39:03	0.440115	1.95772	2.63066	1259.97	FALSE	13
2022-09-12	14:39:03	0.495534	2.20423	2.63066	1176.65	FALSE	13
2022-09-12	14:39:03	0.940064	4.18159	2.63066	1264.15	FALSE	13
2022-09-12	14:39:04	1.14072	5.07415	5.10031	1181.72	FALSE	13
2022-09-12	14:39:04	0.905254	4.02675	5.10031	1268.18	FALSE	13
2022-09-12	14:39:04	1.9022	8.46137	5.10031	1190.18	FALSE	13
2022-09-12	14:39:04	0.638232	2.83898	5.10031	1271.01	FALSE	13
2022-09-12	14:39:05	2.69594	11.9921	7.48361	1202.17	FALSE	13
2022-09-12	14:39:05	0.507239	2.2563	7.48361	1273.27	FALSE	13
2022-09-12	14:39:05	2.49945	11.1181	7.48361	1213.29	FALSE	13
2022-09-12	14:39:05	1.02693	4.56799	7.48361	1277.84	FALSE	13
2022-09-12	14:39:06	1.68846	7.51061	4.72745	1220.8	FALSE	13
2022-09-12	14:39:06	0.545763	2.42766	4.72745	1280.27	FALSE	13
2022-09-12	14:39:06	0.954109	4.24407	4.72745	1225.05	FALSE	13
2022-09-12	14:39:07	1.87558	8.34295	5.16676	1288.61	FALSE	13
2022-09-12	14:39:07	0.394364	1.75421	5.16676	1226.8	FALSE	13
2022-09-12	14:39:07	1.15513	5.13825	5.16676	1293.75	FALSE	13
2022-09-12	14:39:07	1.22108	5.43161	5.16676	1232.23	FALSE	13
2022-09-12	14:39:08	0.837926	3.72726	5.69936	1297.47	FALSE	13
2022-09-12	14:39:08	1.22963	5.46964	5.69936	1237.7	FALSE	13
2022-09-12	14:39:08	0.868613	3.86376	5.69936	1301.34	FALSE	13
2022-09-12	14:39:08	2.18892	9.73675	5.69936	1247.44	FALSE	13
2022-09-12	14:39:09	2.37777	10.5768	6.63998	1311.92	FALSE	13
2022-09-12	14:39:09	0.698944	3.10904	6.63998	1250.55	FALSE	13
2022-09-12	14:39:09	1.27777	5.68378	6.63998	1317.6	FALSE	13
2022-09-12	14:39:09	1.61645	7.19029	6.63998	1257.74	FALSE	13
2022-09-12	14:39:10	0.537265	2.38986	2.01439	1319.99	FALSE	13
2022-09-12	14:39:10	0.306476	1.36327	2.01439	1259.1	FALSE	13
2022-09-12	14:39:10	0.514822	2.29003	2.01439	1322.28	FALSE	13
2022-09-12	14:39:11	0.193651	0.861398	1.2288	1259.96	FALSE	13
2022-09-12	14:39:11	0.324593	1.44385	1.2288	1323.72	FALSE	13
2022-09-12	14:39:11	0.27014	1.20164	1.2288	1261.16	FALSE	13
2022-09-12	14:39:11	0.316603	1.40831	1.2288	1325.13	FALSE	13
2022-09-12	14:39:12	0.325814	1.44929	1.44125	1262.61	FALSE	13
2022-09-12	14:39:12	0.454466	2.02156	1.44125	1327.15	FALSE	13
2022-09-12	14:39:12	0.254517	1.13214	1.44125	1263.75	FALSE	13
2022-09-12	14:39:12	0.261234	1.16202	1.44125	1328.31	FALSE	13
2022-09-12	14:39:13	0.370954	1.65008	1.63253	1265.4	FALSE	13
2022-09-12	14:39:13	0.412328	1.83412	1.63253	1330.15	FALSE	13
2022-09-12	14:39:13	0.238486	1.06083	1.63253	1266.46	FALSE	13
2022-09-12	14:39:13	0.446272	1.98511	1.63253	1332.13	FALSE	13
2022-09-12	14:39:14	0.49472	2.20061	4.06313	1268.66	FALSE	13
2022-09-12	14:39:14	1.36373	6.06614	4.06313	1338.2	FALSE	13
2022-09-12	14:39:14	0.881845	3.92262	4.06313	1272.58	FALSE	13
2022-09-12	14:39:15	2.29711	10.218	6.55266	1348.42	FALSE	13
2022-09-12	14:39:15	2.03192	9.03839	6.55266	1281.62	FALSE	13
2022-09-12	14:39:15	0.79813	3.55024	6.55266	1351.97	FALSE	13
2022-09-12	14:39:15	0.765254	3.404	6.55266	1285.02	FALSE	13
2022-09-12	14:39:16	0.470089	2.09105	2.02376	1354.06	FALSE	13
2022-09-12	14:39:16	0.369122	1.64193	2.02376	1286.66	FALSE	13
2022-09-12	14:39:16	0.446018	1.98398	2.02376	1356.04	FALSE	13
2022-09-12	14:39:16	0.534618	2.37809	2.02376	1289.04	FALSE	13
2022-09-12	14:39:17	0.349071	1.55274	2.11674	1357.6	FALSE	13
2022-09-12	14:39:17	0.600267	2.67011	2.11674	1291.71	FALSE	13
2022-09-12	14:39:17	0.376858	1.67634	2.11674	1359.27	FALSE	13
2022-09-12	14:39:17	0.577265	2.56779	2.11674	1294.28	FALSE	13
2022-09-12	14:39:18	0.425458	1.89252	1.85887	1361.16	FALSE	13
2022-09-12	14:39:18	0.47874	2.12953	1.85887	1296.41	FALSE	13
2022-09-12	14:39:18	0.349478	1.55455	1.85887	1362.72	FALSE	13
2022-09-12	14:39:19	0.491158	2.18477	3.17339	1298.59	FALSE	13
2022-09-12	14:39:19	0.748969	3.33156	3.17339	1366.05	FALSE	13
2022-09-12	14:39:19	0.560623	2.49376	3.17339	1301.09	FALSE	13
2022-09-12	14:39:19	1.05289	4.68347	3.17339	1370.73	FALSE	13
2022-09-12	14:39:20	0.813753	3.61974	8.29759	1304.71	FALSE	13
2022-09-12	14:39:20	2.48276	11.0438	8.29759	1381.78	FALSE	13
2022-09-12	14:39:20	2.7706	12.3242	8.29759	1317.03	FALSE	13
2022-09-12	14:39:20	1.39441	6.20261	8.29759	1387.98	FALSE	13
2022-09-12	14:39:21	1.42602	6.34322	5.22647	1323.38	FALSE	13
2022-09-12	14:39:21	0.870445	3.87191	5.22647	1391.85	FALSE	13
2022-09-12	14:39:21	0.978893	4.35431	5.22647	1327.73	FALSE	13
2022-09-12	14:39:21	1.42449	6.33642	5.22647	1398.19	FALSE	13
2022-09-12	14:39:22	2.79431	12.4296	17.5506	1340.16	FALSE	13
2022-09-12	14:39:22	4.78296	21.2756	17.5506	1419.46	1	14
2022-09-12	14:39:22	4.25935	18.9464	17.5506	1359.11	1	15
2022-09-12	14:39:23	7.25217	32.2591	24.1306	1451.72	1	16
2022-09-12	14:39:23	2.38637	10.6151	24.1306	1369.72	FALSE	16
2022-09-12	14:39:23	7.13787	31.7507	24.1306	1483.47	1	17
2022-09-12	14:39:23	4.92281	21.8976	24.1306	1391.62	1	18
2022-09-12	14:39:24	4.83233	21.4952	15.4681	1504.97	1	19
2022-09-12	14:39:24	3.48093	15.4839	15.4681	1407.1	1	20
2022-09-12	14:39:24	3.5792	15.921	15.4681	1520.89	1	21
2022-09-12	14:39:24	2.01711	8.97251	15.4681	1416.07	FALSE	21
2022-09-12	14:39:25	1.87172	8.32578	6.23065	1529.22	FALSE	21
2022-09-12	14:39:25	2.08556	9.27699	6.23065	1425.35	FALSE	21
2022-09-12	14:39:25	0.898588	3.9971	6.23065	1533.21	FALSE	21
2022-09-12	14:39:25	0.746985	3.32274	6.23065	1428.67	FALSE	21
2022-09-12	14:39:26	0.600115	2.66943	2.06155	1535.88	FALSE	21
2022-09-12	14:39:26	0.403423	1.79451	2.06155	1430.47	FALSE	21
2022-09-12	14:39:26	0.386832	1.72071	2.06155	1537.6	FALSE	21
2022-09-12	14:39:27	0.339046	1.50814	2.7065	1431.98	FALSE	21
2022-09-12	14:39:27	0.456501	2.03061	2.7065	1539.63	FALSE	21
2022-09-12	14:39:27	0.558079	2.48245	2.7065	1434.46	FALSE	21
2022-09-12	14:39:27	1.08017	4.80481	2.7065	1544.44	FALSE	21
2022-09-12	14:39:28	0.551718	2.45415	7.25419	1436.91	FALSE	21
2022-09-12	14:39:28	1.90302	8.46501	7.25419	1552.9	FALSE	21
2022-09-12	14:39:28	2.39889	10.6707	7.25419	1447.58	FALSE	21
2022-09-12	14:39:28	1.66963	7.42685	7.25419	1560.33	FALSE	21
2022-09-12	14:39:29	2.63065	11.7017	8.322	1459.29	FALSE	21
2022-09-12	14:39:29	1.80505	8.02922	8.322	1568.36	FALSE	21
2022-09-12	14:39:29	1.17691	5.23513	8.322	1464.52	FALSE	21
2022-09-12	14:39:30	1.21767	5.41644	2.86099	1573.78	FALSE	21
2022-09-12	14:39:30	0.464084	2.06434	2.86099	1466.59	FALSE	21
2022-09-12	14:39:30	0.605967	2.69546	2.86099	1576.47	FALSE	21
2022-09-12	14:39:30	0.285	1.26774	2.86099	1467.85	FALSE	21
2022-09-12	14:39:31	0.268817	1.19575	1.14533	1577.67	FALSE	21
2022-09-12	14:39:31	0.312786	1.39133	1.14533	1469.24	FALSE	21
2022-09-12	14:39:31	0.352074	1.5661	1.14533	1579.23	FALSE	21
2022-09-12	14:39:31	0.096247	0.428126	1.14533	1469.67	FALSE	21
2022-09-12	14:39:32	0.28444	1.26525	2.90746	1580.5	FALSE	21
2022-09-12	14:39:32	0.626985	2.78895	2.90746	1472.46	FALSE	21
2022-09-12	14:39:32	0.588206	2.61646	2.90746	1583.12	FALSE	21
2022-09-12	14:39:32	1.11487	4.95916	2.90746	1477.42	FALSE	21
2022-09-12	14:39:33	0.990801	4.40728	8.06499	1587.52	FALSE	21
2022-09-12	14:39:33	2.27202	10.1064	8.06499	1487.53	FALSE	21
2022-09-12	14:39:33	2.17645	9.68128	8.06499	1597.2	FALSE	21
2022-09-12	14:39:34	2.5366	11.2833	7.96675	1498.81	FALSE	21
2022-09-12	14:39:34	1.13182	5.03456	7.96675	1602.24	FALSE	21
2022-09-12	14:39:34	2.04383	9.09136	7.96675	1507.9	FALSE	21
2022-09-12	14:39:34	1.45177	6.45776	7.96675	1608.7	FALSE	21
2022-09-12	14:39:35	3.25523	14.4799	20.9454	1522.38	1	22
2022-09-12	14:39:35	1.87508	8.34073	20.9454	1617.04	FALSE	22
2022-09-12	14:39:35	5.87925	26.1521	20.9454	1548.53	1	23
2022-09-12	14:39:35	7.82535	34.8087	20.9454	1651.85	1	24
2022-09-12	14:39:36	6.72352	29.9076	23.1526	1578.44	1	25
2022-09-12	14:39:36	6.66942	29.6669	23.1526	1681.51	1	26
2022-09-12	14:39:36	4.60495	20.4837	23.1526	1598.93	1	27
2022-09-12	14:39:36	2.82184	12.5521	23.1526	1694.07	FALSE	27
2022-09-12	14:39:37	1.46917	6.53516	4.22558	1605.46	FALSE	27
2022-09-12	14:39:37	0.45014	2.00231	4.22558	1696.07	FALSE	27
2022-09-12	14:39:37	0.930547	4.13926	4.22558	1609.6	FALSE	27
2022-09-12	14:39:38	0.826578	3.67678	3.0786	1699.74	FALSE	27
2022-09-12	14:39:38	0.72383	3.21974	3.0786	1612.82	FALSE	27
2022-09-12	14:39:38	0.460267	2.04736	3.0786	1701.79	FALSE	27
2022-09-12	14:39:38	0.757723	3.3705	3.0786	1616.19	FALSE	27
2022-09-12	14:39:39	0.688766	3.06377	2.40582	1704.86	FALSE	27
2022-09-12	14:39:39	0.482914	2.1481	2.40582	1618.34	FALSE	27
2022-09-12	14:39:39	0.494415	2.19926	2.40582	1707.05	FALSE	27
2022-09-12	14:39:39	0.497316	2.21216	2.40582	1620.55	FALSE	27
2022-09-12	14:39:40	0.484898	2.15692	2.08279	1709.21	FALSE	27
2022-09-12	14:39:40	0.488257	2.17186	2.08279	1622.72	FALSE	27
2022-09-12	14:39:40	0.435433	1.93689	2.08279	1711.15	FALSE	27
2022-09-12	14:39:40	0.464339	2.06547	2.08279	1624.79	FALSE	27
2022-09-12	14:39:41	0.408359	1.81646	2.04638	1712.96	FALSE	27
2022-09-12	14:39:41	0.513448	2.28392	2.04638	1627.07	FALSE	27
2022-09-12	14:39:41	0.458333	2.03876	2.04638	1715	FALSE	27
2022-09-12	14:39:42	0.486883	2.16575	2.01001	1629.24	FALSE	27
2022-09-12	14:39:42	0.439708	1.95591	2.01001	1716.96	FALSE	27
2022-09-12	14:39:42	0.46958	2.08879	2.01001	1631.33	FALSE	27
2022-09-12	14:39:42	0.411311	1.82959	2.01001	1718.79	FALSE	27
2022-09-12	14:39:43	0.511718	2.27622	1.85268	1633.6	FALSE	27
2022-09-12	14:39:43	0.432735	1.92489	1.85268	1720.71	FALSE	27
2022-09-12	14:39:43	0.432277	1.92285	1.85268	1635.52	FALSE	27
2022-09-12	14:39:43	0.289275	1.28675	1.85268	1722	FALSE	27
2022-09-12	14:39:44	0.302914	1.34742	1.25942	1636.87	FALSE	27
2022-09-12	14:39:44	0.311921	1.38749	1.25942	1723.39	FALSE	27
2022-09-12	14:39:44	0.120471	0.535879	1.25942	1637.41	FALSE	27
2022-09-12	14:39:44	0.397214	1.76689	1.25942	1725.16	FALSE	27
2022-09-12	14:39:45	1.85518	8.25221	5.67143	1645.66	FALSE	27
2022-09-12	14:39:45	1.03503	4.60402	5.67143	1729.76	FALSE	27
2022-09-12	14:39:45	0.934771	4.15805	5.67143	1649.82	FALSE	27
2022-09-12	14:39:46	0.506221	2.25177	2.20831	1732.01	FALSE	27
2022-09-12	14:39:46	0.57243	2.54628	2.20831	1652.36	FALSE	27
2022-09-12	14:39:46	0.263066	1.17017	2.20831	1733.18	FALSE	27
2022-09-12	14:39:46	0.644084	2.86501	2.20831	1655.23	FALSE	27
2022-09-12	14:39:47	0.118283	0.526146	1.3807	1733.71	FALSE	27
2022-09-12	14:39:47	0.437163	1.94459	1.3807	1657.17	FALSE	27
2022-09-12	14:39:47	0.386018	1.71709	1.3807	1735.42	FALSE	27
2022-09-12	14:39:47	0.300115	1.33497	1.3807	1658.51	FALSE	27
2022-09-12	14:39:48	0.303015	1.34787	1.25121	1736.77	FALSE	27
2022-09-12	14:39:48	0.283168	1.25959	1.25121	1659.77	FALSE	27
2022-09-12	14:39:48	0.25411	1.13033	1.25121	1737.9	FALSE	27
2022-09-12	14:39:48	0.284847	1.26706	1.25121	1661.04	FALSE	27
2022-09-12	14:39:49	0.276145	1.22835	1.25174	1739.13	FALSE	27
2022-09-12	14:39:49	0.273448	1.21635	1.25174	1662.25	FALSE	27
2022-09-12	14:39:49	0.294618	1.31052	1.25174	1740.44	FALSE	27
2022-09-12	14:39:50	0.359911	1.60096	1.22501	1663.85	FALSE	27
2022-09-12	14:39:50	0.163575	0.727614	1.22501	1741.17	FALSE	27
2022-09-12	14:39:50	0.380165	1.69105	1.22501	1665.54	FALSE	27
2022-09-12	14:39:50	0.197926	0.880414	1.22501	1742.05	FALSE	27
2022-09-12	14:39:51	0.35416	1.57537	1.23582	1667.12	FALSE	27
2022-09-12	14:39:51	0.127036	0.565082	1.23582	1742.61	FALSE	27
2022-09-12	14:39:51	0.375076	1.66841	1.23582	1668.79	FALSE	27
2022-09-12	14:39:51	0.255026	1.13441	1.23582	1743.75	FALSE	27
2022-09-12	14:39:52	0.256298	1.14006	1.01307	1669.93	FALSE	27
2022-09-12	14:39:52	0.178741	0.795076	1.01307	1744.54	FALSE	27
2022-09-12	14:39:52	0.275993	1.22767	1.01307	1671.16	FALSE	27
2022-09-12	14:39:52	0.199962	0.889471	1.01307	1745.43	FALSE	27

## Sheet: Ranger_harness_202291214343 (2)
Date	Time	Lbs	Newtons	Total Force x time	Total force steps > 13.345		**GoPro Fitting: 1424
2022-09-12	14:34:52	0.617316	2.74595	2.74595	FALSE	0			Total Force x time	1745.43
2022-09-12	14:34:52	0.39014	1.73542	1.73542	FALSE	0			Total Time Steps Force >3	27
2022-09-12	14:34:52	0.232685	1.03503	3.78097	FALSE	0
2022-09-12	14:34:52	0.605204	2.69207	4.42749	FALSE	0
2022-09-12	14:34:53	0.333092	1.48166	5.26263	FALSE	0
2022-09-12	14:34:53	0.667239	2.96801	7.3955	FALSE	0
2022-09-12	14:34:53	0.464135	2.06457	7.3272	FALSE	0
2022-09-12	14:34:53	0.817214	3.63513	11.0306	FALSE	0
2022-09-12	14:34:54	0.521539	2.31991	9.64711	FALSE	0
2022-09-12	14:34:54	0.321031	1.42801	12.4586	FALSE	0
2022-09-12	14:34:54	0.369224	1.64238	11.2895	FALSE	0
2022-09-12	14:34:54	0.772939	3.43819	15.8968	FALSE	0
2022-09-12	14:34:55	0.362048	1.61046	12.9	FALSE	0
2022-09-12	14:34:55	1.32546	5.89591	21.7927	FALSE	0
2022-09-12	14:34:55	0.401947	1.78794	14.6879	FALSE	0
2022-09-12	14:34:56	1.93497	8.60713	30.3999	FALSE	0
2022-09-12	14:34:56	0.202507	0.900792	15.5887	FALSE	0
2022-09-12	14:34:56	0.521031	2.31765	32.7175	FALSE	0
2022-09-12	14:34:56	1.15009	5.11583	20.7045	FALSE	0
2022-09-12	14:34:57	0.328868	1.46287	34.1804	FALSE	0
2022-09-12	14:34:57	0.358639	1.5953	22.2998	FALSE	0
2022-09-12	14:34:57	0.200725	0.892865	35.0733	FALSE	0
2022-09-12	14:34:57	0.731209	3.25256	25.5524	FALSE	0
2022-09-12	14:34:58	0.175891	0.782398	35.8557	FALSE	0
2022-09-12	14:34:58	1.91441	8.51568	34.0681	FALSE	0
2022-09-12	14:34:58	0.610852	2.71719	38.5729	FALSE	0
2022-09-12	14:34:58	3.08037	13.7021	47.7702	1	1
2022-09-12	14:34:59	0.682608	3.03638	41.6092	FALSE	1
2022-09-12	14:34:59	2.94103	13.0823	60.8524	FALSE	1
2022-09-12	14:34:59	1.53172	6.8134	48.4226	FALSE	1
2022-09-12	14:35:00	2.5251	11.2321	72.0846	FALSE	1
2022-09-12	14:35:00	0.874415	3.88957	52.3122	FALSE	1
2022-09-12	14:35:00	0.801794	3.56654	75.6511	FALSE	1
2022-09-12	14:35:00	0.292583	1.30147	53.6137	FALSE	1
2022-09-12	14:35:01	0.24673	1.0975	76.7486	FALSE	1
2022-09-12	14:35:01	0.184186	0.819296	54.433	FALSE	1
2022-09-12	14:35:01	0.698028	3.10497	79.8536	FALSE	1
2022-09-12	14:35:01	0.0638806	0.284154	54.7171	FALSE	1
2022-09-12	14:35:02	0.33645	1.4966	81.3502	FALSE	1
2022-09-12	14:35:02	0.158435	0.704751	55.4219	FALSE	1
2022-09-12	14:35:02	0.622761	2.77017	84.1204	FALSE	1
2022-09-12	14:35:02	1.90653	8.48063	63.9025	FALSE	1
2022-09-12	14:35:03	1.65452	7.35964	91.48	FALSE	1
2022-09-12	14:35:03	2.29075	10.1897	74.0922	FALSE	1
2022-09-12	14:35:03	1.38922	6.17953	97.6595	FALSE	1
2022-09-12	14:35:04	1.45752	6.48334	80.5755	FALSE	1
2022-09-12	14:35:04	0.449835	2.00096	99.6605	FALSE	1
2022-09-12	14:35:04	1.87513	8.34095	88.9165	FALSE	1
2022-09-12	14:35:04	0.215636	0.959192	100.62	FALSE	1
2022-09-12	14:35:05	1.85833	8.26622	97.1827	FALSE	1
2022-09-12	14:35:05	0.548766	2.44102	103.061	FALSE	1
2022-09-12	14:35:05	2.66251	11.8434	109.026	FALSE	1
2022-09-12	14:35:05	0.894669	3.97967	107.04	FALSE	1
2022-09-12	14:35:06	1.6593	7.3809	116.407	FALSE	1
2022-09-12	14:35:06	1.09961	4.89129	111.932	FALSE	1
2022-09-12	14:35:06	0.977417	4.34775	120.755	FALSE	1
2022-09-12	14:35:06	0.562862	2.50372	114.435	FALSE	1
2022-09-12	14:35:07	0.710038	3.15839	123.913	FALSE	1
2022-09-12	14:35:07	0.240013	1.06763	115.503	FALSE	1
2022-09-12	14:35:07	0.781081	3.4744	127.388	FALSE	1
2022-09-12	14:35:08	0.190496	0.847364	116.35	FALSE	1
2022-09-12	14:35:08	1.19864	5.33179	132.719	FALSE	1
2022-09-12	14:35:08	0.299758	1.33338	117.684	FALSE	1
2022-09-12	14:35:08	2.66469	11.8531	144.572	FALSE	1
2022-09-12	14:35:09	0.46444	2.06592	119.75	FALSE	1
2022-09-12	14:35:09	2.76256	12.2884	156.861	FALSE	1
2022-09-12	14:35:09	0.544338	2.42132	122.171	FALSE	1
2022-09-12	14:35:09	1.60765	7.15115	164.012	FALSE	1
2022-09-12	14:35:10	0.714924	3.18012	125.351	FALSE	1
2022-09-12	14:35:10	0.967341	4.30293	168.315	FALSE	1
2022-09-12	14:35:10	0.750496	3.33836	128.689	FALSE	1
2022-09-12	14:35:10	1.24134	5.52173	173.837	FALSE	1
2022-09-12	14:35:11	1.17335	5.2193	133.909	FALSE	1
2022-09-12	14:35:11	0.909936	4.04758	177.884	FALSE	1
2022-09-12	14:35:11	0.925662	4.11753	138.026	FALSE	1
2022-09-12	14:35:12	0.408766	1.81827	179.702	FALSE	1
2022-09-12	14:35:12	0.203575	0.905542	138.932	FALSE	1
2022-09-12	14:35:12	0.404084	1.79745	181.5	FALSE	1
2022-09-12	14:35:12	0.125509	0.558289	139.49	FALSE	1
2022-09-12	14:35:13	0.361132	1.60639	183.106	FALSE	1
2022-09-12	14:35:13	0.171463	0.762702	140.253	FALSE	1
2022-09-12	14:35:13	0.383931	1.7078	184.814	FALSE	1
2022-09-12	14:35:13	0.149784	0.666269	140.919	FALSE	1
2022-09-12	14:35:14	0.309529	1.37685	186.191	FALSE	1
2022-09-12	14:35:14	0.432277	1.92285	142.842	FALSE	1
2022-09-12	14:35:14	0.540827	2.40571	188.597	FALSE	1
2022-09-12	14:35:14	0.553601	2.46253	145.304	FALSE	1
2022-09-12	14:35:15	0.385254	1.71369	190.31	FALSE	1
2022-09-12	14:35:15	1.72459	7.67132	152.976	FALSE	1
2022-09-12	14:35:15	0.380827	1.69399	192.004	FALSE	1
2022-09-12	14:35:16	2.14047	9.52124	162.497	FALSE	1
2022-09-12	14:35:16	0.372277	1.65596	193.66	FALSE	1
2022-09-12	14:35:16	1.96169	8.72599	171.223	FALSE	1
2022-09-12	14:35:16	0.54215	2.41159	196.072	FALSE	1
2022-09-12	14:35:17	0.392328	1.74515	172.968	FALSE	1
2022-09-12	14:35:17	0.608715	2.70769	198.78	FALSE	1
2022-09-12	14:35:17	0.255789	1.1378	174.106	FALSE	1
2022-09-12	14:35:17	0.362761	1.61363	200.393	FALSE	1
2022-09-12	14:35:18	0.209529	0.932027	175.038	FALSE	1
2022-09-12	14:35:18	0.48897	2.17504	202.568	FALSE	1
2022-09-12	14:35:18	0.226374	1.00696	176.045	FALSE	1
2022-09-12	14:35:18	1.23055	5.47373	208.042	FALSE	1
2022-09-12	14:35:19	0.410954	1.82801	177.873	FALSE	1
2022-09-12	14:35:19	1.3592	6.04599	214.088	FALSE	1
2022-09-12	14:35:19	1.16286	5.17263	183.046	FALSE	1
2022-09-12	14:35:20	1.0565	4.69952	218.788	FALSE	1
2022-09-12	14:35:20	3.06642	13.64	196.686	1	2
2022-09-12	14:35:20	2.76098	12.2814	231.069	FALSE	2
2022-09-12	14:35:20	3.56408	15.8537	212.539	1	3
2022-09-12	14:35:21	0.858384	3.81826	234.887	FALSE	3
2022-09-12	14:35:21	0.759555	3.37865	215.918	FALSE	3
2022-09-12	14:35:21	0.274008	1.21884	236.106	FALSE	3
2022-09-12	14:35:21	0.744287	3.31074	219.229	FALSE	3
2022-09-12	14:35:22	0.666476	2.96462	239.071	FALSE	3
2022-09-12	14:35:22	0.982303	4.36948	223.598	FALSE	3
2022-09-12	14:35:22	0.728003	3.2383	242.309	FALSE	3
2022-09-12	14:35:23	1.82291	8.10867	231.707	FALSE	3
2022-09-12	14:35:23	0.79126	3.51968	245.829	FALSE	3
2022-09-12	14:35:23	1.55151	6.90143	238.608	FALSE	3
2022-09-12	14:35:23	1.03533	4.60535	250.434	FALSE	3
2022-09-12	14:35:24	1.0278	4.57186	243.18	FALSE	3
2022-09-12	14:35:24	0.483372	2.15014	252.584	FALSE	3
2022-09-12	14:35:24	0.323422	1.43865	244.619	FALSE	3
2022-09-12	14:35:24	0.933601	4.15284	256.737	FALSE	3
2022-09-12	14:35:25	2.1394	9.51648	254.135	FALSE	3
2022-09-12	14:35:25	3.80118	16.9084	273.645	1	4
2022-09-12	14:35:25	2.61009	11.6102	265.746	FALSE	4
2022-09-12	14:35:25	1.23467	5.49206	279.137	FALSE	4
2022-09-12	14:35:26	0.359249	1.59801	267.344	FALSE	4
2022-09-12	14:35:26	0.0901401	0.400961	279.538	FALSE	4
2022-09-12	14:35:26	0.582608	2.59156	269.935	FALSE	4
2022-09-12	14:35:27	0.112583	0.500792	280.039	FALSE	4
2022-09-12	14:35:27	0.362863	1.61409	271.549	FALSE	4
2022-09-12	14:35:27	0.218741	0.973004	281.012	FALSE	4
2022-09-12	14:35:27	0.524745	2.33417	273.883	FALSE	4
2022-09-12	14:35:28	0.402608	1.79088	282.803	FALSE	4
2022-09-12	14:35:28	0.573092	2.54923	276.433	FALSE	4
2022-09-12	14:35:28	0.985153	4.38216	287.185	FALSE	4
2022-09-12	14:35:28	0.799046	3.55432	279.987	FALSE	4
2022-09-12	14:35:29	0.207443	0.922748	288.108	FALSE	4
2022-09-12	14:35:29	0.530241	2.35862	282.346	FALSE	4
2022-09-12	14:35:29	1.23299	5.48459	293.593	FALSE	4
2022-09-12	14:35:29	0.646221	2.87452	285.22	FALSE	4
2022-09-12	14:35:30	1.28307	5.70735	299.3	FALSE	4
2022-09-12	14:35:30	0.436959	1.94368	287.164	FALSE	4
2022-09-12	14:35:30	1.27772	5.68355	304.983	FALSE	4
2022-09-12	14:35:31	0.43243	1.92354	289.087	FALSE	4
2022-09-12	14:35:31	3.06683	13.6419	318.625	1	5
2022-09-12	14:35:31	0.831768	3.69987	292.787	FALSE	5
2022-09-12	14:35:31	6.32739	28.1455	346.771	1	6
2022-09-12	14:35:32	1.25146	5.56674	298.354	FALSE	6
2022-09-12	14:35:32	2.87009	12.7667	359.538	FALSE	6
2022-09-12	14:35:32	0.350903	1.56089	299.915	FALSE	6
2022-09-12	14:35:32	0.95757	4.25946	363.797	FALSE	6
2022-09-12	14:35:33	0.423626	1.88437	301.799	FALSE	6
2022-09-12	14:35:33	0.287188	1.27747	365.074	FALSE	6
2022-09-12	14:35:33	0.54617	2.42947	304.229	FALSE	6
2022-09-12	14:35:33	0.255229	1.13531	366.21	FALSE	6
2022-09-12	14:35:34	0.853906	3.79834	308.027	FALSE	6
2022-09-12	14:35:34	0.248257	1.1043	367.314	FALSE	6
2022-09-12	14:35:34	0.759097	3.37662	311.404	FALSE	6
2022-09-12	14:35:35	0.320166	1.42416	368.738	FALSE	6
2022-09-12	14:35:35	0.929173	4.13315	315.537	FALSE	6
2022-09-12	14:35:35	0.260623	1.1593	369.898	FALSE	6
2022-09-12	14:35:35	1.26485	5.62631	321.163	FALSE	6
2022-09-12	14:35:36	0.432888	1.92557	371.823	FALSE	6
2022-09-12	14:35:36	1.88856	8.40069	329.564	FALSE	6
2022-09-12	14:35:36	0.426171	1.89569	373.719	FALSE	6
2022-09-12	14:35:36	0.0583845	0.259706	329.823	FALSE	6
2022-09-12	14:35:37	0.0920739	0.409563	374.128	FALSE	6
2022-09-12	14:35:37	-0.237748	-1.05755	329.823	FALSE	6
2022-09-12	14:35:37	-0.329351	-1.46502	374.128	FALSE	6
2022-09-12	14:35:37	-0.379682	-1.6889	329.823	FALSE	6
2022-09-12	14:35:38	-0.441768	-1.96507	374.128	FALSE	6
2022-09-12	14:35:38	-0.206094	-0.916747	329.823	FALSE	6
2022-09-12	14:35:38	-0.0118445	-0.0526867	374.128	FALSE	6
2022-09-12	14:35:39	0.245102	1.09026	330.914	FALSE	6
2022-09-12	14:35:39	1.28022	5.69467	379.823	FALSE	6
2022-09-12	14:35:39	0.113346	0.504186	331.418	FALSE	6
2022-09-12	14:35:39	0.151362	0.673288	380.496	FALSE	6
2022-09-12	14:35:40	0.594262	2.6434	334.061	FALSE	6
2022-09-12	14:35:40	0.201641	0.896939	381.393	FALSE	6
2022-09-12	14:35:40	0.118995	0.529314	334.591	FALSE	6
2022-09-12	14:35:40	0.210038	0.934291	382.328	FALSE	6
2022-09-12	14:35:41	0.403779	1.79609	336.387	FALSE	6
2022-09-12	14:35:41	0.343219	1.52671	383.854	FALSE	6
2022-09-12	14:35:41	0.456756	2.03174	338.418	FALSE	6
2022-09-12	14:35:41	0.114008	0.50713	384.361	FALSE	6
2022-09-12	14:35:42	0.240573	1.07012	339.489	FALSE	6
2022-09-12	14:35:42	0.104542	0.465024	384.826	FALSE	6
2022-09-12	14:35:42	0.208817	0.92886	340.417	FALSE	6
2022-09-12	14:35:43	0.0198603	0.0883426	384.915	FALSE	6
2022-09-12	14:35:43	0.139606	0.620995	341.038	FALSE	6
2022-09-12	14:35:43	-0.0513865	-0.228577	384.915	FALSE	6
2022-09-12	14:35:43	0.227545	1.01217	342.051	FALSE	6
2022-09-12	14:35:44	0.177214	0.788283	385.703	FALSE	6
2022-09-12	14:35:44	0.164084	0.729878	342.78	FALSE	6
2022-09-12	14:35:44	0.0309035	0.137465	385.841	FALSE	6
2022-09-12	14:35:44	0.240216	1.06853	343.849	FALSE	6
2022-09-12	14:35:45	0.00978398	0.0435211	385.884	FALSE	6
2022-09-12	14:35:45	0.0782318	0.347991	344.197	FALSE	6
2022-09-12	14:35:45	-0.0607504	-0.27023	385.884	FALSE	6
2022-09-12	14:35:45	0.0627101	0.278947	344.476	FALSE	6
2022-09-12	14:35:46	-0.0511321	-0.227446	385.884	FALSE	6
2022-09-12	14:35:46	0.100471	0.446915	344.923	FALSE	6
2022-09-12	14:35:46	-0.0417682	-0.185793	385.884	FALSE	6
2022-09-12	14:35:47	0.0567051	0.252236	345.175	FALSE	6
2022-09-12	14:35:47	-0.0156613	-0.0696646	385.884	FALSE	6
2022-09-12	14:35:47	0.0479519	0.2133	345.388	FALSE	6
2022-09-12	14:35:47	-0.116068	-0.516294	385.884	FALSE	6
2022-09-12	14:35:48	0.037214	0.165535	345.554	FALSE	6
2022-09-12	14:35:48	-0.074389	-0.330897	385.884	FALSE	6
2022-09-12	14:35:48	-0.05673	-0.252346	345.554	FALSE	6
2022-09-12	14:35:48	-0.21729	-0.966549	385.884	FALSE	6
2022-09-12	14:35:49	-0.0477224	-0.212279	345.554	FALSE	6
2022-09-12	14:35:49	-0.0389183	-0.173116	385.884	FALSE	6
2022-09-12	14:35:49	0.104898	0.466607	346.021	FALSE	6
2022-09-12	14:35:49	-0.058104	-0.258458	385.884	FALSE	6
2022-09-12	14:35:50	0.0534989	0.237974	346.258	FALSE	6
2022-09-12	14:35:50	0.294313	1.30916	387.193	FALSE	6
2022-09-12	14:35:50	0.222303	0.988848	347.247	FALSE	6
2022-09-12	14:35:51	0.0624048	0.277589	387.471	FALSE	6
2022-09-12	14:35:51	0.182099	0.810013	348.057	FALSE	6
2022-09-12	14:35:51	0.0733972	0.326485	387.797	FALSE	6
2022-09-12	14:35:51	0.287188	1.27747	349.335	FALSE	6
2022-09-12	14:35:52	0.0408781	0.181834	387.979	FALSE	6
2022-09-12	14:35:52	1.4024	6.23816	355.573	FALSE	6
2022-09-12	14:35:52	0.201031	0.894226	388.873	FALSE	6
2022-09-12	14:35:52	0.893601	3.97492	359.548	FALSE	6
2022-09-12	14:35:53	0.400624	1.78206	390.655	FALSE	6
2022-09-12	14:35:53	0.468206	2.08267	361.631	FALSE	6
2022-09-12	14:35:53	1.44454	6.4256	397.081	FALSE	6
2022-09-12	14:35:53	0.519402	2.3104	363.941	FALSE	6
2022-09-12	14:35:54	0.548664	2.44057	399.522	FALSE	6
2022-09-12	14:35:54	0.586374	2.60831	366.549	FALSE	6
2022-09-12	14:35:54	1.34332	5.97536	405.497	FALSE	6
2022-09-12	14:35:55	1.23126	5.47689	372.026	FALSE	6
2022-09-12	14:35:55	1.71681	7.63671	413.134	FALSE	6
2022-09-12	14:35:55	1.18093	5.25301	377.279	FALSE	6
2022-09-12	14:35:55	0.1993	0.886526	414.02	FALSE	6
2022-09-12	14:35:56	0.339657	1.51086	378.79	FALSE	6
2022-09-12	14:35:56	0.334618	1.48845	415.509	FALSE	6
2022-09-12	14:35:56	0.321489	1.43005	380.22	FALSE	6
2022-09-12	14:35:56	0.177621	0.790094	416.299	FALSE	6
2022-09-12	14:35:57	0.362354	1.61182	381.832	FALSE	6
2022-09-12	14:35:57	0.215433	0.958289	417.257	FALSE	6
2022-09-12	14:35:57	0.331718	1.47555	383.307	FALSE	6
2022-09-12	14:35:57	0.279962	1.24533	418.502	FALSE	6
2022-09-12	14:35:58	0.382557	1.70169	385.009	FALSE	6
2022-09-12	14:35:58	0.419351	1.86536	420.368	FALSE	6
2022-09-12	14:35:58	0.32673	1.45336	386.463	FALSE	6
2022-09-12	14:35:59	0.169428	0.75365	421.121	FALSE	6
2022-09-12	14:35:59	0.725509	3.22721	389.69	FALSE	6
2022-09-12	14:35:59	0.525865	2.33915	423.46	FALSE	6
2022-09-12	14:35:59	0.0806745	0.358856	390.049	FALSE	6
2022-09-12	14:36:00	0.27701	1.2322	424.693	FALSE	6
2022-09-12	14:36:00	0.150598	0.66989	390.718	FALSE	6
2022-09-12	14:36:00	0.202812	0.902148	425.595	FALSE	6
2022-09-12	14:36:00	0.260827	1.16021	391.879	FALSE	6
2022-09-12	14:36:01	1.07737	4.79236	430.387	FALSE	6
2022-09-12	14:36:01	0.220522	0.980926	392.86	FALSE	6
2022-09-12	14:36:01	0.386883	1.72093	432.108	FALSE	6
2022-09-12	14:36:01	0.727748	3.23717	396.097	FALSE	6
2022-09-12	14:36:02	0.687545	3.05834	435.166	FALSE	6
2022-09-12	14:36:02	0.248054	1.10339	397.2	FALSE	6
2022-09-12	14:36:02	0.00545825	0.0242794	435.191	FALSE	6
2022-09-12	14:36:03	-0.147468	-0.655967	397.2	FALSE	6
2022-09-12	14:36:03	-0.18243	-0.811485	435.191	FALSE	6
2022-09-12	14:36:03	-0.138715	-0.617032	397.2	FALSE	6
2022-09-12	14:36:03	-0.177341	-0.788848	435.191	FALSE	6
2022-09-12	14:36:04	-0.326704	-1.45324	397.2	FALSE	6
2022-09-12	14:36:04	-0.467824	-2.08097	435.191	FALSE	6
2022-09-12	14:36:04	-0.38243	-1.70113	397.2	FALSE	6
2022-09-12	14:36:04	-0.397849	-1.76971	435.191	FALSE	6
2022-09-12	14:36:05	-0.26416	-1.17504	397.2	FALSE	6
2022-09-12	14:36:05	-0.36416	-1.61986	435.191	FALSE	6
2022-09-12	14:36:05	-0.186704	-0.830497	397.2	FALSE	6
2022-09-12	14:36:05	0.00591628	0.0263168	435.217	FALSE	6
2022-09-12	14:36:06	0.41869	1.86242	399.063	FALSE	6
2022-09-12	14:36:06	0.406629	1.80877	437.026	FALSE	6
2022-09-12	14:36:06	0.25869	1.1507	400.213	FALSE	6
2022-09-12	14:36:07	0.256349	1.14029	438.166	FALSE	6
2022-09-12	14:36:07	0.274669	1.22178	401.435	FALSE	6
2022-09-12	14:36:07	0.483881	2.1524	440.319	FALSE	6
2022-09-12	14:36:07	0.456349	2.02993	403.465	FALSE	6
2022-09-12	14:36:08	0.623168	2.77198	443.09	FALSE	6
2022-09-12	14:36:08	0.272532	1.21228	404.677	FALSE	6
2022-09-12	14:36:08	0.569885	2.53496	445.625	FALSE	6
2022-09-12	14:36:08	0.576807	2.56575	407.243	FALSE	6
2022-09-12	14:36:09	0.342506	1.52354	447.149	FALSE	6
2022-09-12	14:36:09	0.0605728	0.26944	407.512	FALSE	6
2022-09-12	14:36:09	0.209326	0.931124	448.08	FALSE	6
2022-09-12	14:36:09	-0.0422262	-0.187831	407.512	FALSE	6
2022-09-12	14:36:10	0.144288	0.641822	448.722	FALSE	6
2022-09-12	14:36:10	-0.125636	-0.558854	407.512	FALSE	6
2022-09-12	14:36:10	0.0635244	0.282569	449.005	FALSE	6
2022-09-12	14:36:11	-0.184872	-0.822348	407.512	FALSE	6
2022-09-12	14:36:11	-0.0826842	-0.367796	449.005	FALSE	6
2022-09-12	14:36:11	-0.216425	-0.962702	407.512	FALSE	6
2022-09-12	14:36:11	-0.219885	-0.978092	449.005	FALSE	6
2022-09-12	14:36:12	-0.312506	-1.39009	407.512	FALSE	6
2022-09-12	14:36:12	-0.463193	-2.06038	449.005	FALSE	6
2022-09-12	14:36:12	-0.306908	-1.36519	407.512	FALSE	6
2022-09-12	14:36:12	-0.442837	-1.96983	449.005	FALSE	6
2022-09-12	14:36:13	-0.34701	-1.54357	407.512	FALSE	6
2022-09-12	14:36:13	-0.36701	-1.63253	449.005	FALSE	6
2022-09-12	14:36:13	-0.219224	-0.975152	407.512	FALSE	6
2022-09-12	14:36:14	-0.300699	-1.33757	449.005	FALSE	6
2022-09-12	14:36:14	-0.310216	-1.3799	407.512	FALSE	6
2022-09-12	14:36:14	-0.328587	-1.46162	449.005	FALSE	6
2022-09-12	14:36:14	-0.145738	-0.648272	407.512	FALSE	6
2022-09-12	14:36:15	-0.119936	-0.533499	449.005	FALSE	6
2022-09-12	14:36:15	-0.0210048	-0.0934336	407.512	FALSE	6
2022-09-12	14:36:15	-0.173422	-0.771416	449.005	FALSE	6
2022-09-12	14:36:15	-0.00996157	-0.0443111	407.512	FALSE	6
2022-09-12	14:36:16	0.0246949	0.109848	449.114	FALSE	6
2022-09-12	14:36:16	-0.199427	-0.887091	407.512	FALSE	6
2022-09-12	14:36:16	-0.191132	-0.850193	449.114	FALSE	6
2022-09-12	14:36:16	-0.0617173	-0.274531	407.512	FALSE	6
2022-09-12	14:36:17	0.0153819	0.0684218	449.183	FALSE	6
2022-09-12	14:36:17	-0.0401397	-0.178549	407.512	FALSE	6
2022-09-12	14:36:17	-0.131488	-0.584885	449.183	FALSE	6
2022-09-12	14:36:18	-0.11159	-0.496375	407.512	FALSE	6
2022-09-12	14:36:18	-0.0460939	-0.205035	449.183	FALSE	6
2022-09-12	14:36:18	-0.209962	-0.933953	407.512	FALSE	6
2022-09-12	14:36:18	0.0775193	0.344821	449.528	FALSE	6
2022-09-12	14:36:19	-0.0205468	-0.0913963	407.512	FALSE	6
2022-09-12	14:36:19	0.152583	0.67872	450.206	FALSE	6
2022-09-12	14:36:19	0.373041	1.65936	409.172	FALSE	6
2022-09-12	14:36:19	0.258537	1.15002	451.356	FALSE	6
2022-09-12	14:36:20	1.25116	5.56541	414.737	FALSE	6
2022-09-12	14:36:20	0.150547	0.669663	452.026	FALSE	6
2022-09-12	14:36:20	0.136654	0.607864	415.345	FALSE	6
2022-09-12	14:36:20	0.562099	2.50033	454.526	FALSE	6
2022-09-12	14:36:21	0.395534	1.75941	417.105	FALSE	6
2022-09-12	14:36:21	0.415636	1.84883	456.375	FALSE	6
2022-09-12	14:36:21	0.542252	2.41205	419.517	FALSE	6
2022-09-12	14:36:22	0.556247	2.4743	458.849	FALSE	6
2022-09-12	14:36:22	0.66159	2.94288	422.459	FALSE	6
2022-09-12	14:36:22	0.174669	0.776963	459.626	FALSE	6
2022-09-12	14:36:22	0.210445	0.936101	423.396	FALSE	6
2022-09-12	14:36:23	0.217417	0.967114	460.594	FALSE	6
2022-09-12	14:36:23	0.182099	0.810013	424.206	FALSE	6
2022-09-12	14:36:23	0.154211	0.685961	461.279	FALSE	6
2022-09-12	14:36:23	0.425407	1.8923	426.098	FALSE	6
2022-09-12	14:36:24	0.394517	1.75489	463.034	FALSE	6
2022-09-12	14:36:24	0.400674	1.78228	427.88	FALSE	6
2022-09-12	14:36:24	0.121489	0.540407	463.575	FALSE	6
2022-09-12	14:36:24	0.311565	1.3859	429.266	FALSE	6
2022-09-12	14:36:25	0.216807	0.964401	464.539	FALSE	6
2022-09-12	14:36:25	0.337316	1.50045	430.766	FALSE	6
2022-09-12	14:36:25	0.122608	0.545385	465.085	FALSE	6
2022-09-12	14:36:26	0.437875	1.94776	432.714	FALSE	6
2022-09-12	14:36:26	0.281641	1.2528	466.337	FALSE	6
2022-09-12	14:36:26	0.281947	1.25416	433.968	FALSE	6
2022-09-12	14:36:26	0.202201	0.89943	467.237	FALSE	6
2022-09-12	14:36:27	0.156807	0.697509	434.666	FALSE	6
2022-09-12	14:36:27	0.25701	1.14323	468.38	FALSE	6
2022-09-12	14:36:27	0.26958	1.19915	435.865	FALSE	6
2022-09-12	14:36:27	0.35187	1.56519	469.945	FALSE	6
2022-09-12	14:36:28	0.181285	0.806392	436.671	FALSE	6
2022-09-12	14:36:28	0.392481	1.74583	471.691	FALSE	6
2022-09-12	14:36:28	0.320827	1.4271	438.099	FALSE	6
2022-09-12	14:36:28	0.318537	1.41692	473.108	FALSE	6
2022-09-12	14:36:29	0.317468	1.41216	439.511	FALSE	6
2022-09-12	14:36:29	0.264847	1.17809	474.286	FALSE	6
2022-09-12	14:36:29	0.455433	2.02586	441.537	FALSE	6
2022-09-12	14:36:30	0.293753	1.30667	475.593	FALSE	6
2022-09-12	14:36:30	0.490496	2.18182	443.718	FALSE	6
2022-09-12	14:36:30	0.258588	1.15025	476.743	FALSE	6
2022-09-12	14:36:30	0.454211	2.02042	445.739	FALSE	6
2022-09-12	14:36:31	0.935483	4.16122	480.904	FALSE	6
2022-09-12	14:36:31	0.40612	1.8065	447.545	FALSE	6
2022-09-12	14:36:31	0.326679	1.45313	482.357	FALSE	6
2022-09-12	14:36:31	0.926272	4.12024	451.666	FALSE	6
2022-09-12	14:36:32	0.37299	1.65913	484.016	FALSE	6
2022-09-12	14:36:32	0.936094	4.16393	455.829	FALSE	6
2022-09-12	14:36:32	0.362608	1.61295	485.629	FALSE	6
2022-09-12	14:36:32	0.664593	2.95624	458.786	FALSE	6
2022-09-12	14:36:33	2.06016	9.164	494.793	FALSE	6
2022-09-12	14:36:33	0.608817	2.70814	461.494	FALSE	6
2022-09-12	14:36:33	2.03696	9.06081	503.854	FALSE	6
2022-09-12	14:36:34	0.301336	1.3404	462.834	FALSE	6
2022-09-12	14:36:34	0.307901	1.36961	505.224	FALSE	6
2022-09-12	14:36:34	1.01207	4.50189	467.336	FALSE	6
2022-09-12	14:36:34	0.396909	1.76553	506.989	FALSE	6
2022-09-12	14:36:35	0.2993	1.33135	468.668	FALSE	6
2022-09-12	14:36:35	0.451616	2.00888	508.998	FALSE	6
2022-09-12	14:36:35	0.289173	1.2863	469.954	FALSE	6
2022-09-12	14:36:35	0.272786	1.21341	510.212	FALSE	6
2022-09-12	14:36:36	0.0089188	0.0396726	469.993	FALSE	6
2022-09-12	14:36:36	0.183372	0.815675	511.027	FALSE	6
2022-09-12	14:36:36	0.152278	0.677363	470.671	FALSE	6
2022-09-12	14:36:36	0.237875	1.05812	512.085	FALSE	6
2022-09-12	14:36:37	0.156705	0.697055	471.368	FALSE	6
2022-09-12	14:36:37	0.372888	1.65868	513.744	FALSE	6
2022-09-12	14:36:37	0.124746	0.554895	471.923	FALSE	6
2022-09-12	14:36:38	0.313346	1.39383	515.138	FALSE	6
2022-09-12	14:36:38	0.317926	1.4142	473.337	FALSE	6
2022-09-12	14:36:38	0.345	1.53463	516.673	FALSE	6
2022-09-12	14:36:38	0.246018	1.09434	474.431	FALSE	6
2022-09-12	14:36:39	0.331158	1.47306	518.146	FALSE	6
2022-09-12	14:36:39	0.314466	1.39881	475.83	FALSE	6
2022-09-12	14:36:39	1.33421	5.93483	524.08	FALSE	6
2022-09-12	14:36:39	0.307494	1.36779	477.198	FALSE	6
2022-09-12	14:36:40	0.408003	1.81488	525.895	FALSE	6
2022-09-12	14:36:40	0.585356	2.60378	479.802	FALSE	6
2022-09-12	14:36:40	0.474669	2.11142	528.007	FALSE	6
2022-09-12	14:36:40	1.24195	5.52444	485.326	FALSE	6
2022-09-12	14:36:41	0.4793	2.13202	530.139	FALSE	6
2022-09-12	14:36:41	1.00826	4.48494	489.811	FALSE	6
2022-09-12	14:36:41	1.11218	4.9472	535.086	FALSE	6
2022-09-12	14:36:42	0.666425	2.96439	492.775	FALSE	6
2022-09-12	14:36:42	1.62821	7.2426	542.329	FALSE	6
2022-09-12	14:36:42	0.237316	1.05563	493.831	FALSE	6
2022-09-12	14:36:42	0.464135	2.06457	544.393	FALSE	6
2022-09-12	14:36:43	0.267036	1.18783	495.019	FALSE	6
2022-09-12	14:36:43	0.416909	1.85449	546.248	FALSE	6
2022-09-12	14:36:43	0.132328	0.588621	495.608	FALSE	6
2022-09-12	14:36:43	0.491616	2.18681	548.434	FALSE	6
2022-09-12	14:36:44	0.171361	0.762248	496.37	FALSE	6
2022-09-12	14:36:44	0.410852	1.82755	550.262	FALSE	6
2022-09-12	14:36:44	0.398741	1.77368	498.144	FALSE	6
2022-09-12	14:36:44	0.296603	1.31935	551.581	FALSE	6
2022-09-12	14:36:45	0.335942	1.49434	499.638	FALSE	6
2022-09-12	14:36:45	0.306527	1.36349	552.945	FALSE	6
2022-09-12	14:36:45	0.302608	1.34606	500.984	FALSE	6
2022-09-12	14:36:46	0.194822	0.866607	553.811	FALSE	6
2022-09-12	14:36:46	0.409224	1.82031	502.804	FALSE	6
2022-09-12	14:36:46	0.338588	1.50611	555.318	FALSE	6
2022-09-12	14:36:46	0.426476	1.89705	504.701	FALSE	6
2022-09-12	14:36:47	0.243168	1.08166	556.399	FALSE	6
2022-09-12	14:36:47	0.408563	1.81737	506.519	FALSE	6
2022-09-12	14:36:47	0.379402	1.68766	558.087	FALSE	6
2022-09-12	14:36:47	0.682405	3.03547	509.554	FALSE	6
2022-09-12	14:36:48	0.581845	2.58816	560.675	FALSE	6
2022-09-12	14:36:48	0.52439	2.33259	511.887	FALSE	6
2022-09-12	14:36:48	0.596858	2.65494	563.33	FALSE	6
2022-09-12	14:36:48	0.513652	2.28483	514.172	FALSE	6
2022-09-12	14:36:49	0.397621	1.7687	565.099	FALSE	6
2022-09-12	14:36:49	0.385509	1.71482	515.886	FALSE	6
2022-09-12	14:36:49	0.405865	1.80537	566.904	FALSE	6
2022-09-12	14:36:50	0.405764	1.80492	517.691	FALSE	6
2022-09-12	14:36:50	0.536959	2.3885	569.293	FALSE	6
2022-09-12	14:36:50	0.722557	3.21408	520.905	FALSE	6
2022-09-12	14:36:50	0.567952	2.52636	571.819	FALSE	6
2022-09-12	14:36:51	0.346018	1.53916	522.444	FALSE	6
2022-09-12	14:36:51	0.386629	1.7198	573.539	FALSE	6
2022-09-12	14:36:51	0.491514	2.18635	524.631	FALSE	6
2022-09-12	14:36:51	0.531158	2.3627	575.901	FALSE	6
2022-09-12	14:36:52	0.492837	2.19224	526.823	FALSE	6
2022-09-12	14:36:52	0.402456	1.7902	577.692	FALSE	6
2022-09-12	14:36:52	0.398639	1.77323	528.596	FALSE	6
2022-09-12	14:36:52	0.399046	1.77504	579.467	FALSE	6
2022-09-12	14:36:53	0.38159	1.69739	530.294	FALSE	6
2022-09-12	14:36:53	0.352176	1.56655	581.033	FALSE	6
2022-09-12	14:36:53	0.379606	1.68856	531.982	FALSE	6
2022-09-12	14:36:54	0.344339	1.53169	582.565	FALSE	6
2022-09-12	14:36:54	0.419962	1.86807	533.85	FALSE	6
2022-09-12	14:36:54	0.37701	1.67702	584.242	FALSE	6
2022-09-12	14:36:54	0.365611	1.62631	535.477	FALSE	6
2022-09-12	14:36:55	0.359351	1.59847	585.84	FALSE	6
2022-09-12	14:36:55	0.392735	1.74696	537.224	FALSE	6
2022-09-12	14:36:55	0.178995	0.796206	586.637	FALSE	6
2022-09-12	14:36:55	0.213702	0.950589	538.174	FALSE	6
2022-09-12	14:36:56	0.193041	0.858685	587.495	FALSE	6
2022-09-12	14:36:56	0.147748	0.657213	538.831	FALSE	6
2022-09-12	14:36:56	0.228512	1.01647	588.512	FALSE	6
2022-09-12	14:36:56	0.0810307	0.360441	539.192	FALSE	6
2022-09-12	14:36:57	0.0509036	0.226429	588.738	FALSE	6
2022-09-12	14:36:57	0.101082	0.449633	539.641	FALSE	6
2022-09-12	14:36:57	0.0527356	0.234578	588.973	FALSE	6
2022-09-12	14:36:58	-0.00823129	-0.0366144	539.641	FALSE	6
2022-09-12	14:36:58	-0.297748	-1.32444	588.973	FALSE	6
2022-09-12	14:36:58	-0.671793	-2.98827	539.641	FALSE	6
2022-09-12	14:36:58	-0.647824	-2.88165	588.973	FALSE	6
2022-09-12	14:36:59	-0.74187	-3.29999	539.641	FALSE	6
2022-09-12	14:36:59	-0.532099	-2.36688	588.973	FALSE	6
2022-09-12	14:36:59	-0.362531	-1.61261	539.641	FALSE	6
2022-09-12	14:36:59	-0.394491	-1.75477	588.973	FALSE	6
2022-09-12	14:37:00	-0.513015	-2.28199	539.641	FALSE	6
2022-09-12	14:37:00	-0.368638	-1.63978	588.973	FALSE	6
2022-09-12	14:37:00	-0.100191	-0.44567	539.641	FALSE	6
2022-09-12	14:37:01	-0.175203	-0.779338	588.973	FALSE	6
2022-09-12	14:37:01	0.182405	0.811374	540.453	FALSE	6
2022-09-12	14:37:01	0.146323	0.650874	589.624	FALSE	6
2022-09-12	14:37:01	0.336858	1.49841	541.951	FALSE	6
2022-09-12	14:37:02	0.206985	0.920711	590.544	FALSE	6
2022-09-12	14:37:02	0.448766	1.9962	543.947	FALSE	6
2022-09-12	14:37:02	0.220318	0.980019	591.524	FALSE	6
2022-09-12	14:37:02	0.503473	2.23955	546.187	FALSE	6
2022-09-12	14:37:03	0.244389	1.08709	592.611	FALSE	6
2022-09-12	14:37:03	0.383117	1.70418	547.891	FALSE	6
2022-09-12	14:37:03	0.330344	1.46944	594.081	FALSE	6
2022-09-12	14:37:03	0.344288	1.53146	549.423	FALSE	6
2022-09-12	14:37:04	0.5593	2.48788	596.569	FALSE	6
2022-09-12	14:37:04	0.471311	2.09649	551.519	FALSE	6
2022-09-12	14:37:04	0.312939	1.39202	597.961	FALSE	6
2022-09-12	14:37:05	0.487952	2.17051	553.69	FALSE	6
2022-09-12	14:37:05	0.608766	2.70791	600.669	FALSE	6
2022-09-12	14:37:05	0.847036	3.76779	557.457	FALSE	6
2022-09-12	14:37:05	0.518639	2.30701	602.976	FALSE	6
2022-09-12	14:37:06	0.6536	2.90734	560.365	FALSE	6
2022-09-12	14:37:06	0.392176	1.74448	604.72	FALSE	6
2022-09-12	14:37:06	0.558791	2.48561	562.85	FALSE	6
2022-09-12	14:37:06	0.511819	2.27667	606.997	FALSE	6
2022-09-12	14:37:07	0.45416	2.02019	564.871	FALSE	6
2022-09-12	14:37:07	0.484491	2.15511	609.152	FALSE	6
2022-09-12	14:37:07	0.45355	2.01748	566.888	FALSE	6
2022-09-12	14:37:07	0.491921	2.18816	611.34	FALSE	6
2022-09-12	14:37:08	0.485865	2.16122	569.049	FALSE	6
2022-09-12	14:37:08	0.511209	2.27396	613.614	FALSE	6
2022-09-12	14:37:08	0.426272	1.89614	570.945	FALSE	6
2022-09-12	14:37:09	0.300624	1.33724	614.951	FALSE	6
2022-09-12	14:37:09	0.278639	1.23944	572.185	FALSE	6
2022-09-12	14:37:09	-0.15215	-0.676794	614.951	FALSE	6
2022-09-12	14:37:09	-0.217646	-0.968133	572.185	FALSE	6
2022-09-12	14:37:10	-0.134135	-0.596659	614.951	FALSE	6
2022-09-12	14:37:10	-0.209045	-0.929874	572.185	FALSE	6
2022-09-12	14:37:10	-0.23561	-1.04804	614.951	FALSE	6
2022-09-12	14:37:10	-0.211895	-0.942551	572.185	FALSE	6
2022-09-12	14:37:11	-0.153066	-0.680868	614.951	FALSE	6
2022-09-12	14:37:11	0.03813	0.16961	572.355	FALSE	6
2022-09-12	14:37:11	0.165407	0.735763	615.687	FALSE	6
2022-09-12	14:37:11	0.331769	1.47577	573.83	FALSE	6
2022-09-12	14:37:12	0.33243	1.47872	617.166	FALSE	6
2022-09-12	14:37:12	0.259453	1.1541	574.984	FALSE	6
2022-09-12	14:37:12	0.184797	0.822014	617.988	FALSE	6
2022-09-12	14:37:13	0.27355	1.21681	576.201	FALSE	6
2022-09-12	14:37:13	0.334618	1.48845	619.476	FALSE	6
2022-09-12	14:37:13	0.2707	1.20413	577.405	FALSE	6
2022-09-12	14:37:13	0.296145	1.31731	620.794	FALSE	6
2022-09-12	14:37:14	0.31416	1.39745	578.803	FALSE	6
2022-09-12	14:37:14	0.287087	1.27702	622.071	FALSE	6
2022-09-12	14:37:14	0.244644	1.08823	579.891	FALSE	6
2022-09-12	14:37:14	0.515687	2.29388	624.364	FALSE	6
2022-09-12	14:37:15	0.35411	1.57515	581.466	FALSE	6
2022-09-12	14:37:15	0.626679	2.78759	627.152	FALSE	6
2022-09-12	14:37:15	0.55528	2.47	583.936	FALSE	6
2022-09-12	14:37:15	0.420929	1.87238	629.024	FALSE	6
2022-09-12	14:37:16	0.479911	2.13474	586.071	FALSE	6
2022-09-12	14:37:16	0.562354	2.50146	631.526	FALSE	6
2022-09-12	14:37:16	0.439504	1.955	588.026	FALSE	6
2022-09-12	14:37:17	0.18444	0.820426	632.346	FALSE	6
2022-09-12	14:37:17	0.151311	0.673062	588.699	FALSE	6
2022-09-12	14:37:17	0.268155	1.19281	633.539	FALSE	6
2022-09-12	14:37:17	0.0295804	0.13158	588.831	FALSE	6
2022-09-12	14:37:18	0.137468	0.611485	634.151	FALSE	6
2022-09-12	14:37:18	-0.00726439	-0.0323135	588.831	FALSE	6
2022-09-12	14:37:18	0.142659	0.634576	634.785	FALSE	6
2022-09-12	14:37:18	0.239148	1.06378	589.894	FALSE	6
2022-09-12	14:37:19	0.445255	1.98058	636.766	FALSE	6
2022-09-12	14:37:19	0.33126	1.47351	591.368	FALSE	6
2022-09-12	14:37:19	0.747646	3.32568	640.091	FALSE	6
2022-09-12	14:37:19	0.274771	1.22224	592.59	FALSE	6
2022-09-12	14:37:20	1.0106	4.49535	644.587	FALSE	6
2022-09-12	14:37:20	0.311769	1.38681	593.977	FALSE	6
2022-09-12	14:37:20	1.03905	4.6219	649.209	FALSE	6
2022-09-12	14:37:21	0.289224	1.28653	595.263	FALSE	6
2022-09-12	14:37:21	0.525407	2.33712	651.546	FALSE	6
2022-09-12	14:37:21	0.58556	2.60469	597.868	FALSE	6
2022-09-12	14:37:21	0.620674	2.76088	654.307	FALSE	6
2022-09-12	14:37:22	0.940674	4.18431	602.052	FALSE	6
2022-09-12	14:37:22	0.510954	2.27283	656.58	FALSE	6
2022-09-12	14:37:22	0.861183	3.83071	605.883	FALSE	6
2022-09-12	14:37:22	0.64159	2.85392	659.433	FALSE	6
2022-09-12	14:37:23	0.741336	3.29761	609.181	FALSE	6
2022-09-12	14:37:23	0.882405	3.92511	663.359	FALSE	6
2022-09-12	14:37:23	0.586578	2.60922	611.79	FALSE	6
2022-09-12	14:37:23	0.216909	0.964855	664.323	FALSE	6
2022-09-12	14:37:24	0.652328	2.90169	614.692	FALSE	6
2022-09-12	14:37:24	0.269835	1.20028	665.524	FALSE	6
2022-09-12	14:37:24	0.75528	3.35964	618.051	FALSE	6
2022-09-12	14:37:25	0.282354	1.25597	666.78	FALSE	6
2022-09-12	14:37:25	0.588257	2.61668	620.668	FALSE	6
2022-09-12	14:37:25	0.266069	1.18353	667.963	FALSE	6
2022-09-12	14:37:25	0.672226	2.9902	623.658	FALSE	6
2022-09-12	14:37:26	0.316858	1.40945	669.373	FALSE	6
2022-09-12	14:37:26	0.626374	2.78624	626.444	FALSE	6
2022-09-12	14:37:26	0.704084	3.13191	672.505	FALSE	6
2022-09-12	14:37:26	0.675992	3.00695	629.451	FALSE	6
2022-09-12	14:37:27	0.279758	1.24442	673.749	FALSE	6
2022-09-12	14:37:27	0.724135	3.2211	632.672	FALSE	6
2022-09-12	14:37:27	0.24098	1.07193	674.821	FALSE	6
2022-09-12	14:37:27	1.37574	6.11957	638.792	FALSE	6
2022-09-12	14:37:28	0.313194	1.39315	676.214	FALSE	6
2022-09-12	14:37:28	1.2138	5.39923	644.191	FALSE	6
2022-09-12	14:37:28	0.224491	0.998581	677.213	FALSE	6
2022-09-12	14:37:29	1.26322	5.61906	649.81	FALSE	6
2022-09-12	14:37:29	0.822252	3.65754	680.87	FALSE	6
2022-09-12	14:37:29	1.83477	8.16142	657.972	FALSE	6
2022-09-12	14:37:29	2.49385	11.0931	691.963	FALSE	6
2022-09-12	14:37:30	1.86317	8.28775	666.259	FALSE	6
2022-09-12	14:37:30	2.43136	10.8152	702.779	FALSE	6
2022-09-12	14:37:30	1.48169	6.59085	672.85	FALSE	6
2022-09-12	14:37:30	3.04281	13.535	716.314	1	7
2022-09-12	14:37:31	3.32841	14.8054	687.656	1	8
2022-09-12	14:37:31	2.0252	9.00849	725.322	FALSE	8
2022-09-12	14:37:31	0.987442	4.39234	692.048	FALSE	8
2022-09-12	14:37:31	1.44378	6.42222	731.744	FALSE	8
2022-09-12	14:37:32	1.05869	4.70926	696.757	FALSE	8
2022-09-12	14:37:32	1.56108	6.944	738.688	FALSE	8
2022-09-12	14:37:32	0.233041	1.03661	697.794	FALSE	8
2022-09-12	14:37:33	0.514415	2.28822	740.976	FALSE	8
2022-09-12	14:37:33	0.988257	4.39596	702.19	FALSE	8
2022-09-12	14:37:33	0.507087	2.25562	743.232	FALSE	8
2022-09-12	14:37:33	0.203219	0.903959	703.094	FALSE	8
2022-09-12	14:37:34	0.398232	1.77142	745.004	FALSE	8
2022-09-12	14:37:34	0.357265	1.58919	704.683	FALSE	8
2022-09-12	14:37:34	0.39869	1.77345	746.777	FALSE	8
2022-09-12	14:37:34	0.41986	1.86762	706.551	FALSE	8
2022-09-12	14:37:35	0.380522	1.69264	748.47	FALSE	8
2022-09-12	14:37:35	0.537672	2.39167	708.942	FALSE	8
2022-09-12	14:37:35	0.39187	1.74312	750.213	FALSE	8
2022-09-12	14:37:35	0.411412	1.83004	710.772	FALSE	8
2022-09-12	14:37:36	0.571819	2.54357	752.756	FALSE	8
2022-09-12	14:37:36	0.613397	2.72851	713.501	FALSE	8
2022-09-12	14:37:36	0.593397	2.63955	755.396	FALSE	8
2022-09-12	14:37:37	0.649529	2.88923	716.39	FALSE	8
2022-09-12	14:37:37	0.616756	2.74345	758.139	FALSE	8
2022-09-12	14:37:37	0.598741	2.66332	719.053	FALSE	8
2022-09-12	14:37:37	0.502048	2.23321	760.372	FALSE	8
2022-09-12	14:37:38	0.524084	2.33123	721.385	FALSE	8
2022-09-12	14:37:38	0.468054	2.082	762.454	FALSE	8
2022-09-12	14:37:38	0.132888	0.591112	721.976	FALSE	8
2022-09-12	14:37:38	-0.0226842	-0.100904	762.454	FALSE	8
2022-09-12	14:37:39	0.0117178	0.0521231	722.028	FALSE	8
2022-09-12	14:37:39	0.124593	0.554215	763.009	FALSE	8
2022-09-12	14:37:39	0.217367	0.966892	722.995	FALSE	8
2022-09-12	14:37:39	0.235942	1.04952	764.058	FALSE	8
2022-09-12	14:37:40	0.199351	0.886753	723.882	FALSE	8
2022-09-12	14:37:40	0.248817	1.10679	765.165	FALSE	8
2022-09-12	14:37:40	0.147392	0.655629	724.537	FALSE	8
2022-09-12	14:37:41	0.867799	3.86014	769.025	FALSE	8
2022-09-12	14:37:41	1.73589	7.72159	732.259	FALSE	8
2022-09-12	14:37:41	0.344797	1.53373	770.559	FALSE	8
2022-09-12	14:37:42	1.03294	4.59472	736.853	FALSE	8
2022-09-12	14:37:42	2.02322	8.99969	779.559	FALSE	8
2022-09-12	14:37:42	0.776247	3.4529	740.306	FALSE	8
2022-09-12	14:37:42	1.56342	6.9544	786.513	FALSE	8
2022-09-12	14:37:42	2.24866	10.0025	750.309	FALSE	8
2022-09-12	14:37:43	2.1166	9.41506	795.928	FALSE	8
2022-09-12	14:37:43	1.31996	5.87145	756.18	FALSE	8
2022-09-12	14:37:43	0.407901	1.81443	797.742	FALSE	8
2022-09-12	14:37:43	0.247697	1.10181	757.282	FALSE	8
2022-09-12	14:37:44	-0.0611066	-0.271814	797.742	FALSE	8
2022-09-12	14:37:44	0.0317687	0.141314	757.423	FALSE	8
2022-09-12	14:37:44	0.965967	4.29681	802.039	FALSE	8
2022-09-12	14:37:45	0.680216	3.02574	760.449	FALSE	8
2022-09-12	14:37:45	-0.0172898	-0.0769085	802.039	FALSE	8
2022-09-12	14:37:45	0.0136516	0.060725	760.51	FALSE	8
2022-09-12	14:37:45	0.38729	1.72274	803.762	FALSE	8
2022-09-12	14:37:46	0.0104455	0.0464637	760.556	FALSE	8
2022-09-12	14:37:46	0.0248475	0.110527	803.873	FALSE	8
2022-09-12	14:37:46	0.00550917	0.0245059	760.581	FALSE	8
2022-09-12	14:37:46	0.112227	0.499208	804.372	FALSE	8
2022-09-12	14:37:47	0.0459163	0.204245	760.785	FALSE	8
2022-09-12	14:37:47	0.0129392	0.0575561	804.429	FALSE	8
2022-09-12	14:37:47	0.0554837	0.246803	761.032	FALSE	8
2022-09-12	14:37:47	-0.0220226	-0.0979609	804.429	FALSE	8
2022-09-12	14:37:48	0.218791	0.973226	762.005	FALSE	8
2022-09-12	14:37:48	0.210547	0.936555	805.366	FALSE	8
2022-09-12	14:37:48	0.320166	1.42416	763.429	FALSE	8
2022-09-12	14:37:49	0.158792	0.706339	806.072	FALSE	8
2022-09-12	14:37:49	0.238792	1.06219	764.492	FALSE	8
2022-09-12	14:37:49	0.0660689	0.293888	806.366	FALSE	8
2022-09-12	14:37:49	0.268715	1.1953	765.687	FALSE	8
2022-09-12	14:37:50	0.154975	0.68936	807.055	FALSE	8
2022-09-12	14:37:50	0.332379	1.47849	767.165	FALSE	8
2022-09-12	14:37:50	0.150954	0.671474	807.727	FALSE	8
2022-09-12	14:37:50	0.381438	1.69671	768.862	FALSE	8
2022-09-12	14:37:51	0.0274939	0.122298	807.849	FALSE	8
2022-09-12	14:37:51	0.296349	1.31822	770.18	FALSE	8
2022-09-12	14:37:51	0.0366033	0.162819	808.012	FALSE	8
2022-09-12	14:37:52	0.176654	0.785792	770.966	FALSE	8
2022-09-12	14:37:52	0.152736	0.6794	808.691	FALSE	8
2022-09-12	14:37:52	0.170496	0.7584	771.724	FALSE	8
2022-09-12	14:37:52	0.199758	0.888564	809.58	FALSE	8
2022-09-12	14:37:53	0.238639	1.06151	772.786	FALSE	8
2022-09-12	14:37:53	0.297723	1.32433	810.904	FALSE	8
2022-09-12	14:37:53	0.283117	1.25936	774.045	FALSE	8
2022-09-12	14:37:53	0.295331	1.31369	812.218	FALSE	8
2022-09-12	14:37:54	0.454924	2.02359	776.069	FALSE	8
2022-09-12	14:37:54	0.4593	2.04306	814.261	FALSE	8
2022-09-12	14:37:54	0.394161	1.75331	777.822	FALSE	8
2022-09-12	14:37:54	0.373041	1.65936	815.92	FALSE	8
2022-09-12	14:37:55	0.260827	1.16021	778.982	FALSE	8
2022-09-12	14:37:55	0.494059	2.19767	818.118	FALSE	8
2022-09-12	14:37:55	0.285458	1.26977	780.252	FALSE	8
2022-09-12	14:37:56	0.350394	1.55862	819.677	FALSE	8
2022-09-12	14:37:56	0.524796	2.3344	782.587	FALSE	8
2022-09-12	14:37:56	0.63187	2.81068	822.487	FALSE	8
2022-09-12	14:37:56	0.674822	3.00174	785.588	FALSE	8
2022-09-12	14:37:57	0.685458	3.04905	825.536	FALSE	8
2022-09-12	14:37:57	0.82444	3.66727	789.256	FALSE	8
2022-09-12	14:37:57	0.491056	2.18432	827.721	FALSE	8
2022-09-12	14:37:57	0.394873	1.75647	791.012	FALSE	8
2022-09-12	14:37:58	0.44154	1.96406	829.685	FALSE	8
2022-09-12	14:37:58	0.647901	2.88199	793.894	FALSE	8
2022-09-12	14:37:58	0.459758	2.0451	831.73	FALSE	8
2022-09-12	14:37:58	0.138181	0.614657	794.509	FALSE	8
2022-09-12	14:37:59	0.103473	0.460269	832.19	FALSE	8
2022-09-12	14:37:59	0.378384	1.68313	796.192	FALSE	8
2022-09-12	14:37:59	0.817621	3.63694	835.827	FALSE	8
2022-09-12	14:38:00	1.22999	5.47124	801.663	FALSE	8
2022-09-12	14:38:00	0.808817	3.59778	839.425	FALSE	8
2022-09-12	14:38:00	0.917417	4.08085	805.744	FALSE	8
2022-09-12	14:38:00	1.39345	6.19834	845.623	FALSE	8
2022-09-12	14:38:01	0.178995	0.796206	806.54	FALSE	8
2022-09-12	14:38:01	0.58617	2.6074	848.231	FALSE	8
2022-09-12	14:38:01	0.547035	2.43332	808.973	FALSE	8
2022-09-12	14:38:01	0.644949	2.86886	851.1	FALSE	8
2022-09-12	14:38:02	0.405	1.80152	810.775	FALSE	8
2022-09-12	14:38:02	0.472532	2.10192	853.201	FALSE	8
2022-09-12	14:38:02	0.400878	1.78319	812.558	FALSE	8
2022-09-12	14:38:02	0.717672	3.19235	856.394	FALSE	8
2022-09-12	14:38:03	0.44841	1.99462	814.553	FALSE	8
2022-09-12	14:38:03	0.741132	3.2967	859.691	FALSE	8
2022-09-12	14:38:03	0.28958	1.28811	815.841	FALSE	8
2022-09-12	14:38:04	0.517366	2.30135	861.992	FALSE	8
2022-09-12	14:38:04	0.41355	1.83955	817.68	FALSE	8
2022-09-12	14:38:04	0.440522	1.95953	863.951	FALSE	8
2022-09-12	14:38:04	0.893906	3.97627	821.657	FALSE	8
2022-09-12	14:38:05	0.507545	2.25766	866.209	FALSE	8
2022-09-12	14:38:05	0.832532	3.70327	825.36	FALSE	8
2022-09-12	14:38:05	0.494618	2.20016	868.409	FALSE	8
2022-09-12	14:38:05	0.509122	2.26468	827.625	FALSE	8
2022-09-12	14:38:06	0.619555	2.7559	871.165	FALSE	8
2022-09-12	14:38:06	0.35182	1.56497	829.19	FALSE	8
2022-09-12	14:38:06	0.60785	2.70384	873.869	FALSE	8
2022-09-12	14:38:06	0.400624	1.78206	830.972	FALSE	8
2022-09-12	14:38:07	0.554822	2.46796	876.337	FALSE	8
2022-09-12	14:38:07	0.394517	1.75489	832.727	FALSE	8
2022-09-12	14:38:07	0.376501	1.67475	878.012	FALSE	8
2022-09-12	14:38:08	1.14963	5.11378	837.84	FALSE	8
2022-09-12	14:38:08	0.487545	2.1687	880.18	FALSE	8
2022-09-12	14:38:08	0.753499	3.35171	841.192	FALSE	8
2022-09-12	14:38:08	0.544389	2.42155	882.602	FALSE	8
2022-09-12	14:38:09	1.90983	8.49531	849.687	FALSE	8
2022-09-12	14:38:09	3.6248	16.1238	898.726	1	9
2022-09-12	14:38:09	3.84495	17.1031	866.79	1	10
2022-09-12	14:38:09	5.82632	25.9166	924.642	1	11
2022-09-12	14:38:10	1.551	6.89916	873.69	FALSE	11
2022-09-12	14:38:10	1.52001	6.76131	931.404	FALSE	11
2022-09-12	14:38:10	1.68688	7.50358	881.193	FALSE	11
2022-09-12	14:38:10	0.423728	1.88483	933.289	FALSE	11
2022-09-12	14:38:11	0.670801	2.98386	884.177	FALSE	11
2022-09-12	14:38:11	0.152888	0.680076	933.969	FALSE	11
2022-09-12	14:38:11	0.220623	0.981375	885.158	FALSE	11
2022-09-12	14:38:12	-0.0491982	-0.218843	933.969	FALSE	11
2022-09-12	14:38:12	0.0796567	0.354329	885.513	FALSE	11
2022-09-12	14:38:12	0.229224	1.01963	934.988	FALSE	11
2022-09-12	14:38:12	0.383321	1.70509	887.218	FALSE	11
2022-09-12	14:38:13	0.368461	1.63899	936.627	FALSE	11
2022-09-12	14:38:13	0.512328	2.27894	889.497	FALSE	11
2022-09-12	14:38:13	0.535992	2.3842	939.011	FALSE	11
2022-09-12	14:38:13	0.447443	1.99032	891.487	FALSE	11
2022-09-12	14:38:14	0.522252	2.32308	941.334	FALSE	11
2022-09-12	14:38:14	0.461947	2.05483	893.542	FALSE	11
2022-09-12	14:38:14	0.521743	2.32082	943.655	FALSE	11
2022-09-12	14:38:14	0.564847	2.51255	896.055	FALSE	11
2022-09-12	14:38:15	0.670903	2.98431	946.64	FALSE	11
2022-09-12	14:38:15	0.527137	2.34481	898.399	FALSE	11
2022-09-12	14:38:15	0.442252	1.96723	948.607	FALSE	11
2022-09-12	14:38:16	0.492481	2.19065	900.59	FALSE	11
2022-09-12	14:38:16	0.499911	2.2237	950.831	FALSE	11
2022-09-12	14:38:16	0.484746	2.15625	902.746	FALSE	11
2022-09-12	14:38:16	0.490394	2.18137	953.012	FALSE	11
2022-09-12	14:38:17	0.471616	2.09784	904.844	FALSE	11
2022-09-12	14:38:17	0.493193	2.19382	955.206	FALSE	11
2022-09-12	14:38:17	0.504338	2.2434	907.087	FALSE	11
2022-09-12	14:38:17	0.504033	2.24204	957.448	FALSE	11
2022-09-12	14:38:18	0.363321	1.61612	908.704	FALSE	11
2022-09-12	14:38:18	0.456959	2.03265	959.48	FALSE	11
2022-09-12	14:38:18	0.489886	2.17911	910.883	FALSE	11
2022-09-12	14:38:18	0.632074	2.81159	962.292	FALSE	11
2022-09-12	14:38:19	0.571514	2.54221	913.425	FALSE	11
2022-09-12	14:38:19	0.783473	3.48504	965.777	FALSE	11
2022-09-12	14:38:19	1.09497	4.87065	918.296	FALSE	11
2022-09-12	14:38:20	0.43126	1.91833	967.695	FALSE	11
2022-09-12	14:38:20	0.76159	3.3877	921.683	FALSE	11
2022-09-12	14:38:20	2.11966	9.42867	977.124	FALSE	11
2022-09-12	14:38:20	0.611718	2.72104	924.404	FALSE	11
2022-09-12	14:38:21	0.836908	3.72273	980.847	FALSE	11
2022-09-12	14:38:21	0.82215	3.65709	928.061	FALSE	11
2022-09-12	14:38:21	0.667799	2.9705	983.817	FALSE	11
2022-09-12	14:38:21	0.282863	1.25823	929.32	FALSE	11
2022-09-12	14:38:22	1.10943	4.93497	988.752	FALSE	11
2022-09-12	14:38:22	0.291412	1.29626	930.616	FALSE	11
2022-09-12	14:38:22	0.735941	3.27361	992.026	FALSE	11
2022-09-12	14:38:22	0.746985	3.32274	933.939	FALSE	11
2022-09-12	14:38:23	0.745916	3.31798	995.344	FALSE	11
2022-09-12	14:38:23	0.493702	2.19609	936.135	FALSE	11
2022-09-12	14:38:23	0.912837	4.06048	999.404	FALSE	11
2022-09-12	14:38:24	0.30444	1.35421	937.489	FALSE	11
2022-09-12	14:38:24	0.649224	2.88788	1002.29	FALSE	11
2022-09-12	14:38:24	0.591208	2.62981	940.119	FALSE	11
2022-09-12	14:38:24	0.614771	2.73462	1005.03	FALSE	11
2022-09-12	14:38:25	0.374771	1.66706	941.786	FALSE	11
2022-09-12	14:38:25	0.742201	3.30146	1008.33	FALSE	11
2022-09-12	14:38:25	0.413295	1.83842	943.624	FALSE	11
2022-09-12	14:38:25	0.587086	2.61148	1010.94	FALSE	11
2022-09-12	14:38:26	1.28607	5.7207	949.345	FALSE	11
2022-09-12	14:38:26	1.01569	4.51799	1015.46	FALSE	11
2022-09-12	14:38:26	2.39441	10.6508	959.996	FALSE	11
2022-09-12	14:38:26	0.739911	3.29127	1018.75	FALSE	11
2022-09-12	14:38:27	2.32938	10.3615	970.357	FALSE	11
2022-09-12	14:38:27	3.14037	13.969	1032.72	1	12
2022-09-12	14:38:27	2.83436	12.6078	982.965	FALSE	12
2022-09-12	14:38:28	2.78734	12.3986	1045.12	FALSE	12
2022-09-12	14:38:28	0.84154	3.74334	986.708	FALSE	12
2022-09-12	14:38:28	1.92434	8.55985	1053.68	FALSE	12
2022-09-12	14:38:28	2.72917	12.1399	998.848	FALSE	12
2022-09-12	14:38:29	1.85156	8.23611	1061.91	FALSE	12
2022-09-12	14:38:29	1.32393	5.88911	1004.74	FALSE	12
2022-09-12	14:38:29	0.700114	3.11425	1065.03	FALSE	12
2022-09-12	14:38:29	0.265356	1.18036	1005.92	FALSE	12
2022-09-12	14:38:30	0.532837	2.37017	1067.4	FALSE	12
2022-09-12	14:38:30	0.135433	0.602433	1006.52	FALSE	12
2022-09-12	14:38:30	0.493041	2.19314	1069.59	FALSE	12
2022-09-12	14:38:30	0.360573	1.6039	1008.12	FALSE	12
2022-09-12	14:38:31	0.582863	2.59269	1072.18	FALSE	12
2022-09-12	14:38:31	0.170242	0.75727	1008.88	FALSE	12
2022-09-12	14:38:31	0.812582	3.61453	1075.8	FALSE	12
2022-09-12	14:38:32	0.344949	1.5344	1010.42	FALSE	12
2022-09-12	14:38:32	0.915382	4.0718	1079.87	FALSE	12
2022-09-12	14:38:32	0.70103	3.11832	1013.53	FALSE	12
2022-09-12	14:38:32	2.03248	9.04088	1088.91	FALSE	12
2022-09-12	14:38:33	2.14973	9.56243	1023.1	FALSE	12
2022-09-12	14:38:33	1.83391	8.1576	1097.07	FALSE	12
2022-09-12	14:38:33	2.88006	12.8111	1035.91	FALSE	12
2022-09-12	14:38:33	2.07207	9.21698	1106.28	FALSE	12
2022-09-12	14:38:34	2.7677	12.3113	1048.22	FALSE	12
2022-09-12	14:38:34	5.0997	22.6845	1128.97	1	13
2022-09-12	14:38:34	0.654466	2.9112	1051.13	FALSE	13
2022-09-12	14:38:34	1.42658	6.34571	1135.31	FALSE	13
2022-09-12	14:38:35	0.965102	4.29297	1055.42	FALSE	13
2022-09-12	14:38:35	1.10215	4.90258	1140.22	FALSE	13
2022-09-12	14:38:35	0.372532	1.6571	1057.08	FALSE	13
2022-09-12	14:38:36	0.393295	1.74945	1141.97	FALSE	13
2022-09-12	14:38:36	0.468308	2.08313	1059.16	FALSE	13
2022-09-12	14:38:36	0.910598	4.05052	1146.02	FALSE	13
2022-09-12	14:38:36	1.23207	5.48049	1064.64	FALSE	13
2022-09-12	14:38:37	1.80322	8.02108	1154.04	FALSE	13
2022-09-12	14:38:37	1.57558	7.00849	1071.65	FALSE	13
2022-09-12	14:38:37	0.913651	4.0641	1158.1	FALSE	13
2022-09-12	14:38:37	0.791412	3.52036	1075.17	FALSE	13
2022-09-12	14:38:38	1.01609	4.51977	1162.62	FALSE	13
2022-09-12	14:38:38	1.88719	8.3946	1083.57	FALSE	13
2022-09-12	14:38:38	1.54556	6.87496	1169.5	FALSE	13
2022-09-12	14:38:38	0.320776	1.42688	1084.99	FALSE	13
2022-09-12	14:38:39	-0.0751015	-0.334066	1169.5	FALSE	13
2022-09-12	14:38:39	-0.0322008	-0.143236	1084.99	FALSE	13
2022-09-12	14:38:39	0.155585	0.692073	1170.19	FALSE	13
2022-09-12	14:38:40	0.0969086	0.431069	1085.43	FALSE	13
2022-09-12	14:38:40	0.0279519	0.124336	1170.31	FALSE	13
2022-09-12	14:38:40	0.121336	0.539727	1085.96	FALSE	13
2022-09-12	14:38:40	0.403779	1.79609	1172.11	FALSE	13
2022-09-12	14:38:41	0.243015	1.08098	1087.05	FALSE	13
2022-09-12	14:38:41	0.0919722	0.409111	1172.52	FALSE	13
2022-09-12	14:38:41	0.533142	2.37152	1089.42	FALSE	13
2022-09-12	14:38:41	0.529122	2.35364	1174.87	FALSE	13
2022-09-12	14:38:42	0.375229	1.66909	1091.09	FALSE	13
2022-09-12	14:38:42	0.325611	1.44838	1176.32	FALSE	13
2022-09-12	14:38:42	0.382506	1.70146	1092.79	FALSE	13
2022-09-12	14:38:43	0.302252	1.34448	1177.67	FALSE	13
2022-09-12	14:38:43	0.302914	1.34742	1094.14	FALSE	13
2022-09-12	14:38:43	0.220064	0.978889	1178.64	FALSE	13
2022-09-12	14:38:43	0.296349	1.31822	1095.45	FALSE	13
2022-09-12	14:38:44	0.368613	1.63966	1180.28	FALSE	13
2022-09-12	14:38:44	0.408919	1.81895	1097.27	FALSE	13
2022-09-12	14:38:44	0.200827	0.893319	1181.18	FALSE	13
2022-09-12	14:38:44	0.334975	1.49004	1098.76	FALSE	13
2022-09-12	14:38:45	0.309784	1.37798	1182.56	FALSE	13
2022-09-12	14:38:45	0.316756	1.40899	1100.17	FALSE	13
2022-09-12	14:38:45	0.396654	1.7644	1184.32	FALSE	13
2022-09-12	14:38:45	0.325102	1.44612	1101.62	FALSE	13
2022-09-12	14:38:46	0.376705	1.67566	1186	FALSE	13
2022-09-12	14:38:46	0.263168	1.17062	1102.79	FALSE	13
2022-09-12	14:38:46	0.319199	1.41986	1187.42	FALSE	13
2022-09-12	14:38:47	0.3107	1.38206	1104.17	FALSE	13
2022-09-12	14:38:47	0.270242	1.20209	1188.62	FALSE	13
2022-09-12	14:38:47	0.308512	1.37232	1105.54	FALSE	13
2022-09-12	14:38:47	0.373041	1.65936	1190.28	FALSE	13
2022-09-12	14:38:48	0.108003	0.480419	1106.02	FALSE	13
2022-09-12	14:38:48	0.250191	1.1129	1191.39	FALSE	13
2022-09-12	14:38:48	0.245255	1.09094	1107.11	FALSE	13
2022-09-12	14:38:48	0.250649	1.11494	1192.5	FALSE	13
2022-09-12	14:38:49	0.0578247	0.257216	1107.37	FALSE	13
2022-09-12	14:38:49	-0.0860938	-0.382962	1192.5	FALSE	13
2022-09-12	14:38:49	-0.233168	-1.03718	1107.37	FALSE	13
2022-09-12	14:38:49	-0.0324552	-0.144367	1192.5	FALSE	13
2022-09-12	14:38:50	-0.134236	-0.597109	1107.37	FALSE	13
2022-09-12	14:38:50	-0.115356	-0.513127	1192.5	FALSE	13
2022-09-12	14:38:50	-0.0577478	-0.256874	1107.37	FALSE	13
2022-09-12	14:38:51	-0.106297	-0.47283	1192.5	FALSE	13
2022-09-12	14:38:51	0.20673	0.919576	1108.29	FALSE	13
2022-09-12	14:38:51	0.0882572	0.392586	1192.9	FALSE	13
2022-09-12	14:38:51	0.455738	2.02721	1110.32	FALSE	13
2022-09-12	14:38:52	0.909835	4.04713	1196.94	FALSE	13
2022-09-12	14:38:52	0.965509	4.29478	1114.61	FALSE	13
2022-09-12	14:38:52	0.834262	3.71096	1200.66	FALSE	13
2022-09-12	14:38:52	0.684237	3.04362	1117.66	FALSE	13
2022-09-12	14:38:53	0.602455	2.67984	1203.34	FALSE	13
2022-09-12	14:38:53	0.777773	3.45969	1121.12	FALSE	13
2022-09-12	14:38:53	0.443626	1.97334	1205.31	FALSE	13
2022-09-12	14:38:53	0.474466	2.11052	1123.23	FALSE	13
2022-09-12	14:38:54	0.548461	2.43966	1207.75	FALSE	13
2022-09-12	14:38:54	0.269326	1.19802	1124.42	FALSE	13
2022-09-12	14:38:54	0.647392	2.87973	1210.63	FALSE	13
2022-09-12	14:38:55	0.317519	1.41239	1125.84	FALSE	13
2022-09-12	14:38:55	0.694567	3.08957	1213.72	FALSE	13
2022-09-12	14:38:55	0.343168	1.52648	1127.36	FALSE	13
2022-09-12	14:38:55	0.884949	3.93643	1217.65	FALSE	13
2022-09-12	14:38:56	0.25014	1.11267	1128.48	FALSE	13
2022-09-12	14:38:56	0.641387	2.85302	1220.51	FALSE	13
2022-09-12	14:38:56	0.299148	1.33067	1129.81	FALSE	13
2022-09-12	14:38:56	0.720013	3.20276	1223.71	FALSE	13
2022-09-12	14:38:57	0.791412	3.52036	1133.33	FALSE	13
2022-09-12	14:38:57	0.736501	3.2761	1226.99	FALSE	13
2022-09-12	14:38:57	0.502812	2.23661	1135.56	FALSE	13
2022-09-12	14:38:57	0.658435	2.92885	1229.91	FALSE	13
2022-09-12	14:38:58	0.257774	1.14663	1136.71	FALSE	13
2022-09-12	14:38:58	1.18459	5.26929	1235.18	FALSE	13
2022-09-12	14:38:58	0.301998	1.34335	1138.05	FALSE	13
2022-09-12	14:38:59	0.713346	3.17311	1238.36	FALSE	13
2022-09-12	14:38:59	0.288868	1.28494	1139.34	FALSE	13
2022-09-12	14:38:59	0.51874	2.30746	1240.66	FALSE	13
2022-09-12	14:38:59	0.564389	2.51052	1141.85	FALSE	13
2022-09-12	14:39:00	0.773397	3.44022	1244.1	FALSE	13
2022-09-12	14:39:00	1.0651	4.73778	1146.59	FALSE	13
2022-09-12	14:39:00	0.975534	4.33937	1248.44	FALSE	13
2022-09-12	14:39:00	2.14983	9.56287	1156.15	FALSE	13
2022-09-12	14:39:01	1.17945	5.24643	1253.69	FALSE	13
2022-09-12	14:39:01	2.06312	9.17717	1165.33	FALSE	13
2022-09-12	14:39:01	0.16383	0.728749	1254.42	FALSE	13
2022-09-12	14:39:01	0.919605	4.09059	1169.42	FALSE	13
2022-09-12	14:39:02	0.407901	1.81443	1256.23	FALSE	13
2022-09-12	14:39:02	0.639555	2.84487	1172.26	FALSE	13
2022-09-12	14:39:02	0.399199	1.77572	1258.01	FALSE	13
2022-09-12	14:39:03	0.489886	2.17911	1174.44	FALSE	13
2022-09-12	14:39:03	0.440115	1.95772	1259.97	FALSE	13
2022-09-12	14:39:03	0.495534	2.20423	1176.65	FALSE	13
2022-09-12	14:39:03	0.940064	4.18159	1264.15	FALSE	13
2022-09-12	14:39:04	1.14072	5.07415	1181.72	FALSE	13
2022-09-12	14:39:04	0.905254	4.02675	1268.18	FALSE	13
2022-09-12	14:39:04	1.9022	8.46137	1190.18	FALSE	13
2022-09-12	14:39:04	0.638232	2.83898	1271.01	FALSE	13
2022-09-12	14:39:05	2.69594	11.9921	1202.17	FALSE	13
2022-09-12	14:39:05	0.507239	2.2563	1273.27	FALSE	13
2022-09-12	14:39:05	2.49945	11.1181	1213.29	FALSE	13
2022-09-12	14:39:05	1.02693	4.56799	1277.84	FALSE	13
2022-09-12	14:39:06	1.68846	7.51061	1220.8	FALSE	13
2022-09-12	14:39:06	0.545763	2.42766	1280.27	FALSE	13
2022-09-12	14:39:06	0.954109	4.24407	1225.05	FALSE	13
2022-09-12	14:39:07	1.87558	8.34295	1288.61	FALSE	13
2022-09-12	14:39:07	0.394364	1.75421	1226.8	FALSE	13
2022-09-12	14:39:07	1.15513	5.13825	1293.75	FALSE	13
2022-09-12	14:39:07	1.22108	5.43161	1232.23	FALSE	13
2022-09-12	14:39:08	0.837926	3.72726	1297.47	FALSE	13
2022-09-12	14:39:08	1.22963	5.46964	1237.7	FALSE	13
2022-09-12	14:39:08	0.868613	3.86376	1301.34	FALSE	13
2022-09-12	14:39:08	2.18892	9.73675	1247.44	FALSE	13
2022-09-12	14:39:09	2.37777	10.5768	1311.92	FALSE	13
2022-09-12	14:39:09	0.698944	3.10904	1250.55	FALSE	13
2022-09-12	14:39:09	1.27777	5.68378	1317.6	FALSE	13
2022-09-12	14:39:09	1.61645	7.19029	1257.74	FALSE	13
2022-09-12	14:39:10	0.537265	2.38986	1319.99	FALSE	13
2022-09-12	14:39:10	0.306476	1.36327	1259.1	FALSE	13
2022-09-12	14:39:10	0.514822	2.29003	1322.28	FALSE	13
2022-09-12	14:39:11	0.193651	0.861398	1259.96	FALSE	13
2022-09-12	14:39:11	0.324593	1.44385	1323.72	FALSE	13
2022-09-12	14:39:11	0.27014	1.20164	1261.16	FALSE	13
2022-09-12	14:39:11	0.316603	1.40831	1325.13	FALSE	13
2022-09-12	14:39:12	0.325814	1.44929	1262.61	FALSE	13
2022-09-12	14:39:12	0.454466	2.02156	1327.15	FALSE	13
2022-09-12	14:39:12	0.254517	1.13214	1263.75	FALSE	13
2022-09-12	14:39:12	0.261234	1.16202	1328.31	FALSE	13
2022-09-12	14:39:13	0.370954	1.65008	1265.4	FALSE	13
2022-09-12	14:39:13	0.412328	1.83412	1330.15	FALSE	13
2022-09-12	14:39:13	0.238486	1.06083	1266.46	FALSE	13
2022-09-12	14:39:13	0.446272	1.98511	1332.13	FALSE	13
2022-09-12	14:39:14	0.49472	2.20061	1268.66	FALSE	13
2022-09-12	14:39:14	1.36373	6.06614	1338.2	FALSE	13
2022-09-12	14:39:14	0.881845	3.92262	1272.58	FALSE	13
2022-09-12	14:39:15	2.29711	10.218	1348.42	FALSE	13
2022-09-12	14:39:15	2.03192	9.03839	1281.62	FALSE	13
2022-09-12	14:39:15	0.79813	3.55024	1351.97	FALSE	13
2022-09-12	14:39:15	0.765254	3.404	1285.02	FALSE	13
2022-09-12	14:39:16	0.470089	2.09105	1354.06	FALSE	13
2022-09-12	14:39:16	0.369122	1.64193	1286.66	FALSE	13
2022-09-12	14:39:16	0.446018	1.98398	1356.04	FALSE	13
2022-09-12	14:39:16	0.534618	2.37809	1289.04	FALSE	13
2022-09-12	14:39:17	0.349071	1.55274	1357.6	FALSE	13
2022-09-12	14:39:17	0.600267	2.67011	1291.71	FALSE	13
2022-09-12	14:39:17	0.376858	1.67634	1359.27	FALSE	13
2022-09-12	14:39:17	0.577265	2.56779	1294.28	FALSE	13
2022-09-12	14:39:18	0.425458	1.89252	1361.16	FALSE	13
2022-09-12	14:39:18	0.47874	2.12953	1296.41	FALSE	13
2022-09-12	14:39:18	0.349478	1.55455	1362.72	FALSE	13
2022-09-12	14:39:19	0.491158	2.18477	1298.59	FALSE	13
2022-09-12	14:39:19	0.748969	3.33156	1366.05	FALSE	13
2022-09-12	14:39:19	0.560623	2.49376	1301.09	FALSE	13
2022-09-12	14:39:19	1.05289	4.68347	1370.73	FALSE	13
2022-09-12	14:39:20	0.813753	3.61974	1304.71	FALSE	13
2022-09-12	14:39:20	2.48276	11.0438	1381.78	FALSE	13
2022-09-12	14:39:20	2.7706	12.3242	1317.03	FALSE	13
2022-09-12	14:39:20	1.39441	6.20261	1387.98	FALSE	13
2022-09-12	14:39:21	1.42602	6.34322	1323.38	FALSE	13
2022-09-12	14:39:21	0.870445	3.87191	1391.85	FALSE	13
2022-09-12	14:39:21	0.978893	4.35431	1327.73	FALSE	13
2022-09-12	14:39:21	1.42449	6.33642	1398.19	FALSE	13
2022-09-12	14:39:22	2.79431	12.4296	1340.16	FALSE	13
2022-09-12	14:39:22	4.78296	21.2756	1419.46	1	14
2022-09-12	14:39:22	4.25935	18.9464	1359.11	1	15
2022-09-12	14:39:23	7.25217	32.2591	1451.72	1	16
2022-09-12	14:39:23	2.38637	10.6151	1369.72	FALSE	16
2022-09-12	14:39:23	7.13787	31.7507	1483.47	1	17
2022-09-12	14:39:23	4.92281	21.8976	1391.62	1	18
2022-09-12	14:39:24	4.83233	21.4952	1504.97	1	19
2022-09-12	14:39:24	3.48093	15.4839	1407.1	1	20
2022-09-12	14:39:24	3.5792	15.921	1520.89	1	21
2022-09-12	14:39:24	2.01711	8.97251	1416.07	FALSE	21
2022-09-12	14:39:25	1.87172	8.32578	1529.22	FALSE	21
2022-09-12	14:39:25	2.08556	9.27699	1425.35	FALSE	21
2022-09-12	14:39:25	0.898588	3.9971	1533.21	FALSE	21
2022-09-12	14:39:25	0.746985	3.32274	1428.67	FALSE	21
2022-09-12	14:39:26	0.600115	2.66943	1535.88	FALSE	21
2022-09-12	14:39:26	0.403423	1.79451	1430.47	FALSE	21
2022-09-12	14:39:26	0.386832	1.72071	1537.6	FALSE	21
2022-09-12	14:39:27	0.339046	1.50814	1431.98	FALSE	21
2022-09-12	14:39:27	0.456501	2.03061	1539.63	FALSE	21
2022-09-12	14:39:27	0.558079	2.48245	1434.46	FALSE	21
2022-09-12	14:39:27	1.08017	4.80481	1544.44	FALSE	21
2022-09-12	14:39:28	0.551718	2.45415	1436.91	FALSE	21
2022-09-12	14:39:28	1.90302	8.46501	1552.9	FALSE	21
2022-09-12	14:39:28	2.39889	10.6707	1447.58	FALSE	21
2022-09-12	14:39:28	1.66963	7.42685	1560.33	FALSE	21
2022-09-12	14:39:29	2.63065	11.7017	1459.29	FALSE	21
2022-09-12	14:39:29	1.80505	8.02922	1568.36	FALSE	21
2022-09-12	14:39:29	1.17691	5.23513	1464.52	FALSE	21
2022-09-12	14:39:30	1.21767	5.41644	1573.78	FALSE	21
2022-09-12	14:39:30	0.464084	2.06434	1466.59	FALSE	21
2022-09-12	14:39:30	0.605967	2.69546	1576.47	FALSE	21
2022-09-12	14:39:30	0.285	1.26774	1467.85	FALSE	21
2022-09-12	14:39:31	0.268817	1.19575	1577.67	FALSE	21
2022-09-12	14:39:31	0.312786	1.39133	1469.24	FALSE	21
2022-09-12	14:39:31	0.352074	1.5661	1579.23	FALSE	21
2022-09-12	14:39:31	0.096247	0.428126	1469.67	FALSE	21
2022-09-12	14:39:32	0.28444	1.26525	1580.5	FALSE	21
2022-09-12	14:39:32	0.626985	2.78895	1472.46	FALSE	21
2022-09-12	14:39:32	0.588206	2.61646	1583.12	FALSE	21
2022-09-12	14:39:32	1.11487	4.95916	1477.42	FALSE	21
2022-09-12	14:39:33	0.990801	4.40728	1587.52	FALSE	21
2022-09-12	14:39:33	2.27202	10.1064	1487.53	FALSE	21
2022-09-12	14:39:33	2.17645	9.68128	1597.2	FALSE	21
2022-09-12	14:39:34	2.5366	11.2833	1498.81	FALSE	21
2022-09-12	14:39:34	1.13182	5.03456	1602.24	FALSE	21
2022-09-12	14:39:34	2.04383	9.09136	1507.9	FALSE	21
2022-09-12	14:39:34	1.45177	6.45776	1608.7	FALSE	21
2022-09-12	14:39:35	3.25523	14.4799	1522.38	1	22
2022-09-12	14:39:35	1.87508	8.34073	1617.04	FALSE	22
2022-09-12	14:39:35	5.87925	26.1521	1548.53	1	23
2022-09-12	14:39:35	7.82535	34.8087	1651.85	1	24
2022-09-12	14:39:36	6.72352	29.9076	1578.44	1	25
2022-09-12	14:39:36	6.66942	29.6669	1681.51	1	26
2022-09-12	14:39:36	4.60495	20.4837	1598.93	1	27
2022-09-12	14:39:36	2.82184	12.5521	1694.07	FALSE	27
2022-09-12	14:39:37	1.46917	6.53516	1605.46	FALSE	27
2022-09-12	14:39:37	0.45014	2.00231	1696.07	FALSE	27
2022-09-12	14:39:37	0.930547	4.13926	1609.6	FALSE	27
2022-09-12	14:39:38	0.826578	3.67678	1699.74	FALSE	27
2022-09-12	14:39:38	0.72383	3.21974	1612.82	FALSE	27
2022-09-12	14:39:38	0.460267	2.04736	1701.79	FALSE	27
2022-09-12	14:39:38	0.757723	3.3705	1616.19	FALSE	27
2022-09-12	14:39:39	0.688766	3.06377	1704.86	FALSE	27
2022-09-12	14:39:39	0.482914	2.1481	1618.34	FALSE	27
2022-09-12	14:39:39	0.494415	2.19926	1707.05	FALSE	27
2022-09-12	14:39:39	0.497316	2.21216	1620.55	FALSE	27
2022-09-12	14:39:40	0.484898	2.15692	1709.21	FALSE	27
2022-09-12	14:39:40	0.488257	2.17186	1622.72	FALSE	27
2022-09-12	14:39:40	0.435433	1.93689	1711.15	FALSE	27
2022-09-12	14:39:40	0.464339	2.06547	1624.79	FALSE	27
2022-09-12	14:39:41	0.408359	1.81646	1712.96	FALSE	27
2022-09-12	14:39:41	0.513448	2.28392	1627.07	FALSE	27
2022-09-12	14:39:41	0.458333	2.03876	1715	FALSE	27
2022-09-12	14:39:42	0.486883	2.16575	1629.24	FALSE	27
2022-09-12	14:39:42	0.439708	1.95591	1716.96	FALSE	27
2022-09-12	14:39:42	0.46958	2.08879	1631.33	FALSE	27
2022-09-12	14:39:42	0.411311	1.82959	1718.79	FALSE	27
2022-09-12	14:39:43	0.511718	2.27622	1633.6	FALSE	27
2022-09-12	14:39:43	0.432735	1.92489	1720.71	FALSE	27
2022-09-12	14:39:43	0.432277	1.92285	1635.52	FALSE	27
2022-09-12	14:39:43	0.289275	1.28675	1722	FALSE	27
2022-09-12	14:39:44	0.302914	1.34742	1636.87	FALSE	27
2022-09-12	14:39:44	0.311921	1.38749	1723.39	FALSE	27
2022-09-12	14:39:44	0.120471	0.535879	1637.41	FALSE	27
2022-09-12	14:39:44	0.397214	1.76689	1725.16	FALSE	27
2022-09-12	14:39:45	1.85518	8.25221	1645.66	FALSE	27
2022-09-12	14:39:45	1.03503	4.60402	1729.76	FALSE	27
2022-09-12	14:39:45	0.934771	4.15805	1649.82	FALSE	27
2022-09-12	14:39:46	0.506221	2.25177	1732.01	FALSE	27
2022-09-12	14:39:46	0.57243	2.54628	1652.36	FALSE	27
2022-09-12	14:39:46	0.263066	1.17017	1733.18	FALSE	27
2022-09-12	14:39:46	0.644084	2.86501	1655.23	FALSE	27
2022-09-12	14:39:47	0.118283	0.526146	1733.71	FALSE	27
2022-09-12	14:39:47	0.437163	1.94459	1657.17	FALSE	27
2022-09-12	14:39:47	0.386018	1.71709	1735.42	FALSE	27
2022-09-12	14:39:47	0.300115	1.33497	1658.51	FALSE	27
2022-09-12	14:39:48	0.303015	1.34787	1736.77	FALSE	27
2022-09-12	14:39:48	0.283168	1.25959	1659.77	FALSE	27
2022-09-12	14:39:48	0.25411	1.13033	1737.9	FALSE	27
2022-09-12	14:39:48	0.284847	1.26706	1661.04	FALSE	27
2022-09-12	14:39:49	0.276145	1.22835	1739.13	FALSE	27
2022-09-12	14:39:49	0.273448	1.21635	1662.25	FALSE	27
2022-09-12	14:39:49	0.294618	1.31052	1740.44	FALSE	27
2022-09-12	14:39:50	0.359911	1.60096	1663.85	FALSE	27
2022-09-12	14:39:50	0.163575	0.727614	1741.17	FALSE	27
2022-09-12	14:39:50	0.380165	1.69105	1665.54	FALSE	27
2022-09-12	14:39:50	0.197926	0.880414	1742.05	FALSE	27
2022-09-12	14:39:51	0.35416	1.57537	1667.12	FALSE	27
2022-09-12	14:39:51	0.127036	0.565082	1742.61	FALSE	27
2022-09-12	14:39:51	0.375076	1.66841	1668.79	FALSE	27
2022-09-12	14:39:51	0.255026	1.13441	1743.75	FALSE	27
2022-09-12	14:39:52	0.256298	1.14006	1669.93	FALSE	27
2022-09-12	14:39:52	0.178741	0.795076	1744.54	FALSE	27
2022-09-12	14:39:52	0.275993	1.22767	1671.16	FALSE	27
2022-09-12	14:39:52	0.199962	0.889471	1745.43	FALSE	27

## Sheet: Ranger_harness_202291214343 (E)
Date	Time	Lbs	Total Force x time			**GoPro Fitting: 1424
2022-09-12	14:34:52	0.617316	0.617316	FALSE	0			Total Force x time	768.084
2022-09-12	14:34:52	0.39014	1.00746	FALSE	0			Total Time Steps Force >3	27
2022-09-12	14:34:52	0.232685	1.24014	FALSE	0
2022-09-12	14:34:52	0.605204	1.84535	FALSE	0
2022-09-12	14:34:53	0.333092	2.17844	FALSE	0
2022-09-12	14:34:53	0.667239	2.84568	FALSE	0
2022-09-12	14:34:53	0.464135	3.30981	FALSE	0
2022-09-12	14:34:53	0.817214	4.12703	FALSE	0
2022-09-12	14:34:54	0.521539	4.64856	FALSE	0
2022-09-12	14:34:54	0.321031	4.96959	FALSE	0
2022-09-12	14:34:54	0.369224	5.33882	FALSE	0
2022-09-12	14:34:54	0.772939	6.11176	FALSE	0
2022-09-12	14:34:55	0.362048	6.47381	FALSE	0
2022-09-12	14:34:55	1.32546	7.79927	FALSE	0
2022-09-12	14:34:55	0.401947	8.20121	FALSE	0
2022-09-12	14:34:56	1.93497	10.1362	FALSE	0
2022-09-12	14:34:56	0.202507	10.3387	FALSE	0
2022-09-12	14:34:56	0.521031	10.8597	FALSE	0
2022-09-12	14:34:56	1.15009	12.0098	FALSE	0
2022-09-12	14:34:57	0.328868	12.3387	FALSE	0
2022-09-12	14:34:57	0.358639	12.6973	FALSE	0
2022-09-12	14:34:57	0.200725	12.898	FALSE	0
2022-09-12	14:34:57	0.731209	13.6293	FALSE	0
2022-09-12	14:34:58	0.175891	13.8051	FALSE	0
2022-09-12	14:34:58	1.91441	15.7196	FALSE	0
2022-09-12	14:34:58	0.610852	16.3304	FALSE	0
2022-09-12	14:34:58	3.08037	19.4108	1	1
2022-09-12	14:34:59	0.682608	20.0934	FALSE	1
2022-09-12	14:34:59	2.94103	23.0344	FALSE	1
2022-09-12	14:34:59	1.53172	24.5661	FALSE	1
2022-09-12	14:35:00	2.5251	27.0912	FALSE	1
2022-09-12	14:35:00	0.874415	27.9656	FALSE	1
2022-09-12	14:35:00	0.801794	28.7674	FALSE	1
2022-09-12	14:35:00	0.292583	29.06	FALSE	1
2022-09-12	14:35:01	0.24673	29.3068	FALSE	1
2022-09-12	14:35:01	0.184186	29.4909	FALSE	1
2022-09-12	14:35:01	0.698028	30.189	FALSE	1
2022-09-12	14:35:01	0.0638806	30.2528	FALSE	1
2022-09-12	14:35:02	0.33645	30.5893	FALSE	1
2022-09-12	14:35:02	0.158435	30.7477	FALSE	1
2022-09-12	14:35:02	0.622761	31.3705	FALSE	1
2022-09-12	14:35:02	1.90653	33.277	FALSE	1
2022-09-12	14:35:03	1.65452	34.9315	FALSE	1
2022-09-12	14:35:03	2.29075	37.2223	FALSE	1
2022-09-12	14:35:03	1.38922	38.6115	FALSE	1
2022-09-12	14:35:04	1.45752	40.069	FALSE	1
2022-09-12	14:35:04	0.449835	40.5189	FALSE	1
2022-09-12	14:35:04	1.87513	42.394	FALSE	1
2022-09-12	14:35:04	0.215636	42.6096	FALSE	1
2022-09-12	14:35:05	1.85833	44.468	FALSE	1
2022-09-12	14:35:05	0.548766	45.0167	FALSE	1
2022-09-12	14:35:05	2.66251	47.6792	FALSE	1
2022-09-12	14:35:05	0.894669	48.5739	FALSE	1
2022-09-12	14:35:06	1.6593	50.2332	FALSE	1
2022-09-12	14:35:06	1.09961	51.3328	FALSE	1
2022-09-12	14:35:06	0.977417	52.3102	FALSE	1
2022-09-12	14:35:06	0.562862	52.8731	FALSE	1
2022-09-12	14:35:07	0.710038	53.5831	FALSE	1
2022-09-12	14:35:07	0.240013	53.8232	FALSE	1
2022-09-12	14:35:07	0.781081	54.6042	FALSE	1
2022-09-12	14:35:08	0.190496	54.7947	FALSE	1
2022-09-12	14:35:08	1.19864	55.9934	FALSE	1
2022-09-12	14:35:08	0.299758	56.2931	FALSE	1
2022-09-12	14:35:08	2.66469	58.9578	FALSE	1
2022-09-12	14:35:09	0.46444	59.4223	FALSE	1
2022-09-12	14:35:09	2.76256	62.1848	FALSE	1
2022-09-12	14:35:09	0.544338	62.7292	FALSE	1
2022-09-12	14:35:09	1.60765	64.3368	FALSE	1
2022-09-12	14:35:10	0.714924	65.0517	FALSE	1
2022-09-12	14:35:10	0.967341	66.0191	FALSE	1
2022-09-12	14:35:10	0.750496	66.7696	FALSE	1
2022-09-12	14:35:10	1.24134	68.0109	FALSE	1
2022-09-12	14:35:11	1.17335	69.1843	FALSE	1
2022-09-12	14:35:11	0.909936	70.0942	FALSE	1
2022-09-12	14:35:11	0.925662	71.0199	FALSE	1
2022-09-12	14:35:12	0.408766	71.4286	FALSE	1
2022-09-12	14:35:12	0.203575	71.6322	FALSE	1
2022-09-12	14:35:12	0.404084	72.0363	FALSE	1
2022-09-12	14:35:12	0.125509	72.1618	FALSE	1
2022-09-12	14:35:13	0.361132	72.5229	FALSE	1
2022-09-12	14:35:13	0.171463	72.6944	FALSE	1
2022-09-12	14:35:13	0.383931	73.0783	FALSE	1
2022-09-12	14:35:13	0.149784	73.2281	FALSE	1
2022-09-12	14:35:14	0.309529	73.5376	FALSE	1
2022-09-12	14:35:14	0.432277	73.9699	FALSE	1
2022-09-12	14:35:14	0.540827	74.5107	FALSE	1
2022-09-12	14:35:14	0.553601	75.0643	FALSE	1
2022-09-12	14:35:15	0.385254	75.4496	FALSE	1
2022-09-12	14:35:15	1.72459	77.1742	FALSE	1
2022-09-12	14:35:15	0.380827	77.555	FALSE	1
2022-09-12	14:35:16	2.14047	79.6955	FALSE	1
2022-09-12	14:35:16	0.372277	80.0677	FALSE	1
2022-09-12	14:35:16	1.96169	82.0294	FALSE	1
2022-09-12	14:35:16	0.54215	82.5716	FALSE	1
2022-09-12	14:35:17	0.392328	82.9639	FALSE	1
2022-09-12	14:35:17	0.608715	83.5726	FALSE	1
2022-09-12	14:35:17	0.255789	83.8284	FALSE	1
2022-09-12	14:35:17	0.362761	84.1912	FALSE	1
2022-09-12	14:35:18	0.209529	84.4007	FALSE	1
2022-09-12	14:35:18	0.48897	84.8897	FALSE	1
2022-09-12	14:35:18	0.226374	85.1161	FALSE	1
2022-09-12	14:35:18	1.23055	86.3466	FALSE	1
2022-09-12	14:35:19	0.410954	86.7576	FALSE	1
2022-09-12	14:35:19	1.3592	88.1168	FALSE	1
2022-09-12	14:35:19	1.16286	89.2796	FALSE	1
2022-09-12	14:35:20	1.0565	90.3361	FALSE	1
2022-09-12	14:35:20	3.06642	93.4025	1	2
2022-09-12	14:35:20	2.76098	96.1635	FALSE	2
2022-09-12	14:35:20	3.56408	99.7276	1	3
2022-09-12	14:35:21	0.858384	100.586	FALSE	3
2022-09-12	14:35:21	0.759555	101.346	FALSE	3
2022-09-12	14:35:21	0.274008	101.62	FALSE	3
2022-09-12	14:35:21	0.744287	102.364	FALSE	3
2022-09-12	14:35:22	0.666476	103.03	FALSE	3
2022-09-12	14:35:22	0.982303	104.013	FALSE	3
2022-09-12	14:35:22	0.728003	104.741	FALSE	3
2022-09-12	14:35:23	1.82291	106.564	FALSE	3
2022-09-12	14:35:23	0.79126	107.355	FALSE	3
2022-09-12	14:35:23	1.55151	108.906	FALSE	3
2022-09-12	14:35:23	1.03533	109.942	FALSE	3
2022-09-12	14:35:24	1.0278	110.969	FALSE	3
2022-09-12	14:35:24	0.483372	111.453	FALSE	3
2022-09-12	14:35:24	0.323422	111.776	FALSE	3
2022-09-12	14:35:24	0.933601	112.71	FALSE	3
2022-09-12	14:35:25	2.1394	114.849	FALSE	3
2022-09-12	14:35:25	3.80118	118.65	1	4
2022-09-12	14:35:25	2.61009	121.26	FALSE	4
2022-09-12	14:35:25	1.23467	122.495	FALSE	4
2022-09-12	14:35:26	0.359249	122.854	FALSE	4
2022-09-12	14:35:26	0.0901401	122.945	FALSE	4
2022-09-12	14:35:26	0.582608	123.527	FALSE	4
2022-09-12	14:35:27	0.112583	123.64	FALSE	4
2022-09-12	14:35:27	0.362863	124.003	FALSE	4
2022-09-12	14:35:27	0.218741	124.221	FALSE	4
2022-09-12	14:35:27	0.524745	124.746	FALSE	4
2022-09-12	14:35:28	0.402608	125.149	FALSE	4
2022-09-12	14:35:28	0.573092	125.722	FALSE	4
2022-09-12	14:35:28	0.985153	126.707	FALSE	4
2022-09-12	14:35:28	0.799046	127.506	FALSE	4
2022-09-12	14:35:29	0.207443	127.713	FALSE	4
2022-09-12	14:35:29	0.530241	128.244	FALSE	4
2022-09-12	14:35:29	1.23299	129.477	FALSE	4
2022-09-12	14:35:29	0.646221	130.123	FALSE	4
2022-09-12	14:35:30	1.28307	131.406	FALSE	4
2022-09-12	14:35:30	0.436959	131.843	FALSE	4
2022-09-12	14:35:30	1.27772	133.121	FALSE	4
2022-09-12	14:35:31	0.43243	133.553	FALSE	4
2022-09-12	14:35:31	3.06683	136.62	1	5
2022-09-12	14:35:31	0.831768	137.452	FALSE	5
2022-09-12	14:35:31	6.32739	143.779	1	6
2022-09-12	14:35:32	1.25146	145.031	FALSE	6
2022-09-12	14:35:32	2.87009	147.901	FALSE	6
2022-09-12	14:35:32	0.350903	148.252	FALSE	6
2022-09-12	14:35:32	0.95757	149.209	FALSE	6
2022-09-12	14:35:33	0.423626	149.633	FALSE	6
2022-09-12	14:35:33	0.287188	149.92	FALSE	6
2022-09-12	14:35:33	0.54617	150.466	FALSE	6
2022-09-12	14:35:33	0.255229	150.721	FALSE	6
2022-09-12	14:35:34	0.853906	151.575	FALSE	6
2022-09-12	14:35:34	0.248257	151.823	FALSE	6
2022-09-12	14:35:34	0.759097	152.583	FALSE	6
2022-09-12	14:35:35	0.320166	152.903	FALSE	6
2022-09-12	14:35:35	0.929173	153.832	FALSE	6
2022-09-12	14:35:35	0.260623	154.093	FALSE	6
2022-09-12	14:35:35	1.26485	155.357	FALSE	6
2022-09-12	14:35:36	0.432888	155.79	FALSE	6
2022-09-12	14:35:36	1.88856	157.679	FALSE	6
2022-09-12	14:35:36	0.426171	158.105	FALSE	6
2022-09-12	14:35:36	0.0583845	158.163	FALSE	6
2022-09-12	14:35:37	0.0920739	158.255	FALSE	6
2022-09-12	14:35:37	-0.237748	158.255	FALSE	6
2022-09-12	14:35:37	-0.329351	158.255	FALSE	6
2022-09-12	14:35:37	-0.379682	158.255	FALSE	6
2022-09-12	14:35:38	-0.441768	158.255	FALSE	6
2022-09-12	14:35:38	-0.206094	158.255	FALSE	6
2022-09-12	14:35:38	-0.0118445	158.255	FALSE	6
2022-09-12	14:35:39	0.245102	158.501	FALSE	6
2022-09-12	14:35:39	1.28022	159.781	FALSE	6
2022-09-12	14:35:39	0.113346	159.894	FALSE	6
2022-09-12	14:35:39	0.151362	160.045	FALSE	6
2022-09-12	14:35:40	0.594262	160.64	FALSE	6
2022-09-12	14:35:40	0.201641	160.841	FALSE	6
2022-09-12	14:35:40	0.118995	160.96	FALSE	6
2022-09-12	14:35:40	0.210038	161.17	FALSE	6
2022-09-12	14:35:41	0.403779	161.574	FALSE	6
2022-09-12	14:35:41	0.343219	161.917	FALSE	6
2022-09-12	14:35:41	0.456756	162.374	FALSE	6
2022-09-12	14:35:41	0.114008	162.488	FALSE	6
2022-09-12	14:35:42	0.240573	162.729	FALSE	6
2022-09-12	14:35:42	0.104542	162.833	FALSE	6
2022-09-12	14:35:42	0.208817	163.042	FALSE	6
2022-09-12	14:35:43	0.0198603	163.062	FALSE	6
2022-09-12	14:35:43	0.139606	163.202	FALSE	6
2022-09-12	14:35:43	-0.0513865	163.202	FALSE	6
2022-09-12	14:35:43	0.227545	163.429	FALSE	6
2022-09-12	14:35:44	0.177214	163.606	FALSE	6
2022-09-12	14:35:44	0.164084	163.77	FALSE	6
2022-09-12	14:35:44	0.0309035	163.801	FALSE	6
2022-09-12	14:35:44	0.240216	164.042	FALSE	6
2022-09-12	14:35:45	0.00978398	164.051	FALSE	6
2022-09-12	14:35:45	0.0782318	164.13	FALSE	6
2022-09-12	14:35:45	-0.0607504	164.13	FALSE	6
2022-09-12	14:35:45	0.0627101	164.192	FALSE	6
2022-09-12	14:35:46	-0.0511321	164.192	FALSE	6
2022-09-12	14:35:46	0.100471	164.293	FALSE	6
2022-09-12	14:35:46	-0.0417682	164.293	FALSE	6
2022-09-12	14:35:47	0.0567051	164.349	FALSE	6
2022-09-12	14:35:47	-0.0156613	164.349	FALSE	6
2022-09-12	14:35:47	0.0479519	164.397	FALSE	6
2022-09-12	14:35:47	-0.116068	164.397	FALSE	6
2022-09-12	14:35:48	0.037214	164.435	FALSE	6
2022-09-12	14:35:48	-0.074389	164.435	FALSE	6
2022-09-12	14:35:48	-0.05673	164.435	FALSE	6
2022-09-12	14:35:48	-0.21729	164.435	FALSE	6
2022-09-12	14:35:49	-0.0477224	164.435	FALSE	6
2022-09-12	14:35:49	-0.0389183	164.435	FALSE	6
2022-09-12	14:35:49	0.104898	164.539	FALSE	6
2022-09-12	14:35:49	-0.058104	164.539	FALSE	6
2022-09-12	14:35:50	0.0534989	164.593	FALSE	6
2022-09-12	14:35:50	0.294313	164.887	FALSE	6
2022-09-12	14:35:50	0.222303	165.11	FALSE	6
2022-09-12	14:35:51	0.0624048	165.172	FALSE	6
2022-09-12	14:35:51	0.182099	165.354	FALSE	6
2022-09-12	14:35:51	0.0733972	165.428	FALSE	6
2022-09-12	14:35:51	0.287188	165.715	FALSE	6
2022-09-12	14:35:52	0.0408781	165.756	FALSE	6
2022-09-12	14:35:52	1.4024	167.158	FALSE	6
2022-09-12	14:35:52	0.201031	167.359	FALSE	6
2022-09-12	14:35:52	0.893601	168.253	FALSE	6
2022-09-12	14:35:53	0.400624	168.653	FALSE	6
2022-09-12	14:35:53	0.468206	169.121	FALSE	6
2022-09-12	14:35:53	1.44454	170.566	FALSE	6
2022-09-12	14:35:53	0.519402	171.085	FALSE	6
2022-09-12	14:35:54	0.548664	171.634	FALSE	6
2022-09-12	14:35:54	0.586374	172.22	FALSE	6
2022-09-12	14:35:54	1.34332	173.564	FALSE	6
2022-09-12	14:35:55	1.23126	174.795	FALSE	6
2022-09-12	14:35:55	1.71681	176.512	FALSE	6
2022-09-12	14:35:55	1.18093	177.693	FALSE	6
2022-09-12	14:35:55	0.1993	177.892	FALSE	6
2022-09-12	14:35:56	0.339657	178.232	FALSE	6
2022-09-12	14:35:56	0.334618	178.566	FALSE	6
2022-09-12	14:35:56	0.321489	178.888	FALSE	6
2022-09-12	14:35:56	0.177621	179.065	FALSE	6
2022-09-12	14:35:57	0.362354	179.428	FALSE	6
2022-09-12	14:35:57	0.215433	179.643	FALSE	6
2022-09-12	14:35:57	0.331718	179.975	FALSE	6
2022-09-12	14:35:57	0.279962	180.255	FALSE	6
2022-09-12	14:35:58	0.382557	180.637	FALSE	6
2022-09-12	14:35:58	0.419351	181.057	FALSE	6
2022-09-12	14:35:58	0.32673	181.384	FALSE	6
2022-09-12	14:35:59	0.169428	181.553	FALSE	6
2022-09-12	14:35:59	0.725509	182.278	FALSE	6
2022-09-12	14:35:59	0.525865	182.804	FALSE	6
2022-09-12	14:35:59	0.0806745	182.885	FALSE	6
2022-09-12	14:36:00	0.27701	183.162	FALSE	6
2022-09-12	14:36:00	0.150598	183.313	FALSE	6
2022-09-12	14:36:00	0.202812	183.515	FALSE	6
2022-09-12	14:36:00	0.260827	183.776	FALSE	6
2022-09-12	14:36:01	1.07737	184.854	FALSE	6
2022-09-12	14:36:01	0.220522	185.074	FALSE	6
2022-09-12	14:36:01	0.386883	185.461	FALSE	6
2022-09-12	14:36:01	0.727748	186.189	FALSE	6
2022-09-12	14:36:02	0.687545	186.876	FALSE	6
2022-09-12	14:36:02	0.248054	187.124	FALSE	6
2022-09-12	14:36:02	0.00545825	187.13	FALSE	6
2022-09-12	14:36:03	-0.147468	187.13	FALSE	6
2022-09-12	14:36:03	-0.18243	187.13	FALSE	6
2022-09-12	14:36:03	-0.138715	187.13	FALSE	6
2022-09-12	14:36:03	-0.177341	187.13	FALSE	6
2022-09-12	14:36:04	-0.326704	187.13	FALSE	6
2022-09-12	14:36:04	-0.467824	187.13	FALSE	6
2022-09-12	14:36:04	-0.38243	187.13	FALSE	6
2022-09-12	14:36:04	-0.397849	187.13	FALSE	6
2022-09-12	14:36:05	-0.26416	187.13	FALSE	6
2022-09-12	14:36:05	-0.36416	187.13	FALSE	6
2022-09-12	14:36:05	-0.186704	187.13	FALSE	6
2022-09-12	14:36:05	0.00591628	187.136	FALSE	6
2022-09-12	14:36:06	0.41869	187.554	FALSE	6
2022-09-12	14:36:06	0.406629	187.961	FALSE	6
2022-09-12	14:36:06	0.25869	188.22	FALSE	6
2022-09-12	14:36:07	0.256349	188.476	FALSE	6
2022-09-12	14:36:07	0.274669	188.751	FALSE	6
2022-09-12	14:36:07	0.483881	189.235	FALSE	6
2022-09-12	14:36:07	0.456349	189.691	FALSE	6
2022-09-12	14:36:08	0.623168	190.314	FALSE	6
2022-09-12	14:36:08	0.272532	190.587	FALSE	6
2022-09-12	14:36:08	0.569885	191.157	FALSE	6
2022-09-12	14:36:08	0.576807	191.733	FALSE	6
2022-09-12	14:36:09	0.342506	192.076	FALSE	6
2022-09-12	14:36:09	0.0605728	192.136	FALSE	6
2022-09-12	14:36:09	0.209326	192.346	FALSE	6
2022-09-12	14:36:09	-0.0422262	192.346	FALSE	6
2022-09-12	14:36:10	0.144288	192.49	FALSE	6
2022-09-12	14:36:10	-0.125636	192.49	FALSE	6
2022-09-12	14:36:10	0.0635244	192.554	FALSE	6
2022-09-12	14:36:11	-0.184872	192.554	FALSE	6
2022-09-12	14:36:11	-0.0826842	192.554	FALSE	6
2022-09-12	14:36:11	-0.216425	192.554	FALSE	6
2022-09-12	14:36:11	-0.219885	192.554	FALSE	6
2022-09-12	14:36:12	-0.312506	192.554	FALSE	6
2022-09-12	14:36:12	-0.463193	192.554	FALSE	6
2022-09-12	14:36:12	-0.306908	192.554	FALSE	6
2022-09-12	14:36:12	-0.442837	192.554	FALSE	6
2022-09-12	14:36:13	-0.34701	192.554	FALSE	6
2022-09-12	14:36:13	-0.36701	192.554	FALSE	6
2022-09-12	14:36:13	-0.219224	192.554	FALSE	6
2022-09-12	14:36:14	-0.300699	192.554	FALSE	6
2022-09-12	14:36:14	-0.310216	192.554	FALSE	6
2022-09-12	14:36:14	-0.328587	192.554	FALSE	6
2022-09-12	14:36:14	-0.145738	192.554	FALSE	6
2022-09-12	14:36:15	-0.119936	192.554	FALSE	6
2022-09-12	14:36:15	-0.0210048	192.554	FALSE	6
2022-09-12	14:36:15	-0.173422	192.554	FALSE	6
2022-09-12	14:36:15	-0.00996157	192.554	FALSE	6
2022-09-12	14:36:16	0.0246949	192.578	FALSE	6
2022-09-12	14:36:16	-0.199427	192.578	FALSE	6
2022-09-12	14:36:16	-0.191132	192.578	FALSE	6
2022-09-12	14:36:16	-0.0617173	192.578	FALSE	6
2022-09-12	14:36:17	0.0153819	192.594	FALSE	6
2022-09-12	14:36:17	-0.0401397	192.594	FALSE	6
2022-09-12	14:36:17	-0.131488	192.594	FALSE	6
2022-09-12	14:36:18	-0.11159	192.594	FALSE	6
2022-09-12	14:36:18	-0.0460939	192.594	FALSE	6
2022-09-12	14:36:18	-0.209962	192.594	FALSE	6
2022-09-12	14:36:18	0.0775193	192.671	FALSE	6
2022-09-12	14:36:19	-0.0205468	192.671	FALSE	6
2022-09-12	14:36:19	0.152583	192.824	FALSE	6
2022-09-12	14:36:19	0.373041	193.197	FALSE	6
2022-09-12	14:36:19	0.258537	193.455	FALSE	6
2022-09-12	14:36:20	1.25116	194.707	FALSE	6
2022-09-12	14:36:20	0.150547	194.857	FALSE	6
2022-09-12	14:36:20	0.136654	194.994	FALSE	6
2022-09-12	14:36:20	0.562099	195.556	FALSE	6
2022-09-12	14:36:21	0.395534	195.951	FALSE	6
2022-09-12	14:36:21	0.415636	196.367	FALSE	6
2022-09-12	14:36:21	0.542252	196.909	FALSE	6
2022-09-12	14:36:22	0.556247	197.465	FALSE	6
2022-09-12	14:36:22	0.66159	198.127	FALSE	6
2022-09-12	14:36:22	0.174669	198.302	FALSE	6
2022-09-12	14:36:22	0.210445	198.512	FALSE	6
2022-09-12	14:36:23	0.217417	198.73	FALSE	6
2022-09-12	14:36:23	0.182099	198.912	FALSE	6
2022-09-12	14:36:23	0.154211	199.066	FALSE	6
2022-09-12	14:36:23	0.425407	199.491	FALSE	6
2022-09-12	14:36:24	0.394517	199.886	FALSE	6
2022-09-12	14:36:24	0.400674	200.287	FALSE	6
2022-09-12	14:36:24	0.121489	200.408	FALSE	6
2022-09-12	14:36:24	0.311565	200.72	FALSE	6
2022-09-12	14:36:25	0.216807	200.936	FALSE	6
2022-09-12	14:36:25	0.337316	201.274	FALSE	6
2022-09-12	14:36:25	0.122608	201.396	FALSE	6
2022-09-12	14:36:26	0.437875	201.834	FALSE	6
2022-09-12	14:36:26	0.281641	202.116	FALSE	6
2022-09-12	14:36:26	0.281947	202.398	FALSE	6
2022-09-12	14:36:26	0.202201	202.6	FALSE	6
2022-09-12	14:36:27	0.156807	202.757	FALSE	6
2022-09-12	14:36:27	0.25701	203.014	FALSE	6
2022-09-12	14:36:27	0.26958	203.283	FALSE	6
2022-09-12	14:36:27	0.35187	203.635	FALSE	6
2022-09-12	14:36:28	0.181285	203.817	FALSE	6
2022-09-12	14:36:28	0.392481	204.209	FALSE	6
2022-09-12	14:36:28	0.320827	204.53	FALSE	6
2022-09-12	14:36:28	0.318537	204.848	FALSE	6
2022-09-12	14:36:29	0.317468	205.166	FALSE	6
2022-09-12	14:36:29	0.264847	205.431	FALSE	6
2022-09-12	14:36:29	0.455433	205.886	FALSE	6
2022-09-12	14:36:30	0.293753	206.18	FALSE	6
2022-09-12	14:36:30	0.490496	206.67	FALSE	6
2022-09-12	14:36:30	0.258588	206.929	FALSE	6
2022-09-12	14:36:30	0.454211	207.383	FALSE	6
2022-09-12	14:36:31	0.935483	208.319	FALSE	6
2022-09-12	14:36:31	0.40612	208.725	FALSE	6
2022-09-12	14:36:31	0.326679	209.051	FALSE	6
2022-09-12	14:36:31	0.926272	209.978	FALSE	6
2022-09-12	14:36:32	0.37299	210.351	FALSE	6
2022-09-12	14:36:32	0.936094	211.287	FALSE	6
2022-09-12	14:36:32	0.362608	211.649	FALSE	6
2022-09-12	14:36:32	0.664593	212.314	FALSE	6
2022-09-12	14:36:33	2.06016	214.374	FALSE	6
2022-09-12	14:36:33	0.608817	214.983	FALSE	6
2022-09-12	14:36:33	2.03696	217.02	FALSE	6
2022-09-12	14:36:34	0.301336	217.321	FALSE	6
2022-09-12	14:36:34	0.307901	217.629	FALSE	6
2022-09-12	14:36:34	1.01207	218.641	FALSE	6
2022-09-12	14:36:34	0.396909	219.038	FALSE	6
2022-09-12	14:36:35	0.2993	219.337	FALSE	6
2022-09-12	14:36:35	0.451616	219.789	FALSE	6
2022-09-12	14:36:35	0.289173	220.078	FALSE	6
2022-09-12	14:36:35	0.272786	220.351	FALSE	6
2022-09-12	14:36:36	0.0089188	220.36	FALSE	6
2022-09-12	14:36:36	0.183372	220.543	FALSE	6
2022-09-12	14:36:36	0.152278	220.696	FALSE	6
2022-09-12	14:36:36	0.237875	220.933	FALSE	6
2022-09-12	14:36:37	0.156705	221.09	FALSE	6
2022-09-12	14:36:37	0.372888	221.463	FALSE	6
2022-09-12	14:36:37	0.124746	221.588	FALSE	6
2022-09-12	14:36:38	0.313346	221.901	FALSE	6
2022-09-12	14:36:38	0.317926	222.219	FALSE	6
2022-09-12	14:36:38	0.345	222.564	FALSE	6
2022-09-12	14:36:38	0.246018	222.81	FALSE	6
2022-09-12	14:36:39	0.331158	223.141	FALSE	6
2022-09-12	14:36:39	0.314466	223.456	FALSE	6
2022-09-12	14:36:39	1.33421	224.79	FALSE	6
2022-09-12	14:36:39	0.307494	225.097	FALSE	6
2022-09-12	14:36:40	0.408003	225.505	FALSE	6
2022-09-12	14:36:40	0.585356	226.091	FALSE	6
2022-09-12	14:36:40	0.474669	226.565	FALSE	6
2022-09-12	14:36:40	1.24195	227.807	FALSE	6
2022-09-12	14:36:41	0.4793	228.287	FALSE	6
2022-09-12	14:36:41	1.00826	229.295	FALSE	6
2022-09-12	14:36:41	1.11218	230.407	FALSE	6
2022-09-12	14:36:42	0.666425	231.074	FALSE	6
2022-09-12	14:36:42	1.62821	232.702	FALSE	6
2022-09-12	14:36:42	0.237316	232.939	FALSE	6
2022-09-12	14:36:42	0.464135	233.403	FALSE	6
2022-09-12	14:36:43	0.267036	233.67	FALSE	6
2022-09-12	14:36:43	0.416909	234.087	FALSE	6
2022-09-12	14:36:43	0.132328	234.22	FALSE	6
2022-09-12	14:36:43	0.491616	234.711	FALSE	6
2022-09-12	14:36:44	0.171361	234.882	FALSE	6
2022-09-12	14:36:44	0.410852	235.293	FALSE	6
2022-09-12	14:36:44	0.398741	235.692	FALSE	6
2022-09-12	14:36:44	0.296603	235.989	FALSE	6
2022-09-12	14:36:45	0.335942	236.325	FALSE	6
2022-09-12	14:36:45	0.306527	236.631	FALSE	6
2022-09-12	14:36:45	0.302608	236.934	FALSE	6
2022-09-12	14:36:46	0.194822	237.129	FALSE	6
2022-09-12	14:36:46	0.409224	237.538	FALSE	6
2022-09-12	14:36:46	0.338588	237.876	FALSE	6
2022-09-12	14:36:46	0.426476	238.303	FALSE	6
2022-09-12	14:36:47	0.243168	238.546	FALSE	6
2022-09-12	14:36:47	0.408563	238.955	FALSE	6
2022-09-12	14:36:47	0.379402	239.334	FALSE	6
2022-09-12	14:36:47	0.682405	240.016	FALSE	6
2022-09-12	14:36:48	0.581845	240.598	FALSE	6
2022-09-12	14:36:48	0.52439	241.123	FALSE	6
2022-09-12	14:36:48	0.596858	241.72	FALSE	6
2022-09-12	14:36:48	0.513652	242.233	FALSE	6
2022-09-12	14:36:49	0.397621	242.631	FALSE	6
2022-09-12	14:36:49	0.385509	243.016	FALSE	6
2022-09-12	14:36:49	0.405865	243.422	FALSE	6
2022-09-12	14:36:50	0.405764	243.828	FALSE	6
2022-09-12	14:36:50	0.536959	244.365	FALSE	6
2022-09-12	14:36:50	0.722557	245.087	FALSE	6
2022-09-12	14:36:50	0.567952	245.655	FALSE	6
2022-09-12	14:36:51	0.346018	246.001	FALSE	6
2022-09-12	14:36:51	0.386629	246.388	FALSE	6
2022-09-12	14:36:51	0.491514	246.88	FALSE	6
2022-09-12	14:36:51	0.531158	247.411	FALSE	6
2022-09-12	14:36:52	0.492837	247.904	FALSE	6
2022-09-12	14:36:52	0.402456	248.306	FALSE	6
2022-09-12	14:36:52	0.398639	248.705	FALSE	6
2022-09-12	14:36:52	0.399046	249.104	FALSE	6
2022-09-12	14:36:53	0.38159	249.485	FALSE	6
2022-09-12	14:36:53	0.352176	249.837	FALSE	6
2022-09-12	14:36:53	0.379606	250.217	FALSE	6
2022-09-12	14:36:54	0.344339	250.561	FALSE	6
2022-09-12	14:36:54	0.419962	250.981	FALSE	6
2022-09-12	14:36:54	0.37701	251.358	FALSE	6
2022-09-12	14:36:54	0.365611	251.724	FALSE	6
2022-09-12	14:36:55	0.359351	252.083	FALSE	6
2022-09-12	14:36:55	0.392735	252.476	FALSE	6
2022-09-12	14:36:55	0.178995	252.655	FALSE	6
2022-09-12	14:36:55	0.213702	252.869	FALSE	6
2022-09-12	14:36:56	0.193041	253.062	FALSE	6
2022-09-12	14:36:56	0.147748	253.21	FALSE	6
2022-09-12	14:36:56	0.228512	253.438	FALSE	6
2022-09-12	14:36:56	0.0810307	253.519	FALSE	6
2022-09-12	14:36:57	0.0509036	253.57	FALSE	6
2022-09-12	14:36:57	0.101082	253.671	FALSE	6
2022-09-12	14:36:57	0.0527356	253.724	FALSE	6
2022-09-12	14:36:58	-0.00823129	253.724	FALSE	6
2022-09-12	14:36:58	-0.297748	253.724	FALSE	6
2022-09-12	14:36:58	-0.671793	253.724	FALSE	6
2022-09-12	14:36:58	-0.647824	253.724	FALSE	6
2022-09-12	14:36:59	-0.74187	253.724	FALSE	6
2022-09-12	14:36:59	-0.532099	253.724	FALSE	6
2022-09-12	14:36:59	-0.362531	253.724	FALSE	6
2022-09-12	14:36:59	-0.394491	253.724	FALSE	6
2022-09-12	14:37:00	-0.513015	253.724	FALSE	6
2022-09-12	14:37:00	-0.368638	253.724	FALSE	6
2022-09-12	14:37:00	-0.100191	253.724	FALSE	6
2022-09-12	14:37:01	-0.175203	253.724	FALSE	6
2022-09-12	14:37:01	0.182405	253.906	FALSE	6
2022-09-12	14:37:01	0.146323	254.053	FALSE	6
2022-09-12	14:37:01	0.336858	254.389	FALSE	6
2022-09-12	14:37:02	0.206985	254.596	FALSE	6
2022-09-12	14:37:02	0.448766	255.045	FALSE	6
2022-09-12	14:37:02	0.220318	255.265	FALSE	6
2022-09-12	14:37:02	0.503473	255.769	FALSE	6
2022-09-12	14:37:03	0.244389	256.013	FALSE	6
2022-09-12	14:37:03	0.383117	256.396	FALSE	6
2022-09-12	14:37:03	0.330344	256.727	FALSE	6
2022-09-12	14:37:03	0.344288	257.071	FALSE	6
2022-09-12	14:37:04	0.5593	257.63	FALSE	6
2022-09-12	14:37:04	0.471311	258.102	FALSE	6
2022-09-12	14:37:04	0.312939	258.415	FALSE	6
2022-09-12	14:37:05	0.487952	258.903	FALSE	6
2022-09-12	14:37:05	0.608766	259.511	FALSE	6
2022-09-12	14:37:05	0.847036	260.358	FALSE	6
2022-09-12	14:37:05	0.518639	260.877	FALSE	6
2022-09-12	14:37:06	0.6536	261.531	FALSE	6
2022-09-12	14:37:06	0.392176	261.923	FALSE	6
2022-09-12	14:37:06	0.558791	262.482	FALSE	6
2022-09-12	14:37:06	0.511819	262.993	FALSE	6
2022-09-12	14:37:07	0.45416	263.448	FALSE	6
2022-09-12	14:37:07	0.484491	263.932	FALSE	6
2022-09-12	14:37:07	0.45355	264.386	FALSE	6
2022-09-12	14:37:07	0.491921	264.878	FALSE	6
2022-09-12	14:37:08	0.485865	265.363	FALSE	6
2022-09-12	14:37:08	0.511209	265.875	FALSE	6
2022-09-12	14:37:08	0.426272	266.301	FALSE	6
2022-09-12	14:37:09	0.300624	266.601	FALSE	6
2022-09-12	14:37:09	0.278639	266.88	FALSE	6
2022-09-12	14:37:09	-0.15215	266.88	FALSE	6
2022-09-12	14:37:09	-0.217646	266.88	FALSE	6
2022-09-12	14:37:10	-0.134135	266.88	FALSE	6
2022-09-12	14:37:10	-0.209045	266.88	FALSE	6
2022-09-12	14:37:10	-0.23561	266.88	FALSE	6
2022-09-12	14:37:10	-0.211895	266.88	FALSE	6
2022-09-12	14:37:11	-0.153066	266.88	FALSE	6
2022-09-12	14:37:11	0.03813	266.918	FALSE	6
2022-09-12	14:37:11	0.165407	267.084	FALSE	6
2022-09-12	14:37:11	0.331769	267.415	FALSE	6
2022-09-12	14:37:12	0.33243	267.748	FALSE	6
2022-09-12	14:37:12	0.259453	268.007	FALSE	6
2022-09-12	14:37:12	0.184797	268.192	FALSE	6
2022-09-12	14:37:13	0.27355	268.466	FALSE	6
2022-09-12	14:37:13	0.334618	268.8	FALSE	6
2022-09-12	14:37:13	0.2707	269.071	FALSE	6
2022-09-12	14:37:13	0.296145	269.367	FALSE	6
2022-09-12	14:37:14	0.31416	269.681	FALSE	6
2022-09-12	14:37:14	0.287087	269.968	FALSE	6
2022-09-12	14:37:14	0.244644	270.213	FALSE	6
2022-09-12	14:37:14	0.515687	270.729	FALSE	6
2022-09-12	14:37:15	0.35411	271.083	FALSE	6
2022-09-12	14:37:15	0.626679	271.71	FALSE	6
2022-09-12	14:37:15	0.55528	272.265	FALSE	6
2022-09-12	14:37:15	0.420929	272.686	FALSE	6
2022-09-12	14:37:16	0.479911	273.166	FALSE	6
2022-09-12	14:37:16	0.562354	273.728	FALSE	6
2022-09-12	14:37:16	0.439504	274.167	FALSE	6
2022-09-12	14:37:17	0.18444	274.352	FALSE	6
2022-09-12	14:37:17	0.151311	274.503	FALSE	6
2022-09-12	14:37:17	0.268155	274.771	FALSE	6
2022-09-12	14:37:17	0.0295804	274.801	FALSE	6
2022-09-12	14:37:18	0.137468	274.938	FALSE	6
2022-09-12	14:37:18	-0.00726439	274.938	FALSE	6
2022-09-12	14:37:18	0.142659	275.081	FALSE	6
2022-09-12	14:37:18	0.239148	275.32	FALSE	6
2022-09-12	14:37:19	0.445255	275.765	FALSE	6
2022-09-12	14:37:19	0.33126	276.097	FALSE	6
2022-09-12	14:37:19	0.747646	276.844	FALSE	6
2022-09-12	14:37:19	0.274771	277.119	FALSE	6
2022-09-12	14:37:20	1.0106	278.13	FALSE	6
2022-09-12	14:37:20	0.311769	278.442	FALSE	6
2022-09-12	14:37:20	1.03905	279.481	FALSE	6
2022-09-12	14:37:21	0.289224	279.77	FALSE	6
2022-09-12	14:37:21	0.525407	280.295	FALSE	6
2022-09-12	14:37:21	0.58556	280.881	FALSE	6
2022-09-12	14:37:21	0.620674	281.501	FALSE	6
2022-09-12	14:37:22	0.940674	282.442	FALSE	6
2022-09-12	14:37:22	0.510954	282.953	FALSE	6
2022-09-12	14:37:22	0.861183	283.814	FALSE	6
2022-09-12	14:37:22	0.64159	284.456	FALSE	6
2022-09-12	14:37:23	0.741336	285.197	FALSE	6
2022-09-12	14:37:23	0.882405	286.08	FALSE	6
2022-09-12	14:37:23	0.586578	286.666	FALSE	6
2022-09-12	14:37:23	0.216909	286.883	FALSE	6
2022-09-12	14:37:24	0.652328	287.535	FALSE	6
2022-09-12	14:37:24	0.269835	287.805	FALSE	6
2022-09-12	14:37:24	0.75528	288.561	FALSE	6
2022-09-12	14:37:25	0.282354	288.843	FALSE	6
2022-09-12	14:37:25	0.588257	289.431	FALSE	6
2022-09-12	14:37:25	0.266069	289.697	FALSE	6
2022-09-12	14:37:25	0.672226	290.369	FALSE	6
2022-09-12	14:37:26	0.316858	290.686	FALSE	6
2022-09-12	14:37:26	0.626374	291.313	FALSE	6
2022-09-12	14:37:26	0.704084	292.017	FALSE	6
2022-09-12	14:37:26	0.675992	292.693	FALSE	6
2022-09-12	14:37:27	0.279758	292.973	FALSE	6
2022-09-12	14:37:27	0.724135	293.697	FALSE	6
2022-09-12	14:37:27	0.24098	293.938	FALSE	6
2022-09-12	14:37:27	1.37574	295.313	FALSE	6
2022-09-12	14:37:28	0.313194	295.627	FALSE	6
2022-09-12	14:37:28	1.2138	296.84	FALSE	6
2022-09-12	14:37:28	0.224491	297.065	FALSE	6
2022-09-12	14:37:29	1.26322	298.328	FALSE	6
2022-09-12	14:37:29	0.822252	299.15	FALSE	6
2022-09-12	14:37:29	1.83477	300.985	FALSE	6
2022-09-12	14:37:29	2.49385	303.479	FALSE	6
2022-09-12	14:37:30	1.86317	305.342	FALSE	6
2022-09-12	14:37:30	2.43136	307.773	FALSE	6
2022-09-12	14:37:30	1.48169	309.255	FALSE	6
2022-09-12	14:37:30	3.04281	312.298	1	7
2022-09-12	14:37:31	3.32841	315.626	1	8
2022-09-12	14:37:31	2.0252	317.652	FALSE	8
2022-09-12	14:37:31	0.987442	318.639	FALSE	8
2022-09-12	14:37:31	1.44378	320.083	FALSE	8
2022-09-12	14:37:32	1.05869	321.141	FALSE	8
2022-09-12	14:37:32	1.56108	322.703	FALSE	8
2022-09-12	14:37:32	0.233041	322.936	FALSE	8
2022-09-12	14:37:33	0.514415	323.45	FALSE	8
2022-09-12	14:37:33	0.988257	324.438	FALSE	8
2022-09-12	14:37:33	0.507087	324.945	FALSE	8
2022-09-12	14:37:33	0.203219	325.149	FALSE	8
2022-09-12	14:37:34	0.398232	325.547	FALSE	8
2022-09-12	14:37:34	0.357265	325.904	FALSE	8
2022-09-12	14:37:34	0.39869	326.303	FALSE	8
2022-09-12	14:37:34	0.41986	326.723	FALSE	8
2022-09-12	14:37:35	0.380522	327.103	FALSE	8
2022-09-12	14:37:35	0.537672	327.641	FALSE	8
2022-09-12	14:37:35	0.39187	328.033	FALSE	8
2022-09-12	14:37:35	0.411412	328.444	FALSE	8
2022-09-12	14:37:36	0.571819	329.016	FALSE	8
2022-09-12	14:37:36	0.613397	329.629	FALSE	8
2022-09-12	14:37:36	0.593397	330.223	FALSE	8
2022-09-12	14:37:37	0.649529	330.872	FALSE	8
2022-09-12	14:37:37	0.616756	331.489	FALSE	8
2022-09-12	14:37:37	0.598741	332.088	FALSE	8
2022-09-12	14:37:37	0.502048	332.59	FALSE	8
2022-09-12	14:37:38	0.524084	333.114	FALSE	8
2022-09-12	14:37:38	0.468054	333.582	FALSE	8
2022-09-12	14:37:38	0.132888	333.715	FALSE	8
2022-09-12	14:37:38	-0.0226842	333.715	FALSE	8
2022-09-12	14:37:39	0.0117178	333.727	FALSE	8
2022-09-12	14:37:39	0.124593	333.851	FALSE	8
2022-09-12	14:37:39	0.217367	334.068	FALSE	8
2022-09-12	14:37:39	0.235942	334.304	FALSE	8
2022-09-12	14:37:40	0.199351	334.504	FALSE	8
2022-09-12	14:37:40	0.248817	334.753	FALSE	8
2022-09-12	14:37:40	0.147392	334.9	FALSE	8
2022-09-12	14:37:41	0.867799	335.768	FALSE	8
2022-09-12	14:37:41	1.73589	337.504	FALSE	8
2022-09-12	14:37:41	0.344797	337.848	FALSE	8
2022-09-12	14:37:42	1.03294	338.881	FALSE	8
2022-09-12	14:37:42	2.02322	340.905	FALSE	8
2022-09-12	14:37:42	0.776247	341.681	FALSE	8
2022-09-12	14:37:42	1.56342	343.244	FALSE	8
2022-09-12	14:37:42	2.24866	345.493	FALSE	8
2022-09-12	14:37:43	2.1166	347.61	FALSE	8
2022-09-12	14:37:43	1.31996	348.93	FALSE	8
2022-09-12	14:37:43	0.407901	349.337	FALSE	8
2022-09-12	14:37:43	0.247697	349.585	FALSE	8
2022-09-12	14:37:44	-0.0611066	349.585	FALSE	8
2022-09-12	14:37:44	0.0317687	349.617	FALSE	8
2022-09-12	14:37:44	0.965967	350.583	FALSE	8
2022-09-12	14:37:45	0.680216	351.263	FALSE	8
2022-09-12	14:37:45	-0.0172898	351.263	FALSE	8
2022-09-12	14:37:45	0.0136516	351.277	FALSE	8
2022-09-12	14:37:45	0.38729	351.664	FALSE	8
2022-09-12	14:37:46	0.0104455	351.674	FALSE	8
2022-09-12	14:37:46	0.0248475	351.699	FALSE	8
2022-09-12	14:37:46	0.00550917	351.705	FALSE	8
2022-09-12	14:37:46	0.112227	351.817	FALSE	8
2022-09-12	14:37:47	0.0459163	351.863	FALSE	8
2022-09-12	14:37:47	0.0129392	351.876	FALSE	8
2022-09-12	14:37:47	0.0554837	351.931	FALSE	8
2022-09-12	14:37:47	-0.0220226	351.931	FALSE	8
2022-09-12	14:37:48	0.218791	352.15	FALSE	8
2022-09-12	14:37:48	0.210547	352.361	FALSE	8
2022-09-12	14:37:48	0.320166	352.681	FALSE	8
2022-09-12	14:37:49	0.158792	352.84	FALSE	8
2022-09-12	14:37:49	0.238792	353.078	FALSE	8
2022-09-12	14:37:49	0.0660689	353.145	FALSE	8
2022-09-12	14:37:49	0.268715	353.413	FALSE	8
2022-09-12	14:37:50	0.154975	353.568	FALSE	8
2022-09-12	14:37:50	0.332379	353.901	FALSE	8
2022-09-12	14:37:50	0.150954	354.052	FALSE	8
2022-09-12	14:37:50	0.381438	354.433	FALSE	8
2022-09-12	14:37:51	0.0274939	354.461	FALSE	8
2022-09-12	14:37:51	0.296349	354.757	FALSE	8
2022-09-12	14:37:51	0.0366033	354.793	FALSE	8
2022-09-12	14:37:52	0.176654	354.97	FALSE	8
2022-09-12	14:37:52	0.152736	355.123	FALSE	8
2022-09-12	14:37:52	0.170496	355.293	FALSE	8
2022-09-12	14:37:52	0.199758	355.493	FALSE	8
2022-09-12	14:37:53	0.238639	355.732	FALSE	8
2022-09-12	14:37:53	0.297723	356.029	FALSE	8
2022-09-12	14:37:53	0.283117	356.313	FALSE	8
2022-09-12	14:37:53	0.295331	356.608	FALSE	8
2022-09-12	14:37:54	0.454924	357.063	FALSE	8
2022-09-12	14:37:54	0.4593	357.522	FALSE	8
2022-09-12	14:37:54	0.394161	357.916	FALSE	8
2022-09-12	14:37:54	0.373041	358.289	FALSE	8
2022-09-12	14:37:55	0.260827	358.55	FALSE	8
2022-09-12	14:37:55	0.494059	359.044	FALSE	8
2022-09-12	14:37:55	0.285458	359.33	FALSE	8
2022-09-12	14:37:56	0.350394	359.68	FALSE	8
2022-09-12	14:37:56	0.524796	360.205	FALSE	8
2022-09-12	14:37:56	0.63187	360.837	FALSE	8
2022-09-12	14:37:56	0.674822	361.512	FALSE	8
2022-09-12	14:37:57	0.685458	362.197	FALSE	8
2022-09-12	14:37:57	0.82444	363.021	FALSE	8
2022-09-12	14:37:57	0.491056	363.513	FALSE	8
2022-09-12	14:37:57	0.394873	363.907	FALSE	8
2022-09-12	14:37:58	0.44154	364.349	FALSE	8
2022-09-12	14:37:58	0.647901	364.997	FALSE	8
2022-09-12	14:37:58	0.459758	365.457	FALSE	8
2022-09-12	14:37:58	0.138181	365.595	FALSE	8
2022-09-12	14:37:59	0.103473	365.698	FALSE	8
2022-09-12	14:37:59	0.378384	366.077	FALSE	8
2022-09-12	14:37:59	0.817621	366.894	FALSE	8
2022-09-12	14:38:00	1.22999	368.124	FALSE	8
2022-09-12	14:38:00	0.808817	368.933	FALSE	8
2022-09-12	14:38:00	0.917417	369.85	FALSE	8
2022-09-12	14:38:00	1.39345	371.244	FALSE	8
2022-09-12	14:38:01	0.178995	371.423	FALSE	8
2022-09-12	14:38:01	0.58617	372.009	FALSE	8
2022-09-12	14:38:01	0.547035	372.556	FALSE	8
2022-09-12	14:38:01	0.644949	373.201	FALSE	8
2022-09-12	14:38:02	0.405	373.606	FALSE	8
2022-09-12	14:38:02	0.472532	374.079	FALSE	8
2022-09-12	14:38:02	0.400878	374.479	FALSE	8
2022-09-12	14:38:02	0.717672	375.197	FALSE	8
2022-09-12	14:38:03	0.44841	375.646	FALSE	8
2022-09-12	14:38:03	0.741132	376.387	FALSE	8
2022-09-12	14:38:03	0.28958	376.676	FALSE	8
2022-09-12	14:38:04	0.517366	377.194	FALSE	8
2022-09-12	14:38:04	0.41355	377.607	FALSE	8
2022-09-12	14:38:04	0.440522	378.048	FALSE	8
2022-09-12	14:38:04	0.893906	378.942	FALSE	8
2022-09-12	14:38:05	0.507545	379.449	FALSE	8
2022-09-12	14:38:05	0.832532	380.282	FALSE	8
2022-09-12	14:38:05	0.494618	380.776	FALSE	8
2022-09-12	14:38:05	0.509122	381.285	FALSE	8
2022-09-12	14:38:06	0.619555	381.905	FALSE	8
2022-09-12	14:38:06	0.35182	382.257	FALSE	8
2022-09-12	14:38:06	0.60785	382.865	FALSE	8
2022-09-12	14:38:06	0.400624	383.265	FALSE	8
2022-09-12	14:38:07	0.554822	383.82	FALSE	8
2022-09-12	14:38:07	0.394517	384.215	FALSE	8
2022-09-12	14:38:07	0.376501	384.591	FALSE	8
2022-09-12	14:38:08	1.14963	385.741	FALSE	8
2022-09-12	14:38:08	0.487545	386.228	FALSE	8
2022-09-12	14:38:08	0.753499	386.982	FALSE	8
2022-09-12	14:38:08	0.544389	387.526	FALSE	8
2022-09-12	14:38:09	1.90983	389.436	FALSE	8
2022-09-12	14:38:09	3.6248	393.061	1	9
2022-09-12	14:38:09	3.84495	396.906	1	10
2022-09-12	14:38:09	5.82632	402.732	1	11
2022-09-12	14:38:10	1.551	404.283	FALSE	11
2022-09-12	14:38:10	1.52001	405.803	FALSE	11
2022-09-12	14:38:10	1.68688	407.49	FALSE	11
2022-09-12	14:38:10	0.423728	407.914	FALSE	11
2022-09-12	14:38:11	0.670801	408.585	FALSE	11
2022-09-12	14:38:11	0.152888	408.737	FALSE	11
2022-09-12	14:38:11	0.220623	408.958	FALSE	11
2022-09-12	14:38:12	-0.0491982	408.958	FALSE	11
2022-09-12	14:38:12	0.0796567	409.038	FALSE	11
2022-09-12	14:38:12	0.229224	409.267	FALSE	11
2022-09-12	14:38:12	0.383321	409.65	FALSE	11
2022-09-12	14:38:13	0.368461	410.019	FALSE	11
2022-09-12	14:38:13	0.512328	410.531	FALSE	11
2022-09-12	14:38:13	0.535992	411.067	FALSE	11
2022-09-12	14:38:13	0.447443	411.514	FALSE	11
2022-09-12	14:38:14	0.522252	412.037	FALSE	11
2022-09-12	14:38:14	0.461947	412.499	FALSE	11
2022-09-12	14:38:14	0.521743	413.02	FALSE	11
2022-09-12	14:38:14	0.564847	413.585	FALSE	11
2022-09-12	14:38:15	0.670903	414.256	FALSE	11
2022-09-12	14:38:15	0.527137	414.783	FALSE	11
2022-09-12	14:38:15	0.442252	415.226	FALSE	11
2022-09-12	14:38:16	0.492481	415.718	FALSE	11
2022-09-12	14:38:16	0.499911	416.218	FALSE	11
2022-09-12	14:38:16	0.484746	416.703	FALSE	11
2022-09-12	14:38:16	0.490394	417.193	FALSE	11
2022-09-12	14:38:17	0.471616	417.665	FALSE	11
2022-09-12	14:38:17	0.493193	418.158	FALSE	11
2022-09-12	14:38:17	0.504338	418.662	FALSE	11
2022-09-12	14:38:17	0.504033	419.166	FALSE	11
2022-09-12	14:38:18	0.363321	419.53	FALSE	11
2022-09-12	14:38:18	0.456959	419.987	FALSE	11
2022-09-12	14:38:18	0.489886	420.476	FALSE	11
2022-09-12	14:38:18	0.632074	421.108	FALSE	11
2022-09-12	14:38:19	0.571514	421.68	FALSE	11
2022-09-12	14:38:19	0.783473	422.463	FALSE	11
2022-09-12	14:38:19	1.09497	423.558	FALSE	11
2022-09-12	14:38:20	0.43126	423.99	FALSE	11
2022-09-12	14:38:20	0.76159	424.751	FALSE	11
2022-09-12	14:38:20	2.11966	426.871	FALSE	11
2022-09-12	14:38:20	0.611718	427.483	FALSE	11
2022-09-12	14:38:21	0.836908	428.32	FALSE	11
2022-09-12	14:38:21	0.82215	429.142	FALSE	11
2022-09-12	14:38:21	0.667799	429.81	FALSE	11
2022-09-12	14:38:21	0.282863	430.092	FALSE	11
2022-09-12	14:38:22	1.10943	431.202	FALSE	11
2022-09-12	14:38:22	0.291412	431.493	FALSE	11
2022-09-12	14:38:22	0.735941	432.229	FALSE	11
2022-09-12	14:38:22	0.746985	432.976	FALSE	11
2022-09-12	14:38:23	0.745916	433.722	FALSE	11
2022-09-12	14:38:23	0.493702	434.216	FALSE	11
2022-09-12	14:38:23	0.912837	435.129	FALSE	11
2022-09-12	14:38:24	0.30444	435.433	FALSE	11
2022-09-12	14:38:24	0.649224	436.082	FALSE	11
2022-09-12	14:38:24	0.591208	436.673	FALSE	11
2022-09-12	14:38:24	0.614771	437.288	FALSE	11
2022-09-12	14:38:25	0.374771	437.663	FALSE	11
2022-09-12	14:38:25	0.742201	438.405	FALSE	11
2022-09-12	14:38:25	0.413295	438.819	FALSE	11
2022-09-12	14:38:25	0.587086	439.406	FALSE	11
2022-09-12	14:38:26	1.28607	440.692	FALSE	11
2022-09-12	14:38:26	1.01569	441.707	FALSE	11
2022-09-12	14:38:26	2.39441	444.102	FALSE	11
2022-09-12	14:38:26	0.739911	444.842	FALSE	11
2022-09-12	14:38:27	2.32938	447.171	FALSE	11
2022-09-12	14:38:27	3.14037	450.311	1	12
2022-09-12	14:38:27	2.83436	453.146	FALSE	12
2022-09-12	14:38:28	2.78734	455.933	FALSE	12
2022-09-12	14:38:28	0.84154	456.775	FALSE	12
2022-09-12	14:38:28	1.92434	458.699	FALSE	12
2022-09-12	14:38:28	2.72917	461.428	FALSE	12
2022-09-12	14:38:29	1.85156	463.28	FALSE	12
2022-09-12	14:38:29	1.32393	464.604	FALSE	12
2022-09-12	14:38:29	0.700114	465.304	FALSE	12
2022-09-12	14:38:29	0.265356	465.569	FALSE	12
2022-09-12	14:38:30	0.532837	466.102	FALSE	12
2022-09-12	14:38:30	0.135433	466.237	FALSE	12
2022-09-12	14:38:30	0.493041	466.73	FALSE	12
2022-09-12	14:38:30	0.360573	467.091	FALSE	12
2022-09-12	14:38:31	0.582863	467.674	FALSE	12
2022-09-12	14:38:31	0.170242	467.844	FALSE	12
2022-09-12	14:38:31	0.812582	468.657	FALSE	12
2022-09-12	14:38:32	0.344949	469.002	FALSE	12
2022-09-12	14:38:32	0.915382	469.917	FALSE	12
2022-09-12	14:38:32	0.70103	470.618	FALSE	12
2022-09-12	14:38:32	2.03248	472.651	FALSE	12
2022-09-12	14:38:33	2.14973	474.8	FALSE	12
2022-09-12	14:38:33	1.83391	476.634	FALSE	12
2022-09-12	14:38:33	2.88006	479.514	FALSE	12
2022-09-12	14:38:33	2.07207	481.586	FALSE	12
2022-09-12	14:38:34	2.7677	484.354	FALSE	12
2022-09-12	14:38:34	5.0997	489.454	1	13
2022-09-12	14:38:34	0.654466	490.108	FALSE	13
2022-09-12	14:38:34	1.42658	491.535	FALSE	13
2022-09-12	14:38:35	0.965102	492.5	FALSE	13
2022-09-12	14:38:35	1.10215	493.602	FALSE	13
2022-09-12	14:38:35	0.372532	493.975	FALSE	13
2022-09-12	14:38:36	0.393295	494.368	FALSE	13
2022-09-12	14:38:36	0.468308	494.836	FALSE	13
2022-09-12	14:38:36	0.910598	495.747	FALSE	13
2022-09-12	14:38:36	1.23207	496.979	FALSE	13
2022-09-12	14:38:37	1.80322	498.782	FALSE	13
2022-09-12	14:38:37	1.57558	500.358	FALSE	13
2022-09-12	14:38:37	0.913651	501.271	FALSE	13
2022-09-12	14:38:37	0.791412	502.063	FALSE	13
2022-09-12	14:38:38	1.01609	503.079	FALSE	13
2022-09-12	14:38:38	1.88719	504.966	FALSE	13
2022-09-12	14:38:38	1.54556	506.512	FALSE	13
2022-09-12	14:38:38	0.320776	506.832	FALSE	13
2022-09-12	14:38:39	-0.0751015	506.832	FALSE	13
2022-09-12	14:38:39	-0.0322008	506.832	FALSE	13
2022-09-12	14:38:39	0.155585	506.988	FALSE	13
2022-09-12	14:38:40	0.0969086	507.085	FALSE	13
2022-09-12	14:38:40	0.0279519	507.113	FALSE	13
2022-09-12	14:38:40	0.121336	507.234	FALSE	13
2022-09-12	14:38:40	0.403779	507.638	FALSE	13
2022-09-12	14:38:41	0.243015	507.881	FALSE	13
2022-09-12	14:38:41	0.0919722	507.973	FALSE	13
2022-09-12	14:38:41	0.533142	508.506	FALSE	13
2022-09-12	14:38:41	0.529122	509.035	FALSE	13
2022-09-12	14:38:42	0.375229	509.41	FALSE	13
2022-09-12	14:38:42	0.325611	509.736	FALSE	13
2022-09-12	14:38:42	0.382506	510.118	FALSE	13
2022-09-12	14:38:43	0.302252	510.421	FALSE	13
2022-09-12	14:38:43	0.302914	510.724	FALSE	13
2022-09-12	14:38:43	0.220064	510.944	FALSE	13
2022-09-12	14:38:43	0.296349	511.24	FALSE	13
2022-09-12	14:38:44	0.368613	511.609	FALSE	13
2022-09-12	14:38:44	0.408919	512.018	FALSE	13
2022-09-12	14:38:44	0.200827	512.218	FALSE	13
2022-09-12	14:38:44	0.334975	512.553	FALSE	13
2022-09-12	14:38:45	0.309784	512.863	FALSE	13
2022-09-12	14:38:45	0.316756	513.18	FALSE	13
2022-09-12	14:38:45	0.396654	513.577	FALSE	13
2022-09-12	14:38:45	0.325102	513.902	FALSE	13
2022-09-12	14:38:46	0.376705	514.278	FALSE	13
2022-09-12	14:38:46	0.263168	514.542	FALSE	13
2022-09-12	14:38:46	0.319199	514.861	FALSE	13
2022-09-12	14:38:47	0.3107	515.171	FALSE	13
2022-09-12	14:38:47	0.270242	515.442	FALSE	13
2022-09-12	14:38:47	0.308512	515.75	FALSE	13
2022-09-12	14:38:47	0.373041	516.123	FALSE	13
2022-09-12	14:38:48	0.108003	516.231	FALSE	13
2022-09-12	14:38:48	0.250191	516.481	FALSE	13
2022-09-12	14:38:48	0.245255	516.727	FALSE	13
2022-09-12	14:38:48	0.250649	516.977	FALSE	13
2022-09-12	14:38:49	0.0578247	517.035	FALSE	13
2022-09-12	14:38:49	-0.0860938	517.035	FALSE	13
2022-09-12	14:38:49	-0.233168	517.035	FALSE	13
2022-09-12	14:38:49	-0.0324552	517.035	FALSE	13
2022-09-12	14:38:50	-0.134236	517.035	FALSE	13
2022-09-12	14:38:50	-0.115356	517.035	FALSE	13
2022-09-12	14:38:50	-0.0577478	517.035	FALSE	13
2022-09-12	14:38:51	-0.106297	517.035	FALSE	13
2022-09-12	14:38:51	0.20673	517.242	FALSE	13
2022-09-12	14:38:51	0.0882572	517.33	FALSE	13
2022-09-12	14:38:51	0.455738	517.786	FALSE	13
2022-09-12	14:38:52	0.909835	518.696	FALSE	13
2022-09-12	14:38:52	0.965509	519.661	FALSE	13
2022-09-12	14:38:52	0.834262	520.495	FALSE	13
2022-09-12	14:38:52	0.684237	521.18	FALSE	13
2022-09-12	14:38:53	0.602455	521.782	FALSE	13
2022-09-12	14:38:53	0.777773	522.56	FALSE	13
2022-09-12	14:38:53	0.443626	523.004	FALSE	13
2022-09-12	14:38:53	0.474466	523.478	FALSE	13
2022-09-12	14:38:54	0.548461	524.027	FALSE	13
2022-09-12	14:38:54	0.269326	524.296	FALSE	13
2022-09-12	14:38:54	0.647392	524.943	FALSE	13
2022-09-12	14:38:55	0.317519	525.261	FALSE	13
2022-09-12	14:38:55	0.694567	525.955	FALSE	13
2022-09-12	14:38:55	0.343168	526.298	FALSE	13
2022-09-12	14:38:55	0.884949	527.183	FALSE	13
2022-09-12	14:38:56	0.25014	527.434	FALSE	13
2022-09-12	14:38:56	0.641387	528.075	FALSE	13
2022-09-12	14:38:56	0.299148	528.374	FALSE	13
2022-09-12	14:38:56	0.720013	529.094	FALSE	13
2022-09-12	14:38:57	0.791412	529.886	FALSE	13
2022-09-12	14:38:57	0.736501	530.622	FALSE	13
2022-09-12	14:38:57	0.502812	531.125	FALSE	13
2022-09-12	14:38:57	0.658435	531.783	FALSE	13
2022-09-12	14:38:58	0.257774	532.041	FALSE	13
2022-09-12	14:38:58	1.18459	533.226	FALSE	13
2022-09-12	14:38:58	0.301998	533.528	FALSE	13
2022-09-12	14:38:59	0.713346	534.241	FALSE	13
2022-09-12	14:38:59	0.288868	534.53	FALSE	13
2022-09-12	14:38:59	0.51874	535.049	FALSE	13
2022-09-12	14:38:59	0.564389	535.613	FALSE	13
2022-09-12	14:39:00	0.773397	536.386	FALSE	13
2022-09-12	14:39:00	1.0651	537.451	FALSE	13
2022-09-12	14:39:00	0.975534	538.427	FALSE	13
2022-09-12	14:39:00	2.14983	540.577	FALSE	13
2022-09-12	14:39:01	1.17945	541.756	FALSE	13
2022-09-12	14:39:01	2.06312	543.819	FALSE	13
2022-09-12	14:39:01	0.16383	543.983	FALSE	13
2022-09-12	14:39:01	0.919605	544.903	FALSE	13
2022-09-12	14:39:02	0.407901	545.311	FALSE	13
2022-09-12	14:39:02	0.639555	545.95	FALSE	13
2022-09-12	14:39:02	0.399199	546.35	FALSE	13
2022-09-12	14:39:03	0.489886	546.839	FALSE	13
2022-09-12	14:39:03	0.440115	547.28	FALSE	13
2022-09-12	14:39:03	0.495534	547.775	FALSE	13
2022-09-12	14:39:03	0.940064	548.715	FALSE	13
2022-09-12	14:39:04	1.14072	549.856	FALSE	13
2022-09-12	14:39:04	0.905254	550.761	FALSE	13
2022-09-12	14:39:04	1.9022	552.663	FALSE	13
2022-09-12	14:39:04	0.638232	553.302	FALSE	13
2022-09-12	14:39:05	2.69594	555.997	FALSE	13
2022-09-12	14:39:05	0.507239	556.505	FALSE	13
2022-09-12	14:39:05	2.49945	559.004	FALSE	13
2022-09-12	14:39:05	1.02693	560.031	FALSE	13
2022-09-12	14:39:06	1.68846	561.72	FALSE	13
2022-09-12	14:39:06	0.545763	562.265	FALSE	13
2022-09-12	14:39:06	0.954109	563.219	FALSE	13
2022-09-12	14:39:07	1.87558	565.095	FALSE	13
2022-09-12	14:39:07	0.394364	565.489	FALSE	13
2022-09-12	14:39:07	1.15513	566.644	FALSE	13
2022-09-12	14:39:07	1.22108	567.866	FALSE	13
2022-09-12	14:39:08	0.837926	568.703	FALSE	13
2022-09-12	14:39:08	1.22963	569.933	FALSE	13
2022-09-12	14:39:08	0.868613	570.802	FALSE	13
2022-09-12	14:39:08	2.18892	572.991	FALSE	13
2022-09-12	14:39:09	2.37777	575.368	FALSE	13
2022-09-12	14:39:09	0.698944	576.067	FALSE	13
2022-09-12	14:39:09	1.27777	577.345	FALSE	13
2022-09-12	14:39:09	1.61645	578.962	FALSE	13
2022-09-12	14:39:10	0.537265	579.499	FALSE	13
2022-09-12	14:39:10	0.306476	579.805	FALSE	13
2022-09-12	14:39:10	0.514822	580.32	FALSE	13
2022-09-12	14:39:11	0.193651	580.514	FALSE	13
2022-09-12	14:39:11	0.324593	580.838	FALSE	13
2022-09-12	14:39:11	0.27014	581.109	FALSE	13
2022-09-12	14:39:11	0.316603	581.425	FALSE	13
2022-09-12	14:39:12	0.325814	581.751	FALSE	13
2022-09-12	14:39:12	0.454466	582.205	FALSE	13
2022-09-12	14:39:12	0.254517	582.46	FALSE	13
2022-09-12	14:39:12	0.261234	582.721	FALSE	13
2022-09-12	14:39:13	0.370954	583.092	FALSE	13
2022-09-12	14:39:13	0.412328	583.504	FALSE	13
2022-09-12	14:39:13	0.238486	583.743	FALSE	13
2022-09-12	14:39:13	0.446272	584.189	FALSE	13
2022-09-12	14:39:14	0.49472	584.684	FALSE	13
2022-09-12	14:39:14	1.36373	586.048	FALSE	13
2022-09-12	14:39:14	0.881845	586.929	FALSE	13
2022-09-12	14:39:15	2.29711	589.227	FALSE	13
2022-09-12	14:39:15	2.03192	591.259	FALSE	13
2022-09-12	14:39:15	0.79813	592.057	FALSE	13
2022-09-12	14:39:15	0.765254	592.822	FALSE	13
2022-09-12	14:39:16	0.470089	593.292	FALSE	13
2022-09-12	14:39:16	0.369122	593.661	FALSE	13
2022-09-12	14:39:16	0.446018	594.107	FALSE	13
2022-09-12	14:39:16	0.534618	594.642	FALSE	13
2022-09-12	14:39:17	0.349071	594.991	FALSE	13
2022-09-12	14:39:17	0.600267	595.591	FALSE	13
2022-09-12	14:39:17	0.376858	595.968	FALSE	13
2022-09-12	14:39:17	0.577265	596.545	FALSE	13
2022-09-12	14:39:18	0.425458	596.971	FALSE	13
2022-09-12	14:39:18	0.47874	597.449	FALSE	13
2022-09-12	14:39:18	0.349478	597.799	FALSE	13
2022-09-12	14:39:19	0.491158	598.29	FALSE	13
2022-09-12	14:39:19	0.748969	599.039	FALSE	13
2022-09-12	14:39:19	0.560623	599.6	FALSE	13
2022-09-12	14:39:19	1.05289	600.653	FALSE	13
2022-09-12	14:39:20	0.813753	601.466	FALSE	13
2022-09-12	14:39:20	2.48276	603.949	FALSE	13
2022-09-12	14:39:20	2.7706	606.72	FALSE	13
2022-09-12	14:39:20	1.39441	608.114	FALSE	13
2022-09-12	14:39:21	1.42602	609.54	FALSE	13
2022-09-12	14:39:21	0.870445	610.411	FALSE	13
2022-09-12	14:39:21	0.978893	611.389	FALSE	13
2022-09-12	14:39:21	1.42449	612.814	FALSE	13
2022-09-12	14:39:22	2.79431	615.608	FALSE	13
2022-09-12	14:39:22	4.78296	620.391	1	14
2022-09-12	14:39:22	4.25935	624.651	1	15
2022-09-12	14:39:23	7.25217	631.903	1	16
2022-09-12	14:39:23	2.38637	634.289	FALSE	16
2022-09-12	14:39:23	7.13787	641.427	1	17
2022-09-12	14:39:23	4.92281	646.35	1	18
2022-09-12	14:39:24	4.83233	651.182	1	19
2022-09-12	14:39:24	3.48093	654.663	1	20
2022-09-12	14:39:24	3.5792	658.242	1	21
2022-09-12	14:39:24	2.01711	660.259	FALSE	21
2022-09-12	14:39:25	1.87172	662.131	FALSE	21
2022-09-12	14:39:25	2.08556	664.217	FALSE	21
2022-09-12	14:39:25	0.898588	665.115	FALSE	21
2022-09-12	14:39:25	0.746985	665.862	FALSE	21
2022-09-12	14:39:26	0.600115	666.462	FALSE	21
2022-09-12	14:39:26	0.403423	666.866	FALSE	21
2022-09-12	14:39:26	0.386832	667.253	FALSE	21
2022-09-12	14:39:27	0.339046	667.592	FALSE	21
2022-09-12	14:39:27	0.456501	668.048	FALSE	21
2022-09-12	14:39:27	0.558079	668.606	FALSE	21
2022-09-12	14:39:27	1.08017	669.686	FALSE	21
2022-09-12	14:39:28	0.551718	670.238	FALSE	21
2022-09-12	14:39:28	1.90302	672.141	FALSE	21
2022-09-12	14:39:28	2.39889	674.54	FALSE	21
2022-09-12	14:39:28	1.66963	676.21	FALSE	21
2022-09-12	14:39:29	2.63065	678.84	FALSE	21
2022-09-12	14:39:29	1.80505	680.645	FALSE	21
2022-09-12	14:39:29	1.17691	681.822	FALSE	21
2022-09-12	14:39:30	1.21767	683.04	FALSE	21
2022-09-12	14:39:30	0.464084	683.504	FALSE	21
2022-09-12	14:39:30	0.605967	684.11	FALSE	21
2022-09-12	14:39:30	0.285	684.395	FALSE	21
2022-09-12	14:39:31	0.268817	684.664	FALSE	21
2022-09-12	14:39:31	0.312786	684.977	FALSE	21
2022-09-12	14:39:31	0.352074	685.329	FALSE	21
2022-09-12	14:39:31	0.096247	685.425	FALSE	21
2022-09-12	14:39:32	0.28444	685.709	FALSE	21
2022-09-12	14:39:32	0.626985	686.336	FALSE	21
2022-09-12	14:39:32	0.588206	686.924	FALSE	21
2022-09-12	14:39:32	1.11487	688.039	FALSE	21
2022-09-12	14:39:33	0.990801	689.03	FALSE	21
2022-09-12	14:39:33	2.27202	691.302	FALSE	21
2022-09-12	14:39:33	2.17645	693.479	FALSE	21
2022-09-12	14:39:34	2.5366	696.015	FALSE	21
2022-09-12	14:39:34	1.13182	697.147	FALSE	21
2022-09-12	14:39:34	2.04383	699.191	FALSE	21
2022-09-12	14:39:34	1.45177	700.643	FALSE	21
2022-09-12	14:39:35	3.25523	703.898	1	22
2022-09-12	14:39:35	1.87508	705.773	FALSE	22
2022-09-12	14:39:35	5.87925	711.652	1	23
2022-09-12	14:39:35	7.82535	719.478	1	24
2022-09-12	14:39:36	6.72352	726.201	1	25
2022-09-12	14:39:36	6.66942	732.87	1	26
2022-09-12	14:39:36	4.60495	737.475	1	27
2022-09-12	14:39:36	2.82184	740.297	FALSE	27
2022-09-12	14:39:37	1.46917	741.766	FALSE	27
2022-09-12	14:39:37	0.45014	742.217	FALSE	27
2022-09-12	14:39:37	0.930547	743.147	FALSE	27
2022-09-12	14:39:38	0.826578	743.974	FALSE	27
2022-09-12	14:39:38	0.72383	744.698	FALSE	27
2022-09-12	14:39:38	0.460267	745.158	FALSE	27
2022-09-12	14:39:38	0.757723	745.916	FALSE	27
2022-09-12	14:39:39	0.688766	746.604	FALSE	27
2022-09-12	14:39:39	0.482914	747.087	FALSE	27
2022-09-12	14:39:39	0.494415	747.582	FALSE	27
2022-09-12	14:39:39	0.497316	748.079	FALSE	27
2022-09-12	14:39:40	0.484898	748.564	FALSE	27
2022-09-12	14:39:40	0.488257	749.052	FALSE	27
2022-09-12	14:39:40	0.435433	749.488	FALSE	27
2022-09-12	14:39:40	0.464339	749.952	FALSE	27
2022-09-12	14:39:41	0.408359	750.36	FALSE	27
2022-09-12	14:39:41	0.513448	750.874	FALSE	27
2022-09-12	14:39:41	0.458333	751.332	FALSE	27
2022-09-12	14:39:42	0.486883	751.819	FALSE	27
2022-09-12	14:39:42	0.439708	752.259	FALSE	27
2022-09-12	14:39:42	0.46958	752.728	FALSE	27
2022-09-12	14:39:42	0.411311	753.139	FALSE	27
2022-09-12	14:39:43	0.511718	753.651	FALSE	27
2022-09-12	14:39:43	0.432735	754.084	FALSE	27
2022-09-12	14:39:43	0.432277	754.516	FALSE	27
2022-09-12	14:39:43	0.289275	754.805	FALSE	27
2022-09-12	14:39:44	0.302914	755.108	FALSE	27
2022-09-12	14:39:44	0.311921	755.42	FALSE	27
2022-09-12	14:39:44	0.120471	755.541	FALSE	27
2022-09-12	14:39:44	0.397214	755.938	FALSE	27
2022-09-12	14:39:45	1.85518	757.793	FALSE	27
2022-09-12	14:39:45	1.03503	758.828	FALSE	27
2022-09-12	14:39:45	0.934771	759.763	FALSE	27
2022-09-12	14:39:46	0.506221	760.269	FALSE	27
2022-09-12	14:39:46	0.57243	760.842	FALSE	27
2022-09-12	14:39:46	0.263066	761.105	FALSE	27
2022-09-12	14:39:46	0.644084	761.749	FALSE	27
2022-09-12	14:39:47	0.118283	761.867	FALSE	27
2022-09-12	14:39:47	0.437163	762.304	FALSE	27
2022-09-12	14:39:47	0.386018	762.69	FALSE	27
2022-09-12	14:39:47	0.300115	762.99	FALSE	27
2022-09-12	14:39:48	0.303015	763.293	FALSE	27
2022-09-12	14:39:48	0.283168	763.577	FALSE	27
2022-09-12	14:39:48	0.25411	763.831	FALSE	27
2022-09-12	14:39:48	0.284847	764.116	FALSE	27
2022-09-12	14:39:49	0.276145	764.392	FALSE	27
2022-09-12	14:39:49	0.273448	764.665	FALSE	27
2022-09-12	14:39:49	0.294618	764.96	FALSE	27
2022-09-12	14:39:50	0.359911	765.32	FALSE	27
2022-09-12	14:39:50	0.163575	765.483	FALSE	27
2022-09-12	14:39:50	0.380165	765.863	FALSE	27
2022-09-12	14:39:50	0.197926	766.061	FALSE	27
2022-09-12	14:39:51	0.35416	766.415	FALSE	27
2022-09-12	14:39:51	0.127036	766.543	FALSE	27
2022-09-12	14:39:51	0.375076	766.918	FALSE	27
2022-09-12	14:39:51	0.255026	767.173	FALSE	27
2022-09-12	14:39:52	0.256298	767.429	FALSE	27
2022-09-12	14:39:52	0.178741	767.608	FALSE	27
2022-09-12	14:39:52	0.275993	767.884	FALSE	27
2022-09-12	14:39:52	0.199962	768.084	FALSE	27

## Sheet: Ranger_harness_2022912143430
						**GoPro Fitting: 1424
2022-09-12	14:34:30	0.354364
2022-09-12	14:34:30	0.355178
2022-09-12	14:34:31	0.349733
2022-09-12	14:34:31	0.350293
2022-09-12	14:34:31	0.352532
2022-09-12	14:34:31	0.35813
2022-09-12	14:34:32	0.380776
2022-09-12	14:34:32	0.378741
2022-09-12	14:34:32	0.347392
2022-09-12	14:34:33	0.381794
2022-09-12	14:34:33	0.358181
2022-09-12	14:34:33	0.36668
2022-09-12	14:34:33	0.373448
2022-09-12	14:34:34	0.362965
2022-09-12	14:34:34	0.370903
2022-09-12	14:34:34	0.346781
2022-09-12	14:34:34	0.392583
2022-09-12	14:34:35	0.358537
2022-09-12	14:34:35	0.366527
2022-09-12	14:34:35	0.386018
2022-09-12	14:34:35	0.400522
2022-09-12	14:34:36	0.469275
2022-09-12	14:34:36	0.586425
2022-09-12	14:34:36	0.655025
2022-09-12	14:34:37	0.388715
2022-09-12	14:34:37	0.401743
2022-09-12	14:34:37	0.406679
2022-09-12	14:34:37	0.491005
2022-09-12	14:34:38	0.41187
2022-09-12	14:34:38	0.524084
2022-09-12	14:34:38	0.481997
2022-09-12	14:34:38	0.404797
2022-09-12	14:34:39	0.455178
2022-09-12	14:34:39	0.388155
2022-09-12	14:34:39	0.518791
2022-09-12	14:34:39	0.376756
2022-09-12	14:34:40	0.43869
2022-09-12	14:34:40	0.305305
2022-09-12	14:34:40	0.259555
2022-09-12	14:34:41	0.247952
2022-09-12	14:34:41	0.444491
2022-09-12	14:34:41	1.08678
2022-09-12	14:34:41	0.440522
2022-09-12	14:34:42	4.00622
2022-09-12	14:34:42	4.23299
2022-09-12	14:34:42	5.51686
2022-09-12	14:34:42	1.5248
2022-09-12	14:34:43	1.4452
2022-09-12	14:34:43	2.43849
2022-09-12	14:34:43	1.24714
2022-09-12	14:34:44	3.31416
2022-09-12	14:34:44	0.361998
2022-09-12	14:34:44	2.50607
2022-09-12	14:34:44	0.328206
2022-09-12	14:34:45	0.574415
2022-09-12	14:34:45	0.556603
2022-09-12	14:34:45	2.03777
2022-09-12	14:34:45	0.274924
2022-09-12	14:34:46	1.97716
2022-09-12	14:34:46	0.307392
2022-09-12	14:34:46	0.85528
2022-09-12	14:34:46	0.201692
2022-09-12	14:34:47	0.349173
2022-09-12	14:34:47	0.528308
2022-09-12	14:34:47	0.402964
2022-09-12	14:34:48	0.491667
2022-09-12	14:34:48	0.101896
2022-09-12	14:34:48	0.595534
2022-09-12	14:34:48	0.455127
2022-09-12	14:34:49	0.572837
2022-09-12	14:34:49	0.0994022
2022-09-12	14:34:49	-0.0949488
2022-09-12	14:34:49	-0.351183
2022-09-12	14:34:50	-0.264872
2022-09-12	14:34:50	-0.184262
2022-09-12	14:34:50	-0.0146944
2022-09-12	14:34:50	0.256298
2022-09-12	14:34:51	0.159453
2022-09-12	14:34:51	0.241845
2022-09-12	14:34:51	0.414669
2022-09-12	14:34:52	0.617316
2022-09-12	14:34:52	0.39014
2022-09-12	14:34:52	0.232685
2022-09-12	14:34:52	0.605204
2022-09-12	14:34:53	0.333092
2022-09-12	14:34:53	0.667239
2022-09-12	14:34:53	0.464135
2022-09-12	14:34:53	0.817214
2022-09-12	14:34:54	0.521539
2022-09-12	14:34:54	0.321031
2022-09-12	14:34:54	0.369224
2022-09-12	14:34:54	0.772939
2022-09-12	14:34:55	0.362048
2022-09-12	14:34:55	1.32546
2022-09-12	14:34:55	0.401947
2022-09-12	14:34:56	1.93497
2022-09-12	14:34:56	0.202507
2022-09-12	14:34:56	0.521031
2022-09-12	14:34:56	1.15009
2022-09-12	14:34:57	0.328868
2022-09-12	14:34:57	0.358639
2022-09-12	14:34:57	0.200725
2022-09-12	14:34:57	0.731209
2022-09-12	14:34:58	0.175891
2022-09-12	14:34:58	1.91441
2022-09-12	14:34:58	0.610852
2022-09-12	14:34:58	3.08037
2022-09-12	14:34:59	0.682608
2022-09-12	14:34:59	2.94103
2022-09-12	14:34:59	1.53172
2022-09-12	14:35:00	2.5251
2022-09-12	14:35:00	0.874415
2022-09-12	14:35:00	0.801794
2022-09-12	14:35:00	0.292583
2022-09-12	14:35:01	0.24673
2022-09-12	14:35:01	0.184186
2022-09-12	14:35:01	0.698028
2022-09-12	14:35:01	0.0638806
2022-09-12	14:35:02	0.33645
2022-09-12	14:35:02	0.158435
2022-09-12	14:35:02	0.622761
2022-09-12	14:35:02	1.90653
2022-09-12	14:35:03	1.65452
2022-09-12	14:35:03	2.29075
2022-09-12	14:35:03	1.38922
2022-09-12	14:35:04	1.45752
2022-09-12	14:35:04	0.449835
2022-09-12	14:35:04	1.87513
2022-09-12	14:35:04	0.215636
2022-09-12	14:35:05	1.85833
2022-09-12	14:35:05	0.548766
2022-09-12	14:35:05	2.66251
2022-09-12	14:35:05	0.894669
2022-09-12	14:35:06	1.6593
2022-09-12	14:35:06	1.09961
2022-09-12	14:35:06	0.977417
2022-09-12	14:35:06	0.562862
2022-09-12	14:35:07	0.710038
2022-09-12	14:35:07	0.240013
2022-09-12	14:35:07	0.781081
2022-09-12	14:35:08	0.190496
2022-09-12	14:35:08	1.19864
2022-09-12	14:35:08	0.299758
2022-09-12	14:35:08	2.66469
2022-09-12	14:35:09	0.46444
2022-09-12	14:35:09	2.76256
2022-09-12	14:35:09	0.544338
2022-09-12	14:35:09	1.60765
2022-09-12	14:35:10	0.714924
2022-09-12	14:35:10	0.967341
2022-09-12	14:35:10	0.750496
2022-09-12	14:35:10	1.24134
2022-09-12	14:35:11	1.17335
2022-09-12	14:35:11	0.909936
2022-09-12	14:35:11	0.925662
2022-09-12	14:35:12	0.408766
2022-09-12	14:35:12	0.203575
2022-09-12	14:35:12	0.404084
2022-09-12	14:35:12	0.125509
2022-09-12	14:35:13	0.361132
2022-09-12	14:35:13	0.171463
2022-09-12	14:35:13	0.383931
2022-09-12	14:35:13	0.149784
2022-09-12	14:35:14	0.309529
2022-09-12	14:35:14	0.432277
2022-09-12	14:35:14	0.540827
2022-09-12	14:35:14	0.553601
2022-09-12	14:35:15	0.385254
2022-09-12	14:35:15	1.72459
2022-09-12	14:35:15	0.380827
2022-09-12	14:35:16	2.14047
2022-09-12	14:35:16	0.372277
2022-09-12	14:35:16	1.96169
2022-09-12	14:35:16	0.54215
2022-09-12	14:35:17	0.392328
2022-09-12	14:35:17	0.608715
2022-09-12	14:35:17	0.255789
2022-09-12	14:35:17	0.362761
2022-09-12	14:35:18	0.209529
2022-09-12	14:35:18	0.48897
2022-09-12	14:35:18	0.226374
2022-09-12	14:35:18	1.23055
2022-09-12	14:35:19	0.410954
2022-09-12	14:35:19	1.3592
2022-09-12	14:35:19	1.16286
2022-09-12	14:35:20	1.0565
2022-09-12	14:35:20	3.06642
2022-09-12	14:35:20	2.76098
2022-09-12	14:35:20	3.56408
2022-09-12	14:35:21	0.858384
2022-09-12	14:35:21	0.759555
2022-09-12	14:35:21	0.274008
2022-09-12	14:35:21	0.744287
2022-09-12	14:35:22	0.666476
2022-09-12	14:35:22	0.982303
2022-09-12	14:35:22	0.728003
2022-09-12	14:35:23	1.82291
2022-09-12	14:35:23	0.79126
2022-09-12	14:35:23	1.55151
2022-09-12	14:35:23	1.03533
2022-09-12	14:35:24	1.0278
2022-09-12	14:35:24	0.483372
2022-09-12	14:35:24	0.323422
2022-09-12	14:35:24	0.933601
2022-09-12	14:35:25	2.1394
2022-09-12	14:35:25	3.80118
2022-09-12	14:35:25	2.61009
2022-09-12	14:35:25	1.23467
2022-09-12	14:35:26	0.359249
2022-09-12	14:35:26	0.0901401
2022-09-12	14:35:26	0.582608
2022-09-12	14:35:27	0.112583
2022-09-12	14:35:27	0.362863
2022-09-12	14:35:27	0.218741
2022-09-12	14:35:27	0.524745
2022-09-12	14:35:28	0.402608
2022-09-12	14:35:28	0.573092
2022-09-12	14:35:28	0.985153
2022-09-12	14:35:28	0.799046
2022-09-12	14:35:29	0.207443
2022-09-12	14:35:29	0.530241
2022-09-12	14:35:29	1.23299
2022-09-12	14:35:29	0.646221
2022-09-12	14:35:30	1.28307
2022-09-12	14:35:30	0.436959
2022-09-12	14:35:30	1.27772
2022-09-12	14:35:31	0.43243
2022-09-12	14:35:31	3.06683
2022-09-12	14:35:31	0.831768
2022-09-12	14:35:31	6.32739
2022-09-12	14:35:32	1.25146
2022-09-12	14:35:32	2.87009
2022-09-12	14:35:32	0.350903
2022-09-12	14:35:32	0.95757
2022-09-12	14:35:33	0.423626
2022-09-12	14:35:33	0.287188
2022-09-12	14:35:33	0.54617
2022-09-12	14:35:33	0.255229
2022-09-12	14:35:34	0.853906
2022-09-12	14:35:34	0.248257
2022-09-12	14:35:34	0.759097
2022-09-12	14:35:35	0.320166
2022-09-12	14:35:35	0.929173
2022-09-12	14:35:35	0.260623
2022-09-12	14:35:35	1.26485
2022-09-12	14:35:36	0.432888
2022-09-12	14:35:36	1.88856
2022-09-12	14:35:36	0.426171
2022-09-12	14:35:36	0.0583845
2022-09-12	14:35:37	0.0920739
2022-09-12	14:35:37	-0.237748
2022-09-12	14:35:37	-0.329351
2022-09-12	14:35:37	-0.379682
2022-09-12	14:35:38	-0.441768
2022-09-12	14:35:38	-0.206094
2022-09-12	14:35:38	-0.0118445
2022-09-12	14:35:39	0.245102
2022-09-12	14:35:39	1.28022
2022-09-12	14:35:39	0.113346
2022-09-12	14:35:39	0.151362
2022-09-12	14:35:40	0.594262
2022-09-12	14:35:40	0.201641
2022-09-12	14:35:40	0.118995
2022-09-12	14:35:40	0.210038
2022-09-12	14:35:41	0.403779
2022-09-12	14:35:41	0.343219
2022-09-12	14:35:41	0.456756
2022-09-12	14:35:41	0.114008
2022-09-12	14:35:42	0.240573
2022-09-12	14:35:42	0.104542
2022-09-12	14:35:42	0.208817
2022-09-12	14:35:43	0.0198603
2022-09-12	14:35:43	0.139606
2022-09-12	14:35:43	-0.0513865
2022-09-12	14:35:43	0.227545
2022-09-12	14:35:44	0.177214
2022-09-12	14:35:44	0.164084
2022-09-12	14:35:44	0.0309035
2022-09-12	14:35:44	0.240216
2022-09-12	14:35:45	0.00978398
2022-09-12	14:35:45	0.0782318
2022-09-12	14:35:45	-0.0607504
2022-09-12	14:35:45	0.0627101
2022-09-12	14:35:46	-0.0511321
2022-09-12	14:35:46	0.100471
2022-09-12	14:35:46	-0.0417682
2022-09-12	14:35:47	0.0567051
2022-09-12	14:35:47	-0.0156613
2022-09-12	14:35:47	0.0479519
2022-09-12	14:35:47	-0.116068
2022-09-12	14:35:48	0.037214
2022-09-12	14:35:48	-0.074389
2022-09-12	14:35:48	-0.05673
2022-09-12	14:35:48	-0.21729
2022-09-12	14:35:49	-0.0477224
2022-09-12	14:35:49	-0.0389183
2022-09-12	14:35:49	0.104898
2022-09-12	14:35:49	-0.058104
2022-09-12	14:35:50	0.0534989
2022-09-12	14:35:50	0.294313
2022-09-12	14:35:50	0.222303
2022-09-12	14:35:51	0.0624048
2022-09-12	14:35:51	0.182099
2022-09-12	14:35:51	0.0733972
2022-09-12	14:35:51	0.287188
2022-09-12	14:35:52	0.0408781
2022-09-12	14:35:52	1.4024
2022-09-12	14:35:52	0.201031
2022-09-12	14:35:52	0.893601
2022-09-12	14:35:53	0.400624
2022-09-12	14:35:53	0.468206
2022-09-12	14:35:53	1.44454
2022-09-12	14:35:53	0.519402
2022-09-12	14:35:54	0.548664
2022-09-12	14:35:54	0.586374
2022-09-12	14:35:54	1.34332
2022-09-12	14:35:55	1.23126
2022-09-12	14:35:55	1.71681
2022-09-12	14:35:55	1.18093
2022-09-12	14:35:55	0.1993
2022-09-12	14:35:56	0.339657
2022-09-12	14:35:56	0.334618
2022-09-12	14:35:56	0.321489
2022-09-12	14:35:56	0.177621
2022-09-12	14:35:57	0.362354
2022-09-12	14:35:57	0.215433
2022-09-12	14:35:57	0.331718
2022-09-12	14:35:57	0.279962
2022-09-12	14:35:58	0.382557
2022-09-12	14:35:58	0.419351
2022-09-12	14:35:58	0.32673
2022-09-12	14:35:59	0.169428
2022-09-12	14:35:59	0.725509
2022-09-12	14:35:59	0.525865
2022-09-12	14:35:59	0.0806745
2022-09-12	14:36:00	0.27701
2022-09-12	14:36:00	0.150598
2022-09-12	14:36:00	0.202812
2022-09-12	14:36:00	0.260827
2022-09-12	14:36:01	1.07737
2022-09-12	14:36:01	0.220522
2022-09-12	14:36:01	0.386883
2022-09-12	14:36:01	0.727748
2022-09-12	14:36:02	0.687545
2022-09-12	14:36:02	0.248054
2022-09-12	14:36:02	0.00545825
2022-09-12	14:36:03	-0.147468
2022-09-12	14:36:03	-0.18243
2022-09-12	14:36:03	-0.138715
2022-09-12	14:36:03	-0.177341
2022-09-12	14:36:04	-0.326704
2022-09-12	14:36:04	-0.467824
2022-09-12	14:36:04	-0.38243
2022-09-12	14:36:04	-0.397849
2022-09-12	14:36:05	-0.26416
2022-09-12	14:36:05	-0.36416
2022-09-12	14:36:05	-0.186704
2022-09-12	14:36:05	0.00591628
2022-09-12	14:36:06	0.41869
2022-09-12	14:36:06	0.406629
2022-09-12	14:36:06	0.25869
2022-09-12	14:36:07	0.256349
2022-09-12	14:36:07	0.274669
2022-09-12	14:36:07	0.483881
2022-09-12	14:36:07	0.456349
2022-09-12	14:36:08	0.623168
2022-09-12	14:36:08	0.272532
2022-09-12	14:36:08	0.569885
2022-09-12	14:36:08	0.576807
2022-09-12	14:36:09	0.342506
2022-09-12	14:36:09	0.0605728
2022-09-12	14:36:09	0.209326
2022-09-12	14:36:09	-0.0422262
2022-09-12	14:36:10	0.144288
2022-09-12	14:36:10	-0.125636
2022-09-12	14:36:10	0.0635244
2022-09-12	14:36:11	-0.184872
2022-09-12	14:36:11	-0.0826842
2022-09-12	14:36:11	-0.216425
2022-09-12	14:36:11	-0.219885
2022-09-12	14:36:12	-0.312506
2022-09-12	14:36:12	-0.463193
2022-09-12	14:36:12	-0.306908
2022-09-12	14:36:12	-0.442837
2022-09-12	14:36:13	-0.34701
2022-09-12	14:36:13	-0.36701
2022-09-12	14:36:13	-0.219224
2022-09-12	14:36:14	-0.300699
2022-09-12	14:36:14	-0.310216
2022-09-12	14:36:14	-0.328587
2022-09-12	14:36:14	-0.145738
2022-09-12	14:36:15	-0.119936
2022-09-12	14:36:15	-0.0210048
2022-09-12	14:36:15	-0.173422
2022-09-12	14:36:15	-0.00996157
2022-09-12	14:36:16	0.0246949
2022-09-12	14:36:16	-0.199427
2022-09-12	14:36:16	-0.191132
2022-09-12	14:36:16	-0.0617173
2022-09-12	14:36:17	0.0153819
2022-09-12	14:36:17	-0.0401397
2022-09-12	14:36:17	-0.131488
2022-09-12	14:36:18	-0.11159
2022-09-12	14:36:18	-0.0460939
2022-09-12	14:36:18	-0.209962
2022-09-12	14:36:18	0.0775193
2022-09-12	14:36:19	-0.0205468
2022-09-12	14:36:19	0.152583
2022-09-12	14:36:19	0.373041
2022-09-12	14:36:19	0.258537
2022-09-12	14:36:20	1.25116
2022-09-12	14:36:20	0.150547
2022-09-12	14:36:20	0.136654
2022-09-12	14:36:20	0.562099
2022-09-12	14:36:21	0.395534
2022-09-12	14:36:21	0.415636
2022-09-12	14:36:21	0.542252
2022-09-12	14:36:22	0.556247
2022-09-12	14:36:22	0.66159
2022-09-12	14:36:22	0.174669
2022-09-12	14:36:22	0.210445
2022-09-12	14:36:23	0.217417
2022-09-12	14:36:23	0.182099
2022-09-12	14:36:23	0.154211
2022-09-12	14:36:23	0.425407
2022-09-12	14:36:24	0.394517
2022-09-12	14:36:24	0.400674
2022-09-12	14:36:24	0.121489
2022-09-12	14:36:24	0.311565
2022-09-12	14:36:25	0.216807
2022-09-12	14:36:25	0.337316
2022-09-12	14:36:25	0.122608
2022-09-12	14:36:26	0.437875
2022-09-12	14:36:26	0.281641
2022-09-12	14:36:26	0.281947
2022-09-12	14:36:26	0.202201
2022-09-12	14:36:27	0.156807
2022-09-12	14:36:27	0.25701
2022-09-12	14:36:27	0.26958
2022-09-12	14:36:27	0.35187
2022-09-12	14:36:28	0.181285
2022-09-12	14:36:28	0.392481
2022-09-12	14:36:28	0.320827
2022-09-12	14:36:28	0.318537
2022-09-12	14:36:29	0.317468
2022-09-12	14:36:29	0.264847
2022-09-12	14:36:29	0.455433
2022-09-12	14:36:30	0.293753
2022-09-12	14:36:30	0.490496
2022-09-12	14:36:30	0.258588
2022-09-12	14:36:30	0.454211
2022-09-12	14:36:31	0.935483
2022-09-12	14:36:31	0.40612
2022-09-12	14:36:31	0.326679
2022-09-12	14:36:31	0.926272
2022-09-12	14:36:32	0.37299
2022-09-12	14:36:32	0.936094
2022-09-12	14:36:32	0.362608
2022-09-12	14:36:32	0.664593
2022-09-12	14:36:33	2.06016
2022-09-12	14:36:33	0.608817
2022-09-12	14:36:33	2.03696
2022-09-12	14:36:34	0.301336
2022-09-12	14:36:34	0.307901
2022-09-12	14:36:34	1.01207
2022-09-12	14:36:34	0.396909
2022-09-12	14:36:35	0.2993
2022-09-12	14:36:35	0.451616
2022-09-12	14:36:35	0.289173
2022-09-12	14:36:35	0.272786
2022-09-12	14:36:36	0.0089188
2022-09-12	14:36:36	0.183372
2022-09-12	14:36:36	0.152278
2022-09-12	14:36:36	0.237875
2022-09-12	14:36:37	0.156705
2022-09-12	14:36:37	0.372888
2022-09-12	14:36:37	0.124746
2022-09-12	14:36:38	0.313346
2022-09-12	14:36:38	0.317926
2022-09-12	14:36:38	0.345
2022-09-12	14:36:38	0.246018
2022-09-12	14:36:39	0.331158
2022-09-12	14:36:39	0.314466
2022-09-12	14:36:39	1.33421
2022-09-12	14:36:39	0.307494
2022-09-12	14:36:40	0.408003
2022-09-12	14:36:40	0.585356
2022-09-12	14:36:40	0.474669
2022-09-12	14:36:40	1.24195
2022-09-12	14:36:41	0.4793
2022-09-12	14:36:41	1.00826
2022-09-12	14:36:41	1.11218
2022-09-12	14:36:42	0.666425
2022-09-12	14:36:42	1.62821
2022-09-12	14:36:42	0.237316
2022-09-12	14:36:42	0.464135
2022-09-12	14:36:43	0.267036
2022-09-12	14:36:43	0.416909
2022-09-12	14:36:43	0.132328
2022-09-12	14:36:43	0.491616
2022-09-12	14:36:44	0.171361
2022-09-12	14:36:44	0.410852
2022-09-12	14:36:44	0.398741
2022-09-12	14:36:44	0.296603
2022-09-12	14:36:45	0.335942
2022-09-12	14:36:45	0.306527
2022-09-12	14:36:45	0.302608
2022-09-12	14:36:46	0.194822
2022-09-12	14:36:46	0.409224
2022-09-12	14:36:46	0.338588
2022-09-12	14:36:46	0.426476
2022-09-12	14:36:47	0.243168
2022-09-12	14:36:47	0.408563
2022-09-12	14:36:47	0.379402
2022-09-12	14:36:47	0.682405
2022-09-12	14:36:48	0.581845
2022-09-12	14:36:48	0.52439
2022-09-12	14:36:48	0.596858
2022-09-12	14:36:48	0.513652
2022-09-12	14:36:49	0.397621
2022-09-12	14:36:49	0.385509
2022-09-12	14:36:49	0.405865
2022-09-12	14:36:50	0.405764
2022-09-12	14:36:50	0.536959
2022-09-12	14:36:50	0.722557
2022-09-12	14:36:50	0.567952
2022-09-12	14:36:51	0.346018
2022-09-12	14:36:51	0.386629
2022-09-12	14:36:51	0.491514
2022-09-12	14:36:51	0.531158
2022-09-12	14:36:52	0.492837
2022-09-12	14:36:52	0.402456
2022-09-12	14:36:52	0.398639
2022-09-12	14:36:52	0.399046
2022-09-12	14:36:53	0.38159
2022-09-12	14:36:53	0.352176
2022-09-12	14:36:53	0.379606
2022-09-12	14:36:54	0.344339
2022-09-12	14:36:54	0.419962
2022-09-12	14:36:54	0.37701
2022-09-12	14:36:54	0.365611
2022-09-12	14:36:55	0.359351
2022-09-12	14:36:55	0.392735
2022-09-12	14:36:55	0.178995
2022-09-12	14:36:55	0.213702
2022-09-12	14:36:56	0.193041
2022-09-12	14:36:56	0.147748
2022-09-12	14:36:56	0.228512
2022-09-12	14:36:56	0.0810307
2022-09-12	14:36:57	0.0509036
2022-09-12	14:36:57	0.101082
2022-09-12	14:36:57	0.0527356
2022-09-12	14:36:58	-0.00823129
2022-09-12	14:36:58	-0.297748
2022-09-12	14:36:58	-0.671793
2022-09-12	14:36:58	-0.647824
2022-09-12	14:36:59	-0.74187
2022-09-12	14:36:59	-0.532099
2022-09-12	14:36:59	-0.362531
2022-09-12	14:36:59	-0.394491
2022-09-12	14:37:00	-0.513015
2022-09-12	14:37:00	-0.368638
2022-09-12	14:37:00	-0.100191
2022-09-12	14:37:01	-0.175203
2022-09-12	14:37:01	0.182405
2022-09-12	14:37:01	0.146323
2022-09-12	14:37:01	0.336858
2022-09-12	14:37:02	0.206985
2022-09-12	14:37:02	0.448766
2022-09-12	14:37:02	0.220318
2022-09-12	14:37:02	0.503473
2022-09-12	14:37:03	0.244389
2022-09-12	14:37:03	0.383117
2022-09-12	14:37:03	0.330344
2022-09-12	14:37:03	0.344288
2022-09-12	14:37:04	0.5593
2022-09-12	14:37:04	0.471311
2022-09-12	14:37:04	0.312939
2022-09-12	14:37:05	0.487952
2022-09-12	14:37:05	0.608766
2022-09-12	14:37:05	0.847036
2022-09-12	14:37:05	0.518639
2022-09-12	14:37:06	0.6536
2022-09-12	14:37:06	0.392176
2022-09-12	14:37:06	0.558791
2022-09-12	14:37:06	0.511819
2022-09-12	14:37:07	0.45416
2022-09-12	14:37:07	0.484491
2022-09-12	14:37:07	0.45355
2022-09-12	14:37:07	0.491921
2022-09-12	14:37:08	0.485865
2022-09-12	14:37:08	0.511209
2022-09-12	14:37:08	0.426272
2022-09-12	14:37:09	0.300624
2022-09-12	14:37:09	0.278639
2022-09-12	14:37:09	-0.15215
2022-09-12	14:37:09	-0.217646
2022-09-12	14:37:10	-0.134135
2022-09-12	14:37:10	-0.209045
2022-09-12	14:37:10	-0.23561
2022-09-12	14:37:10	-0.211895
2022-09-12	14:37:11	-0.153066
2022-09-12	14:37:11	0.03813
2022-09-12	14:37:11	0.165407
2022-09-12	14:37:11	0.331769
2022-09-12	14:37:12	0.33243
2022-09-12	14:37:12	0.259453
2022-09-12	14:37:12	0.184797
2022-09-12	14:37:13	0.27355
2022-09-12	14:37:13	0.334618
2022-09-12	14:37:13	0.2707
2022-09-12	14:37:13	0.296145
2022-09-12	14:37:14	0.31416
2022-09-12	14:37:14	0.287087
2022-09-12	14:37:14	0.244644
2022-09-12	14:37:14	0.515687
2022-09-12	14:37:15	0.35411
2022-09-12	14:37:15	0.626679
2022-09-12	14:37:15	0.55528
2022-09-12	14:37:15	0.420929
2022-09-12	14:37:16	0.479911
2022-09-12	14:37:16	0.562354
2022-09-12	14:37:16	0.439504
2022-09-12	14:37:17	0.18444
2022-09-12	14:37:17	0.151311
2022-09-12	14:37:17	0.268155
2022-09-12	14:37:17	0.0295804
2022-09-12	14:37:18	0.137468
2022-09-12	14:37:18	-0.00726439
2022-09-12	14:37:18	0.142659
2022-09-12	14:37:18	0.239148
2022-09-12	14:37:19	0.445255
2022-09-12	14:37:19	0.33126
2022-09-12	14:37:19	0.747646
2022-09-12	14:37:19	0.274771
2022-09-12	14:37:20	1.0106
2022-09-12	14:37:20	0.311769
2022-09-12	14:37:20	1.03905
2022-09-12	14:37:21	0.289224
2022-09-12	14:37:21	0.525407
2022-09-12	14:37:21	0.58556
2022-09-12	14:37:21	0.620674
2022-09-12	14:37:22	0.940674
2022-09-12	14:37:22	0.510954
2022-09-12	14:37:22	0.861183
2022-09-12	14:37:22	0.64159
2022-09-12	14:37:23	0.741336
2022-09-12	14:37:23	0.882405
2022-09-12	14:37:23	0.586578
2022-09-12	14:37:23	0.216909
2022-09-12	14:37:24	0.652328
2022-09-12	14:37:24	0.269835
2022-09-12	14:37:24	0.75528
2022-09-12	14:37:25	0.282354
2022-09-12	14:37:25	0.588257
2022-09-12	14:37:25	0.266069
2022-09-12	14:37:25	0.672226
2022-09-12	14:37:26	0.316858
2022-09-12	14:37:26	0.626374
2022-09-12	14:37:26	0.704084
2022-09-12	14:37:26	0.675992
2022-09-12	14:37:27	0.279758
2022-09-12	14:37:27	0.724135
2022-09-12	14:37:27	0.24098
2022-09-12	14:37:27	1.37574
2022-09-12	14:37:28	0.313194
2022-09-12	14:37:28	1.2138
2022-09-12	14:37:28	0.224491
2022-09-12	14:37:29	1.26322
2022-09-12	14:37:29	0.822252
2022-09-12	14:37:29	1.83477
2022-09-12	14:37:29	2.49385
2022-09-12	14:37:30	1.86317
2022-09-12	14:37:30	2.43136
2022-09-12	14:37:30	1.48169
2022-09-12	14:37:30	3.04281
2022-09-12	14:37:31	3.32841
2022-09-12	14:37:31	2.0252
2022-09-12	14:37:31	0.987442
2022-09-12	14:37:31	1.44378
2022-09-12	14:37:32	1.05869
2022-09-12	14:37:32	1.56108
2022-09-12	14:37:32	0.233041
2022-09-12	14:37:33	0.514415
2022-09-12	14:37:33	0.988257
2022-09-12	14:37:33	0.507087
2022-09-12	14:37:33	0.203219
2022-09-12	14:37:34	0.398232
2022-09-12	14:37:34	0.357265
2022-09-12	14:37:34	0.39869
2022-09-12	14:37:34	0.41986
2022-09-12	14:37:35	0.380522
2022-09-12	14:37:35	0.537672
2022-09-12	14:37:35	0.39187
2022-09-12	14:37:35	0.411412
2022-09-12	14:37:36	0.571819
2022-09-12	14:37:36	0.613397
2022-09-12	14:37:36	0.593397
2022-09-12	14:37:37	0.649529
2022-09-12	14:37:37	0.616756
2022-09-12	14:37:37	0.598741
2022-09-12	14:37:37	0.502048
2022-09-12	14:37:38	0.524084
2022-09-12	14:37:38	0.468054
2022-09-12	14:37:38	0.132888
2022-09-12	14:37:38	-0.0226842
2022-09-12	14:37:39	0.0117178
2022-09-12	14:37:39	0.124593
2022-09-12	14:37:39	0.217367
2022-09-12	14:37:39	0.235942
2022-09-12	14:37:40	0.199351
2022-09-12	14:37:40	0.248817
2022-09-12	14:37:40	0.147392
2022-09-12	14:37:41	0.867799
2022-09-12	14:37:41	1.73589
2022-09-12	14:37:41	0.344797
2022-09-12	14:37:42	1.03294
2022-09-12	14:37:42	2.02322
2022-09-12	14:37:42	0.776247
2022-09-12	14:37:42	1.56342
2022-09-12	14:37:42	2.24866
2022-09-12	14:37:43	2.1166
2022-09-12	14:37:43	1.31996
2022-09-12	14:37:43	0.407901
2022-09-12	14:37:43	0.247697
2022-09-12	14:37:44	-0.0611066
2022-09-12	14:37:44	0.0317687
2022-09-12	14:37:44	0.965967
2022-09-12	14:37:45	0.680216
2022-09-12	14:37:45	-0.0172898
2022-09-12	14:37:45	0.0136516
2022-09-12	14:37:45	0.38729
2022-09-12	14:37:46	0.0104455
2022-09-12	14:37:46	0.0248475
2022-09-12	14:37:46	0.00550917
2022-09-12	14:37:46	0.112227
2022-09-12	14:37:47	0.0459163
2022-09-12	14:37:47	0.0129392
2022-09-12	14:37:47	0.0554837
2022-09-12	14:37:47	-0.0220226
2022-09-12	14:37:48	0.218791
2022-09-12	14:37:48	0.210547
2022-09-12	14:37:48	0.320166
2022-09-12	14:37:49	0.158792
2022-09-12	14:37:49	0.238792
2022-09-12	14:37:49	0.0660689
2022-09-12	14:37:49	0.268715
2022-09-12	14:37:50	0.154975
2022-09-12	14:37:50	0.332379
2022-09-12	14:37:50	0.150954
2022-09-12	14:37:50	0.381438
2022-09-12	14:37:51	0.0274939
2022-09-12	14:37:51	0.296349
2022-09-12	14:37:51	0.0366033
2022-09-12	14:37:52	0.176654
2022-09-12	14:37:52	0.152736
2022-09-12	14:37:52	0.170496
2022-09-12	14:37:52	0.199758
2022-09-12	14:37:53	0.238639
2022-09-12	14:37:53	0.297723
2022-09-12	14:37:53	0.283117
2022-09-12	14:37:53	0.295331
2022-09-12	14:37:54	0.454924
2022-09-12	14:37:54	0.4593
2022-09-12	14:37:54	0.394161
2022-09-12	14:37:54	0.373041
2022-09-12	14:37:55	0.260827
2022-09-12	14:37:55	0.494059
2022-09-12	14:37:55	0.285458
2022-09-12	14:37:56	0.350394
2022-09-12	14:37:56	0.524796
2022-09-12	14:37:56	0.63187
2022-09-12	14:37:56	0.674822
2022-09-12	14:37:57	0.685458
2022-09-12	14:37:57	0.82444
2022-09-12	14:37:57	0.491056
2022-09-12	14:37:57	0.394873
2022-09-12	14:37:58	0.44154
2022-09-12	14:37:58	0.647901
2022-09-12	14:37:58	0.459758
2022-09-12	14:37:58	0.138181
2022-09-12	14:37:59	0.103473
2022-09-12	14:37:59	0.378384
2022-09-12	14:37:59	0.817621
2022-09-12	14:38:00	1.22999
2022-09-12	14:38:00	0.808817
2022-09-12	14:38:00	0.917417
2022-09-12	14:38:00	1.39345
2022-09-12	14:38:01	0.178995
2022-09-12	14:38:01	0.58617
2022-09-12	14:38:01	0.547035
2022-09-12	14:38:01	0.644949
2022-09-12	14:38:02	0.405
2022-09-12	14:38:02	0.472532
2022-09-12	14:38:02	0.400878
2022-09-12	14:38:02	0.717672
2022-09-12	14:38:03	0.44841
2022-09-12	14:38:03	0.741132
2022-09-12	14:38:03	0.28958
2022-09-12	14:38:04	0.517366
2022-09-12	14:38:04	0.41355
2022-09-12	14:38:04	0.440522
2022-09-12	14:38:04	0.893906
2022-09-12	14:38:05	0.507545
2022-09-12	14:38:05	0.832532
2022-09-12	14:38:05	0.494618
2022-09-12	14:38:05	0.509122
2022-09-12	14:38:06	0.619555
2022-09-12	14:38:06	0.35182
2022-09-12	14:38:06	0.60785
2022-09-12	14:38:06	0.400624
2022-09-12	14:38:07	0.554822
2022-09-12	14:38:07	0.394517
2022-09-12	14:38:07	0.376501
2022-09-12	14:38:08	1.14963
2022-09-12	14:38:08	0.487545
2022-09-12	14:38:08	0.753499
2022-09-12	14:38:08	0.544389
2022-09-12	14:38:09	1.90983
2022-09-12	14:38:09	3.6248
2022-09-12	14:38:09	3.84495
2022-09-12	14:38:09	5.82632
2022-09-12	14:38:10	1.551
2022-09-12	14:38:10	1.52001
2022-09-12	14:38:10	1.68688
2022-09-12	14:38:10	0.423728
2022-09-12	14:38:11	0.670801
2022-09-12	14:38:11	0.152888
2022-09-12	14:38:11	0.220623
2022-09-12	14:38:12	-0.0491982
2022-09-12	14:38:12	0.0796567
2022-09-12	14:38:12	0.229224
2022-09-12	14:38:12	0.383321
2022-09-12	14:38:13	0.368461
2022-09-12	14:38:13	0.512328
2022-09-12	14:38:13	0.535992
2022-09-12	14:38:13	0.447443
2022-09-12	14:38:14	0.522252
2022-09-12	14:38:14	0.461947
2022-09-12	14:38:14	0.521743
2022-09-12	14:38:14	0.564847
2022-09-12	14:38:15	0.670903
2022-09-12	14:38:15	0.527137
2022-09-12	14:38:15	0.442252
2022-09-12	14:38:16	0.492481
2022-09-12	14:38:16	0.499911
2022-09-12	14:38:16	0.484746
2022-09-12	14:38:16	0.490394
2022-09-12	14:38:17	0.471616
2022-09-12	14:38:17	0.493193
2022-09-12	14:38:17	0.504338
2022-09-12	14:38:17	0.504033
2022-09-12	14:38:18	0.363321
2022-09-12	14:38:18	0.456959
2022-09-12	14:38:18	0.489886
2022-09-12	14:38:18	0.632074
2022-09-12	14:38:19	0.571514
2022-09-12	14:38:19	0.783473
2022-09-12	14:38:19	1.09497
2022-09-12	14:38:20	0.43126
2022-09-12	14:38:20	0.76159
2022-09-12	14:38:20	2.11966
2022-09-12	14:38:20	0.611718
2022-09-12	14:38:21	0.836908
2022-09-12	14:38:21	0.82215
2022-09-12	14:38:21	0.667799
2022-09-12	14:38:21	0.282863
2022-09-12	14:38:22	1.10943
2022-09-12	14:38:22	0.291412
2022-09-12	14:38:22	0.735941
2022-09-12	14:38:22	0.746985
2022-09-12	14:38:23	0.745916
2022-09-12	14:38:23	0.493702
2022-09-12	14:38:23	0.912837
2022-09-12	14:38:24	0.30444
2022-09-12	14:38:24	0.649224
2022-09-12	14:38:24	0.591208
2022-09-12	14:38:24	0.614771
2022-09-12	14:38:25	0.374771
2022-09-12	14:38:25	0.742201
2022-09-12	14:38:25	0.413295
2022-09-12	14:38:25	0.587086
2022-09-12	14:38:26	1.28607
2022-09-12	14:38:26	1.01569
2022-09-12	14:38:26	2.39441
2022-09-12	14:38:26	0.739911
2022-09-12	14:38:27	2.32938
2022-09-12	14:38:27	3.14037
2022-09-12	14:38:27	2.83436
2022-09-12	14:38:28	2.78734
2022-09-12	14:38:28	0.84154
2022-09-12	14:38:28	1.92434
2022-09-12	14:38:28	2.72917
2022-09-12	14:38:29	1.85156
2022-09-12	14:38:29	1.32393
2022-09-12	14:38:29	0.700114
2022-09-12	14:38:29	0.265356
2022-09-12	14:38:30	0.532837
2022-09-12	14:38:30	0.135433
2022-09-12	14:38:30	0.493041
2022-09-12	14:38:30	0.360573
2022-09-12	14:38:31	0.582863
2022-09-12	14:38:31	0.170242
2022-09-12	14:38:31	0.812582
2022-09-12	14:38:32	0.344949
2022-09-12	14:38:32	0.915382
2022-09-12	14:38:32	0.70103
2022-09-12	14:38:32	2.03248
2022-09-12	14:38:33	2.14973
2022-09-12	14:38:33	1.83391
2022-09-12	14:38:33	2.88006
2022-09-12	14:38:33	2.07207
2022-09-12	14:38:34	2.7677
2022-09-12	14:38:34	5.0997
2022-09-12	14:38:34	0.654466
2022-09-12	14:38:34	1.42658
2022-09-12	14:38:35	0.965102
2022-09-12	14:38:35	1.10215
2022-09-12	14:38:35	0.372532
2022-09-12	14:38:36	0.393295
2022-09-12	14:38:36	0.468308
2022-09-12	14:38:36	0.910598
2022-09-12	14:38:36	1.23207
2022-09-12	14:38:37	1.80322
2022-09-12	14:38:37	1.57558
2022-09-12	14:38:37	0.913651
2022-09-12	14:38:37	0.791412
2022-09-12	14:38:38	1.01609
2022-09-12	14:38:38	1.88719
2022-09-12	14:38:38	1.54556
2022-09-12	14:38:38	0.320776
2022-09-12	14:38:39	-0.0751015
2022-09-12	14:38:39	-0.0322008
2022-09-12	14:38:39	0.155585
2022-09-12	14:38:40	0.0969086
2022-09-12	14:38:40	0.0279519
2022-09-12	14:38:40	0.121336
2022-09-12	14:38:40	0.403779
2022-09-12	14:38:41	0.243015
2022-09-12	14:38:41	0.0919722
2022-09-12	14:38:41	0.533142
2022-09-12	14:38:41	0.529122
2022-09-12	14:38:42	0.375229
2022-09-12	14:38:42	0.325611
2022-09-12	14:38:42	0.382506
2022-09-12	14:38:43	0.302252
2022-09-12	14:38:43	0.302914
2022-09-12	14:38:43	0.220064
2022-09-12	14:38:43	0.296349
2022-09-12	14:38:44	0.368613
2022-09-12	14:38:44	0.408919
2022-09-12	14:38:44	0.200827
2022-09-12	14:38:44	0.334975
2022-09-12	14:38:45	0.309784
2022-09-12	14:38:45	0.316756
2022-09-12	14:38:45	0.396654
2022-09-12	14:38:45	0.325102
2022-09-12	14:38:46	0.376705
2022-09-12	14:38:46	0.263168
2022-09-12	14:38:46	0.319199
2022-09-12	14:38:47	0.3107
2022-09-12	14:38:47	0.270242
2022-09-12	14:38:47	0.308512
2022-09-12	14:38:47	0.373041
2022-09-12	14:38:48	0.108003
2022-09-12	14:38:48	0.250191
2022-09-12	14:38:48	0.245255
2022-09-12	14:38:48	0.250649
2022-09-12	14:38:49	0.0578247
2022-09-12	14:38:49	-0.0860938
2022-09-12	14:38:49	-0.233168
2022-09-12	14:38:49	-0.0324552
2022-09-12	14:38:50	-0.134236
2022-09-12	14:38:50	-0.115356
2022-09-12	14:38:50	-0.0577478
2022-09-12	14:38:51	-0.106297
2022-09-12	14:38:51	0.20673
2022-09-12	14:38:51	0.0882572
2022-09-12	14:38:51	0.455738
2022-09-12	14:38:52	0.909835
2022-09-12	14:38:52	0.965509
2022-09-12	14:38:52	0.834262
2022-09-12	14:38:52	0.684237
2022-09-12	14:38:53	0.602455
2022-09-12	14:38:53	0.777773
2022-09-12	14:38:53	0.443626
2022-09-12	14:38:53	0.474466
2022-09-12	14:38:54	0.548461
2022-09-12	14:38:54	0.269326
2022-09-12	14:38:54	0.647392
2022-09-12	14:38:55	0.317519
2022-09-12	14:38:55	0.694567
2022-09-12	14:38:55	0.343168
2022-09-12	14:38:55	0.884949
2022-09-12	14:38:56	0.25014
2022-09-12	14:38:56	0.641387
2022-09-12	14:38:56	0.299148
2022-09-12	14:38:56	0.720013
2022-09-12	14:38:57	0.791412
2022-09-12	14:38:57	0.736501
2022-09-12	14:38:57	0.502812
2022-09-12	14:38:57	0.658435
2022-09-12	14:38:58	0.257774
2022-09-12	14:38:58	1.18459
2022-09-12	14:38:58	0.301998
2022-09-12	14:38:59	0.713346
2022-09-12	14:38:59	0.288868
2022-09-12	14:38:59	0.51874
2022-09-12	14:38:59	0.564389
2022-09-12	14:39:00	0.773397
2022-09-12	14:39:00	1.0651
2022-09-12	14:39:00	0.975534
2022-09-12	14:39:00	2.14983
2022-09-12	14:39:01	1.17945
2022-09-12	14:39:01	2.06312
2022-09-12	14:39:01	0.16383
2022-09-12	14:39:01	0.919605
2022-09-12	14:39:02	0.407901
2022-09-12	14:39:02	0.639555
2022-09-12	14:39:02	0.399199
2022-09-12	14:39:03	0.489886
2022-09-12	14:39:03	0.440115
2022-09-12	14:39:03	0.495534
2022-09-12	14:39:03	0.940064
2022-09-12	14:39:04	1.14072
2022-09-12	14:39:04	0.905254
2022-09-12	14:39:04	1.9022
2022-09-12	14:39:04	0.638232
2022-09-12	14:39:05	2.69594
2022-09-12	14:39:05	0.507239
2022-09-12	14:39:05	2.49945
2022-09-12	14:39:05	1.02693
2022-09-12	14:39:06	1.68846
2022-09-12	14:39:06	0.545763
2022-09-12	14:39:06	0.954109
2022-09-12	14:39:07	1.87558
2022-09-12	14:39:07	0.394364
2022-09-12	14:39:07	1.15513
2022-09-12	14:39:07	1.22108
2022-09-12	14:39:08	0.837926
2022-09-12	14:39:08	1.22963
2022-09-12	14:39:08	0.868613
2022-09-12	14:39:08	2.18892
2022-09-12	14:39:09	2.37777
2022-09-12	14:39:09	0.698944
2022-09-12	14:39:09	1.27777
2022-09-12	14:39:09	1.61645
2022-09-12	14:39:10	0.537265
2022-09-12	14:39:10	0.306476
2022-09-12	14:39:10	0.514822
2022-09-12	14:39:11	0.193651
2022-09-12	14:39:11	0.324593
2022-09-12	14:39:11	0.27014
2022-09-12	14:39:11	0.316603
2022-09-12	14:39:12	0.325814
2022-09-12	14:39:12	0.454466
2022-09-12	14:39:12	0.254517
2022-09-12	14:39:12	0.261234
2022-09-12	14:39:13	0.370954
2022-09-12	14:39:13	0.412328
2022-09-12	14:39:13	0.238486
2022-09-12	14:39:13	0.446272
2022-09-12	14:39:14	0.49472
2022-09-12	14:39:14	1.36373
2022-09-12	14:39:14	0.881845
2022-09-12	14:39:15	2.29711
2022-09-12	14:39:15	2.03192
2022-09-12	14:39:15	0.79813
2022-09-12	14:39:15	0.765254
2022-09-12	14:39:16	0.470089
2022-09-12	14:39:16	0.369122
2022-09-12	14:39:16	0.446018
2022-09-12	14:39:16	0.534618
2022-09-12	14:39:17	0.349071
2022-09-12	14:39:17	0.600267
2022-09-12	14:39:17	0.376858
2022-09-12	14:39:17	0.577265
2022-09-12	14:39:18	0.425458
2022-09-12	14:39:18	0.47874
2022-09-12	14:39:18	0.349478
2022-09-12	14:39:19	0.491158
2022-09-12	14:39:19	0.748969
2022-09-12	14:39:19	0.560623
2022-09-12	14:39:19	1.05289
2022-09-12	14:39:20	0.813753
2022-09-12	14:39:20	2.48276
2022-09-12	14:39:20	2.7706
2022-09-12	14:39:20	1.39441
2022-09-12	14:39:21	1.42602
2022-09-12	14:39:21	0.870445
2022-09-12	14:39:21	0.978893
2022-09-12	14:39:21	1.42449
2022-09-12	14:39:22	2.79431
2022-09-12	14:39:22	4.78296
2022-09-12	14:39:22	4.25935
2022-09-12	14:39:23	7.25217
2022-09-12	14:39:23	2.38637
2022-09-12	14:39:23	7.13787
2022-09-12	14:39:23	4.92281
2022-09-12	14:39:24	4.83233
2022-09-12	14:39:24	3.48093
2022-09-12	14:39:24	3.5792
2022-09-12	14:39:24	2.01711
2022-09-12	14:39:25	1.87172
2022-09-12	14:39:25	2.08556
2022-09-12	14:39:25	0.898588
2022-09-12	14:39:25	0.746985
2022-09-12	14:39:26	0.600115
2022-09-12	14:39:26	0.403423
2022-09-12	14:39:26	0.386832
2022-09-12	14:39:27	0.339046
2022-09-12	14:39:27	0.456501
2022-09-12	14:39:27	0.558079
2022-09-12	14:39:27	1.08017
2022-09-12	14:39:28	0.551718
2022-09-12	14:39:28	1.90302
2022-09-12	14:39:28	2.39889
2022-09-12	14:39:28	1.66963
2022-09-12	14:39:29	2.63065
2022-09-12	14:39:29	1.80505
2022-09-12	14:39:29	1.17691
2022-09-12	14:39:30	1.21767
2022-09-12	14:39:30	0.464084
2022-09-12	14:39:30	0.605967
2022-09-12	14:39:30	0.285
2022-09-12	14:39:31	0.268817
2022-09-12	14:39:31	0.312786
2022-09-12	14:39:31	0.352074
2022-09-12	14:39:31	0.096247
2022-09-12	14:39:32	0.28444
2022-09-12	14:39:32	0.626985
2022-09-12	14:39:32	0.588206
2022-09-12	14:39:32	1.11487
2022-09-12	14:39:33	0.990801
2022-09-12	14:39:33	2.27202
2022-09-12	14:39:33	2.17645
2022-09-12	14:39:34	2.5366
2022-09-12	14:39:34	1.13182
2022-09-12	14:39:34	2.04383
2022-09-12	14:39:34	1.45177
2022-09-12	14:39:35	3.25523
2022-09-12	14:39:35	1.87508
2022-09-12	14:39:35	5.87925
2022-09-12	14:39:35	7.82535
2022-09-12	14:39:36	6.72352
2022-09-12	14:39:36	6.66942
2022-09-12	14:39:36	4.60495
2022-09-12	14:39:36	2.82184
2022-09-12	14:39:37	1.46917
2022-09-12	14:39:37	0.45014
2022-09-12	14:39:37	0.930547
2022-09-12	14:39:38	0.826578
2022-09-12	14:39:38	0.72383
2022-09-12	14:39:38	0.460267
2022-09-12	14:39:38	0.757723
2022-09-12	14:39:39	0.688766
2022-09-12	14:39:39	0.482914
2022-09-12	14:39:39	0.494415
2022-09-12	14:39:39	0.497316
2022-09-12	14:39:40	0.484898
2022-09-12	14:39:40	0.488257
2022-09-12	14:39:40	0.435433
2022-09-12	14:39:40	0.464339
2022-09-12	14:39:41	0.408359
2022-09-12	14:39:41	0.513448
2022-09-12	14:39:41	0.458333
2022-09-12	14:39:42	0.486883
2022-09-12	14:39:42	0.439708
2022-09-12	14:39:42	0.46958
2022-09-12	14:39:42	0.411311
2022-09-12	14:39:43	0.511718
2022-09-12	14:39:43	0.432735
2022-09-12	14:39:43	0.432277
2022-09-12	14:39:43	0.289275
2022-09-12	14:39:44	0.302914
2022-09-12	14:39:44	0.311921
2022-09-12	14:39:44	0.120471
2022-09-12	14:39:44	0.397214
2022-09-12	14:39:45	1.85518
2022-09-12	14:39:45	1.03503
2022-09-12	14:39:45	0.934771
2022-09-12	14:39:46	0.506221
2022-09-12	14:39:46	0.57243
2022-09-12	14:39:46	0.263066
2022-09-12	14:39:46	0.644084
2022-09-12	14:39:47	0.118283
2022-09-12	14:39:47	0.437163
2022-09-12	14:39:47	0.386018
2022-09-12	14:39:47	0.300115
2022-09-12	14:39:48	0.303015
2022-09-12	14:39:48	0.283168
2022-09-12	14:39:48	0.25411
2022-09-12	14:39:48	0.284847
2022-09-12	14:39:49	0.276145
2022-09-12	14:39:49	0.273448
2022-09-12	14:39:49	0.294618
2022-09-12	14:39:50	0.359911
2022-09-12	14:39:50	0.163575
2022-09-12	14:39:50	0.380165
2022-09-12	14:39:50	0.197926
2022-09-12	14:39:51	0.35416
2022-09-12	14:39:51	0.127036
2022-09-12	14:39:51	0.375076
2022-09-12	14:39:51	0.255026
2022-09-12	14:39:52	0.256298
2022-09-12	14:39:52	0.178741
2022-09-12	14:39:52	0.275993
2022-09-12	14:39:52	0.199962
2022-09-12	14:39:53	0.172532
2022-09-12	14:39:53	0.151412
2022-09-12	14:39:53	0.226934
2022-09-12	14:39:54	0.35869
2022-09-12	14:39:54	0.612837
2022-09-12	14:39:54	0.375331
2022-09-12	14:39:54	0.219504
2022-09-12	14:39:55	0.433448
2022-09-12	14:39:55	0.114669
2022-09-12	14:39:55	0.433041
2022-09-12	14:39:55	0.158181
2022-09-12	14:39:56	0.381031
2022-09-12	14:39:56	0.15299
2022-09-12	14:39:56	0.322252
2022-09-12	14:39:56	0.271056
2022-09-12	14:39:57	0.308817
2022-09-12	14:39:57	0.237316
2022-09-12	14:39:57	0.228461
2022-09-12	14:39:58	0.266069
2022-09-12	14:39:58	0.193244
2022-09-12	14:39:58	0.332176
2022-09-12	14:39:58	0.177672
2022-09-12	14:39:59	0.339707
2022-09-12	14:39:59	0.0958908
2022-09-12	14:39:59	0.272685
2022-09-12	14:39:59	0.0263234
2022-09-12	14:40:00	0.305814
2022-09-12	14:40:00	0.0461198
2022-09-12	14:40:00	0.35126
2022-09-12	14:40:00	0.175127
2022-09-12	14:40:01	0.562761
2022-09-12	14:40:01	0.710344
2022-09-12	14:40:01	1.0676
2022-09-12	14:40:02	0.52841
