# Supplementary material for: Comparing efficacy in reducing pulling and welfare impacts of four types of leash walking equipment
Source: PeerJ journal article supplement (doi:10.7717/peerj.18131), 2024-10-24
Supplement: Shelter1_Tension_files.zip [file Ranger_martin_2022912132344 copy.xlsx]

## Sheet: Averaged impulse
Date	Time	averaged newtons
2022-09-12	13:24:05	1.45681	1.45681	0		Impulse	789.649
2022-09-12	13:24:06	2.63859	4.0954	0		Total steps	4
2022-09-12	13:24:07	1.18947	5.28487	0		# > 5sec	0
2022-09-12	13:24:08	0.980546	6.26541	0
2022-09-12	13:24:09	1.36134	7.62676	0
2022-09-12	13:24:10	1.73644	9.3632	0
2022-09-12	13:24:11	1.75223	11.1154	0
2022-09-12	13:24:12	1.76802	12.8834	0
2022-09-12	13:24:13	1.75981	14.6433	0
2022-09-12	13:24:14	1.84052	16.4838	0
2022-09-12	13:24:15	1.68647	18.1702	0
2022-09-12	13:24:16	1.6334	19.8036	0
2022-09-12	13:24:17	1.87441	21.6781	0
2022-09-12	13:24:18	1.83423	23.5123	0
2022-09-12	13:24:19	2.59903	26.1113	0
2022-09-12	13:24:20	7.15838	33.2697	0
2022-09-12	13:24:21	3.3559	36.6256	0
2022-09-12	13:24:22	2.19648	38.8221	0
2022-09-12	13:24:23	2.6563	41.4784	0
2022-09-12	13:24:24	3.22962	44.708	0
2022-09-12	13:24:25	2.5443	47.2523	0
2022-09-12	13:24:26	2.2108	49.4631	0
2022-09-12	13:24:27	1.9078	51.3709	0
2022-09-12	13:24:28	2.21201	53.5829	0
2022-09-12	13:24:29	1.82048	55.4034	0
2022-09-12	13:24:30	5.55912	60.9625	0
2022-09-12	13:24:31	13.1457	74.1083	1
2022-09-12	13:24:32	3.18541	77.2937	1
2022-09-12	13:24:33	1.26429	78.5579	1
2022-09-12	13:24:34	1.17272	79.7307	1
2022-09-12	13:24:35	2.20044	81.9311	1
2022-09-12	13:24:36	2.64966	84.5808	1
2022-09-12	13:24:37	2.15823	86.739	1
2022-09-12	13:24:38	1.72603	88.465	1
2022-09-12	13:24:39	2.28098	90.746	1
2022-09-12	13:24:40	1.63408	92.3801	1
2022-09-12	13:24:41	1.6391	94.0192	1
2022-09-12	13:24:42	2.0116	96.0308	1
2022-09-12	13:24:43	3.17492	99.2057	1
2022-09-12	13:24:44	1.78584	100.992	1
2022-09-12	13:24:45	0.977586	101.969	1
2022-09-12	13:24:46	1.65579	103.625	1
2022-09-12	13:24:47	2.15896	105.784	1
2022-09-12	13:24:48	2.39648	108.18	1
2022-09-12	13:24:49	2.75087	110.931	1
2022-09-12	13:24:50	1.81691	112.748	1
2022-09-12	13:24:51	1.30909	114.057	1
2022-09-12	13:24:52	0.0650828	114.122	1
2022-09-12	13:24:53	0.460101	114.582	1
2022-09-12	13:24:54	1.37402	115.956	1
2022-09-12	13:24:55	1.87245	117.829	1
2022-09-12	13:24:56	2.29976	120.129	1
2022-09-12	13:24:57	4.05176	124.18	1
2022-09-12	13:24:58	3.75624	127.937	1
2022-09-12	13:24:59	1.76794	129.705	1
2022-09-12	13:25:00	0.139615	129.844	1
2022-09-12	13:25:01	0.125015	129.969	1
2022-09-12	13:25:02	1.62359	131.593	1
2022-09-12	13:25:03	2.25751	133.85	1
2022-09-12	13:25:04	1.81714	135.667	1
2022-09-12	13:25:05	1.57538	137.243	1
2022-09-12	13:25:06	1.55993	138.803	1
2022-09-12	13:25:07	1.54459	140.347	1
2022-09-12	13:25:08	1.57311	141.92	1
2022-09-12	13:25:09	2.40458	144.325	1
2022-09-12	13:25:10	2.94328	147.268	1
2022-09-12	13:25:11	1.21454	148.483	1
2022-09-12	13:25:12	1.26293	149.746	1
2022-09-12	13:25:13	0.810015	150.556	1
2022-09-12	13:25:14	-0.0816627	150.556	1
2022-09-12	13:25:15	1.95991	152.516	1
2022-09-12	13:25:16	1.93678	154.452	1
2022-09-12	13:25:17	1.69892	156.151	1
2022-09-12	13:25:18	1.65528	157.807	1
2022-09-12	13:25:19	1.68381	159.49	1
2022-09-12	13:25:20	1.48324	160.974	1
2022-09-12	13:25:21	2.85851	163.832	1
2022-09-12	13:25:22	1.71742	165.55	1
2022-09-12	13:25:23	1.54557	167.095	1
2022-09-12	13:25:24	1.5262	168.621	1
2022-09-12	13:25:25	1.70299	170.324	1
2022-09-12	13:25:26	1.43035	171.755	1
2022-09-12	13:25:27	1.61171	173.366	1
2022-09-12	13:25:28	1.70254	175.069	1
2022-09-12	13:25:29	1.58539	176.654	1
2022-09-12	13:25:30	1.85902	178.513	1
2022-09-12	13:25:31	2.69801	181.211	1
2022-09-12	13:25:32	2.75913	183.971	1
2022-09-12	13:25:33	1.84821	185.819	1
2022-09-12	13:25:34	2.85362	188.672	1
2022-09-12	13:25:35	2.21884	190.891	1
2022-09-12	13:25:36	5.2611	196.152	1
2022-09-12	13:25:37	3.76343	199.916	1
2022-09-12	13:25:38	1.92821	201.844	1
2022-09-12	13:25:39	2.04736	203.891	1
2022-09-12	13:25:40	1.9936	205.885	1
2022-09-12	13:25:41	2.08647	207.971	1
2022-09-12	13:25:42	2.02978	210.001	1
2022-09-12	13:25:43	1.78449	211.786	1
2022-09-12	13:25:44	1.45121	213.237	1
2022-09-12	13:25:45	1.4425	214.679	1
2022-09-12	13:25:46	5.42822	220.108	1
2022-09-12	13:25:47	8.09447	228.202	1
2022-09-12	13:25:48	5.72846	233.931	1
2022-09-12	13:25:49	4.55741	238.488	1
2022-09-12	13:25:50	3.25694	241.745	1
2022-09-12	13:25:51	5.42109	247.166	1
2022-09-12	13:25:52	1.06417	248.23	1
2022-09-12	13:25:53	5.76353	253.994	1
2022-09-12	13:25:54	5.82828	259.822	1
2022-09-12	13:25:55	2.05766	261.88	1
2022-09-12	13:25:56	1.46259	263.342	1
2022-09-12	13:25:57	0.749856	264.092	1
2022-09-12	13:25:58	0.65231	264.744	1
2022-09-12	13:25:59	6.5019	271.246	1
2022-09-12	13:26:00	4.90593	276.152	1
2022-09-12	13:26:01	6.66952	282.822	1
2022-09-12	13:26:02	0.965983	283.788	1
2022-09-12	13:26:03	0.867908	284.656	1
2022-09-12	13:26:04	0.17859	284.834	1
2022-09-12	13:26:05	0.690218	285.524	1
2022-09-12	13:26:06	1.66344	287.188	1
2022-09-12	13:26:07	1.60712	288.795	1
2022-09-12	13:26:08	1.49207	290.287	1
2022-09-12	13:26:09	1.4073	291.694	1
2022-09-12	13:26:10	0.788885	292.483	1
2022-09-12	13:26:11	-0.280756	292.483	1
2022-09-12	13:26:12	-0.253082	292.483	1
2022-09-12	13:26:13	0.124185	292.607	1
2022-09-12	13:26:14	1.5511	294.159	1
2022-09-12	13:26:15	11.0953	305.254	1
2022-09-12	13:26:16	4.95827	310.212	1
2022-09-12	13:26:17	2.19262	312.405	1
2022-09-12	13:26:18	3.92369	316.328	1
2022-09-12	13:26:19	4.2246	320.553	1
2022-09-12	13:26:20	6.53268	327.086	1
2022-09-12	13:26:21	5.73079	332.817	1
2022-09-12	13:26:22	11.8754	344.692	1
2022-09-12	13:26:23	5.4345	350.126	1
2022-09-12	13:26:24	2.57803	352.704	1
2022-09-12	13:26:25	1.44129	354.146	1
2022-09-12	13:26:26	1.23899	355.385	1
2022-09-12	13:26:27	1.23135	356.616	1
2022-09-12	13:26:28	5.05544	361.672	1
2022-09-12	13:26:29	1.81307	363.485	1
2022-09-12	13:26:30	0.917031	364.402	1
2022-09-12	13:26:31	1.12722	365.529	1
2022-09-12	13:26:32	0.951383	366.48	1
2022-09-12	13:26:33	1.56874	368.049	1
2022-09-12	13:26:34	1.6537	369.703	1
2022-09-12	13:26:35	1.74674	371.449	1
2022-09-12	13:26:36	1.59105	373.04	1
2022-09-12	13:26:37	0.897922	373.938	1
2022-09-12	13:26:38	0.892528	374.831	1
2022-09-12	13:26:39	0.110131	374.941	1
2022-09-12	13:26:40	0.295699	375.237	1
2022-09-12	13:26:41	0.447293	375.684	1
2022-09-12	13:26:42	0.0391069	375.723	1
2022-09-12	13:26:43	0.418902	376.142	1
2022-09-12	13:26:44	0.262253	376.404	1
2022-09-12	13:26:45	0.492943	376.897	1
2022-09-12	13:26:46	0.239219	377.136	1
2022-09-12	13:26:47	0.204641	377.341	1
2022-09-12	13:26:48	0.226938	377.568	1
2022-09-12	13:26:49	0.170742	377.739	1
2022-09-12	13:26:50	0.160725	377.9	1
2022-09-12	13:26:51	0.309507	378.209	1
2022-09-12	13:26:52	0.618881	378.828	1
2022-09-12	13:26:53	3.08233	381.91	1
2022-09-12	13:26:54	1.42201	383.332	1
2022-09-12	13:26:55	0.829596	384.162	1
2022-09-12	13:26:56	1.10203	385.264	1
2022-09-12	13:26:57	2.41182	387.676	1
2022-09-12	13:26:58	1.71194	389.388	1
2022-09-12	13:26:59	1.35104	390.739	1
2022-09-12	13:27:00	1.21643	391.955	1
2022-09-12	13:27:01	1.92167	393.877	1
2022-09-12	13:27:02	1.78992	395.667	1
2022-09-12	13:27:03	1.29943	396.966	1
2022-09-12	13:27:04	1.25838	398.225	1
2022-09-12	13:27:05	1.27215	399.497	1
2022-09-12	13:27:06	1.27973	400.776	1
2022-09-12	13:27:07	1.07385	401.85	1
2022-09-12	13:27:08	-1.69184	401.85	1
2022-09-12	13:27:09	0.00622637	401.856	1
2022-09-12	13:27:10	1.48466	403.341	1
2022-09-12	13:27:11	1.18324	404.524	1
2022-09-12	13:27:12	2.17202	406.696	1
2022-09-12	13:27:13	7.54287	414.239	1
2022-09-12	13:27:14	7.94519	422.184	1
2022-09-12	13:27:15	6.83693	429.021	1
2022-09-12	13:27:16	3.41117	432.433	1
2022-09-12	13:27:17	2.14719	434.58	1
2022-09-12	13:27:18	-0.105543	434.58	1
2022-09-12	13:27:19	3.64961	438.229	1
2022-09-12	13:27:20	3.68629	441.916	1
2022-09-12	13:27:21	1.56695	443.483	1
2022-09-12	13:27:22	1.74504	445.228	1
2022-09-12	13:27:23	2.52455	447.752	1
2022-09-12	13:27:24	1.69218	449.444	1
2022-09-12	13:27:25	1.51007	450.954	1
2022-09-12	13:27:26	1.42014	452.375	1
2022-09-12	13:27:27	1.44533	453.82	1
2022-09-12	13:27:28	1.60307	455.423	1
2022-09-12	13:27:29	1.56547	456.988	1
2022-09-12	13:27:30	1.53361	458.522	1
2022-09-12	13:27:31	1.92801	460.45	1
2022-09-12	13:27:32	1.76085	462.211	1
2022-09-12	13:27:33	2.39201	464.603	1
2022-09-12	13:27:34	3.86574	468.469	1
2022-09-12	13:27:35	5.14146	473.61	1
2022-09-12	13:27:36	1.78462	475.395	1
2022-09-12	13:27:37	2.43961	477.834	1
2022-09-12	13:27:38	3.20253	481.037	1
2022-09-12	13:27:39	2.09158	483.128	1
2022-09-12	13:27:40	3.26671	486.395	1
2022-09-12	13:27:41	2.03259	488.428	1
2022-09-12	13:27:42	1.70113	490.129	1
2022-09-12	13:27:43	2.02435	492.153	1
2022-09-12	13:27:44	2.46988	494.623	1
2022-09-12	13:27:45	2.06813	496.691	1
2022-09-12	13:27:46	1.92704	498.618	1
2022-09-12	13:27:47	2.43136	501.05	1
2022-09-12	13:27:48	2.20854	503.258	1
2022-09-12	13:27:49	1.45206	504.71	1
2022-09-12	13:27:50	3.39421	508.104	1
2022-09-12	13:27:51	1.43095	509.535	1
2022-09-12	13:27:52	1.48896	511.024	1
2022-09-12	13:27:53	1.22461	512.249	1
2022-09-12	13:27:54	1.37266	513.622	1
2022-09-12	13:27:55	1.44355	515.065	1
2022-09-12	13:27:56	1.56909	516.634	1
2022-09-12	13:27:57	1.70101	518.335	1
2022-09-12	13:27:58	1.95879	520.294	1
2022-09-12	13:27:59	2.15504	522.449	1
2022-09-12	13:28:00	2.24459	524.694	1
2022-09-12	13:28:01	2.44702	527.141	1
2022-09-12	13:28:02	2.60774	529.748	1
2022-09-12	13:28:03	2.38405	532.133	1
2022-09-12	13:28:04	2.63162	534.764	1
2022-09-12	13:28:05	2.65387	537.418	1
2022-09-12	13:28:06	5.80711	543.225	1
2022-09-12	13:28:07	2.55338	545.779	1
2022-09-12	13:28:08	2.81448	548.593	1
2022-09-12	13:28:09	6.15747	554.75	1
2022-09-12	13:28:10	13.0453	567.796	2
2022-09-12	13:28:11	2.36971	570.166	2
2022-09-12	13:28:12	2.35228	572.518	2
2022-09-12	13:28:13	2.4361	574.954	2
2022-09-12	13:28:14	2.87107	577.825	2
2022-09-12	13:28:15	2.97028	580.795	2
2022-09-12	13:28:16	3.0576	583.853	2
2022-09-12	13:28:17	2.73208	586.585	2
2022-09-12	13:28:18	2.81069	589.396	2
2022-09-12	13:28:19	2.8082	592.204	2
2022-09-12	13:28:20	2.73038	594.934	2
2022-09-12	13:28:21	3.22778	598.162	2
2022-09-12	13:28:22	6.13729	604.299	2
2022-09-12	13:28:23	6.48068	610.78	2
2022-09-12	13:28:24	3.00667	613.787	2
2022-09-12	13:28:25	33.9251	647.712	3
2022-09-12	13:28:26	10.4272	658.139	3
2022-09-12	13:28:27	3.79166	661.931	3
2022-09-12	13:28:28	7.78147	669.712	3
2022-09-12	13:28:29	2.5082	672.22	3
2022-09-12	13:28:30	2.47852	674.699	3
2022-09-12	13:28:31	1.22133	675.92	3
2022-09-12	13:28:32	3.26246	679.182	3
2022-09-12	13:28:33	1.72076	680.903	3
2022-09-12	13:28:34	3.23354	684.137	3
2022-09-12	13:28:35	1.42671	685.563	3
2022-09-12	13:28:36	2.66552	688.229	3
2022-09-12	13:28:37	3.0408	691.27	3
2022-09-12	13:28:38	3.17364	694.443	3
2022-09-12	13:28:39	10.9646	705.408	3
2022-09-12	13:28:40	4.75923	710.167	3
2022-09-12	13:28:41	2.72291	712.89	3
2022-09-12	13:28:42	2.0494	714.94	3
2022-09-12	13:28:43	1.86955	716.809	3
2022-09-12	13:28:44	17.0866	733.896	4
2022-09-12	13:28:45	5.25227	739.148	4
2022-09-12	13:28:46	1.33542	740.483	4
2022-09-12	13:28:47	1.44646	741.93	4
2022-09-12	13:28:48	0.700055	742.63	4
2022-09-12	13:28:49	0.992924	743.623	4
2022-09-12	13:28:50	1.10867	744.732	4
2022-09-12	13:28:51	1.36366	746.095	4
2022-09-12	13:28:52	3.17418	749.269	4
2022-09-12	13:28:53	1.06083	750.33	4
2022-09-12	13:28:54	1.95213	752.282	4
2022-09-12	13:28:55	4.9521	757.234	4
2022-09-12	13:28:56	1.47555	758.71	4
2022-09-12	13:28:57	1.07334	759.783	4
2022-09-12	13:28:58	1.21982	761.003	4
2022-09-12	13:28:59	1.92869	762.932	4
2022-09-12	13:29:00	5.06591	767.998	4
2022-09-12	13:29:01	6.17429	774.172	4
2022-09-12	13:29:02	5.77344	779.946	4
2022-09-12	13:29:03	2.54894	782.494	4
2022-09-12	13:29:04	4.72245	787.217	4
2022-09-12	13:29:05	2.43236	789.649	4

## Sheet: Ranger_martin_2022912132344 (3)
Date	Time	Lbs	Newtons	averaged newtons	Total Force x time	Total steps > 13.345		**GoPro Fitting: 13:09
2022-09-12	13:24:05	0.328308	1.46038	1.45681	1.46038	FALSE	0			Total Force x time	1524.11
2022-09-12	13:24:05	0.300267	1.33565	1.45681	1.33565	FALSE	0			Total Time Steps Force >3	13
2022-09-12	13:24:05	0.297468	1.3232	1.45681	2.78358	FALSE	0
2022-09-12	13:24:05	0.383982	1.70803	1.45681	3.04368	FALSE	0
2022-09-12	13:24:06	0.647697	2.88109	2.63859	5.66466	FALSE	0
2022-09-12	13:24:06	0.502354	2.23457	2.63859	5.27825	FALSE	0
2022-09-12	13:24:06	0.780929	3.47373	2.63859	9.13839	FALSE	0
2022-09-12	13:24:06	0.441743	1.96496	2.63859	7.24321	FALSE	0
2022-09-12	13:24:07	0.410445	1.82574	1.18947	10.9641	FALSE	0
2022-09-12	13:24:07	0.2107	0.937236	1.18947	8.18044	FALSE	0
2022-09-12	13:24:07	0.220725	0.981829	1.18947	11.946	FALSE	0
2022-09-12	13:24:07	0.227748	1.01307	1.18947	9.19351	FALSE	0
2022-09-12	13:24:08	0.239758	1.06649	0.980546	13.0125	FALSE	0
2022-09-12	13:24:08	0.214262	0.95308	0.980546	10.1466	FALSE	0
2022-09-12	13:24:08	0.20729	0.922067	0.980546	13.9345	FALSE	0
2022-09-12	13:24:09	0.280725	1.24872	1.36134	11.3953	FALSE	0
2022-09-12	13:24:09	0.345814	1.53825	1.36134	15.4728	FALSE	0
2022-09-12	13:24:09	0.329682	1.46649	1.36134	12.8618	FALSE	0
2022-09-12	13:24:09	0.267952	1.1919	1.36134	16.6647	FALSE	0
2022-09-12	13:24:10	0.441031	1.96179	1.73644	14.8236	FALSE	0
2022-09-12	13:24:10	0.398588	1.773	1.73644	18.4377	FALSE	0
2022-09-12	13:24:10	0.381234	1.69581	1.73644	16.5194	FALSE	0
2022-09-12	13:24:10	0.340623	1.51516	1.73644	19.9528	FALSE	0
2022-09-12	13:24:11	0.384288	1.70939	1.75223	18.2288	FALSE	0
2022-09-12	13:24:11	0.388512	1.72818	1.75223	21.681	FALSE	0
2022-09-12	13:24:11	0.393092	1.74855	1.75223	19.9773	FALSE	0
2022-09-12	13:24:11	0.409784	1.8228	1.75223	23.5038	FALSE	0
2022-09-12	13:24:12	0.385764	1.71596	1.76802	21.6933	FALSE	0
2022-09-12	13:24:12	0.402761	1.79156	1.76802	25.2954	FALSE	0
2022-09-12	13:24:12	0.403881	1.79654	1.76802	23.4898	FALSE	0
2022-09-12	13:24:13	0.391921	1.74334	1.75981	27.0387	FALSE	0
2022-09-12	13:24:13	0.386323	1.71844	1.75981	25.2083	FALSE	0
2022-09-12	13:24:13	0.393244	1.74923	1.75981	28.7879	FALSE	0
2022-09-12	13:24:13	0.411005	1.82823	1.75981	27.0365	FALSE	0
2022-09-12	13:24:14	0.420013	1.8683	1.84052	30.6562	FALSE	0
2022-09-12	13:24:14	0.398995	1.77481	1.84052	28.8113	FALSE	0
2022-09-12	13:24:14	0.396349	1.76304	1.84052	32.4193	FALSE	0
2022-09-12	13:24:14	0.439708	1.95591	1.84052	30.7672	FALSE	0
2022-09-12	13:24:15	0.453499	2.01725	1.68647	34.4365	FALSE	0
2022-09-12	13:24:15	0.414059	1.84182	1.68647	32.6091	FALSE	0
2022-09-12	13:24:15	0.285305	1.26909	1.68647	35.7056	FALSE	0
2022-09-12	13:24:15	0.363677	1.61771	1.68647	34.2268	FALSE	0
2022-09-12	13:24:16	0.246069	1.09456	1.6334	36.8002	FALSE	0
2022-09-12	13:24:16	0.435687	1.93802	1.6334	36.1648	FALSE	0
2022-09-12	13:24:16	0.41986	1.86762	1.6334	38.6678	FALSE	0
2022-09-12	13:24:17	0.342506	1.52354	1.87441	37.6883	FALSE	0
2022-09-12	13:24:17	0.468155	2.08245	1.87441	40.7503	FALSE	0
2022-09-12	13:24:17	0.493651	2.19586	1.87441	39.8842	FALSE	0
2022-09-12	13:24:17	0.381234	1.69581	1.87441	42.4461	FALSE	0
2022-09-12	13:24:18	0.425916	1.89456	1.83423	41.7787	FALSE	0
2022-09-12	13:24:18	0.353753	1.57356	1.83423	44.0196	FALSE	0
2022-09-12	13:24:18	0.357417	1.58986	1.83423	43.3686	FALSE	0
2022-09-12	13:24:18	0.512328	2.27894	1.83423	46.2986	FALSE	0
2022-09-12	13:24:19	0.349173	1.55319	2.59903	44.9218	FALSE	0
2022-09-12	13:24:19	0.574924	2.55738	2.59903	48.856	FALSE	0
2022-09-12	13:24:19	0.336043	1.49479	2.59903	46.4166	FALSE	0
2022-09-12	13:24:19	1.07701	4.79076	2.59903	53.6467	FALSE	0
2022-09-12	13:24:20	0.960776	4.27372	7.15838	50.6903	FALSE	0
2022-09-12	13:24:20	1.9249	8.56234	7.15838	62.209	FALSE	0
2022-09-12	13:24:20	1.94215	8.63907	7.15838	59.3294	FALSE	0
2022-09-12	13:24:21	1.19467	5.31413	3.3559	67.5232	FALSE	0
2022-09-12	13:24:21	0.446374	1.98556	3.3559	61.3149	FALSE	0
2022-09-12	13:24:21	0.962812	4.28278	3.3559	71.806	FALSE	0
2022-09-12	13:24:21	0.413906	1.84114	3.3559	63.1561	FALSE	0
2022-09-12	13:24:22	0.389784	1.73384	2.19648	73.5398	FALSE	0
2022-09-12	13:24:22	0.406883	1.8099	2.19648	64.966	FALSE	0
2022-09-12	13:24:22	0.457163	2.03355	2.19648	75.5733	FALSE	0
2022-09-12	13:24:22	0.721336	3.20865	2.19648	68.1746	FALSE	0
2022-09-12	13:24:23	0.496807	2.2099	2.6563	77.7832	FALSE	0
2022-09-12	13:24:23	0.517417	2.30157	2.6563	70.4762	FALSE	0
2022-09-12	13:24:23	0.667341	2.96847	2.6563	80.7517	FALSE	0
2022-09-12	13:24:23	0.707087	3.14526	2.6563	73.6215	FALSE	0
2022-09-12	13:24:24	0.74159	3.29874	3.22962	84.0505	FALSE	0
2022-09-12	13:24:24	0.777723	3.45947	3.22962	77.0809	FALSE	0
2022-09-12	13:24:24	0.658842	2.93066	3.22962	86.9811	FALSE	0
2022-09-12	13:24:25	0.615077	2.73599	2.5443	79.8169	FALSE	0
2022-09-12	13:24:25	0.599911	2.66852	2.5443	89.6496	FALSE	0
2022-09-12	13:24:25	0.548715	2.44079	2.5443	82.2577	FALSE	0
2022-09-12	13:24:25	0.524236	2.33191	2.5443	91.9815	FALSE	0
2022-09-12	13:24:26	0.487137	2.16688	2.2108	84.4246	FALSE	0
2022-09-12	13:24:26	0.510801	2.27215	2.2108	94.2537	FALSE	0
2022-09-12	13:24:26	0.524593	2.33349	2.2108	86.7581	FALSE	0
2022-09-12	13:24:26	0.465509	2.07068	2.2108	96.3244	FALSE	0
2022-09-12	13:24:27	0.417367	1.85653	1.9078	88.6146	FALSE	0
2022-09-12	13:24:27	0.406018	1.80605	1.9078	98.1304	FALSE	0
2022-09-12	13:24:27	0.417926	1.85902	1.9078	90.4736	FALSE	0
2022-09-12	13:24:27	0.474262	2.10961	1.9078	100.24	FALSE	0
2022-09-12	13:24:28	0.549377	2.44374	2.21201	92.9174	FALSE	0
2022-09-12	13:24:28	0.50159	2.23117	2.21201	102.471	FALSE	0
2022-09-12	13:24:28	0.440878	1.96111	2.21201	94.8785	FALSE	0
2022-09-12	13:24:29	0.40729	1.81171	1.82048	104.283	FALSE	0
2022-09-12	13:24:29	0.435738	1.93825	1.82048	96.8167	FALSE	0
2022-09-12	13:24:29	0.451565	2.00865	1.82048	106.292	FALSE	0
2022-09-12	13:24:29	0.342456	1.52331	1.82048	98.34	FALSE	0
2022-09-12	13:24:30	1.02408	4.55531	5.55912	110.847	FALSE	0
2022-09-12	13:24:30	0.825967	3.67407	5.55912	102.014	FALSE	0
2022-09-12	13:24:30	1.88877	8.40163	5.55912	119.248	FALSE	0
2022-09-12	13:24:30	1.26017	5.60549	5.55912	107.62	FALSE	0
2022-09-12	13:24:31	2.64276	11.7555	13.1457	131.004	FALSE	0
2022-09-12	13:24:31	3.67523	16.3482	13.1457	123.968	1	1
2022-09-12	13:24:31	2.90032	12.9012	13.1457	143.905	FALSE	1
2022-09-12	13:24:31	2.60286	11.578	13.1457	135.546	FALSE	1
2022-09-12	13:24:32	1.25513	5.58307	3.18541	149.488	FALSE	1
2022-09-12	13:24:32	0.569376	2.5327	3.18541	138.078	FALSE	1
2022-09-12	13:24:32	0.32383	1.44046	3.18541	150.929	FALSE	1
2022-09-12	13:24:33	0.374517	1.66593	1.26429	139.744	FALSE	1
2022-09-12	13:24:33	0.185713	0.826089	1.26429	151.755	FALSE	1
2022-09-12	13:24:33	0.324135	1.44182	1.26429	141.186	FALSE	1
2022-09-12	13:24:33	0.252532	1.12331	1.26429	152.878	FALSE	1
2022-09-12	13:24:34	0.225763	1.00424	1.17272	142.19	FALSE	1
2022-09-12	13:24:34	0.216909	0.964855	1.17272	153.843	FALSE	1
2022-09-12	13:24:34	0.275636	1.22608	1.17272	143.417	FALSE	1
2022-09-12	13:24:34	0.336247	1.49569	1.17272	155.339	FALSE	1
2022-09-12	13:24:35	0.576959	2.56643	2.20044	145.983	FALSE	1
2022-09-12	13:24:35	0.444084	1.97537	2.20044	157.314	FALSE	1
2022-09-12	13:24:35	0.393448	1.75014	2.20044	147.733	FALSE	1
2022-09-12	13:24:35	0.564237	2.50984	2.20044	159.824	FALSE	1
2022-09-12	13:24:36	0.412634	1.83548	2.64966	149.569	FALSE	1
2022-09-12	13:24:36	0.843066	3.75013	2.64966	163.574	FALSE	1
2022-09-12	13:24:36	0.531311	2.36338	2.64966	151.932	FALSE	1
2022-09-12	13:24:37	0.622405	2.76858	2.15823	166.343	FALSE	1
2022-09-12	13:24:37	0.403728	1.79586	2.15823	153.728	FALSE	1
2022-09-12	13:24:37	0.558842	2.48584	2.15823	168.828	FALSE	1
2022-09-12	13:24:37	0.355789	1.58262	2.15823	155.31	FALSE	1
2022-09-12	13:24:38	0.406883	1.8099	1.72603	170.638	FALSE	1
2022-09-12	13:24:38	0.37131	1.65166	1.72603	156.962	FALSE	1
2022-09-12	13:24:38	0.33126	1.47351	1.72603	172.112	FALSE	1
2022-09-12	13:24:38	0.442659	1.96904	1.72603	158.931	FALSE	1
2022-09-12	13:24:39	0.621896	2.76632	2.28098	174.878	FALSE	1
2022-09-12	13:24:39	0.509326	2.26558	2.28098	161.197	FALSE	1
2022-09-12	13:24:39	0.305611	1.35942	2.28098	176.238	FALSE	1
2022-09-12	13:24:39	0.614313	2.73259	2.28098	163.929	FALSE	1
2022-09-12	13:24:40	0.396094	1.76191	1.63408	178	FALSE	1
2022-09-12	13:24:40	0.263677	1.17289	1.63408	165.102	FALSE	1
2022-09-12	13:24:40	0.442303	1.96745	1.63408	179.967	FALSE	1
2022-09-12	13:24:41	0.311107	1.38387	1.6391	166.486	FALSE	1
2022-09-12	13:24:41	0.437774	1.94731	1.6391	181.914	FALSE	1
2022-09-12	13:24:41	0.369733	1.64465	1.6391	168.131	FALSE	1
2022-09-12	13:24:41	0.355331	1.58058	1.6391	183.495	FALSE	1
2022-09-12	13:24:42	0.396756	1.76485	2.0116	169.896	FALSE	1
2022-09-12	13:24:42	0.396858	1.7653	2.0116	185.26	FALSE	1
2022-09-12	13:24:42	0.418028	1.85947	2.0116	171.755	FALSE	1
2022-09-12	13:24:42	0.597265	2.65675	2.0116	187.917	FALSE	1
2022-09-12	13:24:43	0.78271	3.48165	3.17492	175.237	FALSE	1
2022-09-12	13:24:43	0.925509	4.11685	3.17492	192.034	FALSE	1
2022-09-12	13:24:43	0.433041	1.92625	3.17492	177.163	FALSE	1
2022-09-12	13:24:44	0.430903	1.91674	1.78584	193.951	FALSE	1
2022-09-12	13:24:44	0.378486	1.68358	1.78584	178.847	FALSE	1
2022-09-12	13:24:44	0.438333	1.94979	1.78584	195.9	FALSE	1
2022-09-12	13:24:44	0.358181	1.59326	1.78584	180.44	FALSE	1
2022-09-12	13:24:45	0.441438	1.9636	0.977586	197.864	FALSE	1
2022-09-12	13:24:45	0.138283	0.61511	0.977586	181.055	FALSE	1
2022-09-12	13:24:45	0.115789	0.515053	0.977586	198.379	FALSE	1
2022-09-12	13:24:45	0.183575	0.816578	0.977586	181.871	FALSE	1
2022-09-12	13:24:46	0.376858	1.67634	1.65579	200.055	FALSE	1
2022-09-12	13:24:46	0.374211	1.66457	1.65579	183.536	FALSE	1
2022-09-12	13:24:46	0.373397	1.66094	1.65579	201.716	FALSE	1
2022-09-12	13:24:46	0.364491	1.62133	1.65579	185.157	FALSE	1
2022-09-12	13:24:47	0.327036	1.45472	2.15896	203.171	FALSE	1
2022-09-12	13:24:47	0.493244	2.19405	2.15896	187.351	FALSE	1
2022-09-12	13:24:47	0.635789	2.82812	2.15896	205.999	FALSE	1
2022-09-12	13:24:48	0.78902	3.50972	2.39648	190.861	FALSE	1
2022-09-12	13:24:48	0.499402	2.22144	2.39648	208.221	FALSE	1
2022-09-12	13:24:48	0.470598	2.09331	2.39648	192.954	FALSE	1
2022-09-12	13:24:48	0.395992	1.76145	2.39648	209.982	FALSE	1
2022-09-12	13:24:49	0.45874	2.04057	2.75087	194.995	FALSE	1
2022-09-12	13:24:49	0.602964	2.6821	2.75087	212.664	FALSE	1
2022-09-12	13:24:49	0.869682	3.86852	2.75087	198.864	FALSE	1
2022-09-12	13:24:49	0.542303	2.41227	2.75087	215.076	FALSE	1
2022-09-12	13:24:50	0.543168	2.41612	1.81691	201.28	FALSE	1
2022-09-12	13:24:50	0.345967	1.53893	1.81691	216.615	FALSE	1
2022-09-12	13:24:50	0.305356	1.35828	1.81691	202.638	FALSE	1
2022-09-12	13:24:50	0.439351	1.95432	1.81691	218.57	FALSE	1
2022-09-12	13:24:51	0.172583	0.767684	1.30909	203.406	FALSE	1
2022-09-12	13:24:51	0.332786	1.4803	1.30909	220.05	FALSE	1
2022-09-12	13:24:51	0.377519	1.67928	1.30909	205.085	FALSE	1
2022-09-12	13:24:52	-0.00436363	-0.0194103	0.0650828	220.05	FALSE	1
2022-09-12	13:24:52	-0.0402415	-0.179002	0.0650828	205.085	FALSE	1
2022-09-12	13:24:52	0.0616414	0.274193	0.0650828	220.324	FALSE	1
2022-09-12	13:24:52	0.0414888	0.18455	0.0650828	205.269	FALSE	1
2022-09-12	13:24:53	0.240929	1.0717	0.460101	221.396	FALSE	1
2022-09-12	13:24:53	0.0525321	0.233673	0.460101	205.503	FALSE	1
2022-09-12	13:24:53	0.128308	0.57074	0.460101	221.967	FALSE	1
2022-09-12	13:24:53	-0.00802776	-0.0357091	0.460101	205.503	FALSE	1
2022-09-12	13:24:54	0.368919	1.64103	1.37402	223.608	FALSE	1
2022-09-12	13:24:54	0.228461	1.01624	1.37402	206.519	FALSE	1
2022-09-12	13:24:54	0.402303	1.78952	1.37402	225.397	FALSE	1
2022-09-12	13:24:54	0.235891	1.04929	1.37402	207.569	FALSE	1
2022-09-12	13:24:55	0.458333	2.03876	1.87245	227.436	FALSE	1
2022-09-12	13:24:55	0.279962	1.24533	1.87245	208.814	FALSE	1
2022-09-12	13:24:55	0.524542	2.33327	1.87245	229.769	FALSE	1
2022-09-12	13:24:56	0.415891	1.84997	2.29976	210.664	FALSE	1
2022-09-12	13:24:56	0.559809	2.49014	2.29976	232.259	FALSE	1
2022-09-12	13:24:56	0.620522	2.76021	2.29976	213.424	FALSE	1
2022-09-12	13:24:56	0.471819	2.09875	2.29976	234.358	FALSE	1
2022-09-12	13:24:57	0.646578	2.87611	4.05176	216.3	FALSE	1
2022-09-12	13:24:57	1.01085	4.49646	4.05176	238.854	FALSE	1
2022-09-12	13:24:57	1.09609	4.87563	4.05176	221.176	FALSE	1
2022-09-12	13:24:57	0.889987	3.95884	4.05176	242.813	FALSE	1
2022-09-12	13:24:58	1.12001	4.98203	3.75624	226.158	FALSE	1
2022-09-12	13:24:58	0.937366	4.16959	3.75624	246.983	FALSE	1
2022-09-12	13:24:58	0.775687	3.45041	3.75624	229.608	FALSE	1
2022-09-12	13:24:58	0.544695	2.42291	3.75624	249.406	FALSE	1
2022-09-12	13:24:59	0.350038	1.55704	1.76794	231.165	FALSE	1
2022-09-12	13:24:59	0.330852	1.4717	1.76794	250.877	FALSE	1
2022-09-12	13:24:59	0.511463	2.27509	1.76794	233.44	FALSE	1
2022-09-12	13:25:00	0.183066	0.814314	0.139615	251.692	FALSE	1
2022-09-12	13:25:00	0.136094	0.605373	0.139615	234.046	FALSE	1
2022-09-12	13:25:00	-0.0517936	-0.230388	0.139615	251.692	FALSE	1
2022-09-12	13:25:00	-0.141819	-0.630839	0.139615	234.046	FALSE	1
2022-09-12	13:25:01	0.0321249	0.142898	0.125015	251.835	FALSE	1
2022-09-12	13:25:01	0.0110562	0.0491802	0.125015	234.095	FALSE	1
2022-09-12	13:25:01	-0.0330659	-0.147084	0.125015	251.835	FALSE	1
2022-09-12	13:25:01	0.102303	0.455064	0.125015	234.55	FALSE	1
2022-09-12	13:25:02	0.135229	0.601526	1.62359	252.436	FALSE	1
2022-09-12	13:25:02	0.304491	1.35444	1.62359	235.905	FALSE	1
2022-09-12	13:25:02	0.452227	2.0116	1.62359	254.448	FALSE	1
2022-09-12	13:25:02	0.568053	2.52681	1.62359	238.431	FALSE	1
2022-09-12	13:25:03	0.551208	2.45188	2.25751	256.9	FALSE	1
2022-09-12	13:25:03	0.509224	2.26513	2.25751	240.696	FALSE	1
2022-09-12	13:25:03	0.462099	2.05551	2.25751	258.955	FALSE	1
2022-09-12	13:25:04	0.376247	1.67362	1.81714	242.37	FALSE	1
2022-09-12	13:25:04	0.444796	1.97854	1.81714	260.934	FALSE	1
2022-09-12	13:25:04	0.414109	1.84204	1.81714	244.212	FALSE	1
2022-09-12	13:25:04	0.398893	1.77436	1.81714	262.708	FALSE	1
2022-09-12	13:25:05	0.3593	1.59824	1.57538	245.81	FALSE	1
2022-09-12	13:25:05	0.357163	1.58873	1.57538	264.297	FALSE	1
2022-09-12	13:25:05	0.35355	1.57266	1.57538	247.383	FALSE	1
2022-09-12	13:25:05	0.346629	1.54188	1.57538	265.839	FALSE	1
2022-09-12	13:25:06	0.349835	1.55614	1.55993	248.939	FALSE	1
2022-09-12	13:25:06	0.346069	1.53938	1.55993	267.378	FALSE	1
2022-09-12	13:25:06	0.3564	1.58534	1.55993	250.525	FALSE	1
2022-09-12	13:25:06	0.350445	1.55885	1.55993	268.937	FALSE	1
2022-09-12	13:25:07	0.347341	1.54504	1.54459	252.07	FALSE	1
2022-09-12	13:25:07	0.350293	1.55817	1.54459	270.495	FALSE	1
2022-09-12	13:25:07	0.344084	1.53055	1.54459	253.6	FALSE	1
2022-09-12	13:25:08	0.346832	1.54278	1.57311	272.038	FALSE	1
2022-09-12	13:25:08	0.354262	1.57583	1.57311	255.176	FALSE	1
2022-09-12	13:25:08	0.352481	1.56791	1.57311	273.606	FALSE	1
2022-09-12	13:25:08	0.361031	1.60594	1.57311	256.782	FALSE	1
2022-09-12	13:25:09	0.357621	1.59077	2.40458	275.197	FALSE	1
2022-09-12	13:25:09	0.398283	1.77164	2.40458	258.554	FALSE	1
2022-09-12	13:25:09	0.54327	2.41657	2.40458	277.613	FALSE	1
2022-09-12	13:25:09	0.863117	3.83932	2.40458	262.393	FALSE	1
2022-09-12	13:25:10	0.804084	3.57673	2.94328	281.19	FALSE	1
2022-09-12	13:25:10	0.877621	3.90383	2.94328	266.297	FALSE	1
2022-09-12	13:25:10	0.646985	2.87792	2.94328	284.068	FALSE	1
2022-09-12	13:25:10	0.318028	1.41465	2.94328	267.711	FALSE	1
2022-09-12	13:25:11	0.194822	0.866607	1.21454	284.934	FALSE	1
2022-09-12	13:25:11	0.353193	1.57107	1.21454	269.282	FALSE	1
2022-09-12	13:25:11	0.271107	1.20594	1.21454	286.14	FALSE	1
2022-09-12	13:25:12	0.373092	1.65959	1.26293	270.942	FALSE	1
2022-09-12	13:25:12	0.23986	1.06695	1.26293	287.207	FALSE	1
2022-09-12	13:25:12	0.399707	1.77798	1.26293	272.72	FALSE	1
2022-09-12	13:25:12	0.123015	0.547195	1.26293	287.754	FALSE	1
2022-09-12	13:25:13	0.18785	0.835594	0.810015	273.556	FALSE	1
2022-09-12	13:25:13	0.0631173	0.280758	0.810015	288.035	FALSE	1
2022-09-12	13:25:13	0.397316	1.76734	0.810015	275.323	FALSE	1
2022-09-12	13:25:13	0.0801147	0.356366	0.810015	288.392	FALSE	1
2022-09-12	13:25:14	-0.0157631	-0.0701174	-0.0816627	275.323	FALSE	1
2022-09-12	13:25:14	-0.0975443	-0.433897	-0.0816627	288.392	FALSE	1
2022-09-12	13:25:14	-0.139478	-0.620426	-0.0816627	275.323	FALSE	1
2022-09-12	13:25:14	0.179351	0.797789	-0.0816627	289.189	FALSE	1
2022-09-12	13:25:15	0.348461	1.55002	1.95991	276.873	FALSE	1
2022-09-12	13:25:15	0.410751	1.8271	1.95991	291.017	FALSE	1
2022-09-12	13:25:15	0.562608	2.50259	1.95991	279.376	FALSE	1
2022-09-12	13:25:16	0.444186	1.97583	1.93678	292.992	FALSE	1
2022-09-12	13:25:16	0.460318	2.04759	1.93678	281.423	FALSE	1
2022-09-12	13:25:16	0.402557	1.79065	1.93678	294.783	FALSE	1
2022-09-12	13:25:16	0.434568	1.93305	1.93678	283.356	FALSE	1
2022-09-12	13:25:17	0.390242	1.73587	1.69892	296.519	FALSE	1
2022-09-12	13:25:17	0.396094	1.76191	1.69892	285.118	FALSE	1
2022-09-12	13:25:17	0.366425	1.62993	1.69892	298.149	FALSE	1
2022-09-12	13:25:17	0.374975	1.66796	1.69892	286.786	FALSE	1
2022-09-12	13:25:18	0.377926	1.68109	1.65528	299.83	FALSE	1
2022-09-12	13:25:18	0.367595	1.63514	1.65528	288.421	FALSE	1
2022-09-12	13:25:18	0.372532	1.6571	1.65528	301.487	FALSE	1
2022-09-12	13:25:18	0.370445	1.64781	1.65528	290.069	FALSE	1
2022-09-12	13:25:19	0.358741	1.59575	1.68381	303.083	FALSE	1
2022-09-12	13:25:19	0.374262	1.66479	1.68381	291.734	FALSE	1
2022-09-12	13:25:19	0.402608	1.79088	1.68381	304.874	FALSE	1
2022-09-12	13:25:20	0.29584	1.31596	1.48324	293.05	FALSE	1
2022-09-12	13:25:20	0.287392	1.27838	1.48324	306.152	FALSE	1
2022-09-12	13:25:20	0.346069	1.53938	1.48324	294.589	FALSE	1
2022-09-12	13:25:20	0.404491	1.79926	1.48324	307.951	FALSE	1
2022-09-12	13:25:21	0.380725	1.69354	2.85851	296.283	FALSE	1
2022-09-12	13:25:21	0.560878	2.4949	2.85851	310.446	FALSE	1
2022-09-12	13:25:21	0.903372	4.01838	2.85851	300.301	FALSE	1
2022-09-12	13:25:21	0.725509	3.22721	2.85851	313.673	FALSE	1
2022-09-12	13:25:22	0.517977	2.30407	1.71742	302.605	FALSE	1
2022-09-12	13:25:22	0.36154	1.6082	1.71742	315.282	FALSE	1
2022-09-12	13:25:22	0.321794	1.4314	1.71742	304.036	FALSE	1
2022-09-12	13:25:22	0.343066	1.52603	1.71742	316.808	FALSE	1
2022-09-12	13:25:23	0.307646	1.36847	1.54557	305.405	FALSE	1
2022-09-12	13:25:23	0.364288	1.62043	1.54557	318.428	FALSE	1
2022-09-12	13:25:23	0.370445	1.64781	1.54557	307.053	FALSE	1
2022-09-12	13:25:24	0.357214	1.58896	1.5262	320.017	FALSE	1
2022-09-12	13:25:24	0.351107	1.56179	1.5262	308.615	FALSE	1
2022-09-12	13:25:24	0.341183	1.51765	1.5262	321.535	FALSE	1
2022-09-12	13:25:24	0.322914	1.43639	1.5262	310.051	FALSE	1
2022-09-12	13:25:25	0.342201	1.52218	1.70299	323.057	FALSE	1
2022-09-12	13:25:25	0.399707	1.77798	1.70299	311.829	FALSE	1
2022-09-12	13:25:25	0.414364	1.84317	1.70299	324.9	FALSE	1
2022-09-12	13:25:25	0.375127	1.66864	1.70299	313.498	FALSE	1
2022-09-12	13:25:26	0.343779	1.5292	1.43035	326.429	FALSE	1
2022-09-12	13:25:26	0.312481	1.38998	1.43035	314.888	FALSE	1
2022-09-12	13:25:26	0.30841	1.37187	1.43035	327.801	FALSE	1
2022-09-12	13:25:27	0.336247	1.49569	1.61171	316.383	FALSE	1
2022-09-12	13:25:27	0.311667	1.38636	1.61171	329.187	FALSE	1
2022-09-12	13:25:27	0.354008	1.5747	1.61171	317.958	FALSE	1
2022-09-12	13:25:27	0.447392	1.99009	1.61171	331.177	FALSE	1
2022-09-12	13:25:28	0.270293	1.20232	1.70254	319.16	FALSE	1
2022-09-12	13:25:28	0.484288	2.15421	1.70254	333.332	FALSE	1
2022-09-12	13:25:28	0.283422	1.26072	1.70254	320.421	FALSE	1
2022-09-12	13:25:28	0.49299	2.19292	1.70254	335.525	FALSE	1
2022-09-12	13:25:29	0.314059	1.397	1.58539	321.818	FALSE	1
2022-09-12	13:25:29	0.41701	1.85494	1.58539	337.38	FALSE	1
2022-09-12	13:25:29	0.352888	1.56972	1.58539	323.388	FALSE	1
2022-09-12	13:25:29	0.341692	1.51991	1.58539	338.899	FALSE	1
2022-09-12	13:25:30	0.418435	1.86128	1.85902	325.249	FALSE	1
2022-09-12	13:25:30	0.32612	1.45065	1.85902	340.35	FALSE	1
2022-09-12	13:25:30	0.509224	2.26513	1.85902	327.514	FALSE	1
2022-09-12	13:25:31	0.2764	1.22948	2.69801	341.58	FALSE	1
2022-09-12	13:25:31	0.529071	2.35341	2.69801	329.868	FALSE	1
2022-09-12	13:25:31	0.452379	2.01227	2.69801	343.592	FALSE	1
2022-09-12	13:25:31	1.16831	5.19688	2.69801	335.064	FALSE	1
2022-09-12	13:25:32	0.835839	3.71798	2.75913	347.31	FALSE	1
2022-09-12	13:25:32	0.672176	2.98997	2.75913	338.054	FALSE	1
2022-09-12	13:25:32	0.405204	1.80243	2.75913	349.112	FALSE	1
2022-09-12	13:25:32	0.567901	2.52614	2.75913	340.58	FALSE	1
2022-09-12	13:25:33	0.321387	1.42959	1.84821	350.542	FALSE	1
2022-09-12	13:25:33	0.533295	2.3722	1.84821	342.953	FALSE	1
2022-09-12	13:25:33	0.357316	1.58941	1.84821	352.131	FALSE	1
2022-09-12	13:25:33	0.449987	2.00163	1.84821	344.954	FALSE	1
2022-09-12	13:25:34	0.725153	3.22563	2.85362	355.357	FALSE	1
2022-09-12	13:25:34	0.758537	3.37412	2.85362	348.328	FALSE	1
2022-09-12	13:25:34	0.440878	1.96111	2.85362	357.318	FALSE	1
2022-09-12	13:25:35	0.397316	1.76734	2.21884	350.096	FALSE	1
2022-09-12	13:25:35	0.512634	2.2803	2.21884	359.598	FALSE	1
2022-09-12	13:25:35	0.496654	2.20922	2.21884	352.305	FALSE	1
2022-09-12	13:25:35	0.588664	2.6185	2.21884	362.217	FALSE	1
2022-09-12	13:25:36	1.24286	5.52849	5.2611	357.834	FALSE	1
2022-09-12	13:25:36	0.885662	3.9396	5.2611	366.156	FALSE	1
2022-09-12	13:25:36	0.966832	4.30066	5.2611	362.134	FALSE	1
2022-09-12	13:25:36	1.63564	7.27565	5.2611	373.432	FALSE	1
2022-09-12	13:25:37	1.62933	7.24759	3.76343	369.382	FALSE	1
2022-09-12	13:25:37	0.752125	3.3456	3.76343	376.778	FALSE	1
2022-09-12	13:25:37	0.560725	2.49422	3.76343	371.876	FALSE	1
2022-09-12	13:25:37	0.442048	1.96632	3.76343	378.744	FALSE	1
2022-09-12	13:25:38	0.496451	2.20831	1.92821	374.084	FALSE	1
2022-09-12	13:25:38	0.362303	1.6116	1.92821	380.356	FALSE	1
2022-09-12	13:25:38	0.441692	1.96473	1.92821	376.049	FALSE	1
2022-09-12	13:25:39	0.510547	2.27102	2.04736	382.627	FALSE	1
2022-09-12	13:25:39	0.448868	1.99665	2.04736	378.046	FALSE	1
2022-09-12	13:25:39	0.429173	1.90905	2.04736	384.536	FALSE	1
2022-09-12	13:25:39	0.452481	2.01273	2.04736	380.058	FALSE	1
2022-09-12	13:25:40	0.437214	1.94482	1.9936	386.48	FALSE	1
2022-09-12	13:25:40	0.443524	1.97288	1.9936	382.031	FALSE	1
2022-09-12	13:25:40	0.447545	1.99077	1.9936	388.471	FALSE	1
2022-09-12	13:25:40	0.46444	2.06592	1.9936	384.097	FALSE	1
2022-09-12	13:25:41	0.469428	2.08811	2.08647	390.559	FALSE	1
2022-09-12	13:25:41	0.469122	2.08675	2.08647	386.184	FALSE	1
2022-09-12	13:25:41	0.471107	2.09558	2.08647	392.655	FALSE	1
2022-09-12	13:25:41	0.466578	2.07543	2.08647	388.259	FALSE	1
2022-09-12	13:25:42	0.460522	2.04849	2.02978	394.703	FALSE	1
2022-09-12	13:25:42	0.449682	2.00028	2.02978	390.26	FALSE	1
2022-09-12	13:25:42	0.45874	2.04057	2.02978	396.744	FALSE	1
2022-09-12	13:25:43	0.406425	1.80786	1.78449	392.068	FALSE	1
2022-09-12	13:25:43	0.417723	1.85812	1.78449	398.602	FALSE	1
2022-09-12	13:25:43	0.413092	1.83752	1.78449	393.905	FALSE	1
2022-09-12	13:25:43	0.367443	1.63446	1.78449	400.237	FALSE	1
2022-09-12	13:25:44	0.35986	1.60073	1.45121	395.506	FALSE	1
2022-09-12	13:25:44	0.331616	1.47509	1.45121	401.712	FALSE	1
2022-09-12	13:25:44	0.296858	1.32048	1.45121	396.826	FALSE	1
2022-09-12	13:25:44	0.316654	1.40854	1.45121	403.12	FALSE	1
2022-09-12	13:25:45	0.464339	2.06547	1.4425	398.892	FALSE	1
2022-09-12	13:25:45	0.307188	1.36643	1.4425	404.487	FALSE	1
2022-09-12	13:25:45	0.199453	0.887207	1.4425	399.779	FALSE	1
2022-09-12	13:25:45	0.326171	1.45087	1.4425	405.938	FALSE	1
2022-09-12	13:25:46	0.177672	0.790321	5.42822	400.569	FALSE	1
2022-09-12	13:25:46	0.770751	3.42845	5.42822	409.366	FALSE	1
2022-09-12	13:25:46	2.71253	12.0659	5.42822	412.635	FALSE	1
2022-09-12	13:25:47	2.07141	9.21405	8.09447	418.58	FALSE	1
2022-09-12	13:25:47	1.66398	7.40172	8.09447	420.037	FALSE	1
2022-09-12	13:25:47	2.46693	10.9734	8.09447	429.553	FALSE	1
2022-09-12	13:25:47	1.07655	4.78871	8.09447	424.826	FALSE	1
2022-09-12	13:25:48	1.24775	5.55024	5.72846	435.104	FALSE	1
2022-09-12	13:25:48	2.03319	9.04404	5.72846	433.87	FALSE	1
2022-09-12	13:25:48	0.582506	2.5911	5.72846	437.695	FALSE	1
2022-09-12	13:25:49	1.29329	5.75281	4.55741	439.622	FALSE	1
2022-09-12	13:25:49	1.69981	7.56109	4.55741	445.256	FALSE	1
2022-09-12	13:25:49	0.751769	3.34402	4.55741	442.966	FALSE	1
2022-09-12	13:25:49	0.90103	4.00796	4.55741	449.264	FALSE	1
2022-09-12	13:25:49	0.476858	2.12116	4.55741	445.088	FALSE	1
2022-09-12	13:25:50	0.700674	3.11674	3.25694	452.381	FALSE	1
2022-09-12	13:25:50	0.747595	3.32545	3.25694	448.413	FALSE	1
2022-09-12	13:25:50	0.748308	3.32862	3.25694	455.709	FALSE	1
2022-09-12	13:25:51	0.546221	2.4297	5.42109	450.843	FALSE	1
2022-09-12	13:25:51	1.2792	5.69014	5.42109	461.399	FALSE	1
2022-09-12	13:25:51	1.86536	8.29749	5.42109	459.14	FALSE	1
2022-09-12	13:25:51	1.18408	5.26702	5.42109	466.666	FALSE	1
2022-09-12	13:25:52	0.2993	1.33135	1.06417	460.472	FALSE	1
2022-09-12	13:25:52	0.245	1.08981	1.06417	467.756	FALSE	1
2022-09-12	13:25:52	0.235738	1.04861	1.06417	461.52	FALSE	1
2022-09-12	13:25:52	0.176909	0.786927	1.06417	468.543	FALSE	1
2022-09-12	13:25:53	0.501438	2.2305	5.76353	463.751	FALSE	1
2022-09-12	13:25:53	1.82938	8.13745	5.76353	476.681	FALSE	1
2022-09-12	13:25:53	1.61558	7.18642	5.76353	470.937	FALSE	1
2022-09-12	13:25:53	1.2364	5.49975	5.76353	482.18	FALSE	1
2022-09-12	13:25:54	1.10719	4.925	5.82828	475.862	FALSE	1
2022-09-12	13:25:54	1.64469	7.31591	5.82828	489.496	FALSE	1
2022-09-12	13:25:54	1.17889	5.24394	5.82828	481.106	FALSE	1
2022-09-12	13:25:55	0.972888	4.3276	2.05766	493.824	FALSE	1
2022-09-12	13:25:55	0.354873	1.57855	2.05766	482.685	FALSE	1
2022-09-12	13:25:55	0.228257	1.01533	2.05766	494.839	FALSE	1
2022-09-12	13:25:55	0.294313	1.30916	2.05766	483.994	FALSE	1
2022-09-12	13:25:56	0.29243	1.30079	1.46259	496.14	FALSE	1
2022-09-12	13:25:56	0.331107	1.47283	1.46259	485.467	FALSE	1
2022-09-12	13:25:56	0.475382	2.11459	1.46259	498.254	FALSE	1
2022-09-12	13:25:56	0.216298	0.962137	1.46259	486.429	FALSE	1
2022-09-12	13:25:57	0.217519	0.967568	0.749856	499.222	FALSE	1
2022-09-12	13:25:57	0.178283	0.793038	0.749856	487.222	FALSE	1
2022-09-12	13:25:57	0.114771	0.510524	0.749856	499.733	FALSE	1
2022-09-12	13:25:57	0.163728	0.728295	0.749856	487.95	FALSE	1
2022-09-12	13:25:58	0.0914633	0.406847	0.65231	500.139	FALSE	1
2022-09-12	13:25:58	0.172227	0.7661	0.65231	488.716	FALSE	1
2022-09-12	13:25:58	0.176247	0.783982	0.65231	500.923	FALSE	1
2022-09-12	13:25:59	0.458079	2.03763	6.5019	490.754	FALSE	1
2022-09-12	13:25:59	0.892888	3.97174	6.5019	504.895	FALSE	1
2022-09-12	13:25:59	1.89121	8.41248	6.5019	499.166	FALSE	1
2022-09-12	13:25:59	2.60459	11.5857	6.5019	516.481	FALSE	1
2022-09-12	13:26:00	0.519148	2.30927	4.90593	501.476	FALSE	1
2022-09-12	13:26:00	0.738893	3.28674	4.90593	519.768	FALSE	1
2022-09-12	13:26:00	0.910954	4.05211	4.90593	505.528	FALSE	1
2022-09-12	13:26:00	2.24261	9.97558	4.90593	529.743	FALSE	1
2022-09-12	13:26:01	2.20525	9.80939	6.66952	515.337	FALSE	1
2022-09-12	13:26:01	2.23508	9.94208	6.66952	539.685	FALSE	1
2022-09-12	13:26:01	1.27441	5.66883	6.66952	521.006	FALSE	1
2022-09-12	13:26:01	0.282761	1.25778	6.66952	540.943	FALSE	1
2022-09-12	13:26:02	0.134313	0.597451	0.965983	521.603	FALSE	1
2022-09-12	13:26:02	0.273753	1.21771	0.965983	542.161	FALSE	1
2022-09-12	13:26:02	0.243422	1.08279	0.965983	522.686	FALSE	1
2022-09-12	13:26:03	0.233855	1.04023	0.867908	543.201	FALSE	1
2022-09-12	13:26:03	0.15757	0.700903	0.867908	523.387	FALSE	1
2022-09-12	13:26:03	0.151005	0.6717	0.867908	543.873	FALSE	1
2022-09-12	13:26:03	0.238028	1.0588	0.867908	524.446	FALSE	1
2022-09-12	13:26:04	0.181947	0.809337	0.17859	544.682	FALSE	1
2022-09-12	13:26:04	0.0245422	0.109169	0.17859	524.555	FALSE	1
2022-09-12	13:26:04	-0.086043	-0.382736	0.17859	544.682	FALSE	1
2022-09-12	13:26:05	-0.138053	-0.614087	0.690218	524.555	FALSE	1
2022-09-12	13:26:05	0.175076	0.778773	0.690218	545.461	FALSE	1
2022-09-12	13:26:05	0.17757	0.789867	0.690218	525.345	FALSE	1
2022-09-12	13:26:05	0.401641	1.78658	0.690218	547.247	FALSE	1
2022-09-12	13:26:05	0.159606	0.709959	0.690218	526.055	FALSE	1
2022-09-12	13:26:06	0.404695	1.80016	1.66344	549.048	FALSE	1
2022-09-12	13:26:06	0.17472	0.77719	1.66344	526.832	FALSE	1
2022-09-12	13:26:06	0.542456	2.41295	1.66344	551.461	FALSE	1
2022-09-12	13:26:07	0.171921	0.764739	1.60712	527.597	FALSE	1
2022-09-12	13:26:07	0.515382	2.29252	1.60712	553.753	FALSE	1
2022-09-12	13:26:07	0.248562	1.10565	1.60712	528.702	FALSE	1
2022-09-12	13:26:07	0.509326	2.26558	1.60712	556.019	FALSE	1
2022-09-12	13:26:08	0.201896	0.898074	1.49207	529.6	FALSE	1
2022-09-12	13:26:08	0.470395	2.09241	1.49207	558.111	FALSE	1
2022-09-12	13:26:08	0.222863	0.991339	1.49207	530.592	FALSE	1
2022-09-12	13:26:08	0.446578	1.98647	1.49207	560.098	FALSE	1
2022-09-12	13:26:09	0.181794	0.808656	1.4073	531.4	FALSE	1
2022-09-12	13:26:09	0.417214	1.85585	1.4073	561.953	FALSE	1
2022-09-12	13:26:09	0.166527	0.740745	1.4073	532.141	FALSE	1
2022-09-12	13:26:09	0.499962	2.22393	1.4073	564.177	FALSE	1
2022-09-12	13:26:10	0.134822	0.599715	0.788885	532.741	FALSE	1
2022-09-12	13:26:10	0.177417	0.789186	0.788885	564.966	FALSE	1
2022-09-12	13:26:10	0.219809	0.977754	0.788885	533.719	FALSE	1
2022-09-12	13:26:11	0.118028	0.525012	-0.280756	565.491	FALSE	1
2022-09-12	13:26:11	-0.12131	-0.539611	-0.280756	533.719	FALSE	1
2022-09-12	13:26:11	-0.14533	-0.646457	-0.280756	565.491	FALSE	1
2022-09-12	13:26:11	-0.103855	-0.461968	-0.280756	533.719	FALSE	1
2022-09-12	13:26:12	-0.0952033	-0.423483	-0.253082	565.491	FALSE	1
2022-09-12	13:26:12	-0.12187	-0.542102	-0.253082	533.719	FALSE	1
2022-09-12	13:26:12	-0.0430405	-0.191453	-0.253082	565.491	FALSE	1
2022-09-12	13:26:12	0.0325321	0.144709	-0.253082	533.863	FALSE	1
2022-09-12	13:26:13	0.0695295	0.309281	0.124185	565.801	FALSE	1
2022-09-12	13:26:13	-0.0508776	-0.226314	0.124185	533.863	FALSE	1
2022-09-12	13:26:13	0.065102	0.289587	0.124185	566.09	FALSE	1
2022-09-12	13:26:14	0.03813	0.16961	1.5511	534.033	FALSE	1
2022-09-12	13:26:14	0.128919	0.573457	1.5511	566.664	FALSE	1
2022-09-12	13:26:14	0.145713	0.648161	1.5511	534.681	FALSE	1
2022-09-12	13:26:14	1.08205	4.81317	1.5511	571.477	FALSE	1
2022-09-12	13:26:15	5.63345	25.0587	11.0953	559.74	1	2
2022-09-12	13:26:15	2.74688	12.2187	11.0953	583.696	FALSE	2
2022-09-12	13:26:15	0.475127	2.11346	11.0953	561.853	FALSE	2
2022-09-12	13:26:15	1.1219	4.99044	11.0953	588.686	FALSE	2
2022-09-12	13:26:16	0.676145	3.00763	4.95827	564.861	FALSE	2
2022-09-12	13:26:16	1.60327	7.13167	4.95827	595.818	FALSE	2
2022-09-12	13:26:16	1.60836	7.15431	4.95827	572.015	FALSE	2
2022-09-12	13:26:16	0.570903	2.53949	4.95827	598.357	FALSE	2
2022-09-12	13:26:17	0.477519	2.1241	2.19262	574.139	FALSE	2
2022-09-12	13:26:17	0.721336	3.20865	2.19262	601.566	FALSE	2
2022-09-12	13:26:17	0.279911	1.2451	2.19262	575.384	FALSE	2
2022-09-12	13:26:18	0.786883	3.50021	3.92369	605.066	FALSE	2
2022-09-12	13:26:18	0.751972	3.34492	3.92369	578.729	FALSE	2
2022-09-12	13:26:18	1.11258	4.94898	3.92369	610.015	FALSE	2
2022-09-12	13:26:18	0.876908	3.90066	3.92369	582.63	FALSE	2
2022-09-12	13:26:19	0.662557	2.94719	4.2246	612.962	FALSE	2
2022-09-12	13:26:19	1.06393	4.73257	4.2246	587.363	FALSE	2
2022-09-12	13:26:19	1.42042	6.31831	4.2246	619.281	FALSE	2
2022-09-12	13:26:19	0.652023	2.90033	4.2246	590.263	FALSE	2
2022-09-12	13:26:20	2.12439	9.44971	6.53268	628.73	FALSE	2
2022-09-12	13:26:20	1.76144	7.83524	6.53268	598.098	FALSE	2
2022-09-12	13:26:20	1.33721	5.94818	6.53268	634.678	FALSE	2
2022-09-12	13:26:20	0.651412	2.89761	6.53268	600.996	FALSE	2
2022-09-12	13:26:21	0.719351	3.19982	5.73079	637.878	FALSE	2
2022-09-12	13:26:21	0.894669	3.97967	5.73079	604.975	FALSE	2
2022-09-12	13:26:21	2.251	10.0129	5.73079	647.891	FALSE	2
2022-09-12	13:26:22	4.62719	20.5827	11.8754	625.558	1	3
2022-09-12	13:26:22	2.06571	9.18869	11.8754	657.08	FALSE	3
2022-09-12	13:26:22	2.19111	9.7465	11.8754	635.305	FALSE	3
2022-09-12	13:26:22	1.79487	7.98394	11.8754	665.064	FALSE	3
2022-09-12	13:26:23	1.27034	5.65073	5.4345	640.955	FALSE	3
2022-09-12	13:26:23	1.23513	5.49411	5.4345	670.558	FALSE	3
2022-09-12	13:26:23	1.2281	5.46283	5.4345	646.418	FALSE	3
2022-09-12	13:26:23	1.15335	5.13033	5.4345	675.688	FALSE	3
2022-09-12	13:26:24	0.784644	3.49025	2.57803	649.908	FALSE	3
2022-09-12	13:26:24	0.856501	3.80989	2.57803	679.498	FALSE	3
2022-09-12	13:26:24	0.347901	1.54753	2.57803	651.456	FALSE	3
2022-09-12	13:26:24	0.329224	1.46445	2.57803	680.963	FALSE	3
2022-09-12	13:26:25	0.356043	1.58375	1.44129	653.04	FALSE	3
2022-09-12	13:26:25	0.331005	1.47238	1.44129	682.435	FALSE	3
2022-09-12	13:26:25	0.285	1.26774	1.44129	654.307	FALSE	3
2022-09-12	13:26:26	0.289987	1.28992	1.23899	683.725	FALSE	3
2022-09-12	13:26:26	0.260115	1.15704	1.23899	655.464	FALSE	3
2022-09-12	13:26:26	0.236298	1.0511	1.23899	684.776	FALSE	3
2022-09-12	13:26:26	0.327748	1.45789	1.23899	656.922	FALSE	3
2022-09-12	13:26:27	0.23986	1.06695	1.23135	685.843	FALSE	3
2022-09-12	13:26:27	0.334568	1.48823	1.23135	658.411	FALSE	3
2022-09-12	13:26:27	0.123066	0.547422	1.23135	686.39	FALSE	3
2022-09-12	13:26:27	0.409784	1.8228	1.23135	660.233	FALSE	3
2022-09-12	13:26:28	1.63024	7.25163	5.05544	693.642	FALSE	3
2022-09-12	13:26:28	1.86261	8.28526	5.05544	668.519	FALSE	3
2022-09-12	13:26:28	0.581336	2.5859	5.05544	696.228	FALSE	3
2022-09-12	13:26:28	0.47187	2.09897	5.05544	670.618	FALSE	3
2022-09-12	13:26:29	0.521285	2.31878	1.81307	698.547	FALSE	3
2022-09-12	13:26:29	0.481031	2.13972	1.81307	672.757	FALSE	3
2022-09-12	13:26:29	0.220471	0.980699	1.81307	699.527	FALSE	3
2022-09-12	13:26:30	0.15416	0.685735	0.917031	673.443	FALSE	3
2022-09-12	13:26:30	0.210293	0.935425	0.917031	700.463	FALSE	3
2022-09-12	13:26:30	0.18785	0.835594	0.917031	674.279	FALSE	3
2022-09-12	13:26:30	0.272328	1.21137	0.917031	701.674	FALSE	3
2022-09-12	13:26:31	0.281234	1.25099	1.12722	675.53	FALSE	3
2022-09-12	13:26:31	0.149937	0.66695	1.12722	702.341	FALSE	3
2022-09-12	13:26:31	0.333346	1.48279	1.12722	677.012	FALSE	3
2022-09-12	13:26:31	0.249122	1.10814	1.12722	703.449	FALSE	3
2022-09-12	13:26:32	0.293295	1.30463	0.951383	678.317	FALSE	3
2022-09-12	13:26:32	0.132125	0.587718	0.951383	704.037	FALSE	3
2022-09-12	13:26:32	0.254517	1.13214	0.951383	679.449	FALSE	3
2022-09-12	13:26:32	0.175585	0.781037	0.951383	704.818	FALSE	3
2022-09-12	13:26:33	0.372634	1.65755	1.56874	681.107	FALSE	3
2022-09-12	13:26:33	0.188461	0.838312	1.56874	705.656	FALSE	3
2022-09-12	13:26:33	0.496909	2.21035	1.56874	683.317	FALSE	3
2022-09-12	13:26:34	0.345204	1.53554	1.6537	707.192	FALSE	3
2022-09-12	13:26:34	0.401082	1.78409	1.6537	685.101	FALSE	3
2022-09-12	13:26:34	0.411412	1.83004	1.6537	709.022	FALSE	3
2022-09-12	13:26:34	0.329377	1.46513	1.6537	686.566	FALSE	3
2022-09-12	13:26:35	0.393855	1.75195	1.74674	710.774	FALSE	3
2022-09-12	13:26:35	0.368206	1.63785	1.74674	688.204	FALSE	3
2022-09-12	13:26:35	0.409071	1.81963	1.74674	712.594	FALSE	3
2022-09-12	13:26:35	0.399606	1.77753	1.74674	689.982	FALSE	3
2022-09-12	13:26:36	0.434211	1.93146	1.59105	714.525	FALSE	3
2022-09-12	13:26:36	0.460318	2.04759	1.59105	692.029	FALSE	3
2022-09-12	13:26:36	0.351107	1.56179	1.59105	716.087	FALSE	3
2022-09-12	13:26:36	0.185102	0.823371	1.59105	692.853	FALSE	3
2022-09-12	13:26:37	-0.0603433	-0.268419	0.897922	716.087	FALSE	3
2022-09-12	13:26:37	0.312023	1.38794	0.897922	694.241	FALSE	3
2022-09-12	13:26:37	0.353906	1.57424	0.897922	717.661	FALSE	3
2022-09-12	13:26:38	0.405102	1.80197	0.892528	696.043	FALSE	3
2022-09-12	13:26:38	0.102049	0.453934	0.892528	718.115	FALSE	3
2022-09-12	13:26:38	0.198792	0.884267	0.892528	696.927	FALSE	3
2022-09-12	13:26:38	0.0966541	0.429937	0.892528	718.545	FALSE	3
2022-09-12	13:26:39	0.0167559	0.0745336	0.110131	697.001	FALSE	3
2022-09-12	13:26:39	-0.000953954	-0.00424338	0.110131	718.545	FALSE	3
2022-09-12	13:26:39	0.0349748	0.155575	0.110131	697.157	FALSE	3
2022-09-12	13:26:39	0.0482572	0.214658	0.110131	718.76	FALSE	3
2022-09-12	13:26:40	0.0337534	0.150142	0.295699	697.307	FALSE	3
2022-09-12	13:26:40	0.0143641	0.0638944	0.295699	718.823	FALSE	3
2022-09-12	13:26:40	0.0982826	0.437181	0.295699	697.744	FALSE	3
2022-09-12	13:26:40	0.119504	0.531578	0.295699	719.355	FALSE	3
2022-09-12	13:26:41	0.122049	0.542898	0.447293	698.287	FALSE	3
2022-09-12	13:26:41	0.0940587	0.418392	0.447293	719.773	FALSE	3
2022-09-12	13:26:41	0.08556	0.380588	0.447293	698.668	FALSE	3
2022-09-12	13:26:42	0.0533972	0.237521	0.0391069	720.011	FALSE	3
2022-09-12	13:26:42	0.0216415	0.0962657	0.0391069	698.764	FALSE	3
2022-09-12	13:26:42	0.00530559	0.0236003	0.0391069	720.035	FALSE	3
2022-09-12	13:26:42	-0.0451778	-0.20096	0.0391069	698.764	FALSE	3
2022-09-12	13:26:43	-0.0149998	-0.0667221	0.418902	720.035	FALSE	3
2022-09-12	13:26:43	0.0864761	0.384663	0.418902	699.149	FALSE	3
2022-09-12	13:26:43	0.285153	1.26842	0.418902	721.303	FALSE	3
2022-09-12	13:26:43	0.0200638	0.0892478	0.418902	699.238	FALSE	3
2022-09-12	13:26:44	-0.00370202	-0.0164673	0.262253	721.303	FALSE	3
2022-09-12	13:26:44	0.00291375	0.0129609	0.262253	699.251	FALSE	3
2022-09-12	13:26:44	0.0457636	0.203566	0.262253	721.506	FALSE	3
2022-09-12	13:26:44	0.190853	0.848952	0.262253	700.1	FALSE	3
2022-09-12	13:26:45	0.0218959	0.0973973	0.492943	721.604	FALSE	3
2022-09-12	13:26:45	0.159758	0.710636	0.492943	700.811	FALSE	3
2022-09-12	13:26:45	0.150802	0.670797	0.492943	722.275	FALSE	3
2022-09-12	13:26:46	0.0660689	0.293888	0.239219	701.104	FALSE	3
2022-09-12	13:26:46	0.0391478	0.174137	0.239219	722.449	FALSE	3
2022-09-12	13:26:46	0.0582827	0.259253	0.239219	701.364	FALSE	3
2022-09-12	13:26:46	0.051616	0.229598	0.239219	722.678	FALSE	3
2022-09-12	13:26:47	0.0421503	0.187493	0.204641	701.551	FALSE	3
2022-09-12	13:26:47	0.0395041	0.175722	0.204641	722.854	FALSE	3
2022-09-12	13:26:47	0.0432699	0.192473	0.204641	701.744	FALSE	3
2022-09-12	13:26:47	0.0590969	0.262875	0.204641	723.117	FALSE	3
2022-09-12	13:26:48	0.0582317	0.259026	0.226938	702.003	FALSE	3
2022-09-12	13:26:48	0.0555346	0.247029	0.226938	723.364	FALSE	3
2022-09-12	13:26:48	0.0411326	0.182966	0.226938	702.186	FALSE	3
2022-09-12	13:26:48	0.0491733	0.218733	0.226938	723.583	FALSE	3
2022-09-12	13:26:49	0.0374175	0.166441	0.170742	702.352	FALSE	3
2022-09-12	13:26:49	0.0394023	0.175269	0.170742	723.758	FALSE	3
2022-09-12	13:26:49	0.0383336	0.170516	0.170742	702.523	FALSE	3
2022-09-12	13:26:50	0.0387407	0.172326	0.160725	723.93	FALSE	3
2022-09-12	13:26:50	0.0375193	0.166893	0.160725	702.689	FALSE	3
2022-09-12	13:26:50	0.0291733	0.129769	0.160725	724.06	FALSE	3
2022-09-12	13:26:50	0.0390969	0.173911	0.160725	702.863	FALSE	3
2022-09-12	13:26:51	0.0399621	0.177759	0.309507	724.238	FALSE	3
2022-09-12	13:26:51	0.0435244	0.193605	0.309507	703.057	FALSE	3
2022-09-12	13:26:51	0.0632699	0.281437	0.309507	724.519	FALSE	3
2022-09-12	13:26:51	0.131565	0.585227	0.309507	703.642	FALSE	3
2022-09-12	13:26:52	0.127697	0.568022	0.618881	725.087	FALSE	3
2022-09-12	13:26:52	0.112278	0.499435	0.618881	704.142	FALSE	3
2022-09-12	13:26:52	0.177417	0.789186	0.618881	725.877	FALSE	3
2022-09-12	13:26:53	0.208359	0.926823	3.08233	705.068	FALSE	3
2022-09-12	13:26:53	0.432023	1.92172	3.08233	727.798	FALSE	3
2022-09-12	13:26:53	1.26001	5.60478	3.08233	710.673	FALSE	3
2022-09-12	13:26:53	0.871361	3.87599	3.08233	731.674	FALSE	3
2022-09-12	13:26:54	0.436705	1.94255	1.42201	712.616	FALSE	3
2022-09-12	13:26:54	0.285814	1.27136	1.42201	732.946	FALSE	3
2022-09-12	13:26:54	0.371616	1.65302	1.42201	714.269	FALSE	3
2022-09-12	13:26:54	0.184593	0.821107	1.42201	733.767	FALSE	3
2022-09-12	13:26:55	0.142252	0.632765	0.829596	714.902	FALSE	3
2022-09-12	13:26:55	0.362507	1.6125	0.829596	735.379	FALSE	3
2022-09-12	13:26:55	0.129733	0.577078	0.829596	715.479	FALSE	3
2022-09-12	13:26:55	0.111514	0.496037	0.829596	735.875	FALSE	3
2022-09-12	13:26:56	0.207646	0.923651	1.10203	716.402	FALSE	3
2022-09-12	13:26:56	0.190395	0.846915	1.10203	736.722	FALSE	3
2022-09-12	13:26:56	0.345204	1.53554	1.10203	717.938	FALSE	3
2022-09-12	13:26:57	0.305509	1.35897	2.41182	738.081	FALSE	3
2022-09-12	13:26:57	0.709071	3.15409	2.41182	721.092	FALSE	3
2022-09-12	13:26:57	0.515738	2.29411	2.41182	740.375	FALSE	3
2022-09-12	13:26:57	0.638486	2.84011	2.41182	723.932	FALSE	3
2022-09-12	13:26:58	0.359097	1.59734	1.71194	741.973	FALSE	3
2022-09-12	13:26:58	0.437163	1.94459	1.71194	725.877	FALSE	3
2022-09-12	13:26:58	0.31757	1.41261	1.71194	743.385	FALSE	3
2022-09-12	13:26:58	0.425611	1.8932	1.71194	727.77	FALSE	3
2022-09-12	13:26:59	0.343626	1.52852	1.35104	744.914	FALSE	3
2022-09-12	13:26:59	0.278893	1.24057	1.35104	729.01	FALSE	3
2022-09-12	13:26:59	0.260725	1.15976	1.35104	746.073	FALSE	3
2022-09-12	13:26:59	0.331667	1.47532	1.35104	730.486	FALSE	3
2022-09-12	13:27:00	0.32841	1.46083	1.21643	747.534	FALSE	3
2022-09-12	13:27:00	0.288562	1.28358	1.21643	731.769	FALSE	3
2022-09-12	13:27:00	0.203422	0.904862	1.21643	748.439	FALSE	3
2022-09-12	13:27:01	0.504135	2.24249	1.92167	734.012	FALSE	3
2022-09-12	13:27:01	0.371514	1.65257	1.92167	750.092	FALSE	3
2022-09-12	13:27:01	0.37645	1.67452	1.92167	735.686	FALSE	3
2022-09-12	13:27:01	0.475942	2.11709	1.92167	752.209	FALSE	3
2022-09-12	13:27:02	0.408461	1.81692	1.78992	737.503	FALSE	3
2022-09-12	13:27:02	0.408206	1.81578	1.78992	754.025	FALSE	3
2022-09-12	13:27:02	0.436807	1.943	1.78992	739.446	FALSE	3
2022-09-12	13:27:02	0.356094	1.58398	1.78992	755.609	FALSE	3
2022-09-12	13:27:03	0.303524	1.35014	1.29943	740.796	FALSE	3
2022-09-12	13:27:03	0.305713	1.35987	1.29943	756.968	FALSE	3
2022-09-12	13:27:03	0.27355	1.21681	1.29943	742.013	FALSE	3
2022-09-12	13:27:03	0.285713	1.27091	1.29943	758.239	FALSE	3
2022-09-12	13:27:04	0.28159	1.25257	1.25838	743.266	FALSE	3
2022-09-12	13:27:04	0.280573	1.24804	1.25838	759.487	FALSE	3
2022-09-12	13:27:04	0.286527	1.27453	1.25838	744.54	FALSE	3
2022-09-12	13:27:05	0.287341	1.27815	1.27215	760.766	FALSE	3
2022-09-12	13:27:05	0.284695	1.26638	1.27215	745.807	FALSE	3
2022-09-12	13:27:05	0.285865	1.27158	1.27215	762.037	FALSE	3
2022-09-12	13:27:05	0.286069	1.27249	1.27215	747.079	FALSE	3
2022-09-12	13:27:06	0.28673	1.27543	1.27973	763.313	FALSE	3
2022-09-12	13:27:06	0.287596	1.27928	1.27973	748.358	FALSE	3
2022-09-12	13:27:06	0.289631	1.28834	1.27973	764.601	FALSE	3
2022-09-12	13:27:06	0.286832	1.27589	1.27973	749.634	FALSE	3
2022-09-12	13:27:07	0.294567	1.31029	1.07385	765.911	FALSE	3
2022-09-12	13:27:07	0.405458	1.80356	1.07385	751.438	FALSE	3
2022-09-12	13:27:07	0.358384	1.59416	1.07385	767.505	FALSE	3
2022-09-12	13:27:07	-0.0927605	-0.412617	1.07385	751.438	FALSE	3
2022-09-12	13:27:08	-0.388638	-1.72874	-1.69184	767.505	FALSE	3
2022-09-12	13:27:08	-0.392302	-1.74504	-1.69184	751.438	FALSE	3
2022-09-12	13:27:08	-0.360089	-1.60175	-1.69184	767.505	FALSE	3
2022-09-12	13:27:09	-0.289198	-1.28641	0.00622637	751.438	FALSE	3
2022-09-12	13:27:09	-0.111946	-0.497958	0.00622637	767.505	FALSE	3
2022-09-12	13:27:09	0.239097	1.06355	0.00622637	752.501	FALSE	3
2022-09-12	13:27:09	0.167646	0.745723	0.00622637	768.251	FALSE	3
2022-09-12	13:27:10	0.485611	2.16009	1.48466	754.662	FALSE	3
2022-09-12	13:27:10	0.195331	0.868871	1.48466	769.12	FALSE	3
2022-09-12	13:27:10	0.424135	1.88664	1.48466	756.548	FALSE	3
2022-09-12	13:27:10	0.229987	1.02303	1.48466	770.143	FALSE	3
2022-09-12	13:27:11	0.349987	1.55681	1.18324	758.105	FALSE	3
2022-09-12	13:27:11	0.17416	0.774699	1.18324	770.918	FALSE	3
2022-09-12	13:27:11	0.317061	1.41035	1.18324	759.515	FALSE	3
2022-09-12	13:27:11	0.222812	0.991112	1.18324	771.909	FALSE	3
2022-09-12	13:27:12	0.384339	1.70962	2.17202	761.225	FALSE	3
2022-09-12	13:27:12	0.305	1.3567	2.17202	773.266	FALSE	3
2022-09-12	13:27:12	0.775534	3.44973	2.17202	764.675	FALSE	3
2022-09-12	13:27:13	0.401997	1.78816	7.54287	775.054	FALSE	3
2022-09-12	13:27:13	0.970344	4.31628	7.54287	768.991	FALSE	3
2022-09-12	13:27:13	1.0819	4.81251	7.54287	779.866	FALSE	3
2022-09-12	13:27:13	4.32861	19.2545	7.54287	788.246	1	4
2022-09-12	13:27:14	2.33828	10.4011	7.94519	790.267	FALSE	4
2022-09-12	13:27:14	1.72495	7.67292	7.94519	795.918	FALSE	4
2022-09-12	13:27:14	1.38953	6.18091	7.94519	796.448	FALSE	4
2022-09-12	13:27:14	1.69187	7.52578	7.94519	803.444	FALSE	4
2022-09-12	13:27:15	0.946679	4.21102	6.83693	800.659	FALSE	4
2022-09-12	13:27:15	2.12856	9.46826	6.83693	812.912	FALSE	4
2022-09-12	13:27:15	1.76195	7.83751	6.83693	808.497	FALSE	4
2022-09-12	13:27:15	1.31085	5.83092	6.83693	818.743	FALSE	4
2022-09-12	13:27:16	0.742303	3.30191	3.41117	811.799	FALSE	4
2022-09-12	13:27:16	0.95416	4.24429	3.41117	822.988	FALSE	4
2022-09-12	13:27:16	0.604135	2.68731	3.41117	814.486	FALSE	4
2022-09-12	13:27:17	0.595382	2.64838	2.14719	825.636	FALSE	4
2022-09-12	13:27:17	0.726527	3.23174	2.14719	817.718	FALSE	4
2022-09-12	13:27:17	0.436145	1.94006	2.14719	827.576	FALSE	4
2022-09-12	13:27:17	0.172786	0.768587	2.14719	818.486	FALSE	4
2022-09-12	13:27:18	0.20154	0.89649	-0.105543	828.473	FALSE	4
2022-09-12	13:27:18	-0.0889437	-0.395639	-0.105543	818.486	FALSE	4
2022-09-12	13:27:18	-0.0882312	-0.39247	-0.105543	828.473	FALSE	4
2022-09-12	13:27:18	-0.119274	-0.530555	-0.105543	818.486	FALSE	4
2022-09-12	13:27:19	-0.182786	-0.813069	3.64961	828.473	FALSE	4
2022-09-12	13:27:19	1.36449	6.06952	3.64961	824.556	FALSE	4
2022-09-12	13:27:19	0.724186	3.22132	3.64961	831.694	FALSE	4
2022-09-12	13:27:19	1.37599	6.12068	3.64961	830.677	FALSE	4
2022-09-12	13:27:20	1.71243	7.61723	3.68629	839.311	FALSE	4
2022-09-12	13:27:20	0.369936	1.64555	3.68629	832.322	FALSE	4
2022-09-12	13:27:20	0.403779	1.79609	3.68629	841.107	FALSE	4
2022-09-12	13:27:21	0.522812	2.32557	1.56695	834.648	FALSE	4
2022-09-12	13:27:21	0.215433	0.958289	1.56695	842.066	FALSE	4
2022-09-12	13:27:21	0.346629	1.54188	1.56695	836.189	FALSE	4
2022-09-12	13:27:21	0.324186	1.44204	1.56695	843.508	FALSE	4
2022-09-12	13:27:22	0.362048	1.61046	1.74504	837.8	FALSE	4
2022-09-12	13:27:22	0.394822	1.75625	1.74504	845.264	FALSE	4
2022-09-12	13:27:22	0.50897	2.264	1.74504	840.064	FALSE	4
2022-09-12	13:27:22	0.303372	1.34946	1.74504	846.613	FALSE	4
2022-09-12	13:27:23	0.543372	2.41703	2.52455	842.481	FALSE	4
2022-09-12	13:27:23	0.668715	2.97458	2.52455	849.588	FALSE	4
2022-09-12	13:27:23	0.638537	2.84034	2.52455	845.321	FALSE	4
2022-09-12	13:27:23	0.419555	1.86626	2.52455	851.454	FALSE	4
2022-09-12	13:27:24	0.46042	2.04804	1.69218	847.369	FALSE	4
2022-09-12	13:27:24	0.303524	1.35014	1.69218	852.804	FALSE	4
2022-09-12	13:27:24	0.377316	1.67838	1.69218	849.048	FALSE	4
2022-09-12	13:27:25	0.419657	1.86672	1.51007	854.671	FALSE	4
2022-09-12	13:27:25	0.504288	2.24317	1.51007	851.291	FALSE	4
2022-09-12	13:27:25	0.247901	1.10271	1.51007	855.774	FALSE	4
2022-09-12	13:27:25	0.186069	0.827672	1.51007	852.119	FALSE	4
2022-09-12	13:27:26	0.352074	1.5661	1.42014	857.34	FALSE	4
2022-09-12	13:27:26	0.271718	1.20866	1.42014	853.327	FALSE	4
2022-09-12	13:27:26	0.378893	1.68539	1.42014	859.025	FALSE	4
2022-09-12	13:27:26	0.274364	1.22043	1.42014	854.548	FALSE	4
2022-09-12	13:27:27	0.436349	1.94097	1.44533	860.966	FALSE	4
2022-09-12	13:27:27	0.231565	1.03005	1.44533	855.578	FALSE	4
2022-09-12	13:27:27	0.490344	2.18115	1.44533	863.147	FALSE	4
2022-09-12	13:27:27	0.141438	0.629145	1.44533	856.207	FALSE	4
2022-09-12	13:27:28	0.4307	1.91584	1.60307	865.063	FALSE	4
2022-09-12	13:27:28	0.282252	1.25551	1.60307	857.462	FALSE	4
2022-09-12	13:27:28	0.368206	1.63785	1.60307	866.701	FALSE	4
2022-09-12	13:27:29	0.209224	0.93067	1.56547	858.393	FALSE	4
2022-09-12	13:27:29	0.495026	2.20197	1.56547	868.903	FALSE	4
2022-09-12	13:27:29	0.249071	1.10792	1.56547	859.501	FALSE	4
2022-09-12	13:27:29	0.454415	2.02133	1.56547	870.924	FALSE	4
2022-09-12	13:27:30	0.19299	0.858458	1.53361	860.359	FALSE	4
2022-09-12	13:27:30	0.434669	1.93349	1.53361	872.858	FALSE	4
2022-09-12	13:27:30	0.363626	1.61748	1.53361	861.977	FALSE	4
2022-09-12	13:27:30	0.387799	1.72501	1.53361	874.583	FALSE	4
2022-09-12	13:27:31	0.505203	2.24724	1.92801	864.224	FALSE	4
2022-09-12	13:27:31	0.45187	2.01001	1.92801	876.593	FALSE	4
2022-09-12	13:27:31	0.375433	1.67	1.92801	865.894	FALSE	4
2022-09-12	13:27:31	0.401234	1.78477	1.92801	878.378	FALSE	4
2022-09-12	13:27:32	0.407799	1.81397	1.76085	867.708	FALSE	4
2022-09-12	13:27:32	0.371412	1.65211	1.76085	880.03	FALSE	4
2022-09-12	13:27:32	0.408359	1.81646	1.76085	869.525	FALSE	4
2022-09-12	13:27:33	0.37187	1.65415	2.39201	881.684	FALSE	4
2022-09-12	13:27:33	0.724898	3.22449	2.39201	872.749	FALSE	4
2022-09-12	13:27:33	0.373702	1.6623	2.39201	883.346	FALSE	4
2022-09-12	13:27:33	0.680522	3.0271	2.39201	875.776	FALSE	4
2022-09-12	13:27:34	1.03197	4.59041	3.86574	887.937	FALSE	4
2022-09-12	13:27:34	0.540522	2.40435	3.86574	878.181	FALSE	4
2022-09-12	13:27:34	0.663677	2.95217	3.86574	890.889	FALSE	4
2022-09-12	13:27:34	1.24006	5.51603	3.86574	883.697	FALSE	4
2022-09-12	13:27:35	1.36322	6.06388	5.14146	896.953	FALSE	4
2022-09-12	13:27:35	1.16322	5.17424	5.14146	888.871	FALSE	4
2022-09-12	13:27:35	0.623321	2.77266	5.14146	899.725	FALSE	4
2022-09-12	13:27:35	1.47365	6.55509	5.14146	895.426	FALSE	4
2022-09-12	13:27:36	0.40383	1.79632	1.78462	901.522	FALSE	4
2022-09-12	13:27:36	0.262557	1.16791	1.78462	896.594	FALSE	4
2022-09-12	13:27:36	0.537214	2.38964	1.78462	903.911	FALSE	4
2022-09-12	13:27:37	0.453193	2.01589	2.43961	898.61	FALSE	4
2022-09-12	13:27:37	0.634567	2.82268	2.43961	906.734	FALSE	4
2022-09-12	13:27:37	0.507748	2.25856	2.43961	900.868	FALSE	4
2022-09-12	13:27:37	0.598283	2.66128	2.43961	909.395	FALSE	4
2022-09-12	13:27:38	0.727646	3.23671	3.20253	904.105	FALSE	4
2022-09-12	13:27:38	0.71757	3.19189	3.20253	912.587	FALSE	4
2022-09-12	13:27:38	0.719606	3.20095	3.20253	907.306	FALSE	4
2022-09-12	13:27:38	0.715025	3.18057	3.20253	915.768	FALSE	4
2022-09-12	13:27:39	0.724237	3.22155	2.09158	910.527	FALSE	4
2022-09-12	13:27:39	0.367697	1.63559	2.09158	917.403	FALSE	4
2022-09-12	13:27:39	0.31869	1.4176	2.09158	911.945	FALSE	4
2022-09-12	13:27:40	0.663066	2.94945	3.26671	920.353	FALSE	4
2022-09-12	13:27:40	0.592633	2.63615	3.26671	914.581	FALSE	4
2022-09-12	13:27:40	0.953651	4.24203	3.26671	924.595	FALSE	4
2022-09-12	13:27:40	0.728206	3.23921	3.26671	917.82	FALSE	4
2022-09-12	13:27:41	0.692125	3.07871	2.03259	927.673	FALSE	4
2022-09-12	13:27:41	0.364237	1.6202	2.03259	919.441	FALSE	4
2022-09-12	13:27:41	0.482863	2.14787	2.03259	929.821	FALSE	4
2022-09-12	13:27:41	0.288562	1.28358	2.03259	920.724	FALSE	4
2022-09-12	13:27:42	0.374008	1.66366	1.70113	931.485	FALSE	4
2022-09-12	13:27:42	0.368359	1.63853	1.70113	922.363	FALSE	4
2022-09-12	13:27:42	0.43355	1.92852	1.70113	933.413	FALSE	4
2022-09-12	13:27:42	0.353804	1.57379	1.70113	923.937	FALSE	4
2022-09-12	13:27:43	0.383575	1.70622	2.02435	935.12	FALSE	4
2022-09-12	13:27:43	0.60388	2.68618	2.02435	926.623	FALSE	4
2022-09-12	13:27:43	0.377825	1.68064	2.02435	936.8	FALSE	4
2022-09-12	13:27:44	0.677875	3.01532	2.46988	929.638	FALSE	4
2022-09-12	13:27:44	0.7193	3.19959	2.46988	940	FALSE	4
2022-09-12	13:27:44	0.436756	1.94278	2.46988	931.581	FALSE	4
2022-09-12	13:27:44	0.387087	1.72184	2.46988	941.722	FALSE	4
2022-09-12	13:27:45	0.226425	1.00718	2.06813	932.588	FALSE	4
2022-09-12	13:27:45	0.790293	3.51538	2.06813	945.237	FALSE	4
2022-09-12	13:27:45	0.436145	1.94006	2.06813	934.528	FALSE	4
2022-09-12	13:27:45	0.406883	1.8099	2.06813	947.047	FALSE	4
2022-09-12	13:27:46	0.481591	2.14221	1.92704	936.67	FALSE	4
2022-09-12	13:27:46	0.354466	1.57674	1.92704	948.624	FALSE	4
2022-09-12	13:27:46	0.469987	2.0906	1.92704	938.761	FALSE	4
2022-09-12	13:27:46	0.426832	1.89863	1.92704	950.522	FALSE	4
2022-09-12	13:27:47	0.494618	2.20016	2.43136	940.961	FALSE	4
2022-09-12	13:27:47	0.422761	1.88053	2.43136	952.403	FALSE	4
2022-09-12	13:27:47	0.722404	3.2134	2.43136	944.174	FALSE	4
2022-09-12	13:27:48	0.214262	0.95308	2.20854	953.356	FALSE	4
2022-09-12	13:27:48	0.567443	2.5241	2.20854	946.699	FALSE	4
2022-09-12	13:27:48	0.761896	3.38907	2.20854	956.745	FALSE	4
2022-09-12	13:27:48	0.442405	1.96791	2.20854	948.666	FALSE	4
2022-09-12	13:27:49	0.320166	1.42416	1.45206	958.169	FALSE	4
2022-09-12	13:27:49	0.23416	1.04159	1.45206	949.708	FALSE	4
2022-09-12	13:27:49	0.220929	0.982736	1.45206	959.152	FALSE	4
2022-09-12	13:27:49	0.530496	2.35975	1.45206	952.068	FALSE	4
2022-09-12	13:27:50	1.28953	5.73609	3.39421	964.888	FALSE	4
2022-09-12	13:27:50	0.951921	4.23433	3.39421	956.302	FALSE	4
2022-09-12	13:27:50	0.45416	2.02019	3.39421	966.908	FALSE	4
2022-09-12	13:27:50	0.356603	1.58624	3.39421	957.888	FALSE	4
2022-09-12	13:27:51	0.278588	1.23922	1.43095	968.147	FALSE	4
2022-09-12	13:27:51	0.404898	1.80107	1.43095	959.689	FALSE	4
2022-09-12	13:27:51	0.28159	1.25257	1.43095	969.4	FALSE	4
2022-09-12	13:27:52	0.312125	1.38839	1.48896	961.078	FALSE	4
2022-09-12	13:27:52	0.315076	1.40152	1.48896	970.802	FALSE	4
2022-09-12	13:27:52	0.326069	1.45042	1.48896	962.528	FALSE	4
2022-09-12	13:27:52	0.385662	1.7155	1.48896	972.517	FALSE	4
2022-09-12	13:27:53	0.397977	1.77028	1.22461	964.299	FALSE	4
2022-09-12	13:27:53	0.273804	1.21793	1.22461	973.735	FALSE	4
2022-09-12	13:27:53	0.195331	0.868871	1.22461	965.167	FALSE	4
2022-09-12	13:27:53	0.23411	1.04137	1.22461	974.776	FALSE	4
2022-09-12	13:27:54	0.286781	1.27566	1.37266	966.443	FALSE	4
2022-09-12	13:27:54	0.304644	1.35512	1.37266	976.132	FALSE	4
2022-09-12	13:27:54	0.336807	1.49818	1.37266	967.941	FALSE	4
2022-09-12	13:27:54	0.30612	1.36168	1.37266	977.493	FALSE	4
2022-09-12	13:27:55	0.317061	1.41035	1.44355	969.352	FALSE	4
2022-09-12	13:27:55	0.327545	1.45699	1.44355	978.95	FALSE	4
2022-09-12	13:27:55	0.328969	1.46332	1.44355	970.815	FALSE	4
2022-09-12	13:27:56	0.340115	1.5129	1.56909	980.463	FALSE	4
2022-09-12	13:27:56	0.336501	1.49682	1.56909	972.312	FALSE	4
2022-09-12	13:27:56	0.369122	1.64193	1.56909	982.105	FALSE	4
2022-09-12	13:27:56	0.365255	1.62473	1.56909	973.936	FALSE	4
2022-09-12	13:27:57	0.403881	1.79654	1.70101	983.902	FALSE	4
2022-09-12	13:27:57	0.379148	1.68653	1.70101	975.623	FALSE	4
2022-09-12	13:27:57	0.364186	1.61997	1.70101	985.522	FALSE	4
2022-09-12	13:27:57	0.382405	1.70101	1.70101	977.324	FALSE	4
2022-09-12	13:27:58	0.398639	1.77323	1.95879	987.295	FALSE	4
2022-09-12	13:27:58	0.406323	1.80741	1.95879	979.131	FALSE	4
2022-09-12	13:27:58	0.462303	2.05642	1.95879	989.351	FALSE	4
2022-09-12	13:27:58	0.49416	2.19812	1.95879	981.33	FALSE	4
2022-09-12	13:27:59	0.503626	2.24023	2.15504	991.591	FALSE	4
2022-09-12	13:27:59	0.46673	2.07611	2.15504	983.406	FALSE	4
2022-09-12	13:27:59	0.483066	2.14877	2.15504	993.74	FALSE	4
2022-09-12	13:28:00	0.46042	2.04804	2.24459	985.454	FALSE	4
2022-09-12	13:28:00	0.513957	2.28618	2.24459	996.026	FALSE	4
2022-09-12	13:28:00	0.499351	2.22121	2.24459	987.675	FALSE	4
2022-09-12	13:28:00	0.544695	2.42291	2.24459	998.449	FALSE	4
2022-09-12	13:28:01	0.544237	2.42088	2.44702	990.096	FALSE	4
2022-09-12	13:28:01	0.528104	2.34911	2.44702	1000.8	FALSE	4
2022-09-12	13:28:01	0.559555	2.48901	2.44702	992.585	FALSE	4
2022-09-12	13:28:01	0.568563	2.52908	2.44702	1003.33	FALSE	4
2022-09-12	13:28:02	0.601743	2.67667	2.60774	995.261	FALSE	4
2022-09-12	13:28:02	0.667748	2.97028	2.60774	1006.3	FALSE	4
2022-09-12	13:28:02	0.590852	2.62823	2.60774	997.89	FALSE	4
2022-09-12	13:28:02	0.484644	2.15579	2.60774	1008.45	FALSE	4
2022-09-12	13:28:03	0.47472	2.11165	2.38405	1000	FALSE	4
2022-09-12	13:28:03	0.523524	2.32874	2.38405	1010.78	FALSE	4
2022-09-12	13:28:03	0.609631	2.71176	2.38405	1002.71	FALSE	4
2022-09-12	13:28:04	0.61131	2.71923	2.63162	1013.5	FALSE	4
2022-09-12	13:28:04	0.605407	2.69297	2.63162	1005.41	FALSE	4
2022-09-12	13:28:04	0.570598	2.53813	2.63162	1016.04	FALSE	4
2022-09-12	13:28:04	0.579147	2.57616	2.63162	1007.98	FALSE	4
2022-09-12	13:28:05	0.548613	2.44034	2.65387	1018.48	FALSE	4
2022-09-12	13:28:05	0.571412	2.54175	2.65387	1010.52	FALSE	4
2022-09-12	13:28:05	0.574211	2.55421	2.65387	1021.03	FALSE	4
2022-09-12	13:28:05	0.692226	3.07916	2.65387	1013.6	FALSE	4
2022-09-12	13:28:06	1.92587	8.56665	5.80711	1029.6	FALSE	4
2022-09-12	13:28:06	2.01039	8.94262	5.80711	1022.55	FALSE	4
2022-09-12	13:28:06	0.635076	2.82495	5.80711	1032.43	FALSE	4
2022-09-12	13:28:06	0.650649	2.89422	5.80711	1025.44	FALSE	4
2022-09-12	13:28:07	0.543626	2.41816	2.55338	1034.84	FALSE	4
2022-09-12	13:28:07	0.583931	2.59744	2.55338	1028.04	FALSE	4
2022-09-12	13:28:07	0.594517	2.64453	2.55338	1037.49	FALSE	4
2022-09-12	13:28:08	0.559962	2.49082	2.81448	1030.53	FALSE	4
2022-09-12	13:28:08	0.603117	2.68279	2.81448	1040.17	FALSE	4
2022-09-12	13:28:08	0.533957	2.37515	2.81448	1032.9	FALSE	4
2022-09-12	13:28:08	0.833855	3.70915	2.81448	1043.88	FALSE	4
2022-09-12	13:28:09	2.28525	10.1652	6.15747	1043.07	FALSE	4
2022-09-12	13:28:09	1.76134	7.83479	6.15747	1051.72	FALSE	4
2022-09-12	13:28:09	0.760471	3.38273	6.15747	1046.45	FALSE	4
2022-09-12	13:28:09	0.729987	3.24713	6.15747	1054.96	FALSE	4
2022-09-12	13:28:10	1.00887	4.48766	13.0453	1050.94	FALSE	4
2022-09-12	13:28:10	7.91344	35.2006	13.0453	1090.16	1	5
2022-09-12	13:28:10	2.14968	9.56221	13.0453	1060.5	FALSE	5
2022-09-12	13:28:10	0.658893	2.93089	13.0453	1093.09	FALSE	5
2022-09-12	13:28:11	0.577672	2.5696	2.36971	1063.07	FALSE	5
2022-09-12	13:28:11	0.555891	2.47271	2.36971	1095.57	FALSE	5
2022-09-12	13:28:11	0.464644	2.06683	2.36971	1065.14	FALSE	5
2022-09-12	13:28:12	0.52388	2.33032	2.35228	1097.9	FALSE	5
2022-09-12	13:28:12	0.575687	2.56077	2.35228	1067.7	FALSE	5
2022-09-12	13:28:12	0.499809	2.22325	2.35228	1100.12	FALSE	5
2022-09-12	13:28:12	0.515891	2.29479	2.35228	1069.99	FALSE	5
2022-09-12	13:28:13	0.47472	2.11165	2.4361	1102.23	FALSE	5
2022-09-12	13:28:13	0.624593	2.77831	2.4361	1072.77	FALSE	5
2022-09-12	13:28:13	0.586323	2.60808	2.4361	1104.84	FALSE	5
2022-09-12	13:28:13	0.505	2.24634	2.4361	1075.02	FALSE	5
2022-09-12	13:28:14	0.589224	2.62099	2.87107	1107.46	FALSE	5
2022-09-12	13:28:14	0.621387	2.76405	2.87107	1077.78	FALSE	5
2022-09-12	13:28:14	0.682507	3.03593	2.87107	1110.5	FALSE	5
2022-09-12	13:28:14	0.688664	3.06332	2.87107	1080.85	FALSE	5
2022-09-12	13:28:15	0.652684	2.90327	2.97028	1113.4	FALSE	5
2022-09-12	13:28:15	0.677672	3.01442	2.97028	1083.86	FALSE	5
2022-09-12	13:28:15	0.672888	2.99314	2.97028	1116.39	FALSE	5
2022-09-12	13:28:16	0.72556	3.22744	3.0576	1087.09	FALSE	5
2022-09-12	13:28:16	0.712837	3.17084	3.0576	1119.56	FALSE	5
2022-09-12	13:28:16	0.677723	3.01465	3.0576	1090.1	FALSE	5
2022-09-12	13:28:16	0.633397	2.81748	3.0576	1122.38	FALSE	5
2022-09-12	13:28:17	0.628511	2.79574	2.73208	1092.9	FALSE	5
2022-09-12	13:28:17	0.577163	2.56734	2.73208	1124.95	FALSE	5
2022-09-12	13:28:17	0.61126	2.71901	2.73208	1095.62	FALSE	5
2022-09-12	13:28:17	0.63986	2.84623	2.73208	1127.79	FALSE	5
2022-09-12	13:28:18	0.640471	2.84894	2.81069	1098.47	FALSE	5
2022-09-12	13:28:18	0.680573	3.02732	2.81069	1130.82	FALSE	5
2022-09-12	13:28:18	0.572837	2.54809	2.81069	1101.01	FALSE	5
2022-09-12	13:28:18	0.633601	2.81838	2.81069	1133.64	FALSE	5
2022-09-12	13:28:19	0.70958	3.15635	2.8082	1104.17	FALSE	5
2022-09-12	13:28:19	0.545611	2.42699	2.8082	1136.07	FALSE	5
2022-09-12	13:28:19	0.638741	2.84125	2.8082	1107.01	FALSE	5
2022-09-12	13:28:20	0.57299	2.54877	2.73038	1138.62	FALSE	5
2022-09-12	13:28:20	0.631768	2.81023	2.73038	1109.82	FALSE	5
2022-09-12	13:28:20	0.60103	2.6735	2.73038	1141.29	FALSE	5
2022-09-12	13:28:20	0.649478	2.88901	2.73038	1112.71	FALSE	5
2022-09-12	13:28:21	0.698028	3.10497	3.22778	1144.39	FALSE	5
2022-09-12	13:28:21	0.670191	2.98114	3.22778	1115.69	FALSE	5
2022-09-12	13:28:21	0.753499	3.35171	3.22778	1147.75	FALSE	5
2022-09-12	13:28:21	0.780827	3.47327	3.22778	1119.16	FALSE	5
2022-09-12	13:28:22	0.652481	2.90237	6.13729	1150.65	FALSE	5
2022-09-12	13:28:22	1.68754	7.50652	6.13729	1126.67	FALSE	5
2022-09-12	13:28:22	1.79915	8.00298	6.13729	1158.65	FALSE	5
2022-09-12	13:28:23	2.15228	9.57377	6.48068	1136.25	FALSE	5
2022-09-12	13:28:23	1.59991	7.11672	6.48068	1165.77	FALSE	5
2022-09-12	13:28:23	1.10882	4.93225	6.48068	1141.18	FALSE	5
2022-09-12	13:28:23	0.966679	4.29998	6.48068	1170.07	FALSE	5
2022-09-12	13:28:24	0.808053	3.59438	3.00667	1144.77	FALSE	5
2022-09-12	13:28:24	0.571463	2.54198	3.00667	1172.61	FALSE	5
2022-09-12	13:28:24	0.710751	3.16156	3.00667	1147.93	FALSE	5
2022-09-12	13:28:24	0.613448	2.72874	3.00667	1175.34	FALSE	5
2022-09-12	13:28:25	1.75818	7.82074	33.9251	1155.75	FALSE	5
2022-09-12	13:28:25	10.0006	44.4847	33.9251	1219.82	1	6
2022-09-12	13:28:25	12.1048	53.8446	33.9251	1209.6	1	7
2022-09-12	13:28:25	6.64322	29.5504	33.9251	1249.37	1	8
2022-09-12	13:28:26	3.44378	15.3186	10.4272	1224.92	1	9
2022-09-12	13:28:26	2.1995	9.78382	10.4272	1259.16	FALSE	9
2022-09-12	13:28:26	1.38912	6.17908	10.4272	1231.1	FALSE	9
2022-09-12	13:28:27	1.20464	5.35848	3.79166	1264.52	FALSE	9
2022-09-12	13:28:27	0.881845	3.92262	3.79166	1235.02	FALSE	9
2022-09-12	13:28:27	0.800623	3.56133	3.79166	1268.08	FALSE	9
2022-09-12	13:28:27	0.522506	2.32421	3.79166	1237.34	FALSE	9
2022-09-12	13:28:28	1.22195	5.43548	7.78147	1273.51	FALSE	9
2022-09-12	13:28:28	3.42261	15.2245	7.78147	1252.57	1	10
2022-09-12	13:28:28	1.33696	5.94707	7.78147	1279.46	FALSE	10
2022-09-12	13:28:28	1.01589	4.51888	7.78147	1257.09	FALSE	10
2022-09-12	13:28:29	0.637264	2.83468	2.5082	1282.3	FALSE	10
2022-09-12	13:28:29	0.470954	2.0949	2.5082	1259.18	FALSE	10
2022-09-12	13:28:29	0.704389	3.13326	2.5082	1285.43	FALSE	10
2022-09-12	13:28:29	0.442863	1.96994	2.5082	1261.15	FALSE	10
2022-09-12	13:28:30	0.709377	3.15545	2.47852	1288.58	FALSE	10
2022-09-12	13:28:30	0.436349	1.94097	2.47852	1263.09	FALSE	10
2022-09-12	13:28:30	0.525865	2.33915	2.47852	1290.92	FALSE	10
2022-09-12	13:28:31	0.225407	1.00266	1.22133	1264.09	FALSE	10
2022-09-12	13:28:31	0.524796	2.3344	1.22133	1293.26	FALSE	10
2022-09-12	13:28:31	0.213702	0.950589	1.22133	1265.05	FALSE	10
2022-09-12	13:28:31	0.134364	0.597678	1.22133	1293.86	FALSE	10
2022-09-12	13:28:32	0.741641	3.29897	3.26246	1268.34	FALSE	10
2022-09-12	13:28:32	1.2508	5.56381	3.26246	1299.42	FALSE	10
2022-09-12	13:28:32	0.495942	2.20605	3.26246	1270.55	FALSE	10
2022-09-12	13:28:32	0.445356	1.98103	3.26246	1301.4	FALSE	10
2022-09-12	13:28:33	0.186018	0.827445	1.72076	1271.38	FALSE	10
2022-09-12	13:28:33	0.387443	1.72342	1.72076	1303.12	FALSE	10
2022-09-12	13:28:33	0.243881	1.08483	1.72076	1272.46	FALSE	10
2022-09-12	13:28:33	0.730038	3.24736	1.72076	1306.37	FALSE	10
2022-09-12	13:28:34	0.749377	3.33338	3.23354	1275.8	FALSE	10
2022-09-12	13:28:34	1.15329	5.13006	3.23354	1311.5	FALSE	10
2022-09-12	13:28:34	0.27813	1.23718	3.23354	1277.03	FALSE	10
2022-09-12	13:28:35	0.486476	2.16394	1.42671	1313.66	FALSE	10
2022-09-12	13:28:35	0.249529	1.10995	1.42671	1278.14	FALSE	10
2022-09-12	13:28:35	0.386476	1.71912	1.42671	1315.38	FALSE	10
2022-09-12	13:28:35	0.160471	0.713807	1.42671	1278.86	FALSE	10
2022-09-12	13:28:36	0.385814	1.71618	2.66552	1317.1	FALSE	10
2022-09-12	13:28:36	0.398283	1.77164	2.66552	1280.63	FALSE	10
2022-09-12	13:28:36	0.847901	3.77163	2.66552	1320.87	FALSE	10
2022-09-12	13:28:36	0.764949	3.40265	2.66552	1284.03	FALSE	10
2022-09-12	13:28:37	1.06648	4.74392	3.0408	1325.62	FALSE	10
2022-09-12	13:28:37	0.533753	2.37424	3.0408	1286.41	FALSE	10
2022-09-12	13:28:37	0.587036	2.61125	3.0408	1328.23	FALSE	10
2022-09-12	13:28:37	0.547137	2.43377	3.0408	1288.84	FALSE	10
2022-09-12	13:28:38	0.497519	2.21306	3.17364	1330.44	FALSE	10
2022-09-12	13:28:38	0.655738	2.91685	3.17364	1291.76	FALSE	10
2022-09-12	13:28:38	0.987138	4.39099	3.17364	1334.83	FALSE	10
2022-09-12	13:28:39	1.94841	8.66692	10.9646	1300.42	FALSE	10
2022-09-12	13:28:39	3.46693	15.4216	10.9646	1350.25	1	11
2022-09-12	13:28:39	2.03548	9.05422	10.9646	1309.48	FALSE	11
2022-09-12	13:28:39	2.40902	10.7158	10.9646	1360.97	FALSE	11
2022-09-12	13:28:40	2.08525	9.27561	4.75923	1318.75	FALSE	11
2022-09-12	13:28:40	1.46067	6.49735	4.75923	1367.47	FALSE	11
2022-09-12	13:28:40	0.496909	2.21035	4.75923	1320.96	FALSE	11
2022-09-12	13:28:40	0.236858	1.05359	4.75923	1368.52	FALSE	11
2022-09-12	13:28:41	0.361285	1.60707	2.72291	1322.57	FALSE	11
2022-09-12	13:28:41	0.643626	2.86298	2.72291	1371.38	FALSE	11
2022-09-12	13:28:41	1.0335	4.59721	2.72291	1327.17	FALSE	11
2022-09-12	13:28:41	0.41014	1.82438	2.72291	1373.21	FALSE	11
2022-09-12	13:28:42	0.54729	2.43446	2.0494	1329.6	FALSE	11
2022-09-12	13:28:42	0.491005	2.18409	2.0494	1375.39	FALSE	11
2022-09-12	13:28:42	0.343881	1.52965	2.0494	1331.13	FALSE	11
2022-09-12	13:28:43	0.17355	0.771985	1.86955	1376.16	FALSE	11
2022-09-12	13:28:43	0.211005	0.938592	1.86955	1332.07	FALSE	11
2022-09-12	13:28:43	0.948715	4.22007	1.86955	1380.38	FALSE	11
2022-09-12	13:28:43	0.347901	1.54753	1.86955	1333.62	FALSE	11
2022-09-12	13:28:44	1.4851	6.60602	17.0866	1386.99	FALSE	11
2022-09-12	13:28:44	2.84113	12.6379	17.0866	1346.26	FALSE	11
2022-09-12	13:28:44	5.58479	24.8423	17.0866	1411.83	1	12
2022-09-12	13:28:44	5.45395	24.2603	17.0866	1370.52	1	13
2022-09-12	13:28:45	2.94352	13.0934	5.25227	1424.92	FALSE	13
2022-09-12	13:28:45	0.711412	3.1645	5.25227	1373.68	FALSE	13
2022-09-12	13:28:45	0.612583	2.72489	5.25227	1427.65	FALSE	13
2022-09-12	13:28:45	0.455534	2.02631	5.25227	1375.71	FALSE	13
2022-09-12	13:28:46	0.366272	1.62925	1.33542	1429.28	FALSE	13
2022-09-12	13:28:46	0.2193	0.97549	1.33542	1376.68	FALSE	13
2022-09-12	13:28:46	0.315076	1.40152	1.33542	1430.68	FALSE	13
2022-09-12	13:28:47	0.249275	1.10883	1.44646	1377.79	FALSE	13
2022-09-12	13:28:47	0.469682	2.08924	1.44646	1432.77	FALSE	13
2022-09-12	13:28:47	0.194262	0.864116	1.44646	1378.66	FALSE	13
2022-09-12	13:28:47	0.387494	1.72365	1.44646	1434.49	FALSE	13
2022-09-12	13:28:48	0.439962	1.95704	0.700055	1380.61	FALSE	13
2022-09-12	13:28:48	0.0824048	0.366553	0.700055	1434.86	FALSE	13
2022-09-12	13:28:48	-0.0541855	-0.241028	0.700055	1380.61	FALSE	13
2022-09-12	13:28:48	0.161336	0.717655	0.700055	1435.58	FALSE	13
2022-09-12	13:28:49	0.177774	0.790774	0.992924	1381.4	FALSE	13
2022-09-12	13:28:49	0.197316	0.877701	0.992924	1436.45	FALSE	13
2022-09-12	13:28:49	0.290242	1.29105	0.992924	1382.69	FALSE	13
2022-09-12	13:28:49	0.227545	1.01217	0.992924	1437.47	FALSE	13
2022-09-12	13:28:50	0.254822	1.1335	1.10867	1383.83	FALSE	13
2022-09-12	13:28:50	0.278995	1.24103	1.10867	1438.71	FALSE	13
2022-09-12	13:28:50	0.213906	0.951497	1.10867	1384.78	FALSE	13
2022-09-12	13:28:51	0.241947	1.07623	1.36366	1439.78	FALSE	13
2022-09-12	13:28:51	0.278995	1.24103	1.36366	1386.02	FALSE	13
2022-09-12	13:28:51	0.324084	1.44159	1.36366	1441.23	FALSE	13
2022-09-12	13:28:51	0.381234	1.69581	1.36366	1387.72	FALSE	13
2022-09-12	13:28:52	0.716247	3.18601	3.17418	1444.41	FALSE	13
2022-09-12	13:28:52	0.732023	3.25618	3.17418	1390.97	FALSE	13
2022-09-12	13:28:52	0.83416	3.71051	3.17418	1448.12	FALSE	13
2022-09-12	13:28:52	0.571921	2.54402	3.17418	1393.52	FALSE	13
2022-09-12	13:28:53	0.297061	1.32139	1.06083	1449.44	FALSE	13
2022-09-12	13:28:53	0.177825	0.791001	1.06083	1394.31	FALSE	13
2022-09-12	13:28:53	0.189835	0.844424	1.06083	1450.29	FALSE	13
2022-09-12	13:28:53	0.289224	1.28653	1.06083	1395.59	FALSE	13
2022-09-12	13:28:54	0.567799	2.52568	1.95213	1452.81	FALSE	13
2022-09-12	13:28:54	0.289122	1.28607	1.95213	1396.88	FALSE	13
2022-09-12	13:28:54	0.459657	2.04465	1.95213	1454.86	FALSE	13
2022-09-12	13:28:55	0.503168	2.23819	4.9521	1399.12	FALSE	13
2022-09-12	13:28:55	1.48846	6.62097	4.9521	1461.48	FALSE	13
2022-09-12	13:28:55	1.9709	8.76696	4.9521	1407.88	FALSE	13
2022-09-12	13:28:55	0.490598	2.18228	4.9521	1463.66	FALSE	13
2022-09-12	13:28:56	0.299351	1.33157	1.47555	1409.22	FALSE	13
2022-09-12	13:28:56	0.408257	1.81601	1.47555	1465.48	FALSE	13
2022-09-12	13:28:56	0.367138	1.6331	1.47555	1410.85	FALSE	13
2022-09-12	13:28:56	0.252125	1.1215	1.47555	1466.6	FALSE	13
2022-09-12	13:28:57	0.348817	1.55161	1.07334	1412.4	FALSE	13
2022-09-12	13:28:57	0.168308	0.748668	1.07334	1467.35	FALSE	13
2022-09-12	13:28:57	0.297824	1.32478	1.07334	1413.73	FALSE	13
2022-09-12	13:28:57	0.150242	0.668306	1.07334	1468.02	FALSE	13
2022-09-12	13:28:58	0.362099	1.61069	1.21982	1415.34	FALSE	13
2022-09-12	13:28:58	0.12958	0.576398	1.21982	1468.59	FALSE	13
2022-09-12	13:28:58	0.331005	1.47238	1.21982	1416.81	FALSE	13
2022-09-12	13:28:59	0.24556	1.0923	1.92869	1469.69	FALSE	13
2022-09-12	13:28:59	0.434618	1.93327	1.92869	1418.74	FALSE	13
2022-09-12	13:28:59	0.497316	2.21216	1.92869	1471.9	FALSE	13
2022-09-12	13:28:59	0.556857	2.47701	1.92869	1421.22	FALSE	13
2022-09-12	13:29:00	0.372379	1.65642	5.06591	1473.55	FALSE	13
2022-09-12	13:29:00	0.745255	3.31504	5.06591	1424.53	FALSE	13
2022-09-12	13:29:00	2.07416	9.22628	5.06591	1482.78	FALSE	13
2022-09-12	13:29:00	1.36368	6.06592	5.06591	1430.6	FALSE	13
2022-09-12	13:29:01	1.11335	4.9524	6.17429	1487.73	FALSE	13
2022-09-12	13:29:01	1.70403	7.57987	6.17429	1438.18	FALSE	13
2022-09-12	13:29:01	1.15508	5.13803	6.17429	1492.87	FALSE	13
2022-09-12	13:29:01	1.57971	7.02687	6.17429	1445.21	FALSE	13
2022-09-12	13:29:02	1.27665	5.67879	5.77344	1498.55	FALSE	13
2022-09-12	13:29:02	1.42663	6.34594	5.77344	1451.55	FALSE	13
2022-09-12	13:29:02	1.1905	5.29558	5.77344	1503.84	FALSE	13
2022-09-12	13:29:03	0.511056	2.27328	2.54894	1453.83	FALSE	13
2022-09-12	13:29:03	0.672735	2.99246	2.54894	1506.84	FALSE	13
2022-09-12	13:29:03	0.375636	1.6709	2.54894	1455.5	FALSE	13
2022-09-12	13:29:03	0.732684	3.25912	2.54894	1510.1	FALSE	13
2022-09-12	13:29:04	0.796196	3.54164	4.72245	1459.04	FALSE	13
2022-09-12	13:29:04	1.3364	5.94457	4.72245	1516.04	FALSE	13
2022-09-12	13:29:04	1.34617	5.98803	4.72245	1465.03	FALSE	13
2022-09-12	13:29:04	0.76785	3.41555	4.72245	1519.46	FALSE	13
2022-09-12	13:29:05	0.609122	2.7095	2.43236	1467.74	FALSE	13
2022-09-12	13:29:05	0.515178	2.29161	2.43236	1521.75	FALSE	13
2022-09-12	13:29:05	0.532634	2.36926	2.43236	1470.11	FALSE	13
2022-09-12	13:29:05	0.530344	2.35908	2.43236	1524.11	FALSE	13

## Sheet: Ranger_martin_2022912132344 (2)
Date	Time	Lbs	Newtons	Total Force x time	Total steps > 13.345		**GoPro Fitting: 13:09
2022-09-12	13:24:05	0.328308	1.46038	1.46038	FALSE	0			Total Force x time	1524.11
2022-09-12	13:24:05	0.300267	1.33565	1.33565	FALSE	0			Total Time Steps Force >3	13
2022-09-12	13:24:05	0.297468	1.3232	2.78358	FALSE	0
2022-09-12	13:24:05	0.383982	1.70803	3.04368	FALSE	0
2022-09-12	13:24:06	0.647697	2.88109	5.66466	FALSE	0
2022-09-12	13:24:06	0.502354	2.23457	5.27825	FALSE	0
2022-09-12	13:24:06	0.780929	3.47373	9.13839	FALSE	0
2022-09-12	13:24:06	0.441743	1.96496	7.24321	FALSE	0
2022-09-12	13:24:07	0.410445	1.82574	10.9641	FALSE	0
2022-09-12	13:24:07	0.2107	0.937236	8.18044	FALSE	0
2022-09-12	13:24:07	0.220725	0.981829	11.946	FALSE	0
2022-09-12	13:24:07	0.227748	1.01307	9.19351	FALSE	0
2022-09-12	13:24:08	0.239758	1.06649	13.0125	FALSE	0
2022-09-12	13:24:08	0.214262	0.95308	10.1466	FALSE	0
2022-09-12	13:24:08	0.20729	0.922067	13.9345	FALSE	0
2022-09-12	13:24:09	0.280725	1.24872	11.3953	FALSE	0
2022-09-12	13:24:09	0.345814	1.53825	15.4728	FALSE	0
2022-09-12	13:24:09	0.329682	1.46649	12.8618	FALSE	0
2022-09-12	13:24:09	0.267952	1.1919	16.6647	FALSE	0
2022-09-12	13:24:10	0.441031	1.96179	14.8236	FALSE	0
2022-09-12	13:24:10	0.398588	1.773	18.4377	FALSE	0
2022-09-12	13:24:10	0.381234	1.69581	16.5194	FALSE	0
2022-09-12	13:24:10	0.340623	1.51516	19.9528	FALSE	0
2022-09-12	13:24:11	0.384288	1.70939	18.2288	FALSE	0
2022-09-12	13:24:11	0.388512	1.72818	21.681	FALSE	0
2022-09-12	13:24:11	0.393092	1.74855	19.9773	FALSE	0
2022-09-12	13:24:11	0.409784	1.8228	23.5038	FALSE	0
2022-09-12	13:24:12	0.385764	1.71596	21.6933	FALSE	0
2022-09-12	13:24:12	0.402761	1.79156	25.2954	FALSE	0
2022-09-12	13:24:12	0.403881	1.79654	23.4898	FALSE	0
2022-09-12	13:24:13	0.391921	1.74334	27.0387	FALSE	0
2022-09-12	13:24:13	0.386323	1.71844	25.2083	FALSE	0
2022-09-12	13:24:13	0.393244	1.74923	28.7879	FALSE	0
2022-09-12	13:24:13	0.411005	1.82823	27.0365	FALSE	0
2022-09-12	13:24:14	0.420013	1.8683	30.6562	FALSE	0
2022-09-12	13:24:14	0.398995	1.77481	28.8113	FALSE	0
2022-09-12	13:24:14	0.396349	1.76304	32.4193	FALSE	0
2022-09-12	13:24:14	0.439708	1.95591	30.7672	FALSE	0
2022-09-12	13:24:15	0.453499	2.01725	34.4365	FALSE	0
2022-09-12	13:24:15	0.414059	1.84182	32.6091	FALSE	0
2022-09-12	13:24:15	0.285305	1.26909	35.7056	FALSE	0
2022-09-12	13:24:15	0.363677	1.61771	34.2268	FALSE	0
2022-09-12	13:24:16	0.246069	1.09456	36.8002	FALSE	0
2022-09-12	13:24:16	0.435687	1.93802	36.1648	FALSE	0
2022-09-12	13:24:16	0.41986	1.86762	38.6678	FALSE	0
2022-09-12	13:24:17	0.342506	1.52354	37.6883	FALSE	0
2022-09-12	13:24:17	0.468155	2.08245	40.7503	FALSE	0
2022-09-12	13:24:17	0.493651	2.19586	39.8842	FALSE	0
2022-09-12	13:24:17	0.381234	1.69581	42.4461	FALSE	0
2022-09-12	13:24:18	0.425916	1.89456	41.7787	FALSE	0
2022-09-12	13:24:18	0.353753	1.57356	44.0196	FALSE	0
2022-09-12	13:24:18	0.357417	1.58986	43.3686	FALSE	0
2022-09-12	13:24:18	0.512328	2.27894	46.2986	FALSE	0
2022-09-12	13:24:19	0.349173	1.55319	44.9218	FALSE	0
2022-09-12	13:24:19	0.574924	2.55738	48.856	FALSE	0
2022-09-12	13:24:19	0.336043	1.49479	46.4166	FALSE	0
2022-09-12	13:24:19	1.07701	4.79076	53.6467	FALSE	0
2022-09-12	13:24:20	0.960776	4.27372	50.6903	FALSE	0
2022-09-12	13:24:20	1.9249	8.56234	62.209	FALSE	0
2022-09-12	13:24:20	1.94215	8.63907	59.3294	FALSE	0
2022-09-12	13:24:21	1.19467	5.31413	67.5232	FALSE	0
2022-09-12	13:24:21	0.446374	1.98556	61.3149	FALSE	0
2022-09-12	13:24:21	0.962812	4.28278	71.806	FALSE	0
2022-09-12	13:24:21	0.413906	1.84114	63.1561	FALSE	0
2022-09-12	13:24:22	0.389784	1.73384	73.5398	FALSE	0
2022-09-12	13:24:22	0.406883	1.8099	64.966	FALSE	0
2022-09-12	13:24:22	0.457163	2.03355	75.5733	FALSE	0
2022-09-12	13:24:22	0.721336	3.20865	68.1746	FALSE	0
2022-09-12	13:24:23	0.496807	2.2099	77.7832	FALSE	0
2022-09-12	13:24:23	0.517417	2.30157	70.4762	FALSE	0
2022-09-12	13:24:23	0.667341	2.96847	80.7517	FALSE	0
2022-09-12	13:24:23	0.707087	3.14526	73.6215	FALSE	0
2022-09-12	13:24:24	0.74159	3.29874	84.0505	FALSE	0
2022-09-12	13:24:24	0.777723	3.45947	77.0809	FALSE	0
2022-09-12	13:24:24	0.658842	2.93066	86.9811	FALSE	0
2022-09-12	13:24:25	0.615077	2.73599	79.8169	FALSE	0
2022-09-12	13:24:25	0.599911	2.66852	89.6496	FALSE	0
2022-09-12	13:24:25	0.548715	2.44079	82.2577	FALSE	0
2022-09-12	13:24:25	0.524236	2.33191	91.9815	FALSE	0
2022-09-12	13:24:26	0.487137	2.16688	84.4246	FALSE	0
2022-09-12	13:24:26	0.510801	2.27215	94.2537	FALSE	0
2022-09-12	13:24:26	0.524593	2.33349	86.7581	FALSE	0
2022-09-12	13:24:26	0.465509	2.07068	96.3244	FALSE	0
2022-09-12	13:24:27	0.417367	1.85653	88.6146	FALSE	0
2022-09-12	13:24:27	0.406018	1.80605	98.1304	FALSE	0
2022-09-12	13:24:27	0.417926	1.85902	90.4736	FALSE	0
2022-09-12	13:24:27	0.474262	2.10961	100.24	FALSE	0
2022-09-12	13:24:28	0.549377	2.44374	92.9174	FALSE	0
2022-09-12	13:24:28	0.50159	2.23117	102.471	FALSE	0
2022-09-12	13:24:28	0.440878	1.96111	94.8785	FALSE	0
2022-09-12	13:24:29	0.40729	1.81171	104.283	FALSE	0
2022-09-12	13:24:29	0.435738	1.93825	96.8167	FALSE	0
2022-09-12	13:24:29	0.451565	2.00865	106.292	FALSE	0
2022-09-12	13:24:29	0.342456	1.52331	98.34	FALSE	0
2022-09-12	13:24:30	1.02408	4.55531	110.847	FALSE	0
2022-09-12	13:24:30	0.825967	3.67407	102.014	FALSE	0
2022-09-12	13:24:30	1.88877	8.40163	119.248	FALSE	0
2022-09-12	13:24:30	1.26017	5.60549	107.62	FALSE	0
2022-09-12	13:24:31	2.64276	11.7555	131.004	FALSE	0
2022-09-12	13:24:31	3.67523	16.3482	123.968	1	1
2022-09-12	13:24:31	2.90032	12.9012	143.905	FALSE	1
2022-09-12	13:24:31	2.60286	11.578	135.546	FALSE	1
2022-09-12	13:24:32	1.25513	5.58307	149.488	FALSE	1
2022-09-12	13:24:32	0.569376	2.5327	138.078	FALSE	1
2022-09-12	13:24:32	0.32383	1.44046	150.929	FALSE	1
2022-09-12	13:24:33	0.374517	1.66593	139.744	FALSE	1
2022-09-12	13:24:33	0.185713	0.826089	151.755	FALSE	1
2022-09-12	13:24:33	0.324135	1.44182	141.186	FALSE	1
2022-09-12	13:24:33	0.252532	1.12331	152.878	FALSE	1
2022-09-12	13:24:34	0.225763	1.00424	142.19	FALSE	1
2022-09-12	13:24:34	0.216909	0.964855	153.843	FALSE	1
2022-09-12	13:24:34	0.275636	1.22608	143.417	FALSE	1
2022-09-12	13:24:34	0.336247	1.49569	155.339	FALSE	1
2022-09-12	13:24:35	0.576959	2.56643	145.983	FALSE	1
2022-09-12	13:24:35	0.444084	1.97537	157.314	FALSE	1
2022-09-12	13:24:35	0.393448	1.75014	147.733	FALSE	1
2022-09-12	13:24:35	0.564237	2.50984	159.824	FALSE	1
2022-09-12	13:24:36	0.412634	1.83548	149.569	FALSE	1
2022-09-12	13:24:36	0.843066	3.75013	163.574	FALSE	1
2022-09-12	13:24:36	0.531311	2.36338	151.932	FALSE	1
2022-09-12	13:24:37	0.622405	2.76858	166.343	FALSE	1
2022-09-12	13:24:37	0.403728	1.79586	153.728	FALSE	1
2022-09-12	13:24:37	0.558842	2.48584	168.828	FALSE	1
2022-09-12	13:24:37	0.355789	1.58262	155.31	FALSE	1
2022-09-12	13:24:38	0.406883	1.8099	170.638	FALSE	1
2022-09-12	13:24:38	0.37131	1.65166	156.962	FALSE	1
2022-09-12	13:24:38	0.33126	1.47351	172.112	FALSE	1
2022-09-12	13:24:38	0.442659	1.96904	158.931	FALSE	1
2022-09-12	13:24:39	0.621896	2.76632	174.878	FALSE	1
2022-09-12	13:24:39	0.509326	2.26558	161.197	FALSE	1
2022-09-12	13:24:39	0.305611	1.35942	176.238	FALSE	1
2022-09-12	13:24:39	0.614313	2.73259	163.929	FALSE	1
2022-09-12	13:24:40	0.396094	1.76191	178	FALSE	1
2022-09-12	13:24:40	0.263677	1.17289	165.102	FALSE	1
2022-09-12	13:24:40	0.442303	1.96745	179.967	FALSE	1
2022-09-12	13:24:41	0.311107	1.38387	166.486	FALSE	1
2022-09-12	13:24:41	0.437774	1.94731	181.914	FALSE	1
2022-09-12	13:24:41	0.369733	1.64465	168.131	FALSE	1
2022-09-12	13:24:41	0.355331	1.58058	183.495	FALSE	1
2022-09-12	13:24:42	0.396756	1.76485	169.896	FALSE	1
2022-09-12	13:24:42	0.396858	1.7653	185.26	FALSE	1
2022-09-12	13:24:42	0.418028	1.85947	171.755	FALSE	1
2022-09-12	13:24:42	0.597265	2.65675	187.917	FALSE	1
2022-09-12	13:24:43	0.78271	3.48165	175.237	FALSE	1
2022-09-12	13:24:43	0.925509	4.11685	192.034	FALSE	1
2022-09-12	13:24:43	0.433041	1.92625	177.163	FALSE	1
2022-09-12	13:24:44	0.430903	1.91674	193.951	FALSE	1
2022-09-12	13:24:44	0.378486	1.68358	178.847	FALSE	1
2022-09-12	13:24:44	0.438333	1.94979	195.9	FALSE	1
2022-09-12	13:24:44	0.358181	1.59326	180.44	FALSE	1
2022-09-12	13:24:45	0.441438	1.9636	197.864	FALSE	1
2022-09-12	13:24:45	0.138283	0.61511	181.055	FALSE	1
2022-09-12	13:24:45	0.115789	0.515053	198.379	FALSE	1
2022-09-12	13:24:45	0.183575	0.816578	181.871	FALSE	1
2022-09-12	13:24:46	0.376858	1.67634	200.055	FALSE	1
2022-09-12	13:24:46	0.374211	1.66457	183.536	FALSE	1
2022-09-12	13:24:46	0.373397	1.66094	201.716	FALSE	1
2022-09-12	13:24:46	0.364491	1.62133	185.157	FALSE	1
2022-09-12	13:24:47	0.327036	1.45472	203.171	FALSE	1
2022-09-12	13:24:47	0.493244	2.19405	187.351	FALSE	1
2022-09-12	13:24:47	0.635789	2.82812	205.999	FALSE	1
2022-09-12	13:24:48	0.78902	3.50972	190.861	FALSE	1
2022-09-12	13:24:48	0.499402	2.22144	208.221	FALSE	1
2022-09-12	13:24:48	0.470598	2.09331	192.954	FALSE	1
2022-09-12	13:24:48	0.395992	1.76145	209.982	FALSE	1
2022-09-12	13:24:49	0.45874	2.04057	194.995	FALSE	1
2022-09-12	13:24:49	0.602964	2.6821	212.664	FALSE	1
2022-09-12	13:24:49	0.869682	3.86852	198.864	FALSE	1
2022-09-12	13:24:49	0.542303	2.41227	215.076	FALSE	1
2022-09-12	13:24:50	0.543168	2.41612	201.28	FALSE	1
2022-09-12	13:24:50	0.345967	1.53893	216.615	FALSE	1
2022-09-12	13:24:50	0.305356	1.35828	202.638	FALSE	1
2022-09-12	13:24:50	0.439351	1.95432	218.57	FALSE	1
2022-09-12	13:24:51	0.172583	0.767684	203.406	FALSE	1
2022-09-12	13:24:51	0.332786	1.4803	220.05	FALSE	1
2022-09-12	13:24:51	0.377519	1.67928	205.085	FALSE	1
2022-09-12	13:24:52	-0.00436363	-0.0194103	220.05	FALSE	1
2022-09-12	13:24:52	-0.0402415	-0.179002	205.085	FALSE	1
2022-09-12	13:24:52	0.0616414	0.274193	220.324	FALSE	1
2022-09-12	13:24:52	0.0414888	0.18455	205.269	FALSE	1
2022-09-12	13:24:53	0.240929	1.0717	221.396	FALSE	1
2022-09-12	13:24:53	0.0525321	0.233673	205.503	FALSE	1
2022-09-12	13:24:53	0.128308	0.57074	221.967	FALSE	1
2022-09-12	13:24:53	-0.00802776	-0.0357091	205.503	FALSE	1
2022-09-12	13:24:54	0.368919	1.64103	223.608	FALSE	1
2022-09-12	13:24:54	0.228461	1.01624	206.519	FALSE	1
2022-09-12	13:24:54	0.402303	1.78952	225.397	FALSE	1
2022-09-12	13:24:54	0.235891	1.04929	207.569	FALSE	1
2022-09-12	13:24:55	0.458333	2.03876	227.436	FALSE	1
2022-09-12	13:24:55	0.279962	1.24533	208.814	FALSE	1
2022-09-12	13:24:55	0.524542	2.33327	229.769	FALSE	1
2022-09-12	13:24:56	0.415891	1.84997	210.664	FALSE	1
2022-09-12	13:24:56	0.559809	2.49014	232.259	FALSE	1
2022-09-12	13:24:56	0.620522	2.76021	213.424	FALSE	1
2022-09-12	13:24:56	0.471819	2.09875	234.358	FALSE	1
2022-09-12	13:24:57	0.646578	2.87611	216.3	FALSE	1
2022-09-12	13:24:57	1.01085	4.49646	238.854	FALSE	1
2022-09-12	13:24:57	1.09609	4.87563	221.176	FALSE	1
2022-09-12	13:24:57	0.889987	3.95884	242.813	FALSE	1
2022-09-12	13:24:58	1.12001	4.98203	226.158	FALSE	1
2022-09-12	13:24:58	0.937366	4.16959	246.983	FALSE	1
2022-09-12	13:24:58	0.775687	3.45041	229.608	FALSE	1
2022-09-12	13:24:58	0.544695	2.42291	249.406	FALSE	1
2022-09-12	13:24:59	0.350038	1.55704	231.165	FALSE	1
2022-09-12	13:24:59	0.330852	1.4717	250.877	FALSE	1
2022-09-12	13:24:59	0.511463	2.27509	233.44	FALSE	1
2022-09-12	13:25:00	0.183066	0.814314	251.692	FALSE	1
2022-09-12	13:25:00	0.136094	0.605373	234.046	FALSE	1
2022-09-12	13:25:00	-0.0517936	-0.230388	251.692	FALSE	1
2022-09-12	13:25:00	-0.141819	-0.630839	234.046	FALSE	1
2022-09-12	13:25:01	0.0321249	0.142898	251.835	FALSE	1
2022-09-12	13:25:01	0.0110562	0.0491802	234.095	FALSE	1
2022-09-12	13:25:01	-0.0330659	-0.147084	251.835	FALSE	1
2022-09-12	13:25:01	0.102303	0.455064	234.55	FALSE	1
2022-09-12	13:25:02	0.135229	0.601526	252.436	FALSE	1
2022-09-12	13:25:02	0.304491	1.35444	235.905	FALSE	1
2022-09-12	13:25:02	0.452227	2.0116	254.448	FALSE	1
2022-09-12	13:25:02	0.568053	2.52681	238.431	FALSE	1
2022-09-12	13:25:03	0.551208	2.45188	256.9	FALSE	1
2022-09-12	13:25:03	0.509224	2.26513	240.696	FALSE	1
2022-09-12	13:25:03	0.462099	2.05551	258.955	FALSE	1
2022-09-12	13:25:04	0.376247	1.67362	242.37	FALSE	1
2022-09-12	13:25:04	0.444796	1.97854	260.934	FALSE	1
2022-09-12	13:25:04	0.414109	1.84204	244.212	FALSE	1
2022-09-12	13:25:04	0.398893	1.77436	262.708	FALSE	1
2022-09-12	13:25:05	0.3593	1.59824	245.81	FALSE	1
2022-09-12	13:25:05	0.357163	1.58873	264.297	FALSE	1
2022-09-12	13:25:05	0.35355	1.57266	247.383	FALSE	1
2022-09-12	13:25:05	0.346629	1.54188	265.839	FALSE	1
2022-09-12	13:25:06	0.349835	1.55614	248.939	FALSE	1
2022-09-12	13:25:06	0.346069	1.53938	267.378	FALSE	1
2022-09-12	13:25:06	0.3564	1.58534	250.525	FALSE	1
2022-09-12	13:25:06	0.350445	1.55885	268.937	FALSE	1
2022-09-12	13:25:07	0.347341	1.54504	252.07	FALSE	1
2022-09-12	13:25:07	0.350293	1.55817	270.495	FALSE	1
2022-09-12	13:25:07	0.344084	1.53055	253.6	FALSE	1
2022-09-12	13:25:08	0.346832	1.54278	272.038	FALSE	1
2022-09-12	13:25:08	0.354262	1.57583	255.176	FALSE	1
2022-09-12	13:25:08	0.352481	1.56791	273.606	FALSE	1
2022-09-12	13:25:08	0.361031	1.60594	256.782	FALSE	1
2022-09-12	13:25:09	0.357621	1.59077	275.197	FALSE	1
2022-09-12	13:25:09	0.398283	1.77164	258.554	FALSE	1
2022-09-12	13:25:09	0.54327	2.41657	277.613	FALSE	1
2022-09-12	13:25:09	0.863117	3.83932	262.393	FALSE	1
2022-09-12	13:25:10	0.804084	3.57673	281.19	FALSE	1
2022-09-12	13:25:10	0.877621	3.90383	266.297	FALSE	1
2022-09-12	13:25:10	0.646985	2.87792	284.068	FALSE	1
2022-09-12	13:25:10	0.318028	1.41465	267.711	FALSE	1
2022-09-12	13:25:11	0.194822	0.866607	284.934	FALSE	1
2022-09-12	13:25:11	0.353193	1.57107	269.282	FALSE	1
2022-09-12	13:25:11	0.271107	1.20594	286.14	FALSE	1
2022-09-12	13:25:12	0.373092	1.65959	270.942	FALSE	1
2022-09-12	13:25:12	0.23986	1.06695	287.207	FALSE	1
2022-09-12	13:25:12	0.399707	1.77798	272.72	FALSE	1
2022-09-12	13:25:12	0.123015	0.547195	287.754	FALSE	1
2022-09-12	13:25:13	0.18785	0.835594	273.556	FALSE	1
2022-09-12	13:25:13	0.0631173	0.280758	288.035	FALSE	1
2022-09-12	13:25:13	0.397316	1.76734	275.323	FALSE	1
2022-09-12	13:25:13	0.0801147	0.356366	288.392	FALSE	1
2022-09-12	13:25:14	-0.0157631	-0.0701174	275.323	FALSE	1
2022-09-12	13:25:14	-0.0975443	-0.433897	288.392	FALSE	1
2022-09-12	13:25:14	-0.139478	-0.620426	275.323	FALSE	1
2022-09-12	13:25:14	0.179351	0.797789	289.189	FALSE	1
2022-09-12	13:25:15	0.348461	1.55002	276.873	FALSE	1
2022-09-12	13:25:15	0.410751	1.8271	291.017	FALSE	1
2022-09-12	13:25:15	0.562608	2.50259	279.376	FALSE	1
2022-09-12	13:25:16	0.444186	1.97583	292.992	FALSE	1
2022-09-12	13:25:16	0.460318	2.04759	281.423	FALSE	1
2022-09-12	13:25:16	0.402557	1.79065	294.783	FALSE	1
2022-09-12	13:25:16	0.434568	1.93305	283.356	FALSE	1
2022-09-12	13:25:17	0.390242	1.73587	296.519	FALSE	1
2022-09-12	13:25:17	0.396094	1.76191	285.118	FALSE	1
2022-09-12	13:25:17	0.366425	1.62993	298.149	FALSE	1
2022-09-12	13:25:17	0.374975	1.66796	286.786	FALSE	1
2022-09-12	13:25:18	0.377926	1.68109	299.83	FALSE	1
2022-09-12	13:25:18	0.367595	1.63514	288.421	FALSE	1
2022-09-12	13:25:18	0.372532	1.6571	301.487	FALSE	1
2022-09-12	13:25:18	0.370445	1.64781	290.069	FALSE	1
2022-09-12	13:25:19	0.358741	1.59575	303.083	FALSE	1
2022-09-12	13:25:19	0.374262	1.66479	291.734	FALSE	1
2022-09-12	13:25:19	0.402608	1.79088	304.874	FALSE	1
2022-09-12	13:25:20	0.29584	1.31596	293.05	FALSE	1
2022-09-12	13:25:20	0.287392	1.27838	306.152	FALSE	1
2022-09-12	13:25:20	0.346069	1.53938	294.589	FALSE	1
2022-09-12	13:25:20	0.404491	1.79926	307.951	FALSE	1
2022-09-12	13:25:21	0.380725	1.69354	296.283	FALSE	1
2022-09-12	13:25:21	0.560878	2.4949	310.446	FALSE	1
2022-09-12	13:25:21	0.903372	4.01838	300.301	FALSE	1
2022-09-12	13:25:21	0.725509	3.22721	313.673	FALSE	1
2022-09-12	13:25:22	0.517977	2.30407	302.605	FALSE	1
2022-09-12	13:25:22	0.36154	1.6082	315.282	FALSE	1
2022-09-12	13:25:22	0.321794	1.4314	304.036	FALSE	1
2022-09-12	13:25:22	0.343066	1.52603	316.808	FALSE	1
2022-09-12	13:25:23	0.307646	1.36847	305.405	FALSE	1
2022-09-12	13:25:23	0.364288	1.62043	318.428	FALSE	1
2022-09-12	13:25:23	0.370445	1.64781	307.053	FALSE	1
2022-09-12	13:25:24	0.357214	1.58896	320.017	FALSE	1
2022-09-12	13:25:24	0.351107	1.56179	308.615	FALSE	1
2022-09-12	13:25:24	0.341183	1.51765	321.535	FALSE	1
2022-09-12	13:25:24	0.322914	1.43639	310.051	FALSE	1
2022-09-12	13:25:25	0.342201	1.52218	323.057	FALSE	1
2022-09-12	13:25:25	0.399707	1.77798	311.829	FALSE	1
2022-09-12	13:25:25	0.414364	1.84317	324.9	FALSE	1
2022-09-12	13:25:25	0.375127	1.66864	313.498	FALSE	1
2022-09-12	13:25:26	0.343779	1.5292	326.429	FALSE	1
2022-09-12	13:25:26	0.312481	1.38998	314.888	FALSE	1
2022-09-12	13:25:26	0.30841	1.37187	327.801	FALSE	1
2022-09-12	13:25:27	0.336247	1.49569	316.383	FALSE	1
2022-09-12	13:25:27	0.311667	1.38636	329.187	FALSE	1
2022-09-12	13:25:27	0.354008	1.5747	317.958	FALSE	1
2022-09-12	13:25:27	0.447392	1.99009	331.177	FALSE	1
2022-09-12	13:25:28	0.270293	1.20232	319.16	FALSE	1
2022-09-12	13:25:28	0.484288	2.15421	333.332	FALSE	1
2022-09-12	13:25:28	0.283422	1.26072	320.421	FALSE	1
2022-09-12	13:25:28	0.49299	2.19292	335.525	FALSE	1
2022-09-12	13:25:29	0.314059	1.397	321.818	FALSE	1
2022-09-12	13:25:29	0.41701	1.85494	337.38	FALSE	1
2022-09-12	13:25:29	0.352888	1.56972	323.388	FALSE	1
2022-09-12	13:25:29	0.341692	1.51991	338.899	FALSE	1
2022-09-12	13:25:30	0.418435	1.86128	325.249	FALSE	1
2022-09-12	13:25:30	0.32612	1.45065	340.35	FALSE	1
2022-09-12	13:25:30	0.509224	2.26513	327.514	FALSE	1
2022-09-12	13:25:31	0.2764	1.22948	341.58	FALSE	1
2022-09-12	13:25:31	0.529071	2.35341	329.868	FALSE	1
2022-09-12	13:25:31	0.452379	2.01227	343.592	FALSE	1
2022-09-12	13:25:31	1.16831	5.19688	335.064	FALSE	1
2022-09-12	13:25:32	0.835839	3.71798	347.31	FALSE	1
2022-09-12	13:25:32	0.672176	2.98997	338.054	FALSE	1
2022-09-12	13:25:32	0.405204	1.80243	349.112	FALSE	1
2022-09-12	13:25:32	0.567901	2.52614	340.58	FALSE	1
2022-09-12	13:25:33	0.321387	1.42959	350.542	FALSE	1
2022-09-12	13:25:33	0.533295	2.3722	342.953	FALSE	1
2022-09-12	13:25:33	0.357316	1.58941	352.131	FALSE	1
2022-09-12	13:25:33	0.449987	2.00163	344.954	FALSE	1
2022-09-12	13:25:34	0.725153	3.22563	355.357	FALSE	1
2022-09-12	13:25:34	0.758537	3.37412	348.328	FALSE	1
2022-09-12	13:25:34	0.440878	1.96111	357.318	FALSE	1
2022-09-12	13:25:35	0.397316	1.76734	350.096	FALSE	1
2022-09-12	13:25:35	0.512634	2.2803	359.598	FALSE	1
2022-09-12	13:25:35	0.496654	2.20922	352.305	FALSE	1
2022-09-12	13:25:35	0.588664	2.6185	362.217	FALSE	1
2022-09-12	13:25:36	1.24286	5.52849	357.834	FALSE	1
2022-09-12	13:25:36	0.885662	3.9396	366.156	FALSE	1
2022-09-12	13:25:36	0.966832	4.30066	362.134	FALSE	1
2022-09-12	13:25:36	1.63564	7.27565	373.432	FALSE	1
2022-09-12	13:25:37	1.62933	7.24759	369.382	FALSE	1
2022-09-12	13:25:37	0.752125	3.3456	376.778	FALSE	1
2022-09-12	13:25:37	0.560725	2.49422	371.876	FALSE	1
2022-09-12	13:25:37	0.442048	1.96632	378.744	FALSE	1
2022-09-12	13:25:38	0.496451	2.20831	374.084	FALSE	1
2022-09-12	13:25:38	0.362303	1.6116	380.356	FALSE	1
2022-09-12	13:25:38	0.441692	1.96473	376.049	FALSE	1
2022-09-12	13:25:39	0.510547	2.27102	382.627	FALSE	1
2022-09-12	13:25:39	0.448868	1.99665	378.046	FALSE	1
2022-09-12	13:25:39	0.429173	1.90905	384.536	FALSE	1
2022-09-12	13:25:39	0.452481	2.01273	380.058	FALSE	1
2022-09-12	13:25:40	0.437214	1.94482	386.48	FALSE	1
2022-09-12	13:25:40	0.443524	1.97288	382.031	FALSE	1
2022-09-12	13:25:40	0.447545	1.99077	388.471	FALSE	1
2022-09-12	13:25:40	0.46444	2.06592	384.097	FALSE	1
2022-09-12	13:25:41	0.469428	2.08811	390.559	FALSE	1
2022-09-12	13:25:41	0.469122	2.08675	386.184	FALSE	1
2022-09-12	13:25:41	0.471107	2.09558	392.655	FALSE	1
2022-09-12	13:25:41	0.466578	2.07543	388.259	FALSE	1
2022-09-12	13:25:42	0.460522	2.04849	394.703	FALSE	1
2022-09-12	13:25:42	0.449682	2.00028	390.26	FALSE	1
2022-09-12	13:25:42	0.45874	2.04057	396.744	FALSE	1
2022-09-12	13:25:43	0.406425	1.80786	392.068	FALSE	1
2022-09-12	13:25:43	0.417723	1.85812	398.602	FALSE	1
2022-09-12	13:25:43	0.413092	1.83752	393.905	FALSE	1
2022-09-12	13:25:43	0.367443	1.63446	400.237	FALSE	1
2022-09-12	13:25:44	0.35986	1.60073	395.506	FALSE	1
2022-09-12	13:25:44	0.331616	1.47509	401.712	FALSE	1
2022-09-12	13:25:44	0.296858	1.32048	396.826	FALSE	1
2022-09-12	13:25:44	0.316654	1.40854	403.12	FALSE	1
2022-09-12	13:25:45	0.464339	2.06547	398.892	FALSE	1
2022-09-12	13:25:45	0.307188	1.36643	404.487	FALSE	1
2022-09-12	13:25:45	0.199453	0.887207	399.779	FALSE	1
2022-09-12	13:25:45	0.326171	1.45087	405.938	FALSE	1
2022-09-12	13:25:46	0.177672	0.790321	400.569	FALSE	1
2022-09-12	13:25:46	0.770751	3.42845	409.366	FALSE	1
2022-09-12	13:25:46	2.71253	12.0659	412.635	FALSE	1
2022-09-12	13:25:47	2.07141	9.21405	418.58	FALSE	1
2022-09-12	13:25:47	1.66398	7.40172	420.037	FALSE	1
2022-09-12	13:25:47	2.46693	10.9734	429.553	FALSE	1
2022-09-12	13:25:47	1.07655	4.78871	424.826	FALSE	1
2022-09-12	13:25:48	1.24775	5.55024	435.104	FALSE	1
2022-09-12	13:25:48	2.03319	9.04404	433.87	FALSE	1
2022-09-12	13:25:48	0.582506	2.5911	437.695	FALSE	1
2022-09-12	13:25:49	1.29329	5.75281	439.622	FALSE	1
2022-09-12	13:25:49	1.69981	7.56109	445.256	FALSE	1
2022-09-12	13:25:49	0.751769	3.34402	442.966	FALSE	1
2022-09-12	13:25:49	0.90103	4.00796	449.264	FALSE	1
2022-09-12	13:25:49	0.476858	2.12116	445.088	FALSE	1
2022-09-12	13:25:50	0.700674	3.11674	452.381	FALSE	1
2022-09-12	13:25:50	0.747595	3.32545	448.413	FALSE	1
2022-09-12	13:25:50	0.748308	3.32862	455.709	FALSE	1
2022-09-12	13:25:51	0.546221	2.4297	450.843	FALSE	1
2022-09-12	13:25:51	1.2792	5.69014	461.399	FALSE	1
2022-09-12	13:25:51	1.86536	8.29749	459.14	FALSE	1
2022-09-12	13:25:51	1.18408	5.26702	466.666	FALSE	1
2022-09-12	13:25:52	0.2993	1.33135	460.472	FALSE	1
2022-09-12	13:25:52	0.245	1.08981	467.756	FALSE	1
2022-09-12	13:25:52	0.235738	1.04861	461.52	FALSE	1
2022-09-12	13:25:52	0.176909	0.786927	468.543	FALSE	1
2022-09-12	13:25:53	0.501438	2.2305	463.751	FALSE	1
2022-09-12	13:25:53	1.82938	8.13745	476.681	FALSE	1
2022-09-12	13:25:53	1.61558	7.18642	470.937	FALSE	1
2022-09-12	13:25:53	1.2364	5.49975	482.18	FALSE	1
2022-09-12	13:25:54	1.10719	4.925	475.862	FALSE	1
2022-09-12	13:25:54	1.64469	7.31591	489.496	FALSE	1
2022-09-12	13:25:54	1.17889	5.24394	481.106	FALSE	1
2022-09-12	13:25:55	0.972888	4.3276	493.824	FALSE	1
2022-09-12	13:25:55	0.354873	1.57855	482.685	FALSE	1
2022-09-12	13:25:55	0.228257	1.01533	494.839	FALSE	1
2022-09-12	13:25:55	0.294313	1.30916	483.994	FALSE	1
2022-09-12	13:25:56	0.29243	1.30079	496.14	FALSE	1
2022-09-12	13:25:56	0.331107	1.47283	485.467	FALSE	1
2022-09-12	13:25:56	0.475382	2.11459	498.254	FALSE	1
2022-09-12	13:25:56	0.216298	0.962137	486.429	FALSE	1
2022-09-12	13:25:57	0.217519	0.967568	499.222	FALSE	1
2022-09-12	13:25:57	0.178283	0.793038	487.222	FALSE	1
2022-09-12	13:25:57	0.114771	0.510524	499.733	FALSE	1
2022-09-12	13:25:57	0.163728	0.728295	487.95	FALSE	1
2022-09-12	13:25:58	0.0914633	0.406847	500.139	FALSE	1
2022-09-12	13:25:58	0.172227	0.7661	488.716	FALSE	1
2022-09-12	13:25:58	0.176247	0.783982	500.923	FALSE	1
2022-09-12	13:25:59	0.458079	2.03763	490.754	FALSE	1
2022-09-12	13:25:59	0.892888	3.97174	504.895	FALSE	1
2022-09-12	13:25:59	1.89121	8.41248	499.166	FALSE	1
2022-09-12	13:25:59	2.60459	11.5857	516.481	FALSE	1
2022-09-12	13:26:00	0.519148	2.30927	501.476	FALSE	1
2022-09-12	13:26:00	0.738893	3.28674	519.768	FALSE	1
2022-09-12	13:26:00	0.910954	4.05211	505.528	FALSE	1
2022-09-12	13:26:00	2.24261	9.97558	529.743	FALSE	1
2022-09-12	13:26:01	2.20525	9.80939	515.337	FALSE	1
2022-09-12	13:26:01	2.23508	9.94208	539.685	FALSE	1
2022-09-12	13:26:01	1.27441	5.66883	521.006	FALSE	1
2022-09-12	13:26:01	0.282761	1.25778	540.943	FALSE	1
2022-09-12	13:26:02	0.134313	0.597451	521.603	FALSE	1
2022-09-12	13:26:02	0.273753	1.21771	542.161	FALSE	1
2022-09-12	13:26:02	0.243422	1.08279	522.686	FALSE	1
2022-09-12	13:26:03	0.233855	1.04023	543.201	FALSE	1
2022-09-12	13:26:03	0.15757	0.700903	523.387	FALSE	1
2022-09-12	13:26:03	0.151005	0.6717	543.873	FALSE	1
2022-09-12	13:26:03	0.238028	1.0588	524.446	FALSE	1
2022-09-12	13:26:04	0.181947	0.809337	544.682	FALSE	1
2022-09-12	13:26:04	0.0245422	0.109169	524.555	FALSE	1
2022-09-12	13:26:04	-0.086043	-0.382736	544.682	FALSE	1
2022-09-12	13:26:05	-0.138053	-0.614087	524.555	FALSE	1
2022-09-12	13:26:05	0.175076	0.778773	545.461	FALSE	1
2022-09-12	13:26:05	0.17757	0.789867	525.345	FALSE	1
2022-09-12	13:26:05	0.401641	1.78658	547.247	FALSE	1
2022-09-12	13:26:05	0.159606	0.709959	526.055	FALSE	1
2022-09-12	13:26:06	0.404695	1.80016	549.048	FALSE	1
2022-09-12	13:26:06	0.17472	0.77719	526.832	FALSE	1
2022-09-12	13:26:06	0.542456	2.41295	551.461	FALSE	1
2022-09-12	13:26:07	0.171921	0.764739	527.597	FALSE	1
2022-09-12	13:26:07	0.515382	2.29252	553.753	FALSE	1
2022-09-12	13:26:07	0.248562	1.10565	528.702	FALSE	1
2022-09-12	13:26:07	0.509326	2.26558	556.019	FALSE	1
2022-09-12	13:26:08	0.201896	0.898074	529.6	FALSE	1
2022-09-12	13:26:08	0.470395	2.09241	558.111	FALSE	1
2022-09-12	13:26:08	0.222863	0.991339	530.592	FALSE	1
2022-09-12	13:26:08	0.446578	1.98647	560.098	FALSE	1
2022-09-12	13:26:09	0.181794	0.808656	531.4	FALSE	1
2022-09-12	13:26:09	0.417214	1.85585	561.953	FALSE	1
2022-09-12	13:26:09	0.166527	0.740745	532.141	FALSE	1
2022-09-12	13:26:09	0.499962	2.22393	564.177	FALSE	1
2022-09-12	13:26:10	0.134822	0.599715	532.741	FALSE	1
2022-09-12	13:26:10	0.177417	0.789186	564.966	FALSE	1
2022-09-12	13:26:10	0.219809	0.977754	533.719	FALSE	1
2022-09-12	13:26:11	0.118028	0.525012	565.491	FALSE	1
2022-09-12	13:26:11	-0.12131	-0.539611	533.719	FALSE	1
2022-09-12	13:26:11	-0.14533	-0.646457	565.491	FALSE	1
2022-09-12	13:26:11	-0.103855	-0.461968	533.719	FALSE	1
2022-09-12	13:26:12	-0.0952033	-0.423483	565.491	FALSE	1
2022-09-12	13:26:12	-0.12187	-0.542102	533.719	FALSE	1
2022-09-12	13:26:12	-0.0430405	-0.191453	565.491	FALSE	1
2022-09-12	13:26:12	0.0325321	0.144709	533.863	FALSE	1
2022-09-12	13:26:13	0.0695295	0.309281	565.801	FALSE	1
2022-09-12	13:26:13	-0.0508776	-0.226314	533.863	FALSE	1
2022-09-12	13:26:13	0.065102	0.289587	566.09	FALSE	1
2022-09-12	13:26:14	0.03813	0.16961	534.033	FALSE	1
2022-09-12	13:26:14	0.128919	0.573457	566.664	FALSE	1
2022-09-12	13:26:14	0.145713	0.648161	534.681	FALSE	1
2022-09-12	13:26:14	1.08205	4.81317	571.477	FALSE	1
2022-09-12	13:26:15	5.63345	25.0587	559.74	1	2
2022-09-12	13:26:15	2.74688	12.2187	583.696	FALSE	2
2022-09-12	13:26:15	0.475127	2.11346	561.853	FALSE	2
2022-09-12	13:26:15	1.1219	4.99044	588.686	FALSE	2
2022-09-12	13:26:16	0.676145	3.00763	564.861	FALSE	2
2022-09-12	13:26:16	1.60327	7.13167	595.818	FALSE	2
2022-09-12	13:26:16	1.60836	7.15431	572.015	FALSE	2
2022-09-12	13:26:16	0.570903	2.53949	598.357	FALSE	2
2022-09-12	13:26:17	0.477519	2.1241	574.139	FALSE	2
2022-09-12	13:26:17	0.721336	3.20865	601.566	FALSE	2
2022-09-12	13:26:17	0.279911	1.2451	575.384	FALSE	2
2022-09-12	13:26:18	0.786883	3.50021	605.066	FALSE	2
2022-09-12	13:26:18	0.751972	3.34492	578.729	FALSE	2
2022-09-12	13:26:18	1.11258	4.94898	610.015	FALSE	2
2022-09-12	13:26:18	0.876908	3.90066	582.63	FALSE	2
2022-09-12	13:26:19	0.662557	2.94719	612.962	FALSE	2
2022-09-12	13:26:19	1.06393	4.73257	587.363	FALSE	2
2022-09-12	13:26:19	1.42042	6.31831	619.281	FALSE	2
2022-09-12	13:26:19	0.652023	2.90033	590.263	FALSE	2
2022-09-12	13:26:20	2.12439	9.44971	628.73	FALSE	2
2022-09-12	13:26:20	1.76144	7.83524	598.098	FALSE	2
2022-09-12	13:26:20	1.33721	5.94818	634.678	FALSE	2
2022-09-12	13:26:20	0.651412	2.89761	600.996	FALSE	2
2022-09-12	13:26:21	0.719351	3.19982	637.878	FALSE	2
2022-09-12	13:26:21	0.894669	3.97967	604.975	FALSE	2
2022-09-12	13:26:21	2.251	10.0129	647.891	FALSE	2
2022-09-12	13:26:22	4.62719	20.5827	625.558	1	3
2022-09-12	13:26:22	2.06571	9.18869	657.08	FALSE	3
2022-09-12	13:26:22	2.19111	9.7465	635.305	FALSE	3
2022-09-12	13:26:22	1.79487	7.98394	665.064	FALSE	3
2022-09-12	13:26:23	1.27034	5.65073	640.955	FALSE	3
2022-09-12	13:26:23	1.23513	5.49411	670.558	FALSE	3
2022-09-12	13:26:23	1.2281	5.46283	646.418	FALSE	3
2022-09-12	13:26:23	1.15335	5.13033	675.688	FALSE	3
2022-09-12	13:26:24	0.784644	3.49025	649.908	FALSE	3
2022-09-12	13:26:24	0.856501	3.80989	679.498	FALSE	3
2022-09-12	13:26:24	0.347901	1.54753	651.456	FALSE	3
2022-09-12	13:26:24	0.329224	1.46445	680.963	FALSE	3
2022-09-12	13:26:25	0.356043	1.58375	653.04	FALSE	3
2022-09-12	13:26:25	0.331005	1.47238	682.435	FALSE	3
2022-09-12	13:26:25	0.285	1.26774	654.307	FALSE	3
2022-09-12	13:26:26	0.289987	1.28992	683.725	FALSE	3
2022-09-12	13:26:26	0.260115	1.15704	655.464	FALSE	3
2022-09-12	13:26:26	0.236298	1.0511	684.776	FALSE	3
2022-09-12	13:26:26	0.327748	1.45789	656.922	FALSE	3
2022-09-12	13:26:27	0.23986	1.06695	685.843	FALSE	3
2022-09-12	13:26:27	0.334568	1.48823	658.411	FALSE	3
2022-09-12	13:26:27	0.123066	0.547422	686.39	FALSE	3
2022-09-12	13:26:27	0.409784	1.8228	660.233	FALSE	3
2022-09-12	13:26:28	1.63024	7.25163	693.642	FALSE	3
2022-09-12	13:26:28	1.86261	8.28526	668.519	FALSE	3
2022-09-12	13:26:28	0.581336	2.5859	696.228	FALSE	3
2022-09-12	13:26:28	0.47187	2.09897	670.618	FALSE	3
2022-09-12	13:26:29	0.521285	2.31878	698.547	FALSE	3
2022-09-12	13:26:29	0.481031	2.13972	672.757	FALSE	3
2022-09-12	13:26:29	0.220471	0.980699	699.527	FALSE	3
2022-09-12	13:26:30	0.15416	0.685735	673.443	FALSE	3
2022-09-12	13:26:30	0.210293	0.935425	700.463	FALSE	3
2022-09-12	13:26:30	0.18785	0.835594	674.279	FALSE	3
2022-09-12	13:26:30	0.272328	1.21137	701.674	FALSE	3
2022-09-12	13:26:31	0.281234	1.25099	675.53	FALSE	3
2022-09-12	13:26:31	0.149937	0.66695	702.341	FALSE	3
2022-09-12	13:26:31	0.333346	1.48279	677.012	FALSE	3
2022-09-12	13:26:31	0.249122	1.10814	703.449	FALSE	3
2022-09-12	13:26:32	0.293295	1.30463	678.317	FALSE	3
2022-09-12	13:26:32	0.132125	0.587718	704.037	FALSE	3
2022-09-12	13:26:32	0.254517	1.13214	679.449	FALSE	3
2022-09-12	13:26:32	0.175585	0.781037	704.818	FALSE	3
2022-09-12	13:26:33	0.372634	1.65755	681.107	FALSE	3
2022-09-12	13:26:33	0.188461	0.838312	705.656	FALSE	3
2022-09-12	13:26:33	0.496909	2.21035	683.317	FALSE	3
2022-09-12	13:26:34	0.345204	1.53554	707.192	FALSE	3
2022-09-12	13:26:34	0.401082	1.78409	685.101	FALSE	3
2022-09-12	13:26:34	0.411412	1.83004	709.022	FALSE	3
2022-09-12	13:26:34	0.329377	1.46513	686.566	FALSE	3
2022-09-12	13:26:35	0.393855	1.75195	710.774	FALSE	3
2022-09-12	13:26:35	0.368206	1.63785	688.204	FALSE	3
2022-09-12	13:26:35	0.409071	1.81963	712.594	FALSE	3
2022-09-12	13:26:35	0.399606	1.77753	689.982	FALSE	3
2022-09-12	13:26:36	0.434211	1.93146	714.525	FALSE	3
2022-09-12	13:26:36	0.460318	2.04759	692.029	FALSE	3
2022-09-12	13:26:36	0.351107	1.56179	716.087	FALSE	3
2022-09-12	13:26:36	0.185102	0.823371	692.853	FALSE	3
2022-09-12	13:26:37	-0.0603433	-0.268419	716.087	FALSE	3
2022-09-12	13:26:37	0.312023	1.38794	694.241	FALSE	3
2022-09-12	13:26:37	0.353906	1.57424	717.661	FALSE	3
2022-09-12	13:26:38	0.405102	1.80197	696.043	FALSE	3
2022-09-12	13:26:38	0.102049	0.453934	718.115	FALSE	3
2022-09-12	13:26:38	0.198792	0.884267	696.927	FALSE	3
2022-09-12	13:26:38	0.0966541	0.429937	718.545	FALSE	3
2022-09-12	13:26:39	0.0167559	0.0745336	697.001	FALSE	3
2022-09-12	13:26:39	-0.000953954	-0.00424338	718.545	FALSE	3
2022-09-12	13:26:39	0.0349748	0.155575	697.157	FALSE	3
2022-09-12	13:26:39	0.0482572	0.214658	718.76	FALSE	3
2022-09-12	13:26:40	0.0337534	0.150142	697.307	FALSE	3
2022-09-12	13:26:40	0.0143641	0.0638944	718.823	FALSE	3
2022-09-12	13:26:40	0.0982826	0.437181	697.744	FALSE	3
2022-09-12	13:26:40	0.119504	0.531578	719.355	FALSE	3
2022-09-12	13:26:41	0.122049	0.542898	698.287	FALSE	3
2022-09-12	13:26:41	0.0940587	0.418392	719.773	FALSE	3
2022-09-12	13:26:41	0.08556	0.380588	698.668	FALSE	3
2022-09-12	13:26:42	0.0533972	0.237521	720.011	FALSE	3
2022-09-12	13:26:42	0.0216415	0.0962657	698.764	FALSE	3
2022-09-12	13:26:42	0.00530559	0.0236003	720.035	FALSE	3
2022-09-12	13:26:42	-0.0451778	-0.20096	698.764	FALSE	3
2022-09-12	13:26:43	-0.0149998	-0.0667221	720.035	FALSE	3
2022-09-12	13:26:43	0.0864761	0.384663	699.149	FALSE	3
2022-09-12	13:26:43	0.285153	1.26842	721.303	FALSE	3
2022-09-12	13:26:43	0.0200638	0.0892478	699.238	FALSE	3
2022-09-12	13:26:44	-0.00370202	-0.0164673	721.303	FALSE	3
2022-09-12	13:26:44	0.00291375	0.0129609	699.251	FALSE	3
2022-09-12	13:26:44	0.0457636	0.203566	721.506	FALSE	3
2022-09-12	13:26:44	0.190853	0.848952	700.1	FALSE	3
2022-09-12	13:26:45	0.0218959	0.0973973	721.604	FALSE	3
2022-09-12	13:26:45	0.159758	0.710636	700.811	FALSE	3
2022-09-12	13:26:45	0.150802	0.670797	722.275	FALSE	3
2022-09-12	13:26:46	0.0660689	0.293888	701.104	FALSE	3
2022-09-12	13:26:46	0.0391478	0.174137	722.449	FALSE	3
2022-09-12	13:26:46	0.0582827	0.259253	701.364	FALSE	3
2022-09-12	13:26:46	0.051616	0.229598	722.678	FALSE	3
2022-09-12	13:26:47	0.0421503	0.187493	701.551	FALSE	3
2022-09-12	13:26:47	0.0395041	0.175722	722.854	FALSE	3
2022-09-12	13:26:47	0.0432699	0.192473	701.744	FALSE	3
2022-09-12	13:26:47	0.0590969	0.262875	723.117	FALSE	3
2022-09-12	13:26:48	0.0582317	0.259026	702.003	FALSE	3
2022-09-12	13:26:48	0.0555346	0.247029	723.364	FALSE	3
2022-09-12	13:26:48	0.0411326	0.182966	702.186	FALSE	3
2022-09-12	13:26:48	0.0491733	0.218733	723.583	FALSE	3
2022-09-12	13:26:49	0.0374175	0.166441	702.352	FALSE	3
2022-09-12	13:26:49	0.0394023	0.175269	723.758	FALSE	3
2022-09-12	13:26:49	0.0383336	0.170516	702.523	FALSE	3
2022-09-12	13:26:50	0.0387407	0.172326	723.93	FALSE	3
2022-09-12	13:26:50	0.0375193	0.166893	702.689	FALSE	3
2022-09-12	13:26:50	0.0291733	0.129769	724.06	FALSE	3
2022-09-12	13:26:50	0.0390969	0.173911	702.863	FALSE	3
2022-09-12	13:26:51	0.0399621	0.177759	724.238	FALSE	3
2022-09-12	13:26:51	0.0435244	0.193605	703.057	FALSE	3
2022-09-12	13:26:51	0.0632699	0.281437	724.519	FALSE	3
2022-09-12	13:26:51	0.131565	0.585227	703.642	FALSE	3
2022-09-12	13:26:52	0.127697	0.568022	725.087	FALSE	3
2022-09-12	13:26:52	0.112278	0.499435	704.142	FALSE	3
2022-09-12	13:26:52	0.177417	0.789186	725.877	FALSE	3
2022-09-12	13:26:53	0.208359	0.926823	705.068	FALSE	3
2022-09-12	13:26:53	0.432023	1.92172	727.798	FALSE	3
2022-09-12	13:26:53	1.26001	5.60478	710.673	FALSE	3
2022-09-12	13:26:53	0.871361	3.87599	731.674	FALSE	3
2022-09-12	13:26:54	0.436705	1.94255	712.616	FALSE	3
2022-09-12	13:26:54	0.285814	1.27136	732.946	FALSE	3
2022-09-12	13:26:54	0.371616	1.65302	714.269	FALSE	3
2022-09-12	13:26:54	0.184593	0.821107	733.767	FALSE	3
2022-09-12	13:26:55	0.142252	0.632765	714.902	FALSE	3
2022-09-12	13:26:55	0.362507	1.6125	735.379	FALSE	3
2022-09-12	13:26:55	0.129733	0.577078	715.479	FALSE	3
2022-09-12	13:26:55	0.111514	0.496037	735.875	FALSE	3
2022-09-12	13:26:56	0.207646	0.923651	716.402	FALSE	3
2022-09-12	13:26:56	0.190395	0.846915	736.722	FALSE	3
2022-09-12	13:26:56	0.345204	1.53554	717.938	FALSE	3
2022-09-12	13:26:57	0.305509	1.35897	738.081	FALSE	3
2022-09-12	13:26:57	0.709071	3.15409	721.092	FALSE	3
2022-09-12	13:26:57	0.515738	2.29411	740.375	FALSE	3
2022-09-12	13:26:57	0.638486	2.84011	723.932	FALSE	3
2022-09-12	13:26:58	0.359097	1.59734	741.973	FALSE	3
2022-09-12	13:26:58	0.437163	1.94459	725.877	FALSE	3
2022-09-12	13:26:58	0.31757	1.41261	743.385	FALSE	3
2022-09-12	13:26:58	0.425611	1.8932	727.77	FALSE	3
2022-09-12	13:26:59	0.343626	1.52852	744.914	FALSE	3
2022-09-12	13:26:59	0.278893	1.24057	729.01	FALSE	3
2022-09-12	13:26:59	0.260725	1.15976	746.073	FALSE	3
2022-09-12	13:26:59	0.331667	1.47532	730.486	FALSE	3
2022-09-12	13:27:00	0.32841	1.46083	747.534	FALSE	3
2022-09-12	13:27:00	0.288562	1.28358	731.769	FALSE	3
2022-09-12	13:27:00	0.203422	0.904862	748.439	FALSE	3
2022-09-12	13:27:01	0.504135	2.24249	734.012	FALSE	3
2022-09-12	13:27:01	0.371514	1.65257	750.092	FALSE	3
2022-09-12	13:27:01	0.37645	1.67452	735.686	FALSE	3
2022-09-12	13:27:01	0.475942	2.11709	752.209	FALSE	3
2022-09-12	13:27:02	0.408461	1.81692	737.503	FALSE	3
2022-09-12	13:27:02	0.408206	1.81578	754.025	FALSE	3
2022-09-12	13:27:02	0.436807	1.943	739.446	FALSE	3
2022-09-12	13:27:02	0.356094	1.58398	755.609	FALSE	3
2022-09-12	13:27:03	0.303524	1.35014	740.796	FALSE	3
2022-09-12	13:27:03	0.305713	1.35987	756.968	FALSE	3
2022-09-12	13:27:03	0.27355	1.21681	742.013	FALSE	3
2022-09-12	13:27:03	0.285713	1.27091	758.239	FALSE	3
2022-09-12	13:27:04	0.28159	1.25257	743.266	FALSE	3
2022-09-12	13:27:04	0.280573	1.24804	759.487	FALSE	3
2022-09-12	13:27:04	0.286527	1.27453	744.54	FALSE	3
2022-09-12	13:27:05	0.287341	1.27815	760.766	FALSE	3
2022-09-12	13:27:05	0.284695	1.26638	745.807	FALSE	3
2022-09-12	13:27:05	0.285865	1.27158	762.037	FALSE	3
2022-09-12	13:27:05	0.286069	1.27249	747.079	FALSE	3
2022-09-12	13:27:06	0.28673	1.27543	763.313	FALSE	3
2022-09-12	13:27:06	0.287596	1.27928	748.358	FALSE	3
2022-09-12	13:27:06	0.289631	1.28834	764.601	FALSE	3
2022-09-12	13:27:06	0.286832	1.27589	749.634	FALSE	3
2022-09-12	13:27:07	0.294567	1.31029	765.911	FALSE	3
2022-09-12	13:27:07	0.405458	1.80356	751.438	FALSE	3
2022-09-12	13:27:07	0.358384	1.59416	767.505	FALSE	3
2022-09-12	13:27:07	-0.0927605	-0.412617	751.438	FALSE	3
2022-09-12	13:27:08	-0.388638	-1.72874	767.505	FALSE	3
2022-09-12	13:27:08	-0.392302	-1.74504	751.438	FALSE	3
2022-09-12	13:27:08	-0.360089	-1.60175	767.505	FALSE	3
2022-09-12	13:27:09	-0.289198	-1.28641	751.438	FALSE	3
2022-09-12	13:27:09	-0.111946	-0.497958	767.505	FALSE	3
2022-09-12	13:27:09	0.239097	1.06355	752.501	FALSE	3
2022-09-12	13:27:09	0.167646	0.745723	768.251	FALSE	3
2022-09-12	13:27:10	0.485611	2.16009	754.662	FALSE	3
2022-09-12	13:27:10	0.195331	0.868871	769.12	FALSE	3
2022-09-12	13:27:10	0.424135	1.88664	756.548	FALSE	3
2022-09-12	13:27:10	0.229987	1.02303	770.143	FALSE	3
2022-09-12	13:27:11	0.349987	1.55681	758.105	FALSE	3
2022-09-12	13:27:11	0.17416	0.774699	770.918	FALSE	3
2022-09-12	13:27:11	0.317061	1.41035	759.515	FALSE	3
2022-09-12	13:27:11	0.222812	0.991112	771.909	FALSE	3
2022-09-12	13:27:12	0.384339	1.70962	761.225	FALSE	3
2022-09-12	13:27:12	0.305	1.3567	773.266	FALSE	3
2022-09-12	13:27:12	0.775534	3.44973	764.675	FALSE	3
2022-09-12	13:27:13	0.401997	1.78816	775.054	FALSE	3
2022-09-12	13:27:13	0.970344	4.31628	768.991	FALSE	3
2022-09-12	13:27:13	1.0819	4.81251	779.866	FALSE	3
2022-09-12	13:27:13	4.32861	19.2545	788.246	1	4
2022-09-12	13:27:14	2.33828	10.4011	790.267	FALSE	4
2022-09-12	13:27:14	1.72495	7.67292	795.918	FALSE	4
2022-09-12	13:27:14	1.38953	6.18091	796.448	FALSE	4
2022-09-12	13:27:14	1.69187	7.52578	803.444	FALSE	4
2022-09-12	13:27:15	0.946679	4.21102	800.659	FALSE	4
2022-09-12	13:27:15	2.12856	9.46826	812.912	FALSE	4
2022-09-12	13:27:15	1.76195	7.83751	808.497	FALSE	4
2022-09-12	13:27:15	1.31085	5.83092	818.743	FALSE	4
2022-09-12	13:27:16	0.742303	3.30191	811.799	FALSE	4
2022-09-12	13:27:16	0.95416	4.24429	822.988	FALSE	4
2022-09-12	13:27:16	0.604135	2.68731	814.486	FALSE	4
2022-09-12	13:27:17	0.595382	2.64838	825.636	FALSE	4
2022-09-12	13:27:17	0.726527	3.23174	817.718	FALSE	4
2022-09-12	13:27:17	0.436145	1.94006	827.576	FALSE	4
2022-09-12	13:27:17	0.172786	0.768587	818.486	FALSE	4
2022-09-12	13:27:18	0.20154	0.89649	828.473	FALSE	4
2022-09-12	13:27:18	-0.0889437	-0.395639	818.486	FALSE	4
2022-09-12	13:27:18	-0.0882312	-0.39247	828.473	FALSE	4
2022-09-12	13:27:18	-0.119274	-0.530555	818.486	FALSE	4
2022-09-12	13:27:19	-0.182786	-0.813069	828.473	FALSE	4
2022-09-12	13:27:19	1.36449	6.06952	824.556	FALSE	4
2022-09-12	13:27:19	0.724186	3.22132	831.694	FALSE	4
2022-09-12	13:27:19	1.37599	6.12068	830.677	FALSE	4
2022-09-12	13:27:20	1.71243	7.61723	839.311	FALSE	4
2022-09-12	13:27:20	0.369936	1.64555	832.322	FALSE	4
2022-09-12	13:27:20	0.403779	1.79609	841.107	FALSE	4
2022-09-12	13:27:21	0.522812	2.32557	834.648	FALSE	4
2022-09-12	13:27:21	0.215433	0.958289	842.066	FALSE	4
2022-09-12	13:27:21	0.346629	1.54188	836.189	FALSE	4
2022-09-12	13:27:21	0.324186	1.44204	843.508	FALSE	4
2022-09-12	13:27:22	0.362048	1.61046	837.8	FALSE	4
2022-09-12	13:27:22	0.394822	1.75625	845.264	FALSE	4
2022-09-12	13:27:22	0.50897	2.264	840.064	FALSE	4
2022-09-12	13:27:22	0.303372	1.34946	846.613	FALSE	4
2022-09-12	13:27:23	0.543372	2.41703	842.481	FALSE	4
2022-09-12	13:27:23	0.668715	2.97458	849.588	FALSE	4
2022-09-12	13:27:23	0.638537	2.84034	845.321	FALSE	4
2022-09-12	13:27:23	0.419555	1.86626	851.454	FALSE	4
2022-09-12	13:27:24	0.46042	2.04804	847.369	FALSE	4
2022-09-12	13:27:24	0.303524	1.35014	852.804	FALSE	4
2022-09-12	13:27:24	0.377316	1.67838	849.048	FALSE	4
2022-09-12	13:27:25	0.419657	1.86672	854.671	FALSE	4
2022-09-12	13:27:25	0.504288	2.24317	851.291	FALSE	4
2022-09-12	13:27:25	0.247901	1.10271	855.774	FALSE	4
2022-09-12	13:27:25	0.186069	0.827672	852.119	FALSE	4
2022-09-12	13:27:26	0.352074	1.5661	857.34	FALSE	4
2022-09-12	13:27:26	0.271718	1.20866	853.327	FALSE	4
2022-09-12	13:27:26	0.378893	1.68539	859.025	FALSE	4
2022-09-12	13:27:26	0.274364	1.22043	854.548	FALSE	4
2022-09-12	13:27:27	0.436349	1.94097	860.966	FALSE	4
2022-09-12	13:27:27	0.231565	1.03005	855.578	FALSE	4
2022-09-12	13:27:27	0.490344	2.18115	863.147	FALSE	4
2022-09-12	13:27:27	0.141438	0.629145	856.207	FALSE	4
2022-09-12	13:27:28	0.4307	1.91584	865.063	FALSE	4
2022-09-12	13:27:28	0.282252	1.25551	857.462	FALSE	4
2022-09-12	13:27:28	0.368206	1.63785	866.701	FALSE	4
2022-09-12	13:27:29	0.209224	0.93067	858.393	FALSE	4
2022-09-12	13:27:29	0.495026	2.20197	868.903	FALSE	4
2022-09-12	13:27:29	0.249071	1.10792	859.501	FALSE	4
2022-09-12	13:27:29	0.454415	2.02133	870.924	FALSE	4
2022-09-12	13:27:30	0.19299	0.858458	860.359	FALSE	4
2022-09-12	13:27:30	0.434669	1.93349	872.858	FALSE	4
2022-09-12	13:27:30	0.363626	1.61748	861.977	FALSE	4
2022-09-12	13:27:30	0.387799	1.72501	874.583	FALSE	4
2022-09-12	13:27:31	0.505203	2.24724	864.224	FALSE	4
2022-09-12	13:27:31	0.45187	2.01001	876.593	FALSE	4
2022-09-12	13:27:31	0.375433	1.67	865.894	FALSE	4
2022-09-12	13:27:31	0.401234	1.78477	878.378	FALSE	4
2022-09-12	13:27:32	0.407799	1.81397	867.708	FALSE	4
2022-09-12	13:27:32	0.371412	1.65211	880.03	FALSE	4
2022-09-12	13:27:32	0.408359	1.81646	869.525	FALSE	4
2022-09-12	13:27:33	0.37187	1.65415	881.684	FALSE	4
2022-09-12	13:27:33	0.724898	3.22449	872.749	FALSE	4
2022-09-12	13:27:33	0.373702	1.6623	883.346	FALSE	4
2022-09-12	13:27:33	0.680522	3.0271	875.776	FALSE	4
2022-09-12	13:27:34	1.03197	4.59041	887.937	FALSE	4
2022-09-12	13:27:34	0.540522	2.40435	878.181	FALSE	4
2022-09-12	13:27:34	0.663677	2.95217	890.889	FALSE	4
2022-09-12	13:27:34	1.24006	5.51603	883.697	FALSE	4
2022-09-12	13:27:35	1.36322	6.06388	896.953	FALSE	4
2022-09-12	13:27:35	1.16322	5.17424	888.871	FALSE	4
2022-09-12	13:27:35	0.623321	2.77266	899.725	FALSE	4
2022-09-12	13:27:35	1.47365	6.55509	895.426	FALSE	4
2022-09-12	13:27:36	0.40383	1.79632	901.522	FALSE	4
2022-09-12	13:27:36	0.262557	1.16791	896.594	FALSE	4
2022-09-12	13:27:36	0.537214	2.38964	903.911	FALSE	4
2022-09-12	13:27:37	0.453193	2.01589	898.61	FALSE	4
2022-09-12	13:27:37	0.634567	2.82268	906.734	FALSE	4
2022-09-12	13:27:37	0.507748	2.25856	900.868	FALSE	4
2022-09-12	13:27:37	0.598283	2.66128	909.395	FALSE	4
2022-09-12	13:27:38	0.727646	3.23671	904.105	FALSE	4
2022-09-12	13:27:38	0.71757	3.19189	912.587	FALSE	4
2022-09-12	13:27:38	0.719606	3.20095	907.306	FALSE	4
2022-09-12	13:27:38	0.715025	3.18057	915.768	FALSE	4
2022-09-12	13:27:39	0.724237	3.22155	910.527	FALSE	4
2022-09-12	13:27:39	0.367697	1.63559	917.403	FALSE	4
2022-09-12	13:27:39	0.31869	1.4176	911.945	FALSE	4
2022-09-12	13:27:40	0.663066	2.94945	920.353	FALSE	4
2022-09-12	13:27:40	0.592633	2.63615	914.581	FALSE	4
2022-09-12	13:27:40	0.953651	4.24203	924.595	FALSE	4
2022-09-12	13:27:40	0.728206	3.23921	917.82	FALSE	4
2022-09-12	13:27:41	0.692125	3.07871	927.673	FALSE	4
2022-09-12	13:27:41	0.364237	1.6202	919.441	FALSE	4
2022-09-12	13:27:41	0.482863	2.14787	929.821	FALSE	4
2022-09-12	13:27:41	0.288562	1.28358	920.724	FALSE	4
2022-09-12	13:27:42	0.374008	1.66366	931.485	FALSE	4
2022-09-12	13:27:42	0.368359	1.63853	922.363	FALSE	4
2022-09-12	13:27:42	0.43355	1.92852	933.413	FALSE	4
2022-09-12	13:27:42	0.353804	1.57379	923.937	FALSE	4
2022-09-12	13:27:43	0.383575	1.70622	935.12	FALSE	4
2022-09-12	13:27:43	0.60388	2.68618	926.623	FALSE	4
2022-09-12	13:27:43	0.377825	1.68064	936.8	FALSE	4
2022-09-12	13:27:44	0.677875	3.01532	929.638	FALSE	4
2022-09-12	13:27:44	0.7193	3.19959	940	FALSE	4
2022-09-12	13:27:44	0.436756	1.94278	931.581	FALSE	4
2022-09-12	13:27:44	0.387087	1.72184	941.722	FALSE	4
2022-09-12	13:27:45	0.226425	1.00718	932.588	FALSE	4
2022-09-12	13:27:45	0.790293	3.51538	945.237	FALSE	4
2022-09-12	13:27:45	0.436145	1.94006	934.528	FALSE	4
2022-09-12	13:27:45	0.406883	1.8099	947.047	FALSE	4
2022-09-12	13:27:46	0.481591	2.14221	936.67	FALSE	4
2022-09-12	13:27:46	0.354466	1.57674	948.624	FALSE	4
2022-09-12	13:27:46	0.469987	2.0906	938.761	FALSE	4
2022-09-12	13:27:46	0.426832	1.89863	950.522	FALSE	4
2022-09-12	13:27:47	0.494618	2.20016	940.961	FALSE	4
2022-09-12	13:27:47	0.422761	1.88053	952.403	FALSE	4
2022-09-12	13:27:47	0.722404	3.2134	944.174	FALSE	4
2022-09-12	13:27:48	0.214262	0.95308	953.356	FALSE	4
2022-09-12	13:27:48	0.567443	2.5241	946.699	FALSE	4
2022-09-12	13:27:48	0.761896	3.38907	956.745	FALSE	4
2022-09-12	13:27:48	0.442405	1.96791	948.666	FALSE	4
2022-09-12	13:27:49	0.320166	1.42416	958.169	FALSE	4
2022-09-12	13:27:49	0.23416	1.04159	949.708	FALSE	4
2022-09-12	13:27:49	0.220929	0.982736	959.152	FALSE	4
2022-09-12	13:27:49	0.530496	2.35975	952.068	FALSE	4
2022-09-12	13:27:50	1.28953	5.73609	964.888	FALSE	4
2022-09-12	13:27:50	0.951921	4.23433	956.302	FALSE	4
2022-09-12	13:27:50	0.45416	2.02019	966.908	FALSE	4
2022-09-12	13:27:50	0.356603	1.58624	957.888	FALSE	4
2022-09-12	13:27:51	0.278588	1.23922	968.147	FALSE	4
2022-09-12	13:27:51	0.404898	1.80107	959.689	FALSE	4
2022-09-12	13:27:51	0.28159	1.25257	969.4	FALSE	4
2022-09-12	13:27:52	0.312125	1.38839	961.078	FALSE	4
2022-09-12	13:27:52	0.315076	1.40152	970.802	FALSE	4
2022-09-12	13:27:52	0.326069	1.45042	962.528	FALSE	4
2022-09-12	13:27:52	0.385662	1.7155	972.517	FALSE	4
2022-09-12	13:27:53	0.397977	1.77028	964.299	FALSE	4
2022-09-12	13:27:53	0.273804	1.21793	973.735	FALSE	4
2022-09-12	13:27:53	0.195331	0.868871	965.167	FALSE	4
2022-09-12	13:27:53	0.23411	1.04137	974.776	FALSE	4
2022-09-12	13:27:54	0.286781	1.27566	966.443	FALSE	4
2022-09-12	13:27:54	0.304644	1.35512	976.132	FALSE	4
2022-09-12	13:27:54	0.336807	1.49818	967.941	FALSE	4
2022-09-12	13:27:54	0.30612	1.36168	977.493	FALSE	4
2022-09-12	13:27:55	0.317061	1.41035	969.352	FALSE	4
2022-09-12	13:27:55	0.327545	1.45699	978.95	FALSE	4
2022-09-12	13:27:55	0.328969	1.46332	970.815	FALSE	4
2022-09-12	13:27:56	0.340115	1.5129	980.463	FALSE	4
2022-09-12	13:27:56	0.336501	1.49682	972.312	FALSE	4
2022-09-12	13:27:56	0.369122	1.64193	982.105	FALSE	4
2022-09-12	13:27:56	0.365255	1.62473	973.936	FALSE	4
2022-09-12	13:27:57	0.403881	1.79654	983.902	FALSE	4
2022-09-12	13:27:57	0.379148	1.68653	975.623	FALSE	4
2022-09-12	13:27:57	0.364186	1.61997	985.522	FALSE	4
2022-09-12	13:27:57	0.382405	1.70101	977.324	FALSE	4
2022-09-12	13:27:58	0.398639	1.77323	987.295	FALSE	4
2022-09-12	13:27:58	0.406323	1.80741	979.131	FALSE	4
2022-09-12	13:27:58	0.462303	2.05642	989.351	FALSE	4
2022-09-12	13:27:58	0.49416	2.19812	981.33	FALSE	4
2022-09-12	13:27:59	0.503626	2.24023	991.591	FALSE	4
2022-09-12	13:27:59	0.46673	2.07611	983.406	FALSE	4
2022-09-12	13:27:59	0.483066	2.14877	993.74	FALSE	4
2022-09-12	13:28:00	0.46042	2.04804	985.454	FALSE	4
2022-09-12	13:28:00	0.513957	2.28618	996.026	FALSE	4
2022-09-12	13:28:00	0.499351	2.22121	987.675	FALSE	4
2022-09-12	13:28:00	0.544695	2.42291	998.449	FALSE	4
2022-09-12	13:28:01	0.544237	2.42088	990.096	FALSE	4
2022-09-12	13:28:01	0.528104	2.34911	1000.8	FALSE	4
2022-09-12	13:28:01	0.559555	2.48901	992.585	FALSE	4
2022-09-12	13:28:01	0.568563	2.52908	1003.33	FALSE	4
2022-09-12	13:28:02	0.601743	2.67667	995.261	FALSE	4
2022-09-12	13:28:02	0.667748	2.97028	1006.3	FALSE	4
2022-09-12	13:28:02	0.590852	2.62823	997.89	FALSE	4
2022-09-12	13:28:02	0.484644	2.15579	1008.45	FALSE	4
2022-09-12	13:28:03	0.47472	2.11165	1000	FALSE	4
2022-09-12	13:28:03	0.523524	2.32874	1010.78	FALSE	4
2022-09-12	13:28:03	0.609631	2.71176	1002.71	FALSE	4
2022-09-12	13:28:04	0.61131	2.71923	1013.5	FALSE	4
2022-09-12	13:28:04	0.605407	2.69297	1005.41	FALSE	4
2022-09-12	13:28:04	0.570598	2.53813	1016.04	FALSE	4
2022-09-12	13:28:04	0.579147	2.57616	1007.98	FALSE	4
2022-09-12	13:28:05	0.548613	2.44034	1018.48	FALSE	4
2022-09-12	13:28:05	0.571412	2.54175	1010.52	FALSE	4
2022-09-12	13:28:05	0.574211	2.55421	1021.03	FALSE	4
2022-09-12	13:28:05	0.692226	3.07916	1013.6	FALSE	4
2022-09-12	13:28:06	1.92587	8.56665	1029.6	FALSE	4
2022-09-12	13:28:06	2.01039	8.94262	1022.55	FALSE	4
2022-09-12	13:28:06	0.635076	2.82495	1032.43	FALSE	4
2022-09-12	13:28:06	0.650649	2.89422	1025.44	FALSE	4
2022-09-12	13:28:07	0.543626	2.41816	1034.84	FALSE	4
2022-09-12	13:28:07	0.583931	2.59744	1028.04	FALSE	4
2022-09-12	13:28:07	0.594517	2.64453	1037.49	FALSE	4
2022-09-12	13:28:08	0.559962	2.49082	1030.53	FALSE	4
2022-09-12	13:28:08	0.603117	2.68279	1040.17	FALSE	4
2022-09-12	13:28:08	0.533957	2.37515	1032.9	FALSE	4
2022-09-12	13:28:08	0.833855	3.70915	1043.88	FALSE	4
2022-09-12	13:28:09	2.28525	10.1652	1043.07	FALSE	4
2022-09-12	13:28:09	1.76134	7.83479	1051.72	FALSE	4
2022-09-12	13:28:09	0.760471	3.38273	1046.45	FALSE	4
2022-09-12	13:28:09	0.729987	3.24713	1054.96	FALSE	4
2022-09-12	13:28:10	1.00887	4.48766	1050.94	FALSE	4
2022-09-12	13:28:10	7.91344	35.2006	1090.16	1	5
2022-09-12	13:28:10	2.14968	9.56221	1060.5	FALSE	5
2022-09-12	13:28:10	0.658893	2.93089	1093.09	FALSE	5
2022-09-12	13:28:11	0.577672	2.5696	1063.07	FALSE	5
2022-09-12	13:28:11	0.555891	2.47271	1095.57	FALSE	5
2022-09-12	13:28:11	0.464644	2.06683	1065.14	FALSE	5
2022-09-12	13:28:12	0.52388	2.33032	1097.9	FALSE	5
2022-09-12	13:28:12	0.575687	2.56077	1067.7	FALSE	5
2022-09-12	13:28:12	0.499809	2.22325	1100.12	FALSE	5
2022-09-12	13:28:12	0.515891	2.29479	1069.99	FALSE	5
2022-09-12	13:28:13	0.47472	2.11165	1102.23	FALSE	5
2022-09-12	13:28:13	0.624593	2.77831	1072.77	FALSE	5
2022-09-12	13:28:13	0.586323	2.60808	1104.84	FALSE	5
2022-09-12	13:28:13	0.505	2.24634	1075.02	FALSE	5
2022-09-12	13:28:14	0.589224	2.62099	1107.46	FALSE	5
2022-09-12	13:28:14	0.621387	2.76405	1077.78	FALSE	5
2022-09-12	13:28:14	0.682507	3.03593	1110.5	FALSE	5
2022-09-12	13:28:14	0.688664	3.06332	1080.85	FALSE	5
2022-09-12	13:28:15	0.652684	2.90327	1113.4	FALSE	5
2022-09-12	13:28:15	0.677672	3.01442	1083.86	FALSE	5
2022-09-12	13:28:15	0.672888	2.99314	1116.39	FALSE	5
2022-09-12	13:28:16	0.72556	3.22744	1087.09	FALSE	5
2022-09-12	13:28:16	0.712837	3.17084	1119.56	FALSE	5
2022-09-12	13:28:16	0.677723	3.01465	1090.1	FALSE	5
2022-09-12	13:28:16	0.633397	2.81748	1122.38	FALSE	5
2022-09-12	13:28:17	0.628511	2.79574	1092.9	FALSE	5
2022-09-12	13:28:17	0.577163	2.56734	1124.95	FALSE	5
2022-09-12	13:28:17	0.61126	2.71901	1095.62	FALSE	5
2022-09-12	13:28:17	0.63986	2.84623	1127.79	FALSE	5
2022-09-12	13:28:18	0.640471	2.84894	1098.47	FALSE	5
2022-09-12	13:28:18	0.680573	3.02732	1130.82	FALSE	5
2022-09-12	13:28:18	0.572837	2.54809	1101.01	FALSE	5
2022-09-12	13:28:18	0.633601	2.81838	1133.64	FALSE	5
2022-09-12	13:28:19	0.70958	3.15635	1104.17	FALSE	5
2022-09-12	13:28:19	0.545611	2.42699	1136.07	FALSE	5
2022-09-12	13:28:19	0.638741	2.84125	1107.01	FALSE	5
2022-09-12	13:28:20	0.57299	2.54877	1138.62	FALSE	5
2022-09-12	13:28:20	0.631768	2.81023	1109.82	FALSE	5
2022-09-12	13:28:20	0.60103	2.6735	1141.29	FALSE	5
2022-09-12	13:28:20	0.649478	2.88901	1112.71	FALSE	5
2022-09-12	13:28:21	0.698028	3.10497	1144.39	FALSE	5
2022-09-12	13:28:21	0.670191	2.98114	1115.69	FALSE	5
2022-09-12	13:28:21	0.753499	3.35171	1147.75	FALSE	5
2022-09-12	13:28:21	0.780827	3.47327	1119.16	FALSE	5
2022-09-12	13:28:22	0.652481	2.90237	1150.65	FALSE	5
2022-09-12	13:28:22	1.68754	7.50652	1126.67	FALSE	5
2022-09-12	13:28:22	1.79915	8.00298	1158.65	FALSE	5
2022-09-12	13:28:23	2.15228	9.57377	1136.25	FALSE	5
2022-09-12	13:28:23	1.59991	7.11672	1165.77	FALSE	5
2022-09-12	13:28:23	1.10882	4.93225	1141.18	FALSE	5
2022-09-12	13:28:23	0.966679	4.29998	1170.07	FALSE	5
2022-09-12	13:28:24	0.808053	3.59438	1144.77	FALSE	5
2022-09-12	13:28:24	0.571463	2.54198	1172.61	FALSE	5
2022-09-12	13:28:24	0.710751	3.16156	1147.93	FALSE	5
2022-09-12	13:28:24	0.613448	2.72874	1175.34	FALSE	5
2022-09-12	13:28:25	1.75818	7.82074	1155.75	FALSE	5
2022-09-12	13:28:25	10.0006	44.4847	1219.82	1	6
2022-09-12	13:28:25	12.1048	53.8446	1209.6	1	7
2022-09-12	13:28:25	6.64322	29.5504	1249.37	1	8
2022-09-12	13:28:26	3.44378	15.3186	1224.92	1	9
2022-09-12	13:28:26	2.1995	9.78382	1259.16	FALSE	9
2022-09-12	13:28:26	1.38912	6.17908	1231.1	FALSE	9
2022-09-12	13:28:27	1.20464	5.35848	1264.52	FALSE	9
2022-09-12	13:28:27	0.881845	3.92262	1235.02	FALSE	9
2022-09-12	13:28:27	0.800623	3.56133	1268.08	FALSE	9
2022-09-12	13:28:27	0.522506	2.32421	1237.34	FALSE	9
2022-09-12	13:28:28	1.22195	5.43548	1273.51	FALSE	9
2022-09-12	13:28:28	3.42261	15.2245	1252.57	1	10
2022-09-12	13:28:28	1.33696	5.94707	1279.46	FALSE	10
2022-09-12	13:28:28	1.01589	4.51888	1257.09	FALSE	10
2022-09-12	13:28:29	0.637264	2.83468	1282.3	FALSE	10
2022-09-12	13:28:29	0.470954	2.0949	1259.18	FALSE	10
2022-09-12	13:28:29	0.704389	3.13326	1285.43	FALSE	10
2022-09-12	13:28:29	0.442863	1.96994	1261.15	FALSE	10
2022-09-12	13:28:30	0.709377	3.15545	1288.58	FALSE	10
2022-09-12	13:28:30	0.436349	1.94097	1263.09	FALSE	10
2022-09-12	13:28:30	0.525865	2.33915	1290.92	FALSE	10
2022-09-12	13:28:31	0.225407	1.00266	1264.09	FALSE	10
2022-09-12	13:28:31	0.524796	2.3344	1293.26	FALSE	10
2022-09-12	13:28:31	0.213702	0.950589	1265.05	FALSE	10
2022-09-12	13:28:31	0.134364	0.597678	1293.86	FALSE	10
2022-09-12	13:28:32	0.741641	3.29897	1268.34	FALSE	10
2022-09-12	13:28:32	1.2508	5.56381	1299.42	FALSE	10
2022-09-12	13:28:32	0.495942	2.20605	1270.55	FALSE	10
2022-09-12	13:28:32	0.445356	1.98103	1301.4	FALSE	10
2022-09-12	13:28:33	0.186018	0.827445	1271.38	FALSE	10
2022-09-12	13:28:33	0.387443	1.72342	1303.12	FALSE	10
2022-09-12	13:28:33	0.243881	1.08483	1272.46	FALSE	10
2022-09-12	13:28:33	0.730038	3.24736	1306.37	FALSE	10
2022-09-12	13:28:34	0.749377	3.33338	1275.8	FALSE	10
2022-09-12	13:28:34	1.15329	5.13006	1311.5	FALSE	10
2022-09-12	13:28:34	0.27813	1.23718	1277.03	FALSE	10
2022-09-12	13:28:35	0.486476	2.16394	1313.66	FALSE	10
2022-09-12	13:28:35	0.249529	1.10995	1278.14	FALSE	10
2022-09-12	13:28:35	0.386476	1.71912	1315.38	FALSE	10
2022-09-12	13:28:35	0.160471	0.713807	1278.86	FALSE	10
2022-09-12	13:28:36	0.385814	1.71618	1317.1	FALSE	10
2022-09-12	13:28:36	0.398283	1.77164	1280.63	FALSE	10
2022-09-12	13:28:36	0.847901	3.77163	1320.87	FALSE	10
2022-09-12	13:28:36	0.764949	3.40265	1284.03	FALSE	10
2022-09-12	13:28:37	1.06648	4.74392	1325.62	FALSE	10
2022-09-12	13:28:37	0.533753	2.37424	1286.41	FALSE	10
2022-09-12	13:28:37	0.587036	2.61125	1328.23	FALSE	10
2022-09-12	13:28:37	0.547137	2.43377	1288.84	FALSE	10
2022-09-12	13:28:38	0.497519	2.21306	1330.44	FALSE	10
2022-09-12	13:28:38	0.655738	2.91685	1291.76	FALSE	10
2022-09-12	13:28:38	0.987138	4.39099	1334.83	FALSE	10
2022-09-12	13:28:39	1.94841	8.66692	1300.42	FALSE	10
2022-09-12	13:28:39	3.46693	15.4216	1350.25	1	11
2022-09-12	13:28:39	2.03548	9.05422	1309.48	FALSE	11
2022-09-12	13:28:39	2.40902	10.7158	1360.97	FALSE	11
2022-09-12	13:28:40	2.08525	9.27561	1318.75	FALSE	11
2022-09-12	13:28:40	1.46067	6.49735	1367.47	FALSE	11
2022-09-12	13:28:40	0.496909	2.21035	1320.96	FALSE	11
2022-09-12	13:28:40	0.236858	1.05359	1368.52	FALSE	11
2022-09-12	13:28:41	0.361285	1.60707	1322.57	FALSE	11
2022-09-12	13:28:41	0.643626	2.86298	1371.38	FALSE	11
2022-09-12	13:28:41	1.0335	4.59721	1327.17	FALSE	11
2022-09-12	13:28:41	0.41014	1.82438	1373.21	FALSE	11
2022-09-12	13:28:42	0.54729	2.43446	1329.6	FALSE	11
2022-09-12	13:28:42	0.491005	2.18409	1375.39	FALSE	11
2022-09-12	13:28:42	0.343881	1.52965	1331.13	FALSE	11
2022-09-12	13:28:43	0.17355	0.771985	1376.16	FALSE	11
2022-09-12	13:28:43	0.211005	0.938592	1332.07	FALSE	11
2022-09-12	13:28:43	0.948715	4.22007	1380.38	FALSE	11
2022-09-12	13:28:43	0.347901	1.54753	1333.62	FALSE	11
2022-09-12	13:28:44	1.4851	6.60602	1386.99	FALSE	11
2022-09-12	13:28:44	2.84113	12.6379	1346.26	FALSE	11
2022-09-12	13:28:44	5.58479	24.8423	1411.83	1	12
2022-09-12	13:28:44	5.45395	24.2603	1370.52	1	13
2022-09-12	13:28:45	2.94352	13.0934	1424.92	FALSE	13
2022-09-12	13:28:45	0.711412	3.1645	1373.68	FALSE	13
2022-09-12	13:28:45	0.612583	2.72489	1427.65	FALSE	13
2022-09-12	13:28:45	0.455534	2.02631	1375.71	FALSE	13
2022-09-12	13:28:46	0.366272	1.62925	1429.28	FALSE	13
2022-09-12	13:28:46	0.2193	0.97549	1376.68	FALSE	13
2022-09-12	13:28:46	0.315076	1.40152	1430.68	FALSE	13
2022-09-12	13:28:47	0.249275	1.10883	1377.79	FALSE	13
2022-09-12	13:28:47	0.469682	2.08924	1432.77	FALSE	13
2022-09-12	13:28:47	0.194262	0.864116	1378.66	FALSE	13
2022-09-12	13:28:47	0.387494	1.72365	1434.49	FALSE	13
2022-09-12	13:28:48	0.439962	1.95704	1380.61	FALSE	13
2022-09-12	13:28:48	0.0824048	0.366553	1434.86	FALSE	13
2022-09-12	13:28:48	-0.0541855	-0.241028	1380.61	FALSE	13
2022-09-12	13:28:48	0.161336	0.717655	1435.58	FALSE	13
2022-09-12	13:28:49	0.177774	0.790774	1381.4	FALSE	13
2022-09-12	13:28:49	0.197316	0.877701	1436.45	FALSE	13
2022-09-12	13:28:49	0.290242	1.29105	1382.69	FALSE	13
2022-09-12	13:28:49	0.227545	1.01217	1437.47	FALSE	13
2022-09-12	13:28:50	0.254822	1.1335	1383.83	FALSE	13
2022-09-12	13:28:50	0.278995	1.24103	1438.71	FALSE	13
2022-09-12	13:28:50	0.213906	0.951497	1384.78	FALSE	13
2022-09-12	13:28:51	0.241947	1.07623	1439.78	FALSE	13
2022-09-12	13:28:51	0.278995	1.24103	1386.02	FALSE	13
2022-09-12	13:28:51	0.324084	1.44159	1441.23	FALSE	13
2022-09-12	13:28:51	0.381234	1.69581	1387.72	FALSE	13
2022-09-12	13:28:52	0.716247	3.18601	1444.41	FALSE	13
2022-09-12	13:28:52	0.732023	3.25618	1390.97	FALSE	13
2022-09-12	13:28:52	0.83416	3.71051	1448.12	FALSE	13
2022-09-12	13:28:52	0.571921	2.54402	1393.52	FALSE	13
2022-09-12	13:28:53	0.297061	1.32139	1449.44	FALSE	13
2022-09-12	13:28:53	0.177825	0.791001	1394.31	FALSE	13
2022-09-12	13:28:53	0.189835	0.844424	1450.29	FALSE	13
2022-09-12	13:28:53	0.289224	1.28653	1395.59	FALSE	13
2022-09-12	13:28:54	0.567799	2.52568	1452.81	FALSE	13
2022-09-12	13:28:54	0.289122	1.28607	1396.88	FALSE	13
2022-09-12	13:28:54	0.459657	2.04465	1454.86	FALSE	13
2022-09-12	13:28:55	0.503168	2.23819	1399.12	FALSE	13
2022-09-12	13:28:55	1.48846	6.62097	1461.48	FALSE	13
2022-09-12	13:28:55	1.9709	8.76696	1407.88	FALSE	13
2022-09-12	13:28:55	0.490598	2.18228	1463.66	FALSE	13
2022-09-12	13:28:56	0.299351	1.33157	1409.22	FALSE	13
2022-09-12	13:28:56	0.408257	1.81601	1465.48	FALSE	13
2022-09-12	13:28:56	0.367138	1.6331	1410.85	FALSE	13
2022-09-12	13:28:56	0.252125	1.1215	1466.6	FALSE	13
2022-09-12	13:28:57	0.348817	1.55161	1412.4	FALSE	13
2022-09-12	13:28:57	0.168308	0.748668	1467.35	FALSE	13
2022-09-12	13:28:57	0.297824	1.32478	1413.73	FALSE	13
2022-09-12	13:28:57	0.150242	0.668306	1468.02	FALSE	13
2022-09-12	13:28:58	0.362099	1.61069	1415.34	FALSE	13
2022-09-12	13:28:58	0.12958	0.576398	1468.59	FALSE	13
2022-09-12	13:28:58	0.331005	1.47238	1416.81	FALSE	13
2022-09-12	13:28:59	0.24556	1.0923	1469.69	FALSE	13
2022-09-12	13:28:59	0.434618	1.93327	1418.74	FALSE	13
2022-09-12	13:28:59	0.497316	2.21216	1471.9	FALSE	13
2022-09-12	13:28:59	0.556857	2.47701	1421.22	FALSE	13
2022-09-12	13:29:00	0.372379	1.65642	1473.55	FALSE	13
2022-09-12	13:29:00	0.745255	3.31504	1424.53	FALSE	13
2022-09-12	13:29:00	2.07416	9.22628	1482.78	FALSE	13
2022-09-12	13:29:00	1.36368	6.06592	1430.6	FALSE	13
2022-09-12	13:29:01	1.11335	4.9524	1487.73	FALSE	13
2022-09-12	13:29:01	1.70403	7.57987	1438.18	FALSE	13
2022-09-12	13:29:01	1.15508	5.13803	1492.87	FALSE	13
2022-09-12	13:29:01	1.57971	7.02687	1445.21	FALSE	13
2022-09-12	13:29:02	1.27665	5.67879	1498.55	FALSE	13
2022-09-12	13:29:02	1.42663	6.34594	1451.55	FALSE	13
2022-09-12	13:29:02	1.1905	5.29558	1503.84	FALSE	13
2022-09-12	13:29:03	0.511056	2.27328	1453.83	FALSE	13
2022-09-12	13:29:03	0.672735	2.99246	1506.84	FALSE	13
2022-09-12	13:29:03	0.375636	1.6709	1455.5	FALSE	13
2022-09-12	13:29:03	0.732684	3.25912	1510.1	FALSE	13
2022-09-12	13:29:04	0.796196	3.54164	1459.04	FALSE	13
2022-09-12	13:29:04	1.3364	5.94457	1516.04	FALSE	13
2022-09-12	13:29:04	1.34617	5.98803	1465.03	FALSE	13
2022-09-12	13:29:04	0.76785	3.41555	1519.46	FALSE	13
2022-09-12	13:29:05	0.609122	2.7095	1467.74	FALSE	13
2022-09-12	13:29:05	0.515178	2.29161	1521.75	FALSE	13
2022-09-12	13:29:05	0.532634	2.36926	1470.11	FALSE	13
2022-09-12	13:29:05	0.530344	2.35908	1524.11	FALSE	13

## Sheet: Ranger_martin_2022912132344 (E)
Date	Time	Lbs	Total Force x time			**GoPro Fitting: 13:09
2022-09-12	13:24:05	0.328308	0.328308	FALSE	0			Total Force x time	673.129
2022-09-12	13:24:05	0.300267	0.628575	FALSE	0			Total Time Steps Force >3	13
2022-09-12	13:24:05	0.297468	0.926043	FALSE	0
2022-09-12	13:24:05	0.383982	1.31002	FALSE	0
2022-09-12	13:24:06	0.647697	1.95772	FALSE	0
2022-09-12	13:24:06	0.502354	2.46008	FALSE	0
2022-09-12	13:24:06	0.780929	3.241	FALSE	0
2022-09-12	13:24:06	0.441743	3.68275	FALSE	0
2022-09-12	13:24:07	0.410445	4.09319	FALSE	0
2022-09-12	13:24:07	0.2107	4.30389	FALSE	0
2022-09-12	13:24:07	0.220725	4.52462	FALSE	0
2022-09-12	13:24:07	0.227748	4.75237	FALSE	0
2022-09-12	13:24:08	0.239758	4.99212	FALSE	0
2022-09-12	13:24:08	0.214262	5.20639	FALSE	0
2022-09-12	13:24:08	0.20729	5.41368	FALSE	0
2022-09-12	13:24:09	0.280725	5.6944	FALSE	0
2022-09-12	13:24:09	0.345814	6.04022	FALSE	0
2022-09-12	13:24:09	0.329682	6.3699	FALSE	0
2022-09-12	13:24:09	0.267952	6.63785	FALSE	0
2022-09-12	13:24:10	0.441031	7.07888	FALSE	0
2022-09-12	13:24:10	0.398588	7.47747	FALSE	0
2022-09-12	13:24:10	0.381234	7.8587	FALSE	0
2022-09-12	13:24:10	0.340623	8.19933	FALSE	0
2022-09-12	13:24:11	0.384288	8.58361	FALSE	0
2022-09-12	13:24:11	0.388512	8.97213	FALSE	0
2022-09-12	13:24:11	0.393092	9.36522	FALSE	0
2022-09-12	13:24:11	0.409784	9.775	FALSE	0
2022-09-12	13:24:12	0.385764	10.1608	FALSE	0
2022-09-12	13:24:12	0.402761	10.5635	FALSE	0
2022-09-12	13:24:12	0.403881	10.9674	FALSE	0
2022-09-12	13:24:13	0.391921	11.3593	FALSE	0
2022-09-12	13:24:13	0.386323	11.7457	FALSE	0
2022-09-12	13:24:13	0.393244	12.1389	FALSE	0
2022-09-12	13:24:13	0.411005	12.5499	FALSE	0
2022-09-12	13:24:14	0.420013	12.9699	FALSE	0
2022-09-12	13:24:14	0.398995	13.3689	FALSE	0
2022-09-12	13:24:14	0.396349	13.7653	FALSE	0
2022-09-12	13:24:14	0.439708	14.205	FALSE	0
2022-09-12	13:24:15	0.453499	14.6585	FALSE	0
2022-09-12	13:24:15	0.414059	15.0725	FALSE	0
2022-09-12	13:24:15	0.285305	15.3578	FALSE	0
2022-09-12	13:24:15	0.363677	15.7215	FALSE	0
2022-09-12	13:24:16	0.246069	15.9676	FALSE	0
2022-09-12	13:24:16	0.435687	16.4033	FALSE	0
2022-09-12	13:24:16	0.41986	16.8231	FALSE	0
2022-09-12	13:24:17	0.342506	17.1656	FALSE	0
2022-09-12	13:24:17	0.468155	17.6338	FALSE	0
2022-09-12	13:24:17	0.493651	18.1274	FALSE	0
2022-09-12	13:24:17	0.381234	18.5087	FALSE	0
2022-09-12	13:24:18	0.425916	18.9346	FALSE	0
2022-09-12	13:24:18	0.353753	19.2883	FALSE	0
2022-09-12	13:24:18	0.357417	19.6458	FALSE	0
2022-09-12	13:24:18	0.512328	20.1581	FALSE	0
2022-09-12	13:24:19	0.349173	20.5073	FALSE	0
2022-09-12	13:24:19	0.574924	21.0822	FALSE	0
2022-09-12	13:24:19	0.336043	21.4182	FALSE	0
2022-09-12	13:24:19	1.07701	22.4952	FALSE	0
2022-09-12	13:24:20	0.960776	23.456	FALSE	0
2022-09-12	13:24:20	1.9249	25.3809	FALSE	0
2022-09-12	13:24:20	1.94215	27.3231	FALSE	0
2022-09-12	13:24:21	1.19467	28.5177	FALSE	0
2022-09-12	13:24:21	0.446374	28.9641	FALSE	0
2022-09-12	13:24:21	0.962812	29.9269	FALSE	0
2022-09-12	13:24:21	0.413906	30.3408	FALSE	0
2022-09-12	13:24:22	0.389784	30.7306	FALSE	0
2022-09-12	13:24:22	0.406883	31.1375	FALSE	0
2022-09-12	13:24:22	0.457163	31.5946	FALSE	0
2022-09-12	13:24:22	0.721336	32.316	FALSE	0
2022-09-12	13:24:23	0.496807	32.8128	FALSE	0
2022-09-12	13:24:23	0.517417	33.3302	FALSE	0
2022-09-12	13:24:23	0.667341	33.9976	FALSE	0
2022-09-12	13:24:23	0.707087	34.7046	FALSE	0
2022-09-12	13:24:24	0.74159	35.4462	FALSE	0
2022-09-12	13:24:24	0.777723	36.224	FALSE	0
2022-09-12	13:24:24	0.658842	36.8828	FALSE	0
2022-09-12	13:24:25	0.615077	37.4979	FALSE	0
2022-09-12	13:24:25	0.599911	38.0978	FALSE	0
2022-09-12	13:24:25	0.548715	38.6465	FALSE	0
2022-09-12	13:24:25	0.524236	39.1707	FALSE	0
2022-09-12	13:24:26	0.487137	39.6579	FALSE	0
2022-09-12	13:24:26	0.510801	40.1687	FALSE	0
2022-09-12	13:24:26	0.524593	40.6933	FALSE	0
2022-09-12	13:24:26	0.465509	41.1588	FALSE	0
2022-09-12	13:24:27	0.417367	41.5761	FALSE	0
2022-09-12	13:24:27	0.406018	41.9822	FALSE	0
2022-09-12	13:24:27	0.417926	42.4001	FALSE	0
2022-09-12	13:24:27	0.474262	42.8743	FALSE	0
2022-09-12	13:24:28	0.549377	43.4237	FALSE	0
2022-09-12	13:24:28	0.50159	43.9253	FALSE	0
2022-09-12	13:24:28	0.440878	44.3662	FALSE	0
2022-09-12	13:24:29	0.40729	44.7735	FALSE	0
2022-09-12	13:24:29	0.435738	45.2092	FALSE	0
2022-09-12	13:24:29	0.451565	45.6608	FALSE	0
2022-09-12	13:24:29	0.342456	46.0032	FALSE	0
2022-09-12	13:24:30	1.02408	47.0273	FALSE	0
2022-09-12	13:24:30	0.825967	47.8533	FALSE	0
2022-09-12	13:24:30	1.88877	49.7421	FALSE	0
2022-09-12	13:24:30	1.26017	51.0022	FALSE	0
2022-09-12	13:24:31	2.64276	53.645	FALSE	0
2022-09-12	13:24:31	3.67523	57.3202	1	1
2022-09-12	13:24:31	2.90032	60.2205	FALSE	1
2022-09-12	13:24:31	2.60286	62.8234	FALSE	1
2022-09-12	13:24:32	1.25513	64.0785	FALSE	1
2022-09-12	13:24:32	0.569376	64.6479	FALSE	1
2022-09-12	13:24:32	0.32383	64.9717	FALSE	1
2022-09-12	13:24:33	0.374517	65.3462	FALSE	1
2022-09-12	13:24:33	0.185713	65.532	FALSE	1
2022-09-12	13:24:33	0.324135	65.8561	FALSE	1
2022-09-12	13:24:33	0.252532	66.1086	FALSE	1
2022-09-12	13:24:34	0.225763	66.3344	FALSE	1
2022-09-12	13:24:34	0.216909	66.5513	FALSE	1
2022-09-12	13:24:34	0.275636	66.8269	FALSE	1
2022-09-12	13:24:34	0.336247	67.1632	FALSE	1
2022-09-12	13:24:35	0.576959	67.7401	FALSE	1
2022-09-12	13:24:35	0.444084	68.1842	FALSE	1
2022-09-12	13:24:35	0.393448	68.5777	FALSE	1
2022-09-12	13:24:35	0.564237	69.1419	FALSE	1
2022-09-12	13:24:36	0.412634	69.5545	FALSE	1
2022-09-12	13:24:36	0.843066	70.3976	FALSE	1
2022-09-12	13:24:36	0.531311	70.9289	FALSE	1
2022-09-12	13:24:37	0.622405	71.5513	FALSE	1
2022-09-12	13:24:37	0.403728	71.9551	FALSE	1
2022-09-12	13:24:37	0.558842	72.5139	FALSE	1
2022-09-12	13:24:37	0.355789	72.8697	FALSE	1
2022-09-12	13:24:38	0.406883	73.2766	FALSE	1
2022-09-12	13:24:38	0.37131	73.6479	FALSE	1
2022-09-12	13:24:38	0.33126	73.9791	FALSE	1
2022-09-12	13:24:38	0.442659	74.4218	FALSE	1
2022-09-12	13:24:39	0.621896	75.0437	FALSE	1
2022-09-12	13:24:39	0.509326	75.553	FALSE	1
2022-09-12	13:24:39	0.305611	75.8586	FALSE	1
2022-09-12	13:24:39	0.614313	76.4729	FALSE	1
2022-09-12	13:24:40	0.396094	76.869	FALSE	1
2022-09-12	13:24:40	0.263677	77.1327	FALSE	1
2022-09-12	13:24:40	0.442303	77.575	FALSE	1
2022-09-12	13:24:41	0.311107	77.8861	FALSE	1
2022-09-12	13:24:41	0.437774	78.3239	FALSE	1
2022-09-12	13:24:41	0.369733	78.6936	FALSE	1
2022-09-12	13:24:41	0.355331	79.049	FALSE	1
2022-09-12	13:24:42	0.396756	79.4457	FALSE	1
2022-09-12	13:24:42	0.396858	79.8426	FALSE	1
2022-09-12	13:24:42	0.418028	80.2606	FALSE	1
2022-09-12	13:24:42	0.597265	80.8579	FALSE	1
2022-09-12	13:24:43	0.78271	81.6406	FALSE	1
2022-09-12	13:24:43	0.925509	82.5661	FALSE	1
2022-09-12	13:24:43	0.433041	82.9991	FALSE	1
2022-09-12	13:24:44	0.430903	83.43	FALSE	1
2022-09-12	13:24:44	0.378486	83.8085	FALSE	1
2022-09-12	13:24:44	0.438333	84.2469	FALSE	1
2022-09-12	13:24:44	0.358181	84.605	FALSE	1
2022-09-12	13:24:45	0.441438	85.0465	FALSE	1
2022-09-12	13:24:45	0.138283	85.1848	FALSE	1
2022-09-12	13:24:45	0.115789	85.3005	FALSE	1
2022-09-12	13:24:45	0.183575	85.4841	FALSE	1
2022-09-12	13:24:46	0.376858	85.861	FALSE	1
2022-09-12	13:24:46	0.374211	86.2352	FALSE	1
2022-09-12	13:24:46	0.373397	86.6086	FALSE	1
2022-09-12	13:24:46	0.364491	86.9731	FALSE	1
2022-09-12	13:24:47	0.327036	87.3001	FALSE	1
2022-09-12	13:24:47	0.493244	87.7934	FALSE	1
2022-09-12	13:24:47	0.635789	88.4291	FALSE	1
2022-09-12	13:24:48	0.78902	89.2182	FALSE	1
2022-09-12	13:24:48	0.499402	89.7176	FALSE	1
2022-09-12	13:24:48	0.470598	90.1882	FALSE	1
2022-09-12	13:24:48	0.395992	90.5842	FALSE	1
2022-09-12	13:24:49	0.45874	91.0429	FALSE	1
2022-09-12	13:24:49	0.602964	91.6459	FALSE	1
2022-09-12	13:24:49	0.869682	92.5155	FALSE	1
2022-09-12	13:24:49	0.542303	93.0578	FALSE	1
2022-09-12	13:24:50	0.543168	93.601	FALSE	1
2022-09-12	13:24:50	0.345967	93.947	FALSE	1
2022-09-12	13:24:50	0.305356	94.2523	FALSE	1
2022-09-12	13:24:50	0.439351	94.6917	FALSE	1
2022-09-12	13:24:51	0.172583	94.8643	FALSE	1
2022-09-12	13:24:51	0.332786	95.1971	FALSE	1
2022-09-12	13:24:51	0.377519	95.5746	FALSE	1
2022-09-12	13:24:52	-0.00436363	95.5746	FALSE	1
2022-09-12	13:24:52	-0.0402415	95.5746	FALSE	1
2022-09-12	13:24:52	0.0616414	95.6362	FALSE	1
2022-09-12	13:24:52	0.0414888	95.6777	FALSE	1
2022-09-12	13:24:53	0.240929	95.9186	FALSE	1
2022-09-12	13:24:53	0.0525321	95.9712	FALSE	1
2022-09-12	13:24:53	0.128308	96.0995	FALSE	1
2022-09-12	13:24:53	-0.00802776	96.0995	FALSE	1
2022-09-12	13:24:54	0.368919	96.4684	FALSE	1
2022-09-12	13:24:54	0.228461	96.6969	FALSE	1
2022-09-12	13:24:54	0.402303	97.0992	FALSE	1
2022-09-12	13:24:54	0.235891	97.335	FALSE	1
2022-09-12	13:24:55	0.458333	97.7934	FALSE	1
2022-09-12	13:24:55	0.279962	98.0733	FALSE	1
2022-09-12	13:24:55	0.524542	98.5979	FALSE	1
2022-09-12	13:24:56	0.415891	99.0138	FALSE	1
2022-09-12	13:24:56	0.559809	99.5736	FALSE	1
2022-09-12	13:24:56	0.620522	100.194	FALSE	1
2022-09-12	13:24:56	0.471819	100.666	FALSE	1
2022-09-12	13:24:57	0.646578	101.313	FALSE	1
2022-09-12	13:24:57	1.01085	102.323	FALSE	1
2022-09-12	13:24:57	1.09609	103.419	FALSE	1
2022-09-12	13:24:57	0.889987	104.309	FALSE	1
2022-09-12	13:24:58	1.12001	105.429	FALSE	1
2022-09-12	13:24:58	0.937366	106.367	FALSE	1
2022-09-12	13:24:58	0.775687	107.142	FALSE	1
2022-09-12	13:24:58	0.544695	107.687	FALSE	1
2022-09-12	13:24:59	0.350038	108.037	FALSE	1
2022-09-12	13:24:59	0.330852	108.368	FALSE	1
2022-09-12	13:24:59	0.511463	108.88	FALSE	1
2022-09-12	13:25:00	0.183066	109.063	FALSE	1
2022-09-12	13:25:00	0.136094	109.199	FALSE	1
2022-09-12	13:25:00	-0.0517936	109.199	FALSE	1
2022-09-12	13:25:00	-0.141819	109.199	FALSE	1
2022-09-12	13:25:01	0.0321249	109.231	FALSE	1
2022-09-12	13:25:01	0.0110562	109.242	FALSE	1
2022-09-12	13:25:01	-0.0330659	109.242	FALSE	1
2022-09-12	13:25:01	0.102303	109.344	FALSE	1
2022-09-12	13:25:02	0.135229	109.479	FALSE	1
2022-09-12	13:25:02	0.304491	109.784	FALSE	1
2022-09-12	13:25:02	0.452227	110.236	FALSE	1
2022-09-12	13:25:02	0.568053	110.804	FALSE	1
2022-09-12	13:25:03	0.551208	111.355	FALSE	1
2022-09-12	13:25:03	0.509224	111.865	FALSE	1
2022-09-12	13:25:03	0.462099	112.327	FALSE	1
2022-09-12	13:25:04	0.376247	112.703	FALSE	1
2022-09-12	13:25:04	0.444796	113.148	FALSE	1
2022-09-12	13:25:04	0.414109	113.562	FALSE	1
2022-09-12	13:25:04	0.398893	113.961	FALSE	1
2022-09-12	13:25:05	0.3593	114.32	FALSE	1
2022-09-12	13:25:05	0.357163	114.677	FALSE	1
2022-09-12	13:25:05	0.35355	115.031	FALSE	1
2022-09-12	13:25:05	0.346629	115.377	FALSE	1
2022-09-12	13:25:06	0.349835	115.727	FALSE	1
2022-09-12	13:25:06	0.346069	116.073	FALSE	1
2022-09-12	13:25:06	0.3564	116.43	FALSE	1
2022-09-12	13:25:06	0.350445	116.78	FALSE	1
2022-09-12	13:25:07	0.347341	117.127	FALSE	1
2022-09-12	13:25:07	0.350293	117.478	FALSE	1
2022-09-12	13:25:07	0.344084	117.822	FALSE	1
2022-09-12	13:25:08	0.346832	118.169	FALSE	1
2022-09-12	13:25:08	0.354262	118.523	FALSE	1
2022-09-12	13:25:08	0.352481	118.875	FALSE	1
2022-09-12	13:25:08	0.361031	119.236	FALSE	1
2022-09-12	13:25:09	0.357621	119.594	FALSE	1
2022-09-12	13:25:09	0.398283	119.992	FALSE	1
2022-09-12	13:25:09	0.54327	120.536	FALSE	1
2022-09-12	13:25:09	0.863117	121.399	FALSE	1
2022-09-12	13:25:10	0.804084	122.203	FALSE	1
2022-09-12	13:25:10	0.877621	123.08	FALSE	1
2022-09-12	13:25:10	0.646985	123.727	FALSE	1
2022-09-12	13:25:10	0.318028	124.045	FALSE	1
2022-09-12	13:25:11	0.194822	124.24	FALSE	1
2022-09-12	13:25:11	0.353193	124.594	FALSE	1
2022-09-12	13:25:11	0.271107	124.865	FALSE	1
2022-09-12	13:25:12	0.373092	125.238	FALSE	1
2022-09-12	13:25:12	0.23986	125.478	FALSE	1
2022-09-12	13:25:12	0.399707	125.877	FALSE	1
2022-09-12	13:25:12	0.123015	126	FALSE	1
2022-09-12	13:25:13	0.18785	126.188	FALSE	1
2022-09-12	13:25:13	0.0631173	126.251	FALSE	1
2022-09-12	13:25:13	0.397316	126.649	FALSE	1
2022-09-12	13:25:13	0.0801147	126.729	FALSE	1
2022-09-12	13:25:14	-0.0157631	126.729	FALSE	1
2022-09-12	13:25:14	-0.0975443	126.729	FALSE	1
2022-09-12	13:25:14	-0.139478	126.729	FALSE	1
2022-09-12	13:25:14	0.179351	126.908	FALSE	1
2022-09-12	13:25:15	0.348461	127.256	FALSE	1
2022-09-12	13:25:15	0.410751	127.667	FALSE	1
2022-09-12	13:25:15	0.562608	128.23	FALSE	1
2022-09-12	13:25:16	0.444186	128.674	FALSE	1
2022-09-12	13:25:16	0.460318	129.134	FALSE	1
2022-09-12	13:25:16	0.402557	129.537	FALSE	1
2022-09-12	13:25:16	0.434568	129.971	FALSE	1
2022-09-12	13:25:17	0.390242	130.362	FALSE	1
2022-09-12	13:25:17	0.396094	130.758	FALSE	1
2022-09-12	13:25:17	0.366425	131.124	FALSE	1
2022-09-12	13:25:17	0.374975	131.499	FALSE	1
2022-09-12	13:25:18	0.377926	131.877	FALSE	1
2022-09-12	13:25:18	0.367595	132.245	FALSE	1
2022-09-12	13:25:18	0.372532	132.617	FALSE	1
2022-09-12	13:25:18	0.370445	132.988	FALSE	1
2022-09-12	13:25:19	0.358741	133.346	FALSE	1
2022-09-12	13:25:19	0.374262	133.721	FALSE	1
2022-09-12	13:25:19	0.402608	134.123	FALSE	1
2022-09-12	13:25:20	0.29584	134.419	FALSE	1
2022-09-12	13:25:20	0.287392	134.707	FALSE	1
2022-09-12	13:25:20	0.346069	135.053	FALSE	1
2022-09-12	13:25:20	0.404491	135.457	FALSE	1
2022-09-12	13:25:21	0.380725	135.838	FALSE	1
2022-09-12	13:25:21	0.560878	136.399	FALSE	1
2022-09-12	13:25:21	0.903372	137.302	FALSE	1
2022-09-12	13:25:21	0.725509	138.028	FALSE	1
2022-09-12	13:25:22	0.517977	138.546	FALSE	1
2022-09-12	13:25:22	0.36154	138.907	FALSE	1
2022-09-12	13:25:22	0.321794	139.229	FALSE	1
2022-09-12	13:25:22	0.343066	139.572	FALSE	1
2022-09-12	13:25:23	0.307646	139.88	FALSE	1
2022-09-12	13:25:23	0.364288	140.244	FALSE	1
2022-09-12	13:25:23	0.370445	140.614	FALSE	1
2022-09-12	13:25:24	0.357214	140.972	FALSE	1
2022-09-12	13:25:24	0.351107	141.323	FALSE	1
2022-09-12	13:25:24	0.341183	141.664	FALSE	1
2022-09-12	13:25:24	0.322914	141.987	FALSE	1
2022-09-12	13:25:25	0.342201	142.329	FALSE	1
2022-09-12	13:25:25	0.399707	142.729	FALSE	1
2022-09-12	13:25:25	0.414364	143.143	FALSE	1
2022-09-12	13:25:25	0.375127	143.518	FALSE	1
2022-09-12	13:25:26	0.343779	143.862	FALSE	1
2022-09-12	13:25:26	0.312481	144.174	FALSE	1
2022-09-12	13:25:26	0.30841	144.483	FALSE	1
2022-09-12	13:25:27	0.336247	144.819	FALSE	1
2022-09-12	13:25:27	0.311667	145.131	FALSE	1
2022-09-12	13:25:27	0.354008	145.485	FALSE	1
2022-09-12	13:25:27	0.447392	145.932	FALSE	1
2022-09-12	13:25:28	0.270293	146.202	FALSE	1
2022-09-12	13:25:28	0.484288	146.687	FALSE	1
2022-09-12	13:25:28	0.283422	146.97	FALSE	1
2022-09-12	13:25:28	0.49299	147.463	FALSE	1
2022-09-12	13:25:29	0.314059	147.777	FALSE	1
2022-09-12	13:25:29	0.41701	148.194	FALSE	1
2022-09-12	13:25:29	0.352888	148.547	FALSE	1
2022-09-12	13:25:29	0.341692	148.889	FALSE	1
2022-09-12	13:25:30	0.418435	149.307	FALSE	1
2022-09-12	13:25:30	0.32612	149.633	FALSE	1
2022-09-12	13:25:30	0.509224	150.143	FALSE	1
2022-09-12	13:25:31	0.2764	150.419	FALSE	1
2022-09-12	13:25:31	0.529071	150.948	FALSE	1
2022-09-12	13:25:31	0.452379	151.4	FALSE	1
2022-09-12	13:25:31	1.16831	152.569	FALSE	1
2022-09-12	13:25:32	0.835839	153.405	FALSE	1
2022-09-12	13:25:32	0.672176	154.077	FALSE	1
2022-09-12	13:25:32	0.405204	154.482	FALSE	1
2022-09-12	13:25:32	0.567901	155.05	FALSE	1
2022-09-12	13:25:33	0.321387	155.371	FALSE	1
2022-09-12	13:25:33	0.533295	155.905	FALSE	1
2022-09-12	13:25:33	0.357316	156.262	FALSE	1
2022-09-12	13:25:33	0.449987	156.712	FALSE	1
2022-09-12	13:25:34	0.725153	157.437	FALSE	1
2022-09-12	13:25:34	0.758537	158.196	FALSE	1
2022-09-12	13:25:34	0.440878	158.636	FALSE	1
2022-09-12	13:25:35	0.397316	159.034	FALSE	1
2022-09-12	13:25:35	0.512634	159.546	FALSE	1
2022-09-12	13:25:35	0.496654	160.043	FALSE	1
2022-09-12	13:25:35	0.588664	160.632	FALSE	1
2022-09-12	13:25:36	1.24286	161.875	FALSE	1
2022-09-12	13:25:36	0.885662	162.76	FALSE	1
2022-09-12	13:25:36	0.966832	163.727	FALSE	1
2022-09-12	13:25:36	1.63564	165.363	FALSE	1
2022-09-12	13:25:37	1.62933	166.992	FALSE	1
2022-09-12	13:25:37	0.752125	167.744	FALSE	1
2022-09-12	13:25:37	0.560725	168.305	FALSE	1
2022-09-12	13:25:37	0.442048	168.747	FALSE	1
2022-09-12	13:25:38	0.496451	169.243	FALSE	1
2022-09-12	13:25:38	0.362303	169.606	FALSE	1
2022-09-12	13:25:38	0.441692	170.047	FALSE	1
2022-09-12	13:25:39	0.510547	170.558	FALSE	1
2022-09-12	13:25:39	0.448868	171.007	FALSE	1
2022-09-12	13:25:39	0.429173	171.436	FALSE	1
2022-09-12	13:25:39	0.452481	171.888	FALSE	1
2022-09-12	13:25:40	0.437214	172.326	FALSE	1
2022-09-12	13:25:40	0.443524	172.769	FALSE	1
2022-09-12	13:25:40	0.447545	173.217	FALSE	1
2022-09-12	13:25:40	0.46444	173.681	FALSE	1
2022-09-12	13:25:41	0.469428	174.151	FALSE	1
2022-09-12	13:25:41	0.469122	174.62	FALSE	1
2022-09-12	13:25:41	0.471107	175.091	FALSE	1
2022-09-12	13:25:41	0.466578	175.557	FALSE	1
2022-09-12	13:25:42	0.460522	176.018	FALSE	1
2022-09-12	13:25:42	0.449682	176.468	FALSE	1
2022-09-12	13:25:42	0.45874	176.926	FALSE	1
2022-09-12	13:25:43	0.406425	177.333	FALSE	1
2022-09-12	13:25:43	0.417723	177.75	FALSE	1
2022-09-12	13:25:43	0.413092	178.164	FALSE	1
2022-09-12	13:25:43	0.367443	178.531	FALSE	1
2022-09-12	13:25:44	0.35986	178.891	FALSE	1
2022-09-12	13:25:44	0.331616	179.222	FALSE	1
2022-09-12	13:25:44	0.296858	179.519	FALSE	1
2022-09-12	13:25:44	0.316654	179.836	FALSE	1
2022-09-12	13:25:45	0.464339	180.3	FALSE	1
2022-09-12	13:25:45	0.307188	180.608	FALSE	1
2022-09-12	13:25:45	0.199453	180.807	FALSE	1
2022-09-12	13:25:45	0.326171	181.133	FALSE	1
2022-09-12	13:25:46	0.177672	181.311	FALSE	1
2022-09-12	13:25:46	0.770751	182.082	FALSE	1
2022-09-12	13:25:46	2.71253	184.794	FALSE	1
2022-09-12	13:25:47	2.07141	186.866	FALSE	1
2022-09-12	13:25:47	1.66398	188.529	FALSE	1
2022-09-12	13:25:47	2.46693	190.996	FALSE	1
2022-09-12	13:25:47	1.07655	192.073	FALSE	1
2022-09-12	13:25:48	1.24775	193.321	FALSE	1
2022-09-12	13:25:48	2.03319	195.354	FALSE	1
2022-09-12	13:25:48	0.582506	195.936	FALSE	1
2022-09-12	13:25:49	1.29329	197.23	FALSE	1
2022-09-12	13:25:49	1.69981	198.93	FALSE	1
2022-09-12	13:25:49	0.751769	199.681	FALSE	1
2022-09-12	13:25:49	0.90103	200.582	FALSE	1
2022-09-12	13:25:49	0.476858	201.059	FALSE	1
2022-09-12	13:25:50	0.700674	201.76	FALSE	1
2022-09-12	13:25:50	0.747595	202.507	FALSE	1
2022-09-12	13:25:50	0.748308	203.256	FALSE	1
2022-09-12	13:25:51	0.546221	203.802	FALSE	1
2022-09-12	13:25:51	1.2792	205.081	FALSE	1
2022-09-12	13:25:51	1.86536	206.947	FALSE	1
2022-09-12	13:25:51	1.18408	208.131	FALSE	1
2022-09-12	13:25:52	0.2993	208.43	FALSE	1
2022-09-12	13:25:52	0.245	208.675	FALSE	1
2022-09-12	13:25:52	0.235738	208.911	FALSE	1
2022-09-12	13:25:52	0.176909	209.088	FALSE	1
2022-09-12	13:25:53	0.501438	209.589	FALSE	1
2022-09-12	13:25:53	1.82938	211.418	FALSE	1
2022-09-12	13:25:53	1.61558	213.034	FALSE	1
2022-09-12	13:25:53	1.2364	214.27	FALSE	1
2022-09-12	13:25:54	1.10719	215.378	FALSE	1
2022-09-12	13:25:54	1.64469	217.022	FALSE	1
2022-09-12	13:25:54	1.17889	218.201	FALSE	1
2022-09-12	13:25:55	0.972888	219.174	FALSE	1
2022-09-12	13:25:55	0.354873	219.529	FALSE	1
2022-09-12	13:25:55	0.228257	219.757	FALSE	1
2022-09-12	13:25:55	0.294313	220.051	FALSE	1
2022-09-12	13:25:56	0.29243	220.344	FALSE	1
2022-09-12	13:25:56	0.331107	220.675	FALSE	1
2022-09-12	13:25:56	0.475382	221.15	FALSE	1
2022-09-12	13:25:56	0.216298	221.367	FALSE	1
2022-09-12	13:25:57	0.217519	221.584	FALSE	1
2022-09-12	13:25:57	0.178283	221.762	FALSE	1
2022-09-12	13:25:57	0.114771	221.877	FALSE	1
2022-09-12	13:25:57	0.163728	222.041	FALSE	1
2022-09-12	13:25:58	0.0914633	222.132	FALSE	1
2022-09-12	13:25:58	0.172227	222.305	FALSE	1
2022-09-12	13:25:58	0.176247	222.481	FALSE	1
2022-09-12	13:25:59	0.458079	222.939	FALSE	1
2022-09-12	13:25:59	0.892888	223.832	FALSE	1
2022-09-12	13:25:59	1.89121	225.723	FALSE	1
2022-09-12	13:25:59	2.60459	228.328	FALSE	1
2022-09-12	13:26:00	0.519148	228.847	FALSE	1
2022-09-12	13:26:00	0.738893	229.586	FALSE	1
2022-09-12	13:26:00	0.910954	230.497	FALSE	1
2022-09-12	13:26:00	2.24261	232.739	FALSE	1
2022-09-12	13:26:01	2.20525	234.945	FALSE	1
2022-09-12	13:26:01	2.23508	237.18	FALSE	1
2022-09-12	13:26:01	1.27441	238.454	FALSE	1
2022-09-12	13:26:01	0.282761	238.737	FALSE	1
2022-09-12	13:26:02	0.134313	238.871	FALSE	1
2022-09-12	13:26:02	0.273753	239.145	FALSE	1
2022-09-12	13:26:02	0.243422	239.388	FALSE	1
2022-09-12	13:26:03	0.233855	239.622	FALSE	1
2022-09-12	13:26:03	0.15757	239.78	FALSE	1
2022-09-12	13:26:03	0.151005	239.931	FALSE	1
2022-09-12	13:26:03	0.238028	240.169	FALSE	1
2022-09-12	13:26:04	0.181947	240.351	FALSE	1
2022-09-12	13:26:04	0.0245422	240.375	FALSE	1
2022-09-12	13:26:04	-0.086043	240.375	FALSE	1
2022-09-12	13:26:05	-0.138053	240.375	FALSE	1
2022-09-12	13:26:05	0.175076	240.55	FALSE	1
2022-09-12	13:26:05	0.17757	240.728	FALSE	1
2022-09-12	13:26:05	0.401641	241.13	FALSE	1
2022-09-12	13:26:05	0.159606	241.289	FALSE	1
2022-09-12	13:26:06	0.404695	241.694	FALSE	1
2022-09-12	13:26:06	0.17472	241.869	FALSE	1
2022-09-12	13:26:06	0.542456	242.411	FALSE	1
2022-09-12	13:26:07	0.171921	242.583	FALSE	1
2022-09-12	13:26:07	0.515382	243.098	FALSE	1
2022-09-12	13:26:07	0.248562	243.347	FALSE	1
2022-09-12	13:26:07	0.509326	243.856	FALSE	1
2022-09-12	13:26:08	0.201896	244.058	FALSE	1
2022-09-12	13:26:08	0.470395	244.528	FALSE	1
2022-09-12	13:26:08	0.222863	244.751	FALSE	1
2022-09-12	13:26:08	0.446578	245.198	FALSE	1
2022-09-12	13:26:09	0.181794	245.38	FALSE	1
2022-09-12	13:26:09	0.417214	245.797	FALSE	1
2022-09-12	13:26:09	0.166527	245.963	FALSE	1
2022-09-12	13:26:09	0.499962	246.463	FALSE	1
2022-09-12	13:26:10	0.134822	246.598	FALSE	1
2022-09-12	13:26:10	0.177417	246.776	FALSE	1
2022-09-12	13:26:10	0.219809	246.995	FALSE	1
2022-09-12	13:26:11	0.118028	247.113	FALSE	1
2022-09-12	13:26:11	-0.12131	247.113	FALSE	1
2022-09-12	13:26:11	-0.14533	247.113	FALSE	1
2022-09-12	13:26:11	-0.103855	247.113	FALSE	1
2022-09-12	13:26:12	-0.0952033	247.113	FALSE	1
2022-09-12	13:26:12	-0.12187	247.113	FALSE	1
2022-09-12	13:26:12	-0.0430405	247.113	FALSE	1
2022-09-12	13:26:12	0.0325321	247.146	FALSE	1
2022-09-12	13:26:13	0.0695295	247.216	FALSE	1
2022-09-12	13:26:13	-0.0508776	247.216	FALSE	1
2022-09-12	13:26:13	0.065102	247.281	FALSE	1
2022-09-12	13:26:14	0.03813	247.319	FALSE	1
2022-09-12	13:26:14	0.128919	247.448	FALSE	1
2022-09-12	13:26:14	0.145713	247.593	FALSE	1
2022-09-12	13:26:14	1.08205	248.675	FALSE	1
2022-09-12	13:26:15	5.63345	254.309	1	2
2022-09-12	13:26:15	2.74688	257.056	FALSE	2
2022-09-12	13:26:15	0.475127	257.531	FALSE	2
2022-09-12	13:26:15	1.1219	258.653	FALSE	2
2022-09-12	13:26:16	0.676145	259.329	FALSE	2
2022-09-12	13:26:16	1.60327	260.932	FALSE	2
2022-09-12	13:26:16	1.60836	262.541	FALSE	2
2022-09-12	13:26:16	0.570903	263.111	FALSE	2
2022-09-12	13:26:17	0.477519	263.589	FALSE	2
2022-09-12	13:26:17	0.721336	264.31	FALSE	2
2022-09-12	13:26:17	0.279911	264.59	FALSE	2
2022-09-12	13:26:18	0.786883	265.377	FALSE	2
2022-09-12	13:26:18	0.751972	266.129	FALSE	2
2022-09-12	13:26:18	1.11258	267.242	FALSE	2
2022-09-12	13:26:18	0.876908	268.119	FALSE	2
2022-09-12	13:26:19	0.662557	268.781	FALSE	2
2022-09-12	13:26:19	1.06393	269.845	FALSE	2
2022-09-12	13:26:19	1.42042	271.266	FALSE	2
2022-09-12	13:26:19	0.652023	271.918	FALSE	2
2022-09-12	13:26:20	2.12439	274.042	FALSE	2
2022-09-12	13:26:20	1.76144	275.803	FALSE	2
2022-09-12	13:26:20	1.33721	277.141	FALSE	2
2022-09-12	13:26:20	0.651412	277.792	FALSE	2
2022-09-12	13:26:21	0.719351	278.511	FALSE	2
2022-09-12	13:26:21	0.894669	279.406	FALSE	2
2022-09-12	13:26:21	2.251	281.657	FALSE	2
2022-09-12	13:26:22	4.62719	286.284	1	3
2022-09-12	13:26:22	2.06571	288.35	FALSE	3
2022-09-12	13:26:22	2.19111	290.541	FALSE	3
2022-09-12	13:26:22	1.79487	292.336	FALSE	3
2022-09-12	13:26:23	1.27034	293.606	FALSE	3
2022-09-12	13:26:23	1.23513	294.841	FALSE	3
2022-09-12	13:26:23	1.2281	296.069	FALSE	3
2022-09-12	13:26:23	1.15335	297.223	FALSE	3
2022-09-12	13:26:24	0.784644	298.007	FALSE	3
2022-09-12	13:26:24	0.856501	298.864	FALSE	3
2022-09-12	13:26:24	0.347901	299.212	FALSE	3
2022-09-12	13:26:24	0.329224	299.541	FALSE	3
2022-09-12	13:26:25	0.356043	299.897	FALSE	3
2022-09-12	13:26:25	0.331005	300.228	FALSE	3
2022-09-12	13:26:25	0.285	300.513	FALSE	3
2022-09-12	13:26:26	0.289987	300.803	FALSE	3
2022-09-12	13:26:26	0.260115	301.063	FALSE	3
2022-09-12	13:26:26	0.236298	301.3	FALSE	3
2022-09-12	13:26:26	0.327748	301.627	FALSE	3
2022-09-12	13:26:27	0.23986	301.867	FALSE	3
2022-09-12	13:26:27	0.334568	302.202	FALSE	3
2022-09-12	13:26:27	0.123066	302.325	FALSE	3
2022-09-12	13:26:27	0.409784	302.735	FALSE	3
2022-09-12	13:26:28	1.63024	304.365	FALSE	3
2022-09-12	13:26:28	1.86261	306.227	FALSE	3
2022-09-12	13:26:28	0.581336	306.809	FALSE	3
2022-09-12	13:26:28	0.47187	307.281	FALSE	3
2022-09-12	13:26:29	0.521285	307.802	FALSE	3
2022-09-12	13:26:29	0.481031	308.283	FALSE	3
2022-09-12	13:26:29	0.220471	308.503	FALSE	3
2022-09-12	13:26:30	0.15416	308.658	FALSE	3
2022-09-12	13:26:30	0.210293	308.868	FALSE	3
2022-09-12	13:26:30	0.18785	309.056	FALSE	3
2022-09-12	13:26:30	0.272328	309.328	FALSE	3
2022-09-12	13:26:31	0.281234	309.609	FALSE	3
2022-09-12	13:26:31	0.149937	309.759	FALSE	3
2022-09-12	13:26:31	0.333346	310.093	FALSE	3
2022-09-12	13:26:31	0.249122	310.342	FALSE	3
2022-09-12	13:26:32	0.293295	310.635	FALSE	3
2022-09-12	13:26:32	0.132125	310.767	FALSE	3
2022-09-12	13:26:32	0.254517	311.022	FALSE	3
2022-09-12	13:26:32	0.175585	311.197	FALSE	3
2022-09-12	13:26:33	0.372634	311.57	FALSE	3
2022-09-12	13:26:33	0.188461	311.758	FALSE	3
2022-09-12	13:26:33	0.496909	312.255	FALSE	3
2022-09-12	13:26:34	0.345204	312.6	FALSE	3
2022-09-12	13:26:34	0.401082	313.001	FALSE	3
2022-09-12	13:26:34	0.411412	313.413	FALSE	3
2022-09-12	13:26:34	0.329377	313.742	FALSE	3
2022-09-12	13:26:35	0.393855	314.136	FALSE	3
2022-09-12	13:26:35	0.368206	314.504	FALSE	3
2022-09-12	13:26:35	0.409071	314.913	FALSE	3
2022-09-12	13:26:35	0.399606	315.313	FALSE	3
2022-09-12	13:26:36	0.434211	315.747	FALSE	3
2022-09-12	13:26:36	0.460318	316.208	FALSE	3
2022-09-12	13:26:36	0.351107	316.559	FALSE	3
2022-09-12	13:26:36	0.185102	316.744	FALSE	3
2022-09-12	13:26:37	-0.0603433	316.744	FALSE	3
2022-09-12	13:26:37	0.312023	317.056	FALSE	3
2022-09-12	13:26:37	0.353906	317.41	FALSE	3
2022-09-12	13:26:38	0.405102	317.815	FALSE	3
2022-09-12	13:26:38	0.102049	317.917	FALSE	3
2022-09-12	13:26:38	0.198792	318.116	FALSE	3
2022-09-12	13:26:38	0.0966541	318.212	FALSE	3
2022-09-12	13:26:39	0.0167559	318.229	FALSE	3
2022-09-12	13:26:39	-0.000953954	318.229	FALSE	3
2022-09-12	13:26:39	0.0349748	318.264	FALSE	3
2022-09-12	13:26:39	0.0482572	318.312	FALSE	3
2022-09-12	13:26:40	0.0337534	318.346	FALSE	3
2022-09-12	13:26:40	0.0143641	318.36	FALSE	3
2022-09-12	13:26:40	0.0982826	318.459	FALSE	3
2022-09-12	13:26:40	0.119504	318.578	FALSE	3
2022-09-12	13:26:41	0.122049	318.7	FALSE	3
2022-09-12	13:26:41	0.0940587	318.794	FALSE	3
2022-09-12	13:26:41	0.08556	318.88	FALSE	3
2022-09-12	13:26:42	0.0533972	318.933	FALSE	3
2022-09-12	13:26:42	0.0216415	318.955	FALSE	3
2022-09-12	13:26:42	0.00530559	318.96	FALSE	3
2022-09-12	13:26:42	-0.0451778	318.96	FALSE	3
2022-09-12	13:26:43	-0.0149998	318.96	FALSE	3
2022-09-12	13:26:43	0.0864761	319.047	FALSE	3
2022-09-12	13:26:43	0.285153	319.332	FALSE	3
2022-09-12	13:26:43	0.0200638	319.352	FALSE	3
2022-09-12	13:26:44	-0.00370202	319.352	FALSE	3
2022-09-12	13:26:44	0.00291375	319.355	FALSE	3
2022-09-12	13:26:44	0.0457636	319.401	FALSE	3
2022-09-12	13:26:44	0.190853	319.591	FALSE	3
2022-09-12	13:26:45	0.0218959	319.613	FALSE	3
2022-09-12	13:26:45	0.159758	319.773	FALSE	3
2022-09-12	13:26:45	0.150802	319.924	FALSE	3
2022-09-12	13:26:46	0.0660689	319.99	FALSE	3
2022-09-12	13:26:46	0.0391478	320.029	FALSE	3
2022-09-12	13:26:46	0.0582827	320.087	FALSE	3
2022-09-12	13:26:46	0.051616	320.139	FALSE	3
2022-09-12	13:26:47	0.0421503	320.181	FALSE	3
2022-09-12	13:26:47	0.0395041	320.221	FALSE	3
2022-09-12	13:26:47	0.0432699	320.264	FALSE	3
2022-09-12	13:26:47	0.0590969	320.323	FALSE	3
2022-09-12	13:26:48	0.0582317	320.381	FALSE	3
2022-09-12	13:26:48	0.0555346	320.437	FALSE	3
2022-09-12	13:26:48	0.0411326	320.478	FALSE	3
2022-09-12	13:26:48	0.0491733	320.527	FALSE	3
2022-09-12	13:26:49	0.0374175	320.564	FALSE	3
2022-09-12	13:26:49	0.0394023	320.604	FALSE	3
2022-09-12	13:26:49	0.0383336	320.642	FALSE	3
2022-09-12	13:26:50	0.0387407	320.681	FALSE	3
2022-09-12	13:26:50	0.0375193	320.718	FALSE	3
2022-09-12	13:26:50	0.0291733	320.748	FALSE	3
2022-09-12	13:26:50	0.0390969	320.787	FALSE	3
2022-09-12	13:26:51	0.0399621	320.827	FALSE	3
2022-09-12	13:26:51	0.0435244	320.87	FALSE	3
2022-09-12	13:26:51	0.0632699	320.933	FALSE	3
2022-09-12	13:26:51	0.131565	321.065	FALSE	3
2022-09-12	13:26:52	0.127697	321.193	FALSE	3
2022-09-12	13:26:52	0.112278	321.305	FALSE	3
2022-09-12	13:26:52	0.177417	321.482	FALSE	3
2022-09-12	13:26:53	0.208359	321.691	FALSE	3
2022-09-12	13:26:53	0.432023	322.123	FALSE	3
2022-09-12	13:26:53	1.26001	323.383	FALSE	3
2022-09-12	13:26:53	0.871361	324.254	FALSE	3
2022-09-12	13:26:54	0.436705	324.691	FALSE	3
2022-09-12	13:26:54	0.285814	324.977	FALSE	3
2022-09-12	13:26:54	0.371616	325.348	FALSE	3
2022-09-12	13:26:54	0.184593	325.533	FALSE	3
2022-09-12	13:26:55	0.142252	325.675	FALSE	3
2022-09-12	13:26:55	0.362507	326.038	FALSE	3
2022-09-12	13:26:55	0.129733	326.167	FALSE	3
2022-09-12	13:26:55	0.111514	326.279	FALSE	3
2022-09-12	13:26:56	0.207646	326.487	FALSE	3
2022-09-12	13:26:56	0.190395	326.677	FALSE	3
2022-09-12	13:26:56	0.345204	327.022	FALSE	3
2022-09-12	13:26:57	0.305509	327.328	FALSE	3
2022-09-12	13:26:57	0.709071	328.037	FALSE	3
2022-09-12	13:26:57	0.515738	328.552	FALSE	3
2022-09-12	13:26:57	0.638486	329.191	FALSE	3
2022-09-12	13:26:58	0.359097	329.55	FALSE	3
2022-09-12	13:26:58	0.437163	329.987	FALSE	3
2022-09-12	13:26:58	0.31757	330.305	FALSE	3
2022-09-12	13:26:58	0.425611	330.73	FALSE	3
2022-09-12	13:26:59	0.343626	331.074	FALSE	3
2022-09-12	13:26:59	0.278893	331.353	FALSE	3
2022-09-12	13:26:59	0.260725	331.614	FALSE	3
2022-09-12	13:26:59	0.331667	331.945	FALSE	3
2022-09-12	13:27:00	0.32841	332.274	FALSE	3
2022-09-12	13:27:00	0.288562	332.562	FALSE	3
2022-09-12	13:27:00	0.203422	332.766	FALSE	3
2022-09-12	13:27:01	0.504135	333.27	FALSE	3
2022-09-12	13:27:01	0.371514	333.641	FALSE	3
2022-09-12	13:27:01	0.37645	334.018	FALSE	3
2022-09-12	13:27:01	0.475942	334.494	FALSE	3
2022-09-12	13:27:02	0.408461	334.902	FALSE	3
2022-09-12	13:27:02	0.408206	335.31	FALSE	3
2022-09-12	13:27:02	0.436807	335.747	FALSE	3
2022-09-12	13:27:02	0.356094	336.103	FALSE	3
2022-09-12	13:27:03	0.303524	336.407	FALSE	3
2022-09-12	13:27:03	0.305713	336.713	FALSE	3
2022-09-12	13:27:03	0.27355	336.986	FALSE	3
2022-09-12	13:27:03	0.285713	337.272	FALSE	3
2022-09-12	13:27:04	0.28159	337.553	FALSE	3
2022-09-12	13:27:04	0.280573	337.834	FALSE	3
2022-09-12	13:27:04	0.286527	338.121	FALSE	3
2022-09-12	13:27:05	0.287341	338.408	FALSE	3
2022-09-12	13:27:05	0.284695	338.693	FALSE	3
2022-09-12	13:27:05	0.285865	338.978	FALSE	3
2022-09-12	13:27:05	0.286069	339.264	FALSE	3
2022-09-12	13:27:06	0.28673	339.551	FALSE	3
2022-09-12	13:27:06	0.287596	339.839	FALSE	3
2022-09-12	13:27:06	0.289631	340.128	FALSE	3
2022-09-12	13:27:06	0.286832	340.415	FALSE	3
2022-09-12	13:27:07	0.294567	340.71	FALSE	3
2022-09-12	13:27:07	0.405458	341.115	FALSE	3
2022-09-12	13:27:07	0.358384	341.474	FALSE	3
2022-09-12	13:27:07	-0.0927605	341.474	FALSE	3
2022-09-12	13:27:08	-0.388638	341.474	FALSE	3
2022-09-12	13:27:08	-0.392302	341.474	FALSE	3
2022-09-12	13:27:08	-0.360089	341.474	FALSE	3
2022-09-12	13:27:09	-0.289198	341.474	FALSE	3
2022-09-12	13:27:09	-0.111946	341.474	FALSE	3
2022-09-12	13:27:09	0.239097	341.713	FALSE	3
2022-09-12	13:27:09	0.167646	341.88	FALSE	3
2022-09-12	13:27:10	0.485611	342.366	FALSE	3
2022-09-12	13:27:10	0.195331	342.561	FALSE	3
2022-09-12	13:27:10	0.424135	342.986	FALSE	3
2022-09-12	13:27:10	0.229987	343.216	FALSE	3
2022-09-12	13:27:11	0.349987	343.565	FALSE	3
2022-09-12	13:27:11	0.17416	343.74	FALSE	3
2022-09-12	13:27:11	0.317061	344.057	FALSE	3
2022-09-12	13:27:11	0.222812	344.28	FALSE	3
2022-09-12	13:27:12	0.384339	344.664	FALSE	3
2022-09-12	13:27:12	0.305	344.969	FALSE	3
2022-09-12	13:27:12	0.775534	345.744	FALSE	3
2022-09-12	13:27:13	0.401997	346.146	FALSE	3
2022-09-12	13:27:13	0.970344	347.117	FALSE	3
2022-09-12	13:27:13	1.0819	348.199	FALSE	3
2022-09-12	13:27:13	4.32861	352.527	1	4
2022-09-12	13:27:14	2.33828	354.866	FALSE	4
2022-09-12	13:27:14	1.72495	356.59	FALSE	4
2022-09-12	13:27:14	1.38953	357.98	FALSE	4
2022-09-12	13:27:14	1.69187	359.672	FALSE	4
2022-09-12	13:27:15	0.946679	360.619	FALSE	4
2022-09-12	13:27:15	2.12856	362.747	FALSE	4
2022-09-12	13:27:15	1.76195	364.509	FALSE	4
2022-09-12	13:27:15	1.31085	365.82	FALSE	4
2022-09-12	13:27:16	0.742303	366.562	FALSE	4
2022-09-12	13:27:16	0.95416	367.516	FALSE	4
2022-09-12	13:27:16	0.604135	368.121	FALSE	4
2022-09-12	13:27:17	0.595382	368.716	FALSE	4
2022-09-12	13:27:17	0.726527	369.442	FALSE	4
2022-09-12	13:27:17	0.436145	369.879	FALSE	4
2022-09-12	13:27:17	0.172786	370.051	FALSE	4
2022-09-12	13:27:18	0.20154	370.253	FALSE	4
2022-09-12	13:27:18	-0.0889437	370.253	FALSE	4
2022-09-12	13:27:18	-0.0882312	370.253	FALSE	4
2022-09-12	13:27:18	-0.119274	370.253	FALSE	4
2022-09-12	13:27:19	-0.182786	370.253	FALSE	4
2022-09-12	13:27:19	1.36449	371.617	FALSE	4
2022-09-12	13:27:19	0.724186	372.342	FALSE	4
2022-09-12	13:27:19	1.37599	373.718	FALSE	4
2022-09-12	13:27:20	1.71243	375.43	FALSE	4
2022-09-12	13:27:20	0.369936	375.8	FALSE	4
2022-09-12	13:27:20	0.403779	376.204	FALSE	4
2022-09-12	13:27:21	0.522812	376.727	FALSE	4
2022-09-12	13:27:21	0.215433	376.942	FALSE	4
2022-09-12	13:27:21	0.346629	377.289	FALSE	4
2022-09-12	13:27:21	0.324186	377.613	FALSE	4
2022-09-12	13:27:22	0.362048	377.975	FALSE	4
2022-09-12	13:27:22	0.394822	378.37	FALSE	4
2022-09-12	13:27:22	0.50897	378.879	FALSE	4
2022-09-12	13:27:22	0.303372	379.182	FALSE	4
2022-09-12	13:27:23	0.543372	379.725	FALSE	4
2022-09-12	13:27:23	0.668715	380.394	FALSE	4
2022-09-12	13:27:23	0.638537	381.033	FALSE	4
2022-09-12	13:27:23	0.419555	381.452	FALSE	4
2022-09-12	13:27:24	0.46042	381.913	FALSE	4
2022-09-12	13:27:24	0.303524	382.216	FALSE	4
2022-09-12	13:27:24	0.377316	382.593	FALSE	4
2022-09-12	13:27:25	0.419657	383.013	FALSE	4
2022-09-12	13:27:25	0.504288	383.517	FALSE	4
2022-09-12	13:27:25	0.247901	383.765	FALSE	4
2022-09-12	13:27:25	0.186069	383.951	FALSE	4
2022-09-12	13:27:26	0.352074	384.303	FALSE	4
2022-09-12	13:27:26	0.271718	384.575	FALSE	4
2022-09-12	13:27:26	0.378893	384.954	FALSE	4
2022-09-12	13:27:26	0.274364	385.228	FALSE	4
2022-09-12	13:27:27	0.436349	385.665	FALSE	4
2022-09-12	13:27:27	0.231565	385.896	FALSE	4
2022-09-12	13:27:27	0.490344	386.387	FALSE	4
2022-09-12	13:27:27	0.141438	386.528	FALSE	4
2022-09-12	13:27:28	0.4307	386.959	FALSE	4
2022-09-12	13:27:28	0.282252	387.241	FALSE	4
2022-09-12	13:27:28	0.368206	387.609	FALSE	4
2022-09-12	13:27:29	0.209224	387.818	FALSE	4
2022-09-12	13:27:29	0.495026	388.313	FALSE	4
2022-09-12	13:27:29	0.249071	388.563	FALSE	4
2022-09-12	13:27:29	0.454415	389.017	FALSE	4
2022-09-12	13:27:30	0.19299	389.21	FALSE	4
2022-09-12	13:27:30	0.434669	389.645	FALSE	4
2022-09-12	13:27:30	0.363626	390.008	FALSE	4
2022-09-12	13:27:30	0.387799	390.396	FALSE	4
2022-09-12	13:27:31	0.505203	390.901	FALSE	4
2022-09-12	13:27:31	0.45187	391.353	FALSE	4
2022-09-12	13:27:31	0.375433	391.729	FALSE	4
2022-09-12	13:27:31	0.401234	392.13	FALSE	4
2022-09-12	13:27:32	0.407799	392.538	FALSE	4
2022-09-12	13:27:32	0.371412	392.909	FALSE	4
2022-09-12	13:27:32	0.408359	393.317	FALSE	4
2022-09-12	13:27:33	0.37187	393.689	FALSE	4
2022-09-12	13:27:33	0.724898	394.414	FALSE	4
2022-09-12	13:27:33	0.373702	394.788	FALSE	4
2022-09-12	13:27:33	0.680522	395.468	FALSE	4
2022-09-12	13:27:34	1.03197	396.5	FALSE	4
2022-09-12	13:27:34	0.540522	397.041	FALSE	4
2022-09-12	13:27:34	0.663677	397.705	FALSE	4
2022-09-12	13:27:34	1.24006	398.945	FALSE	4
2022-09-12	13:27:35	1.36322	400.308	FALSE	4
2022-09-12	13:27:35	1.16322	401.471	FALSE	4
2022-09-12	13:27:35	0.623321	402.094	FALSE	4
2022-09-12	13:27:35	1.47365	403.568	FALSE	4
2022-09-12	13:27:36	0.40383	403.972	FALSE	4
2022-09-12	13:27:36	0.262557	404.234	FALSE	4
2022-09-12	13:27:36	0.537214	404.772	FALSE	4
2022-09-12	13:27:37	0.453193	405.225	FALSE	4
2022-09-12	13:27:37	0.634567	405.859	FALSE	4
2022-09-12	13:27:37	0.507748	406.367	FALSE	4
2022-09-12	13:27:37	0.598283	406.965	FALSE	4
2022-09-12	13:27:38	0.727646	407.693	FALSE	4
2022-09-12	13:27:38	0.71757	408.411	FALSE	4
2022-09-12	13:27:38	0.719606	409.13	FALSE	4
2022-09-12	13:27:38	0.715025	409.845	FALSE	4
2022-09-12	13:27:39	0.724237	410.569	FALSE	4
2022-09-12	13:27:39	0.367697	410.937	FALSE	4
2022-09-12	13:27:39	0.31869	411.256	FALSE	4
2022-09-12	13:27:40	0.663066	411.919	FALSE	4
2022-09-12	13:27:40	0.592633	412.512	FALSE	4
2022-09-12	13:27:40	0.953651	413.465	FALSE	4
2022-09-12	13:27:40	0.728206	414.193	FALSE	4
2022-09-12	13:27:41	0.692125	414.886	FALSE	4
2022-09-12	13:27:41	0.364237	415.25	FALSE	4
2022-09-12	13:27:41	0.482863	415.733	FALSE	4
2022-09-12	13:27:41	0.288562	416.021	FALSE	4
2022-09-12	13:27:42	0.374008	416.395	FALSE	4
2022-09-12	13:27:42	0.368359	416.764	FALSE	4
2022-09-12	13:27:42	0.43355	417.197	FALSE	4
2022-09-12	13:27:42	0.353804	417.551	FALSE	4
2022-09-12	13:27:43	0.383575	417.934	FALSE	4
2022-09-12	13:27:43	0.60388	418.538	FALSE	4
2022-09-12	13:27:43	0.377825	418.916	FALSE	4
2022-09-12	13:27:44	0.677875	419.594	FALSE	4
2022-09-12	13:27:44	0.7193	420.313	FALSE	4
2022-09-12	13:27:44	0.436756	420.75	FALSE	4
2022-09-12	13:27:44	0.387087	421.137	FALSE	4
2022-09-12	13:27:45	0.226425	421.364	FALSE	4
2022-09-12	13:27:45	0.790293	422.154	FALSE	4
2022-09-12	13:27:45	0.436145	422.59	FALSE	4
2022-09-12	13:27:45	0.406883	422.997	FALSE	4
2022-09-12	13:27:46	0.481591	423.479	FALSE	4
2022-09-12	13:27:46	0.354466	423.833	FALSE	4
2022-09-12	13:27:46	0.469987	424.303	FALSE	4
2022-09-12	13:27:46	0.426832	424.73	FALSE	4
2022-09-12	13:27:47	0.494618	425.224	FALSE	4
2022-09-12	13:27:47	0.422761	425.647	FALSE	4
2022-09-12	13:27:47	0.722404	426.37	FALSE	4
2022-09-12	13:27:48	0.214262	426.584	FALSE	4
2022-09-12	13:27:48	0.567443	427.151	FALSE	4
2022-09-12	13:27:48	0.761896	427.913	FALSE	4
2022-09-12	13:27:48	0.442405	428.356	FALSE	4
2022-09-12	13:27:49	0.320166	428.676	FALSE	4
2022-09-12	13:27:49	0.23416	428.91	FALSE	4
2022-09-12	13:27:49	0.220929	429.131	FALSE	4
2022-09-12	13:27:49	0.530496	429.661	FALSE	4
2022-09-12	13:27:50	1.28953	430.951	FALSE	4
2022-09-12	13:27:50	0.951921	431.903	FALSE	4
2022-09-12	13:27:50	0.45416	432.357	FALSE	4
2022-09-12	13:27:50	0.356603	432.714	FALSE	4
2022-09-12	13:27:51	0.278588	432.992	FALSE	4
2022-09-12	13:27:51	0.404898	433.397	FALSE	4
2022-09-12	13:27:51	0.28159	433.679	FALSE	4
2022-09-12	13:27:52	0.312125	433.991	FALSE	4
2022-09-12	13:27:52	0.315076	434.306	FALSE	4
2022-09-12	13:27:52	0.326069	434.632	FALSE	4
2022-09-12	13:27:52	0.385662	435.018	FALSE	4
2022-09-12	13:27:53	0.397977	435.416	FALSE	4
2022-09-12	13:27:53	0.273804	435.689	FALSE	4
2022-09-12	13:27:53	0.195331	435.885	FALSE	4
2022-09-12	13:27:53	0.23411	436.119	FALSE	4
2022-09-12	13:27:54	0.286781	436.406	FALSE	4
2022-09-12	13:27:54	0.304644	436.71	FALSE	4
2022-09-12	13:27:54	0.336807	437.047	FALSE	4
2022-09-12	13:27:54	0.30612	437.353	FALSE	4
2022-09-12	13:27:55	0.317061	437.67	FALSE	4
2022-09-12	13:27:55	0.327545	437.998	FALSE	4
2022-09-12	13:27:55	0.328969	438.327	FALSE	4
2022-09-12	13:27:56	0.340115	438.667	FALSE	4
2022-09-12	13:27:56	0.336501	439.003	FALSE	4
2022-09-12	13:27:56	0.369122	439.372	FALSE	4
2022-09-12	13:27:56	0.365255	439.738	FALSE	4
2022-09-12	13:27:57	0.403881	440.142	FALSE	4
2022-09-12	13:27:57	0.379148	440.521	FALSE	4
2022-09-12	13:27:57	0.364186	440.885	FALSE	4
2022-09-12	13:27:57	0.382405	441.267	FALSE	4
2022-09-12	13:27:58	0.398639	441.666	FALSE	4
2022-09-12	13:27:58	0.406323	442.072	FALSE	4
2022-09-12	13:27:58	0.462303	442.535	FALSE	4
2022-09-12	13:27:58	0.49416	443.029	FALSE	4
2022-09-12	13:27:59	0.503626	443.532	FALSE	4
2022-09-12	13:27:59	0.46673	443.999	FALSE	4
2022-09-12	13:27:59	0.483066	444.482	FALSE	4
2022-09-12	13:28:00	0.46042	444.943	FALSE	4
2022-09-12	13:28:00	0.513957	445.457	FALSE	4
2022-09-12	13:28:00	0.499351	445.956	FALSE	4
2022-09-12	13:28:00	0.544695	446.501	FALSE	4
2022-09-12	13:28:01	0.544237	447.045	FALSE	4
2022-09-12	13:28:01	0.528104	447.573	FALSE	4
2022-09-12	13:28:01	0.559555	448.133	FALSE	4
2022-09-12	13:28:01	0.568563	448.701	FALSE	4
2022-09-12	13:28:02	0.601743	449.303	FALSE	4
2022-09-12	13:28:02	0.667748	449.971	FALSE	4
2022-09-12	13:28:02	0.590852	450.561	FALSE	4
2022-09-12	13:28:02	0.484644	451.046	FALSE	4
2022-09-12	13:28:03	0.47472	451.521	FALSE	4
2022-09-12	13:28:03	0.523524	452.044	FALSE	4
2022-09-12	13:28:03	0.609631	452.654	FALSE	4
2022-09-12	13:28:04	0.61131	453.265	FALSE	4
2022-09-12	13:28:04	0.605407	453.871	FALSE	4
2022-09-12	13:28:04	0.570598	454.441	FALSE	4
2022-09-12	13:28:04	0.579147	455.02	FALSE	4
2022-09-12	13:28:05	0.548613	455.569	FALSE	4
2022-09-12	13:28:05	0.571412	456.14	FALSE	4
2022-09-12	13:28:05	0.574211	456.715	FALSE	4
2022-09-12	13:28:05	0.692226	457.407	FALSE	4
2022-09-12	13:28:06	1.92587	459.333	FALSE	4
2022-09-12	13:28:06	2.01039	461.343	FALSE	4
2022-09-12	13:28:06	0.635076	461.978	FALSE	4
2022-09-12	13:28:06	0.650649	462.629	FALSE	4
2022-09-12	13:28:07	0.543626	463.172	FALSE	4
2022-09-12	13:28:07	0.583931	463.756	FALSE	4
2022-09-12	13:28:07	0.594517	464.351	FALSE	4
2022-09-12	13:28:08	0.559962	464.911	FALSE	4
2022-09-12	13:28:08	0.603117	465.514	FALSE	4
2022-09-12	13:28:08	0.533957	466.048	FALSE	4
2022-09-12	13:28:08	0.833855	466.882	FALSE	4
2022-09-12	13:28:09	2.28525	469.167	FALSE	4
2022-09-12	13:28:09	1.76134	470.928	FALSE	4
2022-09-12	13:28:09	0.760471	471.689	FALSE	4
2022-09-12	13:28:09	0.729987	472.419	FALSE	4
2022-09-12	13:28:10	1.00887	473.428	FALSE	4
2022-09-12	13:28:10	7.91344	481.341	1	5
2022-09-12	13:28:10	2.14968	483.491	FALSE	5
2022-09-12	13:28:10	0.658893	484.15	FALSE	5
2022-09-12	13:28:11	0.577672	484.727	FALSE	5
2022-09-12	13:28:11	0.555891	485.283	FALSE	5
2022-09-12	13:28:11	0.464644	485.748	FALSE	5
2022-09-12	13:28:12	0.52388	486.272	FALSE	5
2022-09-12	13:28:12	0.575687	486.848	FALSE	5
2022-09-12	13:28:12	0.499809	487.347	FALSE	5
2022-09-12	13:28:12	0.515891	487.863	FALSE	5
2022-09-12	13:28:13	0.47472	488.338	FALSE	5
2022-09-12	13:28:13	0.624593	488.963	FALSE	5
2022-09-12	13:28:13	0.586323	489.549	FALSE	5
2022-09-12	13:28:13	0.505	490.054	FALSE	5
2022-09-12	13:28:14	0.589224	490.643	FALSE	5
2022-09-12	13:28:14	0.621387	491.264	FALSE	5
2022-09-12	13:28:14	0.682507	491.947	FALSE	5
2022-09-12	13:28:14	0.688664	492.636	FALSE	5
2022-09-12	13:28:15	0.652684	493.288	FALSE	5
2022-09-12	13:28:15	0.677672	493.966	FALSE	5
2022-09-12	13:28:15	0.672888	494.639	FALSE	5
2022-09-12	13:28:16	0.72556	495.364	FALSE	5
2022-09-12	13:28:16	0.712837	496.077	FALSE	5
2022-09-12	13:28:16	0.677723	496.755	FALSE	5
2022-09-12	13:28:16	0.633397	497.388	FALSE	5
2022-09-12	13:28:17	0.628511	498.017	FALSE	5
2022-09-12	13:28:17	0.577163	498.594	FALSE	5
2022-09-12	13:28:17	0.61126	499.205	FALSE	5
2022-09-12	13:28:17	0.63986	499.845	FALSE	5
2022-09-12	13:28:18	0.640471	500.486	FALSE	5
2022-09-12	13:28:18	0.680573	501.166	FALSE	5
2022-09-12	13:28:18	0.572837	501.739	FALSE	5
2022-09-12	13:28:18	0.633601	502.373	FALSE	5
2022-09-12	13:28:19	0.70958	503.082	FALSE	5
2022-09-12	13:28:19	0.545611	503.628	FALSE	5
2022-09-12	13:28:19	0.638741	504.267	FALSE	5
2022-09-12	13:28:20	0.57299	504.84	FALSE	5
2022-09-12	13:28:20	0.631768	505.471	FALSE	5
2022-09-12	13:28:20	0.60103	506.072	FALSE	5
2022-09-12	13:28:20	0.649478	506.722	FALSE	5
2022-09-12	13:28:21	0.698028	507.42	FALSE	5
2022-09-12	13:28:21	0.670191	508.09	FALSE	5
2022-09-12	13:28:21	0.753499	508.844	FALSE	5
2022-09-12	13:28:21	0.780827	509.624	FALSE	5
2022-09-12	13:28:22	0.652481	510.277	FALSE	5
2022-09-12	13:28:22	1.68754	511.964	FALSE	5
2022-09-12	13:28:22	1.79915	513.764	FALSE	5
2022-09-12	13:28:23	2.15228	515.916	FALSE	5
2022-09-12	13:28:23	1.59991	517.516	FALSE	5
2022-09-12	13:28:23	1.10882	518.625	FALSE	5
2022-09-12	13:28:23	0.966679	519.591	FALSE	5
2022-09-12	13:28:24	0.808053	520.399	FALSE	5
2022-09-12	13:28:24	0.571463	520.971	FALSE	5
2022-09-12	13:28:24	0.710751	521.682	FALSE	5
2022-09-12	13:28:24	0.613448	522.295	FALSE	5
2022-09-12	13:28:25	1.75818	524.053	FALSE	5
2022-09-12	13:28:25	10.0006	534.054	1	6
2022-09-12	13:28:25	12.1048	546.159	1	7
2022-09-12	13:28:25	6.64322	552.802	1	8
2022-09-12	13:28:26	3.44378	556.246	1	9
2022-09-12	13:28:26	2.1995	558.445	FALSE	9
2022-09-12	13:28:26	1.38912	559.834	FALSE	9
2022-09-12	13:28:27	1.20464	561.039	FALSE	9
2022-09-12	13:28:27	0.881845	561.921	FALSE	9
2022-09-12	13:28:27	0.800623	562.721	FALSE	9
2022-09-12	13:28:27	0.522506	563.244	FALSE	9
2022-09-12	13:28:28	1.22195	564.466	FALSE	9
2022-09-12	13:28:28	3.42261	567.888	1	10
2022-09-12	13:28:28	1.33696	569.225	FALSE	10
2022-09-12	13:28:28	1.01589	570.241	FALSE	10
2022-09-12	13:28:29	0.637264	570.878	FALSE	10
2022-09-12	13:28:29	0.470954	571.349	FALSE	10
2022-09-12	13:28:29	0.704389	572.054	FALSE	10
2022-09-12	13:28:29	0.442863	572.497	FALSE	10
2022-09-12	13:28:30	0.709377	573.206	FALSE	10
2022-09-12	13:28:30	0.436349	573.642	FALSE	10
2022-09-12	13:28:30	0.525865	574.168	FALSE	10
2022-09-12	13:28:31	0.225407	574.394	FALSE	10
2022-09-12	13:28:31	0.524796	574.918	FALSE	10
2022-09-12	13:28:31	0.213702	575.132	FALSE	10
2022-09-12	13:28:31	0.134364	575.267	FALSE	10
2022-09-12	13:28:32	0.741641	576.008	FALSE	10
2022-09-12	13:28:32	1.2508	577.259	FALSE	10
2022-09-12	13:28:32	0.495942	577.755	FALSE	10
2022-09-12	13:28:32	0.445356	578.2	FALSE	10
2022-09-12	13:28:33	0.186018	578.386	FALSE	10
2022-09-12	13:28:33	0.387443	578.774	FALSE	10
2022-09-12	13:28:33	0.243881	579.018	FALSE	10
2022-09-12	13:28:33	0.730038	579.748	FALSE	10
2022-09-12	13:28:34	0.749377	580.497	FALSE	10
2022-09-12	13:28:34	1.15329	581.65	FALSE	10
2022-09-12	13:28:34	0.27813	581.928	FALSE	10
2022-09-12	13:28:35	0.486476	582.415	FALSE	10
2022-09-12	13:28:35	0.249529	582.664	FALSE	10
2022-09-12	13:28:35	0.386476	583.051	FALSE	10
2022-09-12	13:28:35	0.160471	583.211	FALSE	10
2022-09-12	13:28:36	0.385814	583.597	FALSE	10
2022-09-12	13:28:36	0.398283	583.996	FALSE	10
2022-09-12	13:28:36	0.847901	584.843	FALSE	10
2022-09-12	13:28:36	0.764949	585.608	FALSE	10
2022-09-12	13:28:37	1.06648	586.675	FALSE	10
2022-09-12	13:28:37	0.533753	587.209	FALSE	10
2022-09-12	13:28:37	0.587036	587.796	FALSE	10
2022-09-12	13:28:37	0.547137	588.343	FALSE	10
2022-09-12	13:28:38	0.497519	588.84	FALSE	10
2022-09-12	13:28:38	0.655738	589.496	FALSE	10
2022-09-12	13:28:38	0.987138	590.483	FALSE	10
2022-09-12	13:28:39	1.94841	592.432	FALSE	10
2022-09-12	13:28:39	3.46693	595.899	1	11
2022-09-12	13:28:39	2.03548	597.934	FALSE	11
2022-09-12	13:28:39	2.40902	600.343	FALSE	11
2022-09-12	13:28:40	2.08525	602.428	FALSE	11
2022-09-12	13:28:40	1.46067	603.889	FALSE	11
2022-09-12	13:28:40	0.496909	604.386	FALSE	11
2022-09-12	13:28:40	0.236858	604.623	FALSE	11
2022-09-12	13:28:41	0.361285	604.984	FALSE	11
2022-09-12	13:28:41	0.643626	605.628	FALSE	11
2022-09-12	13:28:41	1.0335	606.661	FALSE	11
2022-09-12	13:28:41	0.41014	607.071	FALSE	11
2022-09-12	13:28:42	0.54729	607.619	FALSE	11
2022-09-12	13:28:42	0.491005	608.11	FALSE	11
2022-09-12	13:28:42	0.343881	608.453	FALSE	11
2022-09-12	13:28:43	0.17355	608.627	FALSE	11
2022-09-12	13:28:43	0.211005	608.838	FALSE	11
2022-09-12	13:28:43	0.948715	609.787	FALSE	11
2022-09-12	13:28:43	0.347901	610.135	FALSE	11
2022-09-12	13:28:44	1.4851	611.62	FALSE	11
2022-09-12	13:28:44	2.84113	614.461	FALSE	11
2022-09-12	13:28:44	5.58479	620.046	1	12
2022-09-12	13:28:44	5.45395	625.5	1	13
2022-09-12	13:28:45	2.94352	628.443	FALSE	13
2022-09-12	13:28:45	0.711412	629.155	FALSE	13
2022-09-12	13:28:45	0.612583	629.767	FALSE	13
2022-09-12	13:28:45	0.455534	630.223	FALSE	13
2022-09-12	13:28:46	0.366272	630.589	FALSE	13
2022-09-12	13:28:46	0.2193	630.808	FALSE	13
2022-09-12	13:28:46	0.315076	631.123	FALSE	13
2022-09-12	13:28:47	0.249275	631.373	FALSE	13
2022-09-12	13:28:47	0.469682	631.842	FALSE	13
2022-09-12	13:28:47	0.194262	632.036	FALSE	13
2022-09-12	13:28:47	0.387494	632.424	FALSE	13
2022-09-12	13:28:48	0.439962	632.864	FALSE	13
2022-09-12	13:28:48	0.0824048	632.946	FALSE	13
2022-09-12	13:28:48	-0.0541855	632.946	FALSE	13
2022-09-12	13:28:48	0.161336	633.108	FALSE	13
2022-09-12	13:28:49	0.177774	633.285	FALSE	13
2022-09-12	13:28:49	0.197316	633.483	FALSE	13
2022-09-12	13:28:49	0.290242	633.773	FALSE	13
2022-09-12	13:28:49	0.227545	634.001	FALSE	13
2022-09-12	13:28:50	0.254822	634.255	FALSE	13
2022-09-12	13:28:50	0.278995	634.534	FALSE	13
2022-09-12	13:28:50	0.213906	634.748	FALSE	13
2022-09-12	13:28:51	0.241947	634.99	FALSE	13
2022-09-12	13:28:51	0.278995	635.269	FALSE	13
2022-09-12	13:28:51	0.324084	635.593	FALSE	13
2022-09-12	13:28:51	0.381234	635.975	FALSE	13
2022-09-12	13:28:52	0.716247	636.691	FALSE	13
2022-09-12	13:28:52	0.732023	637.423	FALSE	13
2022-09-12	13:28:52	0.83416	638.257	FALSE	13
2022-09-12	13:28:52	0.571921	638.829	FALSE	13
2022-09-12	13:28:53	0.297061	639.126	FALSE	13
2022-09-12	13:28:53	0.177825	639.304	FALSE	13
2022-09-12	13:28:53	0.189835	639.494	FALSE	13
2022-09-12	13:28:53	0.289224	639.783	FALSE	13
2022-09-12	13:28:54	0.567799	640.351	FALSE	13
2022-09-12	13:28:54	0.289122	640.64	FALSE	13
2022-09-12	13:28:54	0.459657	641.099	FALSE	13
2022-09-12	13:28:55	0.503168	641.603	FALSE	13
2022-09-12	13:28:55	1.48846	643.091	FALSE	13
2022-09-12	13:28:55	1.9709	645.062	FALSE	13
2022-09-12	13:28:55	0.490598	645.553	FALSE	13
2022-09-12	13:28:56	0.299351	645.852	FALSE	13
2022-09-12	13:28:56	0.408257	646.26	FALSE	13
2022-09-12	13:28:56	0.367138	646.627	FALSE	13
2022-09-12	13:28:56	0.252125	646.879	FALSE	13
2022-09-12	13:28:57	0.348817	647.228	FALSE	13
2022-09-12	13:28:57	0.168308	647.397	FALSE	13
2022-09-12	13:28:57	0.297824	647.694	FALSE	13
2022-09-12	13:28:57	0.150242	647.845	FALSE	13
2022-09-12	13:28:58	0.362099	648.207	FALSE	13
2022-09-12	13:28:58	0.12958	648.336	FALSE	13
2022-09-12	13:28:58	0.331005	648.667	FALSE	13
2022-09-12	13:28:59	0.24556	648.913	FALSE	13
2022-09-12	13:28:59	0.434618	649.347	FALSE	13
2022-09-12	13:28:59	0.497316	649.845	FALSE	13
2022-09-12	13:28:59	0.556857	650.402	FALSE	13
2022-09-12	13:29:00	0.372379	650.774	FALSE	13
2022-09-12	13:29:00	0.745255	651.519	FALSE	13
2022-09-12	13:29:00	2.07416	653.593	FALSE	13
2022-09-12	13:29:00	1.36368	654.957	FALSE	13
2022-09-12	13:29:01	1.11335	656.07	FALSE	13
2022-09-12	13:29:01	1.70403	657.774	FALSE	13
2022-09-12	13:29:01	1.15508	658.93	FALSE	13
2022-09-12	13:29:01	1.57971	660.509	FALSE	13
2022-09-12	13:29:02	1.27665	661.786	FALSE	13
2022-09-12	13:29:02	1.42663	663.213	FALSE	13
2022-09-12	13:29:02	1.1905	664.403	FALSE	13
2022-09-12	13:29:03	0.511056	664.914	FALSE	13
2022-09-12	13:29:03	0.672735	665.587	FALSE	13
2022-09-12	13:29:03	0.375636	665.962	FALSE	13
2022-09-12	13:29:03	0.732684	666.695	FALSE	13
2022-09-12	13:29:04	0.796196	667.491	FALSE	13
2022-09-12	13:29:04	1.3364	668.828	FALSE	13
2022-09-12	13:29:04	1.34617	670.174	FALSE	13
2022-09-12	13:29:04	0.76785	670.942	FALSE	13
2022-09-12	13:29:05	0.609122	671.551	FALSE	13
2022-09-12	13:29:05	0.515178	672.066	FALSE	13
2022-09-12	13:29:05	0.532634	672.599	FALSE	13
2022-09-12	13:29:05	0.530344	673.129	FALSE	13

## Sheet: Ranger_martin_2022912132344
						**GoPro Fitting: 13:09
2022-09-12	13:23:45	0.584847
2022-09-12	13:23:45	0.471616
2022-09-12	13:23:45	0.406578
2022-09-12	13:23:45	0.495993
2022-09-12	13:23:46	0.448562
2022-09-12	13:23:46	0.455127
2022-09-12	13:23:46	0.440725
2022-09-12	13:23:46	0.458791
2022-09-12	13:23:47	0.439198
2022-09-12	13:23:47	0.417468
2022-09-12	13:23:47	0.483473
2022-09-12	13:23:47	0.418995
2022-09-12	13:23:48	0.398384
2022-09-12	13:23:48	0.460471
2022-09-12	13:23:48	0.411667
2022-09-12	13:23:48	0.498639
2022-09-12	13:23:49	0.410038
2022-09-12	13:23:49	0.635942
2022-09-12	13:23:49	0.448817
2022-09-12	13:23:50	0.675229
2022-09-12	13:23:50	0.399097
2022-09-12	13:23:50	0.533346
2022-09-12	13:23:50	0.450547
2022-09-12	13:23:51	0.567137
2022-09-12	13:23:51	0.367748
2022-09-12	13:23:51	0.537977
2022-09-12	13:23:51	0.400166
2022-09-12	13:23:52	0.517875
2022-09-12	13:23:52	0.37187
2022-09-12	13:23:52	0.42388
2022-09-12	13:23:52	0.382354
2022-09-12	13:23:53	0.485204
2022-09-12	13:23:53	0.391718
2022-09-12	13:23:53	0.662608
2022-09-12	13:23:54	0.697112
2022-09-12	13:23:54	1.18113
2022-09-12	13:23:54	0.481132
2022-09-12	13:23:55	0.697672
2022-09-12	13:23:55	0.53645
2022-09-12	13:23:55	0.486781
2022-09-12	13:23:55	0.426883
2022-09-12	13:23:55	0.55701
2022-09-12	13:23:56	0.411005
2022-09-12	13:23:56	0.515534
2022-09-12	13:23:56	0.395891
2022-09-12	13:23:56	0.490344
2022-09-12	13:23:57	0.584898
2022-09-12	13:23:57	0.528104
2022-09-12	13:23:57	0.442354
2022-09-12	13:23:58	0.526679
2022-09-12	13:23:58	0.381234
2022-09-12	13:23:58	0.402557
2022-09-12	13:23:58	0.42327
2022-09-12	13:23:59	0.472176
2022-09-12	13:23:59	0.382506
2022-09-12	13:23:59	0.455178
2022-09-12	13:23:59	0.429428
2022-09-12	13:24:00	0.244695
2022-09-12	13:24:00	0.227952
2022-09-12	13:24:00	0.50383
2022-09-12	13:24:01	0.202099
2022-09-12	13:24:01	0.4193
2022-09-12	13:24:01	0.28154
2022-09-12	13:24:01	0.283321
2022-09-12	13:24:02	0.273855
2022-09-12	13:24:02	0.433397
2022-09-12	13:24:02	0.375178
2022-09-12	13:24:02	0.430191
2022-09-12	13:24:03	0.42215
2022-09-12	13:24:03	0.318028
2022-09-12	13:24:03	0.318435
2022-09-12	13:24:03	0.493142
2022-09-12	13:24:04	0.609885
2022-09-12	13:24:04	0.361234
2022-09-12	13:24:04	0.344644
2022-09-12	13:24:05	0.328308
2022-09-12	13:24:05	0.300267
2022-09-12	13:24:05	0.297468
2022-09-12	13:24:05	0.383982
2022-09-12	13:24:06	0.647697
2022-09-12	13:24:06	0.502354
2022-09-12	13:24:06	0.780929
2022-09-12	13:24:06	0.441743
2022-09-12	13:24:07	0.410445
2022-09-12	13:24:07	0.2107
2022-09-12	13:24:07	0.220725
2022-09-12	13:24:07	0.227748
2022-09-12	13:24:08	0.239758
2022-09-12	13:24:08	0.214262
2022-09-12	13:24:08	0.20729
2022-09-12	13:24:09	0.280725
2022-09-12	13:24:09	0.345814
2022-09-12	13:24:09	0.329682
2022-09-12	13:24:09	0.267952
2022-09-12	13:24:10	0.441031
2022-09-12	13:24:10	0.398588
2022-09-12	13:24:10	0.381234
2022-09-12	13:24:10	0.340623
2022-09-12	13:24:11	0.384288
2022-09-12	13:24:11	0.388512
2022-09-12	13:24:11	0.393092
2022-09-12	13:24:11	0.409784
2022-09-12	13:24:12	0.385764
2022-09-12	13:24:12	0.402761
2022-09-12	13:24:12	0.403881
2022-09-12	13:24:13	0.391921
2022-09-12	13:24:13	0.386323
2022-09-12	13:24:13	0.393244
2022-09-12	13:24:13	0.411005
2022-09-12	13:24:14	0.420013
2022-09-12	13:24:14	0.398995
2022-09-12	13:24:14	0.396349
2022-09-12	13:24:14	0.439708
2022-09-12	13:24:15	0.453499
2022-09-12	13:24:15	0.414059
2022-09-12	13:24:15	0.285305
2022-09-12	13:24:15	0.363677
2022-09-12	13:24:16	0.246069
2022-09-12	13:24:16	0.435687
2022-09-12	13:24:16	0.41986
2022-09-12	13:24:17	0.342506
2022-09-12	13:24:17	0.468155
2022-09-12	13:24:17	0.493651
2022-09-12	13:24:17	0.381234
2022-09-12	13:24:18	0.425916
2022-09-12	13:24:18	0.353753
2022-09-12	13:24:18	0.357417
2022-09-12	13:24:18	0.512328
2022-09-12	13:24:19	0.349173
2022-09-12	13:24:19	0.574924
2022-09-12	13:24:19	0.336043
2022-09-12	13:24:19	1.07701
2022-09-12	13:24:20	0.960776
2022-09-12	13:24:20	1.9249
2022-09-12	13:24:20	1.94215
2022-09-12	13:24:21	1.19467
2022-09-12	13:24:21	0.446374
2022-09-12	13:24:21	0.962812
2022-09-12	13:24:21	0.413906
2022-09-12	13:24:22	0.389784
2022-09-12	13:24:22	0.406883
2022-09-12	13:24:22	0.457163
2022-09-12	13:24:22	0.721336
2022-09-12	13:24:23	0.496807
2022-09-12	13:24:23	0.517417
2022-09-12	13:24:23	0.667341
2022-09-12	13:24:23	0.707087
2022-09-12	13:24:24	0.74159
2022-09-12	13:24:24	0.777723
2022-09-12	13:24:24	0.658842
2022-09-12	13:24:25	0.615077
2022-09-12	13:24:25	0.599911
2022-09-12	13:24:25	0.548715
2022-09-12	13:24:25	0.524236
2022-09-12	13:24:26	0.487137
2022-09-12	13:24:26	0.510801
2022-09-12	13:24:26	0.524593
2022-09-12	13:24:26	0.465509
2022-09-12	13:24:27	0.417367
2022-09-12	13:24:27	0.406018
2022-09-12	13:24:27	0.417926
2022-09-12	13:24:27	0.474262
2022-09-12	13:24:28	0.549377
2022-09-12	13:24:28	0.50159
2022-09-12	13:24:28	0.440878
2022-09-12	13:24:29	0.40729
2022-09-12	13:24:29	0.435738
2022-09-12	13:24:29	0.451565
2022-09-12	13:24:29	0.342456
2022-09-12	13:24:30	1.02408
2022-09-12	13:24:30	0.825967
2022-09-12	13:24:30	1.88877
2022-09-12	13:24:30	1.26017
2022-09-12	13:24:31	2.64276
2022-09-12	13:24:31	3.67523
2022-09-12	13:24:31	2.90032
2022-09-12	13:24:31	2.60286
2022-09-12	13:24:32	1.25513
2022-09-12	13:24:32	0.569376
2022-09-12	13:24:32	0.32383
2022-09-12	13:24:33	0.374517
2022-09-12	13:24:33	0.185713
2022-09-12	13:24:33	0.324135
2022-09-12	13:24:33	0.252532
2022-09-12	13:24:34	0.225763
2022-09-12	13:24:34	0.216909
2022-09-12	13:24:34	0.275636
2022-09-12	13:24:34	0.336247
2022-09-12	13:24:35	0.576959
2022-09-12	13:24:35	0.444084
2022-09-12	13:24:35	0.393448
2022-09-12	13:24:35	0.564237
2022-09-12	13:24:36	0.412634
2022-09-12	13:24:36	0.843066
2022-09-12	13:24:36	0.531311
2022-09-12	13:24:37	0.622405
2022-09-12	13:24:37	0.403728
2022-09-12	13:24:37	0.558842
2022-09-12	13:24:37	0.355789
2022-09-12	13:24:38	0.406883
2022-09-12	13:24:38	0.37131
2022-09-12	13:24:38	0.33126
2022-09-12	13:24:38	0.442659
2022-09-12	13:24:39	0.621896
2022-09-12	13:24:39	0.509326
2022-09-12	13:24:39	0.305611
2022-09-12	13:24:39	0.614313
2022-09-12	13:24:40	0.396094
2022-09-12	13:24:40	0.263677
2022-09-12	13:24:40	0.442303
2022-09-12	13:24:41	0.311107
2022-09-12	13:24:41	0.437774
2022-09-12	13:24:41	0.369733
2022-09-12	13:24:41	0.355331
2022-09-12	13:24:42	0.396756
2022-09-12	13:24:42	0.396858
2022-09-12	13:24:42	0.418028
2022-09-12	13:24:42	0.597265
2022-09-12	13:24:43	0.78271
2022-09-12	13:24:43	0.925509
2022-09-12	13:24:43	0.433041
2022-09-12	13:24:44	0.430903
2022-09-12	13:24:44	0.378486
2022-09-12	13:24:44	0.438333
2022-09-12	13:24:44	0.358181
2022-09-12	13:24:45	0.441438
2022-09-12	13:24:45	0.138283
2022-09-12	13:24:45	0.115789
2022-09-12	13:24:45	0.183575
2022-09-12	13:24:46	0.376858
2022-09-12	13:24:46	0.374211
2022-09-12	13:24:46	0.373397
2022-09-12	13:24:46	0.364491
2022-09-12	13:24:47	0.327036
2022-09-12	13:24:47	0.493244
2022-09-12	13:24:47	0.635789
2022-09-12	13:24:48	0.78902
2022-09-12	13:24:48	0.499402
2022-09-12	13:24:48	0.470598
2022-09-12	13:24:48	0.395992
2022-09-12	13:24:49	0.45874
2022-09-12	13:24:49	0.602964
2022-09-12	13:24:49	0.869682
2022-09-12	13:24:49	0.542303
2022-09-12	13:24:50	0.543168
2022-09-12	13:24:50	0.345967
2022-09-12	13:24:50	0.305356
2022-09-12	13:24:50	0.439351
2022-09-12	13:24:51	0.172583
2022-09-12	13:24:51	0.332786
2022-09-12	13:24:51	0.377519
2022-09-12	13:24:52	-0.00436363
2022-09-12	13:24:52	-0.0402415
2022-09-12	13:24:52	0.0616414
2022-09-12	13:24:52	0.0414888
2022-09-12	13:24:53	0.240929
2022-09-12	13:24:53	0.0525321
2022-09-12	13:24:53	0.128308
2022-09-12	13:24:53	-0.00802776
2022-09-12	13:24:54	0.368919
2022-09-12	13:24:54	0.228461
2022-09-12	13:24:54	0.402303
2022-09-12	13:24:54	0.235891
2022-09-12	13:24:55	0.458333
2022-09-12	13:24:55	0.279962
2022-09-12	13:24:55	0.524542
2022-09-12	13:24:56	0.415891
2022-09-12	13:24:56	0.559809
2022-09-12	13:24:56	0.620522
2022-09-12	13:24:56	0.471819
2022-09-12	13:24:57	0.646578
2022-09-12	13:24:57	1.01085
2022-09-12	13:24:57	1.09609
2022-09-12	13:24:57	0.889987
2022-09-12	13:24:58	1.12001
2022-09-12	13:24:58	0.937366
2022-09-12	13:24:58	0.775687
2022-09-12	13:24:58	0.544695
2022-09-12	13:24:59	0.350038
2022-09-12	13:24:59	0.330852
2022-09-12	13:24:59	0.511463
2022-09-12	13:25:00	0.183066
2022-09-12	13:25:00	0.136094
2022-09-12	13:25:00	-0.0517936
2022-09-12	13:25:00	-0.141819
2022-09-12	13:25:01	0.0321249
2022-09-12	13:25:01	0.0110562
2022-09-12	13:25:01	-0.0330659
2022-09-12	13:25:01	0.102303
2022-09-12	13:25:02	0.135229
2022-09-12	13:25:02	0.304491
2022-09-12	13:25:02	0.452227
2022-09-12	13:25:02	0.568053
2022-09-12	13:25:03	0.551208
2022-09-12	13:25:03	0.509224
2022-09-12	13:25:03	0.462099
2022-09-12	13:25:04	0.376247
2022-09-12	13:25:04	0.444796
2022-09-12	13:25:04	0.414109
2022-09-12	13:25:04	0.398893
2022-09-12	13:25:05	0.3593
2022-09-12	13:25:05	0.357163
2022-09-12	13:25:05	0.35355
2022-09-12	13:25:05	0.346629
2022-09-12	13:25:06	0.349835
2022-09-12	13:25:06	0.346069
2022-09-12	13:25:06	0.3564
2022-09-12	13:25:06	0.350445
2022-09-12	13:25:07	0.347341
2022-09-12	13:25:07	0.350293
2022-09-12	13:25:07	0.344084
2022-09-12	13:25:08	0.346832
2022-09-12	13:25:08	0.354262
2022-09-12	13:25:08	0.352481
2022-09-12	13:25:08	0.361031
2022-09-12	13:25:09	0.357621
2022-09-12	13:25:09	0.398283
2022-09-12	13:25:09	0.54327
2022-09-12	13:25:09	0.863117
2022-09-12	13:25:10	0.804084
2022-09-12	13:25:10	0.877621
2022-09-12	13:25:10	0.646985
2022-09-12	13:25:10	0.318028
2022-09-12	13:25:11	0.194822
2022-09-12	13:25:11	0.353193
2022-09-12	13:25:11	0.271107
2022-09-12	13:25:12	0.373092
2022-09-12	13:25:12	0.23986
2022-09-12	13:25:12	0.399707
2022-09-12	13:25:12	0.123015
2022-09-12	13:25:13	0.18785
2022-09-12	13:25:13	0.0631173
2022-09-12	13:25:13	0.397316
2022-09-12	13:25:13	0.0801147
2022-09-12	13:25:14	-0.0157631
2022-09-12	13:25:14	-0.0975443
2022-09-12	13:25:14	-0.139478
2022-09-12	13:25:14	0.179351
2022-09-12	13:25:15	0.348461
2022-09-12	13:25:15	0.410751
2022-09-12	13:25:15	0.562608
2022-09-12	13:25:16	0.444186
2022-09-12	13:25:16	0.460318
2022-09-12	13:25:16	0.402557
2022-09-12	13:25:16	0.434568
2022-09-12	13:25:17	0.390242
2022-09-12	13:25:17	0.396094
2022-09-12	13:25:17	0.366425
2022-09-12	13:25:17	0.374975
2022-09-12	13:25:18	0.377926
2022-09-12	13:25:18	0.367595
2022-09-12	13:25:18	0.372532
2022-09-12	13:25:18	0.370445
2022-09-12	13:25:19	0.358741
2022-09-12	13:25:19	0.374262
2022-09-12	13:25:19	0.402608
2022-09-12	13:25:20	0.29584
2022-09-12	13:25:20	0.287392
2022-09-12	13:25:20	0.346069
2022-09-12	13:25:20	0.404491
2022-09-12	13:25:21	0.380725
2022-09-12	13:25:21	0.560878
2022-09-12	13:25:21	0.903372
2022-09-12	13:25:21	0.725509
2022-09-12	13:25:22	0.517977
2022-09-12	13:25:22	0.36154
2022-09-12	13:25:22	0.321794
2022-09-12	13:25:22	0.343066
2022-09-12	13:25:23	0.307646
2022-09-12	13:25:23	0.364288
2022-09-12	13:25:23	0.370445
2022-09-12	13:25:24	0.357214
2022-09-12	13:25:24	0.351107
2022-09-12	13:25:24	0.341183
2022-09-12	13:25:24	0.322914
2022-09-12	13:25:25	0.342201
2022-09-12	13:25:25	0.399707
2022-09-12	13:25:25	0.414364
2022-09-12	13:25:25	0.375127
2022-09-12	13:25:26	0.343779
2022-09-12	13:25:26	0.312481
2022-09-12	13:25:26	0.30841
2022-09-12	13:25:27	0.336247
2022-09-12	13:25:27	0.311667
2022-09-12	13:25:27	0.354008
2022-09-12	13:25:27	0.447392
2022-09-12	13:25:28	0.270293
2022-09-12	13:25:28	0.484288
2022-09-12	13:25:28	0.283422
2022-09-12	13:25:28	0.49299
2022-09-12	13:25:29	0.314059
2022-09-12	13:25:29	0.41701
2022-09-12	13:25:29	0.352888
2022-09-12	13:25:29	0.341692
2022-09-12	13:25:30	0.418435
2022-09-12	13:25:30	0.32612
2022-09-12	13:25:30	0.509224
2022-09-12	13:25:31	0.2764
2022-09-12	13:25:31	0.529071
2022-09-12	13:25:31	0.452379
2022-09-12	13:25:31	1.16831
2022-09-12	13:25:32	0.835839
2022-09-12	13:25:32	0.672176
2022-09-12	13:25:32	0.405204
2022-09-12	13:25:32	0.567901
2022-09-12	13:25:33	0.321387
2022-09-12	13:25:33	0.533295
2022-09-12	13:25:33	0.357316
2022-09-12	13:25:33	0.449987
2022-09-12	13:25:34	0.725153
2022-09-12	13:25:34	0.758537
2022-09-12	13:25:34	0.440878
2022-09-12	13:25:35	0.397316
2022-09-12	13:25:35	0.512634
2022-09-12	13:25:35	0.496654
2022-09-12	13:25:35	0.588664
2022-09-12	13:25:36	1.24286
2022-09-12	13:25:36	0.885662
2022-09-12	13:25:36	0.966832
2022-09-12	13:25:36	1.63564
2022-09-12	13:25:37	1.62933
2022-09-12	13:25:37	0.752125
2022-09-12	13:25:37	0.560725
2022-09-12	13:25:37	0.442048
2022-09-12	13:25:38	0.496451
2022-09-12	13:25:38	0.362303
2022-09-12	13:25:38	0.441692
2022-09-12	13:25:39	0.510547
2022-09-12	13:25:39	0.448868
2022-09-12	13:25:39	0.429173
2022-09-12	13:25:39	0.452481
2022-09-12	13:25:40	0.437214
2022-09-12	13:25:40	0.443524
2022-09-12	13:25:40	0.447545
2022-09-12	13:25:40	0.46444
2022-09-12	13:25:41	0.469428
2022-09-12	13:25:41	0.469122
2022-09-12	13:25:41	0.471107
2022-09-12	13:25:41	0.466578
2022-09-12	13:25:42	0.460522
2022-09-12	13:25:42	0.449682
2022-09-12	13:25:42	0.45874
2022-09-12	13:25:43	0.406425
2022-09-12	13:25:43	0.417723
2022-09-12	13:25:43	0.413092
2022-09-12	13:25:43	0.367443
2022-09-12	13:25:44	0.35986
2022-09-12	13:25:44	0.331616
2022-09-12	13:25:44	0.296858
2022-09-12	13:25:44	0.316654
2022-09-12	13:25:45	0.464339
2022-09-12	13:25:45	0.307188
2022-09-12	13:25:45	0.199453
2022-09-12	13:25:45	0.326171
2022-09-12	13:25:46	0.177672
2022-09-12	13:25:46	0.770751
2022-09-12	13:25:46	2.71253
2022-09-12	13:25:47	2.07141
2022-09-12	13:25:47	1.66398
2022-09-12	13:25:47	2.46693
2022-09-12	13:25:47	1.07655
2022-09-12	13:25:48	1.24775
2022-09-12	13:25:48	2.03319
2022-09-12	13:25:48	0.582506
2022-09-12	13:25:49	1.29329
2022-09-12	13:25:49	1.69981
2022-09-12	13:25:49	0.751769
2022-09-12	13:25:49	0.90103
2022-09-12	13:25:49	0.476858
2022-09-12	13:25:50	0.700674
2022-09-12	13:25:50	0.747595
2022-09-12	13:25:50	0.748308
2022-09-12	13:25:51	0.546221
2022-09-12	13:25:51	1.2792
2022-09-12	13:25:51	1.86536
2022-09-12	13:25:51	1.18408
2022-09-12	13:25:52	0.2993
2022-09-12	13:25:52	0.245
2022-09-12	13:25:52	0.235738
2022-09-12	13:25:52	0.176909
2022-09-12	13:25:53	0.501438
2022-09-12	13:25:53	1.82938
2022-09-12	13:25:53	1.61558
2022-09-12	13:25:53	1.2364
2022-09-12	13:25:54	1.10719
2022-09-12	13:25:54	1.64469
2022-09-12	13:25:54	1.17889
2022-09-12	13:25:55	0.972888
2022-09-12	13:25:55	0.354873
2022-09-12	13:25:55	0.228257
2022-09-12	13:25:55	0.294313
2022-09-12	13:25:56	0.29243
2022-09-12	13:25:56	0.331107
2022-09-12	13:25:56	0.475382
2022-09-12	13:25:56	0.216298
2022-09-12	13:25:57	0.217519
2022-09-12	13:25:57	0.178283
2022-09-12	13:25:57	0.114771
2022-09-12	13:25:57	0.163728
2022-09-12	13:25:58	0.0914633
2022-09-12	13:25:58	0.172227
2022-09-12	13:25:58	0.176247
2022-09-12	13:25:59	0.458079
2022-09-12	13:25:59	0.892888
2022-09-12	13:25:59	1.89121
2022-09-12	13:25:59	2.60459
2022-09-12	13:26:00	0.519148
2022-09-12	13:26:00	0.738893
2022-09-12	13:26:00	0.910954
2022-09-12	13:26:00	2.24261
2022-09-12	13:26:01	2.20525
2022-09-12	13:26:01	2.23508
2022-09-12	13:26:01	1.27441
2022-09-12	13:26:01	0.282761
2022-09-12	13:26:02	0.134313
2022-09-12	13:26:02	0.273753
2022-09-12	13:26:02	0.243422
2022-09-12	13:26:03	0.233855
2022-09-12	13:26:03	0.15757
2022-09-12	13:26:03	0.151005
2022-09-12	13:26:03	0.238028
2022-09-12	13:26:04	0.181947
2022-09-12	13:26:04	0.0245422
2022-09-12	13:26:04	-0.086043
2022-09-12	13:26:05	-0.138053
2022-09-12	13:26:05	0.175076
2022-09-12	13:26:05	0.17757
2022-09-12	13:26:05	0.401641
2022-09-12	13:26:05	0.159606
2022-09-12	13:26:06	0.404695
2022-09-12	13:26:06	0.17472
2022-09-12	13:26:06	0.542456
2022-09-12	13:26:07	0.171921
2022-09-12	13:26:07	0.515382
2022-09-12	13:26:07	0.248562
2022-09-12	13:26:07	0.509326
2022-09-12	13:26:08	0.201896
2022-09-12	13:26:08	0.470395
2022-09-12	13:26:08	0.222863
2022-09-12	13:26:08	0.446578
2022-09-12	13:26:09	0.181794
2022-09-12	13:26:09	0.417214
2022-09-12	13:26:09	0.166527
2022-09-12	13:26:09	0.499962
2022-09-12	13:26:10	0.134822
2022-09-12	13:26:10	0.177417
2022-09-12	13:26:10	0.219809
2022-09-12	13:26:11	0.118028
2022-09-12	13:26:11	-0.12131
2022-09-12	13:26:11	-0.14533
2022-09-12	13:26:11	-0.103855
2022-09-12	13:26:12	-0.0952033
2022-09-12	13:26:12	-0.12187
2022-09-12	13:26:12	-0.0430405
2022-09-12	13:26:12	0.0325321
2022-09-12	13:26:13	0.0695295
2022-09-12	13:26:13	-0.0508776
2022-09-12	13:26:13	0.065102
2022-09-12	13:26:14	0.03813
2022-09-12	13:26:14	0.128919
2022-09-12	13:26:14	0.145713
2022-09-12	13:26:14	1.08205
2022-09-12	13:26:15	5.63345
2022-09-12	13:26:15	2.74688
2022-09-12	13:26:15	0.475127
2022-09-12	13:26:15	1.1219
2022-09-12	13:26:16	0.676145
2022-09-12	13:26:16	1.60327
2022-09-12	13:26:16	1.60836
2022-09-12	13:26:16	0.570903
2022-09-12	13:26:17	0.477519
2022-09-12	13:26:17	0.721336
2022-09-12	13:26:17	0.279911
2022-09-12	13:26:18	0.786883
2022-09-12	13:26:18	0.751972
2022-09-12	13:26:18	1.11258
2022-09-12	13:26:18	0.876908
2022-09-12	13:26:19	0.662557
2022-09-12	13:26:19	1.06393
2022-09-12	13:26:19	1.42042
2022-09-12	13:26:19	0.652023
2022-09-12	13:26:20	2.12439
2022-09-12	13:26:20	1.76144
2022-09-12	13:26:20	1.33721
2022-09-12	13:26:20	0.651412
2022-09-12	13:26:21	0.719351
2022-09-12	13:26:21	0.894669
2022-09-12	13:26:21	2.251
2022-09-12	13:26:22	4.62719
2022-09-12	13:26:22	2.06571
2022-09-12	13:26:22	2.19111
2022-09-12	13:26:22	1.79487
2022-09-12	13:26:23	1.27034
2022-09-12	13:26:23	1.23513
2022-09-12	13:26:23	1.2281
2022-09-12	13:26:23	1.15335
2022-09-12	13:26:24	0.784644
2022-09-12	13:26:24	0.856501
2022-09-12	13:26:24	0.347901
2022-09-12	13:26:24	0.329224
2022-09-12	13:26:25	0.356043
2022-09-12	13:26:25	0.331005
2022-09-12	13:26:25	0.285
2022-09-12	13:26:26	0.289987
2022-09-12	13:26:26	0.260115
2022-09-12	13:26:26	0.236298
2022-09-12	13:26:26	0.327748
2022-09-12	13:26:27	0.23986
2022-09-12	13:26:27	0.334568
2022-09-12	13:26:27	0.123066
2022-09-12	13:26:27	0.409784
2022-09-12	13:26:28	1.63024
2022-09-12	13:26:28	1.86261
2022-09-12	13:26:28	0.581336
2022-09-12	13:26:28	0.47187
2022-09-12	13:26:29	0.521285
2022-09-12	13:26:29	0.481031
2022-09-12	13:26:29	0.220471
2022-09-12	13:26:30	0.15416
2022-09-12	13:26:30	0.210293
2022-09-12	13:26:30	0.18785
2022-09-12	13:26:30	0.272328
2022-09-12	13:26:31	0.281234
2022-09-12	13:26:31	0.149937
2022-09-12	13:26:31	0.333346
2022-09-12	13:26:31	0.249122
2022-09-12	13:26:32	0.293295
2022-09-12	13:26:32	0.132125
2022-09-12	13:26:32	0.254517
2022-09-12	13:26:32	0.175585
2022-09-12	13:26:33	0.372634
2022-09-12	13:26:33	0.188461
2022-09-12	13:26:33	0.496909
2022-09-12	13:26:34	0.345204
2022-09-12	13:26:34	0.401082
2022-09-12	13:26:34	0.411412
2022-09-12	13:26:34	0.329377
2022-09-12	13:26:35	0.393855
2022-09-12	13:26:35	0.368206
2022-09-12	13:26:35	0.409071
2022-09-12	13:26:35	0.399606
2022-09-12	13:26:36	0.434211
2022-09-12	13:26:36	0.460318
2022-09-12	13:26:36	0.351107
2022-09-12	13:26:36	0.185102
2022-09-12	13:26:37	-0.0603433
2022-09-12	13:26:37	0.312023
2022-09-12	13:26:37	0.353906
2022-09-12	13:26:38	0.405102
2022-09-12	13:26:38	0.102049
2022-09-12	13:26:38	0.198792
2022-09-12	13:26:38	0.0966541
2022-09-12	13:26:39	0.0167559
2022-09-12	13:26:39	-0.000953954
2022-09-12	13:26:39	0.0349748
2022-09-12	13:26:39	0.0482572
2022-09-12	13:26:40	0.0337534
2022-09-12	13:26:40	0.0143641
2022-09-12	13:26:40	0.0982826
2022-09-12	13:26:40	0.119504
2022-09-12	13:26:41	0.122049
2022-09-12	13:26:41	0.0940587
2022-09-12	13:26:41	0.08556
2022-09-12	13:26:42	0.0533972
2022-09-12	13:26:42	0.0216415
2022-09-12	13:26:42	0.00530559
2022-09-12	13:26:42	-0.0451778
2022-09-12	13:26:43	-0.0149998
2022-09-12	13:26:43	0.0864761
2022-09-12	13:26:43	0.285153
2022-09-12	13:26:43	0.0200638
2022-09-12	13:26:44	-0.00370202
2022-09-12	13:26:44	0.00291375
2022-09-12	13:26:44	0.0457636
2022-09-12	13:26:44	0.190853
2022-09-12	13:26:45	0.0218959
2022-09-12	13:26:45	0.159758
2022-09-12	13:26:45	0.150802
2022-09-12	13:26:46	0.0660689
2022-09-12	13:26:46	0.0391478
2022-09-12	13:26:46	0.0582827
2022-09-12	13:26:46	0.051616
2022-09-12	13:26:47	0.0421503
2022-09-12	13:26:47	0.0395041
2022-09-12	13:26:47	0.0432699
2022-09-12	13:26:47	0.0590969
2022-09-12	13:26:48	0.0582317
2022-09-12	13:26:48	0.0555346
2022-09-12	13:26:48	0.0411326
2022-09-12	13:26:48	0.0491733
2022-09-12	13:26:49	0.0374175
2022-09-12	13:26:49	0.0394023
2022-09-12	13:26:49	0.0383336
2022-09-12	13:26:50	0.0387407
2022-09-12	13:26:50	0.0375193
2022-09-12	13:26:50	0.0291733
2022-09-12	13:26:50	0.0390969
2022-09-12	13:26:51	0.0399621
2022-09-12	13:26:51	0.0435244
2022-09-12	13:26:51	0.0632699
2022-09-12	13:26:51	0.131565
2022-09-12	13:26:52	0.127697
2022-09-12	13:26:52	0.112278
2022-09-12	13:26:52	0.177417
2022-09-12	13:26:53	0.208359
2022-09-12	13:26:53	0.432023
2022-09-12	13:26:53	1.26001
2022-09-12	13:26:53	0.871361
2022-09-12	13:26:54	0.436705
2022-09-12	13:26:54	0.285814
2022-09-12	13:26:54	0.371616
2022-09-12	13:26:54	0.184593
2022-09-12	13:26:55	0.142252
2022-09-12	13:26:55	0.362507
2022-09-12	13:26:55	0.129733
2022-09-12	13:26:55	0.111514
2022-09-12	13:26:56	0.207646
2022-09-12	13:26:56	0.190395
2022-09-12	13:26:56	0.345204
2022-09-12	13:26:57	0.305509
2022-09-12	13:26:57	0.709071
2022-09-12	13:26:57	0.515738
2022-09-12	13:26:57	0.638486
2022-09-12	13:26:58	0.359097
2022-09-12	13:26:58	0.437163
2022-09-12	13:26:58	0.31757
2022-09-12	13:26:58	0.425611
2022-09-12	13:26:59	0.343626
2022-09-12	13:26:59	0.278893
2022-09-12	13:26:59	0.260725
2022-09-12	13:26:59	0.331667
2022-09-12	13:27:00	0.32841
2022-09-12	13:27:00	0.288562
2022-09-12	13:27:00	0.203422
2022-09-12	13:27:01	0.504135
2022-09-12	13:27:01	0.371514
2022-09-12	13:27:01	0.37645
2022-09-12	13:27:01	0.475942
2022-09-12	13:27:02	0.408461
2022-09-12	13:27:02	0.408206
2022-09-12	13:27:02	0.436807
2022-09-12	13:27:02	0.356094
2022-09-12	13:27:03	0.303524
2022-09-12	13:27:03	0.305713
2022-09-12	13:27:03	0.27355
2022-09-12	13:27:03	0.285713
2022-09-12	13:27:04	0.28159
2022-09-12	13:27:04	0.280573
2022-09-12	13:27:04	0.286527
2022-09-12	13:27:05	0.287341
2022-09-12	13:27:05	0.284695
2022-09-12	13:27:05	0.285865
2022-09-12	13:27:05	0.286069
2022-09-12	13:27:06	0.28673
2022-09-12	13:27:06	0.287596
2022-09-12	13:27:06	0.289631
2022-09-12	13:27:06	0.286832
2022-09-12	13:27:07	0.294567
2022-09-12	13:27:07	0.405458
2022-09-12	13:27:07	0.358384
2022-09-12	13:27:07	-0.0927605
2022-09-12	13:27:08	-0.388638
2022-09-12	13:27:08	-0.392302
2022-09-12	13:27:08	-0.360089
2022-09-12	13:27:09	-0.289198
2022-09-12	13:27:09	-0.111946
2022-09-12	13:27:09	0.239097
2022-09-12	13:27:09	0.167646
2022-09-12	13:27:10	0.485611
2022-09-12	13:27:10	0.195331
2022-09-12	13:27:10	0.424135
2022-09-12	13:27:10	0.229987
2022-09-12	13:27:11	0.349987
2022-09-12	13:27:11	0.17416
2022-09-12	13:27:11	0.317061
2022-09-12	13:27:11	0.222812
2022-09-12	13:27:12	0.384339
2022-09-12	13:27:12	0.305
2022-09-12	13:27:12	0.775534
2022-09-12	13:27:13	0.401997
2022-09-12	13:27:13	0.970344
2022-09-12	13:27:13	1.0819
2022-09-12	13:27:13	4.32861
2022-09-12	13:27:14	2.33828
2022-09-12	13:27:14	1.72495
2022-09-12	13:27:14	1.38953
2022-09-12	13:27:14	1.69187
2022-09-12	13:27:15	0.946679
2022-09-12	13:27:15	2.12856
2022-09-12	13:27:15	1.76195
2022-09-12	13:27:15	1.31085
2022-09-12	13:27:16	0.742303
2022-09-12	13:27:16	0.95416
2022-09-12	13:27:16	0.604135
2022-09-12	13:27:17	0.595382
2022-09-12	13:27:17	0.726527
2022-09-12	13:27:17	0.436145
2022-09-12	13:27:17	0.172786
2022-09-12	13:27:18	0.20154
2022-09-12	13:27:18	-0.0889437
2022-09-12	13:27:18	-0.0882312
2022-09-12	13:27:18	-0.119274
2022-09-12	13:27:19	-0.182786
2022-09-12	13:27:19	1.36449
2022-09-12	13:27:19	0.724186
2022-09-12	13:27:19	1.37599
2022-09-12	13:27:20	1.71243
2022-09-12	13:27:20	0.369936
2022-09-12	13:27:20	0.403779
2022-09-12	13:27:21	0.522812
2022-09-12	13:27:21	0.215433
2022-09-12	13:27:21	0.346629
2022-09-12	13:27:21	0.324186
2022-09-12	13:27:22	0.362048
2022-09-12	13:27:22	0.394822
2022-09-12	13:27:22	0.50897
2022-09-12	13:27:22	0.303372
2022-09-12	13:27:23	0.543372
2022-09-12	13:27:23	0.668715
2022-09-12	13:27:23	0.638537
2022-09-12	13:27:23	0.419555
2022-09-12	13:27:24	0.46042
2022-09-12	13:27:24	0.303524
2022-09-12	13:27:24	0.377316
2022-09-12	13:27:25	0.419657
2022-09-12	13:27:25	0.504288
2022-09-12	13:27:25	0.247901
2022-09-12	13:27:25	0.186069
2022-09-12	13:27:26	0.352074
2022-09-12	13:27:26	0.271718
2022-09-12	13:27:26	0.378893
2022-09-12	13:27:26	0.274364
2022-09-12	13:27:27	0.436349
2022-09-12	13:27:27	0.231565
2022-09-12	13:27:27	0.490344
2022-09-12	13:27:27	0.141438
2022-09-12	13:27:28	0.4307
2022-09-12	13:27:28	0.282252
2022-09-12	13:27:28	0.368206
2022-09-12	13:27:29	0.209224
2022-09-12	13:27:29	0.495026
2022-09-12	13:27:29	0.249071
2022-09-12	13:27:29	0.454415
2022-09-12	13:27:30	0.19299
2022-09-12	13:27:30	0.434669
2022-09-12	13:27:30	0.363626
2022-09-12	13:27:30	0.387799
2022-09-12	13:27:31	0.505203
2022-09-12	13:27:31	0.45187
2022-09-12	13:27:31	0.375433
2022-09-12	13:27:31	0.401234
2022-09-12	13:27:32	0.407799
2022-09-12	13:27:32	0.371412
2022-09-12	13:27:32	0.408359
2022-09-12	13:27:33	0.37187
2022-09-12	13:27:33	0.724898
2022-09-12	13:27:33	0.373702
2022-09-12	13:27:33	0.680522
2022-09-12	13:27:34	1.03197
2022-09-12	13:27:34	0.540522
2022-09-12	13:27:34	0.663677
2022-09-12	13:27:34	1.24006
2022-09-12	13:27:35	1.36322
2022-09-12	13:27:35	1.16322
2022-09-12	13:27:35	0.623321
2022-09-12	13:27:35	1.47365
2022-09-12	13:27:36	0.40383
2022-09-12	13:27:36	0.262557
2022-09-12	13:27:36	0.537214
2022-09-12	13:27:37	0.453193
2022-09-12	13:27:37	0.634567
2022-09-12	13:27:37	0.507748
2022-09-12	13:27:37	0.598283
2022-09-12	13:27:38	0.727646
2022-09-12	13:27:38	0.71757
2022-09-12	13:27:38	0.719606
2022-09-12	13:27:38	0.715025
2022-09-12	13:27:39	0.724237
2022-09-12	13:27:39	0.367697
2022-09-12	13:27:39	0.31869
2022-09-12	13:27:40	0.663066
2022-09-12	13:27:40	0.592633
2022-09-12	13:27:40	0.953651
2022-09-12	13:27:40	0.728206
2022-09-12	13:27:41	0.692125
2022-09-12	13:27:41	0.364237
2022-09-12	13:27:41	0.482863
2022-09-12	13:27:41	0.288562
2022-09-12	13:27:42	0.374008
2022-09-12	13:27:42	0.368359
2022-09-12	13:27:42	0.43355
2022-09-12	13:27:42	0.353804
2022-09-12	13:27:43	0.383575
2022-09-12	13:27:43	0.60388
2022-09-12	13:27:43	0.377825
2022-09-12	13:27:44	0.677875
2022-09-12	13:27:44	0.7193
2022-09-12	13:27:44	0.436756
2022-09-12	13:27:44	0.387087
2022-09-12	13:27:45	0.226425
2022-09-12	13:27:45	0.790293
2022-09-12	13:27:45	0.436145
2022-09-12	13:27:45	0.406883
2022-09-12	13:27:46	0.481591
2022-09-12	13:27:46	0.354466
2022-09-12	13:27:46	0.469987
2022-09-12	13:27:46	0.426832
2022-09-12	13:27:47	0.494618
2022-09-12	13:27:47	0.422761
2022-09-12	13:27:47	0.722404
2022-09-12	13:27:48	0.214262
2022-09-12	13:27:48	0.567443
2022-09-12	13:27:48	0.761896
2022-09-12	13:27:48	0.442405
2022-09-12	13:27:49	0.320166
2022-09-12	13:27:49	0.23416
2022-09-12	13:27:49	0.220929
2022-09-12	13:27:49	0.530496
2022-09-12	13:27:50	1.28953
2022-09-12	13:27:50	0.951921
2022-09-12	13:27:50	0.45416
2022-09-12	13:27:50	0.356603
2022-09-12	13:27:51	0.278588
2022-09-12	13:27:51	0.404898
2022-09-12	13:27:51	0.28159
2022-09-12	13:27:52	0.312125
2022-09-12	13:27:52	0.315076
2022-09-12	13:27:52	0.326069
2022-09-12	13:27:52	0.385662
2022-09-12	13:27:53	0.397977
2022-09-12	13:27:53	0.273804
2022-09-12	13:27:53	0.195331
2022-09-12	13:27:53	0.23411
2022-09-12	13:27:54	0.286781
2022-09-12	13:27:54	0.304644
2022-09-12	13:27:54	0.336807
2022-09-12	13:27:54	0.30612
2022-09-12	13:27:55	0.317061
2022-09-12	13:27:55	0.327545
2022-09-12	13:27:55	0.328969
2022-09-12	13:27:56	0.340115
2022-09-12	13:27:56	0.336501
2022-09-12	13:27:56	0.369122
2022-09-12	13:27:56	0.365255
2022-09-12	13:27:57	0.403881
2022-09-12	13:27:57	0.379148
2022-09-12	13:27:57	0.364186
2022-09-12	13:27:57	0.382405
2022-09-12	13:27:58	0.398639
2022-09-12	13:27:58	0.406323
2022-09-12	13:27:58	0.462303
2022-09-12	13:27:58	0.49416
2022-09-12	13:27:59	0.503626
2022-09-12	13:27:59	0.46673
2022-09-12	13:27:59	0.483066
2022-09-12	13:28:00	0.46042
2022-09-12	13:28:00	0.513957
2022-09-12	13:28:00	0.499351
2022-09-12	13:28:00	0.544695
2022-09-12	13:28:01	0.544237
2022-09-12	13:28:01	0.528104
2022-09-12	13:28:01	0.559555
2022-09-12	13:28:01	0.568563
2022-09-12	13:28:02	0.601743
2022-09-12	13:28:02	0.667748
2022-09-12	13:28:02	0.590852
2022-09-12	13:28:02	0.484644
2022-09-12	13:28:03	0.47472
2022-09-12	13:28:03	0.523524
2022-09-12	13:28:03	0.609631
2022-09-12	13:28:04	0.61131
2022-09-12	13:28:04	0.605407
2022-09-12	13:28:04	0.570598
2022-09-12	13:28:04	0.579147
2022-09-12	13:28:05	0.548613
2022-09-12	13:28:05	0.571412
2022-09-12	13:28:05	0.574211
2022-09-12	13:28:05	0.692226
2022-09-12	13:28:06	1.92587
2022-09-12	13:28:06	2.01039
2022-09-12	13:28:06	0.635076
2022-09-12	13:28:06	0.650649
2022-09-12	13:28:07	0.543626
2022-09-12	13:28:07	0.583931
2022-09-12	13:28:07	0.594517
2022-09-12	13:28:08	0.559962
2022-09-12	13:28:08	0.603117
2022-09-12	13:28:08	0.533957
2022-09-12	13:28:08	0.833855
2022-09-12	13:28:09	2.28525
2022-09-12	13:28:09	1.76134
2022-09-12	13:28:09	0.760471
2022-09-12	13:28:09	0.729987
2022-09-12	13:28:10	1.00887
2022-09-12	13:28:10	7.91344
2022-09-12	13:28:10	2.14968
2022-09-12	13:28:10	0.658893
2022-09-12	13:28:11	0.577672
2022-09-12	13:28:11	0.555891
2022-09-12	13:28:11	0.464644
2022-09-12	13:28:12	0.52388
2022-09-12	13:28:12	0.575687
2022-09-12	13:28:12	0.499809
2022-09-12	13:28:12	0.515891
2022-09-12	13:28:13	0.47472
2022-09-12	13:28:13	0.624593
2022-09-12	13:28:13	0.586323
2022-09-12	13:28:13	0.505
2022-09-12	13:28:14	0.589224
2022-09-12	13:28:14	0.621387
2022-09-12	13:28:14	0.682507
2022-09-12	13:28:14	0.688664
2022-09-12	13:28:15	0.652684
2022-09-12	13:28:15	0.677672
2022-09-12	13:28:15	0.672888
2022-09-12	13:28:16	0.72556
2022-09-12	13:28:16	0.712837
2022-09-12	13:28:16	0.677723
2022-09-12	13:28:16	0.633397
2022-09-12	13:28:17	0.628511
2022-09-12	13:28:17	0.577163
2022-09-12	13:28:17	0.61126
2022-09-12	13:28:17	0.63986
2022-09-12	13:28:18	0.640471
2022-09-12	13:28:18	0.680573
2022-09-12	13:28:18	0.572837
2022-09-12	13:28:18	0.633601
2022-09-12	13:28:19	0.70958
2022-09-12	13:28:19	0.545611
2022-09-12	13:28:19	0.638741
2022-09-12	13:28:20	0.57299
2022-09-12	13:28:20	0.631768
2022-09-12	13:28:20	0.60103
2022-09-12	13:28:20	0.649478
2022-09-12	13:28:21	0.698028
2022-09-12	13:28:21	0.670191
2022-09-12	13:28:21	0.753499
2022-09-12	13:28:21	0.780827
2022-09-12	13:28:22	0.652481
2022-09-12	13:28:22	1.68754
2022-09-12	13:28:22	1.79915
2022-09-12	13:28:23	2.15228
2022-09-12	13:28:23	1.59991
2022-09-12	13:28:23	1.10882
2022-09-12	13:28:23	0.966679
2022-09-12	13:28:24	0.808053
2022-09-12	13:28:24	0.571463
2022-09-12	13:28:24	0.710751
2022-09-12	13:28:24	0.613448
2022-09-12	13:28:25	1.75818
2022-09-12	13:28:25	10.0006
2022-09-12	13:28:25	12.1048
2022-09-12	13:28:25	6.64322
2022-09-12	13:28:26	3.44378
2022-09-12	13:28:26	2.1995
2022-09-12	13:28:26	1.38912
2022-09-12	13:28:27	1.20464
2022-09-12	13:28:27	0.881845
2022-09-12	13:28:27	0.800623
2022-09-12	13:28:27	0.522506
2022-09-12	13:28:28	1.22195
2022-09-12	13:28:28	3.42261
2022-09-12	13:28:28	1.33696
2022-09-12	13:28:28	1.01589
2022-09-12	13:28:29	0.637264
2022-09-12	13:28:29	0.470954
2022-09-12	13:28:29	0.704389
2022-09-12	13:28:29	0.442863
2022-09-12	13:28:30	0.709377
2022-09-12	13:28:30	0.436349
2022-09-12	13:28:30	0.525865
2022-09-12	13:28:31	0.225407
2022-09-12	13:28:31	0.524796
2022-09-12	13:28:31	0.213702
2022-09-12	13:28:31	0.134364
2022-09-12	13:28:32	0.741641
2022-09-12	13:28:32	1.2508
2022-09-12	13:28:32	0.495942
2022-09-12	13:28:32	0.445356
2022-09-12	13:28:33	0.186018
2022-09-12	13:28:33	0.387443
2022-09-12	13:28:33	0.243881
2022-09-12	13:28:33	0.730038
2022-09-12	13:28:34	0.749377
2022-09-12	13:28:34	1.15329
2022-09-12	13:28:34	0.27813
2022-09-12	13:28:35	0.486476
2022-09-12	13:28:35	0.249529
2022-09-12	13:28:35	0.386476
2022-09-12	13:28:35	0.160471
2022-09-12	13:28:36	0.385814
2022-09-12	13:28:36	0.398283
2022-09-12	13:28:36	0.847901
2022-09-12	13:28:36	0.764949
2022-09-12	13:28:37	1.06648
2022-09-12	13:28:37	0.533753
2022-09-12	13:28:37	0.587036
2022-09-12	13:28:37	0.547137
2022-09-12	13:28:38	0.497519
2022-09-12	13:28:38	0.655738
2022-09-12	13:28:38	0.987138
2022-09-12	13:28:39	1.94841
2022-09-12	13:28:39	3.46693
2022-09-12	13:28:39	2.03548
2022-09-12	13:28:39	2.40902
2022-09-12	13:28:40	2.08525
2022-09-12	13:28:40	1.46067
2022-09-12	13:28:40	0.496909
2022-09-12	13:28:40	0.236858
2022-09-12	13:28:41	0.361285
2022-09-12	13:28:41	0.643626
2022-09-12	13:28:41	1.0335
2022-09-12	13:28:41	0.41014
2022-09-12	13:28:42	0.54729
2022-09-12	13:28:42	0.491005
2022-09-12	13:28:42	0.343881
2022-09-12	13:28:43	0.17355
2022-09-12	13:28:43	0.211005
2022-09-12	13:28:43	0.948715
2022-09-12	13:28:43	0.347901
2022-09-12	13:28:44	1.4851
2022-09-12	13:28:44	2.84113
2022-09-12	13:28:44	5.58479
2022-09-12	13:28:44	5.45395
2022-09-12	13:28:45	2.94352
2022-09-12	13:28:45	0.711412
2022-09-12	13:28:45	0.612583
2022-09-12	13:28:45	0.455534
2022-09-12	13:28:46	0.366272
2022-09-12	13:28:46	0.2193
2022-09-12	13:28:46	0.315076
2022-09-12	13:28:47	0.249275
2022-09-12	13:28:47	0.469682
2022-09-12	13:28:47	0.194262
2022-09-12	13:28:47	0.387494
2022-09-12	13:28:48	0.439962
2022-09-12	13:28:48	0.0824048
2022-09-12	13:28:48	-0.0541855
2022-09-12	13:28:48	0.161336
2022-09-12	13:28:49	0.177774
2022-09-12	13:28:49	0.197316
2022-09-12	13:28:49	0.290242
2022-09-12	13:28:49	0.227545
2022-09-12	13:28:50	0.254822
2022-09-12	13:28:50	0.278995
2022-09-12	13:28:50	0.213906
2022-09-12	13:28:51	0.241947
2022-09-12	13:28:51	0.278995
2022-09-12	13:28:51	0.324084
2022-09-12	13:28:51	0.381234
2022-09-12	13:28:52	0.716247
2022-09-12	13:28:52	0.732023
2022-09-12	13:28:52	0.83416
2022-09-12	13:28:52	0.571921
2022-09-12	13:28:53	0.297061
2022-09-12	13:28:53	0.177825
2022-09-12	13:28:53	0.189835
2022-09-12	13:28:53	0.289224
2022-09-12	13:28:54	0.567799
2022-09-12	13:28:54	0.289122
2022-09-12	13:28:54	0.459657
2022-09-12	13:28:55	0.503168
2022-09-12	13:28:55	1.48846
2022-09-12	13:28:55	1.9709
2022-09-12	13:28:55	0.490598
2022-09-12	13:28:56	0.299351
2022-09-12	13:28:56	0.408257
2022-09-12	13:28:56	0.367138
2022-09-12	13:28:56	0.252125
2022-09-12	13:28:57	0.348817
2022-09-12	13:28:57	0.168308
2022-09-12	13:28:57	0.297824
2022-09-12	13:28:57	0.150242
2022-09-12	13:28:58	0.362099
2022-09-12	13:28:58	0.12958
2022-09-12	13:28:58	0.331005
2022-09-12	13:28:59	0.24556
2022-09-12	13:28:59	0.434618
2022-09-12	13:28:59	0.497316
2022-09-12	13:28:59	0.556857
2022-09-12	13:29:00	0.372379
2022-09-12	13:29:00	0.745255
2022-09-12	13:29:00	2.07416
2022-09-12	13:29:00	1.36368
2022-09-12	13:29:01	1.11335
2022-09-12	13:29:01	1.70403
2022-09-12	13:29:01	1.15508
2022-09-12	13:29:01	1.57971
2022-09-12	13:29:02	1.27665
2022-09-12	13:29:02	1.42663
2022-09-12	13:29:02	1.1905
2022-09-12	13:29:03	0.511056
2022-09-12	13:29:03	0.672735
2022-09-12	13:29:03	0.375636
2022-09-12	13:29:03	0.732684
2022-09-12	13:29:04	0.796196
2022-09-12	13:29:04	1.3364
2022-09-12	13:29:04	1.34617
2022-09-12	13:29:04	0.76785
2022-09-12	13:29:05	0.609122
2022-09-12	13:29:05	0.515178
2022-09-12	13:29:05	0.532634
2022-09-12	13:29:05	0.530344
2022-09-12	13:29:06	0.577621
2022-09-12	13:29:06	0.603575
2022-09-12	13:29:06	0.808104
2022-09-12	13:29:07	1.09899
2022-09-12	13:29:07	1.04754
2022-09-12	13:29:07	0.707087
2022-09-12	13:29:07	0.955941
2022-09-12	13:29:08	0.798791
2022-09-12	13:29:08	0.727494
2022-09-12	13:29:08	0.682099
2022-09-12	13:29:08	0.657519
2022-09-12	13:29:09	0.590852
2022-09-12	13:29:09	0.414924
2022-09-12	13:29:09	0.480929
2022-09-12	13:29:09	0.554771
2022-09-12	13:29:10	0.517519
2022-09-12	13:29:10	0.605255
2022-09-12	13:29:10	0.433295
2022-09-12	13:29:11	0.512837
2022-09-12	13:29:11	0.46098
2022-09-12	13:29:11	0.507341
2022-09-12	13:29:11	0.30098
2022-09-12	13:29:12	0.611005
2022-09-12	13:29:12	0.424593
2022-09-12	13:29:12	0.354211
2022-09-12	13:29:12	0.384237
2022-09-12	13:29:13	0.420166
2022-09-12	13:29:13	1.69044
2022-09-12	13:29:13	1.90607
2022-09-12	13:29:13	0.392074
2022-09-12	13:29:14	0.32612
2022-09-12	13:29:14	0.440013
2022-09-12	13:29:14	0.916349
2022-09-12	13:29:15	0.463982
2022-09-12	13:29:15	1.17614
2022-09-12	13:29:15	1.39396
2022-09-12	13:29:15	1.55696
2022-09-12	13:29:16	0.856756
2022-09-12	13:29:16	1.0908
2022-09-12	13:29:16	0.540929
2022-09-12	13:29:16	0.925204
2022-09-12	13:29:17	1.12754
2022-09-12	13:29:17	0.940013
2022-09-12	13:29:17	1.25289
2022-09-12	13:29:18	0.805509
2022-09-12	13:29:18	0.335433
2022-09-12	13:29:18	1.11396
2022-09-12	13:29:18	2.47446
2022-09-12	13:29:19	3.12546
2022-09-12	13:29:19	0.580267
2022-09-12	13:29:19	1.56378
2022-09-12	13:29:19	2.51701
2022-09-12	13:29:20	0.387748
2022-09-12	13:29:20	0.393092
2022-09-12	13:29:20	0.421641
2022-09-12	13:29:20	0.55411
2022-09-12	13:29:21	0.256858
2022-09-12	13:29:21	0.211056
2022-09-12	13:29:21	0.488257
2022-09-12	13:29:22	0.125102
2022-09-12	13:29:22	0.234771
2022-09-12	13:29:22	0.0942623
2022-09-12	13:29:22	0.28215
2022-09-12	13:29:23	0.409326
2022-09-12	13:29:23	4.36266
2022-09-12	13:29:23	2.18795
2022-09-12	13:29:23	1.22637
2022-09-12	13:29:24	0.864797
2022-09-12	13:29:24	2.35752
2022-09-12	13:29:24	1.47564
2022-09-12	13:29:24	3.97894
2022-09-12	13:29:25	3.66841
