# Supplementary material for: Comparing efficacy in reducing pulling and welfare impacts of four types of leash walking equipment
Source: PeerJ journal article supplement (doi:10.7717/peerj.18131), 2024-10-24
Supplement: Shelter1_Tension_files.zip [file Ranger_prong_2022912155818 copy.xlsx]

## Sheet: averaged newtons
Date	Time	averaged newtons
2022-09-12	15:58:36	2.53708	2.53708	0		Impulse	944.66
2022-09-12	15:58:37	2.95901	5.49609	0		Total steps	13
2022-09-12	15:58:38	2.13712	7.63321	0		# > 5sec	0
2022-09-12	15:58:39	1.31901	8.95222	0
2022-09-12	15:58:40	1.74863	10.7008	0
2022-09-12	15:58:41	3.3713	14.0721	0
2022-09-12	15:58:42	1.73593	15.8081	0
2022-09-12	15:58:43	1.89094	17.699	0
2022-09-12	15:58:44	1.18971	18.8887	0
2022-09-12	15:58:45	1.69699	20.5857	0
2022-09-12	15:58:46	3.27882	23.8645	0
2022-09-12	15:58:47	1.2228	25.0873	0
2022-09-12	15:58:48	1.26842	26.3558	0
2022-09-12	15:58:49	4.3147	30.6705	0
2022-09-12	15:58:50	4.41577	35.0862	0
2022-09-12	15:58:51	3.9881	39.0743	0
2022-09-12	15:58:52	2.95254	42.0269	0
2022-09-12	15:58:53	2.54436	44.5712	0
2022-09-12	15:58:54	4.34271	48.9139	0
2022-09-12	15:58:55	4.39226	53.3062	0
2022-09-12	15:58:56	2.8477	56.1539	0
2022-09-12	15:58:57	3.10814	59.262	0
2022-09-12	15:58:58	2.91549	62.1775	0
2022-09-12	15:58:59	2.3765	64.554	0
2022-09-12	15:59:00	2.41697	66.971	0
2022-09-12	15:59:01	3.728	70.699	0
2022-09-12	15:59:02	6.18046	76.8795	0
2022-09-12	15:59:03	4.32745	81.2069	0
2022-09-12	15:59:04	3.95092	85.1578	0
2022-09-12	15:59:05	5.02731	90.1852	0
2022-09-12	15:59:06	3.11646	93.3016	0
2022-09-12	15:59:07	1.92172	95.2233	0
2022-09-12	15:59:08	1.57611	96.7994	0
2022-09-12	15:59:09	2.04391	98.8434	0
2022-09-12	15:59:10	3.32698	102.17	0
2022-09-12	15:59:11	1.40122	103.572	0
2022-09-12	15:59:12	1.29915	104.871	0
2022-09-12	15:59:13	1.458	106.329	0
2022-09-12	15:59:14	-0.290321	106.329	0
2022-09-12	15:59:15	-2.80114	106.329	0
2022-09-12	15:59:16	1.52869	107.857	0
2022-09-12	15:59:17	2.41612	110.274	0
2022-09-12	15:59:18	2.54526	112.819	0
2022-09-12	15:59:19	2.73365	115.552	0
2022-09-12	15:59:20	1.33899	116.891	0
2022-09-12	15:59:21	0.819127	117.711	0
2022-09-12	15:59:22	3.13312	120.844	0
2022-09-12	15:59:23	1.23978	122.083	0
2022-09-12	15:59:24	1.13695	123.22	0
2022-09-12	15:59:25	1.48901	124.709	0
2022-09-12	15:59:26	1.45766	126.167	0
2022-09-12	15:59:27	1.73418	127.901	0
2022-09-12	15:59:28	1.44453	129.346	0
2022-09-12	15:59:29	2.13492	131.481	0
2022-09-12	15:59:30	2.2102	133.691	0
2022-09-12	15:59:31	-0.669378	133.691	0
2022-09-12	15:59:32	-2.3718	133.691	0
2022-09-12	15:59:33	-1.24402	133.691	0
2022-09-12	15:59:34	-2.4812	133.691	0
2022-09-12	15:59:35	-3.20898	133.691	0
2022-09-12	15:59:36	-2.34922	133.691	0
2022-09-12	15:59:37	-0.427672	133.691	0
2022-09-12	15:59:38	-1.89037	133.691	0
2022-09-12	15:59:39	-1.13825	133.691	0
2022-09-12	15:59:40	5.32261	139.014	0
2022-09-12	15:59:41	6.74468	145.758	0
2022-09-12	15:59:42	3.74553	149.504	0
2022-09-12	15:59:43	2.46168	151.965	0
2022-09-12	15:59:44	2.20814	154.174	0
2022-09-12	15:59:45	2.89659	157.07	0
2022-09-12	15:59:46	4.17245	161.243	0
2022-09-12	15:59:47	2.02082	163.263	0
2022-09-12	15:59:48	1.52314	164.787	0
2022-09-12	15:59:49	1.30448	166.091	0
2022-09-12	15:59:50	1.58952	167.681	0
2022-09-12	15:59:51	1.81177	169.492	0
2022-09-12	15:59:52	0.320204	169.813	0
2022-09-12	15:59:53	0.243332	170.056	0
2022-09-12	15:59:54	1.43118	171.487	0
2022-09-12	15:59:55	1.70933	173.196	0
2022-09-12	15:59:56	1.36808	174.564	0
2022-09-12	15:59:57	1.70101	176.265	0
2022-09-12	15:59:58	0.0695535	176.335	0
2022-09-12	15:59:59	0.205547	176.541	0
2022-09-12	16:00:00	1.64408	178.185	0
2022-09-12	16:00:01	0.931122	179.116	0
2022-09-12	16:00:02	0.0284117	179.144	0
2022-09-12	16:00:03	1.53667	180.681	0
2022-09-12	16:00:04	2.59874	183.28	0
2022-09-12	16:00:05	2.48018	185.76	0
2022-09-12	16:00:06	1.74646	187.506	0
2022-09-12	16:00:07	1.71912	189.225	0
2022-09-12	16:00:08	1.86247	191.088	0
2022-09-12	16:00:09	5.81954	196.907	0
2022-09-12	16:00:10	7.62589	204.533	0
2022-09-12	16:00:11	1.52642	206.06	0
2022-09-12	16:00:12	1.24321	207.303	0
2022-09-12	16:00:13	2.08149	209.384	0
2022-09-12	16:00:14	2.03021	211.415	0
2022-09-12	16:00:15	1.74714	213.162	0
2022-09-12	16:00:16	1.25861	214.42	0
2022-09-12	16:00:17	1.35223	215.773	0
2022-09-12	16:00:18	1.55076	217.323	0
2022-09-12	16:00:19	1.59835	218.922	0
2022-09-12	16:00:20	1.85721	220.779	0
2022-09-12	16:00:21	2.0915	222.87	0
2022-09-12	16:00:22	2.03168	224.902	0
2022-09-12	16:00:23	1.93638	226.838	0
2022-09-12	16:00:24	1.81691	228.655	0
2022-09-12	16:00:25	2.02936	230.685	0
2022-09-12	16:00:26	2.18052	232.865	0
2022-09-12	16:00:27	1.85183	234.717	0
2022-09-12	16:00:28	1.46219	236.179	0
2022-09-12	16:00:29	1.79049	237.97	0
2022-09-12	16:00:30	1.83983	239.81	0
2022-09-12	16:00:31	8.13369	247.943	0
2022-09-12	16:00:32	3.69172	251.635	0
2022-09-12	16:00:33	-0.334633	251.635	0
2022-09-12	16:00:34	-0.9833	251.635	0
2022-09-12	16:00:35	1.03344	252.668	0
2022-09-12	16:00:36	1.00011	253.669	0
2022-09-12	16:00:37	1.21663	254.885	0
2022-09-12	16:00:38	1.29767	256.183	0
2022-09-12	16:00:39	1.08377	257.267	0
2022-09-12	16:00:40	2.61725	259.884	0
2022-09-12	16:00:41	1.69801	261.582	0
2022-09-12	16:00:42	1.90939	263.491	0
2022-09-12	16:00:43	1.95025	265.442	0
2022-09-12	16:00:44	1.97894	267.42	0
2022-09-12	16:00:45	1.93474	269.355	0
2022-09-12	16:00:46	1.95212	271.307	0
2022-09-12	16:00:47	1.92799	273.235	0
2022-09-12	16:00:48	1.92048	275.156	0
2022-09-12	16:00:49	1.9923	277.148	0
2022-09-12	16:00:50	1.38245	278.531	0
2022-09-12	16:00:51	7.18539	285.716	0
2022-09-12	16:00:52	11.4531	297.169	0
2022-09-12	16:00:53	15.3683	312.537	1
2022-09-12	16:00:54	11.2073	323.745	1
2022-09-12	16:00:55	7.66945	331.414	1
2022-09-12	16:00:56	18.0252	349.439	2
2022-09-12	16:00:57	14.5335	363.973	3
2022-09-12	16:00:58	9.898	373.871	3
2022-09-12	16:00:59	9.07863	382.949	3
2022-09-12	16:01:00	7.02629	389.976	3
2022-09-12	16:01:01	1.48913	391.465	3
2022-09-12	16:01:02	2.75379	394.219	3
2022-09-12	16:01:03	1.64431	395.863	3
2022-09-12	16:01:04	1.86745	397.73	3
2022-09-12	16:01:05	2.09507	399.826	3
2022-09-12	16:01:06	1.8308	401.656	3
2022-09-12	16:01:07	1.8357	403.492	3
2022-09-12	16:01:08	1.86434	405.356	3
2022-09-12	16:01:09	1.89269	407.249	3
2022-09-12	16:01:10	1.86211	409.111	3
2022-09-12	16:01:11	1.88539	410.997	3
2022-09-12	16:01:12	2.79088	413.787	3
2022-09-12	16:01:13	3.79048	417.578	3
2022-09-12	16:01:14	3.58676	421.165	3
2022-09-12	16:01:15	2.23089	423.396	3
2022-09-12	16:01:16	4.49161	427.887	3
2022-09-12	16:01:17	2.30865	430.196	3
2022-09-12	16:01:18	1.2328	431.429	3
2022-09-12	16:01:19	0.782001	432.211	3
2022-09-12	16:01:20	-0.255743	432.211	3
2022-09-12	16:01:21	7.40874	439.619	3
2022-09-12	16:01:22	3.28872	442.908	3
2022-09-12	16:01:23	13.1912	456.099	4
2022-09-12	16:01:24	1.682	457.781	4
2022-09-12	16:01:25	0.335389	458.117	4
2022-09-12	16:01:26	-1.16111	458.117	4
2022-09-12	16:01:27	-1.49829	458.117	4
2022-09-12	16:01:28	-0.903901	458.117	4
2022-09-12	16:01:29	-0.376398	458.117	4
2022-09-12	16:01:30	0.213978	458.331	4
2022-09-12	16:01:31	1.08341	459.414	4
2022-09-12	16:01:32	3.45081	462.865	4
2022-09-12	16:01:33	5.82309	468.688	4
2022-09-12	16:01:34	8.57052	477.259	4
2022-09-12	16:01:35	18.6283	495.887	5
2022-09-12	16:01:36	19.3463	515.233	6
2022-09-12	16:01:37	4.2034	519.437	6
2022-09-12	16:01:38	3.2233	522.66	6
2022-09-12	16:01:39	3.219	525.879	6
2022-09-12	16:01:40	1.45166	527.33	6
2022-09-12	16:01:41	3.41909	530.75	6
2022-09-12	16:01:42	4.74638	535.496	6
2022-09-12	16:01:43	5.12817	540.624	6
2022-09-12	16:01:44	22.8137	563.438	7
2022-09-12	16:01:45	22.3675	585.805	8
2022-09-12	16:01:46	20.5158	606.321	9
2022-09-12	16:01:47	5.07502	611.396	9
2022-09-12	16:01:48	2.57096	613.967	9
2022-09-12	16:01:49	3.3417	617.309	9
2022-09-12	16:01:50	3.57435	620.883	9
2022-09-12	16:01:51	10.701	631.584	9
2022-09-12	16:01:52	33.5348	665.119	10
2022-09-12	16:01:53	11.0385	676.157	10
2022-09-12	16:01:54	13.2905	689.448	11
2022-09-12	16:01:55	2.22506	691.673	11
2022-09-12	16:01:56	15.339	707.012	12
2022-09-12	16:01:57	7.88293	714.895	12
2022-09-12	16:01:58	2.86252	717.757	12
2022-09-12	16:01:59	7.2058	724.963	12
2022-09-12	16:02:00	-2.49357	724.963	12
2022-09-12	16:02:01	-3.68934	724.963	12
2022-09-12	16:02:02	-3.1722	724.963	12
2022-09-12	16:02:03	-2.80287	724.963	12
2022-09-12	16:02:04	-1.80367	724.963	12
2022-09-12	16:02:05	2.01086	726.974	12
2022-09-12	16:02:06	4.02211	730.996	12
2022-09-12	16:02:07	3.01527	734.011	12
2022-09-12	16:02:08	1.43382	735.445	12
2022-09-12	16:02:09	6.71186	742.157	12
2022-09-12	16:02:10	8.27971	750.437	12
2022-09-12	16:02:11	7.04829	757.485	12
2022-09-12	16:02:12	2.40486	759.89	12
2022-09-12	16:02:13	0.63718	760.527	12
2022-09-12	16:02:14	0.982793	761.51	12
2022-09-12	16:02:15	7.14871	768.659	12
2022-09-12	16:02:16	3.93728	772.596	12
2022-09-12	16:02:17	1.95279	774.549	12
2022-09-12	16:02:18	2.33644	776.885	12
2022-09-12	16:02:19	6.76917	783.654	12
2022-09-12	16:02:20	7.85203	791.506	12
2022-09-12	16:02:21	1.70752	793.214	12
2022-09-12	16:02:22	0.267232	793.481	12
2022-09-12	16:02:23	-2.05698	793.481	12
2022-09-12	16:02:24	0.38777	793.869	12
2022-09-12	16:02:25	15.383	809.252	13
2022-09-12	16:02:26	6.32708	815.579	13
2022-09-12	16:02:27	-2.40408	815.579	13
2022-09-12	16:02:28	-0.915784	815.579	13
2022-09-12	16:02:29	0.0108664	815.59	13
2022-09-12	16:02:30	0.0425401	815.632	13
2022-09-12	16:02:31	0.912617	816.545	13
2022-09-12	16:02:32	4.24074	820.786	13
2022-09-12	16:02:33	1.63367	822.419	13
2022-09-12	16:02:34	2.13255	824.552	13
2022-09-12	16:02:35	1.72642	826.278	13
2022-09-12	16:02:36	-1.69043	826.278	13
2022-09-12	16:02:37	0.693432	826.972	13
2022-09-12	16:02:38	0.579719	827.552	13
2022-09-12	16:02:39	0.735255	828.287	13
2022-09-12	16:02:40	0.931746	829.219	13
2022-09-12	16:02:41	1.20311	830.422	13
2022-09-12	16:02:42	1.98805	832.41	13
2022-09-12	16:02:43	2.1627	834.572	13
2022-09-12	16:02:44	2.06389	836.636	13
2022-09-12	16:02:45	2.17803	838.814	13
2022-09-12	16:02:46	1.96843	840.783	13
2022-09-12	16:02:47	1.59111	842.374	13
2022-09-12	16:02:48	1.6322	844.006	13
2022-09-12	16:02:49	1.52278	845.529	13
2022-09-12	16:02:50	1.42173	846.951	13
2022-09-12	16:02:51	-1.03457	846.951	13
2022-09-12	16:02:52	4.37531	851.326	13
2022-09-12	16:02:53	1.40643	852.732	13
2022-09-12	16:02:54	0.866607	853.599	13
2022-09-12	16:02:55	1.41126	855.01	13
2022-09-12	16:02:56	1.78386	856.794	13
2022-09-12	16:02:57	1.73489	858.529	13
2022-09-12	16:02:58	1.94595	860.475	13
2022-09-12	16:02:59	1.25902	861.734	13
2022-09-12	16:03:00	0.838198	862.572	13
2022-09-12	16:03:01	-0.0653637	862.572	13
2022-09-12	16:03:02	0.184776	862.757	13
2022-09-12	16:03:03	-0.160779	862.757	13
2022-09-12	16:03:04	1.05184	863.809	13
2022-09-12	16:03:05	1.83623	865.645	13
2022-09-12	16:03:06	0.97668	866.622	13
2022-09-12	16:03:07	1.7872	868.409	13
2022-09-12	16:03:08	1.82229	870.231	13
2022-09-12	16:03:09	1.57032	871.801	13
2022-09-12	16:03:10	1.6829	873.484	13
2022-09-12	16:03:11	1.43231	874.917	13
2022-09-12	16:03:12	1.85851	876.775	13
2022-09-12	16:03:13	1.872	878.647	13
2022-09-12	16:03:14	1.99428	880.641	13
2022-09-12	16:03:15	2.07939	882.721	13
2022-09-12	16:03:16	2.09196	884.813	13
2022-09-12	16:03:17	2.07798	886.891	13
2022-09-12	16:03:18	2.50876	889.399	13
2022-09-12	16:03:19	1.61267	891.012	13
2022-09-12	16:03:20	3.4833	894.495	13
2022-09-12	16:03:21	2.13746	896.633	13
2022-09-12	16:03:22	2.18624	898.819	13
2022-09-12	16:03:23	2.04668	900.866	13
2022-09-12	16:03:24	2.24046	903.106	13
2022-09-12	16:03:25	2.72585	905.832	13
2022-09-12	16:03:26	3.67316	909.505	13
2022-09-12	16:03:27	4.45347	913.959	13
2022-09-12	16:03:28	2.70693	916.666	13
2022-09-12	16:03:29	2.42393	919.09	13
2022-09-12	16:03:30	2.07758	921.167	13
2022-09-12	16:03:31	4.10831	925.276	13
2022-09-12	16:03:32	5.46768	930.743	13
2022-09-12	16:03:33	2.99569	933.739	13
2022-09-12	16:03:34	3.27611	937.015	13
2022-09-12	16:03:35	6.94016	943.955	13
2022-09-12	16:03:36	0.705203	944.66	13

## Sheet: Ranger_prong_2022912155818 (4)
Date	Time	Lbs	Newtons	averaged newtons	Total Force x time	Total Time Steps Force >3		**GoPro Fitting: 1547
2022-09-12	15:58:36	0.44673	1.98714	2.53708	1.98714	FALSE	0			Total force x time	1836.26
2022-09-12	15:58:36	0.62327	2.77243	2.53708	2.77243	FALSE	0			Total Time Steps Force >3	43
2022-09-12	15:58:36	0.641081	2.85166	2.53708	4.8388	FALSE	0
2022-09-12	15:58:37	0.428613	1.90656	2.95901	4.67899	FALSE	0
2022-09-12	15:58:37	0.782506	3.48074	2.95901	8.31954	FALSE	0
2022-09-12	15:58:37	0.720929	3.20684	2.95901	7.88582	FALSE	0
2022-09-12	15:58:37	0.728817	3.24192	2.95901	11.5615	FALSE	0
2022-09-12	15:58:38	0.556094	2.47362	2.13712	10.3594	FALSE	0
2022-09-12	15:58:38	0.484084	2.1533	2.13712	13.7148	FALSE	0
2022-09-12	15:58:38	0.342608	1.52399	2.13712	11.8834	FALSE	0
2022-09-12	15:58:38	0.538995	2.39756	2.13712	16.1123	FALSE	0
2022-09-12	15:58:39	0.356298	1.58488	1.31901	13.4683	FALSE	0
2022-09-12	15:58:39	0.564491	2.51097	1.31901	18.6233	FALSE	0
2022-09-12	15:58:39	0.0715142	0.318109	1.31901	13.7864	FALSE	0
2022-09-12	15:58:39	0.193804	0.862079	1.31901	19.4854	FALSE	0
2022-09-12	15:58:40	0.0865269	0.384889	1.74863	14.1713	FALSE	0
2022-09-12	15:58:40	0.457774	2.03627	1.74863	21.5216	FALSE	0
2022-09-12	15:58:40	0.635025	2.82472	1.74863	16.996	FALSE	0
2022-09-12	15:58:41	0.512634	2.2803	3.3713	23.8019	FALSE	0
2022-09-12	15:58:41	0.874974	3.89206	3.3713	20.8881	FALSE	0
2022-09-12	15:58:41	1.14093	5.07508	3.3713	28.877	FALSE	0
2022-09-12	15:58:41	0.503066	2.23774	3.3713	23.1258	FALSE	0
2022-09-12	15:58:42	0.462659	2.058	1.73593	30.935	FALSE	0
2022-09-12	15:58:42	0.365305	1.62495	1.73593	24.7508	FALSE	0
2022-09-12	15:58:42	0.288562	1.28358	1.73593	32.2186	FALSE	0
2022-09-12	15:58:42	0.444491	1.97718	1.73593	26.728	FALSE	0
2022-09-12	15:58:43	0.411769	1.83163	1.89094	34.0502	FALSE	0
2022-09-12	15:58:43	0.675483	3.00468	1.89094	29.7326	FALSE	0
2022-09-12	15:58:43	0.217214	0.966211	1.89094	35.0165	FALSE	0
2022-09-12	15:58:43	0.395942	1.76123	1.89094	31.4939	FALSE	0
2022-09-12	15:58:44	0.179504	0.79847	1.18971	35.8149	FALSE	0
2022-09-12	15:58:44	0.480725	2.13836	1.18971	33.6322	FALSE	0
2022-09-12	15:58:44	0.14215	0.632312	1.18971	36.4472	FALSE	0
2022-09-12	15:58:45	0.306527	1.36349	1.69699	34.9957	FALSE	0
2022-09-12	15:58:45	0.248664	1.10611	1.69699	37.5533	FALSE	0
2022-09-12	15:58:45	0.436654	1.94232	1.69699	36.9381	FALSE	0
2022-09-12	15:58:45	0.53416	2.37605	1.69699	39.9294	FALSE	0
2022-09-12	15:58:46	0.865153	3.84837	3.27882	40.7864	FALSE	0
2022-09-12	15:58:46	0.365814	1.62721	3.27882	41.5566	FALSE	0
2022-09-12	15:58:46	0.796654	3.54368	3.27882	44.3301	FALSE	0
2022-09-12	15:58:46	0.920827	4.09602	3.27882	45.6526	FALSE	0
2022-09-12	15:58:47	0.387036	1.72161	1.2228	46.0517	FALSE	0
2022-09-12	15:58:47	0.28098	1.24986	1.2228	46.9025	FALSE	0
2022-09-12	15:58:47	0.212583	0.945612	1.2228	46.9973	FALSE	0
2022-09-12	15:58:47	0.218995	0.974134	1.2228	47.8766	FALSE	0
2022-09-12	15:58:48	0.134822	0.599715	1.26842	47.597	FALSE	0
2022-09-12	15:58:48	0.413244	1.83819	1.26842	49.7148	FALSE	0
2022-09-12	15:58:48	0.307392	1.36734	1.26842	48.9644	FALSE	0
2022-09-12	15:58:49	0.781183	3.47486	4.3147	53.1897	FALSE	0
2022-09-12	15:58:49	0.660471	2.93791	4.3147	51.9023	FALSE	0
2022-09-12	15:58:49	1.13411	5.04475	4.3147	58.2344	FALSE	0
2022-09-12	15:58:49	1.30419	5.8013	4.3147	57.7036	FALSE	0
2022-09-12	15:58:50	1.47966	6.58182	4.41577	64.8162	FALSE	0
2022-09-12	15:58:50	1.1023	4.90325	4.41577	62.6068	FALSE	0
2022-09-12	15:58:50	0.776349	3.45336	4.41577	68.2696	FALSE	0
2022-09-12	15:58:50	0.612532	2.72466	4.41577	65.3315	FALSE	0
2022-09-12	15:58:51	0.346781	1.54255	3.9881	69.8121	FALSE	0
2022-09-12	15:58:51	1.27212	5.65864	3.9881	70.9901	FALSE	0
2022-09-12	15:58:51	0.784287	3.48867	3.9881	73.3008	FALSE	0
2022-09-12	15:58:51	1.18307	5.26253	3.9881	76.2527	FALSE	0
2022-09-12	15:58:52	0.629784	2.80141	2.95254	76.1022	FALSE	0
2022-09-12	15:58:52	0.923168	4.10644	2.95254	80.3591	FALSE	0
2022-09-12	15:58:52	0.438333	1.94979	2.95254	78.052	FALSE	0
2022-09-12	15:58:53	0.530395	2.3593	2.54436	82.7184	FALSE	0
2022-09-12	15:58:53	0.674466	3.00016	2.54436	81.0522	FALSE	0
2022-09-12	15:58:53	0.340369	1.51403	2.54436	84.2325	FALSE	0
2022-09-12	15:58:53	0.742761	3.30395	2.54436	84.3561	FALSE	0
2022-09-12	15:58:54	0.397519	1.76824	4.34271	86.0007	FALSE	0
2022-09-12	15:58:54	1.11452	4.95761	4.34271	89.3137	FALSE	0
2022-09-12	15:58:54	0.927341	4.125	4.34271	90.1257	FALSE	0
2022-09-12	15:58:54	1.46576	6.51999	4.34271	95.8337	FALSE	0
2022-09-12	15:58:55	1.18454	5.26907	4.39226	95.3948	FALSE	0
2022-09-12	15:58:55	0.909682	4.04645	4.39226	99.8802	FALSE	0
2022-09-12	15:58:55	0.868053	3.86127	4.39226	99.256	FALSE	0
2022-09-12	15:58:56	0.76958	3.42325	2.8477	103.303	FALSE	0
2022-09-12	15:58:56	0.592227	2.63434	2.8477	101.89	FALSE	0
2022-09-12	15:58:56	0.477265	2.12297	2.8477	105.426	FALSE	0
2022-09-12	15:58:56	0.721692	3.21023	2.8477	105.101	FALSE	0
2022-09-12	15:58:57	0.587697	2.61419	3.10814	108.041	FALSE	0
2022-09-12	15:58:57	0.704389	3.13326	3.10814	108.234	FALSE	0
2022-09-12	15:58:57	0.578333	2.57254	3.10814	110.613	FALSE	0
2022-09-12	15:58:57	0.924542	4.11255	3.10814	112.346	FALSE	0
2022-09-12	15:58:58	0.656908	2.92206	2.91549	113.535	FALSE	0
2022-09-12	15:58:58	0.714415	3.17786	2.91549	115.524	FALSE	0
2022-09-12	15:58:58	0.666272	2.96371	2.91549	116.499	FALSE	0
2022-09-12	15:58:58	0.584135	2.59835	2.91549	118.123	FALSE	0
2022-09-12	15:58:59	0.729987	3.24713	2.3765	119.746	FALSE	0
2022-09-12	15:58:59	0.429936	1.91244	2.3765	120.035	FALSE	0
2022-09-12	15:58:59	0.442863	1.96994	2.3765	121.716	FALSE	0
2022-09-12	15:59:00	0.308359	1.37164	2.41697	121.407	FALSE	0
2022-09-12	15:59:00	0.673346	2.99518	2.41697	124.711	FALSE	0
2022-09-12	15:59:00	0.568918	2.53066	2.41697	123.937	FALSE	0
2022-09-12	15:59:00	0.622812	2.77039	2.41697	127.482	FALSE	0
2022-09-12	15:59:01	0.588868	2.6194	3.728	126.557	FALSE	0
2022-09-12	15:59:01	0.636348	2.8306	3.728	130.312	FALSE	0
2022-09-12	15:59:01	1.01976	4.5361	3.728	131.093	FALSE	0
2022-09-12	15:59:01	1.10739	4.92589	3.728	135.238	FALSE	0
2022-09-12	15:59:02	1.82037	8.09737	6.18046	139.19	FALSE	0
2022-09-12	15:59:02	1.37808	6.12998	6.18046	141.368	FALSE	0
2022-09-12	15:59:02	1.61915	7.2023	6.18046	146.393	FALSE	0
2022-09-12	15:59:02	0.740114	3.29218	6.18046	144.66	FALSE	0
2022-09-12	15:59:03	1.25223	5.57017	4.32745	151.963	FALSE	0
2022-09-12	15:59:03	1.10281	4.90552	4.32745	149.566	FALSE	0
2022-09-12	15:59:03	0.563524	2.50667	4.32745	154.469	FALSE	0
2022-09-12	15:59:04	1.22729	5.45923	3.95092	155.025	FALSE	0
2022-09-12	15:59:04	0.417977	1.85925	3.95092	156.329	FALSE	0
2022-09-12	15:59:04	1.31686	5.85766	3.95092	160.883	FALSE	0
2022-09-12	15:59:04	0.5907	2.62755	3.95092	158.956	FALSE	0
2022-09-12	15:59:05	2.19253	9.75281	5.02731	170.635	FALSE	0
2022-09-12	15:59:05	0.686119	3.05199	5.02731	162.008	FALSE	0
2022-09-12	15:59:05	1.29192	5.74672	5.02731	176.382	FALSE	0
2022-09-12	15:59:05	0.350191	1.55772	5.02731	163.566	FALSE	0
2022-09-12	15:59:06	1.48332	6.5981	3.11646	182.98	FALSE	0
2022-09-12	15:59:06	0.595229	2.6477	3.11646	166.214	FALSE	0
2022-09-12	15:59:06	0.301641	1.34176	3.11646	184.322	FALSE	0
2022-09-12	15:59:06	0.422252	1.87826	3.11646	168.092	FALSE	0
2022-09-12	15:59:07	0.340522	1.51471	1.92172	185.837	FALSE	0
2022-09-12	15:59:07	0.569733	2.53429	1.92172	170.626	FALSE	0
2022-09-12	15:59:07	0.385814	1.71618	1.92172	187.553	FALSE	0
2022-09-12	15:59:08	0.48271	2.14719	1.57611	172.773	FALSE	0
2022-09-12	15:59:08	0.196043	0.872038	1.57611	188.425	FALSE	0
2022-09-12	15:59:08	0.472684	2.10259	1.57611	174.876	FALSE	0
2022-09-12	15:59:08	0.265865	1.18262	1.57611	189.608	FALSE	0
2022-09-12	15:59:09	0.589427	2.62189	2.04391	177.498	FALSE	0
2022-09-12	15:59:09	0.192125	0.85461	2.04391	190.462	FALSE	0
2022-09-12	15:59:09	0.537977	2.39303	2.04391	179.891	FALSE	0
2022-09-12	15:59:09	0.518435	2.3061	2.04391	192.768	FALSE	0
2022-09-12	15:59:10	0.902201	4.01317	3.32698	183.904	FALSE	0
2022-09-12	15:59:10	0.877214	3.90202	3.32698	196.67	FALSE	0
2022-09-12	15:59:10	0.572277	2.5456	3.32698	186.45	FALSE	0
2022-09-12	15:59:10	0.640064	2.84713	3.32698	199.517	FALSE	0
2022-09-12	15:59:11	0.270445	1.20299	1.40122	187.653	FALSE	0
2022-09-12	15:59:11	0.491769	2.18749	1.40122	201.705	FALSE	0
2022-09-12	15:59:11	0.182812	0.813184	1.40122	188.466	FALSE	0
2022-09-12	15:59:12	0.36958	1.64397	1.29915	203.349	FALSE	0
2022-09-12	15:59:12	0.1793	0.797562	1.29915	189.263	FALSE	0
2022-09-12	15:59:12	0.371514	1.65257	1.29915	205.001	FALSE	0
2022-09-12	15:59:12	0.24785	1.10249	1.29915	190.366	FALSE	0
2022-09-12	15:59:13	0.399046	1.77504	1.458	206.776	FALSE	0
2022-09-12	15:59:13	0.315738	1.40447	1.458	191.77	FALSE	0
2022-09-12	15:59:13	0.35126	1.56247	1.458	208.339	FALSE	0
2022-09-12	15:59:13	0.245051	1.09004	1.458	192.86	FALSE	0
2022-09-12	15:59:14	0.087392	0.388737	-0.290321	208.728	FALSE	0
2022-09-12	15:59:14	0.113346	0.504186	-0.290321	193.365	FALSE	0
2022-09-12	15:59:14	-0.153524	-0.682905	-0.290321	208.728	FALSE	0
2022-09-12	15:59:14	-0.308282	-1.3713	-0.290321	193.365	FALSE	0
2022-09-12	15:59:15	-0.565381	-2.51493	-2.80114	208.728	FALSE	0
2022-09-12	15:59:15	-0.756933	-3.36699	-2.80114	193.365	FALSE	0
2022-09-12	15:59:15	-0.566857	-2.52149	-2.80114	208.728	FALSE	0
2022-09-12	15:59:16	-0.447519	-1.99065	1.52869	193.365	FALSE	0
2022-09-12	15:59:16	0.242507	1.07872	1.52869	209.806	FALSE	0
2022-09-12	15:59:16	0.762048	3.38974	1.52869	196.754	FALSE	0
2022-09-12	15:59:16	0.817621	3.63694	1.52869	213.443	FALSE	0
2022-09-12	15:59:17	0.684898	3.04656	2.41612	199.801	FALSE	0
2022-09-12	15:59:17	0.57757	2.56915	2.41612	216.012	FALSE	0
2022-09-12	15:59:17	0.457672	2.03582	2.41612	201.837	FALSE	0
2022-09-12	15:59:17	0.452532	2.01295	2.41612	218.025	FALSE	0
2022-09-12	15:59:18	0.847188	3.76846	2.54526	205.605	FALSE	0
2022-09-12	15:59:18	0.478181	2.12704	2.54526	220.152	FALSE	0
2022-09-12	15:59:18	0.638435	2.83989	2.54526	208.445	FALSE	0
2022-09-12	15:59:18	0.325	1.44566	2.54526	221.598	FALSE	0
2022-09-12	15:59:19	1.12831	5.01895	2.73365	213.464	FALSE	0
2022-09-12	15:59:19	0.325356	1.44725	2.73365	223.045	FALSE	0
2022-09-12	15:59:19	0.389987	1.73474	2.73365	215.199	FALSE	0
2022-09-12	15:59:20	0.495178	2.20265	1.33899	225.248	FALSE	0
2022-09-12	15:59:20	0.137825	0.613073	1.33899	215.812	FALSE	0
2022-09-12	15:59:20	0.430445	1.91471	1.33899	227.163	FALSE	0
2022-09-12	15:59:20	0.140624	0.625524	1.33899	216.437	FALSE	0
2022-09-12	15:59:21	0.392227	1.7447	0.819127	228.907	FALSE	0
2022-09-12	15:59:21	0.0589443	0.262196	0.819127	216.699	FALSE	0
2022-09-12	15:59:21	0.253092	1.1258	0.819127	230.033	FALSE	0
2022-09-12	15:59:21	0.0323284	0.143803	0.819127	216.843	FALSE	0
2022-09-12	15:59:22	0.250394	1.1138	3.13312	231.147	FALSE	0
2022-09-12	15:59:22	0.383015	1.70373	3.13312	218.547	FALSE	0
2022-09-12	15:59:22	1.47966	6.58182	3.13312	237.729	FALSE	0
2022-09-12	15:59:23	0.487188	2.16711	1.23978	220.714	FALSE	0
2022-09-12	15:59:23	0.200166	0.890378	1.23978	238.619	FALSE	0
2022-09-12	15:59:23	0.212481	0.945158	1.23978	221.659	FALSE	0
2022-09-12	15:59:23	0.215026	0.956479	1.23978	239.576	FALSE	0
2022-09-12	15:59:24	0.187952	0.836048	1.13695	222.495	FALSE	0
2022-09-12	15:59:24	0.365102	1.62405	1.13695	241.2	FALSE	0
2022-09-12	15:59:24	0.29014	1.2906	1.13695	223.786	FALSE	0
2022-09-12	15:59:24	0.179199	0.797113	1.13695	241.997	FALSE	0
2022-09-12	15:59:25	0.384135	1.70871	1.48901	225.495	FALSE	0
2022-09-12	15:59:25	0.389224	1.73135	1.48901	243.728	FALSE	0
2022-09-12	15:59:25	0.26159	1.1636	1.48901	226.658	FALSE	0
2022-09-12	15:59:25	0.304033	1.3524	1.48901	245.081	FALSE	0
2022-09-12	15:59:26	0.207596	0.923429	1.45766	227.582	FALSE	0
2022-09-12	15:59:26	0.384695	1.7112	1.45766	246.792	FALSE	0
2022-09-12	15:59:26	0.390802	1.73837	1.45766	229.32	FALSE	0
2022-09-12	15:59:27	0.324949	1.44544	1.73418	248.237	FALSE	0
2022-09-12	15:59:27	0.309631	1.3773	1.73418	230.697	FALSE	0
2022-09-12	15:59:27	0.4193	1.86513	1.73418	250.102	FALSE	0
2022-09-12	15:59:27	0.50556	2.24883	1.73418	232.946	FALSE	0
2022-09-12	15:59:28	0.25701	1.14323	1.44453	251.246	FALSE	0
2022-09-12	15:59:28	0.374669	1.6666	1.44453	234.613	FALSE	0
2022-09-12	15:59:28	0.342557	1.52376	1.44453	252.769	FALSE	0
2022-09-12	15:59:29	0.375433	1.67	2.13492	236.283	FALSE	0
2022-09-12	15:59:29	0.432837	1.92535	2.13492	254.695	FALSE	0
2022-09-12	15:59:29	0.459707	2.04487	2.13492	238.328	FALSE	0
2022-09-12	15:59:29	0.516399	2.29705	2.13492	256.992	FALSE	0
2022-09-12	15:59:29	0.615382	2.73734	2.13492	241.065	FALSE	0
2022-09-12	15:59:30	0.595382	2.64838	2.2102	259.64	FALSE	0
2022-09-12	15:59:30	0.413244	1.83819	2.2102	242.903	FALSE	0
2022-09-12	15:59:30	0.481997	2.14402	2.2102	261.784	FALSE	0
2022-09-12	15:59:31	0.357723	1.59122	-0.669378	244.494	FALSE	0
2022-09-12	15:59:31	-0.0384094	-0.170853	-0.669378	261.784	FALSE	0
2022-09-12	15:59:31	-0.312709	-1.39099	-0.669378	244.494	FALSE	0
2022-09-12	15:59:31	-0.608536	-2.70689	-0.669378	261.784	FALSE	0
2022-09-12	15:59:32	-0.602938	-2.68199	-2.3718	244.494	FALSE	0
2022-09-12	15:59:32	-0.677035	-3.01159	-2.3718	261.784	FALSE	0
2022-09-12	15:59:32	-0.474389	-2.11018	-2.3718	244.494	FALSE	0
2022-09-12	15:59:32	-0.37846	-1.68347	-2.3718	261.784	FALSE	0
2022-09-12	15:59:33	-0.289758	-1.2889	-1.24402	244.494	FALSE	0
2022-09-12	15:59:33	-0.252506	-1.1232	-1.24402	261.784	FALSE	0
2022-09-12	15:59:33	-0.288638	-1.28392	-1.24402	244.494	FALSE	0
2022-09-12	15:59:33	-0.287773	-1.28007	-1.24402	261.784	FALSE	0
2022-09-12	15:59:34	-0.570419	-2.53734	-2.4812	244.494	FALSE	0
2022-09-12	15:59:34	-0.611793	-2.72138	-2.4812	261.784	FALSE	0
2022-09-12	15:59:34	-0.491183	-2.18488	-2.4812	244.494	FALSE	0
2022-09-12	15:59:35	-0.623803	-2.7748	-3.20898	261.784	FALSE	0
2022-09-12	15:59:35	-0.672048	-2.9894	-3.20898	244.494	FALSE	0
2022-09-12	15:59:35	-0.763396	-3.39574	-3.20898	261.784	FALSE	0
2022-09-12	15:59:35	-0.826399	-3.67599	-3.20898	244.494	FALSE	0
2022-09-12	15:59:36	-0.651691	-2.89885	-2.34922	261.784	FALSE	0
2022-09-12	15:59:36	-0.610012	-2.71346	-2.34922	244.494	FALSE	0
2022-09-12	15:59:36	-0.526501	-2.34198	-2.34922	261.784	FALSE	0
2022-09-12	15:59:36	-0.324312	-1.4426	-2.34922	244.494	FALSE	0
2022-09-12	15:59:37	-0.24243	-1.07838	-0.427672	261.784	FALSE	0
2022-09-12	15:59:37	-0.0272644	-0.121278	-0.427672	244.494	FALSE	0
2022-09-12	15:59:37	0.075789	0.337125	-0.427672	262.121	FALSE	0
2022-09-12	15:59:37	-0.190674	-0.848156	-0.427672	244.494	FALSE	0
2022-09-12	15:59:38	-0.234338	-1.04238	-1.89037	262.121	FALSE	0
2022-09-12	15:59:38	-0.331946	-1.47656	-1.89037	244.494	FALSE	0
2022-09-12	15:59:38	-0.708638	-3.15216	-1.89037	262.121	FALSE	0
2022-09-12	15:59:39	-0.493117	-2.19348	-1.13825	244.494	FALSE	0
2022-09-12	15:59:39	-0.26986	-1.20039	-1.13825	262.121	FALSE	0
2022-09-12	15:59:39	-0.127824	-0.568587	-1.13825	244.494	FALSE	0
2022-09-12	15:59:39	-0.13276	-0.590543	-1.13825	262.121	FALSE	0
2022-09-12	15:59:40	0.938079	4.17276	5.32261	248.667	FALSE	0
2022-09-12	15:59:40	0.980776	4.36269	5.32261	266.484	FALSE	0
2022-09-12	15:59:40	1.65645	7.36822	5.32261	256.035	FALSE	0
2022-09-12	15:59:40	1.211	5.38677	5.32261	271.871	FALSE	0
2022-09-12	15:59:41	1.89798	8.44259	6.74468	264.478	FALSE	0
2022-09-12	15:59:41	1.51177	6.72466	6.74468	278.595	FALSE	0
2022-09-12	15:59:41	1.10836	4.93021	6.74468	269.408	FALSE	0
2022-09-12	15:59:41	1.54698	6.88128	6.74468	285.477	FALSE	0
2022-09-12	15:59:42	0.593499	2.64	3.74553	272.048	FALSE	0
2022-09-12	15:59:42	1.30877	5.82167	3.74553	291.298	FALSE	0
2022-09-12	15:59:42	0.623829	2.77492	3.74553	274.823	FALSE	0
2022-09-12	15:59:43	0.472074	2.09988	2.46168	293.398	FALSE	0
2022-09-12	15:59:43	0.77014	3.42574	2.46168	278.249	FALSE	0
2022-09-12	15:59:43	0.226679	1.00831	2.46168	294.407	FALSE	0
2022-09-12	15:59:43	0.744745	3.31277	2.46168	281.562	FALSE	0
2022-09-12	15:59:44	0.303931	1.35195	2.20814	295.759	FALSE	0
2022-09-12	15:59:44	0.665662	2.961	2.20814	284.523	FALSE	0
2022-09-12	15:59:44	0.331005	1.47238	2.20814	297.231	FALSE	0
2022-09-12	15:59:44	0.685051	3.04724	2.20814	287.57	FALSE	0
2022-09-12	15:59:45	0.602354	2.67939	2.89659	299.91	FALSE	0
2022-09-12	15:59:45	0.641081	2.85166	2.89659	290.422	FALSE	0
2022-09-12	15:59:45	0.612888	2.72625	2.89659	302.637	FALSE	0
2022-09-12	15:59:45	0.74841	3.32908	2.89659	293.751	FALSE	0
2022-09-12	15:59:46	0.704084	3.13191	4.17245	305.768	FALSE	0
2022-09-12	15:59:46	1.24693	5.54659	4.17245	299.297	FALSE	0
2022-09-12	15:59:46	0.863015	3.83886	4.17245	309.607	FALSE	0
2022-09-12	15:59:47	0.535636	2.38262	2.02082	301.68	FALSE	0
2022-09-12	15:59:47	0.727137	3.23445	2.02082	312.842	FALSE	0
2022-09-12	15:59:47	0.174313	0.775379	2.02082	302.455	FALSE	0
2022-09-12	15:59:47	0.380115	1.69083	2.02082	314.533	FALSE	0
2022-09-12	15:59:48	0.217061	0.965531	1.52314	303.421	FALSE	0
2022-09-12	15:59:48	0.552634	2.45823	1.52314	316.991	FALSE	0
2022-09-12	15:59:48	0.14444	0.642498	1.52314	304.063	FALSE	0
2022-09-12	15:59:48	0.455534	2.02631	1.52314	319.017	FALSE	0
2022-09-12	15:59:49	0.230598	1.02575	1.30448	305.089	FALSE	0
2022-09-12	15:59:49	0.455483	2.02608	1.30448	321.043	FALSE	0
2022-09-12	15:59:49	0.193702	0.861625	1.30448	305.951	FALSE	0
2022-09-12	15:59:50	0.486985	2.16621	1.58952	323.209	FALSE	0
2022-09-12	15:59:50	0.306069	1.36146	1.58952	307.312	FALSE	0
2022-09-12	15:59:50	0.383066	1.70395	1.58952	324.913	FALSE	0
2022-09-12	15:59:50	0.253244	1.12648	1.58952	308.439	FALSE	0
2022-09-12	15:59:51	0.409021	1.81941	1.81177	326.733	FALSE	0
2022-09-12	15:59:51	0.392837	1.74742	1.81177	310.186	FALSE	0
2022-09-12	15:59:51	0.435178	1.93576	1.81177	328.669	FALSE	0
2022-09-12	15:59:51	0.392176	1.74448	1.81177	311.93	FALSE	0
2022-09-12	15:59:52	0.298486	1.32773	0.320204	329.996	FALSE	0
2022-09-12	15:59:52	0.236654	1.05268	0.320204	312.983	FALSE	0
2022-09-12	15:59:52	-0.0507249	-0.225635	0.320204	329.996	FALSE	0
2022-09-12	15:59:52	-0.196475	-0.87396	0.320204	312.983	FALSE	0
2022-09-12	15:59:53	0.0588425	0.261743	0.243332	330.258	FALSE	0
2022-09-12	15:59:53	0.0519723	0.231183	0.243332	313.214	FALSE	0
2022-09-12	15:59:53	0.0532954	0.237069	0.243332	330.495	FALSE	0
2022-09-12	15:59:54	0.196552	0.874303	1.43118	314.089	FALSE	0
2022-09-12	15:59:54	0.418079	1.8597	1.43118	332.355	FALSE	0
2022-09-12	15:59:54	0.418079	1.8597	1.43118	315.948	FALSE	0
2022-09-12	15:59:54	0.254262	1.13101	1.43118	333.486	FALSE	0
2022-09-12	15:59:55	0.372888	1.65868	1.70933	317.607	FALSE	0
2022-09-12	15:59:55	0.317519	1.41239	1.70933	334.898	FALSE	0
2022-09-12	15:59:55	0.530802	2.36111	1.70933	319.968	FALSE	0
2022-09-12	15:59:55	0.315891	1.40515	1.70933	336.303	FALSE	0
2022-09-12	15:59:56	0.358283	1.59371	1.36808	321.562	FALSE	0
2022-09-12	15:59:56	0.313295	1.3936	1.36808	337.697	FALSE	0
2022-09-12	15:59:56	0.326985	1.45449	1.36808	323.016	FALSE	0
2022-09-12	15:59:56	0.231667	1.0305	1.36808	338.727	FALSE	0
2022-09-12	15:59:57	0.375026	1.66819	1.70101	324.684	FALSE	0
2022-09-12	15:59:57	0.380624	1.69309	1.70101	340.42	FALSE	0
2022-09-12	15:59:57	0.391565	1.74176	1.70101	326.426	FALSE	0
2022-09-12	15:59:58	0.22897	1.0185	0.0695535	341.439	FALSE	0
2022-09-12	15:59:58	0.198435	0.882679	0.0695535	327.309	FALSE	0
2022-09-12	15:59:58	-0.0457377	-0.20345	0.0695535	341.439	FALSE	0
2022-09-12	15:59:58	-0.319122	-1.41952	0.0695535	327.309	FALSE	0
2022-09-12	15:59:59	-0.180852	-0.804466	0.205547	341.439	FALSE	0
2022-09-12	15:59:59	-0.0679768	-0.302374	0.205547	327.309	FALSE	0
2022-09-12	15:59:59	0.139657	0.621222	0.205547	342.06	FALSE	0
2022-09-12	15:59:59	0.294008	1.30781	0.205547	328.617	FALSE	0
2022-09-12	16:00:00	0.566476	2.5198	1.64408	344.58	FALSE	0
2022-09-12	16:00:00	0.366934	1.6322	1.64408	330.249	FALSE	0
2022-09-12	16:00:00	0.216705	0.963947	1.64408	345.544	FALSE	0
2022-09-12	16:00:00	0.328308	1.46038	1.64408	331.709	FALSE	0
2022-09-12	16:00:01	0.214618	0.954664	0.931122	346.499	FALSE	0
2022-09-12	16:00:01	0.36159	1.60842	0.931122	333.318	FALSE	0
2022-09-12	16:00:01	0.0517687	0.230278	0.931122	346.729	FALSE	0
2022-09-12	16:00:02	-0.130012	-0.578319	0.0284117	333.318	FALSE	0
2022-09-12	16:00:02	-0.141615	-0.629932	0.0284117	346.729	FALSE	0
2022-09-12	16:00:02	0.217163	0.965984	0.0284117	334.284	FALSE	0
2022-09-12	16:00:02	0.0800129	0.355913	0.0284117	347.085	FALSE	0
2022-09-12	16:00:03	0.349377	1.5541	1.53667	335.838	FALSE	0
2022-09-12	16:00:03	0.104237	0.463667	1.53667	347.548	FALSE	0
2022-09-12	16:00:03	0.41472	1.84476	1.53667	337.683	FALSE	0
2022-09-12	16:00:03	0.513499	2.28415	1.53667	349.833	FALSE	0
2022-09-12	16:00:04	0.568766	2.52998	2.59874	340.213	FALSE	0
2022-09-12	16:00:04	0.618842	2.75273	2.59874	352.585	FALSE	0
2022-09-12	16:00:04	0.549071	2.44238	2.59874	342.655	FALSE	0
2022-09-12	16:00:04	0.600216	2.66988	2.59874	355.255	FALSE	0
2022-09-12	16:00:05	0.906221	4.03105	2.48018	346.686	FALSE	0
2022-09-12	16:00:05	0.403931	1.79677	2.48018	357.052	FALSE	0
2022-09-12	16:00:05	0.362557	1.61273	2.48018	348.299	FALSE	0
2022-09-12	16:00:06	0.420318	1.86966	1.74646	358.922	FALSE	0
2022-09-12	16:00:06	0.410089	1.82416	1.74646	350.123	FALSE	0
2022-09-12	16:00:06	0.38729	1.72274	1.74646	360.644	FALSE	0
2022-09-12	16:00:06	0.352786	1.56926	1.74646	351.692	FALSE	0
2022-09-12	16:00:07	0.460115	2.04668	1.71912	362.691	FALSE	0
2022-09-12	16:00:07	0.326476	1.45223	1.71912	353.144	FALSE	0
2022-09-12	16:00:07	0.469733	2.08947	1.71912	364.781	FALSE	0
2022-09-12	16:00:07	0.28958	1.28811	1.71912	354.432	FALSE	0
2022-09-12	16:00:08	0.407646	1.81329	1.86247	366.594	FALSE	0
2022-09-12	16:00:08	0.388308	1.72727	1.86247	356.16	FALSE	0
2022-09-12	16:00:08	0.480267	2.13632	1.86247	368.73	FALSE	0
2022-09-12	16:00:08	0.398588	1.773	1.86247	357.933	FALSE	0
2022-09-12	16:00:09	0.621183	2.76315	5.81954	371.493	FALSE	0
2022-09-12	16:00:09	1.64159	7.30212	5.81954	365.235	FALSE	0
2022-09-12	16:00:09	1.6621	7.39335	5.81954	378.887	FALSE	0
2022-09-12	16:00:10	0.996247	4.43151	7.62589	369.666	FALSE	0
2022-09-12	16:00:10	0.565611	2.51595	7.62589	381.403	FALSE	0
2022-09-12	16:00:10	0.606425	2.6975	7.62589	372.364	FALSE	0
2022-09-12	16:00:10	4.68922	20.8586	7.62589	402.261	1	1
2022-09-12	16:00:11	0.401336	1.78522	1.52642	374.149	FALSE	1
2022-09-12	16:00:11	0.335433	1.49207	1.52642	403.753	FALSE	1
2022-09-12	16:00:11	0.349122	1.55296	1.52642	375.702	FALSE	1
2022-09-12	16:00:11	0.28673	1.27543	1.52642	405.029	FALSE	1
2022-09-12	16:00:12	0.329224	1.46445	1.24321	377.166	FALSE	1
2022-09-12	16:00:12	0.252481	1.12309	1.24321	406.152	FALSE	1
2022-09-12	16:00:12	0.256756	1.1421	1.24321	378.309	FALSE	1
2022-09-12	16:00:13	0.423728	1.88483	2.08149	408.037	FALSE	1
2022-09-12	16:00:13	0.272532	1.21228	2.08149	379.521	FALSE	1
2022-09-12	16:00:13	0.70098	3.1181	2.08149	411.155	FALSE	1
2022-09-12	16:00:13	0.474517	2.11075	2.08149	381.632	FALSE	1
2022-09-12	16:00:14	0.515585	2.29343	2.03021	413.448	FALSE	1
2022-09-12	16:00:14	0.448613	1.99552	2.03021	383.627	FALSE	1
2022-09-12	16:00:14	0.41243	1.83457	2.03021	415.283	FALSE	1
2022-09-12	16:00:14	0.44902	1.99733	2.03021	385.624	FALSE	1
2022-09-12	16:00:15	0.227952	1.01398	1.74714	416.297	FALSE	1
2022-09-12	16:00:15	0.61416	2.73191	1.74714	388.356	FALSE	1
2022-09-12	16:00:15	0.267239	1.18873	1.74714	417.485	FALSE	1
2022-09-12	16:00:15	0.461743	2.05393	1.74714	390.41	FALSE	1
2022-09-12	16:00:16	0.290547	1.29241	1.25861	418.778	FALSE	1
2022-09-12	16:00:16	0.400471	1.78138	1.25861	392.192	FALSE	1
2022-09-12	16:00:16	0.157825	0.702037	1.25861	419.48	FALSE	1
2022-09-12	16:00:17	0.429936	1.91244	1.35223	394.104	FALSE	1
2022-09-12	16:00:17	0.242354	1.07804	1.35223	420.558	FALSE	1
2022-09-12	16:00:17	0.370547	1.64827	1.35223	395.752	FALSE	1
2022-09-12	16:00:17	0.173143	0.770175	1.35223	421.328	FALSE	1
2022-09-12	16:00:18	0.437417	1.94572	1.55076	397.698	FALSE	1
2022-09-12	16:00:18	0.309784	1.37798	1.55076	422.706	FALSE	1
2022-09-12	16:00:18	0.382812	1.70282	1.55076	399.401	FALSE	1
2022-09-12	16:00:18	0.264491	1.17651	1.55076	423.883	FALSE	1
2022-09-12	16:00:19	0.429326	1.90973	1.59835	401.311	FALSE	1
2022-09-12	16:00:19	0.313499	1.39451	1.59835	425.277	FALSE	1
2022-09-12	16:00:19	0.335636	1.49298	1.59835	402.804	FALSE	1
2022-09-12	16:00:19	0.358842	1.5962	1.59835	426.873	FALSE	1
2022-09-12	16:00:20	0.368664	1.63989	1.85721	404.444	FALSE	1
2022-09-12	16:00:20	0.509326	2.26558	1.85721	429.139	FALSE	1
2022-09-12	16:00:20	0.374568	1.66615	1.85721	406.11	FALSE	1
2022-09-12	16:00:21	0.567086	2.52251	2.0915	431.661	FALSE	1
2022-09-12	16:00:21	0.48673	2.16507	2.0915	408.275	FALSE	1
2022-09-12	16:00:21	0.413346	1.83865	2.0915	433.5	FALSE	1
2022-09-12	16:00:21	0.413601	1.83978	2.0915	410.115	FALSE	1
2022-09-12	16:00:22	0.448257	1.99394	2.03168	435.494	FALSE	1
2022-09-12	16:00:22	0.392328	1.74515	2.03168	411.86	FALSE	1
2022-09-12	16:00:22	0.535331	2.38126	2.03168	437.875	FALSE	1
2022-09-12	16:00:22	0.451056	2.00639	2.03168	413.866	FALSE	1
2022-09-12	16:00:23	0.479046	2.13089	1.93638	440.006	FALSE	1
2022-09-12	16:00:23	0.471056	2.09535	1.93638	415.961	FALSE	1
2022-09-12	16:00:23	0.405865	1.80537	1.93638	441.811	FALSE	1
2022-09-12	16:00:23	0.385305	1.71391	1.93638	417.675	FALSE	1
2022-09-12	16:00:24	0.370802	1.6494	1.81691	443.461	FALSE	1
2022-09-12	16:00:24	0.454364	2.0211	1.81691	419.696	FALSE	1
2022-09-12	16:00:24	0.400216	1.78024	1.81691	445.241	FALSE	1
2022-09-12	16:00:25	0.471107	2.09558	2.02936	421.792	FALSE	1
2022-09-12	16:00:25	0.455178	2.02472	2.02936	447.266	FALSE	1
2022-09-12	16:00:25	0.450191	2.00254	2.02936	423.795	FALSE	1
2022-09-12	16:00:25	0.44841	1.99462	2.02936	449.26	FALSE	1
2022-09-12	16:00:26	0.458842	2.04102	2.18052	425.836	FALSE	1
2022-09-12	16:00:26	0.480573	2.13768	2.18052	451.398	FALSE	1
2022-09-12	16:00:26	0.491667	2.18703	2.18052	428.023	FALSE	1
2022-09-12	16:00:26	0.529733	2.35636	2.18052	453.755	FALSE	1
2022-09-12	16:00:27	0.378435	1.68335	1.85183	429.706	FALSE	1
2022-09-12	16:00:27	0.480776	2.13859	1.85183	455.893	FALSE	1
2022-09-12	16:00:27	0.473855	2.1078	1.85183	431.814	FALSE	1
2022-09-12	16:00:27	0.332176	1.47759	1.85183	457.371	FALSE	1
2022-09-12	16:00:28	0.294975	1.31211	1.46219	433.126	FALSE	1
2022-09-12	16:00:28	0.305458	1.35874	1.46219	458.729	FALSE	1
2022-09-12	16:00:28	0.385713	1.71573	1.46219	434.842	FALSE	1
2022-09-12	16:00:29	0.387646	1.72433	1.79049	460.454	FALSE	1
2022-09-12	16:00:29	0.411412	1.83004	1.79049	436.672	FALSE	1
2022-09-12	16:00:29	0.429122	1.90882	1.79049	462.363	FALSE	1
2022-09-12	16:00:29	0.381896	1.69875	1.79049	438.37	FALSE	1
2022-09-12	16:00:30	0.406934	1.81012	1.83983	464.173	FALSE	1
2022-09-12	16:00:30	0.409733	1.82257	1.83983	440.193	FALSE	1
2022-09-12	16:00:30	0.376043	1.67271	1.83983	465.845	FALSE	1
2022-09-12	16:00:30	0.461743	2.05393	1.83983	442.247	FALSE	1
2022-09-12	16:00:31	0.661845	2.94402	8.13369	468.789	FALSE	1
2022-09-12	16:00:31	1.93564	8.61011	8.13369	450.857	FALSE	1
2022-09-12	16:00:31	2.32189	10.3282	8.13369	479.118	FALSE	1
2022-09-12	16:00:31	2.39477	10.6524	8.13369	461.509	FALSE	1
2022-09-12	16:00:32	1.54927	6.89146	3.69172	486.009	FALSE	1
2022-09-12	16:00:32	0.519097	2.30905	3.69172	463.818	FALSE	1
2022-09-12	16:00:32	0.421438	1.87464	3.69172	487.884	FALSE	1
2022-09-12	16:00:33	0.21757	0.967795	-0.334633	464.786	FALSE	1
2022-09-12	16:00:33	0.0119214	0.0530288	-0.334633	487.937	FALSE	1
2022-09-12	16:00:33	-0.241972	-1.07634	-0.334633	464.786	FALSE	1
2022-09-12	16:00:33	-0.288435	-1.28302	-0.334633	487.937	FALSE	1
2022-09-12	16:00:34	-0.279173	-1.24182	-0.9833	464.786	FALSE	1
2022-09-12	16:00:34	-0.343091	-1.52614	-0.9833	487.937	FALSE	1
2022-09-12	16:00:34	-0.187875	-0.835706	-0.9833	464.786	FALSE	1
2022-09-12	16:00:34	-0.0740837	-0.329539	-0.9833	487.937	FALSE	1
2022-09-12	16:00:35	0.0621503	0.276457	1.03344	465.063	FALSE	1
2022-09-12	16:00:35	0.29869	1.32863	1.03344	489.265	FALSE	1
2022-09-12	16:00:35	0.336145	1.49524	1.03344	466.558	FALSE	1
2022-09-12	16:00:36	0.261081	1.16134	1.00011	490.427	FALSE	1
2022-09-12	16:00:36	0.279606	1.24374	1.00011	467.802	FALSE	1
2022-09-12	16:00:36	0.267341	1.18919	1.00011	491.616	FALSE	1
2022-09-12	16:00:36	0.0913106	0.406168	1.00011	468.208	FALSE	1
2022-09-12	16:00:37	0.249071	1.10792	1.21663	492.724	FALSE	1
2022-09-12	16:00:37	0.18902	0.840799	1.21663	469.049	FALSE	1
2022-09-12	16:00:37	0.313244	1.39337	1.21663	494.117	FALSE	1
2022-09-12	16:00:37	0.34271	1.52444	1.21663	470.573	FALSE	1
2022-09-12	16:00:38	0.371667	1.65325	1.29767	495.77	FALSE	1
2022-09-12	16:00:38	0.270496	1.20322	1.29767	471.776	FALSE	1
2022-09-12	16:00:38	0.230038	1.02326	1.29767	496.794	FALSE	1
2022-09-12	16:00:38	0.29472	1.31097	1.29767	473.087	FALSE	1
2022-09-12	16:00:39	0.316858	1.40945	1.08377	498.203	FALSE	1
2022-09-12	16:00:39	0.206323	0.917766	1.08377	474.005	FALSE	1
2022-09-12	16:00:39	0.207748	0.924105	1.08377	499.127	FALSE	1
2022-09-12	16:00:40	0.339249	1.50905	2.61725	475.514	FALSE	1
2022-09-12	16:00:40	1.24627	5.54366	2.61725	504.671	FALSE	1
2022-09-12	16:00:40	0.37416	1.66434	2.61725	477.178	FALSE	1
2022-09-12	16:00:40	0.393855	1.75195	2.61725	506.423	FALSE	1
2022-09-12	16:00:41	0.319249	1.42008	1.69801	478.599	FALSE	1
2022-09-12	16:00:41	0.39869	1.77345	1.69801	508.196	FALSE	1
2022-09-12	16:00:41	0.389835	1.73406	1.69801	480.333	FALSE	1
2022-09-12	16:00:41	0.419148	1.86445	1.69801	510.061	FALSE	1
2022-09-12	16:00:42	0.42388	1.8855	1.90939	482.218	FALSE	1
2022-09-12	16:00:42	0.449377	1.99892	1.90939	512.06	FALSE	1
2022-09-12	16:00:42	0.421794	1.87622	1.90939	484.094	FALSE	1
2022-09-12	16:00:42	0.421947	1.8769	1.90939	513.937	FALSE	1
2022-09-12	16:00:43	0.44897	1.99711	1.95025	486.091	FALSE	1
2022-09-12	16:00:43	0.440013	1.95727	1.95025	515.894	FALSE	1
2022-09-12	16:00:43	0.426323	1.89637	1.95025	487.988	FALSE	1
2022-09-12	16:00:44	0.452583	2.01318	1.97894	517.907	FALSE	1
2022-09-12	16:00:44	0.437926	1.94798	1.97894	489.936	FALSE	1
2022-09-12	16:00:44	0.445305	1.98081	1.97894	519.888	FALSE	1
2022-09-12	16:00:44	0.443728	1.97379	1.97894	491.91	FALSE	1
2022-09-12	16:00:45	0.441132	1.96224	1.93474	521.85	FALSE	1
2022-09-12	16:00:45	0.443575	1.97311	1.93474	493.883	FALSE	1
2022-09-12	16:00:45	0.424542	1.88845	1.93474	523.739	FALSE	1
2022-09-12	16:00:45	0.430547	1.91516	1.93474	495.798	FALSE	1
2022-09-12	16:00:46	0.435738	1.93825	1.95212	525.677	FALSE	1
2022-09-12	16:00:46	0.425	1.89048	1.95212	497.688	FALSE	1
2022-09-12	16:00:46	0.447036	1.98851	1.95212	527.665	FALSE	1
2022-09-12	16:00:46	0.447647	1.99122	1.95212	499.68	FALSE	1
2022-09-12	16:00:47	0.4364	1.94119	1.92799	529.607	FALSE	1
2022-09-12	16:00:47	0.426578	1.8975	1.92799	501.577	FALSE	1
2022-09-12	16:00:47	0.437316	1.94527	1.92799	531.552	FALSE	1
2022-09-12	16:00:48	0.439911	1.95681	1.92048	503.534	FALSE	1
2022-09-12	16:00:48	0.423677	1.8846	1.92048	533.436	FALSE	1
2022-09-12	16:00:48	0.436043	1.93961	1.92048	505.473	FALSE	1
2022-09-12	16:00:48	0.427341	1.9009	1.92048	535.337	FALSE	1
2022-09-12	16:00:49	0.443677	1.97356	1.9923	507.447	FALSE	1
2022-09-12	16:00:49	0.430954	1.91697	1.9923	537.254	FALSE	1
2022-09-12	16:00:49	0.451616	2.00888	1.9923	509.456	FALSE	1
2022-09-12	16:00:49	0.465305	2.06977	1.9923	539.324	FALSE	1
2022-09-12	16:00:50	0.483015	2.14855	1.38245	511.604	FALSE	1
2022-09-12	16:00:50	0.416501	1.85268	1.38245	541.177	FALSE	1
2022-09-12	16:00:50	0.173143	0.770175	1.38245	512.375	FALSE	1
2022-09-12	16:00:50	0.170496	0.7584	1.38245	541.935	FALSE	1
2022-09-12	16:00:51	0.201743	0.897393	7.18539	513.272	FALSE	1
2022-09-12	16:00:51	1.68281	7.48548	7.18539	549.421	FALSE	1
2022-09-12	16:00:51	2.96149	13.1733	7.18539	526.445	FALSE	1
2022-09-12	16:00:52	2.65294	11.8008	11.4531	561.221	FALSE	1
2022-09-12	16:00:52	1.94006	8.62977	11.4531	535.075	FALSE	1
2022-09-12	16:00:52	2.52749	11.2428	11.4531	572.464	FALSE	1
2022-09-12	16:00:52	3.17859	14.139	11.4531	549.214	1	2
2022-09-12	16:00:53	4.85528	21.5973	15.3683	594.061	1	3
2022-09-12	16:00:53	3.65085	16.2397	15.3683	565.454	1	4
2022-09-12	16:00:53	3.38276	15.0472	15.3683	609.109	1	5
2022-09-12	16:00:53	1.9309	8.58903	15.3683	574.043	FALSE	5
2022-09-12	16:00:54	4.48703	19.9592	11.2073	629.068	1	6
2022-09-12	16:00:54	0.791667	3.52149	11.2073	577.564	FALSE	6
2022-09-12	16:00:54	2.20485	9.80761	11.2073	638.875	FALSE	6
2022-09-12	16:00:54	2.59452	11.5409	11.2073	589.105	FALSE	6
2022-09-12	16:00:55	2.62001	11.6543	7.66945	650.53	FALSE	6
2022-09-12	16:00:55	0.629478	2.80004	7.66945	591.905	FALSE	6
2022-09-12	16:00:55	1.92302	8.55398	7.66945	659.084	FALSE	6
2022-09-12	16:00:56	1.29905	5.77843	18.0252	597.684	FALSE	6
2022-09-12	16:00:56	3.64159	16.1985	18.0252	675.282	1	7
2022-09-12	16:00:56	1.79365	7.97851	18.0252	605.662	FALSE	7
2022-09-12	16:00:56	9.47472	42.1454	18.0252	717.428	1	8
2022-09-12	16:00:57	6.27685	27.9207	14.5335	633.583	1	9
2022-09-12	16:00:57	1.94586	8.65557	14.5335	726.083	FALSE	9
2022-09-12	16:00:57	2.14983	9.56287	14.5335	643.146	FALSE	9
2022-09-12	16:00:57	2.6966	11.995	14.5335	738.078	FALSE	9
2022-09-12	16:00:58	2.08897	9.29216	9.898	652.438	FALSE	9
2022-09-12	16:00:58	2.39747	10.6644	9.898	748.743	FALSE	9
2022-09-12	16:00:58	2.18907	9.73742	9.898	662.175	FALSE	9
2022-09-12	16:00:59	2.2652	10.0761	9.07863	758.819	FALSE	9
2022-09-12	16:00:59	2.03111	9.03478	9.07863	671.21	FALSE	9
2022-09-12	16:00:59	1.93197	8.59379	9.07863	767.413	FALSE	9
2022-09-12	16:00:59	1.93559	8.60989	9.07863	679.82	FALSE	9
2022-09-12	16:01:00	1.80561	8.03171	7.02629	775.444	FALSE	9
2022-09-12	16:01:00	1.81808	8.08718	7.02629	687.907	FALSE	9
2022-09-12	16:01:00	1.65889	7.37907	7.02629	782.823	FALSE	9
2022-09-12	16:01:00	1.03574	4.60718	7.02629	692.514	FALSE	9
2022-09-12	16:01:01	0.560471	2.49309	1.48913	785.316	FALSE	9
2022-09-12	16:01:01	0.494516	2.19971	1.48913	694.714	FALSE	9
2022-09-12	16:01:01	0.20902	0.929763	1.48913	786.246	FALSE	9
2022-09-12	16:01:01	0.0750766	0.333956	1.48913	695.048	FALSE	9
2022-09-12	16:01:02	0.336705	1.49773	2.75379	787.744	FALSE	9
2022-09-12	16:01:02	0.868155	3.86173	2.75379	698.91	FALSE	9
2022-09-12	16:01:02	0.652379	2.90191	2.75379	790.646	FALSE	9
2022-09-12	16:01:03	0.418333	1.86083	1.64431	700.771	FALSE	9
2022-09-12	16:01:03	0.34841	1.5498	1.64431	792.196	FALSE	9
2022-09-12	16:01:03	0.295382	1.31392	1.64431	702.085	FALSE	9
2022-09-12	16:01:03	0.416501	1.85268	1.64431	794.048	FALSE	9
2022-09-12	16:01:04	0.394008	1.75263	1.86745	703.837	FALSE	9
2022-09-12	16:01:04	0.405916	1.8056	1.86745	795.854	FALSE	9
2022-09-12	16:01:04	0.441081	1.96202	1.86745	705.799	FALSE	9
2022-09-12	16:01:04	0.438283	1.94957	1.86745	797.804	FALSE	9
2022-09-12	16:01:05	0.489529	2.17752	2.09507	707.977	FALSE	9
2022-09-12	16:01:05	0.516756	2.29863	2.09507	800.102	FALSE	9
2022-09-12	16:01:05	0.404491	1.79926	2.09507	709.776	FALSE	9
2022-09-12	16:01:05	0.473194	2.10486	2.09507	802.207	FALSE	9
2022-09-12	16:01:06	0.422252	1.87826	1.8308	711.654	FALSE	9
2022-09-12	16:01:06	0.392379	1.74538	1.8308	803.952	FALSE	9
2022-09-12	16:01:06	0.420115	1.86876	1.8308	713.523	FALSE	9
2022-09-12	16:01:07	0.412939	1.83684	1.8357	805.789	FALSE	9
2022-09-12	16:01:07	0.409377	1.82099	1.8357	715.344	FALSE	9
2022-09-12	16:01:07	0.418791	1.86287	1.8357	807.652	FALSE	9
2022-09-12	16:01:07	0.409631	1.82212	1.8357	717.166	FALSE	9
2022-09-12	16:01:08	0.394415	1.75444	1.86434	809.407	FALSE	9
2022-09-12	16:01:08	0.423321	1.88302	1.86434	719.049	FALSE	9
2022-09-12	16:01:08	0.432583	1.92422	1.86434	811.331	FALSE	9
2022-09-12	16:01:08	0.426171	1.89569	1.86434	720.945	FALSE	9
2022-09-12	16:01:09	0.414669	1.84453	1.89269	813.175	FALSE	9
2022-09-12	16:01:09	0.424084	1.88641	1.89269	722.831	FALSE	9
2022-09-12	16:01:09	0.435433	1.93689	1.89269	815.112	FALSE	9
2022-09-12	16:01:09	0.427799	1.90294	1.89269	724.734	FALSE	9
2022-09-12	16:01:10	0.412023	1.83276	1.86211	816.945	FALSE	9
2022-09-12	16:01:10	0.416298	1.85178	1.86211	726.586	FALSE	9
2022-09-12	16:01:10	0.427545	1.90181	1.86211	818.847	FALSE	9
2022-09-12	16:01:11	0.428053	1.90407	1.88539	728.49	FALSE	9
2022-09-12	16:01:11	0.444542	1.97741	1.88539	820.824	FALSE	9
2022-09-12	16:01:11	0.419046	1.864	1.88539	730.354	FALSE	9
2022-09-12	16:01:11	0.403779	1.79609	1.88539	822.62	FALSE	9
2022-09-12	16:01:12	0.463473	2.06162	2.79088	732.416	FALSE	9
2022-09-12	16:01:12	0.389936	1.73451	2.79088	824.355	FALSE	9
2022-09-12	16:01:12	0.5507	2.44962	2.79088	734.865	FALSE	9
2022-09-12	16:01:12	1.10556	4.91775	2.79088	829.273	FALSE	9
2022-09-12	16:01:13	0.769326	3.42212	3.79048	738.287	FALSE	9
2022-09-12	16:01:13	0.971819	4.32285	3.79048	833.595	FALSE	9
2022-09-12	16:01:13	0.809529	3.60095	3.79048	741.888	FALSE	9
2022-09-12	16:01:13	0.857875	3.816	3.79048	837.411	FALSE	9
2022-09-12	16:01:14	0.832125	3.70146	3.58676	745.59	FALSE	9
2022-09-12	16:01:14	0.950344	4.22732	3.58676	841.639	FALSE	9
2022-09-12	16:01:14	0.636552	2.83151	3.58676	748.421	FALSE	9
2022-09-12	16:01:15	0.479707	2.13383	2.23089	843.773	FALSE	9
2022-09-12	16:01:15	0.483626	2.15127	2.23089	750.573	FALSE	9
2022-09-12	16:01:15	0.496145	2.20695	2.23089	845.979	FALSE	9
2022-09-12	16:01:15	0.546628	2.43151	2.23089	753.004	FALSE	9
2022-09-12	16:01:16	0.711819	3.16631	4.49161	849.146	FALSE	9
2022-09-12	16:01:16	1.11508	4.9601	4.49161	757.964	FALSE	9
2022-09-12	16:01:16	1.22388	5.44406	4.49161	854.59	FALSE	9
2022-09-12	16:01:16	0.988257	4.39596	4.49161	762.36	FALSE	9
2022-09-12	16:01:17	0.76668	3.41035	2.30865	858	FALSE	9
2022-09-12	16:01:17	0.506934	2.25494	2.30865	764.615	FALSE	9
2022-09-12	16:01:17	0.431667	1.92014	2.30865	859.92	FALSE	9
2022-09-12	16:01:17	0.370751	1.64917	2.30865	766.264	FALSE	9
2022-09-12	16:01:18	0.304186	1.35308	1.2328	861.273	FALSE	9
2022-09-12	16:01:18	0.362863	1.61409	1.2328	767.878	FALSE	9
2022-09-12	16:01:18	0.164389	0.731235	1.2328	862.005	FALSE	9
2022-09-12	16:01:19	0.0545676	0.242728	0.782001	768.121	FALSE	9
2022-09-12	16:01:19	0.343575	1.52829	0.782001	863.533	FALSE	9
2022-09-12	16:01:19	0.192583	0.856648	0.782001	768.978	FALSE	9
2022-09-12	16:01:19	0.112481	0.500338	0.782001	864.033	FALSE	9
2022-09-12	16:01:20	0.0442369	0.196775	-0.255743	769.175	FALSE	9
2022-09-12	16:01:20	-0.247163	-1.09943	-0.255743	864.033	FALSE	9
2022-09-12	16:01:20	-0.256984	-1.14312	-0.255743	769.175	FALSE	9
2022-09-12	16:01:20	0.229936	1.0228	-0.255743	865.056	FALSE	9
2022-09-12	16:01:21	0.972277	4.32488	7.40874	773.499	FALSE	9
2022-09-12	16:01:21	1.62541	7.23015	7.40874	872.286	FALSE	9
2022-09-12	16:01:21	2.39899	10.6712	7.40874	784.171	FALSE	9
2022-09-12	16:01:22	1.05202	4.6796	3.28872	876.966	FALSE	9
2022-09-12	16:01:22	0.639707	2.84554	3.28872	787.016	FALSE	9
2022-09-12	16:01:22	0.4707	2.09377	3.28872	879.06	FALSE	9
2022-09-12	16:01:22	0.794924	3.53598	3.28872	790.552	FALSE	9
2022-09-12	16:01:23	1.2707	5.65233	13.1912	884.712	FALSE	9
2022-09-12	16:01:23	3.70897	16.4982	13.1912	807.05	1	10
2022-09-12	16:01:23	5.00449	22.261	13.1912	906.973	1	11
2022-09-12	16:01:23	1.87793	8.35341	13.1912	815.404	FALSE	11
2022-09-12	16:01:24	0.503422	2.23932	1.682	909.212	FALSE	11
2022-09-12	16:01:24	0.347036	1.54369	1.682	816.947	FALSE	11
2022-09-12	16:01:24	0.288868	1.28494	1.682	910.497	FALSE	11
2022-09-12	16:01:24	0.373193	1.66004	1.682	818.607	FALSE	11
2022-09-12	16:01:25	0.17528	0.77968	0.335389	911.277	FALSE	11
2022-09-12	16:01:25	0.0899875	0.400282	0.335389	819.008	FALSE	11
2022-09-12	16:01:25	-0.039071	-0.173796	0.335389	911.277	FALSE	11
2022-09-12	16:01:26	-0.378511	-1.68369	-1.16111	819.008	FALSE	11
2022-09-12	16:01:26	-0.161717	-0.71935	-1.16111	911.277	FALSE	11
2022-09-12	16:01:26	-0.279224	-1.24204	-1.16111	819.008	FALSE	11
2022-09-12	16:01:26	-0.224669	-0.999373	-1.16111	911.277	FALSE	11
2022-09-12	16:01:27	-0.290572	-1.29252	-1.49829	819.008	FALSE	11
2022-09-12	16:01:27	-0.439478	-1.95489	-1.49829	911.277	FALSE	11
2022-09-12	16:01:27	-0.274949	-1.22303	-1.49829	819.008	FALSE	11
2022-09-12	16:01:27	-0.342328	-1.52274	-1.49829	911.277	FALSE	11
2022-09-12	16:01:28	-0.113677	-0.505658	-0.903901	819.008	FALSE	11
2022-09-12	16:01:28	-0.356374	-1.58522	-0.903901	911.277	FALSE	11
2022-09-12	16:01:28	-0.110318	-0.490717	-0.903901	819.008	FALSE	11
2022-09-12	16:01:28	-0.232455	-1.03401	-0.903901	911.277	FALSE	11
2022-09-12	16:01:29	-0.0910302	-0.404921	-0.376398	819.008	FALSE	11
2022-09-12	16:01:29	-0.125483	-0.558173	-0.376398	911.277	FALSE	11
2022-09-12	16:01:29	-0.0373407	-0.166099	-0.376398	819.008	FALSE	11
2022-09-12	16:01:30	-0.0935239	-0.416013	0.213978	911.277	FALSE	11
2022-09-12	16:01:30	0.0932954	0.414997	0.213978	819.423	FALSE	11
2022-09-12	16:01:30	0.0448984	0.199717	0.213978	911.477	FALSE	11
2022-09-12	16:01:30	0.147748	0.657213	0.213978	820.08	FALSE	11
2022-09-12	16:01:31	0.174466	0.77606	1.08341	912.253	FALSE	11
2022-09-12	16:01:31	0.227494	1.01194	1.08341	821.092	FALSE	11
2022-09-12	16:01:31	0.286628	1.27498	1.08341	913.528	FALSE	11
2022-09-12	16:01:31	0.285662	1.27068	1.08341	822.363	FALSE	11
2022-09-12	16:01:32	0.368308	1.63831	3.45081	915.166	FALSE	11
2022-09-12	16:01:32	0.648562	2.88493	3.45081	825.248	FALSE	11
2022-09-12	16:01:32	1.58704	7.05947	3.45081	922.225	FALSE	11
2022-09-12	16:01:32	0.499198	2.22053	3.45081	827.468	FALSE	11
2022-09-12	16:01:33	0.717366	3.19099	5.82309	925.416	FALSE	11
2022-09-12	16:01:33	1.42668	6.34616	5.82309	833.814	FALSE	11
2022-09-12	16:01:33	1.78322	7.93212	5.82309	933.348	FALSE	11
2022-09-12	16:01:34	2.00179	8.90436	8.57052	842.719	FALSE	11
2022-09-12	16:01:34	1.94444	8.64926	8.57052	941.998	FALSE	11
2022-09-12	16:01:34	1.98464	8.82808	8.57052	851.547	FALSE	11
2022-09-12	16:01:34	1.77609	7.9004	8.57052	949.898	FALSE	11
2022-09-12	16:01:35	2.88383	12.8279	18.6283	864.375	FALSE	11
2022-09-12	16:01:35	4.03166	17.9336	18.6283	967.832	1	12
2022-09-12	16:01:35	4.68902	20.8577	18.6283	885.232	1	13
2022-09-12	16:01:35	5.14678	22.8939	18.6283	990.726	1	14
2022-09-12	16:01:36	4.34006	19.3055	19.3463	904.538	1	15
2022-09-12	16:01:36	7.1996	32.0253	19.3463	1022.75	1	16
2022-09-12	16:01:36	5.67299	25.2346	19.3463	929.772	1	17
2022-09-12	16:01:36	0.184339	0.819977	19.3463	1023.57	FALSE	17
2022-09-12	16:01:37	0.395687	1.76009	4.2034	931.532	FALSE	17
2022-09-12	16:01:37	1.67187	7.43681	4.2034	1031.01	FALSE	17
2022-09-12	16:01:37	0.767341	3.41329	4.2034	934.946	FALSE	17
2022-09-12	16:01:38	0.724186	3.22132	3.2233	1034.23	FALSE	17
2022-09-12	16:01:38	0.722354	3.21318	3.2233	938.159	FALSE	17
2022-09-12	16:01:38	0.725356	3.22653	3.2233	1037.46	FALSE	17
2022-09-12	16:01:38	0.726629	3.23219	3.2233	941.391	FALSE	17
2022-09-12	16:01:39	0.725356	3.22653	3.219	1040.68	FALSE	17
2022-09-12	16:01:39	0.726476	3.23151	3.219	944.623	FALSE	17
2022-09-12	16:01:39	0.721488	3.20932	3.219	1043.89	FALSE	17
2022-09-12	16:01:39	0.721336	3.20865	3.219	947.831	FALSE	17
2022-09-12	16:01:40	0.730496	3.24939	1.45166	1047.14	FALSE	17
2022-09-12	16:01:40	0.179911	0.80028	1.45166	948.631	FALSE	17
2022-09-12	16:01:40	0.176654	0.785792	1.45166	1047.93	FALSE	17
2022-09-12	16:01:40	0.218333	0.971189	1.45166	949.603	FALSE	17
2022-09-12	16:01:41	0.286425	1.27408	3.41909	1049.2	FALSE	17
2022-09-12	16:01:41	0.300725	1.33768	3.41909	950.94	FALSE	17
2022-09-12	16:01:41	1.71879	7.64552	3.41909	1056.85	FALSE	17
2022-09-12	16:01:42	1.34128	5.96628	4.74638	956.907	FALSE	17
2022-09-12	16:01:42	1.71462	7.62697	4.74638	1064.47	FALSE	17
2022-09-12	16:01:42	0.559555	2.48901	4.74638	959.396	FALSE	17
2022-09-12	16:01:42	0.652684	2.90327	4.74638	1067.38	FALSE	17
2022-09-12	16:01:43	0.692532	3.08052	5.12817	962.476	FALSE	17
2022-09-12	16:01:43	0.542863	2.41476	5.12817	1069.79	FALSE	17
2022-09-12	16:01:43	0.405509	1.80379	5.12817	964.28	FALSE	17
2022-09-12	16:01:43	2.97055	13.2136	5.12817	1083	FALSE	17
2022-09-12	16:01:44	5.70281	25.3672	22.8137	989.647	1	18
2022-09-12	16:01:44	5.92291	26.3463	22.8137	1109.35	1	19
2022-09-12	16:01:44	3.76052	16.7275	22.8137	1006.37	1	20
2022-09-12	16:01:45	5.3907	23.9789	22.3675	1133.33	1	21
2022-09-12	16:01:45	4.01609	17.8644	22.3675	1024.24	1	22
2022-09-12	16:01:45	4.41721	19.6486	22.3675	1152.98	1	23
2022-09-12	16:01:45	6.28973	27.978	22.3675	1052.22	1	24
2022-09-12	16:01:46	9.40149	41.8197	20.5158	1194.8	1	25
2022-09-12	16:01:46	4.67716	20.8049	20.5158	1073.02	1	26
2022-09-12	16:01:46	3.52184	15.6658	20.5158	1210.46	1	27
2022-09-12	16:01:46	0.848155	3.77276	20.5158	1076.79	FALSE	27
2022-09-12	16:01:47	1.4934	6.64294	5.07502	1217.11	FALSE	27
2022-09-12	16:01:47	0.784186	3.48822	5.07502	1080.28	FALSE	27
2022-09-12	16:01:47	1.40973	6.27076	5.07502	1223.38	FALSE	27
2022-09-12	16:01:47	0.876349	3.89818	5.07502	1084.18	FALSE	27
2022-09-12	16:01:48	0.729987	3.24713	2.57096	1226.63	FALSE	27
2022-09-12	16:01:48	0.461031	2.05076	2.57096	1086.23	FALSE	27
2022-09-12	16:01:48	0.542914	2.41499	2.57096	1229.04	FALSE	27
2022-09-12	16:01:49	0.786476	3.4984	3.3417	1089.73	FALSE	27
2022-09-12	16:01:49	0.604033	2.68686	3.3417	1231.73	FALSE	27
2022-09-12	16:01:49	0.636705	2.83219	3.3417	1092.56	FALSE	27
2022-09-12	16:01:49	0.977774	4.34933	3.3417	1236.08	FALSE	27
2022-09-12	16:01:50	0.882201	3.92421	3.57435	1096.49	FALSE	27
2022-09-12	16:01:50	0.791972	3.52285	3.57435	1239.6	FALSE	27
2022-09-12	16:01:50	0.940674	4.18431	3.57435	1100.67	FALSE	27
2022-09-12	16:01:50	0.599351	2.66603	3.57435	1242.27	FALSE	27
2022-09-12	16:01:51	0.671616	2.98748	10.701	1103.66	FALSE	27
2022-09-12	16:01:51	0.818537	3.64102	10.701	1245.91	FALSE	27
2022-09-12	16:01:51	2.99004	13.3003	10.701	1116.96	FALSE	27
2022-09-12	16:01:51	5.14255	22.8751	10.701	1268.78	1	28
2022-09-12	16:01:52	7.94001	35.3188	33.5348	1152.28	1	29
2022-09-12	16:01:52	8.28724	36.8633	33.5348	1305.64	1	30
2022-09-12	16:01:52	6.38963	28.4224	33.5348	1180.7	1	31
2022-09-12	16:01:53	3.42902	15.253	11.0385	1320.9	1	32
2022-09-12	16:01:53	1.9448	8.65086	11.0385	1189.35	FALSE	32
2022-09-12	16:01:53	2.79609	12.4376	11.0385	1333.34	FALSE	32
2022-09-12	16:01:53	1.75635	7.8126	11.0385	1197.16	FALSE	32
2022-09-12	16:01:54	2.43874	10.848	13.2905	1344.18	FALSE	32
2022-09-12	16:01:54	3.77976	16.8131	13.2905	1213.98	1	33
2022-09-12	16:01:54	4.49691	20.0032	13.2905	1364.19	1	34
2022-09-12	16:01:54	1.23594	5.49771	13.2905	1219.47	FALSE	34
2022-09-12	16:01:55	0.456094	2.0288	2.22506	1366.21	FALSE	34
2022-09-12	16:01:55	0.365458	1.62563	2.22506	1221.1	FALSE	34
2022-09-12	16:01:55	0.365611	1.62631	2.22506	1367.84	FALSE	34
2022-09-12	16:01:55	0.813702	3.61951	2.22506	1224.72	FALSE	34
2022-09-12	16:01:56	3.17131	14.1066	15.339	1381.95	1	35
2022-09-12	16:01:56	3.19701	14.2209	15.339	1238.94	1	36
2022-09-12	16:01:56	3.97676	17.6894	15.339	1399.64	1	37
2022-09-12	16:01:57	3.72988	16.5913	7.88293	1255.53	1	38
2022-09-12	16:01:57	2.82826	12.5807	7.88293	1412.22	FALSE	38
2022-09-12	16:01:57	0.471514	2.09739	7.88293	1257.63	FALSE	38
2022-09-12	16:01:57	0.0589952	0.262422	7.88293	1412.48	FALSE	38
2022-09-12	16:01:58	0.180929	0.804808	2.86252	1258.43	FALSE	38
2022-09-12	16:01:58	-0.0826333	-0.367569	2.86252	1412.48	FALSE	38
2022-09-12	16:01:58	0.053957	0.240012	2.86252	1258.67	FALSE	38
2022-09-12	16:01:58	2.42184	10.7728	2.86252	1423.25	FALSE	38
2022-09-12	16:01:59	2.628	11.6899	7.2058	1270.36	FALSE	38
2022-09-12	16:01:59	3.85854	17.1636	7.2058	1440.42	1	39
2022-09-12	16:01:59	0.076756	0.341426	7.2058	1270.71	FALSE	39
2022-09-12	16:01:59	-0.0835493	-0.371644	7.2058	1440.42	FALSE	39
2022-09-12	16:02:00	-0.256526	-1.14108	-2.49357	1270.71	FALSE	39
2022-09-12	16:02:00	-0.702633	-3.12545	-2.49357	1440.42	FALSE	39
2022-09-12	16:02:00	-0.722582	-3.21419	-2.49357	1270.71	FALSE	39
2022-09-12	16:02:01	-0.803244	-3.57299	-3.68934	1440.42	FALSE	39
2022-09-12	16:02:01	-0.908333	-4.04045	-3.68934	1270.71	FALSE	39
2022-09-12	16:02:01	-0.798256	-3.5508	-3.68934	1440.42	FALSE	39
2022-09-12	16:02:01	-0.807773	-3.59314	-3.68934	1270.71	FALSE	39
2022-09-12	16:02:02	-0.776475	-3.45392	-3.1722	1440.42	FALSE	39
2022-09-12	16:02:02	-0.71276	-3.1705	-3.1722	1270.71	FALSE	39
2022-09-12	16:02:02	-0.704821	-3.13518	-3.1722	1440.42	FALSE	39
2022-09-12	16:02:02	-0.658511	-2.92919	-3.1722	1270.71	FALSE	39
2022-09-12	16:02:03	-0.628587	-2.79608	-2.80287	1440.42	FALSE	39
2022-09-12	16:02:03	-0.548638	-2.44045	-2.80287	1270.71	FALSE	39
2022-09-12	16:02:03	-0.646551	-2.87599	-2.80287	1440.42	FALSE	39
2022-09-12	16:02:03	-0.696679	-3.09897	-2.80287	1270.71	FALSE	39
2022-09-12	16:02:04	-0.650216	-2.89229	-1.80367	1440.42	FALSE	39
2022-09-12	16:02:04	-0.446043	-1.98409	-1.80367	1270.71	FALSE	39
2022-09-12	16:02:04	-0.120191	-0.534634	-1.80367	1440.42	FALSE	39
2022-09-12	16:02:05	0.227952	1.01398	2.01086	1271.72	FALSE	39
2022-09-12	16:02:05	0.238995	1.0631	2.01086	1441.48	FALSE	39
2022-09-12	16:02:05	0.335891	1.49411	2.01086	1273.21	FALSE	39
2022-09-12	16:02:05	1.00541	4.47226	2.01086	1445.95	FALSE	39
2022-09-12	16:02:06	0.909326	4.04486	4.02211	1277.26	FALSE	39
2022-09-12	16:02:06	0.992074	4.41294	4.02211	1450.37	FALSE	39
2022-09-12	16:02:06	0.911565	4.05482	4.02211	1281.31	FALSE	39
2022-09-12	16:02:06	0.80388	3.57582	4.02211	1453.94	FALSE	39
2022-09-12	16:02:07	0.797316	3.54662	3.01527	1284.86	FALSE	39
2022-09-12	16:02:07	0.836654	3.7216	3.01527	1457.66	FALSE	39
2022-09-12	16:02:07	0.595534	2.64905	3.01527	1287.51	FALSE	39
2022-09-12	16:02:07	0.481947	2.1438	3.01527	1459.81	FALSE	39
2022-09-12	16:02:08	0.378893	1.68539	1.43382	1289.19	FALSE	39
2022-09-12	16:02:08	0.297265	1.32229	1.43382	1461.13	FALSE	39
2022-09-12	16:02:08	0.290853	1.29377	1.43382	1290.49	FALSE	39
2022-09-12	16:02:09	0.628664	2.79642	6.71186	1463.93	FALSE	39
2022-09-12	16:02:09	1.34429	5.97967	6.71186	1296.47	FALSE	39
2022-09-12	16:02:09	1.76994	7.87305	6.71186	1471.8	FALSE	39
2022-09-12	16:02:09	2.29268	10.1983	6.71186	1306.67	FALSE	39
2022-09-12	16:02:10	1.98673	8.83737	8.27971	1480.64	FALSE	39
2022-09-12	16:02:10	1.79854	8.00027	8.27971	1314.67	FALSE	39
2022-09-12	16:02:10	1.70256	7.57333	8.27971	1488.21	FALSE	39
2022-09-12	16:02:10	1.95762	8.70789	8.27971	1323.37	FALSE	39
2022-09-12	16:02:11	2.01681	8.97117	7.04829	1497.18	FALSE	39
2022-09-12	16:02:11	1.90607	8.47858	7.04829	1331.85	FALSE	39
2022-09-12	16:02:11	0.8307	3.69512	7.04829	1500.88	FALSE	39
2022-09-12	16:02:12	0.386527	1.71935	2.40486	1333.57	FALSE	39
2022-09-12	16:02:12	0.29986	1.33384	2.40486	1502.21	FALSE	39
2022-09-12	16:02:12	0.605916	2.69524	2.40486	1336.27	FALSE	39
2022-09-12	16:02:12	0.870242	3.87101	2.40486	1506.08	FALSE	39
2022-09-12	16:02:13	0.352888	1.56972	0.63718	1337.84	FALSE	39
2022-09-12	16:02:13	0.169275	0.752969	0.63718	1506.83	FALSE	39
2022-09-12	16:02:13	0.00662877	0.0294861	0.63718	1337.87	FALSE	39
2022-09-12	16:02:13	0.044186	0.196548	0.63718	1507.03	FALSE	39
2022-09-12	16:02:14	0.0972648	0.432653	0.982793	1338.3	FALSE	39
2022-09-12	16:02:14	0.210293	0.935425	0.982793	1507.96	FALSE	39
2022-09-12	16:02:14	0.27355	1.21681	0.982793	1339.52	FALSE	39
2022-09-12	16:02:14	0.302659	1.34629	0.982793	1509.31	FALSE	39
2022-09-12	16:02:15	0.798588	3.55228	7.14871	1343.07	FALSE	39
2022-09-12	16:02:15	1.58739	7.06103	7.14871	1516.37	FALSE	39
2022-09-12	16:02:15	2.43533	10.8328	7.14871	1353.9	FALSE	39
2022-09-12	16:02:16	1.67813	7.46466	3.93728	1523.84	FALSE	39
2022-09-12	16:02:16	0.829428	3.68946	3.93728	1357.59	FALSE	39
2022-09-12	16:02:16	0.789376	3.5113	3.93728	1527.35	FALSE	39
2022-09-12	16:02:16	0.243626	1.0837	3.93728	1358.67	FALSE	39
2022-09-12	16:02:17	0.486323	2.16326	1.95279	1529.51	FALSE	39
2022-09-12	16:02:17	0.345763	1.53802	1.95279	1360.21	FALSE	39
2022-09-12	16:02:17	0.593448	2.63978	1.95279	1532.15	FALSE	39
2022-09-12	16:02:17	0.330496	1.47011	1.95279	1361.68	FALSE	39
2022-09-12	16:02:18	0.427545	1.90181	2.33644	1534.05	FALSE	39
2022-09-12	16:02:18	0.469784	2.08969	2.33644	1363.77	FALSE	39
2022-09-12	16:02:18	0.479453	2.1327	2.33644	1536.19	FALSE	39
2022-09-12	16:02:18	0.724237	3.22155	2.33644	1366.99	FALSE	39
2022-09-12	16:02:19	0.954109	4.24407	6.76917	1540.43	FALSE	39
2022-09-12	16:02:19	1.62744	7.23918	6.76917	1374.23	FALSE	39
2022-09-12	16:02:19	1.98378	8.82425	6.76917	1549.25	FALSE	39
2022-09-12	16:02:20	3.85314	17.1395	7.85203	1391.37	1	40
2022-09-12	16:02:20	0.82617	3.67497	7.85203	1552.93	FALSE	40
2022-09-12	16:02:20	1.81151	8.05796	7.85203	1399.43	FALSE	40
2022-09-12	16:02:20	0.570038	2.53564	7.85203	1555.46	FALSE	40
2022-09-12	16:02:21	0.654873	2.91301	1.70752	1402.34	FALSE	40
2022-09-12	16:02:21	0.333041	1.48143	1.70752	1556.95	FALSE	40
2022-09-12	16:02:21	0.324746	1.44454	1.70752	1403.79	FALSE	40
2022-09-12	16:02:21	0.222812	0.991112	1.70752	1557.94	FALSE	40
2022-09-12	16:02:22	0.567137	2.52274	0.267232	1406.31	FALSE	40
2022-09-12	16:02:22	0.601387	2.67509	0.267232	1560.61	FALSE	40
2022-09-12	16:02:22	-0.434643	-1.93338	0.267232	1406.31	FALSE	40
2022-09-12	16:02:22	-0.493575	-2.19552	0.267232	1560.61	FALSE	40
2022-09-12	16:02:23	-0.561513	-2.49772	-2.05698	1406.31	FALSE	40
2022-09-12	16:02:23	-0.426196	-1.89581	-2.05698	1560.61	FALSE	40
2022-09-12	16:02:23	-0.39958	-1.77741	-2.05698	1406.31	FALSE	40
2022-09-12	16:02:24	-0.441208	-1.96258	0.38777	1560.61	FALSE	40
2022-09-12	16:02:24	-0.224771	-0.999826	0.38777	1406.31	FALSE	40
2022-09-12	16:02:24	0.00942772	0.0419364	0.38777	1560.65	FALSE	40
2022-09-12	16:02:24	1.00525	4.47155	0.38777	1410.78	FALSE	40
2022-09-12	16:02:25	2.46001	10.9426	15.383	1571.6	FALSE	40
2022-09-12	16:02:25	6.78647	30.1876	15.383	1440.97	1	41
2022-09-12	16:02:25	3.96495	17.6369	15.383	1589.23	1	42
2022-09-12	16:02:25	0.62154	2.76473	15.383	1443.73	FALSE	42
2022-09-12	16:02:26	0.406069	1.80628	6.32708	1591.04	FALSE	42
2022-09-12	16:02:26	5.54973	24.6863	6.32708	1468.42	1	43
2022-09-12	16:02:26	-0.0782567	-0.348101	6.32708	1591.04	FALSE	43
2022-09-12	16:02:26	-0.187977	-0.836159	6.32708	1468.42	FALSE	43
2022-09-12	16:02:27	-0.503753	-2.24079	-2.40408	1591.04	FALSE	43
2022-09-12	16:02:27	-0.550012	-2.44656	-2.40408	1468.42	FALSE	43
2022-09-12	16:02:27	-0.56762	-2.52489	-2.40408	1591.04	FALSE	43
2022-09-12	16:02:28	-0.405788	-1.80503	-0.915784	1468.42	FALSE	43
2022-09-12	16:02:28	-0.405687	-1.80458	-0.915784	1591.04	FALSE	43
2022-09-12	16:02:28	-0.0175443	-0.0780406	-0.915784	1468.42	FALSE	43
2022-09-12	16:02:28	0.00550917	0.0245059	-0.915784	1591.06	FALSE	43
2022-09-12	16:02:29	0.187595	0.83446	0.0108664	1469.25	FALSE	43
2022-09-12	16:02:29	-0.118511	-0.527161	0.0108664	1591.06	FALSE	43
2022-09-12	16:02:29	0.0318195	0.141539	0.0108664	1469.4	FALSE	43
2022-09-12	16:02:29	-0.091132	-0.405373	0.0108664	1591.06	FALSE	43
2022-09-12	16:02:30	0.0846949	0.37674	0.0425401	1469.77	FALSE	43
2022-09-12	16:02:30	-0.0595799	-0.265023	0.0425401	1591.06	FALSE	43
2022-09-12	16:02:30	0.00357532	0.0159037	0.0425401	1469.79	FALSE	43
2022-09-12	16:02:31	-0.0213102	-0.094792	0.912617	1591.06	FALSE	43
2022-09-12	16:02:31	0.251158	1.1172	0.912617	1470.91	FALSE	43
2022-09-12	16:02:31	0.199504	0.887434	0.912617	1591.95	FALSE	43
2022-09-12	16:02:31	0.39131	1.74063	0.912617	1472.65	FALSE	43
2022-09-12	16:02:32	0.354364	1.57628	4.24074	1593.53	FALSE	43
2022-09-12	16:02:32	1.30078	5.78613	4.24074	1478.43	FALSE	43
2022-09-12	16:02:32	1.52607	6.78826	4.24074	1600.32	FALSE	43
2022-09-12	16:02:32	0.632226	2.81227	4.24074	1481.25	FALSE	43
2022-09-12	16:02:33	0.405254	1.80265	1.63367	1602.12	FALSE	43
2022-09-12	16:02:33	0.379707	1.68901	1.63367	1482.93	FALSE	43
2022-09-12	16:02:33	0.341183	1.51765	1.63367	1603.64	FALSE	43
2022-09-12	16:02:33	0.342914	1.52535	1.63367	1484.46	FALSE	43
2022-09-12	16:02:34	0.615585	2.73825	2.13255	1606.38	FALSE	43
2022-09-12	16:02:34	0.433346	1.92761	2.13255	1486.39	FALSE	43
2022-09-12	16:02:34	0.389326	1.7318	2.13255	1608.11	FALSE	43
2022-09-12	16:02:35	0.386069	1.71731	1.72642	1488.1	FALSE	43
2022-09-12	16:02:35	0.573244	2.5499	1.72642	1610.66	FALSE	43
2022-09-12	16:02:35	0.506171	2.25155	1.72642	1490.36	FALSE	43
2022-09-12	16:02:35	0.086985	0.386927	1.72642	1611.04	FALSE	43
2022-09-12	16:02:36	-0.383753	-1.70701	-1.69043	1490.36	FALSE	43
2022-09-12	16:02:36	-0.621106	-2.7628	-1.69043	1611.04	FALSE	43
2022-09-12	16:02:36	-0.467112	-2.07781	-1.69043	1490.36	FALSE	43
2022-09-12	16:02:36	-0.0481295	-0.21409	-1.69043	1611.04	FALSE	43
2022-09-12	16:02:37	0.105865	0.470909	0.693432	1490.83	FALSE	43
2022-09-12	16:02:37	0.116043	0.516182	0.693432	1611.56	FALSE	43
2022-09-12	16:02:37	0.0107	0.0475957	0.693432	1490.87	FALSE	43
2022-09-12	16:02:37	0.390954	1.73904	0.693432	1613.3	FALSE	43
2022-09-12	16:02:38	0.0503438	0.223939	0.579719	1491.1	FALSE	43
2022-09-12	16:02:38	0.181285	0.806392	0.579719	1614.11	FALSE	43
2022-09-12	16:02:38	0.159351	0.708825	0.579719	1491.81	FALSE	43
2022-09-12	16:02:39	0.16958	0.754326	0.735255	1614.86	FALSE	43
2022-09-12	16:02:39	0.224797	0.999942	0.735255	1492.81	FALSE	43
2022-09-12	16:02:39	0.122608	0.545385	0.735255	1615.4	FALSE	43
2022-09-12	16:02:39	0.144186	0.641368	0.735255	1493.45	FALSE	43
2022-09-12	16:02:40	0.220267	0.979792	0.931746	1616.38	FALSE	43
2022-09-12	16:02:40	0.203473	0.905089	0.931746	1494.35	FALSE	43
2022-09-12	16:02:40	0.200573	0.892189	0.931746	1617.28	FALSE	43
2022-09-12	16:02:40	0.21355	0.949913	0.931746	1495.3	FALSE	43
2022-09-12	16:02:41	0.151718	0.674872	1.20311	1617.95	FALSE	43
2022-09-12	16:02:41	0.190802	0.848725	1.20311	1496.15	FALSE	43
2022-09-12	16:02:41	0.422506	1.87939	1.20311	1619.83	FALSE	43
2022-09-12	16:02:41	0.316858	1.40945	1.20311	1497.56	FALSE	43
2022-09-12	16:02:42	0.439758	1.95613	1.98805	1621.79	FALSE	43
2022-09-12	16:02:42	0.461641	2.05347	1.98805	1499.62	FALSE	43
2022-09-12	16:02:42	0.439402	1.95455	1.98805	1623.74	FALSE	43
2022-09-12	16:02:43	0.527137	2.34481	2.1627	1501.96	FALSE	43
2022-09-12	16:02:43	0.421743	1.876	2.1627	1625.62	FALSE	43
2022-09-12	16:02:43	0.523829	2.3301	2.1627	1504.29	FALSE	43
2022-09-12	16:02:43	0.472074	2.09988	2.1627	1627.72	FALSE	43
2022-09-12	16:02:44	0.457367	2.03446	2.06389	1506.32	FALSE	43
2022-09-12	16:02:44	0.475433	2.11482	2.06389	1629.83	FALSE	43
2022-09-12	16:02:44	0.396043	1.76168	2.06389	1508.09	FALSE	43
2022-09-12	16:02:44	0.527086	2.34458	2.06389	1632.18	FALSE	43
2022-09-12	16:02:45	0.431311	1.91856	2.17803	1510	FALSE	43
2022-09-12	16:02:45	0.515025	2.29093	2.17803	1634.47	FALSE	43
2022-09-12	16:02:45	0.470751	2.09399	2.17803	1512.1	FALSE	43
2022-09-12	16:02:45	0.541489	2.40865	2.17803	1636.88	FALSE	43
2022-09-12	16:02:46	0.419504	1.86604	1.96843	1513.96	FALSE	43
2022-09-12	16:02:46	0.450954	2.00593	1.96843	1638.88	FALSE	43
2022-09-12	16:02:46	0.457112	2.03333	1.96843	1516	FALSE	43
2022-09-12	16:02:47	0.452481	2.01273	1.59111	1640.9	FALSE	43
2022-09-12	16:02:47	0.456196	2.02925	1.59111	1518.03	FALSE	43
2022-09-12	16:02:47	0.347952	1.54776	1.59111	1642.44	FALSE	43
2022-09-12	16:02:47	0.17416	0.774699	1.59111	1518.8	FALSE	43
2022-09-12	16:02:48	0.404237	1.79813	1.6322	1644.24	FALSE	43
2022-09-12	16:02:48	0.312176	1.38862	1.6322	1520.19	FALSE	43
2022-09-12	16:02:48	0.414211	1.84249	1.6322	1646.08	FALSE	43
2022-09-12	16:02:48	0.337112	1.49954	1.6322	1521.69	FALSE	43
2022-09-12	16:02:49	0.377061	1.67724	1.52278	1647.76	FALSE	43
2022-09-12	16:02:49	0.335229	1.49117	1.52278	1523.18	FALSE	43
2022-09-12	16:02:49	0.31472	1.39994	1.52278	1649.16	FALSE	43
2022-09-12	16:02:50	0.371718	1.65348	1.42173	1524.84	FALSE	43
2022-09-12	16:02:50	0.365204	1.6245	1.42173	1650.79	FALSE	43
2022-09-12	16:02:50	0.290344	1.29151	1.42173	1526.13	FALSE	43
2022-09-12	16:02:50	0.251209	1.11743	1.42173	1651.9	FALSE	43
2022-09-12	16:02:51	0.135891	0.60447	-1.03457	1526.73	FALSE	43
2022-09-12	16:02:51	-0.170063	-0.756474	-1.03457	1651.9	FALSE	43
2022-09-12	16:02:51	-0.484262	-2.15409	-1.03457	1526.73	FALSE	43
2022-09-12	16:02:51	-0.411895	-1.83219	-1.03457	1651.9	FALSE	43
2022-09-12	16:02:52	0.930598	4.13949	4.37531	1530.87	FALSE	43
2022-09-12	16:02:52	1.31126	5.83275	4.37531	1657.74	FALSE	43
2022-09-12	16:02:52	1.28225	5.7037	4.37531	1536.57	FALSE	43
2022-09-12	16:02:52	0.410344	1.82529	4.37531	1659.56	FALSE	43
2022-09-12	16:02:53	0.322761	1.43571	1.40643	1538.01	FALSE	43
2022-09-12	16:02:53	0.375331	1.66955	1.40643	1661.23	FALSE	43
2022-09-12	16:02:53	0.250445	1.11403	1.40643	1539.12	FALSE	43
2022-09-12	16:02:54	0.162201	0.721502	0.866607	1661.95	FALSE	43
2022-09-12	16:02:54	0.212328	0.944477	0.866607	1540.07	FALSE	43
2022-09-12	16:02:54	0.201438	0.896037	0.866607	1662.85	FALSE	43
2022-09-12	16:02:54	0.203321	0.904412	0.866607	1540.97	FALSE	43
2022-09-12	16:02:55	0.115077	0.511886	1.41126	1663.36	FALSE	43
2022-09-12	16:02:55	0.474975	2.11278	1.41126	1543.09	FALSE	43
2022-09-12	16:02:55	0.24958	1.11018	1.41126	1664.47	FALSE	43
2022-09-12	16:02:55	0.429428	1.91018	1.41126	1545	FALSE	43
2022-09-12	16:02:56	0.323422	1.43865	1.78386	1665.91	FALSE	43
2022-09-12	16:02:56	0.397875	1.76983	1.78386	1546.77	FALSE	43
2022-09-12	16:02:56	0.424288	1.88732	1.78386	1667.8	FALSE	43
2022-09-12	16:02:56	0.458537	2.03966	1.78386	1548.81	FALSE	43
2022-09-12	16:02:57	0.394466	1.75466	1.73489	1669.55	FALSE	43
2022-09-12	16:02:57	0.433397	1.92784	1.73489	1550.73	FALSE	43
2022-09-12	16:02:57	0.342201	1.52218	1.73489	1671.07	FALSE	43
2022-09-12	16:02:58	0.429224	1.90927	1.94595	1552.64	FALSE	43
2022-09-12	16:02:58	0.487239	2.16734	1.94595	1673.24	FALSE	43
2022-09-12	16:02:58	0.361387	1.60752	1.94595	1554.25	FALSE	43
2022-09-12	16:02:58	0.472023	2.09965	1.94595	1675.34	FALSE	43
2022-09-12	16:02:59	0.307341	1.36711	1.25902	1555.62	FALSE	43
2022-09-12	16:02:59	0.428563	1.90633	1.25902	1677.25	FALSE	43
2022-09-12	16:02:59	0.0978756	0.43537	1.25902	1556.05	FALSE	43
2022-09-12	16:02:59	0.298384	1.32727	1.25902	1678.57	FALSE	43
2022-09-12	16:03:00	0.103575	0.460722	0.838198	1556.51	FALSE	43
2022-09-12	16:03:00	0.347596	1.54618	0.838198	1680.12	FALSE	43
2022-09-12	16:03:00	0.0687152	0.305659	0.838198	1556.82	FALSE	43
2022-09-12	16:03:00	0.233855	1.04023	0.838198	1681.16	FALSE	43
2022-09-12	16:03:01	-3.79307e-05	-0.000168723	-0.0653637	1556.82	FALSE	43
2022-09-12	16:03:01	-0.0563229	-0.250536	-0.0653637	1681.16	FALSE	43
2022-09-12	16:03:01	0.0122776	0.0546132	-0.0653637	1556.87	FALSE	43
2022-09-12	16:03:02	-0.100598	-0.44748	0.184776	1681.16	FALSE	43
2022-09-12	16:03:02	0.103066	0.458458	0.184776	1557.33	FALSE	43
2022-09-12	16:03:02	0.079962	0.355687	0.184776	1681.52	FALSE	43
2022-09-12	16:03:02	0.083728	0.372439	0.184776	1557.7	FALSE	43
2022-09-12	16:03:03	-0.129503	-0.576055	-0.160779	1681.52	FALSE	43
2022-09-12	16:03:03	-0.211285	-0.939838	-0.160779	1557.7	FALSE	43
2022-09-12	16:03:03	0.0940079	0.418166	-0.160779	1681.93	FALSE	43
2022-09-12	16:03:03	0.102201	0.45461	-0.160779	1558.16	FALSE	43
2022-09-12	16:03:04	0.243066	1.08121	1.05184	1683.01	FALSE	43
2022-09-12	16:03:04	0.0862724	0.383757	1.05184	1558.54	FALSE	43
2022-09-12	16:03:04	0.379758	1.68924	1.05184	1684.7	FALSE	43
2022-09-12	16:03:04	0.236756	1.05314	1.05184	1559.6	FALSE	43
2022-09-12	16:03:05	0.597977	2.65992	1.83623	1687.36	FALSE	43
2022-09-12	16:03:05	0.157367	0.7	1.83623	1560.3	FALSE	43
2022-09-12	16:03:05	0.483066	2.14877	1.83623	1689.51	FALSE	43
2022-09-12	16:03:06	0.200878	0.893546	0.97668	1561.19	FALSE	43
2022-09-12	16:03:06	0.172176	0.765873	0.97668	1690.28	FALSE	43
2022-09-12	16:03:06	0.0766032	0.340746	0.97668	1561.53	FALSE	43
2022-09-12	16:03:06	0.428613	1.90656	0.97668	1692.19	FALSE	43
2022-09-12	16:03:07	0.292328	1.30033	1.7872	1562.83	FALSE	43
2022-09-12	16:03:07	0.401692	1.78681	1.7872	1693.97	FALSE	43
2022-09-12	16:03:07	0.452277	2.01182	1.7872	1564.84	FALSE	43
2022-09-12	16:03:07	0.460827	2.04985	1.7872	1696.02	FALSE	43
2022-09-12	16:03:08	0.317621	1.41284	1.82229	1566.26	FALSE	43
2022-09-12	16:03:08	0.487748	2.1696	1.82229	1698.19	FALSE	43
2022-09-12	16:03:08	0.380115	1.69083	1.82229	1567.95	FALSE	43
2022-09-12	16:03:08	0.453193	2.01589	1.82229	1700.21	FALSE	43
2022-09-12	16:03:09	0.46612	2.07339	1.57032	1570.02	FALSE	43
2022-09-12	16:03:09	0.330547	1.47034	1.57032	1701.68	FALSE	43
2022-09-12	16:03:09	0.262405	1.16723	1.57032	1571.19	FALSE	43
2022-09-12	16:03:10	0.270903	1.20503	1.6829	1702.88	FALSE	43
2022-09-12	16:03:10	0.290242	1.29105	1.6829	1572.48	FALSE	43
2022-09-12	16:03:10	0.429529	1.91063	1.6829	1704.79	FALSE	43
2022-09-12	16:03:10	0.522659	2.32489	1.6829	1574.8	FALSE	43
2022-09-12	16:03:11	0.213346	0.949006	1.43231	1705.74	FALSE	43
2022-09-12	16:03:11	0.380064	1.6906	1.43231	1576.49	FALSE	43
2022-09-12	16:03:11	0.251667	1.11947	1.43231	1706.86	FALSE	43
2022-09-12	16:03:11	0.442914	1.97017	1.43231	1578.46	FALSE	43
2022-09-12	16:03:12	0.27757	1.23469	1.85851	1708.1	FALSE	43
2022-09-12	16:03:12	0.651158	2.89648	1.85851	1581.36	FALSE	43
2022-09-12	16:03:12	0.267901	1.19168	1.85851	1709.29	FALSE	43
2022-09-12	16:03:12	0.474618	2.1112	1.85851	1583.47	FALSE	43
2022-09-12	16:03:13	0.350547	1.5593	1.872	1710.85	FALSE	43
2022-09-12	16:03:13	0.498639	2.21805	1.872	1585.69	FALSE	43
2022-09-12	16:03:13	0.413346	1.83865	1.872	1712.69	FALSE	43
2022-09-12	16:03:14	0.530344	2.35908	1.99428	1588.05	FALSE	43
2022-09-12	16:03:14	0.430445	1.91471	1.99428	1714.6	FALSE	43
2022-09-12	16:03:14	0.389122	1.73089	1.99428	1589.78	FALSE	43
2022-09-12	16:03:14	0.443422	1.97243	1.99428	1716.57	FALSE	43
2022-09-12	16:03:15	0.472684	2.10259	2.07939	1591.88	FALSE	43
2022-09-12	16:03:15	0.481489	2.14176	2.07939	1718.72	FALSE	43
2022-09-12	16:03:15	0.347799	1.54708	2.07939	1593.43	FALSE	43
2022-09-12	16:03:15	0.567901	2.52614	2.07939	1721.24	FALSE	43
2022-09-12	16:03:16	0.341132	1.51742	2.09196	1594.95	FALSE	43
2022-09-12	16:03:16	0.602659	2.68075	2.09196	1723.92	FALSE	43
2022-09-12	16:03:16	0.467087	2.0777	2.09196	1597.02	FALSE	43
2022-09-12	16:03:17	0.513346	2.28347	2.07798	1726.21	FALSE	43
2022-09-12	16:03:17	0.437774	1.94731	2.07798	1598.97	FALSE	43
2022-09-12	16:03:17	0.409071	1.81963	2.07798	1728.03	FALSE	43
2022-09-12	16:03:17	0.50841	2.26151	2.07798	1601.23	FALSE	43
2022-09-12	16:03:18	0.441743	1.96496	2.50876	1729.99	FALSE	43
2022-09-12	16:03:18	0.634008	2.82019	2.50876	1604.05	FALSE	43
2022-09-12	16:03:18	0.438995	1.95274	2.50876	1731.94	FALSE	43
2022-09-12	16:03:18	0.741234	3.29716	2.50876	1607.35	FALSE	43
2022-09-12	16:03:19	0.346069	1.53938	1.61267	1733.48	FALSE	43
2022-09-12	16:03:19	0.320115	1.42394	1.61267	1608.77	FALSE	43
2022-09-12	16:03:19	0.316756	1.40899	1.61267	1734.89	FALSE	43
2022-09-12	16:03:19	0.467239	2.07837	1.61267	1610.85	FALSE	43
2022-09-12	16:03:20	1.27899	5.6892	3.4833	1740.58	FALSE	43
2022-09-12	16:03:20	0.547443	2.43514	3.4833	1613.29	FALSE	43
2022-09-12	16:03:20	0.522812	2.32557	3.4833	1742.91	FALSE	43
2022-09-12	16:03:21	0.564949	2.51301	2.13746	1615.8	FALSE	43
2022-09-12	16:03:21	0.459657	2.04465	2.13746	1744.95	FALSE	43
2022-09-12	16:03:21	0.291412	1.29626	2.13746	1617.1	FALSE	43
2022-09-12	16:03:21	0.606069	2.69592	2.13746	1747.65	FALSE	43
2022-09-12	16:03:22	0.420725	1.87147	2.18624	1618.97	FALSE	43
2022-09-12	16:03:22	0.546985	2.4331	2.18624	1750.08	FALSE	43
2022-09-12	16:03:22	0.432277	1.92285	2.18624	1620.89	FALSE	43
2022-09-12	16:03:22	0.565967	2.51753	2.18624	1752.6	FALSE	43
2022-09-12	16:03:23	0.450802	2.00526	2.04668	1622.9	FALSE	43
2022-09-12	16:03:23	0.456756	2.03174	2.04668	1754.63	FALSE	43
2022-09-12	16:03:23	0.468868	2.08562	2.04668	1624.98	FALSE	43
2022-09-12	16:03:23	0.464033	2.06411	2.04668	1756.69	FALSE	43
2022-09-12	16:03:24	0.540013	2.40209	2.24046	1627.38	FALSE	43
2022-09-12	16:03:24	0.476756	2.12071	2.24046	1758.81	FALSE	43
2022-09-12	16:03:24	0.494262	2.19858	2.24046	1629.58	FALSE	43
2022-09-12	16:03:25	0.486221	2.16281	2.72585	1760.98	FALSE	43
2022-09-12	16:03:25	0.513092	2.28234	2.72585	1631.86	FALSE	43
2022-09-12	16:03:25	0.691972	3.07803	2.72585	1764.05	FALSE	43
2022-09-12	16:03:25	0.759911	3.38024	2.72585	1635.25	FALSE	43
2022-09-12	16:03:26	0.949733	4.2246	3.67316	1768.28	FALSE	43
2022-09-12	16:03:26	0.606069	2.69592	3.67316	1637.94	FALSE	43
2022-09-12	16:03:26	0.784033	3.48754	3.67316	1771.77	FALSE	43
2022-09-12	16:03:26	0.963219	4.28459	3.67316	1642.23	FALSE	43
2022-09-12	16:03:27	0.853193	3.79517	4.45347	1775.56	FALSE	43
2022-09-12	16:03:27	0.935534	4.16144	4.45347	1646.39	FALSE	43
2022-09-12	16:03:27	1.13523	5.04973	4.45347	1780.61	FALSE	43
2022-09-12	16:03:27	1.08078	4.80753	4.45347	1651.19	FALSE	43
2022-09-12	16:03:28	0.815127	3.62585	2.70693	1784.24	FALSE	43
2022-09-12	16:03:28	0.593346	2.63932	2.70693	1653.83	FALSE	43
2022-09-12	16:03:28	0.417163	1.85562	2.70693	1786.09	FALSE	43
2022-09-12	16:03:29	0.549835	2.44578	2.42393	1656.28	FALSE	43
2022-09-12	16:03:29	0.5764	2.56394	2.42393	1788.66	FALSE	43
2022-09-12	16:03:29	0.641285	2.85256	2.42393	1659.13	FALSE	43
2022-09-12	16:03:29	0.412176	1.83344	2.42393	1790.49	FALSE	43
2022-09-12	16:03:30	0.494618	2.20016	2.07758	1661.33	FALSE	43
2022-09-12	16:03:30	0.505611	2.24906	2.07758	1792.74	FALSE	43
2022-09-12	16:03:30	0.513855	2.28573	2.07758	1663.62	FALSE	43
2022-09-12	16:03:30	0.35416	1.57537	2.07758	1794.31	FALSE	43
2022-09-12	16:03:31	0.444135	1.9756	4.10831	1665.59	FALSE	43
2022-09-12	16:03:31	0.45014	2.00231	4.10831	1796.32	FALSE	43
2022-09-12	16:03:31	1.61935	7.20319	4.10831	1672.8	FALSE	43
2022-09-12	16:03:31	1.18073	5.25212	4.10831	1801.57	FALSE	43
2022-09-12	16:03:32	0.881387	3.92059	5.46768	1676.72	FALSE	43
2022-09-12	16:03:32	0.585611	2.60491	5.46768	1804.17	FALSE	43
2022-09-12	16:03:32	2.22057	9.87754	5.46768	1686.59	FALSE	43
2022-09-12	16:03:33	0.96042	4.27214	2.99569	1808.45	FALSE	43
2022-09-12	16:03:33	0.341489	1.51901	2.99569	1688.11	FALSE	43
2022-09-12	16:03:33	0.90383	4.02042	2.99569	1812.47	FALSE	43
2022-09-12	16:03:33	0.488104	2.17118	2.99569	1690.29	FALSE	43
2022-09-12	16:03:34	0.489733	2.17843	3.27611	1814.65	FALSE	43
2022-09-12	16:03:34	0.382659	1.70214	3.27611	1691.99	FALSE	43
2022-09-12	16:03:34	0.673957	2.9979	3.27611	1817.64	FALSE	43
2022-09-12	16:03:34	1.39966	6.22597	3.27611	1698.21	FALSE	43
2022-09-12	16:03:35	1.52724	6.79347	6.94016	1824.44	FALSE	43
2022-09-12	16:03:35	2.11905	9.42596	6.94016	1707.64	FALSE	43
2022-09-12	16:03:35	2.365	10.52	6.94016	1834.96	FALSE	43
2022-09-12	16:03:35	0.22958	1.02122	6.94016	1708.66	FALSE	43
2022-09-12	16:03:36	0.145356	0.646573	0.705203	1835.6	FALSE	43
2022-09-12	16:03:36	0.181641	0.807975	0.705203	1709.47	FALSE	43
2022-09-12	16:03:36	0.148613	0.66106	0.705203	1836.26	FALSE	43

## Sheet: Ranger_prong_2022912155818 (3)
Date	Time	Lbs	Newtons	Total Force x time	Total Time Steps Force >3		**GoPro Fitting: 1547
2022-09-12	15:58:36	0.44673	1.98714	1.98714	FALSE	0			Total force x time	1836.26
2022-09-12	15:58:36	0.62327	2.77243	2.77243	FALSE	0			Total Time Steps Force >3	43
2022-09-12	15:58:36	0.641081	2.85166	4.8388	FALSE	0
2022-09-12	15:58:37	0.428613	1.90656	4.67899	FALSE	0
2022-09-12	15:58:37	0.782506	3.48074	8.31954	FALSE	0
2022-09-12	15:58:37	0.720929	3.20684	7.88582	FALSE	0
2022-09-12	15:58:37	0.728817	3.24192	11.5615	FALSE	0
2022-09-12	15:58:38	0.556094	2.47362	10.3594	FALSE	0
2022-09-12	15:58:38	0.484084	2.1533	13.7148	FALSE	0
2022-09-12	15:58:38	0.342608	1.52399	11.8834	FALSE	0
2022-09-12	15:58:38	0.538995	2.39756	16.1123	FALSE	0
2022-09-12	15:58:39	0.356298	1.58488	13.4683	FALSE	0
2022-09-12	15:58:39	0.564491	2.51097	18.6233	FALSE	0
2022-09-12	15:58:39	0.0715142	0.318109	13.7864	FALSE	0
2022-09-12	15:58:39	0.193804	0.862079	19.4854	FALSE	0
2022-09-12	15:58:40	0.0865269	0.384889	14.1713	FALSE	0
2022-09-12	15:58:40	0.457774	2.03627	21.5216	FALSE	0
2022-09-12	15:58:40	0.635025	2.82472	16.996	FALSE	0
2022-09-12	15:58:41	0.512634	2.2803	23.8019	FALSE	0
2022-09-12	15:58:41	0.874974	3.89206	20.8881	FALSE	0
2022-09-12	15:58:41	1.14093	5.07508	28.877	FALSE	0
2022-09-12	15:58:41	0.503066	2.23774	23.1258	FALSE	0
2022-09-12	15:58:42	0.462659	2.058	30.935	FALSE	0
2022-09-12	15:58:42	0.365305	1.62495	24.7508	FALSE	0
2022-09-12	15:58:42	0.288562	1.28358	32.2186	FALSE	0
2022-09-12	15:58:42	0.444491	1.97718	26.728	FALSE	0
2022-09-12	15:58:43	0.411769	1.83163	34.0502	FALSE	0
2022-09-12	15:58:43	0.675483	3.00468	29.7326	FALSE	0
2022-09-12	15:58:43	0.217214	0.966211	35.0165	FALSE	0
2022-09-12	15:58:43	0.395942	1.76123	31.4939	FALSE	0
2022-09-12	15:58:44	0.179504	0.79847	35.8149	FALSE	0
2022-09-12	15:58:44	0.480725	2.13836	33.6322	FALSE	0
2022-09-12	15:58:44	0.14215	0.632312	36.4472	FALSE	0
2022-09-12	15:58:45	0.306527	1.36349	34.9957	FALSE	0
2022-09-12	15:58:45	0.248664	1.10611	37.5533	FALSE	0
2022-09-12	15:58:45	0.436654	1.94232	36.9381	FALSE	0
2022-09-12	15:58:45	0.53416	2.37605	39.9294	FALSE	0
2022-09-12	15:58:46	0.865153	3.84837	40.7864	FALSE	0
2022-09-12	15:58:46	0.365814	1.62721	41.5566	FALSE	0
2022-09-12	15:58:46	0.796654	3.54368	44.3301	FALSE	0
2022-09-12	15:58:46	0.920827	4.09602	45.6526	FALSE	0
2022-09-12	15:58:47	0.387036	1.72161	46.0517	FALSE	0
2022-09-12	15:58:47	0.28098	1.24986	46.9025	FALSE	0
2022-09-12	15:58:47	0.212583	0.945612	46.9973	FALSE	0
2022-09-12	15:58:47	0.218995	0.974134	47.8766	FALSE	0
2022-09-12	15:58:48	0.134822	0.599715	47.597	FALSE	0
2022-09-12	15:58:48	0.413244	1.83819	49.7148	FALSE	0
2022-09-12	15:58:48	0.307392	1.36734	48.9644	FALSE	0
2022-09-12	15:58:49	0.781183	3.47486	53.1897	FALSE	0
2022-09-12	15:58:49	0.660471	2.93791	51.9023	FALSE	0
2022-09-12	15:58:49	1.13411	5.04475	58.2344	FALSE	0
2022-09-12	15:58:49	1.30419	5.8013	57.7036	FALSE	0
2022-09-12	15:58:50	1.47966	6.58182	64.8162	FALSE	0
2022-09-12	15:58:50	1.1023	4.90325	62.6068	FALSE	0
2022-09-12	15:58:50	0.776349	3.45336	68.2696	FALSE	0
2022-09-12	15:58:50	0.612532	2.72466	65.3315	FALSE	0
2022-09-12	15:58:51	0.346781	1.54255	69.8121	FALSE	0
2022-09-12	15:58:51	1.27212	5.65864	70.9901	FALSE	0
2022-09-12	15:58:51	0.784287	3.48867	73.3008	FALSE	0
2022-09-12	15:58:51	1.18307	5.26253	76.2527	FALSE	0
2022-09-12	15:58:52	0.629784	2.80141	76.1022	FALSE	0
2022-09-12	15:58:52	0.923168	4.10644	80.3591	FALSE	0
2022-09-12	15:58:52	0.438333	1.94979	78.052	FALSE	0
2022-09-12	15:58:53	0.530395	2.3593	82.7184	FALSE	0
2022-09-12	15:58:53	0.674466	3.00016	81.0522	FALSE	0
2022-09-12	15:58:53	0.340369	1.51403	84.2325	FALSE	0
2022-09-12	15:58:53	0.742761	3.30395	84.3561	FALSE	0
2022-09-12	15:58:54	0.397519	1.76824	86.0007	FALSE	0
2022-09-12	15:58:54	1.11452	4.95761	89.3137	FALSE	0
2022-09-12	15:58:54	0.927341	4.125	90.1257	FALSE	0
2022-09-12	15:58:54	1.46576	6.51999	95.8337	FALSE	0
2022-09-12	15:58:55	1.18454	5.26907	95.3948	FALSE	0
2022-09-12	15:58:55	0.909682	4.04645	99.8802	FALSE	0
2022-09-12	15:58:55	0.868053	3.86127	99.256	FALSE	0
2022-09-12	15:58:56	0.76958	3.42325	103.303	FALSE	0
2022-09-12	15:58:56	0.592227	2.63434	101.89	FALSE	0
2022-09-12	15:58:56	0.477265	2.12297	105.426	FALSE	0
2022-09-12	15:58:56	0.721692	3.21023	105.101	FALSE	0
2022-09-12	15:58:57	0.587697	2.61419	108.041	FALSE	0
2022-09-12	15:58:57	0.704389	3.13326	108.234	FALSE	0
2022-09-12	15:58:57	0.578333	2.57254	110.613	FALSE	0
2022-09-12	15:58:57	0.924542	4.11255	112.346	FALSE	0
2022-09-12	15:58:58	0.656908	2.92206	113.535	FALSE	0
2022-09-12	15:58:58	0.714415	3.17786	115.524	FALSE	0
2022-09-12	15:58:58	0.666272	2.96371	116.499	FALSE	0
2022-09-12	15:58:58	0.584135	2.59835	118.123	FALSE	0
2022-09-12	15:58:59	0.729987	3.24713	119.746	FALSE	0
2022-09-12	15:58:59	0.429936	1.91244	120.035	FALSE	0
2022-09-12	15:58:59	0.442863	1.96994	121.716	FALSE	0
2022-09-12	15:59:00	0.308359	1.37164	121.407	FALSE	0
2022-09-12	15:59:00	0.673346	2.99518	124.711	FALSE	0
2022-09-12	15:59:00	0.568918	2.53066	123.937	FALSE	0
2022-09-12	15:59:00	0.622812	2.77039	127.482	FALSE	0
2022-09-12	15:59:01	0.588868	2.6194	126.557	FALSE	0
2022-09-12	15:59:01	0.636348	2.8306	130.312	FALSE	0
2022-09-12	15:59:01	1.01976	4.5361	131.093	FALSE	0
2022-09-12	15:59:01	1.10739	4.92589	135.238	FALSE	0
2022-09-12	15:59:02	1.82037	8.09737	139.19	FALSE	0
2022-09-12	15:59:02	1.37808	6.12998	141.368	FALSE	0
2022-09-12	15:59:02	1.61915	7.2023	146.393	FALSE	0
2022-09-12	15:59:02	0.740114	3.29218	144.66	FALSE	0
2022-09-12	15:59:03	1.25223	5.57017	151.963	FALSE	0
2022-09-12	15:59:03	1.10281	4.90552	149.566	FALSE	0
2022-09-12	15:59:03	0.563524	2.50667	154.469	FALSE	0
2022-09-12	15:59:04	1.22729	5.45923	155.025	FALSE	0
2022-09-12	15:59:04	0.417977	1.85925	156.329	FALSE	0
2022-09-12	15:59:04	1.31686	5.85766	160.883	FALSE	0
2022-09-12	15:59:04	0.5907	2.62755	158.956	FALSE	0
2022-09-12	15:59:05	2.19253	9.75281	170.635	FALSE	0
2022-09-12	15:59:05	0.686119	3.05199	162.008	FALSE	0
2022-09-12	15:59:05	1.29192	5.74672	176.382	FALSE	0
2022-09-12	15:59:05	0.350191	1.55772	163.566	FALSE	0
2022-09-12	15:59:06	1.48332	6.5981	182.98	FALSE	0
2022-09-12	15:59:06	0.595229	2.6477	166.214	FALSE	0
2022-09-12	15:59:06	0.301641	1.34176	184.322	FALSE	0
2022-09-12	15:59:06	0.422252	1.87826	168.092	FALSE	0
2022-09-12	15:59:07	0.340522	1.51471	185.837	FALSE	0
2022-09-12	15:59:07	0.569733	2.53429	170.626	FALSE	0
2022-09-12	15:59:07	0.385814	1.71618	187.553	FALSE	0
2022-09-12	15:59:08	0.48271	2.14719	172.773	FALSE	0
2022-09-12	15:59:08	0.196043	0.872038	188.425	FALSE	0
2022-09-12	15:59:08	0.472684	2.10259	174.876	FALSE	0
2022-09-12	15:59:08	0.265865	1.18262	189.608	FALSE	0
2022-09-12	15:59:09	0.589427	2.62189	177.498	FALSE	0
2022-09-12	15:59:09	0.192125	0.85461	190.462	FALSE	0
2022-09-12	15:59:09	0.537977	2.39303	179.891	FALSE	0
2022-09-12	15:59:09	0.518435	2.3061	192.768	FALSE	0
2022-09-12	15:59:10	0.902201	4.01317	183.904	FALSE	0
2022-09-12	15:59:10	0.877214	3.90202	196.67	FALSE	0
2022-09-12	15:59:10	0.572277	2.5456	186.45	FALSE	0
2022-09-12	15:59:10	0.640064	2.84713	199.517	FALSE	0
2022-09-12	15:59:11	0.270445	1.20299	187.653	FALSE	0
2022-09-12	15:59:11	0.491769	2.18749	201.705	FALSE	0
2022-09-12	15:59:11	0.182812	0.813184	188.466	FALSE	0
2022-09-12	15:59:12	0.36958	1.64397	203.349	FALSE	0
2022-09-12	15:59:12	0.1793	0.797562	189.263	FALSE	0
2022-09-12	15:59:12	0.371514	1.65257	205.001	FALSE	0
2022-09-12	15:59:12	0.24785	1.10249	190.366	FALSE	0
2022-09-12	15:59:13	0.399046	1.77504	206.776	FALSE	0
2022-09-12	15:59:13	0.315738	1.40447	191.77	FALSE	0
2022-09-12	15:59:13	0.35126	1.56247	208.339	FALSE	0
2022-09-12	15:59:13	0.245051	1.09004	192.86	FALSE	0
2022-09-12	15:59:14	0.087392	0.388737	208.728	FALSE	0
2022-09-12	15:59:14	0.113346	0.504186	193.365	FALSE	0
2022-09-12	15:59:14	-0.153524	-0.682905	208.728	FALSE	0
2022-09-12	15:59:14	-0.308282	-1.3713	193.365	FALSE	0
2022-09-12	15:59:15	-0.565381	-2.51493	208.728	FALSE	0
2022-09-12	15:59:15	-0.756933	-3.36699	193.365	FALSE	0
2022-09-12	15:59:15	-0.566857	-2.52149	208.728	FALSE	0
2022-09-12	15:59:16	-0.447519	-1.99065	193.365	FALSE	0
2022-09-12	15:59:16	0.242507	1.07872	209.806	FALSE	0
2022-09-12	15:59:16	0.762048	3.38974	196.754	FALSE	0
2022-09-12	15:59:16	0.817621	3.63694	213.443	FALSE	0
2022-09-12	15:59:17	0.684898	3.04656	199.801	FALSE	0
2022-09-12	15:59:17	0.57757	2.56915	216.012	FALSE	0
2022-09-12	15:59:17	0.457672	2.03582	201.837	FALSE	0
2022-09-12	15:59:17	0.452532	2.01295	218.025	FALSE	0
2022-09-12	15:59:18	0.847188	3.76846	205.605	FALSE	0
2022-09-12	15:59:18	0.478181	2.12704	220.152	FALSE	0
2022-09-12	15:59:18	0.638435	2.83989	208.445	FALSE	0
2022-09-12	15:59:18	0.325	1.44566	221.598	FALSE	0
2022-09-12	15:59:19	1.12831	5.01895	213.464	FALSE	0
2022-09-12	15:59:19	0.325356	1.44725	223.045	FALSE	0
2022-09-12	15:59:19	0.389987	1.73474	215.199	FALSE	0
2022-09-12	15:59:20	0.495178	2.20265	225.248	FALSE	0
2022-09-12	15:59:20	0.137825	0.613073	215.812	FALSE	0
2022-09-12	15:59:20	0.430445	1.91471	227.163	FALSE	0
2022-09-12	15:59:20	0.140624	0.625524	216.437	FALSE	0
2022-09-12	15:59:21	0.392227	1.7447	228.907	FALSE	0
2022-09-12	15:59:21	0.0589443	0.262196	216.699	FALSE	0
2022-09-12	15:59:21	0.253092	1.1258	230.033	FALSE	0
2022-09-12	15:59:21	0.0323284	0.143803	216.843	FALSE	0
2022-09-12	15:59:22	0.250394	1.1138	231.147	FALSE	0
2022-09-12	15:59:22	0.383015	1.70373	218.547	FALSE	0
2022-09-12	15:59:22	1.47966	6.58182	237.729	FALSE	0
2022-09-12	15:59:23	0.487188	2.16711	220.714	FALSE	0
2022-09-12	15:59:23	0.200166	0.890378	238.619	FALSE	0
2022-09-12	15:59:23	0.212481	0.945158	221.659	FALSE	0
2022-09-12	15:59:23	0.215026	0.956479	239.576	FALSE	0
2022-09-12	15:59:24	0.187952	0.836048	222.495	FALSE	0
2022-09-12	15:59:24	0.365102	1.62405	241.2	FALSE	0
2022-09-12	15:59:24	0.29014	1.2906	223.786	FALSE	0
2022-09-12	15:59:24	0.179199	0.797113	241.997	FALSE	0
2022-09-12	15:59:25	0.384135	1.70871	225.495	FALSE	0
2022-09-12	15:59:25	0.389224	1.73135	243.728	FALSE	0
2022-09-12	15:59:25	0.26159	1.1636	226.658	FALSE	0
2022-09-12	15:59:25	0.304033	1.3524	245.081	FALSE	0
2022-09-12	15:59:26	0.207596	0.923429	227.582	FALSE	0
2022-09-12	15:59:26	0.384695	1.7112	246.792	FALSE	0
2022-09-12	15:59:26	0.390802	1.73837	229.32	FALSE	0
2022-09-12	15:59:27	0.324949	1.44544	248.237	FALSE	0
2022-09-12	15:59:27	0.309631	1.3773	230.697	FALSE	0
2022-09-12	15:59:27	0.4193	1.86513	250.102	FALSE	0
2022-09-12	15:59:27	0.50556	2.24883	232.946	FALSE	0
2022-09-12	15:59:28	0.25701	1.14323	251.246	FALSE	0
2022-09-12	15:59:28	0.374669	1.6666	234.613	FALSE	0
2022-09-12	15:59:28	0.342557	1.52376	252.769	FALSE	0
2022-09-12	15:59:29	0.375433	1.67	236.283	FALSE	0
2022-09-12	15:59:29	0.432837	1.92535	254.695	FALSE	0
2022-09-12	15:59:29	0.459707	2.04487	238.328	FALSE	0
2022-09-12	15:59:29	0.516399	2.29705	256.992	FALSE	0
2022-09-12	15:59:29	0.615382	2.73734	241.065	FALSE	0
2022-09-12	15:59:30	0.595382	2.64838	259.64	FALSE	0
2022-09-12	15:59:30	0.413244	1.83819	242.903	FALSE	0
2022-09-12	15:59:30	0.481997	2.14402	261.784	FALSE	0
2022-09-12	15:59:31	0.357723	1.59122	244.494	FALSE	0
2022-09-12	15:59:31	-0.0384094	-0.170853	261.784	FALSE	0
2022-09-12	15:59:31	-0.312709	-1.39099	244.494	FALSE	0
2022-09-12	15:59:31	-0.608536	-2.70689	261.784	FALSE	0
2022-09-12	15:59:32	-0.602938	-2.68199	244.494	FALSE	0
2022-09-12	15:59:32	-0.677035	-3.01159	261.784	FALSE	0
2022-09-12	15:59:32	-0.474389	-2.11018	244.494	FALSE	0
2022-09-12	15:59:32	-0.37846	-1.68347	261.784	FALSE	0
2022-09-12	15:59:33	-0.289758	-1.2889	244.494	FALSE	0
2022-09-12	15:59:33	-0.252506	-1.1232	261.784	FALSE	0
2022-09-12	15:59:33	-0.288638	-1.28392	244.494	FALSE	0
2022-09-12	15:59:33	-0.287773	-1.28007	261.784	FALSE	0
2022-09-12	15:59:34	-0.570419	-2.53734	244.494	FALSE	0
2022-09-12	15:59:34	-0.611793	-2.72138	261.784	FALSE	0
2022-09-12	15:59:34	-0.491183	-2.18488	244.494	FALSE	0
2022-09-12	15:59:35	-0.623803	-2.7748	261.784	FALSE	0
2022-09-12	15:59:35	-0.672048	-2.9894	244.494	FALSE	0
2022-09-12	15:59:35	-0.763396	-3.39574	261.784	FALSE	0
2022-09-12	15:59:35	-0.826399	-3.67599	244.494	FALSE	0
2022-09-12	15:59:36	-0.651691	-2.89885	261.784	FALSE	0
2022-09-12	15:59:36	-0.610012	-2.71346	244.494	FALSE	0
2022-09-12	15:59:36	-0.526501	-2.34198	261.784	FALSE	0
2022-09-12	15:59:36	-0.324312	-1.4426	244.494	FALSE	0
2022-09-12	15:59:37	-0.24243	-1.07838	261.784	FALSE	0
2022-09-12	15:59:37	-0.0272644	-0.121278	244.494	FALSE	0
2022-09-12	15:59:37	0.075789	0.337125	262.121	FALSE	0
2022-09-12	15:59:37	-0.190674	-0.848156	244.494	FALSE	0
2022-09-12	15:59:38	-0.234338	-1.04238	262.121	FALSE	0
2022-09-12	15:59:38	-0.331946	-1.47656	244.494	FALSE	0
2022-09-12	15:59:38	-0.708638	-3.15216	262.121	FALSE	0
2022-09-12	15:59:39	-0.493117	-2.19348	244.494	FALSE	0
2022-09-12	15:59:39	-0.26986	-1.20039	262.121	FALSE	0
2022-09-12	15:59:39	-0.127824	-0.568587	244.494	FALSE	0
2022-09-12	15:59:39	-0.13276	-0.590543	262.121	FALSE	0
2022-09-12	15:59:40	0.938079	4.17276	248.667	FALSE	0
2022-09-12	15:59:40	0.980776	4.36269	266.484	FALSE	0
2022-09-12	15:59:40	1.65645	7.36822	256.035	FALSE	0
2022-09-12	15:59:40	1.211	5.38677	271.871	FALSE	0
2022-09-12	15:59:41	1.89798	8.44259	264.478	FALSE	0
2022-09-12	15:59:41	1.51177	6.72466	278.595	FALSE	0
2022-09-12	15:59:41	1.10836	4.93021	269.408	FALSE	0
2022-09-12	15:59:41	1.54698	6.88128	285.477	FALSE	0
2022-09-12	15:59:42	0.593499	2.64	272.048	FALSE	0
2022-09-12	15:59:42	1.30877	5.82167	291.298	FALSE	0
2022-09-12	15:59:42	0.623829	2.77492	274.823	FALSE	0
2022-09-12	15:59:43	0.472074	2.09988	293.398	FALSE	0
2022-09-12	15:59:43	0.77014	3.42574	278.249	FALSE	0
2022-09-12	15:59:43	0.226679	1.00831	294.407	FALSE	0
2022-09-12	15:59:43	0.744745	3.31277	281.562	FALSE	0
2022-09-12	15:59:44	0.303931	1.35195	295.759	FALSE	0
2022-09-12	15:59:44	0.665662	2.961	284.523	FALSE	0
2022-09-12	15:59:44	0.331005	1.47238	297.231	FALSE	0
2022-09-12	15:59:44	0.685051	3.04724	287.57	FALSE	0
2022-09-12	15:59:45	0.602354	2.67939	299.91	FALSE	0
2022-09-12	15:59:45	0.641081	2.85166	290.422	FALSE	0
2022-09-12	15:59:45	0.612888	2.72625	302.637	FALSE	0
2022-09-12	15:59:45	0.74841	3.32908	293.751	FALSE	0
2022-09-12	15:59:46	0.704084	3.13191	305.768	FALSE	0
2022-09-12	15:59:46	1.24693	5.54659	299.297	FALSE	0
2022-09-12	15:59:46	0.863015	3.83886	309.607	FALSE	0
2022-09-12	15:59:47	0.535636	2.38262	301.68	FALSE	0
2022-09-12	15:59:47	0.727137	3.23445	312.842	FALSE	0
2022-09-12	15:59:47	0.174313	0.775379	302.455	FALSE	0
2022-09-12	15:59:47	0.380115	1.69083	314.533	FALSE	0
2022-09-12	15:59:48	0.217061	0.965531	303.421	FALSE	0
2022-09-12	15:59:48	0.552634	2.45823	316.991	FALSE	0
2022-09-12	15:59:48	0.14444	0.642498	304.063	FALSE	0
2022-09-12	15:59:48	0.455534	2.02631	319.017	FALSE	0
2022-09-12	15:59:49	0.230598	1.02575	305.089	FALSE	0
2022-09-12	15:59:49	0.455483	2.02608	321.043	FALSE	0
2022-09-12	15:59:49	0.193702	0.861625	305.951	FALSE	0
2022-09-12	15:59:50	0.486985	2.16621	323.209	FALSE	0
2022-09-12	15:59:50	0.306069	1.36146	307.312	FALSE	0
2022-09-12	15:59:50	0.383066	1.70395	324.913	FALSE	0
2022-09-12	15:59:50	0.253244	1.12648	308.439	FALSE	0
2022-09-12	15:59:51	0.409021	1.81941	326.733	FALSE	0
2022-09-12	15:59:51	0.392837	1.74742	310.186	FALSE	0
2022-09-12	15:59:51	0.435178	1.93576	328.669	FALSE	0
2022-09-12	15:59:51	0.392176	1.74448	311.93	FALSE	0
2022-09-12	15:59:52	0.298486	1.32773	329.996	FALSE	0
2022-09-12	15:59:52	0.236654	1.05268	312.983	FALSE	0
2022-09-12	15:59:52	-0.0507249	-0.225635	329.996	FALSE	0
2022-09-12	15:59:52	-0.196475	-0.87396	312.983	FALSE	0
2022-09-12	15:59:53	0.0588425	0.261743	330.258	FALSE	0
2022-09-12	15:59:53	0.0519723	0.231183	313.214	FALSE	0
2022-09-12	15:59:53	0.0532954	0.237069	330.495	FALSE	0
2022-09-12	15:59:54	0.196552	0.874303	314.089	FALSE	0
2022-09-12	15:59:54	0.418079	1.8597	332.355	FALSE	0
2022-09-12	15:59:54	0.418079	1.8597	315.948	FALSE	0
2022-09-12	15:59:54	0.254262	1.13101	333.486	FALSE	0
2022-09-12	15:59:55	0.372888	1.65868	317.607	FALSE	0
2022-09-12	15:59:55	0.317519	1.41239	334.898	FALSE	0
2022-09-12	15:59:55	0.530802	2.36111	319.968	FALSE	0
2022-09-12	15:59:55	0.315891	1.40515	336.303	FALSE	0
2022-09-12	15:59:56	0.358283	1.59371	321.562	FALSE	0
2022-09-12	15:59:56	0.313295	1.3936	337.697	FALSE	0
2022-09-12	15:59:56	0.326985	1.45449	323.016	FALSE	0
2022-09-12	15:59:56	0.231667	1.0305	338.727	FALSE	0
2022-09-12	15:59:57	0.375026	1.66819	324.684	FALSE	0
2022-09-12	15:59:57	0.380624	1.69309	340.42	FALSE	0
2022-09-12	15:59:57	0.391565	1.74176	326.426	FALSE	0
2022-09-12	15:59:58	0.22897	1.0185	341.439	FALSE	0
2022-09-12	15:59:58	0.198435	0.882679	327.309	FALSE	0
2022-09-12	15:59:58	-0.0457377	-0.20345	341.439	FALSE	0
2022-09-12	15:59:58	-0.319122	-1.41952	327.309	FALSE	0
2022-09-12	15:59:59	-0.180852	-0.804466	341.439	FALSE	0
2022-09-12	15:59:59	-0.0679768	-0.302374	327.309	FALSE	0
2022-09-12	15:59:59	0.139657	0.621222	342.06	FALSE	0
2022-09-12	15:59:59	0.294008	1.30781	328.617	FALSE	0
2022-09-12	16:00:00	0.566476	2.5198	344.58	FALSE	0
2022-09-12	16:00:00	0.366934	1.6322	330.249	FALSE	0
2022-09-12	16:00:00	0.216705	0.963947	345.544	FALSE	0
2022-09-12	16:00:00	0.328308	1.46038	331.709	FALSE	0
2022-09-12	16:00:01	0.214618	0.954664	346.499	FALSE	0
2022-09-12	16:00:01	0.36159	1.60842	333.318	FALSE	0
2022-09-12	16:00:01	0.0517687	0.230278	346.729	FALSE	0
2022-09-12	16:00:02	-0.130012	-0.578319	333.318	FALSE	0
2022-09-12	16:00:02	-0.141615	-0.629932	346.729	FALSE	0
2022-09-12	16:00:02	0.217163	0.965984	334.284	FALSE	0
2022-09-12	16:00:02	0.0800129	0.355913	347.085	FALSE	0
2022-09-12	16:00:03	0.349377	1.5541	335.838	FALSE	0
2022-09-12	16:00:03	0.104237	0.463667	347.548	FALSE	0
2022-09-12	16:00:03	0.41472	1.84476	337.683	FALSE	0
2022-09-12	16:00:03	0.513499	2.28415	349.833	FALSE	0
2022-09-12	16:00:04	0.568766	2.52998	340.213	FALSE	0
2022-09-12	16:00:04	0.618842	2.75273	352.585	FALSE	0
2022-09-12	16:00:04	0.549071	2.44238	342.655	FALSE	0
2022-09-12	16:00:04	0.600216	2.66988	355.255	FALSE	0
2022-09-12	16:00:05	0.906221	4.03105	346.686	FALSE	0
2022-09-12	16:00:05	0.403931	1.79677	357.052	FALSE	0
2022-09-12	16:00:05	0.362557	1.61273	348.299	FALSE	0
2022-09-12	16:00:06	0.420318	1.86966	358.922	FALSE	0
2022-09-12	16:00:06	0.410089	1.82416	350.123	FALSE	0
2022-09-12	16:00:06	0.38729	1.72274	360.644	FALSE	0
2022-09-12	16:00:06	0.352786	1.56926	351.692	FALSE	0
2022-09-12	16:00:07	0.460115	2.04668	362.691	FALSE	0
2022-09-12	16:00:07	0.326476	1.45223	353.144	FALSE	0
2022-09-12	16:00:07	0.469733	2.08947	364.781	FALSE	0
2022-09-12	16:00:07	0.28958	1.28811	354.432	FALSE	0
2022-09-12	16:00:08	0.407646	1.81329	366.594	FALSE	0
2022-09-12	16:00:08	0.388308	1.72727	356.16	FALSE	0
2022-09-12	16:00:08	0.480267	2.13632	368.73	FALSE	0
2022-09-12	16:00:08	0.398588	1.773	357.933	FALSE	0
2022-09-12	16:00:09	0.621183	2.76315	371.493	FALSE	0
2022-09-12	16:00:09	1.64159	7.30212	365.235	FALSE	0
2022-09-12	16:00:09	1.6621	7.39335	378.887	FALSE	0
2022-09-12	16:00:10	0.996247	4.43151	369.666	FALSE	0
2022-09-12	16:00:10	0.565611	2.51595	381.403	FALSE	0
2022-09-12	16:00:10	0.606425	2.6975	372.364	FALSE	0
2022-09-12	16:00:10	4.68922	20.8586	402.261	1	1
2022-09-12	16:00:11	0.401336	1.78522	374.149	FALSE	1
2022-09-12	16:00:11	0.335433	1.49207	403.753	FALSE	1
2022-09-12	16:00:11	0.349122	1.55296	375.702	FALSE	1
2022-09-12	16:00:11	0.28673	1.27543	405.029	FALSE	1
2022-09-12	16:00:12	0.329224	1.46445	377.166	FALSE	1
2022-09-12	16:00:12	0.252481	1.12309	406.152	FALSE	1
2022-09-12	16:00:12	0.256756	1.1421	378.309	FALSE	1
2022-09-12	16:00:13	0.423728	1.88483	408.037	FALSE	1
2022-09-12	16:00:13	0.272532	1.21228	379.521	FALSE	1
2022-09-12	16:00:13	0.70098	3.1181	411.155	FALSE	1
2022-09-12	16:00:13	0.474517	2.11075	381.632	FALSE	1
2022-09-12	16:00:14	0.515585	2.29343	413.448	FALSE	1
2022-09-12	16:00:14	0.448613	1.99552	383.627	FALSE	1
2022-09-12	16:00:14	0.41243	1.83457	415.283	FALSE	1
2022-09-12	16:00:14	0.44902	1.99733	385.624	FALSE	1
2022-09-12	16:00:15	0.227952	1.01398	416.297	FALSE	1
2022-09-12	16:00:15	0.61416	2.73191	388.356	FALSE	1
2022-09-12	16:00:15	0.267239	1.18873	417.485	FALSE	1
2022-09-12	16:00:15	0.461743	2.05393	390.41	FALSE	1
2022-09-12	16:00:16	0.290547	1.29241	418.778	FALSE	1
2022-09-12	16:00:16	0.400471	1.78138	392.192	FALSE	1
2022-09-12	16:00:16	0.157825	0.702037	419.48	FALSE	1
2022-09-12	16:00:17	0.429936	1.91244	394.104	FALSE	1
2022-09-12	16:00:17	0.242354	1.07804	420.558	FALSE	1
2022-09-12	16:00:17	0.370547	1.64827	395.752	FALSE	1
2022-09-12	16:00:17	0.173143	0.770175	421.328	FALSE	1
2022-09-12	16:00:18	0.437417	1.94572	397.698	FALSE	1
2022-09-12	16:00:18	0.309784	1.37798	422.706	FALSE	1
2022-09-12	16:00:18	0.382812	1.70282	399.401	FALSE	1
2022-09-12	16:00:18	0.264491	1.17651	423.883	FALSE	1
2022-09-12	16:00:19	0.429326	1.90973	401.311	FALSE	1
2022-09-12	16:00:19	0.313499	1.39451	425.277	FALSE	1
2022-09-12	16:00:19	0.335636	1.49298	402.804	FALSE	1
2022-09-12	16:00:19	0.358842	1.5962	426.873	FALSE	1
2022-09-12	16:00:20	0.368664	1.63989	404.444	FALSE	1
2022-09-12	16:00:20	0.509326	2.26558	429.139	FALSE	1
2022-09-12	16:00:20	0.374568	1.66615	406.11	FALSE	1
2022-09-12	16:00:21	0.567086	2.52251	431.661	FALSE	1
2022-09-12	16:00:21	0.48673	2.16507	408.275	FALSE	1
2022-09-12	16:00:21	0.413346	1.83865	433.5	FALSE	1
2022-09-12	16:00:21	0.413601	1.83978	410.115	FALSE	1
2022-09-12	16:00:22	0.448257	1.99394	435.494	FALSE	1
2022-09-12	16:00:22	0.392328	1.74515	411.86	FALSE	1
2022-09-12	16:00:22	0.535331	2.38126	437.875	FALSE	1
2022-09-12	16:00:22	0.451056	2.00639	413.866	FALSE	1
2022-09-12	16:00:23	0.479046	2.13089	440.006	FALSE	1
2022-09-12	16:00:23	0.471056	2.09535	415.961	FALSE	1
2022-09-12	16:00:23	0.405865	1.80537	441.811	FALSE	1
2022-09-12	16:00:23	0.385305	1.71391	417.675	FALSE	1
2022-09-12	16:00:24	0.370802	1.6494	443.461	FALSE	1
2022-09-12	16:00:24	0.454364	2.0211	419.696	FALSE	1
2022-09-12	16:00:24	0.400216	1.78024	445.241	FALSE	1
2022-09-12	16:00:25	0.471107	2.09558	421.792	FALSE	1
2022-09-12	16:00:25	0.455178	2.02472	447.266	FALSE	1
2022-09-12	16:00:25	0.450191	2.00254	423.795	FALSE	1
2022-09-12	16:00:25	0.44841	1.99462	449.26	FALSE	1
2022-09-12	16:00:26	0.458842	2.04102	425.836	FALSE	1
2022-09-12	16:00:26	0.480573	2.13768	451.398	FALSE	1
2022-09-12	16:00:26	0.491667	2.18703	428.023	FALSE	1
2022-09-12	16:00:26	0.529733	2.35636	453.755	FALSE	1
2022-09-12	16:00:27	0.378435	1.68335	429.706	FALSE	1
2022-09-12	16:00:27	0.480776	2.13859	455.893	FALSE	1
2022-09-12	16:00:27	0.473855	2.1078	431.814	FALSE	1
2022-09-12	16:00:27	0.332176	1.47759	457.371	FALSE	1
2022-09-12	16:00:28	0.294975	1.31211	433.126	FALSE	1
2022-09-12	16:00:28	0.305458	1.35874	458.729	FALSE	1
2022-09-12	16:00:28	0.385713	1.71573	434.842	FALSE	1
2022-09-12	16:00:29	0.387646	1.72433	460.454	FALSE	1
2022-09-12	16:00:29	0.411412	1.83004	436.672	FALSE	1
2022-09-12	16:00:29	0.429122	1.90882	462.363	FALSE	1
2022-09-12	16:00:29	0.381896	1.69875	438.37	FALSE	1
2022-09-12	16:00:30	0.406934	1.81012	464.173	FALSE	1
2022-09-12	16:00:30	0.409733	1.82257	440.193	FALSE	1
2022-09-12	16:00:30	0.376043	1.67271	465.845	FALSE	1
2022-09-12	16:00:30	0.461743	2.05393	442.247	FALSE	1
2022-09-12	16:00:31	0.661845	2.94402	468.789	FALSE	1
2022-09-12	16:00:31	1.93564	8.61011	450.857	FALSE	1
2022-09-12	16:00:31	2.32189	10.3282	479.118	FALSE	1
2022-09-12	16:00:31	2.39477	10.6524	461.509	FALSE	1
2022-09-12	16:00:32	1.54927	6.89146	486.009	FALSE	1
2022-09-12	16:00:32	0.519097	2.30905	463.818	FALSE	1
2022-09-12	16:00:32	0.421438	1.87464	487.884	FALSE	1
2022-09-12	16:00:33	0.21757	0.967795	464.786	FALSE	1
2022-09-12	16:00:33	0.0119214	0.0530288	487.937	FALSE	1
2022-09-12	16:00:33	-0.241972	-1.07634	464.786	FALSE	1
2022-09-12	16:00:33	-0.288435	-1.28302	487.937	FALSE	1
2022-09-12	16:00:34	-0.279173	-1.24182	464.786	FALSE	1
2022-09-12	16:00:34	-0.343091	-1.52614	487.937	FALSE	1
2022-09-12	16:00:34	-0.187875	-0.835706	464.786	FALSE	1
2022-09-12	16:00:34	-0.0740837	-0.329539	487.937	FALSE	1
2022-09-12	16:00:35	0.0621503	0.276457	465.063	FALSE	1
2022-09-12	16:00:35	0.29869	1.32863	489.265	FALSE	1
2022-09-12	16:00:35	0.336145	1.49524	466.558	FALSE	1
2022-09-12	16:00:36	0.261081	1.16134	490.427	FALSE	1
2022-09-12	16:00:36	0.279606	1.24374	467.802	FALSE	1
2022-09-12	16:00:36	0.267341	1.18919	491.616	FALSE	1
2022-09-12	16:00:36	0.0913106	0.406168	468.208	FALSE	1
2022-09-12	16:00:37	0.249071	1.10792	492.724	FALSE	1
2022-09-12	16:00:37	0.18902	0.840799	469.049	FALSE	1
2022-09-12	16:00:37	0.313244	1.39337	494.117	FALSE	1
2022-09-12	16:00:37	0.34271	1.52444	470.573	FALSE	1
2022-09-12	16:00:38	0.371667	1.65325	495.77	FALSE	1
2022-09-12	16:00:38	0.270496	1.20322	471.776	FALSE	1
2022-09-12	16:00:38	0.230038	1.02326	496.794	FALSE	1
2022-09-12	16:00:38	0.29472	1.31097	473.087	FALSE	1
2022-09-12	16:00:39	0.316858	1.40945	498.203	FALSE	1
2022-09-12	16:00:39	0.206323	0.917766	474.005	FALSE	1
2022-09-12	16:00:39	0.207748	0.924105	499.127	FALSE	1
2022-09-12	16:00:40	0.339249	1.50905	475.514	FALSE	1
2022-09-12	16:00:40	1.24627	5.54366	504.671	FALSE	1
2022-09-12	16:00:40	0.37416	1.66434	477.178	FALSE	1
2022-09-12	16:00:40	0.393855	1.75195	506.423	FALSE	1
2022-09-12	16:00:41	0.319249	1.42008	478.599	FALSE	1
2022-09-12	16:00:41	0.39869	1.77345	508.196	FALSE	1
2022-09-12	16:00:41	0.389835	1.73406	480.333	FALSE	1
2022-09-12	16:00:41	0.419148	1.86445	510.061	FALSE	1
2022-09-12	16:00:42	0.42388	1.8855	482.218	FALSE	1
2022-09-12	16:00:42	0.449377	1.99892	512.06	FALSE	1
2022-09-12	16:00:42	0.421794	1.87622	484.094	FALSE	1
2022-09-12	16:00:42	0.421947	1.8769	513.937	FALSE	1
2022-09-12	16:00:43	0.44897	1.99711	486.091	FALSE	1
2022-09-12	16:00:43	0.440013	1.95727	515.894	FALSE	1
2022-09-12	16:00:43	0.426323	1.89637	487.988	FALSE	1
2022-09-12	16:00:44	0.452583	2.01318	517.907	FALSE	1
2022-09-12	16:00:44	0.437926	1.94798	489.936	FALSE	1
2022-09-12	16:00:44	0.445305	1.98081	519.888	FALSE	1
2022-09-12	16:00:44	0.443728	1.97379	491.91	FALSE	1
2022-09-12	16:00:45	0.441132	1.96224	521.85	FALSE	1
2022-09-12	16:00:45	0.443575	1.97311	493.883	FALSE	1
2022-09-12	16:00:45	0.424542	1.88845	523.739	FALSE	1
2022-09-12	16:00:45	0.430547	1.91516	495.798	FALSE	1
2022-09-12	16:00:46	0.435738	1.93825	525.677	FALSE	1
2022-09-12	16:00:46	0.425	1.89048	497.688	FALSE	1
2022-09-12	16:00:46	0.447036	1.98851	527.665	FALSE	1
2022-09-12	16:00:46	0.447647	1.99122	499.68	FALSE	1
2022-09-12	16:00:47	0.4364	1.94119	529.607	FALSE	1
2022-09-12	16:00:47	0.426578	1.8975	501.577	FALSE	1
2022-09-12	16:00:47	0.437316	1.94527	531.552	FALSE	1
2022-09-12	16:00:48	0.439911	1.95681	503.534	FALSE	1
2022-09-12	16:00:48	0.423677	1.8846	533.436	FALSE	1
2022-09-12	16:00:48	0.436043	1.93961	505.473	FALSE	1
2022-09-12	16:00:48	0.427341	1.9009	535.337	FALSE	1
2022-09-12	16:00:49	0.443677	1.97356	507.447	FALSE	1
2022-09-12	16:00:49	0.430954	1.91697	537.254	FALSE	1
2022-09-12	16:00:49	0.451616	2.00888	509.456	FALSE	1
2022-09-12	16:00:49	0.465305	2.06977	539.324	FALSE	1
2022-09-12	16:00:50	0.483015	2.14855	511.604	FALSE	1
2022-09-12	16:00:50	0.416501	1.85268	541.177	FALSE	1
2022-09-12	16:00:50	0.173143	0.770175	512.375	FALSE	1
2022-09-12	16:00:50	0.170496	0.7584	541.935	FALSE	1
2022-09-12	16:00:51	0.201743	0.897393	513.272	FALSE	1
2022-09-12	16:00:51	1.68281	7.48548	549.421	FALSE	1
2022-09-12	16:00:51	2.96149	13.1733	526.445	FALSE	1
2022-09-12	16:00:52	2.65294	11.8008	561.221	FALSE	1
2022-09-12	16:00:52	1.94006	8.62977	535.075	FALSE	1
2022-09-12	16:00:52	2.52749	11.2428	572.464	FALSE	1
2022-09-12	16:00:52	3.17859	14.139	549.214	1	2
2022-09-12	16:00:53	4.85528	21.5973	594.061	1	3
2022-09-12	16:00:53	3.65085	16.2397	565.454	1	4
2022-09-12	16:00:53	3.38276	15.0472	609.109	1	5
2022-09-12	16:00:53	1.9309	8.58903	574.043	FALSE	5
2022-09-12	16:00:54	4.48703	19.9592	629.068	1	6
2022-09-12	16:00:54	0.791667	3.52149	577.564	FALSE	6
2022-09-12	16:00:54	2.20485	9.80761	638.875	FALSE	6
2022-09-12	16:00:54	2.59452	11.5409	589.105	FALSE	6
2022-09-12	16:00:55	2.62001	11.6543	650.53	FALSE	6
2022-09-12	16:00:55	0.629478	2.80004	591.905	FALSE	6
2022-09-12	16:00:55	1.92302	8.55398	659.084	FALSE	6
2022-09-12	16:00:56	1.29905	5.77843	597.684	FALSE	6
2022-09-12	16:00:56	3.64159	16.1985	675.282	1	7
2022-09-12	16:00:56	1.79365	7.97851	605.662	FALSE	7
2022-09-12	16:00:56	9.47472	42.1454	717.428	1	8
2022-09-12	16:00:57	6.27685	27.9207	633.583	1	9
2022-09-12	16:00:57	1.94586	8.65557	726.083	FALSE	9
2022-09-12	16:00:57	2.14983	9.56287	643.146	FALSE	9
2022-09-12	16:00:57	2.6966	11.995	738.078	FALSE	9
2022-09-12	16:00:58	2.08897	9.29216	652.438	FALSE	9
2022-09-12	16:00:58	2.39747	10.6644	748.743	FALSE	9
2022-09-12	16:00:58	2.18907	9.73742	662.175	FALSE	9
2022-09-12	16:00:59	2.2652	10.0761	758.819	FALSE	9
2022-09-12	16:00:59	2.03111	9.03478	671.21	FALSE	9
2022-09-12	16:00:59	1.93197	8.59379	767.413	FALSE	9
2022-09-12	16:00:59	1.93559	8.60989	679.82	FALSE	9
2022-09-12	16:01:00	1.80561	8.03171	775.444	FALSE	9
2022-09-12	16:01:00	1.81808	8.08718	687.907	FALSE	9
2022-09-12	16:01:00	1.65889	7.37907	782.823	FALSE	9
2022-09-12	16:01:00	1.03574	4.60718	692.514	FALSE	9
2022-09-12	16:01:01	0.560471	2.49309	785.316	FALSE	9
2022-09-12	16:01:01	0.494516	2.19971	694.714	FALSE	9
2022-09-12	16:01:01	0.20902	0.929763	786.246	FALSE	9
2022-09-12	16:01:01	0.0750766	0.333956	695.048	FALSE	9
2022-09-12	16:01:02	0.336705	1.49773	787.744	FALSE	9
2022-09-12	16:01:02	0.868155	3.86173	698.91	FALSE	9
2022-09-12	16:01:02	0.652379	2.90191	790.646	FALSE	9
2022-09-12	16:01:03	0.418333	1.86083	700.771	FALSE	9
2022-09-12	16:01:03	0.34841	1.5498	792.196	FALSE	9
2022-09-12	16:01:03	0.295382	1.31392	702.085	FALSE	9
2022-09-12	16:01:03	0.416501	1.85268	794.048	FALSE	9
2022-09-12	16:01:04	0.394008	1.75263	703.837	FALSE	9
2022-09-12	16:01:04	0.405916	1.8056	795.854	FALSE	9
2022-09-12	16:01:04	0.441081	1.96202	705.799	FALSE	9
2022-09-12	16:01:04	0.438283	1.94957	797.804	FALSE	9
2022-09-12	16:01:05	0.489529	2.17752	707.977	FALSE	9
2022-09-12	16:01:05	0.516756	2.29863	800.102	FALSE	9
2022-09-12	16:01:05	0.404491	1.79926	709.776	FALSE	9
2022-09-12	16:01:05	0.473194	2.10486	802.207	FALSE	9
2022-09-12	16:01:06	0.422252	1.87826	711.654	FALSE	9
2022-09-12	16:01:06	0.392379	1.74538	803.952	FALSE	9
2022-09-12	16:01:06	0.420115	1.86876	713.523	FALSE	9
2022-09-12	16:01:07	0.412939	1.83684	805.789	FALSE	9
2022-09-12	16:01:07	0.409377	1.82099	715.344	FALSE	9
2022-09-12	16:01:07	0.418791	1.86287	807.652	FALSE	9
2022-09-12	16:01:07	0.409631	1.82212	717.166	FALSE	9
2022-09-12	16:01:08	0.394415	1.75444	809.407	FALSE	9
2022-09-12	16:01:08	0.423321	1.88302	719.049	FALSE	9
2022-09-12	16:01:08	0.432583	1.92422	811.331	FALSE	9
2022-09-12	16:01:08	0.426171	1.89569	720.945	FALSE	9
2022-09-12	16:01:09	0.414669	1.84453	813.175	FALSE	9
2022-09-12	16:01:09	0.424084	1.88641	722.831	FALSE	9
2022-09-12	16:01:09	0.435433	1.93689	815.112	FALSE	9
2022-09-12	16:01:09	0.427799	1.90294	724.734	FALSE	9
2022-09-12	16:01:10	0.412023	1.83276	816.945	FALSE	9
2022-09-12	16:01:10	0.416298	1.85178	726.586	FALSE	9
2022-09-12	16:01:10	0.427545	1.90181	818.847	FALSE	9
2022-09-12	16:01:11	0.428053	1.90407	728.49	FALSE	9
2022-09-12	16:01:11	0.444542	1.97741	820.824	FALSE	9
2022-09-12	16:01:11	0.419046	1.864	730.354	FALSE	9
2022-09-12	16:01:11	0.403779	1.79609	822.62	FALSE	9
2022-09-12	16:01:12	0.463473	2.06162	732.416	FALSE	9
2022-09-12	16:01:12	0.389936	1.73451	824.355	FALSE	9
2022-09-12	16:01:12	0.5507	2.44962	734.865	FALSE	9
2022-09-12	16:01:12	1.10556	4.91775	829.273	FALSE	9
2022-09-12	16:01:13	0.769326	3.42212	738.287	FALSE	9
2022-09-12	16:01:13	0.971819	4.32285	833.595	FALSE	9
2022-09-12	16:01:13	0.809529	3.60095	741.888	FALSE	9
2022-09-12	16:01:13	0.857875	3.816	837.411	FALSE	9
2022-09-12	16:01:14	0.832125	3.70146	745.59	FALSE	9
2022-09-12	16:01:14	0.950344	4.22732	841.639	FALSE	9
2022-09-12	16:01:14	0.636552	2.83151	748.421	FALSE	9
2022-09-12	16:01:15	0.479707	2.13383	843.773	FALSE	9
2022-09-12	16:01:15	0.483626	2.15127	750.573	FALSE	9
2022-09-12	16:01:15	0.496145	2.20695	845.979	FALSE	9
2022-09-12	16:01:15	0.546628	2.43151	753.004	FALSE	9
2022-09-12	16:01:16	0.711819	3.16631	849.146	FALSE	9
2022-09-12	16:01:16	1.11508	4.9601	757.964	FALSE	9
2022-09-12	16:01:16	1.22388	5.44406	854.59	FALSE	9
2022-09-12	16:01:16	0.988257	4.39596	762.36	FALSE	9
2022-09-12	16:01:17	0.76668	3.41035	858	FALSE	9
2022-09-12	16:01:17	0.506934	2.25494	764.615	FALSE	9
2022-09-12	16:01:17	0.431667	1.92014	859.92	FALSE	9
2022-09-12	16:01:17	0.370751	1.64917	766.264	FALSE	9
2022-09-12	16:01:18	0.304186	1.35308	861.273	FALSE	9
2022-09-12	16:01:18	0.362863	1.61409	767.878	FALSE	9
2022-09-12	16:01:18	0.164389	0.731235	862.005	FALSE	9
2022-09-12	16:01:19	0.0545676	0.242728	768.121	FALSE	9
2022-09-12	16:01:19	0.343575	1.52829	863.533	FALSE	9
2022-09-12	16:01:19	0.192583	0.856648	768.978	FALSE	9
2022-09-12	16:01:19	0.112481	0.500338	864.033	FALSE	9
2022-09-12	16:01:20	0.0442369	0.196775	769.175	FALSE	9
2022-09-12	16:01:20	-0.247163	-1.09943	864.033	FALSE	9
2022-09-12	16:01:20	-0.256984	-1.14312	769.175	FALSE	9
2022-09-12	16:01:20	0.229936	1.0228	865.056	FALSE	9
2022-09-12	16:01:21	0.972277	4.32488	773.499	FALSE	9
2022-09-12	16:01:21	1.62541	7.23015	872.286	FALSE	9
2022-09-12	16:01:21	2.39899	10.6712	784.171	FALSE	9
2022-09-12	16:01:22	1.05202	4.6796	876.966	FALSE	9
2022-09-12	16:01:22	0.639707	2.84554	787.016	FALSE	9
2022-09-12	16:01:22	0.4707	2.09377	879.06	FALSE	9
2022-09-12	16:01:22	0.794924	3.53598	790.552	FALSE	9
2022-09-12	16:01:23	1.2707	5.65233	884.712	FALSE	9
2022-09-12	16:01:23	3.70897	16.4982	807.05	1	10
2022-09-12	16:01:23	5.00449	22.261	906.973	1	11
2022-09-12	16:01:23	1.87793	8.35341	815.404	FALSE	11
2022-09-12	16:01:24	0.503422	2.23932	909.212	FALSE	11
2022-09-12	16:01:24	0.347036	1.54369	816.947	FALSE	11
2022-09-12	16:01:24	0.288868	1.28494	910.497	FALSE	11
2022-09-12	16:01:24	0.373193	1.66004	818.607	FALSE	11
2022-09-12	16:01:25	0.17528	0.77968	911.277	FALSE	11
2022-09-12	16:01:25	0.0899875	0.400282	819.008	FALSE	11
2022-09-12	16:01:25	-0.039071	-0.173796	911.277	FALSE	11
2022-09-12	16:01:26	-0.378511	-1.68369	819.008	FALSE	11
2022-09-12	16:01:26	-0.161717	-0.71935	911.277	FALSE	11
2022-09-12	16:01:26	-0.279224	-1.24204	819.008	FALSE	11
2022-09-12	16:01:26	-0.224669	-0.999373	911.277	FALSE	11
2022-09-12	16:01:27	-0.290572	-1.29252	819.008	FALSE	11
2022-09-12	16:01:27	-0.439478	-1.95489	911.277	FALSE	11
2022-09-12	16:01:27	-0.274949	-1.22303	819.008	FALSE	11
2022-09-12	16:01:27	-0.342328	-1.52274	911.277	FALSE	11
2022-09-12	16:01:28	-0.113677	-0.505658	819.008	FALSE	11
2022-09-12	16:01:28	-0.356374	-1.58522	911.277	FALSE	11
2022-09-12	16:01:28	-0.110318	-0.490717	819.008	FALSE	11
2022-09-12	16:01:28	-0.232455	-1.03401	911.277	FALSE	11
2022-09-12	16:01:29	-0.0910302	-0.404921	819.008	FALSE	11
2022-09-12	16:01:29	-0.125483	-0.558173	911.277	FALSE	11
2022-09-12	16:01:29	-0.0373407	-0.166099	819.008	FALSE	11
2022-09-12	16:01:30	-0.0935239	-0.416013	911.277	FALSE	11
2022-09-12	16:01:30	0.0932954	0.414997	819.423	FALSE	11
2022-09-12	16:01:30	0.0448984	0.199717	911.477	FALSE	11
2022-09-12	16:01:30	0.147748	0.657213	820.08	FALSE	11
2022-09-12	16:01:31	0.174466	0.77606	912.253	FALSE	11
2022-09-12	16:01:31	0.227494	1.01194	821.092	FALSE	11
2022-09-12	16:01:31	0.286628	1.27498	913.528	FALSE	11
2022-09-12	16:01:31	0.285662	1.27068	822.363	FALSE	11
2022-09-12	16:01:32	0.368308	1.63831	915.166	FALSE	11
2022-09-12	16:01:32	0.648562	2.88493	825.248	FALSE	11
2022-09-12	16:01:32	1.58704	7.05947	922.225	FALSE	11
2022-09-12	16:01:32	0.499198	2.22053	827.468	FALSE	11
2022-09-12	16:01:33	0.717366	3.19099	925.416	FALSE	11
2022-09-12	16:01:33	1.42668	6.34616	833.814	FALSE	11
2022-09-12	16:01:33	1.78322	7.93212	933.348	FALSE	11
2022-09-12	16:01:34	2.00179	8.90436	842.719	FALSE	11
2022-09-12	16:01:34	1.94444	8.64926	941.998	FALSE	11
2022-09-12	16:01:34	1.98464	8.82808	851.547	FALSE	11
2022-09-12	16:01:34	1.77609	7.9004	949.898	FALSE	11
2022-09-12	16:01:35	2.88383	12.8279	864.375	FALSE	11
2022-09-12	16:01:35	4.03166	17.9336	967.832	1	12
2022-09-12	16:01:35	4.68902	20.8577	885.232	1	13
2022-09-12	16:01:35	5.14678	22.8939	990.726	1	14
2022-09-12	16:01:36	4.34006	19.3055	904.538	1	15
2022-09-12	16:01:36	7.1996	32.0253	1022.75	1	16
2022-09-12	16:01:36	5.67299	25.2346	929.772	1	17
2022-09-12	16:01:36	0.184339	0.819977	1023.57	FALSE	17
2022-09-12	16:01:37	0.395687	1.76009	931.532	FALSE	17
2022-09-12	16:01:37	1.67187	7.43681	1031.01	FALSE	17
2022-09-12	16:01:37	0.767341	3.41329	934.946	FALSE	17
2022-09-12	16:01:38	0.724186	3.22132	1034.23	FALSE	17
2022-09-12	16:01:38	0.722354	3.21318	938.159	FALSE	17
2022-09-12	16:01:38	0.725356	3.22653	1037.46	FALSE	17
2022-09-12	16:01:38	0.726629	3.23219	941.391	FALSE	17
2022-09-12	16:01:39	0.725356	3.22653	1040.68	FALSE	17
2022-09-12	16:01:39	0.726476	3.23151	944.623	FALSE	17
2022-09-12	16:01:39	0.721488	3.20932	1043.89	FALSE	17
2022-09-12	16:01:39	0.721336	3.20865	947.831	FALSE	17
2022-09-12	16:01:40	0.730496	3.24939	1047.14	FALSE	17
2022-09-12	16:01:40	0.179911	0.80028	948.631	FALSE	17
2022-09-12	16:01:40	0.176654	0.785792	1047.93	FALSE	17
2022-09-12	16:01:40	0.218333	0.971189	949.603	FALSE	17
2022-09-12	16:01:41	0.286425	1.27408	1049.2	FALSE	17
2022-09-12	16:01:41	0.300725	1.33768	950.94	FALSE	17
2022-09-12	16:01:41	1.71879	7.64552	1056.85	FALSE	17
2022-09-12	16:01:42	1.34128	5.96628	956.907	FALSE	17
2022-09-12	16:01:42	1.71462	7.62697	1064.47	FALSE	17
2022-09-12	16:01:42	0.559555	2.48901	959.396	FALSE	17
2022-09-12	16:01:42	0.652684	2.90327	1067.38	FALSE	17
2022-09-12	16:01:43	0.692532	3.08052	962.476	FALSE	17
2022-09-12	16:01:43	0.542863	2.41476	1069.79	FALSE	17
2022-09-12	16:01:43	0.405509	1.80379	964.28	FALSE	17
2022-09-12	16:01:43	2.97055	13.2136	1083	FALSE	17
2022-09-12	16:01:44	5.70281	25.3672	989.647	1	18
2022-09-12	16:01:44	5.92291	26.3463	1109.35	1	19
2022-09-12	16:01:44	3.76052	16.7275	1006.37	1	20
2022-09-12	16:01:45	5.3907	23.9789	1133.33	1	21
2022-09-12	16:01:45	4.01609	17.8644	1024.24	1	22
2022-09-12	16:01:45	4.41721	19.6486	1152.98	1	23
2022-09-12	16:01:45	6.28973	27.978	1052.22	1	24
2022-09-12	16:01:46	9.40149	41.8197	1194.8	1	25
2022-09-12	16:01:46	4.67716	20.8049	1073.02	1	26
2022-09-12	16:01:46	3.52184	15.6658	1210.46	1	27
2022-09-12	16:01:46	0.848155	3.77276	1076.79	FALSE	27
2022-09-12	16:01:47	1.4934	6.64294	1217.11	FALSE	27
2022-09-12	16:01:47	0.784186	3.48822	1080.28	FALSE	27
2022-09-12	16:01:47	1.40973	6.27076	1223.38	FALSE	27
2022-09-12	16:01:47	0.876349	3.89818	1084.18	FALSE	27
2022-09-12	16:01:48	0.729987	3.24713	1226.63	FALSE	27
2022-09-12	16:01:48	0.461031	2.05076	1086.23	FALSE	27
2022-09-12	16:01:48	0.542914	2.41499	1229.04	FALSE	27
2022-09-12	16:01:49	0.786476	3.4984	1089.73	FALSE	27
2022-09-12	16:01:49	0.604033	2.68686	1231.73	FALSE	27
2022-09-12	16:01:49	0.636705	2.83219	1092.56	FALSE	27
2022-09-12	16:01:49	0.977774	4.34933	1236.08	FALSE	27
2022-09-12	16:01:50	0.882201	3.92421	1096.49	FALSE	27
2022-09-12	16:01:50	0.791972	3.52285	1239.6	FALSE	27
2022-09-12	16:01:50	0.940674	4.18431	1100.67	FALSE	27
2022-09-12	16:01:50	0.599351	2.66603	1242.27	FALSE	27
2022-09-12	16:01:51	0.671616	2.98748	1103.66	FALSE	27
2022-09-12	16:01:51	0.818537	3.64102	1245.91	FALSE	27
2022-09-12	16:01:51	2.99004	13.3003	1116.96	FALSE	27
2022-09-12	16:01:51	5.14255	22.8751	1268.78	1	28
2022-09-12	16:01:52	7.94001	35.3188	1152.28	1	29
2022-09-12	16:01:52	8.28724	36.8633	1305.64	1	30
2022-09-12	16:01:52	6.38963	28.4224	1180.7	1	31
2022-09-12	16:01:53	3.42902	15.253	1320.9	1	32
2022-09-12	16:01:53	1.9448	8.65086	1189.35	FALSE	32
2022-09-12	16:01:53	2.79609	12.4376	1333.34	FALSE	32
2022-09-12	16:01:53	1.75635	7.8126	1197.16	FALSE	32
2022-09-12	16:01:54	2.43874	10.848	1344.18	FALSE	32
2022-09-12	16:01:54	3.77976	16.8131	1213.98	1	33
2022-09-12	16:01:54	4.49691	20.0032	1364.19	1	34
2022-09-12	16:01:54	1.23594	5.49771	1219.47	FALSE	34
2022-09-12	16:01:55	0.456094	2.0288	1366.21	FALSE	34
2022-09-12	16:01:55	0.365458	1.62563	1221.1	FALSE	34
2022-09-12	16:01:55	0.365611	1.62631	1367.84	FALSE	34
2022-09-12	16:01:55	0.813702	3.61951	1224.72	FALSE	34
2022-09-12	16:01:56	3.17131	14.1066	1381.95	1	35
2022-09-12	16:01:56	3.19701	14.2209	1238.94	1	36
2022-09-12	16:01:56	3.97676	17.6894	1399.64	1	37
2022-09-12	16:01:57	3.72988	16.5913	1255.53	1	38
2022-09-12	16:01:57	2.82826	12.5807	1412.22	FALSE	38
2022-09-12	16:01:57	0.471514	2.09739	1257.63	FALSE	38
2022-09-12	16:01:57	0.0589952	0.262422	1412.48	FALSE	38
2022-09-12	16:01:58	0.180929	0.804808	1258.43	FALSE	38
2022-09-12	16:01:58	-0.0826333	-0.367569	1412.48	FALSE	38
2022-09-12	16:01:58	0.053957	0.240012	1258.67	FALSE	38
2022-09-12	16:01:58	2.42184	10.7728	1423.25	FALSE	38
2022-09-12	16:01:59	2.628	11.6899	1270.36	FALSE	38
2022-09-12	16:01:59	3.85854	17.1636	1440.42	1	39
2022-09-12	16:01:59	0.076756	0.341426	1270.71	FALSE	39
2022-09-12	16:01:59	-0.0835493	-0.371644	1440.42	FALSE	39
2022-09-12	16:02:00	-0.256526	-1.14108	1270.71	FALSE	39
2022-09-12	16:02:00	-0.702633	-3.12545	1440.42	FALSE	39
2022-09-12	16:02:00	-0.722582	-3.21419	1270.71	FALSE	39
2022-09-12	16:02:01	-0.803244	-3.57299	1440.42	FALSE	39
2022-09-12	16:02:01	-0.908333	-4.04045	1270.71	FALSE	39
2022-09-12	16:02:01	-0.798256	-3.5508	1440.42	FALSE	39
2022-09-12	16:02:01	-0.807773	-3.59314	1270.71	FALSE	39
2022-09-12	16:02:02	-0.776475	-3.45392	1440.42	FALSE	39
2022-09-12	16:02:02	-0.71276	-3.1705	1270.71	FALSE	39
2022-09-12	16:02:02	-0.704821	-3.13518	1440.42	FALSE	39
2022-09-12	16:02:02	-0.658511	-2.92919	1270.71	FALSE	39
2022-09-12	16:02:03	-0.628587	-2.79608	1440.42	FALSE	39
2022-09-12	16:02:03	-0.548638	-2.44045	1270.71	FALSE	39
2022-09-12	16:02:03	-0.646551	-2.87599	1440.42	FALSE	39
2022-09-12	16:02:03	-0.696679	-3.09897	1270.71	FALSE	39
2022-09-12	16:02:04	-0.650216	-2.89229	1440.42	FALSE	39
2022-09-12	16:02:04	-0.446043	-1.98409	1270.71	FALSE	39
2022-09-12	16:02:04	-0.120191	-0.534634	1440.42	FALSE	39
2022-09-12	16:02:05	0.227952	1.01398	1271.72	FALSE	39
2022-09-12	16:02:05	0.238995	1.0631	1441.48	FALSE	39
2022-09-12	16:02:05	0.335891	1.49411	1273.21	FALSE	39
2022-09-12	16:02:05	1.00541	4.47226	1445.95	FALSE	39
2022-09-12	16:02:06	0.909326	4.04486	1277.26	FALSE	39
2022-09-12	16:02:06	0.992074	4.41294	1450.37	FALSE	39
2022-09-12	16:02:06	0.911565	4.05482	1281.31	FALSE	39
2022-09-12	16:02:06	0.80388	3.57582	1453.94	FALSE	39
2022-09-12	16:02:07	0.797316	3.54662	1284.86	FALSE	39
2022-09-12	16:02:07	0.836654	3.7216	1457.66	FALSE	39
2022-09-12	16:02:07	0.595534	2.64905	1287.51	FALSE	39
2022-09-12	16:02:07	0.481947	2.1438	1459.81	FALSE	39
2022-09-12	16:02:08	0.378893	1.68539	1289.19	FALSE	39
2022-09-12	16:02:08	0.297265	1.32229	1461.13	FALSE	39
2022-09-12	16:02:08	0.290853	1.29377	1290.49	FALSE	39
2022-09-12	16:02:09	0.628664	2.79642	1463.93	FALSE	39
2022-09-12	16:02:09	1.34429	5.97967	1296.47	FALSE	39
2022-09-12	16:02:09	1.76994	7.87305	1471.8	FALSE	39
2022-09-12	16:02:09	2.29268	10.1983	1306.67	FALSE	39
2022-09-12	16:02:10	1.98673	8.83737	1480.64	FALSE	39
2022-09-12	16:02:10	1.79854	8.00027	1314.67	FALSE	39
2022-09-12	16:02:10	1.70256	7.57333	1488.21	FALSE	39
2022-09-12	16:02:10	1.95762	8.70789	1323.37	FALSE	39
2022-09-12	16:02:11	2.01681	8.97117	1497.18	FALSE	39
2022-09-12	16:02:11	1.90607	8.47858	1331.85	FALSE	39
2022-09-12	16:02:11	0.8307	3.69512	1500.88	FALSE	39
2022-09-12	16:02:12	0.386527	1.71935	1333.57	FALSE	39
2022-09-12	16:02:12	0.29986	1.33384	1502.21	FALSE	39
2022-09-12	16:02:12	0.605916	2.69524	1336.27	FALSE	39
2022-09-12	16:02:12	0.870242	3.87101	1506.08	FALSE	39
2022-09-12	16:02:13	0.352888	1.56972	1337.84	FALSE	39
2022-09-12	16:02:13	0.169275	0.752969	1506.83	FALSE	39
2022-09-12	16:02:13	0.00662877	0.0294861	1337.87	FALSE	39
2022-09-12	16:02:13	0.044186	0.196548	1507.03	FALSE	39
2022-09-12	16:02:14	0.0972648	0.432653	1338.3	FALSE	39
2022-09-12	16:02:14	0.210293	0.935425	1507.96	FALSE	39
2022-09-12	16:02:14	0.27355	1.21681	1339.52	FALSE	39
2022-09-12	16:02:14	0.302659	1.34629	1509.31	FALSE	39
2022-09-12	16:02:15	0.798588	3.55228	1343.07	FALSE	39
2022-09-12	16:02:15	1.58739	7.06103	1516.37	FALSE	39
2022-09-12	16:02:15	2.43533	10.8328	1353.9	FALSE	39
2022-09-12	16:02:16	1.67813	7.46466	1523.84	FALSE	39
2022-09-12	16:02:16	0.829428	3.68946	1357.59	FALSE	39
2022-09-12	16:02:16	0.789376	3.5113	1527.35	FALSE	39
2022-09-12	16:02:16	0.243626	1.0837	1358.67	FALSE	39
2022-09-12	16:02:17	0.486323	2.16326	1529.51	FALSE	39
2022-09-12	16:02:17	0.345763	1.53802	1360.21	FALSE	39
2022-09-12	16:02:17	0.593448	2.63978	1532.15	FALSE	39
2022-09-12	16:02:17	0.330496	1.47011	1361.68	FALSE	39
2022-09-12	16:02:18	0.427545	1.90181	1534.05	FALSE	39
2022-09-12	16:02:18	0.469784	2.08969	1363.77	FALSE	39
2022-09-12	16:02:18	0.479453	2.1327	1536.19	FALSE	39
2022-09-12	16:02:18	0.724237	3.22155	1366.99	FALSE	39
2022-09-12	16:02:19	0.954109	4.24407	1540.43	FALSE	39
2022-09-12	16:02:19	1.62744	7.23918	1374.23	FALSE	39
2022-09-12	16:02:19	1.98378	8.82425	1549.25	FALSE	39
2022-09-12	16:02:20	3.85314	17.1395	1391.37	1	40
2022-09-12	16:02:20	0.82617	3.67497	1552.93	FALSE	40
2022-09-12	16:02:20	1.81151	8.05796	1399.43	FALSE	40
2022-09-12	16:02:20	0.570038	2.53564	1555.46	FALSE	40
2022-09-12	16:02:21	0.654873	2.91301	1402.34	FALSE	40
2022-09-12	16:02:21	0.333041	1.48143	1556.95	FALSE	40
2022-09-12	16:02:21	0.324746	1.44454	1403.79	FALSE	40
2022-09-12	16:02:21	0.222812	0.991112	1557.94	FALSE	40
2022-09-12	16:02:22	0.567137	2.52274	1406.31	FALSE	40
2022-09-12	16:02:22	0.601387	2.67509	1560.61	FALSE	40
2022-09-12	16:02:22	-0.434643	-1.93338	1406.31	FALSE	40
2022-09-12	16:02:22	-0.493575	-2.19552	1560.61	FALSE	40
2022-09-12	16:02:23	-0.561513	-2.49772	1406.31	FALSE	40
2022-09-12	16:02:23	-0.426196	-1.89581	1560.61	FALSE	40
2022-09-12	16:02:23	-0.39958	-1.77741	1406.31	FALSE	40
2022-09-12	16:02:24	-0.441208	-1.96258	1560.61	FALSE	40
2022-09-12	16:02:24	-0.224771	-0.999826	1406.31	FALSE	40
2022-09-12	16:02:24	0.00942772	0.0419364	1560.65	FALSE	40
2022-09-12	16:02:24	1.00525	4.47155	1410.78	FALSE	40
2022-09-12	16:02:25	2.46001	10.9426	1571.6	FALSE	40
2022-09-12	16:02:25	6.78647	30.1876	1440.97	1	41
2022-09-12	16:02:25	3.96495	17.6369	1589.23	1	42
2022-09-12	16:02:25	0.62154	2.76473	1443.73	FALSE	42
2022-09-12	16:02:26	0.406069	1.80628	1591.04	FALSE	42
2022-09-12	16:02:26	5.54973	24.6863	1468.42	1	43
2022-09-12	16:02:26	-0.0782567	-0.348101	1591.04	FALSE	43
2022-09-12	16:02:26	-0.187977	-0.836159	1468.42	FALSE	43
2022-09-12	16:02:27	-0.503753	-2.24079	1591.04	FALSE	43
2022-09-12	16:02:27	-0.550012	-2.44656	1468.42	FALSE	43
2022-09-12	16:02:27	-0.56762	-2.52489	1591.04	FALSE	43
2022-09-12	16:02:28	-0.405788	-1.80503	1468.42	FALSE	43
2022-09-12	16:02:28	-0.405687	-1.80458	1591.04	FALSE	43
2022-09-12	16:02:28	-0.0175443	-0.0780406	1468.42	FALSE	43
2022-09-12	16:02:28	0.00550917	0.0245059	1591.06	FALSE	43
2022-09-12	16:02:29	0.187595	0.83446	1469.25	FALSE	43
2022-09-12	16:02:29	-0.118511	-0.527161	1591.06	FALSE	43
2022-09-12	16:02:29	0.0318195	0.141539	1469.4	FALSE	43
2022-09-12	16:02:29	-0.091132	-0.405373	1591.06	FALSE	43
2022-09-12	16:02:30	0.0846949	0.37674	1469.77	FALSE	43
2022-09-12	16:02:30	-0.0595799	-0.265023	1591.06	FALSE	43
2022-09-12	16:02:30	0.00357532	0.0159037	1469.79	FALSE	43
2022-09-12	16:02:31	-0.0213102	-0.094792	1591.06	FALSE	43
2022-09-12	16:02:31	0.251158	1.1172	1470.91	FALSE	43
2022-09-12	16:02:31	0.199504	0.887434	1591.95	FALSE	43
2022-09-12	16:02:31	0.39131	1.74063	1472.65	FALSE	43
2022-09-12	16:02:32	0.354364	1.57628	1593.53	FALSE	43
2022-09-12	16:02:32	1.30078	5.78613	1478.43	FALSE	43
2022-09-12	16:02:32	1.52607	6.78826	1600.32	FALSE	43
2022-09-12	16:02:32	0.632226	2.81227	1481.25	FALSE	43
2022-09-12	16:02:33	0.405254	1.80265	1602.12	FALSE	43
2022-09-12	16:02:33	0.379707	1.68901	1482.93	FALSE	43
2022-09-12	16:02:33	0.341183	1.51765	1603.64	FALSE	43
2022-09-12	16:02:33	0.342914	1.52535	1484.46	FALSE	43
2022-09-12	16:02:34	0.615585	2.73825	1606.38	FALSE	43
2022-09-12	16:02:34	0.433346	1.92761	1486.39	FALSE	43
2022-09-12	16:02:34	0.389326	1.7318	1608.11	FALSE	43
2022-09-12	16:02:35	0.386069	1.71731	1488.1	FALSE	43
2022-09-12	16:02:35	0.573244	2.5499	1610.66	FALSE	43
2022-09-12	16:02:35	0.506171	2.25155	1490.36	FALSE	43
2022-09-12	16:02:35	0.086985	0.386927	1611.04	FALSE	43
2022-09-12	16:02:36	-0.383753	-1.70701	1490.36	FALSE	43
2022-09-12	16:02:36	-0.621106	-2.7628	1611.04	FALSE	43
2022-09-12	16:02:36	-0.467112	-2.07781	1490.36	FALSE	43
2022-09-12	16:02:36	-0.0481295	-0.21409	1611.04	FALSE	43
2022-09-12	16:02:37	0.105865	0.470909	1490.83	FALSE	43
2022-09-12	16:02:37	0.116043	0.516182	1611.56	FALSE	43
2022-09-12	16:02:37	0.0107	0.0475957	1490.87	FALSE	43
2022-09-12	16:02:37	0.390954	1.73904	1613.3	FALSE	43
2022-09-12	16:02:38	0.0503438	0.223939	1491.1	FALSE	43
2022-09-12	16:02:38	0.181285	0.806392	1614.11	FALSE	43
2022-09-12	16:02:38	0.159351	0.708825	1491.81	FALSE	43
2022-09-12	16:02:39	0.16958	0.754326	1614.86	FALSE	43
2022-09-12	16:02:39	0.224797	0.999942	1492.81	FALSE	43
2022-09-12	16:02:39	0.122608	0.545385	1615.4	FALSE	43
2022-09-12	16:02:39	0.144186	0.641368	1493.45	FALSE	43
2022-09-12	16:02:40	0.220267	0.979792	1616.38	FALSE	43
2022-09-12	16:02:40	0.203473	0.905089	1494.35	FALSE	43
2022-09-12	16:02:40	0.200573	0.892189	1617.28	FALSE	43
2022-09-12	16:02:40	0.21355	0.949913	1495.3	FALSE	43
2022-09-12	16:02:41	0.151718	0.674872	1617.95	FALSE	43
2022-09-12	16:02:41	0.190802	0.848725	1496.15	FALSE	43
2022-09-12	16:02:41	0.422506	1.87939	1619.83	FALSE	43
2022-09-12	16:02:41	0.316858	1.40945	1497.56	FALSE	43
2022-09-12	16:02:42	0.439758	1.95613	1621.79	FALSE	43
2022-09-12	16:02:42	0.461641	2.05347	1499.62	FALSE	43
2022-09-12	16:02:42	0.439402	1.95455	1623.74	FALSE	43
2022-09-12	16:02:43	0.527137	2.34481	1501.96	FALSE	43
2022-09-12	16:02:43	0.421743	1.876	1625.62	FALSE	43
2022-09-12	16:02:43	0.523829	2.3301	1504.29	FALSE	43
2022-09-12	16:02:43	0.472074	2.09988	1627.72	FALSE	43
2022-09-12	16:02:44	0.457367	2.03446	1506.32	FALSE	43
2022-09-12	16:02:44	0.475433	2.11482	1629.83	FALSE	43
2022-09-12	16:02:44	0.396043	1.76168	1508.09	FALSE	43
2022-09-12	16:02:44	0.527086	2.34458	1632.18	FALSE	43
2022-09-12	16:02:45	0.431311	1.91856	1510	FALSE	43
2022-09-12	16:02:45	0.515025	2.29093	1634.47	FALSE	43
2022-09-12	16:02:45	0.470751	2.09399	1512.1	FALSE	43
2022-09-12	16:02:45	0.541489	2.40865	1636.88	FALSE	43
2022-09-12	16:02:46	0.419504	1.86604	1513.96	FALSE	43
2022-09-12	16:02:46	0.450954	2.00593	1638.88	FALSE	43
2022-09-12	16:02:46	0.457112	2.03333	1516	FALSE	43
2022-09-12	16:02:47	0.452481	2.01273	1640.9	FALSE	43
2022-09-12	16:02:47	0.456196	2.02925	1518.03	FALSE	43
2022-09-12	16:02:47	0.347952	1.54776	1642.44	FALSE	43
2022-09-12	16:02:47	0.17416	0.774699	1518.8	FALSE	43
2022-09-12	16:02:48	0.404237	1.79813	1644.24	FALSE	43
2022-09-12	16:02:48	0.312176	1.38862	1520.19	FALSE	43
2022-09-12	16:02:48	0.414211	1.84249	1646.08	FALSE	43
2022-09-12	16:02:48	0.337112	1.49954	1521.69	FALSE	43
2022-09-12	16:02:49	0.377061	1.67724	1647.76	FALSE	43
2022-09-12	16:02:49	0.335229	1.49117	1523.18	FALSE	43
2022-09-12	16:02:49	0.31472	1.39994	1649.16	FALSE	43
2022-09-12	16:02:50	0.371718	1.65348	1524.84	FALSE	43
2022-09-12	16:02:50	0.365204	1.6245	1650.79	FALSE	43
2022-09-12	16:02:50	0.290344	1.29151	1526.13	FALSE	43
2022-09-12	16:02:50	0.251209	1.11743	1651.9	FALSE	43
2022-09-12	16:02:51	0.135891	0.60447	1526.73	FALSE	43
2022-09-12	16:02:51	-0.170063	-0.756474	1651.9	FALSE	43
2022-09-12	16:02:51	-0.484262	-2.15409	1526.73	FALSE	43
2022-09-12	16:02:51	-0.411895	-1.83219	1651.9	FALSE	43
2022-09-12	16:02:52	0.930598	4.13949	1530.87	FALSE	43
2022-09-12	16:02:52	1.31126	5.83275	1657.74	FALSE	43
2022-09-12	16:02:52	1.28225	5.7037	1536.57	FALSE	43
2022-09-12	16:02:52	0.410344	1.82529	1659.56	FALSE	43
2022-09-12	16:02:53	0.322761	1.43571	1538.01	FALSE	43
2022-09-12	16:02:53	0.375331	1.66955	1661.23	FALSE	43
2022-09-12	16:02:53	0.250445	1.11403	1539.12	FALSE	43
2022-09-12	16:02:54	0.162201	0.721502	1661.95	FALSE	43
2022-09-12	16:02:54	0.212328	0.944477	1540.07	FALSE	43
2022-09-12	16:02:54	0.201438	0.896037	1662.85	FALSE	43
2022-09-12	16:02:54	0.203321	0.904412	1540.97	FALSE	43
2022-09-12	16:02:55	0.115077	0.511886	1663.36	FALSE	43
2022-09-12	16:02:55	0.474975	2.11278	1543.09	FALSE	43
2022-09-12	16:02:55	0.24958	1.11018	1664.47	FALSE	43
2022-09-12	16:02:55	0.429428	1.91018	1545	FALSE	43
2022-09-12	16:02:56	0.323422	1.43865	1665.91	FALSE	43
2022-09-12	16:02:56	0.397875	1.76983	1546.77	FALSE	43
2022-09-12	16:02:56	0.424288	1.88732	1667.8	FALSE	43
2022-09-12	16:02:56	0.458537	2.03966	1548.81	FALSE	43
2022-09-12	16:02:57	0.394466	1.75466	1669.55	FALSE	43
2022-09-12	16:02:57	0.433397	1.92784	1550.73	FALSE	43
2022-09-12	16:02:57	0.342201	1.52218	1671.07	FALSE	43
2022-09-12	16:02:58	0.429224	1.90927	1552.64	FALSE	43
2022-09-12	16:02:58	0.487239	2.16734	1673.24	FALSE	43
2022-09-12	16:02:58	0.361387	1.60752	1554.25	FALSE	43
2022-09-12	16:02:58	0.472023	2.09965	1675.34	FALSE	43
2022-09-12	16:02:59	0.307341	1.36711	1555.62	FALSE	43
2022-09-12	16:02:59	0.428563	1.90633	1677.25	FALSE	43
2022-09-12	16:02:59	0.0978756	0.43537	1556.05	FALSE	43
2022-09-12	16:02:59	0.298384	1.32727	1678.57	FALSE	43
2022-09-12	16:03:00	0.103575	0.460722	1556.51	FALSE	43
2022-09-12	16:03:00	0.347596	1.54618	1680.12	FALSE	43
2022-09-12	16:03:00	0.0687152	0.305659	1556.82	FALSE	43
2022-09-12	16:03:00	0.233855	1.04023	1681.16	FALSE	43
2022-09-12	16:03:01	-3.79307e-05	-0.000168723	1556.82	FALSE	43
2022-09-12	16:03:01	-0.0563229	-0.250536	1681.16	FALSE	43
2022-09-12	16:03:01	0.0122776	0.0546132	1556.87	FALSE	43
2022-09-12	16:03:02	-0.100598	-0.44748	1681.16	FALSE	43
2022-09-12	16:03:02	0.103066	0.458458	1557.33	FALSE	43
2022-09-12	16:03:02	0.079962	0.355687	1681.52	FALSE	43
2022-09-12	16:03:02	0.083728	0.372439	1557.7	FALSE	43
2022-09-12	16:03:03	-0.129503	-0.576055	1681.52	FALSE	43
2022-09-12	16:03:03	-0.211285	-0.939838	1557.7	FALSE	43
2022-09-12	16:03:03	0.0940079	0.418166	1681.93	FALSE	43
2022-09-12	16:03:03	0.102201	0.45461	1558.16	FALSE	43
2022-09-12	16:03:04	0.243066	1.08121	1683.01	FALSE	43
2022-09-12	16:03:04	0.0862724	0.383757	1558.54	FALSE	43
2022-09-12	16:03:04	0.379758	1.68924	1684.7	FALSE	43
2022-09-12	16:03:04	0.236756	1.05314	1559.6	FALSE	43
2022-09-12	16:03:05	0.597977	2.65992	1687.36	FALSE	43
2022-09-12	16:03:05	0.157367	0.7	1560.3	FALSE	43
2022-09-12	16:03:05	0.483066	2.14877	1689.51	FALSE	43
2022-09-12	16:03:06	0.200878	0.893546	1561.19	FALSE	43
2022-09-12	16:03:06	0.172176	0.765873	1690.28	FALSE	43
2022-09-12	16:03:06	0.0766032	0.340746	1561.53	FALSE	43
2022-09-12	16:03:06	0.428613	1.90656	1692.19	FALSE	43
2022-09-12	16:03:07	0.292328	1.30033	1562.83	FALSE	43
2022-09-12	16:03:07	0.401692	1.78681	1693.97	FALSE	43
2022-09-12	16:03:07	0.452277	2.01182	1564.84	FALSE	43
2022-09-12	16:03:07	0.460827	2.04985	1696.02	FALSE	43
2022-09-12	16:03:08	0.317621	1.41284	1566.26	FALSE	43
2022-09-12	16:03:08	0.487748	2.1696	1698.19	FALSE	43
2022-09-12	16:03:08	0.380115	1.69083	1567.95	FALSE	43
2022-09-12	16:03:08	0.453193	2.01589	1700.21	FALSE	43
2022-09-12	16:03:09	0.46612	2.07339	1570.02	FALSE	43
2022-09-12	16:03:09	0.330547	1.47034	1701.68	FALSE	43
2022-09-12	16:03:09	0.262405	1.16723	1571.19	FALSE	43
2022-09-12	16:03:10	0.270903	1.20503	1702.88	FALSE	43
2022-09-12	16:03:10	0.290242	1.29105	1572.48	FALSE	43
2022-09-12	16:03:10	0.429529	1.91063	1704.79	FALSE	43
2022-09-12	16:03:10	0.522659	2.32489	1574.8	FALSE	43
2022-09-12	16:03:11	0.213346	0.949006	1705.74	FALSE	43
2022-09-12	16:03:11	0.380064	1.6906	1576.49	FALSE	43
2022-09-12	16:03:11	0.251667	1.11947	1706.86	FALSE	43
2022-09-12	16:03:11	0.442914	1.97017	1578.46	FALSE	43
2022-09-12	16:03:12	0.27757	1.23469	1708.1	FALSE	43
2022-09-12	16:03:12	0.651158	2.89648	1581.36	FALSE	43
2022-09-12	16:03:12	0.267901	1.19168	1709.29	FALSE	43
2022-09-12	16:03:12	0.474618	2.1112	1583.47	FALSE	43
2022-09-12	16:03:13	0.350547	1.5593	1710.85	FALSE	43
2022-09-12	16:03:13	0.498639	2.21805	1585.69	FALSE	43
2022-09-12	16:03:13	0.413346	1.83865	1712.69	FALSE	43
2022-09-12	16:03:14	0.530344	2.35908	1588.05	FALSE	43
2022-09-12	16:03:14	0.430445	1.91471	1714.6	FALSE	43
2022-09-12	16:03:14	0.389122	1.73089	1589.78	FALSE	43
2022-09-12	16:03:14	0.443422	1.97243	1716.57	FALSE	43
2022-09-12	16:03:15	0.472684	2.10259	1591.88	FALSE	43
2022-09-12	16:03:15	0.481489	2.14176	1718.72	FALSE	43
2022-09-12	16:03:15	0.347799	1.54708	1593.43	FALSE	43
2022-09-12	16:03:15	0.567901	2.52614	1721.24	FALSE	43
2022-09-12	16:03:16	0.341132	1.51742	1594.95	FALSE	43
2022-09-12	16:03:16	0.602659	2.68075	1723.92	FALSE	43
2022-09-12	16:03:16	0.467087	2.0777	1597.02	FALSE	43
2022-09-12	16:03:17	0.513346	2.28347	1726.21	FALSE	43
2022-09-12	16:03:17	0.437774	1.94731	1598.97	FALSE	43
2022-09-12	16:03:17	0.409071	1.81963	1728.03	FALSE	43
2022-09-12	16:03:17	0.50841	2.26151	1601.23	FALSE	43
2022-09-12	16:03:18	0.441743	1.96496	1729.99	FALSE	43
2022-09-12	16:03:18	0.634008	2.82019	1604.05	FALSE	43
2022-09-12	16:03:18	0.438995	1.95274	1731.94	FALSE	43
2022-09-12	16:03:18	0.741234	3.29716	1607.35	FALSE	43
2022-09-12	16:03:19	0.346069	1.53938	1733.48	FALSE	43
2022-09-12	16:03:19	0.320115	1.42394	1608.77	FALSE	43
2022-09-12	16:03:19	0.316756	1.40899	1734.89	FALSE	43
2022-09-12	16:03:19	0.467239	2.07837	1610.85	FALSE	43
2022-09-12	16:03:20	1.27899	5.6892	1740.58	FALSE	43
2022-09-12	16:03:20	0.547443	2.43514	1613.29	FALSE	43
2022-09-12	16:03:20	0.522812	2.32557	1742.91	FALSE	43
2022-09-12	16:03:21	0.564949	2.51301	1615.8	FALSE	43
2022-09-12	16:03:21	0.459657	2.04465	1744.95	FALSE	43
2022-09-12	16:03:21	0.291412	1.29626	1617.1	FALSE	43
2022-09-12	16:03:21	0.606069	2.69592	1747.65	FALSE	43
2022-09-12	16:03:22	0.420725	1.87147	1618.97	FALSE	43
2022-09-12	16:03:22	0.546985	2.4331	1750.08	FALSE	43
2022-09-12	16:03:22	0.432277	1.92285	1620.89	FALSE	43
2022-09-12	16:03:22	0.565967	2.51753	1752.6	FALSE	43
2022-09-12	16:03:23	0.450802	2.00526	1622.9	FALSE	43
2022-09-12	16:03:23	0.456756	2.03174	1754.63	FALSE	43
2022-09-12	16:03:23	0.468868	2.08562	1624.98	FALSE	43
2022-09-12	16:03:23	0.464033	2.06411	1756.69	FALSE	43
2022-09-12	16:03:24	0.540013	2.40209	1627.38	FALSE	43
2022-09-12	16:03:24	0.476756	2.12071	1758.81	FALSE	43
2022-09-12	16:03:24	0.494262	2.19858	1629.58	FALSE	43
2022-09-12	16:03:25	0.486221	2.16281	1760.98	FALSE	43
2022-09-12	16:03:25	0.513092	2.28234	1631.86	FALSE	43
2022-09-12	16:03:25	0.691972	3.07803	1764.05	FALSE	43
2022-09-12	16:03:25	0.759911	3.38024	1635.25	FALSE	43
2022-09-12	16:03:26	0.949733	4.2246	1768.28	FALSE	43
2022-09-12	16:03:26	0.606069	2.69592	1637.94	FALSE	43
2022-09-12	16:03:26	0.784033	3.48754	1771.77	FALSE	43
2022-09-12	16:03:26	0.963219	4.28459	1642.23	FALSE	43
2022-09-12	16:03:27	0.853193	3.79517	1775.56	FALSE	43
2022-09-12	16:03:27	0.935534	4.16144	1646.39	FALSE	43
2022-09-12	16:03:27	1.13523	5.04973	1780.61	FALSE	43
2022-09-12	16:03:27	1.08078	4.80753	1651.19	FALSE	43
2022-09-12	16:03:28	0.815127	3.62585	1784.24	FALSE	43
2022-09-12	16:03:28	0.593346	2.63932	1653.83	FALSE	43
2022-09-12	16:03:28	0.417163	1.85562	1786.09	FALSE	43
2022-09-12	16:03:29	0.549835	2.44578	1656.28	FALSE	43
2022-09-12	16:03:29	0.5764	2.56394	1788.66	FALSE	43
2022-09-12	16:03:29	0.641285	2.85256	1659.13	FALSE	43
2022-09-12	16:03:29	0.412176	1.83344	1790.49	FALSE	43
2022-09-12	16:03:30	0.494618	2.20016	1661.33	FALSE	43
2022-09-12	16:03:30	0.505611	2.24906	1792.74	FALSE	43
2022-09-12	16:03:30	0.513855	2.28573	1663.62	FALSE	43
2022-09-12	16:03:30	0.35416	1.57537	1794.31	FALSE	43
2022-09-12	16:03:31	0.444135	1.9756	1665.59	FALSE	43
2022-09-12	16:03:31	0.45014	2.00231	1796.32	FALSE	43
2022-09-12	16:03:31	1.61935	7.20319	1672.8	FALSE	43
2022-09-12	16:03:31	1.18073	5.25212	1801.57	FALSE	43
2022-09-12	16:03:32	0.881387	3.92059	1676.72	FALSE	43
2022-09-12	16:03:32	0.585611	2.60491	1804.17	FALSE	43
2022-09-12	16:03:32	2.22057	9.87754	1686.59	FALSE	43
2022-09-12	16:03:33	0.96042	4.27214	1808.45	FALSE	43
2022-09-12	16:03:33	0.341489	1.51901	1688.11	FALSE	43
2022-09-12	16:03:33	0.90383	4.02042	1812.47	FALSE	43
2022-09-12	16:03:33	0.488104	2.17118	1690.29	FALSE	43
2022-09-12	16:03:34	0.489733	2.17843	1814.65	FALSE	43
2022-09-12	16:03:34	0.382659	1.70214	1691.99	FALSE	43
2022-09-12	16:03:34	0.673957	2.9979	1817.64	FALSE	43
2022-09-12	16:03:34	1.39966	6.22597	1698.21	FALSE	43
2022-09-12	16:03:35	1.52724	6.79347	1824.44	FALSE	43
2022-09-12	16:03:35	2.11905	9.42596	1707.64	FALSE	43
2022-09-12	16:03:35	2.365	10.52	1834.96	FALSE	43
2022-09-12	16:03:35	0.22958	1.02122	1708.66	FALSE	43
2022-09-12	16:03:36	0.145356	0.646573	1835.6	FALSE	43
2022-09-12	16:03:36	0.181641	0.807975	1709.47	FALSE	43
2022-09-12	16:03:36	0.148613	0.66106	1836.26	FALSE	43

## Sheet: Ranger_prong_2022912155818 (2)
Date	Time	Lbs	Total Force x time	Total Time Steps Force >3		**GoPro Fitting: 1547
2022-09-12	15:58:36	0.44673	0.44673	FALSE	0			Total force x time	797.116
2022-09-12	15:58:36	0.62327	1.07	FALSE	0			Total Time Steps Force >3	43
2022-09-12	15:58:36	0.641081	1.71108	FALSE	0
2022-09-12	15:58:37	0.428613	2.13969	FALSE	0
2022-09-12	15:58:37	0.782506	2.9222	FALSE	0
2022-09-12	15:58:37	0.720929	3.64313	FALSE	0
2022-09-12	15:58:37	0.728817	4.37195	FALSE	0
2022-09-12	15:58:38	0.556094	4.92804	FALSE	0
2022-09-12	15:58:38	0.484084	5.41212	FALSE	0
2022-09-12	15:58:38	0.342608	5.75473	FALSE	0
2022-09-12	15:58:38	0.538995	6.29373	FALSE	0
2022-09-12	15:58:39	0.356298	6.65003	FALSE	0
2022-09-12	15:58:39	0.564491	7.21452	FALSE	0
2022-09-12	15:58:39	0.0715142	7.28603	FALSE	0
2022-09-12	15:58:39	0.193804	7.47983	FALSE	0
2022-09-12	15:58:40	0.0865269	7.56636	FALSE	0
2022-09-12	15:58:40	0.457774	8.02414	FALSE	0
2022-09-12	15:58:40	0.635025	8.65916	FALSE	0
2022-09-12	15:58:41	0.512634	9.17179	FALSE	0
2022-09-12	15:58:41	0.874974	10.0468	FALSE	0
2022-09-12	15:58:41	1.14093	11.1877	FALSE	0
2022-09-12	15:58:41	0.503066	11.6908	FALSE	0
2022-09-12	15:58:42	0.462659	12.1534	FALSE	0
2022-09-12	15:58:42	0.365305	12.5187	FALSE	0
2022-09-12	15:58:42	0.288562	12.8073	FALSE	0
2022-09-12	15:58:42	0.444491	13.2518	FALSE	0
2022-09-12	15:58:43	0.411769	13.6636	FALSE	0
2022-09-12	15:58:43	0.675483	14.339	FALSE	0
2022-09-12	15:58:43	0.217214	14.5562	FALSE	0
2022-09-12	15:58:43	0.395942	14.9522	FALSE	0
2022-09-12	15:58:44	0.179504	15.1317	FALSE	0
2022-09-12	15:58:44	0.480725	15.6124	FALSE	0
2022-09-12	15:58:44	0.14215	15.7546	FALSE	0
2022-09-12	15:58:45	0.306527	16.0611	FALSE	0
2022-09-12	15:58:45	0.248664	16.3098	FALSE	0
2022-09-12	15:58:45	0.436654	16.7464	FALSE	0
2022-09-12	15:58:45	0.53416	17.2806	FALSE	0
2022-09-12	15:58:46	0.865153	18.1457	FALSE	0
2022-09-12	15:58:46	0.365814	18.5115	FALSE	0
2022-09-12	15:58:46	0.796654	19.3082	FALSE	0
2022-09-12	15:58:46	0.920827	20.229	FALSE	0
2022-09-12	15:58:47	0.387036	20.6161	FALSE	0
2022-09-12	15:58:47	0.28098	20.897	FALSE	0
2022-09-12	15:58:47	0.212583	21.1096	FALSE	0
2022-09-12	15:58:47	0.218995	21.3286	FALSE	0
2022-09-12	15:58:48	0.134822	21.4634	FALSE	0
2022-09-12	15:58:48	0.413244	21.8767	FALSE	0
2022-09-12	15:58:48	0.307392	22.1841	FALSE	0
2022-09-12	15:58:49	0.781183	22.9653	FALSE	0
2022-09-12	15:58:49	0.660471	23.6257	FALSE	0
2022-09-12	15:58:49	1.13411	24.7598	FALSE	0
2022-09-12	15:58:49	1.30419	26.064	FALSE	0
2022-09-12	15:58:50	1.47966	27.5437	FALSE	0
2022-09-12	15:58:50	1.1023	28.646	FALSE	0
2022-09-12	15:58:50	0.776349	29.4223	FALSE	0
2022-09-12	15:58:50	0.612532	30.0349	FALSE	0
2022-09-12	15:58:51	0.346781	30.3816	FALSE	0
2022-09-12	15:58:51	1.27212	31.6538	FALSE	0
2022-09-12	15:58:51	0.784287	32.4381	FALSE	0
2022-09-12	15:58:51	1.18307	33.6211	FALSE	0
2022-09-12	15:58:52	0.629784	34.2509	FALSE	0
2022-09-12	15:58:52	0.923168	35.1741	FALSE	0
2022-09-12	15:58:52	0.438333	35.6124	FALSE	0
2022-09-12	15:58:53	0.530395	36.1428	FALSE	0
2022-09-12	15:58:53	0.674466	36.8173	FALSE	0
2022-09-12	15:58:53	0.340369	37.1576	FALSE	0
2022-09-12	15:58:53	0.742761	37.9004	FALSE	0
2022-09-12	15:58:54	0.397519	38.2979	FALSE	0
2022-09-12	15:58:54	1.11452	39.4124	FALSE	0
2022-09-12	15:58:54	0.927341	40.3398	FALSE	0
2022-09-12	15:58:54	1.46576	41.8055	FALSE	0
2022-09-12	15:58:55	1.18454	42.9901	FALSE	0
2022-09-12	15:58:55	0.909682	43.8998	FALSE	0
2022-09-12	15:58:55	0.868053	44.7678	FALSE	0
2022-09-12	15:58:56	0.76958	45.5374	FALSE	0
2022-09-12	15:58:56	0.592227	46.1296	FALSE	0
2022-09-12	15:58:56	0.477265	46.6069	FALSE	0
2022-09-12	15:58:56	0.721692	47.3286	FALSE	0
2022-09-12	15:58:57	0.587697	47.9163	FALSE	0
2022-09-12	15:58:57	0.704389	48.6207	FALSE	0
2022-09-12	15:58:57	0.578333	49.199	FALSE	0
2022-09-12	15:58:57	0.924542	50.1235	FALSE	0
2022-09-12	15:58:58	0.656908	50.7805	FALSE	0
2022-09-12	15:58:58	0.714415	51.4949	FALSE	0
2022-09-12	15:58:58	0.666272	52.1611	FALSE	0
2022-09-12	15:58:58	0.584135	52.7453	FALSE	0
2022-09-12	15:58:59	0.729987	53.4753	FALSE	0
2022-09-12	15:58:59	0.429936	53.9052	FALSE	0
2022-09-12	15:58:59	0.442863	54.3481	FALSE	0
2022-09-12	15:59:00	0.308359	54.6564	FALSE	0
2022-09-12	15:59:00	0.673346	55.3298	FALSE	0
2022-09-12	15:59:00	0.568918	55.8987	FALSE	0
2022-09-12	15:59:00	0.622812	56.5215	FALSE	0
2022-09-12	15:59:01	0.588868	57.1104	FALSE	0
2022-09-12	15:59:01	0.636348	57.7467	FALSE	0
2022-09-12	15:59:01	1.01976	58.7665	FALSE	0
2022-09-12	15:59:01	1.10739	59.8739	FALSE	0
2022-09-12	15:59:02	1.82037	61.6942	FALSE	0
2022-09-12	15:59:02	1.37808	63.0723	FALSE	0
2022-09-12	15:59:02	1.61915	64.6915	FALSE	0
2022-09-12	15:59:02	0.740114	65.4316	FALSE	0
2022-09-12	15:59:03	1.25223	66.6838	FALSE	0
2022-09-12	15:59:03	1.10281	67.7866	FALSE	0
2022-09-12	15:59:03	0.563524	68.3501	FALSE	0
2022-09-12	15:59:04	1.22729	69.5774	FALSE	0
2022-09-12	15:59:04	0.417977	69.9954	FALSE	0
2022-09-12	15:59:04	1.31686	71.3123	FALSE	0
2022-09-12	15:59:04	0.5907	71.903	FALSE	0
2022-09-12	15:59:05	2.19253	74.0955	FALSE	0
2022-09-12	15:59:05	0.686119	74.7816	FALSE	0
2022-09-12	15:59:05	1.29192	76.0735	FALSE	0
2022-09-12	15:59:05	0.350191	76.4237	FALSE	0
2022-09-12	15:59:06	1.48332	77.907	FALSE	0
2022-09-12	15:59:06	0.595229	78.5023	FALSE	0
2022-09-12	15:59:06	0.301641	78.8039	FALSE	0
2022-09-12	15:59:06	0.422252	79.2262	FALSE	0
2022-09-12	15:59:07	0.340522	79.5667	FALSE	0
2022-09-12	15:59:07	0.569733	80.1364	FALSE	0
2022-09-12	15:59:07	0.385814	80.5222	FALSE	0
2022-09-12	15:59:08	0.48271	81.0049	FALSE	0
2022-09-12	15:59:08	0.196043	81.201	FALSE	0
2022-09-12	15:59:08	0.472684	81.6737	FALSE	0
2022-09-12	15:59:08	0.265865	81.9395	FALSE	0
2022-09-12	15:59:09	0.589427	82.529	FALSE	0
2022-09-12	15:59:09	0.192125	82.7211	FALSE	0
2022-09-12	15:59:09	0.537977	83.2591	FALSE	0
2022-09-12	15:59:09	0.518435	83.7775	FALSE	0
2022-09-12	15:59:10	0.902201	84.6797	FALSE	0
2022-09-12	15:59:10	0.877214	85.5569	FALSE	0
2022-09-12	15:59:10	0.572277	86.1292	FALSE	0
2022-09-12	15:59:10	0.640064	86.7693	FALSE	0
2022-09-12	15:59:11	0.270445	87.0397	FALSE	0
2022-09-12	15:59:11	0.491769	87.5315	FALSE	0
2022-09-12	15:59:11	0.182812	87.7143	FALSE	0
2022-09-12	15:59:12	0.36958	88.0839	FALSE	0
2022-09-12	15:59:12	0.1793	88.2632	FALSE	0
2022-09-12	15:59:12	0.371514	88.6347	FALSE	0
2022-09-12	15:59:12	0.24785	88.8825	FALSE	0
2022-09-12	15:59:13	0.399046	89.2816	FALSE	0
2022-09-12	15:59:13	0.315738	89.5973	FALSE	0
2022-09-12	15:59:13	0.35126	89.9486	FALSE	0
2022-09-12	15:59:13	0.245051	90.1936	FALSE	0
2022-09-12	15:59:14	0.087392	90.281	FALSE	0
2022-09-12	15:59:14	0.113346	90.3944	FALSE	0
2022-09-12	15:59:14	-0.153524	90.3944	FALSE	0
2022-09-12	15:59:14	-0.308282	90.3944	FALSE	0
2022-09-12	15:59:15	-0.565381	90.3944	FALSE	0
2022-09-12	15:59:15	-0.756933	90.3944	FALSE	0
2022-09-12	15:59:15	-0.566857	90.3944	FALSE	0
2022-09-12	15:59:16	-0.447519	90.3944	FALSE	0
2022-09-12	15:59:16	0.242507	90.6369	FALSE	0
2022-09-12	15:59:16	0.762048	91.3989	FALSE	0
2022-09-12	15:59:16	0.817621	92.2165	FALSE	0
2022-09-12	15:59:17	0.684898	92.9014	FALSE	0
2022-09-12	15:59:17	0.57757	93.479	FALSE	0
2022-09-12	15:59:17	0.457672	93.9367	FALSE	0
2022-09-12	15:59:17	0.452532	94.3892	FALSE	0
2022-09-12	15:59:18	0.847188	95.2364	FALSE	0
2022-09-12	15:59:18	0.478181	95.7146	FALSE	0
2022-09-12	15:59:18	0.638435	96.353	FALSE	0
2022-09-12	15:59:18	0.325	96.678	FALSE	0
2022-09-12	15:59:19	1.12831	97.8063	FALSE	0
2022-09-12	15:59:19	0.325356	98.1317	FALSE	0
2022-09-12	15:59:19	0.389987	98.5217	FALSE	0
2022-09-12	15:59:20	0.495178	99.0168	FALSE	0
2022-09-12	15:59:20	0.137825	99.1547	FALSE	0
2022-09-12	15:59:20	0.430445	99.5851	FALSE	0
2022-09-12	15:59:20	0.140624	99.7257	FALSE	0
2022-09-12	15:59:21	0.392227	100.118	FALSE	0
2022-09-12	15:59:21	0.0589443	100.177	FALSE	0
2022-09-12	15:59:21	0.253092	100.43	FALSE	0
2022-09-12	15:59:21	0.0323284	100.462	FALSE	0
2022-09-12	15:59:22	0.250394	100.713	FALSE	0
2022-09-12	15:59:22	0.383015	101.096	FALSE	0
2022-09-12	15:59:22	1.47966	102.575	FALSE	0
2022-09-12	15:59:23	0.487188	103.063	FALSE	0
2022-09-12	15:59:23	0.200166	103.263	FALSE	0
2022-09-12	15:59:23	0.212481	103.475	FALSE	0
2022-09-12	15:59:23	0.215026	103.69	FALSE	0
2022-09-12	15:59:24	0.187952	103.878	FALSE	0
2022-09-12	15:59:24	0.365102	104.243	FALSE	0
2022-09-12	15:59:24	0.29014	104.533	FALSE	0
2022-09-12	15:59:24	0.179199	104.713	FALSE	0
2022-09-12	15:59:25	0.384135	105.097	FALSE	0
2022-09-12	15:59:25	0.389224	105.486	FALSE	0
2022-09-12	15:59:25	0.26159	105.748	FALSE	0
2022-09-12	15:59:25	0.304033	106.052	FALSE	0
2022-09-12	15:59:26	0.207596	106.259	FALSE	0
2022-09-12	15:59:26	0.384695	106.644	FALSE	0
2022-09-12	15:59:26	0.390802	107.035	FALSE	0
2022-09-12	15:59:27	0.324949	107.36	FALSE	0
2022-09-12	15:59:27	0.309631	107.669	FALSE	0
2022-09-12	15:59:27	0.4193	108.089	FALSE	0
2022-09-12	15:59:27	0.50556	108.594	FALSE	0
2022-09-12	15:59:28	0.25701	108.851	FALSE	0
2022-09-12	15:59:28	0.374669	109.226	FALSE	0
2022-09-12	15:59:28	0.342557	109.568	FALSE	0
2022-09-12	15:59:29	0.375433	109.944	FALSE	0
2022-09-12	15:59:29	0.432837	110.377	FALSE	0
2022-09-12	15:59:29	0.459707	110.836	FALSE	0
2022-09-12	15:59:29	0.516399	111.353	FALSE	0
2022-09-12	15:59:29	0.615382	111.968	FALSE	0
2022-09-12	15:59:30	0.595382	112.564	FALSE	0
2022-09-12	15:59:30	0.413244	112.977	FALSE	0
2022-09-12	15:59:30	0.481997	113.459	FALSE	0
2022-09-12	15:59:31	0.357723	113.817	FALSE	0
2022-09-12	15:59:31	-0.0384094	113.817	FALSE	0
2022-09-12	15:59:31	-0.312709	113.817	FALSE	0
2022-09-12	15:59:31	-0.608536	113.817	FALSE	0
2022-09-12	15:59:32	-0.602938	113.817	FALSE	0
2022-09-12	15:59:32	-0.677035	113.817	FALSE	0
2022-09-12	15:59:32	-0.474389	113.817	FALSE	0
2022-09-12	15:59:32	-0.37846	113.817	FALSE	0
2022-09-12	15:59:33	-0.289758	113.817	FALSE	0
2022-09-12	15:59:33	-0.252506	113.817	FALSE	0
2022-09-12	15:59:33	-0.288638	113.817	FALSE	0
2022-09-12	15:59:33	-0.287773	113.817	FALSE	0
2022-09-12	15:59:34	-0.570419	113.817	FALSE	0
2022-09-12	15:59:34	-0.611793	113.817	FALSE	0
2022-09-12	15:59:34	-0.491183	113.817	FALSE	0
2022-09-12	15:59:35	-0.623803	113.817	FALSE	0
2022-09-12	15:59:35	-0.672048	113.817	FALSE	0
2022-09-12	15:59:35	-0.763396	113.817	FALSE	0
2022-09-12	15:59:35	-0.826399	113.817	FALSE	0
2022-09-12	15:59:36	-0.651691	113.817	FALSE	0
2022-09-12	15:59:36	-0.610012	113.817	FALSE	0
2022-09-12	15:59:36	-0.526501	113.817	FALSE	0
2022-09-12	15:59:36	-0.324312	113.817	FALSE	0
2022-09-12	15:59:37	-0.24243	113.817	FALSE	0
2022-09-12	15:59:37	-0.0272644	113.817	FALSE	0
2022-09-12	15:59:37	0.075789	113.892	FALSE	0
2022-09-12	15:59:37	-0.190674	113.892	FALSE	0
2022-09-12	15:59:38	-0.234338	113.892	FALSE	0
2022-09-12	15:59:38	-0.331946	113.892	FALSE	0
2022-09-12	15:59:38	-0.708638	113.892	FALSE	0
2022-09-12	15:59:39	-0.493117	113.892	FALSE	0
2022-09-12	15:59:39	-0.26986	113.892	FALSE	0
2022-09-12	15:59:39	-0.127824	113.892	FALSE	0
2022-09-12	15:59:39	-0.13276	113.892	FALSE	0
2022-09-12	15:59:40	0.938079	114.83	FALSE	0
2022-09-12	15:59:40	0.980776	115.811	FALSE	0
2022-09-12	15:59:40	1.65645	117.468	FALSE	0
2022-09-12	15:59:40	1.211	118.679	FALSE	0
2022-09-12	15:59:41	1.89798	120.577	FALSE	0
2022-09-12	15:59:41	1.51177	122.088	FALSE	0
2022-09-12	15:59:41	1.10836	123.197	FALSE	0
2022-09-12	15:59:41	1.54698	124.744	FALSE	0
2022-09-12	15:59:42	0.593499	125.337	FALSE	0
2022-09-12	15:59:42	1.30877	126.646	FALSE	0
2022-09-12	15:59:42	0.623829	127.27	FALSE	0
2022-09-12	15:59:43	0.472074	127.742	FALSE	0
2022-09-12	15:59:43	0.77014	128.512	FALSE	0
2022-09-12	15:59:43	0.226679	128.739	FALSE	0
2022-09-12	15:59:43	0.744745	129.483	FALSE	0
2022-09-12	15:59:44	0.303931	129.787	FALSE	0
2022-09-12	15:59:44	0.665662	130.453	FALSE	0
2022-09-12	15:59:44	0.331005	130.784	FALSE	0
2022-09-12	15:59:44	0.685051	131.469	FALSE	0
2022-09-12	15:59:45	0.602354	132.071	FALSE	0
2022-09-12	15:59:45	0.641081	132.713	FALSE	0
2022-09-12	15:59:45	0.612888	133.325	FALSE	0
2022-09-12	15:59:45	0.74841	134.074	FALSE	0
2022-09-12	15:59:46	0.704084	134.778	FALSE	0
2022-09-12	15:59:46	1.24693	136.025	FALSE	0
2022-09-12	15:59:46	0.863015	136.888	FALSE	0
2022-09-12	15:59:47	0.535636	137.423	FALSE	0
2022-09-12	15:59:47	0.727137	138.151	FALSE	0
2022-09-12	15:59:47	0.174313	138.325	FALSE	0
2022-09-12	15:59:47	0.380115	138.705	FALSE	0
2022-09-12	15:59:48	0.217061	138.922	FALSE	0
2022-09-12	15:59:48	0.552634	139.475	FALSE	0
2022-09-12	15:59:48	0.14444	139.619	FALSE	0
2022-09-12	15:59:48	0.455534	140.075	FALSE	0
2022-09-12	15:59:49	0.230598	140.305	FALSE	0
2022-09-12	15:59:49	0.455483	140.761	FALSE	0
2022-09-12	15:59:49	0.193702	140.954	FALSE	0
2022-09-12	15:59:50	0.486985	141.441	FALSE	0
2022-09-12	15:59:50	0.306069	141.748	FALSE	0
2022-09-12	15:59:50	0.383066	142.131	FALSE	0
2022-09-12	15:59:50	0.253244	142.384	FALSE	0
2022-09-12	15:59:51	0.409021	142.793	FALSE	0
2022-09-12	15:59:51	0.392837	143.186	FALSE	0
2022-09-12	15:59:51	0.435178	143.621	FALSE	0
2022-09-12	15:59:51	0.392176	144.013	FALSE	0
2022-09-12	15:59:52	0.298486	144.312	FALSE	0
2022-09-12	15:59:52	0.236654	144.548	FALSE	0
2022-09-12	15:59:52	-0.0507249	144.548	FALSE	0
2022-09-12	15:59:52	-0.196475	144.548	FALSE	0
2022-09-12	15:59:53	0.0588425	144.607	FALSE	0
2022-09-12	15:59:53	0.0519723	144.659	FALSE	0
2022-09-12	15:59:53	0.0532954	144.712	FALSE	0
2022-09-12	15:59:54	0.196552	144.909	FALSE	0
2022-09-12	15:59:54	0.418079	145.327	FALSE	0
2022-09-12	15:59:54	0.418079	145.745	FALSE	0
2022-09-12	15:59:54	0.254262	145.999	FALSE	0
2022-09-12	15:59:55	0.372888	146.372	FALSE	0
2022-09-12	15:59:55	0.317519	146.69	FALSE	0
2022-09-12	15:59:55	0.530802	147.22	FALSE	0
2022-09-12	15:59:55	0.315891	147.536	FALSE	0
2022-09-12	15:59:56	0.358283	147.895	FALSE	0
2022-09-12	15:59:56	0.313295	148.208	FALSE	0
2022-09-12	15:59:56	0.326985	148.535	FALSE	0
2022-09-12	15:59:56	0.231667	148.767	FALSE	0
2022-09-12	15:59:57	0.375026	149.142	FALSE	0
2022-09-12	15:59:57	0.380624	149.522	FALSE	0
2022-09-12	15:59:57	0.391565	149.914	FALSE	0
2022-09-12	15:59:58	0.22897	150.143	FALSE	0
2022-09-12	15:59:58	0.198435	150.341	FALSE	0
2022-09-12	15:59:58	-0.0457377	150.341	FALSE	0
2022-09-12	15:59:58	-0.319122	150.341	FALSE	0
2022-09-12	15:59:59	-0.180852	150.341	FALSE	0
2022-09-12	15:59:59	-0.0679768	150.341	FALSE	0
2022-09-12	15:59:59	0.139657	150.481	FALSE	0
2022-09-12	15:59:59	0.294008	150.775	FALSE	0
2022-09-12	16:00:00	0.566476	151.341	FALSE	0
2022-09-12	16:00:00	0.366934	151.708	FALSE	0
2022-09-12	16:00:00	0.216705	151.925	FALSE	0
2022-09-12	16:00:00	0.328308	152.253	FALSE	0
2022-09-12	16:00:01	0.214618	152.468	FALSE	0
2022-09-12	16:00:01	0.36159	152.83	FALSE	0
2022-09-12	16:00:01	0.0517687	152.881	FALSE	0
2022-09-12	16:00:02	-0.130012	152.881	FALSE	0
2022-09-12	16:00:02	-0.141615	152.881	FALSE	0
2022-09-12	16:00:02	0.217163	153.098	FALSE	0
2022-09-12	16:00:02	0.0800129	153.178	FALSE	0
2022-09-12	16:00:03	0.349377	153.528	FALSE	0
2022-09-12	16:00:03	0.104237	153.632	FALSE	0
2022-09-12	16:00:03	0.41472	154.047	FALSE	0
2022-09-12	16:00:03	0.513499	154.56	FALSE	0
2022-09-12	16:00:04	0.568766	155.129	FALSE	0
2022-09-12	16:00:04	0.618842	155.748	FALSE	0
2022-09-12	16:00:04	0.549071	156.297	FALSE	0
2022-09-12	16:00:04	0.600216	156.897	FALSE	0
2022-09-12	16:00:05	0.906221	157.803	FALSE	0
2022-09-12	16:00:05	0.403931	158.207	FALSE	0
2022-09-12	16:00:05	0.362557	158.57	FALSE	0
2022-09-12	16:00:06	0.420318	158.99	FALSE	0
2022-09-12	16:00:06	0.410089	159.4	FALSE	0
2022-09-12	16:00:06	0.38729	159.788	FALSE	0
2022-09-12	16:00:06	0.352786	160.14	FALSE	0
2022-09-12	16:00:07	0.460115	160.601	FALSE	0
2022-09-12	16:00:07	0.326476	160.927	FALSE	0
2022-09-12	16:00:07	0.469733	161.397	FALSE	0
2022-09-12	16:00:07	0.28958	161.686	FALSE	0
2022-09-12	16:00:08	0.407646	162.094	FALSE	0
2022-09-12	16:00:08	0.388308	162.482	FALSE	0
2022-09-12	16:00:08	0.480267	162.963	FALSE	0
2022-09-12	16:00:08	0.398588	163.361	FALSE	0
2022-09-12	16:00:09	0.621183	163.982	FALSE	0
2022-09-12	16:00:09	1.64159	165.624	FALSE	0
2022-09-12	16:00:09	1.6621	167.286	FALSE	0
2022-09-12	16:00:10	0.996247	168.282	FALSE	0
2022-09-12	16:00:10	0.565611	168.848	FALSE	0
2022-09-12	16:00:10	0.606425	169.454	FALSE	0
2022-09-12	16:00:10	4.68922	174.143	1	1
2022-09-12	16:00:11	0.401336	174.545	FALSE	1
2022-09-12	16:00:11	0.335433	174.88	FALSE	1
2022-09-12	16:00:11	0.349122	175.229	FALSE	1
2022-09-12	16:00:11	0.28673	175.516	FALSE	1
2022-09-12	16:00:12	0.329224	175.845	FALSE	1
2022-09-12	16:00:12	0.252481	176.098	FALSE	1
2022-09-12	16:00:12	0.256756	176.355	FALSE	1
2022-09-12	16:00:13	0.423728	176.778	FALSE	1
2022-09-12	16:00:13	0.272532	177.051	FALSE	1
2022-09-12	16:00:13	0.70098	177.752	FALSE	1
2022-09-12	16:00:13	0.474517	178.226	FALSE	1
2022-09-12	16:00:14	0.515585	178.742	FALSE	1
2022-09-12	16:00:14	0.448613	179.191	FALSE	1
2022-09-12	16:00:14	0.41243	179.603	FALSE	1
2022-09-12	16:00:14	0.44902	180.052	FALSE	1
2022-09-12	16:00:15	0.227952	180.28	FALSE	1
2022-09-12	16:00:15	0.61416	180.894	FALSE	1
2022-09-12	16:00:15	0.267239	181.161	FALSE	1
2022-09-12	16:00:15	0.461743	181.623	FALSE	1
2022-09-12	16:00:16	0.290547	181.914	FALSE	1
2022-09-12	16:00:16	0.400471	182.314	FALSE	1
2022-09-12	16:00:16	0.157825	182.472	FALSE	1
2022-09-12	16:00:17	0.429936	182.902	FALSE	1
2022-09-12	16:00:17	0.242354	183.144	FALSE	1
2022-09-12	16:00:17	0.370547	183.515	FALSE	1
2022-09-12	16:00:17	0.173143	183.688	FALSE	1
2022-09-12	16:00:18	0.437417	184.125	FALSE	1
2022-09-12	16:00:18	0.309784	184.435	FALSE	1
2022-09-12	16:00:18	0.382812	184.818	FALSE	1
2022-09-12	16:00:18	0.264491	185.082	FALSE	1
2022-09-12	16:00:19	0.429326	185.512	FALSE	1
2022-09-12	16:00:19	0.313499	185.825	FALSE	1
2022-09-12	16:00:19	0.335636	186.161	FALSE	1
2022-09-12	16:00:19	0.358842	186.52	FALSE	1
2022-09-12	16:00:20	0.368664	186.888	FALSE	1
2022-09-12	16:00:20	0.509326	187.398	FALSE	1
2022-09-12	16:00:20	0.374568	187.772	FALSE	1
2022-09-12	16:00:21	0.567086	188.339	FALSE	1
2022-09-12	16:00:21	0.48673	188.826	FALSE	1
2022-09-12	16:00:21	0.413346	189.239	FALSE	1
2022-09-12	16:00:21	0.413601	189.653	FALSE	1
2022-09-12	16:00:22	0.448257	190.101	FALSE	1
2022-09-12	16:00:22	0.392328	190.494	FALSE	1
2022-09-12	16:00:22	0.535331	191.029	FALSE	1
2022-09-12	16:00:22	0.451056	191.48	FALSE	1
2022-09-12	16:00:23	0.479046	191.959	FALSE	1
2022-09-12	16:00:23	0.471056	192.43	FALSE	1
2022-09-12	16:00:23	0.405865	192.836	FALSE	1
2022-09-12	16:00:23	0.385305	193.221	FALSE	1
2022-09-12	16:00:24	0.370802	193.592	FALSE	1
2022-09-12	16:00:24	0.454364	194.046	FALSE	1
2022-09-12	16:00:24	0.400216	194.447	FALSE	1
2022-09-12	16:00:25	0.471107	194.918	FALSE	1
2022-09-12	16:00:25	0.455178	195.373	FALSE	1
2022-09-12	16:00:25	0.450191	195.823	FALSE	1
2022-09-12	16:00:25	0.44841	196.272	FALSE	1
2022-09-12	16:00:26	0.458842	196.73	FALSE	1
2022-09-12	16:00:26	0.480573	197.211	FALSE	1
2022-09-12	16:00:26	0.491667	197.703	FALSE	1
2022-09-12	16:00:26	0.529733	198.232	FALSE	1
2022-09-12	16:00:27	0.378435	198.611	FALSE	1
2022-09-12	16:00:27	0.480776	199.092	FALSE	1
2022-09-12	16:00:27	0.473855	199.565	FALSE	1
2022-09-12	16:00:27	0.332176	199.898	FALSE	1
2022-09-12	16:00:28	0.294975	200.193	FALSE	1
2022-09-12	16:00:28	0.305458	200.498	FALSE	1
2022-09-12	16:00:28	0.385713	200.884	FALSE	1
2022-09-12	16:00:29	0.387646	201.271	FALSE	1
2022-09-12	16:00:29	0.411412	201.683	FALSE	1
2022-09-12	16:00:29	0.429122	202.112	FALSE	1
2022-09-12	16:00:29	0.381896	202.494	FALSE	1
2022-09-12	16:00:30	0.406934	202.901	FALSE	1
2022-09-12	16:00:30	0.409733	203.31	FALSE	1
2022-09-12	16:00:30	0.376043	203.687	FALSE	1
2022-09-12	16:00:30	0.461743	204.148	FALSE	1
2022-09-12	16:00:31	0.661845	204.81	FALSE	1
2022-09-12	16:00:31	1.93564	206.746	FALSE	1
2022-09-12	16:00:31	2.32189	209.068	FALSE	1
2022-09-12	16:00:31	2.39477	211.462	FALSE	1
2022-09-12	16:00:32	1.54927	213.012	FALSE	1
2022-09-12	16:00:32	0.519097	213.531	FALSE	1
2022-09-12	16:00:32	0.421438	213.952	FALSE	1
2022-09-12	16:00:33	0.21757	214.17	FALSE	1
2022-09-12	16:00:33	0.0119214	214.182	FALSE	1
2022-09-12	16:00:33	-0.241972	214.182	FALSE	1
2022-09-12	16:00:33	-0.288435	214.182	FALSE	1
2022-09-12	16:00:34	-0.279173	214.182	FALSE	1
2022-09-12	16:00:34	-0.343091	214.182	FALSE	1
2022-09-12	16:00:34	-0.187875	214.182	FALSE	1
2022-09-12	16:00:34	-0.0740837	214.182	FALSE	1
2022-09-12	16:00:35	0.0621503	214.244	FALSE	1
2022-09-12	16:00:35	0.29869	214.543	FALSE	1
2022-09-12	16:00:35	0.336145	214.879	FALSE	1
2022-09-12	16:00:36	0.261081	215.14	FALSE	1
2022-09-12	16:00:36	0.279606	215.419	FALSE	1
2022-09-12	16:00:36	0.267341	215.687	FALSE	1
2022-09-12	16:00:36	0.0913106	215.778	FALSE	1
2022-09-12	16:00:37	0.249071	216.027	FALSE	1
2022-09-12	16:00:37	0.18902	216.216	FALSE	1
2022-09-12	16:00:37	0.313244	216.529	FALSE	1
2022-09-12	16:00:37	0.34271	216.872	FALSE	1
2022-09-12	16:00:38	0.371667	217.244	FALSE	1
2022-09-12	16:00:38	0.270496	217.514	FALSE	1
2022-09-12	16:00:38	0.230038	217.744	FALSE	1
2022-09-12	16:00:38	0.29472	218.039	FALSE	1
2022-09-12	16:00:39	0.316858	218.356	FALSE	1
2022-09-12	16:00:39	0.206323	218.562	FALSE	1
2022-09-12	16:00:39	0.207748	218.77	FALSE	1
2022-09-12	16:00:40	0.339249	219.109	FALSE	1
2022-09-12	16:00:40	1.24627	220.355	FALSE	1
2022-09-12	16:00:40	0.37416	220.73	FALSE	1
2022-09-12	16:00:40	0.393855	221.123	FALSE	1
2022-09-12	16:00:41	0.319249	221.443	FALSE	1
2022-09-12	16:00:41	0.39869	221.841	FALSE	1
2022-09-12	16:00:41	0.389835	222.231	FALSE	1
2022-09-12	16:00:41	0.419148	222.65	FALSE	1
2022-09-12	16:00:42	0.42388	223.074	FALSE	1
2022-09-12	16:00:42	0.449377	223.524	FALSE	1
2022-09-12	16:00:42	0.421794	223.945	FALSE	1
2022-09-12	16:00:42	0.421947	224.367	FALSE	1
2022-09-12	16:00:43	0.44897	224.816	FALSE	1
2022-09-12	16:00:43	0.440013	225.256	FALSE	1
2022-09-12	16:00:43	0.426323	225.683	FALSE	1
2022-09-12	16:00:44	0.452583	226.135	FALSE	1
2022-09-12	16:00:44	0.437926	226.573	FALSE	1
2022-09-12	16:00:44	0.445305	227.018	FALSE	1
2022-09-12	16:00:44	0.443728	227.462	FALSE	1
2022-09-12	16:00:45	0.441132	227.903	FALSE	1
2022-09-12	16:00:45	0.443575	228.347	FALSE	1
2022-09-12	16:00:45	0.424542	228.771	FALSE	1
2022-09-12	16:00:45	0.430547	229.202	FALSE	1
2022-09-12	16:00:46	0.435738	229.638	FALSE	1
2022-09-12	16:00:46	0.425	230.063	FALSE	1
2022-09-12	16:00:46	0.447036	230.51	FALSE	1
2022-09-12	16:00:46	0.447647	230.957	FALSE	1
2022-09-12	16:00:47	0.4364	231.394	FALSE	1
2022-09-12	16:00:47	0.426578	231.82	FALSE	1
2022-09-12	16:00:47	0.437316	232.258	FALSE	1
2022-09-12	16:00:48	0.439911	232.698	FALSE	1
2022-09-12	16:00:48	0.423677	233.121	FALSE	1
2022-09-12	16:00:48	0.436043	233.557	FALSE	1
2022-09-12	16:00:48	0.427341	233.985	FALSE	1
2022-09-12	16:00:49	0.443677	234.428	FALSE	1
2022-09-12	16:00:49	0.430954	234.859	FALSE	1
2022-09-12	16:00:49	0.451616	235.311	FALSE	1
2022-09-12	16:00:49	0.465305	235.776	FALSE	1
2022-09-12	16:00:50	0.483015	236.259	FALSE	1
2022-09-12	16:00:50	0.416501	236.676	FALSE	1
2022-09-12	16:00:50	0.173143	236.849	FALSE	1
2022-09-12	16:00:50	0.170496	237.019	FALSE	1
2022-09-12	16:00:51	0.201743	237.221	FALSE	1
2022-09-12	16:00:51	1.68281	238.904	FALSE	1
2022-09-12	16:00:51	2.96149	241.865	FALSE	1
2022-09-12	16:00:52	2.65294	244.518	FALSE	1
2022-09-12	16:00:52	1.94006	246.458	FALSE	1
2022-09-12	16:00:52	2.52749	248.986	FALSE	1
2022-09-12	16:00:52	3.17859	252.165	1	2
2022-09-12	16:00:53	4.85528	257.02	1	3
2022-09-12	16:00:53	3.65085	260.671	1	4
2022-09-12	16:00:53	3.38276	264.053	1	5
2022-09-12	16:00:53	1.9309	265.984	FALSE	5
2022-09-12	16:00:54	4.48703	270.471	1	6
2022-09-12	16:00:54	0.791667	271.263	FALSE	6
2022-09-12	16:00:54	2.20485	273.468	FALSE	6
2022-09-12	16:00:54	2.59452	276.062	FALSE	6
2022-09-12	16:00:55	2.62001	278.682	FALSE	6
2022-09-12	16:00:55	0.629478	279.312	FALSE	6
2022-09-12	16:00:55	1.92302	281.235	FALSE	6
2022-09-12	16:00:56	1.29905	282.534	FALSE	6
2022-09-12	16:00:56	3.64159	286.176	1	7
2022-09-12	16:00:56	1.79365	287.969	FALSE	7
2022-09-12	16:00:56	9.47472	297.444	1	8
2022-09-12	16:00:57	6.27685	303.721	1	9
2022-09-12	16:00:57	1.94586	305.667	FALSE	9
2022-09-12	16:00:57	2.14983	307.816	FALSE	9
2022-09-12	16:00:57	2.6966	310.513	FALSE	9
2022-09-12	16:00:58	2.08897	312.602	FALSE	9
2022-09-12	16:00:58	2.39747	314.999	FALSE	9
2022-09-12	16:00:58	2.18907	317.189	FALSE	9
2022-09-12	16:00:59	2.2652	319.454	FALSE	9
2022-09-12	16:00:59	2.03111	321.485	FALSE	9
2022-09-12	16:00:59	1.93197	323.417	FALSE	9
2022-09-12	16:00:59	1.93559	325.352	FALSE	9
2022-09-12	16:01:00	1.80561	327.158	FALSE	9
2022-09-12	16:01:00	1.81808	328.976	FALSE	9
2022-09-12	16:01:00	1.65889	330.635	FALSE	9
2022-09-12	16:01:00	1.03574	331.671	FALSE	9
2022-09-12	16:01:01	0.560471	332.231	FALSE	9
2022-09-12	16:01:01	0.494516	332.726	FALSE	9
2022-09-12	16:01:01	0.20902	332.935	FALSE	9
2022-09-12	16:01:01	0.0750766	333.01	FALSE	9
2022-09-12	16:01:02	0.336705	333.347	FALSE	9
2022-09-12	16:01:02	0.868155	334.215	FALSE	9
2022-09-12	16:01:02	0.652379	334.867	FALSE	9
2022-09-12	16:01:03	0.418333	335.285	FALSE	9
2022-09-12	16:01:03	0.34841	335.634	FALSE	9
2022-09-12	16:01:03	0.295382	335.929	FALSE	9
2022-09-12	16:01:03	0.416501	336.346	FALSE	9
2022-09-12	16:01:04	0.394008	336.74	FALSE	9
2022-09-12	16:01:04	0.405916	337.146	FALSE	9
2022-09-12	16:01:04	0.441081	337.587	FALSE	9
2022-09-12	16:01:04	0.438283	338.025	FALSE	9
2022-09-12	16:01:05	0.489529	338.515	FALSE	9
2022-09-12	16:01:05	0.516756	339.031	FALSE	9
2022-09-12	16:01:05	0.404491	339.436	FALSE	9
2022-09-12	16:01:05	0.473194	339.909	FALSE	9
2022-09-12	16:01:06	0.422252	340.331	FALSE	9
2022-09-12	16:01:06	0.392379	340.724	FALSE	9
2022-09-12	16:01:06	0.420115	341.144	FALSE	9
2022-09-12	16:01:07	0.412939	341.557	FALSE	9
2022-09-12	16:01:07	0.409377	341.966	FALSE	9
2022-09-12	16:01:07	0.418791	342.385	FALSE	9
2022-09-12	16:01:07	0.409631	342.794	FALSE	9
2022-09-12	16:01:08	0.394415	343.189	FALSE	9
2022-09-12	16:01:08	0.423321	343.612	FALSE	9
2022-09-12	16:01:08	0.432583	344.045	FALSE	9
2022-09-12	16:01:08	0.426171	344.471	FALSE	9
2022-09-12	16:01:09	0.414669	344.886	FALSE	9
2022-09-12	16:01:09	0.424084	345.31	FALSE	9
2022-09-12	16:01:09	0.435433	345.745	FALSE	9
2022-09-12	16:01:09	0.427799	346.173	FALSE	9
2022-09-12	16:01:10	0.412023	346.585	FALSE	9
2022-09-12	16:01:10	0.416298	347.001	FALSE	9
2022-09-12	16:01:10	0.427545	347.429	FALSE	9
2022-09-12	16:01:11	0.428053	347.857	FALSE	9
2022-09-12	16:01:11	0.444542	348.301	FALSE	9
2022-09-12	16:01:11	0.419046	348.72	FALSE	9
2022-09-12	16:01:11	0.403779	349.124	FALSE	9
2022-09-12	16:01:12	0.463473	349.588	FALSE	9
2022-09-12	16:01:12	0.389936	349.978	FALSE	9
2022-09-12	16:01:12	0.5507	350.528	FALSE	9
2022-09-12	16:01:12	1.10556	351.634	FALSE	9
2022-09-12	16:01:13	0.769326	352.403	FALSE	9
2022-09-12	16:01:13	0.971819	353.375	FALSE	9
2022-09-12	16:01:13	0.809529	354.185	FALSE	9
2022-09-12	16:01:13	0.857875	355.042	FALSE	9
2022-09-12	16:01:14	0.832125	355.875	FALSE	9
2022-09-12	16:01:14	0.950344	356.825	FALSE	9
2022-09-12	16:01:14	0.636552	357.461	FALSE	9
2022-09-12	16:01:15	0.479707	357.941	FALSE	9
2022-09-12	16:01:15	0.483626	358.425	FALSE	9
2022-09-12	16:01:15	0.496145	358.921	FALSE	9
2022-09-12	16:01:15	0.546628	359.468	FALSE	9
2022-09-12	16:01:16	0.711819	360.179	FALSE	9
2022-09-12	16:01:16	1.11508	361.294	FALSE	9
2022-09-12	16:01:16	1.22388	362.518	FALSE	9
2022-09-12	16:01:16	0.988257	363.507	FALSE	9
2022-09-12	16:01:17	0.76668	364.273	FALSE	9
2022-09-12	16:01:17	0.506934	364.78	FALSE	9
2022-09-12	16:01:17	0.431667	365.212	FALSE	9
2022-09-12	16:01:17	0.370751	365.583	FALSE	9
2022-09-12	16:01:18	0.304186	365.887	FALSE	9
2022-09-12	16:01:18	0.362863	366.25	FALSE	9
2022-09-12	16:01:18	0.164389	366.414	FALSE	9
2022-09-12	16:01:19	0.0545676	366.469	FALSE	9
2022-09-12	16:01:19	0.343575	366.812	FALSE	9
2022-09-12	16:01:19	0.192583	367.005	FALSE	9
2022-09-12	16:01:19	0.112481	367.117	FALSE	9
2022-09-12	16:01:20	0.0442369	367.162	FALSE	9
2022-09-12	16:01:20	-0.247163	367.162	FALSE	9
2022-09-12	16:01:20	-0.256984	367.162	FALSE	9
2022-09-12	16:01:20	0.229936	367.391	FALSE	9
2022-09-12	16:01:21	0.972277	368.364	FALSE	9
2022-09-12	16:01:21	1.62541	369.989	FALSE	9
2022-09-12	16:01:21	2.39899	372.388	FALSE	9
2022-09-12	16:01:22	1.05202	373.44	FALSE	9
2022-09-12	16:01:22	0.639707	374.08	FALSE	9
2022-09-12	16:01:22	0.4707	374.551	FALSE	9
2022-09-12	16:01:22	0.794924	375.345	FALSE	9
2022-09-12	16:01:23	1.2707	376.616	FALSE	9
2022-09-12	16:01:23	3.70897	380.325	1	10
2022-09-12	16:01:23	5.00449	385.33	1	11
2022-09-12	16:01:23	1.87793	387.208	FALSE	11
2022-09-12	16:01:24	0.503422	387.711	FALSE	11
2022-09-12	16:01:24	0.347036	388.058	FALSE	11
2022-09-12	16:01:24	0.288868	388.347	FALSE	11
2022-09-12	16:01:24	0.373193	388.72	FALSE	11
2022-09-12	16:01:25	0.17528	388.895	FALSE	11
2022-09-12	16:01:25	0.0899875	388.985	FALSE	11
2022-09-12	16:01:25	-0.039071	388.985	FALSE	11
2022-09-12	16:01:26	-0.378511	388.985	FALSE	11
2022-09-12	16:01:26	-0.161717	388.985	FALSE	11
2022-09-12	16:01:26	-0.279224	388.985	FALSE	11
2022-09-12	16:01:26	-0.224669	388.985	FALSE	11
2022-09-12	16:01:27	-0.290572	388.985	FALSE	11
2022-09-12	16:01:27	-0.439478	388.985	FALSE	11
2022-09-12	16:01:27	-0.274949	388.985	FALSE	11
2022-09-12	16:01:27	-0.342328	388.985	FALSE	11
2022-09-12	16:01:28	-0.113677	388.985	FALSE	11
2022-09-12	16:01:28	-0.356374	388.985	FALSE	11
2022-09-12	16:01:28	-0.110318	388.985	FALSE	11
2022-09-12	16:01:28	-0.232455	388.985	FALSE	11
2022-09-12	16:01:29	-0.0910302	388.985	FALSE	11
2022-09-12	16:01:29	-0.125483	388.985	FALSE	11
2022-09-12	16:01:29	-0.0373407	388.985	FALSE	11
2022-09-12	16:01:30	-0.0935239	388.985	FALSE	11
2022-09-12	16:01:30	0.0932954	389.079	FALSE	11
2022-09-12	16:01:30	0.0448984	389.124	FALSE	11
2022-09-12	16:01:30	0.147748	389.271	FALSE	11
2022-09-12	16:01:31	0.174466	389.446	FALSE	11
2022-09-12	16:01:31	0.227494	389.673	FALSE	11
2022-09-12	16:01:31	0.286628	389.96	FALSE	11
2022-09-12	16:01:31	0.285662	390.246	FALSE	11
2022-09-12	16:01:32	0.368308	390.614	FALSE	11
2022-09-12	16:01:32	0.648562	391.262	FALSE	11
2022-09-12	16:01:32	1.58704	392.849	FALSE	11
2022-09-12	16:01:32	0.499198	393.349	FALSE	11
2022-09-12	16:01:33	0.717366	394.066	FALSE	11
2022-09-12	16:01:33	1.42668	395.493	FALSE	11
2022-09-12	16:01:33	1.78322	397.276	FALSE	11
2022-09-12	16:01:34	2.00179	399.278	FALSE	11
2022-09-12	16:01:34	1.94444	401.222	FALSE	11
2022-09-12	16:01:34	1.98464	403.207	FALSE	11
2022-09-12	16:01:34	1.77609	404.983	FALSE	11
2022-09-12	16:01:35	2.88383	407.867	FALSE	11
2022-09-12	16:01:35	4.03166	411.898	1	12
2022-09-12	16:01:35	4.68902	416.587	1	13
2022-09-12	16:01:35	5.14678	421.734	1	14
2022-09-12	16:01:36	4.34006	426.074	1	15
2022-09-12	16:01:36	7.1996	433.274	1	16
2022-09-12	16:01:36	5.67299	438.947	1	17
2022-09-12	16:01:36	0.184339	439.131	FALSE	17
2022-09-12	16:01:37	0.395687	439.527	FALSE	17
2022-09-12	16:01:37	1.67187	441.199	FALSE	17
2022-09-12	16:01:37	0.767341	441.966	FALSE	17
2022-09-12	16:01:38	0.724186	442.69	FALSE	17
2022-09-12	16:01:38	0.722354	443.413	FALSE	17
2022-09-12	16:01:38	0.725356	444.138	FALSE	17
2022-09-12	16:01:38	0.726629	444.865	FALSE	17
2022-09-12	16:01:39	0.725356	445.59	FALSE	17
2022-09-12	16:01:39	0.726476	446.316	FALSE	17
2022-09-12	16:01:39	0.721488	447.038	FALSE	17
2022-09-12	16:01:39	0.721336	447.759	FALSE	17
2022-09-12	16:01:40	0.730496	448.49	FALSE	17
2022-09-12	16:01:40	0.179911	448.67	FALSE	17
2022-09-12	16:01:40	0.176654	448.846	FALSE	17
2022-09-12	16:01:40	0.218333	449.065	FALSE	17
2022-09-12	16:01:41	0.286425	449.351	FALSE	17
2022-09-12	16:01:41	0.300725	449.652	FALSE	17
2022-09-12	16:01:41	1.71879	451.371	FALSE	17
2022-09-12	16:01:42	1.34128	452.712	FALSE	17
2022-09-12	16:01:42	1.71462	454.426	FALSE	17
2022-09-12	16:01:42	0.559555	454.986	FALSE	17
2022-09-12	16:01:42	0.652684	455.639	FALSE	17
2022-09-12	16:01:43	0.692532	456.331	FALSE	17
2022-09-12	16:01:43	0.542863	456.874	FALSE	17
2022-09-12	16:01:43	0.405509	457.28	FALSE	17
2022-09-12	16:01:43	2.97055	460.25	FALSE	17
2022-09-12	16:01:44	5.70281	465.953	1	18
2022-09-12	16:01:44	5.92291	471.876	1	19
2022-09-12	16:01:44	3.76052	475.636	1	20
2022-09-12	16:01:45	5.3907	481.027	1	21
2022-09-12	16:01:45	4.01609	485.043	1	22
2022-09-12	16:01:45	4.41721	489.46	1	23
2022-09-12	16:01:45	6.28973	495.75	1	24
2022-09-12	16:01:46	9.40149	505.152	1	25
2022-09-12	16:01:46	4.67716	509.829	1	26
2022-09-12	16:01:46	3.52184	513.351	1	27
2022-09-12	16:01:46	0.848155	514.199	FALSE	27
2022-09-12	16:01:47	1.4934	515.692	FALSE	27
2022-09-12	16:01:47	0.784186	516.476	FALSE	27
2022-09-12	16:01:47	1.40973	517.886	FALSE	27
2022-09-12	16:01:47	0.876349	518.762	FALSE	27
2022-09-12	16:01:48	0.729987	519.492	FALSE	27
2022-09-12	16:01:48	0.461031	519.953	FALSE	27
2022-09-12	16:01:48	0.542914	520.496	FALSE	27
2022-09-12	16:01:49	0.786476	521.283	FALSE	27
2022-09-12	16:01:49	0.604033	521.887	FALSE	27
2022-09-12	16:01:49	0.636705	522.524	FALSE	27
2022-09-12	16:01:49	0.977774	523.501	FALSE	27
2022-09-12	16:01:50	0.882201	524.384	FALSE	27
2022-09-12	16:01:50	0.791972	525.176	FALSE	27
2022-09-12	16:01:50	0.940674	526.116	FALSE	27
2022-09-12	16:01:50	0.599351	526.716	FALSE	27
2022-09-12	16:01:51	0.671616	527.387	FALSE	27
2022-09-12	16:01:51	0.818537	528.206	FALSE	27
2022-09-12	16:01:51	2.99004	531.196	FALSE	27
2022-09-12	16:01:51	5.14255	536.338	1	28
2022-09-12	16:01:52	7.94001	544.278	1	29
2022-09-12	16:01:52	8.28724	552.566	1	30
2022-09-12	16:01:52	6.38963	558.955	1	31
2022-09-12	16:01:53	3.42902	562.384	1	32
2022-09-12	16:01:53	1.9448	564.329	FALSE	32
2022-09-12	16:01:53	2.79609	567.125	FALSE	32
2022-09-12	16:01:53	1.75635	568.881	FALSE	32
2022-09-12	16:01:54	2.43874	571.32	FALSE	32
2022-09-12	16:01:54	3.77976	575.1	1	33
2022-09-12	16:01:54	4.49691	579.597	1	34
2022-09-12	16:01:54	1.23594	580.833	FALSE	34
2022-09-12	16:01:55	0.456094	581.289	FALSE	34
2022-09-12	16:01:55	0.365458	581.654	FALSE	34
2022-09-12	16:01:55	0.365611	582.02	FALSE	34
2022-09-12	16:01:55	0.813702	582.834	FALSE	34
2022-09-12	16:01:56	3.17131	586.005	1	35
2022-09-12	16:01:56	3.19701	589.202	1	36
2022-09-12	16:01:56	3.97676	593.179	1	37
2022-09-12	16:01:57	3.72988	596.909	1	38
2022-09-12	16:01:57	2.82826	599.737	FALSE	38
2022-09-12	16:01:57	0.471514	600.208	FALSE	38
2022-09-12	16:01:57	0.0589952	600.267	FALSE	38
2022-09-12	16:01:58	0.180929	600.448	FALSE	38
2022-09-12	16:01:58	-0.0826333	600.448	FALSE	38
2022-09-12	16:01:58	0.053957	600.502	FALSE	38
2022-09-12	16:01:58	2.42184	602.924	FALSE	38
2022-09-12	16:01:59	2.628	605.552	FALSE	38
2022-09-12	16:01:59	3.85854	609.411	1	39
2022-09-12	16:01:59	0.076756	609.487	FALSE	39
2022-09-12	16:01:59	-0.0835493	609.487	FALSE	39
2022-09-12	16:02:00	-0.256526	609.487	FALSE	39
2022-09-12	16:02:00	-0.702633	609.487	FALSE	39
2022-09-12	16:02:00	-0.722582	609.487	FALSE	39
2022-09-12	16:02:01	-0.803244	609.487	FALSE	39
2022-09-12	16:02:01	-0.908333	609.487	FALSE	39
2022-09-12	16:02:01	-0.798256	609.487	FALSE	39
2022-09-12	16:02:01	-0.807773	609.487	FALSE	39
2022-09-12	16:02:02	-0.776475	609.487	FALSE	39
2022-09-12	16:02:02	-0.71276	609.487	FALSE	39
2022-09-12	16:02:02	-0.704821	609.487	FALSE	39
2022-09-12	16:02:02	-0.658511	609.487	FALSE	39
2022-09-12	16:02:03	-0.628587	609.487	FALSE	39
2022-09-12	16:02:03	-0.548638	609.487	FALSE	39
2022-09-12	16:02:03	-0.646551	609.487	FALSE	39
2022-09-12	16:02:03	-0.696679	609.487	FALSE	39
2022-09-12	16:02:04	-0.650216	609.487	FALSE	39
2022-09-12	16:02:04	-0.446043	609.487	FALSE	39
2022-09-12	16:02:04	-0.120191	609.487	FALSE	39
2022-09-12	16:02:05	0.227952	609.715	FALSE	39
2022-09-12	16:02:05	0.238995	609.954	FALSE	39
2022-09-12	16:02:05	0.335891	610.29	FALSE	39
2022-09-12	16:02:05	1.00541	611.296	FALSE	39
2022-09-12	16:02:06	0.909326	612.205	FALSE	39
2022-09-12	16:02:06	0.992074	613.197	FALSE	39
2022-09-12	16:02:06	0.911565	614.109	FALSE	39
2022-09-12	16:02:06	0.80388	614.912	FALSE	39
2022-09-12	16:02:07	0.797316	615.71	FALSE	39
2022-09-12	16:02:07	0.836654	616.546	FALSE	39
2022-09-12	16:02:07	0.595534	617.142	FALSE	39
2022-09-12	16:02:07	0.481947	617.624	FALSE	39
2022-09-12	16:02:08	0.378893	618.003	FALSE	39
2022-09-12	16:02:08	0.297265	618.3	FALSE	39
2022-09-12	16:02:08	0.290853	618.591	FALSE	39
2022-09-12	16:02:09	0.628664	619.22	FALSE	39
2022-09-12	16:02:09	1.34429	620.564	FALSE	39
2022-09-12	16:02:09	1.76994	622.334	FALSE	39
2022-09-12	16:02:09	2.29268	624.627	FALSE	39
2022-09-12	16:02:10	1.98673	626.613	FALSE	39
2022-09-12	16:02:10	1.79854	628.412	FALSE	39
2022-09-12	16:02:10	1.70256	630.114	FALSE	39
2022-09-12	16:02:10	1.95762	632.072	FALSE	39
2022-09-12	16:02:11	2.01681	634.089	FALSE	39
2022-09-12	16:02:11	1.90607	635.995	FALSE	39
2022-09-12	16:02:11	0.8307	636.826	FALSE	39
2022-09-12	16:02:12	0.386527	637.212	FALSE	39
2022-09-12	16:02:12	0.29986	637.512	FALSE	39
2022-09-12	16:02:12	0.605916	638.118	FALSE	39
2022-09-12	16:02:12	0.870242	638.988	FALSE	39
2022-09-12	16:02:13	0.352888	639.341	FALSE	39
2022-09-12	16:02:13	0.169275	639.51	FALSE	39
2022-09-12	16:02:13	0.00662877	639.517	FALSE	39
2022-09-12	16:02:13	0.044186	639.561	FALSE	39
2022-09-12	16:02:14	0.0972648	639.658	FALSE	39
2022-09-12	16:02:14	0.210293	639.869	FALSE	39
2022-09-12	16:02:14	0.27355	640.142	FALSE	39
2022-09-12	16:02:14	0.302659	640.445	FALSE	39
2022-09-12	16:02:15	0.798588	641.243	FALSE	39
2022-09-12	16:02:15	1.58739	642.831	FALSE	39
2022-09-12	16:02:15	2.43533	645.266	FALSE	39
2022-09-12	16:02:16	1.67813	646.944	FALSE	39
2022-09-12	16:02:16	0.829428	647.774	FALSE	39
2022-09-12	16:02:16	0.789376	648.563	FALSE	39
2022-09-12	16:02:16	0.243626	648.807	FALSE	39
2022-09-12	16:02:17	0.486323	649.293	FALSE	39
2022-09-12	16:02:17	0.345763	649.639	FALSE	39
2022-09-12	16:02:17	0.593448	650.232	FALSE	39
2022-09-12	16:02:17	0.330496	650.563	FALSE	39
2022-09-12	16:02:18	0.427545	650.99	FALSE	39
2022-09-12	16:02:18	0.469784	651.46	FALSE	39
2022-09-12	16:02:18	0.479453	651.94	FALSE	39
2022-09-12	16:02:18	0.724237	652.664	FALSE	39
2022-09-12	16:02:19	0.954109	653.618	FALSE	39
2022-09-12	16:02:19	1.62744	655.245	FALSE	39
2022-09-12	16:02:19	1.98378	657.229	FALSE	39
2022-09-12	16:02:20	3.85314	661.082	1	40
2022-09-12	16:02:20	0.82617	661.908	FALSE	40
2022-09-12	16:02:20	1.81151	663.72	FALSE	40
2022-09-12	16:02:20	0.570038	664.29	FALSE	40
2022-09-12	16:02:21	0.654873	664.945	FALSE	40
2022-09-12	16:02:21	0.333041	665.278	FALSE	40
2022-09-12	16:02:21	0.324746	665.603	FALSE	40
2022-09-12	16:02:21	0.222812	665.825	FALSE	40
2022-09-12	16:02:22	0.567137	666.393	FALSE	40
2022-09-12	16:02:22	0.601387	666.994	FALSE	40
2022-09-12	16:02:22	-0.434643	666.994	FALSE	40
2022-09-12	16:02:22	-0.493575	666.994	FALSE	40
2022-09-12	16:02:23	-0.561513	666.994	FALSE	40
2022-09-12	16:02:23	-0.426196	666.994	FALSE	40
2022-09-12	16:02:23	-0.39958	666.994	FALSE	40
2022-09-12	16:02:24	-0.441208	666.994	FALSE	40
2022-09-12	16:02:24	-0.224771	666.994	FALSE	40
2022-09-12	16:02:24	0.00942772	667.003	FALSE	40
2022-09-12	16:02:24	1.00525	668.009	FALSE	40
2022-09-12	16:02:25	2.46001	670.469	FALSE	40
2022-09-12	16:02:25	6.78647	677.255	1	41
2022-09-12	16:02:25	3.96495	681.22	1	42
2022-09-12	16:02:25	0.62154	681.842	FALSE	42
2022-09-12	16:02:26	0.406069	682.248	FALSE	42
2022-09-12	16:02:26	5.54973	687.797	1	43
2022-09-12	16:02:26	-0.0782567	687.797	FALSE	43
2022-09-12	16:02:26	-0.187977	687.797	FALSE	43
2022-09-12	16:02:27	-0.503753	687.797	FALSE	43
2022-09-12	16:02:27	-0.550012	687.797	FALSE	43
2022-09-12	16:02:27	-0.56762	687.797	FALSE	43
2022-09-12	16:02:28	-0.405788	687.797	FALSE	43
2022-09-12	16:02:28	-0.405687	687.797	FALSE	43
2022-09-12	16:02:28	-0.0175443	687.797	FALSE	43
2022-09-12	16:02:28	0.00550917	687.803	FALSE	43
2022-09-12	16:02:29	0.187595	687.99	FALSE	43
2022-09-12	16:02:29	-0.118511	687.99	FALSE	43
2022-09-12	16:02:29	0.0318195	688.022	FALSE	43
2022-09-12	16:02:29	-0.091132	688.022	FALSE	43
2022-09-12	16:02:30	0.0846949	688.107	FALSE	43
2022-09-12	16:02:30	-0.0595799	688.107	FALSE	43
2022-09-12	16:02:30	0.00357532	688.111	FALSE	43
2022-09-12	16:02:31	-0.0213102	688.111	FALSE	43
2022-09-12	16:02:31	0.251158	688.362	FALSE	43
2022-09-12	16:02:31	0.199504	688.561	FALSE	43
2022-09-12	16:02:31	0.39131	688.953	FALSE	43
2022-09-12	16:02:32	0.354364	689.307	FALSE	43
2022-09-12	16:02:32	1.30078	690.608	FALSE	43
2022-09-12	16:02:32	1.52607	692.134	FALSE	43
2022-09-12	16:02:32	0.632226	692.766	FALSE	43
2022-09-12	16:02:33	0.405254	693.171	FALSE	43
2022-09-12	16:02:33	0.379707	693.551	FALSE	43
2022-09-12	16:02:33	0.341183	693.892	FALSE	43
2022-09-12	16:02:33	0.342914	694.235	FALSE	43
2022-09-12	16:02:34	0.615585	694.851	FALSE	43
2022-09-12	16:02:34	0.433346	695.284	FALSE	43
2022-09-12	16:02:34	0.389326	695.673	FALSE	43
2022-09-12	16:02:35	0.386069	696.059	FALSE	43
2022-09-12	16:02:35	0.573244	696.633	FALSE	43
2022-09-12	16:02:35	0.506171	697.139	FALSE	43
2022-09-12	16:02:35	0.086985	697.226	FALSE	43
2022-09-12	16:02:36	-0.383753	697.226	FALSE	43
2022-09-12	16:02:36	-0.621106	697.226	FALSE	43
2022-09-12	16:02:36	-0.467112	697.226	FALSE	43
2022-09-12	16:02:36	-0.0481295	697.226	FALSE	43
2022-09-12	16:02:37	0.105865	697.332	FALSE	43
2022-09-12	16:02:37	0.116043	697.448	FALSE	43
2022-09-12	16:02:37	0.0107	697.458	FALSE	43
2022-09-12	16:02:37	0.390954	697.849	FALSE	43
2022-09-12	16:02:38	0.0503438	697.9	FALSE	43
2022-09-12	16:02:38	0.181285	698.081	FALSE	43
2022-09-12	16:02:38	0.159351	698.24	FALSE	43
2022-09-12	16:02:39	0.16958	698.41	FALSE	43
2022-09-12	16:02:39	0.224797	698.635	FALSE	43
2022-09-12	16:02:39	0.122608	698.757	FALSE	43
2022-09-12	16:02:39	0.144186	698.901	FALSE	43
2022-09-12	16:02:40	0.220267	699.122	FALSE	43
2022-09-12	16:02:40	0.203473	699.325	FALSE	43
2022-09-12	16:02:40	0.200573	699.526	FALSE	43
2022-09-12	16:02:40	0.21355	699.739	FALSE	43
2022-09-12	16:02:41	0.151718	699.891	FALSE	43
2022-09-12	16:02:41	0.190802	700.082	FALSE	43
2022-09-12	16:02:41	0.422506	700.504	FALSE	43
2022-09-12	16:02:41	0.316858	700.821	FALSE	43
2022-09-12	16:02:42	0.439758	701.261	FALSE	43
2022-09-12	16:02:42	0.461641	701.723	FALSE	43
2022-09-12	16:02:42	0.439402	702.162	FALSE	43
2022-09-12	16:02:43	0.527137	702.689	FALSE	43
2022-09-12	16:02:43	0.421743	703.111	FALSE	43
2022-09-12	16:02:43	0.523829	703.635	FALSE	43
2022-09-12	16:02:43	0.472074	704.107	FALSE	43
2022-09-12	16:02:44	0.457367	704.564	FALSE	43
2022-09-12	16:02:44	0.475433	705.04	FALSE	43
2022-09-12	16:02:44	0.396043	705.436	FALSE	43
2022-09-12	16:02:44	0.527086	705.963	FALSE	43
2022-09-12	16:02:45	0.431311	706.394	FALSE	43
2022-09-12	16:02:45	0.515025	706.909	FALSE	43
2022-09-12	16:02:45	0.470751	707.38	FALSE	43
2022-09-12	16:02:45	0.541489	707.921	FALSE	43
2022-09-12	16:02:46	0.419504	708.341	FALSE	43
2022-09-12	16:02:46	0.450954	708.792	FALSE	43
2022-09-12	16:02:46	0.457112	709.249	FALSE	43
2022-09-12	16:02:47	0.452481	709.701	FALSE	43
2022-09-12	16:02:47	0.456196	710.158	FALSE	43
2022-09-12	16:02:47	0.347952	710.506	FALSE	43
2022-09-12	16:02:47	0.17416	710.68	FALSE	43
2022-09-12	16:02:48	0.404237	711.084	FALSE	43
2022-09-12	16:02:48	0.312176	711.396	FALSE	43
2022-09-12	16:02:48	0.414211	711.81	FALSE	43
2022-09-12	16:02:48	0.337112	712.147	FALSE	43
2022-09-12	16:02:49	0.377061	712.524	FALSE	43
2022-09-12	16:02:49	0.335229	712.86	FALSE	43
2022-09-12	16:02:49	0.31472	713.174	FALSE	43
2022-09-12	16:02:50	0.371718	713.546	FALSE	43
2022-09-12	16:02:50	0.365204	713.911	FALSE	43
2022-09-12	16:02:50	0.290344	714.202	FALSE	43
2022-09-12	16:02:50	0.251209	714.453	FALSE	43
2022-09-12	16:02:51	0.135891	714.589	FALSE	43
2022-09-12	16:02:51	-0.170063	714.589	FALSE	43
2022-09-12	16:02:51	-0.484262	714.589	FALSE	43
2022-09-12	16:02:51	-0.411895	714.589	FALSE	43
2022-09-12	16:02:52	0.930598	715.519	FALSE	43
2022-09-12	16:02:52	1.31126	716.831	FALSE	43
2022-09-12	16:02:52	1.28225	718.113	FALSE	43
2022-09-12	16:02:52	0.410344	718.523	FALSE	43
2022-09-12	16:02:53	0.322761	718.846	FALSE	43
2022-09-12	16:02:53	0.375331	719.221	FALSE	43
2022-09-12	16:02:53	0.250445	719.472	FALSE	43
2022-09-12	16:02:54	0.162201	719.634	FALSE	43
2022-09-12	16:02:54	0.212328	719.846	FALSE	43
2022-09-12	16:02:54	0.201438	720.048	FALSE	43
2022-09-12	16:02:54	0.203321	720.251	FALSE	43
2022-09-12	16:02:55	0.115077	720.366	FALSE	43
2022-09-12	16:02:55	0.474975	720.841	FALSE	43
2022-09-12	16:02:55	0.24958	721.091	FALSE	43
2022-09-12	16:02:55	0.429428	721.52	FALSE	43
2022-09-12	16:02:56	0.323422	721.844	FALSE	43
2022-09-12	16:02:56	0.397875	722.241	FALSE	43
2022-09-12	16:02:56	0.424288	722.666	FALSE	43
2022-09-12	16:02:56	0.458537	723.124	FALSE	43
2022-09-12	16:02:57	0.394466	723.519	FALSE	43
2022-09-12	16:02:57	0.433397	723.952	FALSE	43
2022-09-12	16:02:57	0.342201	724.294	FALSE	43
2022-09-12	16:02:58	0.429224	724.724	FALSE	43
2022-09-12	16:02:58	0.487239	725.211	FALSE	43
2022-09-12	16:02:58	0.361387	725.572	FALSE	43
2022-09-12	16:02:58	0.472023	726.044	FALSE	43
2022-09-12	16:02:59	0.307341	726.352	FALSE	43
2022-09-12	16:02:59	0.428563	726.78	FALSE	43
2022-09-12	16:02:59	0.0978756	726.878	FALSE	43
2022-09-12	16:02:59	0.298384	727.176	FALSE	43
2022-09-12	16:03:00	0.103575	727.28	FALSE	43
2022-09-12	16:03:00	0.347596	727.628	FALSE	43
2022-09-12	16:03:00	0.0687152	727.696	FALSE	43
2022-09-12	16:03:00	0.233855	727.93	FALSE	43
2022-09-12	16:03:01	-3.79307e-05	727.93	FALSE	43
2022-09-12	16:03:01	-0.0563229	727.93	FALSE	43
2022-09-12	16:03:01	0.0122776	727.942	FALSE	43
2022-09-12	16:03:02	-0.100598	727.942	FALSE	43
2022-09-12	16:03:02	0.103066	728.045	FALSE	43
2022-09-12	16:03:02	0.079962	728.125	FALSE	43
2022-09-12	16:03:02	0.083728	728.209	FALSE	43
2022-09-12	16:03:03	-0.129503	728.209	FALSE	43
2022-09-12	16:03:03	-0.211285	728.209	FALSE	43
2022-09-12	16:03:03	0.0940079	728.303	FALSE	43
2022-09-12	16:03:03	0.102201	728.405	FALSE	43
2022-09-12	16:03:04	0.243066	728.648	FALSE	43
2022-09-12	16:03:04	0.0862724	728.735	FALSE	43
2022-09-12	16:03:04	0.379758	729.114	FALSE	43
2022-09-12	16:03:04	0.236756	729.351	FALSE	43
2022-09-12	16:03:05	0.597977	729.949	FALSE	43
2022-09-12	16:03:05	0.157367	730.107	FALSE	43
2022-09-12	16:03:05	0.483066	730.59	FALSE	43
2022-09-12	16:03:06	0.200878	730.79	FALSE	43
2022-09-12	16:03:06	0.172176	730.963	FALSE	43
2022-09-12	16:03:06	0.0766032	731.039	FALSE	43
2022-09-12	16:03:06	0.428613	731.468	FALSE	43
2022-09-12	16:03:07	0.292328	731.76	FALSE	43
2022-09-12	16:03:07	0.401692	732.162	FALSE	43
2022-09-12	16:03:07	0.452277	732.614	FALSE	43
2022-09-12	16:03:07	0.460827	733.075	FALSE	43
2022-09-12	16:03:08	0.317621	733.393	FALSE	43
2022-09-12	16:03:08	0.487748	733.88	FALSE	43
2022-09-12	16:03:08	0.380115	734.26	FALSE	43
2022-09-12	16:03:08	0.453193	734.714	FALSE	43
2022-09-12	16:03:09	0.46612	735.18	FALSE	43
2022-09-12	16:03:09	0.330547	735.51	FALSE	43
2022-09-12	16:03:09	0.262405	735.773	FALSE	43
2022-09-12	16:03:10	0.270903	736.044	FALSE	43
2022-09-12	16:03:10	0.290242	736.334	FALSE	43
2022-09-12	16:03:10	0.429529	736.763	FALSE	43
2022-09-12	16:03:10	0.522659	737.286	FALSE	43
2022-09-12	16:03:11	0.213346	737.499	FALSE	43
2022-09-12	16:03:11	0.380064	737.879	FALSE	43
2022-09-12	16:03:11	0.251667	738.131	FALSE	43
2022-09-12	16:03:11	0.442914	738.574	FALSE	43
2022-09-12	16:03:12	0.27757	738.852	FALSE	43
2022-09-12	16:03:12	0.651158	739.503	FALSE	43
2022-09-12	16:03:12	0.267901	739.771	FALSE	43
2022-09-12	16:03:12	0.474618	740.245	FALSE	43
2022-09-12	16:03:13	0.350547	740.596	FALSE	43
2022-09-12	16:03:13	0.498639	741.095	FALSE	43
2022-09-12	16:03:13	0.413346	741.508	FALSE	43
2022-09-12	16:03:14	0.530344	742.038	FALSE	43
2022-09-12	16:03:14	0.430445	742.469	FALSE	43
2022-09-12	16:03:14	0.389122	742.858	FALSE	43
2022-09-12	16:03:14	0.443422	743.301	FALSE	43
2022-09-12	16:03:15	0.472684	743.774	FALSE	43
2022-09-12	16:03:15	0.481489	744.255	FALSE	43
2022-09-12	16:03:15	0.347799	744.603	FALSE	43
2022-09-12	16:03:15	0.567901	745.171	FALSE	43
2022-09-12	16:03:16	0.341132	745.512	FALSE	43
2022-09-12	16:03:16	0.602659	746.115	FALSE	43
2022-09-12	16:03:16	0.467087	746.582	FALSE	43
2022-09-12	16:03:17	0.513346	747.095	FALSE	43
2022-09-12	16:03:17	0.437774	747.533	FALSE	43
2022-09-12	16:03:17	0.409071	747.942	FALSE	43
2022-09-12	16:03:17	0.50841	748.451	FALSE	43
2022-09-12	16:03:18	0.441743	748.892	FALSE	43
2022-09-12	16:03:18	0.634008	749.526	FALSE	43
2022-09-12	16:03:18	0.438995	749.965	FALSE	43
2022-09-12	16:03:18	0.741234	750.707	FALSE	43
2022-09-12	16:03:19	0.346069	751.053	FALSE	43
2022-09-12	16:03:19	0.320115	751.373	FALSE	43
2022-09-12	16:03:19	0.316756	751.689	FALSE	43
2022-09-12	16:03:19	0.467239	752.157	FALSE	43
2022-09-12	16:03:20	1.27899	753.436	FALSE	43
2022-09-12	16:03:20	0.547443	753.983	FALSE	43
2022-09-12	16:03:20	0.522812	754.506	FALSE	43
2022-09-12	16:03:21	0.564949	755.071	FALSE	43
2022-09-12	16:03:21	0.459657	755.531	FALSE	43
2022-09-12	16:03:21	0.291412	755.822	FALSE	43
2022-09-12	16:03:21	0.606069	756.428	FALSE	43
2022-09-12	16:03:22	0.420725	756.849	FALSE	43
2022-09-12	16:03:22	0.546985	757.396	FALSE	43
2022-09-12	16:03:22	0.432277	757.828	FALSE	43
2022-09-12	16:03:22	0.565967	758.394	FALSE	43
2022-09-12	16:03:23	0.450802	758.845	FALSE	43
2022-09-12	16:03:23	0.456756	759.302	FALSE	43
2022-09-12	16:03:23	0.468868	759.77	FALSE	43
2022-09-12	16:03:23	0.464033	760.234	FALSE	43
2022-09-12	16:03:24	0.540013	760.774	FALSE	43
2022-09-12	16:03:24	0.476756	761.251	FALSE	43
2022-09-12	16:03:24	0.494262	761.745	FALSE	43
2022-09-12	16:03:25	0.486221	762.232	FALSE	43
2022-09-12	16:03:25	0.513092	762.745	FALSE	43
2022-09-12	16:03:25	0.691972	763.437	FALSE	43
2022-09-12	16:03:25	0.759911	764.197	FALSE	43
2022-09-12	16:03:26	0.949733	765.146	FALSE	43
2022-09-12	16:03:26	0.606069	765.752	FALSE	43
2022-09-12	16:03:26	0.784033	766.537	FALSE	43
2022-09-12	16:03:26	0.963219	767.5	FALSE	43
2022-09-12	16:03:27	0.853193	768.353	FALSE	43
2022-09-12	16:03:27	0.935534	769.288	FALSE	43
2022-09-12	16:03:27	1.13523	770.424	FALSE	43
2022-09-12	16:03:27	1.08078	771.504	FALSE	43
2022-09-12	16:03:28	0.815127	772.32	FALSE	43
2022-09-12	16:03:28	0.593346	772.913	FALSE	43
2022-09-12	16:03:28	0.417163	773.33	FALSE	43
2022-09-12	16:03:29	0.549835	773.88	FALSE	43
2022-09-12	16:03:29	0.5764	774.456	FALSE	43
2022-09-12	16:03:29	0.641285	775.098	FALSE	43
2022-09-12	16:03:29	0.412176	775.51	FALSE	43
2022-09-12	16:03:30	0.494618	776.004	FALSE	43
2022-09-12	16:03:30	0.505611	776.51	FALSE	43
2022-09-12	16:03:30	0.513855	777.024	FALSE	43
2022-09-12	16:03:30	0.35416	777.378	FALSE	43
2022-09-12	16:03:31	0.444135	777.822	FALSE	43
2022-09-12	16:03:31	0.45014	778.272	FALSE	43
2022-09-12	16:03:31	1.61935	779.892	FALSE	43
2022-09-12	16:03:31	1.18073	781.072	FALSE	43
2022-09-12	16:03:32	0.881387	781.954	FALSE	43
2022-09-12	16:03:32	0.585611	782.539	FALSE	43
2022-09-12	16:03:32	2.22057	784.76	FALSE	43
2022-09-12	16:03:33	0.96042	785.72	FALSE	43
2022-09-12	16:03:33	0.341489	786.062	FALSE	43
2022-09-12	16:03:33	0.90383	786.966	FALSE	43
2022-09-12	16:03:33	0.488104	787.454	FALSE	43
2022-09-12	16:03:34	0.489733	787.944	FALSE	43
2022-09-12	16:03:34	0.382659	788.326	FALSE	43
2022-09-12	16:03:34	0.673957	789	FALSE	43
2022-09-12	16:03:34	1.39966	790.4	FALSE	43
2022-09-12	16:03:35	1.52724	791.927	FALSE	43
2022-09-12	16:03:35	2.11905	794.046	FALSE	43
2022-09-12	16:03:35	2.365	796.411	FALSE	43
2022-09-12	16:03:35	0.22958	796.641	FALSE	43
2022-09-12	16:03:36	0.145356	796.786	FALSE	43
2022-09-12	16:03:36	0.181641	796.968	FALSE	43
2022-09-12	16:03:36	0.148613	797.116	FALSE	43

## Sheet: Ranger_prong_2022912155818
						**GoPro Fitting: 1547
2022-09-12	15:58:18	0.0724302
2022-09-12	15:58:19	0.088817
2022-09-12	15:58:19	0.121692
2022-09-12	15:58:19	0.311616
2022-09-12	15:58:19	0.347596
2022-09-12	15:58:20	0.381183
2022-09-12	15:58:20	0.321336
2022-09-12	15:58:20	0.42556
2022-09-12	15:58:20	0.399148
2022-09-12	15:58:21	0.368461
2022-09-12	15:58:21	0.388715
2022-09-12	15:58:21	0.418791
2022-09-12	15:58:22	0.404288
2022-09-12	15:58:22	0.391158
2022-09-12	15:58:22	0.382099
2022-09-12	15:58:22	0.421692
2022-09-12	15:58:23	0.424491
2022-09-12	15:58:23	0.376349
2022-09-12	15:58:23	0.388206
2022-09-12	15:58:23	0.374669
2022-09-12	15:58:24	0.395891
2022-09-12	15:58:24	0.36902
2022-09-12	15:58:24	0.377061
2022-09-12	15:58:24	0.413244
2022-09-12	15:58:25	0.383117
2022-09-12	15:58:25	0.506425
2022-09-12	15:58:25	0.412583
2022-09-12	15:58:26	0.362659
2022-09-12	15:58:26	0.470903
2022-09-12	15:58:26	0.470089
2022-09-12	15:58:26	0.480369
2022-09-12	15:58:27	0.503728
2022-09-12	15:58:27	0.473804
2022-09-12	15:58:27	0.450547
2022-09-12	15:58:27	0.476756
2022-09-12	15:58:28	0.457621
2022-09-12	15:58:28	0.494771
2022-09-12	15:58:28	0.397214
2022-09-12	15:58:28	0.636145
2022-09-12	15:58:29	0.397265
2022-09-12	15:58:29	0.295076
2022-09-12	15:58:29	0.276705
2022-09-12	15:58:30	0.217825
2022-09-12	15:58:30	0.582456
2022-09-12	15:58:30	2.30607
2022-09-12	15:58:30	1.54754
2022-09-12	15:58:31	4.16474
2022-09-12	15:58:31	2.9024
2022-09-12	15:58:31	1.55503
2022-09-12	15:58:31	1.17131
2022-09-12	15:58:32	0.381031
2022-09-12	15:58:32	0.556043
2022-09-12	15:58:32	0.148613
2022-09-12	15:58:32	0.615077
2022-09-12	15:58:33	0.330293
2022-09-12	15:58:33	0.526476
2022-09-12	15:58:33	0.535534
2022-09-12	15:58:34	0.443372
2022-09-12	15:58:34	0.663066
2022-09-12	15:58:34	0.926018
2022-09-12	15:58:34	3.09737
2022-09-12	15:58:35	2.95884
2022-09-12	15:58:35	1.78302
2022-09-12	15:58:35	0.548868
2022-09-12	15:58:35	1.13192
2022-09-12	15:58:36	0.44673
2022-09-12	15:58:36	0.62327
2022-09-12	15:58:36	0.641081
2022-09-12	15:58:37	0.428613
2022-09-12	15:58:37	0.782506
2022-09-12	15:58:37	0.720929
2022-09-12	15:58:37	0.728817
2022-09-12	15:58:38	0.556094
2022-09-12	15:58:38	0.484084
2022-09-12	15:58:38	0.342608
2022-09-12	15:58:38	0.538995
2022-09-12	15:58:39	0.356298
2022-09-12	15:58:39	0.564491
2022-09-12	15:58:39	0.0715142
2022-09-12	15:58:39	0.193804
2022-09-12	15:58:40	0.0865269
2022-09-12	15:58:40	0.457774
2022-09-12	15:58:40	0.635025
2022-09-12	15:58:41	0.512634
2022-09-12	15:58:41	0.874974
2022-09-12	15:58:41	1.14093
2022-09-12	15:58:41	0.503066
2022-09-12	15:58:42	0.462659
2022-09-12	15:58:42	0.365305
2022-09-12	15:58:42	0.288562
2022-09-12	15:58:42	0.444491
2022-09-12	15:58:43	0.411769
2022-09-12	15:58:43	0.675483
2022-09-12	15:58:43	0.217214
2022-09-12	15:58:43	0.395942
2022-09-12	15:58:44	0.179504
2022-09-12	15:58:44	0.480725
2022-09-12	15:58:44	0.14215
2022-09-12	15:58:45	0.306527
2022-09-12	15:58:45	0.248664
2022-09-12	15:58:45	0.436654
2022-09-12	15:58:45	0.53416
2022-09-12	15:58:46	0.865153
2022-09-12	15:58:46	0.365814
2022-09-12	15:58:46	0.796654
2022-09-12	15:58:46	0.920827
2022-09-12	15:58:47	0.387036
2022-09-12	15:58:47	0.28098
2022-09-12	15:58:47	0.212583
2022-09-12	15:58:47	0.218995
2022-09-12	15:58:48	0.134822
2022-09-12	15:58:48	0.413244
2022-09-12	15:58:48	0.307392
2022-09-12	15:58:49	0.781183
2022-09-12	15:58:49	0.660471
2022-09-12	15:58:49	1.13411
2022-09-12	15:58:49	1.30419
2022-09-12	15:58:50	1.47966
2022-09-12	15:58:50	1.1023
2022-09-12	15:58:50	0.776349
2022-09-12	15:58:50	0.612532
2022-09-12	15:58:51	0.346781
2022-09-12	15:58:51	1.27212
2022-09-12	15:58:51	0.784287
2022-09-12	15:58:51	1.18307
2022-09-12	15:58:52	0.629784
2022-09-12	15:58:52	0.923168
2022-09-12	15:58:52	0.438333
2022-09-12	15:58:53	0.530395
2022-09-12	15:58:53	0.674466
2022-09-12	15:58:53	0.340369
2022-09-12	15:58:53	0.742761
2022-09-12	15:58:54	0.397519
2022-09-12	15:58:54	1.11452
2022-09-12	15:58:54	0.927341
2022-09-12	15:58:54	1.46576
2022-09-12	15:58:55	1.18454
2022-09-12	15:58:55	0.909682
2022-09-12	15:58:55	0.868053
2022-09-12	15:58:56	0.76958
2022-09-12	15:58:56	0.592227
2022-09-12	15:58:56	0.477265
2022-09-12	15:58:56	0.721692
2022-09-12	15:58:57	0.587697
2022-09-12	15:58:57	0.704389
2022-09-12	15:58:57	0.578333
2022-09-12	15:58:57	0.924542
2022-09-12	15:58:58	0.656908
2022-09-12	15:58:58	0.714415
2022-09-12	15:58:58	0.666272
2022-09-12	15:58:58	0.584135
2022-09-12	15:58:59	0.729987
2022-09-12	15:58:59	0.429936
2022-09-12	15:58:59	0.442863
2022-09-12	15:59:00	0.308359
2022-09-12	15:59:00	0.673346
2022-09-12	15:59:00	0.568918
2022-09-12	15:59:00	0.622812
2022-09-12	15:59:01	0.588868
2022-09-12	15:59:01	0.636348
2022-09-12	15:59:01	1.01976
2022-09-12	15:59:01	1.10739
2022-09-12	15:59:02	1.82037
2022-09-12	15:59:02	1.37808
2022-09-12	15:59:02	1.61915
2022-09-12	15:59:02	0.740114
2022-09-12	15:59:03	1.25223
2022-09-12	15:59:03	1.10281
2022-09-12	15:59:03	0.563524
2022-09-12	15:59:04	1.22729
2022-09-12	15:59:04	0.417977
2022-09-12	15:59:04	1.31686
2022-09-12	15:59:04	0.5907
2022-09-12	15:59:05	2.19253
2022-09-12	15:59:05	0.686119
2022-09-12	15:59:05	1.29192
2022-09-12	15:59:05	0.350191
2022-09-12	15:59:06	1.48332
2022-09-12	15:59:06	0.595229
2022-09-12	15:59:06	0.301641
2022-09-12	15:59:06	0.422252
2022-09-12	15:59:07	0.340522
2022-09-12	15:59:07	0.569733
2022-09-12	15:59:07	0.385814
2022-09-12	15:59:08	0.48271
2022-09-12	15:59:08	0.196043
2022-09-12	15:59:08	0.472684
2022-09-12	15:59:08	0.265865
2022-09-12	15:59:09	0.589427
2022-09-12	15:59:09	0.192125
2022-09-12	15:59:09	0.537977
2022-09-12	15:59:09	0.518435
2022-09-12	15:59:10	0.902201
2022-09-12	15:59:10	0.877214
2022-09-12	15:59:10	0.572277
2022-09-12	15:59:10	0.640064
2022-09-12	15:59:11	0.270445
2022-09-12	15:59:11	0.491769
2022-09-12	15:59:11	0.182812
2022-09-12	15:59:12	0.36958
2022-09-12	15:59:12	0.1793
2022-09-12	15:59:12	0.371514
2022-09-12	15:59:12	0.24785
2022-09-12	15:59:13	0.399046
2022-09-12	15:59:13	0.315738
2022-09-12	15:59:13	0.35126
2022-09-12	15:59:13	0.245051
2022-09-12	15:59:14	0.087392
2022-09-12	15:59:14	0.113346
2022-09-12	15:59:14	-0.153524
2022-09-12	15:59:14	-0.308282
2022-09-12	15:59:15	-0.565381
2022-09-12	15:59:15	-0.756933
2022-09-12	15:59:15	-0.566857
2022-09-12	15:59:16	-0.447519
2022-09-12	15:59:16	0.242507
2022-09-12	15:59:16	0.762048
2022-09-12	15:59:16	0.817621
2022-09-12	15:59:17	0.684898
2022-09-12	15:59:17	0.57757
2022-09-12	15:59:17	0.457672
2022-09-12	15:59:17	0.452532
2022-09-12	15:59:18	0.847188
2022-09-12	15:59:18	0.478181
2022-09-12	15:59:18	0.638435
2022-09-12	15:59:18	0.325
2022-09-12	15:59:19	1.12831
2022-09-12	15:59:19	0.325356
2022-09-12	15:59:19	0.389987
2022-09-12	15:59:20	0.495178
2022-09-12	15:59:20	0.137825
2022-09-12	15:59:20	0.430445
2022-09-12	15:59:20	0.140624
2022-09-12	15:59:21	0.392227
2022-09-12	15:59:21	0.0589443
2022-09-12	15:59:21	0.253092
2022-09-12	15:59:21	0.0323284
2022-09-12	15:59:22	0.250394
2022-09-12	15:59:22	0.383015
2022-09-12	15:59:22	1.47966
2022-09-12	15:59:23	0.487188
2022-09-12	15:59:23	0.200166
2022-09-12	15:59:23	0.212481
2022-09-12	15:59:23	0.215026
2022-09-12	15:59:24	0.187952
2022-09-12	15:59:24	0.365102
2022-09-12	15:59:24	0.29014
2022-09-12	15:59:24	0.179199
2022-09-12	15:59:25	0.384135
2022-09-12	15:59:25	0.389224
2022-09-12	15:59:25	0.26159
2022-09-12	15:59:25	0.304033
2022-09-12	15:59:26	0.207596
2022-09-12	15:59:26	0.384695
2022-09-12	15:59:26	0.390802
2022-09-12	15:59:27	0.324949
2022-09-12	15:59:27	0.309631
2022-09-12	15:59:27	0.4193
2022-09-12	15:59:27	0.50556
2022-09-12	15:59:28	0.25701
2022-09-12	15:59:28	0.374669
2022-09-12	15:59:28	0.342557
2022-09-12	15:59:29	0.375433
2022-09-12	15:59:29	0.432837
2022-09-12	15:59:29	0.459707
2022-09-12	15:59:29	0.516399
2022-09-12	15:59:29	0.615382
2022-09-12	15:59:30	0.595382
2022-09-12	15:59:30	0.413244
2022-09-12	15:59:30	0.481997
2022-09-12	15:59:31	0.357723
2022-09-12	15:59:31	-0.0384094
2022-09-12	15:59:31	-0.312709
2022-09-12	15:59:31	-0.608536
2022-09-12	15:59:32	-0.602938
2022-09-12	15:59:32	-0.677035
2022-09-12	15:59:32	-0.474389
2022-09-12	15:59:32	-0.37846
2022-09-12	15:59:33	-0.289758
2022-09-12	15:59:33	-0.252506
2022-09-12	15:59:33	-0.288638
2022-09-12	15:59:33	-0.287773
2022-09-12	15:59:34	-0.570419
2022-09-12	15:59:34	-0.611793
2022-09-12	15:59:34	-0.491183
2022-09-12	15:59:35	-0.623803
2022-09-12	15:59:35	-0.672048
2022-09-12	15:59:35	-0.763396
2022-09-12	15:59:35	-0.826399
2022-09-12	15:59:36	-0.651691
2022-09-12	15:59:36	-0.610012
2022-09-12	15:59:36	-0.526501
2022-09-12	15:59:36	-0.324312
2022-09-12	15:59:37	-0.24243
2022-09-12	15:59:37	-0.0272644
2022-09-12	15:59:37	0.075789
2022-09-12	15:59:37	-0.190674
2022-09-12	15:59:38	-0.234338
2022-09-12	15:59:38	-0.331946
2022-09-12	15:59:38	-0.708638
2022-09-12	15:59:39	-0.493117
2022-09-12	15:59:39	-0.26986
2022-09-12	15:59:39	-0.127824
2022-09-12	15:59:39	-0.13276
2022-09-12	15:59:40	0.938079
2022-09-12	15:59:40	0.980776
2022-09-12	15:59:40	1.65645
2022-09-12	15:59:40	1.211
2022-09-12	15:59:41	1.89798
2022-09-12	15:59:41	1.51177
2022-09-12	15:59:41	1.10836
2022-09-12	15:59:41	1.54698
2022-09-12	15:59:42	0.593499
2022-09-12	15:59:42	1.30877
2022-09-12	15:59:42	0.623829
2022-09-12	15:59:43	0.472074
2022-09-12	15:59:43	0.77014
2022-09-12	15:59:43	0.226679
2022-09-12	15:59:43	0.744745
2022-09-12	15:59:44	0.303931
2022-09-12	15:59:44	0.665662
2022-09-12	15:59:44	0.331005
2022-09-12	15:59:44	0.685051
2022-09-12	15:59:45	0.602354
2022-09-12	15:59:45	0.641081
2022-09-12	15:59:45	0.612888
2022-09-12	15:59:45	0.74841
2022-09-12	15:59:46	0.704084
2022-09-12	15:59:46	1.24693
2022-09-12	15:59:46	0.863015
2022-09-12	15:59:47	0.535636
2022-09-12	15:59:47	0.727137
2022-09-12	15:59:47	0.174313
2022-09-12	15:59:47	0.380115
2022-09-12	15:59:48	0.217061
2022-09-12	15:59:48	0.552634
2022-09-12	15:59:48	0.14444
2022-09-12	15:59:48	0.455534
2022-09-12	15:59:49	0.230598
2022-09-12	15:59:49	0.455483
2022-09-12	15:59:49	0.193702
2022-09-12	15:59:50	0.486985
2022-09-12	15:59:50	0.306069
2022-09-12	15:59:50	0.383066
2022-09-12	15:59:50	0.253244
2022-09-12	15:59:51	0.409021
2022-09-12	15:59:51	0.392837
2022-09-12	15:59:51	0.435178
2022-09-12	15:59:51	0.392176
2022-09-12	15:59:52	0.298486
2022-09-12	15:59:52	0.236654
2022-09-12	15:59:52	-0.0507249
2022-09-12	15:59:52	-0.196475
2022-09-12	15:59:53	0.0588425
2022-09-12	15:59:53	0.0519723
2022-09-12	15:59:53	0.0532954
2022-09-12	15:59:54	0.196552
2022-09-12	15:59:54	0.418079
2022-09-12	15:59:54	0.418079
2022-09-12	15:59:54	0.254262
2022-09-12	15:59:55	0.372888
2022-09-12	15:59:55	0.317519
2022-09-12	15:59:55	0.530802
2022-09-12	15:59:55	0.315891
2022-09-12	15:59:56	0.358283
2022-09-12	15:59:56	0.313295
2022-09-12	15:59:56	0.326985
2022-09-12	15:59:56	0.231667
2022-09-12	15:59:57	0.375026
2022-09-12	15:59:57	0.380624
2022-09-12	15:59:57	0.391565
2022-09-12	15:59:58	0.22897
2022-09-12	15:59:58	0.198435
2022-09-12	15:59:58	-0.0457377
2022-09-12	15:59:58	-0.319122
2022-09-12	15:59:59	-0.180852
2022-09-12	15:59:59	-0.0679768
2022-09-12	15:59:59	0.139657
2022-09-12	15:59:59	0.294008
2022-09-12	16:00:00	0.566476
2022-09-12	16:00:00	0.366934
2022-09-12	16:00:00	0.216705
2022-09-12	16:00:00	0.328308
2022-09-12	16:00:01	0.214618
2022-09-12	16:00:01	0.36159
2022-09-12	16:00:01	0.0517687
2022-09-12	16:00:02	-0.130012
2022-09-12	16:00:02	-0.141615
2022-09-12	16:00:02	0.217163
2022-09-12	16:00:02	0.0800129
2022-09-12	16:00:03	0.349377
2022-09-12	16:00:03	0.104237
2022-09-12	16:00:03	0.41472
2022-09-12	16:00:03	0.513499
2022-09-12	16:00:04	0.568766
2022-09-12	16:00:04	0.618842
2022-09-12	16:00:04	0.549071
2022-09-12	16:00:04	0.600216
2022-09-12	16:00:05	0.906221
2022-09-12	16:00:05	0.403931
2022-09-12	16:00:05	0.362557
2022-09-12	16:00:06	0.420318
2022-09-12	16:00:06	0.410089
2022-09-12	16:00:06	0.38729
2022-09-12	16:00:06	0.352786
2022-09-12	16:00:07	0.460115
2022-09-12	16:00:07	0.326476
2022-09-12	16:00:07	0.469733
2022-09-12	16:00:07	0.28958
2022-09-12	16:00:08	0.407646
2022-09-12	16:00:08	0.388308
2022-09-12	16:00:08	0.480267
2022-09-12	16:00:08	0.398588
2022-09-12	16:00:09	0.621183
2022-09-12	16:00:09	1.64159
2022-09-12	16:00:09	1.6621
2022-09-12	16:00:10	0.996247
2022-09-12	16:00:10	0.565611
2022-09-12	16:00:10	0.606425
2022-09-12	16:00:10	4.68922
2022-09-12	16:00:11	0.401336
2022-09-12	16:00:11	0.335433
2022-09-12	16:00:11	0.349122
2022-09-12	16:00:11	0.28673
2022-09-12	16:00:12	0.329224
2022-09-12	16:00:12	0.252481
2022-09-12	16:00:12	0.256756
2022-09-12	16:00:13	0.423728
2022-09-12	16:00:13	0.272532
2022-09-12	16:00:13	0.70098
2022-09-12	16:00:13	0.474517
2022-09-12	16:00:14	0.515585
2022-09-12	16:00:14	0.448613
2022-09-12	16:00:14	0.41243
2022-09-12	16:00:14	0.44902
2022-09-12	16:00:15	0.227952
2022-09-12	16:00:15	0.61416
2022-09-12	16:00:15	0.267239
2022-09-12	16:00:15	0.461743
2022-09-12	16:00:16	0.290547
2022-09-12	16:00:16	0.400471
2022-09-12	16:00:16	0.157825
2022-09-12	16:00:17	0.429936
2022-09-12	16:00:17	0.242354
2022-09-12	16:00:17	0.370547
2022-09-12	16:00:17	0.173143
2022-09-12	16:00:18	0.437417
2022-09-12	16:00:18	0.309784
2022-09-12	16:00:18	0.382812
2022-09-12	16:00:18	0.264491
2022-09-12	16:00:19	0.429326
2022-09-12	16:00:19	0.313499
2022-09-12	16:00:19	0.335636
2022-09-12	16:00:19	0.358842
2022-09-12	16:00:20	0.368664
2022-09-12	16:00:20	0.509326
2022-09-12	16:00:20	0.374568
2022-09-12	16:00:21	0.567086
2022-09-12	16:00:21	0.48673
2022-09-12	16:00:21	0.413346
2022-09-12	16:00:21	0.413601
2022-09-12	16:00:22	0.448257
2022-09-12	16:00:22	0.392328
2022-09-12	16:00:22	0.535331
2022-09-12	16:00:22	0.451056
2022-09-12	16:00:23	0.479046
2022-09-12	16:00:23	0.471056
2022-09-12	16:00:23	0.405865
2022-09-12	16:00:23	0.385305
2022-09-12	16:00:24	0.370802
2022-09-12	16:00:24	0.454364
2022-09-12	16:00:24	0.400216
2022-09-12	16:00:25	0.471107
2022-09-12	16:00:25	0.455178
2022-09-12	16:00:25	0.450191
2022-09-12	16:00:25	0.44841
2022-09-12	16:00:26	0.458842
2022-09-12	16:00:26	0.480573
2022-09-12	16:00:26	0.491667
2022-09-12	16:00:26	0.529733
2022-09-12	16:00:27	0.378435
2022-09-12	16:00:27	0.480776
2022-09-12	16:00:27	0.473855
2022-09-12	16:00:27	0.332176
2022-09-12	16:00:28	0.294975
2022-09-12	16:00:28	0.305458
2022-09-12	16:00:28	0.385713
2022-09-12	16:00:29	0.387646
2022-09-12	16:00:29	0.411412
2022-09-12	16:00:29	0.429122
2022-09-12	16:00:29	0.381896
2022-09-12	16:00:30	0.406934
2022-09-12	16:00:30	0.409733
2022-09-12	16:00:30	0.376043
2022-09-12	16:00:30	0.461743
2022-09-12	16:00:31	0.661845
2022-09-12	16:00:31	1.93564
2022-09-12	16:00:31	2.32189
2022-09-12	16:00:31	2.39477
2022-09-12	16:00:32	1.54927
2022-09-12	16:00:32	0.519097
2022-09-12	16:00:32	0.421438
2022-09-12	16:00:33	0.21757
2022-09-12	16:00:33	0.0119214
2022-09-12	16:00:33	-0.241972
2022-09-12	16:00:33	-0.288435
2022-09-12	16:00:34	-0.279173
2022-09-12	16:00:34	-0.343091
2022-09-12	16:00:34	-0.187875
2022-09-12	16:00:34	-0.0740837
2022-09-12	16:00:35	0.0621503
2022-09-12	16:00:35	0.29869
2022-09-12	16:00:35	0.336145
2022-09-12	16:00:36	0.261081
2022-09-12	16:00:36	0.279606
2022-09-12	16:00:36	0.267341
2022-09-12	16:00:36	0.0913106
2022-09-12	16:00:37	0.249071
2022-09-12	16:00:37	0.18902
2022-09-12	16:00:37	0.313244
2022-09-12	16:00:37	0.34271
2022-09-12	16:00:38	0.371667
2022-09-12	16:00:38	0.270496
2022-09-12	16:00:38	0.230038
2022-09-12	16:00:38	0.29472
2022-09-12	16:00:39	0.316858
2022-09-12	16:00:39	0.206323
2022-09-12	16:00:39	0.207748
2022-09-12	16:00:40	0.339249
2022-09-12	16:00:40	1.24627
2022-09-12	16:00:40	0.37416
2022-09-12	16:00:40	0.393855
2022-09-12	16:00:41	0.319249
2022-09-12	16:00:41	0.39869
2022-09-12	16:00:41	0.389835
2022-09-12	16:00:41	0.419148
2022-09-12	16:00:42	0.42388
2022-09-12	16:00:42	0.449377
2022-09-12	16:00:42	0.421794
2022-09-12	16:00:42	0.421947
2022-09-12	16:00:43	0.44897
2022-09-12	16:00:43	0.440013
2022-09-12	16:00:43	0.426323
2022-09-12	16:00:44	0.452583
2022-09-12	16:00:44	0.437926
2022-09-12	16:00:44	0.445305
2022-09-12	16:00:44	0.443728
2022-09-12	16:00:45	0.441132
2022-09-12	16:00:45	0.443575
2022-09-12	16:00:45	0.424542
2022-09-12	16:00:45	0.430547
2022-09-12	16:00:46	0.435738
2022-09-12	16:00:46	0.425
2022-09-12	16:00:46	0.447036
2022-09-12	16:00:46	0.447647
2022-09-12	16:00:47	0.4364
2022-09-12	16:00:47	0.426578
2022-09-12	16:00:47	0.437316
2022-09-12	16:00:48	0.439911
2022-09-12	16:00:48	0.423677
2022-09-12	16:00:48	0.436043
2022-09-12	16:00:48	0.427341
2022-09-12	16:00:49	0.443677
2022-09-12	16:00:49	0.430954
2022-09-12	16:00:49	0.451616
2022-09-12	16:00:49	0.465305
2022-09-12	16:00:50	0.483015
2022-09-12	16:00:50	0.416501
2022-09-12	16:00:50	0.173143
2022-09-12	16:00:50	0.170496
2022-09-12	16:00:51	0.201743
2022-09-12	16:00:51	1.68281
2022-09-12	16:00:51	2.96149
2022-09-12	16:00:52	2.65294
2022-09-12	16:00:52	1.94006
2022-09-12	16:00:52	2.52749
2022-09-12	16:00:52	3.17859
2022-09-12	16:00:53	4.85528
2022-09-12	16:00:53	3.65085
2022-09-12	16:00:53	3.38276
2022-09-12	16:00:53	1.9309
2022-09-12	16:00:54	4.48703
2022-09-12	16:00:54	0.791667
2022-09-12	16:00:54	2.20485
2022-09-12	16:00:54	2.59452
2022-09-12	16:00:55	2.62001
2022-09-12	16:00:55	0.629478
2022-09-12	16:00:55	1.92302
2022-09-12	16:00:56	1.29905
2022-09-12	16:00:56	3.64159
2022-09-12	16:00:56	1.79365
2022-09-12	16:00:56	9.47472
2022-09-12	16:00:57	6.27685
2022-09-12	16:00:57	1.94586
2022-09-12	16:00:57	2.14983
2022-09-12	16:00:57	2.6966
2022-09-12	16:00:58	2.08897
2022-09-12	16:00:58	2.39747
2022-09-12	16:00:58	2.18907
2022-09-12	16:00:59	2.2652
2022-09-12	16:00:59	2.03111
2022-09-12	16:00:59	1.93197
2022-09-12	16:00:59	1.93559
2022-09-12	16:01:00	1.80561
2022-09-12	16:01:00	1.81808
2022-09-12	16:01:00	1.65889
2022-09-12	16:01:00	1.03574
2022-09-12	16:01:01	0.560471
2022-09-12	16:01:01	0.494516
2022-09-12	16:01:01	0.20902
2022-09-12	16:01:01	0.0750766
2022-09-12	16:01:02	0.336705
2022-09-12	16:01:02	0.868155
2022-09-12	16:01:02	0.652379
2022-09-12	16:01:03	0.418333
2022-09-12	16:01:03	0.34841
2022-09-12	16:01:03	0.295382
2022-09-12	16:01:03	0.416501
2022-09-12	16:01:04	0.394008
2022-09-12	16:01:04	0.405916
2022-09-12	16:01:04	0.441081
2022-09-12	16:01:04	0.438283
2022-09-12	16:01:05	0.489529
2022-09-12	16:01:05	0.516756
2022-09-12	16:01:05	0.404491
2022-09-12	16:01:05	0.473194
2022-09-12	16:01:06	0.422252
2022-09-12	16:01:06	0.392379
2022-09-12	16:01:06	0.420115
2022-09-12	16:01:07	0.412939
2022-09-12	16:01:07	0.409377
2022-09-12	16:01:07	0.418791
2022-09-12	16:01:07	0.409631
2022-09-12	16:01:08	0.394415
2022-09-12	16:01:08	0.423321
2022-09-12	16:01:08	0.432583
2022-09-12	16:01:08	0.426171
2022-09-12	16:01:09	0.414669
2022-09-12	16:01:09	0.424084
2022-09-12	16:01:09	0.435433
2022-09-12	16:01:09	0.427799
2022-09-12	16:01:10	0.412023
2022-09-12	16:01:10	0.416298
2022-09-12	16:01:10	0.427545
2022-09-12	16:01:11	0.428053
2022-09-12	16:01:11	0.444542
2022-09-12	16:01:11	0.419046
2022-09-12	16:01:11	0.403779
2022-09-12	16:01:12	0.463473
2022-09-12	16:01:12	0.389936
2022-09-12	16:01:12	0.5507
2022-09-12	16:01:12	1.10556
2022-09-12	16:01:13	0.769326
2022-09-12	16:01:13	0.971819
2022-09-12	16:01:13	0.809529
2022-09-12	16:01:13	0.857875
2022-09-12	16:01:14	0.832125
2022-09-12	16:01:14	0.950344
2022-09-12	16:01:14	0.636552
2022-09-12	16:01:15	0.479707
2022-09-12	16:01:15	0.483626
2022-09-12	16:01:15	0.496145
2022-09-12	16:01:15	0.546628
2022-09-12	16:01:16	0.711819
2022-09-12	16:01:16	1.11508
2022-09-12	16:01:16	1.22388
2022-09-12	16:01:16	0.988257
2022-09-12	16:01:17	0.76668
2022-09-12	16:01:17	0.506934
2022-09-12	16:01:17	0.431667
2022-09-12	16:01:17	0.370751
2022-09-12	16:01:18	0.304186
2022-09-12	16:01:18	0.362863
2022-09-12	16:01:18	0.164389
2022-09-12	16:01:19	0.0545676
2022-09-12	16:01:19	0.343575
2022-09-12	16:01:19	0.192583
2022-09-12	16:01:19	0.112481
2022-09-12	16:01:20	0.0442369
2022-09-12	16:01:20	-0.247163
2022-09-12	16:01:20	-0.256984
2022-09-12	16:01:20	0.229936
2022-09-12	16:01:21	0.972277
2022-09-12	16:01:21	1.62541
2022-09-12	16:01:21	2.39899
2022-09-12	16:01:22	1.05202
2022-09-12	16:01:22	0.639707
2022-09-12	16:01:22	0.4707
2022-09-12	16:01:22	0.794924
2022-09-12	16:01:23	1.2707
2022-09-12	16:01:23	3.70897
2022-09-12	16:01:23	5.00449
2022-09-12	16:01:23	1.87793
2022-09-12	16:01:24	0.503422
2022-09-12	16:01:24	0.347036
2022-09-12	16:01:24	0.288868
2022-09-12	16:01:24	0.373193
2022-09-12	16:01:25	0.17528
2022-09-12	16:01:25	0.0899875
2022-09-12	16:01:25	-0.039071
2022-09-12	16:01:26	-0.378511
2022-09-12	16:01:26	-0.161717
2022-09-12	16:01:26	-0.279224
2022-09-12	16:01:26	-0.224669
2022-09-12	16:01:27	-0.290572
2022-09-12	16:01:27	-0.439478
2022-09-12	16:01:27	-0.274949
2022-09-12	16:01:27	-0.342328
2022-09-12	16:01:28	-0.113677
2022-09-12	16:01:28	-0.356374
2022-09-12	16:01:28	-0.110318
2022-09-12	16:01:28	-0.232455
2022-09-12	16:01:29	-0.0910302
2022-09-12	16:01:29	-0.125483
2022-09-12	16:01:29	-0.0373407
2022-09-12	16:01:30	-0.0935239
2022-09-12	16:01:30	0.0932954
2022-09-12	16:01:30	0.0448984
2022-09-12	16:01:30	0.147748
2022-09-12	16:01:31	0.174466
2022-09-12	16:01:31	0.227494
2022-09-12	16:01:31	0.286628
2022-09-12	16:01:31	0.285662
2022-09-12	16:01:32	0.368308
2022-09-12	16:01:32	0.648562
2022-09-12	16:01:32	1.58704
2022-09-12	16:01:32	0.499198
2022-09-12	16:01:33	0.717366
2022-09-12	16:01:33	1.42668
2022-09-12	16:01:33	1.78322
2022-09-12	16:01:34	2.00179
2022-09-12	16:01:34	1.94444
2022-09-12	16:01:34	1.98464
2022-09-12	16:01:34	1.77609
2022-09-12	16:01:35	2.88383
2022-09-12	16:01:35	4.03166
2022-09-12	16:01:35	4.68902
2022-09-12	16:01:35	5.14678
2022-09-12	16:01:36	4.34006
2022-09-12	16:01:36	7.1996
2022-09-12	16:01:36	5.67299
2022-09-12	16:01:36	0.184339
2022-09-12	16:01:37	0.395687
2022-09-12	16:01:37	1.67187
2022-09-12	16:01:37	0.767341
2022-09-12	16:01:38	0.724186
2022-09-12	16:01:38	0.722354
2022-09-12	16:01:38	0.725356
2022-09-12	16:01:38	0.726629
2022-09-12	16:01:39	0.725356
2022-09-12	16:01:39	0.726476
2022-09-12	16:01:39	0.721488
2022-09-12	16:01:39	0.721336
2022-09-12	16:01:40	0.730496
2022-09-12	16:01:40	0.179911
2022-09-12	16:01:40	0.176654
2022-09-12	16:01:40	0.218333
2022-09-12	16:01:41	0.286425
2022-09-12	16:01:41	0.300725
2022-09-12	16:01:41	1.71879
2022-09-12	16:01:42	1.34128
2022-09-12	16:01:42	1.71462
2022-09-12	16:01:42	0.559555
2022-09-12	16:01:42	0.652684
2022-09-12	16:01:43	0.692532
2022-09-12	16:01:43	0.542863
2022-09-12	16:01:43	0.405509
2022-09-12	16:01:43	2.97055
2022-09-12	16:01:44	5.70281
2022-09-12	16:01:44	5.92291
2022-09-12	16:01:44	3.76052
2022-09-12	16:01:45	5.3907
2022-09-12	16:01:45	4.01609
2022-09-12	16:01:45	4.41721
2022-09-12	16:01:45	6.28973
2022-09-12	16:01:46	9.40149
2022-09-12	16:01:46	4.67716
2022-09-12	16:01:46	3.52184
2022-09-12	16:01:46	0.848155
2022-09-12	16:01:47	1.4934
2022-09-12	16:01:47	0.784186
2022-09-12	16:01:47	1.40973
2022-09-12	16:01:47	0.876349
2022-09-12	16:01:48	0.729987
2022-09-12	16:01:48	0.461031
2022-09-12	16:01:48	0.542914
2022-09-12	16:01:49	0.786476
2022-09-12	16:01:49	0.604033
2022-09-12	16:01:49	0.636705
2022-09-12	16:01:49	0.977774
2022-09-12	16:01:50	0.882201
2022-09-12	16:01:50	0.791972
2022-09-12	16:01:50	0.940674
2022-09-12	16:01:50	0.599351
2022-09-12	16:01:51	0.671616
2022-09-12	16:01:51	0.818537
2022-09-12	16:01:51	2.99004
2022-09-12	16:01:51	5.14255
2022-09-12	16:01:52	7.94001
2022-09-12	16:01:52	8.28724
2022-09-12	16:01:52	6.38963
2022-09-12	16:01:53	3.42902
2022-09-12	16:01:53	1.9448
2022-09-12	16:01:53	2.79609
2022-09-12	16:01:53	1.75635
2022-09-12	16:01:54	2.43874
2022-09-12	16:01:54	3.77976
2022-09-12	16:01:54	4.49691
2022-09-12	16:01:54	1.23594
2022-09-12	16:01:55	0.456094
2022-09-12	16:01:55	0.365458
2022-09-12	16:01:55	0.365611
2022-09-12	16:01:55	0.813702
2022-09-12	16:01:56	3.17131
2022-09-12	16:01:56	3.19701
2022-09-12	16:01:56	3.97676
2022-09-12	16:01:57	3.72988
2022-09-12	16:01:57	2.82826
2022-09-12	16:01:57	0.471514
2022-09-12	16:01:57	0.0589952
2022-09-12	16:01:58	0.180929
2022-09-12	16:01:58	-0.0826333
2022-09-12	16:01:58	0.053957
2022-09-12	16:01:58	2.42184
2022-09-12	16:01:59	2.628
2022-09-12	16:01:59	3.85854
2022-09-12	16:01:59	0.076756
2022-09-12	16:01:59	-0.0835493
2022-09-12	16:02:00	-0.256526
2022-09-12	16:02:00	-0.702633
2022-09-12	16:02:00	-0.722582
2022-09-12	16:02:01	-0.803244
2022-09-12	16:02:01	-0.908333
2022-09-12	16:02:01	-0.798256
2022-09-12	16:02:01	-0.807773
2022-09-12	16:02:02	-0.776475
2022-09-12	16:02:02	-0.71276
2022-09-12	16:02:02	-0.704821
2022-09-12	16:02:02	-0.658511
2022-09-12	16:02:03	-0.628587
2022-09-12	16:02:03	-0.548638
2022-09-12	16:02:03	-0.646551
2022-09-12	16:02:03	-0.696679
2022-09-12	16:02:04	-0.650216
2022-09-12	16:02:04	-0.446043
2022-09-12	16:02:04	-0.120191
2022-09-12	16:02:05	0.227952
2022-09-12	16:02:05	0.238995
2022-09-12	16:02:05	0.335891
2022-09-12	16:02:05	1.00541
2022-09-12	16:02:06	0.909326
2022-09-12	16:02:06	0.992074
2022-09-12	16:02:06	0.911565
2022-09-12	16:02:06	0.80388
2022-09-12	16:02:07	0.797316
2022-09-12	16:02:07	0.836654
2022-09-12	16:02:07	0.595534
2022-09-12	16:02:07	0.481947
2022-09-12	16:02:08	0.378893
2022-09-12	16:02:08	0.297265
2022-09-12	16:02:08	0.290853
2022-09-12	16:02:09	0.628664
2022-09-12	16:02:09	1.34429
2022-09-12	16:02:09	1.76994
2022-09-12	16:02:09	2.29268
2022-09-12	16:02:10	1.98673
2022-09-12	16:02:10	1.79854
2022-09-12	16:02:10	1.70256
2022-09-12	16:02:10	1.95762
2022-09-12	16:02:11	2.01681
2022-09-12	16:02:11	1.90607
2022-09-12	16:02:11	0.8307
2022-09-12	16:02:12	0.386527
2022-09-12	16:02:12	0.29986
2022-09-12	16:02:12	0.605916
2022-09-12	16:02:12	0.870242
2022-09-12	16:02:13	0.352888
2022-09-12	16:02:13	0.169275
2022-09-12	16:02:13	0.00662877
2022-09-12	16:02:13	0.044186
2022-09-12	16:02:14	0.0972648
2022-09-12	16:02:14	0.210293
2022-09-12	16:02:14	0.27355
2022-09-12	16:02:14	0.302659
2022-09-12	16:02:15	0.798588
2022-09-12	16:02:15	1.58739
2022-09-12	16:02:15	2.43533
2022-09-12	16:02:16	1.67813
2022-09-12	16:02:16	0.829428
2022-09-12	16:02:16	0.789376
2022-09-12	16:02:16	0.243626
2022-09-12	16:02:17	0.486323
2022-09-12	16:02:17	0.345763
2022-09-12	16:02:17	0.593448
2022-09-12	16:02:17	0.330496
2022-09-12	16:02:18	0.427545
2022-09-12	16:02:18	0.469784
2022-09-12	16:02:18	0.479453
2022-09-12	16:02:18	0.724237
2022-09-12	16:02:19	0.954109
2022-09-12	16:02:19	1.62744
2022-09-12	16:02:19	1.98378
2022-09-12	16:02:20	3.85314
2022-09-12	16:02:20	0.82617
2022-09-12	16:02:20	1.81151
2022-09-12	16:02:20	0.570038
2022-09-12	16:02:21	0.654873
2022-09-12	16:02:21	0.333041
2022-09-12	16:02:21	0.324746
2022-09-12	16:02:21	0.222812
2022-09-12	16:02:22	0.567137
2022-09-12	16:02:22	0.601387
2022-09-12	16:02:22	-0.434643
2022-09-12	16:02:22	-0.493575
2022-09-12	16:02:23	-0.561513
2022-09-12	16:02:23	-0.426196
2022-09-12	16:02:23	-0.39958
2022-09-12	16:02:24	-0.441208
2022-09-12	16:02:24	-0.224771
2022-09-12	16:02:24	0.00942772
2022-09-12	16:02:24	1.00525
2022-09-12	16:02:25	2.46001
2022-09-12	16:02:25	6.78647
2022-09-12	16:02:25	3.96495
2022-09-12	16:02:25	0.62154
2022-09-12	16:02:26	0.406069
2022-09-12	16:02:26	5.54973
2022-09-12	16:02:26	-0.0782567
2022-09-12	16:02:26	-0.187977
2022-09-12	16:02:27	-0.503753
2022-09-12	16:02:27	-0.550012
2022-09-12	16:02:27	-0.56762
2022-09-12	16:02:28	-0.405788
2022-09-12	16:02:28	-0.405687
2022-09-12	16:02:28	-0.0175443
2022-09-12	16:02:28	0.00550917
2022-09-12	16:02:29	0.187595
2022-09-12	16:02:29	-0.118511
2022-09-12	16:02:29	0.0318195
2022-09-12	16:02:29	-0.091132
2022-09-12	16:02:30	0.0846949
2022-09-12	16:02:30	-0.0595799
2022-09-12	16:02:30	0.00357532
2022-09-12	16:02:31	-0.0213102
2022-09-12	16:02:31	0.251158
2022-09-12	16:02:31	0.199504
2022-09-12	16:02:31	0.39131
2022-09-12	16:02:32	0.354364
2022-09-12	16:02:32	1.30078
2022-09-12	16:02:32	1.52607
2022-09-12	16:02:32	0.632226
2022-09-12	16:02:33	0.405254
2022-09-12	16:02:33	0.379707
2022-09-12	16:02:33	0.341183
2022-09-12	16:02:33	0.342914
2022-09-12	16:02:34	0.615585
2022-09-12	16:02:34	0.433346
2022-09-12	16:02:34	0.389326
2022-09-12	16:02:35	0.386069
2022-09-12	16:02:35	0.573244
2022-09-12	16:02:35	0.506171
2022-09-12	16:02:35	0.086985
2022-09-12	16:02:36	-0.383753
2022-09-12	16:02:36	-0.621106
2022-09-12	16:02:36	-0.467112
2022-09-12	16:02:36	-0.0481295
2022-09-12	16:02:37	0.105865
2022-09-12	16:02:37	0.116043
2022-09-12	16:02:37	0.0107
2022-09-12	16:02:37	0.390954
2022-09-12	16:02:38	0.0503438
2022-09-12	16:02:38	0.181285
2022-09-12	16:02:38	0.159351
2022-09-12	16:02:39	0.16958
2022-09-12	16:02:39	0.224797
2022-09-12	16:02:39	0.122608
2022-09-12	16:02:39	0.144186
2022-09-12	16:02:40	0.220267
2022-09-12	16:02:40	0.203473
2022-09-12	16:02:40	0.200573
2022-09-12	16:02:40	0.21355
2022-09-12	16:02:41	0.151718
2022-09-12	16:02:41	0.190802
2022-09-12	16:02:41	0.422506
2022-09-12	16:02:41	0.316858
2022-09-12	16:02:42	0.439758
2022-09-12	16:02:42	0.461641
2022-09-12	16:02:42	0.439402
2022-09-12	16:02:43	0.527137
2022-09-12	16:02:43	0.421743
2022-09-12	16:02:43	0.523829
2022-09-12	16:02:43	0.472074
2022-09-12	16:02:44	0.457367
2022-09-12	16:02:44	0.475433
2022-09-12	16:02:44	0.396043
2022-09-12	16:02:44	0.527086
2022-09-12	16:02:45	0.431311
2022-09-12	16:02:45	0.515025
2022-09-12	16:02:45	0.470751
2022-09-12	16:02:45	0.541489
2022-09-12	16:02:46	0.419504
2022-09-12	16:02:46	0.450954
2022-09-12	16:02:46	0.457112
2022-09-12	16:02:47	0.452481
2022-09-12	16:02:47	0.456196
2022-09-12	16:02:47	0.347952
2022-09-12	16:02:47	0.17416
2022-09-12	16:02:48	0.404237
2022-09-12	16:02:48	0.312176
2022-09-12	16:02:48	0.414211
2022-09-12	16:02:48	0.337112
2022-09-12	16:02:49	0.377061
2022-09-12	16:02:49	0.335229
2022-09-12	16:02:49	0.31472
2022-09-12	16:02:50	0.371718
2022-09-12	16:02:50	0.365204
2022-09-12	16:02:50	0.290344
2022-09-12	16:02:50	0.251209
2022-09-12	16:02:51	0.135891
2022-09-12	16:02:51	-0.170063
2022-09-12	16:02:51	-0.484262
2022-09-12	16:02:51	-0.411895
2022-09-12	16:02:52	0.930598
2022-09-12	16:02:52	1.31126
2022-09-12	16:02:52	1.28225
2022-09-12	16:02:52	0.410344
2022-09-12	16:02:53	0.322761
2022-09-12	16:02:53	0.375331
2022-09-12	16:02:53	0.250445
2022-09-12	16:02:54	0.162201
2022-09-12	16:02:54	0.212328
2022-09-12	16:02:54	0.201438
2022-09-12	16:02:54	0.203321
2022-09-12	16:02:55	0.115077
2022-09-12	16:02:55	0.474975
2022-09-12	16:02:55	0.24958
2022-09-12	16:02:55	0.429428
2022-09-12	16:02:56	0.323422
2022-09-12	16:02:56	0.397875
2022-09-12	16:02:56	0.424288
2022-09-12	16:02:56	0.458537
2022-09-12	16:02:57	0.394466
2022-09-12	16:02:57	0.433397
2022-09-12	16:02:57	0.342201
2022-09-12	16:02:58	0.429224
2022-09-12	16:02:58	0.487239
2022-09-12	16:02:58	0.361387
2022-09-12	16:02:58	0.472023
2022-09-12	16:02:59	0.307341
2022-09-12	16:02:59	0.428563
2022-09-12	16:02:59	0.0978756
2022-09-12	16:02:59	0.298384
2022-09-12	16:03:00	0.103575
2022-09-12	16:03:00	0.347596
2022-09-12	16:03:00	0.0687152
2022-09-12	16:03:00	0.233855
2022-09-12	16:03:01	-3.79307e-05
2022-09-12	16:03:01	-0.0563229
2022-09-12	16:03:01	0.0122776
2022-09-12	16:03:02	-0.100598
2022-09-12	16:03:02	0.103066
2022-09-12	16:03:02	0.079962
2022-09-12	16:03:02	0.083728
2022-09-12	16:03:03	-0.129503
2022-09-12	16:03:03	-0.211285
2022-09-12	16:03:03	0.0940079
2022-09-12	16:03:03	0.102201
2022-09-12	16:03:04	0.243066
2022-09-12	16:03:04	0.0862724
2022-09-12	16:03:04	0.379758
2022-09-12	16:03:04	0.236756
2022-09-12	16:03:05	0.597977
2022-09-12	16:03:05	0.157367
2022-09-12	16:03:05	0.483066
2022-09-12	16:03:06	0.200878
2022-09-12	16:03:06	0.172176
2022-09-12	16:03:06	0.0766032
2022-09-12	16:03:06	0.428613
2022-09-12	16:03:07	0.292328
2022-09-12	16:03:07	0.401692
2022-09-12	16:03:07	0.452277
2022-09-12	16:03:07	0.460827
2022-09-12	16:03:08	0.317621
2022-09-12	16:03:08	0.487748
2022-09-12	16:03:08	0.380115
2022-09-12	16:03:08	0.453193
2022-09-12	16:03:09	0.46612
2022-09-12	16:03:09	0.330547
2022-09-12	16:03:09	0.262405
2022-09-12	16:03:10	0.270903
2022-09-12	16:03:10	0.290242
2022-09-12	16:03:10	0.429529
2022-09-12	16:03:10	0.522659
2022-09-12	16:03:11	0.213346
2022-09-12	16:03:11	0.380064
2022-09-12	16:03:11	0.251667
2022-09-12	16:03:11	0.442914
2022-09-12	16:03:12	0.27757
2022-09-12	16:03:12	0.651158
2022-09-12	16:03:12	0.267901
2022-09-12	16:03:12	0.474618
2022-09-12	16:03:13	0.350547
2022-09-12	16:03:13	0.498639
2022-09-12	16:03:13	0.413346
2022-09-12	16:03:14	0.530344
2022-09-12	16:03:14	0.430445
2022-09-12	16:03:14	0.389122
2022-09-12	16:03:14	0.443422
2022-09-12	16:03:15	0.472684
2022-09-12	16:03:15	0.481489
2022-09-12	16:03:15	0.347799
2022-09-12	16:03:15	0.567901
2022-09-12	16:03:16	0.341132
2022-09-12	16:03:16	0.602659
2022-09-12	16:03:16	0.467087
2022-09-12	16:03:17	0.513346
2022-09-12	16:03:17	0.437774
2022-09-12	16:03:17	0.409071
2022-09-12	16:03:17	0.50841
2022-09-12	16:03:18	0.441743
2022-09-12	16:03:18	0.634008
2022-09-12	16:03:18	0.438995
2022-09-12	16:03:18	0.741234
2022-09-12	16:03:19	0.346069
2022-09-12	16:03:19	0.320115
2022-09-12	16:03:19	0.316756
2022-09-12	16:03:19	0.467239
2022-09-12	16:03:20	1.27899
2022-09-12	16:03:20	0.547443
2022-09-12	16:03:20	0.522812
2022-09-12	16:03:21	0.564949
2022-09-12	16:03:21	0.459657
2022-09-12	16:03:21	0.291412
2022-09-12	16:03:21	0.606069
2022-09-12	16:03:22	0.420725
2022-09-12	16:03:22	0.546985
2022-09-12	16:03:22	0.432277
2022-09-12	16:03:22	0.565967
2022-09-12	16:03:23	0.450802
2022-09-12	16:03:23	0.456756
2022-09-12	16:03:23	0.468868
2022-09-12	16:03:23	0.464033
2022-09-12	16:03:24	0.540013
2022-09-12	16:03:24	0.476756
2022-09-12	16:03:24	0.494262
2022-09-12	16:03:25	0.486221
2022-09-12	16:03:25	0.513092
2022-09-12	16:03:25	0.691972
2022-09-12	16:03:25	0.759911
2022-09-12	16:03:26	0.949733
2022-09-12	16:03:26	0.606069
2022-09-12	16:03:26	0.784033
2022-09-12	16:03:26	0.963219
2022-09-12	16:03:27	0.853193
2022-09-12	16:03:27	0.935534
2022-09-12	16:03:27	1.13523
2022-09-12	16:03:27	1.08078
2022-09-12	16:03:28	0.815127
2022-09-12	16:03:28	0.593346
2022-09-12	16:03:28	0.417163
2022-09-12	16:03:29	0.549835
2022-09-12	16:03:29	0.5764
2022-09-12	16:03:29	0.641285
2022-09-12	16:03:29	0.412176
2022-09-12	16:03:30	0.494618
2022-09-12	16:03:30	0.505611
2022-09-12	16:03:30	0.513855
2022-09-12	16:03:30	0.35416
2022-09-12	16:03:31	0.444135
2022-09-12	16:03:31	0.45014
2022-09-12	16:03:31	1.61935
2022-09-12	16:03:31	1.18073
2022-09-12	16:03:32	0.881387
2022-09-12	16:03:32	0.585611
2022-09-12	16:03:32	2.22057
2022-09-12	16:03:33	0.96042
2022-09-12	16:03:33	0.341489
2022-09-12	16:03:33	0.90383
2022-09-12	16:03:33	0.488104
2022-09-12	16:03:34	0.489733
2022-09-12	16:03:34	0.382659
2022-09-12	16:03:34	0.673957
2022-09-12	16:03:34	1.39966
2022-09-12	16:03:35	1.52724
2022-09-12	16:03:35	2.11905
2022-09-12	16:03:35	2.365
2022-09-12	16:03:35	0.22958
2022-09-12	16:03:36	0.145356
2022-09-12	16:03:36	0.181641
2022-09-12	16:03:36	0.148613
2022-09-12	16:03:37	0.159199
2022-09-12	16:03:37	0.159453
2022-09-12	16:03:37	0.0502929
2022-09-12	16:03:37	0.0351783
2022-09-12	16:03:38	0.0822521
2022-09-12	16:03:38	0.437316
2022-09-12	16:03:38	1.42775
2022-09-12	16:03:38	0.684237
2022-09-12	16:03:39	1.10296
2022-09-12	16:03:39	1.04871
2022-09-12	16:03:39	0.710293
2022-09-12	16:03:40	0.380725
2022-09-12	16:03:40	0.186832
2022-09-12	16:03:40	0.119097
2022-09-12	16:03:40	0.0940079
2022-09-12	16:03:41	0.0327865
2022-09-12	16:03:41	0.0300384
2022-09-12	16:03:41	-0.00548322
2022-09-12	16:03:41	0.0662724
2022-09-12	16:03:42	0.035789
2022-09-12	16:03:42	-0.0490455
2022-09-12	16:03:42	-0.0203942
