# Supplementary material for: Comparing efficacy in reducing pulling and welfare impacts of four types of leash walking equipment
Source: PeerJ journal article supplement (doi:10.7717/peerj.18131), 2024-10-24
Supplement: Shelter1_Tension_files.zip [file Ranger_star_2022912152113 copy.xlsx]

## Sheet: averaged newtons
Date	Time	Averaged Newtons
2022-09-12	15:21:33	1.01947	1.01947	0		Impulse	737.014
2022-09-12	15:21:34	0.54103	1.5605	0		Total steps	4
2022-09-12	15:21:35	9.55648	11.117	0
2022-09-12	15:21:36	7.523	18.64	0
2022-09-12	15:21:37	2.78499	21.425	0
2022-09-12	15:21:38	14.9046	36.3296	1
2022-09-12	15:21:39	3.20495	39.5345	1
2022-09-12	15:21:40	2.01974	41.5543	1
2022-09-12	15:21:41	0.366836	41.9211	1
2022-09-12	15:21:42	3.14768	45.0688	1
2022-09-12	15:21:43	7.18146	52.2503	1
2022-09-12	15:21:44	1.68788	53.9381	1
2022-09-12	15:21:45	-1.63089	53.9381	1
2022-09-12	15:21:46	-2.43592	53.9381	1
2022-09-12	15:21:47	-0.624557	53.9381	1
2022-09-12	15:21:48	4.11363	58.0518	1
2022-09-12	15:21:49	3.24645	61.2982	1
2022-09-12	15:21:50	1.55689	62.8551	1
2022-09-12	15:21:51	1.90226	64.7574	1
2022-09-12	15:21:52	1.59139	66.3488	1
2022-09-12	15:21:53	1.2593	67.6081	1
2022-09-12	15:21:54	3.62366	71.2317	1
2022-09-12	15:21:55	1.67634	72.9081	1
2022-09-12	15:21:56	4.16427	77.0723	1
2022-09-12	15:21:57	4.68787	81.7602	1
2022-09-12	15:21:58	4.53225	86.2924	1
2022-09-12	15:21:59	2.08432	88.3768	1
2022-09-12	15:22:00	2.14996	90.5267	1
2022-09-12	15:22:01	3.69927	94.226	1
2022-09-12	15:22:02	3.61357	97.8396	1
2022-09-12	15:22:03	0.958344	98.7979	1
2022-09-12	15:22:04	0.0226951	98.8206	1
2022-09-12	15:22:05	-0.171909	98.8206	1
2022-09-12	15:22:06	0.329146	99.1497	1
2022-09-12	15:22:07	0.285003	99.4347	1
2022-09-12	15:22:08	-1.44272	99.4347	1
2022-09-12	15:22:09	-1.45815	99.4347	1
2022-09-12	15:22:10	-0.513635	99.4347	1
2022-09-12	15:22:11	0.936387	100.371	1
2022-09-12	15:22:12	2.22182	102.593	1
2022-09-12	15:22:13	1.12122	103.714	1
2022-09-12	15:22:14	0.686472	104.401	1
2022-09-12	15:22:15	1.45297	105.854	1
2022-09-12	15:22:16	1.20294	107.057	1
2022-09-12	15:22:17	1.45351	108.51	1
2022-09-12	15:22:18	0.793546	109.304	1
2022-09-12	15:22:19	0.965136	110.269	1
2022-09-12	15:22:20	0.804807	111.074	1
2022-09-12	15:22:21	-0.0149393	111.074	1
2022-09-12	15:22:22	1.92097	112.995	1
2022-09-12	15:22:23	1.87545	114.87	1
2022-09-12	15:22:24	3.82497	118.695	1
2022-09-12	15:22:25	3.75222	122.447	1
2022-09-12	15:22:26	1.08958	123.537	1
2022-09-12	15:22:27	1.98658	125.523	1
2022-09-12	15:22:28	7.39758	132.921	1
2022-09-12	15:22:29	2.65862	135.58	1
2022-09-12	15:22:30	2.99105	138.571	1
2022-09-12	15:22:31	2.79948	141.37	1
2022-09-12	15:22:32	3.39766	144.768	1
2022-09-12	15:22:33	2.37385	147.142	1
2022-09-12	15:22:34	1.02195	148.164	1
2022-09-12	15:22:35	1.42507	149.589	1
2022-09-12	15:22:36	1.23967	150.828	1
2022-09-12	15:22:37	1.63316	152.461	1
2022-09-12	15:22:38	1.1198	153.581	1
2022-09-12	15:22:39	1.81805	155.399	1
2022-09-12	15:22:40	2.57339	157.973	1
2022-09-12	15:22:41	2.26405	160.237	1
2022-09-12	15:22:42	2.08466	162.321	1
2022-09-12	15:22:43	1.97598	164.297	1
2022-09-12	15:22:44	2.01244	166.31	1
2022-09-12	15:22:45	2.18454	168.494	1
2022-09-12	15:22:46	2.12025	170.615	1
2022-09-12	15:22:47	1.85449	172.469	1
2022-09-12	15:22:48	1.97435	174.443	1
2022-09-12	15:22:49	1.33203	175.775	1
2022-09-12	15:22:50	1.27204	177.047	1
2022-09-12	15:22:51	1.72327	178.771	1
2022-09-12	15:22:52	1.58709	180.358	1
2022-09-12	15:22:53	1.11494	181.473	1
2022-09-12	15:22:54	-1.08924	181.473	1
2022-09-12	15:22:55	-0.213787	181.473	1
2022-09-12	15:22:56	0.631633	182.104	1
2022-09-12	15:22:57	0.812844	182.917	1
2022-09-12	15:22:58	1.16323	184.08	1
2022-09-12	15:22:59	0.802431	184.883	1
2022-09-12	15:23:00	-0.189245	184.883	1
2022-09-12	15:23:01	1.33503	186.218	1
2022-09-12	15:23:02	1.62065	187.839	1
2022-09-12	15:23:03	1.50475	189.343	1
2022-09-12	15:23:04	1.56191	190.905	1
2022-09-12	15:23:05	0.624334	191.53	1
2022-09-12	15:23:06	0.679852	192.209	1
2022-09-12	15:23:07	0.807977	193.017	1
2022-09-12	15:23:08	2.561	195.578	1
2022-09-12	15:23:09	5.4718	201.05	1
2022-09-12	15:23:10	2.62219	203.672	1
2022-09-12	15:23:11	1.94481	205.617	1
2022-09-12	15:23:12	2.43802	208.055	1
2022-09-12	15:23:13	5.40309	213.458	1
2022-09-12	15:23:14	12.1172	225.576	1
2022-09-12	15:23:15	4.26733	229.843	1
2022-09-12	15:23:16	1.6739	231.517	1
2022-09-12	15:23:17	1.51116	233.028	1
2022-09-12	15:23:18	2.26219	235.29	1
2022-09-12	15:23:19	7.82493	243.115	1
2022-09-12	15:23:20	5.29794	248.413	1
2022-09-12	15:23:21	1.54104	249.954	1
2022-09-12	15:23:22	1.68669	251.641	1
2022-09-12	15:23:23	1.5279	253.169	1
2022-09-12	15:23:24	1.23044	254.399	1
2022-09-12	15:23:25	1.10098	255.5	1
2022-09-12	15:23:26	0.559534	256.06	1
2022-09-12	15:23:27	-2.43655	256.06	1
2022-09-12	15:23:28	-1.27498	256.06	1
2022-09-12	15:23:29	-1.3624	256.06	1
2022-09-12	15:23:30	-0.404751	256.06	1
2022-09-12	15:23:31	-1.37668	256.06	1
2022-09-12	15:23:32	-2.1726	256.06	1
2022-09-12	15:23:33	-2.80514	256.06	1
2022-09-12	15:23:34	-1.45568	256.06	1
2022-09-12	15:23:35	-0.451553	256.06	1
2022-09-12	15:23:36	1.66366	257.723	1
2022-09-12	15:23:37	2.16106	259.884	1
2022-09-12	15:23:38	2.02806	261.912	1
2022-09-12	15:23:39	2.16207	264.074	1
2022-09-12	15:23:40	1.32705	265.401	1
2022-09-12	15:23:41	1.7945	267.196	1
2022-09-12	15:23:42	2.11273	269.309	1
2022-09-12	15:23:43	2.25228	271.561	1
2022-09-12	15:23:44	1.83948	273.4	1
2022-09-12	15:23:45	1.88913	275.29	1
2022-09-12	15:23:46	1.84012	277.13	1
2022-09-12	15:23:47	1.74374	278.873	1
2022-09-12	15:23:48	0.664986	279.538	1
2022-09-12	15:23:49	1.70526	281.244	1
2022-09-12	15:23:50	2.15885	283.403	1
2022-09-12	15:23:51	2.68244	286.085	1
2022-09-12	15:23:52	2.54975	288.635	1
2022-09-12	15:23:53	2.07464	290.709	1
2022-09-12	15:23:54	2.04883	292.758	1
2022-09-12	15:23:55	2.08252	294.841	1
2022-09-12	15:23:56	1.96457	296.805	1
2022-09-12	15:23:57	1.94668	298.752	1
2022-09-12	15:23:58	1.60809	300.36	1
2022-09-12	15:23:59	1.88588	302.246	1
2022-09-12	15:24:00	1.39728	303.643	1
2022-09-12	15:24:01	1.46366	305.107	1
2022-09-12	15:24:02	1.46321	306.57	1
2022-09-12	15:24:03	1.26555	307.836	1
2022-09-12	15:24:04	1.06927	308.905	1
2022-09-12	15:24:05	0.580305	309.485	1
2022-09-12	15:24:06	-0.577925	309.485	1
2022-09-12	15:24:07	1.43805	310.923	1
2022-09-12	15:24:08	2.15557	313.079	1
2022-09-12	15:24:09	1.34318	314.422	1
2022-09-12	15:24:10	1.21726	315.639	1
2022-09-12	15:24:11	1.27074	316.91	1
2022-09-12	15:24:12	1.0451	317.955	1
2022-09-12	15:24:13	0.714938	318.67	1
2022-09-12	15:24:14	1.19854	319.869	1
2022-09-12	15:24:15	5.78713	325.656	1
2022-09-12	15:24:16	11.1644	336.82	1
2022-09-12	15:24:17	5.12505	341.945	1
2022-09-12	15:24:18	8.14007	350.085	1
2022-09-12	15:24:19	6.71435	356.8	1
2022-09-12	15:24:20	4.9505	361.75	1
2022-09-12	15:24:21	5.2637	367.014	1
2022-09-12	15:24:22	5.78084	372.795	1
2022-09-12	15:24:23	6.07758	378.872	1
2022-09-12	15:24:24	6.26637	385.139	1
2022-09-12	15:24:25	9.2526	394.391	1
2022-09-12	15:24:26	8.26971	402.661	1
2022-09-12	15:24:27	13.845	416.506	2
2022-09-12	15:24:28	1.87141	418.377	2
2022-09-12	15:24:29	2.3347	420.712	2
2022-09-12	15:24:30	8.4969	429.209	2
2022-09-12	15:24:31	-0.0674573	429.209	2
2022-09-12	15:24:32	1.17221	430.381	2
2022-09-12	15:24:33	1.02922	431.41	2
2022-09-12	15:24:34	1.45653	432.867	2
2022-09-12	15:24:35	-0.375831	432.867	2
2022-09-12	15:24:36	1.48364	434.351	2
2022-09-12	15:24:37	0.623107	434.974	2
2022-09-12	15:24:38	0.779001	435.753	2
2022-09-12	15:24:39	1.03175	436.784	2
2022-09-12	15:24:40	0.907637	437.692	2
2022-09-12	15:24:41	-0.466495	437.692	2
2022-09-12	15:24:42	-0.368815	437.692	2
2022-09-12	15:24:43	0.942103	438.634	2
2022-09-12	15:24:44	-0.676189	438.634	2
2022-09-12	15:24:45	-3.54016	438.634	2
2022-09-12	15:24:46	-4.21221	438.634	2
2022-09-12	15:24:47	-1.89886	438.634	2
2022-09-12	15:24:48	1.94323	440.577	2
2022-09-12	15:24:49	2.9464	443.524	2
2022-09-12	15:24:50	2.0696	445.593	2
2022-09-12	15:24:51	0.234805	445.828	2
2022-09-12	15:24:52	0.466081	446.294	2
2022-09-12	15:24:53	0.00973497	446.304	2
2022-09-12	15:24:54	0.749234	447.053	2
2022-09-12	15:24:55	1.14578	448.199	2
2022-09-12	15:24:56	1.08106	449.28	2
2022-09-12	15:24:57	1.19558	450.476	2
2022-09-12	15:24:58	1.3554	451.831	2
2022-09-12	15:24:59	0.919127	452.75	2
2022-09-12	15:25:00	1.72222	454.472	2
2022-09-12	15:25:01	1.87453	456.347	2
2022-09-12	15:25:02	5.28854	461.635	2
2022-09-12	15:25:03	4.54167	466.177	2
2022-09-12	15:25:04	6.58549	472.763	2
2022-09-12	15:25:05	5.90445	478.667	2
2022-09-12	15:25:06	2.76898	481.436	2
2022-09-12	15:25:07	4.5628	485.999	2
2022-09-12	15:25:08	2.22155	488.22	2
2022-09-12	15:25:09	1.54985	489.77	2
2022-09-12	15:25:10	1.79722	491.567	2
2022-09-12	15:25:11	3.03517	494.603	2
2022-09-12	15:25:12	1.75613	496.359	2
2022-09-12	15:25:13	1.89439	498.253	2
2022-09-12	15:25:14	1.90412	500.157	2
2022-09-12	15:25:15	1.40047	501.558	2
2022-09-12	15:25:16	1.48896	503.047	2
2022-09-12	15:25:17	1.53095	504.578	2
2022-09-12	15:25:18	1.55372	506.131	2
2022-09-12	15:25:19	0.519637	506.651	2
2022-09-12	15:25:20	2.07277	508.724	2
2022-09-12	15:25:21	2.21697	510.941	2
2022-09-12	15:25:22	1.75278	512.694	2
2022-09-12	15:25:23	1.94662	514.64	2
2022-09-12	15:25:24	2.01974	516.66	2
2022-09-12	15:25:25	2.01386	518.674	2
2022-09-12	15:25:26	2.00103	520.675	2
2022-09-12	15:25:27	1.9958	522.671	2
2022-09-12	15:25:28	2.02523	524.696	2
2022-09-12	15:25:29	1.96802	526.664	2
2022-09-12	15:25:30	1.5836	528.247	2
2022-09-12	15:25:31	-3.7285	528.247	2
2022-09-12	15:25:32	-4.62059	528.247	2
2022-09-12	15:25:33	-4.29647	528.247	2
2022-09-12	15:25:34	-3.62196	528.247	2
2022-09-12	15:25:35	-3.25646	528.247	2
2022-09-12	15:25:36	1.93168	530.179	2
2022-09-12	15:25:37	8.42696	538.606	2
2022-09-12	15:25:38	26.0725	564.679	3
2022-09-12	15:25:39	11.0323	575.711	3
2022-09-12	15:25:40	1.57305	577.284	3
2022-09-12	15:25:41	1.06106	578.345	3
2022-09-12	15:25:42	1.57192	579.917	3
2022-09-12	15:25:43	1.8627	581.78	3
2022-09-12	15:25:44	1.77928	583.559	3
2022-09-12	15:25:45	1.83148	585.39	3
2022-09-12	15:25:46	1.82376	587.214	3
2022-09-12	15:25:47	1.81889	589.033	3
2022-09-12	15:25:48	1.80452	590.838	3
2022-09-12	15:25:49	1.84785	592.685	3
2022-09-12	15:25:50	1.82648	594.512	3
2022-09-12	15:25:51	1.86196	596.374	3
2022-09-12	15:25:52	1.8511	598.225	3
2022-09-12	15:25:53	2.61208	600.837	3
2022-09-12	15:25:54	1.94934	602.786	3
2022-09-12	15:25:55	1.69665	604.483	3
2022-09-12	15:25:56	1.80288	606.286	3
2022-09-12	15:25:57	2.9173	609.203	3
2022-09-12	15:25:58	0.964682	610.168	3
2022-09-12	15:25:59	1.51222	611.68	3
2022-09-12	15:26:00	2.0165	613.697	3
2022-09-12	15:26:01	2.06886	615.765	3
2022-09-12	15:26:02	1.26921	617.035	3
2022-09-12	15:26:03	0.624107	617.659	3
2022-09-12	15:26:04	1.23748	618.896	3
2022-09-12	15:26:05	2.02523	620.921	3
2022-09-12	15:26:06	2.0876	623.009	3
2022-09-12	15:26:07	2.12687	625.136	3
2022-09-12	15:26:08	2.13836	627.274	3
2022-09-12	15:26:09	2.1267	629.401	3
2022-09-12	15:26:10	2.06666	631.468	3
2022-09-12	15:26:11	2.16853	633.636	3
2022-09-12	15:26:12	4.80646	638.443	3
2022-09-12	15:26:13	6.6495	645.092	3
2022-09-12	15:26:14	20.7982	665.89	4
2022-09-12	15:26:15	1.56466	667.455	4
2022-09-12	15:26:16	1.05189	668.507	4
2022-09-12	15:26:17	-0.143123	668.507	4
2022-09-12	15:26:18	1.4232	669.93	4
2022-09-12	15:26:19	1.81435	671.744	4
2022-09-12	15:26:20	5.9041	677.649	4
2022-09-12	15:26:21	2.16666	679.815	4
2022-09-12	15:26:22	2.0035	681.819	4
2022-09-12	15:26:23	2.89769	684.716	4
2022-09-12	15:26:24	7.35458	692.071	4
2022-09-12	15:26:25	2.47135	694.542	4
2022-09-12	15:26:26	3.32081	697.863	4
2022-09-12	15:26:27	9.21866	707.082	4
2022-09-12	15:26:28	6.92629	714.008	4
2022-09-12	15:26:29	3.51464	717.523	4
2022-09-12	15:26:30	4.93461	722.457	4
2022-09-12	15:26:31	4.10033	726.558	4
2022-09-12	15:26:32	2.12885	728.686	4
2022-09-12	15:26:33	8.32725	737.014	4

## Sheet: Ranger_star_2022912152113 (4)
Date	Time	Lbs	Newtons	Averaged Newtons	Total Force x time	Total Time Steps Force >13.345		**GoPro Fitting: 1510
2022-09-12	15:21:33	0.121082	0.538597	1.01947	0.538597	FALSE	0
2022-09-12	15:21:33	-0.14874	-0.661625	1.01947	0	FALSE	0			Total force x time	1405.07
2022-09-12	15:21:33	0.059962	0.266723	1.01947	0.80532	FALSE	0			Total Time Steps Force >3	23
2022-09-12	15:21:33	0.88444	3.93417	1.01947	3.93417	FALSE	0
2022-09-12	15:21:34	-0.0622262	-0.276795	0.54103	0.80532	FALSE	0
2022-09-12	15:21:34	0.165255	0.735087	0.54103	4.66925	FALSE	0
2022-09-12	15:21:34	0.216451	0.962817	0.54103	1.76814	FALSE	0
2022-09-12	15:21:34	0.167036	0.74301	0.54103	5.41226	FALSE	0
2022-09-12	15:21:35	0.635585	2.82721	9.55648	4.59535	FALSE	0
2022-09-12	15:21:35	3.0051	13.3673	9.55648	18.7795	1	1
2022-09-12	15:21:35	2.80449	12.4749	9.55648	17.0703	FALSE	1
2022-09-12	15:21:36	3.12724	13.9106	7.523	32.6901	1	2
2022-09-12	15:21:36	1.78973	7.96108	7.523	25.0314	FALSE	2
2022-09-12	15:21:36	1.22296	5.43997	7.523	38.1301	FALSE	2
2022-09-12	15:21:36	0.625051	2.78035	7.523	27.8117	FALSE	2
2022-09-12	15:21:37	1.80948	8.04893	2.78499	46.179	FALSE	2
2022-09-12	15:21:37	0.218486	0.971869	2.78499	28.7836	FALSE	2
2022-09-12	15:21:37	0.169733	0.755006	2.78499	46.934	FALSE	2
2022-09-12	15:21:37	0.306679	1.36417	2.78499	30.1477	FALSE	2
2022-09-12	15:21:38	1.71345	7.62177	14.9046	54.5558	FALSE	2
2022-09-12	15:21:38	3.37441	15.0101	14.9046	45.1578	1	3
2022-09-12	15:21:38	3.89879	17.3426	14.9046	71.8984	1	4
2022-09-12	15:21:38	4.41619	19.6441	14.9046	64.8019	1	5
2022-09-12	15:21:39	1.21289	5.39518	3.20495	77.2936	FALSE	5
2022-09-12	15:21:39	0.546832	2.43242	3.20495	67.2343	FALSE	5
2022-09-12	15:21:39	0.401794	1.78726	3.20495	79.0808	FALSE	5
2022-09-12	15:21:40	0.65813	2.92749	2.01974	70.1618	FALSE	5
2022-09-12	15:21:40	0.288461	1.28313	2.01974	80.364	FALSE	5
2022-09-12	15:21:40	0.496043	2.2065	2.01974	72.3683	FALSE	5
2022-09-12	15:21:40	0.373601	1.66185	2.01974	82.0258	FALSE	5
2022-09-12	15:21:41	-0.020445	-0.0909434	0.366836	72.3683	FALSE	5
2022-09-12	15:21:41	-0.121208	-0.539157	0.366836	82.0258	FALSE	5
2022-09-12	15:21:41	0.311107	1.38387	0.366836	73.7522	FALSE	5
2022-09-12	15:21:41	0.16042	0.71358	0.366836	82.7394	FALSE	5
2022-09-12	15:21:42	0.565356	2.51482	3.14768	76.267	FALSE	5
2022-09-12	15:21:42	0.336043	1.49479	3.14768	84.2342	FALSE	5
2022-09-12	15:21:42	1.22149	5.43343	3.14768	81.7004	FALSE	5
2022-09-12	15:21:43	1.04373	4.64272	7.18146	88.8769	FALSE	5
2022-09-12	15:21:43	2.18108	9.70188	7.18146	91.4023	FALSE	5
2022-09-12	15:21:43	1.56561	6.96415	7.18146	95.8411	FALSE	5
2022-09-12	15:21:43	1.66744	7.41711	7.18146	98.8194	FALSE	5
2022-09-12	15:21:44	0.596908	2.65517	1.68788	98.4962	FALSE	5
2022-09-12	15:21:44	0.461692	2.0537	1.68788	100.873	FALSE	5
2022-09-12	15:21:44	0.326374	1.45178	1.68788	99.948	FALSE	5
2022-09-12	15:21:44	0.132837	0.590886	1.68788	101.464	FALSE	5
2022-09-12	15:21:45	-0.0996307	-0.443177	-1.63089	99.948	FALSE	5
2022-09-12	15:21:45	-0.354389	-1.57639	-1.63089	101.464	FALSE	5
2022-09-12	15:21:45	-0.446501	-1.98613	-1.63089	99.948	FALSE	5
2022-09-12	15:21:45	-0.566043	-2.51787	-1.63089	101.464	FALSE	5
2022-09-12	15:21:46	-0.48818	-2.17152	-2.43592	99.948	FALSE	5
2022-09-12	15:21:46	-0.547671	-2.43615	-2.43592	101.464	FALSE	5
2022-09-12	15:21:46	-0.60701	-2.7001	-2.43592	99.948	FALSE	5
2022-09-12	15:21:47	-0.572048	-2.54458	-0.624557	101.464	FALSE	5
2022-09-12	15:21:47	-0.378765	-1.68482	-0.624557	99.948	FALSE	5
2022-09-12	15:21:47	0.129377	0.575495	-0.624557	102.039	FALSE	5
2022-09-12	15:21:47	0.259809	1.15568	-0.624557	101.104	FALSE	5
2022-09-12	15:21:48	0.59243	2.63525	4.11363	104.675	FALSE	5
2022-09-12	15:21:48	1.02383	4.5542	4.11363	105.658	FALSE	5
2022-09-12	15:21:48	1.25447	5.58013	4.11363	110.255	FALSE	5
2022-09-12	15:21:48	0.828409	3.68493	4.11363	109.343	FALSE	5
2022-09-12	15:21:49	1.03701	4.61283	3.24645	114.868	FALSE	5
2022-09-12	15:21:49	0.689682	3.06784	3.24645	112.411	FALSE	5
2022-09-12	15:21:49	0.424084	1.88641	3.24645	116.754	FALSE	5
2022-09-12	15:21:49	0.768562	3.41872	3.24645	115.829	FALSE	5
2022-09-12	15:21:50	0.154771	0.688452	1.55689	117.443	FALSE	5
2022-09-12	15:21:50	0.422201	1.87803	1.55689	117.707	FALSE	5
2022-09-12	15:21:50	0.473041	2.10418	1.55689	119.547	FALSE	5
2022-09-12	15:21:51	0.407799	1.81397	1.90226	119.521	FALSE	5
2022-09-12	15:21:51	0.501488	2.23072	1.90226	121.777	FALSE	5
2022-09-12	15:21:51	0.269987	1.20096	1.90226	120.722	FALSE	5
2022-09-12	15:21:51	0.531311	2.36338	1.90226	124.141	FALSE	5
2022-09-12	15:21:52	0.499809	2.22325	1.59139	122.946	FALSE	5
2022-09-12	15:21:52	0.352481	1.56791	1.59139	125.709	FALSE	5
2022-09-12	15:21:52	0.0294277	0.1309	1.59139	123.076	FALSE	5
2022-09-12	15:21:52	0.549326	2.44351	1.59139	128.152	FALSE	5
2022-09-12	15:21:53	0.11813	0.525466	1.2593	123.602	FALSE	5
2022-09-12	15:21:53	0.402659	1.79111	1.2593	129.943	FALSE	5
2022-09-12	15:21:53	0.215076	0.956701	1.2593	124.559	FALSE	5
2022-09-12	15:21:53	0.396552	1.76394	1.2593	131.707	FALSE	5
2022-09-12	15:21:54	0.832735	3.70417	3.62366	128.263	FALSE	5
2022-09-12	15:21:54	0.865305	3.84905	3.62366	135.556	FALSE	5
2022-09-12	15:21:54	0.745865	3.31776	3.62366	131.581	FALSE	5
2022-09-12	15:21:55	0.428003	1.90384	1.67634	137.46	FALSE	5
2022-09-12	15:21:55	0.571921	2.54402	1.67634	134.125	FALSE	5
2022-09-12	15:21:55	0.195687	0.870455	1.67634	138.331	FALSE	5
2022-09-12	15:21:55	0.311819	1.38703	1.67634	135.512	FALSE	5
2022-09-12	15:21:56	0.112227	0.499208	4.16427	138.83	FALSE	5
2022-09-12	15:21:56	1.12902	5.02211	4.16427	140.534	FALSE	5
2022-09-12	15:21:56	0.783473	3.48504	4.16427	142.315	FALSE	5
2022-09-12	15:21:56	1.71996	7.65073	4.16427	148.184	FALSE	5
2022-09-12	15:21:57	1.0681	4.75112	4.68787	147.066	FALSE	5
2022-09-12	15:21:57	1.10307	4.90668	4.68787	153.091	FALSE	5
2022-09-12	15:21:57	1.42627	6.34433	4.68787	153.41	FALSE	5
2022-09-12	15:21:57	0.618079	2.74934	4.68787	155.84	FALSE	5
2022-09-12	15:21:58	1.18994	5.29309	4.53225	158.703	FALSE	5
2022-09-12	15:21:58	0.604644	2.68958	4.53225	158.53	FALSE	5
2022-09-12	15:21:58	1.2621	5.61407	4.53225	164.318	FALSE	5
2022-09-12	15:21:59	0.403219	1.7936	2.08432	160.324	FALSE	5
2022-09-12	15:21:59	0.346272	1.54029	2.08432	165.858	FALSE	5
2022-09-12	15:21:59	0.912684	4.0598	2.08432	164.383	FALSE	5
2022-09-12	15:21:59	0.212125	0.943574	2.08432	166.801	FALSE	5
2022-09-12	15:22:00	0.697061	3.10067	2.14996	167.484	FALSE	5
2022-09-12	15:22:00	0.347952	1.54776	2.14996	168.349	FALSE	5
2022-09-12	15:22:00	0.464949	2.06819	2.14996	169.552	FALSE	5
2022-09-12	15:22:00	0.423372	1.88324	2.14996	170.232	FALSE	5
2022-09-12	15:22:01	0.331972	1.47668	3.69927	171.029	FALSE	5
2022-09-12	15:22:01	0.808766	3.59755	3.69927	173.83	FALSE	5
2022-09-12	15:22:01	1.35416	6.02357	3.69927	177.053	FALSE	5
2022-09-12	15:22:02	1.52118	6.76651	3.61357	180.596	FALSE	5
2022-09-12	15:22:02	0.365305	1.62495	3.61357	178.678	FALSE	5
2022-09-12	15:22:02	1.08719	4.83604	3.61357	185.432	FALSE	5
2022-09-12	15:22:02	0.275789	1.22676	3.61357	179.904	FALSE	5
2022-09-12	15:22:03	0.310598	1.3816	0.958344	186.814	FALSE	5
2022-09-12	15:22:03	0.329937	1.46763	0.958344	181.372	FALSE	5
2022-09-12	15:22:03	0.0461198	0.20515	0.958344	187.019	FALSE	5
2022-09-12	15:22:03	0.175127	0.779	0.958344	182.151	FALSE	5
2022-09-12	15:22:04	-0.00960535	-0.0427265	0.0226951	187.019	FALSE	5
2022-09-12	15:22:04	0.0763997	0.339841	0.0226951	182.491	FALSE	5
2022-09-12	15:22:04	-0.184007	-0.8185	0.0226951	187.019	FALSE	5
2022-09-12	15:22:04	0.137621	0.612166	0.0226951	183.103	FALSE	5
2022-09-12	15:22:05	-0.145992	-0.649402	-0.171909	187.019	FALSE	5
2022-09-12	15:22:05	0.123626	0.549913	-0.171909	183.653	FALSE	5
2022-09-12	15:22:05	-0.0935748	-0.416239	-0.171909	187.019	FALSE	5
2022-09-12	15:22:06	0.0331427	0.147425	0.329146	183.8	FALSE	5
2022-09-12	15:22:06	0.145255	0.646123	0.329146	187.665	FALSE	5
2022-09-12	15:22:06	-0.0838038	-0.372776	0.329146	183.8	FALSE	5
2022-09-12	15:22:06	0.201387	0.89581	0.329146	188.561	FALSE	5
2022-09-12	15:22:07	-0.00202267	-0.00899724	0.285003	183.8	FALSE	5
2022-09-12	15:22:07	0.273906	1.21839	0.285003	189.78	FALSE	5
2022-09-12	15:22:07	-0.0569336	-0.253252	0.285003	183.8	FALSE	5
2022-09-12	15:22:07	0.0413361	0.183871	0.285003	189.963	FALSE	5
2022-09-12	15:22:08	-0.212811	-0.946626	-1.44272	183.8	FALSE	5
2022-09-12	15:22:08	-0.269911	-1.20062	-1.44272	189.963	FALSE	5
2022-09-12	15:22:08	-0.518307	-2.30553	-1.44272	183.8	FALSE	5
2022-09-12	15:22:08	-0.296323	-1.3181	-1.44272	189.963	FALSE	5
2022-09-12	15:22:09	-0.40131	-1.78511	-1.45815	183.8	FALSE	5
2022-09-12	15:22:09	-0.295458	-1.31426	-1.45815	189.963	FALSE	5
2022-09-12	15:22:09	-0.286654	-1.27509	-1.45815	183.8	FALSE	5
2022-09-12	15:22:10	-0.221361	-0.984658	-0.513635	189.963	FALSE	5
2022-09-12	15:22:10	-0.141768	-0.630612	-0.513635	183.8	FALSE	5
2022-09-12	15:22:10	-0.2179	-0.969263	-0.513635	189.963	FALSE	5
2022-09-12	15:22:10	0.119148	0.529994	-0.513635	184.33	FALSE	5
2022-09-12	15:22:11	-0.00497431	-0.0221267	0.936387	189.963	FALSE	5
2022-09-12	15:22:11	0.274822	1.22246	0.936387	185.553	FALSE	5
2022-09-12	15:22:11	0.0378247	0.168252	0.936387	190.132	FALSE	5
2022-09-12	15:22:11	0.534364	2.37696	0.936387	187.93	FALSE	5
2022-09-12	15:22:12	0.381132	1.69535	2.22182	191.827	FALSE	5
2022-09-12	15:22:12	0.747595	3.32545	2.22182	191.255	FALSE	5
2022-09-12	15:22:12	0.369733	1.64465	2.22182	193.472	FALSE	5
2022-09-12	15:22:13	0.210853	0.937916	1.12122	192.193	FALSE	5
2022-09-12	15:22:13	0.406374	1.80763	1.12122	195.279	FALSE	5
2022-09-12	15:22:13	0.0445422	0.198133	1.12122	192.391	FALSE	5
2022-09-12	15:22:13	0.346476	1.54119	1.12122	196.821	FALSE	5
2022-09-12	15:22:14	0.106374	0.473173	0.686472	192.864	FALSE	5
2022-09-12	15:22:14	0.230496	1.02529	0.686472	197.846	FALSE	5
2022-09-12	15:22:14	0.0349239	0.155348	0.686472	193.02	FALSE	5
2022-09-12	15:22:14	0.245509	1.09207	0.686472	198.938	FALSE	5
2022-09-12	15:22:15	0.312074	1.38817	1.45297	194.408	FALSE	5
2022-09-12	15:22:15	0.344746	1.5335	1.45297	200.471	FALSE	5
2022-09-12	15:22:15	0.304339	1.35376	1.45297	195.762	FALSE	5
2022-09-12	15:22:15	0.345407	1.53644	1.45297	202.008	FALSE	5
2022-09-12	15:22:16	0.395076	1.75738	1.20294	197.519	FALSE	5
2022-09-12	15:22:16	0.119453	0.531351	1.20294	202.539	FALSE	5
2022-09-12	15:22:16	0.420115	1.86876	1.20294	199.388	FALSE	5
2022-09-12	15:22:16	0.147087	0.654272	1.20294	203.193	FALSE	5
2022-09-12	15:22:17	0.422303	1.87849	1.45351	201.266	FALSE	5
2022-09-12	15:22:17	0.190903	0.849175	1.45351	204.043	FALSE	5
2022-09-12	15:22:17	0.367087	1.63288	1.45351	202.899	FALSE	5
2022-09-12	15:22:18	0.289937	1.2897	0.793546	205.332	FALSE	5
2022-09-12	15:22:18	0.124033	0.551724	0.793546	203.451	FALSE	5
2022-09-12	15:22:18	0.203422	0.904862	0.793546	206.237	FALSE	5
2022-09-12	15:22:18	0.0961961	0.427899	0.793546	203.879	FALSE	5
2022-09-12	15:22:19	0.436298	1.94074	0.965136	208.178	FALSE	5
2022-09-12	15:22:19	0.0613361	0.272835	0.965136	204.152	FALSE	5
2022-09-12	15:22:19	0.327952	1.4588	0.965136	209.637	FALSE	5
2022-09-12	15:22:19	0.042303	0.188172	0.965136	204.34	FALSE	5
2022-09-12	15:22:20	0.26215	1.1661	0.804807	210.803	FALSE	5
2022-09-12	15:22:20	0.0585371	0.260385	0.804807	204.6	FALSE	5
2022-09-12	15:22:20	0.222099	0.987941	0.804807	211.791	FALSE	5
2022-09-12	15:22:21	0.0337534	0.150142	-0.0149393	204.75	FALSE	5
2022-09-12	15:22:21	0.022303	0.0992082	-0.0149393	211.89	FALSE	5
2022-09-12	15:22:21	-0.140801	-0.626311	-0.0149393	204.75	FALSE	5
2022-09-12	15:22:21	0.0713106	0.317204	-0.0149393	212.207	FALSE	5
2022-09-12	15:22:22	0.0436771	0.194284	1.92097	204.945	FALSE	5
2022-09-12	15:22:22	0.606832	2.69931	1.92097	214.906	FALSE	5
2022-09-12	15:22:22	0.645051	2.86932	1.92097	207.814	FALSE	5
2022-09-12	15:22:23	0.168766	0.750705	1.87545	215.657	FALSE	5
2022-09-12	15:22:23	0.203524	0.905315	1.87545	208.719	FALSE	5
2022-09-12	15:22:23	0.399046	1.77504	1.87545	217.432	FALSE	5
2022-09-12	15:22:23	0.972786	4.32715	1.87545	213.046	FALSE	5
2022-09-12	15:22:23	0.363982	1.61906	1.87545	219.051	FALSE	5
2022-09-12	15:22:24	0.577926	2.57073	3.82497	215.617	FALSE	5
2022-09-12	15:22:24	0.758282	3.37299	3.82497	222.424	FALSE	5
2022-09-12	15:22:24	1.24347	5.5312	3.82497	221.148	FALSE	5
2022-09-12	15:22:25	0.556501	2.47543	3.75222	224.9	FALSE	5
2022-09-12	15:22:25	1.35543	6.02922	3.75222	227.177	FALSE	5
2022-09-12	15:22:25	1.06246	4.72603	3.75222	229.626	FALSE	5
2022-09-12	15:22:25	0.399758	1.7782	3.75222	228.956	FALSE	5
2022-09-12	15:22:26	0.131565	0.585227	1.08958	230.211	FALSE	5
2022-09-12	15:22:26	0.238944	1.06287	1.08958	230.019	FALSE	5
2022-09-12	15:22:26	0.562252	2.50101	1.08958	232.712	FALSE	5
2022-09-12	15:22:26	0.0470358	0.209225	1.08958	230.228	FALSE	5
2022-09-12	15:22:27	0.463677	2.06253	1.98658	234.774	FALSE	5
2022-09-12	15:22:27	0.262048	1.16564	1.98658	231.393	FALSE	5
2022-09-12	15:22:27	0.456247	2.02948	1.98658	236.804	FALSE	5
2022-09-12	15:22:27	0.60444	2.68867	1.98658	234.082	FALSE	5
2022-09-12	15:22:28	1.63966	7.29354	7.39758	244.098	FALSE	5
2022-09-12	15:22:28	1.97589	8.78915	7.39758	242.871	FALSE	5
2022-09-12	15:22:28	1.3736	6.11005	7.39758	250.208	FALSE	5
2022-09-12	15:22:29	1.11594	4.96392	2.65862	247.835	FALSE	5
2022-09-12	15:22:29	0.354313	1.57606	2.65862	251.784	FALSE	5
2022-09-12	15:22:29	0.641234	2.85234	2.65862	250.688	FALSE	5
2022-09-12	15:22:29	0.27925	1.24216	2.65862	253.026	FALSE	5
2022-09-12	15:22:30	0.62841	2.79529	2.99105	253.483	FALSE	5
2022-09-12	15:22:30	0.569021	2.53112	2.99105	255.557	FALSE	5
2022-09-12	15:22:30	0.910191	4.04871	2.99105	257.532	FALSE	5
2022-09-12	15:22:30	0.582048	2.58907	2.99105	258.146	FALSE	5
2022-09-12	15:22:31	0.42388	1.8855	2.79948	259.417	FALSE	5
2022-09-12	15:22:31	0.827494	3.68086	2.79948	261.827	FALSE	5
2022-09-12	15:22:31	0.468512	2.08404	2.79948	261.501	FALSE	5
2022-09-12	15:22:31	0.797519	3.54752	2.79948	265.374	FALSE	5
2022-09-12	15:22:32	0.539046	2.39778	3.39766	263.899	FALSE	5
2022-09-12	15:22:32	1.11655	4.96664	3.39766	270.341	FALSE	5
2022-09-12	15:22:32	0.63589	2.82857	3.39766	266.727	FALSE	5
2022-09-12	15:22:33	0.904593	4.02381	2.37385	274.365	FALSE	5
2022-09-12	15:22:33	0.704695	3.13462	2.37385	269.862	FALSE	5
2022-09-12	15:22:33	0.287545	1.27906	2.37385	275.644	FALSE	5
2022-09-12	15:22:33	0.237824	1.05789	2.37385	270.92	FALSE	5
2022-09-12	15:22:34	0.418486	1.86151	1.02195	277.505	FALSE	5
2022-09-12	15:22:34	0.0465269	0.206961	1.02195	271.127	FALSE	5
2022-09-12	15:22:34	0.345509	1.53689	1.02195	279.042	FALSE	5
2022-09-12	15:22:34	0.108461	0.482456	1.02195	271.609	FALSE	5
2022-09-12	15:22:35	0.380013	1.69037	1.42507	280.733	FALSE	5
2022-09-12	15:22:35	0.187188	0.83265	1.42507	272.442	FALSE	5
2022-09-12	15:22:35	0.367952	1.63672	1.42507	282.369	FALSE	5
2022-09-12	15:22:35	0.346323	1.54051	1.42507	273.983	FALSE	5
2022-09-12	15:22:36	0.276908	1.23174	1.23967	283.601	FALSE	5
2022-09-12	15:22:36	0.390445	1.73678	1.23967	275.719	FALSE	5
2022-09-12	15:22:36	0.168715	0.750478	1.23967	284.352	FALSE	5
2022-09-12	15:22:37	0.703219	3.12806	1.63316	278.847	FALSE	5
2022-09-12	15:22:37	0.0614888	0.273514	1.63316	284.625	FALSE	5
2022-09-12	15:22:37	0.497417	2.21261	1.63316	281.06	FALSE	5
2022-09-12	15:22:37	0.206476	0.918447	1.63316	285.544	FALSE	5
2022-09-12	15:22:38	0.374568	1.66615	1.1198	282.726	FALSE	5
2022-09-12	15:22:38	0.196451	0.873853	1.1198	286.417	FALSE	5
2022-09-12	15:22:38	0.284847	1.26706	1.1198	283.993	FALSE	5
2022-09-12	15:22:38	0.151107	0.672154	1.1198	287.09	FALSE	5
2022-09-12	15:22:39	0.451768	2.00955	1.81805	286.003	FALSE	5
2022-09-12	15:22:39	0.272939	1.21409	1.81805	288.304	FALSE	5
2022-09-12	15:22:39	0.501438	2.2305	1.81805	288.233	FALSE	5
2022-09-12	15:22:40	0.428512	1.90611	2.57339	290.21	FALSE	5
2022-09-12	15:22:40	0.750344	3.33768	2.57339	291.571	FALSE	5
2022-09-12	15:22:40	0.684084	3.04294	2.57339	293.253	FALSE	5
2022-09-12	15:22:40	0.451158	2.00684	2.57339	293.578	FALSE	5
2022-09-12	15:22:41	0.569987	2.53542	2.26405	295.788	FALSE	5
2022-09-12	15:22:41	0.355077	1.57945	2.26405	295.157	FALSE	5
2022-09-12	15:22:41	0.625407	2.78194	2.26405	298.57	FALSE	5
2022-09-12	15:22:41	0.485458	2.15941	2.26405	297.317	FALSE	5
2022-09-12	15:22:42	0.49528	2.2031	2.08466	300.773	FALSE	5
2022-09-12	15:22:42	0.48098	2.1395	2.08466	299.456	FALSE	5
2022-09-12	15:22:42	0.456807	2.03197	2.08466	302.805	FALSE	5
2022-09-12	15:22:42	0.44154	1.96406	2.08466	301.42	FALSE	5
2022-09-12	15:22:43	0.435076	1.93531	1.97598	304.74	FALSE	5
2022-09-12	15:22:43	0.459249	2.04283	1.97598	303.463	FALSE	5
2022-09-12	15:22:43	0.438333	1.94979	1.97598	306.69	FALSE	5
2022-09-12	15:22:44	0.432685	1.92467	2.01244	305.388	FALSE	5
2022-09-12	15:22:44	0.44042	1.95908	2.01244	308.649	FALSE	5
2022-09-12	15:22:44	0.452481	2.01273	2.01244	307.4	FALSE	5
2022-09-12	15:22:44	0.484084	2.1533	2.01244	310.803	FALSE	5
2022-09-12	15:22:45	0.483779	2.15195	2.18454	309.552	FALSE	5
2022-09-12	15:22:45	0.479809	2.13429	2.18454	312.937	FALSE	5
2022-09-12	15:22:45	0.496145	2.20695	2.18454	311.759	FALSE	5
2022-09-12	15:22:45	0.504695	2.24498	2.18454	315.182	FALSE	5
2022-09-12	15:22:46	0.462303	2.05642	2.12025	313.816	FALSE	5
2022-09-12	15:22:46	0.500063	2.22438	2.12025	317.406	FALSE	5
2022-09-12	15:22:46	0.490394	2.18137	2.12025	315.997	FALSE	5
2022-09-12	15:22:46	0.453855	2.01884	2.12025	319.425	FALSE	5
2022-09-12	15:22:47	0.4307	1.91584	1.85449	317.913	FALSE	5
2022-09-12	15:22:47	0.41584	1.84974	1.85449	321.275	FALSE	5
2022-09-12	15:22:47	0.404186	1.7979	1.85449	319.711	FALSE	5
2022-09-12	15:22:48	0.400674	1.78228	1.97435	323.057	FALSE	5
2022-09-12	15:22:48	0.730903	3.2512	1.97435	322.962	FALSE	5
2022-09-12	15:22:48	0.345865	1.53848	1.97435	324.596	FALSE	5
2022-09-12	15:22:48	0.297977	1.32546	1.97435	324.287	FALSE	5
2022-09-12	15:22:49	0.425407	1.8923	1.33203	326.488	FALSE	5
2022-09-12	15:22:49	0.262863	1.16927	1.33203	325.457	FALSE	5
2022-09-12	15:22:49	0.229631	1.02144	1.33203	327.509	FALSE	5
2022-09-12	15:22:49	0.279911	1.2451	1.33203	326.702	FALSE	5
2022-09-12	15:22:50	0.321234	1.42891	1.27204	328.938	FALSE	5
2022-09-12	15:22:50	0.223015	0.992015	1.27204	327.694	FALSE	5
2022-09-12	15:22:50	0.280878	1.2494	1.27204	330.188	FALSE	5
2022-09-12	15:22:50	0.318741	1.41782	1.27204	329.112	FALSE	5
2022-09-12	15:22:51	0.333957	1.48551	1.72327	331.673	FALSE	5
2022-09-12	15:22:51	0.45701	2.03287	1.72327	331.145	FALSE	5
2022-09-12	15:22:51	0.37126	1.65144	1.72327	333.325	FALSE	5
2022-09-12	15:22:52	0.29187	1.2983	1.58709	332.443	FALSE	5
2022-09-12	15:22:52	0.443473	1.97266	1.58709	335.297	FALSE	5
2022-09-12	15:22:52	0.30444	1.35421	1.58709	333.797	FALSE	5
2022-09-12	15:22:52	0.387392	1.7232	1.58709	337.02	FALSE	5
2022-09-12	15:22:53	0.185356	0.824501	1.11494	334.622	FALSE	5
2022-09-12	15:22:53	0.399809	1.77843	1.11494	338.799	FALSE	5
2022-09-12	15:22:53	0.305102	1.35715	1.11494	335.979	FALSE	5
2022-09-12	15:22:53	0.112328	0.499657	1.11494	339.298	FALSE	5
2022-09-12	15:22:54	-0.0872643	-0.388169	-1.08924	335.979	FALSE	5
2022-09-12	15:22:54	-0.318206	-1.41544	-1.08924	339.298	FALSE	5
2022-09-12	15:22:54	-0.444923	-1.97911	-1.08924	335.979	FALSE	5
2022-09-12	15:22:54	-0.129096	-0.574245	-1.08924	339.298	FALSE	5
2022-09-12	15:22:55	-0.207264	-0.921952	-0.213787	335.979	FALSE	5
2022-09-12	15:22:55	0.0560944	0.249519	-0.213787	339.548	FALSE	5
2022-09-12	15:22:55	0.00698499	0.0310706	-0.213787	336.01	FALSE	5
2022-09-12	15:22:56	0.18444	0.820426	0.631633	340.368	FALSE	5
2022-09-12	15:22:56	0.224084	0.99677	0.631633	337.007	FALSE	5
2022-09-12	15:22:56	0.054415	0.242049	0.631633	340.61	FALSE	5
2022-09-12	15:22:56	0.105051	0.467288	0.631633	337.474	FALSE	5
2022-09-12	15:22:57	0.148257	0.659477	0.812844	341.27	FALSE	5
2022-09-12	15:22:57	0.215687	0.959419	0.812844	338.433	FALSE	5
2022-09-12	15:22:57	0.160166	0.71245	0.812844	341.982	FALSE	5
2022-09-12	15:22:57	0.206832	0.92003	0.812844	339.353	FALSE	5
2022-09-12	15:22:58	0.313041	1.39247	1.16323	343.375	FALSE	5
2022-09-12	15:22:58	0.213753	0.950816	1.16323	340.304	FALSE	5
2022-09-12	15:22:58	0.257723	1.1464	1.16323	344.521	FALSE	5
2022-09-12	15:22:59	0.225865	1.00469	0.802431	341.309	FALSE	5
2022-09-12	15:22:59	0.327545	1.45699	0.802431	345.978	FALSE	5
2022-09-12	15:22:59	0.213957	0.951724	0.802431	342.261	FALSE	5
2022-09-12	15:22:59	-0.0457885	-0.203676	0.802431	345.978	FALSE	5
2022-09-12	15:23:00	-0.226348	-1.00684	-0.189245	342.261	FALSE	5
2022-09-12	15:23:00	-0.121005	-0.538254	-0.189245	345.978	FALSE	5
2022-09-12	15:23:00	-0.0819208	-0.3644	-0.189245	342.261	FALSE	5
2022-09-12	15:23:00	0.259097	1.15252	-0.189245	347.131	FALSE	5
2022-09-12	15:23:01	0.205306	0.913242	1.33503	343.174	FALSE	5
2022-09-12	15:23:01	0.238232	1.0597	1.33503	348.19	FALSE	5
2022-09-12	15:23:01	0.364695	1.62224	1.33503	344.796	FALSE	5
2022-09-12	15:23:01	0.392277	1.74493	1.33503	349.935	FALSE	5
2022-09-12	15:23:02	0.369377	1.64306	1.62065	346.439	FALSE	5
2022-09-12	15:23:02	0.387036	1.72161	1.62065	351.657	FALSE	5
2022-09-12	15:23:02	0.336603	1.49728	1.62065	347.936	FALSE	5
2022-09-12	15:23:03	0.334618	1.48845	1.50475	353.145	FALSE	5
2022-09-12	15:23:03	0.312736	1.39111	1.50475	349.327	FALSE	5
2022-09-12	15:23:03	0.375585	1.67068	1.50475	354.816	FALSE	5
2022-09-12	15:23:03	0.330191	1.46876	1.50475	350.796	FALSE	5
2022-09-12	15:23:04	0.357265	1.58919	1.56191	356.405	FALSE	5
2022-09-12	15:23:04	0.493041	2.19314	1.56191	352.989	FALSE	5
2022-09-12	15:23:04	0.335535	1.49253	1.56191	357.898	FALSE	5
2022-09-12	15:23:04	0.21869	0.972777	1.56191	353.962	FALSE	5
2022-09-12	15:23:05	0.182812	0.813184	0.624334	358.711	FALSE	5
2022-09-12	15:23:05	0.178283	0.793038	0.624334	354.755	FALSE	5
2022-09-12	15:23:05	0.139504	0.620542	0.624334	359.332	FALSE	5
2022-09-12	15:23:05	0.0608272	0.270572	0.624334	355.026	FALSE	5
2022-09-12	15:23:06	0.0783845	0.34867	0.679852	359.68	FALSE	5
2022-09-12	15:23:06	0.148359	0.659931	0.679852	355.686	FALSE	5
2022-09-12	15:23:06	0.231769	1.03095	0.679852	360.711	FALSE	5
2022-09-12	15:23:07	0.193092	0.858912	0.807977	356.545	FALSE	5
2022-09-12	15:23:07	0.0862724	0.383757	0.807977	361.095	FALSE	5
2022-09-12	15:23:07	0.261387	1.1627	0.807977	357.707	FALSE	5
2022-09-12	15:23:07	0.185814	0.826538	0.807977	361.922	FALSE	5
2022-09-12	15:23:08	0.484491	2.15511	2.561	359.862	FALSE	5
2022-09-12	15:23:08	0.329987	1.46785	2.561	363.389	FALSE	5
2022-09-12	15:23:08	0.791158	3.51923	2.561	363.382	FALSE	5
2022-09-12	15:23:08	0.697315	3.1018	2.561	366.491	FALSE	5
2022-09-12	15:23:09	1.01202	4.50167	5.4718	367.883	FALSE	5
2022-09-12	15:23:09	1.31732	5.8597	5.4718	372.351	FALSE	5
2022-09-12	15:23:09	1.85737	8.26195	5.4718	376.145	FALSE	5
2022-09-12	15:23:09	0.733753	3.26388	5.4718	375.615	FALSE	5
2022-09-12	15:23:10	0.69986	3.11312	2.62219	379.258	FALSE	5
2022-09-12	15:23:10	0.524338	2.33236	2.62219	377.947	FALSE	5
2022-09-12	15:23:10	0.544287	2.4211	2.62219	381.679	FALSE	5
2022-09-12	15:23:11	0.34042	1.51426	1.94481	379.461	FALSE	5
2022-09-12	15:23:11	0.413346	1.83865	1.94481	383.518	FALSE	5
2022-09-12	15:23:11	0.536247	2.38533	1.94481	381.847	FALSE	5
2022-09-12	15:23:11	0.458842	2.04102	1.94481	385.559	FALSE	5
2022-09-12	15:23:12	0.330649	1.47079	2.43802	383.317	FALSE	5
2022-09-12	15:23:12	0.680929	3.02891	2.43802	388.588	FALSE	5
2022-09-12	15:23:12	0.465153	2.06909	2.43802	385.387	FALSE	5
2022-09-12	15:23:12	0.715636	3.18329	2.43802	391.771	FALSE	5
2022-09-12	15:23:13	0.519758	2.31199	5.40309	387.699	FALSE	5
2022-09-12	15:23:13	0.721488	3.20932	5.40309	394.981	FALSE	5
2022-09-12	15:23:13	1.36332	6.06432	5.40309	393.763	FALSE	5
2022-09-12	15:23:13	2.25411	10.0267	5.40309	405.007	FALSE	5
2022-09-12	15:23:14	2.78882	12.4052	12.1172	406.168	FALSE	5
2022-09-12	15:23:14	3.10795	13.8248	12.1172	418.832	1	6
2022-09-12	15:23:14	2.27543	10.1216	12.1172	416.29	FALSE	6
2022-09-12	15:23:15	1.70398	7.57964	4.26733	426.412	FALSE	6
2022-09-12	15:23:15	0.99243	4.41453	4.26733	420.704	FALSE	6
2022-09-12	15:23:15	0.648969	2.88674	4.26733	429.299	FALSE	6
2022-09-12	15:23:15	0.491972	2.18839	4.26733	422.893	FALSE	6
2022-09-12	15:23:16	0.466934	2.07702	1.6739	431.376	FALSE	6
2022-09-12	15:23:16	0.328817	1.46264	1.6739	424.355	FALSE	6
2022-09-12	15:23:16	0.412888	1.83661	1.6739	433.212	FALSE	6
2022-09-12	15:23:16	0.296603	1.31935	1.6739	425.675	FALSE	6
2022-09-12	15:23:17	0.388054	1.72614	1.51116	434.938	FALSE	6
2022-09-12	15:23:17	0.295484	1.31437	1.51116	426.989	FALSE	6
2022-09-12	15:23:17	0.335636	1.49298	1.51116	436.431	FALSE	6
2022-09-12	15:23:18	0.283473	1.26094	2.26219	428.25	FALSE	6
2022-09-12	15:23:18	0.436705	1.94255	2.26219	438.374	FALSE	6
2022-09-12	15:23:18	0.509224	2.26513	2.26219	430.515	FALSE	6
2022-09-12	15:23:18	0.804847	3.58012	2.26219	441.954	FALSE	6
2022-09-12	15:23:19	1.31564	5.85223	7.82493	436.367	FALSE	6
2022-09-12	15:23:19	1.02317	4.55126	7.82493	446.505	FALSE	6
2022-09-12	15:23:19	2.28515	10.1648	7.82493	446.532	FALSE	6
2022-09-12	15:23:19	2.41253	10.7314	7.82493	457.237	FALSE	6
2022-09-12	15:23:20	2.98602	13.2824	5.29794	459.814	FALSE	6
2022-09-12	15:23:20	0.914974	4.06999	5.29794	461.307	FALSE	6
2022-09-12	15:23:20	0.480573	2.13768	5.29794	461.952	FALSE	6
2022-09-12	15:23:20	0.382557	1.70169	5.29794	463.008	FALSE	6
2022-09-12	15:23:21	0.401132	1.78432	1.54104	463.736	FALSE	6
2022-09-12	15:23:21	0.307087	1.36598	1.54104	464.374	FALSE	6
2022-09-12	15:23:21	0.331107	1.47283	1.54104	465.209	FALSE	6
2022-09-12	15:23:22	0.475076	2.11323	1.68669	466.488	FALSE	6
2022-09-12	15:23:22	0.322812	1.43593	1.68669	466.645	FALSE	6
2022-09-12	15:23:22	0.290445	1.29196	1.68669	467.78	FALSE	6
2022-09-12	15:23:22	0.42841	1.90565	1.68669	468.551	FALSE	6
2022-09-12	15:23:23	0.252481	1.12309	1.5279	468.903	FALSE	6
2022-09-12	15:23:23	0.483219	2.14945	1.5279	470.7	FALSE	6
2022-09-12	15:23:23	0.292532	1.30124	1.5279	470.204	FALSE	6
2022-09-12	15:23:23	0.345713	1.5378	1.5279	472.238	FALSE	6
2022-09-12	15:23:24	0.273753	1.21771	1.23044	471.422	FALSE	6
2022-09-12	15:23:24	0.32383	1.44046	1.23044	473.679	FALSE	6
2022-09-12	15:23:24	0.291311	1.29581	1.23044	472.717	FALSE	6
2022-09-12	15:23:24	0.21757	0.967795	1.23044	474.646	FALSE	6
2022-09-12	15:23:25	0.24612	1.09479	1.10098	473.812	FALSE	6
2022-09-12	15:23:25	0.283931	1.26298	1.10098	475.909	FALSE	6
2022-09-12	15:23:25	0.212481	0.945158	1.10098	474.757	FALSE	6
2022-09-12	15:23:26	0.272837	1.21363	0.559534	477.123	FALSE	6
2022-09-12	15:23:26	0.120776	0.537236	0.559534	475.295	FALSE	6
2022-09-12	15:23:26	0.133957	0.595868	0.559534	477.719	FALSE	6
2022-09-12	15:23:26	-0.0244145	-0.108601	0.559534	475.295	FALSE	6
2022-09-12	15:23:27	-0.363549	-1.61714	-2.43655	477.719	FALSE	6
2022-09-12	15:23:27	-0.650775	-2.89478	-2.43655	475.295	FALSE	6
2022-09-12	15:23:27	-0.642887	-2.85969	-2.43655	477.719	FALSE	6
2022-09-12	15:23:27	-0.533829	-2.37458	-2.43655	475.295	FALSE	6
2022-09-12	15:23:28	-0.384567	-1.71063	-1.27498	477.719	FALSE	6
2022-09-12	15:23:28	-0.209656	-0.932592	-1.27498	475.295	FALSE	6
2022-09-12	15:23:28	-0.264007	-1.17436	-1.27498	477.719	FALSE	6
2022-09-12	15:23:28	-0.288282	-1.28234	-1.27498	475.295	FALSE	6
2022-09-12	15:23:29	-0.346857	-1.54289	-1.3624	477.719	FALSE	6
2022-09-12	15:23:29	-0.287417	-1.27849	-1.3624	475.295	FALSE	6
2022-09-12	15:23:29	-0.284567	-1.26581	-1.3624	477.719	FALSE	6
2022-09-12	15:23:30	-0.212913	-0.94708	-0.404751	475.295	FALSE	6
2022-09-12	15:23:30	-0.102786	-0.457213	-0.404751	477.719	FALSE	6
2022-09-12	15:23:30	-0.0631422	-0.280869	-0.404751	475.295	FALSE	6
2022-09-12	15:23:30	0.014873	0.0661581	-0.404751	477.785	FALSE	6
2022-09-12	15:23:31	-0.296577	-1.31923	-1.37668	475.295	FALSE	6
2022-09-12	15:23:31	-0.337239	-1.50011	-1.37668	477.785	FALSE	6
2022-09-12	15:23:31	-0.368078	-1.63728	-1.37668	475.295	FALSE	6
2022-09-12	15:23:31	-0.236068	-1.05008	-1.37668	477.785	FALSE	6
2022-09-12	15:23:32	-0.458409	-2.03909	-2.1726	475.295	FALSE	6
2022-09-12	15:23:32	-0.463498	-2.06173	-2.1726	477.785	FALSE	6
2022-09-12	15:23:32	-0.517137	-2.30033	-2.1726	475.295	FALSE	6
2022-09-12	15:23:32	-0.514643	-2.28923	-2.1726	477.785	FALSE	6
2022-09-12	15:23:33	-0.612455	-2.72432	-2.80514	475.295	FALSE	6
2022-09-12	15:23:33	-0.802887	-3.5714	-2.80514	477.785	FALSE	6
2022-09-12	15:23:33	-0.476526	-2.11968	-2.80514	475.295	FALSE	6
2022-09-12	15:23:34	-0.382531	-1.70157	-1.45568	477.785	FALSE	6
2022-09-12	15:23:34	-0.253626	-1.12818	-1.45568	475.295	FALSE	6
2022-09-12	15:23:34	-0.37846	-1.68347	-1.45568	477.785	FALSE	6
2022-09-12	15:23:34	-0.294389	-1.3095	-1.45568	475.295	FALSE	6
2022-09-12	15:23:35	-0.331743	-1.47566	-0.451553	477.785	FALSE	6
2022-09-12	15:23:35	-0.266857	-1.18703	-0.451553	475.295	FALSE	6
2022-09-12	15:23:35	0.0347203	0.154443	-0.451553	477.94	FALSE	6
2022-09-12	15:23:35	0.157825	0.702037	-0.451553	475.997	FALSE	6
2022-09-12	15:23:36	0.34383	1.52942	1.66366	479.469	FALSE	6
2022-09-12	15:23:36	0.357519	1.59032	1.66366	477.587	FALSE	6
2022-09-12	15:23:36	0.420674	1.87124	1.66366	481.34	FALSE	6
2022-09-12	15:23:37	0.631921	2.81091	2.16106	480.398	FALSE	6
2022-09-12	15:23:37	0.44612	1.98443	2.16106	483.325	FALSE	6
2022-09-12	15:23:37	0.477875	2.12568	2.16106	482.523	FALSE	6
2022-09-12	15:23:37	0.387392	1.7232	2.16106	485.048	FALSE	6
2022-09-12	15:23:38	0.456654	2.03129	2.02806	484.555	FALSE	6
2022-09-12	15:23:38	0.487239	2.16734	2.02806	487.215	FALSE	6
2022-09-12	15:23:38	0.380878	1.69422	2.02806	486.249	FALSE	6
2022-09-12	15:23:38	0.498944	2.2194	2.02806	489.435	FALSE	6
2022-09-12	15:23:39	0.295025	1.31233	2.16207	487.561	FALSE	6
2022-09-12	15:23:39	0.785204	3.49274	2.16207	492.927	FALSE	6
2022-09-12	15:23:39	0.445051	1.97968	2.16207	489.541	FALSE	6
2022-09-12	15:23:39	0.418944	1.86355	2.16207	494.791	FALSE	6
2022-09-12	15:23:40	0.340165	1.51312	1.32705	491.054	FALSE	6
2022-09-12	15:23:40	0.286476	1.2743	1.32705	496.065	FALSE	6
2022-09-12	15:23:40	0.268359	1.19371	1.32705	492.248	FALSE	6
2022-09-12	15:23:41	0.393702	1.75127	1.7945	497.816	FALSE	6
2022-09-12	15:23:41	0.414517	1.84385	1.7945	494.092	FALSE	6
2022-09-12	15:23:41	0.355585	1.58171	1.7945	499.398	FALSE	6
2022-09-12	15:23:41	0.449886	2.00118	1.7945	496.093	FALSE	6
2022-09-12	15:23:42	0.523932	2.33055	2.11273	501.729	FALSE	6
2022-09-12	15:23:42	0.42902	1.90837	2.11273	498.001	FALSE	6
2022-09-12	15:23:42	0.429886	1.91222	2.11273	503.641	FALSE	6
2022-09-12	15:23:42	0.51701	2.29976	2.11273	500.301	FALSE	6
2022-09-12	15:23:43	0.421387	1.87441	2.25228	505.515	FALSE	6
2022-09-12	15:23:43	0.647595	2.88063	2.25228	503.182	FALSE	6
2022-09-12	15:23:43	0.473295	2.10531	2.25228	507.621	FALSE	6
2022-09-12	15:23:43	0.483066	2.14877	2.25228	505.33	FALSE	6
2022-09-12	15:23:44	0.405153	1.8022	1.83948	509.423	FALSE	6
2022-09-12	15:23:44	0.403626	1.79541	1.83948	507.126	FALSE	6
2022-09-12	15:23:44	0.431819	1.92082	1.83948	511.344	FALSE	6
2022-09-12	15:23:45	0.385407	1.71437	1.88913	508.84	FALSE	6
2022-09-12	15:23:45	0.448257	1.99394	1.88913	513.338	FALSE	6
2022-09-12	15:23:45	0.416909	1.85449	1.88913	510.695	FALSE	6
2022-09-12	15:23:45	0.448206	1.99371	1.88913	515.331	FALSE	6
2022-09-12	15:23:46	0.43813	1.94889	1.84012	512.644	FALSE	6
2022-09-12	15:23:46	0.390496	1.737	1.84012	517.068	FALSE	6
2022-09-12	15:23:46	0.375585	1.67068	1.84012	514.314	FALSE	6
2022-09-12	15:23:46	0.450496	2.0039	1.84012	519.072	FALSE	6
2022-09-12	15:23:47	0.363677	1.61771	1.74374	515.932	FALSE	6
2022-09-12	15:23:47	0.415585	1.84861	1.74374	520.921	FALSE	6
2022-09-12	15:23:47	0.452583	2.01318	1.74374	517.945	FALSE	6
2022-09-12	15:23:47	0.336196	1.49547	1.74374	522.416	FALSE	6
2022-09-12	15:23:48	0.112481	0.500338	0.664986	518.445	FALSE	6
2022-09-12	15:23:48	0.0691223	0.30747	0.664986	522.724	FALSE	6
2022-09-12	15:23:48	0.266883	1.18715	0.664986	519.633	FALSE	6
2022-09-12	15:23:49	0.335382	1.49185	1.70526	524.216	FALSE	6
2022-09-12	15:23:49	0.372685	1.65778	1.70526	521.29	FALSE	6
2022-09-12	15:23:49	0.354211	1.5756	1.70526	525.791	FALSE	6
2022-09-12	15:23:49	0.471158	2.09581	1.70526	523.386	FALSE	6
2022-09-12	15:23:50	0.420013	1.8683	2.15885	527.659	FALSE	6
2022-09-12	15:23:50	0.461489	2.0528	2.15885	525.439	FALSE	6
2022-09-12	15:23:50	0.516145	2.29592	2.15885	529.955	FALSE	6
2022-09-12	15:23:50	0.543677	2.41838	2.15885	527.857	FALSE	6
2022-09-12	15:23:51	0.578486	2.57322	2.68244	532.529	FALSE	6
2022-09-12	15:23:51	0.704084	3.13191	2.68244	530.989	FALSE	6
2022-09-12	15:23:51	0.561946	2.49965	2.68244	535.028	FALSE	6
2022-09-12	15:23:51	0.567646	2.525	2.68244	533.514	FALSE	6
2022-09-12	15:23:52	0.646883	2.87746	2.54975	537.906	FALSE	6
2022-09-12	15:23:52	0.575229	2.55873	2.54975	536.073	FALSE	6
2022-09-12	15:23:52	0.497519	2.21306	2.54975	540.119	FALSE	6
2022-09-12	15:23:53	0.470446	2.09264	2.07464	538.166	FALSE	6
2022-09-12	15:23:53	0.471819	2.09875	2.07464	542.218	FALSE	6
2022-09-12	15:23:53	0.461845	2.05438	2.07464	540.22	FALSE	6
2022-09-12	15:23:53	0.461489	2.0528	2.07464	544.27	FALSE	6
2022-09-12	15:23:54	0.45757	2.03536	2.04883	542.255	FALSE	6
2022-09-12	15:23:54	0.460573	2.04872	2.04883	546.319	FALSE	6
2022-09-12	15:23:54	0.461692	2.0537	2.04883	544.309	FALSE	6
2022-09-12	15:23:54	0.462557	2.05755	2.04883	548.377	FALSE	6
2022-09-12	15:23:55	0.466883	2.07679	2.08252	546.386	FALSE	6
2022-09-12	15:23:55	0.467392	2.07905	2.08252	550.456	FALSE	6
2022-09-12	15:23:55	0.470242	2.09173	2.08252	548.478	FALSE	6
2022-09-12	15:23:56	0.476858	2.12116	1.96457	552.577	FALSE	6
2022-09-12	15:23:56	0.46729	2.0786	1.96457	550.556	FALSE	6
2022-09-12	15:23:56	0.387188	1.72229	1.96457	554.299	FALSE	6
2022-09-12	15:23:56	0.43528	1.93621	1.96457	552.492	FALSE	6
2022-09-12	15:23:57	0.449987	2.00163	1.94668	556.301	FALSE	6
2022-09-12	15:23:57	0.53757	2.39122	1.94668	554.884	FALSE	6
2022-09-12	15:23:57	0.489631	2.17798	1.94668	558.479	FALSE	6
2022-09-12	15:23:57	0.273346	1.2159	1.94668	556.1	FALSE	6
2022-09-12	15:23:58	0.4793	2.13202	1.60809	560.611	FALSE	6
2022-09-12	15:23:58	0.357265	1.58919	1.60809	557.689	FALSE	6
2022-09-12	15:23:58	0.334771	1.48913	1.60809	562.1	FALSE	6
2022-09-12	15:23:58	0.27472	1.22201	1.60809	558.911	FALSE	6
2022-09-12	15:23:59	0.443015	1.97062	1.88588	564.07	FALSE	6
2022-09-12	15:23:59	0.384389	1.70984	1.88588	560.621	FALSE	6
2022-09-12	15:23:59	0.444491	1.97718	1.88588	566.048	FALSE	6
2022-09-12	15:24:00	0.267341	1.18919	1.39728	561.81	FALSE	6
2022-09-12	15:24:00	0.266425	1.18511	1.39728	567.233	FALSE	6
2022-09-12	15:24:00	0.476298	2.11867	1.39728	563.928	FALSE	6
2022-09-12	15:24:00	0.246425	1.09615	1.39728	568.329	FALSE	6
2022-09-12	15:24:01	0.354618	1.57741	1.46366	565.506	FALSE	6
2022-09-12	15:24:01	0.358384	1.59416	1.46366	569.923	FALSE	6
2022-09-12	15:24:01	0.263168	1.17062	1.46366	566.676	FALSE	6
2022-09-12	15:24:01	0.340013	1.51245	1.46366	571.436	FALSE	6
2022-09-12	15:24:02	0.34958	1.555	1.46321	568.231	FALSE	6
2022-09-12	15:24:02	0.372685	1.65778	1.46321	573.093	FALSE	6
2022-09-12	15:24:02	0.234211	1.04182	1.46321	569.273	FALSE	6
2022-09-12	15:24:02	0.3593	1.59824	1.46321	574.692	FALSE	6
2022-09-12	15:24:03	0.329784	1.46695	1.26555	570.74	FALSE	6
2022-09-12	15:24:03	0.248664	1.10611	1.26555	575.798	FALSE	6
2022-09-12	15:24:03	0.275076	1.22359	1.26555	571.964	FALSE	6
2022-09-12	15:24:04	0.228817	1.01782	1.06927	576.815	FALSE	6
2022-09-12	15:24:04	0.222405	0.989302	1.06927	572.953	FALSE	6
2022-09-12	15:24:04	0.181947	0.809337	1.06927	577.625	FALSE	6
2022-09-12	15:24:04	0.328359	1.46061	1.06927	574.414	FALSE	6
2022-09-12	15:24:05	0.146629	0.652235	0.580305	578.277	FALSE	6
2022-09-12	15:24:05	0.154466	0.687096	0.580305	575.101	FALSE	6
2022-09-12	15:24:05	0.0952292	0.423599	0.580305	578.701	FALSE	6
2022-09-12	15:24:05	0.125509	0.558289	0.580305	575.659	FALSE	6
2022-09-12	15:24:06	-0.194084	-0.863324	-0.577925	578.701	FALSE	6
2022-09-12	15:24:06	-0.3036	-1.35047	-0.577925	575.659	FALSE	6
2022-09-12	15:24:06	-0.0764756	-0.340179	-0.577925	578.701	FALSE	6
2022-09-12	15:24:06	0.0544659	0.242275	-0.577925	575.901	FALSE	6
2022-09-12	15:24:07	0.26154	1.16338	1.43805	579.864	FALSE	6
2022-09-12	15:24:07	0.349428	1.55433	1.43805	577.456	FALSE	6
2022-09-12	15:24:07	0.358893	1.59643	1.43805	581.46	FALSE	6
2022-09-12	15:24:08	0.476247	2.11844	2.15557	579.574	FALSE	6
2022-09-12	15:24:08	0.522761	2.32535	2.15557	583.786	FALSE	6
2022-09-12	15:24:08	0.481183	2.1404	2.15557	581.715	FALSE	6
2022-09-12	15:24:08	0.458181	2.03808	2.15557	585.824	FALSE	6
2022-09-12	15:24:09	0.374822	1.66728	1.34318	583.382	FALSE	6
2022-09-12	15:24:09	0.294364	1.30939	1.34318	587.133	FALSE	6
2022-09-12	15:24:09	0.272328	1.21137	1.34318	584.593	FALSE	6
2022-09-12	15:24:09	0.266323	1.18466	1.34318	588.318	FALSE	6
2022-09-12	15:24:10	0.183626	0.816805	1.21726	585.41	FALSE	6
2022-09-12	15:24:10	0.382659	1.70214	1.21726	590.02	FALSE	6
2022-09-12	15:24:10	0.254669	1.13282	1.21726	586.543	FALSE	6
2022-09-12	15:24:11	0.353499	1.57243	1.27074	591.593	FALSE	6
2022-09-12	15:24:11	0.280929	1.24963	1.27074	587.792	FALSE	6
2022-09-12	15:24:11	0.208308	0.926596	1.27074	592.519	FALSE	6
2022-09-12	15:24:11	0.299962	1.33429	1.27074	589.127	FALSE	6
2022-09-12	15:24:12	0.290954	1.29422	1.0451	593.813	FALSE	6
2022-09-12	15:24:12	0.225153	1.00153	1.0451	590.128	FALSE	6
2022-09-12	15:24:12	0.219351	0.975717	1.0451	594.789	FALSE	6
2022-09-12	15:24:12	0.204339	0.908941	1.0451	591.037	FALSE	6
2022-09-12	15:24:13	0.179504	0.79847	0.714938	595.588	FALSE	6
2022-09-12	15:24:13	0.196501	0.874076	0.714938	591.911	FALSE	6
2022-09-12	15:24:13	0.106069	0.471816	0.714938	596.059	FALSE	6
2022-09-12	15:24:13	0.160827	0.715391	0.714938	592.627	FALSE	6
2022-09-12	15:24:14	0.208308	0.926596	1.19854	596.986	FALSE	6
2022-09-12	15:24:14	0.256959	1.14301	1.19854	593.77	FALSE	6
2022-09-12	15:24:14	0.343066	1.52603	1.19854	598.512	FALSE	6
2022-09-12	15:24:15	0.379606	1.68856	5.78713	595.458	FALSE	6
2022-09-12	15:24:15	1.29843	5.77568	5.78713	604.288	FALSE	6
2022-09-12	15:24:15	1.45436	6.46928	5.78713	601.928	FALSE	6
2022-09-12	15:24:15	2.07162	9.21498	5.78713	613.503	FALSE	6
2022-09-12	15:24:16	3.78281	16.8267	11.1644	618.754	1	7
2022-09-12	15:24:16	2.81691	12.5302	11.1644	626.033	FALSE	7
2022-09-12	15:24:16	1.38291	6.15146	11.1644	624.906	FALSE	7
2022-09-12	15:24:16	2.05686	9.14932	11.1644	635.182	FALSE	7
2022-09-12	15:24:17	1.61304	7.17512	5.12505	632.081	FALSE	7
2022-09-12	15:24:17	0.967646	4.30428	5.12505	639.486	FALSE	7
2022-09-12	15:24:17	0.917977	4.08335	5.12505	636.164	FALSE	7
2022-09-12	15:24:17	1.10999	4.93746	5.12505	644.424	FALSE	7
2022-09-12	15:24:18	1.59411	7.09092	8.14007	643.255	FALSE	7
2022-09-12	15:24:18	2.05818	9.1552	8.14007	653.579	FALSE	7
2022-09-12	15:24:18	1.83762	8.1741	8.14007	651.429	FALSE	7
2022-09-12	15:24:19	1.74286	7.75259	6.71435	661.332	FALSE	7
2022-09-12	15:24:19	1.50419	6.69094	6.71435	658.12	FALSE	7
2022-09-12	15:24:19	1.52678	6.79142	6.71435	668.123	FALSE	7
2022-09-12	15:24:19	1.26398	5.62244	6.71435	663.743	FALSE	7
2022-09-12	15:24:20	1.31095	5.83137	4.9505	673.954	FALSE	7
2022-09-12	15:24:20	1.10927	4.93425	4.9505	668.677	FALSE	7
2022-09-12	15:24:20	1.01548	4.51706	4.9505	678.471	FALSE	7
2022-09-12	15:24:20	1.01599	4.51933	4.9505	673.196	FALSE	7
2022-09-12	15:24:21	1.07594	4.786	5.2637	683.257	FALSE	7
2022-09-12	15:24:21	1.19375	5.31004	5.2637	678.506	FALSE	7
2022-09-12	15:24:21	1.22724	5.45901	5.2637	688.716	FALSE	7
2022-09-12	15:24:21	1.2364	5.49975	5.2637	684.006	FALSE	7
2022-09-12	15:24:22	1.23559	5.49615	5.78084	694.213	FALSE	7
2022-09-12	15:24:22	1.30678	5.81282	5.78084	689.819	FALSE	7
2022-09-12	15:24:22	1.3564	6.03354	5.78084	700.246	FALSE	7
2022-09-12	15:24:23	1.27335	5.66412	6.07758	695.483	FALSE	7
2022-09-12	15:24:23	1.33447	5.93599	6.07758	706.182	FALSE	7
2022-09-12	15:24:23	1.44602	6.43219	6.07758	701.915	FALSE	7
2022-09-12	15:24:23	1.41136	6.27801	6.07758	712.46	FALSE	7
2022-09-12	15:24:24	1.41426	6.29091	6.26637	708.206	FALSE	7
2022-09-12	15:24:24	1.36821	6.08607	6.26637	718.546	FALSE	7
2022-09-12	15:24:24	1.4563	6.47791	6.26637	714.684	FALSE	7
2022-09-12	15:24:24	1.3962	6.21058	6.26637	724.757	FALSE	7
2022-09-12	15:24:25	1.87401	8.33597	9.2526	723.02	FALSE	7
2022-09-12	15:24:25	1.97925	8.8041	9.2526	733.561	FALSE	7
2022-09-12	15:24:25	2.12566	9.45536	9.2526	732.475	FALSE	7
2022-09-12	15:24:25	2.34139	10.415	9.2526	743.976	FALSE	7
2022-09-12	15:24:26	2.33116	10.3695	8.26971	742.845	FALSE	7
2022-09-12	15:24:26	2.15584	9.58961	8.26971	753.566	FALSE	7
2022-09-12	15:24:26	1.09034	4.85005	8.26971	747.695	FALSE	7
2022-09-12	15:24:27	1.83497	8.16231	13.845	761.728	FALSE	7
2022-09-12	15:24:27	4.97635	22.1358	13.845	769.831	1	8
2022-09-12	15:24:27	4.37894	19.4784	13.845	781.206	1	9
2022-09-12	15:24:27	1.25976	5.60366	13.845	775.434	FALSE	9
2022-09-12	15:24:28	0.474466	2.11052	1.87141	783.317	FALSE	9
2022-09-12	15:24:28	0.381845	1.69852	1.87141	777.133	FALSE	9
2022-09-12	15:24:28	0.36215	1.61092	1.87141	784.928	FALSE	9
2022-09-12	15:24:28	0.464389	2.0657	1.87141	779.198	FALSE	9
2022-09-12	15:24:29	0.845611	3.76145	2.3347	788.689	FALSE	9
2022-09-12	15:24:29	0.393804	1.75172	2.3347	780.95	FALSE	9
2022-09-12	15:24:29	0.335178	1.49094	2.3347	790.18	FALSE	9
2022-09-12	15:24:30	3.08291	13.7134	8.4969	794.664	1	10
2022-09-12	15:24:30	3.45828	15.3831	8.4969	805.563	1	11
2022-09-12	15:24:30	0.700624	3.11652	8.4969	797.78	FALSE	11
2022-09-12	15:24:30	0.398944	1.77458	8.4969	807.338	FALSE	11
2022-09-12	15:24:31	-0.0877733	-0.390433	-0.0674573	797.78	FALSE	11
2022-09-12	15:24:31	-0.103091	-0.458569	-0.0674573	807.338	FALSE	11
2022-09-12	15:24:31	0.0515142	0.229145	-0.0674573	798.009	FALSE	11
2022-09-12	15:24:31	0.0786898	0.350028	-0.0674573	807.688	FALSE	11
2022-09-12	15:24:32	0.135535	0.602887	1.17221	798.612	FALSE	11
2022-09-12	15:24:32	0.161896	0.720146	1.17221	808.408	FALSE	11
2022-09-12	15:24:32	0.278792	1.24012	1.17221	799.852	FALSE	11
2022-09-12	15:24:32	0.477875	2.12568	1.17221	810.534	FALSE	11
2022-09-12	15:24:33	0.319707	1.42212	1.02922	801.274	FALSE	11
2022-09-12	15:24:33	0.207697	0.923878	1.02922	811.457	FALSE	11
2022-09-12	15:24:33	0.16673	0.741648	1.02922	802.016	FALSE	11
2022-09-12	15:24:34	0.507748	2.25856	1.45653	813.716	FALSE	11
2022-09-12	15:24:34	0.317316	1.41149	1.45653	803.427	FALSE	11
2022-09-12	15:24:34	0.251463	1.11856	1.45653	814.835	FALSE	11
2022-09-12	15:24:34	0.233244	1.03752	1.45653	804.465	FALSE	11
2022-09-12	15:24:35	-0.0742364	-0.330218	-0.375831	814.835	FALSE	11
2022-09-12	15:24:35	0.0712089	0.316751	-0.375831	804.782	FALSE	11
2022-09-12	15:24:35	-0.113778	-0.506107	-0.375831	814.835	FALSE	11
2022-09-12	15:24:35	-0.221157	-0.983751	-0.375831	804.782	FALSE	11
2022-09-12	15:24:36	0.039046	0.173684	1.48364	815.008	FALSE	11
2022-09-12	15:24:36	0.625305	2.78148	1.48364	807.563	FALSE	11
2022-09-12	15:24:36	0.422863	1.88098	1.48364	816.889	FALSE	11
2022-09-12	15:24:36	0.246934	1.09841	1.48364	808.662	FALSE	11
2022-09-12	15:24:37	0.155382	0.69117	0.623107	817.58	FALSE	11
2022-09-12	15:24:37	0.158079	0.703167	0.623107	809.365	FALSE	11
2022-09-12	15:24:37	0.106781	0.474983	0.623107	818.055	FALSE	11
2022-09-12	15:24:38	0.121234	0.539273	0.779001	809.904	FALSE	11
2022-09-12	15:24:38	0.139351	0.619861	0.779001	818.675	FALSE	11
2022-09-12	15:24:38	0.272328	1.21137	0.779001	811.115	FALSE	11
2022-09-12	15:24:38	0.167596	0.745501	0.779001	819.421	FALSE	11
2022-09-12	15:24:39	0.32215	1.43299	1.03175	812.548	FALSE	11
2022-09-12	15:24:39	0.114059	0.507357	1.03175	819.928	FALSE	11
2022-09-12	15:24:39	0.361998	1.61024	1.03175	814.159	FALSE	11
2022-09-12	15:24:39	0.12958	0.576398	1.03175	820.505	FALSE	11
2022-09-12	15:24:40	0.334517	1.488	0.907637	815.647	FALSE	11
2022-09-12	15:24:40	0.0172649	0.0767977	0.907637	820.581	FALSE	11
2022-09-12	15:24:40	0.334313	1.48709	0.907637	817.134	FALSE	11
2022-09-12	15:24:40	0.130089	0.578662	0.907637	821.16	FALSE	11
2022-09-12	15:24:41	0.195127	0.867964	-0.466495	818.002	FALSE	11
2022-09-12	15:24:41	-0.16472	-0.732708	-0.466495	821.16	FALSE	11
2022-09-12	15:24:41	-0.345025	-1.53474	-0.466495	818.002	FALSE	11
2022-09-12	15:24:42	-0.128944	-0.573569	-0.368815	821.16	FALSE	11
2022-09-12	15:24:42	-0.211539	-0.940968	-0.368815	818.002	FALSE	11
2022-09-12	15:24:42	0.0449493	0.199943	-0.368815	821.36	FALSE	11
2022-09-12	15:24:42	-0.0361193	-0.160666	-0.368815	818.002	FALSE	11
2022-09-12	15:24:43	0.225713	1.00402	0.942103	822.364	FALSE	11
2022-09-12	15:24:43	0.117723	0.523655	0.942103	818.525	FALSE	11
2022-09-12	15:24:43	0.342201	1.52218	0.942103	823.886	FALSE	11
2022-09-12	15:24:43	0.16154	0.718562	0.942103	819.244	FALSE	11
2022-09-12	15:24:44	0.319148	1.41963	-0.676189	825.306	FALSE	11
2022-09-12	15:24:44	-0.270369	-1.20266	-0.676189	819.244	FALSE	11
2022-09-12	15:24:44	-0.504821	-2.24554	-0.676189	825.306	FALSE	11
2022-09-12	15:24:45	-0.700801	-3.1173	-3.54016	819.244	FALSE	11
2022-09-12	15:24:45	-0.88421	-3.93314	-3.54016	825.306	FALSE	11
2022-09-12	15:24:45	-0.74472	-3.31266	-3.54016	819.244	FALSE	11
2022-09-12	15:24:45	-0.853727	-3.79755	-3.54016	825.306	FALSE	11
2022-09-12	15:24:46	-0.897798	-3.99359	-4.21221	819.244	FALSE	11
2022-09-12	15:24:46	-0.948231	-4.21792	-4.21221	825.306	FALSE	11
2022-09-12	15:24:46	-1.05948	-4.71278	-4.21221	819.244	FALSE	11
2022-09-12	15:24:46	-0.882277	-3.92454	-4.21221	825.306	FALSE	11
2022-09-12	15:24:47	-0.897136	-3.99064	-1.89886	819.244	FALSE	11
2022-09-12	15:24:47	-0.7665	-3.40955	-1.89886	825.306	FALSE	11
2022-09-12	15:24:47	-0.272099	-1.21035	-1.89886	819.244	FALSE	11
2022-09-12	15:24:47	0.228206	1.01511	-1.89886	826.321	FALSE	11
2022-09-12	15:24:48	0.403117	1.79315	1.94323	821.037	FALSE	11
2022-09-12	15:24:48	0.415229	1.84702	1.94323	828.168	FALSE	11
2022-09-12	15:24:48	0.492227	2.18952	1.94323	823.227	FALSE	11
2022-09-12	15:24:49	0.682761	3.03706	2.9464	831.205	FALSE	11
2022-09-12	15:24:49	0.773652	3.44136	2.9464	826.668	FALSE	11
2022-09-12	15:24:49	0.603321	2.68369	2.9464	833.889	FALSE	11
2022-09-12	15:24:49	0.589784	2.62348	2.9464	829.291	FALSE	11
2022-09-12	15:24:50	0.469784	2.08969	2.0696	835.978	FALSE	11
2022-09-12	15:24:50	0.755585	3.36099	2.0696	832.652	FALSE	11
2022-09-12	15:24:50	0.403524	1.79496	2.0696	837.773	FALSE	11
2022-09-12	15:24:50	0.232176	1.03277	2.0696	833.685	FALSE	11
2022-09-12	15:24:51	0.0512089	0.227787	0.234805	838.001	FALSE	11
2022-09-12	15:24:51	0.0380282	0.169157	0.234805	833.854	FALSE	11
2022-09-12	15:24:51	0.0693259	0.308375	0.234805	838.309	FALSE	11
2022-09-12	15:24:51	0.052583	0.2339	0.234805	834.088	FALSE	11
2022-09-12	15:24:52	0.196552	0.874303	0.466081	839.184	FALSE	11
2022-09-12	15:24:52	0.0623031	0.277137	0.466081	834.365	FALSE	11
2022-09-12	15:24:52	0.0554837	0.246803	0.466081	839.431	FALSE	11
2022-09-12	15:24:53	-0.0229387	-0.102036	0.00973497	834.365	FALSE	11
2022-09-12	15:24:53	0.00326998	0.0145455	0.00973497	839.445	FALSE	11
2022-09-12	15:24:53	0.0122267	0.0543868	0.00973497	834.42	FALSE	11
2022-09-12	15:24:53	0.0161961	0.0720435	0.00973497	839.517	FALSE	11
2022-09-12	15:24:54	-0.00385471	-0.0171465	0.749234	834.42	FALSE	11
2022-09-12	15:24:54	0.0503946	0.224165	0.749234	839.741	FALSE	11
2022-09-12	15:24:54	0.301387	1.34063	0.749234	835.76	FALSE	11
2022-09-12	15:24:54	0.325814	1.44929	0.749234	841.191	FALSE	11
2022-09-12	15:24:55	0.318741	1.41782	1.14578	837.178	FALSE	11
2022-09-12	15:24:55	0.187901	0.835821	1.14578	842.026	FALSE	11
2022-09-12	15:24:55	0.194466	0.865024	1.14578	838.043	FALSE	11
2022-09-12	15:24:55	0.329224	1.46445	1.14578	843.491	FALSE	11
2022-09-12	15:24:56	0.174364	0.775606	1.08106	838.819	FALSE	11
2022-09-12	15:24:56	0.290191	1.29083	1.08106	844.782	FALSE	11
2022-09-12	15:24:56	0.264542	1.17674	1.08106	839.996	FALSE	11
2022-09-12	15:24:57	0.243168	1.08166	1.19558	845.863	FALSE	11
2022-09-12	15:24:57	0.358181	1.59326	1.19558	841.589	FALSE	11
2022-09-12	15:24:57	0.162761	0.723993	1.19558	846.587	FALSE	11
2022-09-12	15:24:57	0.311005	1.38341	1.19558	842.972	FALSE	11
2022-09-12	15:24:58	0.288003	1.28109	1.3554	847.868	FALSE	11
2022-09-12	15:24:58	0.203372	0.904639	1.3554	843.877	FALSE	11
2022-09-12	15:24:58	0.313499	1.39451	1.3554	849.263	FALSE	11
2022-09-12	15:24:58	0.413957	1.84136	1.3554	845.718	FALSE	11
2022-09-12	15:24:59	0.100573	0.447369	0.919127	849.71	FALSE	11
2022-09-12	15:24:59	0.289886	1.28947	0.919127	847.008	FALSE	11
2022-09-12	15:24:59	0.247952	1.10294	0.919127	850.813	FALSE	11
2022-09-12	15:24:59	0.188105	0.836729	0.919127	847.844	FALSE	11
2022-09-12	15:25:00	0.489835	2.17888	1.72222	852.992	FALSE	11
2022-09-12	15:25:00	0.339555	1.51041	1.72222	849.355	FALSE	11
2022-09-12	15:25:00	0.332125	1.47736	1.72222	854.47	FALSE	11
2022-09-12	15:25:01	0.329987	1.46785	1.87453	850.823	FALSE	11
2022-09-12	15:25:01	0.410344	1.82529	1.87453	856.295	FALSE	11
2022-09-12	15:25:01	0.455076	2.02427	1.87453	852.847	FALSE	11
2022-09-12	15:25:01	0.490242	2.18069	1.87453	858.475	FALSE	11
2022-09-12	15:25:02	0.4736	2.10667	5.28854	854.954	FALSE	11
2022-09-12	15:25:02	1.42739	6.34932	5.28854	864.825	FALSE	11
2022-09-12	15:25:02	1.72408	7.66905	5.28854	862.623	FALSE	11
2022-09-12	15:25:02	1.1306	5.02913	5.28854	869.854	FALSE	11
2022-09-12	15:25:03	1.35528	6.02856	4.54167	868.651	FALSE	11
2022-09-12	15:25:03	0.798486	3.55183	4.54167	873.406	FALSE	11
2022-09-12	15:25:03	0.909275	4.04464	4.54167	872.696	FALSE	11
2022-09-12	15:25:04	1.57396	7.00129	6.58549	880.407	FALSE	11
2022-09-12	15:25:04	0.784237	3.48844	6.58549	876.184	FALSE	11
2022-09-12	15:25:04	1.68475	7.4941	6.58549	887.901	FALSE	11
2022-09-12	15:25:04	1.87899	8.35812	6.58549	884.542	FALSE	11
2022-09-12	15:25:05	2.03752	9.0633	5.90445	896.964	FALSE	11
2022-09-12	15:25:05	1.6764	7.45696	5.90445	891.999	FALSE	11
2022-09-12	15:25:05	1.18597	5.27543	5.90445	902.24	FALSE	11
2022-09-12	15:25:05	0.409631	1.82212	5.90445	893.822	FALSE	11
2022-09-12	15:25:06	0.475534	2.11527	2.76898	904.355	FALSE	11
2022-09-12	15:25:06	0.446171	1.98466	2.76898	895.806	FALSE	11
2022-09-12	15:25:06	0.49299	2.19292	2.76898	906.548	FALSE	11
2022-09-12	15:25:06	1.07528	4.78306	2.76898	900.589	FALSE	11
2022-09-12	15:25:07	1.4162	6.29954	4.5628	912.848	FALSE	11
2022-09-12	15:25:07	1.06062	4.71785	4.5628	905.307	FALSE	11
2022-09-12	15:25:07	0.600471	2.67102	4.5628	915.519	FALSE	11
2022-09-12	15:25:08	0.69243	3.08007	2.22155	908.387	FALSE	11
2022-09-12	15:25:08	0.402659	1.79111	2.22155	917.31	FALSE	11
2022-09-12	15:25:08	0.382405	1.70101	2.22155	910.088	FALSE	11
2022-09-12	15:25:08	0.520216	2.31402	2.22155	919.624	FALSE	11
2022-09-12	15:25:09	0.282456	1.25642	1.54985	911.345	FALSE	11
2022-09-12	15:25:09	0.45126	2.00729	1.54985	921.631	FALSE	11
2022-09-12	15:25:09	0.28556	1.27023	1.54985	912.615	FALSE	11
2022-09-12	15:25:09	0.374415	1.66547	1.54985	923.297	FALSE	11
2022-09-12	15:25:10	0.391209	1.74018	1.79722	914.355	FALSE	11
2022-09-12	15:25:10	0.351768	1.56473	1.79722	924.861	FALSE	11
2022-09-12	15:25:10	0.397926	1.77005	1.79722	916.125	FALSE	11
2022-09-12	15:25:10	0.475229	2.11391	1.79722	926.975	FALSE	11
2022-09-12	15:25:11	0.827697	3.68176	3.03517	919.807	FALSE	11
2022-09-12	15:25:11	0.39813	1.77096	3.03517	928.746	FALSE	11
2022-09-12	15:25:11	0.821183	3.65279	3.03517	923.46	FALSE	11
2022-09-12	15:25:12	0.31126	1.38455	1.75613	930.131	FALSE	11
2022-09-12	15:25:12	0.52785	2.34798	1.75613	925.808	FALSE	11
2022-09-12	15:25:12	0.238944	1.06287	1.75613	931.194	FALSE	11
2022-09-12	15:25:12	0.501132	2.22914	1.75613	928.037	FALSE	11
2022-09-12	15:25:13	0.268054	1.19236	1.89439	932.386	FALSE	11
2022-09-12	15:25:13	0.514669	2.28935	1.89439	930.326	FALSE	11
2022-09-12	15:25:13	0.478333	2.12772	1.89439	934.514	FALSE	11
2022-09-12	15:25:13	0.442456	1.96813	1.89439	932.294	FALSE	11
2022-09-12	15:25:14	0.388155	1.72659	1.90412	936.24	FALSE	11
2022-09-12	15:25:14	0.449733	2.0005	1.90412	934.295	FALSE	11
2022-09-12	15:25:14	0.361285	1.60707	1.90412	937.847	FALSE	11
2022-09-12	15:25:14	0.513092	2.28234	1.90412	936.577	FALSE	11
2022-09-12	15:25:15	0.291921	1.29852	1.40047	939.146	FALSE	11
2022-09-12	15:25:15	0.390293	1.7361	1.40047	938.313	FALSE	11
2022-09-12	15:25:15	0.262303	1.16678	1.40047	940.313	FALSE	11
2022-09-12	15:25:16	0.360064	1.60164	1.48896	939.915	FALSE	11
2022-09-12	15:25:16	0.26042	1.1584	1.48896	941.471	FALSE	11
2022-09-12	15:25:16	0.477824	2.12546	1.48896	942.04	FALSE	11
2022-09-12	15:25:16	0.240623	1.07034	1.48896	942.541	FALSE	11
2022-09-12	15:25:17	0.463066	2.05981	1.53095	944.1	FALSE	11
2022-09-12	15:25:17	0.243677	1.08392	1.53095	943.625	FALSE	11
2022-09-12	15:25:17	0.417468	1.85698	1.53095	945.957	FALSE	11
2022-09-12	15:25:17	0.252481	1.12309	1.53095	944.748	FALSE	11
2022-09-12	15:25:18	0.364135	1.61975	1.55372	947.577	FALSE	11
2022-09-12	15:25:18	0.27528	1.2245	1.55372	945.973	FALSE	11
2022-09-12	15:25:18	0.408461	1.81692	1.55372	949.394	FALSE	11
2022-09-12	15:25:19	0.277825	1.23582	0.519637	947.209	FALSE	11
2022-09-12	15:25:19	0.227392	1.01149	0.519637	950.405	FALSE	11
2022-09-12	15:25:19	0.0397585	0.176854	0.519637	947.386	FALSE	11
2022-09-12	15:25:19	-0.0776969	-0.345611	0.519637	950.405	FALSE	11
2022-09-12	15:25:20	0.233702	1.03955	2.07277	948.425	FALSE	11
2022-09-12	15:25:20	0.307036	1.36576	2.07277	951.771	FALSE	11
2022-09-12	15:25:20	0.452685	2.01363	2.07277	950.439	FALSE	11
2022-09-12	15:25:20	0.870496	3.87214	2.07277	955.643	FALSE	11
2022-09-12	15:25:21	0.662557	2.94719	2.21697	953.386	FALSE	11
2022-09-12	15:25:21	0.371412	1.65211	2.21697	957.295	FALSE	11
2022-09-12	15:25:21	0.471158	2.09581	2.21697	955.482	FALSE	11
2022-09-12	15:25:21	0.488461	2.17277	2.21697	959.468	FALSE	11
2022-09-12	15:25:22	0.392074	1.74402	1.75278	957.226	FALSE	11
2022-09-12	15:25:22	0.424033	1.88618	1.75278	961.354	FALSE	11
2022-09-12	15:25:22	0.366018	1.62812	1.75278	958.854	FALSE	11
2022-09-12	15:25:23	0.465865	2.07226	1.94662	963.426	FALSE	11
2022-09-12	15:25:23	0.422099	1.87758	1.94662	960.731	FALSE	11
2022-09-12	15:25:23	0.433448	1.92806	1.94662	965.355	FALSE	11
2022-09-12	15:25:23	0.429071	1.90859	1.94662	962.64	FALSE	11
2022-09-12	15:25:24	0.491769	2.18749	2.01974	967.542	FALSE	11
2022-09-12	15:25:24	0.442303	1.96745	2.01974	964.607	FALSE	11
2022-09-12	15:25:24	0.419555	1.86626	2.01974	969.408	FALSE	11
2022-09-12	15:25:24	0.462608	2.05777	2.01974	966.665	FALSE	11
2022-09-12	15:25:25	0.443168	1.9713	2.01386	971.38	FALSE	11
2022-09-12	15:25:25	0.453041	2.01522	2.01386	968.68	FALSE	11
2022-09-12	15:25:25	0.461438	2.05257	2.01386	973.432	FALSE	11
2022-09-12	15:25:25	0.453295	2.01635	2.01386	970.697	FALSE	11
2022-09-12	15:25:26	0.457112	2.03333	2.00103	975.465	FALSE	11
2022-09-12	15:25:26	0.443728	1.97379	2.00103	972.671	FALSE	11
2022-09-12	15:25:26	0.448715	1.99597	2.00103	977.461	FALSE	11
2022-09-12	15:25:27	0.453397	2.0168	1.9958	974.687	FALSE	11
2022-09-12	15:25:27	0.451361	2.00774	1.9958	979.469	FALSE	11
2022-09-12	15:25:27	0.446221	1.98488	1.9958	976.672	FALSE	11
2022-09-12	15:25:27	0.443728	1.97379	1.9958	981.443	FALSE	11
2022-09-12	15:25:28	0.449835	2.00096	2.02523	978.673	FALSE	11
2022-09-12	15:25:28	0.458435	2.03921	2.02523	983.482	FALSE	11
2022-09-12	15:25:28	0.462456	2.0571	2.02523	980.73	FALSE	11
2022-09-12	15:25:28	0.450445	2.00367	2.02523	985.486	FALSE	11
2022-09-12	15:25:29	0.450089	2.00209	1.96802	982.732	FALSE	11
2022-09-12	15:25:29	0.4507	2.0048	1.96802	987.491	FALSE	11
2022-09-12	15:25:29	0.44042	1.95908	1.96802	984.691	FALSE	11
2022-09-12	15:25:29	0.428512	1.90611	1.96802	989.397	FALSE	11
2022-09-12	15:25:30	0.589478	2.62212	1.5836	987.314	FALSE	11
2022-09-12	15:25:30	0.478181	2.12704	1.5836	991.524	FALSE	11
2022-09-12	15:25:30	0.000369216	0.00164235	1.5836	987.315	FALSE	11
2022-09-12	15:25:31	-0.490572	-2.18216	-3.7285	991.524	FALSE	11
2022-09-12	15:25:31	-0.824719	-3.66852	-3.7285	987.315	FALSE	11
2022-09-12	15:25:31	-1.0092	-4.48912	-3.7285	991.524	FALSE	11
2022-09-12	15:25:31	-1.02833	-4.57422	-3.7285	987.315	FALSE	11
2022-09-12	15:25:32	-1.01831	-4.52965	-4.62059	991.524	FALSE	11
2022-09-12	15:25:32	-1.02396	-4.55478	-4.62059	987.315	FALSE	11
2022-09-12	15:25:32	-1.07322	-4.7739	-4.62059	991.524	FALSE	11
2022-09-12	15:25:32	-1.03953	-4.62404	-4.62059	987.315	FALSE	11
2022-09-12	15:25:33	-1.01729	-4.52511	-4.29647	991.524	FALSE	11
2022-09-12	15:25:33	-0.999529	-4.4461	-4.29647	987.315	FALSE	11
2022-09-12	15:25:33	-0.951233	-4.23127	-4.29647	991.524	FALSE	11
2022-09-12	15:25:33	-0.895508	-3.9834	-4.29647	987.315	FALSE	11
2022-09-12	15:25:34	-0.822073	-3.65675	-3.62196	991.524	FALSE	11
2022-09-12	15:25:34	-0.760495	-3.38283	-3.62196	987.315	FALSE	11
2022-09-12	15:25:34	-0.86019	-3.8263	-3.62196	991.524	FALSE	11
2022-09-12	15:25:35	-0.829503	-3.6898	-3.25646	987.315	FALSE	11
2022-09-12	15:25:35	-0.784618	-3.49014	-3.25646	991.524	FALSE	11
2022-09-12	15:25:35	-0.713829	-3.17525	-3.25646	987.315	FALSE	11
2022-09-12	15:25:35	-0.600394	-2.67067	-3.25646	991.524	FALSE	11
2022-09-12	15:25:36	0.0101911	0.0453321	1.93168	987.361	FALSE	11
2022-09-12	15:25:36	0.759605	3.37887	1.93168	994.903	FALSE	11
2022-09-12	15:25:36	0.998689	4.44237	1.93168	991.803	FALSE	11
2022-09-12	15:25:36	-0.0314374	-0.13984	1.93168	994.903	FALSE	11
2022-09-12	15:25:37	-0.0118445	-0.0526867	8.42696	991.803	FALSE	11
2022-09-12	15:25:37	1.19274	5.30555	8.42696	1000.21	FALSE	11
2022-09-12	15:25:37	4.5025	20.028	8.42696	1011.83	1	12
2022-09-12	15:25:38	4.06072	18.0629	26.0725	1018.27	1	13
2022-09-12	15:25:38	5.63919	25.0842	26.0725	1036.92	1	14
2022-09-12	15:25:38	6.98871	31.0872	26.0725	1049.36	1	15
2022-09-12	15:25:38	6.7568	30.0556	26.0725	1066.97	1	16
2022-09-12	15:25:39	5.53553	24.6231	11.0323	1073.98	1	17
2022-09-12	15:25:39	2.41029	10.7215	11.0323	1077.69	FALSE	17
2022-09-12	15:25:39	1.28714	5.72546	11.0323	1079.71	FALSE	17
2022-09-12	15:25:39	0.687697	3.05901	11.0323	1080.75	FALSE	17
2022-09-12	15:25:40	0.767493	3.41396	1.57305	1083.12	FALSE	17
2022-09-12	15:25:40	0.28271	1.25755	1.57305	1082.01	FALSE	17
2022-09-12	15:25:40	0.198333	0.882225	1.57305	1084	FALSE	17
2022-09-12	15:25:40	0.166018	0.738481	1.57305	1082.75	FALSE	17
2022-09-12	15:25:41	0.17986	0.800053	1.06106	1084.8	FALSE	17
2022-09-12	15:25:41	0.253041	1.12558	1.06106	1083.87	FALSE	17
2022-09-12	15:25:41	0.28271	1.25755	1.06106	1086.06	FALSE	17
2022-09-12	15:25:42	0.263524	1.17221	1.57192	1085.05	FALSE	17
2022-09-12	15:25:42	0.341692	1.51991	1.57192	1087.58	FALSE	17
2022-09-12	15:25:42	0.437468	1.94595	1.57192	1086.99	FALSE	17
2022-09-12	15:25:42	0.370852	1.64962	1.57192	1089.23	FALSE	17
2022-09-12	15:25:43	0.410751	1.8271	1.8627	1088.82	FALSE	17
2022-09-12	15:25:43	0.435484	1.93712	1.8627	1091.17	FALSE	17
2022-09-12	15:25:43	0.415331	1.84748	1.8627	1090.67	FALSE	17
2022-09-12	15:25:43	0.413448	1.8391	1.8627	1093.01	FALSE	17
2022-09-12	15:25:44	0.38958	1.73293	1.77928	1092.4	FALSE	17
2022-09-12	15:25:44	0.396705	1.76462	1.77928	1094.77	FALSE	17
2022-09-12	15:25:44	0.401743	1.78703	1.77928	1094.19	FALSE	17
2022-09-12	15:25:44	0.411972	1.83253	1.77928	1096.6	FALSE	17
2022-09-12	15:25:45	0.401845	1.78749	1.83148	1095.97	FALSE	17
2022-09-12	15:25:45	0.416298	1.85178	1.83148	1098.46	FALSE	17
2022-09-12	15:25:45	0.417061	1.85517	1.83148	1097.83	FALSE	17
2022-09-12	15:25:46	0.413651	1.84	1.82376	1100.3	FALSE	17
2022-09-12	15:25:46	0.411769	1.83163	1.82376	1099.66	FALSE	17
2022-09-12	15:25:46	0.405356	1.8031	1.82376	1102.1	FALSE	17
2022-09-12	15:25:46	0.409224	1.82031	1.82376	1101.48	FALSE	17
2022-09-12	15:25:47	0.409835	1.82303	1.81889	1103.92	FALSE	17
2022-09-12	15:25:47	0.409478	1.82144	1.81889	1103.3	FALSE	17
2022-09-12	15:25:47	0.409631	1.82212	1.81889	1105.74	FALSE	17
2022-09-12	15:25:47	0.406679	1.80899	1.81889	1105.11	FALSE	17
2022-09-12	15:25:48	0.395585	1.75964	1.80452	1107.5	FALSE	17
2022-09-12	15:25:48	0.408308	1.81624	1.80452	1106.93	FALSE	17
2022-09-12	15:25:48	0.41243	1.83457	1.80452	1109.34	FALSE	17
2022-09-12	15:25:48	0.406374	1.80763	1.80452	1108.73	FALSE	17
2022-09-12	15:25:49	0.419962	1.86807	1.84785	1111.21	FALSE	17
2022-09-12	15:25:49	0.417926	1.85902	1.84785	1110.59	FALSE	17
2022-09-12	15:25:49	0.408359	1.81646	1.84785	1113.02	FALSE	17
2022-09-12	15:25:50	0.409275	1.82054	1.82648	1112.41	FALSE	17
2022-09-12	15:25:50	0.417672	1.85789	1.82648	1114.88	FALSE	17
2022-09-12	15:25:50	0.412939	1.83684	1.82648	1114.25	FALSE	17
2022-09-12	15:25:50	0.402557	1.79065	1.82648	1116.67	FALSE	17
2022-09-12	15:25:51	0.418842	1.86309	1.86196	1116.11	FALSE	17
2022-09-12	15:25:51	0.422557	1.87962	1.86196	1118.55	FALSE	17
2022-09-12	15:25:51	0.420624	1.87102	1.86196	1117.98	FALSE	17
2022-09-12	15:25:51	0.412328	1.83412	1.86196	1120.38	FALSE	17
2022-09-12	15:25:52	0.412227	1.83367	1.8511	1119.82	FALSE	17
2022-09-12	15:25:52	0.411972	1.83253	1.8511	1122.22	FALSE	17
2022-09-12	15:25:52	0.421692	1.87577	1.8511	1121.69	FALSE	17
2022-09-12	15:25:52	0.41869	1.86242	1.8511	1124.08	FALSE	17
2022-09-12	15:25:53	0.448053	1.99303	2.61208	1123.69	FALSE	17
2022-09-12	15:25:53	0.573702	2.55194	2.61208	1126.63	FALSE	17
2022-09-12	15:25:53	0.739911	3.29127	2.61208	1126.98	FALSE	17
2022-09-12	15:25:54	0.50902	2.26422	1.94934	1128.9	FALSE	17
2022-09-12	15:25:54	0.557519	2.47996	1.94934	1129.46	FALSE	17
2022-09-12	15:25:54	0.496807	2.2099	1.94934	1131.11	FALSE	17
2022-09-12	15:25:54	0.18958	0.84329	1.94934	1130.3	FALSE	17
2022-09-12	15:25:55	0.255433	1.13622	1.69665	1132.24	FALSE	17
2022-09-12	15:25:55	0.244746	1.08868	1.69665	1131.39	FALSE	17
2022-09-12	15:25:55	0.264796	1.17787	1.69665	1133.42	FALSE	17
2022-09-12	15:25:55	0.760725	3.38386	1.69665	1134.77	FALSE	17
2022-09-12	15:25:56	0.32327	1.43797	1.80288	1134.86	FALSE	17
2022-09-12	15:25:56	0.368155	1.63763	1.80288	1136.41	FALSE	17
2022-09-12	15:25:56	0.524491	2.33304	1.80288	1137.19	FALSE	17
2022-09-12	15:25:57	1.14413	5.08932	2.9173	1141.5	FALSE	17
2022-09-12	15:25:57	0.432583	1.92422	2.9173	1139.11	FALSE	17
2022-09-12	15:25:57	0.555178	2.46954	2.9173	1143.97	FALSE	17
2022-09-12	15:25:57	0.491463	2.18613	2.9173	1141.3	FALSE	17
2022-09-12	15:25:58	0.295331	1.31369	0.964682	1145.28	FALSE	17
2022-09-12	15:25:58	0.177875	0.791224	0.964682	1142.09	FALSE	17
2022-09-12	15:25:58	0.153448	0.682567	0.964682	1145.97	FALSE	17
2022-09-12	15:25:58	0.240827	1.07125	0.964682	1143.16	FALSE	17
2022-09-12	15:25:59	0.20444	0.90939	1.51222	1146.88	FALSE	17
2022-09-12	15:25:59	0.226781	1.00877	1.51222	1144.17	FALSE	17
2022-09-12	15:25:59	0.44897	1.99711	1.51222	1148.87	FALSE	17
2022-09-12	15:25:59	0.479657	2.13361	1.51222	1146.31	FALSE	17
2022-09-12	15:26:00	0.470293	2.09196	2.0165	1150.97	FALSE	17
2022-09-12	15:26:00	0.496298	2.20763	2.0165	1148.51	FALSE	17
2022-09-12	15:26:00	0.393397	1.74991	2.0165	1152.72	FALSE	17
2022-09-12	15:26:01	0.511819	2.27667	2.06886	1150.79	FALSE	17
2022-09-12	15:26:01	0.413193	1.83797	2.06886	1154.55	FALSE	17
2022-09-12	15:26:01	0.554618	2.46705	2.06886	1153.26	FALSE	17
2022-09-12	15:26:01	0.380776	1.69377	2.06886	1156.25	FALSE	17
2022-09-12	15:26:02	0.353346	1.57175	1.26921	1154.83	FALSE	17
2022-09-12	15:26:02	0.341387	1.51856	1.26921	1157.77	FALSE	17
2022-09-12	15:26:02	0.295382	1.31392	1.26921	1156.14	FALSE	17
2022-09-12	15:26:02	0.151209	0.672608	1.26921	1158.44	FALSE	17
2022-09-12	15:26:03	0.221285	0.98432	0.624107	1157.13	FALSE	17
2022-09-12	15:26:03	0.0550257	0.244765	0.624107	1158.68	FALSE	17
2022-09-12	15:26:03	0.110547	0.491735	0.624107	1157.62	FALSE	17
2022-09-12	15:26:03	0.174364	0.775606	0.624107	1159.46	FALSE	17
2022-09-12	15:26:04	0.239504	1.06536	1.23748	1158.68	FALSE	17
2022-09-12	15:26:04	0.184746	0.821787	1.23748	1160.28	FALSE	17
2022-09-12	15:26:04	0.410344	1.82529	1.23748	1160.51	FALSE	17
2022-09-12	15:26:05	0.395433	1.75897	2.02523	1162.04	FALSE	17
2022-09-12	15:26:05	0.52785	2.34798	2.02523	1162.86	FALSE	17
2022-09-12	15:26:05	0.413499	1.83933	2.02523	1163.88	FALSE	17
2022-09-12	15:26:05	0.484389	2.15466	2.02523	1165.01	FALSE	17
2022-09-12	15:26:06	0.429631	1.91108	2.0876	1165.79	FALSE	17
2022-09-12	15:26:06	0.498181	2.21601	2.0876	1167.23	FALSE	17
2022-09-12	15:26:06	0.472074	2.09988	2.0876	1167.89	FALSE	17
2022-09-12	15:26:06	0.477367	2.12342	2.0876	1169.35	FALSE	17
2022-09-12	15:26:07	0.467494	2.07951	2.12687	1169.97	FALSE	17
2022-09-12	15:26:07	0.479758	2.13406	2.12687	1171.49	FALSE	17
2022-09-12	15:26:07	0.480725	2.13836	2.12687	1172.11	FALSE	17
2022-09-12	15:26:07	0.484593	2.15557	2.12687	1173.64	FALSE	17
2022-09-12	15:26:08	0.483728	2.15172	2.13836	1174.26	FALSE	17
2022-09-12	15:26:08	0.481692	2.14266	2.13836	1175.78	FALSE	17
2022-09-12	15:26:08	0.476756	2.12071	2.13836	1176.38	FALSE	17
2022-09-12	15:26:09	0.476756	2.12071	2.1267	1177.9	FALSE	17
2022-09-12	15:26:09	0.46841	2.08358	2.1267	1178.46	FALSE	17
2022-09-12	15:26:09	0.470089	2.09105	2.1267	1180	FALSE	17
2022-09-12	15:26:09	0.497163	2.21148	2.1267	1180.68	FALSE	17
2022-09-12	15:26:10	0.479657	2.13361	2.06666	1182.13	FALSE	17
2022-09-12	15:26:10	0.495585	2.20446	2.06666	1182.88	FALSE	17
2022-09-12	15:26:10	0.63131	2.80819	2.06666	1184.94	FALSE	17
2022-09-12	15:26:10	0.25187	1.12037	2.06666	1184	FALSE	17
2022-09-12	15:26:11	0.160369	0.713353	2.16853	1185.65	FALSE	17
2022-09-12	15:26:11	0.492328	2.18997	2.16853	1186.19	FALSE	17
2022-09-12	15:26:11	0.528359	2.35025	2.16853	1188	FALSE	17
2022-09-12	15:26:11	0.76897	3.42053	2.16853	1189.61	FALSE	17
2022-09-12	15:26:12	1.17767	5.23851	4.80646	1193.24	FALSE	17
2022-09-12	15:26:12	1.25849	5.59802	4.80646	1195.21	FALSE	17
2022-09-12	15:26:12	0.805458	3.58284	4.80646	1196.82	FALSE	17
2022-09-12	15:26:13	0.841896	3.74492	6.6495	1198.95	FALSE	17
2022-09-12	15:26:13	1.58943	7.0701	6.6495	1203.89	FALSE	17
2022-09-12	15:26:13	2.0533	9.13349	6.6495	1208.09	FALSE	17
2022-09-12	15:26:14	4.10769	18.2718	20.7982	1222.16	1	18
2022-09-12	15:26:14	7.93233	35.2846	20.7982	1243.37	1	19
2022-09-12	15:26:14	5.97579	26.5815	20.7982	1248.75	1	20
2022-09-12	15:26:14	4.2938	19.0997	20.7982	1262.47	1	21
2022-09-12	15:26:14	1.06856	4.75317	20.7982	1253.5	FALSE	21
2022-09-12	15:26:15	0.515941	2.29501	1.56466	1264.77	FALSE	21
2022-09-12	15:26:15	0.262252	1.16655	1.56466	1254.67	FALSE	21
2022-09-12	15:26:15	0.277061	1.23242	1.56466	1266	FALSE	21
2022-09-12	15:26:16	0.214008	0.95195	1.05189	1255.62	FALSE	21
2022-09-12	15:26:16	0.35472	1.57787	1.05189	1267.58	FALSE	21
2022-09-12	15:26:16	0.308257	1.37119	1.05189	1256.99	FALSE	21
2022-09-12	15:26:16	0.0689188	0.306565	1.05189	1267.88	FALSE	21
2022-09-12	15:26:17	0.0453565	0.201755	-0.143123	1257.19	FALSE	21
2022-09-12	15:26:17	0.0593005	0.26378	-0.143123	1268.15	FALSE	21
2022-09-12	15:26:17	-0.121565	-0.540745	-0.143123	1257.19	FALSE	21
2022-09-12	15:26:17	-0.111794	-0.497282	-0.143123	1268.15	FALSE	21
2022-09-12	15:26:18	0.330852	1.4717	1.4232	1258.66	FALSE	21
2022-09-12	15:26:18	0.203372	0.904639	1.4232	1269.05	FALSE	21
2022-09-12	15:26:18	0.23528	1.04657	1.4232	1259.71	FALSE	21
2022-09-12	15:26:18	0.510293	2.26989	1.4232	1271.32	FALSE	21
2022-09-12	15:26:19	0.241489	1.07419	1.81435	1260.78	FALSE	21
2022-09-12	15:26:19	0.319606	1.42167	1.81435	1272.74	FALSE	21
2022-09-12	15:26:19	0.662557	2.94719	1.81435	1263.73	FALSE	21
2022-09-12	15:26:20	1.15212	5.12486	5.9041	1277.87	FALSE	21
2022-09-12	15:26:20	1.75233	7.79471	5.9041	1271.52	FALSE	21
2022-09-12	15:26:20	1.63884	7.28989	5.9041	1285.16	FALSE	21
2022-09-12	15:26:20	0.765916	3.40695	5.9041	1274.93	FALSE	21
2022-09-12	15:26:21	0.545407	2.42608	2.16666	1287.58	FALSE	21
2022-09-12	15:26:21	0.492074	2.18884	2.16666	1277.12	FALSE	21
2022-09-12	15:26:21	0.451616	2.00888	2.16666	1289.59	FALSE	21
2022-09-12	15:26:21	0.459249	2.04283	2.16666	1279.16	FALSE	21
2022-09-12	15:26:22	0.452023	2.01069	2.0035	1291.6	FALSE	21
2022-09-12	15:26:22	0.468003	2.08177	2.0035	1281.25	FALSE	21
2022-09-12	15:26:22	0.446832	1.9876	2.0035	1293.59	FALSE	21
2022-09-12	15:26:22	0.434771	1.93395	2.0035	1283.18	FALSE	21
2022-09-12	15:26:23	0.647392	2.87973	2.89769	1296.47	FALSE	21
2022-09-12	15:26:23	0.790344	3.51561	2.89769	1286.69	FALSE	21
2022-09-12	15:26:23	0.516552	2.29773	2.89769	1298.77	FALSE	21
2022-09-12	15:26:24	1.40963	6.27032	7.35458	1292.97	FALSE	21
2022-09-12	15:26:24	2.54871	11.3372	7.35458	1310.11	FALSE	21
2022-09-12	15:26:24	1.67121	7.43388	7.35458	1300.4	FALSE	21
2022-09-12	15:26:24	0.983982	4.37695	7.35458	1314.48	FALSE	21
2022-09-12	15:26:25	0.682811	3.03728	2.47135	1303.44	FALSE	21
2022-09-12	15:26:25	0.716094	3.18533	2.47135	1317.67	FALSE	21
2022-09-12	15:26:25	0.51584	2.29456	2.47135	1305.73	FALSE	21
2022-09-12	15:26:25	0.307596	1.36825	2.47135	1319.04	FALSE	21
2022-09-12	15:26:26	0.660115	2.93632	3.32081	1308.67	FALSE	21
2022-09-12	15:26:26	0.547596	2.43582	3.32081	1321.47	FALSE	21
2022-09-12	15:26:26	0.645763	2.87248	3.32081	1311.54	FALSE	21
2022-09-12	15:26:26	1.13273	5.03861	3.32081	1326.51	FALSE	21
2022-09-12	15:26:27	1.17462	5.22494	9.21866	1316.76	FALSE	21
2022-09-12	15:26:27	1.92907	8.58089	9.21866	1335.09	FALSE	21
2022-09-12	15:26:27	3.11365	13.8501	9.21866	1330.61	1	22
2022-09-12	15:26:28	2.35742	10.4863	6.92629	1345.58	FALSE	22
2022-09-12	15:26:28	1.60357	7.133	6.92629	1337.75	FALSE	22
2022-09-12	15:26:28	1.06485	4.73667	6.92629	1350.31	FALSE	22
2022-09-12	15:26:28	1.20256	5.34923	6.92629	1343.1	FALSE	22
2022-09-12	15:26:29	0.64673	2.87678	3.51464	1353.19	FALSE	22
2022-09-12	15:26:29	1.01472	4.51368	3.51464	1347.61	FALSE	22
2022-09-12	15:26:29	0.751361	3.3422	3.51464	1356.53	FALSE	22
2022-09-12	15:26:29	0.747697	3.32591	3.51464	1350.94	FALSE	22
2022-09-12	15:26:30	0.697875	3.10429	4.93461	1359.64	FALSE	22
2022-09-12	15:26:30	1.13879	5.06557	4.93461	1356	FALSE	22
2022-09-12	15:26:30	1.7309	7.69939	4.93461	1367.34	FALSE	22
2022-09-12	15:26:30	0.869835	3.8692	4.93461	1359.87	FALSE	22
2022-09-12	15:26:31	1.06378	4.73191	4.10033	1372.07	FALSE	22
2022-09-12	15:26:31	0.979758	4.35816	4.10033	1364.23	FALSE	22
2022-09-12	15:26:31	0.721845	3.21091	4.10033	1375.28	FALSE	22
2022-09-12	15:26:32	0.707239	3.14594	2.12885	1367.38	FALSE	22
2022-09-12	15:26:32	0.480623	2.13791	2.12885	1377.42	FALSE	22
2022-09-12	15:26:32	0.389173	1.73112	2.12885	1369.11	FALSE	22
2022-09-12	15:26:32	0.337316	1.50045	2.12885	1378.92	FALSE	22
2022-09-12	15:26:33	0.185255	0.824051	8.32725	1369.93	FALSE	22
2022-09-12	15:26:33	0.35355	1.57266	8.32725	1380.49	FALSE	22
2022-09-12	15:26:33	1.42378	6.33326	8.32725	1376.26	FALSE	22
2022-09-12	15:26:33	5.52561	24.579	8.32725	1405.07	1	23

## Sheet: Ranger_star_2022912152113 (3)
Date	Time	Lbs	Newtons	Total Force x time	Total Time Steps Force >13.345		**GoPro Fitting: 1510
2022-09-12	15:21:33	0.121082	0.538597	0.538597	FALSE	0
2022-09-12	15:21:33	-0.14874	-0.661625	0	FALSE	0			Total force x time	1405.07
2022-09-12	15:21:33	0.059962	0.266723	0.80532	FALSE	0			Total Time Steps Force >3	23
2022-09-12	15:21:33	0.88444	3.93417	3.93417	FALSE	0
2022-09-12	15:21:34	-0.0622262	-0.276795	0.80532	FALSE	0
2022-09-12	15:21:34	0.165255	0.735087	4.66925	FALSE	0
2022-09-12	15:21:34	0.216451	0.962817	1.76814	FALSE	0
2022-09-12	15:21:34	0.167036	0.74301	5.41226	FALSE	0
2022-09-12	15:21:35	0.635585	2.82721	4.59535	FALSE	0
2022-09-12	15:21:35	3.0051	13.3673	18.7795	1	1
2022-09-12	15:21:35	2.80449	12.4749	17.0703	FALSE	1
2022-09-12	15:21:36	3.12724	13.9106	32.6901	1	2
2022-09-12	15:21:36	1.78973	7.96108	25.0314	FALSE	2
2022-09-12	15:21:36	1.22296	5.43997	38.1301	FALSE	2
2022-09-12	15:21:36	0.625051	2.78035	27.8117	FALSE	2
2022-09-12	15:21:37	1.80948	8.04893	46.179	FALSE	2
2022-09-12	15:21:37	0.218486	0.971869	28.7836	FALSE	2
2022-09-12	15:21:37	0.169733	0.755006	46.934	FALSE	2
2022-09-12	15:21:37	0.306679	1.36417	30.1477	FALSE	2
2022-09-12	15:21:38	1.71345	7.62177	54.5558	FALSE	2
2022-09-12	15:21:38	3.37441	15.0101	45.1578	1	3
2022-09-12	15:21:38	3.89879	17.3426	71.8984	1	4
2022-09-12	15:21:38	4.41619	19.6441	64.8019	1	5
2022-09-12	15:21:39	1.21289	5.39518	77.2936	FALSE	5
2022-09-12	15:21:39	0.546832	2.43242	67.2343	FALSE	5
2022-09-12	15:21:39	0.401794	1.78726	79.0808	FALSE	5
2022-09-12	15:21:40	0.65813	2.92749	70.1618	FALSE	5
2022-09-12	15:21:40	0.288461	1.28313	80.364	FALSE	5
2022-09-12	15:21:40	0.496043	2.2065	72.3683	FALSE	5
2022-09-12	15:21:40	0.373601	1.66185	82.0258	FALSE	5
2022-09-12	15:21:41	-0.020445	-0.0909434	72.3683	FALSE	5
2022-09-12	15:21:41	-0.121208	-0.539157	82.0258	FALSE	5
2022-09-12	15:21:41	0.311107	1.38387	73.7522	FALSE	5
2022-09-12	15:21:41	0.16042	0.71358	82.7394	FALSE	5
2022-09-12	15:21:42	0.565356	2.51482	76.267	FALSE	5
2022-09-12	15:21:42	0.336043	1.49479	84.2342	FALSE	5
2022-09-12	15:21:42	1.22149	5.43343	81.7004	FALSE	5
2022-09-12	15:21:43	1.04373	4.64272	88.8769	FALSE	5
2022-09-12	15:21:43	2.18108	9.70188	91.4023	FALSE	5
2022-09-12	15:21:43	1.56561	6.96415	95.8411	FALSE	5
2022-09-12	15:21:43	1.66744	7.41711	98.8194	FALSE	5
2022-09-12	15:21:44	0.596908	2.65517	98.4962	FALSE	5
2022-09-12	15:21:44	0.461692	2.0537	100.873	FALSE	5
2022-09-12	15:21:44	0.326374	1.45178	99.948	FALSE	5
2022-09-12	15:21:44	0.132837	0.590886	101.464	FALSE	5
2022-09-12	15:21:45	-0.0996307	-0.443177	99.948	FALSE	5
2022-09-12	15:21:45	-0.354389	-1.57639	101.464	FALSE	5
2022-09-12	15:21:45	-0.446501	-1.98613	99.948	FALSE	5
2022-09-12	15:21:45	-0.566043	-2.51787	101.464	FALSE	5
2022-09-12	15:21:46	-0.48818	-2.17152	99.948	FALSE	5
2022-09-12	15:21:46	-0.547671	-2.43615	101.464	FALSE	5
2022-09-12	15:21:46	-0.60701	-2.7001	99.948	FALSE	5
2022-09-12	15:21:47	-0.572048	-2.54458	101.464	FALSE	5
2022-09-12	15:21:47	-0.378765	-1.68482	99.948	FALSE	5
2022-09-12	15:21:47	0.129377	0.575495	102.039	FALSE	5
2022-09-12	15:21:47	0.259809	1.15568	101.104	FALSE	5
2022-09-12	15:21:48	0.59243	2.63525	104.675	FALSE	5
2022-09-12	15:21:48	1.02383	4.5542	105.658	FALSE	5
2022-09-12	15:21:48	1.25447	5.58013	110.255	FALSE	5
2022-09-12	15:21:48	0.828409	3.68493	109.343	FALSE	5
2022-09-12	15:21:49	1.03701	4.61283	114.868	FALSE	5
2022-09-12	15:21:49	0.689682	3.06784	112.411	FALSE	5
2022-09-12	15:21:49	0.424084	1.88641	116.754	FALSE	5
2022-09-12	15:21:49	0.768562	3.41872	115.829	FALSE	5
2022-09-12	15:21:50	0.154771	0.688452	117.443	FALSE	5
2022-09-12	15:21:50	0.422201	1.87803	117.707	FALSE	5
2022-09-12	15:21:50	0.473041	2.10418	119.547	FALSE	5
2022-09-12	15:21:51	0.407799	1.81397	119.521	FALSE	5
2022-09-12	15:21:51	0.501488	2.23072	121.777	FALSE	5
2022-09-12	15:21:51	0.269987	1.20096	120.722	FALSE	5
2022-09-12	15:21:51	0.531311	2.36338	124.141	FALSE	5
2022-09-12	15:21:52	0.499809	2.22325	122.946	FALSE	5
2022-09-12	15:21:52	0.352481	1.56791	125.709	FALSE	5
2022-09-12	15:21:52	0.0294277	0.1309	123.076	FALSE	5
2022-09-12	15:21:52	0.549326	2.44351	128.152	FALSE	5
2022-09-12	15:21:53	0.11813	0.525466	123.602	FALSE	5
2022-09-12	15:21:53	0.402659	1.79111	129.943	FALSE	5
2022-09-12	15:21:53	0.215076	0.956701	124.559	FALSE	5
2022-09-12	15:21:53	0.396552	1.76394	131.707	FALSE	5
2022-09-12	15:21:54	0.832735	3.70417	128.263	FALSE	5
2022-09-12	15:21:54	0.865305	3.84905	135.556	FALSE	5
2022-09-12	15:21:54	0.745865	3.31776	131.581	FALSE	5
2022-09-12	15:21:55	0.428003	1.90384	137.46	FALSE	5
2022-09-12	15:21:55	0.571921	2.54402	134.125	FALSE	5
2022-09-12	15:21:55	0.195687	0.870455	138.331	FALSE	5
2022-09-12	15:21:55	0.311819	1.38703	135.512	FALSE	5
2022-09-12	15:21:56	0.112227	0.499208	138.83	FALSE	5
2022-09-12	15:21:56	1.12902	5.02211	140.534	FALSE	5
2022-09-12	15:21:56	0.783473	3.48504	142.315	FALSE	5
2022-09-12	15:21:56	1.71996	7.65073	148.184	FALSE	5
2022-09-12	15:21:57	1.0681	4.75112	147.066	FALSE	5
2022-09-12	15:21:57	1.10307	4.90668	153.091	FALSE	5
2022-09-12	15:21:57	1.42627	6.34433	153.41	FALSE	5
2022-09-12	15:21:57	0.618079	2.74934	155.84	FALSE	5
2022-09-12	15:21:58	1.18994	5.29309	158.703	FALSE	5
2022-09-12	15:21:58	0.604644	2.68958	158.53	FALSE	5
2022-09-12	15:21:58	1.2621	5.61407	164.318	FALSE	5
2022-09-12	15:21:59	0.403219	1.7936	160.324	FALSE	5
2022-09-12	15:21:59	0.346272	1.54029	165.858	FALSE	5
2022-09-12	15:21:59	0.912684	4.0598	164.383	FALSE	5
2022-09-12	15:21:59	0.212125	0.943574	166.801	FALSE	5
2022-09-12	15:22:00	0.697061	3.10067	167.484	FALSE	5
2022-09-12	15:22:00	0.347952	1.54776	168.349	FALSE	5
2022-09-12	15:22:00	0.464949	2.06819	169.552	FALSE	5
2022-09-12	15:22:00	0.423372	1.88324	170.232	FALSE	5
2022-09-12	15:22:01	0.331972	1.47668	171.029	FALSE	5
2022-09-12	15:22:01	0.808766	3.59755	173.83	FALSE	5
2022-09-12	15:22:01	1.35416	6.02357	177.053	FALSE	5
2022-09-12	15:22:02	1.52118	6.76651	180.596	FALSE	5
2022-09-12	15:22:02	0.365305	1.62495	178.678	FALSE	5
2022-09-12	15:22:02	1.08719	4.83604	185.432	FALSE	5
2022-09-12	15:22:02	0.275789	1.22676	179.904	FALSE	5
2022-09-12	15:22:03	0.310598	1.3816	186.814	FALSE	5
2022-09-12	15:22:03	0.329937	1.46763	181.372	FALSE	5
2022-09-12	15:22:03	0.0461198	0.20515	187.019	FALSE	5
2022-09-12	15:22:03	0.175127	0.779	182.151	FALSE	5
2022-09-12	15:22:04	-0.00960535	-0.0427265	187.019	FALSE	5
2022-09-12	15:22:04	0.0763997	0.339841	182.491	FALSE	5
2022-09-12	15:22:04	-0.184007	-0.8185	187.019	FALSE	5
2022-09-12	15:22:04	0.137621	0.612166	183.103	FALSE	5
2022-09-12	15:22:05	-0.145992	-0.649402	187.019	FALSE	5
2022-09-12	15:22:05	0.123626	0.549913	183.653	FALSE	5
2022-09-12	15:22:05	-0.0935748	-0.416239	187.019	FALSE	5
2022-09-12	15:22:06	0.0331427	0.147425	183.8	FALSE	5
2022-09-12	15:22:06	0.145255	0.646123	187.665	FALSE	5
2022-09-12	15:22:06	-0.0838038	-0.372776	183.8	FALSE	5
2022-09-12	15:22:06	0.201387	0.89581	188.561	FALSE	5
2022-09-12	15:22:07	-0.00202267	-0.00899724	183.8	FALSE	5
2022-09-12	15:22:07	0.273906	1.21839	189.78	FALSE	5
2022-09-12	15:22:07	-0.0569336	-0.253252	183.8	FALSE	5
2022-09-12	15:22:07	0.0413361	0.183871	189.963	FALSE	5
2022-09-12	15:22:08	-0.212811	-0.946626	183.8	FALSE	5
2022-09-12	15:22:08	-0.269911	-1.20062	189.963	FALSE	5
2022-09-12	15:22:08	-0.518307	-2.30553	183.8	FALSE	5
2022-09-12	15:22:08	-0.296323	-1.3181	189.963	FALSE	5
2022-09-12	15:22:09	-0.40131	-1.78511	183.8	FALSE	5
2022-09-12	15:22:09	-0.295458	-1.31426	189.963	FALSE	5
2022-09-12	15:22:09	-0.286654	-1.27509	183.8	FALSE	5
2022-09-12	15:22:10	-0.221361	-0.984658	189.963	FALSE	5
2022-09-12	15:22:10	-0.141768	-0.630612	183.8	FALSE	5
2022-09-12	15:22:10	-0.2179	-0.969263	189.963	FALSE	5
2022-09-12	15:22:10	0.119148	0.529994	184.33	FALSE	5
2022-09-12	15:22:11	-0.00497431	-0.0221267	189.963	FALSE	5
2022-09-12	15:22:11	0.274822	1.22246	185.553	FALSE	5
2022-09-12	15:22:11	0.0378247	0.168252	190.132	FALSE	5
2022-09-12	15:22:11	0.534364	2.37696	187.93	FALSE	5
2022-09-12	15:22:12	0.381132	1.69535	191.827	FALSE	5
2022-09-12	15:22:12	0.747595	3.32545	191.255	FALSE	5
2022-09-12	15:22:12	0.369733	1.64465	193.472	FALSE	5
2022-09-12	15:22:13	0.210853	0.937916	192.193	FALSE	5
2022-09-12	15:22:13	0.406374	1.80763	195.279	FALSE	5
2022-09-12	15:22:13	0.0445422	0.198133	192.391	FALSE	5
2022-09-12	15:22:13	0.346476	1.54119	196.821	FALSE	5
2022-09-12	15:22:14	0.106374	0.473173	192.864	FALSE	5
2022-09-12	15:22:14	0.230496	1.02529	197.846	FALSE	5
2022-09-12	15:22:14	0.0349239	0.155348	193.02	FALSE	5
2022-09-12	15:22:14	0.245509	1.09207	198.938	FALSE	5
2022-09-12	15:22:15	0.312074	1.38817	194.408	FALSE	5
2022-09-12	15:22:15	0.344746	1.5335	200.471	FALSE	5
2022-09-12	15:22:15	0.304339	1.35376	195.762	FALSE	5
2022-09-12	15:22:15	0.345407	1.53644	202.008	FALSE	5
2022-09-12	15:22:16	0.395076	1.75738	197.519	FALSE	5
2022-09-12	15:22:16	0.119453	0.531351	202.539	FALSE	5
2022-09-12	15:22:16	0.420115	1.86876	199.388	FALSE	5
2022-09-12	15:22:16	0.147087	0.654272	203.193	FALSE	5
2022-09-12	15:22:17	0.422303	1.87849	201.266	FALSE	5
2022-09-12	15:22:17	0.190903	0.849175	204.043	FALSE	5
2022-09-12	15:22:17	0.367087	1.63288	202.899	FALSE	5
2022-09-12	15:22:18	0.289937	1.2897	205.332	FALSE	5
2022-09-12	15:22:18	0.124033	0.551724	203.451	FALSE	5
2022-09-12	15:22:18	0.203422	0.904862	206.237	FALSE	5
2022-09-12	15:22:18	0.0961961	0.427899	203.879	FALSE	5
2022-09-12	15:22:19	0.436298	1.94074	208.178	FALSE	5
2022-09-12	15:22:19	0.0613361	0.272835	204.152	FALSE	5
2022-09-12	15:22:19	0.327952	1.4588	209.637	FALSE	5
2022-09-12	15:22:19	0.042303	0.188172	204.34	FALSE	5
2022-09-12	15:22:20	0.26215	1.1661	210.803	FALSE	5
2022-09-12	15:22:20	0.0585371	0.260385	204.6	FALSE	5
2022-09-12	15:22:20	0.222099	0.987941	211.791	FALSE	5
2022-09-12	15:22:21	0.0337534	0.150142	204.75	FALSE	5
2022-09-12	15:22:21	0.022303	0.0992082	211.89	FALSE	5
2022-09-12	15:22:21	-0.140801	-0.626311	204.75	FALSE	5
2022-09-12	15:22:21	0.0713106	0.317204	212.207	FALSE	5
2022-09-12	15:22:22	0.0436771	0.194284	204.945	FALSE	5
2022-09-12	15:22:22	0.606832	2.69931	214.906	FALSE	5
2022-09-12	15:22:22	0.645051	2.86932	207.814	FALSE	5
2022-09-12	15:22:23	0.168766	0.750705	215.657	FALSE	5
2022-09-12	15:22:23	0.203524	0.905315	208.719	FALSE	5
2022-09-12	15:22:23	0.399046	1.77504	217.432	FALSE	5
2022-09-12	15:22:23	0.972786	4.32715	213.046	FALSE	5
2022-09-12	15:22:23	0.363982	1.61906	219.051	FALSE	5
2022-09-12	15:22:24	0.577926	2.57073	215.617	FALSE	5
2022-09-12	15:22:24	0.758282	3.37299	222.424	FALSE	5
2022-09-12	15:22:24	1.24347	5.5312	221.148	FALSE	5
2022-09-12	15:22:25	0.556501	2.47543	224.9	FALSE	5
2022-09-12	15:22:25	1.35543	6.02922	227.177	FALSE	5
2022-09-12	15:22:25	1.06246	4.72603	229.626	FALSE	5
2022-09-12	15:22:25	0.399758	1.7782	228.956	FALSE	5
2022-09-12	15:22:26	0.131565	0.585227	230.211	FALSE	5
2022-09-12	15:22:26	0.238944	1.06287	230.019	FALSE	5
2022-09-12	15:22:26	0.562252	2.50101	232.712	FALSE	5
2022-09-12	15:22:26	0.0470358	0.209225	230.228	FALSE	5
2022-09-12	15:22:27	0.463677	2.06253	234.774	FALSE	5
2022-09-12	15:22:27	0.262048	1.16564	231.393	FALSE	5
2022-09-12	15:22:27	0.456247	2.02948	236.804	FALSE	5
2022-09-12	15:22:27	0.60444	2.68867	234.082	FALSE	5
2022-09-12	15:22:28	1.63966	7.29354	244.098	FALSE	5
2022-09-12	15:22:28	1.97589	8.78915	242.871	FALSE	5
2022-09-12	15:22:28	1.3736	6.11005	250.208	FALSE	5
2022-09-12	15:22:29	1.11594	4.96392	247.835	FALSE	5
2022-09-12	15:22:29	0.354313	1.57606	251.784	FALSE	5
2022-09-12	15:22:29	0.641234	2.85234	250.688	FALSE	5
2022-09-12	15:22:29	0.27925	1.24216	253.026	FALSE	5
2022-09-12	15:22:30	0.62841	2.79529	253.483	FALSE	5
2022-09-12	15:22:30	0.569021	2.53112	255.557	FALSE	5
2022-09-12	15:22:30	0.910191	4.04871	257.532	FALSE	5
2022-09-12	15:22:30	0.582048	2.58907	258.146	FALSE	5
2022-09-12	15:22:31	0.42388	1.8855	259.417	FALSE	5
2022-09-12	15:22:31	0.827494	3.68086	261.827	FALSE	5
2022-09-12	15:22:31	0.468512	2.08404	261.501	FALSE	5
2022-09-12	15:22:31	0.797519	3.54752	265.374	FALSE	5
2022-09-12	15:22:32	0.539046	2.39778	263.899	FALSE	5
2022-09-12	15:22:32	1.11655	4.96664	270.341	FALSE	5
2022-09-12	15:22:32	0.63589	2.82857	266.727	FALSE	5
2022-09-12	15:22:33	0.904593	4.02381	274.365	FALSE	5
2022-09-12	15:22:33	0.704695	3.13462	269.862	FALSE	5
2022-09-12	15:22:33	0.287545	1.27906	275.644	FALSE	5
2022-09-12	15:22:33	0.237824	1.05789	270.92	FALSE	5
2022-09-12	15:22:34	0.418486	1.86151	277.505	FALSE	5
2022-09-12	15:22:34	0.0465269	0.206961	271.127	FALSE	5
2022-09-12	15:22:34	0.345509	1.53689	279.042	FALSE	5
2022-09-12	15:22:34	0.108461	0.482456	271.609	FALSE	5
2022-09-12	15:22:35	0.380013	1.69037	280.733	FALSE	5
2022-09-12	15:22:35	0.187188	0.83265	272.442	FALSE	5
2022-09-12	15:22:35	0.367952	1.63672	282.369	FALSE	5
2022-09-12	15:22:35	0.346323	1.54051	273.983	FALSE	5
2022-09-12	15:22:36	0.276908	1.23174	283.601	FALSE	5
2022-09-12	15:22:36	0.390445	1.73678	275.719	FALSE	5
2022-09-12	15:22:36	0.168715	0.750478	284.352	FALSE	5
2022-09-12	15:22:37	0.703219	3.12806	278.847	FALSE	5
2022-09-12	15:22:37	0.0614888	0.273514	284.625	FALSE	5
2022-09-12	15:22:37	0.497417	2.21261	281.06	FALSE	5
2022-09-12	15:22:37	0.206476	0.918447	285.544	FALSE	5
2022-09-12	15:22:38	0.374568	1.66615	282.726	FALSE	5
2022-09-12	15:22:38	0.196451	0.873853	286.417	FALSE	5
2022-09-12	15:22:38	0.284847	1.26706	283.993	FALSE	5
2022-09-12	15:22:38	0.151107	0.672154	287.09	FALSE	5
2022-09-12	15:22:39	0.451768	2.00955	286.003	FALSE	5
2022-09-12	15:22:39	0.272939	1.21409	288.304	FALSE	5
2022-09-12	15:22:39	0.501438	2.2305	288.233	FALSE	5
2022-09-12	15:22:40	0.428512	1.90611	290.21	FALSE	5
2022-09-12	15:22:40	0.750344	3.33768	291.571	FALSE	5
2022-09-12	15:22:40	0.684084	3.04294	293.253	FALSE	5
2022-09-12	15:22:40	0.451158	2.00684	293.578	FALSE	5
2022-09-12	15:22:41	0.569987	2.53542	295.788	FALSE	5
2022-09-12	15:22:41	0.355077	1.57945	295.157	FALSE	5
2022-09-12	15:22:41	0.625407	2.78194	298.57	FALSE	5
2022-09-12	15:22:41	0.485458	2.15941	297.317	FALSE	5
2022-09-12	15:22:42	0.49528	2.2031	300.773	FALSE	5
2022-09-12	15:22:42	0.48098	2.1395	299.456	FALSE	5
2022-09-12	15:22:42	0.456807	2.03197	302.805	FALSE	5
2022-09-12	15:22:42	0.44154	1.96406	301.42	FALSE	5
2022-09-12	15:22:43	0.435076	1.93531	304.74	FALSE	5
2022-09-12	15:22:43	0.459249	2.04283	303.463	FALSE	5
2022-09-12	15:22:43	0.438333	1.94979	306.69	FALSE	5
2022-09-12	15:22:44	0.432685	1.92467	305.388	FALSE	5
2022-09-12	15:22:44	0.44042	1.95908	308.649	FALSE	5
2022-09-12	15:22:44	0.452481	2.01273	307.4	FALSE	5
2022-09-12	15:22:44	0.484084	2.1533	310.803	FALSE	5
2022-09-12	15:22:45	0.483779	2.15195	309.552	FALSE	5
2022-09-12	15:22:45	0.479809	2.13429	312.937	FALSE	5
2022-09-12	15:22:45	0.496145	2.20695	311.759	FALSE	5
2022-09-12	15:22:45	0.504695	2.24498	315.182	FALSE	5
2022-09-12	15:22:46	0.462303	2.05642	313.816	FALSE	5
2022-09-12	15:22:46	0.500063	2.22438	317.406	FALSE	5
2022-09-12	15:22:46	0.490394	2.18137	315.997	FALSE	5
2022-09-12	15:22:46	0.453855	2.01884	319.425	FALSE	5
2022-09-12	15:22:47	0.4307	1.91584	317.913	FALSE	5
2022-09-12	15:22:47	0.41584	1.84974	321.275	FALSE	5
2022-09-12	15:22:47	0.404186	1.7979	319.711	FALSE	5
2022-09-12	15:22:48	0.400674	1.78228	323.057	FALSE	5
2022-09-12	15:22:48	0.730903	3.2512	322.962	FALSE	5
2022-09-12	15:22:48	0.345865	1.53848	324.596	FALSE	5
2022-09-12	15:22:48	0.297977	1.32546	324.287	FALSE	5
2022-09-12	15:22:49	0.425407	1.8923	326.488	FALSE	5
2022-09-12	15:22:49	0.262863	1.16927	325.457	FALSE	5
2022-09-12	15:22:49	0.229631	1.02144	327.509	FALSE	5
2022-09-12	15:22:49	0.279911	1.2451	326.702	FALSE	5
2022-09-12	15:22:50	0.321234	1.42891	328.938	FALSE	5
2022-09-12	15:22:50	0.223015	0.992015	327.694	FALSE	5
2022-09-12	15:22:50	0.280878	1.2494	330.188	FALSE	5
2022-09-12	15:22:50	0.318741	1.41782	329.112	FALSE	5
2022-09-12	15:22:51	0.333957	1.48551	331.673	FALSE	5
2022-09-12	15:22:51	0.45701	2.03287	331.145	FALSE	5
2022-09-12	15:22:51	0.37126	1.65144	333.325	FALSE	5
2022-09-12	15:22:52	0.29187	1.2983	332.443	FALSE	5
2022-09-12	15:22:52	0.443473	1.97266	335.297	FALSE	5
2022-09-12	15:22:52	0.30444	1.35421	333.797	FALSE	5
2022-09-12	15:22:52	0.387392	1.7232	337.02	FALSE	5
2022-09-12	15:22:53	0.185356	0.824501	334.622	FALSE	5
2022-09-12	15:22:53	0.399809	1.77843	338.799	FALSE	5
2022-09-12	15:22:53	0.305102	1.35715	335.979	FALSE	5
2022-09-12	15:22:53	0.112328	0.499657	339.298	FALSE	5
2022-09-12	15:22:54	-0.0872643	-0.388169	335.979	FALSE	5
2022-09-12	15:22:54	-0.318206	-1.41544	339.298	FALSE	5
2022-09-12	15:22:54	-0.444923	-1.97911	335.979	FALSE	5
2022-09-12	15:22:54	-0.129096	-0.574245	339.298	FALSE	5
2022-09-12	15:22:55	-0.207264	-0.921952	335.979	FALSE	5
2022-09-12	15:22:55	0.0560944	0.249519	339.548	FALSE	5
2022-09-12	15:22:55	0.00698499	0.0310706	336.01	FALSE	5
2022-09-12	15:22:56	0.18444	0.820426	340.368	FALSE	5
2022-09-12	15:22:56	0.224084	0.99677	337.007	FALSE	5
2022-09-12	15:22:56	0.054415	0.242049	340.61	FALSE	5
2022-09-12	15:22:56	0.105051	0.467288	337.474	FALSE	5
2022-09-12	15:22:57	0.148257	0.659477	341.27	FALSE	5
2022-09-12	15:22:57	0.215687	0.959419	338.433	FALSE	5
2022-09-12	15:22:57	0.160166	0.71245	341.982	FALSE	5
2022-09-12	15:22:57	0.206832	0.92003	339.353	FALSE	5
2022-09-12	15:22:58	0.313041	1.39247	343.375	FALSE	5
2022-09-12	15:22:58	0.213753	0.950816	340.304	FALSE	5
2022-09-12	15:22:58	0.257723	1.1464	344.521	FALSE	5
2022-09-12	15:22:59	0.225865	1.00469	341.309	FALSE	5
2022-09-12	15:22:59	0.327545	1.45699	345.978	FALSE	5
2022-09-12	15:22:59	0.213957	0.951724	342.261	FALSE	5
2022-09-12	15:22:59	-0.0457885	-0.203676	345.978	FALSE	5
2022-09-12	15:23:00	-0.226348	-1.00684	342.261	FALSE	5
2022-09-12	15:23:00	-0.121005	-0.538254	345.978	FALSE	5
2022-09-12	15:23:00	-0.0819208	-0.3644	342.261	FALSE	5
2022-09-12	15:23:00	0.259097	1.15252	347.131	FALSE	5
2022-09-12	15:23:01	0.205306	0.913242	343.174	FALSE	5
2022-09-12	15:23:01	0.238232	1.0597	348.19	FALSE	5
2022-09-12	15:23:01	0.364695	1.62224	344.796	FALSE	5
2022-09-12	15:23:01	0.392277	1.74493	349.935	FALSE	5
2022-09-12	15:23:02	0.369377	1.64306	346.439	FALSE	5
2022-09-12	15:23:02	0.387036	1.72161	351.657	FALSE	5
2022-09-12	15:23:02	0.336603	1.49728	347.936	FALSE	5
2022-09-12	15:23:03	0.334618	1.48845	353.145	FALSE	5
2022-09-12	15:23:03	0.312736	1.39111	349.327	FALSE	5
2022-09-12	15:23:03	0.375585	1.67068	354.816	FALSE	5
2022-09-12	15:23:03	0.330191	1.46876	350.796	FALSE	5
2022-09-12	15:23:04	0.357265	1.58919	356.405	FALSE	5
2022-09-12	15:23:04	0.493041	2.19314	352.989	FALSE	5
2022-09-12	15:23:04	0.335535	1.49253	357.898	FALSE	5
2022-09-12	15:23:04	0.21869	0.972777	353.962	FALSE	5
2022-09-12	15:23:05	0.182812	0.813184	358.711	FALSE	5
2022-09-12	15:23:05	0.178283	0.793038	354.755	FALSE	5
2022-09-12	15:23:05	0.139504	0.620542	359.332	FALSE	5
2022-09-12	15:23:05	0.0608272	0.270572	355.026	FALSE	5
2022-09-12	15:23:06	0.0783845	0.34867	359.68	FALSE	5
2022-09-12	15:23:06	0.148359	0.659931	355.686	FALSE	5
2022-09-12	15:23:06	0.231769	1.03095	360.711	FALSE	5
2022-09-12	15:23:07	0.193092	0.858912	356.545	FALSE	5
2022-09-12	15:23:07	0.0862724	0.383757	361.095	FALSE	5
2022-09-12	15:23:07	0.261387	1.1627	357.707	FALSE	5
2022-09-12	15:23:07	0.185814	0.826538	361.922	FALSE	5
2022-09-12	15:23:08	0.484491	2.15511	359.862	FALSE	5
2022-09-12	15:23:08	0.329987	1.46785	363.389	FALSE	5
2022-09-12	15:23:08	0.791158	3.51923	363.382	FALSE	5
2022-09-12	15:23:08	0.697315	3.1018	366.491	FALSE	5
2022-09-12	15:23:09	1.01202	4.50167	367.883	FALSE	5
2022-09-12	15:23:09	1.31732	5.8597	372.351	FALSE	5
2022-09-12	15:23:09	1.85737	8.26195	376.145	FALSE	5
2022-09-12	15:23:09	0.733753	3.26388	375.615	FALSE	5
2022-09-12	15:23:10	0.69986	3.11312	379.258	FALSE	5
2022-09-12	15:23:10	0.524338	2.33236	377.947	FALSE	5
2022-09-12	15:23:10	0.544287	2.4211	381.679	FALSE	5
2022-09-12	15:23:11	0.34042	1.51426	379.461	FALSE	5
2022-09-12	15:23:11	0.413346	1.83865	383.518	FALSE	5
2022-09-12	15:23:11	0.536247	2.38533	381.847	FALSE	5
2022-09-12	15:23:11	0.458842	2.04102	385.559	FALSE	5
2022-09-12	15:23:12	0.330649	1.47079	383.317	FALSE	5
2022-09-12	15:23:12	0.680929	3.02891	388.588	FALSE	5
2022-09-12	15:23:12	0.465153	2.06909	385.387	FALSE	5
2022-09-12	15:23:12	0.715636	3.18329	391.771	FALSE	5
2022-09-12	15:23:13	0.519758	2.31199	387.699	FALSE	5
2022-09-12	15:23:13	0.721488	3.20932	394.981	FALSE	5
2022-09-12	15:23:13	1.36332	6.06432	393.763	FALSE	5
2022-09-12	15:23:13	2.25411	10.0267	405.007	FALSE	5
2022-09-12	15:23:14	2.78882	12.4052	406.168	FALSE	5
2022-09-12	15:23:14	3.10795	13.8248	418.832	1	6
2022-09-12	15:23:14	2.27543	10.1216	416.29	FALSE	6
2022-09-12	15:23:15	1.70398	7.57964	426.412	FALSE	6
2022-09-12	15:23:15	0.99243	4.41453	420.704	FALSE	6
2022-09-12	15:23:15	0.648969	2.88674	429.299	FALSE	6
2022-09-12	15:23:15	0.491972	2.18839	422.893	FALSE	6
2022-09-12	15:23:16	0.466934	2.07702	431.376	FALSE	6
2022-09-12	15:23:16	0.328817	1.46264	424.355	FALSE	6
2022-09-12	15:23:16	0.412888	1.83661	433.212	FALSE	6
2022-09-12	15:23:16	0.296603	1.31935	425.675	FALSE	6
2022-09-12	15:23:17	0.388054	1.72614	434.938	FALSE	6
2022-09-12	15:23:17	0.295484	1.31437	426.989	FALSE	6
2022-09-12	15:23:17	0.335636	1.49298	436.431	FALSE	6
2022-09-12	15:23:18	0.283473	1.26094	428.25	FALSE	6
2022-09-12	15:23:18	0.436705	1.94255	438.374	FALSE	6
2022-09-12	15:23:18	0.509224	2.26513	430.515	FALSE	6
2022-09-12	15:23:18	0.804847	3.58012	441.954	FALSE	6
2022-09-12	15:23:19	1.31564	5.85223	436.367	FALSE	6
2022-09-12	15:23:19	1.02317	4.55126	446.505	FALSE	6
2022-09-12	15:23:19	2.28515	10.1648	446.532	FALSE	6
2022-09-12	15:23:19	2.41253	10.7314	457.237	FALSE	6
2022-09-12	15:23:20	2.98602	13.2824	459.814	FALSE	6
2022-09-12	15:23:20	0.914974	4.06999	461.307	FALSE	6
2022-09-12	15:23:20	0.480573	2.13768	461.952	FALSE	6
2022-09-12	15:23:20	0.382557	1.70169	463.008	FALSE	6
2022-09-12	15:23:21	0.401132	1.78432	463.736	FALSE	6
2022-09-12	15:23:21	0.307087	1.36598	464.374	FALSE	6
2022-09-12	15:23:21	0.331107	1.47283	465.209	FALSE	6
2022-09-12	15:23:22	0.475076	2.11323	466.488	FALSE	6
2022-09-12	15:23:22	0.322812	1.43593	466.645	FALSE	6
2022-09-12	15:23:22	0.290445	1.29196	467.78	FALSE	6
2022-09-12	15:23:22	0.42841	1.90565	468.551	FALSE	6
2022-09-12	15:23:23	0.252481	1.12309	468.903	FALSE	6
2022-09-12	15:23:23	0.483219	2.14945	470.7	FALSE	6
2022-09-12	15:23:23	0.292532	1.30124	470.204	FALSE	6
2022-09-12	15:23:23	0.345713	1.5378	472.238	FALSE	6
2022-09-12	15:23:24	0.273753	1.21771	471.422	FALSE	6
2022-09-12	15:23:24	0.32383	1.44046	473.679	FALSE	6
2022-09-12	15:23:24	0.291311	1.29581	472.717	FALSE	6
2022-09-12	15:23:24	0.21757	0.967795	474.646	FALSE	6
2022-09-12	15:23:25	0.24612	1.09479	473.812	FALSE	6
2022-09-12	15:23:25	0.283931	1.26298	475.909	FALSE	6
2022-09-12	15:23:25	0.212481	0.945158	474.757	FALSE	6
2022-09-12	15:23:26	0.272837	1.21363	477.123	FALSE	6
2022-09-12	15:23:26	0.120776	0.537236	475.295	FALSE	6
2022-09-12	15:23:26	0.133957	0.595868	477.719	FALSE	6
2022-09-12	15:23:26	-0.0244145	-0.108601	475.295	FALSE	6
2022-09-12	15:23:27	-0.363549	-1.61714	477.719	FALSE	6
2022-09-12	15:23:27	-0.650775	-2.89478	475.295	FALSE	6
2022-09-12	15:23:27	-0.642887	-2.85969	477.719	FALSE	6
2022-09-12	15:23:27	-0.533829	-2.37458	475.295	FALSE	6
2022-09-12	15:23:28	-0.384567	-1.71063	477.719	FALSE	6
2022-09-12	15:23:28	-0.209656	-0.932592	475.295	FALSE	6
2022-09-12	15:23:28	-0.264007	-1.17436	477.719	FALSE	6
2022-09-12	15:23:28	-0.288282	-1.28234	475.295	FALSE	6
2022-09-12	15:23:29	-0.346857	-1.54289	477.719	FALSE	6
2022-09-12	15:23:29	-0.287417	-1.27849	475.295	FALSE	6
2022-09-12	15:23:29	-0.284567	-1.26581	477.719	FALSE	6
2022-09-12	15:23:30	-0.212913	-0.94708	475.295	FALSE	6
2022-09-12	15:23:30	-0.102786	-0.457213	477.719	FALSE	6
2022-09-12	15:23:30	-0.0631422	-0.280869	475.295	FALSE	6
2022-09-12	15:23:30	0.014873	0.0661581	477.785	FALSE	6
2022-09-12	15:23:31	-0.296577	-1.31923	475.295	FALSE	6
2022-09-12	15:23:31	-0.337239	-1.50011	477.785	FALSE	6
2022-09-12	15:23:31	-0.368078	-1.63728	475.295	FALSE	6
2022-09-12	15:23:31	-0.236068	-1.05008	477.785	FALSE	6
2022-09-12	15:23:32	-0.458409	-2.03909	475.295	FALSE	6
2022-09-12	15:23:32	-0.463498	-2.06173	477.785	FALSE	6
2022-09-12	15:23:32	-0.517137	-2.30033	475.295	FALSE	6
2022-09-12	15:23:32	-0.514643	-2.28923	477.785	FALSE	6
2022-09-12	15:23:33	-0.612455	-2.72432	475.295	FALSE	6
2022-09-12	15:23:33	-0.802887	-3.5714	477.785	FALSE	6
2022-09-12	15:23:33	-0.476526	-2.11968	475.295	FALSE	6
2022-09-12	15:23:34	-0.382531	-1.70157	477.785	FALSE	6
2022-09-12	15:23:34	-0.253626	-1.12818	475.295	FALSE	6
2022-09-12	15:23:34	-0.37846	-1.68347	477.785	FALSE	6
2022-09-12	15:23:34	-0.294389	-1.3095	475.295	FALSE	6
2022-09-12	15:23:35	-0.331743	-1.47566	477.785	FALSE	6
2022-09-12	15:23:35	-0.266857	-1.18703	475.295	FALSE	6
2022-09-12	15:23:35	0.0347203	0.154443	477.94	FALSE	6
2022-09-12	15:23:35	0.157825	0.702037	475.997	FALSE	6
2022-09-12	15:23:36	0.34383	1.52942	479.469	FALSE	6
2022-09-12	15:23:36	0.357519	1.59032	477.587	FALSE	6
2022-09-12	15:23:36	0.420674	1.87124	481.34	FALSE	6
2022-09-12	15:23:37	0.631921	2.81091	480.398	FALSE	6
2022-09-12	15:23:37	0.44612	1.98443	483.325	FALSE	6
2022-09-12	15:23:37	0.477875	2.12568	482.523	FALSE	6
2022-09-12	15:23:37	0.387392	1.7232	485.048	FALSE	6
2022-09-12	15:23:38	0.456654	2.03129	484.555	FALSE	6
2022-09-12	15:23:38	0.487239	2.16734	487.215	FALSE	6
2022-09-12	15:23:38	0.380878	1.69422	486.249	FALSE	6
2022-09-12	15:23:38	0.498944	2.2194	489.435	FALSE	6
2022-09-12	15:23:39	0.295025	1.31233	487.561	FALSE	6
2022-09-12	15:23:39	0.785204	3.49274	492.927	FALSE	6
2022-09-12	15:23:39	0.445051	1.97968	489.541	FALSE	6
2022-09-12	15:23:39	0.418944	1.86355	494.791	FALSE	6
2022-09-12	15:23:40	0.340165	1.51312	491.054	FALSE	6
2022-09-12	15:23:40	0.286476	1.2743	496.065	FALSE	6
2022-09-12	15:23:40	0.268359	1.19371	492.248	FALSE	6
2022-09-12	15:23:41	0.393702	1.75127	497.816	FALSE	6
2022-09-12	15:23:41	0.414517	1.84385	494.092	FALSE	6
2022-09-12	15:23:41	0.355585	1.58171	499.398	FALSE	6
2022-09-12	15:23:41	0.449886	2.00118	496.093	FALSE	6
2022-09-12	15:23:42	0.523932	2.33055	501.729	FALSE	6
2022-09-12	15:23:42	0.42902	1.90837	498.001	FALSE	6
2022-09-12	15:23:42	0.429886	1.91222	503.641	FALSE	6
2022-09-12	15:23:42	0.51701	2.29976	500.301	FALSE	6
2022-09-12	15:23:43	0.421387	1.87441	505.515	FALSE	6
2022-09-12	15:23:43	0.647595	2.88063	503.182	FALSE	6
2022-09-12	15:23:43	0.473295	2.10531	507.621	FALSE	6
2022-09-12	15:23:43	0.483066	2.14877	505.33	FALSE	6
2022-09-12	15:23:44	0.405153	1.8022	509.423	FALSE	6
2022-09-12	15:23:44	0.403626	1.79541	507.126	FALSE	6
2022-09-12	15:23:44	0.431819	1.92082	511.344	FALSE	6
2022-09-12	15:23:45	0.385407	1.71437	508.84	FALSE	6
2022-09-12	15:23:45	0.448257	1.99394	513.338	FALSE	6
2022-09-12	15:23:45	0.416909	1.85449	510.695	FALSE	6
2022-09-12	15:23:45	0.448206	1.99371	515.331	FALSE	6
2022-09-12	15:23:46	0.43813	1.94889	512.644	FALSE	6
2022-09-12	15:23:46	0.390496	1.737	517.068	FALSE	6
2022-09-12	15:23:46	0.375585	1.67068	514.314	FALSE	6
2022-09-12	15:23:46	0.450496	2.0039	519.072	FALSE	6
2022-09-12	15:23:47	0.363677	1.61771	515.932	FALSE	6
2022-09-12	15:23:47	0.415585	1.84861	520.921	FALSE	6
2022-09-12	15:23:47	0.452583	2.01318	517.945	FALSE	6
2022-09-12	15:23:47	0.336196	1.49547	522.416	FALSE	6
2022-09-12	15:23:48	0.112481	0.500338	518.445	FALSE	6
2022-09-12	15:23:48	0.0691223	0.30747	522.724	FALSE	6
2022-09-12	15:23:48	0.266883	1.18715	519.633	FALSE	6
2022-09-12	15:23:49	0.335382	1.49185	524.216	FALSE	6
2022-09-12	15:23:49	0.372685	1.65778	521.29	FALSE	6
2022-09-12	15:23:49	0.354211	1.5756	525.791	FALSE	6
2022-09-12	15:23:49	0.471158	2.09581	523.386	FALSE	6
2022-09-12	15:23:50	0.420013	1.8683	527.659	FALSE	6
2022-09-12	15:23:50	0.461489	2.0528	525.439	FALSE	6
2022-09-12	15:23:50	0.516145	2.29592	529.955	FALSE	6
2022-09-12	15:23:50	0.543677	2.41838	527.857	FALSE	6
2022-09-12	15:23:51	0.578486	2.57322	532.529	FALSE	6
2022-09-12	15:23:51	0.704084	3.13191	530.989	FALSE	6
2022-09-12	15:23:51	0.561946	2.49965	535.028	FALSE	6
2022-09-12	15:23:51	0.567646	2.525	533.514	FALSE	6
2022-09-12	15:23:52	0.646883	2.87746	537.906	FALSE	6
2022-09-12	15:23:52	0.575229	2.55873	536.073	FALSE	6
2022-09-12	15:23:52	0.497519	2.21306	540.119	FALSE	6
2022-09-12	15:23:53	0.470446	2.09264	538.166	FALSE	6
2022-09-12	15:23:53	0.471819	2.09875	542.218	FALSE	6
2022-09-12	15:23:53	0.461845	2.05438	540.22	FALSE	6
2022-09-12	15:23:53	0.461489	2.0528	544.27	FALSE	6
2022-09-12	15:23:54	0.45757	2.03536	542.255	FALSE	6
2022-09-12	15:23:54	0.460573	2.04872	546.319	FALSE	6
2022-09-12	15:23:54	0.461692	2.0537	544.309	FALSE	6
2022-09-12	15:23:54	0.462557	2.05755	548.377	FALSE	6
2022-09-12	15:23:55	0.466883	2.07679	546.386	FALSE	6
2022-09-12	15:23:55	0.467392	2.07905	550.456	FALSE	6
2022-09-12	15:23:55	0.470242	2.09173	548.478	FALSE	6
2022-09-12	15:23:56	0.476858	2.12116	552.577	FALSE	6
2022-09-12	15:23:56	0.46729	2.0786	550.556	FALSE	6
2022-09-12	15:23:56	0.387188	1.72229	554.299	FALSE	6
2022-09-12	15:23:56	0.43528	1.93621	552.492	FALSE	6
2022-09-12	15:23:57	0.449987	2.00163	556.301	FALSE	6
2022-09-12	15:23:57	0.53757	2.39122	554.884	FALSE	6
2022-09-12	15:23:57	0.489631	2.17798	558.479	FALSE	6
2022-09-12	15:23:57	0.273346	1.2159	556.1	FALSE	6
2022-09-12	15:23:58	0.4793	2.13202	560.611	FALSE	6
2022-09-12	15:23:58	0.357265	1.58919	557.689	FALSE	6
2022-09-12	15:23:58	0.334771	1.48913	562.1	FALSE	6
2022-09-12	15:23:58	0.27472	1.22201	558.911	FALSE	6
2022-09-12	15:23:59	0.443015	1.97062	564.07	FALSE	6
2022-09-12	15:23:59	0.384389	1.70984	560.621	FALSE	6
2022-09-12	15:23:59	0.444491	1.97718	566.048	FALSE	6
2022-09-12	15:24:00	0.267341	1.18919	561.81	FALSE	6
2022-09-12	15:24:00	0.266425	1.18511	567.233	FALSE	6
2022-09-12	15:24:00	0.476298	2.11867	563.928	FALSE	6
2022-09-12	15:24:00	0.246425	1.09615	568.329	FALSE	6
2022-09-12	15:24:01	0.354618	1.57741	565.506	FALSE	6
2022-09-12	15:24:01	0.358384	1.59416	569.923	FALSE	6
2022-09-12	15:24:01	0.263168	1.17062	566.676	FALSE	6
2022-09-12	15:24:01	0.340013	1.51245	571.436	FALSE	6
2022-09-12	15:24:02	0.34958	1.555	568.231	FALSE	6
2022-09-12	15:24:02	0.372685	1.65778	573.093	FALSE	6
2022-09-12	15:24:02	0.234211	1.04182	569.273	FALSE	6
2022-09-12	15:24:02	0.3593	1.59824	574.692	FALSE	6
2022-09-12	15:24:03	0.329784	1.46695	570.74	FALSE	6
2022-09-12	15:24:03	0.248664	1.10611	575.798	FALSE	6
2022-09-12	15:24:03	0.275076	1.22359	571.964	FALSE	6
2022-09-12	15:24:04	0.228817	1.01782	576.815	FALSE	6
2022-09-12	15:24:04	0.222405	0.989302	572.953	FALSE	6
2022-09-12	15:24:04	0.181947	0.809337	577.625	FALSE	6
2022-09-12	15:24:04	0.328359	1.46061	574.414	FALSE	6
2022-09-12	15:24:05	0.146629	0.652235	578.277	FALSE	6
2022-09-12	15:24:05	0.154466	0.687096	575.101	FALSE	6
2022-09-12	15:24:05	0.0952292	0.423599	578.701	FALSE	6
2022-09-12	15:24:05	0.125509	0.558289	575.659	FALSE	6
2022-09-12	15:24:06	-0.194084	-0.863324	578.701	FALSE	6
2022-09-12	15:24:06	-0.3036	-1.35047	575.659	FALSE	6
2022-09-12	15:24:06	-0.0764756	-0.340179	578.701	FALSE	6
2022-09-12	15:24:06	0.0544659	0.242275	575.901	FALSE	6
2022-09-12	15:24:07	0.26154	1.16338	579.864	FALSE	6
2022-09-12	15:24:07	0.349428	1.55433	577.456	FALSE	6
2022-09-12	15:24:07	0.358893	1.59643	581.46	FALSE	6
2022-09-12	15:24:08	0.476247	2.11844	579.574	FALSE	6
2022-09-12	15:24:08	0.522761	2.32535	583.786	FALSE	6
2022-09-12	15:24:08	0.481183	2.1404	581.715	FALSE	6
2022-09-12	15:24:08	0.458181	2.03808	585.824	FALSE	6
2022-09-12	15:24:09	0.374822	1.66728	583.382	FALSE	6
2022-09-12	15:24:09	0.294364	1.30939	587.133	FALSE	6
2022-09-12	15:24:09	0.272328	1.21137	584.593	FALSE	6
2022-09-12	15:24:09	0.266323	1.18466	588.318	FALSE	6
2022-09-12	15:24:10	0.183626	0.816805	585.41	FALSE	6
2022-09-12	15:24:10	0.382659	1.70214	590.02	FALSE	6
2022-09-12	15:24:10	0.254669	1.13282	586.543	FALSE	6
2022-09-12	15:24:11	0.353499	1.57243	591.593	FALSE	6
2022-09-12	15:24:11	0.280929	1.24963	587.792	FALSE	6
2022-09-12	15:24:11	0.208308	0.926596	592.519	FALSE	6
2022-09-12	15:24:11	0.299962	1.33429	589.127	FALSE	6
2022-09-12	15:24:12	0.290954	1.29422	593.813	FALSE	6
2022-09-12	15:24:12	0.225153	1.00153	590.128	FALSE	6
2022-09-12	15:24:12	0.219351	0.975717	594.789	FALSE	6
2022-09-12	15:24:12	0.204339	0.908941	591.037	FALSE	6
2022-09-12	15:24:13	0.179504	0.79847	595.588	FALSE	6
2022-09-12	15:24:13	0.196501	0.874076	591.911	FALSE	6
2022-09-12	15:24:13	0.106069	0.471816	596.059	FALSE	6
2022-09-12	15:24:13	0.160827	0.715391	592.627	FALSE	6
2022-09-12	15:24:14	0.208308	0.926596	596.986	FALSE	6
2022-09-12	15:24:14	0.256959	1.14301	593.77	FALSE	6
2022-09-12	15:24:14	0.343066	1.52603	598.512	FALSE	6
2022-09-12	15:24:15	0.379606	1.68856	595.458	FALSE	6
2022-09-12	15:24:15	1.29843	5.77568	604.288	FALSE	6
2022-09-12	15:24:15	1.45436	6.46928	601.928	FALSE	6
2022-09-12	15:24:15	2.07162	9.21498	613.503	FALSE	6
2022-09-12	15:24:16	3.78281	16.8267	618.754	1	7
2022-09-12	15:24:16	2.81691	12.5302	626.033	FALSE	7
2022-09-12	15:24:16	1.38291	6.15146	624.906	FALSE	7
2022-09-12	15:24:16	2.05686	9.14932	635.182	FALSE	7
2022-09-12	15:24:17	1.61304	7.17512	632.081	FALSE	7
2022-09-12	15:24:17	0.967646	4.30428	639.486	FALSE	7
2022-09-12	15:24:17	0.917977	4.08335	636.164	FALSE	7
2022-09-12	15:24:17	1.10999	4.93746	644.424	FALSE	7
2022-09-12	15:24:18	1.59411	7.09092	643.255	FALSE	7
2022-09-12	15:24:18	2.05818	9.1552	653.579	FALSE	7
2022-09-12	15:24:18	1.83762	8.1741	651.429	FALSE	7
2022-09-12	15:24:19	1.74286	7.75259	661.332	FALSE	7
2022-09-12	15:24:19	1.50419	6.69094	658.12	FALSE	7
2022-09-12	15:24:19	1.52678	6.79142	668.123	FALSE	7
2022-09-12	15:24:19	1.26398	5.62244	663.743	FALSE	7
2022-09-12	15:24:20	1.31095	5.83137	673.954	FALSE	7
2022-09-12	15:24:20	1.10927	4.93425	668.677	FALSE	7
2022-09-12	15:24:20	1.01548	4.51706	678.471	FALSE	7
2022-09-12	15:24:20	1.01599	4.51933	673.196	FALSE	7
2022-09-12	15:24:21	1.07594	4.786	683.257	FALSE	7
2022-09-12	15:24:21	1.19375	5.31004	678.506	FALSE	7
2022-09-12	15:24:21	1.22724	5.45901	688.716	FALSE	7
2022-09-12	15:24:21	1.2364	5.49975	684.006	FALSE	7
2022-09-12	15:24:22	1.23559	5.49615	694.213	FALSE	7
2022-09-12	15:24:22	1.30678	5.81282	689.819	FALSE	7
2022-09-12	15:24:22	1.3564	6.03354	700.246	FALSE	7
2022-09-12	15:24:23	1.27335	5.66412	695.483	FALSE	7
2022-09-12	15:24:23	1.33447	5.93599	706.182	FALSE	7
2022-09-12	15:24:23	1.44602	6.43219	701.915	FALSE	7
2022-09-12	15:24:23	1.41136	6.27801	712.46	FALSE	7
2022-09-12	15:24:24	1.41426	6.29091	708.206	FALSE	7
2022-09-12	15:24:24	1.36821	6.08607	718.546	FALSE	7
2022-09-12	15:24:24	1.4563	6.47791	714.684	FALSE	7
2022-09-12	15:24:24	1.3962	6.21058	724.757	FALSE	7
2022-09-12	15:24:25	1.87401	8.33597	723.02	FALSE	7
2022-09-12	15:24:25	1.97925	8.8041	733.561	FALSE	7
2022-09-12	15:24:25	2.12566	9.45536	732.475	FALSE	7
2022-09-12	15:24:25	2.34139	10.415	743.976	FALSE	7
2022-09-12	15:24:26	2.33116	10.3695	742.845	FALSE	7
2022-09-12	15:24:26	2.15584	9.58961	753.566	FALSE	7
2022-09-12	15:24:26	1.09034	4.85005	747.695	FALSE	7
2022-09-12	15:24:27	1.83497	8.16231	761.728	FALSE	7
2022-09-12	15:24:27	4.97635	22.1358	769.831	1	8
2022-09-12	15:24:27	4.37894	19.4784	781.206	1	9
2022-09-12	15:24:27	1.25976	5.60366	775.434	FALSE	9
2022-09-12	15:24:28	0.474466	2.11052	783.317	FALSE	9
2022-09-12	15:24:28	0.381845	1.69852	777.133	FALSE	9
2022-09-12	15:24:28	0.36215	1.61092	784.928	FALSE	9
2022-09-12	15:24:28	0.464389	2.0657	779.198	FALSE	9
2022-09-12	15:24:29	0.845611	3.76145	788.689	FALSE	9
2022-09-12	15:24:29	0.393804	1.75172	780.95	FALSE	9
2022-09-12	15:24:29	0.335178	1.49094	790.18	FALSE	9
2022-09-12	15:24:30	3.08291	13.7134	794.664	1	10
2022-09-12	15:24:30	3.45828	15.3831	805.563	1	11
2022-09-12	15:24:30	0.700624	3.11652	797.78	FALSE	11
2022-09-12	15:24:30	0.398944	1.77458	807.338	FALSE	11
2022-09-12	15:24:31	-0.0877733	-0.390433	797.78	FALSE	11
2022-09-12	15:24:31	-0.103091	-0.458569	807.338	FALSE	11
2022-09-12	15:24:31	0.0515142	0.229145	798.009	FALSE	11
2022-09-12	15:24:31	0.0786898	0.350028	807.688	FALSE	11
2022-09-12	15:24:32	0.135535	0.602887	798.612	FALSE	11
2022-09-12	15:24:32	0.161896	0.720146	808.408	FALSE	11
2022-09-12	15:24:32	0.278792	1.24012	799.852	FALSE	11
2022-09-12	15:24:32	0.477875	2.12568	810.534	FALSE	11
2022-09-12	15:24:33	0.319707	1.42212	801.274	FALSE	11
2022-09-12	15:24:33	0.207697	0.923878	811.457	FALSE	11
2022-09-12	15:24:33	0.16673	0.741648	802.016	FALSE	11
2022-09-12	15:24:34	0.507748	2.25856	813.716	FALSE	11
2022-09-12	15:24:34	0.317316	1.41149	803.427	FALSE	11
2022-09-12	15:24:34	0.251463	1.11856	814.835	FALSE	11
2022-09-12	15:24:34	0.233244	1.03752	804.465	FALSE	11
2022-09-12	15:24:35	-0.0742364	-0.330218	814.835	FALSE	11
2022-09-12	15:24:35	0.0712089	0.316751	804.782	FALSE	11
2022-09-12	15:24:35	-0.113778	-0.506107	814.835	FALSE	11
2022-09-12	15:24:35	-0.221157	-0.983751	804.782	FALSE	11
2022-09-12	15:24:36	0.039046	0.173684	815.008	FALSE	11
2022-09-12	15:24:36	0.625305	2.78148	807.563	FALSE	11
2022-09-12	15:24:36	0.422863	1.88098	816.889	FALSE	11
2022-09-12	15:24:36	0.246934	1.09841	808.662	FALSE	11
2022-09-12	15:24:37	0.155382	0.69117	817.58	FALSE	11
2022-09-12	15:24:37	0.158079	0.703167	809.365	FALSE	11
2022-09-12	15:24:37	0.106781	0.474983	818.055	FALSE	11
2022-09-12	15:24:38	0.121234	0.539273	809.904	FALSE	11
2022-09-12	15:24:38	0.139351	0.619861	818.675	FALSE	11
2022-09-12	15:24:38	0.272328	1.21137	811.115	FALSE	11
2022-09-12	15:24:38	0.167596	0.745501	819.421	FALSE	11
2022-09-12	15:24:39	0.32215	1.43299	812.548	FALSE	11
2022-09-12	15:24:39	0.114059	0.507357	819.928	FALSE	11
2022-09-12	15:24:39	0.361998	1.61024	814.159	FALSE	11
2022-09-12	15:24:39	0.12958	0.576398	820.505	FALSE	11
2022-09-12	15:24:40	0.334517	1.488	815.647	FALSE	11
2022-09-12	15:24:40	0.0172649	0.0767977	820.581	FALSE	11
2022-09-12	15:24:40	0.334313	1.48709	817.134	FALSE	11
2022-09-12	15:24:40	0.130089	0.578662	821.16	FALSE	11
2022-09-12	15:24:41	0.195127	0.867964	818.002	FALSE	11
2022-09-12	15:24:41	-0.16472	-0.732708	821.16	FALSE	11
2022-09-12	15:24:41	-0.345025	-1.53474	818.002	FALSE	11
2022-09-12	15:24:42	-0.128944	-0.573569	821.16	FALSE	11
2022-09-12	15:24:42	-0.211539	-0.940968	818.002	FALSE	11
2022-09-12	15:24:42	0.0449493	0.199943	821.36	FALSE	11
2022-09-12	15:24:42	-0.0361193	-0.160666	818.002	FALSE	11
2022-09-12	15:24:43	0.225713	1.00402	822.364	FALSE	11
2022-09-12	15:24:43	0.117723	0.523655	818.525	FALSE	11
2022-09-12	15:24:43	0.342201	1.52218	823.886	FALSE	11
2022-09-12	15:24:43	0.16154	0.718562	819.244	FALSE	11
2022-09-12	15:24:44	0.319148	1.41963	825.306	FALSE	11
2022-09-12	15:24:44	-0.270369	-1.20266	819.244	FALSE	11
2022-09-12	15:24:44	-0.504821	-2.24554	825.306	FALSE	11
2022-09-12	15:24:45	-0.700801	-3.1173	819.244	FALSE	11
2022-09-12	15:24:45	-0.88421	-3.93314	825.306	FALSE	11
2022-09-12	15:24:45	-0.74472	-3.31266	819.244	FALSE	11
2022-09-12	15:24:45	-0.853727	-3.79755	825.306	FALSE	11
2022-09-12	15:24:46	-0.897798	-3.99359	819.244	FALSE	11
2022-09-12	15:24:46	-0.948231	-4.21792	825.306	FALSE	11
2022-09-12	15:24:46	-1.05948	-4.71278	819.244	FALSE	11
2022-09-12	15:24:46	-0.882277	-3.92454	825.306	FALSE	11
2022-09-12	15:24:47	-0.897136	-3.99064	819.244	FALSE	11
2022-09-12	15:24:47	-0.7665	-3.40955	825.306	FALSE	11
2022-09-12	15:24:47	-0.272099	-1.21035	819.244	FALSE	11
2022-09-12	15:24:47	0.228206	1.01511	826.321	FALSE	11
2022-09-12	15:24:48	0.403117	1.79315	821.037	FALSE	11
2022-09-12	15:24:48	0.415229	1.84702	828.168	FALSE	11
2022-09-12	15:24:48	0.492227	2.18952	823.227	FALSE	11
2022-09-12	15:24:49	0.682761	3.03706	831.205	FALSE	11
2022-09-12	15:24:49	0.773652	3.44136	826.668	FALSE	11
2022-09-12	15:24:49	0.603321	2.68369	833.889	FALSE	11
2022-09-12	15:24:49	0.589784	2.62348	829.291	FALSE	11
2022-09-12	15:24:50	0.469784	2.08969	835.978	FALSE	11
2022-09-12	15:24:50	0.755585	3.36099	832.652	FALSE	11
2022-09-12	15:24:50	0.403524	1.79496	837.773	FALSE	11
2022-09-12	15:24:50	0.232176	1.03277	833.685	FALSE	11
2022-09-12	15:24:51	0.0512089	0.227787	838.001	FALSE	11
2022-09-12	15:24:51	0.0380282	0.169157	833.854	FALSE	11
2022-09-12	15:24:51	0.0693259	0.308375	838.309	FALSE	11
2022-09-12	15:24:51	0.052583	0.2339	834.088	FALSE	11
2022-09-12	15:24:52	0.196552	0.874303	839.184	FALSE	11
2022-09-12	15:24:52	0.0623031	0.277137	834.365	FALSE	11
2022-09-12	15:24:52	0.0554837	0.246803	839.431	FALSE	11
2022-09-12	15:24:53	-0.0229387	-0.102036	834.365	FALSE	11
2022-09-12	15:24:53	0.00326998	0.0145455	839.445	FALSE	11
2022-09-12	15:24:53	0.0122267	0.0543868	834.42	FALSE	11
2022-09-12	15:24:53	0.0161961	0.0720435	839.517	FALSE	11
2022-09-12	15:24:54	-0.00385471	-0.0171465	834.42	FALSE	11
2022-09-12	15:24:54	0.0503946	0.224165	839.741	FALSE	11
2022-09-12	15:24:54	0.301387	1.34063	835.76	FALSE	11
2022-09-12	15:24:54	0.325814	1.44929	841.191	FALSE	11
2022-09-12	15:24:55	0.318741	1.41782	837.178	FALSE	11
2022-09-12	15:24:55	0.187901	0.835821	842.026	FALSE	11
2022-09-12	15:24:55	0.194466	0.865024	838.043	FALSE	11
2022-09-12	15:24:55	0.329224	1.46445	843.491	FALSE	11
2022-09-12	15:24:56	0.174364	0.775606	838.819	FALSE	11
2022-09-12	15:24:56	0.290191	1.29083	844.782	FALSE	11
2022-09-12	15:24:56	0.264542	1.17674	839.996	FALSE	11
2022-09-12	15:24:57	0.243168	1.08166	845.863	FALSE	11
2022-09-12	15:24:57	0.358181	1.59326	841.589	FALSE	11
2022-09-12	15:24:57	0.162761	0.723993	846.587	FALSE	11
2022-09-12	15:24:57	0.311005	1.38341	842.972	FALSE	11
2022-09-12	15:24:58	0.288003	1.28109	847.868	FALSE	11
2022-09-12	15:24:58	0.203372	0.904639	843.877	FALSE	11
2022-09-12	15:24:58	0.313499	1.39451	849.263	FALSE	11
2022-09-12	15:24:58	0.413957	1.84136	845.718	FALSE	11
2022-09-12	15:24:59	0.100573	0.447369	849.71	FALSE	11
2022-09-12	15:24:59	0.289886	1.28947	847.008	FALSE	11
2022-09-12	15:24:59	0.247952	1.10294	850.813	FALSE	11
2022-09-12	15:24:59	0.188105	0.836729	847.844	FALSE	11
2022-09-12	15:25:00	0.489835	2.17888	852.992	FALSE	11
2022-09-12	15:25:00	0.339555	1.51041	849.355	FALSE	11
2022-09-12	15:25:00	0.332125	1.47736	854.47	FALSE	11
2022-09-12	15:25:01	0.329987	1.46785	850.823	FALSE	11
2022-09-12	15:25:01	0.410344	1.82529	856.295	FALSE	11
2022-09-12	15:25:01	0.455076	2.02427	852.847	FALSE	11
2022-09-12	15:25:01	0.490242	2.18069	858.475	FALSE	11
2022-09-12	15:25:02	0.4736	2.10667	854.954	FALSE	11
2022-09-12	15:25:02	1.42739	6.34932	864.825	FALSE	11
2022-09-12	15:25:02	1.72408	7.66905	862.623	FALSE	11
2022-09-12	15:25:02	1.1306	5.02913	869.854	FALSE	11
2022-09-12	15:25:03	1.35528	6.02856	868.651	FALSE	11
2022-09-12	15:25:03	0.798486	3.55183	873.406	FALSE	11
2022-09-12	15:25:03	0.909275	4.04464	872.696	FALSE	11
2022-09-12	15:25:04	1.57396	7.00129	880.407	FALSE	11
2022-09-12	15:25:04	0.784237	3.48844	876.184	FALSE	11
2022-09-12	15:25:04	1.68475	7.4941	887.901	FALSE	11
2022-09-12	15:25:04	1.87899	8.35812	884.542	FALSE	11
2022-09-12	15:25:05	2.03752	9.0633	896.964	FALSE	11
2022-09-12	15:25:05	1.6764	7.45696	891.999	FALSE	11
2022-09-12	15:25:05	1.18597	5.27543	902.24	FALSE	11
2022-09-12	15:25:05	0.409631	1.82212	893.822	FALSE	11
2022-09-12	15:25:06	0.475534	2.11527	904.355	FALSE	11
2022-09-12	15:25:06	0.446171	1.98466	895.806	FALSE	11
2022-09-12	15:25:06	0.49299	2.19292	906.548	FALSE	11
2022-09-12	15:25:06	1.07528	4.78306	900.589	FALSE	11
2022-09-12	15:25:07	1.4162	6.29954	912.848	FALSE	11
2022-09-12	15:25:07	1.06062	4.71785	905.307	FALSE	11
2022-09-12	15:25:07	0.600471	2.67102	915.519	FALSE	11
2022-09-12	15:25:08	0.69243	3.08007	908.387	FALSE	11
2022-09-12	15:25:08	0.402659	1.79111	917.31	FALSE	11
2022-09-12	15:25:08	0.382405	1.70101	910.088	FALSE	11
2022-09-12	15:25:08	0.520216	2.31402	919.624	FALSE	11
2022-09-12	15:25:09	0.282456	1.25642	911.345	FALSE	11
2022-09-12	15:25:09	0.45126	2.00729	921.631	FALSE	11
2022-09-12	15:25:09	0.28556	1.27023	912.615	FALSE	11
2022-09-12	15:25:09	0.374415	1.66547	923.297	FALSE	11
2022-09-12	15:25:10	0.391209	1.74018	914.355	FALSE	11
2022-09-12	15:25:10	0.351768	1.56473	924.861	FALSE	11
2022-09-12	15:25:10	0.397926	1.77005	916.125	FALSE	11
2022-09-12	15:25:10	0.475229	2.11391	926.975	FALSE	11
2022-09-12	15:25:11	0.827697	3.68176	919.807	FALSE	11
2022-09-12	15:25:11	0.39813	1.77096	928.746	FALSE	11
2022-09-12	15:25:11	0.821183	3.65279	923.46	FALSE	11
2022-09-12	15:25:12	0.31126	1.38455	930.131	FALSE	11
2022-09-12	15:25:12	0.52785	2.34798	925.808	FALSE	11
2022-09-12	15:25:12	0.238944	1.06287	931.194	FALSE	11
2022-09-12	15:25:12	0.501132	2.22914	928.037	FALSE	11
2022-09-12	15:25:13	0.268054	1.19236	932.386	FALSE	11
2022-09-12	15:25:13	0.514669	2.28935	930.326	FALSE	11
2022-09-12	15:25:13	0.478333	2.12772	934.514	FALSE	11
2022-09-12	15:25:13	0.442456	1.96813	932.294	FALSE	11
2022-09-12	15:25:14	0.388155	1.72659	936.24	FALSE	11
2022-09-12	15:25:14	0.449733	2.0005	934.295	FALSE	11
2022-09-12	15:25:14	0.361285	1.60707	937.847	FALSE	11
2022-09-12	15:25:14	0.513092	2.28234	936.577	FALSE	11
2022-09-12	15:25:15	0.291921	1.29852	939.146	FALSE	11
2022-09-12	15:25:15	0.390293	1.7361	938.313	FALSE	11
2022-09-12	15:25:15	0.262303	1.16678	940.313	FALSE	11
2022-09-12	15:25:16	0.360064	1.60164	939.915	FALSE	11
2022-09-12	15:25:16	0.26042	1.1584	941.471	FALSE	11
2022-09-12	15:25:16	0.477824	2.12546	942.04	FALSE	11
2022-09-12	15:25:16	0.240623	1.07034	942.541	FALSE	11
2022-09-12	15:25:17	0.463066	2.05981	944.1	FALSE	11
2022-09-12	15:25:17	0.243677	1.08392	943.625	FALSE	11
2022-09-12	15:25:17	0.417468	1.85698	945.957	FALSE	11
2022-09-12	15:25:17	0.252481	1.12309	944.748	FALSE	11
2022-09-12	15:25:18	0.364135	1.61975	947.577	FALSE	11
2022-09-12	15:25:18	0.27528	1.2245	945.973	FALSE	11
2022-09-12	15:25:18	0.408461	1.81692	949.394	FALSE	11
2022-09-12	15:25:19	0.277825	1.23582	947.209	FALSE	11
2022-09-12	15:25:19	0.227392	1.01149	950.405	FALSE	11
2022-09-12	15:25:19	0.0397585	0.176854	947.386	FALSE	11
2022-09-12	15:25:19	-0.0776969	-0.345611	950.405	FALSE	11
2022-09-12	15:25:20	0.233702	1.03955	948.425	FALSE	11
2022-09-12	15:25:20	0.307036	1.36576	951.771	FALSE	11
2022-09-12	15:25:20	0.452685	2.01363	950.439	FALSE	11
2022-09-12	15:25:20	0.870496	3.87214	955.643	FALSE	11
2022-09-12	15:25:21	0.662557	2.94719	953.386	FALSE	11
2022-09-12	15:25:21	0.371412	1.65211	957.295	FALSE	11
2022-09-12	15:25:21	0.471158	2.09581	955.482	FALSE	11
2022-09-12	15:25:21	0.488461	2.17277	959.468	FALSE	11
2022-09-12	15:25:22	0.392074	1.74402	957.226	FALSE	11
2022-09-12	15:25:22	0.424033	1.88618	961.354	FALSE	11
2022-09-12	15:25:22	0.366018	1.62812	958.854	FALSE	11
2022-09-12	15:25:23	0.465865	2.07226	963.426	FALSE	11
2022-09-12	15:25:23	0.422099	1.87758	960.731	FALSE	11
2022-09-12	15:25:23	0.433448	1.92806	965.355	FALSE	11
2022-09-12	15:25:23	0.429071	1.90859	962.64	FALSE	11
2022-09-12	15:25:24	0.491769	2.18749	967.542	FALSE	11
2022-09-12	15:25:24	0.442303	1.96745	964.607	FALSE	11
2022-09-12	15:25:24	0.419555	1.86626	969.408	FALSE	11
2022-09-12	15:25:24	0.462608	2.05777	966.665	FALSE	11
2022-09-12	15:25:25	0.443168	1.9713	971.38	FALSE	11
2022-09-12	15:25:25	0.453041	2.01522	968.68	FALSE	11
2022-09-12	15:25:25	0.461438	2.05257	973.432	FALSE	11
2022-09-12	15:25:25	0.453295	2.01635	970.697	FALSE	11
2022-09-12	15:25:26	0.457112	2.03333	975.465	FALSE	11
2022-09-12	15:25:26	0.443728	1.97379	972.671	FALSE	11
2022-09-12	15:25:26	0.448715	1.99597	977.461	FALSE	11
2022-09-12	15:25:27	0.453397	2.0168	974.687	FALSE	11
2022-09-12	15:25:27	0.451361	2.00774	979.469	FALSE	11
2022-09-12	15:25:27	0.446221	1.98488	976.672	FALSE	11
2022-09-12	15:25:27	0.443728	1.97379	981.443	FALSE	11
2022-09-12	15:25:28	0.449835	2.00096	978.673	FALSE	11
2022-09-12	15:25:28	0.458435	2.03921	983.482	FALSE	11
2022-09-12	15:25:28	0.462456	2.0571	980.73	FALSE	11
2022-09-12	15:25:28	0.450445	2.00367	985.486	FALSE	11
2022-09-12	15:25:29	0.450089	2.00209	982.732	FALSE	11
2022-09-12	15:25:29	0.4507	2.0048	987.491	FALSE	11
2022-09-12	15:25:29	0.44042	1.95908	984.691	FALSE	11
2022-09-12	15:25:29	0.428512	1.90611	989.397	FALSE	11
2022-09-12	15:25:30	0.589478	2.62212	987.314	FALSE	11
2022-09-12	15:25:30	0.478181	2.12704	991.524	FALSE	11
2022-09-12	15:25:30	0.000369216	0.00164235	987.315	FALSE	11
2022-09-12	15:25:31	-0.490572	-2.18216	991.524	FALSE	11
2022-09-12	15:25:31	-0.824719	-3.66852	987.315	FALSE	11
2022-09-12	15:25:31	-1.0092	-4.48912	991.524	FALSE	11
2022-09-12	15:25:31	-1.02833	-4.57422	987.315	FALSE	11
2022-09-12	15:25:32	-1.01831	-4.52965	991.524	FALSE	11
2022-09-12	15:25:32	-1.02396	-4.55478	987.315	FALSE	11
2022-09-12	15:25:32	-1.07322	-4.7739	991.524	FALSE	11
2022-09-12	15:25:32	-1.03953	-4.62404	987.315	FALSE	11
2022-09-12	15:25:33	-1.01729	-4.52511	991.524	FALSE	11
2022-09-12	15:25:33	-0.999529	-4.4461	987.315	FALSE	11
2022-09-12	15:25:33	-0.951233	-4.23127	991.524	FALSE	11
2022-09-12	15:25:33	-0.895508	-3.9834	987.315	FALSE	11
2022-09-12	15:25:34	-0.822073	-3.65675	991.524	FALSE	11
2022-09-12	15:25:34	-0.760495	-3.38283	987.315	FALSE	11
2022-09-12	15:25:34	-0.86019	-3.8263	991.524	FALSE	11
2022-09-12	15:25:35	-0.829503	-3.6898	987.315	FALSE	11
2022-09-12	15:25:35	-0.784618	-3.49014	991.524	FALSE	11
2022-09-12	15:25:35	-0.713829	-3.17525	987.315	FALSE	11
2022-09-12	15:25:35	-0.600394	-2.67067	991.524	FALSE	11
2022-09-12	15:25:36	0.0101911	0.0453321	987.361	FALSE	11
2022-09-12	15:25:36	0.759605	3.37887	994.903	FALSE	11
2022-09-12	15:25:36	0.998689	4.44237	991.803	FALSE	11
2022-09-12	15:25:36	-0.0314374	-0.13984	994.903	FALSE	11
2022-09-12	15:25:37	-0.0118445	-0.0526867	991.803	FALSE	11
2022-09-12	15:25:37	1.19274	5.30555	1000.21	FALSE	11
2022-09-12	15:25:37	4.5025	20.028	1011.83	1	12
2022-09-12	15:25:38	4.06072	18.0629	1018.27	1	13
2022-09-12	15:25:38	5.63919	25.0842	1036.92	1	14
2022-09-12	15:25:38	6.98871	31.0872	1049.36	1	15
2022-09-12	15:25:38	6.7568	30.0556	1066.97	1	16
2022-09-12	15:25:39	5.53553	24.6231	1073.98	1	17
2022-09-12	15:25:39	2.41029	10.7215	1077.69	FALSE	17
2022-09-12	15:25:39	1.28714	5.72546	1079.71	FALSE	17
2022-09-12	15:25:39	0.687697	3.05901	1080.75	FALSE	17
2022-09-12	15:25:40	0.767493	3.41396	1083.12	FALSE	17
2022-09-12	15:25:40	0.28271	1.25755	1082.01	FALSE	17
2022-09-12	15:25:40	0.198333	0.882225	1084	FALSE	17
2022-09-12	15:25:40	0.166018	0.738481	1082.75	FALSE	17
2022-09-12	15:25:41	0.17986	0.800053	1084.8	FALSE	17
2022-09-12	15:25:41	0.253041	1.12558	1083.87	FALSE	17
2022-09-12	15:25:41	0.28271	1.25755	1086.06	FALSE	17
2022-09-12	15:25:42	0.263524	1.17221	1085.05	FALSE	17
2022-09-12	15:25:42	0.341692	1.51991	1087.58	FALSE	17
2022-09-12	15:25:42	0.437468	1.94595	1086.99	FALSE	17
2022-09-12	15:25:42	0.370852	1.64962	1089.23	FALSE	17
2022-09-12	15:25:43	0.410751	1.8271	1088.82	FALSE	17
2022-09-12	15:25:43	0.435484	1.93712	1091.17	FALSE	17
2022-09-12	15:25:43	0.415331	1.84748	1090.67	FALSE	17
2022-09-12	15:25:43	0.413448	1.8391	1093.01	FALSE	17
2022-09-12	15:25:44	0.38958	1.73293	1092.4	FALSE	17
2022-09-12	15:25:44	0.396705	1.76462	1094.77	FALSE	17
2022-09-12	15:25:44	0.401743	1.78703	1094.19	FALSE	17
2022-09-12	15:25:44	0.411972	1.83253	1096.6	FALSE	17
2022-09-12	15:25:45	0.401845	1.78749	1095.97	FALSE	17
2022-09-12	15:25:45	0.416298	1.85178	1098.46	FALSE	17
2022-09-12	15:25:45	0.417061	1.85517	1097.83	FALSE	17
2022-09-12	15:25:46	0.413651	1.84	1100.3	FALSE	17
2022-09-12	15:25:46	0.411769	1.83163	1099.66	FALSE	17
2022-09-12	15:25:46	0.405356	1.8031	1102.1	FALSE	17
2022-09-12	15:25:46	0.409224	1.82031	1101.48	FALSE	17
2022-09-12	15:25:47	0.409835	1.82303	1103.92	FALSE	17
2022-09-12	15:25:47	0.409478	1.82144	1103.3	FALSE	17
2022-09-12	15:25:47	0.409631	1.82212	1105.74	FALSE	17
2022-09-12	15:25:47	0.406679	1.80899	1105.11	FALSE	17
2022-09-12	15:25:48	0.395585	1.75964	1107.5	FALSE	17
2022-09-12	15:25:48	0.408308	1.81624	1106.93	FALSE	17
2022-09-12	15:25:48	0.41243	1.83457	1109.34	FALSE	17
2022-09-12	15:25:48	0.406374	1.80763	1108.73	FALSE	17
2022-09-12	15:25:49	0.419962	1.86807	1111.21	FALSE	17
2022-09-12	15:25:49	0.417926	1.85902	1110.59	FALSE	17
2022-09-12	15:25:49	0.408359	1.81646	1113.02	FALSE	17
2022-09-12	15:25:50	0.409275	1.82054	1112.41	FALSE	17
2022-09-12	15:25:50	0.417672	1.85789	1114.88	FALSE	17
2022-09-12	15:25:50	0.412939	1.83684	1114.25	FALSE	17
2022-09-12	15:25:50	0.402557	1.79065	1116.67	FALSE	17
2022-09-12	15:25:51	0.418842	1.86309	1116.11	FALSE	17
2022-09-12	15:25:51	0.422557	1.87962	1118.55	FALSE	17
2022-09-12	15:25:51	0.420624	1.87102	1117.98	FALSE	17
2022-09-12	15:25:51	0.412328	1.83412	1120.38	FALSE	17
2022-09-12	15:25:52	0.412227	1.83367	1119.82	FALSE	17
2022-09-12	15:25:52	0.411972	1.83253	1122.22	FALSE	17
2022-09-12	15:25:52	0.421692	1.87577	1121.69	FALSE	17
2022-09-12	15:25:52	0.41869	1.86242	1124.08	FALSE	17
2022-09-12	15:25:53	0.448053	1.99303	1123.69	FALSE	17
2022-09-12	15:25:53	0.573702	2.55194	1126.63	FALSE	17
2022-09-12	15:25:53	0.739911	3.29127	1126.98	FALSE	17
2022-09-12	15:25:54	0.50902	2.26422	1128.9	FALSE	17
2022-09-12	15:25:54	0.557519	2.47996	1129.46	FALSE	17
2022-09-12	15:25:54	0.496807	2.2099	1131.11	FALSE	17
2022-09-12	15:25:54	0.18958	0.84329	1130.3	FALSE	17
2022-09-12	15:25:55	0.255433	1.13622	1132.24	FALSE	17
2022-09-12	15:25:55	0.244746	1.08868	1131.39	FALSE	17
2022-09-12	15:25:55	0.264796	1.17787	1133.42	FALSE	17
2022-09-12	15:25:55	0.760725	3.38386	1134.77	FALSE	17
2022-09-12	15:25:56	0.32327	1.43797	1134.86	FALSE	17
2022-09-12	15:25:56	0.368155	1.63763	1136.41	FALSE	17
2022-09-12	15:25:56	0.524491	2.33304	1137.19	FALSE	17
2022-09-12	15:25:57	1.14413	5.08932	1141.5	FALSE	17
2022-09-12	15:25:57	0.432583	1.92422	1139.11	FALSE	17
2022-09-12	15:25:57	0.555178	2.46954	1143.97	FALSE	17
2022-09-12	15:25:57	0.491463	2.18613	1141.3	FALSE	17
2022-09-12	15:25:58	0.295331	1.31369	1145.28	FALSE	17
2022-09-12	15:25:58	0.177875	0.791224	1142.09	FALSE	17
2022-09-12	15:25:58	0.153448	0.682567	1145.97	FALSE	17
2022-09-12	15:25:58	0.240827	1.07125	1143.16	FALSE	17
2022-09-12	15:25:59	0.20444	0.90939	1146.88	FALSE	17
2022-09-12	15:25:59	0.226781	1.00877	1144.17	FALSE	17
2022-09-12	15:25:59	0.44897	1.99711	1148.87	FALSE	17
2022-09-12	15:25:59	0.479657	2.13361	1146.31	FALSE	17
2022-09-12	15:26:00	0.470293	2.09196	1150.97	FALSE	17
2022-09-12	15:26:00	0.496298	2.20763	1148.51	FALSE	17
2022-09-12	15:26:00	0.393397	1.74991	1152.72	FALSE	17
2022-09-12	15:26:01	0.511819	2.27667	1150.79	FALSE	17
2022-09-12	15:26:01	0.413193	1.83797	1154.55	FALSE	17
2022-09-12	15:26:01	0.554618	2.46705	1153.26	FALSE	17
2022-09-12	15:26:01	0.380776	1.69377	1156.25	FALSE	17
2022-09-12	15:26:02	0.353346	1.57175	1154.83	FALSE	17
2022-09-12	15:26:02	0.341387	1.51856	1157.77	FALSE	17
2022-09-12	15:26:02	0.295382	1.31392	1156.14	FALSE	17
2022-09-12	15:26:02	0.151209	0.672608	1158.44	FALSE	17
2022-09-12	15:26:03	0.221285	0.98432	1157.13	FALSE	17
2022-09-12	15:26:03	0.0550257	0.244765	1158.68	FALSE	17
2022-09-12	15:26:03	0.110547	0.491735	1157.62	FALSE	17
2022-09-12	15:26:03	0.174364	0.775606	1159.46	FALSE	17
2022-09-12	15:26:04	0.239504	1.06536	1158.68	FALSE	17
2022-09-12	15:26:04	0.184746	0.821787	1160.28	FALSE	17
2022-09-12	15:26:04	0.410344	1.82529	1160.51	FALSE	17
2022-09-12	15:26:05	0.395433	1.75897	1162.04	FALSE	17
2022-09-12	15:26:05	0.52785	2.34798	1162.86	FALSE	17
2022-09-12	15:26:05	0.413499	1.83933	1163.88	FALSE	17
2022-09-12	15:26:05	0.484389	2.15466	1165.01	FALSE	17
2022-09-12	15:26:06	0.429631	1.91108	1165.79	FALSE	17
2022-09-12	15:26:06	0.498181	2.21601	1167.23	FALSE	17
2022-09-12	15:26:06	0.472074	2.09988	1167.89	FALSE	17
2022-09-12	15:26:06	0.477367	2.12342	1169.35	FALSE	17
2022-09-12	15:26:07	0.467494	2.07951	1169.97	FALSE	17
2022-09-12	15:26:07	0.479758	2.13406	1171.49	FALSE	17
2022-09-12	15:26:07	0.480725	2.13836	1172.11	FALSE	17
2022-09-12	15:26:07	0.484593	2.15557	1173.64	FALSE	17
2022-09-12	15:26:08	0.483728	2.15172	1174.26	FALSE	17
2022-09-12	15:26:08	0.481692	2.14266	1175.78	FALSE	17
2022-09-12	15:26:08	0.476756	2.12071	1176.38	FALSE	17
2022-09-12	15:26:09	0.476756	2.12071	1177.9	FALSE	17
2022-09-12	15:26:09	0.46841	2.08358	1178.46	FALSE	17
2022-09-12	15:26:09	0.470089	2.09105	1180	FALSE	17
2022-09-12	15:26:09	0.497163	2.21148	1180.68	FALSE	17
2022-09-12	15:26:10	0.479657	2.13361	1182.13	FALSE	17
2022-09-12	15:26:10	0.495585	2.20446	1182.88	FALSE	17
2022-09-12	15:26:10	0.63131	2.80819	1184.94	FALSE	17
2022-09-12	15:26:10	0.25187	1.12037	1184	FALSE	17
2022-09-12	15:26:11	0.160369	0.713353	1185.65	FALSE	17
2022-09-12	15:26:11	0.492328	2.18997	1186.19	FALSE	17
2022-09-12	15:26:11	0.528359	2.35025	1188	FALSE	17
2022-09-12	15:26:11	0.76897	3.42053	1189.61	FALSE	17
2022-09-12	15:26:12	1.17767	5.23851	1193.24	FALSE	17
2022-09-12	15:26:12	1.25849	5.59802	1195.21	FALSE	17
2022-09-12	15:26:12	0.805458	3.58284	1196.82	FALSE	17
2022-09-12	15:26:13	0.841896	3.74492	1198.95	FALSE	17
2022-09-12	15:26:13	1.58943	7.0701	1203.89	FALSE	17
2022-09-12	15:26:13	2.0533	9.13349	1208.09	FALSE	17
2022-09-12	15:26:14	4.10769	18.2718	1222.16	1	18
2022-09-12	15:26:14	7.93233	35.2846	1243.37	1	19
2022-09-12	15:26:14	5.97579	26.5815	1248.75	1	20
2022-09-12	15:26:14	4.2938	19.0997	1262.47	1	21
2022-09-12	15:26:14	1.06856	4.75317	1253.5	FALSE	21
2022-09-12	15:26:15	0.515941	2.29501	1264.77	FALSE	21
2022-09-12	15:26:15	0.262252	1.16655	1254.67	FALSE	21
2022-09-12	15:26:15	0.277061	1.23242	1266	FALSE	21
2022-09-12	15:26:16	0.214008	0.95195	1255.62	FALSE	21
2022-09-12	15:26:16	0.35472	1.57787	1267.58	FALSE	21
2022-09-12	15:26:16	0.308257	1.37119	1256.99	FALSE	21
2022-09-12	15:26:16	0.0689188	0.306565	1267.88	FALSE	21
2022-09-12	15:26:17	0.0453565	0.201755	1257.19	FALSE	21
2022-09-12	15:26:17	0.0593005	0.26378	1268.15	FALSE	21
2022-09-12	15:26:17	-0.121565	-0.540745	1257.19	FALSE	21
2022-09-12	15:26:17	-0.111794	-0.497282	1268.15	FALSE	21
2022-09-12	15:26:18	0.330852	1.4717	1258.66	FALSE	21
2022-09-12	15:26:18	0.203372	0.904639	1269.05	FALSE	21
2022-09-12	15:26:18	0.23528	1.04657	1259.71	FALSE	21
2022-09-12	15:26:18	0.510293	2.26989	1271.32	FALSE	21
2022-09-12	15:26:19	0.241489	1.07419	1260.78	FALSE	21
2022-09-12	15:26:19	0.319606	1.42167	1272.74	FALSE	21
2022-09-12	15:26:19	0.662557	2.94719	1263.73	FALSE	21
2022-09-12	15:26:20	1.15212	5.12486	1277.87	FALSE	21
2022-09-12	15:26:20	1.75233	7.79471	1271.52	FALSE	21
2022-09-12	15:26:20	1.63884	7.28989	1285.16	FALSE	21
2022-09-12	15:26:20	0.765916	3.40695	1274.93	FALSE	21
2022-09-12	15:26:21	0.545407	2.42608	1287.58	FALSE	21
2022-09-12	15:26:21	0.492074	2.18884	1277.12	FALSE	21
2022-09-12	15:26:21	0.451616	2.00888	1289.59	FALSE	21
2022-09-12	15:26:21	0.459249	2.04283	1279.16	FALSE	21
2022-09-12	15:26:22	0.452023	2.01069	1291.6	FALSE	21
2022-09-12	15:26:22	0.468003	2.08177	1281.25	FALSE	21
2022-09-12	15:26:22	0.446832	1.9876	1293.59	FALSE	21
2022-09-12	15:26:22	0.434771	1.93395	1283.18	FALSE	21
2022-09-12	15:26:23	0.647392	2.87973	1296.47	FALSE	21
2022-09-12	15:26:23	0.790344	3.51561	1286.69	FALSE	21
2022-09-12	15:26:23	0.516552	2.29773	1298.77	FALSE	21
2022-09-12	15:26:24	1.40963	6.27032	1292.97	FALSE	21
2022-09-12	15:26:24	2.54871	11.3372	1310.11	FALSE	21
2022-09-12	15:26:24	1.67121	7.43388	1300.4	FALSE	21
2022-09-12	15:26:24	0.983982	4.37695	1314.48	FALSE	21
2022-09-12	15:26:25	0.682811	3.03728	1303.44	FALSE	21
2022-09-12	15:26:25	0.716094	3.18533	1317.67	FALSE	21
2022-09-12	15:26:25	0.51584	2.29456	1305.73	FALSE	21
2022-09-12	15:26:25	0.307596	1.36825	1319.04	FALSE	21
2022-09-12	15:26:26	0.660115	2.93632	1308.67	FALSE	21
2022-09-12	15:26:26	0.547596	2.43582	1321.47	FALSE	21
2022-09-12	15:26:26	0.645763	2.87248	1311.54	FALSE	21
2022-09-12	15:26:26	1.13273	5.03861	1326.51	FALSE	21
2022-09-12	15:26:27	1.17462	5.22494	1316.76	FALSE	21
2022-09-12	15:26:27	1.92907	8.58089	1335.09	FALSE	21
2022-09-12	15:26:27	3.11365	13.8501	1330.61	1	22
2022-09-12	15:26:28	2.35742	10.4863	1345.58	FALSE	22
2022-09-12	15:26:28	1.60357	7.133	1337.75	FALSE	22
2022-09-12	15:26:28	1.06485	4.73667	1350.31	FALSE	22
2022-09-12	15:26:28	1.20256	5.34923	1343.1	FALSE	22
2022-09-12	15:26:29	0.64673	2.87678	1353.19	FALSE	22
2022-09-12	15:26:29	1.01472	4.51368	1347.61	FALSE	22
2022-09-12	15:26:29	0.751361	3.3422	1356.53	FALSE	22
2022-09-12	15:26:29	0.747697	3.32591	1350.94	FALSE	22
2022-09-12	15:26:30	0.697875	3.10429	1359.64	FALSE	22
2022-09-12	15:26:30	1.13879	5.06557	1356	FALSE	22
2022-09-12	15:26:30	1.7309	7.69939	1367.34	FALSE	22
2022-09-12	15:26:30	0.869835	3.8692	1359.87	FALSE	22
2022-09-12	15:26:31	1.06378	4.73191	1372.07	FALSE	22
2022-09-12	15:26:31	0.979758	4.35816	1364.23	FALSE	22
2022-09-12	15:26:31	0.721845	3.21091	1375.28	FALSE	22
2022-09-12	15:26:32	0.707239	3.14594	1367.38	FALSE	22
2022-09-12	15:26:32	0.480623	2.13791	1377.42	FALSE	22
2022-09-12	15:26:32	0.389173	1.73112	1369.11	FALSE	22
2022-09-12	15:26:32	0.337316	1.50045	1378.92	FALSE	22
2022-09-12	15:26:33	0.185255	0.824051	1369.93	FALSE	22
2022-09-12	15:26:33	0.35355	1.57266	1380.49	FALSE	22
2022-09-12	15:26:33	1.42378	6.33326	1376.26	FALSE	22
2022-09-12	15:26:33	5.52561	24.579	1405.07	1	23

## Sheet: Ranger_star_2022912152113 (2)
Date	Time	Lbs	Total Force x time	Total Time Steps Force >3		**GoPro Fitting: 1510
2022-09-12	15:21:33	0.121082	0.121082	FALSE	0
2022-09-12	15:21:33	-0.14874	0.121082	FALSE	0			Total force x time	625.272
2022-09-12	15:21:33	0.059962	0.181044	FALSE	0			Total Time Steps Force >3	23
2022-09-12	15:21:33	0.88444	1.06548	FALSE	0
2022-09-12	15:21:34	-0.0622262	1.06548	FALSE	0
2022-09-12	15:21:34	0.165255	1.23074	FALSE	0
2022-09-12	15:21:34	0.216451	1.44719	FALSE	0
2022-09-12	15:21:34	0.167036	1.61423	FALSE	0
2022-09-12	15:21:35	0.635585	2.24981	FALSE	0
2022-09-12	15:21:35	3.0051	5.25491	1	1
2022-09-12	15:21:35	2.80449	8.0594	FALSE	1
2022-09-12	15:21:36	3.12724	11.1866	1	2
2022-09-12	15:21:36	1.78973	12.9764	FALSE	2
2022-09-12	15:21:36	1.22296	14.1993	FALSE	2
2022-09-12	15:21:36	0.625051	14.8244	FALSE	2
2022-09-12	15:21:37	1.80948	16.6339	FALSE	2
2022-09-12	15:21:37	0.218486	16.8523	FALSE	2
2022-09-12	15:21:37	0.169733	17.0221	FALSE	2
2022-09-12	15:21:37	0.306679	17.3288	FALSE	2
2022-09-12	15:21:38	1.71345	19.0422	FALSE	2
2022-09-12	15:21:38	3.37441	22.4166	1	3
2022-09-12	15:21:38	3.89879	26.3154	1	4
2022-09-12	15:21:38	4.41619	30.7316	1	5
2022-09-12	15:21:39	1.21289	31.9445	FALSE	5
2022-09-12	15:21:39	0.546832	32.4913	FALSE	5
2022-09-12	15:21:39	0.401794	32.8931	FALSE	5
2022-09-12	15:21:40	0.65813	33.5512	FALSE	5
2022-09-12	15:21:40	0.288461	33.8397	FALSE	5
2022-09-12	15:21:40	0.496043	34.3358	FALSE	5
2022-09-12	15:21:40	0.373601	34.7094	FALSE	5
2022-09-12	15:21:41	-0.020445	34.7094	FALSE	5
2022-09-12	15:21:41	-0.121208	34.7094	FALSE	5
2022-09-12	15:21:41	0.311107	35.0205	FALSE	5
2022-09-12	15:21:41	0.16042	35.1809	FALSE	5
2022-09-12	15:21:42	0.565356	35.7462	FALSE	5
2022-09-12	15:21:42	0.336043	36.0823	FALSE	5
2022-09-12	15:21:42	1.22149	37.3038	FALSE	5
2022-09-12	15:21:43	1.04373	38.3475	FALSE	5
2022-09-12	15:21:43	2.18108	40.5286	FALSE	5
2022-09-12	15:21:43	1.56561	42.0942	FALSE	5
2022-09-12	15:21:43	1.66744	43.7616	FALSE	5
2022-09-12	15:21:44	0.596908	44.3585	FALSE	5
2022-09-12	15:21:44	0.461692	44.8202	FALSE	5
2022-09-12	15:21:44	0.326374	45.1466	FALSE	5
2022-09-12	15:21:44	0.132837	45.2794	FALSE	5
2022-09-12	15:21:45	-0.0996307	45.2794	FALSE	5
2022-09-12	15:21:45	-0.354389	45.2794	FALSE	5
2022-09-12	15:21:45	-0.446501	45.2794	FALSE	5
2022-09-12	15:21:45	-0.566043	45.2794	FALSE	5
2022-09-12	15:21:46	-0.48818	45.2794	FALSE	5
2022-09-12	15:21:46	-0.547671	45.2794	FALSE	5
2022-09-12	15:21:46	-0.60701	45.2794	FALSE	5
2022-09-12	15:21:47	-0.572048	45.2794	FALSE	5
2022-09-12	15:21:47	-0.378765	45.2794	FALSE	5
2022-09-12	15:21:47	0.129377	45.4088	FALSE	5
2022-09-12	15:21:47	0.259809	45.6686	FALSE	5
2022-09-12	15:21:48	0.59243	46.2611	FALSE	5
2022-09-12	15:21:48	1.02383	47.2849	FALSE	5
2022-09-12	15:21:48	1.25447	48.5394	FALSE	5
2022-09-12	15:21:48	0.828409	49.3678	FALSE	5
2022-09-12	15:21:49	1.03701	50.4048	FALSE	5
2022-09-12	15:21:49	0.689682	51.0945	FALSE	5
2022-09-12	15:21:49	0.424084	51.5185	FALSE	5
2022-09-12	15:21:49	0.768562	52.2871	FALSE	5
2022-09-12	15:21:50	0.154771	52.4419	FALSE	5
2022-09-12	15:21:50	0.422201	52.8641	FALSE	5
2022-09-12	15:21:50	0.473041	53.3371	FALSE	5
2022-09-12	15:21:51	0.407799	53.7449	FALSE	5
2022-09-12	15:21:51	0.501488	54.2464	FALSE	5
2022-09-12	15:21:51	0.269987	54.5164	FALSE	5
2022-09-12	15:21:51	0.531311	55.0477	FALSE	5
2022-09-12	15:21:52	0.499809	55.5475	FALSE	5
2022-09-12	15:21:52	0.352481	55.9	FALSE	5
2022-09-12	15:21:52	0.0294277	55.9294	FALSE	5
2022-09-12	15:21:52	0.549326	56.4787	FALSE	5
2022-09-12	15:21:53	0.11813	56.5969	FALSE	5
2022-09-12	15:21:53	0.402659	56.9995	FALSE	5
2022-09-12	15:21:53	0.215076	57.2146	FALSE	5
2022-09-12	15:21:53	0.396552	57.6112	FALSE	5
2022-09-12	15:21:54	0.832735	58.4439	FALSE	5
2022-09-12	15:21:54	0.865305	59.3092	FALSE	5
2022-09-12	15:21:54	0.745865	60.0551	FALSE	5
2022-09-12	15:21:55	0.428003	60.4831	FALSE	5
2022-09-12	15:21:55	0.571921	61.055	FALSE	5
2022-09-12	15:21:55	0.195687	61.2507	FALSE	5
2022-09-12	15:21:55	0.311819	61.5625	FALSE	5
2022-09-12	15:21:56	0.112227	61.6747	FALSE	5
2022-09-12	15:21:56	1.12902	62.8037	FALSE	5
2022-09-12	15:21:56	0.783473	63.5872	FALSE	5
2022-09-12	15:21:56	1.71996	65.3072	FALSE	5
2022-09-12	15:21:57	1.0681	66.3753	FALSE	5
2022-09-12	15:21:57	1.10307	67.4783	FALSE	5
2022-09-12	15:21:57	1.42627	68.9046	FALSE	5
2022-09-12	15:21:57	0.618079	69.5227	FALSE	5
2022-09-12	15:21:58	1.18994	70.7126	FALSE	5
2022-09-12	15:21:58	0.604644	71.3173	FALSE	5
2022-09-12	15:21:58	1.2621	72.5794	FALSE	5
2022-09-12	15:21:59	0.403219	72.9826	FALSE	5
2022-09-12	15:21:59	0.346272	73.3289	FALSE	5
2022-09-12	15:21:59	0.912684	74.2416	FALSE	5
2022-09-12	15:21:59	0.212125	74.4537	FALSE	5
2022-09-12	15:22:00	0.697061	75.1507	FALSE	5
2022-09-12	15:22:00	0.347952	75.4987	FALSE	5
2022-09-12	15:22:00	0.464949	75.9636	FALSE	5
2022-09-12	15:22:00	0.423372	76.387	FALSE	5
2022-09-12	15:22:01	0.331972	76.719	FALSE	5
2022-09-12	15:22:01	0.808766	77.5277	FALSE	5
2022-09-12	15:22:01	1.35416	78.8819	FALSE	5
2022-09-12	15:22:02	1.52118	80.4031	FALSE	5
2022-09-12	15:22:02	0.365305	80.7684	FALSE	5
2022-09-12	15:22:02	1.08719	81.8556	FALSE	5
2022-09-12	15:22:02	0.275789	82.1314	FALSE	5
2022-09-12	15:22:03	0.310598	82.442	FALSE	5
2022-09-12	15:22:03	0.329937	82.7719	FALSE	5
2022-09-12	15:22:03	0.0461198	82.818	FALSE	5
2022-09-12	15:22:03	0.175127	82.9932	FALSE	5
2022-09-12	15:22:04	-0.00960535	82.9932	FALSE	5
2022-09-12	15:22:04	0.0763997	83.0696	FALSE	5
2022-09-12	15:22:04	-0.184007	83.0696	FALSE	5
2022-09-12	15:22:04	0.137621	83.2072	FALSE	5
2022-09-12	15:22:05	-0.145992	83.2072	FALSE	5
2022-09-12	15:22:05	0.123626	83.3308	FALSE	5
2022-09-12	15:22:05	-0.0935748	83.3308	FALSE	5
2022-09-12	15:22:06	0.0331427	83.3639	FALSE	5
2022-09-12	15:22:06	0.145255	83.5092	FALSE	5
2022-09-12	15:22:06	-0.0838038	83.5092	FALSE	5
2022-09-12	15:22:06	0.201387	83.7106	FALSE	5
2022-09-12	15:22:07	-0.00202267	83.7106	FALSE	5
2022-09-12	15:22:07	0.273906	83.9845	FALSE	5
2022-09-12	15:22:07	-0.0569336	83.9845	FALSE	5
2022-09-12	15:22:07	0.0413361	84.0258	FALSE	5
2022-09-12	15:22:08	-0.212811	84.0258	FALSE	5
2022-09-12	15:22:08	-0.269911	84.0258	FALSE	5
2022-09-12	15:22:08	-0.518307	84.0258	FALSE	5
2022-09-12	15:22:08	-0.296323	84.0258	FALSE	5
2022-09-12	15:22:09	-0.40131	84.0258	FALSE	5
2022-09-12	15:22:09	-0.295458	84.0258	FALSE	5
2022-09-12	15:22:09	-0.286654	84.0258	FALSE	5
2022-09-12	15:22:10	-0.221361	84.0258	FALSE	5
2022-09-12	15:22:10	-0.141768	84.0258	FALSE	5
2022-09-12	15:22:10	-0.2179	84.0258	FALSE	5
2022-09-12	15:22:10	0.119148	84.145	FALSE	5
2022-09-12	15:22:11	-0.00497431	84.145	FALSE	5
2022-09-12	15:22:11	0.274822	84.4198	FALSE	5
2022-09-12	15:22:11	0.0378247	84.4576	FALSE	5
2022-09-12	15:22:11	0.534364	84.992	FALSE	5
2022-09-12	15:22:12	0.381132	85.3731	FALSE	5
2022-09-12	15:22:12	0.747595	86.1207	FALSE	5
2022-09-12	15:22:12	0.369733	86.4904	FALSE	5
2022-09-12	15:22:13	0.210853	86.7013	FALSE	5
2022-09-12	15:22:13	0.406374	87.1077	FALSE	5
2022-09-12	15:22:13	0.0445422	87.1522	FALSE	5
2022-09-12	15:22:13	0.346476	87.4987	FALSE	5
2022-09-12	15:22:14	0.106374	87.6051	FALSE	5
2022-09-12	15:22:14	0.230496	87.8356	FALSE	5
2022-09-12	15:22:14	0.0349239	87.8705	FALSE	5
2022-09-12	15:22:14	0.245509	88.116	FALSE	5
2022-09-12	15:22:15	0.312074	88.4281	FALSE	5
2022-09-12	15:22:15	0.344746	88.7728	FALSE	5
2022-09-12	15:22:15	0.304339	89.0772	FALSE	5
2022-09-12	15:22:15	0.345407	89.4226	FALSE	5
2022-09-12	15:22:16	0.395076	89.8176	FALSE	5
2022-09-12	15:22:16	0.119453	89.9371	FALSE	5
2022-09-12	15:22:16	0.420115	90.3572	FALSE	5
2022-09-12	15:22:16	0.147087	90.5043	FALSE	5
2022-09-12	15:22:17	0.422303	90.9266	FALSE	5
2022-09-12	15:22:17	0.190903	91.1175	FALSE	5
2022-09-12	15:22:17	0.367087	91.4846	FALSE	5
2022-09-12	15:22:18	0.289937	91.7745	FALSE	5
2022-09-12	15:22:18	0.124033	91.8986	FALSE	5
2022-09-12	15:22:18	0.203422	92.102	FALSE	5
2022-09-12	15:22:18	0.0961961	92.1982	FALSE	5
2022-09-12	15:22:19	0.436298	92.6345	FALSE	5
2022-09-12	15:22:19	0.0613361	92.6958	FALSE	5
2022-09-12	15:22:19	0.327952	93.0238	FALSE	5
2022-09-12	15:22:19	0.042303	93.0661	FALSE	5
2022-09-12	15:22:20	0.26215	93.3282	FALSE	5
2022-09-12	15:22:20	0.0585371	93.3868	FALSE	5
2022-09-12	15:22:20	0.222099	93.6088	FALSE	5
2022-09-12	15:22:21	0.0337534	93.6426	FALSE	5
2022-09-12	15:22:21	0.022303	93.6649	FALSE	5
2022-09-12	15:22:21	-0.140801	93.6649	FALSE	5
2022-09-12	15:22:21	0.0713106	93.7362	FALSE	5
2022-09-12	15:22:22	0.0436771	93.7799	FALSE	5
2022-09-12	15:22:22	0.606832	94.3867	FALSE	5
2022-09-12	15:22:22	0.645051	95.0318	FALSE	5
2022-09-12	15:22:23	0.168766	95.2005	FALSE	5
2022-09-12	15:22:23	0.203524	95.4041	FALSE	5
2022-09-12	15:22:23	0.399046	95.8031	FALSE	5
2022-09-12	15:22:23	0.972786	96.7759	FALSE	5
2022-09-12	15:22:23	0.363982	97.1399	FALSE	5
2022-09-12	15:22:24	0.577926	97.7178	FALSE	5
2022-09-12	15:22:24	0.758282	98.4761	FALSE	5
2022-09-12	15:22:24	1.24347	99.7196	FALSE	5
2022-09-12	15:22:25	0.556501	100.276	FALSE	5
2022-09-12	15:22:25	1.35543	101.631	FALSE	5
2022-09-12	15:22:25	1.06246	102.694	FALSE	5
2022-09-12	15:22:25	0.399758	103.094	FALSE	5
2022-09-12	15:22:26	0.131565	103.225	FALSE	5
2022-09-12	15:22:26	0.238944	103.464	FALSE	5
2022-09-12	15:22:26	0.562252	104.026	FALSE	5
2022-09-12	15:22:26	0.0470358	104.074	FALSE	5
2022-09-12	15:22:27	0.463677	104.537	FALSE	5
2022-09-12	15:22:27	0.262048	104.799	FALSE	5
2022-09-12	15:22:27	0.456247	105.255	FALSE	5
2022-09-12	15:22:27	0.60444	105.86	FALSE	5
2022-09-12	15:22:28	1.63966	107.5	FALSE	5
2022-09-12	15:22:28	1.97589	109.475	FALSE	5
2022-09-12	15:22:28	1.3736	110.849	FALSE	5
2022-09-12	15:22:29	1.11594	111.965	FALSE	5
2022-09-12	15:22:29	0.354313	112.319	FALSE	5
2022-09-12	15:22:29	0.641234	112.961	FALSE	5
2022-09-12	15:22:29	0.27925	113.24	FALSE	5
2022-09-12	15:22:30	0.62841	113.868	FALSE	5
2022-09-12	15:22:30	0.569021	114.437	FALSE	5
2022-09-12	15:22:30	0.910191	115.347	FALSE	5
2022-09-12	15:22:30	0.582048	115.929	FALSE	5
2022-09-12	15:22:31	0.42388	116.353	FALSE	5
2022-09-12	15:22:31	0.827494	117.181	FALSE	5
2022-09-12	15:22:31	0.468512	117.649	FALSE	5
2022-09-12	15:22:31	0.797519	118.447	FALSE	5
2022-09-12	15:22:32	0.539046	118.986	FALSE	5
2022-09-12	15:22:32	1.11655	120.102	FALSE	5
2022-09-12	15:22:32	0.63589	120.738	FALSE	5
2022-09-12	15:22:33	0.904593	121.643	FALSE	5
2022-09-12	15:22:33	0.704695	122.348	FALSE	5
2022-09-12	15:22:33	0.287545	122.635	FALSE	5
2022-09-12	15:22:33	0.237824	122.873	FALSE	5
2022-09-12	15:22:34	0.418486	123.292	FALSE	5
2022-09-12	15:22:34	0.0465269	123.338	FALSE	5
2022-09-12	15:22:34	0.345509	123.684	FALSE	5
2022-09-12	15:22:34	0.108461	123.792	FALSE	5
2022-09-12	15:22:35	0.380013	124.172	FALSE	5
2022-09-12	15:22:35	0.187188	124.359	FALSE	5
2022-09-12	15:22:35	0.367952	124.727	FALSE	5
2022-09-12	15:22:35	0.346323	125.073	FALSE	5
2022-09-12	15:22:36	0.276908	125.35	FALSE	5
2022-09-12	15:22:36	0.390445	125.741	FALSE	5
2022-09-12	15:22:36	0.168715	125.91	FALSE	5
2022-09-12	15:22:37	0.703219	126.613	FALSE	5
2022-09-12	15:22:37	0.0614888	126.674	FALSE	5
2022-09-12	15:22:37	0.497417	127.172	FALSE	5
2022-09-12	15:22:37	0.206476	127.378	FALSE	5
2022-09-12	15:22:38	0.374568	127.753	FALSE	5
2022-09-12	15:22:38	0.196451	127.949	FALSE	5
2022-09-12	15:22:38	0.284847	128.234	FALSE	5
2022-09-12	15:22:38	0.151107	128.385	FALSE	5
2022-09-12	15:22:39	0.451768	128.837	FALSE	5
2022-09-12	15:22:39	0.272939	129.11	FALSE	5
2022-09-12	15:22:39	0.501438	129.611	FALSE	5
2022-09-12	15:22:40	0.428512	130.04	FALSE	5
2022-09-12	15:22:40	0.750344	130.79	FALSE	5
2022-09-12	15:22:40	0.684084	131.474	FALSE	5
2022-09-12	15:22:40	0.451158	131.925	FALSE	5
2022-09-12	15:22:41	0.569987	132.495	FALSE	5
2022-09-12	15:22:41	0.355077	132.85	FALSE	5
2022-09-12	15:22:41	0.625407	133.476	FALSE	5
2022-09-12	15:22:41	0.485458	133.961	FALSE	5
2022-09-12	15:22:42	0.49528	134.457	FALSE	5
2022-09-12	15:22:42	0.48098	134.938	FALSE	5
2022-09-12	15:22:42	0.456807	135.394	FALSE	5
2022-09-12	15:22:42	0.44154	135.836	FALSE	5
2022-09-12	15:22:43	0.435076	136.271	FALSE	5
2022-09-12	15:22:43	0.459249	136.73	FALSE	5
2022-09-12	15:22:43	0.438333	137.169	FALSE	5
2022-09-12	15:22:44	0.432685	137.601	FALSE	5
2022-09-12	15:22:44	0.44042	138.042	FALSE	5
2022-09-12	15:22:44	0.452481	138.494	FALSE	5
2022-09-12	15:22:44	0.484084	138.978	FALSE	5
2022-09-12	15:22:45	0.483779	139.462	FALSE	5
2022-09-12	15:22:45	0.479809	139.942	FALSE	5
2022-09-12	15:22:45	0.496145	140.438	FALSE	5
2022-09-12	15:22:45	0.504695	140.943	FALSE	5
2022-09-12	15:22:46	0.462303	141.405	FALSE	5
2022-09-12	15:22:46	0.500063	141.905	FALSE	5
2022-09-12	15:22:46	0.490394	142.395	FALSE	5
2022-09-12	15:22:46	0.453855	142.849	FALSE	5
2022-09-12	15:22:47	0.4307	143.28	FALSE	5
2022-09-12	15:22:47	0.41584	143.696	FALSE	5
2022-09-12	15:22:47	0.404186	144.1	FALSE	5
2022-09-12	15:22:48	0.400674	144.501	FALSE	5
2022-09-12	15:22:48	0.730903	145.232	FALSE	5
2022-09-12	15:22:48	0.345865	145.577	FALSE	5
2022-09-12	15:22:48	0.297977	145.875	FALSE	5
2022-09-12	15:22:49	0.425407	146.301	FALSE	5
2022-09-12	15:22:49	0.262863	146.564	FALSE	5
2022-09-12	15:22:49	0.229631	146.793	FALSE	5
2022-09-12	15:22:49	0.279911	147.073	FALSE	5
2022-09-12	15:22:50	0.321234	147.394	FALSE	5
2022-09-12	15:22:50	0.223015	147.617	FALSE	5
2022-09-12	15:22:50	0.280878	147.898	FALSE	5
2022-09-12	15:22:50	0.318741	148.217	FALSE	5
2022-09-12	15:22:51	0.333957	148.551	FALSE	5
2022-09-12	15:22:51	0.45701	149.008	FALSE	5
2022-09-12	15:22:51	0.37126	149.379	FALSE	5
2022-09-12	15:22:52	0.29187	149.671	FALSE	5
2022-09-12	15:22:52	0.443473	150.115	FALSE	5
2022-09-12	15:22:52	0.30444	150.419	FALSE	5
2022-09-12	15:22:52	0.387392	150.806	FALSE	5
2022-09-12	15:22:53	0.185356	150.992	FALSE	5
2022-09-12	15:22:53	0.399809	151.392	FALSE	5
2022-09-12	15:22:53	0.305102	151.697	FALSE	5
2022-09-12	15:22:53	0.112328	151.809	FALSE	5
2022-09-12	15:22:54	-0.0872643	151.809	FALSE	5
2022-09-12	15:22:54	-0.318206	151.809	FALSE	5
2022-09-12	15:22:54	-0.444923	151.809	FALSE	5
2022-09-12	15:22:54	-0.129096	151.809	FALSE	5
2022-09-12	15:22:55	-0.207264	151.809	FALSE	5
2022-09-12	15:22:55	0.0560944	151.865	FALSE	5
2022-09-12	15:22:55	0.00698499	151.872	FALSE	5
2022-09-12	15:22:56	0.18444	152.057	FALSE	5
2022-09-12	15:22:56	0.224084	152.281	FALSE	5
2022-09-12	15:22:56	0.054415	152.335	FALSE	5
2022-09-12	15:22:56	0.105051	152.44	FALSE	5
2022-09-12	15:22:57	0.148257	152.588	FALSE	5
2022-09-12	15:22:57	0.215687	152.804	FALSE	5
2022-09-12	15:22:57	0.160166	152.964	FALSE	5
2022-09-12	15:22:57	0.206832	153.171	FALSE	5
2022-09-12	15:22:58	0.313041	153.484	FALSE	5
2022-09-12	15:22:58	0.213753	153.698	FALSE	5
2022-09-12	15:22:58	0.257723	153.956	FALSE	5
2022-09-12	15:22:59	0.225865	154.181	FALSE	5
2022-09-12	15:22:59	0.327545	154.509	FALSE	5
2022-09-12	15:22:59	0.213957	154.723	FALSE	5
2022-09-12	15:22:59	-0.0457885	154.723	FALSE	5
2022-09-12	15:23:00	-0.226348	154.723	FALSE	5
2022-09-12	15:23:00	-0.121005	154.723	FALSE	5
2022-09-12	15:23:00	-0.0819208	154.723	FALSE	5
2022-09-12	15:23:00	0.259097	154.982	FALSE	5
2022-09-12	15:23:01	0.205306	155.187	FALSE	5
2022-09-12	15:23:01	0.238232	155.426	FALSE	5
2022-09-12	15:23:01	0.364695	155.79	FALSE	5
2022-09-12	15:23:01	0.392277	156.183	FALSE	5
2022-09-12	15:23:02	0.369377	156.552	FALSE	5
2022-09-12	15:23:02	0.387036	156.939	FALSE	5
2022-09-12	15:23:02	0.336603	157.276	FALSE	5
2022-09-12	15:23:03	0.334618	157.61	FALSE	5
2022-09-12	15:23:03	0.312736	157.923	FALSE	5
2022-09-12	15:23:03	0.375585	158.299	FALSE	5
2022-09-12	15:23:03	0.330191	158.629	FALSE	5
2022-09-12	15:23:04	0.357265	158.986	FALSE	5
2022-09-12	15:23:04	0.493041	159.479	FALSE	5
2022-09-12	15:23:04	0.335535	159.815	FALSE	5
2022-09-12	15:23:04	0.21869	160.033	FALSE	5
2022-09-12	15:23:05	0.182812	160.216	FALSE	5
2022-09-12	15:23:05	0.178283	160.394	FALSE	5
2022-09-12	15:23:05	0.139504	160.534	FALSE	5
2022-09-12	15:23:05	0.0608272	160.595	FALSE	5
2022-09-12	15:23:06	0.0783845	160.673	FALSE	5
2022-09-12	15:23:06	0.148359	160.821	FALSE	5
2022-09-12	15:23:06	0.231769	161.053	FALSE	5
2022-09-12	15:23:07	0.193092	161.246	FALSE	5
2022-09-12	15:23:07	0.0862724	161.333	FALSE	5
2022-09-12	15:23:07	0.261387	161.594	FALSE	5
2022-09-12	15:23:07	0.185814	161.78	FALSE	5
2022-09-12	15:23:08	0.484491	162.264	FALSE	5
2022-09-12	15:23:08	0.329987	162.594	FALSE	5
2022-09-12	15:23:08	0.791158	163.385	FALSE	5
2022-09-12	15:23:08	0.697315	164.083	FALSE	5
2022-09-12	15:23:09	1.01202	165.095	FALSE	5
2022-09-12	15:23:09	1.31732	166.412	FALSE	5
2022-09-12	15:23:09	1.85737	168.269	FALSE	5
2022-09-12	15:23:09	0.733753	169.003	FALSE	5
2022-09-12	15:23:10	0.69986	169.703	FALSE	5
2022-09-12	15:23:10	0.524338	170.227	FALSE	5
2022-09-12	15:23:10	0.544287	170.772	FALSE	5
2022-09-12	15:23:11	0.34042	171.112	FALSE	5
2022-09-12	15:23:11	0.413346	171.525	FALSE	5
2022-09-12	15:23:11	0.536247	172.062	FALSE	5
2022-09-12	15:23:11	0.458842	172.521	FALSE	5
2022-09-12	15:23:12	0.330649	172.851	FALSE	5
2022-09-12	15:23:12	0.680929	173.532	FALSE	5
2022-09-12	15:23:12	0.465153	173.997	FALSE	5
2022-09-12	15:23:12	0.715636	174.713	FALSE	5
2022-09-12	15:23:13	0.519758	175.233	FALSE	5
2022-09-12	15:23:13	0.721488	175.954	FALSE	5
2022-09-12	15:23:13	1.36332	177.317	FALSE	5
2022-09-12	15:23:13	2.25411	179.572	FALSE	5
2022-09-12	15:23:14	2.78882	182.36	FALSE	5
2022-09-12	15:23:14	3.10795	185.468	1	6
2022-09-12	15:23:14	2.27543	187.744	FALSE	6
2022-09-12	15:23:15	1.70398	189.448	FALSE	6
2022-09-12	15:23:15	0.99243	190.44	FALSE	6
2022-09-12	15:23:15	0.648969	191.089	FALSE	6
2022-09-12	15:23:15	0.491972	191.581	FALSE	6
2022-09-12	15:23:16	0.466934	192.048	FALSE	6
2022-09-12	15:23:16	0.328817	192.377	FALSE	6
2022-09-12	15:23:16	0.412888	192.79	FALSE	6
2022-09-12	15:23:16	0.296603	193.086	FALSE	6
2022-09-12	15:23:17	0.388054	193.474	FALSE	6
2022-09-12	15:23:17	0.295484	193.77	FALSE	6
2022-09-12	15:23:17	0.335636	194.106	FALSE	6
2022-09-12	15:23:18	0.283473	194.389	FALSE	6
2022-09-12	15:23:18	0.436705	194.826	FALSE	6
2022-09-12	15:23:18	0.509224	195.335	FALSE	6
2022-09-12	15:23:18	0.804847	196.14	FALSE	6
2022-09-12	15:23:19	1.31564	197.455	FALSE	6
2022-09-12	15:23:19	1.02317	198.479	FALSE	6
2022-09-12	15:23:19	2.28515	200.764	FALSE	6
2022-09-12	15:23:19	2.41253	203.176	FALSE	6
2022-09-12	15:23:20	2.98602	206.162	FALSE	6
2022-09-12	15:23:20	0.914974	207.077	FALSE	6
2022-09-12	15:23:20	0.480573	207.558	FALSE	6
2022-09-12	15:23:20	0.382557	207.94	FALSE	6
2022-09-12	15:23:21	0.401132	208.342	FALSE	6
2022-09-12	15:23:21	0.307087	208.649	FALSE	6
2022-09-12	15:23:21	0.331107	208.98	FALSE	6
2022-09-12	15:23:22	0.475076	209.455	FALSE	6
2022-09-12	15:23:22	0.322812	209.778	FALSE	6
2022-09-12	15:23:22	0.290445	210.068	FALSE	6
2022-09-12	15:23:22	0.42841	210.496	FALSE	6
2022-09-12	15:23:23	0.252481	210.749	FALSE	6
2022-09-12	15:23:23	0.483219	211.232	FALSE	6
2022-09-12	15:23:23	0.292532	211.525	FALSE	6
2022-09-12	15:23:23	0.345713	211.87	FALSE	6
2022-09-12	15:23:24	0.273753	212.144	FALSE	6
2022-09-12	15:23:24	0.32383	212.468	FALSE	6
2022-09-12	15:23:24	0.291311	212.759	FALSE	6
2022-09-12	15:23:24	0.21757	212.977	FALSE	6
2022-09-12	15:23:25	0.24612	213.223	FALSE	6
2022-09-12	15:23:25	0.283931	213.507	FALSE	6
2022-09-12	15:23:25	0.212481	213.719	FALSE	6
2022-09-12	15:23:26	0.272837	213.992	FALSE	6
2022-09-12	15:23:26	0.120776	214.113	FALSE	6
2022-09-12	15:23:26	0.133957	214.247	FALSE	6
2022-09-12	15:23:26	-0.0244145	214.247	FALSE	6
2022-09-12	15:23:27	-0.363549	214.247	FALSE	6
2022-09-12	15:23:27	-0.650775	214.247	FALSE	6
2022-09-12	15:23:27	-0.642887	214.247	FALSE	6
2022-09-12	15:23:27	-0.533829	214.247	FALSE	6
2022-09-12	15:23:28	-0.384567	214.247	FALSE	6
2022-09-12	15:23:28	-0.209656	214.247	FALSE	6
2022-09-12	15:23:28	-0.264007	214.247	FALSE	6
2022-09-12	15:23:28	-0.288282	214.247	FALSE	6
2022-09-12	15:23:29	-0.346857	214.247	FALSE	6
2022-09-12	15:23:29	-0.287417	214.247	FALSE	6
2022-09-12	15:23:29	-0.284567	214.247	FALSE	6
2022-09-12	15:23:30	-0.212913	214.247	FALSE	6
2022-09-12	15:23:30	-0.102786	214.247	FALSE	6
2022-09-12	15:23:30	-0.0631422	214.247	FALSE	6
2022-09-12	15:23:30	0.014873	214.262	FALSE	6
2022-09-12	15:23:31	-0.296577	214.262	FALSE	6
2022-09-12	15:23:31	-0.337239	214.262	FALSE	6
2022-09-12	15:23:31	-0.368078	214.262	FALSE	6
2022-09-12	15:23:31	-0.236068	214.262	FALSE	6
2022-09-12	15:23:32	-0.458409	214.262	FALSE	6
2022-09-12	15:23:32	-0.463498	214.262	FALSE	6
2022-09-12	15:23:32	-0.517137	214.262	FALSE	6
2022-09-12	15:23:32	-0.514643	214.262	FALSE	6
2022-09-12	15:23:33	-0.612455	214.262	FALSE	6
2022-09-12	15:23:33	-0.802887	214.262	FALSE	6
2022-09-12	15:23:33	-0.476526	214.262	FALSE	6
2022-09-12	15:23:34	-0.382531	214.262	FALSE	6
2022-09-12	15:23:34	-0.253626	214.262	FALSE	6
2022-09-12	15:23:34	-0.37846	214.262	FALSE	6
2022-09-12	15:23:34	-0.294389	214.262	FALSE	6
2022-09-12	15:23:35	-0.331743	214.262	FALSE	6
2022-09-12	15:23:35	-0.266857	214.262	FALSE	6
2022-09-12	15:23:35	0.0347203	214.297	FALSE	6
2022-09-12	15:23:35	0.157825	214.454	FALSE	6
2022-09-12	15:23:36	0.34383	214.798	FALSE	6
2022-09-12	15:23:36	0.357519	215.156	FALSE	6
2022-09-12	15:23:36	0.420674	215.576	FALSE	6
2022-09-12	15:23:37	0.631921	216.208	FALSE	6
2022-09-12	15:23:37	0.44612	216.654	FALSE	6
2022-09-12	15:23:37	0.477875	217.132	FALSE	6
2022-09-12	15:23:37	0.387392	217.52	FALSE	6
2022-09-12	15:23:38	0.456654	217.976	FALSE	6
2022-09-12	15:23:38	0.487239	218.464	FALSE	6
2022-09-12	15:23:38	0.380878	218.845	FALSE	6
2022-09-12	15:23:38	0.498944	219.343	FALSE	6
2022-09-12	15:23:39	0.295025	219.638	FALSE	6
2022-09-12	15:23:39	0.785204	220.424	FALSE	6
2022-09-12	15:23:39	0.445051	220.869	FALSE	6
2022-09-12	15:23:39	0.418944	221.288	FALSE	6
2022-09-12	15:23:40	0.340165	221.628	FALSE	6
2022-09-12	15:23:40	0.286476	221.914	FALSE	6
2022-09-12	15:23:40	0.268359	222.183	FALSE	6
2022-09-12	15:23:41	0.393702	222.576	FALSE	6
2022-09-12	15:23:41	0.414517	222.991	FALSE	6
2022-09-12	15:23:41	0.355585	223.346	FALSE	6
2022-09-12	15:23:41	0.449886	223.796	FALSE	6
2022-09-12	15:23:42	0.523932	224.32	FALSE	6
2022-09-12	15:23:42	0.42902	224.749	FALSE	6
2022-09-12	15:23:42	0.429886	225.179	FALSE	6
2022-09-12	15:23:42	0.51701	225.696	FALSE	6
2022-09-12	15:23:43	0.421387	226.118	FALSE	6
2022-09-12	15:23:43	0.647595	226.765	FALSE	6
2022-09-12	15:23:43	0.473295	227.238	FALSE	6
2022-09-12	15:23:43	0.483066	227.722	FALSE	6
2022-09-12	15:23:44	0.405153	228.127	FALSE	6
2022-09-12	15:23:44	0.403626	228.53	FALSE	6
2022-09-12	15:23:44	0.431819	228.962	FALSE	6
2022-09-12	15:23:45	0.385407	229.348	FALSE	6
2022-09-12	15:23:45	0.448257	229.796	FALSE	6
2022-09-12	15:23:45	0.416909	230.213	FALSE	6
2022-09-12	15:23:45	0.448206	230.661	FALSE	6
2022-09-12	15:23:46	0.43813	231.099	FALSE	6
2022-09-12	15:23:46	0.390496	231.49	FALSE	6
2022-09-12	15:23:46	0.375585	231.865	FALSE	6
2022-09-12	15:23:46	0.450496	232.316	FALSE	6
2022-09-12	15:23:47	0.363677	232.679	FALSE	6
2022-09-12	15:23:47	0.415585	233.095	FALSE	6
2022-09-12	15:23:47	0.452583	233.547	FALSE	6
2022-09-12	15:23:47	0.336196	233.884	FALSE	6
2022-09-12	15:23:48	0.112481	233.996	FALSE	6
2022-09-12	15:23:48	0.0691223	234.065	FALSE	6
2022-09-12	15:23:48	0.266883	234.332	FALSE	6
2022-09-12	15:23:49	0.335382	234.668	FALSE	6
2022-09-12	15:23:49	0.372685	235.04	FALSE	6
2022-09-12	15:23:49	0.354211	235.394	FALSE	6
2022-09-12	15:23:49	0.471158	235.866	FALSE	6
2022-09-12	15:23:50	0.420013	236.286	FALSE	6
2022-09-12	15:23:50	0.461489	236.747	FALSE	6
2022-09-12	15:23:50	0.516145	237.263	FALSE	6
2022-09-12	15:23:50	0.543677	237.807	FALSE	6
2022-09-12	15:23:51	0.578486	238.385	FALSE	6
2022-09-12	15:23:51	0.704084	239.089	FALSE	6
2022-09-12	15:23:51	0.561946	239.651	FALSE	6
2022-09-12	15:23:51	0.567646	240.219	FALSE	6
2022-09-12	15:23:52	0.646883	240.866	FALSE	6
2022-09-12	15:23:52	0.575229	241.441	FALSE	6
2022-09-12	15:23:52	0.497519	241.939	FALSE	6
2022-09-12	15:23:53	0.470446	242.409	FALSE	6
2022-09-12	15:23:53	0.471819	242.881	FALSE	6
2022-09-12	15:23:53	0.461845	243.343	FALSE	6
2022-09-12	15:23:53	0.461489	243.804	FALSE	6
2022-09-12	15:23:54	0.45757	244.262	FALSE	6
2022-09-12	15:23:54	0.460573	244.722	FALSE	6
2022-09-12	15:23:54	0.461692	245.184	FALSE	6
2022-09-12	15:23:54	0.462557	245.647	FALSE	6
2022-09-12	15:23:55	0.466883	246.114	FALSE	6
2022-09-12	15:23:55	0.467392	246.581	FALSE	6
2022-09-12	15:23:55	0.470242	247.051	FALSE	6
2022-09-12	15:23:56	0.476858	247.528	FALSE	6
2022-09-12	15:23:56	0.46729	247.995	FALSE	6
2022-09-12	15:23:56	0.387188	248.383	FALSE	6
2022-09-12	15:23:56	0.43528	248.818	FALSE	6
2022-09-12	15:23:57	0.449987	249.268	FALSE	6
2022-09-12	15:23:57	0.53757	249.805	FALSE	6
2022-09-12	15:23:57	0.489631	250.295	FALSE	6
2022-09-12	15:23:57	0.273346	250.568	FALSE	6
2022-09-12	15:23:58	0.4793	251.048	FALSE	6
2022-09-12	15:23:58	0.357265	251.405	FALSE	6
2022-09-12	15:23:58	0.334771	251.74	FALSE	6
2022-09-12	15:23:58	0.27472	252.014	FALSE	6
2022-09-12	15:23:59	0.443015	252.457	FALSE	6
2022-09-12	15:23:59	0.384389	252.842	FALSE	6
2022-09-12	15:23:59	0.444491	253.286	FALSE	6
2022-09-12	15:24:00	0.267341	253.554	FALSE	6
2022-09-12	15:24:00	0.266425	253.82	FALSE	6
2022-09-12	15:24:00	0.476298	254.296	FALSE	6
2022-09-12	15:24:00	0.246425	254.543	FALSE	6
2022-09-12	15:24:01	0.354618	254.897	FALSE	6
2022-09-12	15:24:01	0.358384	255.256	FALSE	6
2022-09-12	15:24:01	0.263168	255.519	FALSE	6
2022-09-12	15:24:01	0.340013	255.859	FALSE	6
2022-09-12	15:24:02	0.34958	256.209	FALSE	6
2022-09-12	15:24:02	0.372685	256.581	FALSE	6
2022-09-12	15:24:02	0.234211	256.815	FALSE	6
2022-09-12	15:24:02	0.3593	257.175	FALSE	6
2022-09-12	15:24:03	0.329784	257.505	FALSE	6
2022-09-12	15:24:03	0.248664	257.753	FALSE	6
2022-09-12	15:24:03	0.275076	258.028	FALSE	6
2022-09-12	15:24:04	0.228817	258.257	FALSE	6
2022-09-12	15:24:04	0.222405	258.48	FALSE	6
2022-09-12	15:24:04	0.181947	258.661	FALSE	6
2022-09-12	15:24:04	0.328359	258.99	FALSE	6
2022-09-12	15:24:05	0.146629	259.136	FALSE	6
2022-09-12	15:24:05	0.154466	259.291	FALSE	6
2022-09-12	15:24:05	0.0952292	259.386	FALSE	6
2022-09-12	15:24:05	0.125509	259.512	FALSE	6
2022-09-12	15:24:06	-0.194084	259.512	FALSE	6
2022-09-12	15:24:06	-0.3036	259.512	FALSE	6
2022-09-12	15:24:06	-0.0764756	259.512	FALSE	6
2022-09-12	15:24:06	0.0544659	259.566	FALSE	6
2022-09-12	15:24:07	0.26154	259.828	FALSE	6
2022-09-12	15:24:07	0.349428	260.177	FALSE	6
2022-09-12	15:24:07	0.358893	260.536	FALSE	6
2022-09-12	15:24:08	0.476247	261.012	FALSE	6
2022-09-12	15:24:08	0.522761	261.535	FALSE	6
2022-09-12	15:24:08	0.481183	262.016	FALSE	6
2022-09-12	15:24:08	0.458181	262.474	FALSE	6
2022-09-12	15:24:09	0.374822	262.849	FALSE	6
2022-09-12	15:24:09	0.294364	263.144	FALSE	6
2022-09-12	15:24:09	0.272328	263.416	FALSE	6
2022-09-12	15:24:09	0.266323	263.682	FALSE	6
2022-09-12	15:24:10	0.183626	263.866	FALSE	6
2022-09-12	15:24:10	0.382659	264.248	FALSE	6
2022-09-12	15:24:10	0.254669	264.503	FALSE	6
2022-09-12	15:24:11	0.353499	264.857	FALSE	6
2022-09-12	15:24:11	0.280929	265.138	FALSE	6
2022-09-12	15:24:11	0.208308	265.346	FALSE	6
2022-09-12	15:24:11	0.299962	265.646	FALSE	6
2022-09-12	15:24:12	0.290954	265.937	FALSE	6
2022-09-12	15:24:12	0.225153	266.162	FALSE	6
2022-09-12	15:24:12	0.219351	266.381	FALSE	6
2022-09-12	15:24:12	0.204339	266.586	FALSE	6
2022-09-12	15:24:13	0.179504	266.765	FALSE	6
2022-09-12	15:24:13	0.196501	266.962	FALSE	6
2022-09-12	15:24:13	0.106069	267.068	FALSE	6
2022-09-12	15:24:13	0.160827	267.229	FALSE	6
2022-09-12	15:24:14	0.208308	267.437	FALSE	6
2022-09-12	15:24:14	0.256959	267.694	FALSE	6
2022-09-12	15:24:14	0.343066	268.037	FALSE	6
2022-09-12	15:24:15	0.379606	268.416	FALSE	6
2022-09-12	15:24:15	1.29843	269.715	FALSE	6
2022-09-12	15:24:15	1.45436	271.169	FALSE	6
2022-09-12	15:24:15	2.07162	273.241	FALSE	6
2022-09-12	15:24:16	3.78281	277.024	1	7
2022-09-12	15:24:16	2.81691	279.841	FALSE	7
2022-09-12	15:24:16	1.38291	281.224	FALSE	7
2022-09-12	15:24:16	2.05686	283.28	FALSE	7
2022-09-12	15:24:17	1.61304	284.893	FALSE	7
2022-09-12	15:24:17	0.967646	285.861	FALSE	7
2022-09-12	15:24:17	0.917977	286.779	FALSE	7
2022-09-12	15:24:17	1.10999	287.889	FALSE	7
2022-09-12	15:24:18	1.59411	289.483	FALSE	7
2022-09-12	15:24:18	2.05818	291.541	FALSE	7
2022-09-12	15:24:18	1.83762	293.379	FALSE	7
2022-09-12	15:24:19	1.74286	295.122	FALSE	7
2022-09-12	15:24:19	1.50419	296.626	FALSE	7
2022-09-12	15:24:19	1.52678	298.153	FALSE	7
2022-09-12	15:24:19	1.26398	299.417	FALSE	7
2022-09-12	15:24:20	1.31095	300.728	FALSE	7
2022-09-12	15:24:20	1.10927	301.837	FALSE	7
2022-09-12	15:24:20	1.01548	302.852	FALSE	7
2022-09-12	15:24:20	1.01599	303.868	FALSE	7
2022-09-12	15:24:21	1.07594	304.944	FALSE	7
2022-09-12	15:24:21	1.19375	306.138	FALSE	7
2022-09-12	15:24:21	1.22724	307.365	FALSE	7
2022-09-12	15:24:21	1.2364	308.602	FALSE	7
2022-09-12	15:24:22	1.23559	309.837	FALSE	7
2022-09-12	15:24:22	1.30678	311.144	FALSE	7
2022-09-12	15:24:22	1.3564	312.501	FALSE	7
2022-09-12	15:24:23	1.27335	313.774	FALSE	7
2022-09-12	15:24:23	1.33447	315.108	FALSE	7
2022-09-12	15:24:23	1.44602	316.554	FALSE	7
2022-09-12	15:24:23	1.41136	317.966	FALSE	7
2022-09-12	15:24:24	1.41426	319.38	FALSE	7
2022-09-12	15:24:24	1.36821	320.748	FALSE	7
2022-09-12	15:24:24	1.4563	322.205	FALSE	7
2022-09-12	15:24:24	1.3962	323.601	FALSE	7
2022-09-12	15:24:25	1.87401	325.475	FALSE	7
2022-09-12	15:24:25	1.97925	327.454	FALSE	7
2022-09-12	15:24:25	2.12566	329.58	FALSE	7
2022-09-12	15:24:25	2.34139	331.921	FALSE	7
2022-09-12	15:24:26	2.33116	334.252	FALSE	7
2022-09-12	15:24:26	2.15584	336.408	FALSE	7
2022-09-12	15:24:26	1.09034	337.498	FALSE	7
2022-09-12	15:24:27	1.83497	339.333	FALSE	7
2022-09-12	15:24:27	4.97635	344.31	1	8
2022-09-12	15:24:27	4.37894	348.689	1	9
2022-09-12	15:24:27	1.25976	349.948	FALSE	9
2022-09-12	15:24:28	0.474466	350.423	FALSE	9
2022-09-12	15:24:28	0.381845	350.805	FALSE	9
2022-09-12	15:24:28	0.36215	351.167	FALSE	9
2022-09-12	15:24:28	0.464389	351.631	FALSE	9
2022-09-12	15:24:29	0.845611	352.477	FALSE	9
2022-09-12	15:24:29	0.393804	352.871	FALSE	9
2022-09-12	15:24:29	0.335178	353.206	FALSE	9
2022-09-12	15:24:30	3.08291	356.289	1	10
2022-09-12	15:24:30	3.45828	359.747	1	11
2022-09-12	15:24:30	0.700624	360.448	FALSE	11
2022-09-12	15:24:30	0.398944	360.847	FALSE	11
2022-09-12	15:24:31	-0.0877733	360.847	FALSE	11
2022-09-12	15:24:31	-0.103091	360.847	FALSE	11
2022-09-12	15:24:31	0.0515142	360.898	FALSE	11
2022-09-12	15:24:31	0.0786898	360.977	FALSE	11
2022-09-12	15:24:32	0.135535	361.112	FALSE	11
2022-09-12	15:24:32	0.161896	361.274	FALSE	11
2022-09-12	15:24:32	0.278792	361.553	FALSE	11
2022-09-12	15:24:32	0.477875	362.031	FALSE	11
2022-09-12	15:24:33	0.319707	362.351	FALSE	11
2022-09-12	15:24:33	0.207697	362.558	FALSE	11
2022-09-12	15:24:33	0.16673	362.725	FALSE	11
2022-09-12	15:24:34	0.507748	363.233	FALSE	11
2022-09-12	15:24:34	0.317316	363.55	FALSE	11
2022-09-12	15:24:34	0.251463	363.802	FALSE	11
2022-09-12	15:24:34	0.233244	364.035	FALSE	11
2022-09-12	15:24:35	-0.0742364	364.035	FALSE	11
2022-09-12	15:24:35	0.0712089	364.106	FALSE	11
2022-09-12	15:24:35	-0.113778	364.106	FALSE	11
2022-09-12	15:24:35	-0.221157	364.106	FALSE	11
2022-09-12	15:24:36	0.039046	364.145	FALSE	11
2022-09-12	15:24:36	0.625305	364.77	FALSE	11
2022-09-12	15:24:36	0.422863	365.193	FALSE	11
2022-09-12	15:24:36	0.246934	365.44	FALSE	11
2022-09-12	15:24:37	0.155382	365.596	FALSE	11
2022-09-12	15:24:37	0.158079	365.754	FALSE	11
2022-09-12	15:24:37	0.106781	365.86	FALSE	11
2022-09-12	15:24:38	0.121234	365.982	FALSE	11
2022-09-12	15:24:38	0.139351	366.121	FALSE	11
2022-09-12	15:24:38	0.272328	366.393	FALSE	11
2022-09-12	15:24:38	0.167596	366.561	FALSE	11
2022-09-12	15:24:39	0.32215	366.883	FALSE	11
2022-09-12	15:24:39	0.114059	366.997	FALSE	11
2022-09-12	15:24:39	0.361998	367.359	FALSE	11
2022-09-12	15:24:39	0.12958	367.489	FALSE	11
2022-09-12	15:24:40	0.334517	367.823	FALSE	11
2022-09-12	15:24:40	0.0172649	367.84	FALSE	11
2022-09-12	15:24:40	0.334313	368.175	FALSE	11
2022-09-12	15:24:40	0.130089	368.305	FALSE	11
2022-09-12	15:24:41	0.195127	368.5	FALSE	11
2022-09-12	15:24:41	-0.16472	368.5	FALSE	11
2022-09-12	15:24:41	-0.345025	368.5	FALSE	11
2022-09-12	15:24:42	-0.128944	368.5	FALSE	11
2022-09-12	15:24:42	-0.211539	368.5	FALSE	11
2022-09-12	15:24:42	0.0449493	368.545	FALSE	11
2022-09-12	15:24:42	-0.0361193	368.545	FALSE	11
2022-09-12	15:24:43	0.225713	368.771	FALSE	11
2022-09-12	15:24:43	0.117723	368.888	FALSE	11
2022-09-12	15:24:43	0.342201	369.231	FALSE	11
2022-09-12	15:24:43	0.16154	369.392	FALSE	11
2022-09-12	15:24:44	0.319148	369.711	FALSE	11
2022-09-12	15:24:44	-0.270369	369.711	FALSE	11
2022-09-12	15:24:44	-0.504821	369.711	FALSE	11
2022-09-12	15:24:45	-0.700801	369.711	FALSE	11
2022-09-12	15:24:45	-0.88421	369.711	FALSE	11
2022-09-12	15:24:45	-0.74472	369.711	FALSE	11
2022-09-12	15:24:45	-0.853727	369.711	FALSE	11
2022-09-12	15:24:46	-0.897798	369.711	FALSE	11
2022-09-12	15:24:46	-0.948231	369.711	FALSE	11
2022-09-12	15:24:46	-1.05948	369.711	FALSE	11
2022-09-12	15:24:46	-0.882277	369.711	FALSE	11
2022-09-12	15:24:47	-0.897136	369.711	FALSE	11
2022-09-12	15:24:47	-0.7665	369.711	FALSE	11
2022-09-12	15:24:47	-0.272099	369.711	FALSE	11
2022-09-12	15:24:47	0.228206	369.939	FALSE	11
2022-09-12	15:24:48	0.403117	370.343	FALSE	11
2022-09-12	15:24:48	0.415229	370.758	FALSE	11
2022-09-12	15:24:48	0.492227	371.25	FALSE	11
2022-09-12	15:24:49	0.682761	371.933	FALSE	11
2022-09-12	15:24:49	0.773652	372.706	FALSE	11
2022-09-12	15:24:49	0.603321	373.31	FALSE	11
2022-09-12	15:24:49	0.589784	373.9	FALSE	11
2022-09-12	15:24:50	0.469784	374.369	FALSE	11
2022-09-12	15:24:50	0.755585	375.125	FALSE	11
2022-09-12	15:24:50	0.403524	375.528	FALSE	11
2022-09-12	15:24:50	0.232176	375.761	FALSE	11
2022-09-12	15:24:51	0.0512089	375.812	FALSE	11
2022-09-12	15:24:51	0.0380282	375.85	FALSE	11
2022-09-12	15:24:51	0.0693259	375.919	FALSE	11
2022-09-12	15:24:51	0.052583	375.972	FALSE	11
2022-09-12	15:24:52	0.196552	376.168	FALSE	11
2022-09-12	15:24:52	0.0623031	376.231	FALSE	11
2022-09-12	15:24:52	0.0554837	376.286	FALSE	11
2022-09-12	15:24:53	-0.0229387	376.286	FALSE	11
2022-09-12	15:24:53	0.00326998	376.289	FALSE	11
2022-09-12	15:24:53	0.0122267	376.302	FALSE	11
2022-09-12	15:24:53	0.0161961	376.318	FALSE	11
2022-09-12	15:24:54	-0.00385471	376.318	FALSE	11
2022-09-12	15:24:54	0.0503946	376.368	FALSE	11
2022-09-12	15:24:54	0.301387	376.67	FALSE	11
2022-09-12	15:24:54	0.325814	376.995	FALSE	11
2022-09-12	15:24:55	0.318741	377.314	FALSE	11
2022-09-12	15:24:55	0.187901	377.502	FALSE	11
2022-09-12	15:24:55	0.194466	377.697	FALSE	11
2022-09-12	15:24:55	0.329224	378.026	FALSE	11
2022-09-12	15:24:56	0.174364	378.2	FALSE	11
2022-09-12	15:24:56	0.290191	378.49	FALSE	11
2022-09-12	15:24:56	0.264542	378.755	FALSE	11
2022-09-12	15:24:57	0.243168	378.998	FALSE	11
2022-09-12	15:24:57	0.358181	379.356	FALSE	11
2022-09-12	15:24:57	0.162761	379.519	FALSE	11
2022-09-12	15:24:57	0.311005	379.83	FALSE	11
2022-09-12	15:24:58	0.288003	380.118	FALSE	11
2022-09-12	15:24:58	0.203372	380.321	FALSE	11
2022-09-12	15:24:58	0.313499	380.635	FALSE	11
2022-09-12	15:24:58	0.413957	381.049	FALSE	11
2022-09-12	15:24:59	0.100573	381.149	FALSE	11
2022-09-12	15:24:59	0.289886	381.439	FALSE	11
2022-09-12	15:24:59	0.247952	381.687	FALSE	11
2022-09-12	15:24:59	0.188105	381.875	FALSE	11
2022-09-12	15:25:00	0.489835	382.365	FALSE	11
2022-09-12	15:25:00	0.339555	382.705	FALSE	11
2022-09-12	15:25:00	0.332125	383.037	FALSE	11
2022-09-12	15:25:01	0.329987	383.367	FALSE	11
2022-09-12	15:25:01	0.410344	383.777	FALSE	11
2022-09-12	15:25:01	0.455076	384.232	FALSE	11
2022-09-12	15:25:01	0.490242	384.722	FALSE	11
2022-09-12	15:25:02	0.4736	385.196	FALSE	11
2022-09-12	15:25:02	1.42739	386.623	FALSE	11
2022-09-12	15:25:02	1.72408	388.348	FALSE	11
2022-09-12	15:25:02	1.1306	389.478	FALSE	11
2022-09-12	15:25:03	1.35528	390.833	FALSE	11
2022-09-12	15:25:03	0.798486	391.632	FALSE	11
2022-09-12	15:25:03	0.909275	392.541	FALSE	11
2022-09-12	15:25:04	1.57396	394.115	FALSE	11
2022-09-12	15:25:04	0.784237	394.899	FALSE	11
2022-09-12	15:25:04	1.68475	396.584	FALSE	11
2022-09-12	15:25:04	1.87899	398.463	FALSE	11
2022-09-12	15:25:05	2.03752	400.501	FALSE	11
2022-09-12	15:25:05	1.6764	402.177	FALSE	11
2022-09-12	15:25:05	1.18597	403.363	FALSE	11
2022-09-12	15:25:05	0.409631	403.773	FALSE	11
2022-09-12	15:25:06	0.475534	404.248	FALSE	11
2022-09-12	15:25:06	0.446171	404.694	FALSE	11
2022-09-12	15:25:06	0.49299	405.187	FALSE	11
2022-09-12	15:25:06	1.07528	406.263	FALSE	11
2022-09-12	15:25:07	1.4162	407.679	FALSE	11
2022-09-12	15:25:07	1.06062	408.739	FALSE	11
2022-09-12	15:25:07	0.600471	409.34	FALSE	11
2022-09-12	15:25:08	0.69243	410.032	FALSE	11
2022-09-12	15:25:08	0.402659	410.435	FALSE	11
2022-09-12	15:25:08	0.382405	410.817	FALSE	11
2022-09-12	15:25:08	0.520216	411.338	FALSE	11
2022-09-12	15:25:09	0.282456	411.62	FALSE	11
2022-09-12	15:25:09	0.45126	412.071	FALSE	11
2022-09-12	15:25:09	0.28556	412.357	FALSE	11
2022-09-12	15:25:09	0.374415	412.731	FALSE	11
2022-09-12	15:25:10	0.391209	413.123	FALSE	11
2022-09-12	15:25:10	0.351768	413.474	FALSE	11
2022-09-12	15:25:10	0.397926	413.872	FALSE	11
2022-09-12	15:25:10	0.475229	414.347	FALSE	11
2022-09-12	15:25:11	0.827697	415.175	FALSE	11
2022-09-12	15:25:11	0.39813	415.573	FALSE	11
2022-09-12	15:25:11	0.821183	416.394	FALSE	11
2022-09-12	15:25:12	0.31126	416.706	FALSE	11
2022-09-12	15:25:12	0.52785	417.234	FALSE	11
2022-09-12	15:25:12	0.238944	417.473	FALSE	11
2022-09-12	15:25:12	0.501132	417.974	FALSE	11
2022-09-12	15:25:13	0.268054	418.242	FALSE	11
2022-09-12	15:25:13	0.514669	418.756	FALSE	11
2022-09-12	15:25:13	0.478333	419.235	FALSE	11
2022-09-12	15:25:13	0.442456	419.677	FALSE	11
2022-09-12	15:25:14	0.388155	420.065	FALSE	11
2022-09-12	15:25:14	0.449733	420.515	FALSE	11
2022-09-12	15:25:14	0.361285	420.876	FALSE	11
2022-09-12	15:25:14	0.513092	421.389	FALSE	11
2022-09-12	15:25:15	0.291921	421.681	FALSE	11
2022-09-12	15:25:15	0.390293	422.072	FALSE	11
2022-09-12	15:25:15	0.262303	422.334	FALSE	11
2022-09-12	15:25:16	0.360064	422.694	FALSE	11
2022-09-12	15:25:16	0.26042	422.954	FALSE	11
2022-09-12	15:25:16	0.477824	423.432	FALSE	11
2022-09-12	15:25:16	0.240623	423.673	FALSE	11
2022-09-12	15:25:17	0.463066	424.136	FALSE	11
2022-09-12	15:25:17	0.243677	424.38	FALSE	11
2022-09-12	15:25:17	0.417468	424.797	FALSE	11
2022-09-12	15:25:17	0.252481	425.05	FALSE	11
2022-09-12	15:25:18	0.364135	425.414	FALSE	11
2022-09-12	15:25:18	0.27528	425.689	FALSE	11
2022-09-12	15:25:18	0.408461	426.097	FALSE	11
2022-09-12	15:25:19	0.277825	426.375	FALSE	11
2022-09-12	15:25:19	0.227392	426.603	FALSE	11
2022-09-12	15:25:19	0.0397585	426.642	FALSE	11
2022-09-12	15:25:19	-0.0776969	426.642	FALSE	11
2022-09-12	15:25:20	0.233702	426.876	FALSE	11
2022-09-12	15:25:20	0.307036	427.183	FALSE	11
2022-09-12	15:25:20	0.452685	427.636	FALSE	11
2022-09-12	15:25:20	0.870496	428.506	FALSE	11
2022-09-12	15:25:21	0.662557	429.169	FALSE	11
2022-09-12	15:25:21	0.371412	429.54	FALSE	11
2022-09-12	15:25:21	0.471158	430.011	FALSE	11
2022-09-12	15:25:21	0.488461	430.5	FALSE	11
2022-09-12	15:25:22	0.392074	430.892	FALSE	11
2022-09-12	15:25:22	0.424033	431.316	FALSE	11
2022-09-12	15:25:22	0.366018	431.682	FALSE	11
2022-09-12	15:25:23	0.465865	432.148	FALSE	11
2022-09-12	15:25:23	0.422099	432.57	FALSE	11
2022-09-12	15:25:23	0.433448	433.003	FALSE	11
2022-09-12	15:25:23	0.429071	433.433	FALSE	11
2022-09-12	15:25:24	0.491769	433.924	FALSE	11
2022-09-12	15:25:24	0.442303	434.367	FALSE	11
2022-09-12	15:25:24	0.419555	434.786	FALSE	11
2022-09-12	15:25:24	0.462608	435.249	FALSE	11
2022-09-12	15:25:25	0.443168	435.692	FALSE	11
2022-09-12	15:25:25	0.453041	436.145	FALSE	11
2022-09-12	15:25:25	0.461438	436.606	FALSE	11
2022-09-12	15:25:25	0.453295	437.06	FALSE	11
2022-09-12	15:25:26	0.457112	437.517	FALSE	11
2022-09-12	15:25:26	0.443728	437.961	FALSE	11
2022-09-12	15:25:26	0.448715	438.409	FALSE	11
2022-09-12	15:25:27	0.453397	438.863	FALSE	11
2022-09-12	15:25:27	0.451361	439.314	FALSE	11
2022-09-12	15:25:27	0.446221	439.76	FALSE	11
2022-09-12	15:25:27	0.443728	440.204	FALSE	11
2022-09-12	15:25:28	0.449835	440.654	FALSE	11
2022-09-12	15:25:28	0.458435	441.112	FALSE	11
2022-09-12	15:25:28	0.462456	441.575	FALSE	11
2022-09-12	15:25:28	0.450445	442.025	FALSE	11
2022-09-12	15:25:29	0.450089	442.475	FALSE	11
2022-09-12	15:25:29	0.4507	442.926	FALSE	11
2022-09-12	15:25:29	0.44042	443.366	FALSE	11
2022-09-12	15:25:29	0.428512	443.795	FALSE	11
2022-09-12	15:25:30	0.589478	444.384	FALSE	11
2022-09-12	15:25:30	0.478181	444.863	FALSE	11
2022-09-12	15:25:30	0.000369216	444.863	FALSE	11
2022-09-12	15:25:31	-0.490572	444.863	FALSE	11
2022-09-12	15:25:31	-0.824719	444.863	FALSE	11
2022-09-12	15:25:31	-1.0092	444.863	FALSE	11
2022-09-12	15:25:31	-1.02833	444.863	FALSE	11
2022-09-12	15:25:32	-1.01831	444.863	FALSE	11
2022-09-12	15:25:32	-1.02396	444.863	FALSE	11
2022-09-12	15:25:32	-1.07322	444.863	FALSE	11
2022-09-12	15:25:32	-1.03953	444.863	FALSE	11
2022-09-12	15:25:33	-1.01729	444.863	FALSE	11
2022-09-12	15:25:33	-0.999529	444.863	FALSE	11
2022-09-12	15:25:33	-0.951233	444.863	FALSE	11
2022-09-12	15:25:33	-0.895508	444.863	FALSE	11
2022-09-12	15:25:34	-0.822073	444.863	FALSE	11
2022-09-12	15:25:34	-0.760495	444.863	FALSE	11
2022-09-12	15:25:34	-0.86019	444.863	FALSE	11
2022-09-12	15:25:35	-0.829503	444.863	FALSE	11
2022-09-12	15:25:35	-0.784618	444.863	FALSE	11
2022-09-12	15:25:35	-0.713829	444.863	FALSE	11
2022-09-12	15:25:35	-0.600394	444.863	FALSE	11
2022-09-12	15:25:36	0.0101911	444.873	FALSE	11
2022-09-12	15:25:36	0.759605	445.633	FALSE	11
2022-09-12	15:25:36	0.998689	446.631	FALSE	11
2022-09-12	15:25:36	-0.0314374	446.631	FALSE	11
2022-09-12	15:25:37	-0.0118445	446.631	FALSE	11
2022-09-12	15:25:37	1.19274	447.824	FALSE	11
2022-09-12	15:25:37	4.5025	452.327	1	12
2022-09-12	15:25:38	4.06072	456.387	1	13
2022-09-12	15:25:38	5.63919	462.027	1	14
2022-09-12	15:25:38	6.98871	469.015	1	15
2022-09-12	15:25:38	6.7568	475.772	1	16
2022-09-12	15:25:39	5.53553	481.308	1	17
2022-09-12	15:25:39	2.41029	483.718	FALSE	17
2022-09-12	15:25:39	1.28714	485.005	FALSE	17
2022-09-12	15:25:39	0.687697	485.693	FALSE	17
2022-09-12	15:25:40	0.767493	486.46	FALSE	17
2022-09-12	15:25:40	0.28271	486.743	FALSE	17
2022-09-12	15:25:40	0.198333	486.941	FALSE	17
2022-09-12	15:25:40	0.166018	487.107	FALSE	17
2022-09-12	15:25:41	0.17986	487.287	FALSE	17
2022-09-12	15:25:41	0.253041	487.54	FALSE	17
2022-09-12	15:25:41	0.28271	487.823	FALSE	17
2022-09-12	15:25:42	0.263524	488.086	FALSE	17
2022-09-12	15:25:42	0.341692	488.428	FALSE	17
2022-09-12	15:25:42	0.437468	488.866	FALSE	17
2022-09-12	15:25:42	0.370852	489.236	FALSE	17
2022-09-12	15:25:43	0.410751	489.647	FALSE	17
2022-09-12	15:25:43	0.435484	490.083	FALSE	17
2022-09-12	15:25:43	0.415331	490.498	FALSE	17
2022-09-12	15:25:43	0.413448	490.911	FALSE	17
2022-09-12	15:25:44	0.38958	491.301	FALSE	17
2022-09-12	15:25:44	0.396705	491.698	FALSE	17
2022-09-12	15:25:44	0.401743	492.099	FALSE	17
2022-09-12	15:25:44	0.411972	492.511	FALSE	17
2022-09-12	15:25:45	0.401845	492.913	FALSE	17
2022-09-12	15:25:45	0.416298	493.33	FALSE	17
2022-09-12	15:25:45	0.417061	493.747	FALSE	17
2022-09-12	15:25:46	0.413651	494.16	FALSE	17
2022-09-12	15:25:46	0.411769	494.572	FALSE	17
2022-09-12	15:25:46	0.405356	494.977	FALSE	17
2022-09-12	15:25:46	0.409224	495.387	FALSE	17
2022-09-12	15:25:47	0.409835	495.796	FALSE	17
2022-09-12	15:25:47	0.409478	496.206	FALSE	17
2022-09-12	15:25:47	0.409631	496.616	FALSE	17
2022-09-12	15:25:47	0.406679	497.022	FALSE	17
2022-09-12	15:25:48	0.395585	497.418	FALSE	17
2022-09-12	15:25:48	0.408308	497.826	FALSE	17
2022-09-12	15:25:48	0.41243	498.239	FALSE	17
2022-09-12	15:25:48	0.406374	498.645	FALSE	17
2022-09-12	15:25:49	0.419962	499.065	FALSE	17
2022-09-12	15:25:49	0.417926	499.483	FALSE	17
2022-09-12	15:25:49	0.408359	499.891	FALSE	17
2022-09-12	15:25:50	0.409275	500.3	FALSE	17
2022-09-12	15:25:50	0.417672	500.718	FALSE	17
2022-09-12	15:25:50	0.412939	501.131	FALSE	17
2022-09-12	15:25:50	0.402557	501.534	FALSE	17
2022-09-12	15:25:51	0.418842	501.952	FALSE	17
2022-09-12	15:25:51	0.422557	502.375	FALSE	17
2022-09-12	15:25:51	0.420624	502.796	FALSE	17
2022-09-12	15:25:51	0.412328	503.208	FALSE	17
2022-09-12	15:25:52	0.412227	503.62	FALSE	17
2022-09-12	15:25:52	0.411972	504.032	FALSE	17
2022-09-12	15:25:52	0.421692	504.454	FALSE	17
2022-09-12	15:25:52	0.41869	504.873	FALSE	17
2022-09-12	15:25:53	0.448053	505.321	FALSE	17
2022-09-12	15:25:53	0.573702	505.894	FALSE	17
2022-09-12	15:25:53	0.739911	506.634	FALSE	17
2022-09-12	15:25:54	0.50902	507.143	FALSE	17
2022-09-12	15:25:54	0.557519	507.701	FALSE	17
2022-09-12	15:25:54	0.496807	508.198	FALSE	17
2022-09-12	15:25:54	0.18958	508.387	FALSE	17
2022-09-12	15:25:55	0.255433	508.643	FALSE	17
2022-09-12	15:25:55	0.244746	508.887	FALSE	17
2022-09-12	15:25:55	0.264796	509.152	FALSE	17
2022-09-12	15:25:55	0.760725	509.913	FALSE	17
2022-09-12	15:25:56	0.32327	510.236	FALSE	17
2022-09-12	15:25:56	0.368155	510.604	FALSE	17
2022-09-12	15:25:56	0.524491	511.129	FALSE	17
2022-09-12	15:25:57	1.14413	512.273	FALSE	17
2022-09-12	15:25:57	0.432583	512.705	FALSE	17
2022-09-12	15:25:57	0.555178	513.261	FALSE	17
2022-09-12	15:25:57	0.491463	513.752	FALSE	17
2022-09-12	15:25:58	0.295331	514.047	FALSE	17
2022-09-12	15:25:58	0.177875	514.225	FALSE	17
2022-09-12	15:25:58	0.153448	514.379	FALSE	17
2022-09-12	15:25:58	0.240827	514.62	FALSE	17
2022-09-12	15:25:59	0.20444	514.824	FALSE	17
2022-09-12	15:25:59	0.226781	515.051	FALSE	17
2022-09-12	15:25:59	0.44897	515.5	FALSE	17
2022-09-12	15:25:59	0.479657	515.979	FALSE	17
2022-09-12	15:26:00	0.470293	516.45	FALSE	17
2022-09-12	15:26:00	0.496298	516.946	FALSE	17
2022-09-12	15:26:00	0.393397	517.339	FALSE	17
2022-09-12	15:26:01	0.511819	517.851	FALSE	17
2022-09-12	15:26:01	0.413193	518.264	FALSE	17
2022-09-12	15:26:01	0.554618	518.819	FALSE	17
2022-09-12	15:26:01	0.380776	519.2	FALSE	17
2022-09-12	15:26:02	0.353346	519.553	FALSE	17
2022-09-12	15:26:02	0.341387	519.895	FALSE	17
2022-09-12	15:26:02	0.295382	520.19	FALSE	17
2022-09-12	15:26:02	0.151209	520.341	FALSE	17
2022-09-12	15:26:03	0.221285	520.562	FALSE	17
2022-09-12	15:26:03	0.0550257	520.617	FALSE	17
2022-09-12	15:26:03	0.110547	520.728	FALSE	17
2022-09-12	15:26:03	0.174364	520.902	FALSE	17
2022-09-12	15:26:04	0.239504	521.142	FALSE	17
2022-09-12	15:26:04	0.184746	521.327	FALSE	17
2022-09-12	15:26:04	0.410344	521.737	FALSE	17
2022-09-12	15:26:05	0.395433	522.132	FALSE	17
2022-09-12	15:26:05	0.52785	522.66	FALSE	17
2022-09-12	15:26:05	0.413499	523.074	FALSE	17
2022-09-12	15:26:05	0.484389	523.558	FALSE	17
2022-09-12	15:26:06	0.429631	523.988	FALSE	17
2022-09-12	15:26:06	0.498181	524.486	FALSE	17
2022-09-12	15:26:06	0.472074	524.958	FALSE	17
2022-09-12	15:26:06	0.477367	525.435	FALSE	17
2022-09-12	15:26:07	0.467494	525.903	FALSE	17
2022-09-12	15:26:07	0.479758	526.383	FALSE	17
2022-09-12	15:26:07	0.480725	526.863	FALSE	17
2022-09-12	15:26:07	0.484593	527.348	FALSE	17
2022-09-12	15:26:08	0.483728	527.832	FALSE	17
2022-09-12	15:26:08	0.481692	528.313	FALSE	17
2022-09-12	15:26:08	0.476756	528.79	FALSE	17
2022-09-12	15:26:09	0.476756	529.267	FALSE	17
2022-09-12	15:26:09	0.46841	529.735	FALSE	17
2022-09-12	15:26:09	0.470089	530.205	FALSE	17
2022-09-12	15:26:09	0.497163	530.703	FALSE	17
2022-09-12	15:26:10	0.479657	531.182	FALSE	17
2022-09-12	15:26:10	0.495585	531.678	FALSE	17
2022-09-12	15:26:10	0.63131	532.309	FALSE	17
2022-09-12	15:26:10	0.25187	532.561	FALSE	17
2022-09-12	15:26:11	0.160369	532.721	FALSE	17
2022-09-12	15:26:11	0.492328	533.214	FALSE	17
2022-09-12	15:26:11	0.528359	533.742	FALSE	17
2022-09-12	15:26:11	0.76897	534.511	FALSE	17
2022-09-12	15:26:12	1.17767	535.689	FALSE	17
2022-09-12	15:26:12	1.25849	536.947	FALSE	17
2022-09-12	15:26:12	0.805458	537.753	FALSE	17
2022-09-12	15:26:13	0.841896	538.595	FALSE	17
2022-09-12	15:26:13	1.58943	540.184	FALSE	17
2022-09-12	15:26:13	2.0533	542.237	FALSE	17
2022-09-12	15:26:14	4.10769	546.345	1	18
2022-09-12	15:26:14	7.93233	554.277	1	19
2022-09-12	15:26:14	5.97579	560.253	1	20
2022-09-12	15:26:14	4.2938	564.547	1	21
2022-09-12	15:26:14	1.06856	565.615	FALSE	21
2022-09-12	15:26:15	0.515941	566.131	FALSE	21
2022-09-12	15:26:15	0.262252	566.394	FALSE	21
2022-09-12	15:26:15	0.277061	566.671	FALSE	21
2022-09-12	15:26:16	0.214008	566.885	FALSE	21
2022-09-12	15:26:16	0.35472	567.239	FALSE	21
2022-09-12	15:26:16	0.308257	567.548	FALSE	21
2022-09-12	15:26:16	0.0689188	567.617	FALSE	21
2022-09-12	15:26:17	0.0453565	567.662	FALSE	21
2022-09-12	15:26:17	0.0593005	567.721	FALSE	21
2022-09-12	15:26:17	-0.121565	567.721	FALSE	21
2022-09-12	15:26:17	-0.111794	567.721	FALSE	21
2022-09-12	15:26:18	0.330852	568.052	FALSE	21
2022-09-12	15:26:18	0.203372	568.255	FALSE	21
2022-09-12	15:26:18	0.23528	568.491	FALSE	21
2022-09-12	15:26:18	0.510293	569.001	FALSE	21
2022-09-12	15:26:19	0.241489	569.243	FALSE	21
2022-09-12	15:26:19	0.319606	569.562	FALSE	21
2022-09-12	15:26:19	0.662557	570.225	FALSE	21
2022-09-12	15:26:20	1.15212	571.377	FALSE	21
2022-09-12	15:26:20	1.75233	573.129	FALSE	21
2022-09-12	15:26:20	1.63884	574.768	FALSE	21
2022-09-12	15:26:20	0.765916	575.534	FALSE	21
2022-09-12	15:26:21	0.545407	576.079	FALSE	21
2022-09-12	15:26:21	0.492074	576.571	FALSE	21
2022-09-12	15:26:21	0.451616	577.023	FALSE	21
2022-09-12	15:26:21	0.459249	577.482	FALSE	21
2022-09-12	15:26:22	0.452023	577.934	FALSE	21
2022-09-12	15:26:22	0.468003	578.402	FALSE	21
2022-09-12	15:26:22	0.446832	578.849	FALSE	21
2022-09-12	15:26:22	0.434771	579.284	FALSE	21
2022-09-12	15:26:23	0.647392	579.931	FALSE	21
2022-09-12	15:26:23	0.790344	580.722	FALSE	21
2022-09-12	15:26:23	0.516552	581.238	FALSE	21
2022-09-12	15:26:24	1.40963	582.648	FALSE	21
2022-09-12	15:26:24	2.54871	585.196	FALSE	21
2022-09-12	15:26:24	1.67121	586.868	FALSE	21
2022-09-12	15:26:24	0.983982	587.852	FALSE	21
2022-09-12	15:26:25	0.682811	588.534	FALSE	21
2022-09-12	15:26:25	0.716094	589.251	FALSE	21
2022-09-12	15:26:25	0.51584	589.766	FALSE	21
2022-09-12	15:26:25	0.307596	590.074	FALSE	21
2022-09-12	15:26:26	0.660115	590.734	FALSE	21
2022-09-12	15:26:26	0.547596	591.282	FALSE	21
2022-09-12	15:26:26	0.645763	591.927	FALSE	21
2022-09-12	15:26:26	1.13273	593.06	FALSE	21
2022-09-12	15:26:27	1.17462	594.235	FALSE	21
2022-09-12	15:26:27	1.92907	596.164	FALSE	21
2022-09-12	15:26:27	3.11365	599.278	1	22
2022-09-12	15:26:28	2.35742	601.635	FALSE	22
2022-09-12	15:26:28	1.60357	603.239	FALSE	22
2022-09-12	15:26:28	1.06485	604.303	FALSE	22
2022-09-12	15:26:28	1.20256	605.506	FALSE	22
2022-09-12	15:26:29	0.64673	606.153	FALSE	22
2022-09-12	15:26:29	1.01472	607.167	FALSE	22
2022-09-12	15:26:29	0.751361	607.919	FALSE	22
2022-09-12	15:26:29	0.747697	608.666	FALSE	22
2022-09-12	15:26:30	0.697875	609.364	FALSE	22
2022-09-12	15:26:30	1.13879	610.503	FALSE	22
2022-09-12	15:26:30	1.7309	612.234	FALSE	22
2022-09-12	15:26:30	0.869835	613.104	FALSE	22
2022-09-12	15:26:31	1.06378	614.168	FALSE	22
2022-09-12	15:26:31	0.979758	615.147	FALSE	22
2022-09-12	15:26:31	0.721845	615.869	FALSE	22
2022-09-12	15:26:32	0.707239	616.576	FALSE	22
2022-09-12	15:26:32	0.480623	617.057	FALSE	22
2022-09-12	15:26:32	0.389173	617.446	FALSE	22
2022-09-12	15:26:32	0.337316	617.784	FALSE	22
2022-09-12	15:26:33	0.185255	617.969	FALSE	22
2022-09-12	15:26:33	0.35355	618.322	FALSE	22
2022-09-12	15:26:33	1.42378	619.746	FALSE	22
2022-09-12	15:26:33	5.52561	625.272	1	23

## Sheet: Ranger_star_2022912152113
					**GoPro Fitting: 1510
2022-09-12	15:21:14	0.385611
2022-09-12	15:21:14	0.370852
2022-09-12	15:21:14	0.395992
2022-09-12	15:21:14	0.385713
2022-09-12	15:21:15	0.388919
2022-09-12	15:21:15	0.392379
2022-09-12	15:21:15	0.388155
2022-09-12	15:21:15	0.398741
2022-09-12	15:21:16	0.341845
2022-09-12	15:21:16	0.374415
2022-09-12	15:21:16	0.407087
2022-09-12	15:21:17	0.349987
2022-09-12	15:21:17	0.43355
2022-09-12	15:21:17	0.391209
2022-09-12	15:21:17	0.449936
2022-09-12	15:21:18	0.364797
2022-09-12	15:21:18	0.395738
2022-09-12	15:21:18	0.28958
2022-09-12	15:21:18	0.397214
2022-09-12	15:21:19	0.367138
2022-09-12	15:21:19	0.344949
2022-09-12	15:21:19	0.374568
2022-09-12	15:21:19	0.323575
2022-09-12	15:21:20	0.408664
2022-09-12	15:21:20	0.390445
2022-09-12	15:21:20	0.523473
2022-09-12	15:21:21	0.19757
2022-09-12	15:21:21	0.326323
2022-09-12	15:21:21	0.292786
2022-09-12	15:21:21	0.486679
2022-09-12	15:21:22	0.55869
2022-09-12	15:21:22	1.09106
2022-09-12	15:21:22	1.56098
2022-09-12	15:21:22	2.76876
2022-09-12	15:21:23	1.10953
2022-09-12	15:21:23	0.462863
2022-09-12	15:21:23	0.773193
2022-09-12	15:21:24	1.28551
2022-09-12	15:21:24	0.409835
2022-09-12	15:21:24	0.278079
2022-09-12	15:21:24	0.205814
2022-09-12	15:21:25	0.265356
2022-09-12	15:21:25	-0.00171733
2022-09-12	15:21:25	-0.147468
2022-09-12	15:21:25	-0.366653
2022-09-12	15:21:26	-0.385076
2022-09-12	15:21:26	-0.176832
2022-09-12	15:21:26	-0.0874679
2022-09-12	15:21:26	-0.133015
2022-09-12	15:21:27	-0.136221
2022-09-12	15:21:27	-0.0524552
2022-09-12	15:21:27	-0.0204959
2022-09-12	15:21:28	-0.0936257
2022-09-12	15:21:28	0.134262
2022-09-12	15:21:28	0.057672
2022-09-12	15:21:28	0.0931427
2022-09-12	15:21:29	0.0220485
2022-09-12	15:21:29	-0.0241092
2022-09-12	15:21:29	0.179097
2022-09-12	15:21:29	-0.0766282
2022-09-12	15:21:30	0.291819
2022-09-12	15:21:30	0.0187916
2022-09-12	15:21:30	0.197265
2022-09-12	15:21:30	0.00637431
2022-09-12	15:21:31	0.022303
2022-09-12	15:21:31	-0.0150506
2022-09-12	15:21:31	0.0336516
2022-09-12	15:21:32	0.00637431
2022-09-12	15:21:32	0.239097
2022-09-12	15:21:32	0.133143
2022-09-12	15:21:32	0.0508018
2022-09-12	15:21:33	0.121082
2022-09-12	15:21:33	-0.14874
2022-09-12	15:21:33	0.059962
2022-09-12	15:21:33	0.88444
2022-09-12	15:21:34	-0.0622262
2022-09-12	15:21:34	0.165255
2022-09-12	15:21:34	0.216451
2022-09-12	15:21:34	0.167036
2022-09-12	15:21:35	0.635585
2022-09-12	15:21:35	3.0051
2022-09-12	15:21:35	2.80449
2022-09-12	15:21:36	3.12724
2022-09-12	15:21:36	1.78973
2022-09-12	15:21:36	1.22296
2022-09-12	15:21:36	0.625051
2022-09-12	15:21:37	1.80948
2022-09-12	15:21:37	0.218486
2022-09-12	15:21:37	0.169733
2022-09-12	15:21:37	0.306679
2022-09-12	15:21:38	1.71345
2022-09-12	15:21:38	3.37441
2022-09-12	15:21:38	3.89879
2022-09-12	15:21:38	4.41619
2022-09-12	15:21:39	1.21289
2022-09-12	15:21:39	0.546832
2022-09-12	15:21:39	0.401794
2022-09-12	15:21:40	0.65813
2022-09-12	15:21:40	0.288461
2022-09-12	15:21:40	0.496043
2022-09-12	15:21:40	0.373601
2022-09-12	15:21:41	-0.020445
2022-09-12	15:21:41	-0.121208
2022-09-12	15:21:41	0.311107
2022-09-12	15:21:41	0.16042
2022-09-12	15:21:42	0.565356
2022-09-12	15:21:42	0.336043
2022-09-12	15:21:42	1.22149
2022-09-12	15:21:43	1.04373
2022-09-12	15:21:43	2.18108
2022-09-12	15:21:43	1.56561
2022-09-12	15:21:43	1.66744
2022-09-12	15:21:44	0.596908
2022-09-12	15:21:44	0.461692
2022-09-12	15:21:44	0.326374
2022-09-12	15:21:44	0.132837
2022-09-12	15:21:45	-0.0996307
2022-09-12	15:21:45	-0.354389
2022-09-12	15:21:45	-0.446501
2022-09-12	15:21:45	-0.566043
2022-09-12	15:21:46	-0.48818
2022-09-12	15:21:46	-0.547671
2022-09-12	15:21:46	-0.60701
2022-09-12	15:21:47	-0.572048
2022-09-12	15:21:47	-0.378765
2022-09-12	15:21:47	0.129377
2022-09-12	15:21:47	0.259809
2022-09-12	15:21:48	0.59243
2022-09-12	15:21:48	1.02383
2022-09-12	15:21:48	1.25447
2022-09-12	15:21:48	0.828409
2022-09-12	15:21:49	1.03701
2022-09-12	15:21:49	0.689682
2022-09-12	15:21:49	0.424084
2022-09-12	15:21:49	0.768562
2022-09-12	15:21:50	0.154771
2022-09-12	15:21:50	0.422201
2022-09-12	15:21:50	0.473041
2022-09-12	15:21:51	0.407799
2022-09-12	15:21:51	0.501488
2022-09-12	15:21:51	0.269987
2022-09-12	15:21:51	0.531311
2022-09-12	15:21:52	0.499809
2022-09-12	15:21:52	0.352481
2022-09-12	15:21:52	0.0294277
2022-09-12	15:21:52	0.549326
2022-09-12	15:21:53	0.11813
2022-09-12	15:21:53	0.402659
2022-09-12	15:21:53	0.215076
2022-09-12	15:21:53	0.396552
2022-09-12	15:21:54	0.832735
2022-09-12	15:21:54	0.865305
2022-09-12	15:21:54	0.745865
2022-09-12	15:21:55	0.428003
2022-09-12	15:21:55	0.571921
2022-09-12	15:21:55	0.195687
2022-09-12	15:21:55	0.311819
2022-09-12	15:21:56	0.112227
2022-09-12	15:21:56	1.12902
2022-09-12	15:21:56	0.783473
2022-09-12	15:21:56	1.71996
2022-09-12	15:21:57	1.0681
2022-09-12	15:21:57	1.10307
2022-09-12	15:21:57	1.42627
2022-09-12	15:21:57	0.618079
2022-09-12	15:21:58	1.18994
2022-09-12	15:21:58	0.604644
2022-09-12	15:21:58	1.2621
2022-09-12	15:21:59	0.403219
2022-09-12	15:21:59	0.346272
2022-09-12	15:21:59	0.912684
2022-09-12	15:21:59	0.212125
2022-09-12	15:22:00	0.697061
2022-09-12	15:22:00	0.347952
2022-09-12	15:22:00	0.464949
2022-09-12	15:22:00	0.423372
2022-09-12	15:22:01	0.331972
2022-09-12	15:22:01	0.808766
2022-09-12	15:22:01	1.35416
2022-09-12	15:22:02	1.52118
2022-09-12	15:22:02	0.365305
2022-09-12	15:22:02	1.08719
2022-09-12	15:22:02	0.275789
2022-09-12	15:22:03	0.310598
2022-09-12	15:22:03	0.329937
2022-09-12	15:22:03	0.0461198
2022-09-12	15:22:03	0.175127
2022-09-12	15:22:04	-0.00960535
2022-09-12	15:22:04	0.0763997
2022-09-12	15:22:04	-0.184007
2022-09-12	15:22:04	0.137621
2022-09-12	15:22:05	-0.145992
2022-09-12	15:22:05	0.123626
2022-09-12	15:22:05	-0.0935748
2022-09-12	15:22:06	0.0331427
2022-09-12	15:22:06	0.145255
2022-09-12	15:22:06	-0.0838038
2022-09-12	15:22:06	0.201387
2022-09-12	15:22:07	-0.00202267
2022-09-12	15:22:07	0.273906
2022-09-12	15:22:07	-0.0569336
2022-09-12	15:22:07	0.0413361
2022-09-12	15:22:08	-0.212811
2022-09-12	15:22:08	-0.269911
2022-09-12	15:22:08	-0.518307
2022-09-12	15:22:08	-0.296323
2022-09-12	15:22:09	-0.40131
2022-09-12	15:22:09	-0.295458
2022-09-12	15:22:09	-0.286654
2022-09-12	15:22:10	-0.221361
2022-09-12	15:22:10	-0.141768
2022-09-12	15:22:10	-0.2179
2022-09-12	15:22:10	0.119148
2022-09-12	15:22:11	-0.00497431
2022-09-12	15:22:11	0.274822
2022-09-12	15:22:11	0.0378247
2022-09-12	15:22:11	0.534364
2022-09-12	15:22:12	0.381132
2022-09-12	15:22:12	0.747595
2022-09-12	15:22:12	0.369733
2022-09-12	15:22:13	0.210853
2022-09-12	15:22:13	0.406374
2022-09-12	15:22:13	0.0445422
2022-09-12	15:22:13	0.346476
2022-09-12	15:22:14	0.106374
2022-09-12	15:22:14	0.230496
2022-09-12	15:22:14	0.0349239
2022-09-12	15:22:14	0.245509
2022-09-12	15:22:15	0.312074
2022-09-12	15:22:15	0.344746
2022-09-12	15:22:15	0.304339
2022-09-12	15:22:15	0.345407
2022-09-12	15:22:16	0.395076
2022-09-12	15:22:16	0.119453
2022-09-12	15:22:16	0.420115
2022-09-12	15:22:16	0.147087
2022-09-12	15:22:17	0.422303
2022-09-12	15:22:17	0.190903
2022-09-12	15:22:17	0.367087
2022-09-12	15:22:18	0.289937
2022-09-12	15:22:18	0.124033
2022-09-12	15:22:18	0.203422
2022-09-12	15:22:18	0.0961961
2022-09-12	15:22:19	0.436298
2022-09-12	15:22:19	0.0613361
2022-09-12	15:22:19	0.327952
2022-09-12	15:22:19	0.042303
2022-09-12	15:22:20	0.26215
2022-09-12	15:22:20	0.0585371
2022-09-12	15:22:20	0.222099
2022-09-12	15:22:21	0.0337534
2022-09-12	15:22:21	0.022303
2022-09-12	15:22:21	-0.140801
2022-09-12	15:22:21	0.0713106
2022-09-12	15:22:22	0.0436771
2022-09-12	15:22:22	0.606832
2022-09-12	15:22:22	0.645051
2022-09-12	15:22:23	0.168766
2022-09-12	15:22:23	0.203524
2022-09-12	15:22:23	0.399046
2022-09-12	15:22:23	0.972786
2022-09-12	15:22:23	0.363982
2022-09-12	15:22:24	0.577926
2022-09-12	15:22:24	0.758282
2022-09-12	15:22:24	1.24347
2022-09-12	15:22:25	0.556501
2022-09-12	15:22:25	1.35543
2022-09-12	15:22:25	1.06246
2022-09-12	15:22:25	0.399758
2022-09-12	15:22:26	0.131565
2022-09-12	15:22:26	0.238944
2022-09-12	15:22:26	0.562252
2022-09-12	15:22:26	0.0470358
2022-09-12	15:22:27	0.463677
2022-09-12	15:22:27	0.262048
2022-09-12	15:22:27	0.456247
2022-09-12	15:22:27	0.60444
2022-09-12	15:22:28	1.63966
2022-09-12	15:22:28	1.97589
2022-09-12	15:22:28	1.3736
2022-09-12	15:22:29	1.11594
2022-09-12	15:22:29	0.354313
2022-09-12	15:22:29	0.641234
2022-09-12	15:22:29	0.27925
2022-09-12	15:22:30	0.62841
2022-09-12	15:22:30	0.569021
2022-09-12	15:22:30	0.910191
2022-09-12	15:22:30	0.582048
2022-09-12	15:22:31	0.42388
2022-09-12	15:22:31	0.827494
2022-09-12	15:22:31	0.468512
2022-09-12	15:22:31	0.797519
2022-09-12	15:22:32	0.539046
2022-09-12	15:22:32	1.11655
2022-09-12	15:22:32	0.63589
2022-09-12	15:22:33	0.904593
2022-09-12	15:22:33	0.704695
2022-09-12	15:22:33	0.287545
2022-09-12	15:22:33	0.237824
2022-09-12	15:22:34	0.418486
2022-09-12	15:22:34	0.0465269
2022-09-12	15:22:34	0.345509
2022-09-12	15:22:34	0.108461
2022-09-12	15:22:35	0.380013
2022-09-12	15:22:35	0.187188
2022-09-12	15:22:35	0.367952
2022-09-12	15:22:35	0.346323
2022-09-12	15:22:36	0.276908
2022-09-12	15:22:36	0.390445
2022-09-12	15:22:36	0.168715
2022-09-12	15:22:37	0.703219
2022-09-12	15:22:37	0.0614888
2022-09-12	15:22:37	0.497417
2022-09-12	15:22:37	0.206476
2022-09-12	15:22:38	0.374568
2022-09-12	15:22:38	0.196451
2022-09-12	15:22:38	0.284847
2022-09-12	15:22:38	0.151107
2022-09-12	15:22:39	0.451768
2022-09-12	15:22:39	0.272939
2022-09-12	15:22:39	0.501438
2022-09-12	15:22:40	0.428512
2022-09-12	15:22:40	0.750344
2022-09-12	15:22:40	0.684084
2022-09-12	15:22:40	0.451158
2022-09-12	15:22:41	0.569987
2022-09-12	15:22:41	0.355077
2022-09-12	15:22:41	0.625407
2022-09-12	15:22:41	0.485458
2022-09-12	15:22:42	0.49528
2022-09-12	15:22:42	0.48098
2022-09-12	15:22:42	0.456807
2022-09-12	15:22:42	0.44154
2022-09-12	15:22:43	0.435076
2022-09-12	15:22:43	0.459249
2022-09-12	15:22:43	0.438333
2022-09-12	15:22:44	0.432685
2022-09-12	15:22:44	0.44042
2022-09-12	15:22:44	0.452481
2022-09-12	15:22:44	0.484084
2022-09-12	15:22:45	0.483779
2022-09-12	15:22:45	0.479809
2022-09-12	15:22:45	0.496145
2022-09-12	15:22:45	0.504695
2022-09-12	15:22:46	0.462303
2022-09-12	15:22:46	0.500063
2022-09-12	15:22:46	0.490394
2022-09-12	15:22:46	0.453855
2022-09-12	15:22:47	0.4307
2022-09-12	15:22:47	0.41584
2022-09-12	15:22:47	0.404186
2022-09-12	15:22:48	0.400674
2022-09-12	15:22:48	0.730903
2022-09-12	15:22:48	0.345865
2022-09-12	15:22:48	0.297977
2022-09-12	15:22:49	0.425407
2022-09-12	15:22:49	0.262863
2022-09-12	15:22:49	0.229631
2022-09-12	15:22:49	0.279911
2022-09-12	15:22:50	0.321234
2022-09-12	15:22:50	0.223015
2022-09-12	15:22:50	0.280878
2022-09-12	15:22:50	0.318741
2022-09-12	15:22:51	0.333957
2022-09-12	15:22:51	0.45701
2022-09-12	15:22:51	0.37126
2022-09-12	15:22:52	0.29187
2022-09-12	15:22:52	0.443473
2022-09-12	15:22:52	0.30444
2022-09-12	15:22:52	0.387392
2022-09-12	15:22:53	0.185356
2022-09-12	15:22:53	0.399809
2022-09-12	15:22:53	0.305102
2022-09-12	15:22:53	0.112328
2022-09-12	15:22:54	-0.0872643
2022-09-12	15:22:54	-0.318206
2022-09-12	15:22:54	-0.444923
2022-09-12	15:22:54	-0.129096
2022-09-12	15:22:55	-0.207264
2022-09-12	15:22:55	0.0560944
2022-09-12	15:22:55	0.00698499
2022-09-12	15:22:56	0.18444
2022-09-12	15:22:56	0.224084
2022-09-12	15:22:56	0.054415
2022-09-12	15:22:56	0.105051
2022-09-12	15:22:57	0.148257
2022-09-12	15:22:57	0.215687
2022-09-12	15:22:57	0.160166
2022-09-12	15:22:57	0.206832
2022-09-12	15:22:58	0.313041
2022-09-12	15:22:58	0.213753
2022-09-12	15:22:58	0.257723
2022-09-12	15:22:59	0.225865
2022-09-12	15:22:59	0.327545
2022-09-12	15:22:59	0.213957
2022-09-12	15:22:59	-0.0457885
2022-09-12	15:23:00	-0.226348
2022-09-12	15:23:00	-0.121005
2022-09-12	15:23:00	-0.0819208
2022-09-12	15:23:00	0.259097
2022-09-12	15:23:01	0.205306
2022-09-12	15:23:01	0.238232
2022-09-12	15:23:01	0.364695
2022-09-12	15:23:01	0.392277
2022-09-12	15:23:02	0.369377
2022-09-12	15:23:02	0.387036
2022-09-12	15:23:02	0.336603
2022-09-12	15:23:03	0.334618
2022-09-12	15:23:03	0.312736
2022-09-12	15:23:03	0.375585
2022-09-12	15:23:03	0.330191
2022-09-12	15:23:04	0.357265
2022-09-12	15:23:04	0.493041
2022-09-12	15:23:04	0.335535
2022-09-12	15:23:04	0.21869
2022-09-12	15:23:05	0.182812
2022-09-12	15:23:05	0.178283
2022-09-12	15:23:05	0.139504
2022-09-12	15:23:05	0.0608272
2022-09-12	15:23:06	0.0783845
2022-09-12	15:23:06	0.148359
2022-09-12	15:23:06	0.231769
2022-09-12	15:23:07	0.193092
2022-09-12	15:23:07	0.0862724
2022-09-12	15:23:07	0.261387
2022-09-12	15:23:07	0.185814
2022-09-12	15:23:08	0.484491
2022-09-12	15:23:08	0.329987
2022-09-12	15:23:08	0.791158
2022-09-12	15:23:08	0.697315
2022-09-12	15:23:09	1.01202
2022-09-12	15:23:09	1.31732
2022-09-12	15:23:09	1.85737
2022-09-12	15:23:09	0.733753
2022-09-12	15:23:10	0.69986
2022-09-12	15:23:10	0.524338
2022-09-12	15:23:10	0.544287
2022-09-12	15:23:11	0.34042
2022-09-12	15:23:11	0.413346
2022-09-12	15:23:11	0.536247
2022-09-12	15:23:11	0.458842
2022-09-12	15:23:12	0.330649
2022-09-12	15:23:12	0.680929
2022-09-12	15:23:12	0.465153
2022-09-12	15:23:12	0.715636
2022-09-12	15:23:13	0.519758
2022-09-12	15:23:13	0.721488
2022-09-12	15:23:13	1.36332
2022-09-12	15:23:13	2.25411
2022-09-12	15:23:14	2.78882
2022-09-12	15:23:14	3.10795
2022-09-12	15:23:14	2.27543
2022-09-12	15:23:15	1.70398
2022-09-12	15:23:15	0.99243
2022-09-12	15:23:15	0.648969
2022-09-12	15:23:15	0.491972
2022-09-12	15:23:16	0.466934
2022-09-12	15:23:16	0.328817
2022-09-12	15:23:16	0.412888
2022-09-12	15:23:16	0.296603
2022-09-12	15:23:17	0.388054
2022-09-12	15:23:17	0.295484
2022-09-12	15:23:17	0.335636
2022-09-12	15:23:18	0.283473
2022-09-12	15:23:18	0.436705
2022-09-12	15:23:18	0.509224
2022-09-12	15:23:18	0.804847
2022-09-12	15:23:19	1.31564
2022-09-12	15:23:19	1.02317
2022-09-12	15:23:19	2.28515
2022-09-12	15:23:19	2.41253
2022-09-12	15:23:20	2.98602
2022-09-12	15:23:20	0.914974
2022-09-12	15:23:20	0.480573
2022-09-12	15:23:20	0.382557
2022-09-12	15:23:21	0.401132
2022-09-12	15:23:21	0.307087
2022-09-12	15:23:21	0.331107
2022-09-12	15:23:22	0.475076
2022-09-12	15:23:22	0.322812
2022-09-12	15:23:22	0.290445
2022-09-12	15:23:22	0.42841
2022-09-12	15:23:23	0.252481
2022-09-12	15:23:23	0.483219
2022-09-12	15:23:23	0.292532
2022-09-12	15:23:23	0.345713
2022-09-12	15:23:24	0.273753
2022-09-12	15:23:24	0.32383
2022-09-12	15:23:24	0.291311
2022-09-12	15:23:24	0.21757
2022-09-12	15:23:25	0.24612
2022-09-12	15:23:25	0.283931
2022-09-12	15:23:25	0.212481
2022-09-12	15:23:26	0.272837
2022-09-12	15:23:26	0.120776
2022-09-12	15:23:26	0.133957
2022-09-12	15:23:26	-0.0244145
2022-09-12	15:23:27	-0.363549
2022-09-12	15:23:27	-0.650775
2022-09-12	15:23:27	-0.642887
2022-09-12	15:23:27	-0.533829
2022-09-12	15:23:28	-0.384567
2022-09-12	15:23:28	-0.209656
2022-09-12	15:23:28	-0.264007
2022-09-12	15:23:28	-0.288282
2022-09-12	15:23:29	-0.346857
2022-09-12	15:23:29	-0.287417
2022-09-12	15:23:29	-0.284567
2022-09-12	15:23:30	-0.212913
2022-09-12	15:23:30	-0.102786
2022-09-12	15:23:30	-0.0631422
2022-09-12	15:23:30	0.014873
2022-09-12	15:23:31	-0.296577
2022-09-12	15:23:31	-0.337239
2022-09-12	15:23:31	-0.368078
2022-09-12	15:23:31	-0.236068
2022-09-12	15:23:32	-0.458409
2022-09-12	15:23:32	-0.463498
2022-09-12	15:23:32	-0.517137
2022-09-12	15:23:32	-0.514643
2022-09-12	15:23:33	-0.612455
2022-09-12	15:23:33	-0.802887
2022-09-12	15:23:33	-0.476526
2022-09-12	15:23:34	-0.382531
2022-09-12	15:23:34	-0.253626
2022-09-12	15:23:34	-0.37846
2022-09-12	15:23:34	-0.294389
2022-09-12	15:23:35	-0.331743
2022-09-12	15:23:35	-0.266857
2022-09-12	15:23:35	0.0347203
2022-09-12	15:23:35	0.157825
2022-09-12	15:23:36	0.34383
2022-09-12	15:23:36	0.357519
2022-09-12	15:23:36	0.420674
2022-09-12	15:23:37	0.631921
2022-09-12	15:23:37	0.44612
2022-09-12	15:23:37	0.477875
2022-09-12	15:23:37	0.387392
2022-09-12	15:23:38	0.456654
2022-09-12	15:23:38	0.487239
2022-09-12	15:23:38	0.380878
2022-09-12	15:23:38	0.498944
2022-09-12	15:23:39	0.295025
2022-09-12	15:23:39	0.785204
2022-09-12	15:23:39	0.445051
2022-09-12	15:23:39	0.418944
2022-09-12	15:23:40	0.340165
2022-09-12	15:23:40	0.286476
2022-09-12	15:23:40	0.268359
2022-09-12	15:23:41	0.393702
2022-09-12	15:23:41	0.414517
2022-09-12	15:23:41	0.355585
2022-09-12	15:23:41	0.449886
2022-09-12	15:23:42	0.523932
2022-09-12	15:23:42	0.42902
2022-09-12	15:23:42	0.429886
2022-09-12	15:23:42	0.51701
2022-09-12	15:23:43	0.421387
2022-09-12	15:23:43	0.647595
2022-09-12	15:23:43	0.473295
2022-09-12	15:23:43	0.483066
2022-09-12	15:23:44	0.405153
2022-09-12	15:23:44	0.403626
2022-09-12	15:23:44	0.431819
2022-09-12	15:23:45	0.385407
2022-09-12	15:23:45	0.448257
2022-09-12	15:23:45	0.416909
2022-09-12	15:23:45	0.448206
2022-09-12	15:23:46	0.43813
2022-09-12	15:23:46	0.390496
2022-09-12	15:23:46	0.375585
2022-09-12	15:23:46	0.450496
2022-09-12	15:23:47	0.363677
2022-09-12	15:23:47	0.415585
2022-09-12	15:23:47	0.452583
2022-09-12	15:23:47	0.336196
2022-09-12	15:23:48	0.112481
2022-09-12	15:23:48	0.0691223
2022-09-12	15:23:48	0.266883
2022-09-12	15:23:49	0.335382
2022-09-12	15:23:49	0.372685
2022-09-12	15:23:49	0.354211
2022-09-12	15:23:49	0.471158
2022-09-12	15:23:50	0.420013
2022-09-12	15:23:50	0.461489
2022-09-12	15:23:50	0.516145
2022-09-12	15:23:50	0.543677
2022-09-12	15:23:51	0.578486
2022-09-12	15:23:51	0.704084
2022-09-12	15:23:51	0.561946
2022-09-12	15:23:51	0.567646
2022-09-12	15:23:52	0.646883
2022-09-12	15:23:52	0.575229
2022-09-12	15:23:52	0.497519
2022-09-12	15:23:53	0.470446
2022-09-12	15:23:53	0.471819
2022-09-12	15:23:53	0.461845
2022-09-12	15:23:53	0.461489
2022-09-12	15:23:54	0.45757
2022-09-12	15:23:54	0.460573
2022-09-12	15:23:54	0.461692
2022-09-12	15:23:54	0.462557
2022-09-12	15:23:55	0.466883
2022-09-12	15:23:55	0.467392
2022-09-12	15:23:55	0.470242
2022-09-12	15:23:56	0.476858
2022-09-12	15:23:56	0.46729
2022-09-12	15:23:56	0.387188
2022-09-12	15:23:56	0.43528
2022-09-12	15:23:57	0.449987
2022-09-12	15:23:57	0.53757
2022-09-12	15:23:57	0.489631
2022-09-12	15:23:57	0.273346
2022-09-12	15:23:58	0.4793
2022-09-12	15:23:58	0.357265
2022-09-12	15:23:58	0.334771
2022-09-12	15:23:58	0.27472
2022-09-12	15:23:59	0.443015
2022-09-12	15:23:59	0.384389
2022-09-12	15:23:59	0.444491
2022-09-12	15:24:00	0.267341
2022-09-12	15:24:00	0.266425
2022-09-12	15:24:00	0.476298
2022-09-12	15:24:00	0.246425
2022-09-12	15:24:01	0.354618
2022-09-12	15:24:01	0.358384
2022-09-12	15:24:01	0.263168
2022-09-12	15:24:01	0.340013
2022-09-12	15:24:02	0.34958
2022-09-12	15:24:02	0.372685
2022-09-12	15:24:02	0.234211
2022-09-12	15:24:02	0.3593
2022-09-12	15:24:03	0.329784
2022-09-12	15:24:03	0.248664
2022-09-12	15:24:03	0.275076
2022-09-12	15:24:04	0.228817
2022-09-12	15:24:04	0.222405
2022-09-12	15:24:04	0.181947
2022-09-12	15:24:04	0.328359
2022-09-12	15:24:05	0.146629
2022-09-12	15:24:05	0.154466
2022-09-12	15:24:05	0.0952292
2022-09-12	15:24:05	0.125509
2022-09-12	15:24:06	-0.194084
2022-09-12	15:24:06	-0.3036
2022-09-12	15:24:06	-0.0764756
2022-09-12	15:24:06	0.0544659
2022-09-12	15:24:07	0.26154
2022-09-12	15:24:07	0.349428
2022-09-12	15:24:07	0.358893
2022-09-12	15:24:08	0.476247
2022-09-12	15:24:08	0.522761
2022-09-12	15:24:08	0.481183
2022-09-12	15:24:08	0.458181
2022-09-12	15:24:09	0.374822
2022-09-12	15:24:09	0.294364
2022-09-12	15:24:09	0.272328
2022-09-12	15:24:09	0.266323
2022-09-12	15:24:10	0.183626
2022-09-12	15:24:10	0.382659
2022-09-12	15:24:10	0.254669
2022-09-12	15:24:11	0.353499
2022-09-12	15:24:11	0.280929
2022-09-12	15:24:11	0.208308
2022-09-12	15:24:11	0.299962
2022-09-12	15:24:12	0.290954
2022-09-12	15:24:12	0.225153
2022-09-12	15:24:12	0.219351
2022-09-12	15:24:12	0.204339
2022-09-12	15:24:13	0.179504
2022-09-12	15:24:13	0.196501
2022-09-12	15:24:13	0.106069
2022-09-12	15:24:13	0.160827
2022-09-12	15:24:14	0.208308
2022-09-12	15:24:14	0.256959
2022-09-12	15:24:14	0.343066
2022-09-12	15:24:15	0.379606
2022-09-12	15:24:15	1.29843
2022-09-12	15:24:15	1.45436
2022-09-12	15:24:15	2.07162
2022-09-12	15:24:16	3.78281
2022-09-12	15:24:16	2.81691
2022-09-12	15:24:16	1.38291
2022-09-12	15:24:16	2.05686
2022-09-12	15:24:17	1.61304
2022-09-12	15:24:17	0.967646
2022-09-12	15:24:17	0.917977
2022-09-12	15:24:17	1.10999
2022-09-12	15:24:18	1.59411
2022-09-12	15:24:18	2.05818
2022-09-12	15:24:18	1.83762
2022-09-12	15:24:19	1.74286
2022-09-12	15:24:19	1.50419
2022-09-12	15:24:19	1.52678
2022-09-12	15:24:19	1.26398
2022-09-12	15:24:20	1.31095
2022-09-12	15:24:20	1.10927
2022-09-12	15:24:20	1.01548
2022-09-12	15:24:20	1.01599
2022-09-12	15:24:21	1.07594
2022-09-12	15:24:21	1.19375
2022-09-12	15:24:21	1.22724
2022-09-12	15:24:21	1.2364
2022-09-12	15:24:22	1.23559
2022-09-12	15:24:22	1.30678
2022-09-12	15:24:22	1.3564
2022-09-12	15:24:23	1.27335
2022-09-12	15:24:23	1.33447
2022-09-12	15:24:23	1.44602
2022-09-12	15:24:23	1.41136
2022-09-12	15:24:24	1.41426
2022-09-12	15:24:24	1.36821
2022-09-12	15:24:24	1.4563
2022-09-12	15:24:24	1.3962
2022-09-12	15:24:25	1.87401
2022-09-12	15:24:25	1.97925
2022-09-12	15:24:25	2.12566
2022-09-12	15:24:25	2.34139
2022-09-12	15:24:26	2.33116
2022-09-12	15:24:26	2.15584
2022-09-12	15:24:26	1.09034
2022-09-12	15:24:27	1.83497
2022-09-12	15:24:27	4.97635
2022-09-12	15:24:27	4.37894
2022-09-12	15:24:27	1.25976
2022-09-12	15:24:28	0.474466
2022-09-12	15:24:28	0.381845
2022-09-12	15:24:28	0.36215
2022-09-12	15:24:28	0.464389
2022-09-12	15:24:29	0.845611
2022-09-12	15:24:29	0.393804
2022-09-12	15:24:29	0.335178
2022-09-12	15:24:30	3.08291
2022-09-12	15:24:30	3.45828
2022-09-12	15:24:30	0.700624
2022-09-12	15:24:30	0.398944
2022-09-12	15:24:31	-0.0877733
2022-09-12	15:24:31	-0.103091
2022-09-12	15:24:31	0.0515142
2022-09-12	15:24:31	0.0786898
2022-09-12	15:24:32	0.135535
2022-09-12	15:24:32	0.161896
2022-09-12	15:24:32	0.278792
2022-09-12	15:24:32	0.477875
2022-09-12	15:24:33	0.319707
2022-09-12	15:24:33	0.207697
2022-09-12	15:24:33	0.16673
2022-09-12	15:24:34	0.507748
2022-09-12	15:24:34	0.317316
2022-09-12	15:24:34	0.251463
2022-09-12	15:24:34	0.233244
2022-09-12	15:24:35	-0.0742364
2022-09-12	15:24:35	0.0712089
2022-09-12	15:24:35	-0.113778
2022-09-12	15:24:35	-0.221157
2022-09-12	15:24:36	0.039046
2022-09-12	15:24:36	0.625305
2022-09-12	15:24:36	0.422863
2022-09-12	15:24:36	0.246934
2022-09-12	15:24:37	0.155382
2022-09-12	15:24:37	0.158079
2022-09-12	15:24:37	0.106781
2022-09-12	15:24:38	0.121234
2022-09-12	15:24:38	0.139351
2022-09-12	15:24:38	0.272328
2022-09-12	15:24:38	0.167596
2022-09-12	15:24:39	0.32215
2022-09-12	15:24:39	0.114059
2022-09-12	15:24:39	0.361998
2022-09-12	15:24:39	0.12958
2022-09-12	15:24:40	0.334517
2022-09-12	15:24:40	0.0172649
2022-09-12	15:24:40	0.334313
2022-09-12	15:24:40	0.130089
2022-09-12	15:24:41	0.195127
2022-09-12	15:24:41	-0.16472
2022-09-12	15:24:41	-0.345025
2022-09-12	15:24:42	-0.128944
2022-09-12	15:24:42	-0.211539
2022-09-12	15:24:42	0.0449493
2022-09-12	15:24:42	-0.0361193
2022-09-12	15:24:43	0.225713
2022-09-12	15:24:43	0.117723
2022-09-12	15:24:43	0.342201
2022-09-12	15:24:43	0.16154
2022-09-12	15:24:44	0.319148
2022-09-12	15:24:44	-0.270369
2022-09-12	15:24:44	-0.504821
2022-09-12	15:24:45	-0.700801
2022-09-12	15:24:45	-0.88421
2022-09-12	15:24:45	-0.74472
2022-09-12	15:24:45	-0.853727
2022-09-12	15:24:46	-0.897798
2022-09-12	15:24:46	-0.948231
2022-09-12	15:24:46	-1.05948
2022-09-12	15:24:46	-0.882277
2022-09-12	15:24:47	-0.897136
2022-09-12	15:24:47	-0.7665
2022-09-12	15:24:47	-0.272099
2022-09-12	15:24:47	0.228206
2022-09-12	15:24:48	0.403117
2022-09-12	15:24:48	0.415229
2022-09-12	15:24:48	0.492227
2022-09-12	15:24:49	0.682761
2022-09-12	15:24:49	0.773652
2022-09-12	15:24:49	0.603321
2022-09-12	15:24:49	0.589784
2022-09-12	15:24:50	0.469784
2022-09-12	15:24:50	0.755585
2022-09-12	15:24:50	0.403524
2022-09-12	15:24:50	0.232176
2022-09-12	15:24:51	0.0512089
2022-09-12	15:24:51	0.0380282
2022-09-12	15:24:51	0.0693259
2022-09-12	15:24:51	0.052583
2022-09-12	15:24:52	0.196552
2022-09-12	15:24:52	0.0623031
2022-09-12	15:24:52	0.0554837
2022-09-12	15:24:53	-0.0229387
2022-09-12	15:24:53	0.00326998
2022-09-12	15:24:53	0.0122267
2022-09-12	15:24:53	0.0161961
2022-09-12	15:24:54	-0.00385471
2022-09-12	15:24:54	0.0503946
2022-09-12	15:24:54	0.301387
2022-09-12	15:24:54	0.325814
2022-09-12	15:24:55	0.318741
2022-09-12	15:24:55	0.187901
2022-09-12	15:24:55	0.194466
2022-09-12	15:24:55	0.329224
2022-09-12	15:24:56	0.174364
2022-09-12	15:24:56	0.290191
2022-09-12	15:24:56	0.264542
2022-09-12	15:24:57	0.243168
2022-09-12	15:24:57	0.358181
2022-09-12	15:24:57	0.162761
2022-09-12	15:24:57	0.311005
2022-09-12	15:24:58	0.288003
2022-09-12	15:24:58	0.203372
2022-09-12	15:24:58	0.313499
2022-09-12	15:24:58	0.413957
2022-09-12	15:24:59	0.100573
2022-09-12	15:24:59	0.289886
2022-09-12	15:24:59	0.247952
2022-09-12	15:24:59	0.188105
2022-09-12	15:25:00	0.489835
2022-09-12	15:25:00	0.339555
2022-09-12	15:25:00	0.332125
2022-09-12	15:25:01	0.329987
2022-09-12	15:25:01	0.410344
2022-09-12	15:25:01	0.455076
2022-09-12	15:25:01	0.490242
2022-09-12	15:25:02	0.4736
2022-09-12	15:25:02	1.42739
2022-09-12	15:25:02	1.72408
2022-09-12	15:25:02	1.1306
2022-09-12	15:25:03	1.35528
2022-09-12	15:25:03	0.798486
2022-09-12	15:25:03	0.909275
2022-09-12	15:25:04	1.57396
2022-09-12	15:25:04	0.784237
2022-09-12	15:25:04	1.68475
2022-09-12	15:25:04	1.87899
2022-09-12	15:25:05	2.03752
2022-09-12	15:25:05	1.6764
2022-09-12	15:25:05	1.18597
2022-09-12	15:25:05	0.409631
2022-09-12	15:25:06	0.475534
2022-09-12	15:25:06	0.446171
2022-09-12	15:25:06	0.49299
2022-09-12	15:25:06	1.07528
2022-09-12	15:25:07	1.4162
2022-09-12	15:25:07	1.06062
2022-09-12	15:25:07	0.600471
2022-09-12	15:25:08	0.69243
2022-09-12	15:25:08	0.402659
2022-09-12	15:25:08	0.382405
2022-09-12	15:25:08	0.520216
2022-09-12	15:25:09	0.282456
2022-09-12	15:25:09	0.45126
2022-09-12	15:25:09	0.28556
2022-09-12	15:25:09	0.374415
2022-09-12	15:25:10	0.391209
2022-09-12	15:25:10	0.351768
2022-09-12	15:25:10	0.397926
2022-09-12	15:25:10	0.475229
2022-09-12	15:25:11	0.827697
2022-09-12	15:25:11	0.39813
2022-09-12	15:25:11	0.821183
2022-09-12	15:25:12	0.31126
2022-09-12	15:25:12	0.52785
2022-09-12	15:25:12	0.238944
2022-09-12	15:25:12	0.501132
2022-09-12	15:25:13	0.268054
2022-09-12	15:25:13	0.514669
2022-09-12	15:25:13	0.478333
2022-09-12	15:25:13	0.442456
2022-09-12	15:25:14	0.388155
2022-09-12	15:25:14	0.449733
2022-09-12	15:25:14	0.361285
2022-09-12	15:25:14	0.513092
2022-09-12	15:25:15	0.291921
2022-09-12	15:25:15	0.390293
2022-09-12	15:25:15	0.262303
2022-09-12	15:25:16	0.360064
2022-09-12	15:25:16	0.26042
2022-09-12	15:25:16	0.477824
2022-09-12	15:25:16	0.240623
2022-09-12	15:25:17	0.463066
2022-09-12	15:25:17	0.243677
2022-09-12	15:25:17	0.417468
2022-09-12	15:25:17	0.252481
2022-09-12	15:25:18	0.364135
2022-09-12	15:25:18	0.27528
2022-09-12	15:25:18	0.408461
2022-09-12	15:25:19	0.277825
2022-09-12	15:25:19	0.227392
2022-09-12	15:25:19	0.0397585
2022-09-12	15:25:19	-0.0776969
2022-09-12	15:25:20	0.233702
2022-09-12	15:25:20	0.307036
2022-09-12	15:25:20	0.452685
2022-09-12	15:25:20	0.870496
2022-09-12	15:25:21	0.662557
2022-09-12	15:25:21	0.371412
2022-09-12	15:25:21	0.471158
2022-09-12	15:25:21	0.488461
2022-09-12	15:25:22	0.392074
2022-09-12	15:25:22	0.424033
2022-09-12	15:25:22	0.366018
2022-09-12	15:25:23	0.465865
2022-09-12	15:25:23	0.422099
2022-09-12	15:25:23	0.433448
2022-09-12	15:25:23	0.429071
2022-09-12	15:25:24	0.491769
2022-09-12	15:25:24	0.442303
2022-09-12	15:25:24	0.419555
2022-09-12	15:25:24	0.462608
2022-09-12	15:25:25	0.443168
2022-09-12	15:25:25	0.453041
2022-09-12	15:25:25	0.461438
2022-09-12	15:25:25	0.453295
2022-09-12	15:25:26	0.457112
2022-09-12	15:25:26	0.443728
2022-09-12	15:25:26	0.448715
2022-09-12	15:25:27	0.453397
2022-09-12	15:25:27	0.451361
2022-09-12	15:25:27	0.446221
2022-09-12	15:25:27	0.443728
2022-09-12	15:25:28	0.449835
2022-09-12	15:25:28	0.458435
2022-09-12	15:25:28	0.462456
2022-09-12	15:25:28	0.450445
2022-09-12	15:25:29	0.450089
2022-09-12	15:25:29	0.4507
2022-09-12	15:25:29	0.44042
2022-09-12	15:25:29	0.428512
2022-09-12	15:25:30	0.589478
2022-09-12	15:25:30	0.478181
2022-09-12	15:25:30	0.000369216
2022-09-12	15:25:31	-0.490572
2022-09-12	15:25:31	-0.824719
2022-09-12	15:25:31	-1.0092
2022-09-12	15:25:31	-1.02833
2022-09-12	15:25:32	-1.01831
2022-09-12	15:25:32	-1.02396
2022-09-12	15:25:32	-1.07322
2022-09-12	15:25:32	-1.03953
2022-09-12	15:25:33	-1.01729
2022-09-12	15:25:33	-0.999529
2022-09-12	15:25:33	-0.951233
2022-09-12	15:25:33	-0.895508
2022-09-12	15:25:34	-0.822073
2022-09-12	15:25:34	-0.760495
2022-09-12	15:25:34	-0.86019
2022-09-12	15:25:35	-0.829503
2022-09-12	15:25:35	-0.784618
2022-09-12	15:25:35	-0.713829
2022-09-12	15:25:35	-0.600394
2022-09-12	15:25:36	0.0101911
2022-09-12	15:25:36	0.759605
2022-09-12	15:25:36	0.998689
2022-09-12	15:25:36	-0.0314374
2022-09-12	15:25:37	-0.0118445
2022-09-12	15:25:37	1.19274
2022-09-12	15:25:37	4.5025
2022-09-12	15:25:38	4.06072
2022-09-12	15:25:38	5.63919
2022-09-12	15:25:38	6.98871
2022-09-12	15:25:38	6.7568
2022-09-12	15:25:39	5.53553
2022-09-12	15:25:39	2.41029
2022-09-12	15:25:39	1.28714
2022-09-12	15:25:39	0.687697
2022-09-12	15:25:40	0.767493
2022-09-12	15:25:40	0.28271
2022-09-12	15:25:40	0.198333
2022-09-12	15:25:40	0.166018
2022-09-12	15:25:41	0.17986
2022-09-12	15:25:41	0.253041
2022-09-12	15:25:41	0.28271
2022-09-12	15:25:42	0.263524
2022-09-12	15:25:42	0.341692
2022-09-12	15:25:42	0.437468
2022-09-12	15:25:42	0.370852
2022-09-12	15:25:43	0.410751
2022-09-12	15:25:43	0.435484
2022-09-12	15:25:43	0.415331
2022-09-12	15:25:43	0.413448
2022-09-12	15:25:44	0.38958
2022-09-12	15:25:44	0.396705
2022-09-12	15:25:44	0.401743
2022-09-12	15:25:44	0.411972
2022-09-12	15:25:45	0.401845
2022-09-12	15:25:45	0.416298
2022-09-12	15:25:45	0.417061
2022-09-12	15:25:46	0.413651
2022-09-12	15:25:46	0.411769
2022-09-12	15:25:46	0.405356
2022-09-12	15:25:46	0.409224
2022-09-12	15:25:47	0.409835
2022-09-12	15:25:47	0.409478
2022-09-12	15:25:47	0.409631
2022-09-12	15:25:47	0.406679
2022-09-12	15:25:48	0.395585
2022-09-12	15:25:48	0.408308
2022-09-12	15:25:48	0.41243
2022-09-12	15:25:48	0.406374
2022-09-12	15:25:49	0.419962
2022-09-12	15:25:49	0.417926
2022-09-12	15:25:49	0.408359
2022-09-12	15:25:50	0.409275
2022-09-12	15:25:50	0.417672
2022-09-12	15:25:50	0.412939
2022-09-12	15:25:50	0.402557
2022-09-12	15:25:51	0.418842
2022-09-12	15:25:51	0.422557
2022-09-12	15:25:51	0.420624
2022-09-12	15:25:51	0.412328
2022-09-12	15:25:52	0.412227
2022-09-12	15:25:52	0.411972
2022-09-12	15:25:52	0.421692
2022-09-12	15:25:52	0.41869
2022-09-12	15:25:53	0.448053
2022-09-12	15:25:53	0.573702
2022-09-12	15:25:53	0.739911
2022-09-12	15:25:54	0.50902
2022-09-12	15:25:54	0.557519
2022-09-12	15:25:54	0.496807
2022-09-12	15:25:54	0.18958
2022-09-12	15:25:55	0.255433
2022-09-12	15:25:55	0.244746
2022-09-12	15:25:55	0.264796
2022-09-12	15:25:55	0.760725
2022-09-12	15:25:56	0.32327
2022-09-12	15:25:56	0.368155
2022-09-12	15:25:56	0.524491
2022-09-12	15:25:57	1.14413
2022-09-12	15:25:57	0.432583
2022-09-12	15:25:57	0.555178
2022-09-12	15:25:57	0.491463
2022-09-12	15:25:58	0.295331
2022-09-12	15:25:58	0.177875
2022-09-12	15:25:58	0.153448
2022-09-12	15:25:58	0.240827
2022-09-12	15:25:59	0.20444
2022-09-12	15:25:59	0.226781
2022-09-12	15:25:59	0.44897
2022-09-12	15:25:59	0.479657
2022-09-12	15:26:00	0.470293
2022-09-12	15:26:00	0.496298
2022-09-12	15:26:00	0.393397
2022-09-12	15:26:01	0.511819
2022-09-12	15:26:01	0.413193
2022-09-12	15:26:01	0.554618
2022-09-12	15:26:01	0.380776
2022-09-12	15:26:02	0.353346
2022-09-12	15:26:02	0.341387
2022-09-12	15:26:02	0.295382
2022-09-12	15:26:02	0.151209
2022-09-12	15:26:03	0.221285
2022-09-12	15:26:03	0.0550257
2022-09-12	15:26:03	0.110547
2022-09-12	15:26:03	0.174364
2022-09-12	15:26:04	0.239504
2022-09-12	15:26:04	0.184746
2022-09-12	15:26:04	0.410344
2022-09-12	15:26:05	0.395433
2022-09-12	15:26:05	0.52785
2022-09-12	15:26:05	0.413499
2022-09-12	15:26:05	0.484389
2022-09-12	15:26:06	0.429631
2022-09-12	15:26:06	0.498181
2022-09-12	15:26:06	0.472074
2022-09-12	15:26:06	0.477367
2022-09-12	15:26:07	0.467494
2022-09-12	15:26:07	0.479758
2022-09-12	15:26:07	0.480725
2022-09-12	15:26:07	0.484593
2022-09-12	15:26:08	0.483728
2022-09-12	15:26:08	0.481692
2022-09-12	15:26:08	0.476756
2022-09-12	15:26:09	0.476756
2022-09-12	15:26:09	0.46841
2022-09-12	15:26:09	0.470089
2022-09-12	15:26:09	0.497163
2022-09-12	15:26:10	0.479657
2022-09-12	15:26:10	0.495585
2022-09-12	15:26:10	0.63131
2022-09-12	15:26:10	0.25187
2022-09-12	15:26:11	0.160369
2022-09-12	15:26:11	0.492328
2022-09-12	15:26:11	0.528359
2022-09-12	15:26:11	0.76897
2022-09-12	15:26:12	1.17767
2022-09-12	15:26:12	1.25849
2022-09-12	15:26:12	0.805458
2022-09-12	15:26:13	0.841896
2022-09-12	15:26:13	1.58943
2022-09-12	15:26:13	2.0533
2022-09-12	15:26:14	4.10769
2022-09-12	15:26:14	7.93233
2022-09-12	15:26:14	5.97579
2022-09-12	15:26:14	4.2938
2022-09-12	15:26:14	1.06856
2022-09-12	15:26:15	0.515941
2022-09-12	15:26:15	0.262252
2022-09-12	15:26:15	0.277061
2022-09-12	15:26:16	0.214008
2022-09-12	15:26:16	0.35472
2022-09-12	15:26:16	0.308257
2022-09-12	15:26:16	0.0689188
2022-09-12	15:26:17	0.0453565
2022-09-12	15:26:17	0.0593005
2022-09-12	15:26:17	-0.121565
2022-09-12	15:26:17	-0.111794
2022-09-12	15:26:18	0.330852
2022-09-12	15:26:18	0.203372
2022-09-12	15:26:18	0.23528
2022-09-12	15:26:18	0.510293
2022-09-12	15:26:19	0.241489
2022-09-12	15:26:19	0.319606
2022-09-12	15:26:19	0.662557
2022-09-12	15:26:20	1.15212
2022-09-12	15:26:20	1.75233
2022-09-12	15:26:20	1.63884
2022-09-12	15:26:20	0.765916
2022-09-12	15:26:21	0.545407
2022-09-12	15:26:21	0.492074
2022-09-12	15:26:21	0.451616
2022-09-12	15:26:21	0.459249
2022-09-12	15:26:22	0.452023
2022-09-12	15:26:22	0.468003
2022-09-12	15:26:22	0.446832
2022-09-12	15:26:22	0.434771
2022-09-12	15:26:23	0.647392
2022-09-12	15:26:23	0.790344
2022-09-12	15:26:23	0.516552
2022-09-12	15:26:24	1.40963
2022-09-12	15:26:24	2.54871
2022-09-12	15:26:24	1.67121
2022-09-12	15:26:24	0.983982
2022-09-12	15:26:25	0.682811
2022-09-12	15:26:25	0.716094
2022-09-12	15:26:25	0.51584
2022-09-12	15:26:25	0.307596
2022-09-12	15:26:26	0.660115
2022-09-12	15:26:26	0.547596
2022-09-12	15:26:26	0.645763
2022-09-12	15:26:26	1.13273
2022-09-12	15:26:27	1.17462
2022-09-12	15:26:27	1.92907
2022-09-12	15:26:27	3.11365
2022-09-12	15:26:28	2.35742
2022-09-12	15:26:28	1.60357
2022-09-12	15:26:28	1.06485
2022-09-12	15:26:28	1.20256
2022-09-12	15:26:29	0.64673
2022-09-12	15:26:29	1.01472
2022-09-12	15:26:29	0.751361
2022-09-12	15:26:29	0.747697
2022-09-12	15:26:30	0.697875
2022-09-12	15:26:30	1.13879
2022-09-12	15:26:30	1.7309
2022-09-12	15:26:30	0.869835
2022-09-12	15:26:31	1.06378
2022-09-12	15:26:31	0.979758
2022-09-12	15:26:31	0.721845
2022-09-12	15:26:32	0.707239
2022-09-12	15:26:32	0.480623
2022-09-12	15:26:32	0.389173
2022-09-12	15:26:32	0.337316
2022-09-12	15:26:33	0.185255
2022-09-12	15:26:33	0.35355
2022-09-12	15:26:33	1.42378
2022-09-12	15:26:33	5.52561
2022-09-12	15:26:34	4.6165
2022-09-12	15:26:34	1.4734
2022-09-12	15:26:34	1.04113
2022-09-12	15:26:35	1.19233
2022-09-12	15:26:35	1.2366
2022-09-12	15:26:35	1.28658
2022-09-12	15:26:35	1.43503
2022-09-12	15:26:36	2.42546
2022-09-12	15:26:36	3.20103
2022-09-12	15:26:36	2.88968
2022-09-12	15:26:36	0.756908
2022-09-12	15:26:37	0.45813
