# Supplementary material for: Comparing efficacy in reducing pulling and welfare impacts of four types of leash walking equipment
Source: PeerJ journal article supplement (doi:10.7717/peerj.18131), 2024-10-24
Supplement: Shelter1_Tension_files.zip [file Royal_harness_2022912100716 copy.xlsx]

## Sheet: Averaged Newtons
Date	Time	averaged newtons
2022-09-12	10:07:38	-0.232708	0	0		Impulse	726.575
2022-09-12	10:07:39	-0.848985	0	0		Total steps	3
2022-09-12	10:07:40	-0.87119	0	0
2022-09-12	10:07:41	-0.976565	0	0
2022-09-12	10:07:42	7.91582	7.91582	0
2022-09-12	10:07:43	14.6246	22.5404	1
2022-09-12	10:07:44	11.4807	34.0211	1
2022-09-12	10:07:45	7.74904	41.7702	1
2022-09-12	10:07:46	8.59548	50.3657	1
2022-09-12	10:07:47	8.06036	58.426	1
2022-09-12	10:07:48	4.08364	62.5097	1
2022-09-12	10:07:49	1.8842	64.3939	1
2022-09-12	10:07:50	1.8833	66.2772	1
2022-09-12	10:07:51	1.9288	68.206	1
2022-09-12	10:07:52	2.61585	70.8218	1
2022-09-12	10:07:53	2.27792	73.0997	1
2022-09-12	10:07:54	3.09263	76.1924	1
2022-09-12	10:07:55	2.38415	78.5765	1
2022-09-12	10:07:56	1.41267	79.9892	1
2022-09-12	10:07:57	1.25053	81.2397	1
2022-09-12	10:07:58	0.0187899	81.2585	1
2022-09-12	10:07:59	0.752404	82.0109	1
2022-09-12	10:08:00	1.43887	83.4498	1
2022-09-12	10:08:01	2.10275	85.5525	1
2022-09-12	10:08:02	6.48622	92.0388	1
2022-09-12	10:08:03	3.35364	95.3924	1
2022-09-12	10:08:04	1.57453	96.9669	1
2022-09-12	10:08:05	2.05023	99.0172	1
2022-09-12	10:08:06	4.91034	103.927	1
2022-09-12	10:08:07	30.6331	134.561	2
2022-09-12	10:08:08	11.5869	146.148	2
2022-09-12	10:08:09	7.18141	153.329	2
2022-09-12	10:08:10	13.6899	167.019	3
2022-09-12	10:08:11	12.7551	179.774	3
2022-09-12	10:08:12	5.03818	184.812	3
2022-09-12	10:08:13	1.59971	186.412	3
2022-09-12	10:08:14	1.53093	187.943	3
2022-09-12	10:08:15	1.15155	189.094	3
2022-09-12	10:08:16	1.39881	190.493	3
2022-09-12	10:08:17	1.36015	191.853	3
2022-09-12	10:08:18	1.49381	193.347	3
2022-09-12	10:08:19	1.39784	194.745	3
2022-09-12	10:08:20	1.97198	196.717	3
2022-09-12	10:08:21	1.98425	198.701	3
2022-09-12	10:08:22	1.72071	200.422	3
2022-09-12	10:08:23	2.85792	203.28	3
2022-09-12	10:08:24	1.34482	204.625	3
2022-09-12	10:08:25	4.85363	209.478	3
2022-09-12	10:08:26	6.52177	216	3
2022-09-12	10:08:27	7.92215	223.922	3
2022-09-12	10:08:28	1.96309	225.885	3
2022-09-12	10:08:29	8.56449	234.45	3
2022-09-12	10:08:30	4.31681	238.766	3
2022-09-12	10:08:31	4.37157	243.138	3
2022-09-12	10:08:32	3.92381	247.062	3
2022-09-12	10:08:33	0.391058	247.453	3
2022-09-12	10:08:34	-0.526935	247.453	3
2022-09-12	10:08:35	-0.397677	247.453	3
2022-09-12	10:08:36	-0.086793	247.453	3
2022-09-12	10:08:37	0.794225	248.247	3
2022-09-12	10:08:38	5.36409	253.611	3
2022-09-12	10:08:39	4.95347	258.565	3
2022-09-12	10:08:40	1.58775	260.152	3
2022-09-12	10:08:41	1.32257	261.475	3
2022-09-12	10:08:42	1.45393	262.929	3
2022-09-12	10:08:43	1.33027	264.259	3
2022-09-12	10:08:44	1.10822	265.367	3
2022-09-12	10:08:45	1.1593	266.527	3
2022-09-12	10:08:46	1.95223	268.479	3
2022-09-12	10:08:47	2.4606	270.94	3
2022-09-12	10:08:48	3.49512	274.435	3
2022-09-12	10:08:49	3.61174	278.046	3
2022-09-12	10:08:50	4.17667	282.223	3
2022-09-12	10:08:51	5.61283	287.836	3
2022-09-12	10:08:52	3.62664	291.463	3
2022-09-12	10:08:53	3.52481	294.987	3
2022-09-12	10:08:54	2.86892	297.856	3
2022-09-12	10:08:55	2.07753	299.934	3
2022-09-12	10:08:56	2.39433	302.328	3
2022-09-12	10:08:57	2.92025	305.248	3
2022-09-12	10:08:58	4.65261	309.901	3
2022-09-12	10:08:59	2.18166	312.083	3
2022-09-12	10:09:00	1.18279	313.265	3
2022-09-12	10:09:01	0.806448	314.072	3
2022-09-12	10:09:02	5.02649	319.098	3
2022-09-12	10:09:03	5.47898	324.577	3
2022-09-12	10:09:04	5.45901	330.036	3
2022-09-12	10:09:05	2.3443	332.381	3
2022-09-12	10:09:06	1.64133	334.022	3
2022-09-12	10:09:07	1.48732	335.509	3
2022-09-12	10:09:08	1.19915	336.708	3
2022-09-12	10:09:09	1.22626	337.935	3
2022-09-12	10:09:10	1.35799	339.293	3
2022-09-12	10:09:11	1.37028	340.663	3
2022-09-12	10:09:12	1.50509	342.168	3
2022-09-12	10:09:13	1.89903	344.067	3
2022-09-12	10:09:14	2.00735	346.074	3
2022-09-12	10:09:15	2.57647	348.651	3
2022-09-12	10:09:16	2.77356	351.425	3
2022-09-12	10:09:17	1.61867	353.043	3
2022-09-12	10:09:18	1.32235	354.366	3
2022-09-12	10:09:19	1.85298	356.219	3
2022-09-12	10:09:20	2.9898	359.208	3
2022-09-12	10:09:21	2.24787	361.456	3
2022-09-12	10:09:22	1.95217	363.408	3
2022-09-12	10:09:23	1.49094	364.899	3
2022-09-12	10:09:24	1.65625	366.556	3
2022-09-12	10:09:25	2.1816	368.737	3
2022-09-12	10:09:26	1.56061	370.298	3
2022-09-12	10:09:27	1.55885	371.857	3
2022-09-12	10:09:28	1.17651	373.033	3
2022-09-12	10:09:29	2.22721	375.26	3
2022-09-12	10:09:30	2.67136	377.932	3
2022-09-12	10:09:31	1.74357	379.675	3
2022-09-12	10:09:32	1.82982	381.505	3
2022-09-12	10:09:33	1.92427	383.429	3
2022-09-12	10:09:34	2.18884	385.618	3
2022-09-12	10:09:35	2.14164	387.76	3
2022-09-12	10:09:36	2.13066	389.89	3
2022-09-12	10:09:37	1.99654	391.887	3
2022-09-12	10:09:38	1.84233	393.729	3
2022-09-12	10:09:39	1.73916	395.469	3
2022-09-12	10:09:40	1.76593	397.234	3
2022-09-12	10:09:41	1.18617	398.421	3
2022-09-12	10:09:42	1.17498	399.596	3
2022-09-12	10:09:43	2.9842	402.58	3
2022-09-12	10:09:44	1.56542	404.145	3
2022-09-12	10:09:45	1.17274	405.318	3
2022-09-12	10:09:46	1.00605	406.324	3
2022-09-12	10:09:47	1.26338	407.587	3
2022-09-12	10:09:48	1.04148	408.629	3
2022-09-12	10:09:49	1.48739	410.116	3
2022-09-12	10:09:50	2.83525	412.951	3
2022-09-12	10:09:51	2.09818	415.05	3
2022-09-12	10:09:52	2.11578	417.165	3
2022-09-12	10:09:53	2.22936	419.395	3
2022-09-12	10:09:54	2.1453	421.54	3
2022-09-12	10:09:55	5.02952	426.57	3
2022-09-12	10:09:56	3.02398	429.594	3
2022-09-12	10:09:57	1.91176	431.505	3
2022-09-12	10:09:58	1.34606	432.851	3
2022-09-12	10:09:59	2.47877	435.33	3
2022-09-12	10:10:00	1.8481	437.178	3
2022-09-12	10:10:01	1.38596	438.564	3
2022-09-12	10:10:02	1.34961	439.914	3
2022-09-12	10:10:03	1.26021	441.174	3
2022-09-12	10:10:04	1.31601	442.49	3
2022-09-12	10:10:05	1.25059	443.741	3
2022-09-12	10:10:06	1.09841	444.839	3
2022-09-12	10:10:07	1.15968	445.999	3
2022-09-12	10:10:08	1.38336	447.382	3
2022-09-12	10:10:09	1.73106	449.113	3
2022-09-12	10:10:10	1.473	450.586	3
2022-09-12	10:10:11	1.5495	452.136	3
2022-09-12	10:10:12	1.49156	453.627	3
2022-09-12	10:10:13	9.22723	462.854	3
2022-09-12	10:10:14	9.98456	472.839	3
2022-09-12	10:10:15	8.60037	481.439	3
2022-09-12	10:10:16	6.69889	488.138	3
2022-09-12	10:10:17	2.52427	490.663	3
2022-09-12	10:10:18	1.69196	492.355	3
2022-09-12	10:10:19	3.11526	495.47	3
2022-09-12	10:10:20	0.705883	496.176	3
2022-09-12	10:10:21	2.21504	498.391	3
2022-09-12	10:10:22	6.79069	505.181	3
2022-09-12	10:10:23	4.04123	509.223	3
2022-09-12	10:10:24	1.1221	510.345	3
2022-09-12	10:10:25	0.636162	510.981	3
2022-09-12	10:10:26	1.4803	512.461	3
2022-09-12	10:10:27	1.39071	513.852	3
2022-09-12	10:10:28	1.42861	515.281	3
2022-09-12	10:10:29	1.34408	516.625	3
2022-09-12	10:10:30	0.538481	517.163	3
2022-09-12	10:10:31	-1.29586	517.163	3
2022-09-12	10:10:32	-1.355	517.163	3
2022-09-12	10:10:33	-1.16364	517.163	3
2022-09-12	10:10:34	-0.22637	517.163	3
2022-09-12	10:10:35	0.22875	517.392	3
2022-09-12	10:10:36	2.85557	520.247	3
2022-09-12	10:10:37	1.85653	522.104	3
2022-09-12	10:10:38	1.779	523.883	3
2022-09-12	10:10:39	2.05421	525.937	3
2022-09-12	10:10:40	1.53089	527.468	3
2022-09-12	10:10:41	1.80914	529.277	3
2022-09-12	10:10:42	1.60288	530.88	3
2022-09-12	10:10:43	0.861684	531.742	3
2022-09-12	10:10:44	0.799489	532.541	3
2022-09-12	10:10:45	0.85512	533.396	3
2022-09-12	10:10:46	1.45774	534.854	3
2022-09-12	10:10:47	1.30775	536.162	3
2022-09-12	10:10:48	1.885	538.047	3
2022-09-12	10:10:49	1.16547	539.212	3
2022-09-12	10:10:50	1.13373	540.346	3
2022-09-12	10:10:51	1.51867	541.865	3
2022-09-12	10:10:52	1.51171	543.376	3
2022-09-12	10:10:53	1.45953	544.836	3
2022-09-12	10:10:54	1.47645	546.312	3
2022-09-12	10:10:55	1.48669	547.799	3
2022-09-12	10:10:56	1.46434	549.263	3
2022-09-12	10:10:57	1.50594	550.769	3
2022-09-12	10:10:58	1.64674	552.416	3
2022-09-12	10:10:59	1.98579	554.402	3
2022-09-12	10:11:00	1.75596	556.158	3
2022-09-12	10:11:01	1.40571	557.564	3
2022-09-12	10:11:02	3.7478	561.311	3
2022-09-12	10:11:03	7.09417	568.406	3
2022-09-12	10:11:04	7.34921	575.755	3
2022-09-12	10:11:05	5.09635	580.851	3
2022-09-12	10:11:06	3.71572	584.567	3
2022-09-12	10:11:07	6.16053	590.727	3
2022-09-12	10:11:08	4.28017	595.008	3
2022-09-12	10:11:09	1.75149	596.759	3
2022-09-12	10:11:10	1.35093	598.11	3
2022-09-12	10:11:11	1.36355	599.474	3
2022-09-12	10:11:12	1.23763	600.711	3
2022-09-12	10:11:13	1.43271	602.144	3
2022-09-12	10:11:14	1.67311	603.817	3
2022-09-12	10:11:15	1.76615	605.583	3
2022-09-12	10:11:16	1.32086	606.904	3
2022-09-12	10:11:17	1.12156	608.026	3
2022-09-12	10:11:18	1.21793	609.243	3
2022-09-12	10:11:19	1.30209	610.546	3
2022-09-12	10:11:20	0.985302	611.531	3
2022-09-12	10:11:21	1.18545	612.716	3
2022-09-12	10:11:22	1.18551	613.902	3
2022-09-12	10:11:23	3.37435	617.276	3
2022-09-12	10:11:24	3.33355	620.61	3
2022-09-12	10:11:25	2.64823	623.258	3
2022-09-12	10:11:26	3.26309	626.521	3
2022-09-12	10:11:27	6.15929	632.68	3
2022-09-12	10:11:28	0.934576	633.615	3
2022-09-12	10:11:29	1.07502	634.69	3
2022-09-12	10:11:30	0.920937	635.611	3
2022-09-12	10:11:31	1.0361	636.647	3
2022-09-12	10:11:32	2.04832	638.695	3
2022-09-12	10:11:33	1.59537	640.291	3
2022-09-12	10:11:34	1.41997	641.711	3
2022-09-12	10:11:35	1.13208	642.843	3
2022-09-12	10:11:36	1.24889	644.092	3
2022-09-12	10:11:37	0.852459	644.944	3
2022-09-12	10:11:38	0.626879	645.571	3
2022-09-12	10:11:39	0.429825	646.001	3
2022-09-12	10:11:40	0.574136	646.575	3
2022-09-12	10:11:41	0.778775	647.354	3
2022-09-12	10:11:42	0.72203	648.076	3
2022-09-12	10:11:43	0.865363	648.941	3
2022-09-12	10:11:44	0.592868	649.534	3
2022-09-12	10:11:45	0.536727	650.071	3
2022-09-12	10:11:46	0.260838	650.332	3
2022-09-12	10:11:47	1.89246	652.224	3
2022-09-12	10:11:48	2.98906	655.213	3
2022-09-12	10:11:49	3.50632	658.719	3
2022-09-12	10:11:50	1.78154	660.501	3
2022-09-12	10:11:51	1.57598	662.077	3
2022-09-12	10:11:52	4.18408	666.261	3
2022-09-12	10:11:53	1.48109	667.742	3
2022-09-12	10:11:54	1.21114	668.953	3
2022-09-12	10:11:55	0.639029	669.592	3
2022-09-12	10:11:56	0.45761	670.05	3
2022-09-12	10:11:57	0.621391	670.671	3
2022-09-12	10:11:58	0.631521	671.303	3
2022-09-12	10:11:59	0.662346	671.965	3
2022-09-12	10:12:00	0.469835	672.435	3
2022-09-12	10:12:01	0.718786	673.154	3
2022-09-12	10:12:02	1.42337	674.577	3
2022-09-12	10:12:03	2.5868	677.164	3
2022-09-12	10:12:04	1.9424	679.106	3
2022-09-12	10:12:05	1.52348	680.63	3
2022-09-12	10:12:06	0.635708	681.265	3
2022-09-12	10:12:07	0.889189	682.155	3
2022-09-12	10:12:08	1.187	683.342	3
2022-09-12	10:12:09	1.2331	684.575	3
2022-09-12	10:12:10	1.78737	686.362	3
2022-09-12	10:12:11	1.18042	687.543	3
2022-09-12	10:12:12	1.66547	689.208	3
2022-09-12	10:12:13	1.52541	690.733	3
2022-09-12	10:12:14	1.82416	692.558	3
2022-09-12	10:12:15	1.8159	694.373	3
2022-09-12	10:12:16	1.70345	696.077	3
2022-09-12	10:12:17	1.74584	697.823	3
2022-09-12	10:12:18	2.15172	699.974	3
2022-09-12	10:12:19	1.78805	701.763	3
2022-09-12	10:12:20	2.33185	704.094	3
2022-09-12	10:12:21	1.49637	705.591	3
2022-09-12	10:12:22	1.69909	707.29	3
2022-09-12	10:12:23	1.12897	708.419	3
2022-09-12	10:12:24	1.13259	709.551	3
2022-09-12	10:12:25	1.38281	710.934	3
2022-09-12	10:12:26	1.29066	712.225	3
2022-09-12	10:12:27	1.16576	713.391	3
2022-09-12	10:12:28	1.16293	714.554	3
2022-09-12	10:12:29	1.15846	715.712	3
2022-09-12	10:12:30	1.39956	717.112	3
2022-09-12	10:12:31	1.09983	718.211	3
2022-09-12	10:12:32	1.35636	719.568	3
2022-09-12	10:12:33	1.2953	720.863	3
2022-09-12	10:12:34	1.30101	722.164	3
2022-09-12	10:12:35	1.16921	723.333	3
2022-09-12	10:12:36	1.161	724.494	3
2022-09-12	10:12:37	0.913693	725.408	3
2022-09-12	10:12:38	1.16738	726.575	3

## Sheet: Royal_harness_2022912100716 (3)
Date	Time	Lbs	Newtons	averaged newtons	Total force by time	Total Time Steps Force >3		**GoPro Fitting: 956
2022-09-12	10:07:38	-0.00110661	-0.00492242	-0.232708	0	FALSE	0			Total force x time	1384.46
2022-09-12	10:07:38	-0.196068	-0.87215	-0.232708	0	FALSE	0			Total Time Steps Force >3	20
2022-09-12	10:07:38	-0.0146944	-0.0653636	-0.232708	0	FALSE	0
2022-09-12	10:07:38	0.00260841	0.0116027	-0.232708	0.0116027	FALSE	0
2022-09-12	10:07:39	-0.13617	-0.605711	-0.848985	0	FALSE	0
2022-09-12	10:07:39	-0.182124	-0.810124	-0.848985	0.0116027	FALSE	0
2022-09-12	10:07:39	-0.254287	-1.13112	-0.848985	0	FALSE	0
2022-09-12	10:07:40	-0.235865	-1.04917	-0.87119	0.0116027	FALSE	0
2022-09-12	10:07:40	-0.143651	-0.638988	-0.87119	0	FALSE	0
2022-09-12	10:07:40	-0.0322008	-0.143236	-0.87119	0.0116027	FALSE	0
2022-09-12	10:07:40	-0.371692	-1.65336	-0.87119	0	FALSE	0
2022-09-12	10:07:41	-0.533575	-2.37345	-0.976565	0.0116027	FALSE	0
2022-09-12	10:07:41	-0.2779	-1.23615	-0.976565	0	FALSE	0
2022-09-12	10:07:41	-0.144669	-0.643517	-0.976565	0.0116027	FALSE	0
2022-09-12	10:07:41	0.0779773	0.346859	-0.976565	0.346859	FALSE	0
2022-09-12	10:07:42	0.297468	1.3232	7.91582	1.3348	FALSE	0
2022-09-12	10:07:42	0.680114	3.02528	7.91582	3.37214	FALSE	0
2022-09-12	10:07:42	3.80332	16.9179	7.91582	18.2527	1	1
2022-09-12	10:07:42	2.33732	10.3969	7.91582	13.769	FALSE	1
2022-09-12	10:07:43	2.96424	13.1855	14.6246	31.4383	FALSE	1
2022-09-12	10:07:43	4.26281	18.9618	14.6246	32.7308	1	2
2022-09-12	10:07:43	3.27492	14.5675	14.6246	46.0058	1	3
2022-09-12	10:07:43	2.64907	11.7836	14.6246	44.5144	FALSE	3
2022-09-12	10:07:44	3.63314	16.1609	11.4807	62.1667	1	4
2022-09-12	10:07:44	1.79391	7.97967	11.4807	52.4941	FALSE	4
2022-09-12	10:07:44	2.31589	10.3015	11.4807	72.4682	FALSE	4
2022-09-12	10:07:45	4.55645	20.268	7.74904	72.7621	1	5
2022-09-12	10:07:45	1.24831	5.55273	7.74904	78.021	FALSE	5
2022-09-12	10:07:45	0.696552	3.0984	7.74904	75.8605	FALSE	5
2022-09-12	10:07:45	0.466934	2.07702	7.74904	80.098	FALSE	5
2022-09-12	10:07:46	1.25579	5.58601	8.59548	81.4465	FALSE	5
2022-09-12	10:07:46	4.79741	21.3398	8.59548	101.438	1	6
2022-09-12	10:07:46	0.606985	2.69999	8.59548	84.1465	FALSE	6
2022-09-12	10:07:46	1.06922	4.7561	8.59548	106.194	FALSE	6
2022-09-12	10:07:47	1.11075	4.94084	8.06036	89.0873	FALSE	6
2022-09-12	10:07:47	1.75284	7.79698	8.06036	113.991	FALSE	6
2022-09-12	10:07:47	2.4505	10.9003	8.06036	99.9877	FALSE	6
2022-09-12	10:07:47	1.93411	8.60331	8.06036	122.594	FALSE	6
2022-09-12	10:07:48	1.47497	6.56096	4.08364	106.549	FALSE	6
2022-09-12	10:07:48	0.826628	3.67701	4.08364	126.271	FALSE	6
2022-09-12	10:07:48	0.452532	2.01295	4.08364	108.562	FALSE	6
2022-09-12	10:07:49	0.455891	2.02789	1.8842	128.299	FALSE	6
2022-09-12	10:07:49	0.495636	2.20469	1.8842	110.766	FALSE	6
2022-09-12	10:07:49	0.33355	1.4837	1.8842	129.783	FALSE	6
2022-09-12	10:07:49	0.409275	1.82054	1.8842	112.587	FALSE	6
2022-09-12	10:07:50	0.435789	1.93848	1.8833	131.721	FALSE	6
2022-09-12	10:07:50	0.409987	1.8237	1.8833	114.41	FALSE	6
2022-09-12	10:07:50	0.428715	1.90701	1.8833	133.628	FALSE	6
2022-09-12	10:07:50	0.419046	1.864	1.8833	116.274	FALSE	6
2022-09-12	10:07:51	0.429478	1.9104	1.9288	135.539	FALSE	6
2022-09-12	10:07:51	0.42159	1.87532	1.9288	118.15	FALSE	6
2022-09-12	10:07:51	0.435382	1.93667	1.9288	137.475	FALSE	6
2022-09-12	10:07:51	0.448003	1.99281	1.9288	120.143	FALSE	6
2022-09-12	10:07:52	0.516145	2.29592	2.61585	139.771	FALSE	6
2022-09-12	10:07:52	0.685712	3.05018	2.61585	123.193	FALSE	6
2022-09-12	10:07:52	0.562354	2.50146	2.61585	142.273	FALSE	6
2022-09-12	10:07:53	0.56159	2.49806	2.27792	125.691	FALSE	6
2022-09-12	10:07:53	0.492227	2.18952	2.27792	144.462	FALSE	6
2022-09-12	10:07:53	0.497621	2.21352	2.27792	127.904	FALSE	6
2022-09-12	10:07:53	0.496959	2.21057	2.27792	146.673	FALSE	6
2022-09-12	10:07:54	0.472532	2.10192	3.09263	130.006	FALSE	6
2022-09-12	10:07:54	0.508308	2.26106	3.09263	148.934	FALSE	6
2022-09-12	10:07:54	0.894211	3.97763	3.09263	133.984	FALSE	6
2022-09-12	10:07:54	0.905967	4.02992	3.09263	152.964	FALSE	6
2022-09-12	10:07:55	0.61645	2.74209	2.38415	136.726	FALSE	6
2022-09-12	10:07:55	0.590649	2.62732	2.38415	155.591	FALSE	6
2022-09-12	10:07:55	0.482507	2.14629	2.38415	138.872	FALSE	6
2022-09-12	10:07:55	0.454313	2.02088	2.38415	157.612	FALSE	6
2022-09-12	10:07:56	0.345916	1.5387	1.41267	140.411	FALSE	6
2022-09-12	10:07:56	0.402252	1.7893	1.41267	159.401	FALSE	6
2022-09-12	10:07:56	0.233753	1.03978	1.41267	141.451	FALSE	6
2022-09-12	10:07:56	0.28841	1.28291	1.41267	160.684	FALSE	6
2022-09-12	10:07:57	0.306629	1.36395	1.25053	142.815	FALSE	6
2022-09-12	10:07:57	0.294008	1.30781	1.25053	161.992	FALSE	6
2022-09-12	10:07:57	0.242761	1.07985	1.25053	143.895	FALSE	6
2022-09-12	10:07:58	-0.012099	-0.0538188	0.0187899	161.992	FALSE	6
2022-09-12	10:07:58	0.0314633	0.139955	0.0187899	144.035	FALSE	6
2022-09-12	10:07:58	0.0257127	0.114375	0.0187899	162.106	FALSE	6
2022-09-12	10:07:58	-0.0281804	-0.125352	0.0187899	144.035	FALSE	6
2022-09-12	10:07:59	-0.0675188	-0.300337	0.752404	162.106	FALSE	6
2022-09-12	10:07:59	-0.0749997	-0.333614	0.752404	144.035	FALSE	6
2022-09-12	10:07:59	0.330344	1.46944	0.752404	163.576	FALSE	6
2022-09-12	10:07:59	0.488766	2.17413	0.752404	146.209	FALSE	6
2022-09-12	10:08:00	0.229733	1.0219	1.43887	164.598	FALSE	6
2022-09-12	10:08:00	0.360013	1.60141	1.43887	147.81	FALSE	6
2022-09-12	10:08:00	0.357112	1.58851	1.43887	166.186	FALSE	6
2022-09-12	10:08:00	0.347036	1.54369	1.43887	149.354	FALSE	6
2022-09-12	10:08:01	0.285814	1.27136	2.10275	167.458	FALSE	6
2022-09-12	10:08:01	0.469428	2.08811	2.10275	151.442	FALSE	6
2022-09-12	10:08:01	0.662913	2.94877	2.10275	170.406	FALSE	6
2022-09-12	10:08:02	1.0648	4.73644	6.48622	156.178	FALSE	6
2022-09-12	10:08:02	1.45915	6.49059	6.48622	176.897	FALSE	6
2022-09-12	10:08:02	1.98927	8.84867	6.48622	165.027	FALSE	6
2022-09-12	10:08:02	1.31945	5.86918	6.48622	182.766	FALSE	6
2022-09-12	10:08:03	1.14678	5.10111	3.35364	170.128	FALSE	6
2022-09-12	10:08:03	0.943219	4.19563	3.35364	186.962	FALSE	6
2022-09-12	10:08:03	0.569682	2.53406	3.35364	172.662	FALSE	6
2022-09-12	10:08:03	0.356043	1.58375	3.35364	188.546	FALSE	6
2022-09-12	10:08:04	0.375229	1.66909	1.57453	174.331	FALSE	6
2022-09-12	10:08:04	0.33014	1.46853	1.57453	190.014	FALSE	6
2022-09-12	10:08:04	0.346374	1.54074	1.57453	175.872	FALSE	6
2022-09-12	10:08:04	0.364135	1.61975	1.57453	191.634	FALSE	6
2022-09-12	10:08:05	0.384491	1.71029	2.05023	177.582	FALSE	6
2022-09-12	10:08:05	0.481183	2.1404	2.05023	193.774	FALSE	6
2022-09-12	10:08:05	0.517061	2.29999	2.05023	179.882	FALSE	6
2022-09-12	10:08:06	0.725102	3.2254	4.91034	197	FALSE	6
2022-09-12	10:08:06	0.981336	4.36518	4.91034	184.247	FALSE	6
2022-09-12	10:08:06	0.895483	3.98329	4.91034	200.983	FALSE	6
2022-09-12	10:08:06	1.81365	8.06748	4.91034	192.315	FALSE	6
2022-09-12	10:08:07	6.09441	27.1092	30.6331	228.092	1	7
2022-09-12	10:08:07	12.5098	55.6461	30.6331	247.961	1	8
2022-09-12	10:08:07	4.97818	22.1439	30.6331	250.236	1	9
2022-09-12	10:08:07	3.96413	17.6332	30.6331	265.594	1	10
2022-09-12	10:08:08	4.80993	21.3955	11.5869	271.632	1	11
2022-09-12	10:08:08	2.40093	10.6798	11.5869	276.274	FALSE	11
2022-09-12	10:08:08	2.41665	10.7497	11.5869	282.381	FALSE	11
2022-09-12	10:08:08	0.791921	3.52262	11.5869	279.797	FALSE	11
2022-09-12	10:08:09	0.648104	2.8829	7.18141	285.264	FALSE	11
2022-09-12	10:08:09	0.465407	2.07022	7.18141	281.867	FALSE	11
2022-09-12	10:08:09	0.976857	4.34526	7.18141	289.609	FALSE	11
2022-09-12	10:08:09	4.36744	19.4272	7.18141	301.294	1	12
2022-09-12	10:08:10	2.13696	9.50563	13.6899	299.115	FALSE	12
2022-09-12	10:08:10	3.34999	14.9014	13.6899	316.196	1	13
2022-09-12	10:08:10	3.74591	16.6626	13.6899	315.778	1	14
2022-09-12	10:08:11	3.60851	16.0514	12.7551	332.247	1	15
2022-09-12	10:08:11	3.60571	16.0389	12.7551	331.817	1	16
2022-09-12	10:08:11	2.31869	10.314	12.7551	342.561	FALSE	16
2022-09-12	10:08:11	1.93696	8.61599	12.7551	340.432	FALSE	16
2022-09-12	10:08:12	1.77726	7.90561	5.03818	350.467	FALSE	16
2022-09-12	10:08:12	1.44098	6.40977	5.03818	346.842	FALSE	16
2022-09-12	10:08:12	0.915738	4.07339	5.03818	354.54	FALSE	16
2022-09-12	10:08:12	0.396552	1.76394	5.03818	348.606	FALSE	16
2022-09-12	10:08:13	0.40154	1.78613	1.59971	356.326	FALSE	16
2022-09-12	10:08:13	0.391361	1.74085	1.59971	350.347	FALSE	16
2022-09-12	10:08:13	0.372328	1.65619	1.59971	357.982	FALSE	16
2022-09-12	10:08:13	0.273295	1.21567	1.59971	351.563	FALSE	16
2022-09-12	10:08:14	0.347901	1.54753	1.53093	359.53	FALSE	16
2022-09-12	10:08:14	0.316705	1.40877	1.53093	352.971	FALSE	16
2022-09-12	10:08:14	0.367901	1.6365	1.53093	361.166	FALSE	16
2022-09-12	10:08:15	0.29126	1.29558	1.15155	354.267	FALSE	16
2022-09-12	10:08:15	0.359402	1.59869	1.15155	362.765	FALSE	16
2022-09-12	10:08:15	0.154669	0.687999	1.15155	354.955	FALSE	16
2022-09-12	10:08:15	0.230191	1.02394	1.15155	363.789	FALSE	16
2022-09-12	10:08:16	0.435992	1.93938	1.39881	356.894	FALSE	16
2022-09-12	10:08:16	0.179504	0.79847	1.39881	364.587	FALSE	16
2022-09-12	10:08:16	0.409987	1.8237	1.39881	358.718	FALSE	16
2022-09-12	10:08:16	0.232379	1.03367	1.39881	365.621	FALSE	16
2022-09-12	10:08:17	0.384491	1.71029	1.36015	360.428	FALSE	16
2022-09-12	10:08:17	0.28098	1.24986	1.36015	366.871	FALSE	16
2022-09-12	10:08:17	0.378232	1.68245	1.36015	362.111	FALSE	16
2022-09-12	10:08:17	0.179402	0.798016	1.36015	367.669	FALSE	16
2022-09-12	10:08:18	0.401285	1.785	1.49381	363.896	FALSE	16
2022-09-12	10:08:18	0.230293	1.02439	1.49381	368.693	FALSE	16
2022-09-12	10:08:18	0.375891	1.67204	1.49381	365.568	FALSE	16
2022-09-12	10:08:19	0.24215	1.07713	1.39784	369.77	FALSE	16
2022-09-12	10:08:19	0.38042	1.69218	1.39784	367.26	FALSE	16
2022-09-12	10:08:19	0.313194	1.39315	1.39784	371.164	FALSE	16
2022-09-12	10:08:19	0.321234	1.42891	1.39784	368.689	FALSE	16
2022-09-12	10:08:20	0.371005	1.6503	1.97198	372.814	FALSE	16
2022-09-12	10:08:20	0.372481	1.65687	1.97198	370.346	FALSE	16
2022-09-12	10:08:20	0.586476	2.60876	1.97198	375.423	FALSE	16
2022-09-12	10:08:21	0.383422	1.70554	1.98425	372.051	FALSE	16
2022-09-12	10:08:21	0.500471	2.2262	1.98425	377.649	FALSE	16
2022-09-12	10:08:21	0.61472	2.7344	1.98425	374.786	FALSE	16
2022-09-12	10:08:21	0.397825	1.76961	1.98425	379.419	FALSE	16
2022-09-12	10:08:21	0.333957	1.48551	1.98425	376.271	FALSE	16
2022-09-12	10:08:22	0.42897	1.90814	1.72071	381.327	FALSE	16
2022-09-12	10:08:22	0.311412	1.38522	1.72071	377.657	FALSE	16
2022-09-12	10:08:22	0.37986	1.68969	1.72071	383.016	FALSE	16
2022-09-12	10:08:22	0.427087	1.89977	1.72071	379.556	FALSE	16
2022-09-12	10:08:23	1.1364	5.05493	2.85792	388.071	FALSE	16
2022-09-12	10:08:23	0.308613	1.37277	2.85792	380.929	FALSE	16
2022-09-12	10:08:23	0.482456	2.14606	2.85792	390.217	FALSE	16
2022-09-12	10:08:24	0.202507	0.900792	1.34482	381.83	FALSE	16
2022-09-12	10:08:24	0.35299	1.57017	1.34482	391.788	FALSE	16
2022-09-12	10:08:24	0.328817	1.46264	1.34482	383.293	FALSE	16
2022-09-12	10:08:24	0.325	1.44566	1.34482	393.233	FALSE	16
2022-09-12	10:08:25	0.314109	1.39722	4.85363	384.69	FALSE	16
2022-09-12	10:08:25	0.396654	1.7644	4.85363	394.998	FALSE	16
2022-09-12	10:08:25	0.831514	3.69874	4.85363	388.389	FALSE	16
2022-09-12	10:08:25	2.8223	12.5542	4.85363	407.552	FALSE	16
2022-09-12	10:08:26	0.951361	4.23184	6.52177	392.62	FALSE	16
2022-09-12	10:08:26	2.6277	11.6885	6.52177	419.24	FALSE	16
2022-09-12	10:08:26	0.706272	3.14164	6.52177	395.762	FALSE	16
2022-09-12	10:08:26	1.5793	7.02504	6.52177	426.265	FALSE	16
2022-09-12	10:08:27	1.74062	7.74263	7.92215	403.505	FALSE	16
2022-09-12	10:08:27	0.540216	2.40299	7.92215	428.668	FALSE	16
2022-09-12	10:08:27	3.0621	13.6208	7.92215	417.125	1	17
2022-09-12	10:08:28	0.454059	2.01975	1.96309	430.688	FALSE	17
2022-09-12	10:08:28	0.600064	2.6692	1.96309	419.795	FALSE	17
2022-09-12	10:08:28	0.48215	2.1447	1.96309	432.833	FALSE	17
2022-09-12	10:08:28	0.22902	1.01873	1.96309	420.813	FALSE	17
2022-09-12	10:08:29	2.30347	10.2463	8.56449	443.079	FALSE	17
2022-09-12	10:08:29	0.686272	3.05268	8.56449	423.866	FALSE	17
2022-09-12	10:08:29	2.4733	11.0017	8.56449	454.081	FALSE	17
2022-09-12	10:08:29	2.23849	9.95725	8.56449	433.823	FALSE	17
2022-09-12	10:08:30	0.456909	2.03242	4.31681	456.113	FALSE	17
2022-09-12	10:08:30	1.74795	7.77523	4.31681	441.599	FALSE	17
2022-09-12	10:08:30	0.706527	3.14277	4.31681	459.256	FALSE	17
2022-09-12	10:08:31	0.585967	2.6065	4.37157	444.205	FALSE	17
2022-09-12	10:08:31	2.28856	10.18	4.37157	469.436	FALSE	17
2022-09-12	10:08:31	0.36327	1.6159	4.37157	445.821	FALSE	17
2022-09-12	10:08:31	0.693295	3.08391	4.37157	472.52	FALSE	17
2022-09-12	10:08:32	2.93843	13.0707	3.92381	458.892	FALSE	17
2022-09-12	10:08:32	0.162048	0.720822	3.92381	473.241	FALSE	17
2022-09-12	10:08:32	0.199962	0.889471	3.92381	459.781	FALSE	17
2022-09-12	10:08:32	0.228003	1.0142	3.92381	474.255	FALSE	17
2022-09-12	10:08:33	0.168359	0.748895	0.391058	460.53	FALSE	17
2022-09-12	10:08:33	0.104848	0.466385	0.391058	474.721	FALSE	17
2022-09-12	10:08:33	0.0374175	0.166441	0.391058	460.696	FALSE	17
2022-09-12	10:08:33	0.0410307	0.182513	0.391058	474.904	FALSE	17
2022-09-12	10:08:34	-0.0533203	-0.237179	-0.526935	460.696	FALSE	17
2022-09-12	10:08:34	-0.126145	-0.561118	-0.526935	474.904	FALSE	17
2022-09-12	10:08:34	-0.0840582	-0.373908	-0.526935	460.696	FALSE	17
2022-09-12	10:08:34	-0.210318	-0.935537	-0.526935	474.904	FALSE	17
2022-09-12	10:08:35	-0.276425	-1.22959	-0.397677	460.696	FALSE	17
2022-09-12	10:08:35	-0.0352033	-0.156591	-0.397677	474.904	FALSE	17
2022-09-12	10:08:35	0.0336516	0.149689	-0.397677	460.846	FALSE	17
2022-09-12	10:08:35	-0.0796308	-0.354214	-0.397677	474.904	FALSE	17
2022-09-12	10:08:36	-0.0256868	-0.11426	-0.086793	460.846	FALSE	17
2022-09-12	10:08:36	-0.245432	-1.09173	-0.086793	474.904	FALSE	17
2022-09-12	10:08:36	0.212583	0.945612	-0.086793	461.792	FALSE	17
2022-09-12	10:08:37	-0.00497431	-0.0221267	0.794225	474.904	FALSE	17
2022-09-12	10:08:37	0.132786	0.590659	0.794225	462.382	FALSE	17
2022-09-12	10:08:37	0.19126	0.850763	0.794225	475.755	FALSE	17
2022-09-12	10:08:37	0.395127	1.7576	0.794225	464.14	FALSE	17
2022-09-12	10:08:38	0.483626	2.15127	5.36409	477.906	FALSE	17
2022-09-12	10:08:38	1.2624	5.61541	5.36409	469.755	FALSE	17
2022-09-12	10:08:38	0.887952	3.94979	5.36409	481.856	FALSE	17
2022-09-12	10:08:38	2.18963	9.73991	5.36409	479.495	FALSE	17
2022-09-12	10:08:39	2.56938	11.4291	4.95347	493.285	FALSE	17
2022-09-12	10:08:39	0.853193	3.79517	4.95347	483.291	FALSE	17
2022-09-12	10:08:39	0.506171	2.25155	4.95347	495.536	FALSE	17
2022-09-12	10:08:39	0.525611	2.33802	4.95347	485.629	FALSE	17
2022-09-12	10:08:40	0.400522	1.7816	1.58775	497.318	FALSE	17
2022-09-12	10:08:40	0.371718	1.65348	1.58775	487.282	FALSE	17
2022-09-12	10:08:40	0.298588	1.32818	1.58775	498.646	FALSE	17
2022-09-12	10:08:41	0.296043	1.31686	1.32257	488.599	FALSE	17
2022-09-12	10:08:41	0.28673	1.27543	1.32257	499.921	FALSE	17
2022-09-12	10:08:41	0.307188	1.36643	1.32257	489.965	FALSE	17
2022-09-12	10:08:41	0.299351	1.33157	1.32257	501.253	FALSE	17
2022-09-12	10:08:42	0.300013	1.33452	1.45393	491.3	FALSE	17
2022-09-12	10:08:42	0.316705	1.40877	1.45393	502.662	FALSE	17
2022-09-12	10:08:42	0.342048	1.5215	1.45393	492.821	FALSE	17
2022-09-12	10:08:42	0.348664	1.55093	1.45393	504.213	FALSE	17
2022-09-12	10:08:43	0.33126	1.47351	1.33027	494.295	FALSE	17
2022-09-12	10:08:43	0.300115	1.33497	1.33027	505.548	FALSE	17
2022-09-12	10:08:43	0.293702	1.30645	1.33027	495.601	FALSE	17
2022-09-12	10:08:43	0.271158	1.20617	1.33027	506.754	FALSE	17
2022-09-12	10:08:44	0.249326	1.10905	1.10822	496.71	FALSE	17
2022-09-12	10:08:44	0.247188	1.09954	1.10822	507.853	FALSE	17
2022-09-12	10:08:44	0.250903	1.11607	1.10822	497.826	FALSE	17
2022-09-12	10:08:45	0.244084	1.08573	1.1593	508.939	FALSE	17
2022-09-12	10:08:45	0.241743	1.07532	1.1593	498.902	FALSE	17
2022-09-12	10:08:45	0.259758	1.15546	1.1593	510.095	FALSE	17
2022-09-12	10:08:45	0.296908	1.32071	1.1593	500.222	FALSE	17
2022-09-12	10:08:46	0.313906	1.39632	1.95223	511.491	FALSE	17
2022-09-12	10:08:46	0.35131	1.5627	1.95223	501.785	FALSE	17
2022-09-12	10:08:46	0.599148	2.66513	1.95223	514.156	FALSE	17
2022-09-12	10:08:46	0.491158	2.18477	1.95223	503.97	FALSE	17
2022-09-12	10:08:47	0.706985	3.14481	2.4606	517.301	FALSE	17
2022-09-12	10:08:47	0.604746	2.69003	2.4606	506.66	FALSE	17
2022-09-12	10:08:47	0.439351	1.95432	2.4606	519.255	FALSE	17
2022-09-12	10:08:47	0.46159	2.05324	2.4606	508.713	FALSE	17
2022-09-12	10:08:48	0.619657	2.75636	3.49512	522.012	FALSE	17
2022-09-12	10:08:48	0.279351	1.24261	3.49512	509.956	FALSE	17
2022-09-12	10:08:48	0.726476	3.23151	3.49512	525.243	FALSE	17
2022-09-12	10:08:48	1.51747	6.75001	3.49512	516.706	FALSE	17
2022-09-12	10:08:49	1.40475	6.24861	3.61174	531.492	FALSE	17
2022-09-12	10:08:49	0.355127	1.57968	3.61174	518.285	FALSE	17
2022-09-12	10:08:49	0.675992	3.00695	3.61174	534.499	FALSE	17
2022-09-12	10:08:50	0.394059	1.75285	4.17667	520.038	FALSE	17
2022-09-12	10:08:50	0.719046	3.19846	4.17667	537.697	FALSE	17
2022-09-12	10:08:50	0.95131	4.23162	4.17667	524.27	FALSE	17
2022-09-12	10:08:50	1.69141	7.52373	4.17667	545.221	FALSE	17
2022-09-12	10:08:51	2.04536	9.09817	5.61283	533.368	FALSE	17
2022-09-12	10:08:51	0.589835	2.6237	5.61283	547.844	FALSE	17
2022-09-12	10:08:51	1.5019	6.68075	5.61283	540.049	FALSE	17
2022-09-12	10:08:51	0.910191	4.04871	5.61283	551.893	FALSE	17
2022-09-12	10:08:52	0.86103	3.83003	3.62664	543.879	FALSE	17
2022-09-12	10:08:52	0.471463	2.09716	3.62664	553.99	FALSE	17
2022-09-12	10:08:52	0.921997	4.10123	3.62664	547.98	FALSE	17
2022-09-12	10:08:52	1.00673	4.47814	3.62664	558.469	FALSE	17
2022-09-12	10:08:53	0.579453	2.57752	3.52481	550.558	FALSE	17
2022-09-12	10:08:53	1.19808	5.3293	3.52481	563.798	FALSE	17
2022-09-12	10:08:53	0.599707	2.66762	3.52481	553.225	FALSE	17
2022-09-12	10:08:54	0.488155	2.17141	2.86892	565.969	FALSE	17
2022-09-12	10:08:54	1.08073	4.8073	2.86892	558.033	FALSE	17
2022-09-12	10:08:54	0.428104	1.90429	2.86892	567.874	FALSE	17
2022-09-12	10:08:54	0.582863	2.59269	2.86892	560.625	FALSE	17
2022-09-12	10:08:55	0.575891	2.56168	2.07753	570.435	FALSE	17
2022-09-12	10:08:55	0.460013	2.04623	2.07753	562.671	FALSE	17
2022-09-12	10:08:55	0.420166	1.86898	2.07753	572.304	FALSE	17
2022-09-12	10:08:55	0.412125	1.83321	2.07753	564.505	FALSE	17
2022-09-12	10:08:56	0.389224	1.73135	2.39433	574.036	FALSE	17
2022-09-12	10:08:56	0.607188	2.70089	2.39433	567.206	FALSE	17
2022-09-12	10:08:56	0.669071	2.97616	2.39433	577.012	FALSE	17
2022-09-12	10:08:56	0.487596	2.16892	2.39433	569.375	FALSE	17
2022-09-12	10:08:57	0.585763	2.60559	2.92025	579.617	FALSE	17
2022-09-12	10:08:57	0.489529	2.17752	2.92025	571.552	FALSE	17
2022-09-12	10:08:57	0.894211	3.97763	2.92025	583.595	FALSE	17
2022-09-12	10:08:58	0.887697	3.94865	4.65261	575.501	FALSE	17
2022-09-12	10:08:58	1.18215	5.25844	4.65261	588.853	FALSE	17
2022-09-12	10:08:58	1.16291	5.17286	4.65261	580.674	FALSE	17
2022-09-12	10:08:58	0.951056	4.23049	4.65261	593.084	FALSE	17
2022-09-12	10:08:59	0.605305	2.69252	2.18166	583.366	FALSE	17
2022-09-12	10:08:59	0.492939	2.19269	2.18166	595.277	FALSE	17
2022-09-12	10:08:59	0.467087	2.0777	2.18166	585.444	FALSE	17
2022-09-12	10:08:59	0.396501	1.76372	2.18166	597.04	FALSE	17
2022-09-12	10:09:00	0.325967	1.44997	1.18279	586.894	FALSE	17
2022-09-12	10:09:00	0.213193	0.948325	1.18279	597.989	FALSE	17
2022-09-12	10:09:00	0.305814	1.36032	1.18279	588.254	FALSE	17
2022-09-12	10:09:00	0.218639	0.97255	1.18279	598.961	FALSE	17
2022-09-12	10:09:01	0.135127	0.601072	0.806448	588.855	FALSE	17
2022-09-12	10:09:01	0.248562	1.10565	0.806448	600.067	FALSE	17
2022-09-12	10:09:01	0.112379	0.499884	0.806448	589.355	FALSE	17
2022-09-12	10:09:01	0.229122	1.01918	0.806448	601.086	FALSE	17
2022-09-12	10:09:02	0.262608	1.16813	5.02649	590.523	FALSE	17
2022-09-12	10:09:02	0.854058	3.79902	5.02649	604.885	FALSE	17
2022-09-12	10:09:02	2.27335	10.1123	5.02649	600.635	FALSE	17
2022-09-12	10:09:03	0.47874	2.12953	5.47898	607.014	FALSE	17
2022-09-12	10:09:03	1.6736	7.44451	5.47898	608.08	FALSE	17
2022-09-12	10:09:03	1.70307	7.5756	5.47898	614.59	FALSE	17
2022-09-12	10:09:03	1.07151	4.76629	5.47898	612.846	FALSE	17
2022-09-12	10:09:04	1.39218	6.1927	5.45901	620.783	FALSE	17
2022-09-12	10:09:04	0.712176	3.1679	5.45901	616.014	FALSE	17
2022-09-12	10:09:04	0.751514	3.34288	5.45901	624.126	FALSE	17
2022-09-12	10:09:04	2.05309	9.13255	5.45901	625.147	FALSE	17
2022-09-12	10:09:05	0.411361	1.82982	2.3443	625.955	FALSE	17
2022-09-12	10:09:05	0.394567	1.75511	2.3443	626.902	FALSE	17
2022-09-12	10:09:05	0.796552	3.54322	2.3443	629.499	FALSE	17
2022-09-12	10:09:05	0.505611	2.24906	2.3443	629.151	FALSE	17
2022-09-12	10:09:06	0.350089	1.55727	1.64133	631.056	FALSE	17
2022-09-12	10:09:06	0.358486	1.59462	1.64133	630.745	FALSE	17
2022-09-12	10:09:06	0.398384	1.77209	1.64133	632.828	FALSE	17
2022-09-12	10:09:07	0.373499	1.6614	1.48732	632.407	FALSE	17
2022-09-12	10:09:07	0.249071	1.10792	1.48732	633.936	FALSE	17
2022-09-12	10:09:07	0.386527	1.71935	1.48732	634.126	FALSE	17
2022-09-12	10:09:07	0.328359	1.46061	1.48732	635.397	FALSE	17
2022-09-12	10:09:08	0.2707	1.20413	1.19915	635.33	FALSE	17
2022-09-12	10:09:08	0.177163	0.788056	1.19915	636.185	FALSE	17
2022-09-12	10:09:08	0.373601	1.66185	1.19915	636.992	FALSE	17
2022-09-12	10:09:08	0.256858	1.14256	1.19915	637.327	FALSE	17
2022-09-12	10:09:09	0.383982	1.70803	1.22626	638.7	FALSE	17
2022-09-12	10:09:09	0.15472	0.688226	1.22626	638.015	FALSE	17
2022-09-12	10:09:09	0.358283	1.59371	1.22626	640.294	FALSE	17
2022-09-12	10:09:09	0.205713	0.915053	1.22626	638.93	FALSE	17
2022-09-12	10:09:10	0.331769	1.47577	1.35799	641.77	FALSE	17
2022-09-12	10:09:10	0.193041	0.858685	1.35799	639.789	FALSE	17
2022-09-12	10:09:10	0.391056	1.7395	1.35799	643.509	FALSE	17
2022-09-12	10:09:11	0.276349	1.22926	1.37028	641.018	FALSE	17
2022-09-12	10:09:11	0.424389	1.88777	1.37028	645.397	FALSE	17
2022-09-12	10:09:11	0.184949	0.82269	1.37028	641.841	FALSE	17
2022-09-12	10:09:11	0.346527	1.54142	1.37028	646.938	FALSE	17
2022-09-12	10:09:12	0.27528	1.2245	1.50509	643.066	FALSE	17
2022-09-12	10:09:12	0.388817	1.72954	1.50509	648.668	FALSE	17
2022-09-12	10:09:12	0.272328	1.21137	1.50509	644.277	FALSE	17
2022-09-12	10:09:12	0.41701	1.85494	1.50509	650.523	FALSE	17
2022-09-12	10:09:13	0.39757	1.76847	1.89903	646.045	FALSE	17
2022-09-12	10:09:13	0.586018	2.60673	1.89903	653.13	FALSE	17
2022-09-12	10:09:13	0.307494	1.36779	1.89903	647.413	FALSE	17
2022-09-12	10:09:13	0.416603	1.85313	1.89903	654.983	FALSE	17
2022-09-12	10:09:14	0.487748	2.1696	2.00735	649.583	FALSE	17
2022-09-12	10:09:14	0.466018	2.07294	2.00735	657.056	FALSE	17
2022-09-12	10:09:14	0.475738	2.11618	2.00735	651.699	FALSE	17
2022-09-12	10:09:14	0.375585	1.67068	2.00735	658.726	FALSE	17
2022-09-12	10:09:15	0.406629	1.80877	2.57647	653.508	FALSE	17
2022-09-12	10:09:15	0.600369	2.67056	2.57647	661.397	FALSE	17
2022-09-12	10:09:15	0.730649	3.25007	2.57647	656.758	FALSE	17
2022-09-12	10:09:16	0.871209	3.87531	2.77356	665.272	FALSE	17
2022-09-12	10:09:16	0.747036	3.32297	2.77356	660.081	FALSE	17
2022-09-12	10:09:16	0.395789	1.76055	2.77356	667.033	FALSE	17
2022-09-12	10:09:16	0.480064	2.13542	2.77356	662.216	FALSE	17
2022-09-12	10:09:17	0.381082	1.69513	1.61867	668.728	FALSE	17
2022-09-12	10:09:17	0.409428	1.82122	1.61867	664.037	FALSE	17
2022-09-12	10:09:17	0.376043	1.67271	1.61867	670.401	FALSE	17
2022-09-12	10:09:17	0.28902	1.28562	1.61867	665.323	FALSE	17
2022-09-12	10:09:18	0.356908	1.5876	1.32235	671.988	FALSE	17
2022-09-12	10:09:18	0.205255	0.913015	1.32235	666.236	FALSE	17
2022-09-12	10:09:18	0.344746	1.5335	1.32235	673.522	FALSE	17
2022-09-12	10:09:18	0.282201	1.25529	1.32235	667.491	FALSE	17
2022-09-12	10:09:19	0.311209	1.38432	1.85298	674.906	FALSE	17
2022-09-12	10:09:19	0.402761	1.79156	1.85298	669.283	FALSE	17
2022-09-12	10:09:19	0.535738	2.38307	1.85298	677.289	FALSE	17
2022-09-12	10:09:20	0.800114	3.55907	2.9898	672.842	FALSE	17
2022-09-12	10:09:20	0.581998	2.58884	2.9898	679.878	FALSE	17
2022-09-12	10:09:20	0.790547	3.51651	2.9898	676.359	FALSE	17
2022-09-12	10:09:20	0.515891	2.29479	2.9898	682.173	FALSE	17
2022-09-12	10:09:21	0.52271	2.32512	2.24787	678.684	FALSE	17
2022-09-12	10:09:21	0.506069	2.2511	2.24787	684.424	FALSE	17
2022-09-12	10:09:21	0.509936	2.2683	2.24787	680.952	FALSE	17
2022-09-12	10:09:21	0.482659	2.14696	2.24787	686.571	FALSE	17
2022-09-12	10:09:22	0.474568	2.11097	1.95217	683.063	FALSE	17
2022-09-12	10:09:22	0.449987	2.00163	1.95217	688.572	FALSE	17
2022-09-12	10:09:22	0.434364	1.93214	1.95217	684.995	FALSE	17
2022-09-12	10:09:22	0.396552	1.76394	1.95217	690.336	FALSE	17
2022-09-12	10:09:23	0.367341	1.63401	1.49094	686.629	FALSE	17
2022-09-12	10:09:23	0.293346	1.30486	1.49094	691.641	FALSE	17
2022-09-12	10:09:23	0.344847	1.53395	1.49094	688.163	FALSE	17
2022-09-12	10:09:24	0.385254	1.71369	1.65625	693.355	FALSE	17
2022-09-12	10:09:24	0.381234	1.69581	1.65625	689.859	FALSE	17
2022-09-12	10:09:24	0.354618	1.57741	1.65625	694.932	FALSE	17
2022-09-12	10:09:24	0.368257	1.63808	1.65625	691.497	FALSE	17
2022-09-12	10:09:25	0.428868	1.90769	2.1816	696.84	FALSE	17
2022-09-12	10:09:25	0.686018	3.05155	2.1816	694.548	FALSE	17
2022-09-12	10:09:25	0.531158	2.3627	2.1816	699.203	FALSE	17
2022-09-12	10:09:25	0.315738	1.40447	2.1816	695.953	FALSE	17
2022-09-12	10:09:26	0.315534	1.40356	1.56061	700.606	FALSE	17
2022-09-12	10:09:26	0.320929	1.42756	1.56061	697.38	FALSE	17
2022-09-12	10:09:26	0.397214	1.76689	1.56061	702.373	FALSE	17
2022-09-12	10:09:26	0.369682	1.64442	1.56061	699.025	FALSE	17
2022-09-12	10:09:27	0.230853	1.02688	1.55885	703.4	FALSE	17
2022-09-12	10:09:27	0.3764	1.6743	1.55885	700.699	FALSE	17
2022-09-12	10:09:27	0.317621	1.41284	1.55885	704.813	FALSE	17
2022-09-12	10:09:27	0.476909	2.12139	1.55885	702.821	FALSE	17
2022-09-12	10:09:28	0.158995	0.707242	1.17651	705.52	FALSE	17
2022-09-12	10:09:28	0.38556	1.71505	1.17651	704.536	FALSE	17
2022-09-12	10:09:28	0.248919	1.10724	1.17651	706.627	FALSE	17
2022-09-12	10:09:29	0.360674	1.60435	2.22721	706.14	FALSE	17
2022-09-12	10:09:29	0.339351	1.5095	2.22721	708.137	FALSE	17
2022-09-12	10:09:29	0.403015	1.79269	2.22721	707.933	FALSE	17
2022-09-12	10:09:29	0.899758	4.0023	2.22721	712.139	FALSE	17
2022-09-12	10:09:30	0.334771	1.48913	2.67136	709.422	FALSE	17
2022-09-12	10:09:30	0.349428	1.55433	2.67136	713.694	FALSE	17
2022-09-12	10:09:30	1.2278	5.4615	2.67136	714.883	FALSE	17
2022-09-12	10:09:30	0.490191	2.18047	2.67136	715.874	FALSE	17
2022-09-12	10:09:31	0.431921	1.92127	1.74357	716.805	FALSE	17
2022-09-12	10:09:31	0.374975	1.66796	1.74357	717.542	FALSE	17
2022-09-12	10:09:31	0.309071	1.37481	1.74357	718.179	FALSE	17
2022-09-12	10:09:31	0.451921	2.01023	1.74357	719.552	FALSE	17
2022-09-12	10:09:32	0.355687	1.58217	1.82982	719.762	FALSE	17
2022-09-12	10:09:32	0.573041	2.549	1.82982	722.101	FALSE	17
2022-09-12	10:09:32	0.305356	1.35828	1.82982	721.12	FALSE	17
2022-09-12	10:09:33	0.561234	2.49648	1.92427	724.598	FALSE	17
2022-09-12	10:09:33	0.311514	1.38568	1.92427	722.505	FALSE	17
2022-09-12	10:09:33	0.523575	2.32897	1.92427	726.927	FALSE	17
2022-09-12	10:09:33	0.334059	1.48596	1.92427	723.991	FALSE	17
2022-09-12	10:09:34	0.4764	2.11912	2.18884	729.046	FALSE	17
2022-09-12	10:09:34	0.361947	1.61001	2.18884	725.601	FALSE	17
2022-09-12	10:09:34	0.48556	2.15987	2.18884	731.206	FALSE	17
2022-09-12	10:09:34	0.644389	2.86637	2.18884	728.468	FALSE	17
2022-09-12	10:09:35	0.315942	1.40537	2.14164	732.611	FALSE	17
2022-09-12	10:09:35	0.427748	1.90271	2.14164	730.371	FALSE	17
2022-09-12	10:09:35	0.674516	3.00038	2.14164	735.611	FALSE	17
2022-09-12	10:09:35	0.507647	2.25812	2.14164	732.629	FALSE	17
2022-09-12	10:09:36	0.444033	1.97515	2.13066	737.587	FALSE	17
2022-09-12	10:09:36	0.635992	2.82902	2.13066	735.458	FALSE	17
2022-09-12	10:09:36	0.356959	1.58783	2.13066	739.174	FALSE	17
2022-09-12	10:09:37	0.463473	2.06162	1.99654	737.519	FALSE	17
2022-09-12	10:09:37	0.311209	1.38432	1.99654	740.559	FALSE	17
2022-09-12	10:09:37	0.638741	2.84125	1.99654	740.361	FALSE	17
2022-09-12	10:09:37	0.381947	1.69898	1.99654	742.258	FALSE	17
2022-09-12	10:09:38	0.572379	2.54606	1.84233	742.907	FALSE	17
2022-09-12	10:09:38	0.326527	1.45246	1.84233	743.71	FALSE	17
2022-09-12	10:09:38	0.280064	1.24578	1.84233	744.152	FALSE	17
2022-09-12	10:09:38	0.477723	2.12501	1.84233	745.835	FALSE	17
2022-09-12	10:09:39	0.385051	1.71278	1.73916	745.865	FALSE	17
2022-09-12	10:09:39	0.441489	1.96383	1.73916	747.799	FALSE	17
2022-09-12	10:09:39	0.341692	1.51991	1.73916	747.385	FALSE	17
2022-09-12	10:09:39	0.395687	1.76009	1.73916	749.559	FALSE	17
2022-09-12	10:09:40	0.274059	1.21907	1.76593	748.604	FALSE	17
2022-09-12	10:09:40	0.538995	2.39756	1.76593	751.957	FALSE	17
2022-09-12	10:09:40	0.204186	0.90826	1.76593	749.512	FALSE	17
2022-09-12	10:09:40	0.570751	2.53881	1.76593	754.495	FALSE	17
2022-09-12	10:09:41	0.294873	1.31165	1.18617	750.824	FALSE	17
2022-09-12	10:09:41	0.29813	1.32614	1.18617	755.822	FALSE	17
2022-09-12	10:09:41	0.206985	0.920711	1.18617	751.745	FALSE	17
2022-09-12	10:09:42	0.255484	1.13644	1.17498	756.958	FALSE	17
2022-09-12	10:09:42	0.257417	1.14504	1.17498	752.89	FALSE	17
2022-09-12	10:09:42	0.253397	1.12716	1.17498	758.085	FALSE	17
2022-09-12	10:09:42	0.290293	1.29128	1.17498	754.181	FALSE	17
2022-09-12	10:09:43	0.345611	1.53735	2.9842	759.623	FALSE	17
2022-09-12	10:09:43	0.672837	2.99291	2.9842	757.174	FALSE	17
2022-09-12	10:09:43	0.300573	1.33701	2.9842	760.96	FALSE	17
2022-09-12	10:09:43	1.36449	6.06952	2.9842	763.244	FALSE	17
2022-09-12	10:09:44	0.241489	1.07419	1.56542	762.034	FALSE	17
2022-09-12	10:09:44	0.352786	1.56926	1.56542	764.813	FALSE	17
2022-09-12	10:09:44	0.396196	1.76236	1.56542	763.796	FALSE	17
2022-09-12	10:09:44	0.417214	1.85585	1.56542	766.669	FALSE	17
2022-09-12	10:09:45	0.272735	1.21318	1.17274	765.009	FALSE	17
2022-09-12	10:09:45	0.275738	1.22654	1.17274	767.895	FALSE	17
2022-09-12	10:09:45	0.242456	1.07849	1.17274	766.088	FALSE	17
2022-09-12	10:09:46	0.332685	1.47985	1.00605	769.375	FALSE	17
2022-09-12	10:09:46	0.124949	0.555798	1.00605	766.644	FALSE	17
2022-09-12	10:09:46	0.307036	1.36576	1.00605	770.741	FALSE	17
2022-09-12	10:09:46	0.140013	0.622806	1.00605	767.266	FALSE	17
2022-09-12	10:09:47	0.380827	1.69399	1.26338	772.435	FALSE	17
2022-09-12	10:09:47	0.115636	0.514372	1.26338	767.781	FALSE	17
2022-09-12	10:09:47	0.433601	1.92874	1.26338	774.364	FALSE	17
2022-09-12	10:09:47	0.206018	0.916409	1.26338	768.697	FALSE	17
2022-09-12	10:09:48	0.190496	0.847364	1.04148	775.211	FALSE	17
2022-09-12	10:09:48	0.168155	0.747987	1.04148	769.445	FALSE	17
2022-09-12	10:09:48	0.285407	1.26955	1.04148	776.48	FALSE	17
2022-09-12	10:09:48	0.292481	1.30101	1.04148	770.746	FALSE	17
2022-09-12	10:09:49	0.371463	1.65234	1.48739	778.133	FALSE	17
2022-09-12	10:09:49	0.377774	1.68041	1.48739	772.427	FALSE	17
2022-09-12	10:09:49	0.253906	1.12942	1.48739	779.262	FALSE	17
2022-09-12	10:09:50	0.629275	2.79914	2.83525	775.226	FALSE	17
2022-09-12	10:09:50	0.308257	1.37119	2.83525	780.633	FALSE	17
2022-09-12	10:09:50	1.2936	5.75419	2.83525	780.98	FALSE	17
2022-09-12	10:09:50	0.318435	1.41646	2.83525	782.05	FALSE	17
2022-09-12	10:09:51	0.376705	1.67566	2.09818	782.656	FALSE	17
2022-09-12	10:09:51	0.330293	1.46921	2.09818	783.519	FALSE	17
2022-09-12	10:09:51	0.433804	1.92965	2.09818	784.585	FALSE	17
2022-09-12	10:09:51	0.745967	3.31821	2.09818	786.837	FALSE	17
2022-09-12	10:09:52	0.381285	1.69603	2.11578	786.281	FALSE	17
2022-09-12	10:09:52	0.297519	1.32342	2.11578	788.161	FALSE	17
2022-09-12	10:09:52	1.03899	4.62164	2.11578	790.903	FALSE	17
2022-09-12	10:09:52	0.184797	0.822014	2.11578	788.983	FALSE	17
2022-09-12	10:09:53	0.72271	3.21476	2.22936	794.118	FALSE	17
2022-09-12	10:09:53	0.289631	1.28834	2.22936	790.271	FALSE	17
2022-09-12	10:09:53	0.397926	1.77005	2.22936	795.888	FALSE	17
2022-09-12	10:09:53	0.594466	2.6443	2.22936	792.915	FALSE	17
2022-09-12	10:09:54	0.628664	2.79642	2.1453	798.684	FALSE	17
2022-09-12	10:09:54	0.534008	2.37537	2.1453	795.291	FALSE	17
2022-09-12	10:09:54	0.284186	1.26412	2.1453	799.948	FALSE	17
2022-09-12	10:09:55	0.296908	1.32071	5.02952	796.611	FALSE	17
2022-09-12	10:09:55	0.524491	2.33304	5.02952	802.281	FALSE	17
2022-09-12	10:09:55	0.470191	2.0915	5.02952	798.703	FALSE	17
2022-09-12	10:09:55	3.23116	14.3728	5.02952	816.654	1	18
2022-09-12	10:09:56	0.453855	2.01884	3.02398	800.722	FALSE	18
2022-09-12	10:09:56	0.637926	2.83762	3.02398	819.492	FALSE	18
2022-09-12	10:09:56	1.10184	4.9012	3.02398	805.623	FALSE	18
2022-09-12	10:09:56	0.525662	2.33825	3.02398	821.83	FALSE	18
2022-09-12	10:09:57	0.506272	2.252	1.91176	807.875	FALSE	18
2022-09-12	10:09:57	0.398995	1.77481	1.91176	823.605	FALSE	18
2022-09-12	10:09:57	0.244186	1.08619	1.91176	808.961	FALSE	18
2022-09-12	10:09:57	0.569682	2.53406	1.91176	826.139	FALSE	18
2022-09-12	10:09:58	0.217723	0.968475	1.34606	809.93	FALSE	18
2022-09-12	10:09:58	0.491463	2.18613	1.34606	828.325	FALSE	18
2022-09-12	10:09:58	0.198639	0.883586	1.34606	810.813	FALSE	18
2022-09-12	10:09:59	0.573092	2.54923	2.47877	830.874	FALSE	18
2022-09-12	10:09:59	1.00281	4.4607	2.47877	815.274	FALSE	18
2022-09-12	10:09:59	0.382354	1.70079	2.47877	832.575	FALSE	18
2022-09-12	10:09:59	0.270751	1.20435	2.47877	816.478	FALSE	18
2022-09-12	10:10:00	0.459809	2.04532	1.8481	834.62	FALSE	18
2022-09-12	10:10:00	0.337468	1.50113	1.8481	817.979	FALSE	18
2022-09-12	10:10:00	0.595229	2.6477	1.8481	837.268	FALSE	18
2022-09-12	10:10:00	0.269377	1.19824	1.8481	819.178	FALSE	18
2022-09-12	10:10:01	0.357214	1.58896	1.38596	838.857	FALSE	18
2022-09-12	10:10:01	0.261692	1.16406	1.38596	820.342	FALSE	18
2022-09-12	10:10:01	0.383779	1.70713	1.38596	840.564	FALSE	18
2022-09-12	10:10:01	0.243626	1.0837	1.38596	821.425	FALSE	18
2022-09-12	10:10:02	0.384898	1.7121	1.34961	842.276	FALSE	18
2022-09-12	10:10:02	0.157468	0.700449	1.34961	822.126	FALSE	18
2022-09-12	10:10:02	0.36785	1.63627	1.34961	843.912	FALSE	18
2022-09-12	10:10:03	0.213855	0.95127	1.26021	823.077	FALSE	18
2022-09-12	10:10:03	0.431005	1.9172	1.26021	845.83	FALSE	18
2022-09-12	10:10:03	0.142303	0.632992	1.26021	823.71	FALSE	18
2022-09-12	10:10:03	0.346069	1.53938	1.26021	847.369	FALSE	18
2022-09-12	10:10:04	0.203066	0.903278	1.31601	824.613	FALSE	18
2022-09-12	10:10:04	0.404695	1.80016	1.31601	849.169	FALSE	18
2022-09-12	10:10:04	0.16668	0.741426	1.31601	825.355	FALSE	18
2022-09-12	10:10:04	0.408969	1.81918	1.31601	850.988	FALSE	18
2022-09-12	10:10:05	0.185153	0.823598	1.25059	826.178	FALSE	18
2022-09-12	10:10:05	0.430089	1.91312	1.25059	852.901	FALSE	18
2022-09-12	10:10:05	0.108919	0.484493	1.25059	826.663	FALSE	18
2022-09-12	10:10:05	0.40042	1.78115	1.25059	854.683	FALSE	18
2022-09-12	10:10:06	0.165611	0.736671	1.09841	827.4	FALSE	18
2022-09-12	10:10:06	0.353906	1.57424	1.09841	856.257	FALSE	18
2022-09-12	10:10:06	0.169275	0.752969	1.09841	828.153	FALSE	18
2022-09-12	10:10:06	0.298944	1.32976	1.09841	857.587	FALSE	18
2022-09-12	10:10:07	0.233957	1.04069	1.15968	829.193	FALSE	18
2022-09-12	10:10:07	0.271209	1.20639	1.15968	858.793	FALSE	18
2022-09-12	10:10:07	0.276959	1.23197	1.15968	830.425	FALSE	18
2022-09-12	10:10:08	0.22729	1.01103	1.38336	859.804	FALSE	18
2022-09-12	10:10:08	0.321896	1.43186	1.38336	831.857	FALSE	18
2022-09-12	10:10:08	0.258741	1.15093	1.38336	860.955	FALSE	18
2022-09-12	10:10:08	0.436043	1.93961	1.38336	833.797	FALSE	18
2022-09-12	10:10:09	0.200064	0.889925	1.73106	861.845	FALSE	18
2022-09-12	10:10:09	0.525662	2.33825	1.73106	836.135	FALSE	18
2022-09-12	10:10:09	0.400267	1.78047	1.73106	863.625	FALSE	18
2022-09-12	10:10:09	0.430649	1.91561	1.73106	838.051	FALSE	18
2022-09-12	10:10:10	0.182252	0.810693	1.473	864.436	FALSE	18
2022-09-12	10:10:10	0.339199	1.50882	1.473	839.559	FALSE	18
2022-09-12	10:10:10	0.302201	1.34425	1.473	865.78	FALSE	18
2022-09-12	10:10:10	0.500929	2.22823	1.473	841.788	FALSE	18
2022-09-12	10:10:11	0.304746	1.35557	1.5495	867.136	FALSE	18
2022-09-12	10:10:11	0.34383	1.52942	1.5495	843.317	FALSE	18
2022-09-12	10:10:11	0.396451	1.76349	1.5495	868.899	FALSE	18
2022-09-12	10:10:12	0.318995	1.41895	1.49156	844.736	FALSE	18
2022-09-12	10:10:12	0.409682	1.82235	1.49156	870.722	FALSE	18
2022-09-12	10:10:12	0.191361	0.851212	1.49156	845.587	FALSE	18
2022-09-12	10:10:12	0.421234	1.87373	1.49156	872.595	FALSE	18
2022-09-12	10:10:13	1.32052	5.87394	9.22723	851.461	FALSE	18
2022-09-12	10:10:13	0.820827	3.6512	9.22723	876.247	FALSE	18
2022-09-12	10:10:13	2.50739	11.1534	9.22723	862.615	FALSE	18
2022-09-12	10:10:13	3.64876	16.2304	9.22723	892.477	1	19
2022-09-12	10:10:14	2.52663	11.239	9.98456	873.853	FALSE	19
2022-09-12	10:10:14	2.7539	12.2499	9.98456	904.727	FALSE	19
2022-09-12	10:10:14	0.829428	3.68946	9.98456	877.543	FALSE	19
2022-09-12	10:10:14	2.86856	12.7599	9.98456	917.487	FALSE	19
2022-09-12	10:10:15	2.79289	12.4233	8.60037	889.966	FALSE	19
2022-09-12	10:10:15	1.02129	4.5429	8.60037	922.03	FALSE	19
2022-09-12	10:10:15	1.98617	8.83488	8.60037	898.801	FALSE	19
2022-09-12	10:10:16	1.11335	4.9524	6.69889	926.982	FALSE	19
2022-09-12	10:10:16	1.46754	6.52791	6.69889	905.329	FALSE	19
2022-09-12	10:10:16	2.95502	13.1445	6.69889	940.127	FALSE	19
2022-09-12	10:10:16	0.488003	2.17073	6.69889	907.5	FALSE	19
2022-09-12	10:10:17	1.12342	4.9972	2.52427	945.124	FALSE	19
2022-09-12	10:10:17	0.349478	1.55455	2.52427	909.054	FALSE	19
2022-09-12	10:10:17	0.434211	1.93146	2.52427	947.055	FALSE	19
2022-09-12	10:10:17	0.362812	1.61386	2.52427	910.668	FALSE	19
2022-09-12	10:10:18	0.284186	1.26412	1.69196	948.32	FALSE	19
2022-09-12	10:10:18	0.193193	0.859361	1.69196	911.528	FALSE	19
2022-09-12	10:10:18	0.543015	2.41544	1.69196	950.735	FALSE	19
2022-09-12	10:10:18	0.501081	2.22891	1.69196	913.756	FALSE	19
2022-09-12	10:10:19	1.02754	4.5707	3.11526	955.306	FALSE	19
2022-09-12	10:10:19	1.09726	4.88083	3.11526	918.637	FALSE	19
2022-09-12	10:10:19	0.286578	1.27476	3.11526	956.58	FALSE	19
2022-09-12	10:10:19	0.389987	1.73474	3.11526	920.372	FALSE	19
2022-09-12	10:10:20	0.141845	0.630955	0.705883	957.211	FALSE	19
2022-09-12	10:10:20	-0.02187	-0.0972821	0.705883	920.372	FALSE	19
2022-09-12	10:10:20	0.356094	1.58398	0.705883	958.795	FALSE	19
2022-09-12	10:10:21	0.31126	1.38455	2.21504	921.757	FALSE	19
2022-09-12	10:10:21	0.594567	2.64475	2.21504	961.44	FALSE	19
2022-09-12	10:10:21	0.657773	2.92591	2.21504	924.682	FALSE	19
2022-09-12	10:10:21	0.428257	1.90497	2.21504	963.345	FALSE	19
2022-09-12	10:10:22	0.333448	1.48324	6.79069	926.166	FALSE	19
2022-09-12	10:10:22	0.879555	3.91244	6.79069	967.258	FALSE	19
2022-09-12	10:10:22	3.53253	15.7134	6.79069	941.879	1	20
2022-09-12	10:10:22	1.36093	6.05369	6.79069	973.311	FALSE	20
2022-09-12	10:10:23	1.77497	7.89542	4.04123	949.775	FALSE	20
2022-09-12	10:10:23	1.0194	4.5345	4.04123	977.846	FALSE	20
2022-09-12	10:10:23	0.582506	2.5911	4.04123	952.366	FALSE	20
2022-09-12	10:10:23	0.257163	1.14391	4.04123	978.99	FALSE	20
2022-09-12	10:10:24	0.250903	1.11607	1.1221	953.482	FALSE	20
2022-09-12	10:10:24	0.312481	1.38998	1.1221	980.38	FALSE	20
2022-09-12	10:10:24	0.193397	0.860269	1.1221	954.342	FALSE	20
2022-09-12	10:10:25	0.221031	0.98319	0.636162	981.363	FALSE	20
2022-09-12	10:10:25	0.0847967	0.377193	0.636162	954.719	FALSE	20
2022-09-12	10:10:25	0.135535	0.602887	0.636162	981.966	FALSE	20
2022-09-12	10:10:25	0.1307	0.58138	0.636162	955.301	FALSE	20
2022-09-12	10:10:26	0.106272	0.472719	1.4803	982.438	FALSE	20
2022-09-12	10:10:26	0.320318	1.42484	1.4803	956.725	FALSE	20
2022-09-12	10:10:26	0.576603	2.56485	1.4803	985.003	FALSE	20
2022-09-12	10:10:26	0.327952	1.4588	1.4803	958.184	FALSE	20
2022-09-12	10:10:27	0.321641	1.43072	1.39071	986.434	FALSE	20
2022-09-12	10:10:27	0.262048	1.16564	1.39071	959.35	FALSE	20
2022-09-12	10:10:27	0.346985	1.54346	1.39071	987.977	FALSE	20
2022-09-12	10:10:27	0.319911	1.42303	1.39071	960.773	FALSE	20
2022-09-12	10:10:28	0.290293	1.29128	1.42861	989.269	FALSE	20
2022-09-12	10:10:28	0.29355	1.30577	1.42861	962.079	FALSE	20
2022-09-12	10:10:28	0.379657	1.68879	1.42861	990.957	FALSE	20
2022-09-12	10:10:29	0.3707	1.64895	1.34408	963.728	FALSE	20
2022-09-12	10:10:29	0.3164	1.40741	1.34408	992.365	FALSE	20
2022-09-12	10:10:29	0.279199	1.24193	1.34408	964.97	FALSE	20
2022-09-12	10:10:29	0.242354	1.07804	1.34408	993.443	FALSE	20
2022-09-12	10:10:30	0.188664	0.839215	0.538481	965.809	FALSE	20
2022-09-12	10:10:30	0.270954	1.20526	0.538481	994.648	FALSE	20
2022-09-12	10:10:30	0.109529	0.487207	0.538481	966.296	FALSE	20
2022-09-12	10:10:30	-0.0849234	-0.377756	0.538481	994.648	FALSE	20
2022-09-12	10:10:31	-0.249351	-1.10916	-1.29586	966.296	FALSE	20
2022-09-12	10:10:31	-0.318714	-1.4177	-1.29586	994.648	FALSE	20
2022-09-12	10:10:31	-0.308079	-1.3704	-1.29586	966.296	FALSE	20
2022-09-12	10:10:31	-0.289147	-1.28618	-1.29586	994.648	FALSE	20
2022-09-12	10:10:32	-0.334287	-1.48698	-1.355	966.296	FALSE	20
2022-09-12	10:10:32	-0.249656	-1.11052	-1.355	994.648	FALSE	20
2022-09-12	10:10:32	-0.281005	-1.24997	-1.355	966.296	FALSE	20
2022-09-12	10:10:32	-0.353524	-1.57255	-1.355	994.648	FALSE	20
2022-09-12	10:10:33	-0.338969	-1.5078	-1.16364	966.296	FALSE	20
2022-09-12	10:10:33	-0.223346	-0.993488	-1.16364	994.648	FALSE	20
2022-09-12	10:10:33	-0.222481	-0.98964	-1.16364	966.296	FALSE	20
2022-09-12	10:10:34	-0.111946	-0.497958	-0.22637	994.648	FALSE	20
2022-09-12	10:10:34	0.0664252	0.295473	-0.22637	966.591	FALSE	20
2022-09-12	10:10:34	-0.128435	-0.571305	-0.22637	994.648	FALSE	20
2022-09-12	10:10:34	-0.0296054	-0.131691	-0.22637	966.591	FALSE	20
2022-09-12	10:10:35	-0.00151375	-0.00673346	0.22875	994.648	FALSE	20
2022-09-12	10:10:35	-0.0261448	-0.116297	0.22875	966.591	FALSE	20
2022-09-12	10:10:35	0.0643895	0.286417	0.22875	994.935	FALSE	20
2022-09-12	10:10:35	0.16897	0.751612	0.22875	967.343	FALSE	20
2022-09-12	10:10:36	0.310598	1.3816	2.85557	996.316	FALSE	20
2022-09-12	10:10:36	0.43411	1.93101	2.85557	969.274	FALSE	20
2022-09-12	10:10:36	0.630394	2.80412	2.85557	999.12	FALSE	20
2022-09-12	10:10:36	1.19274	5.30555	2.85557	974.58	FALSE	20
2022-09-12	10:10:37	0.770598	3.42777	1.85653	1002.55	FALSE	20
2022-09-12	10:10:37	0.263677	1.17289	1.85653	975.752	FALSE	20
2022-09-12	10:10:37	0.217825	0.968929	1.85653	1003.52	FALSE	20
2022-09-12	10:10:38	0.383321	1.70509	1.779	977.458	FALSE	20
2022-09-12	10:10:38	0.354008	1.5747	1.779	1005.09	FALSE	20
2022-09-12	10:10:38	0.315534	1.40356	1.779	978.861	FALSE	20
2022-09-12	10:10:38	0.546883	2.43264	1.779	1007.52	FALSE	20
2022-09-12	10:10:39	0.439758	1.95613	2.05421	980.817	FALSE	20
2022-09-12	10:10:39	0.554924	2.46841	2.05421	1009.99	FALSE	20
2022-09-12	10:10:39	0.38098	1.69468	2.05421	982.512	FALSE	20
2022-09-12	10:10:39	0.471565	2.09762	2.05421	1012.09	FALSE	20
2022-09-12	10:10:40	0.481539	2.14198	1.53089	984.654	FALSE	20
2022-09-12	10:10:40	0.344797	1.53373	1.53089	1013.62	FALSE	20
2022-09-12	10:10:40	0.282456	1.25642	1.53089	985.91	FALSE	20
2022-09-12	10:10:40	0.26785	1.19145	1.53089	1014.82	FALSE	20
2022-09-12	10:10:41	0.278435	1.23853	1.80914	987.149	FALSE	20
2022-09-12	10:10:41	0.503626	2.24023	1.80914	1017.06	FALSE	20
2022-09-12	10:10:41	0.438079	1.94866	1.80914	989.098	FALSE	20
2022-09-12	10:10:42	0.519707	2.31176	1.60288	1019.37	FALSE	20
2022-09-12	10:10:42	0.32215	1.43299	1.60288	990.531	FALSE	20
2022-09-12	10:10:42	0.463321	2.06094	1.60288	1021.43	FALSE	20
2022-09-12	10:10:42	0.136196	0.605827	1.60288	991.136	FALSE	20
2022-09-12	10:10:43	0.122507	0.544936	0.861684	1021.97	FALSE	20
2022-09-12	10:10:43	0.166985	0.742783	0.861684	991.879	FALSE	20
2022-09-12	10:10:43	0.260725	1.15976	0.861684	1023.13	FALSE	20
2022-09-12	10:10:43	0.224644	0.999261	0.861684	992.878	FALSE	20
2022-09-12	10:10:44	0.262354	1.167	0.799489	1024.3	FALSE	20
2022-09-12	10:10:44	0.0902928	0.40164	0.799489	993.28	FALSE	20
2022-09-12	10:10:44	0.11126	0.494907	0.799489	1024.8	FALSE	20
2022-09-12	10:10:44	0.255026	1.13441	0.799489	994.414	FALSE	20
2022-09-12	10:10:45	0.186934	0.83152	0.85512	1025.63	FALSE	20
2022-09-12	10:10:45	0.184288	0.81975	0.85512	995.234	FALSE	20
2022-09-12	10:10:45	0.205051	0.912108	0.85512	1026.54	FALSE	20
2022-09-12	10:10:45	0.192685	0.857101	0.85512	996.091	FALSE	20
2022-09-12	10:10:46	0.285153	1.26842	1.45774	1027.81	FALSE	20
2022-09-12	10:10:46	0.387239	1.72252	1.45774	997.814	FALSE	20
2022-09-12	10:10:46	0.310751	1.38228	1.45774	1029.19	FALSE	20
2022-09-12	10:10:47	0.254211	1.13078	1.30775	998.945	FALSE	20
2022-09-12	10:10:47	0.230903	1.0271	1.30775	1030.22	FALSE	20
2022-09-12	10:10:47	0.40556	1.80401	1.30775	1000.75	FALSE	20
2022-09-12	10:10:47	0.285305	1.26909	1.30775	1031.49	FALSE	20
2022-09-12	10:10:48	0.250954	1.11629	1.885	1001.86	FALSE	20
2022-09-12	10:10:48	0.356247	1.58466	1.885	1033.07	FALSE	20
2022-09-12	10:10:48	0.657723	2.92568	1.885	1004.79	FALSE	20
2022-09-12	10:10:48	0.43014	1.91335	1.885	1034.98	FALSE	20
2022-09-12	10:10:49	0.214568	0.954441	1.16547	1005.75	FALSE	20
2022-09-12	10:10:49	0.24444	1.08732	1.16547	1036.07	FALSE	20
2022-09-12	10:10:49	0.314771	1.40016	1.16547	1007.15	FALSE	20
2022-09-12	10:10:49	0.274262	1.21997	1.16547	1037.29	FALSE	20
2022-09-12	10:10:50	0.285713	1.27091	1.13373	1008.42	FALSE	20
2022-09-12	10:10:50	0.214669	0.954891	1.13373	1038.25	FALSE	20
2022-09-12	10:10:50	0.264237	1.17538	1.13373	1009.59	FALSE	20
2022-09-12	10:10:51	0.383422	1.70554	1.51867	1039.95	FALSE	20
2022-09-12	10:10:51	0.323473	1.43887	1.51867	1011.03	FALSE	20
2022-09-12	10:10:51	0.323219	1.43774	1.51867	1041.39	FALSE	20
2022-09-12	10:10:51	0.335535	1.49253	1.51867	1012.52	FALSE	20
2022-09-12	10:10:52	0.341947	1.52105	1.51171	1042.91	FALSE	20
2022-09-12	10:10:52	0.334364	1.48732	1.51171	1014.01	FALSE	20
2022-09-12	10:10:52	0.345865	1.53848	1.51171	1044.45	FALSE	20
2022-09-12	10:10:52	0.337214	1.5	1.51171	1015.51	FALSE	20
2022-09-12	10:10:53	0.332532	1.47917	1.45953	1045.93	FALSE	20
2022-09-12	10:10:53	0.329122	1.464	1.45953	1016.97	FALSE	20
2022-09-12	10:10:53	0.323117	1.43729	1.45953	1047.37	FALSE	20
2022-09-12	10:10:53	0.327697	1.45766	1.45953	1018.43	FALSE	20
2022-09-12	10:10:54	0.329835	1.46717	1.47645	1048.83	FALSE	20
2022-09-12	10:10:54	0.331005	1.47238	1.47645	1019.9	FALSE	20
2022-09-12	10:10:54	0.334924	1.48981	1.47645	1050.32	FALSE	20
2022-09-12	10:10:55	0.332786	1.4803	1.48669	1021.38	FALSE	20
2022-09-12	10:10:55	0.335127	1.49071	1.48669	1051.81	FALSE	20
2022-09-12	10:10:55	0.334313	1.48709	1.48669	1022.87	FALSE	20
2022-09-12	10:10:55	0.334669	1.48867	1.48669	1053.3	FALSE	20
2022-09-12	10:10:56	0.332328	1.47826	1.46434	1024.35	FALSE	20
2022-09-12	10:10:56	0.339809	1.51154	1.46434	1054.81	FALSE	20
2022-09-12	10:10:56	0.335433	1.49207	1.46434	1025.84	FALSE	20
2022-09-12	10:10:56	0.309224	1.37549	1.46434	1056.19	FALSE	20
2022-09-12	10:10:57	0.324084	1.44159	1.50594	1027.28	FALSE	20
2022-09-12	10:10:57	0.349886	1.55636	1.50594	1057.74	FALSE	20
2022-09-12	10:10:57	0.34673	1.54232	1.50594	1028.83	FALSE	20
2022-09-12	10:10:57	0.333499	1.48347	1.50594	1059.23	FALSE	20
2022-09-12	10:10:58	0.32215	1.43299	1.64674	1030.26	FALSE	20
2022-09-12	10:10:58	0.307494	1.36779	1.64674	1060.6	FALSE	20
2022-09-12	10:10:58	0.404644	1.79994	1.64674	1032.06	FALSE	20
2022-09-12	10:10:58	0.446527	1.98624	1.64674	1062.58	FALSE	20
2022-09-12	10:10:59	0.476959	2.12161	1.98579	1034.18	FALSE	20
2022-09-12	10:10:59	0.435382	1.93667	1.98579	1064.52	FALSE	20
2022-09-12	10:10:59	0.426934	1.89909	1.98579	1036.08	FALSE	20
2022-09-12	10:11:00	0.373906	1.66321	1.75596	1066.18	FALSE	20
2022-09-12	10:11:00	0.422456	1.87917	1.75596	1037.96	FALSE	20
2022-09-12	10:11:00	0.369428	1.64329	1.75596	1067.83	FALSE	20
2022-09-12	10:11:00	0.413244	1.83819	1.75596	1039.8	FALSE	20
2022-09-12	10:11:01	0.446221	1.98488	1.40571	1069.81	FALSE	20
2022-09-12	10:11:01	0.310598	1.3816	1.40571	1041.18	FALSE	20
2022-09-12	10:11:01	0.188105	0.836729	1.40571	1070.65	FALSE	20
2022-09-12	10:11:01	0.319148	1.41963	1.40571	1042.6	FALSE	20
2022-09-12	10:11:02	0.402964	1.79246	3.7478	1072.44	FALSE	20
2022-09-12	10:11:02	0.489173	2.17594	3.7478	1044.77	FALSE	20
2022-09-12	10:11:02	0.438537	1.9507	3.7478	1074.39	FALSE	20
2022-09-12	10:11:02	2.0395	9.0721	3.7478	1053.85	FALSE	20
2022-09-12	10:11:03	1.33355	5.9319	7.09417	1080.32	FALSE	20
2022-09-12	10:11:03	1.18078	5.25235	7.09417	1059.1	FALSE	20
2022-09-12	10:11:03	2.27019	10.0983	7.09417	1090.42	FALSE	20
2022-09-12	10:11:04	2.0649	9.18509	7.34921	1068.28	FALSE	20
2022-09-12	10:11:04	2.70479	12.0314	7.34921	1102.45	FALSE	20
2022-09-12	10:11:04	0.553702	2.46298	7.34921	1070.75	FALSE	20
2022-09-12	10:11:04	1.28531	5.71732	7.34921	1108.17	FALSE	20
2022-09-12	10:11:05	2.75848	12.2703	5.09635	1083.02	FALSE	20
2022-09-12	10:11:05	0.483422	2.15036	5.09635	1110.32	FALSE	20
2022-09-12	10:11:05	0.397926	1.77005	5.09635	1084.79	FALSE	20
2022-09-12	10:11:05	0.943015	4.19472	5.09635	1114.51	FALSE	20
2022-09-12	10:11:06	0.357112	1.58851	3.71572	1086.38	FALSE	20
2022-09-12	10:11:06	1.44541	6.42947	3.71572	1120.94	FALSE	20
2022-09-12	10:11:06	0.379911	1.68992	3.71572	1088.07	FALSE	20
2022-09-12	10:11:06	1.15889	5.15497	3.71572	1126.1	FALSE	20
2022-09-12	10:11:07	2.66149	11.8388	6.16053	1099.9	FALSE	20
2022-09-12	10:11:07	0.360216	1.60231	6.16053	1127.7	FALSE	20
2022-09-12	10:11:07	1.13314	5.04043	6.16053	1104.94	FALSE	20
2022-09-12	10:11:08	0.656145	2.91866	4.28017	1130.62	FALSE	20
2022-09-12	10:11:08	0.892278	3.96903	4.28017	1108.91	FALSE	20
2022-09-12	10:11:08	1.99136	8.85797	4.28017	1139.48	FALSE	20
2022-09-12	10:11:08	0.309122	1.37504	4.28017	1110.29	FALSE	20
2022-09-12	10:11:09	0.392481	1.74583	1.75149	1141.22	FALSE	20
2022-09-12	10:11:09	0.300369	1.3361	1.75149	1111.62	FALSE	20
2022-09-12	10:11:09	0.287087	1.27702	1.75149	1142.5	FALSE	20
2022-09-12	10:11:09	0.595076	2.64702	1.75149	1114.27	FALSE	20
2022-09-12	10:11:10	0.327901	1.45857	1.35093	1143.96	FALSE	20
2022-09-12	10:11:10	0.337468	1.50113	1.35093	1115.77	FALSE	20
2022-09-12	10:11:10	0.242456	1.07849	1.35093	1145.04	FALSE	20
2022-09-12	10:11:10	0.306985	1.36553	1.35093	1117.14	FALSE	20
2022-09-12	10:11:11	0.437672	1.94685	1.36355	1146.98	FALSE	20
2022-09-12	10:11:11	0.264237	1.17538	1.36355	1118.31	FALSE	20
2022-09-12	10:11:11	0.285356	1.26932	1.36355	1148.25	FALSE	20
2022-09-12	10:11:11	0.238893	1.06264	1.36355	1119.38	FALSE	20
2022-09-12	10:11:12	0.349886	1.55636	1.23763	1149.81	FALSE	20
2022-09-12	10:11:12	0.308919	1.37413	1.23763	1120.75	FALSE	20
2022-09-12	10:11:12	0.175891	0.782398	1.23763	1150.59	FALSE	20
2022-09-12	10:11:13	0.339351	1.5095	1.43271	1122.26	FALSE	20
2022-09-12	10:11:13	0.365967	1.62789	1.43271	1152.22	FALSE	20
2022-09-12	10:11:13	0.34215	1.52195	1.43271	1123.78	FALSE	20
2022-09-12	10:11:13	0.240878	1.07147	1.43271	1153.29	FALSE	20
2022-09-12	10:11:14	0.339249	1.50905	1.67311	1125.29	FALSE	20
2022-09-12	10:11:14	0.32444	1.44317	1.67311	1154.74	FALSE	20
2022-09-12	10:11:14	0.620216	2.75884	1.67311	1128.05	FALSE	20
2022-09-12	10:11:14	0.220623	0.981375	1.67311	1155.72	FALSE	20
2022-09-12	10:11:15	0.450802	2.00526	1.76615	1130.06	FALSE	20
2022-09-12	10:11:15	0.473397	2.10576	1.76615	1157.82	FALSE	20
2022-09-12	10:11:15	0.412074	1.83299	1.76615	1131.89	FALSE	20
2022-09-12	10:11:15	0.251921	1.12059	1.76615	1158.94	FALSE	20
2022-09-12	10:11:16	0.351056	1.56157	1.32086	1133.45	FALSE	20
2022-09-12	10:11:16	0.168308	0.748668	1.32086	1159.69	FALSE	20
2022-09-12	10:11:16	0.371463	1.65234	1.32086	1135.1	FALSE	20
2022-09-12	10:11:17	0.15299	0.68053	1.12156	1160.37	FALSE	20
2022-09-12	10:11:17	0.38785	1.72523	1.12156	1136.83	FALSE	20
2022-09-12	10:11:17	0.200318	0.891055	1.12156	1161.26	FALSE	20
2022-09-12	10:11:17	0.267392	1.18941	1.12156	1138.02	FALSE	20
2022-09-12	10:11:18	0.30388	1.35172	1.21793	1162.61	FALSE	20
2022-09-12	10:11:18	0.206018	0.916409	1.21793	1138.93	FALSE	20
2022-09-12	10:11:18	0.345967	1.53893	1.21793	1164.15	FALSE	20
2022-09-12	10:11:18	0.239351	1.06468	1.21793	1140	FALSE	20
2022-09-12	10:11:19	0.415942	1.85019	1.30209	1166	FALSE	20
2022-09-12	10:11:19	0.206171	0.91709	1.30209	1140.91	FALSE	20
2022-09-12	10:11:19	0.335484	1.4923	1.30209	1167.5	FALSE	20
2022-09-12	10:11:19	0.213295	0.948779	1.30209	1141.86	FALSE	20
2022-09-12	10:11:20	0.219555	0.976625	0.985302	1168.47	FALSE	20
2022-09-12	10:11:20	0.298181	1.32637	0.985302	1143.19	FALSE	20
2022-09-12	10:11:20	0.146781	0.652911	0.985302	1169.13	FALSE	20
2022-09-12	10:11:21	0.316603	1.40831	1.18545	1144.6	FALSE	20
2022-09-12	10:11:21	0.218181	0.970513	1.18545	1170.1	FALSE	20
2022-09-12	10:11:21	0.230344	1.02462	1.18545	1145.62	FALSE	20
2022-09-12	10:11:21	0.300878	1.33837	1.18545	1171.43	FALSE	20
2022-09-12	10:11:22	0.196705	0.874983	1.18551	1146.5	FALSE	20
2022-09-12	10:11:22	0.226832	1.00899	1.18551	1172.44	FALSE	20
2022-09-12	10:11:22	0.286171	1.27295	1.18551	1147.77	FALSE	20
2022-09-12	10:11:22	0.356349	1.58511	1.18551	1174.03	FALSE	20
2022-09-12	10:11:23	0.549122	2.4426	3.37435	1150.21	FALSE	20
2022-09-12	10:11:23	1.78439	7.93732	3.37435	1181.97	FALSE	20
2022-09-12	10:11:23	0.328868	1.46287	3.37435	1151.68	FALSE	20
2022-09-12	10:11:23	0.371972	1.65461	3.37435	1183.62	FALSE	20
2022-09-12	10:11:24	1.77182	7.88141	3.33355	1159.56	FALSE	20
2022-09-12	10:11:24	0.318791	1.41805	3.33355	1185.04	FALSE	20
2022-09-12	10:11:24	0.208664	0.928179	3.33355	1160.49	FALSE	20
2022-09-12	10:11:24	0.698384	3.10655	3.33355	1188.15	FALSE	20
2022-09-12	10:11:25	0.400776	1.78273	2.64823	1162.27	FALSE	20
2022-09-12	10:11:25	0.429529	1.91063	2.64823	1190.06	FALSE	20
2022-09-12	10:11:25	0.955738	4.25131	2.64823	1166.52	FALSE	20
2022-09-12	10:11:26	0.674567	3.00061	3.26309	1193.06	FALSE	20
2022-09-12	10:11:26	0.27757	1.23469	3.26309	1167.75	FALSE	20
2022-09-12	10:11:26	1.48704	6.61465	3.26309	1199.67	FALSE	20
2022-09-12	10:11:26	0.495127	2.20242	3.26309	1169.96	FALSE	20
2022-09-12	10:11:27	0.990191	4.40457	6.15929	1204.08	FALSE	20
2022-09-12	10:11:27	2.12765	9.46421	6.15929	1179.42	FALSE	20
2022-09-12	10:11:27	0.353753	1.57356	6.15929	1205.65	FALSE	20
2022-09-12	10:11:27	2.06709	9.19483	6.15929	1188.62	FALSE	20
2022-09-12	10:11:28	0.200929	0.893772	0.934576	1206.54	FALSE	20
2022-09-12	10:11:28	0.128359	0.570967	0.934576	1189.19	FALSE	20
2022-09-12	10:11:28	0.381998	1.6992	0.934576	1208.24	FALSE	20
2022-09-12	10:11:28	0.129122	0.57436	0.934576	1189.76	FALSE	20
2022-09-12	10:11:29	0.321082	1.42824	1.07502	1209.67	FALSE	20
2022-09-12	10:11:29	0.146629	0.652235	1.07502	1190.41	FALSE	20
2022-09-12	10:11:29	0.257316	1.14459	1.07502	1210.82	FALSE	20
2022-09-12	10:11:30	0.117163	0.521164	0.920937	1190.93	FALSE	20
2022-09-12	10:11:30	0.0844913	0.375834	0.920937	1211.19	FALSE	20
2022-09-12	10:11:30	0.178028	0.791904	0.920937	1191.73	FALSE	20
2022-09-12	10:11:30	0.448461	1.99484	0.920937	1213.19	FALSE	20
2022-09-12	10:11:31	0.153753	0.683924	1.0361	1192.41	FALSE	20
2022-09-12	10:11:31	0.186171	0.828126	1.0361	1214.01	FALSE	20
2022-09-12	10:11:31	0.342099	1.52172	1.0361	1193.93	FALSE	20
2022-09-12	10:11:31	0.249682	1.11064	1.0361	1215.12	FALSE	20
2022-09-12	10:11:32	0.739606	3.28992	2.04832	1197.22	FALSE	20
2022-09-12	10:11:32	0.147392	0.655629	2.04832	1215.78	FALSE	20
2022-09-12	10:11:32	0.441489	1.96383	2.04832	1199.19	FALSE	20
2022-09-12	10:11:32	0.513448	2.28392	2.04832	1218.06	FALSE	20
2022-09-12	10:11:33	0.429987	1.91267	1.59537	1201.1	FALSE	20
2022-09-12	10:11:33	0.326069	1.45042	1.59537	1219.51	FALSE	20
2022-09-12	10:11:33	0.319911	1.42303	1.59537	1202.52	FALSE	20
2022-09-12	10:11:34	0.341845	1.52059	1.41997	1221.04	FALSE	20
2022-09-12	10:11:34	0.335178	1.49094	1.41997	1204.01	FALSE	20
2022-09-12	10:11:34	0.349733	1.55568	1.41997	1222.59	FALSE	20
2022-09-12	10:11:34	0.25014	1.11267	1.41997	1205.13	FALSE	20
2022-09-12	10:11:35	0.307137	1.36621	1.13208	1223.96	FALSE	20
2022-09-12	10:11:35	0.224084	0.99677	1.13208	1206.12	FALSE	20
2022-09-12	10:11:35	0.280827	1.24917	1.13208	1225.21	FALSE	20
2022-09-12	10:11:35	0.205967	0.916182	1.13208	1207.04	FALSE	20
2022-09-12	10:11:36	0.345763	1.53802	1.24889	1226.74	FALSE	20
2022-09-12	10:11:36	0.294567	1.31029	1.24889	1208.35	FALSE	20
2022-09-12	10:11:36	0.310344	1.38047	1.24889	1228.12	FALSE	20
2022-09-12	10:11:36	0.172379	0.766776	1.24889	1209.12	FALSE	20
2022-09-12	10:11:37	0.261081	1.16134	0.852459	1229.29	FALSE	20
2022-09-12	10:11:37	0.166832	0.742102	0.852459	1209.86	FALSE	20
2022-09-12	10:11:37	0.234313	1.04227	0.852459	1230.33	FALSE	20
2022-09-12	10:11:37	0.104339	0.464121	0.852459	1210.32	FALSE	20
2022-09-12	10:11:38	0.188664	0.839215	0.626879	1231.17	FALSE	20
2022-09-12	10:11:38	0.170547	0.758627	0.626879	1211.08	FALSE	20
2022-09-12	10:11:38	0.0635753	0.282796	0.626879	1231.45	FALSE	20
2022-09-12	10:11:39	0.14098	0.627107	0.429825	1211.71	FALSE	20
2022-09-12	10:11:39	0.113194	0.50351	0.429825	1231.95	FALSE	20
2022-09-12	10:11:39	0.102507	0.455972	0.429825	1212.16	FALSE	20
2022-09-12	10:11:39	0.0298348	0.132711	0.429825	1232.09	FALSE	20
2022-09-12	10:11:40	0.166272	0.739611	0.574136	1212.9	FALSE	20
2022-09-12	10:11:40	0.0814888	0.362478	0.574136	1232.45	FALSE	20
2022-09-12	10:11:40	0.201998	0.898528	0.574136	1213.8	FALSE	20
2022-09-12	10:11:40	0.0665269	0.295925	0.574136	1232.74	FALSE	20
2022-09-12	10:11:41	0.237265	1.0554	0.778775	1214.86	FALSE	20
2022-09-12	10:11:41	0.150038	0.667399	0.778775	1233.41	FALSE	20
2022-09-12	10:11:41	0.188512	0.838539	0.778775	1215.7	FALSE	20
2022-09-12	10:11:41	0.124491	0.553761	0.778775	1233.97	FALSE	20
2022-09-12	10:11:42	0.172735	0.76836	0.72203	1216.46	FALSE	20
2022-09-12	10:11:42	0.194262	0.864116	0.72203	1234.83	FALSE	20
2022-09-12	10:11:42	0.119962	0.533615	0.72203	1217	FALSE	20
2022-09-12	10:11:43	0.189631	0.843517	0.865363	1235.67	FALSE	20
2022-09-12	10:11:43	0.132532	0.589529	0.865363	1217.59	FALSE	20
2022-09-12	10:11:43	0.286578	1.27476	0.865363	1236.95	FALSE	20
2022-09-12	10:11:43	0.169428	0.75365	0.865363	1218.34	FALSE	20
2022-09-12	10:11:44	0.208308	0.926596	0.592868	1237.88	FALSE	20
2022-09-12	10:11:44	0.0917687	0.408206	0.592868	1218.75	FALSE	20
2022-09-12	10:11:44	0.182456	0.811601	0.592868	1238.69	FALSE	20
2022-09-12	10:11:44	0.0505982	0.225071	0.592868	1218.97	FALSE	20
2022-09-12	10:11:45	0.177417	0.789186	0.536727	1239.48	FALSE	20
2022-09-12	10:11:45	0.0508527	0.226203	0.536727	1219.2	FALSE	20
2022-09-12	10:11:45	0.107443	0.477928	0.536727	1239.95	FALSE	20
2022-09-12	10:11:45	0.146934	0.653592	0.536727	1219.85	FALSE	20
2022-09-12	10:11:46	0.0521249	0.231862	0.260838	1240.19	FALSE	20
2022-09-12	10:11:46	0.11299	0.502602	0.260838	1220.36	FALSE	20
2022-09-12	10:11:46	0.0108018	0.0480486	0.260838	1240.23	FALSE	20
2022-09-12	10:11:47	0.223982	0.996317	1.89246	1221.35	FALSE	20
2022-09-12	10:11:47	0.508104	2.26015	1.89246	1242.49	FALSE	20
2022-09-12	10:11:47	0.243982	1.08528	1.89246	1222.44	FALSE	20
2022-09-12	10:11:47	0.725712	3.22811	1.89246	1245.72	FALSE	20
2022-09-12	10:11:48	0.282048	1.25461	2.98906	1223.69	FALSE	20
2022-09-12	10:11:48	0.286883	1.27611	2.98906	1247	FALSE	20
2022-09-12	10:11:48	1.91533	8.51977	2.98906	1232.21	FALSE	20
2022-09-12	10:11:48	0.203626	0.905769	2.98906	1247.9	FALSE	20
2022-09-12	10:11:49	0.494466	2.19948	3.50632	1234.41	FALSE	20
2022-09-12	10:11:49	0.404033	1.79722	3.50632	1249.7	FALSE	20
2022-09-12	10:11:49	0.546069	2.42902	3.50632	1236.84	FALSE	20
2022-09-12	10:11:49	1.70846	7.59957	3.50632	1257.3	FALSE	20
2022-09-12	10:11:50	0.291107	1.2949	1.78154	1238.14	FALSE	20
2022-09-12	10:11:50	0.386069	1.71731	1.78154	1259.02	FALSE	20
2022-09-12	10:11:50	0.644542	2.86705	1.78154	1241	FALSE	20
2022-09-12	10:11:50	0.280318	1.24691	1.78154	1260.26	FALSE	20
2022-09-12	10:11:51	0.523473	2.32851	1.57598	1243.33	FALSE	20
2022-09-12	10:11:51	0.332278	1.47804	1.57598	1261.74	FALSE	20
2022-09-12	10:11:51	0.207137	0.921387	1.57598	1244.25	FALSE	20
2022-09-12	10:11:52	1.85411	8.24745	4.18408	1269.99	FALSE	20
2022-09-12	10:11:52	0.228155	1.01488	4.18408	1245.27	FALSE	20
2022-09-12	10:11:52	0.357519	1.59032	4.18408	1271.58	FALSE	20
2022-09-12	10:11:52	1.32271	5.88368	4.18408	1251.15	FALSE	20
2022-09-12	10:11:53	0.289326	1.28698	1.48109	1272.87	FALSE	20
2022-09-12	10:11:53	0.3993	1.77617	1.48109	1252.93	FALSE	20
2022-09-12	10:11:53	0.447697	1.99145	1.48109	1274.86	FALSE	20
2022-09-12	10:11:53	0.195534	0.869774	1.48109	1253.8	FALSE	20
2022-09-12	10:11:54	0.363524	1.61703	1.21114	1276.48	FALSE	20
2022-09-12	10:11:54	0.22271	0.990659	1.21114	1254.79	FALSE	20
2022-09-12	10:11:54	0.221641	0.985903	1.21114	1277.46	FALSE	20
2022-09-12	10:11:54	0.281234	1.25099	1.21114	1256.04	FALSE	20
2022-09-12	10:11:55	0.164186	0.730332	0.639029	1278.19	FALSE	20
2022-09-12	10:11:55	0.167036	0.74301	0.639029	1256.78	FALSE	20
2022-09-12	10:11:55	0.0997585	0.443746	0.639029	1278.64	FALSE	20
2022-09-12	10:11:56	0.176959	0.787149	0.45761	1257.57	FALSE	20
2022-09-12	10:11:56	0.0819468	0.364516	0.45761	1279	FALSE	20
2022-09-12	10:11:56	0.107748	0.479285	0.45761	1258.05	FALSE	20
2022-09-12	10:11:56	0.0448475	0.199491	0.45761	1279.2	FALSE	20
2022-09-12	10:11:57	0.15869	0.705885	0.621391	1258.75	FALSE	20
2022-09-12	10:11:57	0.056756	0.252462	0.621391	1279.45	FALSE	20
2022-09-12	10:11:57	0.158334	0.704301	0.621391	1259.46	FALSE	20
2022-09-12	10:11:57	0.185	0.822917	0.621391	1280.28	FALSE	20
2022-09-12	10:11:58	0.0828628	0.36859	0.631521	1259.83	FALSE	20
2022-09-12	10:11:58	0.193804	0.862079	0.631521	1281.14	FALSE	20
2022-09-12	10:11:58	0.155993	0.693888	0.631521	1260.52	FALSE	20
2022-09-12	10:11:58	0.135229	0.601526	0.631521	1281.74	FALSE	20
2022-09-12	10:11:59	0.03813	0.16961	0.662346	1260.69	FALSE	20
2022-09-12	10:11:59	0.283372	1.2605	0.662346	1283	FALSE	20
2022-09-12	10:11:59	0.125204	0.556932	0.662346	1261.25	FALSE	20
2022-09-12	10:12:00	0.163779	0.728522	0.469835	1283.73	FALSE	20
2022-09-12	10:12:00	0.0597076	0.265591	0.469835	1261.51	FALSE	20
2022-09-12	10:12:00	0.0361961	0.161007	0.469835	1283.89	FALSE	20
2022-09-12	10:12:00	0.162812	0.72422	0.469835	1262.24	FALSE	20
2022-09-12	10:12:01	0.0489188	0.217601	0.718786	1284.11	FALSE	20
2022-09-12	10:12:01	0.216145	0.961456	0.718786	1263.2	FALSE	20
2022-09-12	10:12:01	0.0809798	0.360214	0.718786	1284.47	FALSE	20
2022-09-12	10:12:01	0.300318	1.33587	0.718786	1264.53	FALSE	20
2022-09-12	10:12:02	0.180216	0.801637	1.42337	1285.27	FALSE	20
2022-09-12	10:12:02	0.459249	2.04283	1.42337	1266.58	FALSE	20
2022-09-12	10:12:02	0.318741	1.41782	1.42337	1286.69	FALSE	20
2022-09-12	10:12:02	0.321743	1.43118	1.42337	1268.01	FALSE	20
2022-09-12	10:12:03	0.518588	2.30678	2.5868	1288.99	FALSE	20
2022-09-12	10:12:03	0.691259	3.07486	2.5868	1271.08	FALSE	20
2022-09-12	10:12:03	0.430038	1.9129	2.5868	1290.91	FALSE	20
2022-09-12	10:12:03	0.686272	3.05268	2.5868	1274.14	FALSE	20
2022-09-12	10:12:04	0.535229	2.38081	1.9424	1293.29	FALSE	20
2022-09-12	10:12:04	0.361082	1.60616	1.9424	1275.74	FALSE	20
2022-09-12	10:12:04	0.413702	1.84023	1.9424	1295.13	FALSE	20
2022-09-12	10:12:05	0.502405	2.2348	1.52348	1277.98	FALSE	20
2022-09-12	10:12:05	0.259708	1.15523	1.52348	1296.28	FALSE	20
2022-09-12	10:12:05	0.319249	1.42008	1.52348	1279.4	FALSE	20
2022-09-12	10:12:05	0.288613	1.28381	1.52348	1297.57	FALSE	20
2022-09-12	10:12:06	0.128206	0.570286	0.635708	1279.97	FALSE	20
2022-09-12	10:12:06	0.171514	0.762929	0.635708	1298.33	FALSE	20
2022-09-12	10:12:06	0.107952	0.480192	0.635708	1280.45	FALSE	20
2022-09-12	10:12:06	0.163982	0.729425	0.635708	1299.06	FALSE	20
2022-09-12	10:12:07	0.134771	0.599488	0.889189	1281.05	FALSE	20
2022-09-12	10:12:07	0.224288	0.997678	0.889189	1300.06	FALSE	20
2022-09-12	10:12:07	0.222914	0.991566	0.889189	1282.04	FALSE	20
2022-09-12	10:12:07	0.217621	0.968022	0.889189	1301.02	FALSE	20
2022-09-12	10:12:08	0.202507	0.900792	1.187	1282.94	FALSE	20
2022-09-12	10:12:08	0.271514	1.20775	1.187	1302.23	FALSE	20
2022-09-12	10:12:08	0.326527	1.45246	1.187	1284.39	FALSE	20
2022-09-12	10:12:09	0.277316	1.23356	1.2331	1303.47	FALSE	20
2022-09-12	10:12:09	0.250751	1.11539	1.2331	1285.51	FALSE	20
2022-09-12	10:12:09	0.279911	1.2451	1.2331	1304.71	FALSE	20
2022-09-12	10:12:09	0.300878	1.33837	1.2331	1286.85	FALSE	20
2022-09-12	10:12:10	0.375992	1.67249	1.78737	1306.38	FALSE	20
2022-09-12	10:12:10	0.416756	1.85381	1.78737	1288.7	FALSE	20
2022-09-12	10:12:10	0.412735	1.83593	1.78737	1308.22	FALSE	20
2022-09-12	10:12:10	0.401794	1.78726	1.78737	1290.49	FALSE	20
2022-09-12	10:12:11	0.287087	1.27702	1.18042	1309.5	FALSE	20
2022-09-12	10:12:11	0.12841	0.571193	1.18042	1291.06	FALSE	20
2022-09-12	10:12:11	0.290191	1.29083	1.18042	1310.79	FALSE	20
2022-09-12	10:12:11	0.355789	1.58262	1.18042	1292.64	FALSE	20
2022-09-12	10:12:12	0.406374	1.80763	1.66547	1312.59	FALSE	20
2022-09-12	10:12:12	0.320318	1.42484	1.66547	1294.07	FALSE	20
2022-09-12	10:12:12	0.396552	1.76394	1.66547	1314.36	FALSE	20
2022-09-12	10:12:13	0.329428	1.46536	1.52541	1295.53	FALSE	20
2022-09-12	10:12:13	0.329021	1.46355	1.52541	1315.82	FALSE	20
2022-09-12	10:12:13	0.388206	1.72682	1.52541	1297.26	FALSE	20
2022-09-12	10:12:13	0.325051	1.44589	1.52541	1317.27	FALSE	20
2022-09-12	10:12:14	0.35757	1.59054	1.82416	1298.85	FALSE	20
2022-09-12	10:12:14	0.470038	2.09082	1.82416	1319.36	FALSE	20
2022-09-12	10:12:14	0.426374	1.8966	1.82416	1300.74	FALSE	20
2022-09-12	10:12:14	0.386374	1.71867	1.82416	1321.08	FALSE	20
2022-09-12	10:12:15	0.421234	1.87373	1.8159	1302.62	FALSE	20
2022-09-12	10:12:15	0.407087	1.8108	1.8159	1322.89	FALSE	20
2022-09-12	10:12:15	0.428155	1.90452	1.8159	1304.52	FALSE	20
2022-09-12	10:12:15	0.37645	1.67452	1.8159	1324.56	FALSE	20
2022-09-12	10:12:16	0.367392	1.63423	1.70345	1306.16	FALSE	20
2022-09-12	10:12:16	0.410038	1.82393	1.70345	1326.39	FALSE	20
2022-09-12	10:12:16	0.382761	1.7026	1.70345	1307.86	FALSE	20
2022-09-12	10:12:16	0.371616	1.65302	1.70345	1328.04	FALSE	20
2022-09-12	10:12:17	0.386171	1.71777	1.74584	1309.58	FALSE	20
2022-09-12	10:12:17	0.379199	1.68675	1.74584	1329.73	FALSE	20
2022-09-12	10:12:17	0.412074	1.83299	1.74584	1311.41	FALSE	20
2022-09-12	10:12:18	0.490394	2.18137	2.15172	1331.91	FALSE	20
2022-09-12	10:12:18	0.472176	2.10033	2.15172	1313.51	FALSE	20
2022-09-12	10:12:18	0.392328	1.74515	2.15172	1333.65	FALSE	20
2022-09-12	10:12:18	0.580013	2.58001	2.15172	1316.09	FALSE	20
2022-09-12	10:12:19	0.419657	1.86672	1.78805	1335.52	FALSE	20
2022-09-12	10:12:19	0.308257	1.37119	1.78805	1317.46	FALSE	20
2022-09-12	10:12:19	0.390598	1.73746	1.78805	1337.26	FALSE	20
2022-09-12	10:12:19	0.489377	2.17685	1.78805	1319.64	FALSE	20
2022-09-12	10:12:20	0.547137	2.43377	2.33185	1339.69	FALSE	20
2022-09-12	10:12:20	0.757061	3.36756	2.33185	1323.01	FALSE	20
2022-09-12	10:12:20	0.400878	1.78319	2.33185	1341.47	FALSE	20
2022-09-12	10:12:20	0.391819	1.74289	2.33185	1324.75	FALSE	20
2022-09-12	10:12:21	0.408613	1.81759	1.49637	1343.29	FALSE	20
2022-09-12	10:12:21	0.308104	1.37051	1.49637	1326.12	FALSE	20
2022-09-12	10:12:21	0.292481	1.30101	1.49637	1344.59	FALSE	20
2022-09-12	10:12:22	0.366323	1.62948	1.69909	1327.75	FALSE	20
2022-09-12	10:12:22	0.35131	1.5627	1.69909	1346.16	FALSE	20
2022-09-12	10:12:22	0.38612	1.71754	1.69909	1329.47	FALSE	20
2022-09-12	10:12:22	0.424135	1.88664	1.69909	1348.04	FALSE	20
2022-09-12	10:12:23	0.253855	1.1292	1.12897	1330.6	FALSE	20
2022-09-12	10:12:23	0.224644	0.999261	1.12897	1349.04	FALSE	20
2022-09-12	10:12:23	0.274771	1.22224	1.12897	1331.82	FALSE	20
2022-09-12	10:12:23	0.261947	1.16519	1.12897	1350.21	FALSE	20
2022-09-12	10:12:24	0.269784	1.20005	1.13259	1333.02	FALSE	20
2022-09-12	10:12:24	0.282964	1.25868	1.13259	1351.47	FALSE	20
2022-09-12	10:12:24	0.202456	0.900565	1.13259	1333.92	FALSE	20
2022-09-12	10:12:24	0.26327	1.17108	1.13259	1352.64	FALSE	20
2022-09-12	10:12:25	0.306323	1.36259	1.38281	1335.28	FALSE	20
2022-09-12	10:12:25	0.268104	1.19258	1.38281	1353.83	FALSE	20
2022-09-12	10:12:25	0.358181	1.59326	1.38281	1336.87	FALSE	20
2022-09-12	10:12:26	0.2964	1.31845	1.29066	1355.15	FALSE	20
2022-09-12	10:12:26	0.300929	1.33859	1.29066	1338.21	FALSE	20
2022-09-12	10:12:26	0.313143	1.39292	1.29066	1356.54	FALSE	20
2022-09-12	10:12:26	0.25014	1.11267	1.29066	1339.33	FALSE	20
2022-09-12	10:12:27	0.318181	1.41533	1.16576	1357.96	FALSE	20
2022-09-12	10:12:27	0.236247	1.05087	1.16576	1340.38	FALSE	20
2022-09-12	10:12:27	0.212379	0.944704	1.16576	1358.9	FALSE	20
2022-09-12	10:12:27	0.281489	1.25212	1.16576	1341.63	FALSE	20
2022-09-12	10:12:28	0.216247	0.96191	1.16293	1359.86	FALSE	20
2022-09-12	10:12:28	0.33869	1.50656	1.16293	1343.14	FALSE	20
2022-09-12	10:12:28	0.232786	1.03548	1.16293	1360.9	FALSE	20
2022-09-12	10:12:28	0.258028	1.14776	1.16293	1344.28	FALSE	20
2022-09-12	10:12:29	0.305051	1.35693	1.15846	1362.25	FALSE	20
2022-09-12	10:12:29	0.201845	0.897847	1.15846	1345.18	FALSE	20
2022-09-12	10:12:29	0.380471	1.69241	1.15846	1363.95	FALSE	20
2022-09-12	10:12:29	0.154364	0.686642	1.15846	1345.87	FALSE	20
2022-09-12	10:12:30	0.381234	1.69581	1.39956	1365.64	FALSE	20
2022-09-12	10:12:30	0.246781	1.09773	1.39956	1346.97	FALSE	20
2022-09-12	10:12:30	0.315891	1.40515	1.39956	1367.05	FALSE	20
2022-09-12	10:12:31	0.244186	1.08619	1.09983	1348.05	FALSE	20
2022-09-12	10:12:31	0.22556	1.00334	1.09983	1368.05	FALSE	20
2022-09-12	10:12:31	0.284542	1.2657	1.09983	1349.32	FALSE	20
2022-09-12	10:12:31	0.23472	1.04408	1.09983	1369.1	FALSE	20
2022-09-12	10:12:32	0.380471	1.69241	1.35636	1351.01	FALSE	20
2022-09-12	10:12:32	0.178181	0.792585	1.35636	1369.89	FALSE	20
2022-09-12	10:12:32	0.396349	1.76304	1.35636	1352.77	FALSE	20
2022-09-12	10:12:32	0.264695	1.17742	1.35636	1371.07	FALSE	20
2022-09-12	10:12:33	0.306527	1.36349	1.2953	1354.14	FALSE	20
2022-09-12	10:12:33	0.28271	1.25755	1.2953	1372.32	FALSE	20
2022-09-12	10:12:33	0.265611	1.18149	1.2953	1355.32	FALSE	20
2022-09-12	10:12:33	0.309937	1.37866	1.2953	1373.7	FALSE	20
2022-09-12	10:12:34	0.246018	1.09434	1.30101	1356.41	FALSE	20
2022-09-12	10:12:34	0.409987	1.8237	1.30101	1375.53	FALSE	20
2022-09-12	10:12:34	0.221438	0.985001	1.30101	1357.4	FALSE	20
2022-09-12	10:12:35	0.270598	1.20367	1.16921	1376.73	FALSE	20
2022-09-12	10:12:35	0.245051	1.09004	1.16921	1358.49	FALSE	20
2022-09-12	10:12:35	0.30159	1.34153	1.16921	1378.07	FALSE	20
2022-09-12	10:12:35	0.23416	1.04159	1.16921	1359.53	FALSE	20
2022-09-12	10:12:36	0.187188	0.83265	1.161	1378.9	FALSE	20
2022-09-12	10:12:36	0.346629	1.54188	1.161	1361.07	FALSE	20
2022-09-12	10:12:36	0.193753	0.861852	1.161	1379.76	FALSE	20
2022-09-12	10:12:36	0.31645	1.40763	1.161	1362.48	FALSE	20
2022-09-12	10:12:37	0.205407	0.913691	0.913693	1380.68	FALSE	20
2022-09-12	10:12:37	0.229428	1.02054	0.913693	1363.5	FALSE	20
2022-09-12	10:12:37	0.215992	0.960776	0.913693	1381.64	FALSE	20
2022-09-12	10:12:37	0.170802	0.759761	0.913693	1364.26	FALSE	20
2022-09-12	10:12:38	0.280725	1.24872	1.16738	1382.89	FALSE	20
2022-09-12	10:12:38	0.152278	0.677363	1.16738	1364.94	FALSE	20
2022-09-12	10:12:38	0.354313	1.57606	1.16738	1384.46	FALSE	20

## Sheet: Royal_harness_2022912100716 (2)
Date	Time	Lbs	Newtons	Total force by time	Total Time Steps Force >3		**GoPro Fitting: 956
2022-09-12	10:07:38	-0.00110661	-0.00492242	0	FALSE	0			Total force x time	1384.46
2022-09-12	10:07:38	-0.196068	-0.87215	0	FALSE	0			Total Time Steps Force >3	20
2022-09-12	10:07:38	-0.0146944	-0.0653636	0	FALSE	0
2022-09-12	10:07:38	0.00260841	0.0116027	0.0116027	FALSE	0
2022-09-12	10:07:39	-0.13617	-0.605711	0	FALSE	0
2022-09-12	10:07:39	-0.182124	-0.810124	0.0116027	FALSE	0
2022-09-12	10:07:39	-0.254287	-1.13112	0	FALSE	0
2022-09-12	10:07:40	-0.235865	-1.04917	0.0116027	FALSE	0
2022-09-12	10:07:40	-0.143651	-0.638988	0	FALSE	0
2022-09-12	10:07:40	-0.0322008	-0.143236	0.0116027	FALSE	0
2022-09-12	10:07:40	-0.371692	-1.65336	0	FALSE	0
2022-09-12	10:07:41	-0.533575	-2.37345	0.0116027	FALSE	0
2022-09-12	10:07:41	-0.2779	-1.23615	0	FALSE	0
2022-09-12	10:07:41	-0.144669	-0.643517	0.0116027	FALSE	0
2022-09-12	10:07:41	0.0779773	0.346859	0.346859	FALSE	0
2022-09-12	10:07:42	0.297468	1.3232	1.3348	FALSE	0
2022-09-12	10:07:42	0.680114	3.02528	3.37214	FALSE	0
2022-09-12	10:07:42	3.80332	16.9179	18.2527	1	1
2022-09-12	10:07:42	2.33732	10.3969	13.769	FALSE	1
2022-09-12	10:07:43	2.96424	13.1855	31.4383	FALSE	1
2022-09-12	10:07:43	4.26281	18.9618	32.7308	1	2
2022-09-12	10:07:43	3.27492	14.5675	46.0058	1	3
2022-09-12	10:07:43	2.64907	11.7836	44.5144	FALSE	3
2022-09-12	10:07:44	3.63314	16.1609	62.1667	1	4
2022-09-12	10:07:44	1.79391	7.97967	52.4941	FALSE	4
2022-09-12	10:07:44	2.31589	10.3015	72.4682	FALSE	4
2022-09-12	10:07:45	4.55645	20.268	72.7621	1	5
2022-09-12	10:07:45	1.24831	5.55273	78.021	FALSE	5
2022-09-12	10:07:45	0.696552	3.0984	75.8605	FALSE	5
2022-09-12	10:07:45	0.466934	2.07702	80.098	FALSE	5
2022-09-12	10:07:46	1.25579	5.58601	81.4465	FALSE	5
2022-09-12	10:07:46	4.79741	21.3398	101.438	1	6
2022-09-12	10:07:46	0.606985	2.69999	84.1465	FALSE	6
2022-09-12	10:07:46	1.06922	4.7561	106.194	FALSE	6
2022-09-12	10:07:47	1.11075	4.94084	89.0873	FALSE	6
2022-09-12	10:07:47	1.75284	7.79698	113.991	FALSE	6
2022-09-12	10:07:47	2.4505	10.9003	99.9877	FALSE	6
2022-09-12	10:07:47	1.93411	8.60331	122.594	FALSE	6
2022-09-12	10:07:48	1.47497	6.56096	106.549	FALSE	6
2022-09-12	10:07:48	0.826628	3.67701	126.271	FALSE	6
2022-09-12	10:07:48	0.452532	2.01295	108.562	FALSE	6
2022-09-12	10:07:49	0.455891	2.02789	128.299	FALSE	6
2022-09-12	10:07:49	0.495636	2.20469	110.766	FALSE	6
2022-09-12	10:07:49	0.33355	1.4837	129.783	FALSE	6
2022-09-12	10:07:49	0.409275	1.82054	112.587	FALSE	6
2022-09-12	10:07:50	0.435789	1.93848	131.721	FALSE	6
2022-09-12	10:07:50	0.409987	1.8237	114.41	FALSE	6
2022-09-12	10:07:50	0.428715	1.90701	133.628	FALSE	6
2022-09-12	10:07:50	0.419046	1.864	116.274	FALSE	6
2022-09-12	10:07:51	0.429478	1.9104	135.539	FALSE	6
2022-09-12	10:07:51	0.42159	1.87532	118.15	FALSE	6
2022-09-12	10:07:51	0.435382	1.93667	137.475	FALSE	6
2022-09-12	10:07:51	0.448003	1.99281	120.143	FALSE	6
2022-09-12	10:07:52	0.516145	2.29592	139.771	FALSE	6
2022-09-12	10:07:52	0.685712	3.05018	123.193	FALSE	6
2022-09-12	10:07:52	0.562354	2.50146	142.273	FALSE	6
2022-09-12	10:07:53	0.56159	2.49806	125.691	FALSE	6
2022-09-12	10:07:53	0.492227	2.18952	144.462	FALSE	6
2022-09-12	10:07:53	0.497621	2.21352	127.904	FALSE	6
2022-09-12	10:07:53	0.496959	2.21057	146.673	FALSE	6
2022-09-12	10:07:54	0.472532	2.10192	130.006	FALSE	6
2022-09-12	10:07:54	0.508308	2.26106	148.934	FALSE	6
2022-09-12	10:07:54	0.894211	3.97763	133.984	FALSE	6
2022-09-12	10:07:54	0.905967	4.02992	152.964	FALSE	6
2022-09-12	10:07:55	0.61645	2.74209	136.726	FALSE	6
2022-09-12	10:07:55	0.590649	2.62732	155.591	FALSE	6
2022-09-12	10:07:55	0.482507	2.14629	138.872	FALSE	6
2022-09-12	10:07:55	0.454313	2.02088	157.612	FALSE	6
2022-09-12	10:07:56	0.345916	1.5387	140.411	FALSE	6
2022-09-12	10:07:56	0.402252	1.7893	159.401	FALSE	6
2022-09-12	10:07:56	0.233753	1.03978	141.451	FALSE	6
2022-09-12	10:07:56	0.28841	1.28291	160.684	FALSE	6
2022-09-12	10:07:57	0.306629	1.36395	142.815	FALSE	6
2022-09-12	10:07:57	0.294008	1.30781	161.992	FALSE	6
2022-09-12	10:07:57	0.242761	1.07985	143.895	FALSE	6
2022-09-12	10:07:58	-0.012099	-0.0538188	161.992	FALSE	6
2022-09-12	10:07:58	0.0314633	0.139955	144.035	FALSE	6
2022-09-12	10:07:58	0.0257127	0.114375	162.106	FALSE	6
2022-09-12	10:07:58	-0.0281804	-0.125352	144.035	FALSE	6
2022-09-12	10:07:59	-0.0675188	-0.300337	162.106	FALSE	6
2022-09-12	10:07:59	-0.0749997	-0.333614	144.035	FALSE	6
2022-09-12	10:07:59	0.330344	1.46944	163.576	FALSE	6
2022-09-12	10:07:59	0.488766	2.17413	146.209	FALSE	6
2022-09-12	10:08:00	0.229733	1.0219	164.598	FALSE	6
2022-09-12	10:08:00	0.360013	1.60141	147.81	FALSE	6
2022-09-12	10:08:00	0.357112	1.58851	166.186	FALSE	6
2022-09-12	10:08:00	0.347036	1.54369	149.354	FALSE	6
2022-09-12	10:08:01	0.285814	1.27136	167.458	FALSE	6
2022-09-12	10:08:01	0.469428	2.08811	151.442	FALSE	6
2022-09-12	10:08:01	0.662913	2.94877	170.406	FALSE	6
2022-09-12	10:08:02	1.0648	4.73644	156.178	FALSE	6
2022-09-12	10:08:02	1.45915	6.49059	176.897	FALSE	6
2022-09-12	10:08:02	1.98927	8.84867	165.027	FALSE	6
2022-09-12	10:08:02	1.31945	5.86918	182.766	FALSE	6
2022-09-12	10:08:03	1.14678	5.10111	170.128	FALSE	6
2022-09-12	10:08:03	0.943219	4.19563	186.962	FALSE	6
2022-09-12	10:08:03	0.569682	2.53406	172.662	FALSE	6
2022-09-12	10:08:03	0.356043	1.58375	188.546	FALSE	6
2022-09-12	10:08:04	0.375229	1.66909	174.331	FALSE	6
2022-09-12	10:08:04	0.33014	1.46853	190.014	FALSE	6
2022-09-12	10:08:04	0.346374	1.54074	175.872	FALSE	6
2022-09-12	10:08:04	0.364135	1.61975	191.634	FALSE	6
2022-09-12	10:08:05	0.384491	1.71029	177.582	FALSE	6
2022-09-12	10:08:05	0.481183	2.1404	193.774	FALSE	6
2022-09-12	10:08:05	0.517061	2.29999	179.882	FALSE	6
2022-09-12	10:08:06	0.725102	3.2254	197	FALSE	6
2022-09-12	10:08:06	0.981336	4.36518	184.247	FALSE	6
2022-09-12	10:08:06	0.895483	3.98329	200.983	FALSE	6
2022-09-12	10:08:06	1.81365	8.06748	192.315	FALSE	6
2022-09-12	10:08:07	6.09441	27.1092	228.092	1	7
2022-09-12	10:08:07	12.5098	55.6461	247.961	1	8
2022-09-12	10:08:07	4.97818	22.1439	250.236	1	9
2022-09-12	10:08:07	3.96413	17.6332	265.594	1	10
2022-09-12	10:08:08	4.80993	21.3955	271.632	1	11
2022-09-12	10:08:08	2.40093	10.6798	276.274	FALSE	11
2022-09-12	10:08:08	2.41665	10.7497	282.381	FALSE	11
2022-09-12	10:08:08	0.791921	3.52262	279.797	FALSE	11
2022-09-12	10:08:09	0.648104	2.8829	285.264	FALSE	11
2022-09-12	10:08:09	0.465407	2.07022	281.867	FALSE	11
2022-09-12	10:08:09	0.976857	4.34526	289.609	FALSE	11
2022-09-12	10:08:09	4.36744	19.4272	301.294	1	12
2022-09-12	10:08:10	2.13696	9.50563	299.115	FALSE	12
2022-09-12	10:08:10	3.34999	14.9014	316.196	1	13
2022-09-12	10:08:10	3.74591	16.6626	315.778	1	14
2022-09-12	10:08:11	3.60851	16.0514	332.247	1	15
2022-09-12	10:08:11	3.60571	16.0389	331.817	1	16
2022-09-12	10:08:11	2.31869	10.314	342.561	FALSE	16
2022-09-12	10:08:11	1.93696	8.61599	340.432	FALSE	16
2022-09-12	10:08:12	1.77726	7.90561	350.467	FALSE	16
2022-09-12	10:08:12	1.44098	6.40977	346.842	FALSE	16
2022-09-12	10:08:12	0.915738	4.07339	354.54	FALSE	16
2022-09-12	10:08:12	0.396552	1.76394	348.606	FALSE	16
2022-09-12	10:08:13	0.40154	1.78613	356.326	FALSE	16
2022-09-12	10:08:13	0.391361	1.74085	350.347	FALSE	16
2022-09-12	10:08:13	0.372328	1.65619	357.982	FALSE	16
2022-09-12	10:08:13	0.273295	1.21567	351.563	FALSE	16
2022-09-12	10:08:14	0.347901	1.54753	359.53	FALSE	16
2022-09-12	10:08:14	0.316705	1.40877	352.971	FALSE	16
2022-09-12	10:08:14	0.367901	1.6365	361.166	FALSE	16
2022-09-12	10:08:15	0.29126	1.29558	354.267	FALSE	16
2022-09-12	10:08:15	0.359402	1.59869	362.765	FALSE	16
2022-09-12	10:08:15	0.154669	0.687999	354.955	FALSE	16
2022-09-12	10:08:15	0.230191	1.02394	363.789	FALSE	16
2022-09-12	10:08:16	0.435992	1.93938	356.894	FALSE	16
2022-09-12	10:08:16	0.179504	0.79847	364.587	FALSE	16
2022-09-12	10:08:16	0.409987	1.8237	358.718	FALSE	16
2022-09-12	10:08:16	0.232379	1.03367	365.621	FALSE	16
2022-09-12	10:08:17	0.384491	1.71029	360.428	FALSE	16
2022-09-12	10:08:17	0.28098	1.24986	366.871	FALSE	16
2022-09-12	10:08:17	0.378232	1.68245	362.111	FALSE	16
2022-09-12	10:08:17	0.179402	0.798016	367.669	FALSE	16
2022-09-12	10:08:18	0.401285	1.785	363.896	FALSE	16
2022-09-12	10:08:18	0.230293	1.02439	368.693	FALSE	16
2022-09-12	10:08:18	0.375891	1.67204	365.568	FALSE	16
2022-09-12	10:08:19	0.24215	1.07713	369.77	FALSE	16
2022-09-12	10:08:19	0.38042	1.69218	367.26	FALSE	16
2022-09-12	10:08:19	0.313194	1.39315	371.164	FALSE	16
2022-09-12	10:08:19	0.321234	1.42891	368.689	FALSE	16
2022-09-12	10:08:20	0.371005	1.6503	372.814	FALSE	16
2022-09-12	10:08:20	0.372481	1.65687	370.346	FALSE	16
2022-09-12	10:08:20	0.586476	2.60876	375.423	FALSE	16
2022-09-12	10:08:21	0.383422	1.70554	372.051	FALSE	16
2022-09-12	10:08:21	0.500471	2.2262	377.649	FALSE	16
2022-09-12	10:08:21	0.61472	2.7344	374.786	FALSE	16
2022-09-12	10:08:21	0.397825	1.76961	379.419	FALSE	16
2022-09-12	10:08:21	0.333957	1.48551	376.271	FALSE	16
2022-09-12	10:08:22	0.42897	1.90814	381.327	FALSE	16
2022-09-12	10:08:22	0.311412	1.38522	377.657	FALSE	16
2022-09-12	10:08:22	0.37986	1.68969	383.016	FALSE	16
2022-09-12	10:08:22	0.427087	1.89977	379.556	FALSE	16
2022-09-12	10:08:23	1.1364	5.05493	388.071	FALSE	16
2022-09-12	10:08:23	0.308613	1.37277	380.929	FALSE	16
2022-09-12	10:08:23	0.482456	2.14606	390.217	FALSE	16
2022-09-12	10:08:24	0.202507	0.900792	381.83	FALSE	16
2022-09-12	10:08:24	0.35299	1.57017	391.788	FALSE	16
2022-09-12	10:08:24	0.328817	1.46264	383.293	FALSE	16
2022-09-12	10:08:24	0.325	1.44566	393.233	FALSE	16
2022-09-12	10:08:25	0.314109	1.39722	384.69	FALSE	16
2022-09-12	10:08:25	0.396654	1.7644	394.998	FALSE	16
2022-09-12	10:08:25	0.831514	3.69874	388.389	FALSE	16
2022-09-12	10:08:25	2.8223	12.5542	407.552	FALSE	16
2022-09-12	10:08:26	0.951361	4.23184	392.62	FALSE	16
2022-09-12	10:08:26	2.6277	11.6885	419.24	FALSE	16
2022-09-12	10:08:26	0.706272	3.14164	395.762	FALSE	16
2022-09-12	10:08:26	1.5793	7.02504	426.265	FALSE	16
2022-09-12	10:08:27	1.74062	7.74263	403.505	FALSE	16
2022-09-12	10:08:27	0.540216	2.40299	428.668	FALSE	16
2022-09-12	10:08:27	3.0621	13.6208	417.125	1	17
2022-09-12	10:08:28	0.454059	2.01975	430.688	FALSE	17
2022-09-12	10:08:28	0.600064	2.6692	419.795	FALSE	17
2022-09-12	10:08:28	0.48215	2.1447	432.833	FALSE	17
2022-09-12	10:08:28	0.22902	1.01873	420.813	FALSE	17
2022-09-12	10:08:29	2.30347	10.2463	443.079	FALSE	17
2022-09-12	10:08:29	0.686272	3.05268	423.866	FALSE	17
2022-09-12	10:08:29	2.4733	11.0017	454.081	FALSE	17
2022-09-12	10:08:29	2.23849	9.95725	433.823	FALSE	17
2022-09-12	10:08:30	0.456909	2.03242	456.113	FALSE	17
2022-09-12	10:08:30	1.74795	7.77523	441.599	FALSE	17
2022-09-12	10:08:30	0.706527	3.14277	459.256	FALSE	17
2022-09-12	10:08:31	0.585967	2.6065	444.205	FALSE	17
2022-09-12	10:08:31	2.28856	10.18	469.436	FALSE	17
2022-09-12	10:08:31	0.36327	1.6159	445.821	FALSE	17
2022-09-12	10:08:31	0.693295	3.08391	472.52	FALSE	17
2022-09-12	10:08:32	2.93843	13.0707	458.892	FALSE	17
2022-09-12	10:08:32	0.162048	0.720822	473.241	FALSE	17
2022-09-12	10:08:32	0.199962	0.889471	459.781	FALSE	17
2022-09-12	10:08:32	0.228003	1.0142	474.255	FALSE	17
2022-09-12	10:08:33	0.168359	0.748895	460.53	FALSE	17
2022-09-12	10:08:33	0.104848	0.466385	474.721	FALSE	17
2022-09-12	10:08:33	0.0374175	0.166441	460.696	FALSE	17
2022-09-12	10:08:33	0.0410307	0.182513	474.904	FALSE	17
2022-09-12	10:08:34	-0.0533203	-0.237179	460.696	FALSE	17
2022-09-12	10:08:34	-0.126145	-0.561118	474.904	FALSE	17
2022-09-12	10:08:34	-0.0840582	-0.373908	460.696	FALSE	17
2022-09-12	10:08:34	-0.210318	-0.935537	474.904	FALSE	17
2022-09-12	10:08:35	-0.276425	-1.22959	460.696	FALSE	17
2022-09-12	10:08:35	-0.0352033	-0.156591	474.904	FALSE	17
2022-09-12	10:08:35	0.0336516	0.149689	460.846	FALSE	17
2022-09-12	10:08:35	-0.0796308	-0.354214	474.904	FALSE	17
2022-09-12	10:08:36	-0.0256868	-0.11426	460.846	FALSE	17
2022-09-12	10:08:36	-0.245432	-1.09173	474.904	FALSE	17
2022-09-12	10:08:36	0.212583	0.945612	461.792	FALSE	17
2022-09-12	10:08:37	-0.00497431	-0.0221267	474.904	FALSE	17
2022-09-12	10:08:37	0.132786	0.590659	462.382	FALSE	17
2022-09-12	10:08:37	0.19126	0.850763	475.755	FALSE	17
2022-09-12	10:08:37	0.395127	1.7576	464.14	FALSE	17
2022-09-12	10:08:38	0.483626	2.15127	477.906	FALSE	17
2022-09-12	10:08:38	1.2624	5.61541	469.755	FALSE	17
2022-09-12	10:08:38	0.887952	3.94979	481.856	FALSE	17
2022-09-12	10:08:38	2.18963	9.73991	479.495	FALSE	17
2022-09-12	10:08:39	2.56938	11.4291	493.285	FALSE	17
2022-09-12	10:08:39	0.853193	3.79517	483.291	FALSE	17
2022-09-12	10:08:39	0.506171	2.25155	495.536	FALSE	17
2022-09-12	10:08:39	0.525611	2.33802	485.629	FALSE	17
2022-09-12	10:08:40	0.400522	1.7816	497.318	FALSE	17
2022-09-12	10:08:40	0.371718	1.65348	487.282	FALSE	17
2022-09-12	10:08:40	0.298588	1.32818	498.646	FALSE	17
2022-09-12	10:08:41	0.296043	1.31686	488.599	FALSE	17
2022-09-12	10:08:41	0.28673	1.27543	499.921	FALSE	17
2022-09-12	10:08:41	0.307188	1.36643	489.965	FALSE	17
2022-09-12	10:08:41	0.299351	1.33157	501.253	FALSE	17
2022-09-12	10:08:42	0.300013	1.33452	491.3	FALSE	17
2022-09-12	10:08:42	0.316705	1.40877	502.662	FALSE	17
2022-09-12	10:08:42	0.342048	1.5215	492.821	FALSE	17
2022-09-12	10:08:42	0.348664	1.55093	504.213	FALSE	17
2022-09-12	10:08:43	0.33126	1.47351	494.295	FALSE	17
2022-09-12	10:08:43	0.300115	1.33497	505.548	FALSE	17
2022-09-12	10:08:43	0.293702	1.30645	495.601	FALSE	17
2022-09-12	10:08:43	0.271158	1.20617	506.754	FALSE	17
2022-09-12	10:08:44	0.249326	1.10905	496.71	FALSE	17
2022-09-12	10:08:44	0.247188	1.09954	507.853	FALSE	17
2022-09-12	10:08:44	0.250903	1.11607	497.826	FALSE	17
2022-09-12	10:08:45	0.244084	1.08573	508.939	FALSE	17
2022-09-12	10:08:45	0.241743	1.07532	498.902	FALSE	17
2022-09-12	10:08:45	0.259758	1.15546	510.095	FALSE	17
2022-09-12	10:08:45	0.296908	1.32071	500.222	FALSE	17
2022-09-12	10:08:46	0.313906	1.39632	511.491	FALSE	17
2022-09-12	10:08:46	0.35131	1.5627	501.785	FALSE	17
2022-09-12	10:08:46	0.599148	2.66513	514.156	FALSE	17
2022-09-12	10:08:46	0.491158	2.18477	503.97	FALSE	17
2022-09-12	10:08:47	0.706985	3.14481	517.301	FALSE	17
2022-09-12	10:08:47	0.604746	2.69003	506.66	FALSE	17
2022-09-12	10:08:47	0.439351	1.95432	519.255	FALSE	17
2022-09-12	10:08:47	0.46159	2.05324	508.713	FALSE	17
2022-09-12	10:08:48	0.619657	2.75636	522.012	FALSE	17
2022-09-12	10:08:48	0.279351	1.24261	509.956	FALSE	17
2022-09-12	10:08:48	0.726476	3.23151	525.243	FALSE	17
2022-09-12	10:08:48	1.51747	6.75001	516.706	FALSE	17
2022-09-12	10:08:49	1.40475	6.24861	531.492	FALSE	17
2022-09-12	10:08:49	0.355127	1.57968	518.285	FALSE	17
2022-09-12	10:08:49	0.675992	3.00695	534.499	FALSE	17
2022-09-12	10:08:50	0.394059	1.75285	520.038	FALSE	17
2022-09-12	10:08:50	0.719046	3.19846	537.697	FALSE	17
2022-09-12	10:08:50	0.95131	4.23162	524.27	FALSE	17
2022-09-12	10:08:50	1.69141	7.52373	545.221	FALSE	17
2022-09-12	10:08:51	2.04536	9.09817	533.368	FALSE	17
2022-09-12	10:08:51	0.589835	2.6237	547.844	FALSE	17
2022-09-12	10:08:51	1.5019	6.68075	540.049	FALSE	17
2022-09-12	10:08:51	0.910191	4.04871	551.893	FALSE	17
2022-09-12	10:08:52	0.86103	3.83003	543.879	FALSE	17
2022-09-12	10:08:52	0.471463	2.09716	553.99	FALSE	17
2022-09-12	10:08:52	0.921997	4.10123	547.98	FALSE	17
2022-09-12	10:08:52	1.00673	4.47814	558.469	FALSE	17
2022-09-12	10:08:53	0.579453	2.57752	550.558	FALSE	17
2022-09-12	10:08:53	1.19808	5.3293	563.798	FALSE	17
2022-09-12	10:08:53	0.599707	2.66762	553.225	FALSE	17
2022-09-12	10:08:54	0.488155	2.17141	565.969	FALSE	17
2022-09-12	10:08:54	1.08073	4.8073	558.033	FALSE	17
2022-09-12	10:08:54	0.428104	1.90429	567.874	FALSE	17
2022-09-12	10:08:54	0.582863	2.59269	560.625	FALSE	17
2022-09-12	10:08:55	0.575891	2.56168	570.435	FALSE	17
2022-09-12	10:08:55	0.460013	2.04623	562.671	FALSE	17
2022-09-12	10:08:55	0.420166	1.86898	572.304	FALSE	17
2022-09-12	10:08:55	0.412125	1.83321	564.505	FALSE	17
2022-09-12	10:08:56	0.389224	1.73135	574.036	FALSE	17
2022-09-12	10:08:56	0.607188	2.70089	567.206	FALSE	17
2022-09-12	10:08:56	0.669071	2.97616	577.012	FALSE	17
2022-09-12	10:08:56	0.487596	2.16892	569.375	FALSE	17
2022-09-12	10:08:57	0.585763	2.60559	579.617	FALSE	17
2022-09-12	10:08:57	0.489529	2.17752	571.552	FALSE	17
2022-09-12	10:08:57	0.894211	3.97763	583.595	FALSE	17
2022-09-12	10:08:58	0.887697	3.94865	575.501	FALSE	17
2022-09-12	10:08:58	1.18215	5.25844	588.853	FALSE	17
2022-09-12	10:08:58	1.16291	5.17286	580.674	FALSE	17
2022-09-12	10:08:58	0.951056	4.23049	593.084	FALSE	17
2022-09-12	10:08:59	0.605305	2.69252	583.366	FALSE	17
2022-09-12	10:08:59	0.492939	2.19269	595.277	FALSE	17
2022-09-12	10:08:59	0.467087	2.0777	585.444	FALSE	17
2022-09-12	10:08:59	0.396501	1.76372	597.04	FALSE	17
2022-09-12	10:09:00	0.325967	1.44997	586.894	FALSE	17
2022-09-12	10:09:00	0.213193	0.948325	597.989	FALSE	17
2022-09-12	10:09:00	0.305814	1.36032	588.254	FALSE	17
2022-09-12	10:09:00	0.218639	0.97255	598.961	FALSE	17
2022-09-12	10:09:01	0.135127	0.601072	588.855	FALSE	17
2022-09-12	10:09:01	0.248562	1.10565	600.067	FALSE	17
2022-09-12	10:09:01	0.112379	0.499884	589.355	FALSE	17
2022-09-12	10:09:01	0.229122	1.01918	601.086	FALSE	17
2022-09-12	10:09:02	0.262608	1.16813	590.523	FALSE	17
2022-09-12	10:09:02	0.854058	3.79902	604.885	FALSE	17
2022-09-12	10:09:02	2.27335	10.1123	600.635	FALSE	17
2022-09-12	10:09:03	0.47874	2.12953	607.014	FALSE	17
2022-09-12	10:09:03	1.6736	7.44451	608.08	FALSE	17
2022-09-12	10:09:03	1.70307	7.5756	614.59	FALSE	17
2022-09-12	10:09:03	1.07151	4.76629	612.846	FALSE	17
2022-09-12	10:09:04	1.39218	6.1927	620.783	FALSE	17
2022-09-12	10:09:04	0.712176	3.1679	616.014	FALSE	17
2022-09-12	10:09:04	0.751514	3.34288	624.126	FALSE	17
2022-09-12	10:09:04	2.05309	9.13255	625.147	FALSE	17
2022-09-12	10:09:05	0.411361	1.82982	625.955	FALSE	17
2022-09-12	10:09:05	0.394567	1.75511	626.902	FALSE	17
2022-09-12	10:09:05	0.796552	3.54322	629.499	FALSE	17
2022-09-12	10:09:05	0.505611	2.24906	629.151	FALSE	17
2022-09-12	10:09:06	0.350089	1.55727	631.056	FALSE	17
2022-09-12	10:09:06	0.358486	1.59462	630.745	FALSE	17
2022-09-12	10:09:06	0.398384	1.77209	632.828	FALSE	17
2022-09-12	10:09:07	0.373499	1.6614	632.407	FALSE	17
2022-09-12	10:09:07	0.249071	1.10792	633.936	FALSE	17
2022-09-12	10:09:07	0.386527	1.71935	634.126	FALSE	17
2022-09-12	10:09:07	0.328359	1.46061	635.397	FALSE	17
2022-09-12	10:09:08	0.2707	1.20413	635.33	FALSE	17
2022-09-12	10:09:08	0.177163	0.788056	636.185	FALSE	17
2022-09-12	10:09:08	0.373601	1.66185	636.992	FALSE	17
2022-09-12	10:09:08	0.256858	1.14256	637.327	FALSE	17
2022-09-12	10:09:09	0.383982	1.70803	638.7	FALSE	17
2022-09-12	10:09:09	0.15472	0.688226	638.015	FALSE	17
2022-09-12	10:09:09	0.358283	1.59371	640.294	FALSE	17
2022-09-12	10:09:09	0.205713	0.915053	638.93	FALSE	17
2022-09-12	10:09:10	0.331769	1.47577	641.77	FALSE	17
2022-09-12	10:09:10	0.193041	0.858685	639.789	FALSE	17
2022-09-12	10:09:10	0.391056	1.7395	643.509	FALSE	17
2022-09-12	10:09:11	0.276349	1.22926	641.018	FALSE	17
2022-09-12	10:09:11	0.424389	1.88777	645.397	FALSE	17
2022-09-12	10:09:11	0.184949	0.82269	641.841	FALSE	17
2022-09-12	10:09:11	0.346527	1.54142	646.938	FALSE	17
2022-09-12	10:09:12	0.27528	1.2245	643.066	FALSE	17
2022-09-12	10:09:12	0.388817	1.72954	648.668	FALSE	17
2022-09-12	10:09:12	0.272328	1.21137	644.277	FALSE	17
2022-09-12	10:09:12	0.41701	1.85494	650.523	FALSE	17
2022-09-12	10:09:13	0.39757	1.76847	646.045	FALSE	17
2022-09-12	10:09:13	0.586018	2.60673	653.13	FALSE	17
2022-09-12	10:09:13	0.307494	1.36779	647.413	FALSE	17
2022-09-12	10:09:13	0.416603	1.85313	654.983	FALSE	17
2022-09-12	10:09:14	0.487748	2.1696	649.583	FALSE	17
2022-09-12	10:09:14	0.466018	2.07294	657.056	FALSE	17
2022-09-12	10:09:14	0.475738	2.11618	651.699	FALSE	17
2022-09-12	10:09:14	0.375585	1.67068	658.726	FALSE	17
2022-09-12	10:09:15	0.406629	1.80877	653.508	FALSE	17
2022-09-12	10:09:15	0.600369	2.67056	661.397	FALSE	17
2022-09-12	10:09:15	0.730649	3.25007	656.758	FALSE	17
2022-09-12	10:09:16	0.871209	3.87531	665.272	FALSE	17
2022-09-12	10:09:16	0.747036	3.32297	660.081	FALSE	17
2022-09-12	10:09:16	0.395789	1.76055	667.033	FALSE	17
2022-09-12	10:09:16	0.480064	2.13542	662.216	FALSE	17
2022-09-12	10:09:17	0.381082	1.69513	668.728	FALSE	17
2022-09-12	10:09:17	0.409428	1.82122	664.037	FALSE	17
2022-09-12	10:09:17	0.376043	1.67271	670.401	FALSE	17
2022-09-12	10:09:17	0.28902	1.28562	665.323	FALSE	17
2022-09-12	10:09:18	0.356908	1.5876	671.988	FALSE	17
2022-09-12	10:09:18	0.205255	0.913015	666.236	FALSE	17
2022-09-12	10:09:18	0.344746	1.5335	673.522	FALSE	17
2022-09-12	10:09:18	0.282201	1.25529	667.491	FALSE	17
2022-09-12	10:09:19	0.311209	1.38432	674.906	FALSE	17
2022-09-12	10:09:19	0.402761	1.79156	669.283	FALSE	17
2022-09-12	10:09:19	0.535738	2.38307	677.289	FALSE	17
2022-09-12	10:09:20	0.800114	3.55907	672.842	FALSE	17
2022-09-12	10:09:20	0.581998	2.58884	679.878	FALSE	17
2022-09-12	10:09:20	0.790547	3.51651	676.359	FALSE	17
2022-09-12	10:09:20	0.515891	2.29479	682.173	FALSE	17
2022-09-12	10:09:21	0.52271	2.32512	678.684	FALSE	17
2022-09-12	10:09:21	0.506069	2.2511	684.424	FALSE	17
2022-09-12	10:09:21	0.509936	2.2683	680.952	FALSE	17
2022-09-12	10:09:21	0.482659	2.14696	686.571	FALSE	17
2022-09-12	10:09:22	0.474568	2.11097	683.063	FALSE	17
2022-09-12	10:09:22	0.449987	2.00163	688.572	FALSE	17
2022-09-12	10:09:22	0.434364	1.93214	684.995	FALSE	17
2022-09-12	10:09:22	0.396552	1.76394	690.336	FALSE	17
2022-09-12	10:09:23	0.367341	1.63401	686.629	FALSE	17
2022-09-12	10:09:23	0.293346	1.30486	691.641	FALSE	17
2022-09-12	10:09:23	0.344847	1.53395	688.163	FALSE	17
2022-09-12	10:09:24	0.385254	1.71369	693.355	FALSE	17
2022-09-12	10:09:24	0.381234	1.69581	689.859	FALSE	17
2022-09-12	10:09:24	0.354618	1.57741	694.932	FALSE	17
2022-09-12	10:09:24	0.368257	1.63808	691.497	FALSE	17
2022-09-12	10:09:25	0.428868	1.90769	696.84	FALSE	17
2022-09-12	10:09:25	0.686018	3.05155	694.548	FALSE	17
2022-09-12	10:09:25	0.531158	2.3627	699.203	FALSE	17
2022-09-12	10:09:25	0.315738	1.40447	695.953	FALSE	17
2022-09-12	10:09:26	0.315534	1.40356	700.606	FALSE	17
2022-09-12	10:09:26	0.320929	1.42756	697.38	FALSE	17
2022-09-12	10:09:26	0.397214	1.76689	702.373	FALSE	17
2022-09-12	10:09:26	0.369682	1.64442	699.025	FALSE	17
2022-09-12	10:09:27	0.230853	1.02688	703.4	FALSE	17
2022-09-12	10:09:27	0.3764	1.6743	700.699	FALSE	17
2022-09-12	10:09:27	0.317621	1.41284	704.813	FALSE	17
2022-09-12	10:09:27	0.476909	2.12139	702.821	FALSE	17
2022-09-12	10:09:28	0.158995	0.707242	705.52	FALSE	17
2022-09-12	10:09:28	0.38556	1.71505	704.536	FALSE	17
2022-09-12	10:09:28	0.248919	1.10724	706.627	FALSE	17
2022-09-12	10:09:29	0.360674	1.60435	706.14	FALSE	17
2022-09-12	10:09:29	0.339351	1.5095	708.137	FALSE	17
2022-09-12	10:09:29	0.403015	1.79269	707.933	FALSE	17
2022-09-12	10:09:29	0.899758	4.0023	712.139	FALSE	17
2022-09-12	10:09:30	0.334771	1.48913	709.422	FALSE	17
2022-09-12	10:09:30	0.349428	1.55433	713.694	FALSE	17
2022-09-12	10:09:30	1.2278	5.4615	714.883	FALSE	17
2022-09-12	10:09:30	0.490191	2.18047	715.874	FALSE	17
2022-09-12	10:09:31	0.431921	1.92127	716.805	FALSE	17
2022-09-12	10:09:31	0.374975	1.66796	717.542	FALSE	17
2022-09-12	10:09:31	0.309071	1.37481	718.179	FALSE	17
2022-09-12	10:09:31	0.451921	2.01023	719.552	FALSE	17
2022-09-12	10:09:32	0.355687	1.58217	719.762	FALSE	17
2022-09-12	10:09:32	0.573041	2.549	722.101	FALSE	17
2022-09-12	10:09:32	0.305356	1.35828	721.12	FALSE	17
2022-09-12	10:09:33	0.561234	2.49648	724.598	FALSE	17
2022-09-12	10:09:33	0.311514	1.38568	722.505	FALSE	17
2022-09-12	10:09:33	0.523575	2.32897	726.927	FALSE	17
2022-09-12	10:09:33	0.334059	1.48596	723.991	FALSE	17
2022-09-12	10:09:34	0.4764	2.11912	729.046	FALSE	17
2022-09-12	10:09:34	0.361947	1.61001	725.601	FALSE	17
2022-09-12	10:09:34	0.48556	2.15987	731.206	FALSE	17
2022-09-12	10:09:34	0.644389	2.86637	728.468	FALSE	17
2022-09-12	10:09:35	0.315942	1.40537	732.611	FALSE	17
2022-09-12	10:09:35	0.427748	1.90271	730.371	FALSE	17
2022-09-12	10:09:35	0.674516	3.00038	735.611	FALSE	17
2022-09-12	10:09:35	0.507647	2.25812	732.629	FALSE	17
2022-09-12	10:09:36	0.444033	1.97515	737.587	FALSE	17
2022-09-12	10:09:36	0.635992	2.82902	735.458	FALSE	17
2022-09-12	10:09:36	0.356959	1.58783	739.174	FALSE	17
2022-09-12	10:09:37	0.463473	2.06162	737.519	FALSE	17
2022-09-12	10:09:37	0.311209	1.38432	740.559	FALSE	17
2022-09-12	10:09:37	0.638741	2.84125	740.361	FALSE	17
2022-09-12	10:09:37	0.381947	1.69898	742.258	FALSE	17
2022-09-12	10:09:38	0.572379	2.54606	742.907	FALSE	17
2022-09-12	10:09:38	0.326527	1.45246	743.71	FALSE	17
2022-09-12	10:09:38	0.280064	1.24578	744.152	FALSE	17
2022-09-12	10:09:38	0.477723	2.12501	745.835	FALSE	17
2022-09-12	10:09:39	0.385051	1.71278	745.865	FALSE	17
2022-09-12	10:09:39	0.441489	1.96383	747.799	FALSE	17
2022-09-12	10:09:39	0.341692	1.51991	747.385	FALSE	17
2022-09-12	10:09:39	0.395687	1.76009	749.559	FALSE	17
2022-09-12	10:09:40	0.274059	1.21907	748.604	FALSE	17
2022-09-12	10:09:40	0.538995	2.39756	751.957	FALSE	17
2022-09-12	10:09:40	0.204186	0.90826	749.512	FALSE	17
2022-09-12	10:09:40	0.570751	2.53881	754.495	FALSE	17
2022-09-12	10:09:41	0.294873	1.31165	750.824	FALSE	17
2022-09-12	10:09:41	0.29813	1.32614	755.822	FALSE	17
2022-09-12	10:09:41	0.206985	0.920711	751.745	FALSE	17
2022-09-12	10:09:42	0.255484	1.13644	756.958	FALSE	17
2022-09-12	10:09:42	0.257417	1.14504	752.89	FALSE	17
2022-09-12	10:09:42	0.253397	1.12716	758.085	FALSE	17
2022-09-12	10:09:42	0.290293	1.29128	754.181	FALSE	17
2022-09-12	10:09:43	0.345611	1.53735	759.623	FALSE	17
2022-09-12	10:09:43	0.672837	2.99291	757.174	FALSE	17
2022-09-12	10:09:43	0.300573	1.33701	760.96	FALSE	17
2022-09-12	10:09:43	1.36449	6.06952	763.244	FALSE	17
2022-09-12	10:09:44	0.241489	1.07419	762.034	FALSE	17
2022-09-12	10:09:44	0.352786	1.56926	764.813	FALSE	17
2022-09-12	10:09:44	0.396196	1.76236	763.796	FALSE	17
2022-09-12	10:09:44	0.417214	1.85585	766.669	FALSE	17
2022-09-12	10:09:45	0.272735	1.21318	765.009	FALSE	17
2022-09-12	10:09:45	0.275738	1.22654	767.895	FALSE	17
2022-09-12	10:09:45	0.242456	1.07849	766.088	FALSE	17
2022-09-12	10:09:46	0.332685	1.47985	769.375	FALSE	17
2022-09-12	10:09:46	0.124949	0.555798	766.644	FALSE	17
2022-09-12	10:09:46	0.307036	1.36576	770.741	FALSE	17
2022-09-12	10:09:46	0.140013	0.622806	767.266	FALSE	17
2022-09-12	10:09:47	0.380827	1.69399	772.435	FALSE	17
2022-09-12	10:09:47	0.115636	0.514372	767.781	FALSE	17
2022-09-12	10:09:47	0.433601	1.92874	774.364	FALSE	17
2022-09-12	10:09:47	0.206018	0.916409	768.697	FALSE	17
2022-09-12	10:09:48	0.190496	0.847364	775.211	FALSE	17
2022-09-12	10:09:48	0.168155	0.747987	769.445	FALSE	17
2022-09-12	10:09:48	0.285407	1.26955	776.48	FALSE	17
2022-09-12	10:09:48	0.292481	1.30101	770.746	FALSE	17
2022-09-12	10:09:49	0.371463	1.65234	778.133	FALSE	17
2022-09-12	10:09:49	0.377774	1.68041	772.427	FALSE	17
2022-09-12	10:09:49	0.253906	1.12942	779.262	FALSE	17
2022-09-12	10:09:50	0.629275	2.79914	775.226	FALSE	17
2022-09-12	10:09:50	0.308257	1.37119	780.633	FALSE	17
2022-09-12	10:09:50	1.2936	5.75419	780.98	FALSE	17
2022-09-12	10:09:50	0.318435	1.41646	782.05	FALSE	17
2022-09-12	10:09:51	0.376705	1.67566	782.656	FALSE	17
2022-09-12	10:09:51	0.330293	1.46921	783.519	FALSE	17
2022-09-12	10:09:51	0.433804	1.92965	784.585	FALSE	17
2022-09-12	10:09:51	0.745967	3.31821	786.837	FALSE	17
2022-09-12	10:09:52	0.381285	1.69603	786.281	FALSE	17
2022-09-12	10:09:52	0.297519	1.32342	788.161	FALSE	17
2022-09-12	10:09:52	1.03899	4.62164	790.903	FALSE	17
2022-09-12	10:09:52	0.184797	0.822014	788.983	FALSE	17
2022-09-12	10:09:53	0.72271	3.21476	794.118	FALSE	17
2022-09-12	10:09:53	0.289631	1.28834	790.271	FALSE	17
2022-09-12	10:09:53	0.397926	1.77005	795.888	FALSE	17
2022-09-12	10:09:53	0.594466	2.6443	792.915	FALSE	17
2022-09-12	10:09:54	0.628664	2.79642	798.684	FALSE	17
2022-09-12	10:09:54	0.534008	2.37537	795.291	FALSE	17
2022-09-12	10:09:54	0.284186	1.26412	799.948	FALSE	17
2022-09-12	10:09:55	0.296908	1.32071	796.611	FALSE	17
2022-09-12	10:09:55	0.524491	2.33304	802.281	FALSE	17
2022-09-12	10:09:55	0.470191	2.0915	798.703	FALSE	17
2022-09-12	10:09:55	3.23116	14.3728	816.654	1	18
2022-09-12	10:09:56	0.453855	2.01884	800.722	FALSE	18
2022-09-12	10:09:56	0.637926	2.83762	819.492	FALSE	18
2022-09-12	10:09:56	1.10184	4.9012	805.623	FALSE	18
2022-09-12	10:09:56	0.525662	2.33825	821.83	FALSE	18
2022-09-12	10:09:57	0.506272	2.252	807.875	FALSE	18
2022-09-12	10:09:57	0.398995	1.77481	823.605	FALSE	18
2022-09-12	10:09:57	0.244186	1.08619	808.961	FALSE	18
2022-09-12	10:09:57	0.569682	2.53406	826.139	FALSE	18
2022-09-12	10:09:58	0.217723	0.968475	809.93	FALSE	18
2022-09-12	10:09:58	0.491463	2.18613	828.325	FALSE	18
2022-09-12	10:09:58	0.198639	0.883586	810.813	FALSE	18
2022-09-12	10:09:59	0.573092	2.54923	830.874	FALSE	18
2022-09-12	10:09:59	1.00281	4.4607	815.274	FALSE	18
2022-09-12	10:09:59	0.382354	1.70079	832.575	FALSE	18
2022-09-12	10:09:59	0.270751	1.20435	816.478	FALSE	18
2022-09-12	10:10:00	0.459809	2.04532	834.62	FALSE	18
2022-09-12	10:10:00	0.337468	1.50113	817.979	FALSE	18
2022-09-12	10:10:00	0.595229	2.6477	837.268	FALSE	18
2022-09-12	10:10:00	0.269377	1.19824	819.178	FALSE	18
2022-09-12	10:10:01	0.357214	1.58896	838.857	FALSE	18
2022-09-12	10:10:01	0.261692	1.16406	820.342	FALSE	18
2022-09-12	10:10:01	0.383779	1.70713	840.564	FALSE	18
2022-09-12	10:10:01	0.243626	1.0837	821.425	FALSE	18
2022-09-12	10:10:02	0.384898	1.7121	842.276	FALSE	18
2022-09-12	10:10:02	0.157468	0.700449	822.126	FALSE	18
2022-09-12	10:10:02	0.36785	1.63627	843.912	FALSE	18
2022-09-12	10:10:03	0.213855	0.95127	823.077	FALSE	18
2022-09-12	10:10:03	0.431005	1.9172	845.83	FALSE	18
2022-09-12	10:10:03	0.142303	0.632992	823.71	FALSE	18
2022-09-12	10:10:03	0.346069	1.53938	847.369	FALSE	18
2022-09-12	10:10:04	0.203066	0.903278	824.613	FALSE	18
2022-09-12	10:10:04	0.404695	1.80016	849.169	FALSE	18
2022-09-12	10:10:04	0.16668	0.741426	825.355	FALSE	18
2022-09-12	10:10:04	0.408969	1.81918	850.988	FALSE	18
2022-09-12	10:10:05	0.185153	0.823598	826.178	FALSE	18
2022-09-12	10:10:05	0.430089	1.91312	852.901	FALSE	18
2022-09-12	10:10:05	0.108919	0.484493	826.663	FALSE	18
2022-09-12	10:10:05	0.40042	1.78115	854.683	FALSE	18
2022-09-12	10:10:06	0.165611	0.736671	827.4	FALSE	18
2022-09-12	10:10:06	0.353906	1.57424	856.257	FALSE	18
2022-09-12	10:10:06	0.169275	0.752969	828.153	FALSE	18
2022-09-12	10:10:06	0.298944	1.32976	857.587	FALSE	18
2022-09-12	10:10:07	0.233957	1.04069	829.193	FALSE	18
2022-09-12	10:10:07	0.271209	1.20639	858.793	FALSE	18
2022-09-12	10:10:07	0.276959	1.23197	830.425	FALSE	18
2022-09-12	10:10:08	0.22729	1.01103	859.804	FALSE	18
2022-09-12	10:10:08	0.321896	1.43186	831.857	FALSE	18
2022-09-12	10:10:08	0.258741	1.15093	860.955	FALSE	18
2022-09-12	10:10:08	0.436043	1.93961	833.797	FALSE	18
2022-09-12	10:10:09	0.200064	0.889925	861.845	FALSE	18
2022-09-12	10:10:09	0.525662	2.33825	836.135	FALSE	18
2022-09-12	10:10:09	0.400267	1.78047	863.625	FALSE	18
2022-09-12	10:10:09	0.430649	1.91561	838.051	FALSE	18
2022-09-12	10:10:10	0.182252	0.810693	864.436	FALSE	18
2022-09-12	10:10:10	0.339199	1.50882	839.559	FALSE	18
2022-09-12	10:10:10	0.302201	1.34425	865.78	FALSE	18
2022-09-12	10:10:10	0.500929	2.22823	841.788	FALSE	18
2022-09-12	10:10:11	0.304746	1.35557	867.136	FALSE	18
2022-09-12	10:10:11	0.34383	1.52942	843.317	FALSE	18
2022-09-12	10:10:11	0.396451	1.76349	868.899	FALSE	18
2022-09-12	10:10:12	0.318995	1.41895	844.736	FALSE	18
2022-09-12	10:10:12	0.409682	1.82235	870.722	FALSE	18
2022-09-12	10:10:12	0.191361	0.851212	845.587	FALSE	18
2022-09-12	10:10:12	0.421234	1.87373	872.595	FALSE	18
2022-09-12	10:10:13	1.32052	5.87394	851.461	FALSE	18
2022-09-12	10:10:13	0.820827	3.6512	876.247	FALSE	18
2022-09-12	10:10:13	2.50739	11.1534	862.615	FALSE	18
2022-09-12	10:10:13	3.64876	16.2304	892.477	1	19
2022-09-12	10:10:14	2.52663	11.239	873.853	FALSE	19
2022-09-12	10:10:14	2.7539	12.2499	904.727	FALSE	19
2022-09-12	10:10:14	0.829428	3.68946	877.543	FALSE	19
2022-09-12	10:10:14	2.86856	12.7599	917.487	FALSE	19
2022-09-12	10:10:15	2.79289	12.4233	889.966	FALSE	19
2022-09-12	10:10:15	1.02129	4.5429	922.03	FALSE	19
2022-09-12	10:10:15	1.98617	8.83488	898.801	FALSE	19
2022-09-12	10:10:16	1.11335	4.9524	926.982	FALSE	19
2022-09-12	10:10:16	1.46754	6.52791	905.329	FALSE	19
2022-09-12	10:10:16	2.95502	13.1445	940.127	FALSE	19
2022-09-12	10:10:16	0.488003	2.17073	907.5	FALSE	19
2022-09-12	10:10:17	1.12342	4.9972	945.124	FALSE	19
2022-09-12	10:10:17	0.349478	1.55455	909.054	FALSE	19
2022-09-12	10:10:17	0.434211	1.93146	947.055	FALSE	19
2022-09-12	10:10:17	0.362812	1.61386	910.668	FALSE	19
2022-09-12	10:10:18	0.284186	1.26412	948.32	FALSE	19
2022-09-12	10:10:18	0.193193	0.859361	911.528	FALSE	19
2022-09-12	10:10:18	0.543015	2.41544	950.735	FALSE	19
2022-09-12	10:10:18	0.501081	2.22891	913.756	FALSE	19
2022-09-12	10:10:19	1.02754	4.5707	955.306	FALSE	19
2022-09-12	10:10:19	1.09726	4.88083	918.637	FALSE	19
2022-09-12	10:10:19	0.286578	1.27476	956.58	FALSE	19
2022-09-12	10:10:19	0.389987	1.73474	920.372	FALSE	19
2022-09-12	10:10:20	0.141845	0.630955	957.211	FALSE	19
2022-09-12	10:10:20	-0.02187	-0.0972821	920.372	FALSE	19
2022-09-12	10:10:20	0.356094	1.58398	958.795	FALSE	19
2022-09-12	10:10:21	0.31126	1.38455	921.757	FALSE	19
2022-09-12	10:10:21	0.594567	2.64475	961.44	FALSE	19
2022-09-12	10:10:21	0.657773	2.92591	924.682	FALSE	19
2022-09-12	10:10:21	0.428257	1.90497	963.345	FALSE	19
2022-09-12	10:10:22	0.333448	1.48324	926.166	FALSE	19
2022-09-12	10:10:22	0.879555	3.91244	967.258	FALSE	19
2022-09-12	10:10:22	3.53253	15.7134	941.879	1	20
2022-09-12	10:10:22	1.36093	6.05369	973.311	FALSE	20
2022-09-12	10:10:23	1.77497	7.89542	949.775	FALSE	20
2022-09-12	10:10:23	1.0194	4.5345	977.846	FALSE	20
2022-09-12	10:10:23	0.582506	2.5911	952.366	FALSE	20
2022-09-12	10:10:23	0.257163	1.14391	978.99	FALSE	20
2022-09-12	10:10:24	0.250903	1.11607	953.482	FALSE	20
2022-09-12	10:10:24	0.312481	1.38998	980.38	FALSE	20
2022-09-12	10:10:24	0.193397	0.860269	954.342	FALSE	20
2022-09-12	10:10:25	0.221031	0.98319	981.363	FALSE	20
2022-09-12	10:10:25	0.0847967	0.377193	954.719	FALSE	20
2022-09-12	10:10:25	0.135535	0.602887	981.966	FALSE	20
2022-09-12	10:10:25	0.1307	0.58138	955.301	FALSE	20
2022-09-12	10:10:26	0.106272	0.472719	982.438	FALSE	20
2022-09-12	10:10:26	0.320318	1.42484	956.725	FALSE	20
2022-09-12	10:10:26	0.576603	2.56485	985.003	FALSE	20
2022-09-12	10:10:26	0.327952	1.4588	958.184	FALSE	20
2022-09-12	10:10:27	0.321641	1.43072	986.434	FALSE	20
2022-09-12	10:10:27	0.262048	1.16564	959.35	FALSE	20
2022-09-12	10:10:27	0.346985	1.54346	987.977	FALSE	20
2022-09-12	10:10:27	0.319911	1.42303	960.773	FALSE	20
2022-09-12	10:10:28	0.290293	1.29128	989.269	FALSE	20
2022-09-12	10:10:28	0.29355	1.30577	962.079	FALSE	20
2022-09-12	10:10:28	0.379657	1.68879	990.957	FALSE	20
2022-09-12	10:10:29	0.3707	1.64895	963.728	FALSE	20
2022-09-12	10:10:29	0.3164	1.40741	992.365	FALSE	20
2022-09-12	10:10:29	0.279199	1.24193	964.97	FALSE	20
2022-09-12	10:10:29	0.242354	1.07804	993.443	FALSE	20
2022-09-12	10:10:30	0.188664	0.839215	965.809	FALSE	20
2022-09-12	10:10:30	0.270954	1.20526	994.648	FALSE	20
2022-09-12	10:10:30	0.109529	0.487207	966.296	FALSE	20
2022-09-12	10:10:30	-0.0849234	-0.377756	994.648	FALSE	20
2022-09-12	10:10:31	-0.249351	-1.10916	966.296	FALSE	20
2022-09-12	10:10:31	-0.318714	-1.4177	994.648	FALSE	20
2022-09-12	10:10:31	-0.308079	-1.3704	966.296	FALSE	20
2022-09-12	10:10:31	-0.289147	-1.28618	994.648	FALSE	20
2022-09-12	10:10:32	-0.334287	-1.48698	966.296	FALSE	20
2022-09-12	10:10:32	-0.249656	-1.11052	994.648	FALSE	20
2022-09-12	10:10:32	-0.281005	-1.24997	966.296	FALSE	20
2022-09-12	10:10:32	-0.353524	-1.57255	994.648	FALSE	20
2022-09-12	10:10:33	-0.338969	-1.5078	966.296	FALSE	20
2022-09-12	10:10:33	-0.223346	-0.993488	994.648	FALSE	20
2022-09-12	10:10:33	-0.222481	-0.98964	966.296	FALSE	20
2022-09-12	10:10:34	-0.111946	-0.497958	994.648	FALSE	20
2022-09-12	10:10:34	0.0664252	0.295473	966.591	FALSE	20
2022-09-12	10:10:34	-0.128435	-0.571305	994.648	FALSE	20
2022-09-12	10:10:34	-0.0296054	-0.131691	966.591	FALSE	20
2022-09-12	10:10:35	-0.00151375	-0.00673346	994.648	FALSE	20
2022-09-12	10:10:35	-0.0261448	-0.116297	966.591	FALSE	20
2022-09-12	10:10:35	0.0643895	0.286417	994.935	FALSE	20
2022-09-12	10:10:35	0.16897	0.751612	967.343	FALSE	20
2022-09-12	10:10:36	0.310598	1.3816	996.316	FALSE	20
2022-09-12	10:10:36	0.43411	1.93101	969.274	FALSE	20
2022-09-12	10:10:36	0.630394	2.80412	999.12	FALSE	20
2022-09-12	10:10:36	1.19274	5.30555	974.58	FALSE	20
2022-09-12	10:10:37	0.770598	3.42777	1002.55	FALSE	20
2022-09-12	10:10:37	0.263677	1.17289	975.752	FALSE	20
2022-09-12	10:10:37	0.217825	0.968929	1003.52	FALSE	20
2022-09-12	10:10:38	0.383321	1.70509	977.458	FALSE	20
2022-09-12	10:10:38	0.354008	1.5747	1005.09	FALSE	20
2022-09-12	10:10:38	0.315534	1.40356	978.861	FALSE	20
2022-09-12	10:10:38	0.546883	2.43264	1007.52	FALSE	20
2022-09-12	10:10:39	0.439758	1.95613	980.817	FALSE	20
2022-09-12	10:10:39	0.554924	2.46841	1009.99	FALSE	20
2022-09-12	10:10:39	0.38098	1.69468	982.512	FALSE	20
2022-09-12	10:10:39	0.471565	2.09762	1012.09	FALSE	20
2022-09-12	10:10:40	0.481539	2.14198	984.654	FALSE	20
2022-09-12	10:10:40	0.344797	1.53373	1013.62	FALSE	20
2022-09-12	10:10:40	0.282456	1.25642	985.91	FALSE	20
2022-09-12	10:10:40	0.26785	1.19145	1014.82	FALSE	20
2022-09-12	10:10:41	0.278435	1.23853	987.149	FALSE	20
2022-09-12	10:10:41	0.503626	2.24023	1017.06	FALSE	20
2022-09-12	10:10:41	0.438079	1.94866	989.098	FALSE	20
2022-09-12	10:10:42	0.519707	2.31176	1019.37	FALSE	20
2022-09-12	10:10:42	0.32215	1.43299	990.531	FALSE	20
2022-09-12	10:10:42	0.463321	2.06094	1021.43	FALSE	20
2022-09-12	10:10:42	0.136196	0.605827	991.136	FALSE	20
2022-09-12	10:10:43	0.122507	0.544936	1021.97	FALSE	20
2022-09-12	10:10:43	0.166985	0.742783	991.879	FALSE	20
2022-09-12	10:10:43	0.260725	1.15976	1023.13	FALSE	20
2022-09-12	10:10:43	0.224644	0.999261	992.878	FALSE	20
2022-09-12	10:10:44	0.262354	1.167	1024.3	FALSE	20
2022-09-12	10:10:44	0.0902928	0.40164	993.28	FALSE	20
2022-09-12	10:10:44	0.11126	0.494907	1024.8	FALSE	20
2022-09-12	10:10:44	0.255026	1.13441	994.414	FALSE	20
2022-09-12	10:10:45	0.186934	0.83152	1025.63	FALSE	20
2022-09-12	10:10:45	0.184288	0.81975	995.234	FALSE	20
2022-09-12	10:10:45	0.205051	0.912108	1026.54	FALSE	20
2022-09-12	10:10:45	0.192685	0.857101	996.091	FALSE	20
2022-09-12	10:10:46	0.285153	1.26842	1027.81	FALSE	20
2022-09-12	10:10:46	0.387239	1.72252	997.814	FALSE	20
2022-09-12	10:10:46	0.310751	1.38228	1029.19	FALSE	20
2022-09-12	10:10:47	0.254211	1.13078	998.945	FALSE	20
2022-09-12	10:10:47	0.230903	1.0271	1030.22	FALSE	20
2022-09-12	10:10:47	0.40556	1.80401	1000.75	FALSE	20
2022-09-12	10:10:47	0.285305	1.26909	1031.49	FALSE	20
2022-09-12	10:10:48	0.250954	1.11629	1001.86	FALSE	20
2022-09-12	10:10:48	0.356247	1.58466	1033.07	FALSE	20
2022-09-12	10:10:48	0.657723	2.92568	1004.79	FALSE	20
2022-09-12	10:10:48	0.43014	1.91335	1034.98	FALSE	20
2022-09-12	10:10:49	0.214568	0.954441	1005.75	FALSE	20
2022-09-12	10:10:49	0.24444	1.08732	1036.07	FALSE	20
2022-09-12	10:10:49	0.314771	1.40016	1007.15	FALSE	20
2022-09-12	10:10:49	0.274262	1.21997	1037.29	FALSE	20
2022-09-12	10:10:50	0.285713	1.27091	1008.42	FALSE	20
2022-09-12	10:10:50	0.214669	0.954891	1038.25	FALSE	20
2022-09-12	10:10:50	0.264237	1.17538	1009.59	FALSE	20
2022-09-12	10:10:51	0.383422	1.70554	1039.95	FALSE	20
2022-09-12	10:10:51	0.323473	1.43887	1011.03	FALSE	20
2022-09-12	10:10:51	0.323219	1.43774	1041.39	FALSE	20
2022-09-12	10:10:51	0.335535	1.49253	1012.52	FALSE	20
2022-09-12	10:10:52	0.341947	1.52105	1042.91	FALSE	20
2022-09-12	10:10:52	0.334364	1.48732	1014.01	FALSE	20
2022-09-12	10:10:52	0.345865	1.53848	1044.45	FALSE	20
2022-09-12	10:10:52	0.337214	1.5	1015.51	FALSE	20
2022-09-12	10:10:53	0.332532	1.47917	1045.93	FALSE	20
2022-09-12	10:10:53	0.329122	1.464	1016.97	FALSE	20
2022-09-12	10:10:53	0.323117	1.43729	1047.37	FALSE	20
2022-09-12	10:10:53	0.327697	1.45766	1018.43	FALSE	20
2022-09-12	10:10:54	0.329835	1.46717	1048.83	FALSE	20
2022-09-12	10:10:54	0.331005	1.47238	1019.9	FALSE	20
2022-09-12	10:10:54	0.334924	1.48981	1050.32	FALSE	20
2022-09-12	10:10:55	0.332786	1.4803	1021.38	FALSE	20
2022-09-12	10:10:55	0.335127	1.49071	1051.81	FALSE	20
2022-09-12	10:10:55	0.334313	1.48709	1022.87	FALSE	20
2022-09-12	10:10:55	0.334669	1.48867	1053.3	FALSE	20
2022-09-12	10:10:56	0.332328	1.47826	1024.35	FALSE	20
2022-09-12	10:10:56	0.339809	1.51154	1054.81	FALSE	20
2022-09-12	10:10:56	0.335433	1.49207	1025.84	FALSE	20
2022-09-12	10:10:56	0.309224	1.37549	1056.19	FALSE	20
2022-09-12	10:10:57	0.324084	1.44159	1027.28	FALSE	20
2022-09-12	10:10:57	0.349886	1.55636	1057.74	FALSE	20
2022-09-12	10:10:57	0.34673	1.54232	1028.83	FALSE	20
2022-09-12	10:10:57	0.333499	1.48347	1059.23	FALSE	20
2022-09-12	10:10:58	0.32215	1.43299	1030.26	FALSE	20
2022-09-12	10:10:58	0.307494	1.36779	1060.6	FALSE	20
2022-09-12	10:10:58	0.404644	1.79994	1032.06	FALSE	20
2022-09-12	10:10:58	0.446527	1.98624	1062.58	FALSE	20
2022-09-12	10:10:59	0.476959	2.12161	1034.18	FALSE	20
2022-09-12	10:10:59	0.435382	1.93667	1064.52	FALSE	20
2022-09-12	10:10:59	0.426934	1.89909	1036.08	FALSE	20
2022-09-12	10:11:00	0.373906	1.66321	1066.18	FALSE	20
2022-09-12	10:11:00	0.422456	1.87917	1037.96	FALSE	20
2022-09-12	10:11:00	0.369428	1.64329	1067.83	FALSE	20
2022-09-12	10:11:00	0.413244	1.83819	1039.8	FALSE	20
2022-09-12	10:11:01	0.446221	1.98488	1069.81	FALSE	20
2022-09-12	10:11:01	0.310598	1.3816	1041.18	FALSE	20
2022-09-12	10:11:01	0.188105	0.836729	1070.65	FALSE	20
2022-09-12	10:11:01	0.319148	1.41963	1042.6	FALSE	20
2022-09-12	10:11:02	0.402964	1.79246	1072.44	FALSE	20
2022-09-12	10:11:02	0.489173	2.17594	1044.77	FALSE	20
2022-09-12	10:11:02	0.438537	1.9507	1074.39	FALSE	20
2022-09-12	10:11:02	2.0395	9.0721	1053.85	FALSE	20
2022-09-12	10:11:03	1.33355	5.9319	1080.32	FALSE	20
2022-09-12	10:11:03	1.18078	5.25235	1059.1	FALSE	20
2022-09-12	10:11:03	2.27019	10.0983	1090.42	FALSE	20
2022-09-12	10:11:04	2.0649	9.18509	1068.28	FALSE	20
2022-09-12	10:11:04	2.70479	12.0314	1102.45	FALSE	20
2022-09-12	10:11:04	0.553702	2.46298	1070.75	FALSE	20
2022-09-12	10:11:04	1.28531	5.71732	1108.17	FALSE	20
2022-09-12	10:11:05	2.75848	12.2703	1083.02	FALSE	20
2022-09-12	10:11:05	0.483422	2.15036	1110.32	FALSE	20
2022-09-12	10:11:05	0.397926	1.77005	1084.79	FALSE	20
2022-09-12	10:11:05	0.943015	4.19472	1114.51	FALSE	20
2022-09-12	10:11:06	0.357112	1.58851	1086.38	FALSE	20
2022-09-12	10:11:06	1.44541	6.42947	1120.94	FALSE	20
2022-09-12	10:11:06	0.379911	1.68992	1088.07	FALSE	20
2022-09-12	10:11:06	1.15889	5.15497	1126.1	FALSE	20
2022-09-12	10:11:07	2.66149	11.8388	1099.9	FALSE	20
2022-09-12	10:11:07	0.360216	1.60231	1127.7	FALSE	20
2022-09-12	10:11:07	1.13314	5.04043	1104.94	FALSE	20
2022-09-12	10:11:08	0.656145	2.91866	1130.62	FALSE	20
2022-09-12	10:11:08	0.892278	3.96903	1108.91	FALSE	20
2022-09-12	10:11:08	1.99136	8.85797	1139.48	FALSE	20
2022-09-12	10:11:08	0.309122	1.37504	1110.29	FALSE	20
2022-09-12	10:11:09	0.392481	1.74583	1141.22	FALSE	20
2022-09-12	10:11:09	0.300369	1.3361	1111.62	FALSE	20
2022-09-12	10:11:09	0.287087	1.27702	1142.5	FALSE	20
2022-09-12	10:11:09	0.595076	2.64702	1114.27	FALSE	20
2022-09-12	10:11:10	0.327901	1.45857	1143.96	FALSE	20
2022-09-12	10:11:10	0.337468	1.50113	1115.77	FALSE	20
2022-09-12	10:11:10	0.242456	1.07849	1145.04	FALSE	20
2022-09-12	10:11:10	0.306985	1.36553	1117.14	FALSE	20
2022-09-12	10:11:11	0.437672	1.94685	1146.98	FALSE	20
2022-09-12	10:11:11	0.264237	1.17538	1118.31	FALSE	20
2022-09-12	10:11:11	0.285356	1.26932	1148.25	FALSE	20
2022-09-12	10:11:11	0.238893	1.06264	1119.38	FALSE	20
2022-09-12	10:11:12	0.349886	1.55636	1149.81	FALSE	20
2022-09-12	10:11:12	0.308919	1.37413	1120.75	FALSE	20
2022-09-12	10:11:12	0.175891	0.782398	1150.59	FALSE	20
2022-09-12	10:11:13	0.339351	1.5095	1122.26	FALSE	20
2022-09-12	10:11:13	0.365967	1.62789	1152.22	FALSE	20
2022-09-12	10:11:13	0.34215	1.52195	1123.78	FALSE	20
2022-09-12	10:11:13	0.240878	1.07147	1153.29	FALSE	20
2022-09-12	10:11:14	0.339249	1.50905	1125.29	FALSE	20
2022-09-12	10:11:14	0.32444	1.44317	1154.74	FALSE	20
2022-09-12	10:11:14	0.620216	2.75884	1128.05	FALSE	20
2022-09-12	10:11:14	0.220623	0.981375	1155.72	FALSE	20
2022-09-12	10:11:15	0.450802	2.00526	1130.06	FALSE	20
2022-09-12	10:11:15	0.473397	2.10576	1157.82	FALSE	20
2022-09-12	10:11:15	0.412074	1.83299	1131.89	FALSE	20
2022-09-12	10:11:15	0.251921	1.12059	1158.94	FALSE	20
2022-09-12	10:11:16	0.351056	1.56157	1133.45	FALSE	20
2022-09-12	10:11:16	0.168308	0.748668	1159.69	FALSE	20
2022-09-12	10:11:16	0.371463	1.65234	1135.1	FALSE	20
2022-09-12	10:11:17	0.15299	0.68053	1160.37	FALSE	20
2022-09-12	10:11:17	0.38785	1.72523	1136.83	FALSE	20
2022-09-12	10:11:17	0.200318	0.891055	1161.26	FALSE	20
2022-09-12	10:11:17	0.267392	1.18941	1138.02	FALSE	20
2022-09-12	10:11:18	0.30388	1.35172	1162.61	FALSE	20
2022-09-12	10:11:18	0.206018	0.916409	1138.93	FALSE	20
2022-09-12	10:11:18	0.345967	1.53893	1164.15	FALSE	20
2022-09-12	10:11:18	0.239351	1.06468	1140	FALSE	20
2022-09-12	10:11:19	0.415942	1.85019	1166	FALSE	20
2022-09-12	10:11:19	0.206171	0.91709	1140.91	FALSE	20
2022-09-12	10:11:19	0.335484	1.4923	1167.5	FALSE	20
2022-09-12	10:11:19	0.213295	0.948779	1141.86	FALSE	20
2022-09-12	10:11:20	0.219555	0.976625	1168.47	FALSE	20
2022-09-12	10:11:20	0.298181	1.32637	1143.19	FALSE	20
2022-09-12	10:11:20	0.146781	0.652911	1169.13	FALSE	20
2022-09-12	10:11:21	0.316603	1.40831	1144.6	FALSE	20
2022-09-12	10:11:21	0.218181	0.970513	1170.1	FALSE	20
2022-09-12	10:11:21	0.230344	1.02462	1145.62	FALSE	20
2022-09-12	10:11:21	0.300878	1.33837	1171.43	FALSE	20
2022-09-12	10:11:22	0.196705	0.874983	1146.5	FALSE	20
2022-09-12	10:11:22	0.226832	1.00899	1172.44	FALSE	20
2022-09-12	10:11:22	0.286171	1.27295	1147.77	FALSE	20
2022-09-12	10:11:22	0.356349	1.58511	1174.03	FALSE	20
2022-09-12	10:11:23	0.549122	2.4426	1150.21	FALSE	20
2022-09-12	10:11:23	1.78439	7.93732	1181.97	FALSE	20
2022-09-12	10:11:23	0.328868	1.46287	1151.68	FALSE	20
2022-09-12	10:11:23	0.371972	1.65461	1183.62	FALSE	20
2022-09-12	10:11:24	1.77182	7.88141	1159.56	FALSE	20
2022-09-12	10:11:24	0.318791	1.41805	1185.04	FALSE	20
2022-09-12	10:11:24	0.208664	0.928179	1160.49	FALSE	20
2022-09-12	10:11:24	0.698384	3.10655	1188.15	FALSE	20
2022-09-12	10:11:25	0.400776	1.78273	1162.27	FALSE	20
2022-09-12	10:11:25	0.429529	1.91063	1190.06	FALSE	20
2022-09-12	10:11:25	0.955738	4.25131	1166.52	FALSE	20
2022-09-12	10:11:26	0.674567	3.00061	1193.06	FALSE	20
2022-09-12	10:11:26	0.27757	1.23469	1167.75	FALSE	20
2022-09-12	10:11:26	1.48704	6.61465	1199.67	FALSE	20
2022-09-12	10:11:26	0.495127	2.20242	1169.96	FALSE	20
2022-09-12	10:11:27	0.990191	4.40457	1204.08	FALSE	20
2022-09-12	10:11:27	2.12765	9.46421	1179.42	FALSE	20
2022-09-12	10:11:27	0.353753	1.57356	1205.65	FALSE	20
2022-09-12	10:11:27	2.06709	9.19483	1188.62	FALSE	20
2022-09-12	10:11:28	0.200929	0.893772	1206.54	FALSE	20
2022-09-12	10:11:28	0.128359	0.570967	1189.19	FALSE	20
2022-09-12	10:11:28	0.381998	1.6992	1208.24	FALSE	20
2022-09-12	10:11:28	0.129122	0.57436	1189.76	FALSE	20
2022-09-12	10:11:29	0.321082	1.42824	1209.67	FALSE	20
2022-09-12	10:11:29	0.146629	0.652235	1190.41	FALSE	20
2022-09-12	10:11:29	0.257316	1.14459	1210.82	FALSE	20
2022-09-12	10:11:30	0.117163	0.521164	1190.93	FALSE	20
2022-09-12	10:11:30	0.0844913	0.375834	1211.19	FALSE	20
2022-09-12	10:11:30	0.178028	0.791904	1191.73	FALSE	20
2022-09-12	10:11:30	0.448461	1.99484	1213.19	FALSE	20
2022-09-12	10:11:31	0.153753	0.683924	1192.41	FALSE	20
2022-09-12	10:11:31	0.186171	0.828126	1214.01	FALSE	20
2022-09-12	10:11:31	0.342099	1.52172	1193.93	FALSE	20
2022-09-12	10:11:31	0.249682	1.11064	1215.12	FALSE	20
2022-09-12	10:11:32	0.739606	3.28992	1197.22	FALSE	20
2022-09-12	10:11:32	0.147392	0.655629	1215.78	FALSE	20
2022-09-12	10:11:32	0.441489	1.96383	1199.19	FALSE	20
2022-09-12	10:11:32	0.513448	2.28392	1218.06	FALSE	20
2022-09-12	10:11:33	0.429987	1.91267	1201.1	FALSE	20
2022-09-12	10:11:33	0.326069	1.45042	1219.51	FALSE	20
2022-09-12	10:11:33	0.319911	1.42303	1202.52	FALSE	20
2022-09-12	10:11:34	0.341845	1.52059	1221.04	FALSE	20
2022-09-12	10:11:34	0.335178	1.49094	1204.01	FALSE	20
2022-09-12	10:11:34	0.349733	1.55568	1222.59	FALSE	20
2022-09-12	10:11:34	0.25014	1.11267	1205.13	FALSE	20
2022-09-12	10:11:35	0.307137	1.36621	1223.96	FALSE	20
2022-09-12	10:11:35	0.224084	0.99677	1206.12	FALSE	20
2022-09-12	10:11:35	0.280827	1.24917	1225.21	FALSE	20
2022-09-12	10:11:35	0.205967	0.916182	1207.04	FALSE	20
2022-09-12	10:11:36	0.345763	1.53802	1226.74	FALSE	20
2022-09-12	10:11:36	0.294567	1.31029	1208.35	FALSE	20
2022-09-12	10:11:36	0.310344	1.38047	1228.12	FALSE	20
2022-09-12	10:11:36	0.172379	0.766776	1209.12	FALSE	20
2022-09-12	10:11:37	0.261081	1.16134	1229.29	FALSE	20
2022-09-12	10:11:37	0.166832	0.742102	1209.86	FALSE	20
2022-09-12	10:11:37	0.234313	1.04227	1230.33	FALSE	20
2022-09-12	10:11:37	0.104339	0.464121	1210.32	FALSE	20
2022-09-12	10:11:38	0.188664	0.839215	1231.17	FALSE	20
2022-09-12	10:11:38	0.170547	0.758627	1211.08	FALSE	20
2022-09-12	10:11:38	0.0635753	0.282796	1231.45	FALSE	20
2022-09-12	10:11:39	0.14098	0.627107	1211.71	FALSE	20
2022-09-12	10:11:39	0.113194	0.50351	1231.95	FALSE	20
2022-09-12	10:11:39	0.102507	0.455972	1212.16	FALSE	20
2022-09-12	10:11:39	0.0298348	0.132711	1232.09	FALSE	20
2022-09-12	10:11:40	0.166272	0.739611	1212.9	FALSE	20
2022-09-12	10:11:40	0.0814888	0.362478	1232.45	FALSE	20
2022-09-12	10:11:40	0.201998	0.898528	1213.8	FALSE	20
2022-09-12	10:11:40	0.0665269	0.295925	1232.74	FALSE	20
2022-09-12	10:11:41	0.237265	1.0554	1214.86	FALSE	20
2022-09-12	10:11:41	0.150038	0.667399	1233.41	FALSE	20
2022-09-12	10:11:41	0.188512	0.838539	1215.7	FALSE	20
2022-09-12	10:11:41	0.124491	0.553761	1233.97	FALSE	20
2022-09-12	10:11:42	0.172735	0.76836	1216.46	FALSE	20
2022-09-12	10:11:42	0.194262	0.864116	1234.83	FALSE	20
2022-09-12	10:11:42	0.119962	0.533615	1217	FALSE	20
2022-09-12	10:11:43	0.189631	0.843517	1235.67	FALSE	20
2022-09-12	10:11:43	0.132532	0.589529	1217.59	FALSE	20
2022-09-12	10:11:43	0.286578	1.27476	1236.95	FALSE	20
2022-09-12	10:11:43	0.169428	0.75365	1218.34	FALSE	20
2022-09-12	10:11:44	0.208308	0.926596	1237.88	FALSE	20
2022-09-12	10:11:44	0.0917687	0.408206	1218.75	FALSE	20
2022-09-12	10:11:44	0.182456	0.811601	1238.69	FALSE	20
2022-09-12	10:11:44	0.0505982	0.225071	1218.97	FALSE	20
2022-09-12	10:11:45	0.177417	0.789186	1239.48	FALSE	20
2022-09-12	10:11:45	0.0508527	0.226203	1219.2	FALSE	20
2022-09-12	10:11:45	0.107443	0.477928	1239.95	FALSE	20
2022-09-12	10:11:45	0.146934	0.653592	1219.85	FALSE	20
2022-09-12	10:11:46	0.0521249	0.231862	1240.19	FALSE	20
2022-09-12	10:11:46	0.11299	0.502602	1220.36	FALSE	20
2022-09-12	10:11:46	0.0108018	0.0480486	1240.23	FALSE	20
2022-09-12	10:11:47	0.223982	0.996317	1221.35	FALSE	20
2022-09-12	10:11:47	0.508104	2.26015	1242.49	FALSE	20
2022-09-12	10:11:47	0.243982	1.08528	1222.44	FALSE	20
2022-09-12	10:11:47	0.725712	3.22811	1245.72	FALSE	20
2022-09-12	10:11:48	0.282048	1.25461	1223.69	FALSE	20
2022-09-12	10:11:48	0.286883	1.27611	1247	FALSE	20
2022-09-12	10:11:48	1.91533	8.51977	1232.21	FALSE	20
2022-09-12	10:11:48	0.203626	0.905769	1247.9	FALSE	20
2022-09-12	10:11:49	0.494466	2.19948	1234.41	FALSE	20
2022-09-12	10:11:49	0.404033	1.79722	1249.7	FALSE	20
2022-09-12	10:11:49	0.546069	2.42902	1236.84	FALSE	20
2022-09-12	10:11:49	1.70846	7.59957	1257.3	FALSE	20
2022-09-12	10:11:50	0.291107	1.2949	1238.14	FALSE	20
2022-09-12	10:11:50	0.386069	1.71731	1259.02	FALSE	20
2022-09-12	10:11:50	0.644542	2.86705	1241	FALSE	20
2022-09-12	10:11:50	0.280318	1.24691	1260.26	FALSE	20
2022-09-12	10:11:51	0.523473	2.32851	1243.33	FALSE	20
2022-09-12	10:11:51	0.332278	1.47804	1261.74	FALSE	20
2022-09-12	10:11:51	0.207137	0.921387	1244.25	FALSE	20
2022-09-12	10:11:52	1.85411	8.24745	1269.99	FALSE	20
2022-09-12	10:11:52	0.228155	1.01488	1245.27	FALSE	20
2022-09-12	10:11:52	0.357519	1.59032	1271.58	FALSE	20
2022-09-12	10:11:52	1.32271	5.88368	1251.15	FALSE	20
2022-09-12	10:11:53	0.289326	1.28698	1272.87	FALSE	20
2022-09-12	10:11:53	0.3993	1.77617	1252.93	FALSE	20
2022-09-12	10:11:53	0.447697	1.99145	1274.86	FALSE	20
2022-09-12	10:11:53	0.195534	0.869774	1253.8	FALSE	20
2022-09-12	10:11:54	0.363524	1.61703	1276.48	FALSE	20
2022-09-12	10:11:54	0.22271	0.990659	1254.79	FALSE	20
2022-09-12	10:11:54	0.221641	0.985903	1277.46	FALSE	20
2022-09-12	10:11:54	0.281234	1.25099	1256.04	FALSE	20
2022-09-12	10:11:55	0.164186	0.730332	1278.19	FALSE	20
2022-09-12	10:11:55	0.167036	0.74301	1256.78	FALSE	20
2022-09-12	10:11:55	0.0997585	0.443746	1278.64	FALSE	20
2022-09-12	10:11:56	0.176959	0.787149	1257.57	FALSE	20
2022-09-12	10:11:56	0.0819468	0.364516	1279	FALSE	20
2022-09-12	10:11:56	0.107748	0.479285	1258.05	FALSE	20
2022-09-12	10:11:56	0.0448475	0.199491	1279.2	FALSE	20
2022-09-12	10:11:57	0.15869	0.705885	1258.75	FALSE	20
2022-09-12	10:11:57	0.056756	0.252462	1279.45	FALSE	20
2022-09-12	10:11:57	0.158334	0.704301	1259.46	FALSE	20
2022-09-12	10:11:57	0.185	0.822917	1280.28	FALSE	20
2022-09-12	10:11:58	0.0828628	0.36859	1259.83	FALSE	20
2022-09-12	10:11:58	0.193804	0.862079	1281.14	FALSE	20
2022-09-12	10:11:58	0.155993	0.693888	1260.52	FALSE	20
2022-09-12	10:11:58	0.135229	0.601526	1281.74	FALSE	20
2022-09-12	10:11:59	0.03813	0.16961	1260.69	FALSE	20
2022-09-12	10:11:59	0.283372	1.2605	1283	FALSE	20
2022-09-12	10:11:59	0.125204	0.556932	1261.25	FALSE	20
2022-09-12	10:12:00	0.163779	0.728522	1283.73	FALSE	20
2022-09-12	10:12:00	0.0597076	0.265591	1261.51	FALSE	20
2022-09-12	10:12:00	0.0361961	0.161007	1283.89	FALSE	20
2022-09-12	10:12:00	0.162812	0.72422	1262.24	FALSE	20
2022-09-12	10:12:01	0.0489188	0.217601	1284.11	FALSE	20
2022-09-12	10:12:01	0.216145	0.961456	1263.2	FALSE	20
2022-09-12	10:12:01	0.0809798	0.360214	1284.47	FALSE	20
2022-09-12	10:12:01	0.300318	1.33587	1264.53	FALSE	20
2022-09-12	10:12:02	0.180216	0.801637	1285.27	FALSE	20
2022-09-12	10:12:02	0.459249	2.04283	1266.58	FALSE	20
2022-09-12	10:12:02	0.318741	1.41782	1286.69	FALSE	20
2022-09-12	10:12:02	0.321743	1.43118	1268.01	FALSE	20
2022-09-12	10:12:03	0.518588	2.30678	1288.99	FALSE	20
2022-09-12	10:12:03	0.691259	3.07486	1271.08	FALSE	20
2022-09-12	10:12:03	0.430038	1.9129	1290.91	FALSE	20
2022-09-12	10:12:03	0.686272	3.05268	1274.14	FALSE	20
2022-09-12	10:12:04	0.535229	2.38081	1293.29	FALSE	20
2022-09-12	10:12:04	0.361082	1.60616	1275.74	FALSE	20
2022-09-12	10:12:04	0.413702	1.84023	1295.13	FALSE	20
2022-09-12	10:12:05	0.502405	2.2348	1277.98	FALSE	20
2022-09-12	10:12:05	0.259708	1.15523	1296.28	FALSE	20
2022-09-12	10:12:05	0.319249	1.42008	1279.4	FALSE	20
2022-09-12	10:12:05	0.288613	1.28381	1297.57	FALSE	20
2022-09-12	10:12:06	0.128206	0.570286	1279.97	FALSE	20
2022-09-12	10:12:06	0.171514	0.762929	1298.33	FALSE	20
2022-09-12	10:12:06	0.107952	0.480192	1280.45	FALSE	20
2022-09-12	10:12:06	0.163982	0.729425	1299.06	FALSE	20
2022-09-12	10:12:07	0.134771	0.599488	1281.05	FALSE	20
2022-09-12	10:12:07	0.224288	0.997678	1300.06	FALSE	20
2022-09-12	10:12:07	0.222914	0.991566	1282.04	FALSE	20
2022-09-12	10:12:07	0.217621	0.968022	1301.02	FALSE	20
2022-09-12	10:12:08	0.202507	0.900792	1282.94	FALSE	20
2022-09-12	10:12:08	0.271514	1.20775	1302.23	FALSE	20
2022-09-12	10:12:08	0.326527	1.45246	1284.39	FALSE	20
2022-09-12	10:12:09	0.277316	1.23356	1303.47	FALSE	20
2022-09-12	10:12:09	0.250751	1.11539	1285.51	FALSE	20
2022-09-12	10:12:09	0.279911	1.2451	1304.71	FALSE	20
2022-09-12	10:12:09	0.300878	1.33837	1286.85	FALSE	20
2022-09-12	10:12:10	0.375992	1.67249	1306.38	FALSE	20
2022-09-12	10:12:10	0.416756	1.85381	1288.7	FALSE	20
2022-09-12	10:12:10	0.412735	1.83593	1308.22	FALSE	20
2022-09-12	10:12:10	0.401794	1.78726	1290.49	FALSE	20
2022-09-12	10:12:11	0.287087	1.27702	1309.5	FALSE	20
2022-09-12	10:12:11	0.12841	0.571193	1291.06	FALSE	20
2022-09-12	10:12:11	0.290191	1.29083	1310.79	FALSE	20
2022-09-12	10:12:11	0.355789	1.58262	1292.64	FALSE	20
2022-09-12	10:12:12	0.406374	1.80763	1312.59	FALSE	20
2022-09-12	10:12:12	0.320318	1.42484	1294.07	FALSE	20
2022-09-12	10:12:12	0.396552	1.76394	1314.36	FALSE	20
2022-09-12	10:12:13	0.329428	1.46536	1295.53	FALSE	20
2022-09-12	10:12:13	0.329021	1.46355	1315.82	FALSE	20
2022-09-12	10:12:13	0.388206	1.72682	1297.26	FALSE	20
2022-09-12	10:12:13	0.325051	1.44589	1317.27	FALSE	20
2022-09-12	10:12:14	0.35757	1.59054	1298.85	FALSE	20
2022-09-12	10:12:14	0.470038	2.09082	1319.36	FALSE	20
2022-09-12	10:12:14	0.426374	1.8966	1300.74	FALSE	20
2022-09-12	10:12:14	0.386374	1.71867	1321.08	FALSE	20
2022-09-12	10:12:15	0.421234	1.87373	1302.62	FALSE	20
2022-09-12	10:12:15	0.407087	1.8108	1322.89	FALSE	20
2022-09-12	10:12:15	0.428155	1.90452	1304.52	FALSE	20
2022-09-12	10:12:15	0.37645	1.67452	1324.56	FALSE	20
2022-09-12	10:12:16	0.367392	1.63423	1306.16	FALSE	20
2022-09-12	10:12:16	0.410038	1.82393	1326.39	FALSE	20
2022-09-12	10:12:16	0.382761	1.7026	1307.86	FALSE	20
2022-09-12	10:12:16	0.371616	1.65302	1328.04	FALSE	20
2022-09-12	10:12:17	0.386171	1.71777	1309.58	FALSE	20
2022-09-12	10:12:17	0.379199	1.68675	1329.73	FALSE	20
2022-09-12	10:12:17	0.412074	1.83299	1311.41	FALSE	20
2022-09-12	10:12:18	0.490394	2.18137	1331.91	FALSE	20
2022-09-12	10:12:18	0.472176	2.10033	1313.51	FALSE	20
2022-09-12	10:12:18	0.392328	1.74515	1333.65	FALSE	20
2022-09-12	10:12:18	0.580013	2.58001	1316.09	FALSE	20
2022-09-12	10:12:19	0.419657	1.86672	1335.52	FALSE	20
2022-09-12	10:12:19	0.308257	1.37119	1317.46	FALSE	20
2022-09-12	10:12:19	0.390598	1.73746	1337.26	FALSE	20
2022-09-12	10:12:19	0.489377	2.17685	1319.64	FALSE	20
2022-09-12	10:12:20	0.547137	2.43377	1339.69	FALSE	20
2022-09-12	10:12:20	0.757061	3.36756	1323.01	FALSE	20
2022-09-12	10:12:20	0.400878	1.78319	1341.47	FALSE	20
2022-09-12	10:12:20	0.391819	1.74289	1324.75	FALSE	20
2022-09-12	10:12:21	0.408613	1.81759	1343.29	FALSE	20
2022-09-12	10:12:21	0.308104	1.37051	1326.12	FALSE	20
2022-09-12	10:12:21	0.292481	1.30101	1344.59	FALSE	20
2022-09-12	10:12:22	0.366323	1.62948	1327.75	FALSE	20
2022-09-12	10:12:22	0.35131	1.5627	1346.16	FALSE	20
2022-09-12	10:12:22	0.38612	1.71754	1329.47	FALSE	20
2022-09-12	10:12:22	0.424135	1.88664	1348.04	FALSE	20
2022-09-12	10:12:23	0.253855	1.1292	1330.6	FALSE	20
2022-09-12	10:12:23	0.224644	0.999261	1349.04	FALSE	20
2022-09-12	10:12:23	0.274771	1.22224	1331.82	FALSE	20
2022-09-12	10:12:23	0.261947	1.16519	1350.21	FALSE	20
2022-09-12	10:12:24	0.269784	1.20005	1333.02	FALSE	20
2022-09-12	10:12:24	0.282964	1.25868	1351.47	FALSE	20
2022-09-12	10:12:24	0.202456	0.900565	1333.92	FALSE	20
2022-09-12	10:12:24	0.26327	1.17108	1352.64	FALSE	20
2022-09-12	10:12:25	0.306323	1.36259	1335.28	FALSE	20
2022-09-12	10:12:25	0.268104	1.19258	1353.83	FALSE	20
2022-09-12	10:12:25	0.358181	1.59326	1336.87	FALSE	20
2022-09-12	10:12:26	0.2964	1.31845	1355.15	FALSE	20
2022-09-12	10:12:26	0.300929	1.33859	1338.21	FALSE	20
2022-09-12	10:12:26	0.313143	1.39292	1356.54	FALSE	20
2022-09-12	10:12:26	0.25014	1.11267	1339.33	FALSE	20
2022-09-12	10:12:27	0.318181	1.41533	1357.96	FALSE	20
2022-09-12	10:12:27	0.236247	1.05087	1340.38	FALSE	20
2022-09-12	10:12:27	0.212379	0.944704	1358.9	FALSE	20
2022-09-12	10:12:27	0.281489	1.25212	1341.63	FALSE	20
2022-09-12	10:12:28	0.216247	0.96191	1359.86	FALSE	20
2022-09-12	10:12:28	0.33869	1.50656	1343.14	FALSE	20
2022-09-12	10:12:28	0.232786	1.03548	1360.9	FALSE	20
2022-09-12	10:12:28	0.258028	1.14776	1344.28	FALSE	20
2022-09-12	10:12:29	0.305051	1.35693	1362.25	FALSE	20
2022-09-12	10:12:29	0.201845	0.897847	1345.18	FALSE	20
2022-09-12	10:12:29	0.380471	1.69241	1363.95	FALSE	20
2022-09-12	10:12:29	0.154364	0.686642	1345.87	FALSE	20
2022-09-12	10:12:30	0.381234	1.69581	1365.64	FALSE	20
2022-09-12	10:12:30	0.246781	1.09773	1346.97	FALSE	20
2022-09-12	10:12:30	0.315891	1.40515	1367.05	FALSE	20
2022-09-12	10:12:31	0.244186	1.08619	1348.05	FALSE	20
2022-09-12	10:12:31	0.22556	1.00334	1368.05	FALSE	20
2022-09-12	10:12:31	0.284542	1.2657	1349.32	FALSE	20
2022-09-12	10:12:31	0.23472	1.04408	1369.1	FALSE	20
2022-09-12	10:12:32	0.380471	1.69241	1351.01	FALSE	20
2022-09-12	10:12:32	0.178181	0.792585	1369.89	FALSE	20
2022-09-12	10:12:32	0.396349	1.76304	1352.77	FALSE	20
2022-09-12	10:12:32	0.264695	1.17742	1371.07	FALSE	20
2022-09-12	10:12:33	0.306527	1.36349	1354.14	FALSE	20
2022-09-12	10:12:33	0.28271	1.25755	1372.32	FALSE	20
2022-09-12	10:12:33	0.265611	1.18149	1355.32	FALSE	20
2022-09-12	10:12:33	0.309937	1.37866	1373.7	FALSE	20
2022-09-12	10:12:34	0.246018	1.09434	1356.41	FALSE	20
2022-09-12	10:12:34	0.409987	1.8237	1375.53	FALSE	20
2022-09-12	10:12:34	0.221438	0.985001	1357.4	FALSE	20
2022-09-12	10:12:35	0.270598	1.20367	1376.73	FALSE	20
2022-09-12	10:12:35	0.245051	1.09004	1358.49	FALSE	20
2022-09-12	10:12:35	0.30159	1.34153	1378.07	FALSE	20
2022-09-12	10:12:35	0.23416	1.04159	1359.53	FALSE	20
2022-09-12	10:12:36	0.187188	0.83265	1378.9	FALSE	20
2022-09-12	10:12:36	0.346629	1.54188	1361.07	FALSE	20
2022-09-12	10:12:36	0.193753	0.861852	1379.76	FALSE	20
2022-09-12	10:12:36	0.31645	1.40763	1362.48	FALSE	20
2022-09-12	10:12:37	0.205407	0.913691	1380.68	FALSE	20
2022-09-12	10:12:37	0.229428	1.02054	1363.5	FALSE	20
2022-09-12	10:12:37	0.215992	0.960776	1381.64	FALSE	20
2022-09-12	10:12:37	0.170802	0.759761	1364.26	FALSE	20
2022-09-12	10:12:38	0.280725	1.24872	1382.89	FALSE	20
2022-09-12	10:12:38	0.152278	0.677363	1364.94	FALSE	20
2022-09-12	10:12:38	0.354313	1.57606	1384.46	FALSE	20

## Sheet: Royal_harness_2022912100716 (E)
Date	Time	Lbs	Total force by time	Total Time Steps Force >3		**GoPro Fitting: 956
2022-09-12	10:07:38	-0.00110661	0	FALSE	0			Total force x time	618.093
2022-09-12	10:07:38	-0.196068	0	FALSE	0			Total Time Steps Force >3	20
2022-09-12	10:07:38	-0.0146944	0	FALSE	0
2022-09-12	10:07:38	0.00260841	0.00260841	FALSE	0
2022-09-12	10:07:39	-0.13617	0.00260841	FALSE	0
2022-09-12	10:07:39	-0.182124	0.00260841	FALSE	0
2022-09-12	10:07:39	-0.254287	0.00260841	FALSE	0
2022-09-12	10:07:40	-0.235865	0.00260841	FALSE	0
2022-09-12	10:07:40	-0.143651	0.00260841	FALSE	0
2022-09-12	10:07:40	-0.0322008	0.00260841	FALSE	0
2022-09-12	10:07:40	-0.371692	0.00260841	FALSE	0
2022-09-12	10:07:41	-0.533575	0.00260841	FALSE	0
2022-09-12	10:07:41	-0.2779	0.00260841	FALSE	0
2022-09-12	10:07:41	-0.144669	0.00260841	FALSE	0
2022-09-12	10:07:41	0.0779773	0.0805857	FALSE	0
2022-09-12	10:07:42	0.297468	0.378054	FALSE	0
2022-09-12	10:07:42	0.680114	1.05817	FALSE	0
2022-09-12	10:07:42	3.80332	4.86149	1	1
2022-09-12	10:07:42	2.33732	7.19881	FALSE	1
2022-09-12	10:07:43	2.96424	10.163	FALSE	1
2022-09-12	10:07:43	4.26281	14.4259	1	2
2022-09-12	10:07:43	3.27492	17.7008	1	3
2022-09-12	10:07:43	2.64907	20.3498	FALSE	3
2022-09-12	10:07:44	3.63314	23.983	1	4
2022-09-12	10:07:44	1.79391	25.7769	FALSE	4
2022-09-12	10:07:44	2.31589	28.0928	FALSE	4
2022-09-12	10:07:45	4.55645	32.6492	1	5
2022-09-12	10:07:45	1.24831	33.8975	FALSE	5
2022-09-12	10:07:45	0.696552	34.5941	FALSE	5
2022-09-12	10:07:45	0.466934	35.061	FALSE	5
2022-09-12	10:07:46	1.25579	36.3168	FALSE	5
2022-09-12	10:07:46	4.79741	41.1142	1	6
2022-09-12	10:07:46	0.606985	41.7212	FALSE	6
2022-09-12	10:07:46	1.06922	42.7904	FALSE	6
2022-09-12	10:07:47	1.11075	43.9012	FALSE	6
2022-09-12	10:07:47	1.75284	45.654	FALSE	6
2022-09-12	10:07:47	2.4505	48.1045	FALSE	6
2022-09-12	10:07:47	1.93411	50.0386	FALSE	6
2022-09-12	10:07:48	1.47497	51.5136	FALSE	6
2022-09-12	10:07:48	0.826628	52.3402	FALSE	6
2022-09-12	10:07:48	0.452532	52.7928	FALSE	6
2022-09-12	10:07:49	0.455891	53.2487	FALSE	6
2022-09-12	10:07:49	0.495636	53.7443	FALSE	6
2022-09-12	10:07:49	0.33355	54.0778	FALSE	6
2022-09-12	10:07:49	0.409275	54.4871	FALSE	6
2022-09-12	10:07:50	0.435789	54.9229	FALSE	6
2022-09-12	10:07:50	0.409987	55.3329	FALSE	6
2022-09-12	10:07:50	0.428715	55.7616	FALSE	6
2022-09-12	10:07:50	0.419046	56.1807	FALSE	6
2022-09-12	10:07:51	0.429478	56.6101	FALSE	6
2022-09-12	10:07:51	0.42159	57.0317	FALSE	6
2022-09-12	10:07:51	0.435382	57.4671	FALSE	6
2022-09-12	10:07:51	0.448003	57.9151	FALSE	6
2022-09-12	10:07:52	0.516145	58.4313	FALSE	6
2022-09-12	10:07:52	0.685712	59.117	FALSE	6
2022-09-12	10:07:52	0.562354	59.6793	FALSE	6
2022-09-12	10:07:53	0.56159	60.2409	FALSE	6
2022-09-12	10:07:53	0.492227	60.7331	FALSE	6
2022-09-12	10:07:53	0.497621	61.2308	FALSE	6
2022-09-12	10:07:53	0.496959	61.7277	FALSE	6
2022-09-12	10:07:54	0.472532	62.2003	FALSE	6
2022-09-12	10:07:54	0.508308	62.7086	FALSE	6
2022-09-12	10:07:54	0.894211	63.6028	FALSE	6
2022-09-12	10:07:54	0.905967	64.5087	FALSE	6
2022-09-12	10:07:55	0.61645	65.1252	FALSE	6
2022-09-12	10:07:55	0.590649	65.7158	FALSE	6
2022-09-12	10:07:55	0.482507	66.1983	FALSE	6
2022-09-12	10:07:55	0.454313	66.6527	FALSE	6
2022-09-12	10:07:56	0.345916	66.9986	FALSE	6
2022-09-12	10:07:56	0.402252	67.4008	FALSE	6
2022-09-12	10:07:56	0.233753	67.6346	FALSE	6
2022-09-12	10:07:56	0.28841	67.923	FALSE	6
2022-09-12	10:07:57	0.306629	68.2296	FALSE	6
2022-09-12	10:07:57	0.294008	68.5236	FALSE	6
2022-09-12	10:07:57	0.242761	68.7664	FALSE	6
2022-09-12	10:07:58	-0.012099	68.7664	FALSE	6
2022-09-12	10:07:58	0.0314633	68.7978	FALSE	6
2022-09-12	10:07:58	0.0257127	68.8236	FALSE	6
2022-09-12	10:07:58	-0.0281804	68.8236	FALSE	6
2022-09-12	10:07:59	-0.0675188	68.8236	FALSE	6
2022-09-12	10:07:59	-0.0749997	68.8236	FALSE	6
2022-09-12	10:07:59	0.330344	69.1539	FALSE	6
2022-09-12	10:07:59	0.488766	69.6427	FALSE	6
2022-09-12	10:08:00	0.229733	69.8724	FALSE	6
2022-09-12	10:08:00	0.360013	70.2324	FALSE	6
2022-09-12	10:08:00	0.357112	70.5895	FALSE	6
2022-09-12	10:08:00	0.347036	70.9366	FALSE	6
2022-09-12	10:08:01	0.285814	71.2224	FALSE	6
2022-09-12	10:08:01	0.469428	71.6918	FALSE	6
2022-09-12	10:08:01	0.662913	72.3547	FALSE	6
2022-09-12	10:08:02	1.0648	73.4195	FALSE	6
2022-09-12	10:08:02	1.45915	74.8787	FALSE	6
2022-09-12	10:08:02	1.98927	76.8679	FALSE	6
2022-09-12	10:08:02	1.31945	78.1874	FALSE	6
2022-09-12	10:08:03	1.14678	79.3342	FALSE	6
2022-09-12	10:08:03	0.943219	80.2774	FALSE	6
2022-09-12	10:08:03	0.569682	80.8471	FALSE	6
2022-09-12	10:08:03	0.356043	81.2031	FALSE	6
2022-09-12	10:08:04	0.375229	81.5783	FALSE	6
2022-09-12	10:08:04	0.33014	81.9085	FALSE	6
2022-09-12	10:08:04	0.346374	82.2549	FALSE	6
2022-09-12	10:08:04	0.364135	82.619	FALSE	6
2022-09-12	10:08:05	0.384491	83.0035	FALSE	6
2022-09-12	10:08:05	0.481183	83.4847	FALSE	6
2022-09-12	10:08:05	0.517061	84.0017	FALSE	6
2022-09-12	10:08:06	0.725102	84.7268	FALSE	6
2022-09-12	10:08:06	0.981336	85.7082	FALSE	6
2022-09-12	10:08:06	0.895483	86.6036	FALSE	6
2022-09-12	10:08:06	1.81365	88.4173	FALSE	6
2022-09-12	10:08:07	6.09441	94.5117	1	7
2022-09-12	10:08:07	12.5098	107.022	1	8
2022-09-12	10:08:07	4.97818	112	1	9
2022-09-12	10:08:07	3.96413	115.964	1	10
2022-09-12	10:08:08	4.80993	120.774	1	11
2022-09-12	10:08:08	2.40093	123.175	FALSE	11
2022-09-12	10:08:08	2.41665	125.591	FALSE	11
2022-09-12	10:08:08	0.791921	126.383	FALSE	11
2022-09-12	10:08:09	0.648104	127.031	FALSE	11
2022-09-12	10:08:09	0.465407	127.497	FALSE	11
2022-09-12	10:08:09	0.976857	128.474	FALSE	11
2022-09-12	10:08:09	4.36744	132.841	1	12
2022-09-12	10:08:10	2.13696	134.978	FALSE	12
2022-09-12	10:08:10	3.34999	138.328	1	13
2022-09-12	10:08:10	3.74591	142.074	1	14
2022-09-12	10:08:11	3.60851	145.682	1	15
2022-09-12	10:08:11	3.60571	149.288	1	16
2022-09-12	10:08:11	2.31869	151.607	FALSE	16
2022-09-12	10:08:11	1.93696	153.544	FALSE	16
2022-09-12	10:08:12	1.77726	155.321	FALSE	16
2022-09-12	10:08:12	1.44098	156.762	FALSE	16
2022-09-12	10:08:12	0.915738	157.678	FALSE	16
2022-09-12	10:08:12	0.396552	158.074	FALSE	16
2022-09-12	10:08:13	0.40154	158.476	FALSE	16
2022-09-12	10:08:13	0.391361	158.867	FALSE	16
2022-09-12	10:08:13	0.372328	159.24	FALSE	16
2022-09-12	10:08:13	0.273295	159.513	FALSE	16
2022-09-12	10:08:14	0.347901	159.861	FALSE	16
2022-09-12	10:08:14	0.316705	160.177	FALSE	16
2022-09-12	10:08:14	0.367901	160.545	FALSE	16
2022-09-12	10:08:15	0.29126	160.837	FALSE	16
2022-09-12	10:08:15	0.359402	161.196	FALSE	16
2022-09-12	10:08:15	0.154669	161.351	FALSE	16
2022-09-12	10:08:15	0.230191	161.581	FALSE	16
2022-09-12	10:08:16	0.435992	162.017	FALSE	16
2022-09-12	10:08:16	0.179504	162.196	FALSE	16
2022-09-12	10:08:16	0.409987	162.606	FALSE	16
2022-09-12	10:08:16	0.232379	162.839	FALSE	16
2022-09-12	10:08:17	0.384491	163.223	FALSE	16
2022-09-12	10:08:17	0.28098	163.504	FALSE	16
2022-09-12	10:08:17	0.378232	163.882	FALSE	16
2022-09-12	10:08:17	0.179402	164.062	FALSE	16
2022-09-12	10:08:18	0.401285	164.463	FALSE	16
2022-09-12	10:08:18	0.230293	164.693	FALSE	16
2022-09-12	10:08:18	0.375891	165.069	FALSE	16
2022-09-12	10:08:19	0.24215	165.311	FALSE	16
2022-09-12	10:08:19	0.38042	165.692	FALSE	16
2022-09-12	10:08:19	0.313194	166.005	FALSE	16
2022-09-12	10:08:19	0.321234	166.326	FALSE	16
2022-09-12	10:08:20	0.371005	166.697	FALSE	16
2022-09-12	10:08:20	0.372481	167.07	FALSE	16
2022-09-12	10:08:20	0.586476	167.656	FALSE	16
2022-09-12	10:08:21	0.383422	168.04	FALSE	16
2022-09-12	10:08:21	0.500471	168.54	FALSE	16
2022-09-12	10:08:21	0.61472	169.155	FALSE	16
2022-09-12	10:08:21	0.397825	169.553	FALSE	16
2022-09-12	10:08:21	0.333957	169.887	FALSE	16
2022-09-12	10:08:22	0.42897	170.316	FALSE	16
2022-09-12	10:08:22	0.311412	170.627	FALSE	16
2022-09-12	10:08:22	0.37986	171.007	FALSE	16
2022-09-12	10:08:22	0.427087	171.434	FALSE	16
2022-09-12	10:08:23	1.1364	172.57	FALSE	16
2022-09-12	10:08:23	0.308613	172.879	FALSE	16
2022-09-12	10:08:23	0.482456	173.361	FALSE	16
2022-09-12	10:08:24	0.202507	173.564	FALSE	16
2022-09-12	10:08:24	0.35299	173.917	FALSE	16
2022-09-12	10:08:24	0.328817	174.246	FALSE	16
2022-09-12	10:08:24	0.325	174.571	FALSE	16
2022-09-12	10:08:25	0.314109	174.885	FALSE	16
2022-09-12	10:08:25	0.396654	175.282	FALSE	16
2022-09-12	10:08:25	0.831514	176.113	FALSE	16
2022-09-12	10:08:25	2.8223	178.935	FALSE	16
2022-09-12	10:08:26	0.951361	179.887	FALSE	16
2022-09-12	10:08:26	2.6277	182.514	FALSE	16
2022-09-12	10:08:26	0.706272	183.221	FALSE	16
2022-09-12	10:08:26	1.5793	184.8	FALSE	16
2022-09-12	10:08:27	1.74062	186.541	FALSE	16
2022-09-12	10:08:27	0.540216	187.081	FALSE	16
2022-09-12	10:08:27	3.0621	190.143	1	17
2022-09-12	10:08:28	0.454059	190.597	FALSE	17
2022-09-12	10:08:28	0.600064	191.197	FALSE	17
2022-09-12	10:08:28	0.48215	191.679	FALSE	17
2022-09-12	10:08:28	0.22902	191.908	FALSE	17
2022-09-12	10:08:29	2.30347	194.212	FALSE	17
2022-09-12	10:08:29	0.686272	194.898	FALSE	17
2022-09-12	10:08:29	2.4733	197.371	FALSE	17
2022-09-12	10:08:29	2.23849	199.61	FALSE	17
2022-09-12	10:08:30	0.456909	200.067	FALSE	17
2022-09-12	10:08:30	1.74795	201.815	FALSE	17
2022-09-12	10:08:30	0.706527	202.521	FALSE	17
2022-09-12	10:08:31	0.585967	203.107	FALSE	17
2022-09-12	10:08:31	2.28856	205.396	FALSE	17
2022-09-12	10:08:31	0.36327	205.759	FALSE	17
2022-09-12	10:08:31	0.693295	206.452	FALSE	17
2022-09-12	10:08:32	2.93843	209.391	FALSE	17
2022-09-12	10:08:32	0.162048	209.553	FALSE	17
2022-09-12	10:08:32	0.199962	209.753	FALSE	17
2022-09-12	10:08:32	0.228003	209.981	FALSE	17
2022-09-12	10:08:33	0.168359	210.149	FALSE	17
2022-09-12	10:08:33	0.104848	210.254	FALSE	17
2022-09-12	10:08:33	0.0374175	210.291	FALSE	17
2022-09-12	10:08:33	0.0410307	210.332	FALSE	17
2022-09-12	10:08:34	-0.0533203	210.332	FALSE	17
2022-09-12	10:08:34	-0.126145	210.332	FALSE	17
2022-09-12	10:08:34	-0.0840582	210.332	FALSE	17
2022-09-12	10:08:34	-0.210318	210.332	FALSE	17
2022-09-12	10:08:35	-0.276425	210.332	FALSE	17
2022-09-12	10:08:35	-0.0352033	210.332	FALSE	17
2022-09-12	10:08:35	0.0336516	210.366	FALSE	17
2022-09-12	10:08:35	-0.0796308	210.366	FALSE	17
2022-09-12	10:08:36	-0.0256868	210.366	FALSE	17
2022-09-12	10:08:36	-0.245432	210.366	FALSE	17
2022-09-12	10:08:36	0.212583	210.579	FALSE	17
2022-09-12	10:08:37	-0.00497431	210.579	FALSE	17
2022-09-12	10:08:37	0.132786	210.711	FALSE	17
2022-09-12	10:08:37	0.19126	210.903	FALSE	17
2022-09-12	10:08:37	0.395127	211.298	FALSE	17
2022-09-12	10:08:38	0.483626	211.781	FALSE	17
2022-09-12	10:08:38	1.2624	213.044	FALSE	17
2022-09-12	10:08:38	0.887952	213.932	FALSE	17
2022-09-12	10:08:38	2.18963	216.121	FALSE	17
2022-09-12	10:08:39	2.56938	218.691	FALSE	17
2022-09-12	10:08:39	0.853193	219.544	FALSE	17
2022-09-12	10:08:39	0.506171	220.05	FALSE	17
2022-09-12	10:08:39	0.525611	220.576	FALSE	17
2022-09-12	10:08:40	0.400522	220.976	FALSE	17
2022-09-12	10:08:40	0.371718	221.348	FALSE	17
2022-09-12	10:08:40	0.298588	221.647	FALSE	17
2022-09-12	10:08:41	0.296043	221.943	FALSE	17
2022-09-12	10:08:41	0.28673	222.229	FALSE	17
2022-09-12	10:08:41	0.307188	222.536	FALSE	17
2022-09-12	10:08:41	0.299351	222.836	FALSE	17
2022-09-12	10:08:42	0.300013	223.136	FALSE	17
2022-09-12	10:08:42	0.316705	223.453	FALSE	17
2022-09-12	10:08:42	0.342048	223.795	FALSE	17
2022-09-12	10:08:42	0.348664	224.143	FALSE	17
2022-09-12	10:08:43	0.33126	224.475	FALSE	17
2022-09-12	10:08:43	0.300115	224.775	FALSE	17
2022-09-12	10:08:43	0.293702	225.068	FALSE	17
2022-09-12	10:08:43	0.271158	225.339	FALSE	17
2022-09-12	10:08:44	0.249326	225.589	FALSE	17
2022-09-12	10:08:44	0.247188	225.836	FALSE	17
2022-09-12	10:08:44	0.250903	226.087	FALSE	17
2022-09-12	10:08:45	0.244084	226.331	FALSE	17
2022-09-12	10:08:45	0.241743	226.573	FALSE	17
2022-09-12	10:08:45	0.259758	226.832	FALSE	17
2022-09-12	10:08:45	0.296908	227.129	FALSE	17
2022-09-12	10:08:46	0.313906	227.443	FALSE	17
2022-09-12	10:08:46	0.35131	227.795	FALSE	17
2022-09-12	10:08:46	0.599148	228.394	FALSE	17
2022-09-12	10:08:46	0.491158	228.885	FALSE	17
2022-09-12	10:08:47	0.706985	229.592	FALSE	17
2022-09-12	10:08:47	0.604746	230.197	FALSE	17
2022-09-12	10:08:47	0.439351	230.636	FALSE	17
2022-09-12	10:08:47	0.46159	231.098	FALSE	17
2022-09-12	10:08:48	0.619657	231.717	FALSE	17
2022-09-12	10:08:48	0.279351	231.997	FALSE	17
2022-09-12	10:08:48	0.726476	232.723	FALSE	17
2022-09-12	10:08:48	1.51747	234.241	FALSE	17
2022-09-12	10:08:49	1.40475	235.645	FALSE	17
2022-09-12	10:08:49	0.355127	236	FALSE	17
2022-09-12	10:08:49	0.675992	236.676	FALSE	17
2022-09-12	10:08:50	0.394059	237.07	FALSE	17
2022-09-12	10:08:50	0.719046	237.79	FALSE	17
2022-09-12	10:08:50	0.95131	238.741	FALSE	17
2022-09-12	10:08:50	1.69141	240.432	FALSE	17
2022-09-12	10:08:51	2.04536	242.478	FALSE	17
2022-09-12	10:08:51	0.589835	243.067	FALSE	17
2022-09-12	10:08:51	1.5019	244.569	FALSE	17
2022-09-12	10:08:51	0.910191	245.48	FALSE	17
2022-09-12	10:08:52	0.86103	246.341	FALSE	17
2022-09-12	10:08:52	0.471463	246.812	FALSE	17
2022-09-12	10:08:52	0.921997	247.734	FALSE	17
2022-09-12	10:08:52	1.00673	248.741	FALSE	17
2022-09-12	10:08:53	0.579453	249.32	FALSE	17
2022-09-12	10:08:53	1.19808	250.518	FALSE	17
2022-09-12	10:08:53	0.599707	251.118	FALSE	17
2022-09-12	10:08:54	0.488155	251.606	FALSE	17
2022-09-12	10:08:54	1.08073	252.687	FALSE	17
2022-09-12	10:08:54	0.428104	253.115	FALSE	17
2022-09-12	10:08:54	0.582863	253.698	FALSE	17
2022-09-12	10:08:55	0.575891	254.274	FALSE	17
2022-09-12	10:08:55	0.460013	254.734	FALSE	17
2022-09-12	10:08:55	0.420166	255.154	FALSE	17
2022-09-12	10:08:55	0.412125	255.566	FALSE	17
2022-09-12	10:08:56	0.389224	255.955	FALSE	17
2022-09-12	10:08:56	0.607188	256.562	FALSE	17
2022-09-12	10:08:56	0.669071	257.232	FALSE	17
2022-09-12	10:08:56	0.487596	257.719	FALSE	17
2022-09-12	10:08:57	0.585763	258.305	FALSE	17
2022-09-12	10:08:57	0.489529	258.794	FALSE	17
2022-09-12	10:08:57	0.894211	259.689	FALSE	17
2022-09-12	10:08:58	0.887697	260.576	FALSE	17
2022-09-12	10:08:58	1.18215	261.758	FALSE	17
2022-09-12	10:08:58	1.16291	262.921	FALSE	17
2022-09-12	10:08:58	0.951056	263.872	FALSE	17
2022-09-12	10:08:59	0.605305	264.478	FALSE	17
2022-09-12	10:08:59	0.492939	264.971	FALSE	17
2022-09-12	10:08:59	0.467087	265.438	FALSE	17
2022-09-12	10:08:59	0.396501	265.834	FALSE	17
2022-09-12	10:09:00	0.325967	266.16	FALSE	17
2022-09-12	10:09:00	0.213193	266.373	FALSE	17
2022-09-12	10:09:00	0.305814	266.679	FALSE	17
2022-09-12	10:09:00	0.218639	266.898	FALSE	17
2022-09-12	10:09:01	0.135127	267.033	FALSE	17
2022-09-12	10:09:01	0.248562	267.282	FALSE	17
2022-09-12	10:09:01	0.112379	267.394	FALSE	17
2022-09-12	10:09:01	0.229122	267.623	FALSE	17
2022-09-12	10:09:02	0.262608	267.886	FALSE	17
2022-09-12	10:09:02	0.854058	268.74	FALSE	17
2022-09-12	10:09:02	2.27335	271.013	FALSE	17
2022-09-12	10:09:03	0.47874	271.492	FALSE	17
2022-09-12	10:09:03	1.6736	273.165	FALSE	17
2022-09-12	10:09:03	1.70307	274.868	FALSE	17
2022-09-12	10:09:03	1.07151	275.94	FALSE	17
2022-09-12	10:09:04	1.39218	277.332	FALSE	17
2022-09-12	10:09:04	0.712176	278.044	FALSE	17
2022-09-12	10:09:04	0.751514	278.796	FALSE	17
2022-09-12	10:09:04	2.05309	280.849	FALSE	17
2022-09-12	10:09:05	0.411361	281.26	FALSE	17
2022-09-12	10:09:05	0.394567	281.655	FALSE	17
2022-09-12	10:09:05	0.796552	282.451	FALSE	17
2022-09-12	10:09:05	0.505611	282.957	FALSE	17
2022-09-12	10:09:06	0.350089	283.307	FALSE	17
2022-09-12	10:09:06	0.358486	283.666	FALSE	17
2022-09-12	10:09:06	0.398384	284.064	FALSE	17
2022-09-12	10:09:07	0.373499	284.438	FALSE	17
2022-09-12	10:09:07	0.249071	284.687	FALSE	17
2022-09-12	10:09:07	0.386527	285.073	FALSE	17
2022-09-12	10:09:07	0.328359	285.401	FALSE	17
2022-09-12	10:09:08	0.2707	285.672	FALSE	17
2022-09-12	10:09:08	0.177163	285.849	FALSE	17
2022-09-12	10:09:08	0.373601	286.223	FALSE	17
2022-09-12	10:09:08	0.256858	286.48	FALSE	17
2022-09-12	10:09:09	0.383982	286.864	FALSE	17
2022-09-12	10:09:09	0.15472	287.018	FALSE	17
2022-09-12	10:09:09	0.358283	287.377	FALSE	17
2022-09-12	10:09:09	0.205713	287.582	FALSE	17
2022-09-12	10:09:10	0.331769	287.914	FALSE	17
2022-09-12	10:09:10	0.193041	288.107	FALSE	17
2022-09-12	10:09:10	0.391056	288.498	FALSE	17
2022-09-12	10:09:11	0.276349	288.775	FALSE	17
2022-09-12	10:09:11	0.424389	289.199	FALSE	17
2022-09-12	10:09:11	0.184949	289.384	FALSE	17
2022-09-12	10:09:11	0.346527	289.731	FALSE	17
2022-09-12	10:09:12	0.27528	290.006	FALSE	17
2022-09-12	10:09:12	0.388817	290.395	FALSE	17
2022-09-12	10:09:12	0.272328	290.667	FALSE	17
2022-09-12	10:09:12	0.41701	291.084	FALSE	17
2022-09-12	10:09:13	0.39757	291.482	FALSE	17
2022-09-12	10:09:13	0.586018	292.068	FALSE	17
2022-09-12	10:09:13	0.307494	292.375	FALSE	17
2022-09-12	10:09:13	0.416603	292.792	FALSE	17
2022-09-12	10:09:14	0.487748	293.279	FALSE	17
2022-09-12	10:09:14	0.466018	293.745	FALSE	17
2022-09-12	10:09:14	0.475738	294.221	FALSE	17
2022-09-12	10:09:14	0.375585	294.597	FALSE	17
2022-09-12	10:09:15	0.406629	295.003	FALSE	17
2022-09-12	10:09:15	0.600369	295.604	FALSE	17
2022-09-12	10:09:15	0.730649	296.334	FALSE	17
2022-09-12	10:09:16	0.871209	297.206	FALSE	17
2022-09-12	10:09:16	0.747036	297.953	FALSE	17
2022-09-12	10:09:16	0.395789	298.348	FALSE	17
2022-09-12	10:09:16	0.480064	298.829	FALSE	17
2022-09-12	10:09:17	0.381082	299.21	FALSE	17
2022-09-12	10:09:17	0.409428	299.619	FALSE	17
2022-09-12	10:09:17	0.376043	299.995	FALSE	17
2022-09-12	10:09:17	0.28902	300.284	FALSE	17
2022-09-12	10:09:18	0.356908	300.641	FALSE	17
2022-09-12	10:09:18	0.205255	300.846	FALSE	17
2022-09-12	10:09:18	0.344746	301.191	FALSE	17
2022-09-12	10:09:18	0.282201	301.473	FALSE	17
2022-09-12	10:09:19	0.311209	301.784	FALSE	17
2022-09-12	10:09:19	0.402761	302.187	FALSE	17
2022-09-12	10:09:19	0.535738	302.723	FALSE	17
2022-09-12	10:09:20	0.800114	303.523	FALSE	17
2022-09-12	10:09:20	0.581998	304.105	FALSE	17
2022-09-12	10:09:20	0.790547	304.896	FALSE	17
2022-09-12	10:09:20	0.515891	305.411	FALSE	17
2022-09-12	10:09:21	0.52271	305.934	FALSE	17
2022-09-12	10:09:21	0.506069	306.44	FALSE	17
2022-09-12	10:09:21	0.509936	306.95	FALSE	17
2022-09-12	10:09:21	0.482659	307.433	FALSE	17
2022-09-12	10:09:22	0.474568	307.907	FALSE	17
2022-09-12	10:09:22	0.449987	308.357	FALSE	17
2022-09-12	10:09:22	0.434364	308.792	FALSE	17
2022-09-12	10:09:22	0.396552	309.188	FALSE	17
2022-09-12	10:09:23	0.367341	309.556	FALSE	17
2022-09-12	10:09:23	0.293346	309.849	FALSE	17
2022-09-12	10:09:23	0.344847	310.194	FALSE	17
2022-09-12	10:09:24	0.385254	310.579	FALSE	17
2022-09-12	10:09:24	0.381234	310.96	FALSE	17
2022-09-12	10:09:24	0.354618	311.315	FALSE	17
2022-09-12	10:09:24	0.368257	311.683	FALSE	17
2022-09-12	10:09:25	0.428868	312.112	FALSE	17
2022-09-12	10:09:25	0.686018	312.798	FALSE	17
2022-09-12	10:09:25	0.531158	313.329	FALSE	17
2022-09-12	10:09:25	0.315738	313.645	FALSE	17
2022-09-12	10:09:26	0.315534	313.961	FALSE	17
2022-09-12	10:09:26	0.320929	314.281	FALSE	17
2022-09-12	10:09:26	0.397214	314.679	FALSE	17
2022-09-12	10:09:26	0.369682	315.048	FALSE	17
2022-09-12	10:09:27	0.230853	315.279	FALSE	17
2022-09-12	10:09:27	0.3764	315.656	FALSE	17
2022-09-12	10:09:27	0.317621	315.973	FALSE	17
2022-09-12	10:09:27	0.476909	316.45	FALSE	17
2022-09-12	10:09:28	0.158995	316.609	FALSE	17
2022-09-12	10:09:28	0.38556	316.995	FALSE	17
2022-09-12	10:09:28	0.248919	317.244	FALSE	17
2022-09-12	10:09:29	0.360674	317.604	FALSE	17
2022-09-12	10:09:29	0.339351	317.944	FALSE	17
2022-09-12	10:09:29	0.403015	318.347	FALSE	17
2022-09-12	10:09:29	0.899758	319.246	FALSE	17
2022-09-12	10:09:30	0.334771	319.581	FALSE	17
2022-09-12	10:09:30	0.349428	319.931	FALSE	17
2022-09-12	10:09:30	1.2278	321.158	FALSE	17
2022-09-12	10:09:30	0.490191	321.649	FALSE	17
2022-09-12	10:09:31	0.431921	322.081	FALSE	17
2022-09-12	10:09:31	0.374975	322.455	FALSE	17
2022-09-12	10:09:31	0.309071	322.765	FALSE	17
2022-09-12	10:09:31	0.451921	323.216	FALSE	17
2022-09-12	10:09:32	0.355687	323.572	FALSE	17
2022-09-12	10:09:32	0.573041	324.145	FALSE	17
2022-09-12	10:09:32	0.305356	324.451	FALSE	17
2022-09-12	10:09:33	0.561234	325.012	FALSE	17
2022-09-12	10:09:33	0.311514	325.323	FALSE	17
2022-09-12	10:09:33	0.523575	325.847	FALSE	17
2022-09-12	10:09:33	0.334059	326.181	FALSE	17
2022-09-12	10:09:34	0.4764	326.657	FALSE	17
2022-09-12	10:09:34	0.361947	327.019	FALSE	17
2022-09-12	10:09:34	0.48556	327.505	FALSE	17
2022-09-12	10:09:34	0.644389	328.149	FALSE	17
2022-09-12	10:09:35	0.315942	328.465	FALSE	17
2022-09-12	10:09:35	0.427748	328.893	FALSE	17
2022-09-12	10:09:35	0.674516	329.567	FALSE	17
2022-09-12	10:09:35	0.507647	330.075	FALSE	17
2022-09-12	10:09:36	0.444033	330.519	FALSE	17
2022-09-12	10:09:36	0.635992	331.155	FALSE	17
2022-09-12	10:09:36	0.356959	331.512	FALSE	17
2022-09-12	10:09:37	0.463473	331.976	FALSE	17
2022-09-12	10:09:37	0.311209	332.287	FALSE	17
2022-09-12	10:09:37	0.638741	332.926	FALSE	17
2022-09-12	10:09:37	0.381947	333.307	FALSE	17
2022-09-12	10:09:38	0.572379	333.88	FALSE	17
2022-09-12	10:09:38	0.326527	334.206	FALSE	17
2022-09-12	10:09:38	0.280064	334.486	FALSE	17
2022-09-12	10:09:38	0.477723	334.964	FALSE	17
2022-09-12	10:09:39	0.385051	335.349	FALSE	17
2022-09-12	10:09:39	0.441489	335.791	FALSE	17
2022-09-12	10:09:39	0.341692	336.132	FALSE	17
2022-09-12	10:09:39	0.395687	336.528	FALSE	17
2022-09-12	10:09:40	0.274059	336.802	FALSE	17
2022-09-12	10:09:40	0.538995	337.341	FALSE	17
2022-09-12	10:09:40	0.204186	337.545	FALSE	17
2022-09-12	10:09:40	0.570751	338.116	FALSE	17
2022-09-12	10:09:41	0.294873	338.411	FALSE	17
2022-09-12	10:09:41	0.29813	338.709	FALSE	17
2022-09-12	10:09:41	0.206985	338.916	FALSE	17
2022-09-12	10:09:42	0.255484	339.172	FALSE	17
2022-09-12	10:09:42	0.257417	339.429	FALSE	17
2022-09-12	10:09:42	0.253397	339.682	FALSE	17
2022-09-12	10:09:42	0.290293	339.973	FALSE	17
2022-09-12	10:09:43	0.345611	340.318	FALSE	17
2022-09-12	10:09:43	0.672837	340.991	FALSE	17
2022-09-12	10:09:43	0.300573	341.292	FALSE	17
2022-09-12	10:09:43	1.36449	342.656	FALSE	17
2022-09-12	10:09:44	0.241489	342.898	FALSE	17
2022-09-12	10:09:44	0.352786	343.25	FALSE	17
2022-09-12	10:09:44	0.396196	343.647	FALSE	17
2022-09-12	10:09:44	0.417214	344.064	FALSE	17
2022-09-12	10:09:45	0.272735	344.337	FALSE	17
2022-09-12	10:09:45	0.275738	344.612	FALSE	17
2022-09-12	10:09:45	0.242456	344.855	FALSE	17
2022-09-12	10:09:46	0.332685	345.187	FALSE	17
2022-09-12	10:09:46	0.124949	345.312	FALSE	17
2022-09-12	10:09:46	0.307036	345.619	FALSE	17
2022-09-12	10:09:46	0.140013	345.759	FALSE	17
2022-09-12	10:09:47	0.380827	346.14	FALSE	17
2022-09-12	10:09:47	0.115636	346.256	FALSE	17
2022-09-12	10:09:47	0.433601	346.69	FALSE	17
2022-09-12	10:09:47	0.206018	346.896	FALSE	17
2022-09-12	10:09:48	0.190496	347.086	FALSE	17
2022-09-12	10:09:48	0.168155	347.254	FALSE	17
2022-09-12	10:09:48	0.285407	347.54	FALSE	17
2022-09-12	10:09:48	0.292481	347.832	FALSE	17
2022-09-12	10:09:49	0.371463	348.204	FALSE	17
2022-09-12	10:09:49	0.377774	348.581	FALSE	17
2022-09-12	10:09:49	0.253906	348.835	FALSE	17
2022-09-12	10:09:50	0.629275	349.464	FALSE	17
2022-09-12	10:09:50	0.308257	349.773	FALSE	17
2022-09-12	10:09:50	1.2936	351.066	FALSE	17
2022-09-12	10:09:50	0.318435	351.385	FALSE	17
2022-09-12	10:09:51	0.376705	351.761	FALSE	17
2022-09-12	10:09:51	0.330293	352.092	FALSE	17
2022-09-12	10:09:51	0.433804	352.526	FALSE	17
2022-09-12	10:09:51	0.745967	353.272	FALSE	17
2022-09-12	10:09:52	0.381285	353.653	FALSE	17
2022-09-12	10:09:52	0.297519	353.95	FALSE	17
2022-09-12	10:09:52	1.03899	354.989	FALSE	17
2022-09-12	10:09:52	0.184797	355.174	FALSE	17
2022-09-12	10:09:53	0.72271	355.897	FALSE	17
2022-09-12	10:09:53	0.289631	356.186	FALSE	17
2022-09-12	10:09:53	0.397926	356.584	FALSE	17
2022-09-12	10:09:53	0.594466	357.179	FALSE	17
2022-09-12	10:09:54	0.628664	357.808	FALSE	17
2022-09-12	10:09:54	0.534008	358.342	FALSE	17
2022-09-12	10:09:54	0.284186	358.626	FALSE	17
2022-09-12	10:09:55	0.296908	358.923	FALSE	17
2022-09-12	10:09:55	0.524491	359.447	FALSE	17
2022-09-12	10:09:55	0.470191	359.917	FALSE	17
2022-09-12	10:09:55	3.23116	363.148	1	18
2022-09-12	10:09:56	0.453855	363.602	FALSE	18
2022-09-12	10:09:56	0.637926	364.24	FALSE	18
2022-09-12	10:09:56	1.10184	365.342	FALSE	18
2022-09-12	10:09:56	0.525662	365.868	FALSE	18
2022-09-12	10:09:57	0.506272	366.374	FALSE	18
2022-09-12	10:09:57	0.398995	366.773	FALSE	18
2022-09-12	10:09:57	0.244186	367.017	FALSE	18
2022-09-12	10:09:57	0.569682	367.587	FALSE	18
2022-09-12	10:09:58	0.217723	367.805	FALSE	18
2022-09-12	10:09:58	0.491463	368.296	FALSE	18
2022-09-12	10:09:58	0.198639	368.495	FALSE	18
2022-09-12	10:09:59	0.573092	369.068	FALSE	18
2022-09-12	10:09:59	1.00281	370.071	FALSE	18
2022-09-12	10:09:59	0.382354	370.453	FALSE	18
2022-09-12	10:09:59	0.270751	370.724	FALSE	18
2022-09-12	10:10:00	0.459809	371.184	FALSE	18
2022-09-12	10:10:00	0.337468	371.521	FALSE	18
2022-09-12	10:10:00	0.595229	372.116	FALSE	18
2022-09-12	10:10:00	0.269377	372.386	FALSE	18
2022-09-12	10:10:01	0.357214	372.743	FALSE	18
2022-09-12	10:10:01	0.261692	373.005	FALSE	18
2022-09-12	10:10:01	0.383779	373.388	FALSE	18
2022-09-12	10:10:01	0.243626	373.632	FALSE	18
2022-09-12	10:10:02	0.384898	374.017	FALSE	18
2022-09-12	10:10:02	0.157468	374.174	FALSE	18
2022-09-12	10:10:02	0.36785	374.542	FALSE	18
2022-09-12	10:10:03	0.213855	374.756	FALSE	18
2022-09-12	10:10:03	0.431005	375.187	FALSE	18
2022-09-12	10:10:03	0.142303	375.329	FALSE	18
2022-09-12	10:10:03	0.346069	375.675	FALSE	18
2022-09-12	10:10:04	0.203066	375.878	FALSE	18
2022-09-12	10:10:04	0.404695	376.283	FALSE	18
2022-09-12	10:10:04	0.16668	376.45	FALSE	18
2022-09-12	10:10:04	0.408969	376.859	FALSE	18
2022-09-12	10:10:05	0.185153	377.044	FALSE	18
2022-09-12	10:10:05	0.430089	377.474	FALSE	18
2022-09-12	10:10:05	0.108919	377.583	FALSE	18
2022-09-12	10:10:05	0.40042	377.983	FALSE	18
2022-09-12	10:10:06	0.165611	378.149	FALSE	18
2022-09-12	10:10:06	0.353906	378.503	FALSE	18
2022-09-12	10:10:06	0.169275	378.672	FALSE	18
2022-09-12	10:10:06	0.298944	378.971	FALSE	18
2022-09-12	10:10:07	0.233957	379.205	FALSE	18
2022-09-12	10:10:07	0.271209	379.476	FALSE	18
2022-09-12	10:10:07	0.276959	379.753	FALSE	18
2022-09-12	10:10:08	0.22729	379.981	FALSE	18
2022-09-12	10:10:08	0.321896	380.302	FALSE	18
2022-09-12	10:10:08	0.258741	380.561	FALSE	18
2022-09-12	10:10:08	0.436043	380.997	FALSE	18
2022-09-12	10:10:09	0.200064	381.197	FALSE	18
2022-09-12	10:10:09	0.525662	381.723	FALSE	18
2022-09-12	10:10:09	0.400267	382.123	FALSE	18
2022-09-12	10:10:09	0.430649	382.554	FALSE	18
2022-09-12	10:10:10	0.182252	382.736	FALSE	18
2022-09-12	10:10:10	0.339199	383.075	FALSE	18
2022-09-12	10:10:10	0.302201	383.377	FALSE	18
2022-09-12	10:10:10	0.500929	383.878	FALSE	18
2022-09-12	10:10:11	0.304746	384.183	FALSE	18
2022-09-12	10:10:11	0.34383	384.527	FALSE	18
2022-09-12	10:10:11	0.396451	384.923	FALSE	18
2022-09-12	10:10:12	0.318995	385.242	FALSE	18
2022-09-12	10:10:12	0.409682	385.652	FALSE	18
2022-09-12	10:10:12	0.191361	385.843	FALSE	18
2022-09-12	10:10:12	0.421234	386.265	FALSE	18
2022-09-12	10:10:13	1.32052	387.585	FALSE	18
2022-09-12	10:10:13	0.820827	388.406	FALSE	18
2022-09-12	10:10:13	2.50739	390.913	FALSE	18
2022-09-12	10:10:13	3.64876	394.562	1	19
2022-09-12	10:10:14	2.52663	397.089	FALSE	19
2022-09-12	10:10:14	2.7539	399.843	FALSE	19
2022-09-12	10:10:14	0.829428	400.672	FALSE	19
2022-09-12	10:10:14	2.86856	403.541	FALSE	19
2022-09-12	10:10:15	2.79289	406.334	FALSE	19
2022-09-12	10:10:15	1.02129	407.355	FALSE	19
2022-09-12	10:10:15	1.98617	409.341	FALSE	19
2022-09-12	10:10:16	1.11335	410.454	FALSE	19
2022-09-12	10:10:16	1.46754	411.922	FALSE	19
2022-09-12	10:10:16	2.95502	414.877	FALSE	19
2022-09-12	10:10:16	0.488003	415.365	FALSE	19
2022-09-12	10:10:17	1.12342	416.488	FALSE	19
2022-09-12	10:10:17	0.349478	416.838	FALSE	19
2022-09-12	10:10:17	0.434211	417.272	FALSE	19
2022-09-12	10:10:17	0.362812	417.635	FALSE	19
2022-09-12	10:10:18	0.284186	417.919	FALSE	19
2022-09-12	10:10:18	0.193193	418.112	FALSE	19
2022-09-12	10:10:18	0.543015	418.655	FALSE	19
2022-09-12	10:10:18	0.501081	419.156	FALSE	19
2022-09-12	10:10:19	1.02754	420.184	FALSE	19
2022-09-12	10:10:19	1.09726	421.281	FALSE	19
2022-09-12	10:10:19	0.286578	421.568	FALSE	19
2022-09-12	10:10:19	0.389987	421.958	FALSE	19
2022-09-12	10:10:20	0.141845	422.1	FALSE	19
2022-09-12	10:10:20	-0.02187	422.1	FALSE	19
2022-09-12	10:10:20	0.356094	422.456	FALSE	19
2022-09-12	10:10:21	0.31126	422.767	FALSE	19
2022-09-12	10:10:21	0.594567	423.362	FALSE	19
2022-09-12	10:10:21	0.657773	424.019	FALSE	19
2022-09-12	10:10:21	0.428257	424.448	FALSE	19
2022-09-12	10:10:22	0.333448	424.781	FALSE	19
2022-09-12	10:10:22	0.879555	425.661	FALSE	19
2022-09-12	10:10:22	3.53253	429.193	1	20
2022-09-12	10:10:22	1.36093	430.554	FALSE	20
2022-09-12	10:10:23	1.77497	432.329	FALSE	20
2022-09-12	10:10:23	1.0194	433.348	FALSE	20
2022-09-12	10:10:23	0.582506	433.931	FALSE	20
2022-09-12	10:10:23	0.257163	434.188	FALSE	20
2022-09-12	10:10:24	0.250903	434.439	FALSE	20
2022-09-12	10:10:24	0.312481	434.751	FALSE	20
2022-09-12	10:10:24	0.193397	434.945	FALSE	20
2022-09-12	10:10:25	0.221031	435.166	FALSE	20
2022-09-12	10:10:25	0.0847967	435.251	FALSE	20
2022-09-12	10:10:25	0.135535	435.386	FALSE	20
2022-09-12	10:10:25	0.1307	435.517	FALSE	20
2022-09-12	10:10:26	0.106272	435.623	FALSE	20
2022-09-12	10:10:26	0.320318	435.943	FALSE	20
2022-09-12	10:10:26	0.576603	436.52	FALSE	20
2022-09-12	10:10:26	0.327952	436.848	FALSE	20
2022-09-12	10:10:27	0.321641	437.17	FALSE	20
2022-09-12	10:10:27	0.262048	437.432	FALSE	20
2022-09-12	10:10:27	0.346985	437.779	FALSE	20
2022-09-12	10:10:27	0.319911	438.099	FALSE	20
2022-09-12	10:10:28	0.290293	438.389	FALSE	20
2022-09-12	10:10:28	0.29355	438.682	FALSE	20
2022-09-12	10:10:28	0.379657	439.062	FALSE	20
2022-09-12	10:10:29	0.3707	439.433	FALSE	20
2022-09-12	10:10:29	0.3164	439.749	FALSE	20
2022-09-12	10:10:29	0.279199	440.028	FALSE	20
2022-09-12	10:10:29	0.242354	440.271	FALSE	20
2022-09-12	10:10:30	0.188664	440.459	FALSE	20
2022-09-12	10:10:30	0.270954	440.73	FALSE	20
2022-09-12	10:10:30	0.109529	440.84	FALSE	20
2022-09-12	10:10:30	-0.0849234	440.84	FALSE	20
2022-09-12	10:10:31	-0.249351	440.84	FALSE	20
2022-09-12	10:10:31	-0.318714	440.84	FALSE	20
2022-09-12	10:10:31	-0.308079	440.84	FALSE	20
2022-09-12	10:10:31	-0.289147	440.84	FALSE	20
2022-09-12	10:10:32	-0.334287	440.84	FALSE	20
2022-09-12	10:10:32	-0.249656	440.84	FALSE	20
2022-09-12	10:10:32	-0.281005	440.84	FALSE	20
2022-09-12	10:10:32	-0.353524	440.84	FALSE	20
2022-09-12	10:10:33	-0.338969	440.84	FALSE	20
2022-09-12	10:10:33	-0.223346	440.84	FALSE	20
2022-09-12	10:10:33	-0.222481	440.84	FALSE	20
2022-09-12	10:10:34	-0.111946	440.84	FALSE	20
2022-09-12	10:10:34	0.0664252	440.906	FALSE	20
2022-09-12	10:10:34	-0.128435	440.906	FALSE	20
2022-09-12	10:10:34	-0.0296054	440.906	FALSE	20
2022-09-12	10:10:35	-0.00151375	440.906	FALSE	20
2022-09-12	10:10:35	-0.0261448	440.906	FALSE	20
2022-09-12	10:10:35	0.0643895	440.971	FALSE	20
2022-09-12	10:10:35	0.16897	441.14	FALSE	20
2022-09-12	10:10:36	0.310598	441.45	FALSE	20
2022-09-12	10:10:36	0.43411	441.884	FALSE	20
2022-09-12	10:10:36	0.630394	442.515	FALSE	20
2022-09-12	10:10:36	1.19274	443.708	FALSE	20
2022-09-12	10:10:37	0.770598	444.478	FALSE	20
2022-09-12	10:10:37	0.263677	444.742	FALSE	20
2022-09-12	10:10:37	0.217825	444.96	FALSE	20
2022-09-12	10:10:38	0.383321	445.343	FALSE	20
2022-09-12	10:10:38	0.354008	445.697	FALSE	20
2022-09-12	10:10:38	0.315534	446.013	FALSE	20
2022-09-12	10:10:38	0.546883	446.559	FALSE	20
2022-09-12	10:10:39	0.439758	446.999	FALSE	20
2022-09-12	10:10:39	0.554924	447.554	FALSE	20
2022-09-12	10:10:39	0.38098	447.935	FALSE	20
2022-09-12	10:10:39	0.471565	448.407	FALSE	20
2022-09-12	10:10:40	0.481539	448.888	FALSE	20
2022-09-12	10:10:40	0.344797	449.233	FALSE	20
2022-09-12	10:10:40	0.282456	449.515	FALSE	20
2022-09-12	10:10:40	0.26785	449.783	FALSE	20
2022-09-12	10:10:41	0.278435	450.062	FALSE	20
2022-09-12	10:10:41	0.503626	450.565	FALSE	20
2022-09-12	10:10:41	0.438079	451.003	FALSE	20
2022-09-12	10:10:42	0.519707	451.523	FALSE	20
2022-09-12	10:10:42	0.32215	451.845	FALSE	20
2022-09-12	10:10:42	0.463321	452.309	FALSE	20
2022-09-12	10:10:42	0.136196	452.445	FALSE	20
2022-09-12	10:10:43	0.122507	452.567	FALSE	20
2022-09-12	10:10:43	0.166985	452.734	FALSE	20
2022-09-12	10:10:43	0.260725	452.995	FALSE	20
2022-09-12	10:10:43	0.224644	453.22	FALSE	20
2022-09-12	10:10:44	0.262354	453.482	FALSE	20
2022-09-12	10:10:44	0.0902928	453.572	FALSE	20
2022-09-12	10:10:44	0.11126	453.684	FALSE	20
2022-09-12	10:10:44	0.255026	453.939	FALSE	20
2022-09-12	10:10:45	0.186934	454.126	FALSE	20
2022-09-12	10:10:45	0.184288	454.31	FALSE	20
2022-09-12	10:10:45	0.205051	454.515	FALSE	20
2022-09-12	10:10:45	0.192685	454.708	FALSE	20
2022-09-12	10:10:46	0.285153	454.993	FALSE	20
2022-09-12	10:10:46	0.387239	455.38	FALSE	20
2022-09-12	10:10:46	0.310751	455.691	FALSE	20
2022-09-12	10:10:47	0.254211	455.945	FALSE	20
2022-09-12	10:10:47	0.230903	456.176	FALSE	20
2022-09-12	10:10:47	0.40556	456.581	FALSE	20
2022-09-12	10:10:47	0.285305	456.867	FALSE	20
2022-09-12	10:10:48	0.250954	457.118	FALSE	20
2022-09-12	10:10:48	0.356247	457.474	FALSE	20
2022-09-12	10:10:48	0.657723	458.132	FALSE	20
2022-09-12	10:10:48	0.43014	458.562	FALSE	20
2022-09-12	10:10:49	0.214568	458.776	FALSE	20
2022-09-12	10:10:49	0.24444	459.021	FALSE	20
2022-09-12	10:10:49	0.314771	459.335	FALSE	20
2022-09-12	10:10:49	0.274262	459.61	FALSE	20
2022-09-12	10:10:50	0.285713	459.895	FALSE	20
2022-09-12	10:10:50	0.214669	460.11	FALSE	20
2022-09-12	10:10:50	0.264237	460.374	FALSE	20
2022-09-12	10:10:51	0.383422	460.758	FALSE	20
2022-09-12	10:10:51	0.323473	461.081	FALSE	20
2022-09-12	10:10:51	0.323219	461.404	FALSE	20
2022-09-12	10:10:51	0.335535	461.74	FALSE	20
2022-09-12	10:10:52	0.341947	462.082	FALSE	20
2022-09-12	10:10:52	0.334364	462.416	FALSE	20
2022-09-12	10:10:52	0.345865	462.762	FALSE	20
2022-09-12	10:10:52	0.337214	463.099	FALSE	20
2022-09-12	10:10:53	0.332532	463.432	FALSE	20
2022-09-12	10:10:53	0.329122	463.761	FALSE	20
2022-09-12	10:10:53	0.323117	464.084	FALSE	20
2022-09-12	10:10:53	0.327697	464.412	FALSE	20
2022-09-12	10:10:54	0.329835	464.742	FALSE	20
2022-09-12	10:10:54	0.331005	465.073	FALSE	20
2022-09-12	10:10:54	0.334924	465.408	FALSE	20
2022-09-12	10:10:55	0.332786	465.74	FALSE	20
2022-09-12	10:10:55	0.335127	466.076	FALSE	20
2022-09-12	10:10:55	0.334313	466.41	FALSE	20
2022-09-12	10:10:55	0.334669	466.745	FALSE	20
2022-09-12	10:10:56	0.332328	467.077	FALSE	20
2022-09-12	10:10:56	0.339809	467.417	FALSE	20
2022-09-12	10:10:56	0.335433	467.752	FALSE	20
2022-09-12	10:10:56	0.309224	468.061	FALSE	20
2022-09-12	10:10:57	0.324084	468.385	FALSE	20
2022-09-12	10:10:57	0.349886	468.735	FALSE	20
2022-09-12	10:10:57	0.34673	469.082	FALSE	20
2022-09-12	10:10:57	0.333499	469.416	FALSE	20
2022-09-12	10:10:58	0.32215	469.738	FALSE	20
2022-09-12	10:10:58	0.307494	470.045	FALSE	20
2022-09-12	10:10:58	0.404644	470.45	FALSE	20
2022-09-12	10:10:58	0.446527	470.896	FALSE	20
2022-09-12	10:10:59	0.476959	471.373	FALSE	20
2022-09-12	10:10:59	0.435382	471.809	FALSE	20
2022-09-12	10:10:59	0.426934	472.236	FALSE	20
2022-09-12	10:11:00	0.373906	472.61	FALSE	20
2022-09-12	10:11:00	0.422456	473.032	FALSE	20
2022-09-12	10:11:00	0.369428	473.401	FALSE	20
2022-09-12	10:11:00	0.413244	473.815	FALSE	20
2022-09-12	10:11:01	0.446221	474.261	FALSE	20
2022-09-12	10:11:01	0.310598	474.571	FALSE	20
2022-09-12	10:11:01	0.188105	474.76	FALSE	20
2022-09-12	10:11:01	0.319148	475.079	FALSE	20
2022-09-12	10:11:02	0.402964	475.482	FALSE	20
2022-09-12	10:11:02	0.489173	475.971	FALSE	20
2022-09-12	10:11:02	0.438537	476.409	FALSE	20
2022-09-12	10:11:02	2.0395	478.449	FALSE	20
2022-09-12	10:11:03	1.33355	479.782	FALSE	20
2022-09-12	10:11:03	1.18078	480.963	FALSE	20
2022-09-12	10:11:03	2.27019	483.233	FALSE	20
2022-09-12	10:11:04	2.0649	485.298	FALSE	20
2022-09-12	10:11:04	2.70479	488.003	FALSE	20
2022-09-12	10:11:04	0.553702	488.557	FALSE	20
2022-09-12	10:11:04	1.28531	489.842	FALSE	20
2022-09-12	10:11:05	2.75848	492.601	FALSE	20
2022-09-12	10:11:05	0.483422	493.084	FALSE	20
2022-09-12	10:11:05	0.397926	493.482	FALSE	20
2022-09-12	10:11:05	0.943015	494.425	FALSE	20
2022-09-12	10:11:06	0.357112	494.782	FALSE	20
2022-09-12	10:11:06	1.44541	496.227	FALSE	20
2022-09-12	10:11:06	0.379911	496.607	FALSE	20
2022-09-12	10:11:06	1.15889	497.766	FALSE	20
2022-09-12	10:11:07	2.66149	500.428	FALSE	20
2022-09-12	10:11:07	0.360216	500.788	FALSE	20
2022-09-12	10:11:07	1.13314	501.921	FALSE	20
2022-09-12	10:11:08	0.656145	502.577	FALSE	20
2022-09-12	10:11:08	0.892278	503.47	FALSE	20
2022-09-12	10:11:08	1.99136	505.461	FALSE	20
2022-09-12	10:11:08	0.309122	505.77	FALSE	20
2022-09-12	10:11:09	0.392481	506.163	FALSE	20
2022-09-12	10:11:09	0.300369	506.463	FALSE	20
2022-09-12	10:11:09	0.287087	506.75	FALSE	20
2022-09-12	10:11:09	0.595076	507.345	FALSE	20
2022-09-12	10:11:10	0.327901	507.673	FALSE	20
2022-09-12	10:11:10	0.337468	508.01	FALSE	20
2022-09-12	10:11:10	0.242456	508.253	FALSE	20
2022-09-12	10:11:10	0.306985	508.56	FALSE	20
2022-09-12	10:11:11	0.437672	508.998	FALSE	20
2022-09-12	10:11:11	0.264237	509.262	FALSE	20
2022-09-12	10:11:11	0.285356	509.547	FALSE	20
2022-09-12	10:11:11	0.238893	509.786	FALSE	20
2022-09-12	10:11:12	0.349886	510.136	FALSE	20
2022-09-12	10:11:12	0.308919	510.445	FALSE	20
2022-09-12	10:11:12	0.175891	510.621	FALSE	20
2022-09-12	10:11:13	0.339351	510.96	FALSE	20
2022-09-12	10:11:13	0.365967	511.326	FALSE	20
2022-09-12	10:11:13	0.34215	511.668	FALSE	20
2022-09-12	10:11:13	0.240878	511.909	FALSE	20
2022-09-12	10:11:14	0.339249	512.248	FALSE	20
2022-09-12	10:11:14	0.32444	512.573	FALSE	20
2022-09-12	10:11:14	0.620216	513.193	FALSE	20
2022-09-12	10:11:14	0.220623	513.414	FALSE	20
2022-09-12	10:11:15	0.450802	513.864	FALSE	20
2022-09-12	10:11:15	0.473397	514.338	FALSE	20
2022-09-12	10:11:15	0.412074	514.75	FALSE	20
2022-09-12	10:11:15	0.251921	515.002	FALSE	20
2022-09-12	10:11:16	0.351056	515.353	FALSE	20
2022-09-12	10:11:16	0.168308	515.521	FALSE	20
2022-09-12	10:11:16	0.371463	515.893	FALSE	20
2022-09-12	10:11:17	0.15299	516.046	FALSE	20
2022-09-12	10:11:17	0.38785	516.433	FALSE	20
2022-09-12	10:11:17	0.200318	516.634	FALSE	20
2022-09-12	10:11:17	0.267392	516.901	FALSE	20
2022-09-12	10:11:18	0.30388	517.205	FALSE	20
2022-09-12	10:11:18	0.206018	517.411	FALSE	20
2022-09-12	10:11:18	0.345967	517.757	FALSE	20
2022-09-12	10:11:18	0.239351	517.996	FALSE	20
2022-09-12	10:11:19	0.415942	518.412	FALSE	20
2022-09-12	10:11:19	0.206171	518.618	FALSE	20
2022-09-12	10:11:19	0.335484	518.954	FALSE	20
2022-09-12	10:11:19	0.213295	519.167	FALSE	20
2022-09-12	10:11:20	0.219555	519.387	FALSE	20
2022-09-12	10:11:20	0.298181	519.685	FALSE	20
2022-09-12	10:11:20	0.146781	519.832	FALSE	20
2022-09-12	10:11:21	0.316603	520.148	FALSE	20
2022-09-12	10:11:21	0.218181	520.367	FALSE	20
2022-09-12	10:11:21	0.230344	520.597	FALSE	20
2022-09-12	10:11:21	0.300878	520.898	FALSE	20
2022-09-12	10:11:22	0.196705	521.095	FALSE	20
2022-09-12	10:11:22	0.226832	521.321	FALSE	20
2022-09-12	10:11:22	0.286171	521.608	FALSE	20
2022-09-12	10:11:22	0.356349	521.964	FALSE	20
2022-09-12	10:11:23	0.549122	522.513	FALSE	20
2022-09-12	10:11:23	1.78439	524.297	FALSE	20
2022-09-12	10:11:23	0.328868	524.626	FALSE	20
2022-09-12	10:11:23	0.371972	524.998	FALSE	20
2022-09-12	10:11:24	1.77182	526.77	FALSE	20
2022-09-12	10:11:24	0.318791	527.089	FALSE	20
2022-09-12	10:11:24	0.208664	527.297	FALSE	20
2022-09-12	10:11:24	0.698384	527.996	FALSE	20
2022-09-12	10:11:25	0.400776	528.397	FALSE	20
2022-09-12	10:11:25	0.429529	528.826	FALSE	20
2022-09-12	10:11:25	0.955738	529.782	FALSE	20
2022-09-12	10:11:26	0.674567	530.456	FALSE	20
2022-09-12	10:11:26	0.27757	530.734	FALSE	20
2022-09-12	10:11:26	1.48704	532.221	FALSE	20
2022-09-12	10:11:26	0.495127	532.716	FALSE	20
2022-09-12	10:11:27	0.990191	533.706	FALSE	20
2022-09-12	10:11:27	2.12765	535.834	FALSE	20
2022-09-12	10:11:27	0.353753	536.188	FALSE	20
2022-09-12	10:11:27	2.06709	538.255	FALSE	20
2022-09-12	10:11:28	0.200929	538.456	FALSE	20
2022-09-12	10:11:28	0.128359	538.584	FALSE	20
2022-09-12	10:11:28	0.381998	538.966	FALSE	20
2022-09-12	10:11:28	0.129122	539.095	FALSE	20
2022-09-12	10:11:29	0.321082	539.416	FALSE	20
2022-09-12	10:11:29	0.146629	539.563	FALSE	20
2022-09-12	10:11:29	0.257316	539.82	FALSE	20
2022-09-12	10:11:30	0.117163	539.937	FALSE	20
2022-09-12	10:11:30	0.0844913	540.022	FALSE	20
2022-09-12	10:11:30	0.178028	540.2	FALSE	20
2022-09-12	10:11:30	0.448461	540.648	FALSE	20
2022-09-12	10:11:31	0.153753	540.802	FALSE	20
2022-09-12	10:11:31	0.186171	540.988	FALSE	20
2022-09-12	10:11:31	0.342099	541.33	FALSE	20
2022-09-12	10:11:31	0.249682	541.58	FALSE	20
2022-09-12	10:11:32	0.739606	542.32	FALSE	20
2022-09-12	10:11:32	0.147392	542.467	FALSE	20
2022-09-12	10:11:32	0.441489	542.909	FALSE	20
2022-09-12	10:11:32	0.513448	543.422	FALSE	20
2022-09-12	10:11:33	0.429987	543.852	FALSE	20
2022-09-12	10:11:33	0.326069	544.178	FALSE	20
2022-09-12	10:11:33	0.319911	544.498	FALSE	20
2022-09-12	10:11:34	0.341845	544.84	FALSE	20
2022-09-12	10:11:34	0.335178	545.175	FALSE	20
2022-09-12	10:11:34	0.349733	545.525	FALSE	20
2022-09-12	10:11:34	0.25014	545.775	FALSE	20
2022-09-12	10:11:35	0.307137	546.082	FALSE	20
2022-09-12	10:11:35	0.224084	546.306	FALSE	20
2022-09-12	10:11:35	0.280827	546.587	FALSE	20
2022-09-12	10:11:35	0.205967	546.793	FALSE	20
2022-09-12	10:11:36	0.345763	547.139	FALSE	20
2022-09-12	10:11:36	0.294567	547.433	FALSE	20
2022-09-12	10:11:36	0.310344	547.744	FALSE	20
2022-09-12	10:11:36	0.172379	547.916	FALSE	20
2022-09-12	10:11:37	0.261081	548.177	FALSE	20
2022-09-12	10:11:37	0.166832	548.344	FALSE	20
2022-09-12	10:11:37	0.234313	548.578	FALSE	20
2022-09-12	10:11:37	0.104339	548.683	FALSE	20
2022-09-12	10:11:38	0.188664	548.871	FALSE	20
2022-09-12	10:11:38	0.170547	549.042	FALSE	20
2022-09-12	10:11:38	0.0635753	549.105	FALSE	20
2022-09-12	10:11:39	0.14098	549.246	FALSE	20
2022-09-12	10:11:39	0.113194	549.36	FALSE	20
2022-09-12	10:11:39	0.102507	549.462	FALSE	20
2022-09-12	10:11:39	0.0298348	549.492	FALSE	20
2022-09-12	10:11:40	0.166272	549.658	FALSE	20
2022-09-12	10:11:40	0.0814888	549.74	FALSE	20
2022-09-12	10:11:40	0.201998	549.942	FALSE	20
2022-09-12	10:11:40	0.0665269	550.008	FALSE	20
2022-09-12	10:11:41	0.237265	550.245	FALSE	20
2022-09-12	10:11:41	0.150038	550.395	FALSE	20
2022-09-12	10:11:41	0.188512	550.584	FALSE	20
2022-09-12	10:11:41	0.124491	550.709	FALSE	20
2022-09-12	10:11:42	0.172735	550.881	FALSE	20
2022-09-12	10:11:42	0.194262	551.075	FALSE	20
2022-09-12	10:11:42	0.119962	551.195	FALSE	20
2022-09-12	10:11:43	0.189631	551.385	FALSE	20
2022-09-12	10:11:43	0.132532	551.518	FALSE	20
2022-09-12	10:11:43	0.286578	551.804	FALSE	20
2022-09-12	10:11:43	0.169428	551.974	FALSE	20
2022-09-12	10:11:44	0.208308	552.182	FALSE	20
2022-09-12	10:11:44	0.0917687	552.274	FALSE	20
2022-09-12	10:11:44	0.182456	552.456	FALSE	20
2022-09-12	10:11:44	0.0505982	552.507	FALSE	20
2022-09-12	10:11:45	0.177417	552.684	FALSE	20
2022-09-12	10:11:45	0.0508527	552.735	FALSE	20
2022-09-12	10:11:45	0.107443	552.842	FALSE	20
2022-09-12	10:11:45	0.146934	552.989	FALSE	20
2022-09-12	10:11:46	0.0521249	553.042	FALSE	20
2022-09-12	10:11:46	0.11299	553.155	FALSE	20
2022-09-12	10:11:46	0.0108018	553.165	FALSE	20
2022-09-12	10:11:47	0.223982	553.389	FALSE	20
2022-09-12	10:11:47	0.508104	553.897	FALSE	20
2022-09-12	10:11:47	0.243982	554.141	FALSE	20
2022-09-12	10:11:47	0.725712	554.867	FALSE	20
2022-09-12	10:11:48	0.282048	555.149	FALSE	20
2022-09-12	10:11:48	0.286883	555.436	FALSE	20
2022-09-12	10:11:48	1.91533	557.351	FALSE	20
2022-09-12	10:11:48	0.203626	557.555	FALSE	20
2022-09-12	10:11:49	0.494466	558.049	FALSE	20
2022-09-12	10:11:49	0.404033	558.453	FALSE	20
2022-09-12	10:11:49	0.546069	559	FALSE	20
2022-09-12	10:11:49	1.70846	560.708	FALSE	20
2022-09-12	10:11:50	0.291107	560.999	FALSE	20
2022-09-12	10:11:50	0.386069	561.385	FALSE	20
2022-09-12	10:11:50	0.644542	562.03	FALSE	20
2022-09-12	10:11:50	0.280318	562.31	FALSE	20
2022-09-12	10:11:51	0.523473	562.834	FALSE	20
2022-09-12	10:11:51	0.332278	563.166	FALSE	20
2022-09-12	10:11:51	0.207137	563.373	FALSE	20
2022-09-12	10:11:52	1.85411	565.227	FALSE	20
2022-09-12	10:11:52	0.228155	565.455	FALSE	20
2022-09-12	10:11:52	0.357519	565.813	FALSE	20
2022-09-12	10:11:52	1.32271	567.135	FALSE	20
2022-09-12	10:11:53	0.289326	567.425	FALSE	20
2022-09-12	10:11:53	0.3993	567.824	FALSE	20
2022-09-12	10:11:53	0.447697	568.272	FALSE	20
2022-09-12	10:11:53	0.195534	568.467	FALSE	20
2022-09-12	10:11:54	0.363524	568.831	FALSE	20
2022-09-12	10:11:54	0.22271	569.054	FALSE	20
2022-09-12	10:11:54	0.221641	569.275	FALSE	20
2022-09-12	10:11:54	0.281234	569.556	FALSE	20
2022-09-12	10:11:55	0.164186	569.721	FALSE	20
2022-09-12	10:11:55	0.167036	569.888	FALSE	20
2022-09-12	10:11:55	0.0997585	569.987	FALSE	20
2022-09-12	10:11:56	0.176959	570.164	FALSE	20
2022-09-12	10:11:56	0.0819468	570.246	FALSE	20
2022-09-12	10:11:56	0.107748	570.354	FALSE	20
2022-09-12	10:11:56	0.0448475	570.399	FALSE	20
2022-09-12	10:11:57	0.15869	570.558	FALSE	20
2022-09-12	10:11:57	0.056756	570.614	FALSE	20
2022-09-12	10:11:57	0.158334	570.773	FALSE	20
2022-09-12	10:11:57	0.185	570.958	FALSE	20
2022-09-12	10:11:58	0.0828628	571.041	FALSE	20
2022-09-12	10:11:58	0.193804	571.234	FALSE	20
2022-09-12	10:11:58	0.155993	571.39	FALSE	20
2022-09-12	10:11:58	0.135229	571.526	FALSE	20
2022-09-12	10:11:59	0.03813	571.564	FALSE	20
2022-09-12	10:11:59	0.283372	571.847	FALSE	20
2022-09-12	10:11:59	0.125204	571.972	FALSE	20
2022-09-12	10:12:00	0.163779	572.136	FALSE	20
2022-09-12	10:12:00	0.0597076	572.196	FALSE	20
2022-09-12	10:12:00	0.0361961	572.232	FALSE	20
2022-09-12	10:12:00	0.162812	572.395	FALSE	20
2022-09-12	10:12:01	0.0489188	572.444	FALSE	20
2022-09-12	10:12:01	0.216145	572.66	FALSE	20
2022-09-12	10:12:01	0.0809798	572.741	FALSE	20
2022-09-12	10:12:01	0.300318	573.041	FALSE	20
2022-09-12	10:12:02	0.180216	573.221	FALSE	20
2022-09-12	10:12:02	0.459249	573.681	FALSE	20
2022-09-12	10:12:02	0.318741	573.999	FALSE	20
2022-09-12	10:12:02	0.321743	574.321	FALSE	20
2022-09-12	10:12:03	0.518588	574.84	FALSE	20
2022-09-12	10:12:03	0.691259	575.531	FALSE	20
2022-09-12	10:12:03	0.430038	575.961	FALSE	20
2022-09-12	10:12:03	0.686272	576.647	FALSE	20
2022-09-12	10:12:04	0.535229	577.182	FALSE	20
2022-09-12	10:12:04	0.361082	577.544	FALSE	20
2022-09-12	10:12:04	0.413702	577.957	FALSE	20
2022-09-12	10:12:05	0.502405	578.46	FALSE	20
2022-09-12	10:12:05	0.259708	578.719	FALSE	20
2022-09-12	10:12:05	0.319249	579.039	FALSE	20
2022-09-12	10:12:05	0.288613	579.327	FALSE	20
2022-09-12	10:12:06	0.128206	579.455	FALSE	20
2022-09-12	10:12:06	0.171514	579.627	FALSE	20
2022-09-12	10:12:06	0.107952	579.735	FALSE	20
2022-09-12	10:12:06	0.163982	579.899	FALSE	20
2022-09-12	10:12:07	0.134771	580.034	FALSE	20
2022-09-12	10:12:07	0.224288	580.258	FALSE	20
2022-09-12	10:12:07	0.222914	580.481	FALSE	20
2022-09-12	10:12:07	0.217621	580.698	FALSE	20
2022-09-12	10:12:08	0.202507	580.901	FALSE	20
2022-09-12	10:12:08	0.271514	581.172	FALSE	20
2022-09-12	10:12:08	0.326527	581.499	FALSE	20
2022-09-12	10:12:09	0.277316	581.776	FALSE	20
2022-09-12	10:12:09	0.250751	582.027	FALSE	20
2022-09-12	10:12:09	0.279911	582.307	FALSE	20
2022-09-12	10:12:09	0.300878	582.608	FALSE	20
2022-09-12	10:12:10	0.375992	582.984	FALSE	20
2022-09-12	10:12:10	0.416756	583.401	FALSE	20
2022-09-12	10:12:10	0.412735	583.813	FALSE	20
2022-09-12	10:12:10	0.401794	584.215	FALSE	20
2022-09-12	10:12:11	0.287087	584.502	FALSE	20
2022-09-12	10:12:11	0.12841	584.631	FALSE	20
2022-09-12	10:12:11	0.290191	584.921	FALSE	20
2022-09-12	10:12:11	0.355789	585.277	FALSE	20
2022-09-12	10:12:12	0.406374	585.683	FALSE	20
2022-09-12	10:12:12	0.320318	586.003	FALSE	20
2022-09-12	10:12:12	0.396552	586.4	FALSE	20
2022-09-12	10:12:13	0.329428	586.729	FALSE	20
2022-09-12	10:12:13	0.329021	587.058	FALSE	20
2022-09-12	10:12:13	0.388206	587.447	FALSE	20
2022-09-12	10:12:13	0.325051	587.772	FALSE	20
2022-09-12	10:12:14	0.35757	588.129	FALSE	20
2022-09-12	10:12:14	0.470038	588.599	FALSE	20
2022-09-12	10:12:14	0.426374	589.026	FALSE	20
2022-09-12	10:12:14	0.386374	589.412	FALSE	20
2022-09-12	10:12:15	0.421234	589.833	FALSE	20
2022-09-12	10:12:15	0.407087	590.24	FALSE	20
2022-09-12	10:12:15	0.428155	590.668	FALSE	20
2022-09-12	10:12:15	0.37645	591.045	FALSE	20
2022-09-12	10:12:16	0.367392	591.412	FALSE	20
2022-09-12	10:12:16	0.410038	591.822	FALSE	20
2022-09-12	10:12:16	0.382761	592.205	FALSE	20
2022-09-12	10:12:16	0.371616	592.577	FALSE	20
2022-09-12	10:12:17	0.386171	592.963	FALSE	20
2022-09-12	10:12:17	0.379199	593.342	FALSE	20
2022-09-12	10:12:17	0.412074	593.754	FALSE	20
2022-09-12	10:12:18	0.490394	594.244	FALSE	20
2022-09-12	10:12:18	0.472176	594.717	FALSE	20
2022-09-12	10:12:18	0.392328	595.109	FALSE	20
2022-09-12	10:12:18	0.580013	595.689	FALSE	20
2022-09-12	10:12:19	0.419657	596.109	FALSE	20
2022-09-12	10:12:19	0.308257	596.417	FALSE	20
2022-09-12	10:12:19	0.390598	596.808	FALSE	20
2022-09-12	10:12:19	0.489377	597.297	FALSE	20
2022-09-12	10:12:20	0.547137	597.844	FALSE	20
2022-09-12	10:12:20	0.757061	598.601	FALSE	20
2022-09-12	10:12:20	0.400878	599.002	FALSE	20
2022-09-12	10:12:20	0.391819	599.394	FALSE	20
2022-09-12	10:12:21	0.408613	599.802	FALSE	20
2022-09-12	10:12:21	0.308104	600.111	FALSE	20
2022-09-12	10:12:21	0.292481	600.403	FALSE	20
2022-09-12	10:12:22	0.366323	600.769	FALSE	20
2022-09-12	10:12:22	0.35131	601.121	FALSE	20
2022-09-12	10:12:22	0.38612	601.507	FALSE	20
2022-09-12	10:12:22	0.424135	601.931	FALSE	20
2022-09-12	10:12:23	0.253855	602.185	FALSE	20
2022-09-12	10:12:23	0.224644	602.409	FALSE	20
2022-09-12	10:12:23	0.274771	602.684	FALSE	20
2022-09-12	10:12:23	0.261947	602.946	FALSE	20
2022-09-12	10:12:24	0.269784	603.216	FALSE	20
2022-09-12	10:12:24	0.282964	603.499	FALSE	20
2022-09-12	10:12:24	0.202456	603.701	FALSE	20
2022-09-12	10:12:24	0.26327	603.965	FALSE	20
2022-09-12	10:12:25	0.306323	604.271	FALSE	20
2022-09-12	10:12:25	0.268104	604.539	FALSE	20
2022-09-12	10:12:25	0.358181	604.897	FALSE	20
2022-09-12	10:12:26	0.2964	605.194	FALSE	20
2022-09-12	10:12:26	0.300929	605.495	FALSE	20
2022-09-12	10:12:26	0.313143	605.808	FALSE	20
2022-09-12	10:12:26	0.25014	606.058	FALSE	20
2022-09-12	10:12:27	0.318181	606.376	FALSE	20
2022-09-12	10:12:27	0.236247	606.612	FALSE	20
2022-09-12	10:12:27	0.212379	606.825	FALSE	20
2022-09-12	10:12:27	0.281489	607.106	FALSE	20
2022-09-12	10:12:28	0.216247	607.322	FALSE	20
2022-09-12	10:12:28	0.33869	607.661	FALSE	20
2022-09-12	10:12:28	0.232786	607.894	FALSE	20
2022-09-12	10:12:28	0.258028	608.152	FALSE	20
2022-09-12	10:12:29	0.305051	608.457	FALSE	20
2022-09-12	10:12:29	0.201845	608.659	FALSE	20
2022-09-12	10:12:29	0.380471	609.039	FALSE	20
2022-09-12	10:12:29	0.154364	609.194	FALSE	20
2022-09-12	10:12:30	0.381234	609.575	FALSE	20
2022-09-12	10:12:30	0.246781	609.822	FALSE	20
2022-09-12	10:12:30	0.315891	610.137	FALSE	20
2022-09-12	10:12:31	0.244186	610.382	FALSE	20
2022-09-12	10:12:31	0.22556	610.607	FALSE	20
2022-09-12	10:12:31	0.284542	610.892	FALSE	20
2022-09-12	10:12:31	0.23472	611.126	FALSE	20
2022-09-12	10:12:32	0.380471	611.507	FALSE	20
2022-09-12	10:12:32	0.178181	611.685	FALSE	20
2022-09-12	10:12:32	0.396349	612.081	FALSE	20
2022-09-12	10:12:32	0.264695	612.346	FALSE	20
2022-09-12	10:12:33	0.306527	612.653	FALSE	20
2022-09-12	10:12:33	0.28271	612.935	FALSE	20
2022-09-12	10:12:33	0.265611	613.201	FALSE	20
2022-09-12	10:12:33	0.309937	613.511	FALSE	20
2022-09-12	10:12:34	0.246018	613.757	FALSE	20
2022-09-12	10:12:34	0.409987	614.167	FALSE	20
2022-09-12	10:12:34	0.221438	614.388	FALSE	20
2022-09-12	10:12:35	0.270598	614.659	FALSE	20
2022-09-12	10:12:35	0.245051	614.904	FALSE	20
2022-09-12	10:12:35	0.30159	615.206	FALSE	20
2022-09-12	10:12:35	0.23416	615.44	FALSE	20
2022-09-12	10:12:36	0.187188	615.627	FALSE	20
2022-09-12	10:12:36	0.346629	615.974	FALSE	20
2022-09-12	10:12:36	0.193753	616.167	FALSE	20
2022-09-12	10:12:36	0.31645	616.484	FALSE	20
2022-09-12	10:12:37	0.205407	616.689	FALSE	20
2022-09-12	10:12:37	0.229428	616.919	FALSE	20
2022-09-12	10:12:37	0.215992	617.135	FALSE	20
2022-09-12	10:12:37	0.170802	617.305	FALSE	20
2022-09-12	10:12:38	0.280725	617.586	FALSE	20
2022-09-12	10:12:38	0.152278	617.738	FALSE	20
2022-09-12	10:12:38	0.354313	618.093	FALSE	20

## Sheet: Royal_harness_2022912100716
						**GoPro Fitting: 956
2022-09-12	10:07:16	0.176603
2022-09-12	10:07:16	0.205458
2022-09-12	10:07:17	0.222354
2022-09-12	10:07:17	0.223524
2022-09-12	10:07:17	0.217163
2022-09-12	10:07:18	0.226883
2022-09-12	10:07:18	0.298435
2022-09-12	10:07:18	0.236501
2022-09-12	10:07:18	0.199402
2022-09-12	10:07:19	0.382761
2022-09-12	10:07:19	0.369224
2022-09-12	10:07:19	0.498537
2022-09-12	10:07:19	0.414109
2022-09-12	10:07:20	0.472023
2022-09-12	10:07:20	0.476705
2022-09-12	10:07:20	0.468715
2022-09-12	10:07:20	0.517315
2022-09-12	10:07:21	0.438333
2022-09-12	10:07:21	0.485814
2022-09-12	10:07:21	0.389529
2022-09-12	10:07:22	0.393651
2022-09-12	10:07:22	0.22902
2022-09-12	10:07:22	0.112736
2022-09-12	10:07:22	0.335026
2022-09-12	10:07:23	0.216807
2022-09-12	10:07:23	0.200471
2022-09-12	10:07:23	0.257875
2022-09-12	10:07:23	-0.0175952
2022-09-12	10:07:24	-0.206043
2022-09-12	10:07:24	0.0570613
2022-09-12	10:07:24	0.13757
2022-09-12	10:07:24	-0.0497071
2022-09-12	10:07:25	-0.017188
2022-09-12	10:07:25	0.374619
2022-09-12	10:07:25	0.452481
2022-09-12	10:07:25	0.333499
2022-09-12	10:07:26	0.419249
2022-09-12	10:07:26	0.379402
2022-09-12	10:07:26	0.383881
2022-09-12	10:07:27	0.471209
2022-09-12	10:07:27	0.446781
2022-09-12	10:07:27	0.310547
2022-09-12	10:07:27	0.356705
2022-09-12	10:07:28	0.281743
2022-09-12	10:07:28	0.315433
2022-09-12	10:07:28	0.331819
2022-09-12	10:07:28	0.199351
2022-09-12	10:07:29	0.229936
2022-09-12	10:07:29	0.363626
2022-09-12	10:07:29	0.310344
2022-09-12	10:07:29	0.361438
2022-09-12	10:07:30	0.451667
2022-09-12	10:07:30	0.353753
2022-09-12	10:07:30	0.55416
2022-09-12	10:07:31	0.659453
2022-09-12	10:07:31	0.530598
2022-09-12	10:07:31	1.60352
2022-09-12	10:07:31	1.21818
2022-09-12	10:07:32	1.06861
2022-09-12	10:07:32	0.951158
2022-09-12	10:07:32	0.800878
2022-09-12	10:07:32	1.45574
2022-09-12	10:07:33	0.661947
2022-09-12	10:07:33	0.777723
2022-09-12	10:07:33	0.542863
2022-09-12	10:07:33	0.65243
2022-09-12	10:07:34	0.642812
2022-09-12	10:07:34	0.3964
2022-09-12	10:07:34	0.193448
2022-09-12	10:07:34	0.166323
2022-09-12	10:07:35	0.201234
2022-09-12	10:07:35	0.113804
2022-09-12	10:07:35	0.513397
2022-09-12	10:07:36	0.15243
2022-09-12	10:07:36	0.320674
2022-09-12	10:07:36	0.127341
2022-09-12	10:07:36	0.17411
2022-09-12	10:07:37	0.0837788
2022-09-12	10:07:37	0.288919
2022-09-12	10:07:37	0.184898
2022-09-12	10:07:37	0.133346
2022-09-12	10:07:38	-0.00110661
2022-09-12	10:07:38	-0.196068
2022-09-12	10:07:38	-0.0146944
2022-09-12	10:07:38	0.00260841
2022-09-12	10:07:39	-0.13617
2022-09-12	10:07:39	-0.182124
2022-09-12	10:07:39	-0.254287
2022-09-12	10:07:40	-0.235865
2022-09-12	10:07:40	-0.143651
2022-09-12	10:07:40	-0.0322008
2022-09-12	10:07:40	-0.371692
2022-09-12	10:07:41	-0.533575
2022-09-12	10:07:41	-0.2779
2022-09-12	10:07:41	-0.144669
2022-09-12	10:07:41	0.0779773
2022-09-12	10:07:42	0.297468
2022-09-12	10:07:42	0.680114
2022-09-12	10:07:42	3.80332
2022-09-12	10:07:42	2.33732
2022-09-12	10:07:43	2.96424
2022-09-12	10:07:43	4.26281
2022-09-12	10:07:43	3.27492
2022-09-12	10:07:43	2.64907
2022-09-12	10:07:44	3.63314
2022-09-12	10:07:44	1.79391
2022-09-12	10:07:44	2.31589
2022-09-12	10:07:45	4.55645
2022-09-12	10:07:45	1.24831
2022-09-12	10:07:45	0.696552
2022-09-12	10:07:45	0.466934
2022-09-12	10:07:46	1.25579
2022-09-12	10:07:46	4.79741
2022-09-12	10:07:46	0.606985
2022-09-12	10:07:46	1.06922
2022-09-12	10:07:47	1.11075
2022-09-12	10:07:47	1.75284
2022-09-12	10:07:47	2.4505
2022-09-12	10:07:47	1.93411
2022-09-12	10:07:48	1.47497
2022-09-12	10:07:48	0.826628
2022-09-12	10:07:48	0.452532
2022-09-12	10:07:49	0.455891
2022-09-12	10:07:49	0.495636
2022-09-12	10:07:49	0.33355
2022-09-12	10:07:49	0.409275
2022-09-12	10:07:50	0.435789
2022-09-12	10:07:50	0.409987
2022-09-12	10:07:50	0.428715
2022-09-12	10:07:50	0.419046
2022-09-12	10:07:51	0.429478
2022-09-12	10:07:51	0.42159
2022-09-12	10:07:51	0.435382
2022-09-12	10:07:51	0.448003
2022-09-12	10:07:52	0.516145
2022-09-12	10:07:52	0.685712
2022-09-12	10:07:52	0.562354
2022-09-12	10:07:53	0.56159
2022-09-12	10:07:53	0.492227
2022-09-12	10:07:53	0.497621
2022-09-12	10:07:53	0.496959
2022-09-12	10:07:54	0.472532
2022-09-12	10:07:54	0.508308
2022-09-12	10:07:54	0.894211
2022-09-12	10:07:54	0.905967
2022-09-12	10:07:55	0.61645
2022-09-12	10:07:55	0.590649
2022-09-12	10:07:55	0.482507
2022-09-12	10:07:55	0.454313
2022-09-12	10:07:56	0.345916
2022-09-12	10:07:56	0.402252
2022-09-12	10:07:56	0.233753
2022-09-12	10:07:56	0.28841
2022-09-12	10:07:57	0.306629
2022-09-12	10:07:57	0.294008
2022-09-12	10:07:57	0.242761
2022-09-12	10:07:58	-0.012099
2022-09-12	10:07:58	0.0314633
2022-09-12	10:07:58	0.0257127
2022-09-12	10:07:58	-0.0281804
2022-09-12	10:07:59	-0.0675188
2022-09-12	10:07:59	-0.0749997
2022-09-12	10:07:59	0.330344
2022-09-12	10:07:59	0.488766
2022-09-12	10:08:00	0.229733
2022-09-12	10:08:00	0.360013
2022-09-12	10:08:00	0.357112
2022-09-12	10:08:00	0.347036
2022-09-12	10:08:01	0.285814
2022-09-12	10:08:01	0.469428
2022-09-12	10:08:01	0.662913
2022-09-12	10:08:02	1.0648
2022-09-12	10:08:02	1.45915
2022-09-12	10:08:02	1.98927
2022-09-12	10:08:02	1.31945
2022-09-12	10:08:03	1.14678
2022-09-12	10:08:03	0.943219
2022-09-12	10:08:03	0.569682
2022-09-12	10:08:03	0.356043
2022-09-12	10:08:04	0.375229
2022-09-12	10:08:04	0.33014
2022-09-12	10:08:04	0.346374
2022-09-12	10:08:04	0.364135
2022-09-12	10:08:05	0.384491
2022-09-12	10:08:05	0.481183
2022-09-12	10:08:05	0.517061
2022-09-12	10:08:06	0.725102
2022-09-12	10:08:06	0.981336
2022-09-12	10:08:06	0.895483
2022-09-12	10:08:06	1.81365
2022-09-12	10:08:07	6.09441
2022-09-12	10:08:07	12.5098
2022-09-12	10:08:07	4.97818
2022-09-12	10:08:07	3.96413
2022-09-12	10:08:08	4.80993
2022-09-12	10:08:08	2.40093
2022-09-12	10:08:08	2.41665
2022-09-12	10:08:08	0.791921
2022-09-12	10:08:09	0.648104
2022-09-12	10:08:09	0.465407
2022-09-12	10:08:09	0.976857
2022-09-12	10:08:09	4.36744
2022-09-12	10:08:10	2.13696
2022-09-12	10:08:10	3.34999
2022-09-12	10:08:10	3.74591
2022-09-12	10:08:11	3.60851
2022-09-12	10:08:11	3.60571
2022-09-12	10:08:11	2.31869
2022-09-12	10:08:11	1.93696
2022-09-12	10:08:12	1.77726
2022-09-12	10:08:12	1.44098
2022-09-12	10:08:12	0.915738
2022-09-12	10:08:12	0.396552
2022-09-12	10:08:13	0.40154
2022-09-12	10:08:13	0.391361
2022-09-12	10:08:13	0.372328
2022-09-12	10:08:13	0.273295
2022-09-12	10:08:14	0.347901
2022-09-12	10:08:14	0.316705
2022-09-12	10:08:14	0.367901
2022-09-12	10:08:15	0.29126
2022-09-12	10:08:15	0.359402
2022-09-12	10:08:15	0.154669
2022-09-12	10:08:15	0.230191
2022-09-12	10:08:16	0.435992
2022-09-12	10:08:16	0.179504
2022-09-12	10:08:16	0.409987
2022-09-12	10:08:16	0.232379
2022-09-12	10:08:17	0.384491
2022-09-12	10:08:17	0.28098
2022-09-12	10:08:17	0.378232
2022-09-12	10:08:17	0.179402
2022-09-12	10:08:18	0.401285
2022-09-12	10:08:18	0.230293
2022-09-12	10:08:18	0.375891
2022-09-12	10:08:19	0.24215
2022-09-12	10:08:19	0.38042
2022-09-12	10:08:19	0.313194
2022-09-12	10:08:19	0.321234
2022-09-12	10:08:20	0.371005
2022-09-12	10:08:20	0.372481
2022-09-12	10:08:20	0.586476
2022-09-12	10:08:21	0.383422
2022-09-12	10:08:21	0.500471
2022-09-12	10:08:21	0.61472
2022-09-12	10:08:21	0.397825
2022-09-12	10:08:21	0.333957
2022-09-12	10:08:22	0.42897
2022-09-12	10:08:22	0.311412
2022-09-12	10:08:22	0.37986
2022-09-12	10:08:22	0.427087
2022-09-12	10:08:23	1.1364
2022-09-12	10:08:23	0.308613
2022-09-12	10:08:23	0.482456
2022-09-12	10:08:24	0.202507
2022-09-12	10:08:24	0.35299
2022-09-12	10:08:24	0.328817
2022-09-12	10:08:24	0.325
2022-09-12	10:08:25	0.314109
2022-09-12	10:08:25	0.396654
2022-09-12	10:08:25	0.831514
2022-09-12	10:08:25	2.8223
2022-09-12	10:08:26	0.951361
2022-09-12	10:08:26	2.6277
2022-09-12	10:08:26	0.706272
2022-09-12	10:08:26	1.5793
2022-09-12	10:08:27	1.74062
2022-09-12	10:08:27	0.540216
2022-09-12	10:08:27	3.0621
2022-09-12	10:08:28	0.454059
2022-09-12	10:08:28	0.600064
2022-09-12	10:08:28	0.48215
2022-09-12	10:08:28	0.22902
2022-09-12	10:08:29	2.30347
2022-09-12	10:08:29	0.686272
2022-09-12	10:08:29	2.4733
2022-09-12	10:08:29	2.23849
2022-09-12	10:08:30	0.456909
2022-09-12	10:08:30	1.74795
2022-09-12	10:08:30	0.706527
2022-09-12	10:08:31	0.585967
2022-09-12	10:08:31	2.28856
2022-09-12	10:08:31	0.36327
2022-09-12	10:08:31	0.693295
2022-09-12	10:08:32	2.93843
2022-09-12	10:08:32	0.162048
2022-09-12	10:08:32	0.199962
2022-09-12	10:08:32	0.228003
2022-09-12	10:08:33	0.168359
2022-09-12	10:08:33	0.104848
2022-09-12	10:08:33	0.0374175
2022-09-12	10:08:33	0.0410307
2022-09-12	10:08:34	-0.0533203
2022-09-12	10:08:34	-0.126145
2022-09-12	10:08:34	-0.0840582
2022-09-12	10:08:34	-0.210318
2022-09-12	10:08:35	-0.276425
2022-09-12	10:08:35	-0.0352033
2022-09-12	10:08:35	0.0336516
2022-09-12	10:08:35	-0.0796308
2022-09-12	10:08:36	-0.0256868
2022-09-12	10:08:36	-0.245432
2022-09-12	10:08:36	0.212583
2022-09-12	10:08:37	-0.00497431
2022-09-12	10:08:37	0.132786
2022-09-12	10:08:37	0.19126
2022-09-12	10:08:37	0.395127
2022-09-12	10:08:38	0.483626
2022-09-12	10:08:38	1.2624
2022-09-12	10:08:38	0.887952
2022-09-12	10:08:38	2.18963
2022-09-12	10:08:39	2.56938
2022-09-12	10:08:39	0.853193
2022-09-12	10:08:39	0.506171
2022-09-12	10:08:39	0.525611
2022-09-12	10:08:40	0.400522
2022-09-12	10:08:40	0.371718
2022-09-12	10:08:40	0.298588
2022-09-12	10:08:41	0.296043
2022-09-12	10:08:41	0.28673
2022-09-12	10:08:41	0.307188
2022-09-12	10:08:41	0.299351
2022-09-12	10:08:42	0.300013
2022-09-12	10:08:42	0.316705
2022-09-12	10:08:42	0.342048
2022-09-12	10:08:42	0.348664
2022-09-12	10:08:43	0.33126
2022-09-12	10:08:43	0.300115
2022-09-12	10:08:43	0.293702
2022-09-12	10:08:43	0.271158
2022-09-12	10:08:44	0.249326
2022-09-12	10:08:44	0.247188
2022-09-12	10:08:44	0.250903
2022-09-12	10:08:45	0.244084
2022-09-12	10:08:45	0.241743
2022-09-12	10:08:45	0.259758
2022-09-12	10:08:45	0.296908
2022-09-12	10:08:46	0.313906
2022-09-12	10:08:46	0.35131
2022-09-12	10:08:46	0.599148
2022-09-12	10:08:46	0.491158
2022-09-12	10:08:47	0.706985
2022-09-12	10:08:47	0.604746
2022-09-12	10:08:47	0.439351
2022-09-12	10:08:47	0.46159
2022-09-12	10:08:48	0.619657
2022-09-12	10:08:48	0.279351
2022-09-12	10:08:48	0.726476
2022-09-12	10:08:48	1.51747
2022-09-12	10:08:49	1.40475
2022-09-12	10:08:49	0.355127
2022-09-12	10:08:49	0.675992
2022-09-12	10:08:50	0.394059
2022-09-12	10:08:50	0.719046
2022-09-12	10:08:50	0.95131
2022-09-12	10:08:50	1.69141
2022-09-12	10:08:51	2.04536
2022-09-12	10:08:51	0.589835
2022-09-12	10:08:51	1.5019
2022-09-12	10:08:51	0.910191
2022-09-12	10:08:52	0.86103
2022-09-12	10:08:52	0.471463
2022-09-12	10:08:52	0.921997
2022-09-12	10:08:52	1.00673
2022-09-12	10:08:53	0.579453
2022-09-12	10:08:53	1.19808
2022-09-12	10:08:53	0.599707
2022-09-12	10:08:54	0.488155
2022-09-12	10:08:54	1.08073
2022-09-12	10:08:54	0.428104
2022-09-12	10:08:54	0.582863
2022-09-12	10:08:55	0.575891
2022-09-12	10:08:55	0.460013
2022-09-12	10:08:55	0.420166
2022-09-12	10:08:55	0.412125
2022-09-12	10:08:56	0.389224
2022-09-12	10:08:56	0.607188
2022-09-12	10:08:56	0.669071
2022-09-12	10:08:56	0.487596
2022-09-12	10:08:57	0.585763
2022-09-12	10:08:57	0.489529
2022-09-12	10:08:57	0.894211
2022-09-12	10:08:58	0.887697
2022-09-12	10:08:58	1.18215
2022-09-12	10:08:58	1.16291
2022-09-12	10:08:58	0.951056
2022-09-12	10:08:59	0.605305
2022-09-12	10:08:59	0.492939
2022-09-12	10:08:59	0.467087
2022-09-12	10:08:59	0.396501
2022-09-12	10:09:00	0.325967
2022-09-12	10:09:00	0.213193
2022-09-12	10:09:00	0.305814
2022-09-12	10:09:00	0.218639
2022-09-12	10:09:01	0.135127
2022-09-12	10:09:01	0.248562
2022-09-12	10:09:01	0.112379
2022-09-12	10:09:01	0.229122
2022-09-12	10:09:02	0.262608
2022-09-12	10:09:02	0.854058
2022-09-12	10:09:02	2.27335
2022-09-12	10:09:03	0.47874
2022-09-12	10:09:03	1.6736
2022-09-12	10:09:03	1.70307
2022-09-12	10:09:03	1.07151
2022-09-12	10:09:04	1.39218
2022-09-12	10:09:04	0.712176
2022-09-12	10:09:04	0.751514
2022-09-12	10:09:04	2.05309
2022-09-12	10:09:05	0.411361
2022-09-12	10:09:05	0.394567
2022-09-12	10:09:05	0.796552
2022-09-12	10:09:05	0.505611
2022-09-12	10:09:06	0.350089
2022-09-12	10:09:06	0.358486
2022-09-12	10:09:06	0.398384
2022-09-12	10:09:07	0.373499
2022-09-12	10:09:07	0.249071
2022-09-12	10:09:07	0.386527
2022-09-12	10:09:07	0.328359
2022-09-12	10:09:08	0.2707
2022-09-12	10:09:08	0.177163
2022-09-12	10:09:08	0.373601
2022-09-12	10:09:08	0.256858
2022-09-12	10:09:09	0.383982
2022-09-12	10:09:09	0.15472
2022-09-12	10:09:09	0.358283
2022-09-12	10:09:09	0.205713
2022-09-12	10:09:10	0.331769
2022-09-12	10:09:10	0.193041
2022-09-12	10:09:10	0.391056
2022-09-12	10:09:11	0.276349
2022-09-12	10:09:11	0.424389
2022-09-12	10:09:11	0.184949
2022-09-12	10:09:11	0.346527
2022-09-12	10:09:12	0.27528
2022-09-12	10:09:12	0.388817
2022-09-12	10:09:12	0.272328
2022-09-12	10:09:12	0.41701
2022-09-12	10:09:13	0.39757
2022-09-12	10:09:13	0.586018
2022-09-12	10:09:13	0.307494
2022-09-12	10:09:13	0.416603
2022-09-12	10:09:14	0.487748
2022-09-12	10:09:14	0.466018
2022-09-12	10:09:14	0.475738
2022-09-12	10:09:14	0.375585
2022-09-12	10:09:15	0.406629
2022-09-12	10:09:15	0.600369
2022-09-12	10:09:15	0.730649
2022-09-12	10:09:16	0.871209
2022-09-12	10:09:16	0.747036
2022-09-12	10:09:16	0.395789
2022-09-12	10:09:16	0.480064
2022-09-12	10:09:17	0.381082
2022-09-12	10:09:17	0.409428
2022-09-12	10:09:17	0.376043
2022-09-12	10:09:17	0.28902
2022-09-12	10:09:18	0.356908
2022-09-12	10:09:18	0.205255
2022-09-12	10:09:18	0.344746
2022-09-12	10:09:18	0.282201
2022-09-12	10:09:19	0.311209
2022-09-12	10:09:19	0.402761
2022-09-12	10:09:19	0.535738
2022-09-12	10:09:20	0.800114
2022-09-12	10:09:20	0.581998
2022-09-12	10:09:20	0.790547
2022-09-12	10:09:20	0.515891
2022-09-12	10:09:21	0.52271
2022-09-12	10:09:21	0.506069
2022-09-12	10:09:21	0.509936
2022-09-12	10:09:21	0.482659
2022-09-12	10:09:22	0.474568
2022-09-12	10:09:22	0.449987
2022-09-12	10:09:22	0.434364
2022-09-12	10:09:22	0.396552
2022-09-12	10:09:23	0.367341
2022-09-12	10:09:23	0.293346
2022-09-12	10:09:23	0.344847
2022-09-12	10:09:24	0.385254
2022-09-12	10:09:24	0.381234
2022-09-12	10:09:24	0.354618
2022-09-12	10:09:24	0.368257
2022-09-12	10:09:25	0.428868
2022-09-12	10:09:25	0.686018
2022-09-12	10:09:25	0.531158
2022-09-12	10:09:25	0.315738
2022-09-12	10:09:26	0.315534
2022-09-12	10:09:26	0.320929
2022-09-12	10:09:26	0.397214
2022-09-12	10:09:26	0.369682
2022-09-12	10:09:27	0.230853
2022-09-12	10:09:27	0.3764
2022-09-12	10:09:27	0.317621
2022-09-12	10:09:27	0.476909
2022-09-12	10:09:28	0.158995
2022-09-12	10:09:28	0.38556
2022-09-12	10:09:28	0.248919
2022-09-12	10:09:29	0.360674
2022-09-12	10:09:29	0.339351
2022-09-12	10:09:29	0.403015
2022-09-12	10:09:29	0.899758
2022-09-12	10:09:30	0.334771
2022-09-12	10:09:30	0.349428
2022-09-12	10:09:30	1.2278
2022-09-12	10:09:30	0.490191
2022-09-12	10:09:31	0.431921
2022-09-12	10:09:31	0.374975
2022-09-12	10:09:31	0.309071
2022-09-12	10:09:31	0.451921
2022-09-12	10:09:32	0.355687
2022-09-12	10:09:32	0.573041
2022-09-12	10:09:32	0.305356
2022-09-12	10:09:33	0.561234
2022-09-12	10:09:33	0.311514
2022-09-12	10:09:33	0.523575
2022-09-12	10:09:33	0.334059
2022-09-12	10:09:34	0.4764
2022-09-12	10:09:34	0.361947
2022-09-12	10:09:34	0.48556
2022-09-12	10:09:34	0.644389
2022-09-12	10:09:35	0.315942
2022-09-12	10:09:35	0.427748
2022-09-12	10:09:35	0.674516
2022-09-12	10:09:35	0.507647
2022-09-12	10:09:36	0.444033
2022-09-12	10:09:36	0.635992
2022-09-12	10:09:36	0.356959
2022-09-12	10:09:37	0.463473
2022-09-12	10:09:37	0.311209
2022-09-12	10:09:37	0.638741
2022-09-12	10:09:37	0.381947
2022-09-12	10:09:38	0.572379
2022-09-12	10:09:38	0.326527
2022-09-12	10:09:38	0.280064
2022-09-12	10:09:38	0.477723
2022-09-12	10:09:39	0.385051
2022-09-12	10:09:39	0.441489
2022-09-12	10:09:39	0.341692
2022-09-12	10:09:39	0.395687
2022-09-12	10:09:40	0.274059
2022-09-12	10:09:40	0.538995
2022-09-12	10:09:40	0.204186
2022-09-12	10:09:40	0.570751
2022-09-12	10:09:41	0.294873
2022-09-12	10:09:41	0.29813
2022-09-12	10:09:41	0.206985
2022-09-12	10:09:42	0.255484
2022-09-12	10:09:42	0.257417
2022-09-12	10:09:42	0.253397
2022-09-12	10:09:42	0.290293
2022-09-12	10:09:43	0.345611
2022-09-12	10:09:43	0.672837
2022-09-12	10:09:43	0.300573
2022-09-12	10:09:43	1.36449
2022-09-12	10:09:44	0.241489
2022-09-12	10:09:44	0.352786
2022-09-12	10:09:44	0.396196
2022-09-12	10:09:44	0.417214
2022-09-12	10:09:45	0.272735
2022-09-12	10:09:45	0.275738
2022-09-12	10:09:45	0.242456
2022-09-12	10:09:46	0.332685
2022-09-12	10:09:46	0.124949
2022-09-12	10:09:46	0.307036
2022-09-12	10:09:46	0.140013
2022-09-12	10:09:47	0.380827
2022-09-12	10:09:47	0.115636
2022-09-12	10:09:47	0.433601
2022-09-12	10:09:47	0.206018
2022-09-12	10:09:48	0.190496
2022-09-12	10:09:48	0.168155
2022-09-12	10:09:48	0.285407
2022-09-12	10:09:48	0.292481
2022-09-12	10:09:49	0.371463
2022-09-12	10:09:49	0.377774
2022-09-12	10:09:49	0.253906
2022-09-12	10:09:50	0.629275
2022-09-12	10:09:50	0.308257
2022-09-12	10:09:50	1.2936
2022-09-12	10:09:50	0.318435
2022-09-12	10:09:51	0.376705
2022-09-12	10:09:51	0.330293
2022-09-12	10:09:51	0.433804
2022-09-12	10:09:51	0.745967
2022-09-12	10:09:52	0.381285
2022-09-12	10:09:52	0.297519
2022-09-12	10:09:52	1.03899
2022-09-12	10:09:52	0.184797
2022-09-12	10:09:53	0.72271
2022-09-12	10:09:53	0.289631
2022-09-12	10:09:53	0.397926
2022-09-12	10:09:53	0.594466
2022-09-12	10:09:54	0.628664
2022-09-12	10:09:54	0.534008
2022-09-12	10:09:54	0.284186
2022-09-12	10:09:55	0.296908
2022-09-12	10:09:55	0.524491
2022-09-12	10:09:55	0.470191
2022-09-12	10:09:55	3.23116
2022-09-12	10:09:56	0.453855
2022-09-12	10:09:56	0.637926
2022-09-12	10:09:56	1.10184
2022-09-12	10:09:56	0.525662
2022-09-12	10:09:57	0.506272
2022-09-12	10:09:57	0.398995
2022-09-12	10:09:57	0.244186
2022-09-12	10:09:57	0.569682
2022-09-12	10:09:58	0.217723
2022-09-12	10:09:58	0.491463
2022-09-12	10:09:58	0.198639
2022-09-12	10:09:59	0.573092
2022-09-12	10:09:59	1.00281
2022-09-12	10:09:59	0.382354
2022-09-12	10:09:59	0.270751
2022-09-12	10:10:00	0.459809
2022-09-12	10:10:00	0.337468
2022-09-12	10:10:00	0.595229
2022-09-12	10:10:00	0.269377
2022-09-12	10:10:01	0.357214
2022-09-12	10:10:01	0.261692
2022-09-12	10:10:01	0.383779
2022-09-12	10:10:01	0.243626
2022-09-12	10:10:02	0.384898
2022-09-12	10:10:02	0.157468
2022-09-12	10:10:02	0.36785
2022-09-12	10:10:03	0.213855
2022-09-12	10:10:03	0.431005
2022-09-12	10:10:03	0.142303
2022-09-12	10:10:03	0.346069
2022-09-12	10:10:04	0.203066
2022-09-12	10:10:04	0.404695
2022-09-12	10:10:04	0.16668
2022-09-12	10:10:04	0.408969
2022-09-12	10:10:05	0.185153
2022-09-12	10:10:05	0.430089
2022-09-12	10:10:05	0.108919
2022-09-12	10:10:05	0.40042
2022-09-12	10:10:06	0.165611
2022-09-12	10:10:06	0.353906
2022-09-12	10:10:06	0.169275
2022-09-12	10:10:06	0.298944
2022-09-12	10:10:07	0.233957
2022-09-12	10:10:07	0.271209
2022-09-12	10:10:07	0.276959
2022-09-12	10:10:08	0.22729
2022-09-12	10:10:08	0.321896
2022-09-12	10:10:08	0.258741
2022-09-12	10:10:08	0.436043
2022-09-12	10:10:09	0.200064
2022-09-12	10:10:09	0.525662
2022-09-12	10:10:09	0.400267
2022-09-12	10:10:09	0.430649
2022-09-12	10:10:10	0.182252
2022-09-12	10:10:10	0.339199
2022-09-12	10:10:10	0.302201
2022-09-12	10:10:10	0.500929
2022-09-12	10:10:11	0.304746
2022-09-12	10:10:11	0.34383
2022-09-12	10:10:11	0.396451
2022-09-12	10:10:12	0.318995
2022-09-12	10:10:12	0.409682
2022-09-12	10:10:12	0.191361
2022-09-12	10:10:12	0.421234
2022-09-12	10:10:13	1.32052
2022-09-12	10:10:13	0.820827
2022-09-12	10:10:13	2.50739
2022-09-12	10:10:13	3.64876
2022-09-12	10:10:14	2.52663
2022-09-12	10:10:14	2.7539
2022-09-12	10:10:14	0.829428
2022-09-12	10:10:14	2.86856
2022-09-12	10:10:15	2.79289
2022-09-12	10:10:15	1.02129
2022-09-12	10:10:15	1.98617
2022-09-12	10:10:16	1.11335
2022-09-12	10:10:16	1.46754
2022-09-12	10:10:16	2.95502
2022-09-12	10:10:16	0.488003
2022-09-12	10:10:17	1.12342
2022-09-12	10:10:17	0.349478
2022-09-12	10:10:17	0.434211
2022-09-12	10:10:17	0.362812
2022-09-12	10:10:18	0.284186
2022-09-12	10:10:18	0.193193
2022-09-12	10:10:18	0.543015
2022-09-12	10:10:18	0.501081
2022-09-12	10:10:19	1.02754
2022-09-12	10:10:19	1.09726
2022-09-12	10:10:19	0.286578
2022-09-12	10:10:19	0.389987
2022-09-12	10:10:20	0.141845
2022-09-12	10:10:20	-0.02187
2022-09-12	10:10:20	0.356094
2022-09-12	10:10:21	0.31126
2022-09-12	10:10:21	0.594567
2022-09-12	10:10:21	0.657773
2022-09-12	10:10:21	0.428257
2022-09-12	10:10:22	0.333448
2022-09-12	10:10:22	0.879555
2022-09-12	10:10:22	3.53253
2022-09-12	10:10:22	1.36093
2022-09-12	10:10:23	1.77497
2022-09-12	10:10:23	1.0194
2022-09-12	10:10:23	0.582506
2022-09-12	10:10:23	0.257163
2022-09-12	10:10:24	0.250903
2022-09-12	10:10:24	0.312481
2022-09-12	10:10:24	0.193397
2022-09-12	10:10:25	0.221031
2022-09-12	10:10:25	0.0847967
2022-09-12	10:10:25	0.135535
2022-09-12	10:10:25	0.1307
2022-09-12	10:10:26	0.106272
2022-09-12	10:10:26	0.320318
2022-09-12	10:10:26	0.576603
2022-09-12	10:10:26	0.327952
2022-09-12	10:10:27	0.321641
2022-09-12	10:10:27	0.262048
2022-09-12	10:10:27	0.346985
2022-09-12	10:10:27	0.319911
2022-09-12	10:10:28	0.290293
2022-09-12	10:10:28	0.29355
2022-09-12	10:10:28	0.379657
2022-09-12	10:10:29	0.3707
2022-09-12	10:10:29	0.3164
2022-09-12	10:10:29	0.279199
2022-09-12	10:10:29	0.242354
2022-09-12	10:10:30	0.188664
2022-09-12	10:10:30	0.270954
2022-09-12	10:10:30	0.109529
2022-09-12	10:10:30	-0.0849234
2022-09-12	10:10:31	-0.249351
2022-09-12	10:10:31	-0.318714
2022-09-12	10:10:31	-0.308079
2022-09-12	10:10:31	-0.289147
2022-09-12	10:10:32	-0.334287
2022-09-12	10:10:32	-0.249656
2022-09-12	10:10:32	-0.281005
2022-09-12	10:10:32	-0.353524
2022-09-12	10:10:33	-0.338969
2022-09-12	10:10:33	-0.223346
2022-09-12	10:10:33	-0.222481
2022-09-12	10:10:34	-0.111946
2022-09-12	10:10:34	0.0664252
2022-09-12	10:10:34	-0.128435
2022-09-12	10:10:34	-0.0296054
2022-09-12	10:10:35	-0.00151375
2022-09-12	10:10:35	-0.0261448
2022-09-12	10:10:35	0.0643895
2022-09-12	10:10:35	0.16897
2022-09-12	10:10:36	0.310598
2022-09-12	10:10:36	0.43411
2022-09-12	10:10:36	0.630394
2022-09-12	10:10:36	1.19274
2022-09-12	10:10:37	0.770598
2022-09-12	10:10:37	0.263677
2022-09-12	10:10:37	0.217825
2022-09-12	10:10:38	0.383321
2022-09-12	10:10:38	0.354008
2022-09-12	10:10:38	0.315534
2022-09-12	10:10:38	0.546883
2022-09-12	10:10:39	0.439758
2022-09-12	10:10:39	0.554924
2022-09-12	10:10:39	0.38098
2022-09-12	10:10:39	0.471565
2022-09-12	10:10:40	0.481539
2022-09-12	10:10:40	0.344797
2022-09-12	10:10:40	0.282456
2022-09-12	10:10:40	0.26785
2022-09-12	10:10:41	0.278435
2022-09-12	10:10:41	0.503626
2022-09-12	10:10:41	0.438079
2022-09-12	10:10:42	0.519707
2022-09-12	10:10:42	0.32215
2022-09-12	10:10:42	0.463321
2022-09-12	10:10:42	0.136196
2022-09-12	10:10:43	0.122507
2022-09-12	10:10:43	0.166985
2022-09-12	10:10:43	0.260725
2022-09-12	10:10:43	0.224644
2022-09-12	10:10:44	0.262354
2022-09-12	10:10:44	0.0902928
2022-09-12	10:10:44	0.11126
2022-09-12	10:10:44	0.255026
2022-09-12	10:10:45	0.186934
2022-09-12	10:10:45	0.184288
2022-09-12	10:10:45	0.205051
2022-09-12	10:10:45	0.192685
2022-09-12	10:10:46	0.285153
2022-09-12	10:10:46	0.387239
2022-09-12	10:10:46	0.310751
2022-09-12	10:10:47	0.254211
2022-09-12	10:10:47	0.230903
2022-09-12	10:10:47	0.40556
2022-09-12	10:10:47	0.285305
2022-09-12	10:10:48	0.250954
2022-09-12	10:10:48	0.356247
2022-09-12	10:10:48	0.657723
2022-09-12	10:10:48	0.43014
2022-09-12	10:10:49	0.214568
2022-09-12	10:10:49	0.24444
2022-09-12	10:10:49	0.314771
2022-09-12	10:10:49	0.274262
2022-09-12	10:10:50	0.285713
2022-09-12	10:10:50	0.214669
2022-09-12	10:10:50	0.264237
2022-09-12	10:10:51	0.383422
2022-09-12	10:10:51	0.323473
2022-09-12	10:10:51	0.323219
2022-09-12	10:10:51	0.335535
2022-09-12	10:10:52	0.341947
2022-09-12	10:10:52	0.334364
2022-09-12	10:10:52	0.345865
2022-09-12	10:10:52	0.337214
2022-09-12	10:10:53	0.332532
2022-09-12	10:10:53	0.329122
2022-09-12	10:10:53	0.323117
2022-09-12	10:10:53	0.327697
2022-09-12	10:10:54	0.329835
2022-09-12	10:10:54	0.331005
2022-09-12	10:10:54	0.334924
2022-09-12	10:10:55	0.332786
2022-09-12	10:10:55	0.335127
2022-09-12	10:10:55	0.334313
2022-09-12	10:10:55	0.334669
2022-09-12	10:10:56	0.332328
2022-09-12	10:10:56	0.339809
2022-09-12	10:10:56	0.335433
2022-09-12	10:10:56	0.309224
2022-09-12	10:10:57	0.324084
2022-09-12	10:10:57	0.349886
2022-09-12	10:10:57	0.34673
2022-09-12	10:10:57	0.333499
2022-09-12	10:10:58	0.32215
2022-09-12	10:10:58	0.307494
2022-09-12	10:10:58	0.404644
2022-09-12	10:10:58	0.446527
2022-09-12	10:10:59	0.476959
2022-09-12	10:10:59	0.435382
2022-09-12	10:10:59	0.426934
2022-09-12	10:11:00	0.373906
2022-09-12	10:11:00	0.422456
2022-09-12	10:11:00	0.369428
2022-09-12	10:11:00	0.413244
2022-09-12	10:11:01	0.446221
2022-09-12	10:11:01	0.310598
2022-09-12	10:11:01	0.188105
2022-09-12	10:11:01	0.319148
2022-09-12	10:11:02	0.402964
2022-09-12	10:11:02	0.489173
2022-09-12	10:11:02	0.438537
2022-09-12	10:11:02	2.0395
2022-09-12	10:11:03	1.33355
2022-09-12	10:11:03	1.18078
2022-09-12	10:11:03	2.27019
2022-09-12	10:11:04	2.0649
2022-09-12	10:11:04	2.70479
2022-09-12	10:11:04	0.553702
2022-09-12	10:11:04	1.28531
2022-09-12	10:11:05	2.75848
2022-09-12	10:11:05	0.483422
2022-09-12	10:11:05	0.397926
2022-09-12	10:11:05	0.943015
2022-09-12	10:11:06	0.357112
2022-09-12	10:11:06	1.44541
2022-09-12	10:11:06	0.379911
2022-09-12	10:11:06	1.15889
2022-09-12	10:11:07	2.66149
2022-09-12	10:11:07	0.360216
2022-09-12	10:11:07	1.13314
2022-09-12	10:11:08	0.656145
2022-09-12	10:11:08	0.892278
2022-09-12	10:11:08	1.99136
2022-09-12	10:11:08	0.309122
2022-09-12	10:11:09	0.392481
2022-09-12	10:11:09	0.300369
2022-09-12	10:11:09	0.287087
2022-09-12	10:11:09	0.595076
2022-09-12	10:11:10	0.327901
2022-09-12	10:11:10	0.337468
2022-09-12	10:11:10	0.242456
2022-09-12	10:11:10	0.306985
2022-09-12	10:11:11	0.437672
2022-09-12	10:11:11	0.264237
2022-09-12	10:11:11	0.285356
2022-09-12	10:11:11	0.238893
2022-09-12	10:11:12	0.349886
2022-09-12	10:11:12	0.308919
2022-09-12	10:11:12	0.175891
2022-09-12	10:11:13	0.339351
2022-09-12	10:11:13	0.365967
2022-09-12	10:11:13	0.34215
2022-09-12	10:11:13	0.240878
2022-09-12	10:11:14	0.339249
2022-09-12	10:11:14	0.32444
2022-09-12	10:11:14	0.620216
2022-09-12	10:11:14	0.220623
2022-09-12	10:11:15	0.450802
2022-09-12	10:11:15	0.473397
2022-09-12	10:11:15	0.412074
2022-09-12	10:11:15	0.251921
2022-09-12	10:11:16	0.351056
2022-09-12	10:11:16	0.168308
2022-09-12	10:11:16	0.371463
2022-09-12	10:11:17	0.15299
2022-09-12	10:11:17	0.38785
2022-09-12	10:11:17	0.200318
2022-09-12	10:11:17	0.267392
2022-09-12	10:11:18	0.30388
2022-09-12	10:11:18	0.206018
2022-09-12	10:11:18	0.345967
2022-09-12	10:11:18	0.239351
2022-09-12	10:11:19	0.415942
2022-09-12	10:11:19	0.206171
2022-09-12	10:11:19	0.335484
2022-09-12	10:11:19	0.213295
2022-09-12	10:11:20	0.219555
2022-09-12	10:11:20	0.298181
2022-09-12	10:11:20	0.146781
2022-09-12	10:11:21	0.316603
2022-09-12	10:11:21	0.218181
2022-09-12	10:11:21	0.230344
2022-09-12	10:11:21	0.300878
2022-09-12	10:11:22	0.196705
2022-09-12	10:11:22	0.226832
2022-09-12	10:11:22	0.286171
2022-09-12	10:11:22	0.356349
2022-09-12	10:11:23	0.549122
2022-09-12	10:11:23	1.78439
2022-09-12	10:11:23	0.328868
2022-09-12	10:11:23	0.371972
2022-09-12	10:11:24	1.77182
2022-09-12	10:11:24	0.318791
2022-09-12	10:11:24	0.208664
2022-09-12	10:11:24	0.698384
2022-09-12	10:11:25	0.400776
2022-09-12	10:11:25	0.429529
2022-09-12	10:11:25	0.955738
2022-09-12	10:11:26	0.674567
2022-09-12	10:11:26	0.27757
2022-09-12	10:11:26	1.48704
2022-09-12	10:11:26	0.495127
2022-09-12	10:11:27	0.990191
2022-09-12	10:11:27	2.12765
2022-09-12	10:11:27	0.353753
2022-09-12	10:11:27	2.06709
2022-09-12	10:11:28	0.200929
2022-09-12	10:11:28	0.128359
2022-09-12	10:11:28	0.381998
2022-09-12	10:11:28	0.129122
2022-09-12	10:11:29	0.321082
2022-09-12	10:11:29	0.146629
2022-09-12	10:11:29	0.257316
2022-09-12	10:11:30	0.117163
2022-09-12	10:11:30	0.0844913
2022-09-12	10:11:30	0.178028
2022-09-12	10:11:30	0.448461
2022-09-12	10:11:31	0.153753
2022-09-12	10:11:31	0.186171
2022-09-12	10:11:31	0.342099
2022-09-12	10:11:31	0.249682
2022-09-12	10:11:32	0.739606
2022-09-12	10:11:32	0.147392
2022-09-12	10:11:32	0.441489
2022-09-12	10:11:32	0.513448
2022-09-12	10:11:33	0.429987
2022-09-12	10:11:33	0.326069
2022-09-12	10:11:33	0.319911
2022-09-12	10:11:34	0.341845
2022-09-12	10:11:34	0.335178
2022-09-12	10:11:34	0.349733
2022-09-12	10:11:34	0.25014
2022-09-12	10:11:35	0.307137
2022-09-12	10:11:35	0.224084
2022-09-12	10:11:35	0.280827
2022-09-12	10:11:35	0.205967
2022-09-12	10:11:36	0.345763
2022-09-12	10:11:36	0.294567
2022-09-12	10:11:36	0.310344
2022-09-12	10:11:36	0.172379
2022-09-12	10:11:37	0.261081
2022-09-12	10:11:37	0.166832
2022-09-12	10:11:37	0.234313
2022-09-12	10:11:37	0.104339
2022-09-12	10:11:38	0.188664
2022-09-12	10:11:38	0.170547
2022-09-12	10:11:38	0.0635753
2022-09-12	10:11:39	0.14098
2022-09-12	10:11:39	0.113194
2022-09-12	10:11:39	0.102507
2022-09-12	10:11:39	0.0298348
2022-09-12	10:11:40	0.166272
2022-09-12	10:11:40	0.0814888
2022-09-12	10:11:40	0.201998
2022-09-12	10:11:40	0.0665269
2022-09-12	10:11:41	0.237265
2022-09-12	10:11:41	0.150038
2022-09-12	10:11:41	0.188512
2022-09-12	10:11:41	0.124491
2022-09-12	10:11:42	0.172735
2022-09-12	10:11:42	0.194262
2022-09-12	10:11:42	0.119962
2022-09-12	10:11:43	0.189631
2022-09-12	10:11:43	0.132532
2022-09-12	10:11:43	0.286578
2022-09-12	10:11:43	0.169428
2022-09-12	10:11:44	0.208308
2022-09-12	10:11:44	0.0917687
2022-09-12	10:11:44	0.182456
2022-09-12	10:11:44	0.0505982
2022-09-12	10:11:45	0.177417
2022-09-12	10:11:45	0.0508527
2022-09-12	10:11:45	0.107443
2022-09-12	10:11:45	0.146934
2022-09-12	10:11:46	0.0521249
2022-09-12	10:11:46	0.11299
2022-09-12	10:11:46	0.0108018
2022-09-12	10:11:47	0.223982
2022-09-12	10:11:47	0.508104
2022-09-12	10:11:47	0.243982
2022-09-12	10:11:47	0.725712
2022-09-12	10:11:48	0.282048
2022-09-12	10:11:48	0.286883
2022-09-12	10:11:48	1.91533
2022-09-12	10:11:48	0.203626
2022-09-12	10:11:49	0.494466
2022-09-12	10:11:49	0.404033
2022-09-12	10:11:49	0.546069
2022-09-12	10:11:49	1.70846
2022-09-12	10:11:50	0.291107
2022-09-12	10:11:50	0.386069
2022-09-12	10:11:50	0.644542
2022-09-12	10:11:50	0.280318
2022-09-12	10:11:51	0.523473
2022-09-12	10:11:51	0.332278
2022-09-12	10:11:51	0.207137
2022-09-12	10:11:52	1.85411
2022-09-12	10:11:52	0.228155
2022-09-12	10:11:52	0.357519
2022-09-12	10:11:52	1.32271
2022-09-12	10:11:53	0.289326
2022-09-12	10:11:53	0.3993
2022-09-12	10:11:53	0.447697
2022-09-12	10:11:53	0.195534
2022-09-12	10:11:54	0.363524
2022-09-12	10:11:54	0.22271
2022-09-12	10:11:54	0.221641
2022-09-12	10:11:54	0.281234
2022-09-12	10:11:55	0.164186
2022-09-12	10:11:55	0.167036
2022-09-12	10:11:55	0.0997585
2022-09-12	10:11:56	0.176959
2022-09-12	10:11:56	0.0819468
2022-09-12	10:11:56	0.107748
2022-09-12	10:11:56	0.0448475
2022-09-12	10:11:57	0.15869
2022-09-12	10:11:57	0.056756
2022-09-12	10:11:57	0.158334
2022-09-12	10:11:57	0.185
2022-09-12	10:11:58	0.0828628
2022-09-12	10:11:58	0.193804
2022-09-12	10:11:58	0.155993
2022-09-12	10:11:58	0.135229
2022-09-12	10:11:59	0.03813
2022-09-12	10:11:59	0.283372
2022-09-12	10:11:59	0.125204
2022-09-12	10:12:00	0.163779
2022-09-12	10:12:00	0.0597076
2022-09-12	10:12:00	0.0361961
2022-09-12	10:12:00	0.162812
2022-09-12	10:12:01	0.0489188
2022-09-12	10:12:01	0.216145
2022-09-12	10:12:01	0.0809798
2022-09-12	10:12:01	0.300318
2022-09-12	10:12:02	0.180216
2022-09-12	10:12:02	0.459249
2022-09-12	10:12:02	0.318741
2022-09-12	10:12:02	0.321743
2022-09-12	10:12:03	0.518588
2022-09-12	10:12:03	0.691259
2022-09-12	10:12:03	0.430038
2022-09-12	10:12:03	0.686272
2022-09-12	10:12:04	0.535229
2022-09-12	10:12:04	0.361082
2022-09-12	10:12:04	0.413702
2022-09-12	10:12:05	0.502405
2022-09-12	10:12:05	0.259708
2022-09-12	10:12:05	0.319249
2022-09-12	10:12:05	0.288613
2022-09-12	10:12:06	0.128206
2022-09-12	10:12:06	0.171514
2022-09-12	10:12:06	0.107952
2022-09-12	10:12:06	0.163982
2022-09-12	10:12:07	0.134771
2022-09-12	10:12:07	0.224288
2022-09-12	10:12:07	0.222914
2022-09-12	10:12:07	0.217621
2022-09-12	10:12:08	0.202507
2022-09-12	10:12:08	0.271514
2022-09-12	10:12:08	0.326527
2022-09-12	10:12:09	0.277316
2022-09-12	10:12:09	0.250751
2022-09-12	10:12:09	0.279911
2022-09-12	10:12:09	0.300878
2022-09-12	10:12:10	0.375992
2022-09-12	10:12:10	0.416756
2022-09-12	10:12:10	0.412735
2022-09-12	10:12:10	0.401794
2022-09-12	10:12:11	0.287087
2022-09-12	10:12:11	0.12841
2022-09-12	10:12:11	0.290191
2022-09-12	10:12:11	0.355789
2022-09-12	10:12:12	0.406374
2022-09-12	10:12:12	0.320318
2022-09-12	10:12:12	0.396552
2022-09-12	10:12:13	0.329428
2022-09-12	10:12:13	0.329021
2022-09-12	10:12:13	0.388206
2022-09-12	10:12:13	0.325051
2022-09-12	10:12:14	0.35757
2022-09-12	10:12:14	0.470038
2022-09-12	10:12:14	0.426374
2022-09-12	10:12:14	0.386374
2022-09-12	10:12:15	0.421234
2022-09-12	10:12:15	0.407087
2022-09-12	10:12:15	0.428155
2022-09-12	10:12:15	0.37645
2022-09-12	10:12:16	0.367392
2022-09-12	10:12:16	0.410038
2022-09-12	10:12:16	0.382761
2022-09-12	10:12:16	0.371616
2022-09-12	10:12:17	0.386171
2022-09-12	10:12:17	0.379199
2022-09-12	10:12:17	0.412074
2022-09-12	10:12:18	0.490394
2022-09-12	10:12:18	0.472176
2022-09-12	10:12:18	0.392328
2022-09-12	10:12:18	0.580013
2022-09-12	10:12:19	0.419657
2022-09-12	10:12:19	0.308257
2022-09-12	10:12:19	0.390598
2022-09-12	10:12:19	0.489377
2022-09-12	10:12:20	0.547137
2022-09-12	10:12:20	0.757061
2022-09-12	10:12:20	0.400878
2022-09-12	10:12:20	0.391819
2022-09-12	10:12:21	0.408613
2022-09-12	10:12:21	0.308104
2022-09-12	10:12:21	0.292481
2022-09-12	10:12:22	0.366323
2022-09-12	10:12:22	0.35131
2022-09-12	10:12:22	0.38612
2022-09-12	10:12:22	0.424135
2022-09-12	10:12:23	0.253855
2022-09-12	10:12:23	0.224644
2022-09-12	10:12:23	0.274771
2022-09-12	10:12:23	0.261947
2022-09-12	10:12:24	0.269784
2022-09-12	10:12:24	0.282964
2022-09-12	10:12:24	0.202456
2022-09-12	10:12:24	0.26327
2022-09-12	10:12:25	0.306323
2022-09-12	10:12:25	0.268104
2022-09-12	10:12:25	0.358181
2022-09-12	10:12:26	0.2964
2022-09-12	10:12:26	0.300929
2022-09-12	10:12:26	0.313143
2022-09-12	10:12:26	0.25014
2022-09-12	10:12:27	0.318181
2022-09-12	10:12:27	0.236247
2022-09-12	10:12:27	0.212379
2022-09-12	10:12:27	0.281489
2022-09-12	10:12:28	0.216247
2022-09-12	10:12:28	0.33869
2022-09-12	10:12:28	0.232786
2022-09-12	10:12:28	0.258028
2022-09-12	10:12:29	0.305051
2022-09-12	10:12:29	0.201845
2022-09-12	10:12:29	0.380471
2022-09-12	10:12:29	0.154364
2022-09-12	10:12:30	0.381234
2022-09-12	10:12:30	0.246781
2022-09-12	10:12:30	0.315891
2022-09-12	10:12:31	0.244186
2022-09-12	10:12:31	0.22556
2022-09-12	10:12:31	0.284542
2022-09-12	10:12:31	0.23472
2022-09-12	10:12:32	0.380471
2022-09-12	10:12:32	0.178181
2022-09-12	10:12:32	0.396349
2022-09-12	10:12:32	0.264695
2022-09-12	10:12:33	0.306527
2022-09-12	10:12:33	0.28271
2022-09-12	10:12:33	0.265611
2022-09-12	10:12:33	0.309937
2022-09-12	10:12:34	0.246018
2022-09-12	10:12:34	0.409987
2022-09-12	10:12:34	0.221438
2022-09-12	10:12:35	0.270598
2022-09-12	10:12:35	0.245051
2022-09-12	10:12:35	0.30159
2022-09-12	10:12:35	0.23416
2022-09-12	10:12:36	0.187188
2022-09-12	10:12:36	0.346629
2022-09-12	10:12:36	0.193753
2022-09-12	10:12:36	0.31645
2022-09-12	10:12:37	0.205407
2022-09-12	10:12:37	0.229428
2022-09-12	10:12:37	0.215992
2022-09-12	10:12:37	0.170802
2022-09-12	10:12:38	0.280725
2022-09-12	10:12:38	0.152278
2022-09-12	10:12:38	0.354313
2022-09-12	10:12:39	0.15528
2022-09-12	10:12:39	0.217316
2022-09-12	10:12:39	0.191311
2022-09-12	10:12:39	0.145814
2022-09-12	10:12:40	0.169478
2022-09-12	10:12:40	-0.00614479
2022-09-12	10:12:40	0.0853056
2022-09-12	10:12:40	0.00754479
