# Supplementary material for: Comparing efficacy in reducing pulling and welfare impacts of four types of leash walking equipment
Source: PeerJ journal article supplement (doi:10.7717/peerj.18131), 2024-10-24
Supplement: Shelter1_Tension_files.zip [file Royal_martin_20229129143 copy.xlsx]

## Sheet: Averaged newtons
Date	Time	Averaged Newtons	Impulse	total steps
2022-09-12	09:14:12	1.97928	1.97928	0			Impulse	3881.98
2022-09-12	09:14:13	2.32105	4.30033	0			Total steps	94
2022-09-12	09:14:14	36.94	41.2403	1			# > 5sec	6
2022-09-12	09:14:15	48.865	90.1054	2
2022-09-12	09:14:16	69.6154	159.721	3
2022-09-12	09:14:17	26.5088	186.23	4
2022-09-12	09:14:18	30.7198	216.949	5
2022-09-12	09:14:19	42.4328	259.382	6
2022-09-12	09:14:20	66.1491	325.531	7
2022-09-12	09:14:21	41.3838	366.915	8
2022-09-12	09:14:22	53.3375	420.253	9
2022-09-12	09:14:23	76.6311	496.884	10
2022-09-12	09:14:24	49.1594	546.043	11
2022-09-12	09:14:25	15.0974	561.141	12
2022-09-12	09:14:26	37.6548	598.795	13
2022-09-12	09:14:27	11.4662	610.262	13
2022-09-12	09:14:28	42.7757	653.037	14
2022-09-12	09:14:29	18.7892	671.826	15
2022-09-12	09:14:30	29.3227	701.149	16
2022-09-12	09:14:31	19.6331	720.782	17
2022-09-12	09:14:32	16.0602	736.842	18
2022-09-12	09:14:33	0.861627	737.704	18
2022-09-12	09:14:34	4.10409	741.808	18
2022-09-12	09:14:35	59.3388	801.147	19
2022-09-12	09:14:36	79.3321	880.479	20
2022-09-12	09:14:37	86.5228	967.002	21
2022-09-12	09:14:38	98.7818	1065.78	22
2022-09-12	09:14:39	57.9515	1123.74	23
2022-09-12	09:14:40	36.0335	1159.77	24
2022-09-12	09:14:41	12.9499	1172.72	24
2022-09-12	09:14:42	29.9012	1202.62	25
2022-09-12	09:14:43	50.5853	1253.2	26
2022-09-12	09:14:44	11.728	1264.93	26
2022-09-12	09:14:45	4.80604	1269.74	26
2022-09-12	09:14:46	1.23667	1270.98	26
2022-09-12	09:14:47	0.30498	1271.28	26
2022-09-12	09:14:48	-0.408712	1271.28	26
2022-09-12	09:14:49	-0.0178256	1271.28	26
2022-09-12	09:14:50	2.48442	1273.77	26
2022-09-12	09:14:51	16.6546	1290.42	27
2022-09-12	09:14:52	74.4147	1364.83	28
2022-09-12	09:14:53	35.3937	1400.23	29
2022-09-12	09:14:54	1.42676	1401.65	29
2022-09-12	09:14:55	8.25255	1409.91	29
2022-09-12	09:14:56	16.4354	1426.34	30
2022-09-12	09:14:57	43.7947	1470.14	31
2022-09-12	09:14:58	16.9714	1487.11	32
2022-09-12	09:14:59	18.6522	1505.76	33
2022-09-12	09:15:00	24.5693	1530.33	34
2022-09-12	09:15:01	34.4338	1564.76	35
2022-09-12	09:15:02	66.7953	1631.56	36
2022-09-12	09:15:03	44.3601	1675.92	37
2022-09-12	09:15:04	14.2803	1690.2	38
2022-09-12	09:15:05	0.885395	1691.09	38
2022-09-12	09:15:06	1.34137	1692.43	38
2022-09-12	09:15:07	1.1687	1693.6	38
2022-09-12	09:15:08	21.6014	1715.2	39
2022-09-12	09:15:09	30.8777	1746.07	40
2022-09-12	09:15:10	55.622	1801.7	41
2022-09-12	09:15:11	18.3428	1820.04	42
2022-09-12	09:15:12	32.1178	1852.16	43
2022-09-12	09:15:13	33.3039	1885.46	44
2022-09-12	09:15:14	38.0009	1923.46	45
2022-09-12	09:15:15	32.0729	1955.53	46
2022-09-12	09:15:16	26.1395	1981.67	47
2022-09-12	09:15:17	41.9713	2023.65	48
2022-09-12	09:15:18	39.3687	2063.01	49
2022-09-12	09:15:19	23.7522	2086.77	50
2022-09-12	09:15:20	16.4675	2103.23	51
2022-09-12	09:15:21	3.27509	2106.51	51
2022-09-12	09:15:22	1.03203	2107.54	51
2022-09-12	09:15:23	1.44717	2108.99	51
2022-09-12	09:15:24	3.02257	2112.01	51
2022-09-12	09:15:25	3.74192	2115.75	51
2022-09-12	09:15:26	2.97876	2118.73	51
2022-09-12	09:15:27	3.30474	2122.04	51
2022-09-12	09:15:28	1.76545	2123.8	51
2022-09-12	09:15:29	1.54153	2125.34	51
2022-09-12	09:15:30	1.19513	2126.54	51
2022-09-12	09:15:31	0.963607	2127.5	51
2022-09-12	09:15:32	3.20895	2130.71	51
2022-09-12	09:15:33	7.57824	2138.29	51
2022-09-12	09:15:34	3.73767	2142.03	51
2022-09-12	09:15:35	1.17215	2143.2	51
2022-09-12	09:15:36	14.2937	2157.49	52
2022-09-12	09:15:37	11.5756	2169.07	52
2022-09-12	09:15:38	5.16099	2174.23	52
2022-09-12	09:15:39	1.43101	2175.66	52
2022-09-12	09:15:40	1.07781	2176.74	52
2022-09-12	09:15:41	0.836953	2177.57	52
2022-09-12	09:15:42	1.20441	2178.78	52
2022-09-12	09:15:43	1.82025	2180.6	52
2022-09-12	09:15:44	1.07153	2181.67	52
2022-09-12	09:15:45	1.15093	2182.82	52
2022-09-12	09:15:46	2.63788	2185.46	52
2022-09-12	09:15:47	2.82014	2188.28	52
2022-09-12	09:15:48	2.65432	2190.93	52
2022-09-12	09:15:49	18.1575	2209.09	53
2022-09-12	09:15:50	5.43795	2214.53	53
2022-09-12	09:15:51	4.80314	2219.33	53
2022-09-12	09:15:52	2.43513	2221.77	53
2022-09-12	09:15:53	11.4063	2233.17	53
2022-09-12	09:15:54	11.4527	2244.63	53
2022-09-12	09:15:55	9.10011	2253.73	53
2022-09-12	09:15:56	2.54459	2256.27	53
2022-09-12	09:15:57	1.71907	2257.99	53
2022-09-12	09:15:58	3.21968	2261.21	53
2022-09-12	09:15:59	4.11232	2265.32	53
2022-09-12	09:16:00	2.48301	2267.81	53
2022-09-12	09:16:01	1.06666	2268.87	53
2022-09-12	09:16:02	1.82552	2270.7	53
2022-09-12	09:16:03	1.19852	2271.9	53
2022-09-12	09:16:04	1.22631	2273.12	53
2022-09-12	09:16:05	2.53021	2275.65	53
2022-09-12	09:16:06	7.16981	2282.82	53
2022-09-12	09:16:07	5.83749	2288.66	53
2022-09-12	09:16:08	4.01604	2292.68	53
2022-09-12	09:16:09	5.62046	2298.3	53
2022-09-12	09:16:10	3.52749	2301.82	53
2022-09-12	09:16:11	2.69569	2304.52	53
2022-09-12	09:16:12	4.69432	2309.21	53
2022-09-12	09:16:13	6.97094	2316.19	53
2022-09-12	09:16:14	15.5286	2331.71	54
2022-09-12	09:16:15	5.81022	2337.52	54
2022-09-12	09:16:16	2.82404	2340.35	54
2022-09-12	09:16:17	1.64012	2341.99	54
2022-09-12	09:16:18	2.03067	2344.02	54
2022-09-12	09:16:19	3.01216	2347.03	54
2022-09-12	09:16:20	2.66801	2349.7	54
2022-09-12	09:16:21	1.98426	2351.68	54
2022-09-12	09:16:22	4.12779	2355.81	54
2022-09-12	09:16:23	10.5288	2366.34	54
2022-09-12	09:16:24	10.9415	2377.28	54
2022-09-12	09:16:25	10.6142	2387.9	54
2022-09-12	09:16:26	11.7342	2399.63	54
2022-09-12	09:16:27	14.526	2414.16	55
2022-09-12	09:16:28	14.537	2428.69	56
2022-09-12	09:16:29	29.1214	2457.81	57
2022-09-12	09:16:30	31.9955	2489.81	58
2022-09-12	09:16:31	8.06658	2497.88	58
2022-09-12	09:16:32	1.28953	2499.17	58
2022-09-12	09:16:33	-0.351611	2499.17	58
2022-09-12	09:16:34	-0.355741	2499.17	58
2022-09-12	09:16:35	0.431671	2499.6	58
2022-09-12	09:16:36	9.51405	2509.11	58
2022-09-12	09:16:37	8.46052	2517.57	58
2022-09-12	09:16:38	1.40662	2518.98	58
2022-09-12	09:16:39	0.456574	2519.44	58
2022-09-12	09:16:40	0.388681	2519.82	58
2022-09-12	09:16:41	0.0233174	2519.85	58
2022-09-12	09:16:42	0.517033	2520.36	58
2022-09-12	09:16:43	3.43191	2523.8	58
2022-09-12	09:16:44	13.496	2537.29	59
2022-09-12	09:16:45	23.7911	2561.08	60
2022-09-12	09:16:46	17.7069	2578.79	61
2022-09-12	09:16:47	12.4417	2591.23	61
2022-09-12	09:16:48	1.36406	2592.6	61
2022-09-12	09:16:49	2.37847	2594.97	61
2022-09-12	09:16:50	5.67976	2600.65	61
2022-09-12	09:16:51	6.49148	2607.15	61
2022-09-12	09:16:52	17.2898	2624.44	62
2022-09-12	09:16:53	4.25034	2628.69	62
2022-09-12	09:16:54	8.99764	2637.68	62
2022-09-12	09:16:55	13.2718	2650.96	63
2022-09-12	09:16:56	16.9295	2667.89	64
2022-09-12	09:16:57	14.2355	2682.12	65
2022-09-12	09:16:58	9.68438	2691.8	65
2022-09-12	09:16:59	5.38679	2697.19	65
2022-09-12	09:17:00	6.67258	2703.86	65
2022-09-12	09:17:01	1.18426	2705.05	65
2022-09-12	09:17:02	0.647631	2705.7	65
2022-09-12	09:17:03	-0.481774	2705.7	65
2022-09-12	09:17:04	-1.46381	2705.7	65
2022-09-12	09:17:05	0.147743	2705.84	65
2022-09-12	09:17:06	2.66134	2708.51	65
2022-09-12	09:17:07	14.2396	2722.74	66
2022-09-12	09:17:08	3.92324	2726.67	66
2022-09-12	09:17:09	1.44278	2728.11	66
2022-09-12	09:17:10	1.13723	2729.25	66
2022-09-12	09:17:11	33.1257	2762.37	67
2022-09-12	09:17:12	42.1571	2804.53	68
2022-09-12	09:17:13	19.3871	2823.92	69
2022-09-12	09:17:14	33.6251	2857.54	70
2022-09-12	09:17:15	36.4636	2894.01	71
2022-09-12	09:17:16	30.6583	2924.67	72
2022-09-12	09:17:17	6.14015	2930.81	72
2022-09-12	09:17:18	9.03776	2939.84	72
2022-09-12	09:17:19	2.06558	2941.91	72
2022-09-12	09:17:20	4.21985	2946.13	72
2022-09-12	09:17:21	3.9658	2950.09	72
2022-09-12	09:17:22	7.97512	2958.07	72
2022-09-12	09:17:23	3.68436	2961.75	72
2022-09-12	09:17:24	1.87154	2963.63	72
2022-09-12	09:17:25	1.55631	2965.18	72
2022-09-12	09:17:26	6.1615	2971.34	72
2022-09-12	09:17:27	1.68177	2973.02	72
2022-09-12	09:17:28	1.04295	2974.07	72
2022-09-12	09:17:29	0.960853	2975.03	72
2022-09-12	09:17:30	0.912108	2975.94	72
2022-09-12	09:17:31	1.08817	2977.03	72
2022-09-12	09:17:32	1.47351	2978.5	72
2022-09-12	09:17:33	1.29994	2979.8	72
2022-09-12	09:17:34	1.57998	2981.38	72
2022-09-12	09:17:35	1.2125	2982.59	72
2022-09-12	09:17:36	3.13105	2985.73	72
2022-09-12	09:17:37	3.09025	2988.82	72
2022-09-12	09:17:38	8.07639	2996.89	72
2022-09-12	09:17:39	10.0861	3006.98	72
2022-09-12	09:17:40	9.30348	3016.28	72
2022-09-12	09:17:41	2.69563	3018.98	72
2022-09-12	09:17:42	3.03117	3022.01	72
2022-09-12	09:17:43	6.51163	3028.52	72
2022-09-12	09:17:44	2.08534	3030.61	72
2022-09-12	09:17:45	1.33486	3031.94	72
2022-09-12	09:17:46	1.14561	3033.09	72
2022-09-12	09:17:47	1.1627	3034.25	72
2022-09-12	09:17:48	1.30124	3035.55	72
2022-09-12	09:17:49	1.26078	3036.81	72
2022-09-12	09:17:50	1.17572	3037.99	72
2022-09-12	09:17:51	1.14927	3039.14	72
2022-09-12	09:17:52	1.40724	3040.54	72
2022-09-12	09:17:53	1.83163	3042.37	72
2022-09-12	09:17:54	1.58517	3043.96	72
2022-09-12	09:17:55	1.2567	3045.22	72
2022-09-12	09:17:56	1.29566	3046.51	72
2022-09-12	09:17:57	1.32184	3047.83	72
2022-09-12	09:17:58	2.17583	3050.01	72
2022-09-12	09:17:59	4.10831	3054.12	72
2022-09-12	09:18:00	8.25137	3062.37	72
2022-09-12	09:18:01	15.6412	3078.01	73
2022-09-12	09:18:02	11.3756	3089.39	73
2022-09-12	09:18:03	2.52868	3091.92	73
2022-09-12	09:18:04	1.52189	3093.44	73
2022-09-12	09:18:05	1.50845	3094.95	73
2022-09-12	09:18:06	1.79026	3096.74	73
2022-09-12	09:18:07	3.3241	3100.06	73
2022-09-12	09:18:08	10.3608	3110.42	73
2022-09-12	09:18:09	8.25899	3118.68	73
2022-09-12	09:18:10	2.10497	3120.78	73
2022-09-12	09:18:11	0.986075	3121.77	73
2022-09-12	09:18:12	0.922409	3122.69	73
2022-09-12	09:18:13	0.765476	3123.46	73
2022-09-12	09:18:14	-0.0780407	3123.46	73
2022-09-12	09:18:15	1.37374	3124.83	73
2022-09-12	09:18:16	7.41423	3132.25	73
2022-09-12	09:18:17	10.3216	3142.57	73
2022-09-12	09:18:18	6.67756	3149.25	73
2022-09-12	09:18:19	1.6224	3150.87	73
2022-09-12	09:18:20	1.42563	3152.29	73
2022-09-12	09:18:21	4.57298	3156.87	73
2022-09-12	09:18:22	1.76762	3158.63	73
2022-09-12	09:18:23	2.66649	3161.3	73
2022-09-12	09:18:24	1.98765	3163.29	73
2022-09-12	09:18:25	1.56298	3164.85	73
2022-09-12	09:18:26	1.33854	3166.19	73
2022-09-12	09:18:27	1.35663	3167.55	73
2022-09-12	09:18:28	1.84861	3169.4	73
2022-09-12	09:18:29	3.02161	3172.42	73
2022-09-12	09:18:30	8.13778	3180.55	73
2022-09-12	09:18:31	1.60792	3182.16	73
2022-09-12	09:18:32	2.19797	3184.36	73
2022-09-12	09:18:33	25.4288	3209.79	74
2022-09-12	09:18:34	7.81797	3217.61	74
2022-09-12	09:18:35	4.04073	3221.65	74
2022-09-12	09:18:36	6.10665	3227.75	74
2022-09-12	09:18:37	7.44004	3235.19	74
2022-09-12	09:18:38	13.6909	3248.89	75
2022-09-12	09:18:39	20.293	3269.18	76
2022-09-12	09:18:40	20.1696	3289.35	77
2022-09-12	09:18:41	15.2233	3304.57	78
2022-09-12	09:18:42	9.93685	3314.51	78
2022-09-12	09:18:43	3.74894	3318.26	78
2022-09-12	09:18:44	9.15741	3327.41	78
2022-09-12	09:18:45	2.13346	3329.55	78
2022-09-12	09:18:46	4.55618	3334.1	78
2022-09-12	09:18:47	5.90066	3340.01	78
2022-09-12	09:18:48	8.50115	3348.51	78
2022-09-12	09:18:49	12.6873	3361.19	78
2022-09-12	09:18:50	15.0062	3376.2	79
2022-09-12	09:18:51	5.51708	3381.72	79
2022-09-12	09:18:52	3.05698	3384.77	79
2022-09-12	09:18:53	5.12069	3389.89	79
2022-09-12	09:18:54	11.7794	3401.67	79
2022-09-12	09:18:55	7.34903	3409.02	79
2022-09-12	09:18:56	17.7812	3426.8	80
2022-09-12	09:18:57	24.6477	3451.45	81
2022-09-12	09:18:58	17.3593	3468.81	82
2022-09-12	09:18:59	16.1867	3485	83
2022-09-12	09:19:00	14.7312	3499.73	84
2022-09-12	09:19:01	13.2091	3512.94	85
2022-09-12	09:19:02	11.1348	3524.07	85
2022-09-12	09:19:03	19.514	3543.59	86
2022-09-12	09:19:04	15.3015	3558.89	87
2022-09-12	09:19:05	8.91565	3567.8	87
2022-09-12	09:19:06	15.689	3583.49	88
2022-09-12	09:19:07	25.8784	3609.37	89
2022-09-12	09:19:08	44.0878	3653.46	90
2022-09-12	09:19:09	28.2292	3681.69	91
2022-09-12	09:19:10	73.4564	3755.14	92
2022-09-12	09:19:11	56.5189	3811.66	93
2022-09-12	09:19:12	70.3161	3881.98	94

## Sheet: Royal_martin_20229129143 (E (3)
Date	Time	Lbs	Newtons	Averaged Newtons	Total force x time	Total Time Steps Force >3		**GoPro Fitting: 9:02
2022-09-12	09:14:12	0.637417	2.83536	1.97928	2.83536	FALSE	0			Total force x time	7253.17
2022-09-12	09:14:12	0.376247	1.67362	1.97928	1.67362	FALSE	0			Total Time Steps Force >3	318
2022-09-12	09:14:12	0.265713	1.18194	1.97928	4.0173	FALSE	0
2022-09-12	09:14:12	0.500471	2.2262	1.97928	3.89982	FALSE	0
2022-09-12	09:14:13	0.290445	1.29196	2.32105	5.30926	FALSE	0
2022-09-12	09:14:13	0.336959	1.49886	2.32105	5.39868	FALSE	0
2022-09-12	09:14:13	0.337316	1.50045	2.32105	6.80971	FALSE	0
2022-09-12	09:14:13	1.12246	4.99293	2.32105	10.3916	FALSE	0		Sees/pulls to dog first minute or so
2022-09-12	09:14:14	2.23447	9.93937	36.94	16.7491	FALSE	0
2022-09-12	09:14:14	9.95456	44.2799	36.94	54.6715	1	1
2022-09-12	09:14:14	10.5162	46.7782	36.94	63.5272	1	2
2022-09-12	09:14:14	10.5127	46.7626	36.94	101.434	1	3
2022-09-12	09:14:15	6.29049	27.9814	48.865	91.5086	1	4
2022-09-12	09:14:15	14.8685	66.1381	48.865	167.572	1	5
2022-09-12	09:14:15	11.644	51.7948	48.865	143.303	1	6
2022-09-12	09:14:15	11.1384	49.5458	48.865	217.118	1	7
2022-09-12	09:14:16	8.67171	38.5735	69.6154	181.877	1	8
2022-09-12	09:14:16	17.8817	79.5414	69.6154	296.659	1	9
2022-09-12	09:14:16	20.3973	90.7313	69.6154	272.608	1	10
2022-09-12	09:14:17	11.392	50.6739	26.5088	347.333	1	11
2022-09-12	09:14:17	6.59095	29.3179	26.5088	301.926	1	12
2022-09-12	09:14:17	3.95452	17.5905	26.5088	364.924	1	13
2022-09-12	09:14:17	1.90032	8.453	26.5088	310.379	FALSE	13
2022-09-12	09:14:18	3.05558	13.5918	30.7198	378.516	1	14
2022-09-12	09:14:18	6.39996	28.4683	30.7198	338.847	1	15
2022-09-12	09:14:18	10.7918	48.0041	30.7198	426.52	1	16
2022-09-12	09:14:18	7.37711	32.8149	30.7198	371.662	1	17
2022-09-12	09:14:19	4.46815	19.8752	42.4328	446.395	1	18
2022-09-12	09:14:19	6.79421	30.222	42.4328	401.884	1	19
2022-09-12	09:14:19	12.8027	56.949	42.4328	503.344	1	20
2022-09-12	09:14:19	14.0922	62.6849	42.4328	464.569	1	21
2022-09-12	09:14:20	20.2418	90.0396	66.1491	593.383	1	22
2022-09-12	09:14:20	9.91375	44.0983	66.1491	508.668	1	23
2022-09-12	09:14:20	14.4574	64.3094	66.1491	657.693	1	24
2022-09-12	09:14:21	7.62902	33.9354	41.3838	542.603	1	25
2022-09-12	09:14:21	6.37609	28.3621	41.3838	686.055	1	26
2022-09-12	09:14:21	16.2703	72.3735	41.3838	614.976	1	27
2022-09-12	09:14:21	6.93858	30.8642	41.3838	716.919	1	28
2022-09-12	09:14:22	8.52016	37.8994	53.3375	652.876	1	29
2022-09-12	09:14:22	13.3272	59.2821	53.3375	776.201	1	30
2022-09-12	09:14:22	8.23777	36.6432	53.3375	689.519	1	31
2022-09-12	09:14:22	17.8781	79.5254	53.3375	855.727	1	32
2022-09-12	09:14:23	14.6066	64.9731	76.6311	754.492	1	33
2022-09-12	09:14:23	14.3057	63.6346	76.6311	919.361	1	34
2022-09-12	09:14:23	24.3914	108.498	76.6311	862.99	1	35
2022-09-12	09:14:23	15.6061	69.4191	76.6311	988.78	1	36
2022-09-12	09:14:24	11.7435	52.2374	49.1594	915.227	1	37
2022-09-12	09:14:24	15.0865	67.1078	49.1594	1055.89	1	38
2022-09-12	09:14:24	12.4838	55.5304	49.1594	970.758	1	39
2022-09-12	09:14:24	4.89233	21.7621	49.1594	1077.65	1	40
2022-09-12	09:14:25	5.22622	23.2473	15.0974	994.005	1	41
2022-09-12	09:14:25	4.5253	20.1294	15.0974	1097.78	1	42
2022-09-12	09:14:25	0.430649	1.91561	15.0974	995.921	FALSE	42
2022-09-12	09:14:26	0.655331	2.91504	37.6548	1100.69	FALSE	42
2022-09-12	09:14:26	0.29869	1.32863	37.6548	997.249	FALSE	42
2022-09-12	09:14:26	13.3935	59.577	37.6548	1160.27	1	43
2022-09-12	09:14:26	19.5132	86.7986	37.6548	1084.05	1	44
2022-09-12	09:14:27	7.73283	34.3972	11.4662	1194.67	1	45
2022-09-12	09:14:27	1.74475	7.761	11.4662	1091.81	FALSE	45
2022-09-12	09:14:27	0.421438	1.87464	11.4662	1196.54	FALSE	45
2022-09-12	09:14:27	0.41187	1.83208	11.4662	1093.64	FALSE	45
2022-09-12	09:14:28	0.397875	1.76983	42.7757	1198.31	FALSE	45
2022-09-12	09:14:28	4.76143	21.1798	42.7757	1114.82	1	46
2022-09-12	09:14:28	16.7155	74.3539	42.7757	1272.67	1	47
2022-09-12	09:14:28	16.5908	73.7992	42.7757	1188.62	1	48
2022-09-12	09:14:29	8.13527	36.1873	18.7892	1308.85	1	49
2022-09-12	09:14:29	2.20866	9.82456	18.7892	1198.44	FALSE	49
2022-09-12	09:14:29	2.32805	10.3556	18.7892	1319.21	FALSE	49
2022-09-12	09:14:30	0.359199	1.59779	29.3227	1200.04	FALSE	49
2022-09-12	09:14:30	0.962659	4.2821	29.3227	1323.49	FALSE	49
2022-09-12	09:14:30	6.01136	26.7397	29.3227	1226.78	1	50
2022-09-12	09:14:30	19.0349	84.671	29.3227	1408.16	1	51
2022-09-12	09:14:31	13.8941	61.8037	19.6331	1288.59	1	52
2022-09-12	09:14:31	3.14174	13.9751	19.6331	1422.14	1	53
2022-09-12	09:14:31	0.160878	0.715618	19.6331	1289.3	FALSE	53
2022-09-12	09:14:31	0.458181	2.03808	19.6331	1424.18	FALSE	53
2022-09-12	09:14:32	0.331565	1.47487	16.0602	1290.78	FALSE	53
2022-09-12	09:14:32	0.757316	3.36869	16.0602	1427.54	FALSE	53
2022-09-12	09:14:32	4.01283	17.8499	16.0602	1308.63	1	54
2022-09-12	09:14:32	9.34031	41.5476	16.0602	1469.09	1	55
2022-09-12	09:14:33	0.452735	2.01386	0.861627	1310.64	FALSE	55
2022-09-12	09:14:33	0.0727865	0.323769	0.861627	1469.42	FALSE	55
2022-09-12	09:14:33	0.121489	0.540407	0.861627	1311.18	FALSE	55
2022-09-12	09:14:33	0.127799	0.568476	0.861627	1469.98	FALSE	55
2022-09-12	09:14:34	-0.163804	-0.728633	4.10409	1311.18	FALSE	55
2022-09-12	09:14:34	0.00433869	0.0192994	4.10409	1470	FALSE	55
2022-09-12	09:14:34	2.92739	13.0216	4.10409	1324.2	FALSE	55
2022-09-12	09:14:35	25.557	113.683	59.3388	1583.69	1	56
2022-09-12	09:14:35	9.11146	40.5296	59.3388	1364.73	1	57
2022-09-12	09:14:35	8.3993	37.3618	59.3388	1621.05	1	58
2022-09-12	09:14:35	10.2921	45.7813	59.3388	1410.51	1	59
2022-09-12	09:14:36	12.094	53.7965	79.3321	1674.85	1	60
2022-09-12	09:14:36	17.7748	79.0659	79.3321	1489.58	1	61
2022-09-12	09:14:36	20.7793	92.4305	79.3321	1767.28	1	62
2022-09-12	09:14:36	20.6905	92.0355	79.3321	1581.61	1	63
2022-09-12	09:14:37	13.2636	58.9991	86.5228	1826.27	1	64
2022-09-12	09:14:37	24.6726	109.749	86.5228	1691.36	1	65
2022-09-12	09:14:37	23.3474	103.854	86.5228	1930.13	1	66
2022-09-12	09:14:37	16.5212	73.4896	86.5228	1764.85	1	67
2022-09-12	09:14:38	21.7578	96.783	98.7818	2026.91	1	68
2022-09-12	09:14:38	20.1945	89.8292	98.7818	1854.68	1	69
2022-09-12	09:14:38	24.6691	109.733	98.7818	2136.64	1	70
2022-09-12	09:14:39	17.3404	77.1336	57.9515	1931.82	1	71
2022-09-12	09:14:39	7.16948	31.8913	57.9515	2168.54	1	72
2022-09-12	09:14:39	6.62184	29.4553	57.9515	1961.27	1	73
2022-09-12	09:14:39	20.9806	93.3259	57.9515	2261.86	1	74
2022-09-12	09:14:40	23.2485	103.414	36.0335	2064.68	1	75
2022-09-12	09:14:40	6.67202	29.6785	36.0335	2291.54	1	76
2022-09-12	09:14:40	1.7709	7.87732	36.0335	2072.56	FALSE	76
2022-09-12	09:14:40	0.711311	3.16405	36.0335	2294.7	FALSE	76
2022-09-12	09:14:41	1.08139	4.81024	12.9499	2077.37	FALSE	76
2022-09-12	09:14:41	1.86027	8.27485	12.9499	2302.98	FALSE	76
2022-09-12	09:14:41	1.96184	8.72666	12.9499	2086.1	FALSE	76
2022-09-12	09:14:41	6.74154	29.9877	12.9499	2332.97	1	77
2022-09-12	09:14:42	11.6915	52.0061	29.9012	2138.1	1	78
2022-09-12	09:14:42	5.72245	25.4546	29.9012	2358.42	1	79
2022-09-12	09:14:42	5.12846	22.8124	29.9012	2160.92	1	80
2022-09-12	09:14:42	4.34591	19.3315	29.9012	2377.75	1	81
2022-09-12	09:14:43	5.95034	26.4683	50.5853	2187.39	1	82
2022-09-12	09:14:43	13.1716	58.5899	50.5853	2436.34	1	83
2022-09-12	09:14:43	14.9943	66.6976	50.5853	2254.08	1	84
2022-09-12	09:14:44	5.29248	23.542	11.728	2459.88	1	85
2022-09-12	09:14:44	2.68169	11.9287	11.728	2266.01	FALSE	85
2022-09-12	09:14:44	1.44271	6.41746	11.728	2466.3	FALSE	85
2022-09-12	09:14:44	1.12943	5.02393	11.728	2271.04	FALSE	85
2022-09-12	09:14:45	0.873804	3.88685	4.80604	2470.19	FALSE	85
2022-09-12	09:14:45	1.33711	5.94773	4.80604	2276.98	FALSE	85
2022-09-12	09:14:45	1.22999	5.47124	4.80604	2475.66	FALSE	85
2022-09-12	09:14:45	0.880878	3.91832	4.80604	2280.9	FALSE	85
2022-09-12	09:14:46	0.492481	2.19065	1.23667	2477.85	FALSE	85
2022-09-12	09:14:46	0.220064	0.978889	1.23667	2281.88	FALSE	85
2022-09-12	09:14:46	0.354873	1.57855	1.23667	2479.43	FALSE	85
2022-09-12	09:14:46	0.044644	0.198585	1.23667	2282.08	FALSE	85
2022-09-12	09:14:47	0.16729	0.744139	0.30498	2480.17	FALSE	85
2022-09-12	09:14:47	-0.0180023	-0.0800778	0.30498	2282.08	FALSE	85
2022-09-12	09:14:47	0.0563997	0.250877	0.30498	2480.42	FALSE	85
2022-09-12	09:14:48	-0.191488	-0.851777	-0.408712	2282.08	FALSE	85
2022-09-12	09:14:48	-0.0851778	-0.378888	-0.408712	2480.42	FALSE	85
2022-09-12	09:14:48	-0.131641	-0.585565	-0.408712	2282.08	FALSE	85
2022-09-12	09:14:48	0.0407763	0.181381	-0.408712	2480.61	FALSE	85
2022-09-12	09:14:49	-0.0740328	-0.329313	-0.0178256	2282.08	FALSE	85
2022-09-12	09:14:49	-0.0160175	-0.071249	-0.0178256	2480.61	FALSE	85
2022-09-12	09:14:49	0.0659671	0.293435	-0.0178256	2282.37	FALSE	85
2022-09-12	09:14:49	0.00805366	0.0358243	-0.0178256	2480.64	FALSE	85
2022-09-12	09:14:50	0.143168	0.63684	2.48442	2283.01	FALSE	85
2022-09-12	09:14:50	0.132939	0.591339	2.48442	2481.23	FALSE	85
2022-09-12	09:14:50	0.633906	2.81974	2.48442	2285.83	FALSE	85
2022-09-12	09:14:50	1.32408	5.88977	2.48442	2487.12	FALSE	85
2022-09-12	09:14:51	1.05686	4.70112	16.6546	2290.53	FALSE	85
2022-09-12	09:14:51	2.34541	10.4329	16.6546	2497.56	FALSE	85
2022-09-12	09:14:51	5.45355	24.2585	16.6546	2314.79	1	86
2022-09-12	09:14:51	6.12062	27.2257	16.6546	2524.78	1	87
2022-09-12	09:14:52	11.916	53.0048	74.4147	2367.79	1	88
2022-09-12	09:14:52	13.1376	58.4387	74.4147	2583.22	1	89
2022-09-12	09:14:52	25.1339	111.801	74.4147	2479.59	1	90
2022-09-12	09:14:53	15.5246	69.0565	35.3937	2652.28	1	91
2022-09-12	09:14:53	10.9583	48.7447	35.3937	2528.34	1	92
2022-09-12	09:14:53	4.28459	19.0587	35.3937	2671.34	1	93
2022-09-12	09:14:53	1.05991	4.71469	35.3937	2533.05	FALSE	93
2022-09-12	09:14:54	0.307494	1.36779	1.42676	2672.7	FALSE	93
2022-09-12	09:14:54	0.479707	2.13383	1.42676	2535.19	FALSE	93
2022-09-12	09:14:54	0.0714633	0.317883	1.42676	2673.02	FALSE	93
2022-09-12	09:14:54	0.424338	1.88754	1.42676	2537.08	FALSE	93
2022-09-12	09:14:55	0.233601	1.0391	8.25255	2674.06	FALSE	93
2022-09-12	09:14:55	1.53457	6.82607	8.25255	2543.9	FALSE	93
2022-09-12	09:14:55	2.91854	12.9822	8.25255	2687.04	FALSE	93
2022-09-12	09:14:55	2.73431	12.1628	8.25255	2556.06	FALSE	93
2022-09-12	09:14:56	3.5907	15.9722	16.4354	2703.01	1	94
2022-09-12	09:14:56	3.2277	14.3575	16.4354	2570.42	1	95
2022-09-12	09:14:56	4.26612	18.9766	16.4354	2721.99	1	96
2022-09-12	09:14:57	6.8621	30.524	43.7947	2600.95	1	97
2022-09-12	09:14:57	17.4757	77.7354	43.7947	2799.73	1	98
2022-09-12	09:14:57	7.35863	32.7327	43.7947	2633.68	1	99
2022-09-12	09:14:57	7.6855	34.1866	43.7947	2833.91	1	100
2022-09-12	09:14:58	6.38866	28.418	16.9714	2662.1	1	101
2022-09-12	09:14:58	3.4166	15.1977	16.9714	2849.11	1	102
2022-09-12	09:14:58	4.15253	18.4713	16.9714	2680.57	1	103
2022-09-12	09:14:58	1.30358	5.79858	16.9714	2854.91	FALSE	103
2022-09-12	09:14:59	3.23482	14.3891	18.6522	2694.96	1	104
2022-09-12	09:14:59	2.81976	12.5429	18.6522	2867.45	FALSE	104
2022-09-12	09:14:59	3.56057	15.8381	18.6522	2710.79	1	105
2022-09-12	09:14:59	7.15767	31.8387	18.6522	2899.29	1	106
2022-09-12	09:15:00	7.12286	31.6839	24.5693	2742.48	1	107
2022-09-12	09:15:00	4.26037	18.951	24.5693	2918.24	1	108
2022-09-12	09:15:00	5.03431	22.3936	24.5693	2764.87	1	109
2022-09-12	09:15:00	5.67614	25.2486	24.5693	2943.49	1	110
2022-09-12	09:15:01	5.3907	23.9789	34.4338	2788.85	1	111
2022-09-12	09:15:01	7.08118	31.4985	34.4338	2974.99	1	112
2022-09-12	09:15:01	10.7513	47.8239	34.4338	2836.68	1	113
2022-09-12	09:15:02	13.6169	60.5707	66.7953	3035.56	1	114
2022-09-12	09:15:02	8.95843	39.8489	66.7953	2876.52	1	115
2022-09-12	09:15:02	22.9557	102.112	66.7953	3137.67	1	116
2022-09-12	09:15:02	14.534	64.6501	66.7953	2941.17	1	117
2022-09-12	09:15:03	7.51156	33.4129	44.3601	3171.08	1	118
2022-09-12	09:15:03	13.0288	57.9547	44.3601	2999.13	1	119
2022-09-12	09:15:03	9.17772	40.8243	44.3601	3211.91	1	120
2022-09-12	09:15:03	10.1723	45.2484	44.3601	3044.38	1	121
2022-09-12	09:15:04	10.1836	45.2987	14.2803	3257.21	1	122
2022-09-12	09:15:04	1.64205	7.30417	14.2803	3051.68	FALSE	122
2022-09-12	09:15:04	0.477977	2.12614	14.2803	3259.33	FALSE	122
2022-09-12	09:15:04	0.537824	2.39235	14.2803	3054.07	FALSE	122
2022-09-12	09:15:05	0.249122	1.10814	0.885395	3260.44	FALSE	122
2022-09-12	09:15:05	0.23757	1.05676	0.885395	3055.13	FALSE	122
2022-09-12	09:15:05	0.110445	0.491281	0.885395	3260.93	FALSE	122
2022-09-12	09:15:06	0.377774	1.68041	1.34137	3056.81	FALSE	122
2022-09-12	09:15:06	0.28271	1.25755	1.34137	3262.19	FALSE	122
2022-09-12	09:15:06	0.290853	1.29377	1.34137	3058.1	FALSE	122
2022-09-12	09:15:06	0.254873	1.13373	1.34137	3263.32	FALSE	122
2022-09-12	09:15:07	0.216094	0.961229	1.1687	3059.07	FALSE	122
2022-09-12	09:15:07	0.285967	1.27204	1.1687	3264.6	FALSE	122
2022-09-12	09:15:07	0.286985	1.27657	1.1687	3060.34	FALSE	122
2022-09-12	09:15:07	0.261896	1.16497	1.1687	3265.76	FALSE	122
2022-09-12	09:15:08	0.427137	1.89999	21.6014	3062.24	FALSE	122
2022-09-12	09:15:08	2.67787	11.9117	21.6014	3277.67	FALSE	122
2022-09-12	09:15:08	7.28566	32.4081	21.6014	3094.65	1	123
2022-09-12	09:15:08	9.03421	40.186	21.6014	3317.86	1	124
2022-09-12	09:15:09	4.97991	22.1516	30.8777	3116.8	1	125
2022-09-12	09:15:09	4.19721	18.67	30.8777	3336.53	1	126
2022-09-12	09:15:09	8.19777	36.4653	30.8777	3153.27	1	127
2022-09-12	09:15:09	10.3916	46.2239	30.8777	3382.75	1	128
2022-09-12	09:15:10	17.4554	77.6451	55.622	3230.91	1	129
2022-09-12	09:15:10	8.68306	38.624	55.622	3421.38	1	130
2022-09-12	09:15:10	11.3747	50.5969	55.622	3281.51	1	131
2022-09-12	09:15:11	5.88317	26.1695	18.3428	3447.55	1	132
2022-09-12	09:15:11	4.20057	18.685	18.3428	3300.19	1	133
2022-09-12	09:15:11	2.87385	12.7835	18.3428	3460.33	FALSE	133
2022-09-12	09:15:11	3.53696	15.7331	18.3428	3315.93	1	134
2022-09-12	09:15:12	11.5721	51.475	32.1178	3511.81	1	135
2022-09-12	09:15:12	3.1139	13.8512	32.1178	3329.78	1	136
2022-09-12	09:15:12	8.49762	37.7991	32.1178	3549.6	1	137
2022-09-12	09:15:12	5.69802	25.3459	32.1178	3355.12	1	138
2022-09-12	09:15:13	11.126	49.4907	33.3039	3599.09	1	139
2022-09-12	09:15:13	3.22805	14.359	33.3039	3369.48	1	140
2022-09-12	09:15:13	7.56128	33.6341	33.3039	3632.73	1	141
2022-09-12	09:15:13	8.03288	35.7319	33.3039	3405.22	1	142
2022-09-12	09:15:14	6.24174	27.7645	38.0009	3660.49	1	143
2022-09-12	09:15:14	9.94372	44.2317	38.0009	3449.45	1	144
2022-09-12	09:15:14	9.44352	42.0067	38.0009	3702.5	1	145
2022-09-12	09:15:15	8.82352	39.2488	32.0729	3488.7	1	146
2022-09-12	09:15:15	5.58255	24.8323	32.0729	3727.33	1	147
2022-09-12	09:15:15	4.22261	18.783	32.0729	3507.48	1	148
2022-09-12	09:15:15	10.2126	45.4277	32.0729	3772.76	1	149
2022-09-12	09:15:16	2.82352	12.5596	26.1395	3520.04	FALSE	149
2022-09-12	09:15:16	6.32322	28.1269	26.1395	3800.89	1	150
2022-09-12	09:15:16	7.57222	33.6827	26.1395	3553.72	1	151
2022-09-12	09:15:16	6.78673	30.1887	26.1395	3831.08	1	152
2022-09-12	09:15:17	9.02576	40.1484	41.9713	3593.87	1	153
2022-09-12	09:15:17	6.52968	29.0453	41.9713	3860.12	1	154
2022-09-12	09:15:17	15.4152	68.5699	41.9713	3662.44	1	155
2022-09-12	09:15:17	6.77161	30.1215	41.9713	3890.24	1	156
2022-09-12	09:15:18	11.2905	50.2224	39.3687	3712.66	1	157
2022-09-12	09:15:18	9.19059	40.8816	39.3687	3931.12	1	158
2022-09-12	09:15:18	4.39462	19.5481	39.3687	3732.21	1	159
2022-09-12	09:15:18	10.5262	46.8226	39.3687	3977.95	1	160
2022-09-12	09:15:19	6.72052	29.8942	23.7522	3762.1	1	161
2022-09-12	09:15:19	5.67421	25.24	23.7522	4003.19	1	162
2022-09-12	09:15:19	3.62444	16.1222	23.7522	3778.23	1	163
2022-09-12	09:15:20	2.88291	12.8238	16.4675	4016.01	FALSE	163
2022-09-12	09:15:20	6.62754	29.4806	16.4675	3807.71	1	164
2022-09-12	09:15:20	1.82678	8.12588	16.4675	4024.14	FALSE	164
2022-09-12	09:15:20	3.471	15.4397	16.4675	3823.15	1	165
2022-09-12	09:15:21	1.73971	7.73858	3.27509	4031.87	FALSE	165
2022-09-12	09:15:21	0.610344	2.71493	3.27509	3825.86	FALSE	165
2022-09-12	09:15:21	0.46902	2.08629	3.27509	4033.96	FALSE	165
2022-09-12	09:15:21	0.126018	0.560553	3.27509	3826.42	FALSE	165
2022-09-12	09:15:22	0.331412	1.47419	1.03203	4035.44	FALSE	165
2022-09-12	09:15:22	0.097163	0.4322	1.03203	3826.85	FALSE	165
2022-09-12	09:15:22	0.302303	1.3447	1.03203	4036.78	FALSE	165
2022-09-12	09:15:22	0.197163	0.87702	1.03203	3827.73	FALSE	165
2022-09-12	09:15:23	0.442761	1.96949	1.44717	4038.75	FALSE	165
2022-09-12	09:15:23	0.208562	0.927725	1.44717	3828.66	FALSE	165
2022-09-12	09:15:23	0.324695	1.44431	1.44717	4040.19	FALSE	165
2022-09-12	09:15:24	0.269173	1.19734	3.02257	3829.86	FALSE	165
2022-09-12	09:15:24	0.393092	1.74855	3.02257	4041.94	FALSE	165
2022-09-12	09:15:24	0.640827	2.85053	3.02257	3832.71	FALSE	165
2022-09-12	09:15:24	1.41492	6.29385	3.02257	4048.24	FALSE	165
2022-09-12	09:15:25	1.55594	6.92113	3.74192	3839.63	FALSE	165
2022-09-12	09:15:25	0.831056	3.6967	3.74192	4051.93	FALSE	165
2022-09-12	09:15:25	0.584389	2.59948	3.74192	3842.23	FALSE	165
2022-09-12	09:15:25	0.393499	1.75036	3.74192	4053.68	FALSE	165
2022-09-12	09:15:26	0.677315	3.01283	2.97876	3845.24	FALSE	165
2022-09-12	09:15:26	0.479707	2.13383	2.97876	4055.82	FALSE	165
2022-09-12	09:15:26	0.682048	3.03389	2.97876	3848.27	FALSE	165
2022-09-12	09:15:26	0.839555	3.73451	2.97876	4059.55	FALSE	165
2022-09-12	09:15:27	0.971412	4.32103	3.30474	3852.6	FALSE	165
2022-09-12	09:15:27	0.848206	3.77299	3.30474	4063.32	FALSE	165
2022-09-12	09:15:27	0.568257	2.52772	3.30474	3855.12	FALSE	165
2022-09-12	09:15:27	0.58388	2.59722	3.30474	4065.92	FALSE	165
2022-09-12	09:15:28	0.363321	1.61612	1.76545	3856.74	FALSE	165
2022-09-12	09:15:28	0.374313	1.66502	1.76545	4067.59	FALSE	165
2022-09-12	09:15:28	0.453041	2.01522	1.76545	3858.75	FALSE	165
2022-09-12	09:15:29	0.28673	1.27543	1.54153	4068.86	FALSE	165
2022-09-12	09:15:29	0.476094	2.11776	1.54153	3860.87	FALSE	165
2022-09-12	09:15:29	0.213499	0.949686	1.54153	4069.81	FALSE	165
2022-09-12	09:15:29	0.409886	1.82325	1.54153	3862.7	FALSE	165
2022-09-12	09:15:30	0.195534	0.869774	1.19513	4070.68	FALSE	165
2022-09-12	09:15:30	0.358842	1.5962	1.19513	3864.29	FALSE	165
2022-09-12	09:15:30	0.267697	1.19077	1.19513	4071.87	FALSE	165
2022-09-12	09:15:30	0.252634	1.12377	1.19513	3865.42	FALSE	165
2022-09-12	09:15:31	0.26729	1.18896	0.963607	4073.06	FALSE	165
2022-09-12	09:15:31	0.12215	0.543348	0.963607	3865.96	FALSE	165
2022-09-12	09:15:31	0.373143	1.65981	0.963607	4074.72	FALSE	165
2022-09-12	09:15:31	0.103931	0.462306	0.963607	3866.42	FALSE	165
2022-09-12	09:15:32	0.384288	1.70939	3.20895	4076.43	FALSE	165
2022-09-12	09:15:32	0.335687	1.4932	3.20895	3867.91	FALSE	165
2022-09-12	09:15:32	1.44424	6.42427	3.20895	4082.86	FALSE	165
2022-09-12	09:15:33	0.976959	4.34571	7.57824	3872.26	FALSE	165
2022-09-12	09:15:33	1.92388	8.5578	7.57824	4091.41	FALSE	165
2022-09-12	09:15:33	1.85248	8.2402	7.57824	3880.5	FALSE	165
2022-09-12	09:15:33	2.06134	9.16925	7.57824	4100.58	FALSE	165
2022-09-12	09:15:34	2.29202	10.1954	3.73767	3890.7	FALSE	165
2022-09-12	09:15:34	0.451463	2.0082	3.73767	4102.59	FALSE	165
2022-09-12	09:15:34	0.443321	1.97198	3.73767	3892.67	FALSE	165
2022-09-12	09:15:34	0.174262	0.775152	3.73767	4103.37	FALSE	165
2022-09-12	09:15:35	0.215483	0.958511	1.17215	3893.63	FALSE	165
2022-09-12	09:15:35	0.27701	1.2322	1.17215	4104.6	FALSE	165
2022-09-12	09:15:35	0.178944	0.795979	1.17215	3894.42	FALSE	165
2022-09-12	09:15:35	0.382608	1.70192	1.17215	4106.3	FALSE	165
2022-09-12	09:15:36	0.576196	2.56304	14.2937	3896.99	FALSE	165
2022-09-12	09:15:36	2.22195	9.88368	14.2937	4116.18	FALSE	165
2022-09-12	09:15:36	4.46454	19.8592	14.2937	3916.84	1	166
2022-09-12	09:15:36	5.59075	24.8688	14.2937	4141.05	1	167
2022-09-12	09:15:37	2.60683	11.5957	11.5756	3928.44	FALSE	167
2022-09-12	09:15:37	3.41105	15.173	11.5756	4156.23	1	168
2022-09-12	09:15:37	1.78902	7.95792	11.5756	3936.4	FALSE	168
2022-09-12	09:15:38	1.52042	6.76313	5.16099	4162.99	FALSE	168
2022-09-12	09:15:38	1.8536	8.24518	5.16099	3944.64	FALSE	168
2022-09-12	09:15:38	0.418435	1.86128	5.16099	4164.85	FALSE	168
2022-09-12	09:15:38	0.848511	3.77435	5.16099	3948.42	FALSE	168
2022-09-12	09:15:39	0.366272	1.62925	1.43101	4166.48	FALSE	168
2022-09-12	09:15:39	0.506272	2.252	1.43101	3950.67	FALSE	168
2022-09-12	09:15:39	0.271412	1.20729	1.43101	4167.69	FALSE	168
2022-09-12	09:15:39	0.142863	0.635483	1.43101	3951.31	FALSE	168
2022-09-12	09:15:40	0.341336	1.51833	1.07781	4169.2	FALSE	168
2022-09-12	09:15:40	0.126629	0.563271	1.07781	3951.87	FALSE	168
2022-09-12	09:15:40	0.275738	1.22654	1.07781	4170.43	FALSE	168
2022-09-12	09:15:40	0.225509	1.00311	1.07781	3952.87	FALSE	168
2022-09-12	09:15:41	0.174771	0.777416	0.836953	4171.21	FALSE	168
2022-09-12	09:15:41	0.263015	1.16994	0.836953	3954.04	FALSE	168
2022-09-12	09:15:41	0.12668	0.563498	0.836953	4171.77	FALSE	168
2022-09-12	09:15:42	0.372685	1.65778	1.20441	3955.7	FALSE	168
2022-09-12	09:15:42	0.0879009	0.391001	1.20441	4172.16	FALSE	168
2022-09-12	09:15:42	0.381896	1.69875	1.20441	3957.4	FALSE	168
2022-09-12	09:15:42	0.240573	1.07012	1.20441	4173.23	FALSE	168
2022-09-12	09:15:43	0.331769	1.47577	1.82025	3958.87	FALSE	168
2022-09-12	09:15:43	0.387392	1.7232	1.82025	4174.96	FALSE	168
2022-09-12	09:15:43	0.42159	1.87532	1.82025	3960.75	FALSE	168
2022-09-12	09:15:43	0.496094	2.20673	1.82025	4177.16	FALSE	168
2022-09-12	09:15:44	0.195127	0.867964	1.07153	3961.62	FALSE	168
2022-09-12	09:15:44	0.346578	1.54165	1.07153	4178.7	FALSE	168
2022-09-12	09:15:44	0.168613	0.750024	1.07153	3962.37	FALSE	168
2022-09-12	09:15:44	0.253244	1.12648	1.07153	4179.83	FALSE	168
2022-09-12	09:15:45	0.176756	0.786246	1.15093	3963.15	FALSE	168
2022-09-12	09:15:45	0.3164	1.40741	1.15093	4181.24	FALSE	168
2022-09-12	09:15:45	0.325153	1.44635	1.15093	3964.6	FALSE	168
2022-09-12	09:15:45	0.216654	0.96372	1.15093	4182.2	FALSE	168
2022-09-12	09:15:46	0.471972	2.09943	2.63788	3966.7	FALSE	168
2022-09-12	09:15:46	0.223677	0.99496	2.63788	4183.2	FALSE	168
2022-09-12	09:15:46	1.08342	4.81927	2.63788	3971.52	FALSE	168
2022-09-12	09:15:47	1.002	4.4571	2.82014	4187.65	FALSE	168
2022-09-12	09:15:47	0.909886	4.04735	2.82014	3975.57	FALSE	168
2022-09-12	09:15:47	0.359199	1.59779	2.82014	4189.25	FALSE	168
2022-09-12	09:15:47	0.264898	1.17832	2.82014	3976.74	FALSE	168
2022-09-12	09:15:48	0.189784	0.844197	2.65432	4190.1	FALSE	168
2022-09-12	09:15:48	0.135636	0.603336	2.65432	3977.35	FALSE	168
2022-09-12	09:15:48	0.391565	1.74176	2.65432	4191.84	FALSE	168
2022-09-12	09:15:48	1.66989	7.428	2.65432	3984.78	FALSE	168
2022-09-12	09:15:49	4.73385	21.0571	18.1575	4212.9	1	169
2022-09-12	09:15:49	5.47258	24.3431	18.1575	4009.12	1	170
2022-09-12	09:15:49	4.0081	17.8288	18.1575	4230.72	1	171
2022-09-12	09:15:49	2.11345	9.40105	18.1575	4018.52	FALSE	171
2022-09-12	09:15:50	1.30693	5.81349	5.43795	4236.54	FALSE	171
2022-09-12	09:15:50	2.05406	9.13687	5.43795	4027.66	FALSE	171
2022-09-12	09:15:50	0.306527	1.36349	5.43795	4237.9	FALSE	171
2022-09-12	09:15:51	1.96179	8.72643	4.80314	4036.38	FALSE	171
2022-09-12	09:15:51	0.575229	2.55873	4.80314	4240.46	FALSE	171
2022-09-12	09:15:51	1.26698	5.63578	4.80314	4042.02	FALSE	171
2022-09-12	09:15:51	0.515178	2.29161	4.80314	4242.75	FALSE	171
2022-09-12	09:15:52	0.364033	1.61929	2.43513	4043.64	FALSE	171
2022-09-12	09:15:52	0.492023	2.18862	2.43513	4244.94	FALSE	171
2022-09-12	09:15:52	0.669987	2.98024	2.43513	4046.62	FALSE	171
2022-09-12	09:15:52	0.663728	2.95239	2.43513	4247.89	FALSE	171
2022-09-12	09:15:53	1.35447	6.02495	11.4063	4052.64	FALSE	171
2022-09-12	09:15:53	1.69604	7.54433	11.4063	4255.44	FALSE	171
2022-09-12	09:15:53	2.87299	12.7796	11.4063	4065.42	FALSE	171
2022-09-12	09:15:53	4.3335	19.2763	11.4063	4274.71	1	172
2022-09-12	09:15:54	2.84973	12.6762	11.4527	4078.1	FALSE	172
2022-09-12	09:15:54	3.73319	16.606	11.4527	4291.32	1	173
2022-09-12	09:15:54	1.09497	4.87065	11.4527	4082.97	FALSE	173
2022-09-12	09:15:54	2.62082	11.6579	11.4527	4302.98	FALSE	173
2022-09-12	09:15:55	1.88078	8.36609	9.10011	4091.34	FALSE	173
2022-09-12	09:15:55	1.8653	8.29723	9.10011	4311.27	FALSE	173
2022-09-12	09:15:55	2.39131	10.637	9.10011	4101.97	FALSE	173
2022-09-12	09:15:56	0.562659	2.50282	2.54459	4313.78	FALSE	173
2022-09-12	09:15:56	1.16724	5.19212	2.54459	4107.16	FALSE	173
2022-09-12	09:15:56	0.169733	0.755006	2.54459	4314.53	FALSE	173
2022-09-12	09:15:56	0.388562	1.7284	2.54459	4108.89	FALSE	173
2022-09-12	09:15:57	0.24154	1.07442	1.71907	4315.61	FALSE	173
2022-09-12	09:15:57	0.428308	1.9052	1.71907	4110.8	FALSE	173
2022-09-12	09:15:57	0.482863	2.14787	1.71907	4317.75	FALSE	173
2022-09-12	09:15:57	0.393143	1.74878	1.71907	4112.55	FALSE	173
2022-09-12	09:15:58	0.596399	2.6529	3.21968	4320.41	FALSE	173
2022-09-12	09:15:58	0.763066	3.39427	3.21968	4115.94	FALSE	173
2022-09-12	09:15:58	0.723575	3.21861	3.21968	4323.63	FALSE	173
2022-09-12	09:15:58	0.812226	3.61294	3.21968	4119.55	FALSE	173
2022-09-12	09:15:59	0.919809	4.09149	4.11232	4327.72	FALSE	173
2022-09-12	09:15:59	0.822455	3.65844	4.11232	4123.21	FALSE	173
2022-09-12	09:15:59	1.03121	4.58703	4.11232	4332.3	FALSE	173
2022-09-12	09:16:00	0.972328	4.32511	2.48301	4127.54	FALSE	173
2022-09-12	09:16:00	0.515789	2.29433	2.48301	4334.6	FALSE	173
2022-09-12	09:16:00	0.375026	1.66819	2.48301	4129.21	FALSE	173
2022-09-12	09:16:00	0.369682	1.64442	2.48301	4336.24	FALSE	173
2022-09-12	09:16:01	0.249428	1.10951	1.06666	4130.32	FALSE	173
2022-09-12	09:16:01	0.17986	0.800053	1.06666	4337.04	FALSE	173
2022-09-12	09:16:01	0.20159	0.896713	1.06666	4131.21	FALSE	173
2022-09-12	09:16:01	0.328308	1.46038	1.06666	4338.5	FALSE	173
2022-09-12	09:16:02	0.370496	1.64804	1.82552	4132.86	FALSE	173
2022-09-12	09:16:02	0.582964	2.59314	1.82552	4341.1	FALSE	173
2022-09-12	09:16:02	0.296145	1.31731	1.82552	4134.18	FALSE	173
2022-09-12	09:16:02	0.391972	1.74357	1.82552	4342.84	FALSE	173
2022-09-12	09:16:03	0.313957	1.39654	1.19852	4135.57	FALSE	173
2022-09-12	09:16:03	0.279707	1.24419	1.19852	4344.08	FALSE	173
2022-09-12	09:16:03	0.258944	1.15183	1.19852	4136.73	FALSE	173
2022-09-12	09:16:03	0.225153	1.00153	1.19852	4345.09	FALSE	173
2022-09-12	09:16:04	0.362303	1.6116	1.22631	4138.34	FALSE	173
2022-09-12	09:16:04	0.123677	0.55014	1.22631	4345.64	FALSE	173
2022-09-12	09:16:04	0.341082	1.5172	1.22631	4139.86	FALSE	173
2022-09-12	09:16:05	0.175127	0.779	2.53021	4346.41	FALSE	173
2022-09-12	09:16:05	0.310547	1.38138	2.53021	4141.24	FALSE	173
2022-09-12	09:16:05	0.8193	3.64441	2.53021	4350.06	FALSE	173
2022-09-12	09:16:05	0.970293	4.31606	2.53021	4145.55	FALSE	173
2022-09-12	09:16:06	1.60948	7.15929	7.16981	4357.22	FALSE	173
2022-09-12	09:16:06	1.41421	6.29069	7.16981	4151.84	FALSE	173
2022-09-12	09:16:06	1.80337	8.02175	7.16981	4365.24	FALSE	173
2022-09-12	09:16:06	1.62032	7.20751	7.16981	4159.05	FALSE	173
2022-09-12	09:16:07	1.83253	8.15146	5.83749	4373.39	FALSE	173
2022-09-12	09:16:07	1.26576	5.63035	5.83749	4164.68	FALSE	173
2022-09-12	09:16:07	1.26179	5.61269	5.83749	4379	FALSE	173
2022-09-12	09:16:07	0.889224	3.95545	5.83749	4168.64	FALSE	173
2022-09-12	09:16:08	0.671158	2.98545	4.01604	4381.99	FALSE	173
2022-09-12	09:16:08	0.665713	2.96122	4.01604	4171.6	FALSE	173
2022-09-12	09:16:08	1.37167	6.10146	4.01604	4388.09	FALSE	173
2022-09-12	09:16:09	1.43365	6.37716	5.62046	4177.97	FALSE	173
2022-09-12	09:16:09	1.65406	7.35759	5.62046	4395.45	FALSE	173
2022-09-12	09:16:09	0.837875	3.72704	5.62046	4181.7	FALSE	173
2022-09-12	09:16:09	1.12856	5.02006	5.62046	4400.47	FALSE	173
2022-09-12	09:16:10	1.3281	5.90765	3.52749	4187.61	FALSE	173
2022-09-12	09:16:10	0.565458	2.51527	3.52749	4402.98	FALSE	173
2022-09-12	09:16:10	0.809071	3.59891	3.52749	4191.21	FALSE	173
2022-09-12	09:16:10	0.469428	2.08811	3.52749	4405.07	FALSE	173
2022-09-12	09:16:11	0.717468	3.19144	2.69569	4194.4	FALSE	173
2022-09-12	09:16:11	0.391412	1.74108	2.69569	4406.81	FALSE	173
2022-09-12	09:16:11	0.367239	1.63355	2.69569	4196.03	FALSE	173
2022-09-12	09:16:11	0.947952	4.21668	2.69569	4411.03	FALSE	173
2022-09-12	09:16:12	0.868002	3.86105	4.69432	4199.89	FALSE	173
2022-09-12	09:16:12	1.28149	5.70032	4.69432	4416.73	FALSE	173
2022-09-12	09:16:12	0.862557	3.83683	4.69432	4203.73	FALSE	173
2022-09-12	09:16:12	1.20927	5.37907	4.69432	4422.11	FALSE	173
2022-09-12	09:16:13	0.754109	3.35443	6.97094	4207.09	FALSE	173
2022-09-12	09:16:13	1.63833	7.28762	6.97094	4429.4	FALSE	173
2022-09-12	09:16:13	2.30897	10.2708	6.97094	4217.36	FALSE	173
2022-09-12	09:16:14	3.41223	15.1783	15.5286	4444.58	1	174
2022-09-12	09:16:14	3.20301	14.2476	15.5286	4231.6	1	175
2022-09-12	09:16:14	3.93472	17.5024	15.5286	4462.08	1	176
2022-09-12	09:16:14	3.41401	15.1862	15.5286	4246.79	1	177
2022-09-12	09:16:15	1.37991	6.13812	5.81022	4468.22	FALSE	177
2022-09-12	09:16:15	1.67029	7.42978	5.81022	4254.22	FALSE	177
2022-09-12	09:16:15	0.739962	3.2915	5.81022	4471.51	FALSE	177
2022-09-12	09:16:15	1.43462	6.38148	5.81022	4260.6	FALSE	177
2022-09-12	09:16:16	0.619504	2.75568	2.82404	4474.26	FALSE	177
2022-09-12	09:16:16	0.424491	1.88822	2.82404	4262.49	FALSE	177
2022-09-12	09:16:16	1.18439	5.2684	2.82404	4479.53	FALSE	177
2022-09-12	09:16:16	0.311107	1.38387	2.82404	4263.87	FALSE	177
2022-09-12	09:16:17	0.496909	2.21035	1.64012	4481.74	FALSE	177
2022-09-12	09:16:17	0.204695	0.910524	1.64012	4264.78	FALSE	177
2022-09-12	09:16:17	0.404542	1.79948	1.64012	4483.54	FALSE	177
2022-09-12	09:16:18	0.462303	2.05642	2.03067	4266.84	FALSE	177
2022-09-12	09:16:18	0.499555	2.22212	2.03067	4485.76	FALSE	177
2022-09-12	09:16:18	0.383677	1.70667	2.03067	4268.55	FALSE	177
2022-09-12	09:16:18	0.480522	2.13746	2.03067	4487.9	FALSE	177
2022-09-12	09:16:19	0.500979	2.22845	3.01216	4270.78	FALSE	177
2022-09-12	09:16:19	0.610751	2.71674	3.01216	4490.62	FALSE	177
2022-09-12	09:16:19	0.491921	2.18816	3.01216	4272.96	FALSE	177
2022-09-12	09:16:19	1.105	4.91526	3.01216	4495.53	FALSE	177
2022-09-12	09:16:20	0.433957	1.93033	2.66801	4274.89	FALSE	177
2022-09-12	09:16:20	0.334669	1.48867	2.66801	4497.02	FALSE	177
2022-09-12	09:16:20	1.00332	4.46297	2.66801	4279.36	FALSE	177
2022-09-12	09:16:20	0.627239	2.79008	2.66801	4499.81	FALSE	177
2022-09-12	09:16:21	0.654619	2.91188	1.98426	4282.27	FALSE	177
2022-09-12	09:16:21	0.274466	1.22088	1.98426	4501.03	FALSE	177
2022-09-12	09:16:21	0.441896	1.96564	1.98426	4284.23	FALSE	177
2022-09-12	09:16:21	0.413346	1.83865	1.98426	4502.87	FALSE	177
2022-09-12	09:16:22	0.464797	2.06751	4.12779	4286.3	FALSE	177
2022-09-12	09:16:22	1.11849	4.97527	4.12779	4507.85	FALSE	177
2022-09-12	09:16:22	1.20062	5.3406	4.12779	4291.64	FALSE	177
2022-09-12	09:16:23	1.84017	8.18544	10.5288	4516.03	FALSE	177
2022-09-12	09:16:23	2.35553	10.4779	10.5288	4302.12	FALSE	177
2022-09-12	09:16:23	1.99676	8.88199	10.5288	4524.91	FALSE	177
2022-09-12	09:16:23	3.27543	14.5698	10.5288	4316.69	1	178
2022-09-12	09:16:24	2.9507	13.1253	10.9415	4538.04	FALSE	178
2022-09-12	09:16:24	2.22566	9.90018	10.9415	4326.59	FALSE	178
2022-09-12	09:16:24	2.40719	10.7077	10.9415	4548.75	FALSE	178
2022-09-12	09:16:24	2.25553	10.033	10.9415	4336.62	FALSE	178
2022-09-12	09:16:25	2.27116	10.1026	10.6142	4558.85	FALSE	178
2022-09-12	09:16:25	2.69446	11.9855	10.6142	4348.61	FALSE	178
2022-09-12	09:16:25	1.71854	7.64441	10.6142	4566.49	FALSE	178
2022-09-12	09:16:25	2.86057	12.7244	10.6142	4361.33	FALSE	178
2022-09-12	09:16:26	2.03309	9.04359	11.7342	4575.54	FALSE	178
2022-09-12	09:16:26	2.97589	13.2374	11.7342	4374.57	FALSE	178
2022-09-12	09:16:26	2.90495	12.9218	11.7342	4588.46	FALSE	178
2022-09-12	09:16:27	4.29843	19.1203	14.526	4393.69	1	179
2022-09-12	09:16:27	3.06561	13.6364	14.526	4602.1	1	180
2022-09-12	09:16:27	3.56032	15.837	14.526	4409.53	1	181
2022-09-12	09:16:27	2.13803	9.51039	14.526	4611.61	FALSE	181
2022-09-12	09:16:28	4.30892	19.1669	14.537	4428.7	1	182
2022-09-12	09:16:28	1.79411	7.98056	14.537	4619.59	FALSE	182
2022-09-12	09:16:28	3.36373	14.9625	14.537	4443.66	1	183
2022-09-12	09:16:28	3.60546	16.0378	14.537	4635.62	1	184
2022-09-12	09:16:29	5.06174	22.5156	29.1214	4466.17	1	185
2022-09-12	09:16:29	6.3795	28.3773	29.1214	4664	1	186
2022-09-12	09:16:29	7.41121	32.9665	29.1214	4499.14	1	187
2022-09-12	09:16:29	7.33471	32.6263	29.1214	4696.63	1	188
2022-09-12	09:16:30	8.44245	37.5537	31.9955	4536.69	1	189
2022-09-12	09:16:30	7.00759	31.1712	31.9955	4727.8	1	190
2022-09-12	09:16:30	5.64724	25.1201	31.9955	4561.81	1	191
2022-09-12	09:16:30	7.67436	34.1371	31.9955	4761.94	1	192
2022-09-12	09:16:31	2.82922	12.5849	8.06658	4574.4	FALSE	192
2022-09-12	09:16:31	1.64816	7.33135	8.06658	4769.27	FALSE	192
2022-09-12	09:16:31	0.962964	4.28346	8.06658	4578.68	FALSE	192
2022-09-12	09:16:32	0.678842	3.01962	1.28953	4772.29	FALSE	192
2022-09-12	09:16:32	0.185611	0.825635	1.28953	4579.51	FALSE	192
2022-09-12	09:16:32	0.176654	0.785792	1.28953	4773.07	FALSE	192
2022-09-12	09:16:32	0.118486	0.527049	1.28953	4580.03	FALSE	192
2022-09-12	09:16:33	-0.0155087	-0.0689858	-0.351611	4773.07	FALSE	192
2022-09-12	09:16:33	-0.0586639	-0.260949	-0.351611	4580.03	FALSE	192
2022-09-12	09:16:33	-0.176476	-0.785001	-0.351611	4773.07	FALSE	192
2022-09-12	09:16:33	-0.0655341	-0.291509	-0.351611	4580.03	FALSE	192
2022-09-12	09:16:34	-0.0884348	-0.393376	-0.355741	4773.07	FALSE	192
2022-09-12	09:16:34	-0.0524552	-0.233331	-0.355741	4580.03	FALSE	192
2022-09-12	09:16:34	-0.14304	-0.636271	-0.355741	4773.07	FALSE	192
2022-09-12	09:16:34	-0.0359667	-0.159987	-0.355741	4580.03	FALSE	192
2022-09-12	09:16:35	0.112379	0.499884	0.431671	4773.57	FALSE	192
2022-09-12	09:16:35	0.117875	0.524332	0.431671	4580.56	FALSE	192
2022-09-12	09:16:35	0.0608781	0.270798	0.431671	4773.84	FALSE	192
2022-09-12	09:16:36	0.215789	0.959873	9.51405	4581.52	FALSE	192
2022-09-12	09:16:36	1.06358	4.73102	9.51405	4778.57	FALSE	192
2022-09-12	09:16:36	3.29304	14.6481	9.51405	4596.17	1	193
2022-09-12	09:16:36	3.98301	17.7172	9.51405	4796.29	1	194
2022-09-12	09:16:37	2.80556	12.4797	8.46052	4608.65	FALSE	194
2022-09-12	09:16:37	2.05558	9.14363	8.46052	4805.44	FALSE	194
2022-09-12	09:16:37	1.58485	7.04973	8.46052	4615.7	FALSE	194
2022-09-12	09:16:37	1.16205	5.16903	8.46052	4810.6	FALSE	194
2022-09-12	09:16:38	0.605102	2.69161	1.40662	4618.39	FALSE	194
2022-09-12	09:16:38	0.285	1.26774	1.40662	4811.87	FALSE	194
2022-09-12	09:16:38	0.18042	0.802544	1.40662	4619.19	FALSE	194
2022-09-12	09:16:38	0.194364	0.86457	1.40662	4812.74	FALSE	194
2022-09-12	09:16:39	0.121082	0.538597	0.456574	4619.73	FALSE	194
2022-09-12	09:16:39	0.0929391	0.413412	0.456574	4813.15	FALSE	194
2022-09-12	09:16:39	0.0939061	0.417713	0.456574	4620.15	FALSE	194
2022-09-12	09:16:40	0.0931936	0.414544	0.388681	4813.56	FALSE	194
2022-09-12	09:16:40	0.0730409	0.324901	0.388681	4620.47	FALSE	194
2022-09-12	09:16:40	0.109733	0.488114	0.388681	4814.05	FALSE	194
2022-09-12	09:16:40	0.0735498	0.327164	0.388681	4620.8	FALSE	194
2022-09-12	09:16:41	-0.0031932	-0.014204	0.0233174	4814.05	FALSE	194
2022-09-12	09:16:41	0.0440333	0.195869	0.0233174	4620.99	FALSE	194
2022-09-12	09:16:41	-0.054389	-0.241933	0.0233174	4814.05	FALSE	194
2022-09-12	09:16:41	0.0345168	0.153538	0.0233174	4621.15	FALSE	194
2022-09-12	09:16:42	0.0471376	0.209677	0.517033	4814.26	FALSE	194
2022-09-12	09:16:42	0.109682	0.487887	0.517033	4621.64	FALSE	194
2022-09-12	09:16:42	0.0366033	0.162819	0.517033	4814.43	FALSE	194
2022-09-12	09:16:42	0.271514	1.20775	0.517033	4622.84	FALSE	194
2022-09-12	09:16:43	0.312888	1.39179	3.43191	4815.82	FALSE	194
2022-09-12	09:16:43	0.299249	1.33112	3.43191	4624.18	FALSE	194
2022-09-12	09:16:43	1.19335	5.30826	3.43191	4821.13	FALSE	194
2022-09-12	09:16:43	1.28062	5.69645	3.43191	4629.87	FALSE	194
2022-09-12	09:16:44	1.8909	8.4111	13.496	4829.54	FALSE	194
2022-09-12	09:16:44	3.14057	13.9699	13.496	4643.84	1	195
2022-09-12	09:16:44	4.07065	18.1071	13.496	4847.64	1	196
2022-09-12	09:16:45	6.45339	28.706	23.7911	4672.55	1	197
2022-09-12	09:16:45	6.03797	26.8581	23.7911	4874.5	1	198
2022-09-12	09:16:45	4.46474	19.8601	23.7911	4692.41	1	199
2022-09-12	09:16:45	4.43777	19.7401	23.7911	4894.24	1	200
2022-09-12	09:16:46	4.95426	22.0375	17.7069	4714.45	1	201
2022-09-12	09:16:46	3.02897	13.4735	17.7069	4907.72	1	202
2022-09-12	09:16:46	3.89406	17.3216	17.7069	4731.77	1	203
2022-09-12	09:16:46	4.04551	17.9952	17.7069	4925.71	1	204
2022-09-12	09:16:47	4.4997	20.0156	12.4417	4751.78	1	205
2022-09-12	09:16:47	4.06123	18.0652	12.4417	4943.78	1	206
2022-09-12	09:16:47	2.01085	8.94466	12.4417	4760.73	FALSE	206
2022-09-12	09:16:47	0.616298	2.74142	12.4417	4946.52	FALSE	206
2022-09-12	09:16:48	0.372634	1.65755	1.36406	4762.38	FALSE	206
2022-09-12	09:16:48	0.297824	1.32478	1.36406	4947.84	FALSE	206
2022-09-12	09:16:48	0.282303	1.25574	1.36406	4763.64	FALSE	206
2022-09-12	09:16:48	0.273855	1.21816	1.36406	4949.06	FALSE	206
2022-09-12	09:16:49	0.290649	1.29286	2.37847	4764.93	FALSE	206
2022-09-12	09:16:49	0.390496	1.737	2.37847	4950.8	FALSE	206
2022-09-12	09:16:49	0.922964	4.10553	2.37847	4769.04	FALSE	206
2022-09-12	09:16:50	1.48434	6.60264	5.67976	4957.4	FALSE	206
2022-09-12	09:16:50	1.29609	5.76527	5.67976	4774.8	FALSE	206
2022-09-12	09:16:50	1.21894	5.42209	5.67976	4962.82	FALSE	206
2022-09-12	09:16:50	1.1081	4.92905	5.67976	4779.73	FALSE	206
2022-09-12	09:16:51	1.06622	4.74276	6.49148	4967.56	FALSE	206
2022-09-12	09:16:51	1.08439	4.82358	6.49148	4784.56	FALSE	206
2022-09-12	09:16:51	1.52006	6.76153	6.49148	4974.33	FALSE	206
2022-09-12	09:16:51	2.16673	9.63805	6.49148	4794.19	FALSE	206
2022-09-12	09:16:52	3.54251	15.7578	17.2898	4990.08	1	207
2022-09-12	09:16:52	4.61752	20.5397	17.2898	4814.73	1	208
2022-09-12	09:16:52	3.46108	15.3956	17.2898	5005.48	1	209
2022-09-12	09:16:52	3.92658	17.4662	17.2898	4832.2	1	210
2022-09-12	09:16:53	1.29981	5.78181	4.25034	5011.26	FALSE	210
2022-09-12	09:16:53	0.575993	2.56213	4.25034	4834.76	FALSE	210
2022-09-12	09:16:53	0.990751	4.40706	4.25034	5015.67	FALSE	210
2022-09-12	09:16:54	2.17431	9.67177	8.99764	4844.43	FALSE	210
2022-09-12	09:16:54	2.61446	11.6296	8.99764	5027.3	FALSE	210
2022-09-12	09:16:54	2.09803	9.33246	8.99764	4853.77	FALSE	210
2022-09-12	09:16:54	1.20424	5.3567	8.99764	5032.65	FALSE	210
2022-09-12	09:16:55	2.66688	11.8628	13.2718	4865.63	FALSE	210
2022-09-12	09:16:55	2.60383	11.5824	13.2718	5044.24	FALSE	210
2022-09-12	09:16:55	3.68022	16.3704	13.2718	4882	1	211
2022-09-12	09:16:56	2.61024	11.6109	16.9295	5055.85	FALSE	211
2022-09-12	09:16:56	3.42826	15.2496	16.9295	4897.25	1	212
2022-09-12	09:16:56	4.08301	18.162	16.9295	5074.01	1	213
2022-09-12	09:16:56	4.87218	21.6724	16.9295	4918.92	1	214
2022-09-12	09:16:56	4.03594	17.9527	16.9295	5091.96	1	215
2022-09-12	09:16:57	3.09202	13.7539	14.2355	4932.68	1	216
2022-09-12	09:16:57	3.82322	17.0064	14.2355	5108.97	1	217
2022-09-12	09:16:57	3.3168	14.7538	14.2355	4947.43	1	218
2022-09-12	09:16:57	2.56907	11.4277	14.2355	5120.4	FALSE	218
2022-09-12	09:16:58	2.7706	12.3242	9.68438	4959.75	FALSE	218
2022-09-12	09:16:58	1.98994	8.85165	9.68438	5129.25	FALSE	218
2022-09-12	09:16:58	1.7709	7.87732	9.68438	4967.63	FALSE	218
2022-09-12	09:16:59	1.76454	7.84903	5.38679	5137.1	FALSE	218
2022-09-12	09:16:59	1.12332	4.99675	5.38679	4972.63	FALSE	218
2022-09-12	09:16:59	0.613448	2.72874	5.38679	5139.83	FALSE	218
2022-09-12	09:16:59	1.34271	5.97264	5.38679	4978.6	FALSE	218
2022-09-12	09:17:00	2.1791	9.69307	6.67258	5149.52	FALSE	218
2022-09-12	09:17:00	2.04067	9.07731	6.67258	4987.68	FALSE	218
2022-09-12	09:17:00	1.09548	4.87291	6.67258	5154.39	FALSE	218
2022-09-12	09:17:00	0.685	3.04702	6.67258	4990.72	FALSE	218
2022-09-12	09:17:01	0.356043	1.58375	1.18426	5155.98	FALSE	218
2022-09-12	09:17:01	0.282964	1.25868	1.18426	4991.98	FALSE	218
2022-09-12	09:17:01	0.210293	0.935425	1.18426	5156.91	FALSE	218
2022-09-12	09:17:01	0.215636	0.959192	1.18426	4992.94	FALSE	218
2022-09-12	09:17:02	0.241183	1.07283	0.647631	5157.98	FALSE	218
2022-09-12	09:17:02	0.0866287	0.385342	0.647631	4993.33	FALSE	218
2022-09-12	09:17:02	0.10897	0.48472	0.647631	5158.47	FALSE	218
2022-09-12	09:17:03	0.0293768	0.130674	-0.481774	4993.46	FALSE	218
2022-09-12	09:17:03	-0.136832	-0.608656	-0.481774	5158.47	FALSE	218
2022-09-12	09:17:03	-0.0520481	-0.23152	-0.481774	4993.46	FALSE	218
2022-09-12	09:17:03	-0.273727	-1.21759	-0.481774	5158.47	FALSE	218
2022-09-12	09:17:04	-0.339325	-1.50939	-1.46381	4993.46	FALSE	218
2022-09-12	09:17:04	-0.307468	-1.36768	-1.46381	5158.47	FALSE	218
2022-09-12	09:17:04	-0.340445	-1.51437	-1.46381	4993.46	FALSE	218
2022-09-12	09:17:05	-0.104669	-0.465589	0.147743	5158.47	FALSE	218
2022-09-12	09:17:05	0.01584	0.0704595	0.147743	4993.53	FALSE	218
2022-09-12	09:17:05	-0.046501	-0.206846	0.147743	5158.47	FALSE	218
2022-09-12	09:17:05	0.0709544	0.315619	0.147743	4993.84	FALSE	218
2022-09-12	09:17:05	0.230446	1.02507	0.147743	5159.49	FALSE	218
2022-09-12	09:17:06	0.574415	2.55511	2.66134	4996.4	FALSE	218
2022-09-12	09:17:06	0.538639	2.39597	2.66134	5161.89	FALSE	218
2022-09-12	09:17:06	0.496552	2.20876	2.66134	4998.61	FALSE	218
2022-09-12	09:17:06	0.783575	3.4855	2.66134	5165.38	FALSE	218
2022-09-12	09:17:07	2.07955	9.25025	14.2396	5007.86	FALSE	218
2022-09-12	09:17:07	3.30474	14.7001	14.2396	5180.08	1	219
2022-09-12	09:17:07	4.2193	18.7683	14.2396	5026.63	1	220
2022-09-12	09:17:08	2.14973	9.56243	3.92324	5189.64	FALSE	220
2022-09-12	09:17:08	0.55584	2.47249	3.92324	5029.1	FALSE	220
2022-09-12	09:17:08	0.488308	2.17209	3.92324	5191.81	FALSE	220
2022-09-12	09:17:08	0.334059	1.48596	3.92324	5030.59	FALSE	220
2022-09-12	09:17:09	0.319758	1.42235	1.44278	5193.23	FALSE	220
2022-09-12	09:17:09	0.295076	1.31256	1.44278	5031.9	FALSE	220
2022-09-12	09:17:09	0.3393	1.50927	1.44278	5194.74	FALSE	220
2022-09-12	09:17:09	0.34327	1.52693	1.44278	5033.43	FALSE	220
2022-09-12	09:17:10	0.242303	1.07781	1.13723	5195.82	FALSE	220
2022-09-12	09:17:10	0.280216	1.24646	1.13723	5034.67	FALSE	220
2022-09-12	09:17:10	0.207443	0.922748	1.13723	5196.74	FALSE	220
2022-09-12	09:17:10	0.292685	1.30192	1.13723	5035.97	FALSE	220
2022-09-12	09:17:11	3.67055	16.3273	33.1257	5213.07	1	221
2022-09-12	09:17:11	6.48103	28.8289	33.1257	5064.8	1	222
2022-09-12	09:17:11	12.1894	54.2209	33.1257	5267.29	1	223
2022-09-12	09:17:12	13.997	62.2615	42.1571	5127.06	1	224
2022-09-12	09:17:12	9.89309	44.0064	42.1571	5311.3	1	225
2022-09-12	09:17:12	7.63685	33.9702	42.1571	5161.03	1	226
2022-09-12	09:17:12	6.38245	28.3904	42.1571	5339.69	1	227
2022-09-12	09:17:13	5.84077	25.9809	19.3871	5187.02	1	228
2022-09-12	09:17:13	4.34617	19.3326	19.3871	5359.02	1	229
2022-09-12	09:17:13	3.20637	14.2626	19.3871	5201.28	1	230
2022-09-12	09:17:13	4.04032	17.9722	19.3871	5376.99	1	231
2022-09-12	09:17:14	6.37838	28.3723	33.6251	5229.65	1	232
2022-09-12	09:17:14	5.55502	24.7098	33.6251	5401.7	1	233
2022-09-12	09:17:14	9.24886	41.1408	33.6251	5270.79	1	234
2022-09-12	09:17:14	9.05482	40.2777	33.6251	5441.98	1	235
2022-09-12	09:17:15	8.2309	36.6127	36.4636	5307.4	1	236
2022-09-12	09:17:15	7.89436	35.1157	36.4636	5477.1	1	237
2022-09-12	09:17:15	6.91858	30.7752	36.4636	5338.18	1	238
2022-09-12	09:17:15	9.74566	43.3506	36.4636	5520.45	1	239
2022-09-12	09:17:16	11.9836	53.3054	30.6583	5391.48	1	240
2022-09-12	09:17:16	5.58082	24.8246	30.6583	5545.27	1	241
2022-09-12	09:17:16	3.11243	13.8447	30.6583	5405.33	1	242
2022-09-12	09:17:17	2.40413	10.6941	6.14015	5555.96	FALSE	242
2022-09-12	09:17:17	1.19085	5.29714	6.14015	5410.63	FALSE	242
2022-09-12	09:17:17	0.750649	3.33904	6.14015	5559.3	FALSE	242
2022-09-12	09:17:17	1.17584	5.23037	6.14015	5415.86	FALSE	242
2022-09-12	09:17:18	1.1652	5.18304	9.03776	5564.49	FALSE	242
2022-09-12	09:17:18	1.82912	8.13629	9.03776	5423.99	FALSE	242
2022-09-12	09:17:18	4.41472	19.6376	9.03776	5584.12	1	243
2022-09-12	09:17:18	0.718079	3.19416	9.03776	5427.19	FALSE	243
2022-09-12	09:17:19	0.730903	3.2512	2.06558	5587.38	FALSE	243
2022-09-12	09:17:19	0.355178	1.5799	2.06558	5428.77	FALSE	243
2022-09-12	09:17:19	0.340216	1.51335	2.06558	5588.89	FALSE	243
2022-09-12	09:17:19	0.431158	1.91788	2.06558	5430.68	FALSE	243
2022-09-12	09:17:20	0.868613	3.86376	4.21985	5592.75	FALSE	243
2022-09-12	09:17:20	1.01925	4.53383	4.21985	5435.22	FALSE	243
2022-09-12	09:17:20	0.95813	4.26195	4.21985	5597.01	FALSE	243
2022-09-12	09:17:21	0.641489	2.85347	3.9658	5438.07	FALSE	243
2022-09-12	09:17:21	0.538181	2.39394	3.9658	5599.41	FALSE	243
2022-09-12	09:17:21	1.0052	4.47133	3.9658	5442.54	FALSE	243
2022-09-12	09:17:21	1.38134	6.14448	3.9658	5605.55	FALSE	243
2022-09-12	09:17:22	1.38352	6.15417	7.97512	5448.7	FALSE	243
2022-09-12	09:17:22	1.65701	7.37071	7.97512	5612.92	FALSE	243
2022-09-12	09:17:22	2.07472	9.22877	7.97512	5457.93	FALSE	243
2022-09-12	09:17:22	2.0563	9.14683	7.97512	5622.07	FALSE	243
2022-09-12	09:17:23	1.46352	6.51003	3.68436	5464.44	FALSE	243
2022-09-12	09:17:23	0.673397	2.9954	3.68436	5625.07	FALSE	243
2022-09-12	09:17:23	0.580827	2.58363	3.68436	5467.02	FALSE	243
2022-09-12	09:17:23	0.595382	2.64838	3.68436	5627.71	FALSE	243
2022-09-12	09:17:24	0.540267	2.40322	1.87154	5469.42	FALSE	243
2022-09-12	09:17:24	0.402964	1.79246	1.87154	5629.51	FALSE	243
2022-09-12	09:17:24	0.318995	1.41895	1.87154	5470.84	FALSE	243
2022-09-12	09:17:25	0.371209	1.65121	1.55631	5631.16	FALSE	243
2022-09-12	09:17:25	0.278639	1.23944	1.55631	5472.08	FALSE	243
2022-09-12	09:17:25	0.2764	1.22948	1.55631	5632.39	FALSE	243
2022-09-12	09:17:25	0.473244	2.10508	1.55631	5474.19	FALSE	243
2022-09-12	09:17:26	1.66668	7.41373	6.1615	5639.8	FALSE	243
2022-09-12	09:17:26	2.33752	10.3978	6.1615	5484.58	FALSE	243
2022-09-12	09:17:26	1.08653	4.8331	6.1615	5644.63	FALSE	243
2022-09-12	09:17:26	0.449936	2.00141	6.1615	5486.59	FALSE	243
2022-09-12	09:17:27	0.418181	1.86015	1.68177	5646.49	FALSE	243
2022-09-12	09:17:27	0.412685	1.83571	1.68177	5488.42	FALSE	243
2022-09-12	09:17:27	0.341438	1.51878	1.68177	5648.01	FALSE	243
2022-09-12	09:17:27	0.340013	1.51245	1.68177	5489.93	FALSE	243
2022-09-12	09:17:28	0.309224	1.37549	1.04295	5649.39	FALSE	243
2022-09-12	09:17:28	0.233601	1.0391	1.04295	5490.97	FALSE	243
2022-09-12	09:17:28	0.160573	0.714261	1.04295	5650.1	FALSE	243
2022-09-12	09:17:28	0.234466	1.04295	1.04295	5492.02	FALSE	243
2022-09-12	09:17:29	0.189377	0.842387	0.960853	5650.95	FALSE	243
2022-09-12	09:17:29	0.174771	0.777416	0.960853	5492.79	FALSE	243
2022-09-12	09:17:29	0.28388	1.26276	0.960853	5652.21	FALSE	243
2022-09-12	09:17:30	0.177417	0.789186	0.912108	5493.58	FALSE	243
2022-09-12	09:17:30	0.309377	1.37617	0.912108	5653.58	FALSE	243
2022-09-12	09:17:30	0.0621503	0.276457	0.912108	5493.86	FALSE	243
2022-09-12	09:17:30	0.27126	1.20662	0.912108	5654.79	FALSE	243
2022-09-12	09:17:31	0.189733	0.84397	1.08817	5494.7	FALSE	243
2022-09-12	09:17:31	0.317824	1.41374	1.08817	5656.2	FALSE	243
2022-09-12	09:17:31	0.212685	0.946065	1.08817	5495.65	FALSE	243
2022-09-12	09:17:31	0.258283	1.14889	1.08817	5657.35	FALSE	243
2022-09-12	09:17:32	0.330547	1.47034	1.47351	5497.12	FALSE	243
2022-09-12	09:17:32	0.385764	1.71596	1.47351	5659.07	FALSE	243
2022-09-12	09:17:32	0.343779	1.5292	1.47351	5498.65	FALSE	243
2022-09-12	09:17:32	0.264949	1.17855	1.47351	5660.25	FALSE	243
2022-09-12	09:17:33	0.278741	1.2399	1.29994	5499.89	FALSE	243
2022-09-12	09:17:33	0.345	1.53463	1.29994	5661.78	FALSE	243
2022-09-12	09:17:33	0.30154	1.34131	1.29994	5501.23	FALSE	243
2022-09-12	09:17:33	0.243677	1.08392	1.29994	5662.87	FALSE	243
2022-09-12	09:17:34	0.337316	1.50045	1.57998	5502.73	FALSE	243
2022-09-12	09:17:34	0.353804	1.57379	1.57998	5664.44	FALSE	243
2022-09-12	09:17:34	0.374466	1.6657	1.57998	5504.4	FALSE	243
2022-09-12	09:17:35	0.279046	1.24125	1.2125	5665.68	FALSE	243
2022-09-12	09:17:35	0.255229	1.13531	1.2125	5505.53	FALSE	243
2022-09-12	09:17:35	0.249326	1.10905	1.2125	5666.79	FALSE	243
2022-09-12	09:17:35	0.30673	1.3644	1.2125	5506.9	FALSE	243
2022-09-12	09:17:36	0.412176	1.83344	3.13105	5668.62	FALSE	243
2022-09-12	09:17:36	0.901438	4.00978	3.13105	5510.91	FALSE	243
2022-09-12	09:17:36	0.457316	2.03423	3.13105	5670.66	FALSE	243
2022-09-12	09:17:36	1.04464	4.64677	3.13105	5515.55	FALSE	243
2022-09-12	09:17:37	0.336858	1.49841	3.09025	5672.16	FALSE	243
2022-09-12	09:17:37	0.759758	3.37956	3.09025	5518.93	FALSE	243
2022-09-12	09:17:37	0.884491	3.93439	3.09025	5676.09	FALSE	243
2022-09-12	09:17:37	0.797774	3.54866	3.09025	5522.48	FALSE	243
2022-09-12	09:17:38	1.94271	8.64156	8.07639	5684.73	FALSE	243
2022-09-12	09:17:38	1.28856	5.73177	8.07639	5528.21	FALSE	243
2022-09-12	09:17:38	2.21569	9.85583	8.07639	5694.59	FALSE	243
2022-09-12	09:17:39	2.62703	11.6856	10.0861	5539.9	FALSE	243
2022-09-12	09:17:39	1.79274	7.97447	10.0861	5702.56	FALSE	243
2022-09-12	09:17:39	3.72922	16.5883	10.0861	5556.49	1	244
2022-09-12	09:17:39	0.920827	4.09602	10.0861	5706.66	FALSE	244
2022-09-12	09:17:40	3.14597	13.9939	9.30348	5570.48	1	245
2022-09-12	09:17:40	1.39462	6.20355	9.30348	5712.86	FALSE	245
2022-09-12	09:17:40	1.63548	7.27494	9.30348	5577.75	FALSE	245
2022-09-12	09:17:40	2.18999	9.74151	9.30348	5722.6	FALSE	245
2022-09-12	09:17:41	0.502354	2.23457	2.69563	5579.99	FALSE	245
2022-09-12	09:17:41	0.724746	3.22382	2.69563	5725.83	FALSE	245
2022-09-12	09:17:41	0.703372	3.12874	2.69563	5583.12	FALSE	245
2022-09-12	09:17:41	0.49355	2.19541	2.69563	5728.02	FALSE	245
2022-09-12	09:17:42	1.07289	4.77243	3.03117	5587.89	FALSE	245
2022-09-12	09:17:42	0.439046	1.95296	3.03117	5729.98	FALSE	245
2022-09-12	09:17:42	0.532379	2.36813	3.03117	5590.26	FALSE	245
2022-09-12	09:17:43	1.8338	8.15711	6.51163	5738.13	FALSE	245
2022-09-12	09:17:43	1.00169	4.45572	6.51163	5594.71	FALSE	245
2022-09-12	09:17:43	2.48536	11.0554	6.51163	5749.19	FALSE	245
2022-09-12	09:17:43	0.534669	2.37831	6.51163	5597.09	FALSE	245
2022-09-12	09:17:44	0.879657	3.91289	2.08534	5753.1	FALSE	245
2022-09-12	09:17:44	0.310038	1.37911	2.08534	5598.47	FALSE	245
2022-09-12	09:17:44	0.425662	1.89343	2.08534	5755	FALSE	245
2022-09-12	09:17:44	0.25986	1.15591	2.08534	5599.63	FALSE	245
2022-09-12	09:17:45	0.241438	1.07396	1.33486	5756.07	FALSE	245
2022-09-12	09:17:45	0.277723	1.23537	1.33486	5600.86	FALSE	245
2022-09-12	09:17:45	0.37411	1.66412	1.33486	5757.73	FALSE	245
2022-09-12	09:17:45	0.307087	1.36598	1.33486	5602.23	FALSE	245
2022-09-12	09:17:46	0.254313	1.13124	1.14561	5758.86	FALSE	245
2022-09-12	09:17:46	0.284186	1.26412	1.14561	5603.49	FALSE	245
2022-09-12	09:17:46	0.23299	1.03639	1.14561	5759.9	FALSE	245
2022-09-12	09:17:46	0.25869	1.1507	1.14561	5604.64	FALSE	245
2022-09-12	09:17:47	0.258079	1.14799	1.1627	5761.05	FALSE	245
2022-09-12	09:17:47	0.261031	1.16112	1.1627	5605.8	FALSE	245
2022-09-12	09:17:47	0.265051	1.179	1.1627	5762.23	FALSE	245
2022-09-12	09:17:48	0.278232	1.23763	1.30124	5607.04	FALSE	245
2022-09-12	09:17:48	0.267901	1.19168	1.30124	5763.42	FALSE	245
2022-09-12	09:17:48	0.336908	1.49863	1.30124	5608.54	FALSE	245
2022-09-12	09:17:48	0.287087	1.27702	1.30124	5764.7	FALSE	245
2022-09-12	09:17:49	0.285865	1.27158	1.26078	5609.81	FALSE	245
2022-09-12	09:17:49	0.304237	1.35331	1.26078	5766.05	FALSE	245
2022-09-12	09:17:49	0.279351	1.24261	1.26078	5611.06	FALSE	245
2022-09-12	09:17:49	0.264288	1.17561	1.26078	5767.23	FALSE	245
2022-09-12	09:17:50	0.259962	1.15636	1.17572	5612.21	FALSE	245
2022-09-12	09:17:50	0.265611	1.18149	1.17572	5768.41	FALSE	245
2022-09-12	09:17:50	0.265713	1.18194	1.17572	5613.39	FALSE	245
2022-09-12	09:17:50	0.265967	1.18307	1.17572	5769.59	FALSE	245
2022-09-12	09:17:51	0.256552	1.14119	1.14927	5614.53	FALSE	245
2022-09-12	09:17:51	0.2564	1.14052	1.14927	5770.73	FALSE	245
2022-09-12	09:17:51	0.26215	1.1661	1.14927	5615.7	FALSE	245
2022-09-12	09:17:52	0.277825	1.23582	1.40724	5771.97	FALSE	245
2022-09-12	09:17:52	0.287596	1.27928	1.40724	5616.98	FALSE	245
2022-09-12	09:17:52	0.318537	1.41692	1.40724	5773.38	FALSE	245
2022-09-12	09:17:52	0.381489	1.69694	1.40724	5618.68	FALSE	245
2022-09-12	09:17:53	0.470954	2.0949	1.83163	5775.48	FALSE	245
2022-09-12	09:17:53	0.406578	1.80854	1.83163	5620.49	FALSE	245
2022-09-12	09:17:53	0.391819	1.74289	1.83163	5777.22	FALSE	245
2022-09-12	09:17:53	0.377723	1.68019	1.83163	5622.17	FALSE	245
2022-09-12	09:17:54	0.42042	1.87011	1.58517	5779.09	FALSE	245
2022-09-12	09:17:54	0.354873	1.57855	1.58517	5623.74	FALSE	245
2022-09-12	09:17:54	0.322405	1.43412	1.58517	5780.53	FALSE	245
2022-09-12	09:17:54	0.327748	1.45789	1.58517	5625.2	FALSE	245
2022-09-12	09:17:55	0.307799	1.36915	1.2567	5781.89	FALSE	245
2022-09-12	09:17:55	0.280369	1.24714	1.2567	5626.45	FALSE	245
2022-09-12	09:17:55	0.278588	1.23922	1.2567	5783.13	FALSE	245
2022-09-12	09:17:55	0.263321	1.1713	1.2567	5627.62	FALSE	245
2022-09-12	09:17:56	0.282456	1.25642	1.29566	5784.39	FALSE	245
2022-09-12	09:17:56	0.283117	1.25936	1.29566	5628.88	FALSE	245
2022-09-12	09:17:56	0.308257	1.37119	1.29566	5785.76	FALSE	245
2022-09-12	09:17:57	0.271361	1.20707	1.32184	5630.09	FALSE	245
2022-09-12	09:17:57	0.272634	1.21273	1.32184	5786.97	FALSE	245
2022-09-12	09:17:57	0.30271	1.34651	1.32184	5631.43	FALSE	245
2022-09-12	09:17:57	0.341947	1.52105	1.32184	5788.5	FALSE	245
2022-09-12	09:17:58	0.405509	1.80379	2.17583	5633.24	FALSE	245
2022-09-12	09:17:58	0.72673	3.23264	2.17583	5791.73	FALSE	245
2022-09-12	09:17:58	0.434364	1.93214	2.17583	5635.17	FALSE	245
2022-09-12	09:17:58	0.389987	1.73474	2.17583	5793.46	FALSE	245
2022-09-12	09:17:59	0.833549	3.70779	4.10831	5638.88	FALSE	245
2022-09-12	09:17:59	0.834313	3.71119	4.10831	5797.17	FALSE	245
2022-09-12	09:17:59	0.599402	2.66626	4.10831	5641.54	FALSE	245
2022-09-12	09:17:59	1.42709	6.34798	4.10831	5803.52	FALSE	245
2022-09-12	09:18:00	2.08922	9.29327	8.25137	5650.84	FALSE	245
2022-09-12	09:18:00	1.48368	6.59971	8.25137	5810.12	FALSE	245
2022-09-12	09:18:00	1.99207	8.86113	8.25137	5659.7	FALSE	245
2022-09-12	09:18:01	2.78668	12.3957	15.6412	5822.52	FALSE	245
2022-09-12	09:18:01	2.99915	13.3408	15.6412	5673.04	FALSE	245
2022-09-12	09:18:01	3.93406	17.4995	15.6412	5840.02	1	246
2022-09-12	09:18:01	4.3453	19.3288	15.6412	5692.37	1	247
2022-09-12	09:18:02	3.67268	16.3368	11.3756	5856.35	1	248
2022-09-12	09:18:02	2.68917	11.962	11.3756	5704.33	FALSE	248
2022-09-12	09:18:02	1.7705	7.87554	11.3756	5864.23	FALSE	248
2022-09-12	09:18:02	2.09706	9.32814	11.3756	5713.66	FALSE	248
2022-09-12	09:18:03	1.07238	4.77016	2.52868	5869	FALSE	248
2022-09-12	09:18:03	0.425967	1.89479	2.52868	5715.55	FALSE	248
2022-09-12	09:18:03	0.407901	1.81443	2.52868	5870.81	FALSE	248
2022-09-12	09:18:03	0.367646	1.63536	2.52868	5717.19	FALSE	248
2022-09-12	09:18:04	0.31014	1.37956	1.52189	5872.19	FALSE	248
2022-09-12	09:18:04	0.365814	1.62721	1.52189	5718.82	FALSE	248
2022-09-12	09:18:04	0.357519	1.59032	1.52189	5873.78	FALSE	248
2022-09-12	09:18:04	0.335076	1.49049	1.52189	5720.31	FALSE	248
2022-09-12	09:18:05	0.355891	1.58307	1.50845	5875.37	FALSE	248
2022-09-12	09:18:05	0.309479	1.37662	1.50845	5721.68	FALSE	248
2022-09-12	09:18:05	0.351972	1.56564	1.50845	5876.93	FALSE	248
2022-09-12	09:18:06	0.326069	1.45042	1.79026	5723.13	FALSE	248
2022-09-12	09:18:06	0.382863	1.70305	1.79026	5878.64	FALSE	248
2022-09-12	09:18:06	0.353193	1.57107	1.79026	5724.7	FALSE	248
2022-09-12	09:18:06	0.547748	2.43649	1.79026	5881.07	FALSE	248
2022-09-12	09:18:07	0.944084	4.19947	3.3241	5728.9	FALSE	248
2022-09-12	09:18:07	0.749886	3.33564	3.3241	5884.41	FALSE	248
2022-09-12	09:18:07	0.686221	3.05245	3.3241	5731.96	FALSE	248
2022-09-12	09:18:07	0.608969	2.70882	3.3241	5887.12	FALSE	248
2022-09-12	09:18:08	1.64047	7.29714	10.3608	5739.25	FALSE	248
2022-09-12	09:18:08	2.37665	10.5718	10.3608	5897.69	FALSE	248
2022-09-12	09:18:08	2.40424	10.6945	10.3608	5749.95	FALSE	248
2022-09-12	09:18:08	2.89548	12.8797	10.3608	5910.57	FALSE	248
2022-09-12	09:18:09	2.75217	12.2422	8.25899	5762.19	FALSE	248
2022-09-12	09:18:09	1.85564	8.25426	8.25899	5918.82	FALSE	248
2022-09-12	09:18:09	0.962303	4.28052	8.25899	5766.47	FALSE	248
2022-09-12	09:18:10	0.402354	1.78975	2.10497	5920.61	FALSE	248
2022-09-12	09:18:10	0.425865	1.89433	2.10497	5768.36	FALSE	248
2022-09-12	09:18:10	0.765254	3.404	2.10497	5924.02	FALSE	248
2022-09-12	09:18:10	0.299402	1.3318	2.10497	5769.7	FALSE	248
2022-09-12	09:18:11	0.260216	1.15749	0.986075	5925.17	FALSE	248
2022-09-12	09:18:11	0.232583	1.03458	0.986075	5770.73	FALSE	248
2022-09-12	09:18:11	0.164186	0.730332	0.986075	5925.9	FALSE	248
2022-09-12	09:18:11	0.229733	1.0219	0.986075	5771.75	FALSE	248
2022-09-12	09:18:12	0.239504	1.06536	0.922409	5926.97	FALSE	248
2022-09-12	09:18:12	0.20327	0.904186	0.922409	5772.66	FALSE	248
2022-09-12	09:18:12	0.206578	0.9189	0.922409	5927.89	FALSE	248
2022-09-12	09:18:12	0.180115	0.801188	0.922409	5773.46	FALSE	248
2022-09-12	09:18:13	0.160013	0.71177	0.765476	5928.6	FALSE	248
2022-09-12	09:18:13	0.149428	0.664686	0.765476	5774.12	FALSE	248
2022-09-12	09:18:13	0.167239	0.743913	0.765476	5929.34	FALSE	248
2022-09-12	09:18:13	0.211667	0.941537	0.765476	5775.06	FALSE	248
2022-09-12	09:18:14	0.174618	0.776736	-0.0780407	5930.12	FALSE	248
2022-09-12	09:18:14	-0.147264	-0.65506	-0.0780407	5775.06	FALSE	248
2022-09-12	09:18:14	-0.079987	-0.355798	-0.0780407	5930.12	FALSE	248
2022-09-12	09:18:15	0.0360435	0.160329	1.37374	5775.22	FALSE	248
2022-09-12	09:18:15	0.348461	1.55002	1.37374	5931.67	FALSE	248
2022-09-12	09:18:15	0.404491	1.79926	1.37374	5777.02	FALSE	248
2022-09-12	09:18:15	0.446323	1.98533	1.37374	5933.66	FALSE	248
2022-09-12	09:18:16	0.681692	3.0323	7.41423	5780.06	FALSE	248
2022-09-12	09:18:16	0.91925	4.08901	7.41423	5937.74	FALSE	248
2022-09-12	09:18:16	1.845	8.20693	7.41423	5788.26	FALSE	248
2022-09-12	09:18:16	3.22123	14.3287	7.41423	5952.07	1	249
2022-09-12	09:18:17	3.71116	16.508	10.3216	5804.77	1	250
2022-09-12	09:18:17	3.78551	16.8387	10.3216	5968.91	1	251
2022-09-12	09:18:17	1.3162	5.85472	10.3216	5810.63	FALSE	251
2022-09-12	09:18:17	0.468766	2.08516	10.3216	5971	FALSE	251
2022-09-12	09:18:18	0.874007	3.88776	6.67756	5814.51	FALSE	251
2022-09-12	09:18:18	1.74159	7.74694	6.67756	5978.74	FALSE	251
2022-09-12	09:18:18	1.88795	8.39798	6.67756	5822.91	FALSE	251
2022-09-12	09:18:19	0.501946	2.23276	1.6224	5980.98	FALSE	251
2022-09-12	09:18:19	0.35243	1.56768	1.6224	5824.48	FALSE	251
2022-09-12	09:18:19	0.328257	1.46015	1.6224	5982.44	FALSE	251
2022-09-12	09:18:19	0.276298	1.22903	1.6224	5825.71	FALSE	251
2022-09-12	09:18:20	0.294059	1.30803	1.42563	5983.74	FALSE	251
2022-09-12	09:18:20	0.297061	1.32139	1.42563	5827.03	FALSE	251
2022-09-12	09:18:20	0.263168	1.17062	1.42563	5984.92	FALSE	251
2022-09-12	09:18:20	0.427697	1.90248	1.42563	5828.93	FALSE	251
2022-09-12	09:18:21	0.622761	2.77017	4.57298	5987.69	FALSE	251
2022-09-12	09:18:21	0.903728	4.01996	4.57298	5832.95	FALSE	251
2022-09-12	09:18:21	1.56566	6.96437	4.57298	5994.65	FALSE	251
2022-09-12	09:18:21	1.02006	4.53743	4.57298	5837.49	FALSE	251
2022-09-12	09:18:22	0.482303	2.14538	1.76762	5996.8	FALSE	251
2022-09-12	09:18:22	0.383168	1.70441	1.76762	5839.19	FALSE	251
2022-09-12	09:18:22	0.365305	1.62495	1.76762	5998.42	FALSE	251
2022-09-12	09:18:22	0.358741	1.59575	1.76762	5840.79	FALSE	251
2022-09-12	09:18:23	0.545661	2.42721	2.66649	6000.85	FALSE	251
2022-09-12	09:18:23	0.767443	3.41374	2.66649	5844.2	FALSE	251
2022-09-12	09:18:23	0.485255	2.15851	2.66649	6003.01	FALSE	251
2022-09-12	09:18:24	0.44902	1.99733	1.98765	5846.2	FALSE	251
2022-09-12	09:18:24	0.558741	2.48539	1.98765	6005.49	FALSE	251
2022-09-12	09:18:24	0.411921	1.83231	1.98765	5848.03	FALSE	251
2022-09-12	09:18:24	0.367697	1.63559	1.98765	6007.13	FALSE	251
2022-09-12	09:18:25	0.355687	1.58217	1.56298	5849.62	FALSE	251
2022-09-12	09:18:25	0.390802	1.73837	1.56298	6008.87	FALSE	251
2022-09-12	09:18:25	0.349987	1.55681	1.56298	5851.17	FALSE	251
2022-09-12	09:18:25	0.30902	1.37458	1.56298	6010.24	FALSE	251
2022-09-12	09:18:26	0.299657	1.33293	1.33854	5852.51	FALSE	251
2022-09-12	09:18:26	0.294873	1.31165	1.33854	6011.55	FALSE	251
2022-09-12	09:18:26	0.300471	1.33656	1.33854	5853.84	FALSE	251
2022-09-12	09:18:26	0.308664	1.373	1.33854	6012.92	FALSE	251
2022-09-12	09:18:27	0.305255	1.35784	1.35663	5855.2	FALSE	251
2022-09-12	09:18:27	0.301285	1.34018	1.35663	6014.26	FALSE	251
2022-09-12	09:18:27	0.30841	1.37187	1.35663	5856.57	FALSE	251
2022-09-12	09:18:28	0.314211	1.39767	1.84861	6015.66	FALSE	251
2022-09-12	09:18:28	0.375891	1.67204	1.84861	5858.24	FALSE	251
2022-09-12	09:18:28	0.460827	2.04985	1.84861	6017.71	FALSE	251
2022-09-12	09:18:28	0.511412	2.27486	1.84861	5860.52	FALSE	251
2022-09-12	09:18:29	0.584237	2.5988	3.02161	6020.31	FALSE	251
2022-09-12	09:18:29	0.676908	3.01102	3.02161	5863.53	FALSE	251
2022-09-12	09:18:29	0.734262	3.26614	3.02161	6023.58	FALSE	251
2022-09-12	09:18:29	0.721743	3.21046	3.02161	5866.74	FALSE	251
2022-09-12	09:18:30	1.71396	7.62404	8.13778	6031.2	FALSE	251
2022-09-12	09:18:30	2.09106	9.30145	8.13778	5876.04	FALSE	251
2022-09-12	09:18:30	1.89508	8.42969	8.13778	6039.63	FALSE	251
2022-09-12	09:18:30	1.61772	7.19594	8.13778	5883.24	FALSE	251
2022-09-12	09:18:31	0.483117	2.149	1.60792	6041.78	FALSE	251
2022-09-12	09:18:31	0.377723	1.68019	1.60792	5884.92	FALSE	251
2022-09-12	09:18:31	0.299758	1.33338	1.60792	6043.11	FALSE	251
2022-09-12	09:18:31	0.285305	1.26909	1.60792	5886.19	FALSE	251
2022-09-12	09:18:32	0.314415	1.39858	2.19797	6044.51	FALSE	251
2022-09-12	09:18:32	0.233397	1.0382	2.19797	5887.22	FALSE	251
2022-09-12	09:18:32	0.934567	4.15714	2.19797	6048.67	FALSE	251
2022-09-12	09:18:33	5.61085	24.9582	25.4288	5912.18	1	252
2022-09-12	09:18:33	6.7452	30.004	25.4288	6078.67	1	253
2022-09-12	09:18:33	7.90459	35.1612	25.4288	5947.34	1	254
2022-09-12	09:18:33	2.60597	11.5919	25.4288	6090.27	FALSE	254
2022-09-12	09:18:34	2.53401	11.2718	7.81797	5958.62	FALSE	254
2022-09-12	09:18:34	1.15793	5.1507	7.81797	6095.42	FALSE	254
2022-09-12	09:18:34	0.722965	3.21589	7.81797	5961.83	FALSE	254
2022-09-12	09:18:34	2.61533	11.6335	7.81797	6107.05	FALSE	254
2022-09-12	09:18:35	0.510445	2.27056	4.04073	5964.1	FALSE	254
2022-09-12	09:18:35	1.81396	8.06886	4.04073	6115.12	FALSE	254
2022-09-12	09:18:35	0.46215	2.05574	4.04073	5966.16	FALSE	254
2022-09-12	09:18:35	0.847036	3.76779	4.04073	6118.89	FALSE	254
2022-09-12	09:18:36	1.00556	4.47293	6.10665	5970.63	FALSE	254
2022-09-12	09:18:36	1.35187	6.01339	6.10665	6124.9	FALSE	254
2022-09-12	09:18:36	1.76108	7.83364	6.10665	5978.46	FALSE	254
2022-09-12	09:18:37	1.09355	4.86433	7.44004	6129.76	FALSE	254
2022-09-12	09:18:37	1.60256	7.12851	7.44004	5985.59	FALSE	254
2022-09-12	09:18:37	2.45248	10.9091	7.44004	6140.67	FALSE	254
2022-09-12	09:18:37	1.54179	6.85819	7.44004	5992.45	FALSE	254
2022-09-12	09:18:38	2.422	10.7735	13.6909	6151.45	FALSE	254
2022-09-12	09:18:38	3.12576	13.904	13.6909	6006.36	1	255
2022-09-12	09:18:38	2.34128	10.4145	13.6909	6161.86	FALSE	255
2022-09-12	09:18:38	4.42235	19.6715	13.6909	6026.03	1	256
2022-09-12	09:18:39	4.21711	18.7585	20.293	6180.62	1	257
2022-09-12	09:18:39	5.64505	25.1103	20.293	6051.14	1	258
2022-09-12	09:18:39	5.2508	23.3566	20.293	6203.98	1	259
2022-09-12	09:18:39	3.13533	13.9466	20.293	6065.08	1	260
2022-09-12	09:18:40	6.98647	31.0772	20.1696	6235.05	1	261
2022-09-12	09:18:40	2.79421	12.4292	20.1696	6077.51	FALSE	261
2022-09-12	09:18:40	4.35614	19.377	20.1696	6254.43	1	262
2022-09-12	09:18:40	4.00052	17.7951	20.1696	6095.31	1	263
2022-09-12	09:18:41	3.26123	14.5066	15.2233	6268.94	1	264
2022-09-12	09:18:41	4.585	20.395	15.2233	6115.7	1	265
2022-09-12	09:18:41	2.42083	10.7683	15.2233	6279.71	FALSE	265
2022-09-12	09:18:42	3.11731	13.8664	9.93685	6129.57	1	266
2022-09-12	09:18:42	3.24658	14.4414	9.93685	6294.15	1	267
2022-09-12	09:18:42	1.85202	8.23816	9.93685	6137.81	FALSE	267
2022-09-12	09:18:42	0.719707	3.2014	9.93685	6297.35	FALSE	267
2022-09-12	09:18:43	0.846883	3.7671	3.74894	6141.57	FALSE	267
2022-09-12	09:18:43	0.271463	1.20752	3.74894	6298.56	FALSE	267
2022-09-12	09:18:43	0.609173	2.70972	3.74894	6144.28	FALSE	267
2022-09-12	09:18:43	1.64368	7.31142	3.74894	6305.87	FALSE	267
2022-09-12	09:18:44	1.40475	6.24861	9.15741	6150.53	FALSE	267
2022-09-12	09:18:44	2.21528	9.85401	9.15741	6315.72	FALSE	267
2022-09-12	09:18:44	4.04505	17.9932	9.15741	6168.53	1	268
2022-09-12	09:18:44	0.569631	2.53383	9.15741	6318.25	FALSE	268
2022-09-12	09:18:45	0.364288	1.62043	2.13346	6170.15	FALSE	268
2022-09-12	09:18:45	0.701387	3.11991	2.13346	6321.37	FALSE	268
2022-09-12	09:18:45	0.373193	1.66004	2.13346	6171.81	FALSE	268
2022-09-12	09:18:46	0.933041	4.15035	4.55618	6325.52	FALSE	268
2022-09-12	09:18:46	0.869427	3.86739	4.55618	6175.67	FALSE	268
2022-09-12	09:18:46	0.897621	3.9928	4.55618	6329.52	FALSE	268
2022-09-12	09:18:46	1.39701	6.21418	4.55618	6181.89	FALSE	268
2022-09-12	09:18:47	1.53375	6.82243	5.90066	6336.34	FALSE	268
2022-09-12	09:18:47	1.36495	6.07157	5.90066	6187.96	FALSE	268
2022-09-12	09:18:47	1.69966	7.56043	5.90066	6343.9	FALSE	268
2022-09-12	09:18:47	0.707748	3.1482	5.90066	6191.11	FALSE	268
2022-09-12	09:18:48	1.63111	7.2555	8.50115	6351.16	FALSE	268
2022-09-12	09:18:48	0.694058	3.08731	8.50115	6194.2	FALSE	268
2022-09-12	09:18:48	2.96011	13.1672	8.50115	6364.32	FALSE	268
2022-09-12	09:18:48	2.3593	10.4946	8.50115	6204.69	FALSE	268
2022-09-12	09:18:49	3.085	13.7227	12.6873	6378.05	1	269
2022-09-12	09:18:49	3.28429	14.6092	12.6873	6219.3	1	270
2022-09-12	09:18:49	2.18739	9.72995	12.6873	6387.78	FALSE	270
2022-09-12	09:18:50	5.37757	23.9205	15.0062	6243.22	1	271
2022-09-12	09:18:50	2.17034	9.65411	15.0062	6397.43	FALSE	271
2022-09-12	09:18:50	4.15874	18.4989	15.0062	6261.72	1	272
2022-09-12	09:18:50	1.78749	7.95111	15.0062	6405.38	FALSE	272
2022-09-12	09:18:51	1.44531	6.42903	5.51708	6268.15	FALSE	272
2022-09-12	09:18:51	1.23223	5.48121	5.51708	6410.86	FALSE	272
2022-09-12	09:18:51	1.05818	4.707	5.51708	6272.85	FALSE	272
2022-09-12	09:18:51	1.22546	5.45109	5.51708	6416.31	FALSE	272
2022-09-12	09:18:52	0.59187	2.63276	3.05698	6275.49	FALSE	272
2022-09-12	09:18:52	0.768003	3.41623	3.05698	6419.73	FALSE	272
2022-09-12	09:18:52	0.525712	2.33847	3.05698	6277.83	FALSE	272
2022-09-12	09:18:52	0.863372	3.84045	3.05698	6423.57	FALSE	272
2022-09-12	09:18:53	0.607137	2.70067	5.12069	6280.53	FALSE	272
2022-09-12	09:18:53	0.801845	3.56677	5.12069	6427.14	FALSE	272
2022-09-12	09:18:53	1.55258	6.90619	5.12069	6287.43	FALSE	272
2022-09-12	09:18:53	1.64317	7.30915	5.12069	6434.45	FALSE	272
2022-09-12	09:18:54	2.26215	10.0625	11.7794	6297.49	FALSE	272
2022-09-12	09:18:54	2.25385	10.0256	11.7794	6444.47	FALSE	272
2022-09-12	09:18:54	3.42836	15.25	11.7794	6312.75	1	273
2022-09-12	09:18:55	2.24871	10.0027	7.34903	6454.47	FALSE	273
2022-09-12	09:18:55	1.64683	7.32543	7.34903	6320.07	FALSE	273
2022-09-12	09:18:55	1.34683	5.99097	7.34903	6460.47	FALSE	273
2022-09-12	09:18:55	1.36617	6.077	7.34903	6326.15	FALSE	273
2022-09-12	09:18:56	1.10561	4.91797	17.7812	6465.38	FALSE	273
2022-09-12	09:18:56	4.06907	18.1	17.7812	6344.25	1	274
2022-09-12	09:18:56	4.96367	22.0794	17.7812	6487.46	1	275
2022-09-12	09:18:56	5.85121	26.0274	17.7812	6370.27	1	276
2022-09-12	09:18:57	8.71757	38.7775	24.6477	6526.24	1	277
2022-09-12	09:18:57	4.84993	21.5735	24.6477	6391.85	1	278
2022-09-12	09:18:57	4.62347	20.5661	24.6477	6546.81	1	279
2022-09-12	09:18:57	3.97319	17.6735	24.6477	6409.52	1	280
2022-09-12	09:18:58	2.88403	12.8287	17.3593	6559.64	FALSE	280
2022-09-12	09:18:58	6.6221	29.4564	17.3593	6438.98	1	281
2022-09-12	09:18:58	2.20149	9.79267	17.3593	6569.43	FALSE	281
2022-09-12	09:18:59	5.29212	23.5404	16.1867	6462.52	1	282
2022-09-12	09:18:59	2.10525	9.36457	16.1867	6578.79	FALSE	282
2022-09-12	09:18:59	4.66052	20.7309	16.1867	6483.25	1	283
2022-09-12	09:18:59	2.49787	11.111	16.1867	6589.9	FALSE	283
2022-09-12	09:19:00	3.31803	14.7593	14.7312	6498.01	1	284
2022-09-12	09:19:00	3.98296	17.717	14.7312	6607.62	1	285
2022-09-12	09:19:00	1.92072	8.54375	14.7312	6506.55	FALSE	285
2022-09-12	09:19:00	4.0252	17.9049	14.7312	6625.53	1	286
2022-09-12	09:19:01	1.79228	7.97242	13.2091	6514.53	FALSE	286
2022-09-12	09:19:01	4.71904	20.9912	13.2091	6646.52	1	287
2022-09-12	09:19:01	1.58866	7.06668	13.2091	6521.59	FALSE	287
2022-09-12	09:19:01	3.77813	16.8059	13.2091	6663.32	1	288
2022-09-12	09:19:02	1.65955	7.38201	11.1348	6528.97	FALSE	288
2022-09-12	09:19:02	2.35223	10.4632	11.1348	6673.79	FALSE	288
2022-09-12	09:19:02	2.88062	12.8136	11.1348	6541.79	FALSE	288
2022-09-12	09:19:02	3.12042	13.8803	11.1348	6687.67	1	289
2022-09-12	09:19:03	4.76159	21.1805	19.514	6562.97	1	290
2022-09-12	09:19:03	2.60245	11.5762	19.514	6699.24	FALSE	290
2022-09-12	09:19:03	5.7968	25.7853	19.514	6588.75	1	291
2022-09-12	09:19:04	3.72037	16.5489	15.3015	6715.79	1	292
2022-09-12	09:19:04	5.35533	23.8216	15.3015	6612.57	1	293
2022-09-12	09:19:04	1.19039	5.29509	15.3015	6721.09	FALSE	293
2022-09-12	09:19:04	3.49365	15.5405	15.3015	6628.12	1	294
2022-09-12	09:19:05	2.98098	13.26	8.91565	6734.35	FALSE	294
2022-09-12	09:19:05	1.36134	6.05551	8.91565	6634.17	FALSE	294
2022-09-12	09:19:05	2.23971	9.96268	8.91565	6744.31	FALSE	294
2022-09-12	09:19:05	1.43528	6.38441	8.91565	6640.56	FALSE	294
2022-09-12	09:19:06	2.94856	13.1158	15.689	6757.42	FALSE	294
2022-09-12	09:19:06	2.23197	9.92825	15.689	6650.48	FALSE	294
2022-09-12	09:19:06	4.06795	18.0951	15.689	6775.52	1	295
2022-09-12	09:19:06	4.85966	21.6167	15.689	6672.1	1	296
2022-09-12	09:19:07	5.47716	24.3635	25.8784	6799.88	1	297
2022-09-12	09:19:07	6.44881	28.6856	25.8784	6700.79	1	298
2022-09-12	09:19:07	5.52719	24.586	25.8784	6824.47	1	299
2022-09-12	09:19:08	9.66062	42.9724	44.0878	6743.76	1	300
2022-09-12	09:19:08	6.62703	29.4784	44.0878	6853.95	1	301
2022-09-12	09:19:08	17.493	77.8124	44.0878	6821.57	1	302
2022-09-12	09:19:08	5.86489	26.0882	44.0878	6880.04	1	303
2022-09-12	09:19:09	9.69517	43.1261	28.2292	6864.7	1	304
2022-09-12	09:19:09	4.30077	19.1307	28.2292	6899.17	1	305
2022-09-12	09:19:09	5.15838	22.9455	28.2292	6887.64	1	306
2022-09-12	09:19:09	6.23054	27.7147	28.2292	6926.88	1	307
2022-09-12	09:19:10	7.265	32.3162	73.4564	6919.96	1	308
2022-09-12	09:19:10	12.2894	54.6657	73.4564	6981.55	1	309
2022-09-12	09:19:10	17.7934	79.1486	73.4564	6999.11	1	310
2022-09-12	09:19:10	28.7071	127.695	73.4564	7109.24	1	311
2022-09-12	09:19:11	19.4083	86.332	56.5189	7085.44	1	312
2022-09-12	09:19:11	11.4286	50.8367	56.5189	7160.08	1	313
2022-09-12	09:19:11	13.4293	59.7362	56.5189	7145.17	1	314
2022-09-12	09:19:11	6.55782	29.1705	56.5189	7189.25	1	315
2022-09-12	09:19:12	11.276	50.1579	70.3161	7195.33	1	316
2022-09-12	09:19:12	23.1452	102.954	70.3161	7292.2	1	317
2022-09-12	09:19:12	13.0021	57.8359	70.3161	7253.17	1	318

## Sheet: Royal_martin_20229129143 (E (2)
Date	Time	Lbs	Newtons	Total force x time	Total Time Steps Force >3		**GoPro Fitting: 9:02
2022-09-12	09:14:12	0.637417	2.83536	2.83536	FALSE	0			Total force x time	7253.17
2022-09-12	09:14:12	0.376247	1.67362	1.67362	FALSE	0			Total Time Steps Force >3	318
2022-09-12	09:14:12	0.265713	1.18194	4.0173	FALSE	0
2022-09-12	09:14:12	0.500471	2.2262	3.89982	FALSE	0
2022-09-12	09:14:13	0.290445	1.29196	5.30926	FALSE	0
2022-09-12	09:14:13	0.336959	1.49886	5.39868	FALSE	0
2022-09-12	09:14:13	0.337316	1.50045	6.80971	FALSE	0
2022-09-12	09:14:13	1.12246	4.99293	10.3916	FALSE	0		Sees/pulls to dog first minute or so
2022-09-12	09:14:14	2.23447	9.93937	16.7491	FALSE	0
2022-09-12	09:14:14	9.95456	44.2799	54.6715	1	1
2022-09-12	09:14:14	10.5162	46.7782	63.5272	1	2
2022-09-12	09:14:14	10.5127	46.7626	101.434	1	3
2022-09-12	09:14:15	6.29049	27.9814	91.5086	1	4
2022-09-12	09:14:15	14.8685	66.1381	167.572	1	5
2022-09-12	09:14:15	11.644	51.7948	143.303	1	6
2022-09-12	09:14:15	11.1384	49.5458	217.118	1	7
2022-09-12	09:14:16	8.67171	38.5735	181.877	1	8
2022-09-12	09:14:16	17.8817	79.5414	296.659	1	9
2022-09-12	09:14:16	20.3973	90.7313	272.608	1	10
2022-09-12	09:14:17	11.392	50.6739	347.333	1	11
2022-09-12	09:14:17	6.59095	29.3179	301.926	1	12
2022-09-12	09:14:17	3.95452	17.5905	364.924	1	13
2022-09-12	09:14:17	1.90032	8.453	310.379	FALSE	13
2022-09-12	09:14:18	3.05558	13.5918	378.516	1	14
2022-09-12	09:14:18	6.39996	28.4683	338.847	1	15
2022-09-12	09:14:18	10.7918	48.0041	426.52	1	16
2022-09-12	09:14:18	7.37711	32.8149	371.662	1	17
2022-09-12	09:14:19	4.46815	19.8752	446.395	1	18
2022-09-12	09:14:19	6.79421	30.222	401.884	1	19
2022-09-12	09:14:19	12.8027	56.949	503.344	1	20
2022-09-12	09:14:19	14.0922	62.6849	464.569	1	21
2022-09-12	09:14:20	20.2418	90.0396	593.383	1	22
2022-09-12	09:14:20	9.91375	44.0983	508.668	1	23
2022-09-12	09:14:20	14.4574	64.3094	657.693	1	24
2022-09-12	09:14:21	7.62902	33.9354	542.603	1	25
2022-09-12	09:14:21	6.37609	28.3621	686.055	1	26
2022-09-12	09:14:21	16.2703	72.3735	614.976	1	27
2022-09-12	09:14:21	6.93858	30.8642	716.919	1	28
2022-09-12	09:14:22	8.52016	37.8994	652.876	1	29
2022-09-12	09:14:22	13.3272	59.2821	776.201	1	30
2022-09-12	09:14:22	8.23777	36.6432	689.519	1	31
2022-09-12	09:14:22	17.8781	79.5254	855.727	1	32
2022-09-12	09:14:23	14.6066	64.9731	754.492	1	33
2022-09-12	09:14:23	14.3057	63.6346	919.361	1	34
2022-09-12	09:14:23	24.3914	108.498	862.99	1	35
2022-09-12	09:14:23	15.6061	69.4191	988.78	1	36
2022-09-12	09:14:24	11.7435	52.2374	915.227	1	37
2022-09-12	09:14:24	15.0865	67.1078	1055.89	1	38
2022-09-12	09:14:24	12.4838	55.5304	970.758	1	39
2022-09-12	09:14:24	4.89233	21.7621	1077.65	1	40
2022-09-12	09:14:25	5.22622	23.2473	994.005	1	41
2022-09-12	09:14:25	4.5253	20.1294	1097.78	1	42
2022-09-12	09:14:25	0.430649	1.91561	995.921	FALSE	42
2022-09-12	09:14:26	0.655331	2.91504	1100.69	FALSE	42
2022-09-12	09:14:26	0.29869	1.32863	997.249	FALSE	42
2022-09-12	09:14:26	13.3935	59.577	1160.27	1	43
2022-09-12	09:14:26	19.5132	86.7986	1084.05	1	44
2022-09-12	09:14:27	7.73283	34.3972	1194.67	1	45
2022-09-12	09:14:27	1.74475	7.761	1091.81	FALSE	45
2022-09-12	09:14:27	0.421438	1.87464	1196.54	FALSE	45
2022-09-12	09:14:27	0.41187	1.83208	1093.64	FALSE	45
2022-09-12	09:14:28	0.397875	1.76983	1198.31	FALSE	45
2022-09-12	09:14:28	4.76143	21.1798	1114.82	1	46
2022-09-12	09:14:28	16.7155	74.3539	1272.67	1	47
2022-09-12	09:14:28	16.5908	73.7992	1188.62	1	48
2022-09-12	09:14:29	8.13527	36.1873	1308.85	1	49
2022-09-12	09:14:29	2.20866	9.82456	1198.44	FALSE	49
2022-09-12	09:14:29	2.32805	10.3556	1319.21	FALSE	49
2022-09-12	09:14:30	0.359199	1.59779	1200.04	FALSE	49
2022-09-12	09:14:30	0.962659	4.2821	1323.49	FALSE	49
2022-09-12	09:14:30	6.01136	26.7397	1226.78	1	50
2022-09-12	09:14:30	19.0349	84.671	1408.16	1	51
2022-09-12	09:14:31	13.8941	61.8037	1288.59	1	52
2022-09-12	09:14:31	3.14174	13.9751	1422.14	1	53
2022-09-12	09:14:31	0.160878	0.715618	1289.3	FALSE	53
2022-09-12	09:14:31	0.458181	2.03808	1424.18	FALSE	53
2022-09-12	09:14:32	0.331565	1.47487	1290.78	FALSE	53
2022-09-12	09:14:32	0.757316	3.36869	1427.54	FALSE	53
2022-09-12	09:14:32	4.01283	17.8499	1308.63	1	54
2022-09-12	09:14:32	9.34031	41.5476	1469.09	1	55
2022-09-12	09:14:33	0.452735	2.01386	1310.64	FALSE	55
2022-09-12	09:14:33	0.0727865	0.323769	1469.42	FALSE	55
2022-09-12	09:14:33	0.121489	0.540407	1311.18	FALSE	55
2022-09-12	09:14:33	0.127799	0.568476	1469.98	FALSE	55
2022-09-12	09:14:34	-0.163804	-0.728633	1311.18	FALSE	55
2022-09-12	09:14:34	0.00433869	0.0192994	1470	FALSE	55
2022-09-12	09:14:34	2.92739	13.0216	1324.2	FALSE	55
2022-09-12	09:14:35	25.557	113.683	1583.69	1	56
2022-09-12	09:14:35	9.11146	40.5296	1364.73	1	57
2022-09-12	09:14:35	8.3993	37.3618	1621.05	1	58
2022-09-12	09:14:35	10.2921	45.7813	1410.51	1	59
2022-09-12	09:14:36	12.094	53.7965	1674.85	1	60
2022-09-12	09:14:36	17.7748	79.0659	1489.58	1	61
2022-09-12	09:14:36	20.7793	92.4305	1767.28	1	62
2022-09-12	09:14:36	20.6905	92.0355	1581.61	1	63
2022-09-12	09:14:37	13.2636	58.9991	1826.27	1	64
2022-09-12	09:14:37	24.6726	109.749	1691.36	1	65
2022-09-12	09:14:37	23.3474	103.854	1930.13	1	66
2022-09-12	09:14:37	16.5212	73.4896	1764.85	1	67
2022-09-12	09:14:38	21.7578	96.783	2026.91	1	68
2022-09-12	09:14:38	20.1945	89.8292	1854.68	1	69
2022-09-12	09:14:38	24.6691	109.733	2136.64	1	70
2022-09-12	09:14:39	17.3404	77.1336	1931.82	1	71
2022-09-12	09:14:39	7.16948	31.8913	2168.54	1	72
2022-09-12	09:14:39	6.62184	29.4553	1961.27	1	73
2022-09-12	09:14:39	20.9806	93.3259	2261.86	1	74
2022-09-12	09:14:40	23.2485	103.414	2064.68	1	75
2022-09-12	09:14:40	6.67202	29.6785	2291.54	1	76
2022-09-12	09:14:40	1.7709	7.87732	2072.56	FALSE	76
2022-09-12	09:14:40	0.711311	3.16405	2294.7	FALSE	76
2022-09-12	09:14:41	1.08139	4.81024	2077.37	FALSE	76
2022-09-12	09:14:41	1.86027	8.27485	2302.98	FALSE	76
2022-09-12	09:14:41	1.96184	8.72666	2086.1	FALSE	76
2022-09-12	09:14:41	6.74154	29.9877	2332.97	1	77
2022-09-12	09:14:42	11.6915	52.0061	2138.1	1	78
2022-09-12	09:14:42	5.72245	25.4546	2358.42	1	79
2022-09-12	09:14:42	5.12846	22.8124	2160.92	1	80
2022-09-12	09:14:42	4.34591	19.3315	2377.75	1	81
2022-09-12	09:14:43	5.95034	26.4683	2187.39	1	82
2022-09-12	09:14:43	13.1716	58.5899	2436.34	1	83
2022-09-12	09:14:43	14.9943	66.6976	2254.08	1	84
2022-09-12	09:14:44	5.29248	23.542	2459.88	1	85
2022-09-12	09:14:44	2.68169	11.9287	2266.01	FALSE	85
2022-09-12	09:14:44	1.44271	6.41746	2466.3	FALSE	85
2022-09-12	09:14:44	1.12943	5.02393	2271.04	FALSE	85
2022-09-12	09:14:45	0.873804	3.88685	2470.19	FALSE	85
2022-09-12	09:14:45	1.33711	5.94773	2276.98	FALSE	85
2022-09-12	09:14:45	1.22999	5.47124	2475.66	FALSE	85
2022-09-12	09:14:45	0.880878	3.91832	2280.9	FALSE	85
2022-09-12	09:14:46	0.492481	2.19065	2477.85	FALSE	85
2022-09-12	09:14:46	0.220064	0.978889	2281.88	FALSE	85
2022-09-12	09:14:46	0.354873	1.57855	2479.43	FALSE	85
2022-09-12	09:14:46	0.044644	0.198585	2282.08	FALSE	85
2022-09-12	09:14:47	0.16729	0.744139	2480.17	FALSE	85
2022-09-12	09:14:47	-0.0180023	-0.0800778	2282.08	FALSE	85
2022-09-12	09:14:47	0.0563997	0.250877	2480.42	FALSE	85
2022-09-12	09:14:48	-0.191488	-0.851777	2282.08	FALSE	85
2022-09-12	09:14:48	-0.0851778	-0.378888	2480.42	FALSE	85
2022-09-12	09:14:48	-0.131641	-0.585565	2282.08	FALSE	85
2022-09-12	09:14:48	0.0407763	0.181381	2480.61	FALSE	85
2022-09-12	09:14:49	-0.0740328	-0.329313	2282.08	FALSE	85
2022-09-12	09:14:49	-0.0160175	-0.071249	2480.61	FALSE	85
2022-09-12	09:14:49	0.0659671	0.293435	2282.37	FALSE	85
2022-09-12	09:14:49	0.00805366	0.0358243	2480.64	FALSE	85
2022-09-12	09:14:50	0.143168	0.63684	2283.01	FALSE	85
2022-09-12	09:14:50	0.132939	0.591339	2481.23	FALSE	85
2022-09-12	09:14:50	0.633906	2.81974	2285.83	FALSE	85
2022-09-12	09:14:50	1.32408	5.88977	2487.12	FALSE	85
2022-09-12	09:14:51	1.05686	4.70112	2290.53	FALSE	85
2022-09-12	09:14:51	2.34541	10.4329	2497.56	FALSE	85
2022-09-12	09:14:51	5.45355	24.2585	2314.79	1	86
2022-09-12	09:14:51	6.12062	27.2257	2524.78	1	87
2022-09-12	09:14:52	11.916	53.0048	2367.79	1	88
2022-09-12	09:14:52	13.1376	58.4387	2583.22	1	89
2022-09-12	09:14:52	25.1339	111.801	2479.59	1	90
2022-09-12	09:14:53	15.5246	69.0565	2652.28	1	91
2022-09-12	09:14:53	10.9583	48.7447	2528.34	1	92
2022-09-12	09:14:53	4.28459	19.0587	2671.34	1	93
2022-09-12	09:14:53	1.05991	4.71469	2533.05	FALSE	93
2022-09-12	09:14:54	0.307494	1.36779	2672.7	FALSE	93
2022-09-12	09:14:54	0.479707	2.13383	2535.19	FALSE	93
2022-09-12	09:14:54	0.0714633	0.317883	2673.02	FALSE	93
2022-09-12	09:14:54	0.424338	1.88754	2537.08	FALSE	93
2022-09-12	09:14:55	0.233601	1.0391	2674.06	FALSE	93
2022-09-12	09:14:55	1.53457	6.82607	2543.9	FALSE	93
2022-09-12	09:14:55	2.91854	12.9822	2687.04	FALSE	93
2022-09-12	09:14:55	2.73431	12.1628	2556.06	FALSE	93
2022-09-12	09:14:56	3.5907	15.9722	2703.01	1	94
2022-09-12	09:14:56	3.2277	14.3575	2570.42	1	95
2022-09-12	09:14:56	4.26612	18.9766	2721.99	1	96
2022-09-12	09:14:57	6.8621	30.524	2600.95	1	97
2022-09-12	09:14:57	17.4757	77.7354	2799.73	1	98
2022-09-12	09:14:57	7.35863	32.7327	2633.68	1	99
2022-09-12	09:14:57	7.6855	34.1866	2833.91	1	100
2022-09-12	09:14:58	6.38866	28.418	2662.1	1	101
2022-09-12	09:14:58	3.4166	15.1977	2849.11	1	102
2022-09-12	09:14:58	4.15253	18.4713	2680.57	1	103
2022-09-12	09:14:58	1.30358	5.79858	2854.91	FALSE	103
2022-09-12	09:14:59	3.23482	14.3891	2694.96	1	104
2022-09-12	09:14:59	2.81976	12.5429	2867.45	FALSE	104
2022-09-12	09:14:59	3.56057	15.8381	2710.79	1	105
2022-09-12	09:14:59	7.15767	31.8387	2899.29	1	106
2022-09-12	09:15:00	7.12286	31.6839	2742.48	1	107
2022-09-12	09:15:00	4.26037	18.951	2918.24	1	108
2022-09-12	09:15:00	5.03431	22.3936	2764.87	1	109
2022-09-12	09:15:00	5.67614	25.2486	2943.49	1	110
2022-09-12	09:15:01	5.3907	23.9789	2788.85	1	111
2022-09-12	09:15:01	7.08118	31.4985	2974.99	1	112
2022-09-12	09:15:01	10.7513	47.8239	2836.68	1	113
2022-09-12	09:15:02	13.6169	60.5707	3035.56	1	114
2022-09-12	09:15:02	8.95843	39.8489	2876.52	1	115
2022-09-12	09:15:02	22.9557	102.112	3137.67	1	116
2022-09-12	09:15:02	14.534	64.6501	2941.17	1	117
2022-09-12	09:15:03	7.51156	33.4129	3171.08	1	118
2022-09-12	09:15:03	13.0288	57.9547	2999.13	1	119
2022-09-12	09:15:03	9.17772	40.8243	3211.91	1	120
2022-09-12	09:15:03	10.1723	45.2484	3044.38	1	121
2022-09-12	09:15:04	10.1836	45.2987	3257.21	1	122
2022-09-12	09:15:04	1.64205	7.30417	3051.68	FALSE	122
2022-09-12	09:15:04	0.477977	2.12614	3259.33	FALSE	122
2022-09-12	09:15:04	0.537824	2.39235	3054.07	FALSE	122
2022-09-12	09:15:05	0.249122	1.10814	3260.44	FALSE	122
2022-09-12	09:15:05	0.23757	1.05676	3055.13	FALSE	122
2022-09-12	09:15:05	0.110445	0.491281	3260.93	FALSE	122
2022-09-12	09:15:06	0.377774	1.68041	3056.81	FALSE	122
2022-09-12	09:15:06	0.28271	1.25755	3262.19	FALSE	122
2022-09-12	09:15:06	0.290853	1.29377	3058.1	FALSE	122
2022-09-12	09:15:06	0.254873	1.13373	3263.32	FALSE	122
2022-09-12	09:15:07	0.216094	0.961229	3059.07	FALSE	122
2022-09-12	09:15:07	0.285967	1.27204	3264.6	FALSE	122
2022-09-12	09:15:07	0.286985	1.27657	3060.34	FALSE	122
2022-09-12	09:15:07	0.261896	1.16497	3265.76	FALSE	122
2022-09-12	09:15:08	0.427137	1.89999	3062.24	FALSE	122
2022-09-12	09:15:08	2.67787	11.9117	3277.67	FALSE	122
2022-09-12	09:15:08	7.28566	32.4081	3094.65	1	123
2022-09-12	09:15:08	9.03421	40.186	3317.86	1	124
2022-09-12	09:15:09	4.97991	22.1516	3116.8	1	125
2022-09-12	09:15:09	4.19721	18.67	3336.53	1	126
2022-09-12	09:15:09	8.19777	36.4653	3153.27	1	127
2022-09-12	09:15:09	10.3916	46.2239	3382.75	1	128
2022-09-12	09:15:10	17.4554	77.6451	3230.91	1	129
2022-09-12	09:15:10	8.68306	38.624	3421.38	1	130
2022-09-12	09:15:10	11.3747	50.5969	3281.51	1	131
2022-09-12	09:15:11	5.88317	26.1695	3447.55	1	132
2022-09-12	09:15:11	4.20057	18.685	3300.19	1	133
2022-09-12	09:15:11	2.87385	12.7835	3460.33	FALSE	133
2022-09-12	09:15:11	3.53696	15.7331	3315.93	1	134
2022-09-12	09:15:12	11.5721	51.475	3511.81	1	135
2022-09-12	09:15:12	3.1139	13.8512	3329.78	1	136
2022-09-12	09:15:12	8.49762	37.7991	3549.6	1	137
2022-09-12	09:15:12	5.69802	25.3459	3355.12	1	138
2022-09-12	09:15:13	11.126	49.4907	3599.09	1	139
2022-09-12	09:15:13	3.22805	14.359	3369.48	1	140
2022-09-12	09:15:13	7.56128	33.6341	3632.73	1	141
2022-09-12	09:15:13	8.03288	35.7319	3405.22	1	142
2022-09-12	09:15:14	6.24174	27.7645	3660.49	1	143
2022-09-12	09:15:14	9.94372	44.2317	3449.45	1	144
2022-09-12	09:15:14	9.44352	42.0067	3702.5	1	145
2022-09-12	09:15:15	8.82352	39.2488	3488.7	1	146
2022-09-12	09:15:15	5.58255	24.8323	3727.33	1	147
2022-09-12	09:15:15	4.22261	18.783	3507.48	1	148
2022-09-12	09:15:15	10.2126	45.4277	3772.76	1	149
2022-09-12	09:15:16	2.82352	12.5596	3520.04	FALSE	149
2022-09-12	09:15:16	6.32322	28.1269	3800.89	1	150
2022-09-12	09:15:16	7.57222	33.6827	3553.72	1	151
2022-09-12	09:15:16	6.78673	30.1887	3831.08	1	152
2022-09-12	09:15:17	9.02576	40.1484	3593.87	1	153
2022-09-12	09:15:17	6.52968	29.0453	3860.12	1	154
2022-09-12	09:15:17	15.4152	68.5699	3662.44	1	155
2022-09-12	09:15:17	6.77161	30.1215	3890.24	1	156
2022-09-12	09:15:18	11.2905	50.2224	3712.66	1	157
2022-09-12	09:15:18	9.19059	40.8816	3931.12	1	158
2022-09-12	09:15:18	4.39462	19.5481	3732.21	1	159
2022-09-12	09:15:18	10.5262	46.8226	3977.95	1	160
2022-09-12	09:15:19	6.72052	29.8942	3762.1	1	161
2022-09-12	09:15:19	5.67421	25.24	4003.19	1	162
2022-09-12	09:15:19	3.62444	16.1222	3778.23	1	163
2022-09-12	09:15:20	2.88291	12.8238	4016.01	FALSE	163
2022-09-12	09:15:20	6.62754	29.4806	3807.71	1	164
2022-09-12	09:15:20	1.82678	8.12588	4024.14	FALSE	164
2022-09-12	09:15:20	3.471	15.4397	3823.15	1	165
2022-09-12	09:15:21	1.73971	7.73858	4031.87	FALSE	165
2022-09-12	09:15:21	0.610344	2.71493	3825.86	FALSE	165
2022-09-12	09:15:21	0.46902	2.08629	4033.96	FALSE	165
2022-09-12	09:15:21	0.126018	0.560553	3826.42	FALSE	165
2022-09-12	09:15:22	0.331412	1.47419	4035.44	FALSE	165
2022-09-12	09:15:22	0.097163	0.4322	3826.85	FALSE	165
2022-09-12	09:15:22	0.302303	1.3447	4036.78	FALSE	165
2022-09-12	09:15:22	0.197163	0.87702	3827.73	FALSE	165
2022-09-12	09:15:23	0.442761	1.96949	4038.75	FALSE	165
2022-09-12	09:15:23	0.208562	0.927725	3828.66	FALSE	165
2022-09-12	09:15:23	0.324695	1.44431	4040.19	FALSE	165
2022-09-12	09:15:24	0.269173	1.19734	3829.86	FALSE	165
2022-09-12	09:15:24	0.393092	1.74855	4041.94	FALSE	165
2022-09-12	09:15:24	0.640827	2.85053	3832.71	FALSE	165
2022-09-12	09:15:24	1.41492	6.29385	4048.24	FALSE	165
2022-09-12	09:15:25	1.55594	6.92113	3839.63	FALSE	165
2022-09-12	09:15:25	0.831056	3.6967	4051.93	FALSE	165
2022-09-12	09:15:25	0.584389	2.59948	3842.23	FALSE	165
2022-09-12	09:15:25	0.393499	1.75036	4053.68	FALSE	165
2022-09-12	09:15:26	0.677315	3.01283	3845.24	FALSE	165
2022-09-12	09:15:26	0.479707	2.13383	4055.82	FALSE	165
2022-09-12	09:15:26	0.682048	3.03389	3848.27	FALSE	165
2022-09-12	09:15:26	0.839555	3.73451	4059.55	FALSE	165
2022-09-12	09:15:27	0.971412	4.32103	3852.6	FALSE	165
2022-09-12	09:15:27	0.848206	3.77299	4063.32	FALSE	165
2022-09-12	09:15:27	0.568257	2.52772	3855.12	FALSE	165
2022-09-12	09:15:27	0.58388	2.59722	4065.92	FALSE	165
2022-09-12	09:15:28	0.363321	1.61612	3856.74	FALSE	165
2022-09-12	09:15:28	0.374313	1.66502	4067.59	FALSE	165
2022-09-12	09:15:28	0.453041	2.01522	3858.75	FALSE	165
2022-09-12	09:15:29	0.28673	1.27543	4068.86	FALSE	165
2022-09-12	09:15:29	0.476094	2.11776	3860.87	FALSE	165
2022-09-12	09:15:29	0.213499	0.949686	4069.81	FALSE	165
2022-09-12	09:15:29	0.409886	1.82325	3862.7	FALSE	165
2022-09-12	09:15:30	0.195534	0.869774	4070.68	FALSE	165
2022-09-12	09:15:30	0.358842	1.5962	3864.29	FALSE	165
2022-09-12	09:15:30	0.267697	1.19077	4071.87	FALSE	165
2022-09-12	09:15:30	0.252634	1.12377	3865.42	FALSE	165
2022-09-12	09:15:31	0.26729	1.18896	4073.06	FALSE	165
2022-09-12	09:15:31	0.12215	0.543348	3865.96	FALSE	165
2022-09-12	09:15:31	0.373143	1.65981	4074.72	FALSE	165
2022-09-12	09:15:31	0.103931	0.462306	3866.42	FALSE	165
2022-09-12	09:15:32	0.384288	1.70939	4076.43	FALSE	165
2022-09-12	09:15:32	0.335687	1.4932	3867.91	FALSE	165
2022-09-12	09:15:32	1.44424	6.42427	4082.86	FALSE	165
2022-09-12	09:15:33	0.976959	4.34571	3872.26	FALSE	165
2022-09-12	09:15:33	1.92388	8.5578	4091.41	FALSE	165
2022-09-12	09:15:33	1.85248	8.2402	3880.5	FALSE	165
2022-09-12	09:15:33	2.06134	9.16925	4100.58	FALSE	165
2022-09-12	09:15:34	2.29202	10.1954	3890.7	FALSE	165
2022-09-12	09:15:34	0.451463	2.0082	4102.59	FALSE	165
2022-09-12	09:15:34	0.443321	1.97198	3892.67	FALSE	165
2022-09-12	09:15:34	0.174262	0.775152	4103.37	FALSE	165
2022-09-12	09:15:35	0.215483	0.958511	3893.63	FALSE	165
2022-09-12	09:15:35	0.27701	1.2322	4104.6	FALSE	165
2022-09-12	09:15:35	0.178944	0.795979	3894.42	FALSE	165
2022-09-12	09:15:35	0.382608	1.70192	4106.3	FALSE	165
2022-09-12	09:15:36	0.576196	2.56304	3896.99	FALSE	165
2022-09-12	09:15:36	2.22195	9.88368	4116.18	FALSE	165
2022-09-12	09:15:36	4.46454	19.8592	3916.84	1	166
2022-09-12	09:15:36	5.59075	24.8688	4141.05	1	167
2022-09-12	09:15:37	2.60683	11.5957	3928.44	FALSE	167
2022-09-12	09:15:37	3.41105	15.173	4156.23	1	168
2022-09-12	09:15:37	1.78902	7.95792	3936.4	FALSE	168
2022-09-12	09:15:38	1.52042	6.76313	4162.99	FALSE	168
2022-09-12	09:15:38	1.8536	8.24518	3944.64	FALSE	168
2022-09-12	09:15:38	0.418435	1.86128	4164.85	FALSE	168
2022-09-12	09:15:38	0.848511	3.77435	3948.42	FALSE	168
2022-09-12	09:15:39	0.366272	1.62925	4166.48	FALSE	168
2022-09-12	09:15:39	0.506272	2.252	3950.67	FALSE	168
2022-09-12	09:15:39	0.271412	1.20729	4167.69	FALSE	168
2022-09-12	09:15:39	0.142863	0.635483	3951.31	FALSE	168
2022-09-12	09:15:40	0.341336	1.51833	4169.2	FALSE	168
2022-09-12	09:15:40	0.126629	0.563271	3951.87	FALSE	168
2022-09-12	09:15:40	0.275738	1.22654	4170.43	FALSE	168
2022-09-12	09:15:40	0.225509	1.00311	3952.87	FALSE	168
2022-09-12	09:15:41	0.174771	0.777416	4171.21	FALSE	168
2022-09-12	09:15:41	0.263015	1.16994	3954.04	FALSE	168
2022-09-12	09:15:41	0.12668	0.563498	4171.77	FALSE	168
2022-09-12	09:15:42	0.372685	1.65778	3955.7	FALSE	168
2022-09-12	09:15:42	0.0879009	0.391001	4172.16	FALSE	168
2022-09-12	09:15:42	0.381896	1.69875	3957.4	FALSE	168
2022-09-12	09:15:42	0.240573	1.07012	4173.23	FALSE	168
2022-09-12	09:15:43	0.331769	1.47577	3958.87	FALSE	168
2022-09-12	09:15:43	0.387392	1.7232	4174.96	FALSE	168
2022-09-12	09:15:43	0.42159	1.87532	3960.75	FALSE	168
2022-09-12	09:15:43	0.496094	2.20673	4177.16	FALSE	168
2022-09-12	09:15:44	0.195127	0.867964	3961.62	FALSE	168
2022-09-12	09:15:44	0.346578	1.54165	4178.7	FALSE	168
2022-09-12	09:15:44	0.168613	0.750024	3962.37	FALSE	168
2022-09-12	09:15:44	0.253244	1.12648	4179.83	FALSE	168
2022-09-12	09:15:45	0.176756	0.786246	3963.15	FALSE	168
2022-09-12	09:15:45	0.3164	1.40741	4181.24	FALSE	168
2022-09-12	09:15:45	0.325153	1.44635	3964.6	FALSE	168
2022-09-12	09:15:45	0.216654	0.96372	4182.2	FALSE	168
2022-09-12	09:15:46	0.471972	2.09943	3966.7	FALSE	168
2022-09-12	09:15:46	0.223677	0.99496	4183.2	FALSE	168
2022-09-12	09:15:46	1.08342	4.81927	3971.52	FALSE	168
2022-09-12	09:15:47	1.002	4.4571	4187.65	FALSE	168
2022-09-12	09:15:47	0.909886	4.04735	3975.57	FALSE	168
2022-09-12	09:15:47	0.359199	1.59779	4189.25	FALSE	168
2022-09-12	09:15:47	0.264898	1.17832	3976.74	FALSE	168
2022-09-12	09:15:48	0.189784	0.844197	4190.1	FALSE	168
2022-09-12	09:15:48	0.135636	0.603336	3977.35	FALSE	168
2022-09-12	09:15:48	0.391565	1.74176	4191.84	FALSE	168
2022-09-12	09:15:48	1.66989	7.428	3984.78	FALSE	168
2022-09-12	09:15:49	4.73385	21.0571	4212.9	1	169
2022-09-12	09:15:49	5.47258	24.3431	4009.12	1	170
2022-09-12	09:15:49	4.0081	17.8288	4230.72	1	171
2022-09-12	09:15:49	2.11345	9.40105	4018.52	FALSE	171
2022-09-12	09:15:50	1.30693	5.81349	4236.54	FALSE	171
2022-09-12	09:15:50	2.05406	9.13687	4027.66	FALSE	171
2022-09-12	09:15:50	0.306527	1.36349	4237.9	FALSE	171
2022-09-12	09:15:51	1.96179	8.72643	4036.38	FALSE	171
2022-09-12	09:15:51	0.575229	2.55873	4240.46	FALSE	171
2022-09-12	09:15:51	1.26698	5.63578	4042.02	FALSE	171
2022-09-12	09:15:51	0.515178	2.29161	4242.75	FALSE	171
2022-09-12	09:15:52	0.364033	1.61929	4043.64	FALSE	171
2022-09-12	09:15:52	0.492023	2.18862	4244.94	FALSE	171
2022-09-12	09:15:52	0.669987	2.98024	4046.62	FALSE	171
2022-09-12	09:15:52	0.663728	2.95239	4247.89	FALSE	171
2022-09-12	09:15:53	1.35447	6.02495	4052.64	FALSE	171
2022-09-12	09:15:53	1.69604	7.54433	4255.44	FALSE	171
2022-09-12	09:15:53	2.87299	12.7796	4065.42	FALSE	171
2022-09-12	09:15:53	4.3335	19.2763	4274.71	1	172
2022-09-12	09:15:54	2.84973	12.6762	4078.1	FALSE	172
2022-09-12	09:15:54	3.73319	16.606	4291.32	1	173
2022-09-12	09:15:54	1.09497	4.87065	4082.97	FALSE	173
2022-09-12	09:15:54	2.62082	11.6579	4302.98	FALSE	173
2022-09-12	09:15:55	1.88078	8.36609	4091.34	FALSE	173
2022-09-12	09:15:55	1.8653	8.29723	4311.27	FALSE	173
2022-09-12	09:15:55	2.39131	10.637	4101.97	FALSE	173
2022-09-12	09:15:56	0.562659	2.50282	4313.78	FALSE	173
2022-09-12	09:15:56	1.16724	5.19212	4107.16	FALSE	173
2022-09-12	09:15:56	0.169733	0.755006	4314.53	FALSE	173
2022-09-12	09:15:56	0.388562	1.7284	4108.89	FALSE	173
2022-09-12	09:15:57	0.24154	1.07442	4315.61	FALSE	173
2022-09-12	09:15:57	0.428308	1.9052	4110.8	FALSE	173
2022-09-12	09:15:57	0.482863	2.14787	4317.75	FALSE	173
2022-09-12	09:15:57	0.393143	1.74878	4112.55	FALSE	173
2022-09-12	09:15:58	0.596399	2.6529	4320.41	FALSE	173
2022-09-12	09:15:58	0.763066	3.39427	4115.94	FALSE	173
2022-09-12	09:15:58	0.723575	3.21861	4323.63	FALSE	173
2022-09-12	09:15:58	0.812226	3.61294	4119.55	FALSE	173
2022-09-12	09:15:59	0.919809	4.09149	4327.72	FALSE	173
2022-09-12	09:15:59	0.822455	3.65844	4123.21	FALSE	173
2022-09-12	09:15:59	1.03121	4.58703	4332.3	FALSE	173
2022-09-12	09:16:00	0.972328	4.32511	4127.54	FALSE	173
2022-09-12	09:16:00	0.515789	2.29433	4334.6	FALSE	173
2022-09-12	09:16:00	0.375026	1.66819	4129.21	FALSE	173
2022-09-12	09:16:00	0.369682	1.64442	4336.24	FALSE	173
2022-09-12	09:16:01	0.249428	1.10951	4130.32	FALSE	173
2022-09-12	09:16:01	0.17986	0.800053	4337.04	FALSE	173
2022-09-12	09:16:01	0.20159	0.896713	4131.21	FALSE	173
2022-09-12	09:16:01	0.328308	1.46038	4338.5	FALSE	173
2022-09-12	09:16:02	0.370496	1.64804	4132.86	FALSE	173
2022-09-12	09:16:02	0.582964	2.59314	4341.1	FALSE	173
2022-09-12	09:16:02	0.296145	1.31731	4134.18	FALSE	173
2022-09-12	09:16:02	0.391972	1.74357	4342.84	FALSE	173
2022-09-12	09:16:03	0.313957	1.39654	4135.57	FALSE	173
2022-09-12	09:16:03	0.279707	1.24419	4344.08	FALSE	173
2022-09-12	09:16:03	0.258944	1.15183	4136.73	FALSE	173
2022-09-12	09:16:03	0.225153	1.00153	4345.09	FALSE	173
2022-09-12	09:16:04	0.362303	1.6116	4138.34	FALSE	173
2022-09-12	09:16:04	0.123677	0.55014	4345.64	FALSE	173
2022-09-12	09:16:04	0.341082	1.5172	4139.86	FALSE	173
2022-09-12	09:16:05	0.175127	0.779	4346.41	FALSE	173
2022-09-12	09:16:05	0.310547	1.38138	4141.24	FALSE	173
2022-09-12	09:16:05	0.8193	3.64441	4350.06	FALSE	173
2022-09-12	09:16:05	0.970293	4.31606	4145.55	FALSE	173
2022-09-12	09:16:06	1.60948	7.15929	4357.22	FALSE	173
2022-09-12	09:16:06	1.41421	6.29069	4151.84	FALSE	173
2022-09-12	09:16:06	1.80337	8.02175	4365.24	FALSE	173
2022-09-12	09:16:06	1.62032	7.20751	4159.05	FALSE	173
2022-09-12	09:16:07	1.83253	8.15146	4373.39	FALSE	173
2022-09-12	09:16:07	1.26576	5.63035	4164.68	FALSE	173
2022-09-12	09:16:07	1.26179	5.61269	4379	FALSE	173
2022-09-12	09:16:07	0.889224	3.95545	4168.64	FALSE	173
2022-09-12	09:16:08	0.671158	2.98545	4381.99	FALSE	173
2022-09-12	09:16:08	0.665713	2.96122	4171.6	FALSE	173
2022-09-12	09:16:08	1.37167	6.10146	4388.09	FALSE	173
2022-09-12	09:16:09	1.43365	6.37716	4177.97	FALSE	173
2022-09-12	09:16:09	1.65406	7.35759	4395.45	FALSE	173
2022-09-12	09:16:09	0.837875	3.72704	4181.7	FALSE	173
2022-09-12	09:16:09	1.12856	5.02006	4400.47	FALSE	173
2022-09-12	09:16:10	1.3281	5.90765	4187.61	FALSE	173
2022-09-12	09:16:10	0.565458	2.51527	4402.98	FALSE	173
2022-09-12	09:16:10	0.809071	3.59891	4191.21	FALSE	173
2022-09-12	09:16:10	0.469428	2.08811	4405.07	FALSE	173
2022-09-12	09:16:11	0.717468	3.19144	4194.4	FALSE	173
2022-09-12	09:16:11	0.391412	1.74108	4406.81	FALSE	173
2022-09-12	09:16:11	0.367239	1.63355	4196.03	FALSE	173
2022-09-12	09:16:11	0.947952	4.21668	4411.03	FALSE	173
2022-09-12	09:16:12	0.868002	3.86105	4199.89	FALSE	173
2022-09-12	09:16:12	1.28149	5.70032	4416.73	FALSE	173
2022-09-12	09:16:12	0.862557	3.83683	4203.73	FALSE	173
2022-09-12	09:16:12	1.20927	5.37907	4422.11	FALSE	173
2022-09-12	09:16:13	0.754109	3.35443	4207.09	FALSE	173
2022-09-12	09:16:13	1.63833	7.28762	4429.4	FALSE	173
2022-09-12	09:16:13	2.30897	10.2708	4217.36	FALSE	173
2022-09-12	09:16:14	3.41223	15.1783	4444.58	1	174
2022-09-12	09:16:14	3.20301	14.2476	4231.6	1	175
2022-09-12	09:16:14	3.93472	17.5024	4462.08	1	176
2022-09-12	09:16:14	3.41401	15.1862	4246.79	1	177
2022-09-12	09:16:15	1.37991	6.13812	4468.22	FALSE	177
2022-09-12	09:16:15	1.67029	7.42978	4254.22	FALSE	177
2022-09-12	09:16:15	0.739962	3.2915	4471.51	FALSE	177
2022-09-12	09:16:15	1.43462	6.38148	4260.6	FALSE	177
2022-09-12	09:16:16	0.619504	2.75568	4474.26	FALSE	177
2022-09-12	09:16:16	0.424491	1.88822	4262.49	FALSE	177
2022-09-12	09:16:16	1.18439	5.2684	4479.53	FALSE	177
2022-09-12	09:16:16	0.311107	1.38387	4263.87	FALSE	177
2022-09-12	09:16:17	0.496909	2.21035	4481.74	FALSE	177
2022-09-12	09:16:17	0.204695	0.910524	4264.78	FALSE	177
2022-09-12	09:16:17	0.404542	1.79948	4483.54	FALSE	177
2022-09-12	09:16:18	0.462303	2.05642	4266.84	FALSE	177
2022-09-12	09:16:18	0.499555	2.22212	4485.76	FALSE	177
2022-09-12	09:16:18	0.383677	1.70667	4268.55	FALSE	177
2022-09-12	09:16:18	0.480522	2.13746	4487.9	FALSE	177
2022-09-12	09:16:19	0.500979	2.22845	4270.78	FALSE	177
2022-09-12	09:16:19	0.610751	2.71674	4490.62	FALSE	177
2022-09-12	09:16:19	0.491921	2.18816	4272.96	FALSE	177
2022-09-12	09:16:19	1.105	4.91526	4495.53	FALSE	177
2022-09-12	09:16:20	0.433957	1.93033	4274.89	FALSE	177
2022-09-12	09:16:20	0.334669	1.48867	4497.02	FALSE	177
2022-09-12	09:16:20	1.00332	4.46297	4279.36	FALSE	177
2022-09-12	09:16:20	0.627239	2.79008	4499.81	FALSE	177
2022-09-12	09:16:21	0.654619	2.91188	4282.27	FALSE	177
2022-09-12	09:16:21	0.274466	1.22088	4501.03	FALSE	177
2022-09-12	09:16:21	0.441896	1.96564	4284.23	FALSE	177
2022-09-12	09:16:21	0.413346	1.83865	4502.87	FALSE	177
2022-09-12	09:16:22	0.464797	2.06751	4286.3	FALSE	177
2022-09-12	09:16:22	1.11849	4.97527	4507.85	FALSE	177
2022-09-12	09:16:22	1.20062	5.3406	4291.64	FALSE	177
2022-09-12	09:16:23	1.84017	8.18544	4516.03	FALSE	177
2022-09-12	09:16:23	2.35553	10.4779	4302.12	FALSE	177
2022-09-12	09:16:23	1.99676	8.88199	4524.91	FALSE	177
2022-09-12	09:16:23	3.27543	14.5698	4316.69	1	178
2022-09-12	09:16:24	2.9507	13.1253	4538.04	FALSE	178
2022-09-12	09:16:24	2.22566	9.90018	4326.59	FALSE	178
2022-09-12	09:16:24	2.40719	10.7077	4548.75	FALSE	178
2022-09-12	09:16:24	2.25553	10.033	4336.62	FALSE	178
2022-09-12	09:16:25	2.27116	10.1026	4558.85	FALSE	178
2022-09-12	09:16:25	2.69446	11.9855	4348.61	FALSE	178
2022-09-12	09:16:25	1.71854	7.64441	4566.49	FALSE	178
2022-09-12	09:16:25	2.86057	12.7244	4361.33	FALSE	178
2022-09-12	09:16:26	2.03309	9.04359	4575.54	FALSE	178
2022-09-12	09:16:26	2.97589	13.2374	4374.57	FALSE	178
2022-09-12	09:16:26	2.90495	12.9218	4588.46	FALSE	178
2022-09-12	09:16:27	4.29843	19.1203	4393.69	1	179
2022-09-12	09:16:27	3.06561	13.6364	4602.1	1	180
2022-09-12	09:16:27	3.56032	15.837	4409.53	1	181
2022-09-12	09:16:27	2.13803	9.51039	4611.61	FALSE	181
2022-09-12	09:16:28	4.30892	19.1669	4428.7	1	182
2022-09-12	09:16:28	1.79411	7.98056	4619.59	FALSE	182
2022-09-12	09:16:28	3.36373	14.9625	4443.66	1	183
2022-09-12	09:16:28	3.60546	16.0378	4635.62	1	184
2022-09-12	09:16:29	5.06174	22.5156	4466.17	1	185
2022-09-12	09:16:29	6.3795	28.3773	4664	1	186
2022-09-12	09:16:29	7.41121	32.9665	4499.14	1	187
2022-09-12	09:16:29	7.33471	32.6263	4696.63	1	188
2022-09-12	09:16:30	8.44245	37.5537	4536.69	1	189
2022-09-12	09:16:30	7.00759	31.1712	4727.8	1	190
2022-09-12	09:16:30	5.64724	25.1201	4561.81	1	191
2022-09-12	09:16:30	7.67436	34.1371	4761.94	1	192
2022-09-12	09:16:31	2.82922	12.5849	4574.4	FALSE	192
2022-09-12	09:16:31	1.64816	7.33135	4769.27	FALSE	192
2022-09-12	09:16:31	0.962964	4.28346	4578.68	FALSE	192
2022-09-12	09:16:32	0.678842	3.01962	4772.29	FALSE	192
2022-09-12	09:16:32	0.185611	0.825635	4579.51	FALSE	192
2022-09-12	09:16:32	0.176654	0.785792	4773.07	FALSE	192
2022-09-12	09:16:32	0.118486	0.527049	4580.03	FALSE	192
2022-09-12	09:16:33	-0.0155087	-0.0689858	4773.07	FALSE	192
2022-09-12	09:16:33	-0.0586639	-0.260949	4580.03	FALSE	192
2022-09-12	09:16:33	-0.176476	-0.785001	4773.07	FALSE	192
2022-09-12	09:16:33	-0.0655341	-0.291509	4580.03	FALSE	192
2022-09-12	09:16:34	-0.0884348	-0.393376	4773.07	FALSE	192
2022-09-12	09:16:34	-0.0524552	-0.233331	4580.03	FALSE	192
2022-09-12	09:16:34	-0.14304	-0.636271	4773.07	FALSE	192
2022-09-12	09:16:34	-0.0359667	-0.159987	4580.03	FALSE	192
2022-09-12	09:16:35	0.112379	0.499884	4773.57	FALSE	192
2022-09-12	09:16:35	0.117875	0.524332	4580.56	FALSE	192
2022-09-12	09:16:35	0.0608781	0.270798	4773.84	FALSE	192
2022-09-12	09:16:36	0.215789	0.959873	4581.52	FALSE	192
2022-09-12	09:16:36	1.06358	4.73102	4778.57	FALSE	192
2022-09-12	09:16:36	3.29304	14.6481	4596.17	1	193
2022-09-12	09:16:36	3.98301	17.7172	4796.29	1	194
2022-09-12	09:16:37	2.80556	12.4797	4608.65	FALSE	194
2022-09-12	09:16:37	2.05558	9.14363	4805.44	FALSE	194
2022-09-12	09:16:37	1.58485	7.04973	4615.7	FALSE	194
2022-09-12	09:16:37	1.16205	5.16903	4810.6	FALSE	194
2022-09-12	09:16:38	0.605102	2.69161	4618.39	FALSE	194
2022-09-12	09:16:38	0.285	1.26774	4811.87	FALSE	194
2022-09-12	09:16:38	0.18042	0.802544	4619.19	FALSE	194
2022-09-12	09:16:38	0.194364	0.86457	4812.74	FALSE	194
2022-09-12	09:16:39	0.121082	0.538597	4619.73	FALSE	194
2022-09-12	09:16:39	0.0929391	0.413412	4813.15	FALSE	194
2022-09-12	09:16:39	0.0939061	0.417713	4620.15	FALSE	194
2022-09-12	09:16:40	0.0931936	0.414544	4813.56	FALSE	194
2022-09-12	09:16:40	0.0730409	0.324901	4620.47	FALSE	194
2022-09-12	09:16:40	0.109733	0.488114	4814.05	FALSE	194
2022-09-12	09:16:40	0.0735498	0.327164	4620.8	FALSE	194
2022-09-12	09:16:41	-0.0031932	-0.014204	4814.05	FALSE	194
2022-09-12	09:16:41	0.0440333	0.195869	4620.99	FALSE	194
2022-09-12	09:16:41	-0.054389	-0.241933	4814.05	FALSE	194
2022-09-12	09:16:41	0.0345168	0.153538	4621.15	FALSE	194
2022-09-12	09:16:42	0.0471376	0.209677	4814.26	FALSE	194
2022-09-12	09:16:42	0.109682	0.487887	4621.64	FALSE	194
2022-09-12	09:16:42	0.0366033	0.162819	4814.43	FALSE	194
2022-09-12	09:16:42	0.271514	1.20775	4622.84	FALSE	194
2022-09-12	09:16:43	0.312888	1.39179	4815.82	FALSE	194
2022-09-12	09:16:43	0.299249	1.33112	4624.18	FALSE	194
2022-09-12	09:16:43	1.19335	5.30826	4821.13	FALSE	194
2022-09-12	09:16:43	1.28062	5.69645	4629.87	FALSE	194
2022-09-12	09:16:44	1.8909	8.4111	4829.54	FALSE	194
2022-09-12	09:16:44	3.14057	13.9699	4643.84	1	195
2022-09-12	09:16:44	4.07065	18.1071	4847.64	1	196
2022-09-12	09:16:45	6.45339	28.706	4672.55	1	197
2022-09-12	09:16:45	6.03797	26.8581	4874.5	1	198
2022-09-12	09:16:45	4.46474	19.8601	4692.41	1	199
2022-09-12	09:16:45	4.43777	19.7401	4894.24	1	200
2022-09-12	09:16:46	4.95426	22.0375	4714.45	1	201
2022-09-12	09:16:46	3.02897	13.4735	4907.72	1	202
2022-09-12	09:16:46	3.89406	17.3216	4731.77	1	203
2022-09-12	09:16:46	4.04551	17.9952	4925.71	1	204
2022-09-12	09:16:47	4.4997	20.0156	4751.78	1	205
2022-09-12	09:16:47	4.06123	18.0652	4943.78	1	206
2022-09-12	09:16:47	2.01085	8.94466	4760.73	FALSE	206
2022-09-12	09:16:47	0.616298	2.74142	4946.52	FALSE	206
2022-09-12	09:16:48	0.372634	1.65755	4762.38	FALSE	206
2022-09-12	09:16:48	0.297824	1.32478	4947.84	FALSE	206
2022-09-12	09:16:48	0.282303	1.25574	4763.64	FALSE	206
2022-09-12	09:16:48	0.273855	1.21816	4949.06	FALSE	206
2022-09-12	09:16:49	0.290649	1.29286	4764.93	FALSE	206
2022-09-12	09:16:49	0.390496	1.737	4950.8	FALSE	206
2022-09-12	09:16:49	0.922964	4.10553	4769.04	FALSE	206
2022-09-12	09:16:50	1.48434	6.60264	4957.4	FALSE	206
2022-09-12	09:16:50	1.29609	5.76527	4774.8	FALSE	206
2022-09-12	09:16:50	1.21894	5.42209	4962.82	FALSE	206
2022-09-12	09:16:50	1.1081	4.92905	4779.73	FALSE	206
2022-09-12	09:16:51	1.06622	4.74276	4967.56	FALSE	206
2022-09-12	09:16:51	1.08439	4.82358	4784.56	FALSE	206
2022-09-12	09:16:51	1.52006	6.76153	4974.33	FALSE	206
2022-09-12	09:16:51	2.16673	9.63805	4794.19	FALSE	206
2022-09-12	09:16:52	3.54251	15.7578	4990.08	1	207
2022-09-12	09:16:52	4.61752	20.5397	4814.73	1	208
2022-09-12	09:16:52	3.46108	15.3956	5005.48	1	209
2022-09-12	09:16:52	3.92658	17.4662	4832.2	1	210
2022-09-12	09:16:53	1.29981	5.78181	5011.26	FALSE	210
2022-09-12	09:16:53	0.575993	2.56213	4834.76	FALSE	210
2022-09-12	09:16:53	0.990751	4.40706	5015.67	FALSE	210
2022-09-12	09:16:54	2.17431	9.67177	4844.43	FALSE	210
2022-09-12	09:16:54	2.61446	11.6296	5027.3	FALSE	210
2022-09-12	09:16:54	2.09803	9.33246	4853.77	FALSE	210
2022-09-12	09:16:54	1.20424	5.3567	5032.65	FALSE	210
2022-09-12	09:16:55	2.66688	11.8628	4865.63	FALSE	210
2022-09-12	09:16:55	2.60383	11.5824	5044.24	FALSE	210
2022-09-12	09:16:55	3.68022	16.3704	4882	1	211
2022-09-12	09:16:56	2.61024	11.6109	5055.85	FALSE	211
2022-09-12	09:16:56	3.42826	15.2496	4897.25	1	212
2022-09-12	09:16:56	4.08301	18.162	5074.01	1	213
2022-09-12	09:16:56	4.87218	21.6724	4918.92	1	214
2022-09-12	09:16:56	4.03594	17.9527	5091.96	1	215
2022-09-12	09:16:57	3.09202	13.7539	4932.68	1	216
2022-09-12	09:16:57	3.82322	17.0064	5108.97	1	217
2022-09-12	09:16:57	3.3168	14.7538	4947.43	1	218
2022-09-12	09:16:57	2.56907	11.4277	5120.4	FALSE	218
2022-09-12	09:16:58	2.7706	12.3242	4959.75	FALSE	218
2022-09-12	09:16:58	1.98994	8.85165	5129.25	FALSE	218
2022-09-12	09:16:58	1.7709	7.87732	4967.63	FALSE	218
2022-09-12	09:16:59	1.76454	7.84903	5137.1	FALSE	218
2022-09-12	09:16:59	1.12332	4.99675	4972.63	FALSE	218
2022-09-12	09:16:59	0.613448	2.72874	5139.83	FALSE	218
2022-09-12	09:16:59	1.34271	5.97264	4978.6	FALSE	218
2022-09-12	09:17:00	2.1791	9.69307	5149.52	FALSE	218
2022-09-12	09:17:00	2.04067	9.07731	4987.68	FALSE	218
2022-09-12	09:17:00	1.09548	4.87291	5154.39	FALSE	218
2022-09-12	09:17:00	0.685	3.04702	4990.72	FALSE	218
2022-09-12	09:17:01	0.356043	1.58375	5155.98	FALSE	218
2022-09-12	09:17:01	0.282964	1.25868	4991.98	FALSE	218
2022-09-12	09:17:01	0.210293	0.935425	5156.91	FALSE	218
2022-09-12	09:17:01	0.215636	0.959192	4992.94	FALSE	218
2022-09-12	09:17:02	0.241183	1.07283	5157.98	FALSE	218
2022-09-12	09:17:02	0.0866287	0.385342	4993.33	FALSE	218
2022-09-12	09:17:02	0.10897	0.48472	5158.47	FALSE	218
2022-09-12	09:17:03	0.0293768	0.130674	4993.46	FALSE	218
2022-09-12	09:17:03	-0.136832	-0.608656	5158.47	FALSE	218
2022-09-12	09:17:03	-0.0520481	-0.23152	4993.46	FALSE	218
2022-09-12	09:17:03	-0.273727	-1.21759	5158.47	FALSE	218
2022-09-12	09:17:04	-0.339325	-1.50939	4993.46	FALSE	218
2022-09-12	09:17:04	-0.307468	-1.36768	5158.47	FALSE	218
2022-09-12	09:17:04	-0.340445	-1.51437	4993.46	FALSE	218
2022-09-12	09:17:05	-0.104669	-0.465589	5158.47	FALSE	218
2022-09-12	09:17:05	0.01584	0.0704595	4993.53	FALSE	218
2022-09-12	09:17:05	-0.046501	-0.206846	5158.47	FALSE	218
2022-09-12	09:17:05	0.0709544	0.315619	4993.84	FALSE	218
2022-09-12	09:17:05	0.230446	1.02507	5159.49	FALSE	218
2022-09-12	09:17:06	0.574415	2.55511	4996.4	FALSE	218
2022-09-12	09:17:06	0.538639	2.39597	5161.89	FALSE	218
2022-09-12	09:17:06	0.496552	2.20876	4998.61	FALSE	218
2022-09-12	09:17:06	0.783575	3.4855	5165.38	FALSE	218
2022-09-12	09:17:07	2.07955	9.25025	5007.86	FALSE	218
2022-09-12	09:17:07	3.30474	14.7001	5180.08	1	219
2022-09-12	09:17:07	4.2193	18.7683	5026.63	1	220
2022-09-12	09:17:08	2.14973	9.56243	5189.64	FALSE	220
2022-09-12	09:17:08	0.55584	2.47249	5029.1	FALSE	220
2022-09-12	09:17:08	0.488308	2.17209	5191.81	FALSE	220
2022-09-12	09:17:08	0.334059	1.48596	5030.59	FALSE	220
2022-09-12	09:17:09	0.319758	1.42235	5193.23	FALSE	220
2022-09-12	09:17:09	0.295076	1.31256	5031.9	FALSE	220
2022-09-12	09:17:09	0.3393	1.50927	5194.74	FALSE	220
2022-09-12	09:17:09	0.34327	1.52693	5033.43	FALSE	220
2022-09-12	09:17:10	0.242303	1.07781	5195.82	FALSE	220
2022-09-12	09:17:10	0.280216	1.24646	5034.67	FALSE	220
2022-09-12	09:17:10	0.207443	0.922748	5196.74	FALSE	220
2022-09-12	09:17:10	0.292685	1.30192	5035.97	FALSE	220
2022-09-12	09:17:11	3.67055	16.3273	5213.07	1	221
2022-09-12	09:17:11	6.48103	28.8289	5064.8	1	222
2022-09-12	09:17:11	12.1894	54.2209	5267.29	1	223
2022-09-12	09:17:12	13.997	62.2615	5127.06	1	224
2022-09-12	09:17:12	9.89309	44.0064	5311.3	1	225
2022-09-12	09:17:12	7.63685	33.9702	5161.03	1	226
2022-09-12	09:17:12	6.38245	28.3904	5339.69	1	227
2022-09-12	09:17:13	5.84077	25.9809	5187.02	1	228
2022-09-12	09:17:13	4.34617	19.3326	5359.02	1	229
2022-09-12	09:17:13	3.20637	14.2626	5201.28	1	230
2022-09-12	09:17:13	4.04032	17.9722	5376.99	1	231
2022-09-12	09:17:14	6.37838	28.3723	5229.65	1	232
2022-09-12	09:17:14	5.55502	24.7098	5401.7	1	233
2022-09-12	09:17:14	9.24886	41.1408	5270.79	1	234
2022-09-12	09:17:14	9.05482	40.2777	5441.98	1	235
2022-09-12	09:17:15	8.2309	36.6127	5307.4	1	236
2022-09-12	09:17:15	7.89436	35.1157	5477.1	1	237
2022-09-12	09:17:15	6.91858	30.7752	5338.18	1	238
2022-09-12	09:17:15	9.74566	43.3506	5520.45	1	239
2022-09-12	09:17:16	11.9836	53.3054	5391.48	1	240
2022-09-12	09:17:16	5.58082	24.8246	5545.27	1	241
2022-09-12	09:17:16	3.11243	13.8447	5405.33	1	242
2022-09-12	09:17:17	2.40413	10.6941	5555.96	FALSE	242
2022-09-12	09:17:17	1.19085	5.29714	5410.63	FALSE	242
2022-09-12	09:17:17	0.750649	3.33904	5559.3	FALSE	242
2022-09-12	09:17:17	1.17584	5.23037	5415.86	FALSE	242
2022-09-12	09:17:18	1.1652	5.18304	5564.49	FALSE	242
2022-09-12	09:17:18	1.82912	8.13629	5423.99	FALSE	242
2022-09-12	09:17:18	4.41472	19.6376	5584.12	1	243
2022-09-12	09:17:18	0.718079	3.19416	5427.19	FALSE	243
2022-09-12	09:17:19	0.730903	3.2512	5587.38	FALSE	243
2022-09-12	09:17:19	0.355178	1.5799	5428.77	FALSE	243
2022-09-12	09:17:19	0.340216	1.51335	5588.89	FALSE	243
2022-09-12	09:17:19	0.431158	1.91788	5430.68	FALSE	243
2022-09-12	09:17:20	0.868613	3.86376	5592.75	FALSE	243
2022-09-12	09:17:20	1.01925	4.53383	5435.22	FALSE	243
2022-09-12	09:17:20	0.95813	4.26195	5597.01	FALSE	243
2022-09-12	09:17:21	0.641489	2.85347	5438.07	FALSE	243
2022-09-12	09:17:21	0.538181	2.39394	5599.41	FALSE	243
2022-09-12	09:17:21	1.0052	4.47133	5442.54	FALSE	243
2022-09-12	09:17:21	1.38134	6.14448	5605.55	FALSE	243
2022-09-12	09:17:22	1.38352	6.15417	5448.7	FALSE	243
2022-09-12	09:17:22	1.65701	7.37071	5612.92	FALSE	243
2022-09-12	09:17:22	2.07472	9.22877	5457.93	FALSE	243
2022-09-12	09:17:22	2.0563	9.14683	5622.07	FALSE	243
2022-09-12	09:17:23	1.46352	6.51003	5464.44	FALSE	243
2022-09-12	09:17:23	0.673397	2.9954	5625.07	FALSE	243
2022-09-12	09:17:23	0.580827	2.58363	5467.02	FALSE	243
2022-09-12	09:17:23	0.595382	2.64838	5627.71	FALSE	243
2022-09-12	09:17:24	0.540267	2.40322	5469.42	FALSE	243
2022-09-12	09:17:24	0.402964	1.79246	5629.51	FALSE	243
2022-09-12	09:17:24	0.318995	1.41895	5470.84	FALSE	243
2022-09-12	09:17:25	0.371209	1.65121	5631.16	FALSE	243
2022-09-12	09:17:25	0.278639	1.23944	5472.08	FALSE	243
2022-09-12	09:17:25	0.2764	1.22948	5632.39	FALSE	243
2022-09-12	09:17:25	0.473244	2.10508	5474.19	FALSE	243
2022-09-12	09:17:26	1.66668	7.41373	5639.8	FALSE	243
2022-09-12	09:17:26	2.33752	10.3978	5484.58	FALSE	243
2022-09-12	09:17:26	1.08653	4.8331	5644.63	FALSE	243
2022-09-12	09:17:26	0.449936	2.00141	5486.59	FALSE	243
2022-09-12	09:17:27	0.418181	1.86015	5646.49	FALSE	243
2022-09-12	09:17:27	0.412685	1.83571	5488.42	FALSE	243
2022-09-12	09:17:27	0.341438	1.51878	5648.01	FALSE	243
2022-09-12	09:17:27	0.340013	1.51245	5489.93	FALSE	243
2022-09-12	09:17:28	0.309224	1.37549	5649.39	FALSE	243
2022-09-12	09:17:28	0.233601	1.0391	5490.97	FALSE	243
2022-09-12	09:17:28	0.160573	0.714261	5650.1	FALSE	243
2022-09-12	09:17:28	0.234466	1.04295	5492.02	FALSE	243
2022-09-12	09:17:29	0.189377	0.842387	5650.95	FALSE	243
2022-09-12	09:17:29	0.174771	0.777416	5492.79	FALSE	243
2022-09-12	09:17:29	0.28388	1.26276	5652.21	FALSE	243
2022-09-12	09:17:30	0.177417	0.789186	5493.58	FALSE	243
2022-09-12	09:17:30	0.309377	1.37617	5653.58	FALSE	243
2022-09-12	09:17:30	0.0621503	0.276457	5493.86	FALSE	243
2022-09-12	09:17:30	0.27126	1.20662	5654.79	FALSE	243
2022-09-12	09:17:31	0.189733	0.84397	5494.7	FALSE	243
2022-09-12	09:17:31	0.317824	1.41374	5656.2	FALSE	243
2022-09-12	09:17:31	0.212685	0.946065	5495.65	FALSE	243
2022-09-12	09:17:31	0.258283	1.14889	5657.35	FALSE	243
2022-09-12	09:17:32	0.330547	1.47034	5497.12	FALSE	243
2022-09-12	09:17:32	0.385764	1.71596	5659.07	FALSE	243
2022-09-12	09:17:32	0.343779	1.5292	5498.65	FALSE	243
2022-09-12	09:17:32	0.264949	1.17855	5660.25	FALSE	243
2022-09-12	09:17:33	0.278741	1.2399	5499.89	FALSE	243
2022-09-12	09:17:33	0.345	1.53463	5661.78	FALSE	243
2022-09-12	09:17:33	0.30154	1.34131	5501.23	FALSE	243
2022-09-12	09:17:33	0.243677	1.08392	5662.87	FALSE	243
2022-09-12	09:17:34	0.337316	1.50045	5502.73	FALSE	243
2022-09-12	09:17:34	0.353804	1.57379	5664.44	FALSE	243
2022-09-12	09:17:34	0.374466	1.6657	5504.4	FALSE	243
2022-09-12	09:17:35	0.279046	1.24125	5665.68	FALSE	243
2022-09-12	09:17:35	0.255229	1.13531	5505.53	FALSE	243
2022-09-12	09:17:35	0.249326	1.10905	5666.79	FALSE	243
2022-09-12	09:17:35	0.30673	1.3644	5506.9	FALSE	243
2022-09-12	09:17:36	0.412176	1.83344	5668.62	FALSE	243
2022-09-12	09:17:36	0.901438	4.00978	5510.91	FALSE	243
2022-09-12	09:17:36	0.457316	2.03423	5670.66	FALSE	243
2022-09-12	09:17:36	1.04464	4.64677	5515.55	FALSE	243
2022-09-12	09:17:37	0.336858	1.49841	5672.16	FALSE	243
2022-09-12	09:17:37	0.759758	3.37956	5518.93	FALSE	243
2022-09-12	09:17:37	0.884491	3.93439	5676.09	FALSE	243
2022-09-12	09:17:37	0.797774	3.54866	5522.48	FALSE	243
2022-09-12	09:17:38	1.94271	8.64156	5684.73	FALSE	243
2022-09-12	09:17:38	1.28856	5.73177	5528.21	FALSE	243
2022-09-12	09:17:38	2.21569	9.85583	5694.59	FALSE	243
2022-09-12	09:17:39	2.62703	11.6856	5539.9	FALSE	243
2022-09-12	09:17:39	1.79274	7.97447	5702.56	FALSE	243
2022-09-12	09:17:39	3.72922	16.5883	5556.49	1	244
2022-09-12	09:17:39	0.920827	4.09602	5706.66	FALSE	244
2022-09-12	09:17:40	3.14597	13.9939	5570.48	1	245
2022-09-12	09:17:40	1.39462	6.20355	5712.86	FALSE	245
2022-09-12	09:17:40	1.63548	7.27494	5577.75	FALSE	245
2022-09-12	09:17:40	2.18999	9.74151	5722.6	FALSE	245
2022-09-12	09:17:41	0.502354	2.23457	5579.99	FALSE	245
2022-09-12	09:17:41	0.724746	3.22382	5725.83	FALSE	245
2022-09-12	09:17:41	0.703372	3.12874	5583.12	FALSE	245
2022-09-12	09:17:41	0.49355	2.19541	5728.02	FALSE	245
2022-09-12	09:17:42	1.07289	4.77243	5587.89	FALSE	245
2022-09-12	09:17:42	0.439046	1.95296	5729.98	FALSE	245
2022-09-12	09:17:42	0.532379	2.36813	5590.26	FALSE	245
2022-09-12	09:17:43	1.8338	8.15711	5738.13	FALSE	245
2022-09-12	09:17:43	1.00169	4.45572	5594.71	FALSE	245
2022-09-12	09:17:43	2.48536	11.0554	5749.19	FALSE	245
2022-09-12	09:17:43	0.534669	2.37831	5597.09	FALSE	245
2022-09-12	09:17:44	0.879657	3.91289	5753.1	FALSE	245
2022-09-12	09:17:44	0.310038	1.37911	5598.47	FALSE	245
2022-09-12	09:17:44	0.425662	1.89343	5755	FALSE	245
2022-09-12	09:17:44	0.25986	1.15591	5599.63	FALSE	245
2022-09-12	09:17:45	0.241438	1.07396	5756.07	FALSE	245
2022-09-12	09:17:45	0.277723	1.23537	5600.86	FALSE	245
2022-09-12	09:17:45	0.37411	1.66412	5757.73	FALSE	245
2022-09-12	09:17:45	0.307087	1.36598	5602.23	FALSE	245
2022-09-12	09:17:46	0.254313	1.13124	5758.86	FALSE	245
2022-09-12	09:17:46	0.284186	1.26412	5603.49	FALSE	245
2022-09-12	09:17:46	0.23299	1.03639	5759.9	FALSE	245
2022-09-12	09:17:46	0.25869	1.1507	5604.64	FALSE	245
2022-09-12	09:17:47	0.258079	1.14799	5761.05	FALSE	245
2022-09-12	09:17:47	0.261031	1.16112	5605.8	FALSE	245
2022-09-12	09:17:47	0.265051	1.179	5762.23	FALSE	245
2022-09-12	09:17:48	0.278232	1.23763	5607.04	FALSE	245
2022-09-12	09:17:48	0.267901	1.19168	5763.42	FALSE	245
2022-09-12	09:17:48	0.336908	1.49863	5608.54	FALSE	245
2022-09-12	09:17:48	0.287087	1.27702	5764.7	FALSE	245
2022-09-12	09:17:49	0.285865	1.27158	5609.81	FALSE	245
2022-09-12	09:17:49	0.304237	1.35331	5766.05	FALSE	245
2022-09-12	09:17:49	0.279351	1.24261	5611.06	FALSE	245
2022-09-12	09:17:49	0.264288	1.17561	5767.23	FALSE	245
2022-09-12	09:17:50	0.259962	1.15636	5612.21	FALSE	245
2022-09-12	09:17:50	0.265611	1.18149	5768.41	FALSE	245
2022-09-12	09:17:50	0.265713	1.18194	5613.39	FALSE	245
2022-09-12	09:17:50	0.265967	1.18307	5769.59	FALSE	245
2022-09-12	09:17:51	0.256552	1.14119	5614.53	FALSE	245
2022-09-12	09:17:51	0.2564	1.14052	5770.73	FALSE	245
2022-09-12	09:17:51	0.26215	1.1661	5615.7	FALSE	245
2022-09-12	09:17:52	0.277825	1.23582	5771.97	FALSE	245
2022-09-12	09:17:52	0.287596	1.27928	5616.98	FALSE	245
2022-09-12	09:17:52	0.318537	1.41692	5773.38	FALSE	245
2022-09-12	09:17:52	0.381489	1.69694	5618.68	FALSE	245
2022-09-12	09:17:53	0.470954	2.0949	5775.48	FALSE	245
2022-09-12	09:17:53	0.406578	1.80854	5620.49	FALSE	245
2022-09-12	09:17:53	0.391819	1.74289	5777.22	FALSE	245
2022-09-12	09:17:53	0.377723	1.68019	5622.17	FALSE	245
2022-09-12	09:17:54	0.42042	1.87011	5779.09	FALSE	245
2022-09-12	09:17:54	0.354873	1.57855	5623.74	FALSE	245
2022-09-12	09:17:54	0.322405	1.43412	5780.53	FALSE	245
2022-09-12	09:17:54	0.327748	1.45789	5625.2	FALSE	245
2022-09-12	09:17:55	0.307799	1.36915	5781.89	FALSE	245
2022-09-12	09:17:55	0.280369	1.24714	5626.45	FALSE	245
2022-09-12	09:17:55	0.278588	1.23922	5783.13	FALSE	245
2022-09-12	09:17:55	0.263321	1.1713	5627.62	FALSE	245
2022-09-12	09:17:56	0.282456	1.25642	5784.39	FALSE	245
2022-09-12	09:17:56	0.283117	1.25936	5628.88	FALSE	245
2022-09-12	09:17:56	0.308257	1.37119	5785.76	FALSE	245
2022-09-12	09:17:57	0.271361	1.20707	5630.09	FALSE	245
2022-09-12	09:17:57	0.272634	1.21273	5786.97	FALSE	245
2022-09-12	09:17:57	0.30271	1.34651	5631.43	FALSE	245
2022-09-12	09:17:57	0.341947	1.52105	5788.5	FALSE	245
2022-09-12	09:17:58	0.405509	1.80379	5633.24	FALSE	245
2022-09-12	09:17:58	0.72673	3.23264	5791.73	FALSE	245
2022-09-12	09:17:58	0.434364	1.93214	5635.17	FALSE	245
2022-09-12	09:17:58	0.389987	1.73474	5793.46	FALSE	245
2022-09-12	09:17:59	0.833549	3.70779	5638.88	FALSE	245
2022-09-12	09:17:59	0.834313	3.71119	5797.17	FALSE	245
2022-09-12	09:17:59	0.599402	2.66626	5641.54	FALSE	245
2022-09-12	09:17:59	1.42709	6.34798	5803.52	FALSE	245
2022-09-12	09:18:00	2.08922	9.29327	5650.84	FALSE	245
2022-09-12	09:18:00	1.48368	6.59971	5810.12	FALSE	245
2022-09-12	09:18:00	1.99207	8.86113	5659.7	FALSE	245
2022-09-12	09:18:01	2.78668	12.3957	5822.52	FALSE	245
2022-09-12	09:18:01	2.99915	13.3408	5673.04	FALSE	245
2022-09-12	09:18:01	3.93406	17.4995	5840.02	1	246
2022-09-12	09:18:01	4.3453	19.3288	5692.37	1	247
2022-09-12	09:18:02	3.67268	16.3368	5856.35	1	248
2022-09-12	09:18:02	2.68917	11.962	5704.33	FALSE	248
2022-09-12	09:18:02	1.7705	7.87554	5864.23	FALSE	248
2022-09-12	09:18:02	2.09706	9.32814	5713.66	FALSE	248
2022-09-12	09:18:03	1.07238	4.77016	5869	FALSE	248
2022-09-12	09:18:03	0.425967	1.89479	5715.55	FALSE	248
2022-09-12	09:18:03	0.407901	1.81443	5870.81	FALSE	248
2022-09-12	09:18:03	0.367646	1.63536	5717.19	FALSE	248
2022-09-12	09:18:04	0.31014	1.37956	5872.19	FALSE	248
2022-09-12	09:18:04	0.365814	1.62721	5718.82	FALSE	248
2022-09-12	09:18:04	0.357519	1.59032	5873.78	FALSE	248
2022-09-12	09:18:04	0.335076	1.49049	5720.31	FALSE	248
2022-09-12	09:18:05	0.355891	1.58307	5875.37	FALSE	248
2022-09-12	09:18:05	0.309479	1.37662	5721.68	FALSE	248
2022-09-12	09:18:05	0.351972	1.56564	5876.93	FALSE	248
2022-09-12	09:18:06	0.326069	1.45042	5723.13	FALSE	248
2022-09-12	09:18:06	0.382863	1.70305	5878.64	FALSE	248
2022-09-12	09:18:06	0.353193	1.57107	5724.7	FALSE	248
2022-09-12	09:18:06	0.547748	2.43649	5881.07	FALSE	248
2022-09-12	09:18:07	0.944084	4.19947	5728.9	FALSE	248
2022-09-12	09:18:07	0.749886	3.33564	5884.41	FALSE	248
2022-09-12	09:18:07	0.686221	3.05245	5731.96	FALSE	248
2022-09-12	09:18:07	0.608969	2.70882	5887.12	FALSE	248
2022-09-12	09:18:08	1.64047	7.29714	5739.25	FALSE	248
2022-09-12	09:18:08	2.37665	10.5718	5897.69	FALSE	248
2022-09-12	09:18:08	2.40424	10.6945	5749.95	FALSE	248
2022-09-12	09:18:08	2.89548	12.8797	5910.57	FALSE	248
2022-09-12	09:18:09	2.75217	12.2422	5762.19	FALSE	248
2022-09-12	09:18:09	1.85564	8.25426	5918.82	FALSE	248
2022-09-12	09:18:09	0.962303	4.28052	5766.47	FALSE	248
2022-09-12	09:18:10	0.402354	1.78975	5920.61	FALSE	248
2022-09-12	09:18:10	0.425865	1.89433	5768.36	FALSE	248
2022-09-12	09:18:10	0.765254	3.404	5924.02	FALSE	248
2022-09-12	09:18:10	0.299402	1.3318	5769.7	FALSE	248
2022-09-12	09:18:11	0.260216	1.15749	5925.17	FALSE	248
2022-09-12	09:18:11	0.232583	1.03458	5770.73	FALSE	248
2022-09-12	09:18:11	0.164186	0.730332	5925.9	FALSE	248
2022-09-12	09:18:11	0.229733	1.0219	5771.75	FALSE	248
2022-09-12	09:18:12	0.239504	1.06536	5926.97	FALSE	248
2022-09-12	09:18:12	0.20327	0.904186	5772.66	FALSE	248
2022-09-12	09:18:12	0.206578	0.9189	5927.89	FALSE	248
2022-09-12	09:18:12	0.180115	0.801188	5773.46	FALSE	248
2022-09-12	09:18:13	0.160013	0.71177	5928.6	FALSE	248
2022-09-12	09:18:13	0.149428	0.664686	5774.12	FALSE	248
2022-09-12	09:18:13	0.167239	0.743913	5929.34	FALSE	248
2022-09-12	09:18:13	0.211667	0.941537	5775.06	FALSE	248
2022-09-12	09:18:14	0.174618	0.776736	5930.12	FALSE	248
2022-09-12	09:18:14	-0.147264	-0.65506	5775.06	FALSE	248
2022-09-12	09:18:14	-0.079987	-0.355798	5930.12	FALSE	248
2022-09-12	09:18:15	0.0360435	0.160329	5775.22	FALSE	248
2022-09-12	09:18:15	0.348461	1.55002	5931.67	FALSE	248
2022-09-12	09:18:15	0.404491	1.79926	5777.02	FALSE	248
2022-09-12	09:18:15	0.446323	1.98533	5933.66	FALSE	248
2022-09-12	09:18:16	0.681692	3.0323	5780.06	FALSE	248
2022-09-12	09:18:16	0.91925	4.08901	5937.74	FALSE	248
2022-09-12	09:18:16	1.845	8.20693	5788.26	FALSE	248
2022-09-12	09:18:16	3.22123	14.3287	5952.07	1	249
2022-09-12	09:18:17	3.71116	16.508	5804.77	1	250
2022-09-12	09:18:17	3.78551	16.8387	5968.91	1	251
2022-09-12	09:18:17	1.3162	5.85472	5810.63	FALSE	251
2022-09-12	09:18:17	0.468766	2.08516	5971	FALSE	251
2022-09-12	09:18:18	0.874007	3.88776	5814.51	FALSE	251
2022-09-12	09:18:18	1.74159	7.74694	5978.74	FALSE	251
2022-09-12	09:18:18	1.88795	8.39798	5822.91	FALSE	251
2022-09-12	09:18:19	0.501946	2.23276	5980.98	FALSE	251
2022-09-12	09:18:19	0.35243	1.56768	5824.48	FALSE	251
2022-09-12	09:18:19	0.328257	1.46015	5982.44	FALSE	251
2022-09-12	09:18:19	0.276298	1.22903	5825.71	FALSE	251
2022-09-12	09:18:20	0.294059	1.30803	5983.74	FALSE	251
2022-09-12	09:18:20	0.297061	1.32139	5827.03	FALSE	251
2022-09-12	09:18:20	0.263168	1.17062	5984.92	FALSE	251
2022-09-12	09:18:20	0.427697	1.90248	5828.93	FALSE	251
2022-09-12	09:18:21	0.622761	2.77017	5987.69	FALSE	251
2022-09-12	09:18:21	0.903728	4.01996	5832.95	FALSE	251
2022-09-12	09:18:21	1.56566	6.96437	5994.65	FALSE	251
2022-09-12	09:18:21	1.02006	4.53743	5837.49	FALSE	251
2022-09-12	09:18:22	0.482303	2.14538	5996.8	FALSE	251
2022-09-12	09:18:22	0.383168	1.70441	5839.19	FALSE	251
2022-09-12	09:18:22	0.365305	1.62495	5998.42	FALSE	251
2022-09-12	09:18:22	0.358741	1.59575	5840.79	FALSE	251
2022-09-12	09:18:23	0.545661	2.42721	6000.85	FALSE	251
2022-09-12	09:18:23	0.767443	3.41374	5844.2	FALSE	251
2022-09-12	09:18:23	0.485255	2.15851	6003.01	FALSE	251
2022-09-12	09:18:24	0.44902	1.99733	5846.2	FALSE	251
2022-09-12	09:18:24	0.558741	2.48539	6005.49	FALSE	251
2022-09-12	09:18:24	0.411921	1.83231	5848.03	FALSE	251
2022-09-12	09:18:24	0.367697	1.63559	6007.13	FALSE	251
2022-09-12	09:18:25	0.355687	1.58217	5849.62	FALSE	251
2022-09-12	09:18:25	0.390802	1.73837	6008.87	FALSE	251
2022-09-12	09:18:25	0.349987	1.55681	5851.17	FALSE	251
2022-09-12	09:18:25	0.30902	1.37458	6010.24	FALSE	251
2022-09-12	09:18:26	0.299657	1.33293	5852.51	FALSE	251
2022-09-12	09:18:26	0.294873	1.31165	6011.55	FALSE	251
2022-09-12	09:18:26	0.300471	1.33656	5853.84	FALSE	251
2022-09-12	09:18:26	0.308664	1.373	6012.92	FALSE	251
2022-09-12	09:18:27	0.305255	1.35784	5855.2	FALSE	251
2022-09-12	09:18:27	0.301285	1.34018	6014.26	FALSE	251
2022-09-12	09:18:27	0.30841	1.37187	5856.57	FALSE	251
2022-09-12	09:18:28	0.314211	1.39767	6015.66	FALSE	251
2022-09-12	09:18:28	0.375891	1.67204	5858.24	FALSE	251
2022-09-12	09:18:28	0.460827	2.04985	6017.71	FALSE	251
2022-09-12	09:18:28	0.511412	2.27486	5860.52	FALSE	251
2022-09-12	09:18:29	0.584237	2.5988	6020.31	FALSE	251
2022-09-12	09:18:29	0.676908	3.01102	5863.53	FALSE	251
2022-09-12	09:18:29	0.734262	3.26614	6023.58	FALSE	251
2022-09-12	09:18:29	0.721743	3.21046	5866.74	FALSE	251
2022-09-12	09:18:30	1.71396	7.62404	6031.2	FALSE	251
2022-09-12	09:18:30	2.09106	9.30145	5876.04	FALSE	251
2022-09-12	09:18:30	1.89508	8.42969	6039.63	FALSE	251
2022-09-12	09:18:30	1.61772	7.19594	5883.24	FALSE	251
2022-09-12	09:18:31	0.483117	2.149	6041.78	FALSE	251
2022-09-12	09:18:31	0.377723	1.68019	5884.92	FALSE	251
2022-09-12	09:18:31	0.299758	1.33338	6043.11	FALSE	251
2022-09-12	09:18:31	0.285305	1.26909	5886.19	FALSE	251
2022-09-12	09:18:32	0.314415	1.39858	6044.51	FALSE	251
2022-09-12	09:18:32	0.233397	1.0382	5887.22	FALSE	251
2022-09-12	09:18:32	0.934567	4.15714	6048.67	FALSE	251
2022-09-12	09:18:33	5.61085	24.9582	5912.18	1	252
2022-09-12	09:18:33	6.7452	30.004	6078.67	1	253
2022-09-12	09:18:33	7.90459	35.1612	5947.34	1	254
2022-09-12	09:18:33	2.60597	11.5919	6090.27	FALSE	254
2022-09-12	09:18:34	2.53401	11.2718	5958.62	FALSE	254
2022-09-12	09:18:34	1.15793	5.1507	6095.42	FALSE	254
2022-09-12	09:18:34	0.722965	3.21589	5961.83	FALSE	254
2022-09-12	09:18:34	2.61533	11.6335	6107.05	FALSE	254
2022-09-12	09:18:35	0.510445	2.27056	5964.1	FALSE	254
2022-09-12	09:18:35	1.81396	8.06886	6115.12	FALSE	254
2022-09-12	09:18:35	0.46215	2.05574	5966.16	FALSE	254
2022-09-12	09:18:35	0.847036	3.76779	6118.89	FALSE	254
2022-09-12	09:18:36	1.00556	4.47293	5970.63	FALSE	254
2022-09-12	09:18:36	1.35187	6.01339	6124.9	FALSE	254
2022-09-12	09:18:36	1.76108	7.83364	5978.46	FALSE	254
2022-09-12	09:18:37	1.09355	4.86433	6129.76	FALSE	254
2022-09-12	09:18:37	1.60256	7.12851	5985.59	FALSE	254
2022-09-12	09:18:37	2.45248	10.9091	6140.67	FALSE	254
2022-09-12	09:18:37	1.54179	6.85819	5992.45	FALSE	254
2022-09-12	09:18:38	2.422	10.7735	6151.45	FALSE	254
2022-09-12	09:18:38	3.12576	13.904	6006.36	1	255
2022-09-12	09:18:38	2.34128	10.4145	6161.86	FALSE	255
2022-09-12	09:18:38	4.42235	19.6715	6026.03	1	256
2022-09-12	09:18:39	4.21711	18.7585	6180.62	1	257
2022-09-12	09:18:39	5.64505	25.1103	6051.14	1	258
2022-09-12	09:18:39	5.2508	23.3566	6203.98	1	259
2022-09-12	09:18:39	3.13533	13.9466	6065.08	1	260
2022-09-12	09:18:40	6.98647	31.0772	6235.05	1	261
2022-09-12	09:18:40	2.79421	12.4292	6077.51	FALSE	261
2022-09-12	09:18:40	4.35614	19.377	6254.43	1	262
2022-09-12	09:18:40	4.00052	17.7951	6095.31	1	263
2022-09-12	09:18:41	3.26123	14.5066	6268.94	1	264
2022-09-12	09:18:41	4.585	20.395	6115.7	1	265
2022-09-12	09:18:41	2.42083	10.7683	6279.71	FALSE	265
2022-09-12	09:18:42	3.11731	13.8664	6129.57	1	266
2022-09-12	09:18:42	3.24658	14.4414	6294.15	1	267
2022-09-12	09:18:42	1.85202	8.23816	6137.81	FALSE	267
2022-09-12	09:18:42	0.719707	3.2014	6297.35	FALSE	267
2022-09-12	09:18:43	0.846883	3.7671	6141.57	FALSE	267
2022-09-12	09:18:43	0.271463	1.20752	6298.56	FALSE	267
2022-09-12	09:18:43	0.609173	2.70972	6144.28	FALSE	267
2022-09-12	09:18:43	1.64368	7.31142	6305.87	FALSE	267
2022-09-12	09:18:44	1.40475	6.24861	6150.53	FALSE	267
2022-09-12	09:18:44	2.21528	9.85401	6315.72	FALSE	267
2022-09-12	09:18:44	4.04505	17.9932	6168.53	1	268
2022-09-12	09:18:44	0.569631	2.53383	6318.25	FALSE	268
2022-09-12	09:18:45	0.364288	1.62043	6170.15	FALSE	268
2022-09-12	09:18:45	0.701387	3.11991	6321.37	FALSE	268
2022-09-12	09:18:45	0.373193	1.66004	6171.81	FALSE	268
2022-09-12	09:18:46	0.933041	4.15035	6325.52	FALSE	268
2022-09-12	09:18:46	0.869427	3.86739	6175.67	FALSE	268
2022-09-12	09:18:46	0.897621	3.9928	6329.52	FALSE	268
2022-09-12	09:18:46	1.39701	6.21418	6181.89	FALSE	268
2022-09-12	09:18:47	1.53375	6.82243	6336.34	FALSE	268
2022-09-12	09:18:47	1.36495	6.07157	6187.96	FALSE	268
2022-09-12	09:18:47	1.69966	7.56043	6343.9	FALSE	268
2022-09-12	09:18:47	0.707748	3.1482	6191.11	FALSE	268
2022-09-12	09:18:48	1.63111	7.2555	6351.16	FALSE	268
2022-09-12	09:18:48	0.694058	3.08731	6194.2	FALSE	268
2022-09-12	09:18:48	2.96011	13.1672	6364.32	FALSE	268
2022-09-12	09:18:48	2.3593	10.4946	6204.69	FALSE	268
2022-09-12	09:18:49	3.085	13.7227	6378.05	1	269
2022-09-12	09:18:49	3.28429	14.6092	6219.3	1	270
2022-09-12	09:18:49	2.18739	9.72995	6387.78	FALSE	270
2022-09-12	09:18:50	5.37757	23.9205	6243.22	1	271
2022-09-12	09:18:50	2.17034	9.65411	6397.43	FALSE	271
2022-09-12	09:18:50	4.15874	18.4989	6261.72	1	272
2022-09-12	09:18:50	1.78749	7.95111	6405.38	FALSE	272
2022-09-12	09:18:51	1.44531	6.42903	6268.15	FALSE	272
2022-09-12	09:18:51	1.23223	5.48121	6410.86	FALSE	272
2022-09-12	09:18:51	1.05818	4.707	6272.85	FALSE	272
2022-09-12	09:18:51	1.22546	5.45109	6416.31	FALSE	272
2022-09-12	09:18:52	0.59187	2.63276	6275.49	FALSE	272
2022-09-12	09:18:52	0.768003	3.41623	6419.73	FALSE	272
2022-09-12	09:18:52	0.525712	2.33847	6277.83	FALSE	272
2022-09-12	09:18:52	0.863372	3.84045	6423.57	FALSE	272
2022-09-12	09:18:53	0.607137	2.70067	6280.53	FALSE	272
2022-09-12	09:18:53	0.801845	3.56677	6427.14	FALSE	272
2022-09-12	09:18:53	1.55258	6.90619	6287.43	FALSE	272
2022-09-12	09:18:53	1.64317	7.30915	6434.45	FALSE	272
2022-09-12	09:18:54	2.26215	10.0625	6297.49	FALSE	272
2022-09-12	09:18:54	2.25385	10.0256	6444.47	FALSE	272
2022-09-12	09:18:54	3.42836	15.25	6312.75	1	273
2022-09-12	09:18:55	2.24871	10.0027	6454.47	FALSE	273
2022-09-12	09:18:55	1.64683	7.32543	6320.07	FALSE	273
2022-09-12	09:18:55	1.34683	5.99097	6460.47	FALSE	273
2022-09-12	09:18:55	1.36617	6.077	6326.15	FALSE	273
2022-09-12	09:18:56	1.10561	4.91797	6465.38	FALSE	273
2022-09-12	09:18:56	4.06907	18.1	6344.25	1	274
2022-09-12	09:18:56	4.96367	22.0794	6487.46	1	275
2022-09-12	09:18:56	5.85121	26.0274	6370.27	1	276
2022-09-12	09:18:57	8.71757	38.7775	6526.24	1	277
2022-09-12	09:18:57	4.84993	21.5735	6391.85	1	278
2022-09-12	09:18:57	4.62347	20.5661	6546.81	1	279
2022-09-12	09:18:57	3.97319	17.6735	6409.52	1	280
2022-09-12	09:18:58	2.88403	12.8287	6559.64	FALSE	280
2022-09-12	09:18:58	6.6221	29.4564	6438.98	1	281
2022-09-12	09:18:58	2.20149	9.79267	6569.43	FALSE	281
2022-09-12	09:18:59	5.29212	23.5404	6462.52	1	282
2022-09-12	09:18:59	2.10525	9.36457	6578.79	FALSE	282
2022-09-12	09:18:59	4.66052	20.7309	6483.25	1	283
2022-09-12	09:18:59	2.49787	11.111	6589.9	FALSE	283
2022-09-12	09:19:00	3.31803	14.7593	6498.01	1	284
2022-09-12	09:19:00	3.98296	17.717	6607.62	1	285
2022-09-12	09:19:00	1.92072	8.54375	6506.55	FALSE	285
2022-09-12	09:19:00	4.0252	17.9049	6625.53	1	286
2022-09-12	09:19:01	1.79228	7.97242	6514.53	FALSE	286
2022-09-12	09:19:01	4.71904	20.9912	6646.52	1	287
2022-09-12	09:19:01	1.58866	7.06668	6521.59	FALSE	287
2022-09-12	09:19:01	3.77813	16.8059	6663.32	1	288
2022-09-12	09:19:02	1.65955	7.38201	6528.97	FALSE	288
2022-09-12	09:19:02	2.35223	10.4632	6673.79	FALSE	288
2022-09-12	09:19:02	2.88062	12.8136	6541.79	FALSE	288
2022-09-12	09:19:02	3.12042	13.8803	6687.67	1	289
2022-09-12	09:19:03	4.76159	21.1805	6562.97	1	290
2022-09-12	09:19:03	2.60245	11.5762	6699.24	FALSE	290
2022-09-12	09:19:03	5.7968	25.7853	6588.75	1	291
2022-09-12	09:19:04	3.72037	16.5489	6715.79	1	292
2022-09-12	09:19:04	5.35533	23.8216	6612.57	1	293
2022-09-12	09:19:04	1.19039	5.29509	6721.09	FALSE	293
2022-09-12	09:19:04	3.49365	15.5405	6628.12	1	294
2022-09-12	09:19:05	2.98098	13.26	6734.35	FALSE	294
2022-09-12	09:19:05	1.36134	6.05551	6634.17	FALSE	294
2022-09-12	09:19:05	2.23971	9.96268	6744.31	FALSE	294
2022-09-12	09:19:05	1.43528	6.38441	6640.56	FALSE	294
2022-09-12	09:19:06	2.94856	13.1158	6757.42	FALSE	294
2022-09-12	09:19:06	2.23197	9.92825	6650.48	FALSE	294
2022-09-12	09:19:06	4.06795	18.0951	6775.52	1	295
2022-09-12	09:19:06	4.85966	21.6167	6672.1	1	296
2022-09-12	09:19:07	5.47716	24.3635	6799.88	1	297
2022-09-12	09:19:07	6.44881	28.6856	6700.79	1	298
2022-09-12	09:19:07	5.52719	24.586	6824.47	1	299
2022-09-12	09:19:08	9.66062	42.9724	6743.76	1	300
2022-09-12	09:19:08	6.62703	29.4784	6853.95	1	301
2022-09-12	09:19:08	17.493	77.8124	6821.57	1	302
2022-09-12	09:19:08	5.86489	26.0882	6880.04	1	303
2022-09-12	09:19:09	9.69517	43.1261	6864.7	1	304
2022-09-12	09:19:09	4.30077	19.1307	6899.17	1	305
2022-09-12	09:19:09	5.15838	22.9455	6887.64	1	306
2022-09-12	09:19:09	6.23054	27.7147	6926.88	1	307
2022-09-12	09:19:10	7.265	32.3162	6919.96	1	308
2022-09-12	09:19:10	12.2894	54.6657	6981.55	1	309
2022-09-12	09:19:10	17.7934	79.1486	6999.11	1	310
2022-09-12	09:19:10	28.7071	127.695	7109.24	1	311
2022-09-12	09:19:11	19.4083	86.332	7085.44	1	312
2022-09-12	09:19:11	11.4286	50.8367	7160.08	1	313
2022-09-12	09:19:11	13.4293	59.7362	7145.17	1	314
2022-09-12	09:19:11	6.55782	29.1705	7189.25	1	315
2022-09-12	09:19:12	11.276	50.1579	7195.33	1	316
2022-09-12	09:19:12	23.1452	102.954	7292.2	1	317
2022-09-12	09:19:12	13.0021	57.8359	7253.17	1	318

## Sheet: Royal_martin_20229129143 (E)
Date	Time	Lbs	Total force x time	Total Time Steps Force >3		**GoPro Fitting: 9:02
2022-09-12	09:14:12	0.637417	0.637417	FALSE	0			Total force x time	3269.95
2022-09-12	09:14:12	0.376247	1.01366	FALSE	0			Total Time Steps Force >3	318
2022-09-12	09:14:12	0.265713	1.27938	FALSE	0
2022-09-12	09:14:12	0.500471	1.77985	FALSE	0
2022-09-12	09:14:13	0.290445	2.07029	FALSE	0
2022-09-12	09:14:13	0.336959	2.40725	FALSE	0
2022-09-12	09:14:13	0.337316	2.74457	FALSE	0
2022-09-12	09:14:13	1.12246	3.86703	FALSE	0		Sees/pulls to dog first minute or so
2022-09-12	09:14:14	2.23447	6.1015	FALSE	0
2022-09-12	09:14:14	9.95456	16.0561	1	1
2022-09-12	09:14:14	10.5162	26.5723	1	2
2022-09-12	09:14:14	10.5127	37.085	1	3
2022-09-12	09:14:15	6.29049	43.3754	1	4
2022-09-12	09:14:15	14.8685	58.2439	1	5
2022-09-12	09:14:15	11.644	69.8879	1	6
2022-09-12	09:14:15	11.1384	81.0263	1	7
2022-09-12	09:14:16	8.67171	89.6981	1	8
2022-09-12	09:14:16	17.8817	107.58	1	9
2022-09-12	09:14:16	20.3973	127.977	1	10
2022-09-12	09:14:17	11.392	139.369	1	11
2022-09-12	09:14:17	6.59095	145.96	1	12
2022-09-12	09:14:17	3.95452	149.915	1	13
2022-09-12	09:14:17	1.90032	151.815	FALSE	13
2022-09-12	09:14:18	3.05558	154.87	1	14
2022-09-12	09:14:18	6.39996	161.27	1	15
2022-09-12	09:14:18	10.7918	172.062	1	16
2022-09-12	09:14:18	7.37711	179.439	1	17
2022-09-12	09:14:19	4.46815	183.907	1	18
2022-09-12	09:14:19	6.79421	190.702	1	19
2022-09-12	09:14:19	12.8027	203.504	1	20
2022-09-12	09:14:19	14.0922	217.597	1	21
2022-09-12	09:14:20	20.2418	237.838	1	22
2022-09-12	09:14:20	9.91375	247.752	1	23
2022-09-12	09:14:20	14.4574	262.21	1	24
2022-09-12	09:14:21	7.62902	269.839	1	25
2022-09-12	09:14:21	6.37609	276.215	1	26
2022-09-12	09:14:21	16.2703	292.485	1	27
2022-09-12	09:14:21	6.93858	299.423	1	28
2022-09-12	09:14:22	8.52016	307.944	1	29
2022-09-12	09:14:22	13.3272	321.271	1	30
2022-09-12	09:14:22	8.23777	329.509	1	31
2022-09-12	09:14:22	17.8781	347.387	1	32
2022-09-12	09:14:23	14.6066	361.993	1	33
2022-09-12	09:14:23	14.3057	376.299	1	34
2022-09-12	09:14:23	24.3914	400.69	1	35
2022-09-12	09:14:23	15.6061	416.297	1	36
2022-09-12	09:14:24	11.7435	428.04	1	37
2022-09-12	09:14:24	15.0865	443.127	1	38
2022-09-12	09:14:24	12.4838	455.61	1	39
2022-09-12	09:14:24	4.89233	460.503	1	40
2022-09-12	09:14:25	5.22622	465.729	1	41
2022-09-12	09:14:25	4.5253	470.254	1	42
2022-09-12	09:14:25	0.430649	470.685	FALSE	42
2022-09-12	09:14:26	0.655331	471.34	FALSE	42
2022-09-12	09:14:26	0.29869	471.639	FALSE	42
2022-09-12	09:14:26	13.3935	485.032	1	43
2022-09-12	09:14:26	19.5132	504.546	1	44
2022-09-12	09:14:27	7.73283	512.278	1	45
2022-09-12	09:14:27	1.74475	514.023	FALSE	45
2022-09-12	09:14:27	0.421438	514.445	FALSE	45
2022-09-12	09:14:27	0.41187	514.856	FALSE	45
2022-09-12	09:14:28	0.397875	515.254	FALSE	45
2022-09-12	09:14:28	4.76143	520.016	1	46
2022-09-12	09:14:28	16.7155	536.731	1	47
2022-09-12	09:14:28	16.5908	553.322	1	48
2022-09-12	09:14:29	8.13527	561.457	1	49
2022-09-12	09:14:29	2.20866	563.666	FALSE	49
2022-09-12	09:14:29	2.32805	565.994	FALSE	49
2022-09-12	09:14:30	0.359199	566.353	FALSE	49
2022-09-12	09:14:30	0.962659	567.316	FALSE	49
2022-09-12	09:14:30	6.01136	573.327	1	50
2022-09-12	09:14:30	19.0349	592.362	1	51
2022-09-12	09:14:31	13.8941	606.256	1	52
2022-09-12	09:14:31	3.14174	609.398	1	53
2022-09-12	09:14:31	0.160878	609.559	FALSE	53
2022-09-12	09:14:31	0.458181	610.017	FALSE	53
2022-09-12	09:14:32	0.331565	610.349	FALSE	53
2022-09-12	09:14:32	0.757316	611.106	FALSE	53
2022-09-12	09:14:32	4.01283	615.119	1	54
2022-09-12	09:14:32	9.34031	624.459	1	55
2022-09-12	09:14:33	0.452735	624.912	FALSE	55
2022-09-12	09:14:33	0.0727865	624.985	FALSE	55
2022-09-12	09:14:33	0.121489	625.106	FALSE	55
2022-09-12	09:14:33	0.127799	625.234	FALSE	55
2022-09-12	09:14:34	-0.163804	625.234	FALSE	55
2022-09-12	09:14:34	0.00433869	625.238	FALSE	55
2022-09-12	09:14:34	2.92739	628.166	FALSE	55
2022-09-12	09:14:35	25.557	653.723	1	56
2022-09-12	09:14:35	9.11146	662.834	1	57
2022-09-12	09:14:35	8.3993	671.233	1	58
2022-09-12	09:14:35	10.2921	681.525	1	59
2022-09-12	09:14:36	12.094	693.619	1	60
2022-09-12	09:14:36	17.7748	711.394	1	61
2022-09-12	09:14:36	20.7793	732.174	1	62
2022-09-12	09:14:36	20.6905	752.864	1	63
2022-09-12	09:14:37	13.2636	766.128	1	64
2022-09-12	09:14:37	24.6726	790.8	1	65
2022-09-12	09:14:37	23.3474	814.148	1	66
2022-09-12	09:14:37	16.5212	830.669	1	67
2022-09-12	09:14:38	21.7578	852.427	1	68
2022-09-12	09:14:38	20.1945	872.621	1	69
2022-09-12	09:14:38	24.6691	897.29	1	70
2022-09-12	09:14:39	17.3404	914.631	1	71
2022-09-12	09:14:39	7.16948	921.8	1	72
2022-09-12	09:14:39	6.62184	928.422	1	73
2022-09-12	09:14:39	20.9806	949.403	1	74
2022-09-12	09:14:40	23.2485	972.651	1	75
2022-09-12	09:14:40	6.67202	979.323	1	76
2022-09-12	09:14:40	1.7709	981.094	FALSE	76
2022-09-12	09:14:40	0.711311	981.805	FALSE	76
2022-09-12	09:14:41	1.08139	982.887	FALSE	76
2022-09-12	09:14:41	1.86027	984.747	FALSE	76
2022-09-12	09:14:41	1.96184	986.709	FALSE	76
2022-09-12	09:14:41	6.74154	993.45	1	77
2022-09-12	09:14:42	11.6915	1005.14	1	78
2022-09-12	09:14:42	5.72245	1010.86	1	79
2022-09-12	09:14:42	5.12846	1015.99	1	80
2022-09-12	09:14:42	4.34591	1020.34	1	81
2022-09-12	09:14:43	5.95034	1026.29	1	82
2022-09-12	09:14:43	13.1716	1039.46	1	83
2022-09-12	09:14:43	14.9943	1054.45	1	84
2022-09-12	09:14:44	5.29248	1059.75	1	85
2022-09-12	09:14:44	2.68169	1062.43	FALSE	85
2022-09-12	09:14:44	1.44271	1063.87	FALSE	85
2022-09-12	09:14:44	1.12943	1065	FALSE	85
2022-09-12	09:14:45	0.873804	1065.88	FALSE	85
2022-09-12	09:14:45	1.33711	1067.21	FALSE	85
2022-09-12	09:14:45	1.22999	1068.44	FALSE	85
2022-09-12	09:14:45	0.880878	1069.32	FALSE	85
2022-09-12	09:14:46	0.492481	1069.82	FALSE	85
2022-09-12	09:14:46	0.220064	1070.04	FALSE	85
2022-09-12	09:14:46	0.354873	1070.39	FALSE	85
2022-09-12	09:14:46	0.044644	1070.44	FALSE	85
2022-09-12	09:14:47	0.16729	1070.6	FALSE	85
2022-09-12	09:14:47	-0.0180023	1070.6	FALSE	85
2022-09-12	09:14:47	0.0563997	1070.66	FALSE	85
2022-09-12	09:14:48	-0.191488	1070.66	FALSE	85
2022-09-12	09:14:48	-0.0851778	1070.66	FALSE	85
2022-09-12	09:14:48	-0.131641	1070.66	FALSE	85
2022-09-12	09:14:48	0.0407763	1070.7	FALSE	85
2022-09-12	09:14:49	-0.0740328	1070.7	FALSE	85
2022-09-12	09:14:49	-0.0160175	1070.7	FALSE	85
2022-09-12	09:14:49	0.0659671	1070.77	FALSE	85
2022-09-12	09:14:49	0.00805366	1070.77	FALSE	85
2022-09-12	09:14:50	0.143168	1070.92	FALSE	85
2022-09-12	09:14:50	0.132939	1071.05	FALSE	85
2022-09-12	09:14:50	0.633906	1071.68	FALSE	85
2022-09-12	09:14:50	1.32408	1073.01	FALSE	85
2022-09-12	09:14:51	1.05686	1074.06	FALSE	85
2022-09-12	09:14:51	2.34541	1076.41	FALSE	85
2022-09-12	09:14:51	5.45355	1081.86	1	86
2022-09-12	09:14:51	6.12062	1087.98	1	87
2022-09-12	09:14:52	11.916	1099.9	1	88
2022-09-12	09:14:52	13.1376	1113.04	1	89
2022-09-12	09:14:52	25.1339	1138.17	1	90
2022-09-12	09:14:53	15.5246	1153.7	1	91
2022-09-12	09:14:53	10.9583	1164.65	1	92
2022-09-12	09:14:53	4.28459	1168.94	1	93
2022-09-12	09:14:53	1.05991	1170	FALSE	93
2022-09-12	09:14:54	0.307494	1170.31	FALSE	93
2022-09-12	09:14:54	0.479707	1170.79	FALSE	93
2022-09-12	09:14:54	0.0714633	1170.86	FALSE	93
2022-09-12	09:14:54	0.424338	1171.28	FALSE	93
2022-09-12	09:14:55	0.233601	1171.52	FALSE	93
2022-09-12	09:14:55	1.53457	1173.05	FALSE	93
2022-09-12	09:14:55	2.91854	1175.97	FALSE	93
2022-09-12	09:14:55	2.73431	1178.7	FALSE	93
2022-09-12	09:14:56	3.5907	1182.29	1	94
2022-09-12	09:14:56	3.2277	1185.52	1	95
2022-09-12	09:14:56	4.26612	1189.79	1	96
2022-09-12	09:14:57	6.8621	1196.65	1	97
2022-09-12	09:14:57	17.4757	1214.13	1	98
2022-09-12	09:14:57	7.35863	1221.48	1	99
2022-09-12	09:14:57	7.6855	1229.17	1	100
2022-09-12	09:14:58	6.38866	1235.56	1	101
2022-09-12	09:14:58	3.4166	1238.97	1	102
2022-09-12	09:14:58	4.15253	1243.13	1	103
2022-09-12	09:14:58	1.30358	1244.43	FALSE	103
2022-09-12	09:14:59	3.23482	1247.67	1	104
2022-09-12	09:14:59	2.81976	1250.49	FALSE	104
2022-09-12	09:14:59	3.56057	1254.05	1	105
2022-09-12	09:14:59	7.15767	1261.2	1	106
2022-09-12	09:15:00	7.12286	1268.33	1	107
2022-09-12	09:15:00	4.26037	1272.59	1	108
2022-09-12	09:15:00	5.03431	1277.62	1	109
2022-09-12	09:15:00	5.67614	1283.3	1	110
2022-09-12	09:15:01	5.3907	1288.69	1	111
2022-09-12	09:15:01	7.08118	1295.77	1	112
2022-09-12	09:15:01	10.7513	1306.52	1	113
2022-09-12	09:15:02	13.6169	1320.14	1	114
2022-09-12	09:15:02	8.95843	1329.1	1	115
2022-09-12	09:15:02	22.9557	1352.05	1	116
2022-09-12	09:15:02	14.534	1366.59	1	117
2022-09-12	09:15:03	7.51156	1374.1	1	118
2022-09-12	09:15:03	13.0288	1387.13	1	119
2022-09-12	09:15:03	9.17772	1396.3	1	120
2022-09-12	09:15:03	10.1723	1406.48	1	121
2022-09-12	09:15:04	10.1836	1416.66	1	122
2022-09-12	09:15:04	1.64205	1418.3	FALSE	122
2022-09-12	09:15:04	0.477977	1418.78	FALSE	122
2022-09-12	09:15:04	0.537824	1419.32	FALSE	122
2022-09-12	09:15:05	0.249122	1419.57	FALSE	122
2022-09-12	09:15:05	0.23757	1419.8	FALSE	122
2022-09-12	09:15:05	0.110445	1419.91	FALSE	122
2022-09-12	09:15:06	0.377774	1420.29	FALSE	122
2022-09-12	09:15:06	0.28271	1420.57	FALSE	122
2022-09-12	09:15:06	0.290853	1420.87	FALSE	122
2022-09-12	09:15:06	0.254873	1421.12	FALSE	122
2022-09-12	09:15:07	0.216094	1421.34	FALSE	122
2022-09-12	09:15:07	0.285967	1421.62	FALSE	122
2022-09-12	09:15:07	0.286985	1421.91	FALSE	122
2022-09-12	09:15:07	0.261896	1422.17	FALSE	122
2022-09-12	09:15:08	0.427137	1422.6	FALSE	122
2022-09-12	09:15:08	2.67787	1425.28	FALSE	122
2022-09-12	09:15:08	7.28566	1432.56	1	123
2022-09-12	09:15:08	9.03421	1441.6	1	124
2022-09-12	09:15:09	4.97991	1446.58	1	125
2022-09-12	09:15:09	4.19721	1450.77	1	126
2022-09-12	09:15:09	8.19777	1458.97	1	127
2022-09-12	09:15:09	10.3916	1469.36	1	128
2022-09-12	09:15:10	17.4554	1486.82	1	129
2022-09-12	09:15:10	8.68306	1495.5	1	130
2022-09-12	09:15:10	11.3747	1506.88	1	131
2022-09-12	09:15:11	5.88317	1512.76	1	132
2022-09-12	09:15:11	4.20057	1516.96	1	133
2022-09-12	09:15:11	2.87385	1519.83	FALSE	133
2022-09-12	09:15:11	3.53696	1523.37	1	134
2022-09-12	09:15:12	11.5721	1534.94	1	135
2022-09-12	09:15:12	3.1139	1538.06	1	136
2022-09-12	09:15:12	8.49762	1546.55	1	137
2022-09-12	09:15:12	5.69802	1552.25	1	138
2022-09-12	09:15:13	11.126	1563.38	1	139
2022-09-12	09:15:13	3.22805	1566.61	1	140
2022-09-12	09:15:13	7.56128	1574.17	1	141
2022-09-12	09:15:13	8.03288	1582.2	1	142
2022-09-12	09:15:14	6.24174	1588.44	1	143
2022-09-12	09:15:14	9.94372	1598.39	1	144
2022-09-12	09:15:14	9.44352	1607.83	1	145
2022-09-12	09:15:15	8.82352	1616.65	1	146
2022-09-12	09:15:15	5.58255	1622.24	1	147
2022-09-12	09:15:15	4.22261	1626.46	1	148
2022-09-12	09:15:15	10.2126	1636.67	1	149
2022-09-12	09:15:16	2.82352	1639.49	FALSE	149
2022-09-12	09:15:16	6.32322	1645.82	1	150
2022-09-12	09:15:16	7.57222	1653.39	1	151
2022-09-12	09:15:16	6.78673	1660.18	1	152
2022-09-12	09:15:17	9.02576	1669.2	1	153
2022-09-12	09:15:17	6.52968	1675.73	1	154
2022-09-12	09:15:17	15.4152	1691.15	1	155
2022-09-12	09:15:17	6.77161	1697.92	1	156
2022-09-12	09:15:18	11.2905	1709.21	1	157
2022-09-12	09:15:18	9.19059	1718.4	1	158
2022-09-12	09:15:18	4.39462	1722.79	1	159
2022-09-12	09:15:18	10.5262	1733.32	1	160
2022-09-12	09:15:19	6.72052	1740.04	1	161
2022-09-12	09:15:19	5.67421	1745.72	1	162
2022-09-12	09:15:19	3.62444	1749.34	1	163
2022-09-12	09:15:20	2.88291	1752.22	FALSE	163
2022-09-12	09:15:20	6.62754	1758.85	1	164
2022-09-12	09:15:20	1.82678	1760.68	FALSE	164
2022-09-12	09:15:20	3.471	1764.15	1	165
2022-09-12	09:15:21	1.73971	1765.89	FALSE	165
2022-09-12	09:15:21	0.610344	1766.5	FALSE	165
2022-09-12	09:15:21	0.46902	1766.97	FALSE	165
2022-09-12	09:15:21	0.126018	1767.09	FALSE	165
2022-09-12	09:15:22	0.331412	1767.42	FALSE	165
2022-09-12	09:15:22	0.097163	1767.52	FALSE	165
2022-09-12	09:15:22	0.302303	1767.82	FALSE	165
2022-09-12	09:15:22	0.197163	1768.02	FALSE	165
2022-09-12	09:15:23	0.442761	1768.46	FALSE	165
2022-09-12	09:15:23	0.208562	1768.67	FALSE	165
2022-09-12	09:15:23	0.324695	1769	FALSE	165
2022-09-12	09:15:24	0.269173	1769.27	FALSE	165
2022-09-12	09:15:24	0.393092	1769.66	FALSE	165
2022-09-12	09:15:24	0.640827	1770.3	FALSE	165
2022-09-12	09:15:24	1.41492	1771.72	FALSE	165
2022-09-12	09:15:25	1.55594	1773.27	FALSE	165
2022-09-12	09:15:25	0.831056	1774.1	FALSE	165
2022-09-12	09:15:25	0.584389	1774.69	FALSE	165
2022-09-12	09:15:25	0.393499	1775.08	FALSE	165
2022-09-12	09:15:26	0.677315	1775.76	FALSE	165
2022-09-12	09:15:26	0.479707	1776.24	FALSE	165
2022-09-12	09:15:26	0.682048	1776.92	FALSE	165
2022-09-12	09:15:26	0.839555	1777.76	FALSE	165
2022-09-12	09:15:27	0.971412	1778.73	FALSE	165
2022-09-12	09:15:27	0.848206	1779.58	FALSE	165
2022-09-12	09:15:27	0.568257	1780.15	FALSE	165
2022-09-12	09:15:27	0.58388	1780.73	FALSE	165
2022-09-12	09:15:28	0.363321	1781.09	FALSE	165
2022-09-12	09:15:28	0.374313	1781.47	FALSE	165
2022-09-12	09:15:28	0.453041	1781.92	FALSE	165
2022-09-12	09:15:29	0.28673	1782.21	FALSE	165
2022-09-12	09:15:29	0.476094	1782.68	FALSE	165
2022-09-12	09:15:29	0.213499	1782.9	FALSE	165
2022-09-12	09:15:29	0.409886	1783.31	FALSE	165
2022-09-12	09:15:30	0.195534	1783.5	FALSE	165
2022-09-12	09:15:30	0.358842	1783.86	FALSE	165
2022-09-12	09:15:30	0.267697	1784.13	FALSE	165
2022-09-12	09:15:30	0.252634	1784.38	FALSE	165
2022-09-12	09:15:31	0.26729	1784.65	FALSE	165
2022-09-12	09:15:31	0.12215	1784.77	FALSE	165
2022-09-12	09:15:31	0.373143	1785.14	FALSE	165
2022-09-12	09:15:31	0.103931	1785.25	FALSE	165
2022-09-12	09:15:32	0.384288	1785.63	FALSE	165
2022-09-12	09:15:32	0.335687	1785.97	FALSE	165
2022-09-12	09:15:32	1.44424	1787.41	FALSE	165
2022-09-12	09:15:33	0.976959	1788.39	FALSE	165
2022-09-12	09:15:33	1.92388	1790.31	FALSE	165
2022-09-12	09:15:33	1.85248	1792.17	FALSE	165
2022-09-12	09:15:33	2.06134	1794.23	FALSE	165
2022-09-12	09:15:34	2.29202	1796.52	FALSE	165
2022-09-12	09:15:34	0.451463	1796.97	FALSE	165
2022-09-12	09:15:34	0.443321	1797.41	FALSE	165
2022-09-12	09:15:34	0.174262	1797.59	FALSE	165
2022-09-12	09:15:35	0.215483	1797.8	FALSE	165
2022-09-12	09:15:35	0.27701	1798.08	FALSE	165
2022-09-12	09:15:35	0.178944	1798.26	FALSE	165
2022-09-12	09:15:35	0.382608	1798.64	FALSE	165
2022-09-12	09:15:36	0.576196	1799.22	FALSE	165
2022-09-12	09:15:36	2.22195	1801.44	FALSE	165
2022-09-12	09:15:36	4.46454	1805.91	1	166
2022-09-12	09:15:36	5.59075	1811.5	1	167
2022-09-12	09:15:37	2.60683	1814.1	FALSE	167
2022-09-12	09:15:37	3.41105	1817.51	1	168
2022-09-12	09:15:37	1.78902	1819.3	FALSE	168
2022-09-12	09:15:38	1.52042	1820.82	FALSE	168
2022-09-12	09:15:38	1.8536	1822.68	FALSE	168
2022-09-12	09:15:38	0.418435	1823.1	FALSE	168
2022-09-12	09:15:38	0.848511	1823.94	FALSE	168
2022-09-12	09:15:39	0.366272	1824.31	FALSE	168
2022-09-12	09:15:39	0.506272	1824.82	FALSE	168
2022-09-12	09:15:39	0.271412	1825.09	FALSE	168
2022-09-12	09:15:39	0.142863	1825.23	FALSE	168
2022-09-12	09:15:40	0.341336	1825.57	FALSE	168
2022-09-12	09:15:40	0.126629	1825.7	FALSE	168
2022-09-12	09:15:40	0.275738	1825.97	FALSE	168
2022-09-12	09:15:40	0.225509	1826.2	FALSE	168
2022-09-12	09:15:41	0.174771	1826.37	FALSE	168
2022-09-12	09:15:41	0.263015	1826.64	FALSE	168
2022-09-12	09:15:41	0.12668	1826.76	FALSE	168
2022-09-12	09:15:42	0.372685	1827.14	FALSE	168
2022-09-12	09:15:42	0.0879009	1827.22	FALSE	168
2022-09-12	09:15:42	0.381896	1827.61	FALSE	168
2022-09-12	09:15:42	0.240573	1827.85	FALSE	168
2022-09-12	09:15:43	0.331769	1828.18	FALSE	168
2022-09-12	09:15:43	0.387392	1828.57	FALSE	168
2022-09-12	09:15:43	0.42159	1828.99	FALSE	168
2022-09-12	09:15:43	0.496094	1829.48	FALSE	168
2022-09-12	09:15:44	0.195127	1829.68	FALSE	168
2022-09-12	09:15:44	0.346578	1830.03	FALSE	168
2022-09-12	09:15:44	0.168613	1830.19	FALSE	168
2022-09-12	09:15:44	0.253244	1830.45	FALSE	168
2022-09-12	09:15:45	0.176756	1830.62	FALSE	168
2022-09-12	09:15:45	0.3164	1830.94	FALSE	168
2022-09-12	09:15:45	0.325153	1831.27	FALSE	168
2022-09-12	09:15:45	0.216654	1831.48	FALSE	168
2022-09-12	09:15:46	0.471972	1831.95	FALSE	168
2022-09-12	09:15:46	0.223677	1832.18	FALSE	168
2022-09-12	09:15:46	1.08342	1833.26	FALSE	168
2022-09-12	09:15:47	1.002	1834.26	FALSE	168
2022-09-12	09:15:47	0.909886	1835.17	FALSE	168
2022-09-12	09:15:47	0.359199	1835.53	FALSE	168
2022-09-12	09:15:47	0.264898	1835.8	FALSE	168
2022-09-12	09:15:48	0.189784	1835.99	FALSE	168
2022-09-12	09:15:48	0.135636	1836.12	FALSE	168
2022-09-12	09:15:48	0.391565	1836.51	FALSE	168
2022-09-12	09:15:48	1.66989	1838.18	FALSE	168
2022-09-12	09:15:49	4.73385	1842.92	1	169
2022-09-12	09:15:49	5.47258	1848.39	1	170
2022-09-12	09:15:49	4.0081	1852.4	1	171
2022-09-12	09:15:49	2.11345	1854.51	FALSE	171
2022-09-12	09:15:50	1.30693	1855.82	FALSE	171
2022-09-12	09:15:50	2.05406	1857.87	FALSE	171
2022-09-12	09:15:50	0.306527	1858.18	FALSE	171
2022-09-12	09:15:51	1.96179	1860.14	FALSE	171
2022-09-12	09:15:51	0.575229	1860.72	FALSE	171
2022-09-12	09:15:51	1.26698	1861.98	FALSE	171
2022-09-12	09:15:51	0.515178	1862.5	FALSE	171
2022-09-12	09:15:52	0.364033	1862.86	FALSE	171
2022-09-12	09:15:52	0.492023	1863.36	FALSE	171
2022-09-12	09:15:52	0.669987	1864.03	FALSE	171
2022-09-12	09:15:52	0.663728	1864.69	FALSE	171
2022-09-12	09:15:53	1.35447	1866.04	FALSE	171
2022-09-12	09:15:53	1.69604	1867.74	FALSE	171
2022-09-12	09:15:53	2.87299	1870.61	FALSE	171
2022-09-12	09:15:53	4.3335	1874.95	1	172
2022-09-12	09:15:54	2.84973	1877.8	FALSE	172
2022-09-12	09:15:54	3.73319	1881.53	1	173
2022-09-12	09:15:54	1.09497	1882.62	FALSE	173
2022-09-12	09:15:54	2.62082	1885.24	FALSE	173
2022-09-12	09:15:55	1.88078	1887.13	FALSE	173
2022-09-12	09:15:55	1.8653	1888.99	FALSE	173
2022-09-12	09:15:55	2.39131	1891.38	FALSE	173
2022-09-12	09:15:56	0.562659	1891.94	FALSE	173
2022-09-12	09:15:56	1.16724	1893.11	FALSE	173
2022-09-12	09:15:56	0.169733	1893.28	FALSE	173
2022-09-12	09:15:56	0.388562	1893.67	FALSE	173
2022-09-12	09:15:57	0.24154	1893.91	FALSE	173
2022-09-12	09:15:57	0.428308	1894.34	FALSE	173
2022-09-12	09:15:57	0.482863	1894.82	FALSE	173
2022-09-12	09:15:57	0.393143	1895.22	FALSE	173
2022-09-12	09:15:58	0.596399	1895.81	FALSE	173
2022-09-12	09:15:58	0.763066	1896.58	FALSE	173
2022-09-12	09:15:58	0.723575	1897.3	FALSE	173
2022-09-12	09:15:58	0.812226	1898.11	FALSE	173
2022-09-12	09:15:59	0.919809	1899.03	FALSE	173
2022-09-12	09:15:59	0.822455	1899.85	FALSE	173
2022-09-12	09:15:59	1.03121	1900.89	FALSE	173
2022-09-12	09:16:00	0.972328	1901.86	FALSE	173
2022-09-12	09:16:00	0.515789	1902.37	FALSE	173
2022-09-12	09:16:00	0.375026	1902.75	FALSE	173
2022-09-12	09:16:00	0.369682	1903.12	FALSE	173
2022-09-12	09:16:01	0.249428	1903.37	FALSE	173
2022-09-12	09:16:01	0.17986	1903.55	FALSE	173
2022-09-12	09:16:01	0.20159	1903.75	FALSE	173
2022-09-12	09:16:01	0.328308	1904.08	FALSE	173
2022-09-12	09:16:02	0.370496	1904.45	FALSE	173
2022-09-12	09:16:02	0.582964	1905.03	FALSE	173
2022-09-12	09:16:02	0.296145	1905.33	FALSE	173
2022-09-12	09:16:02	0.391972	1905.72	FALSE	173
2022-09-12	09:16:03	0.313957	1906.03	FALSE	173
2022-09-12	09:16:03	0.279707	1906.31	FALSE	173
2022-09-12	09:16:03	0.258944	1906.57	FALSE	173
2022-09-12	09:16:03	0.225153	1906.8	FALSE	173
2022-09-12	09:16:04	0.362303	1907.16	FALSE	173
2022-09-12	09:16:04	0.123677	1907.28	FALSE	173
2022-09-12	09:16:04	0.341082	1907.62	FALSE	173
2022-09-12	09:16:05	0.175127	1907.8	FALSE	173
2022-09-12	09:16:05	0.310547	1908.11	FALSE	173
2022-09-12	09:16:05	0.8193	1908.93	FALSE	173
2022-09-12	09:16:05	0.970293	1909.9	FALSE	173
2022-09-12	09:16:06	1.60948	1911.51	FALSE	173
2022-09-12	09:16:06	1.41421	1912.92	FALSE	173
2022-09-12	09:16:06	1.80337	1914.73	FALSE	173
2022-09-12	09:16:06	1.62032	1916.35	FALSE	173
2022-09-12	09:16:07	1.83253	1918.18	FALSE	173
2022-09-12	09:16:07	1.26576	1919.44	FALSE	173
2022-09-12	09:16:07	1.26179	1920.71	FALSE	173
2022-09-12	09:16:07	0.889224	1921.6	FALSE	173
2022-09-12	09:16:08	0.671158	1922.27	FALSE	173
2022-09-12	09:16:08	0.665713	1922.93	FALSE	173
2022-09-12	09:16:08	1.37167	1924.3	FALSE	173
2022-09-12	09:16:09	1.43365	1925.74	FALSE	173
2022-09-12	09:16:09	1.65406	1927.39	FALSE	173
2022-09-12	09:16:09	0.837875	1928.23	FALSE	173
2022-09-12	09:16:09	1.12856	1929.36	FALSE	173
2022-09-12	09:16:10	1.3281	1930.69	FALSE	173
2022-09-12	09:16:10	0.565458	1931.25	FALSE	173
2022-09-12	09:16:10	0.809071	1932.06	FALSE	173
2022-09-12	09:16:10	0.469428	1932.53	FALSE	173
2022-09-12	09:16:11	0.717468	1933.25	FALSE	173
2022-09-12	09:16:11	0.391412	1933.64	FALSE	173
2022-09-12	09:16:11	0.367239	1934.01	FALSE	173
2022-09-12	09:16:11	0.947952	1934.95	FALSE	173
2022-09-12	09:16:12	0.868002	1935.82	FALSE	173
2022-09-12	09:16:12	1.28149	1937.1	FALSE	173
2022-09-12	09:16:12	0.862557	1937.97	FALSE	173
2022-09-12	09:16:12	1.20927	1939.18	FALSE	173
2022-09-12	09:16:13	0.754109	1939.93	FALSE	173
2022-09-12	09:16:13	1.63833	1941.57	FALSE	173
2022-09-12	09:16:13	2.30897	1943.88	FALSE	173
2022-09-12	09:16:14	3.41223	1947.29	1	174
2022-09-12	09:16:14	3.20301	1950.49	1	175
2022-09-12	09:16:14	3.93472	1954.43	1	176
2022-09-12	09:16:14	3.41401	1957.84	1	177
2022-09-12	09:16:15	1.37991	1959.22	FALSE	177
2022-09-12	09:16:15	1.67029	1960.89	FALSE	177
2022-09-12	09:16:15	0.739962	1961.63	FALSE	177
2022-09-12	09:16:15	1.43462	1963.07	FALSE	177
2022-09-12	09:16:16	0.619504	1963.69	FALSE	177
2022-09-12	09:16:16	0.424491	1964.11	FALSE	177
2022-09-12	09:16:16	1.18439	1965.29	FALSE	177
2022-09-12	09:16:16	0.311107	1965.61	FALSE	177
2022-09-12	09:16:17	0.496909	1966.1	FALSE	177
2022-09-12	09:16:17	0.204695	1966.31	FALSE	177
2022-09-12	09:16:17	0.404542	1966.71	FALSE	177
2022-09-12	09:16:18	0.462303	1967.17	FALSE	177
2022-09-12	09:16:18	0.499555	1967.67	FALSE	177
2022-09-12	09:16:18	0.383677	1968.06	FALSE	177
2022-09-12	09:16:18	0.480522	1968.54	FALSE	177
2022-09-12	09:16:19	0.500979	1969.04	FALSE	177
2022-09-12	09:16:19	0.610751	1969.65	FALSE	177
2022-09-12	09:16:19	0.491921	1970.14	FALSE	177
2022-09-12	09:16:19	1.105	1971.25	FALSE	177
2022-09-12	09:16:20	0.433957	1971.68	FALSE	177
2022-09-12	09:16:20	0.334669	1972.01	FALSE	177
2022-09-12	09:16:20	1.00332	1973.02	FALSE	177
2022-09-12	09:16:20	0.627239	1973.65	FALSE	177
2022-09-12	09:16:21	0.654619	1974.3	FALSE	177
2022-09-12	09:16:21	0.274466	1974.57	FALSE	177
2022-09-12	09:16:21	0.441896	1975.02	FALSE	177
2022-09-12	09:16:21	0.413346	1975.43	FALSE	177
2022-09-12	09:16:22	0.464797	1975.89	FALSE	177
2022-09-12	09:16:22	1.11849	1977.01	FALSE	177
2022-09-12	09:16:22	1.20062	1978.21	FALSE	177
2022-09-12	09:16:23	1.84017	1980.05	FALSE	177
2022-09-12	09:16:23	2.35553	1982.41	FALSE	177
2022-09-12	09:16:23	1.99676	1984.41	FALSE	177
2022-09-12	09:16:23	3.27543	1987.68	1	178
2022-09-12	09:16:24	2.9507	1990.63	FALSE	178
2022-09-12	09:16:24	2.22566	1992.86	FALSE	178
2022-09-12	09:16:24	2.40719	1995.26	FALSE	178
2022-09-12	09:16:24	2.25553	1997.52	FALSE	178
2022-09-12	09:16:25	2.27116	1999.79	FALSE	178
2022-09-12	09:16:25	2.69446	2002.49	FALSE	178
2022-09-12	09:16:25	1.71854	2004.2	FALSE	178
2022-09-12	09:16:25	2.86057	2007.07	FALSE	178
2022-09-12	09:16:26	2.03309	2009.1	FALSE	178
2022-09-12	09:16:26	2.97589	2012.07	FALSE	178
2022-09-12	09:16:26	2.90495	2014.98	FALSE	178
2022-09-12	09:16:27	4.29843	2019.28	1	179
2022-09-12	09:16:27	3.06561	2022.34	1	180
2022-09-12	09:16:27	3.56032	2025.9	1	181
2022-09-12	09:16:27	2.13803	2028.04	FALSE	181
2022-09-12	09:16:28	4.30892	2032.35	1	182
2022-09-12	09:16:28	1.79411	2034.14	FALSE	182
2022-09-12	09:16:28	3.36373	2037.51	1	183
2022-09-12	09:16:28	3.60546	2041.11	1	184
2022-09-12	09:16:29	5.06174	2046.18	1	185
2022-09-12	09:16:29	6.3795	2052.55	1	186
2022-09-12	09:16:29	7.41121	2059.97	1	187
2022-09-12	09:16:29	7.33471	2067.3	1	188
2022-09-12	09:16:30	8.44245	2075.74	1	189
2022-09-12	09:16:30	7.00759	2082.75	1	190
2022-09-12	09:16:30	5.64724	2088.4	1	191
2022-09-12	09:16:30	7.67436	2096.07	1	192
2022-09-12	09:16:31	2.82922	2098.9	FALSE	192
2022-09-12	09:16:31	1.64816	2100.55	FALSE	192
2022-09-12	09:16:31	0.962964	2101.51	FALSE	192
2022-09-12	09:16:32	0.678842	2102.19	FALSE	192
2022-09-12	09:16:32	0.185611	2102.38	FALSE	192
2022-09-12	09:16:32	0.176654	2102.55	FALSE	192
2022-09-12	09:16:32	0.118486	2102.67	FALSE	192
2022-09-12	09:16:33	-0.0155087	2102.67	FALSE	192
2022-09-12	09:16:33	-0.0586639	2102.67	FALSE	192
2022-09-12	09:16:33	-0.176476	2102.67	FALSE	192
2022-09-12	09:16:33	-0.0655341	2102.67	FALSE	192
2022-09-12	09:16:34	-0.0884348	2102.67	FALSE	192
2022-09-12	09:16:34	-0.0524552	2102.67	FALSE	192
2022-09-12	09:16:34	-0.14304	2102.67	FALSE	192
2022-09-12	09:16:34	-0.0359667	2102.67	FALSE	192
2022-09-12	09:16:35	0.112379	2102.78	FALSE	192
2022-09-12	09:16:35	0.117875	2102.9	FALSE	192
2022-09-12	09:16:35	0.0608781	2102.96	FALSE	192
2022-09-12	09:16:36	0.215789	2103.18	FALSE	192
2022-09-12	09:16:36	1.06358	2104.24	FALSE	192
2022-09-12	09:16:36	3.29304	2107.54	1	193
2022-09-12	09:16:36	3.98301	2111.52	1	194
2022-09-12	09:16:37	2.80556	2114.32	FALSE	194
2022-09-12	09:16:37	2.05558	2116.38	FALSE	194
2022-09-12	09:16:37	1.58485	2117.97	FALSE	194
2022-09-12	09:16:37	1.16205	2119.13	FALSE	194
2022-09-12	09:16:38	0.605102	2119.73	FALSE	194
2022-09-12	09:16:38	0.285	2120.02	FALSE	194
2022-09-12	09:16:38	0.18042	2120.2	FALSE	194
2022-09-12	09:16:38	0.194364	2120.39	FALSE	194
2022-09-12	09:16:39	0.121082	2120.51	FALSE	194
2022-09-12	09:16:39	0.0929391	2120.61	FALSE	194
2022-09-12	09:16:39	0.0939061	2120.7	FALSE	194
2022-09-12	09:16:40	0.0931936	2120.79	FALSE	194
2022-09-12	09:16:40	0.0730409	2120.87	FALSE	194
2022-09-12	09:16:40	0.109733	2120.98	FALSE	194
2022-09-12	09:16:40	0.0735498	2121.05	FALSE	194
2022-09-12	09:16:41	-0.0031932	2121.05	FALSE	194
2022-09-12	09:16:41	0.0440333	2121.09	FALSE	194
2022-09-12	09:16:41	-0.054389	2121.09	FALSE	194
2022-09-12	09:16:41	0.0345168	2121.13	FALSE	194
2022-09-12	09:16:42	0.0471376	2121.18	FALSE	194
2022-09-12	09:16:42	0.109682	2121.28	FALSE	194
2022-09-12	09:16:42	0.0366033	2121.32	FALSE	194
2022-09-12	09:16:42	0.271514	2121.59	FALSE	194
2022-09-12	09:16:43	0.312888	2121.91	FALSE	194
2022-09-12	09:16:43	0.299249	2122.21	FALSE	194
2022-09-12	09:16:43	1.19335	2123.4	FALSE	194
2022-09-12	09:16:43	1.28062	2124.68	FALSE	194
2022-09-12	09:16:44	1.8909	2126.57	FALSE	194
2022-09-12	09:16:44	3.14057	2129.71	1	195
2022-09-12	09:16:44	4.07065	2133.78	1	196
2022-09-12	09:16:45	6.45339	2140.23	1	197
2022-09-12	09:16:45	6.03797	2146.27	1	198
2022-09-12	09:16:45	4.46474	2150.74	1	199
2022-09-12	09:16:45	4.43777	2155.17	1	200
2022-09-12	09:16:46	4.95426	2160.13	1	201
2022-09-12	09:16:46	3.02897	2163.16	1	202
2022-09-12	09:16:46	3.89406	2167.05	1	203
2022-09-12	09:16:46	4.04551	2171.1	1	204
2022-09-12	09:16:47	4.4997	2175.6	1	205
2022-09-12	09:16:47	4.06123	2179.66	1	206
2022-09-12	09:16:47	2.01085	2181.67	FALSE	206
2022-09-12	09:16:47	0.616298	2182.29	FALSE	206
2022-09-12	09:16:48	0.372634	2182.66	FALSE	206
2022-09-12	09:16:48	0.297824	2182.96	FALSE	206
2022-09-12	09:16:48	0.282303	2183.24	FALSE	206
2022-09-12	09:16:48	0.273855	2183.51	FALSE	206
2022-09-12	09:16:49	0.290649	2183.8	FALSE	206
2022-09-12	09:16:49	0.390496	2184.19	FALSE	206
2022-09-12	09:16:49	0.922964	2185.12	FALSE	206
2022-09-12	09:16:50	1.48434	2186.6	FALSE	206
2022-09-12	09:16:50	1.29609	2187.9	FALSE	206
2022-09-12	09:16:50	1.21894	2189.12	FALSE	206
2022-09-12	09:16:50	1.1081	2190.22	FALSE	206
2022-09-12	09:16:51	1.06622	2191.29	FALSE	206
2022-09-12	09:16:51	1.08439	2192.37	FALSE	206
2022-09-12	09:16:51	1.52006	2193.89	FALSE	206
2022-09-12	09:16:51	2.16673	2196.06	FALSE	206
2022-09-12	09:16:52	3.54251	2199.6	1	207
2022-09-12	09:16:52	4.61752	2204.22	1	208
2022-09-12	09:16:52	3.46108	2207.68	1	209
2022-09-12	09:16:52	3.92658	2211.61	1	210
2022-09-12	09:16:53	1.29981	2212.91	FALSE	210
2022-09-12	09:16:53	0.575993	2213.48	FALSE	210
2022-09-12	09:16:53	0.990751	2214.48	FALSE	210
2022-09-12	09:16:54	2.17431	2216.65	FALSE	210
2022-09-12	09:16:54	2.61446	2219.26	FALSE	210
2022-09-12	09:16:54	2.09803	2221.36	FALSE	210
2022-09-12	09:16:54	1.20424	2222.57	FALSE	210
2022-09-12	09:16:55	2.66688	2225.23	FALSE	210
2022-09-12	09:16:55	2.60383	2227.84	FALSE	210
2022-09-12	09:16:55	3.68022	2231.52	1	211
2022-09-12	09:16:56	2.61024	2234.13	FALSE	211
2022-09-12	09:16:56	3.42826	2237.56	1	212
2022-09-12	09:16:56	4.08301	2241.64	1	213
2022-09-12	09:16:56	4.87218	2246.51	1	214
2022-09-12	09:16:56	4.03594	2250.55	1	215
2022-09-12	09:16:57	3.09202	2253.64	1	216
2022-09-12	09:16:57	3.82322	2257.46	1	217
2022-09-12	09:16:57	3.3168	2260.78	1	218
2022-09-12	09:16:57	2.56907	2263.35	FALSE	218
2022-09-12	09:16:58	2.7706	2266.12	FALSE	218
2022-09-12	09:16:58	1.98994	2268.11	FALSE	218
2022-09-12	09:16:58	1.7709	2269.88	FALSE	218
2022-09-12	09:16:59	1.76454	2271.64	FALSE	218
2022-09-12	09:16:59	1.12332	2272.77	FALSE	218
2022-09-12	09:16:59	0.613448	2273.38	FALSE	218
2022-09-12	09:16:59	1.34271	2274.72	FALSE	218
2022-09-12	09:17:00	2.1791	2276.9	FALSE	218
2022-09-12	09:17:00	2.04067	2278.94	FALSE	218
2022-09-12	09:17:00	1.09548	2280.04	FALSE	218
2022-09-12	09:17:00	0.685	2280.72	FALSE	218
2022-09-12	09:17:01	0.356043	2281.08	FALSE	218
2022-09-12	09:17:01	0.282964	2281.36	FALSE	218
2022-09-12	09:17:01	0.210293	2281.57	FALSE	218
2022-09-12	09:17:01	0.215636	2281.79	FALSE	218
2022-09-12	09:17:02	0.241183	2282.03	FALSE	218
2022-09-12	09:17:02	0.0866287	2282.12	FALSE	218
2022-09-12	09:17:02	0.10897	2282.23	FALSE	218
2022-09-12	09:17:03	0.0293768	2282.26	FALSE	218
2022-09-12	09:17:03	-0.136832	2282.26	FALSE	218
2022-09-12	09:17:03	-0.0520481	2282.26	FALSE	218
2022-09-12	09:17:03	-0.273727	2282.26	FALSE	218
2022-09-12	09:17:04	-0.339325	2282.26	FALSE	218
2022-09-12	09:17:04	-0.307468	2282.26	FALSE	218
2022-09-12	09:17:04	-0.340445	2282.26	FALSE	218
2022-09-12	09:17:05	-0.104669	2282.26	FALSE	218
2022-09-12	09:17:05	0.01584	2282.27	FALSE	218
2022-09-12	09:17:05	-0.046501	2282.27	FALSE	218
2022-09-12	09:17:05	0.0709544	2282.34	FALSE	218
2022-09-12	09:17:05	0.230446	2282.57	FALSE	218
2022-09-12	09:17:06	0.574415	2283.15	FALSE	218
2022-09-12	09:17:06	0.538639	2283.69	FALSE	218
2022-09-12	09:17:06	0.496552	2284.18	FALSE	218
2022-09-12	09:17:06	0.783575	2284.97	FALSE	218
2022-09-12	09:17:07	2.07955	2287.05	FALSE	218
2022-09-12	09:17:07	3.30474	2290.35	1	219
2022-09-12	09:17:07	4.2193	2294.57	1	220
2022-09-12	09:17:08	2.14973	2296.72	FALSE	220
2022-09-12	09:17:08	0.55584	2297.27	FALSE	220
2022-09-12	09:17:08	0.488308	2297.76	FALSE	220
2022-09-12	09:17:08	0.334059	2298.1	FALSE	220
2022-09-12	09:17:09	0.319758	2298.42	FALSE	220
2022-09-12	09:17:09	0.295076	2298.71	FALSE	220
2022-09-12	09:17:09	0.3393	2299.05	FALSE	220
2022-09-12	09:17:09	0.34327	2299.39	FALSE	220
2022-09-12	09:17:10	0.242303	2299.64	FALSE	220
2022-09-12	09:17:10	0.280216	2299.92	FALSE	220
2022-09-12	09:17:10	0.207443	2300.12	FALSE	220
2022-09-12	09:17:10	0.292685	2300.42	FALSE	220
2022-09-12	09:17:11	3.67055	2304.09	1	221
2022-09-12	09:17:11	6.48103	2310.57	1	222
2022-09-12	09:17:11	12.1894	2322.76	1	223
2022-09-12	09:17:12	13.997	2336.76	1	224
2022-09-12	09:17:12	9.89309	2346.65	1	225
2022-09-12	09:17:12	7.63685	2354.29	1	226
2022-09-12	09:17:12	6.38245	2360.67	1	227
2022-09-12	09:17:13	5.84077	2366.51	1	228
2022-09-12	09:17:13	4.34617	2370.85	1	229
2022-09-12	09:17:13	3.20637	2374.06	1	230
2022-09-12	09:17:13	4.04032	2378.1	1	231
2022-09-12	09:17:14	6.37838	2384.48	1	232
2022-09-12	09:17:14	5.55502	2390.03	1	233
2022-09-12	09:17:14	9.24886	2399.28	1	234
2022-09-12	09:17:14	9.05482	2408.34	1	235
2022-09-12	09:17:15	8.2309	2416.57	1	236
2022-09-12	09:17:15	7.89436	2424.46	1	237
2022-09-12	09:17:15	6.91858	2431.38	1	238
2022-09-12	09:17:15	9.74566	2441.13	1	239
2022-09-12	09:17:16	11.9836	2453.11	1	240
2022-09-12	09:17:16	5.58082	2458.69	1	241
2022-09-12	09:17:16	3.11243	2461.8	1	242
2022-09-12	09:17:17	2.40413	2464.21	FALSE	242
2022-09-12	09:17:17	1.19085	2465.4	FALSE	242
2022-09-12	09:17:17	0.750649	2466.15	FALSE	242
2022-09-12	09:17:17	1.17584	2467.33	FALSE	242
2022-09-12	09:17:18	1.1652	2468.49	FALSE	242
2022-09-12	09:17:18	1.82912	2470.32	FALSE	242
2022-09-12	09:17:18	4.41472	2474.74	1	243
2022-09-12	09:17:18	0.718079	2475.45	FALSE	243
2022-09-12	09:17:19	0.730903	2476.18	FALSE	243
2022-09-12	09:17:19	0.355178	2476.54	FALSE	243
2022-09-12	09:17:19	0.340216	2476.88	FALSE	243
2022-09-12	09:17:19	0.431158	2477.31	FALSE	243
2022-09-12	09:17:20	0.868613	2478.18	FALSE	243
2022-09-12	09:17:20	1.01925	2479.2	FALSE	243
2022-09-12	09:17:20	0.95813	2480.16	FALSE	243
2022-09-12	09:17:21	0.641489	2480.8	FALSE	243
2022-09-12	09:17:21	0.538181	2481.34	FALSE	243
2022-09-12	09:17:21	1.0052	2482.34	FALSE	243
2022-09-12	09:17:21	1.38134	2483.72	FALSE	243
2022-09-12	09:17:22	1.38352	2485.11	FALSE	243
2022-09-12	09:17:22	1.65701	2486.76	FALSE	243
2022-09-12	09:17:22	2.07472	2488.84	FALSE	243
2022-09-12	09:17:22	2.0563	2490.89	FALSE	243
2022-09-12	09:17:23	1.46352	2492.36	FALSE	243
2022-09-12	09:17:23	0.673397	2493.03	FALSE	243
2022-09-12	09:17:23	0.580827	2493.61	FALSE	243
2022-09-12	09:17:23	0.595382	2494.21	FALSE	243
2022-09-12	09:17:24	0.540267	2494.75	FALSE	243
2022-09-12	09:17:24	0.402964	2495.15	FALSE	243
2022-09-12	09:17:24	0.318995	2495.47	FALSE	243
2022-09-12	09:17:25	0.371209	2495.84	FALSE	243
2022-09-12	09:17:25	0.278639	2496.12	FALSE	243
2022-09-12	09:17:25	0.2764	2496.4	FALSE	243
2022-09-12	09:17:25	0.473244	2496.87	FALSE	243
2022-09-12	09:17:26	1.66668	2498.54	FALSE	243
2022-09-12	09:17:26	2.33752	2500.87	FALSE	243
2022-09-12	09:17:26	1.08653	2501.96	FALSE	243
2022-09-12	09:17:26	0.449936	2502.41	FALSE	243
2022-09-12	09:17:27	0.418181	2502.83	FALSE	243
2022-09-12	09:17:27	0.412685	2503.24	FALSE	243
2022-09-12	09:17:27	0.341438	2503.58	FALSE	243
2022-09-12	09:17:27	0.340013	2503.92	FALSE	243
2022-09-12	09:17:28	0.309224	2504.23	FALSE	243
2022-09-12	09:17:28	0.233601	2504.47	FALSE	243
2022-09-12	09:17:28	0.160573	2504.63	FALSE	243
2022-09-12	09:17:28	0.234466	2504.86	FALSE	243
2022-09-12	09:17:29	0.189377	2505.05	FALSE	243
2022-09-12	09:17:29	0.174771	2505.22	FALSE	243
2022-09-12	09:17:29	0.28388	2505.51	FALSE	243
2022-09-12	09:17:30	0.177417	2505.69	FALSE	243
2022-09-12	09:17:30	0.309377	2505.99	FALSE	243
2022-09-12	09:17:30	0.0621503	2506.06	FALSE	243
2022-09-12	09:17:30	0.27126	2506.33	FALSE	243
2022-09-12	09:17:31	0.189733	2506.52	FALSE	243
2022-09-12	09:17:31	0.317824	2506.84	FALSE	243
2022-09-12	09:17:31	0.212685	2507.05	FALSE	243
2022-09-12	09:17:31	0.258283	2507.31	FALSE	243
2022-09-12	09:17:32	0.330547	2507.64	FALSE	243
2022-09-12	09:17:32	0.385764	2508.02	FALSE	243
2022-09-12	09:17:32	0.343779	2508.37	FALSE	243
2022-09-12	09:17:32	0.264949	2508.63	FALSE	243
2022-09-12	09:17:33	0.278741	2508.91	FALSE	243
2022-09-12	09:17:33	0.345	2509.26	FALSE	243
2022-09-12	09:17:33	0.30154	2509.56	FALSE	243
2022-09-12	09:17:33	0.243677	2509.8	FALSE	243
2022-09-12	09:17:34	0.337316	2510.14	FALSE	243
2022-09-12	09:17:34	0.353804	2510.49	FALSE	243
2022-09-12	09:17:34	0.374466	2510.87	FALSE	243
2022-09-12	09:17:35	0.279046	2511.15	FALSE	243
2022-09-12	09:17:35	0.255229	2511.4	FALSE	243
2022-09-12	09:17:35	0.249326	2511.65	FALSE	243
2022-09-12	09:17:35	0.30673	2511.96	FALSE	243
2022-09-12	09:17:36	0.412176	2512.37	FALSE	243
2022-09-12	09:17:36	0.901438	2513.27	FALSE	243
2022-09-12	09:17:36	0.457316	2513.73	FALSE	243
2022-09-12	09:17:36	1.04464	2514.77	FALSE	243
2022-09-12	09:17:37	0.336858	2515.11	FALSE	243
2022-09-12	09:17:37	0.759758	2515.87	FALSE	243
2022-09-12	09:17:37	0.884491	2516.75	FALSE	243
2022-09-12	09:17:37	0.797774	2517.55	FALSE	243
2022-09-12	09:17:38	1.94271	2519.49	FALSE	243
2022-09-12	09:17:38	1.28856	2520.78	FALSE	243
2022-09-12	09:17:38	2.21569	2523	FALSE	243
2022-09-12	09:17:39	2.62703	2525.63	FALSE	243
2022-09-12	09:17:39	1.79274	2527.42	FALSE	243
2022-09-12	09:17:39	3.72922	2531.15	1	244
2022-09-12	09:17:39	0.920827	2532.07	FALSE	244
2022-09-12	09:17:40	3.14597	2535.21	1	245
2022-09-12	09:17:40	1.39462	2536.61	FALSE	245
2022-09-12	09:17:40	1.63548	2538.24	FALSE	245
2022-09-12	09:17:40	2.18999	2540.43	FALSE	245
2022-09-12	09:17:41	0.502354	2540.94	FALSE	245
2022-09-12	09:17:41	0.724746	2541.66	FALSE	245
2022-09-12	09:17:41	0.703372	2542.36	FALSE	245
2022-09-12	09:17:41	0.49355	2542.86	FALSE	245
2022-09-12	09:17:42	1.07289	2543.93	FALSE	245
2022-09-12	09:17:42	0.439046	2544.37	FALSE	245
2022-09-12	09:17:42	0.532379	2544.9	FALSE	245
2022-09-12	09:17:43	1.8338	2546.74	FALSE	245
2022-09-12	09:17:43	1.00169	2547.74	FALSE	245
2022-09-12	09:17:43	2.48536	2550.22	FALSE	245
2022-09-12	09:17:43	0.534669	2550.76	FALSE	245
2022-09-12	09:17:44	0.879657	2551.64	FALSE	245
2022-09-12	09:17:44	0.310038	2551.95	FALSE	245
2022-09-12	09:17:44	0.425662	2552.37	FALSE	245
2022-09-12	09:17:44	0.25986	2552.63	FALSE	245
2022-09-12	09:17:45	0.241438	2552.87	FALSE	245
2022-09-12	09:17:45	0.277723	2553.15	FALSE	245
2022-09-12	09:17:45	0.37411	2553.53	FALSE	245
2022-09-12	09:17:45	0.307087	2553.83	FALSE	245
2022-09-12	09:17:46	0.254313	2554.09	FALSE	245
2022-09-12	09:17:46	0.284186	2554.37	FALSE	245
2022-09-12	09:17:46	0.23299	2554.61	FALSE	245
2022-09-12	09:17:46	0.25869	2554.86	FALSE	245
2022-09-12	09:17:47	0.258079	2555.12	FALSE	245
2022-09-12	09:17:47	0.261031	2555.38	FALSE	245
2022-09-12	09:17:47	0.265051	2555.65	FALSE	245
2022-09-12	09:17:48	0.278232	2555.93	FALSE	245
2022-09-12	09:17:48	0.267901	2556.19	FALSE	245
2022-09-12	09:17:48	0.336908	2556.53	FALSE	245
2022-09-12	09:17:48	0.287087	2556.82	FALSE	245
2022-09-12	09:17:49	0.285865	2557.1	FALSE	245
2022-09-12	09:17:49	0.304237	2557.41	FALSE	245
2022-09-12	09:17:49	0.279351	2557.69	FALSE	245
2022-09-12	09:17:49	0.264288	2557.95	FALSE	245
2022-09-12	09:17:50	0.259962	2558.21	FALSE	245
2022-09-12	09:17:50	0.265611	2558.48	FALSE	245
2022-09-12	09:17:50	0.265713	2558.74	FALSE	245
2022-09-12	09:17:50	0.265967	2559.01	FALSE	245
2022-09-12	09:17:51	0.256552	2559.27	FALSE	245
2022-09-12	09:17:51	0.2564	2559.52	FALSE	245
2022-09-12	09:17:51	0.26215	2559.78	FALSE	245
2022-09-12	09:17:52	0.277825	2560.06	FALSE	245
2022-09-12	09:17:52	0.287596	2560.35	FALSE	245
2022-09-12	09:17:52	0.318537	2560.67	FALSE	245
2022-09-12	09:17:52	0.381489	2561.05	FALSE	245
2022-09-12	09:17:53	0.470954	2561.52	FALSE	245
2022-09-12	09:17:53	0.406578	2561.93	FALSE	245
2022-09-12	09:17:53	0.391819	2562.32	FALSE	245
2022-09-12	09:17:53	0.377723	2562.7	FALSE	245
2022-09-12	09:17:54	0.42042	2563.12	FALSE	245
2022-09-12	09:17:54	0.354873	2563.47	FALSE	245
2022-09-12	09:17:54	0.322405	2563.79	FALSE	245
2022-09-12	09:17:54	0.327748	2564.12	FALSE	245
2022-09-12	09:17:55	0.307799	2564.43	FALSE	245
2022-09-12	09:17:55	0.280369	2564.71	FALSE	245
2022-09-12	09:17:55	0.278588	2564.99	FALSE	245
2022-09-12	09:17:55	0.263321	2565.25	FALSE	245
2022-09-12	09:17:56	0.282456	2565.53	FALSE	245
2022-09-12	09:17:56	0.283117	2565.82	FALSE	245
2022-09-12	09:17:56	0.308257	2566.13	FALSE	245
2022-09-12	09:17:57	0.271361	2566.4	FALSE	245
2022-09-12	09:17:57	0.272634	2566.67	FALSE	245
2022-09-12	09:17:57	0.30271	2566.97	FALSE	245
2022-09-12	09:17:57	0.341947	2567.31	FALSE	245
2022-09-12	09:17:58	0.405509	2567.72	FALSE	245
2022-09-12	09:17:58	0.72673	2568.45	FALSE	245
2022-09-12	09:17:58	0.434364	2568.88	FALSE	245
2022-09-12	09:17:58	0.389987	2569.27	FALSE	245
2022-09-12	09:17:59	0.833549	2570.1	FALSE	245
2022-09-12	09:17:59	0.834313	2570.94	FALSE	245
2022-09-12	09:17:59	0.599402	2571.54	FALSE	245
2022-09-12	09:17:59	1.42709	2572.97	FALSE	245
2022-09-12	09:18:00	2.08922	2575.05	FALSE	245
2022-09-12	09:18:00	1.48368	2576.54	FALSE	245
2022-09-12	09:18:00	1.99207	2578.53	FALSE	245
2022-09-12	09:18:01	2.78668	2581.32	FALSE	245
2022-09-12	09:18:01	2.99915	2584.32	FALSE	245
2022-09-12	09:18:01	3.93406	2588.25	1	246
2022-09-12	09:18:01	4.3453	2592.6	1	247
2022-09-12	09:18:02	3.67268	2596.27	1	248
2022-09-12	09:18:02	2.68917	2598.96	FALSE	248
2022-09-12	09:18:02	1.7705	2600.73	FALSE	248
2022-09-12	09:18:02	2.09706	2602.83	FALSE	248
2022-09-12	09:18:03	1.07238	2603.9	FALSE	248
2022-09-12	09:18:03	0.425967	2604.32	FALSE	248
2022-09-12	09:18:03	0.407901	2604.73	FALSE	248
2022-09-12	09:18:03	0.367646	2605.1	FALSE	248
2022-09-12	09:18:04	0.31014	2605.41	FALSE	248
2022-09-12	09:18:04	0.365814	2605.77	FALSE	248
2022-09-12	09:18:04	0.357519	2606.13	FALSE	248
2022-09-12	09:18:04	0.335076	2606.47	FALSE	248
2022-09-12	09:18:05	0.355891	2606.82	FALSE	248
2022-09-12	09:18:05	0.309479	2607.13	FALSE	248
2022-09-12	09:18:05	0.351972	2607.48	FALSE	248
2022-09-12	09:18:06	0.326069	2607.81	FALSE	248
2022-09-12	09:18:06	0.382863	2608.19	FALSE	248
2022-09-12	09:18:06	0.353193	2608.55	FALSE	248
2022-09-12	09:18:06	0.547748	2609.09	FALSE	248
2022-09-12	09:18:07	0.944084	2610.04	FALSE	248
2022-09-12	09:18:07	0.749886	2610.79	FALSE	248
2022-09-12	09:18:07	0.686221	2611.47	FALSE	248
2022-09-12	09:18:07	0.608969	2612.08	FALSE	248
2022-09-12	09:18:08	1.64047	2613.72	FALSE	248
2022-09-12	09:18:08	2.37665	2616.1	FALSE	248
2022-09-12	09:18:08	2.40424	2618.51	FALSE	248
2022-09-12	09:18:08	2.89548	2621.4	FALSE	248
2022-09-12	09:18:09	2.75217	2624.15	FALSE	248
2022-09-12	09:18:09	1.85564	2626.01	FALSE	248
2022-09-12	09:18:09	0.962303	2626.97	FALSE	248
2022-09-12	09:18:10	0.402354	2627.37	FALSE	248
2022-09-12	09:18:10	0.425865	2627.8	FALSE	248
2022-09-12	09:18:10	0.765254	2628.56	FALSE	248
2022-09-12	09:18:10	0.299402	2628.86	FALSE	248
2022-09-12	09:18:11	0.260216	2629.12	FALSE	248
2022-09-12	09:18:11	0.232583	2629.36	FALSE	248
2022-09-12	09:18:11	0.164186	2629.52	FALSE	248
2022-09-12	09:18:11	0.229733	2629.75	FALSE	248
2022-09-12	09:18:12	0.239504	2629.99	FALSE	248
2022-09-12	09:18:12	0.20327	2630.19	FALSE	248
2022-09-12	09:18:12	0.206578	2630.4	FALSE	248
2022-09-12	09:18:12	0.180115	2630.58	FALSE	248
2022-09-12	09:18:13	0.160013	2630.74	FALSE	248
2022-09-12	09:18:13	0.149428	2630.89	FALSE	248
2022-09-12	09:18:13	0.167239	2631.06	FALSE	248
2022-09-12	09:18:13	0.211667	2631.27	FALSE	248
2022-09-12	09:18:14	0.174618	2631.44	FALSE	248
2022-09-12	09:18:14	-0.147264	2631.44	FALSE	248
2022-09-12	09:18:14	-0.079987	2631.44	FALSE	248
2022-09-12	09:18:15	0.0360435	2631.48	FALSE	248
2022-09-12	09:18:15	0.348461	2631.83	FALSE	248
2022-09-12	09:18:15	0.404491	2632.23	FALSE	248
2022-09-12	09:18:15	0.446323	2632.68	FALSE	248
2022-09-12	09:18:16	0.681692	2633.36	FALSE	248
2022-09-12	09:18:16	0.91925	2634.28	FALSE	248
2022-09-12	09:18:16	1.845	2636.12	FALSE	248
2022-09-12	09:18:16	3.22123	2639.35	1	249
2022-09-12	09:18:17	3.71116	2643.06	1	250
2022-09-12	09:18:17	3.78551	2646.84	1	251
2022-09-12	09:18:17	1.3162	2648.16	FALSE	251
2022-09-12	09:18:17	0.468766	2648.63	FALSE	251
2022-09-12	09:18:18	0.874007	2649.5	FALSE	251
2022-09-12	09:18:18	1.74159	2651.24	FALSE	251
2022-09-12	09:18:18	1.88795	2653.13	FALSE	251
2022-09-12	09:18:19	0.501946	2653.63	FALSE	251
2022-09-12	09:18:19	0.35243	2653.98	FALSE	251
2022-09-12	09:18:19	0.328257	2654.31	FALSE	251
2022-09-12	09:18:19	0.276298	2654.59	FALSE	251
2022-09-12	09:18:20	0.294059	2654.88	FALSE	251
2022-09-12	09:18:20	0.297061	2655.18	FALSE	251
2022-09-12	09:18:20	0.263168	2655.44	FALSE	251
2022-09-12	09:18:20	0.427697	2655.87	FALSE	251
2022-09-12	09:18:21	0.622761	2656.49	FALSE	251
2022-09-12	09:18:21	0.903728	2657.4	FALSE	251
2022-09-12	09:18:21	1.56566	2658.96	FALSE	251
2022-09-12	09:18:21	1.02006	2659.98	FALSE	251
2022-09-12	09:18:22	0.482303	2660.47	FALSE	251
2022-09-12	09:18:22	0.383168	2660.85	FALSE	251
2022-09-12	09:18:22	0.365305	2661.21	FALSE	251
2022-09-12	09:18:22	0.358741	2661.57	FALSE	251
2022-09-12	09:18:23	0.545661	2662.12	FALSE	251
2022-09-12	09:18:23	0.767443	2662.89	FALSE	251
2022-09-12	09:18:23	0.485255	2663.37	FALSE	251
2022-09-12	09:18:24	0.44902	2663.82	FALSE	251
2022-09-12	09:18:24	0.558741	2664.38	FALSE	251
2022-09-12	09:18:24	0.411921	2664.79	FALSE	251
2022-09-12	09:18:24	0.367697	2665.16	FALSE	251
2022-09-12	09:18:25	0.355687	2665.51	FALSE	251
2022-09-12	09:18:25	0.390802	2665.91	FALSE	251
2022-09-12	09:18:25	0.349987	2666.26	FALSE	251
2022-09-12	09:18:25	0.30902	2666.56	FALSE	251
2022-09-12	09:18:26	0.299657	2666.86	FALSE	251
2022-09-12	09:18:26	0.294873	2667.16	FALSE	251
2022-09-12	09:18:26	0.300471	2667.46	FALSE	251
2022-09-12	09:18:26	0.308664	2667.77	FALSE	251
2022-09-12	09:18:27	0.305255	2668.07	FALSE	251
2022-09-12	09:18:27	0.301285	2668.37	FALSE	251
2022-09-12	09:18:27	0.30841	2668.68	FALSE	251
2022-09-12	09:18:28	0.314211	2669	FALSE	251
2022-09-12	09:18:28	0.375891	2669.37	FALSE	251
2022-09-12	09:18:28	0.460827	2669.83	FALSE	251
2022-09-12	09:18:28	0.511412	2670.35	FALSE	251
2022-09-12	09:18:29	0.584237	2670.93	FALSE	251
2022-09-12	09:18:29	0.676908	2671.61	FALSE	251
2022-09-12	09:18:29	0.734262	2672.34	FALSE	251
2022-09-12	09:18:29	0.721743	2673.06	FALSE	251
2022-09-12	09:18:30	1.71396	2674.78	FALSE	251
2022-09-12	09:18:30	2.09106	2676.87	FALSE	251
2022-09-12	09:18:30	1.89508	2678.76	FALSE	251
2022-09-12	09:18:30	1.61772	2680.38	FALSE	251
2022-09-12	09:18:31	0.483117	2680.86	FALSE	251
2022-09-12	09:18:31	0.377723	2681.24	FALSE	251
2022-09-12	09:18:31	0.299758	2681.54	FALSE	251
2022-09-12	09:18:31	0.285305	2681.83	FALSE	251
2022-09-12	09:18:32	0.314415	2682.14	FALSE	251
2022-09-12	09:18:32	0.233397	2682.37	FALSE	251
2022-09-12	09:18:32	0.934567	2683.31	FALSE	251
2022-09-12	09:18:33	5.61085	2688.92	1	252
2022-09-12	09:18:33	6.7452	2695.66	1	253
2022-09-12	09:18:33	7.90459	2703.57	1	254
2022-09-12	09:18:33	2.60597	2706.18	FALSE	254
2022-09-12	09:18:34	2.53401	2708.71	FALSE	254
2022-09-12	09:18:34	1.15793	2709.87	FALSE	254
2022-09-12	09:18:34	0.722965	2710.59	FALSE	254
2022-09-12	09:18:34	2.61533	2713.21	FALSE	254
2022-09-12	09:18:35	0.510445	2713.72	FALSE	254
2022-09-12	09:18:35	1.81396	2715.53	FALSE	254
2022-09-12	09:18:35	0.46215	2715.99	FALSE	254
2022-09-12	09:18:35	0.847036	2716.84	FALSE	254
2022-09-12	09:18:36	1.00556	2717.84	FALSE	254
2022-09-12	09:18:36	1.35187	2719.2	FALSE	254
2022-09-12	09:18:36	1.76108	2720.96	FALSE	254
2022-09-12	09:18:37	1.09355	2722.05	FALSE	254
2022-09-12	09:18:37	1.60256	2723.65	FALSE	254
2022-09-12	09:18:37	2.45248	2726.11	FALSE	254
2022-09-12	09:18:37	1.54179	2727.65	FALSE	254
2022-09-12	09:18:38	2.422	2730.07	FALSE	254
2022-09-12	09:18:38	3.12576	2733.2	1	255
2022-09-12	09:18:38	2.34128	2735.54	FALSE	255
2022-09-12	09:18:38	4.42235	2739.96	1	256
2022-09-12	09:18:39	4.21711	2744.18	1	257
2022-09-12	09:18:39	5.64505	2749.82	1	258
2022-09-12	09:18:39	5.2508	2755.07	1	259
2022-09-12	09:18:39	3.13533	2758.21	1	260
2022-09-12	09:18:40	6.98647	2765.19	1	261
2022-09-12	09:18:40	2.79421	2767.99	FALSE	261
2022-09-12	09:18:40	4.35614	2772.34	1	262
2022-09-12	09:18:40	4.00052	2776.35	1	263
2022-09-12	09:18:41	3.26123	2779.61	1	264
2022-09-12	09:18:41	4.585	2784.19	1	265
2022-09-12	09:18:41	2.42083	2786.61	FALSE	265
2022-09-12	09:18:42	3.11731	2789.73	1	266
2022-09-12	09:18:42	3.24658	2792.98	1	267
2022-09-12	09:18:42	1.85202	2794.83	FALSE	267
2022-09-12	09:18:42	0.719707	2795.55	FALSE	267
2022-09-12	09:18:43	0.846883	2796.39	FALSE	267
2022-09-12	09:18:43	0.271463	2796.67	FALSE	267
2022-09-12	09:18:43	0.609173	2797.28	FALSE	267
2022-09-12	09:18:43	1.64368	2798.92	FALSE	267
2022-09-12	09:18:44	1.40475	2800.32	FALSE	267
2022-09-12	09:18:44	2.21528	2802.54	FALSE	267
2022-09-12	09:18:44	4.04505	2806.58	1	268
2022-09-12	09:18:44	0.569631	2807.15	FALSE	268
2022-09-12	09:18:45	0.364288	2807.52	FALSE	268
2022-09-12	09:18:45	0.701387	2808.22	FALSE	268
2022-09-12	09:18:45	0.373193	2808.59	FALSE	268
2022-09-12	09:18:46	0.933041	2809.53	FALSE	268
2022-09-12	09:18:46	0.869427	2810.39	FALSE	268
2022-09-12	09:18:46	0.897621	2811.29	FALSE	268
2022-09-12	09:18:46	1.39701	2812.69	FALSE	268
2022-09-12	09:18:47	1.53375	2814.22	FALSE	268
2022-09-12	09:18:47	1.36495	2815.59	FALSE	268
2022-09-12	09:18:47	1.69966	2817.29	FALSE	268
2022-09-12	09:18:47	0.707748	2818	FALSE	268
2022-09-12	09:18:48	1.63111	2819.63	FALSE	268
2022-09-12	09:18:48	0.694058	2820.32	FALSE	268
2022-09-12	09:18:48	2.96011	2823.28	FALSE	268
2022-09-12	09:18:48	2.3593	2825.64	FALSE	268
2022-09-12	09:18:49	3.085	2828.73	1	269
2022-09-12	09:18:49	3.28429	2832.01	1	270
2022-09-12	09:18:49	2.18739	2834.2	FALSE	270
2022-09-12	09:18:50	5.37757	2839.57	1	271
2022-09-12	09:18:50	2.17034	2841.74	FALSE	271
2022-09-12	09:18:50	4.15874	2845.9	1	272
2022-09-12	09:18:50	1.78749	2847.69	FALSE	272
2022-09-12	09:18:51	1.44531	2849.14	FALSE	272
2022-09-12	09:18:51	1.23223	2850.37	FALSE	272
2022-09-12	09:18:51	1.05818	2851.43	FALSE	272
2022-09-12	09:18:51	1.22546	2852.65	FALSE	272
2022-09-12	09:18:52	0.59187	2853.24	FALSE	272
2022-09-12	09:18:52	0.768003	2854.01	FALSE	272
2022-09-12	09:18:52	0.525712	2854.54	FALSE	272
2022-09-12	09:18:52	0.863372	2855.4	FALSE	272
2022-09-12	09:18:53	0.607137	2856.01	FALSE	272
2022-09-12	09:18:53	0.801845	2856.81	FALSE	272
2022-09-12	09:18:53	1.55258	2858.36	FALSE	272
2022-09-12	09:18:53	1.64317	2860.01	FALSE	272
2022-09-12	09:18:54	2.26215	2862.27	FALSE	272
2022-09-12	09:18:54	2.25385	2864.52	FALSE	272
2022-09-12	09:18:54	3.42836	2867.95	1	273
2022-09-12	09:18:55	2.24871	2870.2	FALSE	273
2022-09-12	09:18:55	1.64683	2871.85	FALSE	273
2022-09-12	09:18:55	1.34683	2873.19	FALSE	273
2022-09-12	09:18:55	1.36617	2874.56	FALSE	273
2022-09-12	09:18:56	1.10561	2875.66	FALSE	273
2022-09-12	09:18:56	4.06907	2879.73	1	274
2022-09-12	09:18:56	4.96367	2884.7	1	275
2022-09-12	09:18:56	5.85121	2890.55	1	276
2022-09-12	09:18:57	8.71757	2899.27	1	277
2022-09-12	09:18:57	4.84993	2904.12	1	278
2022-09-12	09:18:57	4.62347	2908.74	1	279
2022-09-12	09:18:57	3.97319	2912.71	1	280
2022-09-12	09:18:58	2.88403	2915.6	FALSE	280
2022-09-12	09:18:58	6.6221	2922.22	1	281
2022-09-12	09:18:58	2.20149	2924.42	FALSE	281
2022-09-12	09:18:59	5.29212	2929.71	1	282
2022-09-12	09:18:59	2.10525	2931.82	FALSE	282
2022-09-12	09:18:59	4.66052	2936.48	1	283
2022-09-12	09:18:59	2.49787	2938.98	FALSE	283
2022-09-12	09:19:00	3.31803	2942.29	1	284
2022-09-12	09:19:00	3.98296	2946.28	1	285
2022-09-12	09:19:00	1.92072	2948.2	FALSE	285
2022-09-12	09:19:00	4.0252	2952.22	1	286
2022-09-12	09:19:01	1.79228	2954.02	FALSE	286
2022-09-12	09:19:01	4.71904	2958.73	1	287
2022-09-12	09:19:01	1.58866	2960.32	FALSE	287
2022-09-12	09:19:01	3.77813	2964.1	1	288
2022-09-12	09:19:02	1.65955	2965.76	FALSE	288
2022-09-12	09:19:02	2.35223	2968.11	FALSE	288
2022-09-12	09:19:02	2.88062	2970.99	FALSE	288
2022-09-12	09:19:02	3.12042	2974.11	1	289
2022-09-12	09:19:03	4.76159	2978.88	1	290
2022-09-12	09:19:03	2.60245	2981.48	FALSE	290
2022-09-12	09:19:03	5.7968	2987.27	1	291
2022-09-12	09:19:04	3.72037	2991	1	292
2022-09-12	09:19:04	5.35533	2996.35	1	293
2022-09-12	09:19:04	1.19039	2997.54	FALSE	293
2022-09-12	09:19:04	3.49365	3001.03	1	294
2022-09-12	09:19:05	2.98098	3004.02	FALSE	294
2022-09-12	09:19:05	1.36134	3005.38	FALSE	294
2022-09-12	09:19:05	2.23971	3007.62	FALSE	294
2022-09-12	09:19:05	1.43528	3009.05	FALSE	294
2022-09-12	09:19:06	2.94856	3012	FALSE	294
2022-09-12	09:19:06	2.23197	3014.23	FALSE	294
2022-09-12	09:19:06	4.06795	3018.3	1	295
2022-09-12	09:19:06	4.85966	3023.16	1	296
2022-09-12	09:19:07	5.47716	3028.64	1	297
2022-09-12	09:19:07	6.44881	3035.09	1	298
2022-09-12	09:19:07	5.52719	3040.61	1	299
2022-09-12	09:19:08	9.66062	3050.27	1	300
2022-09-12	09:19:08	6.62703	3056.9	1	301
2022-09-12	09:19:08	17.493	3074.39	1	302
2022-09-12	09:19:08	5.86489	3080.26	1	303
2022-09-12	09:19:09	9.69517	3089.95	1	304
2022-09-12	09:19:09	4.30077	3094.25	1	305
2022-09-12	09:19:09	5.15838	3099.41	1	306
2022-09-12	09:19:09	6.23054	3105.64	1	307
2022-09-12	09:19:10	7.265	3112.91	1	308
2022-09-12	09:19:10	12.2894	3125.2	1	309
2022-09-12	09:19:10	17.7934	3142.99	1	310
2022-09-12	09:19:10	28.7071	3171.7	1	311
2022-09-12	09:19:11	19.4083	3191.11	1	312
2022-09-12	09:19:11	11.4286	3202.54	1	313
2022-09-12	09:19:11	13.4293	3215.96	1	314
2022-09-12	09:19:11	6.55782	3222.52	1	315
2022-09-12	09:19:12	11.276	3233.8	1	316
2022-09-12	09:19:12	23.1452	3256.94	1	317
2022-09-12	09:19:12	13.0021	3269.95	1	318

## Sheet: Royal_martin_20229129143
						**GoPro Fitting: 9:02
2022-09-12	09:14:03	-0.0687402
2022-09-12	09:14:03	-0.015814
2022-09-12	09:14:04	0.071616
2022-09-12	09:14:04	0.125407
2022-09-12	09:14:04	0.119199
2022-09-12	09:14:04	0.188868
2022-09-12	09:14:05	0.414669
2022-09-12	09:14:05	0.460115
2022-09-12	09:14:05	0.354568
2022-09-12	09:14:05	0.40159
2022-09-12	09:14:06	0.388664
2022-09-12	09:14:06	0.39528
2022-09-12	09:14:06	0.385356
2022-09-12	09:14:06	0.384135
2022-09-12	09:14:07	0.388715
2022-09-12	09:14:07	0.341082
2022-09-12	09:14:07	0.421743
2022-09-12	09:14:08	0.401031
2022-09-12	09:14:08	0.381438
2022-09-12	09:14:08	0.444898
2022-09-12	09:14:08	0.374466
2022-09-12	09:14:09	0.40673
2022-09-12	09:14:09	0.398079
2022-09-12	09:14:09	0.346425
2022-09-12	09:14:09	0.341743
2022-09-12	09:14:10	0.501234
2022-09-12	09:14:10	0.118842
2022-09-12	09:14:10	0.12439
2022-09-12	09:14:10	0.0266796
2022-09-12	09:14:11	-0.141157
2022-09-12	09:14:11	-0.0627351
2022-09-12	09:14:11	0.626374
2022-09-12	09:14:12	0.637417
2022-09-12	09:14:12	0.376247
2022-09-12	09:14:12	0.265713
2022-09-12	09:14:12	0.500471
2022-09-12	09:14:13	0.290445
2022-09-12	09:14:13	0.336959
2022-09-12	09:14:13	0.337316
2022-09-12	09:14:13	1.12246
2022-09-12	09:14:14	2.23447
2022-09-12	09:14:14	9.95456
2022-09-12	09:14:14	10.5162
2022-09-12	09:14:14	10.5127
2022-09-12	09:14:15	6.29049
2022-09-12	09:14:15	14.8685
2022-09-12	09:14:15	11.644
2022-09-12	09:14:15	11.1384
2022-09-12	09:14:16	8.67171
2022-09-12	09:14:16	17.8817
2022-09-12	09:14:16	20.3973
2022-09-12	09:14:17	11.392
2022-09-12	09:14:17	6.59095
2022-09-12	09:14:17	3.95452
2022-09-12	09:14:17	1.90032
2022-09-12	09:14:18	3.05558
2022-09-12	09:14:18	6.39996
2022-09-12	09:14:18	10.7918
2022-09-12	09:14:18	7.37711
2022-09-12	09:14:19	4.46815
2022-09-12	09:14:19	6.79421
2022-09-12	09:14:19	12.8027
2022-09-12	09:14:19	14.0922
2022-09-12	09:14:20	20.2418
2022-09-12	09:14:20	9.91375
2022-09-12	09:14:20	14.4574
2022-09-12	09:14:21	7.62902
2022-09-12	09:14:21	6.37609
2022-09-12	09:14:21	16.2703
2022-09-12	09:14:21	6.93858
2022-09-12	09:14:22	8.52016
2022-09-12	09:14:22	13.3272
2022-09-12	09:14:22	8.23777
2022-09-12	09:14:22	17.8781
2022-09-12	09:14:23	14.6066
2022-09-12	09:14:23	14.3057
2022-09-12	09:14:23	24.3914
2022-09-12	09:14:23	15.6061
2022-09-12	09:14:24	11.7435
2022-09-12	09:14:24	15.0865
2022-09-12	09:14:24	12.4838
2022-09-12	09:14:24	4.89233
2022-09-12	09:14:25	5.22622
2022-09-12	09:14:25	4.5253
2022-09-12	09:14:25	0.430649
2022-09-12	09:14:26	0.655331
2022-09-12	09:14:26	0.29869
2022-09-12	09:14:26	13.3935
2022-09-12	09:14:26	19.5132
2022-09-12	09:14:27	7.73283
2022-09-12	09:14:27	1.74475
2022-09-12	09:14:27	0.421438
2022-09-12	09:14:27	0.41187
2022-09-12	09:14:28	0.397875
2022-09-12	09:14:28	4.76143
2022-09-12	09:14:28	16.7155
2022-09-12	09:14:28	16.5908
2022-09-12	09:14:29	8.13527
2022-09-12	09:14:29	2.20866
2022-09-12	09:14:29	2.32805
2022-09-12	09:14:30	0.359199
2022-09-12	09:14:30	0.962659
2022-09-12	09:14:30	6.01136
2022-09-12	09:14:30	19.0349
2022-09-12	09:14:31	13.8941
2022-09-12	09:14:31	3.14174
2022-09-12	09:14:31	0.160878
2022-09-12	09:14:31	0.458181
2022-09-12	09:14:32	0.331565
2022-09-12	09:14:32	0.757316
2022-09-12	09:14:32	4.01283
2022-09-12	09:14:32	9.34031
2022-09-12	09:14:33	0.452735
2022-09-12	09:14:33	0.0727865
2022-09-12	09:14:33	0.121489
2022-09-12	09:14:33	0.127799
2022-09-12	09:14:34	-0.163804
2022-09-12	09:14:34	0.00433869
2022-09-12	09:14:34	2.92739
2022-09-12	09:14:35	25.557
2022-09-12	09:14:35	9.11146
2022-09-12	09:14:35	8.3993
2022-09-12	09:14:35	10.2921
2022-09-12	09:14:36	12.094
2022-09-12	09:14:36	17.7748
2022-09-12	09:14:36	20.7793
2022-09-12	09:14:36	20.6905
2022-09-12	09:14:37	13.2636
2022-09-12	09:14:37	24.6726
2022-09-12	09:14:37	23.3474
2022-09-12	09:14:37	16.5212
2022-09-12	09:14:38	21.7578
2022-09-12	09:14:38	20.1945
2022-09-12	09:14:38	24.6691
2022-09-12	09:14:39	17.3404
2022-09-12	09:14:39	7.16948
2022-09-12	09:14:39	6.62184
2022-09-12	09:14:39	20.9806
2022-09-12	09:14:40	23.2485
2022-09-12	09:14:40	6.67202
2022-09-12	09:14:40	1.7709
2022-09-12	09:14:40	0.711311
2022-09-12	09:14:41	1.08139
2022-09-12	09:14:41	1.86027
2022-09-12	09:14:41	1.96184
2022-09-12	09:14:41	6.74154
2022-09-12	09:14:42	11.6915
2022-09-12	09:14:42	5.72245
2022-09-12	09:14:42	5.12846
2022-09-12	09:14:42	4.34591
2022-09-12	09:14:43	5.95034
2022-09-12	09:14:43	13.1716
2022-09-12	09:14:43	14.9943
2022-09-12	09:14:44	5.29248
2022-09-12	09:14:44	2.68169
2022-09-12	09:14:44	1.44271
2022-09-12	09:14:44	1.12943
2022-09-12	09:14:45	0.873804
2022-09-12	09:14:45	1.33711
2022-09-12	09:14:45	1.22999
2022-09-12	09:14:45	0.880878
2022-09-12	09:14:46	0.492481
2022-09-12	09:14:46	0.220064
2022-09-12	09:14:46	0.354873
2022-09-12	09:14:46	0.044644
2022-09-12	09:14:47	0.16729
2022-09-12	09:14:47	-0.0180023
2022-09-12	09:14:47	0.0563997
2022-09-12	09:14:48	-0.191488
2022-09-12	09:14:48	-0.0851778
2022-09-12	09:14:48	-0.131641
2022-09-12	09:14:48	0.0407763
2022-09-12	09:14:49	-0.0740328
2022-09-12	09:14:49	-0.0160175
2022-09-12	09:14:49	0.0659671
2022-09-12	09:14:49	0.00805366
2022-09-12	09:14:50	0.143168
2022-09-12	09:14:50	0.132939
2022-09-12	09:14:50	0.633906
2022-09-12	09:14:50	1.32408
2022-09-12	09:14:51	1.05686
2022-09-12	09:14:51	2.34541
2022-09-12	09:14:51	5.45355
2022-09-12	09:14:51	6.12062
2022-09-12	09:14:52	11.916
2022-09-12	09:14:52	13.1376
2022-09-12	09:14:52	25.1339
2022-09-12	09:14:53	15.5246
2022-09-12	09:14:53	10.9583
2022-09-12	09:14:53	4.28459
2022-09-12	09:14:53	1.05991
2022-09-12	09:14:54	0.307494
2022-09-12	09:14:54	0.479707
2022-09-12	09:14:54	0.0714633
2022-09-12	09:14:54	0.424338
2022-09-12	09:14:55	0.233601
2022-09-12	09:14:55	1.53457
2022-09-12	09:14:55	2.91854
2022-09-12	09:14:55	2.73431
2022-09-12	09:14:56	3.5907
2022-09-12	09:14:56	3.2277
2022-09-12	09:14:56	4.26612
2022-09-12	09:14:57	6.8621
2022-09-12	09:14:57	17.4757
2022-09-12	09:14:57	7.35863
2022-09-12	09:14:57	7.6855
2022-09-12	09:14:58	6.38866
2022-09-12	09:14:58	3.4166
2022-09-12	09:14:58	4.15253
2022-09-12	09:14:58	1.30358
2022-09-12	09:14:59	3.23482
2022-09-12	09:14:59	2.81976
2022-09-12	09:14:59	3.56057
2022-09-12	09:14:59	7.15767
2022-09-12	09:15:00	7.12286
2022-09-12	09:15:00	4.26037
2022-09-12	09:15:00	5.03431
2022-09-12	09:15:00	5.67614
2022-09-12	09:15:01	5.3907
2022-09-12	09:15:01	7.08118
2022-09-12	09:15:01	10.7513
2022-09-12	09:15:02	13.6169
2022-09-12	09:15:02	8.95843
2022-09-12	09:15:02	22.9557
2022-09-12	09:15:02	14.534
2022-09-12	09:15:03	7.51156
2022-09-12	09:15:03	13.0288
2022-09-12	09:15:03	9.17772
2022-09-12	09:15:03	10.1723
2022-09-12	09:15:04	10.1836
2022-09-12	09:15:04	1.64205
2022-09-12	09:15:04	0.477977
2022-09-12	09:15:04	0.537824
2022-09-12	09:15:05	0.249122
2022-09-12	09:15:05	0.23757
2022-09-12	09:15:05	0.110445
2022-09-12	09:15:06	0.377774
2022-09-12	09:15:06	0.28271
2022-09-12	09:15:06	0.290853
2022-09-12	09:15:06	0.254873
2022-09-12	09:15:07	0.216094
2022-09-12	09:15:07	0.285967
2022-09-12	09:15:07	0.286985
2022-09-12	09:15:07	0.261896
2022-09-12	09:15:08	0.427137
2022-09-12	09:15:08	2.67787
2022-09-12	09:15:08	7.28566
2022-09-12	09:15:08	9.03421
2022-09-12	09:15:09	4.97991
2022-09-12	09:15:09	4.19721
2022-09-12	09:15:09	8.19777
2022-09-12	09:15:09	10.3916
2022-09-12	09:15:10	17.4554
2022-09-12	09:15:10	8.68306
2022-09-12	09:15:10	11.3747
2022-09-12	09:15:11	5.88317
2022-09-12	09:15:11	4.20057
2022-09-12	09:15:11	2.87385
2022-09-12	09:15:11	3.53696
2022-09-12	09:15:12	11.5721
2022-09-12	09:15:12	3.1139
2022-09-12	09:15:12	8.49762
2022-09-12	09:15:12	5.69802
2022-09-12	09:15:13	11.126
2022-09-12	09:15:13	3.22805
2022-09-12	09:15:13	7.56128
2022-09-12	09:15:13	8.03288
2022-09-12	09:15:14	6.24174
2022-09-12	09:15:14	9.94372
2022-09-12	09:15:14	9.44352
2022-09-12	09:15:15	8.82352
2022-09-12	09:15:15	5.58255
2022-09-12	09:15:15	4.22261
2022-09-12	09:15:15	10.2126
2022-09-12	09:15:16	2.82352
2022-09-12	09:15:16	6.32322
2022-09-12	09:15:16	7.57222
2022-09-12	09:15:16	6.78673
2022-09-12	09:15:17	9.02576
2022-09-12	09:15:17	6.52968
2022-09-12	09:15:17	15.4152
2022-09-12	09:15:17	6.77161
2022-09-12	09:15:18	11.2905
2022-09-12	09:15:18	9.19059
2022-09-12	09:15:18	4.39462
2022-09-12	09:15:18	10.5262
2022-09-12	09:15:19	6.72052
2022-09-12	09:15:19	5.67421
2022-09-12	09:15:19	3.62444
2022-09-12	09:15:20	2.88291
2022-09-12	09:15:20	6.62754
2022-09-12	09:15:20	1.82678
2022-09-12	09:15:20	3.471
2022-09-12	09:15:21	1.73971
2022-09-12	09:15:21	0.610344
2022-09-12	09:15:21	0.46902
2022-09-12	09:15:21	0.126018
2022-09-12	09:15:22	0.331412
2022-09-12	09:15:22	0.097163
2022-09-12	09:15:22	0.302303
2022-09-12	09:15:22	0.197163
2022-09-12	09:15:23	0.442761
2022-09-12	09:15:23	0.208562
2022-09-12	09:15:23	0.324695
2022-09-12	09:15:24	0.269173
2022-09-12	09:15:24	0.393092
2022-09-12	09:15:24	0.640827
2022-09-12	09:15:24	1.41492
2022-09-12	09:15:25	1.55594
2022-09-12	09:15:25	0.831056
2022-09-12	09:15:25	0.584389
2022-09-12	09:15:25	0.393499
2022-09-12	09:15:26	0.677315
2022-09-12	09:15:26	0.479707
2022-09-12	09:15:26	0.682048
2022-09-12	09:15:26	0.839555
2022-09-12	09:15:27	0.971412
2022-09-12	09:15:27	0.848206
2022-09-12	09:15:27	0.568257
2022-09-12	09:15:27	0.58388
2022-09-12	09:15:28	0.363321
2022-09-12	09:15:28	0.374313
2022-09-12	09:15:28	0.453041
2022-09-12	09:15:29	0.28673
2022-09-12	09:15:29	0.476094
2022-09-12	09:15:29	0.213499
2022-09-12	09:15:29	0.409886
2022-09-12	09:15:30	0.195534
2022-09-12	09:15:30	0.358842
2022-09-12	09:15:30	0.267697
2022-09-12	09:15:30	0.252634
2022-09-12	09:15:31	0.26729
2022-09-12	09:15:31	0.12215
2022-09-12	09:15:31	0.373143
2022-09-12	09:15:31	0.103931
2022-09-12	09:15:32	0.384288
2022-09-12	09:15:32	0.335687
2022-09-12	09:15:32	1.44424
2022-09-12	09:15:33	0.976959
2022-09-12	09:15:33	1.92388
2022-09-12	09:15:33	1.85248
2022-09-12	09:15:33	2.06134
2022-09-12	09:15:34	2.29202
2022-09-12	09:15:34	0.451463
2022-09-12	09:15:34	0.443321
2022-09-12	09:15:34	0.174262
2022-09-12	09:15:35	0.215483
2022-09-12	09:15:35	0.27701
2022-09-12	09:15:35	0.178944
2022-09-12	09:15:35	0.382608
2022-09-12	09:15:36	0.576196
2022-09-12	09:15:36	2.22195
2022-09-12	09:15:36	4.46454
2022-09-12	09:15:36	5.59075
2022-09-12	09:15:37	2.60683
2022-09-12	09:15:37	3.41105
2022-09-12	09:15:37	1.78902
2022-09-12	09:15:38	1.52042
2022-09-12	09:15:38	1.8536
2022-09-12	09:15:38	0.418435
2022-09-12	09:15:38	0.848511
2022-09-12	09:15:39	0.366272
2022-09-12	09:15:39	0.506272
2022-09-12	09:15:39	0.271412
2022-09-12	09:15:39	0.142863
2022-09-12	09:15:40	0.341336
2022-09-12	09:15:40	0.126629
2022-09-12	09:15:40	0.275738
2022-09-12	09:15:40	0.225509
2022-09-12	09:15:41	0.174771
2022-09-12	09:15:41	0.263015
2022-09-12	09:15:41	0.12668
2022-09-12	09:15:42	0.372685
2022-09-12	09:15:42	0.0879009
2022-09-12	09:15:42	0.381896
2022-09-12	09:15:42	0.240573
2022-09-12	09:15:43	0.331769
2022-09-12	09:15:43	0.387392
2022-09-12	09:15:43	0.42159
2022-09-12	09:15:43	0.496094
2022-09-12	09:15:44	0.195127
2022-09-12	09:15:44	0.346578
2022-09-12	09:15:44	0.168613
2022-09-12	09:15:44	0.253244
2022-09-12	09:15:45	0.176756
2022-09-12	09:15:45	0.3164
2022-09-12	09:15:45	0.325153
2022-09-12	09:15:45	0.216654
2022-09-12	09:15:46	0.471972
2022-09-12	09:15:46	0.223677
2022-09-12	09:15:46	1.08342
2022-09-12	09:15:47	1.002
2022-09-12	09:15:47	0.909886
2022-09-12	09:15:47	0.359199
2022-09-12	09:15:47	0.264898
2022-09-12	09:15:48	0.189784
2022-09-12	09:15:48	0.135636
2022-09-12	09:15:48	0.391565
2022-09-12	09:15:48	1.66989
2022-09-12	09:15:49	4.73385
2022-09-12	09:15:49	5.47258
2022-09-12	09:15:49	4.0081
2022-09-12	09:15:49	2.11345
2022-09-12	09:15:50	1.30693
2022-09-12	09:15:50	2.05406
2022-09-12	09:15:50	0.306527
2022-09-12	09:15:51	1.96179
2022-09-12	09:15:51	0.575229
2022-09-12	09:15:51	1.26698
2022-09-12	09:15:51	0.515178
2022-09-12	09:15:52	0.364033
2022-09-12	09:15:52	0.492023
2022-09-12	09:15:52	0.669987
2022-09-12	09:15:52	0.663728
2022-09-12	09:15:53	1.35447
2022-09-12	09:15:53	1.69604
2022-09-12	09:15:53	2.87299
2022-09-12	09:15:53	4.3335
2022-09-12	09:15:54	2.84973
2022-09-12	09:15:54	3.73319
2022-09-12	09:15:54	1.09497
2022-09-12	09:15:54	2.62082
2022-09-12	09:15:55	1.88078
2022-09-12	09:15:55	1.8653
2022-09-12	09:15:55	2.39131
2022-09-12	09:15:56	0.562659
2022-09-12	09:15:56	1.16724
2022-09-12	09:15:56	0.169733
2022-09-12	09:15:56	0.388562
2022-09-12	09:15:57	0.24154
2022-09-12	09:15:57	0.428308
2022-09-12	09:15:57	0.482863
2022-09-12	09:15:57	0.393143
2022-09-12	09:15:58	0.596399
2022-09-12	09:15:58	0.763066
2022-09-12	09:15:58	0.723575
2022-09-12	09:15:58	0.812226
2022-09-12	09:15:59	0.919809
2022-09-12	09:15:59	0.822455
2022-09-12	09:15:59	1.03121
2022-09-12	09:16:00	0.972328
2022-09-12	09:16:00	0.515789
2022-09-12	09:16:00	0.375026
2022-09-12	09:16:00	0.369682
2022-09-12	09:16:01	0.249428
2022-09-12	09:16:01	0.17986
2022-09-12	09:16:01	0.20159
2022-09-12	09:16:01	0.328308
2022-09-12	09:16:02	0.370496
2022-09-12	09:16:02	0.582964
2022-09-12	09:16:02	0.296145
2022-09-12	09:16:02	0.391972
2022-09-12	09:16:03	0.313957
2022-09-12	09:16:03	0.279707
2022-09-12	09:16:03	0.258944
2022-09-12	09:16:03	0.225153
2022-09-12	09:16:04	0.362303
2022-09-12	09:16:04	0.123677
2022-09-12	09:16:04	0.341082
2022-09-12	09:16:05	0.175127
2022-09-12	09:16:05	0.310547
2022-09-12	09:16:05	0.8193
2022-09-12	09:16:05	0.970293
2022-09-12	09:16:06	1.60948
2022-09-12	09:16:06	1.41421
2022-09-12	09:16:06	1.80337
2022-09-12	09:16:06	1.62032
2022-09-12	09:16:07	1.83253
2022-09-12	09:16:07	1.26576
2022-09-12	09:16:07	1.26179
2022-09-12	09:16:07	0.889224
2022-09-12	09:16:08	0.671158
2022-09-12	09:16:08	0.665713
2022-09-12	09:16:08	1.37167
2022-09-12	09:16:09	1.43365
2022-09-12	09:16:09	1.65406
2022-09-12	09:16:09	0.837875
2022-09-12	09:16:09	1.12856
2022-09-12	09:16:10	1.3281
2022-09-12	09:16:10	0.565458
2022-09-12	09:16:10	0.809071
2022-09-12	09:16:10	0.469428
2022-09-12	09:16:11	0.717468
2022-09-12	09:16:11	0.391412
2022-09-12	09:16:11	0.367239
2022-09-12	09:16:11	0.947952
2022-09-12	09:16:12	0.868002
2022-09-12	09:16:12	1.28149
2022-09-12	09:16:12	0.862557
2022-09-12	09:16:12	1.20927
2022-09-12	09:16:13	0.754109
2022-09-12	09:16:13	1.63833
2022-09-12	09:16:13	2.30897
2022-09-12	09:16:14	3.41223
2022-09-12	09:16:14	3.20301
2022-09-12	09:16:14	3.93472
2022-09-12	09:16:14	3.41401
2022-09-12	09:16:15	1.37991
2022-09-12	09:16:15	1.67029
2022-09-12	09:16:15	0.739962
2022-09-12	09:16:15	1.43462
2022-09-12	09:16:16	0.619504
2022-09-12	09:16:16	0.424491
2022-09-12	09:16:16	1.18439
2022-09-12	09:16:16	0.311107
2022-09-12	09:16:17	0.496909
2022-09-12	09:16:17	0.204695
2022-09-12	09:16:17	0.404542
2022-09-12	09:16:18	0.462303
2022-09-12	09:16:18	0.499555
2022-09-12	09:16:18	0.383677
2022-09-12	09:16:18	0.480522
2022-09-12	09:16:19	0.500979
2022-09-12	09:16:19	0.610751
2022-09-12	09:16:19	0.491921
2022-09-12	09:16:19	1.105
2022-09-12	09:16:20	0.433957
2022-09-12	09:16:20	0.334669
2022-09-12	09:16:20	1.00332
2022-09-12	09:16:20	0.627239
2022-09-12	09:16:21	0.654619
2022-09-12	09:16:21	0.274466
2022-09-12	09:16:21	0.441896
2022-09-12	09:16:21	0.413346
2022-09-12	09:16:22	0.464797
2022-09-12	09:16:22	1.11849
2022-09-12	09:16:22	1.20062
2022-09-12	09:16:23	1.84017
2022-09-12	09:16:23	2.35553
2022-09-12	09:16:23	1.99676
2022-09-12	09:16:23	3.27543
2022-09-12	09:16:24	2.9507
2022-09-12	09:16:24	2.22566
2022-09-12	09:16:24	2.40719
2022-09-12	09:16:24	2.25553
2022-09-12	09:16:25	2.27116
2022-09-12	09:16:25	2.69446
2022-09-12	09:16:25	1.71854
2022-09-12	09:16:25	2.86057
2022-09-12	09:16:26	2.03309
2022-09-12	09:16:26	2.97589
2022-09-12	09:16:26	2.90495
2022-09-12	09:16:27	4.29843
2022-09-12	09:16:27	3.06561
2022-09-12	09:16:27	3.56032
2022-09-12	09:16:27	2.13803
2022-09-12	09:16:28	4.30892
2022-09-12	09:16:28	1.79411
2022-09-12	09:16:28	3.36373
2022-09-12	09:16:28	3.60546
2022-09-12	09:16:29	5.06174
2022-09-12	09:16:29	6.3795
2022-09-12	09:16:29	7.41121
2022-09-12	09:16:29	7.33471
2022-09-12	09:16:30	8.44245
2022-09-12	09:16:30	7.00759
2022-09-12	09:16:30	5.64724
2022-09-12	09:16:30	7.67436
2022-09-12	09:16:31	2.82922
2022-09-12	09:16:31	1.64816
2022-09-12	09:16:31	0.962964
2022-09-12	09:16:32	0.678842
2022-09-12	09:16:32	0.185611
2022-09-12	09:16:32	0.176654
2022-09-12	09:16:32	0.118486
2022-09-12	09:16:33	-0.0155087
2022-09-12	09:16:33	-0.0586639
2022-09-12	09:16:33	-0.176476
2022-09-12	09:16:33	-0.0655341
2022-09-12	09:16:34	-0.0884348
2022-09-12	09:16:34	-0.0524552
2022-09-12	09:16:34	-0.14304
2022-09-12	09:16:34	-0.0359667
2022-09-12	09:16:35	0.112379
2022-09-12	09:16:35	0.117875
2022-09-12	09:16:35	0.0608781
2022-09-12	09:16:36	0.215789
2022-09-12	09:16:36	1.06358
2022-09-12	09:16:36	3.29304
2022-09-12	09:16:36	3.98301
2022-09-12	09:16:37	2.80556
2022-09-12	09:16:37	2.05558
2022-09-12	09:16:37	1.58485
2022-09-12	09:16:37	1.16205
2022-09-12	09:16:38	0.605102
2022-09-12	09:16:38	0.285
2022-09-12	09:16:38	0.18042
2022-09-12	09:16:38	0.194364
2022-09-12	09:16:39	0.121082
2022-09-12	09:16:39	0.0929391
2022-09-12	09:16:39	0.0939061
2022-09-12	09:16:40	0.0931936
2022-09-12	09:16:40	0.0730409
2022-09-12	09:16:40	0.109733
2022-09-12	09:16:40	0.0735498
2022-09-12	09:16:41	-0.00319315
2022-09-12	09:16:41	0.0440333
2022-09-12	09:16:41	-0.054389
2022-09-12	09:16:41	0.0345168
2022-09-12	09:16:42	0.0471376
2022-09-12	09:16:42	0.109682
2022-09-12	09:16:42	0.0366033
2022-09-12	09:16:42	0.271514
2022-09-12	09:16:43	0.312888
2022-09-12	09:16:43	0.299249
2022-09-12	09:16:43	1.19335
2022-09-12	09:16:43	1.28062
2022-09-12	09:16:44	1.8909
2022-09-12	09:16:44	3.14057
2022-09-12	09:16:44	4.07065
2022-09-12	09:16:45	6.45339
2022-09-12	09:16:45	6.03797
2022-09-12	09:16:45	4.46474
2022-09-12	09:16:45	4.43777
2022-09-12	09:16:46	4.95426
2022-09-12	09:16:46	3.02897
2022-09-12	09:16:46	3.89406
2022-09-12	09:16:46	4.04551
2022-09-12	09:16:47	4.4997
2022-09-12	09:16:47	4.06123
2022-09-12	09:16:47	2.01085
2022-09-12	09:16:47	0.616298
2022-09-12	09:16:48	0.372634
2022-09-12	09:16:48	0.297824
2022-09-12	09:16:48	0.282303
2022-09-12	09:16:48	0.273855
2022-09-12	09:16:49	0.290649
2022-09-12	09:16:49	0.390496
2022-09-12	09:16:49	0.922964
2022-09-12	09:16:50	1.48434
2022-09-12	09:16:50	1.29609
2022-09-12	09:16:50	1.21894
2022-09-12	09:16:50	1.1081
2022-09-12	09:16:51	1.06622
2022-09-12	09:16:51	1.08439
2022-09-12	09:16:51	1.52006
2022-09-12	09:16:51	2.16673
2022-09-12	09:16:52	3.54251
2022-09-12	09:16:52	4.61752
2022-09-12	09:16:52	3.46108
2022-09-12	09:16:52	3.92658
2022-09-12	09:16:53	1.29981
2022-09-12	09:16:53	0.575993
2022-09-12	09:16:53	0.990751
2022-09-12	09:16:54	2.17431
2022-09-12	09:16:54	2.61446
2022-09-12	09:16:54	2.09803
2022-09-12	09:16:54	1.20424
2022-09-12	09:16:55	2.66688
2022-09-12	09:16:55	2.60383
2022-09-12	09:16:55	3.68022
2022-09-12	09:16:56	2.61024
2022-09-12	09:16:56	3.42826
2022-09-12	09:16:56	4.08301
2022-09-12	09:16:56	4.87218
2022-09-12	09:16:56	4.03594
2022-09-12	09:16:57	3.09202
2022-09-12	09:16:57	3.82322
2022-09-12	09:16:57	3.3168
2022-09-12	09:16:57	2.56907
2022-09-12	09:16:58	2.7706
2022-09-12	09:16:58	1.98994
2022-09-12	09:16:58	1.7709
2022-09-12	09:16:59	1.76454
2022-09-12	09:16:59	1.12332
2022-09-12	09:16:59	0.613448
2022-09-12	09:16:59	1.34271
2022-09-12	09:17:00	2.1791
2022-09-12	09:17:00	2.04067
2022-09-12	09:17:00	1.09548
2022-09-12	09:17:00	0.685
2022-09-12	09:17:01	0.356043
2022-09-12	09:17:01	0.282964
2022-09-12	09:17:01	0.210293
2022-09-12	09:17:01	0.215636
2022-09-12	09:17:02	0.241183
2022-09-12	09:17:02	0.0866287
2022-09-12	09:17:02	0.10897
2022-09-12	09:17:03	0.0293768
2022-09-12	09:17:03	-0.136832
2022-09-12	09:17:03	-0.0520481
2022-09-12	09:17:03	-0.273727
2022-09-12	09:17:04	-0.339325
2022-09-12	09:17:04	-0.307468
2022-09-12	09:17:04	-0.340445
2022-09-12	09:17:05	-0.104669
2022-09-12	09:17:05	0.01584
2022-09-12	09:17:05	-0.046501
2022-09-12	09:17:05	0.0709544
2022-09-12	09:17:05	0.230446
2022-09-12	09:17:06	0.574415
2022-09-12	09:17:06	0.538639
2022-09-12	09:17:06	0.496552
2022-09-12	09:17:06	0.783575
2022-09-12	09:17:07	2.07955
2022-09-12	09:17:07	3.30474
2022-09-12	09:17:07	4.2193
2022-09-12	09:17:08	2.14973
2022-09-12	09:17:08	0.55584
2022-09-12	09:17:08	0.488308
2022-09-12	09:17:08	0.334059
2022-09-12	09:17:09	0.319758
2022-09-12	09:17:09	0.295076
2022-09-12	09:17:09	0.3393
2022-09-12	09:17:09	0.34327
2022-09-12	09:17:10	0.242303
2022-09-12	09:17:10	0.280216
2022-09-12	09:17:10	0.207443
2022-09-12	09:17:10	0.292685
2022-09-12	09:17:11	3.67055
2022-09-12	09:17:11	6.48103
2022-09-12	09:17:11	12.1894
2022-09-12	09:17:12	13.997
2022-09-12	09:17:12	9.89309
2022-09-12	09:17:12	7.63685
2022-09-12	09:17:12	6.38245
2022-09-12	09:17:13	5.84077
2022-09-12	09:17:13	4.34617
2022-09-12	09:17:13	3.20637
2022-09-12	09:17:13	4.04032
2022-09-12	09:17:14	6.37838
2022-09-12	09:17:14	5.55502
2022-09-12	09:17:14	9.24886
2022-09-12	09:17:14	9.05482
2022-09-12	09:17:15	8.2309
2022-09-12	09:17:15	7.89436
2022-09-12	09:17:15	6.91858
2022-09-12	09:17:15	9.74566
2022-09-12	09:17:16	11.9836
2022-09-12	09:17:16	5.58082
2022-09-12	09:17:16	3.11243
2022-09-12	09:17:17	2.40413
2022-09-12	09:17:17	1.19085
2022-09-12	09:17:17	0.750649
2022-09-12	09:17:17	1.17584
2022-09-12	09:17:18	1.1652
2022-09-12	09:17:18	1.82912
2022-09-12	09:17:18	4.41472
2022-09-12	09:17:18	0.718079
2022-09-12	09:17:19	0.730903
2022-09-12	09:17:19	0.355178
2022-09-12	09:17:19	0.340216
2022-09-12	09:17:19	0.431158
2022-09-12	09:17:20	0.868613
2022-09-12	09:17:20	1.01925
2022-09-12	09:17:20	0.95813
2022-09-12	09:17:21	0.641489
2022-09-12	09:17:21	0.538181
2022-09-12	09:17:21	1.0052
2022-09-12	09:17:21	1.38134
2022-09-12	09:17:22	1.38352
2022-09-12	09:17:22	1.65701
2022-09-12	09:17:22	2.07472
2022-09-12	09:17:22	2.0563
2022-09-12	09:17:23	1.46352
2022-09-12	09:17:23	0.673397
2022-09-12	09:17:23	0.580827
2022-09-12	09:17:23	0.595382
2022-09-12	09:17:24	0.540267
2022-09-12	09:17:24	0.402964
2022-09-12	09:17:24	0.318995
2022-09-12	09:17:25	0.371209
2022-09-12	09:17:25	0.278639
2022-09-12	09:17:25	0.2764
2022-09-12	09:17:25	0.473244
2022-09-12	09:17:26	1.66668
2022-09-12	09:17:26	2.33752
2022-09-12	09:17:26	1.08653
2022-09-12	09:17:26	0.449936
2022-09-12	09:17:27	0.418181
2022-09-12	09:17:27	0.412685
2022-09-12	09:17:27	0.341438
2022-09-12	09:17:27	0.340013
2022-09-12	09:17:28	0.309224
2022-09-12	09:17:28	0.233601
2022-09-12	09:17:28	0.160573
2022-09-12	09:17:28	0.234466
2022-09-12	09:17:29	0.189377
2022-09-12	09:17:29	0.174771
2022-09-12	09:17:29	0.28388
2022-09-12	09:17:30	0.177417
2022-09-12	09:17:30	0.309377
2022-09-12	09:17:30	0.0621503
2022-09-12	09:17:30	0.27126
2022-09-12	09:17:31	0.189733
2022-09-12	09:17:31	0.317824
2022-09-12	09:17:31	0.212685
2022-09-12	09:17:31	0.258283
2022-09-12	09:17:32	0.330547
2022-09-12	09:17:32	0.385764
2022-09-12	09:17:32	0.343779
2022-09-12	09:17:32	0.264949
2022-09-12	09:17:33	0.278741
2022-09-12	09:17:33	0.345
2022-09-12	09:17:33	0.30154
2022-09-12	09:17:33	0.243677
2022-09-12	09:17:34	0.337316
2022-09-12	09:17:34	0.353804
2022-09-12	09:17:34	0.374466
2022-09-12	09:17:35	0.279046
2022-09-12	09:17:35	0.255229
2022-09-12	09:17:35	0.249326
2022-09-12	09:17:35	0.30673
2022-09-12	09:17:36	0.412176
2022-09-12	09:17:36	0.901438
2022-09-12	09:17:36	0.457316
2022-09-12	09:17:36	1.04464
2022-09-12	09:17:37	0.336858
2022-09-12	09:17:37	0.759758
2022-09-12	09:17:37	0.884491
2022-09-12	09:17:37	0.797774
2022-09-12	09:17:38	1.94271
2022-09-12	09:17:38	1.28856
2022-09-12	09:17:38	2.21569
2022-09-12	09:17:39	2.62703
2022-09-12	09:17:39	1.79274
2022-09-12	09:17:39	3.72922
2022-09-12	09:17:39	0.920827
2022-09-12	09:17:40	3.14597
2022-09-12	09:17:40	1.39462
2022-09-12	09:17:40	1.63548
2022-09-12	09:17:40	2.18999
2022-09-12	09:17:41	0.502354
2022-09-12	09:17:41	0.724746
2022-09-12	09:17:41	0.703372
2022-09-12	09:17:41	0.49355
2022-09-12	09:17:42	1.07289
2022-09-12	09:17:42	0.439046
2022-09-12	09:17:42	0.532379
2022-09-12	09:17:43	1.8338
2022-09-12	09:17:43	1.00169
2022-09-12	09:17:43	2.48536
2022-09-12	09:17:43	0.534669
2022-09-12	09:17:44	0.879657
2022-09-12	09:17:44	0.310038
2022-09-12	09:17:44	0.425662
2022-09-12	09:17:44	0.25986
2022-09-12	09:17:45	0.241438
2022-09-12	09:17:45	0.277723
2022-09-12	09:17:45	0.37411
2022-09-12	09:17:45	0.307087
2022-09-12	09:17:46	0.254313
2022-09-12	09:17:46	0.284186
2022-09-12	09:17:46	0.23299
2022-09-12	09:17:46	0.25869
2022-09-12	09:17:47	0.258079
2022-09-12	09:17:47	0.261031
2022-09-12	09:17:47	0.265051
2022-09-12	09:17:48	0.278232
2022-09-12	09:17:48	0.267901
2022-09-12	09:17:48	0.336908
2022-09-12	09:17:48	0.287087
2022-09-12	09:17:49	0.285865
2022-09-12	09:17:49	0.304237
2022-09-12	09:17:49	0.279351
2022-09-12	09:17:49	0.264288
2022-09-12	09:17:50	0.259962
2022-09-12	09:17:50	0.265611
2022-09-12	09:17:50	0.265713
2022-09-12	09:17:50	0.265967
2022-09-12	09:17:51	0.256552
2022-09-12	09:17:51	0.2564
2022-09-12	09:17:51	0.26215
2022-09-12	09:17:52	0.277825
2022-09-12	09:17:52	0.287596
2022-09-12	09:17:52	0.318537
2022-09-12	09:17:52	0.381489
2022-09-12	09:17:53	0.470954
2022-09-12	09:17:53	0.406578
2022-09-12	09:17:53	0.391819
2022-09-12	09:17:53	0.377723
2022-09-12	09:17:54	0.42042
2022-09-12	09:17:54	0.354873
2022-09-12	09:17:54	0.322405
2022-09-12	09:17:54	0.327748
2022-09-12	09:17:55	0.307799
2022-09-12	09:17:55	0.280369
2022-09-12	09:17:55	0.278588
2022-09-12	09:17:55	0.263321
2022-09-12	09:17:56	0.282456
2022-09-12	09:17:56	0.283117
2022-09-12	09:17:56	0.308257
2022-09-12	09:17:57	0.271361
2022-09-12	09:17:57	0.272634
2022-09-12	09:17:57	0.30271
2022-09-12	09:17:57	0.341947
2022-09-12	09:17:58	0.405509
2022-09-12	09:17:58	0.72673
2022-09-12	09:17:58	0.434364
2022-09-12	09:17:58	0.389987
2022-09-12	09:17:59	0.833549
2022-09-12	09:17:59	0.834313
2022-09-12	09:17:59	0.599402
2022-09-12	09:17:59	1.42709
2022-09-12	09:18:00	2.08922
2022-09-12	09:18:00	1.48368
2022-09-12	09:18:00	1.99207
2022-09-12	09:18:01	2.78668
2022-09-12	09:18:01	2.99915
2022-09-12	09:18:01	3.93406
2022-09-12	09:18:01	4.3453
2022-09-12	09:18:02	3.67268
2022-09-12	09:18:02	2.68917
2022-09-12	09:18:02	1.7705
2022-09-12	09:18:02	2.09706
2022-09-12	09:18:03	1.07238
2022-09-12	09:18:03	0.425967
2022-09-12	09:18:03	0.407901
2022-09-12	09:18:03	0.367646
2022-09-12	09:18:04	0.31014
2022-09-12	09:18:04	0.365814
2022-09-12	09:18:04	0.357519
2022-09-12	09:18:04	0.335076
2022-09-12	09:18:05	0.355891
2022-09-12	09:18:05	0.309479
2022-09-12	09:18:05	0.351972
2022-09-12	09:18:06	0.326069
2022-09-12	09:18:06	0.382863
2022-09-12	09:18:06	0.353193
2022-09-12	09:18:06	0.547748
2022-09-12	09:18:07	0.944084
2022-09-12	09:18:07	0.749886
2022-09-12	09:18:07	0.686221
2022-09-12	09:18:07	0.608969
2022-09-12	09:18:08	1.64047
2022-09-12	09:18:08	2.37665
2022-09-12	09:18:08	2.40424
2022-09-12	09:18:08	2.89548
2022-09-12	09:18:09	2.75217
2022-09-12	09:18:09	1.85564
2022-09-12	09:18:09	0.962303
2022-09-12	09:18:10	0.402354
2022-09-12	09:18:10	0.425865
2022-09-12	09:18:10	0.765254
2022-09-12	09:18:10	0.299402
2022-09-12	09:18:11	0.260216
2022-09-12	09:18:11	0.232583
2022-09-12	09:18:11	0.164186
2022-09-12	09:18:11	0.229733
2022-09-12	09:18:12	0.239504
2022-09-12	09:18:12	0.20327
2022-09-12	09:18:12	0.206578
2022-09-12	09:18:12	0.180115
2022-09-12	09:18:13	0.160013
2022-09-12	09:18:13	0.149428
2022-09-12	09:18:13	0.167239
2022-09-12	09:18:13	0.211667
2022-09-12	09:18:14	0.174618
2022-09-12	09:18:14	-0.147264
2022-09-12	09:18:14	-0.079987
2022-09-12	09:18:15	0.0360435
2022-09-12	09:18:15	0.348461
2022-09-12	09:18:15	0.404491
2022-09-12	09:18:15	0.446323
2022-09-12	09:18:16	0.681692
2022-09-12	09:18:16	0.91925
2022-09-12	09:18:16	1.845
2022-09-12	09:18:16	3.22123
2022-09-12	09:18:17	3.71116
2022-09-12	09:18:17	3.78551
2022-09-12	09:18:17	1.3162
2022-09-12	09:18:17	0.468766
2022-09-12	09:18:18	0.874007
2022-09-12	09:18:18	1.74159
2022-09-12	09:18:18	1.88795
2022-09-12	09:18:19	0.501946
2022-09-12	09:18:19	0.35243
2022-09-12	09:18:19	0.328257
2022-09-12	09:18:19	0.276298
2022-09-12	09:18:20	0.294059
2022-09-12	09:18:20	0.297061
2022-09-12	09:18:20	0.263168
2022-09-12	09:18:20	0.427697
2022-09-12	09:18:21	0.622761
2022-09-12	09:18:21	0.903728
2022-09-12	09:18:21	1.56566
2022-09-12	09:18:21	1.02006
2022-09-12	09:18:22	0.482303
2022-09-12	09:18:22	0.383168
2022-09-12	09:18:22	0.365305
2022-09-12	09:18:22	0.358741
2022-09-12	09:18:23	0.545661
2022-09-12	09:18:23	0.767443
2022-09-12	09:18:23	0.485255
2022-09-12	09:18:24	0.44902
2022-09-12	09:18:24	0.558741
2022-09-12	09:18:24	0.411921
2022-09-12	09:18:24	0.367697
2022-09-12	09:18:25	0.355687
2022-09-12	09:18:25	0.390802
2022-09-12	09:18:25	0.349987
2022-09-12	09:18:25	0.30902
2022-09-12	09:18:26	0.299657
2022-09-12	09:18:26	0.294873
2022-09-12	09:18:26	0.300471
2022-09-12	09:18:26	0.308664
2022-09-12	09:18:27	0.305255
2022-09-12	09:18:27	0.301285
2022-09-12	09:18:27	0.30841
2022-09-12	09:18:28	0.314211
2022-09-12	09:18:28	0.375891
2022-09-12	09:18:28	0.460827
2022-09-12	09:18:28	0.511412
2022-09-12	09:18:29	0.584237
2022-09-12	09:18:29	0.676908
2022-09-12	09:18:29	0.734262
2022-09-12	09:18:29	0.721743
2022-09-12	09:18:30	1.71396
2022-09-12	09:18:30	2.09106
2022-09-12	09:18:30	1.89508
2022-09-12	09:18:30	1.61772
2022-09-12	09:18:31	0.483117
2022-09-12	09:18:31	0.377723
2022-09-12	09:18:31	0.299758
2022-09-12	09:18:31	0.285305
2022-09-12	09:18:32	0.314415
2022-09-12	09:18:32	0.233397
2022-09-12	09:18:32	0.934567
2022-09-12	09:18:33	5.61085
2022-09-12	09:18:33	6.7452
2022-09-12	09:18:33	7.90459
2022-09-12	09:18:33	2.60597
2022-09-12	09:18:34	2.53401
2022-09-12	09:18:34	1.15793
2022-09-12	09:18:34	0.722965
2022-09-12	09:18:34	2.61533
2022-09-12	09:18:35	0.510445
2022-09-12	09:18:35	1.81396
2022-09-12	09:18:35	0.46215
2022-09-12	09:18:35	0.847036
2022-09-12	09:18:36	1.00556
2022-09-12	09:18:36	1.35187
2022-09-12	09:18:36	1.76108
2022-09-12	09:18:37	1.09355
2022-09-12	09:18:37	1.60256
2022-09-12	09:18:37	2.45248
2022-09-12	09:18:37	1.54179
2022-09-12	09:18:38	2.422
2022-09-12	09:18:38	3.12576
2022-09-12	09:18:38	2.34128
2022-09-12	09:18:38	4.42235
2022-09-12	09:18:39	4.21711
2022-09-12	09:18:39	5.64505
2022-09-12	09:18:39	5.2508
2022-09-12	09:18:39	3.13533
2022-09-12	09:18:40	6.98647
2022-09-12	09:18:40	2.79421
2022-09-12	09:18:40	4.35614
2022-09-12	09:18:40	4.00052
2022-09-12	09:18:41	3.26123
2022-09-12	09:18:41	4.585
2022-09-12	09:18:41	2.42083
2022-09-12	09:18:42	3.11731
2022-09-12	09:18:42	3.24658
2022-09-12	09:18:42	1.85202
2022-09-12	09:18:42	0.719707
2022-09-12	09:18:43	0.846883
2022-09-12	09:18:43	0.271463
2022-09-12	09:18:43	0.609173
2022-09-12	09:18:43	1.64368
2022-09-12	09:18:44	1.40475
2022-09-12	09:18:44	2.21528
2022-09-12	09:18:44	4.04505
2022-09-12	09:18:44	0.569631
2022-09-12	09:18:45	0.364288
2022-09-12	09:18:45	0.701387
2022-09-12	09:18:45	0.373193
2022-09-12	09:18:46	0.933041
2022-09-12	09:18:46	0.869427
2022-09-12	09:18:46	0.897621
2022-09-12	09:18:46	1.39701
2022-09-12	09:18:47	1.53375
2022-09-12	09:18:47	1.36495
2022-09-12	09:18:47	1.69966
2022-09-12	09:18:47	0.707748
2022-09-12	09:18:48	1.63111
2022-09-12	09:18:48	0.694058
2022-09-12	09:18:48	2.96011
2022-09-12	09:18:48	2.3593
2022-09-12	09:18:49	3.085
2022-09-12	09:18:49	3.28429
2022-09-12	09:18:49	2.18739
2022-09-12	09:18:50	5.37757
2022-09-12	09:18:50	2.17034
2022-09-12	09:18:50	4.15874
2022-09-12	09:18:50	1.78749
2022-09-12	09:18:51	1.44531
2022-09-12	09:18:51	1.23223
2022-09-12	09:18:51	1.05818
2022-09-12	09:18:51	1.22546
2022-09-12	09:18:52	0.59187
2022-09-12	09:18:52	0.768003
2022-09-12	09:18:52	0.525712
2022-09-12	09:18:52	0.863372
2022-09-12	09:18:53	0.607137
2022-09-12	09:18:53	0.801845
2022-09-12	09:18:53	1.55258
2022-09-12	09:18:53	1.64317
2022-09-12	09:18:54	2.26215
2022-09-12	09:18:54	2.25385
2022-09-12	09:18:54	3.42836
2022-09-12	09:18:55	2.24871
2022-09-12	09:18:55	1.64683
2022-09-12	09:18:55	1.34683
2022-09-12	09:18:55	1.36617
2022-09-12	09:18:56	1.10561
2022-09-12	09:18:56	4.06907
2022-09-12	09:18:56	4.96367
2022-09-12	09:18:56	5.85121
2022-09-12	09:18:57	8.71757
2022-09-12	09:18:57	4.84993
2022-09-12	09:18:57	4.62347
2022-09-12	09:18:57	3.97319
2022-09-12	09:18:58	2.88403
2022-09-12	09:18:58	6.6221
2022-09-12	09:18:58	2.20149
2022-09-12	09:18:59	5.29212
2022-09-12	09:18:59	2.10525
2022-09-12	09:18:59	4.66052
2022-09-12	09:18:59	2.49787
2022-09-12	09:19:00	3.31803
2022-09-12	09:19:00	3.98296
2022-09-12	09:19:00	1.92072
2022-09-12	09:19:00	4.0252
2022-09-12	09:19:01	1.79228
2022-09-12	09:19:01	4.71904
2022-09-12	09:19:01	1.58866
2022-09-12	09:19:01	3.77813
2022-09-12	09:19:02	1.65955
2022-09-12	09:19:02	2.35223
2022-09-12	09:19:02	2.88062
2022-09-12	09:19:02	3.12042
2022-09-12	09:19:03	4.76159
2022-09-12	09:19:03	2.60245
2022-09-12	09:19:03	5.7968
2022-09-12	09:19:04	3.72037
2022-09-12	09:19:04	5.35533
2022-09-12	09:19:04	1.19039
2022-09-12	09:19:04	3.49365
2022-09-12	09:19:05	2.98098
2022-09-12	09:19:05	1.36134
2022-09-12	09:19:05	2.23971
2022-09-12	09:19:05	1.43528
2022-09-12	09:19:06	2.94856
2022-09-12	09:19:06	2.23197
2022-09-12	09:19:06	4.06795
2022-09-12	09:19:06	4.85966
2022-09-12	09:19:07	5.47716
2022-09-12	09:19:07	6.44881
2022-09-12	09:19:07	5.52719
2022-09-12	09:19:08	9.66062
2022-09-12	09:19:08	6.62703
2022-09-12	09:19:08	17.493
2022-09-12	09:19:08	5.86489
2022-09-12	09:19:09	9.69517
2022-09-12	09:19:09	4.30077
2022-09-12	09:19:09	5.15838
2022-09-12	09:19:09	6.23054
2022-09-12	09:19:10	7.265
2022-09-12	09:19:10	12.2894
2022-09-12	09:19:10	17.7934
2022-09-12	09:19:10	28.7071
2022-09-12	09:19:11	19.4083
2022-09-12	09:19:11	11.4286
2022-09-12	09:19:11	13.4293
2022-09-12	09:19:11	6.55782
2022-09-12	09:19:12	11.276
2022-09-12	09:19:12	23.1452
2022-09-12	09:19:12	13.0021
2022-09-12	09:19:13	15.2718
2022-09-12	09:19:13	11.4432
2022-09-12	09:19:13	12.8759
2022-09-12	09:19:13	6.85721
2022-09-12	09:19:14	5.24642
2022-09-12	09:19:14	3.54139
2022-09-12	09:19:14	0.581387
2022-09-12	09:19:14	0.503117
2022-09-12	09:19:15	0.40612
2022-09-12	09:19:15	0.364084
2022-09-12	09:19:15	0.45874
2022-09-12	09:19:15	0.134008
2022-09-12	09:19:16	0.308664
