# Supplementary material for: Comparing efficacy in reducing pulling and welfare impacts of four types of leash walking equipment
Source: PeerJ journal article supplement (doi:10.7717/peerj.18131), 2024-10-24
Supplement: Shelter1_Tension_files.zip [file Royal_prong_2022912122642 copy.xlsx]

## Sheet: Sheet2
Date	Time	Averaged newtons	impulse	total steps
2022-09-12	12:27:02	1.2241	1.2241	0		Impulse	824.258
2022-09-12	12:27:03	2.90717	4.13128	0		Total steps	6
2022-09-12	12:27:04	3.80913	7.94041	0
2022-09-12	12:27:05	1.87266	9.81307	0
2022-09-12	12:27:06	1.64793	11.461	0
2022-09-12	12:27:07	1.44946	12.9105	0
2022-09-12	12:27:08	1.12331	14.0338	0
2022-09-12	12:27:09	8.03929	22.0731	0
2022-09-12	12:27:10	2.76773	24.8408	0
2022-09-12	12:27:11	2.45466	27.2954	0
2022-09-12	12:27:12	2.00684	29.3023	0
2022-09-12	12:27:13	2.12252	31.4248	0
2022-09-12	12:27:14	7.79776	39.2226	0
2022-09-12	12:27:15	2.49518	41.7177	0
2022-09-12	12:27:16	0.454762	42.1725	0
2022-09-12	12:27:17	0.675211	42.8477	0
2022-09-12	12:27:18	0.872776	43.7205	0
2022-09-12	12:27:19	1.04714	44.7676	0
2022-09-12	12:27:20	0.493547	45.2612	0
2022-09-12	12:27:21	0.944932	46.2061	0
2022-09-12	12:27:22	0.748951	46.9551	0
2022-09-12	12:27:23	0.63933	47.5944	0
2022-09-12	12:27:24	0.604469	48.1989	0
2022-09-12	12:27:25	0.852233	49.0511	0
2022-09-12	12:27:26	0.939554	49.9906	0
2022-09-12	12:27:27	0.976341	50.967	0
2022-09-12	12:27:28	0.931047	51.898	0
2022-09-12	12:27:29	1.68562	53.5837	0
2022-09-12	12:27:30	1.5455	55.1292	0
2022-09-12	12:27:31	2.06756	57.1967	0
2022-09-12	12:27:32	2.31048	59.5072	0
2022-09-12	12:27:33	1.97713	61.4843	0
2022-09-12	12:27:34	2.54725	64.0316	0
2022-09-12	12:27:35	1.16383	65.1954	0
2022-09-12	12:27:36	4.57435	69.7697	0
2022-09-12	12:27:37	8.98435	78.7541	0
2022-09-12	12:27:38	1.59088	80.345	0
2022-09-12	12:27:39	1.31493	81.6599	0
2022-09-12	12:27:40	13.4743	95.1342	1
2022-09-12	12:27:41	9.43216	104.566	1
2022-09-12	12:27:42	0.681493	105.248	1
2022-09-12	12:27:43	1.07543	106.323	1
2022-09-12	12:27:44	1.04159	107.365	1
2022-09-12	12:27:45	1.00136	108.366	1
2022-09-12	12:27:46	0.927444	109.294	1
2022-09-12	12:27:47	1.09281	110.386	1
2022-09-12	12:27:48	1.25846	111.645	1
2022-09-12	12:27:49	1.3734	113.018	1
2022-09-12	12:27:50	1.44385	114.462	1
2022-09-12	12:27:51	1.41024	115.872	1
2022-09-12	12:27:52	1.47719	117.35	1
2022-09-12	12:27:53	1.72312	119.073	1
2022-09-12	12:27:54	0.716749	119.789	1
2022-09-12	12:27:55	-0.403109	119.789	1
2022-09-12	12:27:56	0.3455	120.135	1
2022-09-12	12:27:57	1.47094	121.606	1
2022-09-12	12:27:58	1.47187	123.078	1
2022-09-12	12:27:59	1.44227	124.52	1
2022-09-12	12:28:00	1.37764	125.898	1
2022-09-12	12:28:01	1.15629	127.054	1
2022-09-12	12:28:02	0.917598	127.972	1
2022-09-12	12:28:03	0.958797	128.93	1
2022-09-12	12:28:04	1.10996	130.04	1
2022-09-12	12:28:05	1.22563	131.266	1
2022-09-12	12:28:06	1.27968	132.546	1
2022-09-12	12:28:07	1.25789	133.804	1
2022-09-12	12:28:08	1.16095	134.964	1
2022-09-12	12:28:09	1.28404	136.249	1
2022-09-12	12:28:10	1.25404	137.503	1
2022-09-12	12:28:11	0.853138	138.356	1
2022-09-12	12:28:12	1.25885	139.615	1
2022-09-12	12:28:13	0.844573	140.459	1
2022-09-12	12:28:14	0.317657	140.777	1
2022-09-12	12:28:15	0.56242	141.339	1
2022-09-12	12:28:16	1.34352	142.683	1
2022-09-12	12:28:17	1.4096	144.092	1
2022-09-12	12:28:18	1.46864	145.561	1
2022-09-12	12:28:19	2.61601	148.177	1
2022-09-12	12:28:20	1.70973	149.887	1
2022-09-12	12:28:21	1.54142	151.428	1
2022-09-12	12:28:22	1.34006	152.768	1
2022-09-12	12:28:23	1.30803	154.076	1
2022-09-12	12:28:24	1.05342	155.13	1
2022-09-12	12:28:25	0.740443	155.87	1
2022-09-12	12:28:26	1.03373	156.904	1
2022-09-12	12:28:27	1.07747	157.981	1
2022-09-12	12:28:28	2.25415	160.235	1
2022-09-12	12:28:29	1.38968	161.625	1
2022-09-12	12:28:30	1.82252	163.448	1
2022-09-12	12:28:31	0.992016	164.44	1
2022-09-12	12:28:32	0.956872	165.397	1
2022-09-12	12:28:33	0.953761	166.35	1
2022-09-12	12:28:34	0.0981895	166.448	1
2022-09-12	12:28:35	0.422296	166.871	1
2022-09-12	12:28:36	0.979341	167.85	1
2022-09-12	12:28:37	1.10377	168.954	1
2022-09-12	12:28:38	0.581605	169.535	1
2022-09-12	12:28:39	0.919691	170.455	1
2022-09-12	12:28:40	1.28619	171.741	1
2022-09-12	12:28:41	0.878077	172.619	1
2022-09-12	12:28:42	1.01511	173.635	1
2022-09-12	12:28:43	1.15144	174.786	1
2022-09-12	12:28:44	1.17872	175.965	1
2022-09-12	12:28:45	1.0302	176.995	1
2022-09-12	12:28:46	0.971983	177.967	1
2022-09-12	12:28:47	1.02218	178.989	1
2022-09-12	12:28:48	1.14651	180.136	1
2022-09-12	12:28:49	0.950893	181.086	1
2022-09-12	12:28:50	0.792074	181.879	1
2022-09-12	12:28:51	1.9503	183.829	1
2022-09-12	12:28:52	1.38194	185.211	1
2022-09-12	12:28:53	2.13957	187.35	1
2022-09-12	12:28:54	1.75302	189.103	1
2022-09-12	12:28:55	1.36061	190.464	1
2022-09-12	12:28:56	1.07051	191.534	1
2022-09-12	12:28:57	1.41262	192.947	1
2022-09-12	12:28:58	4.22217	197.169	1
2022-09-12	12:28:59	11.0058	208.175	1
2022-09-12	12:29:00	2.3301	210.505	1
2022-09-12	12:29:01	2.13446	212.64	1
2022-09-12	12:29:02	1.91408	214.554	1
2022-09-12	12:29:03	2.08783	216.642	1
2022-09-12	12:29:04	2.27532	218.917	1
2022-09-12	12:29:05	3.5866	222.503	1
2022-09-12	12:29:06	12.6129	235.116	1
2022-09-12	12:29:07	3.4211	238.537	1
2022-09-12	12:29:08	2.63191	241.169	1
2022-09-12	12:29:09	2.11459	243.284	1
2022-09-12	12:29:10	1.91063	245.195	1
2022-09-12	12:29:11	2.08992	247.285	1
2022-09-12	12:29:12	1.69903	248.984	1
2022-09-12	12:29:13	1.91916	250.903	1
2022-09-12	12:29:14	1.83401	252.737	1
2022-09-12	12:29:15	1.71692	254.454	1
2022-09-12	12:29:16	1.79869	256.252	1
2022-09-12	12:29:17	1.76274	258.015	1
2022-09-12	12:29:18	1.80373	259.819	1
2022-09-12	12:29:19	1.78958	261.608	1
2022-09-12	12:29:20	1.30356	262.912	1
2022-09-12	12:29:21	1.33595	264.248	1
2022-09-12	12:29:22	1.36723	265.615	1
2022-09-12	12:29:23	1.0897	266.705	1
2022-09-12	12:29:24	1.48822	268.193	1
2022-09-12	12:29:25	1.28223	269.475	1
2022-09-12	12:29:26	1.41748	270.893	1
2022-09-12	12:29:27	1.52722	272.42	1
2022-09-12	12:29:28	1.90848	274.328	1
2022-09-12	12:29:29	2.24875	276.577	1
2022-09-12	12:29:30	2.75081	279.328	1
2022-09-12	12:29:31	3.50644	282.834	1
2022-09-12	12:29:32	4.93513	287.77	1
2022-09-12	12:29:33	9.61345	297.383	1
2022-09-12	12:29:34	7.26449	304.648	1
2022-09-12	12:29:35	4.46569	309.113	1
2022-09-12	12:29:36	10.1412	319.254	1
2022-09-12	12:29:37	8.55636	327.811	1
2022-09-12	12:29:38	7.74094	335.552	1
2022-09-12	12:29:39	6.81644	342.368	1
2022-09-12	12:29:40	5.97246	348.341	1
2022-09-12	12:29:41	4.05256	352.393	1
2022-09-12	12:29:42	5.28624	357.679	1
2022-09-12	12:29:43	6.03314	363.712	1
2022-09-12	12:29:44	7.68622	371.399	1
2022-09-12	12:29:45	6.51767	377.916	1
2022-09-12	12:29:46	6.48425	384.401	1
2022-09-12	12:29:47	5.96099	390.362	1
2022-09-12	12:29:48	4.65498	395.017	1
2022-09-12	12:29:49	2.34655	397.363	1
2022-09-12	12:29:50	1.80882	399.172	1
2022-09-12	12:29:51	1.75036	400.922	1
2022-09-12	12:29:52	1.44148	402.364	1
2022-09-12	12:29:53	10.6603	413.024	1
2022-09-12	12:29:54	22.0394	435.064	2
2022-09-12	12:29:55	1.47419	436.538	2
2022-09-12	12:29:56	1.44136	437.979	2
2022-09-12	12:29:57	1.31516	439.294	2
2022-09-12	12:29:58	1.37994	440.674	2
2022-09-12	12:29:59	0.965192	441.639	2
2022-09-12	12:30:00	0.669437	442.309	2
2022-09-12	12:30:01	0.990206	443.299	2
2022-09-12	12:30:02	1.71657	445.016	2
2022-09-12	12:30:03	1.39071	446.406	2
2022-09-12	12:30:04	1.79264	448.199	2
2022-09-12	12:30:05	1.7674	449.966	2
2022-09-12	12:30:06	1.05261	451.019	2
2022-09-12	12:30:07	1.77453	452.794	2
2022-09-12	12:30:08	2.10078	454.894	2
2022-09-12	12:30:09	1.10894	456.003	2
2022-09-12	12:30:10	0.894828	456.898	2
2022-09-12	12:30:11	1.26881	458.167	2
2022-09-12	12:30:12	1.7906	459.958	2
2022-09-12	12:30:13	1.57168	461.529	2
2022-09-12	12:30:14	1.4593	462.988	2
2022-09-12	12:30:15	2.75058	465.739	2
2022-09-12	12:30:16	0.849404	466.588	2
2022-09-12	12:30:17	-0.121957	466.588	2
2022-09-12	12:30:18	0.348141	466.937	2
2022-09-12	12:30:19	1.61273	468.549	2
2022-09-12	12:30:20	1.68047	470.23	2
2022-09-12	12:30:21	1.64533	471.875	2
2022-09-12	12:30:22	1.62978	473.505	2
2022-09-12	12:30:23	1.61923	475.124	2
2022-09-12	12:30:24	1.65755	476.782	2
2022-09-12	12:30:25	1.7683	478.55	2
2022-09-12	12:30:26	1.79164	480.342	2
2022-09-12	12:30:27	1.72405	482.066	2
2022-09-12	12:30:28	1.68675	483.752	2
2022-09-12	12:30:29	1.69269	485.445	2
2022-09-12	12:30:30	1.71444	487.16	2
2022-09-12	12:30:31	1.69105	488.851	2
2022-09-12	12:30:32	2.03457	490.885	2
2022-09-12	12:30:33	2.3074	493.193	2
2022-09-12	12:30:34	1.96481	495.157	2
2022-09-12	12:30:35	2.03842	497.196	2
2022-09-12	12:30:36	1.65517	498.851	2
2022-09-12	12:30:37	2.03627	500.887	2
2022-09-12	12:30:38	1.62171	502.509	2
2022-09-12	12:30:39	1.86134	504.37	2
2022-09-12	12:30:40	2.46315	506.833	2
2022-09-12	12:30:41	3.56614	510.4	2
2022-09-12	12:30:42	1.9009	512.301	2
2022-09-12	12:30:43	1.80135	514.102	2
2022-09-12	12:30:44	1.82914	515.931	2
2022-09-12	12:30:45	2.06779	517.999	2
2022-09-12	12:30:46	1.84974	519.849	2
2022-09-12	12:30:47	1.88737	521.736	2
2022-09-12	12:30:48	1.84374	523.58	2
2022-09-12	12:30:49	1.83791	525.418	2
2022-09-12	12:30:50	2.06109	527.479	2
2022-09-12	12:30:51	2.04781	529.526	2
2022-09-12	12:30:52	2.13729	531.664	2
2022-09-12	12:30:53	2.4846	534.148	2
2022-09-12	12:30:54	2.74096	536.889	2
2022-09-12	12:30:55	2.52976	539.419	2
2022-09-12	12:30:56	2.26632	541.685	2
2022-09-12	12:30:57	1.75817	543.444	2
2022-09-12	12:30:58	1.76817	545.212	2
2022-09-12	12:30:59	2.04827	547.26	2
2022-09-12	12:31:00	2.20871	549.469	2
2022-09-12	12:31:01	1.65427	551.123	2
2022-09-12	12:31:02	1.80877	552.932	2
2022-09-12	12:31:03	1.49445	554.426	2
2022-09-12	12:31:04	1.76892	556.195	2
2022-09-12	12:31:05	2.18488	558.38	2
2022-09-12	12:31:06	2.02118	560.401	2
2022-09-12	12:31:07	2.20916	562.61	2
2022-09-12	12:31:08	2.8619	565.472	2
2022-09-12	12:31:09	1.78833	567.261	2
2022-09-12	12:31:10	1.9255	569.186	2
2022-09-12	12:31:11	2.10197	571.288	2
2022-09-12	12:31:12	1.49428	572.782	2
2022-09-12	12:31:13	-0.905088	572.782	2
2022-09-12	12:31:14	0.955949	573.738	2
2022-09-12	12:31:15	0.60894	574.347	2
2022-09-12	12:31:16	0.951722	575.299	2
2022-09-12	12:31:17	1.54085	576.84	2
2022-09-12	12:31:18	2.04472	578.884	2
2022-09-12	12:31:19	1.97153	580.856	2
2022-09-12	12:31:20	2.03231	582.888	2
2022-09-12	12:31:21	1.98318	584.872	2
2022-09-12	12:31:22	1.89765	586.769	2
2022-09-12	12:31:23	1.88211	588.651	2
2022-09-12	12:31:24	2.5696	591.221	2
2022-09-12	12:31:25	2.53819	593.759	2
2022-09-12	12:31:26	2.76556	596.525	2
2022-09-12	12:31:27	2.01884	598.543	2
2022-09-12	12:31:28	2.48165	601.025	2
2022-09-12	12:31:29	3.02681	604.052	2
2022-09-12	12:31:30	8.17879	612.231	2
2022-09-12	12:31:31	6.96024	619.191	2
2022-09-12	12:31:32	1.98845	621.179	2
2022-09-12	12:31:33	2.24866	623.428	2
2022-09-12	12:31:34	1.9135	625.342	2
2022-09-12	12:31:35	2.19297	627.535	2
2022-09-12	12:31:36	1.98805	629.523	2
2022-09-12	12:31:37	1.68754	631.21	2
2022-09-12	12:31:38	-0.220956	631.21	2
2022-09-12	12:31:39	0.0588008	631.269	2
2022-09-12	12:31:40	1.28455	632.553	2
2022-09-12	12:31:41	1.44968	634.003	2
2022-09-12	12:31:42	2.06909	636.072	2
2022-09-12	12:31:43	23.7453	659.818	3
2022-09-12	12:31:44	7.57109	667.389	3
2022-09-12	12:31:45	13.1881	680.577	3
2022-09-12	12:31:46	2.24302	682.82	3
2022-09-12	12:31:47	5.76975	688.59	3
2022-09-12	12:31:48	3.92913	692.519	3
2022-09-12	12:31:49	1.95744	694.476	3
2022-09-12	12:31:50	1.70064	696.177	3
2022-09-12	12:31:51	1.74216	697.919	3
2022-09-12	12:31:52	1.81431	699.733	3
2022-09-12	12:31:53	1.95042	701.684	3
2022-09-12	12:31:54	7.72604	709.41	3
2022-09-12	12:31:55	6.34174	715.751	3
2022-09-12	12:31:56	15.9681	731.72	4
2022-09-12	12:31:57	37.789	769.509	5
2022-09-12	12:31:58	11.0348	780.543	5
2022-09-12	12:31:59	2.19179	782.735	5
2022-09-12	12:32:00	5.40795	788.143	5
2022-09-12	12:32:01	31.9446	820.088	6
2022-09-12	12:32:02	4.1708	824.258	6

## Sheet: Royal_prong_2022912122642 ( (3)
Date	Time	Lbs	Newtons	Averaged newtons	Total force x time	Total Time Steps Force >13.345		**GoPro Fitting: 1215
2022-09-12	12:27:02	0.25126	1.11765	1.2241	1.11765	FALSE	0			Total force x time	1549.81
2022-09-12	12:27:02	0.292379	1.30056	1.2241	1.30056	FALSE	0			Total Time Steps Force >3	29
2022-09-12	12:27:02	0.254059	1.13011	1.2241	2.24776	FALSE	0
2022-09-12	12:27:02	0.303066	1.3481	1.2241	2.64866	FALSE	0
2022-09-12	12:27:03	0.392176	1.74448	2.90717	3.99224	FALSE	0
2022-09-12	12:27:03	0.54098	2.40639	2.90717	5.05505	FALSE	0
2022-09-12	12:27:03	0.609682	2.71199	2.90717	6.70422	FALSE	0
2022-09-12	12:27:03	1.07141	4.76585	2.90717	9.82089	FALSE	0
2022-09-12	12:27:04	1.19253	5.30461	3.80913	12.0088	FALSE	0
2022-09-12	12:27:04	0.90841	4.04079	3.80913	13.8617	FALSE	0
2022-09-12	12:27:04	0.468054	2.082	3.80913	14.0908	FALSE	0
2022-09-12	12:27:05	0.386883	1.72093	1.87266	15.5826	FALSE	0
2022-09-12	12:27:05	0.496399	2.20808	1.87266	16.2989	FALSE	0
2022-09-12	12:27:05	0.317519	1.41239	1.87266	16.995	FALSE	0
2022-09-12	12:27:05	0.483168	2.14923	1.87266	18.4481	FALSE	0
2022-09-12	12:27:06	0.368053	1.63717	1.64793	18.6322	FALSE	0
2022-09-12	12:27:06	0.402252	1.7893	1.64793	20.2374	FALSE	0
2022-09-12	12:27:06	0.349733	1.55568	1.64793	20.1879	FALSE	0
2022-09-12	12:27:06	0.361845	1.60956	1.64793	21.847	FALSE	0
2022-09-12	12:27:07	0.34958	1.555	1.44946	21.7429	FALSE	0
2022-09-12	12:27:07	0.335636	1.49298	1.44946	23.34	FALSE	0
2022-09-12	12:27:07	0.246832	1.09796	1.44946	22.8408	FALSE	0
2022-09-12	12:27:07	0.371361	1.65189	1.44946	24.9919	FALSE	0
2022-09-12	12:27:08	0.246374	1.09592	1.12331	23.9367	FALSE	0
2022-09-12	12:27:08	0.24897	1.10747	1.12331	26.0993	FALSE	0
2022-09-12	12:27:08	0.262252	1.16655	1.12331	25.1033	FALSE	0
2022-09-12	12:27:09	0.521031	2.31765	8.03929	28.417	FALSE	0
2022-09-12	12:27:09	1.56352	6.95485	8.03929	32.0581	FALSE	0
2022-09-12	12:27:09	2.32057	10.3224	8.03929	38.7393	FALSE	0
2022-09-12	12:27:09	2.82413	12.5623	8.03929	44.6204	FALSE	0
2022-09-12	12:27:10	0.775687	3.45041	2.76773	42.1898	FALSE	0
2022-09-12	12:27:10	0.689428	3.06671	2.76773	47.6871	FALSE	0
2022-09-12	12:27:10	0.444084	1.97537	2.76773	44.1651	FALSE	0
2022-09-12	12:27:10	0.579656	2.57843	2.76773	50.2656	FALSE	0
2022-09-12	12:27:11	0.638537	2.84034	2.45466	47.0055	FALSE	0
2022-09-12	12:27:11	0.493753	2.19631	2.45466	52.4619	FALSE	0
2022-09-12	12:27:11	0.605967	2.69546	2.45466	49.7009	FALSE	0
2022-09-12	12:27:11	0.469071	2.08652	2.45466	54.5484	FALSE	0
2022-09-12	12:27:12	0.592124	2.63389	2.00684	52.3348	FALSE	0
2022-09-12	12:27:12	0.335585	1.49275	2.00684	56.0412	FALSE	0
2022-09-12	12:27:12	0.425764	1.89388	2.00684	54.2287	FALSE	0
2022-09-12	12:27:13	0.392227	1.7447	2.12252	57.7859	FALSE	0
2022-09-12	12:27:13	0.379962	1.69015	2.12252	55.9188	FALSE	0
2022-09-12	12:27:13	0.419809	1.86739	2.12252	59.6533	FALSE	0
2022-09-12	12:27:13	0.716654	3.18782	2.12252	59.1067	FALSE	0
2022-09-12	12:27:14	0.899962	4.00321	7.79776	63.6565	FALSE	0
2022-09-12	12:27:14	1.9106	8.49873	7.79776	67.6054	FALSE	0
2022-09-12	12:27:14	2.39095	10.6354	7.79776	74.2919	FALSE	0
2022-09-12	12:27:14	1.81055	8.05369	7.79776	75.6591	FALSE	0
2022-09-12	12:27:15	1.32515	5.89453	2.49518	80.1864	FALSE	0
2022-09-12	12:27:15	0.328664	1.46196	2.49518	77.1211	FALSE	0
2022-09-12	12:27:15	0.338435	1.50543	2.49518	81.6918	FALSE	0
2022-09-12	12:27:15	0.251514	1.11878	2.49518	78.2398	FALSE	0
2022-09-12	12:27:16	0.160064	0.711997	0.454762	82.4038	FALSE	0
2022-09-12	12:27:16	0.00316817	0.0140927	0.454762	78.2539	FALSE	0
2022-09-12	12:27:16	0.143473	0.638197	0.454762	83.042	FALSE	0
2022-09-12	12:27:17	0.0643386	0.286191	0.675211	78.5401	FALSE	0
2022-09-12	12:27:17	0.197265	0.877474	0.675211	83.9195	FALSE	0
2022-09-12	12:27:17	0.100725	0.448045	0.675211	78.9882	FALSE	0
2022-09-12	12:27:17	0.244848	1.08913	0.675211	85.0086	FALSE	0
2022-09-12	12:27:18	0.297163	1.32184	0.872776	80.31	FALSE	0
2022-09-12	12:27:18	0.161692	0.719238	0.872776	85.7279	FALSE	0
2022-09-12	12:27:18	0.134466	0.598132	0.872776	80.9081	FALSE	0
2022-09-12	12:27:18	0.191514	0.851893	0.872776	86.5798	FALSE	0
2022-09-12	12:27:19	0.306527	1.36349	1.04714	82.2716	FALSE	0
2022-09-12	12:27:19	0.210802	0.937689	1.04714	87.5175	FALSE	0
2022-09-12	12:27:19	0.182303	0.81092	1.04714	83.0825	FALSE	0
2022-09-12	12:27:19	0.241998	1.07646	1.04714	88.5939	FALSE	0
2022-09-12	12:27:20	0.265255	1.17991	0.493547	84.2625	FALSE	0
2022-09-12	12:27:20	0.170496	0.7584	0.493547	89.3523	FALSE	0
2022-09-12	12:27:20	-0.102888	-0.457666	0.493547	84.2625	FALSE	0
2022-09-12	12:27:21	0.210242	0.935198	0.944932	90.2875	FALSE	0
2022-09-12	12:27:21	0.187392	0.833557	0.944932	85.096	FALSE	0
2022-09-12	12:27:21	0.37355	1.66163	0.944932	91.9491	FALSE	0
2022-09-12	12:27:21	0.0785371	0.349349	0.944932	85.4454	FALSE	0
2022-09-12	12:27:22	0.254364	1.13146	0.748951	93.0806	FALSE	0
2022-09-12	12:27:22	0.147443	0.655856	0.748951	86.1012	FALSE	0
2022-09-12	12:27:22	0.131362	0.584324	0.748951	93.6649	FALSE	0
2022-09-12	12:27:22	0.140318	0.624163	0.748951	86.7254	FALSE	0
2022-09-12	12:27:23	0.0613361	0.272835	0.63933	93.9378	FALSE	0
2022-09-12	12:27:23	0.203728	0.906223	0.63933	87.6316	FALSE	0
2022-09-12	12:27:23	0.159707	0.710409	0.63933	94.6482	FALSE	0
2022-09-12	12:27:23	0.15014	0.667853	0.63933	88.2995	FALSE	0
2022-09-12	12:27:24	0.183524	0.816351	0.604469	95.4645	FALSE	0
2022-09-12	12:27:24	0.0517178	0.230051	0.604469	88.5295	FALSE	0
2022-09-12	12:27:24	0.17243	0.767003	0.604469	96.2315	FALSE	0
2022-09-12	12:27:25	0.188512	0.838539	0.852233	89.368	FALSE	0
2022-09-12	12:27:25	0.233957	1.04069	0.852233	97.2722	FALSE	0
2022-09-12	12:27:25	0.246781	1.09773	0.852233	90.4658	FALSE	0
2022-09-12	12:27:25	0.0971122	0.431974	0.852233	97.7042	FALSE	0
2022-09-12	12:27:26	0.286883	1.27611	0.939554	91.7419	FALSE	0
2022-09-12	12:27:26	0.203626	0.905769	0.939554	98.61	FALSE	0
2022-09-12	12:27:26	0.242964	1.08075	0.939554	92.8226	FALSE	0
2022-09-12	12:27:26	0.111412	0.495583	0.939554	99.1055	FALSE	0
2022-09-12	12:27:27	0.124644	0.554441	0.976341	93.3771	FALSE	0
2022-09-12	12:27:27	0.206679	0.91935	0.976341	100.025	FALSE	0
2022-09-12	12:27:27	0.255891	1.13825	0.976341	94.5153	FALSE	0
2022-09-12	12:27:27	0.290751	1.29332	0.976341	101.318	FALSE	0
2022-09-12	12:27:28	0.16444	0.731462	0.931047	95.2468	FALSE	0
2022-09-12	12:27:28	0.0980282	0.436049	0.931047	101.754	FALSE	0
2022-09-12	12:27:28	0.365458	1.62563	0.931047	96.8724	FALSE	0
2022-09-12	12:27:29	0.296603	1.31935	1.68562	103.074	FALSE	0
2022-09-12	12:27:29	0.373855	1.66298	1.68562	98.5354	FALSE	0
2022-09-12	12:27:29	0.50383	2.24114	1.68562	105.315	FALSE	0
2022-09-12	12:27:29	0.341489	1.51901	1.68562	100.054	FALSE	0
2022-09-12	12:27:30	0.506527	2.25313	1.5455	107.568	FALSE	0
2022-09-12	12:27:30	0.26271	1.16859	1.5455	101.223	FALSE	0
2022-09-12	12:27:30	0.371667	1.65325	1.5455	109.221	FALSE	0
2022-09-12	12:27:30	0.248868	1.10701	1.5455	102.33	FALSE	0
2022-09-12	12:27:31	0.380013	1.69037	2.06756	110.912	FALSE	0
2022-09-12	12:27:31	0.299657	1.33293	2.06756	103.663	FALSE	0
2022-09-12	12:27:31	0.34673	1.54232	2.06756	112.454	FALSE	0
2022-09-12	12:27:31	0.832837	3.70463	2.06756	107.368	FALSE	0
2022-09-12	12:27:32	0.568308	2.52795	2.31048	114.982	FALSE	0
2022-09-12	12:27:32	0.490038	2.17979	2.31048	109.547	FALSE	0
2022-09-12	12:27:32	0.499911	2.2237	2.31048	117.205	FALSE	0
2022-09-12	12:27:33	0.307952	1.36983	1.97713	110.917	FALSE	0
2022-09-12	12:27:33	0.525203	2.33621	1.97713	119.542	FALSE	0
2022-09-12	12:27:33	0.544847	2.42359	1.97713	113.341	FALSE	0
2022-09-12	12:27:33	0.399911	1.77888	1.97713	121.321	FALSE	0
2022-09-12	12:27:34	0.433651	1.92897	2.54725	115.27	FALSE	0
2022-09-12	12:27:34	1.24444	5.53552	2.54725	126.856	FALSE	0
2022-09-12	12:27:34	0.270089	1.20141	2.54725	116.471	FALSE	0
2022-09-12	12:27:34	0.342405	1.52309	2.54725	128.379	FALSE	0
2022-09-12	12:27:35	0.20729	0.922067	1.16383	117.393	FALSE	0
2022-09-12	12:27:35	0.263677	1.17289	1.16383	129.552	FALSE	0
2022-09-12	12:27:35	0.180522	0.802998	1.16383	118.196	FALSE	0
2022-09-12	12:27:35	0.395076	1.75738	1.16383	131.309	FALSE	0
2022-09-12	12:27:36	0.900776	4.00683	4.57435	122.203	FALSE	0
2022-09-12	12:27:36	0.525763	2.3387	4.57435	133.648	FALSE	0
2022-09-12	12:27:36	1.65854	7.37752	4.57435	129.581	FALSE	0
2022-09-12	12:27:37	1.17167	5.21182	8.98435	138.86	FALSE	0
2022-09-12	12:27:37	3.15314	14.0258	8.98435	143.606	1	1
2022-09-12	12:27:37	3.35981	14.9451	8.98435	153.805	1	2
2022-09-12	12:27:37	0.394466	1.75466	8.98435	145.361	FALSE	2
2022-09-12	12:27:38	0.441947	1.96587	1.59088	155.771	FALSE	2
2022-09-12	12:27:38	0.429784	1.91177	1.59088	147.273	FALSE	2
2022-09-12	12:27:38	0.348104	1.54844	1.59088	157.319	FALSE	2
2022-09-12	12:27:38	0.210751	0.937463	1.59088	148.21	FALSE	2
2022-09-12	12:27:39	0.217926	0.969378	1.31493	158.289	FALSE	2
2022-09-12	12:27:39	0.223473	0.994053	1.31493	149.204	FALSE	2
2022-09-12	12:27:39	0.247901	1.10271	1.31493	159.391	FALSE	2
2022-09-12	12:27:39	0.493142	2.19359	1.31493	151.398	FALSE	2
2022-09-12	12:27:40	1.44022	6.40639	13.4743	165.798	FALSE	2
2022-09-12	12:27:40	2.64408	11.7614	13.4743	163.159	FALSE	2
2022-09-12	12:27:40	5.00316	22.2551	13.4743	188.053	1	3
2022-09-12	12:27:41	3.96067	17.6179	9.43216	180.777	1	4
2022-09-12	12:27:41	2.8936	12.8713	9.43216	200.924	FALSE	4
2022-09-12	12:27:41	1.22973	5.47008	9.43216	186.247	FALSE	4
2022-09-12	12:27:41	0.397774	1.76938	9.43216	202.694	FALSE	4
2022-09-12	12:27:42	0.074873	0.33305	0.681493	186.58	FALSE	4
2022-09-12	12:27:42	0.140573	0.625297	0.681493	203.319	FALSE	4
2022-09-12	12:27:42	0.210853	0.937916	0.681493	187.518	FALSE	4
2022-09-12	12:27:42	0.186527	0.829709	0.681493	204.149	FALSE	4
2022-09-12	12:27:43	0.213499	0.949686	1.07543	188.468	FALSE	4
2022-09-12	12:27:43	0.261489	1.16316	1.07543	205.312	FALSE	4
2022-09-12	12:27:43	0.239758	1.06649	1.07543	189.534	FALSE	4
2022-09-12	12:27:43	0.252328	1.12241	1.07543	206.434	FALSE	4
2022-09-12	12:27:44	0.238282	1.05993	1.04159	190.594	FALSE	4
2022-09-12	12:27:44	0.227341	1.01126	1.04159	207.445	FALSE	4
2022-09-12	12:27:44	0.236858	1.05359	1.04159	191.648	FALSE	4
2022-09-12	12:27:45	0.236349	1.05133	1.00136	208.497	FALSE	4
2022-09-12	12:27:45	0.229224	1.01963	1.00136	192.668	FALSE	4
2022-09-12	12:27:45	0.218435	0.971643	1.00136	209.468	FALSE	4
2022-09-12	12:27:45	0.216451	0.962817	1.00136	193.63	FALSE	4
2022-09-12	12:27:46	0.21528	0.957608	0.927444	210.426	FALSE	4
2022-09-12	12:27:46	0.21299	0.947422	0.927444	194.578	FALSE	4
2022-09-12	12:27:46	0.204135	0.908033	0.927444	211.334	FALSE	4
2022-09-12	12:27:46	0.20159	0.896713	0.927444	195.475	FALSE	4
2022-09-12	12:27:47	0.206171	0.91709	1.09281	212.251	FALSE	4
2022-09-12	12:27:47	0.217825	0.968929	1.09281	196.443	FALSE	4
2022-09-12	12:27:47	0.307392	1.36734	1.09281	213.618	FALSE	4
2022-09-12	12:27:47	0.251311	1.11788	1.09281	197.561	FALSE	4
2022-09-12	12:27:48	0.269224	1.19756	1.25846	214.816	FALSE	4
2022-09-12	12:27:48	0.278792	1.24012	1.25846	198.801	FALSE	4
2022-09-12	12:27:48	0.300725	1.33768	1.25846	216.154	FALSE	4
2022-09-12	12:27:49	0.314771	1.40016	1.3734	200.202	FALSE	4
2022-09-12	12:27:49	0.29355	1.30577	1.3734	217.459	FALSE	4
2022-09-12	12:27:49	0.314109	1.39722	1.3734	201.599	FALSE	4
2022-09-12	12:27:49	0.312583	1.39043	1.3734	218.85	FALSE	4
2022-09-12	12:27:50	0.32785	1.45834	1.44385	203.057	FALSE	4
2022-09-12	12:27:50	0.326272	1.45132	1.44385	220.301	FALSE	4
2022-09-12	12:27:50	0.307341	1.36711	1.44385	204.424	FALSE	4
2022-09-12	12:27:50	0.336908	1.49863	1.44385	221.8	FALSE	4
2022-09-12	12:27:51	0.305967	1.361	1.41024	205.785	FALSE	4
2022-09-12	12:27:51	0.323931	1.44091	1.41024	223.241	FALSE	4
2022-09-12	12:27:51	0.315789	1.40469	1.41024	207.19	FALSE	4
2022-09-12	12:27:51	0.322456	1.43435	1.41024	224.675	FALSE	4
2022-09-12	12:27:52	0.318537	1.41692	1.47719	208.607	FALSE	4
2022-09-12	12:27:52	0.323066	1.43706	1.47719	226.112	FALSE	4
2022-09-12	12:27:52	0.33472	1.4889	1.47719	210.096	FALSE	4
2022-09-12	12:27:52	0.352023	1.56587	1.47719	227.678	FALSE	4
2022-09-12	12:27:53	0.369173	1.64216	1.72312	211.738	FALSE	4
2022-09-12	12:27:53	0.48042	2.137	1.72312	229.815	FALSE	4
2022-09-12	12:27:53	0.312532	1.3902	1.72312	213.128	FALSE	4
2022-09-12	12:27:54	0.250293	1.11335	0.716749	230.928	FALSE	4
2022-09-12	12:27:54	0.115585	0.514145	0.716749	213.642	FALSE	4
2022-09-12	12:27:54	0.183066	0.814314	0.716749	231.743	FALSE	4
2022-09-12	12:27:54	0.0955855	0.425183	0.716749	214.067	FALSE	4
2022-09-12	12:27:55	-0.120241	-0.534856	-0.403109	231.743	FALSE	4
2022-09-12	12:27:55	-0.113677	-0.505658	-0.403109	214.067	FALSE	4
2022-09-12	12:27:55	-0.020445	-0.0909434	-0.403109	231.743	FALSE	4
2022-09-12	12:27:55	-0.108129	-0.480979	-0.403109	214.067	FALSE	4
2022-09-12	12:27:56	-0.0278242	-0.123768	0.3455	231.743	FALSE	4
2022-09-12	12:27:56	0.0465778	0.207187	0.3455	214.275	FALSE	4
2022-09-12	12:27:56	0.0846439	0.376513	0.3455	232.119	FALSE	4
2022-09-12	12:27:56	0.20729	0.922067	0.3455	215.197	FALSE	4
2022-09-12	12:27:57	0.347545	1.54595	1.47094	233.665	FALSE	4
2022-09-12	12:27:57	0.312176	1.38862	1.47094	216.585	FALSE	4
2022-09-12	12:27:57	0.332328	1.47826	1.47094	235.143	FALSE	4
2022-09-12	12:27:58	0.400827	1.78296	1.47187	218.368	FALSE	4
2022-09-12	12:27:58	0.285407	1.26955	1.47187	236.413	FALSE	4
2022-09-12	12:27:58	0.325102	1.44612	1.47187	219.814	FALSE	4
2022-09-12	12:27:58	0.312227	1.38885	1.47187	237.802	FALSE	4
2022-09-12	12:27:59	0.378384	1.68313	1.44227	221.498	FALSE	4
2022-09-12	12:27:59	0.274822	1.22246	1.44227	239.024	FALSE	4
2022-09-12	12:27:59	0.221387	0.984774	1.44227	222.482	FALSE	4
2022-09-12	12:27:59	0.422354	1.87872	1.44227	240.903	FALSE	4
2022-09-12	12:28:00	0.282456	1.25642	1.37764	223.739	FALSE	4
2022-09-12	12:28:00	0.38271	1.70237	1.37764	242.605	FALSE	4
2022-09-12	12:28:00	0.144339	0.642049	1.37764	224.381	FALSE	4
2022-09-12	12:28:00	0.429326	1.90973	1.37764	244.515	FALSE	4
2022-09-12	12:28:01	0.340623	1.51516	1.15629	225.896	FALSE	4
2022-09-12	12:28:01	0.250191	1.1129	1.15629	245.628	FALSE	4
2022-09-12	12:28:01	0.18902	0.840799	1.15629	226.737	FALSE	4
2022-09-12	12:28:02	0.228512	1.01647	0.917598	246.644	FALSE	4
2022-09-12	12:28:02	0.167596	0.745501	0.917598	227.482	FALSE	4
2022-09-12	12:28:02	0.224491	0.998581	0.917598	247.643	FALSE	4
2022-09-12	12:28:02	0.204542	0.909844	0.917598	228.392	FALSE	4
2022-09-12	12:28:03	0.117367	0.522072	0.958797	248.165	FALSE	4
2022-09-12	12:28:03	0.300878	1.33837	0.958797	229.73	FALSE	4
2022-09-12	12:28:03	0.231616	1.03027	0.958797	249.195	FALSE	4
2022-09-12	12:28:03	0.212328	0.944477	0.958797	230.675	FALSE	4
2022-09-12	12:28:04	0.301896	1.34289	1.10996	250.538	FALSE	4
2022-09-12	12:28:04	0.167087	0.743236	1.10996	231.418	FALSE	4
2022-09-12	12:28:04	0.225662	1.00379	1.10996	251.542	FALSE	4
2022-09-12	12:28:04	0.303473	1.34991	1.10996	232.768	FALSE	4
2022-09-12	12:28:05	0.251056	1.11675	1.22563	252.659	FALSE	4
2022-09-12	12:28:05	0.349682	1.55546	1.22563	234.324	FALSE	4
2022-09-12	12:28:05	0.225865	1.00469	1.22563	253.664	FALSE	4
2022-09-12	12:28:06	0.290547	1.29241	1.27968	235.616	FALSE	4
2022-09-12	12:28:06	0.230903	1.0271	1.27968	254.691	FALSE	4
2022-09-12	12:28:06	0.215331	0.957835	1.27968	236.574	FALSE	4
2022-09-12	12:28:06	0.413957	1.84136	1.27968	256.532	FALSE	4
2022-09-12	12:28:07	0.196145	0.872492	1.25789	237.446	FALSE	4
2022-09-12	12:28:07	0.342608	1.52399	1.25789	258.056	FALSE	4
2022-09-12	12:28:07	0.285204	1.26864	1.25789	238.715	FALSE	4
2022-09-12	12:28:07	0.307188	1.36643	1.25789	259.422	FALSE	4
2022-09-12	12:28:08	0.29416	1.30848	1.16095	240.023	FALSE	4
2022-09-12	12:28:08	0.176603	0.785565	1.16095	260.208	FALSE	4
2022-09-12	12:28:08	0.39472	1.75579	1.16095	241.779	FALSE	4
2022-09-12	12:28:08	0.178486	0.793941	1.16095	261.002	FALSE	4
2022-09-12	12:28:09	0.274771	1.22224	1.28404	243.001	FALSE	4
2022-09-12	12:28:09	0.380369	1.69196	1.28404	262.694	FALSE	4
2022-09-12	12:28:09	0.210853	0.937916	1.28404	243.939	FALSE	4
2022-09-12	12:28:10	0.267545	1.19009	1.25404	263.884	FALSE	4
2022-09-12	12:28:10	0.410089	1.82416	1.25404	245.764	FALSE	4
2022-09-12	12:28:10	0.180624	0.803452	1.25404	264.687	FALSE	4
2022-09-12	12:28:10	0.269428	1.19847	1.25404	246.962	FALSE	4
2022-09-12	12:28:11	0.130496	0.580472	0.853138	265.268	FALSE	4
2022-09-12	12:28:11	0.266374	1.18488	0.853138	248.147	FALSE	4
2022-09-12	12:28:11	0.205713	0.915053	0.853138	266.183	FALSE	4
2022-09-12	12:28:11	0.164593	0.732143	0.853138	248.879	FALSE	4
2022-09-12	12:28:12	0.0808272	0.359536	1.25885	266.543	FALSE	4
2022-09-12	12:28:12	0.206781	0.919803	1.25885	249.799	FALSE	4
2022-09-12	12:28:12	0.313855	1.39609	1.25885	267.939	FALSE	4
2022-09-12	12:28:12	0.530547	2.35998	1.25885	252.159	FALSE	4
2022-09-12	12:28:13	0.301692	1.34199	0.844573	269.281	FALSE	4
2022-09-12	12:28:13	0.17645	0.784885	0.844573	252.944	FALSE	4
2022-09-12	12:28:13	0.0914633	0.406847	0.844573	269.687	FALSE	4
2022-09-12	12:28:14	0.157214	0.699319	0.317657	253.643	FALSE	4
2022-09-12	12:28:14	-0.0282313	-0.125578	0.317657	269.687	FALSE	4
2022-09-12	12:28:14	0.147443	0.655856	0.317657	254.299	FALSE	4
2022-09-12	12:28:14	0.00922418	0.041031	0.317657	269.728	FALSE	4
2022-09-12	12:28:15	0.0856109	0.380814	0.56242	254.68	FALSE	4
2022-09-12	12:28:15	-0.0163229	-0.0726075	0.56242	269.728	FALSE	4
2022-09-12	12:28:15	0.198639	0.883586	0.56242	255.563	FALSE	4
2022-09-12	12:28:15	0.237824	1.05789	0.56242	270.786	FALSE	4
2022-09-12	12:28:16	0.166527	0.740745	1.34352	256.304	FALSE	4
2022-09-12	12:28:16	0.387392	1.7232	1.34352	272.51	FALSE	4
2022-09-12	12:28:16	0.179199	0.797113	1.34352	257.101	FALSE	4
2022-09-12	12:28:16	0.475026	2.11301	1.34352	274.623	FALSE	4
2022-09-12	12:28:17	0.234873	1.04476	1.4096	258.146	FALSE	4
2022-09-12	12:28:17	0.331311	1.47374	1.4096	276.096	FALSE	4
2022-09-12	12:28:17	0.384491	1.71029	1.4096	259.856	FALSE	4
2022-09-12	12:28:18	0.373855	1.66298	1.46864	277.759	FALSE	4
2022-09-12	12:28:18	0.329937	1.46763	1.46864	261.324	FALSE	4
2022-09-12	12:28:18	0.303575	1.35036	1.46864	279.11	FALSE	4
2022-09-12	12:28:18	0.313295	1.3936	1.46864	262.717	FALSE	4
2022-09-12	12:28:19	0.39472	1.75579	2.61601	280.865	FALSE	4
2022-09-12	12:28:19	0.683066	3.03841	2.61601	265.756	FALSE	4
2022-09-12	12:28:19	0.558944	2.48629	2.61601	283.352	FALSE	4
2022-09-12	12:28:19	0.715687	3.18352	2.61601	268.939	FALSE	4
2022-09-12	12:28:20	0.366171	1.6288	1.70973	284.981	FALSE	4
2022-09-12	12:28:20	0.338741	1.50679	1.70973	270.446	FALSE	4
2022-09-12	12:28:20	0.513753	2.28528	1.70973	287.266	FALSE	4
2022-09-12	12:28:20	0.318791	1.41805	1.70973	271.864	FALSE	4
2022-09-12	12:28:21	0.357926	1.59213	1.54142	288.858	FALSE	4
2022-09-12	12:28:21	0.40098	1.78364	1.54142	273.648	FALSE	4
2022-09-12	12:28:21	0.280674	1.24849	1.54142	290.106	FALSE	4
2022-09-12	12:28:22	0.372277	1.65596	1.34006	275.304	FALSE	4
2022-09-12	12:28:22	0.262608	1.16813	1.34006	291.275	FALSE	4
2022-09-12	12:28:22	0.285102	1.26819	1.34006	276.572	FALSE	4
2022-09-12	12:28:22	0.285051	1.26796	1.34006	292.543	FALSE	4
2022-09-12	12:28:23	0.335331	1.49162	1.30803	278.064	FALSE	4
2022-09-12	12:28:23	0.280064	1.24578	1.30803	293.788	FALSE	4
2022-09-12	12:28:23	0.304847	1.35602	1.30803	279.42	FALSE	4
2022-09-12	12:28:23	0.255993	1.13871	1.30803	294.927	FALSE	4
2022-09-12	12:28:24	0.264135	1.17493	1.05342	280.595	FALSE	4
2022-09-12	12:28:24	0.239453	1.06513	1.05342	295.992	FALSE	4
2022-09-12	12:28:24	0.231972	1.03186	1.05342	281.626	FALSE	4
2022-09-12	12:28:24	0.211718	0.941764	1.05342	296.934	FALSE	4
2022-09-12	12:28:25	0.150089	0.667626	0.740443	282.294	FALSE	4
2022-09-12	12:28:25	0.191311	0.85099	0.740443	297.785	FALSE	4
2022-09-12	12:28:25	0.157977	0.702713	0.740443	282.997	FALSE	4
2022-09-12	12:28:26	0.327239	1.45562	1.03373	299.241	FALSE	4
2022-09-12	12:28:26	0.190395	0.846915	1.03373	283.844	FALSE	4
2022-09-12	12:28:26	0.200318	0.891055	1.03373	300.132	FALSE	4
2022-09-12	12:28:26	0.211616	0.94131	1.03373	284.785	FALSE	4
2022-09-12	12:28:27	0.162099	0.721049	1.07747	300.853	FALSE	4
2022-09-12	12:28:27	0.319453	1.42099	1.07747	286.206	FALSE	4
2022-09-12	12:28:27	0.15187	0.675548	1.07747	301.528	FALSE	4
2022-09-12	12:28:27	0.335484	1.4923	1.07747	287.698	FALSE	4
2022-09-12	12:28:28	0.302659	1.34629	2.25415	302.874	FALSE	4
2022-09-12	12:28:28	1.23294	5.48436	2.25415	293.183	FALSE	4
2022-09-12	12:28:28	0.187392	0.833557	2.25415	303.708	FALSE	4
2022-09-12	12:28:28	0.304033	1.3524	2.25415	294.535	FALSE	4
2022-09-12	12:28:29	0.345102	1.53508	1.38968	305.243	FALSE	4
2022-09-12	12:28:29	0.292532	1.30124	1.38968	295.836	FALSE	4
2022-09-12	12:28:29	0.299606	1.33271	1.38968	306.576	FALSE	4
2022-09-12	12:28:30	0.217163	0.965984	1.82252	296.802	FALSE	4
2022-09-12	12:28:30	0.441896	1.96564	1.82252	308.541	FALSE	4
2022-09-12	12:28:30	0.236247	1.05087	1.82252	297.853	FALSE	4
2022-09-12	12:28:30	0.743575	3.30757	1.82252	311.849	FALSE	4
2022-09-12	12:28:31	0.202048	0.89875	0.992016	298.752	FALSE	4
2022-09-12	12:28:31	0.167188	0.743686	0.992016	312.593	FALSE	4
2022-09-12	12:28:31	0.404746	1.80039	0.992016	300.552	FALSE	4
2022-09-12	12:28:31	0.118079	0.525239	0.992016	313.118	FALSE	4
2022-09-12	12:28:32	0.213346	0.949006	0.956872	301.501	FALSE	4
2022-09-12	12:28:32	0.255534	1.13667	0.956872	314.255	FALSE	4
2022-09-12	12:28:32	0.164033	0.729652	0.956872	302.231	FALSE	4
2022-09-12	12:28:32	0.227545	1.01217	0.956872	315.267	FALSE	4
2022-09-12	12:28:33	0.156145	0.694564	0.953761	302.925	FALSE	4
2022-09-12	12:28:33	0.209784	0.933161	0.953761	316.2	FALSE	4
2022-09-12	12:28:33	0.277316	1.23356	0.953761	304.159	FALSE	4
2022-09-12	12:28:34	0.0840841	0.374023	0.0981895	316.574	FALSE	4
2022-09-12	12:28:34	0.083219	0.370175	0.0981895	304.529	FALSE	4
2022-09-12	12:28:34	-0.0203942	-0.0907175	0.0981895	316.574	FALSE	4
2022-09-12	12:28:34	-0.058613	-0.260722	0.0981895	304.529	FALSE	4
2022-09-12	12:28:35	0.0240333	0.106905	0.422296	316.681	FALSE	4
2022-09-12	12:28:35	0.0895295	0.398245	0.422296	304.927	FALSE	4
2022-09-12	12:28:35	0.113753	0.505996	0.422296	317.187	FALSE	4
2022-09-12	12:28:35	0.15243	0.678039	0.422296	305.605	FALSE	4
2022-09-12	12:28:36	0.188461	0.838312	0.979341	318.025	FALSE	4
2022-09-12	12:28:36	0.253906	1.12942	0.979341	306.735	FALSE	4
2022-09-12	12:28:36	0.254975	1.13418	0.979341	319.159	FALSE	4
2022-09-12	12:28:36	0.183321	0.815448	0.979341	307.55	FALSE	4
2022-09-12	12:28:37	0.346578	1.54165	1.10377	320.701	FALSE	4
2022-09-12	12:28:37	0.17645	0.784885	1.10377	308.335	FALSE	4
2022-09-12	12:28:37	0.221387	0.984774	1.10377	321.686	FALSE	4
2022-09-12	12:28:38	0.0503438	0.223939	0.581605	308.559	FALSE	4
2022-09-12	12:28:38	0.0603692	0.268534	0.581605	321.954	FALSE	4
2022-09-12	12:28:38	0.179249	0.797335	0.581605	309.357	FALSE	4
2022-09-12	12:28:38	0.233041	1.03661	0.581605	322.991	FALSE	4
2022-09-12	12:28:39	0.245662	1.09275	0.919691	310.449	FALSE	4
2022-09-12	12:28:39	0.198333	0.882225	0.919691	323.873	FALSE	4
2022-09-12	12:28:39	0.147494	0.656083	0.919691	311.105	FALSE	4
2022-09-12	12:28:39	0.235534	1.0477	0.919691	324.921	FALSE	4
2022-09-12	12:28:40	0.211412	0.940403	1.28619	312.046	FALSE	4
2022-09-12	12:28:40	0.250598	1.11471	1.28619	326.036	FALSE	4
2022-09-12	12:28:40	0.413448	1.8391	1.28619	313.885	FALSE	4
2022-09-12	12:28:40	0.281132	1.25053	1.28619	327.286	FALSE	4
2022-09-12	12:28:41	0.30042	1.33633	0.878077	315.221	FALSE	4
2022-09-12	12:28:41	0.235484	1.04748	0.878077	328.334	FALSE	4
2022-09-12	12:28:41	0.0562979	0.250424	0.878077	315.472	FALSE	4
2022-09-12	12:28:42	0.0201147	0.0894742	1.01511	328.423	FALSE	4
2022-09-12	12:28:42	0.301183	1.33972	1.01511	316.811	FALSE	4
2022-09-12	12:28:42	0.265407	1.18058	1.01511	329.604	FALSE	4
2022-09-12	12:28:42	0.32612	1.45065	1.01511	318.262	FALSE	4
2022-09-12	12:28:43	0.325763	1.44906	1.15144	331.053	FALSE	4
2022-09-12	12:28:43	0.21126	0.939727	1.15144	319.202	FALSE	4
2022-09-12	12:28:43	0.313702	1.39541	1.15144	332.448	FALSE	4
2022-09-12	12:28:43	0.184695	0.82156	1.15144	320.023	FALSE	4
2022-09-12	12:28:44	0.215585	0.958965	1.17872	333.407	FALSE	4
2022-09-12	12:28:44	0.271565	1.20798	1.17872	321.231	FALSE	4
2022-09-12	12:28:44	0.227341	1.01126	1.17872	334.418	FALSE	4
2022-09-12	12:28:44	0.345458	1.53667	1.17872	322.768	FALSE	4
2022-09-12	12:28:45	0.24215	1.07713	1.0302	335.495	FALSE	4
2022-09-12	12:28:45	0.244339	1.08687	1.0302	323.855	FALSE	4
2022-09-12	12:28:45	0.208308	0.926596	1.0302	336.422	FALSE	4
2022-09-12	12:28:46	0.168613	0.750024	0.971983	324.605	FALSE	4
2022-09-12	12:28:46	0.324746	1.44454	0.971983	337.867	FALSE	4
2022-09-12	12:28:46	0.165611	0.736671	0.971983	325.341	FALSE	4
2022-09-12	12:28:46	0.215076	0.956701	0.971983	338.823	FALSE	4
2022-09-12	12:28:47	0.255484	1.13644	1.02218	326.478	FALSE	4
2022-09-12	12:28:47	0.20327	0.904186	1.02218	339.727	FALSE	4
2022-09-12	12:28:47	0.316705	1.40877	1.02218	327.887	FALSE	4
2022-09-12	12:28:47	0.143728	0.639331	1.02218	340.367	FALSE	4
2022-09-12	12:28:48	0.374313	1.66502	1.14651	329.552	FALSE	4
2022-09-12	12:28:48	0.212277	0.944251	1.14651	341.311	FALSE	4
2022-09-12	12:28:48	0.304949	1.35647	1.14651	330.908	FALSE	4
2022-09-12	12:28:48	0.139453	0.620315	1.14651	341.931	FALSE	4
2022-09-12	12:28:49	0.148257	0.659477	0.950893	331.568	FALSE	4
2022-09-12	12:28:49	0.293499	1.30554	0.950893	343.237	FALSE	4
2022-09-12	12:28:49	0.199555	0.887661	0.950893	332.455	FALSE	4
2022-09-12	12:28:50	0.26841	1.19394	0.792074	344.431	FALSE	4
2022-09-12	12:28:50	-0.00232801	-0.0103555	0.792074	332.455	FALSE	4
2022-09-12	12:28:50	0.145458	0.647026	0.792074	345.078	FALSE	4
2022-09-12	12:28:50	0.300725	1.33768	0.792074	333.793	FALSE	4
2022-09-12	12:28:51	0.611718	2.72104	1.9503	347.799	FALSE	4
2022-09-12	12:28:51	0.492583	2.19111	1.9503	335.984	FALSE	4
2022-09-12	12:28:51	0.236196	1.05065	1.9503	348.85	FALSE	4
2022-09-12	12:28:51	0.413295	1.83842	1.9503	337.823	FALSE	4
2022-09-12	12:28:52	0.295738	1.3155	1.38194	350.165	FALSE	4
2022-09-12	12:28:52	0.320573	1.42597	1.38194	339.248	FALSE	4
2022-09-12	12:28:52	0.327697	1.45766	1.38194	351.623	FALSE	4
2022-09-12	12:28:52	0.29869	1.32863	1.38194	340.577	FALSE	4
2022-09-12	12:28:53	0.526272	2.34096	2.13957	353.964	FALSE	4
2022-09-12	12:28:53	0.517773	2.30316	2.13957	342.88	FALSE	4
2022-09-12	12:28:53	0.398944	1.77458	2.13957	355.738	FALSE	4
2022-09-12	12:28:54	0.37813	1.682	1.75302	344.562	FALSE	4
2022-09-12	12:28:54	0.372735	1.658	1.75302	357.396	FALSE	4
2022-09-12	12:28:54	0.505	2.24634	1.75302	346.809	FALSE	4
2022-09-12	12:28:54	0.320522	1.42575	1.75302	358.822	FALSE	4
2022-09-12	12:28:55	0.276501	1.22993	1.36061	348.039	FALSE	4
2022-09-12	12:28:55	0.285204	1.26864	1.36061	360.091	FALSE	4
2022-09-12	12:28:55	0.354873	1.57855	1.36061	349.617	FALSE	4
2022-09-12	12:28:55	0.306934	1.3653	1.36061	361.456	FALSE	4
2022-09-12	12:28:56	0.232939	1.03616	1.07051	350.653	FALSE	4
2022-09-12	12:28:56	0.126781	0.563947	1.07051	362.02	FALSE	4
2022-09-12	12:28:56	0.432786	1.92512	1.07051	352.578	FALSE	4
2022-09-12	12:28:56	0.17014	0.756817	1.07051	362.777	FALSE	4
2022-09-12	12:28:57	0.347952	1.54776	1.41262	354.126	FALSE	4
2022-09-12	12:28:57	0.287138	1.27725	1.41262	364.054	FALSE	4
2022-09-12	12:28:57	0.317621	1.41284	1.41262	355.539	FALSE	4
2022-09-12	12:28:58	0.57299	2.54877	4.22217	366.603	FALSE	4
2022-09-12	12:28:58	0.524949	2.33508	4.22217	357.874	FALSE	4
2022-09-12	12:28:58	1.16256	5.1713	4.22217	371.774	FALSE	4
2022-09-12	12:28:58	1.53625	6.83355	4.22217	364.708	FALSE	4
2022-09-12	12:28:59	2.91294	12.9573	11.0058	384.731	FALSE	4
2022-09-12	12:28:59	4.15263	18.4717	11.0058	383.179	1	5
2022-09-12	12:28:59	2.1907	9.74467	11.0058	394.476	FALSE	5
2022-09-12	12:28:59	0.640572	2.84939	11.0058	386.029	FALSE	5
2022-09-12	12:29:00	0.691412	3.07554	2.3301	397.552	FALSE	5
2022-09-12	12:29:00	0.441641	1.96451	2.3301	387.993	FALSE	5
2022-09-12	12:29:00	0.438435	1.95025	2.3301	399.502	FALSE	5
2022-09-12	12:29:01	0.590954	2.62868	2.13446	390.622	FALSE	5
2022-09-12	12:29:01	0.416654	1.85336	2.13446	401.355	FALSE	5
2022-09-12	12:29:01	0.362557	1.61273	2.13446	392.235	FALSE	5
2022-09-12	12:29:01	0.549224	2.44306	2.13446	403.798	FALSE	5
2022-09-12	12:29:02	0.394873	1.75647	1.91408	393.991	FALSE	5
2022-09-12	12:29:02	0.389173	1.73112	1.91408	405.529	FALSE	5
2022-09-12	12:29:02	0.487901	2.17028	1.91408	396.161	FALSE	5
2022-09-12	12:29:02	0.449275	1.99847	1.91408	407.528	FALSE	5
2022-09-12	12:29:03	0.434466	1.93259	2.08783	398.094	FALSE	5
2022-09-12	12:29:03	0.442456	1.96813	2.08783	409.496	FALSE	5
2022-09-12	12:29:03	0.407087	1.8108	2.08783	399.905	FALSE	5
2022-09-12	12:29:03	0.593448	2.63978	2.08783	412.136	FALSE	5
2022-09-12	12:29:04	0.569021	2.53112	2.27532	402.436	FALSE	5
2022-09-12	12:29:04	0.466629	2.07566	2.27532	414.211	FALSE	5
2022-09-12	12:29:04	0.471311	2.09649	2.27532	404.532	FALSE	5
2022-09-12	12:29:04	0.539097	2.39801	2.27532	416.609	FALSE	5
2022-09-12	12:29:05	0.36556	1.62608	3.5866	406.158	FALSE	5
2022-09-12	12:29:05	0.900114	4.00389	3.5866	420.613	FALSE	5
2022-09-12	12:29:05	1.15324	5.12984	3.5866	411.288	FALSE	5
2022-09-12	12:29:06	2.08475	9.27338	12.6129	429.887	FALSE	5
2022-09-12	12:29:06	3.68968	16.4124	12.6129	427.701	1	6
2022-09-12	12:29:06	3.88027	17.2602	12.6129	447.147	1	7
2022-09-12	12:29:06	1.68734	7.50563	12.6129	435.206	FALSE	7
2022-09-12	12:29:07	1.04302	4.63956	3.4211	451.786	FALSE	7
2022-09-12	12:29:07	0.749784	3.33519	3.4211	438.542	FALSE	7
2022-09-12	12:29:07	0.614873	2.73508	3.4211	454.522	FALSE	7
2022-09-12	12:29:07	0.668715	2.97458	3.4211	441.516	FALSE	7
2022-09-12	12:29:08	0.495382	2.20356	2.63191	456.725	FALSE	7
2022-09-12	12:29:08	0.723015	3.21612	2.63191	444.732	FALSE	7
2022-09-12	12:29:08	0.546985	2.4331	2.63191	459.158	FALSE	7
2022-09-12	12:29:08	0.601336	2.67486	2.63191	447.407	FALSE	7
2022-09-12	12:29:09	0.447494	1.99054	2.11459	461.149	FALSE	7
2022-09-12	12:29:09	0.539911	2.40163	2.11459	449.809	FALSE	7
2022-09-12	12:29:09	0.43874	1.9516	2.11459	463.1	FALSE	7
2022-09-12	12:29:10	0.440573	1.95976	1.91063	451.769	FALSE	7
2022-09-12	12:29:10	0.507138	2.25585	1.91063	465.356	FALSE	7
2022-09-12	12:29:10	0.442914	1.97017	1.91063	453.739	FALSE	7
2022-09-12	12:29:10	0.327494	1.45676	1.91063	466.813	FALSE	7
2022-09-12	12:29:11	0.444644	1.97787	2.08992	455.717	FALSE	7
2022-09-12	12:29:11	0.436908	1.94345	2.08992	468.756	FALSE	7
2022-09-12	12:29:11	0.487494	2.16847	2.08992	457.885	FALSE	7
2022-09-12	12:29:11	0.510293	2.26989	2.08992	471.026	FALSE	7
2022-09-12	12:29:12	0.338333	1.50497	1.69903	459.39	FALSE	7
2022-09-12	12:29:12	0.420674	1.87124	1.69903	472.898	FALSE	7
2022-09-12	12:29:12	0.428868	1.90769	1.69903	461.298	FALSE	7
2022-09-12	12:29:12	0.339962	1.51222	1.69903	474.41	FALSE	7
2022-09-12	12:29:13	0.360623	1.60412	1.91916	462.902	FALSE	7
2022-09-12	12:29:13	0.547952	2.4374	1.91916	476.847	FALSE	7
2022-09-12	12:29:13	0.385764	1.71596	1.91916	464.618	FALSE	7
2022-09-12	12:29:14	0.432685	1.92467	1.83401	478.772	FALSE	7
2022-09-12	12:29:14	0.473244	2.10508	1.83401	466.723	FALSE	7
2022-09-12	12:29:14	0.345865	1.53848	1.83401	480.31	FALSE	7
2022-09-12	12:29:14	0.397417	1.76779	1.83401	468.491	FALSE	7
2022-09-12	12:29:15	0.461489	2.0528	1.71692	482.363	FALSE	7
2022-09-12	12:29:15	0.364746	1.62246	1.71692	470.113	FALSE	7
2022-09-12	12:29:15	0.325102	1.44612	1.71692	483.809	FALSE	7
2022-09-12	12:29:15	0.392583	1.74629	1.71692	471.859	FALSE	7
2022-09-12	12:29:16	0.475738	2.11618	1.79869	485.925	FALSE	7
2022-09-12	12:29:16	0.308715	1.37323	1.79869	473.233	FALSE	7
2022-09-12	12:29:16	0.518893	2.30814	1.79869	488.234	FALSE	7
2022-09-12	12:29:16	0.314109	1.39722	1.79869	474.63	FALSE	7
2022-09-12	12:29:17	0.443982	1.97492	1.76274	490.208	FALSE	7
2022-09-12	12:29:17	0.36556	1.62608	1.76274	476.256	FALSE	7
2022-09-12	12:29:17	0.3793	1.6872	1.76274	491.896	FALSE	7
2022-09-12	12:29:18	0.477061	2.12206	1.80373	478.378	FALSE	7
2022-09-12	12:29:18	0.317774	1.41352	1.80373	493.309	FALSE	7
2022-09-12	12:29:18	0.467748	2.08064	1.80373	480.459	FALSE	7
2022-09-12	12:29:18	0.359402	1.59869	1.80373	494.908	FALSE	7
2022-09-12	12:29:19	0.432176	1.92241	1.78958	482.381	FALSE	7
2022-09-12	12:29:19	0.388512	1.72818	1.78958	496.636	FALSE	7
2022-09-12	12:29:19	0.40215	1.78884	1.78958	484.17	FALSE	7
2022-09-12	12:29:19	0.386425	1.7189	1.78958	498.355	FALSE	7
2022-09-12	12:29:20	0.189122	0.841252	1.30356	485.011	FALSE	7
2022-09-12	12:29:20	0.342048	1.5215	1.30356	499.876	FALSE	7
2022-09-12	12:29:20	0.328562	1.46151	1.30356	486.473	FALSE	7
2022-09-12	12:29:20	0.312481	1.38998	1.30356	501.266	FALSE	7
2022-09-12	12:29:21	0.26388	1.17379	1.33595	487.646	FALSE	7
2022-09-12	12:29:21	0.182761	0.812957	1.33595	502.079	FALSE	7
2022-09-12	12:29:21	0.454364	2.0211	1.33595	489.668	FALSE	7
2022-09-12	12:29:22	0.298893	1.32954	1.36723	503.409	FALSE	7
2022-09-12	12:29:22	0.44388	1.97447	1.36723	491.642	FALSE	7
2022-09-12	12:29:22	0.215942	0.960553	1.36723	504.369	FALSE	7
2022-09-12	12:29:22	0.270751	1.20435	1.36723	492.846	FALSE	7
2022-09-12	12:29:23	0.229224	1.01963	1.0897	505.389	FALSE	7
2022-09-12	12:29:23	0.288919	1.28517	1.0897	494.132	FALSE	7
2022-09-12	12:29:23	0.273702	1.21748	1.0897	506.607	FALSE	7
2022-09-12	12:29:23	0.188054	0.836502	1.0897	494.968	FALSE	7
2022-09-12	12:29:24	0.524033	2.331	1.48822	508.938	FALSE	7
2022-09-12	12:29:24	0.277112	1.23265	1.48822	496.201	FALSE	7
2022-09-12	12:29:24	0.32612	1.45065	1.48822	510.388	FALSE	7
2022-09-12	12:29:24	0.211005	0.938592	1.48822	497.139	FALSE	7
2022-09-12	12:29:25	0.121133	0.538824	1.28223	510.927	FALSE	7
2022-09-12	12:29:25	0.409275	1.82054	1.28223	498.96	FALSE	7
2022-09-12	12:29:25	0.334364	1.48732	1.28223	512.414	FALSE	7
2022-09-12	12:29:26	0.459046	2.04193	1.41748	501.002	FALSE	7
2022-09-12	12:29:26	0.280318	1.24691	1.41748	513.661	FALSE	7
2022-09-12	12:29:26	0.258283	1.14889	1.41748	502.151	FALSE	7
2022-09-12	12:29:26	0.27701	1.2322	1.41748	514.894	FALSE	7
2022-09-12	12:29:27	0.304339	1.35376	1.52722	503.504	FALSE	7
2022-09-12	12:29:27	0.427392	1.90113	1.52722	516.795	FALSE	7
2022-09-12	12:29:27	0.326221	1.4511	1.52722	504.955	FALSE	7
2022-09-12	12:29:27	0.315382	1.40288	1.52722	518.198	FALSE	7
2022-09-12	12:29:28	0.267646	1.19054	1.90848	506.146	FALSE	7
2022-09-12	12:29:28	0.443524	1.97288	1.90848	520.17	FALSE	7
2022-09-12	12:29:28	0.656094	2.91844	1.90848	509.064	FALSE	7
2022-09-12	12:29:28	0.348919	1.55206	1.90848	521.722	FALSE	7
2022-09-12	12:29:29	0.489529	2.17752	2.24875	511.242	FALSE	7
2022-09-12	12:29:29	0.395789	1.76055	2.24875	523.483	FALSE	7
2022-09-12	12:29:29	0.63131	2.80819	2.24875	514.05	FALSE	7
2022-09-12	12:29:30	0.657723	2.92568	2.75081	526.409	FALSE	7
2022-09-12	12:29:30	0.578079	2.57141	2.75081	516.622	FALSE	7
2022-09-12	12:29:30	0.813702	3.61951	2.75081	530.028	FALSE	7
2022-09-12	12:29:30	0.424135	1.88664	2.75081	518.508	FALSE	7
2022-09-12	12:29:31	1.28963	5.73653	3.50644	535.765	FALSE	7
2022-09-12	12:29:31	0.240623	1.07034	3.50644	519.579	FALSE	7
2022-09-12	12:29:31	0.837621	3.72591	3.50644	539.491	FALSE	7
2022-09-12	12:29:31	0.785254	3.49297	3.50644	523.072	FALSE	7
2022-09-12	12:29:32	0.926985	4.12341	4.93513	543.614	FALSE	7
2022-09-12	12:29:32	0.814975	3.62517	4.93513	526.697	FALSE	7
2022-09-12	12:29:32	0.948206	4.21781	4.93513	547.832	FALSE	7
2022-09-12	12:29:32	1.7477	7.77412	4.93513	534.471	FALSE	7
2022-09-12	12:29:33	2.27233	10.1078	9.61345	557.94	FALSE	7
2022-09-12	12:29:33	2.3995	10.6735	9.61345	545.144	FALSE	7
2022-09-12	12:29:33	1.81177	8.05912	9.61345	565.999	FALSE	7
2022-09-12	12:29:34	1.92179	8.54851	7.26449	553.693	FALSE	7
2022-09-12	12:29:34	2.43177	10.817	7.26449	576.816	FALSE	7
2022-09-12	12:29:34	1.09854	4.88653	7.26449	558.579	FALSE	7
2022-09-12	12:29:34	1.08042	4.80592	7.26449	581.622	FALSE	7
2022-09-12	12:29:35	1.11228	4.94764	4.46569	563.527	FALSE	7
2022-09-12	12:29:35	0.876298	3.89795	4.46569	585.52	FALSE	7
2022-09-12	12:29:35	0.901997	4.01226	4.46569	567.539	FALSE	7
2022-09-12	12:29:35	1.12515	5.00489	4.46569	590.525	FALSE	7
2022-09-12	12:29:36	0.903372	4.01838	10.1412	571.558	FALSE	7
2022-09-12	12:29:36	1.56174	6.94693	10.1412	597.471	FALSE	7
2022-09-12	12:29:36	2.5023	11.1307	10.1412	582.688	FALSE	7
2022-09-12	12:29:36	4.15192	18.4686	10.1412	615.94	1	8
2022-09-12	12:29:37	2.76922	12.318	8.55636	595.006	FALSE	8
2022-09-12	12:29:37	1.94704	8.66082	8.55636	624.601	FALSE	8
2022-09-12	12:29:37	1.05441	4.69023	8.55636	599.697	FALSE	8
2022-09-12	12:29:38	0.832634	3.70372	7.74094	628.305	FALSE	8
2022-09-12	12:29:38	2.1337	9.49112	7.74094	609.188	FALSE	8
2022-09-12	12:29:38	1.78866	7.95632	7.74094	636.261	FALSE	8
2022-09-12	12:29:38	2.20597	9.8126	7.74094	619	FALSE	8
2022-09-12	12:29:39	1.60658	7.14639	6.81644	643.407	FALSE	8
2022-09-12	12:29:39	2.15472	9.58463	6.81644	628.585	FALSE	8
2022-09-12	12:29:39	1.02551	4.56167	6.81644	647.969	FALSE	8
2022-09-12	12:29:39	1.34281	5.97309	6.81644	634.558	FALSE	8
2022-09-12	12:29:40	1.48617	6.61078	5.97246	654.58	FALSE	8
2022-09-12	12:29:40	1.2706	5.65188	5.97246	640.21	FALSE	8
2022-09-12	12:29:40	1.30352	5.79832	5.97246	660.378	FALSE	8
2022-09-12	12:29:40	1.31039	5.82888	5.97246	646.039	FALSE	8
2022-09-12	12:29:41	1.20994	5.38206	4.05256	665.76	FALSE	8
2022-09-12	12:29:41	0.759758	3.37956	4.05256	649.418	FALSE	8
2022-09-12	12:29:41	0.763473	3.39608	4.05256	669.156	FALSE	8
2022-09-12	12:29:42	0.750445	3.33813	5.28624	652.756	FALSE	8
2022-09-12	12:29:42	1.14419	5.08959	5.28624	674.246	FALSE	8
2022-09-12	12:29:42	1.23564	5.49637	5.28624	658.253	FALSE	8
2022-09-12	12:29:42	1.62332	7.22085	5.28624	681.467	FALSE	8
2022-09-12	12:29:43	0.870954	3.87418	6.03314	662.127	FALSE	8
2022-09-12	12:29:43	1.78999	7.96223	6.03314	689.429	FALSE	8
2022-09-12	12:29:43	0.806018	3.58533	6.03314	665.712	FALSE	8
2022-09-12	12:29:43	1.95828	8.71082	6.03314	698.14	FALSE	8
2022-09-12	12:29:44	1.57528	7.00716	7.68622	672.72	FALSE	8
2022-09-12	12:29:44	1.93828	8.62186	7.68622	706.762	FALSE	8
2022-09-12	12:29:44	1.34027	5.96179	7.68622	678.681	FALSE	8
2022-09-12	12:29:44	2.05793	9.15408	7.68622	715.916	FALSE	8
2022-09-12	12:29:45	1.79492	7.98416	6.51767	686.665	FALSE	8
2022-09-12	12:29:45	1.07365	4.77581	6.51767	720.691	FALSE	8
2022-09-12	12:29:45	1.52714	6.79302	6.51767	693.458	FALSE	8
2022-09-12	12:29:46	0.820827	3.6512	6.48425	724.343	FALSE	8
2022-09-12	12:29:46	2.0391	9.07032	6.48425	702.529	FALSE	8
2022-09-12	12:29:46	0.887341	3.94707	6.48425	728.29	FALSE	8
2022-09-12	12:29:46	2.08363	9.2684	6.48425	711.797	FALSE	8
2022-09-12	12:29:47	1.52576	6.78689	5.96099	735.077	FALSE	8
2022-09-12	12:29:47	1.45905	6.49015	5.96099	718.287	FALSE	8
2022-09-12	12:29:47	1.66658	7.41328	5.96099	742.49	FALSE	8
2022-09-12	12:29:47	0.708969	3.15364	5.96099	721.441	FALSE	8
2022-09-12	12:29:48	1.67558	7.45331	4.65498	749.943	FALSE	8
2022-09-12	12:29:48	0.507647	2.25812	4.65498	723.699	FALSE	8
2022-09-12	12:29:48	1.15655	5.14457	4.65498	755.088	FALSE	8
2022-09-12	12:29:48	0.84617	3.76393	4.65498	727.463	FALSE	8
2022-09-12	12:29:49	0.683728	3.04136	2.34655	758.129	FALSE	8
2022-09-12	12:29:49	0.585153	2.60288	2.34655	730.066	FALSE	8
2022-09-12	12:29:49	0.313702	1.39541	2.34655	759.525	FALSE	8
2022-09-12	12:29:50	0.543575	2.41793	1.80882	732.484	FALSE	8
2022-09-12	12:29:50	0.260064	1.15682	1.80882	760.681	FALSE	8
2022-09-12	12:29:50	0.603626	2.68505	1.80882	735.169	FALSE	8
2022-09-12	12:29:50	0.2193	0.97549	1.80882	761.657	FALSE	8
2022-09-12	12:29:51	0.47126	2.09626	1.75036	737.265	FALSE	8
2022-09-12	12:29:51	0.126883	0.564401	1.75036	762.221	FALSE	8
2022-09-12	12:29:51	0.676094	3.0074	1.75036	740.273	FALSE	8
2022-09-12	12:29:51	0.299758	1.33338	1.75036	763.555	FALSE	8
2022-09-12	12:29:52	0.477723	2.12501	1.44148	742.398	FALSE	8
2022-09-12	12:29:52	0.145051	0.645216	1.44148	764.2	FALSE	8
2022-09-12	12:29:52	0.483168	2.14923	1.44148	744.547	FALSE	8
2022-09-12	12:29:52	0.190293	0.846461	1.44148	765.046	FALSE	8
2022-09-12	12:29:53	0.418537	1.86174	10.6603	746.409	FALSE	8
2022-09-12	12:29:53	1.10714	4.92478	10.6603	769.971	FALSE	8
2022-09-12	12:29:53	5.66398	25.1945	10.6603	771.603	1	9
2022-09-12	12:29:54	12.3059	54.7391	22.0394	824.71	1	10
2022-09-12	12:29:54	5.87507	26.1335	22.0394	797.737	1	11
2022-09-12	12:29:54	0.839911	3.73609	22.0394	828.446	FALSE	11
2022-09-12	12:29:54	0.797875	3.54911	22.0394	801.286	FALSE	11
2022-09-12	12:29:55	0.433295	1.92738	1.47419	830.374	FALSE	11
2022-09-12	12:29:55	0.346985	1.54346	1.47419	802.829	FALSE	11
2022-09-12	12:29:55	0.376552	1.67498	1.47419	832.049	FALSE	11
2022-09-12	12:29:55	0.168817	0.750932	1.47419	803.58	FALSE	11
2022-09-12	12:29:56	0.345916	1.5387	1.44136	833.587	FALSE	11
2022-09-12	12:29:56	0.243931	1.08505	1.44136	804.665	FALSE	11
2022-09-12	12:29:56	0.368257	1.63808	1.44136	835.225	FALSE	11
2022-09-12	12:29:56	0.338028	1.50362	1.44136	806.169	FALSE	11
2022-09-12	12:29:57	0.468104	2.08222	1.31516	837.308	FALSE	11
2022-09-12	12:29:57	0.245509	1.09207	1.31516	807.261	FALSE	11
2022-09-12	12:29:57	0.281336	1.25144	1.31516	838.559	FALSE	11
2022-09-12	12:29:57	0.187697	0.834914	1.31516	808.096	FALSE	11
2022-09-12	12:29:58	0.333499	1.48347	1.37994	840.043	FALSE	11
2022-09-12	12:29:58	0.266527	1.18557	1.37994	809.281	FALSE	11
2022-09-12	12:29:58	0.330649	1.47079	1.37994	841.513	FALSE	11
2022-09-12	12:29:59	0.175331	0.779907	0.965192	810.061	FALSE	11
2022-09-12	12:29:59	0.277926	1.23627	0.965192	842.75	FALSE	11
2022-09-12	12:29:59	0.170293	0.757497	0.965192	810.819	FALSE	11
2022-09-12	12:29:59	0.244389	1.08709	0.965192	843.837	FALSE	11
2022-09-12	12:30:00	0.130954	0.58251	0.669437	811.401	FALSE	11
2022-09-12	12:30:00	0.200929	0.893772	0.669437	844.73	FALSE	11
2022-09-12	12:30:00	0.099046	0.440576	0.669437	811.842	FALSE	11
2022-09-12	12:30:00	0.171056	0.760891	0.669437	845.491	FALSE	11
2022-09-12	12:30:01	0.245407	1.09162	0.990206	812.933	FALSE	11
2022-09-12	12:30:01	0.188766	0.839669	0.990206	846.331	FALSE	11
2022-09-12	12:30:01	0.233652	1.03933	0.990206	813.973	FALSE	11
2022-09-12	12:30:02	0.205407	0.913691	1.71657	847.245	FALSE	11
2022-09-12	12:30:02	0.478995	2.13067	1.71657	816.103	FALSE	11
2022-09-12	12:30:02	0.410394	1.82551	1.71657	849.07	FALSE	11
2022-09-12	12:30:02	0.448817	1.99643	1.71657	818.1	FALSE	11
2022-09-12	12:30:03	0.362455	1.61227	1.39071	850.683	FALSE	11
2022-09-12	12:30:03	0.295331	1.31369	1.39071	819.413	FALSE	11
2022-09-12	12:30:03	0.294924	1.31188	1.39071	851.994	FALSE	11
2022-09-12	12:30:03	0.297875	1.32501	1.39071	820.738	FALSE	11
2022-09-12	12:30:04	0.266476	1.18534	1.79264	853.18	FALSE	11
2022-09-12	12:30:04	0.58271	2.59201	1.79264	823.33	FALSE	11
2022-09-12	12:30:04	0.40556	1.80401	1.79264	854.984	FALSE	11
2022-09-12	12:30:04	0.357265	1.58919	1.79264	824.92	FALSE	11
2022-09-12	12:30:05	0.372532	1.6571	1.7674	856.641	FALSE	11
2022-09-12	12:30:05	0.36444	1.6211	1.7674	826.541	FALSE	11
2022-09-12	12:30:05	0.34327	1.52693	1.7674	858.168	FALSE	11
2022-09-12	12:30:05	0.509071	2.26445	1.7674	828.805	FALSE	11
2022-09-12	12:30:06	0.118995	0.529314	1.05261	858.697	FALSE	11
2022-09-12	12:30:06	0.351209	1.56225	1.05261	830.367	FALSE	11
2022-09-12	12:30:06	0.239708	1.06627	1.05261	859.763	FALSE	11
2022-09-12	12:30:07	0.404847	1.80084	1.77453	832.168	FALSE	11
2022-09-12	12:30:07	0.313804	1.39586	1.77453	861.159	FALSE	11
2022-09-12	12:30:07	0.517621	2.30248	1.77453	834.471	FALSE	11
2022-09-12	12:30:07	0.359453	1.59892	1.77453	862.758	FALSE	11
2022-09-12	12:30:08	0.454822	2.02314	2.10078	836.494	FALSE	11
2022-09-12	12:30:08	0.210089	0.934518	2.10078	863.693	FALSE	11
2022-09-12	12:30:08	0.468054	2.082	2.10078	838.576	FALSE	11
2022-09-12	12:30:08	0.756145	3.36348	2.10078	867.056	FALSE	11
2022-09-12	12:30:09	0.375789	1.67158	1.10894	840.248	FALSE	11
2022-09-12	12:30:09	0.628766	2.79688	1.10894	869.853	FALSE	11
2022-09-12	12:30:09	-0.168333	-0.748779	1.10894	840.248	FALSE	11
2022-09-12	12:30:09	0.16098	0.716071	1.10894	870.569	FALSE	11
2022-09-12	12:30:10	0.146374	0.651101	0.894828	840.899	FALSE	11
2022-09-12	12:30:10	0.183117	0.814541	0.894828	871.384	FALSE	11
2022-09-12	12:30:10	0.274008	1.21884	0.894828	842.117	FALSE	11
2022-09-12	12:30:11	0.182405	0.811374	1.26881	872.195	FALSE	11
2022-09-12	12:30:11	0.216909	0.964855	1.26881	843.082	FALSE	11
2022-09-12	12:30:11	0.266781	1.1867	1.26881	873.382	FALSE	11
2022-09-12	12:30:11	0.474873	2.11233	1.26881	845.195	FALSE	11
2022-09-12	12:30:12	0.436501	1.94164	1.7906	875.323	FALSE	11
2022-09-12	12:30:12	0.403372	1.79428	1.7906	846.989	FALSE	11
2022-09-12	12:30:12	0.370903	1.64985	1.7906	876.973	FALSE	11
2022-09-12	12:30:12	0.399402	1.77662	1.7906	848.766	FALSE	11
2022-09-12	12:30:13	0.307341	1.36711	1.57168	878.34	FALSE	11
2022-09-12	12:30:13	0.376145	1.67317	1.57168	850.439	FALSE	11
2022-09-12	12:30:13	0.376501	1.67475	1.57168	880.015	FALSE	11
2022-09-12	12:30:14	0.229835	1.02235	1.4593	851.461	FALSE	11
2022-09-12	12:30:14	0.360216	1.60231	1.4593	881.617	FALSE	11
2022-09-12	12:30:14	0.361998	1.61024	1.4593	853.071	FALSE	11
2022-09-12	12:30:14	0.360216	1.60231	1.4593	883.22	FALSE	11
2022-09-12	12:30:15	0.360216	1.60231	2.75058	854.674	FALSE	11
2022-09-12	12:30:15	0.342506	1.52354	2.75058	884.743	FALSE	11
2022-09-12	12:30:15	0.709529	3.15613	2.75058	857.83	FALSE	11
2022-09-12	12:30:15	1.06118	4.72034	2.75058	889.464	FALSE	11
2022-09-12	12:30:16	0.273753	1.21771	0.849404	859.047	FALSE	11
2022-09-12	12:30:16	0.34897	1.55229	0.849404	891.016	FALSE	11
2022-09-12	12:30:16	0.193092	0.858912	0.849404	859.906	FALSE	11
2022-09-12	12:30:16	-0.0519972	-0.231294	0.849404	891.016	FALSE	11
2022-09-12	12:30:17	-0.136018	-0.605035	-0.121957	859.906	FALSE	11
2022-09-12	12:30:17	-0.00477074	-0.0212212	-0.121957	891.016	FALSE	11
2022-09-12	12:30:17	-0.0679259	-0.302148	-0.121957	859.906	FALSE	11
2022-09-12	12:30:17	0.099046	0.440576	-0.121957	891.456	FALSE	11
2022-09-12	12:30:18	0.0844404	0.375608	0.348141	860.282	FALSE	11
2022-09-12	12:30:18	0.0123285	0.0548396	0.348141	891.511	FALSE	11
2022-09-12	12:30:18	0.138028	0.613976	0.348141	860.896	FALSE	11
2022-09-12	12:30:19	0.263779	1.17334	1.61273	892.685	FALSE	11
2022-09-12	12:30:19	0.442099	1.96654	1.61273	862.863	FALSE	11
2022-09-12	12:30:19	0.330191	1.46876	1.61273	894.153	FALSE	11
2022-09-12	12:30:19	0.41416	1.84227	1.61273	864.705	FALSE	11
2022-09-12	12:30:20	0.459453	2.04374	1.68047	896.197	FALSE	11
2022-09-12	12:30:20	0.353855	1.57402	1.68047	866.279	FALSE	11
2022-09-12	12:30:20	0.334771	1.48913	1.68047	897.686	FALSE	11
2022-09-12	12:30:20	0.363066	1.61499	1.68047	867.894	FALSE	11
2022-09-12	12:30:21	0.360522	1.60367	1.64533	899.29	FALSE	11
2022-09-12	12:30:21	0.370751	1.64917	1.64533	869.543	FALSE	11
2022-09-12	12:30:21	0.371565	1.6528	1.64533	900.943	FALSE	11
2022-09-12	12:30:21	0.376705	1.67566	1.64533	871.219	FALSE	11
2022-09-12	12:30:22	0.366934	1.6322	1.62978	902.575	FALSE	11
2022-09-12	12:30:22	0.367392	1.63423	1.62978	872.853	FALSE	11
2022-09-12	12:30:22	0.364847	1.62291	1.62978	904.198	FALSE	11
2022-09-12	12:30:23	0.359504	1.59915	1.61923	874.452	FALSE	11
2022-09-12	12:30:23	0.356247	1.58466	1.61923	905.782	FALSE	11
2022-09-12	12:30:23	0.37131	1.65166	1.61923	876.104	FALSE	11
2022-09-12	12:30:23	0.36902	1.64147	1.61923	907.424	FALSE	11
2022-09-12	12:30:24	0.378842	1.68516	1.65755	877.789	FALSE	11
2022-09-12	12:30:24	0.366018	1.62812	1.65755	909.052	FALSE	11
2022-09-12	12:30:24	0.363931	1.61884	1.65755	879.408	FALSE	11
2022-09-12	12:30:24	0.381743	1.69807	1.65755	910.75	FALSE	11
2022-09-12	12:30:25	0.38098	1.69468	1.7683	881.102	FALSE	11
2022-09-12	12:30:25	0.400878	1.78319	1.7683	912.533	FALSE	11
2022-09-12	12:30:25	0.401947	1.78794	1.7683	882.89	FALSE	11
2022-09-12	12:30:25	0.406323	1.80741	1.7683	914.341	FALSE	11
2022-09-12	12:30:26	0.400318	1.78069	1.79164	884.671	FALSE	11
2022-09-12	12:30:26	0.406934	1.81012	1.79164	916.151	FALSE	11
2022-09-12	12:30:26	0.401082	1.78409	1.79164	886.455	FALSE	11
2022-09-12	12:30:27	0.399911	1.77888	1.72405	917.93	FALSE	11
2022-09-12	12:30:27	0.38668	1.72003	1.72405	888.175	FALSE	11
2022-09-12	12:30:27	0.384288	1.70939	1.72405	919.639	FALSE	11
2022-09-12	12:30:27	0.379453	1.68788	1.72405	889.863	FALSE	11
2022-09-12	12:30:28	0.382354	1.70079	1.68675	921.34	FALSE	11
2022-09-12	12:30:28	0.379555	1.68834	1.68675	891.551	FALSE	11
2022-09-12	12:30:28	0.376349	1.67408	1.68675	923.014	FALSE	11
2022-09-12	12:30:28	0.378537	1.68381	1.68675	893.235	FALSE	11
2022-09-12	12:30:29	0.379606	1.68856	1.69269	924.703	FALSE	11
2022-09-12	12:30:29	0.375076	1.66841	1.69269	894.904	FALSE	11
2022-09-12	12:30:29	0.384847	1.71188	1.69269	926.414	FALSE	11
2022-09-12	12:30:29	0.382608	1.70192	1.69269	896.605	FALSE	11
2022-09-12	12:30:30	0.377367	1.6786	1.71444	928.093	FALSE	11
2022-09-12	12:30:30	0.380216	1.69128	1.71444	898.297	FALSE	11
2022-09-12	12:30:30	0.39869	1.77345	1.71444	929.866	FALSE	11
2022-09-12	12:30:31	0.392837	1.74742	1.69105	900.044	FALSE	11
2022-09-12	12:30:31	0.347138	1.54414	1.69105	931.411	FALSE	11
2022-09-12	12:30:31	0.407697	1.81352	1.69105	901.858	FALSE	11
2022-09-12	12:30:31	0.37299	1.65913	1.69105	933.07	FALSE	11
2022-09-12	12:30:32	0.2593	1.15342	2.03457	903.011	FALSE	11
2022-09-12	12:30:32	0.518028	2.30429	2.03457	935.374	FALSE	11
2022-09-12	12:30:32	0.503982	2.24181	2.03457	905.253	FALSE	11
2022-09-12	12:30:32	0.548257	2.43876	2.03457	937.813	FALSE	11
2022-09-12	12:30:33	0.72556	3.22744	2.3074	908.48	FALSE	11
2022-09-12	12:30:33	0.525356	2.33689	2.3074	940.15	FALSE	11
2022-09-12	12:30:33	0.400013	1.77934	2.3074	910.26	FALSE	11
2022-09-12	12:30:33	0.423982	1.88596	2.3074	942.036	FALSE	11
2022-09-12	12:30:34	0.408359	1.81646	1.96481	912.076	FALSE	11
2022-09-12	12:30:34	0.548257	2.43876	1.96481	944.474	FALSE	11
2022-09-12	12:30:34	0.368512	1.63922	1.96481	913.715	FALSE	11
2022-09-12	12:30:35	0.412125	1.83321	2.03842	946.308	FALSE	11
2022-09-12	12:30:35	0.47299	2.10395	2.03842	915.819	FALSE	11
2022-09-12	12:30:35	0.481183	2.1404	2.03842	948.448	FALSE	11
2022-09-12	12:30:35	0.46673	2.07611	2.03842	917.895	FALSE	11
2022-09-12	12:30:36	0.345051	1.53486	1.65517	949.983	FALSE	11
2022-09-12	12:30:36	0.34958	1.555	1.65517	919.45	FALSE	11
2022-09-12	12:30:36	0.488308	2.17209	1.65517	952.155	FALSE	11
2022-09-12	12:30:36	0.305458	1.35874	1.65517	920.809	FALSE	11
2022-09-12	12:30:37	0.578232	2.57209	2.03627	954.727	FALSE	11
2022-09-12	12:30:37	0.317723	1.4133	2.03627	922.222	FALSE	11
2022-09-12	12:30:37	0.446934	1.98805	2.03627	956.715	FALSE	11
2022-09-12	12:30:37	0.488206	2.17164	2.03627	924.394	FALSE	11
2022-09-12	12:30:38	0.445102	1.9799	1.62171	958.695	FALSE	11
2022-09-12	12:30:38	0.325051	1.44589	1.62171	925.84	FALSE	11
2022-09-12	12:30:38	0.323575	1.43933	1.62171	960.134	FALSE	11
2022-09-12	12:30:39	0.498435	2.21714	1.86134	928.057	FALSE	11
2022-09-12	12:30:39	0.366832	1.63174	1.86134	961.766	FALSE	11
2022-09-12	12:30:39	0.47528	2.11414	1.86134	930.171	FALSE	11
2022-09-12	12:30:39	0.333244	1.48234	1.86134	963.248	FALSE	11
2022-09-12	12:30:40	0.4307	1.91584	2.46315	932.087	FALSE	11
2022-09-12	12:30:40	0.480165	2.13587	2.46315	965.384	FALSE	11
2022-09-12	12:30:40	0.478181	2.12704	2.46315	934.214	FALSE	11
2022-09-12	12:30:40	0.825916	3.67384	2.46315	969.058	FALSE	11
2022-09-12	12:30:41	0.579962	2.57979	3.56614	936.794	FALSE	11
2022-09-12	12:30:41	1.23019	5.47213	3.56614	974.53	FALSE	11
2022-09-12	12:30:41	0.874516	3.89002	3.56614	940.684	FALSE	11
2022-09-12	12:30:41	0.52215	2.32263	3.56614	976.853	FALSE	11
2022-09-12	12:30:42	0.448613	1.99552	1.9009	942.679	FALSE	11
2022-09-12	12:30:42	0.404338	1.79858	1.9009	978.651	FALSE	11
2022-09-12	12:30:42	0.429071	1.90859	1.9009	944.588	FALSE	11
2022-09-12	12:30:43	0.325	1.44566	1.80135	980.097	FALSE	11
2022-09-12	12:30:43	0.443372	1.97221	1.80135	946.56	FALSE	11
2022-09-12	12:30:43	0.403066	1.79292	1.80135	981.89	FALSE	11
2022-09-12	12:30:43	0.44841	1.99462	1.80135	948.555	FALSE	11
2022-09-12	12:30:44	0.37355	1.66163	1.82914	983.552	FALSE	11
2022-09-12	12:30:44	0.482049	2.14425	1.82914	950.699	FALSE	11
2022-09-12	12:30:44	0.437875	1.94776	1.82914	985.499	FALSE	11
2022-09-12	12:30:44	0.351361	1.56292	1.82914	952.262	FALSE	11
2022-09-12	12:30:45	0.515789	2.29433	2.06779	987.794	FALSE	11
2022-09-12	12:30:45	0.411412	1.83004	2.06779	954.092	FALSE	11
2022-09-12	12:30:45	0.460471	2.04827	2.06779	989.842	FALSE	11
2022-09-12	12:30:45	0.471769	2.09852	2.06779	956.191	FALSE	11
2022-09-12	12:30:46	0.331311	1.47374	1.84974	991.316	FALSE	11
2022-09-12	12:30:46	0.516857	2.29908	1.84974	958.49	FALSE	11
2022-09-12	12:30:46	0.399351	1.77639	1.84974	993.092	FALSE	11
2022-09-12	12:30:47	0.397316	1.76734	1.88737	960.257	FALSE	11
2022-09-12	12:30:47	0.399911	1.77888	1.88737	994.871	FALSE	11
2022-09-12	12:30:47	0.344644	1.53305	1.88737	961.79	FALSE	11
2022-09-12	12:30:47	0.555331	2.47022	1.88737	997.341	FALSE	11
2022-09-12	12:30:48	0.294618	1.31052	1.84374	963.101	FALSE	11
2022-09-12	12:30:48	0.54388	2.41929	1.84374	999.761	FALSE	11
2022-09-12	12:30:48	0.362405	1.61205	1.84374	964.713	FALSE	11
2022-09-12	12:30:48	0.457061	2.0331	1.84374	1001.79	FALSE	11
2022-09-12	12:30:49	0.457519	2.03514	1.83791	966.748	FALSE	11
2022-09-12	12:30:49	0.448766	1.9962	1.83791	1003.79	FALSE	11
2022-09-12	12:30:49	0.382048	1.69943	1.83791	968.447	FALSE	11
2022-09-12	12:30:49	0.364389	1.62088	1.83791	1005.41	FALSE	11
2022-09-12	12:30:50	0.557774	2.48109	2.06109	970.928	FALSE	11
2022-09-12	12:30:50	0.337672	1.50203	2.06109	1006.91	FALSE	11
2022-09-12	12:30:50	0.494618	2.20016	2.06109	973.128	FALSE	11
2022-09-12	12:30:51	0.346374	1.54074	2.04781	1008.45	FALSE	11
2022-09-12	12:30:51	0.613652	2.72965	2.04781	975.858	FALSE	11
2022-09-12	12:30:51	0.339962	1.51222	2.04781	1009.97	FALSE	11
2022-09-12	12:30:51	0.541489	2.40865	2.04781	978.267	FALSE	11
2022-09-12	12:30:52	0.291972	1.29875	2.13729	1011.26	FALSE	11
2022-09-12	12:30:52	0.536959	2.3885	2.13729	980.655	FALSE	11
2022-09-12	12:30:52	0.363931	1.61884	2.13729	1012.88	FALSE	11
2022-09-12	12:30:52	0.729071	3.24305	2.13729	983.898	FALSE	11
2022-09-12	12:30:53	0.505102	2.24679	2.4846	1015.13	FALSE	11
2022-09-12	12:30:53	0.592583	2.63593	2.4846	986.534	FALSE	11
2022-09-12	12:30:53	0.648104	2.8829	2.4846	1018.01	FALSE	11
2022-09-12	12:30:53	0.488461	2.17277	2.4846	988.707	FALSE	11
2022-09-12	12:30:54	0.867595	3.85924	2.74096	1021.87	FALSE	11
2022-09-12	12:30:54	0.402964	1.79246	2.74096	990.499	FALSE	11
2022-09-12	12:30:54	0.578028	2.57118	2.74096	1024.44	FALSE	11
2022-09-12	12:30:55	0.374822	1.66728	2.52976	992.167	FALSE	11
2022-09-12	12:30:55	0.503422	2.23932	2.52976	1026.68	FALSE	11
2022-09-12	12:30:55	0.75584	3.36213	2.52976	995.529	FALSE	11
2022-09-12	12:30:55	0.640776	2.8503	2.52976	1029.53	FALSE	11
2022-09-12	12:30:56	0.585	2.6022	2.26632	998.131	FALSE	11
2022-09-12	12:30:56	0.681031	3.02936	2.26632	1032.56	FALSE	11
2022-09-12	12:30:56	0.293804	1.3069	2.26632	999.438	FALSE	11
2022-09-12	12:30:56	0.47813	2.12682	2.26632	1034.69	FALSE	11
2022-09-12	12:30:57	0.414008	1.84159	1.75817	1001.28	FALSE	11
2022-09-12	12:30:57	0.43925	1.95387	1.75817	1036.64	FALSE	11
2022-09-12	12:30:57	0.309784	1.37798	1.75817	1002.66	FALSE	11
2022-09-12	12:30:57	0.417977	1.85925	1.75817	1038.5	FALSE	11
2022-09-12	12:30:58	0.396501	1.76372	1.76817	1004.42	FALSE	11
2022-09-12	12:30:58	0.390445	1.73678	1.76817	1040.24	FALSE	11
2022-09-12	12:30:58	0.40556	1.80401	1.76817	1006.23	FALSE	11
2022-09-12	12:30:59	0.334975	1.49004	2.04827	1041.73	FALSE	11
2022-09-12	12:30:59	0.567494	2.52433	2.04827	1008.75	FALSE	11
2022-09-12	12:30:59	0.327239	1.45562	2.04827	1043.18	FALSE	11
2022-09-12	12:30:59	0.612176	2.72308	2.04827	1011.47	FALSE	11
2022-09-12	12:31:00	0.535992	2.3842	2.20871	1045.57	FALSE	11
2022-09-12	12:31:00	0.679555	3.0228	2.20871	1014.5	FALSE	11
2022-09-12	12:31:00	0.412277	1.83389	2.20871	1047.4	FALSE	11
2022-09-12	12:31:00	0.358333	1.59394	2.20871	1016.09	FALSE	11
2022-09-12	12:31:01	0.414059	1.84182	1.65427	1049.24	FALSE	11
2022-09-12	12:31:01	0.296959	1.32093	1.65427	1017.41	FALSE	11
2022-09-12	12:31:01	0.517926	2.30384	1.65427	1051.55	FALSE	11
2022-09-12	12:31:01	0.258639	1.15048	1.65427	1018.56	FALSE	11
2022-09-12	12:31:02	0.530344	2.35908	1.80877	1053.91	FALSE	11
2022-09-12	12:31:02	0.335585	1.49275	1.80877	1020.05	FALSE	11
2022-09-12	12:31:02	0.353957	1.57447	1.80877	1055.48	FALSE	11
2022-09-12	12:31:03	0.338842	1.50724	1.49445	1021.56	FALSE	11
2022-09-12	12:31:03	0.358893	1.59643	1.49445	1057.08	FALSE	11
2022-09-12	12:31:03	0.346629	1.54188	1.49445	1023.1	FALSE	11
2022-09-12	12:31:03	0.299504	1.33225	1.49445	1058.41	FALSE	11
2022-09-12	12:31:04	0.445153	1.98013	1.76892	1025.08	FALSE	11
2022-09-12	12:31:04	0.282914	1.25846	1.76892	1059.67	FALSE	11
2022-09-12	12:31:04	0.548155	2.4383	1.76892	1027.52	FALSE	11
2022-09-12	12:31:04	0.314466	1.39881	1.76892	1061.07	FALSE	11
2022-09-12	12:31:05	0.494211	2.19835	2.18488	1029.72	FALSE	11
2022-09-12	12:31:05	0.461489	2.0528	2.18488	1063.12	FALSE	11
2022-09-12	12:31:05	0.488359	2.17232	2.18488	1031.89	FALSE	11
2022-09-12	12:31:05	0.520674	2.31606	2.18488	1065.44	FALSE	11
2022-09-12	12:31:06	0.462965	2.05936	2.02118	1033.95	FALSE	11
2022-09-12	12:31:06	0.505763	2.24973	2.02118	1067.69	FALSE	11
2022-09-12	12:31:06	0.394415	1.75444	2.02118	1035.71	FALSE	11
2022-09-12	12:31:07	0.342659	1.52422	2.20916	1069.21	FALSE	11
2022-09-12	12:31:07	0.462303	2.05642	2.20916	1037.76	FALSE	11
2022-09-12	12:31:07	0.638893	2.84192	2.20916	1072.05	FALSE	11
2022-09-12	12:31:07	0.54271	2.41408	2.20916	1040.18	FALSE	11
2022-09-12	12:31:08	0.583015	2.59337	2.8619	1074.65	FALSE	11
2022-09-12	12:31:08	0.614364	2.73281	2.8619	1042.91	FALSE	11
2022-09-12	12:31:08	0.962201	4.28006	2.8619	1078.93	FALSE	11
2022-09-12	12:31:08	0.413957	1.84136	2.8619	1044.75	FALSE	11
2022-09-12	12:31:09	0.437672	1.94685	1.78833	1080.87	FALSE	11
2022-09-12	12:31:09	0.351514	1.5636	1.78833	1046.31	FALSE	11
2022-09-12	12:31:09	0.377875	1.68086	1.78833	1082.55	FALSE	11
2022-09-12	12:31:09	0.441081	1.96202	1.78833	1048.28	FALSE	11
2022-09-12	12:31:10	0.315433	1.40311	1.9255	1083.96	FALSE	11
2022-09-12	12:31:10	0.617417	2.74639	1.9255	1051.02	FALSE	11
2022-09-12	12:31:10	0.365763	1.62699	1.9255	1085.58	FALSE	11
2022-09-12	12:31:11	0.515687	2.29388	2.10197	1053.32	FALSE	11
2022-09-12	12:31:11	0.44785	1.99213	2.10197	1087.58	FALSE	11
2022-09-12	12:31:11	0.457367	2.03446	2.10197	1055.35	FALSE	11
2022-09-12	12:31:11	0.469275	2.08743	2.10197	1089.66	FALSE	11
2022-09-12	12:31:12	0.508003	2.2597	1.49428	1057.61	FALSE	11
2022-09-12	12:31:12	0.241183	1.07283	1.49428	1090.74	FALSE	11
2022-09-12	12:31:12	0.200674	0.892638	1.49428	1058.5	FALSE	11
2022-09-12	12:31:12	0.393855	1.75195	1.49428	1092.49	FALSE	11
2022-09-12	12:31:13	0.0602674	0.268081	-0.905088	1058.77	FALSE	11
2022-09-12	12:31:13	-0.642175	-2.85652	-0.905088	1092.49	FALSE	11
2022-09-12	12:31:13	-0.264974	-1.17866	-0.905088	1058.77	FALSE	11
2022-09-12	12:31:13	0.03299	0.146746	-0.905088	1092.64	FALSE	11
2022-09-12	12:31:14	0.149479	0.664912	0.955949	1059.44	FALSE	11
2022-09-12	12:31:14	0.306985	1.36553	0.955949	1094	FALSE	11
2022-09-12	12:31:14	0.188257	0.837405	0.955949	1060.27	FALSE	11
2022-09-12	12:31:15	0.630089	2.80276	0.60894	1096.8	FALSE	11
2022-09-12	12:31:15	0.138384	0.61556	0.60894	1060.89	FALSE	11
2022-09-12	12:31:15	-0.207366	-0.922405	0.60894	1096.8	FALSE	11
2022-09-12	12:31:15	-0.0135239	-0.060157	0.60894	1060.89	FALSE	11
2022-09-12	12:31:16	0.00189592	0.00843343	0.951722	1096.81	FALSE	11
2022-09-12	12:31:16	0.280623	1.24827	0.951722	1062.14	FALSE	11
2022-09-12	12:31:16	0.23757	1.05676	0.951722	1097.87	FALSE	11
2022-09-12	12:31:16	0.335738	1.49343	0.951722	1063.63	FALSE	11
2022-09-12	12:31:17	0.462659	2.058	1.54085	1099.93	FALSE	11
2022-09-12	12:31:17	0.257468	1.14527	1.54085	1064.78	FALSE	11
2022-09-12	12:31:17	0.26042	1.1584	1.54085	1101.08	FALSE	11
2022-09-12	12:31:17	0.405051	1.80175	1.54085	1066.58	FALSE	11
2022-09-12	12:31:18	0.460318	2.04759	2.04472	1103.13	FALSE	11
2022-09-12	12:31:18	0.477061	2.12206	2.04472	1068.7	FALSE	11
2022-09-12	12:31:18	0.441641	1.96451	2.04472	1105.1	FALSE	11
2022-09-12	12:31:19	0.436349	1.94097	1.97153	1070.64	FALSE	11
2022-09-12	12:31:19	0.440369	1.95885	1.97153	1107.06	FALSE	11
2022-09-12	12:31:19	0.451565	2.00865	1.97153	1072.65	FALSE	11
2022-09-12	12:31:19	0.444593	1.97764	1.97153	1109.03	FALSE	11
2022-09-12	12:31:20	0.443779	1.97402	2.03231	1074.62	FALSE	11
2022-09-12	12:31:20	0.451107	2.00661	2.03231	1111.04	FALSE	11
2022-09-12	12:31:20	0.460674	2.04917	2.03231	1076.67	FALSE	11
2022-09-12	12:31:20	0.471972	2.09943	2.03231	1113.14	FALSE	11
2022-09-12	12:31:21	0.490191	2.18047	1.98318	1078.85	FALSE	11
2022-09-12	12:31:21	0.36159	1.60842	1.98318	1114.75	FALSE	11
2022-09-12	12:31:21	0.440216	1.95817	1.98318	1080.81	FALSE	11
2022-09-12	12:31:21	0.491361	2.18567	1.98318	1116.93	FALSE	11
2022-09-12	12:31:22	0.522506	2.32421	1.89765	1083.14	FALSE	11
2022-09-12	12:31:22	0.397672	1.76892	1.89765	1118.7	FALSE	11
2022-09-12	12:31:22	0.359657	1.59983	1.89765	1084.74	FALSE	11
2022-09-12	12:31:23	0.461896	2.05461	1.88211	1120.76	FALSE	11
2022-09-12	12:31:23	0.440013	1.95727	1.88211	1086.69	FALSE	11
2022-09-12	12:31:23	0.380827	1.69399	1.88211	1122.45	FALSE	11
2022-09-12	12:31:23	0.409733	1.82257	1.88211	1088.52	FALSE	11
2022-09-12	12:31:24	0.425254	1.89161	2.5696	1124.34	FALSE	11
2022-09-12	12:31:24	0.483931	2.15262	2.5696	1090.67	FALSE	11
2022-09-12	12:31:24	0.61243	2.72421	2.5696	1127.07	FALSE	11
2022-09-12	12:31:24	0.789071	3.50995	2.5696	1094.18	FALSE	11
2022-09-12	12:31:25	0.562557	2.50237	2.53819	1129.57	FALSE	11
2022-09-12	12:31:25	0.880064	3.9147	2.53819	1098.09	FALSE	11
2022-09-12	12:31:25	0.567341	2.52365	2.53819	1132.09	FALSE	11
2022-09-12	12:31:25	0.272481	1.21205	2.53819	1099.3	FALSE	11
2022-09-12	12:31:26	0.63299	2.81567	2.76556	1134.91	FALSE	11
2022-09-12	12:31:26	0.67416	2.9988	2.76556	1102.3	FALSE	11
2022-09-12	12:31:26	0.558028	2.48222	2.76556	1137.39	FALSE	11
2022-09-12	12:31:27	0.323524	1.4391	2.01884	1103.74	FALSE	11
2022-09-12	12:31:27	0.558537	2.48448	2.01884	1139.88	FALSE	11
2022-09-12	12:31:27	0.3907	1.73791	2.01884	1105.48	FALSE	11
2022-09-12	12:31:27	0.542659	2.41386	2.01884	1142.29	FALSE	11
2022-09-12	12:31:28	0.711361	3.16428	2.48165	1108.64	FALSE	11
2022-09-12	12:31:28	0.371056	1.65053	2.48165	1143.94	FALSE	11
2022-09-12	12:31:28	0.533906	2.37492	2.48165	1111.02	FALSE	11
2022-09-12	12:31:28	0.61528	2.73689	2.48165	1146.68	FALSE	11
2022-09-12	12:31:29	0.531667	2.36496	3.02681	1113.38	FALSE	11
2022-09-12	12:31:29	0.492786	2.19201	3.02681	1148.87	FALSE	11
2022-09-12	12:31:29	0.68327	3.03932	3.02681	1116.42	FALSE	11
2022-09-12	12:31:29	1.01411	4.51096	3.02681	1153.38	FALSE	11
2022-09-12	12:31:30	1.93238	8.59561	8.17879	1125.02	FALSE	11
2022-09-12	12:31:30	1.10683	4.9234	8.17879	1158.3	FALSE	11
2022-09-12	12:31:30	2.47681	11.0173	8.17879	1136.04	FALSE	11
2022-09-12	12:31:31	3.05034	13.5685	6.96024	1171.87	1	12
2022-09-12	12:31:31	1.96887	8.75793	6.96024	1144.79	FALSE	12
2022-09-12	12:31:31	0.858995	3.82098	6.96024	1175.69	FALSE	12
2022-09-12	12:31:31	0.380725	1.69354	6.96024	1146.49	FALSE	12
2022-09-12	12:31:32	0.454415	2.02133	1.98845	1177.71	FALSE	12
2022-09-12	12:31:32	0.504898	2.24589	1.98845	1148.73	FALSE	12
2022-09-12	12:31:32	0.452227	2.0116	1.98845	1179.73	FALSE	12
2022-09-12	12:31:32	0.376552	1.67498	1.98845	1150.41	FALSE	12
2022-09-12	12:31:33	0.36215	1.61092	2.24866	1181.34	FALSE	12
2022-09-12	12:31:33	0.492583	2.19111	2.24866	1152.6	FALSE	12
2022-09-12	12:31:33	0.537977	2.39303	2.24866	1183.73	FALSE	12
2022-09-12	12:31:33	0.629377	2.79959	2.24866	1155.4	FALSE	12
2022-09-12	12:31:34	0.370191	1.64668	1.9135	1185.38	FALSE	12
2022-09-12	12:31:34	0.460216	2.04713	1.9135	1157.45	FALSE	12
2022-09-12	12:31:34	0.460115	2.04668	1.9135	1187.42	FALSE	12
2022-09-12	12:31:35	0.456654	2.03129	2.19297	1159.48	FALSE	12
2022-09-12	12:31:35	0.563728	2.50757	2.19297	1189.93	FALSE	12
2022-09-12	12:31:35	0.434517	1.93282	2.19297	1161.41	FALSE	12
2022-09-12	12:31:35	0.517112	2.30022	2.19297	1192.23	FALSE	12
2022-09-12	12:31:36	0.517264	2.30089	1.98805	1163.71	FALSE	12
2022-09-12	12:31:36	0.451158	2.00684	1.98805	1194.24	FALSE	12
2022-09-12	12:31:36	0.370394	1.64759	1.98805	1165.36	FALSE	12
2022-09-12	12:31:36	0.448919	1.99688	1.98805	1196.23	FALSE	12
2022-09-12	12:31:37	0.572939	2.54855	1.68754	1167.91	FALSE	12
2022-09-12	12:31:37	0.385305	1.71391	1.68754	1197.95	FALSE	12
2022-09-12	12:31:37	0.297417	1.32297	1.68754	1169.23	FALSE	12
2022-09-12	12:31:37	0.261845	1.16474	1.68754	1199.11	FALSE	12
2022-09-12	12:31:38	0.0563997	0.250877	-0.220956	1169.48	FALSE	12
2022-09-12	12:31:38	-0.0911829	-0.4056	-0.220956	1199.11	FALSE	12
2022-09-12	12:31:38	-0.114236	-0.508145	-0.220956	1169.48	FALSE	12
2022-09-12	12:31:39	-0.281717	-1.25313	0.0588008	1199.11	FALSE	12
2022-09-12	12:31:39	-0.134135	-0.596659	0.0588008	1169.48	FALSE	12
2022-09-12	12:31:39	0.253295	1.12671	0.0588008	1200.24	FALSE	12
2022-09-12	12:31:39	0.215433	0.958289	0.0588008	1170.44	FALSE	12
2022-09-12	12:31:40	0.29584	1.31596	1.28455	1201.56	FALSE	12
2022-09-12	12:31:40	0.259148	1.15274	1.28455	1171.59	FALSE	12
2022-09-12	12:31:40	0.356959	1.58783	1.28455	1203.14	FALSE	12
2022-09-12	12:31:40	0.243168	1.08166	1.28455	1172.67	FALSE	12
2022-09-12	12:31:41	0.314822	1.40039	1.44968	1204.54	FALSE	12
2022-09-12	12:31:41	0.285865	1.27158	1.44968	1173.95	FALSE	12
2022-09-12	12:31:41	0.39187	1.74312	1.44968	1206.29	FALSE	12
2022-09-12	12:31:41	0.311056	1.38364	1.44968	1175.33	FALSE	12
2022-09-12	12:31:42	0.364898	1.62314	2.06909	1207.91	FALSE	12
2022-09-12	12:31:42	0.406018	1.80605	2.06909	1177.14	FALSE	12
2022-09-12	12:31:42	0.624542	2.77809	2.06909	1210.69	FALSE	12
2022-09-12	12:31:43	3.15055	14.0143	23.7453	1191.15	1	13
2022-09-12	12:31:43	7.22388	32.1333	23.7453	1242.82	1	14
2022-09-12	12:31:43	7.83462	34.85	23.7453	1226	1	15
2022-09-12	12:31:43	3.14368	13.9837	23.7453	1256.81	1	16
2022-09-12	12:31:44	1.58291	7.0411	7.57109	1233.04	FALSE	16
2022-09-12	12:31:44	2.55217	11.3526	7.57109	1268.16	FALSE	16
2022-09-12	12:31:44	2.14357	9.53503	7.57109	1242.58	FALSE	16
2022-09-12	12:31:44	0.52958	2.35568	7.57109	1270.51	FALSE	16
2022-09-12	12:31:45	0.56042	2.49286	13.1881	1245.07	FALSE	16
2022-09-12	12:31:45	1.80067	8.00974	13.1881	1278.52	FALSE	16
2022-09-12	12:31:45	6.48393	28.8418	13.1881	1273.91	1	17
2022-09-12	12:31:45	3.01426	13.408	13.1881	1291.93	1	18
2022-09-12	12:31:46	0.694262	3.08822	2.24302	1277	FALSE	18
2022-09-12	12:31:46	0.38673	1.72025	2.24302	1293.65	FALSE	18
2022-09-12	12:31:46	0.431769	1.92059	2.24302	1278.92	FALSE	18
2022-09-12	12:31:47	0.450852	2.00548	5.76975	1295.66	FALSE	18
2022-09-12	12:31:47	1.05304	4.68413	5.76975	1283.6	FALSE	18
2022-09-12	12:31:47	2.02393	9.00285	5.76975	1304.66	FALSE	18
2022-09-12	12:31:47	1.66057	7.38655	5.76975	1290.99	FALSE	18
2022-09-12	12:31:48	1.08515	4.82696	3.92913	1309.49	FALSE	18
2022-09-12	12:31:48	1.01655	4.52182	3.92913	1295.51	FALSE	18
2022-09-12	12:31:48	0.720878	3.20661	3.92913	1312.69	FALSE	18
2022-09-12	12:31:48	0.710649	3.16111	3.92913	1298.67	FALSE	18
2022-09-12	12:31:49	0.538181	2.39394	1.95744	1315.09	FALSE	18
2022-09-12	12:31:49	0.464746	2.06728	1.95744	1300.74	FALSE	18
2022-09-12	12:31:49	0.379199	1.68675	1.95744	1316.77	FALSE	18
2022-09-12	12:31:49	0.378079	1.68177	1.95744	1302.42	FALSE	18
2022-09-12	12:31:50	0.367138	1.6331	1.70064	1318.41	FALSE	18
2022-09-12	12:31:50	0.39014	1.73542	1.70064	1304.16	FALSE	18
2022-09-12	12:31:50	0.389682	1.73338	1.70064	1320.14	FALSE	18
2022-09-12	12:31:51	0.384695	1.7112	1.74216	1305.87	FALSE	18
2022-09-12	12:31:51	0.393346	1.74968	1.74216	1321.89	FALSE	18
2022-09-12	12:31:51	0.389784	1.73384	1.74216	1307.6	FALSE	18
2022-09-12	12:31:51	0.398791	1.7739	1.74216	1323.66	FALSE	18
2022-09-12	12:31:52	0.395636	1.75987	1.81431	1309.36	FALSE	18
2022-09-12	12:31:52	0.414618	1.8443	1.81431	1325.51	FALSE	18
2022-09-12	12:31:52	0.410903	1.82778	1.81431	1311.19	FALSE	18
2022-09-12	12:31:52	0.410344	1.82529	1.81431	1327.33	FALSE	18
2022-09-12	12:31:53	0.423168	1.88234	1.95042	1313.07	FALSE	18
2022-09-12	12:31:53	0.383372	1.70532	1.95042	1329.04	FALSE	18
2022-09-12	12:31:53	0.50388	2.24136	1.95042	1315.31	FALSE	18
2022-09-12	12:31:53	0.443473	1.97266	1.95042	1331.01	FALSE	18
2022-09-12	12:31:54	0.718384	3.19552	7.72604	1318.51	FALSE	18
2022-09-12	12:31:54	2.26933	10.0944	7.72604	1341.11	FALSE	18
2022-09-12	12:31:54	2.22296	9.88817	7.72604	1328.4	FALSE	18
2022-09-12	12:31:55	2.78342	12.3812	6.34174	1353.49	FALSE	18
2022-09-12	12:31:55	1.2652	5.62786	6.34174	1334.03	FALSE	18
2022-09-12	12:31:55	1.0021	4.45754	6.34174	1357.94	FALSE	18
2022-09-12	12:31:55	0.652023	2.90033	6.34174	1336.93	FALSE	18
2022-09-12	12:31:56	1.19874	5.33224	15.9681	1363.28	FALSE	18
2022-09-12	12:31:56	1.44821	6.44193	15.9681	1343.37	FALSE	18
2022-09-12	12:31:56	4.85014	21.5744	15.9681	1384.85	1	19
2022-09-12	12:31:56	6.8621	30.524	15.9681	1373.89	1	20
2022-09-12	12:31:57	3.84312	17.095	37.789	1401.95	1	21
2022-09-12	12:31:57	5.44846	24.2358	37.789	1398.13	1	22
2022-09-12	12:31:57	11.3608	50.5351	37.789	1452.48	1	23
2022-09-12	12:31:57	13.329	59.2901	37.789	1457.42	1	24
2022-09-12	12:31:58	5.49563	24.4457	11.0348	1476.93	1	25
2022-09-12	12:31:58	1.23477	5.4925	11.0348	1462.91	FALSE	25
2022-09-12	12:31:58	0.711769	3.16609	11.0348	1480.09	FALSE	25
2022-09-12	12:31:59	0.659708	2.93451	2.19179	1465.84	FALSE	25
2022-09-12	12:31:59	0.448308	1.99416	2.19179	1482.09	FALSE	25
2022-09-12	12:31:59	0.449733	2.0005	2.19179	1467.85	FALSE	25
2022-09-12	12:31:59	0.413193	1.83797	2.19179	1483.93	FALSE	25
2022-09-12	12:32:00	0.655382	2.91527	5.40795	1470.76	FALSE	25
2022-09-12	12:32:00	0.991056	4.40842	5.40795	1488.33	FALSE	25
2022-09-12	12:32:00	1.05553	4.69521	5.40795	1475.46	FALSE	25
2022-09-12	12:32:00	2.16108	9.61292	5.40795	1497.95	FALSE	25
2022-09-12	12:32:01	3.09899	13.7849	31.9446	1489.24	1	26
2022-09-12	12:32:01	8.95721	39.8435	31.9446	1537.79	1	27
2022-09-12	12:32:01	11.5249	51.2651	31.9446	1540.51	1	28
2022-09-12	12:32:01	5.14474	22.8848	31.9446	1560.68	1	29
2022-09-12	12:32:02	1.50449	6.69227	4.1708	1547.2	FALSE	29
2022-09-12	12:32:02	0.720216	3.20366	4.1708	1563.88	FALSE	29
2022-09-12	12:32:02	0.588206	2.61646	4.1708	1549.81	FALSE	29

## Sheet: Royal_prong_2022912122642 ( (2)
Date	Time	Lbs	Newtons	Total force x time	Total Time Steps Force >13.345		**GoPro Fitting: 1215
2022-09-12	12:27:02	0.25126	1.11765	1.11765	FALSE	0			Total force x time	1549.81
2022-09-12	12:27:02	0.292379	1.30056	1.30056	FALSE	0			Total Time Steps Force >3	29
2022-09-12	12:27:02	0.254059	1.13011	2.24776	FALSE	0
2022-09-12	12:27:02	0.303066	1.3481	2.64866	FALSE	0
2022-09-12	12:27:03	0.392176	1.74448	3.99224	FALSE	0
2022-09-12	12:27:03	0.54098	2.40639	5.05505	FALSE	0
2022-09-12	12:27:03	0.609682	2.71199	6.70422	FALSE	0
2022-09-12	12:27:03	1.07141	4.76585	9.82089	FALSE	0
2022-09-12	12:27:04	1.19253	5.30461	12.0088	FALSE	0
2022-09-12	12:27:04	0.90841	4.04079	13.8617	FALSE	0
2022-09-12	12:27:04	0.468054	2.082	14.0908	FALSE	0
2022-09-12	12:27:05	0.386883	1.72093	15.5826	FALSE	0
2022-09-12	12:27:05	0.496399	2.20808	16.2989	FALSE	0
2022-09-12	12:27:05	0.317519	1.41239	16.995	FALSE	0
2022-09-12	12:27:05	0.483168	2.14923	18.4481	FALSE	0
2022-09-12	12:27:06	0.368053	1.63717	18.6322	FALSE	0
2022-09-12	12:27:06	0.402252	1.7893	20.2374	FALSE	0
2022-09-12	12:27:06	0.349733	1.55568	20.1879	FALSE	0
2022-09-12	12:27:06	0.361845	1.60956	21.847	FALSE	0
2022-09-12	12:27:07	0.34958	1.555	21.7429	FALSE	0
2022-09-12	12:27:07	0.335636	1.49298	23.34	FALSE	0
2022-09-12	12:27:07	0.246832	1.09796	22.8408	FALSE	0
2022-09-12	12:27:07	0.371361	1.65189	24.9919	FALSE	0
2022-09-12	12:27:08	0.246374	1.09592	23.9367	FALSE	0
2022-09-12	12:27:08	0.24897	1.10747	26.0993	FALSE	0
2022-09-12	12:27:08	0.262252	1.16655	25.1033	FALSE	0
2022-09-12	12:27:09	0.521031	2.31765	28.417	FALSE	0
2022-09-12	12:27:09	1.56352	6.95485	32.0581	FALSE	0
2022-09-12	12:27:09	2.32057	10.3224	38.7393	FALSE	0
2022-09-12	12:27:09	2.82413	12.5623	44.6204	FALSE	0
2022-09-12	12:27:10	0.775687	3.45041	42.1898	FALSE	0
2022-09-12	12:27:10	0.689428	3.06671	47.6871	FALSE	0
2022-09-12	12:27:10	0.444084	1.97537	44.1651	FALSE	0
2022-09-12	12:27:10	0.579656	2.57843	50.2656	FALSE	0
2022-09-12	12:27:11	0.638537	2.84034	47.0055	FALSE	0
2022-09-12	12:27:11	0.493753	2.19631	52.4619	FALSE	0
2022-09-12	12:27:11	0.605967	2.69546	49.7009	FALSE	0
2022-09-12	12:27:11	0.469071	2.08652	54.5484	FALSE	0
2022-09-12	12:27:12	0.592124	2.63389	52.3348	FALSE	0
2022-09-12	12:27:12	0.335585	1.49275	56.0412	FALSE	0
2022-09-12	12:27:12	0.425764	1.89388	54.2287	FALSE	0
2022-09-12	12:27:13	0.392227	1.7447	57.7859	FALSE	0
2022-09-12	12:27:13	0.379962	1.69015	55.9188	FALSE	0
2022-09-12	12:27:13	0.419809	1.86739	59.6533	FALSE	0
2022-09-12	12:27:13	0.716654	3.18782	59.1067	FALSE	0
2022-09-12	12:27:14	0.899962	4.00321	63.6565	FALSE	0
2022-09-12	12:27:14	1.9106	8.49873	67.6054	FALSE	0
2022-09-12	12:27:14	2.39095	10.6354	74.2919	FALSE	0
2022-09-12	12:27:14	1.81055	8.05369	75.6591	FALSE	0
2022-09-12	12:27:15	1.32515	5.89453	80.1864	FALSE	0
2022-09-12	12:27:15	0.328664	1.46196	77.1211	FALSE	0
2022-09-12	12:27:15	0.338435	1.50543	81.6918	FALSE	0
2022-09-12	12:27:15	0.251514	1.11878	78.2398	FALSE	0
2022-09-12	12:27:16	0.160064	0.711997	82.4038	FALSE	0
2022-09-12	12:27:16	0.00316817	0.0140927	78.2539	FALSE	0
2022-09-12	12:27:16	0.143473	0.638197	83.042	FALSE	0
2022-09-12	12:27:17	0.0643386	0.286191	78.5401	FALSE	0
2022-09-12	12:27:17	0.197265	0.877474	83.9195	FALSE	0
2022-09-12	12:27:17	0.100725	0.448045	78.9882	FALSE	0
2022-09-12	12:27:17	0.244848	1.08913	85.0086	FALSE	0
2022-09-12	12:27:18	0.297163	1.32184	80.31	FALSE	0
2022-09-12	12:27:18	0.161692	0.719238	85.7279	FALSE	0
2022-09-12	12:27:18	0.134466	0.598132	80.9081	FALSE	0
2022-09-12	12:27:18	0.191514	0.851893	86.5798	FALSE	0
2022-09-12	12:27:19	0.306527	1.36349	82.2716	FALSE	0
2022-09-12	12:27:19	0.210802	0.937689	87.5175	FALSE	0
2022-09-12	12:27:19	0.182303	0.81092	83.0825	FALSE	0
2022-09-12	12:27:19	0.241998	1.07646	88.5939	FALSE	0
2022-09-12	12:27:20	0.265255	1.17991	84.2625	FALSE	0
2022-09-12	12:27:20	0.170496	0.7584	89.3523	FALSE	0
2022-09-12	12:27:20	-0.102888	-0.457666	84.2625	FALSE	0
2022-09-12	12:27:21	0.210242	0.935198	90.2875	FALSE	0
2022-09-12	12:27:21	0.187392	0.833557	85.096	FALSE	0
2022-09-12	12:27:21	0.37355	1.66163	91.9491	FALSE	0
2022-09-12	12:27:21	0.0785371	0.349349	85.4454	FALSE	0
2022-09-12	12:27:22	0.254364	1.13146	93.0806	FALSE	0
2022-09-12	12:27:22	0.147443	0.655856	86.1012	FALSE	0
2022-09-12	12:27:22	0.131362	0.584324	93.6649	FALSE	0
2022-09-12	12:27:22	0.140318	0.624163	86.7254	FALSE	0
2022-09-12	12:27:23	0.0613361	0.272835	93.9378	FALSE	0
2022-09-12	12:27:23	0.203728	0.906223	87.6316	FALSE	0
2022-09-12	12:27:23	0.159707	0.710409	94.6482	FALSE	0
2022-09-12	12:27:23	0.15014	0.667853	88.2995	FALSE	0
2022-09-12	12:27:24	0.183524	0.816351	95.4645	FALSE	0
2022-09-12	12:27:24	0.0517178	0.230051	88.5295	FALSE	0
2022-09-12	12:27:24	0.17243	0.767003	96.2315	FALSE	0
2022-09-12	12:27:25	0.188512	0.838539	89.368	FALSE	0
2022-09-12	12:27:25	0.233957	1.04069	97.2722	FALSE	0
2022-09-12	12:27:25	0.246781	1.09773	90.4658	FALSE	0
2022-09-12	12:27:25	0.0971122	0.431974	97.7042	FALSE	0
2022-09-12	12:27:26	0.286883	1.27611	91.7419	FALSE	0
2022-09-12	12:27:26	0.203626	0.905769	98.61	FALSE	0
2022-09-12	12:27:26	0.242964	1.08075	92.8226	FALSE	0
2022-09-12	12:27:26	0.111412	0.495583	99.1055	FALSE	0
2022-09-12	12:27:27	0.124644	0.554441	93.3771	FALSE	0
2022-09-12	12:27:27	0.206679	0.91935	100.025	FALSE	0
2022-09-12	12:27:27	0.255891	1.13825	94.5153	FALSE	0
2022-09-12	12:27:27	0.290751	1.29332	101.318	FALSE	0
2022-09-12	12:27:28	0.16444	0.731462	95.2468	FALSE	0
2022-09-12	12:27:28	0.0980282	0.436049	101.754	FALSE	0
2022-09-12	12:27:28	0.365458	1.62563	96.8724	FALSE	0
2022-09-12	12:27:29	0.296603	1.31935	103.074	FALSE	0
2022-09-12	12:27:29	0.373855	1.66298	98.5354	FALSE	0
2022-09-12	12:27:29	0.50383	2.24114	105.315	FALSE	0
2022-09-12	12:27:29	0.341489	1.51901	100.054	FALSE	0
2022-09-12	12:27:30	0.506527	2.25313	107.568	FALSE	0
2022-09-12	12:27:30	0.26271	1.16859	101.223	FALSE	0
2022-09-12	12:27:30	0.371667	1.65325	109.221	FALSE	0
2022-09-12	12:27:30	0.248868	1.10701	102.33	FALSE	0
2022-09-12	12:27:31	0.380013	1.69037	110.912	FALSE	0
2022-09-12	12:27:31	0.299657	1.33293	103.663	FALSE	0
2022-09-12	12:27:31	0.34673	1.54232	112.454	FALSE	0
2022-09-12	12:27:31	0.832837	3.70463	107.368	FALSE	0
2022-09-12	12:27:32	0.568308	2.52795	114.982	FALSE	0
2022-09-12	12:27:32	0.490038	2.17979	109.547	FALSE	0
2022-09-12	12:27:32	0.499911	2.2237	117.205	FALSE	0
2022-09-12	12:27:33	0.307952	1.36983	110.917	FALSE	0
2022-09-12	12:27:33	0.525203	2.33621	119.542	FALSE	0
2022-09-12	12:27:33	0.544847	2.42359	113.341	FALSE	0
2022-09-12	12:27:33	0.399911	1.77888	121.321	FALSE	0
2022-09-12	12:27:34	0.433651	1.92897	115.27	FALSE	0
2022-09-12	12:27:34	1.24444	5.53552	126.856	FALSE	0
2022-09-12	12:27:34	0.270089	1.20141	116.471	FALSE	0
2022-09-12	12:27:34	0.342405	1.52309	128.379	FALSE	0
2022-09-12	12:27:35	0.20729	0.922067	117.393	FALSE	0
2022-09-12	12:27:35	0.263677	1.17289	129.552	FALSE	0
2022-09-12	12:27:35	0.180522	0.802998	118.196	FALSE	0
2022-09-12	12:27:35	0.395076	1.75738	131.309	FALSE	0
2022-09-12	12:27:36	0.900776	4.00683	122.203	FALSE	0
2022-09-12	12:27:36	0.525763	2.3387	133.648	FALSE	0
2022-09-12	12:27:36	1.65854	7.37752	129.581	FALSE	0
2022-09-12	12:27:37	1.17167	5.21182	138.86	FALSE	0
2022-09-12	12:27:37	3.15314	14.0258	143.606	1	1
2022-09-12	12:27:37	3.35981	14.9451	153.805	1	2
2022-09-12	12:27:37	0.394466	1.75466	145.361	FALSE	2
2022-09-12	12:27:38	0.441947	1.96587	155.771	FALSE	2
2022-09-12	12:27:38	0.429784	1.91177	147.273	FALSE	2
2022-09-12	12:27:38	0.348104	1.54844	157.319	FALSE	2
2022-09-12	12:27:38	0.210751	0.937463	148.21	FALSE	2
2022-09-12	12:27:39	0.217926	0.969378	158.289	FALSE	2
2022-09-12	12:27:39	0.223473	0.994053	149.204	FALSE	2
2022-09-12	12:27:39	0.247901	1.10271	159.391	FALSE	2
2022-09-12	12:27:39	0.493142	2.19359	151.398	FALSE	2
2022-09-12	12:27:40	1.44022	6.40639	165.798	FALSE	2
2022-09-12	12:27:40	2.64408	11.7614	163.159	FALSE	2
2022-09-12	12:27:40	5.00316	22.2551	188.053	1	3
2022-09-12	12:27:41	3.96067	17.6179	180.777	1	4
2022-09-12	12:27:41	2.8936	12.8713	200.924	FALSE	4
2022-09-12	12:27:41	1.22973	5.47008	186.247	FALSE	4
2022-09-12	12:27:41	0.397774	1.76938	202.694	FALSE	4
2022-09-12	12:27:42	0.074873	0.33305	186.58	FALSE	4
2022-09-12	12:27:42	0.140573	0.625297	203.319	FALSE	4
2022-09-12	12:27:42	0.210853	0.937916	187.518	FALSE	4
2022-09-12	12:27:42	0.186527	0.829709	204.149	FALSE	4
2022-09-12	12:27:43	0.213499	0.949686	188.468	FALSE	4
2022-09-12	12:27:43	0.261489	1.16316	205.312	FALSE	4
2022-09-12	12:27:43	0.239758	1.06649	189.534	FALSE	4
2022-09-12	12:27:43	0.252328	1.12241	206.434	FALSE	4
2022-09-12	12:27:44	0.238282	1.05993	190.594	FALSE	4
2022-09-12	12:27:44	0.227341	1.01126	207.445	FALSE	4
2022-09-12	12:27:44	0.236858	1.05359	191.648	FALSE	4
2022-09-12	12:27:45	0.236349	1.05133	208.497	FALSE	4
2022-09-12	12:27:45	0.229224	1.01963	192.668	FALSE	4
2022-09-12	12:27:45	0.218435	0.971643	209.468	FALSE	4
2022-09-12	12:27:45	0.216451	0.962817	193.63	FALSE	4
2022-09-12	12:27:46	0.21528	0.957608	210.426	FALSE	4
2022-09-12	12:27:46	0.21299	0.947422	194.578	FALSE	4
2022-09-12	12:27:46	0.204135	0.908033	211.334	FALSE	4
2022-09-12	12:27:46	0.20159	0.896713	195.475	FALSE	4
2022-09-12	12:27:47	0.206171	0.91709	212.251	FALSE	4
2022-09-12	12:27:47	0.217825	0.968929	196.443	FALSE	4
2022-09-12	12:27:47	0.307392	1.36734	213.618	FALSE	4
2022-09-12	12:27:47	0.251311	1.11788	197.561	FALSE	4
2022-09-12	12:27:48	0.269224	1.19756	214.816	FALSE	4
2022-09-12	12:27:48	0.278792	1.24012	198.801	FALSE	4
2022-09-12	12:27:48	0.300725	1.33768	216.154	FALSE	4
2022-09-12	12:27:49	0.314771	1.40016	200.202	FALSE	4
2022-09-12	12:27:49	0.29355	1.30577	217.459	FALSE	4
2022-09-12	12:27:49	0.314109	1.39722	201.599	FALSE	4
2022-09-12	12:27:49	0.312583	1.39043	218.85	FALSE	4
2022-09-12	12:27:50	0.32785	1.45834	203.057	FALSE	4
2022-09-12	12:27:50	0.326272	1.45132	220.301	FALSE	4
2022-09-12	12:27:50	0.307341	1.36711	204.424	FALSE	4
2022-09-12	12:27:50	0.336908	1.49863	221.8	FALSE	4
2022-09-12	12:27:51	0.305967	1.361	205.785	FALSE	4
2022-09-12	12:27:51	0.323931	1.44091	223.241	FALSE	4
2022-09-12	12:27:51	0.315789	1.40469	207.19	FALSE	4
2022-09-12	12:27:51	0.322456	1.43435	224.675	FALSE	4
2022-09-12	12:27:52	0.318537	1.41692	208.607	FALSE	4
2022-09-12	12:27:52	0.323066	1.43706	226.112	FALSE	4
2022-09-12	12:27:52	0.33472	1.4889	210.096	FALSE	4
2022-09-12	12:27:52	0.352023	1.56587	227.678	FALSE	4
2022-09-12	12:27:53	0.369173	1.64216	211.738	FALSE	4
2022-09-12	12:27:53	0.48042	2.137	229.815	FALSE	4
2022-09-12	12:27:53	0.312532	1.3902	213.128	FALSE	4
2022-09-12	12:27:54	0.250293	1.11335	230.928	FALSE	4
2022-09-12	12:27:54	0.115585	0.514145	213.642	FALSE	4
2022-09-12	12:27:54	0.183066	0.814314	231.743	FALSE	4
2022-09-12	12:27:54	0.0955855	0.425183	214.067	FALSE	4
2022-09-12	12:27:55	-0.120241	-0.534856	231.743	FALSE	4
2022-09-12	12:27:55	-0.113677	-0.505658	214.067	FALSE	4
2022-09-12	12:27:55	-0.020445	-0.0909434	231.743	FALSE	4
2022-09-12	12:27:55	-0.108129	-0.480979	214.067	FALSE	4
2022-09-12	12:27:56	-0.0278242	-0.123768	231.743	FALSE	4
2022-09-12	12:27:56	0.0465778	0.207187	214.275	FALSE	4
2022-09-12	12:27:56	0.0846439	0.376513	232.119	FALSE	4
2022-09-12	12:27:56	0.20729	0.922067	215.197	FALSE	4
2022-09-12	12:27:57	0.347545	1.54595	233.665	FALSE	4
2022-09-12	12:27:57	0.312176	1.38862	216.585	FALSE	4
2022-09-12	12:27:57	0.332328	1.47826	235.143	FALSE	4
2022-09-12	12:27:58	0.400827	1.78296	218.368	FALSE	4
2022-09-12	12:27:58	0.285407	1.26955	236.413	FALSE	4
2022-09-12	12:27:58	0.325102	1.44612	219.814	FALSE	4
2022-09-12	12:27:58	0.312227	1.38885	237.802	FALSE	4
2022-09-12	12:27:59	0.378384	1.68313	221.498	FALSE	4
2022-09-12	12:27:59	0.274822	1.22246	239.024	FALSE	4
2022-09-12	12:27:59	0.221387	0.984774	222.482	FALSE	4
2022-09-12	12:27:59	0.422354	1.87872	240.903	FALSE	4
2022-09-12	12:28:00	0.282456	1.25642	223.739	FALSE	4
2022-09-12	12:28:00	0.38271	1.70237	242.605	FALSE	4
2022-09-12	12:28:00	0.144339	0.642049	224.381	FALSE	4
2022-09-12	12:28:00	0.429326	1.90973	244.515	FALSE	4
2022-09-12	12:28:01	0.340623	1.51516	225.896	FALSE	4
2022-09-12	12:28:01	0.250191	1.1129	245.628	FALSE	4
2022-09-12	12:28:01	0.18902	0.840799	226.737	FALSE	4
2022-09-12	12:28:02	0.228512	1.01647	246.644	FALSE	4
2022-09-12	12:28:02	0.167596	0.745501	227.482	FALSE	4
2022-09-12	12:28:02	0.224491	0.998581	247.643	FALSE	4
2022-09-12	12:28:02	0.204542	0.909844	228.392	FALSE	4
2022-09-12	12:28:03	0.117367	0.522072	248.165	FALSE	4
2022-09-12	12:28:03	0.300878	1.33837	229.73	FALSE	4
2022-09-12	12:28:03	0.231616	1.03027	249.195	FALSE	4
2022-09-12	12:28:03	0.212328	0.944477	230.675	FALSE	4
2022-09-12	12:28:04	0.301896	1.34289	250.538	FALSE	4
2022-09-12	12:28:04	0.167087	0.743236	231.418	FALSE	4
2022-09-12	12:28:04	0.225662	1.00379	251.542	FALSE	4
2022-09-12	12:28:04	0.303473	1.34991	232.768	FALSE	4
2022-09-12	12:28:05	0.251056	1.11675	252.659	FALSE	4
2022-09-12	12:28:05	0.349682	1.55546	234.324	FALSE	4
2022-09-12	12:28:05	0.225865	1.00469	253.664	FALSE	4
2022-09-12	12:28:06	0.290547	1.29241	235.616	FALSE	4
2022-09-12	12:28:06	0.230903	1.0271	254.691	FALSE	4
2022-09-12	12:28:06	0.215331	0.957835	236.574	FALSE	4
2022-09-12	12:28:06	0.413957	1.84136	256.532	FALSE	4
2022-09-12	12:28:07	0.196145	0.872492	237.446	FALSE	4
2022-09-12	12:28:07	0.342608	1.52399	258.056	FALSE	4
2022-09-12	12:28:07	0.285204	1.26864	238.715	FALSE	4
2022-09-12	12:28:07	0.307188	1.36643	259.422	FALSE	4
2022-09-12	12:28:08	0.29416	1.30848	240.023	FALSE	4
2022-09-12	12:28:08	0.176603	0.785565	260.208	FALSE	4
2022-09-12	12:28:08	0.39472	1.75579	241.779	FALSE	4
2022-09-12	12:28:08	0.178486	0.793941	261.002	FALSE	4
2022-09-12	12:28:09	0.274771	1.22224	243.001	FALSE	4
2022-09-12	12:28:09	0.380369	1.69196	262.694	FALSE	4
2022-09-12	12:28:09	0.210853	0.937916	243.939	FALSE	4
2022-09-12	12:28:10	0.267545	1.19009	263.884	FALSE	4
2022-09-12	12:28:10	0.410089	1.82416	245.764	FALSE	4
2022-09-12	12:28:10	0.180624	0.803452	264.687	FALSE	4
2022-09-12	12:28:10	0.269428	1.19847	246.962	FALSE	4
2022-09-12	12:28:11	0.130496	0.580472	265.268	FALSE	4
2022-09-12	12:28:11	0.266374	1.18488	248.147	FALSE	4
2022-09-12	12:28:11	0.205713	0.915053	266.183	FALSE	4
2022-09-12	12:28:11	0.164593	0.732143	248.879	FALSE	4
2022-09-12	12:28:12	0.0808272	0.359536	266.543	FALSE	4
2022-09-12	12:28:12	0.206781	0.919803	249.799	FALSE	4
2022-09-12	12:28:12	0.313855	1.39609	267.939	FALSE	4
2022-09-12	12:28:12	0.530547	2.35998	252.159	FALSE	4
2022-09-12	12:28:13	0.301692	1.34199	269.281	FALSE	4
2022-09-12	12:28:13	0.17645	0.784885	252.944	FALSE	4
2022-09-12	12:28:13	0.0914633	0.406847	269.687	FALSE	4
2022-09-12	12:28:14	0.157214	0.699319	253.643	FALSE	4
2022-09-12	12:28:14	-0.0282313	-0.125578	269.687	FALSE	4
2022-09-12	12:28:14	0.147443	0.655856	254.299	FALSE	4
2022-09-12	12:28:14	0.00922418	0.041031	269.728	FALSE	4
2022-09-12	12:28:15	0.0856109	0.380814	254.68	FALSE	4
2022-09-12	12:28:15	-0.0163229	-0.0726075	269.728	FALSE	4
2022-09-12	12:28:15	0.198639	0.883586	255.563	FALSE	4
2022-09-12	12:28:15	0.237824	1.05789	270.786	FALSE	4
2022-09-12	12:28:16	0.166527	0.740745	256.304	FALSE	4
2022-09-12	12:28:16	0.387392	1.7232	272.51	FALSE	4
2022-09-12	12:28:16	0.179199	0.797113	257.101	FALSE	4
2022-09-12	12:28:16	0.475026	2.11301	274.623	FALSE	4
2022-09-12	12:28:17	0.234873	1.04476	258.146	FALSE	4
2022-09-12	12:28:17	0.331311	1.47374	276.096	FALSE	4
2022-09-12	12:28:17	0.384491	1.71029	259.856	FALSE	4
2022-09-12	12:28:18	0.373855	1.66298	277.759	FALSE	4
2022-09-12	12:28:18	0.329937	1.46763	261.324	FALSE	4
2022-09-12	12:28:18	0.303575	1.35036	279.11	FALSE	4
2022-09-12	12:28:18	0.313295	1.3936	262.717	FALSE	4
2022-09-12	12:28:19	0.39472	1.75579	280.865	FALSE	4
2022-09-12	12:28:19	0.683066	3.03841	265.756	FALSE	4
2022-09-12	12:28:19	0.558944	2.48629	283.352	FALSE	4
2022-09-12	12:28:19	0.715687	3.18352	268.939	FALSE	4
2022-09-12	12:28:20	0.366171	1.6288	284.981	FALSE	4
2022-09-12	12:28:20	0.338741	1.50679	270.446	FALSE	4
2022-09-12	12:28:20	0.513753	2.28528	287.266	FALSE	4
2022-09-12	12:28:20	0.318791	1.41805	271.864	FALSE	4
2022-09-12	12:28:21	0.357926	1.59213	288.858	FALSE	4
2022-09-12	12:28:21	0.40098	1.78364	273.648	FALSE	4
2022-09-12	12:28:21	0.280674	1.24849	290.106	FALSE	4
2022-09-12	12:28:22	0.372277	1.65596	275.304	FALSE	4
2022-09-12	12:28:22	0.262608	1.16813	291.275	FALSE	4
2022-09-12	12:28:22	0.285102	1.26819	276.572	FALSE	4
2022-09-12	12:28:22	0.285051	1.26796	292.543	FALSE	4
2022-09-12	12:28:23	0.335331	1.49162	278.064	FALSE	4
2022-09-12	12:28:23	0.280064	1.24578	293.788	FALSE	4
2022-09-12	12:28:23	0.304847	1.35602	279.42	FALSE	4
2022-09-12	12:28:23	0.255993	1.13871	294.927	FALSE	4
2022-09-12	12:28:24	0.264135	1.17493	280.595	FALSE	4
2022-09-12	12:28:24	0.239453	1.06513	295.992	FALSE	4
2022-09-12	12:28:24	0.231972	1.03186	281.626	FALSE	4
2022-09-12	12:28:24	0.211718	0.941764	296.934	FALSE	4
2022-09-12	12:28:25	0.150089	0.667626	282.294	FALSE	4
2022-09-12	12:28:25	0.191311	0.85099	297.785	FALSE	4
2022-09-12	12:28:25	0.157977	0.702713	282.997	FALSE	4
2022-09-12	12:28:26	0.327239	1.45562	299.241	FALSE	4
2022-09-12	12:28:26	0.190395	0.846915	283.844	FALSE	4
2022-09-12	12:28:26	0.200318	0.891055	300.132	FALSE	4
2022-09-12	12:28:26	0.211616	0.94131	284.785	FALSE	4
2022-09-12	12:28:27	0.162099	0.721049	300.853	FALSE	4
2022-09-12	12:28:27	0.319453	1.42099	286.206	FALSE	4
2022-09-12	12:28:27	0.15187	0.675548	301.528	FALSE	4
2022-09-12	12:28:27	0.335484	1.4923	287.698	FALSE	4
2022-09-12	12:28:28	0.302659	1.34629	302.874	FALSE	4
2022-09-12	12:28:28	1.23294	5.48436	293.183	FALSE	4
2022-09-12	12:28:28	0.187392	0.833557	303.708	FALSE	4
2022-09-12	12:28:28	0.304033	1.3524	294.535	FALSE	4
2022-09-12	12:28:29	0.345102	1.53508	305.243	FALSE	4
2022-09-12	12:28:29	0.292532	1.30124	295.836	FALSE	4
2022-09-12	12:28:29	0.299606	1.33271	306.576	FALSE	4
2022-09-12	12:28:30	0.217163	0.965984	296.802	FALSE	4
2022-09-12	12:28:30	0.441896	1.96564	308.541	FALSE	4
2022-09-12	12:28:30	0.236247	1.05087	297.853	FALSE	4
2022-09-12	12:28:30	0.743575	3.30757	311.849	FALSE	4
2022-09-12	12:28:31	0.202048	0.89875	298.752	FALSE	4
2022-09-12	12:28:31	0.167188	0.743686	312.593	FALSE	4
2022-09-12	12:28:31	0.404746	1.80039	300.552	FALSE	4
2022-09-12	12:28:31	0.118079	0.525239	313.118	FALSE	4
2022-09-12	12:28:32	0.213346	0.949006	301.501	FALSE	4
2022-09-12	12:28:32	0.255534	1.13667	314.255	FALSE	4
2022-09-12	12:28:32	0.164033	0.729652	302.231	FALSE	4
2022-09-12	12:28:32	0.227545	1.01217	315.267	FALSE	4
2022-09-12	12:28:33	0.156145	0.694564	302.925	FALSE	4
2022-09-12	12:28:33	0.209784	0.933161	316.2	FALSE	4
2022-09-12	12:28:33	0.277316	1.23356	304.159	FALSE	4
2022-09-12	12:28:34	0.0840841	0.374023	316.574	FALSE	4
2022-09-12	12:28:34	0.083219	0.370175	304.529	FALSE	4
2022-09-12	12:28:34	-0.0203942	-0.0907175	316.574	FALSE	4
2022-09-12	12:28:34	-0.058613	-0.260722	304.529	FALSE	4
2022-09-12	12:28:35	0.0240333	0.106905	316.681	FALSE	4
2022-09-12	12:28:35	0.0895295	0.398245	304.927	FALSE	4
2022-09-12	12:28:35	0.113753	0.505996	317.187	FALSE	4
2022-09-12	12:28:35	0.15243	0.678039	305.605	FALSE	4
2022-09-12	12:28:36	0.188461	0.838312	318.025	FALSE	4
2022-09-12	12:28:36	0.253906	1.12942	306.735	FALSE	4
2022-09-12	12:28:36	0.254975	1.13418	319.159	FALSE	4
2022-09-12	12:28:36	0.183321	0.815448	307.55	FALSE	4
2022-09-12	12:28:37	0.346578	1.54165	320.701	FALSE	4
2022-09-12	12:28:37	0.17645	0.784885	308.335	FALSE	4
2022-09-12	12:28:37	0.221387	0.984774	321.686	FALSE	4
2022-09-12	12:28:38	0.0503438	0.223939	308.559	FALSE	4
2022-09-12	12:28:38	0.0603692	0.268534	321.954	FALSE	4
2022-09-12	12:28:38	0.179249	0.797335	309.357	FALSE	4
2022-09-12	12:28:38	0.233041	1.03661	322.991	FALSE	4
2022-09-12	12:28:39	0.245662	1.09275	310.449	FALSE	4
2022-09-12	12:28:39	0.198333	0.882225	323.873	FALSE	4
2022-09-12	12:28:39	0.147494	0.656083	311.105	FALSE	4
2022-09-12	12:28:39	0.235534	1.0477	324.921	FALSE	4
2022-09-12	12:28:40	0.211412	0.940403	312.046	FALSE	4
2022-09-12	12:28:40	0.250598	1.11471	326.036	FALSE	4
2022-09-12	12:28:40	0.413448	1.8391	313.885	FALSE	4
2022-09-12	12:28:40	0.281132	1.25053	327.286	FALSE	4
2022-09-12	12:28:41	0.30042	1.33633	315.221	FALSE	4
2022-09-12	12:28:41	0.235484	1.04748	328.334	FALSE	4
2022-09-12	12:28:41	0.0562979	0.250424	315.472	FALSE	4
2022-09-12	12:28:42	0.0201147	0.0894742	328.423	FALSE	4
2022-09-12	12:28:42	0.301183	1.33972	316.811	FALSE	4
2022-09-12	12:28:42	0.265407	1.18058	329.604	FALSE	4
2022-09-12	12:28:42	0.32612	1.45065	318.262	FALSE	4
2022-09-12	12:28:43	0.325763	1.44906	331.053	FALSE	4
2022-09-12	12:28:43	0.21126	0.939727	319.202	FALSE	4
2022-09-12	12:28:43	0.313702	1.39541	332.448	FALSE	4
2022-09-12	12:28:43	0.184695	0.82156	320.023	FALSE	4
2022-09-12	12:28:44	0.215585	0.958965	333.407	FALSE	4
2022-09-12	12:28:44	0.271565	1.20798	321.231	FALSE	4
2022-09-12	12:28:44	0.227341	1.01126	334.418	FALSE	4
2022-09-12	12:28:44	0.345458	1.53667	322.768	FALSE	4
2022-09-12	12:28:45	0.24215	1.07713	335.495	FALSE	4
2022-09-12	12:28:45	0.244339	1.08687	323.855	FALSE	4
2022-09-12	12:28:45	0.208308	0.926596	336.422	FALSE	4
2022-09-12	12:28:46	0.168613	0.750024	324.605	FALSE	4
2022-09-12	12:28:46	0.324746	1.44454	337.867	FALSE	4
2022-09-12	12:28:46	0.165611	0.736671	325.341	FALSE	4
2022-09-12	12:28:46	0.215076	0.956701	338.823	FALSE	4
2022-09-12	12:28:47	0.255484	1.13644	326.478	FALSE	4
2022-09-12	12:28:47	0.20327	0.904186	339.727	FALSE	4
2022-09-12	12:28:47	0.316705	1.40877	327.887	FALSE	4
2022-09-12	12:28:47	0.143728	0.639331	340.367	FALSE	4
2022-09-12	12:28:48	0.374313	1.66502	329.552	FALSE	4
2022-09-12	12:28:48	0.212277	0.944251	341.311	FALSE	4
2022-09-12	12:28:48	0.304949	1.35647	330.908	FALSE	4
2022-09-12	12:28:48	0.139453	0.620315	341.931	FALSE	4
2022-09-12	12:28:49	0.148257	0.659477	331.568	FALSE	4
2022-09-12	12:28:49	0.293499	1.30554	343.237	FALSE	4
2022-09-12	12:28:49	0.199555	0.887661	332.455	FALSE	4
2022-09-12	12:28:50	0.26841	1.19394	344.431	FALSE	4
2022-09-12	12:28:50	-0.00232801	-0.0103555	332.455	FALSE	4
2022-09-12	12:28:50	0.145458	0.647026	345.078	FALSE	4
2022-09-12	12:28:50	0.300725	1.33768	333.793	FALSE	4
2022-09-12	12:28:51	0.611718	2.72104	347.799	FALSE	4
2022-09-12	12:28:51	0.492583	2.19111	335.984	FALSE	4
2022-09-12	12:28:51	0.236196	1.05065	348.85	FALSE	4
2022-09-12	12:28:51	0.413295	1.83842	337.823	FALSE	4
2022-09-12	12:28:52	0.295738	1.3155	350.165	FALSE	4
2022-09-12	12:28:52	0.320573	1.42597	339.248	FALSE	4
2022-09-12	12:28:52	0.327697	1.45766	351.623	FALSE	4
2022-09-12	12:28:52	0.29869	1.32863	340.577	FALSE	4
2022-09-12	12:28:53	0.526272	2.34096	353.964	FALSE	4
2022-09-12	12:28:53	0.517773	2.30316	342.88	FALSE	4
2022-09-12	12:28:53	0.398944	1.77458	355.738	FALSE	4
2022-09-12	12:28:54	0.37813	1.682	344.562	FALSE	4
2022-09-12	12:28:54	0.372735	1.658	357.396	FALSE	4
2022-09-12	12:28:54	0.505	2.24634	346.809	FALSE	4
2022-09-12	12:28:54	0.320522	1.42575	358.822	FALSE	4
2022-09-12	12:28:55	0.276501	1.22993	348.039	FALSE	4
2022-09-12	12:28:55	0.285204	1.26864	360.091	FALSE	4
2022-09-12	12:28:55	0.354873	1.57855	349.617	FALSE	4
2022-09-12	12:28:55	0.306934	1.3653	361.456	FALSE	4
2022-09-12	12:28:56	0.232939	1.03616	350.653	FALSE	4
2022-09-12	12:28:56	0.126781	0.563947	362.02	FALSE	4
2022-09-12	12:28:56	0.432786	1.92512	352.578	FALSE	4
2022-09-12	12:28:56	0.17014	0.756817	362.777	FALSE	4
2022-09-12	12:28:57	0.347952	1.54776	354.126	FALSE	4
2022-09-12	12:28:57	0.287138	1.27725	364.054	FALSE	4
2022-09-12	12:28:57	0.317621	1.41284	355.539	FALSE	4
2022-09-12	12:28:58	0.57299	2.54877	366.603	FALSE	4
2022-09-12	12:28:58	0.524949	2.33508	357.874	FALSE	4
2022-09-12	12:28:58	1.16256	5.1713	371.774	FALSE	4
2022-09-12	12:28:58	1.53625	6.83355	364.708	FALSE	4
2022-09-12	12:28:59	2.91294	12.9573	384.731	FALSE	4
2022-09-12	12:28:59	4.15263	18.4717	383.179	1	5
2022-09-12	12:28:59	2.1907	9.74467	394.476	FALSE	5
2022-09-12	12:28:59	0.640572	2.84939	386.029	FALSE	5
2022-09-12	12:29:00	0.691412	3.07554	397.552	FALSE	5
2022-09-12	12:29:00	0.441641	1.96451	387.993	FALSE	5
2022-09-12	12:29:00	0.438435	1.95025	399.502	FALSE	5
2022-09-12	12:29:01	0.590954	2.62868	390.622	FALSE	5
2022-09-12	12:29:01	0.416654	1.85336	401.355	FALSE	5
2022-09-12	12:29:01	0.362557	1.61273	392.235	FALSE	5
2022-09-12	12:29:01	0.549224	2.44306	403.798	FALSE	5
2022-09-12	12:29:02	0.394873	1.75647	393.991	FALSE	5
2022-09-12	12:29:02	0.389173	1.73112	405.529	FALSE	5
2022-09-12	12:29:02	0.487901	2.17028	396.161	FALSE	5
2022-09-12	12:29:02	0.449275	1.99847	407.528	FALSE	5
2022-09-12	12:29:03	0.434466	1.93259	398.094	FALSE	5
2022-09-12	12:29:03	0.442456	1.96813	409.496	FALSE	5
2022-09-12	12:29:03	0.407087	1.8108	399.905	FALSE	5
2022-09-12	12:29:03	0.593448	2.63978	412.136	FALSE	5
2022-09-12	12:29:04	0.569021	2.53112	402.436	FALSE	5
2022-09-12	12:29:04	0.466629	2.07566	414.211	FALSE	5
2022-09-12	12:29:04	0.471311	2.09649	404.532	FALSE	5
2022-09-12	12:29:04	0.539097	2.39801	416.609	FALSE	5
2022-09-12	12:29:05	0.36556	1.62608	406.158	FALSE	5
2022-09-12	12:29:05	0.900114	4.00389	420.613	FALSE	5
2022-09-12	12:29:05	1.15324	5.12984	411.288	FALSE	5
2022-09-12	12:29:06	2.08475	9.27338	429.887	FALSE	5
2022-09-12	12:29:06	3.68968	16.4124	427.701	1	6
2022-09-12	12:29:06	3.88027	17.2602	447.147	1	7
2022-09-12	12:29:06	1.68734	7.50563	435.206	FALSE	7
2022-09-12	12:29:07	1.04302	4.63956	451.786	FALSE	7
2022-09-12	12:29:07	0.749784	3.33519	438.542	FALSE	7
2022-09-12	12:29:07	0.614873	2.73508	454.522	FALSE	7
2022-09-12	12:29:07	0.668715	2.97458	441.516	FALSE	7
2022-09-12	12:29:08	0.495382	2.20356	456.725	FALSE	7
2022-09-12	12:29:08	0.723015	3.21612	444.732	FALSE	7
2022-09-12	12:29:08	0.546985	2.4331	459.158	FALSE	7
2022-09-12	12:29:08	0.601336	2.67486	447.407	FALSE	7
2022-09-12	12:29:09	0.447494	1.99054	461.149	FALSE	7
2022-09-12	12:29:09	0.539911	2.40163	449.809	FALSE	7
2022-09-12	12:29:09	0.43874	1.9516	463.1	FALSE	7
2022-09-12	12:29:10	0.440573	1.95976	451.769	FALSE	7
2022-09-12	12:29:10	0.507138	2.25585	465.356	FALSE	7
2022-09-12	12:29:10	0.442914	1.97017	453.739	FALSE	7
2022-09-12	12:29:10	0.327494	1.45676	466.813	FALSE	7
2022-09-12	12:29:11	0.444644	1.97787	455.717	FALSE	7
2022-09-12	12:29:11	0.436908	1.94345	468.756	FALSE	7
2022-09-12	12:29:11	0.487494	2.16847	457.885	FALSE	7
2022-09-12	12:29:11	0.510293	2.26989	471.026	FALSE	7
2022-09-12	12:29:12	0.338333	1.50497	459.39	FALSE	7
2022-09-12	12:29:12	0.420674	1.87124	472.898	FALSE	7
2022-09-12	12:29:12	0.428868	1.90769	461.298	FALSE	7
2022-09-12	12:29:12	0.339962	1.51222	474.41	FALSE	7
2022-09-12	12:29:13	0.360623	1.60412	462.902	FALSE	7
2022-09-12	12:29:13	0.547952	2.4374	476.847	FALSE	7
2022-09-12	12:29:13	0.385764	1.71596	464.618	FALSE	7
2022-09-12	12:29:14	0.432685	1.92467	478.772	FALSE	7
2022-09-12	12:29:14	0.473244	2.10508	466.723	FALSE	7
2022-09-12	12:29:14	0.345865	1.53848	480.31	FALSE	7
2022-09-12	12:29:14	0.397417	1.76779	468.491	FALSE	7
2022-09-12	12:29:15	0.461489	2.0528	482.363	FALSE	7
2022-09-12	12:29:15	0.364746	1.62246	470.113	FALSE	7
2022-09-12	12:29:15	0.325102	1.44612	483.809	FALSE	7
2022-09-12	12:29:15	0.392583	1.74629	471.859	FALSE	7
2022-09-12	12:29:16	0.475738	2.11618	485.925	FALSE	7
2022-09-12	12:29:16	0.308715	1.37323	473.233	FALSE	7
2022-09-12	12:29:16	0.518893	2.30814	488.234	FALSE	7
2022-09-12	12:29:16	0.314109	1.39722	474.63	FALSE	7
2022-09-12	12:29:17	0.443982	1.97492	490.208	FALSE	7
2022-09-12	12:29:17	0.36556	1.62608	476.256	FALSE	7
2022-09-12	12:29:17	0.3793	1.6872	491.896	FALSE	7
2022-09-12	12:29:18	0.477061	2.12206	478.378	FALSE	7
2022-09-12	12:29:18	0.317774	1.41352	493.309	FALSE	7
2022-09-12	12:29:18	0.467748	2.08064	480.459	FALSE	7
2022-09-12	12:29:18	0.359402	1.59869	494.908	FALSE	7
2022-09-12	12:29:19	0.432176	1.92241	482.381	FALSE	7
2022-09-12	12:29:19	0.388512	1.72818	496.636	FALSE	7
2022-09-12	12:29:19	0.40215	1.78884	484.17	FALSE	7
2022-09-12	12:29:19	0.386425	1.7189	498.355	FALSE	7
2022-09-12	12:29:20	0.189122	0.841252	485.011	FALSE	7
2022-09-12	12:29:20	0.342048	1.5215	499.876	FALSE	7
2022-09-12	12:29:20	0.328562	1.46151	486.473	FALSE	7
2022-09-12	12:29:20	0.312481	1.38998	501.266	FALSE	7
2022-09-12	12:29:21	0.26388	1.17379	487.646	FALSE	7
2022-09-12	12:29:21	0.182761	0.812957	502.079	FALSE	7
2022-09-12	12:29:21	0.454364	2.0211	489.668	FALSE	7
2022-09-12	12:29:22	0.298893	1.32954	503.409	FALSE	7
2022-09-12	12:29:22	0.44388	1.97447	491.642	FALSE	7
2022-09-12	12:29:22	0.215942	0.960553	504.369	FALSE	7
2022-09-12	12:29:22	0.270751	1.20435	492.846	FALSE	7
2022-09-12	12:29:23	0.229224	1.01963	505.389	FALSE	7
2022-09-12	12:29:23	0.288919	1.28517	494.132	FALSE	7
2022-09-12	12:29:23	0.273702	1.21748	506.607	FALSE	7
2022-09-12	12:29:23	0.188054	0.836502	494.968	FALSE	7
2022-09-12	12:29:24	0.524033	2.331	508.938	FALSE	7
2022-09-12	12:29:24	0.277112	1.23265	496.201	FALSE	7
2022-09-12	12:29:24	0.32612	1.45065	510.388	FALSE	7
2022-09-12	12:29:24	0.211005	0.938592	497.139	FALSE	7
2022-09-12	12:29:25	0.121133	0.538824	510.927	FALSE	7
2022-09-12	12:29:25	0.409275	1.82054	498.96	FALSE	7
2022-09-12	12:29:25	0.334364	1.48732	512.414	FALSE	7
2022-09-12	12:29:26	0.459046	2.04193	501.002	FALSE	7
2022-09-12	12:29:26	0.280318	1.24691	513.661	FALSE	7
2022-09-12	12:29:26	0.258283	1.14889	502.151	FALSE	7
2022-09-12	12:29:26	0.27701	1.2322	514.894	FALSE	7
2022-09-12	12:29:27	0.304339	1.35376	503.504	FALSE	7
2022-09-12	12:29:27	0.427392	1.90113	516.795	FALSE	7
2022-09-12	12:29:27	0.326221	1.4511	504.955	FALSE	7
2022-09-12	12:29:27	0.315382	1.40288	518.198	FALSE	7
2022-09-12	12:29:28	0.267646	1.19054	506.146	FALSE	7
2022-09-12	12:29:28	0.443524	1.97288	520.17	FALSE	7
2022-09-12	12:29:28	0.656094	2.91844	509.064	FALSE	7
2022-09-12	12:29:28	0.348919	1.55206	521.722	FALSE	7
2022-09-12	12:29:29	0.489529	2.17752	511.242	FALSE	7
2022-09-12	12:29:29	0.395789	1.76055	523.483	FALSE	7
2022-09-12	12:29:29	0.63131	2.80819	514.05	FALSE	7
2022-09-12	12:29:30	0.657723	2.92568	526.409	FALSE	7
2022-09-12	12:29:30	0.578079	2.57141	516.622	FALSE	7
2022-09-12	12:29:30	0.813702	3.61951	530.028	FALSE	7
2022-09-12	12:29:30	0.424135	1.88664	518.508	FALSE	7
2022-09-12	12:29:31	1.28963	5.73653	535.765	FALSE	7
2022-09-12	12:29:31	0.240623	1.07034	519.579	FALSE	7
2022-09-12	12:29:31	0.837621	3.72591	539.491	FALSE	7
2022-09-12	12:29:31	0.785254	3.49297	523.072	FALSE	7
2022-09-12	12:29:32	0.926985	4.12341	543.614	FALSE	7
2022-09-12	12:29:32	0.814975	3.62517	526.697	FALSE	7
2022-09-12	12:29:32	0.948206	4.21781	547.832	FALSE	7
2022-09-12	12:29:32	1.7477	7.77412	534.471	FALSE	7
2022-09-12	12:29:33	2.27233	10.1078	557.94	FALSE	7
2022-09-12	12:29:33	2.3995	10.6735	545.144	FALSE	7
2022-09-12	12:29:33	1.81177	8.05912	565.999	FALSE	7
2022-09-12	12:29:34	1.92179	8.54851	553.693	FALSE	7
2022-09-12	12:29:34	2.43177	10.817	576.816	FALSE	7
2022-09-12	12:29:34	1.09854	4.88653	558.579	FALSE	7
2022-09-12	12:29:34	1.08042	4.80592	581.622	FALSE	7
2022-09-12	12:29:35	1.11228	4.94764	563.527	FALSE	7
2022-09-12	12:29:35	0.876298	3.89795	585.52	FALSE	7
2022-09-12	12:29:35	0.901997	4.01226	567.539	FALSE	7
2022-09-12	12:29:35	1.12515	5.00489	590.525	FALSE	7
2022-09-12	12:29:36	0.903372	4.01838	571.558	FALSE	7
2022-09-12	12:29:36	1.56174	6.94693	597.471	FALSE	7
2022-09-12	12:29:36	2.5023	11.1307	582.688	FALSE	7
2022-09-12	12:29:36	4.15192	18.4686	615.94	1	8
2022-09-12	12:29:37	2.76922	12.318	595.006	FALSE	8
2022-09-12	12:29:37	1.94704	8.66082	624.601	FALSE	8
2022-09-12	12:29:37	1.05441	4.69023	599.697	FALSE	8
2022-09-12	12:29:38	0.832634	3.70372	628.305	FALSE	8
2022-09-12	12:29:38	2.1337	9.49112	609.188	FALSE	8
2022-09-12	12:29:38	1.78866	7.95632	636.261	FALSE	8
2022-09-12	12:29:38	2.20597	9.8126	619	FALSE	8
2022-09-12	12:29:39	1.60658	7.14639	643.407	FALSE	8
2022-09-12	12:29:39	2.15472	9.58463	628.585	FALSE	8
2022-09-12	12:29:39	1.02551	4.56167	647.969	FALSE	8
2022-09-12	12:29:39	1.34281	5.97309	634.558	FALSE	8
2022-09-12	12:29:40	1.48617	6.61078	654.58	FALSE	8
2022-09-12	12:29:40	1.2706	5.65188	640.21	FALSE	8
2022-09-12	12:29:40	1.30352	5.79832	660.378	FALSE	8
2022-09-12	12:29:40	1.31039	5.82888	646.039	FALSE	8
2022-09-12	12:29:41	1.20994	5.38206	665.76	FALSE	8
2022-09-12	12:29:41	0.759758	3.37956	649.418	FALSE	8
2022-09-12	12:29:41	0.763473	3.39608	669.156	FALSE	8
2022-09-12	12:29:42	0.750445	3.33813	652.756	FALSE	8
2022-09-12	12:29:42	1.14419	5.08959	674.246	FALSE	8
2022-09-12	12:29:42	1.23564	5.49637	658.253	FALSE	8
2022-09-12	12:29:42	1.62332	7.22085	681.467	FALSE	8
2022-09-12	12:29:43	0.870954	3.87418	662.127	FALSE	8
2022-09-12	12:29:43	1.78999	7.96223	689.429	FALSE	8
2022-09-12	12:29:43	0.806018	3.58533	665.712	FALSE	8
2022-09-12	12:29:43	1.95828	8.71082	698.14	FALSE	8
2022-09-12	12:29:44	1.57528	7.00716	672.72	FALSE	8
2022-09-12	12:29:44	1.93828	8.62186	706.762	FALSE	8
2022-09-12	12:29:44	1.34027	5.96179	678.681	FALSE	8
2022-09-12	12:29:44	2.05793	9.15408	715.916	FALSE	8
2022-09-12	12:29:45	1.79492	7.98416	686.665	FALSE	8
2022-09-12	12:29:45	1.07365	4.77581	720.691	FALSE	8
2022-09-12	12:29:45	1.52714	6.79302	693.458	FALSE	8
2022-09-12	12:29:46	0.820827	3.6512	724.343	FALSE	8
2022-09-12	12:29:46	2.0391	9.07032	702.529	FALSE	8
2022-09-12	12:29:46	0.887341	3.94707	728.29	FALSE	8
2022-09-12	12:29:46	2.08363	9.2684	711.797	FALSE	8
2022-09-12	12:29:47	1.52576	6.78689	735.077	FALSE	8
2022-09-12	12:29:47	1.45905	6.49015	718.287	FALSE	8
2022-09-12	12:29:47	1.66658	7.41328	742.49	FALSE	8
2022-09-12	12:29:47	0.708969	3.15364	721.441	FALSE	8
2022-09-12	12:29:48	1.67558	7.45331	749.943	FALSE	8
2022-09-12	12:29:48	0.507647	2.25812	723.699	FALSE	8
2022-09-12	12:29:48	1.15655	5.14457	755.088	FALSE	8
2022-09-12	12:29:48	0.84617	3.76393	727.463	FALSE	8
2022-09-12	12:29:49	0.683728	3.04136	758.129	FALSE	8
2022-09-12	12:29:49	0.585153	2.60288	730.066	FALSE	8
2022-09-12	12:29:49	0.313702	1.39541	759.525	FALSE	8
2022-09-12	12:29:50	0.543575	2.41793	732.484	FALSE	8
2022-09-12	12:29:50	0.260064	1.15682	760.681	FALSE	8
2022-09-12	12:29:50	0.603626	2.68505	735.169	FALSE	8
2022-09-12	12:29:50	0.2193	0.97549	761.657	FALSE	8
2022-09-12	12:29:51	0.47126	2.09626	737.265	FALSE	8
2022-09-12	12:29:51	0.126883	0.564401	762.221	FALSE	8
2022-09-12	12:29:51	0.676094	3.0074	740.273	FALSE	8
2022-09-12	12:29:51	0.299758	1.33338	763.555	FALSE	8
2022-09-12	12:29:52	0.477723	2.12501	742.398	FALSE	8
2022-09-12	12:29:52	0.145051	0.645216	764.2	FALSE	8
2022-09-12	12:29:52	0.483168	2.14923	744.547	FALSE	8
2022-09-12	12:29:52	0.190293	0.846461	765.046	FALSE	8
2022-09-12	12:29:53	0.418537	1.86174	746.409	FALSE	8
2022-09-12	12:29:53	1.10714	4.92478	769.971	FALSE	8
2022-09-12	12:29:53	5.66398	25.1945	771.603	1	9
2022-09-12	12:29:54	12.3059	54.7391	824.71	1	10
2022-09-12	12:29:54	5.87507	26.1335	797.737	1	11
2022-09-12	12:29:54	0.839911	3.73609	828.446	FALSE	11
2022-09-12	12:29:54	0.797875	3.54911	801.286	FALSE	11
2022-09-12	12:29:55	0.433295	1.92738	830.374	FALSE	11
2022-09-12	12:29:55	0.346985	1.54346	802.829	FALSE	11
2022-09-12	12:29:55	0.376552	1.67498	832.049	FALSE	11
2022-09-12	12:29:55	0.168817	0.750932	803.58	FALSE	11
2022-09-12	12:29:56	0.345916	1.5387	833.587	FALSE	11
2022-09-12	12:29:56	0.243931	1.08505	804.665	FALSE	11
2022-09-12	12:29:56	0.368257	1.63808	835.225	FALSE	11
2022-09-12	12:29:56	0.338028	1.50362	806.169	FALSE	11
2022-09-12	12:29:57	0.468104	2.08222	837.308	FALSE	11
2022-09-12	12:29:57	0.245509	1.09207	807.261	FALSE	11
2022-09-12	12:29:57	0.281336	1.25144	838.559	FALSE	11
2022-09-12	12:29:57	0.187697	0.834914	808.096	FALSE	11
2022-09-12	12:29:58	0.333499	1.48347	840.043	FALSE	11
2022-09-12	12:29:58	0.266527	1.18557	809.281	FALSE	11
2022-09-12	12:29:58	0.330649	1.47079	841.513	FALSE	11
2022-09-12	12:29:59	0.175331	0.779907	810.061	FALSE	11
2022-09-12	12:29:59	0.277926	1.23627	842.75	FALSE	11
2022-09-12	12:29:59	0.170293	0.757497	810.819	FALSE	11
2022-09-12	12:29:59	0.244389	1.08709	843.837	FALSE	11
2022-09-12	12:30:00	0.130954	0.58251	811.401	FALSE	11
2022-09-12	12:30:00	0.200929	0.893772	844.73	FALSE	11
2022-09-12	12:30:00	0.099046	0.440576	811.842	FALSE	11
2022-09-12	12:30:00	0.171056	0.760891	845.491	FALSE	11
2022-09-12	12:30:01	0.245407	1.09162	812.933	FALSE	11
2022-09-12	12:30:01	0.188766	0.839669	846.331	FALSE	11
2022-09-12	12:30:01	0.233652	1.03933	813.973	FALSE	11
2022-09-12	12:30:02	0.205407	0.913691	847.245	FALSE	11
2022-09-12	12:30:02	0.478995	2.13067	816.103	FALSE	11
2022-09-12	12:30:02	0.410394	1.82551	849.07	FALSE	11
2022-09-12	12:30:02	0.448817	1.99643	818.1	FALSE	11
2022-09-12	12:30:03	0.362455	1.61227	850.683	FALSE	11
2022-09-12	12:30:03	0.295331	1.31369	819.413	FALSE	11
2022-09-12	12:30:03	0.294924	1.31188	851.994	FALSE	11
2022-09-12	12:30:03	0.297875	1.32501	820.738	FALSE	11
2022-09-12	12:30:04	0.266476	1.18534	853.18	FALSE	11
2022-09-12	12:30:04	0.58271	2.59201	823.33	FALSE	11
2022-09-12	12:30:04	0.40556	1.80401	854.984	FALSE	11
2022-09-12	12:30:04	0.357265	1.58919	824.92	FALSE	11
2022-09-12	12:30:05	0.372532	1.6571	856.641	FALSE	11
2022-09-12	12:30:05	0.36444	1.6211	826.541	FALSE	11
2022-09-12	12:30:05	0.34327	1.52693	858.168	FALSE	11
2022-09-12	12:30:05	0.509071	2.26445	828.805	FALSE	11
2022-09-12	12:30:06	0.118995	0.529314	858.697	FALSE	11
2022-09-12	12:30:06	0.351209	1.56225	830.367	FALSE	11
2022-09-12	12:30:06	0.239708	1.06627	859.763	FALSE	11
2022-09-12	12:30:07	0.404847	1.80084	832.168	FALSE	11
2022-09-12	12:30:07	0.313804	1.39586	861.159	FALSE	11
2022-09-12	12:30:07	0.517621	2.30248	834.471	FALSE	11
2022-09-12	12:30:07	0.359453	1.59892	862.758	FALSE	11
2022-09-12	12:30:08	0.454822	2.02314	836.494	FALSE	11
2022-09-12	12:30:08	0.210089	0.934518	863.693	FALSE	11
2022-09-12	12:30:08	0.468054	2.082	838.576	FALSE	11
2022-09-12	12:30:08	0.756145	3.36348	867.056	FALSE	11
2022-09-12	12:30:09	0.375789	1.67158	840.248	FALSE	11
2022-09-12	12:30:09	0.628766	2.79688	869.853	FALSE	11
2022-09-12	12:30:09	-0.168333	-0.748779	840.248	FALSE	11
2022-09-12	12:30:09	0.16098	0.716071	870.569	FALSE	11
2022-09-12	12:30:10	0.146374	0.651101	840.899	FALSE	11
2022-09-12	12:30:10	0.183117	0.814541	871.384	FALSE	11
2022-09-12	12:30:10	0.274008	1.21884	842.117	FALSE	11
2022-09-12	12:30:11	0.182405	0.811374	872.195	FALSE	11
2022-09-12	12:30:11	0.216909	0.964855	843.082	FALSE	11
2022-09-12	12:30:11	0.266781	1.1867	873.382	FALSE	11
2022-09-12	12:30:11	0.474873	2.11233	845.195	FALSE	11
2022-09-12	12:30:12	0.436501	1.94164	875.323	FALSE	11
2022-09-12	12:30:12	0.403372	1.79428	846.989	FALSE	11
2022-09-12	12:30:12	0.370903	1.64985	876.973	FALSE	11
2022-09-12	12:30:12	0.399402	1.77662	848.766	FALSE	11
2022-09-12	12:30:13	0.307341	1.36711	878.34	FALSE	11
2022-09-12	12:30:13	0.376145	1.67317	850.439	FALSE	11
2022-09-12	12:30:13	0.376501	1.67475	880.015	FALSE	11
2022-09-12	12:30:14	0.229835	1.02235	851.461	FALSE	11
2022-09-12	12:30:14	0.360216	1.60231	881.617	FALSE	11
2022-09-12	12:30:14	0.361998	1.61024	853.071	FALSE	11
2022-09-12	12:30:14	0.360216	1.60231	883.22	FALSE	11
2022-09-12	12:30:15	0.360216	1.60231	854.674	FALSE	11
2022-09-12	12:30:15	0.342506	1.52354	884.743	FALSE	11
2022-09-12	12:30:15	0.709529	3.15613	857.83	FALSE	11
2022-09-12	12:30:15	1.06118	4.72034	889.464	FALSE	11
2022-09-12	12:30:16	0.273753	1.21771	859.047	FALSE	11
2022-09-12	12:30:16	0.34897	1.55229	891.016	FALSE	11
2022-09-12	12:30:16	0.193092	0.858912	859.906	FALSE	11
2022-09-12	12:30:16	-0.0519972	-0.231294	891.016	FALSE	11
2022-09-12	12:30:17	-0.136018	-0.605035	859.906	FALSE	11
2022-09-12	12:30:17	-0.00477074	-0.0212212	891.016	FALSE	11
2022-09-12	12:30:17	-0.0679259	-0.302148	859.906	FALSE	11
2022-09-12	12:30:17	0.099046	0.440576	891.456	FALSE	11
2022-09-12	12:30:18	0.0844404	0.375608	860.282	FALSE	11
2022-09-12	12:30:18	0.0123285	0.0548396	891.511	FALSE	11
2022-09-12	12:30:18	0.138028	0.613976	860.896	FALSE	11
2022-09-12	12:30:19	0.263779	1.17334	892.685	FALSE	11
2022-09-12	12:30:19	0.442099	1.96654	862.863	FALSE	11
2022-09-12	12:30:19	0.330191	1.46876	894.153	FALSE	11
2022-09-12	12:30:19	0.41416	1.84227	864.705	FALSE	11
2022-09-12	12:30:20	0.459453	2.04374	896.197	FALSE	11
2022-09-12	12:30:20	0.353855	1.57402	866.279	FALSE	11
2022-09-12	12:30:20	0.334771	1.48913	897.686	FALSE	11
2022-09-12	12:30:20	0.363066	1.61499	867.894	FALSE	11
2022-09-12	12:30:21	0.360522	1.60367	899.29	FALSE	11
2022-09-12	12:30:21	0.370751	1.64917	869.543	FALSE	11
2022-09-12	12:30:21	0.371565	1.6528	900.943	FALSE	11
2022-09-12	12:30:21	0.376705	1.67566	871.219	FALSE	11
2022-09-12	12:30:22	0.366934	1.6322	902.575	FALSE	11
2022-09-12	12:30:22	0.367392	1.63423	872.853	FALSE	11
2022-09-12	12:30:22	0.364847	1.62291	904.198	FALSE	11
2022-09-12	12:30:23	0.359504	1.59915	874.452	FALSE	11
2022-09-12	12:30:23	0.356247	1.58466	905.782	FALSE	11
2022-09-12	12:30:23	0.37131	1.65166	876.104	FALSE	11
2022-09-12	12:30:23	0.36902	1.64147	907.424	FALSE	11
2022-09-12	12:30:24	0.378842	1.68516	877.789	FALSE	11
2022-09-12	12:30:24	0.366018	1.62812	909.052	FALSE	11
2022-09-12	12:30:24	0.363931	1.61884	879.408	FALSE	11
2022-09-12	12:30:24	0.381743	1.69807	910.75	FALSE	11
2022-09-12	12:30:25	0.38098	1.69468	881.102	FALSE	11
2022-09-12	12:30:25	0.400878	1.78319	912.533	FALSE	11
2022-09-12	12:30:25	0.401947	1.78794	882.89	FALSE	11
2022-09-12	12:30:25	0.406323	1.80741	914.341	FALSE	11
2022-09-12	12:30:26	0.400318	1.78069	884.671	FALSE	11
2022-09-12	12:30:26	0.406934	1.81012	916.151	FALSE	11
2022-09-12	12:30:26	0.401082	1.78409	886.455	FALSE	11
2022-09-12	12:30:27	0.399911	1.77888	917.93	FALSE	11
2022-09-12	12:30:27	0.38668	1.72003	888.175	FALSE	11
2022-09-12	12:30:27	0.384288	1.70939	919.639	FALSE	11
2022-09-12	12:30:27	0.379453	1.68788	889.863	FALSE	11
2022-09-12	12:30:28	0.382354	1.70079	921.34	FALSE	11
2022-09-12	12:30:28	0.379555	1.68834	891.551	FALSE	11
2022-09-12	12:30:28	0.376349	1.67408	923.014	FALSE	11
2022-09-12	12:30:28	0.378537	1.68381	893.235	FALSE	11
2022-09-12	12:30:29	0.379606	1.68856	924.703	FALSE	11
2022-09-12	12:30:29	0.375076	1.66841	894.904	FALSE	11
2022-09-12	12:30:29	0.384847	1.71188	926.414	FALSE	11
2022-09-12	12:30:29	0.382608	1.70192	896.605	FALSE	11
2022-09-12	12:30:30	0.377367	1.6786	928.093	FALSE	11
2022-09-12	12:30:30	0.380216	1.69128	898.297	FALSE	11
2022-09-12	12:30:30	0.39869	1.77345	929.866	FALSE	11
2022-09-12	12:30:31	0.392837	1.74742	900.044	FALSE	11
2022-09-12	12:30:31	0.347138	1.54414	931.411	FALSE	11
2022-09-12	12:30:31	0.407697	1.81352	901.858	FALSE	11
2022-09-12	12:30:31	0.37299	1.65913	933.07	FALSE	11
2022-09-12	12:30:32	0.2593	1.15342	903.011	FALSE	11
2022-09-12	12:30:32	0.518028	2.30429	935.374	FALSE	11
2022-09-12	12:30:32	0.503982	2.24181	905.253	FALSE	11
2022-09-12	12:30:32	0.548257	2.43876	937.813	FALSE	11
2022-09-12	12:30:33	0.72556	3.22744	908.48	FALSE	11
2022-09-12	12:30:33	0.525356	2.33689	940.15	FALSE	11
2022-09-12	12:30:33	0.400013	1.77934	910.26	FALSE	11
2022-09-12	12:30:33	0.423982	1.88596	942.036	FALSE	11
2022-09-12	12:30:34	0.408359	1.81646	912.076	FALSE	11
2022-09-12	12:30:34	0.548257	2.43876	944.474	FALSE	11
2022-09-12	12:30:34	0.368512	1.63922	913.715	FALSE	11
2022-09-12	12:30:35	0.412125	1.83321	946.308	FALSE	11
2022-09-12	12:30:35	0.47299	2.10395	915.819	FALSE	11
2022-09-12	12:30:35	0.481183	2.1404	948.448	FALSE	11
2022-09-12	12:30:35	0.46673	2.07611	917.895	FALSE	11
2022-09-12	12:30:36	0.345051	1.53486	949.983	FALSE	11
2022-09-12	12:30:36	0.34958	1.555	919.45	FALSE	11
2022-09-12	12:30:36	0.488308	2.17209	952.155	FALSE	11
2022-09-12	12:30:36	0.305458	1.35874	920.809	FALSE	11
2022-09-12	12:30:37	0.578232	2.57209	954.727	FALSE	11
2022-09-12	12:30:37	0.317723	1.4133	922.222	FALSE	11
2022-09-12	12:30:37	0.446934	1.98805	956.715	FALSE	11
2022-09-12	12:30:37	0.488206	2.17164	924.394	FALSE	11
2022-09-12	12:30:38	0.445102	1.9799	958.695	FALSE	11
2022-09-12	12:30:38	0.325051	1.44589	925.84	FALSE	11
2022-09-12	12:30:38	0.323575	1.43933	960.134	FALSE	11
2022-09-12	12:30:39	0.498435	2.21714	928.057	FALSE	11
2022-09-12	12:30:39	0.366832	1.63174	961.766	FALSE	11
2022-09-12	12:30:39	0.47528	2.11414	930.171	FALSE	11
2022-09-12	12:30:39	0.333244	1.48234	963.248	FALSE	11
2022-09-12	12:30:40	0.4307	1.91584	932.087	FALSE	11
2022-09-12	12:30:40	0.480165	2.13587	965.384	FALSE	11
2022-09-12	12:30:40	0.478181	2.12704	934.214	FALSE	11
2022-09-12	12:30:40	0.825916	3.67384	969.058	FALSE	11
2022-09-12	12:30:41	0.579962	2.57979	936.794	FALSE	11
2022-09-12	12:30:41	1.23019	5.47213	974.53	FALSE	11
2022-09-12	12:30:41	0.874516	3.89002	940.684	FALSE	11
2022-09-12	12:30:41	0.52215	2.32263	976.853	FALSE	11
2022-09-12	12:30:42	0.448613	1.99552	942.679	FALSE	11
2022-09-12	12:30:42	0.404338	1.79858	978.651	FALSE	11
2022-09-12	12:30:42	0.429071	1.90859	944.588	FALSE	11
2022-09-12	12:30:43	0.325	1.44566	980.097	FALSE	11
2022-09-12	12:30:43	0.443372	1.97221	946.56	FALSE	11
2022-09-12	12:30:43	0.403066	1.79292	981.89	FALSE	11
2022-09-12	12:30:43	0.44841	1.99462	948.555	FALSE	11
2022-09-12	12:30:44	0.37355	1.66163	983.552	FALSE	11
2022-09-12	12:30:44	0.482049	2.14425	950.699	FALSE	11
2022-09-12	12:30:44	0.437875	1.94776	985.499	FALSE	11
2022-09-12	12:30:44	0.351361	1.56292	952.262	FALSE	11
2022-09-12	12:30:45	0.515789	2.29433	987.794	FALSE	11
2022-09-12	12:30:45	0.411412	1.83004	954.092	FALSE	11
2022-09-12	12:30:45	0.460471	2.04827	989.842	FALSE	11
2022-09-12	12:30:45	0.471769	2.09852	956.191	FALSE	11
2022-09-12	12:30:46	0.331311	1.47374	991.316	FALSE	11
2022-09-12	12:30:46	0.516857	2.29908	958.49	FALSE	11
2022-09-12	12:30:46	0.399351	1.77639	993.092	FALSE	11
2022-09-12	12:30:47	0.397316	1.76734	960.257	FALSE	11
2022-09-12	12:30:47	0.399911	1.77888	994.871	FALSE	11
2022-09-12	12:30:47	0.344644	1.53305	961.79	FALSE	11
2022-09-12	12:30:47	0.555331	2.47022	997.341	FALSE	11
2022-09-12	12:30:48	0.294618	1.31052	963.101	FALSE	11
2022-09-12	12:30:48	0.54388	2.41929	999.761	FALSE	11
2022-09-12	12:30:48	0.362405	1.61205	964.713	FALSE	11
2022-09-12	12:30:48	0.457061	2.0331	1001.79	FALSE	11
2022-09-12	12:30:49	0.457519	2.03514	966.748	FALSE	11
2022-09-12	12:30:49	0.448766	1.9962	1003.79	FALSE	11
2022-09-12	12:30:49	0.382048	1.69943	968.447	FALSE	11
2022-09-12	12:30:49	0.364389	1.62088	1005.41	FALSE	11
2022-09-12	12:30:50	0.557774	2.48109	970.928	FALSE	11
2022-09-12	12:30:50	0.337672	1.50203	1006.91	FALSE	11
2022-09-12	12:30:50	0.494618	2.20016	973.128	FALSE	11
2022-09-12	12:30:51	0.346374	1.54074	1008.45	FALSE	11
2022-09-12	12:30:51	0.613652	2.72965	975.858	FALSE	11
2022-09-12	12:30:51	0.339962	1.51222	1009.97	FALSE	11
2022-09-12	12:30:51	0.541489	2.40865	978.267	FALSE	11
2022-09-12	12:30:52	0.291972	1.29875	1011.26	FALSE	11
2022-09-12	12:30:52	0.536959	2.3885	980.655	FALSE	11
2022-09-12	12:30:52	0.363931	1.61884	1012.88	FALSE	11
2022-09-12	12:30:52	0.729071	3.24305	983.898	FALSE	11
2022-09-12	12:30:53	0.505102	2.24679	1015.13	FALSE	11
2022-09-12	12:30:53	0.592583	2.63593	986.534	FALSE	11
2022-09-12	12:30:53	0.648104	2.8829	1018.01	FALSE	11
2022-09-12	12:30:53	0.488461	2.17277	988.707	FALSE	11
2022-09-12	12:30:54	0.867595	3.85924	1021.87	FALSE	11
2022-09-12	12:30:54	0.402964	1.79246	990.499	FALSE	11
2022-09-12	12:30:54	0.578028	2.57118	1024.44	FALSE	11
2022-09-12	12:30:55	0.374822	1.66728	992.167	FALSE	11
2022-09-12	12:30:55	0.503422	2.23932	1026.68	FALSE	11
2022-09-12	12:30:55	0.75584	3.36213	995.529	FALSE	11
2022-09-12	12:30:55	0.640776	2.8503	1029.53	FALSE	11
2022-09-12	12:30:56	0.585	2.6022	998.131	FALSE	11
2022-09-12	12:30:56	0.681031	3.02936	1032.56	FALSE	11
2022-09-12	12:30:56	0.293804	1.3069	999.438	FALSE	11
2022-09-12	12:30:56	0.47813	2.12682	1034.69	FALSE	11
2022-09-12	12:30:57	0.414008	1.84159	1001.28	FALSE	11
2022-09-12	12:30:57	0.43925	1.95387	1036.64	FALSE	11
2022-09-12	12:30:57	0.309784	1.37798	1002.66	FALSE	11
2022-09-12	12:30:57	0.417977	1.85925	1038.5	FALSE	11
2022-09-12	12:30:58	0.396501	1.76372	1004.42	FALSE	11
2022-09-12	12:30:58	0.390445	1.73678	1040.24	FALSE	11
2022-09-12	12:30:58	0.40556	1.80401	1006.23	FALSE	11
2022-09-12	12:30:59	0.334975	1.49004	1041.73	FALSE	11
2022-09-12	12:30:59	0.567494	2.52433	1008.75	FALSE	11
2022-09-12	12:30:59	0.327239	1.45562	1043.18	FALSE	11
2022-09-12	12:30:59	0.612176	2.72308	1011.47	FALSE	11
2022-09-12	12:31:00	0.535992	2.3842	1045.57	FALSE	11
2022-09-12	12:31:00	0.679555	3.0228	1014.5	FALSE	11
2022-09-12	12:31:00	0.412277	1.83389	1047.4	FALSE	11
2022-09-12	12:31:00	0.358333	1.59394	1016.09	FALSE	11
2022-09-12	12:31:01	0.414059	1.84182	1049.24	FALSE	11
2022-09-12	12:31:01	0.296959	1.32093	1017.41	FALSE	11
2022-09-12	12:31:01	0.517926	2.30384	1051.55	FALSE	11
2022-09-12	12:31:01	0.258639	1.15048	1018.56	FALSE	11
2022-09-12	12:31:02	0.530344	2.35908	1053.91	FALSE	11
2022-09-12	12:31:02	0.335585	1.49275	1020.05	FALSE	11
2022-09-12	12:31:02	0.353957	1.57447	1055.48	FALSE	11
2022-09-12	12:31:03	0.338842	1.50724	1021.56	FALSE	11
2022-09-12	12:31:03	0.358893	1.59643	1057.08	FALSE	11
2022-09-12	12:31:03	0.346629	1.54188	1023.1	FALSE	11
2022-09-12	12:31:03	0.299504	1.33225	1058.41	FALSE	11
2022-09-12	12:31:04	0.445153	1.98013	1025.08	FALSE	11
2022-09-12	12:31:04	0.282914	1.25846	1059.67	FALSE	11
2022-09-12	12:31:04	0.548155	2.4383	1027.52	FALSE	11
2022-09-12	12:31:04	0.314466	1.39881	1061.07	FALSE	11
2022-09-12	12:31:05	0.494211	2.19835	1029.72	FALSE	11
2022-09-12	12:31:05	0.461489	2.0528	1063.12	FALSE	11
2022-09-12	12:31:05	0.488359	2.17232	1031.89	FALSE	11
2022-09-12	12:31:05	0.520674	2.31606	1065.44	FALSE	11
2022-09-12	12:31:06	0.462965	2.05936	1033.95	FALSE	11
2022-09-12	12:31:06	0.505763	2.24973	1067.69	FALSE	11
2022-09-12	12:31:06	0.394415	1.75444	1035.71	FALSE	11
2022-09-12	12:31:07	0.342659	1.52422	1069.21	FALSE	11
2022-09-12	12:31:07	0.462303	2.05642	1037.76	FALSE	11
2022-09-12	12:31:07	0.638893	2.84192	1072.05	FALSE	11
2022-09-12	12:31:07	0.54271	2.41408	1040.18	FALSE	11
2022-09-12	12:31:08	0.583015	2.59337	1074.65	FALSE	11
2022-09-12	12:31:08	0.614364	2.73281	1042.91	FALSE	11
2022-09-12	12:31:08	0.962201	4.28006	1078.93	FALSE	11
2022-09-12	12:31:08	0.413957	1.84136	1044.75	FALSE	11
2022-09-12	12:31:09	0.437672	1.94685	1080.87	FALSE	11
2022-09-12	12:31:09	0.351514	1.5636	1046.31	FALSE	11
2022-09-12	12:31:09	0.377875	1.68086	1082.55	FALSE	11
2022-09-12	12:31:09	0.441081	1.96202	1048.28	FALSE	11
2022-09-12	12:31:10	0.315433	1.40311	1083.96	FALSE	11
2022-09-12	12:31:10	0.617417	2.74639	1051.02	FALSE	11
2022-09-12	12:31:10	0.365763	1.62699	1085.58	FALSE	11
2022-09-12	12:31:11	0.515687	2.29388	1053.32	FALSE	11
2022-09-12	12:31:11	0.44785	1.99213	1087.58	FALSE	11
2022-09-12	12:31:11	0.457367	2.03446	1055.35	FALSE	11
2022-09-12	12:31:11	0.469275	2.08743	1089.66	FALSE	11
2022-09-12	12:31:12	0.508003	2.2597	1057.61	FALSE	11
2022-09-12	12:31:12	0.241183	1.07283	1090.74	FALSE	11
2022-09-12	12:31:12	0.200674	0.892638	1058.5	FALSE	11
2022-09-12	12:31:12	0.393855	1.75195	1092.49	FALSE	11
2022-09-12	12:31:13	0.0602674	0.268081	1058.77	FALSE	11
2022-09-12	12:31:13	-0.642175	-2.85652	1092.49	FALSE	11
2022-09-12	12:31:13	-0.264974	-1.17866	1058.77	FALSE	11
2022-09-12	12:31:13	0.03299	0.146746	1092.64	FALSE	11
2022-09-12	12:31:14	0.149479	0.664912	1059.44	FALSE	11
2022-09-12	12:31:14	0.306985	1.36553	1094	FALSE	11
2022-09-12	12:31:14	0.188257	0.837405	1060.27	FALSE	11
2022-09-12	12:31:15	0.630089	2.80276	1096.8	FALSE	11
2022-09-12	12:31:15	0.138384	0.61556	1060.89	FALSE	11
2022-09-12	12:31:15	-0.207366	-0.922405	1096.8	FALSE	11
2022-09-12	12:31:15	-0.0135239	-0.060157	1060.89	FALSE	11
2022-09-12	12:31:16	0.00189592	0.00843343	1096.81	FALSE	11
2022-09-12	12:31:16	0.280623	1.24827	1062.14	FALSE	11
2022-09-12	12:31:16	0.23757	1.05676	1097.87	FALSE	11
2022-09-12	12:31:16	0.335738	1.49343	1063.63	FALSE	11
2022-09-12	12:31:17	0.462659	2.058	1099.93	FALSE	11
2022-09-12	12:31:17	0.257468	1.14527	1064.78	FALSE	11
2022-09-12	12:31:17	0.26042	1.1584	1101.08	FALSE	11
2022-09-12	12:31:17	0.405051	1.80175	1066.58	FALSE	11
2022-09-12	12:31:18	0.460318	2.04759	1103.13	FALSE	11
2022-09-12	12:31:18	0.477061	2.12206	1068.7	FALSE	11
2022-09-12	12:31:18	0.441641	1.96451	1105.1	FALSE	11
2022-09-12	12:31:19	0.436349	1.94097	1070.64	FALSE	11
2022-09-12	12:31:19	0.440369	1.95885	1107.06	FALSE	11
2022-09-12	12:31:19	0.451565	2.00865	1072.65	FALSE	11
2022-09-12	12:31:19	0.444593	1.97764	1109.03	FALSE	11
2022-09-12	12:31:20	0.443779	1.97402	1074.62	FALSE	11
2022-09-12	12:31:20	0.451107	2.00661	1111.04	FALSE	11
2022-09-12	12:31:20	0.460674	2.04917	1076.67	FALSE	11
2022-09-12	12:31:20	0.471972	2.09943	1113.14	FALSE	11
2022-09-12	12:31:21	0.490191	2.18047	1078.85	FALSE	11
2022-09-12	12:31:21	0.36159	1.60842	1114.75	FALSE	11
2022-09-12	12:31:21	0.440216	1.95817	1080.81	FALSE	11
2022-09-12	12:31:21	0.491361	2.18567	1116.93	FALSE	11
2022-09-12	12:31:22	0.522506	2.32421	1083.14	FALSE	11
2022-09-12	12:31:22	0.397672	1.76892	1118.7	FALSE	11
2022-09-12	12:31:22	0.359657	1.59983	1084.74	FALSE	11
2022-09-12	12:31:23	0.461896	2.05461	1120.76	FALSE	11
2022-09-12	12:31:23	0.440013	1.95727	1086.69	FALSE	11
2022-09-12	12:31:23	0.380827	1.69399	1122.45	FALSE	11
2022-09-12	12:31:23	0.409733	1.82257	1088.52	FALSE	11
2022-09-12	12:31:24	0.425254	1.89161	1124.34	FALSE	11
2022-09-12	12:31:24	0.483931	2.15262	1090.67	FALSE	11
2022-09-12	12:31:24	0.61243	2.72421	1127.07	FALSE	11
2022-09-12	12:31:24	0.789071	3.50995	1094.18	FALSE	11
2022-09-12	12:31:25	0.562557	2.50237	1129.57	FALSE	11
2022-09-12	12:31:25	0.880064	3.9147	1098.09	FALSE	11
2022-09-12	12:31:25	0.567341	2.52365	1132.09	FALSE	11
2022-09-12	12:31:25	0.272481	1.21205	1099.3	FALSE	11
2022-09-12	12:31:26	0.63299	2.81567	1134.91	FALSE	11
2022-09-12	12:31:26	0.67416	2.9988	1102.3	FALSE	11
2022-09-12	12:31:26	0.558028	2.48222	1137.39	FALSE	11
2022-09-12	12:31:27	0.323524	1.4391	1103.74	FALSE	11
2022-09-12	12:31:27	0.558537	2.48448	1139.88	FALSE	11
2022-09-12	12:31:27	0.3907	1.73791	1105.48	FALSE	11
2022-09-12	12:31:27	0.542659	2.41386	1142.29	FALSE	11
2022-09-12	12:31:28	0.711361	3.16428	1108.64	FALSE	11
2022-09-12	12:31:28	0.371056	1.65053	1143.94	FALSE	11
2022-09-12	12:31:28	0.533906	2.37492	1111.02	FALSE	11
2022-09-12	12:31:28	0.61528	2.73689	1146.68	FALSE	11
2022-09-12	12:31:29	0.531667	2.36496	1113.38	FALSE	11
2022-09-12	12:31:29	0.492786	2.19201	1148.87	FALSE	11
2022-09-12	12:31:29	0.68327	3.03932	1116.42	FALSE	11
2022-09-12	12:31:29	1.01411	4.51096	1153.38	FALSE	11
2022-09-12	12:31:30	1.93238	8.59561	1125.02	FALSE	11
2022-09-12	12:31:30	1.10683	4.9234	1158.3	FALSE	11
2022-09-12	12:31:30	2.47681	11.0173	1136.04	FALSE	11
2022-09-12	12:31:31	3.05034	13.5685	1171.87	1	12
2022-09-12	12:31:31	1.96887	8.75793	1144.79	FALSE	12
2022-09-12	12:31:31	0.858995	3.82098	1175.69	FALSE	12
2022-09-12	12:31:31	0.380725	1.69354	1146.49	FALSE	12
2022-09-12	12:31:32	0.454415	2.02133	1177.71	FALSE	12
2022-09-12	12:31:32	0.504898	2.24589	1148.73	FALSE	12
2022-09-12	12:31:32	0.452227	2.0116	1179.73	FALSE	12
2022-09-12	12:31:32	0.376552	1.67498	1150.41	FALSE	12
2022-09-12	12:31:33	0.36215	1.61092	1181.34	FALSE	12
2022-09-12	12:31:33	0.492583	2.19111	1152.6	FALSE	12
2022-09-12	12:31:33	0.537977	2.39303	1183.73	FALSE	12
2022-09-12	12:31:33	0.629377	2.79959	1155.4	FALSE	12
2022-09-12	12:31:34	0.370191	1.64668	1185.38	FALSE	12
2022-09-12	12:31:34	0.460216	2.04713	1157.45	FALSE	12
2022-09-12	12:31:34	0.460115	2.04668	1187.42	FALSE	12
2022-09-12	12:31:35	0.456654	2.03129	1159.48	FALSE	12
2022-09-12	12:31:35	0.563728	2.50757	1189.93	FALSE	12
2022-09-12	12:31:35	0.434517	1.93282	1161.41	FALSE	12
2022-09-12	12:31:35	0.517112	2.30022	1192.23	FALSE	12
2022-09-12	12:31:36	0.517264	2.30089	1163.71	FALSE	12
2022-09-12	12:31:36	0.451158	2.00684	1194.24	FALSE	12
2022-09-12	12:31:36	0.370394	1.64759	1165.36	FALSE	12
2022-09-12	12:31:36	0.448919	1.99688	1196.23	FALSE	12
2022-09-12	12:31:37	0.572939	2.54855	1167.91	FALSE	12
2022-09-12	12:31:37	0.385305	1.71391	1197.95	FALSE	12
2022-09-12	12:31:37	0.297417	1.32297	1169.23	FALSE	12
2022-09-12	12:31:37	0.261845	1.16474	1199.11	FALSE	12
2022-09-12	12:31:38	0.0563997	0.250877	1169.48	FALSE	12
2022-09-12	12:31:38	-0.0911829	-0.4056	1199.11	FALSE	12
2022-09-12	12:31:38	-0.114236	-0.508145	1169.48	FALSE	12
2022-09-12	12:31:39	-0.281717	-1.25313	1199.11	FALSE	12
2022-09-12	12:31:39	-0.134135	-0.596659	1169.48	FALSE	12
2022-09-12	12:31:39	0.253295	1.12671	1200.24	FALSE	12
2022-09-12	12:31:39	0.215433	0.958289	1170.44	FALSE	12
2022-09-12	12:31:40	0.29584	1.31596	1201.56	FALSE	12
2022-09-12	12:31:40	0.259148	1.15274	1171.59	FALSE	12
2022-09-12	12:31:40	0.356959	1.58783	1203.14	FALSE	12
2022-09-12	12:31:40	0.243168	1.08166	1172.67	FALSE	12
2022-09-12	12:31:41	0.314822	1.40039	1204.54	FALSE	12
2022-09-12	12:31:41	0.285865	1.27158	1173.95	FALSE	12
2022-09-12	12:31:41	0.39187	1.74312	1206.29	FALSE	12
2022-09-12	12:31:41	0.311056	1.38364	1175.33	FALSE	12
2022-09-12	12:31:42	0.364898	1.62314	1207.91	FALSE	12
2022-09-12	12:31:42	0.406018	1.80605	1177.14	FALSE	12
2022-09-12	12:31:42	0.624542	2.77809	1210.69	FALSE	12
2022-09-12	12:31:43	3.15055	14.0143	1191.15	1	13
2022-09-12	12:31:43	7.22388	32.1333	1242.82	1	14
2022-09-12	12:31:43	7.83462	34.85	1226	1	15
2022-09-12	12:31:43	3.14368	13.9837	1256.81	1	16
2022-09-12	12:31:44	1.58291	7.0411	1233.04	FALSE	16
2022-09-12	12:31:44	2.55217	11.3526	1268.16	FALSE	16
2022-09-12	12:31:44	2.14357	9.53503	1242.58	FALSE	16
2022-09-12	12:31:44	0.52958	2.35568	1270.51	FALSE	16
2022-09-12	12:31:45	0.56042	2.49286	1245.07	FALSE	16
2022-09-12	12:31:45	1.80067	8.00974	1278.52	FALSE	16
2022-09-12	12:31:45	6.48393	28.8418	1273.91	1	17
2022-09-12	12:31:45	3.01426	13.408	1291.93	1	18
2022-09-12	12:31:46	0.694262	3.08822	1277	FALSE	18
2022-09-12	12:31:46	0.38673	1.72025	1293.65	FALSE	18
2022-09-12	12:31:46	0.431769	1.92059	1278.92	FALSE	18
2022-09-12	12:31:47	0.450852	2.00548	1295.66	FALSE	18
2022-09-12	12:31:47	1.05304	4.68413	1283.6	FALSE	18
2022-09-12	12:31:47	2.02393	9.00285	1304.66	FALSE	18
2022-09-12	12:31:47	1.66057	7.38655	1290.99	FALSE	18
2022-09-12	12:31:48	1.08515	4.82696	1309.49	FALSE	18
2022-09-12	12:31:48	1.01655	4.52182	1295.51	FALSE	18
2022-09-12	12:31:48	0.720878	3.20661	1312.69	FALSE	18
2022-09-12	12:31:48	0.710649	3.16111	1298.67	FALSE	18
2022-09-12	12:31:49	0.538181	2.39394	1315.09	FALSE	18
2022-09-12	12:31:49	0.464746	2.06728	1300.74	FALSE	18
2022-09-12	12:31:49	0.379199	1.68675	1316.77	FALSE	18
2022-09-12	12:31:49	0.378079	1.68177	1302.42	FALSE	18
2022-09-12	12:31:50	0.367138	1.6331	1318.41	FALSE	18
2022-09-12	12:31:50	0.39014	1.73542	1304.16	FALSE	18
2022-09-12	12:31:50	0.389682	1.73338	1320.14	FALSE	18
2022-09-12	12:31:51	0.384695	1.7112	1305.87	FALSE	18
2022-09-12	12:31:51	0.393346	1.74968	1321.89	FALSE	18
2022-09-12	12:31:51	0.389784	1.73384	1307.6	FALSE	18
2022-09-12	12:31:51	0.398791	1.7739	1323.66	FALSE	18
2022-09-12	12:31:52	0.395636	1.75987	1309.36	FALSE	18
2022-09-12	12:31:52	0.414618	1.8443	1325.51	FALSE	18
2022-09-12	12:31:52	0.410903	1.82778	1311.19	FALSE	18
2022-09-12	12:31:52	0.410344	1.82529	1327.33	FALSE	18
2022-09-12	12:31:53	0.423168	1.88234	1313.07	FALSE	18
2022-09-12	12:31:53	0.383372	1.70532	1329.04	FALSE	18
2022-09-12	12:31:53	0.50388	2.24136	1315.31	FALSE	18
2022-09-12	12:31:53	0.443473	1.97266	1331.01	FALSE	18
2022-09-12	12:31:54	0.718384	3.19552	1318.51	FALSE	18
2022-09-12	12:31:54	2.26933	10.0944	1341.11	FALSE	18
2022-09-12	12:31:54	2.22296	9.88817	1328.4	FALSE	18
2022-09-12	12:31:55	2.78342	12.3812	1353.49	FALSE	18
2022-09-12	12:31:55	1.2652	5.62786	1334.03	FALSE	18
2022-09-12	12:31:55	1.0021	4.45754	1357.94	FALSE	18
2022-09-12	12:31:55	0.652023	2.90033	1336.93	FALSE	18
2022-09-12	12:31:56	1.19874	5.33224	1363.28	FALSE	18
2022-09-12	12:31:56	1.44821	6.44193	1343.37	FALSE	18
2022-09-12	12:31:56	4.85014	21.5744	1384.85	1	19
2022-09-12	12:31:56	6.8621	30.524	1373.89	1	20
2022-09-12	12:31:57	3.84312	17.095	1401.95	1	21
2022-09-12	12:31:57	5.44846	24.2358	1398.13	1	22
2022-09-12	12:31:57	11.3608	50.5351	1452.48	1	23
2022-09-12	12:31:57	13.329	59.2901	1457.42	1	24
2022-09-12	12:31:58	5.49563	24.4457	1476.93	1	25
2022-09-12	12:31:58	1.23477	5.4925	1462.91	FALSE	25
2022-09-12	12:31:58	0.711769	3.16609	1480.09	FALSE	25
2022-09-12	12:31:59	0.659708	2.93451	1465.84	FALSE	25
2022-09-12	12:31:59	0.448308	1.99416	1482.09	FALSE	25
2022-09-12	12:31:59	0.449733	2.0005	1467.85	FALSE	25
2022-09-12	12:31:59	0.413193	1.83797	1483.93	FALSE	25
2022-09-12	12:32:00	0.655382	2.91527	1470.76	FALSE	25
2022-09-12	12:32:00	0.991056	4.40842	1488.33	FALSE	25
2022-09-12	12:32:00	1.05553	4.69521	1475.46	FALSE	25
2022-09-12	12:32:00	2.16108	9.61292	1497.95	FALSE	25
2022-09-12	12:32:01	3.09899	13.7849	1489.24	1	26
2022-09-12	12:32:01	8.95721	39.8435	1537.79	1	27
2022-09-12	12:32:01	11.5249	51.2651	1540.51	1	28
2022-09-12	12:32:01	5.14474	22.8848	1560.68	1	29
2022-09-12	12:32:02	1.50449	6.69227	1547.2	FALSE	29
2022-09-12	12:32:02	0.720216	3.20366	1563.88	FALSE	29
2022-09-12	12:32:02	0.588206	2.61646	1549.81	FALSE	29

## Sheet: Royal_prong_2022912122642 (E)
Date	Time	Lbs	Total force x time	Total Time Steps Force >3		**GoPro Fitting: 1215
2022-09-12	12:27:02	0.25126	0.25126	FALSE	0			Total force x time	699.989
2022-09-12	12:27:02	0.292379	0.543639	FALSE	0			Total Time Steps Force >3	29
2022-09-12	12:27:02	0.254059	0.797698	FALSE	0
2022-09-12	12:27:02	0.303066	1.10076	FALSE	0
2022-09-12	12:27:03	0.392176	1.49294	FALSE	0
2022-09-12	12:27:03	0.54098	2.03392	FALSE	0
2022-09-12	12:27:03	0.609682	2.6436	FALSE	0
2022-09-12	12:27:03	1.07141	3.71501	FALSE	0
2022-09-12	12:27:04	1.19253	4.90754	FALSE	0
2022-09-12	12:27:04	0.90841	5.81595	FALSE	0
2022-09-12	12:27:04	0.468054	6.28401	FALSE	0
2022-09-12	12:27:05	0.386883	6.67089	FALSE	0
2022-09-12	12:27:05	0.496399	7.16729	FALSE	0
2022-09-12	12:27:05	0.317519	7.48481	FALSE	0
2022-09-12	12:27:05	0.483168	7.96798	FALSE	0
2022-09-12	12:27:06	0.368053	8.33603	FALSE	0
2022-09-12	12:27:06	0.402252	8.73828	FALSE	0
2022-09-12	12:27:06	0.349733	9.08801	FALSE	0
2022-09-12	12:27:06	0.361845	9.44986	FALSE	0
2022-09-12	12:27:07	0.34958	9.79944	FALSE	0
2022-09-12	12:27:07	0.335636	10.1351	FALSE	0
2022-09-12	12:27:07	0.246832	10.3819	FALSE	0
2022-09-12	12:27:07	0.371361	10.7533	FALSE	0
2022-09-12	12:27:08	0.246374	10.9996	FALSE	0
2022-09-12	12:27:08	0.24897	11.2486	FALSE	0
2022-09-12	12:27:08	0.262252	11.5109	FALSE	0
2022-09-12	12:27:09	0.521031	12.0319	FALSE	0
2022-09-12	12:27:09	1.56352	13.5954	FALSE	0
2022-09-12	12:27:09	2.32057	15.916	FALSE	0
2022-09-12	12:27:09	2.82413	18.7401	FALSE	0
2022-09-12	12:27:10	0.775687	19.5158	FALSE	0
2022-09-12	12:27:10	0.689428	20.2052	FALSE	0
2022-09-12	12:27:10	0.444084	20.6493	FALSE	0
2022-09-12	12:27:10	0.579656	21.229	FALSE	0
2022-09-12	12:27:11	0.638537	21.8675	FALSE	0
2022-09-12	12:27:11	0.493753	22.3613	FALSE	0
2022-09-12	12:27:11	0.605967	22.9672	FALSE	0
2022-09-12	12:27:11	0.469071	23.4363	FALSE	0
2022-09-12	12:27:12	0.592124	24.0284	FALSE	0
2022-09-12	12:27:12	0.335585	24.364	FALSE	0
2022-09-12	12:27:12	0.425764	24.7898	FALSE	0
2022-09-12	12:27:13	0.392227	25.182	FALSE	0
2022-09-12	12:27:13	0.379962	25.562	FALSE	0
2022-09-12	12:27:13	0.419809	25.9818	FALSE	0
2022-09-12	12:27:13	0.716654	26.6984	FALSE	0
2022-09-12	12:27:14	0.899962	27.5984	FALSE	0
2022-09-12	12:27:14	1.9106	29.509	FALSE	0
2022-09-12	12:27:14	2.39095	31.8999	FALSE	0
2022-09-12	12:27:14	1.81055	33.7105	FALSE	0
2022-09-12	12:27:15	1.32515	35.0356	FALSE	0
2022-09-12	12:27:15	0.328664	35.3643	FALSE	0
2022-09-12	12:27:15	0.338435	35.7027	FALSE	0
2022-09-12	12:27:15	0.251514	35.9542	FALSE	0
2022-09-12	12:27:16	0.160064	36.1143	FALSE	0
2022-09-12	12:27:16	0.00316817	36.1175	FALSE	0
2022-09-12	12:27:16	0.143473	36.261	FALSE	0
2022-09-12	12:27:17	0.0643386	36.3253	FALSE	0
2022-09-12	12:27:17	0.197265	36.5226	FALSE	0
2022-09-12	12:27:17	0.100725	36.6233	FALSE	0
2022-09-12	12:27:17	0.244848	36.8681	FALSE	0
2022-09-12	12:27:18	0.297163	37.1653	FALSE	0
2022-09-12	12:27:18	0.161692	37.327	FALSE	0
2022-09-12	12:27:18	0.134466	37.4614	FALSE	0
2022-09-12	12:27:18	0.191514	37.653	FALSE	0
2022-09-12	12:27:19	0.306527	37.9595	FALSE	0
2022-09-12	12:27:19	0.210802	38.1703	FALSE	0
2022-09-12	12:27:19	0.182303	38.3526	FALSE	0
2022-09-12	12:27:19	0.241998	38.5946	FALSE	0
2022-09-12	12:27:20	0.265255	38.8598	FALSE	0
2022-09-12	12:27:20	0.170496	39.0303	FALSE	0
2022-09-12	12:27:20	-0.102888	39.0303	FALSE	0
2022-09-12	12:27:21	0.210242	39.2406	FALSE	0
2022-09-12	12:27:21	0.187392	39.428	FALSE	0
2022-09-12	12:27:21	0.37355	39.8015	FALSE	0
2022-09-12	12:27:21	0.0785371	39.8801	FALSE	0
2022-09-12	12:27:22	0.254364	40.1344	FALSE	0
2022-09-12	12:27:22	0.147443	40.2819	FALSE	0
2022-09-12	12:27:22	0.131362	40.4132	FALSE	0
2022-09-12	12:27:22	0.140318	40.5536	FALSE	0
2022-09-12	12:27:23	0.0613361	40.6149	FALSE	0
2022-09-12	12:27:23	0.203728	40.8186	FALSE	0
2022-09-12	12:27:23	0.159707	40.9783	FALSE	0
2022-09-12	12:27:23	0.15014	41.1285	FALSE	0
2022-09-12	12:27:24	0.183524	41.312	FALSE	0
2022-09-12	12:27:24	0.0517178	41.3637	FALSE	0
2022-09-12	12:27:24	0.17243	41.5361	FALSE	0
2022-09-12	12:27:25	0.188512	41.7246	FALSE	0
2022-09-12	12:27:25	0.233957	41.9586	FALSE	0
2022-09-12	12:27:25	0.246781	42.2054	FALSE	0
2022-09-12	12:27:25	0.0971122	42.3025	FALSE	0
2022-09-12	12:27:26	0.286883	42.5894	FALSE	0
2022-09-12	12:27:26	0.203626	42.793	FALSE	0
2022-09-12	12:27:26	0.242964	43.036	FALSE	0
2022-09-12	12:27:26	0.111412	43.1474	FALSE	0
2022-09-12	12:27:27	0.124644	43.272	FALSE	0
2022-09-12	12:27:27	0.206679	43.4787	FALSE	0
2022-09-12	12:27:27	0.255891	43.7346	FALSE	0
2022-09-12	12:27:27	0.290751	44.0253	FALSE	0
2022-09-12	12:27:28	0.16444	44.1898	FALSE	0
2022-09-12	12:27:28	0.0980282	44.2878	FALSE	0
2022-09-12	12:27:28	0.365458	44.6533	FALSE	0
2022-09-12	12:27:29	0.296603	44.9499	FALSE	0
2022-09-12	12:27:29	0.373855	45.3237	FALSE	0
2022-09-12	12:27:29	0.50383	45.8276	FALSE	0
2022-09-12	12:27:29	0.341489	46.1691	FALSE	0
2022-09-12	12:27:30	0.506527	46.6756	FALSE	0
2022-09-12	12:27:30	0.26271	46.9383	FALSE	0
2022-09-12	12:27:30	0.371667	47.31	FALSE	0
2022-09-12	12:27:30	0.248868	47.5588	FALSE	0
2022-09-12	12:27:31	0.380013	47.9388	FALSE	0
2022-09-12	12:27:31	0.299657	48.2385	FALSE	0
2022-09-12	12:27:31	0.34673	48.5852	FALSE	0
2022-09-12	12:27:31	0.832837	49.4181	FALSE	0
2022-09-12	12:27:32	0.568308	49.9864	FALSE	0
2022-09-12	12:27:32	0.490038	50.4764	FALSE	0
2022-09-12	12:27:32	0.499911	50.9763	FALSE	0
2022-09-12	12:27:33	0.307952	51.2843	FALSE	0
2022-09-12	12:27:33	0.525203	51.8095	FALSE	0
2022-09-12	12:27:33	0.544847	52.3543	FALSE	0
2022-09-12	12:27:33	0.399911	52.7542	FALSE	0
2022-09-12	12:27:34	0.433651	53.1879	FALSE	0
2022-09-12	12:27:34	1.24444	54.4323	FALSE	0
2022-09-12	12:27:34	0.270089	54.7024	FALSE	0
2022-09-12	12:27:34	0.342405	55.0448	FALSE	0
2022-09-12	12:27:35	0.20729	55.2521	FALSE	0
2022-09-12	12:27:35	0.263677	55.5158	FALSE	0
2022-09-12	12:27:35	0.180522	55.6963	FALSE	0
2022-09-12	12:27:35	0.395076	56.0914	FALSE	0
2022-09-12	12:27:36	0.900776	56.9922	FALSE	0
2022-09-12	12:27:36	0.525763	57.5179	FALSE	0
2022-09-12	12:27:36	1.65854	59.1765	FALSE	0
2022-09-12	12:27:37	1.17167	60.3481	FALSE	0
2022-09-12	12:27:37	3.15314	63.5013	1	1
2022-09-12	12:27:37	3.35981	66.8611	1	2
2022-09-12	12:27:37	0.394466	67.2555	FALSE	2
2022-09-12	12:27:38	0.441947	67.6975	FALSE	2
2022-09-12	12:27:38	0.429784	68.1273	FALSE	2
2022-09-12	12:27:38	0.348104	68.4754	FALSE	2
2022-09-12	12:27:38	0.210751	68.6861	FALSE	2
2022-09-12	12:27:39	0.217926	68.9041	FALSE	2
2022-09-12	12:27:39	0.223473	69.1275	FALSE	2
2022-09-12	12:27:39	0.247901	69.3754	FALSE	2
2022-09-12	12:27:39	0.493142	69.8686	FALSE	2
2022-09-12	12:27:40	1.44022	71.3088	FALSE	2
2022-09-12	12:27:40	2.64408	73.9529	FALSE	2
2022-09-12	12:27:40	5.00316	78.956	1	3
2022-09-12	12:27:41	3.96067	82.9167	1	4
2022-09-12	12:27:41	2.8936	85.8103	FALSE	4
2022-09-12	12:27:41	1.22973	87.04	FALSE	4
2022-09-12	12:27:41	0.397774	87.4378	FALSE	4
2022-09-12	12:27:42	0.074873	87.5127	FALSE	4
2022-09-12	12:27:42	0.140573	87.6533	FALSE	4
2022-09-12	12:27:42	0.210853	87.8641	FALSE	4
2022-09-12	12:27:42	0.186527	88.0506	FALSE	4
2022-09-12	12:27:43	0.213499	88.2641	FALSE	4
2022-09-12	12:27:43	0.261489	88.5256	FALSE	4
2022-09-12	12:27:43	0.239758	88.7654	FALSE	4
2022-09-12	12:27:43	0.252328	89.0177	FALSE	4
2022-09-12	12:27:44	0.238282	89.256	FALSE	4
2022-09-12	12:27:44	0.227341	89.4833	FALSE	4
2022-09-12	12:27:44	0.236858	89.7202	FALSE	4
2022-09-12	12:27:45	0.236349	89.9565	FALSE	4
2022-09-12	12:27:45	0.229224	90.1858	FALSE	4
2022-09-12	12:27:45	0.218435	90.4042	FALSE	4
2022-09-12	12:27:45	0.216451	90.6206	FALSE	4
2022-09-12	12:27:46	0.21528	90.8359	FALSE	4
2022-09-12	12:27:46	0.21299	91.0489	FALSE	4
2022-09-12	12:27:46	0.204135	91.2531	FALSE	4
2022-09-12	12:27:46	0.20159	91.4546	FALSE	4
2022-09-12	12:27:47	0.206171	91.6608	FALSE	4
2022-09-12	12:27:47	0.217825	91.8786	FALSE	4
2022-09-12	12:27:47	0.307392	92.186	FALSE	4
2022-09-12	12:27:47	0.251311	92.4373	FALSE	4
2022-09-12	12:27:48	0.269224	92.7066	FALSE	4
2022-09-12	12:27:48	0.278792	92.9854	FALSE	4
2022-09-12	12:27:48	0.300725	93.2861	FALSE	4
2022-09-12	12:27:49	0.314771	93.6009	FALSE	4
2022-09-12	12:27:49	0.29355	93.8944	FALSE	4
2022-09-12	12:27:49	0.314109	94.2085	FALSE	4
2022-09-12	12:27:49	0.312583	94.5211	FALSE	4
2022-09-12	12:27:50	0.32785	94.8489	FALSE	4
2022-09-12	12:27:50	0.326272	95.1752	FALSE	4
2022-09-12	12:27:50	0.307341	95.4826	FALSE	4
2022-09-12	12:27:50	0.336908	95.8195	FALSE	4
2022-09-12	12:27:51	0.305967	96.1254	FALSE	4
2022-09-12	12:27:51	0.323931	96.4494	FALSE	4
2022-09-12	12:27:51	0.315789	96.7652	FALSE	4
2022-09-12	12:27:51	0.322456	97.0876	FALSE	4
2022-09-12	12:27:52	0.318537	97.4061	FALSE	4
2022-09-12	12:27:52	0.323066	97.7292	FALSE	4
2022-09-12	12:27:52	0.33472	98.0639	FALSE	4
2022-09-12	12:27:52	0.352023	98.416	FALSE	4
2022-09-12	12:27:53	0.369173	98.7851	FALSE	4
2022-09-12	12:27:53	0.48042	99.2655	FALSE	4
2022-09-12	12:27:53	0.312532	99.5781	FALSE	4
2022-09-12	12:27:54	0.250293	99.8284	FALSE	4
2022-09-12	12:27:54	0.115585	99.944	FALSE	4
2022-09-12	12:27:54	0.183066	100.127	FALSE	4
2022-09-12	12:27:54	0.0955855	100.223	FALSE	4
2022-09-12	12:27:55	-0.120241	100.223	FALSE	4
2022-09-12	12:27:55	-0.113677	100.223	FALSE	4
2022-09-12	12:27:55	-0.020445	100.223	FALSE	4
2022-09-12	12:27:55	-0.108129	100.223	FALSE	4
2022-09-12	12:27:56	-0.0278242	100.223	FALSE	4
2022-09-12	12:27:56	0.0465778	100.269	FALSE	4
2022-09-12	12:27:56	0.0846439	100.354	FALSE	4
2022-09-12	12:27:56	0.20729	100.561	FALSE	4
2022-09-12	12:27:57	0.347545	100.909	FALSE	4
2022-09-12	12:27:57	0.312176	101.221	FALSE	4
2022-09-12	12:27:57	0.332328	101.553	FALSE	4
2022-09-12	12:27:58	0.400827	101.954	FALSE	4
2022-09-12	12:27:58	0.285407	102.239	FALSE	4
2022-09-12	12:27:58	0.325102	102.565	FALSE	4
2022-09-12	12:27:58	0.312227	102.877	FALSE	4
2022-09-12	12:27:59	0.378384	103.255	FALSE	4
2022-09-12	12:27:59	0.274822	103.53	FALSE	4
2022-09-12	12:27:59	0.221387	103.751	FALSE	4
2022-09-12	12:27:59	0.422354	104.174	FALSE	4
2022-09-12	12:28:00	0.282456	104.456	FALSE	4
2022-09-12	12:28:00	0.38271	104.839	FALSE	4
2022-09-12	12:28:00	0.144339	104.983	FALSE	4
2022-09-12	12:28:00	0.429326	105.413	FALSE	4
2022-09-12	12:28:01	0.340623	105.753	FALSE	4
2022-09-12	12:28:01	0.250191	106.003	FALSE	4
2022-09-12	12:28:01	0.18902	106.192	FALSE	4
2022-09-12	12:28:02	0.228512	106.421	FALSE	4
2022-09-12	12:28:02	0.167596	106.588	FALSE	4
2022-09-12	12:28:02	0.224491	106.813	FALSE	4
2022-09-12	12:28:02	0.204542	107.017	FALSE	4
2022-09-12	12:28:03	0.117367	107.135	FALSE	4
2022-09-12	12:28:03	0.300878	107.436	FALSE	4
2022-09-12	12:28:03	0.231616	107.667	FALSE	4
2022-09-12	12:28:03	0.212328	107.88	FALSE	4
2022-09-12	12:28:04	0.301896	108.182	FALSE	4
2022-09-12	12:28:04	0.167087	108.349	FALSE	4
2022-09-12	12:28:04	0.225662	108.574	FALSE	4
2022-09-12	12:28:04	0.303473	108.878	FALSE	4
2022-09-12	12:28:05	0.251056	109.129	FALSE	4
2022-09-12	12:28:05	0.349682	109.479	FALSE	4
2022-09-12	12:28:05	0.225865	109.704	FALSE	4
2022-09-12	12:28:06	0.290547	109.995	FALSE	4
2022-09-12	12:28:06	0.230903	110.226	FALSE	4
2022-09-12	12:28:06	0.215331	110.441	FALSE	4
2022-09-12	12:28:06	0.413957	110.855	FALSE	4
2022-09-12	12:28:07	0.196145	111.051	FALSE	4
2022-09-12	12:28:07	0.342608	111.394	FALSE	4
2022-09-12	12:28:07	0.285204	111.679	FALSE	4
2022-09-12	12:28:07	0.307188	111.986	FALSE	4
2022-09-12	12:28:08	0.29416	112.28	FALSE	4
2022-09-12	12:28:08	0.176603	112.457	FALSE	4
2022-09-12	12:28:08	0.39472	112.852	FALSE	4
2022-09-12	12:28:08	0.178486	113.03	FALSE	4
2022-09-12	12:28:09	0.274771	113.305	FALSE	4
2022-09-12	12:28:09	0.380369	113.685	FALSE	4
2022-09-12	12:28:09	0.210853	113.896	FALSE	4
2022-09-12	12:28:10	0.267545	114.164	FALSE	4
2022-09-12	12:28:10	0.410089	114.574	FALSE	4
2022-09-12	12:28:10	0.180624	114.754	FALSE	4
2022-09-12	12:28:10	0.269428	115.024	FALSE	4
2022-09-12	12:28:11	0.130496	115.154	FALSE	4
2022-09-12	12:28:11	0.266374	115.421	FALSE	4
2022-09-12	12:28:11	0.205713	115.627	FALSE	4
2022-09-12	12:28:11	0.164593	115.791	FALSE	4
2022-09-12	12:28:12	0.0808272	115.872	FALSE	4
2022-09-12	12:28:12	0.206781	116.079	FALSE	4
2022-09-12	12:28:12	0.313855	116.393	FALSE	4
2022-09-12	12:28:12	0.530547	116.923	FALSE	4
2022-09-12	12:28:13	0.301692	117.225	FALSE	4
2022-09-12	12:28:13	0.17645	117.401	FALSE	4
2022-09-12	12:28:13	0.0914633	117.493	FALSE	4
2022-09-12	12:28:14	0.157214	117.65	FALSE	4
2022-09-12	12:28:14	-0.0282313	117.65	FALSE	4
2022-09-12	12:28:14	0.147443	117.797	FALSE	4
2022-09-12	12:28:14	0.00922418	117.807	FALSE	4
2022-09-12	12:28:15	0.0856109	117.892	FALSE	4
2022-09-12	12:28:15	-0.0163229	117.892	FALSE	4
2022-09-12	12:28:15	0.198639	118.091	FALSE	4
2022-09-12	12:28:15	0.237824	118.329	FALSE	4
2022-09-12	12:28:16	0.166527	118.495	FALSE	4
2022-09-12	12:28:16	0.387392	118.883	FALSE	4
2022-09-12	12:28:16	0.179199	119.062	FALSE	4
2022-09-12	12:28:16	0.475026	119.537	FALSE	4
2022-09-12	12:28:17	0.234873	119.772	FALSE	4
2022-09-12	12:28:17	0.331311	120.103	FALSE	4
2022-09-12	12:28:17	0.384491	120.487	FALSE	4
2022-09-12	12:28:18	0.373855	120.861	FALSE	4
2022-09-12	12:28:18	0.329937	121.191	FALSE	4
2022-09-12	12:28:18	0.303575	121.495	FALSE	4
2022-09-12	12:28:18	0.313295	121.808	FALSE	4
2022-09-12	12:28:19	0.39472	122.203	FALSE	4
2022-09-12	12:28:19	0.683066	122.886	FALSE	4
2022-09-12	12:28:19	0.558944	123.445	FALSE	4
2022-09-12	12:28:19	0.715687	124.161	FALSE	4
2022-09-12	12:28:20	0.366171	124.527	FALSE	4
2022-09-12	12:28:20	0.338741	124.865	FALSE	4
2022-09-12	12:28:20	0.513753	125.379	FALSE	4
2022-09-12	12:28:20	0.318791	125.698	FALSE	4
2022-09-12	12:28:21	0.357926	126.056	FALSE	4
2022-09-12	12:28:21	0.40098	126.457	FALSE	4
2022-09-12	12:28:21	0.280674	126.738	FALSE	4
2022-09-12	12:28:22	0.372277	127.11	FALSE	4
2022-09-12	12:28:22	0.262608	127.372	FALSE	4
2022-09-12	12:28:22	0.285102	127.658	FALSE	4
2022-09-12	12:28:22	0.285051	127.943	FALSE	4
2022-09-12	12:28:23	0.335331	128.278	FALSE	4
2022-09-12	12:28:23	0.280064	128.558	FALSE	4
2022-09-12	12:28:23	0.304847	128.863	FALSE	4
2022-09-12	12:28:23	0.255993	129.119	FALSE	4
2022-09-12	12:28:24	0.264135	129.383	FALSE	4
2022-09-12	12:28:24	0.239453	129.622	FALSE	4
2022-09-12	12:28:24	0.231972	129.854	FALSE	4
2022-09-12	12:28:24	0.211718	130.066	FALSE	4
2022-09-12	12:28:25	0.150089	130.216	FALSE	4
2022-09-12	12:28:25	0.191311	130.408	FALSE	4
2022-09-12	12:28:25	0.157977	130.566	FALSE	4
2022-09-12	12:28:26	0.327239	130.893	FALSE	4
2022-09-12	12:28:26	0.190395	131.083	FALSE	4
2022-09-12	12:28:26	0.200318	131.283	FALSE	4
2022-09-12	12:28:26	0.211616	131.495	FALSE	4
2022-09-12	12:28:27	0.162099	131.657	FALSE	4
2022-09-12	12:28:27	0.319453	131.977	FALSE	4
2022-09-12	12:28:27	0.15187	132.129	FALSE	4
2022-09-12	12:28:27	0.335484	132.464	FALSE	4
2022-09-12	12:28:28	0.302659	132.767	FALSE	4
2022-09-12	12:28:28	1.23294	134	FALSE	4
2022-09-12	12:28:28	0.187392	134.187	FALSE	4
2022-09-12	12:28:28	0.304033	134.491	FALSE	4
2022-09-12	12:28:29	0.345102	134.836	FALSE	4
2022-09-12	12:28:29	0.292532	135.129	FALSE	4
2022-09-12	12:28:29	0.299606	135.428	FALSE	4
2022-09-12	12:28:30	0.217163	135.645	FALSE	4
2022-09-12	12:28:30	0.441896	136.087	FALSE	4
2022-09-12	12:28:30	0.236247	136.324	FALSE	4
2022-09-12	12:28:30	0.743575	137.067	FALSE	4
2022-09-12	12:28:31	0.202048	137.269	FALSE	4
2022-09-12	12:28:31	0.167188	137.436	FALSE	4
2022-09-12	12:28:31	0.404746	137.841	FALSE	4
2022-09-12	12:28:31	0.118079	137.959	FALSE	4
2022-09-12	12:28:32	0.213346	138.173	FALSE	4
2022-09-12	12:28:32	0.255534	138.428	FALSE	4
2022-09-12	12:28:32	0.164033	138.592	FALSE	4
2022-09-12	12:28:32	0.227545	138.82	FALSE	4
2022-09-12	12:28:33	0.156145	138.976	FALSE	4
2022-09-12	12:28:33	0.209784	139.186	FALSE	4
2022-09-12	12:28:33	0.277316	139.463	FALSE	4
2022-09-12	12:28:34	0.0840841	139.547	FALSE	4
2022-09-12	12:28:34	0.083219	139.63	FALSE	4
2022-09-12	12:28:34	-0.0203942	139.63	FALSE	4
2022-09-12	12:28:34	-0.058613	139.63	FALSE	4
2022-09-12	12:28:35	0.0240333	139.654	FALSE	4
2022-09-12	12:28:35	0.0895295	139.744	FALSE	4
2022-09-12	12:28:35	0.113753	139.858	FALSE	4
2022-09-12	12:28:35	0.15243	140.01	FALSE	4
2022-09-12	12:28:36	0.188461	140.198	FALSE	4
2022-09-12	12:28:36	0.253906	140.452	FALSE	4
2022-09-12	12:28:36	0.254975	140.707	FALSE	4
2022-09-12	12:28:36	0.183321	140.891	FALSE	4
2022-09-12	12:28:37	0.346578	141.237	FALSE	4
2022-09-12	12:28:37	0.17645	141.414	FALSE	4
2022-09-12	12:28:37	0.221387	141.635	FALSE	4
2022-09-12	12:28:38	0.0503438	141.685	FALSE	4
2022-09-12	12:28:38	0.0603692	141.746	FALSE	4
2022-09-12	12:28:38	0.179249	141.925	FALSE	4
2022-09-12	12:28:38	0.233041	142.158	FALSE	4
2022-09-12	12:28:39	0.245662	142.404	FALSE	4
2022-09-12	12:28:39	0.198333	142.602	FALSE	4
2022-09-12	12:28:39	0.147494	142.75	FALSE	4
2022-09-12	12:28:39	0.235534	142.985	FALSE	4
2022-09-12	12:28:40	0.211412	143.196	FALSE	4
2022-09-12	12:28:40	0.250598	143.447	FALSE	4
2022-09-12	12:28:40	0.413448	143.861	FALSE	4
2022-09-12	12:28:40	0.281132	144.142	FALSE	4
2022-09-12	12:28:41	0.30042	144.442	FALSE	4
2022-09-12	12:28:41	0.235484	144.678	FALSE	4
2022-09-12	12:28:41	0.0562979	144.734	FALSE	4
2022-09-12	12:28:42	0.0201147	144.754	FALSE	4
2022-09-12	12:28:42	0.301183	145.055	FALSE	4
2022-09-12	12:28:42	0.265407	145.321	FALSE	4
2022-09-12	12:28:42	0.32612	145.647	FALSE	4
2022-09-12	12:28:43	0.325763	145.972	FALSE	4
2022-09-12	12:28:43	0.21126	146.184	FALSE	4
2022-09-12	12:28:43	0.313702	146.497	FALSE	4
2022-09-12	12:28:43	0.184695	146.682	FALSE	4
2022-09-12	12:28:44	0.215585	146.898	FALSE	4
2022-09-12	12:28:44	0.271565	147.169	FALSE	4
2022-09-12	12:28:44	0.227341	147.397	FALSE	4
2022-09-12	12:28:44	0.345458	147.742	FALSE	4
2022-09-12	12:28:45	0.24215	147.984	FALSE	4
2022-09-12	12:28:45	0.244339	148.229	FALSE	4
2022-09-12	12:28:45	0.208308	148.437	FALSE	4
2022-09-12	12:28:46	0.168613	148.605	FALSE	4
2022-09-12	12:28:46	0.324746	148.93	FALSE	4
2022-09-12	12:28:46	0.165611	149.096	FALSE	4
2022-09-12	12:28:46	0.215076	149.311	FALSE	4
2022-09-12	12:28:47	0.255484	149.566	FALSE	4
2022-09-12	12:28:47	0.20327	149.77	FALSE	4
2022-09-12	12:28:47	0.316705	150.086	FALSE	4
2022-09-12	12:28:47	0.143728	150.23	FALSE	4
2022-09-12	12:28:48	0.374313	150.604	FALSE	4
2022-09-12	12:28:48	0.212277	150.817	FALSE	4
2022-09-12	12:28:48	0.304949	151.122	FALSE	4
2022-09-12	12:28:48	0.139453	151.261	FALSE	4
2022-09-12	12:28:49	0.148257	151.409	FALSE	4
2022-09-12	12:28:49	0.293499	151.703	FALSE	4
2022-09-12	12:28:49	0.199555	151.902	FALSE	4
2022-09-12	12:28:50	0.26841	152.171	FALSE	4
2022-09-12	12:28:50	-0.00232801	152.171	FALSE	4
2022-09-12	12:28:50	0.145458	152.316	FALSE	4
2022-09-12	12:28:50	0.300725	152.617	FALSE	4
2022-09-12	12:28:51	0.611718	153.229	FALSE	4
2022-09-12	12:28:51	0.492583	153.721	FALSE	4
2022-09-12	12:28:51	0.236196	153.957	FALSE	4
2022-09-12	12:28:51	0.413295	154.371	FALSE	4
2022-09-12	12:28:52	0.295738	154.667	FALSE	4
2022-09-12	12:28:52	0.320573	154.987	FALSE	4
2022-09-12	12:28:52	0.327697	155.315	FALSE	4
2022-09-12	12:28:52	0.29869	155.613	FALSE	4
2022-09-12	12:28:53	0.526272	156.14	FALSE	4
2022-09-12	12:28:53	0.517773	156.658	FALSE	4
2022-09-12	12:28:53	0.398944	157.056	FALSE	4
2022-09-12	12:28:54	0.37813	157.435	FALSE	4
2022-09-12	12:28:54	0.372735	157.807	FALSE	4
2022-09-12	12:28:54	0.505	158.312	FALSE	4
2022-09-12	12:28:54	0.320522	158.633	FALSE	4
2022-09-12	12:28:55	0.276501	158.909	FALSE	4
2022-09-12	12:28:55	0.285204	159.195	FALSE	4
2022-09-12	12:28:55	0.354873	159.549	FALSE	4
2022-09-12	12:28:55	0.306934	159.856	FALSE	4
2022-09-12	12:28:56	0.232939	160.089	FALSE	4
2022-09-12	12:28:56	0.126781	160.216	FALSE	4
2022-09-12	12:28:56	0.432786	160.649	FALSE	4
2022-09-12	12:28:56	0.17014	160.819	FALSE	4
2022-09-12	12:28:57	0.347952	161.167	FALSE	4
2022-09-12	12:28:57	0.287138	161.454	FALSE	4
2022-09-12	12:28:57	0.317621	161.772	FALSE	4
2022-09-12	12:28:58	0.57299	162.345	FALSE	4
2022-09-12	12:28:58	0.524949	162.87	FALSE	4
2022-09-12	12:28:58	1.16256	164.032	FALSE	4
2022-09-12	12:28:58	1.53625	165.568	FALSE	4
2022-09-12	12:28:59	2.91294	168.481	FALSE	4
2022-09-12	12:28:59	4.15263	172.634	1	5
2022-09-12	12:28:59	2.1907	174.825	FALSE	5
2022-09-12	12:28:59	0.640572	175.465	FALSE	5
2022-09-12	12:29:00	0.691412	176.157	FALSE	5
2022-09-12	12:29:00	0.441641	176.598	FALSE	5
2022-09-12	12:29:00	0.438435	177.037	FALSE	5
2022-09-12	12:29:01	0.590954	177.628	FALSE	5
2022-09-12	12:29:01	0.416654	178.044	FALSE	5
2022-09-12	12:29:01	0.362557	178.407	FALSE	5
2022-09-12	12:29:01	0.549224	178.956	FALSE	5
2022-09-12	12:29:02	0.394873	179.351	FALSE	5
2022-09-12	12:29:02	0.389173	179.74	FALSE	5
2022-09-12	12:29:02	0.487901	180.228	FALSE	5
2022-09-12	12:29:02	0.449275	180.677	FALSE	5
2022-09-12	12:29:03	0.434466	181.112	FALSE	5
2022-09-12	12:29:03	0.442456	181.554	FALSE	5
2022-09-12	12:29:03	0.407087	181.961	FALSE	5
2022-09-12	12:29:03	0.593448	182.555	FALSE	5
2022-09-12	12:29:04	0.569021	183.124	FALSE	5
2022-09-12	12:29:04	0.466629	183.591	FALSE	5
2022-09-12	12:29:04	0.471311	184.062	FALSE	5
2022-09-12	12:29:04	0.539097	184.601	FALSE	5
2022-09-12	12:29:05	0.36556	184.966	FALSE	5
2022-09-12	12:29:05	0.900114	185.867	FALSE	5
2022-09-12	12:29:05	1.15324	187.02	FALSE	5
2022-09-12	12:29:06	2.08475	189.105	FALSE	5
2022-09-12	12:29:06	3.68968	192.794	1	6
2022-09-12	12:29:06	3.88027	196.675	1	7
2022-09-12	12:29:06	1.68734	198.362	FALSE	7
2022-09-12	12:29:07	1.04302	199.405	FALSE	7
2022-09-12	12:29:07	0.749784	200.155	FALSE	7
2022-09-12	12:29:07	0.614873	200.77	FALSE	7
2022-09-12	12:29:07	0.668715	201.438	FALSE	7
2022-09-12	12:29:08	0.495382	201.934	FALSE	7
2022-09-12	12:29:08	0.723015	202.657	FALSE	7
2022-09-12	12:29:08	0.546985	203.204	FALSE	7
2022-09-12	12:29:08	0.601336	203.805	FALSE	7
2022-09-12	12:29:09	0.447494	204.252	FALSE	7
2022-09-12	12:29:09	0.539911	204.792	FALSE	7
2022-09-12	12:29:09	0.43874	205.231	FALSE	7
2022-09-12	12:29:10	0.440573	205.672	FALSE	7
2022-09-12	12:29:10	0.507138	206.179	FALSE	7
2022-09-12	12:29:10	0.442914	206.622	FALSE	7
2022-09-12	12:29:10	0.327494	206.949	FALSE	7
2022-09-12	12:29:11	0.444644	207.394	FALSE	7
2022-09-12	12:29:11	0.436908	207.831	FALSE	7
2022-09-12	12:29:11	0.487494	208.318	FALSE	7
2022-09-12	12:29:11	0.510293	208.829	FALSE	7
2022-09-12	12:29:12	0.338333	209.167	FALSE	7
2022-09-12	12:29:12	0.420674	209.588	FALSE	7
2022-09-12	12:29:12	0.428868	210.016	FALSE	7
2022-09-12	12:29:12	0.339962	210.356	FALSE	7
2022-09-12	12:29:13	0.360623	210.717	FALSE	7
2022-09-12	12:29:13	0.547952	211.265	FALSE	7
2022-09-12	12:29:13	0.385764	211.651	FALSE	7
2022-09-12	12:29:14	0.432685	212.083	FALSE	7
2022-09-12	12:29:14	0.473244	212.557	FALSE	7
2022-09-12	12:29:14	0.345865	212.903	FALSE	7
2022-09-12	12:29:14	0.397417	213.3	FALSE	7
2022-09-12	12:29:15	0.461489	213.761	FALSE	7
2022-09-12	12:29:15	0.364746	214.126	FALSE	7
2022-09-12	12:29:15	0.325102	214.451	FALSE	7
2022-09-12	12:29:15	0.392583	214.844	FALSE	7
2022-09-12	12:29:16	0.475738	215.32	FALSE	7
2022-09-12	12:29:16	0.308715	215.628	FALSE	7
2022-09-12	12:29:16	0.518893	216.147	FALSE	7
2022-09-12	12:29:16	0.314109	216.461	FALSE	7
2022-09-12	12:29:17	0.443982	216.905	FALSE	7
2022-09-12	12:29:17	0.36556	217.271	FALSE	7
2022-09-12	12:29:17	0.3793	217.65	FALSE	7
2022-09-12	12:29:18	0.477061	218.127	FALSE	7
2022-09-12	12:29:18	0.317774	218.445	FALSE	7
2022-09-12	12:29:18	0.467748	218.913	FALSE	7
2022-09-12	12:29:18	0.359402	219.272	FALSE	7
2022-09-12	12:29:19	0.432176	219.704	FALSE	7
2022-09-12	12:29:19	0.388512	220.093	FALSE	7
2022-09-12	12:29:19	0.40215	220.495	FALSE	7
2022-09-12	12:29:19	0.386425	220.881	FALSE	7
2022-09-12	12:29:20	0.189122	221.071	FALSE	7
2022-09-12	12:29:20	0.342048	221.413	FALSE	7
2022-09-12	12:29:20	0.328562	221.741	FALSE	7
2022-09-12	12:29:20	0.312481	222.054	FALSE	7
2022-09-12	12:29:21	0.26388	222.318	FALSE	7
2022-09-12	12:29:21	0.182761	222.5	FALSE	7
2022-09-12	12:29:21	0.454364	222.955	FALSE	7
2022-09-12	12:29:22	0.298893	223.254	FALSE	7
2022-09-12	12:29:22	0.44388	223.697	FALSE	7
2022-09-12	12:29:22	0.215942	223.913	FALSE	7
2022-09-12	12:29:22	0.270751	224.184	FALSE	7
2022-09-12	12:29:23	0.229224	224.413	FALSE	7
2022-09-12	12:29:23	0.288919	224.702	FALSE	7
2022-09-12	12:29:23	0.273702	224.976	FALSE	7
2022-09-12	12:29:23	0.188054	225.164	FALSE	7
2022-09-12	12:29:24	0.524033	225.688	FALSE	7
2022-09-12	12:29:24	0.277112	225.965	FALSE	7
2022-09-12	12:29:24	0.32612	226.291	FALSE	7
2022-09-12	12:29:24	0.211005	226.502	FALSE	7
2022-09-12	12:29:25	0.121133	226.623	FALSE	7
2022-09-12	12:29:25	0.409275	227.033	FALSE	7
2022-09-12	12:29:25	0.334364	227.367	FALSE	7
2022-09-12	12:29:26	0.459046	227.826	FALSE	7
2022-09-12	12:29:26	0.280318	228.106	FALSE	7
2022-09-12	12:29:26	0.258283	228.365	FALSE	7
2022-09-12	12:29:26	0.27701	228.642	FALSE	7
2022-09-12	12:29:27	0.304339	228.946	FALSE	7
2022-09-12	12:29:27	0.427392	229.373	FALSE	7
2022-09-12	12:29:27	0.326221	229.7	FALSE	7
2022-09-12	12:29:27	0.315382	230.015	FALSE	7
2022-09-12	12:29:28	0.267646	230.283	FALSE	7
2022-09-12	12:29:28	0.443524	230.726	FALSE	7
2022-09-12	12:29:28	0.656094	231.382	FALSE	7
2022-09-12	12:29:28	0.348919	231.731	FALSE	7
2022-09-12	12:29:29	0.489529	232.221	FALSE	7
2022-09-12	12:29:29	0.395789	232.617	FALSE	7
2022-09-12	12:29:29	0.63131	233.248	FALSE	7
2022-09-12	12:29:30	0.657723	233.906	FALSE	7
2022-09-12	12:29:30	0.578079	234.484	FALSE	7
2022-09-12	12:29:30	0.813702	235.297	FALSE	7
2022-09-12	12:29:30	0.424135	235.722	FALSE	7
2022-09-12	12:29:31	1.28963	237.011	FALSE	7
2022-09-12	12:29:31	0.240623	237.252	FALSE	7
2022-09-12	12:29:31	0.837621	238.089	FALSE	7
2022-09-12	12:29:31	0.785254	238.875	FALSE	7
2022-09-12	12:29:32	0.926985	239.802	FALSE	7
2022-09-12	12:29:32	0.814975	240.617	FALSE	7
2022-09-12	12:29:32	0.948206	241.565	FALSE	7
2022-09-12	12:29:32	1.7477	243.313	FALSE	7
2022-09-12	12:29:33	2.27233	245.585	FALSE	7
2022-09-12	12:29:33	2.3995	247.984	FALSE	7
2022-09-12	12:29:33	1.81177	249.796	FALSE	7
2022-09-12	12:29:34	1.92179	251.718	FALSE	7
2022-09-12	12:29:34	2.43177	254.15	FALSE	7
2022-09-12	12:29:34	1.09854	255.248	FALSE	7
2022-09-12	12:29:34	1.08042	256.329	FALSE	7
2022-09-12	12:29:35	1.11228	257.441	FALSE	7
2022-09-12	12:29:35	0.876298	258.317	FALSE	7
2022-09-12	12:29:35	0.901997	259.219	FALSE	7
2022-09-12	12:29:35	1.12515	260.344	FALSE	7
2022-09-12	12:29:36	0.903372	261.248	FALSE	7
2022-09-12	12:29:36	1.56174	262.809	FALSE	7
2022-09-12	12:29:36	2.5023	265.312	FALSE	7
2022-09-12	12:29:36	4.15192	269.464	1	8
2022-09-12	12:29:37	2.76922	272.233	FALSE	8
2022-09-12	12:29:37	1.94704	274.18	FALSE	8
2022-09-12	12:29:37	1.05441	275.234	FALSE	8
2022-09-12	12:29:38	0.832634	276.067	FALSE	8
2022-09-12	12:29:38	2.1337	278.201	FALSE	8
2022-09-12	12:29:38	1.78866	279.989	FALSE	8
2022-09-12	12:29:38	2.20597	282.195	FALSE	8
2022-09-12	12:29:39	1.60658	283.802	FALSE	8
2022-09-12	12:29:39	2.15472	285.957	FALSE	8
2022-09-12	12:29:39	1.02551	286.982	FALSE	8
2022-09-12	12:29:39	1.34281	288.325	FALSE	8
2022-09-12	12:29:40	1.48617	289.811	FALSE	8
2022-09-12	12:29:40	1.2706	291.082	FALSE	8
2022-09-12	12:29:40	1.30352	292.385	FALSE	8
2022-09-12	12:29:40	1.31039	293.696	FALSE	8
2022-09-12	12:29:41	1.20994	294.906	FALSE	8
2022-09-12	12:29:41	0.759758	295.665	FALSE	8
2022-09-12	12:29:41	0.763473	296.429	FALSE	8
2022-09-12	12:29:42	0.750445	297.179	FALSE	8
2022-09-12	12:29:42	1.14419	298.323	FALSE	8
2022-09-12	12:29:42	1.23564	299.559	FALSE	8
2022-09-12	12:29:42	1.62332	301.182	FALSE	8
2022-09-12	12:29:43	0.870954	302.053	FALSE	8
2022-09-12	12:29:43	1.78999	303.843	FALSE	8
2022-09-12	12:29:43	0.806018	304.649	FALSE	8
2022-09-12	12:29:43	1.95828	306.608	FALSE	8
2022-09-12	12:29:44	1.57528	308.183	FALSE	8
2022-09-12	12:29:44	1.93828	310.121	FALSE	8
2022-09-12	12:29:44	1.34027	311.461	FALSE	8
2022-09-12	12:29:44	2.05793	313.519	FALSE	8
2022-09-12	12:29:45	1.79492	315.314	FALSE	8
2022-09-12	12:29:45	1.07365	316.388	FALSE	8
2022-09-12	12:29:45	1.52714	317.915	FALSE	8
2022-09-12	12:29:46	0.820827	318.736	FALSE	8
2022-09-12	12:29:46	2.0391	320.775	FALSE	8
2022-09-12	12:29:46	0.887341	321.662	FALSE	8
2022-09-12	12:29:46	2.08363	323.746	FALSE	8
2022-09-12	12:29:47	1.52576	325.272	FALSE	8
2022-09-12	12:29:47	1.45905	326.731	FALSE	8
2022-09-12	12:29:47	1.66658	328.397	FALSE	8
2022-09-12	12:29:47	0.708969	329.106	FALSE	8
2022-09-12	12:29:48	1.67558	330.782	FALSE	8
2022-09-12	12:29:48	0.507647	331.29	FALSE	8
2022-09-12	12:29:48	1.15655	332.446	FALSE	8
2022-09-12	12:29:48	0.84617	333.292	FALSE	8
2022-09-12	12:29:49	0.683728	333.976	FALSE	8
2022-09-12	12:29:49	0.585153	334.561	FALSE	8
2022-09-12	12:29:49	0.313702	334.875	FALSE	8
2022-09-12	12:29:50	0.543575	335.418	FALSE	8
2022-09-12	12:29:50	0.260064	335.679	FALSE	8
2022-09-12	12:29:50	0.603626	336.282	FALSE	8
2022-09-12	12:29:50	0.2193	336.501	FALSE	8
2022-09-12	12:29:51	0.47126	336.973	FALSE	8
2022-09-12	12:29:51	0.126883	337.1	FALSE	8
2022-09-12	12:29:51	0.676094	337.776	FALSE	8
2022-09-12	12:29:51	0.299758	338.075	FALSE	8
2022-09-12	12:29:52	0.477723	338.553	FALSE	8
2022-09-12	12:29:52	0.145051	338.698	FALSE	8
2022-09-12	12:29:52	0.483168	339.181	FALSE	8
2022-09-12	12:29:52	0.190293	339.372	FALSE	8
2022-09-12	12:29:53	0.418537	339.79	FALSE	8
2022-09-12	12:29:53	1.10714	340.897	FALSE	8
2022-09-12	12:29:53	5.66398	346.561	1	9
2022-09-12	12:29:54	12.3059	358.867	1	10
2022-09-12	12:29:54	5.87507	364.742	1	11
2022-09-12	12:29:54	0.839911	365.582	FALSE	11
2022-09-12	12:29:54	0.797875	366.38	FALSE	11
2022-09-12	12:29:55	0.433295	366.813	FALSE	11
2022-09-12	12:29:55	0.346985	367.16	FALSE	11
2022-09-12	12:29:55	0.376552	367.537	FALSE	11
2022-09-12	12:29:55	0.168817	367.706	FALSE	11
2022-09-12	12:29:56	0.345916	368.052	FALSE	11
2022-09-12	12:29:56	0.243931	368.296	FALSE	11
2022-09-12	12:29:56	0.368257	368.664	FALSE	11
2022-09-12	12:29:56	0.338028	369.002	FALSE	11
2022-09-12	12:29:57	0.468104	369.47	FALSE	11
2022-09-12	12:29:57	0.245509	369.715	FALSE	11
2022-09-12	12:29:57	0.281336	369.997	FALSE	11
2022-09-12	12:29:57	0.187697	370.185	FALSE	11
2022-09-12	12:29:58	0.333499	370.518	FALSE	11
2022-09-12	12:29:58	0.266527	370.785	FALSE	11
2022-09-12	12:29:58	0.330649	371.115	FALSE	11
2022-09-12	12:29:59	0.175331	371.291	FALSE	11
2022-09-12	12:29:59	0.277926	371.568	FALSE	11
2022-09-12	12:29:59	0.170293	371.739	FALSE	11
2022-09-12	12:29:59	0.244389	371.983	FALSE	11
2022-09-12	12:30:00	0.130954	372.114	FALSE	11
2022-09-12	12:30:00	0.200929	372.315	FALSE	11
2022-09-12	12:30:00	0.099046	372.414	FALSE	11
2022-09-12	12:30:00	0.171056	372.585	FALSE	11
2022-09-12	12:30:01	0.245407	372.831	FALSE	11
2022-09-12	12:30:01	0.188766	373.019	FALSE	11
2022-09-12	12:30:01	0.233652	373.253	FALSE	11
2022-09-12	12:30:02	0.205407	373.458	FALSE	11
2022-09-12	12:30:02	0.478995	373.937	FALSE	11
2022-09-12	12:30:02	0.410394	374.348	FALSE	11
2022-09-12	12:30:02	0.448817	374.797	FALSE	11
2022-09-12	12:30:03	0.362455	375.159	FALSE	11
2022-09-12	12:30:03	0.295331	375.454	FALSE	11
2022-09-12	12:30:03	0.294924	375.749	FALSE	11
2022-09-12	12:30:03	0.297875	376.047	FALSE	11
2022-09-12	12:30:04	0.266476	376.314	FALSE	11
2022-09-12	12:30:04	0.58271	376.896	FALSE	11
2022-09-12	12:30:04	0.40556	377.302	FALSE	11
2022-09-12	12:30:04	0.357265	377.659	FALSE	11
2022-09-12	12:30:05	0.372532	378.032	FALSE	11
2022-09-12	12:30:05	0.36444	378.396	FALSE	11
2022-09-12	12:30:05	0.34327	378.739	FALSE	11
2022-09-12	12:30:05	0.509071	379.248	FALSE	11
2022-09-12	12:30:06	0.118995	379.367	FALSE	11
2022-09-12	12:30:06	0.351209	379.719	FALSE	11
2022-09-12	12:30:06	0.239708	379.958	FALSE	11
2022-09-12	12:30:07	0.404847	380.363	FALSE	11
2022-09-12	12:30:07	0.313804	380.677	FALSE	11
2022-09-12	12:30:07	0.517621	381.195	FALSE	11
2022-09-12	12:30:07	0.359453	381.554	FALSE	11
2022-09-12	12:30:08	0.454822	382.009	FALSE	11
2022-09-12	12:30:08	0.210089	382.219	FALSE	11
2022-09-12	12:30:08	0.468054	382.687	FALSE	11
2022-09-12	12:30:08	0.756145	383.443	FALSE	11
2022-09-12	12:30:09	0.375789	383.819	FALSE	11
2022-09-12	12:30:09	0.628766	384.448	FALSE	11
2022-09-12	12:30:09	-0.168333	384.448	FALSE	11
2022-09-12	12:30:09	0.16098	384.609	FALSE	11
2022-09-12	12:30:10	0.146374	384.755	FALSE	11
2022-09-12	12:30:10	0.183117	384.938	FALSE	11
2022-09-12	12:30:10	0.274008	385.212	FALSE	11
2022-09-12	12:30:11	0.182405	385.395	FALSE	11
2022-09-12	12:30:11	0.216909	385.612	FALSE	11
2022-09-12	12:30:11	0.266781	385.878	FALSE	11
2022-09-12	12:30:11	0.474873	386.353	FALSE	11
2022-09-12	12:30:12	0.436501	386.79	FALSE	11
2022-09-12	12:30:12	0.403372	387.193	FALSE	11
2022-09-12	12:30:12	0.370903	387.564	FALSE	11
2022-09-12	12:30:12	0.399402	387.963	FALSE	11
2022-09-12	12:30:13	0.307341	388.271	FALSE	11
2022-09-12	12:30:13	0.376145	388.647	FALSE	11
2022-09-12	12:30:13	0.376501	389.023	FALSE	11
2022-09-12	12:30:14	0.229835	389.253	FALSE	11
2022-09-12	12:30:14	0.360216	389.613	FALSE	11
2022-09-12	12:30:14	0.361998	389.975	FALSE	11
2022-09-12	12:30:14	0.360216	390.336	FALSE	11
2022-09-12	12:30:15	0.360216	390.696	FALSE	11
2022-09-12	12:30:15	0.342506	391.038	FALSE	11
2022-09-12	12:30:15	0.709529	391.748	FALSE	11
2022-09-12	12:30:15	1.06118	392.809	FALSE	11
2022-09-12	12:30:16	0.273753	393.083	FALSE	11
2022-09-12	12:30:16	0.34897	393.432	FALSE	11
2022-09-12	12:30:16	0.193092	393.625	FALSE	11
2022-09-12	12:30:16	-0.0519972	393.625	FALSE	11
2022-09-12	12:30:17	-0.136018	393.625	FALSE	11
2022-09-12	12:30:17	-0.00477074	393.625	FALSE	11
2022-09-12	12:30:17	-0.0679259	393.625	FALSE	11
2022-09-12	12:30:17	0.099046	393.724	FALSE	11
2022-09-12	12:30:18	0.0844404	393.808	FALSE	11
2022-09-12	12:30:18	0.0123285	393.821	FALSE	11
2022-09-12	12:30:18	0.138028	393.959	FALSE	11
2022-09-12	12:30:19	0.263779	394.223	FALSE	11
2022-09-12	12:30:19	0.442099	394.665	FALSE	11
2022-09-12	12:30:19	0.330191	394.995	FALSE	11
2022-09-12	12:30:19	0.41416	395.409	FALSE	11
2022-09-12	12:30:20	0.459453	395.868	FALSE	11
2022-09-12	12:30:20	0.353855	396.222	FALSE	11
2022-09-12	12:30:20	0.334771	396.557	FALSE	11
2022-09-12	12:30:20	0.363066	396.92	FALSE	11
2022-09-12	12:30:21	0.360522	397.281	FALSE	11
2022-09-12	12:30:21	0.370751	397.651	FALSE	11
2022-09-12	12:30:21	0.371565	398.023	FALSE	11
2022-09-12	12:30:21	0.376705	398.4	FALSE	11
2022-09-12	12:30:22	0.366934	398.767	FALSE	11
2022-09-12	12:30:22	0.367392	399.134	FALSE	11
2022-09-12	12:30:22	0.364847	399.499	FALSE	11
2022-09-12	12:30:23	0.359504	399.858	FALSE	11
2022-09-12	12:30:23	0.356247	400.215	FALSE	11
2022-09-12	12:30:23	0.37131	400.586	FALSE	11
2022-09-12	12:30:23	0.36902	400.955	FALSE	11
2022-09-12	12:30:24	0.378842	401.334	FALSE	11
2022-09-12	12:30:24	0.366018	401.7	FALSE	11
2022-09-12	12:30:24	0.363931	402.064	FALSE	11
2022-09-12	12:30:24	0.381743	402.445	FALSE	11
2022-09-12	12:30:25	0.38098	402.826	FALSE	11
2022-09-12	12:30:25	0.400878	403.227	FALSE	11
2022-09-12	12:30:25	0.401947	403.629	FALSE	11
2022-09-12	12:30:25	0.406323	404.036	FALSE	11
2022-09-12	12:30:26	0.400318	404.436	FALSE	11
2022-09-12	12:30:26	0.406934	404.843	FALSE	11
2022-09-12	12:30:26	0.401082	405.244	FALSE	11
2022-09-12	12:30:27	0.399911	405.644	FALSE	11
2022-09-12	12:30:27	0.38668	406.03	FALSE	11
2022-09-12	12:30:27	0.384288	406.415	FALSE	11
2022-09-12	12:30:27	0.379453	406.794	FALSE	11
2022-09-12	12:30:28	0.382354	407.177	FALSE	11
2022-09-12	12:30:28	0.379555	407.556	FALSE	11
2022-09-12	12:30:28	0.376349	407.932	FALSE	11
2022-09-12	12:30:28	0.378537	408.311	FALSE	11
2022-09-12	12:30:29	0.379606	408.691	FALSE	11
2022-09-12	12:30:29	0.375076	409.066	FALSE	11
2022-09-12	12:30:29	0.384847	409.451	FALSE	11
2022-09-12	12:30:29	0.382608	409.833	FALSE	11
2022-09-12	12:30:30	0.377367	410.211	FALSE	11
2022-09-12	12:30:30	0.380216	410.591	FALSE	11
2022-09-12	12:30:30	0.39869	410.989	FALSE	11
2022-09-12	12:30:31	0.392837	411.382	FALSE	11
2022-09-12	12:30:31	0.347138	411.729	FALSE	11
2022-09-12	12:30:31	0.407697	412.137	FALSE	11
2022-09-12	12:30:31	0.37299	412.51	FALSE	11
2022-09-12	12:30:32	0.2593	412.769	FALSE	11
2022-09-12	12:30:32	0.518028	413.287	FALSE	11
2022-09-12	12:30:32	0.503982	413.791	FALSE	11
2022-09-12	12:30:32	0.548257	414.34	FALSE	11
2022-09-12	12:30:33	0.72556	415.065	FALSE	11
2022-09-12	12:30:33	0.525356	415.591	FALSE	11
2022-09-12	12:30:33	0.400013	415.991	FALSE	11
2022-09-12	12:30:33	0.423982	416.415	FALSE	11
2022-09-12	12:30:34	0.408359	416.823	FALSE	11
2022-09-12	12:30:34	0.548257	417.371	FALSE	11
2022-09-12	12:30:34	0.368512	417.74	FALSE	11
2022-09-12	12:30:35	0.412125	418.152	FALSE	11
2022-09-12	12:30:35	0.47299	418.625	FALSE	11
2022-09-12	12:30:35	0.481183	419.106	FALSE	11
2022-09-12	12:30:35	0.46673	419.573	FALSE	11
2022-09-12	12:30:36	0.345051	419.918	FALSE	11
2022-09-12	12:30:36	0.34958	420.267	FALSE	11
2022-09-12	12:30:36	0.488308	420.756	FALSE	11
2022-09-12	12:30:36	0.305458	421.061	FALSE	11
2022-09-12	12:30:37	0.578232	421.639	FALSE	11
2022-09-12	12:30:37	0.317723	421.957	FALSE	11
2022-09-12	12:30:37	0.446934	422.404	FALSE	11
2022-09-12	12:30:37	0.488206	422.892	FALSE	11
2022-09-12	12:30:38	0.445102	423.337	FALSE	11
2022-09-12	12:30:38	0.325051	423.662	FALSE	11
2022-09-12	12:30:38	0.323575	423.986	FALSE	11
2022-09-12	12:30:39	0.498435	424.484	FALSE	11
2022-09-12	12:30:39	0.366832	424.851	FALSE	11
2022-09-12	12:30:39	0.47528	425.326	FALSE	11
2022-09-12	12:30:39	0.333244	425.66	FALSE	11
2022-09-12	12:30:40	0.4307	426.09	FALSE	11
2022-09-12	12:30:40	0.480165	426.571	FALSE	11
2022-09-12	12:30:40	0.478181	427.049	FALSE	11
2022-09-12	12:30:40	0.825916	427.875	FALSE	11
2022-09-12	12:30:41	0.579962	428.455	FALSE	11
2022-09-12	12:30:41	1.23019	429.685	FALSE	11
2022-09-12	12:30:41	0.874516	430.559	FALSE	11
2022-09-12	12:30:41	0.52215	431.082	FALSE	11
2022-09-12	12:30:42	0.448613	431.53	FALSE	11
2022-09-12	12:30:42	0.404338	431.934	FALSE	11
2022-09-12	12:30:42	0.429071	432.364	FALSE	11
2022-09-12	12:30:43	0.325	432.689	FALSE	11
2022-09-12	12:30:43	0.443372	433.132	FALSE	11
2022-09-12	12:30:43	0.403066	433.535	FALSE	11
2022-09-12	12:30:43	0.44841	433.983	FALSE	11
2022-09-12	12:30:44	0.37355	434.357	FALSE	11
2022-09-12	12:30:44	0.482049	434.839	FALSE	11
2022-09-12	12:30:44	0.437875	435.277	FALSE	11
2022-09-12	12:30:44	0.351361	435.628	FALSE	11
2022-09-12	12:30:45	0.515789	436.144	FALSE	11
2022-09-12	12:30:45	0.411412	436.555	FALSE	11
2022-09-12	12:30:45	0.460471	437.016	FALSE	11
2022-09-12	12:30:45	0.471769	437.488	FALSE	11
2022-09-12	12:30:46	0.331311	437.819	FALSE	11
2022-09-12	12:30:46	0.516857	438.336	FALSE	11
2022-09-12	12:30:46	0.399351	438.735	FALSE	11
2022-09-12	12:30:47	0.397316	439.132	FALSE	11
2022-09-12	12:30:47	0.399911	439.532	FALSE	11
2022-09-12	12:30:47	0.344644	439.877	FALSE	11
2022-09-12	12:30:47	0.555331	440.432	FALSE	11
2022-09-12	12:30:48	0.294618	440.727	FALSE	11
2022-09-12	12:30:48	0.54388	441.271	FALSE	11
2022-09-12	12:30:48	0.362405	441.633	FALSE	11
2022-09-12	12:30:48	0.457061	442.09	FALSE	11
2022-09-12	12:30:49	0.457519	442.548	FALSE	11
2022-09-12	12:30:49	0.448766	442.997	FALSE	11
2022-09-12	12:30:49	0.382048	443.379	FALSE	11
2022-09-12	12:30:49	0.364389	443.743	FALSE	11
2022-09-12	12:30:50	0.557774	444.301	FALSE	11
2022-09-12	12:30:50	0.337672	444.639	FALSE	11
2022-09-12	12:30:50	0.494618	445.133	FALSE	11
2022-09-12	12:30:51	0.346374	445.48	FALSE	11
2022-09-12	12:30:51	0.613652	446.093	FALSE	11
2022-09-12	12:30:51	0.339962	446.433	FALSE	11
2022-09-12	12:30:51	0.541489	446.975	FALSE	11
2022-09-12	12:30:52	0.291972	447.267	FALSE	11
2022-09-12	12:30:52	0.536959	447.804	FALSE	11
2022-09-12	12:30:52	0.363931	448.167	FALSE	11
2022-09-12	12:30:52	0.729071	448.897	FALSE	11
2022-09-12	12:30:53	0.505102	449.402	FALSE	11
2022-09-12	12:30:53	0.592583	449.994	FALSE	11
2022-09-12	12:30:53	0.648104	450.642	FALSE	11
2022-09-12	12:30:53	0.488461	451.131	FALSE	11
2022-09-12	12:30:54	0.867595	451.998	FALSE	11
2022-09-12	12:30:54	0.402964	452.401	FALSE	11
2022-09-12	12:30:54	0.578028	452.979	FALSE	11
2022-09-12	12:30:55	0.374822	453.354	FALSE	11
2022-09-12	12:30:55	0.503422	453.858	FALSE	11
2022-09-12	12:30:55	0.75584	454.613	FALSE	11
2022-09-12	12:30:55	0.640776	455.254	FALSE	11
2022-09-12	12:30:56	0.585	455.839	FALSE	11
2022-09-12	12:30:56	0.681031	456.52	FALSE	11
2022-09-12	12:30:56	0.293804	456.814	FALSE	11
2022-09-12	12:30:56	0.47813	457.292	FALSE	11
2022-09-12	12:30:57	0.414008	457.706	FALSE	11
2022-09-12	12:30:57	0.43925	458.145	FALSE	11
2022-09-12	12:30:57	0.309784	458.455	FALSE	11
2022-09-12	12:30:57	0.417977	458.873	FALSE	11
2022-09-12	12:30:58	0.396501	459.27	FALSE	11
2022-09-12	12:30:58	0.390445	459.66	FALSE	11
2022-09-12	12:30:58	0.40556	460.066	FALSE	11
2022-09-12	12:30:59	0.334975	460.401	FALSE	11
2022-09-12	12:30:59	0.567494	460.968	FALSE	11
2022-09-12	12:30:59	0.327239	461.295	FALSE	11
2022-09-12	12:30:59	0.612176	461.908	FALSE	11
2022-09-12	12:31:00	0.535992	462.444	FALSE	11
2022-09-12	12:31:00	0.679555	463.123	FALSE	11
2022-09-12	12:31:00	0.412277	463.535	FALSE	11
2022-09-12	12:31:00	0.358333	463.894	FALSE	11
2022-09-12	12:31:01	0.414059	464.308	FALSE	11
2022-09-12	12:31:01	0.296959	464.605	FALSE	11
2022-09-12	12:31:01	0.517926	465.123	FALSE	11
2022-09-12	12:31:01	0.258639	465.381	FALSE	11
2022-09-12	12:31:02	0.530344	465.912	FALSE	11
2022-09-12	12:31:02	0.335585	466.247	FALSE	11
2022-09-12	12:31:02	0.353957	466.601	FALSE	11
2022-09-12	12:31:03	0.338842	466.94	FALSE	11
2022-09-12	12:31:03	0.358893	467.299	FALSE	11
2022-09-12	12:31:03	0.346629	467.646	FALSE	11
2022-09-12	12:31:03	0.299504	467.945	FALSE	11
2022-09-12	12:31:04	0.445153	468.39	FALSE	11
2022-09-12	12:31:04	0.282914	468.673	FALSE	11
2022-09-12	12:31:04	0.548155	469.221	FALSE	11
2022-09-12	12:31:04	0.314466	469.536	FALSE	11
2022-09-12	12:31:05	0.494211	470.03	FALSE	11
2022-09-12	12:31:05	0.461489	470.491	FALSE	11
2022-09-12	12:31:05	0.488359	470.98	FALSE	11
2022-09-12	12:31:05	0.520674	471.501	FALSE	11
2022-09-12	12:31:06	0.462965	471.963	FALSE	11
2022-09-12	12:31:06	0.505763	472.469	FALSE	11
2022-09-12	12:31:06	0.394415	472.864	FALSE	11
2022-09-12	12:31:07	0.342659	473.206	FALSE	11
2022-09-12	12:31:07	0.462303	473.669	FALSE	11
2022-09-12	12:31:07	0.638893	474.308	FALSE	11
2022-09-12	12:31:07	0.54271	474.85	FALSE	11
2022-09-12	12:31:08	0.583015	475.433	FALSE	11
2022-09-12	12:31:08	0.614364	476.048	FALSE	11
2022-09-12	12:31:08	0.962201	477.01	FALSE	11
2022-09-12	12:31:08	0.413957	477.424	FALSE	11
2022-09-12	12:31:09	0.437672	477.861	FALSE	11
2022-09-12	12:31:09	0.351514	478.213	FALSE	11
2022-09-12	12:31:09	0.377875	478.591	FALSE	11
2022-09-12	12:31:09	0.441081	479.032	FALSE	11
2022-09-12	12:31:10	0.315433	479.347	FALSE	11
2022-09-12	12:31:10	0.617417	479.965	FALSE	11
2022-09-12	12:31:10	0.365763	480.331	FALSE	11
2022-09-12	12:31:11	0.515687	480.846	FALSE	11
2022-09-12	12:31:11	0.44785	481.294	FALSE	11
2022-09-12	12:31:11	0.457367	481.751	FALSE	11
2022-09-12	12:31:11	0.469275	482.221	FALSE	11
2022-09-12	12:31:12	0.508003	482.729	FALSE	11
2022-09-12	12:31:12	0.241183	482.97	FALSE	11
2022-09-12	12:31:12	0.200674	483.171	FALSE	11
2022-09-12	12:31:12	0.393855	483.564	FALSE	11
2022-09-12	12:31:13	0.0602674	483.625	FALSE	11
2022-09-12	12:31:13	-0.642175	483.625	FALSE	11
2022-09-12	12:31:13	-0.264974	483.625	FALSE	11
2022-09-12	12:31:13	0.03299	483.658	FALSE	11
2022-09-12	12:31:14	0.149479	483.807	FALSE	11
2022-09-12	12:31:14	0.306985	484.114	FALSE	11
2022-09-12	12:31:14	0.188257	484.302	FALSE	11
2022-09-12	12:31:15	0.630089	484.932	FALSE	11
2022-09-12	12:31:15	0.138384	485.071	FALSE	11
2022-09-12	12:31:15	-0.207366	485.071	FALSE	11
2022-09-12	12:31:15	-0.0135239	485.071	FALSE	11
2022-09-12	12:31:16	0.00189592	485.073	FALSE	11
2022-09-12	12:31:16	0.280623	485.353	FALSE	11
2022-09-12	12:31:16	0.23757	485.591	FALSE	11
2022-09-12	12:31:16	0.335738	485.927	FALSE	11
2022-09-12	12:31:17	0.462659	486.389	FALSE	11
2022-09-12	12:31:17	0.257468	486.647	FALSE	11
2022-09-12	12:31:17	0.26042	486.907	FALSE	11
2022-09-12	12:31:17	0.405051	487.312	FALSE	11
2022-09-12	12:31:18	0.460318	487.773	FALSE	11
2022-09-12	12:31:18	0.477061	488.25	FALSE	11
2022-09-12	12:31:18	0.441641	488.691	FALSE	11
2022-09-12	12:31:19	0.436349	489.128	FALSE	11
2022-09-12	12:31:19	0.440369	489.568	FALSE	11
2022-09-12	12:31:19	0.451565	490.02	FALSE	11
2022-09-12	12:31:19	0.444593	490.464	FALSE	11
2022-09-12	12:31:20	0.443779	490.908	FALSE	11
2022-09-12	12:31:20	0.451107	491.359	FALSE	11
2022-09-12	12:31:20	0.460674	491.82	FALSE	11
2022-09-12	12:31:20	0.471972	492.292	FALSE	11
2022-09-12	12:31:21	0.490191	492.782	FALSE	11
2022-09-12	12:31:21	0.36159	493.144	FALSE	11
2022-09-12	12:31:21	0.440216	493.584	FALSE	11
2022-09-12	12:31:21	0.491361	494.075	FALSE	11
2022-09-12	12:31:22	0.522506	494.598	FALSE	11
2022-09-12	12:31:22	0.397672	494.995	FALSE	11
2022-09-12	12:31:22	0.359657	495.355	FALSE	11
2022-09-12	12:31:23	0.461896	495.817	FALSE	11
2022-09-12	12:31:23	0.440013	496.257	FALSE	11
2022-09-12	12:31:23	0.380827	496.638	FALSE	11
2022-09-12	12:31:23	0.409733	497.047	FALSE	11
2022-09-12	12:31:24	0.425254	497.473	FALSE	11
2022-09-12	12:31:24	0.483931	497.957	FALSE	11
2022-09-12	12:31:24	0.61243	498.569	FALSE	11
2022-09-12	12:31:24	0.789071	499.358	FALSE	11
2022-09-12	12:31:25	0.562557	499.921	FALSE	11
2022-09-12	12:31:25	0.880064	500.801	FALSE	11
2022-09-12	12:31:25	0.567341	501.368	FALSE	11
2022-09-12	12:31:25	0.272481	501.641	FALSE	11
2022-09-12	12:31:26	0.63299	502.274	FALSE	11
2022-09-12	12:31:26	0.67416	502.948	FALSE	11
2022-09-12	12:31:26	0.558028	503.506	FALSE	11
2022-09-12	12:31:27	0.323524	503.829	FALSE	11
2022-09-12	12:31:27	0.558537	504.388	FALSE	11
2022-09-12	12:31:27	0.3907	504.778	FALSE	11
2022-09-12	12:31:27	0.542659	505.321	FALSE	11
2022-09-12	12:31:28	0.711361	506.032	FALSE	11
2022-09-12	12:31:28	0.371056	506.404	FALSE	11
2022-09-12	12:31:28	0.533906	506.937	FALSE	11
2022-09-12	12:31:28	0.61528	507.553	FALSE	11
2022-09-12	12:31:29	0.531667	508.084	FALSE	11
2022-09-12	12:31:29	0.492786	508.577	FALSE	11
2022-09-12	12:31:29	0.68327	509.26	FALSE	11
2022-09-12	12:31:29	1.01411	510.275	FALSE	11
2022-09-12	12:31:30	1.93238	512.207	FALSE	11
2022-09-12	12:31:30	1.10683	513.314	FALSE	11
2022-09-12	12:31:30	2.47681	515.791	FALSE	11
2022-09-12	12:31:31	3.05034	518.841	1	12
2022-09-12	12:31:31	1.96887	520.81	FALSE	12
2022-09-12	12:31:31	0.858995	521.669	FALSE	12
2022-09-12	12:31:31	0.380725	522.05	FALSE	12
2022-09-12	12:31:32	0.454415	522.504	FALSE	12
2022-09-12	12:31:32	0.504898	523.009	FALSE	12
2022-09-12	12:31:32	0.452227	523.461	FALSE	12
2022-09-12	12:31:32	0.376552	523.838	FALSE	12
2022-09-12	12:31:33	0.36215	524.2	FALSE	12
2022-09-12	12:31:33	0.492583	524.692	FALSE	12
2022-09-12	12:31:33	0.537977	525.23	FALSE	12
2022-09-12	12:31:33	0.629377	525.86	FALSE	12
2022-09-12	12:31:34	0.370191	526.23	FALSE	12
2022-09-12	12:31:34	0.460216	526.69	FALSE	12
2022-09-12	12:31:34	0.460115	527.15	FALSE	12
2022-09-12	12:31:35	0.456654	527.607	FALSE	12
2022-09-12	12:31:35	0.563728	528.171	FALSE	12
2022-09-12	12:31:35	0.434517	528.605	FALSE	12
2022-09-12	12:31:35	0.517112	529.122	FALSE	12
2022-09-12	12:31:36	0.517264	529.639	FALSE	12
2022-09-12	12:31:36	0.451158	530.091	FALSE	12
2022-09-12	12:31:36	0.370394	530.461	FALSE	12
2022-09-12	12:31:36	0.448919	530.91	FALSE	12
2022-09-12	12:31:37	0.572939	531.483	FALSE	12
2022-09-12	12:31:37	0.385305	531.868	FALSE	12
2022-09-12	12:31:37	0.297417	532.166	FALSE	12
2022-09-12	12:31:37	0.261845	532.427	FALSE	12
2022-09-12	12:31:38	0.0563997	532.484	FALSE	12
2022-09-12	12:31:38	-0.0911829	532.484	FALSE	12
2022-09-12	12:31:38	-0.114236	532.484	FALSE	12
2022-09-12	12:31:39	-0.281717	532.484	FALSE	12
2022-09-12	12:31:39	-0.134135	532.484	FALSE	12
2022-09-12	12:31:39	0.253295	532.737	FALSE	12
2022-09-12	12:31:39	0.215433	532.953	FALSE	12
2022-09-12	12:31:40	0.29584	533.248	FALSE	12
2022-09-12	12:31:40	0.259148	533.508	FALSE	12
2022-09-12	12:31:40	0.356959	533.865	FALSE	12
2022-09-12	12:31:40	0.243168	534.108	FALSE	12
2022-09-12	12:31:41	0.314822	534.423	FALSE	12
2022-09-12	12:31:41	0.285865	534.708	FALSE	12
2022-09-12	12:31:41	0.39187	535.1	FALSE	12
2022-09-12	12:31:41	0.311056	535.411	FALSE	12
2022-09-12	12:31:42	0.364898	535.776	FALSE	12
2022-09-12	12:31:42	0.406018	536.182	FALSE	12
2022-09-12	12:31:42	0.624542	536.807	FALSE	12
2022-09-12	12:31:43	3.15055	539.957	1	13
2022-09-12	12:31:43	7.22388	547.181	1	14
2022-09-12	12:31:43	7.83462	555.016	1	15
2022-09-12	12:31:43	3.14368	558.16	1	16
2022-09-12	12:31:44	1.58291	559.742	FALSE	16
2022-09-12	12:31:44	2.55217	562.295	FALSE	16
2022-09-12	12:31:44	2.14357	564.438	FALSE	16
2022-09-12	12:31:44	0.52958	564.968	FALSE	16
2022-09-12	12:31:45	0.56042	565.528	FALSE	16
2022-09-12	12:31:45	1.80067	567.329	FALSE	16
2022-09-12	12:31:45	6.48393	573.813	1	17
2022-09-12	12:31:45	3.01426	576.827	1	18
2022-09-12	12:31:46	0.694262	577.521	FALSE	18
2022-09-12	12:31:46	0.38673	577.908	FALSE	18
2022-09-12	12:31:46	0.431769	578.34	FALSE	18
2022-09-12	12:31:47	0.450852	578.791	FALSE	18
2022-09-12	12:31:47	1.05304	579.844	FALSE	18
2022-09-12	12:31:47	2.02393	581.868	FALSE	18
2022-09-12	12:31:47	1.66057	583.528	FALSE	18
2022-09-12	12:31:48	1.08515	584.613	FALSE	18
2022-09-12	12:31:48	1.01655	585.63	FALSE	18
2022-09-12	12:31:48	0.720878	586.351	FALSE	18
2022-09-12	12:31:48	0.710649	587.061	FALSE	18
2022-09-12	12:31:49	0.538181	587.6	FALSE	18
2022-09-12	12:31:49	0.464746	588.064	FALSE	18
2022-09-12	12:31:49	0.379199	588.444	FALSE	18
2022-09-12	12:31:49	0.378079	588.822	FALSE	18
2022-09-12	12:31:50	0.367138	589.189	FALSE	18
2022-09-12	12:31:50	0.39014	589.579	FALSE	18
2022-09-12	12:31:50	0.389682	589.969	FALSE	18
2022-09-12	12:31:51	0.384695	590.353	FALSE	18
2022-09-12	12:31:51	0.393346	590.747	FALSE	18
2022-09-12	12:31:51	0.389784	591.136	FALSE	18
2022-09-12	12:31:51	0.398791	591.535	FALSE	18
2022-09-12	12:31:52	0.395636	591.931	FALSE	18
2022-09-12	12:31:52	0.414618	592.345	FALSE	18
2022-09-12	12:31:52	0.410903	592.756	FALSE	18
2022-09-12	12:31:52	0.410344	593.167	FALSE	18
2022-09-12	12:31:53	0.423168	593.59	FALSE	18
2022-09-12	12:31:53	0.383372	593.973	FALSE	18
2022-09-12	12:31:53	0.50388	594.477	FALSE	18
2022-09-12	12:31:53	0.443473	594.921	FALSE	18
2022-09-12	12:31:54	0.718384	595.639	FALSE	18
2022-09-12	12:31:54	2.26933	597.908	FALSE	18
2022-09-12	12:31:54	2.22296	600.131	FALSE	18
2022-09-12	12:31:55	2.78342	602.915	FALSE	18
2022-09-12	12:31:55	1.2652	604.18	FALSE	18
2022-09-12	12:31:55	1.0021	605.182	FALSE	18
2022-09-12	12:31:55	0.652023	605.834	FALSE	18
2022-09-12	12:31:56	1.19874	607.033	FALSE	18
2022-09-12	12:31:56	1.44821	608.481	FALSE	18
2022-09-12	12:31:56	4.85014	613.331	1	19
2022-09-12	12:31:56	6.8621	620.193	1	20
2022-09-12	12:31:57	3.84312	624.036	1	21
2022-09-12	12:31:57	5.44846	629.485	1	22
2022-09-12	12:31:57	11.3608	640.846	1	23
2022-09-12	12:31:57	13.329	654.175	1	24
2022-09-12	12:31:58	5.49563	659.67	1	25
2022-09-12	12:31:58	1.23477	660.905	FALSE	25
2022-09-12	12:31:58	0.711769	661.617	FALSE	25
2022-09-12	12:31:59	0.659708	662.276	FALSE	25
2022-09-12	12:31:59	0.448308	662.725	FALSE	25
2022-09-12	12:31:59	0.449733	663.174	FALSE	25
2022-09-12	12:31:59	0.413193	663.588	FALSE	25
2022-09-12	12:32:00	0.655382	664.243	FALSE	25
2022-09-12	12:32:00	0.991056	665.234	FALSE	25
2022-09-12	12:32:00	1.05553	666.29	FALSE	25
2022-09-12	12:32:00	2.16108	668.451	FALSE	25
2022-09-12	12:32:01	3.09899	671.55	1	26
2022-09-12	12:32:01	8.95721	680.507	1	27
2022-09-12	12:32:01	11.5249	692.032	1	28
2022-09-12	12:32:01	5.14474	697.177	1	29
2022-09-12	12:32:02	1.50449	698.681	FALSE	29
2022-09-12	12:32:02	0.720216	699.401	FALSE	29
2022-09-12	12:32:02	0.588206	699.989	FALSE	29

## Sheet: Royal_prong_2022912122642
						**GoPro Fitting: 1215
2022-09-12	12:26:42	0.480064
2022-09-12	12:26:42	0.723321
2022-09-12	12:26:43	1.23452
2022-09-12	12:26:43	1.34179
2022-09-12	12:26:43	1.58581
2022-09-12	12:26:43	3.63075
2022-09-12	12:26:44	4.87258
2022-09-12	12:26:44	3.47584
2022-09-12	12:26:44	1.63177
2022-09-12	12:26:45	2.36754
2022-09-12	12:26:45	2.45599
2022-09-12	12:26:45	2.97401
2022-09-12	12:26:45	4.53182
2022-09-12	12:26:46	7.36942
2022-09-12	12:26:46	5.34123
2022-09-12	12:26:46	1.805
2022-09-12	12:26:46	2.10612
2022-09-12	12:26:47	2.62592
2022-09-12	12:26:47	1.64831
2022-09-12	12:26:47	0.72383
2022-09-12	12:26:47	0.546731
2022-09-12	12:26:48	0.406527
2022-09-12	12:26:48	0.486883
2022-09-12	12:26:48	1.38622
2022-09-12	12:26:49	3.01915
2022-09-12	12:26:49	3.04887
2022-09-12	12:26:49	0.806221
2022-09-12	12:26:49	0.749326
2022-09-12	12:26:50	0.67589
2022-09-12	12:26:50	0.443168
2022-09-12	12:26:50	0.408053
2022-09-12	12:26:50	0.476858
2022-09-12	12:26:51	0.488003
2022-09-12	12:26:51	0.460725
2022-09-12	12:26:51	0.464237
2022-09-12	12:26:51	0.562862
2022-09-12	12:26:52	0.341845
2022-09-12	12:26:52	0.0387407
2022-09-12	12:26:52	0.0619468
2022-09-12	12:26:53	0.00403331
2022-09-12	12:26:53	-0.0885366
2022-09-12	12:26:53	-0.48075
2022-09-12	12:26:53	-0.483397
2022-09-12	12:26:54	-0.395712
2022-09-12	12:26:54	-0.0887402
2022-09-12	12:26:54	-0.170928
2022-09-12	12:26:54	-0.342735
2022-09-12	12:26:55	-0.274694
2022-09-12	12:26:55	-0.429605
2022-09-12	12:26:55	-0.561208
2022-09-12	12:26:55	-0.591132
2022-09-12	12:26:56	-0.600954
2022-09-12	12:26:56	-0.542938
2022-09-12	12:26:56	-0.503295
2022-09-12	12:26:57	-0.340903
2022-09-12	12:26:57	0.00525471
2022-09-12	12:26:57	1.0533
2022-09-12	12:26:57	3.69156
2022-09-12	12:26:58	5.37889
2022-09-12	12:26:58	3.50714
2022-09-12	12:26:58	1.17319
2022-09-12	12:26:58	1.32561
2022-09-12	12:26:59	0.379809
2022-09-12	12:26:59	0.434415
2022-09-12	12:26:59	2.59808
2022-09-12	12:26:59	0.606578
2022-09-12	12:27:00	0.285814
2022-09-12	12:27:00	0.233143
2022-09-12	12:27:00	0.621387
2022-09-12	12:27:01	1.13218
2022-09-12	12:27:01	1.36821
2022-09-12	12:27:01	0.592736
2022-09-12	12:27:01	0.375076
2022-09-12	12:27:02	0.25126
2022-09-12	12:27:02	0.292379
2022-09-12	12:27:02	0.254059
2022-09-12	12:27:02	0.303066
2022-09-12	12:27:03	0.392176
2022-09-12	12:27:03	0.54098
2022-09-12	12:27:03	0.609682
2022-09-12	12:27:03	1.07141
2022-09-12	12:27:04	1.19253
2022-09-12	12:27:04	0.90841
2022-09-12	12:27:04	0.468054
2022-09-12	12:27:05	0.386883
2022-09-12	12:27:05	0.496399
2022-09-12	12:27:05	0.317519
2022-09-12	12:27:05	0.483168
2022-09-12	12:27:06	0.368053
2022-09-12	12:27:06	0.402252
2022-09-12	12:27:06	0.349733
2022-09-12	12:27:06	0.361845
2022-09-12	12:27:07	0.34958
2022-09-12	12:27:07	0.335636
2022-09-12	12:27:07	0.246832
2022-09-12	12:27:07	0.371361
2022-09-12	12:27:08	0.246374
2022-09-12	12:27:08	0.24897
2022-09-12	12:27:08	0.262252
2022-09-12	12:27:09	0.521031
2022-09-12	12:27:09	1.56352
2022-09-12	12:27:09	2.32057
2022-09-12	12:27:09	2.82413
2022-09-12	12:27:10	0.775687
2022-09-12	12:27:10	0.689428
2022-09-12	12:27:10	0.444084
2022-09-12	12:27:10	0.579656
2022-09-12	12:27:11	0.638537
2022-09-12	12:27:11	0.493753
2022-09-12	12:27:11	0.605967
2022-09-12	12:27:11	0.469071
2022-09-12	12:27:12	0.592124
2022-09-12	12:27:12	0.335585
2022-09-12	12:27:12	0.425764
2022-09-12	12:27:13	0.392227
2022-09-12	12:27:13	0.379962
2022-09-12	12:27:13	0.419809
2022-09-12	12:27:13	0.716654
2022-09-12	12:27:14	0.899962
2022-09-12	12:27:14	1.9106
2022-09-12	12:27:14	2.39095
2022-09-12	12:27:14	1.81055
2022-09-12	12:27:15	1.32515
2022-09-12	12:27:15	0.328664
2022-09-12	12:27:15	0.338435
2022-09-12	12:27:15	0.251514
2022-09-12	12:27:16	0.160064
2022-09-12	12:27:16	0.00316817
2022-09-12	12:27:16	0.143473
2022-09-12	12:27:17	0.0643386
2022-09-12	12:27:17	0.197265
2022-09-12	12:27:17	0.100725
2022-09-12	12:27:17	0.244848
2022-09-12	12:27:18	0.297163
2022-09-12	12:27:18	0.161692
2022-09-12	12:27:18	0.134466
2022-09-12	12:27:18	0.191514
2022-09-12	12:27:19	0.306527
2022-09-12	12:27:19	0.210802
2022-09-12	12:27:19	0.182303
2022-09-12	12:27:19	0.241998
2022-09-12	12:27:20	0.265255
2022-09-12	12:27:20	0.170496
2022-09-12	12:27:20	-0.102888
2022-09-12	12:27:21	0.210242
2022-09-12	12:27:21	0.187392
2022-09-12	12:27:21	0.37355
2022-09-12	12:27:21	0.0785371
2022-09-12	12:27:22	0.254364
2022-09-12	12:27:22	0.147443
2022-09-12	12:27:22	0.131362
2022-09-12	12:27:22	0.140318
2022-09-12	12:27:23	0.0613361
2022-09-12	12:27:23	0.203728
2022-09-12	12:27:23	0.159707
2022-09-12	12:27:23	0.15014
2022-09-12	12:27:24	0.183524
2022-09-12	12:27:24	0.0517178
2022-09-12	12:27:24	0.17243
2022-09-12	12:27:25	0.188512
2022-09-12	12:27:25	0.233957
2022-09-12	12:27:25	0.246781
2022-09-12	12:27:25	0.0971122
2022-09-12	12:27:26	0.286883
2022-09-12	12:27:26	0.203626
2022-09-12	12:27:26	0.242964
2022-09-12	12:27:26	0.111412
2022-09-12	12:27:27	0.124644
2022-09-12	12:27:27	0.206679
2022-09-12	12:27:27	0.255891
2022-09-12	12:27:27	0.290751
2022-09-12	12:27:28	0.16444
2022-09-12	12:27:28	0.0980282
2022-09-12	12:27:28	0.365458
2022-09-12	12:27:29	0.296603
2022-09-12	12:27:29	0.373855
2022-09-12	12:27:29	0.50383
2022-09-12	12:27:29	0.341489
2022-09-12	12:27:30	0.506527
2022-09-12	12:27:30	0.26271
2022-09-12	12:27:30	0.371667
2022-09-12	12:27:30	0.248868
2022-09-12	12:27:31	0.380013
2022-09-12	12:27:31	0.299657
2022-09-12	12:27:31	0.34673
2022-09-12	12:27:31	0.832837
2022-09-12	12:27:32	0.568308
2022-09-12	12:27:32	0.490038
2022-09-12	12:27:32	0.499911
2022-09-12	12:27:33	0.307952
2022-09-12	12:27:33	0.525203
2022-09-12	12:27:33	0.544847
2022-09-12	12:27:33	0.399911
2022-09-12	12:27:34	0.433651
2022-09-12	12:27:34	1.24444
2022-09-12	12:27:34	0.270089
2022-09-12	12:27:34	0.342405
2022-09-12	12:27:35	0.20729
2022-09-12	12:27:35	0.263677
2022-09-12	12:27:35	0.180522
2022-09-12	12:27:35	0.395076
2022-09-12	12:27:36	0.900776
2022-09-12	12:27:36	0.525763
2022-09-12	12:27:36	1.65854
2022-09-12	12:27:37	1.17167
2022-09-12	12:27:37	3.15314
2022-09-12	12:27:37	3.35981
2022-09-12	12:27:37	0.394466
2022-09-12	12:27:38	0.441947
2022-09-12	12:27:38	0.429784
2022-09-12	12:27:38	0.348104
2022-09-12	12:27:38	0.210751
2022-09-12	12:27:39	0.217926
2022-09-12	12:27:39	0.223473
2022-09-12	12:27:39	0.247901
2022-09-12	12:27:39	0.493142
2022-09-12	12:27:40	1.44022
2022-09-12	12:27:40	2.64408
2022-09-12	12:27:40	5.00316
2022-09-12	12:27:41	3.96067
2022-09-12	12:27:41	2.8936
2022-09-12	12:27:41	1.22973
2022-09-12	12:27:41	0.397774
2022-09-12	12:27:42	0.074873
2022-09-12	12:27:42	0.140573
2022-09-12	12:27:42	0.210853
2022-09-12	12:27:42	0.186527
2022-09-12	12:27:43	0.213499
2022-09-12	12:27:43	0.261489
2022-09-12	12:27:43	0.239758
2022-09-12	12:27:43	0.252328
2022-09-12	12:27:44	0.238282
2022-09-12	12:27:44	0.227341
2022-09-12	12:27:44	0.236858
2022-09-12	12:27:45	0.236349
2022-09-12	12:27:45	0.229224
2022-09-12	12:27:45	0.218435
2022-09-12	12:27:45	0.216451
2022-09-12	12:27:46	0.21528
2022-09-12	12:27:46	0.21299
2022-09-12	12:27:46	0.204135
2022-09-12	12:27:46	0.20159
2022-09-12	12:27:47	0.206171
2022-09-12	12:27:47	0.217825
2022-09-12	12:27:47	0.307392
2022-09-12	12:27:47	0.251311
2022-09-12	12:27:48	0.269224
2022-09-12	12:27:48	0.278792
2022-09-12	12:27:48	0.300725
2022-09-12	12:27:49	0.314771
2022-09-12	12:27:49	0.29355
2022-09-12	12:27:49	0.314109
2022-09-12	12:27:49	0.312583
2022-09-12	12:27:50	0.32785
2022-09-12	12:27:50	0.326272
2022-09-12	12:27:50	0.307341
2022-09-12	12:27:50	0.336908
2022-09-12	12:27:51	0.305967
2022-09-12	12:27:51	0.323931
2022-09-12	12:27:51	0.315789
2022-09-12	12:27:51	0.322456
2022-09-12	12:27:52	0.318537
2022-09-12	12:27:52	0.323066
2022-09-12	12:27:52	0.33472
2022-09-12	12:27:52	0.352023
2022-09-12	12:27:53	0.369173
2022-09-12	12:27:53	0.48042
2022-09-12	12:27:53	0.312532
2022-09-12	12:27:54	0.250293
2022-09-12	12:27:54	0.115585
2022-09-12	12:27:54	0.183066
2022-09-12	12:27:54	0.0955855
2022-09-12	12:27:55	-0.120241
2022-09-12	12:27:55	-0.113677
2022-09-12	12:27:55	-0.020445
2022-09-12	12:27:55	-0.108129
2022-09-12	12:27:56	-0.0278242
2022-09-12	12:27:56	0.0465778
2022-09-12	12:27:56	0.0846439
2022-09-12	12:27:56	0.20729
2022-09-12	12:27:57	0.347545
2022-09-12	12:27:57	0.312176
2022-09-12	12:27:57	0.332328
2022-09-12	12:27:58	0.400827
2022-09-12	12:27:58	0.285407
2022-09-12	12:27:58	0.325102
2022-09-12	12:27:58	0.312227
2022-09-12	12:27:59	0.378384
2022-09-12	12:27:59	0.274822
2022-09-12	12:27:59	0.221387
2022-09-12	12:27:59	0.422354
2022-09-12	12:28:00	0.282456
2022-09-12	12:28:00	0.38271
2022-09-12	12:28:00	0.144339
2022-09-12	12:28:00	0.429326
2022-09-12	12:28:01	0.340623
2022-09-12	12:28:01	0.250191
2022-09-12	12:28:01	0.18902
2022-09-12	12:28:02	0.228512
2022-09-12	12:28:02	0.167596
2022-09-12	12:28:02	0.224491
2022-09-12	12:28:02	0.204542
2022-09-12	12:28:03	0.117367
2022-09-12	12:28:03	0.300878
2022-09-12	12:28:03	0.231616
2022-09-12	12:28:03	0.212328
2022-09-12	12:28:04	0.301896
2022-09-12	12:28:04	0.167087
2022-09-12	12:28:04	0.225662
2022-09-12	12:28:04	0.303473
2022-09-12	12:28:05	0.251056
2022-09-12	12:28:05	0.349682
2022-09-12	12:28:05	0.225865
2022-09-12	12:28:06	0.290547
2022-09-12	12:28:06	0.230903
2022-09-12	12:28:06	0.215331
2022-09-12	12:28:06	0.413957
2022-09-12	12:28:07	0.196145
2022-09-12	12:28:07	0.342608
2022-09-12	12:28:07	0.285204
2022-09-12	12:28:07	0.307188
2022-09-12	12:28:08	0.29416
2022-09-12	12:28:08	0.176603
2022-09-12	12:28:08	0.39472
2022-09-12	12:28:08	0.178486
2022-09-12	12:28:09	0.274771
2022-09-12	12:28:09	0.380369
2022-09-12	12:28:09	0.210853
2022-09-12	12:28:10	0.267545
2022-09-12	12:28:10	0.410089
2022-09-12	12:28:10	0.180624
2022-09-12	12:28:10	0.269428
2022-09-12	12:28:11	0.130496
2022-09-12	12:28:11	0.266374
2022-09-12	12:28:11	0.205713
2022-09-12	12:28:11	0.164593
2022-09-12	12:28:12	0.0808272
2022-09-12	12:28:12	0.206781
2022-09-12	12:28:12	0.313855
2022-09-12	12:28:12	0.530547
2022-09-12	12:28:13	0.301692
2022-09-12	12:28:13	0.17645
2022-09-12	12:28:13	0.0914633
2022-09-12	12:28:14	0.157214
2022-09-12	12:28:14	-0.0282313
2022-09-12	12:28:14	0.147443
2022-09-12	12:28:14	0.00922418
2022-09-12	12:28:15	0.0856109
2022-09-12	12:28:15	-0.0163229
2022-09-12	12:28:15	0.198639
2022-09-12	12:28:15	0.237824
2022-09-12	12:28:16	0.166527
2022-09-12	12:28:16	0.387392
2022-09-12	12:28:16	0.179199
2022-09-12	12:28:16	0.475026
2022-09-12	12:28:17	0.234873
2022-09-12	12:28:17	0.331311
2022-09-12	12:28:17	0.384491
2022-09-12	12:28:18	0.373855
2022-09-12	12:28:18	0.329937
2022-09-12	12:28:18	0.303575
2022-09-12	12:28:18	0.313295
2022-09-12	12:28:19	0.39472
2022-09-12	12:28:19	0.683066
2022-09-12	12:28:19	0.558944
2022-09-12	12:28:19	0.715687
2022-09-12	12:28:20	0.366171
2022-09-12	12:28:20	0.338741
2022-09-12	12:28:20	0.513753
2022-09-12	12:28:20	0.318791
2022-09-12	12:28:21	0.357926
2022-09-12	12:28:21	0.40098
2022-09-12	12:28:21	0.280674
2022-09-12	12:28:22	0.372277
2022-09-12	12:28:22	0.262608
2022-09-12	12:28:22	0.285102
2022-09-12	12:28:22	0.285051
2022-09-12	12:28:23	0.335331
2022-09-12	12:28:23	0.280064
2022-09-12	12:28:23	0.304847
2022-09-12	12:28:23	0.255993
2022-09-12	12:28:24	0.264135
2022-09-12	12:28:24	0.239453
2022-09-12	12:28:24	0.231972
2022-09-12	12:28:24	0.211718
2022-09-12	12:28:25	0.150089
2022-09-12	12:28:25	0.191311
2022-09-12	12:28:25	0.157977
2022-09-12	12:28:26	0.327239
2022-09-12	12:28:26	0.190395
2022-09-12	12:28:26	0.200318
2022-09-12	12:28:26	0.211616
2022-09-12	12:28:27	0.162099
2022-09-12	12:28:27	0.319453
2022-09-12	12:28:27	0.15187
2022-09-12	12:28:27	0.335484
2022-09-12	12:28:28	0.302659
2022-09-12	12:28:28	1.23294
2022-09-12	12:28:28	0.187392
2022-09-12	12:28:28	0.304033
2022-09-12	12:28:29	0.345102
2022-09-12	12:28:29	0.292532
2022-09-12	12:28:29	0.299606
2022-09-12	12:28:30	0.217163
2022-09-12	12:28:30	0.441896
2022-09-12	12:28:30	0.236247
2022-09-12	12:28:30	0.743575
2022-09-12	12:28:31	0.202048
2022-09-12	12:28:31	0.167188
2022-09-12	12:28:31	0.404746
2022-09-12	12:28:31	0.118079
2022-09-12	12:28:32	0.213346
2022-09-12	12:28:32	0.255534
2022-09-12	12:28:32	0.164033
2022-09-12	12:28:32	0.227545
2022-09-12	12:28:33	0.156145
2022-09-12	12:28:33	0.209784
2022-09-12	12:28:33	0.277316
2022-09-12	12:28:34	0.0840841
2022-09-12	12:28:34	0.083219
2022-09-12	12:28:34	-0.0203942
2022-09-12	12:28:34	-0.058613
2022-09-12	12:28:35	0.0240333
2022-09-12	12:28:35	0.0895295
2022-09-12	12:28:35	0.113753
2022-09-12	12:28:35	0.15243
2022-09-12	12:28:36	0.188461
2022-09-12	12:28:36	0.253906
2022-09-12	12:28:36	0.254975
2022-09-12	12:28:36	0.183321
2022-09-12	12:28:37	0.346578
2022-09-12	12:28:37	0.17645
2022-09-12	12:28:37	0.221387
2022-09-12	12:28:38	0.0503438
2022-09-12	12:28:38	0.0603692
2022-09-12	12:28:38	0.179249
2022-09-12	12:28:38	0.233041
2022-09-12	12:28:39	0.245662
2022-09-12	12:28:39	0.198333
2022-09-12	12:28:39	0.147494
2022-09-12	12:28:39	0.235534
2022-09-12	12:28:40	0.211412
2022-09-12	12:28:40	0.250598
2022-09-12	12:28:40	0.413448
2022-09-12	12:28:40	0.281132
2022-09-12	12:28:41	0.30042
2022-09-12	12:28:41	0.235484
2022-09-12	12:28:41	0.0562979
2022-09-12	12:28:42	0.0201147
2022-09-12	12:28:42	0.301183
2022-09-12	12:28:42	0.265407
2022-09-12	12:28:42	0.32612
2022-09-12	12:28:43	0.325763
2022-09-12	12:28:43	0.21126
2022-09-12	12:28:43	0.313702
2022-09-12	12:28:43	0.184695
2022-09-12	12:28:44	0.215585
2022-09-12	12:28:44	0.271565
2022-09-12	12:28:44	0.227341
2022-09-12	12:28:44	0.345458
2022-09-12	12:28:45	0.24215
2022-09-12	12:28:45	0.244339
2022-09-12	12:28:45	0.208308
2022-09-12	12:28:46	0.168613
2022-09-12	12:28:46	0.324746
2022-09-12	12:28:46	0.165611
2022-09-12	12:28:46	0.215076
2022-09-12	12:28:47	0.255484
2022-09-12	12:28:47	0.20327
2022-09-12	12:28:47	0.316705
2022-09-12	12:28:47	0.143728
2022-09-12	12:28:48	0.374313
2022-09-12	12:28:48	0.212277
2022-09-12	12:28:48	0.304949
2022-09-12	12:28:48	0.139453
2022-09-12	12:28:49	0.148257
2022-09-12	12:28:49	0.293499
2022-09-12	12:28:49	0.199555
2022-09-12	12:28:50	0.26841
2022-09-12	12:28:50	-0.00232801
2022-09-12	12:28:50	0.145458
2022-09-12	12:28:50	0.300725
2022-09-12	12:28:51	0.611718
2022-09-12	12:28:51	0.492583
2022-09-12	12:28:51	0.236196
2022-09-12	12:28:51	0.413295
2022-09-12	12:28:52	0.295738
2022-09-12	12:28:52	0.320573
2022-09-12	12:28:52	0.327697
2022-09-12	12:28:52	0.29869
2022-09-12	12:28:53	0.526272
2022-09-12	12:28:53	0.517773
2022-09-12	12:28:53	0.398944
2022-09-12	12:28:54	0.37813
2022-09-12	12:28:54	0.372735
2022-09-12	12:28:54	0.505
2022-09-12	12:28:54	0.320522
2022-09-12	12:28:55	0.276501
2022-09-12	12:28:55	0.285204
2022-09-12	12:28:55	0.354873
2022-09-12	12:28:55	0.306934
2022-09-12	12:28:56	0.232939
2022-09-12	12:28:56	0.126781
2022-09-12	12:28:56	0.432786
2022-09-12	12:28:56	0.17014
2022-09-12	12:28:57	0.347952
2022-09-12	12:28:57	0.287138
2022-09-12	12:28:57	0.317621
2022-09-12	12:28:58	0.57299
2022-09-12	12:28:58	0.524949
2022-09-12	12:28:58	1.16256
2022-09-12	12:28:58	1.53625
2022-09-12	12:28:59	2.91294
2022-09-12	12:28:59	4.15263
2022-09-12	12:28:59	2.1907
2022-09-12	12:28:59	0.640572
2022-09-12	12:29:00	0.691412
2022-09-12	12:29:00	0.441641
2022-09-12	12:29:00	0.438435
2022-09-12	12:29:01	0.590954
2022-09-12	12:29:01	0.416654
2022-09-12	12:29:01	0.362557
2022-09-12	12:29:01	0.549224
2022-09-12	12:29:02	0.394873
2022-09-12	12:29:02	0.389173
2022-09-12	12:29:02	0.487901
2022-09-12	12:29:02	0.449275
2022-09-12	12:29:03	0.434466
2022-09-12	12:29:03	0.442456
2022-09-12	12:29:03	0.407087
2022-09-12	12:29:03	0.593448
2022-09-12	12:29:04	0.569021
2022-09-12	12:29:04	0.466629
2022-09-12	12:29:04	0.471311
2022-09-12	12:29:04	0.539097
2022-09-12	12:29:05	0.36556
2022-09-12	12:29:05	0.900114
2022-09-12	12:29:05	1.15324
2022-09-12	12:29:06	2.08475
2022-09-12	12:29:06	3.68968
2022-09-12	12:29:06	3.88027
2022-09-12	12:29:06	1.68734
2022-09-12	12:29:07	1.04302
2022-09-12	12:29:07	0.749784
2022-09-12	12:29:07	0.614873
2022-09-12	12:29:07	0.668715
2022-09-12	12:29:08	0.495382
2022-09-12	12:29:08	0.723015
2022-09-12	12:29:08	0.546985
2022-09-12	12:29:08	0.601336
2022-09-12	12:29:09	0.447494
2022-09-12	12:29:09	0.539911
2022-09-12	12:29:09	0.43874
2022-09-12	12:29:10	0.440573
2022-09-12	12:29:10	0.507138
2022-09-12	12:29:10	0.442914
2022-09-12	12:29:10	0.327494
2022-09-12	12:29:11	0.444644
2022-09-12	12:29:11	0.436908
2022-09-12	12:29:11	0.487494
2022-09-12	12:29:11	0.510293
2022-09-12	12:29:12	0.338333
2022-09-12	12:29:12	0.420674
2022-09-12	12:29:12	0.428868
2022-09-12	12:29:12	0.339962
2022-09-12	12:29:13	0.360623
2022-09-12	12:29:13	0.547952
2022-09-12	12:29:13	0.385764
2022-09-12	12:29:14	0.432685
2022-09-12	12:29:14	0.473244
2022-09-12	12:29:14	0.345865
2022-09-12	12:29:14	0.397417
2022-09-12	12:29:15	0.461489
2022-09-12	12:29:15	0.364746
2022-09-12	12:29:15	0.325102
2022-09-12	12:29:15	0.392583
2022-09-12	12:29:16	0.475738
2022-09-12	12:29:16	0.308715
2022-09-12	12:29:16	0.518893
2022-09-12	12:29:16	0.314109
2022-09-12	12:29:17	0.443982
2022-09-12	12:29:17	0.36556
2022-09-12	12:29:17	0.3793
2022-09-12	12:29:18	0.477061
2022-09-12	12:29:18	0.317774
2022-09-12	12:29:18	0.467748
2022-09-12	12:29:18	0.359402
2022-09-12	12:29:19	0.432176
2022-09-12	12:29:19	0.388512
2022-09-12	12:29:19	0.40215
2022-09-12	12:29:19	0.386425
2022-09-12	12:29:20	0.189122
2022-09-12	12:29:20	0.342048
2022-09-12	12:29:20	0.328562
2022-09-12	12:29:20	0.312481
2022-09-12	12:29:21	0.26388
2022-09-12	12:29:21	0.182761
2022-09-12	12:29:21	0.454364
2022-09-12	12:29:22	0.298893
2022-09-12	12:29:22	0.44388
2022-09-12	12:29:22	0.215942
2022-09-12	12:29:22	0.270751
2022-09-12	12:29:23	0.229224
2022-09-12	12:29:23	0.288919
2022-09-12	12:29:23	0.273702
2022-09-12	12:29:23	0.188054
2022-09-12	12:29:24	0.524033
2022-09-12	12:29:24	0.277112
2022-09-12	12:29:24	0.32612
2022-09-12	12:29:24	0.211005
2022-09-12	12:29:25	0.121133
2022-09-12	12:29:25	0.409275
2022-09-12	12:29:25	0.334364
2022-09-12	12:29:26	0.459046
2022-09-12	12:29:26	0.280318
2022-09-12	12:29:26	0.258283
2022-09-12	12:29:26	0.27701
2022-09-12	12:29:27	0.304339
2022-09-12	12:29:27	0.427392
2022-09-12	12:29:27	0.326221
2022-09-12	12:29:27	0.315382
2022-09-12	12:29:28	0.267646
2022-09-12	12:29:28	0.443524
2022-09-12	12:29:28	0.656094
2022-09-12	12:29:28	0.348919
2022-09-12	12:29:29	0.489529
2022-09-12	12:29:29	0.395789
2022-09-12	12:29:29	0.63131
2022-09-12	12:29:30	0.657723
2022-09-12	12:29:30	0.578079
2022-09-12	12:29:30	0.813702
2022-09-12	12:29:30	0.424135
2022-09-12	12:29:31	1.28963
2022-09-12	12:29:31	0.240623
2022-09-12	12:29:31	0.837621
2022-09-12	12:29:31	0.785254
2022-09-12	12:29:32	0.926985
2022-09-12	12:29:32	0.814975
2022-09-12	12:29:32	0.948206
2022-09-12	12:29:32	1.7477
2022-09-12	12:29:33	2.27233
2022-09-12	12:29:33	2.3995
2022-09-12	12:29:33	1.81177
2022-09-12	12:29:34	1.92179
2022-09-12	12:29:34	2.43177
2022-09-12	12:29:34	1.09854
2022-09-12	12:29:34	1.08042
2022-09-12	12:29:35	1.11228
2022-09-12	12:29:35	0.876298
2022-09-12	12:29:35	0.901997
2022-09-12	12:29:35	1.12515
2022-09-12	12:29:36	0.903372
2022-09-12	12:29:36	1.56174
2022-09-12	12:29:36	2.5023
2022-09-12	12:29:36	4.15192
2022-09-12	12:29:37	2.76922
2022-09-12	12:29:37	1.94704
2022-09-12	12:29:37	1.05441
2022-09-12	12:29:38	0.832634
2022-09-12	12:29:38	2.1337
2022-09-12	12:29:38	1.78866
2022-09-12	12:29:38	2.20597
2022-09-12	12:29:39	1.60658
2022-09-12	12:29:39	2.15472
2022-09-12	12:29:39	1.02551
2022-09-12	12:29:39	1.34281
2022-09-12	12:29:40	1.48617
2022-09-12	12:29:40	1.2706
2022-09-12	12:29:40	1.30352
2022-09-12	12:29:40	1.31039
2022-09-12	12:29:41	1.20994
2022-09-12	12:29:41	0.759758
2022-09-12	12:29:41	0.763473
2022-09-12	12:29:42	0.750445
2022-09-12	12:29:42	1.14419
2022-09-12	12:29:42	1.23564
2022-09-12	12:29:42	1.62332
2022-09-12	12:29:43	0.870954
2022-09-12	12:29:43	1.78999
2022-09-12	12:29:43	0.806018
2022-09-12	12:29:43	1.95828
2022-09-12	12:29:44	1.57528
2022-09-12	12:29:44	1.93828
2022-09-12	12:29:44	1.34027
2022-09-12	12:29:44	2.05793
2022-09-12	12:29:45	1.79492
2022-09-12	12:29:45	1.07365
2022-09-12	12:29:45	1.52714
2022-09-12	12:29:46	0.820827
2022-09-12	12:29:46	2.0391
2022-09-12	12:29:46	0.887341
2022-09-12	12:29:46	2.08363
2022-09-12	12:29:47	1.52576
2022-09-12	12:29:47	1.45905
2022-09-12	12:29:47	1.66658
2022-09-12	12:29:47	0.708969
2022-09-12	12:29:48	1.67558
2022-09-12	12:29:48	0.507647
2022-09-12	12:29:48	1.15655
2022-09-12	12:29:48	0.84617
2022-09-12	12:29:49	0.683728
2022-09-12	12:29:49	0.585153
2022-09-12	12:29:49	0.313702
2022-09-12	12:29:50	0.543575
2022-09-12	12:29:50	0.260064
2022-09-12	12:29:50	0.603626
2022-09-12	12:29:50	0.2193
2022-09-12	12:29:51	0.47126
2022-09-12	12:29:51	0.126883
2022-09-12	12:29:51	0.676094
2022-09-12	12:29:51	0.299758
2022-09-12	12:29:52	0.477723
2022-09-12	12:29:52	0.145051
2022-09-12	12:29:52	0.483168
2022-09-12	12:29:52	0.190293
2022-09-12	12:29:53	0.418537
2022-09-12	12:29:53	1.10714
2022-09-12	12:29:53	5.66398
2022-09-12	12:29:54	12.3059
2022-09-12	12:29:54	5.87507
2022-09-12	12:29:54	0.839911
2022-09-12	12:29:54	0.797875
2022-09-12	12:29:55	0.433295
2022-09-12	12:29:55	0.346985
2022-09-12	12:29:55	0.376552
2022-09-12	12:29:55	0.168817
2022-09-12	12:29:56	0.345916
2022-09-12	12:29:56	0.243931
2022-09-12	12:29:56	0.368257
2022-09-12	12:29:56	0.338028
2022-09-12	12:29:57	0.468104
2022-09-12	12:29:57	0.245509
2022-09-12	12:29:57	0.281336
2022-09-12	12:29:57	0.187697
2022-09-12	12:29:58	0.333499
2022-09-12	12:29:58	0.266527
2022-09-12	12:29:58	0.330649
2022-09-12	12:29:59	0.175331
2022-09-12	12:29:59	0.277926
2022-09-12	12:29:59	0.170293
2022-09-12	12:29:59	0.244389
2022-09-12	12:30:00	0.130954
2022-09-12	12:30:00	0.200929
2022-09-12	12:30:00	0.099046
2022-09-12	12:30:00	0.171056
2022-09-12	12:30:01	0.245407
2022-09-12	12:30:01	0.188766
2022-09-12	12:30:01	0.233652
2022-09-12	12:30:02	0.205407
2022-09-12	12:30:02	0.478995
2022-09-12	12:30:02	0.410394
2022-09-12	12:30:02	0.448817
2022-09-12	12:30:03	0.362455
2022-09-12	12:30:03	0.295331
2022-09-12	12:30:03	0.294924
2022-09-12	12:30:03	0.297875
2022-09-12	12:30:04	0.266476
2022-09-12	12:30:04	0.58271
2022-09-12	12:30:04	0.40556
2022-09-12	12:30:04	0.357265
2022-09-12	12:30:05	0.372532
2022-09-12	12:30:05	0.36444
2022-09-12	12:30:05	0.34327
2022-09-12	12:30:05	0.509071
2022-09-12	12:30:06	0.118995
2022-09-12	12:30:06	0.351209
2022-09-12	12:30:06	0.239708
2022-09-12	12:30:07	0.404847
2022-09-12	12:30:07	0.313804
2022-09-12	12:30:07	0.517621
2022-09-12	12:30:07	0.359453
2022-09-12	12:30:08	0.454822
2022-09-12	12:30:08	0.210089
2022-09-12	12:30:08	0.468054
2022-09-12	12:30:08	0.756145
2022-09-12	12:30:09	0.375789
2022-09-12	12:30:09	0.628766
2022-09-12	12:30:09	-0.168333
2022-09-12	12:30:09	0.16098
2022-09-12	12:30:10	0.146374
2022-09-12	12:30:10	0.183117
2022-09-12	12:30:10	0.274008
2022-09-12	12:30:11	0.182405
2022-09-12	12:30:11	0.216909
2022-09-12	12:30:11	0.266781
2022-09-12	12:30:11	0.474873
2022-09-12	12:30:12	0.436501
2022-09-12	12:30:12	0.403372
2022-09-12	12:30:12	0.370903
2022-09-12	12:30:12	0.399402
2022-09-12	12:30:13	0.307341
2022-09-12	12:30:13	0.376145
2022-09-12	12:30:13	0.376501
2022-09-12	12:30:14	0.229835
2022-09-12	12:30:14	0.360216
2022-09-12	12:30:14	0.361998
2022-09-12	12:30:14	0.360216
2022-09-12	12:30:15	0.360216
2022-09-12	12:30:15	0.342506
2022-09-12	12:30:15	0.709529
2022-09-12	12:30:15	1.06118
2022-09-12	12:30:16	0.273753
2022-09-12	12:30:16	0.34897
2022-09-12	12:30:16	0.193092
2022-09-12	12:30:16	-0.0519972
2022-09-12	12:30:17	-0.136018
2022-09-12	12:30:17	-0.00477074
2022-09-12	12:30:17	-0.0679259
2022-09-12	12:30:17	0.099046
2022-09-12	12:30:18	0.0844404
2022-09-12	12:30:18	0.0123285
2022-09-12	12:30:18	0.138028
2022-09-12	12:30:19	0.263779
2022-09-12	12:30:19	0.442099
2022-09-12	12:30:19	0.330191
2022-09-12	12:30:19	0.41416
2022-09-12	12:30:20	0.459453
2022-09-12	12:30:20	0.353855
2022-09-12	12:30:20	0.334771
2022-09-12	12:30:20	0.363066
2022-09-12	12:30:21	0.360522
2022-09-12	12:30:21	0.370751
2022-09-12	12:30:21	0.371565
2022-09-12	12:30:21	0.376705
2022-09-12	12:30:22	0.366934
2022-09-12	12:30:22	0.367392
2022-09-12	12:30:22	0.364847
2022-09-12	12:30:23	0.359504
2022-09-12	12:30:23	0.356247
2022-09-12	12:30:23	0.37131
2022-09-12	12:30:23	0.36902
2022-09-12	12:30:24	0.378842
2022-09-12	12:30:24	0.366018
2022-09-12	12:30:24	0.363931
2022-09-12	12:30:24	0.381743
2022-09-12	12:30:25	0.38098
2022-09-12	12:30:25	0.400878
2022-09-12	12:30:25	0.401947
2022-09-12	12:30:25	0.406323
2022-09-12	12:30:26	0.400318
2022-09-12	12:30:26	0.406934
2022-09-12	12:30:26	0.401082
2022-09-12	12:30:27	0.399911
2022-09-12	12:30:27	0.38668
2022-09-12	12:30:27	0.384288
2022-09-12	12:30:27	0.379453
2022-09-12	12:30:28	0.382354
2022-09-12	12:30:28	0.379555
2022-09-12	12:30:28	0.376349
2022-09-12	12:30:28	0.378537
2022-09-12	12:30:29	0.379606
2022-09-12	12:30:29	0.375076
2022-09-12	12:30:29	0.384847
2022-09-12	12:30:29	0.382608
2022-09-12	12:30:30	0.377367
2022-09-12	12:30:30	0.380216
2022-09-12	12:30:30	0.39869
2022-09-12	12:30:31	0.392837
2022-09-12	12:30:31	0.347138
2022-09-12	12:30:31	0.407697
2022-09-12	12:30:31	0.37299
2022-09-12	12:30:32	0.2593
2022-09-12	12:30:32	0.518028
2022-09-12	12:30:32	0.503982
2022-09-12	12:30:32	0.548257
2022-09-12	12:30:33	0.72556
2022-09-12	12:30:33	0.525356
2022-09-12	12:30:33	0.400013
2022-09-12	12:30:33	0.423982
2022-09-12	12:30:34	0.408359
2022-09-12	12:30:34	0.548257
2022-09-12	12:30:34	0.368512
2022-09-12	12:30:35	0.412125
2022-09-12	12:30:35	0.47299
2022-09-12	12:30:35	0.481183
2022-09-12	12:30:35	0.46673
2022-09-12	12:30:36	0.345051
2022-09-12	12:30:36	0.34958
2022-09-12	12:30:36	0.488308
2022-09-12	12:30:36	0.305458
2022-09-12	12:30:37	0.578232
2022-09-12	12:30:37	0.317723
2022-09-12	12:30:37	0.446934
2022-09-12	12:30:37	0.488206
2022-09-12	12:30:38	0.445102
2022-09-12	12:30:38	0.325051
2022-09-12	12:30:38	0.323575
2022-09-12	12:30:39	0.498435
2022-09-12	12:30:39	0.366832
2022-09-12	12:30:39	0.47528
2022-09-12	12:30:39	0.333244
2022-09-12	12:30:40	0.4307
2022-09-12	12:30:40	0.480165
2022-09-12	12:30:40	0.478181
2022-09-12	12:30:40	0.825916
2022-09-12	12:30:41	0.579962
2022-09-12	12:30:41	1.23019
2022-09-12	12:30:41	0.874516
2022-09-12	12:30:41	0.52215
2022-09-12	12:30:42	0.448613
2022-09-12	12:30:42	0.404338
2022-09-12	12:30:42	0.429071
2022-09-12	12:30:43	0.325
2022-09-12	12:30:43	0.443372
2022-09-12	12:30:43	0.403066
2022-09-12	12:30:43	0.44841
2022-09-12	12:30:44	0.37355
2022-09-12	12:30:44	0.482049
2022-09-12	12:30:44	0.437875
2022-09-12	12:30:44	0.351361
2022-09-12	12:30:45	0.515789
2022-09-12	12:30:45	0.411412
2022-09-12	12:30:45	0.460471
2022-09-12	12:30:45	0.471769
2022-09-12	12:30:46	0.331311
2022-09-12	12:30:46	0.516857
2022-09-12	12:30:46	0.399351
2022-09-12	12:30:47	0.397316
2022-09-12	12:30:47	0.399911
2022-09-12	12:30:47	0.344644
2022-09-12	12:30:47	0.555331
2022-09-12	12:30:48	0.294618
2022-09-12	12:30:48	0.54388
2022-09-12	12:30:48	0.362405
2022-09-12	12:30:48	0.457061
2022-09-12	12:30:49	0.457519
2022-09-12	12:30:49	0.448766
2022-09-12	12:30:49	0.382048
2022-09-12	12:30:49	0.364389
2022-09-12	12:30:50	0.557774
2022-09-12	12:30:50	0.337672
2022-09-12	12:30:50	0.494618
2022-09-12	12:30:51	0.346374
2022-09-12	12:30:51	0.613652
2022-09-12	12:30:51	0.339962
2022-09-12	12:30:51	0.541489
2022-09-12	12:30:52	0.291972
2022-09-12	12:30:52	0.536959
2022-09-12	12:30:52	0.363931
2022-09-12	12:30:52	0.729071
2022-09-12	12:30:53	0.505102
2022-09-12	12:30:53	0.592583
2022-09-12	12:30:53	0.648104
2022-09-12	12:30:53	0.488461
2022-09-12	12:30:54	0.867595
2022-09-12	12:30:54	0.402964
2022-09-12	12:30:54	0.578028
2022-09-12	12:30:55	0.374822
2022-09-12	12:30:55	0.503422
2022-09-12	12:30:55	0.75584
2022-09-12	12:30:55	0.640776
2022-09-12	12:30:56	0.585
2022-09-12	12:30:56	0.681031
2022-09-12	12:30:56	0.293804
2022-09-12	12:30:56	0.47813
2022-09-12	12:30:57	0.414008
2022-09-12	12:30:57	0.43925
2022-09-12	12:30:57	0.309784
2022-09-12	12:30:57	0.417977
2022-09-12	12:30:58	0.396501
2022-09-12	12:30:58	0.390445
2022-09-12	12:30:58	0.40556
2022-09-12	12:30:59	0.334975
2022-09-12	12:30:59	0.567494
2022-09-12	12:30:59	0.327239
2022-09-12	12:30:59	0.612176
2022-09-12	12:31:00	0.535992
2022-09-12	12:31:00	0.679555
2022-09-12	12:31:00	0.412277
2022-09-12	12:31:00	0.358333
2022-09-12	12:31:01	0.414059
2022-09-12	12:31:01	0.296959
2022-09-12	12:31:01	0.517926
2022-09-12	12:31:01	0.258639
2022-09-12	12:31:02	0.530344
2022-09-12	12:31:02	0.335585
2022-09-12	12:31:02	0.353957
2022-09-12	12:31:03	0.338842
2022-09-12	12:31:03	0.358893
2022-09-12	12:31:03	0.346629
2022-09-12	12:31:03	0.299504
2022-09-12	12:31:04	0.445153
2022-09-12	12:31:04	0.282914
2022-09-12	12:31:04	0.548155
2022-09-12	12:31:04	0.314466
2022-09-12	12:31:05	0.494211
2022-09-12	12:31:05	0.461489
2022-09-12	12:31:05	0.488359
2022-09-12	12:31:05	0.520674
2022-09-12	12:31:06	0.462965
2022-09-12	12:31:06	0.505763
2022-09-12	12:31:06	0.394415
2022-09-12	12:31:07	0.342659
2022-09-12	12:31:07	0.462303
2022-09-12	12:31:07	0.638893
2022-09-12	12:31:07	0.54271
2022-09-12	12:31:08	0.583015
2022-09-12	12:31:08	0.614364
2022-09-12	12:31:08	0.962201
2022-09-12	12:31:08	0.413957
2022-09-12	12:31:09	0.437672
2022-09-12	12:31:09	0.351514
2022-09-12	12:31:09	0.377875
2022-09-12	12:31:09	0.441081
2022-09-12	12:31:10	0.315433
2022-09-12	12:31:10	0.617417
2022-09-12	12:31:10	0.365763
2022-09-12	12:31:11	0.515687
2022-09-12	12:31:11	0.44785
2022-09-12	12:31:11	0.457367
2022-09-12	12:31:11	0.469275
2022-09-12	12:31:12	0.508003
2022-09-12	12:31:12	0.241183
2022-09-12	12:31:12	0.200674
2022-09-12	12:31:12	0.393855
2022-09-12	12:31:13	0.0602674
2022-09-12	12:31:13	-0.642175
2022-09-12	12:31:13	-0.264974
2022-09-12	12:31:13	0.03299
2022-09-12	12:31:14	0.149479
2022-09-12	12:31:14	0.306985
2022-09-12	12:31:14	0.188257
2022-09-12	12:31:15	0.630089
2022-09-12	12:31:15	0.138384
2022-09-12	12:31:15	-0.207366
2022-09-12	12:31:15	-0.0135239
2022-09-12	12:31:16	0.00189592
2022-09-12	12:31:16	0.280623
2022-09-12	12:31:16	0.23757
2022-09-12	12:31:16	0.335738
2022-09-12	12:31:17	0.462659
2022-09-12	12:31:17	0.257468
2022-09-12	12:31:17	0.26042
2022-09-12	12:31:17	0.405051
2022-09-12	12:31:18	0.460318
2022-09-12	12:31:18	0.477061
2022-09-12	12:31:18	0.441641
2022-09-12	12:31:19	0.436349
2022-09-12	12:31:19	0.440369
2022-09-12	12:31:19	0.451565
2022-09-12	12:31:19	0.444593
2022-09-12	12:31:20	0.443779
2022-09-12	12:31:20	0.451107
2022-09-12	12:31:20	0.460674
2022-09-12	12:31:20	0.471972
2022-09-12	12:31:21	0.490191
2022-09-12	12:31:21	0.36159
2022-09-12	12:31:21	0.440216
2022-09-12	12:31:21	0.491361
2022-09-12	12:31:22	0.522506
2022-09-12	12:31:22	0.397672
2022-09-12	12:31:22	0.359657
2022-09-12	12:31:23	0.461896
2022-09-12	12:31:23	0.440013
2022-09-12	12:31:23	0.380827
2022-09-12	12:31:23	0.409733
2022-09-12	12:31:24	0.425254
2022-09-12	12:31:24	0.483931
2022-09-12	12:31:24	0.61243
2022-09-12	12:31:24	0.789071
2022-09-12	12:31:25	0.562557
2022-09-12	12:31:25	0.880064
2022-09-12	12:31:25	0.567341
2022-09-12	12:31:25	0.272481
2022-09-12	12:31:26	0.63299
2022-09-12	12:31:26	0.67416
2022-09-12	12:31:26	0.558028
2022-09-12	12:31:27	0.323524
2022-09-12	12:31:27	0.558537
2022-09-12	12:31:27	0.3907
2022-09-12	12:31:27	0.542659
2022-09-12	12:31:28	0.711361
2022-09-12	12:31:28	0.371056
2022-09-12	12:31:28	0.533906
2022-09-12	12:31:28	0.61528
2022-09-12	12:31:29	0.531667
2022-09-12	12:31:29	0.492786
2022-09-12	12:31:29	0.68327
2022-09-12	12:31:29	1.01411
2022-09-12	12:31:30	1.93238
2022-09-12	12:31:30	1.10683
2022-09-12	12:31:30	2.47681
2022-09-12	12:31:31	3.05034
2022-09-12	12:31:31	1.96887
2022-09-12	12:31:31	0.858995
2022-09-12	12:31:31	0.380725
2022-09-12	12:31:32	0.454415
2022-09-12	12:31:32	0.504898
2022-09-12	12:31:32	0.452227
2022-09-12	12:31:32	0.376552
2022-09-12	12:31:33	0.36215
2022-09-12	12:31:33	0.492583
2022-09-12	12:31:33	0.537977
2022-09-12	12:31:33	0.629377
2022-09-12	12:31:34	0.370191
2022-09-12	12:31:34	0.460216
2022-09-12	12:31:34	0.460115
2022-09-12	12:31:35	0.456654
2022-09-12	12:31:35	0.563728
2022-09-12	12:31:35	0.434517
2022-09-12	12:31:35	0.517112
2022-09-12	12:31:36	0.517264
2022-09-12	12:31:36	0.451158
2022-09-12	12:31:36	0.370394
2022-09-12	12:31:36	0.448919
2022-09-12	12:31:37	0.572939
2022-09-12	12:31:37	0.385305
2022-09-12	12:31:37	0.297417
2022-09-12	12:31:37	0.261845
2022-09-12	12:31:38	0.0563997
2022-09-12	12:31:38	-0.0911829
2022-09-12	12:31:38	-0.114236
2022-09-12	12:31:39	-0.281717
2022-09-12	12:31:39	-0.134135
2022-09-12	12:31:39	0.253295
2022-09-12	12:31:39	0.215433
2022-09-12	12:31:40	0.29584
2022-09-12	12:31:40	0.259148
2022-09-12	12:31:40	0.356959
2022-09-12	12:31:40	0.243168
2022-09-12	12:31:41	0.314822
2022-09-12	12:31:41	0.285865
2022-09-12	12:31:41	0.39187
2022-09-12	12:31:41	0.311056
2022-09-12	12:31:42	0.364898
2022-09-12	12:31:42	0.406018
2022-09-12	12:31:42	0.624542
2022-09-12	12:31:43	3.15055
2022-09-12	12:31:43	7.22388
2022-09-12	12:31:43	7.83462
2022-09-12	12:31:43	3.14368
2022-09-12	12:31:44	1.58291
2022-09-12	12:31:44	2.55217
2022-09-12	12:31:44	2.14357
2022-09-12	12:31:44	0.52958
2022-09-12	12:31:45	0.56042
2022-09-12	12:31:45	1.80067
2022-09-12	12:31:45	6.48393
2022-09-12	12:31:45	3.01426
2022-09-12	12:31:46	0.694262
2022-09-12	12:31:46	0.38673
2022-09-12	12:31:46	0.431769
2022-09-12	12:31:47	0.450852
2022-09-12	12:31:47	1.05304
2022-09-12	12:31:47	2.02393
2022-09-12	12:31:47	1.66057
2022-09-12	12:31:48	1.08515
2022-09-12	12:31:48	1.01655
2022-09-12	12:31:48	0.720878
2022-09-12	12:31:48	0.710649
2022-09-12	12:31:49	0.538181
2022-09-12	12:31:49	0.464746
2022-09-12	12:31:49	0.379199
2022-09-12	12:31:49	0.378079
2022-09-12	12:31:50	0.367138
2022-09-12	12:31:50	0.39014
2022-09-12	12:31:50	0.389682
2022-09-12	12:31:51	0.384695
2022-09-12	12:31:51	0.393346
2022-09-12	12:31:51	0.389784
2022-09-12	12:31:51	0.398791
2022-09-12	12:31:52	0.395636
2022-09-12	12:31:52	0.414618
2022-09-12	12:31:52	0.410903
2022-09-12	12:31:52	0.410344
2022-09-12	12:31:53	0.423168
2022-09-12	12:31:53	0.383372
2022-09-12	12:31:53	0.50388
2022-09-12	12:31:53	0.443473
2022-09-12	12:31:54	0.718384
2022-09-12	12:31:54	2.26933
2022-09-12	12:31:54	2.22296
2022-09-12	12:31:55	2.78342
2022-09-12	12:31:55	1.2652
2022-09-12	12:31:55	1.0021
2022-09-12	12:31:55	0.652023
2022-09-12	12:31:56	1.19874
2022-09-12	12:31:56	1.44821
2022-09-12	12:31:56	4.85014
2022-09-12	12:31:56	6.8621
2022-09-12	12:31:57	3.84312
2022-09-12	12:31:57	5.44846
2022-09-12	12:31:57	11.3608
2022-09-12	12:31:57	13.329
2022-09-12	12:31:58	5.49563
2022-09-12	12:31:58	1.23477
2022-09-12	12:31:58	0.711769
2022-09-12	12:31:59	0.659708
2022-09-12	12:31:59	0.448308
2022-09-12	12:31:59	0.449733
2022-09-12	12:31:59	0.413193
2022-09-12	12:32:00	0.655382
2022-09-12	12:32:00	0.991056
2022-09-12	12:32:00	1.05553
2022-09-12	12:32:00	2.16108
2022-09-12	12:32:01	3.09899
2022-09-12	12:32:01	8.95721
2022-09-12	12:32:01	11.5249
2022-09-12	12:32:01	5.14474
2022-09-12	12:32:02	1.50449
2022-09-12	12:32:02	0.720216
2022-09-12	12:32:02	0.588206
2022-09-12	12:32:03	0.772786
2022-09-12	12:32:03	0.889376
2022-09-12	12:32:03	1.38363
2022-09-12	12:32:03	0.948919
2022-09-12	12:32:04	0.452634
2022-09-12	12:32:04	0.439962
2022-09-12	12:32:04	0.485102
